# Supplementary material for: Dietary calcium and zinc deficiency risks are decreasing but remain prevalent
Source: PubMed Central journal article supplement (PMC4476434; doi:10.1038/srep10974), 2015-06-22
Supplement: srep10974-s1.pdf [file srep10974-s1.pdf]

# Dietary calcium and zinc deficiency risks are decreasing but remain prevalent

Diriba B. Kumssa<sup>1,2,3</sup>, Edward J. M. Joy<sup>1,2</sup>, E. Louise Ander<sup>2</sup>, Michael J. Watts<sup>2</sup>, Scott D. Young<sup>1</sup>, Sue Walker<sup>3</sup> & Martin R. Broadley<sup>1</sup>

<sup>1</sup>School of Biosciences, University of Nottingham, Sutton Bonington Campus, Loughborough, LE12 5RD, UK,  
<sup>2</sup>Centre for Environmental Geochemistry, British Geological Survey, Keyworth, Nottingham, NG12 5GG, UK,  
<sup>3</sup>Crops For the Future, The University of Nottingham Malaysia Campus, Jalan Broga, 43500 Semenyih, Selangor Darul Ehsan, Malaysia.

Correspondence and requests for materials should be addressed to M.R.B. ([martin.broadley@nottingham.ac.uk](mailto:martin.broadley@nottingham.ac.uk))

## Supplementary figures

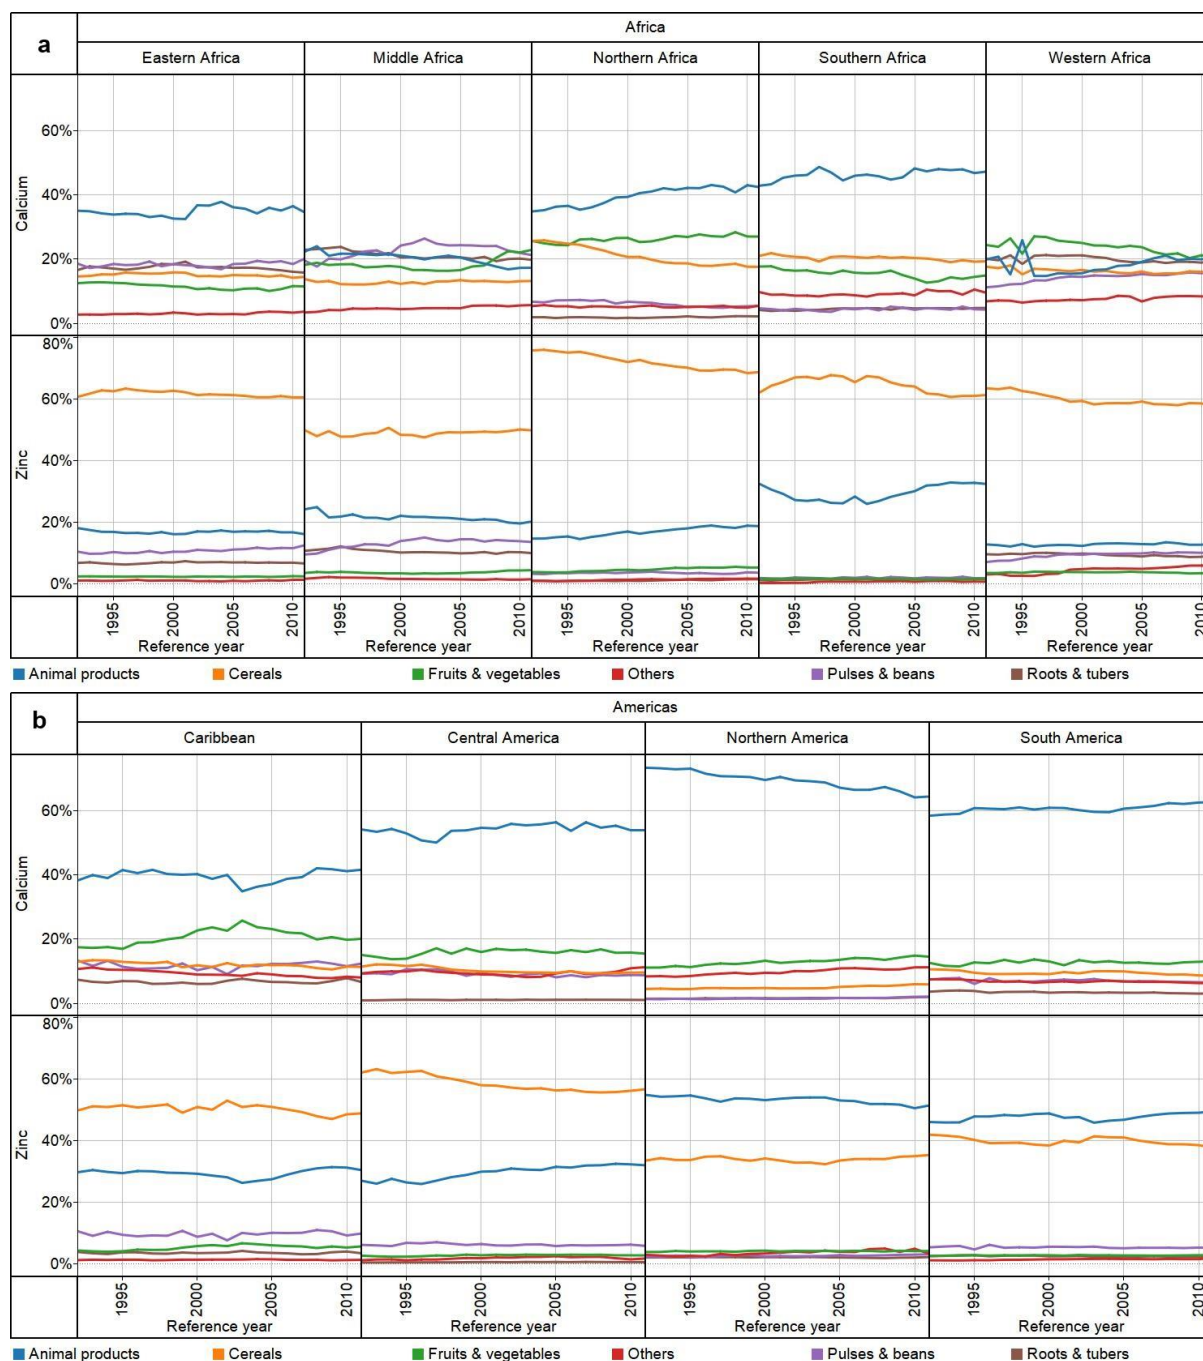

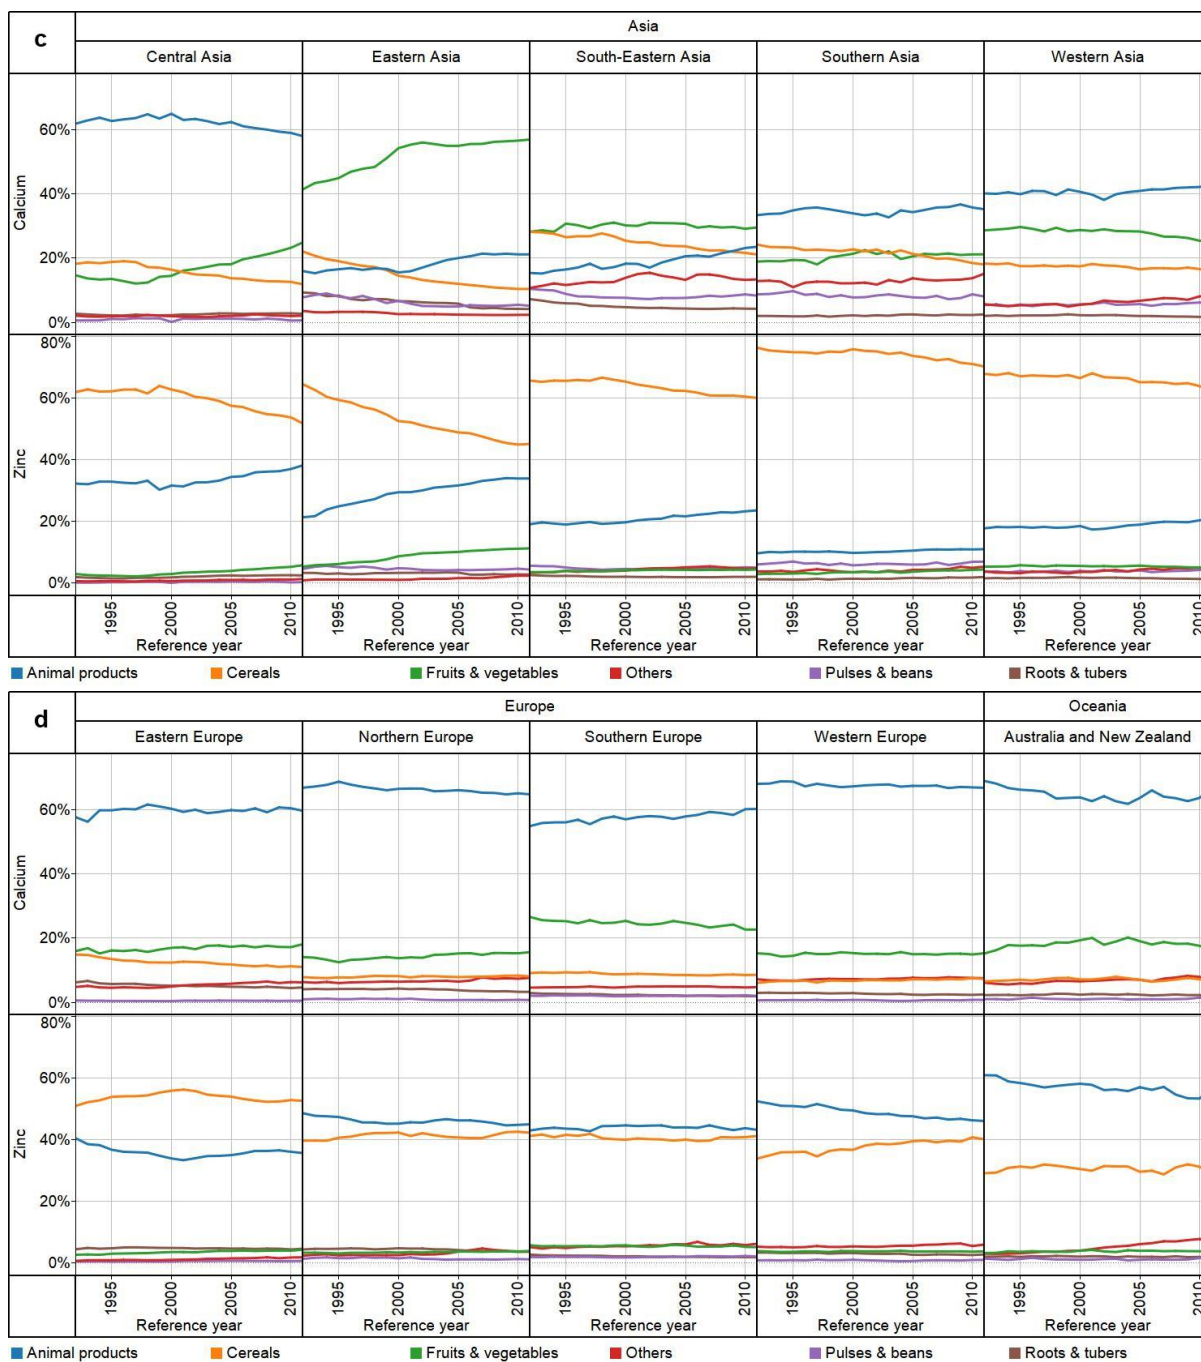

**Supplementary Figure S1:** Trends in the percentage contribution of food groups to Ca and Zn supply between 1992 and 2011. Africa (a), Americas (b), Asia (c), and Europe and Oceania (d). The line graphs were drawn using Tableau Software for Desktop version 8.2.

## Dietary calcium and zinc deficiency risks are decreasing but remain prevalent

Diriba B. Kumssa<sup>1,2,3</sup>, Edward J. M. Joy<sup>1,2</sup>, E. Louise Ander<sup>2</sup>, Michael J. Watts<sup>2</sup>, Scott D. Young<sup>1</sup>, Sue Walker<sup>3</sup> & Martin R. Broadley<sup>1</sup>

<sup>1</sup>School of Biosciences, University of Nottingham, Sutton Bonington Campus, Loughborough, LE12 5RD, UK,

<sup>2</sup>Centre for Environmental Geochemistry, British Geological Survey, Keyworth, Nottingham, NG12 5GG, UK,

<sup>3</sup>Crops For the Future, The University of Nottingham Malaysia Campus, Jalan Broga, 43500 Semenyih, Selangor Darul Ehsan, Malaysia.

Correspondence and requests for materials should be addressed to M.R.B. ([martin.broadley@nottingham.ac.uk](mailto:martin.broadley@nottingham.ac.uk))

### Supplementary information

**Supplementary Figure S1:** Trends in the percentage contribution of food groups to Ca and Zn supply between 1992 and 2011. Africa (a), Americas (b), Asia (c), and Europe and Oceania (d). The line graphs were drawn using Tableau Software for Desktop version 8.2.

**Supplementary Table S1:** Food supply by FBS food item, reference year, and country.

**Supplementary Table S2:** Food Balance Sheet (FBS) food items obtained from FAOSTAT.

**Supplementary Table S3:** Nutrient and phytate composition of food commodities (Ca and Zn composition data from USDA nutrient database SR 26 [USDA SR 26]; phytate composition from the Tanzanian food composition table [Tanzanian FCT]).

**Supplementary Table S4:** Dietary energy supply ( $\text{kcal capita}^{-1} \text{d}^{-1}$ ) by Food Balance Sheet (FBS) food item, reference year, and country.

**Supplementary Table S5:** Population size by age/gender group, reference year, and country.

**Supplementary Table S6:** Country-level Ca, Zn and phytate supplies, WtdEAR, phytate:zinc molar ratio and population between 1992 and 2011.

**Supplementary Table S7:** Global-level Ca and Zn supply, WtdEAR and deficiency risks between 1992 and 2011.

**Supplementary Table S8:** Continental-level Ca and Zn supply, WtdEAR and deficiency risks between 1992 and 2011 (mean $\pm$ SD; national-level data were weighted by population size).

**Supplementary Table S9:** Regional-level Ca and Zn supply, WtdEAR and deficiency risks between 1992 and 2011 (mean $\pm$ SD; national-level data were weighted by population size).

**Supplementary Table S10:** Gross national income based on purchasing power parity (GNI-PPP) by country for comparison with the supplies and deficiency risks of Ca and Zn, and energy between 1992 and 2011. GNI-PPP obtained from the World Bank (<http://data.worldbank.org/indicator/NY.GNP.PCAP.PP.CD>, Accessed on 09 July 2014).

**Supplementary Table S11:** Estimated Ca and Zn deficiency risks in 1992 and 2011; target Ca and Zn deficiency risks in 2011, consistent with MDG1 to halve hunger in the period 1990-2015; and national MDG1 Ca and Zn deficiency risk reduction target status (Yes/No).

**Dietary calcium and zinc deficiency risks are decreasing but remain prevalent**Diriba B. Kumssa<sup>1,2,3</sup>, Edward J. M. Joy<sup>1,2</sup>, E. Louise Ander<sup>2</sup>, Michael J. Watts<sup>2</sup>, Scott D. Young<sup>1</sup>, Sue Walker<sup>3</sup> & Martin R. Broadley<sup>1</sup><sup>1</sup>School of Biosciences, University of Nottingham, Sutton Bonington Campus, Loughborough, LE12 5RD, UK, <sup>2</sup>Centre for Environmental Geochemistry, British Geological Survey, Keyworth, Nottingham, NG12 5GG, UK, <sup>3</sup>Crops For the Future, The University of Nottingham Malaysia Campus, Jalan Broga, 43500 Semenyih, Selangor Darul Ehsan, Malaysia.

Correspondence and requests for materials should be addressed to M.R.B. (martin.broadley@nottingham.ac.uk)

**Supplementary Table S1 : Food supply by FBS food item, reference year, and country.**

| FAO country code | Country     | Reference year | Food item                 | Gross food supply (g capita <sup>-1</sup> d <sup>-1</sup> ) |
|------------------|-------------|----------------|---------------------------|-------------------------------------------------------------|
| 2                | Afghanistan | 1992           | Apples                    | 3                                                           |
| 2                | Afghanistan | 1992           | Bananas                   | 1                                                           |
| 2                | Afghanistan | 1992           | Barley                    | 24                                                          |
| 2                | Afghanistan | 1992           | Bovine Meat               | 17                                                          |
| 2                | Afghanistan | 1992           | Butter, Ghee              | 3                                                           |
| 2                | Afghanistan | 1992           | Cheese                    | 3                                                           |
| 2                | Afghanistan | 1992           | Citrus, Other             | 1                                                           |
| 2                | Afghanistan | 1992           | Cottonseed Oil            | 1                                                           |
| 2                | Afghanistan | 1992           | Eggs                      | 2                                                           |
| 2                | Afghanistan | 1992           | Fats, Animals, Raw        | 3                                                           |
| 2                | Afghanistan | 1992           | Fruits, Other             | 44                                                          |
| 2                | Afghanistan | 1992           | Grapes                    | 38                                                          |
| 2                | Afghanistan | 1992           | Honey                     | 1                                                           |
| 2                | Afghanistan | 1992           | Maize                     | 34                                                          |
| 2                | Afghanistan | 1992           | Meat, Other               | 3                                                           |
| 2                | Afghanistan | 1992           | Milk, Whole               | 87                                                          |
| 2                | Afghanistan | 1992           | Millet                    | 4                                                           |
| 2                | Afghanistan | 1992           | Mutton & Goat Meat        | 26                                                          |
| 2                | Afghanistan | 1992           | Nuts                      | 3                                                           |
| 2                | Afghanistan | 1992           | Offals, Edible            | 8                                                           |
| 2                | Afghanistan | 1992           | Oilcrops Oil, Other       | 6                                                           |
| 2                | Afghanistan | 1992           | Oranges, Mandarines       | 3                                                           |
| 2                | Afghanistan | 1992           | Palm Oil                  | 1                                                           |
| 2                | Afghanistan | 1992           | Potatoes                  | 42                                                          |
| 2                | Afghanistan | 1992           | Poultry Meat              | 3                                                           |
| 2                | Afghanistan | 1992           | Pulses, Other             | 6                                                           |
| 2                | Afghanistan | 1992           | Rice (Milled Equivalent)  | 49                                                          |
| 2                | Afghanistan | 1992           | Sesameseed                | 3                                                           |
| 2                | Afghanistan | 1992           | Sesameseed Oil            | 1                                                           |
| 2                | Afghanistan | 1992           | Sugar, Refined Equivalent | 9                                                           |
| 2                | Afghanistan | 1992           | Sunflowerseed Oil         | 1                                                           |
| 2                | Afghanistan | 1992           | Tea                       | 2                                                           |
| 2                | Afghanistan | 1992           | Vegetables, Other         | 86                                                          |
| 2                | Afghanistan | 1992           | Wheat                     | 314                                                         |
| 2                | Afghanistan | 1993           | Apples                    | 3                                                           |
| 2                | Afghanistan | 1993           | Bananas                   | 1                                                           |
| 2                | Afghanistan | 1993           | Barley                    | 28                                                          |
| 2                | Afghanistan | 1993           | Bovine Meat               | 18                                                          |
| 2                | Afghanistan | 1993           | Butter, Ghee              | 4                                                           |
| 2                | Afghanistan | 1993           | Cheese                    | 3                                                           |
| 2                | Afghanistan | 1993           | Citrus, Other             | 1                                                           |
| 2                | Afghanistan | 1993           | Cottonseed Oil            | 1                                                           |
| 2                | Afghanistan | 1993           | Eggs                      | 2                                                           |
| 2                | Afghanistan | 1993           | Fats, Animals, Raw        | 2                                                           |
| 2                | Afghanistan | 1993           | Fruits, Other             | 44                                                          |
| 2                | Afghanistan | 1993           | Grapes                    | 36                                                          |
| 2                | Afghanistan | 1993           | Honey                     | 1                                                           |
| 2                | Afghanistan | 1993           | Maize                     | 49                                                          |
| 2                | Afghanistan | 1993           | Meat, Other               | 3                                                           |
| 2                | Afghanistan | 1993           | Milk, Whole               | 92                                                          |
| 2                | Afghanistan | 1993           | Millet                    | 4                                                           |
| 2                | Afghanistan | 1993           | Mutton & Goat Meat        | 24                                                          |
| 2                | Afghanistan | 1993           | Nuts                      | 3                                                           |
| 2                | Afghanistan | 1993           | Offals, Edible            | 8                                                           |
| 2                | Afghanistan | 1993           | Oilcrops Oil, Other       | 2                                                           |
| 2                | Afghanistan | 1993           | Oranges, Mandarines       | 2                                                           |
| 2                | Afghanistan | 1993           | Potatoes                  | 38                                                          |
| 2                | Afghanistan | 1993           | Poultry Meat              | 2                                                           |
| 2                | Afghanistan | 1993           | Pulses, Other             | 6                                                           |
| 2                | Afghanistan | 1993           | Rice (Milled Equivalent)  | 39                                                          |
| 2                | Afghanistan | 1993           | Sesameseed                | 2                                                           |
| 2                | Afghanistan | 1993           | Sesameseed Oil            | 1                                                           |
| 2                | Afghanistan | 1993           | Sugar, Refined Equivalent | 8                                                           |
| 2                | Afghanistan | 1993           | Sunflowerseed Oil         | 1                                                           |
| 2                | Afghanistan | 1993           | Tea                       | 2                                                           |
| 2                | Afghanistan | 1993           | Vegetables, Other         | 82                                                          |
| 2                | Afghanistan | 1993           | Wheat                     | 332                                                         |
| 2                | Afghanistan | 1994           | Apples                    | 2                                                           |
| 2                | Afghanistan | 1994           | Barley                    | 24                                                          |
| 2                | Afghanistan | 1994           | Bovine Meat               | 19                                                          |
| 2                | Afghanistan | 1994           | Butter, Ghee              | 4                                                           |
| 2                | Afghanistan | 1994           | Cheese                    | 3                                                           |
| 2                | Afghanistan | 1994           | Citrus, Other             | 1                                                           |
| 2                | Afghanistan | 1994           | Cottonseed Oil            | 1                                                           |
| 2                | Afghanistan | 1994           | Eggs                      | 2                                                           |
| 2                | Afghanistan | 1994           | Fats, Animals, Raw        | 2                                                           |
| 2                | Afghanistan | 1994           | Fruits, Other             | 44                                                          |
| 2                | Afghanistan | 1994           | Grapes                    | 34                                                          |
| 2                | Afghanistan | 1994           | Honey                     | 1                                                           |
| 2                | Afghanistan | 1994           | Maize                     | 48                                                          |
| 2                | Afghanistan | 1994           | Meat, Other               | 2                                                           |
| 2                | Afghanistan | 1994           | Milk, Whole               | 102                                                         |
| 2                | Afghanistan | 1994           | Millet                    | 3                                                           |
| 2                | Afghanistan | 1994           | Mutton & Goat Meat        | 22                                                          |
| 2                | Afghanistan | 1994           | Nuts                      | 3                                                           |

Dietary calcium and zinc deficiency risks are decreasing but remain prevalent

| FAO countrycode | Country     | Reference year | Food item                 | Gross food supply (g capita <sup>-1</sup> d <sup>-1</sup> ) |
|-----------------|-------------|----------------|---------------------------|-------------------------------------------------------------|
| 2               | Afghanistan | 1994           | Offals, Edible            | 8                                                           |
| 2               | Afghanistan | 1994           | Oilcrops Oil, Other       | 1                                                           |
| 2               | Afghanistan | 1994           | Oranges, Mandarines       | 2                                                           |
| 2               | Afghanistan | 1994           | Potatoes                  | 35                                                          |
| 2               | Afghanistan | 1994           | Poultry Meat              | 2                                                           |
| 2               | Afghanistan | 1994           | Pulses, Other             | 7                                                           |
| 2               | Afghanistan | 1994           | Rice (Milled Equivalent)  | 43                                                          |
| 2               | Afghanistan | 1994           | Sesameseed                | 2                                                           |
| 2               | Afghanistan | 1994           | Sesameseed Oil            | 1                                                           |
| 2               | Afghanistan | 1994           | Sugar, Refined Equivalent | 7                                                           |
| 2               | Afghanistan | 1994           | Sunflowerseed Oil         | 1                                                           |
| 2               | Afghanistan | 1994           | Tea                       | 2                                                           |
| 2               | Afghanistan | 1994           | Vegetables, Other         | 74                                                          |
| 2               | Afghanistan | 1994           | Wheat                     | 308                                                         |
| 2               | Afghanistan | 1995           | Apples                    | 2                                                           |
| 2               | Afghanistan | 1995           | Barley                    | 19                                                          |
| 2               | Afghanistan | 1995           | Bovine Meat               | 20                                                          |
| 2               | Afghanistan | 1995           | Butter, Ghee              | 4                                                           |
| 2               | Afghanistan | 1995           | Cheese                    | 3                                                           |
| 2               | Afghanistan | 1995           | Citrus, Other             | 1                                                           |
| 2               | Afghanistan | 1995           | Cottonseed Oil            | 1                                                           |
| 2               | Afghanistan | 1995           | Eggs                      | 2                                                           |
| 2               | Afghanistan | 1995           | Fats, Animals, Raw        | 4                                                           |
| 2               | Afghanistan | 1995           | Fruits, Other             | 40                                                          |
| 2               | Afghanistan | 1995           | Grapes                    | 35                                                          |
| 2               | Afghanistan | 1995           | Honey                     | 1                                                           |
| 2               | Afghanistan | 1995           | Maize                     | 48                                                          |
| 2               | Afghanistan | 1995           | Meat, Other               | 2                                                           |
| 2               | Afghanistan | 1995           | Milk, Whole               | 109                                                         |
| 2               | Afghanistan | 1995           | Millet                    | 3                                                           |
| 2               | Afghanistan | 1995           | Mutton & Goat Meat        | 21                                                          |
| 2               | Afghanistan | 1995           | Nuts                      | 2                                                           |
| 2               | Afghanistan | 1995           | Offals, Edible            | 8                                                           |
| 2               | Afghanistan | 1995           | Oilcrops Oil, Other       | 2                                                           |
| 2               | Afghanistan | 1995           | Oranges, Mandarines       | 2                                                           |
| 2               | Afghanistan | 1995           | Potatoes                  | 33                                                          |
| 2               | Afghanistan | 1995           | Poultry Meat              | 2                                                           |
| 2               | Afghanistan | 1995           | Pulses, Other             | 5                                                           |
| 2               | Afghanistan | 1995           | Rice (Milled Equivalent)  | 50                                                          |
| 2               | Afghanistan | 1995           | Sesameseed                | 2                                                           |
| 2               | Afghanistan | 1995           | Sesameseed Oil            | 1                                                           |
| 2               | Afghanistan | 1995           | Soyabean Oil              | 5                                                           |
| 2               | Afghanistan | 1995           | Sugar, Refined Equivalent | 7                                                           |
| 2               | Afghanistan | 1995           | Sunflowerseed Oil         | 3                                                           |
| 2               | Afghanistan | 1995           | Tea                       | 3                                                           |
| 2               | Afghanistan | 1995           | Vegetables, Other         | 75                                                          |
| 2               | Afghanistan | 1995           | Wheat                     | 289                                                         |
| 2               | Afghanistan | 1996           | Apples                    | 2                                                           |
| 2               | Afghanistan | 1996           | Barley                    | 21                                                          |
| 2               | Afghanistan | 1996           | Bovine Meat               | 21                                                          |
| 2               | Afghanistan | 1996           | Butter, Ghee              | 4                                                           |
| 2               | Afghanistan | 1996           | Cheese                    | 3                                                           |
| 2               | Afghanistan | 1996           | Citrus, Other             | 1                                                           |
| 2               | Afghanistan | 1996           | Cottonseed Oil            | 1                                                           |
| 2               | Afghanistan | 1996           | Eggs                      | 2                                                           |
| 2               | Afghanistan | 1996           | Fats, Animals, Raw        | 3                                                           |
| 2               | Afghanistan | 1996           | Fruits, Other             | 40                                                          |
| 2               | Afghanistan | 1996           | Grapes                    | 31                                                          |
| 2               | Afghanistan | 1996           | Honey                     | 1                                                           |
| 2               | Afghanistan | 1996           | Maize                     | 31                                                          |
| 2               | Afghanistan | 1996           | Meat, Other               | 1                                                           |
| 2               | Afghanistan | 1996           | Milk, Whole               | 119                                                         |
| 2               | Afghanistan | 1996           | Millet                    | 3                                                           |
| 2               | Afghanistan | 1996           | Mutton & Goat Meat        | 22                                                          |
| 2               | Afghanistan | 1996           | Nuts                      | 2                                                           |
| 2               | Afghanistan | 1996           | Offals, Edible            | 8                                                           |
| 2               | Afghanistan | 1996           | Oilcrops Oil, Other       | 1                                                           |
| 2               | Afghanistan | 1996           | Oranges, Mandarines       | 2                                                           |
| 2               | Afghanistan | 1996           | Potatoes                  | 32                                                          |
| 2               | Afghanistan | 1996           | Poultry Meat              | 2                                                           |
| 2               | Afghanistan | 1996           | Pulses, Other             | 5                                                           |
| 2               | Afghanistan | 1996           | Rice (Milled Equivalent)  | 38                                                          |
| 2               | Afghanistan | 1996           | Sesameseed                | 2                                                           |
| 2               | Afghanistan | 1996           | Sesameseed Oil            | 1                                                           |
| 2               | Afghanistan | 1996           | Soyabean Oil              | 5                                                           |
| 2               | Afghanistan | 1996           | Sugar, Refined Equivalent | 6                                                           |
| 2               | Afghanistan | 1996           | Sunflowerseed Oil         | 2                                                           |
| 2               | Afghanistan | 1996           | Tea                       | 2                                                           |
| 2               | Afghanistan | 1996           | Vegetables, Other         | 74                                                          |
| 2               | Afghanistan | 1996           | Wheat                     | 324                                                         |
| 2               | Afghanistan | 1997           | Apples                    | 2                                                           |
| 2               | Afghanistan | 1997           | Barley                    | 23                                                          |
| 2               | Afghanistan | 1997           | Bovine Meat               | 22                                                          |
| 2               | Afghanistan | 1997           | Butter, Ghee              | 5                                                           |
| 2               | Afghanistan | 1997           | Cheese                    | 3                                                           |
| 2               | Afghanistan | 1997           | Citrus, Other             | 1                                                           |
| 2               | Afghanistan | 1997           | Cottonseed Oil            | 1                                                           |
| 2               | Afghanistan | 1997           | Eggs                      | 2                                                           |
| 2               | Afghanistan | 1997           | Fats, Animals, Raw        | 3                                                           |
| 2               | Afghanistan | 1997           | Fruits, Other             | 40                                                          |
| 2               | Afghanistan | 1997           | Grapes                    | 31                                                          |
| 2               | Afghanistan | 1997           | Honey                     | 1                                                           |
| 2               | Afghanistan | 1997           | Maize                     | 25                                                          |
| 2               | Afghanistan | 1997           | Meat, Other               | 1                                                           |
| 2               | Afghanistan | 1997           | Milk, Whole               | 127                                                         |
| 2               | Afghanistan | 1997           | Millet                    | 3                                                           |
| 2               | Afghanistan | 1997           | Mutton & Goat Meat        | 23                                                          |

Dietary calcium and zinc deficiency risks are decreasing but remain prevalent

| FAO countrycode | Country     | Reference year | Food item                 | Gross food supply (g capita <sup>-1</sup> d <sup>-1</sup> ) |
|-----------------|-------------|----------------|---------------------------|-------------------------------------------------------------|
| 2               | Afghanistan | 1997           | Nuts                      | 2                                                           |
| 2               | Afghanistan | 1997           | Offals, Edible            | 8                                                           |
| 2               | Afghanistan | 1997           | Oranges, Mandarines       | 3                                                           |
| 2               | Afghanistan | 1997           | Potatoes                  | 31                                                          |
| 2               | Afghanistan | 1997           | Poultry Meat              | 2                                                           |
| 2               | Afghanistan | 1997           | Pulses, Other             | 4                                                           |
| 2               | Afghanistan | 1997           | Rice (Milled Equivalent)  | 47                                                          |
| 2               | Afghanistan | 1997           | Sesameseed                | 2                                                           |
| 2               | Afghanistan | 1997           | Sesameseed Oil            | 1                                                           |
| 2               | Afghanistan | 1997           | Soyabean Oil              | 1                                                           |
| 2               | Afghanistan | 1997           | Sugar, Refined Equivalent | 7                                                           |
| 2               | Afghanistan | 1997           | Sunflowerseed Oil         | 1                                                           |
| 2               | Afghanistan | 1997           | Tea                       | 4                                                           |
| 2               | Afghanistan | 1997           | Vegetables, Other         | 76                                                          |
| 2               | Afghanistan | 1997           | Wheat                     | 337                                                         |
| 2               | Afghanistan | 1998           | Apples                    | 2                                                           |
| 2               | Afghanistan | 1998           | Barley                    | 22                                                          |
| 2               | Afghanistan | 1998           | Bovine Meat               | 24                                                          |
| 2               | Afghanistan | 1998           | Butter, Ghee              | 5                                                           |
| 2               | Afghanistan | 1998           | Cheese                    | 4                                                           |
| 2               | Afghanistan | 1998           | Citrus, Other             | 1                                                           |
| 2               | Afghanistan | 1998           | Cottonseed Oil            | 1                                                           |
| 2               | Afghanistan | 1998           | Eggs                      | 2                                                           |
| 2               | Afghanistan | 1998           | Fats, Animals, Raw        | 3                                                           |
| 2               | Afghanistan | 1998           | Fruits, Other             | 42                                                          |
| 2               | Afghanistan | 1998           | Grapes                    | 30                                                          |
| 2               | Afghanistan | 1998           | Honey                     | 1                                                           |
| 2               | Afghanistan | 1998           | Maize                     | 27                                                          |
| 2               | Afghanistan | 1998           | Meat, Other               | 1                                                           |
| 2               | Afghanistan | 1998           | Milk, Whole               | 129                                                         |
| 2               | Afghanistan | 1998           | Millet                    | 3                                                           |
| 2               | Afghanistan | 1998           | Mutton & Goat Meat        | 24                                                          |
| 2               | Afghanistan | 1998           | Nuts                      | 2                                                           |
| 2               | Afghanistan | 1998           | Offals, Edible            | 9                                                           |
| 2               | Afghanistan | 1998           | Oranges, Mandarines       | 2                                                           |
| 2               | Afghanistan | 1998           | Potatoes                  | 30                                                          |
| 2               | Afghanistan | 1998           | Poultry Meat              | 2                                                           |
| 2               | Afghanistan | 1998           | Pulses, Other             | 5                                                           |
| 2               | Afghanistan | 1998           | Rice (Milled Equivalent)  | 49                                                          |
| 2               | Afghanistan | 1998           | Sesameseed                | 2                                                           |
| 2               | Afghanistan | 1998           | Sesameseed Oil            | 1                                                           |
| 2               | Afghanistan | 1998           | Soyabean Oil              | 2                                                           |
| 2               | Afghanistan | 1998           | Sugar, Refined Equivalent | 7                                                           |
| 2               | Afghanistan | 1998           | Sunflowerseed Oil         | 1                                                           |
| 2               | Afghanistan | 1998           | Tea                       | 3                                                           |
| 2               | Afghanistan | 1998           | Vegetables, Other         | 74                                                          |
| 2               | Afghanistan | 1998           | Wheat                     | 338                                                         |
| 2               | Afghanistan | 1999           | Apples                    | 1                                                           |
| 2               | Afghanistan | 1999           | Barley                    | 19                                                          |
| 2               | Afghanistan | 1999           | Bovine Meat               | 20                                                          |
| 2               | Afghanistan | 1999           | Butter, Ghee              | 5                                                           |
| 2               | Afghanistan | 1999           | Cheese                    | 4                                                           |
| 2               | Afghanistan | 1999           | Citrus, Other             | 1                                                           |
| 2               | Afghanistan | 1999           | Cottonseed Oil            | 1                                                           |
| 2               | Afghanistan | 1999           | Eggs                      | 2                                                           |
| 2               | Afghanistan | 1999           | Fats, Animals, Raw        | 3                                                           |
| 2               | Afghanistan | 1999           | Fruits, Other             | 38                                                          |
| 2               | Afghanistan | 1999           | Grapes                    | 27                                                          |
| 2               | Afghanistan | 1999           | Honey                     | 1                                                           |
| 2               | Afghanistan | 1999           | Maize                     | 19                                                          |
| 2               | Afghanistan | 1999           | Meat, Other               | 1                                                           |
| 2               | Afghanistan | 1999           | Milk, Whole               | 145                                                         |
| 2               | Afghanistan | 1999           | Millet                    | 2                                                           |
| 2               | Afghanistan | 1999           | Mutton & Goat Meat        | 26                                                          |
| 2               | Afghanistan | 1999           | Nuts                      | 2                                                           |
| 2               | Afghanistan | 1999           | Offals, Edible            | 8                                                           |
| 2               | Afghanistan | 1999           | Oranges, Mandarines       | 2                                                           |
| 2               | Afghanistan | 1999           | Potatoes                  | 30                                                          |
| 2               | Afghanistan | 1999           | Poultry Meat              | 2                                                           |
| 2               | Afghanistan | 1999           | Pulses, Other             | 3                                                           |
| 2               | Afghanistan | 1999           | Rice (Milled Equivalent)  | 37                                                          |
| 2               | Afghanistan | 1999           | Sesameseed                | 2                                                           |
| 2               | Afghanistan | 1999           | Sesameseed Oil            | 1                                                           |
| 2               | Afghanistan | 1999           | Soyabean Oil              | 4                                                           |
| 2               | Afghanistan | 1999           | Sugar, Refined Equivalent | 8                                                           |
| 2               | Afghanistan | 1999           | Sunflowerseed Oil         | 1                                                           |
| 2               | Afghanistan | 1999           | Tea                       | 2                                                           |
| 2               | Afghanistan | 1999           | Vegetables, Other         | 79                                                          |
| 2               | Afghanistan | 1999           | Wheat                     | 338                                                         |
| 2               | Afghanistan | 2000           | Apples                    | 1                                                           |
| 2               | Afghanistan | 2000           | Barley                    | 11                                                          |
| 2               | Afghanistan | 2000           | Bovine Meat               | 17                                                          |
| 2               | Afghanistan | 2000           | Butter, Ghee              | 4                                                           |
| 2               | Afghanistan | 2000           | Cheese                    | 3                                                           |
| 2               | Afghanistan | 2000           | Citrus, Other             | 1                                                           |
| 2               | Afghanistan | 2000           | Cottonseed Oil            | 1                                                           |
| 2               | Afghanistan | 2000           | Eggs                      | 2                                                           |
| 2               | Afghanistan | 2000           | Fats, Animals, Raw        | 2                                                           |
| 2               | Afghanistan | 2000           | Fruits, Other             | 38                                                          |
| 2               | Afghanistan | 2000           | Grapes                    | 25                                                          |
| 2               | Afghanistan | 2000           | Honey                     | 1                                                           |
| 2               | Afghanistan | 2000           | Maize                     | 9                                                           |
| 2               | Afghanistan | 2000           | Meat, Other               | 1                                                           |
| 2               | Afghanistan | 2000           | Milk, Whole               | 113                                                         |
| 2               | Afghanistan | 2000           | Millet                    | 3                                                           |
| 2               | Afghanistan | 2000           | Mutton & Goat Meat        | 23                                                          |
| 2               | Afghanistan | 2000           | Nuts                      | 2                                                           |

Dietary calcium and zinc deficiency risks are decreasing but remain prevalent

| FAO countrycode | Country     | Reference year | Food item                 | Gross food supply (g capita <sup>-1</sup> d <sup>-1</sup> ) |
|-----------------|-------------|----------------|---------------------------|-------------------------------------------------------------|
| 2               | Afghanistan | 2000           | Offals, Edible            | 7                                                           |
| 2               | Afghanistan | 2000           | Oranges, Mandarines       | 2                                                           |
| 2               | Afghanistan | 2000           | Potatoes                  | 29                                                          |
| 2               | Afghanistan | 2000           | Poultry Meat              | 2                                                           |
| 2               | Afghanistan | 2000           | Pulses, Other             | 3                                                           |
| 2               | Afghanistan | 2000           | Rice (Milled Equivalent)  | 49                                                          |
| 2               | Afghanistan | 2000           | Sesameseed                | 2                                                           |
| 2               | Afghanistan | 2000           | Sesameseed Oil            | 1                                                           |
| 2               | Afghanistan | 2000           | Soyabean Oil              | 3                                                           |
| 2               | Afghanistan | 2000           | Sugar, Refined Equivalent | 7                                                           |
| 2               | Afghanistan | 2000           | Sunflowerseed Oil         | 1                                                           |
| 2               | Afghanistan | 2000           | Tea                       | 3                                                           |
| 2               | Afghanistan | 2000           | Vegetables, Other         | 80                                                          |
| 2               | Afghanistan | 2000           | Wheat                     | 346                                                         |
| 2               | Afghanistan | 2001           | Apples                    | 2                                                           |
| 2               | Afghanistan | 2001           | Barley                    | 11                                                          |
| 2               | Afghanistan | 2001           | Bovine Meat               | 14                                                          |
| 2               | Afghanistan | 2001           | Butter, Ghee              | 3                                                           |
| 2               | Afghanistan | 2001           | Cheese                    | 3                                                           |
| 2               | Afghanistan | 2001           | Citrus, Other             | 1                                                           |
| 2               | Afghanistan | 2001           | Cottonseed Oil            | 1                                                           |
| 2               | Afghanistan | 2001           | Eggs                      | 1                                                           |
| 2               | Afghanistan | 2001           | Fats, Animals, Raw        | 2                                                           |
| 2               | Afghanistan | 2001           | Fruits, Other             | 38                                                          |
| 2               | Afghanistan | 2001           | Grapes                    | 32                                                          |
| 2               | Afghanistan | 2001           | Honey                     | 1                                                           |
| 2               | Afghanistan | 2001           | Maize                     | 12                                                          |
| 2               | Afghanistan | 2001           | Meat, Other               | 1                                                           |
| 2               | Afghanistan | 2001           | Milk, Whole               | 70                                                          |
| 2               | Afghanistan | 2001           | Millet                    | 3                                                           |
| 2               | Afghanistan | 2001           | Mutton & Goat Meat        | 19                                                          |
| 2               | Afghanistan | 2001           | Nuts                      | 1                                                           |
| 2               | Afghanistan | 2001           | Offals, Edible            | 5                                                           |
| 2               | Afghanistan | 2001           | Oranges, Mandarines       | 3                                                           |
| 2               | Afghanistan | 2001           | Potatoes                  | 28                                                          |
| 2               | Afghanistan | 2001           | Poultry Meat              | 2                                                           |
| 2               | Afghanistan | 2001           | Pulses, Other             | 5                                                           |
| 2               | Afghanistan | 2001           | Rice (Milled Equivalent)  | 53                                                          |
| 2               | Afghanistan | 2001           | Sesameseed                | 1                                                           |
| 2               | Afghanistan | 2001           | Sesameseed Oil            | 1                                                           |
| 2               | Afghanistan | 2001           | Soyabean Oil              | 3                                                           |
| 2               | Afghanistan | 2001           | Sugar, Refined Equivalent | 7                                                           |
| 2               | Afghanistan | 2001           | Sunflowerseed Oil         | 1                                                           |
| 2               | Afghanistan | 2001           | Tea                       | 3                                                           |
| 2               | Afghanistan | 2001           | Vegetables, Other         | 93                                                          |
| 2               | Afghanistan | 2001           | Wheat                     | 342                                                         |
| 2               | Afghanistan | 2002           | Apples                    | 2                                                           |
| 2               | Afghanistan | 2002           | Barley                    | 15                                                          |
| 2               | Afghanistan | 2002           | Bovine Meat               | 19                                                          |
| 2               | Afghanistan | 2002           | Butter, Ghee              | 4                                                           |
| 2               | Afghanistan | 2002           | Cheese                    | 2                                                           |
| 2               | Afghanistan | 2002           | Citrus, Other             | 1                                                           |
| 2               | Afghanistan | 2002           | Cottonseed Oil            | 1                                                           |
| 2               | Afghanistan | 2002           | Eggs                      | 2                                                           |
| 2               | Afghanistan | 2002           | Fats, Animals, Raw        | 1                                                           |
| 2               | Afghanistan | 2002           | Fruits, Other             | 36                                                          |
| 2               | Afghanistan | 2002           | Grapes                    | 27                                                          |
| 2               | Afghanistan | 2002           | Honey                     | 1                                                           |
| 2               | Afghanistan | 2002           | Maize                     | 21                                                          |
| 2               | Afghanistan | 2002           | Meat, Other               | 1                                                           |
| 2               | Afghanistan | 2002           | Milk, Whole               | 122                                                         |
| 2               | Afghanistan | 2002           | Millet                    | 2                                                           |
| 2               | Afghanistan | 2002           | Mutton & Goat Meat        | 15                                                          |
| 2               | Afghanistan | 2002           | Nuts                      | 2                                                           |
| 2               | Afghanistan | 2002           | Offals, Edible            | 6                                                           |
| 2               | Afghanistan | 2002           | Oranges, Mandarines       | 3                                                           |
| 2               | Afghanistan | 2002           | Palm Oil                  | 2                                                           |
| 2               | Afghanistan | 2002           | Potatoes                  | 27                                                          |
| 2               | Afghanistan | 2002           | Poultry Meat              | 3                                                           |
| 2               | Afghanistan | 2002           | Pulses, Other             | 3                                                           |
| 2               | Afghanistan | 2002           | Rice (Milled Equivalent)  | 55                                                          |
| 2               | Afghanistan | 2002           | Sesameseed                | 1                                                           |
| 2               | Afghanistan | 2002           | Soyabean Oil              | 1                                                           |
| 2               | Afghanistan | 2002           | Sugar, Refined Equivalent | 8                                                           |
| 2               | Afghanistan | 2002           | Sunflowerseed Oil         | 1                                                           |
| 2               | Afghanistan | 2002           | Tea                       | 2                                                           |
| 2               | Afghanistan | 2002           | Vegetables, Other         | 74                                                          |
| 2               | Afghanistan | 2002           | Wheat                     | 343                                                         |
| 2               | Afghanistan | 2003           | Apples                    | 2                                                           |
| 2               | Afghanistan | 2003           | Bananas                   | 1                                                           |
| 2               | Afghanistan | 2003           | Barley                    | 17                                                          |
| 2               | Afghanistan | 2003           | Bovine Meat               | 16                                                          |
| 2               | Afghanistan | 2003           | Butter, Ghee              | 4                                                           |
| 2               | Afghanistan | 2003           | Cheese                    | 2                                                           |
| 2               | Afghanistan | 2003           | Citrus, Other             | 1                                                           |
| 2               | Afghanistan | 2003           | Eggs                      | 2                                                           |
| 2               | Afghanistan | 2003           | Fats, Animals, Raw        | 1                                                           |
| 2               | Afghanistan | 2003           | Fruits, Other             | 29                                                          |
| 2               | Afghanistan | 2003           | Grapes                    | 20                                                          |
| 2               | Afghanistan | 2003           | Honey                     | 1                                                           |
| 2               | Afghanistan | 2003           | Maize                     | 14                                                          |
| 2               | Afghanistan | 2003           | Meat, Other               | 1                                                           |
| 2               | Afghanistan | 2003           | Milk, Whole               | 109                                                         |
| 2               | Afghanistan | 2003           | Millet                    | 2                                                           |
| 2               | Afghanistan | 2003           | Mutton & Goat Meat        | 14                                                          |
| 2               | Afghanistan | 2003           | Nuts                      | 1                                                           |
| 2               | Afghanistan | 2003           | Offals, Edible            | 5                                                           |



Dietary calcium and zinc deficiency risks are decreasing but remain prevalent

| FAO countrycode | Country     | Reference year | Food item                 | Gross food supply (g capita <sup>-1</sup> d <sup>-1</sup> ) |
|-----------------|-------------|----------------|---------------------------|-------------------------------------------------------------|
| 2               | Afghanistan | 2003           | Oranges, Mandarines       | 3                                                           |
| 2               | Afghanistan | 2003           | Palm Oil                  | 4                                                           |
| 2               | Afghanistan | 2003           | Potatoes                  | 41                                                          |
| 2               | Afghanistan | 2003           | Poultry Meat              | 3                                                           |
| 2               | Afghanistan | 2003           | Pulses, Other             | 3                                                           |
| 2               | Afghanistan | 2003           | Rice (Milled Equivalent)  | 55                                                          |
| 2               | Afghanistan | 2003           | Sesameseed                | 2                                                           |
| 2               | Afghanistan | 2003           | Soyabean Oil              | 1                                                           |
| 2               | Afghanistan | 2003           | Sugar, Refined Equivalent | 10                                                          |
| 2               | Afghanistan | 2003           | Sunflowerseed Oil         | 1                                                           |
| 2               | Afghanistan | 2003           | Sweeteners, Other         | 1                                                           |
| 2               | Afghanistan | 2003           | Tea                       | 6                                                           |
| 2               | Afghanistan | 2003           | Vegetables, Other         | 95                                                          |
| 2               | Afghanistan | 2003           | Wheat                     | 367                                                         |
| 2               | Afghanistan | 2004           | Apples                    | 2                                                           |
| 2               | Afghanistan | 2004           | Bananas                   | 1                                                           |
| 2               | Afghanistan | 2004           | Barley                    | 21                                                          |
| 2               | Afghanistan | 2004           | Beer                      | 1                                                           |
| 2               | Afghanistan | 2004           | Bovine Meat               | 17                                                          |
| 2               | Afghanistan | 2004           | Butter, Ghee              | 4                                                           |
| 2               | Afghanistan | 2004           | Cheese                    | 2                                                           |
| 2               | Afghanistan | 2004           | Citrus, Other             | 1                                                           |
| 2               | Afghanistan | 2004           | Eggs                      | 2                                                           |
| 2               | Afghanistan | 2004           | Fats, Animals, Raw        | 1                                                           |
| 2               | Afghanistan | 2004           | Fruits, Other             | 28                                                          |
| 2               | Afghanistan | 2004           | Grapes                    | 23                                                          |
| 2               | Afghanistan | 2004           | Maize                     | 26                                                          |
| 2               | Afghanistan | 2004           | Meat, Other               | 1                                                           |
| 2               | Afghanistan | 2004           | Milk, Whole               | 108                                                         |
| 2               | Afghanistan | 2004           | Millet                    | 2                                                           |
| 2               | Afghanistan | 2004           | Mutton & Goat Meat        | 15                                                          |
| 2               | Afghanistan | 2004           | Nuts                      | 1                                                           |
| 2               | Afghanistan | 2004           | Offals, Edible            | 5                                                           |
| 2               | Afghanistan | 2004           | Oranges, Mandarines       | 4                                                           |
| 2               | Afghanistan | 2004           | Palm Oil                  | 8                                                           |
| 2               | Afghanistan | 2004           | Potatoes                  | 32                                                          |
| 2               | Afghanistan | 2004           | Poultry Meat              | 4                                                           |
| 2               | Afghanistan | 2004           | Pulses, Other             | 2                                                           |
| 2               | Afghanistan | 2004           | Rice (Milled Equivalent)  | 48                                                          |
| 2               | Afghanistan | 2004           | Sesameseed                | 2                                                           |
| 2               | Afghanistan | 2004           | Soyabean Oil              | 1                                                           |
| 2               | Afghanistan | 2004           | Sugar, Refined Equivalent | 13                                                          |
| 2               | Afghanistan | 2004           | Sunflowerseed Oil         | 1                                                           |
| 2               | Afghanistan | 2004           | Sweeteners, Other         | 1                                                           |
| 2               | Afghanistan | 2004           | Tea                       | 3                                                           |
| 2               | Afghanistan | 2004           | Vegetables, Other         | 72                                                          |
| 2               | Afghanistan | 2004           | Wheat                     | 371                                                         |
| 2               | Afghanistan | 2005           | Apples                    | 2                                                           |
| 2               | Afghanistan | 2005           | Barley                    | 5                                                           |
| 2               | Afghanistan | 2005           | Bovine Meat               | 16                                                          |
| 2               | Afghanistan | 2005           | Butter, Ghee              | 4                                                           |
| 2               | Afghanistan | 2005           | Cheese                    | 2                                                           |
| 2               | Afghanistan | 2005           | Citrus, Other             | 1                                                           |
| 2               | Afghanistan | 2005           | Dates                     | 1                                                           |
| 2               | Afghanistan | 2005           | Eggs                      | 2                                                           |
| 2               | Afghanistan | 2005           | Fats, Animals, Raw        | 1                                                           |
| 2               | Afghanistan | 2005           | Fruits, Other             | 30                                                          |
| 2               | Afghanistan | 2005           | Grapes                    | 25                                                          |
| 2               | Afghanistan | 2005           | Maize                     | 7                                                           |
| 2               | Afghanistan | 2005           | Meat, Other               | 2                                                           |
| 2               | Afghanistan | 2005           | Milk, Whole               | 101                                                         |
| 2               | Afghanistan | 2005           | Millet                    | 2                                                           |
| 2               | Afghanistan | 2005           | Mutton & Goat Meat        | 15                                                          |
| 2               | Afghanistan | 2005           | Nuts                      | 1                                                           |
| 2               | Afghanistan | 2005           | Offals, Edible            | 6                                                           |
| 2               | Afghanistan | 2005           | Oranges, Mandarines       | 1                                                           |
| 2               | Afghanistan | 2005           | Palm Oil                  | 8                                                           |
| 2               | Afghanistan | 2005           | Potatoes                  | 32                                                          |
| 2               | Afghanistan | 2005           | Poultry Meat              | 6                                                           |
| 2               | Afghanistan | 2005           | Pulses, Other             | 4                                                           |
| 2               | Afghanistan | 2005           | Rice (Milled Equivalent)  | 49                                                          |
| 2               | Afghanistan | 2005           | Sesameseed                | 2                                                           |
| 2               | Afghanistan | 2005           | Soyabean Oil              | 4                                                           |
| 2               | Afghanistan | 2005           | Sugar, Refined Equivalent | 15                                                          |
| 2               | Afghanistan | 2005           | Sunflowerseed Oil         | 1                                                           |
| 2               | Afghanistan | 2005           | Sweeteners, Other         | 2                                                           |
| 2               | Afghanistan | 2005           | Tea                       | 1                                                           |
| 2               | Afghanistan | 2005           | Vegetables, Other         | 101                                                         |
| 2               | Afghanistan | 2005           | Wheat                     | 384                                                         |
| 2               | Afghanistan | 2006           | Apples                    | 5                                                           |
| 2               | Afghanistan | 2006           | Bananas                   | 1                                                           |
| 2               | Afghanistan | 2006           | Barley                    | 5                                                           |
| 2               | Afghanistan | 2006           | Bovine Meat               | 13                                                          |
| 2               | Afghanistan | 2006           | Butter, Ghee              | 3                                                           |
| 2               | Afghanistan | 2006           | Cheese                    | 2                                                           |
| 2               | Afghanistan | 2006           | Citrus, Other             | 1                                                           |
| 2               | Afghanistan | 2006           | Dates                     | 1                                                           |
| 2               | Afghanistan | 2006           | Eggs                      | 2                                                           |
| 2               | Afghanistan | 2006           | Fats, Animals, Raw        | 1                                                           |
| 2               | Afghanistan | 2006           | Fruits, Other             | 28                                                          |
| 2               | Afghanistan | 2006           | Grapes                    | 21                                                          |
| 2               | Afghanistan | 2006           | Maize                     | 9                                                           |
| 2               | Afghanistan | 2006           | Meat, Other               | 1                                                           |
| 2               | Afghanistan | 2006           | Milk, Whole               | 93                                                          |
| 2               | Afghanistan | 2006           | Millet                    | 1                                                           |
| 2               | Afghanistan | 2006           | Mutton & Goat Meat        | 13                                                          |
| 2               | Afghanistan | 2006           | Nuts                      | 3                                                           |

Dietary calcium and zinc deficiency risks are decreasing but remain prevalent

| FAO countrycode | Country     | Reference year | Food item                 | Gross food supply (g capita <sup>-1</sup> d <sup>-1</sup> ) |
|-----------------|-------------|----------------|---------------------------|-------------------------------------------------------------|
| 2               | Afghanistan | 2006           | Offals, Edible            | 5                                                           |
| 2               | Afghanistan | 2006           | Oranges, Mandarines       | 5                                                           |
| 2               | Afghanistan | 2006           | Palm Oil                  | 6                                                           |
| 2               | Afghanistan | 2006           | Potatoes                  | 31                                                          |
| 2               | Afghanistan | 2006           | Poultry Meat              | 4                                                           |
| 2               | Afghanistan | 2006           | Pulses, Other             | 4                                                           |
| 2               | Afghanistan | 2006           | Rice (Milled Equivalent)  | 58                                                          |
| 2               | Afghanistan | 2006           | Sesameseed                | 1                                                           |
| 2               | Afghanistan | 2006           | Soyabean Oil              | 2                                                           |
| 2               | Afghanistan | 2006           | Sugar, Refined Equivalent | 17                                                          |
| 2               | Afghanistan | 2006           | Sunflowerseed Oil         | 1                                                           |
| 2               | Afghanistan | 2006           | Sweeteners, Other         | 1                                                           |
| 2               | Afghanistan | 2006           | Tea                       | 2                                                           |
| 2               | Afghanistan | 2006           | Tomatoes                  | 1                                                           |
| 2               | Afghanistan | 2006           | Vegetables, Other         | 101                                                         |
| 2               | Afghanistan | 2006           | Wheat                     | 396                                                         |
| 2               | Afghanistan | 2007           | Apples                    | 5                                                           |
| 2               | Afghanistan | 2007           | Bananas                   | 1                                                           |
| 2               | Afghanistan | 2007           | Barley                    | 5                                                           |
| 2               | Afghanistan | 2007           | Bovine Meat               | 15                                                          |
| 2               | Afghanistan | 2007           | Butter, Ghee              | 3                                                           |
| 2               | Afghanistan | 2007           | Cheese                    | 2                                                           |
| 2               | Afghanistan | 2007           | Eggs                      | 3                                                           |
| 2               | Afghanistan | 2007           | Fats, Animals, Raw        | 1                                                           |
| 2               | Afghanistan | 2007           | Fruits, Other             | 24                                                          |
| 2               | Afghanistan | 2007           | Grapes                    | 24                                                          |
| 2               | Afghanistan | 2007           | Maize                     | 7                                                           |
| 2               | Afghanistan | 2007           | Meat, Other               | 1                                                           |
| 2               | Afghanistan | 2007           | Milk, Whole               | 94                                                          |
| 2               | Afghanistan | 2007           | Millet                    | 2                                                           |
| 2               | Afghanistan | 2007           | Mutton & Goat Meat        | 10                                                          |
| 2               | Afghanistan | 2007           | Nuts                      | 4                                                           |
| 2               | Afghanistan | 2007           | Offals, Edible            | 5                                                           |
| 2               | Afghanistan | 2007           | Oranges, Mandarines       | 1                                                           |
| 2               | Afghanistan | 2007           | Palm Oil                  | 5                                                           |
| 2               | Afghanistan | 2007           | Potatoes                  | 27                                                          |
| 2               | Afghanistan | 2007           | Poultry Meat              | 3                                                           |
| 2               | Afghanistan | 2007           | Pulses, Other             | 4                                                           |
| 2               | Afghanistan | 2007           | Rape and Mustard Oil      | 1                                                           |
| 2               | Afghanistan | 2007           | Rice (Milled Equivalent)  | 47                                                          |
| 2               | Afghanistan | 2007           | Sesameseed                | 2                                                           |
| 2               | Afghanistan | 2007           | Soyabean Oil              | 2                                                           |
| 2               | Afghanistan | 2007           | Sugar, Refined Equivalent | 18                                                          |
| 2               | Afghanistan | 2007           | Sunflowerseed Oil         | 1                                                           |
| 2               | Afghanistan | 2007           | Sweeteners, Other         | 1                                                           |
| 2               | Afghanistan | 2007           | Tea                       | 3                                                           |
| 2               | Afghanistan | 2007           | Vegetables, Other         | 99                                                          |
| 2               | Afghanistan | 2007           | Wheat                     | 433                                                         |
| 2               | Afghanistan | 2008           | Apples                    | 5                                                           |
| 2               | Afghanistan | 2008           | Bananas                   | 1                                                           |
| 2               | Afghanistan | 2008           | Barley                    | 6                                                           |
| 2               | Afghanistan | 2008           | Bovine Meat               | 14                                                          |
| 2               | Afghanistan | 2008           | Butter, Ghee              | 3                                                           |
| 2               | Afghanistan | 2008           | Cheese                    | 2                                                           |
| 2               | Afghanistan | 2008           | Eggs                      | 3                                                           |
| 2               | Afghanistan | 2008           | Fats, Animals, Raw        | 1                                                           |
| 2               | Afghanistan | 2008           | Fruits, Other             | 24                                                          |
| 2               | Afghanistan | 2008           | Grapes                    | 20                                                          |
| 2               | Afghanistan | 2008           | Maize                     | 7                                                           |
| 2               | Afghanistan | 2008           | Meat, Other               | 1                                                           |
| 2               | Afghanistan | 2008           | Milk, Whole               | 90                                                          |
| 2               | Afghanistan | 2008           | Millet                    | 2                                                           |
| 2               | Afghanistan | 2008           | Mutton & Goat Meat        | 13                                                          |
| 2               | Afghanistan | 2008           | Nuts                      | 4                                                           |
| 2               | Afghanistan | 2008           | Offals, Edible            | 5                                                           |
| 2               | Afghanistan | 2008           | Oranges, Mandarines       | 1                                                           |
| 2               | Afghanistan | 2008           | Palm Oil                  | 4                                                           |
| 2               | Afghanistan | 2008           | Potatoes                  | 25                                                          |
| 2               | Afghanistan | 2008           | Poultry Meat              | 5                                                           |
| 2               | Afghanistan | 2008           | Pulses, Other             | 5                                                           |
| 2               | Afghanistan | 2008           | Rape and Mustard Oil      | 1                                                           |
| 2               | Afghanistan | 2008           | Rice (Milled Equivalent)  | 50                                                          |
| 2               | Afghanistan | 2008           | Sesameseed                | 2                                                           |
| 2               | Afghanistan | 2008           | Soyabean Oil              | 1                                                           |
| 2               | Afghanistan | 2008           | Spices, Other             | 1                                                           |
| 2               | Afghanistan | 2008           | Sugar, Refined Equivalent | 20                                                          |
| 2               | Afghanistan | 2008           | Sweeteners, Other         | 1                                                           |
| 2               | Afghanistan | 2008           | Tea                       | 4                                                           |
| 2               | Afghanistan | 2008           | Vegetables, Other         | 91                                                          |
| 2               | Afghanistan | 2008           | Wheat                     | 431                                                         |
| 2               | Afghanistan | 2009           | Apples                    | 6                                                           |
| 2               | Afghanistan | 2009           | Bananas                   | 4                                                           |
| 2               | Afghanistan | 2009           | Barley                    | 5                                                           |
| 2               | Afghanistan | 2009           | Bovine Meat               | 13                                                          |
| 2               | Afghanistan | 2009           | Butter, Ghee              | 3                                                           |
| 2               | Afghanistan | 2009           | Cheese                    | 2                                                           |
| 2               | Afghanistan | 2009           | Eggs                      | 3                                                           |
| 2               | Afghanistan | 2009           | Fats, Animals, Raw        | 1                                                           |
| 2               | Afghanistan | 2009           | Fruits, Other             | 22                                                          |
| 2               | Afghanistan | 2009           | Grapes                    | 21                                                          |
| 2               | Afghanistan | 2009           | Maize                     | 7                                                           |
| 2               | Afghanistan | 2009           | Meat, Other               | 1                                                           |
| 2               | Afghanistan | 2009           | Milk, Whole               | 89                                                          |
| 2               | Afghanistan | 2009           | Millet                    | 2                                                           |
| 2               | Afghanistan | 2009           | Mutton & Goat Meat        | 14                                                          |
| 2               | Afghanistan | 2009           | Nuts                      | 3                                                           |
| 2               | Afghanistan | 2009           | Offals, Edible            | 5                                                           |

Dietary calcium and zinc deficiency risks are decreasing but remain prevalent

| FAO countrycode | Country     | Reference year | Food item                 | Gross food supply (g capita <sup>-1</sup> d <sup>-1</sup> ) |
|-----------------|-------------|----------------|---------------------------|-------------------------------------------------------------|
| 2               | Afghanistan | 2009           | Oranges, Mandarines       | 4                                                           |
| 2               | Afghanistan | 2009           | Palm Oil                  | 5                                                           |
| 2               | Afghanistan | 2009           | Potatoes                  | 25                                                          |
| 2               | Afghanistan | 2009           | Poultry Meat              | 4                                                           |
| 2               | Afghanistan | 2009           | Pulses, Other             | 8                                                           |
| 2               | Afghanistan | 2009           | Rape and Mustard Oil      | 1                                                           |
| 2               | Afghanistan | 2009           | Rice (Milled Equivalent)  | 41                                                          |
| 2               | Afghanistan | 2009           | Sesameseed                | 2                                                           |
| 2               | Afghanistan | 2009           | Soyabean Oil              | 1                                                           |
| 2               | Afghanistan | 2009           | Sugar, Refined Equivalent | 21                                                          |
| 2               | Afghanistan | 2009           | Sunflowerseed Oil         | 1                                                           |
| 2               | Afghanistan | 2009           | Tea                       | 1                                                           |
| 2               | Afghanistan | 2009           | Vegetables, Other         | 104                                                         |
| 2               | Afghanistan | 2009           | Wheat                     | 449                                                         |
| 2               | Afghanistan | 2010           | Apples                    | 6                                                           |
| 2               | Afghanistan | 2010           | Bananas                   | 2                                                           |
| 2               | Afghanistan | 2010           | Barley                    | 6                                                           |
| 2               | Afghanistan | 2010           | Bovine Meat               | 13                                                          |
| 2               | Afghanistan | 2010           | Butter, Ghee              | 3                                                           |
| 2               | Afghanistan | 2010           | Cheese                    | 2                                                           |
| 2               | Afghanistan | 2010           | Dates                     | 1                                                           |
| 2               | Afghanistan | 2010           | Eggs                      | 2                                                           |
| 2               | Afghanistan | 2010           | Fats, Animals, Raw        | 2                                                           |
| 2               | Afghanistan | 2010           | Fruits, Other             | 24                                                          |
| 2               | Afghanistan | 2010           | Grapes                    | 25                                                          |
| 2               | Afghanistan | 2010           | Maize                     | 8                                                           |
| 2               | Afghanistan | 2010           | Meat, Other               | 1                                                           |
| 2               | Afghanistan | 2010           | Milk, Whole               | 87                                                          |
| 2               | Afghanistan | 2010           | Millet                    | 1                                                           |
| 2               | Afghanistan | 2010           | Mutton & Goat Meat        | 15                                                          |
| 2               | Afghanistan | 2010           | Nuts                      | 6                                                           |
| 2               | Afghanistan | 2010           | Offals, Edible            | 5                                                           |
| 2               | Afghanistan | 2010           | Oranges, Mandarines       | 12                                                          |
| 2               | Afghanistan | 2010           | Palm Oil                  | 6                                                           |
| 2               | Afghanistan | 2010           | Potatoes                  | 19                                                          |
| 2               | Afghanistan | 2010           | Poultry Meat              | 6                                                           |
| 2               | Afghanistan | 2010           | Pulses, Other             | 6                                                           |
| 2               | Afghanistan | 2010           | Rice (Milled Equivalent)  | 43                                                          |
| 2               | Afghanistan | 2010           | Sesameseed                | 2                                                           |
| 2               | Afghanistan | 2010           | Soyabean Oil              | 1                                                           |
| 2               | Afghanistan | 2010           | Sugar, Refined Equivalent | 21                                                          |
| 2               | Afghanistan | 2010           | Sunflowerseed Oil         | 1                                                           |
| 2               | Afghanistan | 2010           | Sweeteners, Other         | 1                                                           |
| 2               | Afghanistan | 2010           | Tea                       | 3                                                           |
| 2               | Afghanistan | 2010           | Vegetables, Other         | 94                                                          |
| 2               | Afghanistan | 2010           | Wheat                     | 444                                                         |
| 2               | Afghanistan | 2011           | Apples                    | 5                                                           |
| 2               | Afghanistan | 2011           | Bananas                   | 3                                                           |
| 2               | Afghanistan | 2011           | Barley                    | 7                                                           |
| 2               | Afghanistan | 2011           | Bovine Meat               | 13                                                          |
| 2               | Afghanistan | 2011           | Butter, Ghee              | 3                                                           |
| 2               | Afghanistan | 2011           | Cheese                    | 2                                                           |
| 2               | Afghanistan | 2011           | Citrus, Other             | 3                                                           |
| 2               | Afghanistan | 2011           | Dates                     | 1                                                           |
| 2               | Afghanistan | 2011           | Eggs                      | 3                                                           |
| 2               | Afghanistan | 2011           | Fats, Animals, Raw        | 2                                                           |
| 2               | Afghanistan | 2011           | Fruits, Other             | 19                                                          |
| 2               | Afghanistan | 2011           | Grapes                    | 31                                                          |
| 2               | Afghanistan | 2011           | Maize                     | 7                                                           |
| 2               | Afghanistan | 2011           | Meat, Other               | 1                                                           |
| 2               | Afghanistan | 2011           | Milk, Whole               | 85                                                          |
| 2               | Afghanistan | 2011           | Millet                    | 1                                                           |
| 2               | Afghanistan | 2011           | Mutton & Goat Meat        | 15                                                          |
| 2               | Afghanistan | 2011           | Nuts                      | 7                                                           |
| 2               | Afghanistan | 2011           | Offals, Edible            | 5                                                           |
| 2               | Afghanistan | 2011           | Oranges, Mandarines       | 10                                                          |
| 2               | Afghanistan | 2011           | Palm Oil                  | 5                                                           |
| 2               | Afghanistan | 2011           | Potatoes                  | 16                                                          |
| 2               | Afghanistan | 2011           | Poultry Meat              | 7                                                           |
| 2               | Afghanistan | 2011           | Pulses, Other             | 8                                                           |
| 2               | Afghanistan | 2011           | Rice (Milled Equivalent)  | 45                                                          |
| 2               | Afghanistan | 2011           | Sesameseed                | 2                                                           |
| 2               | Afghanistan | 2011           | Soyabean Oil              | 2                                                           |
| 2               | Afghanistan | 2011           | Spices, Other             | 1                                                           |
| 2               | Afghanistan | 2011           | Sugar, Refined Equivalent | 21                                                          |
| 2               | Afghanistan | 2011           | Sunflowerseed Oil         | 1                                                           |
| 2               | Afghanistan | 2011           | Sweeteners, Other         | 2                                                           |
| 2               | Afghanistan | 2011           | Tea                       | 6                                                           |
| 2               | Afghanistan | 2011           | Vegetables, Other         | 81                                                          |
| 2               | Afghanistan | 2011           | Wheat                     | 443                                                         |
| 3               | Albania     | 1992           | Apples                    | 8                                                           |
| 3               | Albania     | 1992           | Barley                    | 1                                                           |
| 3               | Albania     | 1992           | Beans                     | 11                                                          |
| 3               | Albania     | 1992           | Beer                      | 3                                                           |
| 3               | Albania     | 1992           | Beverages, Alcoholic      | 3                                                           |
| 3               | Albania     | 1992           | Bovine Meat               | 31                                                          |
| 3               | Albania     | 1992           | Butter, Ghee              | 8                                                           |
| 3               | Albania     | 1992           | Cheese                    | 8                                                           |
| 3               | Albania     | 1992           | Cocoa Beans               | 1                                                           |
| 3               | Albania     | 1992           | Coffee                    | 2                                                           |
| 3               | Albania     | 1992           | Demersal Fish             | 1                                                           |
| 3               | Albania     | 1992           | Eggs                      | 10                                                          |
| 3               | Albania     | 1992           | Fats, Animals, Raw        | 3                                                           |
| 3               | Albania     | 1992           | Freshwater Fish           | 1                                                           |
| 3               | Albania     | 1992           | Fruits, Other             | 18                                                          |
| 3               | Albania     | 1992           | Grapes                    | 18                                                          |
| 3               | Albania     | 1992           | Maize                     | 16                                                          |

Dietary calcium and zinc deficiency risks are decreasing but remain prevalent

| FAO countrycode | Country | Reference year | Food item                 | Gross food supply (g capita <sup>-1</sup> d <sup>-1</sup> ) |
|-----------------|---------|----------------|---------------------------|-------------------------------------------------------------|
| 3               | Albania | 1992           | Milk, Whole               | 393                                                         |
| 3               | Albania | 1992           | Mutton & Goat Meat        | 12                                                          |
| 3               | Albania | 1992           | Nuts                      | 3                                                           |
| 3               | Albania | 1992           | Offals, Edible            | 6                                                           |
| 3               | Albania | 1992           | Olive Oil                 | 2                                                           |
| 3               | Albania | 1992           | Olives                    | 6                                                           |
| 3               | Albania | 1992           | Onions                    | 37                                                          |
| 3               | Albania | 1992           | Oranges, Mandarines       | 10                                                          |
| 3               | Albania | 1992           | Pigmeat                   | 10                                                          |
| 3               | Albania | 1992           | Potatoes                  | 40                                                          |
| 3               | Albania | 1992           | Poultry Meat              | 2                                                           |
| 3               | Albania | 1992           | Rice (Milled Equivalent)  | 13                                                          |
| 3               | Albania | 1992           | Soyabean Oil              | 4                                                           |
| 3               | Albania | 1992           | Sugar, Refined Equivalent | 37                                                          |
| 3               | Albania | 1992           | Sunflowerseed Oil         | 17                                                          |
| 3               | Albania | 1992           | Sweeteners, Other         | 11                                                          |
| 3               | Albania | 1992           | Tomatoes                  | 79                                                          |
| 3               | Albania | 1992           | Vegetables, Other         | 239                                                         |
| 3               | Albania | 1992           | Wheat                     | 537                                                         |
| 3               | Albania | 1992           | Wine                      | 10                                                          |
| 3               | Albania | 1993           | Apples                    | 21                                                          |
| 3               | Albania | 1993           | Bananas                   | 1                                                           |
| 3               | Albania | 1993           | Beans                     | 11                                                          |
| 3               | Albania | 1993           | Beer                      | 18                                                          |
| 3               | Albania | 1993           | Beverages, Alcoholic      | 1                                                           |
| 3               | Albania | 1993           | Bovine Meat               | 24                                                          |
| 3               | Albania | 1993           | Butter, Ghee              | 9                                                           |
| 3               | Albania | 1993           | Cheese                    | 8                                                           |
| 3               | Albania | 1993           | Cocoa Beans               | 1                                                           |
| 3               | Albania | 1993           | Coffee                    | 3                                                           |
| 3               | Albania | 1993           | Eggs                      | 13                                                          |
| 3               | Albania | 1993           | Fats, Animals, Raw        | 2                                                           |
| 3               | Albania | 1993           | Freshwater Fish           | 1                                                           |
| 3               | Albania | 1993           | Fruits, Other             | 25                                                          |
| 3               | Albania | 1993           | Grapes                    | 28                                                          |
| 3               | Albania | 1993           | Maize                     | 16                                                          |
| 3               | Albania | 1993           | Milk, Whole               | 442                                                         |
| 3               | Albania | 1993           | Molluscs, Other           | 1                                                           |
| 3               | Albania | 1993           | Mutton & Goat Meat        | 12                                                          |
| 3               | Albania | 1993           | Nuts                      | 3                                                           |
| 3               | Albania | 1993           | Offals, Edible            | 7                                                           |
| 3               | Albania | 1993           | Olive Oil                 | 2                                                           |
| 3               | Albania | 1993           | Olives                    | 3                                                           |
| 3               | Albania | 1993           | Onions                    | 42                                                          |
| 3               | Albania | 1993           | Oranges, Mandarines       | 20                                                          |
| 3               | Albania | 1993           | Pigmeat                   | 13                                                          |
| 3               | Albania | 1993           | Potatoes                  | 40                                                          |
| 3               | Albania | 1993           | Poultry Meat              | 11                                                          |
| 3               | Albania | 1993           | Rice (Milled Equivalent)  | 17                                                          |
| 3               | Albania | 1993           | Rye                       | 1                                                           |
| 3               | Albania | 1993           | Soyabean Oil              | 2                                                           |
| 3               | Albania | 1993           | Sugar, Refined Equivalent | 40                                                          |
| 3               | Albania | 1993           | Sunflowerseed Oil         | 18                                                          |
| 3               | Albania | 1993           | Sweeteners, Other         | 32                                                          |
| 3               | Albania | 1993           | Tomatoes                  | 90                                                          |
| 3               | Albania | 1993           | Vegetables, Other         | 273                                                         |
| 3               | Albania | 1993           | Wheat                     | 545                                                         |
| 3               | Albania | 1993           | Wine                      | 10                                                          |
| 3               | Albania | 1994           | Apples                    | 16                                                          |
| 3               | Albania | 1994           | Bananas                   | 4                                                           |
| 3               | Albania | 1994           | Beans                     | 10                                                          |
| 3               | Albania | 1994           | Beer                      | 44                                                          |
| 3               | Albania | 1994           | Beverages, Alcoholic      | 4                                                           |
| 3               | Albania | 1994           | Bovine Meat               | 27                                                          |
| 3               | Albania | 1994           | Butter, Ghee              | 5                                                           |
| 3               | Albania | 1994           | Cheese                    | 11                                                          |
| 3               | Albania | 1994           | Cocoa Beans               | 1                                                           |
| 3               | Albania | 1994           | Coffee                    | 2                                                           |
| 3               | Albania | 1994           | Eggs                      | 13                                                          |
| 3               | Albania | 1994           | Fats, Animals, Raw        | 2                                                           |
| 3               | Albania | 1994           | Freshwater Fish           | 1                                                           |
| 3               | Albania | 1994           | Fruits, Other             | 29                                                          |
| 3               | Albania | 1994           | Grapes                    | 30                                                          |
| 3               | Albania | 1994           | Lemons, Limes             | 2                                                           |
| 3               | Albania | 1994           | Maize                     | 16                                                          |
| 3               | Albania | 1994           | Milk, Whole               | 543                                                         |
| 3               | Albania | 1994           | Molluscs, Other           | 2                                                           |
| 3               | Albania | 1994           | Mutton & Goat Meat        | 15                                                          |
| 3               | Albania | 1994           | Nuts                      | 4                                                           |
| 3               | Albania | 1994           | Offals, Edible            | 9                                                           |
| 3               | Albania | 1994           | Olive Oil                 | 2                                                           |
| 3               | Albania | 1994           | Olives                    | 6                                                           |
| 3               | Albania | 1994           | Onions                    | 46                                                          |
| 3               | Albania | 1994           | Oranges, Mandarines       | 25                                                          |
| 3               | Albania | 1994           | Pigmeat                   | 14                                                          |
| 3               | Albania | 1994           | Potatoes                  | 40                                                          |
| 3               | Albania | 1994           | Poultry Meat              | 12                                                          |
| 3               | Albania | 1994           | Rice (Milled Equivalent)  | 8                                                           |
| 3               | Albania | 1994           | Rye                       | 2                                                           |
| 3               | Albania | 1994           | Sugar, Refined Equivalent | 45                                                          |
| 3               | Albania | 1994           | Sunflowerseed Oil         | 17                                                          |
| 3               | Albania | 1994           | Sweeteners, Other         | 49                                                          |
| 3               | Albania | 1994           | Tomatoes                  | 95                                                          |
| 3               | Albania | 1994           | Vegetables, Other         | 287                                                         |
| 3               | Albania | 1994           | Wheat                     | 550                                                         |
| 3               | Albania | 1994           | Wine                      | 10                                                          |
| 3               | Albania | 1995           | Apples                    | 13                                                          |

Dietary calcium and zinc deficiency risks are decreasing but remain prevalent

| FAO countrycode | Country | Reference year | Food item                 | Gross food supply (g capita <sup>-1</sup> d <sup>-1</sup> ) |
|-----------------|---------|----------------|---------------------------|-------------------------------------------------------------|
| 3               | Albania | 1995           | Bananas                   | 18                                                          |
| 3               | Albania | 1995           | Beans                     | 11                                                          |
| 3               | Albania | 1995           | Beer                      | 35                                                          |
| 3               | Albania | 1995           | Beverages, Alcoholic      | 3                                                           |
| 3               | Albania | 1995           | Bovine Meat               | 28                                                          |
| 3               | Albania | 1995           | Butter, Ghee              | 4                                                           |
| 3               | Albania | 1995           | Cheese                    | 11                                                          |
| 3               | Albania | 1995           | Cocoa Beans               | 1                                                           |
| 3               | Albania | 1995           | Coffee                    | 2                                                           |
| 3               | Albania | 1995           | Eggs                      | 14                                                          |
| 3               | Albania | 1995           | Fats, Animals, Raw        | 4                                                           |
| 3               | Albania | 1995           | Fruits, Other             | 29                                                          |
| 3               | Albania | 1995           | Grapes                    | 31                                                          |
| 3               | Albania | 1995           | Lemons, Limes             | 1                                                           |
| 3               | Albania | 1995           | Maize                     | 19                                                          |
| 3               | Albania | 1995           | Milk, Whole               | 644                                                         |
| 3               | Albania | 1995           | Molluscs, Other           | 3                                                           |
| 3               | Albania | 1995           | Mutton & Goat Meat        | 15                                                          |
| 3               | Albania | 1995           | Nuts                      | 3                                                           |
| 3               | Albania | 1995           | Offals, Edible            | 10                                                          |
| 3               | Albania | 1995           | Oilcrops Oil, Other       | 1                                                           |
| 3               | Albania | 1995           | Olive Oil                 | 2                                                           |
| 3               | Albania | 1995           | Olives                    | 7                                                           |
| 3               | Albania | 1995           | Onions                    | 33                                                          |
| 3               | Albania | 1995           | Oranges, Mandarines       | 18                                                          |
| 3               | Albania | 1995           | Pelagic Fish              | 1                                                           |
| 3               | Albania | 1995           | Pigmeat                   | 14                                                          |
| 3               | Albania | 1995           | Potatoes                  | 61                                                          |
| 3               | Albania | 1995           | Poultry Meat              | 14                                                          |
| 3               | Albania | 1995           | Rice (Milled Equivalent)  | 15                                                          |
| 3               | Albania | 1995           | Rye                       | 3                                                           |
| 3               | Albania | 1995           | Sugar, Refined Equivalent | 50                                                          |
| 3               | Albania | 1995           | Sunflowerseed Oil         | 15                                                          |
| 3               | Albania | 1995           | Tomatoes                  | 115                                                         |
| 3               | Albania | 1995           | Vegetables, Other         | 245                                                         |
| 3               | Albania | 1995           | Wheat                     | 444                                                         |
| 3               | Albania | 1995           | Wine                      | 15                                                          |
| 3               | Albania | 1996           | Apples                    | 25                                                          |
| 3               | Albania | 1996           | Bananas                   | 10                                                          |
| 3               | Albania | 1996           | Beans                     | 12                                                          |
| 3               | Albania | 1996           | Beer                      | 20                                                          |
| 3               | Albania | 1996           | Beverages, Alcoholic      | 5                                                           |
| 3               | Albania | 1996           | Bovine Meat               | 33                                                          |
| 3               | Albania | 1996           | Butter, Ghee              | 2                                                           |
| 3               | Albania | 1996           | Cereals, Other            | 2                                                           |
| 3               | Albania | 1996           | Cheese                    | 11                                                          |
| 3               | Albania | 1996           | Cocoa Beans               | 1                                                           |
| 3               | Albania | 1996           | Coffee                    | 1                                                           |
| 3               | Albania | 1996           | Eggs                      | 16                                                          |
| 3               | Albania | 1996           | Fats, Animals, Raw        | 4                                                           |
| 3               | Albania | 1996           | Fruits, Other             | 45                                                          |
| 3               | Albania | 1996           | Grapes                    | 26                                                          |
| 3               | Albania | 1996           | Honey                     | 1                                                           |
| 3               | Albania | 1996           | Lemons, Limes             | 4                                                           |
| 3               | Albania | 1996           | Maize                     | 8                                                           |
| 3               | Albania | 1996           | Marine Fish, Other        | 1                                                           |
| 3               | Albania | 1996           | Meat, Other               | 1                                                           |
| 3               | Albania | 1996           | Milk, Whole               | 709                                                         |
| 3               | Albania | 1996           | Mutton & Goat Meat        | 14                                                          |
| 3               | Albania | 1996           | Nuts                      | 7                                                           |
| 3               | Albania | 1996           | Offals, Edible            | 9                                                           |
| 3               | Albania | 1996           | Oilcrops Oil, Other       | 1                                                           |
| 3               | Albania | 1996           | Olive Oil                 | 2                                                           |
| 3               | Albania | 1996           | Olives                    | 9                                                           |
| 3               | Albania | 1996           | Onions                    | 32                                                          |
| 3               | Albania | 1996           | Oranges, Mandarines       | 16                                                          |
| 3               | Albania | 1996           | Pelagic Fish              | 1                                                           |
| 3               | Albania | 1996           | Pigmeat                   | 9                                                           |
| 3               | Albania | 1996           | Potatoes                  | 72                                                          |
| 3               | Albania | 1996           | Poultry Meat              | 18                                                          |
| 3               | Albania | 1996           | Rice (Milled Equivalent)  | 24                                                          |
| 3               | Albania | 1996           | Rye                       | 4                                                           |
| 3               | Albania | 1996           | Sugar, Refined Equivalent | 46                                                          |
| 3               | Albania | 1996           | Sunflowerseed Oil         | 17                                                          |
| 3               | Albania | 1996           | Sweeteners, Other         | 12                                                          |
| 3               | Albania | 1996           | Tomatoes                  | 138                                                         |
| 3               | Albania | 1996           | Vegetables, Other         | 271                                                         |
| 3               | Albania | 1996           | Wheat                     | 460                                                         |
| 3               | Albania | 1996           | Wine                      | 20                                                          |
| 3               | Albania | 1997           | Apples                    | 19                                                          |
| 3               | Albania | 1997           | Bananas                   | 3                                                           |
| 3               | Albania | 1997           | Beans                     | 12                                                          |
| 3               | Albania | 1997           | Beer                      | 16                                                          |
| 3               | Albania | 1997           | Beverages, Alcoholic      | 3                                                           |
| 3               | Albania | 1997           | Bovine Meat               | 30                                                          |
| 3               | Albania | 1997           | Butter, Ghee              | 1                                                           |
| 3               | Albania | 1997           | Cheese                    | 10                                                          |
| 3               | Albania | 1997           | Eggs                      | 13                                                          |
| 3               | Albania | 1997           | Fats, Animals, Raw        | 4                                                           |
| 3               | Albania | 1997           | Fruits, Other             | 36                                                          |
| 3               | Albania | 1997           | Grapes                    | 41                                                          |
| 3               | Albania | 1997           | Groundnut Oil             | 1                                                           |
| 3               | Albania | 1997           | Honey                     | 1                                                           |
| 3               | Albania | 1997           | Lemons, Limes             | 2                                                           |
| 3               | Albania | 1997           | Maize                     | 7                                                           |
| 3               | Albania | 1997           | Meat, Other               | 1                                                           |
| 3               | Albania | 1997           | Milk, Whole               | 591                                                         |

Dietary calcium and zinc deficiency risks are decreasing but remain prevalent

| FAO countrycode | Country | Reference year | Food item                 | Gross food supply (g capita <sup>-1</sup> d <sup>-1</sup> ) |
|-----------------|---------|----------------|---------------------------|-------------------------------------------------------------|
| 3               | Albania | 1997           | Molluscs, Other           | 1                                                           |
| 3               | Albania | 1997           | Mutton & Goat Meat        | 13                                                          |
| 3               | Albania | 1997           | Nuts                      | 6                                                           |
| 3               | Albania | 1997           | Offals, Edible            | 11                                                          |
| 3               | Albania | 1997           | Oilcrops Oil, Other       | 1                                                           |
| 3               | Albania | 1997           | Olive Oil                 | 2                                                           |
| 3               | Albania | 1997           | Olives                    | 11                                                          |
| 3               | Albania | 1997           | Onions                    | 36                                                          |
| 3               | Albania | 1997           | Oranges, Mandarines       | 12                                                          |
| 3               | Albania | 1997           | Pelagic Fish              | 2                                                           |
| 3               | Albania | 1997           | Pigmeat                   | 8                                                           |
| 3               | Albania | 1997           | Potatoes                  | 69                                                          |
| 3               | Albania | 1997           | Poultry Meat              | 9                                                           |
| 3               | Albania | 1997           | Rice (Milled Equivalent)  | 15                                                          |
| 3               | Albania | 1997           | Rye                       | 2                                                           |
| 3               | Albania | 1997           | Soyabean Oil              | 1                                                           |
| 3               | Albania | 1997           | Sugar, Refined Equivalent | 54                                                          |
| 3               | Albania | 1997           | Sunflowerseed Oil         | 16                                                          |
| 3               | Albania | 1997           | Sweeteners, Other         | 3                                                           |
| 3               | Albania | 1997           | Tomatoes                  | 111                                                         |
| 3               | Albania | 1997           | Vegetables, Other         | 261                                                         |
| 3               | Albania | 1997           | Wheat                     | 482                                                         |
| 3               | Albania | 1997           | Wine                      | 14                                                          |
| 3               | Albania | 1998           | Apples                    | 20                                                          |
| 3               | Albania | 1998           | Bananas                   | 3                                                           |
| 3               | Albania | 1998           | Barley                    | 1                                                           |
| 3               | Albania | 1998           | Beans                     | 12                                                          |
| 3               | Albania | 1998           | Beer                      | 16                                                          |
| 3               | Albania | 1998           | Beverages, Alcoholic      | 2                                                           |
| 3               | Albania | 1998           | Beverages, Fermented      | 1                                                           |
| 3               | Albania | 1998           | Bovine Meat               | 29                                                          |
| 3               | Albania | 1998           | Butter, Ghee              | 1                                                           |
| 3               | Albania | 1998           | Cheese                    | 9                                                           |
| 3               | Albania | 1998           | Demersal Fish             | 1                                                           |
| 3               | Albania | 1998           | Eggs                      | 14                                                          |
| 3               | Albania | 1998           | Fats, Animals, Raw        | 4                                                           |
| 3               | Albania | 1998           | Fruits, Other             | 48                                                          |
| 3               | Albania | 1998           | Grapes                    | 48                                                          |
| 3               | Albania | 1998           | Groundnut Oil             | 1                                                           |
| 3               | Albania | 1998           | Honey                     | 1                                                           |
| 3               | Albania | 1998           | Lemons, Limes             | 1                                                           |
| 3               | Albania | 1998           | Maize                     | 7                                                           |
| 3               | Albania | 1998           | Marine Fish, Other        | 1                                                           |
| 3               | Albania | 1998           | Meat, Other               | 1                                                           |
| 3               | Albania | 1998           | Milk, Whole               | 563                                                         |
| 3               | Albania | 1998           | Mutton & Goat Meat        | 14                                                          |
| 3               | Albania | 1998           | Nuts                      | 7                                                           |
| 3               | Albania | 1998           | Offals, Edible            | 11                                                          |
| 3               | Albania | 1998           | Oilcrops Oil, Other       | 1                                                           |
| 3               | Albania | 1998           | Olive Oil                 | 1                                                           |
| 3               | Albania | 1998           | Olives                    | 30                                                          |
| 3               | Albania | 1998           | Onions                    | 41                                                          |
| 3               | Albania | 1998           | Oranges, Mandarines       | 11                                                          |
| 3               | Albania | 1998           | Pelagic Fish              | 3                                                           |
| 3               | Albania | 1998           | Pigmeat                   | 14                                                          |
| 3               | Albania | 1998           | Potatoes                  | 79                                                          |
| 3               | Albania | 1998           | Poultry Meat              | 7                                                           |
| 3               | Albania | 1998           | Pulses, Other             | 1                                                           |
| 3               | Albania | 1998           | Rape and Mustard Oil      | 1                                                           |
| 3               | Albania | 1998           | Rice (Milled Equivalent)  | 21                                                          |
| 3               | Albania | 1998           | Rye                       | 2                                                           |
| 3               | Albania | 1998           | Soyabean Oil              | 1                                                           |
| 3               | Albania | 1998           | Sugar, Refined Equivalent | 48                                                          |
| 3               | Albania | 1998           | Sunflowerseed Oil         | 16                                                          |
| 3               | Albania | 1998           | Sweeteners, Other         | 4                                                           |
| 3               | Albania | 1998           | Tomatoes                  | 117                                                         |
| 3               | Albania | 1998           | Vegetables, Other         | 288                                                         |
| 3               | Albania | 1998           | Wheat                     | 468                                                         |
| 3               | Albania | 1998           | Wine                      | 9                                                           |
| 3               | Albania | 1999           | Apples                    | 23                                                          |
| 3               | Albania | 1999           | Bananas                   | 7                                                           |
| 3               | Albania | 1999           | Beans                     | 13                                                          |
| 3               | Albania | 1999           | Beer                      | 29                                                          |
| 3               | Albania | 1999           | Beverages, Alcoholic      | 3                                                           |
| 3               | Albania | 1999           | Bovine Meat               | 30                                                          |
| 3               | Albania | 1999           | Butter, Ghee              | 1                                                           |
| 3               | Albania | 1999           | Cheese                    | 9                                                           |
| 3               | Albania | 1999           | Cocoa Beans               | 1                                                           |
| 3               | Albania | 1999           | Coffee                    | 2                                                           |
| 3               | Albania | 1999           | Dates                     | 1                                                           |
| 3               | Albania | 1999           | Demersal Fish             | 1                                                           |
| 3               | Albania | 1999           | Eggs                      | 15                                                          |
| 3               | Albania | 1999           | Fats, Animals, Raw        | 3                                                           |
| 3               | Albania | 1999           | Freshwater Fish           | 1                                                           |
| 3               | Albania | 1999           | Fruits, Other             | 60                                                          |
| 3               | Albania | 1999           | Grapes                    | 48                                                          |
| 3               | Albania | 1999           | Honey                     | 1                                                           |
| 3               | Albania | 1999           | Lemons, Limes             | 2                                                           |
| 3               | Albania | 1999           | Maize                     | 8                                                           |
| 3               | Albania | 1999           | Marine Fish, Other        | 3                                                           |
| 3               | Albania | 1999           | Milk, Whole               | 561                                                         |
| 3               | Albania | 1999           | Molluscs, Other           | 1                                                           |
| 3               | Albania | 1999           | Mutton & Goat Meat        | 15                                                          |
| 3               | Albania | 1999           | Nuts                      | 7                                                           |
| 3               | Albania | 1999           | Offals, Edible            | 9                                                           |
| 3               | Albania | 1999           | Oilcrops Oil, Other       | 1                                                           |
| 3               | Albania | 1999           | Olive Oil                 | 1                                                           |

Dietary calcium and zinc deficiency risks are decreasing but remain prevalent

| FAO countrycode | Country | Reference year | Food item                 | Gross food supply (g capita <sup>-1</sup> d <sup>-1</sup> ) |
|-----------------|---------|----------------|---------------------------|-------------------------------------------------------------|
| 3               | Albania | 1999           | Olives                    | 28                                                          |
| 3               | Albania | 1999           | Onions                    | 32                                                          |
| 3               | Albania | 1999           | Oranges, Mandarines       | 17                                                          |
| 3               | Albania | 1999           | Pelagic Fish              | 2                                                           |
| 3               | Albania | 1999           | Pig meat                  | 17                                                          |
| 3               | Albania | 1999           | Potatoes                  | 85                                                          |
| 3               | Albania | 1999           | Poultry Meat              | 24                                                          |
| 3               | Albania | 1999           | Pulses, Other             | 1                                                           |
| 3               | Albania | 1999           | Rice (Milled Equivalent)  | 16                                                          |
| 3               | Albania | 1999           | Rye                       | 2                                                           |
| 3               | Albania | 1999           | Sugar, Refined Equivalent | 47                                                          |
| 3               | Albania | 1999           | Sunflowerseed Oil         | 17                                                          |
| 3               | Albania | 1999           | Sweeteners, Other         | 5                                                           |
| 3               | Albania | 1999           | Tomatoes                  | 121                                                         |
| 3               | Albania | 1999           | Vegetables, Other         | 270                                                         |
| 3               | Albania | 1999           | Wheat                     | 476                                                         |
| 3               | Albania | 1999           | Wine                      | 11                                                          |
| 3               | Albania | 2000           | Apples                    | 30                                                          |
| 3               | Albania | 2000           | Bananas                   | 15                                                          |
| 3               | Albania | 2000           | Beans                     | 13                                                          |
| 3               | Albania | 2000           | Beer                      | 34                                                          |
| 3               | Albania | 2000           | Beverages, Alcoholic      | 3                                                           |
| 3               | Albania | 2000           | Bovine Meat               | 31                                                          |
| 3               | Albania | 2000           | Butter, Ghee              | 1                                                           |
| 3               | Albania | 2000           | Cheese                    | 9                                                           |
| 3               | Albania | 2000           | Cocoa Beans               | 1                                                           |
| 3               | Albania | 2000           | Coffee                    | 3                                                           |
| 3               | Albania | 2000           | Demersal Fish             | 1                                                           |
| 3               | Albania | 2000           | Eggs                      | 17                                                          |
| 3               | Albania | 2000           | Fats, Animals, Raw        | 4                                                           |
| 3               | Albania | 2000           | Freshwater Fish           | 1                                                           |
| 3               | Albania | 2000           | Fruits, Other             | 62                                                          |
| 3               | Albania | 2000           | Grapes                    | 61                                                          |
| 3               | Albania | 2000           | Groundnuts (Shelled Eq)   | 1                                                           |
| 3               | Albania | 2000           | Honey                     | 1                                                           |
| 3               | Albania | 2000           | Lemons, Limes             | 1                                                           |
| 3               | Albania | 2000           | Maize                     | 14                                                          |
| 3               | Albania | 2000           | Marine Fish, Other        | 1                                                           |
| 3               | Albania | 2000           | Milk, Whole               | 593                                                         |
| 3               | Albania | 2000           | Molluscs, Other           | 1                                                           |
| 3               | Albania | 2000           | Mutton & Goat Meat        | 16                                                          |
| 3               | Albania | 2000           | Nuts                      | 6                                                           |
| 3               | Albania | 2000           | Offals, Edible            | 11                                                          |
| 3               | Albania | 2000           | Oilcrops Oil, Other       | 1                                                           |
| 3               | Albania | 2000           | Olive Oil                 | 2                                                           |
| 3               | Albania | 2000           | Olives                    | 20                                                          |
| 3               | Albania | 2000           | Onions                    | 30                                                          |
| 3               | Albania | 2000           | Oranges, Mandarines       | 24                                                          |
| 3               | Albania | 2000           | Pelagic Fish              | 5                                                           |
| 3               | Albania | 2000           | Pig meat                  | 11                                                          |
| 3               | Albania | 2000           | Potatoes                  | 80                                                          |
| 3               | Albania | 2000           | Poultry Meat              | 15                                                          |
| 3               | Albania | 2000           | Rice (Milled Equivalent)  | 15                                                          |
| 3               | Albania | 2000           | Rye                       | 1                                                           |
| 3               | Albania | 2000           | Soyabean Oil              | 3                                                           |
| 3               | Albania | 2000           | Sugar, Refined Equivalent | 47                                                          |
| 3               | Albania | 2000           | Sunflowerseed Oil         | 12                                                          |
| 3               | Albania | 2000           | Sweeteners, Other         | 12                                                          |
| 3               | Albania | 2000           | Tomatoes                  | 120                                                         |
| 3               | Albania | 2000           | Vegetables, Other         | 280                                                         |
| 3               | Albania | 2000           | Wheat                     | 443                                                         |
| 3               | Albania | 2000           | Wine                      | 6                                                           |
| 3               | Albania | 2001           | Apples                    | 37                                                          |
| 3               | Albania | 2001           | Bananas                   | 7                                                           |
| 3               | Albania | 2001           | Beans                     | 13                                                          |
| 3               | Albania | 2001           | Beer                      | 40                                                          |
| 3               | Albania | 2001           | Beverages, Alcoholic      | 3                                                           |
| 3               | Albania | 2001           | Bovine Meat               | 31                                                          |
| 3               | Albania | 2001           | Butter, Ghee              | 1                                                           |
| 3               | Albania | 2001           | Cheese                    | 9                                                           |
| 3               | Albania | 2001           | Citrus, Other             | 1                                                           |
| 3               | Albania | 2001           | Cocoa Beans               | 2                                                           |
| 3               | Albania | 2001           | Coffee                    | 4                                                           |
| 3               | Albania | 2001           | Demersal Fish             | 1                                                           |
| 3               | Albania | 2001           | Eggs                      | 16                                                          |
| 3               | Albania | 2001           | Fats, Animals, Raw        | 5                                                           |
| 3               | Albania | 2001           | Freshwater Fish           | 1                                                           |
| 3               | Albania | 2001           | Fruits, Other             | 95                                                          |
| 3               | Albania | 2001           | Grapes                    | 58                                                          |
| 3               | Albania | 2001           | Groundnuts (Shelled Eq)   | 1                                                           |
| 3               | Albania | 2001           | Honey                     | 1                                                           |
| 3               | Albania | 2001           | Lemons, Limes             | 2                                                           |
| 3               | Albania | 2001           | Maize                     | 8                                                           |
| 3               | Albania | 2001           | Maize Germ Oil            | 1                                                           |
| 3               | Albania | 2001           | Marine Fish, Other        | 1                                                           |
| 3               | Albania | 2001           | Milk, Whole               | 615                                                         |
| 3               | Albania | 2001           | Mutton & Goat Meat        | 16                                                          |
| 3               | Albania | 2001           | Nuts                      | 7                                                           |
| 3               | Albania | 2001           | Offals, Edible            | 10                                                          |
| 3               | Albania | 2001           | Oilcrops Oil, Other       | 1                                                           |
| 3               | Albania | 2001           | Olive Oil                 | 2                                                           |
| 3               | Albania | 2001           | Olives                    | 22                                                          |
| 3               | Albania | 2001           | Onions                    | 30                                                          |
| 3               | Albania | 2001           | Oranges, Mandarines       | 29                                                          |
| 3               | Albania | 2001           | Pelagic Fish              | 5                                                           |
| 3               | Albania | 2001           | Pig meat                  | 18                                                          |
| 3               | Albania | 2001           | Potatoes                  | 81                                                          |

Dietary calcium and zinc deficiency risks are decreasing but remain prevalent

| FAO countrycode | Country | Reference year | Food item                 | Gross food supply (g capita <sup>-1</sup> d <sup>-1</sup> ) |
|-----------------|---------|----------------|---------------------------|-------------------------------------------------------------|
| 3               | Albania | 2001           | Poultry Meat              | 21                                                          |
| 3               | Albania | 2001           | Rape and Mustard Oil      | 1                                                           |
| 3               | Albania | 2001           | Rice (Milled Equivalent)  | 16                                                          |
| 3               | Albania | 2001           | Rye                       | 2                                                           |
| 3               | Albania | 2001           | Soyabean Oil              | 1                                                           |
| 3               | Albania | 2001           | Sugar, Refined Equivalent | 46                                                          |
| 3               | Albania | 2001           | Sunflowerseed Oil         | 13                                                          |
| 3               | Albania | 2001           | Sweet Potatoes            | 1                                                           |
| 3               | Albania | 2001           | Sweeteners, Other         | 15                                                          |
| 3               | Albania | 2001           | Tomatoes                  | 130                                                         |
| 3               | Albania | 2001           | Vegetables, Other         | 286                                                         |
| 3               | Albania | 2001           | Wheat                     | 445                                                         |
| 3               | Albania | 2001           | Wine                      | 8                                                           |
| 3               | Albania | 2002           | Apples                    | 34                                                          |
| 3               | Albania | 2002           | Bananas                   | 16                                                          |
| 3               | Albania | 2002           | Beans                     | 13                                                          |
| 3               | Albania | 2002           | Beer                      | 36                                                          |
| 3               | Albania | 2002           | Beverages, Alcoholic      | 2                                                           |
| 3               | Albania | 2002           | Bovine Meat               | 36                                                          |
| 3               | Albania | 2002           | Butter, Ghee              | 1                                                           |
| 3               | Albania | 2002           | Cheese                    | 12                                                          |
| 3               | Albania | 2002           | Cocoa Beans               | 1                                                           |
| 3               | Albania | 2002           | Coffee                    | 3                                                           |
| 3               | Albania | 2002           | Demersal Fish             | 1                                                           |
| 3               | Albania | 2002           | Eggs                      | 14                                                          |
| 3               | Albania | 2002           | Fats, Animals, Raw        | 5                                                           |
| 3               | Albania | 2002           | Freshwater Fish           | 1                                                           |
| 3               | Albania | 2002           | Fruits, Other             | 99                                                          |
| 3               | Albania | 2002           | Grapes                    | 67                                                          |
| 3               | Albania | 2002           | Groundnuts (Shelled Eq)   | 1                                                           |
| 3               | Albania | 2002           | Honey                     | 1                                                           |
| 3               | Albania | 2002           | Lemons, Limes             | 2                                                           |
| 3               | Albania | 2002           | Maize                     | 9                                                           |
| 3               | Albania | 2002           | Marine Fish, Other        | 1                                                           |
| 3               | Albania | 2002           | Milk, Whole               | 624                                                         |
| 3               | Albania | 2002           | Mutton & Goat Meat        | 17                                                          |
| 3               | Albania | 2002           | Nuts                      | 7                                                           |
| 3               | Albania | 2002           | Offals, Edible            | 11                                                          |
| 3               | Albania | 2002           | Oilcrops Oil, Other       | 1                                                           |
| 3               | Albania | 2002           | Olive Oil                 | 2                                                           |
| 3               | Albania | 2002           | Olives                    | 14                                                          |
| 3               | Albania | 2002           | Onions                    | 32                                                          |
| 3               | Albania | 2002           | Oranges, Mandarines       | 21                                                          |
| 3               | Albania | 2002           | Pelagic Fish              | 8                                                           |
| 3               | Albania | 2002           | Pig meat                  | 20                                                          |
| 3               | Albania | 2002           | Potatoes                  | 81                                                          |
| 3               | Albania | 2002           | Poultry Meat              | 32                                                          |
| 3               | Albania | 2002           | Rice (Milled Equivalent)  | 21                                                          |
| 3               | Albania | 2002           | Rye                       | 1                                                           |
| 3               | Albania | 2002           | Soyabean Oil              | 1                                                           |
| 3               | Albania | 2002           | Sugar, Refined Equivalent | 47                                                          |
| 3               | Albania | 2002           | Sunflowerseed Oil         | 12                                                          |
| 3               | Albania | 2002           | Sweet Potatoes            | 3                                                           |
| 3               | Albania | 2002           | Sweeteners, Other         | 19                                                          |
| 3               | Albania | 2002           | Tomatoes                  | 131                                                         |
| 3               | Albania | 2002           | Vegetables, Other         | 308                                                         |
| 3               | Albania | 2002           | Wheat                     | 455                                                         |
| 3               | Albania | 2002           | Wine                      | 9                                                           |
| 3               | Albania | 2003           | Apples                    | 34                                                          |
| 3               | Albania | 2003           | Bananas                   | 19                                                          |
| 3               | Albania | 2003           | Beans                     | 11                                                          |
| 3               | Albania | 2003           | Beer                      | 34                                                          |
| 3               | Albania | 2003           | Beverages, Alcoholic      | 2                                                           |
| 3               | Albania | 2003           | Bovine Meat               | 38                                                          |
| 3               | Albania | 2003           | Butter, Ghee              | 2                                                           |
| 3               | Albania | 2003           | Cheese                    | 13                                                          |
| 3               | Albania | 2003           | Cocoa Beans               | 1                                                           |
| 3               | Albania | 2003           | Coffee                    | 4                                                           |
| 3               | Albania | 2003           | Demersal Fish             | 1                                                           |
| 3               | Albania | 2003           | Eggs                      | 16                                                          |
| 3               | Albania | 2003           | Fats, Animals, Raw        | 5                                                           |
| 3               | Albania | 2003           | Freshwater Fish           | 2                                                           |
| 3               | Albania | 2003           | Fruits, Other             | 93                                                          |
| 3               | Albania | 2003           | Grapes                    | 83                                                          |
| 3               | Albania | 2003           | Groundnuts (Shelled Eq)   | 1                                                           |
| 3               | Albania | 2003           | Honey                     | 1                                                           |
| 3               | Albania | 2003           | Lemons, Limes             | 1                                                           |
| 3               | Albania | 2003           | Maize                     | 9                                                           |
| 3               | Albania | 2003           | Milk, Whole               | 672                                                         |
| 3               | Albania | 2003           | Molluscs, Other           | 1                                                           |
| 3               | Albania | 2003           | Mutton & Goat Meat        | 17                                                          |
| 3               | Albania | 2003           | Nuts                      | 7                                                           |
| 3               | Albania | 2003           | Offals, Edible            | 11                                                          |
| 3               | Albania | 2003           | Oilcrops Oil, Other       | 2                                                           |
| 3               | Albania | 2003           | Olive Oil                 | 2                                                           |
| 3               | Albania | 2003           | Olives                    | 15                                                          |
| 3               | Albania | 2003           | Onions                    | 49                                                          |
| 3               | Albania | 2003           | Oranges, Mandarines       | 21                                                          |
| 3               | Albania | 2003           | Pelagic Fish              | 8                                                           |
| 3               | Albania | 2003           | Pig meat                  | 22                                                          |
| 3               | Albania | 2003           | Potatoes                  | 82                                                          |
| 3               | Albania | 2003           | Poultry Meat              | 27                                                          |
| 3               | Albania | 2003           | Rice (Milled Equivalent)  | 21                                                          |
| 3               | Albania | 2003           | Rye                       | 1                                                           |
| 3               | Albania | 2003           | Sugar, Refined Equivalent | 47                                                          |
| 3               | Albania | 2003           | Sunflowerseed Oil         | 13                                                          |
| 3               | Albania | 2003           | Sweeteners, Other         | 15                                                          |



Dietary calcium and zinc deficiency risks are decreasing but remain prevalent

| FAO countrycode | Country | Reference year | Food item                 | Gross food supply (g capita <sup>-1</sup> d <sup>-1</sup> ) |
|-----------------|---------|----------------|---------------------------|-------------------------------------------------------------|
| 3               | Albania | 2003           | Tomatoes                  | 121                                                         |
| 3               | Albania | 2003           | Vegetables, Other         | 338                                                         |
| 3               | Albania | 2003           | Wheat                     | 404                                                         |
| 3               | Albania | 2003           | Wine                      | 11                                                          |
| 3               | Albania | 2004           | Apples                    | 38                                                          |
| 3               | Albania | 2004           | Bananas                   | 14                                                          |
| 3               | Albania | 2004           | Beans                     | 13                                                          |
| 3               | Albania | 2004           | Beer                      | 44                                                          |
| 3               | Albania | 2004           | Beverages, Alcoholic      | 3                                                           |
| 3               | Albania | 2004           | Bovine Meat               | 41                                                          |
| 3               | Albania | 2004           | Butter, Ghee              | 2                                                           |
| 3               | Albania | 2004           | Cheese                    | 13                                                          |
| 3               | Albania | 2004           | Cocoa Beans               | 1                                                           |
| 3               | Albania | 2004           | Coffee                    | 3                                                           |
| 3               | Albania | 2004           | Dates                     | 5                                                           |
| 3               | Albania | 2004           | Demersal Fish             | 2                                                           |
| 3               | Albania | 2004           | Eggs                      | 16                                                          |
| 3               | Albania | 2004           | Fats, Animals, Raw        | 5                                                           |
| 3               | Albania | 2004           | Freshwater Fish           | 2                                                           |
| 3               | Albania | 2004           | Fruits, Other             | 95                                                          |
| 3               | Albania | 2004           | Grapefruit                | 1                                                           |
| 3               | Albania | 2004           | Grapes                    | 77                                                          |
| 3               | Albania | 2004           | Groundnuts (Shelled Eq)   | 1                                                           |
| 3               | Albania | 2004           | Honey                     | 2                                                           |
| 3               | Albania | 2004           | Lemons, Limes             | 3                                                           |
| 3               | Albania | 2004           | Maize                     | 7                                                           |
| 3               | Albania | 2004           | Marine Fish, Other        | 1                                                           |
| 3               | Albania | 2004           | Milk, Whole               | 670                                                         |
| 3               | Albania | 2004           | Molluscs, Other           | 1                                                           |
| 3               | Albania | 2004           | Mutton & Goat Meat        | 18                                                          |
| 3               | Albania | 2004           | Nuts                      | 8                                                           |
| 3               | Albania | 2004           | Offals, Edible            | 11                                                          |
| 3               | Albania | 2004           | Oilcrops Oil, Other       | 2                                                           |
| 3               | Albania | 2004           | Olive Oil                 | 2                                                           |
| 3               | Albania | 2004           | Olives                    | 43                                                          |
| 3               | Albania | 2004           | Onions                    | 48                                                          |
| 3               | Albania | 2004           | Oranges, Mandarines       | 25                                                          |
| 3               | Albania | 2004           | Pelagic Fish              | 7                                                           |
| 3               | Albania | 2004           | Pigmeat                   | 24                                                          |
| 3               | Albania | 2004           | Potatoes                  | 83                                                          |
| 3               | Albania | 2004           | Poultry Meat              | 25                                                          |
| 3               | Albania | 2004           | Rice (Milled Equivalent)  | 20                                                          |
| 3               | Albania | 2004           | Rye                       | 1                                                           |
| 3               | Albania | 2004           | Sugar, Refined Equivalent | 47                                                          |
| 3               | Albania | 2004           | Sunflowerseed Oil         | 14                                                          |
| 3               | Albania | 2004           | Sweet Potatoes            | 2                                                           |
| 3               | Albania | 2004           | Sweeteners, Other         | 2                                                           |
| 3               | Albania | 2004           | Tomatoes                  | 123                                                         |
| 3               | Albania | 2004           | Vegetables, Other         | 334                                                         |
| 3               | Albania | 2004           | Wheat                     | 383                                                         |
| 3               | Albania | 2004           | Wine                      | 13                                                          |
| 3               | Albania | 2005           | Apples                    | 41                                                          |
| 3               | Albania | 2005           | Bananas                   | 13                                                          |
| 3               | Albania | 2005           | Beans                     | 13                                                          |
| 3               | Albania | 2005           | Beer                      | 42                                                          |
| 3               | Albania | 2005           | Beverages, Alcoholic      | 3                                                           |
| 3               | Albania | 2005           | Bovine Meat               | 41                                                          |
| 3               | Albania | 2005           | Butter, Ghee              | 2                                                           |
| 3               | Albania | 2005           | Cheese                    | 14                                                          |
| 3               | Albania | 2005           | Cocoa Beans               | 1                                                           |
| 3               | Albania | 2005           | Coffee                    | 3                                                           |
| 3               | Albania | 2005           | Dates                     | 7                                                           |
| 3               | Albania | 2005           | Demersal Fish             | 2                                                           |
| 3               | Albania | 2005           | Eggs                      | 16                                                          |
| 3               | Albania | 2005           | Fats, Animals, Raw        | 6                                                           |
| 3               | Albania | 2005           | Freshwater Fish           | 2                                                           |
| 3               | Albania | 2005           | Fruits, Other             | 99                                                          |
| 3               | Albania | 2005           | Grapes                    | 89                                                          |
| 3               | Albania | 2005           | Groundnuts (Shelled Eq)   | 1                                                           |
| 3               | Albania | 2005           | Honey                     | 2                                                           |
| 3               | Albania | 2005           | Lemons, Limes             | 3                                                           |
| 3               | Albania | 2005           | Maize                     | 7                                                           |
| 3               | Albania | 2005           | Maize Germ Oil            | 1                                                           |
| 3               | Albania | 2005           | Marine Fish, Other        | 2                                                           |
| 3               | Albania | 2005           | Milk, Whole               | 674                                                         |
| 3               | Albania | 2005           | Molluscs, Other           | 1                                                           |
| 3               | Albania | 2005           | Mutton & Goat Meat        | 19                                                          |
| 3               | Albania | 2005           | Nuts                      | 9                                                           |
| 3               | Albania | 2005           | Offals, Edible            | 11                                                          |
| 3               | Albania | 2005           | Oilcrops Oil, Other       | 2                                                           |
| 3               | Albania | 2005           | Olive Oil                 | 1                                                           |
| 3               | Albania | 2005           | Olives                    | 19                                                          |
| 3               | Albania | 2005           | Onions                    | 48                                                          |
| 3               | Albania | 2005           | Oranges, Mandarines       | 29                                                          |
| 3               | Albania | 2005           | Pelagic Fish              | 7                                                           |
| 3               | Albania | 2005           | Pigmeat                   | 25                                                          |
| 3               | Albania | 2005           | Potatoes                  | 84                                                          |
| 3               | Albania | 2005           | Poultry Meat              | 26                                                          |
| 3               | Albania | 2005           | Pulses, Other             | 1                                                           |
| 3               | Albania | 2005           | Rice (Milled Equivalent)  | 21                                                          |
| 3               | Albania | 2005           | Rye                       | 2                                                           |
| 3               | Albania | 2005           | Sugar, Refined Equivalent | 48                                                          |
| 3               | Albania | 2005           | Sunflowerseed Oil         | 14                                                          |
| 3               | Albania | 2005           | Sweet Potatoes            | 2                                                           |
| 3               | Albania | 2005           | Sweeteners, Other         | 5                                                           |
| 3               | Albania | 2005           | Tomatoes                  | 125                                                         |
| 3               | Albania | 2005           | Vegetables, Other         | 336                                                         |

Dietary calcium and zinc deficiency risks are decreasing but remain prevalent

| FAO countrycode | Country | Reference year | Food item                 | Gross food supply (g capita <sup>-1</sup> d <sup>-1</sup> ) |
|-----------------|---------|----------------|---------------------------|-------------------------------------------------------------|
| 3               | Albania | 2005           | Wheat                     | 401                                                         |
| 3               | Albania | 2005           | Wine                      | 17                                                          |
| 3               | Albania | 2006           | Apples                    | 51                                                          |
| 3               | Albania | 2006           | Bananas                   | 13                                                          |
| 3               | Albania | 2006           | Beans                     | 13                                                          |
| 3               | Albania | 2006           | Beer                      | 49                                                          |
| 3               | Albania | 2006           | Beverages, Alcoholic      | 3                                                           |
| 3               | Albania | 2006           | Bovine Meat               | 50                                                          |
| 3               | Albania | 2006           | Butter, Ghee              | 3                                                           |
| 3               | Albania | 2006           | Cheese                    | 14                                                          |
| 3               | Albania | 2006           | Cocoa Beans               | 1                                                           |
| 3               | Albania | 2006           | Coconuts - Incl Copra     | 1                                                           |
| 3               | Albania | 2006           | Coffee                    | 5                                                           |
| 3               | Albania | 2006           | Dates                     | 7                                                           |
| 3               | Albania | 2006           | Demersal Fish             | 2                                                           |
| 3               | Albania | 2006           | Eggs                      | 16                                                          |
| 3               | Albania | 2006           | Fats, Animals, Raw        | 6                                                           |
| 3               | Albania | 2006           | Freshwater Fish           | 2                                                           |
| 3               | Albania | 2006           | Fruits, Other             | 102                                                         |
| 3               | Albania | 2006           | Grapes                    | 97                                                          |
| 3               | Albania | 2006           | Groundnuts (Shelled Eq)   | 1                                                           |
| 3               | Albania | 2006           | Honey                     | 2                                                           |
| 3               | Albania | 2006           | Lemons, Limes             | 4                                                           |
| 3               | Albania | 2006           | Maize                     | 8                                                           |
| 3               | Albania | 2006           | Marine Fish, Other        | 2                                                           |
| 3               | Albania | 2006           | Milk, Whole               | 680                                                         |
| 3               | Albania | 2006           | Molluscs, Other           | 1                                                           |
| 3               | Albania | 2006           | Mutton & Goat Meat        | 19                                                          |
| 3               | Albania | 2006           | Nuts                      | 11                                                          |
| 3               | Albania | 2006           | Offals, Edible            | 12                                                          |
| 3               | Albania | 2006           | Oilcrops Oil, Other       | 2                                                           |
| 3               | Albania | 2006           | Olive Oil                 | 1                                                           |
| 3               | Albania | 2006           | Olives                    | 29                                                          |
| 3               | Albania | 2006           | Onions                    | 57                                                          |
| 3               | Albania | 2006           | Oranges, Mandarines       | 30                                                          |
| 3               | Albania | 2006           | Pelagic Fish              | 6                                                           |
| 3               | Albania | 2006           | Pig meat                  | 33                                                          |
| 3               | Albania | 2006           | Potatoes                  | 86                                                          |
| 3               | Albania | 2006           | Poultry Meat              | 20                                                          |
| 3               | Albania | 2006           | Pulses, Other             | 1                                                           |
| 3               | Albania | 2006           | Rice (Milled Equivalent)  | 26                                                          |
| 3               | Albania | 2006           | Rye                       | 2                                                           |
| 3               | Albania | 2006           | Sugar, Refined Equivalent | 48                                                          |
| 3               | Albania | 2006           | Sunflowerseed Oil         | 14                                                          |
| 3               | Albania | 2006           | Sweet Potatoes            | 7                                                           |
| 3               | Albania | 2006           | Sweeteners, Other         | 13                                                          |
| 3               | Albania | 2006           | Tomatoes                  | 137                                                         |
| 3               | Albania | 2006           | Vegetables, Other         | 327                                                         |
| 3               | Albania | 2006           | Wheat                     | 364                                                         |
| 3               | Albania | 2006           | Wine                      | 16                                                          |
| 3               | Albania | 2007           | Apples                    | 49                                                          |
| 3               | Albania | 2007           | Bananas                   | 18                                                          |
| 3               | Albania | 2007           | Beans                     | 13                                                          |
| 3               | Albania | 2007           | Beer                      | 57                                                          |
| 3               | Albania | 2007           | Beverages, Alcoholic      | 3                                                           |
| 3               | Albania | 2007           | Bovine Meat               | 50                                                          |
| 3               | Albania | 2007           | Butter, Ghee              | 4                                                           |
| 3               | Albania | 2007           | Cephalopods               | 1                                                           |
| 3               | Albania | 2007           | Cheese                    | 15                                                          |
| 3               | Albania | 2007           | Citrus, Other             | 1                                                           |
| 3               | Albania | 2007           | Cocoa Beans               | 1                                                           |
| 3               | Albania | 2007           | Coffee                    | 5                                                           |
| 3               | Albania | 2007           | Dates                     | 7                                                           |
| 3               | Albania | 2007           | Demersal Fish             | 2                                                           |
| 3               | Albania | 2007           | Eggs                      | 16                                                          |
| 3               | Albania | 2007           | Fats, Animals, Raw        | 7                                                           |
| 3               | Albania | 2007           | Freshwater Fish           | 2                                                           |
| 3               | Albania | 2007           | Fruits, Other             | 105                                                         |
| 3               | Albania | 2007           | Grapes                    | 109                                                         |
| 3               | Albania | 2007           | Groundnuts (Shelled Eq)   | 1                                                           |
| 3               | Albania | 2007           | Honey                     | 2                                                           |
| 3               | Albania | 2007           | Lemons, Limes             | 4                                                           |
| 3               | Albania | 2007           | Maize                     | 8                                                           |
| 3               | Albania | 2007           | Maize Germ Oil            | 1                                                           |
| 3               | Albania | 2007           | Marine Fish, Other        | 1                                                           |
| 3               | Albania | 2007           | Milk, Whole               | 585                                                         |
| 3               | Albania | 2007           | Molluscs, Other           | 1                                                           |
| 3               | Albania | 2007           | Mutton & Goat Meat        | 24                                                          |
| 3               | Albania | 2007           | Nuts                      | 11                                                          |
| 3               | Albania | 2007           | Offals, Edible            | 15                                                          |
| 3               | Albania | 2007           | Oilcrops Oil, Other       | 2                                                           |
| 3               | Albania | 2007           | Olive Oil                 | 1                                                           |
| 3               | Albania | 2007           | Olives                    | 19                                                          |
| 3               | Albania | 2007           | Onions                    | 56                                                          |
| 3               | Albania | 2007           | Oranges, Mandarines       | 32                                                          |
| 3               | Albania | 2007           | Pelagic Fish              | 7                                                           |
| 3               | Albania | 2007           | Pigmeat                   | 32                                                          |
| 3               | Albania | 2007           | Potatoes                  | 86                                                          |
| 3               | Albania | 2007           | Poultry Meat              | 27                                                          |
| 3               | Albania | 2007           | Pulses, Other             | 1                                                           |
| 3               | Albania | 2007           | Rice (Milled Equivalent)  | 23                                                          |
| 3               | Albania | 2007           | Rye                       | 2                                                           |
| 3               | Albania | 2007           | Sugar, Refined Equivalent | 48                                                          |
| 3               | Albania | 2007           | Sunflowerseed Oil         | 14                                                          |
| 3               | Albania | 2007           | Sweet Potatoes            | 11                                                          |
| 3               | Albania | 2007           | Sweeteners, Other         | 21                                                          |
| 3               | Albania | 2007           | Tomatoes                  | 132                                                         |

## Dietary calcium and zinc deficiency risks are decreasing but remain prevalent

| FAO countrycode | Country | Reference year | Food item                 | Gross food supply (g capita <sup>-1</sup> d <sup>-1</sup> ) |
|-----------------|---------|----------------|---------------------------|-------------------------------------------------------------|
| 3               | Albania | 2007           | Vegetables, Other         | 320                                                         |
| 3               | Albania | 2007           | Wheat                     | 368                                                         |
| 3               | Albania | 2007           | Wine                      | 18                                                          |
| 3               | Albania | 2008           | Apples                    | 50                                                          |
| 3               | Albania | 2008           | Bananas                   | 14                                                          |
| 3               | Albania | 2008           | Beans                     | 13                                                          |
| 3               | Albania | 2008           | Beer                      | 57                                                          |
| 3               | Albania | 2008           | Beverages, Alcoholic      | 3                                                           |
| 3               | Albania | 2008           | Bovine Meat               | 40                                                          |
| 3               | Albania | 2008           | Butter, Ghee              | 3                                                           |
| 3               | Albania | 2008           | Cheese                    | 13                                                          |
| 3               | Albania | 2008           | Citrus, Other             | 2                                                           |
| 3               | Albania | 2008           | Cocoa Beans               | 1                                                           |
| 3               | Albania | 2008           | Coffee                    | 6                                                           |
| 3               | Albania | 2008           | Dates                     | 8                                                           |
| 3               | Albania | 2008           | Demersal Fish             | 2                                                           |
| 3               | Albania | 2008           | Eggs                      | 16                                                          |
| 3               | Albania | 2008           | Fats, Animals, Raw        | 7                                                           |
| 3               | Albania | 2008           | Freshwater Fish           | 2                                                           |
| 3               | Albania | 2008           | Fruits, Other             | 101                                                         |
| 3               | Albania | 2008           | Grapes                    | 116                                                         |
| 3               | Albania | 2008           | Honey                     | 2                                                           |
| 3               | Albania | 2008           | Lemons, Limes             | 4                                                           |
| 3               | Albania | 2008           | Maize                     | 7                                                           |
| 3               | Albania | 2008           | Maize Germ Oil            | 1                                                           |
| 3               | Albania | 2008           | Marine Fish, Other        | 1                                                           |
| 3               | Albania | 2008           | Milk, Whole               | 635                                                         |
| 3               | Albania | 2008           | Molluscs, Other           | 1                                                           |
| 3               | Albania | 2008           | Mutton & Goat Meat        | 18                                                          |
| 3               | Albania | 2008           | Nuts                      | 9                                                           |
| 3               | Albania | 2008           | Offals, Edible            | 13                                                          |
| 3               | Albania | 2008           | Oilcrops Oil, Other       | 2                                                           |
| 3               | Albania | 2008           | Olive Oil                 | 2                                                           |
| 3               | Albania | 2008           | Olives                    | 42                                                          |
| 3               | Albania | 2008           | Onions                    | 58                                                          |
| 3               | Albania | 2008           | Oranges, Mandarines       | 31                                                          |
| 3               | Albania | 2008           | Pelagic Fish              | 8                                                           |
| 3               | Albania | 2008           | Pigmeat                   | 27                                                          |
| 3               | Albania | 2008           | Potatoes                  | 86                                                          |
| 3               | Albania | 2008           | Poultry Meat              | 35                                                          |
| 3               | Albania | 2008           | Pulses, Other             | 1                                                           |
| 3               | Albania | 2008           | Rice (Milled Equivalent)  | 17                                                          |
| 3               | Albania | 2008           | Rye                       | 2                                                           |
| 3               | Albania | 2008           | Sugar, Refined Equivalent | 49                                                          |
| 3               | Albania | 2008           | Sunflowerseed Oil         | 12                                                          |
| 3               | Albania | 2008           | Sweet Potatoes            | 10                                                          |
| 3               | Albania | 2008           | Sweeteners, Other         | 47                                                          |
| 3               | Albania | 2008           | Tomatoes                  | 132                                                         |
| 3               | Albania | 2008           | Vegetables, Other         | 374                                                         |
| 3               | Albania | 2008           | Wheat                     | 377                                                         |
| 3               | Albania | 2008           | Wine                      | 16                                                          |
| 3               | Albania | 2009           | Apples                    | 49                                                          |
| 3               | Albania | 2009           | Bananas                   | 15                                                          |
| 3               | Albania | 2009           | Beans                     | 13                                                          |
| 3               | Albania | 2009           | Beer                      | 53                                                          |
| 3               | Albania | 2009           | Beverages, Alcoholic      | 3                                                           |
| 3               | Albania | 2009           | Bovine Meat               | 37                                                          |
| 3               | Albania | 2009           | Butter, Ghee              | 3                                                           |
| 3               | Albania | 2009           | Cereals, Other            | 1                                                           |
| 3               | Albania | 2009           | Cheese                    | 14                                                          |
| 3               | Albania | 2009           | Citrus, Other             | 2                                                           |
| 3               | Albania | 2009           | Cocoa Beans               | 1                                                           |
| 3               | Albania | 2009           | Coffee                    | 6                                                           |
| 3               | Albania | 2009           | Dates                     | 8                                                           |
| 3               | Albania | 2009           | Demersal Fish             | 2                                                           |
| 3               | Albania | 2009           | Eggs                      | 16                                                          |
| 3               | Albania | 2009           | Fats, Animals, Raw        | 9                                                           |
| 3               | Albania | 2009           | Freshwater Fish           | 2                                                           |
| 3               | Albania | 2009           | Fruits, Other             | 111                                                         |
| 3               | Albania | 2009           | Grapes                    | 121                                                         |
| 3               | Albania | 2009           | Honey                     | 2                                                           |
| 3               | Albania | 2009           | Lemons, Limes             | 4                                                           |
| 3               | Albania | 2009           | Maize                     | 8                                                           |
| 3               | Albania | 2009           | Marine Fish, Other        | 2                                                           |
| 3               | Albania | 2009           | Milk, Whole               | 630                                                         |
| 3               | Albania | 2009           | Molluscs, Other           | 1                                                           |
| 3               | Albania | 2009           | Mutton & Goat Meat        | 19                                                          |
| 3               | Albania | 2009           | Nuts                      | 11                                                          |
| 3               | Albania | 2009           | Offals, Edible            | 12                                                          |
| 3               | Albania | 2009           | Oilcrops Oil, Other       | 3                                                           |
| 3               | Albania | 2009           | Olive Oil                 | 2                                                           |
| 3               | Albania | 2009           | Olives                    | 62                                                          |
| 3               | Albania | 2009           | Onions                    | 58                                                          |
| 3               | Albania | 2009           | Oranges, Mandarines       | 36                                                          |
| 3               | Albania | 2009           | Pelagic Fish              | 8                                                           |
| 3               | Albania | 2009           | Pigmeat                   | 28                                                          |
| 3               | Albania | 2009           | Potatoes                  | 87                                                          |
| 3               | Albania | 2009           | Poultry Meat              | 38                                                          |
| 3               | Albania | 2009           | Pulses, Other             | 1                                                           |
| 3               | Albania | 2009           | Rice (Milled Equivalent)  | 20                                                          |
| 3               | Albania | 2009           | Rye                       | 2                                                           |
| 3               | Albania | 2009           | Sugar, Refined Equivalent | 49                                                          |
| 3               | Albania | 2009           | Sunflowerseed Oil         | 14                                                          |
| 3               | Albania | 2009           | Sweet Potatoes            | 13                                                          |
| 3               | Albania | 2009           | Sweeteners, Other         | 62                                                          |
| 3               | Albania | 2009           | Tomatoes                  | 131                                                         |
| 3               | Albania | 2009           | Vegetables, Other         | 365                                                         |

Dietary calcium and zinc deficiency risks are decreasing but remain prevalent

| FAO countrycode | Country | Reference year | Food item                 | Gross food supply (g capita <sup>-1</sup> d <sup>-1</sup> ) |
|-----------------|---------|----------------|---------------------------|-------------------------------------------------------------|
| 3               | Albania | 2009           | Wheat                     | 361                                                         |
| 3               | Albania | 2009           | Wine                      | 18                                                          |
| 3               | Albania | 2010           | Apples                    | 59                                                          |
| 3               | Albania | 2010           | Bananas                   | 15                                                          |
| 3               | Albania | 2010           | Beans                     | 13                                                          |
| 3               | Albania | 2010           | Beer                      | 68                                                          |
| 3               | Albania | 2010           | Beverages, Alcoholic      | 3                                                           |
| 3               | Albania | 2010           | Bovine Meat               | 38                                                          |
| 3               | Albania | 2010           | Butter, Ghee              | 3                                                           |
| 3               | Albania | 2010           | Cephalopods               | 1                                                           |
| 3               | Albania | 2010           | Cheese                    | 15                                                          |
| 3               | Albania | 2010           | Citrus, Other             | 2                                                           |
| 3               | Albania | 2010           | Cocoa Beans               | 1                                                           |
| 3               | Albania | 2010           | Coffee                    | 6                                                           |
| 3               | Albania | 2010           | Crustaceans               | 1                                                           |
| 3               | Albania | 2010           | Dates                     | 10                                                          |
| 3               | Albania | 2010           | Demersal Fish             | 2                                                           |
| 3               | Albania | 2010           | Eggs                      | 16                                                          |
| 3               | Albania | 2010           | Fats, Animals, Raw        | 7                                                           |
| 3               | Albania | 2010           | Freshwater Fish           | 3                                                           |
| 3               | Albania | 2010           | Fruits, Other             | 105                                                         |
| 3               | Albania | 2010           | Grapefruit                | 3                                                           |
| 3               | Albania | 2010           | Grapes                    | 140                                                         |
| 3               | Albania | 2010           | Groundnuts (Shelled Eq)   | 1                                                           |
| 3               | Albania | 2010           | Honey                     | 3                                                           |
| 3               | Albania | 2010           | Lemons, Limes             | 4                                                           |
| 3               | Albania | 2010           | Maize                     | 10                                                          |
| 3               | Albania | 2010           | Maize Germ Oil            | 1                                                           |
| 3               | Albania | 2010           | Marine Fish, Other        | 1                                                           |
| 3               | Albania | 2010           | Milk, Whole               | 636                                                         |
| 3               | Albania | 2010           | Molluscs, Other           | 1                                                           |
| 3               | Albania | 2010           | Mutton & Goat Meat        | 19                                                          |
| 3               | Albania | 2010           | Nuts                      | 11                                                          |
| 3               | Albania | 2010           | Offals, Edible            | 14                                                          |
| 3               | Albania | 2010           | Oilcrops Oil, Other       | 3                                                           |
| 3               | Albania | 2010           | Olive Oil                 | 2                                                           |
| 3               | Albania | 2010           | Olives                    | 54                                                          |
| 3               | Albania | 2010           | Onions                    | 66                                                          |
| 3               | Albania | 2010           | Oranges, Mandarines       | 41                                                          |
| 3               | Albania | 2010           | Pelagic Fish              | 7                                                           |
| 3               | Albania | 2010           | Pigmeat                   | 27                                                          |
| 3               | Albania | 2010           | Potatoes                  | 91                                                          |
| 3               | Albania | 2010           | Poultry Meat              | 39                                                          |
| 3               | Albania | 2010           | Pulses, Other             | 1                                                           |
| 3               | Albania | 2010           | Rice (Milled Equivalent)  | 21                                                          |
| 3               | Albania | 2010           | Rye                       | 2                                                           |
| 3               | Albania | 2010           | Sugar, Refined Equivalent | 42                                                          |
| 3               | Albania | 2010           | Sunflowerseed Oil         | 11                                                          |
| 3               | Albania | 2010           | Sweet Potatoes            | 15                                                          |
| 3               | Albania | 2010           | Sweeteners, Other         | 65                                                          |
| 3               | Albania | 2010           | Tomatoes                  | 157                                                         |
| 3               | Albania | 2010           | Vegetables, Other         | 427                                                         |
| 3               | Albania | 2010           | Wheat                     | 380                                                         |
| 3               | Albania | 2010           | Wine                      | 18                                                          |
| 3               | Albania | 2011           | Apples                    | 61                                                          |
| 3               | Albania | 2011           | Bananas                   | 15                                                          |
| 3               | Albania | 2011           | Beans                     | 13                                                          |
| 3               | Albania | 2011           | Beer                      | 77                                                          |
| 3               | Albania | 2011           | Beverages, Alcoholic      | 3                                                           |
| 3               | Albania | 2011           | Bovine Meat               | 38                                                          |
| 3               | Albania | 2011           | Butter, Ghee              | 3                                                           |
| 3               | Albania | 2011           | Cephalopods               | 1                                                           |
| 3               | Albania | 2011           | Cheese                    | 16                                                          |
| 3               | Albania | 2011           | Citrus, Other             | 1                                                           |
| 3               | Albania | 2011           | Cocoa Beans               | 1                                                           |
| 3               | Albania | 2011           | Coffee                    | 6                                                           |
| 3               | Albania | 2011           | Cream                     | 1                                                           |
| 3               | Albania | 2011           | Crustaceans               | 1                                                           |
| 3               | Albania | 2011           | Dates                     | 10                                                          |
| 3               | Albania | 2011           | Demersal Fish             | 2                                                           |
| 3               | Albania | 2011           | Eggs                      | 16                                                          |
| 3               | Albania | 2011           | Fats, Animals, Raw        | 6                                                           |
| 3               | Albania | 2011           | Freshwater Fish           | 2                                                           |
| 3               | Albania | 2011           | Fruits, Other             | 106                                                         |
| 3               | Albania | 2011           | Grapefruit                | 3                                                           |
| 3               | Albania | 2011           | Grapes                    | 152                                                         |
| 3               | Albania | 2011           | Honey                     | 3                                                           |
| 3               | Albania | 2011           | Lemons, Limes             | 4                                                           |
| 3               | Albania | 2011           | Maize                     | 9                                                           |
| 3               | Albania | 2011           | Maize Germ Oil            | 1                                                           |
| 3               | Albania | 2011           | Marine Fish, Other        | 2                                                           |
| 3               | Albania | 2011           | Milk, Whole               | 648                                                         |
| 3               | Albania | 2011           | Molluscs, Other           | 1                                                           |
| 3               | Albania | 2011           | Mutton & Goat Meat        | 19                                                          |
| 3               | Albania | 2011           | Nuts                      | 11                                                          |
| 3               | Albania | 2011           | Offals, Edible            | 13                                                          |
| 3               | Albania | 2011           | Oilcrops Oil, Other       | 3                                                           |
| 3               | Albania | 2011           | Olive Oil                 | 2                                                           |
| 3               | Albania | 2011           | Olives                    | 51                                                          |
| 3               | Albania | 2011           | Onions                    | 91                                                          |
| 3               | Albania | 2011           | Oranges, Mandarines       | 37                                                          |
| 3               | Albania | 2011           | Pelagic Fish              | 7                                                           |
| 3               | Albania | 2011           | Pigmeat                   | 26                                                          |
| 3               | Albania | 2011           | Potatoes                  | 108                                                         |
| 3               | Albania | 2011           | Poultry Meat              | 37                                                          |
| 3               | Albania | 2011           | Pulses, Other             | 1                                                           |
| 3               | Albania | 2011           | Rice (Milled Equivalent)  | 18                                                          |

Dietary calcium and zinc deficiency risks are decreasing but remain prevalent

| FAO countrycode | Country | Reference year | Food item                 | Gross food supply (g capita <sup>-1</sup> d <sup>-1</sup> ) |
|-----------------|---------|----------------|---------------------------|-------------------------------------------------------------|
| 3               | Albania | 2011           | Rye                       | 2                                                           |
| 3               | Albania | 2011           | Sugar, Refined Equivalent | 42                                                          |
| 3               | Albania | 2011           | Sunflowerseed Oil         | 8                                                           |
| 3               | Albania | 2011           | Sweet Potatoes            | 6                                                           |
| 3               | Albania | 2011           | Sweeteners, Other         | 72                                                          |
| 3               | Albania | 2011           | Tomatoes                  | 153                                                         |
| 3               | Albania | 2011           | Vegetables, Other         | 444                                                         |
| 3               | Albania | 2011           | Wheat                     | 386                                                         |
| 3               | Albania | 2011           | Wine                      | 18                                                          |
| 4               | Algeria | 1992           | Apples                    | 6                                                           |
| 4               | Algeria | 1992           | Bananas                   | 1                                                           |
| 4               | Algeria | 1992           | Barley                    | 59                                                          |
| 4               | Algeria | 1992           | Beans                     | 3                                                           |
| 4               | Algeria | 1992           | Beer                      | 6                                                           |
| 4               | Algeria | 1992           | Bovine Meat               | 12                                                          |
| 4               | Algeria | 1992           | Butter, Ghee              | 3                                                           |
| 4               | Algeria | 1992           | Cheese                    | 1                                                           |
| 4               | Algeria | 1992           | Cocoa Beans               | 1                                                           |
| 4               | Algeria | 1992           | Coffee                    | 5                                                           |
| 4               | Algeria | 1992           | Dates                     | 23                                                          |
| 4               | Algeria | 1992           | Demersal Fish             | 1                                                           |
| 4               | Algeria | 1992           | Eggs                      | 9                                                           |
| 4               | Algeria | 1992           | Fats, Animals, Raw        | 1                                                           |
| 4               | Algeria | 1992           | Fruits, Other             | 26                                                          |
| 4               | Algeria | 1992           | Grapes                    | 17                                                          |
| 4               | Algeria | 1992           | Groundnut Oil             | 1                                                           |
| 4               | Algeria | 1992           | Lemons, Limes             | 1                                                           |
| 4               | Algeria | 1992           | Maize                     | 5                                                           |
| 4               | Algeria | 1992           | Meat, Other               | 1                                                           |
| 4               | Algeria | 1992           | Milk, Whole               | 183                                                         |
| 4               | Algeria | 1992           | Mutton & Goat Meat        | 16                                                          |
| 4               | Algeria | 1992           | Nuts                      | 2                                                           |
| 4               | Algeria | 1992           | Offals, Edible            | 4                                                           |
| 4               | Algeria | 1992           | Oilcrops Oil, Other       | 1                                                           |
| 4               | Algeria | 1992           | Olive Oil                 | 5                                                           |
| 4               | Algeria | 1992           | Olives                    | 2                                                           |
| 4               | Algeria | 1992           | Onions                    | 24                                                          |
| 4               | Algeria | 1992           | Oranges, Mandarines       | 32                                                          |
| 4               | Algeria | 1992           | Palm Oil                  | 5                                                           |
| 4               | Algeria | 1992           | Peas                      | 2                                                           |
| 4               | Algeria | 1992           | Pelagic Fish              | 8                                                           |
| 4               | Algeria | 1992           | Pimento                   | 1                                                           |
| 4               | Algeria | 1992           | Potatoes                  | 100                                                         |
| 4               | Algeria | 1992           | Poultry Meat              | 20                                                          |
| 4               | Algeria | 1992           | Pulses, Other             | 11                                                          |
| 4               | Algeria | 1992           | Rape and Mustard Oil      | 8                                                           |
| 4               | Algeria | 1992           | Rice (Milled Equivalent)  | 4                                                           |
| 4               | Algeria | 1992           | Soyabean Oil              | 6                                                           |
| 4               | Algeria | 1992           | Sugar, Refined Equivalent | 66                                                          |
| 4               | Algeria | 1992           | Sunflowerseed Oil         | 20                                                          |
| 4               | Algeria | 1992           | Tea                       | 2                                                           |
| 4               | Algeria | 1992           | Tomatoes                  | 66                                                          |
| 4               | Algeria | 1992           | Vegetables, Other         | 126                                                         |
| 4               | Algeria | 1992           | Wheat                     | 516                                                         |
| 4               | Algeria | 1993           | Apples                    | 6                                                           |
| 4               | Algeria | 1993           | Barley                    | 58                                                          |
| 4               | Algeria | 1993           | Beans                     | 2                                                           |
| 4               | Algeria | 1993           | Beer                      | 7                                                           |
| 4               | Algeria | 1993           | Bovine Meat               | 12                                                          |
| 4               | Algeria | 1993           | Butter, Ghee              | 4                                                           |
| 4               | Algeria | 1993           | Coffee                    | 9                                                           |
| 4               | Algeria | 1993           | Dates                     | 22                                                          |
| 4               | Algeria | 1993           | Demersal Fish             | 1                                                           |
| 4               | Algeria | 1993           | Eggs                      | 9                                                           |
| 4               | Algeria | 1993           | Fats, Animals, Raw        | 1                                                           |
| 4               | Algeria | 1993           | Fruits, Other             | 29                                                          |
| 4               | Algeria | 1993           | Grapes                    | 12                                                          |
| 4               | Algeria | 1993           | Groundnut Oil             | 1                                                           |
| 4               | Algeria | 1993           | Lemons, Limes             | 2                                                           |
| 4               | Algeria | 1993           | Maize                     | 7                                                           |
| 4               | Algeria | 1993           | Meat, Other               | 1                                                           |
| 4               | Algeria | 1993           | Milk, Whole               | 184                                                         |
| 4               | Algeria | 1993           | Mutton & Goat Meat        | 17                                                          |
| 4               | Algeria | 1993           | Nuts                      | 2                                                           |
| 4               | Algeria | 1993           | Offals, Edible            | 4                                                           |
| 4               | Algeria | 1993           | Oilcrops Oil, Other       | 1                                                           |
| 4               | Algeria | 1993           | Olive Oil                 | 3                                                           |
| 4               | Algeria | 1993           | Olives                    | 2                                                           |
| 4               | Algeria | 1993           | Onions                    | 23                                                          |
| 4               | Algeria | 1993           | Oranges, Mandarines       | 31                                                          |
| 4               | Algeria | 1993           | Palm Oil                  | 7                                                           |
| 4               | Algeria | 1993           | Peas                      | 2                                                           |
| 4               | Algeria | 1993           | Pelagic Fish              | 8                                                           |
| 4               | Algeria | 1993           | Pimento                   | 1                                                           |
| 4               | Algeria | 1993           | Potatoes                  | 90                                                          |
| 4               | Algeria | 1993           | Poultry Meat              | 20                                                          |
| 4               | Algeria | 1993           | Pulses, Other             | 9                                                           |
| 4               | Algeria | 1993           | Rape and Mustard Oil      | 8                                                           |
| 4               | Algeria | 1993           | Rice (Milled Equivalent)  | 4                                                           |
| 4               | Algeria | 1993           | Soyabean Oil              | 17                                                          |
| 4               | Algeria | 1993           | Sugar, Refined Equivalent | 68                                                          |
| 4               | Algeria | 1993           | Sunflowerseed Oil         | 8                                                           |
| 4               | Algeria | 1993           | Tomatoes                  | 74                                                          |
| 4               | Algeria | 1993           | Vegetables, Other         | 120                                                         |
| 4               | Algeria | 1993           | Wheat                     | 517                                                         |
| 4               | Algeria | 1994           | Apples                    | 4                                                           |
| 4               | Algeria | 1994           | Barley                    | 53                                                          |

Dietary calcium and zinc deficiency risks are decreasing but remain prevalent

| FAO countrycode | Country | Reference year | Food item                 | Gross food supply (g capita <sup>-1</sup> d <sup>-1</sup> ) |
|-----------------|---------|----------------|---------------------------|-------------------------------------------------------------|
| 4               | Algeria | 1994           | Beans                     | 4                                                           |
| 4               | Algeria | 1994           | Beer                      | 8                                                           |
| 4               | Algeria | 1994           | Bovine Meat               | 12                                                          |
| 4               | Algeria | 1994           | Butter, Ghee              | 2                                                           |
| 4               | Algeria | 1994           | Cereals, Other            | 1                                                           |
| 4               | Algeria | 1994           | Cheese                    | 1                                                           |
| 4               | Algeria | 1994           | Coffee                    | 10                                                          |
| 4               | Algeria | 1994           | Dates                     | 29                                                          |
| 4               | Algeria | 1994           | Demersal Fish             | 1                                                           |
| 4               | Algeria | 1994           | Eggs                      | 9                                                           |
| 4               | Algeria | 1994           | Fats, Animals, Raw        | 1                                                           |
| 4               | Algeria | 1994           | Fruits, Other             | 22                                                          |
| 4               | Algeria | 1994           | Grapes                    | 7                                                           |
| 4               | Algeria | 1994           | Groundnut Oil             | 1                                                           |
| 4               | Algeria | 1994           | Lemons, Limes             | 2                                                           |
| 4               | Algeria | 1994           | Maize                     | 8                                                           |
| 4               | Algeria | 1994           | Meat, Other               | 1                                                           |
| 4               | Algeria | 1994           | Milk, Whole               | 176                                                         |
| 4               | Algeria | 1994           | Mutton & Goat Meat        | 17                                                          |
| 4               | Algeria | 1994           | Nuts                      | 2                                                           |
| 4               | Algeria | 1994           | Offals, Edible            | 4                                                           |
| 4               | Algeria | 1994           | Oilcrops Oil, Other       | 1                                                           |
| 4               | Algeria | 1994           | Olive Oil                 | 2                                                           |
| 4               | Algeria | 1994           | Olives                    | 2                                                           |
| 4               | Algeria | 1994           | Onions                    | 22                                                          |
| 4               | Algeria | 1994           | Oranges, Mandarines       | 32                                                          |
| 4               | Algeria | 1994           | Palm Oil                  | 2                                                           |
| 4               | Algeria | 1994           | Peas                      | 2                                                           |
| 4               | Algeria | 1994           | Pelagic Fish              | 11                                                          |
| 4               | Algeria | 1994           | Pimento                   | 1                                                           |
| 4               | Algeria | 1994           | Potatoes                  | 66                                                          |
| 4               | Algeria | 1994           | Poultry Meat              | 20                                                          |
| 4               | Algeria | 1994           | Pulses, Other             | 8                                                           |
| 4               | Algeria | 1994           | Rape and Mustard Oil      | 9                                                           |
| 4               | Algeria | 1994           | Rice (Milled Equivalent)  | 4                                                           |
| 4               | Algeria | 1994           | Soyabean Oil              | 17                                                          |
| 4               | Algeria | 1994           | Sugar, Refined Equivalent | 65                                                          |
| 4               | Algeria | 1994           | Sunflowerseed Oil         | 10                                                          |
| 4               | Algeria | 1994           | Sweeteners, Other         | 1                                                           |
| 4               | Algeria | 1994           | Tea                       | 1                                                           |
| 4               | Algeria | 1994           | Tomatoes                  | 61                                                          |
| 4               | Algeria | 1994           | Vegetables, Other         | 119                                                         |
| 4               | Algeria | 1994           | Wheat                     | 508                                                         |
| 4               | Algeria | 1995           | Apples                    | 6                                                           |
| 4               | Algeria | 1995           | Bananas                   | 3                                                           |
| 4               | Algeria | 1995           | Barley                    | 51                                                          |
| 4               | Algeria | 1995           | Beans                     | 6                                                           |
| 4               | Algeria | 1995           | Beer                      | 9                                                           |
| 4               | Algeria | 1995           | Bovine Meat               | 12                                                          |
| 4               | Algeria | 1995           | Butter, Ghee              | 2                                                           |
| 4               | Algeria | 1995           | Cheese                    | 1                                                           |
| 4               | Algeria | 1995           | Coconut Oil               | 2                                                           |
| 4               | Algeria | 1995           | Coffee                    | 5                                                           |
| 4               | Algeria | 1995           | Dates                     | 24                                                          |
| 4               | Algeria | 1995           | Demersal Fish             | 1                                                           |
| 4               | Algeria | 1995           | Eggs                      | 11                                                          |
| 4               | Algeria | 1995           | Fats, Animals, Raw        | 1                                                           |
| 4               | Algeria | 1995           | Fruits, Other             | 25                                                          |
| 4               | Algeria | 1995           | Grapes                    | 12                                                          |
| 4               | Algeria | 1995           | Groundnut Oil             | 1                                                           |
| 4               | Algeria | 1995           | Lemons, Limes             | 1                                                           |
| 4               | Algeria | 1995           | Maize                     | 9                                                           |
| 4               | Algeria | 1995           | Meat, Other               | 1                                                           |
| 4               | Algeria | 1995           | Milk, Whole               | 155                                                         |
| 4               | Algeria | 1995           | Mutton & Goat Meat        | 17                                                          |
| 4               | Algeria | 1995           | Nuts                      | 2                                                           |
| 4               | Algeria | 1995           | Offals, Edible            | 3                                                           |
| 4               | Algeria | 1995           | Olive Oil                 | 2                                                           |
| 4               | Algeria | 1995           | Olives                    | 1                                                           |
| 4               | Algeria | 1995           | Onions                    | 28                                                          |
| 4               | Algeria | 1995           | Oranges, Mandarines       | 28                                                          |
| 4               | Algeria | 1995           | Palm Oil                  | 1                                                           |
| 4               | Algeria | 1995           | Peas                      | 1                                                           |
| 4               | Algeria | 1995           | Pelagic Fish              | 9                                                           |
| 4               | Algeria | 1995           | Pimento                   | 1                                                           |
| 4               | Algeria | 1995           | Potatoes                  | 101                                                         |
| 4               | Algeria | 1995           | Poultry Meat              | 19                                                          |
| 4               | Algeria | 1995           | Pulses, Other             | 8                                                           |
| 4               | Algeria | 1995           | Rape and Mustard Oil      | 8                                                           |
| 4               | Algeria | 1995           | Rice (Milled Equivalent)  | 3                                                           |
| 4               | Algeria | 1995           | Soyabean Oil              | 11                                                          |
| 4               | Algeria | 1995           | Sugar, Refined Equivalent | 65                                                          |
| 4               | Algeria | 1995           | Sunflowerseed Oil         | 20                                                          |
| 4               | Algeria | 1995           | Tomatoes                  | 84                                                          |
| 4               | Algeria | 1995           | Vegetables, Other         | 118                                                         |
| 4               | Algeria | 1995           | Wheat                     | 508                                                         |
| 4               | Algeria | 1996           | Apples                    | 7                                                           |
| 4               | Algeria | 1996           | Bananas                   | 1                                                           |
| 4               | Algeria | 1996           | Barley                    | 59                                                          |
| 4               | Algeria | 1996           | Beans                     | 4                                                           |
| 4               | Algeria | 1996           | Beer                      | 7                                                           |
| 4               | Algeria | 1996           | Bovine Meat               | 12                                                          |
| 4               | Algeria | 1996           | Butter, Ghee              | 1                                                           |
| 4               | Algeria | 1996           | Cereals, Other            | 3                                                           |
| 4               | Algeria | 1996           | Cheese                    | 1                                                           |
| 4               | Algeria | 1996           | Cocoa Beans               | 1                                                           |
| 4               | Algeria | 1996           | Coffee                    | 7                                                           |

Dietary calcium and zinc deficiency risks are decreasing but remain prevalent

| FAO countrycode | Country | Reference year | Food item                 | Gross food supply (g capita <sup>-1</sup> d <sup>-1</sup> ) |
|-----------------|---------|----------------|---------------------------|-------------------------------------------------------------|
| 4               | Algeria | 1996           | Dates                     | 30                                                          |
| 4               | Algeria | 1996           | Demersal Fish             | 1                                                           |
| 4               | Algeria | 1996           | Eggs                      | 6                                                           |
| 4               | Algeria | 1996           | Fats, Animals, Raw        | 1                                                           |
| 4               | Algeria | 1996           | Fruits, Other             | 28                                                          |
| 4               | Algeria | 1996           | Grapes                    | 13                                                          |
| 4               | Algeria | 1996           | Groundnut Oil             | 1                                                           |
| 4               | Algeria | 1996           | Lemons, Limes             | 1                                                           |
| 4               | Algeria | 1996           | Maize                     | 18                                                          |
| 4               | Algeria | 1996           | Meat, Other               | 1                                                           |
| 4               | Algeria | 1996           | Milk, Whole               | 153                                                         |
| 4               | Algeria | 1996           | Mutton & Goat Meat        | 18                                                          |
| 4               | Algeria | 1996           | Nuts                      | 3                                                           |
| 4               | Algeria | 1996           | Offals, Edible            | 3                                                           |
| 4               | Algeria | 1996           | Oilcrops Oil, Other       | 1                                                           |
| 4               | Algeria | 1996           | Olive Oil                 | 5                                                           |
| 4               | Algeria | 1996           | Olives                    | 3                                                           |
| 4               | Algeria | 1996           | Onions                    | 27                                                          |
| 4               | Algeria | 1996           | Oranges, Mandarines       | 28                                                          |
| 4               | Algeria | 1996           | Peas                      | 2                                                           |
| 4               | Algeria | 1996           | Pelagic Fish              | 7                                                           |
| 4               | Algeria | 1996           | Pimento                   | 1                                                           |
| 4               | Algeria | 1996           | Potatoes                  | 93                                                          |
| 4               | Algeria | 1996           | Poultry Meat              | 20                                                          |
| 4               | Algeria | 1996           | Pulses, Other             | 11                                                          |
| 4               | Algeria | 1996           | Rape and Mustard Oil      | 7                                                           |
| 4               | Algeria | 1996           | Rice (Milled Equivalent)  | 4                                                           |
| 4               | Algeria | 1996           | Sugar, Refined Equivalent | 66                                                          |
| 4               | Algeria | 1996           | Sunflowerseed Oil         | 24                                                          |
| 4               | Algeria | 1996           | Tomatoes                  | 62                                                          |
| 4               | Algeria | 1996           | Vegetables, Other         | 118                                                         |
| 4               | Algeria | 1996           | Wheat                     | 513                                                         |
| 4               | Algeria | 1997           | Apples                    | 6                                                           |
| 4               | Algeria | 1997           | Barley                    | 53                                                          |
| 4               | Algeria | 1997           | Beans                     | 6                                                           |
| 4               | Algeria | 1997           | Beer                      | 6                                                           |
| 4               | Algeria | 1997           | Bovine Meat               | 10                                                          |
| 4               | Algeria | 1997           | Butter, Ghee              | 1                                                           |
| 4               | Algeria | 1997           | Cheese                    | 1                                                           |
| 4               | Algeria | 1997           | Cocoa Beans               | 1                                                           |
| 4               | Algeria | 1997           | Coffee                    | 8                                                           |
| 4               | Algeria | 1997           | Dates                     | 25                                                          |
| 4               | Algeria | 1997           | Demersal Fish             | 1                                                           |
| 4               | Algeria | 1997           | Eggs                      | 7                                                           |
| 4               | Algeria | 1997           | Fats, Animals, Raw        | 1                                                           |
| 4               | Algeria | 1997           | Fruits, Other             | 22                                                          |
| 4               | Algeria | 1997           | Grapes                    | 13                                                          |
| 4               | Algeria | 1997           | Groundnut Oil             | 1                                                           |
| 4               | Algeria | 1997           | Lemons, Limes             | 1                                                           |
| 4               | Algeria | 1997           | Maize                     | 12                                                          |
| 4               | Algeria | 1997           | Meat, Other               | 1                                                           |
| 4               | Algeria | 1997           | Milk, Whole               | 162                                                         |
| 4               | Algeria | 1997           | Mutton & Goat Meat        | 16                                                          |
| 4               | Algeria | 1997           | Nuts                      | 2                                                           |
| 4               | Algeria | 1997           | Offals, Edible            | 3                                                           |
| 4               | Algeria | 1997           | Oilcrops Oil, Other       | 1                                                           |
| 4               | Algeria | 1997           | Olive Oil                 | 4                                                           |
| 4               | Algeria | 1997           | Olives                    | 4                                                           |
| 4               | Algeria | 1997           | Onions                    | 30                                                          |
| 4               | Algeria | 1997           | Oranges, Mandarines       | 29                                                          |
| 4               | Algeria | 1997           | Palm Oil                  | 1                                                           |
| 4               | Algeria | 1997           | Peas                      | 2                                                           |
| 4               | Algeria | 1997           | Pelagic Fish              | 7                                                           |
| 4               | Algeria | 1997           | Pimento                   | 1                                                           |
| 4               | Algeria | 1997           | Potatoes                  | 89                                                          |
| 4               | Algeria | 1997           | Poultry Meat              | 20                                                          |
| 4               | Algeria | 1997           | Pulses, Other             | 10                                                          |
| 4               | Algeria | 1997           | Rape and Mustard Oil      | 9                                                           |
| 4               | Algeria | 1997           | Rice (Milled Equivalent)  | 5                                                           |
| 4               | Algeria | 1997           | Sorghum                   | 1                                                           |
| 4               | Algeria | 1997           | Soyabean Oil              | 1                                                           |
| 4               | Algeria | 1997           | Sugar, Refined Equivalent | 70                                                          |
| 4               | Algeria | 1997           | Sunflowerseed Oil         | 25                                                          |
| 4               | Algeria | 1997           | Tomatoes                  | 59                                                          |
| 4               | Algeria | 1997           | Vegetables, Other         | 115                                                         |
| 4               | Algeria | 1997           | Wheat                     | 490                                                         |
| 4               | Algeria | 1998           | Apples                    | 6                                                           |
| 4               | Algeria | 1998           | Barley                    | 61                                                          |
| 4               | Algeria | 1998           | Beans                     | 5                                                           |
| 4               | Algeria | 1998           | Beer                      | 6                                                           |
| 4               | Algeria | 1998           | Bovine Meat               | 11                                                          |
| 4               | Algeria | 1998           | Butter, Ghee              | 1                                                           |
| 4               | Algeria | 1998           | Cheese                    | 1                                                           |
| 4               | Algeria | 1998           | Cocoa Beans               | 1                                                           |
| 4               | Algeria | 1998           | Coffee                    | 8                                                           |
| 4               | Algeria | 1998           | Dates                     | 32                                                          |
| 4               | Algeria | 1998           | Demersal Fish             | 1                                                           |
| 4               | Algeria | 1998           | Eggs                      | 8                                                           |
| 4               | Algeria | 1998           | Fats, Animals, Raw        | 1                                                           |
| 4               | Algeria | 1998           | Fruits, Other             | 23                                                          |
| 4               | Algeria | 1998           | Grapes                    | 8                                                           |
| 4               | Algeria | 1998           | Lemons, Limes             | 2                                                           |
| 4               | Algeria | 1998           | Maize                     | 3                                                           |
| 4               | Algeria | 1998           | Meat, Other               | 1                                                           |
| 4               | Algeria | 1998           | Milk, Whole               | 181                                                         |
| 4               | Algeria | 1998           | Mutton & Goat Meat        | 16                                                          |
| 4               | Algeria | 1998           | Nuts                      | 2                                                           |

Dietary calcium and zinc deficiency risks are decreasing but remain prevalent

| FAO countrycode | Country | Reference year | Food item                 | Gross food supply (g capita <sup>-1</sup> d <sup>-1</sup> ) |
|-----------------|---------|----------------|---------------------------|-------------------------------------------------------------|
| 4               | Algeria | 1998           | Offals, Edible            | 3                                                           |
| 4               | Algeria | 1998           | Oilcrops Oil, Other       | 1                                                           |
| 4               | Algeria | 1998           | Olive Oil                 | 1                                                           |
| 4               | Algeria | 1998           | Olives                    | 1                                                           |
| 4               | Algeria | 1998           | Onions                    | 33                                                          |
| 4               | Algeria | 1998           | Oranges, Mandarines       | 33                                                          |
| 4               | Algeria | 1998           | Palm Oil                  | 1                                                           |
| 4               | Algeria | 1998           | Peas                      | 2                                                           |
| 4               | Algeria | 1998           | Pelagic Fish              | 7                                                           |
| 4               | Algeria | 1998           | Pimento                   | 1                                                           |
| 4               | Algeria | 1998           | Potatoes                  | 91                                                          |
| 4               | Algeria | 1998           | Poultry Meat              | 22                                                          |
| 4               | Algeria | 1998           | Pulses, Other             | 11                                                          |
| 4               | Algeria | 1998           | Rape and Mustard Oil      | 8                                                           |
| 4               | Algeria | 1998           | Rice (Milled Equivalent)  | 2                                                           |
| 4               | Algeria | 1998           | Soyabean Oil              | 6                                                           |
| 4               | Algeria | 1998           | Sugar, Refined Equivalent | 48                                                          |
| 4               | Algeria | 1998           | Sunflowerseed Oil         | 23                                                          |
| 4               | Algeria | 1998           | Sweeteners, Other         | 1                                                           |
| 4               | Algeria | 1998           | Tea                       | 1                                                           |
| 4               | Algeria | 1998           | Tomatoes                  | 63                                                          |
| 4               | Algeria | 1998           | Vegetables, Other         | 120                                                         |
| 4               | Algeria | 1998           | Wheat                     | 541                                                         |
| 4               | Algeria | 1999           | Apples                    | 7                                                           |
| 4               | Algeria | 1999           | Barley                    | 52                                                          |
| 4               | Algeria | 1999           | Beans                     | 8                                                           |
| 4               | Algeria | 1999           | Beer                      | 6                                                           |
| 4               | Algeria | 1999           | Bovine Meat               | 12                                                          |
| 4               | Algeria | 1999           | Butter, Ghee              | 1                                                           |
| 4               | Algeria | 1999           | Cheese                    | 2                                                           |
| 4               | Algeria | 1999           | Cocoa Beans               | 1                                                           |
| 4               | Algeria | 1999           | Coffee                    | 8                                                           |
| 4               | Algeria | 1999           | Dates                     | 35                                                          |
| 4               | Algeria | 1999           | Demersal Fish             | 1                                                           |
| 4               | Algeria | 1999           | Eggs                      | 7                                                           |
| 4               | Algeria | 1999           | Fats, Animals, Raw        | 1                                                           |
| 4               | Algeria | 1999           | Fruits, Other             | 28                                                          |
| 4               | Algeria | 1999           | Grapes                    | 11                                                          |
| 4               | Algeria | 1999           | Lemons, Limes             | 2                                                           |
| 4               | Algeria | 1999           | Maize                     | 9                                                           |
| 4               | Algeria | 1999           | Meat, Other               | 1                                                           |
| 4               | Algeria | 1999           | Milk, Whole               | 184                                                         |
| 4               | Algeria | 1999           | Mutton & Goat Meat        | 16                                                          |
| 4               | Algeria | 1999           | Nuts                      | 2                                                           |
| 4               | Algeria | 1999           | Offals, Edible            | 3                                                           |
| 4               | Algeria | 1999           | Oilcrops Oil, Other       | 2                                                           |
| 4               | Algeria | 1999           | Olive Oil                 | 5                                                           |
| 4               | Algeria | 1999           | Olives                    | 4                                                           |
| 4               | Algeria | 1999           | Onions                    | 32                                                          |
| 4               | Algeria | 1999           | Oranges, Mandarines       | 35                                                          |
| 4               | Algeria | 1999           | Palm Oil                  | 1                                                           |
| 4               | Algeria | 1999           | Peas                      | 3                                                           |
| 4               | Algeria | 1999           | Pelagic Fish              | 8                                                           |
| 4               | Algeria | 1999           | Pimento                   | 1                                                           |
| 4               | Algeria | 1999           | Potatoes                  | 79                                                          |
| 4               | Algeria | 1999           | Poultry Meat              | 21                                                          |
| 4               | Algeria | 1999           | Pulses, Other             | 11                                                          |
| 4               | Algeria | 1999           | Rape and Mustard Oil      | 7                                                           |
| 4               | Algeria | 1999           | Rice (Milled Equivalent)  | 4                                                           |
| 4               | Algeria | 1999           | Soyabean Oil              | 1                                                           |
| 4               | Algeria | 1999           | Sugar, Refined Equivalent | 54                                                          |
| 4               | Algeria | 1999           | Sunflowerseed Oil         | 27                                                          |
| 4               | Algeria | 1999           | Sweeteners, Other         | 1                                                           |
| 4               | Algeria | 1999           | Tomatoes                  | 78                                                          |
| 4               | Algeria | 1999           | Vegetables, Other         | 126                                                         |
| 4               | Algeria | 1999           | Wheat                     | 539                                                         |
| 4               | Algeria | 2000           | Apples                    | 8                                                           |
| 4               | Algeria | 2000           | Barley                    | 25                                                          |
| 4               | Algeria | 2000           | Beans                     | 3                                                           |
| 4               | Algeria | 2000           | Beer                      | 9                                                           |
| 4               | Algeria | 2000           | Bovine Meat               | 12                                                          |
| 4               | Algeria | 2000           | Butter, Ghee              | 1                                                           |
| 4               | Algeria | 2000           | Cheese                    | 2                                                           |
| 4               | Algeria | 2000           | Cocoa Beans               | 1                                                           |
| 4               | Algeria | 2000           | Coffee                    | 9                                                           |
| 4               | Algeria | 2000           | Dates                     | 30                                                          |
| 4               | Algeria | 2000           | Demersal Fish             | 1                                                           |
| 4               | Algeria | 2000           | Eggs                      | 7                                                           |
| 4               | Algeria | 2000           | Fats, Animals, Raw        | 1                                                           |
| 4               | Algeria | 2000           | Fruits, Other             | 27                                                          |
| 4               | Algeria | 2000           | Grapes                    | 13                                                          |
| 4               | Algeria | 2000           | Lemons, Limes             | 2                                                           |
| 4               | Algeria | 2000           | Maize                     | 49                                                          |
| 4               | Algeria | 2000           | Marine Fish, Other        | 1                                                           |
| 4               | Algeria | 2000           | Meat, Other               | 1                                                           |
| 4               | Algeria | 2000           | Milk, Whole               | 185                                                         |
| 4               | Algeria | 2000           | Mutton & Goat Meat        | 16                                                          |
| 4               | Algeria | 2000           | Nuts                      | 2                                                           |
| 4               | Algeria | 2000           | Offals, Edible            | 3                                                           |
| 4               | Algeria | 2000           | Oilcrops Oil, Other       | 2                                                           |
| 4               | Algeria | 2000           | Olive Oil                 | 3                                                           |
| 4               | Algeria | 2000           | Olives                    | 2                                                           |
| 4               | Algeria | 2000           | Onions                    | 26                                                          |
| 4               | Algeria | 2000           | Oranges, Mandarines       | 33                                                          |
| 4               | Algeria | 2000           | Palm Oil                  | 2                                                           |
| 4               | Algeria | 2000           | Peas                      | 1                                                           |
| 4               | Algeria | 2000           | Pelagic Fish              | 8                                                           |



Dietary calcium and zinc deficiency risks are decreasing but remain prevalent

| FAO countrycode | Country | Reference year | Food item                 | Gross food supply (g capita <sup>-1</sup> d <sup>-1</sup> ) |
|-----------------|---------|----------------|---------------------------|-------------------------------------------------------------|
| 4               | Algeria | 2000           | Pimento                   | 1                                                           |
| 4               | Algeria | 2000           | Potatoes                  | 102                                                         |
| 4               | Algeria | 2000           | Poultry Meat              | 21                                                          |
| 4               | Algeria | 2000           | Pulses, Other             | 11                                                          |
| 4               | Algeria | 2000           | Rape and Mustard Oil      | 7                                                           |
| 4               | Algeria | 2000           | Rice (Milled Equivalent)  | 5                                                           |
| 4               | Algeria | 2000           | Soyabean Oil              | 1                                                           |
| 4               | Algeria | 2000           | Sugar, Refined Equivalent | 72                                                          |
| 4               | Algeria | 2000           | Sunflowerseed Oil         | 25                                                          |
| 4               | Algeria | 2000           | Sweeteners, Other         | 1                                                           |
| 4               | Algeria | 2000           | Tea                       | 1                                                           |
| 4               | Algeria | 2000           | Tomatoes                  | 66                                                          |
| 4               | Algeria | 2000           | Vegetables, Other         | 116                                                         |
| 4               | Algeria | 2000           | Wheat                     | 494                                                         |
| 4               | Algeria | 2001           | Apples                    | 9                                                           |
| 4               | Algeria | 2001           | Bananas                   | 7                                                           |
| 4               | Algeria | 2001           | Barley                    | 34                                                          |
| 4               | Algeria | 2001           | Beans                     | 4                                                           |
| 4               | Algeria | 2001           | Beer                      | 9                                                           |
| 4               | Algeria | 2001           | Bovine Meat               | 9                                                           |
| 4               | Algeria | 2001           | Butter, Ghee              | 1                                                           |
| 4               | Algeria | 2001           | Cheese                    | 1                                                           |
| 4               | Algeria | 2001           | Cocoa Beans               | 1                                                           |
| 4               | Algeria | 2001           | Coffee                    | 7                                                           |
| 4               | Algeria | 2001           | Dates                     | 35                                                          |
| 4               | Algeria | 2001           | Demersal Fish             | 1                                                           |
| 4               | Algeria | 2001           | Eggs                      | 8                                                           |
| 4               | Algeria | 2001           | Fats, Animals, Raw        | 1                                                           |
| 4               | Algeria | 2001           | Fruits, Other             | 27                                                          |
| 4               | Algeria | 2001           | Grapes                    | 13                                                          |
| 4               | Algeria | 2001           | Groundnut Oil             | 1                                                           |
| 4               | Algeria | 2001           | Lemons, Limes             | 2                                                           |
| 4               | Algeria | 2001           | Maize                     | 40                                                          |
| 4               | Algeria | 2001           | Marine Fish, Other        | 1                                                           |
| 4               | Algeria | 2001           | Meat, Other               | 1                                                           |
| 4               | Algeria | 2001           | Milk, Whole               | 211                                                         |
| 4               | Algeria | 2001           | Mutton & Goat Meat        | 15                                                          |
| 4               | Algeria | 2001           | Nuts                      | 3                                                           |
| 4               | Algeria | 2001           | Offals, Edible            | 3                                                           |
| 4               | Algeria | 2001           | Oilcrops Oil, Other       | 2                                                           |
| 4               | Algeria | 2001           | Olive Oil                 | 2                                                           |
| 4               | Algeria | 2001           | Olives                    | 2                                                           |
| 4               | Algeria | 2001           | Onions                    | 35                                                          |
| 4               | Algeria | 2001           | Oranges, Mandarines       | 35                                                          |
| 4               | Algeria | 2001           | Palm Oil                  | 5                                                           |
| 4               | Algeria | 2001           | Peas                      | 1                                                           |
| 4               | Algeria | 2001           | Pelagic Fish              | 10                                                          |
| 4               | Algeria | 2001           | Pimento                   | 1                                                           |
| 4               | Algeria | 2001           | Potatoes                  | 76                                                          |
| 4               | Algeria | 2001           | Poultry Meat              | 21                                                          |
| 4               | Algeria | 2001           | Pulses, Other             | 10                                                          |
| 4               | Algeria | 2001           | Rape and Mustard Oil      | 6                                                           |
| 4               | Algeria | 2001           | Rice (Milled Equivalent)  | 2                                                           |
| 4               | Algeria | 2001           | Rye                       | 4                                                           |
| 4               | Algeria | 2001           | Soyabean Oil              | 1                                                           |
| 4               | Algeria | 2001           | Sugar, Refined Equivalent | 70                                                          |
| 4               | Algeria | 2001           | Sunflowerseed Oil         | 27                                                          |
| 4               | Algeria | 2001           | Sweeteners, Other         | 1                                                           |
| 4               | Algeria | 2001           | Tea                       | 1                                                           |
| 4               | Algeria | 2001           | Tomatoes                  | 65                                                          |
| 4               | Algeria | 2001           | Vegetables, Other         | 124                                                         |
| 4               | Algeria | 2001           | Wheat                     | 505                                                         |
| 4               | Algeria | 2001           | Whey                      | 1                                                           |
| 4               | Algeria | 2002           | Apples                    | 13                                                          |
| 4               | Algeria | 2002           | Bananas                   | 18                                                          |
| 4               | Algeria | 2002           | Barley                    | 41                                                          |
| 4               | Algeria | 2002           | Beans                     | 4                                                           |
| 4               | Algeria | 2002           | Beer                      | 9                                                           |
| 4               | Algeria | 2002           | Bovine Meat               | 11                                                          |
| 4               | Algeria | 2002           | Butter, Ghee              | 1                                                           |
| 4               | Algeria | 2002           | Cheese                    | 2                                                           |
| 4               | Algeria | 2002           | Cocoa Beans               | 1                                                           |
| 4               | Algeria | 2002           | Coffee                    | 9                                                           |
| 4               | Algeria | 2002           | Dates                     | 33                                                          |
| 4               | Algeria | 2002           | Demersal Fish             | 1                                                           |
| 4               | Algeria | 2002           | Eggs                      | 12                                                          |
| 4               | Algeria | 2002           | Fats, Animals, Raw        | 1                                                           |
| 4               | Algeria | 2002           | Fruits, Other             | 34                                                          |
| 4               | Algeria | 2002           | Grapes                    | 17                                                          |
| 4               | Algeria | 2002           | Groundnut Oil             | 2                                                           |
| 4               | Algeria | 2002           | Lemons, Limes             | 3                                                           |
| 4               | Algeria | 2002           | Maize                     | 37                                                          |
| 4               | Algeria | 2002           | Marine Fish, Other        | 1                                                           |
| 4               | Algeria | 2002           | Meat, Other               | 1                                                           |
| 4               | Algeria | 2002           | Milk, Whole               | 194                                                         |
| 4               | Algeria | 2002           | Mutton & Goat Meat        | 15                                                          |
| 4               | Algeria | 2002           | Nuts                      | 3                                                           |
| 4               | Algeria | 2002           | Offals, Edible            | 3                                                           |
| 4               | Algeria | 2002           | Oilcrops Oil, Other       | 2                                                           |
| 4               | Algeria | 2002           | Olive Oil                 | 2                                                           |
| 4               | Algeria | 2002           | Olives                    | 2                                                           |
| 4               | Algeria | 2002           | Onions                    | 36                                                          |
| 4               | Algeria | 2002           | Oranges, Mandarines       | 39                                                          |
| 4               | Algeria | 2002           | Palm Oil                  | 7                                                           |
| 4               | Algeria | 2002           | Peas                      | 1                                                           |
| 4               | Algeria | 2002           | Pelagic Fish              | 10                                                          |
| 4               | Algeria | 2002           | Pimento                   | 1                                                           |

Dietary calcium and zinc deficiency risks are decreasing but remain prevalent

| FAO countrycode | Country | Reference year | Food item                 | Gross food supply (g capita <sup>-1</sup> d <sup>-1</sup> ) |
|-----------------|---------|----------------|---------------------------|-------------------------------------------------------------|
| 4               | Algeria | 2002           | Potatoes                  | 107                                                         |
| 4               | Algeria | 2002           | Poultry Meat              | 21                                                          |
| 4               | Algeria | 2002           | Pulses, Other             | 10                                                          |
| 4               | Algeria | 2002           | Rape and Mustard Oil      | 13                                                          |
| 4               | Algeria | 2002           | Rice (Milled Equivalent)  | 8                                                           |
| 4               | Algeria | 2002           | Soyabean Oil              | 2                                                           |
| 4               | Algeria | 2002           | Spices, Other             | 1                                                           |
| 4               | Algeria | 2002           | Sugar, Refined Equivalent | 73                                                          |
| 4               | Algeria | 2002           | Sunflowerseed Oil         | 12                                                          |
| 4               | Algeria | 2002           | Sweeteners, Other         | 1                                                           |
| 4               | Algeria | 2002           | Tea                       | 1                                                           |
| 4               | Algeria | 2002           | Tomatoes                  | 64                                                          |
| 4               | Algeria | 2002           | Vegetables, Other         | 128                                                         |
| 4               | Algeria | 2002           | Wheat                     | 507                                                         |
| 4               | Algeria | 2003           | Apples                    | 15                                                          |
| 4               | Algeria | 2003           | Bananas                   | 17                                                          |
| 4               | Algeria | 2003           | Barley                    | 41                                                          |
| 4               | Algeria | 2003           | Beans                     | 4                                                           |
| 4               | Algeria | 2003           | Beer                      | 10                                                          |
| 4               | Algeria | 2003           | Bovine Meat               | 14                                                          |
| 4               | Algeria | 2003           | Butter, Ghee              | 1                                                           |
| 4               | Algeria | 2003           | Cheese                    | 2                                                           |
| 4               | Algeria | 2003           | Cocoa Beans               | 1                                                           |
| 4               | Algeria | 2003           | Coffee                    | 9                                                           |
| 4               | Algeria | 2003           | Dates                     | 39                                                          |
| 4               | Algeria | 2003           | Demersal Fish             | 1                                                           |
| 4               | Algeria | 2003           | Eggs                      | 12                                                          |
| 4               | Algeria | 2003           | Fats, Animals, Raw        | 1                                                           |
| 4               | Algeria | 2003           | Fruits, Other             | 38                                                          |
| 4               | Algeria | 2003           | Grapes                    | 17                                                          |
| 4               | Algeria | 2003           | Groundnut Oil             | 2                                                           |
| 4               | Algeria | 2003           | Lemons, Limes             | 3                                                           |
| 4               | Algeria | 2003           | Maize                     | 29                                                          |
| 4               | Algeria | 2003           | Marine Fish, Other        | 1                                                           |
| 4               | Algeria | 2003           | Meat, Other               | 1                                                           |
| 4               | Algeria | 2003           | Milk, Whole               | 199                                                         |
| 4               | Algeria | 2003           | Mutton & Goat Meat        | 15                                                          |
| 4               | Algeria | 2003           | Nuts                      | 4                                                           |
| 4               | Algeria | 2003           | Offals, Edible            | 3                                                           |
| 4               | Algeria | 2003           | Oilcrops Oil, Other       | 2                                                           |
| 4               | Algeria | 2003           | Olive Oil                 | 2                                                           |
| 4               | Algeria | 2003           | Olives                    | 1                                                           |
| 4               | Algeria | 2003           | Onions                    | 44                                                          |
| 4               | Algeria | 2003           | Oranges, Mandarines       | 41                                                          |
| 4               | Algeria | 2003           | Palm Oil                  | 3                                                           |
| 4               | Algeria | 2003           | Peas                      | 1                                                           |
| 4               | Algeria | 2003           | Pelagic Fish              | 11                                                          |
| 4               | Algeria | 2003           | Pimento                   | 1                                                           |
| 4               | Algeria | 2003           | Potatoes                  | 140                                                         |
| 4               | Algeria | 2003           | Poultry Meat              | 22                                                          |
| 4               | Algeria | 2003           | Pulses, Other             | 12                                                          |
| 4               | Algeria | 2003           | Rape and Mustard Oil      | 4                                                           |
| 4               | Algeria | 2003           | Rice (Milled Equivalent)  | 5                                                           |
| 4               | Algeria | 2003           | Soyabean Oil              | 1                                                           |
| 4               | Algeria | 2003           | Sugar, Refined Equivalent | 75                                                          |
| 4               | Algeria | 2003           | Sunflowerseed Oil         | 20                                                          |
| 4               | Algeria | 2003           | Sweeteners, Other         | 1                                                           |
| 4               | Algeria | 2003           | Tea                       | 1                                                           |
| 4               | Algeria | 2003           | Tomatoes                  | 71                                                          |
| 4               | Algeria | 2003           | Vegetables, Other         | 153                                                         |
| 4               | Algeria | 2003           | Wheat                     | 530                                                         |
| 4               | Algeria | 2004           | Apples                    | 18                                                          |
| 4               | Algeria | 2004           | Bananas                   | 15                                                          |
| 4               | Algeria | 2004           | Barley                    | 41                                                          |
| 4               | Algeria | 2004           | Beans                     | 4                                                           |
| 4               | Algeria | 2004           | Beer                      | 9                                                           |
| 4               | Algeria | 2004           | Bovine Meat               | 18                                                          |
| 4               | Algeria | 2004           | Butter, Ghee              | 1                                                           |
| 4               | Algeria | 2004           | Cheese                    | 2                                                           |
| 4               | Algeria | 2004           | Cocoa Beans               | 1                                                           |
| 4               | Algeria | 2004           | Coffee                    | 11                                                          |
| 4               | Algeria | 2004           | Dates                     | 35                                                          |
| 4               | Algeria | 2004           | Demersal Fish             | 1                                                           |
| 4               | Algeria | 2004           | Eggs                      | 13                                                          |
| 4               | Algeria | 2004           | Fats, Animals, Raw        | 1                                                           |
| 4               | Algeria | 2004           | Fruits, Other             | 39                                                          |
| 4               | Algeria | 2004           | Grapes                    | 16                                                          |
| 4               | Algeria | 2004           | Groundnut Oil             | 2                                                           |
| 4               | Algeria | 2004           | Lemons, Limes             | 3                                                           |
| 4               | Algeria | 2004           | Maize                     | 26                                                          |
| 4               | Algeria | 2004           | Meat, Other               | 1                                                           |
| 4               | Algeria | 2004           | Milk, Whole               | 228                                                         |
| 4               | Algeria | 2004           | Mutton & Goat Meat        | 16                                                          |
| 4               | Algeria | 2004           | Nuts                      | 4                                                           |
| 4               | Algeria | 2004           | Offals, Edible            | 3                                                           |
| 4               | Algeria | 2004           | Oilcrops Oil, Other       | 4                                                           |
| 4               | Algeria | 2004           | Olive Oil                 | 5                                                           |
| 4               | Algeria | 2004           | Olives                    | 7                                                           |
| 4               | Algeria | 2004           | Onions                    | 51                                                          |
| 4               | Algeria | 2004           | Oranges, Mandarines       | 44                                                          |
| 4               | Algeria | 2004           | Palm Oil                  | 3                                                           |
| 4               | Algeria | 2004           | Peas                      | 2                                                           |
| 4               | Algeria | 2004           | Pelagic Fish              | 10                                                          |
| 4               | Algeria | 2004           | Pimento                   | 1                                                           |
| 4               | Algeria | 2004           | Potatoes                  | 139                                                         |
| 4               | Algeria | 2004           | Poultry Meat              | 22                                                          |
| 4               | Algeria | 2004           | Pulses, Other             | 10                                                          |

Dietary calcium and zinc deficiency risks are decreasing but remain prevalent

| FAO countrycode | Country | Reference year | Food item                 | Gross food supply (g capita <sup>-1</sup> d <sup>-1</sup> ) |
|-----------------|---------|----------------|---------------------------|-------------------------------------------------------------|
| 4               | Algeria | 2004           | Rape and Mustard Oil      | 5                                                           |
| 4               | Algeria | 2004           | Rice (Milled Equivalent)  | 5                                                           |
| 4               | Algeria | 2004           | Soyabean Oil              | 4                                                           |
| 4               | Algeria | 2004           | Sugar, Refined Equivalent | 76                                                          |
| 4               | Algeria | 2004           | Sunflowerseed Oil         | 12                                                          |
| 4               | Algeria | 2004           | Sweeteners, Other         | 1                                                           |
| 4               | Algeria | 2004           | Tea                       | 1                                                           |
| 4               | Algeria | 2004           | Tomatoes                  | 92                                                          |
| 4               | Algeria | 2004           | Vegetables, Other         | 176                                                         |
| 4               | Algeria | 2004           | Wheat                     | 521                                                         |
| 4               | Algeria | 2004           | Whey                      | 2                                                           |
| 4               | Algeria | 2005           | Apples                    | 21                                                          |
| 4               | Algeria | 2005           | Bananas                   | 11                                                          |
| 4               | Algeria | 2005           | Barley                    | 40                                                          |
| 4               | Algeria | 2005           | Beans                     | 4                                                           |
| 4               | Algeria | 2005           | Beer                      | 10                                                          |
| 4               | Algeria | 2005           | Bovine Meat               | 18                                                          |
| 4               | Algeria | 2005           | Butter, Ghee              | 1                                                           |
| 4               | Algeria | 2005           | Cheese                    | 2                                                           |
| 4               | Algeria | 2005           | Cocoa Beans               | 1                                                           |
| 4               | Algeria | 2005           | Coconuts - Incl Copra     | 1                                                           |
| 4               | Algeria | 2005           | Coffee                    | 9                                                           |
| 4               | Algeria | 2005           | Dates                     | 39                                                          |
| 4               | Algeria | 2005           | Demersal Fish             | 1                                                           |
| 4               | Algeria | 2005           | Eggs                      | 12                                                          |
| 4               | Algeria | 2005           | Fats, Animals, Raw        | 1                                                           |
| 4               | Algeria | 2005           | Fruits, Other             | 48                                                          |
| 4               | Algeria | 2005           | Grapes                    | 19                                                          |
| 4               | Algeria | 2005           | Groundnut Oil             | 2                                                           |
| 4               | Algeria | 2005           | Lemons, Limes             | 4                                                           |
| 4               | Algeria | 2005           | Maize                     | 26                                                          |
| 4               | Algeria | 2005           | Meat, Other               | 1                                                           |
| 4               | Algeria | 2005           | Milk, Whole               | 236                                                         |
| 4               | Algeria | 2005           | Mutton & Goat Meat        | 17                                                          |
| 4               | Algeria | 2005           | Nuts                      | 4                                                           |
| 4               | Algeria | 2005           | Offals, Edible            | 3                                                           |
| 4               | Algeria | 2005           | Oilcrops Oil, Other       | 4                                                           |
| 4               | Algeria | 2005           | Olive Oil                 | 3                                                           |
| 4               | Algeria | 2005           | Olives                    | 4                                                           |
| 4               | Algeria | 2005           | Onions                    | 53                                                          |
| 4               | Algeria | 2005           | Oranges, Mandarines       | 45                                                          |
| 4               | Algeria | 2005           | Peas                      | 1                                                           |
| 4               | Algeria | 2005           | Pelagic Fish              | 11                                                          |
| 4               | Algeria | 2005           | Pimento                   | 1                                                           |
| 4               | Algeria | 2005           | Potatoes                  | 154                                                         |
| 4               | Algeria | 2005           | Poultry Meat              | 22                                                          |
| 4               | Algeria | 2005           | Pulses, Other             | 13                                                          |
| 4               | Algeria | 2005           | Rape and Mustard Oil      | 3                                                           |
| 4               | Algeria | 2005           | Rice (Milled Equivalent)  | 4                                                           |
| 4               | Algeria | 2005           | Soyabean Oil              | 14                                                          |
| 4               | Algeria | 2005           | Sugar, Refined Equivalent | 68                                                          |
| 4               | Algeria | 2005           | Sunflowerseed Oil         | 6                                                           |
| 4               | Algeria | 2005           | Sweeteners, Other         | 1                                                           |
| 4               | Algeria | 2005           | Tea                       | 1                                                           |
| 4               | Algeria | 2005           | Tomatoes                  | 81                                                          |
| 4               | Algeria | 2005           | Vegetables, Other         | 187                                                         |
| 4               | Algeria | 2005           | Wheat                     | 520                                                         |
| 4               | Algeria | 2005           | Whey                      | 2                                                           |
| 4               | Algeria | 2006           | Apples                    | 28                                                          |
| 4               | Algeria | 2006           | Bananas                   | 11                                                          |
| 4               | Algeria | 2006           | Barley                    | 47                                                          |
| 4               | Algeria | 2006           | Beans                     | 4                                                           |
| 4               | Algeria | 2006           | Beer                      | 11                                                          |
| 4               | Algeria | 2006           | Bovine Meat               | 15                                                          |
| 4               | Algeria | 2006           | Butter, Ghee              | 1                                                           |
| 4               | Algeria | 2006           | Cheese                    | 2                                                           |
| 4               | Algeria | 2006           | Cocoa Beans               | 1                                                           |
| 4               | Algeria | 2006           | Coffee                    | 9                                                           |
| 4               | Algeria | 2006           | Dates                     | 37                                                          |
| 4               | Algeria | 2006           | Demersal Fish             | 1                                                           |
| 4               | Algeria | 2006           | Eggs                      | 12                                                          |
| 4               | Algeria | 2006           | Fats, Animals, Raw        | 1                                                           |
| 4               | Algeria | 2006           | Fruits, Other             | 57                                                          |
| 4               | Algeria | 2006           | Grapes                    | 22                                                          |
| 4               | Algeria | 2006           | Groundnut Oil             | 1                                                           |
| 4               | Algeria | 2006           | Lemons, Limes             | 3                                                           |
| 4               | Algeria | 2006           | Maize                     | 52                                                          |
| 4               | Algeria | 2006           | Meat, Other               | 1                                                           |
| 4               | Algeria | 2006           | Milk, Whole               | 259                                                         |
| 4               | Algeria | 2006           | Mutton & Goat Meat        | 16                                                          |
| 4               | Algeria | 2006           | Nuts                      | 5                                                           |
| 4               | Algeria | 2006           | Offals, Edible            | 3                                                           |
| 4               | Algeria | 2006           | Oilcrops Oil, Other       | 5                                                           |
| 4               | Algeria | 2006           | Olive Oil                 | 3                                                           |
| 4               | Algeria | 2006           | Olives                    | 4                                                           |
| 4               | Algeria | 2006           | Onions                    | 53                                                          |
| 4               | Algeria | 2006           | Oranges, Mandarines       | 48                                                          |
| 4               | Algeria | 2006           | Palm Oil                  | 2                                                           |
| 4               | Algeria | 2006           | Peas                      | 1                                                           |
| 4               | Algeria | 2006           | Pelagic Fish              | 13                                                          |
| 4               | Algeria | 2006           | Pimento                   | 1                                                           |
| 4               | Algeria | 2006           | Potatoes                  | 157                                                         |
| 4               | Algeria | 2006           | Poultry Meat              | 21                                                          |
| 4               | Algeria | 2006           | Pulses, Other             | 10                                                          |
| 4               | Algeria | 2006           | Rape and Mustard Oil      | 4                                                           |
| 4               | Algeria | 2006           | Rice (Milled Equivalent)  | 5                                                           |
| 4               | Algeria | 2006           | Soyabean Oil              | 16                                                          |

Dietary calcium and zinc deficiency risks are decreasing but remain prevalent

| FAO countrycode | Country | Reference year | Food item                 | Gross food supply (g capita <sup>-1</sup> d <sup>-1</sup> ) |
|-----------------|---------|----------------|---------------------------|-------------------------------------------------------------|
| 4               | Algeria | 2006           | Spices, Other             | 1                                                           |
| 4               | Algeria | 2006           | Sugar, Refined Equivalent | 71                                                          |
| 4               | Algeria | 2006           | Sunflowerseed Oil         | 6                                                           |
| 4               | Algeria | 2006           | Sweeteners, Other         | 1                                                           |
| 4               | Algeria | 2006           | Tea                       | 1                                                           |
| 4               | Algeria | 2006           | Tomatoes                  | 70                                                          |
| 4               | Algeria | 2006           | Vegetables, Other         | 179                                                         |
| 4               | Algeria | 2006           | Wheat                     | 492                                                         |
| 4               | Algeria | 2006           | Whey                      | 2                                                           |
| 4               | Algeria | 2007           | Apples                    | 21                                                          |
| 4               | Algeria | 2007           | Bananas                   | 11                                                          |
| 4               | Algeria | 2007           | Barley                    | 50                                                          |
| 4               | Algeria | 2007           | Beans                     | 4                                                           |
| 4               | Algeria | 2007           | Beer                      | 11                                                          |
| 4               | Algeria | 2007           | Bovine Meat               | 15                                                          |
| 4               | Algeria | 2007           | Butter, Ghee              | 1                                                           |
| 4               | Algeria | 2007           | Cheese                    | 2                                                           |
| 4               | Algeria | 2007           | Cocoa Beans               | 2                                                           |
| 4               | Algeria | 2007           | Coconuts - Incl Copra     | 1                                                           |
| 4               | Algeria | 2007           | Coffee                    | 9                                                           |
| 4               | Algeria | 2007           | Dates                     | 39                                                          |
| 4               | Algeria | 2007           | Demersal Fish             | 1                                                           |
| 4               | Algeria | 2007           | Eggs                      | 13                                                          |
| 4               | Algeria | 2007           | Fats, Animals, Raw        | 1                                                           |
| 4               | Algeria | 2007           | Fruits, Other             | 42                                                          |
| 4               | Algeria | 2007           | Grapes                    | 17                                                          |
| 4               | Algeria | 2007           | Groundnut Oil             | 2                                                           |
| 4               | Algeria | 2007           | Lemons, Limes             | 3                                                           |
| 4               | Algeria | 2007           | Maize                     | 58                                                          |
| 4               | Algeria | 2007           | Marine Fish, Other        | 1                                                           |
| 4               | Algeria | 2007           | Meat, Other               | 1                                                           |
| 4               | Algeria | 2007           | Milk, Whole               | 241                                                         |
| 4               | Algeria | 2007           | Mutton & Goat Meat        | 16                                                          |
| 4               | Algeria | 2007           | Nuts                      | 4                                                           |
| 4               | Algeria | 2007           | Offals, Edible            | 3                                                           |
| 4               | Algeria | 2007           | Oilcrops Oil, Other       | 4                                                           |
| 4               | Algeria | 2007           | Olive Oil                 | 2                                                           |
| 4               | Algeria | 2007           | Olives                    | 2                                                           |
| 4               | Algeria | 2007           | Onions                    | 61                                                          |
| 4               | Algeria | 2007           | Oranges, Mandarines       | 49                                                          |
| 4               | Algeria | 2007           | Palm Oil                  | 1                                                           |
| 4               | Algeria | 2007           | Peas                      | 1                                                           |
| 4               | Algeria | 2007           | Pelagic Fish              | 12                                                          |
| 4               | Algeria | 2007           | Pimento                   | 1                                                           |
| 4               | Algeria | 2007           | Potatoes                  | 114                                                         |
| 4               | Algeria | 2007           | Poultry Meat              | 21                                                          |
| 4               | Algeria | 2007           | Pulses, Other             | 12                                                          |
| 4               | Algeria | 2007           | Rape and Mustard Oil      | 4                                                           |
| 4               | Algeria | 2007           | Rice (Milled Equivalent)  | 6                                                           |
| 4               | Algeria | 2007           | Soyabean Oil              | 21                                                          |
| 4               | Algeria | 2007           | Spices, Other             | 1                                                           |
| 4               | Algeria | 2007           | Sugar, Refined Equivalent | 79                                                          |
| 4               | Algeria | 2007           | Sunflowerseed Oil         | 3                                                           |
| 4               | Algeria | 2007           | Sweeteners, Other         | 1                                                           |
| 4               | Algeria | 2007           | Tea                       | 1                                                           |
| 4               | Algeria | 2007           | Tomatoes                  | 53                                                          |
| 4               | Algeria | 2007           | Vegetables, Other         | 181                                                         |
| 4               | Algeria | 2007           | Wheat                     | 485                                                         |
| 4               | Algeria | 2007           | Whey                      | 3                                                           |
| 4               | Algeria | 2008           | Apples                    | 26                                                          |
| 4               | Algeria | 2008           | Bananas                   | 11                                                          |
| 4               | Algeria | 2008           | Barley                    | 38                                                          |
| 4               | Algeria | 2008           | Beans                     | 5                                                           |
| 4               | Algeria | 2008           | Beer                      | 12                                                          |
| 4               | Algeria | 2008           | Bovine Meat               | 15                                                          |
| 4               | Algeria | 2008           | Butter, Ghee              | 1                                                           |
| 4               | Algeria | 2008           | Cheese                    | 1                                                           |
| 4               | Algeria | 2008           | Cocoa Beans               | 2                                                           |
| 4               | Algeria | 2008           | Coffee                    | 10                                                          |
| 4               | Algeria | 2008           | Dates                     | 41                                                          |
| 4               | Algeria | 2008           | Demersal Fish             | 1                                                           |
| 4               | Algeria | 2008           | Eggs                      | 12                                                          |
| 4               | Algeria | 2008           | Fats, Animals, Raw        | 1                                                           |
| 4               | Algeria | 2008           | Fruits, Other             | 54                                                          |
| 4               | Algeria | 2008           | Grapes                    | 26                                                          |
| 4               | Algeria | 2008           | Groundnut Oil             | 2                                                           |
| 4               | Algeria | 2008           | Lemons, Limes             | 3                                                           |
| 4               | Algeria | 2008           | Maize                     | 52                                                          |
| 4               | Algeria | 2008           | Marine Fish, Other        | 1                                                           |
| 4               | Algeria | 2008           | Meat, Other               | 1                                                           |
| 4               | Algeria | 2008           | Milk, Whole               | 232                                                         |
| 4               | Algeria | 2008           | Mutton & Goat Meat        | 15                                                          |
| 4               | Algeria | 2008           | Nuts                      | 5                                                           |
| 4               | Algeria | 2008           | Offals, Edible            | 3                                                           |
| 4               | Algeria | 2008           | Oilcrops Oil, Other       | 5                                                           |
| 4               | Algeria | 2008           | Olive Oil                 | 3                                                           |
| 4               | Algeria | 2008           | Olives                    | 1                                                           |
| 4               | Algeria | 2008           | Onions                    | 55                                                          |
| 4               | Algeria | 2008           | Oranges, Mandarines       | 48                                                          |
| 4               | Algeria | 2008           | Palm Oil                  | 2                                                           |
| 4               | Algeria | 2008           | Peas                      | 1                                                           |
| 4               | Algeria | 2008           | Pelagic Fish              | 10                                                          |
| 4               | Algeria | 2008           | Pimento                   | 1                                                           |
| 4               | Algeria | 2008           | Potatoes                  | 150                                                         |
| 4               | Algeria | 2008           | Poultry Meat              | 21                                                          |
| 4               | Algeria | 2008           | Pulses, Other             | 10                                                          |
| 4               | Algeria | 2008           | Rape and Mustard Oil      | 2                                                           |

Dietary calcium and zinc deficiency risks are decreasing but remain prevalent

| FAO countrycode | Country | Reference year | Food item                 | Gross food supply (g capita <sup>-1</sup> d <sup>-1</sup> ) |
|-----------------|---------|----------------|---------------------------|-------------------------------------------------------------|
| 4               | Algeria | 2008           | Rice (Milled Equivalent)  | 7                                                           |
| 4               | Algeria | 2008           | Soyabean Oil              | 20                                                          |
| 4               | Algeria | 2008           | Spices, Other             | 1                                                           |
| 4               | Algeria | 2008           | Sugar, Refined Equivalent | 70                                                          |
| 4               | Algeria | 2008           | Sunflowerseed Oil         | 3                                                           |
| 4               | Algeria | 2008           | Sweeteners, Other         | 2                                                           |
| 4               | Algeria | 2008           | Tea                       | 1                                                           |
| 4               | Algeria | 2008           | Tomatoes                  | 47                                                          |
| 4               | Algeria | 2008           | Vegetables, Other         | 182                                                         |
| 4               | Algeria | 2008           | Wheat                     | 503                                                         |
| 4               | Algeria | 2008           | Whey                      | 3                                                           |
| 4               | Algeria | 2009           | Apples                    | 28                                                          |
| 4               | Algeria | 2009           | Bananas                   | 12                                                          |
| 4               | Algeria | 2009           | Barley                    | 38                                                          |
| 4               | Algeria | 2009           | Beans                     | 4                                                           |
| 4               | Algeria | 2009           | Beer                      | 11                                                          |
| 4               | Algeria | 2009           | Bovine Meat               | 16                                                          |
| 4               | Algeria | 2009           | Butter, Ghee              | 1                                                           |
| 4               | Algeria | 2009           | Cheese                    | 2                                                           |
| 4               | Algeria | 2009           | Citrus, Other             | 1                                                           |
| 4               | Algeria | 2009           | Cocoa Beans               | 2                                                           |
| 4               | Algeria | 2009           | Coconuts - Incl Copra     | 1                                                           |
| 4               | Algeria | 2009           | Coffee                    | 9                                                           |
| 4               | Algeria | 2009           | Dates                     | 43                                                          |
| 4               | Algeria | 2009           | Demersal Fish             | 1                                                           |
| 4               | Algeria | 2009           | Eggs                      | 13                                                          |
| 4               | Algeria | 2009           | Fats, Animals, Raw        | 1                                                           |
| 4               | Algeria | 2009           | Fruits, Other             | 60                                                          |
| 4               | Algeria | 2009           | Grapes                    | 35                                                          |
| 4               | Algeria | 2009           | Groundnut Oil             | 2                                                           |
| 4               | Algeria | 2009           | Groundnuts (Shelled Eq)   | 1                                                           |
| 4               | Algeria | 2009           | Lemons, Limes             | 4                                                           |
| 4               | Algeria | 2009           | Maize                     | 36                                                          |
| 4               | Algeria | 2009           | Marine Fish, Other        | 1                                                           |
| 4               | Algeria | 2009           | Meat, Other               | 1                                                           |
| 4               | Algeria | 2009           | Milk, Whole               | 274                                                         |
| 4               | Algeria | 2009           | Mutton & Goat Meat        | 16                                                          |
| 4               | Algeria | 2009           | Nuts                      | 6                                                           |
| 4               | Algeria | 2009           | Offals, Edible            | 3                                                           |
| 4               | Algeria | 2009           | Oilcrops Oil, Other       | 5                                                           |
| 4               | Algeria | 2009           | Olive Oil                 | 4                                                           |
| 4               | Algeria | 2009           | Olives                    | 6                                                           |
| 4               | Algeria | 2009           | Onions                    | 70                                                          |
| 4               | Algeria | 2009           | Oranges, Mandarines       | 57                                                          |
| 4               | Algeria | 2009           | Palm Oil                  | 2                                                           |
| 4               | Algeria | 2009           | Peas                      | 1                                                           |
| 4               | Algeria | 2009           | Pelagic Fish              | 10                                                          |
| 4               | Algeria | 2009           | Pimento                   | 1                                                           |
| 4               | Algeria | 2009           | Potatoes                  | 178                                                         |
| 4               | Algeria | 2009           | Poultry Meat              | 20                                                          |
| 4               | Algeria | 2009           | Pulses, Other             | 11                                                          |
| 4               | Algeria | 2009           | Rape and Mustard Oil      | 2                                                           |
| 4               | Algeria | 2009           | Rice (Milled Equivalent)  | 6                                                           |
| 4               | Algeria | 2009           | Soyabean Oil              | 16                                                          |
| 4               | Algeria | 2009           | Spices, Other             | 1                                                           |
| 4               | Algeria | 2009           | Sugar, Refined Equivalent | 77                                                          |
| 4               | Algeria | 2009           | Sunflowerseed Oil         | 3                                                           |
| 4               | Algeria | 2009           | Sweeteners, Other         | 1                                                           |
| 4               | Algeria | 2009           | Tea                       | 1                                                           |
| 4               | Algeria | 2009           | Tomatoes                  | 57                                                          |
| 4               | Algeria | 2009           | Vegetables, Other         | 218                                                         |
| 4               | Algeria | 2009           | Wheat                     | 518                                                         |
| 4               | Algeria | 2009           | Whey                      | 2                                                           |
| 4               | Algeria | 2010           | Apples                    | 34                                                          |
| 4               | Algeria | 2010           | Bananas                   | 4                                                           |
| 4               | Algeria | 2010           | Barley                    | 37                                                          |
| 4               | Algeria | 2010           | Beans                     | 4                                                           |
| 4               | Algeria | 2010           | Beer                      | 11                                                          |
| 4               | Algeria | 2010           | Bovine Meat               | 13                                                          |
| 4               | Algeria | 2010           | Butter, Ghee              | 1                                                           |
| 4               | Algeria | 2010           | Cheese                    | 2                                                           |
| 4               | Algeria | 2010           | Cocoa Beans               | 2                                                           |
| 4               | Algeria | 2010           | Coconuts - Incl Copra     | 1                                                           |
| 4               | Algeria | 2010           | Coffee                    | 5                                                           |
| 4               | Algeria | 2010           | Dates                     | 46                                                          |
| 4               | Algeria | 2010           | Demersal Fish             | 1                                                           |
| 4               | Algeria | 2010           | Eggs                      | 17                                                          |
| 4               | Algeria | 2010           | Fats, Animals, Raw        | 1                                                           |
| 4               | Algeria | 2010           | Fruits, Other             | 68                                                          |
| 4               | Algeria | 2010           | Grapes                    | 37                                                          |
| 4               | Algeria | 2010           | Groundnut Oil             | 1                                                           |
| 4               | Algeria | 2010           | Groundnuts (Shelled Eq)   | 1                                                           |
| 4               | Algeria | 2010           | Lemons, Limes             | 4                                                           |
| 4               | Algeria | 2010           | Maize                     | 51                                                          |
| 4               | Algeria | 2010           | Marine Fish, Other        | 1                                                           |
| 4               | Algeria | 2010           | Meat, Other               | 1                                                           |
| 4               | Algeria | 2010           | Milk, Whole               | 267                                                         |
| 4               | Algeria | 2010           | Mutton & Goat Meat        | 16                                                          |
| 4               | Algeria | 2010           | Nuts                      | 6                                                           |
| 4               | Algeria | 2010           | Offals, Edible            | 3                                                           |
| 4               | Algeria | 2010           | Oilcrops Oil, Other       | 2                                                           |
| 4               | Algeria | 2010           | Olive Oil                 | 3                                                           |
| 4               | Algeria | 2010           | Olives                    | 3                                                           |
| 4               | Algeria | 2010           | Onions                    | 70                                                          |
| 4               | Algeria | 2010           | Oranges, Mandarines       | 53                                                          |
| 4               | Algeria | 2010           | Palm Oil                  | 2                                                           |
| 4               | Algeria | 2010           | Peas                      | 1                                                           |

Dietary calcium and zinc deficiency risks are decreasing but remain prevalent

| FAO countrycode | Country | Reference year | Food item                 | Gross food supply (g capita <sup>-1</sup> d <sup>-1</sup> ) |
|-----------------|---------|----------------|---------------------------|-------------------------------------------------------------|
| 4               | Algeria | 2010           | Pelagic Fish              | 8                                                           |
| 4               | Algeria | 2010           | Pimento                   | 1                                                           |
| 4               | Algeria | 2010           | Potatoes                  | 180                                                         |
| 4               | Algeria | 2010           | Poultry Meat              | 21                                                          |
| 4               | Algeria | 2010           | Pulses, Other             | 14                                                          |
| 4               | Algeria | 2010           | Rape and Mustard Oil      | 1                                                           |
| 4               | Algeria | 2010           | Rice (Milled Equivalent)  | 8                                                           |
| 4               | Algeria | 2010           | Soyabean Oil              | 22                                                          |
| 4               | Algeria | 2010           | Spices, Other             | 1                                                           |
| 4               | Algeria | 2010           | Sugar, Refined Equivalent | 77                                                          |
| 4               | Algeria | 2010           | Sunflowerseed Oil         | 6                                                           |
| 4               | Algeria | 2010           | Sweeteners, Other         | 2                                                           |
| 4               | Algeria | 2010           | Tea                       | 1                                                           |
| 4               | Algeria | 2010           | Tomatoes                  | 59                                                          |
| 4               | Algeria | 2010           | Vegetables, Other         | 239                                                         |
| 4               | Algeria | 2010           | Wheat                     | 494                                                         |
| 4               | Algeria | 2010           | Whey                      | 4                                                           |
| 4               | Algeria | 2011           | Apples                    | 37                                                          |
| 4               | Algeria | 2011           | Bananas                   | 16                                                          |
| 4               | Algeria | 2011           | Barley                    | 37                                                          |
| 4               | Algeria | 2011           | Beans                     | 6                                                           |
| 4               | Algeria | 2011           | Beer                      | 11                                                          |
| 4               | Algeria | 2011           | Bovine Meat               | 13                                                          |
| 4               | Algeria | 2011           | Butter, Ghee              | 2                                                           |
| 4               | Algeria | 2011           | Cheese                    | 1                                                           |
| 4               | Algeria | 2011           | Citrus, Other             | 1                                                           |
| 4               | Algeria | 2011           | Cocoa Beans               | 2                                                           |
| 4               | Algeria | 2011           | Coffee                    | 9                                                           |
| 4               | Algeria | 2011           | Dates                     | 50                                                          |
| 4               | Algeria | 2011           | Demersal Fish             | 1                                                           |
| 4               | Algeria | 2011           | Eggs                      | 17                                                          |
| 4               | Algeria | 2011           | Fats, Animals, Raw        | 1                                                           |
| 4               | Algeria | 2011           | Fruits, Other             | 76                                                          |
| 4               | Algeria | 2011           | Grapes                    | 25                                                          |
| 4               | Algeria | 2011           | Groundnut Oil             | 1                                                           |
| 4               | Algeria | 2011           | Groundnuts (Shelled Eq)   | 1                                                           |
| 4               | Algeria | 2011           | Lemons, Limes             | 5                                                           |
| 4               | Algeria | 2011           | Maize                     | 40                                                          |
| 4               | Algeria | 2011           | Marine Fish, Other        | 1                                                           |
| 4               | Algeria | 2011           | Meat, Other               | 1                                                           |
| 4               | Algeria | 2011           | Milk, Whole               | 313                                                         |
| 4               | Algeria | 2011           | Mutton & Goat Meat        | 20                                                          |
| 4               | Algeria | 2011           | Nuts                      | 4                                                           |
| 4               | Algeria | 2011           | Offals, Edible            | 4                                                           |
| 4               | Algeria | 2011           | Oilcrops Oil, Other       | 5                                                           |
| 4               | Algeria | 2011           | Olive Oil                 | 4                                                           |
| 4               | Algeria | 2011           | Olives                    | 6                                                           |
| 4               | Algeria | 2011           | Onions                    | 79                                                          |
| 4               | Algeria | 2011           | Oranges, Mandarines       | 73                                                          |
| 4               | Algeria | 2011           | Palm Oil                  | 2                                                           |
| 4               | Algeria | 2011           | Peas                      | 1                                                           |
| 4               | Algeria | 2011           | Pelagic Fish              | 8                                                           |
| 4               | Algeria | 2011           | Pimento                   | 1                                                           |
| 4               | Algeria | 2011           | Potatoes                  | 177                                                         |
| 4               | Algeria | 2011           | Poultry Meat              | 20                                                          |
| 4               | Algeria | 2011           | Pulses, Other             | 15                                                          |
| 4               | Algeria | 2011           | Rape and Mustard Oil      | 1                                                           |
| 4               | Algeria | 2011           | Rice (Milled Equivalent)  | 6                                                           |
| 4               | Algeria | 2011           | Soyabean Oil              | 21                                                          |
| 4               | Algeria | 2011           | Spices, Other             | 1                                                           |
| 4               | Algeria | 2011           | Sugar, Refined Equivalent | 67                                                          |
| 4               | Algeria | 2011           | Sunflowerseed Oil         | 6                                                           |
| 4               | Algeria | 2011           | Sweeteners, Other         | 1                                                           |
| 4               | Algeria | 2011           | Tea                       | 1                                                           |
| 4               | Algeria | 2011           | Tomatoes                  | 64                                                          |
| 4               | Algeria | 2011           | Vegetables, Other         | 247                                                         |
| 4               | Algeria | 2011           | Wheat                     | 507                                                         |
| 4               | Algeria | 2011           | Whey                      | 3                                                           |
| 7               | Angola  | 1992           | Bananas                   | 61                                                          |
| 7               | Angola  | 1992           | Beans                     | 15                                                          |
| 7               | Angola  | 1992           | Beer                      | 17                                                          |
| 7               | Angola  | 1992           | Beverages, Alcoholic      | 2                                                           |
| 7               | Angola  | 1992           | Beverages, Fermented      | 12                                                          |
| 7               | Angola  | 1992           | Bovine Meat               | 21                                                          |
| 7               | Angola  | 1992           | Cassava                   | 444                                                         |
| 7               | Angola  | 1992           | Citrus, Other             | 18                                                          |
| 7               | Angola  | 1992           | Demersal Fish             | 2                                                           |
| 7               | Angola  | 1992           | Eggs                      | 1                                                           |
| 7               | Angola  | 1992           | Fats, Animals, Raw        | 2                                                           |
| 7               | Angola  | 1992           | Freshwater Fish           | 2                                                           |
| 7               | Angola  | 1992           | Fruits, Other             | 7                                                           |
| 7               | Angola  | 1992           | Groundnut Oil             | 1                                                           |
| 7               | Angola  | 1992           | Groundnuts (Shelled Eq)   | 2                                                           |
| 7               | Angola  | 1992           | Honey                     | 4                                                           |
| 7               | Angola  | 1992           | Maize                     | 70                                                          |
| 7               | Angola  | 1992           | Marine Fish, Other        | 13                                                          |
| 7               | Angola  | 1992           | Meat, Other               | 2                                                           |
| 7               | Angola  | 1992           | Milk, Whole               | 35                                                          |
| 7               | Angola  | 1992           | Millet                    | 15                                                          |
| 7               | Angola  | 1992           | Mutton & Goat Meat        | 1                                                           |
| 7               | Angola  | 1992           | Offals, Edible            | 3                                                           |
| 7               | Angola  | 1992           | Oilcrops Oil, Other       | 1                                                           |
| 7               | Angola  | 1992           | Olive Oil                 | 1                                                           |
| 7               | Angola  | 1992           | Palm Oil                  | 9                                                           |
| 7               | Angola  | 1992           | Palmkernel Oil            | 1                                                           |
| 7               | Angola  | 1992           | Pelagic Fish              | 14                                                          |
| 7               | Angola  | 1992           | Pigmeat                   | 8                                                           |

Dietary calcium and zinc deficiency risks are decreasing but remain prevalent

| FAO countrycode | Country | Reference year | Food item                 | Gross food supply (g capita <sup>-1</sup> d <sup>-1</sup> ) |
|-----------------|---------|----------------|---------------------------|-------------------------------------------------------------|
| 7               | Angola  | 1992           | Pineapples                | 8                                                           |
| 7               | Angola  | 1992           | Potatoes                  | 9                                                           |
| 7               | Angola  | 1992           | Poultry Meat              | 8                                                           |
| 7               | Angola  | 1992           | Rape and Mustard Oil      | 1                                                           |
| 7               | Angola  | 1992           | Rice (Milled Equivalent)  | 23                                                          |
| 7               | Angola  | 1992           | Sesameseed                | 1                                                           |
| 7               | Angola  | 1992           | Soyabean Oil              | 9                                                           |
| 7               | Angola  | 1992           | Soyabeans                 | 2                                                           |
| 7               | Angola  | 1992           | Sugar, Refined Equivalent | 21                                                          |
| 7               | Angola  | 1992           | Sunflowerseed Oil         | 2                                                           |
| 7               | Angola  | 1992           | Sweet Potatoes            | 40                                                          |
| 7               | Angola  | 1992           | Sweeteners, Other         | 1                                                           |
| 7               | Angola  | 1992           | Tomatoes                  | 4                                                           |
| 7               | Angola  | 1992           | Vegetables, Other         | 54                                                          |
| 7               | Angola  | 1992           | Wheat                     | 38                                                          |
| 7               | Angola  | 1992           | Wine                      | 15                                                          |
| 7               | Angola  | 1993           | Bananas                   | 58                                                          |
| 7               | Angola  | 1993           | Beans                     | 16                                                          |
| 7               | Angola  | 1993           | Beer                      | 16                                                          |
| 7               | Angola  | 1993           | Beverages, Alcoholic      | 1                                                           |
| 7               | Angola  | 1993           | Beverages, Fermented      | 8                                                           |
| 7               | Angola  | 1993           | Bovine Meat               | 19                                                          |
| 7               | Angola  | 1993           | Cassava                   | 427                                                         |
| 7               | Angola  | 1993           | Citrus, Other             | 17                                                          |
| 7               | Angola  | 1993           | Demersal Fish             | 2                                                           |
| 7               | Angola  | 1993           | Eggs                      | 1                                                           |
| 7               | Angola  | 1993           | Fats, Animals, Raw        | 2                                                           |
| 7               | Angola  | 1993           | Freshwater Fish           | 2                                                           |
| 7               | Angola  | 1993           | Fruits, Other             | 7                                                           |
| 7               | Angola  | 1993           | Groundnut Oil             | 1                                                           |
| 7               | Angola  | 1993           | Groundnuts (Shelled Eq)   | 2                                                           |
| 7               | Angola  | 1993           | Honey                     | 5                                                           |
| 7               | Angola  | 1993           | Maize                     | 82                                                          |
| 7               | Angola  | 1993           | Marine Fish, Other        | 13                                                          |
| 7               | Angola  | 1993           | Meat, Other               | 2                                                           |
| 7               | Angola  | 1993           | Milk, Whole               | 34                                                          |
| 7               | Angola  | 1993           | Millet                    | 8                                                           |
| 7               | Angola  | 1993           | Mutton & Goat Meat        | 1                                                           |
| 7               | Angola  | 1993           | Offals, Edible            | 3                                                           |
| 7               | Angola  | 1993           | Palm Oil                  | 9                                                           |
| 7               | Angola  | 1993           | Palmkernel Oil            | 1                                                           |
| 7               | Angola  | 1993           | Pelagic Fish              | 15                                                          |
| 7               | Angola  | 1993           | Pigmeat                   | 7                                                           |
| 7               | Angola  | 1993           | Pineapples                | 7                                                           |
| 7               | Angola  | 1993           | Potatoes                  | 4                                                           |
| 7               | Angola  | 1993           | Poultry Meat              | 5                                                           |
| 7               | Angola  | 1993           | Rape and Mustard Oil      | 1                                                           |
| 7               | Angola  | 1993           | Rice (Milled Equivalent)  | 22                                                          |
| 7               | Angola  | 1993           | Soyabean Oil              | 7                                                           |
| 7               | Angola  | 1993           | Sugar, Refined Equivalent | 18                                                          |
| 7               | Angola  | 1993           | Sunflowerseed Oil         | 2                                                           |
| 7               | Angola  | 1993           | Sweet Potatoes            | 40                                                          |
| 7               | Angola  | 1993           | Sweeteners, Other         | 1                                                           |
| 7               | Angola  | 1993           | Tomatoes                  | 5                                                           |
| 7               | Angola  | 1993           | Vegetables, Other         | 51                                                          |
| 7               | Angola  | 1993           | Wheat                     | 42                                                          |
| 7               | Angola  | 1993           | Wine                      | 8                                                           |
| 7               | Angola  | 1994           | Bananas                   | 58                                                          |
| 7               | Angola  | 1994           | Beans                     | 27                                                          |
| 7               | Angola  | 1994           | Beer                      | 18                                                          |
| 7               | Angola  | 1994           | Beverages, Alcoholic      | 1                                                           |
| 7               | Angola  | 1994           | Beverages, Fermented      | 10                                                          |
| 7               | Angola  | 1994           | Bovine Meat               | 17                                                          |
| 7               | Angola  | 1994           | Cassava                   | 527                                                         |
| 7               | Angola  | 1994           | Citrus, Other             | 17                                                          |
| 7               | Angola  | 1994           | Demersal Fish             | 2                                                           |
| 7               | Angola  | 1994           | Eggs                      | 1                                                           |
| 7               | Angola  | 1994           | Fats, Animals, Raw        | 2                                                           |
| 7               | Angola  | 1994           | Freshwater Fish           | 2                                                           |
| 7               | Angola  | 1994           | Fruits, Other             | 6                                                           |
| 7               | Angola  | 1994           | Groundnut Oil             | 1                                                           |
| 7               | Angola  | 1994           | Groundnuts (Shelled Eq)   | 2                                                           |
| 7               | Angola  | 1994           | Honey                     | 5                                                           |
| 7               | Angola  | 1994           | Maize                     | 76                                                          |
| 7               | Angola  | 1994           | Marine Fish, Other        | 15                                                          |
| 7               | Angola  | 1994           | Meat, Other               | 2                                                           |
| 7               | Angola  | 1994           | Milk, Whole               | 30                                                          |
| 7               | Angola  | 1994           | Millet                    | 11                                                          |
| 7               | Angola  | 1994           | Mutton & Goat Meat        | 1                                                           |
| 7               | Angola  | 1994           | Offals, Edible            | 3                                                           |
| 7               | Angola  | 1994           | Palm Oil                  | 9                                                           |
| 7               | Angola  | 1994           | Palmkernel Oil            | 1                                                           |
| 7               | Angola  | 1994           | Pelagic Fish              | 13                                                          |
| 7               | Angola  | 1994           | Pigmeat                   | 7                                                           |
| 7               | Angola  | 1994           | Pineapples                | 8                                                           |
| 7               | Angola  | 1994           | Potatoes                  | 7                                                           |
| 7               | Angola  | 1994           | Poultry Meat              | 3                                                           |
| 7               | Angola  | 1994           | Rape and Mustard Oil      | 1                                                           |
| 7               | Angola  | 1994           | Rice (Milled Equivalent)  | 14                                                          |
| 7               | Angola  | 1994           | Soyabean Oil              | 5                                                           |
| 7               | Angola  | 1994           | Sugar, Refined Equivalent | 14                                                          |
| 7               | Angola  | 1994           | Sunflowerseed Oil         | 2                                                           |
| 7               | Angola  | 1994           | Sweet Potatoes            | 38                                                          |
| 7               | Angola  | 1994           | Sweeteners, Other         | 1                                                           |
| 7               | Angola  | 1994           | Tomatoes                  | 4                                                           |
| 7               | Angola  | 1994           | Vegetables, Other         | 50                                                          |
| 7               | Angola  | 1994           | Wheat                     | 48                                                          |

Dietary calcium and zinc deficiency risks are decreasing but remain prevalent

| FAO countrycode | Country | Reference year | Food item                 | Gross food supply (g capita <sup>-1</sup> d <sup>-1</sup> ) |
|-----------------|---------|----------------|---------------------------|-------------------------------------------------------------|
| 7               | Angola  | 1994           | Wine                      | 9                                                           |
| 7               | Angola  | 1995           | Bananas                   | 58                                                          |
| 7               | Angola  | 1995           | Beans                     | 25                                                          |
| 7               | Angola  | 1995           | Beer                      | 19                                                          |
| 7               | Angola  | 1995           | Beverages, Alcoholic      | 2                                                           |
| 7               | Angola  | 1995           | Beverages, Fermented      | 10                                                          |
| 7               | Angola  | 1995           | Bovine Meat               | 15                                                          |
| 7               | Angola  | 1995           | Cassava                   | 549                                                         |
| 7               | Angola  | 1995           | Citrus, Other             | 16                                                          |
| 7               | Angola  | 1995           | Demersal Fish             | 2                                                           |
| 7               | Angola  | 1995           | Eggs                      | 1                                                           |
| 7               | Angola  | 1995           | Fats, Animals, Raw        | 2                                                           |
| 7               | Angola  | 1995           | Freshwater Fish           | 1                                                           |
| 7               | Angola  | 1995           | Fruits, Other             | 7                                                           |
| 7               | Angola  | 1995           | Groundnuts (Shelled Eq)   | 2                                                           |
| 7               | Angola  | 1995           | Honey                     | 5                                                           |
| 7               | Angola  | 1995           | Maize                     | 75                                                          |
| 7               | Angola  | 1995           | Marine Fish, Other        | 10                                                          |
| 7               | Angola  | 1995           | Meat, Other               | 2                                                           |
| 7               | Angola  | 1995           | Milk, Whole               | 31                                                          |
| 7               | Angola  | 1995           | Millet                    | 11                                                          |
| 7               | Angola  | 1995           | Mutton & Goat Meat        | 1                                                           |
| 7               | Angola  | 1995           | Offals, Edible            | 3                                                           |
| 7               | Angola  | 1995           | Palm Oil                  | 9                                                           |
| 7               | Angola  | 1995           | Palmkernel Oil            | 1                                                           |
| 7               | Angola  | 1995           | Pelagic Fish              | 14                                                          |
| 7               | Angola  | 1995           | Pigmeat                   | 8                                                           |
| 7               | Angola  | 1995           | Pineapples                | 7                                                           |
| 7               | Angola  | 1995           | Potatoes                  | 5                                                           |
| 7               | Angola  | 1995           | Poultry Meat              | 4                                                           |
| 7               | Angola  | 1995           | Rape and Mustard Oil      | 1                                                           |
| 7               | Angola  | 1995           | Rice (Milled Equivalent)  | 10                                                          |
| 7               | Angola  | 1995           | Soyabean Oil              | 6                                                           |
| 7               | Angola  | 1995           | Sugar, Refined Equivalent | 16                                                          |
| 7               | Angola  | 1995           | Sunflowerseed Oil         | 2                                                           |
| 7               | Angola  | 1995           | Sweet Potatoes            | 38                                                          |
| 7               | Angola  | 1995           | Sweeteners, Other         | 1                                                           |
| 7               | Angola  | 1995           | Tomatoes                  | 5                                                           |
| 7               | Angola  | 1995           | Vegetables, Other         | 49                                                          |
| 7               | Angola  | 1995           | Wheat                     | 58                                                          |
| 7               | Angola  | 1995           | Wine                      | 7                                                           |
| 7               | Angola  | 1996           | Bananas                   | 57                                                          |
| 7               | Angola  | 1996           | Beans                     | 24                                                          |
| 7               | Angola  | 1996           | Beer                      | 23                                                          |
| 7               | Angola  | 1996           | Beverages, Alcoholic      | 2                                                           |
| 7               | Angola  | 1996           | Beverages, Fermented      | 11                                                          |
| 7               | Angola  | 1996           | Bovine Meat               | 18                                                          |
| 7               | Angola  | 1996           | Cassava                   | 523                                                         |
| 7               | Angola  | 1996           | Citrus, Other             | 16                                                          |
| 7               | Angola  | 1996           | Demersal Fish             | 3                                                           |
| 7               | Angola  | 1996           | Eggs                      | 1                                                           |
| 7               | Angola  | 1996           | Fats, Animals, Raw        | 1                                                           |
| 7               | Angola  | 1996           | Freshwater Fish           | 1                                                           |
| 7               | Angola  | 1996           | Fruits, Other             | 7                                                           |
| 7               | Angola  | 1996           | Groundnut Oil             | 1                                                           |
| 7               | Angola  | 1996           | Groundnuts (Shelled Eq)   | 2                                                           |
| 7               | Angola  | 1996           | Honey                     | 5                                                           |
| 7               | Angola  | 1996           | Maize                     | 90                                                          |
| 7               | Angola  | 1996           | Marine Fish, Other        | 18                                                          |
| 7               | Angola  | 1996           | Meat, Other               | 2                                                           |
| 7               | Angola  | 1996           | Milk, Whole               | 32                                                          |
| 7               | Angola  | 1996           | Millet                    | 12                                                          |
| 7               | Angola  | 1996           | Mutton & Goat Meat        | 2                                                           |
| 7               | Angola  | 1996           | Offals, Edible            | 3                                                           |
| 7               | Angola  | 1996           | Oilcrops Oil, Other       | 1                                                           |
| 7               | Angola  | 1996           | Palm Oil                  | 10                                                          |
| 7               | Angola  | 1996           | Palmkernel Oil            | 1                                                           |
| 7               | Angola  | 1996           | Pelagic Fish              | 9                                                           |
| 7               | Angola  | 1996           | Pigmeat                   | 8                                                           |
| 7               | Angola  | 1996           | Pineapples                | 8                                                           |
| 7               | Angola  | 1996           | Potatoes                  | 5                                                           |
| 7               | Angola  | 1996           | Poultry Meat              | 3                                                           |
| 7               | Angola  | 1996           | Rape and Mustard Oil      | 1                                                           |
| 7               | Angola  | 1996           | Rice (Milled Equivalent)  | 9                                                           |
| 7               | Angola  | 1996           | Soyabean Oil              | 6                                                           |
| 7               | Angola  | 1996           | Sugar, Refined Equivalent | 19                                                          |
| 7               | Angola  | 1996           | Sunflowerseed Oil         | 2                                                           |
| 7               | Angola  | 1996           | Sweet Potatoes            | 37                                                          |
| 7               | Angola  | 1996           | Sweeteners, Other         | 1                                                           |
| 7               | Angola  | 1996           | Tomatoes                  | 7                                                           |
| 7               | Angola  | 1996           | Vegetables, Other         | 49                                                          |
| 7               | Angola  | 1996           | Wheat                     | 61                                                          |
| 7               | Angola  | 1996           | Wine                      | 6                                                           |
| 7               | Angola  | 1997           | Apples                    | 1                                                           |
| 7               | Angola  | 1997           | Bananas                   | 55                                                          |
| 7               | Angola  | 1997           | Beans                     | 27                                                          |
| 7               | Angola  | 1997           | Beer                      | 28                                                          |
| 7               | Angola  | 1997           | Beverages, Alcoholic      | 2                                                           |
| 7               | Angola  | 1997           | Beverages, Fermented      | 14                                                          |
| 7               | Angola  | 1997           | Bovine Meat               | 19                                                          |
| 7               | Angola  | 1997           | Cassava                   | 473                                                         |
| 7               | Angola  | 1997           | Citrus, Other             | 15                                                          |
| 7               | Angola  | 1997           | Demersal Fish             | 2                                                           |
| 7               | Angola  | 1997           | Eggs                      | 3                                                           |
| 7               | Angola  | 1997           | Fats, Animals, Raw        | 1                                                           |
| 7               | Angola  | 1997           | Freshwater Fish           | 1                                                           |
| 7               | Angola  | 1997           | Fruits, Other             | 7                                                           |



Dietary calcium and zinc deficiency risks are decreasing but remain prevalent

| FAO countrycode | Country | Reference year | Food item                 | Gross food supply (g capita <sup>-1</sup> d <sup>-1</sup> ) |
|-----------------|---------|----------------|---------------------------|-------------------------------------------------------------|
| 7               | Angola  | 1997           | Groundnuts (Shelled Eq)   | 2                                                           |
| 7               | Angola  | 1997           | Honey                     | 6                                                           |
| 7               | Angola  | 1997           | Maize                     | 96                                                          |
| 7               | Angola  | 1997           | Marine Fish, Other        | 16                                                          |
| 7               | Angola  | 1997           | Meat, Other               | 2                                                           |
| 7               | Angola  | 1997           | Milk, Whole               | 35                                                          |
| 7               | Angola  | 1997           | Millet                    | 16                                                          |
| 7               | Angola  | 1997           | Mutton & Goat Meat        | 2                                                           |
| 7               | Angola  | 1997           | Offals, Edible            | 3                                                           |
| 7               | Angola  | 1997           | Oilcrops Oil, Other       | 1                                                           |
| 7               | Angola  | 1997           | Palm Oil                  | 10                                                          |
| 7               | Angola  | 1997           | Palmkernel Oil            | 1                                                           |
| 7               | Angola  | 1997           | Pelagic Fish              | 9                                                           |
| 7               | Angola  | 1997           | Pigmeat                   | 8                                                           |
| 7               | Angola  | 1997           | Pineapples                | 7                                                           |
| 7               | Angola  | 1997           | Potatoes                  | 6                                                           |
| 7               | Angola  | 1997           | Poultry Meat              | 7                                                           |
| 7               | Angola  | 1997           | Rice (Milled Equivalent)  | 9                                                           |
| 7               | Angola  | 1997           | Soyabean Oil              | 6                                                           |
| 7               | Angola  | 1997           | Sugar, Refined Equivalent | 22                                                          |
| 7               | Angola  | 1997           | Sunflowerseed Oil         | 2                                                           |
| 7               | Angola  | 1997           | Sweet Potatoes            | 36                                                          |
| 7               | Angola  | 1997           | Sweeteners, Other         | 2                                                           |
| 7               | Angola  | 1997           | Tomatoes                  | 6                                                           |
| 7               | Angola  | 1997           | Vegetables, Other         | 47                                                          |
| 7               | Angola  | 1997           | Wheat                     | 63                                                          |
| 7               | Angola  | 1997           | Wine                      | 10                                                          |
| 7               | Angola  | 1998           | Apples                    | 1                                                           |
| 7               | Angola  | 1998           | Bananas                   | 55                                                          |
| 7               | Angola  | 1998           | Beans                     | 19                                                          |
| 7               | Angola  | 1998           | Beer                      | 24                                                          |
| 7               | Angola  | 1998           | Beverages, Alcoholic      | 2                                                           |
| 7               | Angola  | 1998           | Beverages, Fermented      | 13                                                          |
| 7               | Angola  | 1998           | Bovine Meat               | 20                                                          |
| 7               | Angola  | 1998           | Cassava                   | 561                                                         |
| 7               | Angola  | 1998           | Citrus, Other             | 15                                                          |
| 7               | Angola  | 1998           | Demersal Fish             | 5                                                           |
| 7               | Angola  | 1998           | Eggs                      | 3                                                           |
| 7               | Angola  | 1998           | Fats, Animals, Raw        | 1                                                           |
| 7               | Angola  | 1998           | Freshwater Fish           | 1                                                           |
| 7               | Angola  | 1998           | Fruits, Other             | 7                                                           |
| 7               | Angola  | 1998           | Groundnut Oil             | 1                                                           |
| 7               | Angola  | 1998           | Groundnuts (Shelled Eq)   | 2                                                           |
| 7               | Angola  | 1998           | Honey                     | 5                                                           |
| 7               | Angola  | 1998           | Maize                     | 95                                                          |
| 7               | Angola  | 1998           | Marine Fish, Other        | 9                                                           |
| 7               | Angola  | 1998           | Meat, Other               | 2                                                           |
| 7               | Angola  | 1998           | Milk, Whole               | 37                                                          |
| 7               | Angola  | 1998           | Millet                    | 15                                                          |
| 7               | Angola  | 1998           | Mutton & Goat Meat        | 2                                                           |
| 7               | Angola  | 1998           | Offals, Edible            | 4                                                           |
| 7               | Angola  | 1998           | Oilcrops Oil, Other       | 1                                                           |
| 7               | Angola  | 1998           | Palm Oil                  | 10                                                          |
| 7               | Angola  | 1998           | Palmkernel Oil            | 1                                                           |
| 7               | Angola  | 1998           | Pelagic Fish              | 8                                                           |
| 7               | Angola  | 1998           | Pigmeat                   | 9                                                           |
| 7               | Angola  | 1998           | Pineapples                | 7                                                           |
| 7               | Angola  | 1998           | Potatoes                  | 7                                                           |
| 7               | Angola  | 1998           | Poultry Meat              | 9                                                           |
| 7               | Angola  | 1998           | Rape and Mustard Oil      | 2                                                           |
| 7               | Angola  | 1998           | Rice (Milled Equivalent)  | 9                                                           |
| 7               | Angola  | 1998           | Soyabean Oil              | 5                                                           |
| 7               | Angola  | 1998           | Sugar, Refined Equivalent | 20                                                          |
| 7               | Angola  | 1998           | Sunflowerseed Oil         | 2                                                           |
| 7               | Angola  | 1998           | Sweet Potatoes            | 36                                                          |
| 7               | Angola  | 1998           | Sweeteners, Other         | 2                                                           |
| 7               | Angola  | 1998           | Tomatoes                  | 6                                                           |
| 7               | Angola  | 1998           | Vegetables, Other         | 47                                                          |
| 7               | Angola  | 1998           | Wheat                     | 62                                                          |
| 7               | Angola  | 1998           | Wine                      | 11                                                          |
| 7               | Angola  | 1999           | Bananas                   | 50                                                          |
| 7               | Angola  | 1999           | Beans                     | 15                                                          |
| 7               | Angola  | 1999           | Beer                      | 23                                                          |
| 7               | Angola  | 1999           | Beverages, Alcoholic      | 2                                                           |
| 7               | Angola  | 1999           | Beverages, Fermented      | 14                                                          |
| 7               | Angola  | 1999           | Bovine Meat               | 19                                                          |
| 7               | Angola  | 1999           | Cassava                   | 564                                                         |
| 7               | Angola  | 1999           | Citrus, Other             | 14                                                          |
| 7               | Angola  | 1999           | Demersal Fish             | 6                                                           |
| 7               | Angola  | 1999           | Eggs                      | 2                                                           |
| 7               | Angola  | 1999           | Fats, Animals, Raw        | 1                                                           |
| 7               | Angola  | 1999           | Freshwater Fish           | 1                                                           |
| 7               | Angola  | 1999           | Fruits, Other             | 6                                                           |
| 7               | Angola  | 1999           | Groundnuts (Shelled Eq)   | 1                                                           |
| 7               | Angola  | 1999           | Honey                     | 5                                                           |
| 7               | Angola  | 1999           | Maize                     | 109                                                         |
| 7               | Angola  | 1999           | Marine Fish, Other        | 6                                                           |
| 7               | Angola  | 1999           | Meat, Other               | 2                                                           |
| 7               | Angola  | 1999           | Milk, Whole               | 35                                                          |
| 7               | Angola  | 1999           | Millet                    | 17                                                          |
| 7               | Angola  | 1999           | Mutton & Goat Meat        | 2                                                           |
| 7               | Angola  | 1999           | Offals, Edible            | 4                                                           |
| 7               | Angola  | 1999           | Oilcrops Oil, Other       | 1                                                           |
| 7               | Angola  | 1999           | Onions                    | 1                                                           |
| 7               | Angola  | 1999           | Palm Oil                  | 9                                                           |
| 7               | Angola  | 1999           | Palmkernel Oil            | 1                                                           |
| 7               | Angola  | 1999           | Pelagic Fish              | 19                                                          |

Dietary calcium and zinc deficiency risks are decreasing but remain prevalent

| FAO countrycode | Country | Reference year | Food item                 | Gross food supply (g capita <sup>-1</sup> d <sup>-1</sup> ) |
|-----------------|---------|----------------|---------------------------|-------------------------------------------------------------|
| 7               | Angola  | 1999           | Pigmeat                   | 8                                                           |
| 7               | Angola  | 1999           | Pineapples                | 6                                                           |
| 7               | Angola  | 1999           | Potatoes                  | 4                                                           |
| 7               | Angola  | 1999           | Poultry Meat              | 7                                                           |
| 7               | Angola  | 1999           | Rape and Mustard Oil      | 1                                                           |
| 7               | Angola  | 1999           | Rice (Milled Equivalent)  | 10                                                          |
| 7               | Angola  | 1999           | Soyabean Oil              | 6                                                           |
| 7               | Angola  | 1999           | Sugar, Refined Equivalent | 25                                                          |
| 7               | Angola  | 1999           | Sunflowerseed Oil         | 1                                                           |
| 7               | Angola  | 1999           | Sweet Potatoes            | 33                                                          |
| 7               | Angola  | 1999           | Sweeteners, Other         | 3                                                           |
| 7               | Angola  | 1999           | Tomatoes                  | 6                                                           |
| 7               | Angola  | 1999           | Vegetables, Other         | 42                                                          |
| 7               | Angola  | 1999           | Wheat                     | 63                                                          |
| 7               | Angola  | 1999           | Wine                      | 5                                                           |
| 7               | Angola  | 2000           | Apples                    | 1                                                           |
| 7               | Angola  | 2000           | Bananas                   | 50                                                          |
| 7               | Angola  | 2000           | Beans                     | 19                                                          |
| 7               | Angola  | 2000           | Beer                      | 24                                                          |
| 7               | Angola  | 2000           | Beverages, Alcoholic      | 1                                                           |
| 7               | Angola  | 2000           | Beverages, Fermented      | 14                                                          |
| 7               | Angola  | 2000           | Bovine Meat               | 24                                                          |
| 7               | Angola  | 2000           | Cassava                   | 534                                                         |
| 7               | Angola  | 2000           | Citrus, Other             | 14                                                          |
| 7               | Angola  | 2000           | Demersal Fish             | 7                                                           |
| 7               | Angola  | 2000           | Eggs                      | 2                                                           |
| 7               | Angola  | 2000           | Fats, Animals, Raw        | 1                                                           |
| 7               | Angola  | 2000           | Freshwater Fish           | 1                                                           |
| 7               | Angola  | 2000           | Fruits, Other             | 6                                                           |
| 7               | Angola  | 2000           | Groundnuts (Shelled Eq)   | 1                                                           |
| 7               | Angola  | 2000           | Honey                     | 4                                                           |
| 7               | Angola  | 2000           | Maize                     | 100                                                         |
| 7               | Angola  | 2000           | Marine Fish, Other        | 6                                                           |
| 7               | Angola  | 2000           | Meat, Other               | 1                                                           |
| 7               | Angola  | 2000           | Milk, Whole               | 35                                                          |
| 7               | Angola  | 2000           | Millet                    | 17                                                          |
| 7               | Angola  | 2000           | Mutton & Goat Meat        | 2                                                           |
| 7               | Angola  | 2000           | Offals, Edible            | 3                                                           |
| 7               | Angola  | 2000           | Oilcrops Oil, Other       | 1                                                           |
| 7               | Angola  | 2000           | Onions                    | 1                                                           |
| 7               | Angola  | 2000           | Palm Oil                  | 9                                                           |
| 7               | Angola  | 2000           | Palmkernel Oil            | 1                                                           |
| 7               | Angola  | 2000           | Pelagic Fish              | 18                                                          |
| 7               | Angola  | 2000           | Pigmeat                   | 8                                                           |
| 7               | Angola  | 2000           | Pineapples                | 7                                                           |
| 7               | Angola  | 2000           | Potatoes                  | 1                                                           |
| 7               | Angola  | 2000           | Poultry Meat              | 11                                                          |
| 7               | Angola  | 2000           | Rape and Mustard Oil      | 1                                                           |
| 7               | Angola  | 2000           | Rice (Milled Equivalent)  | 13                                                          |
| 7               | Angola  | 2000           | Soyabean Oil              | 8                                                           |
| 7               | Angola  | 2000           | Sugar, Refined Equivalent | 20                                                          |
| 7               | Angola  | 2000           | Sunflowerseed Oil         | 1                                                           |
| 7               | Angola  | 2000           | Sweet Potatoes            | 40                                                          |
| 7               | Angola  | 2000           | Sweeteners, Other         | 1                                                           |
| 7               | Angola  | 2000           | Tomatoes                  | 9                                                           |
| 7               | Angola  | 2000           | Vegetables, Other         | 45                                                          |
| 7               | Angola  | 2000           | Wheat                     | 71                                                          |
| 7               | Angola  | 2000           | Wine                      | 5                                                           |
| 7               | Angola  | 2001           | Apples                    | 1                                                           |
| 7               | Angola  | 2001           | Bananas                   | 57                                                          |
| 7               | Angola  | 2001           | Beans                     | 18                                                          |
| 7               | Angola  | 2001           | Beer                      | 41                                                          |
| 7               | Angola  | 2001           | Beverages, Alcoholic      | 2                                                           |
| 7               | Angola  | 2001           | Beverages, Fermented      | 14                                                          |
| 7               | Angola  | 2001           | Bovine Meat               | 24                                                          |
| 7               | Angola  | 2001           | Cassava                   | 529                                                         |
| 7               | Angola  | 2001           | Citrus, Other             | 14                                                          |
| 7               | Angola  | 2001           | Crustaceans               | 1                                                           |
| 7               | Angola  | 2001           | Demersal Fish             | 11                                                          |
| 7               | Angola  | 2001           | Eggs                      | 2                                                           |
| 7               | Angola  | 2001           | Fats, Animals, Raw        | 1                                                           |
| 7               | Angola  | 2001           | Freshwater Fish           | 2                                                           |
| 7               | Angola  | 2001           | Fruits, Other             | 6                                                           |
| 7               | Angola  | 2001           | Groundnut Oil             | 1                                                           |
| 7               | Angola  | 2001           | Groundnuts (Shelled Eq)   | 2                                                           |
| 7               | Angola  | 2001           | Honey                     | 5                                                           |
| 7               | Angola  | 2001           | Maize                     | 104                                                         |
| 7               | Angola  | 2001           | Marine Fish, Other        | 15                                                          |
| 7               | Angola  | 2001           | Meat, Other               | 1                                                           |
| 7               | Angola  | 2001           | Milk, Whole               | 36                                                          |
| 7               | Angola  | 2001           | Millet                    | 17                                                          |
| 7               | Angola  | 2001           | Mutton & Goat Meat        | 2                                                           |
| 7               | Angola  | 2001           | Offals, Edible            | 3                                                           |
| 7               | Angola  | 2001           | Oilcrops Oil, Other       | 2                                                           |
| 7               | Angola  | 2001           | Onions                    | 2                                                           |
| 7               | Angola  | 2001           | Palm Oil                  | 9                                                           |
| 7               | Angola  | 2001           | Palmkernel Oil            | 1                                                           |
| 7               | Angola  | 2001           | Pelagic Fish              | 14                                                          |
| 7               | Angola  | 2001           | Pigmeat                   | 9                                                           |
| 7               | Angola  | 2001           | Pineapples                | 7                                                           |
| 7               | Angola  | 2001           | Potatoes                  | 15                                                          |
| 7               | Angola  | 2001           | Poultry Meat              | 8                                                           |
| 7               | Angola  | 2001           | Rice (Milled Equivalent)  | 14                                                          |
| 7               | Angola  | 2001           | Soyabean Oil              | 8                                                           |
| 7               | Angola  | 2001           | Sugar, Refined Equivalent | 20                                                          |
| 7               | Angola  | 2001           | Sunflowerseed Oil         | 1                                                           |
| 7               | Angola  | 2001           | Sweet Potatoes            | 61                                                          |

Dietary calcium and zinc deficiency risks are decreasing but remain prevalent

| FAO countrycode | Country | Reference year | Food item                 | Gross food supply (g capita <sup>-1</sup> d <sup>-1</sup> ) |
|-----------------|---------|----------------|---------------------------|-------------------------------------------------------------|
| 7               | Angola  | 2001           | Sweeteners, Other         | 3                                                           |
| 7               | Angola  | 2001           | Tomatoes                  | 9                                                           |
| 7               | Angola  | 2001           | Vegetables, Other         | 44                                                          |
| 7               | Angola  | 2001           | Wheat                     | 66                                                          |
| 7               | Angola  | 2001           | Wine                      | 7                                                           |
| 7               | Angola  | 2002           | Apples                    | 2                                                           |
| 7               | Angola  | 2002           | Bananas                   | 73                                                          |
| 7               | Angola  | 2002           | Beans                     | 21                                                          |
| 7               | Angola  | 2002           | Beer                      | 51                                                          |
| 7               | Angola  | 2002           | Beverages, Alcoholic      | 2                                                           |
| 7               | Angola  | 2002           | Beverages, Fermented      | 14                                                          |
| 7               | Angola  | 2002           | Bovine Meat               | 25                                                          |
| 7               | Angola  | 2002           | Cassava                   | 528                                                         |
| 7               | Angola  | 2002           | Citrus, Other             | 13                                                          |
| 7               | Angola  | 2002           | Crustaceans               | 1                                                           |
| 7               | Angola  | 2002           | Demersal Fish             | 16                                                          |
| 7               | Angola  | 2002           | Eggs                      | 3                                                           |
| 7               | Angola  | 2002           | Fats, Animals, Raw        | 1                                                           |
| 7               | Angola  | 2002           | Freshwater Fish           | 2                                                           |
| 7               | Angola  | 2002           | Fruits, Other             | 7                                                           |
| 7               | Angola  | 2002           | Groundnut Oil             | 1                                                           |
| 7               | Angola  | 2002           | Groundnuts (Shelled Eq)   | 2                                                           |
| 7               | Angola  | 2002           | Honey                     | 5                                                           |
| 7               | Angola  | 2002           | Maize                     | 108                                                         |
| 7               | Angola  | 2002           | Marine Fish, Other        | 14                                                          |
| 7               | Angola  | 2002           | Meat, Other               | 1                                                           |
| 7               | Angola  | 2002           | Milk, Whole               | 36                                                          |
| 7               | Angola  | 2002           | Millet                    | 17                                                          |
| 7               | Angola  | 2002           | Mutton & Goat Meat        | 3                                                           |
| 7               | Angola  | 2002           | Offals, Edible            | 3                                                           |
| 7               | Angola  | 2002           | Oilcrops Oil, Other       | 2                                                           |
| 7               | Angola  | 2002           | Onions                    | 2                                                           |
| 7               | Angola  | 2002           | Palm Oil                  | 7                                                           |
| 7               | Angola  | 2002           | Palmkernel Oil            | 1                                                           |
| 7               | Angola  | 2002           | Pelagic Fish              | 11                                                          |
| 7               | Angola  | 2002           | Pigmeat                   | 10                                                          |
| 7               | Angola  | 2002           | Pineapples                | 7                                                           |
| 7               | Angola  | 2002           | Potatoes                  | 17                                                          |
| 7               | Angola  | 2002           | Poultry Meat              | 16                                                          |
| 7               | Angola  | 2002           | Rice (Milled Equivalent)  | 15                                                          |
| 7               | Angola  | 2002           | Soyabean Oil              | 8                                                           |
| 7               | Angola  | 2002           | Sugar, Refined Equivalent | 25                                                          |
| 7               | Angola  | 2002           | Sunflowerseed Oil         | 1                                                           |
| 7               | Angola  | 2002           | Sweet Potatoes            | 70                                                          |
| 7               | Angola  | 2002           | Sweeteners, Other         | 5                                                           |
| 7               | Angola  | 2002           | Tomatoes                  | 10                                                          |
| 7               | Angola  | 2002           | Vegetables, Other         | 46                                                          |
| 7               | Angola  | 2002           | Wheat                     | 67                                                          |
| 7               | Angola  | 2002           | Wine                      | 7                                                           |
| 7               | Angola  | 2003           | Apples                    | 1                                                           |
| 7               | Angola  | 2003           | Bananas                   | 96                                                          |
| 7               | Angola  | 2003           | Beans                     | 21                                                          |
| 7               | Angola  | 2003           | Beer                      | 51                                                          |
| 7               | Angola  | 2003           | Beverages, Alcoholic      | 2                                                           |
| 7               | Angola  | 2003           | Beverages, Fermented      | 12                                                          |
| 7               | Angola  | 2003           | Bovine Meat               | 26                                                          |
| 7               | Angola  | 2003           | Cassava                   | 530                                                         |
| 7               | Angola  | 2003           | Citrus, Other             | 13                                                          |
| 7               | Angola  | 2003           | Crustaceans               | 1                                                           |
| 7               | Angola  | 2003           | Demersal Fish             | 16                                                          |
| 7               | Angola  | 2003           | Eggs                      | 2                                                           |
| 7               | Angola  | 2003           | Fats, Animals, Raw        | 1                                                           |
| 7               | Angola  | 2003           | Freshwater Fish           | 2                                                           |
| 7               | Angola  | 2003           | Fruits, Other             | 6                                                           |
| 7               | Angola  | 2003           | Groundnut Oil             | 1                                                           |
| 7               | Angola  | 2003           | Groundnuts (Shelled Eq)   | 3                                                           |
| 7               | Angola  | 2003           | Honey                     | 4                                                           |
| 7               | Angola  | 2003           | Maize                     | 104                                                         |
| 7               | Angola  | 2003           | Marine Fish, Other        | 4                                                           |
| 7               | Angola  | 2003           | Meat, Other               | 1                                                           |
| 7               | Angola  | 2003           | Milk, Whole               | 36                                                          |
| 7               | Angola  | 2003           | Millet                    | 14                                                          |
| 7               | Angola  | 2003           | Mutton & Goat Meat        | 3                                                           |
| 7               | Angola  | 2003           | Offals, Edible            | 3                                                           |
| 7               | Angola  | 2003           | Oilcrops Oil, Other       | 3                                                           |
| 7               | Angola  | 2003           | Onions                    | 2                                                           |
| 7               | Angola  | 2003           | Palm Oil                  | 8                                                           |
| 7               | Angola  | 2003           | Palmkernel Oil            | 1                                                           |
| 7               | Angola  | 2003           | Pelagic Fish              | 14                                                          |
| 7               | Angola  | 2003           | Pigmeat                   | 10                                                          |
| 7               | Angola  | 2003           | Pineapples                | 7                                                           |
| 7               | Angola  | 2003           | Potatoes                  | 16                                                          |
| 7               | Angola  | 2003           | Poultry Meat              | 19                                                          |
| 7               | Angola  | 2003           | Rice (Milled Equivalent)  | 16                                                          |
| 7               | Angola  | 2003           | Soyabean Oil              | 9                                                           |
| 7               | Angola  | 2003           | Sugar, Refined Equivalent | 34                                                          |
| 7               | Angola  | 2003           | Sunflowerseed Oil         | 1                                                           |
| 7               | Angola  | 2003           | Sweet Potatoes            | 86                                                          |
| 7               | Angola  | 2003           | Tomatoes                  | 11                                                          |
| 7               | Angola  | 2003           | Vegetables, Other         | 45                                                          |
| 7               | Angola  | 2003           | Wheat                     | 74                                                          |
| 7               | Angola  | 2003           | Wine                      | 9                                                           |
| 7               | Angola  | 2004           | Apples                    | 1                                                           |
| 7               | Angola  | 2004           | Bananas                   | 108                                                         |
| 7               | Angola  | 2004           | Beans                     | 17                                                          |
| 7               | Angola  | 2004           | Beer                      | 58                                                          |
| 7               | Angola  | 2004           | Beverages, Alcoholic      | 3                                                           |

Dietary calcium and zinc deficiency risks are decreasing but remain prevalent

| FAO countrycode | Country | Reference year | Food item                 | Gross food supply (g capita <sup>-1</sup> d <sup>-1</sup> ) |
|-----------------|---------|----------------|---------------------------|-------------------------------------------------------------|
| 7               | Angola  | 2004           | Beverages, Fermented      | 16                                                          |
| 7               | Angola  | 2004           | Bovine Meat               | 22                                                          |
| 7               | Angola  | 2004           | Cassava                   | 530                                                         |
| 7               | Angola  | 2004           | Citrus, Other             | 13                                                          |
| 7               | Angola  | 2004           | Crustaceans               | 1                                                           |
| 7               | Angola  | 2004           | Demersal Fish             | 16                                                          |
| 7               | Angola  | 2004           | Eggs                      | 3                                                           |
| 7               | Angola  | 2004           | Fats, Animals, Raw        | 1                                                           |
| 7               | Angola  | 2004           | Freshwater Fish           | 2                                                           |
| 7               | Angola  | 2004           | Fruits, Other             | 6                                                           |
| 7               | Angola  | 2004           | Groundnut Oil             | 1                                                           |
| 7               | Angola  | 2004           | Groundnuts (Shelled Eq)   | 3                                                           |
| 7               | Angola  | 2004           | Honey                     | 4                                                           |
| 7               | Angola  | 2004           | Maize                     | 104                                                         |
| 7               | Angola  | 2004           | Marine Fish, Other        | 6                                                           |
| 7               | Angola  | 2004           | Meat, Other               | 1                                                           |
| 7               | Angola  | 2004           | Milk, Whole               | 36                                                          |
| 7               | Angola  | 2004           | Millet                    | 19                                                          |
| 7               | Angola  | 2004           | Mutton & Goat Meat        | 3                                                           |
| 7               | Angola  | 2004           | Offals, Edible            | 3                                                           |
| 7               | Angola  | 2004           | Oilcrops Oil, Other       | 3                                                           |
| 7               | Angola  | 2004           | Onions                    | 2                                                           |
| 7               | Angola  | 2004           | Palm Oil                  | 9                                                           |
| 7               | Angola  | 2004           | Palmkernel Oil            | 1                                                           |
| 7               | Angola  | 2004           | Pelagic Fish              | 12                                                          |
| 7               | Angola  | 2004           | Pigmeat                   | 11                                                          |
| 7               | Angola  | 2004           | Pineapples                | 6                                                           |
| 7               | Angola  | 2004           | Potatoes                  | 7                                                           |
| 7               | Angola  | 2004           | Poultry Meat              | 16                                                          |
| 7               | Angola  | 2004           | Rice (Milled Equivalent)  | 20                                                          |
| 7               | Angola  | 2004           | Soyabean Oil              | 8                                                           |
| 7               | Angola  | 2004           | Sugar, Refined Equivalent | 33                                                          |
| 7               | Angola  | 2004           | Sunflowerseed Oil         | 1                                                           |
| 7               | Angola  | 2004           | Sweet Potatoes            | 96                                                          |
| 7               | Angola  | 2004           | Tomatoes                  | 18                                                          |
| 7               | Angola  | 2004           | Vegetables, Other         | 44                                                          |
| 7               | Angola  | 2004           | Wheat                     | 82                                                          |
| 7               | Angola  | 2004           | Wine                      | 10                                                          |
| 7               | Angola  | 2005           | Apples                    | 1                                                           |
| 7               | Angola  | 2005           | Bananas                   | 125                                                         |
| 7               | Angola  | 2005           | Beans                     | 20                                                          |
| 7               | Angola  | 2005           | Beer                      | 63                                                          |
| 7               | Angola  | 2005           | Beverages, Alcoholic      | 3                                                           |
| 7               | Angola  | 2005           | Beverages, Fermented      | 16                                                          |
| 7               | Angola  | 2005           | Bovine Meat               | 26                                                          |
| 7               | Angola  | 2005           | Cassava                   | 531                                                         |
| 7               | Angola  | 2005           | Cheese                    | 1                                                           |
| 7               | Angola  | 2005           | Citrus, Other             | 13                                                          |
| 7               | Angola  | 2005           | Coffee                    | 1                                                           |
| 7               | Angola  | 2005           | Demersal Fish             | 14                                                          |
| 7               | Angola  | 2005           | Eggs                      | 3                                                           |
| 7               | Angola  | 2005           | Fats, Animals, Raw        | 1                                                           |
| 7               | Angola  | 2005           | Freshwater Fish           | 2                                                           |
| 7               | Angola  | 2005           | Fruits, Other             | 6                                                           |
| 7               | Angola  | 2005           | Groundnut Oil             | 1                                                           |
| 7               | Angola  | 2005           | Groundnuts (Shelled Eq)   | 4                                                           |
| 7               | Angola  | 2005           | Honey                     | 4                                                           |
| 7               | Angola  | 2005           | Maize                     | 101                                                         |
| 7               | Angola  | 2005           | Marine Fish, Other        | 3                                                           |
| 7               | Angola  | 2005           | Meat, Other               | 1                                                           |
| 7               | Angola  | 2005           | Milk, Whole               | 36                                                          |
| 7               | Angola  | 2005           | Millet                    | 19                                                          |
| 7               | Angola  | 2005           | Mutton & Goat Meat        | 3                                                           |
| 7               | Angola  | 2005           | Offals, Edible            | 3                                                           |
| 7               | Angola  | 2005           | Oilcrops Oil, Other       | 3                                                           |
| 7               | Angola  | 2005           | Onions                    | 2                                                           |
| 7               | Angola  | 2005           | Palm Oil                  | 9                                                           |
| 7               | Angola  | 2005           | Palmkernel Oil            | 1                                                           |
| 7               | Angola  | 2005           | Pelagic Fish              | 13                                                          |
| 7               | Angola  | 2005           | Pigmeat                   | 12                                                          |
| 7               | Angola  | 2005           | Pineapples                | 7                                                           |
| 7               | Angola  | 2005           | Potatoes                  | 8                                                           |
| 7               | Angola  | 2005           | Poultry Meat              | 18                                                          |
| 7               | Angola  | 2005           | Rice (Milled Equivalent)  | 19                                                          |
| 7               | Angola  | 2005           | Soyabean Oil              | 9                                                           |
| 7               | Angola  | 2005           | Sugar, Refined Equivalent | 30                                                          |
| 7               | Angola  | 2005           | Sunflowerseed Oil         | 1                                                           |
| 7               | Angola  | 2005           | Sweet Potatoes            | 98                                                          |
| 7               | Angola  | 2005           | Tomatoes                  | 17                                                          |
| 7               | Angola  | 2005           | Vegetables, Other         | 40                                                          |
| 7               | Angola  | 2005           | Wheat                     | 86                                                          |
| 7               | Angola  | 2005           | Wine                      | 12                                                          |
| 7               | Angola  | 2006           | Apples                    | 1                                                           |
| 7               | Angola  | 2006           | Bananas                   | 129                                                         |
| 7               | Angola  | 2006           | Beans                     | 18                                                          |
| 7               | Angola  | 2006           | Beer                      | 83                                                          |
| 7               | Angola  | 2006           | Beverages, Alcoholic      | 4                                                           |
| 7               | Angola  | 2006           | Beverages, Fermented      | 19                                                          |
| 7               | Angola  | 2006           | Bovine Meat               | 24                                                          |
| 7               | Angola  | 2006           | Cassava                   | 527                                                         |
| 7               | Angola  | 2006           | Citrus, Other             | 13                                                          |
| 7               | Angola  | 2006           | Coffee                    | 1                                                           |
| 7               | Angola  | 2006           | Demersal Fish             | 16                                                          |
| 7               | Angola  | 2006           | Eggs                      | 4                                                           |
| 7               | Angola  | 2006           | Fats, Animals, Raw        | 1                                                           |
| 7               | Angola  | 2006           | Freshwater Fish           | 2                                                           |
| 7               | Angola  | 2006           | Fruits, Other             | 6                                                           |

Dietary calcium and zinc deficiency risks are decreasing but remain prevalent

| FAO countrycode | Country | Reference year | Food item                 | Gross food supply (g capita <sup>-1</sup> d <sup>-1</sup> ) |
|-----------------|---------|----------------|---------------------------|-------------------------------------------------------------|
| 7               | Angola  | 2006           | Groundnut Oil             | 1                                                           |
| 7               | Angola  | 2006           | Groundnuts (Shelled Eq)   | 3                                                           |
| 7               | Angola  | 2006           | Honey                     | 4                                                           |
| 7               | Angola  | 2006           | Maize                     | 101                                                         |
| 7               | Angola  | 2006           | Marine Fish, Other        | 4                                                           |
| 7               | Angola  | 2006           | Meat, Other               | 1                                                           |
| 7               | Angola  | 2006           | Milk, Whole               | 28                                                          |
| 7               | Angola  | 2006           | Millet                    | 19                                                          |
| 7               | Angola  | 2006           | Mutton & Goat Meat        | 3                                                           |
| 7               | Angola  | 2006           | Offals, Edible            | 3                                                           |
| 7               | Angola  | 2006           | Oilcrops Oil, Other       | 3                                                           |
| 7               | Angola  | 2006           | Onions                    | 2                                                           |
| 7               | Angola  | 2006           | Palm Oil                  | 9                                                           |
| 7               | Angola  | 2006           | Palmkernel Oil            | 1                                                           |
| 7               | Angola  | 2006           | Pelagic Fish              | 16                                                          |
| 7               | Angola  | 2006           | Pigmeat                   | 13                                                          |
| 7               | Angola  | 2006           | Pineapples                | 11                                                          |
| 7               | Angola  | 2006           | Potatoes                  | 28                                                          |
| 7               | Angola  | 2006           | Poultry Meat              | 22                                                          |
| 7               | Angola  | 2006           | Rice (Milled Equivalent)  | 19                                                          |
| 7               | Angola  | 2006           | Soyabean Oil              | 9                                                           |
| 7               | Angola  | 2006           | Sugar, Refined Equivalent | 32                                                          |
| 7               | Angola  | 2006           | Sunflowerseed Oil         | 1                                                           |
| 7               | Angola  | 2006           | Sweet Potatoes            | 98                                                          |
| 7               | Angola  | 2006           | Tomatoes                  | 17                                                          |
| 7               | Angola  | 2006           | Vegetables, Other         | 46                                                          |
| 7               | Angola  | 2006           | Wheat                     | 91                                                          |
| 7               | Angola  | 2006           | Wine                      | 14                                                          |
| 7               | Angola  | 2007           | Apples                    | 1                                                           |
| 7               | Angola  | 2007           | Bananas                   | 140                                                         |
| 7               | Angola  | 2007           | Beans                     | 19                                                          |
| 7               | Angola  | 2007           | Beer                      | 83                                                          |
| 7               | Angola  | 2007           | Beverages, Alcoholic      | 4                                                           |
| 7               | Angola  | 2007           | Beverages, Fermented      | 19                                                          |
| 7               | Angola  | 2007           | Bovine Meat               | 25                                                          |
| 7               | Angola  | 2007           | Cassava                   | 531                                                         |
| 7               | Angola  | 2007           | Cheese                    | 1                                                           |
| 7               | Angola  | 2007           | Citrus, Other             | 13                                                          |
| 7               | Angola  | 2007           | Coffee                    | 2                                                           |
| 7               | Angola  | 2007           | Demersal Fish             | 20                                                          |
| 7               | Angola  | 2007           | Eggs                      | 3                                                           |
| 7               | Angola  | 2007           | Fats, Animals, Raw        | 1                                                           |
| 7               | Angola  | 2007           | Freshwater Fish           | 4                                                           |
| 7               | Angola  | 2007           | Fruits, Other             | 6                                                           |
| 7               | Angola  | 2007           | Groundnut Oil             | 1                                                           |
| 7               | Angola  | 2007           | Groundnuts (Shelled Eq)   | 4                                                           |
| 7               | Angola  | 2007           | Honey                     | 4                                                           |
| 7               | Angola  | 2007           | Maize                     | 100                                                         |
| 7               | Angola  | 2007           | Marine Fish, Other        | 4                                                           |
| 7               | Angola  | 2007           | Meat, Other               | 1                                                           |
| 7               | Angola  | 2007           | Milk, Whole               | 28                                                          |
| 7               | Angola  | 2007           | Millet                    | 8                                                           |
| 7               | Angola  | 2007           | Mutton & Goat Meat        | 3                                                           |
| 7               | Angola  | 2007           | Offals, Edible            | 3                                                           |
| 7               | Angola  | 2007           | Oilcrops Oil, Other       | 3                                                           |
| 7               | Angola  | 2007           | Onions                    | 1                                                           |
| 7               | Angola  | 2007           | Palm Oil                  | 9                                                           |
| 7               | Angola  | 2007           | Palmkernel Oil            | 1                                                           |
| 7               | Angola  | 2007           | Pelagic Fish              | 18                                                          |
| 7               | Angola  | 2007           | Pigmeat                   | 16                                                          |
| 7               | Angola  | 2007           | Pineapples                | 11                                                          |
| 7               | Angola  | 2007           | Potatoes                  | 47                                                          |
| 7               | Angola  | 2007           | Poultry Meat              | 23                                                          |
| 7               | Angola  | 2007           | Rice (Milled Equivalent)  | 19                                                          |
| 7               | Angola  | 2007           | Soyabean Oil              | 9                                                           |
| 7               | Angola  | 2007           | Sugar, Refined Equivalent | 33                                                          |
| 7               | Angola  | 2007           | Sunflowerseed Oil         | 1                                                           |
| 7               | Angola  | 2007           | Sweet Potatoes            | 131                                                         |
| 7               | Angola  | 2007           | Tomatoes                  | 11                                                          |
| 7               | Angola  | 2007           | Vegetables, Other         | 49                                                          |
| 7               | Angola  | 2007           | Wheat                     | 94                                                          |
| 7               | Angola  | 2007           | Wine                      | 14                                                          |
| 7               | Angola  | 2008           | Apples                    | 1                                                           |
| 7               | Angola  | 2008           | Bananas                   | 141                                                         |
| 7               | Angola  | 2008           | Beans                     | 22                                                          |
| 7               | Angola  | 2008           | Beer                      | 104                                                         |
| 7               | Angola  | 2008           | Beverages, Alcoholic      | 5                                                           |
| 7               | Angola  | 2008           | Beverages, Fermented      | 27                                                          |
| 7               | Angola  | 2008           | Bovine Meat               | 23                                                          |
| 7               | Angola  | 2008           | Cassava                   | 525                                                         |
| 7               | Angola  | 2008           | Cheese                    | 1                                                           |
| 7               | Angola  | 2008           | Citrus, Other             | 14                                                          |
| 7               | Angola  | 2008           | Coffee                    | 1                                                           |
| 7               | Angola  | 2008           | Demersal Fish             | 20                                                          |
| 7               | Angola  | 2008           | Eggs                      | 4                                                           |
| 7               | Angola  | 2008           | Fats, Animals, Raw        | 1                                                           |
| 7               | Angola  | 2008           | Freshwater Fish           | 4                                                           |
| 7               | Angola  | 2008           | Fruits, Other             | 7                                                           |
| 7               | Angola  | 2008           | Groundnut Oil             | 2                                                           |
| 7               | Angola  | 2008           | Groundnuts (Shelled Eq)   | 5                                                           |
| 7               | Angola  | 2008           | Honey                     | 4                                                           |
| 7               | Angola  | 2008           | Maize                     | 106                                                         |
| 7               | Angola  | 2008           | Marine Fish, Other        | 4                                                           |
| 7               | Angola  | 2008           | Meat, Other               | 1                                                           |
| 7               | Angola  | 2008           | Milk, Whole               | 27                                                          |
| 7               | Angola  | 2008           | Millet                    | 7                                                           |
| 7               | Angola  | 2008           | Mutton & Goat Meat        | 4                                                           |

Dietary calcium and zinc deficiency risks are decreasing but remain prevalent

| FAO countrycode | Country | Reference year | Food item                 | Gross food supply (g capita <sup>-1</sup> d <sup>-1</sup> ) |
|-----------------|---------|----------------|---------------------------|-------------------------------------------------------------|
| 7               | Angola  | 2008           | Offals, Edible            | 3                                                           |
| 7               | Angola  | 2008           | Oilcrops Oil, Other       | 2                                                           |
| 7               | Angola  | 2008           | Palm Oil                  | 9                                                           |
| 7               | Angola  | 2008           | Palmkernel Oil            | 1                                                           |
| 7               | Angola  | 2008           | Pelagic Fish              | 19                                                          |
| 7               | Angola  | 2008           | Pigmeat                   | 18                                                          |
| 7               | Angola  | 2008           | Pineapples                | 13                                                          |
| 7               | Angola  | 2008           | Potatoes                  | 41                                                          |
| 7               | Angola  | 2008           | Poultry Meat              | 27                                                          |
| 7               | Angola  | 2008           | Rice (Milled Equivalent)  | 20                                                          |
| 7               | Angola  | 2008           | Soyabean Oil              | 9                                                           |
| 7               | Angola  | 2008           | Sugar, Refined Equivalent | 37                                                          |
| 7               | Angola  | 2008           | Sunflowerseed Oil         | 1                                                           |
| 7               | Angola  | 2008           | Sweet Potatoes            | 109                                                         |
| 7               | Angola  | 2008           | Tomatoes                  | 12                                                          |
| 7               | Angola  | 2008           | Vegetables, Other         | 121                                                         |
| 7               | Angola  | 2008           | Wheat                     | 96                                                          |
| 7               | Angola  | 2008           | Wine                      | 17                                                          |
| 7               | Angola  | 2009           | Apples                    | 1                                                           |
| 7               | Angola  | 2009           | Bananas                   | 142                                                         |
| 7               | Angola  | 2009           | Beans                     | 24                                                          |
| 7               | Angola  | 2009           | Beer                      | 119                                                         |
| 7               | Angola  | 2009           | Beverages, Alcoholic      | 4                                                           |
| 7               | Angola  | 2009           | Beverages, Fermented      | 32                                                          |
| 7               | Angola  | 2009           | Bovine Meat               | 20                                                          |
| 7               | Angola  | 2009           | Cassava                   | 525                                                         |
| 7               | Angola  | 2009           | Cheese                    | 1                                                           |
| 7               | Angola  | 2009           | Citrus, Other             | 30                                                          |
| 7               | Angola  | 2009           | Cocoa Beans               | 1                                                           |
| 7               | Angola  | 2009           | Coconuts - Incl Copra     | 1                                                           |
| 7               | Angola  | 2009           | Coffee                    | 2                                                           |
| 7               | Angola  | 2009           | Demersal Fish             | 19                                                          |
| 7               | Angola  | 2009           | Eggs                      | 3                                                           |
| 7               | Angola  | 2009           | Fats, Animals, Raw        | 1                                                           |
| 7               | Angola  | 2009           | Freshwater Fish           | 2                                                           |
| 7               | Angola  | 2009           | Fruits, Other             | 8                                                           |
| 7               | Angola  | 2009           | Groundnut Oil             | 2                                                           |
| 7               | Angola  | 2009           | Groundnuts (Shelled Eq)   | 6                                                           |
| 7               | Angola  | 2009           | Honey                     | 4                                                           |
| 7               | Angola  | 2009           | Maize                     | 106                                                         |
| 7               | Angola  | 2009           | Marine Fish, Other        | 3                                                           |
| 7               | Angola  | 2009           | Meat, Other               | 1                                                           |
| 7               | Angola  | 2009           | Milk, Whole               | 22                                                          |
| 7               | Angola  | 2009           | Millet                    | 5                                                           |
| 7               | Angola  | 2009           | Mutton & Goat Meat        | 3                                                           |
| 7               | Angola  | 2009           | Offals, Edible            | 3                                                           |
| 7               | Angola  | 2009           | Oilcrops Oil, Other       | 3                                                           |
| 7               | Angola  | 2009           | Palm Oil                  | 9                                                           |
| 7               | Angola  | 2009           | Palmkernel Oil            | 1                                                           |
| 7               | Angola  | 2009           | Pelagic Fish              | 20                                                          |
| 7               | Angola  | 2009           | Pigmeat                   | 19                                                          |
| 7               | Angola  | 2009           | Pineapples                | 38                                                          |
| 7               | Angola  | 2009           | Potatoes                  | 79                                                          |
| 7               | Angola  | 2009           | Poultry Meat              | 26                                                          |
| 7               | Angola  | 2009           | Rice (Milled Equivalent)  | 20                                                          |
| 7               | Angola  | 2009           | Soyabean Oil              | 9                                                           |
| 7               | Angola  | 2009           | Sugar, Refined Equivalent | 34                                                          |
| 7               | Angola  | 2009           | Sunflowerseed Oil         | 1                                                           |
| 7               | Angola  | 2009           | Sweet Potatoes            | 127                                                         |
| 7               | Angola  | 2009           | Tomatoes                  | 11                                                          |
| 7               | Angola  | 2009           | Vegetables, Other         | 171                                                         |
| 7               | Angola  | 2009           | Wheat                     | 95                                                          |
| 7               | Angola  | 2009           | Wine                      | 12                                                          |
| 7               | Angola  | 2010           | Apples                    | 1                                                           |
| 7               | Angola  | 2010           | Bananas                   | 146                                                         |
| 7               | Angola  | 2010           | Beans                     | 24                                                          |
| 7               | Angola  | 2010           | Beer                      | 126                                                         |
| 7               | Angola  | 2010           | Beverages, Alcoholic      | 7                                                           |
| 7               | Angola  | 2010           | Beverages, Fermented      | 43                                                          |
| 7               | Angola  | 2010           | Bovine Meat               | 18                                                          |
| 7               | Angola  | 2010           | Cassava                   | 530                                                         |
| 7               | Angola  | 2010           | Cheese                    | 1                                                           |
| 7               | Angola  | 2010           | Citrus, Other             | 31                                                          |
| 7               | Angola  | 2010           | Coffee                    | 7                                                           |
| 7               | Angola  | 2010           | Demersal Fish             | 18                                                          |
| 7               | Angola  | 2010           | Eggs                      | 5                                                           |
| 7               | Angola  | 2010           | Fats, Animals, Raw        | 1                                                           |
| 7               | Angola  | 2010           | Freshwater Fish           | 3                                                           |
| 7               | Angola  | 2010           | Fruits, Other             | 5                                                           |
| 7               | Angola  | 2010           | Groundnut Oil             | 2                                                           |
| 7               | Angola  | 2010           | Groundnuts (Shelled Eq)   | 6                                                           |
| 7               | Angola  | 2010           | Honey                     | 3                                                           |
| 7               | Angola  | 2010           | Maize                     | 110                                                         |
| 7               | Angola  | 2010           | Marine Fish, Other        | 3                                                           |
| 7               | Angola  | 2010           | Meat, Other               | 1                                                           |
| 7               | Angola  | 2010           | Milk, Whole               | 24                                                          |
| 7               | Angola  | 2010           | Millet                    | 6                                                           |
| 7               | Angola  | 2010           | Mutton & Goat Meat        | 3                                                           |
| 7               | Angola  | 2010           | Offals, Edible            | 3                                                           |
| 7               | Angola  | 2010           | Oilcrops Oil, Other       | 3                                                           |
| 7               | Angola  | 2010           | Palm Oil                  | 8                                                           |
| 7               | Angola  | 2010           | Palmkernel Oil            | 1                                                           |
| 7               | Angola  | 2010           | Pelagic Fish              | 17                                                          |
| 7               | Angola  | 2010           | Pigmeat                   | 18                                                          |
| 7               | Angola  | 2010           | Pineapples                | 40                                                          |
| 7               | Angola  | 2010           | Potatoes                  | 78                                                          |
| 7               | Angola  | 2010           | Poultry Meat              | 36                                                          |

Dietary calcium and zinc deficiency risks are decreasing but remain prevalent

| FAO countrycode | Country   | Reference year | Food item                 | Gross food supply (g capita <sup>-1</sup> d <sup>-1</sup> ) |
|-----------------|-----------|----------------|---------------------------|-------------------------------------------------------------|
| 7               | Angola    | 2010           | Rice (Milled Equivalent)  | 19                                                          |
| 7               | Angola    | 2010           | Soyabean Oil              | 9                                                           |
| 7               | Angola    | 2010           | Sugar, Refined Equivalent | 33                                                          |
| 7               | Angola    | 2010           | Sunflowerseed Oil         | 1                                                           |
| 7               | Angola    | 2010           | Sweet Potatoes            | 123                                                         |
| 7               | Angola    | 2010           | Tomatoes                  | 10                                                          |
| 7               | Angola    | 2010           | Vegetables, Other         | 174                                                         |
| 7               | Angola    | 2010           | Wheat                     | 97                                                          |
| 7               | Angola    | 2010           | Wine                      | 13                                                          |
| 7               | Angola    | 2011           | Apples                    | 2                                                           |
| 7               | Angola    | 2011           | Bananas                   | 134                                                         |
| 7               | Angola    | 2011           | Beans                     | 25                                                          |
| 7               | Angola    | 2011           | Beer                      | 137                                                         |
| 7               | Angola    | 2011           | Beverages, Alcoholic      | 6                                                           |
| 7               | Angola    | 2011           | Beverages, Fermented      | 46                                                          |
| 7               | Angola    | 2011           | Bovine Meat               | 19                                                          |
| 7               | Angola    | 2011           | Cassava                   | 530                                                         |
| 7               | Angola    | 2011           | Cheese                    | 1                                                           |
| 7               | Angola    | 2011           | Citrus, Other             | 33                                                          |
| 7               | Angola    | 2011           | Coffee                    | 7                                                           |
| 7               | Angola    | 2011           | Demersal Fish             | 17                                                          |
| 7               | Angola    | 2011           | Eggs                      | 5                                                           |
| 7               | Angola    | 2011           | Fats, Animals, Raw        | 2                                                           |
| 7               | Angola    | 2011           | Freshwater Fish           | 3                                                           |
| 7               | Angola    | 2011           | Fruits, Other             | 7                                                           |
| 7               | Angola    | 2011           | Groundnut Oil             | 2                                                           |
| 7               | Angola    | 2011           | Groundnuts (Shelled Eq)   | 6                                                           |
| 7               | Angola    | 2011           | Honey                     | 3                                                           |
| 7               | Angola    | 2011           | Maize                     | 108                                                         |
| 7               | Angola    | 2011           | Marine Fish, Other        | 3                                                           |
| 7               | Angola    | 2011           | Meat, Other               | 1                                                           |
| 7               | Angola    | 2011           | Milk, Whole               | 25                                                          |
| 7               | Angola    | 2011           | Millet                    | 6                                                           |
| 7               | Angola    | 2011           | Mutton & Goat Meat        | 3                                                           |
| 7               | Angola    | 2011           | Offals, Edible            | 3                                                           |
| 7               | Angola    | 2011           | Oilcrops Oil, Other       | 2                                                           |
| 7               | Angola    | 2011           | Onions                    | 1                                                           |
| 7               | Angola    | 2011           | Palm Oil                  | 8                                                           |
| 7               | Angola    | 2011           | Palmkernel Oil            | 1                                                           |
| 7               | Angola    | 2011           | Pelagic Fish              | 16                                                          |
| 7               | Angola    | 2011           | Pigmeat                   | 22                                                          |
| 7               | Angola    | 2011           | Pineapples                | 40                                                          |
| 7               | Angola    | 2011           | Potatoes                  | 76                                                          |
| 7               | Angola    | 2011           | Poultry Meat              | 42                                                          |
| 7               | Angola    | 2011           | Rice (Milled Equivalent)  | 20                                                          |
| 7               | Angola    | 2011           | Soyabean Oil              | 10                                                          |
| 7               | Angola    | 2011           | Sugar, Refined Equivalent | 34                                                          |
| 7               | Angola    | 2011           | Sunflowerseed Oil         | 1                                                           |
| 7               | Angola    | 2011           | Sweet Potatoes            | 126                                                         |
| 7               | Angola    | 2011           | Tomatoes                  | 12                                                          |
| 7               | Angola    | 2011           | Vegetables, Other         | 184                                                         |
| 7               | Angola    | 2011           | Wheat                     | 105                                                         |
| 7               | Angola    | 2011           | Wine                      | 13                                                          |
| 9               | Argentina | 1992           | Apples                    | 40                                                          |
| 9               | Argentina | 1992           | Bananas                   | 25                                                          |
| 9               | Argentina | 1992           | Beer                      | 83                                                          |
| 9               | Argentina | 1992           | Beverages, Alcoholic      | 6                                                           |
| 9               | Argentina | 1992           | Bovine Meat               | 178                                                         |
| 9               | Argentina | 1992           | Butter, Ghee              | 4                                                           |
| 9               | Argentina | 1992           | Cassava                   | 6                                                           |
| 9               | Argentina | 1992           | Cephalopods               | 2                                                           |
| 9               | Argentina | 1992           | Cereals, Other            | 2                                                           |
| 9               | Argentina | 1992           | Cheese                    | 28                                                          |
| 9               | Argentina | 1992           | Cocoa Beans               | 3                                                           |
| 9               | Argentina | 1992           | Coconuts - Incl Copra     | 1                                                           |
| 9               | Argentina | 1992           | Coffee                    | 3                                                           |
| 9               | Argentina | 1992           | Cottonseed Oil            | 1                                                           |
| 9               | Argentina | 1992           | Cream                     | 1                                                           |
| 9               | Argentina | 1992           | Demersal Fish             | 18                                                          |
| 9               | Argentina | 1992           | Eggs                      | 19                                                          |
| 9               | Argentina | 1992           | Fats, Animals, Raw        | 7                                                           |
| 9               | Argentina | 1992           | Freshwater Fish           | 1                                                           |
| 9               | Argentina | 1992           | Fruits, Other             | 34                                                          |
| 9               | Argentina | 1992           | Grapefruit                | 7                                                           |
| 9               | Argentina | 1992           | Grapes                    | 3                                                           |
| 9               | Argentina | 1992           | Lemons, Limes             | 41                                                          |
| 9               | Argentina | 1992           | Maize                     | 14                                                          |
| 9               | Argentina | 1992           | Maize Germ Oil            | 2                                                           |
| 9               | Argentina | 1992           | Meat, Other               | 4                                                           |
| 9               | Argentina | 1992           | Milk, Whole               | 241                                                         |
| 9               | Argentina | 1992           | Mutton & Goat Meat        | 6                                                           |
| 9               | Argentina | 1992           | Nuts                      | 1                                                           |
| 9               | Argentina | 1992           | Offals, Edible            | 17                                                          |
| 9               | Argentina | 1992           | Onions                    | 37                                                          |
| 9               | Argentina | 1992           | Oranges, Mandarines       | 90                                                          |
| 9               | Argentina | 1992           | Peas                      | 1                                                           |
| 9               | Argentina | 1992           | Pelagic Fish              | 3                                                           |
| 9               | Argentina | 1992           | Pigmeat                   | 15                                                          |
| 9               | Argentina | 1992           | Pineapples                | 2                                                           |
| 9               | Argentina | 1992           | Potatoes                  | 112                                                         |
| 9               | Argentina | 1992           | Poultry Meat              | 44                                                          |
| 9               | Argentina | 1992           | Pulses, Other             | 2                                                           |
| 9               | Argentina | 1992           | Rice (Milled Equivalent)  | 19                                                          |
| 9               | Argentina | 1992           | Soyabean Oil              | 6                                                           |
| 9               | Argentina | 1992           | Sugar, Refined Equivalent | 88                                                          |
| 9               | Argentina | 1992           | Sunflowerseed Oil         | 29                                                          |
| 9               | Argentina | 1992           | Sweet Potatoes            | 20                                                          |

Dietary calcium and zinc deficiency risks are decreasing but remain prevalent

| FAO countrycode | Country   | Reference year | Food item                 | Gross food supply (g capita <sup>-1</sup> d <sup>-1</sup> ) |
|-----------------|-----------|----------------|---------------------------|-------------------------------------------------------------|
| 9               | Argentina | 1992           | Sweeteners, Other         | 19                                                          |
| 9               | Argentina | 1992           | Tea                       | 14                                                          |
| 9               | Argentina | 1992           | Tomatoes                  | 59                                                          |
| 9               | Argentina | 1992           | Vegetables, Other         | 121                                                         |
| 9               | Argentina | 1992           | Wheat                     | 297                                                         |
| 9               | Argentina | 1992           | Whey                      | 1                                                           |
| 9               | Argentina | 1992           | Wine                      | 137                                                         |
| 9               | Argentina | 1993           | Apples                    | 37                                                          |
| 9               | Argentina | 1993           | Bananas                   | 30                                                          |
| 9               | Argentina | 1993           | Beer                      | 87                                                          |
| 9               | Argentina | 1993           | Beverages, Alcoholic      | 7                                                           |
| 9               | Argentina | 1993           | Bovine Meat               | 177                                                         |
| 9               | Argentina | 1993           | Butter, Ghee              | 3                                                           |
| 9               | Argentina | 1993           | Cassava                   | 6                                                           |
| 9               | Argentina | 1993           | Cephalopods               | 1                                                           |
| 9               | Argentina | 1993           | Cereals, Other            | 1                                                           |
| 9               | Argentina | 1993           | Cheese                    | 28                                                          |
| 9               | Argentina | 1993           | Cocoa Beans               | 3                                                           |
| 9               | Argentina | 1993           | Coconuts - Incl Copra     | 1                                                           |
| 9               | Argentina | 1993           | Coffee                    | 3                                                           |
| 9               | Argentina | 1993           | Cream                     | 1                                                           |
| 9               | Argentina | 1993           | Demersal Fish             | 21                                                          |
| 9               | Argentina | 1993           | Eggs                      | 19                                                          |
| 9               | Argentina | 1993           | Fats, Animals, Raw        | 7                                                           |
| 9               | Argentina | 1993           | Freshwater Fish           | 1                                                           |
| 9               | Argentina | 1993           | Fruits, Other             | 44                                                          |
| 9               | Argentina | 1993           | Grapefruit                | 9                                                           |
| 9               | Argentina | 1993           | Grapes                    | 4                                                           |
| 9               | Argentina | 1993           | Lemons, Limes             | 41                                                          |
| 9               | Argentina | 1993           | Maize                     | 21                                                          |
| 9               | Argentina | 1993           | Maize Germ Oil            | 2                                                           |
| 9               | Argentina | 1993           | Meat, Other               | 4                                                           |
| 9               | Argentina | 1993           | Milk, Whole               | 251                                                         |
| 9               | Argentina | 1993           | Mutton & Goat Meat        | 6                                                           |
| 9               | Argentina | 1993           | Nuts                      | 1                                                           |
| 9               | Argentina | 1993           | Oats                      | 2                                                           |
| 9               | Argentina | 1993           | Offals, Edible            | 18                                                          |
| 9               | Argentina | 1993           | Olives                    | 1                                                           |
| 9               | Argentina | 1993           | Onions                    | 27                                                          |
| 9               | Argentina | 1993           | Oranges, Mandarines       | 81                                                          |
| 9               | Argentina | 1993           | Peas                      | 1                                                           |
| 9               | Argentina | 1993           | Pelagic Fish              | 2                                                           |
| 9               | Argentina | 1993           | Pigmeat                   | 21                                                          |
| 9               | Argentina | 1993           | Pineapples                | 3                                                           |
| 9               | Argentina | 1993           | Potatoes                  | 145                                                         |
| 9               | Argentina | 1993           | Poultry Meat              | 62                                                          |
| 9               | Argentina | 1993           | Pulses, Other             | 2                                                           |
| 9               | Argentina | 1993           | Rice (Milled Equivalent)  | 8                                                           |
| 9               | Argentina | 1993           | Soyabean Oil              | 6                                                           |
| 9               | Argentina | 1993           | Sugar, Refined Equivalent | 89                                                          |
| 9               | Argentina | 1993           | Sunflowerseed Oil         | 30                                                          |
| 9               | Argentina | 1993           | Sweet Potatoes            | 20                                                          |
| 9               | Argentina | 1993           | Sweeteners, Other         | 20                                                          |
| 9               | Argentina | 1993           | Tea                       | 17                                                          |
| 9               | Argentina | 1993           | Tomatoes                  | 65                                                          |
| 9               | Argentina | 1993           | Vegetables, Other         | 114                                                         |
| 9               | Argentina | 1993           | Wheat                     | 289                                                         |
| 9               | Argentina | 1993           | Whey                      | 1                                                           |
| 9               | Argentina | 1993           | Wine                      | 127                                                         |
| 9               | Argentina | 1994           | Apples                    | 40                                                          |
| 9               | Argentina | 1994           | Bananas                   | 29                                                          |
| 9               | Argentina | 1994           | Beer                      | 94                                                          |
| 9               | Argentina | 1994           | Beverages, Alcoholic      | 7                                                           |
| 9               | Argentina | 1994           | Bovine Meat               | 169                                                         |
| 9               | Argentina | 1994           | Butter, Ghee              | 4                                                           |
| 9               | Argentina | 1994           | Cassava                   | 6                                                           |
| 9               | Argentina | 1994           | Cephalopods               | 1                                                           |
| 9               | Argentina | 1994           | Cereals, Other            | 1                                                           |
| 9               | Argentina | 1994           | Cheese                    | 30                                                          |
| 9               | Argentina | 1994           | Cocoa Beans               | 3                                                           |
| 9               | Argentina | 1994           | Coconuts - Incl Copra     | 1                                                           |
| 9               | Argentina | 1994           | Coffee                    | 3                                                           |
| 9               | Argentina | 1994           | Crustaceans               | 1                                                           |
| 9               | Argentina | 1994           | Demersal Fish             | 16                                                          |
| 9               | Argentina | 1994           | Eggs                      | 19                                                          |
| 9               | Argentina | 1994           | Fats, Animals, Raw        | 8                                                           |
| 9               | Argentina | 1994           | Freshwater Fish           | 1                                                           |
| 9               | Argentina | 1994           | Fruits, Other             | 45                                                          |
| 9               | Argentina | 1994           | Grapefruit                | 15                                                          |
| 9               | Argentina | 1994           | Grapes                    | 3                                                           |
| 9               | Argentina | 1994           | Lemons, Limes             | 41                                                          |
| 9               | Argentina | 1994           | Maize                     | 10                                                          |
| 9               | Argentina | 1994           | Maize Germ Oil            | 2                                                           |
| 9               | Argentina | 1994           | Meat, Other               | 4                                                           |
| 9               | Argentina | 1994           | Milk, Whole               | 262                                                         |
| 9               | Argentina | 1994           | Mutton & Goat Meat        | 7                                                           |
| 9               | Argentina | 1994           | Nuts                      | 1                                                           |
| 9               | Argentina | 1994           | Oats                      | 1                                                           |
| 9               | Argentina | 1994           | Offals, Edible            | 18                                                          |
| 9               | Argentina | 1994           | Onions                    | 24                                                          |
| 9               | Argentina | 1994           | Oranges, Mandarines       | 99                                                          |
| 9               | Argentina | 1994           | Peas                      | 1                                                           |
| 9               | Argentina | 1994           | Pelagic Fish              | 3                                                           |
| 9               | Argentina | 1994           | Pigmeat                   | 22                                                          |
| 9               | Argentina | 1994           | Pineapples                | 2                                                           |
| 9               | Argentina | 1994           | Potatoes                  | 154                                                         |
| 9               | Argentina | 1994           | Poultry Meat              | 64                                                          |



Dietary calcium and zinc deficiency risks are decreasing but remain prevalent

| FAO countrycode | Country   | Reference year | Food item                 | Gross food supply (g capita <sup>-1</sup> d <sup>-1</sup> ) |
|-----------------|-----------|----------------|---------------------------|-------------------------------------------------------------|
| 9               | Argentina | 1994           | Pulses, Other             | 3                                                           |
| 9               | Argentina | 1994           | Rape and Mustard Oil      | 1                                                           |
| 9               | Argentina | 1994           | Rice (Milled Equivalent)  | 12                                                          |
| 9               | Argentina | 1994           | Soyabean Oil              | 5                                                           |
| 9               | Argentina | 1994           | Sugar, Refined Equivalent | 95                                                          |
| 9               | Argentina | 1994           | Sunflowerseed Oil         | 31                                                          |
| 9               | Argentina | 1994           | Sweet Potatoes            | 27                                                          |
| 9               | Argentina | 1994           | Sweeteners, Other         | 22                                                          |
| 9               | Argentina | 1994           | Tea                       | 18                                                          |
| 9               | Argentina | 1994           | Tomatoes                  | 62                                                          |
| 9               | Argentina | 1994           | Vegetables, Other         | 121                                                         |
| 9               | Argentina | 1994           | Wheat                     | 291                                                         |
| 9               | Argentina | 1994           | Whey                      | 1                                                           |
| 9               | Argentina | 1994           | Wine                      | 115                                                         |
| 9               | Argentina | 1995           | Apples                    | 40                                                          |
| 9               | Argentina | 1995           | Bananas                   | 27                                                          |
| 9               | Argentina | 1995           | Beans                     | 1                                                           |
| 9               | Argentina | 1995           | Beer                      | 89                                                          |
| 9               | Argentina | 1995           | Beverages, Alcoholic      | 5                                                           |
| 9               | Argentina | 1995           | Bovine Meat               | 153                                                         |
| 9               | Argentina | 1995           | Butter, Ghee              | 4                                                           |
| 9               | Argentina | 1995           | Cassava                   | 6                                                           |
| 9               | Argentina | 1995           | Cephalopods               | 1                                                           |
| 9               | Argentina | 1995           | Cereals, Other            | 1                                                           |
| 9               | Argentina | 1995           | Cheese                    | 28                                                          |
| 9               | Argentina | 1995           | Cocoa Beans               | 2                                                           |
| 9               | Argentina | 1995           | Coconuts - Incl Copra     | 1                                                           |
| 9               | Argentina | 1995           | Coffee                    | 3                                                           |
| 9               | Argentina | 1995           | Cream                     | 1                                                           |
| 9               | Argentina | 1995           | Demersal Fish             | 19                                                          |
| 9               | Argentina | 1995           | Eggs                      | 19                                                          |
| 9               | Argentina | 1995           | Fats, Animals, Raw        | 8                                                           |
| 9               | Argentina | 1995           | Freshwater Fish           | 1                                                           |
| 9               | Argentina | 1995           | Fruits, Other             | 41                                                          |
| 9               | Argentina | 1995           | Grapefruit                | 12                                                          |
| 9               | Argentina | 1995           | Grapes                    | 2                                                           |
| 9               | Argentina | 1995           | Honey                     | 1                                                           |
| 9               | Argentina | 1995           | Lemons, Limes             | 43                                                          |
| 9               | Argentina | 1995           | Maize                     | 17                                                          |
| 9               | Argentina | 1995           | Maize Germ Oil            | 2                                                           |
| 9               | Argentina | 1995           | Marine Fish, Other        | 1                                                           |
| 9               | Argentina | 1995           | Meat, Other               | 4                                                           |
| 9               | Argentina | 1995           | Milk, Whole               | 290                                                         |
| 9               | Argentina | 1995           | Molluscs, Other           | 1                                                           |
| 9               | Argentina | 1995           | Mutton & Goat Meat        | 7                                                           |
| 9               | Argentina | 1995           | Nuts                      | 1                                                           |
| 9               | Argentina | 1995           | Oats                      | 1                                                           |
| 9               | Argentina | 1995           | Offals, Edible            | 18                                                          |
| 9               | Argentina | 1995           | Olives                    | 2                                                           |
| 9               | Argentina | 1995           | Onions                    | 22                                                          |
| 9               | Argentina | 1995           | Oranges, Mandarines       | 92                                                          |
| 9               | Argentina | 1995           | Peas                      | 1                                                           |
| 9               | Argentina | 1995           | Pelagic Fish              | 4                                                           |
| 9               | Argentina | 1995           | Pigmeat                   | 19                                                          |
| 9               | Argentina | 1995           | Pineapples                | 2                                                           |
| 9               | Argentina | 1995           | Potatoes                  | 162                                                         |
| 9               | Argentina | 1995           | Poultry Meat              | 65                                                          |
| 9               | Argentina | 1995           | Pulses, Other             | 2                                                           |
| 9               | Argentina | 1995           | Rice (Milled Equivalent)  | 13                                                          |
| 9               | Argentina | 1995           | Soyabean Oil              | 5                                                           |
| 9               | Argentina | 1995           | Sugar, Refined Equivalent | 98                                                          |
| 9               | Argentina | 1995           | Sunflowerseed Oil         | 31                                                          |
| 9               | Argentina | 1995           | Sweet Potatoes            | 24                                                          |
| 9               | Argentina | 1995           | Sweeteners, Other         | 22                                                          |
| 9               | Argentina | 1995           | Tea                       | 18                                                          |
| 9               | Argentina | 1995           | Tomatoes                  | 71                                                          |
| 9               | Argentina | 1995           | Vegetables, Other         | 121                                                         |
| 9               | Argentina | 1995           | Wheat                     | 292                                                         |
| 9               | Argentina | 1995           | Whey                      | 1                                                           |
| 9               | Argentina | 1995           | Wine                      | 109                                                         |
| 9               | Argentina | 1996           | Apples                    | 52                                                          |
| 9               | Argentina | 1996           | Bananas                   | 26                                                          |
| 9               | Argentina | 1996           | Beer                      | 93                                                          |
| 9               | Argentina | 1996           | Beverages, Alcoholic      | 6                                                           |
| 9               | Argentina | 1996           | Bovine Meat               | 149                                                         |
| 9               | Argentina | 1996           | Butter, Ghee              | 4                                                           |
| 9               | Argentina | 1996           | Cassava                   | 5                                                           |
| 9               | Argentina | 1996           | Cephalopods               | 4                                                           |
| 9               | Argentina | 1996           | Cheese                    | 29                                                          |
| 9               | Argentina | 1996           | Cocoa Beans               | 2                                                           |
| 9               | Argentina | 1996           | Coconut Oil               | 1                                                           |
| 9               | Argentina | 1996           | Coconuts - Incl Copra     | 1                                                           |
| 9               | Argentina | 1996           | Coffee                    | 3                                                           |
| 9               | Argentina | 1996           | Cottonseed Oil            | 1                                                           |
| 9               | Argentina | 1996           | Demersal Fish             | 22                                                          |
| 9               | Argentina | 1996           | Eggs                      | 19                                                          |
| 9               | Argentina | 1996           | Fats, Animals, Raw        | 8                                                           |
| 9               | Argentina | 1996           | Freshwater Fish           | 1                                                           |
| 9               | Argentina | 1996           | Fruits, Other             | 47                                                          |
| 9               | Argentina | 1996           | Grapefruit                | 11                                                          |
| 9               | Argentina | 1996           | Grapes                    | 2                                                           |
| 9               | Argentina | 1996           | Lemons, Limes             | 43                                                          |
| 9               | Argentina | 1996           | Maize                     | 17                                                          |
| 9               | Argentina | 1996           | Maize Germ Oil            | 2                                                           |
| 9               | Argentina | 1996           | Meat, Other               | 5                                                           |
| 9               | Argentina | 1996           | Milk, Whole               | 317                                                         |
| 9               | Argentina | 1996           | Molluscs, Other           | 1                                                           |

Dietary calcium and zinc deficiency risks are decreasing but remain prevalent

| FAO countrycode | Country   | Reference year | Food item                 | Gross food supply (g capita <sup>-1</sup> d <sup>-1</sup> ) |
|-----------------|-----------|----------------|---------------------------|-------------------------------------------------------------|
| 9               | Argentina | 1996           | Mutton & Goat Meat        | 6                                                           |
| 9               | Argentina | 1996           | Nuts                      | 1                                                           |
| 9               | Argentina | 1996           | Oats                      | 1                                                           |
| 9               | Argentina | 1996           | Offals, Edible            | 17                                                          |
| 9               | Argentina | 1996           | Olives                    | 1                                                           |
| 9               | Argentina | 1996           | Onions                    | 26                                                          |
| 9               | Argentina | 1996           | Oranges, Mandarines       | 64                                                          |
| 9               | Argentina | 1996           | Peas                      | 1                                                           |
| 9               | Argentina | 1996           | Pelagic Fish              | 3                                                           |
| 9               | Argentina | 1996           | Pigmeat                   | 18                                                          |
| 9               | Argentina | 1996           | Pineapples                | 3                                                           |
| 9               | Argentina | 1996           | Potatoes                  | 147                                                         |
| 9               | Argentina | 1996           | Poultry Meat              | 63                                                          |
| 9               | Argentina | 1996           | Pulses, Other             | 2                                                           |
| 9               | Argentina | 1996           | Rice (Milled Equivalent)  | 17                                                          |
| 9               | Argentina | 1996           | Soyabean Oil              | 6                                                           |
| 9               | Argentina | 1996           | Sugar, Refined Equivalent | 96                                                          |
| 9               | Argentina | 1996           | Sunflowerseed Oil         | 29                                                          |
| 9               | Argentina | 1996           | Sweet Potatoes            | 24                                                          |
| 9               | Argentina | 1996           | Sweeteners, Other         | 19                                                          |
| 9               | Argentina | 1996           | Tea                       | 19                                                          |
| 9               | Argentina | 1996           | Tomatoes                  | 53                                                          |
| 9               | Argentina | 1996           | Vegetables, Other         | 121                                                         |
| 9               | Argentina | 1996           | Wheat                     | 298                                                         |
| 9               | Argentina | 1996           | Whey                      | 1                                                           |
| 9               | Argentina | 1996           | Wine                      | 104                                                         |
| 9               | Argentina | 1997           | Apples                    | 36                                                          |
| 9               | Argentina | 1997           | Bananas                   | 29                                                          |
| 9               | Argentina | 1997           | Beans                     | 1                                                           |
| 9               | Argentina | 1997           | Beer                      | 101                                                         |
| 9               | Argentina | 1997           | Beverages, Alcoholic      | 6                                                           |
| 9               | Argentina | 1997           | Bovine Meat               | 154                                                         |
| 9               | Argentina | 1997           | Butter, Ghee              | 4                                                           |
| 9               | Argentina | 1997           | Cassava                   | 5                                                           |
| 9               | Argentina | 1997           | Cephalopods               | 8                                                           |
| 9               | Argentina | 1997           | Cheese                    | 33                                                          |
| 9               | Argentina | 1997           | Cocoa Beans               | 2                                                           |
| 9               | Argentina | 1997           | Coconuts - Incl Copra     | 1                                                           |
| 9               | Argentina | 1997           | Coffee                    | 3                                                           |
| 9               | Argentina | 1997           | Demersal Fish             | 16                                                          |
| 9               | Argentina | 1997           | Eggs                      | 19                                                          |
| 9               | Argentina | 1997           | Fats, Animals, Raw        | 8                                                           |
| 9               | Argentina | 1997           | Freshwater Fish           | 2                                                           |
| 9               | Argentina | 1997           | Fruits, Other             | 43                                                          |
| 9               | Argentina | 1997           | Grapefruit                | 16                                                          |
| 9               | Argentina | 1997           | Grapes                    | 3                                                           |
| 9               | Argentina | 1997           | Lemons, Limes             | 52                                                          |
| 9               | Argentina | 1997           | Maize                     | 17                                                          |
| 9               | Argentina | 1997           | Maize Germ Oil            | 2                                                           |
| 9               | Argentina | 1997           | Meat, Other               | 4                                                           |
| 9               | Argentina | 1997           | Milk, Whole               | 271                                                         |
| 9               | Argentina | 1997           | Molluscs, Other           | 2                                                           |
| 9               | Argentina | 1997           | Mutton & Goat Meat        | 5                                                           |
| 9               | Argentina | 1997           | Nuts                      | 1                                                           |
| 9               | Argentina | 1997           | Oats                      | 2                                                           |
| 9               | Argentina | 1997           | Offals, Edible            | 17                                                          |
| 9               | Argentina | 1997           | Olives                    | 1                                                           |
| 9               | Argentina | 1997           | Onions                    | 15                                                          |
| 9               | Argentina | 1997           | Oranges, Mandarines       | 108                                                         |
| 9               | Argentina | 1997           | Peas                      | 1                                                           |
| 9               | Argentina | 1997           | Pelagic Fish              | 4                                                           |
| 9               | Argentina | 1997           | Pigmeat                   | 17                                                          |
| 9               | Argentina | 1997           | Pineapples                | 3                                                           |
| 9               | Argentina | 1997           | Potatoes                  | 194                                                         |
| 9               | Argentina | 1997           | Poultry Meat              | 65                                                          |
| 9               | Argentina | 1997           | Pulses, Other             | 2                                                           |
| 9               | Argentina | 1997           | Rice (Milled Equivalent)  | 16                                                          |
| 9               | Argentina | 1997           | Soyabean Oil              | 5                                                           |
| 9               | Argentina | 1997           | Sugar, Refined Equivalent | 95                                                          |
| 9               | Argentina | 1997           | Sunflowerseed Oil         | 29                                                          |
| 9               | Argentina | 1997           | Sweet Potatoes            | 17                                                          |
| 9               | Argentina | 1997           | Sweeteners, Other         | 18                                                          |
| 9               | Argentina | 1997           | Tea                       | 19                                                          |
| 9               | Argentina | 1997           | Tomatoes                  | 56                                                          |
| 9               | Argentina | 1997           | Vegetables, Other         | 111                                                         |
| 9               | Argentina | 1997           | Wheat                     | 288                                                         |
| 9               | Argentina | 1997           | Wine                      | 104                                                         |
| 9               | Argentina | 1998           | Apples                    | 37                                                          |
| 9               | Argentina | 1998           | Bananas                   | 29                                                          |
| 9               | Argentina | 1998           | Beans                     | 1                                                           |
| 9               | Argentina | 1998           | Beer                      | 96                                                          |
| 9               | Argentina | 1998           | Beverages, Alcoholic      | 4                                                           |
| 9               | Argentina | 1998           | Bovine Meat               | 154                                                         |
| 9               | Argentina | 1998           | Butter, Ghee              | 4                                                           |
| 9               | Argentina | 1998           | Cassava                   | 5                                                           |
| 9               | Argentina | 1998           | Cephalopods               | 4                                                           |
| 9               | Argentina | 1998           | Cheese                    | 31                                                          |
| 9               | Argentina | 1998           | Cocoa Beans               | 2                                                           |
| 9               | Argentina | 1998           | Coconuts - Incl Copra     | 1                                                           |
| 9               | Argentina | 1998           | Coffee                    | 3                                                           |
| 9               | Argentina | 1998           | Cottonseed Oil            | 1                                                           |
| 9               | Argentina | 1998           | Demersal Fish             | 20                                                          |
| 9               | Argentina | 1998           | Eggs                      | 20                                                          |
| 9               | Argentina | 1998           | Fats, Animals, Raw        | 9                                                           |
| 9               | Argentina | 1998           | Freshwater Fish           | 2                                                           |
| 9               | Argentina | 1998           | Fruits, Other             | 43                                                          |
| 9               | Argentina | 1998           | Grapefruit                | 15                                                          |

Dietary calcium and zinc deficiency risks are decreasing but remain prevalent

| FAO countrycode | Country   | Reference year | Food item                 | Gross food supply (g capita <sup>-1</sup> d <sup>-1</sup> ) |
|-----------------|-----------|----------------|---------------------------|-------------------------------------------------------------|
| 9               | Argentina | 1998           | Grapes                    | 3                                                           |
| 9               | Argentina | 1998           | Honey                     | 1                                                           |
| 9               | Argentina | 1998           | Lemons, Limes             | 56                                                          |
| 9               | Argentina | 1998           | Maize                     | 19                                                          |
| 9               | Argentina | 1998           | Maize Germ Oil            | 2                                                           |
| 9               | Argentina | 1998           | Meat, Other               | 4                                                           |
| 9               | Argentina | 1998           | Milk, Whole               | 295                                                         |
| 9               | Argentina | 1998           | Molluscs, Other           | 3                                                           |
| 9               | Argentina | 1998           | Mutton & Goat Meat        | 4                                                           |
| 9               | Argentina | 1998           | Nuts                      | 1                                                           |
| 9               | Argentina | 1998           | Oats                      | 3                                                           |
| 9               | Argentina | 1998           | Offals, Edible            | 17                                                          |
| 9               | Argentina | 1998           | Olive Oil                 | 1                                                           |
| 9               | Argentina | 1998           | Olives                    | 2                                                           |
| 9               | Argentina | 1998           | Onions                    | 28                                                          |
| 9               | Argentina | 1998           | Oranges, Mandarines       | 89                                                          |
| 9               | Argentina | 1998           | Peas                      | 1                                                           |
| 9               | Argentina | 1998           | Pelagic Fish              | 2                                                           |
| 9               | Argentina | 1998           | Pigmeat                   | 20                                                          |
| 9               | Argentina | 1998           | Pineapples                | 2                                                           |
| 9               | Argentina | 1998           | Potatoes                  | 209                                                         |
| 9               | Argentina | 1998           | Poultry Meat              | 74                                                          |
| 9               | Argentina | 1998           | Pulses, Other             | 2                                                           |
| 9               | Argentina | 1998           | Rice (Milled Equivalent)  | 12                                                          |
| 9               | Argentina | 1998           | Soyabean Oil              | 6                                                           |
| 9               | Argentina | 1998           | Spices, Other             | 1                                                           |
| 9               | Argentina | 1998           | Sugar, Refined Equivalent | 94                                                          |
| 9               | Argentina | 1998           | Sunflowerseed Oil         | 30                                                          |
| 9               | Argentina | 1998           | Sweet Potatoes            | 22                                                          |
| 9               | Argentina | 1998           | Sweeteners, Other         | 17                                                          |
| 9               | Argentina | 1998           | Tea                       | 19                                                          |
| 9               | Argentina | 1998           | Tomatoes                  | 51                                                          |
| 9               | Argentina | 1998           | Vegetables, Other         | 120                                                         |
| 9               | Argentina | 1998           | Wheat                     | 288                                                         |
| 9               | Argentina | 1998           | Whey                      | 1                                                           |
| 9               | Argentina | 1998           | Wine                      | 96                                                          |
| 9               | Argentina | 1999           | Apples                    | 36                                                          |
| 9               | Argentina | 1999           | Bananas                   | 33                                                          |
| 9               | Argentina | 1999           | Beer                      | 91                                                          |
| 9               | Argentina | 1999           | Beverages, Alcoholic      | 6                                                           |
| 9               | Argentina | 1999           | Bovine Meat               | 165                                                         |
| 9               | Argentina | 1999           | Butter, Ghee              | 3                                                           |
| 9               | Argentina | 1999           | Cassava                   | 5                                                           |
| 9               | Argentina | 1999           | Cephalopods               | 5                                                           |
| 9               | Argentina | 1999           | Cereals, Other            | 1                                                           |
| 9               | Argentina | 1999           | Cheese                    | 32                                                          |
| 9               | Argentina | 1999           | Cocoa Beans               | 2                                                           |
| 9               | Argentina | 1999           | Coconuts - Incl Copra     | 1                                                           |
| 9               | Argentina | 1999           | Coffee                    | 3                                                           |
| 9               | Argentina | 1999           | Cottonseed Oil            | 2                                                           |
| 9               | Argentina | 1999           | Crustaceans               | 1                                                           |
| 9               | Argentina | 1999           | Demersal Fish             | 12                                                          |
| 9               | Argentina | 1999           | Eggs                      | 21                                                          |
| 9               | Argentina | 1999           | Fats, Animals, Raw        | 8                                                           |
| 9               | Argentina | 1999           | Freshwater Fish           | 2                                                           |
| 9               | Argentina | 1999           | Fruits, Other             | 41                                                          |
| 9               | Argentina | 1999           | Grapefruit                | 13                                                          |
| 9               | Argentina | 1999           | Grapes                    | 3                                                           |
| 9               | Argentina | 1999           | Honey                     | 1                                                           |
| 9               | Argentina | 1999           | Lemons, Limes             | 54                                                          |
| 9               | Argentina | 1999           | Maize                     | 24                                                          |
| 9               | Argentina | 1999           | Maize Germ Oil            | 2                                                           |
| 9               | Argentina | 1999           | Meat, Other               | 5                                                           |
| 9               | Argentina | 1999           | Milk, Whole               | 296                                                         |
| 9               | Argentina | 1999           | Molluscs, Other           | 3                                                           |
| 9               | Argentina | 1999           | Mutton & Goat Meat        | 4                                                           |
| 9               | Argentina | 1999           | Nuts                      | 1                                                           |
| 9               | Argentina | 1999           | Oats                      | 4                                                           |
| 9               | Argentina | 1999           | Offals, Edible            | 17                                                          |
| 9               | Argentina | 1999           | Olive Oil                 | 1                                                           |
| 9               | Argentina | 1999           | Olives                    | 2                                                           |
| 9               | Argentina | 1999           | Onions                    | 42                                                          |
| 9               | Argentina | 1999           | Oranges, Mandarines       | 85                                                          |
| 9               | Argentina | 1999           | Peas                      | 1                                                           |
| 9               | Argentina | 1999           | Pelagic Fish              | 4                                                           |
| 9               | Argentina | 1999           | Pigmeat                   | 22                                                          |
| 9               | Argentina | 1999           | Pineapples                | 3                                                           |
| 9               | Argentina | 1999           | Potatoes                  | 167                                                         |
| 9               | Argentina | 1999           | Poultry Meat              | 77                                                          |
| 9               | Argentina | 1999           | Pulses, Other             | 2                                                           |
| 9               | Argentina | 1999           | Rice (Milled Equivalent)  | 16                                                          |
| 9               | Argentina | 1999           | Soyabean Oil              | 6                                                           |
| 9               | Argentina | 1999           | Sugar, Refined Equivalent | 100                                                         |
| 9               | Argentina | 1999           | Sunflowerseed Oil         | 30                                                          |
| 9               | Argentina | 1999           | Sweet Potatoes            | 17                                                          |
| 9               | Argentina | 1999           | Sweeteners, Other         | 21                                                          |
| 9               | Argentina | 1999           | Tea                       | 21                                                          |
| 9               | Argentina | 1999           | Tomatoes                  | 59                                                          |
| 9               | Argentina | 1999           | Vegetables, Other         | 115                                                         |
| 9               | Argentina | 1999           | Wheat                     | 286                                                         |
| 9               | Argentina | 1999           | Wine                      | 95                                                          |
| 9               | Argentina | 2000           | Apples                    | 39                                                          |
| 9               | Argentina | 2000           | Bananas                   | 36                                                          |
| 9               | Argentina | 2000           | Beer                      | 91                                                          |
| 9               | Argentina | 2000           | Beverages, Alcoholic      | 5                                                           |
| 9               | Argentina | 2000           | Bovine Meat               | 162                                                         |
| 9               | Argentina | 2000           | Butter, Ghee              | 3                                                           |

Dietary calcium and zinc deficiency risks are decreasing but remain prevalent

| FAO countrycode | Country   | Reference year | Food item                 | Gross food supply (g capita <sup>-1</sup> d <sup>-1</sup> ) |
|-----------------|-----------|----------------|---------------------------|-------------------------------------------------------------|
| 9               | Argentina | 2000           | Cassava                   | 5                                                           |
| 9               | Argentina | 2000           | Cephalopods               | 1                                                           |
| 9               | Argentina | 2000           | Cereals, Other            | 1                                                           |
| 9               | Argentina | 2000           | Cheese                    | 33                                                          |
| 9               | Argentina | 2000           | Cocoa Beans               | 2                                                           |
| 9               | Argentina | 2000           | Coconuts - Incl Copra     | 1                                                           |
| 9               | Argentina | 2000           | Coffee                    | 3                                                           |
| 9               | Argentina | 2000           | Cottonseed Oil            | 1                                                           |
| 9               | Argentina | 2000           | Crustaceans               | 1                                                           |
| 9               | Argentina | 2000           | Demersal Fish             | 11                                                          |
| 9               | Argentina | 2000           | Eggs                      | 21                                                          |
| 9               | Argentina | 2000           | Fats, Animals, Raw        | 7                                                           |
| 9               | Argentina | 2000           | Freshwater Fish           | 3                                                           |
| 9               | Argentina | 2000           | Fruits, Other             | 38                                                          |
| 9               | Argentina | 2000           | Grapefruit                | 15                                                          |
| 9               | Argentina | 2000           | Grapes                    | 3                                                           |
| 9               | Argentina | 2000           | Lemons, Limes             | 61                                                          |
| 9               | Argentina | 2000           | Maize                     | 30                                                          |
| 9               | Argentina | 2000           | Maize Germ Oil            | 1                                                           |
| 9               | Argentina | 2000           | Marine Fish, Other        | 1                                                           |
| 9               | Argentina | 2000           | Meat, Other               | 5                                                           |
| 9               | Argentina | 2000           | Milk, Whole               | 295                                                         |
| 9               | Argentina | 2000           | Molluscs, Other           | 3                                                           |
| 9               | Argentina | 2000           | Mutton & Goat Meat        | 4                                                           |
| 9               | Argentina | 2000           | Nuts                      | 1                                                           |
| 9               | Argentina | 2000           | Oats                      | 4                                                           |
| 9               | Argentina | 2000           | Offals, Edible            | 17                                                          |
| 9               | Argentina | 2000           | Olive Oil                 | 1                                                           |
| 9               | Argentina | 2000           | Olives                    | 3                                                           |
| 9               | Argentina | 2000           | Onions                    | 33                                                          |
| 9               | Argentina | 2000           | Oranges, Mandarines       | 107                                                         |
| 9               | Argentina | 2000           | Peas                      | 1                                                           |
| 9               | Argentina | 2000           | Pelagic Fish              | 4                                                           |
| 9               | Argentina | 2000           | Pigmeat                   | 22                                                          |
| 9               | Argentina | 2000           | Pineapples                | 3                                                           |
| 9               | Argentina | 2000           | Potatoes                  | 132                                                         |
| 9               | Argentina | 2000           | Poultry Meat              | 76                                                          |
| 9               | Argentina | 2000           | Pulses, Other             | 2                                                           |
| 9               | Argentina | 2000           | Rice (Milled Equivalent)  | 14                                                          |
| 9               | Argentina | 2000           | Soyabean Oil              | 6                                                           |
| 9               | Argentina | 2000           | Sugar, Refined Equivalent | 101                                                         |
| 9               | Argentina | 2000           | Sunflowerseed Oil         | 29                                                          |
| 9               | Argentina | 2000           | Sweet Potatoes            | 18                                                          |
| 9               | Argentina | 2000           | Sweeteners, Other         | 19                                                          |
| 9               | Argentina | 2000           | Tea                       | 20                                                          |
| 9               | Argentina | 2000           | Tomatoes                  | 55                                                          |
| 9               | Argentina | 2000           | Vegetables, Other         | 109                                                         |
| 9               | Argentina | 2000           | Wheat                     | 304                                                         |
| 9               | Argentina | 2000           | Whey                      | 1                                                           |
| 9               | Argentina | 2000           | Wine                      | 93                                                          |
| 9               | Argentina | 2001           | Apples                    | 57                                                          |
| 9               | Argentina | 2001           | Bananas                   | 36                                                          |
| 9               | Argentina | 2001           | Beer                      | 91                                                          |
| 9               | Argentina | 2001           | Beverages, Alcoholic      | 4                                                           |
| 9               | Argentina | 2001           | Bovine Meat               | 156                                                         |
| 9               | Argentina | 2001           | Butter, Ghee              | 4                                                           |
| 9               | Argentina | 2001           | Cassava                   | 5                                                           |
| 9               | Argentina | 2001           | Cephalopods               | 6                                                           |
| 9               | Argentina | 2001           | Cereals, Other            | 1                                                           |
| 9               | Argentina | 2001           | Cheese                    | 30                                                          |
| 9               | Argentina | 2001           | Cocoa Beans               | 2                                                           |
| 9               | Argentina | 2001           | Coconuts - Incl Copra     | 1                                                           |
| 9               | Argentina | 2001           | Coffee                    | 3                                                           |
| 9               | Argentina | 2001           | Cottonseed Oil            | 1                                                           |
| 9               | Argentina | 2001           | Crustaceans               | 1                                                           |
| 9               | Argentina | 2001           | Demersal Fish             | 12                                                          |
| 9               | Argentina | 2001           | Eggs                      | 19                                                          |
| 9               | Argentina | 2001           | Fats, Animals, Raw        | 7                                                           |
| 9               | Argentina | 2001           | Freshwater Fish           | 1                                                           |
| 9               | Argentina | 2001           | Fruits, Other             | 42                                                          |
| 9               | Argentina | 2001           | Grapefruit                | 11                                                          |
| 9               | Argentina | 2001           | Grapes                    | 3                                                           |
| 9               | Argentina | 2001           | Honey                     | 1                                                           |
| 9               | Argentina | 2001           | Lemons, Limes             | 60                                                          |
| 9               | Argentina | 2001           | Maize                     | 29                                                          |
| 9               | Argentina | 2001           | Maize Germ Oil            | 2                                                           |
| 9               | Argentina | 2001           | Marine Fish, Other        | 1                                                           |
| 9               | Argentina | 2001           | Meat, Other               | 4                                                           |
| 9               | Argentina | 2001           | Milk, Whole               | 267                                                         |
| 9               | Argentina | 2001           | Molluscs, Other           | 4                                                           |
| 9               | Argentina | 2001           | Mutton & Goat Meat        | 4                                                           |
| 9               | Argentina | 2001           | Nuts                      | 1                                                           |
| 9               | Argentina | 2001           | Oats                      | 5                                                           |
| 9               | Argentina | 2001           | Offals, Edible            | 17                                                          |
| 9               | Argentina | 2001           | Olive Oil                 | 1                                                           |
| 9               | Argentina | 2001           | Olives                    | 3                                                           |
| 9               | Argentina | 2001           | Onions                    | 32                                                          |
| 9               | Argentina | 2001           | Oranges, Mandarines       | 109                                                         |
| 9               | Argentina | 2001           | Peas                      | 1                                                           |
| 9               | Argentina | 2001           | Pelagic Fish              | 4                                                           |
| 9               | Argentina | 2001           | Pigmeat                   | 20                                                          |
| 9               | Argentina | 2001           | Pineapples                | 3                                                           |
| 9               | Argentina | 2001           | Potatoes                  | 147                                                         |
| 9               | Argentina | 2001           | Poultry Meat              | 73                                                          |
| 9               | Argentina | 2001           | Pulses, Other             | 2                                                           |
| 9               | Argentina | 2001           | Rice (Milled Equivalent)  | 17                                                          |
| 9               | Argentina | 2001           | Soyabean Oil              | 7                                                           |

Dietary calcium and zinc deficiency risks are decreasing but remain prevalent

| FAO countrycode | Country   | Reference year | Food item                 | Gross food supply (g capita <sup>-1</sup> d <sup>-1</sup> ) |
|-----------------|-----------|----------------|---------------------------|-------------------------------------------------------------|
| 9               | Argentina | 2001           | Sugar, Refined Equivalent | 103                                                         |
| 9               | Argentina | 2001           | Sunflowerseed Oil         | 30                                                          |
| 9               | Argentina | 2001           | Sweet Potatoes            | 18                                                          |
| 9               | Argentina | 2001           | Sweeteners, Other         | 19                                                          |
| 9               | Argentina | 2001           | Tea                       | 21                                                          |
| 9               | Argentina | 2001           | Tomatoes                  | 56                                                          |
| 9               | Argentina | 2001           | Vegetables, Other         | 109                                                         |
| 9               | Argentina | 2001           | Wheat                     | 295                                                         |
| 9               | Argentina | 2001           | Wine                      | 89                                                          |
| 9               | Argentina | 2002           | Apples                    | 51                                                          |
| 9               | Argentina | 2002           | Bananas                   | 28                                                          |
| 9               | Argentina | 2002           | Beer                      | 87                                                          |
| 9               | Argentina | 2002           | Beverages, Alcoholic      | 3                                                           |
| 9               | Argentina | 2002           | Bovine Meat               | 145                                                         |
| 9               | Argentina | 2002           | Butter, Ghee              | 4                                                           |
| 9               | Argentina | 2002           | Cassava                   | 5                                                           |
| 9               | Argentina | 2002           | Cephalopods               | 5                                                           |
| 9               | Argentina | 2002           | Cereals, Other            | 1                                                           |
| 9               | Argentina | 2002           | Cheese                    | 25                                                          |
| 9               | Argentina | 2002           | Cocoa Beans               | 1                                                           |
| 9               | Argentina | 2002           | Coffee                    | 2                                                           |
| 9               | Argentina | 2002           | Cottonseed Oil            | 1                                                           |
| 9               | Argentina | 2002           | Demersal Fish             | 8                                                           |
| 9               | Argentina | 2002           | Eggs                      | 16                                                          |
| 9               | Argentina | 2002           | Fats, Animals, Raw        | 6                                                           |
| 9               | Argentina | 2002           | Freshwater Fish           | 1                                                           |
| 9               | Argentina | 2002           | Fruits, Other             | 28                                                          |
| 9               | Argentina | 2002           | Grapefruit                | 10                                                          |
| 9               | Argentina | 2002           | Grapes                    | 3                                                           |
| 9               | Argentina | 2002           | Lemons, Limes             | 31                                                          |
| 9               | Argentina | 2002           | Maize                     | 29                                                          |
| 9               | Argentina | 2002           | Maize Germ Oil            | 2                                                           |
| 9               | Argentina | 2002           | Meat, Other               | 4                                                           |
| 9               | Argentina | 2002           | Milk, Whole               | 211                                                         |
| 9               | Argentina | 2002           | Molluscs, Other           | 2                                                           |
| 9               | Argentina | 2002           | Mutton & Goat Meat        | 4                                                           |
| 9               | Argentina | 2002           | Nuts                      | 1                                                           |
| 9               | Argentina | 2002           | Oats                      | 3                                                           |
| 9               | Argentina | 2002           | Offals, Edible            | 16                                                          |
| 9               | Argentina | 2002           | Olives                    | 1                                                           |
| 9               | Argentina | 2002           | Onions                    | 35                                                          |
| 9               | Argentina | 2002           | Oranges, Mandarines       | 82                                                          |
| 9               | Argentina | 2002           | Peas                      | 1                                                           |
| 9               | Argentina | 2002           | Pelagic Fish              | 2                                                           |
| 9               | Argentina | 2002           | Pig meat                  | 13                                                          |
| 9               | Argentina | 2002           | Pineapples                | 1                                                           |
| 9               | Argentina | 2002           | Potatoes                  | 131                                                         |
| 9               | Argentina | 2002           | Poultry Meat              | 52                                                          |
| 9               | Argentina | 2002           | Pulses, Other             | 1                                                           |
| 9               | Argentina | 2002           | Rice (Milled Equivalent)  | 15                                                          |
| 9               | Argentina | 2002           | Soyabean Oil              | 5                                                           |
| 9               | Argentina | 2002           | Sugar, Refined Equivalent | 101                                                         |
| 9               | Argentina | 2002           | Sunflowerseed Oil         | 28                                                          |
| 9               | Argentina | 2002           | Sweet Potatoes            | 19                                                          |
| 9               | Argentina | 2002           | Sweeteners, Other         | 19                                                          |
| 9               | Argentina | 2002           | Tea                       | 19                                                          |
| 9               | Argentina | 2002           | Tomatoes                  | 50                                                          |
| 9               | Argentina | 2002           | Vegetables, Other         | 111                                                         |
| 9               | Argentina | 2002           | Wheat                     | 302                                                         |
| 9               | Argentina | 2002           | Whey                      | 1                                                           |
| 9               | Argentina | 2002           | Wine                      | 87                                                          |
| 9               | Argentina | 2003           | Apples                    | 51                                                          |
| 9               | Argentina | 2003           | Bananas                   | 32                                                          |
| 9               | Argentina | 2003           | Beer                      | 93                                                          |
| 9               | Argentina | 2003           | Beverages, Alcoholic      | 3                                                           |
| 9               | Argentina | 2003           | Bovine Meat               | 152                                                         |
| 9               | Argentina | 2003           | Butter, Ghee              | 4                                                           |
| 9               | Argentina | 2003           | Cassava                   | 5                                                           |
| 9               | Argentina | 2003           | Cephalopods               | 4                                                           |
| 9               | Argentina | 2003           | Cereals, Other            | 1                                                           |
| 9               | Argentina | 2003           | Cheese                    | 24                                                          |
| 9               | Argentina | 2003           | Cocoa Beans               | 1                                                           |
| 9               | Argentina | 2003           | Coconuts - Incl Copra     | 1                                                           |
| 9               | Argentina | 2003           | Coffee                    | 3                                                           |
| 9               | Argentina | 2003           | Crustaceans               | 1                                                           |
| 9               | Argentina | 2003           | Demersal Fish             | 9                                                           |
| 9               | Argentina | 2003           | Eggs                      | 19                                                          |
| 9               | Argentina | 2003           | Fats, Animals, Raw        | 6                                                           |
| 9               | Argentina | 2003           | Freshwater Fish           | 2                                                           |
| 9               | Argentina | 2003           | Fruits, Other             | 35                                                          |
| 9               | Argentina | 2003           | Grapefruit                | 6                                                           |
| 9               | Argentina | 2003           | Grapes                    | 3                                                           |
| 9               | Argentina | 2003           | Lemons, Limes             | 27                                                          |
| 9               | Argentina | 2003           | Maize                     | 29                                                          |
| 9               | Argentina | 2003           | Maize Germ Oil            | 1                                                           |
| 9               | Argentina | 2003           | Meat, Other               | 5                                                           |
| 9               | Argentina | 2003           | Milk, Whole               | 207                                                         |
| 9               | Argentina | 2003           | Molluscs, Other           | 2                                                           |
| 9               | Argentina | 2003           | Mutton & Goat Meat        | 4                                                           |
| 9               | Argentina | 2003           | Nuts                      | 1                                                           |
| 9               | Argentina | 2003           | Oats                      | 3                                                           |
| 9               | Argentina | 2003           | Offals, Edible            | 17                                                          |
| 9               | Argentina | 2003           | Olives                    | 1                                                           |
| 9               | Argentina | 2003           | Onions                    | 32                                                          |
| 9               | Argentina | 2003           | Oranges, Mandarines       | 75                                                          |
| 9               | Argentina | 2003           | Peas                      | 1                                                           |
| 9               | Argentina | 2003           | Pelagic Fish              | 2                                                           |

Dietary calcium and zinc deficiency risks are decreasing but remain prevalent

| FAO countrycode | Country   | Reference year | Food item                 | Gross food supply (g capita <sup>-1</sup> d <sup>-1</sup> ) |
|-----------------|-----------|----------------|---------------------------|-------------------------------------------------------------|
| 9               | Argentina | 2003           | Pigmeat                   | 14                                                          |
| 9               | Argentina | 2003           | Pineapples                | 2                                                           |
| 9               | Argentina | 2003           | Potatoes                  | 120                                                         |
| 9               | Argentina | 2003           | Poultry Meat              | 54                                                          |
| 9               | Argentina | 2003           | Pulses, Other             | 2                                                           |
| 9               | Argentina | 2003           | Rice (Milled Equivalent)  | 20                                                          |
| 9               | Argentina | 2003           | Soyabean Oil              | 5                                                           |
| 9               | Argentina | 2003           | Sugar, Refined Equivalent | 101                                                         |
| 9               | Argentina | 2003           | Sunflowerseed Oil         | 28                                                          |
| 9               | Argentina | 2003           | Sweet Potatoes            | 19                                                          |
| 9               | Argentina | 2003           | Sweeteners, Other         | 19                                                          |
| 9               | Argentina | 2003           | Tea                       | 18                                                          |
| 9               | Argentina | 2003           | Tomatoes                  | 46                                                          |
| 9               | Argentina | 2003           | Vegetables, Other         | 110                                                         |
| 9               | Argentina | 2003           | Wheat                     | 310                                                         |
| 9               | Argentina | 2003           | Whey                      | 1                                                           |
| 9               | Argentina | 2003           | Wine                      | 89                                                          |
| 9               | Argentina | 2004           | Apples                    | 54                                                          |
| 9               | Argentina | 2004           | Bananas                   | 33                                                          |
| 9               | Argentina | 2004           | Beer                      | 91                                                          |
| 9               | Argentina | 2004           | Beverages, Alcoholic      | 4                                                           |
| 9               | Argentina | 2004           | Bovine Meat               | 155                                                         |
| 9               | Argentina | 2004           | Butter, Ghee              | 4                                                           |
| 9               | Argentina | 2004           | Cassava                   | 5                                                           |
| 9               | Argentina | 2004           | Cephalopods               | 2                                                           |
| 9               | Argentina | 2004           | Cereals, Other            | 1                                                           |
| 9               | Argentina | 2004           | Cheese                    | 23                                                          |
| 9               | Argentina | 2004           | Cocoa Beans               | 1                                                           |
| 9               | Argentina | 2004           | Coconuts - Incl Copra     | 1                                                           |
| 9               | Argentina | 2004           | Coffee                    | 3                                                           |
| 9               | Argentina | 2004           | Cottonseed Oil            | 1                                                           |
| 9               | Argentina | 2004           | Demersal Fish             | 12                                                          |
| 9               | Argentina | 2004           | Eggs                      | 22                                                          |
| 9               | Argentina | 2004           | Fats, Animals, Raw        | 6                                                           |
| 9               | Argentina | 2004           | Fruits, Other             | 37                                                          |
| 9               | Argentina | 2004           | Grapefruit                | 7                                                           |
| 9               | Argentina | 2004           | Grapes                    | 3                                                           |
| 9               | Argentina | 2004           | Honey                     | 1                                                           |
| 9               | Argentina | 2004           | Lemons, Limes             | 33                                                          |
| 9               | Argentina | 2004           | Maize                     | 28                                                          |
| 9               | Argentina | 2004           | Maize Germ Oil            | 1                                                           |
| 9               | Argentina | 2004           | Meat, Other               | 4                                                           |
| 9               | Argentina | 2004           | Milk, Whole               | 141                                                         |
| 9               | Argentina | 2004           | Molluscs, Other           | 2                                                           |
| 9               | Argentina | 2004           | Mutton & Goat Meat        | 3                                                           |
| 9               | Argentina | 2004           | Nuts                      | 1                                                           |
| 9               | Argentina | 2004           | Oats                      | 3                                                           |
| 9               | Argentina | 2004           | Offals, Edible            | 16                                                          |
| 9               | Argentina | 2004           | Olive Oil                 | 1                                                           |
| 9               | Argentina | 2004           | Olives                    | 1                                                           |
| 9               | Argentina | 2004           | Onions                    | 33                                                          |
| 9               | Argentina | 2004           | Oranges, Mandarines       | 64                                                          |
| 9               | Argentina | 2004           | Pelagic Fish              | 3                                                           |
| 9               | Argentina | 2004           | Pigmeat                   | 14                                                          |
| 9               | Argentina | 2004           | Pineapples                | 2                                                           |
| 9               | Argentina | 2004           | Potatoes                  | 110                                                         |
| 9               | Argentina | 2004           | Poultry Meat              | 60                                                          |
| 9               | Argentina | 2004           | Pulses, Other             | 2                                                           |
| 9               | Argentina | 2004           | Rice (Milled Equivalent)  | 22                                                          |
| 9               | Argentina | 2004           | Soyabean Oil              | 5                                                           |
| 9               | Argentina | 2004           | Sugar, Refined Equivalent | 104                                                         |
| 9               | Argentina | 2004           | Sunflowerseed Oil         | 29                                                          |
| 9               | Argentina | 2004           | Sweet Potatoes            | 23                                                          |
| 9               | Argentina | 2004           | Sweeteners, Other         | 18                                                          |
| 9               | Argentina | 2004           | Tea                       | 16                                                          |
| 9               | Argentina | 2004           | Tomatoes                  | 43                                                          |
| 9               | Argentina | 2004           | Vegetables, Other         | 107                                                         |
| 9               | Argentina | 2004           | Wheat                     | 299                                                         |
| 9               | Argentina | 2004           | Whey                      | 2                                                           |
| 9               | Argentina | 2004           | Wine                      | 80                                                          |
| 9               | Argentina | 2005           | Apples                    | 38                                                          |
| 9               | Argentina | 2005           | Bananas                   | 33                                                          |
| 9               | Argentina | 2005           | Beer                      | 95                                                          |
| 9               | Argentina | 2005           | Beverages, Alcoholic      | 4                                                           |
| 9               | Argentina | 2005           | Bovine Meat               | 154                                                         |
| 9               | Argentina | 2005           | Butter, Ghee              | 4                                                           |
| 9               | Argentina | 2005           | Cassava                   | 6                                                           |
| 9               | Argentina | 2005           | Cephalopods               | 4                                                           |
| 9               | Argentina | 2005           | Cereals, Other            | 1                                                           |
| 9               | Argentina | 2005           | Cheese                    | 22                                                          |
| 9               | Argentina | 2005           | Cocoa Beans               | 2                                                           |
| 9               | Argentina | 2005           | Coconuts - Incl Copra     | 1                                                           |
| 9               | Argentina | 2005           | Coffee                    | 3                                                           |
| 9               | Argentina | 2005           | Cottonseed Oil            | 1                                                           |
| 9               | Argentina | 2005           | Demersal Fish             | 9                                                           |
| 9               | Argentina | 2005           | Eggs                      | 23                                                          |
| 9               | Argentina | 2005           | Fats, Animals, Raw        | 7                                                           |
| 9               | Argentina | 2005           | Fruits, Other             | 36                                                          |
| 9               | Argentina | 2005           | Grapefruit                | 10                                                          |
| 9               | Argentina | 2005           | Grapes                    | 4                                                           |
| 9               | Argentina | 2005           | Lemons, Limes             | 28                                                          |
| 9               | Argentina | 2005           | Maize                     | 28                                                          |
| 9               | Argentina | 2005           | Maize Germ Oil            | 1                                                           |
| 9               | Argentina | 2005           | Meat, Other               | 4                                                           |
| 9               | Argentina | 2005           | Milk, Whole               | 281                                                         |
| 9               | Argentina | 2005           | Molluscs, Other           | 2                                                           |
| 9               | Argentina | 2005           | Mutton & Goat Meat        | 4                                                           |

Dietary calcium and zinc deficiency risks are decreasing but remain prevalent

| FAO countrycode | Country   | Reference year | Food item                 | Gross food supply (g capita <sup>-1</sup> d <sup>-1</sup> ) |
|-----------------|-----------|----------------|---------------------------|-------------------------------------------------------------|
| 9               | Argentina | 2005           | Nuts                      | 1                                                           |
| 9               | Argentina | 2005           | Oats                      | 3                                                           |
| 9               | Argentina | 2005           | Offals, Edible            | 17                                                          |
| 9               | Argentina | 2005           | Olive Oil                 | 1                                                           |
| 9               | Argentina | 2005           | Olives                    | 1                                                           |
| 9               | Argentina | 2005           | Onions                    | 38                                                          |
| 9               | Argentina | 2005           | Oranges, Mandarines       | 61                                                          |
| 9               | Argentina | 2005           | Pelagic Fish              | 3                                                           |
| 9               | Argentina | 2005           | Pigmeat                   | 15                                                          |
| 9               | Argentina | 2005           | Pineapples                | 2                                                           |
| 9               | Argentina | 2005           | Potatoes                  | 93                                                          |
| 9               | Argentina | 2005           | Poultry Meat              | 67                                                          |
| 9               | Argentina | 2005           | Pulses, Other             | 2                                                           |
| 9               | Argentina | 2005           | Rice (Milled Equivalent)  | 17                                                          |
| 9               | Argentina | 2005           | Soyabean Oil              | 7                                                           |
| 9               | Argentina | 2005           | Sugar, Refined Equivalent | 108                                                         |
| 9               | Argentina | 2005           | Sunflowerseed Oil         | 29                                                          |
| 9               | Argentina | 2005           | Sweet Potatoes            | 25                                                          |
| 9               | Argentina | 2005           | Sweeteners, Other         | 18                                                          |
| 9               | Argentina | 2005           | Tea                       | 17                                                          |
| 9               | Argentina | 2005           | Tomatoes                  | 45                                                          |
| 9               | Argentina | 2005           | Vegetables, Other         | 109                                                         |
| 9               | Argentina | 2005           | Wheat                     | 295                                                         |
| 9               | Argentina | 2005           | Whey                      | 4                                                           |
| 9               | Argentina | 2005           | Wine                      | 78                                                          |
| 9               | Argentina | 2006           | Apples                    | 34                                                          |
| 9               | Argentina | 2006           | Bananas                   | 31                                                          |
| 9               | Argentina | 2006           | Beans                     | 5                                                           |
| 9               | Argentina | 2006           | Beer                      | 97                                                          |
| 9               | Argentina | 2006           | Beverages, Alcoholic      | 4                                                           |
| 9               | Argentina | 2006           | Bovine Meat               | 152                                                         |
| 9               | Argentina | 2006           | Butter, Ghee              | 3                                                           |
| 9               | Argentina | 2006           | Cassava                   | 5                                                           |
| 9               | Argentina | 2006           | Cephalopods               | 8                                                           |
| 9               | Argentina | 2006           | Cereals, Other            | 1                                                           |
| 9               | Argentina | 2006           | Cheese                    | 21                                                          |
| 9               | Argentina | 2006           | Cocoa Beans               | 2                                                           |
| 9               | Argentina | 2006           | Coconuts - Incl Copra     | 1                                                           |
| 9               | Argentina | 2006           | Coffee                    | 3                                                           |
| 9               | Argentina | 2006           | Demersal Fish             | 8                                                           |
| 9               | Argentina | 2006           | Eggs                      | 25                                                          |
| 9               | Argentina | 2006           | Fats, Animals, Raw        | 6                                                           |
| 9               | Argentina | 2006           | Fruits, Other             | 32                                                          |
| 9               | Argentina | 2006           | Grapefruit                | 11                                                          |
| 9               | Argentina | 2006           | Grapes                    | 3                                                           |
| 9               | Argentina | 2006           | Lemons, Limes             | 33                                                          |
| 9               | Argentina | 2006           | Maize                     | 28                                                          |
| 9               | Argentina | 2006           | Maize Germ Oil            | 1                                                           |
| 9               | Argentina | 2006           | Meat, Other               | 4                                                           |
| 9               | Argentina | 2006           | Milk, Whole               | 283                                                         |
| 9               | Argentina | 2006           | Molluscs, Other           | 3                                                           |
| 9               | Argentina | 2006           | Mutton & Goat Meat        | 4                                                           |
| 9               | Argentina | 2006           | Nuts                      | 1                                                           |
| 9               | Argentina | 2006           | Oats                      | 3                                                           |
| 9               | Argentina | 2006           | Offals, Edible            | 15                                                          |
| 9               | Argentina | 2006           | Onions                    | 30                                                          |
| 9               | Argentina | 2006           | Oranges, Mandarines       | 67                                                          |
| 9               | Argentina | 2006           | Pelagic Fish              | 4                                                           |
| 9               | Argentina | 2006           | Pigmeat                   | 18                                                          |
| 9               | Argentina | 2006           | Pineapples                | 2                                                           |
| 9               | Argentina | 2006           | Potatoes                  | 97                                                          |
| 9               | Argentina | 2006           | Poultry Meat              | 76                                                          |
| 9               | Argentina | 2006           | Pulses, Other             | 1                                                           |
| 9               | Argentina | 2006           | Rice (Milled Equivalent)  | 18                                                          |
| 9               | Argentina | 2006           | Soyabean Oil              | 7                                                           |
| 9               | Argentina | 2006           | Sugar, Refined Equivalent | 105                                                         |
| 9               | Argentina | 2006           | Sunflowerseed Oil         | 29                                                          |
| 9               | Argentina | 2006           | Sweet Potatoes            | 21                                                          |
| 9               | Argentina | 2006           | Sweeteners, Other         | 18                                                          |
| 9               | Argentina | 2006           | Tea                       | 18                                                          |
| 9               | Argentina | 2006           | Tomatoes                  | 44                                                          |
| 9               | Argentina | 2006           | Vegetables, Other         | 103                                                         |
| 9               | Argentina | 2006           | Wheat                     | 289                                                         |
| 9               | Argentina | 2006           | Wine                      | 78                                                          |
| 9               | Argentina | 2007           | Apples                    | 25                                                          |
| 9               | Argentina | 2007           | Bananas                   | 32                                                          |
| 9               | Argentina | 2007           | Beans                     | 2                                                           |
| 9               | Argentina | 2007           | Beer                      | 99                                                          |
| 9               | Argentina | 2007           | Beverages, Alcoholic      | 5                                                           |
| 9               | Argentina | 2007           | Bovine Meat               | 151                                                         |
| 9               | Argentina | 2007           | Butter, Ghee              | 3                                                           |
| 9               | Argentina | 2007           | Cassava                   | 5                                                           |
| 9               | Argentina | 2007           | Cephalopods               | 6                                                           |
| 9               | Argentina | 2007           | Cereals, Other            | 1                                                           |
| 9               | Argentina | 2007           | Cheese                    | 22                                                          |
| 9               | Argentina | 2007           | Cocoa Beans               | 2                                                           |
| 9               | Argentina | 2007           | Coconuts - Incl Copra     | 1                                                           |
| 9               | Argentina | 2007           | Coffee                    | 3                                                           |
| 9               | Argentina | 2007           | Cottonseed Oil            | 1                                                           |
| 9               | Argentina | 2007           | Demersal Fish             | 6                                                           |
| 9               | Argentina | 2007           | Eggs                      | 26                                                          |
| 9               | Argentina | 2007           | Fats, Animals, Raw        | 6                                                           |
| 9               | Argentina | 2007           | Fruits, Other             | 27                                                          |
| 9               | Argentina | 2007           | Grapefruit                | 10                                                          |
| 9               | Argentina | 2007           | Grapes                    | 4                                                           |
| 9               | Argentina | 2007           | Lemons, Limes             | 28                                                          |
| 9               | Argentina | 2007           | Maize                     | 27                                                          |

Dietary calcium and zinc deficiency risks are decreasing but remain prevalent

| FAO countrycode | Country   | Reference year | Food item                 | Gross food supply (g capita <sup>-1</sup> d <sup>-1</sup> ) |
|-----------------|-----------|----------------|---------------------------|-------------------------------------------------------------|
| 9               | Argentina | 2007           | Maize Germ Oil            | 1                                                           |
| 9               | Argentina | 2007           | Meat, Other               | 4                                                           |
| 9               | Argentina | 2007           | Milk, Whole               | 306                                                         |
| 9               | Argentina | 2007           | Molluscs, Other           | 2                                                           |
| 9               | Argentina | 2007           | Mutton & Goat Meat        | 4                                                           |
| 9               | Argentina | 2007           | Nuts                      | 1                                                           |
| 9               | Argentina | 2007           | Oats                      | 3                                                           |
| 9               | Argentina | 2007           | Offals, Edible            | 14                                                          |
| 9               | Argentina | 2007           | Onions                    | 34                                                          |
| 9               | Argentina | 2007           | Oranges, Mandarines       | 52                                                          |
| 9               | Argentina | 2007           | Pelagic Fish              | 5                                                           |
| 9               | Argentina | 2007           | Pigmeat                   | 19                                                          |
| 9               | Argentina | 2007           | Pineapples                | 2                                                           |
| 9               | Argentina | 2007           | Potatoes                  | 98                                                          |
| 9               | Argentina | 2007           | Poultry Meat              | 79                                                          |
| 9               | Argentina | 2007           | Pulses, Other             | 1                                                           |
| 9               | Argentina | 2007           | Rape and Mustard Oil      | 1                                                           |
| 9               | Argentina | 2007           | Rice (Milled Equivalent)  | 19                                                          |
| 9               | Argentina | 2007           | Soyabean Oil              | 7                                                           |
| 9               | Argentina | 2007           | Sugar, Refined Equivalent | 105                                                         |
| 9               | Argentina | 2007           | Sunflowerseed Oil         | 29                                                          |
| 9               | Argentina | 2007           | Sweet Potatoes            | 22                                                          |
| 9               | Argentina | 2007           | Sweeteners, Other         | 18                                                          |
| 9               | Argentina | 2007           | Tea                       | 18                                                          |
| 9               | Argentina | 2007           | Tomatoes                  | 47                                                          |
| 9               | Argentina | 2007           | Vegetables, Other         | 104                                                         |
| 9               | Argentina | 2007           | Wheat                     | 291                                                         |
| 9               | Argentina | 2007           | Whey                      | 4                                                           |
| 9               | Argentina | 2007           | Wine                      | 78                                                          |
| 9               | Argentina | 2008           | Apples                    | 30                                                          |
| 9               | Argentina | 2008           | Bananas                   | 34                                                          |
| 9               | Argentina | 2008           | Beans                     | 2                                                           |
| 9               | Argentina | 2008           | Beer                      | 117                                                         |
| 9               | Argentina | 2008           | Beverages, Alcoholic      | 5                                                           |
| 9               | Argentina | 2008           | Bovine Meat               | 150                                                         |
| 9               | Argentina | 2008           | Butter, Ghee              | 3                                                           |
| 9               | Argentina | 2008           | Cassava                   | 5                                                           |
| 9               | Argentina | 2008           | Cephalopods               | 6                                                           |
| 9               | Argentina | 2008           | Cereals, Other            | 1                                                           |
| 9               | Argentina | 2008           | Cheese                    | 32                                                          |
| 9               | Argentina | 2008           | Cocoa Beans               | 2                                                           |
| 9               | Argentina | 2008           | Coconuts - Incl Copra     | 1                                                           |
| 9               | Argentina | 2008           | Coffee                    | 3                                                           |
| 9               | Argentina | 2008           | Demersal Fish             | 9                                                           |
| 9               | Argentina | 2008           | Eggs                      | 27                                                          |
| 9               | Argentina | 2008           | Fats, Animals, Raw        | 5                                                           |
| 9               | Argentina | 2008           | Fruits, Other             | 34                                                          |
| 9               | Argentina | 2008           | Grapefruit                | 11                                                          |
| 9               | Argentina | 2008           | Grapes                    | 3                                                           |
| 9               | Argentina | 2008           | Lemons, Limes             | 26                                                          |
| 9               | Argentina | 2008           | Maize                     | 27                                                          |
| 9               | Argentina | 2008           | Maize Germ Oil            | 1                                                           |
| 9               | Argentina | 2008           | Meat, Other               | 3                                                           |
| 9               | Argentina | 2008           | Milk, Whole               | 246                                                         |
| 9               | Argentina | 2008           | Molluscs, Other           | 3                                                           |
| 9               | Argentina | 2008           | Mutton & Goat Meat        | 3                                                           |
| 9               | Argentina | 2008           | Nuts                      | 1                                                           |
| 9               | Argentina | 2008           | Oats                      | 2                                                           |
| 9               | Argentina | 2008           | Offals, Edible            | 14                                                          |
| 9               | Argentina | 2008           | Onions                    | 32                                                          |
| 9               | Argentina | 2008           | Oranges, Mandarines       | 66                                                          |
| 9               | Argentina | 2008           | Pelagic Fish              | 3                                                           |
| 9               | Argentina | 2008           | Pigmeat                   | 21                                                          |
| 9               | Argentina | 2008           | Pineapples                | 2                                                           |
| 9               | Argentina | 2008           | Potatoes                  | 93                                                          |
| 9               | Argentina | 2008           | Poultry Meat              | 86                                                          |
| 9               | Argentina | 2008           | Pulses, Other             | 1                                                           |
| 9               | Argentina | 2008           | Rice (Milled Equivalent)  | 22                                                          |
| 9               | Argentina | 2008           | Soyabean Oil              | 7                                                           |
| 9               | Argentina | 2008           | Sugar, Refined Equivalent | 104                                                         |
| 9               | Argentina | 2008           | Sunflowerseed Oil         | 29                                                          |
| 9               | Argentina | 2008           | Sweet Potatoes            | 22                                                          |
| 9               | Argentina | 2008           | Sweeteners, Other         | 18                                                          |
| 9               | Argentina | 2008           | Tea                       | 14                                                          |
| 9               | Argentina | 2008           | Tomatoes                  | 47                                                          |
| 9               | Argentina | 2008           | Vegetables, Other         | 104                                                         |
| 9               | Argentina | 2008           | Wheat                     | 288                                                         |
| 9               | Argentina | 2008           | Whey                      | 4                                                           |
| 9               | Argentina | 2008           | Wine                      | 74                                                          |
| 9               | Argentina | 2009           | Apples                    | 32                                                          |
| 9               | Argentina | 2009           | Bananas                   | 33                                                          |
| 9               | Argentina | 2009           | Beans                     | 1                                                           |
| 9               | Argentina | 2009           | Beer                      | 117                                                         |
| 9               | Argentina | 2009           | Beverages, Alcoholic      | 5                                                           |
| 9               | Argentina | 2009           | Bovine Meat               | 149                                                         |
| 9               | Argentina | 2009           | Butter, Ghee              | 3                                                           |
| 9               | Argentina | 2009           | Cassava                   | 5                                                           |
| 9               | Argentina | 2009           | Cephalopods               | 1                                                           |
| 9               | Argentina | 2009           | Cereals, Other            | 1                                                           |
| 9               | Argentina | 2009           | Cheese                    | 32                                                          |
| 9               | Argentina | 2009           | Cocoa Beans               | 2                                                           |
| 9               | Argentina | 2009           | Coconuts - Incl Copra     | 1                                                           |
| 9               | Argentina | 2009           | Coffee                    | 3                                                           |
| 9               | Argentina | 2009           | Demersal Fish             | 6                                                           |
| 9               | Argentina | 2009           | Eggs                      | 30                                                          |
| 9               | Argentina | 2009           | Fats, Animals, Raw        | 6                                                           |
| 9               | Argentina | 2009           | Fruits, Other             | 31                                                          |



Dietary calcium and zinc deficiency risks are decreasing but remain prevalent

| FAO countrycode | Country   | Reference year | Food item                 | Gross food supply (g capita <sup>-1</sup> d <sup>-1</sup> ) |
|-----------------|-----------|----------------|---------------------------|-------------------------------------------------------------|
| 9               | Argentina | 2009           | Grapefruit                | 12                                                          |
| 9               | Argentina | 2009           | Grapes                    | 2                                                           |
| 9               | Argentina | 2009           | Lemons, Limes             | 33                                                          |
| 9               | Argentina | 2009           | Maize                     | 28                                                          |
| 9               | Argentina | 2009           | Maize Germ Oil            | 1                                                           |
| 9               | Argentina | 2009           | Meat, Other               | 4                                                           |
| 9               | Argentina | 2009           | Milk, Whole               | 209                                                         |
| 9               | Argentina | 2009           | Molluscs, Other           | 4                                                           |
| 9               | Argentina | 2009           | Mutton & Goat Meat        | 3                                                           |
| 9               | Argentina | 2009           | Nuts                      | 1                                                           |
| 9               | Argentina | 2009           | Oats                      | 2                                                           |
| 9               | Argentina | 2009           | Offals, Edible            | 15                                                          |
| 9               | Argentina | 2009           | Onions                    | 30                                                          |
| 9               | Argentina | 2009           | Oranges, Mandarines       | 61                                                          |
| 9               | Argentina | 2009           | Pelagic Fish              | 4                                                           |
| 9               | Argentina | 2009           | Pigmeat                   | 22                                                          |
| 9               | Argentina | 2009           | Pineapples                | 2                                                           |
| 9               | Argentina | 2009           | Potatoes                  | 96                                                          |
| 9               | Argentina | 2009           | Poultry Meat              | 92                                                          |
| 9               | Argentina | 2009           | Pulses, Other             | 1                                                           |
| 9               | Argentina | 2009           | Rice (Milled Equivalent)  | 21                                                          |
| 9               | Argentina | 2009           | Soyabean Oil              | 7                                                           |
| 9               | Argentina | 2009           | Sugar, Refined Equivalent | 103                                                         |
| 9               | Argentina | 2009           | Sunflowerseed Oil         | 30                                                          |
| 9               | Argentina | 2009           | Sweet Potatoes            | 22                                                          |
| 9               | Argentina | 2009           | Sweeteners, Other         | 17                                                          |
| 9               | Argentina | 2009           | Tea                       | 13                                                          |
| 9               | Argentina | 2009           | Tomatoes                  | 43                                                          |
| 9               | Argentina | 2009           | Vegetables, Other         | 107                                                         |
| 9               | Argentina | 2009           | Wheat                     | 283                                                         |
| 9               | Argentina | 2009           | Whey                      | 2                                                           |
| 9               | Argentina | 2009           | Wine                      | 71                                                          |
| 9               | Argentina | 2010           | Apples                    | 39                                                          |
| 9               | Argentina | 2010           | Bananas                   | 33                                                          |
| 9               | Argentina | 2010           | Beer                      | 116                                                         |
| 9               | Argentina | 2010           | Beverages, Alcoholic      | 5                                                           |
| 9               | Argentina | 2010           | Bovine Meat               | 150                                                         |
| 9               | Argentina | 2010           | Butter, Ghee              | 3                                                           |
| 9               | Argentina | 2010           | Cassava                   | 5                                                           |
| 9               | Argentina | 2010           | Cephalopods               | 2                                                           |
| 9               | Argentina | 2010           | Cereals, Other            | 1                                                           |
| 9               | Argentina | 2010           | Cheese                    | 32                                                          |
| 9               | Argentina | 2010           | Cocoa Beans               | 2                                                           |
| 9               | Argentina | 2010           | Coconuts - Incl Copra     | 1                                                           |
| 9               | Argentina | 2010           | Coffee                    | 3                                                           |
| 9               | Argentina | 2010           | Crustaceans               | 1                                                           |
| 9               | Argentina | 2010           | Demersal Fish             | 6                                                           |
| 9               | Argentina | 2010           | Eggs                      | 32                                                          |
| 9               | Argentina | 2010           | Fats, Animals, Raw        | 5                                                           |
| 9               | Argentina | 2010           | Fruits, Other             | 40                                                          |
| 9               | Argentina | 2010           | Grapefruit                | 9                                                           |
| 9               | Argentina | 2010           | Grapes                    | 2                                                           |
| 9               | Argentina | 2010           | Lemons, Limes             | 23                                                          |
| 9               | Argentina | 2010           | Maize                     | 27                                                          |
| 9               | Argentina | 2010           | Maize Germ Oil            | 1                                                           |
| 9               | Argentina | 2010           | Meat, Other               | 3                                                           |
| 9               | Argentina | 2010           | Milk, Whole               | 229                                                         |
| 9               | Argentina | 2010           | Molluscs, Other           | 2                                                           |
| 9               | Argentina | 2010           | Mutton & Goat Meat        | 3                                                           |
| 9               | Argentina | 2010           | Nuts                      | 1                                                           |
| 9               | Argentina | 2010           | Oats                      | 3                                                           |
| 9               | Argentina | 2010           | Offals, Edible            | 15                                                          |
| 9               | Argentina | 2010           | Onions                    | 31                                                          |
| 9               | Argentina | 2010           | Oranges, Mandarines       | 58                                                          |
| 9               | Argentina | 2010           | Pelagic Fish              | 4                                                           |
| 9               | Argentina | 2010           | Pigmeat                   | 23                                                          |
| 9               | Argentina | 2010           | Pineapples                | 2                                                           |
| 9               | Argentina | 2010           | Potatoes                  | 93                                                          |
| 9               | Argentina | 2010           | Poultry Meat              | 95                                                          |
| 9               | Argentina | 2010           | Pulses, Other             | 1                                                           |
| 9               | Argentina | 2010           | Rice (Milled Equivalent)  | 23                                                          |
| 9               | Argentina | 2010           | Soyabean Oil              | 7                                                           |
| 9               | Argentina | 2010           | Sugar, Refined Equivalent | 103                                                         |
| 9               | Argentina | 2010           | Sunflowerseed Oil         | 30                                                          |
| 9               | Argentina | 2010           | Sweet Potatoes            | 22                                                          |
| 9               | Argentina | 2010           | Sweeteners, Other         | 17                                                          |
| 9               | Argentina | 2010           | Tea                       | 15                                                          |
| 9               | Argentina | 2010           | Tomatoes                  | 45                                                          |
| 9               | Argentina | 2010           | Vegetables, Other         | 106                                                         |
| 9               | Argentina | 2010           | Wheat                     | 284                                                         |
| 9               | Argentina | 2010           | Whey                      | 1                                                           |
| 9               | Argentina | 2010           | Wine                      | 66                                                          |
| 9               | Argentina | 2011           | Apples                    | 39                                                          |
| 9               | Argentina | 2011           | Bananas                   | 35                                                          |
| 9               | Argentina | 2011           | Beer                      | 112                                                         |
| 9               | Argentina | 2011           | Beverages, Alcoholic      | 5                                                           |
| 9               | Argentina | 2011           | Bovine Meat               | 151                                                         |
| 9               | Argentina | 2011           | Butter, Ghee              | 2                                                           |
| 9               | Argentina | 2011           | Cassava                   | 5                                                           |
| 9               | Argentina | 2011           | Cephalopods               | 2                                                           |
| 9               | Argentina | 2011           | Cereals, Other            | 1                                                           |
| 9               | Argentina | 2011           | Cheese                    | 32                                                          |
| 9               | Argentina | 2011           | Cocoa Beans               | 2                                                           |
| 9               | Argentina | 2011           | Coconuts - Incl Copra     | 1                                                           |
| 9               | Argentina | 2011           | Coffee                    | 3                                                           |
| 9               | Argentina | 2011           | Crustaceans               | 1                                                           |
| 9               | Argentina | 2011           | Demersal Fish             | 6                                                           |

Dietary calcium and zinc deficiency risks are decreasing but remain prevalent

| FAO countrycode | Country   | Reference year | Food item                 | Gross food supply (g capita <sup>-1</sup> d <sup>-1</sup> ) |
|-----------------|-----------|----------------|---------------------------|-------------------------------------------------------------|
| 9               | Argentina | 2011           | Eggs                      | 34                                                          |
| 9               | Argentina | 2011           | Fats, Animals, Raw        | 5                                                           |
| 9               | Argentina | 2011           | Fruits, Other             | 28                                                          |
| 9               | Argentina | 2011           | Grapefruit                | 10                                                          |
| 9               | Argentina | 2011           | Grapes                    | 2                                                           |
| 9               | Argentina | 2011           | Lemons, Limes             | 14                                                          |
| 9               | Argentina | 2011           | Maize                     | 27                                                          |
| 9               | Argentina | 2011           | Maize Germ Oil            | 1                                                           |
| 9               | Argentina | 2011           | Meat, Other               | 3                                                           |
| 9               | Argentina | 2011           | Milk, Whole               | 214                                                         |
| 9               | Argentina | 2011           | Molluscs, Other           | 2                                                           |
| 9               | Argentina | 2011           | Mutton & Goat Meat        | 3                                                           |
| 9               | Argentina | 2011           | Nuts                      | 1                                                           |
| 9               | Argentina | 2011           | Oats                      | 3                                                           |
| 9               | Argentina | 2011           | Offals, Edible            | 15                                                          |
| 9               | Argentina | 2011           | Onions                    | 34                                                          |
| 9               | Argentina | 2011           | Oranges, Mandarines       | 59                                                          |
| 9               | Argentina | 2011           | Pelagic Fish              | 4                                                           |
| 9               | Argentina | 2011           | Pigmeat                   | 25                                                          |
| 9               | Argentina | 2011           | Pineapples                | 3                                                           |
| 9               | Argentina | 2011           | Potatoes                  | 99                                                          |
| 9               | Argentina | 2011           | Poultry Meat              | 97                                                          |
| 9               | Argentina | 2011           | Pulses, Other             | 1                                                           |
| 9               | Argentina | 2011           | Rice (Milled Equivalent)  | 21                                                          |
| 9               | Argentina | 2011           | Soyabean Oil              | 7                                                           |
| 9               | Argentina | 2011           | Sugar, Refined Equivalent | 104                                                         |
| 9               | Argentina | 2011           | Sunflowerseed Oil         | 31                                                          |
| 9               | Argentina | 2011           | Sweet Potatoes            | 24                                                          |
| 9               | Argentina | 2011           | Sweeteners, Other         | 16                                                          |
| 9               | Argentina | 2011           | Tea                       | 17                                                          |
| 9               | Argentina | 2011           | Tomatoes                  | 47                                                          |
| 9               | Argentina | 2011           | Vegetables, Other         | 112                                                         |
| 9               | Argentina | 2011           | Wheat                     | 283                                                         |
| 9               | Argentina | 2011           | Whey                      | 2                                                           |
| 9               | Argentina | 2011           | Wine                      | 66                                                          |
| 1               | Armenia   | 1992           | Apples                    | 48                                                          |
| 1               | Armenia   | 1992           | Beer                      | 1                                                           |
| 1               | Armenia   | 1992           | Beverages, Alcoholic      | 6                                                           |
| 1               | Armenia   | 1992           | Bovine Meat               | 22                                                          |
| 1               | Armenia   | 1992           | Butter, Ghee              | 2                                                           |
| 1               | Armenia   | 1992           | Cereals, Other            | 2                                                           |
| 1               | Armenia   | 1992           | Cheese                    | 1                                                           |
| 1               | Armenia   | 1992           | Eggs                      | 10                                                          |
| 1               | Armenia   | 1992           | Fats, Animals, Raw        | 2                                                           |
| 1               | Armenia   | 1992           | Freshwater Fish           | 4                                                           |
| 1               | Armenia   | 1992           | Fruits, Other             | 47                                                          |
| 1               | Armenia   | 1992           | Grapes                    | 73                                                          |
| 1               | Armenia   | 1992           | Honey                     | 1                                                           |
| 1               | Armenia   | 1992           | Milk, Whole               | 292                                                         |
| 1               | Armenia   | 1992           | Mutton & Goat Meat        | 7                                                           |
| 1               | Armenia   | 1992           | Offals, Edible            | 4                                                           |
| 1               | Armenia   | 1992           | Onions                    | 38                                                          |
| 1               | Armenia   | 1992           | Pigmeat                   | 13                                                          |
| 1               | Armenia   | 1992           | Potatoes                  | 175                                                         |
| 1               | Armenia   | 1992           | Poultry Meat              | 9                                                           |
| 1               | Armenia   | 1992           | Rice (Milled Equivalent)  | 20                                                          |
| 1               | Armenia   | 1992           | Soyabean Oil              | 1                                                           |
| 1               | Armenia   | 1992           | Sugar, Refined Equivalent | 56                                                          |
| 1               | Armenia   | 1992           | Tomatoes                  | 147                                                         |
| 1               | Armenia   | 1992           | Vegetables, Other         | 178                                                         |
| 1               | Armenia   | 1992           | Wheat                     | 428                                                         |
| 1               | Armenia   | 1992           | Wine                      | 20                                                          |
| 1               | Armenia   | 1993           | Apples                    | 16                                                          |
| 1               | Armenia   | 1993           | Beverages, Alcoholic      | 6                                                           |
| 1               | Armenia   | 1993           | Bovine Meat               | 34                                                          |
| 1               | Armenia   | 1993           | Butter, Ghee              | 6                                                           |
| 1               | Armenia   | 1993           | Cereals, Other            | 3                                                           |
| 1               | Armenia   | 1993           | Cheese                    | 1                                                           |
| 1               | Armenia   | 1993           | Cottonseed Oil            | 1                                                           |
| 1               | Armenia   | 1993           | Eggs                      | 7                                                           |
| 1               | Armenia   | 1993           | Fats, Animals, Raw        | 1                                                           |
| 1               | Armenia   | 1993           | Freshwater Fish           | 3                                                           |
| 1               | Armenia   | 1993           | Fruits, Other             | 17                                                          |
| 1               | Armenia   | 1993           | Grapes                    | 68                                                          |
| 1               | Armenia   | 1993           | Honey                     | 1                                                           |
| 1               | Armenia   | 1993           | Milk, Whole               | 121                                                         |
| 1               | Armenia   | 1993           | Mutton & Goat Meat        | 7                                                           |
| 1               | Armenia   | 1993           | Offals, Edible            | 5                                                           |
| 1               | Armenia   | 1993           | Onions                    | 30                                                          |
| 1               | Armenia   | 1993           | Pigmeat                   | 4                                                           |
| 1               | Armenia   | 1993           | Potatoes                  | 200                                                         |
| 1               | Armenia   | 1993           | Poultry Meat              | 5                                                           |
| 1               | Armenia   | 1993           | Rice (Milled Equivalent)  | 15                                                          |
| 1               | Armenia   | 1993           | Sugar, Refined Equivalent | 57                                                          |
| 1               | Armenia   | 1993           | Tomatoes                  | 116                                                         |
| 1               | Armenia   | 1993           | Vegetables, Other         | 147                                                         |
| 1               | Armenia   | 1993           | Wheat                     | 442                                                         |
| 1               | Armenia   | 1993           | Wine                      | 23                                                          |
| 1               | Armenia   | 1994           | Apples                    | 26                                                          |
| 1               | Armenia   | 1994           | Beer                      | 2                                                           |
| 1               | Armenia   | 1994           | Beverages, Alcoholic      | 15                                                          |
| 1               | Armenia   | 1994           | Bovine Meat               | 39                                                          |
| 1               | Armenia   | 1994           | Butter, Ghee              | 6                                                           |
| 1               | Armenia   | 1994           | Cereals, Other            | 1                                                           |
| 1               | Armenia   | 1994           | Cheese                    | 1                                                           |
| 1               | Armenia   | 1994           | Cottonseed Oil            | 2                                                           |
| 1               | Armenia   | 1994           | Eggs                      | 9                                                           |

Dietary calcium and zinc deficiency risks are decreasing but remain prevalent

| FAO countrycode | Country | Reference year | Food item                 | Gross food supply (g capita <sup>-1</sup> d <sup>-1</sup> ) |
|-----------------|---------|----------------|---------------------------|-------------------------------------------------------------|
| 1               | Armenia | 1994           | Fats, Animals, Raw        | 1                                                           |
| 1               | Armenia | 1994           | Freshwater Fish           | 2                                                           |
| 1               | Armenia | 1994           | Fruits, Other             | 47                                                          |
| 1               | Armenia | 1994           | Grapes                    | 76                                                          |
| 1               | Armenia | 1994           | Honey                     | 1                                                           |
| 1               | Armenia | 1994           | Milk, Whole               | 265                                                         |
| 1               | Armenia | 1994           | Mutton & Goat Meat        | 6                                                           |
| 1               | Armenia | 1994           | Offals, Edible            | 6                                                           |
| 1               | Armenia | 1994           | Onions                    | 30                                                          |
| 1               | Armenia | 1994           | Pigmeat                   | 5                                                           |
| 1               | Armenia | 1994           | Potatoes                  | 219                                                         |
| 1               | Armenia | 1994           | Poultry Meat              | 4                                                           |
| 1               | Armenia | 1994           | Rice (Milled Equivalent)  | 14                                                          |
| 1               | Armenia | 1994           | Soyabean Oil              | 3                                                           |
| 1               | Armenia | 1994           | Sugar, Refined Equivalent | 54                                                          |
| 1               | Armenia | 1994           | Sunflowerseed Oil         | 2                                                           |
| 1               | Armenia | 1994           | Tomatoes                  | 168                                                         |
| 1               | Armenia | 1994           | Vegetables, Other         | 162                                                         |
| 1               | Armenia | 1994           | Wheat                     | 421                                                         |
| 1               | Armenia | 1994           | Wine                      | 20                                                          |
| 1               | Armenia | 1995           | Apples                    | 46                                                          |
| 1               | Armenia | 1995           | Barley                    | 1                                                           |
| 1               | Armenia | 1995           | Beverages, Alcoholic      | 12                                                          |
| 1               | Armenia | 1995           | Bovine Meat               | 45                                                          |
| 1               | Armenia | 1995           | Butter, Ghee              | 8                                                           |
| 1               | Armenia | 1995           | Cereals, Other            | 1                                                           |
| 1               | Armenia | 1995           | Cheese                    | 1                                                           |
| 1               | Armenia | 1995           | Coffee                    | 2                                                           |
| 1               | Armenia | 1995           | Cottonseed Oil            | 5                                                           |
| 1               | Armenia | 1995           | Cream                     | 1                                                           |
| 1               | Armenia | 1995           | Dates                     | 1                                                           |
| 1               | Armenia | 1995           | Eggs                      | 10                                                          |
| 1               | Armenia | 1995           | Fats, Animals, Raw        | 2                                                           |
| 1               | Armenia | 1995           | Freshwater Fish           | 2                                                           |
| 1               | Armenia | 1995           | Fruits, Other             | 54                                                          |
| 1               | Armenia | 1995           | Grapes                    | 86                                                          |
| 1               | Armenia | 1995           | Honey                     | 1                                                           |
| 1               | Armenia | 1995           | Marine Fish, Other        | 1                                                           |
| 1               | Armenia | 1995           | Milk, Whole               | 133                                                         |
| 1               | Armenia | 1995           | Mutton & Goat Meat        | 6                                                           |
| 1               | Armenia | 1995           | Offals, Edible            | 7                                                           |
| 1               | Armenia | 1995           | Oilcrops Oil, Other       | 3                                                           |
| 1               | Armenia | 1995           | Onions                    | 37                                                          |
| 1               | Armenia | 1995           | Oranges, Mandarines       | 4                                                           |
| 1               | Armenia | 1995           | Pelagic Fish              | 1                                                           |
| 1               | Armenia | 1995           | Pigmeat                   | 4                                                           |
| 1               | Armenia | 1995           | Potatoes                  | 250                                                         |
| 1               | Armenia | 1995           | Poultry Meat              | 7                                                           |
| 1               | Armenia | 1995           | Rice (Milled Equivalent)  | 8                                                           |
| 1               | Armenia | 1995           | Soyabean Oil              | 1                                                           |
| 1               | Armenia | 1995           | Sugar, Refined Equivalent | 51                                                          |
| 1               | Armenia | 1995           | Sunflowerseed Oil         | 3                                                           |
| 1               | Armenia | 1995           | Sweeteners, Other         | 5                                                           |
| 1               | Armenia | 1995           | Tomatoes                  | 143                                                         |
| 1               | Armenia | 1995           | Vegetables, Other         | 181                                                         |
| 1               | Armenia | 1995           | Wheat                     | 423                                                         |
| 1               | Armenia | 1995           | Wine                      | 9                                                           |
| 1               | Armenia | 1996           | Apples                    | 33                                                          |
| 1               | Armenia | 1996           | Bananas                   | 1                                                           |
| 1               | Armenia | 1996           | Barley                    | 1                                                           |
| 1               | Armenia | 1996           | Beer                      | 3                                                           |
| 1               | Armenia | 1996           | Beverages, Alcoholic      | 12                                                          |
| 1               | Armenia | 1996           | Bovine Meat               | 28                                                          |
| 1               | Armenia | 1996           | Butter, Ghee              | 5                                                           |
| 1               | Armenia | 1996           | Cereals, Other            | 49                                                          |
| 1               | Armenia | 1996           | Cheese                    | 2                                                           |
| 1               | Armenia | 1996           | Cocoa Beans               | 1                                                           |
| 1               | Armenia | 1996           | Coffee                    | 3                                                           |
| 1               | Armenia | 1996           | Dates                     | 1                                                           |
| 1               | Armenia | 1996           | Eggs                      | 11                                                          |
| 1               | Armenia | 1996           | Fats, Animals, Raw        | 3                                                           |
| 1               | Armenia | 1996           | Freshwater Fish           | 1                                                           |
| 1               | Armenia | 1996           | Fruits, Other             | 65                                                          |
| 1               | Armenia | 1996           | Grapefruit                | 1                                                           |
| 1               | Armenia | 1996           | Grapes                    | 73                                                          |
| 1               | Armenia | 1996           | Honey                     | 1                                                           |
| 1               | Armenia | 1996           | Milk, Whole               | 205                                                         |
| 1               | Armenia | 1996           | Mutton & Goat Meat        | 5                                                           |
| 1               | Armenia | 1996           | Offals, Edible            | 6                                                           |
| 1               | Armenia | 1996           | Oilcrops Oil, Other       | 5                                                           |
| 1               | Armenia | 1996           | Olive Oil                 | 3                                                           |
| 1               | Armenia | 1996           | Onions                    | 33                                                          |
| 1               | Armenia | 1996           | Oranges, Mandarines       | 11                                                          |
| 1               | Armenia | 1996           | Pigmeat                   | 2                                                           |
| 1               | Armenia | 1996           | Potatoes                  | 223                                                         |
| 1               | Armenia | 1996           | Poultry Meat              | 16                                                          |
| 1               | Armenia | 1996           | Rice (Milled Equivalent)  | 8                                                           |
| 1               | Armenia | 1996           | Rye                       | 6                                                           |
| 1               | Armenia | 1996           | Sesameseed Oil            | 1                                                           |
| 1               | Armenia | 1996           | Sugar, Refined Equivalent | 55                                                          |
| 1               | Armenia | 1996           | Sunflowerseed Oil         | 7                                                           |
| 1               | Armenia | 1996           | Sweeteners, Other         | 1                                                           |
| 1               | Armenia | 1996           | Tomatoes                  | 127                                                         |
| 1               | Armenia | 1996           | Vegetables, Other         | 207                                                         |
| 1               | Armenia | 1996           | Wheat                     | 428                                                         |
| 1               | Armenia | 1996           | Wine                      | 7                                                           |
| 1               | Armenia | 1997           | Apples                    | 27                                                          |

Dietary calcium and zinc deficiency risks are decreasing but remain prevalent

| FAO countrycode | Country | Reference year | Food item                 | Gross food supply (g capita <sup>-1</sup> d <sup>-1</sup> ) |
|-----------------|---------|----------------|---------------------------|-------------------------------------------------------------|
| 1               | Armenia | 1997           | Bananas                   | 1                                                           |
| 1               | Armenia | 1997           | Barley                    | 3                                                           |
| 1               | Armenia | 1997           | Beer                      | 6                                                           |
| 1               | Armenia | 1997           | Beverages, Alcoholic      | 12                                                          |
| 1               | Armenia | 1997           | Bovine Meat               | 33                                                          |
| 1               | Armenia | 1997           | Butter, Ghee              | 5                                                           |
| 1               | Armenia | 1997           | Cereals, Other            | 23                                                          |
| 1               | Armenia | 1997           | Cheese                    | 4                                                           |
| 1               | Armenia | 1997           | Coffee                    | 4                                                           |
| 1               | Armenia | 1997           | Cream                     | 1                                                           |
| 1               | Armenia | 1997           | Eggs                      | 11                                                          |
| 1               | Armenia | 1997           | Fats, Animals, Raw        | 3                                                           |
| 1               | Armenia | 1997           | Freshwater Fish           | 1                                                           |
| 1               | Armenia | 1997           | Fruits, Other             | 47                                                          |
| 1               | Armenia | 1997           | Grapefruit                | 1                                                           |
| 1               | Armenia | 1997           | Grapes                    | 57                                                          |
| 1               | Armenia | 1997           | Honey                     | 1                                                           |
| 1               | Armenia | 1997           | Milk, Whole               | 183                                                         |
| 1               | Armenia | 1997           | Mutton & Goat Meat        | 4                                                           |
| 1               | Armenia | 1997           | Offals, Edible            | 7                                                           |
| 1               | Armenia | 1997           | Oilcrops Oil, Other       | 6                                                           |
| 1               | Armenia | 1997           | Onions                    | 28                                                          |
| 1               | Armenia | 1997           | Oranges, Mandarines       | 8                                                           |
| 1               | Armenia | 1997           | Pigmeat                   | 2                                                           |
| 1               | Armenia | 1997           | Potatoes                  | 207                                                         |
| 1               | Armenia | 1997           | Poultry Meat              | 17                                                          |
| 1               | Armenia | 1997           | Rice (Milled Equivalent)  | 6                                                           |
| 1               | Armenia | 1997           | Sesameseed Oil            | 1                                                           |
| 1               | Armenia | 1997           | Soyabean Oil              | 1                                                           |
| 1               | Armenia | 1997           | Sugar, Refined Equivalent | 54                                                          |
| 1               | Armenia | 1997           | Sunflowerseed Oil         | 8                                                           |
| 1               | Armenia | 1997           | Sweeteners, Other         | 1                                                           |
| 1               | Armenia | 1997           | Tomatoes                  | 106                                                         |
| 1               | Armenia | 1997           | Vegetables, Other         | 185                                                         |
| 1               | Armenia | 1997           | Wheat                     | 439                                                         |
| 1               | Armenia | 1997           | Wine                      | 4                                                           |
| 1               | Armenia | 1998           | Apples                    | 14                                                          |
| 1               | Armenia | 1998           | Bananas                   | 1                                                           |
| 1               | Armenia | 1998           | Barley                    | 3                                                           |
| 1               | Armenia | 1998           | Beer                      | 12                                                          |
| 1               | Armenia | 1998           | Beverages, Alcoholic      | 7                                                           |
| 1               | Armenia | 1998           | Bovine Meat               | 34                                                          |
| 1               | Armenia | 1998           | Butter, Ghee              | 4                                                           |
| 1               | Armenia | 1998           | Cereals, Other            | 22                                                          |
| 1               | Armenia | 1998           | Cheese                    | 4                                                           |
| 1               | Armenia | 1998           | Citrus, Other             | 1                                                           |
| 1               | Armenia | 1998           | Cocoa Beans               | 1                                                           |
| 1               | Armenia | 1998           | Coffee                    | 4                                                           |
| 1               | Armenia | 1998           | Eggs                      | 9                                                           |
| 1               | Armenia | 1998           | Fats, Animals, Raw        | 2                                                           |
| 1               | Armenia | 1998           | Freshwater Fish           | 1                                                           |
| 1               | Armenia | 1998           | Fruits, Other             | 66                                                          |
| 1               | Armenia | 1998           | Grapefruit                | 1                                                           |
| 1               | Armenia | 1998           | Grapes                    | 53                                                          |
| 1               | Armenia | 1998           | Honey                     | 1                                                           |
| 1               | Armenia | 1998           | Marine Fish, Other        | 1                                                           |
| 1               | Armenia | 1998           | Milk, Whole               | 197                                                         |
| 1               | Armenia | 1998           | Mutton & Goat Meat        | 4                                                           |
| 1               | Armenia | 1998           | Offals, Edible            | 7                                                           |
| 1               | Armenia | 1998           | Oilcrops Oil, Other       | 3                                                           |
| 1               | Armenia | 1998           | Onions                    | 31                                                          |
| 1               | Armenia | 1998           | Oranges, Mandarines       | 7                                                           |
| 1               | Armenia | 1998           | Pigmeat                   | 3                                                           |
| 1               | Armenia | 1998           | Pineapples                | 1                                                           |
| 1               | Armenia | 1998           | Potatoes                  | 229                                                         |
| 1               | Armenia | 1998           | Poultry Meat              | 18                                                          |
| 1               | Armenia | 1998           | Rice (Milled Equivalent)  | 10                                                          |
| 1               | Armenia | 1998           | Sesameseed Oil            | 2                                                           |
| 1               | Armenia | 1998           | Soyabean Oil              | 3                                                           |
| 1               | Armenia | 1998           | Sugar, Refined Equivalent | 63                                                          |
| 1               | Armenia | 1998           | Sunflowerseed Oil         | 2                                                           |
| 1               | Armenia | 1998           | Tomatoes                  | 100                                                         |
| 1               | Armenia | 1998           | Vegetables, Other         | 204                                                         |
| 1               | Armenia | 1998           | Wheat                     | 435                                                         |
| 1               | Armenia | 1998           | Wine                      | 2                                                           |
| 1               | Armenia | 1999           | Apples                    | 8                                                           |
| 1               | Armenia | 1999           | Bananas                   | 1                                                           |
| 1               | Armenia | 1999           | Barley                    | 3                                                           |
| 1               | Armenia | 1999           | Beer                      | 7                                                           |
| 1               | Armenia | 1999           | Beverages, Alcoholic      | 8                                                           |
| 1               | Armenia | 1999           | Bovine Meat               | 29                                                          |
| 1               | Armenia | 1999           | Butter, Ghee              | 4                                                           |
| 1               | Armenia | 1999           | Cereals, Other            | 16                                                          |
| 1               | Armenia | 1999           | Cheese                    | 4                                                           |
| 1               | Armenia | 1999           | Citrus, Other             | 2                                                           |
| 1               | Armenia | 1999           | Cocoa Beans               | 1                                                           |
| 1               | Armenia | 1999           | Coffee                    | 6                                                           |
| 1               | Armenia | 1999           | Eggs                      | 13                                                          |
| 1               | Armenia | 1999           | Fats, Animals, Raw        | 3                                                           |
| 1               | Armenia | 1999           | Freshwater Fish           | 2                                                           |
| 1               | Armenia | 1999           | Fruits, Other             | 51                                                          |
| 1               | Armenia | 1999           | Grapes                    | 40                                                          |
| 1               | Armenia | 1999           | Honey                     | 1                                                           |
| 1               | Armenia | 1999           | Milk, Whole               | 221                                                         |
| 1               | Armenia | 1999           | Mutton & Goat Meat        | 4                                                           |
| 1               | Armenia | 1999           | Offals, Edible            | 7                                                           |
| 1               | Armenia | 1999           | Oilcrops Oil, Other       | 3                                                           |

Dietary calcium and zinc deficiency risks are decreasing but remain prevalent

| FAO countrycode | Country | Reference year | Food item                 | Gross food supply (g capita <sup>-1</sup> d <sup>-1</sup> ) |
|-----------------|---------|----------------|---------------------------|-------------------------------------------------------------|
| 1               | Armenia | 1999           | Olives                    | 1                                                           |
| 1               | Armenia | 1999           | Onions                    | 35                                                          |
| 1               | Armenia | 1999           | Oranges, Mandarines       | 9                                                           |
| 1               | Armenia | 1999           | Pelagic Fish              | 1                                                           |
| 1               | Armenia | 1999           | Pig meat                  | 3                                                           |
| 1               | Armenia | 1999           | Potatoes                  | 231                                                         |
| 1               | Armenia | 1999           | Poultry Meat              | 19                                                          |
| 1               | Armenia | 1999           | Rice (Milled Equivalent)  | 9                                                           |
| 1               | Armenia | 1999           | Soyabean Oil              | 4                                                           |
| 1               | Armenia | 1999           | Sugar, Refined Equivalent | 62                                                          |
| 1               | Armenia | 1999           | Sunflowerseed Oil         | 1                                                           |
| 1               | Armenia | 1999           | Tomatoes                  | 90                                                          |
| 1               | Armenia | 1999           | Vegetables, Other         | 253                                                         |
| 1               | Armenia | 1999           | Wheat                     | 433                                                         |
| 1               | Armenia | 1999           | Wine                      | 5                                                           |
| 1               | Armenia | 2000           | Apples                    | 11                                                          |
| 1               | Armenia | 2000           | Bananas                   | 1                                                           |
| 1               | Armenia | 2000           | Barley                    | 4                                                           |
| 1               | Armenia | 2000           | Beer                      | 6                                                           |
| 1               | Armenia | 2000           | Beverages, Alcoholic      | 7                                                           |
| 1               | Armenia | 2000           | Bovine Meat               | 29                                                          |
| 1               | Armenia | 2000           | Butter, Ghee              | 3                                                           |
| 1               | Armenia | 2000           | Cereals, Other            | 2                                                           |
| 1               | Armenia | 2000           | Cheese                    | 4                                                           |
| 1               | Armenia | 2000           | Cocoa Beans               | 1                                                           |
| 1               | Armenia | 2000           | Coffee                    | 7                                                           |
| 1               | Armenia | 2000           | Eggs                      | 14                                                          |
| 1               | Armenia | 2000           | Fats, Animals, Raw        | 3                                                           |
| 1               | Armenia | 2000           | Freshwater Fish           | 2                                                           |
| 1               | Armenia | 2000           | Fruits, Other             | 85                                                          |
| 1               | Armenia | 2000           | Grapes                    | 34                                                          |
| 1               | Armenia | 2000           | Honey                     | 1                                                           |
| 1               | Armenia | 2000           | Milk, Whole               | 222                                                         |
| 1               | Armenia | 2000           | Mutton & Goat Meat        | 7                                                           |
| 1               | Armenia | 2000           | Nuts                      | 1                                                           |
| 1               | Armenia | 2000           | Offals, Edible            | 8                                                           |
| 1               | Armenia | 2000           | Oilcrops Oil, Other       | 5                                                           |
| 1               | Armenia | 2000           | Olives                    | 1                                                           |
| 1               | Armenia | 2000           | Onions                    | 27                                                          |
| 1               | Armenia | 2000           | Oranges, Mandarines       | 1                                                           |
| 1               | Armenia | 2000           | Pelagic Fish              | 1                                                           |
| 1               | Armenia | 2000           | Pig meat                  | 7                                                           |
| 1               | Armenia | 2000           | Potatoes                  | 175                                                         |
| 1               | Armenia | 2000           | Poultry Meat              | 15                                                          |
| 1               | Armenia | 2000           | Rice (Milled Equivalent)  | 8                                                           |
| 1               | Armenia | 2000           | Soyabean Oil              | 2                                                           |
| 1               | Armenia | 2000           | Sugar, Refined Equivalent | 61                                                          |
| 1               | Armenia | 2000           | Sunflowerseed Oil         | 3                                                           |
| 1               | Armenia | 2000           | Tomatoes                  | 107                                                         |
| 1               | Armenia | 2000           | Vegetables, Other         | 196                                                         |
| 1               | Armenia | 2000           | Wheat                     | 429                                                         |
| 1               | Armenia | 2000           | Wine                      | 4                                                           |
| 1               | Armenia | 2001           | Apples                    | 19                                                          |
| 1               | Armenia | 2001           | Bananas                   | 1                                                           |
| 1               | Armenia | 2001           | Barley                    | 5                                                           |
| 1               | Armenia | 2001           | Beer                      | 5                                                           |
| 1               | Armenia | 2001           | Beverages, Alcoholic      | 6                                                           |
| 1               | Armenia | 2001           | Bovine Meat               | 29                                                          |
| 1               | Armenia | 2001           | Butter, Ghee              | 3                                                           |
| 1               | Armenia | 2001           | Cereals, Other            | 6                                                           |
| 1               | Armenia | 2001           | Cheese                    | 4                                                           |
| 1               | Armenia | 2001           | Citrus, Other             | 1                                                           |
| 1               | Armenia | 2001           | Cocoa Beans               | 2                                                           |
| 1               | Armenia | 2001           | Coffee                    | 10                                                          |
| 1               | Armenia | 2001           | Eggs                      | 15                                                          |
| 1               | Armenia | 2001           | Fats, Animals, Raw        | 3                                                           |
| 1               | Armenia | 2001           | Freshwater Fish           | 2                                                           |
| 1               | Armenia | 2001           | Fruits, Other             | 56                                                          |
| 1               | Armenia | 2001           | Grapes                    | 54                                                          |
| 1               | Armenia | 2001           | Honey                     | 1                                                           |
| 1               | Armenia | 2001           | Milk, Whole               | 228                                                         |
| 1               | Armenia | 2001           | Mutton & Goat Meat        | 6                                                           |
| 1               | Armenia | 2001           | Nuts                      | 1                                                           |
| 1               | Armenia | 2001           | Offals, Edible            | 7                                                           |
| 1               | Armenia | 2001           | Oilcrops Oil, Other       | 2                                                           |
| 1               | Armenia | 2001           | Olives                    | 1                                                           |
| 1               | Armenia | 2001           | Onions                    | 29                                                          |
| 1               | Armenia | 2001           | Oranges, Mandarines       | 2                                                           |
| 1               | Armenia | 2001           | Pelagic Fish              | 1                                                           |
| 1               | Armenia | 2001           | Pig meat                  | 8                                                           |
| 1               | Armenia | 2001           | Potatoes                  | 178                                                         |
| 1               | Armenia | 2001           | Poultry Meat              | 17                                                          |
| 1               | Armenia | 2001           | Rice (Milled Equivalent)  | 8                                                           |
| 1               | Armenia | 2001           | Soyabean Oil              | 2                                                           |
| 1               | Armenia | 2001           | Sugar, Refined Equivalent | 65                                                          |
| 1               | Armenia | 2001           | Sunflowerseed Oil         | 7                                                           |
| 1               | Armenia | 2001           | Tomatoes                  | 81                                                          |
| 1               | Armenia | 2001           | Vegetables, Other         | 251                                                         |
| 1               | Armenia | 2001           | Wheat                     | 413                                                         |
| 1               | Armenia | 2001           | Wine                      | 6                                                           |
| 1               | Armenia | 2002           | Apples                    | 22                                                          |
| 1               | Armenia | 2002           | Bananas                   | 2                                                           |
| 1               | Armenia | 2002           | Barley                    | 6                                                           |
| 1               | Armenia | 2002           | Beer                      | 5                                                           |
| 1               | Armenia | 2002           | Beverages, Alcoholic      | 5                                                           |
| 1               | Armenia | 2002           | Bovine Meat               | 32                                                          |
| 1               | Armenia | 2002           | Butter, Ghee              | 4                                                           |

Dietary calcium and zinc deficiency risks are decreasing but remain prevalent

| FAO countrycode | Country | Reference year | Food item                 | Gross food supply (g capita <sup>-1</sup> d <sup>-1</sup> ) |
|-----------------|---------|----------------|---------------------------|-------------------------------------------------------------|
| 1               | Armenia | 2002           | Cereals, Other            | 4                                                           |
| 1               | Armenia | 2002           | Cheese                    | 4                                                           |
| 1               | Armenia | 2002           | Cocoa Beans               | 2                                                           |
| 1               | Armenia | 2002           | Coffee                    | 9                                                           |
| 1               | Armenia | 2002           | Eggs                      | 16                                                          |
| 1               | Armenia | 2002           | Fats, Animals, Raw        | 4                                                           |
| 1               | Armenia | 2002           | Freshwater Fish           | 1                                                           |
| 1               | Armenia | 2002           | Fruits, Other             | 40                                                          |
| 1               | Armenia | 2002           | Grapes                    | 51                                                          |
| 1               | Armenia | 2002           | Honey                     | 1                                                           |
| 1               | Armenia | 2002           | Milk, Whole               | 302                                                         |
| 1               | Armenia | 2002           | Mutton & Goat Meat        | 5                                                           |
| 1               | Armenia | 2002           | Nuts                      | 1                                                           |
| 1               | Armenia | 2002           | Offals, Edible            | 8                                                           |
| 1               | Armenia | 2002           | Oilcrops Oil, Other       | 2                                                           |
| 1               | Armenia | 2002           | Olives                    | 1                                                           |
| 1               | Armenia | 2002           | Onions                    | 33                                                          |
| 1               | Armenia | 2002           | Oranges, Mandarines       | 2                                                           |
| 1               | Armenia | 2002           | Pelagic Fish              | 2                                                           |
| 1               | Armenia | 2002           | Pigmeat                   | 9                                                           |
| 1               | Armenia | 2002           | Pineapples                | 1                                                           |
| 1               | Armenia | 2002           | Potatoes                  | 137                                                         |
| 1               | Armenia | 2002           | Poultry Meat              | 17                                                          |
| 1               | Armenia | 2002           | Rice (Milled Equivalent)  | 12                                                          |
| 1               | Armenia | 2002           | Soyabean Oil              | 1                                                           |
| 1               | Armenia | 2002           | Sugar, Refined Equivalent | 70                                                          |
| 1               | Armenia | 2002           | Sunflowerseed Oil         | 9                                                           |
| 1               | Armenia | 2002           | Tomatoes                  | 106                                                         |
| 1               | Armenia | 2002           | Vegetables, Other         | 284                                                         |
| 1               | Armenia | 2002           | Wheat                     | 398                                                         |
| 1               | Armenia | 2002           | Wine                      | 4                                                           |
| 1               | Armenia | 2003           | Apples                    | 24                                                          |
| 1               | Armenia | 2003           | Bananas                   | 2                                                           |
| 1               | Armenia | 2003           | Barley                    | 7                                                           |
| 1               | Armenia | 2003           | Beer                      | 5                                                           |
| 1               | Armenia | 2003           | Beverages, Alcoholic      | 5                                                           |
| 1               | Armenia | 2003           | Bovine Meat               | 38                                                          |
| 1               | Armenia | 2003           | Butter, Ghee              | 3                                                           |
| 1               | Armenia | 2003           | Cereals, Other            | 6                                                           |
| 1               | Armenia | 2003           | Cheese                    | 4                                                           |
| 1               | Armenia | 2003           | Cocoa Beans               | 3                                                           |
| 1               | Armenia | 2003           | Coffee                    | 8                                                           |
| 1               | Armenia | 2003           | Eggs                      | 23                                                          |
| 1               | Armenia | 2003           | Fats, Animals, Raw        | 6                                                           |
| 1               | Armenia | 2003           | Freshwater Fish           | 1                                                           |
| 1               | Armenia | 2003           | Fruits, Other             | 43                                                          |
| 1               | Armenia | 2003           | Grapes                    | 37                                                          |
| 1               | Armenia | 2003           | Honey                     | 1                                                           |
| 1               | Armenia | 2003           | Milk, Whole               | 318                                                         |
| 1               | Armenia | 2003           | Mutton & Goat Meat        | 6                                                           |
| 1               | Armenia | 2003           | Nuts                      | 1                                                           |
| 1               | Armenia | 2003           | Offals, Edible            | 8                                                           |
| 1               | Armenia | 2003           | Oilcrops Oil, Other       | 2                                                           |
| 1               | Armenia | 2003           | Olives                    | 2                                                           |
| 1               | Armenia | 2003           | Onions                    | 30                                                          |
| 1               | Armenia | 2003           | Oranges, Mandarines       | 2                                                           |
| 1               | Armenia | 2003           | Palmkernel Oil            | 1                                                           |
| 1               | Armenia | 2003           | Pelagic Fish              | 1                                                           |
| 1               | Armenia | 2003           | Pigmeat                   | 9                                                           |
| 1               | Armenia | 2003           | Potatoes                  | 132                                                         |
| 1               | Armenia | 2003           | Poultry Meat              | 16                                                          |
| 1               | Armenia | 2003           | Rice (Milled Equivalent)  | 11                                                          |
| 1               | Armenia | 2003           | Soyabean Oil              | 2                                                           |
| 1               | Armenia | 2003           | Sugar, Refined Equivalent | 79                                                          |
| 1               | Armenia | 2003           | Sunflowerseed Oil         | 12                                                          |
| 1               | Armenia | 2003           | Tomatoes                  | 144                                                         |
| 1               | Armenia | 2003           | Vegetables, Other         | 342                                                         |
| 1               | Armenia | 2003           | Wheat                     | 409                                                         |
| 1               | Armenia | 2003           | Wine                      | 2                                                           |
| 1               | Armenia | 2004           | Apples                    | 29                                                          |
| 1               | Armenia | 2004           | Bananas                   | 4                                                           |
| 1               | Armenia | 2004           | Barley                    | 8                                                           |
| 1               | Armenia | 2004           | Beer                      | 6                                                           |
| 1               | Armenia | 2004           | Beverages, Alcoholic      | 9                                                           |
| 1               | Armenia | 2004           | Bovine Meat               | 41                                                          |
| 1               | Armenia | 2004           | Butter, Ghee              | 5                                                           |
| 1               | Armenia | 2004           | Cereals, Other            | 4                                                           |
| 1               | Armenia | 2004           | Cheese                    | 13                                                          |
| 1               | Armenia | 2004           | Cocoa Beans               | 3                                                           |
| 1               | Armenia | 2004           | Coffee                    | 6                                                           |
| 1               | Armenia | 2004           | Eggs                      | 24                                                          |
| 1               | Armenia | 2004           | Fats, Animals, Raw        | 6                                                           |
| 1               | Armenia | 2004           | Fruits, Other             | 57                                                          |
| 1               | Armenia | 2004           | Grapefruit                | 1                                                           |
| 1               | Armenia | 2004           | Grapes                    | 31                                                          |
| 1               | Armenia | 2004           | Honey                     | 1                                                           |
| 1               | Armenia | 2004           | Milk, Whole               | 247                                                         |
| 1               | Armenia | 2004           | Mutton & Goat Meat        | 7                                                           |
| 1               | Armenia | 2004           | Nuts                      | 1                                                           |
| 1               | Armenia | 2004           | Offals, Edible            | 8                                                           |
| 1               | Armenia | 2004           | Oilcrops Oil, Other       | 2                                                           |
| 1               | Armenia | 2004           | Olives                    | 2                                                           |
| 1               | Armenia | 2004           | Onions                    | 39                                                          |
| 1               | Armenia | 2004           | Oranges, Mandarines       | 6                                                           |
| 1               | Armenia | 2004           | Palmkernel Oil            | 1                                                           |
| 1               | Armenia | 2004           | Pelagic Fish              | 1                                                           |
| 1               | Armenia | 2004           | Pigmeat                   | 9                                                           |

Dietary calcium and zinc deficiency risks are decreasing but remain prevalent

| FAO countrycode | Country | Reference year | Food item                 | Gross food supply (g capita <sup>-1</sup> d <sup>-1</sup> ) |
|-----------------|---------|----------------|---------------------------|-------------------------------------------------------------|
| 1               | Armenia | 2004           | Potatoes                  | 165                                                         |
| 1               | Armenia | 2004           | Poultry Meat              | 16                                                          |
| 1               | Armenia | 2004           | Rice (Milled Equivalent)  | 10                                                          |
| 1               | Armenia | 2004           | Soyabean Oil              | 1                                                           |
| 1               | Armenia | 2004           | Sugar, Refined Equivalent | 77                                                          |
| 1               | Armenia | 2004           | Sunflowerseed Oil         | 7                                                           |
| 1               | Armenia | 2004           | Tomatoes                  | 185                                                         |
| 1               | Armenia | 2004           | Vegetables, Other         | 373                                                         |
| 1               | Armenia | 2004           | Wheat                     | 436                                                         |
| 1               | Armenia | 2004           | Wine                      | 6                                                           |
| 1               | Armenia | 2005           | Apples                    | 68                                                          |
| 1               | Armenia | 2005           | Bananas                   | 7                                                           |
| 1               | Armenia | 2005           | Barley                    | 7                                                           |
| 1               | Armenia | 2005           | Beer                      | 8                                                           |
| 1               | Armenia | 2005           | Beverages, Alcoholic      | 8                                                           |
| 1               | Armenia | 2005           | Bovine Meat               | 40                                                          |
| 1               | Armenia | 2005           | Butter, Ghee              | 4                                                           |
| 1               | Armenia | 2005           | Cereals, Other            | 5                                                           |
| 1               | Armenia | 2005           | Cheese                    | 11                                                          |
| 1               | Armenia | 2005           | Cocoa Beans               | 3                                                           |
| 1               | Armenia | 2005           | Coconut Oil               | 1                                                           |
| 1               | Armenia | 2005           | Coffee                    | 6                                                           |
| 1               | Armenia | 2005           | Dates                     | 1                                                           |
| 1               | Armenia | 2005           | Eggs                      | 24                                                          |
| 1               | Armenia | 2005           | Fats, Animals, Raw        | 5                                                           |
| 1               | Armenia | 2005           | Fruits, Other             | 93                                                          |
| 1               | Armenia | 2005           | Grapefruit                | 1                                                           |
| 1               | Armenia | 2005           | Grapes                    | 77                                                          |
| 1               | Armenia | 2005           | Honey                     | 1                                                           |
| 1               | Armenia | 2005           | Marine Fish, Other        | 5                                                           |
| 1               | Armenia | 2005           | Milk, Whole               | 316                                                         |
| 1               | Armenia | 2005           | Mutton & Goat Meat        | 7                                                           |
| 1               | Armenia | 2005           | Nuts                      | 1                                                           |
| 1               | Armenia | 2005           | Offals, Edible            | 10                                                          |
| 1               | Armenia | 2005           | Oilcrops Oil, Other       | 3                                                           |
| 1               | Armenia | 2005           | Olives                    | 2                                                           |
| 1               | Armenia | 2005           | Onions                    | 45                                                          |
| 1               | Armenia | 2005           | Oranges, Mandarines       | 9                                                           |
| 1               | Armenia | 2005           | Palmkernel Oil            | 1                                                           |
| 1               | Armenia | 2005           | Pelagic Fish              | 2                                                           |
| 1               | Armenia | 2005           | Pigmeat                   | 13                                                          |
| 1               | Armenia | 2005           | Pineapples                | 1                                                           |
| 1               | Armenia | 2005           | Potatoes                  | 195                                                         |
| 1               | Armenia | 2005           | Poultry Meat              | 20                                                          |
| 1               | Armenia | 2005           | Rice (Milled Equivalent)  | 13                                                          |
| 1               | Armenia | 2005           | Soyabean Oil              | 1                                                           |
| 1               | Armenia | 2005           | Sugar, Refined Equivalent | 85                                                          |
| 1               | Armenia | 2005           | Sunflowerseed Oil         | 11                                                          |
| 1               | Armenia | 2005           | Tomatoes                  | 167                                                         |
| 1               | Armenia | 2005           | Vegetables, Other         | 428                                                         |
| 1               | Armenia | 2005           | Wheat                     | 394                                                         |
| 1               | Armenia | 2005           | Wine                      | 6                                                           |
| 1               | Armenia | 2006           | Apples                    | 64                                                          |
| 1               | Armenia | 2006           | Bananas                   | 5                                                           |
| 1               | Armenia | 2006           | Barley                    | 7                                                           |
| 1               | Armenia | 2006           | Beer                      | 13                                                          |
| 1               | Armenia | 2006           | Beverages, Alcoholic      | 8                                                           |
| 1               | Armenia | 2006           | Bovine Meat               | 45                                                          |
| 1               | Armenia | 2006           | Butter, Ghee              | 3                                                           |
| 1               | Armenia | 2006           | Cereals, Other            | 5                                                           |
| 1               | Armenia | 2006           | Cheese                    | 13                                                          |
| 1               | Armenia | 2006           | Cocoa Beans               | 4                                                           |
| 1               | Armenia | 2006           | Coconut Oil               | 1                                                           |
| 1               | Armenia | 2006           | Coffee                    | 4                                                           |
| 1               | Armenia | 2006           | Eggs                      | 22                                                          |
| 1               | Armenia | 2006           | Fats, Animals, Raw        | 6                                                           |
| 1               | Armenia | 2006           | Fruits, Other             | 111                                                         |
| 1               | Armenia | 2006           | Grapefruit                | 1                                                           |
| 1               | Armenia | 2006           | Grapes                    | 67                                                          |
| 1               | Armenia | 2006           | Honey                     | 1                                                           |
| 1               | Armenia | 2006           | Lemons, Limes             | 1                                                           |
| 1               | Armenia | 2006           | Marine Fish, Other        | 2                                                           |
| 1               | Armenia | 2006           | Milk, Whole               | 349                                                         |
| 1               | Armenia | 2006           | Mutton & Goat Meat        | 7                                                           |
| 1               | Armenia | 2006           | Nuts                      | 1                                                           |
| 1               | Armenia | 2006           | Offals, Edible            | 10                                                          |
| 1               | Armenia | 2006           | Oilcrops Oil, Other       | 4                                                           |
| 1               | Armenia | 2006           | Olives                    | 3                                                           |
| 1               | Armenia | 2006           | Onions                    | 61                                                          |
| 1               | Armenia | 2006           | Oranges, Mandarines       | 15                                                          |
| 1               | Armenia | 2006           | Palmkernel Oil            | 1                                                           |
| 1               | Armenia | 2006           | Pelagic Fish              | 2                                                           |
| 1               | Armenia | 2006           | Pigmeat                   | 18                                                          |
| 1               | Armenia | 2006           | Pineapples                | 1                                                           |
| 1               | Armenia | 2006           | Potatoes                  | 178                                                         |
| 1               | Armenia | 2006           | Poultry Meat              | 14                                                          |
| 1               | Armenia | 2006           | Rice (Milled Equivalent)  | 15                                                          |
| 1               | Armenia | 2006           | Soyabean Oil              | 1                                                           |
| 1               | Armenia | 2006           | Sugar, Refined Equivalent | 84                                                          |
| 1               | Armenia | 2006           | Sunflowerseed Oil         | 10                                                          |
| 1               | Armenia | 2006           | Tomatoes                  | 268                                                         |
| 1               | Armenia | 2006           | Vegetables, Other         | 465                                                         |
| 1               | Armenia | 2006           | Wheat                     | 406                                                         |
| 1               | Armenia | 2006           | Wine                      | 4                                                           |
| 1               | Armenia | 2007           | Apples                    | 64                                                          |
| 1               | Armenia | 2007           | Bananas                   | 14                                                          |
| 1               | Armenia | 2007           | Beer                      | 16                                                          |

Dietary calcium and zinc deficiency risks are decreasing but remain prevalent

| FAO countrycode | Country | Reference year | Food item                 | Gross food supply (g capita <sup>-1</sup> d <sup>-1</sup> ) |
|-----------------|---------|----------------|---------------------------|-------------------------------------------------------------|
| 1               | Armenia | 2007           | Beverages, Alcoholic      | 5                                                           |
| 1               | Armenia | 2007           | Bovine Meat               | 46                                                          |
| 1               | Armenia | 2007           | Butter, Ghee              | 2                                                           |
| 1               | Armenia | 2007           | Cereals, Other            | 6                                                           |
| 1               | Armenia | 2007           | Cheese                    | 16                                                          |
| 1               | Armenia | 2007           | Cocoa Beans               | 5                                                           |
| 1               | Armenia | 2007           | Coconut Oil               | 1                                                           |
| 1               | Armenia | 2007           | Coffee                    | 5                                                           |
| 1               | Armenia | 2007           | Dates                     | 1                                                           |
| 1               | Armenia | 2007           | Eggs                      | 25                                                          |
| 1               | Armenia | 2007           | Fats, Animals, Raw        | 8                                                           |
| 1               | Armenia | 2007           | Freshwater Fish           | 4                                                           |
| 1               | Armenia | 2007           | Fruits, Other             | 126                                                         |
| 1               | Armenia | 2007           | Grapefruit                | 1                                                           |
| 1               | Armenia | 2007           | Grapes                    | 33                                                          |
| 1               | Armenia | 2007           | Honey                     | 2                                                           |
| 1               | Armenia | 2007           | Lemons, Limes             | 1                                                           |
| 1               | Armenia | 2007           | Marine Fish, Other        | 1                                                           |
| 1               | Armenia | 2007           | Milk, Whole               | 347                                                         |
| 1               | Armenia | 2007           | Mutton & Goat Meat        | 7                                                           |
| 1               | Armenia | 2007           | Nuts                      | 5                                                           |
| 1               | Armenia | 2007           | Offals, Edible            | 11                                                          |
| 1               | Armenia | 2007           | Oilcrops Oil, Other       | 4                                                           |
| 1               | Armenia | 2007           | Olives                    | 3                                                           |
| 1               | Armenia | 2007           | Onions                    | 58                                                          |
| 1               | Armenia | 2007           | Oranges, Mandarines       | 10                                                          |
| 1               | Armenia | 2007           | Palmkernel Oil            | 1                                                           |
| 1               | Armenia | 2007           | Pelagic Fish              | 2                                                           |
| 1               | Armenia | 2007           | Pig meat                  | 19                                                          |
| 1               | Armenia | 2007           | Pineapples                | 1                                                           |
| 1               | Armenia | 2007           | Potatoes                  | 140                                                         |
| 1               | Armenia | 2007           | Poultry Meat              | 30                                                          |
| 1               | Armenia | 2007           | Rice (Milled Equivalent)  | 14                                                          |
| 1               | Armenia | 2007           | Soyabean Oil              | 2                                                           |
| 1               | Armenia | 2007           | Sugar, Refined Equivalent | 78                                                          |
| 1               | Armenia | 2007           | Sunflowerseed Oil         | 12                                                          |
| 1               | Armenia | 2007           | Tomatoes                  | 267                                                         |
| 1               | Armenia | 2007           | Vegetables, Other         | 577                                                         |
| 1               | Armenia | 2007           | Wheat                     | 405                                                         |
| 1               | Armenia | 2007           | Wine                      | 3                                                           |
| 1               | Armenia | 2008           | Apples                    | 94                                                          |
| 1               | Armenia | 2008           | Bananas                   | 8                                                           |
| 1               | Armenia | 2008           | Barley                    | 8                                                           |
| 1               | Armenia | 2008           | Beer                      | 16                                                          |
| 1               | Armenia | 2008           | Beverages, Alcoholic      | 5                                                           |
| 1               | Armenia | 2008           | Bovine Meat               | 63                                                          |
| 1               | Armenia | 2008           | Butter, Ghee              | 5                                                           |
| 1               | Armenia | 2008           | Cereals, Other            | 5                                                           |
| 1               | Armenia | 2008           | Cheese                    | 16                                                          |
| 1               | Armenia | 2008           | Cocoa Beans               | 7                                                           |
| 1               | Armenia | 2008           | Coconut Oil               | 1                                                           |
| 1               | Armenia | 2008           | Coffee                    | 7                                                           |
| 1               | Armenia | 2008           | Eggs                      | 27                                                          |
| 1               | Armenia | 2008           | Fats, Animals, Raw        | 7                                                           |
| 1               | Armenia | 2008           | Freshwater Fish           | 4                                                           |
| 1               | Armenia | 2008           | Fruits, Other             | 116                                                         |
| 1               | Armenia | 2008           | Grapefruit                | 2                                                           |
| 1               | Armenia | 2008           | Grapes                    | 72                                                          |
| 1               | Armenia | 2008           | Groundnuts (Shelled Eq)   | 1                                                           |
| 1               | Armenia | 2008           | Honey                     | 1                                                           |
| 1               | Armenia | 2008           | Lemons, Limes             | 1                                                           |
| 1               | Armenia | 2008           | Marine Fish, Other        | 2                                                           |
| 1               | Armenia | 2008           | Milk, Whole               | 312                                                         |
| 1               | Armenia | 2008           | Mutton & Goat Meat        | 7                                                           |
| 1               | Armenia | 2008           | Nuts                      | 4                                                           |
| 1               | Armenia | 2008           | Offals, Edible            | 12                                                          |
| 1               | Armenia | 2008           | Oilcrops Oil, Other       | 5                                                           |
| 1               | Armenia | 2008           | Olives                    | 3                                                           |
| 1               | Armenia | 2008           | Onions                    | 58                                                          |
| 1               | Armenia | 2008           | Oranges, Mandarines       | 13                                                          |
| 1               | Armenia | 2008           | Pelagic Fish              | 3                                                           |
| 1               | Armenia | 2008           | Pig meat                  | 23                                                          |
| 1               | Armenia | 2008           | Pineapples                | 1                                                           |
| 1               | Armenia | 2008           | Potatoes                  | 138                                                         |
| 1               | Armenia | 2008           | Poultry Meat              | 40                                                          |
| 1               | Armenia | 2008           | Rice (Milled Equivalent)  | 12                                                          |
| 1               | Armenia | 2008           | Soyabean Oil              | 2                                                           |
| 1               | Armenia | 2008           | Sugar, Refined Equivalent | 83                                                          |
| 1               | Armenia | 2008           | Sunflowerseed Oil         | 11                                                          |
| 1               | Armenia | 2008           | Tomatoes                  | 261                                                         |
| 1               | Armenia | 2008           | Vegetables, Other         | 572                                                         |
| 1               | Armenia | 2008           | Wheat                     | 386                                                         |
| 1               | Armenia | 2008           | Wine                      | 3                                                           |
| 1               | Armenia | 2009           | Apples                    | 91                                                          |
| 1               | Armenia | 2009           | Bananas                   | 8                                                           |
| 1               | Armenia | 2009           | Barley                    | 5                                                           |
| 1               | Armenia | 2009           | Beer                      | 15                                                          |
| 1               | Armenia | 2009           | Beverages, Alcoholic      | 10                                                          |
| 1               | Armenia | 2009           | Bovine Meat               | 58                                                          |
| 1               | Armenia | 2009           | Butter, Ghee              | 3                                                           |
| 1               | Armenia | 2009           | Cereals, Other            | 4                                                           |
| 1               | Armenia | 2009           | Cheese                    | 16                                                          |
| 1               | Armenia | 2009           | Citrus, Other             | 2                                                           |
| 1               | Armenia | 2009           | Cocoa Beans               | 5                                                           |
| 1               | Armenia | 2009           | Coconut Oil               | 1                                                           |
| 1               | Armenia | 2009           | Coffee                    | 8                                                           |
| 1               | Armenia | 2009           | Eggs                      | 30                                                          |



Dietary calcium and zinc deficiency risks are decreasing but remain prevalent

| FAO countrycode | Country | Reference year | Food item                 | Gross food supply (g capita <sup>-1</sup> d <sup>-1</sup> ) |
|-----------------|---------|----------------|---------------------------|-------------------------------------------------------------|
| 1               | Armenia | 2009           | Fats, Animals, Raw        | 8                                                           |
| 1               | Armenia | 2009           | Freshwater Fish           | 5                                                           |
| 1               | Armenia | 2009           | Fruits, Other             | 119                                                         |
| 1               | Armenia | 2009           | Grapefruit                | 1                                                           |
| 1               | Armenia | 2009           | Grapes                    | 98                                                          |
| 1               | Armenia | 2009           | Honey                     | 2                                                           |
| 1               | Armenia | 2009           | Lemons, Limes             | 1                                                           |
| 1               | Armenia | 2009           | Marine Fish, Other        | 1                                                           |
| 1               | Armenia | 2009           | Milk, Whole               | 357                                                         |
| 1               | Armenia | 2009           | Mutton & Goat Meat        | 8                                                           |
| 1               | Armenia | 2009           | Nuts                      | 4                                                           |
| 1               | Armenia | 2009           | Oats                      | 1                                                           |
| 1               | Armenia | 2009           | Offals, Edible            | 12                                                          |
| 1               | Armenia | 2009           | Oilcrops Oil, Other       | 7                                                           |
| 1               | Armenia | 2009           | Olives                    | 2                                                           |
| 1               | Armenia | 2009           | Onions                    | 53                                                          |
| 1               | Armenia | 2009           | Oranges, Mandarines       | 10                                                          |
| 1               | Armenia | 2009           | Pelagic Fish              | 3                                                           |
| 1               | Armenia | 2009           | Pigmeat                   | 14                                                          |
| 1               | Armenia | 2009           | Pineapples                | 1                                                           |
| 1               | Armenia | 2009           | Potatoes                  | 157                                                         |
| 1               | Armenia | 2009           | Poultry Meat              | 31                                                          |
| 1               | Armenia | 2009           | Rice (Milled Equivalent)  | 12                                                          |
| 1               | Armenia | 2009           | Sugar, Refined Equivalent | 83                                                          |
| 1               | Armenia | 2009           | Sunflowerseed Oil         | 11                                                          |
| 1               | Armenia | 2009           | Tomatoes                  | 244                                                         |
| 1               | Armenia | 2009           | Vegetables, Other         | 621                                                         |
| 1               | Armenia | 2009           | Wheat                     | 363                                                         |
| 1               | Armenia | 2009           | Wine                      | 4                                                           |
| 1               | Armenia | 2010           | Apples                    | 39                                                          |
| 1               | Armenia | 2010           | Bananas                   | 8                                                           |
| 1               | Armenia | 2010           | Beer                      | 17                                                          |
| 1               | Armenia | 2010           | Beverages, Alcoholic      | 9                                                           |
| 1               | Armenia | 2010           | Bovine Meat               | 49                                                          |
| 1               | Armenia | 2010           | Butter, Ghee              | 4                                                           |
| 1               | Armenia | 2010           | Cereals, Other            | 6                                                           |
| 1               | Armenia | 2010           | Cheese                    | 16                                                          |
| 1               | Armenia | 2010           | Citrus, Other             | 3                                                           |
| 1               | Armenia | 2010           | Cocoa Beans               | 5                                                           |
| 1               | Armenia | 2010           | Coconut Oil               | 2                                                           |
| 1               | Armenia | 2010           | Coffee                    | 11                                                          |
| 1               | Armenia | 2010           | Dates                     | 1                                                           |
| 1               | Armenia | 2010           | Eggs                      | 34                                                          |
| 1               | Armenia | 2010           | Fats, Animals, Raw        | 9                                                           |
| 1               | Armenia | 2010           | Freshwater Fish           | 4                                                           |
| 1               | Armenia | 2010           | Fruits, Other             | 62                                                          |
| 1               | Armenia | 2010           | Grapefruit                | 2                                                           |
| 1               | Armenia | 2010           | Grapes                    | 49                                                          |
| 1               | Armenia | 2010           | Groundnuts (Shelled Eq)   | 1                                                           |
| 1               | Armenia | 2010           | Honey                     | 2                                                           |
| 1               | Armenia | 2010           | Lemons, Limes             | 1                                                           |
| 1               | Armenia | 2010           | Milk, Whole               | 390                                                         |
| 1               | Armenia | 2010           | Mutton & Goat Meat        | 7                                                           |
| 1               | Armenia | 2010           | Nuts                      | 4                                                           |
| 1               | Armenia | 2010           | Oats                      | 1                                                           |
| 1               | Armenia | 2010           | Offals, Edible            | 12                                                          |
| 1               | Armenia | 2010           | Oilcrops Oil, Other       | 7                                                           |
| 1               | Armenia | 2010           | Olives                    | 2                                                           |
| 1               | Armenia | 2010           | Onions                    | 43                                                          |
| 1               | Armenia | 2010           | Oranges, Mandarines       | 15                                                          |
| 1               | Armenia | 2010           | Pelagic Fish              | 2                                                           |
| 1               | Armenia | 2010           | Pigmeat                   | 17                                                          |
| 1               | Armenia | 2010           | Pineapples                | 1                                                           |
| 1               | Armenia | 2010           | Potatoes                  | 133                                                         |
| 1               | Armenia | 2010           | Poultry Meat              | 38                                                          |
| 1               | Armenia | 2010           | Rice (Milled Equivalent)  | 10                                                          |
| 1               | Armenia | 2010           | Sesameseed                | 1                                                           |
| 1               | Armenia | 2010           | Soybean Oil               | 1                                                           |
| 1               | Armenia | 2010           | Sugar, Refined Equivalent | 101                                                         |
| 1               | Armenia | 2010           | Sunflowerseed Oil         | 10                                                          |
| 1               | Armenia | 2010           | Sweeteners, Other         | 1                                                           |
| 1               | Armenia | 2010           | Tomatoes                  | 217                                                         |
| 1               | Armenia | 2010           | Vegetables, Other         | 483                                                         |
| 1               | Armenia | 2010           | Wheat                     | 366                                                         |
| 1               | Armenia | 2010           | Wine                      | 4                                                           |
| 1               | Armenia | 2011           | Apples                    | 55                                                          |
| 1               | Armenia | 2011           | Bananas                   | 10                                                          |
| 1               | Armenia | 2011           | Beer                      | 15                                                          |
| 1               | Armenia | 2011           | Beverages, Alcoholic      | 4                                                           |
| 1               | Armenia | 2011           | Bovine Meat               | 51                                                          |
| 1               | Armenia | 2011           | Butter, Ghee              | 5                                                           |
| 1               | Armenia | 2011           | Cereals, Other            | 23                                                          |
| 1               | Armenia | 2011           | Cheese                    | 17                                                          |
| 1               | Armenia | 2011           | Citrus, Other             | 2                                                           |
| 1               | Armenia | 2011           | Cocoa Beans               | 6                                                           |
| 1               | Armenia | 2011           | Coconut Oil               | 1                                                           |
| 1               | Armenia | 2011           | Coconuts - Incl Copra     | 1                                                           |
| 1               | Armenia | 2011           | Coffee                    | 11                                                          |
| 1               | Armenia | 2011           | Dates                     | 1                                                           |
| 1               | Armenia | 2011           | Eggs                      | 31                                                          |
| 1               | Armenia | 2011           | Fats, Animals, Raw        | 8                                                           |
| 1               | Armenia | 2011           | Freshwater Fish           | 5                                                           |
| 1               | Armenia | 2011           | Fruits, Other             | 96                                                          |
| 1               | Armenia | 2011           | Grapefruit                | 2                                                           |
| 1               | Armenia | 2011           | Grapes                    | 37                                                          |
| 1               | Armenia | 2011           | Groundnuts (Shelled Eq)   | 1                                                           |
| 1               | Armenia | 2011           | Honey                     | 2                                                           |

Dietary calcium and zinc deficiency risks are decreasing but remain prevalent

| FAO countrycode | Country   | Reference year | Food item                 | Gross food supply (g capita <sup>-1</sup> d <sup>-1</sup> ) |
|-----------------|-----------|----------------|---------------------------|-------------------------------------------------------------|
| 1               | Armenia   | 2011           | Lemons, Limes             | 1                                                           |
| 1               | Armenia   | 2011           | Milk, Whole               | 386                                                         |
| 1               | Armenia   | 2011           | Mutton & Goat Meat        | 8                                                           |
| 1               | Armenia   | 2011           | Nuts                      | 4                                                           |
| 1               | Armenia   | 2011           | Oats                      | 1                                                           |
| 1               | Armenia   | 2011           | Offals, Edible            | 12                                                          |
| 1               | Armenia   | 2011           | Oilcrops Oil, Other       | 5                                                           |
| 1               | Armenia   | 2011           | Olives                    | 3                                                           |
| 1               | Armenia   | 2011           | Onions                    | 47                                                          |
| 1               | Armenia   | 2011           | Oranges, Mandarines       | 14                                                          |
| 1               | Armenia   | 2011           | Pelagic Fish              | 3                                                           |
| 1               | Armenia   | 2011           | Pigmeat                   | 18                                                          |
| 1               | Armenia   | 2011           | Pineapples                | 1                                                           |
| 1               | Armenia   | 2011           | Potatoes                  | 121                                                         |
| 1               | Armenia   | 2011           | Poultry Meat              | 40                                                          |
| 1               | Armenia   | 2011           | Rice (Milled Equivalent)  | 8                                                           |
| 1               | Armenia   | 2011           | Soyabean Oil              | 1                                                           |
| 1               | Armenia   | 2011           | Sugar, Refined Equivalent | 91                                                          |
| 1               | Armenia   | 2011           | Sunflowerseed Oil         | 14                                                          |
| 1               | Armenia   | 2011           | Sweeteners, Other         | 3                                                           |
| 1               | Armenia   | 2011           | Tomatoes                  | 234                                                         |
| 1               | Armenia   | 2011           | Vegetables, Other         | 573                                                         |
| 1               | Armenia   | 2011           | Wheat                     | 364                                                         |
| 1               | Armenia   | 2011           | Wine                      | 5                                                           |
| 10              | Australia | 1992           | Apples                    | 43                                                          |
| 10              | Australia | 1992           | Bananas                   | 26                                                          |
| 10              | Australia | 1992           | Beer                      | 282                                                         |
| 10              | Australia | 1992           | Beverages, Alcoholic      | 4                                                           |
| 10              | Australia | 1992           | Beverages, Fermented      | 1                                                           |
| 10              | Australia | 1992           | Bovine Meat               | 119                                                         |
| 10              | Australia | 1992           | Butter, Ghee              | 7                                                           |
| 10              | Australia | 1992           | Cephalopods               | 1                                                           |
| 10              | Australia | 1992           | Cheese                    | 24                                                          |
| 10              | Australia | 1992           | Cocoa Beans               | 5                                                           |
| 10              | Australia | 1992           | Coconuts - Incl Copra     | 8                                                           |
| 10              | Australia | 1992           | Coffee                    | 8                                                           |
| 10              | Australia | 1992           | Cottonseed Oil            | 8                                                           |
| 10              | Australia | 1992           | Crustaceans               | 7                                                           |
| 10              | Australia | 1992           | Dates                     | 1                                                           |
| 10              | Australia | 1992           | Demersal Fish             | 20                                                          |
| 10              | Australia | 1992           | Eggs                      | 18                                                          |
| 10              | Australia | 1992           | Fats, Animals, Raw        | 12                                                          |
| 10              | Australia | 1992           | Freshwater Fish           | 4                                                           |
| 10              | Australia | 1992           | Fruits, Other             | 46                                                          |
| 10              | Australia | 1992           | Grapefruit                | 4                                                           |
| 10              | Australia | 1992           | Grapes                    | 21                                                          |
| 10              | Australia | 1992           | Groundnuts (Shelled Eq)   | 6                                                           |
| 10              | Australia | 1992           | Honey                     | 2                                                           |
| 10              | Australia | 1992           | Lemons, Limes             | 5                                                           |
| 10              | Australia | 1992           | Maize                     | 13                                                          |
| 10              | Australia | 1992           | Marine Fish, Other        | 9                                                           |
| 10              | Australia | 1992           | Meat, Other               | 2                                                           |
| 10              | Australia | 1992           | Milk, Whole               | 359                                                         |
| 10              | Australia | 1992           | Molluscs, Other           | 6                                                           |
| 10              | Australia | 1992           | Mutton & Goat Meat        | 57                                                          |
| 10              | Australia | 1992           | Nuts                      | 9                                                           |
| 10              | Australia | 1992           | Oats                      | 7                                                           |
| 10              | Australia | 1992           | Offals, Edible            | 29                                                          |
| 10              | Australia | 1992           | Olive Oil                 | 2                                                           |
| 10              | Australia | 1992           | Olives                    | 1                                                           |
| 10              | Australia | 1992           | Onions                    | 21                                                          |
| 10              | Australia | 1992           | Oranges, Mandarines       | 72                                                          |
| 10              | Australia | 1992           | Palm Oil                  | 13                                                          |
| 10              | Australia | 1992           | Peas                      | 4                                                           |
| 10              | Australia | 1992           | Pelagic Fish              | 9                                                           |
| 10              | Australia | 1992           | Pigmeat                   | 52                                                          |
| 10              | Australia | 1992           | Pineapples                | 24                                                          |
| 10              | Australia | 1992           | Potatoes                  | 155                                                         |
| 10              | Australia | 1992           | Poultry Meat              | 69                                                          |
| 10              | Australia | 1992           | Pulses, Other             | 2                                                           |
| 10              | Australia | 1992           | Rape and Mustard Oil      | 10                                                          |
| 10              | Australia | 1992           | Rice (Milled Equivalent)  | 15                                                          |
| 10              | Australia | 1992           | Rye                       | 4                                                           |
| 10              | Australia | 1992           | Soyabean Oil              | 6                                                           |
| 10              | Australia | 1992           | Sugar, Refined Equivalent | 118                                                         |
| 10              | Australia | 1992           | Sunflowerseed Oil         | 8                                                           |
| 10              | Australia | 1992           | Sweet Potatoes            | 1                                                           |
| 10              | Australia | 1992           | Sweeteners, Other         | 9                                                           |
| 10              | Australia | 1992           | Tea                       | 3                                                           |
| 10              | Australia | 1992           | Tomatoes                  | 56                                                          |
| 10              | Australia | 1992           | Vegetables, Other         | 150                                                         |
| 10              | Australia | 1992           | Wheat                     | 186                                                         |
| 10              | Australia | 1992           | Wine                      | 51                                                          |
| 10              | Australia | 1993           | Apples                    | 46                                                          |
| 10              | Australia | 1993           | Bananas                   | 31                                                          |
| 10              | Australia | 1993           | Beer                      | 272                                                         |
| 10              | Australia | 1993           | Beverages, Alcoholic      | 4                                                           |
| 10              | Australia | 1993           | Beverages, Fermented      | 1                                                           |
| 10              | Australia | 1993           | Bovine Meat               | 115                                                         |
| 10              | Australia | 1993           | Butter, Ghee              | 7                                                           |
| 10              | Australia | 1993           | Cephalopods               | 1                                                           |
| 10              | Australia | 1993           | Cheese                    | 23                                                          |
| 10              | Australia | 1993           | Cocoa Beans               | 5                                                           |
| 10              | Australia | 1993           | Coconut Oil               | 2                                                           |
| 10              | Australia | 1993           | Coconuts - Incl Copra     | 8                                                           |
| 10              | Australia | 1993           | Coffee                    | 8                                                           |
| 10              | Australia | 1993           | Cottonseed Oil            | 6                                                           |

Dietary calcium and zinc deficiency risks are decreasing but remain prevalent

| FAO countrycode | Country   | Reference year | Food item                 | Gross food supply (g capita <sup>-1</sup> d <sup>-1</sup> ) |
|-----------------|-----------|----------------|---------------------------|-------------------------------------------------------------|
| 10              | Australia | 1993           | Crustaceans               | 8                                                           |
| 10              | Australia | 1993           | Dates                     | 1                                                           |
| 10              | Australia | 1993           | Demersal Fish             | 20                                                          |
| 10              | Australia | 1993           | Eggs                      | 18                                                          |
| 10              | Australia | 1993           | Fats, Animals, Raw        | 11                                                          |
| 10              | Australia | 1993           | Freshwater Fish           | 3                                                           |
| 10              | Australia | 1993           | Fruits, Other             | 45                                                          |
| 10              | Australia | 1993           | Grapefruit                | 3                                                           |
| 10              | Australia | 1993           | Grapes                    | 15                                                          |
| 10              | Australia | 1993           | Groundnuts (Shelled Eq)   | 5                                                           |
| 10              | Australia | 1993           | Honey                     | 2                                                           |
| 10              | Australia | 1993           | Lemons, Limes             | 5                                                           |
| 10              | Australia | 1993           | Maize                     | 12                                                          |
| 10              | Australia | 1993           | Marine Fish, Other        | 8                                                           |
| 10              | Australia | 1993           | Meat, Other               | 2                                                           |
| 10              | Australia | 1993           | Milk, Whole               | 357                                                         |
| 10              | Australia | 1993           | Molluscs, Other           | 4                                                           |
| 10              | Australia | 1993           | Mutton & Goat Meat        | 57                                                          |
| 10              | Australia | 1993           | Nuts                      | 9                                                           |
| 10              | Australia | 1993           | Oats                      | 5                                                           |
| 10              | Australia | 1993           | Offals, Edible            | 28                                                          |
| 10              | Australia | 1993           | Olive Oil                 | 3                                                           |
| 10              | Australia | 1993           | Olives                    | 1                                                           |
| 10              | Australia | 1993           | Onions                    | 19                                                          |
| 10              | Australia | 1993           | Oranges, Mandarines       | 90                                                          |
| 10              | Australia | 1993           | Palm Oil                  | 12                                                          |
| 10              | Australia | 1993           | Peas                      | 1                                                           |
| 10              | Australia | 1993           | Pelagic Fish              | 10                                                          |
| 10              | Australia | 1993           | Pig meat                  | 50                                                          |
| 10              | Australia | 1993           | Pineapples                | 24                                                          |
| 10              | Australia | 1993           | Potatoes                  | 150                                                         |
| 10              | Australia | 1993           | Poultry Meat              | 71                                                          |
| 10              | Australia | 1993           | Pulses, Other             | 2                                                           |
| 10              | Australia | 1993           | Rape and Mustard Oil      | 13                                                          |
| 10              | Australia | 1993           | Rice (Milled Equivalent)  | 17                                                          |
| 10              | Australia | 1993           | Rye                       | 3                                                           |
| 10              | Australia | 1993           | Soybean Oil               | 6                                                           |
| 10              | Australia | 1993           | Sugar, Refined Equivalent | 103                                                         |
| 10              | Australia | 1993           | Sunflowerseed Oil         | 7                                                           |
| 10              | Australia | 1993           | Sweet Potatoes            | 1                                                           |
| 10              | Australia | 1993           | Sweeteners, Other         | 12                                                          |
| 10              | Australia | 1993           | Tea                       | 3                                                           |
| 10              | Australia | 1993           | Tomatoes                  | 49                                                          |
| 10              | Australia | 1993           | Vegetables, Other         | 149                                                         |
| 10              | Australia | 1993           | Wheat                     | 191                                                         |
| 10              | Australia | 1993           | Wine                      | 50                                                          |
| 10              | Australia | 1994           | Apples                    | 40                                                          |
| 10              | Australia | 1994           | Bananas                   | 30                                                          |
| 10              | Australia | 1994           | Beer                      | 264                                                         |
| 10              | Australia | 1994           | Beverages, Alcoholic      | 4                                                           |
| 10              | Australia | 1994           | Beverages, Fermented      | 1                                                           |
| 10              | Australia | 1994           | Bovine Meat               | 115                                                         |
| 10              | Australia | 1994           | Butter, Ghee              | 8                                                           |
| 10              | Australia | 1994           | Cephalopods               | 2                                                           |
| 10              | Australia | 1994           | Cheese                    | 24                                                          |
| 10              | Australia | 1994           | Cocoa Beans               | 5                                                           |
| 10              | Australia | 1994           | Coconut Oil               | 1                                                           |
| 10              | Australia | 1994           | Coconuts - Incl Copra     | 8                                                           |
| 10              | Australia | 1994           | Coffee                    | 9                                                           |
| 10              | Australia | 1994           | Cottonseed Oil            | 5                                                           |
| 10              | Australia | 1994           | Crustaceans               | 6                                                           |
| 10              | Australia | 1994           | Dates                     | 1                                                           |
| 10              | Australia | 1994           | Demersal Fish             | 23                                                          |
| 10              | Australia | 1994           | Eggs                      | 18                                                          |
| 10              | Australia | 1994           | Fats, Animals, Raw        | 10                                                          |
| 10              | Australia | 1994           | Freshwater Fish           | 2                                                           |
| 10              | Australia | 1994           | Fruits, Other             | 43                                                          |
| 10              | Australia | 1994           | Grapefruit                | 3                                                           |
| 10              | Australia | 1994           | Grapes                    | 17                                                          |
| 10              | Australia | 1994           | Groundnuts (Shelled Eq)   | 3                                                           |
| 10              | Australia | 1994           | Honey                     | 2                                                           |
| 10              | Australia | 1994           | Lemons, Limes             | 5                                                           |
| 10              | Australia | 1994           | Maize                     | 12                                                          |
| 10              | Australia | 1994           | Marine Fish, Other        | 5                                                           |
| 10              | Australia | 1994           | Meat, Other               | 2                                                           |
| 10              | Australia | 1994           | Milk, Whole               | 363                                                         |
| 10              | Australia | 1994           | Molluscs, Other           | 6                                                           |
| 10              | Australia | 1994           | Mutton & Goat Meat        | 54                                                          |
| 10              | Australia | 1994           | Nuts                      | 9                                                           |
| 10              | Australia | 1994           | Oats                      | 8                                                           |
| 10              | Australia | 1994           | Offals, Edible            | 28                                                          |
| 10              | Australia | 1994           | Olive Oil                 | 2                                                           |
| 10              | Australia | 1994           | Olives                    | 1                                                           |
| 10              | Australia | 1994           | Onions                    | 21                                                          |
| 10              | Australia | 1994           | Oranges, Mandarines       | 83                                                          |
| 10              | Australia | 1994           | Palm Oil                  | 13                                                          |
| 10              | Australia | 1994           | Peas                      | 2                                                           |
| 10              | Australia | 1994           | Pelagic Fish              | 10                                                          |
| 10              | Australia | 1994           | Pigmeat                   | 52                                                          |
| 10              | Australia | 1994           | Pineapples                | 25                                                          |
| 10              | Australia | 1994           | Potatoes                  | 155                                                         |
| 10              | Australia | 1994           | Poultry Meat              | 73                                                          |
| 10              | Australia | 1994           | Pulses, Other             | 2                                                           |
| 10              | Australia | 1994           | Rape and Mustard Oil      | 10                                                          |
| 10              | Australia | 1994           | Rice (Milled Equivalent)  | 18                                                          |
| 10              | Australia | 1994           | Rye                       | 3                                                           |
| 10              | Australia | 1994           | Soybean Oil               | 6                                                           |

Dietary calcium and zinc deficiency risks are decreasing but remain prevalent

| FAO countrycode | Country   | Reference year | Food item                 | Gross food supply (g capita <sup>-1</sup> d <sup>-1</sup> ) |
|-----------------|-----------|----------------|---------------------------|-------------------------------------------------------------|
| 10              | Australia | 1994           | Sugar, Refined Equivalent | 100                                                         |
| 10              | Australia | 1994           | Sunflowerseed Oil         | 6                                                           |
| 10              | Australia | 1994           | Sweet Potatoes            | 1                                                           |
| 10              | Australia | 1994           | Sweeteners, Other         | 12                                                          |
| 10              | Australia | 1994           | Tea                       | 3                                                           |
| 10              | Australia | 1994           | Tomatoes                  | 65                                                          |
| 10              | Australia | 1994           | Vegetables, Other         | 155                                                         |
| 10              | Australia | 1994           | Wheat                     | 202                                                         |
| 10              | Australia | 1994           | Wine                      | 50                                                          |
| 10              | Australia | 1995           | Apples                    | 42                                                          |
| 10              | Australia | 1995           | Bananas                   | 30                                                          |
| 10              | Australia | 1995           | Beans                     | 1                                                           |
| 10              | Australia | 1995           | Beer                      | 258                                                         |
| 10              | Australia | 1995           | Beverages, Alcoholic      | 4                                                           |
| 10              | Australia | 1995           | Beverages, Fermented      | 1                                                           |
| 10              | Australia | 1995           | Bovine Meat               | 112                                                         |
| 10              | Australia | 1995           | Butter, Ghee              | 9                                                           |
| 10              | Australia | 1995           | Cephalopods               | 2                                                           |
| 10              | Australia | 1995           | Cheese                    | 22                                                          |
| 10              | Australia | 1995           | Cocoa Beans               | 6                                                           |
| 10              | Australia | 1995           | Coconut Oil               | 2                                                           |
| 10              | Australia | 1995           | Coconuts - Incl Copra     | 6                                                           |
| 10              | Australia | 1995           | Coffee                    | 13                                                          |
| 10              | Australia | 1995           | Cottonseed Oil            | 7                                                           |
| 10              | Australia | 1995           | Crustaceans               | 5                                                           |
| 10              | Australia | 1995           | Demersal Fish             | 23                                                          |
| 10              | Australia | 1995           | Eggs                      | 17                                                          |
| 10              | Australia | 1995           | Fats, Animals, Raw        | 9                                                           |
| 10              | Australia | 1995           | Freshwater Fish           | 3                                                           |
| 10              | Australia | 1995           | Fruits, Other             | 41                                                          |
| 10              | Australia | 1995           | Grapefruit                | 2                                                           |
| 10              | Australia | 1995           | Grapes                    | 19                                                          |
| 10              | Australia | 1995           | Groundnuts (Shelled Eq)   | 4                                                           |
| 10              | Australia | 1995           | Honey                     | 1                                                           |
| 10              | Australia | 1995           | Lemons, Limes             | 5                                                           |
| 10              | Australia | 1995           | Maize                     | 12                                                          |
| 10              | Australia | 1995           | Marine Fish, Other        | 5                                                           |
| 10              | Australia | 1995           | Meat, Other               | 2                                                           |
| 10              | Australia | 1995           | Milk, Whole               | 377                                                         |
| 10              | Australia | 1995           | Molluscs, Other           | 4                                                           |
| 10              | Australia | 1995           | Mutton & Goat Meat        | 50                                                          |
| 10              | Australia | 1995           | Nuts                      | 10                                                          |
| 10              | Australia | 1995           | Oats                      | 6                                                           |
| 10              | Australia | 1995           | Offals, Edible            | 28                                                          |
| 10              | Australia | 1995           | Olive Oil                 | 3                                                           |
| 10              | Australia | 1995           | Olives                    | 1                                                           |
| 10              | Australia | 1995           | Onions                    | 18                                                          |
| 10              | Australia | 1995           | Oranges, Mandarines       | 71                                                          |
| 10              | Australia | 1995           | Palm Oil                  | 14                                                          |
| 10              | Australia | 1995           | Peas                      | 2                                                           |
| 10              | Australia | 1995           | Pelagic Fish              | 10                                                          |
| 10              | Australia | 1995           | Pigmeat                   | 53                                                          |
| 10              | Australia | 1995           | Pineapples                | 22                                                          |
| 10              | Australia | 1995           | Potatoes                  | 145                                                         |
| 10              | Australia | 1995           | Poultry Meat              | 72                                                          |
| 10              | Australia | 1995           | Pulses, Other             | 3                                                           |
| 10              | Australia | 1995           | Rape and Mustard Oil      | 11                                                          |
| 10              | Australia | 1995           | Rice (Milled Equivalent)  | 19                                                          |
| 10              | Australia | 1995           | Rye                       | 3                                                           |
| 10              | Australia | 1995           | Soyabean Oil              | 5                                                           |
| 10              | Australia | 1995           | Sugar, Refined Equivalent | 110                                                         |
| 10              | Australia | 1995           | Sunflowerseed Oil         | 4                                                           |
| 10              | Australia | 1995           | Sweet Potatoes            | 1                                                           |
| 10              | Australia | 1995           | Sweeteners, Other         | 11                                                          |
| 10              | Australia | 1995           | Tea                       | 2                                                           |
| 10              | Australia | 1995           | Tomatoes                  | 60                                                          |
| 10              | Australia | 1995           | Vegetables, Other         | 158                                                         |
| 10              | Australia | 1995           | Wheat                     | 214                                                         |
| 10              | Australia | 1995           | Wine                      | 50                                                          |
| 10              | Australia | 1996           | Apples                    | 38                                                          |
| 10              | Australia | 1996           | Bananas                   | 30                                                          |
| 10              | Australia | 1996           | Beans                     | 5                                                           |
| 10              | Australia | 1996           | Beer                      | 253                                                         |
| 10              | Australia | 1996           | Beverages, Alcoholic      | 5                                                           |
| 10              | Australia | 1996           | Bovine Meat               | 115                                                         |
| 10              | Australia | 1996           | Butter, Ghee              | 8                                                           |
| 10              | Australia | 1996           | Cephalopods               | 2                                                           |
| 10              | Australia | 1996           | Cheese                    | 24                                                          |
| 10              | Australia | 1996           | Cocoa Beans               | 6                                                           |
| 10              | Australia | 1996           | Coconut Oil               | 2                                                           |
| 10              | Australia | 1996           | Coconuts - Incl Copra     | 7                                                           |
| 10              | Australia | 1996           | Coffee                    | 12                                                          |
| 10              | Australia | 1996           | Cottonseed Oil            | 7                                                           |
| 10              | Australia | 1996           | Crustaceans               | 7                                                           |
| 10              | Australia | 1996           | Dates                     | 1                                                           |
| 10              | Australia | 1996           | Demersal Fish             | 23                                                          |
| 10              | Australia | 1996           | Eggs                      | 16                                                          |
| 10              | Australia | 1996           | Fats, Animals, Raw        | 9                                                           |
| 10              | Australia | 1996           | Freshwater Fish           | 3                                                           |
| 10              | Australia | 1996           | Fruits, Other             | 44                                                          |
| 10              | Australia | 1996           | Grapefruit                | 3                                                           |
| 10              | Australia | 1996           | Grapes                    | 25                                                          |
| 10              | Australia | 1996           | Groundnuts (Shelled Eq)   | 4                                                           |
| 10              | Australia | 1996           | Honey                     | 2                                                           |
| 10              | Australia | 1996           | Lemons, Limes             | 4                                                           |
| 10              | Australia | 1996           | Maize                     | 12                                                          |
| 10              | Australia | 1996           | Marine Fish, Other        | 7                                                           |

Dietary calcium and zinc deficiency risks are decreasing but remain prevalent

| FAO countrycode | Country   | Reference year | Food item                 | Gross food supply (g capita <sup>-1</sup> d <sup>-1</sup> ) |
|-----------------|-----------|----------------|---------------------------|-------------------------------------------------------------|
| 10              | Australia | 1996           | Meat, Other               | 2                                                           |
| 10              | Australia | 1996           | Milk, Whole               | 371                                                         |
| 10              | Australia | 1996           | Molluscs, Other           | 6                                                           |
| 10              | Australia | 1996           | Mutton & Goat Meat        | 45                                                          |
| 10              | Australia | 1996           | Nuts                      | 10                                                          |
| 10              | Australia | 1996           | Oats                      | 4                                                           |
| 10              | Australia | 1996           | Offals, Edible            | 26                                                          |
| 10              | Australia | 1996           | Olive Oil                 | 2                                                           |
| 10              | Australia | 1996           | Olives                    | 1                                                           |
| 10              | Australia | 1996           | Onions                    | 25                                                          |
| 10              | Australia | 1996           | Oranges, Mandarines       | 59                                                          |
| 10              | Australia | 1996           | Palm Oil                  | 14                                                          |
| 10              | Australia | 1996           | Peas                      | 2                                                           |
| 10              | Australia | 1996           | Pelagic Fish              | 8                                                           |
| 10              | Australia | 1996           | Pigmeat                   | 50                                                          |
| 10              | Australia | 1996           | Pineapples                | 20                                                          |
| 10              | Australia | 1996           | Potatoes                  | 166                                                         |
| 10              | Australia | 1996           | Poultry Meat              | 73                                                          |
| 10              | Australia | 1996           | Pulses, Other             | 2                                                           |
| 10              | Australia | 1996           | Rape and Mustard Oil      | 9                                                           |
| 10              | Australia | 1996           | Rice (Milled Equivalent)  | 22                                                          |
| 10              | Australia | 1996           | Rye                       | 3                                                           |
| 10              | Australia | 1996           | Soyabean Oil              | 5                                                           |
| 10              | Australia | 1996           | Sugar, Refined Equivalent | 106                                                         |
| 10              | Australia | 1996           | Sunflowerseed Oil         | 5                                                           |
| 10              | Australia | 1996           | Sweet Potatoes            | 1                                                           |
| 10              | Australia | 1996           | Sweeteners, Other         | 7                                                           |
| 10              | Australia | 1996           | Tea                       | 2                                                           |
| 10              | Australia | 1996           | Tomatoes                  | 60                                                          |
| 10              | Australia | 1996           | Vegetables, Other         | 166                                                         |
| 10              | Australia | 1996           | Wheat                     | 207                                                         |
| 10              | Australia | 1996           | Wine                      | 49                                                          |
| 10              | Australia | 1997           | Apples                    | 46                                                          |
| 10              | Australia | 1997           | Bananas                   | 28                                                          |
| 10              | Australia | 1997           | Beans                     | 2                                                           |
| 10              | Australia | 1997           | Beer                      | 254                                                         |
| 10              | Australia | 1997           | Beverages, Alcoholic      | 3                                                           |
| 10              | Australia | 1997           | Beverages, Fermented      | 1                                                           |
| 10              | Australia | 1997           | Bovine Meat               | 101                                                         |
| 10              | Australia | 1997           | Butter, Ghee              | 8                                                           |
| 10              | Australia | 1997           | Cephalopods               | 2                                                           |
| 10              | Australia | 1997           | Cheese                    | 24                                                          |
| 10              | Australia | 1997           | Cocoa Beans               | 6                                                           |
| 10              | Australia | 1997           | Coconut Oil               | 1                                                           |
| 10              | Australia | 1997           | Coconuts - Incl Copra     | 7                                                           |
| 10              | Australia | 1997           | Coffee                    | 9                                                           |
| 10              | Australia | 1997           | Cottonseed Oil            | 7                                                           |
| 10              | Australia | 1997           | Crustaceans               | 9                                                           |
| 10              | Australia | 1997           | Dates                     | 1                                                           |
| 10              | Australia | 1997           | Demersal Fish             | 22                                                          |
| 10              | Australia | 1997           | Eggs                      | 17                                                          |
| 10              | Australia | 1997           | Fats, Animals, Raw        | 9                                                           |
| 10              | Australia | 1997           | Freshwater Fish           | 3                                                           |
| 10              | Australia | 1997           | Fruits, Other             | 49                                                          |
| 10              | Australia | 1997           | Grapefruit                | 2                                                           |
| 10              | Australia | 1997           | Grapes                    | 27                                                          |
| 10              | Australia | 1997           | Groundnuts (Shelled Eq)   | 4                                                           |
| 10              | Australia | 1997           | Honey                     | 2                                                           |
| 10              | Australia | 1997           | Lemons, Limes             | 5                                                           |
| 10              | Australia | 1997           | Maize                     | 13                                                          |
| 10              | Australia | 1997           | Marine Fish, Other        | 7                                                           |
| 10              | Australia | 1997           | Meat, Other               | 2                                                           |
| 10              | Australia | 1997           | Milk, Whole               | 343                                                         |
| 10              | Australia | 1997           | Molluscs, Other           | 6                                                           |
| 10              | Australia | 1997           | Mutton & Goat Meat        | 46                                                          |
| 10              | Australia | 1997           | Nuts                      | 11                                                          |
| 10              | Australia | 1997           | Oats                      | 3                                                           |
| 10              | Australia | 1997           | Offals, Edible            | 26                                                          |
| 10              | Australia | 1997           | Olive Oil                 | 3                                                           |
| 10              | Australia | 1997           | Olives                    | 1                                                           |
| 10              | Australia | 1997           | Onions                    | 23                                                          |
| 10              | Australia | 1997           | Oranges, Mandarines       | 70                                                          |
| 10              | Australia | 1997           | Palm Oil                  | 12                                                          |
| 10              | Australia | 1997           | Peas                      | 1                                                           |
| 10              | Australia | 1997           | Pelagic Fish              | 7                                                           |
| 10              | Australia | 1997           | Pigmeat                   | 52                                                          |
| 10              | Australia | 1997           | Pineapples                | 20                                                          |
| 10              | Australia | 1997           | Potatoes                  | 160                                                         |
| 10              | Australia | 1997           | Poultry Meat              | 85                                                          |
| 10              | Australia | 1997           | Pulses, Other             | 2                                                           |
| 10              | Australia | 1997           | Rape and Mustard Oil      | 16                                                          |
| 10              | Australia | 1997           | Rice (Milled Equivalent)  | 22                                                          |
| 10              | Australia | 1997           | Rye                       | 3                                                           |
| 10              | Australia | 1997           | Soyabean Oil              | 4                                                           |
| 10              | Australia | 1997           | Sugar, Refined Equivalent | 112                                                         |
| 10              | Australia | 1997           | Sunflowerseed Oil         | 6                                                           |
| 10              | Australia | 1997           | Sweet Potatoes            | 1                                                           |
| 10              | Australia | 1997           | Sweeteners, Other         | 11                                                          |
| 10              | Australia | 1997           | Tea                       | 2                                                           |
| 10              | Australia | 1997           | Tomatoes                  | 63                                                          |
| 10              | Australia | 1997           | Vegetables, Other         | 160                                                         |
| 10              | Australia | 1997           | Wheat                     | 204                                                         |
| 10              | Australia | 1997           | Wine                      | 51                                                          |
| 10              | Australia | 1998           | Apples                    | 40                                                          |
| 10              | Australia | 1998           | Bananas                   | 31                                                          |
| 10              | Australia | 1998           | Beans                     | 2                                                           |
| 10              | Australia | 1998           | Beer                      | 249                                                         |

Dietary calcium and zinc deficiency risks are decreasing but remain prevalent

| FAO countrycode | Country   | Reference year | Food item                 | Gross food supply (g capita <sup>-1</sup> d <sup>-1</sup> ) |
|-----------------|-----------|----------------|---------------------------|-------------------------------------------------------------|
| 10              | Australia | 1998           | Beverages, Alcoholic      | 4                                                           |
| 10              | Australia | 1998           | Beverages, Fermented      | 1                                                           |
| 10              | Australia | 1998           | Bovine Meat               | 107                                                         |
| 10              | Australia | 1998           | Butter, Ghee              | 8                                                           |
| 10              | Australia | 1998           | Cephalopods               | 2                                                           |
| 10              | Australia | 1998           | Cheese                    | 22                                                          |
| 10              | Australia | 1998           | Cocoa Beans               | 6                                                           |
| 10              | Australia | 1998           | Coconut Oil               | 1                                                           |
| 10              | Australia | 1998           | Coconuts - Incl Copra     | 6                                                           |
| 10              | Australia | 1998           | Coffee                    | 9                                                           |
| 10              | Australia | 1998           | Cottonseed Oil            | 6                                                           |
| 10              | Australia | 1998           | Crustaceans               | 9                                                           |
| 10              | Australia | 1998           | Dates                     | 1                                                           |
| 10              | Australia | 1998           | Demersal Fish             | 23                                                          |
| 10              | Australia | 1998           | Eggs                      | 17                                                          |
| 10              | Australia | 1998           | Fats, Animals, Raw        | 9                                                           |
| 10              | Australia | 1998           | Freshwater Fish           | 3                                                           |
| 10              | Australia | 1998           | Fruits, Other             | 45                                                          |
| 10              | Australia | 1998           | Grapefruit                | 3                                                           |
| 10              | Australia | 1998           | Grapes                    | 28                                                          |
| 10              | Australia | 1998           | Groundnuts (Shelled Eq)   | 3                                                           |
| 10              | Australia | 1998           | Honey                     | 2                                                           |
| 10              | Australia | 1998           | Lemons, Limes             | 4                                                           |
| 10              | Australia | 1998           | Maize                     | 13                                                          |
| 10              | Australia | 1998           | Marine Fish, Other        | 7                                                           |
| 10              | Australia | 1998           | Meat, Other               | 2                                                           |
| 10              | Australia | 1998           | Milk, Whole               | 298                                                         |
| 10              | Australia | 1998           | Molluscs, Other           | 6                                                           |
| 10              | Australia | 1998           | Mutton & Goat Meat        | 46                                                          |
| 10              | Australia | 1998           | Nuts                      | 11                                                          |
| 10              | Australia | 1998           | Oats                      | 4                                                           |
| 10              | Australia | 1998           | Offals, Edible            | 28                                                          |
| 10              | Australia | 1998           | Olive Oil                 | 2                                                           |
| 10              | Australia | 1998           | Olives                    | 1                                                           |
| 10              | Australia | 1998           | Onions                    | 23                                                          |
| 10              | Australia | 1998           | Oranges, Mandarines       | 66                                                          |
| 10              | Australia | 1998           | Palm Oil                  | 14                                                          |
| 10              | Australia | 1998           | Peas                      | 1                                                           |
| 10              | Australia | 1998           | Pelagic Fish              | 5                                                           |
| 10              | Australia | 1998           | Pigmeat                   | 53                                                          |
| 10              | Australia | 1998           | Pineapples                | 19                                                          |
| 10              | Australia | 1998           | Potatoes                  | 169                                                         |
| 10              | Australia | 1998           | Poultry Meat              | 89                                                          |
| 10              | Australia | 1998           | Pulses, Other             | 2                                                           |
| 10              | Australia | 1998           | Rape and Mustard Oil      | 15                                                          |
| 10              | Australia | 1998           | Rice (Milled Equivalent)  | 21                                                          |
| 10              | Australia | 1998           | Rye                       | 3                                                           |
| 10              | Australia | 1998           | Soyabean Oil              | 2                                                           |
| 10              | Australia | 1998           | Sugar, Refined Equivalent | 109                                                         |
| 10              | Australia | 1998           | Sunflowerseed Oil         | 6                                                           |
| 10              | Australia | 1998           | Sweet Potatoes            | 2                                                           |
| 10              | Australia | 1998           | Sweeteners, Other         | 11                                                          |
| 10              | Australia | 1998           | Tea                       | 2                                                           |
| 10              | Australia | 1998           | Tomatoes                  | 61                                                          |
| 10              | Australia | 1998           | Vegetables, Other         | 164                                                         |
| 10              | Australia | 1998           | Wheat                     | 188                                                         |
| 10              | Australia | 1998           | Wine                      | 53                                                          |
| 10              | Australia | 1999           | Apples                    | 45                                                          |
| 10              | Australia | 1999           | Bananas                   | 29                                                          |
| 10              | Australia | 1999           | Beans                     | 1                                                           |
| 10              | Australia | 1999           | Beer                      | 250                                                         |
| 10              | Australia | 1999           | Beverages, Alcoholic      | 3                                                           |
| 10              | Australia | 1999           | Beverages, Fermented      | 1                                                           |
| 10              | Australia | 1999           | Bovine Meat               | 116                                                         |
| 10              | Australia | 1999           | Butter, Ghee              | 8                                                           |
| 10              | Australia | 1999           | Cephalopods               | 2                                                           |
| 10              | Australia | 1999           | Cheese                    | 24                                                          |
| 10              | Australia | 1999           | Cocoa Beans               | 4                                                           |
| 10              | Australia | 1999           | Coconut Oil               | 1                                                           |
| 10              | Australia | 1999           | Coconuts - Incl Copra     | 7                                                           |
| 10              | Australia | 1999           | Coffee                    | 11                                                          |
| 10              | Australia | 1999           | Cottonseed Oil            | 5                                                           |
| 10              | Australia | 1999           | Crustaceans               | 9                                                           |
| 10              | Australia | 1999           | Dates                     | 1                                                           |
| 10              | Australia | 1999           | Demersal Fish             | 23                                                          |
| 10              | Australia | 1999           | Eggs                      | 18                                                          |
| 10              | Australia | 1999           | Fats, Animals, Raw        | 9                                                           |
| 10              | Australia | 1999           | Freshwater Fish           | 3                                                           |
| 10              | Australia | 1999           | Fruits, Other             | 49                                                          |
| 10              | Australia | 1999           | Grapefruit                | 2                                                           |
| 10              | Australia | 1999           | Grapes                    | 28                                                          |
| 10              | Australia | 1999           | Groundnuts (Shelled Eq)   | 4                                                           |
| 10              | Australia | 1999           | Honey                     | 1                                                           |
| 10              | Australia | 1999           | Lemons, Limes             | 4                                                           |
| 10              | Australia | 1999           | Maize                     | 12                                                          |
| 10              | Australia | 1999           | Marine Fish, Other        | 7                                                           |
| 10              | Australia | 1999           | Meat, Other               | 2                                                           |
| 10              | Australia | 1999           | Milk, Whole               | 300                                                         |
| 10              | Australia | 1999           | Molluscs, Other           | 7                                                           |
| 10              | Australia | 1999           | Mutton & Goat Meat        | 43                                                          |
| 10              | Australia | 1999           | Nuts                      | 12                                                          |
| 10              | Australia | 1999           | Oats                      | 4                                                           |
| 10              | Australia | 1999           | Offals, Edible            | 28                                                          |
| 10              | Australia | 1999           | Olive Oil                 | 3                                                           |
| 10              | Australia | 1999           | Olives                    | 2                                                           |
| 10              | Australia | 1999           | Onions                    | 22                                                          |
| 10              | Australia | 1999           | Oranges, Mandarines       | 61                                                          |

Dietary calcium and zinc deficiency risks are decreasing but remain prevalent

| FAO countrycode | Country   | Reference year | Food item                 | Gross food supply (g capita <sup>-1</sup> d <sup>-1</sup> ) |
|-----------------|-----------|----------------|---------------------------|-------------------------------------------------------------|
| 10              | Australia | 1999           | Palm Oil                  | 15                                                          |
| 10              | Australia | 1999           | Peas                      | 1                                                           |
| 10              | Australia | 1999           | Pelagic Fish              | 6                                                           |
| 10              | Australia | 1999           | Pigmeat                   | 52                                                          |
| 10              | Australia | 1999           | Pineapples                | 21                                                          |
| 10              | Australia | 1999           | Potatoes                  | 161                                                         |
| 10              | Australia | 1999           | Poultry Meat              | 84                                                          |
| 10              | Australia | 1999           | Pulses, Other             | 2                                                           |
| 10              | Australia | 1999           | Rape and Mustard Oil      | 17                                                          |
| 10              | Australia | 1999           | Rice (Milled Equivalent)  | 22                                                          |
| 10              | Australia | 1999           | Rye                       | 3                                                           |
| 10              | Australia | 1999           | Sesameseed Oil            | 1                                                           |
| 10              | Australia | 1999           | Soyabean Oil              | 3                                                           |
| 10              | Australia | 1999           | Sugar, Refined Equivalent | 98                                                          |
| 10              | Australia | 1999           | Sunflowerseed Oil         | 7                                                           |
| 10              | Australia | 1999           | Sweet Potatoes            | 3                                                           |
| 10              | Australia | 1999           | Sweeteners, Other         | 13                                                          |
| 10              | Australia | 1999           | Tea                       | 2                                                           |
| 10              | Australia | 1999           | Tomatoes                  | 61                                                          |
| 10              | Australia | 1999           | Vegetables, Other         | 161                                                         |
| 10              | Australia | 1999           | Wheat                     | 188                                                         |
| 10              | Australia | 1999           | Wine                      | 54                                                          |
| 10              | Australia | 2000           | Apples                    | 40                                                          |
| 10              | Australia | 2000           | Bananas                   | 33                                                          |
| 10              | Australia | 2000           | Beer                      | 246                                                         |
| 10              | Australia | 2000           | Beverages, Alcoholic      | 6                                                           |
| 10              | Australia | 2000           | Beverages, Fermented      | 1                                                           |
| 10              | Australia | 2000           | Bovine Meat               | 107                                                         |
| 10              | Australia | 2000           | Butter, Ghee              | 8                                                           |
| 10              | Australia | 2000           | Cephalopods               | 2                                                           |
| 10              | Australia | 2000           | Cheese                    | 25                                                          |
| 10              | Australia | 2000           | Cocoa Beans               | 4                                                           |
| 10              | Australia | 2000           | Coconut Oil               | 1                                                           |
| 10              | Australia | 2000           | Coconuts - Incl Copra     | 6                                                           |
| 10              | Australia | 2000           | Coffee                    | 8                                                           |
| 10              | Australia | 2000           | Cottonseed Oil            | 4                                                           |
| 10              | Australia | 2000           | Crustaceans               | 8                                                           |
| 10              | Australia | 2000           | Dates                     | 1                                                           |
| 10              | Australia | 2000           | Demersal Fish             | 25                                                          |
| 10              | Australia | 2000           | Eggs                      | 16                                                          |
| 10              | Australia | 2000           | Fats, Animals, Raw        | 10                                                          |
| 10              | Australia | 2000           | Freshwater Fish           | 4                                                           |
| 10              | Australia | 2000           | Fruits, Other             | 51                                                          |
| 10              | Australia | 2000           | Grapefruit                | 2                                                           |
| 10              | Australia | 2000           | Grapes                    | 30                                                          |
| 10              | Australia | 2000           | Groundnuts (Shelled Eq)   | 4                                                           |
| 10              | Australia | 2000           | Honey                     | 2                                                           |
| 10              | Australia | 2000           | Lemons, Limes             | 5                                                           |
| 10              | Australia | 2000           | Maize                     | 12                                                          |
| 10              | Australia | 2000           | Marine Fish, Other        | 5                                                           |
| 10              | Australia | 2000           | Meat, Other               | 3                                                           |
| 10              | Australia | 2000           | Milk, Whole               | 289                                                         |
| 10              | Australia | 2000           | Molluscs, Other           | 7                                                           |
| 10              | Australia | 2000           | Mutton & Goat Meat        | 48                                                          |
| 10              | Australia | 2000           | Nuts                      | 12                                                          |
| 10              | Australia | 2000           | Oats                      | 4                                                           |
| 10              | Australia | 2000           | Offals, Edible            | 28                                                          |
| 10              | Australia | 2000           | Olive Oil                 | 4                                                           |
| 10              | Australia | 2000           | Olives                    | 2                                                           |
| 10              | Australia | 2000           | Onions                    | 28                                                          |
| 10              | Australia | 2000           | Oranges, Mandarines       | 65                                                          |
| 10              | Australia | 2000           | Palm Oil                  | 16                                                          |
| 10              | Australia | 2000           | Peas                      | 1                                                           |
| 10              | Australia | 2000           | Pelagic Fish              | 7                                                           |
| 10              | Australia | 2000           | Pigmeat                   | 52                                                          |
| 10              | Australia | 2000           | Pineapples                | 22                                                          |
| 10              | Australia | 2000           | Potatoes                  | 144                                                         |
| 10              | Australia | 2000           | Poultry Meat              | 89                                                          |
| 10              | Australia | 2000           | Pulses, Other             | 2                                                           |
| 10              | Australia | 2000           | Rape and Mustard Oil      | 16                                                          |
| 10              | Australia | 2000           | Rice (Milled Equivalent)  | 24                                                          |
| 10              | Australia | 2000           | Rye                       | 1                                                           |
| 10              | Australia | 2000           | Sesameseed Oil            | 1                                                           |
| 10              | Australia | 2000           | Soyabean Oil              | 2                                                           |
| 10              | Australia | 2000           | Sugar, Refined Equivalent | 97                                                          |
| 10              | Australia | 2000           | Sunflowerseed Oil         | 8                                                           |
| 10              | Australia | 2000           | Sweet Potatoes            | 3                                                           |
| 10              | Australia | 2000           | Sweeteners, Other         | 16                                                          |
| 10              | Australia | 2000           | Tea                       | 2                                                           |
| 10              | Australia | 2000           | Tomatoes                  | 65                                                          |
| 10              | Australia | 2000           | Vegetables, Other         | 175                                                         |
| 10              | Australia | 2000           | Wheat                     | 182                                                         |
| 10              | Australia | 2000           | Wine                      | 56                                                          |
| 10              | Australia | 2001           | Apples                    | 42                                                          |
| 10              | Australia | 2001           | Bananas                   | 46                                                          |
| 10              | Australia | 2001           | Beans                     | 1                                                           |
| 10              | Australia | 2001           | Beer                      | 247                                                         |
| 10              | Australia | 2001           | Beverages, Alcoholic      | 5                                                           |
| 10              | Australia | 2001           | Beverages, Fermented      | 3                                                           |
| 10              | Australia | 2001           | Bovine Meat               | 116                                                         |
| 10              | Australia | 2001           | Butter, Ghee              | 9                                                           |
| 10              | Australia | 2001           | Cephalopods               | 2                                                           |
| 10              | Australia | 2001           | Cheese                    | 30                                                          |
| 10              | Australia | 2001           | Cocoa Beans               | 4                                                           |
| 10              | Australia | 2001           | Coconut Oil               | 2                                                           |
| 10              | Australia | 2001           | Coconuts - Incl Copra     | 7                                                           |
| 10              | Australia | 2001           | Coffee                    | 6                                                           |

Dietary calcium and zinc deficiency risks are decreasing but remain prevalent

| FAO countrycode | Country   | Reference year | Food item                 | Gross food supply (g capita <sup>-1</sup> d <sup>-1</sup> ) |
|-----------------|-----------|----------------|---------------------------|-------------------------------------------------------------|
| 10              | Australia | 2001           | Cottonseed Oil            | 8                                                           |
| 10              | Australia | 2001           | Crustaceans               | 9                                                           |
| 10              | Australia | 2001           | Dates                     | 1                                                           |
| 10              | Australia | 2001           | Demersal Fish             | 24                                                          |
| 10              | Australia | 2001           | Eggs                      | 16                                                          |
| 10              | Australia | 2001           | Fats, Animals, Raw        | 9                                                           |
| 10              | Australia | 2001           | Freshwater Fish           | 4                                                           |
| 10              | Australia | 2001           | Fruits, Other             | 56                                                          |
| 10              | Australia | 2001           | Grapefruit                | 2                                                           |
| 10              | Australia | 2001           | Grapes                    | 26                                                          |
| 10              | Australia | 2001           | Groundnuts (Shelled Eq)   | 3                                                           |
| 10              | Australia | 2001           | Honey                     | 2                                                           |
| 10              | Australia | 2001           | Lemons, Limes             | 5                                                           |
| 10              | Australia | 2001           | Maize                     | 11                                                          |
| 10              | Australia | 2001           | Marine Fish, Other        | 5                                                           |
| 10              | Australia | 2001           | Meat, Other               | 2                                                           |
| 10              | Australia | 2001           | Milk, Whole               | 250                                                         |
| 10              | Australia | 2001           | Molluscs, Other           | 7                                                           |
| 10              | Australia | 2001           | Mutton & Goat Meat        | 41                                                          |
| 10              | Australia | 2001           | Nuts                      | 14                                                          |
| 10              | Australia | 2001           | Oats                      | 4                                                           |
| 10              | Australia | 2001           | Offals, Edible            | 29                                                          |
| 10              | Australia | 2001           | Olive Oil                 | 4                                                           |
| 10              | Australia | 2001           | Olives                    | 2                                                           |
| 10              | Australia | 2001           | Onions                    | 24                                                          |
| 10              | Australia | 2001           | Oranges, Mandarines       | 69                                                          |
| 10              | Australia | 2001           | Palm Oil                  | 19                                                          |
| 10              | Australia | 2001           | Peas                      | 1                                                           |
| 10              | Australia | 2001           | Pelagic Fish              | 7                                                           |
| 10              | Australia | 2001           | Pigmeat                   | 48                                                          |
| 10              | Australia | 2001           | Pineapples                | 19                                                          |
| 10              | Australia | 2001           | Potatoes                  | 155                                                         |
| 10              | Australia | 2001           | Poultry Meat              | 87                                                          |
| 10              | Australia | 2001           | Pulses, Other             | 2                                                           |
| 10              | Australia | 2001           | Rape and Mustard Oil      | 18                                                          |
| 10              | Australia | 2001           | Rice (Milled Equivalent)  | 26                                                          |
| 10              | Australia | 2001           | Rye                       | 3                                                           |
| 10              | Australia | 2001           | Sesameseed Oil            | 1                                                           |
| 10              | Australia | 2001           | Soyabean Oil              | 1                                                           |
| 10              | Australia | 2001           | Sugar, Refined Equivalent | 97                                                          |
| 10              | Australia | 2001           | Sunflowerseed Oil         | 7                                                           |
| 10              | Australia | 2001           | Sweet Potatoes            | 4                                                           |
| 10              | Australia | 2001           | Sweeteners, Other         | 18                                                          |
| 10              | Australia | 2001           | Tea                       | 2                                                           |
| 10              | Australia | 2001           | Tomatoes                  | 85                                                          |
| 10              | Australia | 2001           | Vegetables, Other         | 178                                                         |
| 10              | Australia | 2001           | Wheat                     | 185                                                         |
| 10              | Australia | 2001           | Wine                      | 56                                                          |
| 10              | Australia | 2002           | Apples                    | 57                                                          |
| 10              | Australia | 2002           | Bananas                   | 40                                                          |
| 10              | Australia | 2002           | Beer                      | 239                                                         |
| 10              | Australia | 2002           | Beverages, Alcoholic      | 5                                                           |
| 10              | Australia | 2002           | Beverages, Fermented      | 1                                                           |
| 10              | Australia | 2002           | Bovine Meat               | 106                                                         |
| 10              | Australia | 2002           | Butter, Ghee              | 9                                                           |
| 10              | Australia | 2002           | Cephalopods               | 2                                                           |
| 10              | Australia | 2002           | Cheese                    | 35                                                          |
| 10              | Australia | 2002           | Cocoa Beans               | 5                                                           |
| 10              | Australia | 2002           | Coconut Oil               | 1                                                           |
| 10              | Australia | 2002           | Coconuts - Incl Copra     | 6                                                           |
| 10              | Australia | 2002           | Coffee                    | 9                                                           |
| 10              | Australia | 2002           | Cottonseed Oil            | 9                                                           |
| 10              | Australia | 2002           | Crustaceans               | 9                                                           |
| 10              | Australia | 2002           | Dates                     | 1                                                           |
| 10              | Australia | 2002           | Demersal Fish             | 25                                                          |
| 10              | Australia | 2002           | Eggs                      | 15                                                          |
| 10              | Australia | 2002           | Fats, Animals, Raw        | 9                                                           |
| 10              | Australia | 2002           | Freshwater Fish           | 4                                                           |
| 10              | Australia | 2002           | Fruits, Other             | 51                                                          |
| 10              | Australia | 2002           | Grapefruit                | 2                                                           |
| 10              | Australia | 2002           | Grapes                    | 32                                                          |
| 10              | Australia | 2002           | Groundnuts (Shelled Eq)   | 5                                                           |
| 10              | Australia | 2002           | Honey                     | 2                                                           |
| 10              | Australia | 2002           | Lemons, Limes             | 5                                                           |
| 10              | Australia | 2002           | Maize                     | 14                                                          |
| 10              | Australia | 2002           | Marine Fish, Other        | 5                                                           |
| 10              | Australia | 2002           | Meat, Other               | 2                                                           |
| 10              | Australia | 2002           | Milk, Whole               | 243                                                         |
| 10              | Australia | 2002           | Molluscs, Other           | 8                                                           |
| 10              | Australia | 2002           | Mutton & Goat Meat        | 40                                                          |
| 10              | Australia | 2002           | Nuts                      | 16                                                          |
| 10              | Australia | 2002           | Oats                      | 4                                                           |
| 10              | Australia | 2002           | Offals, Edible            | 28                                                          |
| 10              | Australia | 2002           | Olive Oil                 | 4                                                           |
| 10              | Australia | 2002           | Olives                    | 2                                                           |
| 10              | Australia | 2002           | Onions                    | 30                                                          |
| 10              | Australia | 2002           | Oranges, Mandarines       | 55                                                          |
| 10              | Australia | 2002           | Palm Oil                  | 13                                                          |
| 10              | Australia | 2002           | Peas                      | 1                                                           |
| 10              | Australia | 2002           | Pelagic Fish              | 8                                                           |
| 10              | Australia | 2002           | Pigmeat                   | 54                                                          |
| 10              | Australia | 2002           | Pineapples                | 19                                                          |
| 10              | Australia | 2002           | Potatoes                  | 158                                                         |
| 10              | Australia | 2002           | Poultry Meat              | 92                                                          |
| 10              | Australia | 2002           | Pulses, Other             | 2                                                           |
| 10              | Australia | 2002           | Rape and Mustard Oil      | 15                                                          |
| 10              | Australia | 2002           | Rice (Milled Equivalent)  | 27                                                          |



Dietary calcium and zinc deficiency risks are decreasing but remain prevalent

| FAO countrycode | Country   | Reference year | Food item                 | Gross food supply (g capita <sup>-1</sup> d <sup>-1</sup> ) |
|-----------------|-----------|----------------|---------------------------|-------------------------------------------------------------|
| 10              | Australia | 2002           | Rye                       | 4                                                           |
| 10              | Australia | 2002           | Soyabean Oil              | 2                                                           |
| 10              | Australia | 2002           | Sugar, Refined Equivalent | 97                                                          |
| 10              | Australia | 2002           | Sunflowerseed Oil         | 5                                                           |
| 10              | Australia | 2002           | Sweet Potatoes            | 4                                                           |
| 10              | Australia | 2002           | Sweeteners, Other         | 18                                                          |
| 10              | Australia | 2002           | Tea                       | 2                                                           |
| 10              | Australia | 2002           | Tomatoes                  | 67                                                          |
| 10              | Australia | 2002           | Vegetables, Other         | 162                                                         |
| 10              | Australia | 2002           | Wheat                     | 198                                                         |
| 10              | Australia | 2002           | Wine                      | 56                                                          |
| 10              | Australia | 2003           | Apples                    | 59                                                          |
| 10              | Australia | 2003           | Bananas                   | 35                                                          |
| 10              | Australia | 2003           | Beer                      | 236                                                         |
| 10              | Australia | 2003           | Beverages, Alcoholic      | 5                                                           |
| 10              | Australia | 2003           | Beverages, Fermented      | 1                                                           |
| 10              | Australia | 2003           | Bovine Meat               | 125                                                         |
| 10              | Australia | 2003           | Butter, Ghee              | 9                                                           |
| 10              | Australia | 2003           | Cephalopods               | 2                                                           |
| 10              | Australia | 2003           | Cheese                    | 30                                                          |
| 10              | Australia | 2003           | Cocoa Beans               | 4                                                           |
| 10              | Australia | 2003           | Coconut Oil               | 1                                                           |
| 10              | Australia | 2003           | Coconuts - Incl Copra     | 6                                                           |
| 10              | Australia | 2003           | Coffee                    | 9                                                           |
| 10              | Australia | 2003           | Cottonseed Oil            | 8                                                           |
| 10              | Australia | 2003           | Crustaceans               | 9                                                           |
| 10              | Australia | 2003           | Dates                     | 1                                                           |
| 10              | Australia | 2003           | Demersal Fish             | 26                                                          |
| 10              | Australia | 2003           | Eggs                      | 14                                                          |
| 10              | Australia | 2003           | Fats, Animals, Raw        | 9                                                           |
| 10              | Australia | 2003           | Freshwater Fish           | 5                                                           |
| 10              | Australia | 2003           | Fruits, Other             | 55                                                          |
| 10              | Australia | 2003           | Grapefruit                | 2                                                           |
| 10              | Australia | 2003           | Grapes                    | 23                                                          |
| 10              | Australia | 2003           | Groundnuts (Shelled Eq)   | 6                                                           |
| 10              | Australia | 2003           | Honey                     | 3                                                           |
| 10              | Australia | 2003           | Lemons, Limes             | 5                                                           |
| 10              | Australia | 2003           | Maize                     | 14                                                          |
| 10              | Australia | 2003           | Marine Fish, Other        | 6                                                           |
| 10              | Australia | 2003           | Meat, Other               | 3                                                           |
| 10              | Australia | 2003           | Milk, Whole               | 241                                                         |
| 10              | Australia | 2003           | Molluscs, Other           | 9                                                           |
| 10              | Australia | 2003           | Mutton & Goat Meat        | 37                                                          |
| 10              | Australia | 2003           | Nuts                      | 18                                                          |
| 10              | Australia | 2003           | Oats                      | 12                                                          |
| 10              | Australia | 2003           | Offals, Edible            | 28                                                          |
| 10              | Australia | 2003           | Oilcrops Oil, Other       | 1                                                           |
| 10              | Australia | 2003           | Olive Oil                 | 4                                                           |
| 10              | Australia | 2003           | Olives                    | 2                                                           |
| 10              | Australia | 2003           | Onions                    | 23                                                          |
| 10              | Australia | 2003           | Oranges, Mandarines       | 83                                                          |
| 10              | Australia | 2003           | Palm Oil                  | 12                                                          |
| 10              | Australia | 2003           | Peas                      | 1                                                           |
| 10              | Australia | 2003           | Pelagic Fish              | 10                                                          |
| 10              | Australia | 2003           | Pigmeat                   | 57                                                          |
| 10              | Australia | 2003           | Pineapples                | 19                                                          |
| 10              | Australia | 2003           | Potatoes                  | 144                                                         |
| 10              | Australia | 2003           | Poultry Meat              | 95                                                          |
| 10              | Australia | 2003           | Pulses, Other             | 2                                                           |
| 10              | Australia | 2003           | Rape and Mustard Oil      | 16                                                          |
| 10              | Australia | 2003           | Rice (Milled Equivalent)  | 27                                                          |
| 10              | Australia | 2003           | Rye                       | 3                                                           |
| 10              | Australia | 2003           | Soyabean Oil              | 2                                                           |
| 10              | Australia | 2003           | Sugar, Refined Equivalent | 100                                                         |
| 10              | Australia | 2003           | Sunflowerseed Oil         | 6                                                           |
| 10              | Australia | 2003           | Sweet Potatoes            | 5                                                           |
| 10              | Australia | 2003           | Sweeteners, Other         | 17                                                          |
| 10              | Australia | 2003           | Tea                       | 2                                                           |
| 10              | Australia | 2003           | Tomatoes                  | 60                                                          |
| 10              | Australia | 2003           | Vegetables, Other         | 166                                                         |
| 10              | Australia | 2003           | Wheat                     | 196                                                         |
| 10              | Australia | 2003           | Wine                      | 58                                                          |
| 10              | Australia | 2004           | Apples                    | 71                                                          |
| 10              | Australia | 2004           | Bananas                   | 35                                                          |
| 10              | Australia | 2004           | Beer                      | 237                                                         |
| 10              | Australia | 2004           | Beverages, Alcoholic      | 6                                                           |
| 10              | Australia | 2004           | Beverages, Fermented      | 1                                                           |
| 10              | Australia | 2004           | Bovine Meat               | 101                                                         |
| 10              | Australia | 2004           | Butter, Ghee              | 10                                                          |
| 10              | Australia | 2004           | Cephalopods               | 2                                                           |
| 10              | Australia | 2004           | Cheese                    | 27                                                          |
| 10              | Australia | 2004           | Cocoa Beans               | 5                                                           |
| 10              | Australia | 2004           | Coconut Oil               | 1                                                           |
| 10              | Australia | 2004           | Coconuts - Incl Copra     | 6                                                           |
| 10              | Australia | 2004           | Coffee                    | 10                                                          |
| 10              | Australia | 2004           | Cottonseed Oil            | 12                                                          |
| 10              | Australia | 2004           | Crustaceans               | 11                                                          |
| 10              | Australia | 2004           | Dates                     | 1                                                           |
| 10              | Australia | 2004           | Demersal Fish             | 25                                                          |
| 10              | Australia | 2004           | Eggs                      | 14                                                          |
| 10              | Australia | 2004           | Fats, Animals, Raw        | 11                                                          |
| 10              | Australia | 2004           | Freshwater Fish           | 5                                                           |
| 10              | Australia | 2004           | Fruits, Other             | 54                                                          |
| 10              | Australia | 2004           | Grapefruit                | 2                                                           |
| 10              | Australia | 2004           | Grapes                    | 29                                                          |
| 10              | Australia | 2004           | Groundnuts (Shelled Eq)   | 2                                                           |
| 10              | Australia | 2004           | Honey                     | 1                                                           |

Dietary calcium and zinc deficiency risks are decreasing but remain prevalent

| FAO countrycode | Country   | Reference year | Food item                 | Gross food supply (g capita <sup>-1</sup> d <sup>-1</sup> ) |
|-----------------|-----------|----------------|---------------------------|-------------------------------------------------------------|
| 10              | Australia | 2004           | Lemons, Limes             | 4                                                           |
| 10              | Australia | 2004           | Maize                     | 14                                                          |
| 10              | Australia | 2004           | Maize Germ Oil            | 1                                                           |
| 10              | Australia | 2004           | Marine Fish, Other        | 6                                                           |
| 10              | Australia | 2004           | Meat, Other               | 3                                                           |
| 10              | Australia | 2004           | Milk, Whole               | 245                                                         |
| 10              | Australia | 2004           | Molluscs, Other           | 10                                                          |
| 10              | Australia | 2004           | Mutton & Goat Meat        | 35                                                          |
| 10              | Australia | 2004           | Nuts                      | 17                                                          |
| 10              | Australia | 2004           | Oats                      | 9                                                           |
| 10              | Australia | 2004           | Offals, Edible            | 26                                                          |
| 10              | Australia | 2004           | Olive Oil                 | 4                                                           |
| 10              | Australia | 2004           | Olives                    | 2                                                           |
| 10              | Australia | 2004           | Onions                    | 21                                                          |
| 10              | Australia | 2004           | Oranges, Mandarines       | 62                                                          |
| 10              | Australia | 2004           | Palm Oil                  | 15                                                          |
| 10              | Australia | 2004           | Peas                      | 1                                                           |
| 10              | Australia | 2004           | Pelagic Fish              | 15                                                          |
| 10              | Australia | 2004           | Pigmeat                   | 56                                                          |
| 10              | Australia | 2004           | Pineapples                | 19                                                          |
| 10              | Australia | 2004           | Potatoes                  | 152                                                         |
| 10              | Australia | 2004           | Poultry Meat              | 94                                                          |
| 10              | Australia | 2004           | Pulses, Other             | 2                                                           |
| 10              | Australia | 2004           | Rape and Mustard Oil      | 21                                                          |
| 10              | Australia | 2004           | Rice (Milled Equivalent)  | 27                                                          |
| 10              | Australia | 2004           | Rye                       | 2                                                           |
| 10              | Australia | 2004           | Soyabean Oil              | 2                                                           |
| 10              | Australia | 2004           | Sugar, Refined Equivalent | 100                                                         |
| 10              | Australia | 2004           | Sunflowerseed Oil         | 1                                                           |
| 10              | Australia | 2004           | Sweet Potatoes            | 5                                                           |
| 10              | Australia | 2004           | Sweeteners, Other         | 18                                                          |
| 10              | Australia | 2004           | Tea                       | 2                                                           |
| 10              | Australia | 2004           | Tomatoes                  | 75                                                          |
| 10              | Australia | 2004           | Vegetables, Other         | 179                                                         |
| 10              | Australia | 2004           | Wheat                     | 179                                                         |
| 10              | Australia | 2004           | Wine                      | 59                                                          |
| 10              | Australia | 2005           | Apples                    | 73                                                          |
| 10              | Australia | 2005           | Aquatic Animals, Others   | 1                                                           |
| 10              | Australia | 2005           | Bananas                   | 32                                                          |
| 10              | Australia | 2005           | Beer                      | 242                                                         |
| 10              | Australia | 2005           | Beverages, Alcoholic      | 3                                                           |
| 10              | Australia | 2005           | Beverages, Fermented      | 2                                                           |
| 10              | Australia | 2005           | Bovine Meat               | 116                                                         |
| 10              | Australia | 2005           | Butter, Ghee              | 11                                                          |
| 10              | Australia | 2005           | Cephalopods               | 2                                                           |
| 10              | Australia | 2005           | Cheese                    | 31                                                          |
| 10              | Australia | 2005           | Cocoa Beans               | 5                                                           |
| 10              | Australia | 2005           | Coconut Oil               | 1                                                           |
| 10              | Australia | 2005           | Coconuts - Incl Copra     | 6                                                           |
| 10              | Australia | 2005           | Coffee                    | 12                                                          |
| 10              | Australia | 2005           | Cottonseed Oil            | 6                                                           |
| 10              | Australia | 2005           | Crustaceans               | 10                                                          |
| 10              | Australia | 2005           | Dates                     | 1                                                           |
| 10              | Australia | 2005           | Demersal Fish             | 25                                                          |
| 10              | Australia | 2005           | Eggs                      | 14                                                          |
| 10              | Australia | 2005           | Fats, Animals, Raw        | 10                                                          |
| 10              | Australia | 2005           | Freshwater Fish           | 5                                                           |
| 10              | Australia | 2005           | Fruits, Other             | 66                                                          |
| 10              | Australia | 2005           | Grapefruit                | 2                                                           |
| 10              | Australia | 2005           | Grapes                    | 30                                                          |
| 10              | Australia | 2005           | Groundnuts (Shelled Eq)   | 3                                                           |
| 10              | Australia | 2005           | Honey                     | 1                                                           |
| 10              | Australia | 2005           | Lemons, Limes             | 4                                                           |
| 10              | Australia | 2005           | Maize                     | 14                                                          |
| 10              | Australia | 2005           | Maize Germ Oil            | 1                                                           |
| 10              | Australia | 2005           | Marine Fish, Other        | 6                                                           |
| 10              | Australia | 2005           | Meat, Other               | 3                                                           |
| 10              | Australia | 2005           | Milk, Whole               | 256                                                         |
| 10              | Australia | 2005           | Molluscs, Other           | 9                                                           |
| 10              | Australia | 2005           | Mutton & Goat Meat        | 35                                                          |
| 10              | Australia | 2005           | Nuts                      | 20                                                          |
| 10              | Australia | 2005           | Oats                      | 8                                                           |
| 10              | Australia | 2005           | Offals, Edible            | 27                                                          |
| 10              | Australia | 2005           | Olive Oil                 | 4                                                           |
| 10              | Australia | 2005           | Olives                    | 3                                                           |
| 10              | Australia | 2005           | Onions                    | 26                                                          |
| 10              | Australia | 2005           | Oranges, Mandarines       | 68                                                          |
| 10              | Australia | 2005           | Palm Oil                  | 11                                                          |
| 10              | Australia | 2005           | Peas                      | 1                                                           |
| 10              | Australia | 2005           | Pelagic Fish              | 10                                                          |
| 10              | Australia | 2005           | Pigmeat                   | 60                                                          |
| 10              | Australia | 2005           | Pineapples                | 19                                                          |
| 10              | Australia | 2005           | Potatoes                  | 149                                                         |
| 10              | Australia | 2005           | Poultry Meat              | 101                                                         |
| 10              | Australia | 2005           | Pulses, Other             | 2                                                           |
| 10              | Australia | 2005           | Rape and Mustard Oil      | 27                                                          |
| 10              | Australia | 2005           | Rice (Milled Equivalent)  | 27                                                          |
| 10              | Australia | 2005           | Rye                       | 2                                                           |
| 10              | Australia | 2005           | Soyabean Oil              | 2                                                           |
| 10              | Australia | 2005           | Sugar, Refined Equivalent | 99                                                          |
| 10              | Australia | 2005           | Sunflowerseed Oil         | 5                                                           |
| 10              | Australia | 2005           | Sweet Potatoes            | 5                                                           |
| 10              | Australia | 2005           | Sweeteners, Other         | 19                                                          |
| 10              | Australia | 2005           | Tea                       | 2                                                           |
| 10              | Australia | 2005           | Tomatoes                  | 68                                                          |
| 10              | Australia | 2005           | Vegetables, Other         | 174                                                         |
| 10              | Australia | 2005           | Wheat                     | 175                                                         |

Dietary calcium and zinc deficiency risks are decreasing but remain prevalent

| FAO countrycode | Country   | Reference year | Food item                 | Gross food supply (g capita <sup>-1</sup> d <sup>-1</sup> ) |
|-----------------|-----------|----------------|---------------------------|-------------------------------------------------------------|
| 10              | Australia | 2005           | Wine                      | 61                                                          |
| 10              | Australia | 2006           | Apples                    | 66                                                          |
| 10              | Australia | 2006           | Aquatic Animals, Others   | 1                                                           |
| 10              | Australia | 2006           | Bananas                   | 24                                                          |
| 10              | Australia | 2006           | Beer                      | 235                                                         |
| 10              | Australia | 2006           | Beverages, Alcoholic      | 4                                                           |
| 10              | Australia | 2006           | Beverages, Fermented      | 2                                                           |
| 10              | Australia | 2006           | Bovine Meat               | 97                                                          |
| 10              | Australia | 2006           | Butter, Ghee              | 11                                                          |
| 10              | Australia | 2006           | Cassava                   | 1                                                           |
| 10              | Australia | 2006           | Cephalopods               | 2                                                           |
| 10              | Australia | 2006           | Cheese                    | 30                                                          |
| 10              | Australia | 2006           | Cocoa Beans               | 6                                                           |
| 10              | Australia | 2006           | Coconuts - Incl Copra     | 6                                                           |
| 10              | Australia | 2006           | Coffee                    | 12                                                          |
| 10              | Australia | 2006           | Cottonseed Oil            | 9                                                           |
| 10              | Australia | 2006           | Crustaceans               | 11                                                          |
| 10              | Australia | 2006           | Dates                     | 1                                                           |
| 10              | Australia | 2006           | Demersal Fish             | 25                                                          |
| 10              | Australia | 2006           | Eggs                      | 18                                                          |
| 10              | Australia | 2006           | Fats, Animals, Raw        | 9                                                           |
| 10              | Australia | 2006           | Freshwater Fish           | 6                                                           |
| 10              | Australia | 2006           | Fruits, Other             | 62                                                          |
| 10              | Australia | 2006           | Grapefruit                | 2                                                           |
| 10              | Australia | 2006           | Grapes                    | 24                                                          |
| 10              | Australia | 2006           | Groundnuts (Shelled Eq)   | 3                                                           |
| 10              | Australia | 2006           | Honey                     | 1                                                           |
| 10              | Australia | 2006           | Lemons, Limes             | 5                                                           |
| 10              | Australia | 2006           | Maize                     | 14                                                          |
| 10              | Australia | 2006           | Maize Germ Oil            | 1                                                           |
| 10              | Australia | 2006           | Marine Fish, Other        | 5                                                           |
| 10              | Australia | 2006           | Meat, Other               | 3                                                           |
| 10              | Australia | 2006           | Milk, Whole               | 339                                                         |
| 10              | Australia | 2006           | Molluscs, Other           | 9                                                           |
| 10              | Australia | 2006           | Mutton & Goat Meat        | 37                                                          |
| 10              | Australia | 2006           | Nuts                      | 21                                                          |
| 10              | Australia | 2006           | Oats                      | 7                                                           |
| 10              | Australia | 2006           | Offals, Edible            | 26                                                          |
| 10              | Australia | 2006           | Olive Oil                 | 4                                                           |
| 10              | Australia | 2006           | Olives                    | 6                                                           |
| 10              | Australia | 2006           | Onions                    | 23                                                          |
| 10              | Australia | 2006           | Oranges, Mandarines       | 68                                                          |
| 10              | Australia | 2006           | Palm Oil                  | 12                                                          |
| 10              | Australia | 2006           | Peas                      | 2                                                           |
| 10              | Australia | 2006           | Pelagic Fish              | 10                                                          |
| 10              | Australia | 2006           | Pigmeat                   | 59                                                          |
| 10              | Australia | 2006           | Pineapples                | 25                                                          |
| 10              | Australia | 2006           | Potatoes                  | 148                                                         |
| 10              | Australia | 2006           | Poultry Meat              | 103                                                         |
| 10              | Australia | 2006           | Pulses, Other             | 2                                                           |
| 10              | Australia | 2006           | Rape and Mustard Oil      | 25                                                          |
| 10              | Australia | 2006           | Rice (Milled Equivalent)  | 27                                                          |
| 10              | Australia | 2006           | Rye                       | 1                                                           |
| 10              | Australia | 2006           | Soyabean Oil              | 4                                                           |
| 10              | Australia | 2006           | Sugar, Refined Equivalent | 99                                                          |
| 10              | Australia | 2006           | Sunflowerseed Oil         | 6                                                           |
| 10              | Australia | 2006           | Sweet Potatoes            | 5                                                           |
| 10              | Australia | 2006           | Sweeteners, Other         | 19                                                          |
| 10              | Australia | 2006           | Tea                       | 2                                                           |
| 10              | Australia | 2006           | Tomatoes                  | 71                                                          |
| 10              | Australia | 2006           | Vegetables, Other         | 173                                                         |
| 10              | Australia | 2006           | Wheat                     | 180                                                         |
| 10              | Australia | 2006           | Wine                      | 61                                                          |
| 10              | Australia | 2007           | Apples                    | 71                                                          |
| 10              | Australia | 2007           | Aquatic Animals, Others   | 1                                                           |
| 10              | Australia | 2007           | Bananas                   | 25                                                          |
| 10              | Australia | 2007           | Beer                      | 231                                                         |
| 10              | Australia | 2007           | Beverages, Alcoholic      | 4                                                           |
| 10              | Australia | 2007           | Beverages, Fermented      | 2                                                           |
| 10              | Australia | 2007           | Bovine Meat               | 118                                                         |
| 10              | Australia | 2007           | Butter, Ghee              | 11                                                          |
| 10              | Australia | 2007           | Cephalopods               | 2                                                           |
| 10              | Australia | 2007           | Cheese                    | 27                                                          |
| 10              | Australia | 2007           | Cocoa Beans               | 8                                                           |
| 10              | Australia | 2007           | Coconut Oil               | 2                                                           |
| 10              | Australia | 2007           | Coconuts - Incl Copra     | 6                                                           |
| 10              | Australia | 2007           | Coffee                    | 12                                                          |
| 10              | Australia | 2007           | Cottonseed Oil            | 7                                                           |
| 10              | Australia | 2007           | Crustaceans               | 10                                                          |
| 10              | Australia | 2007           | Dates                     | 1                                                           |
| 10              | Australia | 2007           | Demersal Fish             | 25                                                          |
| 10              | Australia | 2007           | Eggs                      | 17                                                          |
| 10              | Australia | 2007           | Fats, Animals, Raw        | 10                                                          |
| 10              | Australia | 2007           | Freshwater Fish           | 6                                                           |
| 10              | Australia | 2007           | Fruits, Other             | 67                                                          |
| 10              | Australia | 2007           | Grapefruit                | 1                                                           |
| 10              | Australia | 2007           | Grapes                    | 29                                                          |
| 10              | Australia | 2007           | Groundnuts (Shelled Eq)   | 4                                                           |
| 10              | Australia | 2007           | Honey                     | 2                                                           |
| 10              | Australia | 2007           | Lemons, Limes             | 5                                                           |
| 10              | Australia | 2007           | Maize                     | 14                                                          |
| 10              | Australia | 2007           | Marine Fish, Other        | 7                                                           |
| 10              | Australia | 2007           | Meat, Other               | 3                                                           |
| 10              | Australia | 2007           | Milk, Whole               | 321                                                         |
| 10              | Australia | 2007           | Molluscs, Other           | 9                                                           |
| 10              | Australia | 2007           | Mutton & Goat Meat        | 39                                                          |
| 10              | Australia | 2007           | Nuts                      | 24                                                          |

Dietary calcium and zinc deficiency risks are decreasing but remain prevalent

| FAO countrycode | Country   | Reference year | Food item                 | Gross food supply (g capita <sup>-1</sup> d <sup>-1</sup> ) |
|-----------------|-----------|----------------|---------------------------|-------------------------------------------------------------|
| 10              | Australia | 2007           | Oats                      | 7                                                           |
| 10              | Australia | 2007           | Offals, Edible            | 28                                                          |
| 10              | Australia | 2007           | Oilcrops Oil, Other       | 1                                                           |
| 10              | Australia | 2007           | Olive Oil                 | 6                                                           |
| 10              | Australia | 2007           | Olives                    | 7                                                           |
| 10              | Australia | 2007           | Onions                    | 25                                                          |
| 10              | Australia | 2007           | Oranges, Mandarines       | 63                                                          |
| 10              | Australia | 2007           | Palm Oil                  | 10                                                          |
| 10              | Australia | 2007           | Peas                      | 1                                                           |
| 10              | Australia | 2007           | Pelagic Fish              | 10                                                          |
| 10              | Australia | 2007           | Pigmeat                   | 62                                                          |
| 10              | Australia | 2007           | Pineapples                | 27                                                          |
| 10              | Australia | 2007           | Potatoes                  | 148                                                         |
| 10              | Australia | 2007           | Poultry Meat              | 107                                                         |
| 10              | Australia | 2007           | Pulses, Other             | 2                                                           |
| 10              | Australia | 2007           | Rape and Mustard Oil      | 25                                                          |
| 10              | Australia | 2007           | Rice (Milled Equivalent)  | 27                                                          |
| 10              | Australia | 2007           | Roots, Other              | 1                                                           |
| 10              | Australia | 2007           | Rye                       | 1                                                           |
| 10              | Australia | 2007           | Soyabean Oil              | 3                                                           |
| 10              | Australia | 2007           | Spices, Other             | 1                                                           |
| 10              | Australia | 2007           | Sugar, Refined Equivalent | 98                                                          |
| 10              | Australia | 2007           | Sunflowerseed Oil         | 6                                                           |
| 10              | Australia | 2007           | Sweet Potatoes            | 6                                                           |
| 10              | Australia | 2007           | Sweeteners, Other         | 21                                                          |
| 10              | Australia | 2007           | Tea                       | 2                                                           |
| 10              | Australia | 2007           | Tomatoes                  | 57                                                          |
| 10              | Australia | 2007           | Vegetables, Other         | 191                                                         |
| 10              | Australia | 2007           | Wheat                     | 186                                                         |
| 10              | Australia | 2007           | Wine                      | 63                                                          |
| 10              | Australia | 2008           | Apples                    | 71                                                          |
| 10              | Australia | 2008           | Aquatic Animals, Others   | 1                                                           |
| 10              | Australia | 2008           | Bananas                   | 24                                                          |
| 10              | Australia | 2008           | Beer                      | 218                                                         |
| 10              | Australia | 2008           | Beverages, Alcoholic      | 3                                                           |
| 10              | Australia | 2008           | Beverages, Fermented      | 2                                                           |
| 10              | Australia | 2008           | Bovine Meat               | 104                                                         |
| 10              | Australia | 2008           | Butter, Ghee              | 11                                                          |
| 10              | Australia | 2008           | Cephalopods               | 2                                                           |
| 10              | Australia | 2008           | Cheese                    | 34                                                          |
| 10              | Australia | 2008           | Cocoa Beans               | 8                                                           |
| 10              | Australia | 2008           | Coconut Oil               | 4                                                           |
| 10              | Australia | 2008           | Coconuts - Incl Copra     | 6                                                           |
| 10              | Australia | 2008           | Coffee                    | 13                                                          |
| 10              | Australia | 2008           | Cottonseed Oil            | 5                                                           |
| 10              | Australia | 2008           | Crustaceans               | 12                                                          |
| 10              | Australia | 2008           | Dates                     | 1                                                           |
| 10              | Australia | 2008           | Demersal Fish             | 24                                                          |
| 10              | Australia | 2008           | Eggs                      | 16                                                          |
| 10              | Australia | 2008           | Fats, Animals, Raw        | 10                                                          |
| 10              | Australia | 2008           | Freshwater Fish           | 6                                                           |
| 10              | Australia | 2008           | Fruits, Other             | 61                                                          |
| 10              | Australia | 2008           | Grapefruit                | 1                                                           |
| 10              | Australia | 2008           | Grapes                    | 33                                                          |
| 10              | Australia | 2008           | Groundnuts (Shelled Eq)   | 3                                                           |
| 10              | Australia | 2008           | Honey                     | 2                                                           |
| 10              | Australia | 2008           | Lemons, Limes             | 5                                                           |
| 10              | Australia | 2008           | Maize                     | 14                                                          |
| 10              | Australia | 2008           | Marine Fish, Other        | 7                                                           |
| 10              | Australia | 2008           | Meat, Other               | 3                                                           |
| 10              | Australia | 2008           | Milk, Whole               | 280                                                         |
| 10              | Australia | 2008           | Molluscs, Other           | 8                                                           |
| 10              | Australia | 2008           | Mutton & Goat Meat        | 34                                                          |
| 10              | Australia | 2008           | Nuts                      | 23                                                          |
| 10              | Australia | 2008           | Oats                      | 4                                                           |
| 10              | Australia | 2008           | Offals, Edible            | 26                                                          |
| 10              | Australia | 2008           | Oilcrops Oil, Other       | 1                                                           |
| 10              | Australia | 2008           | Olive Oil                 | 3                                                           |
| 10              | Australia | 2008           | Olives                    | 5                                                           |
| 10              | Australia | 2008           | Onions                    | 26                                                          |
| 10              | Australia | 2008           | Oranges, Mandarines       | 56                                                          |
| 10              | Australia | 2008           | Palm Oil                  | 16                                                          |
| 10              | Australia | 2008           | Peas                      | 1                                                           |
| 10              | Australia | 2008           | Pelagic Fish              | 12                                                          |
| 10              | Australia | 2008           | Pigmeat                   | 61                                                          |
| 10              | Australia | 2008           | Pineapples                | 26                                                          |
| 10              | Australia | 2008           | Potatoes                  | 176                                                         |
| 10              | Australia | 2008           | Poultry Meat              | 102                                                         |
| 10              | Australia | 2008           | Pulses, Other             | 3                                                           |
| 10              | Australia | 2008           | Rape and Mustard Oil      | 21                                                          |
| 10              | Australia | 2008           | Rice (Milled Equivalent)  | 31                                                          |
| 10              | Australia | 2008           | Rye                       | 2                                                           |
| 10              | Australia | 2008           | Soyabean Oil              | 3                                                           |
| 10              | Australia | 2008           | Spices, Other             | 1                                                           |
| 10              | Australia | 2008           | Sugar, Refined Equivalent | 97                                                          |
| 10              | Australia | 2008           | Sunflowerseed Oil         | 4                                                           |
| 10              | Australia | 2008           | Sweet Potatoes            | 4                                                           |
| 10              | Australia | 2008           | Sweeteners, Other         | 21                                                          |
| 10              | Australia | 2008           | Tea                       | 2                                                           |
| 10              | Australia | 2008           | Tomatoes                  | 76                                                          |
| 10              | Australia | 2008           | Vegetables, Other         | 178                                                         |
| 10              | Australia | 2008           | Wheat                     | 198                                                         |
| 10              | Australia | 2008           | Wine                      | 61                                                          |
| 10              | Australia | 2009           | Apples                    | 76                                                          |
| 10              | Australia | 2009           | Aquatic Animals, Others   | 1                                                           |
| 10              | Australia | 2009           | Bananas                   | 31                                                          |
| 10              | Australia | 2009           | Beer                      | 232                                                         |

Dietary calcium and zinc deficiency risks are decreasing but remain prevalent

| FAO countrycode | Country   | Reference year | Food item                 | Gross food supply (g capita <sup>-1</sup> d <sup>-1</sup> ) |
|-----------------|-----------|----------------|---------------------------|-------------------------------------------------------------|
| 10              | Australia | 2009           | Beverages, Alcoholic      | 3                                                           |
| 10              | Australia | 2009           | Beverages, Fermented      | 2                                                           |
| 10              | Australia | 2009           | Bovine Meat               | 106                                                         |
| 10              | Australia | 2009           | Butter, Ghee              | 11                                                          |
| 10              | Australia | 2009           | Cassava                   | 1                                                           |
| 10              | Australia | 2009           | Cephalopods               | 2                                                           |
| 10              | Australia | 2009           | Cheese                    | 30                                                          |
| 10              | Australia | 2009           | Cocoa Beans               | 8                                                           |
| 10              | Australia | 2009           | Coconuts - Incl Copra     | 6                                                           |
| 10              | Australia | 2009           | Coffee                    | 13                                                          |
| 10              | Australia | 2009           | Cottonseed Oil            | 6                                                           |
| 10              | Australia | 2009           | Crustaceans               | 12                                                          |
| 10              | Australia | 2009           | Dates                     | 1                                                           |
| 10              | Australia | 2009           | Demersal Fish             | 21                                                          |
| 10              | Australia | 2009           | Eggs                      | 16                                                          |
| 10              | Australia | 2009           | Fats, Animals, Raw        | 11                                                          |
| 10              | Australia | 2009           | Freshwater Fish           | 6                                                           |
| 10              | Australia | 2009           | Fruits, Other             | 58                                                          |
| 10              | Australia | 2009           | Grapefruit                | 1                                                           |
| 10              | Australia | 2009           | Grapes                    | 21                                                          |
| 10              | Australia | 2009           | Groundnuts (Shelled Eq)   | 2                                                           |
| 10              | Australia | 2009           | Honey                     | 2                                                           |
| 10              | Australia | 2009           | Lemons, Limes             | 4                                                           |
| 10              | Australia | 2009           | Maize                     | 14                                                          |
| 10              | Australia | 2009           | Marine Fish, Other        | 7                                                           |
| 10              | Australia | 2009           | Meat, Other               | 3                                                           |
| 10              | Australia | 2009           | Milk, Whole               | 261                                                         |
| 10              | Australia | 2009           | Molluscs, Other           | 9                                                           |
| 10              | Australia | 2009           | Mutton & Goat Meat        | 31                                                          |
| 10              | Australia | 2009           | Nuts                      | 24                                                          |
| 10              | Australia | 2009           | Oats                      | 2                                                           |
| 10              | Australia | 2009           | Offals, Edible            | 25                                                          |
| 10              | Australia | 2009           | Oilcrops Oil, Other       | 2                                                           |
| 10              | Australia | 2009           | Olive Oil                 | 4                                                           |
| 10              | Australia | 2009           | Olives                    | 5                                                           |
| 10              | Australia | 2009           | Onions                    | 28                                                          |
| 10              | Australia | 2009           | Oranges, Mandarines       | 47                                                          |
| 10              | Australia | 2009           | Palm Oil                  | 19                                                          |
| 10              | Australia | 2009           | Peas                      | 2                                                           |
| 10              | Australia | 2009           | Pelagic Fish              | 10                                                          |
| 10              | Australia | 2009           | Pig meat                  | 59                                                          |
| 10              | Australia | 2009           | Pineapples                | 25                                                          |
| 10              | Australia | 2009           | Potatoes                  | 145                                                         |
| 10              | Australia | 2009           | Poultry Meat              | 105                                                         |
| 10              | Australia | 2009           | Pulses, Other             | 4                                                           |
| 10              | Australia | 2009           | Rape and Mustard Oil      | 22                                                          |
| 10              | Australia | 2009           | Rice (Milled Equivalent)  | 31                                                          |
| 10              | Australia | 2009           | Rye                       | 1                                                           |
| 10              | Australia | 2009           | Soyabean Oil              | 3                                                           |
| 10              | Australia | 2009           | Spices, Other             | 1                                                           |
| 10              | Australia | 2009           | Sugar, Refined Equivalent | 96                                                          |
| 10              | Australia | 2009           | Sunflowerseed Oil         | 6                                                           |
| 10              | Australia | 2009           | Sweet Potatoes            | 5                                                           |
| 10              | Australia | 2009           | Sweeteners, Other         | 20                                                          |
| 10              | Australia | 2009           | Tea                       | 2                                                           |
| 10              | Australia | 2009           | Tomatoes                  | 72                                                          |
| 10              | Australia | 2009           | Vegetables, Other         | 166                                                         |
| 10              | Australia | 2009           | Wheat                     | 209                                                         |
| 10              | Australia | 2009           | Wine                      | 64                                                          |
| 10              | Australia | 2010           | Apples                    | 73                                                          |
| 10              | Australia | 2010           | Aquatic Animals, Others   | 1                                                           |
| 10              | Australia | 2010           | Bananas                   | 34                                                          |
| 10              | Australia | 2010           | Beer                      | 210                                                         |
| 10              | Australia | 2010           | Beverages, Alcoholic      | 3                                                           |
| 10              | Australia | 2010           | Beverages, Fermented      | 3                                                           |
| 10              | Australia | 2010           | Bovine Meat               | 102                                                         |
| 10              | Australia | 2010           | Butter, Ghee              | 11                                                          |
| 10              | Australia | 2010           | Cassava                   | 1                                                           |
| 10              | Australia | 2010           | Cephalopods               | 2                                                           |
| 10              | Australia | 2010           | Cheese                    | 32                                                          |
| 10              | Australia | 2010           | Cocoa Beans               | 8                                                           |
| 10              | Australia | 2010           | Coconut Oil               | 1                                                           |
| 10              | Australia | 2010           | Coconuts - Incl Copra     | 6                                                           |
| 10              | Australia | 2010           | Coffee                    | 13                                                          |
| 10              | Australia | 2010           | Cottonseed Oil            | 6                                                           |
| 10              | Australia | 2010           | Crustaceans               | 13                                                          |
| 10              | Australia | 2010           | Dates                     | 1                                                           |
| 10              | Australia | 2010           | Demersal Fish             | 23                                                          |
| 10              | Australia | 2010           | Eggs                      | 17                                                          |
| 10              | Australia | 2010           | Fats, Animals, Raw        | 10                                                          |
| 10              | Australia | 2010           | Freshwater Fish           | 6                                                           |
| 10              | Australia | 2010           | Fruits, Other             | 57                                                          |
| 10              | Australia | 2010           | Grapefruit                | 1                                                           |
| 10              | Australia | 2010           | Grapes                    | 26                                                          |
| 10              | Australia | 2010           | Groundnuts (Shelled Eq)   | 4                                                           |
| 10              | Australia | 2010           | Honey                     | 2                                                           |
| 10              | Australia | 2010           | Lemons, Limes             | 4                                                           |
| 10              | Australia | 2010           | Maize                     | 14                                                          |
| 10              | Australia | 2010           | Maize Germ Oil            | 1                                                           |
| 10              | Australia | 2010           | Marine Fish, Other        | 7                                                           |
| 10              | Australia | 2010           | Meat, Other               | 3                                                           |
| 10              | Australia | 2010           | Milk, Whole               | 277                                                         |
| 10              | Australia | 2010           | Molluscs, Other           | 9                                                           |
| 10              | Australia | 2010           | Mutton & Goat Meat        | 31                                                          |
| 10              | Australia | 2010           | Nuts                      | 25                                                          |
| 10              | Australia | 2010           | Offals, Edible            | 23                                                          |
| 10              | Australia | 2010           | Oilcrops Oil, Other       | 1                                                           |

Dietary calcium and zinc deficiency risks are decreasing but remain prevalent

| FAO countrycode | Country   | Reference year | Food item                 | Gross food supply (g capita <sup>-1</sup> d <sup>-1</sup> ) |
|-----------------|-----------|----------------|---------------------------|-------------------------------------------------------------|
| 10              | Australia | 2010           | Olive Oil                 | 5                                                           |
| 10              | Australia | 2010           | Olives                    | 6                                                           |
| 10              | Australia | 2010           | Onions                    | 26                                                          |
| 10              | Australia | 2010           | Oranges, Mandarines       | 57                                                          |
| 10              | Australia | 2010           | Palm Oil                  | 15                                                          |
| 10              | Australia | 2010           | Peas                      | 2                                                           |
| 10              | Australia | 2010           | Pelagic Fish              | 11                                                          |
| 10              | Australia | 2010           | Pigmeat                   | 61                                                          |
| 10              | Australia | 2010           | Pineapples                | 20                                                          |
| 10              | Australia | 2010           | Potatoes                  | 149                                                         |
| 10              | Australia | 2010           | Poultry Meat              | 110                                                         |
| 10              | Australia | 2010           | Pulses, Other             | 5                                                           |
| 10              | Australia | 2010           | Rape and Mustard Oil      | 27                                                          |
| 10              | Australia | 2010           | Rice (Milled Equivalent)  | 31                                                          |
| 10              | Australia | 2010           | Rye                       | 2                                                           |
| 10              | Australia | 2010           | Soybean Oil               | 3                                                           |
| 10              | Australia | 2010           | Spices, Other             | 1                                                           |
| 10              | Australia | 2010           | Sugar, Refined Equivalent | 94                                                          |
| 10              | Australia | 2010           | Sunflowerseed Oil         | 3                                                           |
| 10              | Australia | 2010           | Sweet Potatoes            | 5                                                           |
| 10              | Australia | 2010           | Sweeteners, Other         | 22                                                          |
| 10              | Australia | 2010           | Tea                       | 2                                                           |
| 10              | Australia | 2010           | Tomatoes                  | 78                                                          |
| 10              | Australia | 2010           | Vegetables, Other         | 165                                                         |
| 10              | Australia | 2010           | Wheat                     | 202                                                         |
| 10              | Australia | 2010           | Wine                      | 66                                                          |
| 10              | Australia | 2011           | Apples                    | 77                                                          |
| 10              | Australia | 2011           | Aquatic Animals, Others   | 1                                                           |
| 10              | Australia | 2011           | Bananas                   | 22                                                          |
| 10              | Australia | 2011           | Beer                      | 230                                                         |
| 10              | Australia | 2011           | Beverages, Fermented      | 4                                                           |
| 10              | Australia | 2011           | Bovine Meat               | 111                                                         |
| 10              | Australia | 2011           | Butter, Ghee              | 10                                                          |
| 10              | Australia | 2011           | Cassava                   | 1                                                           |
| 10              | Australia | 2011           | Cephalopods               | 2                                                           |
| 10              | Australia | 2011           | Cheese                    | 32                                                          |
| 10              | Australia | 2011           | Cocoa Beans               | 9                                                           |
| 10              | Australia | 2011           | Coconut Oil               | 2                                                           |
| 10              | Australia | 2011           | Coconuts - Incl Copra     | 6                                                           |
| 10              | Australia | 2011           | Coffee                    | 13                                                          |
| 10              | Australia | 2011           | Cottonseed Oil            | 8                                                           |
| 10              | Australia | 2011           | Crustaceans               | 13                                                          |
| 10              | Australia | 2011           | Dates                     | 1                                                           |
| 10              | Australia | 2011           | Demersal Fish             | 23                                                          |
| 10              | Australia | 2011           | Eggs                      | 20                                                          |
| 10              | Australia | 2011           | Fats, Animals, Raw        | 9                                                           |
| 10              | Australia | 2011           | Freshwater Fish           | 6                                                           |
| 10              | Australia | 2011           | Fruits, Other             | 63                                                          |
| 10              | Australia | 2011           | Grapefruit                | 1                                                           |
| 10              | Australia | 2011           | Grapes                    | 27                                                          |
| 10              | Australia | 2011           | Groundnuts (Shelled Eq)   | 3                                                           |
| 10              | Australia | 2011           | Honey                     | 1                                                           |
| 10              | Australia | 2011           | Lemons, Limes             | 4                                                           |
| 10              | Australia | 2011           | Maize                     | 14                                                          |
| 10              | Australia | 2011           | Maize Germ Oil            | 1                                                           |
| 10              | Australia | 2011           | Marine Fish, Other        | 7                                                           |
| 10              | Australia | 2011           | Meat, Other               | 3                                                           |
| 10              | Australia | 2011           | Milk, Whole               | 309                                                         |
| 10              | Australia | 2011           | Molluscs, Other           | 9                                                           |
| 10              | Australia | 2011           | Mutton & Goat Meat        | 31                                                          |
| 10              | Australia | 2011           | Nuts                      | 24                                                          |
| 10              | Australia | 2011           | Oats                      | 2                                                           |
| 10              | Australia | 2011           | Offals, Edible            | 22                                                          |
| 10              | Australia | 2011           | Oilcrops Oil, Other       | 2                                                           |
| 10              | Australia | 2011           | Olive Oil                 | 4                                                           |
| 10              | Australia | 2011           | Olives                    | 6                                                           |
| 10              | Australia | 2011           | Onions                    | 32                                                          |
| 10              | Australia | 2011           | Oranges, Mandarines       | 45                                                          |
| 10              | Australia | 2011           | Palm Oil                  | 13                                                          |
| 10              | Australia | 2011           | Peas                      | 7                                                           |
| 10              | Australia | 2011           | Pelagic Fish              | 11                                                          |
| 10              | Australia | 2011           | Pigmeat                   | 63                                                          |
| 10              | Australia | 2011           | Pineapples                | 17                                                          |
| 10              | Australia | 2011           | Potatoes                  | 136                                                         |
| 10              | Australia | 2011           | Poultry Meat              | 124                                                         |
| 10              | Australia | 2011           | Pulses, Other             | 4                                                           |
| 10              | Australia | 2011           | Rape and Mustard Oil      | 26                                                          |
| 10              | Australia | 2011           | Rice (Milled Equivalent)  | 30                                                          |
| 10              | Australia | 2011           | Rye                       | 3                                                           |
| 10              | Australia | 2011           | Soybean Oil               | 5                                                           |
| 10              | Australia | 2011           | Spices, Other             | 1                                                           |
| 10              | Australia | 2011           | Sugar, Refined Equivalent | 93                                                          |
| 10              | Australia | 2011           | Sunflowerseed Oil         | 4                                                           |
| 10              | Australia | 2011           | Sweet Potatoes            | 4                                                           |
| 10              | Australia | 2011           | Sweeteners, Other         | 25                                                          |
| 10              | Australia | 2011           | Tea                       | 1                                                           |
| 10              | Australia | 2011           | Tomatoes                  | 66                                                          |
| 10              | Australia | 2011           | Vegetables, Other         | 164                                                         |
| 10              | Australia | 2011           | Wheat                     | 191                                                         |
| 10              | Australia | 2011           | Wine                      | 55                                                          |
| 11              | Austria   | 1992           | Apples                    | 126                                                         |
| 11              | Austria   | 1992           | Bananas                   | 40                                                          |
| 11              | Austria   | 1992           | Barley                    | 1                                                           |
| 11              | Austria   | 1992           | Beans                     | 1                                                           |
| 11              | Austria   | 1992           | Beer                      | 335                                                         |
| 11              | Austria   | 1992           | Beverages, Alcoholic      | 9                                                           |
| 11              | Austria   | 1992           | Beverages, Fermented      | 5                                                           |

Dietary calcium and zinc deficiency risks are decreasing but remain prevalent

| FAO countrycode | Country | Reference year | Food item                 | Gross food supply (g capita <sup>-1</sup> d <sup>-1</sup> ) |
|-----------------|---------|----------------|---------------------------|-------------------------------------------------------------|
| 11              | Austria | 1992           | Bovine Meat               | 68                                                          |
| 11              | Austria | 1992           | Butter, Ghee              | 15                                                          |
| 11              | Austria | 1992           | Cheese                    | 35                                                          |
| 11              | Austria | 1992           | Cocoa Beans               | 8                                                           |
| 11              | Austria | 1992           | Coconut Oil               | 3                                                           |
| 11              | Austria | 1992           | Coconuts - Incl Copra     | 3                                                           |
| 11              | Austria | 1992           | Coffee                    | 26                                                          |
| 11              | Austria | 1992           | Cream                     | 16                                                          |
| 11              | Austria | 1992           | Crustaceans               | 1                                                           |
| 11              | Austria | 1992           | Demersal Fish             | 4                                                           |
| 11              | Austria | 1992           | Eggs                      | 36                                                          |
| 11              | Austria | 1992           | Fats, Animals, Raw        | 27                                                          |
| 11              | Austria | 1992           | Freshwater Fish           | 4                                                           |
| 11              | Austria | 1992           | Fruits, Other             | 110                                                         |
| 11              | Austria | 1992           | Grapefruit                | 3                                                           |
| 11              | Austria | 1992           | Grapes                    | 27                                                          |
| 11              | Austria | 1992           | Groundnut Oil             | 1                                                           |
| 11              | Austria | 1992           | Groundnuts (Shelled Eq)   | 2                                                           |
| 11              | Austria | 1992           | Honey                     | 4                                                           |
| 11              | Austria | 1992           | Lemons, Limes             | 10                                                          |
| 11              | Austria | 1992           | Maize                     | 12                                                          |
| 11              | Austria | 1992           | Maize Germ Oil            | 2                                                           |
| 11              | Austria | 1992           | Marine Fish, Other        | 7                                                           |
| 11              | Austria | 1992           | Meat, Other               | 4                                                           |
| 11              | Austria | 1992           | Milk, Whole               | 312                                                         |
| 11              | Austria | 1992           | Mutton & Goat Meat        | 3                                                           |
| 11              | Austria | 1992           | Nuts                      | 20                                                          |
| 11              | Austria | 1992           | Oats                      | 3                                                           |
| 11              | Austria | 1992           | Offals, Edible            | 11                                                          |
| 11              | Austria | 1992           | Oilcrops Oil, Other       | 8                                                           |
| 11              | Austria | 1992           | Oilcrops, Other           | 1                                                           |
| 11              | Austria | 1992           | Olive Oil                 | 1                                                           |
| 11              | Austria | 1992           | Olives                    | 1                                                           |
| 11              | Austria | 1992           | Onions                    | 16                                                          |
| 11              | Austria | 1992           | Oranges, Mandarines       | 81                                                          |
| 11              | Austria | 1992           | Palm Oil                  | 4                                                           |
| 11              | Austria | 1992           | Peas                      | 1                                                           |
| 11              | Austria | 1992           | Pelagic Fish              | 12                                                          |
| 11              | Austria | 1992           | Pigmeat                   | 185                                                         |
| 11              | Austria | 1992           | Pimento                   | 1                                                           |
| 11              | Austria | 1992           | Pineapples                | 4                                                           |
| 11              | Austria | 1992           | Potatoes                  | 169                                                         |
| 11              | Austria | 1992           | Poultry Meat              | 40                                                          |
| 11              | Austria | 1992           | Pulses, Other             | 1                                                           |
| 11              | Austria | 1992           | Rape and Mustard Oil      | 21                                                          |
| 11              | Austria | 1992           | Rice (Milled Equivalent)  | 16                                                          |
| 11              | Austria | 1992           | Rye                       | 45                                                          |
| 11              | Austria | 1992           | Soyabean Oil              | 1                                                           |
| 11              | Austria | 1992           | Soyabeans                 | 1                                                           |
| 11              | Austria | 1992           | Spices, Other             | 1                                                           |
| 11              | Austria | 1992           | Sugar, Refined Equivalent | 100                                                         |
| 11              | Austria | 1992           | Sunflowerseed Oil         | 11                                                          |
| 11              | Austria | 1992           | Sweeteners, Other         | 7                                                           |
| 11              | Austria | 1992           | Tea                       | 1                                                           |
| 11              | Austria | 1992           | Tomatoes                  | 35                                                          |
| 11              | Austria | 1992           | Vegetables, Other         | 131                                                         |
| 11              | Austria | 1992           | Wheat                     | 173                                                         |
| 11              | Austria | 1992           | Wine                      | 93                                                          |
| 11              | Austria | 1993           | Apples                    | 162                                                         |
| 11              | Austria | 1993           | Bananas                   | 38                                                          |
| 11              | Austria | 1993           | Barley                    | 1                                                           |
| 11              | Austria | 1993           | Beans                     | 1                                                           |
| 11              | Austria | 1993           | Beer                      | 318                                                         |
| 11              | Austria | 1993           | Beverages, Alcoholic      | 11                                                          |
| 11              | Austria | 1993           | Beverages, Fermented      | 5                                                           |
| 11              | Austria | 1993           | Bovine Meat               | 63                                                          |
| 11              | Austria | 1993           | Butter, Ghee              | 14                                                          |
| 11              | Austria | 1993           | Cheese                    | 34                                                          |
| 11              | Austria | 1993           | Cocoa Beans               | 8                                                           |
| 11              | Austria | 1993           | Coconut Oil               | 2                                                           |
| 11              | Austria | 1993           | Coconuts - Incl Copra     | 3                                                           |
| 11              | Austria | 1993           | Coffee                    | 27                                                          |
| 11              | Austria | 1993           | Cream                     | 16                                                          |
| 11              | Austria | 1993           | Crustaceans               | 1                                                           |
| 11              | Austria | 1993           | Demersal Fish             | 5                                                           |
| 11              | Austria | 1993           | Eggs                      | 37                                                          |
| 11              | Austria | 1993           | Fats, Animals, Raw        | 27                                                          |
| 11              | Austria | 1993           | Freshwater Fish           | 3                                                           |
| 11              | Austria | 1993           | Fruits, Other             | 109                                                         |
| 11              | Austria | 1993           | Grapefruit                | 2                                                           |
| 11              | Austria | 1993           | Grapes                    | 25                                                          |
| 11              | Austria | 1993           | Groundnut Oil             | 1                                                           |
| 11              | Austria | 1993           | Groundnuts (Shelled Eq)   | 2                                                           |
| 11              | Austria | 1993           | Honey                     | 5                                                           |
| 11              | Austria | 1993           | Lemons, Limes             | 10                                                          |
| 11              | Austria | 1993           | Maize                     | 12                                                          |
| 11              | Austria | 1993           | Maize Germ Oil            | 2                                                           |
| 11              | Austria | 1993           | Marine Fish, Other        | 6                                                           |
| 11              | Austria | 1993           | Meat, Other               | 3                                                           |
| 11              | Austria | 1993           | Milk, Whole               | 312                                                         |
| 11              | Austria | 1993           | Mutton & Goat Meat        | 3                                                           |
| 11              | Austria | 1993           | Nuts                      | 23                                                          |
| 11              | Austria | 1993           | Oats                      | 3                                                           |
| 11              | Austria | 1993           | Offals, Edible            | 10                                                          |
| 11              | Austria | 1993           | Oilcrops Oil, Other       | 9                                                           |
| 11              | Austria | 1993           | Oilcrops, Other           | 1                                                           |
| 11              | Austria | 1993           | Olive Oil                 | 1                                                           |

Dietary calcium and zinc deficiency risks are decreasing but remain prevalent

| FAO countrycode | Country | Reference year | Food item                 | Gross food supply (g capita <sup>-1</sup> d <sup>-1</sup> ) |
|-----------------|---------|----------------|---------------------------|-------------------------------------------------------------|
| 11              | Austria | 1993           | Olives                    | 1                                                           |
| 11              | Austria | 1993           | Onions                    | 17                                                          |
| 11              | Austria | 1993           | Oranges, Mandarines       | 102                                                         |
| 11              | Austria | 1993           | Palm Oil                  | 2                                                           |
| 11              | Austria | 1993           | Peas                      | 1                                                           |
| 11              | Austria | 1993           | Pelagic Fish              | 11                                                          |
| 11              | Austria | 1993           | Pigmeat                   | 180                                                         |
| 11              | Austria | 1993           | Pimento                   | 1                                                           |
| 11              | Austria | 1993           | Pineapples                | 4                                                           |
| 11              | Austria | 1993           | Potatoes                  | 170                                                         |
| 11              | Austria | 1993           | Poultry Meat              | 41                                                          |
| 11              | Austria | 1993           | Rape and Mustard Oil      | 19                                                          |
| 11              | Austria | 1993           | Rice (Milled Equivalent)  | 19                                                          |
| 11              | Austria | 1993           | Rye                       | 43                                                          |
| 11              | Austria | 1993           | Soyabean Oil              | 4                                                           |
| 11              | Austria | 1993           | Soyabeans                 | 2                                                           |
| 11              | Austria | 1993           | Spices, Other             | 1                                                           |
| 11              | Austria | 1993           | Sugar, Refined Equivalent | 95                                                          |
| 11              | Austria | 1993           | Sunflowerseed Oil         | 11                                                          |
| 11              | Austria | 1993           | Sweeteners, Other         | 8                                                           |
| 11              | Austria | 1993           | Tomatoes                  | 35                                                          |
| 11              | Austria | 1993           | Vegetables, Other         | 130                                                         |
| 11              | Austria | 1993           | Wheat                     | 168                                                         |
| 11              | Austria | 1993           | Wine                      | 87                                                          |
| 11              | Austria | 1994           | Apples                    | 110                                                         |
| 11              | Austria | 1994           | Aquatic Animals, Others   | 1                                                           |
| 11              | Austria | 1994           | Bananas                   | 37                                                          |
| 11              | Austria | 1994           | Barley                    | 1                                                           |
| 11              | Austria | 1994           | Beans                     | 2                                                           |
| 11              | Austria | 1994           | Beer                      | 317                                                         |
| 11              | Austria | 1994           | Beverages, Alcoholic      | 11                                                          |
| 11              | Austria | 1994           | Beverages, Fermented      | 5                                                           |
| 11              | Austria | 1994           | Bovine Meat               | 60                                                          |
| 11              | Austria | 1994           | Butter, Ghee              | 13                                                          |
| 11              | Austria | 1994           | Cheese                    | 40                                                          |
| 11              | Austria | 1994           | Cocoa Beans               | 7                                                           |
| 11              | Austria | 1994           | Coconut Oil               | 3                                                           |
| 11              | Austria | 1994           | Coconuts - Incl Copra     | 3                                                           |
| 11              | Austria | 1994           | Coffee                    | 22                                                          |
| 11              | Austria | 1994           | Cream                     | 16                                                          |
| 11              | Austria | 1994           | Crustaceans               | 1                                                           |
| 11              | Austria | 1994           | Demersal Fish             | 5                                                           |
| 11              | Austria | 1994           | Eggs                      | 39                                                          |
| 11              | Austria | 1994           | Fats, Animals, Raw        | 26                                                          |
| 11              | Austria | 1994           | Freshwater Fish           | 4                                                           |
| 11              | Austria | 1994           | Fruits, Other             | 103                                                         |
| 11              | Austria | 1994           | Grapefruit                | 2                                                           |
| 11              | Austria | 1994           | Grapes                    | 26                                                          |
| 11              | Austria | 1994           | Groundnut Oil             | 1                                                           |
| 11              | Austria | 1994           | Groundnuts (Shelled Eq)   | 2                                                           |
| 11              | Austria | 1994           | Honey                     | 5                                                           |
| 11              | Austria | 1994           | Lemons, Limes             | 11                                                          |
| 11              | Austria | 1994           | Maize                     | 23                                                          |
| 11              | Austria | 1994           | Maize Germ Oil            | 2                                                           |
| 11              | Austria | 1994           | Marine Fish, Other        | 7                                                           |
| 11              | Austria | 1994           | Meat, Other               | 3                                                           |
| 11              | Austria | 1994           | Milk, Whole               | 304                                                         |
| 11              | Austria | 1994           | Mutton & Goat Meat        | 3                                                           |
| 11              | Austria | 1994           | Nuts                      | 18                                                          |
| 11              | Austria | 1994           | Oats                      | 3                                                           |
| 11              | Austria | 1994           | Offals, Edible            | 10                                                          |
| 11              | Austria | 1994           | Oilcrops Oil, Other       | 9                                                           |
| 11              | Austria | 1994           | Oilcrops, Other           | 1                                                           |
| 11              | Austria | 1994           | Olive Oil                 | 1                                                           |
| 11              | Austria | 1994           | Olives                    | 1                                                           |
| 11              | Austria | 1994           | Onions                    | 18                                                          |
| 11              | Austria | 1994           | Oranges, Mandarines       | 124                                                         |
| 11              | Austria | 1994           | Palm Oil                  | 1                                                           |
| 11              | Austria | 1994           | Peas                      | 1                                                           |
| 11              | Austria | 1994           | Pelagic Fish              | 15                                                          |
| 11              | Austria | 1994           | Pigmeat                   | 196                                                         |
| 11              | Austria | 1994           | Pimento                   | 1                                                           |
| 11              | Austria | 1994           | Pineapples                | 6                                                           |
| 11              | Austria | 1994           | Potatoes                  | 148                                                         |
| 11              | Austria | 1994           | Poultry Meat              | 40                                                          |
| 11              | Austria | 1994           | Rape and Mustard Oil      | 17                                                          |
| 11              | Austria | 1994           | Rice (Milled Equivalent)  | 14                                                          |
| 11              | Austria | 1994           | Rye                       | 39                                                          |
| 11              | Austria | 1994           | Soyabean Oil              | 4                                                           |
| 11              | Austria | 1994           | Soyabeans                 | 1                                                           |
| 11              | Austria | 1994           | Spices, Other             | 1                                                           |
| 11              | Austria | 1994           | Sugar, Refined Equivalent | 113                                                         |
| 11              | Austria | 1994           | Sunflowerseed Oil         | 9                                                           |
| 11              | Austria | 1994           | Sweeteners, Other         | 7                                                           |
| 11              | Austria | 1994           | Tea                       | 1                                                           |
| 11              | Austria | 1994           | Tomatoes                  | 39                                                          |
| 11              | Austria | 1994           | Vegetables, Other         | 135                                                         |
| 11              | Austria | 1994           | Wheat                     | 170                                                         |
| 11              | Austria | 1994           | Wine                      | 89                                                          |
| 11              | Austria | 1995           | Apples                    | 108                                                         |
| 11              | Austria | 1995           | Bananas                   | 28                                                          |
| 11              | Austria | 1995           | Barley                    | 1                                                           |
| 11              | Austria | 1995           | Beans                     | 1                                                           |
| 11              | Austria | 1995           | Beer                      | 311                                                         |
| 11              | Austria | 1995           | Beverages, Alcoholic      | 13                                                          |
| 11              | Austria | 1995           | Beverages, Fermented      | 5                                                           |
| 11              | Austria | 1995           | Bovine Meat               | 55                                                          |



Dietary calcium and zinc deficiency risks are decreasing but remain prevalent

| FAO countrycode | Country | Reference year | Food item                 | Gross food supply (g capita <sup>-1</sup> d <sup>-1</sup> ) |
|-----------------|---------|----------------|---------------------------|-------------------------------------------------------------|
| 11              | Austria | 1995           | Butter, Ghee              | 14                                                          |
| 11              | Austria | 1995           | Cheese                    | 43                                                          |
| 11              | Austria | 1995           | Cocoa Beans               | 8                                                           |
| 11              | Austria | 1995           | Coconut Oil               | 2                                                           |
| 11              | Austria | 1995           | Coconuts - Incl Copra     | 2                                                           |
| 11              | Austria | 1995           | Coffee                    | 19                                                          |
| 11              | Austria | 1995           | Cream                     | 13                                                          |
| 11              | Austria | 1995           | Crustaceans               | 1                                                           |
| 11              | Austria | 1995           | Demersal Fish             | 9                                                           |
| 11              | Austria | 1995           | Eggs                      | 37                                                          |
| 11              | Austria | 1995           | Fats, Animals, Raw        | 26                                                          |
| 11              | Austria | 1995           | Freshwater Fish           | 4                                                           |
| 11              | Austria | 1995           | Fruits, Other             | 85                                                          |
| 11              | Austria | 1995           | Grapefruit                | 3                                                           |
| 11              | Austria | 1995           | Grapes                    | 19                                                          |
| 11              | Austria | 1995           | Groundnut Oil             | 1                                                           |
| 11              | Austria | 1995           | Groundnuts (Shelled Eq)   | 1                                                           |
| 11              | Austria | 1995           | Honey                     | 4                                                           |
| 11              | Austria | 1995           | Lemons, Limes             | 11                                                          |
| 11              | Austria | 1995           | Maize                     | 29                                                          |
| 11              | Austria | 1995           | Maize Germ Oil            | 2                                                           |
| 11              | Austria | 1995           | Marine Fish, Other        | 1                                                           |
| 11              | Austria | 1995           | Meat, Other               | 3                                                           |
| 11              | Austria | 1995           | Milk, Whole               | 301                                                         |
| 11              | Austria | 1995           | Molluscs, Other           | 1                                                           |
| 11              | Austria | 1995           | Mutton & Goat Meat        | 3                                                           |
| 11              | Austria | 1995           | Nuts                      | 17                                                          |
| 11              | Austria | 1995           | Oats                      | 3                                                           |
| 11              | Austria | 1995           | Offals, Edible            | 10                                                          |
| 11              | Austria | 1995           | Oilcrops Oil, Other       | 8                                                           |
| 11              | Austria | 1995           | Oilcrops, Other           | 1                                                           |
| 11              | Austria | 1995           | Onions                    | 15                                                          |
| 11              | Austria | 1995           | Oranges, Mandarines       | 73                                                          |
| 11              | Austria | 1995           | Palm Oil                  | 1                                                           |
| 11              | Austria | 1995           | Peas                      | 1                                                           |
| 11              | Austria | 1995           | Pelagic Fish              | 7                                                           |
| 11              | Austria | 1995           | Pepper                    | 1                                                           |
| 11              | Austria | 1995           | Pigmeat                   | 191                                                         |
| 11              | Austria | 1995           | Pimento                   | 1                                                           |
| 11              | Austria | 1995           | Pineapples                | 2                                                           |
| 11              | Austria | 1995           | Potatoes                  | 184                                                         |
| 11              | Austria | 1995           | Poultry Meat              | 42                                                          |
| 11              | Austria | 1995           | Rape and Mustard Oil      | 18                                                          |
| 11              | Austria | 1995           | Rice (Milled Equivalent)  | 13                                                          |
| 11              | Austria | 1995           | Rye                       | 33                                                          |
| 11              | Austria | 1995           | Soyabean Oil              | 6                                                           |
| 11              | Austria | 1995           | Soyabeans                 | 2                                                           |
| 11              | Austria | 1995           | Spices, Other             | 1                                                           |
| 11              | Austria | 1995           | Sugar, Refined Equivalent | 110                                                         |
| 11              | Austria | 1995           | Sunflowerseed Oil         | 9                                                           |
| 11              | Austria | 1995           | Sweeteners, Other         | 8                                                           |
| 11              | Austria | 1995           | Tomatoes                  | 33                                                          |
| 11              | Austria | 1995           | Vegetables, Other         | 171                                                         |
| 11              | Austria | 1995           | Wheat                     | 188                                                         |
| 11              | Austria | 1995           | Wine                      | 88                                                          |
| 11              | Austria | 1996           | Apples                    | 98                                                          |
| 11              | Austria | 1996           | Bananas                   | 22                                                          |
| 11              | Austria | 1996           | Barley                    | 1                                                           |
| 11              | Austria | 1996           | Beans                     | 1                                                           |
| 11              | Austria | 1996           | Beer                      | 308                                                         |
| 11              | Austria | 1996           | Beverages, Alcoholic      | 12                                                          |
| 11              | Austria | 1996           | Beverages, Fermented      | 6                                                           |
| 11              | Austria | 1996           | Bovine Meat               | 60                                                          |
| 11              | Austria | 1996           | Butter, Ghee              | 14                                                          |
| 11              | Austria | 1996           | Cheese                    | 48                                                          |
| 11              | Austria | 1996           | Cocoa Beans               | 7                                                           |
| 11              | Austria | 1996           | Coconut Oil               | 3                                                           |
| 11              | Austria | 1996           | Coconuts - Incl Copra     | 2                                                           |
| 11              | Austria | 1996           | Coffee                    | 20                                                          |
| 11              | Austria | 1996           | Cream                     | 16                                                          |
| 11              | Austria | 1996           | Crustaceans               | 1                                                           |
| 11              | Austria | 1996           | Demersal Fish             | 11                                                          |
| 11              | Austria | 1996           | Eggs                      | 38                                                          |
| 11              | Austria | 1996           | Fats, Animals, Raw        | 27                                                          |
| 11              | Austria | 1996           | Freshwater Fish           | 4                                                           |
| 11              | Austria | 1996           | Fruits, Other             | 91                                                          |
| 11              | Austria | 1996           | Grapefruit                | 2                                                           |
| 11              | Austria | 1996           | Grapes                    | 18                                                          |
| 11              | Austria | 1996           | Groundnuts (Shelled Eq)   | 1                                                           |
| 11              | Austria | 1996           | Honey                     | 4                                                           |
| 11              | Austria | 1996           | Lemons, Limes             | 6                                                           |
| 11              | Austria | 1996           | Maize                     | 31                                                          |
| 11              | Austria | 1996           | Maize Germ Oil            | 2                                                           |
| 11              | Austria | 1996           | Marine Fish, Other        | 1                                                           |
| 11              | Austria | 1996           | Meat, Other               | 3                                                           |
| 11              | Austria | 1996           | Milk, Whole               | 244                                                         |
| 11              | Austria | 1996           | Molluscs, Other           | 1                                                           |
| 11              | Austria | 1996           | Mutton & Goat Meat        | 3                                                           |
| 11              | Austria | 1996           | Nuts                      | 15                                                          |
| 11              | Austria | 1996           | Oats                      | 3                                                           |
| 11              | Austria | 1996           | Offals, Edible            | 9                                                           |
| 11              | Austria | 1996           | Oilcrops Oil, Other       | 8                                                           |
| 11              | Austria | 1996           | Oilcrops, Other           | 1                                                           |
| 11              | Austria | 1996           | Onions                    | 19                                                          |
| 11              | Austria | 1996           | Oranges, Mandarines       | 32                                                          |
| 11              | Austria | 1996           | Palm Oil                  | 2                                                           |
| 11              | Austria | 1996           | Pelagic Fish              | 10                                                          |

Dietary calcium and zinc deficiency risks are decreasing but remain prevalent

| FAO countrycode | Country | Reference year | Food item                 | Gross food supply (g capita <sup>-1</sup> d <sup>-1</sup> ) |
|-----------------|---------|----------------|---------------------------|-------------------------------------------------------------|
| 11              | Austria | 1996           | Pepper                    | 1                                                           |
| 11              | Austria | 1996           | Pigmeat                   | 201                                                         |
| 11              | Austria | 1996           | Pimento                   | 1                                                           |
| 11              | Austria | 1996           | Pineapples                | 3                                                           |
| 11              | Austria | 1996           | Potatoes                  | 171                                                         |
| 11              | Austria | 1996           | Poultry Meat              | 42                                                          |
| 11              | Austria | 1996           | Rape and Mustard Oil      | 20                                                          |
| 11              | Austria | 1996           | Rice (Milled Equivalent)  | 12                                                          |
| 11              | Austria | 1996           | Rye                       | 34                                                          |
| 11              | Austria | 1996           | Soyabean Oil              | 3                                                           |
| 11              | Austria | 1996           | Soyabean                  | 2                                                           |
| 11              | Austria | 1996           | Spices, Other             | 1                                                           |
| 11              | Austria | 1996           | Sugar, Refined Equivalent | 111                                                         |
| 11              | Austria | 1996           | Sunflowerseed Oil         | 10                                                          |
| 11              | Austria | 1996           | Sweeteners, Other         | 6                                                           |
| 11              | Austria | 1996           | Tea                       | 1                                                           |
| 11              | Austria | 1996           | Tomatoes                  | 34                                                          |
| 11              | Austria | 1996           | Vegetables, Other         | 172                                                         |
| 11              | Austria | 1996           | Wheat                     | 200                                                         |
| 11              | Austria | 1996           | Wine                      | 84                                                          |
| 11              | Austria | 1997           | Apples                    | 127                                                         |
| 11              | Austria | 1997           | Bananas                   | 27                                                          |
| 11              | Austria | 1997           | Barley                    | 1                                                           |
| 11              | Austria | 1997           | Beans                     | 1                                                           |
| 11              | Austria | 1997           | Beer                      | 313                                                         |
| 11              | Austria | 1997           | Beverages, Alcoholic      | 14                                                          |
| 11              | Austria | 1997           | Beverages, Fermented      | 6                                                           |
| 11              | Austria | 1997           | Bovine Meat               | 55                                                          |
| 11              | Austria | 1997           | Butter, Ghee              | 14                                                          |
| 11              | Austria | 1997           | Cheese                    | 49                                                          |
| 11              | Austria | 1997           | Citrus, Other             | 1                                                           |
| 11              | Austria | 1997           | Cocoa Beans               | 5                                                           |
| 11              | Austria | 1997           | Coconut Oil               | 2                                                           |
| 11              | Austria | 1997           | Coconuts - Incl Copra     | 2                                                           |
| 11              | Austria | 1997           | Coffee                    | 22                                                          |
| 11              | Austria | 1997           | Cream                     | 13                                                          |
| 11              | Austria | 1997           | Crustaceans               | 1                                                           |
| 11              | Austria | 1997           | Demersal Fish             | 10                                                          |
| 11              | Austria | 1997           | Eggs                      | 39                                                          |
| 11              | Austria | 1997           | Fats, Animals, Raw        | 28                                                          |
| 11              | Austria | 1997           | Freshwater Fish           | 5                                                           |
| 11              | Austria | 1997           | Fruits, Other             | 91                                                          |
| 11              | Austria | 1997           | Grapefruit                | 1                                                           |
| 11              | Austria | 1997           | Grapes                    | 19                                                          |
| 11              | Austria | 1997           | Groundnuts (Shelled Eq)   | 1                                                           |
| 11              | Austria | 1997           | Honey                     | 3                                                           |
| 11              | Austria | 1997           | Lemons, Limes             | 6                                                           |
| 11              | Austria | 1997           | Maize                     | 33                                                          |
| 11              | Austria | 1997           | Maize Germ Oil            | 2                                                           |
| 11              | Austria | 1997           | Marine Fish, Other        | 1                                                           |
| 11              | Austria | 1997           | Meat, Other               | 3                                                           |
| 11              | Austria | 1997           | Milk, Whole               | 285                                                         |
| 11              | Austria | 1997           | Molluscs, Other           | 1                                                           |
| 11              | Austria | 1997           | Mutton & Goat Meat        | 3                                                           |
| 11              | Austria | 1997           | Nuts                      | 15                                                          |
| 11              | Austria | 1997           | Oats                      | 4                                                           |
| 11              | Austria | 1997           | Offals, Edible            | 4                                                           |
| 11              | Austria | 1997           | Oilcrops Oil, Other       | 9                                                           |
| 11              | Austria | 1997           | Oilcrops, Other           | 1                                                           |
| 11              | Austria | 1997           | Olive Oil                 | 1                                                           |
| 11              | Austria | 1997           | Olives                    | 1                                                           |
| 11              | Austria | 1997           | Onions                    | 16                                                          |
| 11              | Austria | 1997           | Oranges, Mandarines       | 52                                                          |
| 11              | Austria | 1997           | Palm Oil                  | 1                                                           |
| 11              | Austria | 1997           | Peas                      | 1                                                           |
| 11              | Austria | 1997           | Pelagic Fish              | 11                                                          |
| 11              | Austria | 1997           | Pepper                    | 1                                                           |
| 11              | Austria | 1997           | Pigmeat                   | 200                                                         |
| 11              | Austria | 1997           | Pimento                   | 1                                                           |
| 11              | Austria | 1997           | Pineapples                | 2                                                           |
| 11              | Austria | 1997           | Potatoes                  | 165                                                         |
| 11              | Austria | 1997           | Poultry Meat              | 44                                                          |
| 11              | Austria | 1997           | Rape and Mustard Oil      | 20                                                          |
| 11              | Austria | 1997           | Rice (Milled Equivalent)  | 12                                                          |
| 11              | Austria | 1997           | Rye                       | 39                                                          |
| 11              | Austria | 1997           | Soyabean Oil              | 2                                                           |
| 11              | Austria | 1997           | Soyabean                  | 2                                                           |
| 11              | Austria | 1997           | Spices, Other             | 1                                                           |
| 11              | Austria | 1997           | Sugar, Refined Equivalent | 111                                                         |
| 11              | Austria | 1997           | Sunflowerseed Oil         | 10                                                          |
| 11              | Austria | 1997           | Sweeteners, Other         | 4                                                           |
| 11              | Austria | 1997           | Tomatoes                  | 33                                                          |
| 11              | Austria | 1997           | Vegetables, Other         | 174                                                         |
| 11              | Austria | 1997           | Wheat                     | 181                                                         |
| 11              | Austria | 1997           | Wine                      | 86                                                          |
| 11              | Austria | 1998           | Apples                    | 90                                                          |
| 11              | Austria | 1998           | Bananas                   | 26                                                          |
| 11              | Austria | 1998           | Barley                    | 1                                                           |
| 11              | Austria | 1998           | Beans                     | 1                                                           |
| 11              | Austria | 1998           | Beer                      | 313                                                         |
| 11              | Austria | 1998           | Beverages, Alcoholic      | 14                                                          |
| 11              | Austria | 1998           | Beverages, Fermented      | 2                                                           |
| 11              | Austria | 1998           | Bovine Meat               | 55                                                          |
| 11              | Austria | 1998           | Butter, Ghee              | 14                                                          |
| 11              | Austria | 1998           | Cheese                    | 53                                                          |
| 11              | Austria | 1998           | Citrus, Other             | 2                                                           |
| 11              | Austria | 1998           | Cocoa Beans               | 5                                                           |

Dietary calcium and zinc deficiency risks are decreasing but remain prevalent

| FAO countrycode | Country | Reference year | Food item                 | Gross food supply (g capita <sup>-1</sup> d <sup>-1</sup> ) |
|-----------------|---------|----------------|---------------------------|-------------------------------------------------------------|
| 11              | Austria | 1998           | Coconut Oil               | 1                                                           |
| 11              | Austria | 1998           | Coconuts - Incl Copra     | 2                                                           |
| 11              | Austria | 1998           | Coffee                    | 22                                                          |
| 11              | Austria | 1998           | Cream                     | 11                                                          |
| 11              | Austria | 1998           | Crustaceans               | 1                                                           |
| 11              | Austria | 1998           | Demersal Fish             | 10                                                          |
| 11              | Austria | 1998           | Eggs                      | 38                                                          |
| 11              | Austria | 1998           | Fats, Animals, Raw        | 27                                                          |
| 11              | Austria | 1998           | Freshwater Fish           | 5                                                           |
| 11              | Austria | 1998           | Fruits, Other             | 81                                                          |
| 11              | Austria | 1998           | Grapes                    | 12                                                          |
| 11              | Austria | 1998           | Groundnuts (Shelled Eq)   | 2                                                           |
| 11              | Austria | 1998           | Honey                     | 4                                                           |
| 11              | Austria | 1998           | Lemons, Limes             | 6                                                           |
| 11              | Austria | 1998           | Maize                     | 39                                                          |
| 11              | Austria | 1998           | Maize Germ Oil            | 2                                                           |
| 11              | Austria | 1998           | Marine Fish, Other        | 1                                                           |
| 11              | Austria | 1998           | Meat, Other               | 3                                                           |
| 11              | Austria | 1998           | Milk, Whole               | 226                                                         |
| 11              | Austria | 1998           | Molluscs, Other           | 1                                                           |
| 11              | Austria | 1998           | Mutton & Goat Meat        | 3                                                           |
| 11              | Austria | 1998           | Nuts                      | 16                                                          |
| 11              | Austria | 1998           | Oats                      | 3                                                           |
| 11              | Austria | 1998           | Offals, Edible            | 3                                                           |
| 11              | Austria | 1998           | Oilcrops Oil, Other       | 8                                                           |
| 11              | Austria | 1998           | Oilcrops, Other           | 1                                                           |
| 11              | Austria | 1998           | Olive Oil                 | 1                                                           |
| 11              | Austria | 1998           | Olives                    | 1                                                           |
| 11              | Austria | 1998           | Onions                    | 20                                                          |
| 11              | Austria | 1998           | Oranges, Mandarines       | 31                                                          |
| 11              | Austria | 1998           | Palm Oil                  | 2                                                           |
| 11              | Austria | 1998           | Pelagic Fish              | 11                                                          |
| 11              | Austria | 1998           | Pepper                    | 1                                                           |
| 11              | Austria | 1998           | Pigmeat                   | 210                                                         |
| 11              | Austria | 1998           | Pimento                   | 1                                                           |
| 11              | Austria | 1998           | Pineapples                | 2                                                           |
| 11              | Austria | 1998           | Potatoes                  | 152                                                         |
| 11              | Austria | 1998           | Poultry Meat              | 45                                                          |
| 11              | Austria | 1998           | Rape and Mustard Oil      | 17                                                          |
| 11              | Austria | 1998           | Rice (Milled Equivalent)  | 11                                                          |
| 11              | Austria | 1998           | Rye                       | 39                                                          |
| 11              | Austria | 1998           | Soybean Oil               | 4                                                           |
| 11              | Austria | 1998           | Soybeans                  | 2                                                           |
| 11              | Austria | 1998           | Spices, Other             | 1                                                           |
| 11              | Austria | 1998           | Sugar, Refined Equivalent | 107                                                         |
| 11              | Austria | 1998           | Sunflowerseed Oil         | 13                                                          |
| 11              | Austria | 1998           | Sweeteners, Other         | 7                                                           |
| 11              | Austria | 1998           | Tea                       | 1                                                           |
| 11              | Austria | 1998           | Tomatoes                  | 19                                                          |
| 11              | Austria | 1998           | Vegetables, Other         | 163                                                         |
| 11              | Austria | 1998           | Wheat                     | 219                                                         |
| 11              | Austria | 1998           | Wine                      | 86                                                          |
| 11              | Austria | 1999           | Apples                    | 111                                                         |
| 11              | Austria | 1999           | Bananas                   | 30                                                          |
| 11              | Austria | 1999           | Barley                    | 1                                                           |
| 11              | Austria | 1999           | Beans                     | 1                                                           |
| 11              | Austria | 1999           | Beer                      | 316                                                         |
| 11              | Austria | 1999           | Beverages, Alcoholic      | 18                                                          |
| 11              | Austria | 1999           | Beverages, Fermented      | 1                                                           |
| 11              | Austria | 1999           | Bovine Meat               | 50                                                          |
| 11              | Austria | 1999           | Butter, Ghee              | 13                                                          |
| 11              | Austria | 1999           | Cheese                    | 54                                                          |
| 11              | Austria | 1999           | Citrus, Other             | 1                                                           |
| 11              | Austria | 1999           | Cocoa Beans               | 8                                                           |
| 11              | Austria | 1999           | Coconut Oil               | 1                                                           |
| 11              | Austria | 1999           | Coconuts - Incl Copra     | 2                                                           |
| 11              | Austria | 1999           | Coffee                    | 22                                                          |
| 11              | Austria | 1999           | Cream                     | 11                                                          |
| 11              | Austria | 1999           | Crustaceans               | 1                                                           |
| 11              | Austria | 1999           | Demersal Fish             | 8                                                           |
| 11              | Austria | 1999           | Eggs                      | 36                                                          |
| 11              | Austria | 1999           | Fats, Animals, Raw        | 27                                                          |
| 11              | Austria | 1999           | Freshwater Fish           | 6                                                           |
| 11              | Austria | 1999           | Fruits, Other             | 106                                                         |
| 11              | Austria | 1999           | Grapes                    | 18                                                          |
| 11              | Austria | 1999           | Groundnuts (Shelled Eq)   | 2                                                           |
| 11              | Austria | 1999           | Honey                     | 5                                                           |
| 11              | Austria | 1999           | Lemons, Limes             | 8                                                           |
| 11              | Austria | 1999           | Maize                     | 41                                                          |
| 11              | Austria | 1999           | Maize Germ Oil            | 2                                                           |
| 11              | Austria | 1999           | Marine Fish, Other        | 2                                                           |
| 11              | Austria | 1999           | Meat, Other               | 3                                                           |
| 11              | Austria | 1999           | Milk, Whole               | 229                                                         |
| 11              | Austria | 1999           | Molluscs, Other           | 1                                                           |
| 11              | Austria | 1999           | Mutton & Goat Meat        | 3                                                           |
| 11              | Austria | 1999           | Nuts                      | 17                                                          |
| 11              | Austria | 1999           | Oats                      | 3                                                           |
| 11              | Austria | 1999           | Offals, Edible            | 4                                                           |
| 11              | Austria | 1999           | Oilcrops Oil, Other       | 9                                                           |
| 11              | Austria | 1999           | Oilcrops, Other           | 1                                                           |
| 11              | Austria | 1999           | Olive Oil                 | 1                                                           |
| 11              | Austria | 1999           | Olives                    | 1                                                           |
| 11              | Austria | 1999           | Onions                    | 32                                                          |
| 11              | Austria | 1999           | Oranges, Mandarines       | 32                                                          |
| 11              | Austria | 1999           | Palm Oil                  | 1                                                           |
| 11              | Austria | 1999           | Peas                      | 1                                                           |
| 11              | Austria | 1999           | Pelagic Fish              | 11                                                          |

Dietary calcium and zinc deficiency risks are decreasing but remain prevalent

| FAO countrycode | Country | Reference year | Food item                 | Gross food supply (g capita <sup>-1</sup> d <sup>-1</sup> ) |
|-----------------|---------|----------------|---------------------------|-------------------------------------------------------------|
| 11              | Austria | 1999           | Pigmeat                   | 214                                                         |
| 11              | Austria | 1999           | Pimento                   | 1                                                           |
| 11              | Austria | 1999           | Pineapples                | 2                                                           |
| 11              | Austria | 1999           | Potatoes                  | 168                                                         |
| 11              | Austria | 1999           | Poultry Meat              | 46                                                          |
| 11              | Austria | 1999           | Rape and Mustard Oil      | 17                                                          |
| 11              | Austria | 1999           | Rice (Milled Equivalent)  | 11                                                          |
| 11              | Austria | 1999           | Rye                       | 38                                                          |
| 11              | Austria | 1999           | Sesameseed                | 1                                                           |
| 11              | Austria | 1999           | Soyabean Oil              | 5                                                           |
| 11              | Austria | 1999           | Soyabeans                 | 2                                                           |
| 11              | Austria | 1999           | Spices, Other             | 1                                                           |
| 11              | Austria | 1999           | Sugar, Refined Equivalent | 107                                                         |
| 11              | Austria | 1999           | Sunflowerseed             | 1                                                           |
| 11              | Austria | 1999           | Sunflowerseed Oil         | 14                                                          |
| 11              | Austria | 1999           | Sweeteners, Other         | 5                                                           |
| 11              | Austria | 1999           | Tea                       | 1                                                           |
| 11              | Austria | 1999           | Tomatoes                  | 36                                                          |
| 11              | Austria | 1999           | Vegetables, Other         | 186                                                         |
| 11              | Austria | 1999           | Wheat                     | 215                                                         |
| 11              | Austria | 1999           | Wine                      | 87                                                          |
| 11              | Austria | 2000           | Apples                    | 156                                                         |
| 11              | Austria | 2000           | Bananas                   | 25                                                          |
| 11              | Austria | 2000           | Barley                    | 1                                                           |
| 11              | Austria | 2000           | Beans                     | 1                                                           |
| 11              | Austria | 2000           | Beer                      | 301                                                         |
| 11              | Austria | 2000           | Beverages, Alcoholic      | 20                                                          |
| 11              | Austria | 2000           | Beverages, Fermented      | 1                                                           |
| 11              | Austria | 2000           | Bovine Meat               | 53                                                          |
| 11              | Austria | 2000           | Butter, Ghee              | 14                                                          |
| 11              | Austria | 2000           | Cheese                    | 54                                                          |
| 11              | Austria | 2000           | Citrus, Other             | 11                                                          |
| 11              | Austria | 2000           | Cocoa Beans               | 7                                                           |
| 11              | Austria | 2000           | Coconut Oil               | 1                                                           |
| 11              | Austria | 2000           | Coconuts - Incl Copra     | 2                                                           |
| 11              | Austria | 2000           | Coffee                    | 15                                                          |
| 11              | Austria | 2000           | Cream                     | 10                                                          |
| 11              | Austria | 2000           | Crustaceans               | 1                                                           |
| 11              | Austria | 2000           | Demersal Fish             | 6                                                           |
| 11              | Austria | 2000           | Eggs                      | 34                                                          |
| 11              | Austria | 2000           | Fats, Animals, Raw        | 26                                                          |
| 11              | Austria | 2000           | Freshwater Fish           | 5                                                           |
| 11              | Austria | 2000           | Fruits, Other             | 105                                                         |
| 11              | Austria | 2000           | Grapes                    | 18                                                          |
| 11              | Austria | 2000           | Groundnuts (Shelled Eq)   | 2                                                           |
| 11              | Austria | 2000           | Honey                     | 4                                                           |
| 11              | Austria | 2000           | Lemons, Limes             | 7                                                           |
| 11              | Austria | 2000           | Maize                     | 48                                                          |
| 11              | Austria | 2000           | Maize Germ Oil            | 2                                                           |
| 11              | Austria | 2000           | Marine Fish, Other        | 2                                                           |
| 11              | Austria | 2000           | Meat, Other               | 3                                                           |
| 11              | Austria | 2000           | Milk, Whole               | 226                                                         |
| 11              | Austria | 2000           | Molluscs, Other           | 1                                                           |
| 11              | Austria | 2000           | Mutton & Goat Meat        | 3                                                           |
| 11              | Austria | 2000           | Nuts                      | 17                                                          |
| 11              | Austria | 2000           | Oats                      | 4                                                           |
| 11              | Austria | 2000           | Offals, Edible            | 1                                                           |
| 11              | Austria | 2000           | Oilcrops Oil, Other       | 11                                                          |
| 11              | Austria | 2000           | Oilcrops, Other           | 1                                                           |
| 11              | Austria | 2000           | Olive Oil                 | 1                                                           |
| 11              | Austria | 2000           | Olives                    | 1                                                           |
| 11              | Austria | 2000           | Onions                    | 17                                                          |
| 11              | Austria | 2000           | Oranges, Mandarines       | 25                                                          |
| 11              | Austria | 2000           | Palm Oil                  | 1                                                           |
| 11              | Austria | 2000           | Peas                      | 1                                                           |
| 11              | Austria | 2000           | Pelagic Fish              | 10                                                          |
| 11              | Austria | 2000           | Pepper                    | 1                                                           |
| 11              | Austria | 2000           | Pigmeat                   | 206                                                         |
| 11              | Austria | 2000           | Pimento                   | 1                                                           |
| 11              | Austria | 2000           | Pineapples                | 2                                                           |
| 11              | Austria | 2000           | Potatoes                  | 170                                                         |
| 11              | Austria | 2000           | Poultry Meat              | 47                                                          |
| 11              | Austria | 2000           | Rape and Mustard Oil      | 18                                                          |
| 11              | Austria | 2000           | Rice (Milled Equivalent)  | 10                                                          |
| 11              | Austria | 2000           | Rye                       | 39                                                          |
| 11              | Austria | 2000           | Sesameseed                | 1                                                           |
| 11              | Austria | 2000           | Soyabean Oil              | 3                                                           |
| 11              | Austria | 2000           | Soyabeans                 | 3                                                           |
| 11              | Austria | 2000           | Spices, Other             | 1                                                           |
| 11              | Austria | 2000           | Sugar, Refined Equivalent | 108                                                         |
| 11              | Austria | 2000           | Sunflowerseed             | 1                                                           |
| 11              | Austria | 2000           | Sunflowerseed Oil         | 13                                                          |
| 11              | Austria | 2000           | Sweeteners, Other         | 5                                                           |
| 11              | Austria | 2000           | Tea                       | 1                                                           |
| 11              | Austria | 2000           | Tomatoes                  | 33                                                          |
| 11              | Austria | 2000           | Vegetables, Other         | 175                                                         |
| 11              | Austria | 2000           | Wheat                     | 220                                                         |
| 11              | Austria | 2000           | Wine                      | 85                                                          |
| 11              | Austria | 2001           | Apples                    | 143                                                         |
| 11              | Austria | 2001           | Bananas                   | 25                                                          |
| 11              | Austria | 2001           | Barley                    | 1                                                           |
| 11              | Austria | 2001           | Beans                     | 1                                                           |
| 11              | Austria | 2001           | Beer                      | 304                                                         |
| 11              | Austria | 2001           | Beverages, Alcoholic      | 19                                                          |
| 11              | Austria | 2001           | Beverages, Fermented      | 1                                                           |
| 11              | Austria | 2001           | Bovine Meat               | 51                                                          |
| 11              | Austria | 2001           | Butter, Ghee              | 15                                                          |

Dietary calcium and zinc deficiency risks are decreasing but remain prevalent

| FAO countrycode | Country | Reference year | Food item                 | Gross food supply (g capita <sup>-1</sup> d <sup>-1</sup> ) |
|-----------------|---------|----------------|---------------------------|-------------------------------------------------------------|
| 11              | Austria | 2001           | Cheese                    | 57                                                          |
| 11              | Austria | 2001           | Citrus, Other             | 7                                                           |
| 11              | Austria | 2001           | Cocoa Beans               | 7                                                           |
| 11              | Austria | 2001           | Coconut Oil               | 1                                                           |
| 11              | Austria | 2001           | Coconuts - Incl Copra     | 2                                                           |
| 11              | Austria | 2001           | Coffee                    | 20                                                          |
| 11              | Austria | 2001           | Cream                     | 8                                                           |
| 11              | Austria | 2001           | Crustaceans               | 2                                                           |
| 11              | Austria | 2001           | Demersal Fish             | 7                                                           |
| 11              | Austria | 2001           | Eggs                      | 35                                                          |
| 11              | Austria | 2001           | Fats, Animals, Raw        | 27                                                          |
| 11              | Austria | 2001           | Freshwater Fish           | 6                                                           |
| 11              | Austria | 2001           | Fruits, Other             | 117                                                         |
| 11              | Austria | 2001           | Grapes                    | 19                                                          |
| 11              | Austria | 2001           | Groundnut Oil             | 1                                                           |
| 11              | Austria | 2001           | Groundnuts (Shelled Eq)   | 2                                                           |
| 11              | Austria | 2001           | Honey                     | 4                                                           |
| 11              | Austria | 2001           | Lemons, Limes             | 7                                                           |
| 11              | Austria | 2001           | Maize                     | 49                                                          |
| 11              | Austria | 2001           | Maize Germ Oil            | 2                                                           |
| 11              | Austria | 2001           | Marine Fish, Other        | 2                                                           |
| 11              | Austria | 2001           | Meat, Other               | 3                                                           |
| 11              | Austria | 2001           | Milk, Whole               | 223                                                         |
| 11              | Austria | 2001           | Molluscs, Other           | 1                                                           |
| 11              | Austria | 2001           | Mutton & Goat Meat        | 3                                                           |
| 11              | Austria | 2001           | Nuts                      | 17                                                          |
| 11              | Austria | 2001           | Oats                      | 5                                                           |
| 11              | Austria | 2001           | Offals, Edible            | 2                                                           |
| 11              | Austria | 2001           | Oilcrops Oil, Other       | 8                                                           |
| 11              | Austria | 2001           | Oilcrops, Other           | 1                                                           |
| 11              | Austria | 2001           | Olive Oil                 | 2                                                           |
| 11              | Austria | 2001           | Olives                    | 1                                                           |
| 11              | Austria | 2001           | Onions                    | 30                                                          |
| 11              | Austria | 2001           | Oranges, Mandarines       | 37                                                          |
| 11              | Austria | 2001           | Palm Oil                  | 1                                                           |
| 11              | Austria | 2001           | Peas                      | 1                                                           |
| 11              | Austria | 2001           | Pelagic Fish              | 11                                                          |
| 11              | Austria | 2001           | Pigmeat                   | 197                                                         |
| 11              | Austria | 2001           | Pimento                   | 1                                                           |
| 11              | Austria | 2001           | Pineapples                | 1                                                           |
| 11              | Austria | 2001           | Potatoes                  | 163                                                         |
| 11              | Austria | 2001           | Poultry Meat              | 49                                                          |
| 11              | Austria | 2001           | Pulses, Other             | 1                                                           |
| 11              | Austria | 2001           | Rape and Mustard Oil      | 20                                                          |
| 11              | Austria | 2001           | Rice (Milled Equivalent)  | 10                                                          |
| 11              | Austria | 2001           | Rye                       | 37                                                          |
| 11              | Austria | 2001           | Sesameseed                | 1                                                           |
| 11              | Austria | 2001           | Soyabean Oil              | 10                                                          |
| 11              | Austria | 2001           | Soyabeans                 | 3                                                           |
| 11              | Austria | 2001           | Spices, Other             | 1                                                           |
| 11              | Austria | 2001           | Sugar, Refined Equivalent | 105                                                         |
| 11              | Austria | 2001           | Sunflowerseed             | 1                                                           |
| 11              | Austria | 2001           | Sunflowerseed Oil         | 9                                                           |
| 11              | Austria | 2001           | Sweeteners, Other         | 6                                                           |
| 11              | Austria | 2001           | Tea                       | 1                                                           |
| 11              | Austria | 2001           | Tomatoes                  | 36                                                          |
| 11              | Austria | 2001           | Vegetables, Other         | 193                                                         |
| 11              | Austria | 2001           | Wheat                     | 219                                                         |
| 11              | Austria | 2001           | Wine                      | 79                                                          |
| 11              | Austria | 2002           | Apples                    | 138                                                         |
| 11              | Austria | 2002           | Bananas                   | 25                                                          |
| 11              | Austria | 2002           | Barley                    | 1                                                           |
| 11              | Austria | 2002           | Beans                     | 1                                                           |
| 11              | Austria | 2002           | Beer                      | 306                                                         |
| 11              | Austria | 2002           | Beverages, Alcoholic      | 18                                                          |
| 11              | Austria | 2002           | Beverages, Fermented      | 1                                                           |
| 11              | Austria | 2002           | Bovine Meat               | 52                                                          |
| 11              | Austria | 2002           | Butter, Ghee              | 13                                                          |
| 11              | Austria | 2002           | Cheese                    | 57                                                          |
| 11              | Austria | 2002           | Citrus, Other             | 4                                                           |
| 11              | Austria | 2002           | Cocoa Beans               | 6                                                           |
| 11              | Austria | 2002           | Coconut Oil               | 1                                                           |
| 11              | Austria | 2002           | Coconuts - Incl Copra     | 2                                                           |
| 11              | Austria | 2002           | Coffee                    | 18                                                          |
| 11              | Austria | 2002           | Cream                     | 7                                                           |
| 11              | Austria | 2002           | Crustaceans               | 1                                                           |
| 11              | Austria | 2002           | Demersal Fish             | 7                                                           |
| 11              | Austria | 2002           | Eggs                      | 36                                                          |
| 11              | Austria | 2002           | Fats, Animals, Raw        | 27                                                          |
| 11              | Austria | 2002           | Freshwater Fish           | 5                                                           |
| 11              | Austria | 2002           | Fruits, Other             | 97                                                          |
| 11              | Austria | 2002           | Grapefruit                | 2                                                           |
| 11              | Austria | 2002           | Grapes                    | 16                                                          |
| 11              | Austria | 2002           | Groundnut Oil             | 1                                                           |
| 11              | Austria | 2002           | Groundnuts (Shelled Eq)   | 2                                                           |
| 11              | Austria | 2002           | Honey                     | 4                                                           |
| 11              | Austria | 2002           | Lemons, Limes             | 7                                                           |
| 11              | Austria | 2002           | Maize                     | 44                                                          |
| 11              | Austria | 2002           | Maize Germ Oil            | 1                                                           |
| 11              | Austria | 2002           | Marine Fish, Other        | 2                                                           |
| 11              | Austria | 2002           | Meat, Other               | 2                                                           |
| 11              | Austria | 2002           | Milk, Whole               | 227                                                         |
| 11              | Austria | 2002           | Molluscs, Other           | 1                                                           |
| 11              | Austria | 2002           | Mutton & Goat Meat        | 3                                                           |
| 11              | Austria | 2002           | Nuts                      | 16                                                          |
| 11              | Austria | 2002           | Oats                      | 4                                                           |
| 11              | Austria | 2002           | Offals, Edible            | 3                                                           |

Dietary calcium and zinc deficiency risks are decreasing but remain prevalent

| FAO countrycode | Country | Reference year | Food item                 | Gross food supply (g capita <sup>-1</sup> d <sup>-1</sup> ) |
|-----------------|---------|----------------|---------------------------|-------------------------------------------------------------|
| 11              | Austria | 2002           | Oilcrops Oil, Other       | 7                                                           |
| 11              | Austria | 2002           | Oilcrops, Other           | 1                                                           |
| 11              | Austria | 2002           | Olive Oil                 | 1                                                           |
| 11              | Austria | 2002           | Olives                    | 1                                                           |
| 11              | Austria | 2002           | Onions                    | 22                                                          |
| 11              | Austria | 2002           | Oranges, Mandarines       | 34                                                          |
| 11              | Austria | 2002           | Palm Oil                  | 1                                                           |
| 11              | Austria | 2002           | Peas                      | 1                                                           |
| 11              | Austria | 2002           | Pelagic Fish              | 11                                                          |
| 11              | Austria | 2002           | Pigmeat                   | 202                                                         |
| 11              | Austria | 2002           | Pimento                   | 1                                                           |
| 11              | Austria | 2002           | Pineapples                | 5                                                           |
| 11              | Austria | 2002           | Potatoes                  | 174                                                         |
| 11              | Austria | 2002           | Poultry Meat              | 47                                                          |
| 11              | Austria | 2002           | Rape and Mustard Oil      | 16                                                          |
| 11              | Austria | 2002           | Rice (Milled Equivalent)  | 11                                                          |
| 11              | Austria | 2002           | Rye                       | 37                                                          |
| 11              | Austria | 2002           | Sesameseed                | 1                                                           |
| 11              | Austria | 2002           | Soyabean Oil              | 10                                                          |
| 11              | Austria | 2002           | Soyabeans                 | 3                                                           |
| 11              | Austria | 2002           | Spices, Other             | 1                                                           |
| 11              | Austria | 2002           | Sugar, Refined Equivalent | 104                                                         |
| 11              | Austria | 2002           | Sunflowerseed             | 1                                                           |
| 11              | Austria | 2002           | Sunflowerseed Oil         | 11                                                          |
| 11              | Austria | 2002           | Sweeteners, Other         | 6                                                           |
| 11              | Austria | 2002           | Tea                       | 1                                                           |
| 11              | Austria | 2002           | Tomatoes                  | 35                                                          |
| 11              | Austria | 2002           | Vegetables, Other         | 194                                                         |
| 11              | Austria | 2002           | Wheat                     | 219                                                         |
| 11              | Austria | 2002           | Wine                      | 82                                                          |
| 11              | Austria | 2003           | Apples                    | 159                                                         |
| 11              | Austria | 2003           | Bananas                   | 25                                                          |
| 11              | Austria | 2003           | Barley                    | 1                                                           |
| 11              | Austria | 2003           | Beans                     | 1                                                           |
| 11              | Austria | 2003           | Beer                      | 308                                                         |
| 11              | Austria | 2003           | Beverages, Alcoholic      | 19                                                          |
| 11              | Austria | 2003           | Bovine Meat               | 51                                                          |
| 11              | Austria | 2003           | Butter, Ghee              | 14                                                          |
| 11              | Austria | 2003           | Cheese                    | 63                                                          |
| 11              | Austria | 2003           | Citrus, Other             | 4                                                           |
| 11              | Austria | 2003           | Cocoa Beans               | 7                                                           |
| 11              | Austria | 2003           | Coconut Oil               | 1                                                           |
| 11              | Austria | 2003           | Coconuts - Incl Copra     | 2                                                           |
| 11              | Austria | 2003           | Coffee                    | 17                                                          |
| 11              | Austria | 2003           | Cream                     | 9                                                           |
| 11              | Austria | 2003           | Crustaceans               | 2                                                           |
| 11              | Austria | 2003           | Demersal Fish             | 7                                                           |
| 11              | Austria | 2003           | Eggs                      | 35                                                          |
| 11              | Austria | 2003           | Fats, Animals, Raw        | 28                                                          |
| 11              | Austria | 2003           | Freshwater Fish           | 6                                                           |
| 11              | Austria | 2003           | Fruits, Other             | 129                                                         |
| 11              | Austria | 2003           | Grapefruit                | 2                                                           |
| 11              | Austria | 2003           | Grapes                    | 15                                                          |
| 11              | Austria | 2003           | Groundnuts (Shelled Eq)   | 2                                                           |
| 11              | Austria | 2003           | Honey                     | 4                                                           |
| 11              | Austria | 2003           | Lemons, Limes             | 8                                                           |
| 11              | Austria | 2003           | Maize                     | 43                                                          |
| 11              | Austria | 2003           | Maize Germ Oil            | 1                                                           |
| 11              | Austria | 2003           | Marine Fish, Other        | 2                                                           |
| 11              | Austria | 2003           | Meat, Other               | 3                                                           |
| 11              | Austria | 2003           | Milk, Whole               | 58                                                          |
| 11              | Austria | 2003           | Molluscs, Other           | 1                                                           |
| 11              | Austria | 2003           | Mutton & Goat Meat        | 3                                                           |
| 11              | Austria | 2003           | Nuts                      | 18                                                          |
| 11              | Austria | 2003           | Oats                      | 4                                                           |
| 11              | Austria | 2003           | Offals, Edible            | 2                                                           |
| 11              | Austria | 2003           | Oilcrops Oil, Other       | 9                                                           |
| 11              | Austria | 2003           | Oilcrops, Other           | 1                                                           |
| 11              | Austria | 2003           | Olive Oil                 | 2                                                           |
| 11              | Austria | 2003           | Olives                    | 1                                                           |
| 11              | Austria | 2003           | Onions                    | 20                                                          |
| 11              | Austria | 2003           | Oranges, Mandarines       | 35                                                          |
| 11              | Austria | 2003           | Palm Oil                  | 2                                                           |
| 11              | Austria | 2003           | Peas                      | 1                                                           |
| 11              | Austria | 2003           | Pelagic Fish              | 11                                                          |
| 11              | Austria | 2003           | Pigmeat                   | 203                                                         |
| 11              | Austria | 2003           | Pimento                   | 1                                                           |
| 11              | Austria | 2003           | Pineapples                | 8                                                           |
| 11              | Austria | 2003           | Potatoes                  | 154                                                         |
| 11              | Austria | 2003           | Poultry Meat              | 46                                                          |
| 11              | Austria | 2003           | Rape and Mustard Oil      | 15                                                          |
| 11              | Austria | 2003           | Rice (Milled Equivalent)  | 9                                                           |
| 11              | Austria | 2003           | Rye                       | 36                                                          |
| 11              | Austria | 2003           | Sesameseed                | 1                                                           |
| 11              | Austria | 2003           | Soyabean Oil              | 11                                                          |
| 11              | Austria | 2003           | Soyabeans                 | 3                                                           |
| 11              | Austria | 2003           | Spices, Other             | 1                                                           |
| 11              | Austria | 2003           | Sugar, Refined Equivalent | 106                                                         |
| 11              | Austria | 2003           | Sunflowerseed             | 1                                                           |
| 11              | Austria | 2003           | Sunflowerseed Oil         | 10                                                          |
| 11              | Austria | 2003           | Sweeteners, Other         | 8                                                           |
| 11              | Austria | 2003           | Tomatoes                  | 39                                                          |
| 11              | Austria | 2003           | Vegetables, Other         | 191                                                         |
| 11              | Austria | 2003           | Wheat                     | 226                                                         |
| 11              | Austria | 2003           | Wine                      | 77                                                          |
| 11              | Austria | 2004           | Apples                    | 133                                                         |
| 11              | Austria | 2004           | Bananas                   | 26                                                          |

Dietary calcium and zinc deficiency risks are decreasing but remain prevalent

| FAO countrycode | Country | Reference year | Food item                 | Gross food supply (g capita <sup>-1</sup> d <sup>-1</sup> ) |
|-----------------|---------|----------------|---------------------------|-------------------------------------------------------------|
| 11              | Austria | 2004           | Barley                    | 1                                                           |
| 11              | Austria | 2004           | Beans                     | 1                                                           |
| 11              | Austria | 2004           | Beer                      | 297                                                         |
| 11              | Austria | 2004           | Beverages, Alcoholic      | 15                                                          |
| 11              | Austria | 2004           | Bovine Meat               | 50                                                          |
| 11              | Austria | 2004           | Butter, Ghee              | 14                                                          |
| 11              | Austria | 2004           | Cheese                    | 56                                                          |
| 11              | Austria | 2004           | Citrus, Other             | 6                                                           |
| 11              | Austria | 2004           | Cocoa Beans               | 8                                                           |
| 11              | Austria | 2004           | Coconut Oil               | 2                                                           |
| 11              | Austria | 2004           | Coconuts - Incl Copra     | 2                                                           |
| 11              | Austria | 2004           | Coffee                    | 21                                                          |
| 11              | Austria | 2004           | Cream                     | 7                                                           |
| 11              | Austria | 2004           | Crustaceans               | 3                                                           |
| 11              | Austria | 2004           | Demersal Fish             | 7                                                           |
| 11              | Austria | 2004           | Eggs                      | 35                                                          |
| 11              | Austria | 2004           | Fats, Animals, Raw        | 21                                                          |
| 11              | Austria | 2004           | Freshwater Fish           | 8                                                           |
| 11              | Austria | 2004           | Fruits, Other             | 128                                                         |
| 11              | Austria | 2004           | Grapefruit                | 4                                                           |
| 11              | Austria | 2004           | Grapes                    | 33                                                          |
| 11              | Austria | 2004           | Groundnuts (Shelled Eq)   | 2                                                           |
| 11              | Austria | 2004           | Honey                     | 3                                                           |
| 11              | Austria | 2004           | Lemons, Limes             | 7                                                           |
| 11              | Austria | 2004           | Maize                     | 34                                                          |
| 11              | Austria | 2004           | Maize Germ Oil            | 2                                                           |
| 11              | Austria | 2004           | Marine Fish, Other        | 2                                                           |
| 11              | Austria | 2004           | Meat, Other               | 3                                                           |
| 11              | Austria | 2004           | Milk, Whole               | 45                                                          |
| 11              | Austria | 2004           | Molluscs, Other           | 2                                                           |
| 11              | Austria | 2004           | Mutton & Goat Meat        | 3                                                           |
| 11              | Austria | 2004           | Nuts                      | 19                                                          |
| 11              | Austria | 2004           | Oats                      | 4                                                           |
| 11              | Austria | 2004           | Offals, Edible            | 2                                                           |
| 11              | Austria | 2004           | Oilcrops Oil, Other       | 10                                                          |
| 11              | Austria | 2004           | Oilcrops, Other           | 1                                                           |
| 11              | Austria | 2004           | Olive Oil                 | 2                                                           |
| 11              | Austria | 2004           | Olives                    | 1                                                           |
| 11              | Austria | 2004           | Onions                    | 27                                                          |
| 11              | Austria | 2004           | Oranges, Mandarines       | 44                                                          |
| 11              | Austria | 2004           | Palm Oil                  | 2                                                           |
| 11              | Austria | 2004           | Peas                      | 1                                                           |
| 11              | Austria | 2004           | Pelagic Fish              | 11                                                          |
| 11              | Austria | 2004           | Pepper                    | 1                                                           |
| 11              | Austria | 2004           | Pig meat                  | 203                                                         |
| 11              | Austria | 2004           | Pimento                   | 1                                                           |
| 11              | Austria | 2004           | Pineapples                | 6                                                           |
| 11              | Austria | 2004           | Potatoes                  | 164                                                         |
| 11              | Austria | 2004           | Poultry Meat              | 49                                                          |
| 11              | Austria | 2004           | Rape and Mustard Oil      | 27                                                          |
| 11              | Austria | 2004           | Rice (Milled Equivalent)  | 8                                                           |
| 11              | Austria | 2004           | Rye                       | 37                                                          |
| 11              | Austria | 2004           | Sesameseed                | 1                                                           |
| 11              | Austria | 2004           | Soyabean Oil              | 11                                                          |
| 11              | Austria | 2004           | Soybeans                  | 2                                                           |
| 11              | Austria | 2004           | Spices, Other             | 1                                                           |
| 11              | Austria | 2004           | Sugar, Refined Equivalent | 107                                                         |
| 11              | Austria | 2004           | Sunflowerseed             | 1                                                           |
| 11              | Austria | 2004           | Sunflowerseed Oil         | 5                                                           |
| 11              | Austria | 2004           | Sweeteners, Other         | 11                                                          |
| 11              | Austria | 2004           | Tomatoes                  | 40                                                          |
| 11              | Austria | 2004           | Vegetables, Other         | 213                                                         |
| 11              | Austria | 2004           | Wheat                     | 222                                                         |
| 11              | Austria | 2004           | Wine                      | 82                                                          |
| 11              | Austria | 2005           | Apples                    | 146                                                         |
| 11              | Austria | 2005           | Bananas                   | 27                                                          |
| 11              | Austria | 2005           | Barley                    | 1                                                           |
| 11              | Austria | 2005           | Beans                     | 1                                                           |
| 11              | Austria | 2005           | Beer                      | 299                                                         |
| 11              | Austria | 2005           | Beverages, Alcoholic      | 13                                                          |
| 11              | Austria | 2005           | Beverages, Fermented      | 1                                                           |
| 11              | Austria | 2005           | Bovine Meat               | 49                                                          |
| 11              | Austria | 2005           | Butter, Ghee              | 14                                                          |
| 11              | Austria | 2005           | Cheese                    | 57                                                          |
| 11              | Austria | 2005           | Citrus, Other             | 7                                                           |
| 11              | Austria | 2005           | Cocoa Beans               | 4                                                           |
| 11              | Austria | 2005           | Coconut Oil               | 1                                                           |
| 11              | Austria | 2005           | Coconuts - Incl Copra     | 2                                                           |
| 11              | Austria | 2005           | Coffee                    | 14                                                          |
| 11              | Austria | 2005           | Cream                     | 7                                                           |
| 11              | Austria | 2005           | Crustaceans               | 4                                                           |
| 11              | Austria | 2005           | Demersal Fish             | 6                                                           |
| 11              | Austria | 2005           | Eggs                      | 36                                                          |
| 11              | Austria | 2005           | Fats, Animals, Raw        | 28                                                          |
| 11              | Austria | 2005           | Freshwater Fish           | 10                                                          |
| 11              | Austria | 2005           | Fruits, Other             | 118                                                         |
| 11              | Austria | 2005           | Grapefruit                | 4                                                           |
| 11              | Austria | 2005           | Grapes                    | 21                                                          |
| 11              | Austria | 2005           | Groundnuts (Shelled Eq)   | 3                                                           |
| 11              | Austria | 2005           | Honey                     | 3                                                           |
| 11              | Austria | 2005           | Lemons, Limes             | 8                                                           |
| 11              | Austria | 2005           | Maize                     | 32                                                          |
| 11              | Austria | 2005           | Maize Germ Oil            | 1                                                           |
| 11              | Austria | 2005           | Marine Fish, Other        | 2                                                           |
| 11              | Austria | 2005           | Meat, Other               | 3                                                           |
| 11              | Austria | 2005           | Milk, Whole               | 53                                                          |
| 11              | Austria | 2005           | Molluscs, Other           | 2                                                           |

Dietary calcium and zinc deficiency risks are decreasing but remain prevalent

| FAO countrycode | Country | Reference year | Food item                 | Gross food supply (g capita <sup>-1</sup> d <sup>-1</sup> ) |
|-----------------|---------|----------------|---------------------------|-------------------------------------------------------------|
| 11              | Austria | 2005           | Mutton & Goat Meat        | 3                                                           |
| 11              | Austria | 2005           | Nuts                      | 17                                                          |
| 11              | Austria | 2005           | Oats                      | 4                                                           |
| 11              | Austria | 2005           | Offals, Edible            | 4                                                           |
| 11              | Austria | 2005           | Oilcrops Oil, Other       | 6                                                           |
| 11              | Austria | 2005           | Oilcrops, Other           | 1                                                           |
| 11              | Austria | 2005           | Olive Oil                 | 2                                                           |
| 11              | Austria | 2005           | Olives                    | 1                                                           |
| 11              | Austria | 2005           | Onions                    | 20                                                          |
| 11              | Austria | 2005           | Oranges, Mandarines       | 54                                                          |
| 11              | Austria | 2005           | Palm Oil                  | 2                                                           |
| 11              | Austria | 2005           | Peas                      | 1                                                           |
| 11              | Austria | 2005           | Pelagic Fish              | 13                                                          |
| 11              | Austria | 2005           | Pepper                    | 1                                                           |
| 11              | Austria | 2005           | Pigmeat                   | 197                                                         |
| 11              | Austria | 2005           | Pimento                   | 1                                                           |
| 11              | Austria | 2005           | Pineapples                | 8                                                           |
| 11              | Austria | 2005           | Potatoes                  | 163                                                         |
| 11              | Austria | 2005           | Poultry Meat              | 51                                                          |
| 11              | Austria | 2005           | Rape and Mustard Oil      | 17                                                          |
| 11              | Austria | 2005           | Rice (Milled Equivalent)  | 9                                                           |
| 11              | Austria | 2005           | Rye                       | 37                                                          |
| 11              | Austria | 2005           | Sesameseed                | 1                                                           |
| 11              | Austria | 2005           | Soyabean Oil              | 10                                                          |
| 11              | Austria | 2005           | Soyabeans                 | 3                                                           |
| 11              | Austria | 2005           | Spices, Other             | 1                                                           |
| 11              | Austria | 2005           | Sugar, Refined Equivalent | 110                                                         |
| 11              | Austria | 2005           | Sunflowerseed             | 1                                                           |
| 11              | Austria | 2005           | Sunflowerseed Oil         | 9                                                           |
| 11              | Austria | 2005           | Sweeteners, Other         | 13                                                          |
| 11              | Austria | 2005           | Tea                       | 5                                                           |
| 11              | Austria | 2005           | Tomatoes                  | 41                                                          |
| 11              | Austria | 2005           | Vegetables, Other         | 195                                                         |
| 11              | Austria | 2005           | Wheat                     | 244                                                         |
| 11              | Austria | 2005           | Wine                      | 88                                                          |
| 11              | Austria | 2006           | Apples                    | 136                                                         |
| 11              | Austria | 2006           | Bananas                   | 36                                                          |
| 11              | Austria | 2006           | Barley                    | 1                                                           |
| 11              | Austria | 2006           | Beer                      | 297                                                         |
| 11              | Austria | 2006           | Beverages, Alcoholic      | 13                                                          |
| 11              | Austria | 2006           | Beverages, Fermented      | 1                                                           |
| 11              | Austria | 2006           | Bovine Meat               | 50                                                          |
| 11              | Austria | 2006           | Butter, Ghee              | 15                                                          |
| 11              | Austria | 2006           | Cheese                    | 55                                                          |
| 11              | Austria | 2006           | Citrus, Other             | 5                                                           |
| 11              | Austria | 2006           | Cocoa Beans               | 5                                                           |
| 11              | Austria | 2006           | Coconut Oil               | 1                                                           |
| 11              | Austria | 2006           | Coconuts - Incl Copra     | 2                                                           |
| 11              | Austria | 2006           | Coffee                    | 14                                                          |
| 11              | Austria | 2006           | Cream                     | 11                                                          |
| 11              | Austria | 2006           | Crustaceans               | 3                                                           |
| 11              | Austria | 2006           | Demersal Fish             | 8                                                           |
| 11              | Austria | 2006           | Eggs                      | 37                                                          |
| 11              | Austria | 2006           | Fats, Animals, Raw        | 25                                                          |
| 11              | Austria | 2006           | Freshwater Fish           | 8                                                           |
| 11              | Austria | 2006           | Fruits, Other             | 122                                                         |
| 11              | Austria | 2006           | Grapefruit                | 2                                                           |
| 11              | Austria | 2006           | Grapes                    | 22                                                          |
| 11              | Austria | 2006           | Groundnuts (Shelled Eq)   | 2                                                           |
| 11              | Austria | 2006           | Honey                     | 3                                                           |
| 11              | Austria | 2006           | Lemons, Limes             | 8                                                           |
| 11              | Austria | 2006           | Maize                     | 35                                                          |
| 11              | Austria | 2006           | Maize Germ Oil            | 2                                                           |
| 11              | Austria | 2006           | Marine Fish, Other        | 3                                                           |
| 11              | Austria | 2006           | Meat, Other               | 3                                                           |
| 11              | Austria | 2006           | Milk, Whole               | 49                                                          |
| 11              | Austria | 2006           | Molluscs, Other           | 2                                                           |
| 11              | Austria | 2006           | Mutton & Goat Meat        | 3                                                           |
| 11              | Austria | 2006           | Nuts                      | 17                                                          |
| 11              | Austria | 2006           | Oats                      | 4                                                           |
| 11              | Austria | 2006           | Offals, Edible            | 3                                                           |
| 11              | Austria | 2006           | Oilcrops Oil, Other       | 5                                                           |
| 11              | Austria | 2006           | Oilcrops, Other           | 2                                                           |
| 11              | Austria | 2006           | Olive Oil                 | 2                                                           |
| 11              | Austria | 2006           | Olives                    | 1                                                           |
| 11              | Austria | 2006           | Onions                    | 21                                                          |
| 11              | Austria | 2006           | Oranges, Mandarines       | 56                                                          |
| 11              | Austria | 2006           | Palm Oil                  | 2                                                           |
| 11              | Austria | 2006           | Peas                      | 1                                                           |
| 11              | Austria | 2006           | Pelagic Fish              | 12                                                          |
| 11              | Austria | 2006           | Pepper                    | 1                                                           |
| 11              | Austria | 2006           | Pigmeat                   | 192                                                         |
| 11              | Austria | 2006           | Pimento                   | 1                                                           |
| 11              | Austria | 2006           | Pineapples                | 8                                                           |
| 11              | Austria | 2006           | Potatoes                  | 145                                                         |
| 11              | Austria | 2006           | Poultry Meat              | 47                                                          |
| 11              | Austria | 2006           | Rape and Mustard Oil      | 31                                                          |
| 11              | Austria | 2006           | Rice (Milled Equivalent)  | 8                                                           |
| 11              | Austria | 2006           | Rye                       | 35                                                          |
| 11              | Austria | 2006           | Sesameseed                | 1                                                           |
| 11              | Austria | 2006           | Soyabean Oil              | 10                                                          |
| 11              | Austria | 2006           | Soyabeans                 | 3                                                           |
| 11              | Austria | 2006           | Spices, Other             | 1                                                           |
| 11              | Austria | 2006           | Sugar, Refined Equivalent | 106                                                         |
| 11              | Austria | 2006           | Sunflowerseed             | 1                                                           |
| 11              | Austria | 2006           | Sunflowerseed Oil         | 11                                                          |
| 11              | Austria | 2006           | Sweeteners, Other         | 15                                                          |



Dietary calcium and zinc deficiency risks are decreasing but remain prevalent

| FAO countrycode | Country | Reference year | Food item                 | Gross food supply (g capita <sup>-1</sup> d <sup>-1</sup> ) |
|-----------------|---------|----------------|---------------------------|-------------------------------------------------------------|
| 11              | Austria | 2006           | Tea                       | 4                                                           |
| 11              | Austria | 2006           | Tomatoes                  | 44                                                          |
| 11              | Austria | 2006           | Vegetables, Other         | 195                                                         |
| 11              | Austria | 2006           | Wheat                     | 237                                                         |
| 11              | Austria | 2006           | Wine                      | 89                                                          |
| 11              | Austria | 2007           | Apples                    | 172                                                         |
| 11              | Austria | 2007           | Bananas                   | 27                                                          |
| 11              | Austria | 2007           | Barley                    | 1                                                           |
| 11              | Austria | 2007           | Beer                      | 296                                                         |
| 11              | Austria | 2007           | Beverages, Alcoholic      | 16                                                          |
| 11              | Austria | 2007           | Bovine Meat               | 49                                                          |
| 11              | Austria | 2007           | Butter, Ghee              | 15                                                          |
| 11              | Austria | 2007           | Cheese                    | 59                                                          |
| 11              | Austria | 2007           | Citrus, Other             | 3                                                           |
| 11              | Austria | 2007           | Cocoa Beans               | 3                                                           |
| 11              | Austria | 2007           | Coconut Oil               | 2                                                           |
| 11              | Austria | 2007           | Coconuts - Incl Copra     | 2                                                           |
| 11              | Austria | 2007           | Coffee                    | 24                                                          |
| 11              | Austria | 2007           | Cottonseed Oil            | 1                                                           |
| 11              | Austria | 2007           | Cream                     | 17                                                          |
| 11              | Austria | 2007           | Crustaceans               | 3                                                           |
| 11              | Austria | 2007           | Dates                     | 1                                                           |
| 11              | Austria | 2007           | Demersal Fish             | 10                                                          |
| 11              | Austria | 2007           | Eggs                      | 38                                                          |
| 11              | Austria | 2007           | Fats, Animals, Raw        | 26                                                          |
| 11              | Austria | 2007           | Freshwater Fish           | 10                                                          |
| 11              | Austria | 2007           | Fruits, Other             | 127                                                         |
| 11              | Austria | 2007           | Grapefruit                | 3                                                           |
| 11              | Austria | 2007           | Grapes                    | 22                                                          |
| 11              | Austria | 2007           | Groundnuts (Shelled Eq)   | 2                                                           |
| 11              | Austria | 2007           | Honey                     | 3                                                           |
| 11              | Austria | 2007           | Lemons, Limes             | 8                                                           |
| 11              | Austria | 2007           | Maize                     | 32                                                          |
| 11              | Austria | 2007           | Maize Germ Oil            | 4                                                           |
| 11              | Austria | 2007           | Marine Fish, Other        | 3                                                           |
| 11              | Austria | 2007           | Meat, Other               | 2                                                           |
| 11              | Austria | 2007           | Milk, Whole               | 45                                                          |
| 11              | Austria | 2007           | Molluscs, Other           | 2                                                           |
| 11              | Austria | 2007           | Mutton & Goat Meat        | 3                                                           |
| 11              | Austria | 2007           | Nuts                      | 18                                                          |
| 11              | Austria | 2007           | Oats                      | 4                                                           |
| 11              | Austria | 2007           | Offals, Edible            | 3                                                           |
| 11              | Austria | 2007           | Oilcrops Oil, Other       | 3                                                           |
| 11              | Austria | 2007           | Oilcrops, Other           | 2                                                           |
| 11              | Austria | 2007           | Olive Oil                 | 3                                                           |
| 11              | Austria | 2007           | Olives                    | 2                                                           |
| 11              | Austria | 2007           | Onions                    | 22                                                          |
| 11              | Austria | 2007           | Oranges, Mandarines       | 38                                                          |
| 11              | Austria | 2007           | Palm Oil                  | 3                                                           |
| 11              | Austria | 2007           | Peas                      | 1                                                           |
| 11              | Austria | 2007           | Pelagic Fish              | 13                                                          |
| 11              | Austria | 2007           | Pepper                    | 1                                                           |
| 11              | Austria | 2007           | Pigmeat                   | 198                                                         |
| 11              | Austria | 2007           | Pimento                   | 1                                                           |
| 11              | Austria | 2007           | Pineapples                | 9                                                           |
| 11              | Austria | 2007           | Potatoes                  | 153                                                         |
| 11              | Austria | 2007           | Poultry Meat              | 48                                                          |
| 11              | Austria | 2007           | Rape and Mustard Oil      | 20                                                          |
| 11              | Austria | 2007           | Rice (Milled Equivalent)  | 10                                                          |
| 11              | Austria | 2007           | Rye                       | 37                                                          |
| 11              | Austria | 2007           | Sesameseed                | 1                                                           |
| 11              | Austria | 2007           | Soyabean Oil              | 10                                                          |
| 11              | Austria | 2007           | Soybeans                  | 4                                                           |
| 11              | Austria | 2007           | Spices, Other             | 1                                                           |
| 11              | Austria | 2007           | Sugar, Refined Equivalent | 106                                                         |
| 11              | Austria | 2007           | Sunflowerseed             | 1                                                           |
| 11              | Austria | 2007           | Sunflowerseed Oil         | 15                                                          |
| 11              | Austria | 2007           | Sweeteners, Other         | 10                                                          |
| 11              | Austria | 2007           | Tea                       | 3                                                           |
| 11              | Austria | 2007           | Tomatoes                  | 49                                                          |
| 11              | Austria | 2007           | Vegetables, Other         | 191                                                         |
| 11              | Austria | 2007           | Wheat                     | 242                                                         |
| 11              | Austria | 2007           | Wine                      | 80                                                          |
| 11              | Austria | 2008           | Apples                    | 184                                                         |
| 11              | Austria | 2008           | Bananas                   | 31                                                          |
| 11              | Austria | 2008           | Barley                    | 1                                                           |
| 11              | Austria | 2008           | Beer                      | 285                                                         |
| 11              | Austria | 2008           | Beverages, Alcoholic      | 11                                                          |
| 11              | Austria | 2008           | Beverages, Fermented      | 1                                                           |
| 11              | Austria | 2008           | Bovine Meat               | 49                                                          |
| 11              | Austria | 2008           | Butter, Ghee              | 14                                                          |
| 11              | Austria | 2008           | Cheese                    | 61                                                          |
| 11              | Austria | 2008           | Citrus, Other             | 4                                                           |
| 11              | Austria | 2008           | Cocoa Beans               | 2                                                           |
| 11              | Austria | 2008           | Coconut Oil               | 2                                                           |
| 11              | Austria | 2008           | Coconuts - Incl Copra     | 2                                                           |
| 11              | Austria | 2008           | Coffee                    | 22                                                          |
| 11              | Austria | 2008           | Cream                     | 16                                                          |
| 11              | Austria | 2008           | Crustaceans               | 3                                                           |
| 11              | Austria | 2008           | Demersal Fish             | 8                                                           |
| 11              | Austria | 2008           | Eggs                      | 38                                                          |
| 11              | Austria | 2008           | Fats, Animals, Raw        | 24                                                          |
| 11              | Austria | 2008           | Freshwater Fish           | 10                                                          |
| 11              | Austria | 2008           | Fruits, Other             | 127                                                         |
| 11              | Austria | 2008           | Grapefruit                | 2                                                           |
| 11              | Austria | 2008           | Grapes                    | 22                                                          |
| 11              | Austria | 2008           | Groundnuts (Shelled Eq)   | 2                                                           |

Dietary calcium and zinc deficiency risks are decreasing but remain prevalent

| FAO countrycode | Country | Reference year | Food item                 | Gross food supply (g capita <sup>-1</sup> d <sup>-1</sup> ) |
|-----------------|---------|----------------|---------------------------|-------------------------------------------------------------|
| 11              | Austria | 2008           | Honey                     | 3                                                           |
| 11              | Austria | 2008           | Lemons, Limes             | 8                                                           |
| 11              | Austria | 2008           | Maize                     | 31                                                          |
| 11              | Austria | 2008           | Maize Germ Oil            | 2                                                           |
| 11              | Austria | 2008           | Marine Fish, Other        | 3                                                           |
| 11              | Austria | 2008           | Meat, Other               | 1                                                           |
| 11              | Austria | 2008           | Milk, Whole               | 46                                                          |
| 11              | Austria | 2008           | Molluscs, Other           | 2                                                           |
| 11              | Austria | 2008           | Mutton & Goat Meat        | 3                                                           |
| 11              | Austria | 2008           | Nuts                      | 19                                                          |
| 11              | Austria | 2008           | Oats                      | 4                                                           |
| 11              | Austria | 2008           | Offals, Edible            | 2                                                           |
| 11              | Austria | 2008           | Oilcrops Oil, Other       | 4                                                           |
| 11              | Austria | 2008           | Oilcrops, Other           | 1                                                           |
| 11              | Austria | 2008           | Olive Oil                 | 3                                                           |
| 11              | Austria | 2008           | Olives                    | 2                                                           |
| 11              | Austria | 2008           | Onions                    | 32                                                          |
| 11              | Austria | 2008           | Oranges, Mandarines       | 42                                                          |
| 11              | Austria | 2008           | Palm Oil                  | 3                                                           |
| 11              | Austria | 2008           | Peas                      | 1                                                           |
| 11              | Austria | 2008           | Pelagic Fish              | 13                                                          |
| 11              | Austria | 2008           | Pigmeat                   | 189                                                         |
| 11              | Austria | 2008           | Pimento                   | 1                                                           |
| 11              | Austria | 2008           | Pineapples                | 10                                                          |
| 11              | Austria | 2008           | Potatoes                  | 157                                                         |
| 11              | Austria | 2008           | Poultry Meat              | 47                                                          |
| 11              | Austria | 2008           | Pulses, Other             | 1                                                           |
| 11              | Austria | 2008           | Rape and Mustard Oil      | 24                                                          |
| 11              | Austria | 2008           | Rice (Milled Equivalent)  | 11                                                          |
| 11              | Austria | 2008           | Rye                       | 34                                                          |
| 11              | Austria | 2008           | Sesameseed                | 1                                                           |
| 11              | Austria | 2008           | Soyabean Oil              | 9                                                           |
| 11              | Austria | 2008           | Soyabeans                 | 4                                                           |
| 11              | Austria | 2008           | Spices, Other             | 1                                                           |
| 11              | Austria | 2008           | Sugar, Refined Equivalent | 106                                                         |
| 11              | Austria | 2008           | Sunflowerseed             | 1                                                           |
| 11              | Austria | 2008           | Sunflowerseed Oil         | 16                                                          |
| 11              | Austria | 2008           | Sweeteners, Other         | 15                                                          |
| 11              | Austria | 2008           | Tea                       | 1                                                           |
| 11              | Austria | 2008           | Tomatoes                  | 49                                                          |
| 11              | Austria | 2008           | Vegetables, Other         | 197                                                         |
| 11              | Austria | 2008           | Wheat                     | 234                                                         |
| 11              | Austria | 2008           | Wine                      | 81                                                          |
| 11              | Austria | 2009           | Apples                    | 122                                                         |
| 11              | Austria | 2009           | Bananas                   | 31                                                          |
| 11              | Austria | 2009           | Barley                    | 1                                                           |
| 11              | Austria | 2009           | Beans                     | 1                                                           |
| 11              | Austria | 2009           | Beer                      | 287                                                         |
| 11              | Austria | 2009           | Beverages, Alcoholic      | 14                                                          |
| 11              | Austria | 2009           | Beverages, Fermented      | 1                                                           |
| 11              | Austria | 2009           | Bovine Meat               | 48                                                          |
| 11              | Austria | 2009           | Butter, Ghee              | 15                                                          |
| 11              | Austria | 2009           | Cheese                    | 59                                                          |
| 11              | Austria | 2009           | Citrus, Other             | 3                                                           |
| 11              | Austria | 2009           | Cocoa Beans               | 4                                                           |
| 11              | Austria | 2009           | Coconut Oil               | 2                                                           |
| 11              | Austria | 2009           | Coconuts - Incl Copra     | 2                                                           |
| 11              | Austria | 2009           | Coffee                    | 18                                                          |
| 11              | Austria | 2009           | Cream                     | 17                                                          |
| 11              | Austria | 2009           | Crustaceans               | 4                                                           |
| 11              | Austria | 2009           | Demersal Fish             | 7                                                           |
| 11              | Austria | 2009           | Eggs                      | 37                                                          |
| 11              | Austria | 2009           | Fats, Animals, Raw        | 28                                                          |
| 11              | Austria | 2009           | Freshwater Fish           | 11                                                          |
| 11              | Austria | 2009           | Fruits, Other             | 133                                                         |
| 11              | Austria | 2009           | Grapefruit                | 2                                                           |
| 11              | Austria | 2009           | Grapes                    | 22                                                          |
| 11              | Austria | 2009           | Groundnuts (Shelled Eq)   | 2                                                           |
| 11              | Austria | 2009           | Honey                     | 3                                                           |
| 11              | Austria | 2009           | Lemons, Limes             | 9                                                           |
| 11              | Austria | 2009           | Maize                     | 37                                                          |
| 11              | Austria | 2009           | Maize Germ Oil            | 2                                                           |
| 11              | Austria | 2009           | Marine Fish, Other        | 2                                                           |
| 11              | Austria | 2009           | Meat, Other               | 2                                                           |
| 11              | Austria | 2009           | Milk, Whole               | 47                                                          |
| 11              | Austria | 2009           | Molluscs, Other           | 2                                                           |
| 11              | Austria | 2009           | Mutton & Goat Meat        | 3                                                           |
| 11              | Austria | 2009           | Nuts                      | 19                                                          |
| 11              | Austria | 2009           | Oats                      | 5                                                           |
| 11              | Austria | 2009           | Offals, Edible            | 3                                                           |
| 11              | Austria | 2009           | Oilcrops Oil, Other       | 9                                                           |
| 11              | Austria | 2009           | Oilcrops, Other           | 2                                                           |
| 11              | Austria | 2009           | Olive Oil                 | 3                                                           |
| 11              | Austria | 2009           | Olives                    | 2                                                           |
| 11              | Austria | 2009           | Onions                    | 32                                                          |
| 11              | Austria | 2009           | Oranges, Mandarines       | 28                                                          |
| 11              | Austria | 2009           | Palm Oil                  | 2                                                           |
| 11              | Austria | 2009           | Peas                      | 1                                                           |
| 11              | Austria | 2009           | Pelagic Fish              | 12                                                          |
| 11              | Austria | 2009           | Pigmeat                   | 194                                                         |
| 11              | Austria | 2009           | Pimento                   | 1                                                           |
| 11              | Austria | 2009           | Pineapples                | 7                                                           |
| 11              | Austria | 2009           | Potatoes                  | 157                                                         |
| 11              | Austria | 2009           | Poultry Meat              | 48                                                          |
| 11              | Austria | 2009           | Pulses, Other             | 1                                                           |
| 11              | Austria | 2009           | Rape and Mustard Oil      | 29                                                          |
| 11              | Austria | 2009           | Rice (Milled Equivalent)  | 10                                                          |

Dietary calcium and zinc deficiency risks are decreasing but remain prevalent

| FAO countrycode | Country | Reference year | Food item                 | Gross food supply (g capita <sup>-1</sup> d <sup>-1</sup> ) |
|-----------------|---------|----------------|---------------------------|-------------------------------------------------------------|
| 11              | Austria | 2009           | Rye                       | 35                                                          |
| 11              | Austria | 2009           | Sesameseed                | 1                                                           |
| 11              | Austria | 2009           | Soyabean Oil              | 4                                                           |
| 11              | Austria | 2009           | Soyabeans                 | 5                                                           |
| 11              | Austria | 2009           | Spices, Other             | 1                                                           |
| 11              | Austria | 2009           | Sugar, Refined Equivalent | 103                                                         |
| 11              | Austria | 2009           | Sunflowerseed             | 1                                                           |
| 11              | Austria | 2009           | Sunflowerseed Oil         | 13                                                          |
| 11              | Austria | 2009           | Sweeteners, Other         | 13                                                          |
| 11              | Austria | 2009           | Tea                       | 1                                                           |
| 11              | Austria | 2009           | Tomatoes                  | 44                                                          |
| 11              | Austria | 2009           | Vegetables, Other         | 201                                                         |
| 11              | Austria | 2009           | Wheat                     | 220                                                         |
| 11              | Austria | 2009           | Wine                      | 88                                                          |
| 11              | Austria | 2010           | Apples                    | 131                                                         |
| 11              | Austria | 2010           | Bananas                   | 34                                                          |
| 11              | Austria | 2010           | Barley                    | 1                                                           |
| 11              | Austria | 2010           | Beer                      | 286                                                         |
| 11              | Austria | 2010           | Beverages, Alcoholic      | 12                                                          |
| 11              | Austria | 2010           | Beverages, Fermented      | 1                                                           |
| 11              | Austria | 2010           | Bovine Meat               | 48                                                          |
| 11              | Austria | 2010           | Butter, Ghee              | 15                                                          |
| 11              | Austria | 2010           | Cheese                    | 59                                                          |
| 11              | Austria | 2010           | Citrus, Other             | 3                                                           |
| 11              | Austria | 2010           | Cocoa Beans               | 2                                                           |
| 11              | Austria | 2010           | Coconut Oil               | 3                                                           |
| 11              | Austria | 2010           | Coconuts - Incl Copra     | 2                                                           |
| 11              | Austria | 2010           | Coffee                    | 17                                                          |
| 11              | Austria | 2010           | Cream                     | 18                                                          |
| 11              | Austria | 2010           | Crustaceans               | 3                                                           |
| 11              | Austria | 2010           | Demersal Fish             | 7                                                           |
| 11              | Austria | 2010           | Eggs                      | 37                                                          |
| 11              | Austria | 2010           | Fats, Animals, Raw        | 31                                                          |
| 11              | Austria | 2010           | Freshwater Fish           | 11                                                          |
| 11              | Austria | 2010           | Fruits, Other             | 106                                                         |
| 11              | Austria | 2010           | Grapefruit                | 2                                                           |
| 11              | Austria | 2010           | Grapes                    | 21                                                          |
| 11              | Austria | 2010           | Groundnuts (Shelled Eq)   | 2                                                           |
| 11              | Austria | 2010           | Honey                     | 3                                                           |
| 11              | Austria | 2010           | Lemons, Limes             | 8                                                           |
| 11              | Austria | 2010           | Maize                     | 39                                                          |
| 11              | Austria | 2010           | Maize Germ Oil            | 2                                                           |
| 11              | Austria | 2010           | Marine Fish, Other        | 2                                                           |
| 11              | Austria | 2010           | Meat, Other               | 3                                                           |
| 11              | Austria | 2010           | Milk, Whole               | 43                                                          |
| 11              | Austria | 2010           | Molluscs, Other           | 2                                                           |
| 11              | Austria | 2010           | Mutton & Goat Meat        | 3                                                           |
| 11              | Austria | 2010           | Nuts                      | 16                                                          |
| 11              | Austria | 2010           | Oats                      | 5                                                           |
| 11              | Austria | 2010           | Offals, Edible            | 2                                                           |
| 11              | Austria | 2010           | Oilcrops Oil, Other       | 6                                                           |
| 11              | Austria | 2010           | Oilcrops, Other           | 2                                                           |
| 11              | Austria | 2010           | Olive Oil                 | 3                                                           |
| 11              | Austria | 2010           | Olives                    | 2                                                           |
| 11              | Austria | 2010           | Onions                    | 40                                                          |
| 11              | Austria | 2010           | Oranges, Mandarines       | 27                                                          |
| 11              | Austria | 2010           | Palm Oil                  | 2                                                           |
| 11              | Austria | 2010           | Peas                      | 1                                                           |
| 11              | Austria | 2010           | Pelagic Fish              | 11                                                          |
| 11              | Austria | 2010           | Pigmeat                   | 190                                                         |
| 11              | Austria | 2010           | Pimento                   | 1                                                           |
| 11              | Austria | 2010           | Pineapples                | 7                                                           |
| 11              | Austria | 2010           | Potatoes                  | 156                                                         |
| 11              | Austria | 2010           | Poultry Meat              | 52                                                          |
| 11              | Austria | 2010           | Rape and Mustard Oil      | 33                                                          |
| 11              | Austria | 2010           | Rice (Milled Equivalent)  | 9                                                           |
| 11              | Austria | 2010           | Rye                       | 34                                                          |
| 11              | Austria | 2010           | Sesameseed                | 1                                                           |
| 11              | Austria | 2010           | Soyabean Oil              | 4                                                           |
| 11              | Austria | 2010           | Soyabeans                 | 5                                                           |
| 11              | Austria | 2010           | Spices, Other             | 1                                                           |
| 11              | Austria | 2010           | Sugar, Refined Equivalent | 103                                                         |
| 11              | Austria | 2010           | Sunflowerseed             | 2                                                           |
| 11              | Austria | 2010           | Sunflowerseed Oil         | 12                                                          |
| 11              | Austria | 2010           | Sweeteners, Other         | 17                                                          |
| 11              | Austria | 2010           | Tomatoes                  | 50                                                          |
| 11              | Austria | 2010           | Vegetables, Other         | 200                                                         |
| 11              | Austria | 2010           | Wheat                     | 212                                                         |
| 11              | Austria | 2010           | Wine                      | 84                                                          |
| 11              | Austria | 2011           | Apples                    | 145                                                         |
| 11              | Austria | 2011           | Bananas                   | 32                                                          |
| 11              | Austria | 2011           | Barley                    | 1                                                           |
| 11              | Austria | 2011           | Beans                     | 1                                                           |
| 11              | Austria | 2011           | Beer                      | 293                                                         |
| 11              | Austria | 2011           | Beverages, Alcoholic      | 12                                                          |
| 11              | Austria | 2011           | Beverages, Fermented      | 1                                                           |
| 11              | Austria | 2011           | Bovine Meat               | 48                                                          |
| 11              | Austria | 2011           | Butter, Ghee              | 15                                                          |
| 11              | Austria | 2011           | Cheese                    | 60                                                          |
| 11              | Austria | 2011           | Citrus, Other             | 2                                                           |
| 11              | Austria | 2011           | Cocoa Beans               | 2                                                           |
| 11              | Austria | 2011           | Coconut Oil               | 3                                                           |
| 11              | Austria | 2011           | Coconuts - Incl Copra     | 2                                                           |
| 11              | Austria | 2011           | Coffee                    | 22                                                          |
| 11              | Austria | 2011           | Cream                     | 21                                                          |
| 11              | Austria | 2011           | Crustaceans               | 3                                                           |
| 11              | Austria | 2011           | Demersal Fish             | 7                                                           |

Dietary calcium and zinc deficiency risks are decreasing but remain prevalent

| FAO countrycode | Country    | Reference year | Food item                 | Gross food supply (g capita <sup>-1</sup> d <sup>-1</sup> ) |
|-----------------|------------|----------------|---------------------------|-------------------------------------------------------------|
| 11              | Austria    | 2011           | Eggs                      | 38                                                          |
| 11              | Austria    | 2011           | Fats, Animals, Raw        | 31                                                          |
| 11              | Austria    | 2011           | Freshwater Fish           | 11                                                          |
| 11              | Austria    | 2011           | Fruits, Other             | 123                                                         |
| 11              | Austria    | 2011           | Grapefruit                | 2                                                           |
| 11              | Austria    | 2011           | Grapes                    | 22                                                          |
| 11              | Austria    | 2011           | Groundnuts (Shelled Eq)   | 2                                                           |
| 11              | Austria    | 2011           | Honey                     | 3                                                           |
| 11              | Austria    | 2011           | Lemons, Limes             | 9                                                           |
| 11              | Austria    | 2011           | Maize                     | 34                                                          |
| 11              | Austria    | 2011           | Maize Germ Oil            | 4                                                           |
| 11              | Austria    | 2011           | Marine Fish, Other        | 2                                                           |
| 11              | Austria    | 2011           | Meat, Other               | 3                                                           |
| 11              | Austria    | 2011           | Milk, Whole               | 42                                                          |
| 11              | Austria    | 2011           | Molluscs, Other           | 2                                                           |
| 11              | Austria    | 2011           | Mutton & Goat Meat        | 3                                                           |
| 11              | Austria    | 2011           | Nuts                      | 16                                                          |
| 11              | Austria    | 2011           | Oats                      | 5                                                           |
| 11              | Austria    | 2011           | Offals, Edible            | 2                                                           |
| 11              | Austria    | 2011           | Oilcrops Oil, Other       | 6                                                           |
| 11              | Austria    | 2011           | Oilcrops, Other           | 2                                                           |
| 11              | Austria    | 2011           | Olive Oil                 | 3                                                           |
| 11              | Austria    | 2011           | Olives                    | 2                                                           |
| 11              | Austria    | 2011           | Onions                    | 46                                                          |
| 11              | Austria    | 2011           | Oranges, Mandarines       | 59                                                          |
| 11              | Austria    | 2011           | Palm Oil                  | 2                                                           |
| 11              | Austria    | 2011           | Peas                      | 1                                                           |
| 11              | Austria    | 2011           | Pelagic Fish              | 11                                                          |
| 11              | Austria    | 2011           | Pig meat                  | 185                                                         |
| 11              | Austria    | 2011           | Pimento                   | 1                                                           |
| 11              | Austria    | 2011           | Pineapples                | 6                                                           |
| 11              | Austria    | 2011           | Potatoes                  | 160                                                         |
| 11              | Austria    | 2011           | Poultry Meat              | 53                                                          |
| 11              | Austria    | 2011           | Rape and Mustard Oil      | 25                                                          |
| 11              | Austria    | 2011           | Rice (Milled Equivalent)  | 10                                                          |
| 11              | Austria    | 2011           | Rye                       | 35                                                          |
| 11              | Austria    | 2011           | Sesameseed                | 1                                                           |
| 11              | Austria    | 2011           | Soyabean Oil              | 4                                                           |
| 11              | Austria    | 2011           | Soyabeans                 | 5                                                           |
| 11              | Austria    | 2011           | Spices, Other             | 1                                                           |
| 11              | Austria    | 2011           | Sugar, Refined Equivalent | 104                                                         |
| 11              | Austria    | 2011           | Sunflowerseed             | 2                                                           |
| 11              | Austria    | 2011           | Sunflowerseed Oil         | 13                                                          |
| 11              | Austria    | 2011           | Sweeteners, Other         | 15                                                          |
| 11              | Austria    | 2011           | Tea                       | 1                                                           |
| 11              | Austria    | 2011           | Tomatoes                  | 53                                                          |
| 11              | Austria    | 2011           | Vegetables, Other         | 200                                                         |
| 11              | Austria    | 2011           | Wheat                     | 222                                                         |
| 11              | Austria    | 2011           | Wine                      | 84                                                          |
| 52              | Azerbaijan | 1992           | Apples                    | 38                                                          |
| 52              | Azerbaijan | 1992           | Barley                    | 50                                                          |
| 52              | Azerbaijan | 1992           | Beer                      | 8                                                           |
| 52              | Azerbaijan | 1992           | Beverages, Alcoholic      | 20                                                          |
| 52              | Azerbaijan | 1992           | Bovine Meat               | 25                                                          |
| 52              | Azerbaijan | 1992           | Butter, Ghee              | 7                                                           |
| 52              | Azerbaijan | 1992           | Cereals, Other            | 1                                                           |
| 52              | Azerbaijan | 1992           | Cheese                    | 15                                                          |
| 52              | Azerbaijan | 1992           | Cottonseed Oil            | 4                                                           |
| 52              | Azerbaijan | 1992           | Eggs                      | 16                                                          |
| 52              | Azerbaijan | 1992           | Fats, Animals, Raw        | 1                                                           |
| 52              | Azerbaijan | 1992           | Freshwater Fish           | 12                                                          |
| 52              | Azerbaijan | 1992           | Fruits, Other             | 77                                                          |
| 52              | Azerbaijan | 1992           | Grapes                    | 116                                                         |
| 52              | Azerbaijan | 1992           | Milk, Whole               | 151                                                         |
| 52              | Azerbaijan | 1992           | Mutton & Goat Meat        | 10                                                          |
| 52              | Azerbaijan | 1992           | Nuts                      | 8                                                           |
| 52              | Azerbaijan | 1992           | Offals, Edible            | 5                                                           |
| 52              | Azerbaijan | 1992           | Onions                    | 19                                                          |
| 52              | Azerbaijan | 1992           | Oranges, Mandarines       | 11                                                          |
| 52              | Azerbaijan | 1992           | Pig meat                  | 2                                                           |
| 52              | Azerbaijan | 1992           | Potatoes                  | 71                                                          |
| 52              | Azerbaijan | 1992           | Poultry Meat              | 13                                                          |
| 52              | Azerbaijan | 1992           | Rice (Milled Equivalent)  | 6                                                           |
| 52              | Azerbaijan | 1992           | Sugar, Refined Equivalent | 34                                                          |
| 52              | Azerbaijan | 1992           | Tea                       | 2                                                           |
| 52              | Azerbaijan | 1992           | Tomatoes                  | 72                                                          |
| 52              | Azerbaijan | 1992           | Vegetables, Other         | 60                                                          |
| 52              | Azerbaijan | 1992           | Wheat                     | 503                                                         |
| 52              | Azerbaijan | 1992           | Wine                      | 1                                                           |
| 52              | Azerbaijan | 1993           | Apples                    | 33                                                          |
| 52              | Azerbaijan | 1993           | Barley                    | 34                                                          |
| 52              | Azerbaijan | 1993           | Beer                      | 6                                                           |
| 52              | Azerbaijan | 1993           | Beverages, Alcoholic      | 12                                                          |
| 52              | Azerbaijan | 1993           | Bovine Meat               | 23                                                          |
| 52              | Azerbaijan | 1993           | Butter, Ghee              | 7                                                           |
| 52              | Azerbaijan | 1993           | Cereals, Other            | 1                                                           |
| 52              | Azerbaijan | 1993           | Cheese                    | 13                                                          |
| 52              | Azerbaijan | 1993           | Cottonseed Oil            | 2                                                           |
| 52              | Azerbaijan | 1993           | Eggs                      | 11                                                          |
| 52              | Azerbaijan | 1993           | Fats, Animals, Raw        | 1                                                           |
| 52              | Azerbaijan | 1993           | Freshwater Fish           | 8                                                           |
| 52              | Azerbaijan | 1993           | Fruits, Other             | 65                                                          |
| 52              | Azerbaijan | 1993           | Grapes                    | 94                                                          |
| 52              | Azerbaijan | 1993           | Milk, Whole               | 152                                                         |
| 52              | Azerbaijan | 1993           | Mutton & Goat Meat        | 9                                                           |
| 52              | Azerbaijan | 1993           | Nuts                      | 9                                                           |
| 52              | Azerbaijan | 1993           | Offals, Edible            | 4                                                           |

Dietary calcium and zinc deficiency risks are decreasing but remain prevalent

| FAO countrycode | Country    | Reference year | Food item                 | Gross food supply (g capita <sup>-1</sup> d <sup>-1</sup> ) |
|-----------------|------------|----------------|---------------------------|-------------------------------------------------------------|
| 52              | Azerbaijan | 1993           | Onions                    | 21                                                          |
| 52              | Azerbaijan | 1993           | Oranges, Mandarines       | 12                                                          |
| 52              | Azerbaijan | 1993           | Pigmeat                   | 1                                                           |
| 52              | Azerbaijan | 1993           | Potatoes                  | 69                                                          |
| 52              | Azerbaijan | 1993           | Poultry Meat              | 9                                                           |
| 52              | Azerbaijan | 1993           | Rice (Milled Equivalent)  | 7                                                           |
| 52              | Azerbaijan | 1993           | Sugar, Refined Equivalent | 28                                                          |
| 52              | Azerbaijan | 1993           | Tea                       | 3                                                           |
| 52              | Azerbaijan | 1993           | Tomatoes                  | 76                                                          |
| 52              | Azerbaijan | 1993           | Vegetables, Other         | 67                                                          |
| 52              | Azerbaijan | 1993           | Wheat                     | 523                                                         |
| 52              | Azerbaijan | 1993           | Wine                      | 2                                                           |
| 52              | Azerbaijan | 1994           | Apples                    | 46                                                          |
| 52              | Azerbaijan | 1994           | Barley                    | 27                                                          |
| 52              | Azerbaijan | 1994           | Beer                      | 8                                                           |
| 52              | Azerbaijan | 1994           | Beverages, Alcoholic      | 5                                                           |
| 52              | Azerbaijan | 1994           | Bovine Meat               | 15                                                          |
| 52              | Azerbaijan | 1994           | Butter, Ghee              | 7                                                           |
| 52              | Azerbaijan | 1994           | Cheese                    | 12                                                          |
| 52              | Azerbaijan | 1994           | Cottonseed Oil            | 2                                                           |
| 52              | Azerbaijan | 1994           | Dates                     | 1                                                           |
| 52              | Azerbaijan | 1994           | Eggs                      | 12                                                          |
| 52              | Azerbaijan | 1994           | Fats, Animals, Raw        | 4                                                           |
| 52              | Azerbaijan | 1994           | Freshwater Fish           | 6                                                           |
| 52              | Azerbaijan | 1994           | Fruits, Other             | 59                                                          |
| 52              | Azerbaijan | 1994           | Grapes                    | 82                                                          |
| 52              | Azerbaijan | 1994           | Lemons, Limes             | 14                                                          |
| 52              | Azerbaijan | 1994           | Milk, Whole               | 170                                                         |
| 52              | Azerbaijan | 1994           | Mutton & Goat Meat        | 8                                                           |
| 52              | Azerbaijan | 1994           | Nuts                      | 9                                                           |
| 52              | Azerbaijan | 1994           | Offals, Edible            | 1                                                           |
| 52              | Azerbaijan | 1994           | Onions                    | 20                                                          |
| 52              | Azerbaijan | 1994           | Oranges, Mandarines       | 15                                                          |
| 52              | Azerbaijan | 1994           | Pigmeat                   | 1                                                           |
| 52              | Azerbaijan | 1994           | Potatoes                  | 63                                                          |
| 52              | Azerbaijan | 1994           | Poultry Meat              | 8                                                           |
| 52              | Azerbaijan | 1994           | Rice (Milled Equivalent)  | 3                                                           |
| 52              | Azerbaijan | 1994           | Soyabean Oil              | 1                                                           |
| 52              | Azerbaijan | 1994           | Sugar, Refined Equivalent | 29                                                          |
| 52              | Azerbaijan | 1994           | Sunflowerseed Oil         | 2                                                           |
| 52              | Azerbaijan | 1994           | Sweeteners, Other         | 1                                                           |
| 52              | Azerbaijan | 1994           | Tea                       | 2                                                           |
| 52              | Azerbaijan | 1994           | Tomatoes                  | 63                                                          |
| 52              | Azerbaijan | 1994           | Vegetables, Other         | 73                                                          |
| 52              | Azerbaijan | 1994           | Wheat                     | 488                                                         |
| 52              | Azerbaijan | 1994           | Wine                      | 2                                                           |
| 52              | Azerbaijan | 1995           | Apples                    | 47                                                          |
| 52              | Azerbaijan | 1995           | Barley                    | 55                                                          |
| 52              | Azerbaijan | 1995           | Beer                      | 9                                                           |
| 52              | Azerbaijan | 1995           | Beverages, Alcoholic      | 4                                                           |
| 52              | Azerbaijan | 1995           | Bovine Meat               | 18                                                          |
| 52              | Azerbaijan | 1995           | Butter, Ghee              | 5                                                           |
| 52              | Azerbaijan | 1995           | Cereals, Other            | 1                                                           |
| 52              | Azerbaijan | 1995           | Cheese                    | 11                                                          |
| 52              | Azerbaijan | 1995           | Cocoa Beans               | 1                                                           |
| 52              | Azerbaijan | 1995           | Cottonseed Oil            | 2                                                           |
| 52              | Azerbaijan | 1995           | Eggs                      | 12                                                          |
| 52              | Azerbaijan | 1995           | Fats, Animals, Raw        | 1                                                           |
| 52              | Azerbaijan | 1995           | Freshwater Fish           | 4                                                           |
| 52              | Azerbaijan | 1995           | Fruits, Other             | 87                                                          |
| 52              | Azerbaijan | 1995           | Grapes                    | 78                                                          |
| 52              | Azerbaijan | 1995           | Milk, Whole               | 167                                                         |
| 52              | Azerbaijan | 1995           | Mutton & Goat Meat        | 8                                                           |
| 52              | Azerbaijan | 1995           | Nuts                      | 7                                                           |
| 52              | Azerbaijan | 1995           | Offals, Edible            | 4                                                           |
| 52              | Azerbaijan | 1995           | Onions                    | 15                                                          |
| 52              | Azerbaijan | 1995           | Oranges, Mandarines       | 12                                                          |
| 52              | Azerbaijan | 1995           | Pigmeat                   | 1                                                           |
| 52              | Azerbaijan | 1995           | Potatoes                  | 63                                                          |
| 52              | Azerbaijan | 1995           | Poultry Meat              | 10                                                          |
| 52              | Azerbaijan | 1995           | Rice (Milled Equivalent)  | 8                                                           |
| 52              | Azerbaijan | 1995           | Soyabean Oil              | 3                                                           |
| 52              | Azerbaijan | 1995           | Sugar, Refined Equivalent | 32                                                          |
| 52              | Azerbaijan | 1995           | Sunflowerseed Oil         | 1                                                           |
| 52              | Azerbaijan | 1995           | Tea                       | 2                                                           |
| 52              | Azerbaijan | 1995           | Tomatoes                  | 61                                                          |
| 52              | Azerbaijan | 1995           | Vegetables, Other         | 82                                                          |
| 52              | Azerbaijan | 1995           | Wheat                     | 456                                                         |
| 52              | Azerbaijan | 1995           | Wine                      | 2                                                           |
| 52              | Azerbaijan | 1996           | Apples                    | 36                                                          |
| 52              | Azerbaijan | 1996           | Barley                    | 75                                                          |
| 52              | Azerbaijan | 1996           | Beer                      | 7                                                           |
| 52              | Azerbaijan | 1996           | Beverages, Alcoholic      | 11                                                          |
| 52              | Azerbaijan | 1996           | Bovine Meat               | 17                                                          |
| 52              | Azerbaijan | 1996           | Butter, Ghee              | 11                                                          |
| 52              | Azerbaijan | 1996           | Cereals, Other            | 1                                                           |
| 52              | Azerbaijan | 1996           | Cheese                    | 11                                                          |
| 52              | Azerbaijan | 1996           | Citrus, Other             | 3                                                           |
| 52              | Azerbaijan | 1996           | Cocoa Beans               | 1                                                           |
| 52              | Azerbaijan | 1996           | Cottonseed Oil            | 4                                                           |
| 52              | Azerbaijan | 1996           | Eggs                      | 12                                                          |
| 52              | Azerbaijan | 1996           | Fats, Animals, Raw        | 1                                                           |
| 52              | Azerbaijan | 1996           | Freshwater Fish           | 2                                                           |
| 52              | Azerbaijan | 1996           | Fruits, Other             | 64                                                          |
| 52              | Azerbaijan | 1996           | Grapes                    | 80                                                          |
| 52              | Azerbaijan | 1996           | Milk, Whole               | 110                                                         |
| 52              | Azerbaijan | 1996           | Mutton & Goat Meat        | 11                                                          |

Dietary calcium and zinc deficiency risks are decreasing but remain prevalent

| FAO countrycode | Country    | Reference year | Food item                 | Gross food supply (g capita <sup>-1</sup> d <sup>-1</sup> ) |
|-----------------|------------|----------------|---------------------------|-------------------------------------------------------------|
| 52              | Azerbaijan | 1996           | Nuts                      | 6                                                           |
| 52              | Azerbaijan | 1996           | Offals, Edible            | 1                                                           |
| 52              | Azerbaijan | 1996           | Onions                    | 25                                                          |
| 52              | Azerbaijan | 1996           | Oranges, Mandarines       | 14                                                          |
| 52              | Azerbaijan | 1996           | Pigmeat                   | 2                                                           |
| 52              | Azerbaijan | 1996           | Potatoes                  | 69                                                          |
| 52              | Azerbaijan | 1996           | Poultry Meat              | 14                                                          |
| 52              | Azerbaijan | 1996           | Rice (Milled Equivalent)  | 17                                                          |
| 52              | Azerbaijan | 1996           | Soyabean Oil              | 2                                                           |
| 52              | Azerbaijan | 1996           | Sugar, Refined Equivalent | 35                                                          |
| 52              | Azerbaijan | 1996           | Sunflowerseed Oil         | 1                                                           |
| 52              | Azerbaijan | 1996           | Tea                       | 4                                                           |
| 52              | Azerbaijan | 1996           | Tomatoes                  | 83                                                          |
| 52              | Azerbaijan | 1996           | Vegetables, Other         | 103                                                         |
| 52              | Azerbaijan | 1996           | Wheat                     | 460                                                         |
| 52              | Azerbaijan | 1996           | Wine                      | 2                                                           |
| 52              | Azerbaijan | 1997           | Apples                    | 31                                                          |
| 52              | Azerbaijan | 1997           | Bananas                   | 1                                                           |
| 52              | Azerbaijan | 1997           | Barley                    | 23                                                          |
| 52              | Azerbaijan | 1997           | Beer                      | 6                                                           |
| 52              | Azerbaijan | 1997           | Beverages, Alcoholic      | 1                                                           |
| 52              | Azerbaijan | 1997           | Bovine Meat               | 17                                                          |
| 52              | Azerbaijan | 1997           | Butter, Ghee              | 6                                                           |
| 52              | Azerbaijan | 1997           | Cereals, Other            | 1                                                           |
| 52              | Azerbaijan | 1997           | Cheese                    | 9                                                           |
| 52              | Azerbaijan | 1997           | Cottonseed Oil            | 2                                                           |
| 52              | Azerbaijan | 1997           | Dates                     | 1                                                           |
| 52              | Azerbaijan | 1997           | Eggs                      | 12                                                          |
| 52              | Azerbaijan | 1997           | Fats, Animals, Raw        | 1                                                           |
| 52              | Azerbaijan | 1997           | Freshwater Fish           | 1                                                           |
| 52              | Azerbaijan | 1997           | Fruits, Other             | 58                                                          |
| 52              | Azerbaijan | 1997           | Grapes                    | 23                                                          |
| 52              | Azerbaijan | 1997           | Milk, Whole               | 157                                                         |
| 52              | Azerbaijan | 1997           | Mutton & Goat Meat        | 9                                                           |
| 52              | Azerbaijan | 1997           | Nuts                      | 5                                                           |
| 52              | Azerbaijan | 1997           | Offals, Edible            | 1                                                           |
| 52              | Azerbaijan | 1997           | Onions                    | 20                                                          |
| 52              | Azerbaijan | 1997           | Oranges, Mandarines       | 9                                                           |
| 52              | Azerbaijan | 1997           | Pigmeat                   | 2                                                           |
| 52              | Azerbaijan | 1997           | Potatoes                  | 75                                                          |
| 52              | Azerbaijan | 1997           | Poultry Meat              | 14                                                          |
| 52              | Azerbaijan | 1997           | Rice (Milled Equivalent)  | 15                                                          |
| 52              | Azerbaijan | 1997           | Soyabean Oil              | 1                                                           |
| 52              | Azerbaijan | 1997           | Sugar, Refined Equivalent | 38                                                          |
| 52              | Azerbaijan | 1997           | Sunflowerseed Oil         | 1                                                           |
| 52              | Azerbaijan | 1997           | Tea                       | 2                                                           |
| 52              | Azerbaijan | 1997           | Tomatoes                  | 68                                                          |
| 52              | Azerbaijan | 1997           | Vegetables, Other         | 108                                                         |
| 52              | Azerbaijan | 1997           | Wheat                     | 482                                                         |
| 52              | Azerbaijan | 1997           | Wine                      | 2                                                           |
| 52              | Azerbaijan | 1998           | Apples                    | 35                                                          |
| 52              | Azerbaijan | 1998           | Bananas                   | 2                                                           |
| 52              | Azerbaijan | 1998           | Barley                    | 51                                                          |
| 52              | Azerbaijan | 1998           | Beer                      | 4                                                           |
| 52              | Azerbaijan | 1998           | Beverages, Alcoholic      | 3                                                           |
| 52              | Azerbaijan | 1998           | Bovine Meat               | 16                                                          |
| 52              | Azerbaijan | 1998           | Butter, Ghee              | 7                                                           |
| 52              | Azerbaijan | 1998           | Cereals, Other            | 1                                                           |
| 52              | Azerbaijan | 1998           | Cheese                    | 13                                                          |
| 52              | Azerbaijan | 1998           | Cottonseed Oil            | 1                                                           |
| 52              | Azerbaijan | 1998           | Dates                     | 1                                                           |
| 52              | Azerbaijan | 1998           | Demersal Fish             | 1                                                           |
| 52              | Azerbaijan | 1998           | Eggs                      | 12                                                          |
| 52              | Azerbaijan | 1998           | Fats, Animals, Raw        | 2                                                           |
| 52              | Azerbaijan | 1998           | Freshwater Fish           | 2                                                           |
| 52              | Azerbaijan | 1998           | Fruits, Other             | 77                                                          |
| 52              | Azerbaijan | 1998           | Grapes                    | 41                                                          |
| 52              | Azerbaijan | 1998           | Lemons, Limes             | 2                                                           |
| 52              | Azerbaijan | 1998           | Maize                     | 1                                                           |
| 52              | Azerbaijan | 1998           | Milk, Whole               | 123                                                         |
| 52              | Azerbaijan | 1998           | Mutton & Goat Meat        | 11                                                          |
| 52              | Azerbaijan | 1998           | Nuts                      | 4                                                           |
| 52              | Azerbaijan | 1998           | Offals, Edible            | 4                                                           |
| 52              | Azerbaijan | 1998           | Oilcrops Oil, Other       | 1                                                           |
| 52              | Azerbaijan | 1998           | Onions                    | 22                                                          |
| 52              | Azerbaijan | 1998           | Oranges, Mandarines       | 5                                                           |
| 52              | Azerbaijan | 1998           | Pigmeat                   | 3                                                           |
| 52              | Azerbaijan | 1998           | Potatoes                  | 86                                                          |
| 52              | Azerbaijan | 1998           | Poultry Meat              | 21                                                          |
| 52              | Azerbaijan | 1998           | Rice (Milled Equivalent)  | 18                                                          |
| 52              | Azerbaijan | 1998           | Soyabean Oil              | 1                                                           |
| 52              | Azerbaijan | 1998           | Sugar, Refined Equivalent | 37                                                          |
| 52              | Azerbaijan | 1998           | Sunflowerseed Oil         | 1                                                           |
| 52              | Azerbaijan | 1998           | Tea                       | 2                                                           |
| 52              | Azerbaijan | 1998           | Tomatoes                  | 67                                                          |
| 52              | Azerbaijan | 1998           | Vegetables, Other         | 98                                                          |
| 52              | Azerbaijan | 1998           | Wheat                     | 452                                                         |
| 52              | Azerbaijan | 1998           | Wine                      | 1                                                           |
| 52              | Azerbaijan | 1999           | Apples                    | 39                                                          |
| 52              | Azerbaijan | 1999           | Bananas                   | 1                                                           |
| 52              | Azerbaijan | 1999           | Barley                    | 30                                                          |
| 52              | Azerbaijan | 1999           | Beer                      | 24                                                          |
| 52              | Azerbaijan | 1999           | Beverages, Alcoholic      | 16                                                          |
| 52              | Azerbaijan | 1999           | Bovine Meat               | 18                                                          |
| 52              | Azerbaijan | 1999           | Butter, Ghee              | 7                                                           |
| 52              | Azerbaijan | 1999           | Cereals, Other            | 2                                                           |
| 52              | Azerbaijan | 1999           | Cheese                    | 13                                                          |

Dietary calcium and zinc deficiency risks are decreasing but remain prevalent

| FAO countrycode | Country    | Reference year | Food item                 | Gross food supply (g capita <sup>-1</sup> d <sup>-1</sup> ) |
|-----------------|------------|----------------|---------------------------|-------------------------------------------------------------|
| 52              | Azerbaijan | 1999           | Cottonseed Oil            | 2                                                           |
| 52              | Azerbaijan | 1999           | Eggs                      | 12                                                          |
| 52              | Azerbaijan | 1999           | Fats, Animals, Raw        | 2                                                           |
| 52              | Azerbaijan | 1999           | Freshwater Fish           | 6                                                           |
| 52              | Azerbaijan | 1999           | Fruits, Other             | 84                                                          |
| 52              | Azerbaijan | 1999           | Grapes                    | 35                                                          |
| 52              | Azerbaijan | 1999           | Lemons, Limes             | 2                                                           |
| 52              | Azerbaijan | 1999           | Maize                     | 4                                                           |
| 52              | Azerbaijan | 1999           | Maize Germ Oil            | 1                                                           |
| 52              | Azerbaijan | 1999           | Milk, Whole               | 124                                                         |
| 52              | Azerbaijan | 1999           | Mutton & Goat Meat        | 12                                                          |
| 52              | Azerbaijan | 1999           | Nuts                      | 5                                                           |
| 52              | Azerbaijan | 1999           | Offals, Edible            | 5                                                           |
| 52              | Azerbaijan | 1999           | Onions                    | 27                                                          |
| 52              | Azerbaijan | 1999           | Oranges, Mandarines       | 8                                                           |
| 52              | Azerbaijan | 1999           | Pigmeat                   | 2                                                           |
| 52              | Azerbaijan | 1999           | Potatoes                  | 104                                                         |
| 52              | Azerbaijan | 1999           | Poultry Meat              | 15                                                          |
| 52              | Azerbaijan | 1999           | Rice (Milled Equivalent)  | 9                                                           |
| 52              | Azerbaijan | 1999           | Soyabean Oil              | 2                                                           |
| 52              | Azerbaijan | 1999           | Sugar, Refined Equivalent | 29                                                          |
| 52              | Azerbaijan | 1999           | Sunflowerseed Oil         | 2                                                           |
| 52              | Azerbaijan | 1999           | Sweeteners, Other         | 2                                                           |
| 52              | Azerbaijan | 1999           | Tea                       | 1                                                           |
| 52              | Azerbaijan | 1999           | Tomatoes                  | 112                                                         |
| 52              | Azerbaijan | 1999           | Vegetables, Other         | 113                                                         |
| 52              | Azerbaijan | 1999           | Wheat                     | 503                                                         |
| 52              | Azerbaijan | 1999           | Wine                      | 2                                                           |
| 52              | Azerbaijan | 2000           | Apples                    | 42                                                          |
| 52              | Azerbaijan | 2000           | Bananas                   | 1                                                           |
| 52              | Azerbaijan | 2000           | Barley                    | 3                                                           |
| 52              | Azerbaijan | 2000           | Beer                      | 24                                                          |
| 52              | Azerbaijan | 2000           | Beverages, Alcoholic      | 28                                                          |
| 52              | Azerbaijan | 2000           | Bovine Meat               | 19                                                          |
| 52              | Azerbaijan | 2000           | Butter, Ghee              | 6                                                           |
| 52              | Azerbaijan | 2000           | Cereals, Other            | 1                                                           |
| 52              | Azerbaijan | 2000           | Cheese                    | 14                                                          |
| 52              | Azerbaijan | 2000           | Cottonseed Oil            | 2                                                           |
| 52              | Azerbaijan | 2000           | Eggs                      | 11                                                          |
| 52              | Azerbaijan | 2000           | Fats, Animals, Raw        | 2                                                           |
| 52              | Azerbaijan | 2000           | Freshwater Fish           | 6                                                           |
| 52              | Azerbaijan | 2000           | Fruits, Other             | 87                                                          |
| 52              | Azerbaijan | 2000           | Grapes                    | 22                                                          |
| 52              | Azerbaijan | 2000           | Lemons, Limes             | 2                                                           |
| 52              | Azerbaijan | 2000           | Maize                     | 17                                                          |
| 52              | Azerbaijan | 2000           | Milk, Whole               | 129                                                         |
| 52              | Azerbaijan | 2000           | Mutton & Goat Meat        | 12                                                          |
| 52              | Azerbaijan | 2000           | Nuts                      | 5                                                           |
| 52              | Azerbaijan | 2000           | Offals, Edible            | 5                                                           |
| 52              | Azerbaijan | 2000           | Onions                    | 31                                                          |
| 52              | Azerbaijan | 2000           | Oranges, Mandarines       | 5                                                           |
| 52              | Azerbaijan | 2000           | Pelagic Fish              | 1                                                           |
| 52              | Azerbaijan | 2000           | Pigmeat                   | 2                                                           |
| 52              | Azerbaijan | 2000           | Potatoes                  | 129                                                         |
| 52              | Azerbaijan | 2000           | Poultry Meat              | 12                                                          |
| 52              | Azerbaijan | 2000           | Rice (Milled Equivalent)  | 9                                                           |
| 52              | Azerbaijan | 2000           | Soyabean Oil              | 1                                                           |
| 52              | Azerbaijan | 2000           | Sugar, Refined Equivalent | 27                                                          |
| 52              | Azerbaijan | 2000           | Sunflowerseed Oil         | 2                                                           |
| 52              | Azerbaijan | 2000           | Tea                       | 1                                                           |
| 52              | Azerbaijan | 2000           | Tomatoes                  | 112                                                         |
| 52              | Azerbaijan | 2000           | Vegetables, Other         | 129                                                         |
| 52              | Azerbaijan | 2000           | Wheat                     | 523                                                         |
| 52              | Azerbaijan | 2000           | Wine                      | 2                                                           |
| 52              | Azerbaijan | 2001           | Apples                    | 44                                                          |
| 52              | Azerbaijan | 2001           | Barley                    | 4                                                           |
| 52              | Azerbaijan | 2001           | Beer                      | 39                                                          |
| 52              | Azerbaijan | 2001           | Beverages, Alcoholic      | 22                                                          |
| 52              | Azerbaijan | 2001           | Bovine Meat               | 19                                                          |
| 52              | Azerbaijan | 2001           | Butter, Ghee              | 7                                                           |
| 52              | Azerbaijan | 2001           | Cereals, Other            | 2                                                           |
| 52              | Azerbaijan | 2001           | Cheese                    | 14                                                          |
| 52              | Azerbaijan | 2001           | Cocoa Beans               | 1                                                           |
| 52              | Azerbaijan | 2001           | Cottonseed Oil            | 1                                                           |
| 52              | Azerbaijan | 2001           | Eggs                      | 11                                                          |
| 52              | Azerbaijan | 2001           | Fats, Animals, Raw        | 2                                                           |
| 52              | Azerbaijan | 2001           | Freshwater Fish           | 4                                                           |
| 52              | Azerbaijan | 2001           | Fruits, Other             | 92                                                          |
| 52              | Azerbaijan | 2001           | Grapes                    | 19                                                          |
| 52              | Azerbaijan | 2001           | Lemons, Limes             | 2                                                           |
| 52              | Azerbaijan | 2001           | Maize                     | 19                                                          |
| 52              | Azerbaijan | 2001           | Maize Germ Oil            | 1                                                           |
| 52              | Azerbaijan | 2001           | Milk, Whole               | 127                                                         |
| 52              | Azerbaijan | 2001           | Mutton & Goat Meat        | 12                                                          |
| 52              | Azerbaijan | 2001           | Nuts                      | 6                                                           |
| 52              | Azerbaijan | 2001           | Offals, Edible            | 5                                                           |
| 52              | Azerbaijan | 2001           | Onions                    | 39                                                          |
| 52              | Azerbaijan | 2001           | Oranges, Mandarines       | 6                                                           |
| 52              | Azerbaijan | 2001           | Pigmeat                   | 2                                                           |
| 52              | Azerbaijan | 2001           | Potatoes                  | 156                                                         |
| 52              | Azerbaijan | 2001           | Poultry Meat              | 10                                                          |
| 52              | Azerbaijan | 2001           | Rice (Milled Equivalent)  | 8                                                           |
| 52              | Azerbaijan | 2001           | Soyabean Oil              | 3                                                           |
| 52              | Azerbaijan | 2001           | Sugar, Refined Equivalent | 32                                                          |
| 52              | Azerbaijan | 2001           | Sunflowerseed Oil         | 2                                                           |
| 52              | Azerbaijan | 2001           | Tea                       | 2                                                           |
| 52              | Azerbaijan | 2001           | Tomatoes                  | 133                                                         |

Dietary calcium and zinc deficiency risks are decreasing but remain prevalent

| FAO countrycode | Country    | Reference year | Food item                 | Gross food supply (g capita <sup>-1</sup> d <sup>-1</sup> ) |
|-----------------|------------|----------------|---------------------------|-------------------------------------------------------------|
| 52              | Azerbaijan | 2001           | Vegetables, Other         | 155                                                         |
| 52              | Azerbaijan | 2001           | Wheat                     | 549                                                         |
| 52              | Azerbaijan | 2001           | Wine                      | 2                                                           |
| 52              | Azerbaijan | 2002           | Apples                    | 39                                                          |
| 52              | Azerbaijan | 2002           | Barley                    | 3                                                           |
| 52              | Azerbaijan | 2002           | Beer                      | 42                                                          |
| 52              | Azerbaijan | 2002           | Beverages, Alcoholic      | 17                                                          |
| 52              | Azerbaijan | 2002           | Bovine Meat               | 21                                                          |
| 52              | Azerbaijan | 2002           | Butter, Ghee              | 9                                                           |
| 52              | Azerbaijan | 2002           | Cereals, Other            | 2                                                           |
| 52              | Azerbaijan | 2002           | Cheese                    | 14                                                          |
| 52              | Azerbaijan | 2002           | Cocoa Beans               | 1                                                           |
| 52              | Azerbaijan | 2002           | Cottonseed Oil            | 1                                                           |
| 52              | Azerbaijan | 2002           | Eggs                      | 11                                                          |
| 52              | Azerbaijan | 2002           | Fats, Animals, Raw        | 1                                                           |
| 52              | Azerbaijan | 2002           | Freshwater Fish           | 4                                                           |
| 52              | Azerbaijan | 2002           | Fruits, Other             | 87                                                          |
| 52              | Azerbaijan | 2002           | Grapes                    | 18                                                          |
| 52              | Azerbaijan | 2002           | Lemons, Limes             | 1                                                           |
| 52              | Azerbaijan | 2002           | Maize                     | 21                                                          |
| 52              | Azerbaijan | 2002           | Milk, Whole               | 127                                                         |
| 52              | Azerbaijan | 2002           | Mutton & Goat Meat        | 12                                                          |
| 52              | Azerbaijan | 2002           | Nuts                      | 5                                                           |
| 52              | Azerbaijan | 2002           | Offals, Edible            | 7                                                           |
| 52              | Azerbaijan | 2002           | Onions                    | 43                                                          |
| 52              | Azerbaijan | 2002           | Oranges, Mandarines       | 6                                                           |
| 52              | Azerbaijan | 2002           | Pelagic Fish              | 1                                                           |
| 52              | Azerbaijan | 2002           | Pigmeat                   | 2                                                           |
| 52              | Azerbaijan | 2002           | Potatoes                  | 178                                                         |
| 52              | Azerbaijan | 2002           | Poultry Meat              | 9                                                           |
| 52              | Azerbaijan | 2002           | Rice (Milled Equivalent)  | 9                                                           |
| 52              | Azerbaijan | 2002           | Soyabean Oil              | 4                                                           |
| 52              | Azerbaijan | 2002           | Sugar, Refined Equivalent | 39                                                          |
| 52              | Azerbaijan | 2002           | Sunflowerseed Oil         | 2                                                           |
| 52              | Azerbaijan | 2002           | Tea                       | 1                                                           |
| 52              | Azerbaijan | 2002           | Tomatoes                  | 135                                                         |
| 52              | Azerbaijan | 2002           | Vegetables, Other         | 198                                                         |
| 52              | Azerbaijan | 2002           | Wheat                     | 567                                                         |
| 52              | Azerbaijan | 2002           | Wine                      | 1                                                           |
| 52              | Azerbaijan | 2003           | Apples                    | 34                                                          |
| 52              | Azerbaijan | 2003           | Bananas                   | 1                                                           |
| 52              | Azerbaijan | 2003           | Barley                    | 1                                                           |
| 52              | Azerbaijan | 2003           | Beer                      | 44                                                          |
| 52              | Azerbaijan | 2003           | Beverages, Alcoholic      | 15                                                          |
| 52              | Azerbaijan | 2003           | Bovine Meat               | 23                                                          |
| 52              | Azerbaijan | 2003           | Butter, Ghee              | 8                                                           |
| 52              | Azerbaijan | 2003           | Cereals, Other            | 1                                                           |
| 52              | Azerbaijan | 2003           | Cheese                    | 14                                                          |
| 52              | Azerbaijan | 2003           | Cocoa Beans               | 2                                                           |
| 52              | Azerbaijan | 2003           | Eggs                      | 12                                                          |
| 52              | Azerbaijan | 2003           | Fats, Animals, Raw        | 1                                                           |
| 52              | Azerbaijan | 2003           | Freshwater Fish           | 3                                                           |
| 52              | Azerbaijan | 2003           | Fruits, Other             | 81                                                          |
| 52              | Azerbaijan | 2003           | Grapes                    | 19                                                          |
| 52              | Azerbaijan | 2003           | Lemons, Limes             | 2                                                           |
| 52              | Azerbaijan | 2003           | Maize                     | 25                                                          |
| 52              | Azerbaijan | 2003           | Maize Germ Oil            | 2                                                           |
| 52              | Azerbaijan | 2003           | Milk, Whole               | 142                                                         |
| 52              | Azerbaijan | 2003           | Mutton & Goat Meat        | 13                                                          |
| 52              | Azerbaijan | 2003           | Nuts                      | 5                                                           |
| 52              | Azerbaijan | 2003           | Offals, Edible            | 8                                                           |
| 52              | Azerbaijan | 2003           | Onions                    | 52                                                          |
| 52              | Azerbaijan | 2003           | Oranges, Mandarines       | 7                                                           |
| 52              | Azerbaijan | 2003           | Pelagic Fish              | 1                                                           |
| 52              | Azerbaijan | 2003           | Pigmeat                   | 2                                                           |
| 52              | Azerbaijan | 2003           | Potatoes                  | 200                                                         |
| 52              | Azerbaijan | 2003           | Poultry Meat              | 10                                                          |
| 52              | Azerbaijan | 2003           | Rice (Milled Equivalent)  | 9                                                           |
| 52              | Azerbaijan | 2003           | Soyabean Oil              | 7                                                           |
| 52              | Azerbaijan | 2003           | Sugar, Refined Equivalent | 41                                                          |
| 52              | Azerbaijan | 2003           | Sunflowerseed Oil         | 2                                                           |
| 52              | Azerbaijan | 2003           | Tea                       | 1                                                           |
| 52              | Azerbaijan | 2003           | Tomatoes                  | 135                                                         |
| 52              | Azerbaijan | 2003           | Vegetables, Other         | 236                                                         |
| 52              | Azerbaijan | 2003           | Wheat                     | 585                                                         |
| 52              | Azerbaijan | 2003           | Wine                      | 1                                                           |
| 52              | Azerbaijan | 2004           | Apples                    | 32                                                          |
| 52              | Azerbaijan | 2004           | Bananas                   | 2                                                           |
| 52              | Azerbaijan | 2004           | Barley                    | 1                                                           |
| 52              | Azerbaijan | 2004           | Beer                      | 58                                                          |
| 52              | Azerbaijan | 2004           | Beverages, Alcoholic      | 14                                                          |
| 52              | Azerbaijan | 2004           | Bovine Meat               | 23                                                          |
| 52              | Azerbaijan | 2004           | Butter, Ghee              | 9                                                           |
| 52              | Azerbaijan | 2004           | Cereals, Other            | 3                                                           |
| 52              | Azerbaijan | 2004           | Cheese                    | 14                                                          |
| 52              | Azerbaijan | 2004           | Cocoa Beans               | 2                                                           |
| 52              | Azerbaijan | 2004           | Eggs                      | 14                                                          |
| 52              | Azerbaijan | 2004           | Fats, Animals, Raw        | 1                                                           |
| 52              | Azerbaijan | 2004           | Freshwater Fish           | 4                                                           |
| 52              | Azerbaijan | 2004           | Fruits, Other             | 54                                                          |
| 52              | Azerbaijan | 2004           | Grapes                    | 16                                                          |
| 52              | Azerbaijan | 2004           | Lemons, Limes             | 2                                                           |
| 52              | Azerbaijan | 2004           | Maize                     | 28                                                          |
| 52              | Azerbaijan | 2004           | Maize Germ Oil            | 3                                                           |
| 52              | Azerbaijan | 2004           | Milk, Whole               | 117                                                         |
| 52              | Azerbaijan | 2004           | Mutton & Goat Meat        | 13                                                          |
| 52              | Azerbaijan | 2004           | Nuts                      | 3                                                           |



## Dietary calcium and zinc deficiency risks are decreasing but remain prevalent

| FAO countrycode | Country    | Reference year | Food item                 | Gross food supply (g capita <sup>-1</sup> d <sup>-1</sup> ) |
|-----------------|------------|----------------|---------------------------|-------------------------------------------------------------|
| 52              | Azerbaijan | 2004           | Offals, Edible            | 9                                                           |
| 52              | Azerbaijan | 2004           | Onions                    | 54                                                          |
| 52              | Azerbaijan | 2004           | Oranges, Mandarines       | 7                                                           |
| 52              | Azerbaijan | 2004           | Pigmeat                   | 2                                                           |
| 52              | Azerbaijan | 2004           | Potatoes                  | 222                                                         |
| 52              | Azerbaijan | 2004           | Poultry Meat              | 12                                                          |
| 52              | Azerbaijan | 2004           | Rice (Milled Equivalent)  | 7                                                           |
| 52              | Azerbaijan | 2004           | Soyabean Oil              | 7                                                           |
| 52              | Azerbaijan | 2004           | Sugar, Refined Equivalent | 39                                                          |
| 52              | Azerbaijan | 2004           | Sunflowerseed Oil         | 5                                                           |
| 52              | Azerbaijan | 2004           | Tea                       | 1                                                           |
| 52              | Azerbaijan | 2004           | Tomatoes                  | 128                                                         |
| 52              | Azerbaijan | 2004           | Vegetables, Other         | 244                                                         |
| 52              | Azerbaijan | 2004           | Wheat                     | 623                                                         |
| 52              | Azerbaijan | 2004           | Wine                      | 1                                                           |
| 52              | Azerbaijan | 2005           | Apples                    | 32                                                          |
| 52              | Azerbaijan | 2005           | Bananas                   | 2                                                           |
| 52              | Azerbaijan | 2005           | Beer                      | 80                                                          |
| 52              | Azerbaijan | 2005           | Beverages, Alcoholic      | 14                                                          |
| 52              | Azerbaijan | 2005           | Bovine Meat               | 24                                                          |
| 52              | Azerbaijan | 2005           | Butter, Ghee              | 7                                                           |
| 52              | Azerbaijan | 2005           | Cereals, Other            | 2                                                           |
| 52              | Azerbaijan | 2005           | Cheese                    | 14                                                          |
| 52              | Azerbaijan | 2005           | Cocoa Beans               | 3                                                           |
| 52              | Azerbaijan | 2005           | Eggs                      | 15                                                          |
| 52              | Azerbaijan | 2005           | Freshwater Fish           | 3                                                           |
| 52              | Azerbaijan | 2005           | Fruits, Other             | 90                                                          |
| 52              | Azerbaijan | 2005           | Grapes                    | 24                                                          |
| 52              | Azerbaijan | 2005           | Lemons, Limes             | 2                                                           |
| 52              | Azerbaijan | 2005           | Maize                     | 30                                                          |
| 52              | Azerbaijan | 2005           | Maize Germ Oil            | 2                                                           |
| 52              | Azerbaijan | 2005           | Milk, Whole               | 166                                                         |
| 52              | Azerbaijan | 2005           | Mutton & Goat Meat        | 13                                                          |
| 52              | Azerbaijan | 2005           | Nuts                      | 7                                                           |
| 52              | Azerbaijan | 2005           | Offals, Edible            | 9                                                           |
| 52              | Azerbaijan | 2005           | Onions                    | 56                                                          |
| 52              | Azerbaijan | 2005           | Oranges, Mandarines       | 6                                                           |
| 52              | Azerbaijan | 2005           | Palm Oil                  | 2                                                           |
| 52              | Azerbaijan | 2005           | Pelagic Fish              | 2                                                           |
| 52              | Azerbaijan | 2005           | Pigmeat                   | 2                                                           |
| 52              | Azerbaijan | 2005           | Potatoes                  | 249                                                         |
| 52              | Azerbaijan | 2005           | Poultry Meat              | 13                                                          |
| 52              | Azerbaijan | 2005           | Rice (Milled Equivalent)  | 6                                                           |
| 52              | Azerbaijan | 2005           | Soyabean Oil              | 4                                                           |
| 52              | Azerbaijan | 2005           | Sugar, Refined Equivalent | 44                                                          |
| 52              | Azerbaijan | 2005           | Sunflowerseed Oil         | 5                                                           |
| 52              | Azerbaijan | 2005           | Tea                       | 1                                                           |
| 52              | Azerbaijan | 2005           | Tomatoes                  | 128                                                         |
| 52              | Azerbaijan | 2005           | Vegetables, Other         | 277                                                         |
| 52              | Azerbaijan | 2005           | Wheat                     | 614                                                         |
| 52              | Azerbaijan | 2005           | Wine                      | 1                                                           |
| 52              | Azerbaijan | 2006           | Apples                    | 36                                                          |
| 52              | Azerbaijan | 2006           | Bananas                   | 3                                                           |
| 52              | Azerbaijan | 2006           | Beer                      | 101                                                         |
| 52              | Azerbaijan | 2006           | Beverages, Alcoholic      | 16                                                          |
| 52              | Azerbaijan | 2006           | Bovine Meat               | 25                                                          |
| 52              | Azerbaijan | 2006           | Butter, Ghee              | 7                                                           |
| 52              | Azerbaijan | 2006           | Cereals, Other            | 2                                                           |
| 52              | Azerbaijan | 2006           | Cheese                    | 15                                                          |
| 52              | Azerbaijan | 2006           | Cocoa Beans               | 3                                                           |
| 52              | Azerbaijan | 2006           | Eggs                      | 13                                                          |
| 52              | Azerbaijan | 2006           | Freshwater Fish           | 2                                                           |
| 52              | Azerbaijan | 2006           | Fruits, Other             | 93                                                          |
| 52              | Azerbaijan | 2006           | Grapes                    | 28                                                          |
| 52              | Azerbaijan | 2006           | Lemons, Limes             | 2                                                           |
| 52              | Azerbaijan | 2006           | Maize                     | 29                                                          |
| 52              | Azerbaijan | 2006           | Maize Germ Oil            | 1                                                           |
| 52              | Azerbaijan | 2006           | Milk, Whole               | 175                                                         |
| 52              | Azerbaijan | 2006           | Mutton & Goat Meat        | 14                                                          |
| 52              | Azerbaijan | 2006           | Nuts                      | 9                                                           |
| 52              | Azerbaijan | 2006           | Offals, Edible            | 7                                                           |
| 52              | Azerbaijan | 2006           | Onions                    | 59                                                          |
| 52              | Azerbaijan | 2006           | Oranges, Mandarines       | 7                                                           |
| 52              | Azerbaijan | 2006           | Pelagic Fish              | 2                                                           |
| 52              | Azerbaijan | 2006           | Pigmeat                   | 2                                                           |
| 52              | Azerbaijan | 2006           | Potatoes                  | 245                                                         |
| 52              | Azerbaijan | 2006           | Poultry Meat              | 13                                                          |
| 52              | Azerbaijan | 2006           | Rice (Milled Equivalent)  | 6                                                           |
| 52              | Azerbaijan | 2006           | Soyabean Oil              | 8                                                           |
| 52              | Azerbaijan | 2006           | Sugar, Refined Equivalent | 46                                                          |
| 52              | Azerbaijan | 2006           | Sunflowerseed Oil         | 2                                                           |
| 52              | Azerbaijan | 2006           | Sweeteners, Other         | 1                                                           |
| 52              | Azerbaijan | 2006           | Tomatoes                  | 128                                                         |
| 52              | Azerbaijan | 2006           | Vegetables, Other         | 281                                                         |
| 52              | Azerbaijan | 2006           | Wheat                     | 607                                                         |
| 52              | Azerbaijan | 2006           | Wine                      | 1                                                           |
| 52              | Azerbaijan | 2007           | Apples                    | 19                                                          |
| 52              | Azerbaijan | 2007           | Bananas                   | 4                                                           |
| 52              | Azerbaijan | 2007           | Beer                      | 102                                                         |
| 52              | Azerbaijan | 2007           | Beverages, Alcoholic      | 41                                                          |
| 52              | Azerbaijan | 2007           | Bovine Meat               | 23                                                          |
| 52              | Azerbaijan | 2007           | Butter, Ghee              | 7                                                           |
| 52              | Azerbaijan | 2007           | Cereals, Other            | 1                                                           |
| 52              | Azerbaijan | 2007           | Cheese                    | 15                                                          |
| 52              | Azerbaijan | 2007           | Cocoa Beans               | 3                                                           |
| 52              | Azerbaijan | 2007           | Eggs                      | 15                                                          |
| 52              | Azerbaijan | 2007           | Freshwater Fish           | 1                                                           |

Dietary calcium and zinc deficiency risks are decreasing but remain prevalent

| FAO countrycode | Country    | Reference year | Food item                 | Gross food supply (g capita <sup>-1</sup> d <sup>-1</sup> ) |
|-----------------|------------|----------------|---------------------------|-------------------------------------------------------------|
| 52              | Azerbaijan | 2007           | Fruits, Other             | 94                                                          |
| 52              | Azerbaijan | 2007           | Grapes                    | 27                                                          |
| 52              | Azerbaijan | 2007           | Lemons, Limes             | 2                                                           |
| 52              | Azerbaijan | 2007           | Maize                     | 26                                                          |
| 52              | Azerbaijan | 2007           | Milk, Whole               | 178                                                         |
| 52              | Azerbaijan | 2007           | Mutton & Goat Meat        | 14                                                          |
| 52              | Azerbaijan | 2007           | Nuts                      | 8                                                           |
| 52              | Azerbaijan | 2007           | Offals, Edible            | 6                                                           |
| 52              | Azerbaijan | 2007           | Onions                    | 59                                                          |
| 52              | Azerbaijan | 2007           | Oranges, Mandarines       | 2                                                           |
| 52              | Azerbaijan | 2007           | Pelagic Fish              | 3                                                           |
| 52              | Azerbaijan | 2007           | Pigmeat                   | 2                                                           |
| 52              | Azerbaijan | 2007           | Potatoes                  | 241                                                         |
| 52              | Azerbaijan | 2007           | Poultry Meat              | 19                                                          |
| 52              | Azerbaijan | 2007           | Rice (Milled Equivalent)  | 5                                                           |
| 52              | Azerbaijan | 2007           | Soyabean Oil              | 5                                                           |
| 52              | Azerbaijan | 2007           | Sugar, Refined Equivalent | 33                                                          |
| 52              | Azerbaijan | 2007           | Sunflowerseed Oil         | 2                                                           |
| 52              | Azerbaijan | 2007           | Sweeteners, Other         | 1                                                           |
| 52              | Azerbaijan | 2007           | Tea                       | 3                                                           |
| 52              | Azerbaijan | 2007           | Tomatoes                  | 125                                                         |
| 52              | Azerbaijan | 2007           | Vegetables, Other         | 294                                                         |
| 52              | Azerbaijan | 2007           | Wheat                     | 599                                                         |
| 52              | Azerbaijan | 2007           | Wine                      | 1                                                           |
| 52              | Azerbaijan | 2008           | Apples                    | 25                                                          |
| 52              | Azerbaijan | 2008           | Bananas                   | 5                                                           |
| 52              | Azerbaijan | 2008           | Beer                      | 101                                                         |
| 52              | Azerbaijan | 2008           | Beverages, Alcoholic      | 23                                                          |
| 52              | Azerbaijan | 2008           | Bovine Meat               | 24                                                          |
| 52              | Azerbaijan | 2008           | Butter, Ghee              | 7                                                           |
| 52              | Azerbaijan | 2008           | Cereals, Other            | 3                                                           |
| 52              | Azerbaijan | 2008           | Cheese                    | 17                                                          |
| 52              | Azerbaijan | 2008           | Citrus, Other             | 1                                                           |
| 52              | Azerbaijan | 2008           | Cocoa Beans               | 3                                                           |
| 52              | Azerbaijan | 2008           | Coffee                    | 1                                                           |
| 52              | Azerbaijan | 2008           | Demersal Fish             | 1                                                           |
| 52              | Azerbaijan | 2008           | Eggs                      | 20                                                          |
| 52              | Azerbaijan | 2008           | Freshwater Fish           | 1                                                           |
| 52              | Azerbaijan | 2008           | Fruits, Other             | 89                                                          |
| 52              | Azerbaijan | 2008           | Grapes                    | 30                                                          |
| 52              | Azerbaijan | 2008           | Lemons, Limes             | 1                                                           |
| 52              | Azerbaijan | 2008           | Maize                     | 31                                                          |
| 52              | Azerbaijan | 2008           | Maize Germ Oil            | 4                                                           |
| 52              | Azerbaijan | 2008           | Milk, Whole               | 171                                                         |
| 52              | Azerbaijan | 2008           | Mutton & Goat Meat        | 14                                                          |
| 52              | Azerbaijan | 2008           | Nuts                      | 10                                                          |
| 52              | Azerbaijan | 2008           | Offals, Edible            | 4                                                           |
| 52              | Azerbaijan | 2008           | Onions                    | 49                                                          |
| 52              | Azerbaijan | 2008           | Oranges, Mandarines       | 2                                                           |
| 52              | Azerbaijan | 2008           | Pelagic Fish              | 4                                                           |
| 52              | Azerbaijan | 2008           | Pigmeat                   | 2                                                           |
| 52              | Azerbaijan | 2008           | Potatoes                  | 223                                                         |
| 52              | Azerbaijan | 2008           | Poultry Meat              | 20                                                          |
| 52              | Azerbaijan | 2008           | Rice (Milled Equivalent)  | 8                                                           |
| 52              | Azerbaijan | 2008           | Soyabean Oil              | 2                                                           |
| 52              | Azerbaijan | 2008           | Sugar, Refined Equivalent | 35                                                          |
| 52              | Azerbaijan | 2008           | Sweeteners, Other         | 1                                                           |
| 52              | Azerbaijan | 2008           | Tea                       | 3                                                           |
| 52              | Azerbaijan | 2008           | Tomatoes                  | 129                                                         |
| 52              | Azerbaijan | 2008           | Vegetables, Other         | 268                                                         |
| 52              | Azerbaijan | 2008           | Wheat                     | 598                                                         |
| 52              | Azerbaijan | 2008           | Wine                      | 1                                                           |
| 52              | Azerbaijan | 2009           | Apples                    | 32                                                          |
| 52              | Azerbaijan | 2009           | Bananas                   | 8                                                           |
| 52              | Azerbaijan | 2009           | Beer                      | 110                                                         |
| 52              | Azerbaijan | 2009           | Beverages, Alcoholic      | 26                                                          |
| 52              | Azerbaijan | 2009           | Bovine Meat               | 28                                                          |
| 52              | Azerbaijan | 2009           | Butter, Ghee              | 10                                                          |
| 52              | Azerbaijan | 2009           | Cereals, Other            | 2                                                           |
| 52              | Azerbaijan | 2009           | Cheese                    | 18                                                          |
| 52              | Azerbaijan | 2009           | Citrus, Other             | 1                                                           |
| 52              | Azerbaijan | 2009           | Cocoa Beans               | 3                                                           |
| 52              | Azerbaijan | 2009           | Coffee                    | 1                                                           |
| 52              | Azerbaijan | 2009           | Eggs                      | 21                                                          |
| 52              | Azerbaijan | 2009           | Freshwater Fish           | 2                                                           |
| 52              | Azerbaijan | 2009           | Fruits, Other             | 93                                                          |
| 52              | Azerbaijan | 2009           | Grapes                    | 32                                                          |
| 52              | Azerbaijan | 2009           | Lemons, Limes             | 2                                                           |
| 52              | Azerbaijan | 2009           | Maize                     | 31                                                          |
| 52              | Azerbaijan | 2009           | Milk, Whole               | 190                                                         |
| 52              | Azerbaijan | 2009           | Mutton & Goat Meat        | 21                                                          |
| 52              | Azerbaijan | 2009           | Nuts                      | 8                                                           |
| 52              | Azerbaijan | 2009           | Offals, Edible            | 5                                                           |
| 52              | Azerbaijan | 2009           | Onions                    | 49                                                          |
| 52              | Azerbaijan | 2009           | Oranges, Mandarines       | 6                                                           |
| 52              | Azerbaijan | 2009           | Palm Oil                  | 1                                                           |
| 52              | Azerbaijan | 2009           | Pelagic Fish              | 3                                                           |
| 52              | Azerbaijan | 2009           | Pigmeat                   | 2                                                           |
| 52              | Azerbaijan | 2009           | Potatoes                  | 222                                                         |
| 52              | Azerbaijan | 2009           | Poultry Meat              | 24                                                          |
| 52              | Azerbaijan | 2009           | Rice (Milled Equivalent)  | 7                                                           |
| 52              | Azerbaijan | 2009           | Soyabean Oil              | 1                                                           |
| 52              | Azerbaijan | 2009           | Sugar, Refined Equivalent | 34                                                          |
| 52              | Azerbaijan | 2009           | Sunflowerseed Oil         | 3                                                           |
| 52              | Azerbaijan | 2009           | Sweeteners, Other         | 2                                                           |
| 52              | Azerbaijan | 2009           | Tea                       | 4                                                           |
| 52              | Azerbaijan | 2009           | Tomatoes                  | 115                                                         |

Dietary calcium and zinc deficiency risks are decreasing but remain prevalent

| FAO countrycode | Country    | Reference year | Food item                 | Gross food supply (g capita <sup>-1</sup> d <sup>-1</sup> ) |
|-----------------|------------|----------------|---------------------------|-------------------------------------------------------------|
| 52              | Azerbaijan | 2009           | Vegetables, Other         | 273                                                         |
| 52              | Azerbaijan | 2009           | Wheat                     | 592                                                         |
| 52              | Azerbaijan | 2009           | Wine                      | 1                                                           |
| 52              | Azerbaijan | 2010           | Apples                    | 32                                                          |
| 52              | Azerbaijan | 2010           | Bananas                   | 6                                                           |
| 52              | Azerbaijan | 2010           | Beer                      | 114                                                         |
| 52              | Azerbaijan | 2010           | Beverages, Alcoholic      | 28                                                          |
| 52              | Azerbaijan | 2010           | Bovine Meat               | 34                                                          |
| 52              | Azerbaijan | 2010           | Butter, Ghee              | 10                                                          |
| 52              | Azerbaijan | 2010           | Cereals, Other            | 5                                                           |
| 52              | Azerbaijan | 2010           | Cheese                    | 18                                                          |
| 52              | Azerbaijan | 2010           | Citrus, Other             | 1                                                           |
| 52              | Azerbaijan | 2010           | Cocoa Beans               | 3                                                           |
| 52              | Azerbaijan | 2010           | Coffee                    | 1                                                           |
| 52              | Azerbaijan | 2010           | Eggs                      | 19                                                          |
| 52              | Azerbaijan | 2010           | Freshwater Fish           | 2                                                           |
| 52              | Azerbaijan | 2010           | Fruits, Other             | 94                                                          |
| 52              | Azerbaijan | 2010           | Grapes                    | 32                                                          |
| 52              | Azerbaijan | 2010           | Honey                     | 1                                                           |
| 52              | Azerbaijan | 2010           | Lemons, Limes             | 4                                                           |
| 52              | Azerbaijan | 2010           | Maize                     | 32                                                          |
| 52              | Azerbaijan | 2010           | Maize Germ Oil            | 5                                                           |
| 52              | Azerbaijan | 2010           | Milk, Whole               | 224                                                         |
| 52              | Azerbaijan | 2010           | Mutton & Goat Meat        | 22                                                          |
| 52              | Azerbaijan | 2010           | Nuts                      | 9                                                           |
| 52              | Azerbaijan | 2010           | Offals, Edible            | 7                                                           |
| 52              | Azerbaijan | 2010           | Onions                    | 52                                                          |
| 52              | Azerbaijan | 2010           | Oranges, Mandarines       | 9                                                           |
| 52              | Azerbaijan | 2010           | Pelagic Fish              | 3                                                           |
| 52              | Azerbaijan | 2010           | Pigmeat                   | 1                                                           |
| 52              | Azerbaijan | 2010           | Pineapples                | 1                                                           |
| 52              | Azerbaijan | 2010           | Potatoes                  | 200                                                         |
| 52              | Azerbaijan | 2010           | Poultry Meat              | 24                                                          |
| 52              | Azerbaijan | 2010           | Rice (Milled Equivalent)  | 6                                                           |
| 52              | Azerbaijan | 2010           | Soyabean Oil              | 1                                                           |
| 52              | Azerbaijan | 2010           | Sugar, Refined Equivalent | 37                                                          |
| 52              | Azerbaijan | 2010           | Sunflowerseed Oil         | 1                                                           |
| 52              | Azerbaijan | 2010           | Sweeteners, Other         | 2                                                           |
| 52              | Azerbaijan | 2010           | Tea                       | 3                                                           |
| 52              | Azerbaijan | 2010           | Tomatoes                  | 122                                                         |
| 52              | Azerbaijan | 2010           | Vegetables, Other         | 279                                                         |
| 52              | Azerbaijan | 2010           | Wheat                     | 583                                                         |
| 52              | Azerbaijan | 2010           | Wine                      | 1                                                           |
| 52              | Azerbaijan | 2011           | Apples                    | 32                                                          |
| 52              | Azerbaijan | 2011           | Bananas                   | 7                                                           |
| 52              | Azerbaijan | 2011           | Beer                      | 117                                                         |
| 52              | Azerbaijan | 2011           | Beverages, Alcoholic      | 28                                                          |
| 52              | Azerbaijan | 2011           | Bovine Meat               | 36                                                          |
| 52              | Azerbaijan | 2011           | Butter, Ghee              | 9                                                           |
| 52              | Azerbaijan | 2011           | Cereals, Other            | 8                                                           |
| 52              | Azerbaijan | 2011           | Cheese                    | 18                                                          |
| 52              | Azerbaijan | 2011           | Citrus, Other             | 1                                                           |
| 52              | Azerbaijan | 2011           | Cocoa Beans               | 3                                                           |
| 52              | Azerbaijan | 2011           | Coffee                    | 1                                                           |
| 52              | Azerbaijan | 2011           | Eggs                      | 20                                                          |
| 52              | Azerbaijan | 2011           | Fruits, Other             | 102                                                         |
| 52              | Azerbaijan | 2011           | Grapes                    | 37                                                          |
| 52              | Azerbaijan | 2011           | Groundnuts (Shelled Eq)   | 1                                                           |
| 52              | Azerbaijan | 2011           | Honey                     | 1                                                           |
| 52              | Azerbaijan | 2011           | Lemons, Limes             | 3                                                           |
| 52              | Azerbaijan | 2011           | Maize                     | 29                                                          |
| 52              | Azerbaijan | 2011           | Maize Germ Oil            | 4                                                           |
| 52              | Azerbaijan | 2011           | Milk, Whole               | 244                                                         |
| 52              | Azerbaijan | 2011           | Mutton & Goat Meat        | 22                                                          |
| 52              | Azerbaijan | 2011           | Nuts                      | 8                                                           |
| 52              | Azerbaijan | 2011           | Offals, Edible            | 6                                                           |
| 52              | Azerbaijan | 2011           | Onions                    | 51                                                          |
| 52              | Azerbaijan | 2011           | Oranges, Mandarines       | 9                                                           |
| 52              | Azerbaijan | 2011           | Pelagic Fish              | 5                                                           |
| 52              | Azerbaijan | 2011           | Pigmeat                   | 1                                                           |
| 52              | Azerbaijan | 2011           | Pineapples                | 1                                                           |
| 52              | Azerbaijan | 2011           | Potatoes                  | 197                                                         |
| 52              | Azerbaijan | 2011           | Poultry Meat              | 27                                                          |
| 52              | Azerbaijan | 2011           | Rice (Milled Equivalent)  | 6                                                           |
| 52              | Azerbaijan | 2011           | Soyabean Oil              | 1                                                           |
| 52              | Azerbaijan | 2011           | Sugar, Refined Equivalent | 38                                                          |
| 52              | Azerbaijan | 2011           | Sunflowerseed Oil         | 1                                                           |
| 52              | Azerbaijan | 2011           | Sweeteners, Other         | 2                                                           |
| 52              | Azerbaijan | 2011           | Tea                       | 4                                                           |
| 52              | Azerbaijan | 2011           | Tomatoes                  | 128                                                         |
| 52              | Azerbaijan | 2011           | Vegetables, Other         | 292                                                         |
| 52              | Azerbaijan | 2011           | Wheat                     | 576                                                         |
| 52              | Azerbaijan | 2011           | Wine                      | 1                                                           |
| 16              | Bangladesh | 1992           | Bananas                   | 14                                                          |
| 16              | Bangladesh | 1992           | Beans                     | 2                                                           |
| 16              | Bangladesh | 1992           | Bovine Meat               | 4                                                           |
| 16              | Bangladesh | 1992           | Coconut Oil               | 1                                                           |
| 16              | Bangladesh | 1992           | Demersal Fish             | 1                                                           |
| 16              | Bangladesh | 1992           | Eggs                      | 2                                                           |
| 16              | Bangladesh | 1992           | Freshwater Fish           | 18                                                          |
| 16              | Bangladesh | 1992           | Fruits, Other             | 12                                                          |
| 16              | Bangladesh | 1992           | Marine Fish, Other        | 1                                                           |
| 16              | Bangladesh | 1992           | Milk, Whole               | 36                                                          |
| 16              | Bangladesh | 1992           | Millet                    | 2                                                           |
| 16              | Bangladesh | 1992           | Mutton & Goat Meat        | 2                                                           |
| 16              | Bangladesh | 1992           | Nuts                      | 1                                                           |
| 16              | Bangladesh | 1992           | Offals, Edible            | 1                                                           |

Dietary calcium and zinc deficiency risks are decreasing but remain prevalent

| FAO countrycode | Country    | Reference year | Food item                 | Gross food supply (g capita <sup>-1</sup> d <sup>-1</sup> ) |
|-----------------|------------|----------------|---------------------------|-------------------------------------------------------------|
| 16              | Bangladesh | 1992           | Onions                    | 6                                                           |
| 16              | Bangladesh | 1992           | Palm Oil                  | 2                                                           |
| 16              | Bangladesh | 1992           | Peas                      | 1                                                           |
| 16              | Bangladesh | 1992           | Pelagic Fish              | 1                                                           |
| 16              | Bangladesh | 1992           | Pimento                   | 2                                                           |
| 16              | Bangladesh | 1992           | Pineapples                | 3                                                           |
| 16              | Bangladesh | 1992           | Potatoes                  | 27                                                          |
| 16              | Bangladesh | 1992           | Poultry Meat              | 2                                                           |
| 16              | Bangladesh | 1992           | Pulses, Other             | 10                                                          |
| 16              | Bangladesh | 1992           | Rape and Mustard Oil      | 2                                                           |
| 16              | Bangladesh | 1992           | Rice (Milled Equivalent)  | 428                                                         |
| 16              | Bangladesh | 1992           | Soyabean Oil              | 7                                                           |
| 16              | Bangladesh | 1992           | Spices, Other             | 2                                                           |
| 16              | Bangladesh | 1992           | Sugar Cane                | 10                                                          |
| 16              | Bangladesh | 1992           | Sugar, Non-Centrifugal    | 12                                                          |
| 16              | Bangladesh | 1992           | Sugar, Refined Equivalent | 5                                                           |
| 16              | Bangladesh | 1992           | Sweet Potatoes            | 10                                                          |
| 16              | Bangladesh | 1992           | Sweeteners, Other         | 3                                                           |
| 16              | Bangladesh | 1992           | Tomatoes                  | 2                                                           |
| 16              | Bangladesh | 1992           | Vegetables, Other         | 26                                                          |
| 16              | Bangladesh | 1992           | Wheat                     | 61                                                          |
| 16              | Bangladesh | 1993           | Bananas                   | 14                                                          |
| 16              | Bangladesh | 1993           | Beans                     | 2                                                           |
| 16              | Bangladesh | 1993           | Bovine Meat               | 4                                                           |
| 16              | Bangladesh | 1993           | Coconut Oil               | 1                                                           |
| 16              | Bangladesh | 1993           | Crustaceans               | 1                                                           |
| 16              | Bangladesh | 1993           | Demersal Fish             | 1                                                           |
| 16              | Bangladesh | 1993           | Eggs                      | 2                                                           |
| 16              | Bangladesh | 1993           | Freshwater Fish           | 18                                                          |
| 16              | Bangladesh | 1993           | Fruits, Other             | 12                                                          |
| 16              | Bangladesh | 1993           | Marine Fish, Other        | 2                                                           |
| 16              | Bangladesh | 1993           | Milk, Whole               | 37                                                          |
| 16              | Bangladesh | 1993           | Millet                    | 1                                                           |
| 16              | Bangladesh | 1993           | Mutton & Goat Meat        | 2                                                           |
| 16              | Bangladesh | 1993           | Nuts                      | 1                                                           |
| 16              | Bangladesh | 1993           | Offals, Edible            | 1                                                           |
| 16              | Bangladesh | 1993           | Onions                    | 5                                                           |
| 16              | Bangladesh | 1993           | Palm Oil                  | 1                                                           |
| 16              | Bangladesh | 1993           | Peas                      | 1                                                           |
| 16              | Bangladesh | 1993           | Pelagic Fish              | 1                                                           |
| 16              | Bangladesh | 1993           | Pimento                   | 1                                                           |
| 16              | Bangladesh | 1993           | Pineapples                | 3                                                           |
| 16              | Bangladesh | 1993           | Potatoes                  | 27                                                          |
| 16              | Bangladesh | 1993           | Poultry Meat              | 3                                                           |
| 16              | Bangladesh | 1993           | Pulses, Other             | 10                                                          |
| 16              | Bangladesh | 1993           | Rape and Mustard Oil      | 2                                                           |
| 16              | Bangladesh | 1993           | Rice (Milled Equivalent)  | 415                                                         |
| 16              | Bangladesh | 1993           | Sesameseed Oil            | 1                                                           |
| 16              | Bangladesh | 1993           | Soyabean Oil              | 5                                                           |
| 16              | Bangladesh | 1993           | Spices, Other             | 2                                                           |
| 16              | Bangladesh | 1993           | Sugar Cane                | 10                                                          |
| 16              | Bangladesh | 1993           | Sugar, Non-Centrifugal    | 11                                                          |
| 16              | Bangladesh | 1993           | Sugar, Refined Equivalent | 6                                                           |
| 16              | Bangladesh | 1993           | Sweet Potatoes            | 9                                                           |
| 16              | Bangladesh | 1993           | Sweeteners, Other         | 3                                                           |
| 16              | Bangladesh | 1993           | Tomatoes                  | 2                                                           |
| 16              | Bangladesh | 1993           | Vegetables, Other         | 26                                                          |
| 16              | Bangladesh | 1993           | Wheat                     | 48                                                          |
| 16              | Bangladesh | 1994           | Bananas                   | 13                                                          |
| 16              | Bangladesh | 1994           | Beans                     | 2                                                           |
| 16              | Bangladesh | 1994           | Bovine Meat               | 4                                                           |
| 16              | Bangladesh | 1994           | Coconut Oil               | 1                                                           |
| 16              | Bangladesh | 1994           | Demersal Fish             | 1                                                           |
| 16              | Bangladesh | 1994           | Eggs                      | 2                                                           |
| 16              | Bangladesh | 1994           | Freshwater Fish           | 20                                                          |
| 16              | Bangladesh | 1994           | Fruits, Other             | 12                                                          |
| 16              | Bangladesh | 1994           | Marine Fish, Other        | 1                                                           |
| 16              | Bangladesh | 1994           | Milk, Whole               | 36                                                          |
| 16              | Bangladesh | 1994           | Millet                    | 1                                                           |
| 16              | Bangladesh | 1994           | Mutton & Goat Meat        | 2                                                           |
| 16              | Bangladesh | 1994           | Nuts                      | 1                                                           |
| 16              | Bangladesh | 1994           | Offals, Edible            | 1                                                           |
| 16              | Bangladesh | 1994           | Onions                    | 4                                                           |
| 16              | Bangladesh | 1994           | Palm Oil                  | 3                                                           |
| 16              | Bangladesh | 1994           | Peas                      | 1                                                           |
| 16              | Bangladesh | 1994           | Pelagic Fish              | 1                                                           |
| 16              | Bangladesh | 1994           | Pimento                   | 1                                                           |
| 16              | Bangladesh | 1994           | Pineapples                | 3                                                           |
| 16              | Bangladesh | 1994           | Potatoes                  | 27                                                          |
| 16              | Bangladesh | 1994           | Poultry Meat              | 3                                                           |
| 16              | Bangladesh | 1994           | Pulses, Other             | 11                                                          |
| 16              | Bangladesh | 1994           | Rape and Mustard Oil      | 2                                                           |
| 16              | Bangladesh | 1994           | Rice (Milled Equivalent)  | 414                                                         |
| 16              | Bangladesh | 1994           | Soyabean Oil              | 3                                                           |
| 16              | Bangladesh | 1994           | Spices, Other             | 2                                                           |
| 16              | Bangladesh | 1994           | Sugar Cane                | 10                                                          |
| 16              | Bangladesh | 1994           | Sugar, Non-Centrifugal    | 10                                                          |
| 16              | Bangladesh | 1994           | Sugar, Refined Equivalent | 7                                                           |
| 16              | Bangladesh | 1994           | Sweet Potatoes            | 9                                                           |
| 16              | Bangladesh | 1994           | Sweeteners, Other         | 3                                                           |
| 16              | Bangladesh | 1994           | Tomatoes                  | 2                                                           |
| 16              | Bangladesh | 1994           | Vegetables, Other         | 26                                                          |
| 16              | Bangladesh | 1994           | Wheat                     | 48                                                          |
| 16              | Bangladesh | 1995           | Bananas                   | 13                                                          |
| 16              | Bangladesh | 1995           | Beans                     | 2                                                           |
| 16              | Bangladesh | 1995           | Bovine Meat               | 3                                                           |
| 16              | Bangladesh | 1995           | Coconut Oil               | 1                                                           |

Dietary calcium and zinc deficiency risks are decreasing but remain prevalent

| FAO countrycode | Country    | Reference year | Food item                 | Gross food supply (g capita <sup>-1</sup> d <sup>-1</sup> ) |
|-----------------|------------|----------------|---------------------------|-------------------------------------------------------------|
| 16              | Bangladesh | 1995           | Crustaceans               | 1                                                           |
| 16              | Bangladesh | 1995           | Demersal Fish             | 1                                                           |
| 16              | Bangladesh | 1995           | Eggs                      | 2                                                           |
| 16              | Bangladesh | 1995           | Freshwater Fish           | 21                                                          |
| 16              | Bangladesh | 1995           | Fruits, Other             | 12                                                          |
| 16              | Bangladesh | 1995           | Marine Fish, Other        | 1                                                           |
| 16              | Bangladesh | 1995           | Milk, Whole               | 35                                                          |
| 16              | Bangladesh | 1995           | Millet                    | 1                                                           |
| 16              | Bangladesh | 1995           | Mutton & Goat Meat        | 2                                                           |
| 16              | Bangladesh | 1995           | Nuts                      | 1                                                           |
| 16              | Bangladesh | 1995           | Offals, Edible            | 1                                                           |
| 16              | Bangladesh | 1995           | Onions                    | 4                                                           |
| 16              | Bangladesh | 1995           | Oranges, Mandarines       | 1                                                           |
| 16              | Bangladesh | 1995           | Palm Oil                  | 2                                                           |
| 16              | Bangladesh | 1995           | Peas                      | 1                                                           |
| 16              | Bangladesh | 1995           | Pelagic Fish              | 1                                                           |
| 16              | Bangladesh | 1995           | Pimento                   | 1                                                           |
| 16              | Bangladesh | 1995           | Pineapples                | 3                                                           |
| 16              | Bangladesh | 1995           | Potatoes                  | 27                                                          |
| 16              | Bangladesh | 1995           | Poultry Meat              | 3                                                           |
| 16              | Bangladesh | 1995           | Pulses, Other             | 9                                                           |
| 16              | Bangladesh | 1995           | Rape and Mustard Oil      | 2                                                           |
| 16              | Bangladesh | 1995           | Rice (Milled Equivalent)  | 420                                                         |
| 16              | Bangladesh | 1995           | Soyabean Oil              | 5                                                           |
| 16              | Bangladesh | 1995           | Spices, Other             | 2                                                           |
| 16              | Bangladesh | 1995           | Sugar Cane                | 10                                                          |
| 16              | Bangladesh | 1995           | Sugar, Non-Centrifugal    | 8                                                           |
| 16              | Bangladesh | 1995           | Sugar, Refined Equivalent | 8                                                           |
| 16              | Bangladesh | 1995           | Sweet Potatoes            | 9                                                           |
| 16              | Bangladesh | 1995           | Sweeteners, Other         | 3                                                           |
| 16              | Bangladesh | 1995           | Tea                       | 1                                                           |
| 16              | Bangladesh | 1995           | Tomatoes                  | 2                                                           |
| 16              | Bangladesh | 1995           | Vegetables, Other         | 26                                                          |
| 16              | Bangladesh | 1995           | Wheat                     | 52                                                          |
| 16              | Bangladesh | 1996           | Bananas                   | 13                                                          |
| 16              | Bangladesh | 1996           | Beans                     | 2                                                           |
| 16              | Bangladesh | 1996           | Bovine Meat               | 3                                                           |
| 16              | Bangladesh | 1996           | Coconut Oil               | 1                                                           |
| 16              | Bangladesh | 1996           | Crustaceans               | 1                                                           |
| 16              | Bangladesh | 1996           | Demersal Fish             | 1                                                           |
| 16              | Bangladesh | 1996           | Eggs                      | 3                                                           |
| 16              | Bangladesh | 1996           | Freshwater Fish           | 22                                                          |
| 16              | Bangladesh | 1996           | Fruits, Other             | 12                                                          |
| 16              | Bangladesh | 1996           | Marine Fish, Other        | 1                                                           |
| 16              | Bangladesh | 1996           | Milk, Whole               | 37                                                          |
| 16              | Bangladesh | 1996           | Millet                    | 1                                                           |
| 16              | Bangladesh | 1996           | Mutton & Goat Meat        | 3                                                           |
| 16              | Bangladesh | 1996           | Nuts                      | 1                                                           |
| 16              | Bangladesh | 1996           | Offals, Edible            | 1                                                           |
| 16              | Bangladesh | 1996           | Onions                    | 4                                                           |
| 16              | Bangladesh | 1996           | Oranges, Mandarines       | 1                                                           |
| 16              | Bangladesh | 1996           | Palm Oil                  | 3                                                           |
| 16              | Bangladesh | 1996           | Peas                      | 1                                                           |
| 16              | Bangladesh | 1996           | Pelagic Fish              | 1                                                           |
| 16              | Bangladesh | 1996           | Pimento                   | 1                                                           |
| 16              | Bangladesh | 1996           | Pineapples                | 3                                                           |
| 16              | Bangladesh | 1996           | Potatoes                  | 27                                                          |
| 16              | Bangladesh | 1996           | Poultry Meat              | 2                                                           |
| 16              | Bangladesh | 1996           | Pulses, Other             | 9                                                           |
| 16              | Bangladesh | 1996           | Rape and Mustard Oil      | 2                                                           |
| 16              | Bangladesh | 1996           | Rice (Milled Equivalent)  | 419                                                         |
| 16              | Bangladesh | 1996           | Sorghum                   | 1                                                           |
| 16              | Bangladesh | 1996           | Soyabean Oil              | 5                                                           |
| 16              | Bangladesh | 1996           | Spices, Other             | 2                                                           |
| 16              | Bangladesh | 1996           | Sugar Cane                | 10                                                          |
| 16              | Bangladesh | 1996           | Sugar, Non-Centrifugal    | 10                                                          |
| 16              | Bangladesh | 1996           | Sugar, Refined Equivalent | 6                                                           |
| 16              | Bangladesh | 1996           | Sweet Potatoes            | 9                                                           |
| 16              | Bangladesh | 1996           | Sweeteners, Other         | 3                                                           |
| 16              | Bangladesh | 1996           | Tea                       | 1                                                           |
| 16              | Bangladesh | 1996           | Tomatoes                  | 2                                                           |
| 16              | Bangladesh | 1996           | Vegetables, Other         | 26                                                          |
| 16              | Bangladesh | 1996           | Wheat                     | 54                                                          |
| 16              | Bangladesh | 1997           | Bananas                   | 12                                                          |
| 16              | Bangladesh | 1997           | Beans                     | 2                                                           |
| 16              | Bangladesh | 1997           | Bovine Meat               | 4                                                           |
| 16              | Bangladesh | 1997           | Cassava                   | 1                                                           |
| 16              | Bangladesh | 1997           | Coconut Oil               | 1                                                           |
| 16              | Bangladesh | 1997           | Crustaceans               | 1                                                           |
| 16              | Bangladesh | 1997           | Demersal Fish             | 1                                                           |
| 16              | Bangladesh | 1997           | Eggs                      | 3                                                           |
| 16              | Bangladesh | 1997           | Freshwater Fish           | 24                                                          |
| 16              | Bangladesh | 1997           | Fruits, Other             | 12                                                          |
| 16              | Bangladesh | 1997           | Marine Fish, Other        | 1                                                           |
| 16              | Bangladesh | 1997           | Milk, Whole               | 38                                                          |
| 16              | Bangladesh | 1997           | Millet                    | 1                                                           |
| 16              | Bangladesh | 1997           | Mutton & Goat Meat        | 3                                                           |
| 16              | Bangladesh | 1997           | Nuts                      | 1                                                           |
| 16              | Bangladesh | 1997           | Offals, Edible            | 1                                                           |
| 16              | Bangladesh | 1997           | Onions                    | 4                                                           |
| 16              | Bangladesh | 1997           | Oranges, Mandarines       | 1                                                           |
| 16              | Bangladesh | 1997           | Palm Oil                  | 3                                                           |
| 16              | Bangladesh | 1997           | Peas                      | 2                                                           |
| 16              | Bangladesh | 1997           | Pelagic Fish              | 1                                                           |
| 16              | Bangladesh | 1997           | Pimento                   | 1                                                           |
| 16              | Bangladesh | 1997           | Pineapples                | 3                                                           |
| 16              | Bangladesh | 1997           | Potatoes                  | 27                                                          |

Dietary calcium and zinc deficiency risks are decreasing but remain prevalent

| FAO countrycode | Country    | Reference year | Food item                 | Gross food supply (g capita <sup>-1</sup> d <sup>-1</sup> ) |
|-----------------|------------|----------------|---------------------------|-------------------------------------------------------------|
| 16              | Bangladesh | 1997           | Poultry Meat              | 2                                                           |
| 16              | Bangladesh | 1997           | Pulses, Other             | 10                                                          |
| 16              | Bangladesh | 1997           | Rape and Mustard Oil      | 2                                                           |
| 16              | Bangladesh | 1997           | Rice (Milled Equivalent)  | 407                                                         |
| 16              | Bangladesh | 1997           | Soyabean Oil              | 9                                                           |
| 16              | Bangladesh | 1997           | Spices, Other             | 2                                                           |
| 16              | Bangladesh | 1997           | Sugar Cane                | 10                                                          |
| 16              | Bangladesh | 1997           | Sugar, Non-Centrifugal    | 12                                                          |
| 16              | Bangladesh | 1997           | Sugar, Refined Equivalent | 8                                                           |
| 16              | Bangladesh | 1997           | Sweet Potatoes            | 8                                                           |
| 16              | Bangladesh | 1997           | Sweeteners, Other         | 3                                                           |
| 16              | Bangladesh | 1997           | Tea                       | 1                                                           |
| 16              | Bangladesh | 1997           | Tomatoes                  | 2                                                           |
| 16              | Bangladesh | 1997           | Vegetables, Other         | 26                                                          |
| 16              | Bangladesh | 1997           | Wheat                     | 66                                                          |
| 16              | Bangladesh | 1998           | Bananas                   | 12                                                          |
| 16              | Bangladesh | 1998           | Beans                     | 1                                                           |
| 16              | Bangladesh | 1998           | Bovine Meat               | 4                                                           |
| 16              | Bangladesh | 1998           | Cassava                   | 1                                                           |
| 16              | Bangladesh | 1998           | Coconut Oil               | 1                                                           |
| 16              | Bangladesh | 1998           | Crustaceans               | 2                                                           |
| 16              | Bangladesh | 1998           | Demersal Fish             | 1                                                           |
| 16              | Bangladesh | 1998           | Eggs                      | 3                                                           |
| 16              | Bangladesh | 1998           | Freshwater Fish           | 25                                                          |
| 16              | Bangladesh | 1998           | Fruits, Other             | 12                                                          |
| 16              | Bangladesh | 1998           | Marine Fish, Other        | 1                                                           |
| 16              | Bangladesh | 1998           | Milk, Whole               | 35                                                          |
| 16              | Bangladesh | 1998           | Millet                    | 1                                                           |
| 16              | Bangladesh | 1998           | Mutton & Goat Meat        | 3                                                           |
| 16              | Bangladesh | 1998           | Nuts                      | 1                                                           |
| 16              | Bangladesh | 1998           | Offals, Edible            | 1                                                           |
| 16              | Bangladesh | 1998           | Onions                    | 4                                                           |
| 16              | Bangladesh | 1998           | Palm Oil                  | 5                                                           |
| 16              | Bangladesh | 1998           | Peas                      | 2                                                           |
| 16              | Bangladesh | 1998           | Pelagic Fish              | 1                                                           |
| 16              | Bangladesh | 1998           | Pimento                   | 1                                                           |
| 16              | Bangladesh | 1998           | Pineapples                | 3                                                           |
| 16              | Bangladesh | 1998           | Potatoes                  | 25                                                          |
| 16              | Bangladesh | 1998           | Poultry Meat              | 2                                                           |
| 16              | Bangladesh | 1998           | Pulses, Other             | 9                                                           |
| 16              | Bangladesh | 1998           | Rape and Mustard Oil      | 3                                                           |
| 16              | Bangladesh | 1998           | Rice (Milled Equivalent)  | 419                                                         |
| 16              | Bangladesh | 1998           | Soyabean Oil              | 11                                                          |
| 16              | Bangladesh | 1998           | Spices, Other             | 2                                                           |
| 16              | Bangladesh | 1998           | Sugar Cane                | 9                                                           |
| 16              | Bangladesh | 1998           | Sugar, Non-Centrifugal    | 10                                                          |
| 16              | Bangladesh | 1998           | Sugar, Refined Equivalent | 7                                                           |
| 16              | Bangladesh | 1998           | Sweet Potatoes            | 8                                                           |
| 16              | Bangladesh | 1998           | Sweeteners, Other         | 3                                                           |
| 16              | Bangladesh | 1998           | Tea                       | 1                                                           |
| 16              | Bangladesh | 1998           | Tomatoes                  | 2                                                           |
| 16              | Bangladesh | 1998           | Vegetables, Other         | 26                                                          |
| 16              | Bangladesh | 1998           | Wheat                     | 61                                                          |
| 16              | Bangladesh | 1999           | Bananas                   | 11                                                          |
| 16              | Bangladesh | 1999           | Beans                     | 1                                                           |
| 16              | Bangladesh | 1999           | Bovine Meat               | 4                                                           |
| 16              | Bangladesh | 1999           | Coconut Oil               | 1                                                           |
| 16              | Bangladesh | 1999           | Crustaceans               | 2                                                           |
| 16              | Bangladesh | 1999           | Demersal Fish             | 1                                                           |
| 16              | Bangladesh | 1999           | Eggs                      | 3                                                           |
| 16              | Bangladesh | 1999           | Freshwater Fish           | 27                                                          |
| 16              | Bangladesh | 1999           | Fruits, Other             | 12                                                          |
| 16              | Bangladesh | 1999           | Marine Fish, Other        | 1                                                           |
| 16              | Bangladesh | 1999           | Milk, Whole               | 36                                                          |
| 16              | Bangladesh | 1999           | Millet                    | 1                                                           |
| 16              | Bangladesh | 1999           | Mutton & Goat Meat        | 3                                                           |
| 16              | Bangladesh | 1999           | Nuts                      | 1                                                           |
| 16              | Bangladesh | 1999           | Offals, Edible            | 1                                                           |
| 16              | Bangladesh | 1999           | Onions                    | 3                                                           |
| 16              | Bangladesh | 1999           | Oranges, Mandarines       | 1                                                           |
| 16              | Bangladesh | 1999           | Palm Oil                  | 4                                                           |
| 16              | Bangladesh | 1999           | Peas                      | 3                                                           |
| 16              | Bangladesh | 1999           | Pelagic Fish              | 1                                                           |
| 16              | Bangladesh | 1999           | Pimento                   | 3                                                           |
| 16              | Bangladesh | 1999           | Pineapples                | 3                                                           |
| 16              | Bangladesh | 1999           | Potatoes                  | 47                                                          |
| 16              | Bangladesh | 1999           | Poultry Meat              | 3                                                           |
| 16              | Bangladesh | 1999           | Pulses, Other             | 8                                                           |
| 16              | Bangladesh | 1999           | Rape and Mustard Oil      | 4                                                           |
| 16              | Bangladesh | 1999           | Rice (Milled Equivalent)  | 446                                                         |
| 16              | Bangladesh | 1999           | Soyabean Oil              | 5                                                           |
| 16              | Bangladesh | 1999           | Spices, Other             | 2                                                           |
| 16              | Bangladesh | 1999           | Sugar Cane                | 9                                                           |
| 16              | Bangladesh | 1999           | Sugar, Non-Centrifugal    | 9                                                           |
| 16              | Bangladesh | 1999           | Sugar, Refined Equivalent | 6                                                           |
| 16              | Bangladesh | 1999           | Sweet Potatoes            | 7                                                           |
| 16              | Bangladesh | 1999           | Sweeteners, Other         | 3                                                           |
| 16              | Bangladesh | 1999           | Tea                       | 1                                                           |
| 16              | Bangladesh | 1999           | Tomatoes                  | 2                                                           |
| 16              | Bangladesh | 1999           | Vegetables, Other         | 30                                                          |
| 16              | Bangladesh | 1999           | Wheat                     | 81                                                          |
| 16              | Bangladesh | 2000           | Bananas                   | 11                                                          |
| 16              | Bangladesh | 2000           | Beans                     | 1                                                           |
| 16              | Bangladesh | 2000           | Bovine Meat               | 4                                                           |
| 16              | Bangladesh | 2000           | Cassava                   | 1                                                           |
| 16              | Bangladesh | 2000           | Coconut Oil               | 1                                                           |
| 16              | Bangladesh | 2000           | Crustaceans               | 1                                                           |

Dietary calcium and zinc deficiency risks are decreasing but remain prevalent

| FAO countrycode | Country    | Reference year | Food item                 | Gross food supply (g capita <sup>-1</sup> d <sup>-1</sup> ) |
|-----------------|------------|----------------|---------------------------|-------------------------------------------------------------|
| 16              | Bangladesh | 2000           | Demersal Fish             | 1                                                           |
| 16              | Bangladesh | 2000           | Eggs                      | 3                                                           |
| 16              | Bangladesh | 2000           | Freshwater Fish           | 28                                                          |
| 16              | Bangladesh | 2000           | Fruits, Other             | 12                                                          |
| 16              | Bangladesh | 2000           | Marine Fish, Other        | 2                                                           |
| 16              | Bangladesh | 2000           | Milk, Whole               | 37                                                          |
| 16              | Bangladesh | 2000           | Mutton & Goat Meat        | 3                                                           |
| 16              | Bangladesh | 2000           | Nuts                      | 1                                                           |
| 16              | Bangladesh | 2000           | Offals, Edible            | 1                                                           |
| 16              | Bangladesh | 2000           | Onions                    | 3                                                           |
| 16              | Bangladesh | 2000           | Oranges, Mandarines       | 1                                                           |
| 16              | Bangladesh | 2000           | Palm Oil                  | 3                                                           |
| 16              | Bangladesh | 2000           | Peas                      | 3                                                           |
| 16              | Bangladesh | 2000           | Pelagic Fish              | 1                                                           |
| 16              | Bangladesh | 2000           | Pimento                   | 3                                                           |
| 16              | Bangladesh | 2000           | Pineapples                | 3                                                           |
| 16              | Bangladesh | 2000           | Potatoes                  | 50                                                          |
| 16              | Bangladesh | 2000           | Poultry Meat              | 3                                                           |
| 16              | Bangladesh | 2000           | Pulses, Other             | 7                                                           |
| 16              | Bangladesh | 2000           | Rape and Mustard Oil      | 3                                                           |
| 16              | Bangladesh | 2000           | Rice (Milled Equivalent)  | 449                                                         |
| 16              | Bangladesh | 2000           | Soyabean Oil              | 9                                                           |
| 16              | Bangladesh | 2000           | Spices, Other             | 2                                                           |
| 16              | Bangladesh | 2000           | Sugar Cane                | 8                                                           |
| 16              | Bangladesh | 2000           | Sugar, Non-Centrifugal    | 10                                                          |
| 16              | Bangladesh | 2000           | Sugar, Refined Equivalent | 5                                                           |
| 16              | Bangladesh | 2000           | Sweet Potatoes            | 7                                                           |
| 16              | Bangladesh | 2000           | Sweeteners, Other         | 3                                                           |
| 16              | Bangladesh | 2000           | Tea                       | 1                                                           |
| 16              | Bangladesh | 2000           | Tomatoes                  | 2                                                           |
| 16              | Bangladesh | 2000           | Vegetables, Other         | 29                                                          |
| 16              | Bangladesh | 2000           | Wheat                     | 66                                                          |
| 16              | Bangladesh | 2001           | Apples                    | 1                                                           |
| 16              | Bangladesh | 2001           | Bananas                   | 11                                                          |
| 16              | Bangladesh | 2001           | Beans                     | 1                                                           |
| 16              | Bangladesh | 2001           | Bovine Meat               | 4                                                           |
| 16              | Bangladesh | 2001           | Cassava                   | 1                                                           |
| 16              | Bangladesh | 2001           | Coconut Oil               | 1                                                           |
| 16              | Bangladesh | 2001           | Crustaceans               | 1                                                           |
| 16              | Bangladesh | 2001           | Demersal Fish             | 1                                                           |
| 16              | Bangladesh | 2001           | Eggs                      | 3                                                           |
| 16              | Bangladesh | 2001           | Freshwater Fish           | 30                                                          |
| 16              | Bangladesh | 2001           | Fruits, Other             | 12                                                          |
| 16              | Bangladesh | 2001           | Marine Fish, Other        | 2                                                           |
| 16              | Bangladesh | 2001           | Milk, Whole               | 36                                                          |
| 16              | Bangladesh | 2001           | Mutton & Goat Meat        | 3                                                           |
| 16              | Bangladesh | 2001           | Nuts                      | 1                                                           |
| 16              | Bangladesh | 2001           | Offals, Edible            | 1                                                           |
| 16              | Bangladesh | 2001           | Onions                    | 3                                                           |
| 16              | Bangladesh | 2001           | Oranges, Mandarines       | 1                                                           |
| 16              | Bangladesh | 2001           | Palm Oil                  | 4                                                           |
| 16              | Bangladesh | 2001           | Peas                      | 6                                                           |
| 16              | Bangladesh | 2001           | Pelagic Fish              | 1                                                           |
| 16              | Bangladesh | 2001           | Pimento                   | 3                                                           |
| 16              | Bangladesh | 2001           | Pineapples                | 3                                                           |
| 16              | Bangladesh | 2001           | Potatoes                  | 54                                                          |
| 16              | Bangladesh | 2001           | Poultry Meat              | 3                                                           |
| 16              | Bangladesh | 2001           | Pulses, Other             | 7                                                           |
| 16              | Bangladesh | 2001           | Rape and Mustard Oil      | 3                                                           |
| 16              | Bangladesh | 2001           | Rice (Milled Equivalent)  | 474                                                         |
| 16              | Bangladesh | 2001           | Soyabean Oil              | 10                                                          |
| 16              | Bangladesh | 2001           | Spices, Other             | 2                                                           |
| 16              | Bangladesh | 2001           | Sugar Cane                | 8                                                           |
| 16              | Bangladesh | 2001           | Sugar, Non-Centrifugal    | 10                                                          |
| 16              | Bangladesh | 2001           | Sugar, Refined Equivalent | 9                                                           |
| 16              | Bangladesh | 2001           | Sweet Potatoes            | 7                                                           |
| 16              | Bangladesh | 2001           | Sweeteners, Other         | 3                                                           |
| 16              | Bangladesh | 2001           | Tea                       | 1                                                           |
| 16              | Bangladesh | 2001           | Tomatoes                  | 2                                                           |
| 16              | Bangladesh | 2001           | Vegetables, Other         | 29                                                          |
| 16              | Bangladesh | 2001           | Wheat                     | 52                                                          |
| 16              | Bangladesh | 2002           | Bananas                   | 12                                                          |
| 16              | Bangladesh | 2002           | Beans                     | 1                                                           |
| 16              | Bangladesh | 2002           | Bovine Meat               | 4                                                           |
| 16              | Bangladesh | 2002           | Cassava                   | 1                                                           |
| 16              | Bangladesh | 2002           | Coconut Oil               | 1                                                           |
| 16              | Bangladesh | 2002           | Crustaceans               | 1                                                           |
| 16              | Bangladesh | 2002           | Demersal Fish             | 1                                                           |
| 16              | Bangladesh | 2002           | Eggs                      | 3                                                           |
| 16              | Bangladesh | 2002           | Freshwater Fish           | 31                                                          |
| 16              | Bangladesh | 2002           | Fruits, Other             | 12                                                          |
| 16              | Bangladesh | 2002           | Marine Fish, Other        | 3                                                           |
| 16              | Bangladesh | 2002           | Milk, Whole               | 38                                                          |
| 16              | Bangladesh | 2002           | Mutton & Goat Meat        | 3                                                           |
| 16              | Bangladesh | 2002           | Nuts                      | 1                                                           |
| 16              | Bangladesh | 2002           | Offals, Edible            | 1                                                           |
| 16              | Bangladesh | 2002           | Onions                    | 4                                                           |
| 16              | Bangladesh | 2002           | Oranges, Mandarines       | 1                                                           |
| 16              | Bangladesh | 2002           | Palm Oil                  | 4                                                           |
| 16              | Bangladesh | 2002           | Peas                      | 6                                                           |
| 16              | Bangladesh | 2002           | Pelagic Fish              | 1                                                           |
| 16              | Bangladesh | 2002           | Pimento                   | 3                                                           |
| 16              | Bangladesh | 2002           | Pineapples                | 3                                                           |
| 16              | Bangladesh | 2002           | Potatoes                  | 49                                                          |
| 16              | Bangladesh | 2002           | Poultry Meat              | 3                                                           |
| 16              | Bangladesh | 2002           | Pulses, Other             | 7                                                           |
| 16              | Bangladesh | 2002           | Rape and Mustard Oil      | 2                                                           |

Dietary calcium and zinc deficiency risks are decreasing but remain prevalent

| FAO countrycode | Country    | Reference year | Food item                 | Gross food supply (g capita <sup>-1</sup> d <sup>-1</sup> ) |
|-----------------|------------|----------------|---------------------------|-------------------------------------------------------------|
| 16              | Bangladesh | 2002           | Rice (Milled Equivalent)  | 474                                                         |
| 16              | Bangladesh | 2002           | Soyabean Oil              | 5                                                           |
| 16              | Bangladesh | 2002           | Spices, Other             | 2                                                           |
| 16              | Bangladesh | 2002           | Sugar Cane                | 8                                                           |
| 16              | Bangladesh | 2002           | Sugar, Non-Centrifugal    | 8                                                           |
| 16              | Bangladesh | 2002           | Sugar, Refined Equivalent | 8                                                           |
| 16              | Bangladesh | 2002           | Sweet Potatoes            | 6                                                           |
| 16              | Bangladesh | 2002           | Sweeteners, Other         | 2                                                           |
| 16              | Bangladesh | 2002           | Tea                       | 1                                                           |
| 16              | Bangladesh | 2002           | Tomatoes                  | 2                                                           |
| 16              | Bangladesh | 2002           | Vegetables, Other         | 29                                                          |
| 16              | Bangladesh | 2002           | Wheat                     | 61                                                          |
| 16              | Bangladesh | 2003           | Bananas                   | 12                                                          |
| 16              | Bangladesh | 2003           | Beans                     | 1                                                           |
| 16              | Bangladesh | 2003           | Bovine Meat               | 4                                                           |
| 16              | Bangladesh | 2003           | Cassava                   | 1                                                           |
| 16              | Bangladesh | 2003           | Coconut Oil               | 1                                                           |
| 16              | Bangladesh | 2003           | Crustaceans               | 1                                                           |
| 16              | Bangladesh | 2003           | Dates                     | 1                                                           |
| 16              | Bangladesh | 2003           | Demersal Fish             | 2                                                           |
| 16              | Bangladesh | 2003           | Eggs                      | 4                                                           |
| 16              | Bangladesh | 2003           | Freshwater Fish           | 32                                                          |
| 16              | Bangladesh | 2003           | Fruits, Other             | 14                                                          |
| 16              | Bangladesh | 2003           | Marine Fish, Other        | 3                                                           |
| 16              | Bangladesh | 2003           | Milk, Whole               | 38                                                          |
| 16              | Bangladesh | 2003           | Millet                    | 1                                                           |
| 16              | Bangladesh | 2003           | Mutton & Goat Meat        | 3                                                           |
| 16              | Bangladesh | 2003           | Nuts                      | 1                                                           |
| 16              | Bangladesh | 2003           | Offals, Edible            | 1                                                           |
| 16              | Bangladesh | 2003           | Onions                    | 9                                                           |
| 16              | Bangladesh | 2003           | Oranges, Mandarines       | 1                                                           |
| 16              | Bangladesh | 2003           | Palm Oil                  | 6                                                           |
| 16              | Bangladesh | 2003           | Peas                      | 3                                                           |
| 16              | Bangladesh | 2003           | Pelagic Fish              | 1                                                           |
| 16              | Bangladesh | 2003           | Pimento                   | 3                                                           |
| 16              | Bangladesh | 2003           | Pineapples                | 3                                                           |
| 16              | Bangladesh | 2003           | Potatoes                  | 55                                                          |
| 16              | Bangladesh | 2003           | Poultry Meat              | 3                                                           |
| 16              | Bangladesh | 2003           | Pulses, Other             | 9                                                           |
| 16              | Bangladesh | 2003           | Rape and Mustard Oil      | 2                                                           |
| 16              | Bangladesh | 2003           | Rice (Milled Equivalent)  | 482                                                         |
| 16              | Bangladesh | 2003           | Soyabean Oil              | 6                                                           |
| 16              | Bangladesh | 2003           | Spices, Other             | 2                                                           |
| 16              | Bangladesh | 2003           | Sugar Cane                | 8                                                           |
| 16              | Bangladesh | 2003           | Sugar, Non-Centrifugal    | 7                                                           |
| 16              | Bangladesh | 2003           | Sugar, Refined Equivalent | 6                                                           |
| 16              | Bangladesh | 2003           | Sweet Potatoes            | 6                                                           |
| 16              | Bangladesh | 2003           | Sweeteners, Other         | 3                                                           |
| 16              | Bangladesh | 2003           | Tea                       | 1                                                           |
| 16              | Bangladesh | 2003           | Tomatoes                  | 2                                                           |
| 16              | Bangladesh | 2003           | Vegetables, Other         | 29                                                          |
| 16              | Bangladesh | 2003           | Wheat                     | 58                                                          |
| 16              | Bangladesh | 2004           | Apples                    | 1                                                           |
| 16              | Bangladesh | 2004           | Bananas                   | 12                                                          |
| 16              | Bangladesh | 2004           | Beans                     | 1                                                           |
| 16              | Bangladesh | 2004           | Bovine Meat               | 4                                                           |
| 16              | Bangladesh | 2004           | Cassava                   | 1                                                           |
| 16              | Bangladesh | 2004           | Crustaceans               | 1                                                           |
| 16              | Bangladesh | 2004           | Demersal Fish             | 1                                                           |
| 16              | Bangladesh | 2004           | Eggs                      | 4                                                           |
| 16              | Bangladesh | 2004           | Freshwater Fish           | 33                                                          |
| 16              | Bangladesh | 2004           | Fruits, Other             | 17                                                          |
| 16              | Bangladesh | 2004           | Maize                     | 1                                                           |
| 16              | Bangladesh | 2004           | Marine Fish, Other        | 3                                                           |
| 16              | Bangladesh | 2004           | Milk, Whole               | 39                                                          |
| 16              | Bangladesh | 2004           | Millet                    | 1                                                           |
| 16              | Bangladesh | 2004           | Mutton & Goat Meat        | 3                                                           |
| 16              | Bangladesh | 2004           | Nuts                      | 1                                                           |
| 16              | Bangladesh | 2004           | Offals, Edible            | 1                                                           |
| 16              | Bangladesh | 2004           | Onions                    | 12                                                          |
| 16              | Bangladesh | 2004           | Oranges, Mandarines       | 1                                                           |
| 16              | Bangladesh | 2004           | Palm Oil                  | 7                                                           |
| 16              | Bangladesh | 2004           | Peas                      | 4                                                           |
| 16              | Bangladesh | 2004           | Pelagic Fish              | 1                                                           |
| 16              | Bangladesh | 2004           | Pimento                   | 3                                                           |
| 16              | Bangladesh | 2004           | Pineapples                | 4                                                           |
| 16              | Bangladesh | 2004           | Potatoes                  | 62                                                          |
| 16              | Bangladesh | 2004           | Poultry Meat              | 3                                                           |
| 16              | Bangladesh | 2004           | Pulses, Other             | 9                                                           |
| 16              | Bangladesh | 2004           | Rape and Mustard Oil      | 2                                                           |
| 16              | Bangladesh | 2004           | Rice (Milled Equivalent)  | 477                                                         |
| 16              | Bangladesh | 2004           | Soyabean Oil              | 5                                                           |
| 16              | Bangladesh | 2004           | Soyabeans                 | 2                                                           |
| 16              | Bangladesh | 2004           | Spices, Other             | 3                                                           |
| 16              | Bangladesh | 2004           | Sugar Cane                | 7                                                           |
| 16              | Bangladesh | 2004           | Sugar, Non-Centrifugal    | 7                                                           |
| 16              | Bangladesh | 2004           | Sugar, Refined Equivalent | 11                                                          |
| 16              | Bangladesh | 2004           | Sweet Potatoes            | 6                                                           |
| 16              | Bangladesh | 2004           | Sweeteners, Other         | 3                                                           |
| 16              | Bangladesh | 2004           | Tea                       | 1                                                           |
| 16              | Bangladesh | 2004           | Tomatoes                  | 2                                                           |
| 16              | Bangladesh | 2004           | Vegetables, Other         | 30                                                          |
| 16              | Bangladesh | 2004           | Wheat                     | 60                                                          |
| 16              | Bangladesh | 2005           | Apples                    | 1                                                           |
| 16              | Bangladesh | 2005           | Bananas                   | 15                                                          |
| 16              | Bangladesh | 2005           | Beans                     | 1                                                           |
| 16              | Bangladesh | 2005           | Bovine Meat               | 4                                                           |



Dietary calcium and zinc deficiency risks are decreasing but remain prevalent

| FAO countrycode | Country    | Reference year | Food item                 | Gross food supply (g capita <sup>-1</sup> d <sup>-1</sup> ) |
|-----------------|------------|----------------|---------------------------|-------------------------------------------------------------|
| 16              | Bangladesh | 2005           | Cassava                   | 1                                                           |
| 16              | Bangladesh | 2005           | Crustaceans               | 2                                                           |
| 16              | Bangladesh | 2005           | Demersal Fish             | 1                                                           |
| 16              | Bangladesh | 2005           | Eggs                      | 4                                                           |
| 16              | Bangladesh | 2005           | Freshwater Fish           | 35                                                          |
| 16              | Bangladesh | 2005           | Fruits, Other             | 30                                                          |
| 16              | Bangladesh | 2005           | Grapefruit                | 1                                                           |
| 16              | Bangladesh | 2005           | Lemons, Limes             | 1                                                           |
| 16              | Bangladesh | 2005           | Marine Fish, Other        | 3                                                           |
| 16              | Bangladesh | 2005           | Milk, Whole               | 41                                                          |
| 16              | Bangladesh | 2005           | Mutton & Goat Meat        | 3                                                           |
| 16              | Bangladesh | 2005           | Nuts                      | 2                                                           |
| 16              | Bangladesh | 2005           | Offals, Edible            | 1                                                           |
| 16              | Bangladesh | 2005           | Onions                    | 12                                                          |
| 16              | Bangladesh | 2005           | Palm Oil                  | 8                                                           |
| 16              | Bangladesh | 2005           | Peas                      | 3                                                           |
| 16              | Bangladesh | 2005           | Pelagic Fish              | 1                                                           |
| 16              | Bangladesh | 2005           | Pimento                   | 4                                                           |
| 16              | Bangladesh | 2005           | Pineapples                | 4                                                           |
| 16              | Bangladesh | 2005           | Potatoes                  | 76                                                          |
| 16              | Bangladesh | 2005           | Poultry Meat              | 3                                                           |
| 16              | Bangladesh | 2005           | Pulses, Other             | 8                                                           |
| 16              | Bangladesh | 2005           | Rape and Mustard Oil      | 2                                                           |
| 16              | Bangladesh | 2005           | Rice (Milled Equivalent)  | 464                                                         |
| 16              | Bangladesh | 2005           | Soyabean Oil              | 5                                                           |
| 16              | Bangladesh | 2005           | Soyabeans                 | 2                                                           |
| 16              | Bangladesh | 2005           | Spices, Other             | 3                                                           |
| 16              | Bangladesh | 2005           | Sugar Cane                | 7                                                           |
| 16              | Bangladesh | 2005           | Sugar, Non-Centrifugal    | 9                                                           |
| 16              | Bangladesh | 2005           | Sugar, Refined Equivalent | 15                                                          |
| 16              | Bangladesh | 2005           | Sweet Potatoes            | 5                                                           |
| 16              | Bangladesh | 2005           | Sweeteners, Other         | 3                                                           |
| 16              | Bangladesh | 2005           | Tea                       | 1                                                           |
| 16              | Bangladesh | 2005           | Tomatoes                  | 2                                                           |
| 16              | Bangladesh | 2005           | Vegetables, Other         | 32                                                          |
| 16              | Bangladesh | 2005           | Wheat                     | 56                                                          |
| 16              | Bangladesh | 2006           | Bananas                   | 15                                                          |
| 16              | Bangladesh | 2006           | Beans                     | 1                                                           |
| 16              | Bangladesh | 2006           | Bovine Meat               | 4                                                           |
| 16              | Bangladesh | 2006           | Cassava                   | 1                                                           |
| 16              | Bangladesh | 2006           | Coconut Oil               | 1                                                           |
| 16              | Bangladesh | 2006           | Crustaceans               | 2                                                           |
| 16              | Bangladesh | 2006           | Demersal Fish             | 2                                                           |
| 16              | Bangladesh | 2006           | Eggs                      | 4                                                           |
| 16              | Bangladesh | 2006           | Freshwater Fish           | 36                                                          |
| 16              | Bangladesh | 2006           | Fruits, Other             | 33                                                          |
| 16              | Bangladesh | 2006           | Grapefruit                | 1                                                           |
| 16              | Bangladesh | 2006           | Lemons, Limes             | 1                                                           |
| 16              | Bangladesh | 2006           | Maize                     | 1                                                           |
| 16              | Bangladesh | 2006           | Marine Fish, Other        | 2                                                           |
| 16              | Bangladesh | 2006           | Milk, Whole               | 43                                                          |
| 16              | Bangladesh | 2006           | Mutton & Goat Meat        | 3                                                           |
| 16              | Bangladesh | 2006           | Nuts                      | 2                                                           |
| 16              | Bangladesh | 2006           | Offals, Edible            | 2                                                           |
| 16              | Bangladesh | 2006           | Onions                    | 16                                                          |
| 16              | Bangladesh | 2006           | Palm Oil                  | 8                                                           |
| 16              | Bangladesh | 2006           | Peas                      | 2                                                           |
| 16              | Bangladesh | 2006           | Pelagic Fish              | 1                                                           |
| 16              | Bangladesh | 2006           | Pimento                   | 3                                                           |
| 16              | Bangladesh | 2006           | Pineapples                | 4                                                           |
| 16              | Bangladesh | 2006           | Potatoes                  | 85                                                          |
| 16              | Bangladesh | 2006           | Poultry Meat              | 3                                                           |
| 16              | Bangladesh | 2006           | Pulses, Other             | 7                                                           |
| 16              | Bangladesh | 2006           | Rape and Mustard Oil      | 2                                                           |
| 16              | Bangladesh | 2006           | Rice (Milled Equivalent)  | 469                                                         |
| 16              | Bangladesh | 2006           | Soyabean Oil              | 7                                                           |
| 16              | Bangladesh | 2006           | Soyabeans                 | 3                                                           |
| 16              | Bangladesh | 2006           | Spices, Other             | 3                                                           |
| 16              | Bangladesh | 2006           | Sugar Cane                | 6                                                           |
| 16              | Bangladesh | 2006           | Sugar, Non-Centrifugal    | 6                                                           |
| 16              | Bangladesh | 2006           | Sugar, Refined Equivalent | 14                                                          |
| 16              | Bangladesh | 2006           | Sweet Potatoes            | 5                                                           |
| 16              | Bangladesh | 2006           | Sweeteners, Other         | 3                                                           |
| 16              | Bangladesh | 2006           | Tea                       | 1                                                           |
| 16              | Bangladesh | 2006           | Tomatoes                  | 2                                                           |
| 16              | Bangladesh | 2006           | Vegetables, Other         | 34                                                          |
| 16              | Bangladesh | 2006           | Wheat                     | 50                                                          |
| 16              | Bangladesh | 2007           | Apples                    | 1                                                           |
| 16              | Bangladesh | 2007           | Bananas                   | 17                                                          |
| 16              | Bangladesh | 2007           | Beans                     | 1                                                           |
| 16              | Bangladesh | 2007           | Bovine Meat               | 4                                                           |
| 16              | Bangladesh | 2007           | Cassava                   | 1                                                           |
| 16              | Bangladesh | 2007           | Crustaceans               | 1                                                           |
| 16              | Bangladesh | 2007           | Demersal Fish             | 2                                                           |
| 16              | Bangladesh | 2007           | Eggs                      | 4                                                           |
| 16              | Bangladesh | 2007           | Freshwater Fish           | 38                                                          |
| 16              | Bangladesh | 2007           | Fruits, Other             | 38                                                          |
| 16              | Bangladesh | 2007           | Grapefruit                | 1                                                           |
| 16              | Bangladesh | 2007           | Lemons, Limes             | 1                                                           |
| 16              | Bangladesh | 2007           | Maize                     | 1                                                           |
| 16              | Bangladesh | 2007           | Marine Fish, Other        | 2                                                           |
| 16              | Bangladesh | 2007           | Milk, Whole               | 45                                                          |
| 16              | Bangladesh | 2007           | Mutton & Goat Meat        | 3                                                           |
| 16              | Bangladesh | 2007           | Nuts                      | 2                                                           |
| 16              | Bangladesh | 2007           | Offals, Edible            | 2                                                           |
| 16              | Bangladesh | 2007           | Onions                    | 18                                                          |
| 16              | Bangladesh | 2007           | Palm Oil                  | 8                                                           |

Dietary calcium and zinc deficiency risks are decreasing but remain prevalent

| FAO countrycode | Country    | Reference year | Food item                 | Gross food supply (g capita <sup>-1</sup> d <sup>-1</sup> ) |
|-----------------|------------|----------------|---------------------------|-------------------------------------------------------------|
| 16              | Bangladesh | 2007           | Peas                      | 6                                                           |
| 16              | Bangladesh | 2007           | Pelagic Fish              | 1                                                           |
| 16              | Bangladesh | 2007           | Pimento                   | 3                                                           |
| 16              | Bangladesh | 2007           | Pineapples                | 4                                                           |
| 16              | Bangladesh | 2007           | Potatoes                  | 79                                                          |
| 16              | Bangladesh | 2007           | Poultry Meat              | 4                                                           |
| 16              | Bangladesh | 2007           | Pulses, Other             | 7                                                           |
| 16              | Bangladesh | 2007           | Rape and Mustard Oil      | 2                                                           |
| 16              | Bangladesh | 2007           | Rice (Milled Equivalent)  | 482                                                         |
| 16              | Bangladesh | 2007           | Soyabean Oil              | 6                                                           |
| 16              | Bangladesh | 2007           | Soyabeans                 | 3                                                           |
| 16              | Bangladesh | 2007           | Spices, Other             | 4                                                           |
| 16              | Bangladesh | 2007           | Sugar Cane                | 6                                                           |
| 16              | Bangladesh | 2007           | Sugar, Non-Centrifugal    | 6                                                           |
| 16              | Bangladesh | 2007           | Sugar, Refined Equivalent | 14                                                          |
| 16              | Bangladesh | 2007           | Sweet Potatoes            | 5                                                           |
| 16              | Bangladesh | 2007           | Sweeteners, Other         | 2                                                           |
| 16              | Bangladesh | 2007           | Tea                       | 1                                                           |
| 16              | Bangladesh | 2007           | Tomatoes                  | 2                                                           |
| 16              | Bangladesh | 2007           | Vegetables, Other         | 38                                                          |
| 16              | Bangladesh | 2007           | Wheat                     | 43                                                          |
| 16              | Bangladesh | 2008           | Apples                    | 2                                                           |
| 16              | Bangladesh | 2008           | Bananas                   | 15                                                          |
| 16              | Bangladesh | 2008           | Beans                     | 1                                                           |
| 16              | Bangladesh | 2008           | Bovine Meat               | 4                                                           |
| 16              | Bangladesh | 2008           | Crustaceans               | 3                                                           |
| 16              | Bangladesh | 2008           | Demersal Fish             | 1                                                           |
| 16              | Bangladesh | 2008           | Eggs                      | 4                                                           |
| 16              | Bangladesh | 2008           | Freshwater Fish           | 38                                                          |
| 16              | Bangladesh | 2008           | Fruits, Other             | 40                                                          |
| 16              | Bangladesh | 2008           | Grapefruit                | 1                                                           |
| 16              | Bangladesh | 2008           | Grapes                    | 1                                                           |
| 16              | Bangladesh | 2008           | Lemons, Limes             | 1                                                           |
| 16              | Bangladesh | 2008           | Maize                     | 1                                                           |
| 16              | Bangladesh | 2008           | Marine Fish, Other        | 2                                                           |
| 16              | Bangladesh | 2008           | Milk, Whole               | 46                                                          |
| 16              | Bangladesh | 2008           | Mutton & Goat Meat        | 3                                                           |
| 16              | Bangladesh | 2008           | Nuts                      | 2                                                           |
| 16              | Bangladesh | 2008           | Offals, Edible            | 2                                                           |
| 16              | Bangladesh | 2008           | Onions                    | 28                                                          |
| 16              | Bangladesh | 2008           | Oranges, Mandarines       | 1                                                           |
| 16              | Bangladesh | 2008           | Palm Oil                  | 8                                                           |
| 16              | Bangladesh | 2008           | Peas                      | 2                                                           |
| 16              | Bangladesh | 2008           | Pelagic Fish              | 1                                                           |
| 16              | Bangladesh | 2008           | Pimento                   | 2                                                           |
| 16              | Bangladesh | 2008           | Pineapples                | 4                                                           |
| 16              | Bangladesh | 2008           | Potatoes                  | 104                                                         |
| 16              | Bangladesh | 2008           | Poultry Meat              | 4                                                           |
| 16              | Bangladesh | 2008           | Pulses, Other             | 5                                                           |
| 16              | Bangladesh | 2008           | Rape and Mustard Oil      | 2                                                           |
| 16              | Bangladesh | 2008           | Rice (Milled Equivalent)  | 477                                                         |
| 16              | Bangladesh | 2008           | Soyabean Oil              | 5                                                           |
| 16              | Bangladesh | 2008           | Soyabeans                 | 3                                                           |
| 16              | Bangladesh | 2008           | Spices, Other             | 5                                                           |
| 16              | Bangladesh | 2008           | Sugar Cane                | 5                                                           |
| 16              | Bangladesh | 2008           | Sugar, Non-Centrifugal    | 6                                                           |
| 16              | Bangladesh | 2008           | Sugar, Refined Equivalent | 14                                                          |
| 16              | Bangladesh | 2008           | Sweet Potatoes            | 5                                                           |
| 16              | Bangladesh | 2008           | Sweeteners, Other         | 2                                                           |
| 16              | Bangladesh | 2008           | Tea                       | 1                                                           |
| 16              | Bangladesh | 2008           | Tomatoes                  | 3                                                           |
| 16              | Bangladesh | 2008           | Vegetables, Other         | 42                                                          |
| 16              | Bangladesh | 2008           | Wheat                     | 44                                                          |
| 16              | Bangladesh | 2009           | Apples                    | 3                                                           |
| 16              | Bangladesh | 2009           | Bananas                   | 14                                                          |
| 16              | Bangladesh | 2009           | Beans                     | 1                                                           |
| 16              | Bangladesh | 2009           | Bovine Meat               | 4                                                           |
| 16              | Bangladesh | 2009           | Butter, Ghee              | 1                                                           |
| 16              | Bangladesh | 2009           | Crustaceans               | 3                                                           |
| 16              | Bangladesh | 2009           | Demersal Fish             | 2                                                           |
| 16              | Bangladesh | 2009           | Eggs                      | 3                                                           |
| 16              | Bangladesh | 2009           | Freshwater Fish           | 41                                                          |
| 16              | Bangladesh | 2009           | Fruits, Other             | 41                                                          |
| 16              | Bangladesh | 2009           | Grapefruit                | 1                                                           |
| 16              | Bangladesh | 2009           | Grapes                    | 1                                                           |
| 16              | Bangladesh | 2009           | Lemons, Limes             | 1                                                           |
| 16              | Bangladesh | 2009           | Maize                     | 3                                                           |
| 16              | Bangladesh | 2009           | Marine Fish, Other        | 4                                                           |
| 16              | Bangladesh | 2009           | Milk, Whole               | 49                                                          |
| 16              | Bangladesh | 2009           | Mutton & Goat Meat        | 3                                                           |
| 16              | Bangladesh | 2009           | Nuts                      | 3                                                           |
| 16              | Bangladesh | 2009           | Offals, Edible            | 2                                                           |
| 16              | Bangladesh | 2009           | Onions                    | 26                                                          |
| 16              | Bangladesh | 2009           | Oranges, Mandarines       | 1                                                           |
| 16              | Bangladesh | 2009           | Palm Oil                  | 8                                                           |
| 16              | Bangladesh | 2009           | Peas                      | 9                                                           |
| 16              | Bangladesh | 2009           | Pelagic Fish              | 1                                                           |
| 16              | Bangladesh | 2009           | Pimento                   | 2                                                           |
| 16              | Bangladesh | 2009           | Pineapples                | 4                                                           |
| 16              | Bangladesh | 2009           | Potatoes                  | 79                                                          |
| 16              | Bangladesh | 2009           | Poultry Meat              | 4                                                           |
| 16              | Bangladesh | 2009           | Pulses, Other             | 8                                                           |
| 16              | Bangladesh | 2009           | Rape and Mustard Oil      | 2                                                           |
| 16              | Bangladesh | 2009           | Rice (Milled Equivalent)  | 474                                                         |
| 16              | Bangladesh | 2009           | Soyabean Oil              | 6                                                           |
| 16              | Bangladesh | 2009           | Soyabeans                 | 4                                                           |
| 16              | Bangladesh | 2009           | Spices, Other             | 5                                                           |

Dietary calcium and zinc deficiency risks are decreasing but remain prevalent

| FAO countrycode | Country    | Reference year | Food item                 | Gross food supply (g capita <sup>-1</sup> d <sup>-1</sup> ) |
|-----------------|------------|----------------|---------------------------|-------------------------------------------------------------|
| 16              | Bangladesh | 2009           | Sugar Cane                | 6                                                           |
| 16              | Bangladesh | 2009           | Sugar, Non-Centrifugal    | 6                                                           |
| 16              | Bangladesh | 2009           | Sugar, Refined Equivalent | 14                                                          |
| 16              | Bangladesh | 2009           | Sweet Potatoes            | 5                                                           |
| 16              | Bangladesh | 2009           | Sweeteners, Other         | 2                                                           |
| 16              | Bangladesh | 2009           | Tea                       | 1                                                           |
| 16              | Bangladesh | 2009           | Tomatoes                  | 3                                                           |
| 16              | Bangladesh | 2009           | Vegetables, Other         | 44                                                          |
| 16              | Bangladesh | 2009           | Wheat                     | 45                                                          |
| 16              | Bangladesh | 2010           | Apples                    | 3                                                           |
| 16              | Bangladesh | 2010           | Bananas                   | 13                                                          |
| 16              | Bangladesh | 2010           | Beans                     | 1                                                           |
| 16              | Bangladesh | 2010           | Bovine Meat               | 4                                                           |
| 16              | Bangladesh | 2010           | Butter, Ghee              | 1                                                           |
| 16              | Bangladesh | 2010           | Crustaceans               | 4                                                           |
| 16              | Bangladesh | 2010           | Demersal Fish             | 2                                                           |
| 16              | Bangladesh | 2010           | Eggs                      | 4                                                           |
| 16              | Bangladesh | 2010           | Freshwater Fish           | 42                                                          |
| 16              | Bangladesh | 2010           | Fruits, Other             | 45                                                          |
| 16              | Bangladesh | 2010           | Grapefruit                | 1                                                           |
| 16              | Bangladesh | 2010           | Grapes                    | 1                                                           |
| 16              | Bangladesh | 2010           | Lemons, Limes             | 1                                                           |
| 16              | Bangladesh | 2010           | Maize                     | 2                                                           |
| 16              | Bangladesh | 2010           | Marine Fish, Other        | 4                                                           |
| 16              | Bangladesh | 2010           | Milk, Whole               | 52                                                          |
| 16              | Bangladesh | 2010           | Mutton & Goat Meat        | 4                                                           |
| 16              | Bangladesh | 2010           | Nuts                      | 2                                                           |
| 16              | Bangladesh | 2010           | Offals, Edible            | 2                                                           |
| 16              | Bangladesh | 2010           | Onions                    | 24                                                          |
| 16              | Bangladesh | 2010           | Oranges, Mandarines       | 2                                                           |
| 16              | Bangladesh | 2010           | Palm Oil                  | 8                                                           |
| 16              | Bangladesh | 2010           | Peas                      | 8                                                           |
| 16              | Bangladesh | 2010           | Pelagic Fish              | 1                                                           |
| 16              | Bangladesh | 2010           | Pimento                   | 2                                                           |
| 16              | Bangladesh | 2010           | Pineapples                | 4                                                           |
| 16              | Bangladesh | 2010           | Potatoes                  | 121                                                         |
| 16              | Bangladesh | 2010           | Poultry Meat              | 4                                                           |
| 16              | Bangladesh | 2010           | Pulses, Other             | 8                                                           |
| 16              | Bangladesh | 2010           | Rape and Mustard Oil      | 2                                                           |
| 16              | Bangladesh | 2010           | Rice (Milled Equivalent)  | 473                                                         |
| 16              | Bangladesh | 2010           | Soyabean Oil              | 5                                                           |
| 16              | Bangladesh | 2010           | Soyabeans                 | 2                                                           |
| 16              | Bangladesh | 2010           | Spices, Other             | 5                                                           |
| 16              | Bangladesh | 2010           | Sugar Cane                | 5                                                           |
| 16              | Bangladesh | 2010           | Sugar, Non-Centrifugal    | 5                                                           |
| 16              | Bangladesh | 2010           | Sugar, Refined Equivalent | 14                                                          |
| 16              | Bangladesh | 2010           | Sweet Potatoes            | 5                                                           |
| 16              | Bangladesh | 2010           | Sweeteners, Other         | 2                                                           |
| 16              | Bangladesh | 2010           | Tea                       | 1                                                           |
| 16              | Bangladesh | 2010           | Tomatoes                  | 3                                                           |
| 16              | Bangladesh | 2010           | Vegetables, Other         | 44                                                          |
| 16              | Bangladesh | 2010           | Wheat                     | 46                                                          |
| 16              | Bangladesh | 2011           | Apples                    | 3                                                           |
| 16              | Bangladesh | 2011           | Bananas                   | 13                                                          |
| 16              | Bangladesh | 2011           | Beans                     | 1                                                           |
| 16              | Bangladesh | 2011           | Bovine Meat               | 4                                                           |
| 16              | Bangladesh | 2011           | Butter, Ghee              | 1                                                           |
| 16              | Bangladesh | 2011           | Crustaceans               | 3                                                           |
| 16              | Bangladesh | 2011           | Demersal Fish             | 2                                                           |
| 16              | Bangladesh | 2011           | Eggs                      | 4                                                           |
| 16              | Bangladesh | 2011           | Freshwater Fish           | 46                                                          |
| 16              | Bangladesh | 2011           | Fruits, Other             | 41                                                          |
| 16              | Bangladesh | 2011           | Grapefruit                | 1                                                           |
| 16              | Bangladesh | 2011           | Grapes                    | 1                                                           |
| 16              | Bangladesh | 2011           | Lemons, Limes             | 1                                                           |
| 16              | Bangladesh | 2011           | Maize                     | 1                                                           |
| 16              | Bangladesh | 2011           | Marine Fish, Other        | 2                                                           |
| 16              | Bangladesh | 2011           | Milk, Whole               | 52                                                          |
| 16              | Bangladesh | 2011           | Mutton & Goat Meat        | 4                                                           |
| 16              | Bangladesh | 2011           | Nuts                      | 2                                                           |
| 16              | Bangladesh | 2011           | Offals, Edible            | 2                                                           |
| 16              | Bangladesh | 2011           | Onions                    | 22                                                          |
| 16              | Bangladesh | 2011           | Oranges, Mandarines       | 2                                                           |
| 16              | Bangladesh | 2011           | Palm Oil                  | 8                                                           |
| 16              | Bangladesh | 2011           | Peas                      | 4                                                           |
| 16              | Bangladesh | 2011           | Pelagic Fish              | 1                                                           |
| 16              | Bangladesh | 2011           | Pimento                   | 3                                                           |
| 16              | Bangladesh | 2011           | Pineapples                | 4                                                           |
| 16              | Bangladesh | 2011           | Potatoes                  | 124                                                         |
| 16              | Bangladesh | 2011           | Poultry Meat              | 4                                                           |
| 16              | Bangladesh | 2011           | Pulses, Other             | 6                                                           |
| 16              | Bangladesh | 2011           | Rape and Mustard Oil      | 2                                                           |
| 16              | Bangladesh | 2011           | Rice (Milled Equivalent)  | 473                                                         |
| 16              | Bangladesh | 2011           | Soyabean Oil              | 6                                                           |
| 16              | Bangladesh | 2011           | Soyabeans                 | 3                                                           |
| 16              | Bangladesh | 2011           | Spices, Other             | 5                                                           |
| 16              | Bangladesh | 2011           | Sugar Cane                | 5                                                           |
| 16              | Bangladesh | 2011           | Sugar, Non-Centrifugal    | 5                                                           |
| 16              | Bangladesh | 2011           | Sugar, Refined Equivalent | 14                                                          |
| 16              | Bangladesh | 2011           | Sweet Potatoes            | 5                                                           |
| 16              | Bangladesh | 2011           | Sweeteners, Other         | 3                                                           |
| 16              | Bangladesh | 2011           | Tea                       | 1                                                           |
| 16              | Bangladesh | 2011           | Tomatoes                  | 4                                                           |
| 16              | Bangladesh | 2011           | Vegetables, Other         | 45                                                          |
| 16              | Bangladesh | 2011           | Wheat                     | 47                                                          |
| 57              | Belarus    | 1992           | Apples                    | 55                                                          |
| 57              | Belarus    | 1992           | Barley                    | 35                                                          |

Dietary calcium and zinc deficiency risks are decreasing but remain prevalent

| FAO countrycode | Country | Reference year | Food item                 | Gross food supply (g capita <sup>-1</sup> d <sup>-1</sup> ) |
|-----------------|---------|----------------|---------------------------|-------------------------------------------------------------|
| 57              | Belarus | 1992           | Beer                      | 74                                                          |
| 57              | Belarus | 1992           | Beverages, Alcoholic      | 33                                                          |
| 57              | Belarus | 1992           | Beverages, Fermented      | 7                                                           |
| 57              | Belarus | 1992           | Bovine Meat               | 99                                                          |
| 57              | Belarus | 1992           | Butter, Ghee              | 21                                                          |
| 57              | Belarus | 1992           | Cereals, Other            | 1                                                           |
| 57              | Belarus | 1992           | Cheese                    | 15                                                          |
| 57              | Belarus | 1992           | Cocoa Beans               | 1                                                           |
| 57              | Belarus | 1992           | Cream                     | 7                                                           |
| 57              | Belarus | 1992           | Eggs                      | 47                                                          |
| 57              | Belarus | 1992           | Fats, Animals, Raw        | 2                                                           |
| 57              | Belarus | 1992           | Freshwater Fish           | 3                                                           |
| 57              | Belarus | 1992           | Fruits, Other             | 48                                                          |
| 57              | Belarus | 1992           | Honey                     | 1                                                           |
| 57              | Belarus | 1992           | Meat, Other               | 2                                                           |
| 57              | Belarus | 1992           | Milk, Whole               | 248                                                         |
| 57              | Belarus | 1992           | Mutton & Goat Meat        | 1                                                           |
| 57              | Belarus | 1992           | Nuts                      | 2                                                           |
| 57              | Belarus | 1992           | Oats                      | 36                                                          |
| 57              | Belarus | 1992           | Offals, Edible            | 4                                                           |
| 57              | Belarus | 1992           | Onions                    | 14                                                          |
| 57              | Belarus | 1992           | Oranges, Mandarines       | 1                                                           |
| 57              | Belarus | 1992           | Pigmeat                   | 82                                                          |
| 57              | Belarus | 1992           | Potatoes                  | 468                                                         |
| 57              | Belarus | 1992           | Poultry Meat              | 32                                                          |
| 57              | Belarus | 1992           | Rape and Mustard Oil      | 3                                                           |
| 57              | Belarus | 1992           | Rice (Milled Equivalent)  | 7                                                           |
| 57              | Belarus | 1992           | Rye                       | 183                                                         |
| 57              | Belarus | 1992           | Sugar, Refined Equivalent | 92                                                          |
| 57              | Belarus | 1992           | Sunflowerseed Oil         | 9                                                           |
| 57              | Belarus | 1992           | Tomatoes                  | 18                                                          |
| 57              | Belarus | 1992           | Vegetables, Other         | 179                                                         |
| 57              | Belarus | 1992           | Wheat                     | 176                                                         |
| 57              | Belarus | 1992           | Wine                      | 3                                                           |
| 57              | Belarus | 1993           | Apples                    | 61                                                          |
| 57              | Belarus | 1993           | Barley                    | 15                                                          |
| 57              | Belarus | 1993           | Beer                      | 59                                                          |
| 57              | Belarus | 1993           | Beverages, Alcoholic      | 41                                                          |
| 57              | Belarus | 1993           | Beverages, Fermented      | 12                                                          |
| 57              | Belarus | 1993           | Bovine Meat               | 92                                                          |
| 57              | Belarus | 1993           | Butter, Ghee              | 17                                                          |
| 57              | Belarus | 1993           | Cereals, Other            | 1                                                           |
| 57              | Belarus | 1993           | Cheese                    | 14                                                          |
| 57              | Belarus | 1993           | Cocoa Beans               | 1                                                           |
| 57              | Belarus | 1993           | Cream                     | 5                                                           |
| 57              | Belarus | 1993           | Eggs                      | 48                                                          |
| 57              | Belarus | 1993           | Fats, Animals, Raw        | 5                                                           |
| 57              | Belarus | 1993           | Freshwater Fish           | 3                                                           |
| 57              | Belarus | 1993           | Fruits, Other             | 60                                                          |
| 57              | Belarus | 1993           | Honey                     | 1                                                           |
| 57              | Belarus | 1993           | Meat, Other               | 2                                                           |
| 57              | Belarus | 1993           | Milk, Whole               | 368                                                         |
| 57              | Belarus | 1993           | Mutton & Goat Meat        | 1                                                           |
| 57              | Belarus | 1993           | Nuts                      | 3                                                           |
| 57              | Belarus | 1993           | Oats                      | 36                                                          |
| 57              | Belarus | 1993           | Offals, Edible            | 9                                                           |
| 57              | Belarus | 1993           | Onions                    | 14                                                          |
| 57              | Belarus | 1993           | Oranges, Mandarines       | 1                                                           |
| 57              | Belarus | 1993           | Pigmeat                   | 72                                                          |
| 57              | Belarus | 1993           | Potatoes                  | 493                                                         |
| 57              | Belarus | 1993           | Poultry Meat              | 35                                                          |
| 57              | Belarus | 1993           | Rape and Mustard Oil      | 3                                                           |
| 57              | Belarus | 1993           | Rice (Milled Equivalent)  | 7                                                           |
| 57              | Belarus | 1993           | Rye                       | 203                                                         |
| 57              | Belarus | 1993           | Sugar, Refined Equivalent | 88                                                          |
| 57              | Belarus | 1993           | Sunflowerseed Oil         | 10                                                          |
| 57              | Belarus | 1993           | Tomatoes                  | 22                                                          |
| 57              | Belarus | 1993           | Vegetables, Other         | 182                                                         |
| 57              | Belarus | 1993           | Wheat                     | 168                                                         |
| 57              | Belarus | 1993           | Wine                      | 7                                                           |
| 57              | Belarus | 1994           | Apples                    | 60                                                          |
| 57              | Belarus | 1994           | Bananas                   | 1                                                           |
| 57              | Belarus | 1994           | Barley                    | 18                                                          |
| 57              | Belarus | 1994           | Beer                      | 42                                                          |
| 57              | Belarus | 1994           | Beverages, Alcoholic      | 39                                                          |
| 57              | Belarus | 1994           | Beverages, Fermented      | 15                                                          |
| 57              | Belarus | 1994           | Bovine Meat               | 82                                                          |
| 57              | Belarus | 1994           | Butter, Ghee              | 16                                                          |
| 57              | Belarus | 1994           | Cereals, Other            | 1                                                           |
| 57              | Belarus | 1994           | Cheese                    | 13                                                          |
| 57              | Belarus | 1994           | Cocoa Beans               | 2                                                           |
| 57              | Belarus | 1994           | Cream                     | 3                                                           |
| 57              | Belarus | 1994           | Crustaceans               | 1                                                           |
| 57              | Belarus | 1994           | Eggs                      | 47                                                          |
| 57              | Belarus | 1994           | Fats, Animals, Raw        | 10                                                          |
| 57              | Belarus | 1994           | Freshwater Fish           | 1                                                           |
| 57              | Belarus | 1994           | Fruits, Other             | 45                                                          |
| 57              | Belarus | 1994           | Honey                     | 1                                                           |
| 57              | Belarus | 1994           | Marine Fish, Other        | 1                                                           |
| 57              | Belarus | 1994           | Meat, Other               | 1                                                           |
| 57              | Belarus | 1994           | Milk, Whole               | 496                                                         |
| 57              | Belarus | 1994           | Mutton & Goat Meat        | 1                                                           |
| 57              | Belarus | 1994           | Nuts                      | 2                                                           |
| 57              | Belarus | 1994           | Oats                      | 29                                                          |
| 57              | Belarus | 1994           | Offals, Edible            | 9                                                           |
| 57              | Belarus | 1994           | Onions                    | 16                                                          |
| 57              | Belarus | 1994           | Oranges, Mandarines       | 2                                                           |

Dietary calcium and zinc deficiency risks are decreasing but remain prevalent

| FAO countrycode | Country | Reference year | Food item                 | Gross food supply (g capita <sup>-1</sup> d <sup>-1</sup> ) |
|-----------------|---------|----------------|---------------------------|-------------------------------------------------------------|
| 57              | Belarus | 1994           | Pelagic Fish              | 1                                                           |
| 57              | Belarus | 1994           | Pigmeat                   | 68                                                          |
| 57              | Belarus | 1994           | Potatoes                  | 488                                                         |
| 57              | Belarus | 1994           | Poultry Meat              | 25                                                          |
| 57              | Belarus | 1994           | Rape and Mustard Oil      | 2                                                           |
| 57              | Belarus | 1994           | Rice (Milled Equivalent)  | 4                                                           |
| 57              | Belarus | 1994           | Rye                       | 210                                                         |
| 57              | Belarus | 1994           | Sugar, Refined Equivalent | 73                                                          |
| 57              | Belarus | 1994           | Sunflowerseed Oil         | 11                                                          |
| 57              | Belarus | 1994           | Tomatoes                  | 23                                                          |
| 57              | Belarus | 1994           | Vegetables, Other         | 182                                                         |
| 57              | Belarus | 1994           | Wheat                     | 166                                                         |
| 57              | Belarus | 1994           | Wine                      | 10                                                          |
| 57              | Belarus | 1995           | Apples                    | 38                                                          |
| 57              | Belarus | 1995           | Bananas                   | 10                                                          |
| 57              | Belarus | 1995           | Barley                    | 11                                                          |
| 57              | Belarus | 1995           | Beer                      | 38                                                          |
| 57              | Belarus | 1995           | Beverages, Alcoholic      | 38                                                          |
| 57              | Belarus | 1995           | Beverages, Fermented      | 14                                                          |
| 57              | Belarus | 1995           | Bovine Meat               | 73                                                          |
| 57              | Belarus | 1995           | Butter, Ghee              | 15                                                          |
| 57              | Belarus | 1995           | Cereals, Other            | 1                                                           |
| 57              | Belarus | 1995           | Cheese                    | 8                                                           |
| 57              | Belarus | 1995           | Cocoa Beans               | 1                                                           |
| 57              | Belarus | 1995           | Cream                     | 1                                                           |
| 57              | Belarus | 1995           | Eggs                      | 46                                                          |
| 57              | Belarus | 1995           | Fats, Animals, Raw        | 11                                                          |
| 57              | Belarus | 1995           | Freshwater Fish           | 2                                                           |
| 57              | Belarus | 1995           | Fruits, Other             | 53                                                          |
| 57              | Belarus | 1995           | Honey                     | 1                                                           |
| 57              | Belarus | 1995           | Lemons, Limes             | 3                                                           |
| 57              | Belarus | 1995           | Marine Fish, Other        | 14                                                          |
| 57              | Belarus | 1995           | Meat, Other               | 1                                                           |
| 57              | Belarus | 1995           | Milk, Whole               | 458                                                         |
| 57              | Belarus | 1995           | Mutton & Goat Meat        | 1                                                           |
| 57              | Belarus | 1995           | Nuts                      | 2                                                           |
| 57              | Belarus | 1995           | Oats                      | 29                                                          |
| 57              | Belarus | 1995           | Offals, Edible            | 10                                                          |
| 57              | Belarus | 1995           | Onions                    | 14                                                          |
| 57              | Belarus | 1995           | Oranges, Mandarines       | 9                                                           |
| 57              | Belarus | 1995           | Pigmeat                   | 70                                                          |
| 57              | Belarus | 1995           | Potatoes                  | 499                                                         |
| 57              | Belarus | 1995           | Poultry Meat              | 19                                                          |
| 57              | Belarus | 1995           | Rape and Mustard Oil      | 3                                                           |
| 57              | Belarus | 1995           | Rice (Milled Equivalent)  | 1                                                           |
| 57              | Belarus | 1995           | Rye                       | 214                                                         |
| 57              | Belarus | 1995           | Sugar, Refined Equivalent | 96                                                          |
| 57              | Belarus | 1995           | Sunflowerseed Oil         | 14                                                          |
| 57              | Belarus | 1995           | Tomatoes                  | 27                                                          |
| 57              | Belarus | 1995           | Vegetables, Other         | 189                                                         |
| 57              | Belarus | 1995           | Wheat                     | 168                                                         |
| 57              | Belarus | 1995           | Wine                      | 7                                                           |
| 57              | Belarus | 1996           | Apples                    | 44                                                          |
| 57              | Belarus | 1996           | Bananas                   | 12                                                          |
| 57              | Belarus | 1996           | Barley                    | 13                                                          |
| 57              | Belarus | 1996           | Beer                      | 47                                                          |
| 57              | Belarus | 1996           | Beverages, Alcoholic      | 45                                                          |
| 57              | Belarus | 1996           | Beverages, Fermented      | 21                                                          |
| 57              | Belarus | 1996           | Bovine Meat               | 71                                                          |
| 57              | Belarus | 1996           | Butter, Ghee              | 15                                                          |
| 57              | Belarus | 1996           | Cereals, Other            | 4                                                           |
| 57              | Belarus | 1996           | Cheese                    | 9                                                           |
| 57              | Belarus | 1996           | Cocoa Beans               | 1                                                           |
| 57              | Belarus | 1996           | Cream                     | 1                                                           |
| 57              | Belarus | 1996           | Eggs                      | 46                                                          |
| 57              | Belarus | 1996           | Fats, Animals, Raw        | 12                                                          |
| 57              | Belarus | 1996           | Freshwater Fish           | 2                                                           |
| 57              | Belarus | 1996           | Fruits, Other             | 39                                                          |
| 57              | Belarus | 1996           | Honey                     | 1                                                           |
| 57              | Belarus | 1996           | Lemons, Limes             | 1                                                           |
| 57              | Belarus | 1996           | Marine Fish, Other        | 16                                                          |
| 57              | Belarus | 1996           | Meat, Other               | 2                                                           |
| 57              | Belarus | 1996           | Milk, Whole               | 455                                                         |
| 57              | Belarus | 1996           | Mutton & Goat Meat        | 1                                                           |
| 57              | Belarus | 1996           | Nuts                      | 3                                                           |
| 57              | Belarus | 1996           | Oats                      | 30                                                          |
| 57              | Belarus | 1996           | Offals, Edible            | 15                                                          |
| 57              | Belarus | 1996           | Onions                    | 16                                                          |
| 57              | Belarus | 1996           | Oranges, Mandarines       | 12                                                          |
| 57              | Belarus | 1996           | Pigmeat                   | 72                                                          |
| 57              | Belarus | 1996           | Potatoes                  | 515                                                         |
| 57              | Belarus | 1996           | Poultry Meat              | 17                                                          |
| 57              | Belarus | 1996           | Rape and Mustard Oil      | 1                                                           |
| 57              | Belarus | 1996           | Rice (Milled Equivalent)  | 4                                                           |
| 57              | Belarus | 1996           | Rye                       | 202                                                         |
| 57              | Belarus | 1996           | Sugar, Refined Equivalent | 97                                                          |
| 57              | Belarus | 1996           | Sunflowerseed Oil         | 16                                                          |
| 57              | Belarus | 1996           | Tomatoes                  | 32                                                          |
| 57              | Belarus | 1996           | Vegetables, Other         | 195                                                         |
| 57              | Belarus | 1996           | Wheat                     | 175                                                         |
| 57              | Belarus | 1996           | Wine                      | 8                                                           |
| 57              | Belarus | 1997           | Apples                    | 49                                                          |
| 57              | Belarus | 1997           | Bananas                   | 10                                                          |
| 57              | Belarus | 1997           | Barley                    | 8                                                           |
| 57              | Belarus | 1997           | Beer                      | 56                                                          |
| 57              | Belarus | 1997           | Beverages, Alcoholic      | 43                                                          |
| 57              | Belarus | 1997           | Beverages, Fermented      | 31                                                          |

Dietary calcium and zinc deficiency risks are decreasing but remain prevalent

| FAO countrycode | Country | Reference year | Food item                 | Gross food supply (g capita <sup>-1</sup> d <sup>-1</sup> ) |
|-----------------|---------|----------------|---------------------------|-------------------------------------------------------------|
| 57              | Belarus | 1997           | Bovine Meat               | 68                                                          |
| 57              | Belarus | 1997           | Butter, Ghee              | 15                                                          |
| 57              | Belarus | 1997           | Cereals, Other            | 10                                                          |
| 57              | Belarus | 1997           | Cheese                    | 11                                                          |
| 57              | Belarus | 1997           | Cocoa Beans               | 2                                                           |
| 57              | Belarus | 1997           | Cream                     | 1                                                           |
| 57              | Belarus | 1997           | Eggs                      | 46                                                          |
| 57              | Belarus | 1997           | Fats, Animals, Raw        | 11                                                          |
| 57              | Belarus | 1997           | Freshwater Fish           | 1                                                           |
| 57              | Belarus | 1997           | Fruits, Other             | 37                                                          |
| 57              | Belarus | 1997           | Honey                     | 1                                                           |
| 57              | Belarus | 1997           | Lemons, Limes             | 1                                                           |
| 57              | Belarus | 1997           | Marine Fish, Other        | 25                                                          |
| 57              | Belarus | 1997           | Meat, Other               | 2                                                           |
| 57              | Belarus | 1997           | Milk, Whole               | 353                                                         |
| 57              | Belarus | 1997           | Mutton & Goat Meat        | 1                                                           |
| 57              | Belarus | 1997           | Nuts                      | 3                                                           |
| 57              | Belarus | 1997           | Oats                      | 32                                                          |
| 57              | Belarus | 1997           | Offals, Edible            | 11                                                          |
| 57              | Belarus | 1997           | Onions                    | 18                                                          |
| 57              | Belarus | 1997           | Oranges, Mandarines       | 9                                                           |
| 57              | Belarus | 1997           | Pelagic Fish              | 4                                                           |
| 57              | Belarus | 1997           | Pigmeat                   | 77                                                          |
| 57              | Belarus | 1997           | Potatoes                  | 499                                                         |
| 57              | Belarus | 1997           | Poultry Meat              | 20                                                          |
| 57              | Belarus | 1997           | Rape and Mustard Oil      | 3                                                           |
| 57              | Belarus | 1997           | Rice (Milled Equivalent)  | 3                                                           |
| 57              | Belarus | 1997           | Rye                       | 194                                                         |
| 57              | Belarus | 1997           | Sugar, Refined Equivalent | 105                                                         |
| 57              | Belarus | 1997           | Sunflowerseed Oil         | 15                                                          |
| 57              | Belarus | 1997           | Tomatoes                  | 26                                                          |
| 57              | Belarus | 1997           | Vegetables, Other         | 200                                                         |
| 57              | Belarus | 1997           | Wheat                     | 182                                                         |
| 57              | Belarus | 1997           | Wine                      | 8                                                           |
| 57              | Belarus | 1998           | Apples                    | 17                                                          |
| 57              | Belarus | 1998           | Bananas                   | 4                                                           |
| 57              | Belarus | 1998           | Barley                    | 9                                                           |
| 57              | Belarus | 1998           | Beer                      | 59                                                          |
| 57              | Belarus | 1998           | Beverages, Alcoholic      | 32                                                          |
| 57              | Belarus | 1998           | Beverages, Fermented      | 18                                                          |
| 57              | Belarus | 1998           | Bovine Meat               | 71                                                          |
| 57              | Belarus | 1998           | Butter, Ghee              | 15                                                          |
| 57              | Belarus | 1998           | Cereals, Other            | 5                                                           |
| 57              | Belarus | 1998           | Cheese                    | 12                                                          |
| 57              | Belarus | 1998           | Cocoa Beans               | 1                                                           |
| 57              | Belarus | 1998           | Cream                     | 1                                                           |
| 57              | Belarus | 1998           | Demersal Fish             | 6                                                           |
| 57              | Belarus | 1998           | Eggs                      | 42                                                          |
| 57              | Belarus | 1998           | Fats, Animals, Raw        | 11                                                          |
| 57              | Belarus | 1998           | Freshwater Fish           | 2                                                           |
| 57              | Belarus | 1998           | Fruits, Other             | 22                                                          |
| 57              | Belarus | 1998           | Grapefruit                | 1                                                           |
| 57              | Belarus | 1998           | Grapes                    | 2                                                           |
| 57              | Belarus | 1998           | Honey                     | 1                                                           |
| 57              | Belarus | 1998           | Lemons, Limes             | 1                                                           |
| 57              | Belarus | 1998           | Marine Fish, Other        | 1                                                           |
| 57              | Belarus | 1998           | Meat, Other               | 4                                                           |
| 57              | Belarus | 1998           | Milk, Whole               | 422                                                         |
| 57              | Belarus | 1998           | Millet                    | 1                                                           |
| 57              | Belarus | 1998           | Mutton & Goat Meat        | 1                                                           |
| 57              | Belarus | 1998           | Nuts                      | 4                                                           |
| 57              | Belarus | 1998           | Oats                      | 21                                                          |
| 57              | Belarus | 1998           | Offals, Edible            | 12                                                          |
| 57              | Belarus | 1998           | Onions                    | 19                                                          |
| 57              | Belarus | 1998           | Oranges, Mandarines       | 8                                                           |
| 57              | Belarus | 1998           | Pelagic Fish              | 11                                                          |
| 57              | Belarus | 1998           | Pigmeat                   | 83                                                          |
| 57              | Belarus | 1998           | Potatoes                  | 475                                                         |
| 57              | Belarus | 1998           | Poultry Meat              | 16                                                          |
| 57              | Belarus | 1998           | Rape and Mustard Oil      | 6                                                           |
| 57              | Belarus | 1998           | Rice (Milled Equivalent)  | 5                                                           |
| 57              | Belarus | 1998           | Rye                       | 170                                                         |
| 57              | Belarus | 1998           | Sugar, Refined Equivalent | 112                                                         |
| 57              | Belarus | 1998           | Sunflowerseed Oil         | 11                                                          |
| 57              | Belarus | 1998           | Sweeteners, Other         | 1                                                           |
| 57              | Belarus | 1998           | Tomatoes                  | 28                                                          |
| 57              | Belarus | 1998           | Vegetables, Other         | 195                                                         |
| 57              | Belarus | 1998           | Wheat                     | 201                                                         |
| 57              | Belarus | 1998           | Wine                      | 8                                                           |
| 57              | Belarus | 1999           | Apples                    | 39                                                          |
| 57              | Belarus | 1999           | Bananas                   | 5                                                           |
| 57              | Belarus | 1999           | Barley                    | 10                                                          |
| 57              | Belarus | 1999           | Beer                      | 61                                                          |
| 57              | Belarus | 1999           | Beverages, Alcoholic      | 36                                                          |
| 57              | Belarus | 1999           | Beverages, Fermented      | 3                                                           |
| 57              | Belarus | 1999           | Bovine Meat               | 69                                                          |
| 57              | Belarus | 1999           | Butter, Ghee              | 13                                                          |
| 57              | Belarus | 1999           | Cereals, Other            | 5                                                           |
| 57              | Belarus | 1999           | Cheese                    | 12                                                          |
| 57              | Belarus | 1999           | Cocoa Beans               | 2                                                           |
| 57              | Belarus | 1999           | Coffee                    | 1                                                           |
| 57              | Belarus | 1999           | Cream                     | 1                                                           |
| 57              | Belarus | 1999           | Demersal Fish             | 4                                                           |
| 57              | Belarus | 1999           | Eggs                      | 36                                                          |
| 57              | Belarus | 1999           | Fats, Animals, Raw        | 12                                                          |
| 57              | Belarus | 1999           | Freshwater Fish           | 3                                                           |
| 57              | Belarus | 1999           | Fruits, Other             | 18                                                          |

Dietary calcium and zinc deficiency risks are decreasing but remain prevalent

| FAO countrycode | Country | Reference year | Food item                 | Gross food supply (g capita <sup>-1</sup> d <sup>-1</sup> ) |
|-----------------|---------|----------------|---------------------------|-------------------------------------------------------------|
| 57              | Belarus | 1999           | Grapes                    | 1                                                           |
| 57              | Belarus | 1999           | Honey                     | 1                                                           |
| 57              | Belarus | 1999           | Lemons, Limes             | 1                                                           |
| 57              | Belarus | 1999           | Maize                     | 1                                                           |
| 57              | Belarus | 1999           | Marine Fish, Other        | 1                                                           |
| 57              | Belarus | 1999           | Meat, Other               | 4                                                           |
| 57              | Belarus | 1999           | Milk, Whole               | 365                                                         |
| 57              | Belarus | 1999           | Mutton & Goat Meat        | 1                                                           |
| 57              | Belarus | 1999           | Nuts                      | 4                                                           |
| 57              | Belarus | 1999           | Oats                      | 24                                                          |
| 57              | Belarus | 1999           | Offals, Edible            | 11                                                          |
| 57              | Belarus | 1999           | Onions                    | 20                                                          |
| 57              | Belarus | 1999           | Oranges, Mandarines       | 5                                                           |
| 57              | Belarus | 1999           | Pelagic Fish              | 10                                                          |
| 57              | Belarus | 1999           | Pigmeat                   | 82                                                          |
| 57              | Belarus | 1999           | Potatoes                  | 467                                                         |
| 57              | Belarus | 1999           | Poultry Meat              | 21                                                          |
| 57              | Belarus | 1999           | Rape and Mustard Oil      | 10                                                          |
| 57              | Belarus | 1999           | Rice (Milled Equivalent)  | 5                                                           |
| 57              | Belarus | 1999           | Rye                       | 139                                                         |
| 57              | Belarus | 1999           | Soybean Oil               | 1                                                           |
| 57              | Belarus | 1999           | Sugar, Refined Equivalent | 92                                                          |
| 57              | Belarus | 1999           | Sunflowerseed Oil         | 11                                                          |
| 57              | Belarus | 1999           | Sweeteners, Other         | 1                                                           |
| 57              | Belarus | 1999           | Tomatoes                  | 24                                                          |
| 57              | Belarus | 1999           | Vegetables, Other         | 205                                                         |
| 57              | Belarus | 1999           | Wheat                     | 219                                                         |
| 57              | Belarus | 1999           | Wine                      | 5                                                           |
| 57              | Belarus | 2000           | Apples                    | 30                                                          |
| 57              | Belarus | 2000           | Bananas                   | 8                                                           |
| 57              | Belarus | 2000           | Barley                    | 12                                                          |
| 57              | Belarus | 2000           | Beer                      | 53                                                          |
| 57              | Belarus | 2000           | Beverages, Alcoholic      | 29                                                          |
| 57              | Belarus | 2000           | Beverages, Fermented      | 7                                                           |
| 57              | Belarus | 2000           | Bovine Meat               | 56                                                          |
| 57              | Belarus | 2000           | Butter, Ghee              | 13                                                          |
| 57              | Belarus | 2000           | Cereals, Other            | 6                                                           |
| 57              | Belarus | 2000           | Cheese                    | 10                                                          |
| 57              | Belarus | 2000           | Cocoa Beans               | 2                                                           |
| 57              | Belarus | 2000           | Coconut Oil               | 1                                                           |
| 57              | Belarus | 2000           | Cream                     | 2                                                           |
| 57              | Belarus | 2000           | Demersal Fish             | 2                                                           |
| 57              | Belarus | 2000           | Eggs                      | 34                                                          |
| 57              | Belarus | 2000           | Fats, Animals, Raw        | 10                                                          |
| 57              | Belarus | 2000           | Freshwater Fish           | 3                                                           |
| 57              | Belarus | 2000           | Fruits, Other             | 24                                                          |
| 57              | Belarus | 2000           | Grapes                    | 1                                                           |
| 57              | Belarus | 2000           | Groundnuts (Shelled Eq)   | 1                                                           |
| 57              | Belarus | 2000           | Honey                     | 1                                                           |
| 57              | Belarus | 2000           | Lemons, Limes             | 2                                                           |
| 57              | Belarus | 2000           | Maize                     | 1                                                           |
| 57              | Belarus | 2000           | Marine Fish, Other        | 9                                                           |
| 57              | Belarus | 2000           | Meat, Other               | 3                                                           |
| 57              | Belarus | 2000           | Milk, Whole               | 245                                                         |
| 57              | Belarus | 2000           | Millet                    | 1                                                           |
| 57              | Belarus | 2000           | Mutton & Goat Meat        | 1                                                           |
| 57              | Belarus | 2000           | Nuts                      | 5                                                           |
| 57              | Belarus | 2000           | Oats                      | 25                                                          |
| 57              | Belarus | 2000           | Offals, Edible            | 13                                                          |
| 57              | Belarus | 2000           | Onions                    | 19                                                          |
| 57              | Belarus | 2000           | Oranges, Mandarines       | 7                                                           |
| 57              | Belarus | 2000           | Pelagic Fish              | 13                                                          |
| 57              | Belarus | 2000           | Pigmeat                   | 78                                                          |
| 57              | Belarus | 2000           | Potatoes                  | 478                                                         |
| 57              | Belarus | 2000           | Poultry Meat              | 25                                                          |
| 57              | Belarus | 2000           | Rape and Mustard Oil      | 7                                                           |
| 57              | Belarus | 2000           | Rice (Milled Equivalent)  | 5                                                           |
| 57              | Belarus | 2000           | Rye                       | 109                                                         |
| 57              | Belarus | 2000           | Soybean Oil               | 1                                                           |
| 57              | Belarus | 2000           | Soybeans                  | 1                                                           |
| 57              | Belarus | 2000           | Sugar, Refined Equivalent | 94                                                          |
| 57              | Belarus | 2000           | Sunflowerseed Oil         | 15                                                          |
| 57              | Belarus | 2000           | Sweeteners, Other         | 4                                                           |
| 57              | Belarus | 2000           | Tea                       | 1                                                           |
| 57              | Belarus | 2000           | Tomatoes                  | 36                                                          |
| 57              | Belarus | 2000           | Vegetables, Other         | 205                                                         |
| 57              | Belarus | 2000           | Wheat                     | 230                                                         |
| 57              | Belarus | 2000           | Wine                      | 7                                                           |
| 57              | Belarus | 2001           | Apples                    | 47                                                          |
| 57              | Belarus | 2001           | Bananas                   | 5                                                           |
| 57              | Belarus | 2001           | Barley                    | 13                                                          |
| 57              | Belarus | 2001           | Beer                      | 52                                                          |
| 57              | Belarus | 2001           | Beverages, Alcoholic      | 27                                                          |
| 57              | Belarus | 2001           | Beverages, Fermented      | 7                                                           |
| 57              | Belarus | 2001           | Bovine Meat               | 57                                                          |
| 57              | Belarus | 2001           | Butter, Ghee              | 11                                                          |
| 57              | Belarus | 2001           | Cereals, Other            | 9                                                           |
| 57              | Belarus | 2001           | Cheese                    | 13                                                          |
| 57              | Belarus | 2001           | Cocoa Beans               | 2                                                           |
| 57              | Belarus | 2001           | Coconut Oil               | 1                                                           |
| 57              | Belarus | 2001           | Cream                     | 2                                                           |
| 57              | Belarus | 2001           | Demersal Fish             | 8                                                           |
| 57              | Belarus | 2001           | Eggs                      | 35                                                          |
| 57              | Belarus | 2001           | Fats, Animals, Raw        | 9                                                           |
| 57              | Belarus | 2001           | Freshwater Fish           | 2                                                           |
| 57              | Belarus | 2001           | Fruits, Other             | 30                                                          |
| 57              | Belarus | 2001           | Grapefruit                | 1                                                           |

## Dietary calcium and zinc deficiency risks are decreasing but remain prevalent

| FAO countrycode | Country | Reference year | Food item                 | Gross food supply (g capita <sup>-1</sup> d <sup>-1</sup> ) |
|-----------------|---------|----------------|---------------------------|-------------------------------------------------------------|
| 57              | Belarus | 2001           | Grapes                    | 2                                                           |
| 57              | Belarus | 2001           | Honey                     | 1                                                           |
| 57              | Belarus | 2001           | Lemons, Limes             | 1                                                           |
| 57              | Belarus | 2001           | Marine Fish, Other        | 4                                                           |
| 57              | Belarus | 2001           | Meat, Other               | 3                                                           |
| 57              | Belarus | 2001           | Milk, Whole               | 286                                                         |
| 57              | Belarus | 2001           | Mutton & Goat Meat        | 1                                                           |
| 57              | Belarus | 2001           | Nuts                      | 5                                                           |
| 57              | Belarus | 2001           | Oats                      | 24                                                          |
| 57              | Belarus | 2001           | Offals, Edible            | 14                                                          |
| 57              | Belarus | 2001           | Onions                    | 21                                                          |
| 57              | Belarus | 2001           | Oranges, Mandarines       | 9                                                           |
| 57              | Belarus | 2001           | Pelagic Fish              | 22                                                          |
| 57              | Belarus | 2001           | Pigmeat                   | 76                                                          |
| 57              | Belarus | 2001           | Potatoes                  | 473                                                         |
| 57              | Belarus | 2001           | Poultry Meat              | 26                                                          |
| 57              | Belarus | 2001           | Rape and Mustard Oil      | 4                                                           |
| 57              | Belarus | 2001           | Rice (Milled Equivalent)  | 6                                                           |
| 57              | Belarus | 2001           | Rye                       | 106                                                         |
| 57              | Belarus | 2001           | Soyabean Oil              | 4                                                           |
| 57              | Belarus | 2001           | Sugar, Refined Equivalent | 97                                                          |
| 57              | Belarus | 2001           | Sunflowerseed Oil         | 23                                                          |
| 57              | Belarus | 2001           | Sweeteners, Other         | 4                                                           |
| 57              | Belarus | 2001           | Tomatoes                  | 37                                                          |
| 57              | Belarus | 2001           | Vegetables, Other         | 216                                                         |
| 57              | Belarus | 2001           | Wheat                     | 212                                                         |
| 57              | Belarus | 2001           | Wine                      | 7                                                           |
| 57              | Belarus | 2002           | Apples                    | 73                                                          |
| 57              | Belarus | 2002           | Bananas                   | 4                                                           |
| 57              | Belarus | 2002           | Barley                    | 12                                                          |
| 57              | Belarus | 2002           | Beer                      | 50                                                          |
| 57              | Belarus | 2002           | Beverages, Alcoholic      | 26                                                          |
| 57              | Belarus | 2002           | Beverages, Fermented      | 10                                                          |
| 57              | Belarus | 2002           | Bovine Meat               | 54                                                          |
| 57              | Belarus | 2002           | Butter, Ghee              | 10                                                          |
| 57              | Belarus | 2002           | Cereals, Other            | 11                                                          |
| 57              | Belarus | 2002           | Cheese                    | 9                                                           |
| 57              | Belarus | 2002           | Citrus, Other             | 1                                                           |
| 57              | Belarus | 2002           | Cocoa Beans               | 2                                                           |
| 57              | Belarus | 2002           | Coconut Oil               | 1                                                           |
| 57              | Belarus | 2002           | Cream                     | 2                                                           |
| 57              | Belarus | 2002           | Demersal Fish             | 8                                                           |
| 57              | Belarus | 2002           | Eggs                      | 35                                                          |
| 57              | Belarus | 2002           | Fats, Animals, Raw        | 9                                                           |
| 57              | Belarus | 2002           | Freshwater Fish           | 4                                                           |
| 57              | Belarus | 2002           | Fruits, Other             | 44                                                          |
| 57              | Belarus | 2002           | Grapefruit                | 3                                                           |
| 57              | Belarus | 2002           | Grapes                    | 1                                                           |
| 57              | Belarus | 2002           | Groundnuts (Shelled Eq)   | 1                                                           |
| 57              | Belarus | 2002           | Honey                     | 1                                                           |
| 57              | Belarus | 2002           | Lemons, Limes             | 1                                                           |
| 57              | Belarus | 2002           | Maize                     | 1                                                           |
| 57              | Belarus | 2002           | Marine Fish, Other        | 7                                                           |
| 57              | Belarus | 2002           | Meat, Other               | 1                                                           |
| 57              | Belarus | 2002           | Milk, Whole               | 290                                                         |
| 57              | Belarus | 2002           | Nuts                      | 5                                                           |
| 57              | Belarus | 2002           | Oats                      | 25                                                          |
| 57              | Belarus | 2002           | Offals, Edible            | 13                                                          |
| 57              | Belarus | 2002           | Onions                    | 23                                                          |
| 57              | Belarus | 2002           | Oranges, Mandarines       | 19                                                          |
| 57              | Belarus | 2002           | Pelagic Fish              | 22                                                          |
| 57              | Belarus | 2002           | Pigmeat                   | 78                                                          |
| 57              | Belarus | 2002           | Pineapples                | 2                                                           |
| 57              | Belarus | 2002           | Potatoes                  | 469                                                         |
| 57              | Belarus | 2002           | Poultry Meat              | 26                                                          |
| 57              | Belarus | 2002           | Rape and Mustard Oil      | 4                                                           |
| 57              | Belarus | 2002           | Rice (Milled Equivalent)  | 7                                                           |
| 57              | Belarus | 2002           | Rye                       | 90                                                          |
| 57              | Belarus | 2002           | Soyabean Oil              | 7                                                           |
| 57              | Belarus | 2002           | Sugar, Refined Equivalent | 96                                                          |
| 57              | Belarus | 2002           | Sunflowerseed Oil         | 20                                                          |
| 57              | Belarus | 2002           | Sweeteners, Other         | 5                                                           |
| 57              | Belarus | 2002           | Tomatoes                  | 37                                                          |
| 57              | Belarus | 2002           | Vegetables, Other         | 228                                                         |
| 57              | Belarus | 2002           | Wheat                     | 201                                                         |
| 57              | Belarus | 2002           | Wine                      | 10                                                          |
| 57              | Belarus | 2003           | Apples                    | 77                                                          |
| 57              | Belarus | 2003           | Bananas                   | 6                                                           |
| 57              | Belarus | 2003           | Barley                    | 14                                                          |
| 57              | Belarus | 2003           | Beer                      | 52                                                          |
| 57              | Belarus | 2003           | Beverages, Alcoholic      | 22                                                          |
| 57              | Belarus | 2003           | Beverages, Fermented      | 8                                                           |
| 57              | Belarus | 2003           | Bovine Meat               | 47                                                          |
| 57              | Belarus | 2003           | Butter, Ghee              | 10                                                          |
| 57              | Belarus | 2003           | Cereals, Other            | 6                                                           |
| 57              | Belarus | 2003           | Cheese                    | 8                                                           |
| 57              | Belarus | 2003           | Cocoa Beans               | 2                                                           |
| 57              | Belarus | 2003           | Coconut Oil               | 1                                                           |
| 57              | Belarus | 2003           | Coffee                    | 1                                                           |
| 57              | Belarus | 2003           | Cream                     | 2                                                           |
| 57              | Belarus | 2003           | Demersal Fish             | 9                                                           |
| 57              | Belarus | 2003           | Eggs                      | 35                                                          |
| 57              | Belarus | 2003           | Fats, Animals, Raw        | 10                                                          |
| 57              | Belarus | 2003           | Freshwater Fish           | 3                                                           |
| 57              | Belarus | 2003           | Fruits, Other             | 32                                                          |
| 57              | Belarus | 2003           | Grapefruit                | 3                                                           |
| 57              | Belarus | 2003           | Grapes                    | 1                                                           |



Dietary calcium and zinc deficiency risks are decreasing but remain prevalent

| FAO countrycode | Country | Reference year | Food item                 | Gross food supply (g capita <sup>-1</sup> d <sup>-1</sup> ) |
|-----------------|---------|----------------|---------------------------|-------------------------------------------------------------|
| 57              | Belarus | 2003           | Honey                     | 1                                                           |
| 57              | Belarus | 2003           | Lemons, Limes             | 1                                                           |
| 57              | Belarus | 2003           | Maize                     | 1                                                           |
| 57              | Belarus | 2003           | Marine Fish, Other        | 6                                                           |
| 57              | Belarus | 2003           | Meat, Other               | 1                                                           |
| 57              | Belarus | 2003           | Milk, Whole               | 225                                                         |
| 57              | Belarus | 2003           | Mutton & Goat Meat        | 1                                                           |
| 57              | Belarus | 2003           | Nuts                      | 7                                                           |
| 57              | Belarus | 2003           | Oats                      | 25                                                          |
| 57              | Belarus | 2003           | Offals, Edible            | 12                                                          |
| 57              | Belarus | 2003           | Onions                    | 37                                                          |
| 57              | Belarus | 2003           | Oranges, Mandarines       | 16                                                          |
| 57              | Belarus | 2003           | Pelagic Fish              | 21                                                          |
| 57              | Belarus | 2003           | Pigmeat                   | 89                                                          |
| 57              | Belarus | 2003           | Pineapples                | 4                                                           |
| 57              | Belarus | 2003           | Potatoes                  | 474                                                         |
| 57              | Belarus | 2003           | Poultry Meat              | 25                                                          |
| 57              | Belarus | 2003           | Rape and Mustard Oil      | 2                                                           |
| 57              | Belarus | 2003           | Rice (Milled Equivalent)  | 15                                                          |
| 57              | Belarus | 2003           | Rye                       | 87                                                          |
| 57              | Belarus | 2003           | Soyabean Oil              | 2                                                           |
| 57              | Belarus | 2003           | Sugar, Refined Equivalent | 82                                                          |
| 57              | Belarus | 2003           | Sunflowerseed Oil         | 19                                                          |
| 57              | Belarus | 2003           | Sweeteners, Other         | 1                                                           |
| 57              | Belarus | 2003           | Tea                       | 1                                                           |
| 57              | Belarus | 2003           | Tomatoes                  | 61                                                          |
| 57              | Belarus | 2003           | Vegetables, Other         | 199                                                         |
| 57              | Belarus | 2003           | Wheat                     | 193                                                         |
| 57              | Belarus | 2003           | Wine                      | 11                                                          |
| 57              | Belarus | 2004           | Apples                    | 73                                                          |
| 57              | Belarus | 2004           | Bananas                   | 3                                                           |
| 57              | Belarus | 2004           | Barley                    | 13                                                          |
| 57              | Belarus | 2004           | Beer                      | 62                                                          |
| 57              | Belarus | 2004           | Beverages, Alcoholic      | 20                                                          |
| 57              | Belarus | 2004           | Beverages, Fermented      | 8                                                           |
| 57              | Belarus | 2004           | Bovine Meat               | 49                                                          |
| 57              | Belarus | 2004           | Butter, Ghee              | 10                                                          |
| 57              | Belarus | 2004           | Cereals, Other            | 12                                                          |
| 57              | Belarus | 2004           | Cheese                    | 8                                                           |
| 57              | Belarus | 2004           | Cocoa Beans               | 2                                                           |
| 57              | Belarus | 2004           | Coconut Oil               | 1                                                           |
| 57              | Belarus | 2004           | Coffee                    | 2                                                           |
| 57              | Belarus | 2004           | Cream                     | 1                                                           |
| 57              | Belarus | 2004           | Demersal Fish             | 12                                                          |
| 57              | Belarus | 2004           | Eggs                      | 37                                                          |
| 57              | Belarus | 2004           | Fats, Animals, Raw        | 11                                                          |
| 57              | Belarus | 2004           | Freshwater Fish           | 4                                                           |
| 57              | Belarus | 2004           | Fruits, Other             | 45                                                          |
| 57              | Belarus | 2004           | Grapefruit                | 2                                                           |
| 57              | Belarus | 2004           | Grapes                    | 1                                                           |
| 57              | Belarus | 2004           | Groundnuts (Shelled Eq)   | 1                                                           |
| 57              | Belarus | 2004           | Honey                     | 1                                                           |
| 57              | Belarus | 2004           | Lemons, Limes             | 1                                                           |
| 57              | Belarus | 2004           | Maize                     | 1                                                           |
| 57              | Belarus | 2004           | Marine Fish, Other        | 5                                                           |
| 57              | Belarus | 2004           | Meat, Other               | 3                                                           |
| 57              | Belarus | 2004           | Milk, Whole               | 192                                                         |
| 57              | Belarus | 2004           | Nuts                      | 6                                                           |
| 57              | Belarus | 2004           | Oats                      | 32                                                          |
| 57              | Belarus | 2004           | Offals, Edible            | 15                                                          |
| 57              | Belarus | 2004           | Onions                    | 45                                                          |
| 57              | Belarus | 2004           | Oranges, Mandarines       | 16                                                          |
| 57              | Belarus | 2004           | Pelagic Fish              | 21                                                          |
| 57              | Belarus | 2004           | Pigmeat                   | 79                                                          |
| 57              | Belarus | 2004           | Pineapples                | 3                                                           |
| 57              | Belarus | 2004           | Potatoes                  | 509                                                         |
| 57              | Belarus | 2004           | Poultry Meat              | 31                                                          |
| 57              | Belarus | 2004           | Rape and Mustard Oil      | 2                                                           |
| 57              | Belarus | 2004           | Rice (Milled Equivalent)  | 8                                                           |
| 57              | Belarus | 2004           | Rye                       | 91                                                          |
| 57              | Belarus | 2004           | Soyabean Oil              | 2                                                           |
| 57              | Belarus | 2004           | Sugar, Refined Equivalent | 83                                                          |
| 57              | Belarus | 2004           | Sunflowerseed Oil         | 20                                                          |
| 57              | Belarus | 2004           | Sweeteners, Other         | 5                                                           |
| 57              | Belarus | 2004           | Tea                       | 1                                                           |
| 57              | Belarus | 2004           | Tomatoes                  | 70                                                          |
| 57              | Belarus | 2004           | Vegetables, Other         | 213                                                         |
| 57              | Belarus | 2004           | Wheat                     | 198                                                         |
| 57              | Belarus | 2004           | Wine                      | 16                                                          |
| 57              | Belarus | 2005           | Apples                    | 63                                                          |
| 57              | Belarus | 2005           | Bananas                   | 5                                                           |
| 57              | Belarus | 2005           | Barley                    | 13                                                          |
| 57              | Belarus | 2005           | Beer                      | 89                                                          |
| 57              | Belarus | 2005           | Beverages, Alcoholic      | 24                                                          |
| 57              | Belarus | 2005           | Beverages, Fermented      | 13                                                          |
| 57              | Belarus | 2005           | Bovine Meat               | 59                                                          |
| 57              | Belarus | 2005           | Butter, Ghee              | 10                                                          |
| 57              | Belarus | 2005           | Cereals, Other            | 12                                                          |
| 57              | Belarus | 2005           | Cheese                    | 9                                                           |
| 57              | Belarus | 2005           | Cocoa Beans               | 2                                                           |
| 57              | Belarus | 2005           | Coconut Oil               | 1                                                           |
| 57              | Belarus | 2005           | Coffee                    | 3                                                           |
| 57              | Belarus | 2005           | Cream                     | 2                                                           |
| 57              | Belarus | 2005           | Demersal Fish             | 13                                                          |
| 57              | Belarus | 2005           | Eggs                      | 40                                                          |
| 57              | Belarus | 2005           | Fats, Animals, Raw        | 10                                                          |
| 57              | Belarus | 2005           | Freshwater Fish           | 4                                                           |

## Dietary calcium and zinc deficiency risks are decreasing but remain prevalent

| FAO countrycode | Country | Reference year | Food item                 | Gross food supply (g capita <sup>-1</sup> d <sup>-1</sup> ) |
|-----------------|---------|----------------|---------------------------|-------------------------------------------------------------|
| 57              | Belarus | 2005           | Fruits, Other             | 53                                                          |
| 57              | Belarus | 2005           | Grapefruit                | 2                                                           |
| 57              | Belarus | 2005           | Grapes                    | 2                                                           |
| 57              | Belarus | 2005           | Groundnuts (Shelled Eq)   | 1                                                           |
| 57              | Belarus | 2005           | Honey                     | 1                                                           |
| 57              | Belarus | 2005           | Lemons, Limes             | 1                                                           |
| 57              | Belarus | 2005           | Maize                     | 1                                                           |
| 57              | Belarus | 2005           | Marine Fish, Other        | 5                                                           |
| 57              | Belarus | 2005           | Meat, Other               | 3                                                           |
| 57              | Belarus | 2005           | Milk, Whole               | 243                                                         |
| 57              | Belarus | 2005           | Nuts                      | 7                                                           |
| 57              | Belarus | 2005           | Oats                      | 27                                                          |
| 57              | Belarus | 2005           | Offals, Edible            | 17                                                          |
| 57              | Belarus | 2005           | Olives                    | 1                                                           |
| 57              | Belarus | 2005           | Onions                    | 44                                                          |
| 57              | Belarus | 2005           | Oranges, Mandarines       | 17                                                          |
| 57              | Belarus | 2005           | Pelagic Fish              | 21                                                          |
| 57              | Belarus | 2005           | Pigmeat                   | 71                                                          |
| 57              | Belarus | 2005           | Pineapples                | 2                                                           |
| 57              | Belarus | 2005           | Potatoes                  | 503                                                         |
| 57              | Belarus | 2005           | Poultry Meat              | 36                                                          |
| 57              | Belarus | 2005           | Rape and Mustard Oil      | 6                                                           |
| 57              | Belarus | 2005           | Rice (Milled Equivalent)  | 7                                                           |
| 57              | Belarus | 2005           | Rye                       | 92                                                          |
| 57              | Belarus | 2005           | Soyabean Oil              | 3                                                           |
| 57              | Belarus | 2005           | Sugar, Refined Equivalent | 91                                                          |
| 57              | Belarus | 2005           | Sunflowerseed Oil         | 22                                                          |
| 57              | Belarus | 2005           | Sweeteners, Other         | 5                                                           |
| 57              | Belarus | 2005           | Tea                       | 1                                                           |
| 57              | Belarus | 2005           | Tomatoes                  | 79                                                          |
| 57              | Belarus | 2005           | Vegetables, Other         | 234                                                         |
| 57              | Belarus | 2005           | Wheat                     | 186                                                         |
| 57              | Belarus | 2005           | Wine                      | 18                                                          |
| 57              | Belarus | 2006           | Apples                    | 69                                                          |
| 57              | Belarus | 2006           | Bananas                   | 7                                                           |
| 57              | Belarus | 2006           | Barley                    | 12                                                          |
| 57              | Belarus | 2006           | Beer                      | 115                                                         |
| 57              | Belarus | 2006           | Beverages, Alcoholic      | 31                                                          |
| 57              | Belarus | 2006           | Beverages, Fermented      | 6                                                           |
| 57              | Belarus | 2006           | Bovine Meat               | 62                                                          |
| 57              | Belarus | 2006           | Butter, Ghee              | 10                                                          |
| 57              | Belarus | 2006           | Cereals, Other            | 11                                                          |
| 57              | Belarus | 2006           | Cheese                    | 10                                                          |
| 57              | Belarus | 2006           | Cocoa Beans               | 4                                                           |
| 57              | Belarus | 2006           | Coconut Oil               | 1                                                           |
| 57              | Belarus | 2006           | Coffee                    | 4                                                           |
| 57              | Belarus | 2006           | Cream                     | 2                                                           |
| 57              | Belarus | 2006           | Demersal Fish             | 12                                                          |
| 57              | Belarus | 2006           | Eggs                      | 43                                                          |
| 57              | Belarus | 2006           | Fats, Animals, Raw        | 10                                                          |
| 57              | Belarus | 2006           | Freshwater Fish           | 5                                                           |
| 57              | Belarus | 2006           | Fruits, Other             | 77                                                          |
| 57              | Belarus | 2006           | Grapefruit                | 2                                                           |
| 57              | Belarus | 2006           | Grapes                    | 3                                                           |
| 57              | Belarus | 2006           | Groundnuts (Shelled Eq)   | 1                                                           |
| 57              | Belarus | 2006           | Honey                     | 1                                                           |
| 57              | Belarus | 2006           | Lemons, Limes             | 2                                                           |
| 57              | Belarus | 2006           | Maize                     | 1                                                           |
| 57              | Belarus | 2006           | Marine Fish, Other        | 3                                                           |
| 57              | Belarus | 2006           | Meat, Other               | 1                                                           |
| 57              | Belarus | 2006           | Milk, Whole               | 183                                                         |
| 57              | Belarus | 2006           | Nuts                      | 5                                                           |
| 57              | Belarus | 2006           | Oats                      | 25                                                          |
| 57              | Belarus | 2006           | Offals, Edible            | 15                                                          |
| 57              | Belarus | 2006           | Olives                    | 1                                                           |
| 57              | Belarus | 2006           | Onions                    | 48                                                          |
| 57              | Belarus | 2006           | Oranges, Mandarines       | 21                                                          |
| 57              | Belarus | 2006           | Pelagic Fish              | 23                                                          |
| 57              | Belarus | 2006           | Pigmeat                   | 80                                                          |
| 57              | Belarus | 2006           | Pineapples                | 2                                                           |
| 57              | Belarus | 2006           | Potatoes                  | 525                                                         |
| 57              | Belarus | 2006           | Poultry Meat              | 45                                                          |
| 57              | Belarus | 2006           | Rape and Mustard Oil      | 4                                                           |
| 57              | Belarus | 2006           | Rice (Milled Equivalent)  | 9                                                           |
| 57              | Belarus | 2006           | Rye                       | 82                                                          |
| 57              | Belarus | 2006           | Soyabean Oil              | 2                                                           |
| 57              | Belarus | 2006           | Sugar, Refined Equivalent | 83                                                          |
| 57              | Belarus | 2006           | Sunflowerseed Oil         | 31                                                          |
| 57              | Belarus | 2006           | Sweeteners, Other         | 5                                                           |
| 57              | Belarus | 2006           | Tea                       | 1                                                           |
| 57              | Belarus | 2006           | Tomatoes                  | 82                                                          |
| 57              | Belarus | 2006           | Vegetables, Other         | 249                                                         |
| 57              | Belarus | 2006           | Wheat                     | 191                                                         |
| 57              | Belarus | 2006           | Wine                      | 18                                                          |
| 57              | Belarus | 2007           | Apples                    | 81                                                          |
| 57              | Belarus | 2007           | Bananas                   | 8                                                           |
| 57              | Belarus | 2007           | Barley                    | 12                                                          |
| 57              | Belarus | 2007           | Beer                      | 137                                                         |
| 57              | Belarus | 2007           | Beverages, Alcoholic      | 36                                                          |
| 57              | Belarus | 2007           | Beverages, Fermented      | 6                                                           |
| 57              | Belarus | 2007           | Bovine Meat               | 61                                                          |
| 57              | Belarus | 2007           | Butter, Ghee              | 9                                                           |
| 57              | Belarus | 2007           | Cephalopods               | 1                                                           |
| 57              | Belarus | 2007           | Cereals, Other            | 10                                                          |
| 57              | Belarus | 2007           | Cheese                    | 9                                                           |
| 57              | Belarus | 2007           | Cocoa Beans               | 4                                                           |
| 57              | Belarus | 2007           | Coconut Oil               | 1                                                           |

Dietary calcium and zinc deficiency risks are decreasing but remain prevalent

| FAO countrycode | Country | Reference year | Food item                 | Gross food supply (g capita <sup>-1</sup> d <sup>-1</sup> ) |
|-----------------|---------|----------------|---------------------------|-------------------------------------------------------------|
| 57              | Belarus | 2007           | Coffee                    | 5                                                           |
| 57              | Belarus | 2007           | Cream                     | 2                                                           |
| 57              | Belarus | 2007           | Demersal Fish             | 9                                                           |
| 57              | Belarus | 2007           | Eggs                      | 42                                                          |
| 57              | Belarus | 2007           | Fats, Animals, Raw        | 11                                                          |
| 57              | Belarus | 2007           | Freshwater Fish           | 7                                                           |
| 57              | Belarus | 2007           | Fruits, Other             | 60                                                          |
| 57              | Belarus | 2007           | Grapefruit                | 4                                                           |
| 57              | Belarus | 2007           | Grapes                    | 3                                                           |
| 57              | Belarus | 2007           | Groundnuts (Shelled Eq)   | 1                                                           |
| 57              | Belarus | 2007           | Honey                     | 1                                                           |
| 57              | Belarus | 2007           | Lemons, Limes             | 2                                                           |
| 57              | Belarus | 2007           | Maize                     | 1                                                           |
| 57              | Belarus | 2007           | Marine Fish, Other        | 3                                                           |
| 57              | Belarus | 2007           | Meat, Other               | 1                                                           |
| 57              | Belarus | 2007           | Milk, Whole               | 208                                                         |
| 57              | Belarus | 2007           | Nuts                      | 5                                                           |
| 57              | Belarus | 2007           | Oats                      | 26                                                          |
| 57              | Belarus | 2007           | Offals, Edible            | 14                                                          |
| 57              | Belarus | 2007           | Olives                    | 1                                                           |
| 57              | Belarus | 2007           | Onions                    | 50                                                          |
| 57              | Belarus | 2007           | Oranges, Mandarines       | 22                                                          |
| 57              | Belarus | 2007           | Pelagic Fish              | 26                                                          |
| 57              | Belarus | 2007           | Pigmeat                   | 90                                                          |
| 57              | Belarus | 2007           | Pineapples                | 3                                                           |
| 57              | Belarus | 2007           | Potatoes                  | 526                                                         |
| 57              | Belarus | 2007           | Poultry Meat              | 49                                                          |
| 57              | Belarus | 2007           | Rape and Mustard Oil      | 6                                                           |
| 57              | Belarus | 2007           | Rice (Milled Equivalent)  | 9                                                           |
| 57              | Belarus | 2007           | Rye                       | 86                                                          |
| 57              | Belarus | 2007           | Soyabean Oil              | 3                                                           |
| 57              | Belarus | 2007           | Sugar, Refined Equivalent | 91                                                          |
| 57              | Belarus | 2007           | Sunflowerseed Oil         | 32                                                          |
| 57              | Belarus | 2007           | Sweeteners, Other         | 4                                                           |
| 57              | Belarus | 2007           | Tea                       | 2                                                           |
| 57              | Belarus | 2007           | Tomatoes                  | 90                                                          |
| 57              | Belarus | 2007           | Vegetables, Other         | 249                                                         |
| 57              | Belarus | 2007           | Wheat                     | 182                                                         |
| 57              | Belarus | 2007           | Wine                      | 19                                                          |
| 57              | Belarus | 2008           | Apples                    | 67                                                          |
| 57              | Belarus | 2008           | Bananas                   | 12                                                          |
| 57              | Belarus | 2008           | Barley                    | 12                                                          |
| 57              | Belarus | 2008           | Beer                      | 142                                                         |
| 57              | Belarus | 2008           | Beverages, Alcoholic      | 41                                                          |
| 57              | Belarus | 2008           | Beverages, Fermented      | 6                                                           |
| 57              | Belarus | 2008           | Bovine Meat               | 58                                                          |
| 57              | Belarus | 2008           | Butter, Ghee              | 11                                                          |
| 57              | Belarus | 2008           | Cephalopods               | 1                                                           |
| 57              | Belarus | 2008           | Cereals, Other            | 11                                                          |
| 57              | Belarus | 2008           | Cheese                    | 11                                                          |
| 57              | Belarus | 2008           | Cocoa Beans               | 5                                                           |
| 57              | Belarus | 2008           | Coconut Oil               | 1                                                           |
| 57              | Belarus | 2008           | Coffee                    | 6                                                           |
| 57              | Belarus | 2008           | Cream                     | 3                                                           |
| 57              | Belarus | 2008           | Crustaceans               | 1                                                           |
| 57              | Belarus | 2008           | Demersal Fish             | 9                                                           |
| 57              | Belarus | 2008           | Eggs                      | 43                                                          |
| 57              | Belarus | 2008           | Fats, Animals, Raw        | 11                                                          |
| 57              | Belarus | 2008           | Freshwater Fish           | 10                                                          |
| 57              | Belarus | 2008           | Fruits, Other             | 72                                                          |
| 57              | Belarus | 2008           | Grapefruit                | 4                                                           |
| 57              | Belarus | 2008           | Grapes                    | 3                                                           |
| 57              | Belarus | 2008           | Groundnuts (Shelled Eq)   | 1                                                           |
| 57              | Belarus | 2008           | Honey                     | 1                                                           |
| 57              | Belarus | 2008           | Lemons, Limes             | 2                                                           |
| 57              | Belarus | 2008           | Maize                     | 1                                                           |
| 57              | Belarus | 2008           | Marine Fish, Other        | 2                                                           |
| 57              | Belarus | 2008           | Meat, Other               | 1                                                           |
| 57              | Belarus | 2008           | Milk, Whole               | 105                                                         |
| 57              | Belarus | 2008           | Nuts                      | 6                                                           |
| 57              | Belarus | 2008           | Oats                      | 26                                                          |
| 57              | Belarus | 2008           | Offals, Edible            | 17                                                          |
| 57              | Belarus | 2008           | Olives                    | 1                                                           |
| 57              | Belarus | 2008           | Onions                    | 57                                                          |
| 57              | Belarus | 2008           | Oranges, Mandarines       | 21                                                          |
| 57              | Belarus | 2008           | Pelagic Fish              | 27                                                          |
| 57              | Belarus | 2008           | Pigmeat                   | 95                                                          |
| 57              | Belarus | 2008           | Pineapples                | 3                                                           |
| 57              | Belarus | 2008           | Potatoes                  | 529                                                         |
| 57              | Belarus | 2008           | Poultry Meat              | 57                                                          |
| 57              | Belarus | 2008           | Rape and Mustard Oil      | 12                                                          |
| 57              | Belarus | 2008           | Rice (Milled Equivalent)  | 9                                                           |
| 57              | Belarus | 2008           | Rye                       | 87                                                          |
| 57              | Belarus | 2008           | Soyabean Oil              | 7                                                           |
| 57              | Belarus | 2008           | Sugar, Refined Equivalent | 99                                                          |
| 57              | Belarus | 2008           | Sunflowerseed Oil         | 22                                                          |
| 57              | Belarus | 2008           | Sweeteners, Other         | 4                                                           |
| 57              | Belarus | 2008           | Tea                       | 2                                                           |
| 57              | Belarus | 2008           | Tomatoes                  | 91                                                          |
| 57              | Belarus | 2008           | Vegetables, Other         | 256                                                         |
| 57              | Belarus | 2008           | Wheat                     | 170                                                         |
| 57              | Belarus | 2008           | Wine                      | 21                                                          |
| 57              | Belarus | 2009           | Apples                    | 64                                                          |
| 57              | Belarus | 2009           | Bananas                   | 10                                                          |
| 57              | Belarus | 2009           | Barley                    | 13                                                          |
| 57              | Belarus | 2009           | Beer                      | 130                                                         |
| 57              | Belarus | 2009           | Beverages, Alcoholic      | 42                                                          |

Dietary calcium and zinc deficiency risks are decreasing but remain prevalent

| FAO countrycode | Country | Reference year | Food item                 | Gross food supply (g capita <sup>-1</sup> d <sup>-1</sup> ) |
|-----------------|---------|----------------|---------------------------|-------------------------------------------------------------|
| 57              | Belarus | 2009           | Beverages, Fermented      | 6                                                           |
| 57              | Belarus | 2009           | Bovine Meat               | 56                                                          |
| 57              | Belarus | 2009           | Butter, Ghee              | 9                                                           |
| 57              | Belarus | 2009           | Cereals, Other            | 14                                                          |
| 57              | Belarus | 2009           | Cheese                    | 8                                                           |
| 57              | Belarus | 2009           | Cocoa Beans               | 4                                                           |
| 57              | Belarus | 2009           | Coconut Oil               | 1                                                           |
| 57              | Belarus | 2009           | Coffee                    | 4                                                           |
| 57              | Belarus | 2009           | Cream                     | 2                                                           |
| 57              | Belarus | 2009           | Demersal Fish             | 7                                                           |
| 57              | Belarus | 2009           | Eggs                      | 43                                                          |
| 57              | Belarus | 2009           | Fats, Animals, Raw        | 10                                                          |
| 57              | Belarus | 2009           | Freshwater Fish           | 12                                                          |
| 57              | Belarus | 2009           | Fruits, Other             | 79                                                          |
| 57              | Belarus | 2009           | Grapefruit                | 3                                                           |
| 57              | Belarus | 2009           | Grapes                    | 3                                                           |
| 57              | Belarus | 2009           | Groundnuts (Shelled Eq)   | 1                                                           |
| 57              | Belarus | 2009           | Honey                     | 1                                                           |
| 57              | Belarus | 2009           | Lemons, Limes             | 2                                                           |
| 57              | Belarus | 2009           | Maize                     | 1                                                           |
| 57              | Belarus | 2009           | Marine Fish, Other        | 5                                                           |
| 57              | Belarus | 2009           | Meat, Other               | 1                                                           |
| 57              | Belarus | 2009           | Milk, Whole               | 174                                                         |
| 57              | Belarus | 2009           | Nuts                      | 6                                                           |
| 57              | Belarus | 2009           | Oats                      | 25                                                          |
| 57              | Belarus | 2009           | Offals, Edible            | 19                                                          |
| 57              | Belarus | 2009           | Olives                    | 1                                                           |
| 57              | Belarus | 2009           | Onions                    | 52                                                          |
| 57              | Belarus | 2009           | Oranges, Mandarines       | 19                                                          |
| 57              | Belarus | 2009           | Pelagic Fish              | 25                                                          |
| 57              | Belarus | 2009           | Pigmeat                   | 100                                                         |
| 57              | Belarus | 2009           | Pineapples                | 2                                                           |
| 57              | Belarus | 2009           | Potatoes                  | 509                                                         |
| 57              | Belarus | 2009           | Poultry Meat              | 61                                                          |
| 57              | Belarus | 2009           | Rape and Mustard Oil      | 14                                                          |
| 57              | Belarus | 2009           | Rice (Milled Equivalent)  | 8                                                           |
| 57              | Belarus | 2009           | Rye                       | 88                                                          |
| 57              | Belarus | 2009           | Soyabean Oil              | 4                                                           |
| 57              | Belarus | 2009           | Sugar, Refined Equivalent | 105                                                         |
| 57              | Belarus | 2009           | Sunflowerseed Oil         | 17                                                          |
| 57              | Belarus | 2009           | Sweeteners, Other         | 3                                                           |
| 57              | Belarus | 2009           | Tea                       | 1                                                           |
| 57              | Belarus | 2009           | Tomatoes                  | 92                                                          |
| 57              | Belarus | 2009           | Vegetables, Other         | 269                                                         |
| 57              | Belarus | 2009           | Wheat                     | 156                                                         |
| 57              | Belarus | 2009           | Wine                      | 18                                                          |
| 57              | Belarus | 2010           | Apples                    | 62                                                          |
| 57              | Belarus | 2010           | Bananas                   | 12                                                          |
| 57              | Belarus | 2010           | Barley                    | 12                                                          |
| 57              | Belarus | 2010           | Beer                      | 143                                                         |
| 57              | Belarus | 2010           | Beverages, Alcoholic      | 43                                                          |
| 57              | Belarus | 2010           | Beverages, Fermented      | 6                                                           |
| 57              | Belarus | 2010           | Bovine Meat               | 51                                                          |
| 57              | Belarus | 2010           | Butter, Ghee              | 11                                                          |
| 57              | Belarus | 2010           | Cephalopods               | 1                                                           |
| 57              | Belarus | 2010           | Cereals, Other            | 4                                                           |
| 57              | Belarus | 2010           | Cheese                    | 12                                                          |
| 57              | Belarus | 2010           | Cocoa Beans               | 5                                                           |
| 57              | Belarus | 2010           | Coconut Oil               | 1                                                           |
| 57              | Belarus | 2010           | Coffee                    | 4                                                           |
| 57              | Belarus | 2010           | Cream                     | 1                                                           |
| 57              | Belarus | 2010           | Crustaceans               | 1                                                           |
| 57              | Belarus | 2010           | Demersal Fish             | 8                                                           |
| 57              | Belarus | 2010           | Eggs                      | 45                                                          |
| 57              | Belarus | 2010           | Fats, Animals, Raw        | 10                                                          |
| 57              | Belarus | 2010           | Freshwater Fish           | 13                                                          |
| 57              | Belarus | 2010           | Fruits, Other             | 88                                                          |
| 57              | Belarus | 2010           | Grapefruit                | 4                                                           |
| 57              | Belarus | 2010           | Grapes                    | 3                                                           |
| 57              | Belarus | 2010           | Groundnuts (Shelled Eq)   | 2                                                           |
| 57              | Belarus | 2010           | Honey                     | 1                                                           |
| 57              | Belarus | 2010           | Lemons, Limes             | 2                                                           |
| 57              | Belarus | 2010           | Maize                     | 1                                                           |
| 57              | Belarus | 2010           | Marine Fish, Other        | 5                                                           |
| 57              | Belarus | 2010           | Meat, Other               | 1                                                           |
| 57              | Belarus | 2010           | Milk, Whole               | 133                                                         |
| 57              | Belarus | 2010           | Nuts                      | 6                                                           |
| 57              | Belarus | 2010           | Oats                      | 25                                                          |
| 57              | Belarus | 2010           | Offals, Edible            | 19                                                          |
| 57              | Belarus | 2010           | Olives                    | 1                                                           |
| 57              | Belarus | 2010           | Onions                    | 52                                                          |
| 57              | Belarus | 2010           | Oranges, Mandarines       | 20                                                          |
| 57              | Belarus | 2010           | Pelagic Fish              | 21                                                          |
| 57              | Belarus | 2010           | Pigmeat                   | 110                                                         |
| 57              | Belarus | 2010           | Pineapples                | 3                                                           |
| 57              | Belarus | 2010           | Potatoes                  | 507                                                         |
| 57              | Belarus | 2010           | Poultry Meat              | 67                                                          |
| 57              | Belarus | 2010           | Rape and Mustard Oil      | 15                                                          |
| 57              | Belarus | 2010           | Rice (Milled Equivalent)  | 9                                                           |
| 57              | Belarus | 2010           | Rye                       | 73                                                          |
| 57              | Belarus | 2010           | Soyabean Oil              | 5                                                           |
| 57              | Belarus | 2010           | Soybeans                  | 2                                                           |
| 57              | Belarus | 2010           | Sugar, Refined Equivalent | 90                                                          |
| 57              | Belarus | 2010           | Sunflowerseed Oil         | 21                                                          |
| 57              | Belarus | 2010           | Sweeteners, Other         | 4                                                           |
| 57              | Belarus | 2010           | Tea                       | 1                                                           |
| 57              | Belarus | 2010           | Tomatoes                  | 95                                                          |

Dietary calcium and zinc deficiency risks are decreasing but remain prevalent

| FAO countrycode | Country | Reference year | Food item                 | Gross food supply (g capita <sup>-1</sup> d <sup>-1</sup> ) |
|-----------------|---------|----------------|---------------------------|-------------------------------------------------------------|
| 57              | Belarus | 2010           | Vegetables, Other         | 269                                                         |
| 57              | Belarus | 2010           | Wheat                     | 181                                                         |
| 57              | Belarus | 2010           | Wine                      | 21                                                          |
| 57              | Belarus | 2011           | Apples                    | 58                                                          |
| 57              | Belarus | 2011           | Bananas                   | 11                                                          |
| 57              | Belarus | 2011           | Barley                    | 12                                                          |
| 57              | Belarus | 2011           | Beer                      | 143                                                         |
| 57              | Belarus | 2011           | Beverages, Alcoholic      | 47                                                          |
| 57              | Belarus | 2011           | Beverages, Fermented      | 5                                                           |
| 57              | Belarus | 2011           | Bovine Meat               | 50                                                          |
| 57              | Belarus | 2011           | Butter, Ghee              | 12                                                          |
| 57              | Belarus | 2011           | Cephalopods               | 1                                                           |
| 57              | Belarus | 2011           | Cereals, Other            | 16                                                          |
| 57              | Belarus | 2011           | Cheese                    | 12                                                          |
| 57              | Belarus | 2011           | Cocoa Beans               | 4                                                           |
| 57              | Belarus | 2011           | Coffee                    | 3                                                           |
| 57              | Belarus | 2011           | Cream                     | 2                                                           |
| 57              | Belarus | 2011           | Crustaceans               | 1                                                           |
| 57              | Belarus | 2011           | Demersal Fish             | 8                                                           |
| 57              | Belarus | 2011           | Eggs                      | 45                                                          |
| 57              | Belarus | 2011           | Fats, Animals, Raw        | 10                                                          |
| 57              | Belarus | 2011           | Freshwater Fish           | 13                                                          |
| 57              | Belarus | 2011           | Fruits, Other             | 72                                                          |
| 57              | Belarus | 2011           | Grapefruit                | 3                                                           |
| 57              | Belarus | 2011           | Grapes                    | 3                                                           |
| 57              | Belarus | 2011           | Groundnuts (Shelled Eq)   | 1                                                           |
| 57              | Belarus | 2011           | Honey                     | 1                                                           |
| 57              | Belarus | 2011           | Lemons, Limes             | 2                                                           |
| 57              | Belarus | 2011           | Maize                     | 1                                                           |
| 57              | Belarus | 2011           | Marine Fish, Other        | 5                                                           |
| 57              | Belarus | 2011           | Meat, Other               | 1                                                           |
| 57              | Belarus | 2011           | Milk, Whole               | 126                                                         |
| 57              | Belarus | 2011           | Nuts                      | 7                                                           |
| 57              | Belarus | 2011           | Oats                      | 25                                                          |
| 57              | Belarus | 2011           | Offals, Edible            | 19                                                          |
| 57              | Belarus | 2011           | Olives                    | 1                                                           |
| 57              | Belarus | 2011           | Onions                    | 48                                                          |
| 57              | Belarus | 2011           | Oranges, Mandarines       | 20                                                          |
| 57              | Belarus | 2011           | Pelagic Fish              | 21                                                          |
| 57              | Belarus | 2011           | Pigmeat                   | 95                                                          |
| 57              | Belarus | 2011           | Pineapples                | 3                                                           |
| 57              | Belarus | 2011           | Potatoes                  | 507                                                         |
| 57              | Belarus | 2011           | Poultry Meat              | 69                                                          |
| 57              | Belarus | 2011           | Rape and Mustard Oil      | 18                                                          |
| 57              | Belarus | 2011           | Rice (Milled Equivalent)  | 8                                                           |
| 57              | Belarus | 2011           | Rye                       | 88                                                          |
| 57              | Belarus | 2011           | Soyabean Oil              | 5                                                           |
| 57              | Belarus | 2011           | Soyabeans                 | 3                                                           |
| 57              | Belarus | 2011           | Sugar, Refined Equivalent | 87                                                          |
| 57              | Belarus | 2011           | Sunflowerseed Oil         | 24                                                          |
| 57              | Belarus | 2011           | Sweeteners, Other         | 4                                                           |
| 57              | Belarus | 2011           | Tea                       | 1                                                           |
| 57              | Belarus | 2011           | Tomatoes                  | 40                                                          |
| 57              | Belarus | 2011           | Vegetables, Other         | 313                                                         |
| 57              | Belarus | 2011           | Wheat                     | 181                                                         |
| 57              | Belarus | 2011           | Wine                      | 21                                                          |
| 255             | Belgium | 1992           | Apples                    | 141                                                         |
| 255             | Belgium | 1992           | Bananas                   | 42                                                          |
| 255             | Belgium | 1992           | Barley                    | 2                                                           |
| 255             | Belgium | 1992           | Beans                     | 2                                                           |
| 255             | Belgium | 1992           | Beer                      | 315                                                         |
| 255             | Belgium | 1992           | Beverages, Alcoholic      | 8                                                           |
| 255             | Belgium | 1992           | Beverages, Fermented      | 2                                                           |
| 255             | Belgium | 1992           | Bovine Meat               | 54                                                          |
| 255             | Belgium | 1992           | Butter, Ghee              | 20                                                          |
| 255             | Belgium | 1992           | Cephalopods               | 1                                                           |
| 255             | Belgium | 1992           | Cereals, Other            | 4                                                           |
| 255             | Belgium | 1992           | Cheese                    | 37                                                          |
| 255             | Belgium | 1992           | Cocoa Beans               | 8                                                           |
| 255             | Belgium | 1992           | Coconut Oil               | 1                                                           |
| 255             | Belgium | 1992           | Coconuts - Incl Copra     | 3                                                           |
| 255             | Belgium | 1992           | Coffee                    | 21                                                          |
| 255             | Belgium | 1992           | Cream                     | 11                                                          |
| 255             | Belgium | 1992           | Crustaceans               | 8                                                           |
| 255             | Belgium | 1992           | Dates                     | 1                                                           |
| 255             | Belgium | 1992           | Demersal Fish             | 20                                                          |
| 255             | Belgium | 1992           | Eggs                      | 35                                                          |
| 255             | Belgium | 1992           | Fats, Animals, Raw        | 40                                                          |
| 255             | Belgium | 1992           | Freshwater Fish           | 6                                                           |
| 255             | Belgium | 1992           | Fruits, Other             | 74                                                          |
| 255             | Belgium | 1992           | Grapefruit                | 17                                                          |
| 255             | Belgium | 1992           | Grapes                    | 19                                                          |
| 255             | Belgium | 1992           | Groundnut Oil             | 3                                                           |
| 255             | Belgium | 1992           | Groundnuts (Shelled Eq)   | 1                                                           |
| 255             | Belgium | 1992           | Honey                     | 2                                                           |
| 255             | Belgium | 1992           | Lemons, Limes             | 8                                                           |
| 255             | Belgium | 1992           | Maize                     | 6                                                           |
| 255             | Belgium | 1992           | Maize Germ Oil            | 5                                                           |
| 255             | Belgium | 1992           | Marine Fish, Other        | 6                                                           |
| 255             | Belgium | 1992           | Meat, Other               | 14                                                          |
| 255             | Belgium | 1992           | Milk, Whole               | 187                                                         |
| 255             | Belgium | 1992           | Molluscs, Other           | 12                                                          |
| 255             | Belgium | 1992           | Mutton & Goat Meat        | 6                                                           |
| 255             | Belgium | 1992           | Nuts                      | 11                                                          |
| 255             | Belgium | 1992           | Oats                      | 1                                                           |
| 255             | Belgium | 1992           | Offals, Edible            | 18                                                          |
| 255             | Belgium | 1992           | Oilcrops Oil, Other       | 8                                                           |

## Dietary calcium and zinc deficiency risks are decreasing but remain prevalent

| FAO countrycode | Country | Reference year | Food item                 | Gross food supply (g capita <sup>-1</sup> d <sup>-1</sup> ) |
|-----------------|---------|----------------|---------------------------|-------------------------------------------------------------|
| 255             | Belgium | 1992           | Olive Oil                 | 1                                                           |
| 255             | Belgium | 1992           | Olives                    | 1                                                           |
| 255             | Belgium | 1992           | Onions                    | 20                                                          |
| 255             | Belgium | 1992           | Oranges, Mandarines       | 141                                                         |
| 255             | Belgium | 1992           | Palm Oil                  | 10                                                          |
| 255             | Belgium | 1992           | Palmkernel Oil            | 1                                                           |
| 255             | Belgium | 1992           | Peas                      | 3                                                           |
| 255             | Belgium | 1992           | Pelagic Fish              | 13                                                          |
| 255             | Belgium | 1992           | Pigmeat                   | 142                                                         |
| 255             | Belgium | 1992           | Pineapples                | 8                                                           |
| 255             | Belgium | 1992           | Potatoes                  | 305                                                         |
| 255             | Belgium | 1992           | Poultry Meat              | 48                                                          |
| 255             | Belgium | 1992           | Pulses, Other             | 2                                                           |
| 255             | Belgium | 1992           | Rape and Mustard Oil      | 4                                                           |
| 255             | Belgium | 1992           | Rice (Milled Equivalent)  | 11                                                          |
| 255             | Belgium | 1992           | Rye                       | 4                                                           |
| 255             | Belgium | 1992           | Soyabean Oil              | 11                                                          |
| 255             | Belgium | 1992           | Spices, Other             | 1                                                           |
| 255             | Belgium | 1992           | Sugar, Refined Equivalent | 102                                                         |
| 255             | Belgium | 1992           | Sunflowerseed Oil         | 12                                                          |
| 255             | Belgium | 1992           | Sweeteners, Other         | 12                                                          |
| 255             | Belgium | 1992           | Tea                       | 1                                                           |
| 255             | Belgium | 1992           | Tomatoes                  | 67                                                          |
| 255             | Belgium | 1992           | Vegetables, Other         | 223                                                         |
| 255             | Belgium | 1992           | Wheat                     | 258                                                         |
| 255             | Belgium | 1992           | Wine                      | 69                                                          |
| 255             | Belgium | 1993           | Apples                    | 97                                                          |
| 255             | Belgium | 1993           | Bananas                   | 39                                                          |
| 255             | Belgium | 1993           | Barley                    | 2                                                           |
| 255             | Belgium | 1993           | Beans                     | 2                                                           |
| 255             | Belgium | 1993           | Beer                      | 313                                                         |
| 255             | Belgium | 1993           | Beverages, Alcoholic      | 8                                                           |
| 255             | Belgium | 1993           | Bovine Meat               | 58                                                          |
| 255             | Belgium | 1993           | Butter, Ghee              | 19                                                          |
| 255             | Belgium | 1993           | Cereals, Other            | 4                                                           |
| 255             | Belgium | 1993           | Cheese                    | 40                                                          |
| 255             | Belgium | 1993           | Cocoa Beans               | 9                                                           |
| 255             | Belgium | 1993           | Coconut Oil               | 7                                                           |
| 255             | Belgium | 1993           | Coconuts - Incl Copra     | 4                                                           |
| 255             | Belgium | 1993           | Coffee                    | 10                                                          |
| 255             | Belgium | 1993           | Cream                     | 11                                                          |
| 255             | Belgium | 1993           | Crustaceans               | 6                                                           |
| 255             | Belgium | 1993           | Dates                     | 1                                                           |
| 255             | Belgium | 1993           | Demersal Fish             | 22                                                          |
| 255             | Belgium | 1993           | Eggs                      | 36                                                          |
| 255             | Belgium | 1993           | Fats, Animals, Raw        | 37                                                          |
| 255             | Belgium | 1993           | Freshwater Fish           | 5                                                           |
| 255             | Belgium | 1993           | Fruits, Other             | 51                                                          |
| 255             | Belgium | 1993           | Grapefruit                | 5                                                           |
| 255             | Belgium | 1993           | Grapes                    | 17                                                          |
| 255             | Belgium | 1993           | Groundnut Oil             | 2                                                           |
| 255             | Belgium | 1993           | Groundnuts (Shelled Eq)   | 1                                                           |
| 255             | Belgium | 1993           | Honey                     | 1                                                           |
| 255             | Belgium | 1993           | Lemons, Limes             | 5                                                           |
| 255             | Belgium | 1993           | Maize                     | 6                                                           |
| 255             | Belgium | 1993           | Maize Germ Oil            | 3                                                           |
| 255             | Belgium | 1993           | Marine Fish, Other        | 4                                                           |
| 255             | Belgium | 1993           | Meat, Other               | 13                                                          |
| 255             | Belgium | 1993           | Milk, Whole               | 186                                                         |
| 255             | Belgium | 1993           | Molluscs, Other           | 10                                                          |
| 255             | Belgium | 1993           | Mutton & Goat Meat        | 5                                                           |
| 255             | Belgium | 1993           | Nuts                      | 11                                                          |
| 255             | Belgium | 1993           | Oats                      | 2                                                           |
| 255             | Belgium | 1993           | Offals, Edible            | 16                                                          |
| 255             | Belgium | 1993           | Oilcrops Oil, Other       | 6                                                           |
| 255             | Belgium | 1993           | Olive Oil                 | 1                                                           |
| 255             | Belgium | 1993           | Olives                    | 1                                                           |
| 255             | Belgium | 1993           | Onions                    | 21                                                          |
| 255             | Belgium | 1993           | Oranges, Mandarines       | 71                                                          |
| 255             | Belgium | 1993           | Palm Oil                  | 7                                                           |
| 255             | Belgium | 1993           | Palmkernel Oil            | 2                                                           |
| 255             | Belgium | 1993           | Peas                      | 2                                                           |
| 255             | Belgium | 1993           | Pelagic Fish              | 10                                                          |
| 255             | Belgium | 1993           | Pepper                    | 1                                                           |
| 255             | Belgium | 1993           | Pigmeat                   | 146                                                         |
| 255             | Belgium | 1993           | Pineapples                | 6                                                           |
| 255             | Belgium | 1993           | Potatoes                  | 305                                                         |
| 255             | Belgium | 1993           | Poultry Meat              | 48                                                          |
| 255             | Belgium | 1993           | Pulses, Other             | 3                                                           |
| 255             | Belgium | 1993           | Rape and Mustard Oil      | 8                                                           |
| 255             | Belgium | 1993           | Rice (Milled Equivalent)  | 11                                                          |
| 255             | Belgium | 1993           | Rye                       | 3                                                           |
| 255             | Belgium | 1993           | Soyabean Oil              | 12                                                          |
| 255             | Belgium | 1993           | Spices, Other             | 1                                                           |
| 255             | Belgium | 1993           | Sugar, Refined Equivalent | 102                                                         |
| 255             | Belgium | 1993           | Sunflowerseed Oil         | 6                                                           |
| 255             | Belgium | 1993           | Sweeteners, Other         | 11                                                          |
| 255             | Belgium | 1993           | Tomatoes                  | 71                                                          |
| 255             | Belgium | 1993           | Vegetables, Other         | 234                                                         |
| 255             | Belgium | 1993           | Wheat                     | 257                                                         |
| 255             | Belgium | 1993           | Wine                      | 66                                                          |
| 255             | Belgium | 1994           | Apples                    | 105                                                         |
| 255             | Belgium | 1994           | Bananas                   | 31                                                          |
| 255             | Belgium | 1994           | Barley                    | 1                                                           |
| 255             | Belgium | 1994           | Beans                     | 2                                                           |
| 255             | Belgium | 1994           | Beer                      | 299                                                         |
| 255             | Belgium | 1994           | Beverages, Alcoholic      | 7                                                           |

Dietary calcium and zinc deficiency risks are decreasing but remain prevalent

| FAO countrycode | Country | Reference year | Food item                 | Gross food supply (g capita <sup>-1</sup> d <sup>-1</sup> ) |
|-----------------|---------|----------------|---------------------------|-------------------------------------------------------------|
| 255             | Belgium | 1994           | Beverages, Fermented      | 1                                                           |
| 255             | Belgium | 1994           | Bovine Meat               | 59                                                          |
| 255             | Belgium | 1994           | Butter, Ghee              | 18                                                          |
| 255             | Belgium | 1994           | Cephalopods               | 1                                                           |
| 255             | Belgium | 1994           | Cereals, Other            | 1                                                           |
| 255             | Belgium | 1994           | Cheese                    | 37                                                          |
| 255             | Belgium | 1994           | Cocoa Beans               | 11                                                          |
| 255             | Belgium | 1994           | Coconut Oil               | 9                                                           |
| 255             | Belgium | 1994           | Coconuts - Incl Copra     | 4                                                           |
| 255             | Belgium | 1994           | Coffee                    | 8                                                           |
| 255             | Belgium | 1994           | Cream                     | 10                                                          |
| 255             | Belgium | 1994           | Crustaceans               | 7                                                           |
| 255             | Belgium | 1994           | Dates                     | 1                                                           |
| 255             | Belgium | 1994           | Demersal Fish             | 21                                                          |
| 255             | Belgium | 1994           | Eggs                      | 40                                                          |
| 255             | Belgium | 1994           | Fats, Animals, Raw        | 37                                                          |
| 255             | Belgium | 1994           | Freshwater Fish           | 7                                                           |
| 255             | Belgium | 1994           | Fruits, Other             | 60                                                          |
| 255             | Belgium | 1994           | Grapefruit                | 11                                                          |
| 255             | Belgium | 1994           | Grapes                    | 17                                                          |
| 255             | Belgium | 1994           | Groundnut Oil             | 3                                                           |
| 255             | Belgium | 1994           | Groundnuts (Shelled Eq)   | 1                                                           |
| 255             | Belgium | 1994           | Honey                     | 1                                                           |
| 255             | Belgium | 1994           | Lemons, Limes             | 6                                                           |
| 255             | Belgium | 1994           | Maize                     | 5                                                           |
| 255             | Belgium | 1994           | Maize Germ Oil            | 5                                                           |
| 255             | Belgium | 1994           | Marine Fish, Other        | 4                                                           |
| 255             | Belgium | 1994           | Meat, Other               | 12                                                          |
| 255             | Belgium | 1994           | Milk, Whole               | 186                                                         |
| 255             | Belgium | 1994           | Molluscs, Other           | 12                                                          |
| 255             | Belgium | 1994           | Mutton & Goat Meat        | 6                                                           |
| 255             | Belgium | 1994           | Nuts                      | 14                                                          |
| 255             | Belgium | 1994           | Oats                      | 1                                                           |
| 255             | Belgium | 1994           | Offals, Edible            | 16                                                          |
| 255             | Belgium | 1994           | Oilcrops Oil, Other       | 11                                                          |
| 255             | Belgium | 1994           | Olive Oil                 | 1                                                           |
| 255             | Belgium | 1994           | Olives                    | 1                                                           |
| 255             | Belgium | 1994           | Onions                    | 26                                                          |
| 255             | Belgium | 1994           | Oranges, Mandarines       | 130                                                         |
| 255             | Belgium | 1994           | Palm Oil                  | 2                                                           |
| 255             | Belgium | 1994           | Palmkernel Oil            | 5                                                           |
| 255             | Belgium | 1994           | Peas                      | 3                                                           |
| 255             | Belgium | 1994           | Pelagic Fish              | 11                                                          |
| 255             | Belgium | 1994           | Pigmeat                   | 114                                                         |
| 255             | Belgium | 1994           | Pineapples                | 3                                                           |
| 255             | Belgium | 1994           | Potatoes                  | 296                                                         |
| 255             | Belgium | 1994           | Poultry Meat              | 54                                                          |
| 255             | Belgium | 1994           | Pulses, Other             | 2                                                           |
| 255             | Belgium | 1994           | Rape and Mustard Oil      | 7                                                           |
| 255             | Belgium | 1994           | Rice (Milled Equivalent)  | 10                                                          |
| 255             | Belgium | 1994           | Rye                       | 4                                                           |
| 255             | Belgium | 1994           | Soyabean Oil              | 11                                                          |
| 255             | Belgium | 1994           | Spices, Other             | 1                                                           |
| 255             | Belgium | 1994           | Sugar, Refined Equivalent | 107                                                         |
| 255             | Belgium | 1994           | Sunflowerseed Oil         | 6                                                           |
| 255             | Belgium | 1994           | Sweeteners, Other         | 9                                                           |
| 255             | Belgium | 1994           | Tomatoes                  | 42                                                          |
| 255             | Belgium | 1994           | Vegetables, Other         | 235                                                         |
| 255             | Belgium | 1994           | Wheat                     | 255                                                         |
| 255             | Belgium | 1994           | Wine                      | 63                                                          |
| 255             | Belgium | 1995           | Apples                    | 99                                                          |
| 255             | Belgium | 1995           | Bananas                   | 20                                                          |
| 255             | Belgium | 1995           | Barley                    | 2                                                           |
| 255             | Belgium | 1995           | Beans                     | 2                                                           |
| 255             | Belgium | 1995           | Beer                      | 299                                                         |
| 255             | Belgium | 1995           | Beverages, Alcoholic      | 8                                                           |
| 255             | Belgium | 1995           | Bovine Meat               | 59                                                          |
| 255             | Belgium | 1995           | Butter, Ghee              | 17                                                          |
| 255             | Belgium | 1995           | Cephalopods               | 1                                                           |
| 255             | Belgium | 1995           | Cereals, Other            | 1                                                           |
| 255             | Belgium | 1995           | Cheese                    | 36                                                          |
| 255             | Belgium | 1995           | Citrus, Other             | 1                                                           |
| 255             | Belgium | 1995           | Cocoa Beans               | 4                                                           |
| 255             | Belgium | 1995           | Coconut Oil               | 13                                                          |
| 255             | Belgium | 1995           | Coconuts - Incl Copra     | 3                                                           |
| 255             | Belgium | 1995           | Coffee                    | 6                                                           |
| 255             | Belgium | 1995           | Cream                     | 18                                                          |
| 255             | Belgium | 1995           | Crustaceans               | 9                                                           |
| 255             | Belgium | 1995           | Demersal Fish             | 21                                                          |
| 255             | Belgium | 1995           | Eggs                      | 38                                                          |
| 255             | Belgium | 1995           | Fats, Animals, Raw        | 36                                                          |
| 255             | Belgium | 1995           | Freshwater Fish           | 8                                                           |
| 255             | Belgium | 1995           | Fruits, Other             | 46                                                          |
| 255             | Belgium | 1995           | Grapefruit                | 3                                                           |
| 255             | Belgium | 1995           | Grapes                    | 15                                                          |
| 255             | Belgium | 1995           | Groundnut Oil             | 2                                                           |
| 255             | Belgium | 1995           | Groundnuts (Shelled Eq)   | 1                                                           |
| 255             | Belgium | 1995           | Honey                     | 1                                                           |
| 255             | Belgium | 1995           | Lemons, Limes             | 5                                                           |
| 255             | Belgium | 1995           | Maize                     | 6                                                           |
| 255             | Belgium | 1995           | Maize Germ Oil            | 3                                                           |
| 255             | Belgium | 1995           | Marine Fish, Other        | 4                                                           |
| 255             | Belgium | 1995           | Meat, Other               | 12                                                          |
| 255             | Belgium | 1995           | Milk, Whole               | 175                                                         |
| 255             | Belgium | 1995           | Molluscs, Other           | 12                                                          |
| 255             | Belgium | 1995           | Mutton & Goat Meat        | 5                                                           |
| 255             | Belgium | 1995           | Nuts                      | 12                                                          |

Dietary calcium and zinc deficiency risks are decreasing but remain prevalent

| FAO countrycode | Country | Reference year | Food item                 | Gross food supply (g capita <sup>-1</sup> d <sup>-1</sup> ) |
|-----------------|---------|----------------|---------------------------|-------------------------------------------------------------|
| 255             | Belgium | 1995           | Offals, Edible            | 15                                                          |
| 255             | Belgium | 1995           | Oilcrops Oil, Other       | 6                                                           |
| 255             | Belgium | 1995           | Olive Oil                 | 1                                                           |
| 255             | Belgium | 1995           | Olives                    | 1                                                           |
| 255             | Belgium | 1995           | Onions                    | 18                                                          |
| 255             | Belgium | 1995           | Oranges, Mandarines       | 122                                                         |
| 255             | Belgium | 1995           | Palm Oil                  | 6                                                           |
| 255             | Belgium | 1995           | Palmkernel Oil            | 2                                                           |
| 255             | Belgium | 1995           | Peas                      | 4                                                           |
| 255             | Belgium | 1995           | Pelagic Fish              | 12                                                          |
| 255             | Belgium | 1995           | Pigmeat                   | 108                                                         |
| 255             | Belgium | 1995           | Pineapples                | 3                                                           |
| 255             | Belgium | 1995           | Potatoes                  | 293                                                         |
| 255             | Belgium | 1995           | Poultry Meat              | 60                                                          |
| 255             | Belgium | 1995           | Pulses, Other             | 2                                                           |
| 255             | Belgium | 1995           | Rape and Mustard Oil      | 8                                                           |
| 255             | Belgium | 1995           | Rice (Milled Equivalent)  | 10                                                          |
| 255             | Belgium | 1995           | Rye                       | 4                                                           |
| 255             | Belgium | 1995           | Soyabean Oil              | 13                                                          |
| 255             | Belgium | 1995           | Spices, Other             | 1                                                           |
| 255             | Belgium | 1995           | Sugar, Refined Equivalent | 107                                                         |
| 255             | Belgium | 1995           | Sunflowerseed Oil         | 7                                                           |
| 255             | Belgium | 1995           | Sweeteners, Other         | 9                                                           |
| 255             | Belgium | 1995           | Tomatoes                  | 76                                                          |
| 255             | Belgium | 1995           | Vegetables, Other         | 248                                                         |
| 255             | Belgium | 1995           | Wheat                     | 255                                                         |
| 255             | Belgium | 1995           | Wine                      | 60                                                          |
| 255             | Belgium | 1996           | Apples                    | 76                                                          |
| 255             | Belgium | 1996           | Bananas                   | 55                                                          |
| 255             | Belgium | 1996           | Barley                    | 1                                                           |
| 255             | Belgium | 1996           | Beans                     | 2                                                           |
| 255             | Belgium | 1996           | Beer                      | 294                                                         |
| 255             | Belgium | 1996           | Beverages, Alcoholic      | 7                                                           |
| 255             | Belgium | 1996           | Bovine Meat               | 61                                                          |
| 255             | Belgium | 1996           | Butter, Ghee              | 17                                                          |
| 255             | Belgium | 1996           | Cereals, Other            | 1                                                           |
| 255             | Belgium | 1996           | Cheese                    | 38                                                          |
| 255             | Belgium | 1996           | Citrus, Other             | 1                                                           |
| 255             | Belgium | 1996           | Cocoa Beans               | 2                                                           |
| 255             | Belgium | 1996           | Coconut Oil               | 7                                                           |
| 255             | Belgium | 1996           | Coconuts - Incl Copra     | 5                                                           |
| 255             | Belgium | 1996           | Coffee                    | 15                                                          |
| 255             | Belgium | 1996           | Cottonseed Oil            | 1                                                           |
| 255             | Belgium | 1996           | Cream                     | 19                                                          |
| 255             | Belgium | 1996           | Crustaceans               | 7                                                           |
| 255             | Belgium | 1996           | Dates                     | 1                                                           |
| 255             | Belgium | 1996           | Demersal Fish             | 19                                                          |
| 255             | Belgium | 1996           | Eggs                      | 36                                                          |
| 255             | Belgium | 1996           | Fats, Animals, Raw        | 36                                                          |
| 255             | Belgium | 1996           | Freshwater Fish           | 7                                                           |
| 255             | Belgium | 1996           | Fruits, Other             | 49                                                          |
| 255             | Belgium | 1996           | Grapefruit                | 15                                                          |
| 255             | Belgium | 1996           | Grapes                    | 15                                                          |
| 255             | Belgium | 1996           | Groundnut Oil             | 1                                                           |
| 255             | Belgium | 1996           | Honey                     | 2                                                           |
| 255             | Belgium | 1996           | Lemons, Limes             | 6                                                           |
| 255             | Belgium | 1996           | Maize                     | 8                                                           |
| 255             | Belgium | 1996           | Maize Germ Oil            | 2                                                           |
| 255             | Belgium | 1996           | Marine Fish, Other        | 4                                                           |
| 255             | Belgium | 1996           | Meat, Other               | 11                                                          |
| 255             | Belgium | 1996           | Milk, Whole               | 171                                                         |
| 255             | Belgium | 1996           | Molluscs, Other           | 9                                                           |
| 255             | Belgium | 1996           | Mutton & Goat Meat        | 5                                                           |
| 255             | Belgium | 1996           | Nuts                      | 12                                                          |
| 255             | Belgium | 1996           | Offals, Edible            | 13                                                          |
| 255             | Belgium | 1996           | Oilcrops Oil, Other       | 8                                                           |
| 255             | Belgium | 1996           | Olive Oil                 | 2                                                           |
| 255             | Belgium | 1996           | Olives                    | 1                                                           |
| 255             | Belgium | 1996           | Onions                    | 22                                                          |
| 255             | Belgium | 1996           | Oranges, Mandarines       | 162                                                         |
| 255             | Belgium | 1996           | Palm Oil                  | 3                                                           |
| 255             | Belgium | 1996           | Palmkernel Oil            | 3                                                           |
| 255             | Belgium | 1996           | Peas                      | 4                                                           |
| 255             | Belgium | 1996           | Pelagic Fish              | 11                                                          |
| 255             | Belgium | 1996           | Pepper                    | 1                                                           |
| 255             | Belgium | 1996           | Pigmeat                   | 105                                                         |
| 255             | Belgium | 1996           | Pineapples                | 7                                                           |
| 255             | Belgium | 1996           | Plantains                 | 1                                                           |
| 255             | Belgium | 1996           | Potatoes                  | 290                                                         |
| 255             | Belgium | 1996           | Poultry Meat              | 58                                                          |
| 255             | Belgium | 1996           | Pulses, Other             | 1                                                           |
| 255             | Belgium | 1996           | Rape and Mustard Oil      | 12                                                          |
| 255             | Belgium | 1996           | Rice (Milled Equivalent)  | 10                                                          |
| 255             | Belgium | 1996           | Rye                       | 3                                                           |
| 255             | Belgium | 1996           | Soyabean Oil              | 14                                                          |
| 255             | Belgium | 1996           | Spices, Other             | 1                                                           |
| 255             | Belgium | 1996           | Sugar, Refined Equivalent | 114                                                         |
| 255             | Belgium | 1996           | Sunflowerseed Oil         | 12                                                          |
| 255             | Belgium | 1996           | Sweeteners, Other         | 8                                                           |
| 255             | Belgium | 1996           | Tomatoes                  | 67                                                          |
| 255             | Belgium | 1996           | Vegetables, Other         | 259                                                         |
| 255             | Belgium | 1996           | Wheat                     | 262                                                         |
| 255             | Belgium | 1996           | Wine                      | 61                                                          |
| 255             | Belgium | 1997           | Apples                    | 82                                                          |
| 255             | Belgium | 1997           | Bananas                   | 55                                                          |
| 255             | Belgium | 1997           | Barley                    | 2                                                           |
| 255             | Belgium | 1997           | Beans                     | 2                                                           |



Dietary calcium and zinc deficiency risks are decreasing but remain prevalent

| FAO countrycode | Country | Reference year | Food item                 | Gross food supply (g capita <sup>-1</sup> d <sup>-1</sup> ) |
|-----------------|---------|----------------|---------------------------|-------------------------------------------------------------|
| 255             | Belgium | 1997           | Beer                      | 332                                                         |
| 255             | Belgium | 1997           | Beverages, Alcoholic      | 7                                                           |
| 255             | Belgium | 1997           | Bovine Meat               | 58                                                          |
| 255             | Belgium | 1997           | Butter, Ghee              | 18                                                          |
| 255             | Belgium | 1997           | Cereals, Other            | 2                                                           |
| 255             | Belgium | 1997           | Cheese                    | 40                                                          |
| 255             | Belgium | 1997           | Citrus, Other             | 1                                                           |
| 255             | Belgium | 1997           | Coconut Oil               | 4                                                           |
| 255             | Belgium | 1997           | Coconuts - Incl Copra     | 11                                                          |
| 255             | Belgium | 1997           | Coffee                    | 12                                                          |
| 255             | Belgium | 1997           | Cottonseed Oil            | 4                                                           |
| 255             | Belgium | 1997           | Cream                     | 19                                                          |
| 255             | Belgium | 1997           | Crustaceans               | 6                                                           |
| 255             | Belgium | 1997           | Dates                     | 1                                                           |
| 255             | Belgium | 1997           | Demersal Fish             | 20                                                          |
| 255             | Belgium | 1997           | Eggs                      | 39                                                          |
| 255             | Belgium | 1997           | Fats, Animals, Raw        | 38                                                          |
| 255             | Belgium | 1997           | Freshwater Fish           | 8                                                           |
| 255             | Belgium | 1997           | Fruits, Other             | 52                                                          |
| 255             | Belgium | 1997           | Grapefruit                | 12                                                          |
| 255             | Belgium | 1997           | Grapes                    | 13                                                          |
| 255             | Belgium | 1997           | Groundnut Oil             | 2                                                           |
| 255             | Belgium | 1997           | Groundnuts (Shelled Eq)   | 1                                                           |
| 255             | Belgium | 1997           | Honey                     | 2                                                           |
| 255             | Belgium | 1997           | Lemons, Limes             | 6                                                           |
| 255             | Belgium | 1997           | Maize                     | 6                                                           |
| 255             | Belgium | 1997           | Maize Germ Oil            | 3                                                           |
| 255             | Belgium | 1997           | Marine Fish, Other        | 5                                                           |
| 255             | Belgium | 1997           | Meat, Other               | 11                                                          |
| 255             | Belgium | 1997           | Milk, Whole               | 160                                                         |
| 255             | Belgium | 1997           | Molluscs, Other           | 10                                                          |
| 255             | Belgium | 1997           | Mutton & Goat Meat        | 5                                                           |
| 255             | Belgium | 1997           | Nuts                      | 13                                                          |
| 255             | Belgium | 1997           | Offals, Edible            | 13                                                          |
| 255             | Belgium | 1997           | Oilcrops Oil, Other       | 6                                                           |
| 255             | Belgium | 1997           | Olive Oil                 | 2                                                           |
| 255             | Belgium | 1997           | Olives                    | 1                                                           |
| 255             | Belgium | 1997           | Onions                    | 20                                                          |
| 255             | Belgium | 1997           | Oranges, Mandarines       | 78                                                          |
| 255             | Belgium | 1997           | Palm Oil                  | 9                                                           |
| 255             | Belgium | 1997           | Palmkernel Oil            | 1                                                           |
| 255             | Belgium | 1997           | Peas                      | 4                                                           |
| 255             | Belgium | 1997           | Pelagic Fish              | 12                                                          |
| 255             | Belgium | 1997           | Pepper                    | 1                                                           |
| 255             | Belgium | 1997           | Pig meat                  | 94                                                          |
| 255             | Belgium | 1997           | Pineapples                | 10                                                          |
| 255             | Belgium | 1997           | Plantains                 | 1                                                           |
| 255             | Belgium | 1997           | Potatoes                  | 288                                                         |
| 255             | Belgium | 1997           | Poultry Meat              | 51                                                          |
| 255             | Belgium | 1997           | Pulses, Other             | 1                                                           |
| 255             | Belgium | 1997           | Rape and Mustard Oil      | 12                                                          |
| 255             | Belgium | 1997           | Rice (Milled Equivalent)  | 18                                                          |
| 255             | Belgium | 1997           | Rye                       | 5                                                           |
| 255             | Belgium | 1997           | Soyabean Oil              | 12                                                          |
| 255             | Belgium | 1997           | Spices, Other             | 1                                                           |
| 255             | Belgium | 1997           | Sugar, Refined Equivalent | 115                                                         |
| 255             | Belgium | 1997           | Sunflowerseed Oil         | 6                                                           |
| 255             | Belgium | 1997           | Sweeteners, Other         | 7                                                           |
| 255             | Belgium | 1997           | Tomatoes                  | 77                                                          |
| 255             | Belgium | 1997           | Vegetables, Other         | 273                                                         |
| 255             | Belgium | 1997           | Wheat                     | 262                                                         |
| 255             | Belgium | 1997           | Wine                      | 60                                                          |
| 255             | Belgium | 1998           | Apples                    | 93                                                          |
| 255             | Belgium | 1998           | Bananas                   | 16                                                          |
| 255             | Belgium | 1998           | Barley                    | 2                                                           |
| 255             | Belgium | 1998           | Beans                     | 2                                                           |
| 255             | Belgium | 1998           | Beer                      | 287                                                         |
| 255             | Belgium | 1998           | Beverages, Alcoholic      | 9                                                           |
| 255             | Belgium | 1998           | Bovine Meat               | 54                                                          |
| 255             | Belgium | 1998           | Butter, Ghee              | 16                                                          |
| 255             | Belgium | 1998           | Cereals, Other            | 1                                                           |
| 255             | Belgium | 1998           | Cheese                    | 38                                                          |
| 255             | Belgium | 1998           | Citrus, Other             | 1                                                           |
| 255             | Belgium | 1998           | Cocoa Beans               | 1                                                           |
| 255             | Belgium | 1998           | Coconut Oil               | 3                                                           |
| 255             | Belgium | 1998           | Coconuts - Incl Copra     | 5                                                           |
| 255             | Belgium | 1998           | Coffee                    | 19                                                          |
| 255             | Belgium | 1998           | Cottonseed Oil            | 4                                                           |
| 255             | Belgium | 1998           | Cream                     | 21                                                          |
| 255             | Belgium | 1998           | Crustaceans               | 7                                                           |
| 255             | Belgium | 1998           | Dates                     | 1                                                           |
| 255             | Belgium | 1998           | Demersal Fish             | 20                                                          |
| 255             | Belgium | 1998           | Eggs                      | 41                                                          |
| 255             | Belgium | 1998           | Fats, Animals, Raw        | 37                                                          |
| 255             | Belgium | 1998           | Freshwater Fish           | 8                                                           |
| 255             | Belgium | 1998           | Fruits, Other             | 52                                                          |
| 255             | Belgium | 1998           | Grapefruit                | 7                                                           |
| 255             | Belgium | 1998           | Grapes                    | 16                                                          |
| 255             | Belgium | 1998           | Groundnut Oil             | 2                                                           |
| 255             | Belgium | 1998           | Groundnuts (Shelled Eq)   | 1                                                           |
| 255             | Belgium | 1998           | Honey                     | 2                                                           |
| 255             | Belgium | 1998           | Lemons, Limes             | 6                                                           |
| 255             | Belgium | 1998           | Maize                     | 6                                                           |
| 255             | Belgium | 1998           | Maize Germ Oil            | 2                                                           |
| 255             | Belgium | 1998           | Marine Fish, Other        | 4                                                           |
| 255             | Belgium | 1998           | Meat, Other               | 12                                                          |
| 255             | Belgium | 1998           | Milk, Whole               | 153                                                         |

## Dietary calcium and zinc deficiency risks are decreasing but remain prevalent

| FAO countrycode | Country | Reference year | Food item                 | Gross food supply(g capita <sup>-1</sup> d <sup>-1</sup> ) |
|-----------------|---------|----------------|---------------------------|------------------------------------------------------------|
| 255             | Belgium | 1998           | Molluscs, Other           | 10                                                         |
| 255             | Belgium | 1998           | Mutton & Goat Meat        | 5                                                          |
| 255             | Belgium | 1998           | Nuts                      | 13                                                         |
| 255             | Belgium | 1998           | Offals, Edible            | 20                                                         |
| 255             | Belgium | 1998           | Oilcrops Oil, Other       | 6                                                          |
| 255             | Belgium | 1998           | Olive Oil                 | 2                                                          |
| 255             | Belgium | 1998           | Olives                    | 1                                                          |
| 255             | Belgium | 1998           | Onions                    | 19                                                         |
| 255             | Belgium | 1998           | Oranges, Mandarines       | 115                                                        |
| 255             | Belgium | 1998           | Palm Oil                  | 8                                                          |
| 255             | Belgium | 1998           | Palmkernel Oil            | 1                                                          |
| 255             | Belgium | 1998           | Peas                      | 4                                                          |
| 255             | Belgium | 1998           | Pelagic Fish              | 13                                                         |
| 255             | Belgium | 1998           | Pigmeat                   | 91                                                         |
| 255             | Belgium | 1998           | Pineapples                | 9                                                          |
| 255             | Belgium | 1998           | Plantains                 | 1                                                          |
| 255             | Belgium | 1998           | Potatoes                  | 280                                                        |
| 255             | Belgium | 1998           | Poultry Meat              | 51                                                         |
| 255             | Belgium | 1998           | Pulses, Other             | 1                                                          |
| 255             | Belgium | 1998           | Rape and Mustard Oil      | 12                                                         |
| 255             | Belgium | 1998           | Rice (Milled Equivalent)  | 10                                                         |
| 255             | Belgium | 1998           | Rye                       | 5                                                          |
| 255             | Belgium | 1998           | Soyabean Oil              | 16                                                         |
| 255             | Belgium | 1998           | Spices, Other             | 1                                                          |
| 255             | Belgium | 1998           | Sugar, Refined Equivalent | 122                                                        |
| 255             | Belgium | 1998           | Sunflowerseed Oil         | 8                                                          |
| 255             | Belgium | 1998           | Sweeteners, Other         | 9                                                          |
| 255             | Belgium | 1998           | Tomatoes                  | 85                                                         |
| 255             | Belgium | 1998           | Vegetables, Other         | 265                                                        |
| 255             | Belgium | 1998           | Wheat                     | 271                                                        |
| 255             | Belgium | 1998           | Wine                      | 69                                                         |
| 255             | Belgium | 1999           | Apples                    | 105                                                        |
| 255             | Belgium | 1999           | Bananas                   | 11                                                         |
| 255             | Belgium | 1999           | Barley                    | 1                                                          |
| 255             | Belgium | 1999           | Beans                     | 3                                                          |
| 255             | Belgium | 1999           | Beer                      | 273                                                        |
| 255             | Belgium | 1999           | Beverages, Alcoholic      | 6                                                          |
| 255             | Belgium | 1999           | Bovine Meat               | 56                                                         |
| 255             | Belgium | 1999           | Butter, Ghee              | 14                                                         |
| 255             | Belgium | 1999           | Cephalopods               | 1                                                          |
| 255             | Belgium | 1999           | Cheese                    | 41                                                         |
| 255             | Belgium | 1999           | Citrus, Other             | 1                                                          |
| 255             | Belgium | 1999           | Coconut Oil               | 13                                                         |
| 255             | Belgium | 1999           | Coconuts - Incl Copra     | 4                                                          |
| 255             | Belgium | 1999           | Coffee                    | 15                                                         |
| 255             | Belgium | 1999           | Cottonseed Oil            | 2                                                          |
| 255             | Belgium | 1999           | Cream                     | 18                                                         |
| 255             | Belgium | 1999           | Crustaceans               | 6                                                          |
| 255             | Belgium | 1999           | Demersal Fish             | 18                                                         |
| 255             | Belgium | 1999           | Eggs                      | 40                                                         |
| 255             | Belgium | 1999           | Fats, Animals, Raw        | 37                                                         |
| 255             | Belgium | 1999           | Freshwater Fish           | 9                                                          |
| 255             | Belgium | 1999           | Fruits, Other             | 80                                                         |
| 255             | Belgium | 1999           | Grapefruit                | 11                                                         |
| 255             | Belgium | 1999           | Grapes                    | 16                                                         |
| 255             | Belgium | 1999           | Honey                     | 2                                                          |
| 255             | Belgium | 1999           | Lemons, Limes             | 5                                                          |
| 255             | Belgium | 1999           | Maize                     | 6                                                          |
| 255             | Belgium | 1999           | Maize Germ Oil            | 3                                                          |
| 255             | Belgium | 1999           | Marine Fish, Other        | 5                                                          |
| 255             | Belgium | 1999           | Meat, Other               | 12                                                         |
| 255             | Belgium | 1999           | Milk, Whole               | 152                                                        |
| 255             | Belgium | 1999           | Molluscs, Other           | 12                                                         |
| 255             | Belgium | 1999           | Mutton & Goat Meat        | 5                                                          |
| 255             | Belgium | 1999           | Nuts                      | 12                                                         |
| 255             | Belgium | 1999           | Offals, Edible            | 22                                                         |
| 255             | Belgium | 1999           | Oilcrops Oil, Other       | 5                                                          |
| 255             | Belgium | 1999           | Olive Oil                 | 3                                                          |
| 255             | Belgium | 1999           | Olives                    | 2                                                          |
| 255             | Belgium | 1999           | Onions                    | 30                                                         |
| 255             | Belgium | 1999           | Oranges, Mandarines       | 75                                                         |
| 255             | Belgium | 1999           | Palm Oil                  | 7                                                          |
| 255             | Belgium | 1999           | Palmkernel Oil            | 1                                                          |
| 255             | Belgium | 1999           | Peas                      | 3                                                          |
| 255             | Belgium | 1999           | Pelagic Fish              | 13                                                         |
| 255             | Belgium | 1999           | Pigmeat                   | 106                                                        |
| 255             | Belgium | 1999           | Pineapples                | 7                                                          |
| 255             | Belgium | 1999           | Plantains                 | 4                                                          |
| 255             | Belgium | 1999           | Potatoes                  | 307                                                        |
| 255             | Belgium | 1999           | Poultry Meat              | 53                                                         |
| 255             | Belgium | 1999           | Pulses, Other             | 1                                                          |
| 255             | Belgium | 1999           | Rape and Mustard Oil      | 7                                                          |
| 255             | Belgium | 1999           | Rice (Milled Equivalent)  | 11                                                         |
| 255             | Belgium | 1999           | Rye                       | 2                                                          |
| 255             | Belgium | 1999           | Soyabean Oil              | 15                                                         |
| 255             | Belgium | 1999           | Spices, Other             | 1                                                          |
| 255             | Belgium | 1999           | Sugar, Refined Equivalent | 122                                                        |
| 255             | Belgium | 1999           | Sunflowerseed Oil         | 7                                                          |
| 255             | Belgium | 1999           | Sweeteners, Other         | 8                                                          |
| 255             | Belgium | 1999           | Tomatoes                  | 77                                                         |
| 255             | Belgium | 1999           | Vegetables, Other         | 298                                                        |
| 255             | Belgium | 1999           | Wheat                     | 271                                                        |
| 255             | Belgium | 1999           | Wine                      | 66                                                         |
| 255             | Belgium | 2000           | Apples                    | 86                                                         |
| 255             | Belgium | 2000           | Bananas                   | 3                                                          |
| 255             | Belgium | 2000           | Barley                    | 1                                                          |
| 255             | Belgium | 2000           | Beans                     | 2                                                          |

Dietary calcium and zinc deficiency risks are decreasing but remain prevalent

| FAO countrycode | Country | Reference year | Food item                 | Gross food supply (g capita <sup>-1</sup> d <sup>-1</sup> ) |
|-----------------|---------|----------------|---------------------------|-------------------------------------------------------------|
| 255             | Belgium | 2000           | Beer                      | 278                                                         |
| 255             | Belgium | 2000           | Beverages, Alcoholic      | 4                                                           |
| 255             | Belgium | 2000           | Bovine Meat               | 53                                                          |
| 255             | Belgium | 2000           | Butter, Ghee              | 18                                                          |
| 255             | Belgium | 2000           | Cheese                    | 48                                                          |
| 255             | Belgium | 2000           | Citrus, Other             | 1                                                           |
| 255             | Belgium | 2000           | Coconuts - Incl Copra     | 5                                                           |
| 255             | Belgium | 2000           | Coffee                    | 10                                                          |
| 255             | Belgium | 2000           | Cottonseed Oil            | 1                                                           |
| 255             | Belgium | 2000           | Cream                     | 19                                                          |
| 255             | Belgium | 2000           | Crustaceans               | 7                                                           |
| 255             | Belgium | 2000           | Dates                     | 1                                                           |
| 255             | Belgium | 2000           | Demersal Fish             | 20                                                          |
| 255             | Belgium | 2000           | Eggs                      | 30                                                          |
| 255             | Belgium | 2000           | Fats, Animals, Raw        | 34                                                          |
| 255             | Belgium | 2000           | Freshwater Fish           | 12                                                          |
| 255             | Belgium | 2000           | Fruits, Other             | 67                                                          |
| 255             | Belgium | 2000           | Grapefruit                | 11                                                          |
| 255             | Belgium | 2000           | Grapes                    | 9                                                           |
| 255             | Belgium | 2000           | Groundnuts (Shelled Eq)   | 1                                                           |
| 255             | Belgium | 2000           | Honey                     | 2                                                           |
| 255             | Belgium | 2000           | Lemons, Limes             | 5                                                           |
| 255             | Belgium | 2000           | Maize                     | 6                                                           |
| 255             | Belgium | 2000           | Maize Germ Oil            | 3                                                           |
| 255             | Belgium | 2000           | Marine Fish, Other        | 4                                                           |
| 255             | Belgium | 2000           | Meat, Other               | 4                                                           |
| 255             | Belgium | 2000           | Milk, Whole               | 182                                                         |
| 255             | Belgium | 2000           | Molluscs, Other           | 11                                                          |
| 255             | Belgium | 2000           | Mutton & Goat Meat        | 6                                                           |
| 255             | Belgium | 2000           | Nuts                      | 15                                                          |
| 255             | Belgium | 2000           | Offals, Edible            | 12                                                          |
| 255             | Belgium | 2000           | Oilcrops Oil, Other       | 2                                                           |
| 255             | Belgium | 2000           | Olive Oil                 | 3                                                           |
| 255             | Belgium | 2000           | Olives                    | 2                                                           |
| 255             | Belgium | 2000           | Onions                    | 1                                                           |
| 255             | Belgium | 2000           | Oranges, Mandarines       | 12                                                          |
| 255             | Belgium | 2000           | Palm Oil                  | 20                                                          |
| 255             | Belgium | 2000           | Palmkernel Oil            | 3                                                           |
| 255             | Belgium | 2000           | Peas                      | 4                                                           |
| 255             | Belgium | 2000           | Pelagic Fish              | 11                                                          |
| 255             | Belgium | 2000           | Pigmeat                   | 106                                                         |
| 255             | Belgium | 2000           | Pineapples                | 5                                                           |
| 255             | Belgium | 2000           | Potatoes                  | 346                                                         |
| 255             | Belgium | 2000           | Poultry Meat              | 54                                                          |
| 255             | Belgium | 2000           | Pulses, Other             | 1                                                           |
| 255             | Belgium | 2000           | Rape and Mustard Oil      | 11                                                          |
| 255             | Belgium | 2000           | Rice (Milled Equivalent)  | 11                                                          |
| 255             | Belgium | 2000           | Rye                       | 1                                                           |
| 255             | Belgium | 2000           | Soyabean Oil              | 13                                                          |
| 255             | Belgium | 2000           | Spices, Other             | 1                                                           |
| 255             | Belgium | 2000           | Sugar, Refined Equivalent | 139                                                         |
| 255             | Belgium | 2000           | Sunflowerseed Oil         | 6                                                           |
| 255             | Belgium | 2000           | Sweeteners, Other         | 10                                                          |
| 255             | Belgium | 2000           | Tomatoes                  | 63                                                          |
| 255             | Belgium | 2000           | Vegetables, Other         | 263                                                         |
| 255             | Belgium | 2000           | Wheat                     | 274                                                         |
| 255             | Belgium | 2000           | Wine                      | 71                                                          |
| 255             | Belgium | 2001           | Apples                    | 78                                                          |
| 255             | Belgium | 2001           | Bananas                   | 1                                                           |
| 255             | Belgium | 2001           | Barley                    | 1                                                           |
| 255             | Belgium | 2001           | Beans                     | 2                                                           |
| 255             | Belgium | 2001           | Beer                      | 275                                                         |
| 255             | Belgium | 2001           | Beverages, Alcoholic      | 4                                                           |
| 255             | Belgium | 2001           | Bovine Meat               | 57                                                          |
| 255             | Belgium | 2001           | Butter, Ghee              | 17                                                          |
| 255             | Belgium | 2001           | Cheese                    | 49                                                          |
| 255             | Belgium | 2001           | Coconut Oil               | 2                                                           |
| 255             | Belgium | 2001           | Coconuts - Incl Copra     | 4                                                           |
| 255             | Belgium | 2001           | Coffee                    | 8                                                           |
| 255             | Belgium | 2001           | Cream                     | 19                                                          |
| 255             | Belgium | 2001           | Crustaceans               | 6                                                           |
| 255             | Belgium | 2001           | Dates                     | 1                                                           |
| 255             | Belgium | 2001           | Demersal Fish             | 20                                                          |
| 255             | Belgium | 2001           | Eggs                      | 36                                                          |
| 255             | Belgium | 2001           | Fats, Animals, Raw        | 32                                                          |
| 255             | Belgium | 2001           | Freshwater Fish           | 11                                                          |
| 255             | Belgium | 2001           | Fruits, Other             | 72                                                          |
| 255             | Belgium | 2001           | Grapefruit                | 9                                                           |
| 255             | Belgium | 2001           | Grapes                    | 10                                                          |
| 255             | Belgium | 2001           | Groundnuts (Shelled Eq)   | 1                                                           |
| 255             | Belgium | 2001           | Honey                     | 2                                                           |
| 255             | Belgium | 2001           | Lemons, Limes             | 5                                                           |
| 255             | Belgium | 2001           | Maize                     | 6                                                           |
| 255             | Belgium | 2001           | Maize Germ Oil            | 3                                                           |
| 255             | Belgium | 2001           | Marine Fish, Other        | 3                                                           |
| 255             | Belgium | 2001           | Meat, Other               | 7                                                           |
| 255             | Belgium | 2001           | Milk, Whole               | 185                                                         |
| 255             | Belgium | 2001           | Molluscs, Other           | 10                                                          |
| 255             | Belgium | 2001           | Mutton & Goat Meat        | 5                                                           |
| 255             | Belgium | 2001           | Nuts                      | 14                                                          |
| 255             | Belgium | 2001           | Offals, Edible            | 9                                                           |
| 255             | Belgium | 2001           | Oilcrops Oil, Other       | 3                                                           |
| 255             | Belgium | 2001           | Olive Oil                 | 3                                                           |
| 255             | Belgium | 2001           | Olives                    | 2                                                           |
| 255             | Belgium | 2001           | Onions                    | 4                                                           |
| 255             | Belgium | 2001           | Oranges, Mandarines       | 11                                                          |
| 255             | Belgium | 2001           | Palm Oil                  | 21                                                          |

Dietary calcium and zinc deficiency risks are decreasing but remain prevalent

| FAO countrycode | Country | Reference year | Food item                 | Gross food supply (g capita <sup>-1</sup> d <sup>-1</sup> ) |
|-----------------|---------|----------------|---------------------------|-------------------------------------------------------------|
| 255             | Belgium | 2001           | Peas                      | 3                                                           |
| 255             | Belgium | 2001           | Pelagic Fish              | 11                                                          |
| 255             | Belgium | 2001           | Pigmeat                   | 107                                                         |
| 255             | Belgium | 2001           | Pineapples                | 4                                                           |
| 255             | Belgium | 2001           | Potatoes                  | 309                                                         |
| 255             | Belgium | 2001           | Poultry Meat              | 61                                                          |
| 255             | Belgium | 2001           | Pulses, Other             | 1                                                           |
| 255             | Belgium | 2001           | Rape and Mustard Oil      | 14                                                          |
| 255             | Belgium | 2001           | Rice (Milled Equivalent)  | 10                                                          |
| 255             | Belgium | 2001           | Rye                       | 1                                                           |
| 255             | Belgium | 2001           | Soyabean Oil              | 13                                                          |
| 255             | Belgium | 2001           | Spices, Other             | 1                                                           |
| 255             | Belgium | 2001           | Sugar, Refined Equivalent | 138                                                         |
| 255             | Belgium | 2001           | Sunflowerseed Oil         | 6                                                           |
| 255             | Belgium | 2001           | Sweeteners, Other         | 5                                                           |
| 255             | Belgium | 2001           | Tomatoes                  | 68                                                          |
| 255             | Belgium | 2001           | Vegetables, Other         | 245                                                         |
| 255             | Belgium | 2001           | Wheat                     | 286                                                         |
| 255             | Belgium | 2001           | Wine                      | 69                                                          |
| 255             | Belgium | 2002           | Apples                    | 63                                                          |
| 255             | Belgium | 2002           | Bananas                   | 2                                                           |
| 255             | Belgium | 2002           | Beans                     | 3                                                           |
| 255             | Belgium | 2002           | Beer                      | 276                                                         |
| 255             | Belgium | 2002           | Beverages, Alcoholic      | 4                                                           |
| 255             | Belgium | 2002           | Bovine Meat               | 54                                                          |
| 255             | Belgium | 2002           | Butter, Ghee              | 17                                                          |
| 255             | Belgium | 2002           | Cheese                    | 51                                                          |
| 255             | Belgium | 2002           | Coconut Oil               | 6                                                           |
| 255             | Belgium | 2002           | Coconuts - Incl Copra     | 5                                                           |
| 255             | Belgium | 2002           | Coffee                    | 21                                                          |
| 255             | Belgium | 2002           | Cream                     | 20                                                          |
| 255             | Belgium | 2002           | Crustaceans               | 7                                                           |
| 255             | Belgium | 2002           | Demersal Fish             | 19                                                          |
| 255             | Belgium | 2002           | Eggs                      | 33                                                          |
| 255             | Belgium | 2002           | Fats, Animals, Raw        | 35                                                          |
| 255             | Belgium | 2002           | Freshwater Fish           | 9                                                           |
| 255             | Belgium | 2002           | Fruits, Other             | 85                                                          |
| 255             | Belgium | 2002           | Grapefruit                | 8                                                           |
| 255             | Belgium | 2002           | Grapes                    | 10                                                          |
| 255             | Belgium | 2002           | Groundnuts (Shelled Eq)   | 1                                                           |
| 255             | Belgium | 2002           | Honey                     | 2                                                           |
| 255             | Belgium | 2002           | Lemons, Limes             | 7                                                           |
| 255             | Belgium | 2002           | Maize                     | 6                                                           |
| 255             | Belgium | 2002           | Maize Germ Oil            | 3                                                           |
| 255             | Belgium | 2002           | Marine Fish, Other        | 4                                                           |
| 255             | Belgium | 2002           | Meat, Other               | 5                                                           |
| 255             | Belgium | 2002           | Milk, Whole               | 198                                                         |
| 255             | Belgium | 2002           | Molluscs, Other           | 9                                                           |
| 255             | Belgium | 2002           | Mutton & Goat Meat        | 4                                                           |
| 255             | Belgium | 2002           | Nuts                      | 16                                                          |
| 255             | Belgium | 2002           | Offals, Edible            | 7                                                           |
| 255             | Belgium | 2002           | Oilcrops Oil, Other       | 7                                                           |
| 255             | Belgium | 2002           | Olive Oil                 | 3                                                           |
| 255             | Belgium | 2002           | Olives                    | 2                                                           |
| 255             | Belgium | 2002           | Onions                    | 1                                                           |
| 255             | Belgium | 2002           | Oranges, Mandarines       | 13                                                          |
| 255             | Belgium | 2002           | Palm Oil                  | 8                                                           |
| 255             | Belgium | 2002           | Palmkernel Oil            | 1                                                           |
| 255             | Belgium | 2002           | Peas                      | 3                                                           |
| 255             | Belgium | 2002           | Pelagic Fish              | 12                                                          |
| 255             | Belgium | 2002           | Pepper                    | 1                                                           |
| 255             | Belgium | 2002           | Pigmeat                   | 98                                                          |
| 255             | Belgium | 2002           | Pineapples                | 4                                                           |
| 255             | Belgium | 2002           | Potatoes                  | 295                                                         |
| 255             | Belgium | 2002           | Poultry Meat              | 69                                                          |
| 255             | Belgium | 2002           | Pulses, Other             | 1                                                           |
| 255             | Belgium | 2002           | Rape and Mustard Oil      | 16                                                          |
| 255             | Belgium | 2002           | Rice (Milled Equivalent)  | 13                                                          |
| 255             | Belgium | 2002           | Rye                       | 1                                                           |
| 255             | Belgium | 2002           | Soyabean Oil              | 13                                                          |
| 255             | Belgium | 2002           | Spices, Other             | 2                                                           |
| 255             | Belgium | 2002           | Sugar, Refined Equivalent | 126                                                         |
| 255             | Belgium | 2002           | Sunflowerseed Oil         | 5                                                           |
| 255             | Belgium | 2002           | Sweeteners, Other         | 10                                                          |
| 255             | Belgium | 2002           | Tomatoes                  | 71                                                          |
| 255             | Belgium | 2002           | Vegetables, Other         | 271                                                         |
| 255             | Belgium | 2002           | Wheat                     | 286                                                         |
| 255             | Belgium | 2002           | Wine                      | 73                                                          |
| 255             | Belgium | 2003           | Apples                    | 77                                                          |
| 255             | Belgium | 2003           | Bananas                   | 2                                                           |
| 255             | Belgium | 2003           | Beans                     | 2                                                           |
| 255             | Belgium | 2003           | Beer                      | 279                                                         |
| 255             | Belgium | 2003           | Beverages, Alcoholic      | 4                                                           |
| 255             | Belgium | 2003           | Bovine Meat               | 51                                                          |
| 255             | Belgium | 2003           | Butter, Ghee              | 14                                                          |
| 255             | Belgium | 2003           | Cheese                    | 52                                                          |
| 255             | Belgium | 2003           | Coconut Oil               | 5                                                           |
| 255             | Belgium | 2003           | Coconuts - Incl Copra     | 6                                                           |
| 255             | Belgium | 2003           | Coffee                    | 25                                                          |
| 255             | Belgium | 2003           | Cream                     | 21                                                          |
| 255             | Belgium | 2003           | Crustaceans               | 9                                                           |
| 255             | Belgium | 2003           | Demersal Fish             | 16                                                          |
| 255             | Belgium | 2003           | Eggs                      | 32                                                          |
| 255             | Belgium | 2003           | Fats, Animals, Raw        | 33                                                          |
| 255             | Belgium | 2003           | Freshwater Fish           | 11                                                          |
| 255             | Belgium | 2003           | Fruits, Other             | 81                                                          |
| 255             | Belgium | 2003           | Grapefruit                | 8                                                           |

Dietary calcium and zinc deficiency risks are decreasing but remain prevalent

| FAO countrycode | Country | Reference year | Food item                 | Gross food supply (g capita <sup>-1</sup> d <sup>-1</sup> ) |
|-----------------|---------|----------------|---------------------------|-------------------------------------------------------------|
| 255             | Belgium | 2003           | Grapes                    | 10                                                          |
| 255             | Belgium | 2003           | Honey                     | 2                                                           |
| 255             | Belgium | 2003           | Lemons, Limes             | 6                                                           |
| 255             | Belgium | 2003           | Maize                     | 6                                                           |
| 255             | Belgium | 2003           | Maize Germ Oil            | 3                                                           |
| 255             | Belgium | 2003           | Marine Fish, Other        | 5                                                           |
| 255             | Belgium | 2003           | Meat, Other               | 5                                                           |
| 255             | Belgium | 2003           | Milk, Whole               | 153                                                         |
| 255             | Belgium | 2003           | Molluscs, Other           | 13                                                          |
| 255             | Belgium | 2003           | Mutton & Goat Meat        | 5                                                           |
| 255             | Belgium | 2003           | Nuts                      | 17                                                          |
| 255             | Belgium | 2003           | Offals, Edible            | 6                                                           |
| 255             | Belgium | 2003           | Oilcrops Oil, Other       | 6                                                           |
| 255             | Belgium | 2003           | Olive Oil                 | 3                                                           |
| 255             | Belgium | 2003           | Olives                    | 2                                                           |
| 255             | Belgium | 2003           | Onions                    | 1                                                           |
| 255             | Belgium | 2003           | Oranges, Mandarines       | 14                                                          |
| 255             | Belgium | 2003           | Palm Oil                  | 6                                                           |
| 255             | Belgium | 2003           | Palmkernel Oil            | 5                                                           |
| 255             | Belgium | 2003           | Peas                      | 3                                                           |
| 255             | Belgium | 2003           | Pelagic Fish              | 13                                                          |
| 255             | Belgium | 2003           | Pepper                    | 1                                                           |
| 255             | Belgium | 2003           | Pigmeat                   | 97                                                          |
| 255             | Belgium | 2003           | Pineapples                | 4                                                           |
| 255             | Belgium | 2003           | Potatoes                  | 290                                                         |
| 255             | Belgium | 2003           | Poultry Meat              | 60                                                          |
| 255             | Belgium | 2003           | Pulses, Other             | 1                                                           |
| 255             | Belgium | 2003           | Rape and Mustard Oil      | 10                                                          |
| 255             | Belgium | 2003           | Rice (Milled Equivalent)  | 11                                                          |
| 255             | Belgium | 2003           | Rye                       | 2                                                           |
| 255             | Belgium | 2003           | Soyabean Oil              | 13                                                          |
| 255             | Belgium | 2003           | Spices, Other             | 2                                                           |
| 255             | Belgium | 2003           | Sugar, Refined Equivalent | 125                                                         |
| 255             | Belgium | 2003           | Sunflowerseed Oil         | 12                                                          |
| 255             | Belgium | 2003           | Sweeteners, Other         | 13                                                          |
| 255             | Belgium | 2003           | Tea                       | 1                                                           |
| 255             | Belgium | 2003           | Tomatoes                  | 72                                                          |
| 255             | Belgium | 2003           | Vegetables, Other         | 280                                                         |
| 255             | Belgium | 2003           | Wheat                     | 286                                                         |
| 255             | Belgium | 2003           | Wine                      | 70                                                          |
| 255             | Belgium | 2004           | Apples                    | 84                                                          |
| 255             | Belgium | 2004           | Bananas                   | 33                                                          |
| 255             | Belgium | 2004           | Barley                    | 1                                                           |
| 255             | Belgium | 2004           | Beans                     | 2                                                           |
| 255             | Belgium | 2004           | Beer                      | 270                                                         |
| 255             | Belgium | 2004           | Beverages, Alcoholic      | 4                                                           |
| 255             | Belgium | 2004           | Bovine Meat               | 54                                                          |
| 255             | Belgium | 2004           | Butter, Ghee              | 14                                                          |
| 255             | Belgium | 2004           | Cheese                    | 53                                                          |
| 255             | Belgium | 2004           | Coconuts - Incl Copra     | 6                                                           |
| 255             | Belgium | 2004           | Coffee                    | 23                                                          |
| 255             | Belgium | 2004           | Cream                     | 22                                                          |
| 255             | Belgium | 2004           | Crustaceans               | 8                                                           |
| 255             | Belgium | 2004           | Demersal Fish             | 19                                                          |
| 255             | Belgium | 2004           | Eggs                      | 39                                                          |
| 255             | Belgium | 2004           | Fats, Animals, Raw        | 34                                                          |
| 255             | Belgium | 2004           | Freshwater Fish           | 12                                                          |
| 255             | Belgium | 2004           | Fruits, Other             | 78                                                          |
| 255             | Belgium | 2004           | Grapefruit                | 6                                                           |
| 255             | Belgium | 2004           | Grapes                    | 8                                                           |
| 255             | Belgium | 2004           | Groundnuts (Shelled Eq)   | 1                                                           |
| 255             | Belgium | 2004           | Honey                     | 1                                                           |
| 255             | Belgium | 2004           | Lemons, Limes             | 5                                                           |
| 255             | Belgium | 2004           | Maize                     | 6                                                           |
| 255             | Belgium | 2004           | Maize Germ Oil            | 3                                                           |
| 255             | Belgium | 2004           | Marine Fish, Other        | 5                                                           |
| 255             | Belgium | 2004           | Meat, Other               | 4                                                           |
| 255             | Belgium | 2004           | Milk, Whole               | 154                                                         |
| 255             | Belgium | 2004           | Molluscs, Other           | 12                                                          |
| 255             | Belgium | 2004           | Mutton & Goat Meat        | 5                                                           |
| 255             | Belgium | 2004           | Nuts                      | 16                                                          |
| 255             | Belgium | 2004           | Offals, Edible            | 6                                                           |
| 255             | Belgium | 2004           | Oilcrops Oil, Other       | 4                                                           |
| 255             | Belgium | 2004           | Olive Oil                 | 3                                                           |
| 255             | Belgium | 2004           | Olives                    | 3                                                           |
| 255             | Belgium | 2004           | Onions                    | 1                                                           |
| 255             | Belgium | 2004           | Oranges, Mandarines       | 18                                                          |
| 255             | Belgium | 2004           | Palm Oil                  | 12                                                          |
| 255             | Belgium | 2004           | Palmkernel Oil            | 5                                                           |
| 255             | Belgium | 2004           | Peas                      | 3                                                           |
| 255             | Belgium | 2004           | Pelagic Fish              | 11                                                          |
| 255             | Belgium | 2004           | Pepper                    | 1                                                           |
| 255             | Belgium | 2004           | Pigmeat                   | 93                                                          |
| 255             | Belgium | 2004           | Pineapples                | 4                                                           |
| 255             | Belgium | 2004           | Potatoes                  | 255                                                         |
| 255             | Belgium | 2004           | Poultry Meat              | 60                                                          |
| 255             | Belgium | 2004           | Pulses, Other             | 1                                                           |
| 255             | Belgium | 2004           | Rape and Mustard Oil      | 14                                                          |
| 255             | Belgium | 2004           | Rice (Milled Equivalent)  | 23                                                          |
| 255             | Belgium | 2004           | Rye                       | 1                                                           |
| 255             | Belgium | 2004           | Soyabean Oil              | 13                                                          |
| 255             | Belgium | 2004           | Spices, Other             | 2                                                           |
| 255             | Belgium | 2004           | Sugar, Refined Equivalent | 125                                                         |
| 255             | Belgium | 2004           | Sunflowerseed Oil         | 8                                                           |
| 255             | Belgium | 2004           | Sweeteners, Other         | 11                                                          |
| 255             | Belgium | 2004           | Tea                       | 1                                                           |
| 255             | Belgium | 2004           | Tomatoes                  | 68                                                          |

Dietary calcium and zinc deficiency risks are decreasing but remain prevalent

| FAO countrycode | Country | Reference year | Food item                 | Gross food supply (g capita <sup>-1</sup> d <sup>-1</sup> ) |
|-----------------|---------|----------------|---------------------------|-------------------------------------------------------------|
| 255             | Belgium | 2004           | Vegetables, Other         | 272                                                         |
| 255             | Belgium | 2004           | Wheat                     | 286                                                         |
| 255             | Belgium | 2004           | Wine                      | 74                                                          |
| 255             | Belgium | 2005           | Apples                    | 83                                                          |
| 255             | Belgium | 2005           | Bananas                   | 7                                                           |
| 255             | Belgium | 2005           | Beans                     | 2                                                           |
| 255             | Belgium | 2005           | Beer                      | 276                                                         |
| 255             | Belgium | 2005           | Beverages, Alcoholic      | 4                                                           |
| 255             | Belgium | 2005           | Bovine Meat               | 51                                                          |
| 255             | Belgium | 2005           | Butter, Ghee              | 15                                                          |
| 255             | Belgium | 2005           | Cheese                    | 53                                                          |
| 255             | Belgium | 2005           | Coconut Oil               | 8                                                           |
| 255             | Belgium | 2005           | Coconuts - Incl Copra     | 7                                                           |
| 255             | Belgium | 2005           | Coffee                    | 19                                                          |
| 255             | Belgium | 2005           | Cream                     | 26                                                          |
| 255             | Belgium | 2005           | Crustaceans               | 8                                                           |
| 255             | Belgium | 2005           | Dates                     | 1                                                           |
| 255             | Belgium | 2005           | Demersal Fish             | 17                                                          |
| 255             | Belgium | 2005           | Eggs                      | 31                                                          |
| 255             | Belgium | 2005           | Fats, Animals, Raw        | 34                                                          |
| 255             | Belgium | 2005           | Freshwater Fish           | 12                                                          |
| 255             | Belgium | 2005           | Fruits, Other             | 57                                                          |
| 255             | Belgium | 2005           | Grapefruit                | 9                                                           |
| 255             | Belgium | 2005           | Grapes                    | 10                                                          |
| 255             | Belgium | 2005           | Honey                     | 1                                                           |
| 255             | Belgium | 2005           | Lemons, Limes             | 5                                                           |
| 255             | Belgium | 2005           | Maize                     | 6                                                           |
| 255             | Belgium | 2005           | Maize Germ Oil            | 3                                                           |
| 255             | Belgium | 2005           | Marine Fish, Other        | 4                                                           |
| 255             | Belgium | 2005           | Meat, Other               | 5                                                           |
| 255             | Belgium | 2005           | Milk, Whole               | 158                                                         |
| 255             | Belgium | 2005           | Molluscs, Other           | 12                                                          |
| 255             | Belgium | 2005           | Mutton & Goat Meat        | 5                                                           |
| 255             | Belgium | 2005           | Nuts                      | 19                                                          |
| 255             | Belgium | 2005           | Offals, Edible            | 5                                                           |
| 255             | Belgium | 2005           | Oilcrops Oil, Other       | 4                                                           |
| 255             | Belgium | 2005           | Olive Oil                 | 3                                                           |
| 255             | Belgium | 2005           | Olives                    | 3                                                           |
| 255             | Belgium | 2005           | Onions                    | 1                                                           |
| 255             | Belgium | 2005           | Oranges, Mandarines       | 16                                                          |
| 255             | Belgium | 2005           | Palm Oil                  | 11                                                          |
| 255             | Belgium | 2005           | Palmkernel Oil            | 4                                                           |
| 255             | Belgium | 2005           | Peas                      | 3                                                           |
| 255             | Belgium | 2005           | Pelagic Fish              | 13                                                          |
| 255             | Belgium | 2005           | Pepper                    | 1                                                           |
| 255             | Belgium | 2005           | Pigmeat                   | 95                                                          |
| 255             | Belgium | 2005           | Pineapples                | 3                                                           |
| 255             | Belgium | 2005           | Potatoes                  | 249                                                         |
| 255             | Belgium | 2005           | Poultry Meat              | 69                                                          |
| 255             | Belgium | 2005           | Pulses, Other             | 1                                                           |
| 255             | Belgium | 2005           | Rape and Mustard Oil      | 8                                                           |
| 255             | Belgium | 2005           | Rice (Milled Equivalent)  | 22                                                          |
| 255             | Belgium | 2005           | Rye                       | 1                                                           |
| 255             | Belgium | 2005           | Soyabean Oil              | 13                                                          |
| 255             | Belgium | 2005           | Spices, Other             | 2                                                           |
| 255             | Belgium | 2005           | Sugar, Refined Equivalent | 124                                                         |
| 255             | Belgium | 2005           | Sunflowerseed Oil         | 8                                                           |
| 255             | Belgium | 2005           | Sweeteners, Other         | 11                                                          |
| 255             | Belgium | 2005           | Tea                       | 1                                                           |
| 255             | Belgium | 2005           | Tomatoes                  | 70                                                          |
| 255             | Belgium | 2005           | Vegetables, Other         | 270                                                         |
| 255             | Belgium | 2005           | Wheat                     | 284                                                         |
| 255             | Belgium | 2005           | Wine                      | 73                                                          |
| 255             | Belgium | 2006           | Apples                    | 100                                                         |
| 255             | Belgium | 2006           | Bananas                   | 29                                                          |
| 255             | Belgium | 2006           | Barley                    | 1                                                           |
| 255             | Belgium | 2006           | Beans                     | 2                                                           |
| 255             | Belgium | 2006           | Beer                      | 255                                                         |
| 255             | Belgium | 2006           | Beverages, Alcoholic      | 4                                                           |
| 255             | Belgium | 2006           | Bovine Meat               | 57                                                          |
| 255             | Belgium | 2006           | Butter, Ghee              | 17                                                          |
| 255             | Belgium | 2006           | Cheese                    | 57                                                          |
| 255             | Belgium | 2006           | Cocoa Beans               | 1                                                           |
| 255             | Belgium | 2006           | Coconut Oil               | 6                                                           |
| 255             | Belgium | 2006           | Coconuts - Incl Copra     | 8                                                           |
| 255             | Belgium | 2006           | Coffee                    | 25                                                          |
| 255             | Belgium | 2006           | Cream                     | 30                                                          |
| 255             | Belgium | 2006           | Crustaceans               | 8                                                           |
| 255             | Belgium | 2006           | Demersal Fish             | 15                                                          |
| 255             | Belgium | 2006           | Eggs                      | 37                                                          |
| 255             | Belgium | 2006           | Fats, Animals, Raw        | 32                                                          |
| 255             | Belgium | 2006           | Freshwater Fish           | 13                                                          |
| 255             | Belgium | 2006           | Fruits, Other             | 51                                                          |
| 255             | Belgium | 2006           | Grapefruit                | 7                                                           |
| 255             | Belgium | 2006           | Grapes                    | 11                                                          |
| 255             | Belgium | 2006           | Honey                     | 2                                                           |
| 255             | Belgium | 2006           | Lemons, Limes             | 4                                                           |
| 255             | Belgium | 2006           | Maize                     | 6                                                           |
| 255             | Belgium | 2006           | Maize Germ Oil            | 6                                                           |
| 255             | Belgium | 2006           | Marine Fish, Other        | 5                                                           |
| 255             | Belgium | 2006           | Meat, Other               | 4                                                           |
| 255             | Belgium | 2006           | Milk, Whole               | 175                                                         |
| 255             | Belgium | 2006           | Molluscs, Other           | 11                                                          |
| 255             | Belgium | 2006           | Mutton & Goat Meat        | 4                                                           |
| 255             | Belgium | 2006           | Nuts                      | 21                                                          |
| 255             | Belgium | 2006           | Offals, Edible            | 5                                                           |
| 255             | Belgium | 2006           | Oilcrops Oil, Other       | 3                                                           |

Dietary calcium and zinc deficiency risks are decreasing but remain prevalent

| FAO countrycode | Country | Reference year | Food item                 | Gross food supply (g capita <sup>-1</sup> d <sup>-1</sup> ) |
|-----------------|---------|----------------|---------------------------|-------------------------------------------------------------|
| 255             | Belgium | 2006           | Olive Oil                 | 3                                                           |
| 255             | Belgium | 2006           | Olives                    | 2                                                           |
| 255             | Belgium | 2006           | Onions                    | 3                                                           |
| 255             | Belgium | 2006           | Oranges, Mandarines       | 31                                                          |
| 255             | Belgium | 2006           | Palm Oil                  | 20                                                          |
| 255             | Belgium | 2006           | Palmkernel Oil            | 2                                                           |
| 255             | Belgium | 2006           | Peas                      | 3                                                           |
| 255             | Belgium | 2006           | Pelagic Fish              | 13                                                          |
| 255             | Belgium | 2006           | Pepper                    | 1                                                           |
| 255             | Belgium | 2006           | Pigmeat                   | 88                                                          |
| 255             | Belgium | 2006           | Pineapples                | 5                                                           |
| 255             | Belgium | 2006           | Potatoes                  | 261                                                         |
| 255             | Belgium | 2006           | Poultry Meat              | 62                                                          |
| 255             | Belgium | 2006           | Pulses, Other             | 1                                                           |
| 255             | Belgium | 2006           | Rape and Mustard Oil      | 4                                                           |
| 255             | Belgium | 2006           | Rice (Milled Equivalent)  | 22                                                          |
| 255             | Belgium | 2006           | Rye                       | 1                                                           |
| 255             | Belgium | 2006           | Soyabean Oil              | 12                                                          |
| 255             | Belgium | 2006           | Spices, Other             | 2                                                           |
| 255             | Belgium | 2006           | Sugar, Refined Equivalent | 117                                                         |
| 255             | Belgium | 2006           | Sunflowerseed Oil         | 7                                                           |
| 255             | Belgium | 2006           | Sweeteners, Other         | 11                                                          |
| 255             | Belgium | 2006           | Tea                       | 1                                                           |
| 255             | Belgium | 2006           | Tomatoes                  | 70                                                          |
| 255             | Belgium | 2006           | Vegetables, Other         | 263                                                         |
| 255             | Belgium | 2006           | Wheat                     | 284                                                         |
| 255             | Belgium | 2006           | Wine                      | 77                                                          |
| 255             | Belgium | 2007           | Apples                    | 89                                                          |
| 255             | Belgium | 2007           | Bananas                   | 18                                                          |
| 255             | Belgium | 2007           | Beans                     | 2                                                           |
| 255             | Belgium | 2007           | Beer                      | 237                                                         |
| 255             | Belgium | 2007           | Beverages, Alcoholic      | 4                                                           |
| 255             | Belgium | 2007           | Bovine Meat               | 56                                                          |
| 255             | Belgium | 2007           | Butter, Ghee              | 19                                                          |
| 255             | Belgium | 2007           | Cheese                    | 55                                                          |
| 255             | Belgium | 2007           | Coconut Oil               | 7                                                           |
| 255             | Belgium | 2007           | Coconuts - Incl Copra     | 9                                                           |
| 255             | Belgium | 2007           | Coffee                    | 19                                                          |
| 255             | Belgium | 2007           | Cream                     | 28                                                          |
| 255             | Belgium | 2007           | Crustaceans               | 9                                                           |
| 255             | Belgium | 2007           | Dates                     | 1                                                           |
| 255             | Belgium | 2007           | Demersal Fish             | 16                                                          |
| 255             | Belgium | 2007           | Eggs                      | 35                                                          |
| 255             | Belgium | 2007           | Fats, Animals, Raw        | 32                                                          |
| 255             | Belgium | 2007           | Freshwater Fish           | 14                                                          |
| 255             | Belgium | 2007           | Fruits, Other             | 55                                                          |
| 255             | Belgium | 2007           | Grapefruit                | 10                                                          |
| 255             | Belgium | 2007           | Grapes                    | 14                                                          |
| 255             | Belgium | 2007           | Honey                     | 2                                                           |
| 255             | Belgium | 2007           | Lemons, Limes             | 4                                                           |
| 255             | Belgium | 2007           | Maize                     | 6                                                           |
| 255             | Belgium | 2007           | Maize Germ Oil            | 6                                                           |
| 255             | Belgium | 2007           | Marine Fish, Other        | 5                                                           |
| 255             | Belgium | 2007           | Meat, Other               | 6                                                           |
| 255             | Belgium | 2007           | Milk, Whole               | 165                                                         |
| 255             | Belgium | 2007           | Molluscs, Other           | 12                                                          |
| 255             | Belgium | 2007           | Mutton & Goat Meat        | 4                                                           |
| 255             | Belgium | 2007           | Nuts                      | 21                                                          |
| 255             | Belgium | 2007           | Offals, Edible            | 5                                                           |
| 255             | Belgium | 2007           | Oilcrops Oil, Other       | 3                                                           |
| 255             | Belgium | 2007           | Olive Oil                 | 3                                                           |
| 255             | Belgium | 2007           | Olives                    | 2                                                           |
| 255             | Belgium | 2007           | Onions                    | 6                                                           |
| 255             | Belgium | 2007           | Oranges, Mandarines       | 30                                                          |
| 255             | Belgium | 2007           | Palm Oil                  | 5                                                           |
| 255             | Belgium | 2007           | Palmkernel Oil            | 1                                                           |
| 255             | Belgium | 2007           | Peas                      | 3                                                           |
| 255             | Belgium | 2007           | Pelagic Fish              | 13                                                          |
| 255             | Belgium | 2007           | Pepper                    | 1                                                           |
| 255             | Belgium | 2007           | Pigmeat                   | 93                                                          |
| 255             | Belgium | 2007           | Pineapples                | 8                                                           |
| 255             | Belgium | 2007           | Potatoes                  | 260                                                         |
| 255             | Belgium | 2007           | Poultry Meat              | 68                                                          |
| 255             | Belgium | 2007           | Pulses, Other             | 1                                                           |
| 255             | Belgium | 2007           | Rape and Mustard Oil      | 15                                                          |
| 255             | Belgium | 2007           | Rice (Milled Equivalent)  | 22                                                          |
| 255             | Belgium | 2007           | Rye                       | 1                                                           |
| 255             | Belgium | 2007           | Soyabean Oil              | 12                                                          |
| 255             | Belgium | 2007           | Spices, Other             | 2                                                           |
| 255             | Belgium | 2007           | Sugar, Refined Equivalent | 128                                                         |
| 255             | Belgium | 2007           | Sunflowerseed Oil         | 8                                                           |
| 255             | Belgium | 2007           | Sweeteners, Other         | 11                                                          |
| 255             | Belgium | 2007           | Tea                       | 1                                                           |
| 255             | Belgium | 2007           | Tomatoes                  | 67                                                          |
| 255             | Belgium | 2007           | Vegetables, Other         | 281                                                         |
| 255             | Belgium | 2007           | Wheat                     | 284                                                         |
| 255             | Belgium | 2007           | Wine                      | 75                                                          |
| 255             | Belgium | 2008           | Apples                    | 85                                                          |
| 255             | Belgium | 2008           | Bananas                   | 41                                                          |
| 255             | Belgium | 2008           | Barley                    | 1                                                           |
| 255             | Belgium | 2008           | Beans                     | 2                                                           |
| 255             | Belgium | 2008           | Beer                      | 213                                                         |
| 255             | Belgium | 2008           | Beverages, Alcoholic      | 4                                                           |
| 255             | Belgium | 2008           | Bovine Meat               | 52                                                          |
| 255             | Belgium | 2008           | Butter, Ghee              | 15                                                          |
| 255             | Belgium | 2008           | Cheese                    | 71                                                          |
| 255             | Belgium | 2008           | Coconut Oil               | 7                                                           |

Dietary calcium and zinc deficiency risks are decreasing but remain prevalent

| FAO countrycode | Country | Reference year | Food item                 | Gross food supply (g capita <sup>-1</sup> d <sup>-1</sup> ) |
|-----------------|---------|----------------|---------------------------|-------------------------------------------------------------|
| 255             | Belgium | 2008           | Coconuts - Incl Copra     | 8                                                           |
| 255             | Belgium | 2008           | Coffee                    | 14                                                          |
| 255             | Belgium | 2008           | Cream                     | 26                                                          |
| 255             | Belgium | 2008           | Crustaceans               | 9                                                           |
| 255             | Belgium | 2008           | Dates                     | 1                                                           |
| 255             | Belgium | 2008           | Demersal Fish             | 16                                                          |
| 255             | Belgium | 2008           | Eggs                      | 33                                                          |
| 255             | Belgium | 2008           | Fats, Animals, Raw        | 32                                                          |
| 255             | Belgium | 2008           | Freshwater Fish           | 16                                                          |
| 255             | Belgium | 2008           | Fruits, Other             | 57                                                          |
| 255             | Belgium | 2008           | Grapefruit                | 13                                                          |
| 255             | Belgium | 2008           | Grapes                    | 12                                                          |
| 255             | Belgium | 2008           | Honey                     | 2                                                           |
| 255             | Belgium | 2008           | Lemons, Limes             | 3                                                           |
| 255             | Belgium | 2008           | Maize                     | 6                                                           |
| 255             | Belgium | 2008           | Maize Germ Oil            | 8                                                           |
| 255             | Belgium | 2008           | Marine Fish, Other        | 5                                                           |
| 255             | Belgium | 2008           | Meat, Other               | 5                                                           |
| 255             | Belgium | 2008           | Milk, Whole               | 168                                                         |
| 255             | Belgium | 2008           | Molluscs, Other           | 13                                                          |
| 255             | Belgium | 2008           | Mutton & Goat Meat        | 4                                                           |
| 255             | Belgium | 2008           | Nuts                      | 19                                                          |
| 255             | Belgium | 2008           | Offals, Edible            | 5                                                           |
| 255             | Belgium | 2008           | Oilcrops Oil, Other       | 4                                                           |
| 255             | Belgium | 2008           | Olive Oil                 | 3                                                           |
| 255             | Belgium | 2008           | Olives                    | 2                                                           |
| 255             | Belgium | 2008           | Onions                    | 7                                                           |
| 255             | Belgium | 2008           | Oranges, Mandarines       | 18                                                          |
| 255             | Belgium | 2008           | Palm Oil                  | 10                                                          |
| 255             | Belgium | 2008           | Palmkernel Oil            | 4                                                           |
| 255             | Belgium | 2008           | Peas                      | 3                                                           |
| 255             | Belgium | 2008           | Pelagic Fish              | 13                                                          |
| 255             | Belgium | 2008           | Pigmeat                   | 90                                                          |
| 255             | Belgium | 2008           | Pineapples                | 17                                                          |
| 255             | Belgium | 2008           | Plantains                 | 2                                                           |
| 255             | Belgium | 2008           | Potatoes                  | 233                                                         |
| 255             | Belgium | 2008           | Poultry Meat              | 66                                                          |
| 255             | Belgium | 2008           | Pulses, Other             | 1                                                           |
| 255             | Belgium | 2008           | Rape and Mustard Oil      | 10                                                          |
| 255             | Belgium | 2008           | Rice (Milled Equivalent)  | 22                                                          |
| 255             | Belgium | 2008           | Rye                       | 1                                                           |
| 255             | Belgium | 2008           | Soybean Oil               | 12                                                          |
| 255             | Belgium | 2008           | Spices, Other             | 2                                                           |
| 255             | Belgium | 2008           | Sugar, Refined Equivalent | 127                                                         |
| 255             | Belgium | 2008           | Sunflowerseed Oil         | 6                                                           |
| 255             | Belgium | 2008           | Sweeteners, Other         | 11                                                          |
| 255             | Belgium | 2008           | Tea                       | 1                                                           |
| 255             | Belgium | 2008           | Tomatoes                  | 77                                                          |
| 255             | Belgium | 2008           | Vegetables, Other         | 270                                                         |
| 255             | Belgium | 2008           | Wheat                     | 277                                                         |
| 255             | Belgium | 2008           | Wine                      | 74                                                          |
| 255             | Belgium | 2009           | Apples                    | 79                                                          |
| 255             | Belgium | 2009           | Bananas                   | 18                                                          |
| 255             | Belgium | 2009           | Barley                    | 1                                                           |
| 255             | Belgium | 2009           | Beans                     | 2                                                           |
| 255             | Belgium | 2009           | Beer                      | 206                                                         |
| 255             | Belgium | 2009           | Beverages, Alcoholic      | 4                                                           |
| 255             | Belgium | 2009           | Beverages, Fermented      | 1                                                           |
| 255             | Belgium | 2009           | Bovine Meat               | 50                                                          |
| 255             | Belgium | 2009           | Butter, Ghee              | 15                                                          |
| 255             | Belgium | 2009           | Cheese                    | 54                                                          |
| 255             | Belgium | 2009           | Coconut Oil               | 1                                                           |
| 255             | Belgium | 2009           | Coconuts - Incl Copra     | 7                                                           |
| 255             | Belgium | 2009           | Coffee                    | 16                                                          |
| 255             | Belgium | 2009           | Cream                     | 27                                                          |
| 255             | Belgium | 2009           | Crustaceans               | 8                                                           |
| 255             | Belgium | 2009           | Demersal Fish             | 15                                                          |
| 255             | Belgium | 2009           | Eggs                      | 27                                                          |
| 255             | Belgium | 2009           | Fats, Animals, Raw        | 32                                                          |
| 255             | Belgium | 2009           | Freshwater Fish           | 15                                                          |
| 255             | Belgium | 2009           | Fruits, Other             | 75                                                          |
| 255             | Belgium | 2009           | Grapefruit                | 9                                                           |
| 255             | Belgium | 2009           | Grapes                    | 13                                                          |
| 255             | Belgium | 2009           | Groundnuts (Shelled Eq)   | 1                                                           |
| 255             | Belgium | 2009           | Honey                     | 2                                                           |
| 255             | Belgium | 2009           | Lemons, Limes             | 3                                                           |
| 255             | Belgium | 2009           | Maize                     | 6                                                           |
| 255             | Belgium | 2009           | Maize Germ Oil            | 7                                                           |
| 255             | Belgium | 2009           | Marine Fish, Other        | 4                                                           |
| 255             | Belgium | 2009           | Meat, Other               | 6                                                           |
| 255             | Belgium | 2009           | Milk, Whole               | 181                                                         |
| 255             | Belgium | 2009           | Molluscs, Other           | 12                                                          |
| 255             | Belgium | 2009           | Mutton & Goat Meat        | 4                                                           |
| 255             | Belgium | 2009           | Nuts                      | 16                                                          |
| 255             | Belgium | 2009           | Offals, Edible            | 8                                                           |
| 255             | Belgium | 2009           | Oilcrops Oil, Other       | 5                                                           |
| 255             | Belgium | 2009           | Olive Oil                 | 3                                                           |
| 255             | Belgium | 2009           | Olives                    | 2                                                           |
| 255             | Belgium | 2009           | Onions                    | 5                                                           |
| 255             | Belgium | 2009           | Oranges, Mandarines       | 18                                                          |
| 255             | Belgium | 2009           | Palm Oil                  | 23                                                          |
| 255             | Belgium | 2009           | Palmkernel Oil            | 3                                                           |
| 255             | Belgium | 2009           | Peas                      | 3                                                           |
| 255             | Belgium | 2009           | Pelagic Fish              | 13                                                          |
| 255             | Belgium | 2009           | Pigmeat                   | 92                                                          |
| 255             | Belgium | 2009           | Pineapples                | 12                                                          |
| 255             | Belgium | 2009           | Plantains                 | 1                                                           |



Dietary calcium and zinc deficiency risks are decreasing but remain prevalent

| FAO countrycode | Country | Reference year | Food item                 | Gross food supply (g capita <sup>-1</sup> d <sup>-1</sup> ) |
|-----------------|---------|----------------|---------------------------|-------------------------------------------------------------|
| 255             | Belgium | 2009           | Potatoes                  | 226                                                         |
| 255             | Belgium | 2009           | Poultry Meat              | 59                                                          |
| 255             | Belgium | 2009           | Pulses, Other             | 1                                                           |
| 255             | Belgium | 2009           | Rape and Mustard Oil      | 6                                                           |
| 255             | Belgium | 2009           | Rice (Milled Equivalent)  | 26                                                          |
| 255             | Belgium | 2009           | Rye                       | 1                                                           |
| 255             | Belgium | 2009           | Soyabean Oil              | 12                                                          |
| 255             | Belgium | 2009           | Spices, Other             | 1                                                           |
| 255             | Belgium | 2009           | Sugar, Refined Equivalent | 127                                                         |
| 255             | Belgium | 2009           | Sunflowerseed Oil         | 6                                                           |
| 255             | Belgium | 2009           | Sweeteners, Other         | 15                                                          |
| 255             | Belgium | 2009           | Tea                       | 1                                                           |
| 255             | Belgium | 2009           | Tomatoes                  | 74                                                          |
| 255             | Belgium | 2009           | Vegetables, Other         | 274                                                         |
| 255             | Belgium | 2009           | Wheat                     | 305                                                         |
| 255             | Belgium | 2009           | Wine                      | 76                                                          |
| 255             | Belgium | 2010           | Apples                    | 62                                                          |
| 255             | Belgium | 2010           | Bananas                   | 33                                                          |
| 255             | Belgium | 2010           | Beans                     | 2                                                           |
| 255             | Belgium | 2010           | Beer                      | 230                                                         |
| 255             | Belgium | 2010           | Beverages, Alcoholic      | 5                                                           |
| 255             | Belgium | 2010           | Beverages, Fermented      | 1                                                           |
| 255             | Belgium | 2010           | Bovine Meat               | 50                                                          |
| 255             | Belgium | 2010           | Butter, Ghee              | 15                                                          |
| 255             | Belgium | 2010           | Cheese                    | 56                                                          |
| 255             | Belgium | 2010           | Coconut Oil               | 3                                                           |
| 255             | Belgium | 2010           | Coconuts - Incl Copra     | 8                                                           |
| 255             | Belgium | 2010           | Coffee                    | 16                                                          |
| 255             | Belgium | 2010           | Cream                     | 29                                                          |
| 255             | Belgium | 2010           | Crustaceans               | 9                                                           |
| 255             | Belgium | 2010           | Demersal Fish             | 17                                                          |
| 255             | Belgium | 2010           | Eggs                      | 31                                                          |
| 255             | Belgium | 2010           | Fats, Animals, Raw        | 27                                                          |
| 255             | Belgium | 2010           | Fish, Liver Oil           | 1                                                           |
| 255             | Belgium | 2010           | Freshwater Fish           | 17                                                          |
| 255             | Belgium | 2010           | Fruits, Other             | 48                                                          |
| 255             | Belgium | 2010           | Grapefruit                | 5                                                           |
| 255             | Belgium | 2010           | Grapes                    | 16                                                          |
| 255             | Belgium | 2010           | Groundnut Oil             | 1                                                           |
| 255             | Belgium | 2010           | Honey                     | 2                                                           |
| 255             | Belgium | 2010           | Lemons, Limes             | 4                                                           |
| 255             | Belgium | 2010           | Maize                     | 6                                                           |
| 255             | Belgium | 2010           | Maize Germ Oil            | 1                                                           |
| 255             | Belgium | 2010           | Marine Fish, Other        | 4                                                           |
| 255             | Belgium | 2010           | Meat, Other               | 3                                                           |
| 255             | Belgium | 2010           | Milk, Whole               | 162                                                         |
| 255             | Belgium | 2010           | Molluscs, Other           | 12                                                          |
| 255             | Belgium | 2010           | Mutton & Goat Meat        | 4                                                           |
| 255             | Belgium | 2010           | Nuts                      | 16                                                          |
| 255             | Belgium | 2010           | Offals, Edible            | 9                                                           |
| 255             | Belgium | 2010           | Oilcrops Oil, Other       | 5                                                           |
| 255             | Belgium | 2010           | Olive Oil                 | 3                                                           |
| 255             | Belgium | 2010           | Olives                    | 3                                                           |
| 255             | Belgium | 2010           | Onions                    | 1                                                           |
| 255             | Belgium | 2010           | Oranges, Mandarines       | 21                                                          |
| 255             | Belgium | 2010           | Palm Oil                  | 18                                                          |
| 255             | Belgium | 2010           | Palmkernel Oil            | 1                                                           |
| 255             | Belgium | 2010           | Peas                      | 3                                                           |
| 255             | Belgium | 2010           | Pelagic Fish              | 11                                                          |
| 255             | Belgium | 2010           | Pigmeat                   | 99                                                          |
| 255             | Belgium | 2010           | Pineapples                | 8                                                           |
| 255             | Belgium | 2010           | Plantains                 | 1                                                           |
| 255             | Belgium | 2010           | Potatoes                  | 231                                                         |
| 255             | Belgium | 2010           | Poultry Meat              | 59                                                          |
| 255             | Belgium | 2010           | Pulses, Other             | 1                                                           |
| 255             | Belgium | 2010           | Rape and Mustard Oil      | 4                                                           |
| 255             | Belgium | 2010           | Rice (Milled Equivalent)  | 25                                                          |
| 255             | Belgium | 2010           | Rye                       | 2                                                           |
| 255             | Belgium | 2010           | Soyabean Oil              | 9                                                           |
| 255             | Belgium | 2010           | Spices, Other             | 1                                                           |
| 255             | Belgium | 2010           | Sugar, Refined Equivalent | 126                                                         |
| 255             | Belgium | 2010           | Sunflowerseed Oil         | 7                                                           |
| 255             | Belgium | 2010           | Sweeteners, Other         | 24                                                          |
| 255             | Belgium | 2010           | Tea                       | 1                                                           |
| 255             | Belgium | 2010           | Tomatoes                  | 74                                                          |
| 255             | Belgium | 2010           | Vegetables, Other         | 249                                                         |
| 255             | Belgium | 2010           | Wheat                     | 360                                                         |
| 255             | Belgium | 2010           | Wine                      | 71                                                          |
| 255             | Belgium | 2011           | Apples                    | 57                                                          |
| 255             | Belgium | 2011           | Bananas                   | 17                                                          |
| 255             | Belgium | 2011           | Beans                     | 2                                                           |
| 255             | Belgium | 2011           | Beer                      | 243                                                         |
| 255             | Belgium | 2011           | Beverages, Alcoholic      | 4                                                           |
| 255             | Belgium | 2011           | Beverages, Fermented      | 1                                                           |
| 255             | Belgium | 2011           | Bovine Meat               | 44                                                          |
| 255             | Belgium | 2011           | Butter, Ghee              | 20                                                          |
| 255             | Belgium | 2011           | Cheese                    | 53                                                          |
| 255             | Belgium | 2011           | Cocoa Beans               | 1                                                           |
| 255             | Belgium | 2011           | Coconut Oil               | 2                                                           |
| 255             | Belgium | 2011           | Coconuts - Incl Copra     | 7                                                           |
| 255             | Belgium | 2011           | Coffee                    | 14                                                          |
| 255             | Belgium | 2011           | Cream                     | 25                                                          |
| 255             | Belgium | 2011           | Crustaceans               | 9                                                           |
| 255             | Belgium | 2011           | Demersal Fish             | 17                                                          |
| 255             | Belgium | 2011           | Eggs                      | 38                                                          |
| 255             | Belgium | 2011           | Fats, Animals, Raw        | 32                                                          |
| 255             | Belgium | 2011           | Fish, Liver Oil           | 1                                                           |

Dietary calcium and zinc deficiency risks are decreasing but remain prevalent

| FAO countrycode | Country | Reference year | Food item                 | Gross food supply (g capita <sup>-1</sup> d <sup>-1</sup> ) |
|-----------------|---------|----------------|---------------------------|-------------------------------------------------------------|
| 255             | Belgium | 2011           | Freshwater Fish           | 16                                                          |
| 255             | Belgium | 2011           | Fruits, Other             | 32                                                          |
| 255             | Belgium | 2011           | Grapefruit                | 6                                                           |
| 255             | Belgium | 2011           | Grapes                    | 11                                                          |
| 255             | Belgium | 2011           | Groundnuts (Shelled Eq)   | 1                                                           |
| 255             | Belgium | 2011           | Honey                     | 2                                                           |
| 255             | Belgium | 2011           | Lemons, Limes             | 6                                                           |
| 255             | Belgium | 2011           | Maize                     | 6                                                           |
| 255             | Belgium | 2011           | Maize Germ Oil            | 5                                                           |
| 255             | Belgium | 2011           | Marine Fish, Other        | 4                                                           |
| 255             | Belgium | 2011           | Meat, Other               | 3                                                           |
| 255             | Belgium | 2011           | Milk, Whole               | 145                                                         |
| 255             | Belgium | 2011           | Molluscs, Other           | 12                                                          |
| 255             | Belgium | 2011           | Mutton & Goat Meat        | 4                                                           |
| 255             | Belgium | 2011           | Nuts                      | 16                                                          |
| 255             | Belgium | 2011           | Offals, Edible            | 7                                                           |
| 255             | Belgium | 2011           | Oilcrops Oil, Other       | 8                                                           |
| 255             | Belgium | 2011           | Olive Oil                 | 4                                                           |
| 255             | Belgium | 2011           | Olives                    | 2                                                           |
| 255             | Belgium | 2011           | Onions                    | 1                                                           |
| 255             | Belgium | 2011           | Oranges, Mandarines       | 21                                                          |
| 255             | Belgium | 2011           | Palm Oil                  | 16                                                          |
| 255             | Belgium | 2011           | Peas                      | 3                                                           |
| 255             | Belgium | 2011           | Pelagic Fish              | 11                                                          |
| 255             | Belgium | 2011           | Pigmeat                   | 96                                                          |
| 255             | Belgium | 2011           | Pineapples                | 6                                                           |
| 255             | Belgium | 2011           | Plantains                 | 7                                                           |
| 255             | Belgium | 2011           | Potatoes                  | 290                                                         |
| 255             | Belgium | 2011           | Poultry Meat              | 63                                                          |
| 255             | Belgium | 2011           | Pulses, Other             | 1                                                           |
| 255             | Belgium | 2011           | Rape and Mustard Oil      | 8                                                           |
| 255             | Belgium | 2011           | Rice (Milled Equivalent)  | 23                                                          |
| 255             | Belgium | 2011           | Rye                       | 2                                                           |
| 255             | Belgium | 2011           | Soybean Oil               | 14                                                          |
| 255             | Belgium | 2011           | Spices, Other             | 1                                                           |
| 255             | Belgium | 2011           | Sugar, Refined Equivalent | 113                                                         |
| 255             | Belgium | 2011           | Sunflowerseed Oil         | 5                                                           |
| 255             | Belgium | 2011           | Sweeteners, Other         | 16                                                          |
| 255             | Belgium | 2011           | Tea                       | 1                                                           |
| 255             | Belgium | 2011           | Tomatoes                  | 75                                                          |
| 255             | Belgium | 2011           | Vegetables, Other         | 274                                                         |
| 255             | Belgium | 2011           | Wheat                     | 328                                                         |
| 255             | Belgium | 2011           | Wine                      | 78                                                          |
| 53              | Benin   | 1992           | Bananas                   | 7                                                           |
| 53              | Benin   | 1992           | Beans                     | 21                                                          |
| 53              | Benin   | 1992           | Beer                      | 14                                                          |
| 53              | Benin   | 1992           | Beverages, Alcoholic      | 1                                                           |
| 53              | Benin   | 1992           | Beverages, Fermented      | 12                                                          |
| 53              | Benin   | 1992           | Bovine Meat               | 11                                                          |
| 53              | Benin   | 1992           | Cassava                   | 381                                                         |
| 53              | Benin   | 1992           | Cereals, Other            | 5                                                           |
| 53              | Benin   | 1992           | Coconut Oil               | 1                                                           |
| 53              | Benin   | 1992           | Coconuts - Incl Copra     | 1                                                           |
| 53              | Benin   | 1992           | Crustaceans               | 3                                                           |
| 53              | Benin   | 1992           | Dates                     | 1                                                           |
| 53              | Benin   | 1992           | Demersal Fish             | 2                                                           |
| 53              | Benin   | 1992           | Eggs                      | 2                                                           |
| 53              | Benin   | 1992           | Fats, Animals, Raw        | 1                                                           |
| 53              | Benin   | 1992           | Freshwater Fish           | 9                                                           |
| 53              | Benin   | 1992           | Fruits, Other             | 59                                                          |
| 53              | Benin   | 1992           | Groundnut Oil             | 3                                                           |
| 53              | Benin   | 1992           | Groundnuts (Shelled Eq)   | 17                                                          |
| 53              | Benin   | 1992           | Maize                     | 150                                                         |
| 53              | Benin   | 1992           | Marine Fish, Other        | 3                                                           |
| 53              | Benin   | 1992           | Meat, Other               | 3                                                           |
| 53              | Benin   | 1992           | Milk, Whole               | 14                                                          |
| 53              | Benin   | 1992           | Millet                    | 9                                                           |
| 53              | Benin   | 1992           | Mutton & Goat Meat        | 3                                                           |
| 53              | Benin   | 1992           | Nuts                      | 2                                                           |
| 53              | Benin   | 1992           | Offals, Edible            | 3                                                           |
| 53              | Benin   | 1992           | Oilcrops Oil, Other       | 1                                                           |
| 53              | Benin   | 1992           | Onions                    | 4                                                           |
| 53              | Benin   | 1992           | Oranges, Mandarines       | 6                                                           |
| 53              | Benin   | 1992           | Palm Oil                  | 7                                                           |
| 53              | Benin   | 1992           | Palmkernel Oil            | 2                                                           |
| 53              | Benin   | 1992           | Pelagic Fish              | 6                                                           |
| 53              | Benin   | 1992           | Pigmeat                   | 3                                                           |
| 53              | Benin   | 1992           | Pimento                   | 9                                                           |
| 53              | Benin   | 1992           | Pineapples                | 13                                                          |
| 53              | Benin   | 1992           | Poultry Meat              | 10                                                          |
| 53              | Benin   | 1992           | Pulses, Other             | 4                                                           |
| 53              | Benin   | 1992           | Rice (Milled Equivalent)  | 38                                                          |
| 53              | Benin   | 1992           | Roots, Other              | 1                                                           |
| 53              | Benin   | 1992           | Sesameseed                | 3                                                           |
| 53              | Benin   | 1992           | Sorghum                   | 45                                                          |
| 53              | Benin   | 1992           | Sugar, Refined Equivalent | 11                                                          |
| 53              | Benin   | 1992           | Sweet Potatoes            | 16                                                          |
| 53              | Benin   | 1992           | Tomatoes                  | 42                                                          |
| 53              | Benin   | 1992           | Vegetables, Other         | 74                                                          |
| 53              | Benin   | 1992           | Wheat                     | 38                                                          |
| 53              | Benin   | 1992           | Wine                      | 1                                                           |
| 53              | Benin   | 1992           | Yams                      | 290                                                         |
| 53              | Benin   | 1993           | Bananas                   | 9                                                           |
| 53              | Benin   | 1993           | Beans                     | 19                                                          |
| 53              | Benin   | 1993           | Beer                      | 16                                                          |
| 53              | Benin   | 1993           | Beverages, Alcoholic      | 1                                                           |
| 53              | Benin   | 1993           | Beverages, Fermented      | 11                                                          |

Dietary calcium and zinc deficiency risks are decreasing but remain prevalent

| FAO countrycode | Country | Reference year | Food item                 | Gross food supply (g capita <sup>-1</sup> d <sup>-1</sup> ) |
|-----------------|---------|----------------|---------------------------|-------------------------------------------------------------|
| 53              | Benin   | 1993           | Bovine Meat               | 12                                                          |
| 53              | Benin   | 1993           | Cassava                   | 380                                                         |
| 53              | Benin   | 1993           | Cereals, Other            | 2                                                           |
| 53              | Benin   | 1993           | Coconut Oil               | 1                                                           |
| 53              | Benin   | 1993           | Coconuts - Incl Copra     | 1                                                           |
| 53              | Benin   | 1993           | Cottonseed Oil            | 1                                                           |
| 53              | Benin   | 1993           | Crustaceans               | 4                                                           |
| 53              | Benin   | 1993           | Dates                     | 1                                                           |
| 53              | Benin   | 1993           | Demersal Fish             | 2                                                           |
| 53              | Benin   | 1993           | Eggs                      | 2                                                           |
| 53              | Benin   | 1993           | Fats, Animals, Raw        | 1                                                           |
| 53              | Benin   | 1993           | Freshwater Fish           | 11                                                          |
| 53              | Benin   | 1993           | Fruits, Other             | 55                                                          |
| 53              | Benin   | 1993           | Groundnut Oil             | 3                                                           |
| 53              | Benin   | 1993           | Groundnuts (Shelled Eq)   | 17                                                          |
| 53              | Benin   | 1993           | Maize                     | 151                                                         |
| 53              | Benin   | 1993           | Marine Fish, Other        | 5                                                           |
| 53              | Benin   | 1993           | Meat, Other               | 3                                                           |
| 53              | Benin   | 1993           | Milk, Whole               | 15                                                          |
| 53              | Benin   | 1993           | Millet                    | 7                                                           |
| 53              | Benin   | 1993           | Mutton & Goat Meat        | 3                                                           |
| 53              | Benin   | 1993           | Offals, Edible            | 2                                                           |
| 53              | Benin   | 1993           | Oilcrops Oil, Other       | 3                                                           |
| 53              | Benin   | 1993           | Onions                    | 4                                                           |
| 53              | Benin   | 1993           | Oranges, Mandarines       | 6                                                           |
| 53              | Benin   | 1993           | Palm Oil                  | 6                                                           |
| 53              | Benin   | 1993           | Palmkernel Oil            | 2                                                           |
| 53              | Benin   | 1993           | Pelagic Fish              | 7                                                           |
| 53              | Benin   | 1993           | Pigmeat                   | 3                                                           |
| 53              | Benin   | 1993           | Pimento                   | 7                                                           |
| 53              | Benin   | 1993           | Pineapples                | 13                                                          |
| 53              | Benin   | 1993           | Poultry Meat              | 14                                                          |
| 53              | Benin   | 1993           | Pulses, Other             | 3                                                           |
| 53              | Benin   | 1993           | Rice (Milled Equivalent)  | 50                                                          |
| 53              | Benin   | 1993           | Roots, Other              | 1                                                           |
| 53              | Benin   | 1993           | Sesameseed                | 3                                                           |
| 53              | Benin   | 1993           | Sorghum                   | 42                                                          |
| 53              | Benin   | 1993           | Sugar, Refined Equivalent | 14                                                          |
| 53              | Benin   | 1993           | Sweet Potatoes            | 18                                                          |
| 53              | Benin   | 1993           | Tomatoes                  | 39                                                          |
| 53              | Benin   | 1993           | Vegetables, Other         | 73                                                          |
| 53              | Benin   | 1993           | Wheat                     | 22                                                          |
| 53              | Benin   | 1993           | Wine                      | 1                                                           |
| 53              | Benin   | 1993           | Yams                      | 295                                                         |
| 53              | Benin   | 1994           | Bananas                   | 9                                                           |
| 53              | Benin   | 1994           | Beans                     | 21                                                          |
| 53              | Benin   | 1994           | Beer                      | 14                                                          |
| 53              | Benin   | 1994           | Beverages, Alcoholic      | 1                                                           |
| 53              | Benin   | 1994           | Beverages, Fermented      | 11                                                          |
| 53              | Benin   | 1994           | Bovine Meat               | 10                                                          |
| 53              | Benin   | 1994           | Cassava                   | 379                                                         |
| 53              | Benin   | 1994           | Cereals, Other            | 3                                                           |
| 53              | Benin   | 1994           | Coconut Oil               | 1                                                           |
| 53              | Benin   | 1994           | Coconuts - Incl Copra     | 1                                                           |
| 53              | Benin   | 1994           | Cottonseed Oil            | 1                                                           |
| 53              | Benin   | 1994           | Crustaceans               | 3                                                           |
| 53              | Benin   | 1994           | Dates                     | 1                                                           |
| 53              | Benin   | 1994           | Demersal Fish             | 2                                                           |
| 53              | Benin   | 1994           | Eggs                      | 2                                                           |
| 53              | Benin   | 1994           | Fats, Animals, Raw        | 1                                                           |
| 53              | Benin   | 1994           | Freshwater Fish           | 11                                                          |
| 53              | Benin   | 1994           | Fruits, Other             | 54                                                          |
| 53              | Benin   | 1994           | Groundnut Oil             | 3                                                           |
| 53              | Benin   | 1994           | Groundnuts (Shelled Eq)   | 16                                                          |
| 53              | Benin   | 1994           | Maize                     | 155                                                         |
| 53              | Benin   | 1994           | Marine Fish, Other        | 4                                                           |
| 53              | Benin   | 1994           | Meat, Other               | 4                                                           |
| 53              | Benin   | 1994           | Milk, Whole               | 14                                                          |
| 53              | Benin   | 1994           | Millet                    | 7                                                           |
| 53              | Benin   | 1994           | Mutton & Goat Meat        | 3                                                           |
| 53              | Benin   | 1994           | Nuts                      | 1                                                           |
| 53              | Benin   | 1994           | Offals, Edible            | 3                                                           |
| 53              | Benin   | 1994           | Oilcrops Oil, Other       | 1                                                           |
| 53              | Benin   | 1994           | Onions                    | 4                                                           |
| 53              | Benin   | 1994           | Oranges, Mandarines       | 6                                                           |
| 53              | Benin   | 1994           | Palm Oil                  | 6                                                           |
| 53              | Benin   | 1994           | Palmkernel Oil            | 1                                                           |
| 53              | Benin   | 1994           | Pelagic Fish              | 5                                                           |
| 53              | Benin   | 1994           | Pigmeat                   | 3                                                           |
| 53              | Benin   | 1994           | Pimento                   | 7                                                           |
| 53              | Benin   | 1994           | Pineapples                | 13                                                          |
| 53              | Benin   | 1994           | Poultry Meat              | 12                                                          |
| 53              | Benin   | 1994           | Pulses, Other             | 3                                                           |
| 53              | Benin   | 1994           | Rice (Milled Equivalent)  | 48                                                          |
| 53              | Benin   | 1994           | Roots, Other              | 2                                                           |
| 53              | Benin   | 1994           | Sesameseed                | 3                                                           |
| 53              | Benin   | 1994           | Sorghum                   | 41                                                          |
| 53              | Benin   | 1994           | Sugar, Refined Equivalent | 21                                                          |
| 53              | Benin   | 1994           | Sweet Potatoes            | 20                                                          |
| 53              | Benin   | 1994           | Tomatoes                  | 48                                                          |
| 53              | Benin   | 1994           | Vegetables, Other         | 78                                                          |
| 53              | Benin   | 1994           | Wheat                     | 30                                                          |
| 53              | Benin   | 1994           | Wine                      | 1                                                           |
| 53              | Benin   | 1994           | Yams                      | 307                                                         |
| 53              | Benin   | 1995           | Bananas                   | 8                                                           |
| 53              | Benin   | 1995           | Beans                     | 18                                                          |
| 53              | Benin   | 1995           | Beer                      | 14                                                          |

Dietary calcium and zinc deficiency risks are decreasing but remain prevalent

| FAO countrycode | Country | Reference year | Food item                 | Gross food supply (g capita <sup>-1</sup> d <sup>-1</sup> ) |
|-----------------|---------|----------------|---------------------------|-------------------------------------------------------------|
| 53              | Benin   | 1995           | Beverages, Alcoholic      | 1                                                           |
| 53              | Benin   | 1995           | Beverages, Fermented      | 12                                                          |
| 53              | Benin   | 1995           | Bovine Meat               | 8                                                           |
| 53              | Benin   | 1995           | Cassava                   | 394                                                         |
| 53              | Benin   | 1995           | Cereals, Other            | 2                                                           |
| 53              | Benin   | 1995           | Coconut Oil               | 1                                                           |
| 53              | Benin   | 1995           | Coconuts - Incl Copra     | 1                                                           |
| 53              | Benin   | 1995           | Cottonseed Oil            | 1                                                           |
| 53              | Benin   | 1995           | Crustaceans               | 3                                                           |
| 53              | Benin   | 1995           | Dates                     | 1                                                           |
| 53              | Benin   | 1995           | Demersal Fish             | 1                                                           |
| 53              | Benin   | 1995           | Eggs                      | 2                                                           |
| 53              | Benin   | 1995           | Fats, Animals, Raw        | 1                                                           |
| 53              | Benin   | 1995           | Freshwater Fish           | 13                                                          |
| 53              | Benin   | 1995           | Fruits, Other             | 51                                                          |
| 53              | Benin   | 1995           | Groundnut Oil             | 3                                                           |
| 53              | Benin   | 1995           | Groundnuts (Shelled Eq)   | 20                                                          |
| 53              | Benin   | 1995           | Maize                     | 140                                                         |
| 53              | Benin   | 1995           | Marine Fish, Other        | 7                                                           |
| 53              | Benin   | 1995           | Meat, Other               | 3                                                           |
| 53              | Benin   | 1995           | Milk, Whole               | 15                                                          |
| 53              | Benin   | 1995           | Millet                    | 6                                                           |
| 53              | Benin   | 1995           | Mutton & Goat Meat        | 3                                                           |
| 53              | Benin   | 1995           | Nuts                      | 3                                                           |
| 53              | Benin   | 1995           | Offals, Edible            | 2                                                           |
| 53              | Benin   | 1995           | Oilcrops Oil, Other       | 1                                                           |
| 53              | Benin   | 1995           | Onions                    | 1                                                           |
| 53              | Benin   | 1995           | Oranges, Mandarines       | 5                                                           |
| 53              | Benin   | 1995           | Palm Oil                  | 6                                                           |
| 53              | Benin   | 1995           | Palmkernel Oil            | 1                                                           |
| 53              | Benin   | 1995           | Pelagic Fish              | 3                                                           |
| 53              | Benin   | 1995           | Pigmeat                   | 3                                                           |
| 53              | Benin   | 1995           | Pimento                   | 10                                                          |
| 53              | Benin   | 1995           | Pineapples                | 15                                                          |
| 53              | Benin   | 1995           | Poultry Meat              | 13                                                          |
| 53              | Benin   | 1995           | Pulses, Other             | 3                                                           |
| 53              | Benin   | 1995           | Rice (Milled Equivalent)  | 57                                                          |
| 53              | Benin   | 1995           | Roots, Other              | 1                                                           |
| 53              | Benin   | 1995           | Sesameseed                | 4                                                           |
| 53              | Benin   | 1995           | Sorghum                   | 43                                                          |
| 53              | Benin   | 1995           | Sugar, Refined Equivalent | 20                                                          |
| 53              | Benin   | 1995           | Sweet Potatoes            | 20                                                          |
| 53              | Benin   | 1995           | Tomatoes                  | 53                                                          |
| 53              | Benin   | 1995           | Vegetables, Other         | 65                                                          |
| 53              | Benin   | 1995           | Wheat                     | 32                                                          |
| 53              | Benin   | 1995           | Wine                      | 1                                                           |
| 53              | Benin   | 1995           | Yams                      | 291                                                         |
| 53              | Benin   | 1996           | Bananas                   | 5                                                           |
| 53              | Benin   | 1996           | Beans                     | 18                                                          |
| 53              | Benin   | 1996           | Beer                      | 20                                                          |
| 53              | Benin   | 1996           | Beverages, Alcoholic      | 2                                                           |
| 53              | Benin   | 1996           | Beverages, Fermented      | 10                                                          |
| 53              | Benin   | 1996           | Bovine Meat               | 7                                                           |
| 53              | Benin   | 1996           | Cassava                   | 421                                                         |
| 53              | Benin   | 1996           | Cereals, Other            | 2                                                           |
| 53              | Benin   | 1996           | Coconut Oil               | 1                                                           |
| 53              | Benin   | 1996           | Coconuts - Incl Copra     | 1                                                           |
| 53              | Benin   | 1996           | Cottonseed Oil            | 1                                                           |
| 53              | Benin   | 1996           | Crustaceans               | 3                                                           |
| 53              | Benin   | 1996           | Dates                     | 1                                                           |
| 53              | Benin   | 1996           | Demersal Fish             | 2                                                           |
| 53              | Benin   | 1996           | Eggs                      | 2                                                           |
| 53              | Benin   | 1996           | Fats, Animals, Raw        | 1                                                           |
| 53              | Benin   | 1996           | Freshwater Fish           | 11                                                          |
| 53              | Benin   | 1996           | Fruits, Other             | 49                                                          |
| 53              | Benin   | 1996           | Grapes                    | 1                                                           |
| 53              | Benin   | 1996           | Groundnut Oil             | 4                                                           |
| 53              | Benin   | 1996           | Groundnuts (Shelled Eq)   | 18                                                          |
| 53              | Benin   | 1996           | Maize                     | 157                                                         |
| 53              | Benin   | 1996           | Marine Fish, Other        | 6                                                           |
| 53              | Benin   | 1996           | Meat, Other               | 3                                                           |
| 53              | Benin   | 1996           | Milk, Whole               | 17                                                          |
| 53              | Benin   | 1996           | Millet                    | 7                                                           |
| 53              | Benin   | 1996           | Mutton & Goat Meat        | 3                                                           |
| 53              | Benin   | 1996           | Nuts                      | 4                                                           |
| 53              | Benin   | 1996           | Offals, Edible            | 2                                                           |
| 53              | Benin   | 1996           | Oilcrops Oil, Other       | 1                                                           |
| 53              | Benin   | 1996           | Onions                    | 3                                                           |
| 53              | Benin   | 1996           | Oranges, Mandarines       | 6                                                           |
| 53              | Benin   | 1996           | Palm Oil                  | 5                                                           |
| 53              | Benin   | 1996           | Palmkernel Oil            | 1                                                           |
| 53              | Benin   | 1996           | Pelagic Fish              | 2                                                           |
| 53              | Benin   | 1996           | Pigmeat                   | 3                                                           |
| 53              | Benin   | 1996           | Pimento                   | 8                                                           |
| 53              | Benin   | 1996           | Pineapples                | 35                                                          |
| 53              | Benin   | 1996           | Poultry Meat              | 12                                                          |
| 53              | Benin   | 1996           | Pulses, Other             | 4                                                           |
| 53              | Benin   | 1996           | Rice (Milled Equivalent)  | 57                                                          |
| 53              | Benin   | 1996           | Roots, Other              | 1                                                           |
| 53              | Benin   | 1996           | Sesameseed                | 3                                                           |
| 53              | Benin   | 1996           | Sorghum                   | 38                                                          |
| 53              | Benin   | 1996           | Sugar, Refined Equivalent | 14                                                          |
| 53              | Benin   | 1996           | Sweet Potatoes            | 25                                                          |
| 53              | Benin   | 1996           | Tomatoes                  | 52                                                          |
| 53              | Benin   | 1996           | Vegetables, Other         | 78                                                          |
| 53              | Benin   | 1996           | Wheat                     | 22                                                          |
| 53              | Benin   | 1996           | Wine                      | 1                                                           |

Dietary calcium and zinc deficiency risks are decreasing but remain prevalent

| FAO countrycode | Country | Reference year | Food item                 | Gross food supply (g capita <sup>-1</sup> d <sup>-1</sup> ) |
|-----------------|---------|----------------|---------------------------|-------------------------------------------------------------|
| 53              | Benin   | 1996           | Yams                      | 304                                                         |
| 53              | Benin   | 1997           | Apples                    | 1                                                           |
| 53              | Benin   | 1997           | Bananas                   | 3                                                           |
| 53              | Benin   | 1997           | Beans                     | 21                                                          |
| 53              | Benin   | 1997           | Beer                      | 18                                                          |
| 53              | Benin   | 1997           | Beverages, Alcoholic      | 2                                                           |
| 53              | Benin   | 1997           | Beverages, Fermented      | 11                                                          |
| 53              | Benin   | 1997           | Bovine Meat               | 7                                                           |
| 53              | Benin   | 1997           | Cassava                   | 444                                                         |
| 53              | Benin   | 1997           | Cereals, Other            | 3                                                           |
| 53              | Benin   | 1997           | Coconut Oil               | 1                                                           |
| 53              | Benin   | 1997           | Coconuts - Incl Copra     | 1                                                           |
| 53              | Benin   | 1997           | Cottonseed Oil            | 1                                                           |
| 53              | Benin   | 1997           | Crustaceans               | 3                                                           |
| 53              | Benin   | 1997           | Dates                     | 1                                                           |
| 53              | Benin   | 1997           | Demersal Fish             | 2                                                           |
| 53              | Benin   | 1997           | Eggs                      | 2                                                           |
| 53              | Benin   | 1997           | Fats, Animals, Raw        | 1                                                           |
| 53              | Benin   | 1997           | Freshwater Fish           | 10                                                          |
| 53              | Benin   | 1997           | Fruits, Other             | 48                                                          |
| 53              | Benin   | 1997           | Grapes                    | 1                                                           |
| 53              | Benin   | 1997           | Groundnut Oil             | 4                                                           |
| 53              | Benin   | 1997           | Groundnuts (Shelled Eq)   | 18                                                          |
| 53              | Benin   | 1997           | Maize                     | 176                                                         |
| 53              | Benin   | 1997           | Marine Fish, Other        | 7                                                           |
| 53              | Benin   | 1997           | Meat, Other               | 4                                                           |
| 53              | Benin   | 1997           | Milk, Whole               | 19                                                          |
| 53              | Benin   | 1997           | Millet                    | 7                                                           |
| 53              | Benin   | 1997           | Mutton & Goat Meat        | 3                                                           |
| 53              | Benin   | 1997           | Nuts                      | 3                                                           |
| 53              | Benin   | 1997           | Offals, Edible            | 2                                                           |
| 53              | Benin   | 1997           | Oilcrops Oil, Other       | 1                                                           |
| 53              | Benin   | 1997           | Onions                    | 4                                                           |
| 53              | Benin   | 1997           | Oranges, Mandarines       | 6                                                           |
| 53              | Benin   | 1997           | Palm Oil                  | 3                                                           |
| 53              | Benin   | 1997           | Palmkernel Oil            | 2                                                           |
| 53              | Benin   | 1997           | Pelagic Fish              | 2                                                           |
| 53              | Benin   | 1997           | Pigmeat                   | 3                                                           |
| 53              | Benin   | 1997           | Pimento                   | 7                                                           |
| 53              | Benin   | 1997           | Pineapples                | 23                                                          |
| 53              | Benin   | 1997           | Poultry Meat              | 14                                                          |
| 53              | Benin   | 1997           | Pulses, Other             | 5                                                           |
| 53              | Benin   | 1997           | Rice (Milled Equivalent)  | 40                                                          |
| 53              | Benin   | 1997           | Roots, Other              | 1                                                           |
| 53              | Benin   | 1997           | Sesameseed                | 4                                                           |
| 53              | Benin   | 1997           | Sorghum                   | 40                                                          |
| 53              | Benin   | 1997           | Sugar, Refined Equivalent | 13                                                          |
| 53              | Benin   | 1997           | Sweet Potatoes            | 22                                                          |
| 53              | Benin   | 1997           | Tomatoes                  | 63                                                          |
| 53              | Benin   | 1997           | Vegetables, Other         | 68                                                          |
| 53              | Benin   | 1997           | Wheat                     | 19                                                          |
| 53              | Benin   | 1997           | Wine                      | 1                                                           |
| 53              | Benin   | 1997           | Yams                      | 298                                                         |
| 53              | Benin   | 1998           | Apples                    | 1                                                           |
| 53              | Benin   | 1998           | Bananas                   | 3                                                           |
| 53              | Benin   | 1998           | Beans                     | 21                                                          |
| 53              | Benin   | 1998           | Beer                      | 17                                                          |
| 53              | Benin   | 1998           | Beverages, Alcoholic      | 2                                                           |
| 53              | Benin   | 1998           | Beverages, Fermented      | 12                                                          |
| 53              | Benin   | 1998           | Bovine Meat               | 8                                                           |
| 53              | Benin   | 1998           | Cassava                   | 369                                                         |
| 53              | Benin   | 1998           | Cereals, Other            | 2                                                           |
| 53              | Benin   | 1998           | Coconut Oil               | 1                                                           |
| 53              | Benin   | 1998           | Coconuts - Incl Copra     | 1                                                           |
| 53              | Benin   | 1998           | Cottonseed Oil            | 2                                                           |
| 53              | Benin   | 1998           | Crustaceans               | 3                                                           |
| 53              | Benin   | 1998           | Dates                     | 1                                                           |
| 53              | Benin   | 1998           | Demersal Fish             | 2                                                           |
| 53              | Benin   | 1998           | Eggs                      | 2                                                           |
| 53              | Benin   | 1998           | Freshwater Fish           | 9                                                           |
| 53              | Benin   | 1998           | Fruits, Other             | 37                                                          |
| 53              | Benin   | 1998           | Groundnut Oil             | 4                                                           |
| 53              | Benin   | 1998           | Groundnuts (Shelled Eq)   | 17                                                          |
| 53              | Benin   | 1998           | Maize                     | 175                                                         |
| 53              | Benin   | 1998           | Marine Fish, Other        | 3                                                           |
| 53              | Benin   | 1998           | Meat, Other               | 4                                                           |
| 53              | Benin   | 1998           | Milk, Whole               | 33                                                          |
| 53              | Benin   | 1998           | Millet                    | 8                                                           |
| 53              | Benin   | 1998           | Mutton & Goat Meat        | 3                                                           |
| 53              | Benin   | 1998           | Nuts                      | 5                                                           |
| 53              | Benin   | 1998           | Offals, Edible            | 2                                                           |
| 53              | Benin   | 1998           | Oilcrops Oil, Other       | 1                                                           |
| 53              | Benin   | 1998           | Onions                    | 4                                                           |
| 53              | Benin   | 1998           | Oranges, Mandarines       | 6                                                           |
| 53              | Benin   | 1998           | Palm Oil                  | 3                                                           |
| 53              | Benin   | 1998           | Palmkernel Oil            | 2                                                           |
| 53              | Benin   | 1998           | Pelagic Fish              | 5                                                           |
| 53              | Benin   | 1998           | Pigmeat                   | 1                                                           |
| 53              | Benin   | 1998           | Pimento                   | 6                                                           |
| 53              | Benin   | 1998           | Pineapples                | 17                                                          |
| 53              | Benin   | 1998           | Poultry Meat              | 13                                                          |
| 53              | Benin   | 1998           | Pulses, Other             | 5                                                           |
| 53              | Benin   | 1998           | Rape and Mustard Oil      | 1                                                           |
| 53              | Benin   | 1998           | Rice (Milled Equivalent)  | 37                                                          |
| 53              | Benin   | 1998           | Roots, Other              | 1                                                           |
| 53              | Benin   | 1998           | Sesameseed                | 4                                                           |
| 53              | Benin   | 1998           | Sorghum                   | 45                                                          |

Dietary calcium and zinc deficiency risks are decreasing but remain prevalent

| FAO countrycode | Country | Reference year | Food item                 | Gross food supply (g capita <sup>-1</sup> d <sup>-1</sup> ) |
|-----------------|---------|----------------|---------------------------|-------------------------------------------------------------|
| 53              | Benin   | 1998           | Soyabean Oil              | 1                                                           |
| 53              | Benin   | 1998           | Sugar, Refined Equivalent | 12                                                          |
| 53              | Benin   | 1998           | Sweet Potatoes            | 15                                                          |
| 53              | Benin   | 1998           | Tomatoes                  | 66                                                          |
| 53              | Benin   | 1998           | Vegetables, Other         | 63                                                          |
| 53              | Benin   | 1998           | Wheat                     | 25                                                          |
| 53              | Benin   | 1998           | Wine                      | 2                                                           |
| 53              | Benin   | 1998           | Yams                      | 348                                                         |
| 53              | Benin   | 1999           | Apples                    | 1                                                           |
| 53              | Benin   | 1999           | Bananas                   | 3                                                           |
| 53              | Benin   | 1999           | Beans                     | 20                                                          |
| 53              | Benin   | 1999           | Beer                      | 11                                                          |
| 53              | Benin   | 1999           | Beverages, Alcoholic      | 3                                                           |
| 53              | Benin   | 1999           | Beverages, Fermented      | 11                                                          |
| 53              | Benin   | 1999           | Bovine Meat               | 8                                                           |
| 53              | Benin   | 1999           | Cassava                   | 374                                                         |
| 53              | Benin   | 1999           | Cereals, Other            | 1                                                           |
| 53              | Benin   | 1999           | Coconut Oil               | 1                                                           |
| 53              | Benin   | 1999           | Coconuts - Incl Copra     | 1                                                           |
| 53              | Benin   | 1999           | Cottonseed Oil            | 1                                                           |
| 53              | Benin   | 1999           | Crustaceans               | 3                                                           |
| 53              | Benin   | 1999           | Dates                     | 1                                                           |
| 53              | Benin   | 1999           | Demersal Fish             | 2                                                           |
| 53              | Benin   | 1999           | Eggs                      | 2                                                           |
| 53              | Benin   | 1999           | Freshwater Fish           | 9                                                           |
| 53              | Benin   | 1999           | Fruits, Other             | 44                                                          |
| 53              | Benin   | 1999           | Groundnut Oil             | 4                                                           |
| 53              | Benin   | 1999           | Groundnuts (Shelled Eq)   | 17                                                          |
| 53              | Benin   | 1999           | Maize                     | 183                                                         |
| 53              | Benin   | 1999           | Marine Fish, Other        | 3                                                           |
| 53              | Benin   | 1999           | Meat, Other               | 3                                                           |
| 53              | Benin   | 1999           | Milk, Whole               | 23                                                          |
| 53              | Benin   | 1999           | Millet                    | 7                                                           |
| 53              | Benin   | 1999           | Mutton & Goat Meat        | 3                                                           |
| 53              | Benin   | 1999           | Nuts                      | 2                                                           |
| 53              | Benin   | 1999           | Offals, Edible            | 2                                                           |
| 53              | Benin   | 1999           | Oilcrops Oil, Other       | 1                                                           |
| 53              | Benin   | 1999           | Onions                    | 5                                                           |
| 53              | Benin   | 1999           | Oranges, Mandarines       | 6                                                           |
| 53              | Benin   | 1999           | Palm Oil                  | 3                                                           |
| 53              | Benin   | 1999           | Palmkernel Oil            | 2                                                           |
| 53              | Benin   | 1999           | Pelagic Fish              | 7                                                           |
| 53              | Benin   | 1999           | Pigmeat                   | 1                                                           |
| 53              | Benin   | 1999           | Pimento                   | 6                                                           |
| 53              | Benin   | 1999           | Pineapples                | 29                                                          |
| 53              | Benin   | 1999           | Poultry Meat              | 22                                                          |
| 53              | Benin   | 1999           | Pulses, Other             | 6                                                           |
| 53              | Benin   | 1999           | Rape and Mustard Oil      | 3                                                           |
| 53              | Benin   | 1999           | Rice (Milled Equivalent)  | 28                                                          |
| 53              | Benin   | 1999           | Roots, Other              | 2                                                           |
| 53              | Benin   | 1999           | Sesameseed                | 3                                                           |
| 53              | Benin   | 1999           | Sorghum                   | 40                                                          |
| 53              | Benin   | 1999           | Soyabean Oil              | 2                                                           |
| 53              | Benin   | 1999           | Sugar, Refined Equivalent | 15                                                          |
| 53              | Benin   | 1999           | Sweet Potatoes            | 25                                                          |
| 53              | Benin   | 1999           | Tomatoes                  | 70                                                          |
| 53              | Benin   | 1999           | Vegetables, Other         | 83                                                          |
| 53              | Benin   | 1999           | Wheat                     | 24                                                          |
| 53              | Benin   | 1999           | Wine                      | 2                                                           |
| 53              | Benin   | 1999           | Yams                      | 346                                                         |
| 53              | Benin   | 2000           | Apples                    | 2                                                           |
| 53              | Benin   | 2000           | Bananas                   | 3                                                           |
| 53              | Benin   | 2000           | Beans                     | 23                                                          |
| 53              | Benin   | 2000           | Beer                      | 14                                                          |
| 53              | Benin   | 2000           | Beverages, Alcoholic      | 1                                                           |
| 53              | Benin   | 2000           | Beverages, Fermented      | 13                                                          |
| 53              | Benin   | 2000           | Bovine Meat               | 7                                                           |
| 53              | Benin   | 2000           | Cassava                   | 391                                                         |
| 53              | Benin   | 2000           | Cereals, Other            | 1                                                           |
| 53              | Benin   | 2000           | Coconut Oil               | 1                                                           |
| 53              | Benin   | 2000           | Coconuts - Incl Copra     | 1                                                           |
| 53              | Benin   | 2000           | Cottonseed Oil            | 1                                                           |
| 53              | Benin   | 2000           | Crustaceans               | 2                                                           |
| 53              | Benin   | 2000           | Dates                     | 1                                                           |
| 53              | Benin   | 2000           | Demersal Fish             | 1                                                           |
| 53              | Benin   | 2000           | Eggs                      | 2                                                           |
| 53              | Benin   | 2000           | Freshwater Fish           | 7                                                           |
| 53              | Benin   | 2000           | Fruits, Other             | 31                                                          |
| 53              | Benin   | 2000           | Grapes                    | 1                                                           |
| 53              | Benin   | 2000           | Groundnut Oil             | 4                                                           |
| 53              | Benin   | 2000           | Groundnuts (Shelled Eq)   | 21                                                          |
| 53              | Benin   | 2000           | Maize                     | 169                                                         |
| 53              | Benin   | 2000           | Marine Fish, Other        | 2                                                           |
| 53              | Benin   | 2000           | Meat, Other               | 3                                                           |
| 53              | Benin   | 2000           | Milk, Whole               | 22                                                          |
| 53              | Benin   | 2000           | Millet                    | 9                                                           |
| 53              | Benin   | 2000           | Mutton & Goat Meat        | 3                                                           |
| 53              | Benin   | 2000           | Nuts                      | 1                                                           |
| 53              | Benin   | 2000           | Offals, Edible            | 2                                                           |
| 53              | Benin   | 2000           | Oilcrops Oil, Other       | 1                                                           |
| 53              | Benin   | 2000           | Onions                    | 5                                                           |
| 53              | Benin   | 2000           | Oranges, Mandarines       | 5                                                           |
| 53              | Benin   | 2000           | Palm Oil                  | 4                                                           |
| 53              | Benin   | 2000           | Palmkernel Oil            | 2                                                           |
| 53              | Benin   | 2000           | Pelagic Fish              | 9                                                           |
| 53              | Benin   | 2000           | Pigmeat                   | 2                                                           |
| 53              | Benin   | 2000           | Pimento                   | 6                                                           |

Dietary calcium and zinc deficiency risks are decreasing but remain prevalent

| FAO countrycode | Country | Reference year | Food item                 | Gross food supply (g capita <sup>-1</sup> d <sup>-1</sup> ) |
|-----------------|---------|----------------|---------------------------|-------------------------------------------------------------|
| 53              | Benin   | 2000           | Pineapples                | 19                                                          |
| 53              | Benin   | 2000           | Poultry Meat              | 27                                                          |
| 53              | Benin   | 2000           | Pulses, Other             | 6                                                           |
| 53              | Benin   | 2000           | Rape and Mustard Oil      | 1                                                           |
| 53              | Benin   | 2000           | Rice (Milled Equivalent)  | 26                                                          |
| 53              | Benin   | 2000           | Roots, Other              | 1                                                           |
| 53              | Benin   | 2000           | Sesameseed                | 4                                                           |
| 53              | Benin   | 2000           | Sorghum                   | 48                                                          |
| 53              | Benin   | 2000           | Soyabean Oil              | 2                                                           |
| 53              | Benin   | 2000           | Sugar, Refined Equivalent | 12                                                          |
| 53              | Benin   | 2000           | Sweet Potatoes            | 23                                                          |
| 53              | Benin   | 2000           | Tomatoes                  | 65                                                          |
| 53              | Benin   | 2000           | Vegetables, Other         | 74                                                          |
| 53              | Benin   | 2000           | Wheat                     | 19                                                          |
| 53              | Benin   | 2000           | Wine                      | 2                                                           |
| 53              | Benin   | 2000           | Yams                      | 365                                                         |
| 53              | Benin   | 2001           | Apples                    | 2                                                           |
| 53              | Benin   | 2001           | Bananas                   | 3                                                           |
| 53              | Benin   | 2001           | Beans                     | 20                                                          |
| 53              | Benin   | 2001           | Beer                      | 15                                                          |
| 53              | Benin   | 2001           | Beverages, Fermented      | 13                                                          |
| 53              | Benin   | 2001           | Bovine Meat               | 7                                                           |
| 53              | Benin   | 2001           | Cassava                   | 438                                                         |
| 53              | Benin   | 2001           | Cereals, Other            | 1                                                           |
| 53              | Benin   | 2001           | Coconut Oil               | 1                                                           |
| 53              | Benin   | 2001           | Coconuts - Incl Copra     | 1                                                           |
| 53              | Benin   | 2001           | Cottonseed Oil            | 8                                                           |
| 53              | Benin   | 2001           | Crustaceans               | 2                                                           |
| 53              | Benin   | 2001           | Dates                     | 1                                                           |
| 53              | Benin   | 2001           | Demersal Fish             | 2                                                           |
| 53              | Benin   | 2001           | Eggs                      | 2                                                           |
| 53              | Benin   | 2001           | Freshwater Fish           | 8                                                           |
| 53              | Benin   | 2001           | Fruits, Other             | 33                                                          |
| 53              | Benin   | 2001           | Grapes                    | 1                                                           |
| 53              | Benin   | 2001           | Groundnut Oil             | 4                                                           |
| 53              | Benin   | 2001           | Groundnuts (Shelled Eq)   | 21                                                          |
| 53              | Benin   | 2001           | Maize                     | 165                                                         |
| 53              | Benin   | 2001           | Marine Fish, Other        | 2                                                           |
| 53              | Benin   | 2001           | Meat, Other               | 4                                                           |
| 53              | Benin   | 2001           | Milk, Whole               | 24                                                          |
| 53              | Benin   | 2001           | Millet                    | 8                                                           |
| 53              | Benin   | 2001           | Mutton & Goat Meat        | 3                                                           |
| 53              | Benin   | 2001           | Nuts                      | 2                                                           |
| 53              | Benin   | 2001           | Offals, Edible            | 2                                                           |
| 53              | Benin   | 2001           | Oilcrops Oil, Other       | 1                                                           |
| 53              | Benin   | 2001           | Onions                    | 6                                                           |
| 53              | Benin   | 2001           | Oranges, Mandarines       | 6                                                           |
| 53              | Benin   | 2001           | Palm Oil                  | 5                                                           |
| 53              | Benin   | 2001           | Palmkernel Oil            | 2                                                           |
| 53              | Benin   | 2001           | Pelagic Fish              | 6                                                           |
| 53              | Benin   | 2001           | Pigmeat                   | 1                                                           |
| 53              | Benin   | 2001           | Pimento                   | 6                                                           |
| 53              | Benin   | 2001           | Pineapples                | 19                                                          |
| 53              | Benin   | 2001           | Poultry Meat              | 22                                                          |
| 53              | Benin   | 2001           | Pulses, Other             | 5                                                           |
| 53              | Benin   | 2001           | Rice (Milled Equivalent)  | 39                                                          |
| 53              | Benin   | 2001           | Roots, Other              | 1                                                           |
| 53              | Benin   | 2001           | Sesameseed                | 4                                                           |
| 53              | Benin   | 2001           | Sorghum                   | 49                                                          |
| 53              | Benin   | 2001           | Soyabean Oil              | 1                                                           |
| 53              | Benin   | 2001           | Sugar, Refined Equivalent | 11                                                          |
| 53              | Benin   | 2001           | Sweet Potatoes            | 20                                                          |
| 53              | Benin   | 2001           | Tomatoes                  | 55                                                          |
| 53              | Benin   | 2001           | Vegetables, Other         | 66                                                          |
| 53              | Benin   | 2001           | Wheat                     | 19                                                          |
| 53              | Benin   | 2001           | Wine                      | 1                                                           |
| 53              | Benin   | 2001           | Yams                      | 319                                                         |
| 53              | Benin   | 2002           | Apples                    | 4                                                           |
| 53              | Benin   | 2002           | Bananas                   | 3                                                           |
| 53              | Benin   | 2002           | Beans                     | 25                                                          |
| 53              | Benin   | 2002           | Beer                      | 17                                                          |
| 53              | Benin   | 2002           | Beverages, Fermented      | 13                                                          |
| 53              | Benin   | 2002           | Bovine Meat               | 7                                                           |
| 53              | Benin   | 2002           | Cassava                   | 357                                                         |
| 53              | Benin   | 2002           | Cereals, Other            | 1                                                           |
| 53              | Benin   | 2002           | Coconut Oil               | 1                                                           |
| 53              | Benin   | 2002           | Coconuts - Incl Copra     | 1                                                           |
| 53              | Benin   | 2002           | Cottonseed Oil            | 8                                                           |
| 53              | Benin   | 2002           | Crustaceans               | 2                                                           |
| 53              | Benin   | 2002           | Dates                     | 1                                                           |
| 53              | Benin   | 2002           | Demersal Fish             | 2                                                           |
| 53              | Benin   | 2002           | Eggs                      | 2                                                           |
| 53              | Benin   | 2002           | Freshwater Fish           | 7                                                           |
| 53              | Benin   | 2002           | Fruits, Other             | 32                                                          |
| 53              | Benin   | 2002           | Grapes                    | 1                                                           |
| 53              | Benin   | 2002           | Groundnut Oil             | 4                                                           |
| 53              | Benin   | 2002           | Groundnuts (Shelled Eq)   | 26                                                          |
| 53              | Benin   | 2002           | Maize                     | 160                                                         |
| 53              | Benin   | 2002           | Marine Fish, Other        | 3                                                           |
| 53              | Benin   | 2002           | Meat, Other               | 7                                                           |
| 53              | Benin   | 2002           | Milk, Whole               | 27                                                          |
| 53              | Benin   | 2002           | Millet                    | 10                                                          |
| 53              | Benin   | 2002           | Mutton & Goat Meat        | 2                                                           |
| 53              | Benin   | 2002           | Nuts                      | 3                                                           |
| 53              | Benin   | 2002           | Offals, Edible            | 2                                                           |
| 53              | Benin   | 2002           | Oilcrops Oil, Other       | 1                                                           |
| 53              | Benin   | 2002           | Onions                    | 5                                                           |

## Dietary calcium and zinc deficiency risks are decreasing but remain prevalent

| FAO countrycode | Country | Reference year | Food item                 | Gross food supply (g capita <sup>-1</sup> d <sup>-1</sup> ) |
|-----------------|---------|----------------|---------------------------|-------------------------------------------------------------|
| 53              | Benin   | 2002           | Oranges, Mandarines       | 6                                                           |
| 53              | Benin   | 2002           | Palm Oil                  | 6                                                           |
| 53              | Benin   | 2002           | Palmkernel Oil            | 2                                                           |
| 53              | Benin   | 2002           | Pelagic Fish              | 9                                                           |
| 53              | Benin   | 2002           | Pigmeat                   | 1                                                           |
| 53              | Benin   | 2002           | Pimento                   | 6                                                           |
| 53              | Benin   | 2002           | Pineapples                | 28                                                          |
| 53              | Benin   | 2002           | Potatoes                  | 1                                                           |
| 53              | Benin   | 2002           | Poultry Meat              | 30                                                          |
| 53              | Benin   | 2002           | Pulses, Other             | 6                                                           |
| 53              | Benin   | 2002           | Rice (Milled Equivalent)  | 48                                                          |
| 53              | Benin   | 2002           | Roots, Other              | 1                                                           |
| 53              | Benin   | 2002           | Sesameseed                | 4                                                           |
| 53              | Benin   | 2002           | Sorghum                   | 48                                                          |
| 53              | Benin   | 2002           | Soyabean Oil              | 1                                                           |
| 53              | Benin   | 2002           | Sugar, Refined Equivalent | 13                                                          |
| 53              | Benin   | 2002           | Sweet Potatoes            | 25                                                          |
| 53              | Benin   | 2002           | Tomatoes                  | 57                                                          |
| 53              | Benin   | 2002           | Vegetables, Other         | 74                                                          |
| 53              | Benin   | 2002           | Wheat                     | 23                                                          |
| 53              | Benin   | 2002           | Wine                      | 1                                                           |
| 53              | Benin   | 2002           | Yams                      | 369                                                         |
| 53              | Benin   | 2003           | Apples                    | 3                                                           |
| 53              | Benin   | 2003           | Bananas                   | 4                                                           |
| 53              | Benin   | 2003           | Beans                     | 20                                                          |
| 53              | Benin   | 2003           | Beer                      | 17                                                          |
| 53              | Benin   | 2003           | Beverages, Alcoholic      | 1                                                           |
| 53              | Benin   | 2003           | Beverages, Fermented      | 12                                                          |
| 53              | Benin   | 2003           | Bovine Meat               | 7                                                           |
| 53              | Benin   | 2003           | Cassava                   | 344                                                         |
| 53              | Benin   | 2003           | Cereals, Other            | 1                                                           |
| 53              | Benin   | 2003           | Coconut Oil               | 1                                                           |
| 53              | Benin   | 2003           | Coconuts - Incl Copra     | 1                                                           |
| 53              | Benin   | 2003           | Cottonseed Oil            | 9                                                           |
| 53              | Benin   | 2003           | Crustaceans               | 2                                                           |
| 53              | Benin   | 2003           | Demersal Fish             | 2                                                           |
| 53              | Benin   | 2003           | Eggs                      | 2                                                           |
| 53              | Benin   | 2003           | Freshwater Fish           | 8                                                           |
| 53              | Benin   | 2003           | Fruits, Other             | 33                                                          |
| 53              | Benin   | 2003           | Groundnut Oil             | 4                                                           |
| 53              | Benin   | 2003           | Groundnuts (Shelled Eq)   | 20                                                          |
| 53              | Benin   | 2003           | Maize                     | 158                                                         |
| 53              | Benin   | 2003           | Marine Fish, Other        | 6                                                           |
| 53              | Benin   | 2003           | Meat, Other               | 9                                                           |
| 53              | Benin   | 2003           | Milk, Whole               | 22                                                          |
| 53              | Benin   | 2003           | Millet                    | 8                                                           |
| 53              | Benin   | 2003           | Mutton & Goat Meat        | 2                                                           |
| 53              | Benin   | 2003           | Nuts                      | 3                                                           |
| 53              | Benin   | 2003           | Offals, Edible            | 2                                                           |
| 53              | Benin   | 2003           | Oilcrops Oil, Other       | 1                                                           |
| 53              | Benin   | 2003           | Onions                    | 6                                                           |
| 53              | Benin   | 2003           | Oranges, Mandarines       | 6                                                           |
| 53              | Benin   | 2003           | Palm Oil                  | 5                                                           |
| 53              | Benin   | 2003           | Palmkernel Oil            | 2                                                           |
| 53              | Benin   | 2003           | Pelagic Fish              | 7                                                           |
| 53              | Benin   | 2003           | Pigmeat                   | 2                                                           |
| 53              | Benin   | 2003           | Pimento                   | 6                                                           |
| 53              | Benin   | 2003           | Pineapples                | 34                                                          |
| 53              | Benin   | 2003           | Potatoes                  | 1                                                           |
| 53              | Benin   | 2003           | Poultry Meat              | 30                                                          |
| 53              | Benin   | 2003           | Pulses, Other             | 6                                                           |
| 53              | Benin   | 2003           | Rice (Milled Equivalent)  | 58                                                          |
| 53              | Benin   | 2003           | Roots, Other              | 1                                                           |
| 53              | Benin   | 2003           | Sesameseed                | 4                                                           |
| 53              | Benin   | 2003           | Sorghum                   | 45                                                          |
| 53              | Benin   | 2003           | Soyabean Oil              | 1                                                           |
| 53              | Benin   | 2003           | Sugar, Refined Equivalent | 14                                                          |
| 53              | Benin   | 2003           | Sweet Potatoes            | 16                                                          |
| 53              | Benin   | 2003           | Tomatoes                  | 52                                                          |
| 53              | Benin   | 2003           | Vegetables, Other         | 77                                                          |
| 53              | Benin   | 2003           | Wheat                     | 19                                                          |
| 53              | Benin   | 2003           | Wine                      | 2                                                           |
| 53              | Benin   | 2003           | Yams                      | 379                                                         |
| 53              | Benin   | 2004           | Apples                    | 2                                                           |
| 53              | Benin   | 2004           | Bananas                   | 4                                                           |
| 53              | Benin   | 2004           | Beans                     | 27                                                          |
| 53              | Benin   | 2004           | Beer                      | 21                                                          |
| 53              | Benin   | 2004           | Beverages, Alcoholic      | 1                                                           |
| 53              | Benin   | 2004           | Beverages, Fermented      | 12                                                          |
| 53              | Benin   | 2004           | Bovine Meat               | 7                                                           |
| 53              | Benin   | 2004           | Cassava                   | 354                                                         |
| 53              | Benin   | 2004           | Coconut Oil               | 1                                                           |
| 53              | Benin   | 2004           | Coconuts - Incl Copra     | 1                                                           |
| 53              | Benin   | 2004           | Cottonseed Oil            | 8                                                           |
| 53              | Benin   | 2004           | Crustaceans               | 2                                                           |
| 53              | Benin   | 2004           | Demersal Fish             | 2                                                           |
| 53              | Benin   | 2004           | Eggs                      | 2                                                           |
| 53              | Benin   | 2004           | Fats, Animals, Raw        | 2                                                           |
| 53              | Benin   | 2004           | Freshwater Fish           | 7                                                           |
| 53              | Benin   | 2004           | Fruits, Other             | 32                                                          |
| 53              | Benin   | 2004           | Groundnut Oil             | 4                                                           |
| 53              | Benin   | 2004           | Groundnuts (Shelled Eq)   | 21                                                          |
| 53              | Benin   | 2004           | Maize                     | 158                                                         |
| 53              | Benin   | 2004           | Marine Fish, Other        | 6                                                           |
| 53              | Benin   | 2004           | Meat, Other               | 3                                                           |
| 53              | Benin   | 2004           | Milk, Whole               | 24                                                          |
| 53              | Benin   | 2004           | Millet                    | 8                                                           |



Dietary calcium and zinc deficiency risks are decreasing but remain prevalent

| FAO countrycode | Country | Reference year | Food item                 | Gross food supply (g capita <sup>-1</sup> d <sup>-1</sup> ) |
|-----------------|---------|----------------|---------------------------|-------------------------------------------------------------|
| 53              | Benin   | 2004           | Mutton & Goat Meat        | 2                                                           |
| 53              | Benin   | 2004           | Nuts                      | 1                                                           |
| 53              | Benin   | 2004           | Offals, Edible            | 2                                                           |
| 53              | Benin   | 2004           | Oilcrops Oil, Other       | 1                                                           |
| 53              | Benin   | 2004           | Onions                    | 3                                                           |
| 53              | Benin   | 2004           | Oranges, Mandarines       | 6                                                           |
| 53              | Benin   | 2004           | Palm Oil                  | 6                                                           |
| 53              | Benin   | 2004           | Palmkernel Oil            | 2                                                           |
| 53              | Benin   | 2004           | Pelagic Fish              | 6                                                           |
| 53              | Benin   | 2004           | Pigmeat                   | 2                                                           |
| 53              | Benin   | 2004           | Pimento                   | 5                                                           |
| 53              | Benin   | 2004           | Pineapples                | 34                                                          |
| 53              | Benin   | 2004           | Potatoes                  | 1                                                           |
| 53              | Benin   | 2004           | Poultry Meat              | 25                                                          |
| 53              | Benin   | 2004           | Pulses, Other             | 8                                                           |
| 53              | Benin   | 2004           | Rice (Milled Equivalent)  | 97                                                          |
| 53              | Benin   | 2004           | Roots, Other              | 1                                                           |
| 53              | Benin   | 2004           | Sesameseed                | 3                                                           |
| 53              | Benin   | 2004           | Sorghum                   | 44                                                          |
| 53              | Benin   | 2004           | Sugar, Refined Equivalent | 9                                                           |
| 53              | Benin   | 2004           | Sweet Potatoes            | 16                                                          |
| 53              | Benin   | 2004           | Tomatoes                  | 53                                                          |
| 53              | Benin   | 2004           | Vegetables, Other         | 70                                                          |
| 53              | Benin   | 2004           | Wheat                     | 13                                                          |
| 53              | Benin   | 2004           | Wine                      | 2                                                           |
| 53              | Benin   | 2004           | Yams                      | 381                                                         |
| 53              | Benin   | 2005           | Apples                    | 3                                                           |
| 53              | Benin   | 2005           | Bananas                   | 5                                                           |
| 53              | Benin   | 2005           | Beans                     | 22                                                          |
| 53              | Benin   | 2005           | Beer                      | 20                                                          |
| 53              | Benin   | 2005           | Beverages, Alcoholic      | 1                                                           |
| 53              | Benin   | 2005           | Beverages, Fermented      | 11                                                          |
| 53              | Benin   | 2005           | Bovine Meat               | 7                                                           |
| 53              | Benin   | 2005           | Cassava                   | 350                                                         |
| 53              | Benin   | 2005           | Cereals, Other            | 1                                                           |
| 53              | Benin   | 2005           | Coconut Oil               | 1                                                           |
| 53              | Benin   | 2005           | Coconuts - Incl Copra     | 1                                                           |
| 53              | Benin   | 2005           | Cottonseed Oil            | 6                                                           |
| 53              | Benin   | 2005           | Crustaceans               | 2                                                           |
| 53              | Benin   | 2005           | Demersal Fish             | 2                                                           |
| 53              | Benin   | 2005           | Eggs                      | 2                                                           |
| 53              | Benin   | 2005           | Fats, Animals, Raw        | 4                                                           |
| 53              | Benin   | 2005           | Freshwater Fish           | 8                                                           |
| 53              | Benin   | 2005           | Fruits, Other             | 32                                                          |
| 53              | Benin   | 2005           | Groundnut Oil             | 3                                                           |
| 53              | Benin   | 2005           | Groundnuts (Shelled Eq)   | 23                                                          |
| 53              | Benin   | 2005           | Maize                     | 156                                                         |
| 53              | Benin   | 2005           | Marine Fish, Other        | 12                                                          |
| 53              | Benin   | 2005           | Meat, Other               | 3                                                           |
| 53              | Benin   | 2005           | Milk, Whole               | 23                                                          |
| 53              | Benin   | 2005           | Millet                    | 8                                                           |
| 53              | Benin   | 2005           | Mutton & Goat Meat        | 2                                                           |
| 53              | Benin   | 2005           | Nuts                      | 1                                                           |
| 53              | Benin   | 2005           | Offals, Edible            | 2                                                           |
| 53              | Benin   | 2005           | Oilcrops Oil, Other       | 1                                                           |
| 53              | Benin   | 2005           | Onions                    | 4                                                           |
| 53              | Benin   | 2005           | Oranges, Mandarines       | 6                                                           |
| 53              | Benin   | 2005           | Palm Oil                  | 7                                                           |
| 53              | Benin   | 2005           | Palmkernel Oil            | 2                                                           |
| 53              | Benin   | 2005           | Pelagic Fish              | 3                                                           |
| 53              | Benin   | 2005           | Pigmeat                   | 2                                                           |
| 53              | Benin   | 2005           | Pimento                   | 5                                                           |
| 53              | Benin   | 2005           | Pineapples                | 36                                                          |
| 53              | Benin   | 2005           | Potatoes                  | 1                                                           |
| 53              | Benin   | 2005           | Poultry Meat              | 22                                                          |
| 53              | Benin   | 2005           | Pulses, Other             | 5                                                           |
| 53              | Benin   | 2005           | Rice (Milled Equivalent)  | 116                                                         |
| 53              | Benin   | 2005           | Roots, Other              | 1                                                           |
| 53              | Benin   | 2005           | Sesameseed                | 4                                                           |
| 53              | Benin   | 2005           | Sorghum                   | 43                                                          |
| 53              | Benin   | 2005           | Soyabean Oil              | 1                                                           |
| 53              | Benin   | 2005           | Sugar, Refined Equivalent | 8                                                           |
| 53              | Benin   | 2005           | Sweet Potatoes            | 19                                                          |
| 53              | Benin   | 2005           | Tomatoes                  | 53                                                          |
| 53              | Benin   | 2005           | Vegetables, Other         | 79                                                          |
| 53              | Benin   | 2005           | Wheat                     | 9                                                           |
| 53              | Benin   | 2005           | Wine                      | 2                                                           |
| 53              | Benin   | 2005           | Yams                      | 308                                                         |
| 53              | Benin   | 2006           | Apples                    | 3                                                           |
| 53              | Benin   | 2006           | Bananas                   | 3                                                           |
| 53              | Benin   | 2006           | Beans                     | 27                                                          |
| 53              | Benin   | 2006           | Beer                      | 22                                                          |
| 53              | Benin   | 2006           | Beverages, Alcoholic      | 1                                                           |
| 53              | Benin   | 2006           | Beverages, Fermented      | 11                                                          |
| 53              | Benin   | 2006           | Bovine Meat               | 7                                                           |
| 53              | Benin   | 2006           | Cassava                   | 354                                                         |
| 53              | Benin   | 2006           | Coconut Oil               | 1                                                           |
| 53              | Benin   | 2006           | Coconuts - Incl Copra     | 1                                                           |
| 53              | Benin   | 2006           | Cottonseed Oil            | 6                                                           |
| 53              | Benin   | 2006           | Crustaceans               | 2                                                           |
| 53              | Benin   | 2006           | Demersal Fish             | 2                                                           |
| 53              | Benin   | 2006           | Eggs                      | 2                                                           |
| 53              | Benin   | 2006           | Fats, Animals, Raw        | 3                                                           |
| 53              | Benin   | 2006           | Freshwater Fish           | 9                                                           |
| 53              | Benin   | 2006           | Fruits, Other             | 32                                                          |
| 53              | Benin   | 2006           | Grapes                    | 1                                                           |
| 53              | Benin   | 2006           | Groundnut Oil             | 3                                                           |

Dietary calcium and zinc deficiency risks are decreasing but remain prevalent

| FAO countrycode | Country | Reference year | Food item                 | Gross food supply (g capita <sup>-1</sup> d <sup>-1</sup> ) |
|-----------------|---------|----------------|---------------------------|-------------------------------------------------------------|
| 53              | Benin   | 2006           | Groundnuts (Shelled Eq)   | 18                                                          |
| 53              | Benin   | 2006           | Maize                     | 134                                                         |
| 53              | Benin   | 2006           | Marine Fish, Other        | 18                                                          |
| 53              | Benin   | 2006           | Meat, Other               | 3                                                           |
| 53              | Benin   | 2006           | Milk, Whole               | 23                                                          |
| 53              | Benin   | 2006           | Millet                    | 8                                                           |
| 53              | Benin   | 2006           | Mutton & Goat Meat        | 2                                                           |
| 53              | Benin   | 2006           | Nuts                      | 1                                                           |
| 53              | Benin   | 2006           | Offals, Edible            | 2                                                           |
| 53              | Benin   | 2006           | Oilcrops Oil, Other       | 1                                                           |
| 53              | Benin   | 2006           | Onions                    | 9                                                           |
| 53              | Benin   | 2006           | Oranges, Mandarines       | 6                                                           |
| 53              | Benin   | 2006           | Palm Oil                  | 4                                                           |
| 53              | Benin   | 2006           | Palmkernel Oil            | 2                                                           |
| 53              | Benin   | 2006           | Pelagic Fish              | 3                                                           |
| 53              | Benin   | 2006           | Pigmeat                   | 1                                                           |
| 53              | Benin   | 2006           | Pimento                   | 6                                                           |
| 53              | Benin   | 2006           | Pineapples                | 23                                                          |
| 53              | Benin   | 2006           | Poultry Meat              | 21                                                          |
| 53              | Benin   | 2006           | Pulses, Other             | 2                                                           |
| 53              | Benin   | 2006           | Rice (Milled Equivalent)  | 134                                                         |
| 53              | Benin   | 2006           | Roots, Other              | 1                                                           |
| 53              | Benin   | 2006           | Sesameseed                | 2                                                           |
| 53              | Benin   | 2006           | Sorghum                   | 40                                                          |
| 53              | Benin   | 2006           | Sugar, Refined Equivalent | 8                                                           |
| 53              | Benin   | 2006           | Sweet Potatoes            | 16                                                          |
| 53              | Benin   | 2006           | Tomatoes                  | 51                                                          |
| 53              | Benin   | 2006           | Vegetables, Other         | 72                                                          |
| 53              | Benin   | 2006           | Wheat                     | 15                                                          |
| 53              | Benin   | 2006           | Wine                      | 2                                                           |
| 53              | Benin   | 2006           | Yams                      | 371                                                         |
| 53              | Benin   | 2007           | Apples                    | 4                                                           |
| 53              | Benin   | 2007           | Bananas                   | 4                                                           |
| 53              | Benin   | 2007           | Barley                    | 1                                                           |
| 53              | Benin   | 2007           | Beans                     | 28                                                          |
| 53              | Benin   | 2007           | Beer                      | 22                                                          |
| 53              | Benin   | 2007           | Beverages, Fermented      | 10                                                          |
| 53              | Benin   | 2007           | Bovine Meat               | 7                                                           |
| 53              | Benin   | 2007           | Cassava                   | 411                                                         |
| 53              | Benin   | 2007           | Coconut Oil               | 1                                                           |
| 53              | Benin   | 2007           | Coconuts - Incl Copra     | 1                                                           |
| 53              | Benin   | 2007           | Cottonseed Oil            | 6                                                           |
| 53              | Benin   | 2007           | Crustaceans               | 1                                                           |
| 53              | Benin   | 2007           | Demersal Fish             | 2                                                           |
| 53              | Benin   | 2007           | Eggs                      | 3                                                           |
| 53              | Benin   | 2007           | Fats, Animals, Raw        | 3                                                           |
| 53              | Benin   | 2007           | Freshwater Fish           | 12                                                          |
| 53              | Benin   | 2007           | Fruits, Other             | 34                                                          |
| 53              | Benin   | 2007           | Grapes                    | 1                                                           |
| 53              | Benin   | 2007           | Groundnut Oil             | 3                                                           |
| 53              | Benin   | 2007           | Groundnuts (Shelled Eq)   | 16                                                          |
| 53              | Benin   | 2007           | Maize                     | 128                                                         |
| 53              | Benin   | 2007           | Marine Fish, Other        | 18                                                          |
| 53              | Benin   | 2007           | Meat, Other               | 2                                                           |
| 53              | Benin   | 2007           | Milk, Whole               | 22                                                          |
| 53              | Benin   | 2007           | Millet                    | 8                                                           |
| 53              | Benin   | 2007           | Mutton & Goat Meat        | 2                                                           |
| 53              | Benin   | 2007           | Nuts                      | 6                                                           |
| 53              | Benin   | 2007           | Offals, Edible            | 2                                                           |
| 53              | Benin   | 2007           | Onions                    | 6                                                           |
| 53              | Benin   | 2007           | Oranges, Mandarines       | 5                                                           |
| 53              | Benin   | 2007           | Palm Oil                  | 6                                                           |
| 53              | Benin   | 2007           | Palmkernel Oil            | 2                                                           |
| 53              | Benin   | 2007           | Pelagic Fish              | 3                                                           |
| 53              | Benin   | 2007           | Pigmeat                   | 2                                                           |
| 53              | Benin   | 2007           | Pimento                   | 9                                                           |
| 53              | Benin   | 2007           | Pineapples                | 37                                                          |
| 53              | Benin   | 2007           | Poultry Meat              | 22                                                          |
| 53              | Benin   | 2007           | Pulses, Other             | 13                                                          |
| 53              | Benin   | 2007           | Rice (Milled Equivalent)  | 134                                                         |
| 53              | Benin   | 2007           | Roots, Other              | 1                                                           |
| 53              | Benin   | 2007           | Sesameseed                | 3                                                           |
| 53              | Benin   | 2007           | Sorghum                   | 39                                                          |
| 53              | Benin   | 2007           | Soyabean Oil              | 1                                                           |
| 53              | Benin   | 2007           | Sugar, Refined Equivalent | 7                                                           |
| 53              | Benin   | 2007           | Sweet Potatoes            | 19                                                          |
| 53              | Benin   | 2007           | Tomatoes                  | 57                                                          |
| 53              | Benin   | 2007           | Vegetables, Other         | 57                                                          |
| 53              | Benin   | 2007           | Wheat                     | 13                                                          |
| 53              | Benin   | 2007           | Wine                      | 1                                                           |
| 53              | Benin   | 2007           | Yams                      | 372                                                         |
| 53              | Benin   | 2008           | Apples                    | 6                                                           |
| 53              | Benin   | 2008           | Bananas                   | 4                                                           |
| 53              | Benin   | 2008           | Beans                     | 29                                                          |
| 53              | Benin   | 2008           | Beer                      | 23                                                          |
| 53              | Benin   | 2008           | Beverages, Alcoholic      | 1                                                           |
| 53              | Benin   | 2008           | Beverages, Fermented      | 9                                                           |
| 53              | Benin   | 2008           | Bovine Meat               | 7                                                           |
| 53              | Benin   | 2008           | Cassava                   | 258                                                         |
| 53              | Benin   | 2008           | Cereals, Other            | 1                                                           |
| 53              | Benin   | 2008           | Coconut Oil               | 1                                                           |
| 53              | Benin   | 2008           | Coconuts - Incl Copra     | 1                                                           |
| 53              | Benin   | 2008           | Cottonseed Oil            | 6                                                           |
| 53              | Benin   | 2008           | Crustaceans               | 1                                                           |
| 53              | Benin   | 2008           | Demersal Fish             | 2                                                           |
| 53              | Benin   | 2008           | Eggs                      | 3                                                           |
| 53              | Benin   | 2008           | Fats, Animals, Raw        | 1                                                           |

Dietary calcium and zinc deficiency risks are decreasing but remain prevalent

| FAO countrycode | Country | Reference year | Food item                 | Gross food supply (g capita <sup>-1</sup> d <sup>-1</sup> ) |
|-----------------|---------|----------------|---------------------------|-------------------------------------------------------------|
| 53              | Benin   | 2008           | Freshwater Fish           | 13                                                          |
| 53              | Benin   | 2008           | Fruits, Other             | 35                                                          |
| 53              | Benin   | 2008           | Groundnut Oil             | 5                                                           |
| 53              | Benin   | 2008           | Groundnuts (Shelled Eq)   | 16                                                          |
| 53              | Benin   | 2008           | Maize                     | 126                                                         |
| 53              | Benin   | 2008           | Marine Fish, Other        | 21                                                          |
| 53              | Benin   | 2008           | Meat, Other               | 2                                                           |
| 53              | Benin   | 2008           | Milk, Whole               | 24                                                          |
| 53              | Benin   | 2008           | Millet                    | 7                                                           |
| 53              | Benin   | 2008           | Mutton & Goat Meat        | 2                                                           |
| 53              | Benin   | 2008           | Nuts                      | 9                                                           |
| 53              | Benin   | 2008           | Offals, Edible            | 2                                                           |
| 53              | Benin   | 2008           | Onions                    | 3                                                           |
| 53              | Benin   | 2008           | Oranges, Mandarines       | 4                                                           |
| 53              | Benin   | 2008           | Palm Oil                  | 6                                                           |
| 53              | Benin   | 2008           | Palmkernel Oil            | 3                                                           |
| 53              | Benin   | 2008           | Pelagic Fish              | 3                                                           |
| 53              | Benin   | 2008           | Pigmeat                   | 2                                                           |
| 53              | Benin   | 2008           | Pimento                   | 14                                                          |
| 53              | Benin   | 2008           | Pineapples                | 37                                                          |
| 53              | Benin   | 2008           | Poultry Meat              | 35                                                          |
| 53              | Benin   | 2008           | Pulses, Other             | 13                                                          |
| 53              | Benin   | 2008           | Rice (Milled Equivalent)  | 146                                                         |
| 53              | Benin   | 2008           | Roots, Other              | 1                                                           |
| 53              | Benin   | 2008           | Sesameseed                | 3                                                           |
| 53              | Benin   | 2008           | Sorghum                   | 35                                                          |
| 53              | Benin   | 2008           | Sugar, Refined Equivalent | 13                                                          |
| 53              | Benin   | 2008           | Sweet Potatoes            | 20                                                          |
| 53              | Benin   | 2008           | Sweeteners, Other         | 1                                                           |
| 53              | Benin   | 2008           | Tomatoes                  | 77                                                          |
| 53              | Benin   | 2008           | Vegetables, Other         | 56                                                          |
| 53              | Benin   | 2008           | Wheat                     | 20                                                          |
| 53              | Benin   | 2008           | Wine                      | 1                                                           |
| 53              | Benin   | 2008           | Yams                      | 387                                                         |
| 53              | Benin   | 2009           | Apples                    | 5                                                           |
| 53              | Benin   | 2009           | Bananas                   | 4                                                           |
| 53              | Benin   | 2009           | Beans                     | 31                                                          |
| 53              | Benin   | 2009           | Beer                      | 24                                                          |
| 53              | Benin   | 2009           | Beverages, Alcoholic      | 1                                                           |
| 53              | Benin   | 2009           | Beverages, Fermented      | 9                                                           |
| 53              | Benin   | 2009           | Bovine Meat               | 9                                                           |
| 53              | Benin   | 2009           | Cassava                   | 327                                                         |
| 53              | Benin   | 2009           | Coconuts - Incl Copra     | 1                                                           |
| 53              | Benin   | 2009           | Cottonseed Oil            | 5                                                           |
| 53              | Benin   | 2009           | Crustaceans               | 1                                                           |
| 53              | Benin   | 2009           | Demersal Fish             | 2                                                           |
| 53              | Benin   | 2009           | Eggs                      | 3                                                           |
| 53              | Benin   | 2009           | Fats, Animals, Raw        | 1                                                           |
| 53              | Benin   | 2009           | Freshwater Fish           | 14                                                          |
| 53              | Benin   | 2009           | Fruits, Other             | 36                                                          |
| 53              | Benin   | 2009           | Grapes                    | 1                                                           |
| 53              | Benin   | 2009           | Groundnut Oil             | 5                                                           |
| 53              | Benin   | 2009           | Groundnuts (Shelled Eq)   | 18                                                          |
| 53              | Benin   | 2009           | Maize                     | 127                                                         |
| 53              | Benin   | 2009           | Marine Fish, Other        | 17                                                          |
| 53              | Benin   | 2009           | Meat, Other               | 2                                                           |
| 53              | Benin   | 2009           | Milk, Whole               | 28                                                          |
| 53              | Benin   | 2009           | Millet                    | 5                                                           |
| 53              | Benin   | 2009           | Mutton & Goat Meat        | 2                                                           |
| 53              | Benin   | 2009           | Nuts                      | 18                                                          |
| 53              | Benin   | 2009           | Offals, Edible            | 3                                                           |
| 53              | Benin   | 2009           | Oilcrops Oil, Other       | 1                                                           |
| 53              | Benin   | 2009           | Onions                    | 11                                                          |
| 53              | Benin   | 2009           | Oranges, Mandarines       | 4                                                           |
| 53              | Benin   | 2009           | Palm Oil                  | 5                                                           |
| 53              | Benin   | 2009           | Palmkernel Oil            | 2                                                           |
| 53              | Benin   | 2009           | Pelagic Fish              | 3                                                           |
| 53              | Benin   | 2009           | Pigmeat                   | 2                                                           |
| 53              | Benin   | 2009           | Pimento                   | 8                                                           |
| 53              | Benin   | 2009           | Pineapples                | 59                                                          |
| 53              | Benin   | 2009           | Poultry Meat              | 29                                                          |
| 53              | Benin   | 2009           | Pulses, Other             | 10                                                          |
| 53              | Benin   | 2009           | Rice (Milled Equivalent)  | 152                                                         |
| 53              | Benin   | 2009           | Roots, Other              | 1                                                           |
| 53              | Benin   | 2009           | Sesameseed                | 3                                                           |
| 53              | Benin   | 2009           | Sorghum                   | 33                                                          |
| 53              | Benin   | 2009           | Soyabean Oil              | 1                                                           |
| 53              | Benin   | 2009           | Sugar, Refined Equivalent | 12                                                          |
| 53              | Benin   | 2009           | Sweet Potatoes            | 17                                                          |
| 53              | Benin   | 2009           | Sweeteners, Other         | 1                                                           |
| 53              | Benin   | 2009           | Tomatoes                  | 62                                                          |
| 53              | Benin   | 2009           | Vegetables, Other         | 48                                                          |
| 53              | Benin   | 2009           | Wheat                     | 19                                                          |
| 53              | Benin   | 2009           | Wine                      | 1                                                           |
| 53              | Benin   | 2009           | Yams                      | 360                                                         |
| 53              | Benin   | 2010           | Apples                    | 5                                                           |
| 53              | Benin   | 2010           | Bananas                   | 5                                                           |
| 53              | Benin   | 2010           | Beans                     | 22                                                          |
| 53              | Benin   | 2010           | Beer                      | 26                                                          |
| 53              | Benin   | 2010           | Beverages, Alcoholic      | 1                                                           |
| 53              | Benin   | 2010           | Beverages, Fermented      | 9                                                           |
| 53              | Benin   | 2010           | Bovine Meat               | 8                                                           |
| 53              | Benin   | 2010           | Cassava                   | 319                                                         |
| 53              | Benin   | 2010           | Coconuts - Incl Copra     | 1                                                           |
| 53              | Benin   | 2010           | Cottonseed Oil            | 2                                                           |
| 53              | Benin   | 2010           | Crustaceans               | 1                                                           |
| 53              | Benin   | 2010           | Demersal Fish             | 2                                                           |

## Dietary calcium and zinc deficiency risks are decreasing but remain prevalent

| FAO countrycode | Country | Reference year | Food item                 | Gross food supply (g capita <sup>-1</sup> d <sup>-1</sup> ) |
|-----------------|---------|----------------|---------------------------|-------------------------------------------------------------|
| 53              | Benin   | 2010           | Eggs                      | 2                                                           |
| 53              | Benin   | 2010           | Freshwater Fish           | 15                                                          |
| 53              | Benin   | 2010           | Fruits, Other             | 39                                                          |
| 53              | Benin   | 2010           | Groundnut Oil             | 9                                                           |
| 53              | Benin   | 2010           | Groundnuts (Shelled Eq)   | 23                                                          |
| 53              | Benin   | 2010           | Maize                     | 118                                                         |
| 53              | Benin   | 2010           | Marine Fish, Other        | 17                                                          |
| 53              | Benin   | 2010           | Meat, Other               | 2                                                           |
| 53              | Benin   | 2010           | Milk, Whole               | 20                                                          |
| 53              | Benin   | 2010           | Millet                    | 5                                                           |
| 53              | Benin   | 2010           | Mutton & Goat Meat        | 2                                                           |
| 53              | Benin   | 2010           | Nuts                      | 13                                                          |
| 53              | Benin   | 2010           | Offals, Edible            | 2                                                           |
| 53              | Benin   | 2010           | Onions                    | 2                                                           |
| 53              | Benin   | 2010           | Oranges, Mandarines       | 4                                                           |
| 53              | Benin   | 2010           | Palm Oil                  | 5                                                           |
| 53              | Benin   | 2010           | Palmkernel Oil            | 2                                                           |
| 53              | Benin   | 2010           | Pelagic Fish              | 3                                                           |
| 53              | Benin   | 2010           | Pigmeat                   | 2                                                           |
| 53              | Benin   | 2010           | Pimento                   | 8                                                           |
| 53              | Benin   | 2010           | Pineapples                | 69                                                          |
| 53              | Benin   | 2010           | Potatoes                  | 1                                                           |
| 53              | Benin   | 2010           | Poultry Meat              | 24                                                          |
| 53              | Benin   | 2010           | Pulses, Other             | 11                                                          |
| 53              | Benin   | 2010           | Rice (Milled Equivalent)  | 138                                                         |
| 53              | Benin   | 2010           | Sesameseed                | 3                                                           |
| 53              | Benin   | 2010           | Sorghum                   | 33                                                          |
| 53              | Benin   | 2010           | Soyabean Oil              | 1                                                           |
| 53              | Benin   | 2010           | Sugar, Refined Equivalent | 12                                                          |
| 53              | Benin   | 2010           | Sweet Potatoes            | 20                                                          |
| 53              | Benin   | 2010           | Sweeteners, Other         | 1                                                           |
| 53              | Benin   | 2010           | Tomatoes                  | 69                                                          |
| 53              | Benin   | 2010           | Vegetables, Other         | 30                                                          |
| 53              | Benin   | 2010           | Wheat                     | 20                                                          |
| 53              | Benin   | 2010           | Wine                      | 3                                                           |
| 53              | Benin   | 2010           | Yams                      | 418                                                         |
| 53              | Benin   | 2011           | Apples                    | 7                                                           |
| 53              | Benin   | 2011           | Bananas                   | 5                                                           |
| 53              | Benin   | 2011           | Beans                     | 19                                                          |
| 53              | Benin   | 2011           | Beer                      | 27                                                          |
| 53              | Benin   | 2011           | Beverages, Alcoholic      | 1                                                           |
| 53              | Benin   | 2011           | Beverages, Fermented      | 9                                                           |
| 53              | Benin   | 2011           | Bovine Meat               | 9                                                           |
| 53              | Benin   | 2011           | Cassava                   | 387                                                         |
| 53              | Benin   | 2011           | Coconut Oil               | 1                                                           |
| 53              | Benin   | 2011           | Coconuts - Incl Copra     | 1                                                           |
| 53              | Benin   | 2011           | Cottonseed Oil            | 3                                                           |
| 53              | Benin   | 2011           | Crustaceans               | 1                                                           |
| 53              | Benin   | 2011           | Demersal Fish             | 2                                                           |
| 53              | Benin   | 2011           | Eggs                      | 2                                                           |
| 53              | Benin   | 2011           | Fats, Animals, Raw        | 1                                                           |
| 53              | Benin   | 2011           | Freshwater Fish           | 14                                                          |
| 53              | Benin   | 2011           | Fruits, Other             | 38                                                          |
| 53              | Benin   | 2011           | Grapes                    | 1                                                           |
| 53              | Benin   | 2011           | Groundnut Oil             | 7                                                           |
| 53              | Benin   | 2011           | Groundnuts (Shelled Eq)   | 18                                                          |
| 53              | Benin   | 2011           | Maize                     | 110                                                         |
| 53              | Benin   | 2011           | Marine Fish, Other        | 17                                                          |
| 53              | Benin   | 2011           | Meat, Other               | 2                                                           |
| 53              | Benin   | 2011           | Milk, Whole               | 21                                                          |
| 53              | Benin   | 2011           | Millet                    | 4                                                           |
| 53              | Benin   | 2011           | Mutton & Goat Meat        | 2                                                           |
| 53              | Benin   | 2011           | Nuts                      | 12                                                          |
| 53              | Benin   | 2011           | Offals, Edible            | 2                                                           |
| 53              | Benin   | 2011           | Oilcrops Oil, Other       | 1                                                           |
| 53              | Benin   | 2011           | Onions                    | 4                                                           |
| 53              | Benin   | 2011           | Oranges, Mandarines       | 4                                                           |
| 53              | Benin   | 2011           | Palm Oil                  | 6                                                           |
| 53              | Benin   | 2011           | Palmkernel Oil            | 2                                                           |
| 53              | Benin   | 2011           | Pelagic Fish              | 4                                                           |
| 53              | Benin   | 2011           | Pigmeat                   | 2                                                           |
| 53              | Benin   | 2011           | Pimento                   | 8                                                           |
| 53              | Benin   | 2011           | Pineapples                | 62                                                          |
| 53              | Benin   | 2011           | Potatoes                  | 1                                                           |
| 53              | Benin   | 2011           | Poultry Meat              | 34                                                          |
| 53              | Benin   | 2011           | Pulses, Other             | 10                                                          |
| 53              | Benin   | 2011           | Rice (Milled Equivalent)  | 146                                                         |
| 53              | Benin   | 2011           | Sesameseed                | 3                                                           |
| 53              | Benin   | 2011           | Sorghum                   | 32                                                          |
| 53              | Benin   | 2011           | Soyabean Oil              | 1                                                           |
| 53              | Benin   | 2011           | Sugar, Refined Equivalent | 13                                                          |
| 53              | Benin   | 2011           | Sweet Potatoes            | 12                                                          |
| 53              | Benin   | 2011           | Sweeteners, Other         | 1                                                           |
| 53              | Benin   | 2011           | Tomatoes                  | 56                                                          |
| 53              | Benin   | 2011           | Vegetables, Other         | 29                                                          |
| 53              | Benin   | 2011           | Wheat                     | 24                                                          |
| 53              | Benin   | 2011           | Wine                      | 3                                                           |
| 53              | Benin   | 2011           | Yams                      | 422                                                         |
| 19              | Bolivia | 1992           | Apples                    | 4                                                           |
| 19              | Bolivia | 1992           | Bananas                   | 43                                                          |
| 19              | Bolivia | 1992           | Barley                    | 1                                                           |
| 19              | Bolivia | 1992           | Beans                     | 1                                                           |
| 19              | Bolivia | 1992           | Beer                      | 43                                                          |
| 19              | Bolivia | 1992           | Beverages, Alcoholic      | 6                                                           |
| 19              | Bolivia | 1992           | Bovine Meat               | 49                                                          |
| 19              | Bolivia | 1992           | Cassava                   | 48                                                          |
| 19              | Bolivia | 1992           | Cereals, Other            | 8                                                           |

Dietary calcium and zinc deficiency risks are decreasing but remain prevalent

| FAO countrycode | Country | Reference year | Food item                 | Gross food supply (g capita <sup>-1</sup> d <sup>-1</sup> ) |
|-----------------|---------|----------------|---------------------------|-------------------------------------------------------------|
| 19              | Bolivia | 1992           | Cheese                    | 3                                                           |
| 19              | Bolivia | 1992           | Cocoa Beans               | 2                                                           |
| 19              | Bolivia | 1992           | Coffee                    | 4                                                           |
| 19              | Bolivia | 1992           | Cottonseed Oil            | 1                                                           |
| 19              | Bolivia | 1992           | Eggs                      | 17                                                          |
| 19              | Bolivia | 1992           | Fats, Animals, Raw        | 6                                                           |
| 19              | Bolivia | 1992           | Freshwater Fish           | 1                                                           |
| 19              | Bolivia | 1992           | Fruits, Other             | 28                                                          |
| 19              | Bolivia | 1992           | Grapefruit                | 10                                                          |
| 19              | Bolivia | 1992           | Grapes                    | 5                                                           |
| 19              | Bolivia | 1992           | Groundnuts (Shelled Eq)   | 2                                                           |
| 19              | Bolivia | 1992           | Lemons, Limes             | 19                                                          |
| 19              | Bolivia | 1992           | Maize                     | 73                                                          |
| 19              | Bolivia | 1992           | Meat, Other               | 3                                                           |
| 19              | Bolivia | 1992           | Milk, Whole               | 52                                                          |
| 19              | Bolivia | 1992           | Mutton & Goat Meat        | 7                                                           |
| 19              | Bolivia | 1992           | Nuts                      | 14                                                          |
| 19              | Bolivia | 1992           | Oats                      | 1                                                           |
| 19              | Bolivia | 1992           | Offals, Edible            | 11                                                          |
| 19              | Bolivia | 1992           | Onions                    | 14                                                          |
| 19              | Bolivia | 1992           | Oranges, Mandarines       | 42                                                          |
| 19              | Bolivia | 1992           | Peas                      | 2                                                           |
| 19              | Bolivia | 1992           | Pelagic Fish              | 1                                                           |
| 19              | Bolivia | 1992           | Pigmeat                   | 26                                                          |
| 19              | Bolivia | 1992           | Pineapples                | 5                                                           |
| 19              | Bolivia | 1992           | Plantains                 | 91                                                          |
| 19              | Bolivia | 1992           | Potatoes                  | 152                                                         |
| 19              | Bolivia | 1992           | Poultry Meat              | 21                                                          |
| 19              | Bolivia | 1992           | Pulses, Other             | 5                                                           |
| 19              | Bolivia | 1992           | Rice (Milled Equivalent)  | 54                                                          |
| 19              | Bolivia | 1992           | Roots, Other              | 22                                                          |
| 19              | Bolivia | 1992           | Soyabean Oil              | 6                                                           |
| 19              | Bolivia | 1992           | Sugar, Refined Equivalent | 70                                                          |
| 19              | Bolivia | 1992           | Sunflowerseed Oil         | 5                                                           |
| 19              | Bolivia | 1992           | Sweet Potatoes            | 3                                                           |
| 19              | Bolivia | 1992           | Tomatoes                  | 15                                                          |
| 19              | Bolivia | 1992           | Vegetables, Other         | 103                                                         |
| 19              | Bolivia | 1992           | Wheat                     | 176                                                         |
| 19              | Bolivia | 1992           | Wine                      | 1                                                           |
| 19              | Bolivia | 1993           | Apples                    | 5                                                           |
| 19              | Bolivia | 1993           | Bananas                   | 42                                                          |
| 19              | Bolivia | 1993           | Beer                      | 52                                                          |
| 19              | Bolivia | 1993           | Beverages, Alcoholic      | 5                                                           |
| 19              | Bolivia | 1993           | Bovine Meat               | 49                                                          |
| 19              | Bolivia | 1993           | Cassava                   | 43                                                          |
| 19              | Bolivia | 1993           | Cereals, Other            | 7                                                           |
| 19              | Bolivia | 1993           | Cheese                    | 3                                                           |
| 19              | Bolivia | 1993           | Cocoa Beans               | 2                                                           |
| 19              | Bolivia | 1993           | Coffee                    | 4                                                           |
| 19              | Bolivia | 1993           | Cottonseed Oil            | 1                                                           |
| 19              | Bolivia | 1993           | Eggs                      | 17                                                          |
| 19              | Bolivia | 1993           | Fats, Animals, Raw        | 5                                                           |
| 19              | Bolivia | 1993           | Freshwater Fish           | 2                                                           |
| 19              | Bolivia | 1993           | Fruits, Other             | 30                                                          |
| 19              | Bolivia | 1993           | Grapefruit                | 9                                                           |
| 19              | Bolivia | 1993           | Grapes                    | 6                                                           |
| 19              | Bolivia | 1993           | Groundnuts (Shelled Eq)   | 2                                                           |
| 19              | Bolivia | 1993           | Lemons, Limes             | 20                                                          |
| 19              | Bolivia | 1993           | Maize                     | 79                                                          |
| 19              | Bolivia | 1993           | Marine Fish, Other        | 1                                                           |
| 19              | Bolivia | 1993           | Meat, Other               | 3                                                           |
| 19              | Bolivia | 1993           | Milk, Whole               | 53                                                          |
| 19              | Bolivia | 1993           | Mutton & Goat Meat        | 7                                                           |
| 19              | Bolivia | 1993           | Nuts                      | 11                                                          |
| 19              | Bolivia | 1993           | Oats                      | 2                                                           |
| 19              | Bolivia | 1993           | Offals, Edible            | 11                                                          |
| 19              | Bolivia | 1993           | Onions                    | 15                                                          |
| 19              | Bolivia | 1993           | Oranges, Mandarines       | 44                                                          |
| 19              | Bolivia | 1993           | Peas                      | 2                                                           |
| 19              | Bolivia | 1993           | Pigmeat                   | 22                                                          |
| 19              | Bolivia | 1993           | Pineapples                | 5                                                           |
| 19              | Bolivia | 1993           | Plantains                 | 84                                                          |
| 19              | Bolivia | 1993           | Potatoes                  | 121                                                         |
| 19              | Bolivia | 1993           | Poultry Meat              | 27                                                          |
| 19              | Bolivia | 1993           | Pulses, Other             | 5                                                           |
| 19              | Bolivia | 1993           | Rice (Milled Equivalent)  | 51                                                          |
| 19              | Bolivia | 1993           | Roots, Other              | 23                                                          |
| 19              | Bolivia | 1993           | Soyabean Oil              | 6                                                           |
| 19              | Bolivia | 1993           | Sugar, Refined Equivalent | 71                                                          |
| 19              | Bolivia | 1993           | Sunflowerseed Oil         | 4                                                           |
| 19              | Bolivia | 1993           | Sweet Potatoes            | 3                                                           |
| 19              | Bolivia | 1993           | Tomatoes                  | 13                                                          |
| 19              | Bolivia | 1993           | Vegetables, Other         | 108                                                         |
| 19              | Bolivia | 1993           | Wheat                     | 184                                                         |
| 19              | Bolivia | 1993           | Wine                      | 1                                                           |
| 19              | Bolivia | 1994           | Apples                    | 5                                                           |
| 19              | Bolivia | 1994           | Bananas                   | 29                                                          |
| 19              | Bolivia | 1994           | Beans                     | 1                                                           |
| 19              | Bolivia | 1994           | Beer                      | 51                                                          |
| 19              | Bolivia | 1994           | Beverages, Alcoholic      | 6                                                           |
| 19              | Bolivia | 1994           | Bovine Meat               | 50                                                          |
| 19              | Bolivia | 1994           | Cassava                   | 44                                                          |
| 19              | Bolivia | 1994           | Cereals, Other            | 7                                                           |
| 19              | Bolivia | 1994           | Cheese                    | 3                                                           |
| 19              | Bolivia | 1994           | Cocoa Beans               | 2                                                           |
| 19              | Bolivia | 1994           | Coffee                    | 6                                                           |
| 19              | Bolivia | 1994           | Cottonseed Oil            | 1                                                           |

Dietary calcium and zinc deficiency risks are decreasing but remain prevalent

| FAO countrycode | Country | Reference year | Food item                 | Gross food supply (g capita <sup>-1</sup> d <sup>-1</sup> ) |
|-----------------|---------|----------------|---------------------------|-------------------------------------------------------------|
| 19              | Bolivia | 1994           | Eggs                      | 19                                                          |
| 19              | Bolivia | 1994           | Fats, Animals, Raw        | 5                                                           |
| 19              | Bolivia | 1994           | Freshwater Fish           | 2                                                           |
| 19              | Bolivia | 1994           | Fruits, Other             | 30                                                          |
| 19              | Bolivia | 1994           | Grapefruit                | 9                                                           |
| 19              | Bolivia | 1994           | Grapes                    | 7                                                           |
| 19              | Bolivia | 1994           | Groundnuts (Shelled Eq)   | 2                                                           |
| 19              | Bolivia | 1994           | Lemons, Limes             | 20                                                          |
| 19              | Bolivia | 1994           | Maize                     | 79                                                          |
| 19              | Bolivia | 1994           | Marine Fish, Other        | 1                                                           |
| 19              | Bolivia | 1994           | Meat, Other               | 3                                                           |
| 19              | Bolivia | 1994           | Milk, Whole               | 58                                                          |
| 19              | Bolivia | 1994           | Mutton & Goat Meat        | 7                                                           |
| 19              | Bolivia | 1994           | Nuts                      | 10                                                          |
| 19              | Bolivia | 1994           | Oats                      | 2                                                           |
| 19              | Bolivia | 1994           | Offals, Edible            | 11                                                          |
| 19              | Bolivia | 1994           | Onions                    | 17                                                          |
| 19              | Bolivia | 1994           | Oranges, Mandarines       | 45                                                          |
| 19              | Bolivia | 1994           | Peas                      | 2                                                           |
| 19              | Bolivia | 1994           | Pelagic Fish              | 1                                                           |
| 19              | Bolivia | 1994           | Pigmeat                   | 22                                                          |
| 19              | Bolivia | 1994           | Pineapples                | 5                                                           |
| 19              | Bolivia | 1994           | Plantains                 | 88                                                          |
| 19              | Bolivia | 1994           | Potatoes                  | 143                                                         |
| 19              | Bolivia | 1994           | Poultry Meat              | 32                                                          |
| 19              | Bolivia | 1994           | Pulses, Other             | 4                                                           |
| 19              | Bolivia | 1994           | Rice (Milled Equivalent)  | 56                                                          |
| 19              | Bolivia | 1994           | Roots, Other              | 22                                                          |
| 19              | Bolivia | 1994           | Soyabean Oil              | 7                                                           |
| 19              | Bolivia | 1994           | Sugar, Refined Equivalent | 70                                                          |
| 19              | Bolivia | 1994           | Sunflowerseed Oil         | 3                                                           |
| 19              | Bolivia | 1994           | Sweet Potatoes            | 3                                                           |
| 19              | Bolivia | 1994           | Tomatoes                  | 15                                                          |
| 19              | Bolivia | 1994           | Vegetables, Other         | 106                                                         |
| 19              | Bolivia | 1994           | Wheat                     | 148                                                         |
| 19              | Bolivia | 1994           | Wine                      | 1                                                           |
| 19              | Bolivia | 1995           | Apples                    | 5                                                           |
| 19              | Bolivia | 1995           | Bananas                   | 42                                                          |
| 19              | Bolivia | 1995           | Beans                     | 1                                                           |
| 19              | Bolivia | 1995           | Beer                      | 55                                                          |
| 19              | Bolivia | 1995           | Beverages, Alcoholic      | 7                                                           |
| 19              | Bolivia | 1995           | Bovine Meat               | 50                                                          |
| 19              | Bolivia | 1995           | Cassava                   | 48                                                          |
| 19              | Bolivia | 1995           | Cereals, Other            | 7                                                           |
| 19              | Bolivia | 1995           | Cheese                    | 4                                                           |
| 19              | Bolivia | 1995           | Cocoa Beans               | 2                                                           |
| 19              | Bolivia | 1995           | Coffee                    | 6                                                           |
| 19              | Bolivia | 1995           | Cottonseed Oil            | 2                                                           |
| 19              | Bolivia | 1995           | Demersal Fish             | 1                                                           |
| 19              | Bolivia | 1995           | Eggs                      | 20                                                          |
| 19              | Bolivia | 1995           | Fats, Animals, Raw        | 6                                                           |
| 19              | Bolivia | 1995           | Freshwater Fish           | 2                                                           |
| 19              | Bolivia | 1995           | Fruits, Other             | 30                                                          |
| 19              | Bolivia | 1995           | Grapefruit                | 9                                                           |
| 19              | Bolivia | 1995           | Grapes                    | 6                                                           |
| 19              | Bolivia | 1995           | Groundnuts (Shelled Eq)   | 2                                                           |
| 19              | Bolivia | 1995           | Lemons, Limes             | 19                                                          |
| 19              | Bolivia | 1995           | Maize                     | 110                                                         |
| 19              | Bolivia | 1995           | Meat, Other               | 3                                                           |
| 19              | Bolivia | 1995           | Milk, Whole               | 78                                                          |
| 19              | Bolivia | 1995           | Mutton & Goat Meat        | 7                                                           |
| 19              | Bolivia | 1995           | Nuts                      | 13                                                          |
| 19              | Bolivia | 1995           | Oats                      | 2                                                           |
| 19              | Bolivia | 1995           | Offals, Edible            | 11                                                          |
| 19              | Bolivia | 1995           | Onions                    | 15                                                          |
| 19              | Bolivia | 1995           | Oranges, Mandarines       | 45                                                          |
| 19              | Bolivia | 1995           | Peas                      | 1                                                           |
| 19              | Bolivia | 1995           | Pelagic Fish              | 1                                                           |
| 19              | Bolivia | 1995           | Pigmeat                   | 22                                                          |
| 19              | Bolivia | 1995           | Pineapples                | 6                                                           |
| 19              | Bolivia | 1995           | Plantains                 | 89                                                          |
| 19              | Bolivia | 1995           | Potatoes                  | 118                                                         |
| 19              | Bolivia | 1995           | Poultry Meat              | 34                                                          |
| 19              | Bolivia | 1995           | Pulses, Other             | 3                                                           |
| 19              | Bolivia | 1995           | Rice (Milled Equivalent)  | 58                                                          |
| 19              | Bolivia | 1995           | Roots, Other              | 20                                                          |
| 19              | Bolivia | 1995           | Soyabean Oil              | 7                                                           |
| 19              | Bolivia | 1995           | Sugar, Refined Equivalent | 70                                                          |
| 19              | Bolivia | 1995           | Sunflowerseed Oil         | 5                                                           |
| 19              | Bolivia | 1995           | Sweet Potatoes            | 3                                                           |
| 19              | Bolivia | 1995           | Sweeteners, Other         | 1                                                           |
| 19              | Bolivia | 1995           | Tomatoes                  | 19                                                          |
| 19              | Bolivia | 1995           | Vegetables, Other         | 112                                                         |
| 19              | Bolivia | 1995           | Wheat                     | 158                                                         |
| 19              | Bolivia | 1995           | Wine                      | 1                                                           |
| 19              | Bolivia | 1996           | Apples                    | 5                                                           |
| 19              | Bolivia | 1996           | Bananas                   | 40                                                          |
| 19              | Bolivia | 1996           | Beans                     | 1                                                           |
| 19              | Bolivia | 1996           | Beer                      | 53                                                          |
| 19              | Bolivia | 1996           | Beverages, Alcoholic      | 7                                                           |
| 19              | Bolivia | 1996           | Bovine Meat               | 50                                                          |
| 19              | Bolivia | 1996           | Cassava                   | 48                                                          |
| 19              | Bolivia | 1996           | Cereals, Other            | 8                                                           |
| 19              | Bolivia | 1996           | Cheese                    | 4                                                           |
| 19              | Bolivia | 1996           | Cocoa Beans               | 2                                                           |
| 19              | Bolivia | 1996           | Coffee                    | 6                                                           |
| 19              | Bolivia | 1996           | Cottonseed Oil            | 2                                                           |

Dietary calcium and zinc deficiency risks are decreasing but remain prevalent

| FAO countrycode | Country | Reference year | Food item                 | Gross food supply (g capita <sup>-1</sup> d <sup>-1</sup> ) |
|-----------------|---------|----------------|---------------------------|-------------------------------------------------------------|
| 19              | Bolivia | 1996           | Demersal Fish             | 1                                                           |
| 19              | Bolivia | 1996           | Eggs                      | 19                                                          |
| 19              | Bolivia | 1996           | Fats, Animals, Raw        | 6                                                           |
| 19              | Bolivia | 1996           | Freshwater Fish           | 2                                                           |
| 19              | Bolivia | 1996           | Fruits, Other             | 30                                                          |
| 19              | Bolivia | 1996           | Grapefruit                | 9                                                           |
| 19              | Bolivia | 1996           | Grapes                    | 7                                                           |
| 19              | Bolivia | 1996           | Groundnuts (Shelled Eq)   | 3                                                           |
| 19              | Bolivia | 1996           | Lemons, Limes             | 19                                                          |
| 19              | Bolivia | 1996           | Maize                     | 116                                                         |
| 19              | Bolivia | 1996           | Meat, Other               | 3                                                           |
| 19              | Bolivia | 1996           | Milk, Whole               | 87                                                          |
| 19              | Bolivia | 1996           | Mutton & Goat Meat        | 7                                                           |
| 19              | Bolivia | 1996           | Nuts                      | 18                                                          |
| 19              | Bolivia | 1996           | Oats                      | 2                                                           |
| 19              | Bolivia | 1996           | Offals, Edible            | 11                                                          |
| 19              | Bolivia | 1996           | Onions                    | 15                                                          |
| 19              | Bolivia | 1996           | Oranges, Mandarines       | 45                                                          |
| 19              | Bolivia | 1996           | Peas                      | 1                                                           |
| 19              | Bolivia | 1996           | Pelagic Fish              | 1                                                           |
| 19              | Bolivia | 1996           | Pigmeat                   | 23                                                          |
| 19              | Bolivia | 1996           | Pineapples                | 7                                                           |
| 19              | Bolivia | 1996           | Plantains                 | 89                                                          |
| 19              | Bolivia | 1996           | Potatoes                  | 124                                                         |
| 19              | Bolivia | 1996           | Poultry Meat              | 36                                                          |
| 19              | Bolivia | 1996           | Pulses, Other             | 3                                                           |
| 19              | Bolivia | 1996           | Rice (Milled Equivalent)  | 64                                                          |
| 19              | Bolivia | 1996           | Roots, Other              | 19                                                          |
| 19              | Bolivia | 1996           | Soyabean Oil              | 8                                                           |
| 19              | Bolivia | 1996           | Sugar, Refined Equivalent | 69                                                          |
| 19              | Bolivia | 1996           | Sunflowerseed Oil         | 5                                                           |
| 19              | Bolivia | 1996           | Sweet Potatoes            | 3                                                           |
| 19              | Bolivia | 1996           | Sweeteners, Other         | 1                                                           |
| 19              | Bolivia | 1996           | Tomatoes                  | 22                                                          |
| 19              | Bolivia | 1996           | Vegetables, Other         | 114                                                         |
| 19              | Bolivia | 1996           | Wheat                     | 103                                                         |
| 19              | Bolivia | 1996           | Wine                      | 1                                                           |
| 19              | Bolivia | 1997           | Apples                    | 6                                                           |
| 19              | Bolivia | 1997           | Bananas                   | 39                                                          |
| 19              | Bolivia | 1997           | Beans                     | 1                                                           |
| 19              | Bolivia | 1997           | Beer                      | 56                                                          |
| 19              | Bolivia | 1997           | Beverages, Alcoholic      | 6                                                           |
| 19              | Bolivia | 1997           | Bovine Meat               | 51                                                          |
| 19              | Bolivia | 1997           | Cassava                   | 44                                                          |
| 19              | Bolivia | 1997           | Cereals, Other            | 9                                                           |
| 19              | Bolivia | 1997           | Cheese                    | 3                                                           |
| 19              | Bolivia | 1997           | Cocoa Beans               | 2                                                           |
| 19              | Bolivia | 1997           | Coffee                    | 6                                                           |
| 19              | Bolivia | 1997           | Cottonseed Oil            | 2                                                           |
| 19              | Bolivia | 1997           | Demersal Fish             | 1                                                           |
| 19              | Bolivia | 1997           | Eggs                      | 20                                                          |
| 19              | Bolivia | 1997           | Fats, Animals, Raw        | 5                                                           |
| 19              | Bolivia | 1997           | Freshwater Fish           | 2                                                           |
| 19              | Bolivia | 1997           | Fruits, Other             | 29                                                          |
| 19              | Bolivia | 1997           | Grapefruit                | 9                                                           |
| 19              | Bolivia | 1997           | Grapes                    | 7                                                           |
| 19              | Bolivia | 1997           | Groundnuts (Shelled Eq)   | 3                                                           |
| 19              | Bolivia | 1997           | Lemons, Limes             | 19                                                          |
| 19              | Bolivia | 1997           | Maize                     | 118                                                         |
| 19              | Bolivia | 1997           | Meat, Other               | 3                                                           |
| 19              | Bolivia | 1997           | Milk, Whole               | 85                                                          |
| 19              | Bolivia | 1997           | Mutton & Goat Meat        | 7                                                           |
| 19              | Bolivia | 1997           | Nuts                      | 17                                                          |
| 19              | Bolivia | 1997           | Oats                      | 2                                                           |
| 19              | Bolivia | 1997           | Offals, Edible            | 11                                                          |
| 19              | Bolivia | 1997           | Onions                    | 15                                                          |
| 19              | Bolivia | 1997           | Oranges, Mandarines       | 46                                                          |
| 19              | Bolivia | 1997           | Peas                      | 1                                                           |
| 19              | Bolivia | 1997           | Pelagic Fish              | 1                                                           |
| 19              | Bolivia | 1997           | Pigmeat                   | 24                                                          |
| 19              | Bolivia | 1997           | Pineapples                | 14                                                          |
| 19              | Bolivia | 1997           | Plantains                 | 92                                                          |
| 19              | Bolivia | 1997           | Potatoes                  | 122                                                         |
| 19              | Bolivia | 1997           | Poultry Meat              | 39                                                          |
| 19              | Bolivia | 1997           | Pulses, Other             | 4                                                           |
| 19              | Bolivia | 1997           | Rice (Milled Equivalent)  | 64                                                          |
| 19              | Bolivia | 1997           | Roots, Other              | 17                                                          |
| 19              | Bolivia | 1997           | Soyabean Oil              | 8                                                           |
| 19              | Bolivia | 1997           | Sugar, Refined Equivalent | 68                                                          |
| 19              | Bolivia | 1997           | Sunflowerseed Oil         | 5                                                           |
| 19              | Bolivia | 1997           | Sweet Potatoes            | 3                                                           |
| 19              | Bolivia | 1997           | Tomatoes                  | 26                                                          |
| 19              | Bolivia | 1997           | Vegetables, Other         | 115                                                         |
| 19              | Bolivia | 1997           | Wheat                     | 105                                                         |
| 19              | Bolivia | 1997           | Wine                      | 1                                                           |
| 19              | Bolivia | 1998           | Apples                    | 7                                                           |
| 19              | Bolivia | 1998           | Bananas                   | 38                                                          |
| 19              | Bolivia | 1998           | Beans                     | 1                                                           |
| 19              | Bolivia | 1998           | Beer                      | 55                                                          |
| 19              | Bolivia | 1998           | Beverages, Alcoholic      | 6                                                           |
| 19              | Bolivia | 1998           | Bovine Meat               | 52                                                          |
| 19              | Bolivia | 1998           | Cassava                   | 48                                                          |
| 19              | Bolivia | 1998           | Cereals, Other            | 8                                                           |
| 19              | Bolivia | 1998           | Cheese                    | 2                                                           |
| 19              | Bolivia | 1998           | Cocoa Beans               | 2                                                           |
| 19              | Bolivia | 1998           | Coffee                    | 7                                                           |
| 19              | Bolivia | 1998           | Cottonseed Oil            | 2                                                           |

Dietary calcium and zinc deficiency risks are decreasing but remain prevalent

| FAO countrycode | Country | Reference year | Food item                 | Gross food supply (g capita <sup>-1</sup> d <sup>-1</sup> ) |
|-----------------|---------|----------------|---------------------------|-------------------------------------------------------------|
| 19              | Bolivia | 1998           | Eggs                      | 10                                                          |
| 19              | Bolivia | 1998           | Fats, Animals, Raw        | 5                                                           |
| 19              | Bolivia | 1998           | Freshwater Fish           | 2                                                           |
| 19              | Bolivia | 1998           | Fruits, Other             | 29                                                          |
| 19              | Bolivia | 1998           | Grapefruit                | 9                                                           |
| 19              | Bolivia | 1998           | Grapes                    | 6                                                           |
| 19              | Bolivia | 1998           | Groundnuts (Shelled Eq)   | 2                                                           |
| 19              | Bolivia | 1998           | Lemons, Limes             | 19                                                          |
| 19              | Bolivia | 1998           | Maize                     | 112                                                         |
| 19              | Bolivia | 1998           | Marine Fish, Other        | 1                                                           |
| 19              | Bolivia | 1998           | Meat, Other               | 3                                                           |
| 19              | Bolivia | 1998           | Milk, Whole               | 86                                                          |
| 19              | Bolivia | 1998           | Mutton & Goat Meat        | 7                                                           |
| 19              | Bolivia | 1998           | Nuts                      | 13                                                          |
| 19              | Bolivia | 1998           | Oats                      | 2                                                           |
| 19              | Bolivia | 1998           | Offals, Edible            | 11                                                          |
| 19              | Bolivia | 1998           | Onions                    | 15                                                          |
| 19              | Bolivia | 1998           | Oranges, Mandarines       | 46                                                          |
| 19              | Bolivia | 1998           | Peas                      | 1                                                           |
| 19              | Bolivia | 1998           | Pelagic Fish              | 1                                                           |
| 19              | Bolivia | 1998           | Pigmeat                   | 24                                                          |
| 19              | Bolivia | 1998           | Pineapples                | 14                                                          |
| 19              | Bolivia | 1998           | Plantains                 | 88                                                          |
| 19              | Bolivia | 1998           | Potatoes                  | 108                                                         |
| 19              | Bolivia | 1998           | Poultry Meat              | 45                                                          |
| 19              | Bolivia | 1998           | Pulses, Other             | 3                                                           |
| 19              | Bolivia | 1998           | Rice (Milled Equivalent)  | 59                                                          |
| 19              | Bolivia | 1998           | Roots, Other              | 15                                                          |
| 19              | Bolivia | 1998           | Soyabean Oil              | 5                                                           |
| 19              | Bolivia | 1998           | Sugar, Refined Equivalent | 67                                                          |
| 19              | Bolivia | 1998           | Sunflowerseed Oil         | 4                                                           |
| 19              | Bolivia | 1998           | Sweet Potatoes            | 3                                                           |
| 19              | Bolivia | 1998           | Tomatoes                  | 22                                                          |
| 19              | Bolivia | 1998           | Vegetables, Other         | 108                                                         |
| 19              | Bolivia | 1998           | Wheat                     | 106                                                         |
| 19              | Bolivia | 1998           | Wine                      | 1                                                           |
| 19              | Bolivia | 1999           | Apples                    | 7                                                           |
| 19              | Bolivia | 1999           | Bananas                   | 37                                                          |
| 19              | Bolivia | 1999           | Beer                      | 71                                                          |
| 19              | Bolivia | 1999           | Beverages, Alcoholic      | 5                                                           |
| 19              | Bolivia | 1999           | Bovine Meat               | 51                                                          |
| 19              | Bolivia | 1999           | Cassava                   | 51                                                          |
| 19              | Bolivia | 1999           | Cereals, Other            | 8                                                           |
| 19              | Bolivia | 1999           | Cheese                    | 3                                                           |
| 19              | Bolivia | 1999           | Cocoa Beans               | 2                                                           |
| 19              | Bolivia | 1999           | Coffee                    | 7                                                           |
| 19              | Bolivia | 1999           | Cottonseed Oil            | 1                                                           |
| 19              | Bolivia | 1999           | Eggs                      | 10                                                          |
| 19              | Bolivia | 1999           | Fats, Animals, Raw        | 5                                                           |
| 19              | Bolivia | 1999           | Freshwater Fish           | 2                                                           |
| 19              | Bolivia | 1999           | Fruits, Other             | 29                                                          |
| 19              | Bolivia | 1999           | Grapefruit                | 9                                                           |
| 19              | Bolivia | 1999           | Grapes                    | 7                                                           |
| 19              | Bolivia | 1999           | Groundnuts (Shelled Eq)   | 2                                                           |
| 19              | Bolivia | 1999           | Lemons, Limes             | 19                                                          |
| 19              | Bolivia | 1999           | Maize                     | 100                                                         |
| 19              | Bolivia | 1999           | Marine Fish, Other        | 1                                                           |
| 19              | Bolivia | 1999           | Meat, Other               | 3                                                           |
| 19              | Bolivia | 1999           | Milk, Whole               | 87                                                          |
| 19              | Bolivia | 1999           | Mutton & Goat Meat        | 7                                                           |
| 19              | Bolivia | 1999           | Nuts                      | 15                                                          |
| 19              | Bolivia | 1999           | Oats                      | 2                                                           |
| 19              | Bolivia | 1999           | Offals, Edible            | 11                                                          |
| 19              | Bolivia | 1999           | Onions                    | 15                                                          |
| 19              | Bolivia | 1999           | Oranges, Mandarines       | 48                                                          |
| 19              | Bolivia | 1999           | Peas                      | 1                                                           |
| 19              | Bolivia | 1999           | Pelagic Fish              | 1                                                           |
| 19              | Bolivia | 1999           | Pigmeat                   | 24                                                          |
| 19              | Bolivia | 1999           | Pineapples                | 16                                                          |
| 19              | Bolivia | 1999           | Plantains                 | 88                                                          |
| 19              | Bolivia | 1999           | Potatoes                  | 141                                                         |
| 19              | Bolivia | 1999           | Poultry Meat              | 46                                                          |
| 19              | Bolivia | 1999           | Pulses, Other             | 5                                                           |
| 19              | Bolivia | 1999           | Rice (Milled Equivalent)  | 56                                                          |
| 19              | Bolivia | 1999           | Roots, Other              | 16                                                          |
| 19              | Bolivia | 1999           | Soyabean Oil              | 5                                                           |
| 19              | Bolivia | 1999           | Sugar, Refined Equivalent | 67                                                          |
| 19              | Bolivia | 1999           | Sunflowerseed Oil         | 5                                                           |
| 19              | Bolivia | 1999           | Sweet Potatoes            | 3                                                           |
| 19              | Bolivia | 1999           | Tomatoes                  | 25                                                          |
| 19              | Bolivia | 1999           | Vegetables, Other         | 110                                                         |
| 19              | Bolivia | 1999           | Wheat                     | 144                                                         |
| 19              | Bolivia | 1999           | Wine                      | 1                                                           |
| 19              | Bolivia | 2000           | Apples                    | 6                                                           |
| 19              | Bolivia | 2000           | Bananas                   | 38                                                          |
| 19              | Bolivia | 2000           | Beans                     | 1                                                           |
| 19              | Bolivia | 2000           | Beer                      | 70                                                          |
| 19              | Bolivia | 2000           | Beverages, Alcoholic      | 6                                                           |
| 19              | Bolivia | 2000           | Bovine Meat               | 52                                                          |
| 19              | Bolivia | 2000           | Cassava                   | 52                                                          |
| 19              | Bolivia | 2000           | Cereals, Other            | 8                                                           |
| 19              | Bolivia | 2000           | Cheese                    | 2                                                           |
| 19              | Bolivia | 2000           | Cocoa Beans               | 2                                                           |
| 19              | Bolivia | 2000           | Coffee                    | 8                                                           |
| 19              | Bolivia | 2000           | Cottonseed Oil            | 1                                                           |
| 19              | Bolivia | 2000           | Eggs                      | 9                                                           |
| 19              | Bolivia | 2000           | Fats, Animals, Raw        | 5                                                           |



Dietary calcium and zinc deficiency risks are decreasing but remain prevalent

| FAO countrycode | Country | Reference year | Food item                 | Gross food supply (g capita <sup>-1</sup> d <sup>-1</sup> ) |
|-----------------|---------|----------------|---------------------------|-------------------------------------------------------------|
| 19              | Bolivia | 2000           | Freshwater Fish           | 2                                                           |
| 19              | Bolivia | 2000           | Fruits, Other             | 32                                                          |
| 19              | Bolivia | 2000           | Grapefruit                | 9                                                           |
| 19              | Bolivia | 2000           | Grapes                    | 9                                                           |
| 19              | Bolivia | 2000           | Groundnuts (Shelled Eq)   | 3                                                           |
| 19              | Bolivia | 2000           | Lemons, Limes             | 19                                                          |
| 19              | Bolivia | 2000           | Maize                     | 102                                                         |
| 19              | Bolivia | 2000           | Marine Fish, Other        | 2                                                           |
| 19              | Bolivia | 2000           | Meat, Other               | 3                                                           |
| 19              | Bolivia | 2000           | Milk, Whole               | 82                                                          |
| 19              | Bolivia | 2000           | Mutton & Goat Meat        | 7                                                           |
| 19              | Bolivia | 2000           | Nuts                      | 15                                                          |
| 19              | Bolivia | 2000           | Oats                      | 2                                                           |
| 19              | Bolivia | 2000           | Offals, Edible            | 11                                                          |
| 19              | Bolivia | 2000           | Oilcrops Oil, Other       | 1                                                           |
| 19              | Bolivia | 2000           | Onions                    | 14                                                          |
| 19              | Bolivia | 2000           | Oranges, Mandarines       | 49                                                          |
| 19              | Bolivia | 2000           | Peas                      | 2                                                           |
| 19              | Bolivia | 2000           | Pelagic Fish              | 3                                                           |
| 19              | Bolivia | 2000           | Pigmeat                   | 25                                                          |
| 19              | Bolivia | 2000           | Pineapples                | 17                                                          |
| 19              | Bolivia | 2000           | Plantains                 | 89                                                          |
| 19              | Bolivia | 2000           | Potatoes                  | 134                                                         |
| 19              | Bolivia | 2000           | Poultry Meat              | 44                                                          |
| 19              | Bolivia | 2000           | Pulses, Other             | 4                                                           |
| 19              | Bolivia | 2000           | Rice (Milled Equivalent)  | 59                                                          |
| 19              | Bolivia | 2000           | Roots, Other              | 16                                                          |
| 19              | Bolivia | 2000           | Soyabean Oil              | 3                                                           |
| 19              | Bolivia | 2000           | Sugar, Refined Equivalent | 69                                                          |
| 19              | Bolivia | 2000           | Sunflowerseed Oil         | 4                                                           |
| 19              | Bolivia | 2000           | Sweet Potatoes            | 3                                                           |
| 19              | Bolivia | 2000           | Tea                       | 1                                                           |
| 19              | Bolivia | 2000           | Tomatoes                  | 26                                                          |
| 19              | Bolivia | 2000           | Vegetables, Other         | 110                                                         |
| 19              | Bolivia | 2000           | Wheat                     | 149                                                         |
| 19              | Bolivia | 2000           | Wine                      | 1                                                           |
| 19              | Bolivia | 2001           | Apples                    | 9                                                           |
| 19              | Bolivia | 2001           | Bananas                   | 36                                                          |
| 19              | Bolivia | 2001           | Beer                      | 66                                                          |
| 19              | Bolivia | 2001           | Beverages, Alcoholic      | 6                                                           |
| 19              | Bolivia | 2001           | Beverages, Fermented      | 1                                                           |
| 19              | Bolivia | 2001           | Bovine Meat               | 51                                                          |
| 19              | Bolivia | 2001           | Cassava                   | 47                                                          |
| 19              | Bolivia | 2001           | Cereals, Other            | 7                                                           |
| 19              | Bolivia | 2001           | Cheese                    | 3                                                           |
| 19              | Bolivia | 2001           | Cocoa Beans               | 2                                                           |
| 19              | Bolivia | 2001           | Coffee                    | 7                                                           |
| 19              | Bolivia | 2001           | Cottonseed Oil            | 2                                                           |
| 19              | Bolivia | 2001           | Eggs                      | 9                                                           |
| 19              | Bolivia | 2001           | Fats, Animals, Raw        | 6                                                           |
| 19              | Bolivia | 2001           | Freshwater Fish           | 2                                                           |
| 19              | Bolivia | 2001           | Fruits, Other             | 32                                                          |
| 19              | Bolivia | 2001           | Grapefruit                | 9                                                           |
| 19              | Bolivia | 2001           | Grapes                    | 8                                                           |
| 19              | Bolivia | 2001           | Groundnuts (Shelled Eq)   | 2                                                           |
| 19              | Bolivia | 2001           | Lemons, Limes             | 19                                                          |
| 19              | Bolivia | 2001           | Maize                     | 100                                                         |
| 19              | Bolivia | 2001           | Marine Fish, Other        | 1                                                           |
| 19              | Bolivia | 2001           | Meat, Other               | 3                                                           |
| 19              | Bolivia | 2001           | Milk, Whole               | 58                                                          |
| 19              | Bolivia | 2001           | Mutton & Goat Meat        | 7                                                           |
| 19              | Bolivia | 2001           | Nuts                      | 16                                                          |
| 19              | Bolivia | 2001           | Oats                      | 2                                                           |
| 19              | Bolivia | 2001           | Offals, Edible            | 12                                                          |
| 19              | Bolivia | 2001           | Oilcrops Oil, Other       | 1                                                           |
| 19              | Bolivia | 2001           | Onions                    | 14                                                          |
| 19              | Bolivia | 2001           | Oranges, Mandarines       | 48                                                          |
| 19              | Bolivia | 2001           | Peas                      | 1                                                           |
| 19              | Bolivia | 2001           | Pelagic Fish              | 2                                                           |
| 19              | Bolivia | 2001           | Pigmeat                   | 31                                                          |
| 19              | Bolivia | 2001           | Pineapples                | 17                                                          |
| 19              | Bolivia | 2001           | Plantains                 | 92                                                          |
| 19              | Bolivia | 2001           | Potatoes                  | 130                                                         |
| 19              | Bolivia | 2001           | Poultry Meat              | 41                                                          |
| 19              | Bolivia | 2001           | Pulses, Other             | 4                                                           |
| 19              | Bolivia | 2001           | Rice (Milled Equivalent)  | 62                                                          |
| 19              | Bolivia | 2001           | Roots, Other              | 14                                                          |
| 19              | Bolivia | 2001           | Soyabean Oil              | 4                                                           |
| 19              | Bolivia | 2001           | Sugar, Refined Equivalent | 70                                                          |
| 19              | Bolivia | 2001           | Sunflowerseed Oil         | 4                                                           |
| 19              | Bolivia | 2001           | Sweet Potatoes            | 3                                                           |
| 19              | Bolivia | 2001           | Tea                       | 1                                                           |
| 19              | Bolivia | 2001           | Tomatoes                  | 27                                                          |
| 19              | Bolivia | 2001           | Vegetables, Other         | 106                                                         |
| 19              | Bolivia | 2001           | Wheat                     | 154                                                         |
| 19              | Bolivia | 2001           | Wine                      | 1                                                           |
| 19              | Bolivia | 2002           | Apples                    | 7                                                           |
| 19              | Bolivia | 2002           | Bananas                   | 36                                                          |
| 19              | Bolivia | 2002           | Beer                      | 65                                                          |
| 19              | Bolivia | 2002           | Beverages, Alcoholic      | 6                                                           |
| 19              | Bolivia | 2002           | Bovine Meat               | 51                                                          |
| 19              | Bolivia | 2002           | Cassava                   | 48                                                          |
| 19              | Bolivia | 2002           | Cereals, Other            | 6                                                           |
| 19              | Bolivia | 2002           | Cheese                    | 2                                                           |
| 19              | Bolivia | 2002           | Cocoa Beans               | 2                                                           |
| 19              | Bolivia | 2002           | Coffee                    | 7                                                           |
| 19              | Bolivia | 2002           | Cottonseed Oil            | 3                                                           |

Dietary calcium and zinc deficiency risks are decreasing but remain prevalent

| FAO countrycode | Country | Reference year | Food item                 | Gross food supply (g capita <sup>-1</sup> d <sup>-1</sup> ) |
|-----------------|---------|----------------|---------------------------|-------------------------------------------------------------|
| 19              | Bolivia | 2002           | Eggs                      | 9                                                           |
| 19              | Bolivia | 2002           | Fats, Animals, Raw        | 6                                                           |
| 19              | Bolivia | 2002           | Freshwater Fish           | 2                                                           |
| 19              | Bolivia | 2002           | Fruits, Other             | 29                                                          |
| 19              | Bolivia | 2002           | Grapefruit                | 9                                                           |
| 19              | Bolivia | 2002           | Grapes                    | 8                                                           |
| 19              | Bolivia | 2002           | Groundnuts (Shelled Eq)   | 2                                                           |
| 19              | Bolivia | 2002           | Lemons, Limes             | 18                                                          |
| 19              | Bolivia | 2002           | Maize                     | 100                                                         |
| 19              | Bolivia | 2002           | Marine Fish, Other        | 1                                                           |
| 19              | Bolivia | 2002           | Meat, Other               | 3                                                           |
| 19              | Bolivia | 2002           | Milk, Whole               | 88                                                          |
| 19              | Bolivia | 2002           | Mutton & Goat Meat        | 7                                                           |
| 19              | Bolivia | 2002           | Nuts                      | 19                                                          |
| 19              | Bolivia | 2002           | Oats                      | 2                                                           |
| 19              | Bolivia | 2002           | Offals, Edible            | 12                                                          |
| 19              | Bolivia | 2002           | Oilcrops Oil, Other       | 1                                                           |
| 19              | Bolivia | 2002           | Onions                    | 14                                                          |
| 19              | Bolivia | 2002           | Oranges, Mandarines       | 45                                                          |
| 19              | Bolivia | 2002           | Peas                      | 2                                                           |
| 19              | Bolivia | 2002           | Pelagic Fish              | 2                                                           |
| 19              | Bolivia | 2002           | Pigmeat                   | 31                                                          |
| 19              | Bolivia | 2002           | Pineapples                | 16                                                          |
| 19              | Bolivia | 2002           | Plantains                 | 93                                                          |
| 19              | Bolivia | 2002           | Potatoes                  | 136                                                         |
| 19              | Bolivia | 2002           | Poultry Meat              | 42                                                          |
| 19              | Bolivia | 2002           | Pulses, Other             | 4                                                           |
| 19              | Bolivia | 2002           | Rice (Milled Equivalent)  | 60                                                          |
| 19              | Bolivia | 2002           | Roots, Other              | 14                                                          |
| 19              | Bolivia | 2002           | Soyabean Oil              | 4                                                           |
| 19              | Bolivia | 2002           | Sugar, Refined Equivalent | 69                                                          |
| 19              | Bolivia | 2002           | Sunflowerseed Oil         | 3                                                           |
| 19              | Bolivia | 2002           | Sweet Potatoes            | 4                                                           |
| 19              | Bolivia | 2002           | Tomatoes                  | 29                                                          |
| 19              | Bolivia | 2002           | Vegetables, Other         | 104                                                         |
| 19              | Bolivia | 2002           | Wheat                     | 154                                                         |
| 19              | Bolivia | 2002           | Wine                      | 1                                                           |
| 19              | Bolivia | 2003           | Apples                    | 6                                                           |
| 19              | Bolivia | 2003           | Bananas                   | 32                                                          |
| 19              | Bolivia | 2003           | Beer                      | 49                                                          |
| 19              | Bolivia | 2003           | Beverages, Alcoholic      | 5                                                           |
| 19              | Bolivia | 2003           | Bovine Meat               | 51                                                          |
| 19              | Bolivia | 2003           | Cassava                   | 45                                                          |
| 19              | Bolivia | 2003           | Cereals, Other            | 6                                                           |
| 19              | Bolivia | 2003           | Cheese                    | 2                                                           |
| 19              | Bolivia | 2003           | Cocoa Beans               | 2                                                           |
| 19              | Bolivia | 2003           | Coffee                    | 7                                                           |
| 19              | Bolivia | 2003           | Cottonseed Oil            | 3                                                           |
| 19              | Bolivia | 2003           | Eggs                      | 11                                                          |
| 19              | Bolivia | 2003           | Fats, Animals, Raw        | 7                                                           |
| 19              | Bolivia | 2003           | Freshwater Fish           | 2                                                           |
| 19              | Bolivia | 2003           | Fruits, Other             | 21                                                          |
| 19              | Bolivia | 2003           | Grapefruit                | 8                                                           |
| 19              | Bolivia | 2003           | Grapes                    | 7                                                           |
| 19              | Bolivia | 2003           | Groundnuts (Shelled Eq)   | 2                                                           |
| 19              | Bolivia | 2003           | Lemons, Limes             | 18                                                          |
| 19              | Bolivia | 2003           | Maize                     | 101                                                         |
| 19              | Bolivia | 2003           | Marine Fish, Other        | 1                                                           |
| 19              | Bolivia | 2003           | Meat, Other               | 3                                                           |
| 19              | Bolivia | 2003           | Milk, Whole               | 82                                                          |
| 19              | Bolivia | 2003           | Mutton & Goat Meat        | 7                                                           |
| 19              | Bolivia | 2003           | Nuts                      | 19                                                          |
| 19              | Bolivia | 2003           | Oats                      | 2                                                           |
| 19              | Bolivia | 2003           | Offals, Edible            | 12                                                          |
| 19              | Bolivia | 2003           | Onions                    | 9                                                           |
| 19              | Bolivia | 2003           | Oranges, Mandarines       | 32                                                          |
| 19              | Bolivia | 2003           | Peas                      | 2                                                           |
| 19              | Bolivia | 2003           | Pelagic Fish              | 1                                                           |
| 19              | Bolivia | 2003           | Pigmeat                   | 32                                                          |
| 19              | Bolivia | 2003           | Pineapples                | 16                                                          |
| 19              | Bolivia | 2003           | Plantains                 | 94                                                          |
| 19              | Bolivia | 2003           | Potatoes                  | 138                                                         |
| 19              | Bolivia | 2003           | Poultry Meat              | 41                                                          |
| 19              | Bolivia | 2003           | Pulses, Other             | 4                                                           |
| 19              | Bolivia | 2003           | Rice (Milled Equivalent)  | 65                                                          |
| 19              | Bolivia | 2003           | Roots, Other              | 12                                                          |
| 19              | Bolivia | 2003           | Soyabean Oil              | 3                                                           |
| 19              | Bolivia | 2003           | Sugar, Refined Equivalent | 68                                                          |
| 19              | Bolivia | 2003           | Sunflowerseed Oil         | 3                                                           |
| 19              | Bolivia | 2003           | Sweet Potatoes            | 1                                                           |
| 19              | Bolivia | 2003           | Tomatoes                  | 29                                                          |
| 19              | Bolivia | 2003           | Vegetables, Other         | 92                                                          |
| 19              | Bolivia | 2003           | Wheat                     | 155                                                         |
| 19              | Bolivia | 2003           | Wine                      | 2                                                           |
| 19              | Bolivia | 2004           | Apples                    | 6                                                           |
| 19              | Bolivia | 2004           | Bananas                   | 28                                                          |
| 19              | Bolivia | 2004           | Beer                      | 60                                                          |
| 19              | Bolivia | 2004           | Beverages, Alcoholic      | 3                                                           |
| 19              | Bolivia | 2004           | Bovine Meat               | 51                                                          |
| 19              | Bolivia | 2004           | Cassava                   | 47                                                          |
| 19              | Bolivia | 2004           | Cereals, Other            | 6                                                           |
| 19              | Bolivia | 2004           | Cheese                    | 2                                                           |
| 19              | Bolivia | 2004           | Cocoa Beans               | 2                                                           |
| 19              | Bolivia | 2004           | Coffee                    | 7                                                           |
| 19              | Bolivia | 2004           | Cottonseed Oil            | 3                                                           |
| 19              | Bolivia | 2004           | Eggs                      | 12                                                          |
| 19              | Bolivia | 2004           | Fats, Animals, Raw        | 7                                                           |

Dietary calcium and zinc deficiency risks are decreasing but remain prevalent

| FAO countrycode | Country | Reference year | Food item                 | Gross food supply (g capita <sup>-1</sup> d <sup>-1</sup> ) |
|-----------------|---------|----------------|---------------------------|-------------------------------------------------------------|
| 19              | Bolivia | 2004           | Freshwater Fish           | 2                                                           |
| 19              | Bolivia | 2004           | Fruits, Other             | 17                                                          |
| 19              | Bolivia | 2004           | Grapefruit                | 2                                                           |
| 19              | Bolivia | 2004           | Grapes                    | 6                                                           |
| 19              | Bolivia | 2004           | Groundnuts (Shelled Eq)   | 2                                                           |
| 19              | Bolivia | 2004           | Lemons, Limes             | 7                                                           |
| 19              | Bolivia | 2004           | Maize                     | 94                                                          |
| 19              | Bolivia | 2004           | Marine Fish, Other        | 2                                                           |
| 19              | Bolivia | 2004           | Meat, Other               | 3                                                           |
| 19              | Bolivia | 2004           | Milk, Whole               | 83                                                          |
| 19              | Bolivia | 2004           | Mutton & Goat Meat        | 7                                                           |
| 19              | Bolivia | 2004           | Nuts                      | 22                                                          |
| 19              | Bolivia | 2004           | Oats                      | 2                                                           |
| 19              | Bolivia | 2004           | Offals, Edible            | 12                                                          |
| 19              | Bolivia | 2004           | Onions                    | 8                                                           |
| 19              | Bolivia | 2004           | Oranges, Mandarines       | 32                                                          |
| 19              | Bolivia | 2004           | Peas                      | 2                                                           |
| 19              | Bolivia | 2004           | Pelagic Fish              | 1                                                           |
| 19              | Bolivia | 2004           | Pigmeat                   | 32                                                          |
| 19              | Bolivia | 2004           | Pineapples                | 3                                                           |
| 19              | Bolivia | 2004           | Plantains                 | 94                                                          |
| 19              | Bolivia | 2004           | Potatoes                  | 137                                                         |
| 19              | Bolivia | 2004           | Poultry Meat              | 44                                                          |
| 19              | Bolivia | 2004           | Pulses, Other             | 4                                                           |
| 19              | Bolivia | 2004           | Rice (Milled Equivalent)  | 71                                                          |
| 19              | Bolivia | 2004           | Roots, Other              | 10                                                          |
| 19              | Bolivia | 2004           | Soyabean Oil              | 4                                                           |
| 19              | Bolivia | 2004           | Sugar, Refined Equivalent | 68                                                          |
| 19              | Bolivia | 2004           | Sunflowerseed Oil         | 2                                                           |
| 19              | Bolivia | 2004           | Sweet Potatoes            | 1                                                           |
| 19              | Bolivia | 2004           | Tomatoes                  | 30                                                          |
| 19              | Bolivia | 2004           | Vegetables, Other         | 90                                                          |
| 19              | Bolivia | 2004           | Wheat                     | 135                                                         |
| 19              | Bolivia | 2004           | Wine                      | 2                                                           |
| 19              | Bolivia | 2005           | Apples                    | 5                                                           |
| 19              | Bolivia | 2005           | Bananas                   | 26                                                          |
| 19              | Bolivia | 2005           | Beer                      | 67                                                          |
| 19              | Bolivia | 2005           | Beverages, Alcoholic      | 3                                                           |
| 19              | Bolivia | 2005           | Bovine Meat               | 51                                                          |
| 19              | Bolivia | 2005           | Cassava                   | 48                                                          |
| 19              | Bolivia | 2005           | Cereals, Other            | 5                                                           |
| 19              | Bolivia | 2005           | Cheese                    | 2                                                           |
| 19              | Bolivia | 2005           | Cocoa Beans               | 3                                                           |
| 19              | Bolivia | 2005           | Coffee                    | 7                                                           |
| 19              | Bolivia | 2005           | Cottonseed Oil            | 3                                                           |
| 19              | Bolivia | 2005           | Eggs                      | 12                                                          |
| 19              | Bolivia | 2005           | Fats, Animals, Raw        | 8                                                           |
| 19              | Bolivia | 2005           | Freshwater Fish           | 2                                                           |
| 19              | Bolivia | 2005           | Fruits, Other             | 15                                                          |
| 19              | Bolivia | 2005           | Grapefruit                | 2                                                           |
| 19              | Bolivia | 2005           | Grapes                    | 6                                                           |
| 19              | Bolivia | 2005           | Groundnuts (Shelled Eq)   | 2                                                           |
| 19              | Bolivia | 2005           | Lemons, Limes             | 7                                                           |
| 19              | Bolivia | 2005           | Maize                     | 107                                                         |
| 19              | Bolivia | 2005           | Marine Fish, Other        | 2                                                           |
| 19              | Bolivia | 2005           | Meat, Other               | 2                                                           |
| 19              | Bolivia | 2005           | Milk, Whole               | 87                                                          |
| 19              | Bolivia | 2005           | Mutton & Goat Meat        | 7                                                           |
| 19              | Bolivia | 2005           | Nuts                      | 22                                                          |
| 19              | Bolivia | 2005           | Oats                      | 3                                                           |
| 19              | Bolivia | 2005           | Offals, Edible            | 12                                                          |
| 19              | Bolivia | 2005           | Onions                    | 9                                                           |
| 19              | Bolivia | 2005           | Oranges, Mandarines       | 32                                                          |
| 19              | Bolivia | 2005           | Peas                      | 2                                                           |
| 19              | Bolivia | 2005           | Pelagic Fish              | 1                                                           |
| 19              | Bolivia | 2005           | Pigmeat                   | 32                                                          |
| 19              | Bolivia | 2005           | Pineapples                | 3                                                           |
| 19              | Bolivia | 2005           | Plantains                 | 95                                                          |
| 19              | Bolivia | 2005           | Potatoes                  | 138                                                         |
| 19              | Bolivia | 2005           | Poultry Meat              | 54                                                          |
| 19              | Bolivia | 2005           | Pulses, Other             | 4                                                           |
| 19              | Bolivia | 2005           | Rice (Milled Equivalent)  | 75                                                          |
| 19              | Bolivia | 2005           | Roots, Other              | 10                                                          |
| 19              | Bolivia | 2005           | Soyabean Oil              | 4                                                           |
| 19              | Bolivia | 2005           | Sugar, Refined Equivalent | 68                                                          |
| 19              | Bolivia | 2005           | Sunflowerseed Oil         | 1                                                           |
| 19              | Bolivia | 2005           | Sweet Potatoes            | 1                                                           |
| 19              | Bolivia | 2005           | Tomatoes                  | 31                                                          |
| 19              | Bolivia | 2005           | Vegetables, Other         | 91                                                          |
| 19              | Bolivia | 2005           | Wheat                     | 133                                                         |
| 19              | Bolivia | 2005           | Wine                      | 2                                                           |
| 19              | Bolivia | 2006           | Apples                    | 5                                                           |
| 19              | Bolivia | 2006           | Bananas                   | 17                                                          |
| 19              | Bolivia | 2006           | Beer                      | 72                                                          |
| 19              | Bolivia | 2006           | Beverages, Alcoholic      | 3                                                           |
| 19              | Bolivia | 2006           | Bovine Meat               | 57                                                          |
| 19              | Bolivia | 2006           | Cassava                   | 48                                                          |
| 19              | Bolivia | 2006           | Cereals, Other            | 5                                                           |
| 19              | Bolivia | 2006           | Cheese                    | 2                                                           |
| 19              | Bolivia | 2006           | Cocoa Beans               | 3                                                           |
| 19              | Bolivia | 2006           | Coconuts - Incl Copra     | 1                                                           |
| 19              | Bolivia | 2006           | Coffee                    | 7                                                           |
| 19              | Bolivia | 2006           | Cottonseed Oil            | 3                                                           |
| 19              | Bolivia | 2006           | Eggs                      | 12                                                          |
| 19              | Bolivia | 2006           | Fats, Animals, Raw        | 9                                                           |
| 19              | Bolivia | 2006           | Freshwater Fish           | 2                                                           |
| 19              | Bolivia | 2006           | Fruits, Other             | 14                                                          |

Dietary calcium and zinc deficiency risks are decreasing but remain prevalent

| FAO countrycode | Country | Reference year | Food item                 | Gross food supply (g capita <sup>-1</sup> d <sup>-1</sup> ) |
|-----------------|---------|----------------|---------------------------|-------------------------------------------------------------|
| 19              | Bolivia | 2006           | Grapefruit                | 2                                                           |
| 19              | Bolivia | 2006           | Grapes                    | 6                                                           |
| 19              | Bolivia | 2006           | Groundnuts (Shelled Eq)   | 2                                                           |
| 19              | Bolivia | 2006           | Lemons, Limes             | 7                                                           |
| 19              | Bolivia | 2006           | Maize                     | 113                                                         |
| 19              | Bolivia | 2006           | Marine Fish, Other        | 2                                                           |
| 19              | Bolivia | 2006           | Meat, Other               | 2                                                           |
| 19              | Bolivia | 2006           | Milk, Whole               | 64                                                          |
| 19              | Bolivia | 2006           | Mutton & Goat Meat        | 7                                                           |
| 19              | Bolivia | 2006           | Nuts                      | 18                                                          |
| 19              | Bolivia | 2006           | Oats                      | 3                                                           |
| 19              | Bolivia | 2006           | Offals, Edible            | 13                                                          |
| 19              | Bolivia | 2006           | Onions                    | 9                                                           |
| 19              | Bolivia | 2006           | Oranges, Mandarines       | 32                                                          |
| 19              | Bolivia | 2006           | Peas                      | 1                                                           |
| 19              | Bolivia | 2006           | Pelagic Fish              | 1                                                           |
| 19              | Bolivia | 2006           | Pigmeat                   | 32                                                          |
| 19              | Bolivia | 2006           | Pineapples                | 2                                                           |
| 19              | Bolivia | 2006           | Plantains                 | 93                                                          |
| 19              | Bolivia | 2006           | Potatoes                  | 133                                                         |
| 19              | Bolivia | 2006           | Poultry Meat              | 72                                                          |
| 19              | Bolivia | 2006           | Pulses, Other             | 4                                                           |
| 19              | Bolivia | 2006           | Rice (Milled Equivalent)  | 80                                                          |
| 19              | Bolivia | 2006           | Roots, Other              | 8                                                           |
| 19              | Bolivia | 2006           | Soyabean Oil              | 4                                                           |
| 19              | Bolivia | 2006           | Sugar, Refined Equivalent | 65                                                          |
| 19              | Bolivia | 2006           | Sunflowerseed Oil         | 1                                                           |
| 19              | Bolivia | 2006           | Sweet Potatoes            | 1                                                           |
| 19              | Bolivia | 2006           | Sweeteners, Other         | 1                                                           |
| 19              | Bolivia | 2006           | Tea                       | 1                                                           |
| 19              | Bolivia | 2006           | Tomatoes                  | 30                                                          |
| 19              | Bolivia | 2006           | Vegetables, Other         | 59                                                          |
| 19              | Bolivia | 2006           | Wheat                     | 132                                                         |
| 19              | Bolivia | 2006           | Wine                      | 2                                                           |
| 19              | Bolivia | 2007           | Apples                    | 4                                                           |
| 19              | Bolivia | 2007           | Bananas                   | 18                                                          |
| 19              | Bolivia | 2007           | Beer                      | 77                                                          |
| 19              | Bolivia | 2007           | Beverages, Alcoholic      | 3                                                           |
| 19              | Bolivia | 2007           | Bovine Meat               | 69                                                          |
| 19              | Bolivia | 2007           | Cassava                   | 44                                                          |
| 19              | Bolivia | 2007           | Cereals, Other            | 4                                                           |
| 19              | Bolivia | 2007           | Cheese                    | 2                                                           |
| 19              | Bolivia | 2007           | Cocoa Beans               | 3                                                           |
| 19              | Bolivia | 2007           | Coffee                    | 7                                                           |
| 19              | Bolivia | 2007           | Cottonseed Oil            | 3                                                           |
| 19              | Bolivia | 2007           | Eggs                      | 12                                                          |
| 19              | Bolivia | 2007           | Fats, Animals, Raw        | 8                                                           |
| 19              | Bolivia | 2007           | Freshwater Fish           | 2                                                           |
| 19              | Bolivia | 2007           | Fruits, Other             | 13                                                          |
| 19              | Bolivia | 2007           | Grapefruit                | 2                                                           |
| 19              | Bolivia | 2007           | Grapes                    | 6                                                           |
| 19              | Bolivia | 2007           | Groundnuts (Shelled Eq)   | 2                                                           |
| 19              | Bolivia | 2007           | Lemons, Limes             | 7                                                           |
| 19              | Bolivia | 2007           | Maize                     | 106                                                         |
| 19              | Bolivia | 2007           | Marine Fish, Other        | 2                                                           |
| 19              | Bolivia | 2007           | Meat, Other               | 2                                                           |
| 19              | Bolivia | 2007           | Milk, Whole               | 63                                                          |
| 19              | Bolivia | 2007           | Mutton & Goat Meat        | 7                                                           |
| 19              | Bolivia | 2007           | Nuts                      | 15                                                          |
| 19              | Bolivia | 2007           | Oats                      | 3                                                           |
| 19              | Bolivia | 2007           | Offals, Edible            | 14                                                          |
| 19              | Bolivia | 2007           | Onions                    | 8                                                           |
| 19              | Bolivia | 2007           | Oranges, Mandarines       | 33                                                          |
| 19              | Bolivia | 2007           | Peas                      | 2                                                           |
| 19              | Bolivia | 2007           | Pelagic Fish              | 1                                                           |
| 19              | Bolivia | 2007           | Pigmeat                   | 32                                                          |
| 19              | Bolivia | 2007           | Pineapples                | 3                                                           |
| 19              | Bolivia | 2007           | Plantains                 | 92                                                          |
| 19              | Bolivia | 2007           | Potatoes                  | 130                                                         |
| 19              | Bolivia | 2007           | Poultry Meat              | 81                                                          |
| 19              | Bolivia | 2007           | Pulses, Other             | 4                                                           |
| 19              | Bolivia | 2007           | Rice (Milled Equivalent)  | 67                                                          |
| 19              | Bolivia | 2007           | Roots, Other              | 10                                                          |
| 19              | Bolivia | 2007           | Soyabean Oil              | 4                                                           |
| 19              | Bolivia | 2007           | Sugar, Refined Equivalent | 64                                                          |
| 19              | Bolivia | 2007           | Sunflowerseed Oil         | 1                                                           |
| 19              | Bolivia | 2007           | Sweet Potatoes            | 1                                                           |
| 19              | Bolivia | 2007           | Sweeteners, Other         | 1                                                           |
| 19              | Bolivia | 2007           | Tomatoes                  | 29                                                          |
| 19              | Bolivia | 2007           | Vegetables, Other         | 61                                                          |
| 19              | Bolivia | 2007           | Wheat                     | 143                                                         |
| 19              | Bolivia | 2007           | Wine                      | 2                                                           |
| 19              | Bolivia | 2008           | Apples                    | 4                                                           |
| 19              | Bolivia | 2008           | Bananas                   | 16                                                          |
| 19              | Bolivia | 2008           | Beer                      | 84                                                          |
| 19              | Bolivia | 2008           | Beverages, Alcoholic      | 3                                                           |
| 19              | Bolivia | 2008           | Bovine Meat               | 69                                                          |
| 19              | Bolivia | 2008           | Cassava                   | 44                                                          |
| 19              | Bolivia | 2008           | Cereals, Other            | 4                                                           |
| 19              | Bolivia | 2008           | Cheese                    | 2                                                           |
| 19              | Bolivia | 2008           | Cocoa Beans               | 3                                                           |
| 19              | Bolivia | 2008           | Coffee                    | 7                                                           |
| 19              | Bolivia | 2008           | Cottonseed Oil            | 3                                                           |
| 19              | Bolivia | 2008           | Eggs                      | 12                                                          |
| 19              | Bolivia | 2008           | Fats, Animals, Raw        | 8                                                           |
| 19              | Bolivia | 2008           | Freshwater Fish           | 2                                                           |
| 19              | Bolivia | 2008           | Fruits, Other             | 14                                                          |

Dietary calcium and zinc deficiency risks are decreasing but remain prevalent

| FAO countrycode | Country | Reference year | Food item                 | Gross food supply (g capita <sup>-1</sup> d <sup>-1</sup> ) |
|-----------------|---------|----------------|---------------------------|-------------------------------------------------------------|
| 19              | Bolivia | 2008           | Grapefruit                | 2                                                           |
| 19              | Bolivia | 2008           | Grapes                    | 5                                                           |
| 19              | Bolivia | 2008           | Groundnuts (Shelled Eq)   | 2                                                           |
| 19              | Bolivia | 2008           | Lemons, Limes             | 7                                                           |
| 19              | Bolivia | 2008           | Maize                     | 99                                                          |
| 19              | Bolivia | 2008           | Marine Fish, Other        | 3                                                           |
| 19              | Bolivia | 2008           | Meat, Other               | 2                                                           |
| 19              | Bolivia | 2008           | Milk, Whole               | 66                                                          |
| 19              | Bolivia | 2008           | Mutton & Goat Meat        | 7                                                           |
| 19              | Bolivia | 2008           | Nuts                      | 19                                                          |
| 19              | Bolivia | 2008           | Oats                      | 3                                                           |
| 19              | Bolivia | 2008           | Offals, Edible            | 15                                                          |
| 19              | Bolivia | 2008           | Oilcrops Oil, Other       | 1                                                           |
| 19              | Bolivia | 2008           | Onions                    | 8                                                           |
| 19              | Bolivia | 2008           | Oranges, Mandarines       | 33                                                          |
| 19              | Bolivia | 2008           | Peas                      | 1                                                           |
| 19              | Bolivia | 2008           | Pelagic Fish              | 2                                                           |
| 19              | Bolivia | 2008           | Pigmeat                   | 32                                                          |
| 19              | Bolivia | 2008           | Pineapples                | 3                                                           |
| 19              | Bolivia | 2008           | Plantains                 | 92                                                          |
| 19              | Bolivia | 2008           | Potatoes                  | 131                                                         |
| 19              | Bolivia | 2008           | Poultry Meat              | 85                                                          |
| 19              | Bolivia | 2008           | Pulses, Other             | 3                                                           |
| 19              | Bolivia | 2008           | Rice (Milled Equivalent)  | 67                                                          |
| 19              | Bolivia | 2008           | Roots, Other              | 10                                                          |
| 19              | Bolivia | 2008           | Soyabean Oil              | 4                                                           |
| 19              | Bolivia | 2008           | Sugar, Refined Equivalent | 64                                                          |
| 19              | Bolivia | 2008           | Sunflowerseed Oil         | 2                                                           |
| 19              | Bolivia | 2008           | Sweet Potatoes            | 1                                                           |
| 19              | Bolivia | 2008           | Sweeteners, Other         | 1                                                           |
| 19              | Bolivia | 2008           | Tea                       | 1                                                           |
| 19              | Bolivia | 2008           | Tomatoes                  | 29                                                          |
| 19              | Bolivia | 2008           | Vegetables, Other         | 59                                                          |
| 19              | Bolivia | 2008           | Wheat                     | 144                                                         |
| 19              | Bolivia | 2008           | Wine                      | 2                                                           |
| 19              | Bolivia | 2009           | Apples                    | 6                                                           |
| 19              | Bolivia | 2009           | Bananas                   | 8                                                           |
| 19              | Bolivia | 2009           | Beer                      | 83                                                          |
| 19              | Bolivia | 2009           | Beverages, Alcoholic      | 1                                                           |
| 19              | Bolivia | 2009           | Bovine Meat               | 56                                                          |
| 19              | Bolivia | 2009           | Cassava                   | 42                                                          |
| 19              | Bolivia | 2009           | Cereals, Other            | 6                                                           |
| 19              | Bolivia | 2009           | Cheese                    | 2                                                           |
| 19              | Bolivia | 2009           | Cocoa Beans               | 3                                                           |
| 19              | Bolivia | 2009           | Coconuts - Incl Copra     | 1                                                           |
| 19              | Bolivia | 2009           | Coffee                    | 7                                                           |
| 19              | Bolivia | 2009           | Cottonseed Oil            | 3                                                           |
| 19              | Bolivia | 2009           | Eggs                      | 13                                                          |
| 19              | Bolivia | 2009           | Fats, Animals, Raw        | 7                                                           |
| 19              | Bolivia | 2009           | Freshwater Fish           | 2                                                           |
| 19              | Bolivia | 2009           | Fruits, Other             | 19                                                          |
| 19              | Bolivia | 2009           | Grapefruit                | 2                                                           |
| 19              | Bolivia | 2009           | Grapes                    | 4                                                           |
| 19              | Bolivia | 2009           | Groundnuts (Shelled Eq)   | 1                                                           |
| 19              | Bolivia | 2009           | Lemons, Limes             | 5                                                           |
| 19              | Bolivia | 2009           | Maize                     | 108                                                         |
| 19              | Bolivia | 2009           | Marine Fish, Other        | 2                                                           |
| 19              | Bolivia | 2009           | Meat, Other               | 2                                                           |
| 19              | Bolivia | 2009           | Milk, Whole               | 86                                                          |
| 19              | Bolivia | 2009           | Mutton & Goat Meat        | 5                                                           |
| 19              | Bolivia | 2009           | Nuts                      | 18                                                          |
| 19              | Bolivia | 2009           | Oats                      | 2                                                           |
| 19              | Bolivia | 2009           | Offals, Edible            | 13                                                          |
| 19              | Bolivia | 2009           | Oilcrops Oil, Other       | 1                                                           |
| 19              | Bolivia | 2009           | Onions                    | 20                                                          |
| 19              | Bolivia | 2009           | Oranges, Mandarines       | 71                                                          |
| 19              | Bolivia | 2009           | Peas                      | 2                                                           |
| 19              | Bolivia | 2009           | Pelagic Fish              | 1                                                           |
| 19              | Bolivia | 2009           | Pigmeat                   | 22                                                          |
| 19              | Bolivia | 2009           | Pineapples                | 11                                                          |
| 19              | Bolivia | 2009           | Plantains                 | 66                                                          |
| 19              | Bolivia | 2009           | Potatoes                  | 164                                                         |
| 19              | Bolivia | 2009           | Poultry Meat              | 89                                                          |
| 19              | Bolivia | 2009           | Pulses, Other             | 4                                                           |
| 19              | Bolivia | 2009           | Rice (Milled Equivalent)  | 69                                                          |
| 19              | Bolivia | 2009           | Roots, Other              | 10                                                          |
| 19              | Bolivia | 2009           | Soyabean Oil              | 3                                                           |
| 19              | Bolivia | 2009           | Sugar, Refined Equivalent | 63                                                          |
| 19              | Bolivia | 2009           | Sunflowerseed Oil         | 2                                                           |
| 19              | Bolivia | 2009           | Sweet Potatoes            | 2                                                           |
| 19              | Bolivia | 2009           | Sweeteners, Other         | 1                                                           |
| 19              | Bolivia | 2009           | Tea                       | 1                                                           |
| 19              | Bolivia | 2009           | Tomatoes                  | 13                                                          |
| 19              | Bolivia | 2009           | Vegetables, Other         | 58                                                          |
| 19              | Bolivia | 2009           | Wheat                     | 152                                                         |
| 19              | Bolivia | 2009           | Wine                      | 2                                                           |
| 19              | Bolivia | 2010           | Apples                    | 6                                                           |
| 19              | Bolivia | 2010           | Bananas                   | 12                                                          |
| 19              | Bolivia | 2010           | Beans                     | 5                                                           |
| 19              | Bolivia | 2010           | Beer                      | 83                                                          |
| 19              | Bolivia | 2010           | Beverages, Alcoholic      | 1                                                           |
| 19              | Bolivia | 2010           | Bovine Meat               | 55                                                          |
| 19              | Bolivia | 2010           | Cassava                   | 45                                                          |
| 19              | Bolivia | 2010           | Cereals, Other            | 5                                                           |
| 19              | Bolivia | 2010           | Cheese                    | 3                                                           |
| 19              | Bolivia | 2010           | Cocoa Beans               | 3                                                           |
| 19              | Bolivia | 2010           | Coffee                    | 7                                                           |

Dietary calcium and zinc deficiency risks are decreasing but remain prevalent

| FAO countrycode | Country                | Reference year | Food item                 | Gross food supply (g capita <sup>-1</sup> d <sup>-1</sup> ) |
|-----------------|------------------------|----------------|---------------------------|-------------------------------------------------------------|
| 19              | Bolivia                | 2010           | Cottonseed Oil            | 3                                                           |
| 19              | Bolivia                | 2010           | Eggs                      | 14                                                          |
| 19              | Bolivia                | 2010           | Fats, Animals, Raw        | 6                                                           |
| 19              | Bolivia                | 2010           | Freshwater Fish           | 2                                                           |
| 19              | Bolivia                | 2010           | Fruits, Other             | 19                                                          |
| 19              | Bolivia                | 2010           | Grapefruit                | 2                                                           |
| 19              | Bolivia                | 2010           | Grapes                    | 4                                                           |
| 19              | Bolivia                | 2010           | Groundnuts (Shelled Eq)   | 1                                                           |
| 19              | Bolivia                | 2010           | Lemons, Limes             | 5                                                           |
| 19              | Bolivia                | 2010           | Maize                     | 104                                                         |
| 19              | Bolivia                | 2010           | Marine Fish, Other        | 2                                                           |
| 19              | Bolivia                | 2010           | Meat, Other               | 2                                                           |
| 19              | Bolivia                | 2010           | Milk, Whole               | 91                                                          |
| 19              | Bolivia                | 2010           | Mutton & Goat Meat        | 5                                                           |
| 19              | Bolivia                | 2010           | Nuts                      | 18                                                          |
| 19              | Bolivia                | 2010           | Oats                      | 2                                                           |
| 19              | Bolivia                | 2010           | Offals, Edible            | 10                                                          |
| 19              | Bolivia                | 2010           | Onions                    | 18                                                          |
| 19              | Bolivia                | 2010           | Oranges, Mandarines       | 69                                                          |
| 19              | Bolivia                | 2010           | Peas                      | 2                                                           |
| 19              | Bolivia                | 2010           | Pelagic Fish              | 1                                                           |
| 19              | Bolivia                | 2010           | Pigmeat                   | 23                                                          |
| 19              | Bolivia                | 2010           | Pineapples                | 11                                                          |
| 19              | Bolivia                | 2010           | Plantains                 | 68                                                          |
| 19              | Bolivia                | 2010           | Potatoes                  | 173                                                         |
| 19              | Bolivia                | 2010           | Poultry Meat              | 103                                                         |
| 19              | Bolivia                | 2010           | Pulses, Other             | 3                                                           |
| 19              | Bolivia                | 2010           | Rice (Milled Equivalent)  | 70                                                          |
| 19              | Bolivia                | 2010           | Roots, Other              | 10                                                          |
| 19              | Bolivia                | 2010           | Soyabean Oil              | 4                                                           |
| 19              | Bolivia                | 2010           | Sugar, Refined Equivalent | 63                                                          |
| 19              | Bolivia                | 2010           | Sunflowerseed Oil         | 1                                                           |
| 19              | Bolivia                | 2010           | Sweet Potatoes            | 1                                                           |
| 19              | Bolivia                | 2010           | Sweeteners, Other         | 1                                                           |
| 19              | Bolivia                | 2010           | Tea                       | 1                                                           |
| 19              | Bolivia                | 2010           | Tomatoes                  | 15                                                          |
| 19              | Bolivia                | 2010           | Vegetables, Other         | 55                                                          |
| 19              | Bolivia                | 2010           | Wheat                     | 148                                                         |
| 19              | Bolivia                | 2010           | Wine                      | 2                                                           |
| 19              | Bolivia                | 2011           | Apples                    | 6                                                           |
| 19              | Bolivia                | 2011           | Bananas                   | 5                                                           |
| 19              | Bolivia                | 2011           | Beans                     | 9                                                           |
| 19              | Bolivia                | 2011           | Beer                      | 74                                                          |
| 19              | Bolivia                | 2011           | Beverages, Alcoholic      | 2                                                           |
| 19              | Bolivia                | 2011           | Bovine Meat               | 54                                                          |
| 19              | Bolivia                | 2011           | Cassava                   | 47                                                          |
| 19              | Bolivia                | 2011           | Cereals, Other            | 4                                                           |
| 19              | Bolivia                | 2011           | Cheese                    | 3                                                           |
| 19              | Bolivia                | 2011           | Cocoa Beans               | 3                                                           |
| 19              | Bolivia                | 2011           | Coffee                    | 6                                                           |
| 19              | Bolivia                | 2011           | Cottonseed Oil            | 3                                                           |
| 19              | Bolivia                | 2011           | Eggs                      | 15                                                          |
| 19              | Bolivia                | 2011           | Fats, Animals, Raw        | 6                                                           |
| 19              | Bolivia                | 2011           | Freshwater Fish           | 2                                                           |
| 19              | Bolivia                | 2011           | Fruits, Other             | 19                                                          |
| 19              | Bolivia                | 2011           | Grapefruit                | 2                                                           |
| 19              | Bolivia                | 2011           | Grapes                    | 4                                                           |
| 19              | Bolivia                | 2011           | Groundnuts (Shelled Eq)   | 1                                                           |
| 19              | Bolivia                | 2011           | Lemons, Limes             | 5                                                           |
| 19              | Bolivia                | 2011           | Maize                     | 105                                                         |
| 19              | Bolivia                | 2011           | Marine Fish, Other        | 2                                                           |
| 19              | Bolivia                | 2011           | Meat, Other               | 2                                                           |
| 19              | Bolivia                | 2011           | Milk, Whole               | 107                                                         |
| 19              | Bolivia                | 2011           | Mutton & Goat Meat        | 5                                                           |
| 19              | Bolivia                | 2011           | Nuts                      | 18                                                          |
| 19              | Bolivia                | 2011           | Oats                      | 3                                                           |
| 19              | Bolivia                | 2011           | Offals, Edible            | 10                                                          |
| 19              | Bolivia                | 2011           | Oilcrops Oil, Other       | 1                                                           |
| 19              | Bolivia                | 2011           | Onions                    | 18                                                          |
| 19              | Bolivia                | 2011           | Oranges, Mandarines       | 68                                                          |
| 19              | Bolivia                | 2011           | Peas                      | 1                                                           |
| 19              | Bolivia                | 2011           | Pelagic Fish              | 1                                                           |
| 19              | Bolivia                | 2011           | Pigmeat                   | 23                                                          |
| 19              | Bolivia                | 2011           | Pineapples                | 11                                                          |
| 19              | Bolivia                | 2011           | Plantains                 | 69                                                          |
| 19              | Bolivia                | 2011           | Potatoes                  | 181                                                         |
| 19              | Bolivia                | 2011           | Poultry Meat              | 100                                                         |
| 19              | Bolivia                | 2011           | Pulses, Other             | 3                                                           |
| 19              | Bolivia                | 2011           | Rice (Milled Equivalent)  | 72                                                          |
| 19              | Bolivia                | 2011           | Roots, Other              | 9                                                           |
| 19              | Bolivia                | 2011           | Soyabean Oil              | 8                                                           |
| 19              | Bolivia                | 2011           | Sugar, Refined Equivalent | 65                                                          |
| 19              | Bolivia                | 2011           | Sunflowerseed Oil         | 3                                                           |
| 19              | Bolivia                | 2011           | Sweet Potatoes            | 1                                                           |
| 19              | Bolivia                | 2011           | Sweeteners, Other         | 2                                                           |
| 19              | Bolivia                | 2011           | Tea                       | 1                                                           |
| 19              | Bolivia                | 2011           | Tomatoes                  | 15                                                          |
| 19              | Bolivia                | 2011           | Vegetables, Other         | 55                                                          |
| 19              | Bolivia                | 2011           | Wheat                     | 148                                                         |
| 19              | Bolivia                | 2011           | Wine                      | 2                                                           |
| 80              | Bosnia and Herzegovina | 1992           | Apples                    | 4                                                           |
| 80              | Bosnia and Herzegovina | 1992           | Beans                     | 10                                                          |
| 80              | Bosnia and Herzegovina | 1992           | Beer                      | 35                                                          |
| 80              | Bosnia and Herzegovina | 1992           | Beverages, Alcoholic      | 43                                                          |
| 80              | Bosnia and Herzegovina | 1992           | Bovine Meat               | 19                                                          |
| 80              | Bosnia and Herzegovina | 1992           | Cheese                    | 13                                                          |
| 80              | Bosnia and Herzegovina | 1992           | Coffee                    | 2                                                           |

Dietary calcium and zinc deficiency risks are decreasing but remain prevalent

| FAO countrycode | Country                | Reference year | Food item                 | Gross food supply (g capita <sup>-1</sup> d <sup>-1</sup> ) |
|-----------------|------------------------|----------------|---------------------------|-------------------------------------------------------------|
| 80              | Bosnia and Herzegovina | 1992           | Eggs                      | 11                                                          |
| 80              | Bosnia and Herzegovina | 1992           | Fats, Animals, Raw        | 1                                                           |
| 80              | Bosnia and Herzegovina | 1992           | Freshwater Fish           | 1                                                           |
| 80              | Bosnia and Herzegovina | 1992           | Fruits, Other             | 50                                                          |
| 80              | Bosnia and Herzegovina | 1992           | Grapes                    | 5                                                           |
| 80              | Bosnia and Herzegovina | 1992           | Lemons, Limes             | 1                                                           |
| 80              | Bosnia and Herzegovina | 1992           | Maize                     | 263                                                         |
| 80              | Bosnia and Herzegovina | 1992           | Milk, Whole               | 174                                                         |
| 80              | Bosnia and Herzegovina | 1992           | Mutton & Goat Meat        | 1                                                           |
| 80              | Bosnia and Herzegovina | 1992           | Nuts                      | 1                                                           |
| 80              | Bosnia and Herzegovina | 1992           | Offals, Edible            | 3                                                           |
| 80              | Bosnia and Herzegovina | 1992           | Onions                    | 13                                                          |
| 80              | Bosnia and Herzegovina | 1992           | Oranges, Mandarines       | 2                                                           |
| 80              | Bosnia and Herzegovina | 1992           | Peas                      | 4                                                           |
| 80              | Bosnia and Herzegovina | 1992           | Pigmeat                   | 11                                                          |
| 80              | Bosnia and Herzegovina | 1992           | Pimento                   | 26                                                          |
| 80              | Bosnia and Herzegovina | 1992           | Potatoes                  | 152                                                         |
| 80              | Bosnia and Herzegovina | 1992           | Poultry Meat              | 10                                                          |
| 80              | Bosnia and Herzegovina | 1992           | Pulses, Other             | 1                                                           |
| 80              | Bosnia and Herzegovina | 1992           | Rice (Milled Equivalent)  | 1                                                           |
| 80              | Bosnia and Herzegovina | 1992           | Rye                       | 4                                                           |
| 80              | Bosnia and Herzegovina | 1992           | Soyabean Oil              | 1                                                           |
| 80              | Bosnia and Herzegovina | 1992           | Sugar, Refined Equivalent | 25                                                          |
| 80              | Bosnia and Herzegovina | 1992           | Sunflowerseed Oil         | 2                                                           |
| 80              | Bosnia and Herzegovina | 1992           | Sweeteners, Other         | 1                                                           |
| 80              | Bosnia and Herzegovina | 1992           | Tomatoes                  | 11                                                          |
| 80              | Bosnia and Herzegovina | 1992           | Vegetables, Other         | 325                                                         |
| 80              | Bosnia and Herzegovina | 1992           | Wheat                     | 224                                                         |
| 80              | Bosnia and Herzegovina | 1992           | Wine                      | 14                                                          |
| 80              | Bosnia and Herzegovina | 1993           | Apples                    | 13                                                          |
| 80              | Bosnia and Herzegovina | 1993           | Beans                     | 13                                                          |
| 80              | Bosnia and Herzegovina | 1993           | Beer                      | 37                                                          |
| 80              | Bosnia and Herzegovina | 1993           | Beverages, Alcoholic      | 37                                                          |
| 80              | Bosnia and Herzegovina | 1993           | Bovine Meat               | 21                                                          |
| 80              | Bosnia and Herzegovina | 1993           | Cheese                    | 13                                                          |
| 80              | Bosnia and Herzegovina | 1993           | Coffee                    | 2                                                           |
| 80              | Bosnia and Herzegovina | 1993           | Eggs                      | 10                                                          |
| 80              | Bosnia and Herzegovina | 1993           | Fats, Animals, Raw        | 2                                                           |
| 80              | Bosnia and Herzegovina | 1993           | Freshwater Fish           | 1                                                           |
| 80              | Bosnia and Herzegovina | 1993           | Fruits, Other             | 40                                                          |
| 80              | Bosnia and Herzegovina | 1993           | Grapes                    | 4                                                           |
| 80              | Bosnia and Herzegovina | 1993           | Lemons, Limes             | 2                                                           |
| 80              | Bosnia and Herzegovina | 1993           | Maize                     | 255                                                         |
| 80              | Bosnia and Herzegovina | 1993           | Marine Fish, Other        | 2                                                           |
| 80              | Bosnia and Herzegovina | 1993           | Milk, Whole               | 190                                                         |
| 80              | Bosnia and Herzegovina | 1993           | Mutton & Goat Meat        | 1                                                           |
| 80              | Bosnia and Herzegovina | 1993           | Nuts                      | 2                                                           |
| 80              | Bosnia and Herzegovina | 1993           | Offals, Edible            | 3                                                           |
| 80              | Bosnia and Herzegovina | 1993           | Onions                    | 16                                                          |
| 80              | Bosnia and Herzegovina | 1993           | Oranges, Mandarines       | 10                                                          |
| 80              | Bosnia and Herzegovina | 1993           | Peas                      | 7                                                           |
| 80              | Bosnia and Herzegovina | 1993           | Pigmeat                   | 9                                                           |
| 80              | Bosnia and Herzegovina | 1993           | Pimento                   | 27                                                          |
| 80              | Bosnia and Herzegovina | 1993           | Potatoes                  | 167                                                         |
| 80              | Bosnia and Herzegovina | 1993           | Poultry Meat              | 10                                                          |
| 80              | Bosnia and Herzegovina | 1993           | Pulses, Other             | 2                                                           |
| 80              | Bosnia and Herzegovina | 1993           | Rice (Milled Equivalent)  | 1                                                           |
| 80              | Bosnia and Herzegovina | 1993           | Rye                       | 4                                                           |
| 80              | Bosnia and Herzegovina | 1993           | Soyabean Oil              | 5                                                           |
| 80              | Bosnia and Herzegovina | 1993           | Sugar, Refined Equivalent | 22                                                          |
| 80              | Bosnia and Herzegovina | 1993           | Sunflowerseed Oil         | 1                                                           |
| 80              | Bosnia and Herzegovina | 1993           | Sweeteners, Other         | 2                                                           |
| 80              | Bosnia and Herzegovina | 1993           | Tomatoes                  | 14                                                          |
| 80              | Bosnia and Herzegovina | 1993           | Vegetables, Other         | 339                                                         |
| 80              | Bosnia and Herzegovina | 1993           | Wheat                     | 252                                                         |
| 80              | Bosnia and Herzegovina | 1993           | Wine                      | 8                                                           |
| 80              | Bosnia and Herzegovina | 1994           | Apples                    | 16                                                          |
| 80              | Bosnia and Herzegovina | 1994           | Bananas                   | 1                                                           |
| 80              | Bosnia and Herzegovina | 1994           | Beans                     | 16                                                          |
| 80              | Bosnia and Herzegovina | 1994           | Beer                      | 45                                                          |
| 80              | Bosnia and Herzegovina | 1994           | Beverages, Alcoholic      | 34                                                          |
| 80              | Bosnia and Herzegovina | 1994           | Bovine Meat               | 22                                                          |
| 80              | Bosnia and Herzegovina | 1994           | Cheese                    | 12                                                          |
| 80              | Bosnia and Herzegovina | 1994           | Citrus, Other             | 1                                                           |
| 80              | Bosnia and Herzegovina | 1994           | Cocoa Beans               | 1                                                           |
| 80              | Bosnia and Herzegovina | 1994           | Coffee                    | 1                                                           |
| 80              | Bosnia and Herzegovina | 1994           | Eggs                      | 12                                                          |
| 80              | Bosnia and Herzegovina | 1994           | Fats, Animals, Raw        | 2                                                           |
| 80              | Bosnia and Herzegovina | 1994           | Freshwater Fish           | 1                                                           |
| 80              | Bosnia and Herzegovina | 1994           | Fruits, Other             | 37                                                          |
| 80              | Bosnia and Herzegovina | 1994           | Grapes                    | 5                                                           |
| 80              | Bosnia and Herzegovina | 1994           | Honey                     | 1                                                           |
| 80              | Bosnia and Herzegovina | 1994           | Maize                     | 234                                                         |
| 80              | Bosnia and Herzegovina | 1994           | Milk, Whole               | 181                                                         |
| 80              | Bosnia and Herzegovina | 1994           | Mutton & Goat Meat        | 1                                                           |
| 80              | Bosnia and Herzegovina | 1994           | Nuts                      | 3                                                           |
| 80              | Bosnia and Herzegovina | 1994           | Offals, Edible            | 4                                                           |
| 80              | Bosnia and Herzegovina | 1994           | Oilcrops Oil, Other       | 1                                                           |
| 80              | Bosnia and Herzegovina | 1994           | Onions                    | 17                                                          |
| 80              | Bosnia and Herzegovina | 1994           | Oranges, Mandarines       | 6                                                           |
| 80              | Bosnia and Herzegovina | 1994           | Peas                      | 5                                                           |
| 80              | Bosnia and Herzegovina | 1994           | Pigmeat                   | 12                                                          |
| 80              | Bosnia and Herzegovina | 1994           | Pimento                   | 25                                                          |
| 80              | Bosnia and Herzegovina | 1994           | Potatoes                  | 143                                                         |
| 80              | Bosnia and Herzegovina | 1994           | Poultry Meat              | 14                                                          |
| 80              | Bosnia and Herzegovina | 1994           | Pulses, Other             | 2                                                           |
| 80              | Bosnia and Herzegovina | 1994           | Rice (Milled Equivalent)  | 4                                                           |

Dietary calcium and zinc deficiency risks are decreasing but remain prevalent

| FAO countrycode | Country                | Reference year | Food item                 | Gross food supply (g capita <sup>-1</sup> d <sup>-1</sup> ) |
|-----------------|------------------------|----------------|---------------------------|-------------------------------------------------------------|
| 80              | Bosnia and Herzegovina | 1994           | Rye                       | 4                                                           |
| 80              | Bosnia and Herzegovina | 1994           | Soyabean Oil              | 3                                                           |
| 80              | Bosnia and Herzegovina | 1994           | Sugar, Refined Equivalent | 23                                                          |
| 80              | Bosnia and Herzegovina | 1994           | Sunflowerseed Oil         | 2                                                           |
| 80              | Bosnia and Herzegovina | 1994           | Sweeteners, Other         | 4                                                           |
| 80              | Bosnia and Herzegovina | 1994           | Tomatoes                  | 15                                                          |
| 80              | Bosnia and Herzegovina | 1994           | Vegetables, Other         | 357                                                         |
| 80              | Bosnia and Herzegovina | 1994           | Wheat                     | 339                                                         |
| 80              | Bosnia and Herzegovina | 1994           | Wine                      | 7                                                           |
| 80              | Bosnia and Herzegovina | 1995           | Apples                    | 19                                                          |
| 80              | Bosnia and Herzegovina | 1995           | Bananas                   | 1                                                           |
| 80              | Bosnia and Herzegovina | 1995           | Beans                     | 11                                                          |
| 80              | Bosnia and Herzegovina | 1995           | Beer                      | 46                                                          |
| 80              | Bosnia and Herzegovina | 1995           | Beverages, Alcoholic      | 34                                                          |
| 80              | Bosnia and Herzegovina | 1995           | Bovine Meat               | 20                                                          |
| 80              | Bosnia and Herzegovina | 1995           | Cheese                    | 13                                                          |
| 80              | Bosnia and Herzegovina | 1995           | Citrus, Other             | 1                                                           |
| 80              | Bosnia and Herzegovina | 1995           | Cocoa Beans               | 2                                                           |
| 80              | Bosnia and Herzegovina | 1995           | Coffee                    | 1                                                           |
| 80              | Bosnia and Herzegovina | 1995           | Cream                     | 1                                                           |
| 80              | Bosnia and Herzegovina | 1995           | Eggs                      | 14                                                          |
| 80              | Bosnia and Herzegovina | 1995           | Fats, Animals, Raw        | 2                                                           |
| 80              | Bosnia and Herzegovina | 1995           | Freshwater Fish           | 1                                                           |
| 80              | Bosnia and Herzegovina | 1995           | Fruits, Other             | 42                                                          |
| 80              | Bosnia and Herzegovina | 1995           | Grapes                    | 3                                                           |
| 80              | Bosnia and Herzegovina | 1995           | Lemons, Limes             | 1                                                           |
| 80              | Bosnia and Herzegovina | 1995           | Maize                     | 210                                                         |
| 80              | Bosnia and Herzegovina | 1995           | Milk, Whole               | 177                                                         |
| 80              | Bosnia and Herzegovina | 1995           | Mutton & Goat Meat        | 1                                                           |
| 80              | Bosnia and Herzegovina | 1995           | Nuts                      | 2                                                           |
| 80              | Bosnia and Herzegovina | 1995           | Offals, Edible            | 3                                                           |
| 80              | Bosnia and Herzegovina | 1995           | Oilcrops Oil, Other       | 1                                                           |
| 80              | Bosnia and Herzegovina | 1995           | Onions                    | 16                                                          |
| 80              | Bosnia and Herzegovina | 1995           | Oranges, Mandarines       | 11                                                          |
| 80              | Bosnia and Herzegovina | 1995           | Peas                      | 3                                                           |
| 80              | Bosnia and Herzegovina | 1995           | Pelagic Fish              | 2                                                           |
| 80              | Bosnia and Herzegovina | 1995           | Pigmeat                   | 15                                                          |
| 80              | Bosnia and Herzegovina | 1995           | Pimento                   | 30                                                          |
| 80              | Bosnia and Herzegovina | 1995           | Potatoes                  | 216                                                         |
| 80              | Bosnia and Herzegovina | 1995           | Poultry Meat              | 19                                                          |
| 80              | Bosnia and Herzegovina | 1995           | Pulses, Other             | 2                                                           |
| 80              | Bosnia and Herzegovina | 1995           | Rice (Milled Equivalent)  | 1                                                           |
| 80              | Bosnia and Herzegovina | 1995           | Rye                       | 4                                                           |
| 80              | Bosnia and Herzegovina | 1995           | Soyabean Oil              | 1                                                           |
| 80              | Bosnia and Herzegovina | 1995           | Sugar, Refined Equivalent | 21                                                          |
| 80              | Bosnia and Herzegovina | 1995           | Sunflowerseed Oil         | 3                                                           |
| 80              | Bosnia and Herzegovina | 1995           | Sweeteners, Other         | 6                                                           |
| 80              | Bosnia and Herzegovina | 1995           | Tomatoes                  | 16                                                          |
| 80              | Bosnia and Herzegovina | 1995           | Vegetables, Other         | 400                                                         |
| 80              | Bosnia and Herzegovina | 1995           | Wheat                     | 340                                                         |
| 80              | Bosnia and Herzegovina | 1995           | Wine                      | 14                                                          |
| 80              | Bosnia and Herzegovina | 1996           | Apples                    | 21                                                          |
| 80              | Bosnia and Herzegovina | 1996           | Beans                     | 14                                                          |
| 80              | Bosnia and Herzegovina | 1996           | Beer                      | 62                                                          |
| 80              | Bosnia and Herzegovina | 1996           | Beverages, Alcoholic      | 43                                                          |
| 80              | Bosnia and Herzegovina | 1996           | Bovine Meat               | 23                                                          |
| 80              | Bosnia and Herzegovina | 1996           | Butter, Ghee              | 1                                                           |
| 80              | Bosnia and Herzegovina | 1996           | Cheese                    | 15                                                          |
| 80              | Bosnia and Herzegovina | 1996           | Citrus, Other             | 3                                                           |
| 80              | Bosnia and Herzegovina | 1996           | Cocoa Beans               | 3                                                           |
| 80              | Bosnia and Herzegovina | 1996           | Coffee                    | 1                                                           |
| 80              | Bosnia and Herzegovina | 1996           | Cream                     | 1                                                           |
| 80              | Bosnia and Herzegovina | 1996           | Eggs                      | 21                                                          |
| 80              | Bosnia and Herzegovina | 1996           | Fats, Animals, Raw        | 1                                                           |
| 80              | Bosnia and Herzegovina | 1996           | Freshwater Fish           | 2                                                           |
| 80              | Bosnia and Herzegovina | 1996           | Fruits, Other             | 47                                                          |
| 80              | Bosnia and Herzegovina | 1996           | Grapes                    | 2                                                           |
| 80              | Bosnia and Herzegovina | 1996           | Honey                     | 1                                                           |
| 80              | Bosnia and Herzegovina | 1996           | Lemons, Limes             | 1                                                           |
| 80              | Bosnia and Herzegovina | 1996           | Maize                     | 237                                                         |
| 80              | Bosnia and Herzegovina | 1996           | Milk, Whole               | 137                                                         |
| 80              | Bosnia and Herzegovina | 1996           | Mutton & Goat Meat        | 1                                                           |
| 80              | Bosnia and Herzegovina | 1996           | Nuts                      | 3                                                           |
| 80              | Bosnia and Herzegovina | 1996           | Offals, Edible            | 2                                                           |
| 80              | Bosnia and Herzegovina | 1996           | Onions                    | 27                                                          |
| 80              | Bosnia and Herzegovina | 1996           | Oranges, Mandarines       | 13                                                          |
| 80              | Bosnia and Herzegovina | 1996           | Peas                      | 3                                                           |
| 80              | Bosnia and Herzegovina | 1996           | Pigmeat                   | 23                                                          |
| 80              | Bosnia and Herzegovina | 1996           | Pimento                   | 29                                                          |
| 80              | Bosnia and Herzegovina | 1996           | Potatoes                  | 202                                                         |
| 80              | Bosnia and Herzegovina | 1996           | Poultry Meat              | 30                                                          |
| 80              | Bosnia and Herzegovina | 1996           | Pulses, Other             | 1                                                           |
| 80              | Bosnia and Herzegovina | 1996           | Rice (Milled Equivalent)  | 1                                                           |
| 80              | Bosnia and Herzegovina | 1996           | Rye                       | 2                                                           |
| 80              | Bosnia and Herzegovina | 1996           | Soyabean Oil              | 5                                                           |
| 80              | Bosnia and Herzegovina | 1996           | Sugar, Refined Equivalent | 22                                                          |
| 80              | Bosnia and Herzegovina | 1996           | Sunflowerseed Oil         | 11                                                          |
| 80              | Bosnia and Herzegovina | 1996           | Sweeteners, Other         | 8                                                           |
| 80              | Bosnia and Herzegovina | 1996           | Tomatoes                  | 26                                                          |
| 80              | Bosnia and Herzegovina | 1996           | Vegetables, Other         | 375                                                         |
| 80              | Bosnia and Herzegovina | 1996           | Wheat                     | 334                                                         |
| 80              | Bosnia and Herzegovina | 1996           | Wine                      | 3                                                           |
| 80              | Bosnia and Herzegovina | 1997           | Apples                    | 25                                                          |
| 80              | Bosnia and Herzegovina | 1997           | Bananas                   | 1                                                           |
| 80              | Bosnia and Herzegovina | 1997           | Barley                    | 8                                                           |
| 80              | Bosnia and Herzegovina | 1997           | Beans                     | 18                                                          |
| 80              | Bosnia and Herzegovina | 1997           | Beer                      | 75                                                          |



Dietary calcium and zinc deficiency risks are decreasing but remain prevalent

| FAO countrycode | Country                | Reference year | Food item                 | Gross food supply (g capita <sup>-1</sup> d <sup>-1</sup> ) |
|-----------------|------------------------|----------------|---------------------------|-------------------------------------------------------------|
| 80              | Bosnia and Herzegovina | 1997           | Beverages, Alcoholic      | 43                                                          |
| 80              | Bosnia and Herzegovina | 1997           | Bovine Meat               | 22                                                          |
| 80              | Bosnia and Herzegovina | 1997           | Butter, Ghee              | 1                                                           |
| 80              | Bosnia and Herzegovina | 1997           | Cheese                    | 15                                                          |
| 80              | Bosnia and Herzegovina | 1997           | Citrus, Other             | 1                                                           |
| 80              | Bosnia and Herzegovina | 1997           | Cocoa Beans               | 4                                                           |
| 80              | Bosnia and Herzegovina | 1997           | Coffee                    | 1                                                           |
| 80              | Bosnia and Herzegovina | 1997           | Eggs                      | 14                                                          |
| 80              | Bosnia and Herzegovina | 1997           | Fats, Animals, Raw        | 2                                                           |
| 80              | Bosnia and Herzegovina | 1997           | Freshwater Fish           | 2                                                           |
| 80              | Bosnia and Herzegovina | 1997           | Fruits, Other             | 60                                                          |
| 80              | Bosnia and Herzegovina | 1997           | Grapes                    | 4                                                           |
| 80              | Bosnia and Herzegovina | 1997           | Honey                     | 1                                                           |
| 80              | Bosnia and Herzegovina | 1997           | Lemons, Limes             | 2                                                           |
| 80              | Bosnia and Herzegovina | 1997           | Maize                     | 266                                                         |
| 80              | Bosnia and Herzegovina | 1997           | Milk, Whole               | 229                                                         |
| 80              | Bosnia and Herzegovina | 1997           | Mutton & Goat Meat        | 1                                                           |
| 80              | Bosnia and Herzegovina | 1997           | Nuts                      | 3                                                           |
| 80              | Bosnia and Herzegovina | 1997           | Offals, Edible            | 2                                                           |
| 80              | Bosnia and Herzegovina | 1997           | Oilcrops Oil, Other       | 1                                                           |
| 80              | Bosnia and Herzegovina | 1997           | Onions                    | 32                                                          |
| 80              | Bosnia and Herzegovina | 1997           | Oranges, Mandarines       | 14                                                          |
| 80              | Bosnia and Herzegovina | 1997           | Peas                      | 2                                                           |
| 80              | Bosnia and Herzegovina | 1997           | Pelagic Fish              | 1                                                           |
| 80              | Bosnia and Herzegovina | 1997           | Pigmeat                   | 20                                                          |
| 80              | Bosnia and Herzegovina | 1997           | Pimento                   | 36                                                          |
| 80              | Bosnia and Herzegovina | 1997           | Potatoes                  | 195                                                         |
| 80              | Bosnia and Herzegovina | 1997           | Poultry Meat              | 26                                                          |
| 80              | Bosnia and Herzegovina | 1997           | Pulses, Other             | 1                                                           |
| 80              | Bosnia and Herzegovina | 1997           | Rice (Milled Equivalent)  | 2                                                           |
| 80              | Bosnia and Herzegovina | 1997           | Rye                       | 4                                                           |
| 80              | Bosnia and Herzegovina | 1997           | Soyabean Oil              | 4                                                           |
| 80              | Bosnia and Herzegovina | 1997           | Sugar, Refined Equivalent | 24                                                          |
| 80              | Bosnia and Herzegovina | 1997           | Sunflowerseed Oil         | 9                                                           |
| 80              | Bosnia and Herzegovina | 1997           | Sweeteners, Other         | 16                                                          |
| 80              | Bosnia and Herzegovina | 1997           | Tomatoes                  | 35                                                          |
| 80              | Bosnia and Herzegovina | 1997           | Vegetables, Other         | 421                                                         |
| 80              | Bosnia and Herzegovina | 1997           | Wheat                     | 337                                                         |
| 80              | Bosnia and Herzegovina | 1997           | Wine                      | 4                                                           |
| 80              | Bosnia and Herzegovina | 1998           | Apples                    | 17                                                          |
| 80              | Bosnia and Herzegovina | 1998           | Bananas                   | 1                                                           |
| 80              | Bosnia and Herzegovina | 1998           | Barley                    | 9                                                           |
| 80              | Bosnia and Herzegovina | 1998           | Beans                     | 11                                                          |
| 80              | Bosnia and Herzegovina | 1998           | Beer                      | 75                                                          |
| 80              | Bosnia and Herzegovina | 1998           | Beverages, Alcoholic      | 35                                                          |
| 80              | Bosnia and Herzegovina | 1998           | Bovine Meat               | 20                                                          |
| 80              | Bosnia and Herzegovina | 1998           | Butter, Ghee              | 1                                                           |
| 80              | Bosnia and Herzegovina | 1998           | Cheese                    | 15                                                          |
| 80              | Bosnia and Herzegovina | 1998           | Cocoa Beans               | 2                                                           |
| 80              | Bosnia and Herzegovina | 1998           | Eggs                      | 15                                                          |
| 80              | Bosnia and Herzegovina | 1998           | Fats, Animals, Raw        | 1                                                           |
| 80              | Bosnia and Herzegovina | 1998           | Freshwater Fish           | 2                                                           |
| 80              | Bosnia and Herzegovina | 1998           | Fruits, Other             | 53                                                          |
| 80              | Bosnia and Herzegovina | 1998           | Grapes                    | 3                                                           |
| 80              | Bosnia and Herzegovina | 1998           | Honey                     | 1                                                           |
| 80              | Bosnia and Herzegovina | 1998           | Lemons, Limes             | 3                                                           |
| 80              | Bosnia and Herzegovina | 1998           | Maize                     | 259                                                         |
| 80              | Bosnia and Herzegovina | 1998           | Milk, Whole               | 285                                                         |
| 80              | Bosnia and Herzegovina | 1998           | Mutton & Goat Meat        | 1                                                           |
| 80              | Bosnia and Herzegovina | 1998           | Nuts                      | 3                                                           |
| 80              | Bosnia and Herzegovina | 1998           | Offals, Edible            | 3                                                           |
| 80              | Bosnia and Herzegovina | 1998           | Onions                    | 32                                                          |
| 80              | Bosnia and Herzegovina | 1998           | Oranges, Mandarines       | 13                                                          |
| 80              | Bosnia and Herzegovina | 1998           | Peas                      | 4                                                           |
| 80              | Bosnia and Herzegovina | 1998           | Pelagic Fish              | 1                                                           |
| 80              | Bosnia and Herzegovina | 1998           | Pigmeat                   | 21                                                          |
| 80              | Bosnia and Herzegovina | 1998           | Pimento                   | 27                                                          |
| 80              | Bosnia and Herzegovina | 1998           | Potatoes                  | 236                                                         |
| 80              | Bosnia and Herzegovina | 1998           | Poultry Meat              | 20                                                          |
| 80              | Bosnia and Herzegovina | 1998           | Pulses, Other             | 1                                                           |
| 80              | Bosnia and Herzegovina | 1998           | Rice (Milled Equivalent)  | 3                                                           |
| 80              | Bosnia and Herzegovina | 1998           | Rye                       | 5                                                           |
| 80              | Bosnia and Herzegovina | 1998           | Soyabean Oil              | 3                                                           |
| 80              | Bosnia and Herzegovina | 1998           | Sugar, Refined Equivalent | 27                                                          |
| 80              | Bosnia and Herzegovina | 1998           | Sunflowerseed Oil         | 10                                                          |
| 80              | Bosnia and Herzegovina | 1998           | Sweeteners, Other         | 9                                                           |
| 80              | Bosnia and Herzegovina | 1998           | Tomatoes                  | 37                                                          |
| 80              | Bosnia and Herzegovina | 1998           | Vegetables, Other         | 445                                                         |
| 80              | Bosnia and Herzegovina | 1998           | Wheat                     | 329                                                         |
| 80              | Bosnia and Herzegovina | 1998           | Wine                      | 5                                                           |
| 80              | Bosnia and Herzegovina | 1999           | Apples                    | 15                                                          |
| 80              | Bosnia and Herzegovina | 1999           | Barley                    | 9                                                           |
| 80              | Bosnia and Herzegovina | 1999           | Beans                     | 10                                                          |
| 80              | Bosnia and Herzegovina | 1999           | Beer                      | 70                                                          |
| 80              | Bosnia and Herzegovina | 1999           | Beverages, Alcoholic      | 37                                                          |
| 80              | Bosnia and Herzegovina | 1999           | Bovine Meat               | 17                                                          |
| 80              | Bosnia and Herzegovina | 1999           | Butter, Ghee              | 2                                                           |
| 80              | Bosnia and Herzegovina | 1999           | Cheese                    | 13                                                          |
| 80              | Bosnia and Herzegovina | 1999           | Cocoa Beans               | 2                                                           |
| 80              | Bosnia and Herzegovina | 1999           | Coffee                    | 1                                                           |
| 80              | Bosnia and Herzegovina | 1999           | Cream                     | 1                                                           |
| 80              | Bosnia and Herzegovina | 1999           | Eggs                      | 14                                                          |
| 80              | Bosnia and Herzegovina | 1999           | Fats, Animals, Raw        | 3                                                           |
| 80              | Bosnia and Herzegovina | 1999           | Freshwater Fish           | 2                                                           |
| 80              | Bosnia and Herzegovina | 1999           | Fruits, Other             | 36                                                          |
| 80              | Bosnia and Herzegovina | 1999           | Grapes                    | 5                                                           |
| 80              | Bosnia and Herzegovina | 1999           | Honey                     | 1                                                           |

Dietary calcium and zinc deficiency risks are decreasing but remain prevalent

| FAO countrycode | Country                | Reference year | Food item                 | Gross food supply (g capita <sup>-1</sup> d <sup>-1</sup> ) |
|-----------------|------------------------|----------------|---------------------------|-------------------------------------------------------------|
| 80              | Bosnia and Herzegovina | 1999           | Lemons, Limes             | 3                                                           |
| 80              | Bosnia and Herzegovina | 1999           | Maize                     | 249                                                         |
| 80              | Bosnia and Herzegovina | 1999           | Milk, Whole               | 302                                                         |
| 80              | Bosnia and Herzegovina | 1999           | Mutton & Goat Meat        | 1                                                           |
| 80              | Bosnia and Herzegovina | 1999           | Nuts                      | 2                                                           |
| 80              | Bosnia and Herzegovina | 1999           | Offals, Edible            | 3                                                           |
| 80              | Bosnia and Herzegovina | 1999           | Onions                    | 28                                                          |
| 80              | Bosnia and Herzegovina | 1999           | Oranges, Mandarines       | 8                                                           |
| 80              | Bosnia and Herzegovina | 1999           | Peas                      | 3                                                           |
| 80              | Bosnia and Herzegovina | 1999           | Pelagic Fish              | 3                                                           |
| 80              | Bosnia and Herzegovina | 1999           | Pigmeat                   | 18                                                          |
| 80              | Bosnia and Herzegovina | 1999           | Pimento                   | 31                                                          |
| 80              | Bosnia and Herzegovina | 1999           | Potatoes                  | 205                                                         |
| 80              | Bosnia and Herzegovina | 1999           | Poultry Meat              | 15                                                          |
| 80              | Bosnia and Herzegovina | 1999           | Pulses, Other             | 1                                                           |
| 80              | Bosnia and Herzegovina | 1999           | Rice (Milled Equivalent)  | 2                                                           |
| 80              | Bosnia and Herzegovina | 1999           | Rye                       | 4                                                           |
| 80              | Bosnia and Herzegovina | 1999           | Soyabean Oil              | 1                                                           |
| 80              | Bosnia and Herzegovina | 1999           | Sugar, Refined Equivalent | 29                                                          |
| 80              | Bosnia and Herzegovina | 1999           | Sunflowerseed Oil         | 16                                                          |
| 80              | Bosnia and Herzegovina | 1999           | Sweeteners, Other         | 6                                                           |
| 80              | Bosnia and Herzegovina | 1999           | Tomatoes                  | 31                                                          |
| 80              | Bosnia and Herzegovina | 1999           | Vegetables, Other         | 427                                                         |
| 80              | Bosnia and Herzegovina | 1999           | Wheat                     | 306                                                         |
| 80              | Bosnia and Herzegovina | 1999           | Wine                      | 4                                                           |
| 80              | Bosnia and Herzegovina | 2000           | Apples                    | 20                                                          |
| 80              | Bosnia and Herzegovina | 2000           | Barley                    | 14                                                          |
| 80              | Bosnia and Herzegovina | 2000           | Beans                     | 5                                                           |
| 80              | Bosnia and Herzegovina | 2000           | Beer                      | 71                                                          |
| 80              | Bosnia and Herzegovina | 2000           | Beverages, Alcoholic      | 40                                                          |
| 80              | Bosnia and Herzegovina | 2000           | Bovine Meat               | 19                                                          |
| 80              | Bosnia and Herzegovina | 2000           | Butter, Ghee              | 2                                                           |
| 80              | Bosnia and Herzegovina | 2000           | Cheese                    | 11                                                          |
| 80              | Bosnia and Herzegovina | 2000           | Citrus, Other             | 1                                                           |
| 80              | Bosnia and Herzegovina | 2000           | Cocoa Beans               | 3                                                           |
| 80              | Bosnia and Herzegovina | 2000           | Coffee                    | 1                                                           |
| 80              | Bosnia and Herzegovina | 2000           | Demersal Fish             | 1                                                           |
| 80              | Bosnia and Herzegovina | 2000           | Eggs                      | 14                                                          |
| 80              | Bosnia and Herzegovina | 2000           | Fats, Animals, Raw        | 2                                                           |
| 80              | Bosnia and Herzegovina | 2000           | Freshwater Fish           | 2                                                           |
| 80              | Bosnia and Herzegovina | 2000           | Fruits, Other             | 35                                                          |
| 80              | Bosnia and Herzegovina | 2000           | Grapes                    | 6                                                           |
| 80              | Bosnia and Herzegovina | 2000           | Honey                     | 1                                                           |
| 80              | Bosnia and Herzegovina | 2000           | Lemons, Limes             | 4                                                           |
| 80              | Bosnia and Herzegovina | 2000           | Maize                     | 252                                                         |
| 80              | Bosnia and Herzegovina | 2000           | Milk, Whole               | 322                                                         |
| 80              | Bosnia and Herzegovina | 2000           | Mutton & Goat Meat        | 1                                                           |
| 80              | Bosnia and Herzegovina | 2000           | Nuts                      | 4                                                           |
| 80              | Bosnia and Herzegovina | 2000           | Offals, Edible            | 3                                                           |
| 80              | Bosnia and Herzegovina | 2000           | Onions                    | 20                                                          |
| 80              | Bosnia and Herzegovina | 2000           | Oranges, Mandarines       | 15                                                          |
| 80              | Bosnia and Herzegovina | 2000           | Peas                      | 1                                                           |
| 80              | Bosnia and Herzegovina | 2000           | Pelagic Fish              | 4                                                           |
| 80              | Bosnia and Herzegovina | 2000           | Pigmeat                   | 16                                                          |
| 80              | Bosnia and Herzegovina | 2000           | Pimento                   | 21                                                          |
| 80              | Bosnia and Herzegovina | 2000           | Potatoes                  | 191                                                         |
| 80              | Bosnia and Herzegovina | 2000           | Poultry Meat              | 11                                                          |
| 80              | Bosnia and Herzegovina | 2000           | Pulses, Other             | 1                                                           |
| 80              | Bosnia and Herzegovina | 2000           | Rice (Milled Equivalent)  | 2                                                           |
| 80              | Bosnia and Herzegovina | 2000           | Rye                       | 4                                                           |
| 80              | Bosnia and Herzegovina | 2000           | Soyabean Oil              | 3                                                           |
| 80              | Bosnia and Herzegovina | 2000           | Spices, Other             | 1                                                           |
| 80              | Bosnia and Herzegovina | 2000           | Sugar, Refined Equivalent | 29                                                          |
| 80              | Bosnia and Herzegovina | 2000           | Sunflowerseed Oil         | 16                                                          |
| 80              | Bosnia and Herzegovina | 2000           | Sweeteners, Other         | 5                                                           |
| 80              | Bosnia and Herzegovina | 2000           | Tomatoes                  | 24                                                          |
| 80              | Bosnia and Herzegovina | 2000           | Vegetables, Other         | 301                                                         |
| 80              | Bosnia and Herzegovina | 2000           | Wheat                     | 275                                                         |
| 80              | Bosnia and Herzegovina | 2000           | Wine                      | 4                                                           |
| 80              | Bosnia and Herzegovina | 2001           | Apples                    | 20                                                          |
| 80              | Bosnia and Herzegovina | 2001           | Barley                    | 13                                                          |
| 80              | Bosnia and Herzegovina | 2001           | Beans                     | 11                                                          |
| 80              | Bosnia and Herzegovina | 2001           | Beer                      | 85                                                          |
| 80              | Bosnia and Herzegovina | 2001           | Beverages, Alcoholic      | 35                                                          |
| 80              | Bosnia and Herzegovina | 2001           | Bovine Meat               | 22                                                          |
| 80              | Bosnia and Herzegovina | 2001           | Butter, Ghee              | 2                                                           |
| 80              | Bosnia and Herzegovina | 2001           | Cheese                    | 11                                                          |
| 80              | Bosnia and Herzegovina | 2001           | Cocoa Beans               | 4                                                           |
| 80              | Bosnia and Herzegovina | 2001           | Coffee                    | 1                                                           |
| 80              | Bosnia and Herzegovina | 2001           | Cream                     | 3                                                           |
| 80              | Bosnia and Herzegovina | 2001           | Demersal Fish             | 1                                                           |
| 80              | Bosnia and Herzegovina | 2001           | Eggs                      | 12                                                          |
| 80              | Bosnia and Herzegovina | 2001           | Fats, Animals, Raw        | 3                                                           |
| 80              | Bosnia and Herzegovina | 2001           | Freshwater Fish           | 2                                                           |
| 80              | Bosnia and Herzegovina | 2001           | Fruits, Other             | 38                                                          |
| 80              | Bosnia and Herzegovina | 2001           | Grapes                    | 7                                                           |
| 80              | Bosnia and Herzegovina | 2001           | Honey                     | 1                                                           |
| 80              | Bosnia and Herzegovina | 2001           | Lemons, Limes             | 4                                                           |
| 80              | Bosnia and Herzegovina | 2001           | Maize                     | 265                                                         |
| 80              | Bosnia and Herzegovina | 2001           | Milk, Whole               | 326                                                         |
| 80              | Bosnia and Herzegovina | 2001           | Mutton & Goat Meat        | 1                                                           |
| 80              | Bosnia and Herzegovina | 2001           | Nuts                      | 2                                                           |
| 80              | Bosnia and Herzegovina | 2001           | Offals, Edible            | 2                                                           |
| 80              | Bosnia and Herzegovina | 2001           | Onions                    | 24                                                          |
| 80              | Bosnia and Herzegovina | 2001           | Oranges, Mandarines       | 15                                                          |
| 80              | Bosnia and Herzegovina | 2001           | Peas                      | 2                                                           |
| 80              | Bosnia and Herzegovina | 2001           | Pelagic Fish              | 6                                                           |

Dietary calcium and zinc deficiency risks are decreasing but remain prevalent

| FAO countrycode | Country                | Reference year | Food item                 | Gross food supply (g capita <sup>-1</sup> d <sup>-1</sup> ) |
|-----------------|------------------------|----------------|---------------------------|-------------------------------------------------------------|
| 80              | Bosnia and Herzegovina | 2001           | Pigmeat                   | 19                                                          |
| 80              | Bosnia and Herzegovina | 2001           | Pimento                   | 22                                                          |
| 80              | Bosnia and Herzegovina | 2001           | Potatoes                  | 252                                                         |
| 80              | Bosnia and Herzegovina | 2001           | Poultry Meat              | 11                                                          |
| 80              | Bosnia and Herzegovina | 2001           | Pulses, Other             | 2                                                           |
| 80              | Bosnia and Herzegovina | 2001           | Rice (Milled Equivalent)  | 2                                                           |
| 80              | Bosnia and Herzegovina | 2001           | Rye                       | 4                                                           |
| 80              | Bosnia and Herzegovina | 2001           | Soyabean Oil              | 1                                                           |
| 80              | Bosnia and Herzegovina | 2001           | Spices, Other             | 1                                                           |
| 80              | Bosnia and Herzegovina | 2001           | Sugar, Refined Equivalent | 29                                                          |
| 80              | Bosnia and Herzegovina | 2001           | Sunflowerseed Oil         | 19                                                          |
| 80              | Bosnia and Herzegovina | 2001           | Sweeteners, Other         | 13                                                          |
| 80              | Bosnia and Herzegovina | 2001           | Tomatoes                  | 24                                                          |
| 80              | Bosnia and Herzegovina | 2001           | Vegetables, Other         | 326                                                         |
| 80              | Bosnia and Herzegovina | 2001           | Wheat                     | 248                                                         |
| 80              | Bosnia and Herzegovina | 2001           | Wine                      | 7                                                           |
| 80              | Bosnia and Herzegovina | 2002           | Apples                    | 19                                                          |
| 80              | Bosnia and Herzegovina | 2002           | Barley                    | 11                                                          |
| 80              | Bosnia and Herzegovina | 2002           | Beans                     | 10                                                          |
| 80              | Bosnia and Herzegovina | 2002           | Beer                      | 112                                                         |
| 80              | Bosnia and Herzegovina | 2002           | Beverages, Alcoholic      | 34                                                          |
| 80              | Bosnia and Herzegovina | 2002           | Bovine Meat               | 25                                                          |
| 80              | Bosnia and Herzegovina | 2002           | Butter, Ghee              | 2                                                           |
| 80              | Bosnia and Herzegovina | 2002           | Cheese                    | 9                                                           |
| 80              | Bosnia and Herzegovina | 2002           | Cocoa Beans               | 4                                                           |
| 80              | Bosnia and Herzegovina | 2002           | Coffee                    | 1                                                           |
| 80              | Bosnia and Herzegovina | 2002           | Cream                     | 2                                                           |
| 80              | Bosnia and Herzegovina | 2002           | Demersal Fish             | 1                                                           |
| 80              | Bosnia and Herzegovina | 2002           | Eggs                      | 13                                                          |
| 80              | Bosnia and Herzegovina | 2002           | Fats, Animals, Raw        | 3                                                           |
| 80              | Bosnia and Herzegovina | 2002           | Freshwater Fish           | 5                                                           |
| 80              | Bosnia and Herzegovina | 2002           | Fruits, Other             | 33                                                          |
| 80              | Bosnia and Herzegovina | 2002           | Grapes                    | 9                                                           |
| 80              | Bosnia and Herzegovina | 2002           | Honey                     | 1                                                           |
| 80              | Bosnia and Herzegovina | 2002           | Lemons, Limes             | 4                                                           |
| 80              | Bosnia and Herzegovina | 2002           | Maize                     | 271                                                         |
| 80              | Bosnia and Herzegovina | 2002           | Marine Fish, Other        | 1                                                           |
| 80              | Bosnia and Herzegovina | 2002           | Milk, Whole               | 334                                                         |
| 80              | Bosnia and Herzegovina | 2002           | Mutton & Goat Meat        | 1                                                           |
| 80              | Bosnia and Herzegovina | 2002           | Nuts                      | 2                                                           |
| 80              | Bosnia and Herzegovina | 2002           | Offals, Edible            | 3                                                           |
| 80              | Bosnia and Herzegovina | 2002           | Onions                    | 24                                                          |
| 80              | Bosnia and Herzegovina | 2002           | Oranges, Mandarines       | 17                                                          |
| 80              | Bosnia and Herzegovina | 2002           | Peas                      | 3                                                           |
| 80              | Bosnia and Herzegovina | 2002           | Pelagic Fish              | 6                                                           |
| 80              | Bosnia and Herzegovina | 2002           | Pigmeat                   | 17                                                          |
| 80              | Bosnia and Herzegovina | 2002           | Pimento                   | 16                                                          |
| 80              | Bosnia and Herzegovina | 2002           | Potatoes                  | 210                                                         |
| 80              | Bosnia and Herzegovina | 2002           | Poultry Meat              | 18                                                          |
| 80              | Bosnia and Herzegovina | 2002           | Pulses, Other             | 3                                                           |
| 80              | Bosnia and Herzegovina | 2002           | Rice (Milled Equivalent)  | 3                                                           |
| 80              | Bosnia and Herzegovina | 2002           | Rye                       | 6                                                           |
| 80              | Bosnia and Herzegovina | 2002           | Soyabean Oil              | 1                                                           |
| 80              | Bosnia and Herzegovina | 2002           | Soyabeans                 | 3                                                           |
| 80              | Bosnia and Herzegovina | 2002           | Sugar, Refined Equivalent | 30                                                          |
| 80              | Bosnia and Herzegovina | 2002           | Sunflowerseed Oil         | 18                                                          |
| 80              | Bosnia and Herzegovina | 2002           | Sweeteners, Other         | 13                                                          |
| 80              | Bosnia and Herzegovina | 2002           | Tomatoes                  | 31                                                          |
| 80              | Bosnia and Herzegovina | 2002           | Vegetables, Other         | 372                                                         |
| 80              | Bosnia and Herzegovina | 2002           | Wheat                     | 249                                                         |
| 80              | Bosnia and Herzegovina | 2002           | Wine                      | 4                                                           |
| 80              | Bosnia and Herzegovina | 2003           | Apples                    | 36                                                          |
| 80              | Bosnia and Herzegovina | 2003           | Bananas                   | 26                                                          |
| 80              | Bosnia and Herzegovina | 2003           | Barley                    | 12                                                          |
| 80              | Bosnia and Herzegovina | 2003           | Beans                     | 10                                                          |
| 80              | Bosnia and Herzegovina | 2003           | Beer                      | 106                                                         |
| 80              | Bosnia and Herzegovina | 2003           | Beverages, Alcoholic      | 42                                                          |
| 80              | Bosnia and Herzegovina | 2003           | Bovine Meat               | 23                                                          |
| 80              | Bosnia and Herzegovina | 2003           | Butter, Ghee              | 2                                                           |
| 80              | Bosnia and Herzegovina | 2003           | Cheese                    | 6                                                           |
| 80              | Bosnia and Herzegovina | 2003           | Cocoa Beans               | 3                                                           |
| 80              | Bosnia and Herzegovina | 2003           | Coffee                    | 8                                                           |
| 80              | Bosnia and Herzegovina | 2003           | Cream                     | 1                                                           |
| 80              | Bosnia and Herzegovina | 2003           | Demersal Fish             | 2                                                           |
| 80              | Bosnia and Herzegovina | 2003           | Eggs                      | 12                                                          |
| 80              | Bosnia and Herzegovina | 2003           | Fats, Animals, Raw        | 2                                                           |
| 80              | Bosnia and Herzegovina | 2003           | Freshwater Fish           | 6                                                           |
| 80              | Bosnia and Herzegovina | 2003           | Fruits, Other             | 65                                                          |
| 80              | Bosnia and Herzegovina | 2003           | Grapefruit                | 1                                                           |
| 80              | Bosnia and Herzegovina | 2003           | Grapes                    | 8                                                           |
| 80              | Bosnia and Herzegovina | 2003           | Groundnuts (Shelled Eq)   | 1                                                           |
| 80              | Bosnia and Herzegovina | 2003           | Honey                     | 1                                                           |
| 80              | Bosnia and Herzegovina | 2003           | Lemons, Limes             | 5                                                           |
| 80              | Bosnia and Herzegovina | 2003           | Maize                     | 275                                                         |
| 80              | Bosnia and Herzegovina | 2003           | Marine Fish, Other        | 1                                                           |
| 80              | Bosnia and Herzegovina | 2003           | Milk, Whole               | 364                                                         |
| 80              | Bosnia and Herzegovina | 2003           | Mutton & Goat Meat        | 1                                                           |
| 80              | Bosnia and Herzegovina | 2003           | Nuts                      | 5                                                           |
| 80              | Bosnia and Herzegovina | 2003           | Offals, Edible            | 6                                                           |
| 80              | Bosnia and Herzegovina | 2003           | Onions                    | 19                                                          |
| 80              | Bosnia and Herzegovina | 2003           | Oranges, Mandarines       | 14                                                          |
| 80              | Bosnia and Herzegovina | 2003           | Peas                      | 2                                                           |
| 80              | Bosnia and Herzegovina | 2003           | Pelagic Fish              | 6                                                           |
| 80              | Bosnia and Herzegovina | 2003           | Pigmeat                   | 11                                                          |
| 80              | Bosnia and Herzegovina | 2003           | Pimento                   | 19                                                          |
| 80              | Bosnia and Herzegovina | 2003           | Pineapples                | 1                                                           |
| 80              | Bosnia and Herzegovina | 2003           | Potatoes                  | 219                                                         |

Dietary calcium and zinc deficiency risks are decreasing but remain prevalent

| FAO countrycode | Country                | Reference year | Food item                 | Gross food supply (g capita <sup>-1</sup> d <sup>-1</sup> ) |
|-----------------|------------------------|----------------|---------------------------|-------------------------------------------------------------|
| 80              | Bosnia and Herzegovina | 2003           | Poultry Meat              | 16                                                          |
| 80              | Bosnia and Herzegovina | 2003           | Pulses, Other             | 2                                                           |
| 80              | Bosnia and Herzegovina | 2003           | Rice (Milled Equivalent)  | 4                                                           |
| 80              | Bosnia and Herzegovina | 2003           | Rye                       | 4                                                           |
| 80              | Bosnia and Herzegovina | 2003           | Soyabean Oil              | 1                                                           |
| 80              | Bosnia and Herzegovina | 2003           | Sugar, Refined Equivalent | 30                                                          |
| 80              | Bosnia and Herzegovina | 2003           | Sunflowerseed Oil         | 15                                                          |
| 80              | Bosnia and Herzegovina | 2003           | Sweeteners, Other         | 8                                                           |
| 80              | Bosnia and Herzegovina | 2003           | Tomatoes                  | 28                                                          |
| 80              | Bosnia and Herzegovina | 2003           | Vegetables, Other         | 429                                                         |
| 80              | Bosnia and Herzegovina | 2003           | Wheat                     | 207                                                         |
| 80              | Bosnia and Herzegovina | 2003           | Wine                      | 6                                                           |
| 80              | Bosnia and Herzegovina | 2004           | Apples                    | 69                                                          |
| 80              | Bosnia and Herzegovina | 2004           | Bananas                   | 29                                                          |
| 80              | Bosnia and Herzegovina | 2004           | Barley                    | 3                                                           |
| 80              | Bosnia and Herzegovina | 2004           | Beans                     | 14                                                          |
| 80              | Bosnia and Herzegovina | 2004           | Beer                      | 124                                                         |
| 80              | Bosnia and Herzegovina | 2004           | Beverages, Alcoholic      | 41                                                          |
| 80              | Bosnia and Herzegovina | 2004           | Bovine Meat               | 17                                                          |
| 80              | Bosnia and Herzegovina | 2004           | Butter, Ghee              | 2                                                           |
| 80              | Bosnia and Herzegovina | 2004           | Cheese                    | 7                                                           |
| 80              | Bosnia and Herzegovina | 2004           | Cocoa Beans               | 6                                                           |
| 80              | Bosnia and Herzegovina | 2004           | Coffee                    | 17                                                          |
| 80              | Bosnia and Herzegovina | 2004           | Cream                     | 1                                                           |
| 80              | Bosnia and Herzegovina | 2004           | Demersal Fish             | 3                                                           |
| 80              | Bosnia and Herzegovina | 2004           | Eggs                      | 11                                                          |
| 80              | Bosnia and Herzegovina | 2004           | Fats, Animals, Raw        | 2                                                           |
| 80              | Bosnia and Herzegovina | 2004           | Freshwater Fish           | 5                                                           |
| 80              | Bosnia and Herzegovina | 2004           | Fruits, Other             | 131                                                         |
| 80              | Bosnia and Herzegovina | 2004           | Grapefruit                | 3                                                           |
| 80              | Bosnia and Herzegovina | 2004           | Grapes                    | 14                                                          |
| 80              | Bosnia and Herzegovina | 2004           | Groundnuts (Shelled Eq)   | 1                                                           |
| 80              | Bosnia and Herzegovina | 2004           | Honey                     | 2                                                           |
| 80              | Bosnia and Herzegovina | 2004           | Lemons, Limes             | 6                                                           |
| 80              | Bosnia and Herzegovina | 2004           | Maize                     | 270                                                         |
| 80              | Bosnia and Herzegovina | 2004           | Marine Fish, Other        | 2                                                           |
| 80              | Bosnia and Herzegovina | 2004           | Milk, Whole               | 389                                                         |
| 80              | Bosnia and Herzegovina | 2004           | Mutton & Goat Meat        | 1                                                           |
| 80              | Bosnia and Herzegovina | 2004           | Nuts                      | 5                                                           |
| 80              | Bosnia and Herzegovina | 2004           | Offals, Edible            | 8                                                           |
| 80              | Bosnia and Herzegovina | 2004           | Onions                    | 27                                                          |
| 80              | Bosnia and Herzegovina | 2004           | Oranges, Mandarines       | 34                                                          |
| 80              | Bosnia and Herzegovina | 2004           | Palm Oil                  | 1                                                           |
| 80              | Bosnia and Herzegovina | 2004           | Peas                      | 3                                                           |
| 80              | Bosnia and Herzegovina | 2004           | Pelagic Fish              | 7                                                           |
| 80              | Bosnia and Herzegovina | 2004           | Pigmeat                   | 14                                                          |
| 80              | Bosnia and Herzegovina | 2004           | Pimento                   | 21                                                          |
| 80              | Bosnia and Herzegovina | 2004           | Pineapples                | 1                                                           |
| 80              | Bosnia and Herzegovina | 2004           | Potatoes                  | 249                                                         |
| 80              | Bosnia and Herzegovina | 2004           | Poultry Meat              | 19                                                          |
| 80              | Bosnia and Herzegovina | 2004           | Pulses, Other             | 3                                                           |
| 80              | Bosnia and Herzegovina | 2004           | Rice (Milled Equivalent)  | 5                                                           |
| 80              | Bosnia and Herzegovina | 2004           | Rye                       | 4                                                           |
| 80              | Bosnia and Herzegovina | 2004           | Soyabean Oil              | 1                                                           |
| 80              | Bosnia and Herzegovina | 2004           | Soyabans                  | 3                                                           |
| 80              | Bosnia and Herzegovina | 2004           | Sugar, Refined Equivalent | 31                                                          |
| 80              | Bosnia and Herzegovina | 2004           | Sunflowerseed Oil         | 14                                                          |
| 80              | Bosnia and Herzegovina | 2004           | Sweeteners, Other         | 9                                                           |
| 80              | Bosnia and Herzegovina | 2004           | Tomatoes                  | 39                                                          |
| 80              | Bosnia and Herzegovina | 2004           | Vegetables, Other         | 467                                                         |
| 80              | Bosnia and Herzegovina | 2004           | Wheat                     | 239                                                         |
| 80              | Bosnia and Herzegovina | 2004           | Wine                      | 6                                                           |
| 80              | Bosnia and Herzegovina | 2005           | Apples                    | 87                                                          |
| 80              | Bosnia and Herzegovina | 2005           | Bananas                   | 29                                                          |
| 80              | Bosnia and Herzegovina | 2005           | Barley                    | 2                                                           |
| 80              | Bosnia and Herzegovina | 2005           | Beans                     | 13                                                          |
| 80              | Bosnia and Herzegovina | 2005           | Beer                      | 130                                                         |
| 80              | Bosnia and Herzegovina | 2005           | Beverages, Alcoholic      | 43                                                          |
| 80              | Bosnia and Herzegovina | 2005           | Bovine Meat               | 22                                                          |
| 80              | Bosnia and Herzegovina | 2005           | Butter, Ghee              | 2                                                           |
| 80              | Bosnia and Herzegovina | 2005           | Cheese                    | 8                                                           |
| 80              | Bosnia and Herzegovina | 2005           | Cocoa Beans               | 6                                                           |
| 80              | Bosnia and Herzegovina | 2005           | Coconuts - Incl Copra     | 1                                                           |
| 80              | Bosnia and Herzegovina | 2005           | Coffee                    | 16                                                          |
| 80              | Bosnia and Herzegovina | 2005           | Cream                     | 1                                                           |
| 80              | Bosnia and Herzegovina | 2005           | Demersal Fish             | 3                                                           |
| 80              | Bosnia and Herzegovina | 2005           | Eggs                      | 14                                                          |
| 80              | Bosnia and Herzegovina | 2005           | Fats, Animals, Raw        | 2                                                           |
| 80              | Bosnia and Herzegovina | 2005           | Freshwater Fish           | 5                                                           |
| 80              | Bosnia and Herzegovina | 2005           | Fruits, Other             | 99                                                          |
| 80              | Bosnia and Herzegovina | 2005           | Grapefruit                | 1                                                           |
| 80              | Bosnia and Herzegovina | 2005           | Grapes                    | 18                                                          |
| 80              | Bosnia and Herzegovina | 2005           | Groundnuts (Shelled Eq)   | 1                                                           |
| 80              | Bosnia and Herzegovina | 2005           | Honey                     | 2                                                           |
| 80              | Bosnia and Herzegovina | 2005           | Lemons, Limes             | 7                                                           |
| 80              | Bosnia and Herzegovina | 2005           | Maize                     | 251                                                         |
| 80              | Bosnia and Herzegovina | 2005           | Marine Fish, Other        | 3                                                           |
| 80              | Bosnia and Herzegovina | 2005           | Milk, Whole               | 410                                                         |
| 80              | Bosnia and Herzegovina | 2005           | Molluscs, Other           | 1                                                           |
| 80              | Bosnia and Herzegovina | 2005           | Mutton & Goat Meat        | 1                                                           |
| 80              | Bosnia and Herzegovina | 2005           | Nuts                      | 5                                                           |
| 80              | Bosnia and Herzegovina | 2005           | Offals, Edible            | 10                                                          |
| 80              | Bosnia and Herzegovina | 2005           | Onions                    | 26                                                          |
| 80              | Bosnia and Herzegovina | 2005           | Oranges, Mandarines       | 34                                                          |
| 80              | Bosnia and Herzegovina | 2005           | Palm Oil                  | 1                                                           |
| 80              | Bosnia and Herzegovina | 2005           | Peas                      | 3                                                           |
| 80              | Bosnia and Herzegovina | 2005           | Pelagic Fish              | 8                                                           |

Dietary calcium and zinc deficiency risks are decreasing but remain prevalent

| FAO countrycode | Country                | Reference year | Food item                 | Gross food supply (g capita <sup>-1</sup> d <sup>-1</sup> ) |
|-----------------|------------------------|----------------|---------------------------|-------------------------------------------------------------|
| 80              | Bosnia and Herzegovina | 2005           | Pigmeat                   | 16                                                          |
| 80              | Bosnia and Herzegovina | 2005           | Pimento                   | 19                                                          |
| 80              | Bosnia and Herzegovina | 2005           | Pineapples                | 1                                                           |
| 80              | Bosnia and Herzegovina | 2005           | Potatoes                  | 243                                                         |
| 80              | Bosnia and Herzegovina | 2005           | Poultry Meat              | 17                                                          |
| 80              | Bosnia and Herzegovina | 2005           | Pulses, Other             | 3                                                           |
| 80              | Bosnia and Herzegovina | 2005           | Rice (Milled Equivalent)  | 5                                                           |
| 80              | Bosnia and Herzegovina | 2005           | Rye                       | 4                                                           |
| 80              | Bosnia and Herzegovina | 2005           | Soyabean Oil              | 1                                                           |
| 80              | Bosnia and Herzegovina | 2005           | Soyabeans                 | 1                                                           |
| 80              | Bosnia and Herzegovina | 2005           | Sugar, Refined Equivalent | 30                                                          |
| 80              | Bosnia and Herzegovina | 2005           | Sunflowerseed Oil         | 16                                                          |
| 80              | Bosnia and Herzegovina | 2005           | Sweeteners, Other         | 12                                                          |
| 80              | Bosnia and Herzegovina | 2005           | Tomatoes                  | 36                                                          |
| 80              | Bosnia and Herzegovina | 2005           | Vegetables, Other         | 478                                                         |
| 80              | Bosnia and Herzegovina | 2005           | Wheat                     | 226                                                         |
| 80              | Bosnia and Herzegovina | 2005           | Wine                      | 7                                                           |
| 80              | Bosnia and Herzegovina | 2006           | Apples                    | 52                                                          |
| 80              | Bosnia and Herzegovina | 2006           | Bananas                   | 24                                                          |
| 80              | Bosnia and Herzegovina | 2006           | Barley                    | 8                                                           |
| 80              | Bosnia and Herzegovina | 2006           | Beans                     | 14                                                          |
| 80              | Bosnia and Herzegovina | 2006           | Beer                      | 159                                                         |
| 80              | Bosnia and Herzegovina | 2006           | Beverages, Alcoholic      | 44                                                          |
| 80              | Bosnia and Herzegovina | 2006           | Bovine Meat               | 21                                                          |
| 80              | Bosnia and Herzegovina | 2006           | Butter, Ghee              | 2                                                           |
| 80              | Bosnia and Herzegovina | 2006           | Cheese                    | 7                                                           |
| 80              | Bosnia and Herzegovina | 2006           | Cocoa Beans               | 6                                                           |
| 80              | Bosnia and Herzegovina | 2006           | Coffee                    | 18                                                          |
| 80              | Bosnia and Herzegovina | 2006           | Cream                     | 1                                                           |
| 80              | Bosnia and Herzegovina | 2006           | Demersal Fish             | 3                                                           |
| 80              | Bosnia and Herzegovina | 2006           | Eggs                      | 12                                                          |
| 80              | Bosnia and Herzegovina | 2006           | Fats, Animals, Raw        | 2                                                           |
| 80              | Bosnia and Herzegovina | 2006           | Freshwater Fish           | 5                                                           |
| 80              | Bosnia and Herzegovina | 2006           | Fruits, Other             | 107                                                         |
| 80              | Bosnia and Herzegovina | 2006           | Grapefruit                | 1                                                           |
| 80              | Bosnia and Herzegovina | 2006           | Grapes                    | 19                                                          |
| 80              | Bosnia and Herzegovina | 2006           | Groundnuts (Shelled Eq)   | 1                                                           |
| 80              | Bosnia and Herzegovina | 2006           | Honey                     | 2                                                           |
| 80              | Bosnia and Herzegovina | 2006           | Lemons, Limes             | 6                                                           |
| 80              | Bosnia and Herzegovina | 2006           | Maize                     | 224                                                         |
| 80              | Bosnia and Herzegovina | 2006           | Marine Fish, Other        | 2                                                           |
| 80              | Bosnia and Herzegovina | 2006           | Milk, Whole               | 422                                                         |
| 80              | Bosnia and Herzegovina | 2006           | Molluscs, Other           | 1                                                           |
| 80              | Bosnia and Herzegovina | 2006           | Mutton & Goat Meat        | 2                                                           |
| 80              | Bosnia and Herzegovina | 2006           | Nuts                      | 5                                                           |
| 80              | Bosnia and Herzegovina | 2006           | Offals, Edible            | 10                                                          |
| 80              | Bosnia and Herzegovina | 2006           | Onions                    | 29                                                          |
| 80              | Bosnia and Herzegovina | 2006           | Oranges, Mandarines       | 28                                                          |
| 80              | Bosnia and Herzegovina | 2006           | Palm Oil                  | 1                                                           |
| 80              | Bosnia and Herzegovina | 2006           | Peas                      | 4                                                           |
| 80              | Bosnia and Herzegovina | 2006           | Pelagic Fish              | 6                                                           |
| 80              | Bosnia and Herzegovina | 2006           | Pigmeat                   | 14                                                          |
| 80              | Bosnia and Herzegovina | 2006           | Pimento                   | 16                                                          |
| 80              | Bosnia and Herzegovina | 2006           | Pineapples                | 1                                                           |
| 80              | Bosnia and Herzegovina | 2006           | Potatoes                  | 215                                                         |
| 80              | Bosnia and Herzegovina | 2006           | Poultry Meat              | 15                                                          |
| 80              | Bosnia and Herzegovina | 2006           | Pulses, Other             | 3                                                           |
| 80              | Bosnia and Herzegovina | 2006           | Rice (Milled Equivalent)  | 5                                                           |
| 80              | Bosnia and Herzegovina | 2006           | Rye                       | 4                                                           |
| 80              | Bosnia and Herzegovina | 2006           | Soyabean Oil              | 2                                                           |
| 80              | Bosnia and Herzegovina | 2006           | Soyabeans                 | 2                                                           |
| 80              | Bosnia and Herzegovina | 2006           | Sugar, Refined Equivalent | 32                                                          |
| 80              | Bosnia and Herzegovina | 2006           | Sunflowerseed Oil         | 16                                                          |
| 80              | Bosnia and Herzegovina | 2006           | Sweeteners, Other         | 15                                                          |
| 80              | Bosnia and Herzegovina | 2006           | Tomatoes                  | 43                                                          |
| 80              | Bosnia and Herzegovina | 2006           | Vegetables, Other         | 468                                                         |
| 80              | Bosnia and Herzegovina | 2006           | Wheat                     | 238                                                         |
| 80              | Bosnia and Herzegovina | 2006           | Wine                      | 7                                                           |
| 80              | Bosnia and Herzegovina | 2007           | Apples                    | 49                                                          |
| 80              | Bosnia and Herzegovina | 2007           | Bananas                   | 24                                                          |
| 80              | Bosnia and Herzegovina | 2007           | Barley                    | 4                                                           |
| 80              | Bosnia and Herzegovina | 2007           | Beans                     | 13                                                          |
| 80              | Bosnia and Herzegovina | 2007           | Beer                      | 166                                                         |
| 80              | Bosnia and Herzegovina | 2007           | Beverages, Alcoholic      | 43                                                          |
| 80              | Bosnia and Herzegovina | 2007           | Bovine Meat               | 21                                                          |
| 80              | Bosnia and Herzegovina | 2007           | Butter, Ghee              | 2                                                           |
| 80              | Bosnia and Herzegovina | 2007           | Cereals, Other            | 4                                                           |
| 80              | Bosnia and Herzegovina | 2007           | Cheese                    | 10                                                          |
| 80              | Bosnia and Herzegovina | 2007           | Cocoa Beans               | 7                                                           |
| 80              | Bosnia and Herzegovina | 2007           | Coffee                    | 18                                                          |
| 80              | Bosnia and Herzegovina | 2007           | Cream                     | 1                                                           |
| 80              | Bosnia and Herzegovina | 2007           | Demersal Fish             | 1                                                           |
| 80              | Bosnia and Herzegovina | 2007           | Eggs                      | 14                                                          |
| 80              | Bosnia and Herzegovina | 2007           | Fats, Animals, Raw        | 1                                                           |
| 80              | Bosnia and Herzegovina | 2007           | Freshwater Fish           | 5                                                           |
| 80              | Bosnia and Herzegovina | 2007           | Fruits, Other             | 114                                                         |
| 80              | Bosnia and Herzegovina | 2007           | Grapefruit                | 1                                                           |
| 80              | Bosnia and Herzegovina | 2007           | Grapes                    | 15                                                          |
| 80              | Bosnia and Herzegovina | 2007           | Groundnuts (Shelled Eq)   | 1                                                           |
| 80              | Bosnia and Herzegovina | 2007           | Honey                     | 2                                                           |
| 80              | Bosnia and Herzegovina | 2007           | Lemons, Limes             | 6                                                           |
| 80              | Bosnia and Herzegovina | 2007           | Maize                     | 222                                                         |
| 80              | Bosnia and Herzegovina | 2007           | Marine Fish, Other        | 3                                                           |
| 80              | Bosnia and Herzegovina | 2007           | Milk, Whole               | 428                                                         |
| 80              | Bosnia and Herzegovina | 2007           | Molluscs, Other           | 1                                                           |
| 80              | Bosnia and Herzegovina | 2007           | Mutton & Goat Meat        | 1                                                           |
| 80              | Bosnia and Herzegovina | 2007           | Nuts                      | 5                                                           |

Dietary calcium and zinc deficiency risks are decreasing but remain prevalent

| FAO countrycode | Country                | Reference year | Food item                 | Gross food supply (g capita <sup>-1</sup> d <sup>-1</sup> ) |
|-----------------|------------------------|----------------|---------------------------|-------------------------------------------------------------|
| 80              | Bosnia and Herzegovina | 2007           | Offals, Edible            | 10                                                          |
| 80              | Bosnia and Herzegovina | 2007           | Olive Oil                 | 1                                                           |
| 80              | Bosnia and Herzegovina | 2007           | Onions                    | 26                                                          |
| 80              | Bosnia and Herzegovina | 2007           | Oranges, Mandarines       | 26                                                          |
| 80              | Bosnia and Herzegovina | 2007           | Palm Oil                  | 1                                                           |
| 80              | Bosnia and Herzegovina | 2007           | Peas                      | 3                                                           |
| 80              | Bosnia and Herzegovina | 2007           | Pelagic Fish              | 7                                                           |
| 80              | Bosnia and Herzegovina | 2007           | Pigmeat                   | 14                                                          |
| 80              | Bosnia and Herzegovina | 2007           | Pimento                   | 14                                                          |
| 80              | Bosnia and Herzegovina | 2007           | Pineapples                | 1                                                           |
| 80              | Bosnia and Herzegovina | 2007           | Potatoes                  | 207                                                         |
| 80              | Bosnia and Herzegovina | 2007           | Poultry Meat              | 20                                                          |
| 80              | Bosnia and Herzegovina | 2007           | Pulses, Other             | 3                                                           |
| 80              | Bosnia and Herzegovina | 2007           | Rice (Milled Equivalent)  | 5                                                           |
| 80              | Bosnia and Herzegovina | 2007           | Rye                       | 4                                                           |
| 80              | Bosnia and Herzegovina | 2007           | Soyabean Oil              | 3                                                           |
| 80              | Bosnia and Herzegovina | 2007           | Soyabeans                 | 2                                                           |
| 80              | Bosnia and Herzegovina | 2007           | Sugar, Refined Equivalent | 34                                                          |
| 80              | Bosnia and Herzegovina | 2007           | Sunflowerseed Oil         | 15                                                          |
| 80              | Bosnia and Herzegovina | 2007           | Sweeteners, Other         | 18                                                          |
| 80              | Bosnia and Herzegovina | 2007           | Tomatoes                  | 36                                                          |
| 80              | Bosnia and Herzegovina | 2007           | Vegetables, Other         | 460                                                         |
| 80              | Bosnia and Herzegovina | 2007           | Wheat                     | 251                                                         |
| 80              | Bosnia and Herzegovina | 2007           | Wine                      | 9                                                           |
| 80              | Bosnia and Herzegovina | 2008           | Apples                    | 48                                                          |
| 80              | Bosnia and Herzegovina | 2008           | Bananas                   | 26                                                          |
| 80              | Bosnia and Herzegovina | 2008           | Barley                    | 2                                                           |
| 80              | Bosnia and Herzegovina | 2008           | Beans                     | 14                                                          |
| 80              | Bosnia and Herzegovina | 2008           | Beer                      | 173                                                         |
| 80              | Bosnia and Herzegovina | 2008           | Beverages, Alcoholic      | 40                                                          |
| 80              | Bosnia and Herzegovina | 2008           | Bovine Meat               | 24                                                          |
| 80              | Bosnia and Herzegovina | 2008           | Butter, Ghee              | 2                                                           |
| 80              | Bosnia and Herzegovina | 2008           | Cereals, Other            | 3                                                           |
| 80              | Bosnia and Herzegovina | 2008           | Cheese                    | 8                                                           |
| 80              | Bosnia and Herzegovina | 2008           | Cocoa Beans               | 7                                                           |
| 80              | Bosnia and Herzegovina | 2008           | Coffee                    | 18                                                          |
| 80              | Bosnia and Herzegovina | 2008           | Cream                     | 2                                                           |
| 80              | Bosnia and Herzegovina | 2008           | Demersal Fish             | 2                                                           |
| 80              | Bosnia and Herzegovina | 2008           | Eggs                      | 17                                                          |
| 80              | Bosnia and Herzegovina | 2008           | Fats, Animals, Raw        | 2                                                           |
| 80              | Bosnia and Herzegovina | 2008           | Freshwater Fish           | 5                                                           |
| 80              | Bosnia and Herzegovina | 2008           | Fruits, Other             | 107                                                         |
| 80              | Bosnia and Herzegovina | 2008           | Grapefruit                | 2                                                           |
| 80              | Bosnia and Herzegovina | 2008           | Grapes                    | 19                                                          |
| 80              | Bosnia and Herzegovina | 2008           | Groundnuts (Shelled Eq)   | 1                                                           |
| 80              | Bosnia and Herzegovina | 2008           | Honey                     | 2                                                           |
| 80              | Bosnia and Herzegovina | 2008           | Lemons, Limes             | 6                                                           |
| 80              | Bosnia and Herzegovina | 2008           | Maize                     | 222                                                         |
| 80              | Bosnia and Herzegovina | 2008           | Marine Fish, Other        | 3                                                           |
| 80              | Bosnia and Herzegovina | 2008           | Milk, Whole               | 425                                                         |
| 80              | Bosnia and Herzegovina | 2008           | Molluscs, Other           | 1                                                           |
| 80              | Bosnia and Herzegovina | 2008           | Mutton & Goat Meat        | 1                                                           |
| 80              | Bosnia and Herzegovina | 2008           | Nuts                      | 5                                                           |
| 80              | Bosnia and Herzegovina | 2008           | Offals, Edible            | 9                                                           |
| 80              | Bosnia and Herzegovina | 2008           | Onions                    | 30                                                          |
| 80              | Bosnia and Herzegovina | 2008           | Oranges, Mandarines       | 30                                                          |
| 80              | Bosnia and Herzegovina | 2008           | Palm Oil                  | 2                                                           |
| 80              | Bosnia and Herzegovina | 2008           | Peas                      | 3                                                           |
| 80              | Bosnia and Herzegovina | 2008           | Pelagic Fish              | 4                                                           |
| 80              | Bosnia and Herzegovina | 2008           | Pigmeat                   | 14                                                          |
| 80              | Bosnia and Herzegovina | 2008           | Pimento                   | 13                                                          |
| 80              | Bosnia and Herzegovina | 2008           | Pineapples                | 1                                                           |
| 80              | Bosnia and Herzegovina | 2008           | Potatoes                  | 209                                                         |
| 80              | Bosnia and Herzegovina | 2008           | Poultry Meat              | 29                                                          |
| 80              | Bosnia and Herzegovina | 2008           | Pulses, Other             | 3                                                           |
| 80              | Bosnia and Herzegovina | 2008           | Rice (Milled Equivalent)  | 5                                                           |
| 80              | Bosnia and Herzegovina | 2008           | Rye                       | 4                                                           |
| 80              | Bosnia and Herzegovina | 2008           | Soyabean Oil              | 4                                                           |
| 80              | Bosnia and Herzegovina | 2008           | Soyabeans                 | 4                                                           |
| 80              | Bosnia and Herzegovina | 2008           | Sugar, Refined Equivalent | 35                                                          |
| 80              | Bosnia and Herzegovina | 2008           | Sunflowerseed Oil         | 14                                                          |
| 80              | Bosnia and Herzegovina | 2008           | Sweeteners, Other         | 20                                                          |
| 80              | Bosnia and Herzegovina | 2008           | Tomatoes                  | 43                                                          |
| 80              | Bosnia and Herzegovina | 2008           | Vegetables, Other         | 477                                                         |
| 80              | Bosnia and Herzegovina | 2008           | Wheat                     | 251                                                         |
| 80              | Bosnia and Herzegovina | 2008           | Wine                      | 8                                                           |
| 80              | Bosnia and Herzegovina | 2009           | Apples                    | 62                                                          |
| 80              | Bosnia and Herzegovina | 2009           | Bananas                   | 24                                                          |
| 80              | Bosnia and Herzegovina | 2009           | Barley                    | 3                                                           |
| 80              | Bosnia and Herzegovina | 2009           | Beans                     | 14                                                          |
| 80              | Bosnia and Herzegovina | 2009           | Beer                      | 160                                                         |
| 80              | Bosnia and Herzegovina | 2009           | Beverages, Alcoholic      | 47                                                          |
| 80              | Bosnia and Herzegovina | 2009           | Bovine Meat               | 24                                                          |
| 80              | Bosnia and Herzegovina | 2009           | Butter, Ghee              | 2                                                           |
| 80              | Bosnia and Herzegovina | 2009           | Cereals, Other            | 2                                                           |
| 80              | Bosnia and Herzegovina | 2009           | Cheese                    | 8                                                           |
| 80              | Bosnia and Herzegovina | 2009           | Cocoa Beans               | 6                                                           |
| 80              | Bosnia and Herzegovina | 2009           | Coffee                    | 16                                                          |
| 80              | Bosnia and Herzegovina | 2009           | Cream                     | 1                                                           |
| 80              | Bosnia and Herzegovina | 2009           | Demersal Fish             | 2                                                           |
| 80              | Bosnia and Herzegovina | 2009           | Eggs                      | 15                                                          |
| 80              | Bosnia and Herzegovina | 2009           | Fats, Animals, Raw        | 3                                                           |
| 80              | Bosnia and Herzegovina | 2009           | Freshwater Fish           | 5                                                           |
| 80              | Bosnia and Herzegovina | 2009           | Fruits, Other             | 123                                                         |
| 80              | Bosnia and Herzegovina | 2009           | Grapefruit                | 1                                                           |
| 80              | Bosnia and Herzegovina | 2009           | Grapes                    | 19                                                          |
| 80              | Bosnia and Herzegovina | 2009           | Groundnuts (Shelled Eq)   | 1                                                           |

Dietary calcium and zinc deficiency risks are decreasing but remain prevalent

| FAO countrycode | Country                | Reference year | Food item                 | Gross food supply (g capita <sup>-1</sup> d <sup>-1</sup> ) |
|-----------------|------------------------|----------------|---------------------------|-------------------------------------------------------------|
| 80              | Bosnia and Herzegovina | 2009           | Honey                     | 3                                                           |
| 80              | Bosnia and Herzegovina | 2009           | Lemons, Limes             | 6                                                           |
| 80              | Bosnia and Herzegovina | 2009           | Maize                     | 224                                                         |
| 80              | Bosnia and Herzegovina | 2009           | Marine Fish, Other        | 3                                                           |
| 80              | Bosnia and Herzegovina | 2009           | Milk, Whole               | 416                                                         |
| 80              | Bosnia and Herzegovina | 2009           | Molluscs, Other           | 1                                                           |
| 80              | Bosnia and Herzegovina | 2009           | Mutton & Goat Meat        | 1                                                           |
| 80              | Bosnia and Herzegovina | 2009           | Nuts                      | 6                                                           |
| 80              | Bosnia and Herzegovina | 2009           | Offals, Edible            | 10                                                          |
| 80              | Bosnia and Herzegovina | 2009           | Onions                    | 29                                                          |
| 80              | Bosnia and Herzegovina | 2009           | Oranges, Mandarines       | 28                                                          |
| 80              | Bosnia and Herzegovina | 2009           | Palm Oil                  | 3                                                           |
| 80              | Bosnia and Herzegovina | 2009           | Peas                      | 2                                                           |
| 80              | Bosnia and Herzegovina | 2009           | Pelagic Fish              | 6                                                           |
| 80              | Bosnia and Herzegovina | 2009           | Pigmeat                   | 18                                                          |
| 80              | Bosnia and Herzegovina | 2009           | Pimento                   | 17                                                          |
| 80              | Bosnia and Herzegovina | 2009           | Pineapples                | 1                                                           |
| 80              | Bosnia and Herzegovina | 2009           | Potatoes                  | 208                                                         |
| 80              | Bosnia and Herzegovina | 2009           | Poultry Meat              | 31                                                          |
| 80              | Bosnia and Herzegovina | 2009           | Pulses, Other             | 3                                                           |
| 80              | Bosnia and Herzegovina | 2009           | Rice (Milled Equivalent)  | 5                                                           |
| 80              | Bosnia and Herzegovina | 2009           | Rye                       | 4                                                           |
| 80              | Bosnia and Herzegovina | 2009           | Soyabean Oil              | 3                                                           |
| 80              | Bosnia and Herzegovina | 2009           | Soyabeans                 | 4                                                           |
| 80              | Bosnia and Herzegovina | 2009           | Sugar, Refined Equivalent | 31                                                          |
| 80              | Bosnia and Herzegovina | 2009           | Sunflowerseed Oil         | 11                                                          |
| 80              | Bosnia and Herzegovina | 2009           | Sweeteners, Other         | 17                                                          |
| 80              | Bosnia and Herzegovina | 2009           | Tomatoes                  | 46                                                          |
| 80              | Bosnia and Herzegovina | 2009           | Vegetables, Other         | 461                                                         |
| 80              | Bosnia and Herzegovina | 2009           | Wheat                     | 248                                                         |
| 80              | Bosnia and Herzegovina | 2009           | Wine                      | 7                                                           |
| 80              | Bosnia and Herzegovina | 2010           | Apples                    | 51                                                          |
| 80              | Bosnia and Herzegovina | 2010           | Bananas                   | 24                                                          |
| 80              | Bosnia and Herzegovina | 2010           | Barley                    | 7                                                           |
| 80              | Bosnia and Herzegovina | 2010           | Beans                     | 12                                                          |
| 80              | Bosnia and Herzegovina | 2010           | Beer                      | 153                                                         |
| 80              | Bosnia and Herzegovina | 2010           | Beverages, Alcoholic      | 46                                                          |
| 80              | Bosnia and Herzegovina | 2010           | Bovine Meat               | 25                                                          |
| 80              | Bosnia and Herzegovina | 2010           | Butter, Ghee              | 2                                                           |
| 80              | Bosnia and Herzegovina | 2010           | Cereals, Other            | 2                                                           |
| 80              | Bosnia and Herzegovina | 2010           | Cheese                    | 8                                                           |
| 80              | Bosnia and Herzegovina | 2010           | Cocoa Beans               | 7                                                           |
| 80              | Bosnia and Herzegovina | 2010           | Coffee                    | 15                                                          |
| 80              | Bosnia and Herzegovina | 2010           | Cream                     | 1                                                           |
| 80              | Bosnia and Herzegovina | 2010           | Demersal Fish             | 2                                                           |
| 80              | Bosnia and Herzegovina | 2010           | Eggs                      | 12                                                          |
| 80              | Bosnia and Herzegovina | 2010           | Fats, Animals, Raw        | 3                                                           |
| 80              | Bosnia and Herzegovina | 2010           | Freshwater Fish           | 5                                                           |
| 80              | Bosnia and Herzegovina | 2010           | Fruits, Other             | 115                                                         |
| 80              | Bosnia and Herzegovina | 2010           | Grapefruit                | 2                                                           |
| 80              | Bosnia and Herzegovina | 2010           | Grapes                    | 16                                                          |
| 80              | Bosnia and Herzegovina | 2010           | Groundnuts (Shelled Eq)   | 1                                                           |
| 80              | Bosnia and Herzegovina | 2010           | Honey                     | 3                                                           |
| 80              | Bosnia and Herzegovina | 2010           | Lemons, Limes             | 5                                                           |
| 80              | Bosnia and Herzegovina | 2010           | Maize                     | 220                                                         |
| 80              | Bosnia and Herzegovina | 2010           | Marine Fish, Other        | 2                                                           |
| 80              | Bosnia and Herzegovina | 2010           | Milk, Whole               | 408                                                         |
| 80              | Bosnia and Herzegovina | 2010           | Molluscs, Other           | 1                                                           |
| 80              | Bosnia and Herzegovina | 2010           | Mutton & Goat Meat        | 2                                                           |
| 80              | Bosnia and Herzegovina | 2010           | Nuts                      | 6                                                           |
| 80              | Bosnia and Herzegovina | 2010           | Offals, Edible            | 7                                                           |
| 80              | Bosnia and Herzegovina | 2010           | Olive Oil                 | 1                                                           |
| 80              | Bosnia and Herzegovina | 2010           | Onions                    | 28                                                          |
| 80              | Bosnia and Herzegovina | 2010           | Oranges, Mandarines       | 31                                                          |
| 80              | Bosnia and Herzegovina | 2010           | Palm Oil                  | 2                                                           |
| 80              | Bosnia and Herzegovina | 2010           | Peas                      | 2                                                           |
| 80              | Bosnia and Herzegovina | 2010           | Pelagic Fish              | 5                                                           |
| 80              | Bosnia and Herzegovina | 2010           | Pigmeat                   | 22                                                          |
| 80              | Bosnia and Herzegovina | 2010           | Pimento                   | 19                                                          |
| 80              | Bosnia and Herzegovina | 2010           | Pineapples                | 2                                                           |
| 80              | Bosnia and Herzegovina | 2010           | Potatoes                  | 209                                                         |
| 80              | Bosnia and Herzegovina | 2010           | Poultry Meat              | 33                                                          |
| 80              | Bosnia and Herzegovina | 2010           | Pulses, Other             | 3                                                           |
| 80              | Bosnia and Herzegovina | 2010           | Rice (Milled Equivalent)  | 5                                                           |
| 80              | Bosnia and Herzegovina | 2010           | Rye                       | 4                                                           |
| 80              | Bosnia and Herzegovina | 2010           | Soyabean Oil              | 3                                                           |
| 80              | Bosnia and Herzegovina | 2010           | Soyabeans                 | 2                                                           |
| 80              | Bosnia and Herzegovina | 2010           | Sugar, Refined Equivalent | 34                                                          |
| 80              | Bosnia and Herzegovina | 2010           | Sunflowerseed Oil         | 14                                                          |
| 80              | Bosnia and Herzegovina | 2010           | Sweeteners, Other         | 14                                                          |
| 80              | Bosnia and Herzegovina | 2010           | Tomatoes                  | 41                                                          |
| 80              | Bosnia and Herzegovina | 2010           | Vegetables, Other         | 453                                                         |
| 80              | Bosnia and Herzegovina | 2010           | Wheat                     | 250                                                         |
| 80              | Bosnia and Herzegovina | 2010           | Wine                      | 7                                                           |
| 80              | Bosnia and Herzegovina | 2011           | Apples                    | 48                                                          |
| 80              | Bosnia and Herzegovina | 2011           | Bananas                   | 24                                                          |
| 80              | Bosnia and Herzegovina | 2011           | Barley                    | 7                                                           |
| 80              | Bosnia and Herzegovina | 2011           | Beans                     | 11                                                          |
| 80              | Bosnia and Herzegovina | 2011           | Beer                      | 155                                                         |
| 80              | Bosnia and Herzegovina | 2011           | Beverages, Alcoholic      | 47                                                          |
| 80              | Bosnia and Herzegovina | 2011           | Beverages, Fermented      | 3                                                           |
| 80              | Bosnia and Herzegovina | 2011           | Bovine Meat               | 26                                                          |
| 80              | Bosnia and Herzegovina | 2011           | Butter, Ghee              | 2                                                           |
| 80              | Bosnia and Herzegovina | 2011           | Cereals, Other            | 2                                                           |
| 80              | Bosnia and Herzegovina | 2011           | Cheese                    | 8                                                           |
| 80              | Bosnia and Herzegovina | 2011           | Cocoa Beans               | 7                                                           |
| 80              | Bosnia and Herzegovina | 2011           | Coffee                    | 17                                                          |

Dietary calcium and zinc deficiency risks are decreasing but remain prevalent

| FAO countrycode | Country                | Reference year | Food item                 | Gross food supply (g capita <sup>-1</sup> d <sup>-1</sup> ) |
|-----------------|------------------------|----------------|---------------------------|-------------------------------------------------------------|
| 80              | Bosnia and Herzegovina | 2011           | Cream                     | 2                                                           |
| 80              | Bosnia and Herzegovina | 2011           | Demersal Fish             | 2                                                           |
| 80              | Bosnia and Herzegovina | 2011           | Eggs                      | 10                                                          |
| 80              | Bosnia and Herzegovina | 2011           | Fats, Animals, Raw        | 3                                                           |
| 80              | Bosnia and Herzegovina | 2011           | Freshwater Fish           | 6                                                           |
| 80              | Bosnia and Herzegovina | 2011           | Fruits, Other             | 121                                                         |
| 80              | Bosnia and Herzegovina | 2011           | Grapefruit                | 1                                                           |
| 80              | Bosnia and Herzegovina | 2011           | Grapes                    | 17                                                          |
| 80              | Bosnia and Herzegovina | 2011           | Groundnuts (Shelled Eq)   | 1                                                           |
| 80              | Bosnia and Herzegovina | 2011           | Honey                     | 2                                                           |
| 80              | Bosnia and Herzegovina | 2011           | Lemons, Limes             | 6                                                           |
| 80              | Bosnia and Herzegovina | 2011           | Maize                     | 227                                                         |
| 80              | Bosnia and Herzegovina | 2011           | Marine Fish, Other        | 3                                                           |
| 80              | Bosnia and Herzegovina | 2011           | Milk, Whole               | 404                                                         |
| 80              | Bosnia and Herzegovina | 2011           | Molluscs, Other           | 1                                                           |
| 80              | Bosnia and Herzegovina | 2011           | Mutton & Goat Meat        | 2                                                           |
| 80              | Bosnia and Herzegovina | 2011           | Nuts                      | 5                                                           |
| 80              | Bosnia and Herzegovina | 2011           | Offals, Edible            | 7                                                           |
| 80              | Bosnia and Herzegovina | 2011           | Olive Oil                 | 1                                                           |
| 80              | Bosnia and Herzegovina | 2011           | Onions                    | 29                                                          |
| 80              | Bosnia and Herzegovina | 2011           | Oranges, Mandarines       | 30                                                          |
| 80              | Bosnia and Herzegovina | 2011           | Palm Oil                  | 2                                                           |
| 80              | Bosnia and Herzegovina | 2011           | Peas                      | 2                                                           |
| 80              | Bosnia and Herzegovina | 2011           | Pelagic Fish              | 4                                                           |
| 80              | Bosnia and Herzegovina | 2011           | Pigmeat                   | 25                                                          |
| 80              | Bosnia and Herzegovina | 2011           | Pimento                   | 20                                                          |
| 80              | Bosnia and Herzegovina | 2011           | Pineapples                | 1                                                           |
| 80              | Bosnia and Herzegovina | 2011           | Potatoes                  | 206                                                         |
| 80              | Bosnia and Herzegovina | 2011           | Poultry Meat              | 39                                                          |
| 80              | Bosnia and Herzegovina | 2011           | Pulses, Other             | 3                                                           |
| 80              | Bosnia and Herzegovina | 2011           | Rice (Milled Equivalent)  | 5                                                           |
| 80              | Bosnia and Herzegovina | 2011           | Rye                       | 4                                                           |
| 80              | Bosnia and Herzegovina | 2011           | Soyabean Oil              | 4                                                           |
| 80              | Bosnia and Herzegovina | 2011           | Soyabean                  | 3                                                           |
| 80              | Bosnia and Herzegovina | 2011           | Sugar, Refined Equivalent | 37                                                          |
| 80              | Bosnia and Herzegovina | 2011           | Sunflowerseed Oil         | 14                                                          |
| 80              | Bosnia and Herzegovina | 2011           | Sweeteners, Other         | 13                                                          |
| 80              | Bosnia and Herzegovina | 2011           | Tomatoes                  | 45                                                          |
| 80              | Bosnia and Herzegovina | 2011           | Vegetables, Other         | 442                                                         |
| 80              | Bosnia and Herzegovina | 2011           | Wheat                     | 245                                                         |
| 80              | Bosnia and Herzegovina | 2011           | Wine                      | 5                                                           |
| 20              | Botswana               | 1992           | Apples                    | 8                                                           |
| 20              | Botswana               | 1992           | Bananas                   | 5                                                           |
| 20              | Botswana               | 1992           | Beans                     | 1                                                           |
| 20              | Botswana               | 1992           | Beer                      | 91                                                          |
| 20              | Botswana               | 1992           | Beverages, Alcoholic      | 4                                                           |
| 20              | Botswana               | 1992           | Beverages, Fermented      | 54                                                          |
| 20              | Botswana               | 1992           | Bovine Meat               | 47                                                          |
| 20              | Botswana               | 1992           | Butter, Ghee              | 3                                                           |
| 20              | Botswana               | 1992           | Cereals, Other            | 5                                                           |
| 20              | Botswana               | 1992           | Cheese                    | 7                                                           |
| 20              | Botswana               | 1992           | Citrus, Other             | 2                                                           |
| 20              | Botswana               | 1992           | Cocoa Beans               | 1                                                           |
| 20              | Botswana               | 1992           | Coffee                    | 1                                                           |
| 20              | Botswana               | 1992           | Cottonseed Oil            | 1                                                           |
| 20              | Botswana               | 1992           | Cream                     | 1                                                           |
| 20              | Botswana               | 1992           | Crustaceans               | 1                                                           |
| 20              | Botswana               | 1992           | Eggs                      | 3                                                           |
| 20              | Botswana               | 1992           | Fats, Animals, Raw        | 17                                                          |
| 20              | Botswana               | 1992           | Freshwater Fish           | 2                                                           |
| 20              | Botswana               | 1992           | Fruits, Other             | 64                                                          |
| 20              | Botswana               | 1992           | Grapefruit                | 2                                                           |
| 20              | Botswana               | 1992           | Grapes                    | 5                                                           |
| 20              | Botswana               | 1992           | Maize                     | 98                                                          |
| 20              | Botswana               | 1992           | Marine Fish, Other        | 9                                                           |
| 20              | Botswana               | 1992           | Meat, Other               | 14                                                          |
| 20              | Botswana               | 1992           | Milk, Whole               | 233                                                         |
| 20              | Botswana               | 1992           | Mutton & Goat Meat        | 13                                                          |
| 20              | Botswana               | 1992           | Nuts                      | 1                                                           |
| 20              | Botswana               | 1992           | Offals, Edible            | 12                                                          |
| 20              | Botswana               | 1992           | Oilcrops Oil, Other       | 5                                                           |
| 20              | Botswana               | 1992           | Onions                    | 5                                                           |
| 20              | Botswana               | 1992           | Oranges, Mandarines       | 27                                                          |
| 20              | Botswana               | 1992           | Peas                      | 5                                                           |
| 20              | Botswana               | 1992           | Pelagic Fish              | 1                                                           |
| 20              | Botswana               | 1992           | Pepper                    | 1                                                           |
| 20              | Botswana               | 1992           | Pigmeat                   | 2                                                           |
| 20              | Botswana               | 1992           | Pineapples                | 1                                                           |
| 20              | Botswana               | 1992           | Potatoes                  | 44                                                          |
| 20              | Botswana               | 1992           | Poultry Meat              | 14                                                          |
| 20              | Botswana               | 1992           | Pulses, Other             | 26                                                          |
| 20              | Botswana               | 1992           | Rice (Milled Equivalent)  | 18                                                          |
| 20              | Botswana               | 1992           | Roots, Other              | 119                                                         |
| 20              | Botswana               | 1992           | Sorghum                   | 64                                                          |
| 20              | Botswana               | 1992           | Soyabean Oil              | 2                                                           |
| 20              | Botswana               | 1992           | Soyabean                  | 1                                                           |
| 20              | Botswana               | 1992           | Spices, Other             | 2                                                           |
| 20              | Botswana               | 1992           | Sugar, Refined Equivalent | 49                                                          |
| 20              | Botswana               | 1992           | Sunflowerseed Oil         | 4                                                           |
| 20              | Botswana               | 1992           | Sweeteners, Other         | 27                                                          |
| 20              | Botswana               | 1992           | Tea                       | 4                                                           |
| 20              | Botswana               | 1992           | Tomatoes                  | 7                                                           |
| 20              | Botswana               | 1992           | Vegetables, Other         | 64                                                          |
| 20              | Botswana               | 1992           | Wheat                     | 97                                                          |
| 20              | Botswana               | 1992           | Wine                      | 12                                                          |
| 20              | Botswana               | 1993           | Apples                    | 7                                                           |
| 20              | Botswana               | 1993           | Bananas                   | 5                                                           |



Dietary calcium and zinc deficiency risks are decreasing but remain prevalent

| FAO countrycode | Country  | Reference year | Food item                 | Gross food supply (g capita <sup>-1</sup> d <sup>-1</sup> ) |
|-----------------|----------|----------------|---------------------------|-------------------------------------------------------------|
| 20              | Botswana | 1993           | Beans                     | 1                                                           |
| 20              | Botswana | 1993           | Beer                      | 96                                                          |
| 20              | Botswana | 1993           | Beverages, Alcoholic      | 2                                                           |
| 20              | Botswana | 1993           | Beverages, Fermented      | 55                                                          |
| 20              | Botswana | 1993           | Bovine Meat               | 40                                                          |
| 20              | Botswana | 1993           | Butter, Ghee              | 2                                                           |
| 20              | Botswana | 1993           | Cereals, Other            | 3                                                           |
| 20              | Botswana | 1993           | Cheese                    | 5                                                           |
| 20              | Botswana | 1993           | Citrus, Other             | 1                                                           |
| 20              | Botswana | 1993           | Cocoa Beans               | 1                                                           |
| 20              | Botswana | 1993           | Coffee                    | 3                                                           |
| 20              | Botswana | 1993           | Cottonseed Oil            | 1                                                           |
| 20              | Botswana | 1993           | Cream                     | 1                                                           |
| 20              | Botswana | 1993           | Crustaceans               | 1                                                           |
| 20              | Botswana | 1993           | Eggs                      | 3                                                           |
| 20              | Botswana | 1993           | Fats, Animals, Raw        | 14                                                          |
| 20              | Botswana | 1993           | Freshwater Fish           | 2                                                           |
| 20              | Botswana | 1993           | Fruits, Other             | 88                                                          |
| 20              | Botswana | 1993           | Grapefruit                | 2                                                           |
| 20              | Botswana | 1993           | Grapes                    | 6                                                           |
| 20              | Botswana | 1993           | Groundnuts (Shelled Eq)   | 1                                                           |
| 20              | Botswana | 1993           | Maize                     | 74                                                          |
| 20              | Botswana | 1993           | Marine Fish, Other        | 7                                                           |
| 20              | Botswana | 1993           | Meat, Other               | 13                                                          |
| 20              | Botswana | 1993           | Milk, Whole               | 199                                                         |
| 20              | Botswana | 1993           | Millet                    | 2                                                           |
| 20              | Botswana | 1993           | Mutton & Goat Meat        | 13                                                          |
| 20              | Botswana | 1993           | Nuts                      | 1                                                           |
| 20              | Botswana | 1993           | Offals, Edible            | 13                                                          |
| 20              | Botswana | 1993           | Oilcrops Oil, Other       | 4                                                           |
| 20              | Botswana | 1993           | Onions                    | 6                                                           |
| 20              | Botswana | 1993           | Oranges, Mandarines       | 23                                                          |
| 20              | Botswana | 1993           | Peas                      | 1                                                           |
| 20              | Botswana | 1993           | Pelagic Fish              | 1                                                           |
| 20              | Botswana | 1993           | Pigmeat                   | 2                                                           |
| 20              | Botswana | 1993           | Potatoes                  | 28                                                          |
| 20              | Botswana | 1993           | Poultry Meat              | 14                                                          |
| 20              | Botswana | 1993           | Pulses, Other             | 29                                                          |
| 20              | Botswana | 1993           | Rice (Milled Equivalent)  | 20                                                          |
| 20              | Botswana | 1993           | Roots, Other              | 116                                                         |
| 20              | Botswana | 1993           | Sorghum                   | 63                                                          |
| 20              | Botswana | 1993           | Soyabean Oil              | 2                                                           |
| 20              | Botswana | 1993           | Soybeans                  | 1                                                           |
| 20              | Botswana | 1993           | Spices, Other             | 1                                                           |
| 20              | Botswana | 1993           | Sugar, Refined Equivalent | 51                                                          |
| 20              | Botswana | 1993           | Sunflowerseed Oil         | 3                                                           |
| 20              | Botswana | 1993           | Sweet Potatoes            | 1                                                           |
| 20              | Botswana | 1993           | Sweeteners, Other         | 13                                                          |
| 20              | Botswana | 1993           | Tea                       | 4                                                           |
| 20              | Botswana | 1993           | Tomatoes                  | 8                                                           |
| 20              | Botswana | 1993           | Vegetables, Other         | 74                                                          |
| 20              | Botswana | 1993           | Wheat                     | 132                                                         |
| 20              | Botswana | 1993           | Wine                      | 3                                                           |
| 20              | Botswana | 1994           | Apples                    | 7                                                           |
| 20              | Botswana | 1994           | Bananas                   | 5                                                           |
| 20              | Botswana | 1994           | Beans                     | 1                                                           |
| 20              | Botswana | 1994           | Beer                      | 68                                                          |
| 20              | Botswana | 1994           | Beverages, Alcoholic      | 2                                                           |
| 20              | Botswana | 1994           | Beverages, Fermented      | 68                                                          |
| 20              | Botswana | 1994           | Bovine Meat               | 25                                                          |
| 20              | Botswana | 1994           | Butter, Ghee              | 3                                                           |
| 20              | Botswana | 1994           | Cassava                   | 1                                                           |
| 20              | Botswana | 1994           | Cereals, Other            | 12                                                          |
| 20              | Botswana | 1994           | Cheese                    | 5                                                           |
| 20              | Botswana | 1994           | Citrus, Other             | 1                                                           |
| 20              | Botswana | 1994           | Cocoa Beans               | 2                                                           |
| 20              | Botswana | 1994           | Coffee                    | 3                                                           |
| 20              | Botswana | 1994           | Cottonseed Oil            | 1                                                           |
| 20              | Botswana | 1994           | Crustaceans               | 1                                                           |
| 20              | Botswana | 1994           | Eggs                      | 3                                                           |
| 20              | Botswana | 1994           | Fats, Animals, Raw        | 9                                                           |
| 20              | Botswana | 1994           | Freshwater Fish           | 1                                                           |
| 20              | Botswana | 1994           | Fruits, Other             | 62                                                          |
| 20              | Botswana | 1994           | Grapefruit                | 1                                                           |
| 20              | Botswana | 1994           | Grapes                    | 2                                                           |
| 20              | Botswana | 1994           | Groundnuts (Shelled Eq)   | 1                                                           |
| 20              | Botswana | 1994           | Maize                     | 107                                                         |
| 20              | Botswana | 1994           | Marine Fish, Other        | 6                                                           |
| 20              | Botswana | 1994           | Meat, Other               | 14                                                          |
| 20              | Botswana | 1994           | Milk, Whole               | 231                                                         |
| 20              | Botswana | 1994           | Millet                    | 3                                                           |
| 20              | Botswana | 1994           | Mutton & Goat Meat        | 12                                                          |
| 20              | Botswana | 1994           | Nuts                      | 1                                                           |
| 20              | Botswana | 1994           | Offals, Edible            | 10                                                          |
| 20              | Botswana | 1994           | Oilcrops Oil, Other       | 2                                                           |
| 20              | Botswana | 1994           | Onions                    | 7                                                           |
| 20              | Botswana | 1994           | Oranges, Mandarines       | 17                                                          |
| 20              | Botswana | 1994           | Peas                      | 5                                                           |
| 20              | Botswana | 1994           | Pelagic Fish              | 1                                                           |
| 20              | Botswana | 1994           | Pigmeat                   | 3                                                           |
| 20              | Botswana | 1994           | Potatoes                  | 32                                                          |
| 20              | Botswana | 1994           | Poultry Meat              | 12                                                          |
| 20              | Botswana | 1994           | Pulses, Other             | 29                                                          |
| 20              | Botswana | 1994           | Rape and Mustard Oil      | 2                                                           |
| 20              | Botswana | 1994           | Rice (Milled Equivalent)  | 17                                                          |
| 20              | Botswana | 1994           | Roots, Other              | 117                                                         |
| 20              | Botswana | 1994           | Sorghum                   | 77                                                          |

Dietary calcium and zinc deficiency risks are decreasing but remain prevalent

| FAO countrycode | Country  | Reference year | Food item                 | Gross food supply (g capita <sup>-1</sup> d <sup>-1</sup> ) |
|-----------------|----------|----------------|---------------------------|-------------------------------------------------------------|
| 20              | Botswana | 1994           | Soyabean Oil              | 2                                                           |
| 20              | Botswana | 1994           | Soyabeans                 | 2                                                           |
| 20              | Botswana | 1994           | Spices, Other             | 2                                                           |
| 20              | Botswana | 1994           | Sugar, Refined Equivalent | 51                                                          |
| 20              | Botswana | 1994           | Sunflowerseed Oil         | 3                                                           |
| 20              | Botswana | 1994           | Sweeteners, Other         | 10                                                          |
| 20              | Botswana | 1994           | Tea                       | 2                                                           |
| 20              | Botswana | 1994           | Tomatoes                  | 8                                                           |
| 20              | Botswana | 1994           | Vegetables, Other         | 65                                                          |
| 20              | Botswana | 1994           | Wheat                     | 132                                                         |
| 20              | Botswana | 1994           | Wine                      | 5                                                           |
| 20              | Botswana | 1995           | Apples                    | 7                                                           |
| 20              | Botswana | 1995           | Bananas                   | 4                                                           |
| 20              | Botswana | 1995           | Beans                     | 5                                                           |
| 20              | Botswana | 1995           | Beer                      | 66                                                          |
| 20              | Botswana | 1995           | Beverages, Alcoholic      | 2                                                           |
| 20              | Botswana | 1995           | Beverages, Fermented      | 79                                                          |
| 20              | Botswana | 1995           | Bovine Meat               | 41                                                          |
| 20              | Botswana | 1995           | Butter, Ghee              | 2                                                           |
| 20              | Botswana | 1995           | Cereals, Other            | 11                                                          |
| 20              | Botswana | 1995           | Cheese                    | 5                                                           |
| 20              | Botswana | 1995           | Citrus, Other             | 1                                                           |
| 20              | Botswana | 1995           | Cocoa Beans               | 2                                                           |
| 20              | Botswana | 1995           | Coffee                    | 2                                                           |
| 20              | Botswana | 1995           | Cottonseed Oil            | 1                                                           |
| 20              | Botswana | 1995           | Crustaceans               | 1                                                           |
| 20              | Botswana | 1995           | Eggs                      | 5                                                           |
| 20              | Botswana | 1995           | Fats, Animals, Raw        | 4                                                           |
| 20              | Botswana | 1995           | Freshwater Fish           | 1                                                           |
| 20              | Botswana | 1995           | Fruits, Other             | 59                                                          |
| 20              | Botswana | 1995           | Grapes                    | 2                                                           |
| 20              | Botswana | 1995           | Groundnuts (Shelled Eq)   | 1                                                           |
| 20              | Botswana | 1995           | Maize                     | 133                                                         |
| 20              | Botswana | 1995           | Marine Fish, Other        | 5                                                           |
| 20              | Botswana | 1995           | Meat, Other               | 11                                                          |
| 20              | Botswana | 1995           | Milk, Whole               | 245                                                         |
| 20              | Botswana | 1995           | Millet                    | 2                                                           |
| 20              | Botswana | 1995           | Mutton & Goat Meat        | 18                                                          |
| 20              | Botswana | 1995           | Nuts                      | 1                                                           |
| 20              | Botswana | 1995           | Offals, Edible            | 12                                                          |
| 20              | Botswana | 1995           | Oilcrops Oil, Other       | 2                                                           |
| 20              | Botswana | 1995           | Onions                    | 6                                                           |
| 20              | Botswana | 1995           | Oranges, Mandarines       | 17                                                          |
| 20              | Botswana | 1995           | Peas                      | 1                                                           |
| 20              | Botswana | 1995           | Pelagic Fish              | 1                                                           |
| 20              | Botswana | 1995           | Pigmeat                   | 2                                                           |
| 20              | Botswana | 1995           | Potatoes                  | 25                                                          |
| 20              | Botswana | 1995           | Poultry Meat              | 15                                                          |
| 20              | Botswana | 1995           | Pulses, Other             | 23                                                          |
| 20              | Botswana | 1995           | Rape and Mustard Oil      | 1                                                           |
| 20              | Botswana | 1995           | Rice (Milled Equivalent)  | 13                                                          |
| 20              | Botswana | 1995           | Roots, Other              | 117                                                         |
| 20              | Botswana | 1995           | Rye                       | 1                                                           |
| 20              | Botswana | 1995           | Sorghum                   | 80                                                          |
| 20              | Botswana | 1995           | Soyabean Oil              | 3                                                           |
| 20              | Botswana | 1995           | Soyabeans                 | 2                                                           |
| 20              | Botswana | 1995           | Spices, Other             | 2                                                           |
| 20              | Botswana | 1995           | Sugar Cane                | 1                                                           |
| 20              | Botswana | 1995           | Sugar, Refined Equivalent | 50                                                          |
| 20              | Botswana | 1995           | Sunflowerseed Oil         | 10                                                          |
| 20              | Botswana | 1995           | Sweeteners, Other         | 8                                                           |
| 20              | Botswana | 1995           | Tea                       | 2                                                           |
| 20              | Botswana | 1995           | Tomatoes                  | 8                                                           |
| 20              | Botswana | 1995           | Vegetables, Other         | 51                                                          |
| 20              | Botswana | 1995           | Wheat                     | 96                                                          |
| 20              | Botswana | 1995           | Wine                      | 3                                                           |
| 20              | Botswana | 1996           | Apples                    | 8                                                           |
| 20              | Botswana | 1996           | Bananas                   | 5                                                           |
| 20              | Botswana | 1996           | Beans                     | 6                                                           |
| 20              | Botswana | 1996           | Beer                      | 75                                                          |
| 20              | Botswana | 1996           | Beverages, Alcoholic      | 2                                                           |
| 20              | Botswana | 1996           | Beverages, Fermented      | 84                                                          |
| 20              | Botswana | 1996           | Bovine Meat               | 43                                                          |
| 20              | Botswana | 1996           | Butter, Ghee              | 2                                                           |
| 20              | Botswana | 1996           | Cereals, Other            | 33                                                          |
| 20              | Botswana | 1996           | Cheese                    | 7                                                           |
| 20              | Botswana | 1996           | Citrus, Other             | 1                                                           |
| 20              | Botswana | 1996           | Cocoa Beans               | 1                                                           |
| 20              | Botswana | 1996           | Coffee                    | 2                                                           |
| 20              | Botswana | 1996           | Cottonseed Oil            | 1                                                           |
| 20              | Botswana | 1996           | Demersal Fish             | 1                                                           |
| 20              | Botswana | 1996           | Eggs                      | 2                                                           |
| 20              | Botswana | 1996           | Fats, Animals, Raw        | 4                                                           |
| 20              | Botswana | 1996           | Freshwater Fish           | 1                                                           |
| 20              | Botswana | 1996           | Fruits, Other             | 54                                                          |
| 20              | Botswana | 1996           | Grapes                    | 3                                                           |
| 20              | Botswana | 1996           | Groundnuts (Shelled Eq)   | 1                                                           |
| 20              | Botswana | 1996           | Maize                     | 105                                                         |
| 20              | Botswana | 1996           | Marine Fish, Other        | 7                                                           |
| 20              | Botswana | 1996           | Meat, Other               | 12                                                          |
| 20              | Botswana | 1996           | Milk, Whole               | 225                                                         |
| 20              | Botswana | 1996           | Millet                    | 3                                                           |
| 20              | Botswana | 1996           | Mutton & Goat Meat        | 14                                                          |
| 20              | Botswana | 1996           | Nuts                      | 1                                                           |
| 20              | Botswana | 1996           | Offals, Edible            | 12                                                          |
| 20              | Botswana | 1996           | Oilcrops Oil, Other       | 6                                                           |
| 20              | Botswana | 1996           | Onions                    | 8                                                           |

Dietary calcium and zinc deficiency risks are decreasing but remain prevalent

| FAO countrycode | Country  | Reference year | Food item                 | Gross food supply (g capita <sup>-1</sup> d <sup>-1</sup> ) |
|-----------------|----------|----------------|---------------------------|-------------------------------------------------------------|
| 20              | Botswana | 1996           | Oranges, Mandarines       | 19                                                          |
| 20              | Botswana | 1996           | Peas                      | 4                                                           |
| 20              | Botswana | 1996           | Pigmeat                   | 3                                                           |
| 20              | Botswana | 1996           | Potatoes                  | 28                                                          |
| 20              | Botswana | 1996           | Poultry Meat              | 13                                                          |
| 20              | Botswana | 1996           | Pulses, Other             | 25                                                          |
| 20              | Botswana | 1996           | Rice (Milled Equivalent)  | 19                                                          |
| 20              | Botswana | 1996           | Roots, Other              | 116                                                         |
| 20              | Botswana | 1996           | Sorghum                   | 96                                                          |
| 20              | Botswana | 1996           | Soyabean Oil              | 3                                                           |
| 20              | Botswana | 1996           | Soyabeans                 | 2                                                           |
| 20              | Botswana | 1996           | Spices, Other             | 2                                                           |
| 20              | Botswana | 1996           | Sugar, Refined Equivalent | 52                                                          |
| 20              | Botswana | 1996           | Sunflowerseed Oil         | 10                                                          |
| 20              | Botswana | 1996           | Sweeteners, Other         | 4                                                           |
| 20              | Botswana | 1996           | Tea                       | 3                                                           |
| 20              | Botswana | 1996           | Tomatoes                  | 8                                                           |
| 20              | Botswana | 1996           | Vegetables, Other         | 54                                                          |
| 20              | Botswana | 1996           | Wheat                     | 84                                                          |
| 20              | Botswana | 1996           | Wine                      | 3                                                           |
| 20              | Botswana | 1997           | Apples                    | 8                                                           |
| 20              | Botswana | 1997           | Bananas                   | 7                                                           |
| 20              | Botswana | 1997           | Beans                     | 5                                                           |
| 20              | Botswana | 1997           | Beer                      | 66                                                          |
| 20              | Botswana | 1997           | Beverages, Alcoholic      | 2                                                           |
| 20              | Botswana | 1997           | Beverages, Fermented      | 74                                                          |
| 20              | Botswana | 1997           | Bovine Meat               | 29                                                          |
| 20              | Botswana | 1997           | Butter, Ghee              | 2                                                           |
| 20              | Botswana | 1997           | Cereals, Other            | 23                                                          |
| 20              | Botswana | 1997           | Cheese                    | 9                                                           |
| 20              | Botswana | 1997           | Citrus, Other             | 1                                                           |
| 20              | Botswana | 1997           | Cocoa Beans               | 1                                                           |
| 20              | Botswana | 1997           | Coffee                    | 5                                                           |
| 20              | Botswana | 1997           | Cream                     | 1                                                           |
| 20              | Botswana | 1997           | Crustaceans               | 1                                                           |
| 20              | Botswana | 1997           | Demersal Fish             | 1                                                           |
| 20              | Botswana | 1997           | Eggs                      | 3                                                           |
| 20              | Botswana | 1997           | Fats, Animals, Raw        | 3                                                           |
| 20              | Botswana | 1997           | Freshwater Fish           | 2                                                           |
| 20              | Botswana | 1997           | Fruits, Other             | 60                                                          |
| 20              | Botswana | 1997           | Grapes                    | 1                                                           |
| 20              | Botswana | 1997           | Groundnuts (Shelled Eq)   | 1                                                           |
| 20              | Botswana | 1997           | Maize                     | 108                                                         |
| 20              | Botswana | 1997           | Marine Fish, Other        | 6                                                           |
| 20              | Botswana | 1997           | Meat, Other               | 10                                                          |
| 20              | Botswana | 1997           | Milk, Whole               | 221                                                         |
| 20              | Botswana | 1997           | Millet                    | 3                                                           |
| 20              | Botswana | 1997           | Mutton & Goat Meat        | 16                                                          |
| 20              | Botswana | 1997           | Nuts                      | 1                                                           |
| 20              | Botswana | 1997           | Offals, Edible            | 10                                                          |
| 20              | Botswana | 1997           | Oilcrops Oil, Other       | 7                                                           |
| 20              | Botswana | 1997           | Onions                    | 7                                                           |
| 20              | Botswana | 1997           | Oranges, Mandarines       | 29                                                          |
| 20              | Botswana | 1997           | Pelagic Fish              | 1                                                           |
| 20              | Botswana | 1997           | Pepper                    | 1                                                           |
| 20              | Botswana | 1997           | Pigmeat                   | 4                                                           |
| 20              | Botswana | 1997           | Potatoes                  | 36                                                          |
| 20              | Botswana | 1997           | Poultry Meat              | 15                                                          |
| 20              | Botswana | 1997           | Pulses, Other             | 23                                                          |
| 20              | Botswana | 1997           | Rice (Milled Equivalent)  | 19                                                          |
| 20              | Botswana | 1997           | Roots, Other              | 116                                                         |
| 20              | Botswana | 1997           | Rye                       | 1                                                           |
| 20              | Botswana | 1997           | Sorghum                   | 82                                                          |
| 20              | Botswana | 1997           | Soyabean Oil              | 3                                                           |
| 20              | Botswana | 1997           | Soyabeans                 | 2                                                           |
| 20              | Botswana | 1997           | Spices, Other             | 2                                                           |
| 20              | Botswana | 1997           | Sugar, Refined Equivalent | 53                                                          |
| 20              | Botswana | 1997           | Sunflowerseed Oil         | 10                                                          |
| 20              | Botswana | 1997           | Sweeteners, Other         | 8                                                           |
| 20              | Botswana | 1997           | Tea                       | 4                                                           |
| 20              | Botswana | 1997           | Tomatoes                  | 10                                                          |
| 20              | Botswana | 1997           | Vegetables, Other         | 56                                                          |
| 20              | Botswana | 1997           | Wheat                     | 94                                                          |
| 20              | Botswana | 1997           | Wine                      | 4                                                           |
| 20              | Botswana | 1998           | Apples                    | 8                                                           |
| 20              | Botswana | 1998           | Bananas                   | 8                                                           |
| 20              | Botswana | 1998           | Beans                     | 6                                                           |
| 20              | Botswana | 1998           | Beer                      | 69                                                          |
| 20              | Botswana | 1998           | Beverages, Alcoholic      | 3                                                           |
| 20              | Botswana | 1998           | Beverages, Fermented      | 74                                                          |
| 20              | Botswana | 1998           | Bovine Meat               | 21                                                          |
| 20              | Botswana | 1998           | Butter, Ghee              | 2                                                           |
| 20              | Botswana | 1998           | Cereals, Other            | 11                                                          |
| 20              | Botswana | 1998           | Cheese                    | 7                                                           |
| 20              | Botswana | 1998           | Citrus, Other             | 1                                                           |
| 20              | Botswana | 1998           | Cocoa Beans               | 1                                                           |
| 20              | Botswana | 1998           | Coffee                    | 2                                                           |
| 20              | Botswana | 1998           | Cottonseed Oil            | 1                                                           |
| 20              | Botswana | 1998           | Cream                     | 1                                                           |
| 20              | Botswana | 1998           | Demersal Fish             | 1                                                           |
| 20              | Botswana | 1998           | Eggs                      | 4                                                           |
| 20              | Botswana | 1998           | Fats, Animals, Raw        | 3                                                           |
| 20              | Botswana | 1998           | Freshwater Fish           | 1                                                           |
| 20              | Botswana | 1998           | Fruits, Other             | 61                                                          |
| 20              | Botswana | 1998           | Grapes                    | 1                                                           |
| 20              | Botswana | 1998           | Maize                     | 114                                                         |
| 20              | Botswana | 1998           | Marine Fish, Other        | 4                                                           |

Dietary calcium and zinc deficiency risks are decreasing but remain prevalent

| FAO countrycode | Country  | Reference year | Food item                 | Gross food supply (g capita <sup>-1</sup> d <sup>-1</sup> ) |
|-----------------|----------|----------------|---------------------------|-------------------------------------------------------------|
| 20              | Botswana | 1998           | Meat, Other               | 11                                                          |
| 20              | Botswana | 1998           | Milk, Whole               | 231                                                         |
| 20              | Botswana | 1998           | Millet                    | 3                                                           |
| 20              | Botswana | 1998           | Mutton & Goat Meat        | 14                                                          |
| 20              | Botswana | 1998           | Nuts                      | 1                                                           |
| 20              | Botswana | 1998           | Offals, Edible            | 10                                                          |
| 20              | Botswana | 1998           | Oilcrops Oil, Other       | 6                                                           |
| 20              | Botswana | 1998           | Onions                    | 7                                                           |
| 20              | Botswana | 1998           | Oranges, Mandarines       | 35                                                          |
| 20              | Botswana | 1998           | Peas                      | 1                                                           |
| 20              | Botswana | 1998           | Pelagic Fish              | 1                                                           |
| 20              | Botswana | 1998           | Pepper                    | 1                                                           |
| 20              | Botswana | 1998           | Pigmeat                   | 4                                                           |
| 20              | Botswana | 1998           | Potatoes                  | 32                                                          |
| 20              | Botswana | 1998           | Poultry Meat              | 12                                                          |
| 20              | Botswana | 1998           | Pulses, Other             | 17                                                          |
| 20              | Botswana | 1998           | Rice (Milled Equivalent)  | 18                                                          |
| 20              | Botswana | 1998           | Roots, Other              | 118                                                         |
| 20              | Botswana | 1998           | Rye                       | 2                                                           |
| 20              | Botswana | 1998           | Sorghum                   | 81                                                          |
| 20              | Botswana | 1998           | Soyabean Oil              | 3                                                           |
| 20              | Botswana | 1998           | Soyabeans                 | 1                                                           |
| 20              | Botswana | 1998           | Spices, Other             | 2                                                           |
| 20              | Botswana | 1998           | Sugar, Refined Equivalent | 53                                                          |
| 20              | Botswana | 1998           | Sunflowerseed Oil         | 9                                                           |
| 20              | Botswana | 1998           | Sweeteners, Other         | 8                                                           |
| 20              | Botswana | 1998           | Tea                       | 3                                                           |
| 20              | Botswana | 1998           | Tomatoes                  | 10                                                          |
| 20              | Botswana | 1998           | Vegetables, Other         | 54                                                          |
| 20              | Botswana | 1998           | Wheat                     | 85                                                          |
| 20              | Botswana | 1998           | Wine                      | 3                                                           |
| 20              | Botswana | 1999           | Apples                    | 9                                                           |
| 20              | Botswana | 1999           | Bananas                   | 13                                                          |
| 20              | Botswana | 1999           | Beans                     | 7                                                           |
| 20              | Botswana | 1999           | Beer                      | 68                                                          |
| 20              | Botswana | 1999           | Beverages, Alcoholic      | 2                                                           |
| 20              | Botswana | 1999           | Beverages, Fermented      | 63                                                          |
| 20              | Botswana | 1999           | Bovine Meat               | 12                                                          |
| 20              | Botswana | 1999           | Butter, Ghee              | 2                                                           |
| 20              | Botswana | 1999           | Cereals, Other            | 4                                                           |
| 20              | Botswana | 1999           | Cheese                    | 14                                                          |
| 20              | Botswana | 1999           | Citrus, Other             | 1                                                           |
| 20              | Botswana | 1999           | Cocoa Beans               | 1                                                           |
| 20              | Botswana | 1999           | Coconuts - Incl Copra     | 1                                                           |
| 20              | Botswana | 1999           | Coffee                    | 2                                                           |
| 20              | Botswana | 1999           | Cream                     | 4                                                           |
| 20              | Botswana | 1999           | Crustaceans               | 1                                                           |
| 20              | Botswana | 1999           | Demersal Fish             | 1                                                           |
| 20              | Botswana | 1999           | Eggs                      | 5                                                           |
| 20              | Botswana | 1999           | Fats, Animals, Raw        | 2                                                           |
| 20              | Botswana | 1999           | Fruits, Other             | 112                                                         |
| 20              | Botswana | 1999           | Grapes                    | 1                                                           |
| 20              | Botswana | 1999           | Maize                     | 114                                                         |
| 20              | Botswana | 1999           | Marine Fish, Other        | 2                                                           |
| 20              | Botswana | 1999           | Meat, Other               | 15                                                          |
| 20              | Botswana | 1999           | Milk, Whole               | 210                                                         |
| 20              | Botswana | 1999           | Millet                    | 1                                                           |
| 20              | Botswana | 1999           | Mutton & Goat Meat        | 13                                                          |
| 20              | Botswana | 1999           | Offals, Edible            | 8                                                           |
| 20              | Botswana | 1999           | Oilcrops Oil, Other       | 5                                                           |
| 20              | Botswana | 1999           | Onions                    | 8                                                           |
| 20              | Botswana | 1999           | Oranges, Mandarines       | 29                                                          |
| 20              | Botswana | 1999           | Peas                      | 2                                                           |
| 20              | Botswana | 1999           | Pelagic Fish              | 6                                                           |
| 20              | Botswana | 1999           | Pepper                    | 1                                                           |
| 20              | Botswana | 1999           | Pigmeat                   | 4                                                           |
| 20              | Botswana | 1999           | Potatoes                  | 37                                                          |
| 20              | Botswana | 1999           | Poultry Meat              | 13                                                          |
| 20              | Botswana | 1999           | Pulses, Other             | 24                                                          |
| 20              | Botswana | 1999           | Rice (Milled Equivalent)  | 20                                                          |
| 20              | Botswana | 1999           | Roots, Other              | 118                                                         |
| 20              | Botswana | 1999           | Rye                       | 1                                                           |
| 20              | Botswana | 1999           | Sorghum                   | 65                                                          |
| 20              | Botswana | 1999           | Soyabean Oil              | 4                                                           |
| 20              | Botswana | 1999           | Soyabeans                 | 2                                                           |
| 20              | Botswana | 1999           | Spices, Other             | 2                                                           |
| 20              | Botswana | 1999           | Sugar, Refined Equivalent | 54                                                          |
| 20              | Botswana | 1999           | Sunflowerseed Oil         | 12                                                          |
| 20              | Botswana | 1999           | Sweeteners, Other         | 8                                                           |
| 20              | Botswana | 1999           | Tea                       | 2                                                           |
| 20              | Botswana | 1999           | Tomatoes                  | 10                                                          |
| 20              | Botswana | 1999           | Vegetables, Other         | 55                                                          |
| 20              | Botswana | 1999           | Wheat                     | 95                                                          |
| 20              | Botswana | 1999           | Wine                      | 4                                                           |
| 20              | Botswana | 2000           | Apples                    | 27                                                          |
| 20              | Botswana | 2000           | Bananas                   | 18                                                          |
| 20              | Botswana | 2000           | Beans                     | 7                                                           |
| 20              | Botswana | 2000           | Beer                      | 67                                                          |
| 20              | Botswana | 2000           | Beverages, Alcoholic      | 2                                                           |
| 20              | Botswana | 2000           | Beverages, Fermented      | 70                                                          |
| 20              | Botswana | 2000           | Bovine Meat               | 13                                                          |
| 20              | Botswana | 2000           | Butter, Ghee              | 2                                                           |
| 20              | Botswana | 2000           | Cereals, Other            | 3                                                           |
| 20              | Botswana | 2000           | Cheese                    | 10                                                          |
| 20              | Botswana | 2000           | Citrus, Other             | 1                                                           |
| 20              | Botswana | 2000           | Cocoa Beans               | 1                                                           |
| 20              | Botswana | 2000           | Coconuts - Incl Copra     | 1                                                           |

Dietary calcium and zinc deficiency risks are decreasing but remain prevalent

| FAO countrycode | Country  | Reference year | Food item                 | Gross food supply (g capita <sup>-1</sup> d <sup>-1</sup> ) |
|-----------------|----------|----------------|---------------------------|-------------------------------------------------------------|
| 20              | Botswana | 2000           | Coffee                    | 2                                                           |
| 20              | Botswana | 2000           | Cottonseed Oil            | 2                                                           |
| 20              | Botswana | 2000           | Cream                     | 5                                                           |
| 20              | Botswana | 2000           | Crustaceans               | 1                                                           |
| 20              | Botswana | 2000           | Eggs                      | 5                                                           |
| 20              | Botswana | 2000           | Fats, Animals, Raw        | 2                                                           |
| 20              | Botswana | 2000           | Freshwater Fish           | 1                                                           |
| 20              | Botswana | 2000           | Fruits, Other             | 72                                                          |
| 20              | Botswana | 2000           | Grapes                    | 2                                                           |
| 20              | Botswana | 2000           | Groundnuts (Shelled Eq)   | 1                                                           |
| 20              | Botswana | 2000           | Maize                     | 110                                                         |
| 20              | Botswana | 2000           | Marine Fish, Other        | 1                                                           |
| 20              | Botswana | 2000           | Meat, Other               | 18                                                          |
| 20              | Botswana | 2000           | Milk, Whole               | 268                                                         |
| 20              | Botswana | 2000           | Millet                    | 1                                                           |
| 20              | Botswana | 2000           | Molluscs, Other           | 1                                                           |
| 20              | Botswana | 2000           | Mutton & Goat Meat        | 12                                                          |
| 20              | Botswana | 2000           | Nuts                      | 1                                                           |
| 20              | Botswana | 2000           | Offals, Edible            | 8                                                           |
| 20              | Botswana | 2000           | Oilcrops Oil, Other       | 4                                                           |
| 20              | Botswana | 2000           | Onions                    | 23                                                          |
| 20              | Botswana | 2000           | Oranges, Mandarines       | 57                                                          |
| 20              | Botswana | 2000           | Peas                      | 1                                                           |
| 20              | Botswana | 2000           | Pelagic Fish              | 9                                                           |
| 20              | Botswana | 2000           | Pepper                    | 1                                                           |
| 20              | Botswana | 2000           | Pigmeat                   | 6                                                           |
| 20              | Botswana | 2000           | Pineapples                | 1                                                           |
| 20              | Botswana | 2000           | Potatoes                  | 35                                                          |
| 20              | Botswana | 2000           | Poultry Meat              | 15                                                          |
| 20              | Botswana | 2000           | Pulses, Other             | 26                                                          |
| 20              | Botswana | 2000           | Rice (Milled Equivalent)  | 16                                                          |
| 20              | Botswana | 2000           | Roots, Other              | 117                                                         |
| 20              | Botswana | 2000           | Rye                       | 1                                                           |
| 20              | Botswana | 2000           | Sorghum                   | 65                                                          |
| 20              | Botswana | 2000           | Soyabean Oil              | 2                                                           |
| 20              | Botswana | 2000           | Soyabeans                 | 1                                                           |
| 20              | Botswana | 2000           | Spices, Other             | 2                                                           |
| 20              | Botswana | 2000           | Sugar, Refined Equivalent | 50                                                          |
| 20              | Botswana | 2000           | Sunflowerseed Oil         | 9                                                           |
| 20              | Botswana | 2000           | Sweet Potatoes            | 1                                                           |
| 20              | Botswana | 2000           | Sweeteners, Other         | 11                                                          |
| 20              | Botswana | 2000           | Tea                       | 3                                                           |
| 20              | Botswana | 2000           | Tomatoes                  | 37                                                          |
| 20              | Botswana | 2000           | Vegetables, Other         | 65                                                          |
| 20              | Botswana | 2000           | Wheat                     | 88                                                          |
| 20              | Botswana | 2000           | Wine                      | 5                                                           |
| 20              | Botswana | 2001           | Apples                    | 14                                                          |
| 20              | Botswana | 2001           | Bananas                   | 15                                                          |
| 20              | Botswana | 2001           | Beans                     | 7                                                           |
| 20              | Botswana | 2001           | Beer                      | 79                                                          |
| 20              | Botswana | 2001           | Beverages, Alcoholic      | 2                                                           |
| 20              | Botswana | 2001           | Beverages, Fermented      | 73                                                          |
| 20              | Botswana | 2001           | Bovine Meat               | 10                                                          |
| 20              | Botswana | 2001           | Butter, Ghee              | 2                                                           |
| 20              | Botswana | 2001           | Cereals, Other            | 2                                                           |
| 20              | Botswana | 2001           | Cheese                    | 10                                                          |
| 20              | Botswana | 2001           | Citrus, Other             | 1                                                           |
| 20              | Botswana | 2001           | Cocoa Beans               | 1                                                           |
| 20              | Botswana | 2001           | Coconuts - Incl Copra     | 1                                                           |
| 20              | Botswana | 2001           | Coffee                    | 2                                                           |
| 20              | Botswana | 2001           | Cottonseed Oil            | 4                                                           |
| 20              | Botswana | 2001           | Cream                     | 1                                                           |
| 20              | Botswana | 2001           | Crustaceans               | 2                                                           |
| 20              | Botswana | 2001           | Eggs                      | 7                                                           |
| 20              | Botswana | 2001           | Fats, Animals, Raw        | 2                                                           |
| 20              | Botswana | 2001           | Freshwater Fish           | 1                                                           |
| 20              | Botswana | 2001           | Fruits, Other             | 65                                                          |
| 20              | Botswana | 2001           | Grapes                    | 1                                                           |
| 20              | Botswana | 2001           | Groundnuts (Shelled Eq)   | 1                                                           |
| 20              | Botswana | 2001           | Maize                     | 118                                                         |
| 20              | Botswana | 2001           | Marine Fish, Other        | 1                                                           |
| 20              | Botswana | 2001           | Meat, Other               | 18                                                          |
| 20              | Botswana | 2001           | Milk, Whole               | 289                                                         |
| 20              | Botswana | 2001           | Mutton & Goat Meat        | 12                                                          |
| 20              | Botswana | 2001           | Nuts                      | 2                                                           |
| 20              | Botswana | 2001           | Offals, Edible            | 8                                                           |
| 20              | Botswana | 2001           | Oilcrops Oil, Other       | 2                                                           |
| 20              | Botswana | 2001           | Onions                    | 9                                                           |
| 20              | Botswana | 2001           | Oranges, Mandarines       | 30                                                          |
| 20              | Botswana | 2001           | Peas                      | 3                                                           |
| 20              | Botswana | 2001           | Pelagic Fish              | 7                                                           |
| 20              | Botswana | 2001           | Pepper                    | 1                                                           |
| 20              | Botswana | 2001           | Pigmeat                   | 2                                                           |
| 20              | Botswana | 2001           | Potatoes                  | 35                                                          |
| 20              | Botswana | 2001           | Poultry Meat              | 15                                                          |
| 20              | Botswana | 2001           | Pulses, Other             | 28                                                          |
| 20              | Botswana | 2001           | Rice (Milled Equivalent)  | 29                                                          |
| 20              | Botswana | 2001           | Roots, Other              | 124                                                         |
| 20              | Botswana | 2001           | Sorghum                   | 70                                                          |
| 20              | Botswana | 2001           | Soyabean Oil              | 1                                                           |
| 20              | Botswana | 2001           | Soyabeans                 | 3                                                           |
| 20              | Botswana | 2001           | Spices, Other             | 2                                                           |
| 20              | Botswana | 2001           | Sugar, Refined Equivalent | 54                                                          |
| 20              | Botswana | 2001           | Sunflowerseed Oil         | 11                                                          |
| 20              | Botswana | 2001           | Sweet Potatoes            | 1                                                           |
| 20              | Botswana | 2001           | Sweeteners, Other         | 9                                                           |
| 20              | Botswana | 2001           | Tea                       | 2                                                           |

Dietary calcium and zinc deficiency risks are decreasing but remain prevalent

| FAO countrycode | Country  | Reference year | Food item                 | Gross food supply (g capita <sup>-1</sup> d <sup>-1</sup> ) |
|-----------------|----------|----------------|---------------------------|-------------------------------------------------------------|
| 20              | Botswana | 2001           | Tomatoes                  | 12                                                          |
| 20              | Botswana | 2001           | Vegetables, Other         | 73                                                          |
| 20              | Botswana | 2001           | Wheat                     | 85                                                          |
| 20              | Botswana | 2001           | Wine                      | 3                                                           |
| 20              | Botswana | 2002           | Apples                    | 16                                                          |
| 20              | Botswana | 2002           | Bananas                   | 12                                                          |
| 20              | Botswana | 2002           | Beans                     | 6                                                           |
| 20              | Botswana | 2002           | Beer                      | 88                                                          |
| 20              | Botswana | 2002           | Beverages, Alcoholic      | 5                                                           |
| 20              | Botswana | 2002           | Beverages, Fermented      | 68                                                          |
| 20              | Botswana | 2002           | Bovine Meat               | 18                                                          |
| 20              | Botswana | 2002           | Butter, Ghee              | 2                                                           |
| 20              | Botswana | 2002           | Cereals, Other            | 5                                                           |
| 20              | Botswana | 2002           | Cheese                    | 12                                                          |
| 20              | Botswana | 2002           | Citrus, Other             | 3                                                           |
| 20              | Botswana | 2002           | Cocoa Beans               | 1                                                           |
| 20              | Botswana | 2002           | Coconuts - Incl Copra     | 2                                                           |
| 20              | Botswana | 2002           | Coffee                    | 6                                                           |
| 20              | Botswana | 2002           | Cottonseed Oil            | 3                                                           |
| 20              | Botswana | 2002           | Cream                     | 3                                                           |
| 20              | Botswana | 2002           | Crustaceans               | 1                                                           |
| 20              | Botswana | 2002           | Dates                     | 1                                                           |
| 20              | Botswana | 2002           | Eggs                      | 7                                                           |
| 20              | Botswana | 2002           | Fats, Animals, Raw        | 2                                                           |
| 20              | Botswana | 2002           | Freshwater Fish           | 1                                                           |
| 20              | Botswana | 2002           | Fruits, Other             | 113                                                         |
| 20              | Botswana | 2002           | Grapes                    | 3                                                           |
| 20              | Botswana | 2002           | Groundnuts (Shelled Eq)   | 1                                                           |
| 20              | Botswana | 2002           | Maize                     | 94                                                          |
| 20              | Botswana | 2002           | Meat, Other               | 18                                                          |
| 20              | Botswana | 2002           | Milk, Whole               | 226                                                         |
| 20              | Botswana | 2002           | Molluscs, Other           | 1                                                           |
| 20              | Botswana | 2002           | Mutton & Goat Meat        | 11                                                          |
| 20              | Botswana | 2002           | Nuts                      | 3                                                           |
| 20              | Botswana | 2002           | Offals, Edible            | 8                                                           |
| 20              | Botswana | 2002           | Oilcrops Oil, Other       | 2                                                           |
| 20              | Botswana | 2002           | Oilcrops, Other           | 1                                                           |
| 20              | Botswana | 2002           | Onions                    | 9                                                           |
| 20              | Botswana | 2002           | Oranges, Mandarines       | 27                                                          |
| 20              | Botswana | 2002           | Peas                      | 1                                                           |
| 20              | Botswana | 2002           | Pelagic Fish              | 5                                                           |
| 20              | Botswana | 2002           | Pepper                    | 1                                                           |
| 20              | Botswana | 2002           | Pigmeat                   | 2                                                           |
| 20              | Botswana | 2002           | Pineapples                | 2                                                           |
| 20              | Botswana | 2002           | Potatoes                  | 43                                                          |
| 20              | Botswana | 2002           | Poultry Meat              | 14                                                          |
| 20              | Botswana | 2002           | Pulses, Other             | 28                                                          |
| 20              | Botswana | 2002           | Rice (Milled Equivalent)  | 21                                                          |
| 20              | Botswana | 2002           | Roots, Other              | 124                                                         |
| 20              | Botswana | 2002           | Rye                       | 4                                                           |
| 20              | Botswana | 2002           | Sorghum                   | 70                                                          |
| 20              | Botswana | 2002           | Soyabean Oil              | 1                                                           |
| 20              | Botswana | 2002           | Soyabeans                 | 3                                                           |
| 20              | Botswana | 2002           | Spices, Other             | 4                                                           |
| 20              | Botswana | 2002           | Sugar, Refined Equivalent | 48                                                          |
| 20              | Botswana | 2002           | Sunflowerseed Oil         | 9                                                           |
| 20              | Botswana | 2002           | Sweet Potatoes            | 2                                                           |
| 20              | Botswana | 2002           | Sweeteners, Other         | 15                                                          |
| 20              | Botswana | 2002           | Tea                       | 4                                                           |
| 20              | Botswana | 2002           | Tomatoes                  | 13                                                          |
| 20              | Botswana | 2002           | Vegetables, Other         | 94                                                          |
| 20              | Botswana | 2002           | Wheat                     | 90                                                          |
| 20              | Botswana | 2002           | Wine                      | 7                                                           |
| 20              | Botswana | 2003           | Apples                    | 10                                                          |
| 20              | Botswana | 2003           | Bananas                   | 11                                                          |
| 20              | Botswana | 2003           | Beans                     | 6                                                           |
| 20              | Botswana | 2003           | Beer                      | 87                                                          |
| 20              | Botswana | 2003           | Beverages, Alcoholic      | 3                                                           |
| 20              | Botswana | 2003           | Beverages, Fermented      | 66                                                          |
| 20              | Botswana | 2003           | Bovine Meat               | 15                                                          |
| 20              | Botswana | 2003           | Butter, Ghee              | 2                                                           |
| 20              | Botswana | 2003           | Cereals, Other            | 6                                                           |
| 20              | Botswana | 2003           | Cheese                    | 6                                                           |
| 20              | Botswana | 2003           | Citrus, Other             | 1                                                           |
| 20              | Botswana | 2003           | Cocoa Beans               | 1                                                           |
| 20              | Botswana | 2003           | Coconuts - Incl Copra     | 1                                                           |
| 20              | Botswana | 2003           | Coffee                    | 3                                                           |
| 20              | Botswana | 2003           | Cottonseed Oil            | 2                                                           |
| 20              | Botswana | 2003           | Cream                     | 2                                                           |
| 20              | Botswana | 2003           | Eggs                      | 8                                                           |
| 20              | Botswana | 2003           | Fats, Animals, Raw        | 2                                                           |
| 20              | Botswana | 2003           | Fruits, Other             | 71                                                          |
| 20              | Botswana | 2003           | Grapefruit                | 1                                                           |
| 20              | Botswana | 2003           | Grapes                    | 2                                                           |
| 20              | Botswana | 2003           | Groundnuts (Shelled Eq)   | 1                                                           |
| 20              | Botswana | 2003           | Maize                     | 98                                                          |
| 20              | Botswana | 2003           | Meat, Other               | 20                                                          |
| 20              | Botswana | 2003           | Milk, Whole               | 175                                                         |
| 20              | Botswana | 2003           | Mutton & Goat Meat        | 8                                                           |
| 20              | Botswana | 2003           | Nuts                      | 3                                                           |
| 20              | Botswana | 2003           | Offals, Edible            | 7                                                           |
| 20              | Botswana | 2003           | Oilcrops Oil, Other       | 1                                                           |
| 20              | Botswana | 2003           | Onions                    | 7                                                           |
| 20              | Botswana | 2003           | Oranges, Mandarines       | 26                                                          |
| 20              | Botswana | 2003           | Peas                      | 1                                                           |
| 20              | Botswana | 2003           | Pelagic Fish              | 6                                                           |
| 20              | Botswana | 2003           | Pepper                    | 1                                                           |

Dietary calcium and zinc deficiency risks are decreasing but remain prevalent

| FAO countrycode | Country  | Reference year | Food item                 | Gross food supply (g capita <sup>-1</sup> d <sup>-1</sup> ) |
|-----------------|----------|----------------|---------------------------|-------------------------------------------------------------|
| 20              | Botswana | 2003           | Pigmeat                   | 1                                                           |
| 20              | Botswana | 2003           | Potatoes                  | 37                                                          |
| 20              | Botswana | 2003           | Poultry Meat              | 9                                                           |
| 20              | Botswana | 2003           | Pulses, Other             | 31                                                          |
| 20              | Botswana | 2003           | Rice (Milled Equivalent)  | 28                                                          |
| 20              | Botswana | 2003           | Roots, Other              | 111                                                         |
| 20              | Botswana | 2003           | Rye                       | 1                                                           |
| 20              | Botswana | 2003           | Sorghum                   | 69                                                          |
| 20              | Botswana | 2003           | Soyabean Oil              | 2                                                           |
| 20              | Botswana | 2003           | Soyabeans                 | 3                                                           |
| 20              | Botswana | 2003           | Spices, Other             | 2                                                           |
| 20              | Botswana | 2003           | Sugar, Refined Equivalent | 66                                                          |
| 20              | Botswana | 2003           | Sunflowerseed Oil         | 15                                                          |
| 20              | Botswana | 2003           | Sweet Potatoes            | 1                                                           |
| 20              | Botswana | 2003           | Sweeteners, Other         | 9                                                           |
| 20              | Botswana | 2003           | Tea                       | 1                                                           |
| 20              | Botswana | 2003           | Tomatoes                  | 10                                                          |
| 20              | Botswana | 2003           | Vegetables, Other         | 75                                                          |
| 20              | Botswana | 2003           | Wheat                     | 85                                                          |
| 20              | Botswana | 2003           | Wine                      | 6                                                           |
| 20              | Botswana | 2004           | Apples                    | 11                                                          |
| 20              | Botswana | 2004           | Bananas                   | 10                                                          |
| 20              | Botswana | 2004           | Beans                     | 5                                                           |
| 20              | Botswana | 2004           | Beer                      | 84                                                          |
| 20              | Botswana | 2004           | Beverages, Alcoholic      | 4                                                           |
| 20              | Botswana | 2004           | Beverages, Fermented      | 57                                                          |
| 20              | Botswana | 2004           | Bovine Meat               | 30                                                          |
| 20              | Botswana | 2004           | Butter, Ghee              | 2                                                           |
| 20              | Botswana | 2004           | Cereals, Other            | 5                                                           |
| 20              | Botswana | 2004           | Cheese                    | 6                                                           |
| 20              | Botswana | 2004           | Citrus, Other             | 1                                                           |
| 20              | Botswana | 2004           | Cocoa Beans               | 1                                                           |
| 20              | Botswana | 2004           | Coconuts - Incl Copra     | 1                                                           |
| 20              | Botswana | 2004           | Coffee                    | 2                                                           |
| 20              | Botswana | 2004           | Cottonseed Oil            | 2                                                           |
| 20              | Botswana | 2004           | Cream                     | 3                                                           |
| 20              | Botswana | 2004           | Eggs                      | 6                                                           |
| 20              | Botswana | 2004           | Fats, Animals, Raw        | 2                                                           |
| 20              | Botswana | 2004           | Fruits, Other             | 76                                                          |
| 20              | Botswana | 2004           | Grapefruit                | 1                                                           |
| 20              | Botswana | 2004           | Grapes                    | 2                                                           |
| 20              | Botswana | 2004           | Maize                     | 114                                                         |
| 20              | Botswana | 2004           | Meat, Other               | 21                                                          |
| 20              | Botswana | 2004           | Milk, Whole               | 194                                                         |
| 20              | Botswana | 2004           | Mutton & Goat Meat        | 10                                                          |
| 20              | Botswana | 2004           | Nuts                      | 3                                                           |
| 20              | Botswana | 2004           | Offals, Edible            | 8                                                           |
| 20              | Botswana | 2004           | Oilcrops Oil, Other       | 5                                                           |
| 20              | Botswana | 2004           | Onions                    | 7                                                           |
| 20              | Botswana | 2004           | Oranges, Mandarines       | 4                                                           |
| 20              | Botswana | 2004           | Peas                      | 1                                                           |
| 20              | Botswana | 2004           | Pelagic Fish              | 6                                                           |
| 20              | Botswana | 2004           | Pigmeat                   | 1                                                           |
| 20              | Botswana | 2004           | Potatoes                  | 39                                                          |
| 20              | Botswana | 2004           | Poultry Meat              | 10                                                          |
| 20              | Botswana | 2004           | Pulses, Other             | 34                                                          |
| 20              | Botswana | 2004           | Rice (Milled Equivalent)  | 30                                                          |
| 20              | Botswana | 2004           | Roots, Other              | 132                                                         |
| 20              | Botswana | 2004           | Sorghum                   | 57                                                          |
| 20              | Botswana | 2004           | Soyabean Oil              | 1                                                           |
| 20              | Botswana | 2004           | Spices, Other             | 2                                                           |
| 20              | Botswana | 2004           | Sugar, Refined Equivalent | 65                                                          |
| 20              | Botswana | 2004           | Sunflowerseed Oil         | 18                                                          |
| 20              | Botswana | 2004           | Sweet Potatoes            | 1                                                           |
| 20              | Botswana | 2004           | Sweeteners, Other         | 7                                                           |
| 20              | Botswana | 2004           | Tomatoes                  | 11                                                          |
| 20              | Botswana | 2004           | Vegetables, Other         | 54                                                          |
| 20              | Botswana | 2004           | Wheat                     | 83                                                          |
| 20              | Botswana | 2004           | Wine                      | 9                                                           |
| 20              | Botswana | 2005           | Apples                    | 12                                                          |
| 20              | Botswana | 2005           | Bananas                   | 9                                                           |
| 20              | Botswana | 2005           | Beans                     | 4                                                           |
| 20              | Botswana | 2005           | Beer                      | 78                                                          |
| 20              | Botswana | 2005           | Beverages, Alcoholic      | 4                                                           |
| 20              | Botswana | 2005           | Beverages, Fermented      | 64                                                          |
| 20              | Botswana | 2005           | Bovine Meat               | 35                                                          |
| 20              | Botswana | 2005           | Butter, Ghee              | 2                                                           |
| 20              | Botswana | 2005           | Cereals, Other            | 6                                                           |
| 20              | Botswana | 2005           | Cheese                    | 5                                                           |
| 20              | Botswana | 2005           | Cocoa Beans               | 1                                                           |
| 20              | Botswana | 2005           | Coconuts - Incl Copra     | 1                                                           |
| 20              | Botswana | 2005           | Coffee                    | 2                                                           |
| 20              | Botswana | 2005           | Cottonseed Oil            | 2                                                           |
| 20              | Botswana | 2005           | Cream                     | 5                                                           |
| 20              | Botswana | 2005           | Demersal Fish             | 2                                                           |
| 20              | Botswana | 2005           | Eggs                      | 6                                                           |
| 20              | Botswana | 2005           | Fats, Animals, Raw        | 2                                                           |
| 20              | Botswana | 2005           | Fruits, Other             | 81                                                          |
| 20              | Botswana | 2005           | Grapefruit                | 1                                                           |
| 20              | Botswana | 2005           | Grapes                    | 2                                                           |
| 20              | Botswana | 2005           | Maize                     | 104                                                         |
| 20              | Botswana | 2005           | Meat, Other               | 23                                                          |
| 20              | Botswana | 2005           | Milk, Whole               | 197                                                         |
| 20              | Botswana | 2005           | Mutton & Goat Meat        | 11                                                          |
| 20              | Botswana | 2005           | Offals, Edible            | 9                                                           |
| 20              | Botswana | 2005           | Oilcrops Oil, Other       | 8                                                           |
| 20              | Botswana | 2005           | Onions                    | 7                                                           |

Dietary calcium and zinc deficiency risks are decreasing but remain prevalent

| FAO countrycode | Country  | Reference year | Food item                 | Gross food supply (g capita <sup>-1</sup> d <sup>-1</sup> ) |
|-----------------|----------|----------------|---------------------------|-------------------------------------------------------------|
| 20              | Botswana | 2005           | Oranges, Mandarines       | 3                                                           |
| 20              | Botswana | 2005           | Peas                      | 1                                                           |
| 20              | Botswana | 2005           | Pelagic Fish              | 6                                                           |
| 20              | Botswana | 2005           | Pigmeat                   | 1                                                           |
| 20              | Botswana | 2005           | Potatoes                  | 38                                                          |
| 20              | Botswana | 2005           | Poultry Meat              | 8                                                           |
| 20              | Botswana | 2005           | Pulses, Other             | 20                                                          |
| 20              | Botswana | 2005           | Rice (Milled Equivalent)  | 32                                                          |
| 20              | Botswana | 2005           | Roots, Other              | 128                                                         |
| 20              | Botswana | 2005           | Sorghum                   | 63                                                          |
| 20              | Botswana | 2005           | Soyabean Oil              | 2                                                           |
| 20              | Botswana | 2005           | Spices, Other             | 2                                                           |
| 20              | Botswana | 2005           | Sugar, Refined Equivalent | 67                                                          |
| 20              | Botswana | 2005           | Sunflowerseed Oil         | 19                                                          |
| 20              | Botswana | 2005           | Sweeteners, Other         | 6                                                           |
| 20              | Botswana | 2005           | Tomatoes                  | 12                                                          |
| 20              | Botswana | 2005           | Vegetables, Other         | 47                                                          |
| 20              | Botswana | 2005           | Wheat                     | 86                                                          |
| 20              | Botswana | 2005           | Wine                      | 14                                                          |
| 20              | Botswana | 2006           | Apples                    | 12                                                          |
| 20              | Botswana | 2006           | Bananas                   | 9                                                           |
| 20              | Botswana | 2006           | Beans                     | 4                                                           |
| 20              | Botswana | 2006           | Beer                      | 80                                                          |
| 20              | Botswana | 2006           | Beverages, Alcoholic      | 5                                                           |
| 20              | Botswana | 2006           | Beverages, Fermented      | 71                                                          |
| 20              | Botswana | 2006           | Bovine Meat               | 30                                                          |
| 20              | Botswana | 2006           | Butter, Ghee              | 2                                                           |
| 20              | Botswana | 2006           | Cereals, Other            | 5                                                           |
| 20              | Botswana | 2006           | Cheese                    | 4                                                           |
| 20              | Botswana | 2006           | Cocoa Beans               | 1                                                           |
| 20              | Botswana | 2006           | Coconuts - Incl Copra     | 1                                                           |
| 20              | Botswana | 2006           | Coffee                    | 2                                                           |
| 20              | Botswana | 2006           | Cottonseed Oil            | 3                                                           |
| 20              | Botswana | 2006           | Cream                     | 9                                                           |
| 20              | Botswana | 2006           | Demersal Fish             | 1                                                           |
| 20              | Botswana | 2006           | Eggs                      | 6                                                           |
| 20              | Botswana | 2006           | Fats, Animals, Raw        | 2                                                           |
| 20              | Botswana | 2006           | Fruits, Other             | 86                                                          |
| 20              | Botswana | 2006           | Grapes                    | 2                                                           |
| 20              | Botswana | 2006           | Maize                     | 103                                                         |
| 20              | Botswana | 2006           | Meat, Other               | 19                                                          |
| 20              | Botswana | 2006           | Milk, Whole               | 193                                                         |
| 20              | Botswana | 2006           | Millet                    | 1                                                           |
| 20              | Botswana | 2006           | Mutton & Goat Meat        | 11                                                          |
| 20              | Botswana | 2006           | Offals, Edible            | 9                                                           |
| 20              | Botswana | 2006           | Oilcrops Oil, Other       | 2                                                           |
| 20              | Botswana | 2006           | Onions                    | 7                                                           |
| 20              | Botswana | 2006           | Oranges, Mandarines       | 8                                                           |
| 20              | Botswana | 2006           | Palm Oil                  | 1                                                           |
| 20              | Botswana | 2006           | Peas                      | 1                                                           |
| 20              | Botswana | 2006           | Pelagic Fish              | 5                                                           |
| 20              | Botswana | 2006           | Pigmeat                   | 1                                                           |
| 20              | Botswana | 2006           | Potatoes                  | 39                                                          |
| 20              | Botswana | 2006           | Poultry Meat              | 9                                                           |
| 20              | Botswana | 2006           | Pulses, Other             | 10                                                          |
| 20              | Botswana | 2006           | Rice (Milled Equivalent)  | 35                                                          |
| 20              | Botswana | 2006           | Roots, Other              | 119                                                         |
| 20              | Botswana | 2006           | Sorghum                   | 69                                                          |
| 20              | Botswana | 2006           | Spices, Other             | 2                                                           |
| 20              | Botswana | 2006           | Sugar, Refined Equivalent | 68                                                          |
| 20              | Botswana | 2006           | Sunflowerseed Oil         | 20                                                          |
| 20              | Botswana | 2006           | Sweeteners, Other         | 8                                                           |
| 20              | Botswana | 2006           | Tomatoes                  | 15                                                          |
| 20              | Botswana | 2006           | Vegetables, Other         | 50                                                          |
| 20              | Botswana | 2006           | Wheat                     | 95                                                          |
| 20              | Botswana | 2006           | Wine                      | 21                                                          |
| 20              | Botswana | 2007           | Apples                    | 13                                                          |
| 20              | Botswana | 2007           | Bananas                   | 8                                                           |
| 20              | Botswana | 2007           | Beans                     | 4                                                           |
| 20              | Botswana | 2007           | Beer                      | 82                                                          |
| 20              | Botswana | 2007           | Beverages, Alcoholic      | 2                                                           |
| 20              | Botswana | 2007           | Beverages, Fermented      | 68                                                          |
| 20              | Botswana | 2007           | Bovine Meat               | 20                                                          |
| 20              | Botswana | 2007           | Butter, Ghee              | 2                                                           |
| 20              | Botswana | 2007           | Cereals, Other            | 8                                                           |
| 20              | Botswana | 2007           | Cheese                    | 5                                                           |
| 20              | Botswana | 2007           | Citrus, Other             | 1                                                           |
| 20              | Botswana | 2007           | Cocoa Beans               | 1                                                           |
| 20              | Botswana | 2007           | Coffee                    | 1                                                           |
| 20              | Botswana | 2007           | Cottonseed Oil            | 3                                                           |
| 20              | Botswana | 2007           | Cream                     | 12                                                          |
| 20              | Botswana | 2007           | Demersal Fish             | 1                                                           |
| 20              | Botswana | 2007           | Eggs                      | 7                                                           |
| 20              | Botswana | 2007           | Fats, Animals, Raw        | 2                                                           |
| 20              | Botswana | 2007           | Fruits, Other             | 87                                                          |
| 20              | Botswana | 2007           | Grapes                    | 3                                                           |
| 20              | Botswana | 2007           | Groundnuts (Shelled Eq)   | 1                                                           |
| 20              | Botswana | 2007           | Maize                     | 104                                                         |
| 20              | Botswana | 2007           | Marine Fish, Other        | 1                                                           |
| 20              | Botswana | 2007           | Meat, Other               | 26                                                          |
| 20              | Botswana | 2007           | Milk, Whole               | 182                                                         |
| 20              | Botswana | 2007           | Millet                    | 1                                                           |
| 20              | Botswana | 2007           | Mutton & Goat Meat        | 11                                                          |
| 20              | Botswana | 2007           | Nuts                      | 2                                                           |
| 20              | Botswana | 2007           | Offals, Edible            | 9                                                           |
| 20              | Botswana | 2007           | Oilcrops Oil, Other       | 2                                                           |
| 20              | Botswana | 2007           | Onions                    | 7                                                           |



Dietary calcium and zinc deficiency risks are decreasing but remain prevalent

| FAO countrycode | Country  | Reference year | Food item                 | Gross food supply (g capita <sup>-1</sup> d <sup>-1</sup> ) |
|-----------------|----------|----------------|---------------------------|-------------------------------------------------------------|
| 20              | Botswana | 2007           | Oranges, Mandarines       | 24                                                          |
| 20              | Botswana | 2007           | Palm Oil                  | 1                                                           |
| 20              | Botswana | 2007           | Peas                      | 1                                                           |
| 20              | Botswana | 2007           | Pelagic Fish              | 6                                                           |
| 20              | Botswana | 2007           | Pepper                    | 2                                                           |
| 20              | Botswana | 2007           | Pigmeat                   | 1                                                           |
| 20              | Botswana | 2007           | Potatoes                  | 37                                                          |
| 20              | Botswana | 2007           | Poultry Meat              | 10                                                          |
| 20              | Botswana | 2007           | Pulses, Other             | 1                                                           |
| 20              | Botswana | 2007           | Rice (Milled Equivalent)  | 39                                                          |
| 20              | Botswana | 2007           | Roots, Other              | 118                                                         |
| 20              | Botswana | 2007           | Sorghum                   | 65                                                          |
| 20              | Botswana | 2007           | Soyabean Oil              | 1                                                           |
| 20              | Botswana | 2007           | Soyabeans                 | 2                                                           |
| 20              | Botswana | 2007           | Spices, Other             | 2                                                           |
| 20              | Botswana | 2007           | Sugar, Refined Equivalent | 67                                                          |
| 20              | Botswana | 2007           | Sunflowerseed Oil         | 20                                                          |
| 20              | Botswana | 2007           | Sweeteners, Other         | 12                                                          |
| 20              | Botswana | 2007           | Tea                       | 4                                                           |
| 20              | Botswana | 2007           | Tomatoes                  | 17                                                          |
| 20              | Botswana | 2007           | Vegetables, Other         | 78                                                          |
| 20              | Botswana | 2007           | Wheat                     | 85                                                          |
| 20              | Botswana | 2007           | Wine                      | 27                                                          |
| 20              | Botswana | 2008           | Apples                    | 13                                                          |
| 20              | Botswana | 2008           | Bananas                   | 10                                                          |
| 20              | Botswana | 2008           | Beans                     | 7                                                           |
| 20              | Botswana | 2008           | Beer                      | 93                                                          |
| 20              | Botswana | 2008           | Beverages, Alcoholic      | 10                                                          |
| 20              | Botswana | 2008           | Beverages, Fermented      | 78                                                          |
| 20              | Botswana | 2008           | Bovine Meat               | 19                                                          |
| 20              | Botswana | 2008           | Butter, Ghee              | 2                                                           |
| 20              | Botswana | 2008           | Cereals, Other            | 10                                                          |
| 20              | Botswana | 2008           | Cheese                    | 5                                                           |
| 20              | Botswana | 2008           | Citrus, Other             | 2                                                           |
| 20              | Botswana | 2008           | Cocoa Beans               | 1                                                           |
| 20              | Botswana | 2008           | Coffee                    | 3                                                           |
| 20              | Botswana | 2008           | Cottonseed Oil            | 4                                                           |
| 20              | Botswana | 2008           | Cream                     | 3                                                           |
| 20              | Botswana | 2008           | Demersal Fish             | 1                                                           |
| 20              | Botswana | 2008           | Eggs                      | 6                                                           |
| 20              | Botswana | 2008           | Fats, Animals, Raw        | 2                                                           |
| 20              | Botswana | 2008           | Fruits, Other             | 94                                                          |
| 20              | Botswana | 2008           | Grapes                    | 2                                                           |
| 20              | Botswana | 2008           | Groundnuts (Shelled Eq)   | 1                                                           |
| 20              | Botswana | 2008           | Maize                     | 97                                                          |
| 20              | Botswana | 2008           | Marine Fish, Other        | 1                                                           |
| 20              | Botswana | 2008           | Meat, Other               | 30                                                          |
| 20              | Botswana | 2008           | Milk, Whole               | 174                                                         |
| 20              | Botswana | 2008           | Millet                    | 2                                                           |
| 20              | Botswana | 2008           | Mutton & Goat Meat        | 11                                                          |
| 20              | Botswana | 2008           | Nuts                      | 3                                                           |
| 20              | Botswana | 2008           | Offals, Edible            | 9                                                           |
| 20              | Botswana | 2008           | Oilcrops Oil, Other       | 2                                                           |
| 20              | Botswana | 2008           | Onions                    | 6                                                           |
| 20              | Botswana | 2008           | Oranges, Mandarines       | 35                                                          |
| 20              | Botswana | 2008           | Palm Oil                  | 1                                                           |
| 20              | Botswana | 2008           | Peas                      | 1                                                           |
| 20              | Botswana | 2008           | Pelagic Fish              | 6                                                           |
| 20              | Botswana | 2008           | Pepper                    | 3                                                           |
| 20              | Botswana | 2008           | Pigmeat                   | 2                                                           |
| 20              | Botswana | 2008           | Potatoes                  | 38                                                          |
| 20              | Botswana | 2008           | Poultry Meat              | 13                                                          |
| 20              | Botswana | 2008           | Pulses, Other             | 3                                                           |
| 20              | Botswana | 2008           | Rice (Milled Equivalent)  | 36                                                          |
| 20              | Botswana | 2008           | Roots, Other              | 112                                                         |
| 20              | Botswana | 2008           | Sorghum                   | 58                                                          |
| 20              | Botswana | 2008           | Soyabeans                 | 3                                                           |
| 20              | Botswana | 2008           | Spices, Other             | 3                                                           |
| 20              | Botswana | 2008           | Sugar, Refined Equivalent | 65                                                          |
| 20              | Botswana | 2008           | Sunflowerseed Oil         | 17                                                          |
| 20              | Botswana | 2008           | Sweeteners, Other         | 8                                                           |
| 20              | Botswana | 2008           | Tea                       | 3                                                           |
| 20              | Botswana | 2008           | Tomatoes                  | 9                                                           |
| 20              | Botswana | 2008           | Vegetables, Other         | 77                                                          |
| 20              | Botswana | 2008           | Wheat                     | 95                                                          |
| 20              | Botswana | 2008           | Wine                      | 16                                                          |
| 20              | Botswana | 2009           | Apples                    | 14                                                          |
| 20              | Botswana | 2009           | Bananas                   | 11                                                          |
| 20              | Botswana | 2009           | Beans                     | 8                                                           |
| 20              | Botswana | 2009           | Beer                      | 102                                                         |
| 20              | Botswana | 2009           | Beverages, Alcoholic      | 3                                                           |
| 20              | Botswana | 2009           | Beverages, Fermented      | 63                                                          |
| 20              | Botswana | 2009           | Bovine Meat               | 23                                                          |
| 20              | Botswana | 2009           | Butter, Ghee              | 3                                                           |
| 20              | Botswana | 2009           | Cereals, Other            | 5                                                           |
| 20              | Botswana | 2009           | Cheese                    | 5                                                           |
| 20              | Botswana | 2009           | Citrus, Other             | 3                                                           |
| 20              | Botswana | 2009           | Cocoa Beans               | 1                                                           |
| 20              | Botswana | 2009           | Coffee                    | 2                                                           |
| 20              | Botswana | 2009           | Cottonseed Oil            | 2                                                           |
| 20              | Botswana | 2009           | Cream                     | 2                                                           |
| 20              | Botswana | 2009           | Demersal Fish             | 3                                                           |
| 20              | Botswana | 2009           | Eggs                      | 5                                                           |
| 20              | Botswana | 2009           | Fats, Animals, Raw        | 2                                                           |
| 20              | Botswana | 2009           | Fruits, Other             | 76                                                          |
| 20              | Botswana | 2009           | Grapes                    | 2                                                           |
| 20              | Botswana | 2009           | Groundnut Oil             | 1                                                           |

Dietary calcium and zinc deficiency risks are decreasing but remain prevalent

| FAO countrycode | Country  | Reference year | Food item                 | Gross food supply (g capita <sup>-1</sup> d <sup>-1</sup> ) |
|-----------------|----------|----------------|---------------------------|-------------------------------------------------------------|
| 20              | Botswana | 2009           | Groundnuts (Shelled Eq)   | 1                                                           |
| 20              | Botswana | 2009           | Maize                     | 104                                                         |
| 20              | Botswana | 2009           | Meat, Other               | 31                                                          |
| 20              | Botswana | 2009           | Milk, Whole               | 187                                                         |
| 20              | Botswana | 2009           | Millet                    | 3                                                           |
| 20              | Botswana | 2009           | Mutton & Goat Meat        | 11                                                          |
| 20              | Botswana | 2009           | Nuts                      | 2                                                           |
| 20              | Botswana | 2009           | Offals, Edible            | 10                                                          |
| 20              | Botswana | 2009           | Oilcrops Oil, Other       | 2                                                           |
| 20              | Botswana | 2009           | Onions                    | 7                                                           |
| 20              | Botswana | 2009           | Oranges, Mandarines       | 24                                                          |
| 20              | Botswana | 2009           | Palm Oil                  | 1                                                           |
| 20              | Botswana | 2009           | Peas                      | 1                                                           |
| 20              | Botswana | 2009           | Pelagic Fish              | 6                                                           |
| 20              | Botswana | 2009           | Pepper                    | 3                                                           |
| 20              | Botswana | 2009           | Pigmeat                   | 2                                                           |
| 20              | Botswana | 2009           | Pineapples                | 1                                                           |
| 20              | Botswana | 2009           | Potatoes                  | 15                                                          |
| 20              | Botswana | 2009           | Poultry Meat              | 13                                                          |
| 20              | Botswana | 2009           | Pulses, Other             | 5                                                           |
| 20              | Botswana | 2009           | Rice (Milled Equivalent)  | 27                                                          |
| 20              | Botswana | 2009           | Roots, Other              | 103                                                         |
| 20              | Botswana | 2009           | Sorghum                   | 60                                                          |
| 20              | Botswana | 2009           | Soyabeans                 | 10                                                          |
| 20              | Botswana | 2009           | Spices, Other             | 3                                                           |
| 20              | Botswana | 2009           | Sugar, Refined Equivalent | 66                                                          |
| 20              | Botswana | 2009           | Sunflowerseed Oil         | 20                                                          |
| 20              | Botswana | 2009           | Sweeteners, Other         | 11                                                          |
| 20              | Botswana | 2009           | Tea                       | 3                                                           |
| 20              | Botswana | 2009           | Tomatoes                  | 8                                                           |
| 20              | Botswana | 2009           | Vegetables, Other         | 69                                                          |
| 20              | Botswana | 2009           | Wheat                     | 96                                                          |
| 20              | Botswana | 2009           | Wine                      | 10                                                          |
| 20              | Botswana | 2010           | Apples                    | 13                                                          |
| 20              | Botswana | 2010           | Bananas                   | 13                                                          |
| 20              | Botswana | 2010           | Beans                     | 9                                                           |
| 20              | Botswana | 2010           | Beer                      | 80                                                          |
| 20              | Botswana | 2010           | Beverages, Alcoholic      | 3                                                           |
| 20              | Botswana | 2010           | Beverages, Fermented      | 73                                                          |
| 20              | Botswana | 2010           | Bovine Meat               | 20                                                          |
| 20              | Botswana | 2010           | Butter, Ghee              | 2                                                           |
| 20              | Botswana | 2010           | Cereals, Other            | 16                                                          |
| 20              | Botswana | 2010           | Cheese                    | 6                                                           |
| 20              | Botswana | 2010           | Citrus, Other             | 2                                                           |
| 20              | Botswana | 2010           | Cocoa Beans               | 1                                                           |
| 20              | Botswana | 2010           | Coffee                    | 2                                                           |
| 20              | Botswana | 2010           | Cottonseed Oil            | 3                                                           |
| 20              | Botswana | 2010           | Cream                     | 1                                                           |
| 20              | Botswana | 2010           | Demersal Fish             | 1                                                           |
| 20              | Botswana | 2010           | Eggs                      | 6                                                           |
| 20              | Botswana | 2010           | Fats, Animals, Raw        | 3                                                           |
| 20              | Botswana | 2010           | Fruits, Other             | 81                                                          |
| 20              | Botswana | 2010           | Grapefruit                | 1                                                           |
| 20              | Botswana | 2010           | Grapes                    | 2                                                           |
| 20              | Botswana | 2010           | Groundnut Oil             | 1                                                           |
| 20              | Botswana | 2010           | Groundnuts (Shelled Eq)   | 1                                                           |
| 20              | Botswana | 2010           | Maize                     | 95                                                          |
| 20              | Botswana | 2010           | Marine Fish, Other        | 1                                                           |
| 20              | Botswana | 2010           | Meat, Other               | 35                                                          |
| 20              | Botswana | 2010           | Milk, Whole               | 184                                                         |
| 20              | Botswana | 2010           | Millet                    | 4                                                           |
| 20              | Botswana | 2010           | Mutton & Goat Meat        | 11                                                          |
| 20              | Botswana | 2010           | Nuts                      | 2                                                           |
| 20              | Botswana | 2010           | Offals, Edible            | 11                                                          |
| 20              | Botswana | 2010           | Oilcrops Oil, Other       | 1                                                           |
| 20              | Botswana | 2010           | Onions                    | 7                                                           |
| 20              | Botswana | 2010           | Oranges, Mandarines       | 27                                                          |
| 20              | Botswana | 2010           | Palm Oil                  | 1                                                           |
| 20              | Botswana | 2010           | Pelagic Fish              | 8                                                           |
| 20              | Botswana | 2010           | Pepper                    | 3                                                           |
| 20              | Botswana | 2010           | Pigmeat                   | 2                                                           |
| 20              | Botswana | 2010           | Pineapples                | 1                                                           |
| 20              | Botswana | 2010           | Potatoes                  | 25                                                          |
| 20              | Botswana | 2010           | Poultry Meat              | 15                                                          |
| 20              | Botswana | 2010           | Pulses, Other             | 4                                                           |
| 20              | Botswana | 2010           | Rice (Milled Equivalent)  | 30                                                          |
| 20              | Botswana | 2010           | Roots, Other              | 114                                                         |
| 20              | Botswana | 2010           | Sorghum                   | 67                                                          |
| 20              | Botswana | 2010           | Soyabeans                 | 6                                                           |
| 20              | Botswana | 2010           | Spices, Other             | 4                                                           |
| 20              | Botswana | 2010           | Sugar, Refined Equivalent | 65                                                          |
| 20              | Botswana | 2010           | Sunflowerseed Oil         | 18                                                          |
| 20              | Botswana | 2010           | Sweet Potatoes            | 1                                                           |
| 20              | Botswana | 2010           | Sweeteners, Other         | 22                                                          |
| 20              | Botswana | 2010           | Tea                       | 3                                                           |
| 20              | Botswana | 2010           | Tomatoes                  | 7                                                           |
| 20              | Botswana | 2010           | Vegetables, Other         | 90                                                          |
| 20              | Botswana | 2010           | Wheat                     | 98                                                          |
| 20              | Botswana | 2010           | Wine                      | 11                                                          |
| 20              | Botswana | 2011           | Apples                    | 10                                                          |
| 20              | Botswana | 2011           | Bananas                   | 9                                                           |
| 20              | Botswana | 2011           | Beans                     | 9                                                           |
| 20              | Botswana | 2011           | Beer                      | 86                                                          |
| 20              | Botswana | 2011           | Beverages, Alcoholic      | 7                                                           |
| 20              | Botswana | 2011           | Beverages, Fermented      | 79                                                          |
| 20              | Botswana | 2011           | Bovine Meat               | 22                                                          |
| 20              | Botswana | 2011           | Butter, Ghee              | 2                                                           |

Dietary calcium and zinc deficiency risks are decreasing but remain prevalent

| FAO countrycode | Country  | Reference year | Food item                 | Gross food supply (g capita <sup>-1</sup> d <sup>-1</sup> ) |
|-----------------|----------|----------------|---------------------------|-------------------------------------------------------------|
| 20              | Botswana | 2011           | Cereals, Other            | 17                                                          |
| 20              | Botswana | 2011           | Cheese                    | 5                                                           |
| 20              | Botswana | 2011           | Citrus, Other             | 2                                                           |
| 20              | Botswana | 2011           | Cocoa Beans               | 2                                                           |
| 20              | Botswana | 2011           | Coffee                    | 3                                                           |
| 20              | Botswana | 2011           | Cottonseed Oil            | 2                                                           |
| 20              | Botswana | 2011           | Demersal Fish             | 1                                                           |
| 20              | Botswana | 2011           | Eggs                      | 5                                                           |
| 20              | Botswana | 2011           | Fats, Animals, Raw        | 3                                                           |
| 20              | Botswana | 2011           | Freshwater Fish           | 1                                                           |
| 20              | Botswana | 2011           | Fruits, Other             | 80                                                          |
| 20              | Botswana | 2011           | Grapes                    | 2                                                           |
| 20              | Botswana | 2011           | Groundnut Oil             | 2                                                           |
| 20              | Botswana | 2011           | Groundnuts (Shelled Eq)   | 2                                                           |
| 20              | Botswana | 2011           | Maize                     | 98                                                          |
| 20              | Botswana | 2011           | Marine Fish, Other        | 1                                                           |
| 20              | Botswana | 2011           | Meat, Other               | 33                                                          |
| 20              | Botswana | 2011           | Milk, Whole               | 222                                                         |
| 20              | Botswana | 2011           | Millet                    | 2                                                           |
| 20              | Botswana | 2011           | Mutton & Goat Meat        | 11                                                          |
| 20              | Botswana | 2011           | Nuts                      | 1                                                           |
| 20              | Botswana | 2011           | Oats                      | 2                                                           |
| 20              | Botswana | 2011           | Offals, Edible            | 11                                                          |
| 20              | Botswana | 2011           | Oilcrops Oil, Other       | 2                                                           |
| 20              | Botswana | 2011           | Olive Oil                 | 1                                                           |
| 20              | Botswana | 2011           | Onions                    | 6                                                           |
| 20              | Botswana | 2011           | Oranges, Mandarines       | 26                                                          |
| 20              | Botswana | 2011           | Palm Oil                  | 1                                                           |
| 20              | Botswana | 2011           | Pelagic Fish              | 6                                                           |
| 20              | Botswana | 2011           | Pepper                    | 2                                                           |
| 20              | Botswana | 2011           | Pigmeat                   | 2                                                           |
| 20              | Botswana | 2011           | Pineapples                | 1                                                           |
| 20              | Botswana | 2011           | Potatoes                  | 26                                                          |
| 20              | Botswana | 2011           | Poultry Meat              | 14                                                          |
| 20              | Botswana | 2011           | Pulses, Other             | 4                                                           |
| 20              | Botswana | 2011           | Rice (Milled Equivalent)  | 30                                                          |
| 20              | Botswana | 2011           | Roots, Other              | 118                                                         |
| 20              | Botswana | 2011           | Rye                       | 2                                                           |
| 20              | Botswana | 2011           | Sesameseed Oil            | 1                                                           |
| 20              | Botswana | 2011           | Sorghum                   | 66                                                          |
| 20              | Botswana | 2011           | Soyabeans                 | 4                                                           |
| 20              | Botswana | 2011           | Spices, Other             | 4                                                           |
| 20              | Botswana | 2011           | Sugar, Refined Equivalent | 65                                                          |
| 20              | Botswana | 2011           | Sunflowerseed Oil         | 20                                                          |
| 20              | Botswana | 2011           | Sweet Potatoes            | 1                                                           |
| 20              | Botswana | 2011           | Sweeteners, Other         | 11                                                          |
| 20              | Botswana | 2011           | Tea                       | 3                                                           |
| 20              | Botswana | 2011           | Tomatoes                  | 5                                                           |
| 20              | Botswana | 2011           | Vegetables, Other         | 90                                                          |
| 20              | Botswana | 2011           | Wheat                     | 98                                                          |
| 20              | Botswana | 2011           | Wine                      | 9                                                           |
| 21              | Brazil   | 1992           | Apples                    | 10                                                          |
| 21              | Brazil   | 1992           | Bananas                   | 86                                                          |
| 21              | Brazil   | 1992           | Beans                     | 43                                                          |
| 21              | Brazil   | 1992           | Beer                      | 76                                                          |
| 21              | Brazil   | 1992           | Beverages, Alcoholic      | 10                                                          |
| 21              | Brazil   | 1992           | Bovine Meat               | 78                                                          |
| 21              | Brazil   | 1992           | Butter, Ghee              | 1                                                           |
| 21              | Brazil   | 1992           | Cassava                   | 128                                                         |
| 21              | Brazil   | 1992           | Cereals, Other            | 1                                                           |
| 21              | Brazil   | 1992           | Cheese                    | 1                                                           |
| 21              | Brazil   | 1992           | Cocoa Beans               | 1                                                           |
| 21              | Brazil   | 1992           | Coconuts - Incl Copra     | 9                                                           |
| 21              | Brazil   | 1992           | Coffee                    | 3                                                           |
| 21              | Brazil   | 1992           | Cottonseed Oil            | 2                                                           |
| 21              | Brazil   | 1992           | Crustaceans               | 1                                                           |
| 21              | Brazil   | 1992           | Demersal Fish             | 4                                                           |
| 21              | Brazil   | 1992           | Eggs                      | 20                                                          |
| 21              | Brazil   | 1992           | Fats, Animals, Raw        | 5                                                           |
| 21              | Brazil   | 1992           | Freshwater Fish           | 3                                                           |
| 21              | Brazil   | 1992           | Fruits, Other             | 50                                                          |
| 21              | Brazil   | 1992           | Grapes                    | 4                                                           |
| 21              | Brazil   | 1992           | Groundnuts (Shelled Eq)   | 1                                                           |
| 21              | Brazil   | 1992           | Lemons, Limes             | 7                                                           |
| 21              | Brazil   | 1992           | Maize                     | 60                                                          |
| 21              | Brazil   | 1992           | Maize Germ Oil            | 1                                                           |
| 21              | Brazil   | 1992           | Marine Fish, Other        | 2                                                           |
| 21              | Brazil   | 1992           | Milk, Whole               | 239                                                         |
| 21              | Brazil   | 1992           | Mutton & Goat Meat        | 2                                                           |
| 21              | Brazil   | 1992           | Nuts                      | 1                                                           |
| 21              | Brazil   | 1992           | Oats                      | 4                                                           |
| 21              | Brazil   | 1992           | Offals, Edible            | 5                                                           |
| 21              | Brazil   | 1992           | Olives                    | 1                                                           |
| 21              | Brazil   | 1992           | Onions                    | 14                                                          |
| 21              | Brazil   | 1992           | Oranges, Mandarines       | 106                                                         |
| 21              | Brazil   | 1992           | Palm Oil                  | 1                                                           |
| 21              | Brazil   | 1992           | Pelagic Fish              | 2                                                           |
| 21              | Brazil   | 1992           | Pigmeat                   | 22                                                          |
| 21              | Brazil   | 1992           | Pineapples                | 17                                                          |
| 21              | Brazil   | 1992           | Potatoes                  | 35                                                          |
| 21              | Brazil   | 1992           | Poultry Meat              | 45                                                          |
| 21              | Brazil   | 1992           | Rice (Milled Equivalent)  | 106                                                         |
| 21              | Brazil   | 1992           | Soyabean Oil              | 36                                                          |
| 21              | Brazil   | 1992           | Soyabeans                 | 5                                                           |
| 21              | Brazil   | 1992           | Sugar Cane                | 15                                                          |
| 21              | Brazil   | 1992           | Sugar, Non-Centrifugal    | 4                                                           |
| 21              | Brazil   | 1992           | Sugar, Refined Equivalent | 122                                                         |

Dietary calcium and zinc deficiency risks are decreasing but remain prevalent

| FAO countrycode | Country | Reference year | Food item                 | Gross food supply (g capita <sup>-1</sup> d <sup>-1</sup> ) |
|-----------------|---------|----------------|---------------------------|-------------------------------------------------------------|
| 21              | Brazil  | 1992           | Sweet Potatoes            | 4                                                           |
| 21              | Brazil  | 1992           | Tea                       | 2                                                           |
| 21              | Brazil  | 1992           | Tomatoes                  | 35                                                          |
| 21              | Brazil  | 1992           | Vegetables, Other         | 40                                                          |
| 21              | Brazil  | 1992           | Wheat                     | 123                                                         |
| 21              | Brazil  | 1992           | Wine                      | 6                                                           |
| 21              | Brazil  | 1992           | Yams                      | 2                                                           |
| 21              | Brazil  | 1993           | Apples                    | 11                                                          |
| 21              | Brazil  | 1993           | Bananas                   | 85                                                          |
| 21              | Brazil  | 1993           | Beans                     | 46                                                          |
| 21              | Brazil  | 1993           | Beer                      | 78                                                          |
| 21              | Brazil  | 1993           | Beverages, Alcoholic      | 10                                                          |
| 21              | Brazil  | 1993           | Bovine Meat               | 77                                                          |
| 21              | Brazil  | 1993           | Butter, Ghee              | 1                                                           |
| 21              | Brazil  | 1993           | Cassava                   | 127                                                         |
| 21              | Brazil  | 1993           | Cereals, Other            | 1                                                           |
| 21              | Brazil  | 1993           | Cheese                    | 1                                                           |
| 21              | Brazil  | 1993           | Cocoa Beans               | 1                                                           |
| 21              | Brazil  | 1993           | Coconuts - Incl Copra     | 9                                                           |
| 21              | Brazil  | 1993           | Coffee                    | 3                                                           |
| 21              | Brazil  | 1993           | Cottonseed Oil            | 2                                                           |
| 21              | Brazil  | 1993           | Crustaceans               | 1                                                           |
| 21              | Brazil  | 1993           | Demersal Fish             | 5                                                           |
| 21              | Brazil  | 1993           | Eggs                      | 20                                                          |
| 21              | Brazil  | 1993           | Fats, Animals, Raw        | 5                                                           |
| 21              | Brazil  | 1993           | Freshwater Fish           | 3                                                           |
| 21              | Brazil  | 1993           | Fruits, Other             | 52                                                          |
| 21              | Brazil  | 1993           | Grapes                    | 6                                                           |
| 21              | Brazil  | 1993           | Groundnuts (Shelled Eq)   | 1                                                           |
| 21              | Brazil  | 1993           | Lemons, Limes             | 6                                                           |
| 21              | Brazil  | 1993           | Maize                     | 60                                                          |
| 21              | Brazil  | 1993           | Maize Germ Oil            | 1                                                           |
| 21              | Brazil  | 1993           | Marine Fish, Other        | 3                                                           |
| 21              | Brazil  | 1993           | Milk, Whole               | 232                                                         |
| 21              | Brazil  | 1993           | Mutton & Goat Meat        | 2                                                           |
| 21              | Brazil  | 1993           | Nuts                      | 1                                                           |
| 21              | Brazil  | 1993           | Oats                      | 4                                                           |
| 21              | Brazil  | 1993           | Offals, Edible            | 5                                                           |
| 21              | Brazil  | 1993           | Olives                    | 1                                                           |
| 21              | Brazil  | 1993           | Onions                    | 15                                                          |
| 21              | Brazil  | 1993           | Oranges, Mandarines       | 49                                                          |
| 21              | Brazil  | 1993           | Palm Oil                  | 2                                                           |
| 21              | Brazil  | 1993           | Pelagic Fish              | 2                                                           |
| 21              | Brazil  | 1993           | Pigmeat                   | 25                                                          |
| 21              | Brazil  | 1993           | Pineapples                | 17                                                          |
| 21              | Brazil  | 1993           | Potatoes                  | 33                                                          |
| 21              | Brazil  | 1993           | Poultry Meat              | 47                                                          |
| 21              | Brazil  | 1993           | Rice (Milled Equivalent)  | 114                                                         |
| 21              | Brazil  | 1993           | Soyabean Oil              | 35                                                          |
| 21              | Brazil  | 1993           | Soyabeans                 | 6                                                           |
| 21              | Brazil  | 1993           | Sugar Cane                | 14                                                          |
| 21              | Brazil  | 1993           | Sugar, Non-Centrifugal    | 4                                                           |
| 21              | Brazil  | 1993           | Sugar, Refined Equivalent | 123                                                         |
| 21              | Brazil  | 1993           | Sweet Potatoes            | 4                                                           |
| 21              | Brazil  | 1993           | Tea                       | 3                                                           |
| 21              | Brazil  | 1993           | Tomatoes                  | 37                                                          |
| 21              | Brazil  | 1993           | Vegetables, Other         | 42                                                          |
| 21              | Brazil  | 1993           | Wheat                     | 119                                                         |
| 21              | Brazil  | 1993           | Wine                      | 4                                                           |
| 21              | Brazil  | 1993           | Yams                      | 2                                                           |
| 21              | Brazil  | 1994           | Apples                    | 12                                                          |
| 21              | Brazil  | 1994           | Bananas                   | 86                                                          |
| 21              | Brazil  | 1994           | Beans                     | 48                                                          |
| 21              | Brazil  | 1994           | Beer                      | 89                                                          |
| 21              | Brazil  | 1994           | Beverages, Alcoholic      | 10                                                          |
| 21              | Brazil  | 1994           | Bovine Meat               | 83                                                          |
| 21              | Brazil  | 1994           | Butter, Ghee              | 1                                                           |
| 21              | Brazil  | 1994           | Cassava                   | 138                                                         |
| 21              | Brazil  | 1994           | Cereals, Other            | 1                                                           |
| 21              | Brazil  | 1994           | Cheese                    | 1                                                           |
| 21              | Brazil  | 1994           | Cocoa Beans               | 2                                                           |
| 21              | Brazil  | 1994           | Coconuts - Incl Copra     | 10                                                          |
| 21              | Brazil  | 1994           | Coffee                    | 3                                                           |
| 21              | Brazil  | 1994           | Cottonseed Oil            | 2                                                           |
| 21              | Brazil  | 1994           | Crustaceans               | 1                                                           |
| 21              | Brazil  | 1994           | Demersal Fish             | 5                                                           |
| 21              | Brazil  | 1994           | Eggs                      | 20                                                          |
| 21              | Brazil  | 1994           | Fats, Animals, Raw        | 5                                                           |
| 21              | Brazil  | 1994           | Freshwater Fish           | 3                                                           |
| 21              | Brazil  | 1994           | Fruits, Other             | 52                                                          |
| 21              | Brazil  | 1994           | Grapefruit                | 1                                                           |
| 21              | Brazil  | 1994           | Grapes                    | 6                                                           |
| 21              | Brazil  | 1994           | Groundnuts (Shelled Eq)   | 1                                                           |
| 21              | Brazil  | 1994           | Lemons, Limes             | 6                                                           |
| 21              | Brazil  | 1994           | Maize                     | 56                                                          |
| 21              | Brazil  | 1994           | Maize Germ Oil            | 1                                                           |
| 21              | Brazil  | 1994           | Marine Fish, Other        | 3                                                           |
| 21              | Brazil  | 1994           | Milk, Whole               | 240                                                         |
| 21              | Brazil  | 1994           | Mutton & Goat Meat        | 2                                                           |
| 21              | Brazil  | 1994           | Nuts                      | 1                                                           |
| 21              | Brazil  | 1994           | Oats                      | 4                                                           |
| 21              | Brazil  | 1994           | Offals, Edible            | 6                                                           |
| 21              | Brazil  | 1994           | Olives                    | 1                                                           |
| 21              | Brazil  | 1994           | Onions                    | 16                                                          |
| 21              | Brazil  | 1994           | Oranges, Mandarines       | 31                                                          |
| 21              | Brazil  | 1994           | Palm Oil                  | 2                                                           |
| 21              | Brazil  | 1994           | Pelagic Fish              | 2                                                           |

Dietary calcium and zinc deficiency risks are decreasing but remain prevalent

| FAO countrycode | Country | Reference year | Food item                 | Gross food supply (g capita <sup>-1</sup> d <sup>-1</sup> ) |
|-----------------|---------|----------------|---------------------------|-------------------------------------------------------------|
| 21              | Brazil  | 1994           | Pigmeat                   | 29                                                          |
| 21              | Brazil  | 1994           | Pineapples                | 20                                                          |
| 21              | Brazil  | 1994           | Potatoes                  | 37                                                          |
| 21              | Brazil  | 1994           | Poultry Meat              | 52                                                          |
| 21              | Brazil  | 1994           | Rice (Milled Equivalent)  | 108                                                         |
| 21              | Brazil  | 1994           | Soyabean Oil              | 33                                                          |
| 21              | Brazil  | 1994           | Soyabeans                 | 6                                                           |
| 21              | Brazil  | 1994           | Sugar Cane                | 15                                                          |
| 21              | Brazil  | 1994           | Sugar, Non-Centrifugal    | 4                                                           |
| 21              | Brazil  | 1994           | Sugar, Refined Equivalent | 126                                                         |
| 21              | Brazil  | 1994           | Sunflowerseed Oil         | 1                                                           |
| 21              | Brazil  | 1994           | Sweet Potatoes            | 5                                                           |
| 21              | Brazil  | 1994           | Tea                       | 3                                                           |
| 21              | Brazil  | 1994           | Tomatoes                  | 42                                                          |
| 21              | Brazil  | 1994           | Vegetables, Other         | 43                                                          |
| 21              | Brazil  | 1994           | Wheat                     | 126                                                         |
| 21              | Brazil  | 1994           | Wine                      | 5                                                           |
| 21              | Brazil  | 1994           | Yams                      | 2                                                           |
| 21              | Brazil  | 1995           | Apples                    | 14                                                          |
| 21              | Brazil  | 1995           | Bananas                   | 83                                                          |
| 21              | Brazil  | 1995           | Beans                     | 36                                                          |
| 21              | Brazil  | 1995           | Beer                      | 116                                                         |
| 21              | Brazil  | 1995           | Beverages, Alcoholic      | 11                                                          |
| 21              | Brazil  | 1995           | Bovine Meat               | 94                                                          |
| 21              | Brazil  | 1995           | Butter, Ghee              | 1                                                           |
| 21              | Brazil  | 1995           | Cassava                   | 142                                                         |
| 21              | Brazil  | 1995           | Cereals, Other            | 1                                                           |
| 21              | Brazil  | 1995           | Cheese                    | 2                                                           |
| 21              | Brazil  | 1995           | Cocoa Beans               | 2                                                           |
| 21              | Brazil  | 1995           | Coconuts - Incl Copra     | 11                                                          |
| 21              | Brazil  | 1995           | Coffee                    | 3                                                           |
| 21              | Brazil  | 1995           | Cottonseed Oil            | 1                                                           |
| 21              | Brazil  | 1995           | Crustaceans               | 1                                                           |
| 21              | Brazil  | 1995           | Demersal Fish             | 7                                                           |
| 21              | Brazil  | 1995           | Eggs                      | 20                                                          |
| 21              | Brazil  | 1995           | Fats, Animals, Raw        | 5                                                           |
| 21              | Brazil  | 1995           | Freshwater Fish           | 4                                                           |
| 21              | Brazil  | 1995           | Fruits, Other             | 57                                                          |
| 21              | Brazil  | 1995           | Grapefruit                | 1                                                           |
| 21              | Brazil  | 1995           | Grapes                    | 8                                                           |
| 21              | Brazil  | 1995           | Groundnuts (Shelled Eq)   | 1                                                           |
| 21              | Brazil  | 1995           | Lemons, Limes             | 6                                                           |
| 21              | Brazil  | 1995           | Maize                     | 52                                                          |
| 21              | Brazil  | 1995           | Maize Germ Oil            | 1                                                           |
| 21              | Brazil  | 1995           | Marine Fish, Other        | 2                                                           |
| 21              | Brazil  | 1995           | Milk, Whole               | 278                                                         |
| 21              | Brazil  | 1995           | Mutton & Goat Meat        | 2                                                           |
| 21              | Brazil  | 1995           | Nuts                      | 1                                                           |
| 21              | Brazil  | 1995           | Oats                      | 3                                                           |
| 21              | Brazil  | 1995           | Offals, Edible            | 6                                                           |
| 21              | Brazil  | 1995           | Olives                    | 1                                                           |
| 21              | Brazil  | 1995           | Onions                    | 14                                                          |
| 21              | Brazil  | 1995           | Oranges, Mandarines       | 107                                                         |
| 21              | Brazil  | 1995           | Palm Oil                  | 1                                                           |
| 21              | Brazil  | 1995           | Pelagic Fish              | 3                                                           |
| 21              | Brazil  | 1995           | Pigmeat                   | 30                                                          |
| 21              | Brazil  | 1995           | Pineapples                | 19                                                          |
| 21              | Brazil  | 1995           | Potatoes                  | 39                                                          |
| 21              | Brazil  | 1995           | Poultry Meat              | 63                                                          |
| 21              | Brazil  | 1995           | Rice (Milled Equivalent)  | 89                                                          |
| 21              | Brazil  | 1995           | Soyabean Oil              | 30                                                          |
| 21              | Brazil  | 1995           | Soyabeans                 | 7                                                           |
| 21              | Brazil  | 1995           | Sugar Cane                | 14                                                          |
| 21              | Brazil  | 1995           | Sugar, Non-Centrifugal    | 4                                                           |
| 21              | Brazil  | 1995           | Sugar, Refined Equivalent | 129                                                         |
| 21              | Brazil  | 1995           | Sunflowerseed Oil         | 1                                                           |
| 21              | Brazil  | 1995           | Sweet Potatoes            | 4                                                           |
| 21              | Brazil  | 1995           | Tea                       | 4                                                           |
| 21              | Brazil  | 1995           | Tomatoes                  | 43                                                          |
| 21              | Brazil  | 1995           | Vegetables, Other         | 49                                                          |
| 21              | Brazil  | 1995           | Wheat                     | 139                                                         |
| 21              | Brazil  | 1995           | Wine                      | 5                                                           |
| 21              | Brazil  | 1995           | Yams                      | 2                                                           |
| 21              | Brazil  | 1996           | Apples                    | 14                                                          |
| 21              | Brazil  | 1996           | Bananas                   | 73                                                          |
| 21              | Brazil  | 1996           | Beans                     | 52                                                          |
| 21              | Brazil  | 1996           | Beer                      | 108                                                         |
| 21              | Brazil  | 1996           | Beverages, Alcoholic      | 11                                                          |
| 21              | Brazil  | 1996           | Bovine Meat               | 101                                                         |
| 21              | Brazil  | 1996           | Butter, Ghee              | 1                                                           |
| 21              | Brazil  | 1996           | Cassava                   | 103                                                         |
| 21              | Brazil  | 1996           | Cereals, Other            | 1                                                           |
| 21              | Brazil  | 1996           | Cheese                    | 1                                                           |
| 21              | Brazil  | 1996           | Cocoa Beans               | 2                                                           |
| 21              | Brazil  | 1996           | Coconuts - Incl Copra     | 10                                                          |
| 21              | Brazil  | 1996           | Coffee                    | 6                                                           |
| 21              | Brazil  | 1996           | Cottonseed Oil            | 1                                                           |
| 21              | Brazil  | 1996           | Crustaceans               | 1                                                           |
| 21              | Brazil  | 1996           | Demersal Fish             | 8                                                           |
| 21              | Brazil  | 1996           | Eggs                      | 19                                                          |
| 21              | Brazil  | 1996           | Fats, Animals, Raw        | 5                                                           |
| 21              | Brazil  | 1996           | Freshwater Fish           | 5                                                           |
| 21              | Brazil  | 1996           | Fruits, Other             | 52                                                          |
| 21              | Brazil  | 1996           | Grapefruit                | 1                                                           |
| 21              | Brazil  | 1996           | Grapes                    | 6                                                           |
| 21              | Brazil  | 1996           | Groundnuts (Shelled Eq)   | 1                                                           |
| 21              | Brazil  | 1996           | Lemons, Limes             | 6                                                           |

Dietary calcium and zinc deficiency risks are decreasing but remain prevalent

| FAO countrycode | Country | Reference year | Food item                 | Gross food supply (g capita <sup>-1</sup> d <sup>-1</sup> ) |
|-----------------|---------|----------------|---------------------------|-------------------------------------------------------------|
| 21              | Brazil  | 1996           | Maize                     | 51                                                          |
| 21              | Brazil  | 1996           | Maize Germ Oil            | 1                                                           |
| 21              | Brazil  | 1996           | Marine Fish, Other        | 2                                                           |
| 21              | Brazil  | 1996           | Milk, Whole               | 288                                                         |
| 21              | Brazil  | 1996           | Mutton & Goat Meat        | 2                                                           |
| 21              | Brazil  | 1996           | Nuts                      | 1                                                           |
| 21              | Brazil  | 1996           | Oats                      | 3                                                           |
| 21              | Brazil  | 1996           | Offals, Edible            | 6                                                           |
| 21              | Brazil  | 1996           | Olives                    | 1                                                           |
| 21              | Brazil  | 1996           | Onions                    | 13                                                          |
| 21              | Brazil  | 1996           | Oranges, Mandarines       | 127                                                         |
| 21              | Brazil  | 1996           | Palm Oil                  | 1                                                           |
| 21              | Brazil  | 1996           | Peas                      | 1                                                           |
| 21              | Brazil  | 1996           | Pelagic Fish              | 3                                                           |
| 21              | Brazil  | 1996           | Pigmeat                   | 30                                                          |
| 21              | Brazil  | 1996           | Pineapples                | 15                                                          |
| 21              | Brazil  | 1996           | Potatoes                  | 33                                                          |
| 21              | Brazil  | 1996           | Poultry Meat              | 59                                                          |
| 21              | Brazil  | 1996           | Rice (Milled Equivalent)  | 103                                                         |
| 21              | Brazil  | 1996           | Soyabean Oil              | 31                                                          |
| 21              | Brazil  | 1996           | Soyabeans                 | 7                                                           |
| 21              | Brazil  | 1996           | Sugar Cane                | 15                                                          |
| 21              | Brazil  | 1996           | Sugar, Non-Centrifugal    | 4                                                           |
| 21              | Brazil  | 1996           | Sugar, Refined Equivalent | 125                                                         |
| 21              | Brazil  | 1996           | Sunflowerseed Oil         | 1                                                           |
| 21              | Brazil  | 1996           | Sweet Potatoes            | 3                                                           |
| 21              | Brazil  | 1996           | Tea                       | 3                                                           |
| 21              | Brazil  | 1996           | Tomatoes                  | 41                                                          |
| 21              | Brazil  | 1996           | Vegetables, Other         | 47                                                          |
| 21              | Brazil  | 1996           | Wheat                     | 126                                                         |
| 21              | Brazil  | 1996           | Wine                      | 4                                                           |
| 21              | Brazil  | 1996           | Yams                      | 2                                                           |
| 21              | Brazil  | 1997           | Apples                    | 13                                                          |
| 21              | Brazil  | 1997           | Bananas                   | 75                                                          |
| 21              | Brazil  | 1997           | Beans                     | 41                                                          |
| 21              | Brazil  | 1997           | Beer                      | 110                                                         |
| 21              | Brazil  | 1997           | Beverages, Alcoholic      | 12                                                          |
| 21              | Brazil  | 1997           | Bovine Meat               | 95                                                          |
| 21              | Brazil  | 1997           | Butter, Ghee              | 1                                                           |
| 21              | Brazil  | 1997           | Cassava                   | 112                                                         |
| 21              | Brazil  | 1997           | Cereals, Other            | 1                                                           |
| 21              | Brazil  | 1997           | Cheese                    | 1                                                           |
| 21              | Brazil  | 1997           | Cocoa Beans               | 2                                                           |
| 21              | Brazil  | 1997           | Coconuts - Incl Copra     | 23                                                          |
| 21              | Brazil  | 1997           | Coffee                    | 7                                                           |
| 21              | Brazil  | 1997           | Cottonseed Oil            | 2                                                           |
| 21              | Brazil  | 1997           | Crustaceans               | 1                                                           |
| 21              | Brazil  | 1997           | Demersal Fish             | 8                                                           |
| 21              | Brazil  | 1997           | Eggs                      | 21                                                          |
| 21              | Brazil  | 1997           | Fats, Animals, Raw        | 5                                                           |
| 21              | Brazil  | 1997           | Freshwater Fish           | 4                                                           |
| 21              | Brazil  | 1997           | Fruits, Other             | 57                                                          |
| 21              | Brazil  | 1997           | Grapefruit                | 1                                                           |
| 21              | Brazil  | 1997           | Grapes                    | 8                                                           |
| 21              | Brazil  | 1997           | Groundnuts (Shelled Eq)   | 1                                                           |
| 21              | Brazil  | 1997           | Lemons, Limes             | 6                                                           |
| 21              | Brazil  | 1997           | Maize                     | 53                                                          |
| 21              | Brazil  | 1997           | Maize Germ Oil            | 1                                                           |
| 21              | Brazil  | 1997           | Marine Fish, Other        | 2                                                           |
| 21              | Brazil  | 1997           | Milk, Whole               | 285                                                         |
| 21              | Brazil  | 1997           | Mutton & Goat Meat        | 2                                                           |
| 21              | Brazil  | 1997           | Nuts                      | 1                                                           |
| 21              | Brazil  | 1997           | Oats                      | 3                                                           |
| 21              | Brazil  | 1997           | Offals, Edible            | 6                                                           |
| 21              | Brazil  | 1997           | Olives                    | 1                                                           |
| 21              | Brazil  | 1997           | Onions                    | 13                                                          |
| 21              | Brazil  | 1997           | Oranges, Mandarines       | 156                                                         |
| 21              | Brazil  | 1997           | Palm Oil                  | 1                                                           |
| 21              | Brazil  | 1997           | Peas                      | 1                                                           |
| 21              | Brazil  | 1997           | Pelagic Fish              | 2                                                           |
| 21              | Brazil  | 1997           | Pigmeat                   | 32                                                          |
| 21              | Brazil  | 1997           | Pineapples                | 21                                                          |
| 21              | Brazil  | 1997           | Potatoes                  | 37                                                          |
| 21              | Brazil  | 1997           | Poultry Meat              | 68                                                          |
| 21              | Brazil  | 1997           | Rice (Milled Equivalent)  | 102                                                         |
| 21              | Brazil  | 1997           | Soyabean Oil              | 30                                                          |
| 21              | Brazil  | 1997           | Soyabeans                 | 6                                                           |
| 21              | Brazil  | 1997           | Sugar Cane                | 15                                                          |
| 21              | Brazil  | 1997           | Sugar, Non-Centrifugal    | 4                                                           |
| 21              | Brazil  | 1997           | Sugar, Refined Equivalent | 123                                                         |
| 21              | Brazil  | 1997           | Sunflowerseed Oil         | 1                                                           |
| 21              | Brazil  | 1997           | Sweet Potatoes            | 3                                                           |
| 21              | Brazil  | 1997           | Tea                       | 5                                                           |
| 21              | Brazil  | 1997           | Tomatoes                  | 42                                                          |
| 21              | Brazil  | 1997           | Vegetables, Other         | 49                                                          |
| 21              | Brazil  | 1997           | Wheat                     | 125                                                         |
| 21              | Brazil  | 1997           | Wine                      | 4                                                           |
| 21              | Brazil  | 1997           | Yams                      | 2                                                           |
| 21              | Brazil  | 1998           | Apples                    | 13                                                          |
| 21              | Brazil  | 1998           | Bananas                   | 72                                                          |
| 21              | Brazil  | 1998           | Beans                     | 42                                                          |
| 21              | Brazil  | 1998           | Beer                      | 107                                                         |
| 21              | Brazil  | 1998           | Beverages, Alcoholic      | 11                                                          |
| 21              | Brazil  | 1998           | Bovine Meat               | 89                                                          |
| 21              | Brazil  | 1998           | Butter, Ghee              | 1                                                           |
| 21              | Brazil  | 1998           | Cassava                   | 108                                                         |
| 21              | Brazil  | 1998           | Cereals, Other            | 1                                                           |

Dietary calcium and zinc deficiency risks are decreasing but remain prevalent

| FAO countrycode | Country | Reference year | Food item                 | Gross food supply (g capita <sup>-1</sup> d <sup>-1</sup> ) |
|-----------------|---------|----------------|---------------------------|-------------------------------------------------------------|
| 21              | Brazil  | 1998           | Cheese                    | 1                                                           |
| 21              | Brazil  | 1998           | Cocoa Beans               | 2                                                           |
| 21              | Brazil  | 1998           | Coconuts - Incl Copra     | 22                                                          |
| 21              | Brazil  | 1998           | Coffee                    | 7                                                           |
| 21              | Brazil  | 1998           | Cottonseed Oil            | 2                                                           |
| 21              | Brazil  | 1998           | Crustaceans               | 1                                                           |
| 21              | Brazil  | 1998           | Demersal Fish             | 7                                                           |
| 21              | Brazil  | 1998           | Eggs                      | 19                                                          |
| 21              | Brazil  | 1998           | Fats, Animals, Raw        | 5                                                           |
| 21              | Brazil  | 1998           | Freshwater Fish           | 4                                                           |
| 21              | Brazil  | 1998           | Fruits, Other             | 52                                                          |
| 21              | Brazil  | 1998           | Grapefruit                | 1                                                           |
| 21              | Brazil  | 1998           | Grapes                    | 7                                                           |
| 21              | Brazil  | 1998           | Groundnuts (Shelled Eq)   | 1                                                           |
| 21              | Brazil  | 1998           | Lemons, Limes             | 6                                                           |
| 21              | Brazil  | 1998           | Maize                     | 46                                                          |
| 21              | Brazil  | 1998           | Maize Germ Oil            | 1                                                           |
| 21              | Brazil  | 1998           | Marine Fish, Other        | 2                                                           |
| 21              | Brazil  | 1998           | Milk, Whole               | 285                                                         |
| 21              | Brazil  | 1998           | Mutton & Goat Meat        | 2                                                           |
| 21              | Brazil  | 1998           | Nuts                      | 1                                                           |
| 21              | Brazil  | 1998           | Oats                      | 3                                                           |
| 21              | Brazil  | 1998           | Offals, Edible            | 6                                                           |
| 21              | Brazil  | 1998           | Olives                    | 1                                                           |
| 21              | Brazil  | 1998           | Onions                    | 12                                                          |
| 21              | Brazil  | 1998           | Oranges, Mandarines       | 114                                                         |
| 21              | Brazil  | 1998           | Palm Oil                  | 2                                                           |
| 21              | Brazil  | 1998           | Pelagic Fish              | 2                                                           |
| 21              | Brazil  | 1998           | Pig meat                  | 37                                                          |
| 21              | Brazil  | 1998           | Pineapples                | 22                                                          |
| 21              | Brazil  | 1998           | Potatoes                  | 40                                                          |
| 21              | Brazil  | 1998           | Poultry Meat              | 70                                                          |
| 21              | Brazil  | 1998           | Pulses, Other             | 1                                                           |
| 21              | Brazil  | 1998           | Rice (Milled Equivalent)  | 109                                                         |
| 21              | Brazil  | 1998           | Soyabean Oil              | 30                                                          |
| 21              | Brazil  | 1998           | Soybeans                  | 7                                                           |
| 21              | Brazil  | 1998           | Sugar Cane                | 15                                                          |
| 21              | Brazil  | 1998           | Sugar, Non-Centrifugal    | 4                                                           |
| 21              | Brazil  | 1998           | Sugar, Refined Equivalent | 121                                                         |
| 21              | Brazil  | 1998           | Sunflowerseed Oil         | 1                                                           |
| 21              | Brazil  | 1998           | Sweet Potatoes            | 3                                                           |
| 21              | Brazil  | 1998           | Tea                       | 6                                                           |
| 21              | Brazil  | 1998           | Tomatoes                  | 41                                                          |
| 21              | Brazil  | 1998           | Vegetables, Other         | 49                                                          |
| 21              | Brazil  | 1998           | Wheat                     | 127                                                         |
| 21              | Brazil  | 1998           | Wine                      | 4                                                           |
| 21              | Brazil  | 1998           | Yams                      | 2                                                           |
| 21              | Brazil  | 1999           | Apples                    | 13                                                          |
| 21              | Brazil  | 1999           | Bananas                   | 73                                                          |
| 21              | Brazil  | 1999           | Beans                     | 42                                                          |
| 21              | Brazil  | 1999           | Beer                      | 99                                                          |
| 21              | Brazil  | 1999           | Beverages, Alcoholic      | 11                                                          |
| 21              | Brazil  | 1999           | Bovine Meat               | 94                                                          |
| 21              | Brazil  | 1999           | Butter, Ghee              | 1                                                           |
| 21              | Brazil  | 1999           | Cassava                   | 113                                                         |
| 21              | Brazil  | 1999           | Cereals, Other            | 1                                                           |
| 21              | Brazil  | 1999           | Cheese                    | 1                                                           |
| 21              | Brazil  | 1999           | Cocoa Beans               | 2                                                           |
| 21              | Brazil  | 1999           | Coconuts - Incl Copra     | 26                                                          |
| 21              | Brazil  | 1999           | Coffee                    | 8                                                           |
| 21              | Brazil  | 1999           | Cottonseed Oil            | 2                                                           |
| 21              | Brazil  | 1999           | Crustaceans               | 1                                                           |
| 21              | Brazil  | 1999           | Demersal Fish             | 6                                                           |
| 21              | Brazil  | 1999           | Eggs                      | 20                                                          |
| 21              | Brazil  | 1999           | Fats, Animals, Raw        | 6                                                           |
| 21              | Brazil  | 1999           | Freshwater Fish           | 5                                                           |
| 21              | Brazil  | 1999           | Fruits, Other             | 51                                                          |
| 21              | Brazil  | 1999           | Grapefruit                | 1                                                           |
| 21              | Brazil  | 1999           | Grapes                    | 7                                                           |
| 21              | Brazil  | 1999           | Groundnuts (Shelled Eq)   | 1                                                           |
| 21              | Brazil  | 1999           | Lemons, Limes             | 6                                                           |
| 21              | Brazil  | 1999           | Maize                     | 45                                                          |
| 21              | Brazil  | 1999           | Maize Germ Oil            | 1                                                           |
| 21              | Brazil  | 1999           | Marine Fish, Other        | 2                                                           |
| 21              | Brazil  | 1999           | Milk, Whole               | 287                                                         |
| 21              | Brazil  | 1999           | Mutton & Goat Meat        | 2                                                           |
| 21              | Brazil  | 1999           | Nuts                      | 1                                                           |
| 21              | Brazil  | 1999           | Oats                      | 4                                                           |
| 21              | Brazil  | 1999           | Offals, Edible            | 7                                                           |
| 21              | Brazil  | 1999           | Olives                    | 1                                                           |
| 21              | Brazil  | 1999           | Onions                    | 14                                                          |
| 21              | Brazil  | 1999           | Oranges, Mandarines       | 151                                                         |
| 21              | Brazil  | 1999           | Palm Oil                  | 1                                                           |
| 21              | Brazil  | 1999           | Peas                      | 1                                                           |
| 21              | Brazil  | 1999           | Pelagic Fish              | 2                                                           |
| 21              | Brazil  | 1999           | Pig meat                  | 36                                                          |
| 21              | Brazil  | 1999           | Pineapples                | 23                                                          |
| 21              | Brazil  | 1999           | Potatoes                  | 41                                                          |
| 21              | Brazil  | 1999           | Poultry Meat              | 77                                                          |
| 21              | Brazil  | 1999           | Rice (Milled Equivalent)  | 109                                                         |
| 21              | Brazil  | 1999           | Soyabean Oil              | 37                                                          |
| 21              | Brazil  | 1999           | Soybeans                  | 7                                                           |
| 21              | Brazil  | 1999           | Sugar Cane                | 14                                                          |
| 21              | Brazil  | 1999           | Sugar, Non-Centrifugal    | 3                                                           |
| 21              | Brazil  | 1999           | Sugar, Refined Equivalent | 96                                                          |
| 21              | Brazil  | 1999           | Sunflowerseed Oil         | 2                                                           |
| 21              | Brazil  | 1999           | Sweet Potatoes            | 3                                                           |

Dietary calcium and zinc deficiency risks are decreasing but remain prevalent

| FAO countrycode | Country | Reference year | Food item                 | Gross food supply (g capita <sup>-1</sup> d <sup>-1</sup> ) |
|-----------------|---------|----------------|---------------------------|-------------------------------------------------------------|
| 21              | Brazil  | 1999           | Tea                       | 7                                                           |
| 21              | Brazil  | 1999           | Tomatoes                  | 47                                                          |
| 21              | Brazil  | 1999           | Vegetables, Other         | 47                                                          |
| 21              | Brazil  | 1999           | Wheat                     | 130                                                         |
| 21              | Brazil  | 1999           | Wine                      | 5                                                           |
| 21              | Brazil  | 1999           | Yams                      | 2                                                           |
| 21              | Brazil  | 2000           | Apples                    | 15                                                          |
| 21              | Brazil  | 2000           | Bananas                   | 74                                                          |
| 21              | Brazil  | 2000           | Beans                     | 45                                                          |
| 21              | Brazil  | 2000           | Beer                      | 137                                                         |
| 21              | Brazil  | 2000           | Beverages, Alcoholic      | 11                                                          |
| 21              | Brazil  | 2000           | Bovine Meat               | 96                                                          |
| 21              | Brazil  | 2000           | Butter, Ghee              | 1                                                           |
| 21              | Brazil  | 2000           | Cassava                   | 124                                                         |
| 21              | Brazil  | 2000           | Cereals, Other            | 1                                                           |
| 21              | Brazil  | 2000           | Cheese                    | 1                                                           |
| 21              | Brazil  | 2000           | Cocoa Beans               | 2                                                           |
| 21              | Brazil  | 2000           | Coconuts - Incl Copra     | 28                                                          |
| 21              | Brazil  | 2000           | Coffee                    | 8                                                           |
| 21              | Brazil  | 2000           | Cottonseed Oil            | 2                                                           |
| 21              | Brazil  | 2000           | Crustaceans               | 1                                                           |
| 21              | Brazil  | 2000           | Demersal Fish             | 6                                                           |
| 21              | Brazil  | 2000           | Eggs                      | 20                                                          |
| 21              | Brazil  | 2000           | Fats, Animals, Raw        | 6                                                           |
| 21              | Brazil  | 2000           | Freshwater Fish           | 5                                                           |
| 21              | Brazil  | 2000           | Fruits, Other             | 52                                                          |
| 21              | Brazil  | 2000           | Grapefruit                | 1                                                           |
| 21              | Brazil  | 2000           | Grapes                    | 8                                                           |
| 21              | Brazil  | 2000           | Groundnuts (Shelled Eq)   | 1                                                           |
| 21              | Brazil  | 2000           | Lemons, Limes             | 6                                                           |
| 21              | Brazil  | 2000           | Maize                     | 43                                                          |
| 21              | Brazil  | 2000           | Maize Germ Oil            | 1                                                           |
| 21              | Brazil  | 2000           | Marine Fish, Other        | 2                                                           |
| 21              | Brazil  | 2000           | Milk, Whole               | 288                                                         |
| 21              | Brazil  | 2000           | Mutton & Goat Meat        | 2                                                           |
| 21              | Brazil  | 2000           | Nuts                      | 1                                                           |
| 21              | Brazil  | 2000           | Oats                      | 2                                                           |
| 21              | Brazil  | 2000           | Offals, Edible            | 7                                                           |
| 21              | Brazil  | 2000           | Olives                    | 1                                                           |
| 21              | Brazil  | 2000           | Onions                    | 16                                                          |
| 21              | Brazil  | 2000           | Oranges, Mandarines       | 118                                                         |
| 21              | Brazil  | 2000           | Palm Oil                  | 2                                                           |
| 21              | Brazil  | 2000           | Peas                      | 1                                                           |
| 21              | Brazil  | 2000           | Pelagic Fish              | 2                                                           |
| 21              | Brazil  | 2000           | Pig meat                  | 38                                                          |
| 21              | Brazil  | 2000           | Pineapples                | 25                                                          |
| 21              | Brazil  | 2000           | Potatoes                  | 35                                                          |
| 21              | Brazil  | 2000           | Poultry Meat              | 81                                                          |
| 21              | Brazil  | 2000           | Rice (Milled Equivalent)  | 105                                                         |
| 21              | Brazil  | 2000           | Soyabean Oil              | 38                                                          |
| 21              | Brazil  | 2000           | Soybeans                  | 7                                                           |
| 21              | Brazil  | 2000           | Sugar Cane                | 31                                                          |
| 21              | Brazil  | 2000           | Sugar, Non-Centrifugal    | 5                                                           |
| 21              | Brazil  | 2000           | Sugar, Refined Equivalent | 95                                                          |
| 21              | Brazil  | 2000           | Sunflowerseed Oil         | 2                                                           |
| 21              | Brazil  | 2000           | Sweet Potatoes            | 3                                                           |
| 21              | Brazil  | 2000           | Tea                       | 8                                                           |
| 21              | Brazil  | 2000           | Tomatoes                  | 42                                                          |
| 21              | Brazil  | 2000           | Vegetables, Other         | 45                                                          |
| 21              | Brazil  | 2000           | Wheat                     | 120                                                         |
| 21              | Brazil  | 2000           | Wine                      | 5                                                           |
| 21              | Brazil  | 2000           | Yams                      | 2                                                           |
| 21              | Brazil  | 2001           | Apples                    | 10                                                          |
| 21              | Brazil  | 2001           | Bananas                   | 80                                                          |
| 21              | Brazil  | 2001           | Beans                     | 45                                                          |
| 21              | Brazil  | 2001           | Beer                      | 141                                                         |
| 21              | Brazil  | 2001           | Beverages, Alcoholic      | 11                                                          |
| 21              | Brazil  | 2001           | Bovine Meat               | 94                                                          |
| 21              | Brazil  | 2001           | Butter, Ghee              | 1                                                           |
| 21              | Brazil  | 2001           | Cassava                   | 119                                                         |
| 21              | Brazil  | 2001           | Cereals, Other            | 1                                                           |
| 21              | Brazil  | 2001           | Cheese                    | 1                                                           |
| 21              | Brazil  | 2001           | Cocoa Beans               | 2                                                           |
| 21              | Brazil  | 2001           | Coconuts - Incl Copra     | 30                                                          |
| 21              | Brazil  | 2001           | Coffee                    | 9                                                           |
| 21              | Brazil  | 2001           | Cottonseed Oil            | 3                                                           |
| 21              | Brazil  | 2001           | Crustaceans               | 1                                                           |
| 21              | Brazil  | 2001           | Demersal Fish             | 5                                                           |
| 21              | Brazil  | 2001           | Eggs                      | 20                                                          |
| 21              | Brazil  | 2001           | Fats, Animals, Raw        | 6                                                           |
| 21              | Brazil  | 2001           | Freshwater Fish           | 6                                                           |
| 21              | Brazil  | 2001           | Fruits, Other             | 58                                                          |
| 21              | Brazil  | 2001           | Grapefruit                | 1                                                           |
| 21              | Brazil  | 2001           | Grapes                    | 9                                                           |
| 21              | Brazil  | 2001           | Groundnuts (Shelled Eq)   | 1                                                           |
| 21              | Brazil  | 2001           | Lemons, Limes             | 12                                                          |
| 21              | Brazil  | 2001           | Maize                     | 52                                                          |
| 21              | Brazil  | 2001           | Maize Germ Oil            | 1                                                           |
| 21              | Brazil  | 2001           | Marine Fish, Other        | 2                                                           |
| 21              | Brazil  | 2001           | Milk, Whole               | 282                                                         |
| 21              | Brazil  | 2001           | Mutton & Goat Meat        | 2                                                           |
| 21              | Brazil  | 2001           | Nuts                      | 1                                                           |
| 21              | Brazil  | 2001           | Oats                      | 5                                                           |
| 21              | Brazil  | 2001           | Offals, Edible            | 7                                                           |
| 21              | Brazil  | 2001           | Olives                    | 1                                                           |
| 21              | Brazil  | 2001           | Onions                    | 15                                                          |
| 21              | Brazil  | 2001           | Oranges, Mandarines       | 37                                                          |



Dietary calcium and zinc deficiency risks are decreasing but remain prevalent

| FAO countrycode | Country | Reference year | Food item                 | Gross food supply (g capita <sup>-1</sup> d <sup>-1</sup> ) |
|-----------------|---------|----------------|---------------------------|-------------------------------------------------------------|
| 21              | Brazil  | 2001           | Palm Oil                  | 2                                                           |
| 21              | Brazil  | 2001           | Pelagic Fish              | 2                                                           |
| 21              | Brazil  | 2001           | Pigmeat                   | 36                                                          |
| 21              | Brazil  | 2001           | Pineapples                | 26                                                          |
| 21              | Brazil  | 2001           | Potatoes                  | 39                                                          |
| 21              | Brazil  | 2001           | Poultry Meat              | 78                                                          |
| 21              | Brazil  | 2001           | Rice (Milled Equivalent)  | 97                                                          |
| 21              | Brazil  | 2001           | Soyabean Oil              | 39                                                          |
| 21              | Brazil  | 2001           | Soyabeans                 | 7                                                           |
| 21              | Brazil  | 2001           | Sugar Cane                | 15                                                          |
| 21              | Brazil  | 2001           | Sugar, Non-Centrifugal    | 5                                                           |
| 21              | Brazil  | 2001           | Sugar, Refined Equivalent | 94                                                          |
| 21              | Brazil  | 2001           | Sunflowerseed Oil         | 1                                                           |
| 21              | Brazil  | 2001           | Sweet Potatoes            | 3                                                           |
| 21              | Brazil  | 2001           | Tea                       | 9                                                           |
| 21              | Brazil  | 2001           | Tomatoes                  | 43                                                          |
| 21              | Brazil  | 2001           | Vegetables, Other         | 47                                                          |
| 21              | Brazil  | 2001           | Wheat                     | 135                                                         |
| 21              | Brazil  | 2001           | Wine                      | 5                                                           |
| 21              | Brazil  | 2001           | Yams                      | 2                                                           |
| 21              | Brazil  | 2002           | Apples                    | 10                                                          |
| 21              | Brazil  | 2002           | Bananas                   | 80                                                          |
| 21              | Brazil  | 2002           | Beans                     | 44                                                          |
| 21              | Brazil  | 2002           | Beer                      | 122                                                         |
| 21              | Brazil  | 2002           | Beverages, Alcoholic      | 11                                                          |
| 21              | Brazil  | 2002           | Bovine Meat               | 96                                                          |
| 21              | Brazil  | 2002           | Butter, Ghee              | 1                                                           |
| 21              | Brazil  | 2002           | Cassava                   | 119                                                         |
| 21              | Brazil  | 2002           | Cereals, Other            | 1                                                           |
| 21              | Brazil  | 2002           | Cheese                    | 1                                                           |
| 21              | Brazil  | 2002           | Cocoa Beans               | 2                                                           |
| 21              | Brazil  | 2002           | Coconuts - Incl Copra     | 40                                                          |
| 21              | Brazil  | 2002           | Coffee                    | 8                                                           |
| 21              | Brazil  | 2002           | Cottonseed Oil            | 2                                                           |
| 21              | Brazil  | 2002           | Crustaceans               | 1                                                           |
| 21              | Brazil  | 2002           | Demersal Fish             | 6                                                           |
| 21              | Brazil  | 2002           | Eggs                      | 20                                                          |
| 21              | Brazil  | 2002           | Fats, Animals, Raw        | 6                                                           |
| 21              | Brazil  | 2002           | Freshwater Fish           | 6                                                           |
| 21              | Brazil  | 2002           | Fruits, Other             | 60                                                          |
| 21              | Brazil  | 2002           | Grapefruit                | 1                                                           |
| 21              | Brazil  | 2002           | Grapes                    | 9                                                           |
| 21              | Brazil  | 2002           | Groundnuts (Shelled Eq)   | 1                                                           |
| 21              | Brazil  | 2002           | Lemons, Limes             | 11                                                          |
| 21              | Brazil  | 2002           | Maize                     | 57                                                          |
| 21              | Brazil  | 2002           | Maize Germ Oil            | 1                                                           |
| 21              | Brazil  | 2002           | Marine Fish, Other        | 2                                                           |
| 21              | Brazil  | 2002           | Milk, Whole               | 300                                                         |
| 21              | Brazil  | 2002           | Mutton & Goat Meat        | 2                                                           |
| 21              | Brazil  | 2002           | Nuts                      | 1                                                           |
| 21              | Brazil  | 2002           | Oats                      | 4                                                           |
| 21              | Brazil  | 2002           | Offals, Edible            | 7                                                           |
| 21              | Brazil  | 2002           | Olives                    | 1                                                           |
| 21              | Brazil  | 2002           | Onions                    | 17                                                          |
| 21              | Brazil  | 2002           | Oranges, Mandarines       | 108                                                         |
| 21              | Brazil  | 2002           | Palm Oil                  | 2                                                           |
| 21              | Brazil  | 2002           | Pelagic Fish              | 2                                                           |
| 21              | Brazil  | 2002           | Pigmeat                   | 34                                                          |
| 21              | Brazil  | 2002           | Pineapples                | 26                                                          |
| 21              | Brazil  | 2002           | Potatoes                  | 42                                                          |
| 21              | Brazil  | 2002           | Poultry Meat              | 84                                                          |
| 21              | Brazil  | 2002           | Rice (Milled Equivalent)  | 94                                                          |
| 21              | Brazil  | 2002           | Soyabean Oil              | 37                                                          |
| 21              | Brazil  | 2002           | Soyabeans                 | 8                                                           |
| 21              | Brazil  | 2002           | Sugar Cane                | 15                                                          |
| 21              | Brazil  | 2002           | Sugar, Non-Centrifugal    | 3                                                           |
| 21              | Brazil  | 2002           | Sugar, Refined Equivalent | 96                                                          |
| 21              | Brazil  | 2002           | Sweet Potatoes            | 3                                                           |
| 21              | Brazil  | 2002           | Tea                       | 7                                                           |
| 21              | Brazil  | 2002           | Tomatoes                  | 50                                                          |
| 21              | Brazil  | 2002           | Vegetables, Other         | 55                                                          |
| 21              | Brazil  | 2002           | Wheat                     | 133                                                         |
| 21              | Brazil  | 2002           | Wine                      | 5                                                           |
| 21              | Brazil  | 2002           | Yams                      | 2                                                           |
| 21              | Brazil  | 2003           | Apples                    | 9                                                           |
| 21              | Brazil  | 2003           | Bananas                   | 84                                                          |
| 21              | Brazil  | 2003           | Beans                     | 47                                                          |
| 21              | Brazil  | 2003           | Beer                      | 116                                                         |
| 21              | Brazil  | 2003           | Beverages, Alcoholic      | 11                                                          |
| 21              | Brazil  | 2003           | Bovine Meat               | 91                                                          |
| 21              | Brazil  | 2003           | Butter, Ghee              | 1                                                           |
| 21              | Brazil  | 2003           | Cassava                   | 111                                                         |
| 21              | Brazil  | 2003           | Cereals, Other            | 1                                                           |
| 21              | Brazil  | 2003           | Cheese                    | 1                                                           |
| 21              | Brazil  | 2003           | Cocoa Beans               | 1                                                           |
| 21              | Brazil  | 2003           | Coconuts - Incl Copra     | 40                                                          |
| 21              | Brazil  | 2003           | Coffee                    | 9                                                           |
| 21              | Brazil  | 2003           | Cottonseed Oil            | 3                                                           |
| 21              | Brazil  | 2003           | Crustaceans               | 1                                                           |
| 21              | Brazil  | 2003           | Demersal Fish             | 5                                                           |
| 21              | Brazil  | 2003           | Eggs                      | 20                                                          |
| 21              | Brazil  | 2003           | Fats, Animals, Raw        | 6                                                           |
| 21              | Brazil  | 2003           | Freshwater Fish           | 6                                                           |
| 21              | Brazil  | 2003           | Fruits, Other             | 60                                                          |
| 21              | Brazil  | 2003           | Grapefruit                | 1                                                           |
| 21              | Brazil  | 2003           | Grapes                    | 9                                                           |
| 21              | Brazil  | 2003           | Groundnuts (Shelled Eq)   | 1                                                           |

Dietary calcium and zinc deficiency risks are decreasing but remain prevalent

| FAO countrycode | Country | Reference year | Food item                 | Gross food supply (g capita <sup>-1</sup> d <sup>-1</sup> ) |
|-----------------|---------|----------------|---------------------------|-------------------------------------------------------------|
| 21              | Brazil  | 2003           | Lemons, Limes             | 11                                                          |
| 21              | Brazil  | 2003           | Maize                     | 70                                                          |
| 21              | Brazil  | 2003           | Maize Germ Oil            | 1                                                           |
| 21              | Brazil  | 2003           | Marine Fish, Other        | 1                                                           |
| 21              | Brazil  | 2003           | Milk, Whole               | 295                                                         |
| 21              | Brazil  | 2003           | Mutton & Goat Meat        | 2                                                           |
| 21              | Brazil  | 2003           | Nuts                      | 1                                                           |
| 21              | Brazil  | 2003           | Oats                      | 6                                                           |
| 21              | Brazil  | 2003           | Offals, Edible            | 7                                                           |
| 21              | Brazil  | 2003           | Olives                    | 1                                                           |
| 21              | Brazil  | 2003           | Onions                    | 17                                                          |
| 21              | Brazil  | 2003           | Oranges, Mandarines       | 71                                                          |
| 21              | Brazil  | 2003           | Palm Oil                  | 2                                                           |
| 21              | Brazil  | 2003           | Pelagic Fish              | 2                                                           |
| 21              | Brazil  | 2003           | Pigmeat                   | 37                                                          |
| 21              | Brazil  | 2003           | Pineapples                | 26                                                          |
| 21              | Brazil  | 2003           | Potatoes                  | 41                                                          |
| 21              | Brazil  | 2003           | Poultry Meat              | 89                                                          |
| 21              | Brazil  | 2003           | Rice (Milled Equivalent)  | 98                                                          |
| 21              | Brazil  | 2003           | Soyabean Oil              | 38                                                          |
| 21              | Brazil  | 2003           | Soyabeans                 | 8                                                           |
| 21              | Brazil  | 2003           | Sugar Cane                | 15                                                          |
| 21              | Brazil  | 2003           | Sugar, Non-Centrifugal    | 5                                                           |
| 21              | Brazil  | 2003           | Sugar, Refined Equivalent | 99                                                          |
| 21              | Brazil  | 2003           | Sunflowerseed Oil         | 1                                                           |
| 21              | Brazil  | 2003           | Sweet Potatoes            | 3                                                           |
| 21              | Brazil  | 2003           | Tea                       | 7                                                           |
| 21              | Brazil  | 2003           | Tomatoes                  | 50                                                          |
| 21              | Brazil  | 2003           | Vegetables, Other         | 62                                                          |
| 21              | Brazil  | 2003           | Wheat                     | 146                                                         |
| 21              | Brazil  | 2003           | Wine                      | 4                                                           |
| 21              | Brazil  | 2003           | Yams                      | 1                                                           |
| 21              | Brazil  | 2004           | Apples                    | 9                                                           |
| 21              | Brazil  | 2004           | Bananas                   | 81                                                          |
| 21              | Brazil  | 2004           | Beans                     | 42                                                          |
| 21              | Brazil  | 2004           | Beer                      | 129                                                         |
| 21              | Brazil  | 2004           | Beverages, Alcoholic      | 10                                                          |
| 21              | Brazil  | 2004           | Bovine Meat               | 92                                                          |
| 21              | Brazil  | 2004           | Butter, Ghee              | 1                                                           |
| 21              | Brazil  | 2004           | Cassava                   | 120                                                         |
| 21              | Brazil  | 2004           | Cereals, Other            | 1                                                           |
| 21              | Brazil  | 2004           | Cheese                    | 1                                                           |
| 21              | Brazil  | 2004           | Cocoa Beans               | 1                                                           |
| 21              | Brazil  | 2004           | Coconuts - Incl Copra     | 42                                                          |
| 21              | Brazil  | 2004           | Coffee                    | 10                                                          |
| 21              | Brazil  | 2004           | Cottonseed Oil            | 3                                                           |
| 21              | Brazil  | 2004           | Crustaceans               | 1                                                           |
| 21              | Brazil  | 2004           | Demersal Fish             | 5                                                           |
| 21              | Brazil  | 2004           | Eggs                      | 20                                                          |
| 21              | Brazil  | 2004           | Fats, Animals, Raw        | 8                                                           |
| 21              | Brazil  | 2004           | Freshwater Fish           | 7                                                           |
| 21              | Brazil  | 2004           | Fruits, Other             | 59                                                          |
| 21              | Brazil  | 2004           | Grapefruit                | 1                                                           |
| 21              | Brazil  | 2004           | Grapes                    | 9                                                           |
| 21              | Brazil  | 2004           | Groundnuts (Shelled Eq)   | 1                                                           |
| 21              | Brazil  | 2004           | Lemons, Limes             | 10                                                          |
| 21              | Brazil  | 2004           | Maize                     | 66                                                          |
| 21              | Brazil  | 2004           | Maize Germ Oil            | 1                                                           |
| 21              | Brazil  | 2004           | Marine Fish, Other        | 1                                                           |
| 21              | Brazil  | 2004           | Milk, Whole               | 304                                                         |
| 21              | Brazil  | 2004           | Mutton & Goat Meat        | 2                                                           |
| 21              | Brazil  | 2004           | Nuts                      | 1                                                           |
| 21              | Brazil  | 2004           | Oats                      | 6                                                           |
| 21              | Brazil  | 2004           | Offals, Edible            | 7                                                           |
| 21              | Brazil  | 2004           | Olives                    | 1                                                           |
| 21              | Brazil  | 2004           | Onions                    | 16                                                          |
| 21              | Brazil  | 2004           | Oranges, Mandarines       | 93                                                          |
| 21              | Brazil  | 2004           | Palm Oil                  | 2                                                           |
| 21              | Brazil  | 2004           | Pelagic Fish              | 2                                                           |
| 21              | Brazil  | 2004           | Pigmeat                   | 36                                                          |
| 21              | Brazil  | 2004           | Pineapples                | 25                                                          |
| 21              | Brazil  | 2004           | Potatoes                  | 41                                                          |
| 21              | Brazil  | 2004           | Poultry Meat              | 94                                                          |
| 21              | Brazil  | 2004           | Rice (Milled Equivalent)  | 105                                                         |
| 21              | Brazil  | 2004           | Soyabean Oil              | 38                                                          |
| 21              | Brazil  | 2004           | Soyabeans                 | 9                                                           |
| 21              | Brazil  | 2004           | Sugar Cane                | 30                                                          |
| 21              | Brazil  | 2004           | Sugar, Non-Centrifugal    | 4                                                           |
| 21              | Brazil  | 2004           | Sugar, Refined Equivalent | 101                                                         |
| 21              | Brazil  | 2004           | Sweet Potatoes            | 3                                                           |
| 21              | Brazil  | 2004           | Sweeteners, Other         | 1                                                           |
| 21              | Brazil  | 2004           | Tea                       | 5                                                           |
| 21              | Brazil  | 2004           | Tomatoes                  | 47                                                          |
| 21              | Brazil  | 2004           | Vegetables, Other         | 60                                                          |
| 21              | Brazil  | 2004           | Wheat                     | 139                                                         |
| 21              | Brazil  | 2004           | Wine                      | 6                                                           |
| 21              | Brazil  | 2004           | Yams                      | 2                                                           |
| 21              | Brazil  | 2005           | Apples                    | 8                                                           |
| 21              | Brazil  | 2005           | Bananas                   | 81                                                          |
| 21              | Brazil  | 2005           | Beans                     | 42                                                          |
| 21              | Brazil  | 2005           | Beer                      | 132                                                         |
| 21              | Brazil  | 2005           | Beverages, Alcoholic      | 10                                                          |
| 21              | Brazil  | 2005           | Bovine Meat               | 99                                                          |
| 21              | Brazil  | 2005           | Butter, Ghee              | 1                                                           |
| 21              | Brazil  | 2005           | Cassava                   | 127                                                         |
| 21              | Brazil  | 2005           | Cereals, Other            | 5                                                           |
| 21              | Brazil  | 2005           | Cheese                    | 1                                                           |

Dietary calcium and zinc deficiency risks are decreasing but remain prevalent

| FAO countrycode | Country | Reference year | Food item                 | Gross food supply (g capita <sup>-1</sup> d <sup>-1</sup> ) |
|-----------------|---------|----------------|---------------------------|-------------------------------------------------------------|
| 21              | Brazil  | 2005           | Cocoa Beans               | 2                                                           |
| 21              | Brazil  | 2005           | Coconuts - Incl Copra     | 42                                                          |
| 21              | Brazil  | 2005           | Coffee                    | 10                                                          |
| 21              | Brazil  | 2005           | Cottonseed Oil            | 3                                                           |
| 21              | Brazil  | 2005           | Crustaceans               | 1                                                           |
| 21              | Brazil  | 2005           | Demersal Fish             | 5                                                           |
| 21              | Brazil  | 2005           | Eggs                      | 20                                                          |
| 21              | Brazil  | 2005           | Fats, Animals, Raw        | 7                                                           |
| 21              | Brazil  | 2005           | Freshwater Fish           | 6                                                           |
| 21              | Brazil  | 2005           | Fruits, Other             | 59                                                          |
| 21              | Brazil  | 2005           | Grapefruit                | 1                                                           |
| 21              | Brazil  | 2005           | Grapes                    | 10                                                          |
| 21              | Brazil  | 2005           | Groundnuts (Shelled Eq)   | 1                                                           |
| 21              | Brazil  | 2005           | Lemons, Limes             | 11                                                          |
| 21              | Brazil  | 2005           | Maize                     | 62                                                          |
| 21              | Brazil  | 2005           | Maize Germ Oil            | 1                                                           |
| 21              | Brazil  | 2005           | Marine Fish, Other        | 1                                                           |
| 21              | Brazil  | 2005           | Milk, Whole               | 317                                                         |
| 21              | Brazil  | 2005           | Mutton & Goat Meat        | 2                                                           |
| 21              | Brazil  | 2005           | Nuts                      | 1                                                           |
| 21              | Brazil  | 2005           | Oats                      | 7                                                           |
| 21              | Brazil  | 2005           | Offals, Edible            | 7                                                           |
| 21              | Brazil  | 2005           | Olives                    | 1                                                           |
| 21              | Brazil  | 2005           | Onions                    | 15                                                          |
| 21              | Brazil  | 2005           | Oranges, Mandarines       | 76                                                          |
| 21              | Brazil  | 2005           | Palm Oil                  | 2                                                           |
| 21              | Brazil  | 2005           | Pelagic Fish              | 2                                                           |
| 21              | Brazil  | 2005           | Pepper                    | 1                                                           |
| 21              | Brazil  | 2005           | Pig meat                  | 28                                                          |
| 21              | Brazil  | 2005           | Pineapples                | 26                                                          |
| 21              | Brazil  | 2005           | Potatoes                  | 42                                                          |
| 21              | Brazil  | 2005           | Poultry Meat              | 75                                                          |
| 21              | Brazil  | 2005           | Rice (Milled Equivalent)  | 108                                                         |
| 21              | Brazil  | 2005           | Soyabean Oil              | 38                                                          |
| 21              | Brazil  | 2005           | Soyabeans                 | 9                                                           |
| 21              | Brazil  | 2005           | Sugar Cane                | 29                                                          |
| 21              | Brazil  | 2005           | Sugar, Non-Centrifugal    | 4                                                           |
| 21              | Brazil  | 2005           | Sugar, Refined Equivalent | 102                                                         |
| 21              | Brazil  | 2005           | Sweet Potatoes            | 3                                                           |
| 21              | Brazil  | 2005           | Tea                       | 6                                                           |
| 21              | Brazil  | 2005           | Tomatoes                  | 46                                                          |
| 21              | Brazil  | 2005           | Vegetables, Other         | 59                                                          |
| 21              | Brazil  | 2005           | Wheat                     | 142                                                         |
| 21              | Brazil  | 2005           | Wine                      | 5                                                           |
| 21              | Brazil  | 2005           | Yams                      | 2                                                           |
| 21              | Brazil  | 2006           | Apples                    | 10                                                          |
| 21              | Brazil  | 2006           | Bananas                   | 83                                                          |
| 21              | Brazil  | 2006           | Beans                     | 44                                                          |
| 21              | Brazil  | 2006           | Beer                      | 135                                                         |
| 21              | Brazil  | 2006           | Beverages, Alcoholic      | 10                                                          |
| 21              | Brazil  | 2006           | Bovine Meat               | 100                                                         |
| 21              | Brazil  | 2006           | Butter, Ghee              | 1                                                           |
| 21              | Brazil  | 2006           | Cassava                   | 129                                                         |
| 21              | Brazil  | 2006           | Cereals, Other            | 4                                                           |
| 21              | Brazil  | 2006           | Cheese                    | 1                                                           |
| 21              | Brazil  | 2006           | Cocoa Beans               | 2                                                           |
| 21              | Brazil  | 2006           | Coconuts - Incl Copra     | 39                                                          |
| 21              | Brazil  | 2006           | Coffee                    | 9                                                           |
| 21              | Brazil  | 2006           | Cottonseed Oil            | 3                                                           |
| 21              | Brazil  | 2006           | Crustaceans               | 1                                                           |
| 21              | Brazil  | 2006           | Demersal Fish             | 6                                                           |
| 21              | Brazil  | 2006           | Eggs                      | 21                                                          |
| 21              | Brazil  | 2006           | Fats, Animals, Raw        | 7                                                           |
| 21              | Brazil  | 2006           | Freshwater Fish           | 7                                                           |
| 21              | Brazil  | 2006           | Fruits, Other             | 67                                                          |
| 21              | Brazil  | 2006           | Grapefruit                | 1                                                           |
| 21              | Brazil  | 2006           | Grapes                    | 12                                                          |
| 21              | Brazil  | 2006           | Groundnuts (Shelled Eq)   | 1                                                           |
| 21              | Brazil  | 2006           | Lemons, Limes             | 10                                                          |
| 21              | Brazil  | 2006           | Maize                     | 67                                                          |
| 21              | Brazil  | 2006           | Maize Germ Oil            | 1                                                           |
| 21              | Brazil  | 2006           | Marine Fish, Other        | 2                                                           |
| 21              | Brazil  | 2006           | Milk, Whole               | 323                                                         |
| 21              | Brazil  | 2006           | Mutton & Goat Meat        | 2                                                           |
| 21              | Brazil  | 2006           | Nuts                      | 1                                                           |
| 21              | Brazil  | 2006           | Oats                      | 6                                                           |
| 21              | Brazil  | 2006           | Offals, Edible            | 7                                                           |
| 21              | Brazil  | 2006           | Olives                    | 1                                                           |
| 21              | Brazil  | 2006           | Onions                    | 18                                                          |
| 21              | Brazil  | 2006           | Oranges, Mandarines       | 88                                                          |
| 21              | Brazil  | 2006           | Palm Oil                  | 3                                                           |
| 21              | Brazil  | 2006           | Pelagic Fish              | 2                                                           |
| 21              | Brazil  | 2006           | Pepper                    | 1                                                           |
| 21              | Brazil  | 2006           | Pig meat                  | 30                                                          |
| 21              | Brazil  | 2006           | Pineapples                | 29                                                          |
| 21              | Brazil  | 2006           | Potatoes                  | 42                                                          |
| 21              | Brazil  | 2006           | Poultry Meat              | 81                                                          |
| 21              | Brazil  | 2006           | Rice (Milled Equivalent)  | 95                                                          |
| 21              | Brazil  | 2006           | Soyabean Oil              | 38                                                          |
| 21              | Brazil  | 2006           | Soyabeans                 | 8                                                           |
| 21              | Brazil  | 2006           | Sugar Cane                | 36                                                          |
| 21              | Brazil  | 2006           | Sugar, Non-Centrifugal    | 5                                                           |
| 21              | Brazil  | 2006           | Sugar, Refined Equivalent | 100                                                         |
| 21              | Brazil  | 2006           | Sunflowerseed Oil         | 1                                                           |
| 21              | Brazil  | 2006           | Sweet Potatoes            | 3                                                           |
| 21              | Brazil  | 2006           | Tea                       | 6                                                           |
| 21              | Brazil  | 2006           | Tomatoes                  | 44                                                          |

Dietary calcium and zinc deficiency risks are decreasing but remain prevalent

| FAO countrycode | Country | Reference year | Food item                 | Gross food supply (g capita <sup>-1</sup> d <sup>-1</sup> ) |
|-----------------|---------|----------------|---------------------------|-------------------------------------------------------------|
| 21              | Brazil  | 2006           | Vegetables, Other         | 65                                                          |
| 21              | Brazil  | 2006           | Wheat                     | 143                                                         |
| 21              | Brazil  | 2006           | Wine                      | 4                                                           |
| 21              | Brazil  | 2006           | Yams                      | 2                                                           |
| 21              | Brazil  | 2007           | Apples                    | 12                                                          |
| 21              | Brazil  | 2007           | Bananas                   | 84                                                          |
| 21              | Brazil  | 2007           | Beans                     | 44                                                          |
| 21              | Brazil  | 2007           | Beer                      | 138                                                         |
| 21              | Brazil  | 2007           | Beverages, Alcoholic      | 10                                                          |
| 21              | Brazil  | 2007           | Bovine Meat               | 102                                                         |
| 21              | Brazil  | 2007           | Butter, Ghee              | 1                                                           |
| 21              | Brazil  | 2007           | Cassava                   | 127                                                         |
| 21              | Brazil  | 2007           | Cereals, Other            | 3                                                           |
| 21              | Brazil  | 2007           | Cheese                    | 1                                                           |
| 21              | Brazil  | 2007           | Cocoa Beans               | 2                                                           |
| 21              | Brazil  | 2007           | Coconuts - Incl Copra     | 37                                                          |
| 21              | Brazil  | 2007           | Coffee                    | 9                                                           |
| 21              | Brazil  | 2007           | Cottonseed Oil            | 4                                                           |
| 21              | Brazil  | 2007           | Crustaceans               | 1                                                           |
| 21              | Brazil  | 2007           | Demersal Fish             | 6                                                           |
| 21              | Brazil  | 2007           | Eggs                      | 20                                                          |
| 21              | Brazil  | 2007           | Fats, Animals, Raw        | 8                                                           |
| 21              | Brazil  | 2007           | Freshwater Fish           | 7                                                           |
| 21              | Brazil  | 2007           | Fruits, Other             | 66                                                          |
| 21              | Brazil  | 2007           | Grapefruit                | 1                                                           |
| 21              | Brazil  | 2007           | Grapes                    | 10                                                          |
| 21              | Brazil  | 2007           | Groundnuts (Shelled Eq)   | 1                                                           |
| 21              | Brazil  | 2007           | Lemons, Limes             | 9                                                           |
| 21              | Brazil  | 2007           | Maize                     | 69                                                          |
| 21              | Brazil  | 2007           | Maize Germ Oil            | 1                                                           |
| 21              | Brazil  | 2007           | Marine Fish, Other        | 2                                                           |
| 21              | Brazil  | 2007           | Milk, Whole               | 316                                                         |
| 21              | Brazil  | 2007           | Mutton & Goat Meat        | 2                                                           |
| 21              | Brazil  | 2007           | Nuts                      | 1                                                           |
| 21              | Brazil  | 2007           | Oats                      | 3                                                           |
| 21              | Brazil  | 2007           | Offals, Edible            | 7                                                           |
| 21              | Brazil  | 2007           | Olive Oil                 | 1                                                           |
| 21              | Brazil  | 2007           | Olives                    | 1                                                           |
| 21              | Brazil  | 2007           | Onions                    | 18                                                          |
| 21              | Brazil  | 2007           | Oranges, Mandarines       | 87                                                          |
| 21              | Brazil  | 2007           | Palm Oil                  | 4                                                           |
| 21              | Brazil  | 2007           | Pelagic Fish              | 2                                                           |
| 21              | Brazil  | 2007           | Pepper                    | 1                                                           |
| 21              | Brazil  | 2007           | Pigmeat                   | 30                                                          |
| 21              | Brazil  | 2007           | Pineapples                | 30                                                          |
| 21              | Brazil  | 2007           | Potatoes                  | 46                                                          |
| 21              | Brazil  | 2007           | Poultry Meat              | 87                                                          |
| 21              | Brazil  | 2007           | Rice (Milled Equivalent)  | 91                                                          |
| 21              | Brazil  | 2007           | Soyabean Oil              | 37                                                          |
| 21              | Brazil  | 2007           | Soyabeans                 | 9                                                           |
| 21              | Brazil  | 2007           | Sugar Cane                | 39                                                          |
| 21              | Brazil  | 2007           | Sugar, Non-Centrifugal    | 5                                                           |
| 21              | Brazil  | 2007           | Sugar, Refined Equivalent | 100                                                         |
| 21              | Brazil  | 2007           | Sunflowerseed Oil         | 1                                                           |
| 21              | Brazil  | 2007           | Sweet Potatoes            | 3                                                           |
| 21              | Brazil  | 2007           | Sweeteners, Other         | 1                                                           |
| 21              | Brazil  | 2007           | Tea                       | 6                                                           |
| 21              | Brazil  | 2007           | Tomatoes                  | 44                                                          |
| 21              | Brazil  | 2007           | Vegetables, Other         | 65                                                          |
| 21              | Brazil  | 2007           | Wheat                     | 147                                                         |
| 21              | Brazil  | 2007           | Wine                      | 6                                                           |
| 21              | Brazil  | 2007           | Yams                      | 2                                                           |
| 21              | Brazil  | 2008           | Apples                    | 12                                                          |
| 21              | Brazil  | 2008           | Bananas                   | 83                                                          |
| 21              | Brazil  | 2008           | Beans                     | 45                                                          |
| 21              | Brazil  | 2008           | Beer                      | 151                                                         |
| 21              | Brazil  | 2008           | Beverages, Alcoholic      | 10                                                          |
| 21              | Brazil  | 2008           | Bovine Meat               | 103                                                         |
| 21              | Brazil  | 2008           | Butter, Ghee              | 1                                                           |
| 21              | Brazil  | 2008           | Cassava                   | 127                                                         |
| 21              | Brazil  | 2008           | Cereals, Other            | 3                                                           |
| 21              | Brazil  | 2008           | Cheese                    | 1                                                           |
| 21              | Brazil  | 2008           | Cocoa Beans               | 2                                                           |
| 21              | Brazil  | 2008           | Coconuts - Incl Copra     | 41                                                          |
| 21              | Brazil  | 2008           | Coffee                    | 11                                                          |
| 21              | Brazil  | 2008           | Cottonseed Oil            | 4                                                           |
| 21              | Brazil  | 2008           | Crustaceans               | 2                                                           |
| 21              | Brazil  | 2008           | Demersal Fish             | 6                                                           |
| 21              | Brazil  | 2008           | Eggs                      | 21                                                          |
| 21              | Brazil  | 2008           | Fats, Animals, Raw        | 8                                                           |
| 21              | Brazil  | 2008           | Freshwater Fish           | 8                                                           |
| 21              | Brazil  | 2008           | Fruits, Other             | 65                                                          |
| 21              | Brazil  | 2008           | Grapefruit                | 1                                                           |
| 21              | Brazil  | 2008           | Grapes                    | 11                                                          |
| 21              | Brazil  | 2008           | Groundnuts (Shelled Eq)   | 1                                                           |
| 21              | Brazil  | 2008           | Lemons, Limes             | 7                                                           |
| 21              | Brazil  | 2008           | Maize                     | 69                                                          |
| 21              | Brazil  | 2008           | Maize Germ Oil            | 1                                                           |
| 21              | Brazil  | 2008           | Marine Fish, Other        | 2                                                           |
| 21              | Brazil  | 2008           | Milk, Whole               | 338                                                         |
| 21              | Brazil  | 2008           | Mutton & Goat Meat        | 2                                                           |
| 21              | Brazil  | 2008           | Nuts                      | 1                                                           |
| 21              | Brazil  | 2008           | Oats                      | 3                                                           |
| 21              | Brazil  | 2008           | Offals, Edible            | 7                                                           |
| 21              | Brazil  | 2008           | Olive Oil                 | 1                                                           |
| 21              | Brazil  | 2008           | Olives                    | 1                                                           |
| 21              | Brazil  | 2008           | Onions                    | 18                                                          |

Dietary calcium and zinc deficiency risks are decreasing but remain prevalent

| FAO countrycode | Country | Reference year | Food item                 | Gross food supply (g capita <sup>-1</sup> d <sup>-1</sup> ) |
|-----------------|---------|----------------|---------------------------|-------------------------------------------------------------|
| 21              | Brazil  | 2008           | Oranges, Mandarines       | 106                                                         |
| 21              | Brazil  | 2008           | Palm Oil                  | 5                                                           |
| 21              | Brazil  | 2008           | Peas                      | 1                                                           |
| 21              | Brazil  | 2008           | Pelagic Fish              | 2                                                           |
| 21              | Brazil  | 2008           | Pigmeat                   | 32                                                          |
| 21              | Brazil  | 2008           | Pineapples                | 28                                                          |
| 21              | Brazil  | 2008           | Potatoes                  | 49                                                          |
| 21              | Brazil  | 2008           | Poultry Meat              | 100                                                         |
| 21              | Brazil  | 2008           | Rice (Milled Equivalent)  | 91                                                          |
| 21              | Brazil  | 2008           | Soyabean Oil              | 37                                                          |
| 21              | Brazil  | 2008           | Soyabeans                 | 9                                                           |
| 21              | Brazil  | 2008           | Sugar Cane                | 41                                                          |
| 21              | Brazil  | 2008           | Sugar, Non-Centrifugal    | 6                                                           |
| 21              | Brazil  | 2008           | Sugar, Refined Equivalent | 100                                                         |
| 21              | Brazil  | 2008           | Sunflowerseed Oil         | 1                                                           |
| 21              | Brazil  | 2008           | Sweet Potatoes            | 3                                                           |
| 21              | Brazil  | 2008           | Sweeteners, Other         | 1                                                           |
| 21              | Brazil  | 2008           | Tea                       | 6                                                           |
| 21              | Brazil  | 2008           | Tomatoes                  | 50                                                          |
| 21              | Brazil  | 2008           | Vegetables, Other         | 62                                                          |
| 21              | Brazil  | 2008           | Wheat                     | 147                                                         |
| 21              | Brazil  | 2008           | Wine                      | 6                                                           |
| 21              | Brazil  | 2008           | Yams                      | 2                                                           |
| 21              | Brazil  | 2009           | Apples                    | 14                                                          |
| 21              | Brazil  | 2009           | Bananas                   | 80                                                          |
| 21              | Brazil  | 2009           | Beans                     | 45                                                          |
| 21              | Brazil  | 2009           | Beer                      | 151                                                         |
| 21              | Brazil  | 2009           | Beverages, Alcoholic      | 10                                                          |
| 21              | Brazil  | 2009           | Bovine Meat               | 110                                                         |
| 21              | Brazil  | 2009           | Butter, Ghee              | 1                                                           |
| 21              | Brazil  | 2009           | Cassava                   | 116                                                         |
| 21              | Brazil  | 2009           | Cereals, Other            | 2                                                           |
| 21              | Brazil  | 2009           | Cheese                    | 1                                                           |
| 21              | Brazil  | 2009           | Cocoa Beans               | 3                                                           |
| 21              | Brazil  | 2009           | Coconuts - Incl Copra     | 38                                                          |
| 21              | Brazil  | 2009           | Coffee                    | 8                                                           |
| 21              | Brazil  | 2009           | Cottonseed Oil            | 3                                                           |
| 21              | Brazil  | 2009           | Crustaceans               | 2                                                           |
| 21              | Brazil  | 2009           | Demersal Fish             | 7                                                           |
| 21              | Brazil  | 2009           | Eggs                      | 22                                                          |
| 21              | Brazil  | 2009           | Fats, Animals, Raw        | 8                                                           |
| 21              | Brazil  | 2009           | Freshwater Fish           | 9                                                           |
| 21              | Brazil  | 2009           | Fruits, Other             | 65                                                          |
| 21              | Brazil  | 2009           | Grapefruit                | 1                                                           |
| 21              | Brazil  | 2009           | Grapes                    | 11                                                          |
| 21              | Brazil  | 2009           | Lemons, Limes             | 8                                                           |
| 21              | Brazil  | 2009           | Maize                     | 67                                                          |
| 21              | Brazil  | 2009           | Maize Germ Oil            | 1                                                           |
| 21              | Brazil  | 2009           | Marine Fish, Other        | 2                                                           |
| 21              | Brazil  | 2009           | Milk, Whole               | 357                                                         |
| 21              | Brazil  | 2009           | Mutton & Goat Meat        | 2                                                           |
| 21              | Brazil  | 2009           | Nuts                      | 1                                                           |
| 21              | Brazil  | 2009           | Oats                      | 3                                                           |
| 21              | Brazil  | 2009           | Offals, Edible            | 6                                                           |
| 21              | Brazil  | 2009           | Olive Oil                 | 1                                                           |
| 21              | Brazil  | 2009           | Olives                    | 1                                                           |
| 21              | Brazil  | 2009           | Onions                    | 19                                                          |
| 21              | Brazil  | 2009           | Oranges, Mandarines       | 117                                                         |
| 21              | Brazil  | 2009           | Palm Oil                  | 5                                                           |
| 21              | Brazil  | 2009           | Peas                      | 1                                                           |
| 21              | Brazil  | 2009           | Pelagic Fish              | 3                                                           |
| 21              | Brazil  | 2009           | Pigmeat                   | 32                                                          |
| 21              | Brazil  | 2009           | Pineapples                | 24                                                          |
| 21              | Brazil  | 2009           | Potatoes                  | 45                                                          |
| 21              | Brazil  | 2009           | Poultry Meat              | 96                                                          |
| 21              | Brazil  | 2009           | Rice (Milled Equivalent)  | 95                                                          |
| 21              | Brazil  | 2009           | Soyabean Oil              | 37                                                          |
| 21              | Brazil  | 2009           | Soyabeans                 | 9                                                           |
| 21              | Brazil  | 2009           | Sugar Cane                | 44                                                          |
| 21              | Brazil  | 2009           | Sugar, Non-Centrifugal    | 6                                                           |
| 21              | Brazil  | 2009           | Sugar, Refined Equivalent | 99                                                          |
| 21              | Brazil  | 2009           | Sunflowerseed Oil         | 1                                                           |
| 21              | Brazil  | 2009           | Sweet Potatoes            | 3                                                           |
| 21              | Brazil  | 2009           | Sweeteners, Other         | 1                                                           |
| 21              | Brazil  | 2009           | Tea                       | 6                                                           |
| 21              | Brazil  | 2009           | Tomatoes                  | 55                                                          |
| 21              | Brazil  | 2009           | Vegetables, Other         | 67                                                          |
| 21              | Brazil  | 2009           | Wheat                     | 146                                                         |
| 21              | Brazil  | 2009           | Wine                      | 5                                                           |
| 21              | Brazil  | 2009           | Yams                      | 1                                                           |
| 21              | Brazil  | 2010           | Apples                    | 13                                                          |
| 21              | Brazil  | 2010           | Bananas                   | 81                                                          |
| 21              | Brazil  | 2010           | Beans                     | 45                                                          |
| 21              | Brazil  | 2010           | Beer                      | 180                                                         |
| 21              | Brazil  | 2010           | Beverages, Alcoholic      | 10                                                          |
| 21              | Brazil  | 2010           | Bovine Meat               | 106                                                         |
| 21              | Brazil  | 2010           | Butter, Ghee              | 1                                                           |
| 21              | Brazil  | 2010           | Cassava                   | 117                                                         |
| 21              | Brazil  | 2010           | Cereals, Other            | 2                                                           |
| 21              | Brazil  | 2010           | Cheese                    | 1                                                           |
| 21              | Brazil  | 2010           | Cocoa Beans               | 3                                                           |
| 21              | Brazil  | 2010           | Coconuts - Incl Copra     | 36                                                          |
| 21              | Brazil  | 2010           | Coffee                    | 9                                                           |
| 21              | Brazil  | 2010           | Cottonseed Oil            | 3                                                           |
| 21              | Brazil  | 2010           | Crustaceans               | 2                                                           |
| 21              | Brazil  | 2010           | Demersal Fish             | 9                                                           |
| 21              | Brazil  | 2010           | Eggs                      | 23                                                          |

Dietary calcium and zinc deficiency risks are decreasing but remain prevalent

| FAO countrycode | Country | Reference year | Food item                 | Gross food supply (g capita <sup>-1</sup> d <sup>-1</sup> ) |
|-----------------|---------|----------------|---------------------------|-------------------------------------------------------------|
| 21              | Brazil  | 2010           | Fats, Animals, Raw        | 8                                                           |
| 21              | Brazil  | 2010           | Freshwater Fish           | 10                                                          |
| 21              | Brazil  | 2010           | Fruits, Other             | 70                                                          |
| 21              | Brazil  | 2010           | Grapefruit                | 1                                                           |
| 21              | Brazil  | 2010           | Grapes                    | 11                                                          |
| 21              | Brazil  | 2010           | Groundnuts (Shelled Eq)   | 1                                                           |
| 21              | Brazil  | 2010           | Lemons, Limes             | 10                                                          |
| 21              | Brazil  | 2010           | Maize                     | 67                                                          |
| 21              | Brazil  | 2010           | Maize Germ Oil            | 1                                                           |
| 21              | Brazil  | 2010           | Marine Fish, Other        | 2                                                           |
| 21              | Brazil  | 2010           | Milk, Whole               | 372                                                         |
| 21              | Brazil  | 2010           | Mutton & Goat Meat        | 2                                                           |
| 21              | Brazil  | 2010           | Nuts                      | 1                                                           |
| 21              | Brazil  | 2010           | Oats                      | 5                                                           |
| 21              | Brazil  | 2010           | Offals, Edible            | 6                                                           |
| 21              | Brazil  | 2010           | Olive Oil                 | 1                                                           |
| 21              | Brazil  | 2010           | Olives                    | 1                                                           |
| 21              | Brazil  | 2010           | Onions                    | 22                                                          |
| 21              | Brazil  | 2010           | Oranges, Mandarines       | 143                                                         |
| 21              | Brazil  | 2010           | Palm Oil                  | 5                                                           |
| 21              | Brazil  | 2010           | Peas                      | 1                                                           |
| 21              | Brazil  | 2010           | Pelagic Fish              | 2                                                           |
| 21              | Brazil  | 2010           | Pigmeat                   | 34                                                          |
| 21              | Brazil  | 2010           | Pineapples                | 24                                                          |
| 21              | Brazil  | 2010           | Potatoes                  | 48                                                          |
| 21              | Brazil  | 2010           | Poultry Meat              | 103                                                         |
| 21              | Brazil  | 2010           | Rice (Milled Equivalent)  | 92                                                          |
| 21              | Brazil  | 2010           | Soyabean Oil              | 37                                                          |
| 21              | Brazil  | 2010           | Soyabeans                 | 10                                                          |
| 21              | Brazil  | 2010           | Sugar Cane                | 45                                                          |
| 21              | Brazil  | 2010           | Sugar, Non-Centrifugal    | 6                                                           |
| 21              | Brazil  | 2010           | Sugar, Refined Equivalent | 100                                                         |
| 21              | Brazil  | 2010           | Sunflowerseed Oil         | 1                                                           |
| 21              | Brazil  | 2010           | Sweet Potatoes            | 3                                                           |
| 21              | Brazil  | 2010           | Sweeteners, Other         | 1                                                           |
| 21              | Brazil  | 2010           | Tea                       | 5                                                           |
| 21              | Brazil  | 2010           | Tomatoes                  | 53                                                          |
| 21              | Brazil  | 2010           | Vegetables, Other         | 70                                                          |
| 21              | Brazil  | 2010           | Wheat                     | 148                                                         |
| 21              | Brazil  | 2010           | Wine                      | 6                                                           |
| 21              | Brazil  | 2010           | Yams                      | 2                                                           |
| 21              | Brazil  | 2011           | Apples                    | 15                                                          |
| 21              | Brazil  | 2011           | Bananas                   | 85                                                          |
| 21              | Brazil  | 2011           | Beans                     | 45                                                          |
| 21              | Brazil  | 2011           | Beer                      | 185                                                         |
| 21              | Brazil  | 2011           | Beverages, Alcoholic      | 10                                                          |
| 21              | Brazil  | 2011           | Bovine Meat               | 107                                                         |
| 21              | Brazil  | 2011           | Butter, Ghee              | 1                                                           |
| 21              | Brazil  | 2011           | Cassava                   | 118                                                         |
| 21              | Brazil  | 2011           | Cereals, Other            | 2                                                           |
| 21              | Brazil  | 2011           | Cheese                    | 1                                                           |
| 21              | Brazil  | 2011           | Cocoa Beans               | 3                                                           |
| 21              | Brazil  | 2011           | Coconuts - Incl Copra     | 37                                                          |
| 21              | Brazil  | 2011           | Coffee                    | 8                                                           |
| 21              | Brazil  | 2011           | Cottonseed Oil            | 3                                                           |
| 21              | Brazil  | 2011           | Crustaceans               | 2                                                           |
| 21              | Brazil  | 2011           | Demersal Fish             | 11                                                          |
| 21              | Brazil  | 2011           | Eggs                      | 24                                                          |
| 21              | Brazil  | 2011           | Fats, Animals, Raw        | 8                                                           |
| 21              | Brazil  | 2011           | Freshwater Fish           | 12                                                          |
| 21              | Brazil  | 2011           | Fruits, Other             | 71                                                          |
| 21              | Brazil  | 2011           | Grapefruit                | 1                                                           |
| 21              | Brazil  | 2011           | Grapes                    | 13                                                          |
| 21              | Brazil  | 2011           | Groundnuts (Shelled Eq)   | 2                                                           |
| 21              | Brazil  | 2011           | Lemons, Limes             | 11                                                          |
| 21              | Brazil  | 2011           | Maize                     | 67                                                          |
| 21              | Brazil  | 2011           | Maize Germ Oil            | 1                                                           |
| 21              | Brazil  | 2011           | Marine Fish, Other        | 2                                                           |
| 21              | Brazil  | 2011           | Milk, Whole               | 390                                                         |
| 21              | Brazil  | 2011           | Molluscs, Other           | 1                                                           |
| 21              | Brazil  | 2011           | Mutton & Goat Meat        | 2                                                           |
| 21              | Brazil  | 2011           | Nuts                      | 3                                                           |
| 21              | Brazil  | 2011           | Oats                      | 5                                                           |
| 21              | Brazil  | 2011           | Offals, Edible            | 6                                                           |
| 21              | Brazil  | 2011           | Olive Oil                 | 1                                                           |
| 21              | Brazil  | 2011           | Olives                    | 1                                                           |
| 21              | Brazil  | 2011           | Onions                    | 19                                                          |
| 21              | Brazil  | 2011           | Oranges, Mandarines       | 159                                                         |
| 21              | Brazil  | 2011           | Palm Oil                  | 5                                                           |
| 21              | Brazil  | 2011           | Peas                      | 1                                                           |
| 21              | Brazil  | 2011           | Pelagic Fish              | 3                                                           |
| 21              | Brazil  | 2011           | Pigmeat                   | 34                                                          |
| 21              | Brazil  | 2011           | Pineapples                | 26                                                          |
| 21              | Brazil  | 2011           | Potatoes                  | 53                                                          |
| 21              | Brazil  | 2011           | Poultry Meat              | 111                                                         |
| 21              | Brazil  | 2011           | Pulses, Other             | 1                                                           |
| 21              | Brazil  | 2011           | Rice (Milled Equivalent)  | 94                                                          |
| 21              | Brazil  | 2011           | Soyabean Oil              | 37                                                          |
| 21              | Brazil  | 2011           | Soyabeans                 | 10                                                          |
| 21              | Brazil  | 2011           | Sugar Cane                | 46                                                          |
| 21              | Brazil  | 2011           | Sugar, Non-Centrifugal    | 7                                                           |
| 21              | Brazil  | 2011           | Sugar, Refined Equivalent | 100                                                         |
| 21              | Brazil  | 2011           | Sunflowerseed Oil         | 1                                                           |
| 21              | Brazil  | 2011           | Sweet Potatoes            | 3                                                           |
| 21              | Brazil  | 2011           | Sweeteners, Other         | 1                                                           |
| 21              | Brazil  | 2011           | Tea                       | 5                                                           |
| 21              | Brazil  | 2011           | Tomatoes                  | 56                                                          |

Dietary calcium and zinc deficiency risks are decreasing but remain prevalent

| FAO countrycode | Country  | Reference year | Food item                 | Gross food supply (g capita <sup>-1</sup> d <sup>-1</sup> ) |
|-----------------|----------|----------------|---------------------------|-------------------------------------------------------------|
| 21              | Brazil   | 2011           | Vegetables, Other         | 73                                                          |
| 21              | Brazil   | 2011           | Wheat                     | 146                                                         |
| 21              | Brazil   | 2011           | Wine                      | 6                                                           |
| 21              | Brazil   | 2011           | Yams                      | 2                                                           |
| 27              | Bulgaria | 1992           | Apples                    | 50                                                          |
| 27              | Bulgaria | 1992           | Bananas                   | 6                                                           |
| 27              | Bulgaria | 1992           | Barley                    | 4                                                           |
| 27              | Bulgaria | 1992           | Beans                     | 8                                                           |
| 27              | Bulgaria | 1992           | Beer                      | 119                                                         |
| 27              | Bulgaria | 1992           | Beverages, Alcoholic      | 29                                                          |
| 27              | Bulgaria | 1992           | Bovine Meat               | 41                                                          |
| 27              | Bulgaria | 1992           | Butter, Ghee              | 3                                                           |
| 27              | Bulgaria | 1992           | Cephalopods               | 2                                                           |
| 27              | Bulgaria | 1992           | Cheese                    | 28                                                          |
| 27              | Bulgaria | 1992           | Citrus, Other             | 4                                                           |
| 27              | Bulgaria | 1992           | Cocoa Beans               | 3                                                           |
| 27              | Bulgaria | 1992           | Coffee                    | 4                                                           |
| 27              | Bulgaria | 1992           | Eggs                      | 26                                                          |
| 27              | Bulgaria | 1992           | Fats, Animals, Raw        | 21                                                          |
| 27              | Bulgaria | 1992           | Freshwater Fish           | 3                                                           |
| 27              | Bulgaria | 1992           | Fruits, Other             | 100                                                         |
| 27              | Bulgaria | 1992           | Grapes                    | 27                                                          |
| 27              | Bulgaria | 1992           | Groundnut Oil             | 1                                                           |
| 27              | Bulgaria | 1992           | Groundnuts (Shelled Eq)   | 1                                                           |
| 27              | Bulgaria | 1992           | Honey                     | 1                                                           |
| 27              | Bulgaria | 1992           | Lemons, Limes             | 2                                                           |
| 27              | Bulgaria | 1992           | Maize                     | 4                                                           |
| 27              | Bulgaria | 1992           | Meat, Other               | 1                                                           |
| 27              | Bulgaria | 1992           | Milk, Whole               | 218                                                         |
| 27              | Bulgaria | 1992           | Mutton & Goat Meat        | 17                                                          |
| 27              | Bulgaria | 1992           | Nuts                      | 6                                                           |
| 27              | Bulgaria | 1992           | Offals, Edible            | 21                                                          |
| 27              | Bulgaria | 1992           | Olives                    | 2                                                           |
| 27              | Bulgaria | 1992           | Onions                    | 29                                                          |
| 27              | Bulgaria | 1992           | Oranges, Mandarines       | 8                                                           |
| 27              | Bulgaria | 1992           | Peas                      | 3                                                           |
| 27              | Bulgaria | 1992           | Pelagic Fish              | 2                                                           |
| 27              | Bulgaria | 1992           | Pigmeat                   | 64                                                          |
| 27              | Bulgaria | 1992           | Potatoes                  | 86                                                          |
| 27              | Bulgaria | 1992           | Poultry Meat              | 23                                                          |
| 27              | Bulgaria | 1992           | Rice (Milled Equivalent)  | 13                                                          |
| 27              | Bulgaria | 1992           | Rye                       | 1                                                           |
| 27              | Bulgaria | 1992           | Sesameseed                | 2                                                           |
| 27              | Bulgaria | 1992           | Soyabean Oil              | 1                                                           |
| 27              | Bulgaria | 1992           | Sugar, Refined Equivalent | 80                                                          |
| 27              | Bulgaria | 1992           | Sunflowerseed             | 5                                                           |
| 27              | Bulgaria | 1992           | Sunflowerseed Oil         | 35                                                          |
| 27              | Bulgaria | 1992           | Sweeteners, Other         | 2                                                           |
| 27              | Bulgaria | 1992           | Tomatoes                  | 109                                                         |
| 27              | Bulgaria | 1992           | Vegetables, Other         | 184                                                         |
| 27              | Bulgaria | 1992           | Wheat                     | 428                                                         |
| 27              | Bulgaria | 1992           | Wine                      | 31                                                          |
| 27              | Bulgaria | 1993           | Apples                    | 36                                                          |
| 27              | Bulgaria | 1993           | Bananas                   | 12                                                          |
| 27              | Bulgaria | 1993           | Barley                    | 4                                                           |
| 27              | Bulgaria | 1993           | Beans                     | 8                                                           |
| 27              | Bulgaria | 1993           | Beer                      | 137                                                         |
| 27              | Bulgaria | 1993           | Beverages, Alcoholic      | 32                                                          |
| 27              | Bulgaria | 1993           | Bovine Meat               | 44                                                          |
| 27              | Bulgaria | 1993           | Butter, Ghee              | 3                                                           |
| 27              | Bulgaria | 1993           | Cheese                    | 31                                                          |
| 27              | Bulgaria | 1993           | Citrus, Other             | 10                                                          |
| 27              | Bulgaria | 1993           | Cocoa Beans               | 3                                                           |
| 27              | Bulgaria | 1993           | Coffee                    | 5                                                           |
| 27              | Bulgaria | 1993           | Eggs                      | 27                                                          |
| 27              | Bulgaria | 1993           | Fats, Animals, Raw        | 14                                                          |
| 27              | Bulgaria | 1993           | Freshwater Fish           | 3                                                           |
| 27              | Bulgaria | 1993           | Fruits, Other             | 58                                                          |
| 27              | Bulgaria | 1993           | Grapefruit                | 1                                                           |
| 27              | Bulgaria | 1993           | Grapes                    | 15                                                          |
| 27              | Bulgaria | 1993           | Groundnut Oil             | 1                                                           |
| 27              | Bulgaria | 1993           | Groundnuts (Shelled Eq)   | 1                                                           |
| 27              | Bulgaria | 1993           | Honey                     | 1                                                           |
| 27              | Bulgaria | 1993           | Lemons, Limes             | 3                                                           |
| 27              | Bulgaria | 1993           | Maize                     | 4                                                           |
| 27              | Bulgaria | 1993           | Meat, Other               | 2                                                           |
| 27              | Bulgaria | 1993           | Milk, Whole               | 229                                                         |
| 27              | Bulgaria | 1993           | Mutton & Goat Meat        | 17                                                          |
| 27              | Bulgaria | 1993           | Nuts                      | 5                                                           |
| 27              | Bulgaria | 1993           | Offals, Edible            | 19                                                          |
| 27              | Bulgaria | 1993           | Oilcrops Oil, Other       | 1                                                           |
| 27              | Bulgaria | 1993           | Olives                    | 2                                                           |
| 27              | Bulgaria | 1993           | Onions                    | 15                                                          |
| 27              | Bulgaria | 1993           | Oranges, Mandarines       | 14                                                          |
| 27              | Bulgaria | 1993           | Peas                      | 3                                                           |
| 27              | Bulgaria | 1993           | Pelagic Fish              | 1                                                           |
| 27              | Bulgaria | 1993           | Pigmeat                   | 81                                                          |
| 27              | Bulgaria | 1993           | Potatoes                  | 80                                                          |
| 27              | Bulgaria | 1993           | Poultry Meat              | 28                                                          |
| 27              | Bulgaria | 1993           | Pulses, Other             | 1                                                           |
| 27              | Bulgaria | 1993           | Rice (Milled Equivalent)  | 10                                                          |
| 27              | Bulgaria | 1993           | Rye                       | 1                                                           |
| 27              | Bulgaria | 1993           | Soyabean Oil              | 1                                                           |
| 27              | Bulgaria | 1993           | Spices, Other             | 1                                                           |
| 27              | Bulgaria | 1993           | Sugar, Refined Equivalent | 79                                                          |
| 27              | Bulgaria | 1993           | Sunflowerseed             | 4                                                           |
| 27              | Bulgaria | 1993           | Sunflowerseed Oil         | 33                                                          |

## Dietary calcium and zinc deficiency risks are decreasing but remain prevalent

| FAO countrycode | Country  | Reference year | Food item                 | Gross food supply (g capita <sup>-1</sup> d <sup>-1</sup> ) |
|-----------------|----------|----------------|---------------------------|-------------------------------------------------------------|
| 27              | Bulgaria | 1993           | Sweeteners, Other         | 1                                                           |
| 27              | Bulgaria | 1993           | Tomatoes                  | 121                                                         |
| 27              | Bulgaria | 1993           | Vegetables, Other         | 170                                                         |
| 27              | Bulgaria | 1993           | Wheat                     | 423                                                         |
| 27              | Bulgaria | 1993           | Wine                      | 32                                                          |
| 27              | Bulgaria | 1994           | Apples                    | 27                                                          |
| 27              | Bulgaria | 1994           | Bananas                   | 15                                                          |
| 27              | Bulgaria | 1994           | Barley                    | 5                                                           |
| 27              | Bulgaria | 1994           | Beans                     | 7                                                           |
| 27              | Bulgaria | 1994           | Beer                      | 154                                                         |
| 27              | Bulgaria | 1994           | Beverages, Alcoholic      | 32                                                          |
| 27              | Bulgaria | 1994           | Bovine Meat               | 35                                                          |
| 27              | Bulgaria | 1994           | Butter, Ghee              | 2                                                           |
| 27              | Bulgaria | 1994           | Cheese                    | 24                                                          |
| 27              | Bulgaria | 1994           | Citrus, Other             | 2                                                           |
| 27              | Bulgaria | 1994           | Cocoa Beans               | 3                                                           |
| 27              | Bulgaria | 1994           | Coffee                    | 7                                                           |
| 27              | Bulgaria | 1994           | Eggs                      | 29                                                          |
| 27              | Bulgaria | 1994           | Fats, Animals, Raw        | 12                                                          |
| 27              | Bulgaria | 1994           | Freshwater Fish           | 2                                                           |
| 27              | Bulgaria | 1994           | Fruits, Other             | 75                                                          |
| 27              | Bulgaria | 1994           | Grapefruit                | 1                                                           |
| 27              | Bulgaria | 1994           | Grapes                    | 14                                                          |
| 27              | Bulgaria | 1994           | Groundnut Oil             | 1                                                           |
| 27              | Bulgaria | 1994           | Groundnuts (Shelled Eq)   | 1                                                           |
| 27              | Bulgaria | 1994           | Lemons, Limes             | 2                                                           |
| 27              | Bulgaria | 1994           | Maize                     | 8                                                           |
| 27              | Bulgaria | 1994           | Meat, Other               | 2                                                           |
| 27              | Bulgaria | 1994           | Milk, Whole               | 250                                                         |
| 27              | Bulgaria | 1994           | Mutton & Goat Meat        | 14                                                          |
| 27              | Bulgaria | 1994           | Nuts                      | 4                                                           |
| 27              | Bulgaria | 1994           | Offals, Edible            | 15                                                          |
| 27              | Bulgaria | 1994           | Oilcrops Oil, Other       | 1                                                           |
| 27              | Bulgaria | 1994           | Olives                    | 2                                                           |
| 27              | Bulgaria | 1994           | Onions                    | 23                                                          |
| 27              | Bulgaria | 1994           | Oranges, Mandarines       | 12                                                          |
| 27              | Bulgaria | 1994           | Peas                      | 3                                                           |
| 27              | Bulgaria | 1994           | Pelagic Fish              | 1                                                           |
| 27              | Bulgaria | 1994           | Pigmeat                   | 78                                                          |
| 27              | Bulgaria | 1994           | Potatoes                  | 80                                                          |
| 27              | Bulgaria | 1994           | Poultry Meat              | 28                                                          |
| 27              | Bulgaria | 1994           | Pulses, Other             | 1                                                           |
| 27              | Bulgaria | 1994           | Rice (Milled Equivalent)  | 13                                                          |
| 27              | Bulgaria | 1994           | Rye                       | 1                                                           |
| 27              | Bulgaria | 1994           | Soyabean Oil              | 1                                                           |
| 27              | Bulgaria | 1994           | Sugar, Refined Equivalent | 74                                                          |
| 27              | Bulgaria | 1994           | Sunflowerseed             | 5                                                           |
| 27              | Bulgaria | 1994           | Sunflowerseed Oil         | 29                                                          |
| 27              | Bulgaria | 1994           | Sweeteners, Other         | 2                                                           |
| 27              | Bulgaria | 1994           | Tomatoes                  | 114                                                         |
| 27              | Bulgaria | 1994           | Vegetables, Other         | 183                                                         |
| 27              | Bulgaria | 1994           | Wheat                     | 419                                                         |
| 27              | Bulgaria | 1994           | Wine                      | 28                                                          |
| 27              | Bulgaria | 1995           | Apples                    | 43                                                          |
| 27              | Bulgaria | 1995           | Bananas                   | 10                                                          |
| 27              | Bulgaria | 1995           | Barley                    | 5                                                           |
| 27              | Bulgaria | 1995           | Beans                     | 8                                                           |
| 27              | Bulgaria | 1995           | Beer                      | 138                                                         |
| 27              | Bulgaria | 1995           | Beverages, Alcoholic      | 26                                                          |
| 27              | Bulgaria | 1995           | Bovine Meat               | 29                                                          |
| 27              | Bulgaria | 1995           | Butter, Ghee              | 1                                                           |
| 27              | Bulgaria | 1995           | Cheese                    | 24                                                          |
| 27              | Bulgaria | 1995           | Citrus, Other             | 1                                                           |
| 27              | Bulgaria | 1995           | Cocoa Beans               | 4                                                           |
| 27              | Bulgaria | 1995           | Coffee                    | 8                                                           |
| 27              | Bulgaria | 1995           | Eggs                      | 31                                                          |
| 27              | Bulgaria | 1995           | Fats, Animals, Raw        | 11                                                          |
| 27              | Bulgaria | 1995           | Freshwater Fish           | 1                                                           |
| 27              | Bulgaria | 1995           | Fruits, Other             | 82                                                          |
| 27              | Bulgaria | 1995           | Grapefruit                | 1                                                           |
| 27              | Bulgaria | 1995           | Grapes                    | 30                                                          |
| 27              | Bulgaria | 1995           | Groundnut Oil             | 1                                                           |
| 27              | Bulgaria | 1995           | Groundnuts (Shelled Eq)   | 1                                                           |
| 27              | Bulgaria | 1995           | Lemons, Limes             | 3                                                           |
| 27              | Bulgaria | 1995           | Maize                     | 9                                                           |
| 27              | Bulgaria | 1995           | Meat, Other               | 2                                                           |
| 27              | Bulgaria | 1995           | Milk, Whole               | 259                                                         |
| 27              | Bulgaria | 1995           | Mutton & Goat Meat        | 14                                                          |
| 27              | Bulgaria | 1995           | Nuts                      | 1                                                           |
| 27              | Bulgaria | 1995           | Offals, Edible            | 16                                                          |
| 27              | Bulgaria | 1995           | Oilcrops Oil, Other       | 1                                                           |
| 27              | Bulgaria | 1995           | Olives                    | 2                                                           |
| 27              | Bulgaria | 1995           | Onions                    | 33                                                          |
| 27              | Bulgaria | 1995           | Oranges, Mandarines       | 14                                                          |
| 27              | Bulgaria | 1995           | Peas                      | 3                                                           |
| 27              | Bulgaria | 1995           | Pigmeat                   | 85                                                          |
| 27              | Bulgaria | 1995           | Potatoes                  | 82                                                          |
| 27              | Bulgaria | 1995           | Poultry Meat              | 30                                                          |
| 27              | Bulgaria | 1995           | Pulses, Other             | 1                                                           |
| 27              | Bulgaria | 1995           | Rice (Milled Equivalent)  | 11                                                          |
| 27              | Bulgaria | 1995           | Rye                       | 1                                                           |
| 27              | Bulgaria | 1995           | Soyabean Oil              | 1                                                           |
| 27              | Bulgaria | 1995           | Sugar, Refined Equivalent | 74                                                          |
| 27              | Bulgaria | 1995           | Sunflowerseed             | 5                                                           |
| 27              | Bulgaria | 1995           | Sunflowerseed Oil         | 30                                                          |
| 27              | Bulgaria | 1995           | Sweeteners, Other         | 2                                                           |
| 27              | Bulgaria | 1995           | Tomatoes                  | 100                                                         |



Dietary calcium and zinc deficiency risks are decreasing but remain prevalent

| FAO countrycode | Country  | Reference year | Food item                 | Gross food supply (g capita <sup>-1</sup> d <sup>-1</sup> ) |
|-----------------|----------|----------------|---------------------------|-------------------------------------------------------------|
| 27              | Bulgaria | 1995           | Vegetables, Other         | 222                                                         |
| 27              | Bulgaria | 1995           | Wheat                     | 418                                                         |
| 27              | Bulgaria | 1995           | Wine                      | 28                                                          |
| 27              | Bulgaria | 1996           | Apples                    | 48                                                          |
| 27              | Bulgaria | 1996           | Bananas                   | 6                                                           |
| 27              | Bulgaria | 1996           | Barley                    | 6                                                           |
| 27              | Bulgaria | 1996           | Beans                     | 6                                                           |
| 27              | Bulgaria | 1996           | Beer                      | 136                                                         |
| 27              | Bulgaria | 1996           | Beverages, Alcoholic      | 20                                                          |
| 27              | Bulgaria | 1996           | Bovine Meat               | 26                                                          |
| 27              | Bulgaria | 1996           | Butter, Ghee              | 1                                                           |
| 27              | Bulgaria | 1996           | Cheese                    | 21                                                          |
| 27              | Bulgaria | 1996           | Cocoa Beans               | 3                                                           |
| 27              | Bulgaria | 1996           | Coffee                    | 5                                                           |
| 27              | Bulgaria | 1996           | Eggs                      | 31                                                          |
| 27              | Bulgaria | 1996           | Fats, Animals, Raw        | 9                                                           |
| 27              | Bulgaria | 1996           | Freshwater Fish           | 1                                                           |
| 27              | Bulgaria | 1996           | Fruits, Other             | 79                                                          |
| 27              | Bulgaria | 1996           | Grapefruit                | 1                                                           |
| 27              | Bulgaria | 1996           | Grapes                    | 24                                                          |
| 27              | Bulgaria | 1996           | Groundnut Oil             | 1                                                           |
| 27              | Bulgaria | 1996           | Groundnuts (Shelled Eq)   | 1                                                           |
| 27              | Bulgaria | 1996           | Lemons, Limes             | 2                                                           |
| 27              | Bulgaria | 1996           | Maize                     | 11                                                          |
| 27              | Bulgaria | 1996           | Meat, Other               | 2                                                           |
| 27              | Bulgaria | 1996           | Milk, Whole               | 265                                                         |
| 27              | Bulgaria | 1996           | Molluscs, Other           | 1                                                           |
| 27              | Bulgaria | 1996           | Mutton & Goat Meat        | 17                                                          |
| 27              | Bulgaria | 1996           | Nuts                      | 1                                                           |
| 27              | Bulgaria | 1996           | Offals, Edible            | 16                                                          |
| 27              | Bulgaria | 1996           | Oilcrops Oil, Other       | 1                                                           |
| 27              | Bulgaria | 1996           | Olives                    | 1                                                           |
| 27              | Bulgaria | 1996           | Onions                    | 28                                                          |
| 27              | Bulgaria | 1996           | Oranges, Mandarines       | 7                                                           |
| 27              | Bulgaria | 1996           | Peas                      | 3                                                           |
| 27              | Bulgaria | 1996           | Pelagic Fish              | 1                                                           |
| 27              | Bulgaria | 1996           | Pig meat                  | 79                                                          |
| 27              | Bulgaria | 1996           | Potatoes                  | 84                                                          |
| 27              | Bulgaria | 1996           | Poultry Meat              | 34                                                          |
| 27              | Bulgaria | 1996           | Pulses, Other             | 1                                                           |
| 27              | Bulgaria | 1996           | Rice (Milled Equivalent)  | 12                                                          |
| 27              | Bulgaria | 1996           | Rye                       | 1                                                           |
| 27              | Bulgaria | 1996           | Spices, Other             | 1                                                           |
| 27              | Bulgaria | 1996           | Sugar, Refined Equivalent | 69                                                          |
| 27              | Bulgaria | 1996           | Sunflowerseed             | 5                                                           |
| 27              | Bulgaria | 1996           | Sunflowerseed Oil         | 31                                                          |
| 27              | Bulgaria | 1996           | Sweeteners, Other         | 2                                                           |
| 27              | Bulgaria | 1996           | Tomatoes                  | 96                                                          |
| 27              | Bulgaria | 1996           | Vegetables, Other         | 206                                                         |
| 27              | Bulgaria | 1996           | Wheat                     | 390                                                         |
| 27              | Bulgaria | 1996           | Wine                      | 29                                                          |
| 27              | Bulgaria | 1997           | Apples                    | 45                                                          |
| 27              | Bulgaria | 1997           | Bananas                   | 5                                                           |
| 27              | Bulgaria | 1997           | Barley                    | 6                                                           |
| 27              | Bulgaria | 1997           | Beans                     | 6                                                           |
| 27              | Bulgaria | 1997           | Beer                      | 99                                                          |
| 27              | Bulgaria | 1997           | Beverages, Alcoholic      | 23                                                          |
| 27              | Bulgaria | 1997           | Bovine Meat               | 26                                                          |
| 27              | Bulgaria | 1997           | Butter, Ghee              | 1                                                           |
| 27              | Bulgaria | 1997           | Cheese                    | 18                                                          |
| 27              | Bulgaria | 1997           | Cocoa Beans               | 3                                                           |
| 27              | Bulgaria | 1997           | Coffee                    | 6                                                           |
| 27              | Bulgaria | 1997           | Crustaceans               | 1                                                           |
| 27              | Bulgaria | 1997           | Eggs                      | 27                                                          |
| 27              | Bulgaria | 1997           | Fats, Animals, Raw        | 8                                                           |
| 27              | Bulgaria | 1997           | Freshwater Fish           | 2                                                           |
| 27              | Bulgaria | 1997           | Fruits, Other             | 66                                                          |
| 27              | Bulgaria | 1997           | Grapes                    | 26                                                          |
| 27              | Bulgaria | 1997           | Groundnut Oil             | 1                                                           |
| 27              | Bulgaria | 1997           | Groundnuts (Shelled Eq)   | 1                                                           |
| 27              | Bulgaria | 1997           | Lemons, Limes             | 1                                                           |
| 27              | Bulgaria | 1997           | Maize                     | 12                                                          |
| 27              | Bulgaria | 1997           | Marine Fish, Other        | 1                                                           |
| 27              | Bulgaria | 1997           | Meat, Other               | 4                                                           |
| 27              | Bulgaria | 1997           | Milk, Whole               | 300                                                         |
| 27              | Bulgaria | 1997           | Molluscs, Other           | 1                                                           |
| 27              | Bulgaria | 1997           | Mutton & Goat Meat        | 16                                                          |
| 27              | Bulgaria | 1997           | Nuts                      | 1                                                           |
| 27              | Bulgaria | 1997           | Offals, Edible            | 15                                                          |
| 27              | Bulgaria | 1997           | Oilcrops Oil, Other       | 1                                                           |
| 27              | Bulgaria | 1997           | Olives                    | 1                                                           |
| 27              | Bulgaria | 1997           | Onions                    | 22                                                          |
| 27              | Bulgaria | 1997           | Oranges, Mandarines       | 7                                                           |
| 27              | Bulgaria | 1997           | Peas                      | 3                                                           |
| 27              | Bulgaria | 1997           | Pelagic Fish              | 3                                                           |
| 27              | Bulgaria | 1997           | Pig meat                  | 75                                                          |
| 27              | Bulgaria | 1997           | Potatoes                  | 77                                                          |
| 27              | Bulgaria | 1997           | Poultry Meat              | 37                                                          |
| 27              | Bulgaria | 1997           | Pulses, Other             | 2                                                           |
| 27              | Bulgaria | 1997           | Rice (Milled Equivalent)  | 10                                                          |
| 27              | Bulgaria | 1997           | Rye                       | 2                                                           |
| 27              | Bulgaria | 1997           | Soyabean Oil              | 1                                                           |
| 27              | Bulgaria | 1997           | Spices, Other             | 1                                                           |
| 27              | Bulgaria | 1997           | Sugar, Refined Equivalent | 71                                                          |
| 27              | Bulgaria | 1997           | Sunflowerseed             | 4                                                           |
| 27              | Bulgaria | 1997           | Sunflowerseed Oil         | 31                                                          |
| 27              | Bulgaria | 1997           | Sweeteners, Other         | 2                                                           |

Dietary calcium and zinc deficiency risks are decreasing but remain prevalent

| FAO countrycode | Country  | Reference year | Food item                 | Gross food supply (g capita <sup>-1</sup> d <sup>-1</sup> ) |
|-----------------|----------|----------------|---------------------------|-------------------------------------------------------------|
| 27              | Bulgaria | 1997           | Tomatoes                  | 84                                                          |
| 27              | Bulgaria | 1997           | Vegetables, Other         | 237                                                         |
| 27              | Bulgaria | 1997           | Wheat                     | 378                                                         |
| 27              | Bulgaria | 1997           | Wine                      | 20                                                          |
| 27              | Bulgaria | 1998           | Apples                    | 32                                                          |
| 27              | Bulgaria | 1998           | Bananas                   | 9                                                           |
| 27              | Bulgaria | 1998           | Barley                    | 5                                                           |
| 27              | Bulgaria | 1998           | Beans                     | 7                                                           |
| 27              | Bulgaria | 1998           | Beer                      | 126                                                         |
| 27              | Bulgaria | 1998           | Beverages, Alcoholic      | 22                                                          |
| 27              | Bulgaria | 1998           | Bovine Meat               | 28                                                          |
| 27              | Bulgaria | 1998           | Butter, Ghee              | 1                                                           |
| 27              | Bulgaria | 1998           | Cheese                    | 21                                                          |
| 27              | Bulgaria | 1998           | Cocoa Beans               | 3                                                           |
| 27              | Bulgaria | 1998           | Coffee                    | 6                                                           |
| 27              | Bulgaria | 1998           | Crustaceans               | 1                                                           |
| 27              | Bulgaria | 1998           | Demersal Fish             | 1                                                           |
| 27              | Bulgaria | 1998           | Eggs                      | 31                                                          |
| 27              | Bulgaria | 1998           | Fats, Animals, Raw        | 8                                                           |
| 27              | Bulgaria | 1998           | Freshwater Fish           | 2                                                           |
| 27              | Bulgaria | 1998           | Fruits, Other             | 58                                                          |
| 27              | Bulgaria | 1998           | Grapefruit                | 1                                                           |
| 27              | Bulgaria | 1998           | Grapes                    | 15                                                          |
| 27              | Bulgaria | 1998           | Groundnut Oil             | 1                                                           |
| 27              | Bulgaria | 1998           | Groundnuts (Shelled Eq)   | 1                                                           |
| 27              | Bulgaria | 1998           | Honey                     | 1                                                           |
| 27              | Bulgaria | 1998           | Lemons, Limes             | 2                                                           |
| 27              | Bulgaria | 1998           | Maize                     | 19                                                          |
| 27              | Bulgaria | 1998           | Marine Fish, Other        | 1                                                           |
| 27              | Bulgaria | 1998           | Meat, Other               | 2                                                           |
| 27              | Bulgaria | 1998           | Milk, Whole               | 318                                                         |
| 27              | Bulgaria | 1998           | Molluscs, Other           | 1                                                           |
| 27              | Bulgaria | 1998           | Mutton & Goat Meat        | 16                                                          |
| 27              | Bulgaria | 1998           | Nuts                      | 1                                                           |
| 27              | Bulgaria | 1998           | Offals, Edible            | 18                                                          |
| 27              | Bulgaria | 1998           | Olives                    | 2                                                           |
| 27              | Bulgaria | 1998           | Onions                    | 29                                                          |
| 27              | Bulgaria | 1998           | Oranges, Mandarines       | 9                                                           |
| 27              | Bulgaria | 1998           | Peas                      | 2                                                           |
| 27              | Bulgaria | 1998           | Pelagic Fish              | 9                                                           |
| 27              | Bulgaria | 1998           | Pigmeat                   | 90                                                          |
| 27              | Bulgaria | 1998           | Potatoes                  | 88                                                          |
| 27              | Bulgaria | 1998           | Poultry Meat              | 43                                                          |
| 27              | Bulgaria | 1998           | Pulses, Other             | 1                                                           |
| 27              | Bulgaria | 1998           | Rice (Milled Equivalent)  | 7                                                           |
| 27              | Bulgaria | 1998           | Rye                       | 2                                                           |
| 27              | Bulgaria | 1998           | Soyabean Oil              | 2                                                           |
| 27              | Bulgaria | 1998           | Sugar, Refined Equivalent | 69                                                          |
| 27              | Bulgaria | 1998           | Sunflowerseed             | 4                                                           |
| 27              | Bulgaria | 1998           | Sunflowerseed Oil         | 35                                                          |
| 27              | Bulgaria | 1998           | Sweeteners, Other         | 2                                                           |
| 27              | Bulgaria | 1998           | Tomatoes                  | 132                                                         |
| 27              | Bulgaria | 1998           | Vegetables, Other         | 289                                                         |
| 27              | Bulgaria | 1998           | Wheat                     | 384                                                         |
| 27              | Bulgaria | 1998           | Wine                      | 9                                                           |
| 27              | Bulgaria | 1999           | Apples                    | 30                                                          |
| 27              | Bulgaria | 1999           | Bananas                   | 12                                                          |
| 27              | Bulgaria | 1999           | Barley                    | 5                                                           |
| 27              | Bulgaria | 1999           | Beans                     | 7                                                           |
| 27              | Bulgaria | 1999           | Beer                      | 138                                                         |
| 27              | Bulgaria | 1999           | Beverages, Alcoholic      | 22                                                          |
| 27              | Bulgaria | 1999           | Bovine Meat               | 29                                                          |
| 27              | Bulgaria | 1999           | Butter, Ghee              | 1                                                           |
| 27              | Bulgaria | 1999           | Cheese                    | 21                                                          |
| 27              | Bulgaria | 1999           | Cocoa Beans               | 4                                                           |
| 27              | Bulgaria | 1999           | Coffee                    | 7                                                           |
| 27              | Bulgaria | 1999           | Eggs                      | 29                                                          |
| 27              | Bulgaria | 1999           | Fats, Animals, Raw        | 8                                                           |
| 27              | Bulgaria | 1999           | Freshwater Fish           | 3                                                           |
| 27              | Bulgaria | 1999           | Fruits, Other             | 61                                                          |
| 27              | Bulgaria | 1999           | Grapefruit                | 2                                                           |
| 27              | Bulgaria | 1999           | Grapes                    | 14                                                          |
| 27              | Bulgaria | 1999           | Groundnut Oil             | 1                                                           |
| 27              | Bulgaria | 1999           | Groundnuts (Shelled Eq)   | 1                                                           |
| 27              | Bulgaria | 1999           | Lemons, Limes             | 2                                                           |
| 27              | Bulgaria | 1999           | Maize                     | 32                                                          |
| 27              | Bulgaria | 1999           | Maize Germ Oil            | 1                                                           |
| 27              | Bulgaria | 1999           | Marine Fish, Other        | 1                                                           |
| 27              | Bulgaria | 1999           | Meat, Other               | 2                                                           |
| 27              | Bulgaria | 1999           | Milk, Whole               | 308                                                         |
| 27              | Bulgaria | 1999           | Molluscs, Other           | 1                                                           |
| 27              | Bulgaria | 1999           | Mutton & Goat Meat        | 18                                                          |
| 27              | Bulgaria | 1999           | Nuts                      | 1                                                           |
| 27              | Bulgaria | 1999           | Offals, Edible            | 18                                                          |
| 27              | Bulgaria | 1999           | Olives                    | 3                                                           |
| 27              | Bulgaria | 1999           | Onions                    | 28                                                          |
| 27              | Bulgaria | 1999           | Oranges, Mandarines       | 15                                                          |
| 27              | Bulgaria | 1999           | Peas                      | 3                                                           |
| 27              | Bulgaria | 1999           | Pelagic Fish              | 6                                                           |
| 27              | Bulgaria | 1999           | Pigmeat                   | 67                                                          |
| 27              | Bulgaria | 1999           | Potatoes                  | 90                                                          |
| 27              | Bulgaria | 1999           | Poultry Meat              | 41                                                          |
| 27              | Bulgaria | 1999           | Pulses, Other             | 1                                                           |
| 27              | Bulgaria | 1999           | Rice (Milled Equivalent)  | 6                                                           |
| 27              | Bulgaria | 1999           | Rye                       | 2                                                           |
| 27              | Bulgaria | 1999           | Soyabean Oil              | 1                                                           |
| 27              | Bulgaria | 1999           | Sugar, Refined Equivalent | 73                                                          |

Dietary calcium and zinc deficiency risks are decreasing but remain prevalent

| FAO countrycode | Country  | Reference year | Food item                 | Gross food supply (g capita <sup>-1</sup> d <sup>-1</sup> ) |
|-----------------|----------|----------------|---------------------------|-------------------------------------------------------------|
| 27              | Bulgaria | 1999           | Sunflowerseed             | 4                                                           |
| 27              | Bulgaria | 1999           | Sunflowerseed Oil         | 34                                                          |
| 27              | Bulgaria | 1999           | Sweeteners, Other         | 2                                                           |
| 27              | Bulgaria | 1999           | Tomatoes                  | 117                                                         |
| 27              | Bulgaria | 1999           | Vegetables, Other         | 269                                                         |
| 27              | Bulgaria | 1999           | Wheat                     | 399                                                         |
| 27              | Bulgaria | 1999           | Wine                      | 29                                                          |
| 27              | Bulgaria | 2000           | Apples                    | 32                                                          |
| 27              | Bulgaria | 2000           | Bananas                   | 10                                                          |
| 27              | Bulgaria | 2000           | Barley                    | 6                                                           |
| 27              | Bulgaria | 2000           | Beans                     | 5                                                           |
| 27              | Bulgaria | 2000           | Beer                      | 141                                                         |
| 27              | Bulgaria | 2000           | Beverages, Alcoholic      | 19                                                          |
| 27              | Bulgaria | 2000           | Bovine Meat               | 24                                                          |
| 27              | Bulgaria | 2000           | Butter, Ghee              | 1                                                           |
| 27              | Bulgaria | 2000           | Cheese                    | 24                                                          |
| 27              | Bulgaria | 2000           | Cocoa Beans               | 2                                                           |
| 27              | Bulgaria | 2000           | Coffee                    | 6                                                           |
| 27              | Bulgaria | 2000           | Eggs                      | 27                                                          |
| 27              | Bulgaria | 2000           | Fats, Animals, Raw        | 9                                                           |
| 27              | Bulgaria | 2000           | Freshwater Fish           | 2                                                           |
| 27              | Bulgaria | 2000           | Fruits, Other             | 61                                                          |
| 27              | Bulgaria | 2000           | Grapefruit                | 1                                                           |
| 27              | Bulgaria | 2000           | Grapes                    | 22                                                          |
| 27              | Bulgaria | 2000           | Groundnut Oil             | 1                                                           |
| 27              | Bulgaria | 2000           | Groundnuts (Shelled Eq)   | 1                                                           |
| 27              | Bulgaria | 2000           | Honey                     | 1                                                           |
| 27              | Bulgaria | 2000           | Lemons, Limes             | 3                                                           |
| 27              | Bulgaria | 2000           | Maize                     | 37                                                          |
| 27              | Bulgaria | 2000           | Maize Germ Oil            | 1                                                           |
| 27              | Bulgaria | 2000           | Marine Fish, Other        | 1                                                           |
| 27              | Bulgaria | 2000           | Meat, Other               | 2                                                           |
| 27              | Bulgaria | 2000           | Milk, Whole               | 291                                                         |
| 27              | Bulgaria | 2000           | Mutton & Goat Meat        | 18                                                          |
| 27              | Bulgaria | 2000           | Nuts                      | 1                                                           |
| 27              | Bulgaria | 2000           | Offals, Edible            | 17                                                          |
| 27              | Bulgaria | 2000           | Oilcrops Oil, Other       | 1                                                           |
| 27              | Bulgaria | 2000           | Olives                    | 2                                                           |
| 27              | Bulgaria | 2000           | Onions                    | 21                                                          |
| 27              | Bulgaria | 2000           | Oranges, Mandarines       | 12                                                          |
| 27              | Bulgaria | 2000           | Peas                      | 2                                                           |
| 27              | Bulgaria | 2000           | Pelagic Fish              | 6                                                           |
| 27              | Bulgaria | 2000           | Pigmeat                   | 67                                                          |
| 27              | Bulgaria | 2000           | Potatoes                  | 88                                                          |
| 27              | Bulgaria | 2000           | Poultry Meat              | 45                                                          |
| 27              | Bulgaria | 2000           | Pulses, Other             | 1                                                           |
| 27              | Bulgaria | 2000           | Rice (Milled Equivalent)  | 9                                                           |
| 27              | Bulgaria | 2000           | Rye                       | 2                                                           |
| 27              | Bulgaria | 2000           | Soyabean Oil              | 2                                                           |
| 27              | Bulgaria | 2000           | Spices, Other             | 1                                                           |
| 27              | Bulgaria | 2000           | Sugar, Refined Equivalent | 71                                                          |
| 27              | Bulgaria | 2000           | Sunflowerseed             | 4                                                           |
| 27              | Bulgaria | 2000           | Sunflowerseed Oil         | 33                                                          |
| 27              | Bulgaria | 2000           | Sweeteners, Other         | 2                                                           |
| 27              | Bulgaria | 2000           | Tomatoes                  | 114                                                         |
| 27              | Bulgaria | 2000           | Vegetables, Other         | 254                                                         |
| 27              | Bulgaria | 2000           | Wheat                     | 375                                                         |
| 27              | Bulgaria | 2000           | Wine                      | 30                                                          |
| 27              | Bulgaria | 2001           | Apples                    | 20                                                          |
| 27              | Bulgaria | 2001           | Bananas                   | 10                                                          |
| 27              | Bulgaria | 2001           | Barley                    | 5                                                           |
| 27              | Bulgaria | 2001           | Beans                     | 6                                                           |
| 27              | Bulgaria | 2001           | Beer                      | 142                                                         |
| 27              | Bulgaria | 2001           | Beverages, Alcoholic      | 20                                                          |
| 27              | Bulgaria | 2001           | Bovine Meat               | 30                                                          |
| 27              | Bulgaria | 2001           | Butter, Ghee              | 1                                                           |
| 27              | Bulgaria | 2001           | Cheese                    | 20                                                          |
| 27              | Bulgaria | 2001           | Cocoa Beans               | 4                                                           |
| 27              | Bulgaria | 2001           | Coffee                    | 7                                                           |
| 27              | Bulgaria | 2001           | Demersal Fish             | 1                                                           |
| 27              | Bulgaria | 2001           | Eggs                      | 27                                                          |
| 27              | Bulgaria | 2001           | Fats, Animals, Raw        | 9                                                           |
| 27              | Bulgaria | 2001           | Freshwater Fish           | 2                                                           |
| 27              | Bulgaria | 2001           | Fruits, Other             | 47                                                          |
| 27              | Bulgaria | 2001           | Grapefruit                | 1                                                           |
| 27              | Bulgaria | 2001           | Grapes                    | 46                                                          |
| 27              | Bulgaria | 2001           | Groundnut Oil             | 1                                                           |
| 27              | Bulgaria | 2001           | Groundnuts (Shelled Eq)   | 1                                                           |
| 27              | Bulgaria | 2001           | Honey                     | 1                                                           |
| 27              | Bulgaria | 2001           | Lemons, Limes             | 3                                                           |
| 27              | Bulgaria | 2001           | Maize                     | 34                                                          |
| 27              | Bulgaria | 2001           | Marine Fish, Other        | 1                                                           |
| 27              | Bulgaria | 2001           | Meat, Other               | 2                                                           |
| 27              | Bulgaria | 2001           | Milk, Whole               | 247                                                         |
| 27              | Bulgaria | 2001           | Mutton & Goat Meat        | 16                                                          |
| 27              | Bulgaria | 2001           | Nuts                      | 2                                                           |
| 27              | Bulgaria | 2001           | Offals, Edible            | 19                                                          |
| 27              | Bulgaria | 2001           | Oilcrops Oil, Other       | 1                                                           |
| 27              | Bulgaria | 2001           | Olives                    | 2                                                           |
| 27              | Bulgaria | 2001           | Onions                    | 16                                                          |
| 27              | Bulgaria | 2001           | Oranges, Mandarines       | 12                                                          |
| 27              | Bulgaria | 2001           | Peas                      | 3                                                           |
| 27              | Bulgaria | 2001           | Pelagic Fish              | 6                                                           |
| 27              | Bulgaria | 2001           | Pigmeat                   | 56                                                          |
| 27              | Bulgaria | 2001           | Potatoes                  | 95                                                          |
| 27              | Bulgaria | 2001           | Poultry Meat              | 49                                                          |
| 27              | Bulgaria | 2001           | Pulses, Other             | 2                                                           |

Dietary calcium and zinc deficiency risks are decreasing but remain prevalent

| FAO countrycode | Country  | Reference year | Food item                 | Gross food supply (g capita <sup>-1</sup> d <sup>-1</sup> ) |
|-----------------|----------|----------------|---------------------------|-------------------------------------------------------------|
| 27              | Bulgaria | 2001           | Rice (Milled Equivalent)  | 10                                                          |
| 27              | Bulgaria | 2001           | Rye                       | 2                                                           |
| 27              | Bulgaria | 2001           | Soyabean Oil              | 3                                                           |
| 27              | Bulgaria | 2001           | Sugar, Refined Equivalent | 77                                                          |
| 27              | Bulgaria | 2001           | Sunflowerseed             | 4                                                           |
| 27              | Bulgaria | 2001           | Sunflowerseed Oil         | 35                                                          |
| 27              | Bulgaria | 2001           | Sweeteners, Other         | 2                                                           |
| 27              | Bulgaria | 2001           | Tomatoes                  | 111                                                         |
| 27              | Bulgaria | 2001           | Vegetables, Other         | 188                                                         |
| 27              | Bulgaria | 2001           | Wheat                     | 373                                                         |
| 27              | Bulgaria | 2001           | Wine                      | 22                                                          |
| 27              | Bulgaria | 2002           | Apples                    | 14                                                          |
| 27              | Bulgaria | 2002           | Bananas                   | 11                                                          |
| 27              | Bulgaria | 2002           | Barley                    | 5                                                           |
| 27              | Bulgaria | 2002           | Beans                     | 7                                                           |
| 27              | Bulgaria | 2002           | Beer                      | 138                                                         |
| 27              | Bulgaria | 2002           | Beverages, Alcoholic      | 20                                                          |
| 27              | Bulgaria | 2002           | Bovine Meat               | 18                                                          |
| 27              | Bulgaria | 2002           | Butter, Ghee              | 1                                                           |
| 27              | Bulgaria | 2002           | Cheese                    | 23                                                          |
| 27              | Bulgaria | 2002           | Citrus, Other             | 2                                                           |
| 27              | Bulgaria | 2002           | Cocoa Beans               | 4                                                           |
| 27              | Bulgaria | 2002           | Coffee                    | 7                                                           |
| 27              | Bulgaria | 2002           | Demersal Fish             | 1                                                           |
| 27              | Bulgaria | 2002           | Eggs                      | 30                                                          |
| 27              | Bulgaria | 2002           | Fats, Animals, Raw        | 7                                                           |
| 27              | Bulgaria | 2002           | Freshwater Fish           | 1                                                           |
| 27              | Bulgaria | 2002           | Fruits, Other             | 34                                                          |
| 27              | Bulgaria | 2002           | Grapefruit                | 2                                                           |
| 27              | Bulgaria | 2002           | Grapes                    | 43                                                          |
| 27              | Bulgaria | 2002           | Groundnut Oil             | 1                                                           |
| 27              | Bulgaria | 2002           | Groundnuts (Shelled Eq)   | 1                                                           |
| 27              | Bulgaria | 2002           | Lemons, Limes             | 3                                                           |
| 27              | Bulgaria | 2002           | Maize                     | 35                                                          |
| 27              | Bulgaria | 2002           | Maize Germ Oil            | 1                                                           |
| 27              | Bulgaria | 2002           | Meat, Other               | 2                                                           |
| 27              | Bulgaria | 2002           | Milk, Whole               | 259                                                         |
| 27              | Bulgaria | 2002           | Mutton & Goat Meat        | 16                                                          |
| 27              | Bulgaria | 2002           | Nuts                      | 2                                                           |
| 27              | Bulgaria | 2002           | Offals, Edible            | 8                                                           |
| 27              | Bulgaria | 2002           | Olives                    | 3                                                           |
| 27              | Bulgaria | 2002           | Onions                    | 13                                                          |
| 27              | Bulgaria | 2002           | Oranges, Mandarines       | 12                                                          |
| 27              | Bulgaria | 2002           | Peas                      | 3                                                           |
| 27              | Bulgaria | 2002           | Pelagic Fish              | 9                                                           |
| 27              | Bulgaria | 2002           | Pigmeat                   | 55                                                          |
| 27              | Bulgaria | 2002           | Potatoes                  | 96                                                          |
| 27              | Bulgaria | 2002           | Poultry Meat              | 57                                                          |
| 27              | Bulgaria | 2002           | Pulses, Other             | 1                                                           |
| 27              | Bulgaria | 2002           | Rice (Milled Equivalent)  | 9                                                           |
| 27              | Bulgaria | 2002           | Rye                       | 2                                                           |
| 27              | Bulgaria | 2002           | Soyabean Oil              | 5                                                           |
| 27              | Bulgaria | 2002           | Sugar, Refined Equivalent | 76                                                          |
| 27              | Bulgaria | 2002           | Sunflowerseed             | 4                                                           |
| 27              | Bulgaria | 2002           | Sunflowerseed Oil         | 36                                                          |
| 27              | Bulgaria | 2002           | Sweeteners, Other         | 2                                                           |
| 27              | Bulgaria | 2002           | Tomatoes                  | 79                                                          |
| 27              | Bulgaria | 2002           | Vegetables, Other         | 193                                                         |
| 27              | Bulgaria | 2002           | Wheat                     | 366                                                         |
| 27              | Bulgaria | 2002           | Wine                      | 24                                                          |
| 27              | Bulgaria | 2003           | Apples                    | 11                                                          |
| 27              | Bulgaria | 2003           | Bananas                   | 16                                                          |
| 27              | Bulgaria | 2003           | Barley                    | 4                                                           |
| 27              | Bulgaria | 2003           | Beans                     | 8                                                           |
| 27              | Bulgaria | 2003           | Beer                      | 155                                                         |
| 27              | Bulgaria | 2003           | Beverages, Alcoholic      | 22                                                          |
| 27              | Bulgaria | 2003           | Bovine Meat               | 20                                                          |
| 27              | Bulgaria | 2003           | Butter, Ghee              | 1                                                           |
| 27              | Bulgaria | 2003           | Cheese                    | 24                                                          |
| 27              | Bulgaria | 2003           | Citrus, Other             | 2                                                           |
| 27              | Bulgaria | 2003           | Cocoa Beans               | 5                                                           |
| 27              | Bulgaria | 2003           | Coffee                    | 8                                                           |
| 27              | Bulgaria | 2003           | Demersal Fish             | 1                                                           |
| 27              | Bulgaria | 2003           | Eggs                      | 31                                                          |
| 27              | Bulgaria | 2003           | Fats, Animals, Raw        | 8                                                           |
| 27              | Bulgaria | 2003           | Freshwater Fish           | 1                                                           |
| 27              | Bulgaria | 2003           | Fruits, Other             | 33                                                          |
| 27              | Bulgaria | 2003           | Grapefruit                | 2                                                           |
| 27              | Bulgaria | 2003           | Grapes                    | 22                                                          |
| 27              | Bulgaria | 2003           | Groundnuts (Shelled Eq)   | 1                                                           |
| 27              | Bulgaria | 2003           | Honey                     | 1                                                           |
| 27              | Bulgaria | 2003           | Lemons, Limes             | 3                                                           |
| 27              | Bulgaria | 2003           | Maize                     | 38                                                          |
| 27              | Bulgaria | 2003           | Marine Fish, Other        | 1                                                           |
| 27              | Bulgaria | 2003           | Meat, Other               | 2                                                           |
| 27              | Bulgaria | 2003           | Milk, Whole               | 256                                                         |
| 27              | Bulgaria | 2003           | Mutton & Goat Meat        | 4                                                           |
| 27              | Bulgaria | 2003           | Nuts                      | 2                                                           |
| 27              | Bulgaria | 2003           | Offals, Edible            | 8                                                           |
| 27              | Bulgaria | 2003           | Olives                    | 3                                                           |
| 27              | Bulgaria | 2003           | Onions                    | 12                                                          |
| 27              | Bulgaria | 2003           | Oranges, Mandarines       | 13                                                          |
| 27              | Bulgaria | 2003           | Peas                      | 1                                                           |
| 27              | Bulgaria | 2003           | Pelagic Fish              | 10                                                          |
| 27              | Bulgaria | 2003           | Pigmeat                   | 58                                                          |
| 27              | Bulgaria | 2003           | Potatoes                  | 98                                                          |
| 27              | Bulgaria | 2003           | Poultry Meat              | 39                                                          |

Dietary calcium and zinc deficiency risks are decreasing but remain prevalent

| FAO countrycode | Country  | Reference year | Food item                 | Gross food supply (g capita <sup>-1</sup> d <sup>-1</sup> ) |
|-----------------|----------|----------------|---------------------------|-------------------------------------------------------------|
| 27              | Bulgaria | 2003           | Pulses, Other             | 1                                                           |
| 27              | Bulgaria | 2003           | Rice (Milled Equivalent)  | 10                                                          |
| 27              | Bulgaria | 2003           | Rye                       | 2                                                           |
| 27              | Bulgaria | 2003           | Soyabean Oil              | 5                                                           |
| 27              | Bulgaria | 2003           | Sugar, Refined Equivalent | 74                                                          |
| 27              | Bulgaria | 2003           | Sunflowerseed             | 5                                                           |
| 27              | Bulgaria | 2003           | Sunflowerseed Oil         | 40                                                          |
| 27              | Bulgaria | 2003           | Sweeteners, Other         | 2                                                           |
| 27              | Bulgaria | 2003           | Tomatoes                  | 121                                                         |
| 27              | Bulgaria | 2003           | Vegetables, Other         | 233                                                         |
| 27              | Bulgaria | 2003           | Wheat                     | 346                                                         |
| 27              | Bulgaria | 2003           | Wine                      | 21                                                          |
| 27              | Bulgaria | 2004           | Apples                    | 15                                                          |
| 27              | Bulgaria | 2004           | Bananas                   | 17                                                          |
| 27              | Bulgaria | 2004           | Barley                    | 4                                                           |
| 27              | Bulgaria | 2004           | Beans                     | 6                                                           |
| 27              | Bulgaria | 2004           | Beer                      | 140                                                         |
| 27              | Bulgaria | 2004           | Beverages, Alcoholic      | 21                                                          |
| 27              | Bulgaria | 2004           | Bovine Meat               | 26                                                          |
| 27              | Bulgaria | 2004           | Butter, Ghee              | 1                                                           |
| 27              | Bulgaria | 2004           | Cheese                    | 24                                                          |
| 27              | Bulgaria | 2004           | Citrus, Other             | 3                                                           |
| 27              | Bulgaria | 2004           | Cocoa Beans               | 4                                                           |
| 27              | Bulgaria | 2004           | Coffee                    | 9                                                           |
| 27              | Bulgaria | 2004           | Demersal Fish             | 1                                                           |
| 27              | Bulgaria | 2004           | Eggs                      | 33                                                          |
| 27              | Bulgaria | 2004           | Fats, Animals, Raw        | 9                                                           |
| 27              | Bulgaria | 2004           | Freshwater Fish           | 1                                                           |
| 27              | Bulgaria | 2004           | Fruits, Other             | 41                                                          |
| 27              | Bulgaria | 2004           | Grapefruit                | 2                                                           |
| 27              | Bulgaria | 2004           | Grapes                    | 19                                                          |
| 27              | Bulgaria | 2004           | Groundnut Oil             | 2                                                           |
| 27              | Bulgaria | 2004           | Groundnuts (Shelled Eq)   | 1                                                           |
| 27              | Bulgaria | 2004           | Honey                     | 1                                                           |
| 27              | Bulgaria | 2004           | Lemons, Limes             | 3                                                           |
| 27              | Bulgaria | 2004           | Maize                     | 50                                                          |
| 27              | Bulgaria | 2004           | Marine Fish, Other        | 1                                                           |
| 27              | Bulgaria | 2004           | Meat, Other               | 2                                                           |
| 27              | Bulgaria | 2004           | Milk, Whole               | 269                                                         |
| 27              | Bulgaria | 2004           | Mutton & Goat Meat        | 5                                                           |
| 27              | Bulgaria | 2004           | Nuts                      | 3                                                           |
| 27              | Bulgaria | 2004           | Offals, Edible            | 10                                                          |
| 27              | Bulgaria | 2004           | Oilcrops Oil, Other       | 1                                                           |
| 27              | Bulgaria | 2004           | Olives                    | 3                                                           |
| 27              | Bulgaria | 2004           | Onions                    | 12                                                          |
| 27              | Bulgaria | 2004           | Oranges, Mandarines       | 12                                                          |
| 27              | Bulgaria | 2004           | Peas                      | 1                                                           |
| 27              | Bulgaria | 2004           | Pelagic Fish              | 7                                                           |
| 27              | Bulgaria | 2004           | Pigmeat                   | 61                                                          |
| 27              | Bulgaria | 2004           | Pineapples                | 1                                                           |
| 27              | Bulgaria | 2004           | Potatoes                  | 101                                                         |
| 27              | Bulgaria | 2004           | Poultry Meat              | 44                                                          |
| 27              | Bulgaria | 2004           | Pulses, Other             | 1                                                           |
| 27              | Bulgaria | 2004           | Rice (Milled Equivalent)  | 11                                                          |
| 27              | Bulgaria | 2004           | Rye                       | 2                                                           |
| 27              | Bulgaria | 2004           | Soyabean Oil              | 4                                                           |
| 27              | Bulgaria | 2004           | Sugar, Refined Equivalent | 76                                                          |
| 27              | Bulgaria | 2004           | Sunflowerseed             | 5                                                           |
| 27              | Bulgaria | 2004           | Sunflowerseed Oil         | 36                                                          |
| 27              | Bulgaria | 2004           | Sweeteners, Other         | 3                                                           |
| 27              | Bulgaria | 2004           | Tomatoes                  | 79                                                          |
| 27              | Bulgaria | 2004           | Vegetables, Other         | 204                                                         |
| 27              | Bulgaria | 2004           | Wheat                     | 331                                                         |
| 27              | Bulgaria | 2004           | Wine                      | 25                                                          |
| 27              | Bulgaria | 2005           | Apples                    | 13                                                          |
| 27              | Bulgaria | 2005           | Bananas                   | 19                                                          |
| 27              | Bulgaria | 2005           | Barley                    | 4                                                           |
| 27              | Bulgaria | 2005           | Beans                     | 7                                                           |
| 27              | Bulgaria | 2005           | Beer                      | 148                                                         |
| 27              | Bulgaria | 2005           | Beverages, Alcoholic      | 18                                                          |
| 27              | Bulgaria | 2005           | Bovine Meat               | 34                                                          |
| 27              | Bulgaria | 2005           | Cheese                    | 23                                                          |
| 27              | Bulgaria | 2005           | Citrus, Other             | 1                                                           |
| 27              | Bulgaria | 2005           | Cocoa Beans               | 5                                                           |
| 27              | Bulgaria | 2005           | Coffee                    | 11                                                          |
| 27              | Bulgaria | 2005           | Demersal Fish             | 1                                                           |
| 27              | Bulgaria | 2005           | Eggs                      | 34                                                          |
| 27              | Bulgaria | 2005           | Fats, Animals, Raw        | 11                                                          |
| 27              | Bulgaria | 2005           | Freshwater Fish           | 1                                                           |
| 27              | Bulgaria | 2005           | Fruits, Other             | 26                                                          |
| 27              | Bulgaria | 2005           | Grapefruit                | 2                                                           |
| 27              | Bulgaria | 2005           | Grapes                    | 9                                                           |
| 27              | Bulgaria | 2005           | Groundnut Oil             | 1                                                           |
| 27              | Bulgaria | 2005           | Groundnuts (Shelled Eq)   | 1                                                           |
| 27              | Bulgaria | 2005           | Honey                     | 3                                                           |
| 27              | Bulgaria | 2005           | Lemons, Limes             | 4                                                           |
| 27              | Bulgaria | 2005           | Maize                     | 46                                                          |
| 27              | Bulgaria | 2005           | Marine Fish, Other        | 2                                                           |
| 27              | Bulgaria | 2005           | Meat, Other               | 2                                                           |
| 27              | Bulgaria | 2005           | Milk, Whole               | 257                                                         |
| 27              | Bulgaria | 2005           | Mutton & Goat Meat        | 6                                                           |
| 27              | Bulgaria | 2005           | Nuts                      | 3                                                           |
| 27              | Bulgaria | 2005           | Offals, Edible            | 11                                                          |
| 27              | Bulgaria | 2005           | Oilcrops Oil, Other       | 1                                                           |
| 27              | Bulgaria | 2005           | Olives                    | 4                                                           |
| 27              | Bulgaria | 2005           | Onions                    | 7                                                           |
| 27              | Bulgaria | 2005           | Oranges, Mandarines       | 14                                                          |

## Dietary calcium and zinc deficiency risks are decreasing but remain prevalent

| FAO countrycode | Country  | Reference year | Food item                 | Gross food supply (g capita <sup>-1</sup> d <sup>-1</sup> ) |
|-----------------|----------|----------------|---------------------------|-------------------------------------------------------------|
| 27              | Bulgaria | 2005           | Peas                      | 1                                                           |
| 27              | Bulgaria | 2005           | Pelagic Fish              | 7                                                           |
| 27              | Bulgaria | 2005           | Pigmeat                   | 49                                                          |
| 27              | Bulgaria | 2005           | Pineapples                | 1                                                           |
| 27              | Bulgaria | 2005           | Potatoes                  | 104                                                         |
| 27              | Bulgaria | 2005           | Poultry Meat              | 47                                                          |
| 27              | Bulgaria | 2005           | Pulses, Other             | 1                                                           |
| 27              | Bulgaria | 2005           | Rice (Milled Equivalent)  | 11                                                          |
| 27              | Bulgaria | 2005           | Rye                       | 2                                                           |
| 27              | Bulgaria | 2005           | Soyabean Oil              | 4                                                           |
| 27              | Bulgaria | 2005           | Sugar, Refined Equivalent | 82                                                          |
| 27              | Bulgaria | 2005           | Sunflowerseed             | 5                                                           |
| 27              | Bulgaria | 2005           | Sunflowerseed Oil         | 38                                                          |
| 27              | Bulgaria | 2005           | Sweeteners, Other         | 3                                                           |
| 27              | Bulgaria | 2005           | Tomatoes                  | 50                                                          |
| 27              | Bulgaria | 2005           | Vegetables, Other         | 117                                                         |
| 27              | Bulgaria | 2005           | Wheat                     | 320                                                         |
| 27              | Bulgaria | 2005           | Wine                      | 31                                                          |
| 27              | Bulgaria | 2006           | Apples                    | 10                                                          |
| 27              | Bulgaria | 2006           | Bananas                   | 17                                                          |
| 27              | Bulgaria | 2006           | Barley                    | 5                                                           |
| 27              | Bulgaria | 2006           | Beans                     | 5                                                           |
| 27              | Bulgaria | 2006           | Beer                      | 179                                                         |
| 27              | Bulgaria | 2006           | Beverages, Alcoholic      | 18                                                          |
| 27              | Bulgaria | 2006           | Bovine Meat               | 38                                                          |
| 27              | Bulgaria | 2006           | Butter, Ghee              | 1                                                           |
| 27              | Bulgaria | 2006           | Cheese                    | 27                                                          |
| 27              | Bulgaria | 2006           | Cocoa Beans               | 7                                                           |
| 27              | Bulgaria | 2006           | Coconuts - Incl Copra     | 1                                                           |
| 27              | Bulgaria | 2006           | Coffee                    | 12                                                          |
| 27              | Bulgaria | 2006           | Demersal Fish             | 3                                                           |
| 27              | Bulgaria | 2006           | Eggs                      | 34                                                          |
| 27              | Bulgaria | 2006           | Fats, Animals, Raw        | 12                                                          |
| 27              | Bulgaria | 2006           | Freshwater Fish           | 2                                                           |
| 27              | Bulgaria | 2006           | Fruits, Other             | 35                                                          |
| 27              | Bulgaria | 2006           | Grapefruit                | 3                                                           |
| 27              | Bulgaria | 2006           | Grapes                    | 7                                                           |
| 27              | Bulgaria | 2006           | Groundnut Oil             | 2                                                           |
| 27              | Bulgaria | 2006           | Groundnuts (Shelled Eq)   | 1                                                           |
| 27              | Bulgaria | 2006           | Honey                     | 2                                                           |
| 27              | Bulgaria | 2006           | Lemons, Limes             | 4                                                           |
| 27              | Bulgaria | 2006           | Maize                     | 48                                                          |
| 27              | Bulgaria | 2006           | Marine Fish, Other        | 1                                                           |
| 27              | Bulgaria | 2006           | Meat, Other               | 3                                                           |
| 27              | Bulgaria | 2006           | Milk, Whole               | 259                                                         |
| 27              | Bulgaria | 2006           | Mutton & Goat Meat        | 6                                                           |
| 27              | Bulgaria | 2006           | Nuts                      | 3                                                           |
| 27              | Bulgaria | 2006           | Offals, Edible            | 12                                                          |
| 27              | Bulgaria | 2006           | Oilcrops Oil, Other       | 1                                                           |
| 27              | Bulgaria | 2006           | Olives                    | 5                                                           |
| 27              | Bulgaria | 2006           | Onions                    | 14                                                          |
| 27              | Bulgaria | 2006           | Oranges, Mandarines       | 16                                                          |
| 27              | Bulgaria | 2006           | Pelagic Fish              | 9                                                           |
| 27              | Bulgaria | 2006           | Pigmeat                   | 36                                                          |
| 27              | Bulgaria | 2006           | Pineapples                | 1                                                           |
| 27              | Bulgaria | 2006           | Potatoes                  | 97                                                          |
| 27              | Bulgaria | 2006           | Poultry Meat              | 49                                                          |
| 27              | Bulgaria | 2006           | Pulses, Other             | 1                                                           |
| 27              | Bulgaria | 2006           | Rice (Milled Equivalent)  | 11                                                          |
| 27              | Bulgaria | 2006           | Rye                       | 2                                                           |
| 27              | Bulgaria | 2006           | Soyabean Oil              | 4                                                           |
| 27              | Bulgaria | 2006           | Sugar, Refined Equivalent | 84                                                          |
| 27              | Bulgaria | 2006           | Sunflowerseed             | 5                                                           |
| 27              | Bulgaria | 2006           | Sunflowerseed Oil         | 32                                                          |
| 27              | Bulgaria | 2006           | Sweeteners, Other         | 4                                                           |
| 27              | Bulgaria | 2006           | Tomatoes                  | 75                                                          |
| 27              | Bulgaria | 2006           | Vegetables, Other         | 164                                                         |
| 27              | Bulgaria | 2006           | Wheat                     | 328                                                         |
| 27              | Bulgaria | 2006           | Wine                      | 36                                                          |
| 27              | Bulgaria | 2007           | Apples                    | 19                                                          |
| 27              | Bulgaria | 2007           | Bananas                   | 13                                                          |
| 27              | Bulgaria | 2007           | Barley                    | 5                                                           |
| 27              | Bulgaria | 2007           | Beans                     | 5                                                           |
| 27              | Bulgaria | 2007           | Beer                      | 201                                                         |
| 27              | Bulgaria | 2007           | Beverages, Alcoholic      | 17                                                          |
| 27              | Bulgaria | 2007           | Bovine Meat               | 14                                                          |
| 27              | Bulgaria | 2007           | Butter, Ghee              | 1                                                           |
| 27              | Bulgaria | 2007           | Cheese                    | 27                                                          |
| 27              | Bulgaria | 2007           | Cocoa Beans               | 4                                                           |
| 27              | Bulgaria | 2007           | Coconuts - Incl Copra     | 1                                                           |
| 27              | Bulgaria | 2007           | Coffee                    | 12                                                          |
| 27              | Bulgaria | 2007           | Demersal Fish             | 2                                                           |
| 27              | Bulgaria | 2007           | Eggs                      | 31                                                          |
| 27              | Bulgaria | 2007           | Fats, Animals, Raw        | 12                                                          |
| 27              | Bulgaria | 2007           | Freshwater Fish           | 2                                                           |
| 27              | Bulgaria | 2007           | Fruits, Other             | 46                                                          |
| 27              | Bulgaria | 2007           | Grapefruit                | 3                                                           |
| 27              | Bulgaria | 2007           | Grapes                    | 33                                                          |
| 27              | Bulgaria | 2007           | Groundnut Oil             | 2                                                           |
| 27              | Bulgaria | 2007           | Groundnuts (Shelled Eq)   | 1                                                           |
| 27              | Bulgaria | 2007           | Honey                     | 1                                                           |
| 27              | Bulgaria | 2007           | Lemons, Limes             | 4                                                           |
| 27              | Bulgaria | 2007           | Maize                     | 45                                                          |
| 27              | Bulgaria | 2007           | Marine Fish, Other        | 1                                                           |
| 27              | Bulgaria | 2007           | Meat, Other               | 3                                                           |
| 27              | Bulgaria | 2007           | Milk, Whole               | 217                                                         |
| 27              | Bulgaria | 2007           | Mutton & Goat Meat        | 5                                                           |

Dietary calcium and zinc deficiency risks are decreasing but remain prevalent

| FAO countrycode | Country  | Reference year | Food item                 | Gross food supply (g capita <sup>-1</sup> d <sup>-1</sup> ) |
|-----------------|----------|----------------|---------------------------|-------------------------------------------------------------|
| 27              | Bulgaria | 2007           | Nuts                      | 2                                                           |
| 27              | Bulgaria | 2007           | Offals, Edible            | 13                                                          |
| 27              | Bulgaria | 2007           | Oilcrops Oil, Other       | 2                                                           |
| 27              | Bulgaria | 2007           | Olives                    | 4                                                           |
| 27              | Bulgaria | 2007           | Onions                    | 14                                                          |
| 27              | Bulgaria | 2007           | Oranges, Mandarines       | 16                                                          |
| 27              | Bulgaria | 2007           | Peas                      | 1                                                           |
| 27              | Bulgaria | 2007           | Pelagic Fish              | 7                                                           |
| 27              | Bulgaria | 2007           | Pigmeat                   | 54                                                          |
| 27              | Bulgaria | 2007           | Pineapples                | 2                                                           |
| 27              | Bulgaria | 2007           | Plantains                 | 1                                                           |
| 27              | Bulgaria | 2007           | Potatoes                  | 99                                                          |
| 27              | Bulgaria | 2007           | Poultry Meat              | 53                                                          |
| 27              | Bulgaria | 2007           | Pulses, Other             | 1                                                           |
| 27              | Bulgaria | 2007           | Rice (Milled Equivalent)  | 8                                                           |
| 27              | Bulgaria | 2007           | Rye                       | 2                                                           |
| 27              | Bulgaria | 2007           | Soyabean Oil              | 6                                                           |
| 27              | Bulgaria | 2007           | Spices, Other             | 1                                                           |
| 27              | Bulgaria | 2007           | Sugar, Refined Equivalent | 80                                                          |
| 27              | Bulgaria | 2007           | Sunflowerseed             | 5                                                           |
| 27              | Bulgaria | 2007           | Sunflowerseed Oil         | 31                                                          |
| 27              | Bulgaria | 2007           | Sweeteners, Other         | 5                                                           |
| 27              | Bulgaria | 2007           | Tomatoes                  | 64                                                          |
| 27              | Bulgaria | 2007           | Vegetables, Other         | 128                                                         |
| 27              | Bulgaria | 2007           | Wheat                     | 323                                                         |
| 27              | Bulgaria | 2007           | Wine                      | 37                                                          |
| 27              | Bulgaria | 2008           | Apples                    | 16                                                          |
| 27              | Bulgaria | 2008           | Bananas                   | 12                                                          |
| 27              | Bulgaria | 2008           | Barley                    | 7                                                           |
| 27              | Bulgaria | 2008           | Beans                     | 5                                                           |
| 27              | Bulgaria | 2008           | Beer                      | 203                                                         |
| 27              | Bulgaria | 2008           | Beverages, Alcoholic      | 18                                                          |
| 27              | Bulgaria | 2008           | Bovine Meat               | 14                                                          |
| 27              | Bulgaria | 2008           | Butter, Ghee              | 1                                                           |
| 27              | Bulgaria | 2008           | Cheese                    | 24                                                          |
| 27              | Bulgaria | 2008           | Citrus, Other             | 3                                                           |
| 27              | Bulgaria | 2008           | Cocoa Beans               | 5                                                           |
| 27              | Bulgaria | 2008           | Coconuts - Incl Copra     | 2                                                           |
| 27              | Bulgaria | 2008           | Coffee                    | 14                                                          |
| 27              | Bulgaria | 2008           | Demersal Fish             | 3                                                           |
| 27              | Bulgaria | 2008           | Eggs                      | 29                                                          |
| 27              | Bulgaria | 2008           | Fats, Animals, Raw        | 14                                                          |
| 27              | Bulgaria | 2008           | Freshwater Fish           | 4                                                           |
| 27              | Bulgaria | 2008           | Fruits, Other             | 35                                                          |
| 27              | Bulgaria | 2008           | Grapefruit                | 3                                                           |
| 27              | Bulgaria | 2008           | Grapes                    | 5                                                           |
| 27              | Bulgaria | 2008           | Groundnut Oil             | 2                                                           |
| 27              | Bulgaria | 2008           | Groundnuts (Shelled Eq)   | 1                                                           |
| 27              | Bulgaria | 2008           | Honey                     | 3                                                           |
| 27              | Bulgaria | 2008           | Lemons, Limes             | 3                                                           |
| 27              | Bulgaria | 2008           | Maize                     | 68                                                          |
| 27              | Bulgaria | 2008           | Maize Germ Oil            | 1                                                           |
| 27              | Bulgaria | 2008           | Marine Fish, Other        | 1                                                           |
| 27              | Bulgaria | 2008           | Meat, Other               | 6                                                           |
| 27              | Bulgaria | 2008           | Milk, Whole               | 223                                                         |
| 27              | Bulgaria | 2008           | Mutton & Goat Meat        | 6                                                           |
| 27              | Bulgaria | 2008           | Nuts                      | 4                                                           |
| 27              | Bulgaria | 2008           | Oats                      | 1                                                           |
| 27              | Bulgaria | 2008           | Offals, Edible            | 13                                                          |
| 27              | Bulgaria | 2008           | Oilcrops Oil, Other       | 3                                                           |
| 27              | Bulgaria | 2008           | Olives                    | 7                                                           |
| 27              | Bulgaria | 2008           | Onions                    | 14                                                          |
| 27              | Bulgaria | 2008           | Oranges, Mandarines       | 12                                                          |
| 27              | Bulgaria | 2008           | Peas                      | 1                                                           |
| 27              | Bulgaria | 2008           | Pelagic Fish              | 9                                                           |
| 27              | Bulgaria | 2008           | Pigmeat                   | 61                                                          |
| 27              | Bulgaria | 2008           | Pimento                   | 1                                                           |
| 27              | Bulgaria | 2008           | Pineapples                | 2                                                           |
| 27              | Bulgaria | 2008           | Plantains                 | 2                                                           |
| 27              | Bulgaria | 2008           | Potatoes                  | 110                                                         |
| 27              | Bulgaria | 2008           | Poultry Meat              | 55                                                          |
| 27              | Bulgaria | 2008           | Pulses, Other             | 1                                                           |
| 27              | Bulgaria | 2008           | Rice (Milled Equivalent)  | 6                                                           |
| 27              | Bulgaria | 2008           | Rye                       | 2                                                           |
| 27              | Bulgaria | 2008           | Soyabean Oil              | 6                                                           |
| 27              | Bulgaria | 2008           | Spices, Other             | 1                                                           |
| 27              | Bulgaria | 2008           | Sugar, Refined Equivalent | 77                                                          |
| 27              | Bulgaria | 2008           | Sunflowerseed             | 5                                                           |
| 27              | Bulgaria | 2008           | Sunflowerseed Oil         | 16                                                          |
| 27              | Bulgaria | 2008           | Sweeteners, Other         | 5                                                           |
| 27              | Bulgaria | 2008           | Tomatoes                  | 65                                                          |
| 27              | Bulgaria | 2008           | Vegetables, Other         | 133                                                         |
| 27              | Bulgaria | 2008           | Wheat                     | 320                                                         |
| 27              | Bulgaria | 2008           | Wine                      | 41                                                          |
| 27              | Bulgaria | 2009           | Apples                    | 19                                                          |
| 27              | Bulgaria | 2009           | Bananas                   | 7                                                           |
| 27              | Bulgaria | 2009           | Barley                    | 2                                                           |
| 27              | Bulgaria | 2009           | Beans                     | 6                                                           |
| 27              | Bulgaria | 2009           | Beer                      | 189                                                         |
| 27              | Bulgaria | 2009           | Beverages, Alcoholic      | 18                                                          |
| 27              | Bulgaria | 2009           | Bovine Meat               | 14                                                          |
| 27              | Bulgaria | 2009           | Cheese                    | 24                                                          |
| 27              | Bulgaria | 2009           | Citrus, Other             | 4                                                           |
| 27              | Bulgaria | 2009           | Cocoa Beans               | 8                                                           |
| 27              | Bulgaria | 2009           | Coconuts - Incl Copra     | 2                                                           |
| 27              | Bulgaria | 2009           | Coffee                    | 14                                                          |
| 27              | Bulgaria | 2009           | Cream                     | 1                                                           |

## Dietary calcium and zinc deficiency risks are decreasing but remain prevalent

| FAO countrycode | Country  | Reference year | Food item                 | Gross food supply (g capita <sup>-1</sup> d <sup>-1</sup> ) |
|-----------------|----------|----------------|---------------------------|-------------------------------------------------------------|
| 27              | Bulgaria | 2009           | Demersal Fish             | 2                                                           |
| 27              | Bulgaria | 2009           | Eggs                      | 27                                                          |
| 27              | Bulgaria | 2009           | Fats, Animals, Raw        | 15                                                          |
| 27              | Bulgaria | 2009           | Freshwater Fish           | 6                                                           |
| 27              | Bulgaria | 2009           | Fruits, Other             | 34                                                          |
| 27              | Bulgaria | 2009           | Grapefruit                | 4                                                           |
| 27              | Bulgaria | 2009           | Grapes                    | 2                                                           |
| 27              | Bulgaria | 2009           | Groundnut Oil             | 1                                                           |
| 27              | Bulgaria | 2009           | Groundnuts (Shelled Eq)   | 1                                                           |
| 27              | Bulgaria | 2009           | Honey                     | 1                                                           |
| 27              | Bulgaria | 2009           | Lemons, Limes             | 6                                                           |
| 27              | Bulgaria | 2009           | Maize                     | 69                                                          |
| 27              | Bulgaria | 2009           | Maize Germ Oil            | 2                                                           |
| 27              | Bulgaria | 2009           | Marine Fish, Other        | 1                                                           |
| 27              | Bulgaria | 2009           | Meat, Other               | 5                                                           |
| 27              | Bulgaria | 2009           | Milk, Whole               | 180                                                         |
| 27              | Bulgaria | 2009           | Mutton & Goat Meat        | 5                                                           |
| 27              | Bulgaria | 2009           | Nuts                      | 3                                                           |
| 27              | Bulgaria | 2009           | Oats                      | 1                                                           |
| 27              | Bulgaria | 2009           | Offals, Edible            | 12                                                          |
| 27              | Bulgaria | 2009           | Oilcrops Oil, Other       | 2                                                           |
| 27              | Bulgaria | 2009           | Olives                    | 9                                                           |
| 27              | Bulgaria | 2009           | Onions                    | 8                                                           |
| 27              | Bulgaria | 2009           | Oranges, Mandarines       | 15                                                          |
| 27              | Bulgaria | 2009           | Pelagic Fish              | 8                                                           |
| 27              | Bulgaria | 2009           | Pigmeat                   | 69                                                          |
| 27              | Bulgaria | 2009           | Pimento                   | 1                                                           |
| 27              | Bulgaria | 2009           | Pineapples                | 1                                                           |
| 27              | Bulgaria | 2009           | Plantains                 | 6                                                           |
| 27              | Bulgaria | 2009           | Potatoes                  | 91                                                          |
| 27              | Bulgaria | 2009           | Poultry Meat              | 60                                                          |
| 27              | Bulgaria | 2009           | Pulses, Other             | 1                                                           |
| 27              | Bulgaria | 2009           | Rice (Milled Equivalent)  | 8                                                           |
| 27              | Bulgaria | 2009           | Rye                       | 2                                                           |
| 27              | Bulgaria | 2009           | Soyabean Oil              | 4                                                           |
| 27              | Bulgaria | 2009           | Spices, Other             | 1                                                           |
| 27              | Bulgaria | 2009           | Sugar, Refined Equivalent | 74                                                          |
| 27              | Bulgaria | 2009           | Sunflowerseed             | 6                                                           |
| 27              | Bulgaria | 2009           | Sunflowerseed Oil         | 34                                                          |
| 27              | Bulgaria | 2009           | Sweeteners, Other         | 5                                                           |
| 27              | Bulgaria | 2009           | Tea                       | 1                                                           |
| 27              | Bulgaria | 2009           | Tomatoes                  | 64                                                          |
| 27              | Bulgaria | 2009           | Vegetables, Other         | 133                                                         |
| 27              | Bulgaria | 2009           | Wheat                     | 328                                                         |
| 27              | Bulgaria | 2009           | Wine                      | 34                                                          |
| 27              | Bulgaria | 2010           | Apples                    | 10                                                          |
| 27              | Bulgaria | 2010           | Bananas                   | 8                                                           |
| 27              | Bulgaria | 2010           | Barley                    | 34                                                          |
| 27              | Bulgaria | 2010           | Beans                     | 6                                                           |
| 27              | Bulgaria | 2010           | Beer                      | 187                                                         |
| 27              | Bulgaria | 2010           | Beverages, Alcoholic      | 20                                                          |
| 27              | Bulgaria | 2010           | Bovine Meat               | 14                                                          |
| 27              | Bulgaria | 2010           | Butter, Ghee              | 1                                                           |
| 27              | Bulgaria | 2010           | Cheese                    | 23                                                          |
| 27              | Bulgaria | 2010           | Cocoa Beans               | 5                                                           |
| 27              | Bulgaria | 2010           | Coconuts - Incl Copra     | 2                                                           |
| 27              | Bulgaria | 2010           | Coffee                    | 14                                                          |
| 27              | Bulgaria | 2010           | Demersal Fish             | 2                                                           |
| 27              | Bulgaria | 2010           | Eggs                      | 28                                                          |
| 27              | Bulgaria | 2010           | Fats, Animals, Raw        | 15                                                          |
| 27              | Bulgaria | 2010           | Freshwater Fish           | 7                                                           |
| 27              | Bulgaria | 2010           | Fruits, Other             | 45                                                          |
| 27              | Bulgaria | 2010           | Grapefruit                | 4                                                           |
| 27              | Bulgaria | 2010           | Grapes                    | 3                                                           |
| 27              | Bulgaria | 2010           | Groundnut Oil             | 1                                                           |
| 27              | Bulgaria | 2010           | Groundnuts (Shelled Eq)   | 1                                                           |
| 27              | Bulgaria | 2010           | Honey                     | 1                                                           |
| 27              | Bulgaria | 2010           | Lemons, Limes             | 4                                                           |
| 27              | Bulgaria | 2010           | Maize                     | 87                                                          |
| 27              | Bulgaria | 2010           | Maize Germ Oil            | 2                                                           |
| 27              | Bulgaria | 2010           | Meat, Other               | 3                                                           |
| 27              | Bulgaria | 2010           | Milk, Whole               | 197                                                         |
| 27              | Bulgaria | 2010           | Molluscs, Other           | 1                                                           |
| 27              | Bulgaria | 2010           | Mutton & Goat Meat        | 5                                                           |
| 27              | Bulgaria | 2010           | Nuts                      | 2                                                           |
| 27              | Bulgaria | 2010           | Oats                      | 1                                                           |
| 27              | Bulgaria | 2010           | Offals, Edible            | 11                                                          |
| 27              | Bulgaria | 2010           | Oilcrops Oil, Other       | 2                                                           |
| 27              | Bulgaria | 2010           | Olive Oil                 | 1                                                           |
| 27              | Bulgaria | 2010           | Olives                    | 5                                                           |
| 27              | Bulgaria | 2010           | Onions                    | 13                                                          |
| 27              | Bulgaria | 2010           | Oranges, Mandarines       | 17                                                          |
| 27              | Bulgaria | 2010           | Pelagic Fish              | 8                                                           |
| 27              | Bulgaria | 2010           | Pigmeat                   | 73                                                          |
| 27              | Bulgaria | 2010           | Pimento                   | 1                                                           |
| 27              | Bulgaria | 2010           | Pineapples                | 1                                                           |
| 27              | Bulgaria | 2010           | Plantains                 | 7                                                           |
| 27              | Bulgaria | 2010           | Potatoes                  | 86                                                          |
| 27              | Bulgaria | 2010           | Poultry Meat              | 51                                                          |
| 27              | Bulgaria | 2010           | Pulses, Other             | 1                                                           |
| 27              | Bulgaria | 2010           | Rice (Milled Equivalent)  | 5                                                           |
| 27              | Bulgaria | 2010           | Rye                       | 2                                                           |
| 27              | Bulgaria | 2010           | Soyabean Oil              | 5                                                           |
| 27              | Bulgaria | 2010           | Spices, Other             | 4                                                           |
| 27              | Bulgaria | 2010           | Sugar, Refined Equivalent | 61                                                          |
| 27              | Bulgaria | 2010           | Sunflowerseed             | 6                                                           |
| 27              | Bulgaria | 2010           | Sunflowerseed Oil         | 24                                                          |



Dietary calcium and zinc deficiency risks are decreasing but remain prevalent

| FAO countrycode | Country      | Reference year | Food item                 | Gross food supply (g capita <sup>-1</sup> d <sup>-1</sup> ) |
|-----------------|--------------|----------------|---------------------------|-------------------------------------------------------------|
| 27              | Bulgaria     | 2010           | Sweeteners, Other         | 5                                                           |
| 27              | Bulgaria     | 2010           | Tomatoes                  | 60                                                          |
| 27              | Bulgaria     | 2010           | Vegetables, Other         | 141                                                         |
| 27              | Bulgaria     | 2010           | Wheat                     | 318                                                         |
| 27              | Bulgaria     | 2010           | Wine                      | 39                                                          |
| 27              | Bulgaria     | 2011           | Apples                    | 17                                                          |
| 27              | Bulgaria     | 2011           | Bananas                   | 10                                                          |
| 27              | Bulgaria     | 2011           | Barley                    | 2                                                           |
| 27              | Bulgaria     | 2011           | Beans                     | 4                                                           |
| 27              | Bulgaria     | 2011           | Beer                      | 192                                                         |
| 27              | Bulgaria     | 2011           | Beverages, Alcoholic      | 22                                                          |
| 27              | Bulgaria     | 2011           | Bovine Meat               | 12                                                          |
| 27              | Bulgaria     | 2011           | Butter, Ghee              | 1                                                           |
| 27              | Bulgaria     | 2011           | Cheese                    | 24                                                          |
| 27              | Bulgaria     | 2011           | Cocoa Beans               | 5                                                           |
| 27              | Bulgaria     | 2011           | Coconuts - Incl Copra     | 1                                                           |
| 27              | Bulgaria     | 2011           | Coffee                    | 12                                                          |
| 27              | Bulgaria     | 2011           | Cream                     | 1                                                           |
| 27              | Bulgaria     | 2011           | Demersal Fish             | 2                                                           |
| 27              | Bulgaria     | 2011           | Eggs                      | 22                                                          |
| 27              | Bulgaria     | 2011           | Fats, Animals, Raw        | 14                                                          |
| 27              | Bulgaria     | 2011           | Freshwater Fish           | 7                                                           |
| 27              | Bulgaria     | 2011           | Fruits, Other             | 53                                                          |
| 27              | Bulgaria     | 2011           | Grapefruit                | 5                                                           |
| 27              | Bulgaria     | 2011           | Grapes                    | 14                                                          |
| 27              | Bulgaria     | 2011           | Groundnut Oil             | 1                                                           |
| 27              | Bulgaria     | 2011           | Groundnuts (Shelled Eq)   | 1                                                           |
| 27              | Bulgaria     | 2011           | Honey                     | 1                                                           |
| 27              | Bulgaria     | 2011           | Lemons, Limes             | 4                                                           |
| 27              | Bulgaria     | 2011           | Maize                     | 113                                                         |
| 27              | Bulgaria     | 2011           | Maize Germ Oil            | 2                                                           |
| 27              | Bulgaria     | 2011           | Meat, Other               | 3                                                           |
| 27              | Bulgaria     | 2011           | Milk, Whole               | 213                                                         |
| 27              | Bulgaria     | 2011           | Molluscs, Other           | 1                                                           |
| 27              | Bulgaria     | 2011           | Mutton & Goat Meat        | 5                                                           |
| 27              | Bulgaria     | 2011           | Nuts                      | 3                                                           |
| 27              | Bulgaria     | 2011           | Oats                      | 1                                                           |
| 27              | Bulgaria     | 2011           | Offals, Edible            | 11                                                          |
| 27              | Bulgaria     | 2011           | Oilcrops Oil, Other       | 2                                                           |
| 27              | Bulgaria     | 2011           | Olive Oil                 | 1                                                           |
| 27              | Bulgaria     | 2011           | Olives                    | 5                                                           |
| 27              | Bulgaria     | 2011           | Onions                    | 12                                                          |
| 27              | Bulgaria     | 2011           | Oranges, Mandarines       | 17                                                          |
| 27              | Bulgaria     | 2011           | Pelagic Fish              | 8                                                           |
| 27              | Bulgaria     | 2011           | Pigmeat                   | 78                                                          |
| 27              | Bulgaria     | 2011           | Pimento                   | 1                                                           |
| 27              | Bulgaria     | 2011           | Pineapples                | 1                                                           |
| 27              | Bulgaria     | 2011           | Plantains                 | 6                                                           |
| 27              | Bulgaria     | 2011           | Potatoes                  | 85                                                          |
| 27              | Bulgaria     | 2011           | Poultry Meat              | 58                                                          |
| 27              | Bulgaria     | 2011           | Pulses, Other             | 1                                                           |
| 27              | Bulgaria     | 2011           | Rice (Milled Equivalent)  | 9                                                           |
| 27              | Bulgaria     | 2011           | Rye                       | 2                                                           |
| 27              | Bulgaria     | 2011           | Soyabean Oil              | 4                                                           |
| 27              | Bulgaria     | 2011           | Spices, Other             | 3                                                           |
| 27              | Bulgaria     | 2011           | Sugar, Refined Equivalent | 66                                                          |
| 27              | Bulgaria     | 2011           | Sunflowerseed             | 6                                                           |
| 27              | Bulgaria     | 2011           | Sunflowerseed Oil         | 24                                                          |
| 27              | Bulgaria     | 2011           | Sweet Potatoes            | 2                                                           |
| 27              | Bulgaria     | 2011           | Sweeteners, Other         | 5                                                           |
| 27              | Bulgaria     | 2011           | Tomatoes                  | 50                                                          |
| 27              | Bulgaria     | 2011           | Vegetables, Other         | 138                                                         |
| 27              | Bulgaria     | 2011           | Wheat                     | 328                                                         |
| 27              | Bulgaria     | 2011           | Wine                      | 26                                                          |
| 233             | Burkina Faso | 1992           | Beer                      | 11                                                          |
| 233             | Burkina Faso | 1992           | Beverages, Fermented      | 647                                                         |
| 233             | Burkina Faso | 1992           | Bovine Meat               | 17                                                          |
| 233             | Burkina Faso | 1992           | Cereals, Other            | 3                                                           |
| 233             | Burkina Faso | 1992           | Cottonseed Oil            | 5                                                           |
| 233             | Burkina Faso | 1992           | Eggs                      | 7                                                           |
| 233             | Burkina Faso | 1992           | Fats, Animals, Raw        | 1                                                           |
| 233             | Burkina Faso | 1992           | Freshwater Fish           | 2                                                           |
| 233             | Burkina Faso | 1992           | Fruits, Other             | 18                                                          |
| 233             | Burkina Faso | 1992           | Groundnut Oil             | 1                                                           |
| 233             | Burkina Faso | 1992           | Groundnuts (Shelled Eq)   | 23                                                          |
| 233             | Burkina Faso | 1992           | Maize                     | 77                                                          |
| 233             | Burkina Faso | 1992           | Marine Fish, Other        | 2                                                           |
| 233             | Burkina Faso | 1992           | Meat, Other               | 2                                                           |
| 233             | Burkina Faso | 1992           | Milk, Whole               | 49                                                          |
| 233             | Burkina Faso | 1992           | Millet                    | 219                                                         |
| 233             | Burkina Faso | 1992           | Mutton & Goat Meat        | 9                                                           |
| 233             | Burkina Faso | 1992           | Nuts                      | 5                                                           |
| 233             | Burkina Faso | 1992           | Offals, Edible            | 6                                                           |
| 233             | Burkina Faso | 1992           | Oilcrops Oil, Other       | 2                                                           |
| 233             | Burkina Faso | 1992           | Palm Oil                  | 1                                                           |
| 233             | Burkina Faso | 1992           | Pigmeat                   | 3                                                           |
| 233             | Burkina Faso | 1992           | Potatoes                  | 2                                                           |
| 233             | Burkina Faso | 1992           | Poultry Meat              | 6                                                           |
| 233             | Burkina Faso | 1992           | Pulses, Other             | 35                                                          |
| 233             | Burkina Faso | 1992           | Rice (Milled Equivalent)  | 34                                                          |
| 233             | Burkina Faso | 1992           | Sesameseed                | 1                                                           |
| 233             | Burkina Faso | 1992           | Sorghum                   | 190                                                         |
| 233             | Burkina Faso | 1992           | Soyabean Oil              | 1                                                           |
| 233             | Burkina Faso | 1992           | Spices, Other             | 2                                                           |
| 233             | Burkina Faso | 1992           | Sugar, Refined Equivalent | 10                                                          |
| 233             | Burkina Faso | 1992           | Sweet Potatoes            | 4                                                           |
| 233             | Burkina Faso | 1992           | Tomatoes                  | 6                                                           |

Dietary calcium and zinc deficiency risks are decreasing but remain prevalent

| FAO countrycode | Country      | Reference year | Food item                 | Gross food supply (g capita <sup>-1</sup> d <sup>-1</sup> ) |
|-----------------|--------------|----------------|---------------------------|-------------------------------------------------------------|
| 233             | Burkina Faso | 1992           | Vegetables, Other         | 60                                                          |
| 233             | Burkina Faso | 1992           | Wheat                     | 12                                                          |
| 233             | Burkina Faso | 1992           | Yams                      | 19                                                          |
| 233             | Burkina Faso | 1993           | Beer                      | 11                                                          |
| 233             | Burkina Faso | 1993           | Beverages, Fermented      | 666                                                         |
| 233             | Burkina Faso | 1993           | Bovine Meat               | 17                                                          |
| 233             | Burkina Faso | 1993           | Cereals, Other            | 6                                                           |
| 233             | Burkina Faso | 1993           | Cottonseed Oil            | 2                                                           |
| 233             | Burkina Faso | 1993           | Eggs                      | 7                                                           |
| 233             | Burkina Faso | 1993           | Fats, Animals, Raw        | 1                                                           |
| 233             | Burkina Faso | 1993           | Freshwater Fish           | 2                                                           |
| 233             | Burkina Faso | 1993           | Fruits, Other             | 18                                                          |
| 233             | Burkina Faso | 1993           | Groundnut Oil             | 2                                                           |
| 233             | Burkina Faso | 1993           | Groundnuts (Shelled Eq)   | 33                                                          |
| 233             | Burkina Faso | 1993           | Maize                     | 89                                                          |
| 233             | Burkina Faso | 1993           | Marine Fish, Other        | 2                                                           |
| 233             | Burkina Faso | 1993           | Meat, Other               | 2                                                           |
| 233             | Burkina Faso | 1993           | Milk, Whole               | 50                                                          |
| 233             | Burkina Faso | 1993           | Millet                    | 202                                                         |
| 233             | Burkina Faso | 1993           | Mutton & Goat Meat        | 9                                                           |
| 233             | Burkina Faso | 1993           | Nuts                      | 5                                                           |
| 233             | Burkina Faso | 1993           | Offals, Edible            | 6                                                           |
| 233             | Burkina Faso | 1993           | Oilcrops Oil, Other       | 2                                                           |
| 233             | Burkina Faso | 1993           | Palm Oil                  | 1                                                           |
| 233             | Burkina Faso | 1993           | Pigmeat                   | 3                                                           |
| 233             | Burkina Faso | 1993           | Potatoes                  | 2                                                           |
| 233             | Burkina Faso | 1993           | Poultry Meat              | 6                                                           |
| 233             | Burkina Faso | 1993           | Pulses, Other             | 32                                                          |
| 233             | Burkina Faso | 1993           | Rice (Milled Equivalent)  | 33                                                          |
| 233             | Burkina Faso | 1993           | Sesameseed                | 1                                                           |
| 233             | Burkina Faso | 1993           | Sorghum                   | 196                                                         |
| 233             | Burkina Faso | 1993           | Soyabean Oil              | 1                                                           |
| 233             | Burkina Faso | 1993           | Soyabeans                 | 1                                                           |
| 233             | Burkina Faso | 1993           | Spices, Other             | 3                                                           |
| 233             | Burkina Faso | 1993           | Sugar, Refined Equivalent | 10                                                          |
| 233             | Burkina Faso | 1993           | Sweet Potatoes            | 4                                                           |
| 233             | Burkina Faso | 1993           | Tomatoes                  | 6                                                           |
| 233             | Burkina Faso | 1993           | Vegetables, Other         | 61                                                          |
| 233             | Burkina Faso | 1993           | Wheat                     | 10                                                          |
| 233             | Burkina Faso | 1993           | Yams                      | 11                                                          |
| 233             | Burkina Faso | 1994           | Beans                     | 1                                                           |
| 233             | Burkina Faso | 1994           | Beer                      | 9                                                           |
| 233             | Burkina Faso | 1994           | Beverages, Fermented      | 625                                                         |
| 233             | Burkina Faso | 1994           | Bovine Meat               | 17                                                          |
| 233             | Burkina Faso | 1994           | Cereals, Other            | 4                                                           |
| 233             | Burkina Faso | 1994           | Coffee                    | 2                                                           |
| 233             | Burkina Faso | 1994           | Cottonseed Oil            | 5                                                           |
| 233             | Burkina Faso | 1994           | Eggs                      | 7                                                           |
| 233             | Burkina Faso | 1994           | Fats, Animals, Raw        | 1                                                           |
| 233             | Burkina Faso | 1994           | Freshwater Fish           | 2                                                           |
| 233             | Burkina Faso | 1994           | Fruits, Other             | 18                                                          |
| 233             | Burkina Faso | 1994           | Groundnut Oil             | 2                                                           |
| 233             | Burkina Faso | 1994           | Groundnuts (Shelled Eq)   | 30                                                          |
| 233             | Burkina Faso | 1994           | Maize                     | 64                                                          |
| 233             | Burkina Faso | 1994           | Marine Fish, Other        | 4                                                           |
| 233             | Burkina Faso | 1994           | Meat, Other               | 2                                                           |
| 233             | Burkina Faso | 1994           | Milk, Whole               | 49                                                          |
| 233             | Burkina Faso | 1994           | Millet                    | 207                                                         |
| 233             | Burkina Faso | 1994           | Mutton & Goat Meat        | 9                                                           |
| 233             | Burkina Faso | 1994           | Nuts                      | 6                                                           |
| 233             | Burkina Faso | 1994           | Offals, Edible            | 6                                                           |
| 233             | Burkina Faso | 1994           | Oilcrops Oil, Other       | 3                                                           |
| 233             | Burkina Faso | 1994           | Palm Oil                  | 4                                                           |
| 233             | Burkina Faso | 1994           | Pigmeat                   | 3                                                           |
| 233             | Burkina Faso | 1994           | Potatoes                  | 2                                                           |
| 233             | Burkina Faso | 1994           | Poultry Meat              | 6                                                           |
| 233             | Burkina Faso | 1994           | Pulses, Other             | 36                                                          |
| 233             | Burkina Faso | 1994           | Rice (Milled Equivalent)  | 55                                                          |
| 233             | Burkina Faso | 1994           | Roots, Other              | 1                                                           |
| 233             | Burkina Faso | 1994           | Sorghum                   | 184                                                         |
| 233             | Burkina Faso | 1994           | Soyabean Oil              | 1                                                           |
| 233             | Burkina Faso | 1994           | Spices, Other             | 3                                                           |
| 233             | Burkina Faso | 1994           | Sugar, Refined Equivalent | 9                                                           |
| 233             | Burkina Faso | 1994           | Sweet Potatoes            | 3                                                           |
| 233             | Burkina Faso | 1994           | Tomatoes                  | 5                                                           |
| 233             | Burkina Faso | 1994           | Vegetables, Other         | 67                                                          |
| 233             | Burkina Faso | 1994           | Wheat                     | 17                                                          |
| 233             | Burkina Faso | 1994           | Yams                      | 9                                                           |
| 233             | Burkina Faso | 1995           | Beer                      | 10                                                          |
| 233             | Burkina Faso | 1995           | Beverages, Alcoholic      | 1                                                           |
| 233             | Burkina Faso | 1995           | Beverages, Fermented      | 610                                                         |
| 233             | Burkina Faso | 1995           | Bovine Meat               | 17                                                          |
| 233             | Burkina Faso | 1995           | Cassava                   | 1                                                           |
| 233             | Burkina Faso | 1995           | Cereals, Other            | 3                                                           |
| 233             | Burkina Faso | 1995           | Cottonseed Oil            | 3                                                           |
| 233             | Burkina Faso | 1995           | Eggs                      | 7                                                           |
| 233             | Burkina Faso | 1995           | Fats, Animals, Raw        | 1                                                           |
| 233             | Burkina Faso | 1995           | Freshwater Fish           | 2                                                           |
| 233             | Burkina Faso | 1995           | Fruits, Other             | 19                                                          |
| 233             | Burkina Faso | 1995           | Groundnut Oil             | 2                                                           |
| 233             | Burkina Faso | 1995           | Groundnuts (Shelled Eq)   | 27                                                          |
| 233             | Burkina Faso | 1995           | Maize                     | 95                                                          |
| 233             | Burkina Faso | 1995           | Marine Fish, Other        | 4                                                           |
| 233             | Burkina Faso | 1995           | Meat, Other               | 2                                                           |
| 233             | Burkina Faso | 1995           | Milk, Whole               | 55                                                          |
| 233             | Burkina Faso | 1995           | Millet                    | 197                                                         |
| 233             | Burkina Faso | 1995           | Mutton & Goat Meat        | 9                                                           |

Dietary calcium and zinc deficiency risks are decreasing but remain prevalent

| FAO countrycode | Country      | Reference year | Food item                 | Gross food supply (g capita <sup>-1</sup> d <sup>-1</sup> ) |
|-----------------|--------------|----------------|---------------------------|-------------------------------------------------------------|
| 233             | Burkina Faso | 1995           | Nuts                      | 5                                                           |
| 233             | Burkina Faso | 1995           | Offals, Edible            | 6                                                           |
| 233             | Burkina Faso | 1995           | Oilcrops Oil, Other       | 2                                                           |
| 233             | Burkina Faso | 1995           | Palm Oil                  | 4                                                           |
| 233             | Burkina Faso | 1995           | Pigmeat                   | 3                                                           |
| 233             | Burkina Faso | 1995           | Potatoes                  | 1                                                           |
| 233             | Burkina Faso | 1995           | Poultry Meat              | 6                                                           |
| 233             | Burkina Faso | 1995           | Pulses, Other             | 31                                                          |
| 233             | Burkina Faso | 1995           | Rice (Milled Equivalent)  | 43                                                          |
| 233             | Burkina Faso | 1995           | Roots, Other              | 1                                                           |
| 233             | Burkina Faso | 1995           | Sesameseed                | 2                                                           |
| 233             | Burkina Faso | 1995           | Sorghum                   | 179                                                         |
| 233             | Burkina Faso | 1995           | Soyabean Oil              | 1                                                           |
| 233             | Burkina Faso | 1995           | Soyabeans                 | 1                                                           |
| 233             | Burkina Faso | 1995           | Spices, Other             | 3                                                           |
| 233             | Burkina Faso | 1995           | Sugar, Refined Equivalent | 8                                                           |
| 233             | Burkina Faso | 1995           | Sweet Potatoes            | 3                                                           |
| 233             | Burkina Faso | 1995           | Tomatoes                  | 3                                                           |
| 233             | Burkina Faso | 1995           | Vegetables, Other         | 62                                                          |
| 233             | Burkina Faso | 1995           | Wheat                     | 18                                                          |
| 233             | Burkina Faso | 1995           | Yams                      | 16                                                          |
| 233             | Burkina Faso | 1996           | Beer                      | 15                                                          |
| 233             | Burkina Faso | 1996           | Beverages, Fermented      | 641                                                         |
| 233             | Burkina Faso | 1996           | Bovine Meat               | 17                                                          |
| 233             | Burkina Faso | 1996           | Cereals, Other            | 2                                                           |
| 233             | Burkina Faso | 1996           | Cottonseed Oil            | 5                                                           |
| 233             | Burkina Faso | 1996           | Eggs                      | 7                                                           |
| 233             | Burkina Faso | 1996           | Fats, Animals, Raw        | 1                                                           |
| 233             | Burkina Faso | 1996           | Freshwater Fish           | 2                                                           |
| 233             | Burkina Faso | 1996           | Fruits, Other             | 19                                                          |
| 233             | Burkina Faso | 1996           | Groundnut Oil             | 2                                                           |
| 233             | Burkina Faso | 1996           | Groundnuts (Shelled Eq)   | 32                                                          |
| 233             | Burkina Faso | 1996           | Maize                     | 64                                                          |
| 233             | Burkina Faso | 1996           | Marine Fish, Other        | 4                                                           |
| 233             | Burkina Faso | 1996           | Meat, Other               | 2                                                           |
| 233             | Burkina Faso | 1996           | Milk, Whole               | 50                                                          |
| 233             | Burkina Faso | 1996           | Millet                    | 175                                                         |
| 233             | Burkina Faso | 1996           | Mutton & Goat Meat        | 9                                                           |
| 233             | Burkina Faso | 1996           | Nuts                      | 6                                                           |
| 233             | Burkina Faso | 1996           | Offals, Edible            | 6                                                           |
| 233             | Burkina Faso | 1996           | Oilcrops Oil, Other       | 2                                                           |
| 233             | Burkina Faso | 1996           | Palm Oil                  | 2                                                           |
| 233             | Burkina Faso | 1996           | Pigmeat                   | 4                                                           |
| 233             | Burkina Faso | 1996           | Poultry Meat              | 6                                                           |
| 233             | Burkina Faso | 1996           | Pulses, Other             | 31                                                          |
| 233             | Burkina Faso | 1996           | Rice (Milled Equivalent)  | 66                                                          |
| 233             | Burkina Faso | 1996           | Sesameseed                | 1                                                           |
| 233             | Burkina Faso | 1996           | Sorghum                   | 188                                                         |
| 233             | Burkina Faso | 1996           | Soyabean Oil              | 1                                                           |
| 233             | Burkina Faso | 1996           | Spices, Other             | 3                                                           |
| 233             | Burkina Faso | 1996           | Sugar, Refined Equivalent | 13                                                          |
| 233             | Burkina Faso | 1996           | Sweet Potatoes            | 1                                                           |
| 233             | Burkina Faso | 1996           | Tomatoes                  | 4                                                           |
| 233             | Burkina Faso | 1996           | Vegetables, Other         | 78                                                          |
| 233             | Burkina Faso | 1996           | Wheat                     | 22                                                          |
| 233             | Burkina Faso | 1996           | Yams                      | 12                                                          |
| 233             | Burkina Faso | 1997           | Beans                     | 1                                                           |
| 233             | Burkina Faso | 1997           | Beer                      | 14                                                          |
| 233             | Burkina Faso | 1997           | Beverages, Alcoholic      | 1                                                           |
| 233             | Burkina Faso | 1997           | Beverages, Fermented      | 593                                                         |
| 233             | Burkina Faso | 1997           | Bovine Meat               | 17                                                          |
| 233             | Burkina Faso | 1997           | Cereals, Other            | 11                                                          |
| 233             | Burkina Faso | 1997           | Cottonseed Oil            | 9                                                           |
| 233             | Burkina Faso | 1997           | Eggs                      | 7                                                           |
| 233             | Burkina Faso | 1997           | Fats, Animals, Raw        | 1                                                           |
| 233             | Burkina Faso | 1997           | Freshwater Fish           | 2                                                           |
| 233             | Burkina Faso | 1997           | Fruits, Other             | 20                                                          |
| 233             | Burkina Faso | 1997           | Groundnut Oil             | 1                                                           |
| 233             | Burkina Faso | 1997           | Groundnuts (Shelled Eq)   | 20                                                          |
| 233             | Burkina Faso | 1997           | Maize                     | 92                                                          |
| 233             | Burkina Faso | 1997           | Marine Fish, Other        | 5                                                           |
| 233             | Burkina Faso | 1997           | Meat, Other               | 2                                                           |
| 233             | Burkina Faso | 1997           | Milk, Whole               | 51                                                          |
| 233             | Burkina Faso | 1997           | Millet                    | 165                                                         |
| 233             | Burkina Faso | 1997           | Mutton & Goat Meat        | 9                                                           |
| 233             | Burkina Faso | 1997           | Nuts                      | 6                                                           |
| 233             | Burkina Faso | 1997           | Offals, Edible            | 6                                                           |
| 233             | Burkina Faso | 1997           | Oilcrops Oil, Other       | 3                                                           |
| 233             | Burkina Faso | 1997           | Palm Oil                  | 2                                                           |
| 233             | Burkina Faso | 1997           | Palmkernel Oil            | 1                                                           |
| 233             | Burkina Faso | 1997           | Pigmeat                   | 4                                                           |
| 233             | Burkina Faso | 1997           | Poultry Meat              | 6                                                           |
| 233             | Burkina Faso | 1997           | Pulses, Other             | 30                                                          |
| 233             | Burkina Faso | 1997           | Rice (Milled Equivalent)  | 62                                                          |
| 233             | Burkina Faso | 1997           | Sorghum                   | 174                                                         |
| 233             | Burkina Faso | 1997           | Soyabeans                 | 1                                                           |
| 233             | Burkina Faso | 1997           | Spices, Other             | 3                                                           |
| 233             | Burkina Faso | 1997           | Sugar, Refined Equivalent | 14                                                          |
| 233             | Burkina Faso | 1997           | Sweet Potatoes            | 4                                                           |
| 233             | Burkina Faso | 1997           | Tomatoes                  | 3                                                           |
| 233             | Burkina Faso | 1997           | Vegetables, Other         | 78                                                          |
| 233             | Burkina Faso | 1997           | Wheat                     | 17                                                          |
| 233             | Burkina Faso | 1997           | Yams                      | 8                                                           |
| 233             | Burkina Faso | 1998           | Bananas                   | 1                                                           |
| 233             | Burkina Faso | 1998           | Beer                      | 14                                                          |
| 233             | Burkina Faso | 1998           | Beverages, Fermented      | 540                                                         |
| 233             | Burkina Faso | 1998           | Bovine Meat               | 17                                                          |

Dietary calcium and zinc deficiency risks are decreasing but remain prevalent

| FAO countrycode | Country      | Reference year | Food item                 | Gross food supply (g capita <sup>-1</sup> d <sup>-1</sup> ) |
|-----------------|--------------|----------------|---------------------------|-------------------------------------------------------------|
| 233             | Burkina Faso | 1998           | Cereals, Other            | 6                                                           |
| 233             | Burkina Faso | 1998           | Cottonseed Oil            | 7                                                           |
| 233             | Burkina Faso | 1998           | Eggs                      | 7                                                           |
| 233             | Burkina Faso | 1998           | Fats, Animals, Raw        | 1                                                           |
| 233             | Burkina Faso | 1998           | Freshwater Fish           | 2                                                           |
| 233             | Burkina Faso | 1998           | Fruits, Other             | 20                                                          |
| 233             | Burkina Faso | 1998           | Groundnut Oil             | 1                                                           |
| 233             | Burkina Faso | 1998           | Groundnuts (Shelled Eq)   | 29                                                          |
| 233             | Burkina Faso | 1998           | Maize                     | 97                                                          |
| 233             | Burkina Faso | 1998           | Marine Fish, Other        | 3                                                           |
| 233             | Burkina Faso | 1998           | Meat, Other               | 2                                                           |
| 233             | Burkina Faso | 1998           | Milk, Whole               | 51                                                          |
| 233             | Burkina Faso | 1998           | Millet                    | 184                                                         |
| 233             | Burkina Faso | 1998           | Mutton & Goat Meat        | 9                                                           |
| 233             | Burkina Faso | 1998           | Nuts                      | 4                                                           |
| 233             | Burkina Faso | 1998           | Offals, Edible            | 6                                                           |
| 233             | Burkina Faso | 1998           | Oilcrops Oil, Other       | 2                                                           |
| 233             | Burkina Faso | 1998           | Palm Oil                  | 1                                                           |
| 233             | Burkina Faso | 1998           | Pigmeat                   | 4                                                           |
| 233             | Burkina Faso | 1998           | Poultry Meat              | 6                                                           |
| 233             | Burkina Faso | 1998           | Pulses, Other             | 31                                                          |
| 233             | Burkina Faso | 1998           | Rice (Milled Equivalent)  | 52                                                          |
| 233             | Burkina Faso | 1998           | Sorghum                   | 159                                                         |
| 233             | Burkina Faso | 1998           | Soyabans                  | 1                                                           |
| 233             | Burkina Faso | 1998           | Spices, Other             | 3                                                           |
| 233             | Burkina Faso | 1998           | Sugar, Refined Equivalent | 12                                                          |
| 233             | Burkina Faso | 1998           | Sweet Potatoes            | 3                                                           |
| 233             | Burkina Faso | 1998           | Tomatoes                  | 2                                                           |
| 233             | Burkina Faso | 1998           | Vegetables, Other         | 77                                                          |
| 233             | Burkina Faso | 1998           | Wheat                     | 17                                                          |
| 233             | Burkina Faso | 1998           | Yams                      | 10                                                          |
| 233             | Burkina Faso | 1999           | Bananas                   | 1                                                           |
| 233             | Burkina Faso | 1999           | Beans                     | 1                                                           |
| 233             | Burkina Faso | 1999           | Beer                      | 12                                                          |
| 233             | Burkina Faso | 1999           | Beverages, Alcoholic      | 1                                                           |
| 233             | Burkina Faso | 1999           | Beverages, Fermented      | 559                                                         |
| 233             | Burkina Faso | 1999           | Bovine Meat               | 16                                                          |
| 233             | Burkina Faso | 1999           | Cereals, Other            | 8                                                           |
| 233             | Burkina Faso | 1999           | Cottonseed Oil            | 5                                                           |
| 233             | Burkina Faso | 1999           | Eggs                      | 7                                                           |
| 233             | Burkina Faso | 1999           | Fats, Animals, Raw        | 1                                                           |
| 233             | Burkina Faso | 1999           | Freshwater Fish           | 2                                                           |
| 233             | Burkina Faso | 1999           | Fruits, Other             | 20                                                          |
| 233             | Burkina Faso | 1999           | Groundnut Oil             | 1                                                           |
| 233             | Burkina Faso | 1999           | Groundnuts (Shelled Eq)   | 28                                                          |
| 233             | Burkina Faso | 1999           | Maize                     | 63                                                          |
| 233             | Burkina Faso | 1999           | Marine Fish, Other        | 6                                                           |
| 233             | Burkina Faso | 1999           | Meat, Other               | 2                                                           |
| 233             | Burkina Faso | 1999           | Milk, Whole               | 55                                                          |
| 233             | Burkina Faso | 1999           | Millet                    | 205                                                         |
| 233             | Burkina Faso | 1999           | Mutton & Goat Meat        | 9                                                           |
| 233             | Burkina Faso | 1999           | Nuts                      | 7                                                           |
| 233             | Burkina Faso | 1999           | Offals, Edible            | 6                                                           |
| 233             | Burkina Faso | 1999           | Oilcrops Oil, Other       | 3                                                           |
| 233             | Burkina Faso | 1999           | Palm Oil                  | 3                                                           |
| 233             | Burkina Faso | 1999           | Pigmeat                   | 4                                                           |
| 233             | Burkina Faso | 1999           | Potatoes                  | 1                                                           |
| 233             | Burkina Faso | 1999           | Poultry Meat              | 6                                                           |
| 233             | Burkina Faso | 1999           | Pulses, Other             | 34                                                          |
| 233             | Burkina Faso | 1999           | Rice (Milled Equivalent)  | 66                                                          |
| 233             | Burkina Faso | 1999           | Sesameseed                | 1                                                           |
| 233             | Burkina Faso | 1999           | Sorghum                   | 164                                                         |
| 233             | Burkina Faso | 1999           | Soyabans                  | 1                                                           |
| 233             | Burkina Faso | 1999           | Spices, Other             | 3                                                           |
| 233             | Burkina Faso | 1999           | Sugar, Refined Equivalent | 13                                                          |
| 233             | Burkina Faso | 1999           | Sweet Potatoes            | 4                                                           |
| 233             | Burkina Faso | 1999           | Tomatoes                  | 3                                                           |
| 233             | Burkina Faso | 1999           | Vegetables, Other         | 78                                                          |
| 233             | Burkina Faso | 1999           | Wheat                     | 20                                                          |
| 233             | Burkina Faso | 1999           | Yams                      | 9                                                           |
| 233             | Burkina Faso | 2000           | Bananas                   | 2                                                           |
| 233             | Burkina Faso | 2000           | Beans                     | 1                                                           |
| 233             | Burkina Faso | 2000           | Beer                      | 13                                                          |
| 233             | Burkina Faso | 2000           | Beverages, Alcoholic      | 1                                                           |
| 233             | Burkina Faso | 2000           | Beverages, Fermented      | 433                                                         |
| 233             | Burkina Faso | 2000           | Bovine Meat               | 16                                                          |
| 233             | Burkina Faso | 2000           | Cereals, Other            | 12                                                          |
| 233             | Burkina Faso | 2000           | Cottonseed Oil            | 3                                                           |
| 233             | Burkina Faso | 2000           | Eggs                      | 7                                                           |
| 233             | Burkina Faso | 2000           | Fats, Animals, Raw        | 1                                                           |
| 233             | Burkina Faso | 2000           | Freshwater Fish           | 2                                                           |
| 233             | Burkina Faso | 2000           | Fruits, Other             | 19                                                          |
| 233             | Burkina Faso | 2000           | Groundnut Oil             | 1                                                           |
| 233             | Burkina Faso | 2000           | Groundnuts (Shelled Eq)   | 30                                                          |
| 233             | Burkina Faso | 2000           | Maize                     | 127                                                         |
| 233             | Burkina Faso | 2000           | Marine Fish, Other        | 4                                                           |
| 233             | Burkina Faso | 2000           | Meat, Other               | 2                                                           |
| 233             | Burkina Faso | 2000           | Milk, Whole               | 52                                                          |
| 233             | Burkina Faso | 2000           | Millet                    | 192                                                         |
| 233             | Burkina Faso | 2000           | Mutton & Goat Meat        | 9                                                           |
| 233             | Burkina Faso | 2000           | Nuts                      | 4                                                           |
| 233             | Burkina Faso | 2000           | Offals, Edible            | 6                                                           |
| 233             | Burkina Faso | 2000           | Oilcrops Oil, Other       | 2                                                           |
| 233             | Burkina Faso | 2000           | Palm Oil                  | 6                                                           |
| 233             | Burkina Faso | 2000           | Pigmeat                   | 5                                                           |
| 233             | Burkina Faso | 2000           | Potatoes                  | 1                                                           |
| 233             | Burkina Faso | 2000           | Poultry Meat              | 6                                                           |

Dietary calcium and zinc deficiency risks are decreasing but remain prevalent

| FAO countrycode | Country      | Reference year | Food item                 | Gross food supply (g capita <sup>-1</sup> d <sup>-1</sup> ) |
|-----------------|--------------|----------------|---------------------------|-------------------------------------------------------------|
| 233             | Burkina Faso | 2000           | Pulses, Other             | 29                                                          |
| 233             | Burkina Faso | 2000           | Rice (Milled Equivalent)  | 56                                                          |
| 233             | Burkina Faso | 2000           | Sorghum                   | 127                                                         |
| 233             | Burkina Faso | 2000           | Soyabeans                 | 1                                                           |
| 233             | Burkina Faso | 2000           | Spices, Other             | 3                                                           |
| 233             | Burkina Faso | 2000           | Sugar, Refined Equivalent | 8                                                           |
| 233             | Burkina Faso | 2000           | Sweet Potatoes            | 6                                                           |
| 233             | Burkina Faso | 2000           | Tomatoes                  | 4                                                           |
| 233             | Burkina Faso | 2000           | Vegetables, Other         | 77                                                          |
| 233             | Burkina Faso | 2000           | Wheat                     | 22                                                          |
| 233             | Burkina Faso | 2000           | Wine                      | 1                                                           |
| 233             | Burkina Faso | 2000           | Yams                      | 12                                                          |
| 233             | Burkina Faso | 2001           | Bananas                   | 1                                                           |
| 233             | Burkina Faso | 2001           | Beer                      | 11                                                          |
| 233             | Burkina Faso | 2001           | Beverages, Alcoholic      | 1                                                           |
| 233             | Burkina Faso | 2001           | Beverages, Fermented      | 562                                                         |
| 233             | Burkina Faso | 2001           | Bovine Meat               | 16                                                          |
| 233             | Burkina Faso | 2001           | Cassava                   | 1                                                           |
| 233             | Burkina Faso | 2001           | Cereals, Other            | 5                                                           |
| 233             | Burkina Faso | 2001           | Cottonseed Oil            | 7                                                           |
| 233             | Burkina Faso | 2001           | Eggs                      | 7                                                           |
| 233             | Burkina Faso | 2001           | Fats, Animals, Raw        | 1                                                           |
| 233             | Burkina Faso | 2001           | Freshwater Fish           | 2                                                           |
| 233             | Burkina Faso | 2001           | Fruits, Other             | 18                                                          |
| 233             | Burkina Faso | 2001           | Groundnut Oil             | 1                                                           |
| 233             | Burkina Faso | 2001           | Groundnuts (Shelled Eq)   | 30                                                          |
| 233             | Burkina Faso | 2001           | Maize                     | 91                                                          |
| 233             | Burkina Faso | 2001           | Marine Fish, Other        | 1                                                           |
| 233             | Burkina Faso | 2001           | Meat, Other               | 2                                                           |
| 233             | Burkina Faso | 2001           | Milk, Whole               | 46                                                          |
| 233             | Burkina Faso | 2001           | Millet                    | 194                                                         |
| 233             | Burkina Faso | 2001           | Mutton & Goat Meat        | 9                                                           |
| 233             | Burkina Faso | 2001           | Nuts                      | 3                                                           |
| 233             | Burkina Faso | 2001           | Offals, Edible            | 6                                                           |
| 233             | Burkina Faso | 2001           | Oilcrops Oil, Other       | 1                                                           |
| 233             | Burkina Faso | 2001           | Palm Oil                  | 2                                                           |
| 233             | Burkina Faso | 2001           | Pelagic Fish              | 1                                                           |
| 233             | Burkina Faso | 2001           | Pigmeat                   | 5                                                           |
| 233             | Burkina Faso | 2001           | Poultry Meat              | 6                                                           |
| 233             | Burkina Faso | 2001           | Pulses, Other             | 32                                                          |
| 233             | Burkina Faso | 2001           | Rice (Milled Equivalent)  | 60                                                          |
| 233             | Burkina Faso | 2001           | Sesameseed                | 1                                                           |
| 233             | Burkina Faso | 2001           | Sorghum                   | 165                                                         |
| 233             | Burkina Faso | 2001           | Soyabeans                 | 1                                                           |
| 233             | Burkina Faso | 2001           | Spices, Other             | 3                                                           |
| 233             | Burkina Faso | 2001           | Sugar, Refined Equivalent | 11                                                          |
| 233             | Burkina Faso | 2001           | Sweet Potatoes            | 9                                                           |
| 233             | Burkina Faso | 2001           | Tomatoes                  | 2                                                           |
| 233             | Burkina Faso | 2001           | Vegetables, Other         | 75                                                          |
| 233             | Burkina Faso | 2001           | Wheat                     | 11                                                          |
| 233             | Burkina Faso | 2001           | Yams                      | 15                                                          |
| 233             | Burkina Faso | 2002           | Bananas                   | 1                                                           |
| 233             | Burkina Faso | 2002           | Beer                      | 11                                                          |
| 233             | Burkina Faso | 2002           | Beverages, Alcoholic      | 1                                                           |
| 233             | Burkina Faso | 2002           | Beverages, Fermented      | 549                                                         |
| 233             | Burkina Faso | 2002           | Bovine Meat               | 16                                                          |
| 233             | Burkina Faso | 2002           | Cassava                   | 1                                                           |
| 233             | Burkina Faso | 2002           | Cereals, Other            | 3                                                           |
| 233             | Burkina Faso | 2002           | Cottonseed Oil            | 8                                                           |
| 233             | Burkina Faso | 2002           | Eggs                      | 7                                                           |
| 233             | Burkina Faso | 2002           | Fats, Animals, Raw        | 1                                                           |
| 233             | Burkina Faso | 2002           | Freshwater Fish           | 2                                                           |
| 233             | Burkina Faso | 2002           | Fruits, Other             | 18                                                          |
| 233             | Burkina Faso | 2002           | Groundnut Oil             | 2                                                           |
| 233             | Burkina Faso | 2002           | Groundnuts (Shelled Eq)   | 39                                                          |
| 233             | Burkina Faso | 2002           | Maize                     | 102                                                         |
| 233             | Burkina Faso | 2002           | Marine Fish, Other        | 1                                                           |
| 233             | Burkina Faso | 2002           | Meat, Other               | 2                                                           |
| 233             | Burkina Faso | 2002           | Milk, Whole               | 45                                                          |
| 233             | Burkina Faso | 2002           | Millet                    | 189                                                         |
| 233             | Burkina Faso | 2002           | Mutton & Goat Meat        | 9                                                           |
| 233             | Burkina Faso | 2002           | Nuts                      | 3                                                           |
| 233             | Burkina Faso | 2002           | Offals, Edible            | 6                                                           |
| 233             | Burkina Faso | 2002           | Oilcrops Oil, Other       | 1                                                           |
| 233             | Burkina Faso | 2002           | Palm Oil                  | 3                                                           |
| 233             | Burkina Faso | 2002           | Pelagic Fish              | 2                                                           |
| 233             | Burkina Faso | 2002           | Pigmeat                   | 6                                                           |
| 233             | Burkina Faso | 2002           | Poultry Meat              | 6                                                           |
| 233             | Burkina Faso | 2002           | Pulses, Other             | 32                                                          |
| 233             | Burkina Faso | 2002           | Rice (Milled Equivalent)  | 63                                                          |
| 233             | Burkina Faso | 2002           | Sesameseed                | 1                                                           |
| 233             | Burkina Faso | 2002           | Sorghum                   | 161                                                         |
| 233             | Burkina Faso | 2002           | Soyabeans                 | 1                                                           |
| 233             | Burkina Faso | 2002           | Spices, Other             | 3                                                           |
| 233             | Burkina Faso | 2002           | Sugar, Refined Equivalent | 15                                                          |
| 233             | Burkina Faso | 2002           | Sweet Potatoes            | 7                                                           |
| 233             | Burkina Faso | 2002           | Tomatoes                  | 2                                                           |
| 233             | Burkina Faso | 2002           | Vegetables, Other         | 78                                                          |
| 233             | Burkina Faso | 2002           | Wheat                     | 11                                                          |
| 233             | Burkina Faso | 2002           | Yams                      | 5                                                           |
| 233             | Burkina Faso | 2003           | Beer                      | 10                                                          |
| 233             | Burkina Faso | 2003           | Beverages, Alcoholic      | 1                                                           |
| 233             | Burkina Faso | 2003           | Beverages, Fermented      | 565                                                         |
| 233             | Burkina Faso | 2003           | Bovine Meat               | 23                                                          |
| 233             | Burkina Faso | 2003           | Cassava                   | 1                                                           |
| 233             | Burkina Faso | 2003           | Cereals, Other            | 2                                                           |
| 233             | Burkina Faso | 2003           | Cottonseed Oil            | 6                                                           |

Dietary calcium and zinc deficiency risks are decreasing but remain prevalent

| FAO countrycode | Country      | Reference year | Food item                 | Gross food supply (g capita <sup>-1</sup> d <sup>-1</sup> ) |
|-----------------|--------------|----------------|---------------------------|-------------------------------------------------------------|
| 233             | Burkina Faso | 2003           | Eggs                      | 7                                                           |
| 233             | Burkina Faso | 2003           | Fats, Animals, Raw        | 1                                                           |
| 233             | Burkina Faso | 2003           | Freshwater Fish           | 2                                                           |
| 233             | Burkina Faso | 2003           | Fruits, Other             | 15                                                          |
| 233             | Burkina Faso | 2003           | Groundnut Oil             | 2                                                           |
| 233             | Burkina Faso | 2003           | Groundnuts (Shelled Eq)   | 43                                                          |
| 233             | Burkina Faso | 2003           | Maize                     | 134                                                         |
| 233             | Burkina Faso | 2003           | Marine Fish, Other        | 1                                                           |
| 233             | Burkina Faso | 2003           | Meat, Other               | 2                                                           |
| 233             | Burkina Faso | 2003           | Milk, Whole               | 52                                                          |
| 233             | Burkina Faso | 2003           | Millet                    | 202                                                         |
| 233             | Burkina Faso | 2003           | Mutton & Goat Meat        | 9                                                           |
| 233             | Burkina Faso | 2003           | Nuts                      | 2                                                           |
| 233             | Burkina Faso | 2003           | Offals, Edible            | 7                                                           |
| 233             | Burkina Faso | 2003           | Oilcrops Oil, Other       | 1                                                           |
| 233             | Burkina Faso | 2003           | Palm Oil                  | 1                                                           |
| 233             | Burkina Faso | 2003           | Peas                      | 1                                                           |
| 233             | Burkina Faso | 2003           | Pelagic Fish              | 2                                                           |
| 233             | Burkina Faso | 2003           | Pigmeat                   | 6                                                           |
| 233             | Burkina Faso | 2003           | Poultry Meat              | 6                                                           |
| 233             | Burkina Faso | 2003           | Pulses, Other             | 30                                                          |
| 233             | Burkina Faso | 2003           | Rice (Milled Equivalent)  | 46                                                          |
| 233             | Burkina Faso | 2003           | Sesameseed                | 1                                                           |
| 233             | Burkina Faso | 2003           | Sorghum                   | 166                                                         |
| 233             | Burkina Faso | 2003           | Soyabeans                 | 1                                                           |
| 233             | Burkina Faso | 2003           | Spices, Other             | 3                                                           |
| 233             | Burkina Faso | 2003           | Sugar, Refined Equivalent | 11                                                          |
| 233             | Burkina Faso | 2003           | Sweet Potatoes            | 6                                                           |
| 233             | Burkina Faso | 2003           | Tomatoes                  | 4                                                           |
| 233             | Burkina Faso | 2003           | Vegetables, Other         | 79                                                          |
| 233             | Burkina Faso | 2003           | Wheat                     | 6                                                           |
| 233             | Burkina Faso | 2003           | Wine                      | 1                                                           |
| 233             | Burkina Faso | 2003           | Yams                      | 7                                                           |
| 233             | Burkina Faso | 2004           | Beer                      | 9                                                           |
| 233             | Burkina Faso | 2004           | Beverages, Alcoholic      | 1                                                           |
| 233             | Burkina Faso | 2004           | Beverages, Fermented      | 566                                                         |
| 233             | Burkina Faso | 2004           | Bovine Meat               | 22                                                          |
| 233             | Burkina Faso | 2004           | Cassava                   | 1                                                           |
| 233             | Burkina Faso | 2004           | Cereals, Other            | 2                                                           |
| 233             | Burkina Faso | 2004           | Cottonseed Oil            | 10                                                          |
| 233             | Burkina Faso | 2004           | Eggs                      | 7                                                           |
| 233             | Burkina Faso | 2004           | Fats, Animals, Raw        | 2                                                           |
| 233             | Burkina Faso | 2004           | Freshwater Fish           | 2                                                           |
| 233             | Burkina Faso | 2004           | Fruits, Other             | 16                                                          |
| 233             | Burkina Faso | 2004           | Groundnut Oil             | 2                                                           |
| 233             | Burkina Faso | 2004           | Groundnuts (Shelled Eq)   | 36                                                          |
| 233             | Burkina Faso | 2004           | Maize                     | 130                                                         |
| 233             | Burkina Faso | 2004           | Marine Fish, Other        | 1                                                           |
| 233             | Burkina Faso | 2004           | Meat, Other               | 2                                                           |
| 233             | Burkina Faso | 2004           | Milk, Whole               | 52                                                          |
| 233             | Burkina Faso | 2004           | Millet                    | 197                                                         |
| 233             | Burkina Faso | 2004           | Mutton & Goat Meat        | 9                                                           |
| 233             | Burkina Faso | 2004           | Nuts                      | 2                                                           |
| 233             | Burkina Faso | 2004           | Offals, Edible            | 7                                                           |
| 233             | Burkina Faso | 2004           | Oilcrops Oil, Other       | 1                                                           |
| 233             | Burkina Faso | 2004           | Palm Oil                  | 1                                                           |
| 233             | Burkina Faso | 2004           | Pelagic Fish              | 2                                                           |
| 233             | Burkina Faso | 2004           | Pigmeat                   | 6                                                           |
| 233             | Burkina Faso | 2004           | Poultry Meat              | 6                                                           |
| 233             | Burkina Faso | 2004           | Pulses, Other             | 33                                                          |
| 233             | Burkina Faso | 2004           | Rice (Milled Equivalent)  | 50                                                          |
| 233             | Burkina Faso | 2004           | Sorghum                   | 166                                                         |
| 233             | Burkina Faso | 2004           | Spices, Other             | 3                                                           |
| 233             | Burkina Faso | 2004           | Sugar, Refined Equivalent | 9                                                           |
| 233             | Burkina Faso | 2004           | Sweet Potatoes            | 8                                                           |
| 233             | Burkina Faso | 2004           | Tomatoes                  | 4                                                           |
| 233             | Burkina Faso | 2004           | Vegetables, Other         | 82                                                          |
| 233             | Burkina Faso | 2004           | Wheat                     | 15                                                          |
| 233             | Burkina Faso | 2004           | Wine                      | 1                                                           |
| 233             | Burkina Faso | 2004           | Yams                      | 17                                                          |
| 233             | Burkina Faso | 2005           | Beer                      | 13                                                          |
| 233             | Burkina Faso | 2005           | Beverages, Alcoholic      | 2                                                           |
| 233             | Burkina Faso | 2005           | Beverages, Fermented      | 578                                                         |
| 233             | Burkina Faso | 2005           | Bovine Meat               | 23                                                          |
| 233             | Burkina Faso | 2005           | Cassava                   | 1                                                           |
| 233             | Burkina Faso | 2005           | Cereals, Other            | 2                                                           |
| 233             | Burkina Faso | 2005           | Cottonseed Oil            | 9                                                           |
| 233             | Burkina Faso | 2005           | Eggs                      | 7                                                           |
| 233             | Burkina Faso | 2005           | Fats, Animals, Raw        | 2                                                           |
| 233             | Burkina Faso | 2005           | Freshwater Fish           | 2                                                           |
| 233             | Burkina Faso | 2005           | Fruits, Other             | 17                                                          |
| 233             | Burkina Faso | 2005           | Groundnut Oil             | 1                                                           |
| 233             | Burkina Faso | 2005           | Groundnuts (Shelled Eq)   | 24                                                          |
| 233             | Burkina Faso | 2005           | Maize                     | 130                                                         |
| 233             | Burkina Faso | 2005           | Meat, Other               | 2                                                           |
| 233             | Burkina Faso | 2005           | Milk, Whole               | 53                                                          |
| 233             | Burkina Faso | 2005           | Millet                    | 193                                                         |
| 233             | Burkina Faso | 2005           | Mutton & Goat Meat        | 9                                                           |
| 233             | Burkina Faso | 2005           | Nuts                      | 2                                                           |
| 233             | Burkina Faso | 2005           | Offals, Edible            | 7                                                           |
| 233             | Burkina Faso | 2005           | Oilcrops Oil, Other       | 1                                                           |
| 233             | Burkina Faso | 2005           | Palm Oil                  | 4                                                           |
| 233             | Burkina Faso | 2005           | Pelagic Fish              | 5                                                           |
| 233             | Burkina Faso | 2005           | Pigmeat                   | 7                                                           |
| 233             | Burkina Faso | 2005           | Poultry Meat              | 6                                                           |
| 233             | Burkina Faso | 2005           | Pulses, Other             | 35                                                          |
| 233             | Burkina Faso | 2005           | Rice (Milled Equivalent)  | 38                                                          |

Dietary calcium and zinc deficiency risks are decreasing but remain prevalent

| FAO countrycode | Country      | Reference year | Food item                 | Gross food supply (g capita <sup>-1</sup> d <sup>-1</sup> ) |
|-----------------|--------------|----------------|---------------------------|-------------------------------------------------------------|
| 233             | Burkina Faso | 2005           | Sesameseed                | 1                                                           |
| 233             | Burkina Faso | 2005           | Sorghum                   | 170                                                         |
| 233             | Burkina Faso | 2005           | Soyabeans                 | 1                                                           |
| 233             | Burkina Faso | 2005           | Spices, Other             | 1                                                           |
| 233             | Burkina Faso | 2005           | Sugar, Refined Equivalent | 15                                                          |
| 233             | Burkina Faso | 2005           | Sweet Potatoes            | 13                                                          |
| 233             | Burkina Faso | 2005           | Tomatoes                  | 7                                                           |
| 233             | Burkina Faso | 2005           | Vegetables, Other         | 74                                                          |
| 233             | Burkina Faso | 2005           | Wheat                     | 23                                                          |
| 233             | Burkina Faso | 2005           | Wine                      | 1                                                           |
| 233             | Burkina Faso | 2005           | Yams                      | 3                                                           |
| 233             | Burkina Faso | 2006           | Beer                      | 13                                                          |
| 233             | Burkina Faso | 2006           | Beverages, Alcoholic      | 2                                                           |
| 233             | Burkina Faso | 2006           | Beverages, Fermented      | 543                                                         |
| 233             | Burkina Faso | 2006           | Bovine Meat               | 23                                                          |
| 233             | Burkina Faso | 2006           | Cassava                   | 1                                                           |
| 233             | Burkina Faso | 2006           | Cereals, Other            | 2                                                           |
| 233             | Burkina Faso | 2006           | Cottonseed Oil            | 11                                                          |
| 233             | Burkina Faso | 2006           | Eggs                      | 7                                                           |
| 233             | Burkina Faso | 2006           | Fats, Animals, Raw        | 2                                                           |
| 233             | Burkina Faso | 2006           | Freshwater Fish           | 2                                                           |
| 233             | Burkina Faso | 2006           | Fruits, Other             | 13                                                          |
| 233             | Burkina Faso | 2006           | Groundnut Oil             | 1                                                           |
| 233             | Burkina Faso | 2006           | Groundnuts (Shelled Eq)   | 22                                                          |
| 233             | Burkina Faso | 2006           | Maize                     | 137                                                         |
| 233             | Burkina Faso | 2006           | Meat, Other               | 2                                                           |
| 233             | Burkina Faso | 2006           | Milk, Whole               | 58                                                          |
| 233             | Burkina Faso | 2006           | Millet                    | 201                                                         |
| 233             | Burkina Faso | 2006           | Mutton & Goat Meat        | 9                                                           |
| 233             | Burkina Faso | 2006           | Nuts                      | 1                                                           |
| 233             | Burkina Faso | 2006           | Offals, Edible            | 7                                                           |
| 233             | Burkina Faso | 2006           | Oilcrops Oil, Other       | 1                                                           |
| 233             | Burkina Faso | 2006           | Palm Oil                  | 4                                                           |
| 233             | Burkina Faso | 2006           | Pelagic Fish              | 6                                                           |
| 233             | Burkina Faso | 2006           | Pigmeat                   | 7                                                           |
| 233             | Burkina Faso | 2006           | Poultry Meat              | 6                                                           |
| 233             | Burkina Faso | 2006           | Pulses, Other             | 40                                                          |
| 233             | Burkina Faso | 2006           | Rice (Milled Equivalent)  | 57                                                          |
| 233             | Burkina Faso | 2006           | Sesameseed                | 1                                                           |
| 233             | Burkina Faso | 2006           | Sorghum                   | 160                                                         |
| 233             | Burkina Faso | 2006           | Soyabeans                 | 1                                                           |
| 233             | Burkina Faso | 2006           | Spices, Other             | 1                                                           |
| 233             | Burkina Faso | 2006           | Sugar, Refined Equivalent | 15                                                          |
| 233             | Burkina Faso | 2006           | Sweet Potatoes            | 15                                                          |
| 233             | Burkina Faso | 2006           | Tomatoes                  | 4                                                           |
| 233             | Burkina Faso | 2006           | Vegetables, Other         | 78                                                          |
| 233             | Burkina Faso | 2006           | Wheat                     | 23                                                          |
| 233             | Burkina Faso | 2006           | Wine                      | 1                                                           |
| 233             | Burkina Faso | 2006           | Yams                      | 4                                                           |
| 233             | Burkina Faso | 2007           | Beer                      | 14                                                          |
| 233             | Burkina Faso | 2007           | Beverages, Alcoholic      | 1                                                           |
| 233             | Burkina Faso | 2007           | Beverages, Fermented      | 566                                                         |
| 233             | Burkina Faso | 2007           | Bovine Meat               | 22                                                          |
| 233             | Burkina Faso | 2007           | Cassava                   | 1                                                           |
| 233             | Burkina Faso | 2007           | Cereals, Other            | 2                                                           |
| 233             | Burkina Faso | 2007           | Cottonseed Oil            | 9                                                           |
| 233             | Burkina Faso | 2007           | Eggs                      | 7                                                           |
| 233             | Burkina Faso | 2007           | Fats, Animals, Raw        | 2                                                           |
| 233             | Burkina Faso | 2007           | Freshwater Fish           | 1                                                           |
| 233             | Burkina Faso | 2007           | Fruits, Other             | 14                                                          |
| 233             | Burkina Faso | 2007           | Groundnut Oil             | 1                                                           |
| 233             | Burkina Faso | 2007           | Groundnuts (Shelled Eq)   | 25                                                          |
| 233             | Burkina Faso | 2007           | Maize                     | 157                                                         |
| 233             | Burkina Faso | 2007           | Meat, Other               | 2                                                           |
| 233             | Burkina Faso | 2007           | Milk, Whole               | 52                                                          |
| 233             | Burkina Faso | 2007           | Millet                    | 190                                                         |
| 233             | Burkina Faso | 2007           | Mutton & Goat Meat        | 9                                                           |
| 233             | Burkina Faso | 2007           | Nuts                      | 1                                                           |
| 233             | Burkina Faso | 2007           | Offals, Edible            | 7                                                           |
| 233             | Burkina Faso | 2007           | Oilcrops Oil, Other       | 1                                                           |
| 233             | Burkina Faso | 2007           | Palm Oil                  | 3                                                           |
| 233             | Burkina Faso | 2007           | Pelagic Fish              | 6                                                           |
| 233             | Burkina Faso | 2007           | Pigmeat                   | 7                                                           |
| 233             | Burkina Faso | 2007           | Poultry Meat              | 6                                                           |
| 233             | Burkina Faso | 2007           | Pulses, Other             | 43                                                          |
| 233             | Burkina Faso | 2007           | Rice (Milled Equivalent)  | 44                                                          |
| 233             | Burkina Faso | 2007           | Sesameseed                | 1                                                           |
| 233             | Burkina Faso | 2007           | Sorghum                   | 166                                                         |
| 233             | Burkina Faso | 2007           | Soyabeans                 | 1                                                           |
| 233             | Burkina Faso | 2007           | Spices, Other             | 1                                                           |
| 233             | Burkina Faso | 2007           | Sugar, Refined Equivalent | 17                                                          |
| 233             | Burkina Faso | 2007           | Sweet Potatoes            | 11                                                          |
| 233             | Burkina Faso | 2007           | Tomatoes                  | 3                                                           |
| 233             | Burkina Faso | 2007           | Vegetables, Other         | 41                                                          |
| 233             | Burkina Faso | 2007           | Wheat                     | 22                                                          |
| 233             | Burkina Faso | 2007           | Wine                      | 1                                                           |
| 233             | Burkina Faso | 2007           | Yams                      | 3                                                           |
| 233             | Burkina Faso | 2008           | Beer                      | 13                                                          |
| 233             | Burkina Faso | 2008           | Beverages, Alcoholic      | 1                                                           |
| 233             | Burkina Faso | 2008           | Beverages, Fermented      | 558                                                         |
| 233             | Burkina Faso | 2008           | Bovine Meat               | 22                                                          |
| 233             | Burkina Faso | 2008           | Cassava                   | 1                                                           |
| 233             | Burkina Faso | 2008           | Cereals, Other            | 3                                                           |
| 233             | Burkina Faso | 2008           | Cottonseed Oil            | 10                                                          |
| 233             | Burkina Faso | 2008           | Eggs                      | 7                                                           |
| 233             | Burkina Faso | 2008           | Fats, Animals, Raw        | 1                                                           |
| 233             | Burkina Faso | 2008           | Freshwater Fish           | 1                                                           |

## Dietary calcium and zinc deficiency risks are decreasing but remain prevalent

| FAO countrycode | Country      | Reference year | Food item                 | Gross food supply (g capita <sup>-1</sup> d <sup>-1</sup> ) |
|-----------------|--------------|----------------|---------------------------|-------------------------------------------------------------|
| 233             | Burkina Faso | 2008           | Fruits, Other             | 15                                                          |
| 233             | Burkina Faso | 2008           | Groundnut Oil             | 1                                                           |
| 233             | Burkina Faso | 2008           | Groundnuts (Shelled Eq)   | 29                                                          |
| 233             | Burkina Faso | 2008           | Maize                     | 160                                                         |
| 233             | Burkina Faso | 2008           | Meat, Other               | 2                                                           |
| 233             | Burkina Faso | 2008           | Milk, Whole               | 54                                                          |
| 233             | Burkina Faso | 2008           | Millet                    | 183                                                         |
| 233             | Burkina Faso | 2008           | Mutton & Goat Meat        | 9                                                           |
| 233             | Burkina Faso | 2008           | Nuts                      | 2                                                           |
| 233             | Burkina Faso | 2008           | Offals, Edible            | 7                                                           |
| 233             | Burkina Faso | 2008           | Oilcrops Oil, Other       | 1                                                           |
| 233             | Burkina Faso | 2008           | Palm Oil                  | 4                                                           |
| 233             | Burkina Faso | 2008           | Pelagic Fish              | 6                                                           |
| 233             | Burkina Faso | 2008           | Pigmeat                   | 6                                                           |
| 233             | Burkina Faso | 2008           | Poultry Meat              | 6                                                           |
| 233             | Burkina Faso | 2008           | Pulses, Other             | 42                                                          |
| 233             | Burkina Faso | 2008           | Rice (Milled Equivalent)  | 49                                                          |
| 233             | Burkina Faso | 2008           | Sesameseed                | 2                                                           |
| 233             | Burkina Faso | 2008           | Sorghum                   | 164                                                         |
| 233             | Burkina Faso | 2008           | Soyabeans                 | 5                                                           |
| 233             | Burkina Faso | 2008           | Spices, Other             | 1                                                           |
| 233             | Burkina Faso | 2008           | Sugar, Refined Equivalent | 12                                                          |
| 233             | Burkina Faso | 2008           | Sweet Potatoes            | 12                                                          |
| 233             | Burkina Faso | 2008           | Tomatoes                  | 2                                                           |
| 233             | Burkina Faso | 2008           | Vegetables, Other         | 45                                                          |
| 233             | Burkina Faso | 2008           | Wheat                     | 16                                                          |
| 233             | Burkina Faso | 2008           | Wine                      | 1                                                           |
| 233             | Burkina Faso | 2008           | Yams                      | 7                                                           |
| 233             | Burkina Faso | 2009           | Beer                      | 14                                                          |
| 233             | Burkina Faso | 2009           | Beverages, Alcoholic      | 1                                                           |
| 233             | Burkina Faso | 2009           | Beverages, Fermented      | 560                                                         |
| 233             | Burkina Faso | 2009           | Bovine Meat               | 22                                                          |
| 233             | Burkina Faso | 2009           | Cassava                   | 2                                                           |
| 233             | Burkina Faso | 2009           | Cereals, Other            | 6                                                           |
| 233             | Burkina Faso | 2009           | Coconut Oil               | 1                                                           |
| 233             | Burkina Faso | 2009           | Coffee                    | 1                                                           |
| 233             | Burkina Faso | 2009           | Cottonseed Oil            | 8                                                           |
| 233             | Burkina Faso | 2009           | Eggs                      | 7                                                           |
| 233             | Burkina Faso | 2009           | Fats, Animals, Raw        | 1                                                           |
| 233             | Burkina Faso | 2009           | Freshwater Fish           | 1                                                           |
| 233             | Burkina Faso | 2009           | Fruits, Other             | 14                                                          |
| 233             | Burkina Faso | 2009           | Groundnut Oil             | 2                                                           |
| 233             | Burkina Faso | 2009           | Groundnuts (Shelled Eq)   | 33                                                          |
| 233             | Burkina Faso | 2009           | Maize                     | 161                                                         |
| 233             | Burkina Faso | 2009           | Marine Fish, Other        | 3                                                           |
| 233             | Burkina Faso | 2009           | Meat, Other               | 2                                                           |
| 233             | Burkina Faso | 2009           | Milk, Whole               | 55                                                          |
| 233             | Burkina Faso | 2009           | Millet                    | 170                                                         |
| 233             | Burkina Faso | 2009           | Mutton & Goat Meat        | 9                                                           |
| 233             | Burkina Faso | 2009           | Nuts                      | 2                                                           |
| 233             | Burkina Faso | 2009           | Offals, Edible            | 7                                                           |
| 233             | Burkina Faso | 2009           | Oilcrops Oil, Other       | 1                                                           |
| 233             | Burkina Faso | 2009           | Palm Oil                  | 3                                                           |
| 233             | Burkina Faso | 2009           | Pelagic Fish              | 7                                                           |
| 233             | Burkina Faso | 2009           | Pigmeat                   | 6                                                           |
| 233             | Burkina Faso | 2009           | Potatoes                  | 1                                                           |
| 233             | Burkina Faso | 2009           | Poultry Meat              | 6                                                           |
| 233             | Burkina Faso | 2009           | Pulses, Other             | 42                                                          |
| 233             | Burkina Faso | 2009           | Rice (Milled Equivalent)  | 61                                                          |
| 233             | Burkina Faso | 2009           | Sesameseed                | 1                                                           |
| 233             | Burkina Faso | 2009           | Sorghum                   | 165                                                         |
| 233             | Burkina Faso | 2009           | Soyabeans                 | 3                                                           |
| 233             | Burkina Faso | 2009           | Spices, Other             | 1                                                           |
| 233             | Burkina Faso | 2009           | Sugar, Refined Equivalent | 12                                                          |
| 233             | Burkina Faso | 2009           | Sweet Potatoes            | 13                                                          |
| 233             | Burkina Faso | 2009           | Tomatoes                  | 5                                                           |
| 233             | Burkina Faso | 2009           | Vegetables, Other         | 39                                                          |
| 233             | Burkina Faso | 2009           | Wheat                     | 23                                                          |
| 233             | Burkina Faso | 2009           | Wine                      | 1                                                           |
| 233             | Burkina Faso | 2009           | Yams                      | 13                                                          |
| 233             | Burkina Faso | 2010           | Beer                      | 13                                                          |
| 233             | Burkina Faso | 2010           | Beverages, Fermented      | 565                                                         |
| 233             | Burkina Faso | 2010           | Bovine Meat               | 22                                                          |
| 233             | Burkina Faso | 2010           | Cassava                   | 2                                                           |
| 233             | Burkina Faso | 2010           | Cereals, Other            | 3                                                           |
| 233             | Burkina Faso | 2010           | Coconut Oil               | 1                                                           |
| 233             | Burkina Faso | 2010           | Coffee                    | 1                                                           |
| 233             | Burkina Faso | 2010           | Cottonseed Oil            | 10                                                          |
| 233             | Burkina Faso | 2010           | Eggs                      | 7                                                           |
| 233             | Burkina Faso | 2010           | Fats, Animals, Raw        | 1                                                           |
| 233             | Burkina Faso | 2010           | Freshwater Fish           | 2                                                           |
| 233             | Burkina Faso | 2010           | Fruits, Other             | 14                                                          |
| 233             | Burkina Faso | 2010           | Groundnut Oil             | 2                                                           |
| 233             | Burkina Faso | 2010           | Groundnuts (Shelled Eq)   | 33                                                          |
| 233             | Burkina Faso | 2010           | Maize                     | 163                                                         |
| 233             | Burkina Faso | 2010           | Marine Fish, Other        | 4                                                           |
| 233             | Burkina Faso | 2010           | Meat, Other               | 2                                                           |
| 233             | Burkina Faso | 2010           | Milk, Whole               | 53                                                          |
| 233             | Burkina Faso | 2010           | Millet                    | 169                                                         |
| 233             | Burkina Faso | 2010           | Mutton & Goat Meat        | 9                                                           |
| 233             | Burkina Faso | 2010           | Nuts                      | 2                                                           |
| 233             | Burkina Faso | 2010           | Offals, Edible            | 7                                                           |
| 233             | Burkina Faso | 2010           | Oranges, Mandarines       | 2                                                           |
| 233             | Burkina Faso | 2010           | Palm Oil                  | 5                                                           |
| 233             | Burkina Faso | 2010           | Pelagic Fish              | 8                                                           |
| 233             | Burkina Faso | 2010           | Pigmeat                   | 6                                                           |
| 233             | Burkina Faso | 2010           | Potatoes                  | 1                                                           |



## Dietary calcium and zinc deficiency risks are decreasing but remain prevalent

| FAO countrycode | Country      | Reference year | Food item                 | Gross food supply (g capita <sup>-1</sup> d <sup>-1</sup> ) |
|-----------------|--------------|----------------|---------------------------|-------------------------------------------------------------|
| 233             | Burkina Faso | 2010           | Poultry Meat              | 7                                                           |
| 233             | Burkina Faso | 2010           | Pulses, Other             | 40                                                          |
| 233             | Burkina Faso | 2010           | Rice (Milled Equivalent)  | 58                                                          |
| 233             | Burkina Faso | 2010           | Sesameseed                | 4                                                           |
| 233             | Burkina Faso | 2010           | Sorghum                   | 166                                                         |
| 233             | Burkina Faso | 2010           | Soybeans                  | 4                                                           |
| 233             | Burkina Faso | 2010           | Spices, Other             | 1                                                           |
| 233             | Burkina Faso | 2010           | Sugar, Refined Equivalent | 12                                                          |
| 233             | Burkina Faso | 2010           | Sweet Potatoes            | 15                                                          |
| 233             | Burkina Faso | 2010           | Sweeteners, Other         | 1                                                           |
| 233             | Burkina Faso | 2010           | Tomatoes                  | 4                                                           |
| 233             | Burkina Faso | 2010           | Vegetables, Other         | 46                                                          |
| 233             | Burkina Faso | 2010           | Wheat                     | 24                                                          |
| 233             | Burkina Faso | 2010           | Wine                      | 1                                                           |
| 233             | Burkina Faso | 2010           | Yams                      | 15                                                          |
| 233             | Burkina Faso | 2011           | Beer                      | 15                                                          |
| 233             | Burkina Faso | 2011           | Beverages, Alcoholic      | 1                                                           |
| 233             | Burkina Faso | 2011           | Beverages, Fermented      | 547                                                         |
| 233             | Burkina Faso | 2011           | Bovine Meat               | 22                                                          |
| 233             | Burkina Faso | 2011           | Cassava                   | 1                                                           |
| 233             | Burkina Faso | 2011           | Cereals, Other            | 2                                                           |
| 233             | Burkina Faso | 2011           | Coconut Oil               | 1                                                           |
| 233             | Burkina Faso | 2011           | Coffee                    | 1                                                           |
| 233             | Burkina Faso | 2011           | Cottonseed Oil            | 8                                                           |
| 233             | Burkina Faso | 2011           | Eggs                      | 7                                                           |
| 233             | Burkina Faso | 2011           | Fats, Animals, Raw        | 1                                                           |
| 233             | Burkina Faso | 2011           | Freshwater Fish           | 2                                                           |
| 233             | Burkina Faso | 2011           | Fruits, Other             | 14                                                          |
| 233             | Burkina Faso | 2011           | Groundnut Oil             | 2                                                           |
| 233             | Burkina Faso | 2011           | Groundnuts (Shelled Eq)   | 30                                                          |
| 233             | Burkina Faso | 2011           | Maize                     | 167                                                         |
| 233             | Burkina Faso | 2011           | Marine Fish, Other        | 8                                                           |
| 233             | Burkina Faso | 2011           | Meat, Other               | 2                                                           |
| 233             | Burkina Faso | 2011           | Milk, Whole               | 55                                                          |
| 233             | Burkina Faso | 2011           | Millet                    | 167                                                         |
| 233             | Burkina Faso | 2011           | Mutton & Goat Meat        | 9                                                           |
| 233             | Burkina Faso | 2011           | Nuts                      | 2                                                           |
| 233             | Burkina Faso | 2011           | Offals, Edible            | 7                                                           |
| 233             | Burkina Faso | 2011           | Oranges, Mandarines       | 1                                                           |
| 233             | Burkina Faso | 2011           | Palm Oil                  | 7                                                           |
| 233             | Burkina Faso | 2011           | Pelagic Fish              | 8                                                           |
| 233             | Burkina Faso | 2011           | Pigmeat                   | 5                                                           |
| 233             | Burkina Faso | 2011           | Pineapples                | 1                                                           |
| 233             | Burkina Faso | 2011           | Potatoes                  | 1                                                           |
| 233             | Burkina Faso | 2011           | Poultry Meat              | 7                                                           |
| 233             | Burkina Faso | 2011           | Pulses, Other             | 39                                                          |
| 233             | Burkina Faso | 2011           | Rice (Milled Equivalent)  | 56                                                          |
| 233             | Burkina Faso | 2011           | Sesameseed                | 4                                                           |
| 233             | Burkina Faso | 2011           | Sorghum                   | 161                                                         |
| 233             | Burkina Faso | 2011           | Soybeans                  | 4                                                           |
| 233             | Burkina Faso | 2011           | Spices, Other             | 1                                                           |
| 233             | Burkina Faso | 2011           | Sugar, Refined Equivalent | 17                                                          |
| 233             | Burkina Faso | 2011           | Sweet Potatoes            | 22                                                          |
| 233             | Burkina Faso | 2011           | Sweeteners, Other         | 1                                                           |
| 233             | Burkina Faso | 2011           | Tomatoes                  | 3                                                           |
| 233             | Burkina Faso | 2011           | Vegetables, Other         | 42                                                          |
| 233             | Burkina Faso | 2011           | Wheat                     | 24                                                          |
| 233             | Burkina Faso | 2011           | Wine                      | 1                                                           |
| 233             | Burkina Faso | 2011           | Yams                      | 15                                                          |
| 115             | Cambodia     | 1992           | Bananas                   | 33                                                          |
| 115             | Cambodia     | 1992           | Beans                     | 3                                                           |
| 115             | Cambodia     | 1992           | Beer                      | 2                                                           |
| 115             | Cambodia     | 1992           | Beverages, Alcoholic      | 1                                                           |
| 115             | Cambodia     | 1992           | Bovine Meat               | 13                                                          |
| 115             | Cambodia     | 1992           | Cassava                   | 40                                                          |
| 115             | Cambodia     | 1992           | Coconut Oil               | 2                                                           |
| 115             | Cambodia     | 1992           | Coconuts - Incl Copra     | 2                                                           |
| 115             | Cambodia     | 1992           | Crustaceans               | 2                                                           |
| 115             | Cambodia     | 1992           | Eggs                      | 3                                                           |
| 115             | Cambodia     | 1992           | Fats, Animals, Raw        | 2                                                           |
| 115             | Cambodia     | 1992           | Freshwater Fish           | 12                                                          |
| 115             | Cambodia     | 1992           | Fruits, Other             | 17                                                          |
| 115             | Cambodia     | 1992           | Grapefruit                | 1                                                           |
| 115             | Cambodia     | 1992           | Groundnuts (Shelled Eq)   | 1                                                           |
| 115             | Cambodia     | 1992           | Maize                     | 13                                                          |
| 115             | Cambodia     | 1992           | Marine Fish, Other        | 6                                                           |
| 115             | Cambodia     | 1992           | Milk, Whole               | 6                                                           |
| 115             | Cambodia     | 1992           | Molluscs, Other           | 1                                                           |
| 115             | Cambodia     | 1992           | Offals, Edible            | 4                                                           |
| 115             | Cambodia     | 1992           | Oranges, Mandarines       | 12                                                          |
| 115             | Cambodia     | 1992           | Palm Oil                  | 2                                                           |
| 115             | Cambodia     | 1992           | Pepper                    | 1                                                           |
| 115             | Cambodia     | 1992           | Pigmeat                   | 23                                                          |
| 115             | Cambodia     | 1992           | Pimento                   | 2                                                           |
| 115             | Cambodia     | 1992           | Pineapples                | 3                                                           |
| 115             | Cambodia     | 1992           | Poultry Meat              | 5                                                           |
| 115             | Cambodia     | 1992           | Rice (Milled Equivalent)  | 474                                                         |
| 115             | Cambodia     | 1992           | Roots, Other              | 4                                                           |
| 115             | Cambodia     | 1992           | Sesameseed                | 2                                                           |
| 115             | Cambodia     | 1992           | Soybean Oil               | 1                                                           |
| 115             | Cambodia     | 1992           | Soybeans                  | 1                                                           |
| 115             | Cambodia     | 1992           | Sugar Cane                | 8                                                           |
| 115             | Cambodia     | 1992           | Sugar, Refined Equivalent | 10                                                          |
| 115             | Cambodia     | 1992           | Sweet Potatoes            | 16                                                          |
| 115             | Cambodia     | 1992           | Vegetables, Other         | 121                                                         |
| 115             | Cambodia     | 1993           | Bananas                   | 32                                                          |
| 115             | Cambodia     | 1993           | Beans                     | 3                                                           |

Dietary calcium and zinc deficiency risks are decreasing but remain prevalent

| FAO countrycode | Country  | Reference year | Food item                 | Gross food supply (g capita <sup>-1</sup> d <sup>-1</sup> ) |
|-----------------|----------|----------------|---------------------------|-------------------------------------------------------------|
| 115             | Cambodia | 1993           | Beer                      | 2                                                           |
| 115             | Cambodia | 1993           | Beverages, Alcoholic      | 1                                                           |
| 115             | Cambodia | 1993           | Bovine Meat               | 13                                                          |
| 115             | Cambodia | 1993           | Cassava                   | 13                                                          |
| 115             | Cambodia | 1993           | Coconut Oil               | 2                                                           |
| 115             | Cambodia | 1993           | Coconuts - Incl Copra     | 2                                                           |
| 115             | Cambodia | 1993           | Crustaceans               | 2                                                           |
| 115             | Cambodia | 1993           | Eggs                      | 3                                                           |
| 115             | Cambodia | 1993           | Fats, Animals, Raw        | 2                                                           |
| 115             | Cambodia | 1993           | Freshwater Fish           | 12                                                          |
| 115             | Cambodia | 1993           | Fruits, Other             | 18                                                          |
| 115             | Cambodia | 1993           | Grapefruit                | 1                                                           |
| 115             | Cambodia | 1993           | Groundnuts (Shelled Eq)   | 1                                                           |
| 115             | Cambodia | 1993           | Maize                     | 9                                                           |
| 115             | Cambodia | 1993           | Marine Fish, Other        | 6                                                           |
| 115             | Cambodia | 1993           | Milk, Whole               | 8                                                           |
| 115             | Cambodia | 1993           | Offals, Edible            | 4                                                           |
| 115             | Cambodia | 1993           | Oranges, Mandarines       | 12                                                          |
| 115             | Cambodia | 1993           | Palm Oil                  | 4                                                           |
| 115             | Cambodia | 1993           | Pepper                    | 1                                                           |
| 115             | Cambodia | 1993           | Pigmeat                   | 23                                                          |
| 115             | Cambodia | 1993           | Pimento                   | 2                                                           |
| 115             | Cambodia | 1993           | Pineapples                | 3                                                           |
| 115             | Cambodia | 1993           | Poultry Meat              | 6                                                           |
| 115             | Cambodia | 1993           | Rice (Milled Equivalent)  | 477                                                         |
| 115             | Cambodia | 1993           | Roots, Other              | 4                                                           |
| 115             | Cambodia | 1993           | Sesameseed                | 1                                                           |
| 115             | Cambodia | 1993           | Soyabean Oil              | 1                                                           |
| 115             | Cambodia | 1993           | Soyabeans                 | 1                                                           |
| 115             | Cambodia | 1993           | Sugar Cane                | 8                                                           |
| 115             | Cambodia | 1993           | Sugar, Refined Equivalent | 4                                                           |
| 115             | Cambodia | 1993           | Sweet Potatoes            | 12                                                          |
| 115             | Cambodia | 1993           | Vegetables, Other         | 118                                                         |
| 115             | Cambodia | 1993           | Wheat                     | 6                                                           |
| 115             | Cambodia | 1994           | Bananas                   | 32                                                          |
| 115             | Cambodia | 1994           | Beans                     | 3                                                           |
| 115             | Cambodia | 1994           | Beer                      | 7                                                           |
| 115             | Cambodia | 1994           | Beverages, Alcoholic      | 4                                                           |
| 115             | Cambodia | 1994           | Bovine Meat               | 13                                                          |
| 115             | Cambodia | 1994           | Cassava                   | 16                                                          |
| 115             | Cambodia | 1994           | Coconut Oil               | 2                                                           |
| 115             | Cambodia | 1994           | Coconuts - Incl Copra     | 2                                                           |
| 115             | Cambodia | 1994           | Crustaceans               | 2                                                           |
| 115             | Cambodia | 1994           | Eggs                      | 3                                                           |
| 115             | Cambodia | 1994           | Fats, Animals, Raw        | 2                                                           |
| 115             | Cambodia | 1994           | Freshwater Fish           | 12                                                          |
| 115             | Cambodia | 1994           | Fruits, Other             | 18                                                          |
| 115             | Cambodia | 1994           | Grapefruit                | 1                                                           |
| 115             | Cambodia | 1994           | Groundnuts (Shelled Eq)   | 1                                                           |
| 115             | Cambodia | 1994           | Maize                     | 10                                                          |
| 115             | Cambodia | 1994           | Marine Fish, Other        | 5                                                           |
| 115             | Cambodia | 1994           | Milk, Whole               | 11                                                          |
| 115             | Cambodia | 1994           | Offals, Edible            | 4                                                           |
| 115             | Cambodia | 1994           | Oranges, Mandarines       | 11                                                          |
| 115             | Cambodia | 1994           | Palm Oil                  | 5                                                           |
| 115             | Cambodia | 1994           | Pelagic Fish              | 1                                                           |
| 115             | Cambodia | 1994           | Pepper                    | 1                                                           |
| 115             | Cambodia | 1994           | Pigmeat                   | 21                                                          |
| 115             | Cambodia | 1994           | Pimento                   | 2                                                           |
| 115             | Cambodia | 1994           | Pineapples                | 3                                                           |
| 115             | Cambodia | 1994           | Poultry Meat              | 5                                                           |
| 115             | Cambodia | 1994           | Rice (Milled Equivalent)  | 480                                                         |
| 115             | Cambodia | 1994           | Roots, Other              | 4                                                           |
| 115             | Cambodia | 1994           | Sesameseed                | 1                                                           |
| 115             | Cambodia | 1994           | Soyabean Oil              | 1                                                           |
| 115             | Cambodia | 1994           | Sugar Cane                | 12                                                          |
| 115             | Cambodia | 1994           | Sugar, Refined Equivalent | 5                                                           |
| 115             | Cambodia | 1994           | Sweet Potatoes            | 9                                                           |
| 115             | Cambodia | 1994           | Vegetables, Other         | 115                                                         |
| 115             | Cambodia | 1994           | Wheat                     | 2                                                           |
| 115             | Cambodia | 1995           | Bananas                   | 32                                                          |
| 115             | Cambodia | 1995           | Beans                     | 3                                                           |
| 115             | Cambodia | 1995           | Beer                      | 6                                                           |
| 115             | Cambodia | 1995           | Beverages, Alcoholic      | 3                                                           |
| 115             | Cambodia | 1995           | Bovine Meat               | 13                                                          |
| 115             | Cambodia | 1995           | Cassava                   | 20                                                          |
| 115             | Cambodia | 1995           | Coconut Oil               | 2                                                           |
| 115             | Cambodia | 1995           | Coconuts - Incl Copra     | 1                                                           |
| 115             | Cambodia | 1995           | Crustaceans               | 2                                                           |
| 115             | Cambodia | 1995           | Eggs                      | 3                                                           |
| 115             | Cambodia | 1995           | Fats, Animals, Raw        | 2                                                           |
| 115             | Cambodia | 1995           | Freshwater Fish           | 15                                                          |
| 115             | Cambodia | 1995           | Fruits, Other             | 18                                                          |
| 115             | Cambodia | 1995           | Grapefruit                | 1                                                           |
| 115             | Cambodia | 1995           | Groundnuts (Shelled Eq)   | 1                                                           |
| 115             | Cambodia | 1995           | Maize                     | 11                                                          |
| 115             | Cambodia | 1995           | Marine Fish, Other        | 5                                                           |
| 115             | Cambodia | 1995           | Milk, Whole               | 12                                                          |
| 115             | Cambodia | 1995           | Offals, Edible            | 4                                                           |
| 115             | Cambodia | 1995           | Oranges, Mandarines       | 11                                                          |
| 115             | Cambodia | 1995           | Palm Oil                  | 5                                                           |
| 115             | Cambodia | 1995           | Pelagic Fish              | 3                                                           |
| 115             | Cambodia | 1995           | Pepper                    | 1                                                           |
| 115             | Cambodia | 1995           | Pigmeat                   | 21                                                          |
| 115             | Cambodia | 1995           | Pimento                   | 2                                                           |
| 115             | Cambodia | 1995           | Pineapples                | 3                                                           |
| 115             | Cambodia | 1995           | Poultry Meat              | 5                                                           |

Dietary calcium and zinc deficiency risks are decreasing but remain prevalent

| FAO countrycode | Country  | Reference year | Food item                 | Gross food supply (g capita <sup>-1</sup> d <sup>-1</sup> ) |
|-----------------|----------|----------------|---------------------------|-------------------------------------------------------------|
| 115             | Cambodia | 1995           | Rice (Milled Equivalent)  | 478                                                         |
| 115             | Cambodia | 1995           | Roots, Other              | 5                                                           |
| 115             | Cambodia | 1995           | Sesameseed                | 1                                                           |
| 115             | Cambodia | 1995           | Soyabean Oil              | 1                                                           |
| 115             | Cambodia | 1995           | Sugar Cane                | 10                                                          |
| 115             | Cambodia | 1995           | Sugar, Refined Equivalent | 5                                                           |
| 115             | Cambodia | 1995           | Sweet Potatoes            | 9                                                           |
| 115             | Cambodia | 1995           | Vegetables, Other         | 103                                                         |
| 115             | Cambodia | 1995           | Wheat                     | 4                                                           |
| 115             | Cambodia | 1996           | Apples                    | 1                                                           |
| 115             | Cambodia | 1996           | Bananas                   | 33                                                          |
| 115             | Cambodia | 1996           | Beans                     | 3                                                           |
| 115             | Cambodia | 1996           | Beer                      | 3                                                           |
| 115             | Cambodia | 1996           | Beverages, Alcoholic      | 6                                                           |
| 115             | Cambodia | 1996           | Bovine Meat               | 13                                                          |
| 115             | Cambodia | 1996           | Cassava                   | 16                                                          |
| 115             | Cambodia | 1996           | Coconut Oil               | 2                                                           |
| 115             | Cambodia | 1996           | Coconuts - Incl Copra     | 5                                                           |
| 115             | Cambodia | 1996           | Crustaceans               | 2                                                           |
| 115             | Cambodia | 1996           | Eggs                      | 3                                                           |
| 115             | Cambodia | 1996           | Fats, Animals, Raw        | 2                                                           |
| 115             | Cambodia | 1996           | Freshwater Fish           | 12                                                          |
| 115             | Cambodia | 1996           | Fruits, Other             | 19                                                          |
| 115             | Cambodia | 1996           | Grapefruit                | 1                                                           |
| 115             | Cambodia | 1996           | Groundnuts (Shelled Eq)   | 1                                                           |
| 115             | Cambodia | 1996           | Maize                     | 11                                                          |
| 115             | Cambodia | 1996           | Marine Fish, Other        | 7                                                           |
| 115             | Cambodia | 1996           | Milk, Whole               | 10                                                          |
| 115             | Cambodia | 1996           | Offals, Edible            | 4                                                           |
| 115             | Cambodia | 1996           | Oranges, Mandarines       | 13                                                          |
| 115             | Cambodia | 1996           | Palm Oil                  | 4                                                           |
| 115             | Cambodia | 1996           | Pigmeat                   | 21                                                          |
| 115             | Cambodia | 1996           | Pimento                   | 2                                                           |
| 115             | Cambodia | 1996           | Pineapples                | 3                                                           |
| 115             | Cambodia | 1996           | Poultry Meat              | 5                                                           |
| 115             | Cambodia | 1996           | Rice (Milled Equivalent)  | 430                                                         |
| 115             | Cambodia | 1996           | Roots, Other              | 5                                                           |
| 115             | Cambodia | 1996           | Sesameseed                | 1                                                           |
| 115             | Cambodia | 1996           | Soyabean Oil              | 1                                                           |
| 115             | Cambodia | 1996           | Sugar Cane                | 8                                                           |
| 115             | Cambodia | 1996           | Sugar, Refined Equivalent | 9                                                           |
| 115             | Cambodia | 1996           | Sweet Potatoes            | 9                                                           |
| 115             | Cambodia | 1996           | Vegetables, Other         | 102                                                         |
| 115             | Cambodia | 1996           | Wheat                     | 6                                                           |
| 115             | Cambodia | 1997           | Apples                    | 1                                                           |
| 115             | Cambodia | 1997           | Bananas                   | 33                                                          |
| 115             | Cambodia | 1997           | Beans                     | 4                                                           |
| 115             | Cambodia | 1997           | Beer                      | 6                                                           |
| 115             | Cambodia | 1997           | Beverages, Alcoholic      | 6                                                           |
| 115             | Cambodia | 1997           | Bovine Meat               | 13                                                          |
| 115             | Cambodia | 1997           | Cassava                   | 18                                                          |
| 115             | Cambodia | 1997           | Coconut Oil               | 2                                                           |
| 115             | Cambodia | 1997           | Coconuts - Incl Copra     | 1                                                           |
| 115             | Cambodia | 1997           | Crustaceans               | 2                                                           |
| 115             | Cambodia | 1997           | Eggs                      | 3                                                           |
| 115             | Cambodia | 1997           | Fats, Animals, Raw        | 2                                                           |
| 115             | Cambodia | 1997           | Freshwater Fish           | 11                                                          |
| 115             | Cambodia | 1997           | Fruits, Other             | 20                                                          |
| 115             | Cambodia | 1997           | Grapefruit                | 1                                                           |
| 115             | Cambodia | 1997           | Groundnuts (Shelled Eq)   | 1                                                           |
| 115             | Cambodia | 1997           | Maize                     | 9                                                           |
| 115             | Cambodia | 1997           | Marine Fish, Other        | 4                                                           |
| 115             | Cambodia | 1997           | Milk, Whole               | 7                                                           |
| 115             | Cambodia | 1997           | Offals, Edible            | 4                                                           |
| 115             | Cambodia | 1997           | Oranges, Mandarines       | 13                                                          |
| 115             | Cambodia | 1997           | Palm Oil                  | 4                                                           |
| 115             | Cambodia | 1997           | Pelagic Fish              | 1                                                           |
| 115             | Cambodia | 1997           | Pigmeat                   | 23                                                          |
| 115             | Cambodia | 1997           | Pimento                   | 2                                                           |
| 115             | Cambodia | 1997           | Pineapples                | 3                                                           |
| 115             | Cambodia | 1997           | Poultry Meat              | 6                                                           |
| 115             | Cambodia | 1997           | Rice (Milled Equivalent)  | 428                                                         |
| 115             | Cambodia | 1997           | Roots, Other              | 5                                                           |
| 115             | Cambodia | 1997           | Sesameseed                | 2                                                           |
| 115             | Cambodia | 1997           | Soyabean Oil              | 1                                                           |
| 115             | Cambodia | 1997           | Sugar Cane                | 9                                                           |
| 115             | Cambodia | 1997           | Sugar, Refined Equivalent | 13                                                          |
| 115             | Cambodia | 1997           | Sweet Potatoes            | 7                                                           |
| 115             | Cambodia | 1997           | Sweeteners, Other         | 1                                                           |
| 115             | Cambodia | 1997           | Vegetables, Other         | 100                                                         |
| 115             | Cambodia | 1997           | Wheat                     | 4                                                           |
| 115             | Cambodia | 1998           | Bananas                   | 33                                                          |
| 115             | Cambodia | 1998           | Beans                     | 3                                                           |
| 115             | Cambodia | 1998           | Beer                      | 6                                                           |
| 115             | Cambodia | 1998           | Beverages, Alcoholic      | 7                                                           |
| 115             | Cambodia | 1998           | Bovine Meat               | 12                                                          |
| 115             | Cambodia | 1998           | Cassava                   | 15                                                          |
| 115             | Cambodia | 1998           | Coconut Oil               | 2                                                           |
| 115             | Cambodia | 1998           | Coconuts - Incl Copra     | 1                                                           |
| 115             | Cambodia | 1998           | Crustaceans               | 1                                                           |
| 115             | Cambodia | 1998           | Eggs                      | 3                                                           |
| 115             | Cambodia | 1998           | Fats, Animals, Raw        | 2                                                           |
| 115             | Cambodia | 1998           | Freshwater Fish           | 11                                                          |
| 115             | Cambodia | 1998           | Fruits, Other             | 20                                                          |
| 115             | Cambodia | 1998           | Grapefruit                | 1                                                           |
| 115             | Cambodia | 1998           | Groundnuts (Shelled Eq)   | 1                                                           |
| 115             | Cambodia | 1998           | Maize                     | 11                                                          |

## Dietary calcium and zinc deficiency risks are decreasing but remain prevalent

| FAO countrycode | Country  | Reference year | Food item                 | Gross food supply (g capita <sup>-1</sup> d <sup>-1</sup> ) |
|-----------------|----------|----------------|---------------------------|-------------------------------------------------------------|
| 115             | Cambodia | 1998           | Marine Fish, Other        | 5                                                           |
| 115             | Cambodia | 1998           | Milk, Whole               | 8                                                           |
| 115             | Cambodia | 1998           | Molluscs, Other           | 1                                                           |
| 115             | Cambodia | 1998           | Nuts                      | 1                                                           |
| 115             | Cambodia | 1998           | Offals, Edible            | 4                                                           |
| 115             | Cambodia | 1998           | Oranges, Mandarines       | 13                                                          |
| 115             | Cambodia | 1998           | Palm Oil                  | 3                                                           |
| 115             | Cambodia | 1998           | Pelagic Fish              | 1                                                           |
| 115             | Cambodia | 1998           | Pigmeat                   | 23                                                          |
| 115             | Cambodia | 1998           | Pimento                   | 2                                                           |
| 115             | Cambodia | 1998           | Pineapples                | 3                                                           |
| 115             | Cambodia | 1998           | Poultry Meat              | 6                                                           |
| 115             | Cambodia | 1998           | Rice (Milled Equivalent)  | 448                                                         |
| 115             | Cambodia | 1998           | Roots, Other              | 5                                                           |
| 115             | Cambodia | 1998           | Sesameseed                | 1                                                           |
| 115             | Cambodia | 1998           | Soyabean Oil              | 1                                                           |
| 115             | Cambodia | 1998           | Sugar Cane                | 6                                                           |
| 115             | Cambodia | 1998           | Sugar, Refined Equivalent | 14                                                          |
| 115             | Cambodia | 1998           | Sweet Potatoes            | 7                                                           |
| 115             | Cambodia | 1998           | Sweeteners, Other         | 1                                                           |
| 115             | Cambodia | 1998           | Vegetables, Other         | 98                                                          |
| 115             | Cambodia | 1998           | Wheat                     | 6                                                           |
| 115             | Cambodia | 1999           | Bananas                   | 32                                                          |
| 115             | Cambodia | 1999           | Beans                     | 3                                                           |
| 115             | Cambodia | 1999           | Beer                      | 7                                                           |
| 115             | Cambodia | 1999           | Beverages, Alcoholic      | 7                                                           |
| 115             | Cambodia | 1999           | Bovine Meat               | 12                                                          |
| 115             | Cambodia | 1999           | Cassava                   | 27                                                          |
| 115             | Cambodia | 1999           | Coconut Oil               | 2                                                           |
| 115             | Cambodia | 1999           | Coconuts - Incl Copra     | 2                                                           |
| 115             | Cambodia | 1999           | Crustaceans               | 2                                                           |
| 115             | Cambodia | 1999           | Eggs                      | 3                                                           |
| 115             | Cambodia | 1999           | Fats, Animals, Raw        | 2                                                           |
| 115             | Cambodia | 1999           | Freshwater Fish           | 46                                                          |
| 115             | Cambodia | 1999           | Fruits, Other             | 20                                                          |
| 115             | Cambodia | 1999           | Grapefruit                | 1                                                           |
| 115             | Cambodia | 1999           | Groundnuts (Shelled Eq)   | 1                                                           |
| 115             | Cambodia | 1999           | Maize                     | 18                                                          |
| 115             | Cambodia | 1999           | Marine Fish, Other        | 6                                                           |
| 115             | Cambodia | 1999           | Milk, Whole               | 8                                                           |
| 115             | Cambodia | 1999           | Nuts                      | 1                                                           |
| 115             | Cambodia | 1999           | Offals, Edible            | 4                                                           |
| 115             | Cambodia | 1999           | Oranges, Mandarines       | 13                                                          |
| 115             | Cambodia | 1999           | Palm Oil                  | 3                                                           |
| 115             | Cambodia | 1999           | Pelagic Fish              | 1                                                           |
| 115             | Cambodia | 1999           | Pepper                    | 1                                                           |
| 115             | Cambodia | 1999           | Pigmeat                   | 23                                                          |
| 115             | Cambodia | 1999           | Pimento                   | 2                                                           |
| 115             | Cambodia | 1999           | Pineapples                | 3                                                           |
| 115             | Cambodia | 1999           | Poultry Meat              | 6                                                           |
| 115             | Cambodia | 1999           | Rice (Milled Equivalent)  | 448                                                         |
| 115             | Cambodia | 1999           | Roots, Other              | 5                                                           |
| 115             | Cambodia | 1999           | Sesameseed                | 2                                                           |
| 115             | Cambodia | 1999           | Soyabean Oil              | 1                                                           |
| 115             | Cambodia | 1999           | Sugar Cane                | 7                                                           |
| 115             | Cambodia | 1999           | Sugar, Refined Equivalent | 16                                                          |
| 115             | Cambodia | 1999           | Sweet Potatoes            | 7                                                           |
| 115             | Cambodia | 1999           | Sweeteners, Other         | 1                                                           |
| 115             | Cambodia | 1999           | Vegetables, Other         | 97                                                          |
| 115             | Cambodia | 1999           | Wheat                     | 7                                                           |
| 115             | Cambodia | 2000           | Apples                    | 1                                                           |
| 115             | Cambodia | 2000           | Bananas                   | 31                                                          |
| 115             | Cambodia | 2000           | Beans                     | 3                                                           |
| 115             | Cambodia | 2000           | Beer                      | 10                                                          |
| 115             | Cambodia | 2000           | Beverages, Alcoholic      | 5                                                           |
| 115             | Cambodia | 2000           | Bovine Meat               | 15                                                          |
| 115             | Cambodia | 2000           | Cassava                   | 29                                                          |
| 115             | Cambodia | 2000           | Cephalopods               | 1                                                           |
| 115             | Cambodia | 2000           | Cereals, Other            | 1                                                           |
| 115             | Cambodia | 2000           | Coconut Oil               | 2                                                           |
| 115             | Cambodia | 2000           | Coconuts - Incl Copra     | 3                                                           |
| 115             | Cambodia | 2000           | Crustaceans               | 2                                                           |
| 115             | Cambodia | 2000           | Eggs                      | 3                                                           |
| 115             | Cambodia | 2000           | Fats, Animals, Raw        | 2                                                           |
| 115             | Cambodia | 2000           | Freshwater Fish           | 48                                                          |
| 115             | Cambodia | 2000           | Fruits, Other             | 19                                                          |
| 115             | Cambodia | 2000           | Grapefruit                | 1                                                           |
| 115             | Cambodia | 2000           | Groundnuts (Shelled Eq)   | 1                                                           |
| 115             | Cambodia | 2000           | Maize                     | 19                                                          |
| 115             | Cambodia | 2000           | Marine Fish, Other        | 5                                                           |
| 115             | Cambodia | 2000           | Milk, Whole               | 6                                                           |
| 115             | Cambodia | 2000           | Nuts                      | 1                                                           |
| 115             | Cambodia | 2000           | Offals, Edible            | 5                                                           |
| 115             | Cambodia | 2000           | Oranges, Mandarines       | 13                                                          |
| 115             | Cambodia | 2000           | Palm Oil                  | 2                                                           |
| 115             | Cambodia | 2000           | Pelagic Fish              | 1                                                           |
| 115             | Cambodia | 2000           | Pigmeat                   | 24                                                          |
| 115             | Cambodia | 2000           | Pimento                   | 2                                                           |
| 115             | Cambodia | 2000           | Pineapples                | 3                                                           |
| 115             | Cambodia | 2000           | Poultry Meat              | 6                                                           |
| 115             | Cambodia | 2000           | Rice (Milled Equivalent)  | 459                                                         |
| 115             | Cambodia | 2000           | Roots, Other              | 6                                                           |
| 115             | Cambodia | 2000           | Sesameseed                | 2                                                           |
| 115             | Cambodia | 2000           | Soyabean Oil              | 1                                                           |
| 115             | Cambodia | 2000           | Soyabeans                 | 1                                                           |
| 115             | Cambodia | 2000           | Sugar Cane                | 7                                                           |
| 115             | Cambodia | 2000           | Sugar, Refined Equivalent | 21                                                          |

Dietary calcium and zinc deficiency risks are decreasing but remain prevalent

| FAO countrycode | Country  | Reference year | Food item                 | Gross food supply (g capita <sup>-1</sup> d <sup>-1</sup> ) |
|-----------------|----------|----------------|---------------------------|-------------------------------------------------------------|
| 115             | Cambodia | 2000           | Sweet Potatoes            | 6                                                           |
| 115             | Cambodia | 2000           | Vegetables, Other         | 103                                                         |
| 115             | Cambodia | 2000           | Wheat                     | 6                                                           |
| 115             | Cambodia | 2000           | Whey                      | 1                                                           |
| 115             | Cambodia | 2001           | Apples                    | 1                                                           |
| 115             | Cambodia | 2001           | Bananas                   | 31                                                          |
| 115             | Cambodia | 2001           | Beans                     | 3                                                           |
| 115             | Cambodia | 2001           | Beer                      | 9                                                           |
| 115             | Cambodia | 2001           | Beverages, Alcoholic      | 6                                                           |
| 115             | Cambodia | 2001           | Bovine Meat               | 15                                                          |
| 115             | Cambodia | 2001           | Cassava                   | 29                                                          |
| 115             | Cambodia | 2001           | Cephalopods               | 1                                                           |
| 115             | Cambodia | 2001           | Cereals, Other            | 2                                                           |
| 115             | Cambodia | 2001           | Coconut Oil               | 2                                                           |
| 115             | Cambodia | 2001           | Coconuts - Incl Copra     | 2                                                           |
| 115             | Cambodia | 2001           | Crustaceans               | 3                                                           |
| 115             | Cambodia | 2001           | Eggs                      | 3                                                           |
| 115             | Cambodia | 2001           | Fats, Animals, Raw        | 2                                                           |
| 115             | Cambodia | 2001           | Freshwater Fish           | 79                                                          |
| 115             | Cambodia | 2001           | Fruits, Other             | 19                                                          |
| 115             | Cambodia | 2001           | Grapefruit                | 1                                                           |
| 115             | Cambodia | 2001           | Groundnuts (Shelled Eq)   | 1                                                           |
| 115             | Cambodia | 2001           | Maize                     | 23                                                          |
| 115             | Cambodia | 2001           | Marine Fish, Other        | 5                                                           |
| 115             | Cambodia | 2001           | Milk, Whole               | 7                                                           |
| 115             | Cambodia | 2001           | Nuts                      | 1                                                           |
| 115             | Cambodia | 2001           | Offals, Edible            | 4                                                           |
| 115             | Cambodia | 2001           | Oilcrops Oil, Other       | 1                                                           |
| 115             | Cambodia | 2001           | Oranges, Mandarines       | 13                                                          |
| 115             | Cambodia | 2001           | Palm Oil                  | 3                                                           |
| 115             | Cambodia | 2001           | Pepper                    | 1                                                           |
| 115             | Cambodia | 2001           | Pigmeat                   | 23                                                          |
| 115             | Cambodia | 2001           | Pimento                   | 2                                                           |
| 115             | Cambodia | 2001           | Pineapples                | 3                                                           |
| 115             | Cambodia | 2001           | Poultry Meat              | 6                                                           |
| 115             | Cambodia | 2001           | Rice (Milled Eq uivalent) | 439                                                         |
| 115             | Cambodia | 2001           | Roots, Other              | 5                                                           |
| 115             | Cambodia | 2001           | Sesameseed                | 2                                                           |
| 115             | Cambodia | 2001           | Soyabean Oil              | 1                                                           |
| 115             | Cambodia | 2001           | Sugar Cane                | 7                                                           |
| 115             | Cambodia | 2001           | Sugar, Refined Equivalent | 29                                                          |
| 115             | Cambodia | 2001           | Sweet Potatoes            | 5                                                           |
| 115             | Cambodia | 2001           | Vegetables, Other         | 94                                                          |
| 115             | Cambodia | 2001           | Wheat                     | 5                                                           |
| 115             | Cambodia | 2001           | Whey                      | 1                                                           |
| 115             | Cambodia | 2002           | Apples                    | 1                                                           |
| 115             | Cambodia | 2002           | Bananas                   | 30                                                          |
| 115             | Cambodia | 2002           | Beans                     | 4                                                           |
| 115             | Cambodia | 2002           | Beer                      | 9                                                           |
| 115             | Cambodia | 2002           | Beverages, Alcoholic      | 5                                                           |
| 115             | Cambodia | 2002           | Bovine Meat               | 13                                                          |
| 115             | Cambodia | 2002           | Cassava                   | 24                                                          |
| 115             | Cambodia | 2002           | Cephalopods               | 1                                                           |
| 115             | Cambodia | 2002           | Coconut Oil               | 2                                                           |
| 115             | Cambodia | 2002           | Coconuts - Incl Copra     | 5                                                           |
| 115             | Cambodia | 2002           | Crustaceans               | 3                                                           |
| 115             | Cambodia | 2002           | Eggs                      | 3                                                           |
| 115             | Cambodia | 2002           | Fats, Animals, Raw        | 2                                                           |
| 115             | Cambodia | 2002           | Freshwater Fish           | 70                                                          |
| 115             | Cambodia | 2002           | Fruits, Other             | 22                                                          |
| 115             | Cambodia | 2002           | Grapefruit                | 1                                                           |
| 115             | Cambodia | 2002           | Groundnuts (Shelled Eq)   | 1                                                           |
| 115             | Cambodia | 2002           | Maize                     | 26                                                          |
| 115             | Cambodia | 2002           | Marine Fish, Other        | 5                                                           |
| 115             | Cambodia | 2002           | Milk, Whole               | 6                                                           |
| 115             | Cambodia | 2002           | Nuts                      | 1                                                           |
| 115             | Cambodia | 2002           | Offals, Edible            | 4                                                           |
| 115             | Cambodia | 2002           | Oilcrops Oil, Other       | 1                                                           |
| 115             | Cambodia | 2002           | Oranges, Mandarines       | 13                                                          |
| 115             | Cambodia | 2002           | Palm Oil                  | 3                                                           |
| 115             | Cambodia | 2002           | Pelagic Fish              | 1                                                           |
| 115             | Cambodia | 2002           | Pepper                    | 1                                                           |
| 115             | Cambodia | 2002           | Pigmeat                   | 23                                                          |
| 115             | Cambodia | 2002           | Pimento                   | 2                                                           |
| 115             | Cambodia | 2002           | Pineapples                | 3                                                           |
| 115             | Cambodia | 2002           | Poultry Meat              | 6                                                           |
| 115             | Cambodia | 2002           | Rice (Milled Eq uivalent) | 443                                                         |
| 115             | Cambodia | 2002           | Roots, Other              | 6                                                           |
| 115             | Cambodia | 2002           | Sesameseed                | 2                                                           |
| 115             | Cambodia | 2002           | Soyabean Oil              | 1                                                           |
| 115             | Cambodia | 2002           | Soybeans                  | 2                                                           |
| 115             | Cambodia | 2002           | Sugar Cane                | 9                                                           |
| 115             | Cambodia | 2002           | Sugar, Refined Equivalent | 47                                                          |
| 115             | Cambodia | 2002           | Sweet Potatoes            | 6                                                           |
| 115             | Cambodia | 2002           | Vegetables, Other         | 92                                                          |
| 115             | Cambodia | 2002           | Wheat                     | 5                                                           |
| 115             | Cambodia | 2003           | Apples                    | 1                                                           |
| 115             | Cambodia | 2003           | Bananas                   | 29                                                          |
| 115             | Cambodia | 2003           | Beans                     | 6                                                           |
| 115             | Cambodia | 2003           | Beer                      | 12                                                          |
| 115             | Cambodia | 2003           | Beverages, Alcoholic      | 5                                                           |
| 115             | Cambodia | 2003           | Bovine Meat               | 13                                                          |
| 115             | Cambodia | 2003           | Cassava                   | 59                                                          |
| 115             | Cambodia | 2003           | Cephalopods               | 1                                                           |
| 115             | Cambodia | 2003           | Coconut Oil               | 1                                                           |
| 115             | Cambodia | 2003           | Coconuts - Incl Copra     | 6                                                           |
| 115             | Cambodia | 2003           | Crustaceans               | 4                                                           |

Dietary calcium and zinc deficiency risks are decreasing but remain prevalent

| FAO countrycode | Country  | Reference year | Food item                 | Gross food supply (g capita <sup>-1</sup> d <sup>-1</sup> ) |
|-----------------|----------|----------------|---------------------------|-------------------------------------------------------------|
| 115             | Cambodia | 2003           | Eggs                      | 3                                                           |
| 115             | Cambodia | 2003           | Fats, Animals, Raw        | 2                                                           |
| 115             | Cambodia | 2003           | Freshwater Fish           | 58                                                          |
| 115             | Cambodia | 2003           | Fruits, Other             | 20                                                          |
| 115             | Cambodia | 2003           | Grapefruit                | 1                                                           |
| 115             | Cambodia | 2003           | Groundnuts (Shelled Eq)   | 2                                                           |
| 115             | Cambodia | 2003           | Maize                     | 28                                                          |
| 115             | Cambodia | 2003           | Marine Fish, Other        | 6                                                           |
| 115             | Cambodia | 2003           | Milk, Whole               | 7                                                           |
| 115             | Cambodia | 2003           | Nuts                      | 1                                                           |
| 115             | Cambodia | 2003           | Offals, Edible            | 4                                                           |
| 115             | Cambodia | 2003           | Oilcrops Oil, Other       | 1                                                           |
| 115             | Cambodia | 2003           | Oranges, Mandarines       | 13                                                          |
| 115             | Cambodia | 2003           | Palm Oil                  | 2                                                           |
| 115             | Cambodia | 2003           | Pelagic Fish              | 1                                                           |
| 115             | Cambodia | 2003           | Pepper                    | 1                                                           |
| 115             | Cambodia | 2003           | Pigmeat                   | 25                                                          |
| 115             | Cambodia | 2003           | Pimento                   | 2                                                           |
| 115             | Cambodia | 2003           | Pineapples                | 3                                                           |
| 115             | Cambodia | 2003           | Poultry Meat              | 6                                                           |
| 115             | Cambodia | 2003           | Rice (Milled Equivalent)  | 428                                                         |
| 115             | Cambodia | 2003           | Roots, Other              | 5                                                           |
| 115             | Cambodia | 2003           | Sesameseed                | 4                                                           |
| 115             | Cambodia | 2003           | Soyabean Oil              | 2                                                           |
| 115             | Cambodia | 2003           | Soyabeans                 | 4                                                           |
| 115             | Cambodia | 2003           | Sugar Cane                | 7                                                           |
| 115             | Cambodia | 2003           | Sugar, Refined Equivalent | 44                                                          |
| 115             | Cambodia | 2003           | Sweet Potatoes            | 7                                                           |
| 115             | Cambodia | 2003           | Vegetables, Other         | 90                                                          |
| 115             | Cambodia | 2003           | Wheat                     | 7                                                           |
| 115             | Cambodia | 2004           | Apples                    | 1                                                           |
| 115             | Cambodia | 2004           | Bananas                   | 27                                                          |
| 115             | Cambodia | 2004           | Beans                     | 6                                                           |
| 115             | Cambodia | 2004           | Beer                      | 15                                                          |
| 115             | Cambodia | 2004           | Beverages, Alcoholic      | 5                                                           |
| 115             | Cambodia | 2004           | Bovine Meat               | 13                                                          |
| 115             | Cambodia | 2004           | Cassava                   | 63                                                          |
| 115             | Cambodia | 2004           | Cephalopods               | 1                                                           |
| 115             | Cambodia | 2004           | Coconut Oil               | 1                                                           |
| 115             | Cambodia | 2004           | Coconuts - Incl Copra     | 5                                                           |
| 115             | Cambodia | 2004           | Crustaceans               | 2                                                           |
| 115             | Cambodia | 2004           | Eggs                      | 3                                                           |
| 115             | Cambodia | 2004           | Fats, Animals, Raw        | 3                                                           |
| 115             | Cambodia | 2004           | Freshwater Fish           | 48                                                          |
| 115             | Cambodia | 2004           | Fruits, Other             | 21                                                          |
| 115             | Cambodia | 2004           | Grapefruit                | 1                                                           |
| 115             | Cambodia | 2004           | Groundnuts (Shelled Eq)   | 3                                                           |
| 115             | Cambodia | 2004           | Maize                     | 29                                                          |
| 115             | Cambodia | 2004           | Marine Fish, Other        | 7                                                           |
| 115             | Cambodia | 2004           | Milk, Whole               | 6                                                           |
| 115             | Cambodia | 2004           | Nuts                      | 1                                                           |
| 115             | Cambodia | 2004           | Offals, Edible            | 4                                                           |
| 115             | Cambodia | 2004           | Oranges, Mandarines       | 12                                                          |
| 115             | Cambodia | 2004           | Palm Oil                  | 2                                                           |
| 115             | Cambodia | 2004           | Pelagic Fish              | 1                                                           |
| 115             | Cambodia | 2004           | Pepper                    | 1                                                           |
| 115             | Cambodia | 2004           | Pigmeat                   | 25                                                          |
| 115             | Cambodia | 2004           | Pimento                   | 2                                                           |
| 115             | Cambodia | 2004           | Pineapples                | 3                                                           |
| 115             | Cambodia | 2004           | Poultry Meat              | 6                                                           |
| 115             | Cambodia | 2004           | Rice (Milled Equivalent)  | 414                                                         |
| 115             | Cambodia | 2004           | Roots, Other              | 5                                                           |
| 115             | Cambodia | 2004           | Sesameseed                | 6                                                           |
| 115             | Cambodia | 2004           | Soyabean Oil              | 2                                                           |
| 115             | Cambodia | 2004           | Soyabeans                 | 4                                                           |
| 115             | Cambodia | 2004           | Sugar Cane                | 5                                                           |
| 115             | Cambodia | 2004           | Sugar, Refined Equivalent | 58                                                          |
| 115             | Cambodia | 2004           | Sweet Potatoes            | 7                                                           |
| 115             | Cambodia | 2004           | Vegetables, Other         | 95                                                          |
| 115             | Cambodia | 2004           | Wheat                     | 8                                                           |
| 115             | Cambodia | 2005           | Apples                    | 1                                                           |
| 115             | Cambodia | 2005           | Bananas                   | 25                                                          |
| 115             | Cambodia | 2005           | Beans                     | 7                                                           |
| 115             | Cambodia | 2005           | Beer                      | 27                                                          |
| 115             | Cambodia | 2005           | Beverages, Alcoholic      | 5                                                           |
| 115             | Cambodia | 2005           | Bovine Meat               | 14                                                          |
| 115             | Cambodia | 2005           | Cassava                   | 63                                                          |
| 115             | Cambodia | 2005           | Cephalopods               | 1                                                           |
| 115             | Cambodia | 2005           | Coconut Oil               | 1                                                           |
| 115             | Cambodia | 2005           | Coconuts - Incl Copra     | 5                                                           |
| 115             | Cambodia | 2005           | Crustaceans               | 4                                                           |
| 115             | Cambodia | 2005           | Eggs                      | 3                                                           |
| 115             | Cambodia | 2005           | Fats, Animals, Raw        | 3                                                           |
| 115             | Cambodia | 2005           | Freshwater Fish           | 62                                                          |
| 115             | Cambodia | 2005           | Fruits, Other             | 27                                                          |
| 115             | Cambodia | 2005           | Grapefruit                | 1                                                           |
| 115             | Cambodia | 2005           | Groundnuts (Shelled Eq)   | 3                                                           |
| 115             | Cambodia | 2005           | Maize                     | 31                                                          |
| 115             | Cambodia | 2005           | Marine Fish, Other        | 7                                                           |
| 115             | Cambodia | 2005           | Milk, Whole               | 11                                                          |
| 115             | Cambodia | 2005           | Nuts                      | 1                                                           |
| 115             | Cambodia | 2005           | Offals, Edible            | 4                                                           |
| 115             | Cambodia | 2005           | Oilcrops Oil, Other       | 1                                                           |
| 115             | Cambodia | 2005           | Oranges, Mandarines       | 12                                                          |
| 115             | Cambodia | 2005           | Palm Oil                  | 2                                                           |
| 115             | Cambodia | 2005           | Pepper                    | 1                                                           |
| 115             | Cambodia | 2005           | Pigmeat                   | 25                                                          |

Dietary calcium and zinc deficiency risks are decreasing but remain prevalent

| FAO countrycode | Country  | Reference year | Food item                 | Gross food supply (g capita <sup>-1</sup> d <sup>-1</sup> ) |
|-----------------|----------|----------------|---------------------------|-------------------------------------------------------------|
| 115             | Cambodia | 2005           | Pimento                   | 2                                                           |
| 115             | Cambodia | 2005           | Pineapples                | 4                                                           |
| 115             | Cambodia | 2005           | Poultry Meat              | 5                                                           |
| 115             | Cambodia | 2005           | Rice (Milled Equivalent)  | 431                                                         |
| 115             | Cambodia | 2005           | Roots, Other              | 5                                                           |
| 115             | Cambodia | 2005           | Sesameseed                | 5                                                           |
| 115             | Cambodia | 2005           | Soyabean Oil              | 2                                                           |
| 115             | Cambodia | 2005           | Soyabeans                 | 6                                                           |
| 115             | Cambodia | 2005           | Sugar Cane                | 5                                                           |
| 115             | Cambodia | 2005           | Sugar, Refined Equivalent | 43                                                          |
| 115             | Cambodia | 2005           | Sweet Potatoes            | 8                                                           |
| 115             | Cambodia | 2005           | Sweeteners, Other         | 3                                                           |
| 115             | Cambodia | 2005           | Vegetables, Other         | 89                                                          |
| 115             | Cambodia | 2005           | Wheat                     | 8                                                           |
| 115             | Cambodia | 2006           | Bananas                   | 25                                                          |
| 115             | Cambodia | 2006           | Beans                     | 7                                                           |
| 115             | Cambodia | 2006           | Beer                      | 29                                                          |
| 115             | Cambodia | 2006           | Beverages, Alcoholic      | 5                                                           |
| 115             | Cambodia | 2006           | Bovine Meat               | 14                                                          |
| 115             | Cambodia | 2006           | Cassava                   | 66                                                          |
| 115             | Cambodia | 2006           | Cephalopods               | 1                                                           |
| 115             | Cambodia | 2006           | Coconut Oil               | 1                                                           |
| 115             | Cambodia | 2006           | Coconuts - Incl Copra     | 5                                                           |
| 115             | Cambodia | 2006           | Crustaceans               | 4                                                           |
| 115             | Cambodia | 2006           | Eggs                      | 3                                                           |
| 115             | Cambodia | 2006           | Fats, Animals, Raw        | 3                                                           |
| 115             | Cambodia | 2006           | Freshwater Fish           | 87                                                          |
| 115             | Cambodia | 2006           | Fruits, Other             | 31                                                          |
| 115             | Cambodia | 2006           | Grapefruit                | 1                                                           |
| 115             | Cambodia | 2006           | Groundnuts (Shelled Eq)   | 3                                                           |
| 115             | Cambodia | 2006           | Maize                     | 31                                                          |
| 115             | Cambodia | 2006           | Marine Fish, Other        | 7                                                           |
| 115             | Cambodia | 2006           | Milk, Whole               | 18                                                          |
| 115             | Cambodia | 2006           | Molluscs, Other           | 1                                                           |
| 115             | Cambodia | 2006           | Nuts                      | 1                                                           |
| 115             | Cambodia | 2006           | Offals, Edible            | 5                                                           |
| 115             | Cambodia | 2006           | Oilcrops Oil, Other       | 1                                                           |
| 115             | Cambodia | 2006           | Oranges, Mandarines       | 13                                                          |
| 115             | Cambodia | 2006           | Palm Oil                  | 2                                                           |
| 115             | Cambodia | 2006           | Pelagic Fish              | 1                                                           |
| 115             | Cambodia | 2006           | Pigmeat                   | 25                                                          |
| 115             | Cambodia | 2006           | Pimento                   | 2                                                           |
| 115             | Cambodia | 2006           | Pineapples                | 4                                                           |
| 115             | Cambodia | 2006           | Poultry Meat              | 5                                                           |
| 115             | Cambodia | 2006           | Rice (Milled Equivalent)  | 433                                                         |
| 115             | Cambodia | 2006           | Roots, Other              | 6                                                           |
| 115             | Cambodia | 2006           | Sesameseed                | 7                                                           |
| 115             | Cambodia | 2006           | Soyabean Oil              | 2                                                           |
| 115             | Cambodia | 2006           | Soyabeans                 | 7                                                           |
| 115             | Cambodia | 2006           | Sugar Cane                | 6                                                           |
| 115             | Cambodia | 2006           | Sugar, Refined Equivalent | 42                                                          |
| 115             | Cambodia | 2006           | Sweet Potatoes            | 9                                                           |
| 115             | Cambodia | 2006           | Sweeteners, Other         | 2                                                           |
| 115             | Cambodia | 2006           | Tea                       | 2                                                           |
| 115             | Cambodia | 2006           | Vegetables, Other         | 88                                                          |
| 115             | Cambodia | 2006           | Wheat                     | 9                                                           |
| 115             | Cambodia | 2007           | Apples                    | 1                                                           |
| 115             | Cambodia | 2007           | Bananas                   | 27                                                          |
| 115             | Cambodia | 2007           | Beans                     | 7                                                           |
| 115             | Cambodia | 2007           | Beer                      | 32                                                          |
| 115             | Cambodia | 2007           | Beverages, Alcoholic      | 5                                                           |
| 115             | Cambodia | 2007           | Bovine Meat               | 14                                                          |
| 115             | Cambodia | 2007           | Cassava                   | 67                                                          |
| 115             | Cambodia | 2007           | Cephalopods               | 1                                                           |
| 115             | Cambodia | 2007           | Citrus, Other             | 1                                                           |
| 115             | Cambodia | 2007           | Coconut Oil               | 1                                                           |
| 115             | Cambodia | 2007           | Coconuts - Incl Copra     | 5                                                           |
| 115             | Cambodia | 2007           | Crustaceans               | 3                                                           |
| 115             | Cambodia | 2007           | Eggs                      | 4                                                           |
| 115             | Cambodia | 2007           | Fats, Animals, Raw        | 2                                                           |
| 115             | Cambodia | 2007           | Freshwater Fish           | 81                                                          |
| 115             | Cambodia | 2007           | Fruits, Other             | 26                                                          |
| 115             | Cambodia | 2007           | Grapefruit                | 1                                                           |
| 115             | Cambodia | 2007           | Groundnuts (Shelled Eq)   | 4                                                           |
| 115             | Cambodia | 2007           | Maize                     | 32                                                          |
| 115             | Cambodia | 2007           | Marine Fish, Other        | 8                                                           |
| 115             | Cambodia | 2007           | Milk, Whole               | 14                                                          |
| 115             | Cambodia | 2007           | Molluscs, Other           | 1                                                           |
| 115             | Cambodia | 2007           | Nuts                      | 1                                                           |
| 115             | Cambodia | 2007           | Offals, Edible            | 4                                                           |
| 115             | Cambodia | 2007           | Oilcrops Oil, Other       | 1                                                           |
| 115             | Cambodia | 2007           | Oranges, Mandarines       | 13                                                          |
| 115             | Cambodia | 2007           | Palm Oil                  | 1                                                           |
| 115             | Cambodia | 2007           | Pelagic Fish              | 1                                                           |
| 115             | Cambodia | 2007           | Pigmeat                   | 25                                                          |
| 115             | Cambodia | 2007           | Pimento                   | 2                                                           |
| 115             | Cambodia | 2007           | Pineapples                | 4                                                           |
| 115             | Cambodia | 2007           | Poultry Meat              | 5                                                           |
| 115             | Cambodia | 2007           | Rice (Milled Equivalent)  | 434                                                         |
| 115             | Cambodia | 2007           | Roots, Other              | 7                                                           |
| 115             | Cambodia | 2007           | Sesameseed                | 6                                                           |
| 115             | Cambodia | 2007           | Soyabean Oil              | 2                                                           |
| 115             | Cambodia | 2007           | Soyabeans                 | 7                                                           |
| 115             | Cambodia | 2007           | Sugar Cane                | 11                                                          |
| 115             | Cambodia | 2007           | Sugar, Refined Equivalent | 43                                                          |
| 115             | Cambodia | 2007           | Sweet Potatoes            | 7                                                           |
| 115             | Cambodia | 2007           | Sweeteners, Other         | 2                                                           |

Dietary calcium and zinc deficiency risks are decreasing but remain prevalent

| FAO countrycode | Country  | Reference year | Food item                 | Gross food supply (g capita <sup>-1</sup> d <sup>-1</sup> ) |
|-----------------|----------|----------------|---------------------------|-------------------------------------------------------------|
| 115             | Cambodia | 2007           | Tea                       | 1                                                           |
| 115             | Cambodia | 2007           | Vegetables, Other         | 88                                                          |
| 115             | Cambodia | 2007           | Wheat                     | 9                                                           |
| 115             | Cambodia | 2007           | Whey                      | 2                                                           |
| 115             | Cambodia | 2008           | Apples                    | 1                                                           |
| 115             | Cambodia | 2008           | Bananas                   | 32                                                          |
| 115             | Cambodia | 2008           | Beans                     | 9                                                           |
| 115             | Cambodia | 2008           | Beer                      | 35                                                          |
| 115             | Cambodia | 2008           | Beverages, Alcoholic      | 6                                                           |
| 115             | Cambodia | 2008           | Bovine Meat               | 14                                                          |
| 115             | Cambodia | 2008           | Cassava                   | 69                                                          |
| 115             | Cambodia | 2008           | Cephalopods               | 1                                                           |
| 115             | Cambodia | 2008           | Citrus, Other             | 1                                                           |
| 115             | Cambodia | 2008           | Coconut Oil               | 1                                                           |
| 115             | Cambodia | 2008           | Coconuts - Incl Copra     | 5                                                           |
| 115             | Cambodia | 2008           | Crustaceans               | 3                                                           |
| 115             | Cambodia | 2008           | Eggs                      | 4                                                           |
| 115             | Cambodia | 2008           | Fats, Animals, Raw        | 2                                                           |
| 115             | Cambodia | 2008           | Freshwater Fish           | 75                                                          |
| 115             | Cambodia | 2008           | Fruits, Other             | 27                                                          |
| 115             | Cambodia | 2008           | Grapefruit                | 1                                                           |
| 115             | Cambodia | 2008           | Groundnuts (Shelled Eq)   | 3                                                           |
| 115             | Cambodia | 2008           | Maize                     | 30                                                          |
| 115             | Cambodia | 2008           | Marine Fish, Other        | 8                                                           |
| 115             | Cambodia | 2008           | Milk, Whole               | 11                                                          |
| 115             | Cambodia | 2008           | Molluscs, Other           | 1                                                           |
| 115             | Cambodia | 2008           | Nuts                      | 1                                                           |
| 115             | Cambodia | 2008           | Offals, Edible            | 4                                                           |
| 115             | Cambodia | 2008           | Oilcrops Oil, Other       | 1                                                           |
| 115             | Cambodia | 2008           | Oranges, Mandarines       | 13                                                          |
| 115             | Cambodia | 2008           | Palm Oil                  | 1                                                           |
| 115             | Cambodia | 2008           | Pigmeat                   | 24                                                          |
| 115             | Cambodia | 2008           | Pimento                   | 2                                                           |
| 115             | Cambodia | 2008           | Pineapples                | 4                                                           |
| 115             | Cambodia | 2008           | Poultry Meat              | 5                                                           |
| 115             | Cambodia | 2008           | Rice (Milled Equivalent)  | 435                                                         |
| 115             | Cambodia | 2008           | Roots, Other              | 7                                                           |
| 115             | Cambodia | 2008           | Sesameseed                | 6                                                           |
| 115             | Cambodia | 2008           | Soyabean Oil              | 2                                                           |
| 115             | Cambodia | 2008           | Soyabeans                 | 8                                                           |
| 115             | Cambodia | 2008           | Sugar Cane                | 15                                                          |
| 115             | Cambodia | 2008           | Sugar, Refined Equivalent | 46                                                          |
| 115             | Cambodia | 2008           | Sweet Potatoes            | 7                                                           |
| 115             | Cambodia | 2008           | Sweeteners, Other         | 7                                                           |
| 115             | Cambodia | 2008           | Vegetables, Other         | 82                                                          |
| 115             | Cambodia | 2008           | Wheat                     | 6                                                           |
| 115             | Cambodia | 2008           | Whey                      | 13                                                          |
| 115             | Cambodia | 2009           | Bananas                   | 31                                                          |
| 115             | Cambodia | 2009           | Beans                     | 11                                                          |
| 115             | Cambodia | 2009           | Beer                      | 35                                                          |
| 115             | Cambodia | 2009           | Beverages, Alcoholic      | 5                                                           |
| 115             | Cambodia | 2009           | Bovine Meat               | 15                                                          |
| 115             | Cambodia | 2009           | Cassava                   | 68                                                          |
| 115             | Cambodia | 2009           | Cephalopods               | 1                                                           |
| 115             | Cambodia | 2009           | Citrus, Other             | 1                                                           |
| 115             | Cambodia | 2009           | Coconut Oil               | 1                                                           |
| 115             | Cambodia | 2009           | Coconuts - Incl Copra     | 3                                                           |
| 115             | Cambodia | 2009           | Coffee                    | 2                                                           |
| 115             | Cambodia | 2009           | Crustaceans               | 2                                                           |
| 115             | Cambodia | 2009           | Eggs                      | 3                                                           |
| 115             | Cambodia | 2009           | Fats, Animals, Raw        | 2                                                           |
| 115             | Cambodia | 2009           | Freshwater Fish           | 80                                                          |
| 115             | Cambodia | 2009           | Fruits, Other             | 27                                                          |
| 115             | Cambodia | 2009           | Grapefruit                | 1                                                           |
| 115             | Cambodia | 2009           | Groundnuts (Shelled Eq)   | 2                                                           |
| 115             | Cambodia | 2009           | Maize                     | 31                                                          |
| 115             | Cambodia | 2009           | Marine Fish, Other        | 10                                                          |
| 115             | Cambodia | 2009           | Milk, Whole               | 12                                                          |
| 115             | Cambodia | 2009           | Molluscs, Other           | 1                                                           |
| 115             | Cambodia | 2009           | Nuts                      | 1                                                           |
| 115             | Cambodia | 2009           | Offals, Edible            | 4                                                           |
| 115             | Cambodia | 2009           | Oilcrops Oil, Other       | 1                                                           |
| 115             | Cambodia | 2009           | Oranges, Mandarines       | 12                                                          |
| 115             | Cambodia | 2009           | Palm Oil                  | 1                                                           |
| 115             | Cambodia | 2009           | Pigmeat                   | 24                                                          |
| 115             | Cambodia | 2009           | Pimento                   | 2                                                           |
| 115             | Cambodia | 2009           | Pineapples                | 4                                                           |
| 115             | Cambodia | 2009           | Poultry Meat              | 6                                                           |
| 115             | Cambodia | 2009           | Rice (Milled Equivalent)  | 434                                                         |
| 115             | Cambodia | 2009           | Roots, Other              | 6                                                           |
| 115             | Cambodia | 2009           | Sesameseed                | 6                                                           |
| 115             | Cambodia | 2009           | Soyabean Oil              | 2                                                           |
| 115             | Cambodia | 2009           | Soyabeans                 | 9                                                           |
| 115             | Cambodia | 2009           | Sugar Cane                | 14                                                          |
| 115             | Cambodia | 2009           | Sugar, Refined Equivalent | 46                                                          |
| 115             | Cambodia | 2009           | Sweet Potatoes            | 15                                                          |
| 115             | Cambodia | 2009           | Sweeteners, Other         | 4                                                           |
| 115             | Cambodia | 2009           | Vegetables, Other         | 94                                                          |
| 115             | Cambodia | 2009           | Wheat                     | 7                                                           |
| 115             | Cambodia | 2009           | Whey                      | 11                                                          |
| 115             | Cambodia | 2010           | Bananas                   | 31                                                          |
| 115             | Cambodia | 2010           | Beans                     | 13                                                          |
| 115             | Cambodia | 2010           | Beer                      | 34                                                          |
| 115             | Cambodia | 2010           | Beverages, Alcoholic      | 6                                                           |
| 115             | Cambodia | 2010           | Bovine Meat               | 14                                                          |
| 115             | Cambodia | 2010           | Cassava                   | 71                                                          |
| 115             | Cambodia | 2010           | Cephalopods               | 1                                                           |



Dietary calcium and zinc deficiency risks are decreasing but remain prevalent

| FAO countrycode | Country  | Reference year | Food item                 | Gross food supply (g capita <sup>-1</sup> d <sup>-1</sup> ) |
|-----------------|----------|----------------|---------------------------|-------------------------------------------------------------|
| 115             | Cambodia | 2010           | Cereals, Other            | 1                                                           |
| 115             | Cambodia | 2010           | Coconut Oil               | 2                                                           |
| 115             | Cambodia | 2010           | Crustaceans               | 3                                                           |
| 115             | Cambodia | 2010           | Eggs                      | 4                                                           |
| 115             | Cambodia | 2010           | Fats, Animals, Raw        | 2                                                           |
| 115             | Cambodia | 2010           | Freshwater Fish           | 82                                                          |
| 115             | Cambodia | 2010           | Fruits, Other             | 27                                                          |
| 115             | Cambodia | 2010           | Grapefruit                | 1                                                           |
| 115             | Cambodia | 2010           | Groundnuts (Shelled Eq)   | 2                                                           |
| 115             | Cambodia | 2010           | Maize                     | 32                                                          |
| 115             | Cambodia | 2010           | Marine Fish, Other        | 11                                                          |
| 115             | Cambodia | 2010           | Milk, Whole               | 5                                                           |
| 115             | Cambodia | 2010           | Molluscs, Other           | 1                                                           |
| 115             | Cambodia | 2010           | Nuts                      | 1                                                           |
| 115             | Cambodia | 2010           | Offals, Edible            | 4                                                           |
| 115             | Cambodia | 2010           | Oilcrops Oil, Other       | 1                                                           |
| 115             | Cambodia | 2010           | Oranges, Mandarines       | 11                                                          |
| 115             | Cambodia | 2010           | Pigmeat                   | 21                                                          |
| 115             | Cambodia | 2010           | Pimento                   | 2                                                           |
| 115             | Cambodia | 2010           | Pineapples                | 4                                                           |
| 115             | Cambodia | 2010           | Poultry Meat              | 5                                                           |
| 115             | Cambodia | 2010           | Rice (Milled Equivalent)  | 438                                                         |
| 115             | Cambodia | 2010           | Roots, Other              | 6                                                           |
| 115             | Cambodia | 2010           | Sesameseed                | 6                                                           |
| 115             | Cambodia | 2010           | Soyabean Oil              | 2                                                           |
| 115             | Cambodia | 2010           | Soyabean                  | 9                                                           |
| 115             | Cambodia | 2010           | Sugar Cane                | 14                                                          |
| 115             | Cambodia | 2010           | Sugar, Refined Equivalent | 47                                                          |
| 115             | Cambodia | 2010           | Sweet Potatoes            | 14                                                          |
| 115             | Cambodia | 2010           | Vegetables, Other         | 92                                                          |
| 115             | Cambodia | 2010           | Wheat                     | 6                                                           |
| 115             | Cambodia | 2011           | Bananas                   | 29                                                          |
| 115             | Cambodia | 2011           | Beans                     | 13                                                          |
| 115             | Cambodia | 2011           | Beer                      | 51                                                          |
| 115             | Cambodia | 2011           | Beverages, Alcoholic      | 4                                                           |
| 115             | Cambodia | 2011           | Bovine Meat               | 14                                                          |
| 115             | Cambodia | 2011           | Cassava                   | 74                                                          |
| 115             | Cambodia | 2011           | Cephalopods               | 1                                                           |
| 115             | Cambodia | 2011           | Cereals, Other            | 1                                                           |
| 115             | Cambodia | 2011           | Coconut Oil               | 2                                                           |
| 115             | Cambodia | 2011           | Crustaceans               | 3                                                           |
| 115             | Cambodia | 2011           | Eggs                      | 4                                                           |
| 115             | Cambodia | 2011           | Fats, Animals, Raw        | 2                                                           |
| 115             | Cambodia | 2011           | Freshwater Fish           | 81                                                          |
| 115             | Cambodia | 2011           | Fruits, Other             | 24                                                          |
| 115             | Cambodia | 2011           | Grapefruit                | 2                                                           |
| 115             | Cambodia | 2011           | Groundnuts (Shelled Eq)   | 2                                                           |
| 115             | Cambodia | 2011           | Maize                     | 31                                                          |
| 115             | Cambodia | 2011           | Marine Fish, Other        | 11                                                          |
| 115             | Cambodia | 2011           | Milk, Whole               | 5                                                           |
| 115             | Cambodia | 2011           | Molluscs, Other           | 1                                                           |
| 115             | Cambodia | 2011           | Nuts                      | 1                                                           |
| 115             | Cambodia | 2011           | Offals, Edible            | 4                                                           |
| 115             | Cambodia | 2011           | Oilcrops Oil, Other       | 1                                                           |
| 115             | Cambodia | 2011           | Oranges, Mandarines       | 10                                                          |
| 115             | Cambodia | 2011           | Pepper                    | 1                                                           |
| 115             | Cambodia | 2011           | Pigmeat                   | 22                                                          |
| 115             | Cambodia | 2011           | Pimento                   | 2                                                           |
| 115             | Cambodia | 2011           | Pineapples                | 4                                                           |
| 115             | Cambodia | 2011           | Poultry Meat              | 5                                                           |
| 115             | Cambodia | 2011           | Rice (Milled Equivalent)  | 436                                                         |
| 115             | Cambodia | 2011           | Roots, Other              | 6                                                           |
| 115             | Cambodia | 2011           | Sesameseed                | 7                                                           |
| 115             | Cambodia | 2011           | Soyabean Oil              | 2                                                           |
| 115             | Cambodia | 2011           | Soyabean                  | 10                                                          |
| 115             | Cambodia | 2011           | Sugar Cane                | 18                                                          |
| 115             | Cambodia | 2011           | Sugar, Refined Equivalent | 45                                                          |
| 115             | Cambodia | 2011           | Sweet Potatoes            | 8                                                           |
| 115             | Cambodia | 2011           | Sweeteners, Other         | 1                                                           |
| 115             | Cambodia | 2011           | Vegetables, Other         | 106                                                         |
| 115             | Cambodia | 2011           | Wheat                     | 7                                                           |
| 32              | Cameroon | 1992           | Bananas                   | 145                                                         |
| 32              | Cameroon | 1992           | Barley                    | 3                                                           |
| 32              | Cameroon | 1992           | Beans                     | 15                                                          |
| 32              | Cameroon | 1992           | Beer                      | 54                                                          |
| 32              | Cameroon | 1992           | Beverages, Fermented      | 78                                                          |
| 32              | Cameroon | 1992           | Bovine Meat               | 17                                                          |
| 32              | Cameroon | 1992           | Cassava                   | 263                                                         |
| 32              | Cameroon | 1992           | Cocoa Beans               | 1                                                           |
| 32              | Cameroon | 1992           | Coffee                    | 1                                                           |
| 32              | Cameroon | 1992           | Cottonseed Oil            | 2                                                           |
| 32              | Cameroon | 1992           | Demersal Fish             | 3                                                           |
| 32              | Cameroon | 1992           | Eggs                      | 2                                                           |
| 32              | Cameroon | 1992           | Fats, Animals, Raw        | 1                                                           |
| 32              | Cameroon | 1992           | Freshwater Fish           | 5                                                           |
| 32              | Cameroon | 1992           | Fruits, Other             | 26                                                          |
| 32              | Cameroon | 1992           | Groundnut Oil             | 2                                                           |
| 32              | Cameroon | 1992           | Groundnuts (Shelled Eq)   | 2                                                           |
| 32              | Cameroon | 1992           | Honey                     | 1                                                           |
| 32              | Cameroon | 1992           | Maize                     | 112                                                         |
| 32              | Cameroon | 1992           | Marine Fish, Other        | 11                                                          |
| 32              | Cameroon | 1992           | Meat, Other               | 10                                                          |
| 32              | Cameroon | 1992           | Milk, Whole               | 39                                                          |
| 32              | Cameroon | 1992           | Millet                    | 11                                                          |
| 32              | Cameroon | 1992           | Mutton & Goat Meat        | 6                                                           |
| 32              | Cameroon | 1992           | Nuts                      | 6                                                           |
| 32              | Cameroon | 1992           | Offals, Edible            | 4                                                           |

Dietary calcium and zinc deficiency risks are decreasing but remain prevalent

| FAO countrycode | Country  | Reference year | Food item                 | Gross food supply (g capita <sup>-1</sup> d <sup>-1</sup> ) |
|-----------------|----------|----------------|---------------------------|-------------------------------------------------------------|
| 32              | Cameroon | 1992           | Oilcrops Oil, Other       | 1                                                           |
| 32              | Cameroon | 1992           | Oilcrops, Other           | 8                                                           |
| 32              | Cameroon | 1992           | Onions                    | 4                                                           |
| 32              | Cameroon | 1992           | Palm Oil                  | 13                                                          |
| 32              | Cameroon | 1992           | Palmkernel Oil            | 1                                                           |
| 32              | Cameroon | 1992           | Pelagic Fish              | 11                                                          |
| 32              | Cameroon | 1992           | Pigmeat                   | 3                                                           |
| 32              | Cameroon | 1992           | Pimento                   | 2                                                           |
| 32              | Cameroon | 1992           | Pineapples                | 7                                                           |
| 32              | Cameroon | 1992           | Plantains                 | 133                                                         |
| 32              | Cameroon | 1992           | Potatoes                  | 5                                                           |
| 32              | Cameroon | 1992           | Poultry Meat              | 4                                                           |
| 32              | Cameroon | 1992           | Pulses, Other             | 1                                                           |
| 32              | Cameroon | 1992           | Rice (Milled Equivalent)  | 24                                                          |
| 32              | Cameroon | 1992           | Roots, Other              | 74                                                          |
| 32              | Cameroon | 1992           | Sesameseed                | 1                                                           |
| 32              | Cameroon | 1992           | Sorghum                   | 63                                                          |
| 32              | Cameroon | 1992           | Soyabean Oil              | 1                                                           |
| 32              | Cameroon | 1992           | Soyabbeans                | 1                                                           |
| 32              | Cameroon | 1992           | Sugar Cane                | 122                                                         |
| 32              | Cameroon | 1992           | Sugar, Refined Equivalent | 16                                                          |
| 32              | Cameroon | 1992           | Sweet Potatoes            | 35                                                          |
| 32              | Cameroon | 1992           | Tea                       | 1                                                           |
| 32              | Cameroon | 1992           | Tomatoes                  | 14                                                          |
| 32              | Cameroon | 1992           | Vegetables, Other         | 111                                                         |
| 32              | Cameroon | 1992           | Wheat                     | 67                                                          |
| 32              | Cameroon | 1992           | Wine                      | 1                                                           |
| 32              | Cameroon | 1992           | Yams                      | 15                                                          |
| 32              | Cameroon | 1993           | Bananas                   | 147                                                         |
| 32              | Cameroon | 1993           | Barley                    | 3                                                           |
| 32              | Cameroon | 1993           | Beans                     | 17                                                          |
| 32              | Cameroon | 1993           | Beer                      | 49                                                          |
| 32              | Cameroon | 1993           | Beverages, Fermented      | 81                                                          |
| 32              | Cameroon | 1993           | Bovine Meat               | 16                                                          |
| 32              | Cameroon | 1993           | Cassava                   | 257                                                         |
| 32              | Cameroon | 1993           | Cocoa Beans               | 1                                                           |
| 32              | Cameroon | 1993           | Coffee                    | 1                                                           |
| 32              | Cameroon | 1993           | Cottonseed Oil            | 2                                                           |
| 32              | Cameroon | 1993           | Demersal Fish             | 3                                                           |
| 32              | Cameroon | 1993           | Eggs                      | 2                                                           |
| 32              | Cameroon | 1993           | Fats, Animals, Raw        | 1                                                           |
| 32              | Cameroon | 1993           | Freshwater Fish           | 5                                                           |
| 32              | Cameroon | 1993           | Fruits, Other             | 26                                                          |
| 32              | Cameroon | 1993           | Groundnut Oil             | 2                                                           |
| 32              | Cameroon | 1993           | Groundnuts (Shelled Eq)   | 3                                                           |
| 32              | Cameroon | 1993           | Honey                     | 1                                                           |
| 32              | Cameroon | 1993           | Maize                     | 96                                                          |
| 32              | Cameroon | 1993           | Marine Fish, Other        | 8                                                           |
| 32              | Cameroon | 1993           | Meat, Other               | 10                                                          |
| 32              | Cameroon | 1993           | Milk, Whole               | 40                                                          |
| 32              | Cameroon | 1993           | Millet                    | 11                                                          |
| 32              | Cameroon | 1993           | Mutton & Goat Meat        | 6                                                           |
| 32              | Cameroon | 1993           | Nuts                      | 7                                                           |
| 32              | Cameroon | 1993           | Offals, Edible            | 4                                                           |
| 32              | Cameroon | 1993           | Oilcrops Oil, Other       | 1                                                           |
| 32              | Cameroon | 1993           | Oilcrops, Other           | 8                                                           |
| 32              | Cameroon | 1993           | Onions                    | 4                                                           |
| 32              | Cameroon | 1993           | Palm Oil                  | 13                                                          |
| 32              | Cameroon | 1993           | Palmkernel Oil            | 1                                                           |
| 32              | Cameroon | 1993           | Pelagic Fish              | 9                                                           |
| 32              | Cameroon | 1993           | Pigmeat                   | 3                                                           |
| 32              | Cameroon | 1993           | Pimento                   | 2                                                           |
| 32              | Cameroon | 1993           | Pineapples                | 7                                                           |
| 32              | Cameroon | 1993           | Plantains                 | 140                                                         |
| 32              | Cameroon | 1993           | Potatoes                  | 4                                                           |
| 32              | Cameroon | 1993           | Poultry Meat              | 4                                                           |
| 32              | Cameroon | 1993           | Pulses, Other             | 1                                                           |
| 32              | Cameroon | 1993           | Rice (Milled Equivalent)  | 24                                                          |
| 32              | Cameroon | 1993           | Roots, Other              | 72                                                          |
| 32              | Cameroon | 1993           | Sesameseed                | 1                                                           |
| 32              | Cameroon | 1993           | Sorghum                   | 76                                                          |
| 32              | Cameroon | 1993           | Soyabbeans                | 1                                                           |
| 32              | Cameroon | 1993           | Sugar Cane                | 137                                                         |
| 32              | Cameroon | 1993           | Sugar, Refined Equivalent | 17                                                          |
| 32              | Cameroon | 1993           | Sweet Potatoes            | 37                                                          |
| 32              | Cameroon | 1993           | Tea                       | 1                                                           |
| 32              | Cameroon | 1993           | Tomatoes                  | 13                                                          |
| 32              | Cameroon | 1993           | Vegetables, Other         | 115                                                         |
| 32              | Cameroon | 1993           | Wheat                     | 36                                                          |
| 32              | Cameroon | 1993           | Wine                      | 1                                                           |
| 32              | Cameroon | 1993           | Yams                      | 13                                                          |
| 32              | Cameroon | 1994           | Bananas                   | 145                                                         |
| 32              | Cameroon | 1994           | Barley                    | 6                                                           |
| 32              | Cameroon | 1994           | Beans                     | 18                                                          |
| 32              | Cameroon | 1994           | Beer                      | 38                                                          |
| 32              | Cameroon | 1994           | Beverages, Fermented      | 73                                                          |
| 32              | Cameroon | 1994           | Bovine Meat               | 15                                                          |
| 32              | Cameroon | 1994           | Cassava                   | 260                                                         |
| 32              | Cameroon | 1994           | Cocoa Beans               | 1                                                           |
| 32              | Cameroon | 1994           | Coffee                    | 1                                                           |
| 32              | Cameroon | 1994           | Cottonseed Oil            | 2                                                           |
| 32              | Cameroon | 1994           | Demersal Fish             | 2                                                           |
| 32              | Cameroon | 1994           | Eggs                      | 2                                                           |
| 32              | Cameroon | 1994           | Fats, Animals, Raw        | 1                                                           |
| 32              | Cameroon | 1994           | Freshwater Fish           | 5                                                           |
| 32              | Cameroon | 1994           | Fruits, Other             | 26                                                          |
| 32              | Cameroon | 1994           | Groundnut Oil             | 2                                                           |

Dietary calcium and zinc deficiency risks are decreasing but remain prevalent

| FAO countrycode | Country  | Reference year | Food item                 | Gross food supply (g capita <sup>-1</sup> d <sup>-1</sup> ) |
|-----------------|----------|----------------|---------------------------|-------------------------------------------------------------|
| 32              | Cameroon | 1994           | Groundnuts (Shelled Eq)   | 6                                                           |
| 32              | Cameroon | 1994           | Honey                     | 1                                                           |
| 32              | Cameroon | 1994           | Maize                     | 102                                                         |
| 32              | Cameroon | 1994           | Marine Fish, Other        | 7                                                           |
| 32              | Cameroon | 1994           | Meat, Other               | 10                                                          |
| 32              | Cameroon | 1994           | Milk, Whole               | 39                                                          |
| 32              | Cameroon | 1994           | Millet                    | 11                                                          |
| 32              | Cameroon | 1994           | Mutton & Goat Meat        | 6                                                           |
| 32              | Cameroon | 1994           | Nuts                      | 8                                                           |
| 32              | Cameroon | 1994           | Offals, Edible            | 4                                                           |
| 32              | Cameroon | 1994           | Oilcrops, Other           | 10                                                          |
| 32              | Cameroon | 1994           | Onions                    | 4                                                           |
| 32              | Cameroon | 1994           | Palm Oil                  | 13                                                          |
| 32              | Cameroon | 1994           | Palmkernel Oil            | 1                                                           |
| 32              | Cameroon | 1994           | Pelagic Fish              | 10                                                          |
| 32              | Cameroon | 1994           | Pigmeat                   | 3                                                           |
| 32              | Cameroon | 1994           | Pimento                   | 2                                                           |
| 32              | Cameroon | 1994           | Pineapples                | 8                                                           |
| 32              | Cameroon | 1994           | Plantains                 | 147                                                         |
| 32              | Cameroon | 1994           | Potatoes                  | 5                                                           |
| 32              | Cameroon | 1994           | Poultry Meat              | 4                                                           |
| 32              | Cameroon | 1994           | Pulses, Other             | 3                                                           |
| 32              | Cameroon | 1994           | Rice (Milled Equivalent)  | 24                                                          |
| 32              | Cameroon | 1994           | Roots, Other              | 70                                                          |
| 32              | Cameroon | 1994           | Sesameseed                | 1                                                           |
| 32              | Cameroon | 1994           | Sorghum                   | 65                                                          |
| 32              | Cameroon | 1994           | Soybeans                  | 1                                                           |
| 32              | Cameroon | 1994           | Spices, Other             | 1                                                           |
| 32              | Cameroon | 1994           | Sugar Cane                | 129                                                         |
| 32              | Cameroon | 1994           | Sugar, Refined Equivalent | 15                                                          |
| 32              | Cameroon | 1994           | Sweet Potatoes            | 38                                                          |
| 32              | Cameroon | 1994           | Tea                       | 1                                                           |
| 32              | Cameroon | 1994           | Tomatoes                  | 14                                                          |
| 32              | Cameroon | 1994           | Vegetables, Other         | 118                                                         |
| 32              | Cameroon | 1994           | Wheat                     | 32                                                          |
| 32              | Cameroon | 1994           | Wine                      | 1                                                           |
| 32              | Cameroon | 1994           | Yams                      | 15                                                          |
| 32              | Cameroon | 1995           | Bananas                   | 142                                                         |
| 32              | Cameroon | 1995           | Barley                    | 14                                                          |
| 32              | Cameroon | 1995           | Beans                     | 19                                                          |
| 32              | Cameroon | 1995           | Beer                      | 34                                                          |
| 32              | Cameroon | 1995           | Beverages, Fermented      | 88                                                          |
| 32              | Cameroon | 1995           | Bovine Meat               | 14                                                          |
| 32              | Cameroon | 1995           | Cassava                   | 263                                                         |
| 32              | Cameroon | 1995           | Cocoa Beans               | 1                                                           |
| 32              | Cameroon | 1995           | Coffee                    | 1                                                           |
| 32              | Cameroon | 1995           | Cottonseed Oil            | 3                                                           |
| 32              | Cameroon | 1995           | Demersal Fish             | 3                                                           |
| 32              | Cameroon | 1995           | Eggs                      | 2                                                           |
| 32              | Cameroon | 1995           | Fats, Animals, Raw        | 1                                                           |
| 32              | Cameroon | 1995           | Freshwater Fish           | 6                                                           |
| 32              | Cameroon | 1995           | Fruits, Other             | 26                                                          |
| 32              | Cameroon | 1995           | Groundnut Oil             | 2                                                           |
| 32              | Cameroon | 1995           | Groundnuts (Shelled Eq)   | 3                                                           |
| 32              | Cameroon | 1995           | Honey                     | 1                                                           |
| 32              | Cameroon | 1995           | Maize                     | 105                                                         |
| 32              | Cameroon | 1995           | Marine Fish, Other        | 8                                                           |
| 32              | Cameroon | 1995           | Meat, Other               | 10                                                          |
| 32              | Cameroon | 1995           | Milk, Whole               | 39                                                          |
| 32              | Cameroon | 1995           | Millet                    | 12                                                          |
| 32              | Cameroon | 1995           | Mutton & Goat Meat        | 5                                                           |
| 32              | Cameroon | 1995           | Nuts                      | 7                                                           |
| 32              | Cameroon | 1995           | Offals, Edible            | 4                                                           |
| 32              | Cameroon | 1995           | Oilcrops, Other           | 8                                                           |
| 32              | Cameroon | 1995           | Onions                    | 4                                                           |
| 32              | Cameroon | 1995           | Palm Oil                  | 13                                                          |
| 32              | Cameroon | 1995           | Palmkernel Oil            | 1                                                           |
| 32              | Cameroon | 1995           | Pelagic Fish              | 11                                                          |
| 32              | Cameroon | 1995           | Pigmeat                   | 3                                                           |
| 32              | Cameroon | 1995           | Pimento                   | 2                                                           |
| 32              | Cameroon | 1995           | Pineapples                | 8                                                           |
| 32              | Cameroon | 1995           | Plantains                 | 148                                                         |
| 32              | Cameroon | 1995           | Potatoes                  | 4                                                           |
| 32              | Cameroon | 1995           | Poultry Meat              | 4                                                           |
| 32              | Cameroon | 1995           | Pulses, Other             | 5                                                           |
| 32              | Cameroon | 1995           | Rice (Milled Equivalent)  | 23                                                          |
| 32              | Cameroon | 1995           | Roots, Other              | 72                                                          |
| 32              | Cameroon | 1995           | Sesameseed                | 1                                                           |
| 32              | Cameroon | 1995           | Sorghum                   | 71                                                          |
| 32              | Cameroon | 1995           | Soybeans                  | 1                                                           |
| 32              | Cameroon | 1995           | Spices, Other             | 1                                                           |
| 32              | Cameroon | 1995           | Sugar Cane                | 130                                                         |
| 32              | Cameroon | 1995           | Sugar, Refined Equivalent | 16                                                          |
| 32              | Cameroon | 1995           | Sweet Potatoes            | 38                                                          |
| 32              | Cameroon | 1995           | Tea                       | 1                                                           |
| 32              | Cameroon | 1995           | Tomatoes                  | 12                                                          |
| 32              | Cameroon | 1995           | Vegetables, Other         | 122                                                         |
| 32              | Cameroon | 1995           | Wheat                     | 21                                                          |
| 32              | Cameroon | 1995           | Wine                      | 1                                                           |
| 32              | Cameroon | 1995           | Yams                      | 14                                                          |
| 32              | Cameroon | 1996           | Bananas                   | 145                                                         |
| 32              | Cameroon | 1996           | Barley                    | 6                                                           |
| 32              | Cameroon | 1996           | Beans                     | 20                                                          |
| 32              | Cameroon | 1996           | Beer                      | 29                                                          |
| 32              | Cameroon | 1996           | Beverages, Fermented      | 84                                                          |
| 32              | Cameroon | 1996           | Bovine Meat               | 17                                                          |
| 32              | Cameroon | 1996           | Cassava                   | 265                                                         |

## Dietary calcium and zinc deficiency risks are decreasing but remain prevalent

| FAO countrycode | Country  | Reference year | Food item                 | Gross food supply (g capita <sup>-1</sup> d <sup>-1</sup> ) |
|-----------------|----------|----------------|---------------------------|-------------------------------------------------------------|
| 32              | Cameroon | 1996           | Cocoa Beans               | 1                                                           |
| 32              | Cameroon | 1996           | Coffee                    | 1                                                           |
| 32              | Cameroon | 1996           | Cottonseed Oil            | 3                                                           |
| 32              | Cameroon | 1996           | Demersal Fish             | 3                                                           |
| 32              | Cameroon | 1996           | Eggs                      | 2                                                           |
| 32              | Cameroon | 1996           | Fats, Animals, Raw        | 1                                                           |
| 32              | Cameroon | 1996           | Freshwater Fish           | 6                                                           |
| 32              | Cameroon | 1996           | Fruits, Other             | 25                                                          |
| 32              | Cameroon | 1996           | Groundnut Oil             | 3                                                           |
| 32              | Cameroon | 1996           | Groundnuts (Shelled Eq)   | 5                                                           |
| 32              | Cameroon | 1996           | Honey                     | 1                                                           |
| 32              | Cameroon | 1996           | Maize                     | 110                                                         |
| 32              | Cameroon | 1996           | Marine Fish, Other        | 5                                                           |
| 32              | Cameroon | 1996           | Meat, Other               | 9                                                           |
| 32              | Cameroon | 1996           | Milk, Whole               | 38                                                          |
| 32              | Cameroon | 1996           | Millet                    | 12                                                          |
| 32              | Cameroon | 1996           | Mutton & Goat Meat        | 5                                                           |
| 32              | Cameroon | 1996           | Nuts                      | 7                                                           |
| 32              | Cameroon | 1996           | Offals, Edible            | 3                                                           |
| 32              | Cameroon | 1996           | Oilcrops, Other           | 7                                                           |
| 32              | Cameroon | 1996           | Onions                    | 3                                                           |
| 32              | Cameroon | 1996           | Palm Oil                  | 11                                                          |
| 32              | Cameroon | 1996           | Palmkernel Oil            | 1                                                           |
| 32              | Cameroon | 1996           | Pelagic Fish              | 13                                                          |
| 32              | Cameroon | 1996           | Pigmeat                   | 2                                                           |
| 32              | Cameroon | 1996           | Pimento                   | 2                                                           |
| 32              | Cameroon | 1996           | Pineapples                | 8                                                           |
| 32              | Cameroon | 1996           | Plantains                 | 148                                                         |
| 32              | Cameroon | 1996           | Potatoes                  | 4                                                           |
| 32              | Cameroon | 1996           | Poultry Meat              | 5                                                           |
| 32              | Cameroon | 1996           | Pulses, Other             | 7                                                           |
| 32              | Cameroon | 1996           | Rice (Milled Equivalent)  | 28                                                          |
| 32              | Cameroon | 1996           | Roots, Other              | 50                                                          |
| 32              | Cameroon | 1996           | Sesameseed                | 1                                                           |
| 32              | Cameroon | 1996           | Sorghum                   | 66                                                          |
| 32              | Cameroon | 1996           | Soybeans                  | 1                                                           |
| 32              | Cameroon | 1996           | Spices, Other             | 1                                                           |
| 32              | Cameroon | 1996           | Sugar Cane                | 103                                                         |
| 32              | Cameroon | 1996           | Sugar, Refined Equivalent | 17                                                          |
| 32              | Cameroon | 1996           | Sweet Potatoes            | 38                                                          |
| 32              | Cameroon | 1996           | Tea                       | 1                                                           |
| 32              | Cameroon | 1996           | Tomatoes                  | 12                                                          |
| 32              | Cameroon | 1996           | Vegetables, Other         | 126                                                         |
| 32              | Cameroon | 1996           | Wheat                     | 22                                                          |
| 32              | Cameroon | 1996           | Wine                      | 1                                                           |
| 32              | Cameroon | 1996           | Yams                      | 14                                                          |
| 32              | Cameroon | 1997           | Bananas                   | 105                                                         |
| 32              | Cameroon | 1997           | Barley                    | 6                                                           |
| 32              | Cameroon | 1997           | Beans                     | 21                                                          |
| 32              | Cameroon | 1997           | Beer                      | 28                                                          |
| 32              | Cameroon | 1997           | Beverages, Fermented      | 77                                                          |
| 32              | Cameroon | 1997           | Bovine Meat               | 14                                                          |
| 32              | Cameroon | 1997           | Cassava                   | 268                                                         |
| 32              | Cameroon | 1997           | Cocoa Beans               | 1                                                           |
| 32              | Cameroon | 1997           | Coffee                    | 1                                                           |
| 32              | Cameroon | 1997           | Cottonseed Oil            | 4                                                           |
| 32              | Cameroon | 1997           | Demersal Fish             | 3                                                           |
| 32              | Cameroon | 1997           | Eggs                      | 2                                                           |
| 32              | Cameroon | 1997           | Fats, Animals, Raw        | 1                                                           |
| 32              | Cameroon | 1997           | Freshwater Fish           | 7                                                           |
| 32              | Cameroon | 1997           | Fruits, Other             | 25                                                          |
| 32              | Cameroon | 1997           | Groundnut Oil             | 2                                                           |
| 32              | Cameroon | 1997           | Groundnuts (Shelled Eq)   | 4                                                           |
| 32              | Cameroon | 1997           | Honey                     | 1                                                           |
| 32              | Cameroon | 1997           | Maize                     | 106                                                         |
| 32              | Cameroon | 1997           | Marine Fish, Other        | 9                                                           |
| 32              | Cameroon | 1997           | Meat, Other               | 9                                                           |
| 32              | Cameroon | 1997           | Milk, Whole               | 39                                                          |
| 32              | Cameroon | 1997           | Millet                    | 12                                                          |
| 32              | Cameroon | 1997           | Mutton & Goat Meat        | 5                                                           |
| 32              | Cameroon | 1997           | Nuts                      | 7                                                           |
| 32              | Cameroon | 1997           | Offals, Edible            | 3                                                           |
| 32              | Cameroon | 1997           | Oilcrops, Other           | 7                                                           |
| 32              | Cameroon | 1997           | Onions                    | 7                                                           |
| 32              | Cameroon | 1997           | Palm Oil                  | 12                                                          |
| 32              | Cameroon | 1997           | Palmkernel Oil            | 1                                                           |
| 32              | Cameroon | 1997           | Pelagic Fish              | 13                                                          |
| 32              | Cameroon | 1997           | Pigmeat                   | 2                                                           |
| 32              | Cameroon | 1997           | Pimento                   | 1                                                           |
| 32              | Cameroon | 1997           | Pineapples                | 7                                                           |
| 32              | Cameroon | 1997           | Plantains                 | 148                                                         |
| 32              | Cameroon | 1997           | Potatoes                  | 4                                                           |
| 32              | Cameroon | 1997           | Poultry Meat              | 6                                                           |
| 32              | Cameroon | 1997           | Pulses, Other             | 8                                                           |
| 32              | Cameroon | 1997           | Rice (Milled Equivalent)  | 31                                                          |
| 32              | Cameroon | 1997           | Roots, Other              | 93                                                          |
| 32              | Cameroon | 1997           | Sesameseed                | 1                                                           |
| 32              | Cameroon | 1997           | Sorghum                   | 58                                                          |
| 32              | Cameroon | 1997           | Soybeans                  | 1                                                           |
| 32              | Cameroon | 1997           | Spices, Other             | 1                                                           |
| 32              | Cameroon | 1997           | Sugar Cane                | 100                                                         |
| 32              | Cameroon | 1997           | Sugar, Refined Equivalent | 22                                                          |
| 32              | Cameroon | 1997           | Sweet Potatoes            | 38                                                          |
| 32              | Cameroon | 1997           | Tea                       | 1                                                           |
| 32              | Cameroon | 1997           | Tomatoes                  | 12                                                          |
| 32              | Cameroon | 1997           | Vegetables, Other         | 130                                                         |
| 32              | Cameroon | 1997           | Wheat                     | 38                                                          |

Dietary calcium and zinc deficiency risks are decreasing but remain prevalent

| FAO countrycode | Country  | Reference year | Food item                 | Gross food supply (g capita <sup>-1</sup> d <sup>-1</sup> ) |
|-----------------|----------|----------------|---------------------------|-------------------------------------------------------------|
| 32              | Cameroon | 1997           | Wine                      | 1                                                           |
| 32              | Cameroon | 1997           | Yams                      | 17                                                          |
| 32              | Cameroon | 1998           | Bananas                   | 99                                                          |
| 32              | Cameroon | 1998           | Barley                    | 6                                                           |
| 32              | Cameroon | 1998           | Beans                     | 21                                                          |
| 32              | Cameroon | 1998           | Beer                      | 43                                                          |
| 32              | Cameroon | 1998           | Beverages, Fermented      | 90                                                          |
| 32              | Cameroon | 1998           | Bovine Meat               | 14                                                          |
| 32              | Cameroon | 1998           | Cassava                   | 267                                                         |
| 32              | Cameroon | 1998           | Cocoa Beans               | 1                                                           |
| 32              | Cameroon | 1998           | Coffee                    | 1                                                           |
| 32              | Cameroon | 1998           | Cottonseed Oil            | 3                                                           |
| 32              | Cameroon | 1998           | Demersal Fish             | 3                                                           |
| 32              | Cameroon | 1998           | Eggs                      | 2                                                           |
| 32              | Cameroon | 1998           | Fats, Animals, Raw        | 1                                                           |
| 32              | Cameroon | 1998           | Freshwater Fish           | 8                                                           |
| 32              | Cameroon | 1998           | Fruits, Other             | 25                                                          |
| 32              | Cameroon | 1998           | Groundnut Oil             | 1                                                           |
| 32              | Cameroon | 1998           | Groundnuts (Shelled Eq)   | 5                                                           |
| 32              | Cameroon | 1998           | Honey                     | 1                                                           |
| 32              | Cameroon | 1998           | Maize                     | 107                                                         |
| 32              | Cameroon | 1998           | Marine Fish, Other        | 12                                                          |
| 32              | Cameroon | 1998           | Meat, Other               | 9                                                           |
| 32              | Cameroon | 1998           | Milk, Whole               | 37                                                          |
| 32              | Cameroon | 1998           | Millet                    | 11                                                          |
| 32              | Cameroon | 1998           | Mutton & Goat Meat        | 5                                                           |
| 32              | Cameroon | 1998           | Nuts                      | 7                                                           |
| 32              | Cameroon | 1998           | Offals, Edible            | 3                                                           |
| 32              | Cameroon | 1998           | Oilcrops, Other           | 7                                                           |
| 32              | Cameroon | 1998           | Onions                    | 7                                                           |
| 32              | Cameroon | 1998           | Palm Oil                  | 14                                                          |
| 32              | Cameroon | 1998           | Palmkernel Oil            | 1                                                           |
| 32              | Cameroon | 1998           | Pelagic Fish              | 12                                                          |
| 32              | Cameroon | 1998           | Pigmeat                   | 3                                                           |
| 32              | Cameroon | 1998           | Pimento                   | 1                                                           |
| 32              | Cameroon | 1998           | Pineapples                | 8                                                           |
| 32              | Cameroon | 1998           | Plantains                 | 148                                                         |
| 32              | Cameroon | 1998           | Potatoes                  | 4                                                           |
| 32              | Cameroon | 1998           | Poultry Meat              | 6                                                           |
| 32              | Cameroon | 1998           | Pulses, Other             | 10                                                          |
| 32              | Cameroon | 1998           | Rice (Milled Equivalent)  | 26                                                          |
| 32              | Cameroon | 1998           | Roots, Other              | 78                                                          |
| 32              | Cameroon | 1998           | Sesameseed                | 1                                                           |
| 32              | Cameroon | 1998           | Sorghum                   | 73                                                          |
| 32              | Cameroon | 1998           | Soyabeans                 | 1                                                           |
| 32              | Cameroon | 1998           | Spices, Other             | 1                                                           |
| 32              | Cameroon | 1998           | Sugar Cane                | 98                                                          |
| 32              | Cameroon | 1998           | Sugar, Refined Equivalent | 18                                                          |
| 32              | Cameroon | 1998           | Sweet Potatoes            | 23                                                          |
| 32              | Cameroon | 1998           | Sweeteners, Other         | 1                                                           |
| 32              | Cameroon | 1998           | Tea                       | 1                                                           |
| 32              | Cameroon | 1998           | Tomatoes                  | 13                                                          |
| 32              | Cameroon | 1998           | Vegetables, Other         | 136                                                         |
| 32              | Cameroon | 1998           | Wheat                     | 29                                                          |
| 32              | Cameroon | 1998           | Wine                      | 1                                                           |
| 32              | Cameroon | 1998           | Yams                      | 27                                                          |
| 32              | Cameroon | 1999           | Bananas                   | 73                                                          |
| 32              | Cameroon | 1999           | Beans                     | 24                                                          |
| 32              | Cameroon | 1999           | Beer                      | 64                                                          |
| 32              | Cameroon | 1999           | Beverages, Fermented      | 54                                                          |
| 32              | Cameroon | 1999           | Bovine Meat               | 16                                                          |
| 32              | Cameroon | 1999           | Cassava                   | 250                                                         |
| 32              | Cameroon | 1999           | Cocoa Beans               | 1                                                           |
| 32              | Cameroon | 1999           | Coffee                    | 1                                                           |
| 32              | Cameroon | 1999           | Cottonseed Oil            | 3                                                           |
| 32              | Cameroon | 1999           | Demersal Fish             | 2                                                           |
| 32              | Cameroon | 1999           | Eggs                      | 2                                                           |
| 32              | Cameroon | 1999           | Fats, Animals, Raw        | 1                                                           |
| 32              | Cameroon | 1999           | Freshwater Fish           | 9                                                           |
| 32              | Cameroon | 1999           | Fruits, Other             | 24                                                          |
| 32              | Cameroon | 1999           | Groundnut Oil             | 2                                                           |
| 32              | Cameroon | 1999           | Groundnuts (Shelled Eq)   | 7                                                           |
| 32              | Cameroon | 1999           | Honey                     | 1                                                           |
| 32              | Cameroon | 1999           | Maize                     | 135                                                         |
| 32              | Cameroon | 1999           | Marine Fish, Other        | 11                                                          |
| 32              | Cameroon | 1999           | Meat, Other               | 9                                                           |
| 32              | Cameroon | 1999           | Milk, Whole               | 39                                                          |
| 32              | Cameroon | 1999           | Millet                    | 10                                                          |
| 32              | Cameroon | 1999           | Mutton & Goat Meat        | 5                                                           |
| 32              | Cameroon | 1999           | Nuts                      | 6                                                           |
| 32              | Cameroon | 1999           | Offals, Edible            | 4                                                           |
| 32              | Cameroon | 1999           | Oilcrops, Other           | 7                                                           |
| 32              | Cameroon | 1999           | Onions                    | 9                                                           |
| 32              | Cameroon | 1999           | Palm Oil                  | 14                                                          |
| 32              | Cameroon | 1999           | Palmkernel Oil            | 1                                                           |
| 32              | Cameroon | 1999           | Pelagic Fish              | 12                                                          |
| 32              | Cameroon | 1999           | Pigmeat                   | 2                                                           |
| 32              | Cameroon | 1999           | Pimento                   | 1                                                           |
| 32              | Cameroon | 1999           | Pineapples                | 6                                                           |
| 32              | Cameroon | 1999           | Plantains                 | 123                                                         |
| 32              | Cameroon | 1999           | Potatoes                  | 17                                                          |
| 32              | Cameroon | 1999           | Poultry Meat              | 7                                                           |
| 32              | Cameroon | 1999           | Pulses, Other             | 12                                                          |
| 32              | Cameroon | 1999           | Rice (Milled Equivalent)  | 34                                                          |
| 32              | Cameroon | 1999           | Roots, Other              | 76                                                          |
| 32              | Cameroon | 1999           | Sorghum                   | 37                                                          |
| 32              | Cameroon | 1999           | Soyabean Oil              | 1                                                           |

Dietary calcium and zinc deficiency risks are decreasing but remain prevalent

| FAO countrycode | Country  | Reference year | Food item                 | Gross food supply (g capita <sup>-1</sup> d <sup>-1</sup> ) |
|-----------------|----------|----------------|---------------------------|-------------------------------------------------------------|
| 32              | Cameroon | 1999           | Soyabeans                 | 1                                                           |
| 32              | Cameroon | 1999           | Spices, Other             | 1                                                           |
| 32              | Cameroon | 1999           | Sugar Cane                | 95                                                          |
| 32              | Cameroon | 1999           | Sugar, Refined Equivalent | 17                                                          |
| 32              | Cameroon | 1999           | Sweet Potatoes            | 28                                                          |
| 32              | Cameroon | 1999           | Tea                       | 1                                                           |
| 32              | Cameroon | 1999           | Tomatoes                  | 56                                                          |
| 32              | Cameroon | 1999           | Vegetables, Other         | 144                                                         |
| 32              | Cameroon | 1999           | Wheat                     | 42                                                          |
| 32              | Cameroon | 1999           | Wine                      | 1                                                           |
| 32              | Cameroon | 1999           | Yams                      | 28                                                          |
| 32              | Cameroon | 2000           | Bananas                   | 59                                                          |
| 32              | Cameroon | 2000           | Beans                     | 24                                                          |
| 32              | Cameroon | 2000           | Beer                      | 63                                                          |
| 32              | Cameroon | 2000           | Beverages, Fermented      | 71                                                          |
| 32              | Cameroon | 2000           | Bovine Meat               | 16                                                          |
| 32              | Cameroon | 2000           | Cassava                   | 247                                                         |
| 32              | Cameroon | 2000           | Cocoa Beans               | 1                                                           |
| 32              | Cameroon | 2000           | Coffee                    | 1                                                           |
| 32              | Cameroon | 2000           | Cottonseed Oil            | 3                                                           |
| 32              | Cameroon | 2000           | Demersal Fish             | 2                                                           |
| 32              | Cameroon | 2000           | Eggs                      | 2                                                           |
| 32              | Cameroon | 2000           | Fats, Animals, Raw        | 1                                                           |
| 32              | Cameroon | 2000           | Freshwater Fish           | 9                                                           |
| 32              | Cameroon | 2000           | Fruits, Other             | 24                                                          |
| 32              | Cameroon | 2000           | Groundnut Oil             | 1                                                           |
| 32              | Cameroon | 2000           | Groundnuts (Shelled Eq)   | 11                                                          |
| 32              | Cameroon | 2000           | Honey                     | 1                                                           |
| 32              | Cameroon | 2000           | Maize                     | 118                                                         |
| 32              | Cameroon | 2000           | Marine Fish, Other        | 10                                                          |
| 32              | Cameroon | 2000           | Meat, Other               | 9                                                           |
| 32              | Cameroon | 2000           | Milk, Whole               | 38                                                          |
| 32              | Cameroon | 2000           | Millet                    | 8                                                           |
| 32              | Cameroon | 2000           | Mutton & Goat Meat        | 5                                                           |
| 32              | Cameroon | 2000           | Nuts                      | 6                                                           |
| 32              | Cameroon | 2000           | Offals, Edible            | 4                                                           |
| 32              | Cameroon | 2000           | Oilcrops Oil, Other       | 1                                                           |
| 32              | Cameroon | 2000           | Oilcrops, Other           | 7                                                           |
| 32              | Cameroon | 2000           | Onions                    | 12                                                          |
| 32              | Cameroon | 2000           | Palm Oil                  | 14                                                          |
| 32              | Cameroon | 2000           | Palmkernel Oil            | 1                                                           |
| 32              | Cameroon | 2000           | Pelagic Fish              | 13                                                          |
| 32              | Cameroon | 2000           | Pigmeat                   | 3                                                           |
| 32              | Cameroon | 2000           | Pimento                   | 1                                                           |
| 32              | Cameroon | 2000           | Pineapples                | 6                                                           |
| 32              | Cameroon | 2000           | Plantains                 | 120                                                         |
| 32              | Cameroon | 2000           | Potatoes                  | 17                                                          |
| 32              | Cameroon | 2000           | Poultry Meat              | 6                                                           |
| 32              | Cameroon | 2000           | Pulses, Other             | 13                                                          |
| 32              | Cameroon | 2000           | Rice (Milled Equivalent)  | 27                                                          |
| 32              | Cameroon | 2000           | Roots, Other              | 74                                                          |
| 32              | Cameroon | 2000           | Sesameseed                | 1                                                           |
| 32              | Cameroon | 2000           | Sorghum                   | 56                                                          |
| 32              | Cameroon | 2000           | Soyabean Oil              | 1                                                           |
| 32              | Cameroon | 2000           | Soyabeans                 | 1                                                           |
| 32              | Cameroon | 2000           | Spices, Other             | 1                                                           |
| 32              | Cameroon | 2000           | Sugar Cane                | 93                                                          |
| 32              | Cameroon | 2000           | Sugar, Refined Equivalent | 21                                                          |
| 32              | Cameroon | 2000           | Sweet Potatoes            | 26                                                          |
| 32              | Cameroon | 2000           | Tea                       | 1                                                           |
| 32              | Cameroon | 2000           | Tomatoes                  | 59                                                          |
| 32              | Cameroon | 2000           | Vegetables, Other         | 143                                                         |
| 32              | Cameroon | 2000           | Wheat                     | 37                                                          |
| 32              | Cameroon | 2000           | Wine                      | 1                                                           |
| 32              | Cameroon | 2000           | Yams                      | 27                                                          |
| 32              | Cameroon | 2001           | Bananas                   | 56                                                          |
| 32              | Cameroon | 2001           | Beans                     | 23                                                          |
| 32              | Cameroon | 2001           | Beer                      | 68                                                          |
| 32              | Cameroon | 2001           | Beverages, Fermented      | 80                                                          |
| 32              | Cameroon | 2001           | Bovine Meat               | 16                                                          |
| 32              | Cameroon | 2001           | Cassava                   | 245                                                         |
| 32              | Cameroon | 2001           | Cocoa Beans               | 1                                                           |
| 32              | Cameroon | 2001           | Coffee                    | 1                                                           |
| 32              | Cameroon | 2001           | Cottonseed Oil            | 3                                                           |
| 32              | Cameroon | 2001           | Crustaceans               | 2                                                           |
| 32              | Cameroon | 2001           | Demersal Fish             | 3                                                           |
| 32              | Cameroon | 2001           | Eggs                      | 2                                                           |
| 32              | Cameroon | 2001           | Fats, Animals, Raw        | 1                                                           |
| 32              | Cameroon | 2001           | Freshwater Fish           | 9                                                           |
| 32              | Cameroon | 2001           | Fruits, Other             | 24                                                          |
| 32              | Cameroon | 2001           | Groundnut Oil             | 1                                                           |
| 32              | Cameroon | 2001           | Groundnuts (Shelled Eq)   | 12                                                          |
| 32              | Cameroon | 2001           | Honey                     | 1                                                           |
| 32              | Cameroon | 2001           | Maize                     | 97                                                          |
| 32              | Cameroon | 2001           | Marine Fish, Other        | 11                                                          |
| 32              | Cameroon | 2001           | Meat, Other               | 9                                                           |
| 32              | Cameroon | 2001           | Milk, Whole               | 38                                                          |
| 32              | Cameroon | 2001           | Millet                    | 8                                                           |
| 32              | Cameroon | 2001           | Mutton & Goat Meat        | 5                                                           |
| 32              | Cameroon | 2001           | Nuts                      | 6                                                           |
| 32              | Cameroon | 2001           | Offals, Edible            | 4                                                           |
| 32              | Cameroon | 2001           | Oilcrops Oil, Other       | 1                                                           |
| 32              | Cameroon | 2001           | Oilcrops, Other           | 7                                                           |
| 32              | Cameroon | 2001           | Onions                    | 10                                                          |
| 32              | Cameroon | 2001           | Palm Oil                  | 10                                                          |
| 32              | Cameroon | 2001           | Palmkernel Oil            | 1                                                           |
| 32              | Cameroon | 2001           | Pelagic Fish              | 15                                                          |

Dietary calcium and zinc deficiency risks are decreasing but remain prevalent

| FAO countrycode | Country  | Reference year | Food item                 | Gross food supply (g capita <sup>-1</sup> d <sup>-1</sup> ) |
|-----------------|----------|----------------|---------------------------|-------------------------------------------------------------|
| 32              | Cameroon | 2001           | Pigmeat                   | 3                                                           |
| 32              | Cameroon | 2001           | Pimento                   | 1                                                           |
| 32              | Cameroon | 2001           | Pineapples                | 6                                                           |
| 32              | Cameroon | 2001           | Plantains                 | 119                                                         |
| 32              | Cameroon | 2001           | Potatoes                  | 16                                                          |
| 32              | Cameroon | 2001           | Poultry Meat              | 6                                                           |
| 32              | Cameroon | 2001           | Pulses, Other             | 15                                                          |
| 32              | Cameroon | 2001           | Rice (Milled Equivalent)  | 47                                                          |
| 32              | Cameroon | 2001           | Roots, Other              | 72                                                          |
| 32              | Cameroon | 2001           | Sesameseed                | 1                                                           |
| 32              | Cameroon | 2001           | Sorghum                   | 67                                                          |
| 32              | Cameroon | 2001           | Soyabean Oil              | 1                                                           |
| 32              | Cameroon | 2001           | Soyabeans                 | 1                                                           |
| 32              | Cameroon | 2001           | Spices, Other             | 1                                                           |
| 32              | Cameroon | 2001           | Sugar Cane                | 90                                                          |
| 32              | Cameroon | 2001           | Sugar, Refined Equivalent | 22                                                          |
| 32              | Cameroon | 2001           | Sweet Potatoes            | 26                                                          |
| 32              | Cameroon | 2001           | Tea                       | 1                                                           |
| 32              | Cameroon | 2001           | Tomatoes                  | 57                                                          |
| 32              | Cameroon | 2001           | Vegetables, Other         | 140                                                         |
| 32              | Cameroon | 2001           | Wheat                     | 49                                                          |
| 32              | Cameroon | 2001           | Wine                      | 1                                                           |
| 32              | Cameroon | 2001           | Yams                      | 27                                                          |
| 32              | Cameroon | 2002           | Bananas                   | 66                                                          |
| 32              | Cameroon | 2002           | Barley                    | 1                                                           |
| 32              | Cameroon | 2002           | Beans                     | 24                                                          |
| 32              | Cameroon | 2002           | Beer                      | 71                                                          |
| 32              | Cameroon | 2002           | Beverages, Fermented      | 83                                                          |
| 32              | Cameroon | 2002           | Bovine Meat               | 15                                                          |
| 32              | Cameroon | 2002           | Cassava                   | 245                                                         |
| 32              | Cameroon | 2002           | Coffee                    | 1                                                           |
| 32              | Cameroon | 2002           | Cottonseed Oil            | 3                                                           |
| 32              | Cameroon | 2002           | Crustaceans               | 2                                                           |
| 32              | Cameroon | 2002           | Demersal Fish             | 2                                                           |
| 32              | Cameroon | 2002           | Eggs                      | 2                                                           |
| 32              | Cameroon | 2002           | Fats, Animals, Raw        | 1                                                           |
| 32              | Cameroon | 2002           | Freshwater Fish           | 11                                                          |
| 32              | Cameroon | 2002           | Fruits, Other             | 24                                                          |
| 32              | Cameroon | 2002           | Groundnut Oil             | 3                                                           |
| 32              | Cameroon | 2002           | Groundnuts (Shelled Eq)   | 12                                                          |
| 32              | Cameroon | 2002           | Maize                     | 86                                                          |
| 32              | Cameroon | 2002           | Marine Fish, Other        | 9                                                           |
| 32              | Cameroon | 2002           | Meat, Other               | 9                                                           |
| 32              | Cameroon | 2002           | Milk, Whole               | 37                                                          |
| 32              | Cameroon | 2002           | Millet                    | 7                                                           |
| 32              | Cameroon | 2002           | Mutton & Goat Meat        | 5                                                           |
| 32              | Cameroon | 2002           | Nuts                      | 6                                                           |
| 32              | Cameroon | 2002           | Offals, Edible            | 4                                                           |
| 32              | Cameroon | 2002           | Oilcrops Oil, Other       | 1                                                           |
| 32              | Cameroon | 2002           | Oilcrops, Other           | 6                                                           |
| 32              | Cameroon | 2002           | Onions                    | 10                                                          |
| 32              | Cameroon | 2002           | Palm Oil                  | 15                                                          |
| 32              | Cameroon | 2002           | Palmkernel Oil            | 1                                                           |
| 32              | Cameroon | 2002           | Pelagic Fish              | 12                                                          |
| 32              | Cameroon | 2002           | Pigmeat                   | 3                                                           |
| 32              | Cameroon | 2002           | Pimento                   | 1                                                           |
| 32              | Cameroon | 2002           | Pineapples                | 7                                                           |
| 32              | Cameroon | 2002           | Plantains                 | 121                                                         |
| 32              | Cameroon | 2002           | Potatoes                  | 15                                                          |
| 32              | Cameroon | 2002           | Poultry Meat              | 8                                                           |
| 32              | Cameroon | 2002           | Pulses, Other             | 15                                                          |
| 32              | Cameroon | 2002           | Rice (Milled Equivalent)  | 47                                                          |
| 32              | Cameroon | 2002           | Roots, Other              | 70                                                          |
| 32              | Cameroon | 2002           | Sesameseed                | 1                                                           |
| 32              | Cameroon | 2002           | Sorghum                   | 70                                                          |
| 32              | Cameroon | 2002           | Soyabean Oil              | 2                                                           |
| 32              | Cameroon | 2002           | Soyabeans                 | 1                                                           |
| 32              | Cameroon | 2002           | Spices, Other             | 1                                                           |
| 32              | Cameroon | 2002           | Sugar Cane                | 66                                                          |
| 32              | Cameroon | 2002           | Sugar, Refined Equivalent | 26                                                          |
| 32              | Cameroon | 2002           | Sweet Potatoes            | 26                                                          |
| 32              | Cameroon | 2002           | Sweeteners, Other         | 1                                                           |
| 32              | Cameroon | 2002           | Tea                       | 1                                                           |
| 32              | Cameroon | 2002           | Tomatoes                  | 59                                                          |
| 32              | Cameroon | 2002           | Vegetables, Other         | 142                                                         |
| 32              | Cameroon | 2002           | Wheat                     | 49                                                          |
| 32              | Cameroon | 2002           | Wine                      | 1                                                           |
| 32              | Cameroon | 2002           | Yams                      | 27                                                          |
| 32              | Cameroon | 2003           | Bananas                   | 60                                                          |
| 32              | Cameroon | 2003           | Barley                    | 1                                                           |
| 32              | Cameroon | 2003           | Beans                     | 24                                                          |
| 32              | Cameroon | 2003           | Beer                      | 72                                                          |
| 32              | Cameroon | 2003           | Beverages, Fermented      | 84                                                          |
| 32              | Cameroon | 2003           | Bovine Meat               | 14                                                          |
| 32              | Cameroon | 2003           | Cassava                   | 244                                                         |
| 32              | Cameroon | 2003           | Coffee                    | 1                                                           |
| 32              | Cameroon | 2003           | Cottonseed Oil            | 3                                                           |
| 32              | Cameroon | 2003           | Crustaceans               | 2                                                           |
| 32              | Cameroon | 2003           | Demersal Fish             | 2                                                           |
| 32              | Cameroon | 2003           | Eggs                      | 2                                                           |
| 32              | Cameroon | 2003           | Fats, Animals, Raw        | 1                                                           |
| 32              | Cameroon | 2003           | Freshwater Fish           | 9                                                           |
| 32              | Cameroon | 2003           | Fruits, Other             | 24                                                          |
| 32              | Cameroon | 2003           | Groundnut Oil             | 3                                                           |
| 32              | Cameroon | 2003           | Groundnuts (Shelled Eq)   | 12                                                          |
| 32              | Cameroon | 2003           | Honey                     | 1                                                           |
| 32              | Cameroon | 2003           | Maize                     | 96                                                          |

## Dietary calcium and zinc deficiency risks are decreasing but remain prevalent

| FAO countrycode | Country  | Reference year | Food item                 | Gross food supply (g capita <sup>-1</sup> d <sup>-1</sup> ) |
|-----------------|----------|----------------|---------------------------|-------------------------------------------------------------|
| 32              | Cameroon | 2003           | Marine Fish, Other        | 15                                                          |
| 32              | Cameroon | 2003           | Meat, Other               | 9                                                           |
| 32              | Cameroon | 2003           | Milk, Whole               | 40                                                          |
| 32              | Cameroon | 2003           | Millet                    | 8                                                           |
| 32              | Cameroon | 2003           | Mutton & Goat Meat        | 5                                                           |
| 32              | Cameroon | 2003           | Nuts                      | 6                                                           |
| 32              | Cameroon | 2003           | Offals, Edible            | 4                                                           |
| 32              | Cameroon | 2003           | Oilcrops, Other           | 7                                                           |
| 32              | Cameroon | 2003           | Onions                    | 10                                                          |
| 32              | Cameroon | 2003           | Palm Oil                  | 15                                                          |
| 32              | Cameroon | 2003           | Palmkernel Oil            | 1                                                           |
| 32              | Cameroon | 2003           | Pelagic Fish              | 14                                                          |
| 32              | Cameroon | 2003           | Pigmeat                   | 3                                                           |
| 32              | Cameroon | 2003           | Pimento                   | 2                                                           |
| 32              | Cameroon | 2003           | Pineapples                | 7                                                           |
| 32              | Cameroon | 2003           | Plantains                 | 122                                                         |
| 32              | Cameroon | 2003           | Potatoes                  | 14                                                          |
| 32              | Cameroon | 2003           | Poultry Meat              | 8                                                           |
| 32              | Cameroon | 2003           | Pulses, Other             | 15                                                          |
| 32              | Cameroon | 2003           | Rice (Milled Equivalent)  | 51                                                          |
| 32              | Cameroon | 2003           | Roots, Other              | 69                                                          |
| 32              | Cameroon | 2003           | Sesameseed                | 1                                                           |
| 32              | Cameroon | 2003           | Sorghum                   | 72                                                          |
| 32              | Cameroon | 2003           | Soyabean Oil              | 3                                                           |
| 32              | Cameroon | 2003           | Soyabeans                 | 1                                                           |
| 32              | Cameroon | 2003           | Spices, Other             | 1                                                           |
| 32              | Cameroon | 2003           | Sugar Cane                | 61                                                          |
| 32              | Cameroon | 2003           | Sugar, Refined Equivalent | 24                                                          |
| 32              | Cameroon | 2003           | Sweet Potatoes            | 26                                                          |
| 32              | Cameroon | 2003           | Sweeteners, Other         | 1                                                           |
| 32              | Cameroon | 2003           | Tea                       | 1                                                           |
| 32              | Cameroon | 2003           | Tomatoes                  | 59                                                          |
| 32              | Cameroon | 2003           | Vegetables, Other         | 137                                                         |
| 32              | Cameroon | 2003           | Wheat                     | 44                                                          |
| 32              | Cameroon | 2003           | Wine                      | 1                                                           |
| 32              | Cameroon | 2003           | Yams                      | 27                                                          |
| 32              | Cameroon | 2004           | Bananas                   | 69                                                          |
| 32              | Cameroon | 2004           | Barley                    | 1                                                           |
| 32              | Cameroon | 2004           | Beans                     | 25                                                          |
| 32              | Cameroon | 2004           | Beer                      | 73                                                          |
| 32              | Cameroon | 2004           | Beverages, Fermented      | 84                                                          |
| 32              | Cameroon | 2004           | Bovine Meat               | 14                                                          |
| 32              | Cameroon | 2004           | Cassava                   | 243                                                         |
| 32              | Cameroon | 2004           | Coffee                    | 1                                                           |
| 32              | Cameroon | 2004           | Cottonseed Oil            | 3                                                           |
| 32              | Cameroon | 2004           | Crustaceans               | 2                                                           |
| 32              | Cameroon | 2004           | Demersal Fish             | 1                                                           |
| 32              | Cameroon | 2004           | Eggs                      | 1                                                           |
| 32              | Cameroon | 2004           | Fats, Animals, Raw        | 1                                                           |
| 32              | Cameroon | 2004           | Freshwater Fish           | 10                                                          |
| 32              | Cameroon | 2004           | Fruits, Other             | 23                                                          |
| 32              | Cameroon | 2004           | Groundnut Oil             | 3                                                           |
| 32              | Cameroon | 2004           | Groundnuts (Shelled Eq)   | 12                                                          |
| 32              | Cameroon | 2004           | Honey                     | 1                                                           |
| 32              | Cameroon | 2004           | Maize                     | 97                                                          |
| 32              | Cameroon | 2004           | Marine Fish, Other        | 7                                                           |
| 32              | Cameroon | 2004           | Meat, Other               | 9                                                           |
| 32              | Cameroon | 2004           | Milk, Whole               | 40                                                          |
| 32              | Cameroon | 2004           | Millet                    | 9                                                           |
| 32              | Cameroon | 2004           | Mutton & Goat Meat        | 5                                                           |
| 32              | Cameroon | 2004           | Nuts                      | 6                                                           |
| 32              | Cameroon | 2004           | Offals, Edible            | 4                                                           |
| 32              | Cameroon | 2004           | Oilcrops Oil, Other       | 1                                                           |
| 32              | Cameroon | 2004           | Oilcrops, Other           | 7                                                           |
| 32              | Cameroon | 2004           | Onions                    | 10                                                          |
| 32              | Cameroon | 2004           | Palm Oil                  | 14                                                          |
| 32              | Cameroon | 2004           | Palmkernel Oil            | 1                                                           |
| 32              | Cameroon | 2004           | Pelagic Fish              | 21                                                          |
| 32              | Cameroon | 2004           | Pigmeat                   | 5                                                           |
| 32              | Cameroon | 2004           | Pimento                   | 1                                                           |
| 32              | Cameroon | 2004           | Pineapples                | 7                                                           |
| 32              | Cameroon | 2004           | Plantains                 | 122                                                         |
| 32              | Cameroon | 2004           | Potatoes                  | 13                                                          |
| 32              | Cameroon | 2004           | Poultry Meat              | 13                                                          |
| 32              | Cameroon | 2004           | Pulses, Other             | 16                                                          |
| 32              | Cameroon | 2004           | Rice (Milled Equivalent)  | 52                                                          |
| 32              | Cameroon | 2004           | Roots, Other              | 67                                                          |
| 32              | Cameroon | 2004           | Sesameseed                | 1                                                           |
| 32              | Cameroon | 2004           | Sorghum                   | 71                                                          |
| 32              | Cameroon | 2004           | Soyabean Oil              | 2                                                           |
| 32              | Cameroon | 2004           | Soyabeans                 | 1                                                           |
| 32              | Cameroon | 2004           | Spices, Other             | 1                                                           |
| 32              | Cameroon | 2004           | Sugar Cane                | 67                                                          |
| 32              | Cameroon | 2004           | Sugar, Refined Equivalent | 24                                                          |
| 32              | Cameroon | 2004           | Sweet Potatoes            | 26                                                          |
| 32              | Cameroon | 2004           | Tea                       | 1                                                           |
| 32              | Cameroon | 2004           | Tomatoes                  | 58                                                          |
| 32              | Cameroon | 2004           | Vegetables, Other         | 137                                                         |
| 32              | Cameroon | 2004           | Wheat                     | 43                                                          |
| 32              | Cameroon | 2004           | Yams                      | 27                                                          |
| 32              | Cameroon | 2005           | Bananas                   | 91                                                          |
| 32              | Cameroon | 2005           | Barley                    | 1                                                           |
| 32              | Cameroon | 2005           | Beans                     | 27                                                          |
| 32              | Cameroon | 2005           | Beer                      | 64                                                          |
| 32              | Cameroon | 2005           | Beverages, Fermented      | 92                                                          |
| 32              | Cameroon | 2005           | Bovine Meat               | 14                                                          |
| 32              | Cameroon | 2005           | Cassava                   | 248                                                         |



Dietary calcium and zinc deficiency risks are decreasing but remain prevalent

| FAO countrycode | Country  | Reference year | Food item                 | Gross food supply (g capita <sup>-1</sup> d <sup>-1</sup> ) |
|-----------------|----------|----------------|---------------------------|-------------------------------------------------------------|
| 32              | Cameroon | 2005           | Coffee                    | 2                                                           |
| 32              | Cameroon | 2005           | Cottonseed Oil            | 2                                                           |
| 32              | Cameroon | 2005           | Crustaceans               | 2                                                           |
| 32              | Cameroon | 2005           | Demersal Fish             | 1                                                           |
| 32              | Cameroon | 2005           | Eggs                      | 1                                                           |
| 32              | Cameroon | 2005           | Fats, Animals, Raw        | 1                                                           |
| 32              | Cameroon | 2005           | Freshwater Fish           | 11                                                          |
| 32              | Cameroon | 2005           | Fruits, Other             | 23                                                          |
| 32              | Cameroon | 2005           | Grapes                    | 1                                                           |
| 32              | Cameroon | 2005           | Groundnut Oil             | 3                                                           |
| 32              | Cameroon | 2005           | Groundnuts (Shelled Eq)   | 18                                                          |
| 32              | Cameroon | 2005           | Maize                     | 97                                                          |
| 32              | Cameroon | 2005           | Marine Fish, Other        | 5                                                           |
| 32              | Cameroon | 2005           | Meat, Other               | 9                                                           |
| 32              | Cameroon | 2005           | Milk, Whole               | 39                                                          |
| 32              | Cameroon | 2005           | Millet                    | 9                                                           |
| 32              | Cameroon | 2005           | Mutton & Goat Meat        | 5                                                           |
| 32              | Cameroon | 2005           | Nuts                      | 6                                                           |
| 32              | Cameroon | 2005           | Offals, Edible            | 4                                                           |
| 32              | Cameroon | 2005           | Oilcrops, Other           | 9                                                           |
| 32              | Cameroon | 2005           | Onions                    | 11                                                          |
| 32              | Cameroon | 2005           | Palm Oil                  | 14                                                          |
| 32              | Cameroon | 2005           | Palmkernel Oil            | 1                                                           |
| 32              | Cameroon | 2005           | Pelagic Fish              | 20                                                          |
| 32              | Cameroon | 2005           | Pigmeat                   | 5                                                           |
| 32              | Cameroon | 2005           | Pimento                   | 2                                                           |
| 32              | Cameroon | 2005           | Pineapples                | 13                                                          |
| 32              | Cameroon | 2005           | Plantains                 | 122                                                         |
| 32              | Cameroon | 2005           | Potatoes                  | 12                                                          |
| 32              | Cameroon | 2005           | Poultry Meat              | 9                                                           |
| 32              | Cameroon | 2005           | Pulses, Other             | 16                                                          |
| 32              | Cameroon | 2005           | Rice (Milled Equivalent)  | 55                                                          |
| 32              | Cameroon | 2005           | Roots, Other              | 67                                                          |
| 32              | Cameroon | 2005           | Sesameseed                | 1                                                           |
| 32              | Cameroon | 2005           | Sorghum                   | 72                                                          |
| 32              | Cameroon | 2005           | Soyabean Oil              | 1                                                           |
| 32              | Cameroon | 2005           | Soyabeans                 | 1                                                           |
| 32              | Cameroon | 2005           | Spices, Other             | 1                                                           |
| 32              | Cameroon | 2005           | Sugar Cane                | 67                                                          |
| 32              | Cameroon | 2005           | Sugar, Refined Equivalent | 23                                                          |
| 32              | Cameroon | 2005           | Sweet Potatoes            | 22                                                          |
| 32              | Cameroon | 2005           | Tea                       | 1                                                           |
| 32              | Cameroon | 2005           | Tomatoes                  | 68                                                          |
| 32              | Cameroon | 2005           | Vegetables, Other         | 138                                                         |
| 32              | Cameroon | 2005           | Wheat                     | 45                                                          |
| 32              | Cameroon | 2005           | Wine                      | 1                                                           |
| 32              | Cameroon | 2005           | Yams                      | 28                                                          |
| 32              | Cameroon | 2006           | Bananas                   | 95                                                          |
| 32              | Cameroon | 2006           | Beans                     | 30                                                          |
| 32              | Cameroon | 2006           | Beer                      | 64                                                          |
| 32              | Cameroon | 2006           | Beverages, Fermented      | 95                                                          |
| 32              | Cameroon | 2006           | Bovine Meat               | 14                                                          |
| 32              | Cameroon | 2006           | Cassava                   | 253                                                         |
| 32              | Cameroon | 2006           | Coffee                    | 2                                                           |
| 32              | Cameroon | 2006           | Cottonseed Oil            | 3                                                           |
| 32              | Cameroon | 2006           | Crustaceans               | 2                                                           |
| 32              | Cameroon | 2006           | Demersal Fish             | 1                                                           |
| 32              | Cameroon | 2006           | Eggs                      | 1                                                           |
| 32              | Cameroon | 2006           | Fats, Animals, Raw        | 1                                                           |
| 32              | Cameroon | 2006           | Freshwater Fish           | 11                                                          |
| 32              | Cameroon | 2006           | Fruits, Other             | 25                                                          |
| 32              | Cameroon | 2006           | Groundnut Oil             | 3                                                           |
| 32              | Cameroon | 2006           | Groundnuts (Shelled Eq)   | 18                                                          |
| 32              | Cameroon | 2006           | Maize                     | 105                                                         |
| 32              | Cameroon | 2006           | Marine Fish, Other        | 3                                                           |
| 32              | Cameroon | 2006           | Meat, Other               | 9                                                           |
| 32              | Cameroon | 2006           | Milk, Whole               | 42                                                          |
| 32              | Cameroon | 2006           | Millet                    | 9                                                           |
| 32              | Cameroon | 2006           | Mutton & Goat Meat        | 5                                                           |
| 32              | Cameroon | 2006           | Nuts                      | 5                                                           |
| 32              | Cameroon | 2006           | Offals, Edible            | 4                                                           |
| 32              | Cameroon | 2006           | Oilcrops, Other           | 7                                                           |
| 32              | Cameroon | 2006           | Onions                    | 13                                                          |
| 32              | Cameroon | 2006           | Palm Oil                  | 14                                                          |
| 32              | Cameroon | 2006           | Palmkernel Oil            | 1                                                           |
| 32              | Cameroon | 2006           | Pelagic Fish              | 20                                                          |
| 32              | Cameroon | 2006           | Pigmeat                   | 5                                                           |
| 32              | Cameroon | 2006           | Pimento                   | 3                                                           |
| 32              | Cameroon | 2006           | Pineapples                | 13                                                          |
| 32              | Cameroon | 2006           | Plantains                 | 119                                                         |
| 32              | Cameroon | 2006           | Potatoes                  | 12                                                          |
| 32              | Cameroon | 2006           | Poultry Meat              | 9                                                           |
| 32              | Cameroon | 2006           | Pulses, Other             | 18                                                          |
| 32              | Cameroon | 2006           | Rice (Milled Equivalent)  | 54                                                          |
| 32              | Cameroon | 2006           | Roots, Other              | 68                                                          |
| 32              | Cameroon | 2006           | Sesameseed                | 1                                                           |
| 32              | Cameroon | 2006           | Sorghum                   | 74                                                          |
| 32              | Cameroon | 2006           | Soyabean Oil              | 1                                                           |
| 32              | Cameroon | 2006           | Soyabeans                 | 1                                                           |
| 32              | Cameroon | 2006           | Spices, Other             | 2                                                           |
| 32              | Cameroon | 2006           | Sugar Cane                | 48                                                          |
| 32              | Cameroon | 2006           | Sugar, Refined Equivalent | 21                                                          |
| 32              | Cameroon | 2006           | Sweet Potatoes            | 28                                                          |
| 32              | Cameroon | 2006           | Tea                       | 1                                                           |
| 32              | Cameroon | 2006           | Tomatoes                  | 71                                                          |
| 32              | Cameroon | 2006           | Vegetables, Other         | 158                                                         |
| 32              | Cameroon | 2006           | Wheat                     | 46                                                          |

Dietary calcium and zinc deficiency risks are decreasing but remain prevalent

| FAO countrycode | Country  | Reference year | Food item                 | Gross food supply (g capita <sup>-1</sup> d <sup>-1</sup> ) |
|-----------------|----------|----------------|---------------------------|-------------------------------------------------------------|
| 32              | Cameroon | 2006           | Wine                      | 1                                                           |
| 32              | Cameroon | 2006           | Yams                      | 32                                                          |
| 32              | Cameroon | 2007           | Bananas                   | 96                                                          |
| 32              | Cameroon | 2007           | Barley                    | 1                                                           |
| 32              | Cameroon | 2007           | Beans                     | 31                                                          |
| 32              | Cameroon | 2007           | Beer                      | 64                                                          |
| 32              | Cameroon | 2007           | Beverages, Fermented      | 97                                                          |
| 32              | Cameroon | 2007           | Bovine Meat               | 14                                                          |
| 32              | Cameroon | 2007           | Cassava                   | 259                                                         |
| 32              | Cameroon | 2007           | Cocoa Beans               | 1                                                           |
| 32              | Cameroon | 2007           | Cottonseed Oil            | 2                                                           |
| 32              | Cameroon | 2007           | Crustaceans               | 2                                                           |
| 32              | Cameroon | 2007           | Demersal Fish             | 1                                                           |
| 32              | Cameroon | 2007           | Eggs                      | 1                                                           |
| 32              | Cameroon | 2007           | Fats, Animals, Raw        | 1                                                           |
| 32              | Cameroon | 2007           | Freshwater Fish           | 11                                                          |
| 32              | Cameroon | 2007           | Fruits, Other             | 22                                                          |
| 32              | Cameroon | 2007           | Grapes                    | 1                                                           |
| 32              | Cameroon | 2007           | Groundnut Oil             | 4                                                           |
| 32              | Cameroon | 2007           | Groundnuts (Shelled Eq)   | 18                                                          |
| 32              | Cameroon | 2007           | Maize                     | 105                                                         |
| 32              | Cameroon | 2007           | Marine Fish, Other        | 6                                                           |
| 32              | Cameroon | 2007           | Meat, Other               | 9                                                           |
| 32              | Cameroon | 2007           | Milk, Whole               | 39                                                          |
| 32              | Cameroon | 2007           | Millet                    | 9                                                           |
| 32              | Cameroon | 2007           | Mutton & Goat Meat        | 5                                                           |
| 32              | Cameroon | 2007           | Nuts                      | 5                                                           |
| 32              | Cameroon | 2007           | Offals, Edible            | 4                                                           |
| 32              | Cameroon | 2007           | Oilcrops, Other           | 6                                                           |
| 32              | Cameroon | 2007           | Onions                    | 14                                                          |
| 32              | Cameroon | 2007           | Palm Oil                  | 14                                                          |
| 32              | Cameroon | 2007           | Palmkernel Oil            | 1                                                           |
| 32              | Cameroon | 2007           | Pelagic Fish              | 22                                                          |
| 32              | Cameroon | 2007           | Pigmeat                   | 5                                                           |
| 32              | Cameroon | 2007           | Pimento                   | 3                                                           |
| 32              | Cameroon | 2007           | Pineapples                | 14                                                          |
| 32              | Cameroon | 2007           | Plantains                 | 121                                                         |
| 32              | Cameroon | 2007           | Potatoes                  | 12                                                          |
| 32              | Cameroon | 2007           | Poultry Meat              | 10                                                          |
| 32              | Cameroon | 2007           | Pulses, Other             | 19                                                          |
| 32              | Cameroon | 2007           | Rice (Milled Equivalent)  | 53                                                          |
| 32              | Cameroon | 2007           | Roots, Other              | 68                                                          |
| 32              | Cameroon | 2007           | Sesameseed                | 1                                                           |
| 32              | Cameroon | 2007           | Sorghum                   | 74                                                          |
| 32              | Cameroon | 2007           | Soyabean Oil              | 1                                                           |
| 32              | Cameroon | 2007           | Soyabeans                 | 1                                                           |
| 32              | Cameroon | 2007           | Spices, Other             | 2                                                           |
| 32              | Cameroon | 2007           | Sugar Cane                | 33                                                          |
| 32              | Cameroon | 2007           | Sugar, Refined Equivalent | 25                                                          |
| 32              | Cameroon | 2007           | Sweet Potatoes            | 26                                                          |
| 32              | Cameroon | 2007           | Tea                       | 1                                                           |
| 32              | Cameroon | 2007           | Tomatoes                  | 73                                                          |
| 32              | Cameroon | 2007           | Vegetables, Other         | 178                                                         |
| 32              | Cameroon | 2007           | Wheat                     | 45                                                          |
| 32              | Cameroon | 2007           | Wine                      | 1                                                           |
| 32              | Cameroon | 2007           | Yams                      | 33                                                          |
| 32              | Cameroon | 2008           | Apples                    | 1                                                           |
| 32              | Cameroon | 2008           | Bananas                   | 94                                                          |
| 32              | Cameroon | 2008           | Beans                     | 32                                                          |
| 32              | Cameroon | 2008           | Beer                      | 70                                                          |
| 32              | Cameroon | 2008           | Beverages, Fermented      | 99                                                          |
| 32              | Cameroon | 2008           | Bovine Meat               | 15                                                          |
| 32              | Cameroon | 2008           | Cassava                   | 263                                                         |
| 32              | Cameroon | 2008           | Cocoa Beans               | 1                                                           |
| 32              | Cameroon | 2008           | Coffee                    | 2                                                           |
| 32              | Cameroon | 2008           | Cottonseed Oil            | 2                                                           |
| 32              | Cameroon | 2008           | Crustaceans               | 2                                                           |
| 32              | Cameroon | 2008           | Demersal Fish             | 1                                                           |
| 32              | Cameroon | 2008           | Eggs                      | 1                                                           |
| 32              | Cameroon | 2008           | Fats, Animals, Raw        | 1                                                           |
| 32              | Cameroon | 2008           | Freshwater Fish           | 11                                                          |
| 32              | Cameroon | 2008           | Fruits, Other             | 22                                                          |
| 32              | Cameroon | 2008           | Groundnut Oil             | 5                                                           |
| 32              | Cameroon | 2008           | Groundnuts (Shelled Eq)   | 19                                                          |
| 32              | Cameroon | 2008           | Honey                     | 1                                                           |
| 32              | Cameroon | 2008           | Maize                     | 113                                                         |
| 32              | Cameroon | 2008           | Marine Fish, Other        | 6                                                           |
| 32              | Cameroon | 2008           | Meat, Other               | 9                                                           |
| 32              | Cameroon | 2008           | Milk, Whole               | 38                                                          |
| 32              | Cameroon | 2008           | Millet                    | 10                                                          |
| 32              | Cameroon | 2008           | Mutton & Goat Meat        | 4                                                           |
| 32              | Cameroon | 2008           | Nuts                      | 6                                                           |
| 32              | Cameroon | 2008           | Offals, Edible            | 4                                                           |
| 32              | Cameroon | 2008           | Oilcrops Oil, Other       | 1                                                           |
| 32              | Cameroon | 2008           | Oilcrops, Other           | 6                                                           |
| 32              | Cameroon | 2008           | Onions                    | 14                                                          |
| 32              | Cameroon | 2008           | Palm Oil                  | 14                                                          |
| 32              | Cameroon | 2008           | Palmkernel Oil            | 1                                                           |
| 32              | Cameroon | 2008           | Pelagic Fish              | 24                                                          |
| 32              | Cameroon | 2008           | Pigmeat                   | 5                                                           |
| 32              | Cameroon | 2008           | Pimento                   | 3                                                           |
| 32              | Cameroon | 2008           | Pineapples                | 15                                                          |
| 32              | Cameroon | 2008           | Plantains                 | 122                                                         |
| 32              | Cameroon | 2008           | Potatoes                  | 12                                                          |
| 32              | Cameroon | 2008           | Poultry Meat              | 10                                                          |
| 32              | Cameroon | 2008           | Pulses, Other             | 20                                                          |
| 32              | Cameroon | 2008           | Rice (Milled Equivalent)  | 55                                                          |

Dietary calcium and zinc deficiency risks are decreasing but remain prevalent

| FAO countrycode | Country  | Reference year | Food item                 | Gross food supply (g capita <sup>-1</sup> d <sup>-1</sup> ) |
|-----------------|----------|----------------|---------------------------|-------------------------------------------------------------|
| 32              | Cameroon | 2008           | Roots, Other              | 68                                                          |
| 32              | Cameroon | 2008           | Sesameseed                | 1                                                           |
| 32              | Cameroon | 2008           | Sorghum                   | 75                                                          |
| 32              | Cameroon | 2008           | Soyabean Oil              | 1                                                           |
| 32              | Cameroon | 2008           | Soyabeans                 | 1                                                           |
| 32              | Cameroon | 2008           | Spices, Other             | 2                                                           |
| 32              | Cameroon | 2008           | Sugar Cane                | 35                                                          |
| 32              | Cameroon | 2008           | Sugar, Refined Equivalent | 23                                                          |
| 32              | Cameroon | 2008           | Sweet Potatoes            | 28                                                          |
| 32              | Cameroon | 2008           | Tea                       | 1                                                           |
| 32              | Cameroon | 2008           | Tomatoes                  | 74                                                          |
| 32              | Cameroon | 2008           | Vegetables, Other         | 176                                                         |
| 32              | Cameroon | 2008           | Wheat                     | 47                                                          |
| 32              | Cameroon | 2008           | Wine                      | 1                                                           |
| 32              | Cameroon | 2008           | Yams                      | 34                                                          |
| 32              | Cameroon | 2009           | Apples                    | 1                                                           |
| 32              | Cameroon | 2009           | Bananas                   | 104                                                         |
| 32              | Cameroon | 2009           | Barley                    | 1                                                           |
| 32              | Cameroon | 2009           | Beans                     | 32                                                          |
| 32              | Cameroon | 2009           | Beer                      | 83                                                          |
| 32              | Cameroon | 2009           | Beverages, Fermented      | 102                                                         |
| 32              | Cameroon | 2009           | Bovine Meat               | 15                                                          |
| 32              | Cameroon | 2009           | Cassava                   | 268                                                         |
| 32              | Cameroon | 2009           | Cocoa Beans               | 1                                                           |
| 32              | Cameroon | 2009           | Coffee                    | 1                                                           |
| 32              | Cameroon | 2009           | Cottonseed Oil            | 2                                                           |
| 32              | Cameroon | 2009           | Crustaceans               | 2                                                           |
| 32              | Cameroon | 2009           | Demersal Fish             | 2                                                           |
| 32              | Cameroon | 2009           | Eggs                      | 1                                                           |
| 32              | Cameroon | 2009           | Fats, Animals, Raw        | 1                                                           |
| 32              | Cameroon | 2009           | Freshwater Fish           | 10                                                          |
| 32              | Cameroon | 2009           | Fruits, Other             | 22                                                          |
| 32              | Cameroon | 2009           | Grapes                    | 1                                                           |
| 32              | Cameroon | 2009           | Groundnut Oil             | 6                                                           |
| 32              | Cameroon | 2009           | Groundnuts (Shelled Eq)   | 19                                                          |
| 32              | Cameroon | 2009           | Honey                     | 1                                                           |
| 32              | Cameroon | 2009           | Maize                     | 112                                                         |
| 32              | Cameroon | 2009           | Marine Fish, Other        | 8                                                           |
| 32              | Cameroon | 2009           | Meat, Other               | 9                                                           |
| 32              | Cameroon | 2009           | Milk, Whole               | 39                                                          |
| 32              | Cameroon | 2009           | Millet                    | 11                                                          |
| 32              | Cameroon | 2009           | Mutton & Goat Meat        | 4                                                           |
| 32              | Cameroon | 2009           | Nuts                      | 5                                                           |
| 32              | Cameroon | 2009           | Offals, Edible            | 4                                                           |
| 32              | Cameroon | 2009           | Oilcrops Oil, Other       | 1                                                           |
| 32              | Cameroon | 2009           | Oilcrops, Other           | 6                                                           |
| 32              | Cameroon | 2009           | Onions                    | 7                                                           |
| 32              | Cameroon | 2009           | Palm Oil                  | 14                                                          |
| 32              | Cameroon | 2009           | Palmkernel Oil            | 1                                                           |
| 32              | Cameroon | 2009           | Pelagic Fish              | 28                                                          |
| 32              | Cameroon | 2009           | Pigmeat                   | 5                                                           |
| 32              | Cameroon | 2009           | Pimento                   | 3                                                           |
| 32              | Cameroon | 2009           | Pineapples                | 17                                                          |
| 32              | Cameroon | 2009           | Plantains                 | 125                                                         |
| 32              | Cameroon | 2009           | Potatoes                  | 13                                                          |
| 32              | Cameroon | 2009           | Poultry Meat              | 9                                                           |
| 32              | Cameroon | 2009           | Pulses, Other             | 21                                                          |
| 32              | Cameroon | 2009           | Rice (Milled Equivalent)  | 58                                                          |
| 32              | Cameroon | 2009           | Roots, Other              | 68                                                          |
| 32              | Cameroon | 2009           | Sesameseed                | 1                                                           |
| 32              | Cameroon | 2009           | Sorghum                   | 76                                                          |
| 32              | Cameroon | 2009           | Soyabeans                 | 2                                                           |
| 32              | Cameroon | 2009           | Spices, Other             | 2                                                           |
| 32              | Cameroon | 2009           | Sugar Cane                | 59                                                          |
| 32              | Cameroon | 2009           | Sugar, Refined Equivalent | 19                                                          |
| 32              | Cameroon | 2009           | Sweet Potatoes            | 31                                                          |
| 32              | Cameroon | 2009           | Tea                       | 1                                                           |
| 32              | Cameroon | 2009           | Tomatoes                  | 83                                                          |
| 32              | Cameroon | 2009           | Vegetables, Other         | 184                                                         |
| 32              | Cameroon | 2009           | Wheat                     | 49                                                          |
| 32              | Cameroon | 2009           | Wine                      | 1                                                           |
| 32              | Cameroon | 2009           | Yams                      | 38                                                          |
| 32              | Cameroon | 2010           | Apples                    | 1                                                           |
| 32              | Cameroon | 2010           | Bananas                   | 117                                                         |
| 32              | Cameroon | 2010           | Barley                    | 1                                                           |
| 32              | Cameroon | 2010           | Beans                     | 32                                                          |
| 32              | Cameroon | 2010           | Beer                      | 78                                                          |
| 32              | Cameroon | 2010           | Beverages, Fermented      | 110                                                         |
| 32              | Cameroon | 2010           | Bovine Meat               | 14                                                          |
| 32              | Cameroon | 2010           | Cassava                   | 258                                                         |
| 32              | Cameroon | 2010           | Cocoa Beans               | 2                                                           |
| 32              | Cameroon | 2010           | Coffee                    | 2                                                           |
| 32              | Cameroon | 2010           | Cottonseed Oil            | 2                                                           |
| 32              | Cameroon | 2010           | Crustaceans               | 2                                                           |
| 32              | Cameroon | 2010           | Demersal Fish             | 1                                                           |
| 32              | Cameroon | 2010           | Eggs                      | 1                                                           |
| 32              | Cameroon | 2010           | Fats, Animals, Raw        | 1                                                           |
| 32              | Cameroon | 2010           | Freshwater Fish           | 10                                                          |
| 32              | Cameroon | 2010           | Fruits, Other             | 22                                                          |
| 32              | Cameroon | 2010           | Groundnut Oil             | 6                                                           |
| 32              | Cameroon | 2010           | Groundnuts (Shelled Eq)   | 19                                                          |
| 32              | Cameroon | 2010           | Honey                     | 1                                                           |
| 32              | Cameroon | 2010           | Maize                     | 114                                                         |
| 32              | Cameroon | 2010           | Marine Fish, Other        | 7                                                           |
| 32              | Cameroon | 2010           | Meat, Other               | 9                                                           |
| 32              | Cameroon | 2010           | Milk, Whole               | 39                                                          |
| 32              | Cameroon | 2010           | Millet                    | 11                                                          |

Dietary calcium and zinc deficiency risks are decreasing but remain prevalent

| FAO countrycode | Country  | Reference year | Food item                 | Gross food supply (g capita <sup>-1</sup> d <sup>-1</sup> ) |
|-----------------|----------|----------------|---------------------------|-------------------------------------------------------------|
| 32              | Cameroon | 2010           | Mutton & Goat Meat        | 5                                                           |
| 32              | Cameroon | 2010           | Nuts                      | 5                                                           |
| 32              | Cameroon | 2010           | Offals, Edible            | 4                                                           |
| 32              | Cameroon | 2010           | Oilcrops Oil, Other       | 1                                                           |
| 32              | Cameroon | 2010           | Oilcrops, Other           | 6                                                           |
| 32              | Cameroon | 2010           | Onions                    | 8                                                           |
| 32              | Cameroon | 2010           | Palm Oil                  | 14                                                          |
| 32              | Cameroon | 2010           | Palmkernel Oil            | 1                                                           |
| 32              | Cameroon | 2010           | Pelagic Fish              | 22                                                          |
| 32              | Cameroon | 2010           | Pigmeat                   | 5                                                           |
| 32              | Cameroon | 2010           | Pimento                   | 3                                                           |
| 32              | Cameroon | 2010           | Pineapples                | 18                                                          |
| 32              | Cameroon | 2010           | Plantains                 | 122                                                         |
| 32              | Cameroon | 2010           | Potatoes                  | 15                                                          |
| 32              | Cameroon | 2010           | Poultry Meat              | 9                                                           |
| 32              | Cameroon | 2010           | Pulses, Other             | 22                                                          |
| 32              | Cameroon | 2010           | Rice (Milled Equivalent)  | 57                                                          |
| 32              | Cameroon | 2010           | Roots, Other              | 68                                                          |
| 32              | Cameroon | 2010           | Sesameseed                | 1                                                           |
| 32              | Cameroon | 2010           | Sorghum                   | 75                                                          |
| 32              | Cameroon | 2010           | Soyabean Oil              | 1                                                           |
| 32              | Cameroon | 2010           | Soyabeans                 | 2                                                           |
| 32              | Cameroon | 2010           | Spices, Other             | 2                                                           |
| 32              | Cameroon | 2010           | Sugar Cane                | 58                                                          |
| 32              | Cameroon | 2010           | Sugar, Refined Equivalent | 24                                                          |
| 32              | Cameroon | 2010           | Sweet Potatoes            | 32                                                          |
| 32              | Cameroon | 2010           | Tea                       | 1                                                           |
| 32              | Cameroon | 2010           | Tomatoes                  | 97                                                          |
| 32              | Cameroon | 2010           | Vegetables, Other         | 165                                                         |
| 32              | Cameroon | 2010           | Wheat                     | 49                                                          |
| 32              | Cameroon | 2010           | Wine                      | 1                                                           |
| 32              | Cameroon | 2010           | Yams                      | 40                                                          |
| 32              | Cameroon | 2011           | Apples                    | 1                                                           |
| 32              | Cameroon | 2011           | Bananas                   | 121                                                         |
| 32              | Cameroon | 2011           | Barley                    | 1                                                           |
| 32              | Cameroon | 2011           | Beans                     | 33                                                          |
| 32              | Cameroon | 2011           | Beer                      | 78                                                          |
| 32              | Cameroon | 2011           | Beverages, Fermented      | 113                                                         |
| 32              | Cameroon | 2011           | Bovine Meat               | 15                                                          |
| 32              | Cameroon | 2011           | Cassava                   | 258                                                         |
| 32              | Cameroon | 2011           | Cocoa Beans               | 2                                                           |
| 32              | Cameroon | 2011           | Coffee                    | 4                                                           |
| 32              | Cameroon | 2011           | Cottonseed Oil            | 2                                                           |
| 32              | Cameroon | 2011           | Crustaceans               | 2                                                           |
| 32              | Cameroon | 2011           | Demersal Fish             | 2                                                           |
| 32              | Cameroon | 2011           | Eggs                      | 1                                                           |
| 32              | Cameroon | 2011           | Fats, Animals, Raw        | 1                                                           |
| 32              | Cameroon | 2011           | Freshwater Fish           | 10                                                          |
| 32              | Cameroon | 2011           | Fruits, Other             | 26                                                          |
| 32              | Cameroon | 2011           | Grapes                    | 1                                                           |
| 32              | Cameroon | 2011           | Groundnut Oil             | 6                                                           |
| 32              | Cameroon | 2011           | Groundnuts (Shelled Eq)   | 19                                                          |
| 32              | Cameroon | 2011           | Honey                     | 1                                                           |
| 32              | Cameroon | 2011           | Maize                     | 115                                                         |
| 32              | Cameroon | 2011           | Marine Fish, Other        | 11                                                          |
| 32              | Cameroon | 2011           | Meat, Other               | 9                                                           |
| 32              | Cameroon | 2011           | Milk, Whole               | 39                                                          |
| 32              | Cameroon | 2011           | Millet                    | 11                                                          |
| 32              | Cameroon | 2011           | Mutton & Goat Meat        | 5                                                           |
| 32              | Cameroon | 2011           | Nuts                      | 6                                                           |
| 32              | Cameroon | 2011           | Offals, Edible            | 4                                                           |
| 32              | Cameroon | 2011           | Oilcrops Oil, Other       | 1                                                           |
| 32              | Cameroon | 2011           | Oilcrops, Other           | 4                                                           |
| 32              | Cameroon | 2011           | Onions                    | 22                                                          |
| 32              | Cameroon | 2011           | Palm Oil                  | 15                                                          |
| 32              | Cameroon | 2011           | Palmkernel Oil            | 1                                                           |
| 32              | Cameroon | 2011           | Pelagic Fish              | 26                                                          |
| 32              | Cameroon | 2011           | Pigmeat                   | 5                                                           |
| 32              | Cameroon | 2011           | Pimento                   | 3                                                           |
| 32              | Cameroon | 2011           | Pineapples                | 18                                                          |
| 32              | Cameroon | 2011           | Plantains                 | 126                                                         |
| 32              | Cameroon | 2011           | Potatoes                  | 16                                                          |
| 32              | Cameroon | 2011           | Poultry Meat              | 9                                                           |
| 32              | Cameroon | 2011           | Pulses, Other             | 22                                                          |
| 32              | Cameroon | 2011           | Rice (Milled Equivalent)  | 59                                                          |
| 32              | Cameroon | 2011           | Roots, Other              | 67                                                          |
| 32              | Cameroon | 2011           | Sesameseed                | 1                                                           |
| 32              | Cameroon | 2011           | Sorghum                   | 76                                                          |
| 32              | Cameroon | 2011           | Soyabeans                 | 2                                                           |
| 32              | Cameroon | 2011           | Spices, Other             | 2                                                           |
| 32              | Cameroon | 2011           | Sugar Cane                | 57                                                          |
| 32              | Cameroon | 2011           | Sugar, Refined Equivalent | 26                                                          |
| 32              | Cameroon | 2011           | Sweet Potatoes            | 33                                                          |
| 32              | Cameroon | 2011           | Tea                       | 1                                                           |
| 32              | Cameroon | 2011           | Tomatoes                  | 101                                                         |
| 32              | Cameroon | 2011           | Vegetables, Other         | 167                                                         |
| 32              | Cameroon | 2011           | Wheat                     | 51                                                          |
| 32              | Cameroon | 2011           | Wine                      | 2                                                           |
| 32              | Cameroon | 2011           | Yams                      | 40                                                          |
| 33              | Canada   | 1992           | Apples                    | 64                                                          |
| 33              | Canada   | 1992           | Bananas                   | 36                                                          |
| 33              | Canada   | 1992           | Barley                    | 1                                                           |
| 33              | Canada   | 1992           | Beans                     | 7                                                           |
| 33              | Canada   | 1992           | Beer                      | 196                                                         |
| 33              | Canada   | 1992           | Beverages, Alcoholic      | 3                                                           |
| 33              | Canada   | 1992           | Beverages, Fermented      | 54                                                          |
| 33              | Canada   | 1992           | Bovine Meat               | 93                                                          |

Dietary calcium and zinc deficiency risks are decreasing but remain prevalent

| FAO countrycode | Country | Reference year | Food item                 | Gross food supply (g capita <sup>-1</sup> d <sup>-1</sup> ) |
|-----------------|---------|----------------|---------------------------|-------------------------------------------------------------|
| 33              | Canada  | 1992           | Butter, Ghee              | 8                                                           |
| 33              | Canada  | 1992           | Cheese                    | 29                                                          |
| 33              | Canada  | 1992           | Cocoa Beans               | 7                                                           |
| 33              | Canada  | 1992           | Coconut Oil               | 1                                                           |
| 33              | Canada  | 1992           | Coconuts - Incl Copra     | 4                                                           |
| 33              | Canada  | 1992           | Coffee                    | 11                                                          |
| 33              | Canada  | 1992           | Cream                     | 14                                                          |
| 33              | Canada  | 1992           | Crustaceans               | 9                                                           |
| 33              | Canada  | 1992           | Demersal Fish             | 18                                                          |
| 33              | Canada  | 1992           | Eggs                      | 29                                                          |
| 33              | Canada  | 1992           | Fats, Animals, Raw        | 18                                                          |
| 33              | Canada  | 1992           | Freshwater Fish           | 9                                                           |
| 33              | Canada  | 1992           | Fruits, Other             | 54                                                          |
| 33              | Canada  | 1992           | Grapefruit                | 11                                                          |
| 33              | Canada  | 1992           | Grapes                    | 27                                                          |
| 33              | Canada  | 1992           | Groundnuts (Shelled Eq)   | 7                                                           |
| 33              | Canada  | 1992           | Honey                     | 2                                                           |
| 33              | Canada  | 1992           | Lemons, Limes             | 6                                                           |
| 33              | Canada  | 1992           | Maize                     | 9                                                           |
| 33              | Canada  | 1992           | Maize Germ Oil            | 2                                                           |
| 33              | Canada  | 1992           | Marine Fish, Other        | 2                                                           |
| 33              | Canada  | 1992           | Milk, Whole               | 207                                                         |
| 33              | Canada  | 1992           | Molluscs, Other           | 13                                                          |
| 33              | Canada  | 1992           | Mutton & Goat Meat        | 2                                                           |
| 33              | Canada  | 1992           | Nuts                      | 7                                                           |
| 33              | Canada  | 1992           | Oats                      | 9                                                           |
| 33              | Canada  | 1992           | Offals, Edible            | 4                                                           |
| 33              | Canada  | 1992           | Olive Oil                 | 1                                                           |
| 33              | Canada  | 1992           | Olives                    | 1                                                           |
| 33              | Canada  | 1992           | Onions                    | 19                                                          |
| 33              | Canada  | 1992           | Oranges, Mandarines       | 102                                                         |
| 33              | Canada  | 1992           | Palm Oil                  | 1                                                           |
| 33              | Canada  | 1992           | Peas                      | 3                                                           |
| 33              | Canada  | 1992           | Pelagic Fish              | 14                                                          |
| 33              | Canada  | 1992           | Pigmeat                   | 82                                                          |
| 33              | Canada  | 1992           | Pineapples                | 7                                                           |
| 33              | Canada  | 1992           | Potatoes                  | 226                                                         |
| 33              | Canada  | 1992           | Poultry Meat              | 76                                                          |
| 33              | Canada  | 1992           | Pulses, Other             | 9                                                           |
| 33              | Canada  | 1992           | Rape and Mustard Oil      | 36                                                          |
| 33              | Canada  | 1992           | Rice (Milled Equivalent)  | 15                                                          |
| 33              | Canada  | 1992           | Roots, Other              | 1                                                           |
| 33              | Canada  | 1992           | Rye                       | 1                                                           |
| 33              | Canada  | 1992           | Soyabean Oil              | 13                                                          |
| 33              | Canada  | 1992           | Soyabeans                 | 1                                                           |
| 33              | Canada  | 1992           | Spices, Other             | 1                                                           |
| 33              | Canada  | 1992           | Sugar, Refined Equivalent | 100                                                         |
| 33              | Canada  | 1992           | Sunflowerseed Oil         | 2                                                           |
| 33              | Canada  | 1992           | Sweet Potatoes            | 1                                                           |
| 33              | Canada  | 1992           | Sweeteners, Other         | 9                                                           |
| 33              | Canada  | 1992           | Tea                       | 1                                                           |
| 33              | Canada  | 1992           | Tomatoes                  | 75                                                          |
| 33              | Canada  | 1992           | Vegetables, Other         | 218                                                         |
| 33              | Canada  | 1992           | Wheat                     | 208                                                         |
| 33              | Canada  | 1992           | Whey                      | 29                                                          |
| 33              | Canada  | 1992           | Wine                      | 17                                                          |
| 33              | Canada  | 1993           | Apples                    | 55                                                          |
| 33              | Canada  | 1993           | Bananas                   | 36                                                          |
| 33              | Canada  | 1993           | Barley                    | 1                                                           |
| 33              | Canada  | 1993           | Beans                     | 4                                                           |
| 33              | Canada  | 1993           | Beer                      | 201                                                         |
| 33              | Canada  | 1993           | Beverages, Alcoholic      | 4                                                           |
| 33              | Canada  | 1993           | Beverages, Fermented      | 42                                                          |
| 33              | Canada  | 1993           | Bovine Meat               | 89                                                          |
| 33              | Canada  | 1993           | Butter, Ghee              | 8                                                           |
| 33              | Canada  | 1993           | Cheese                    | 29                                                          |
| 33              | Canada  | 1993           | Cocoa Beans               | 6                                                           |
| 33              | Canada  | 1993           | Coconut Oil               | 1                                                           |
| 33              | Canada  | 1993           | Coconuts - Incl Copra     | 4                                                           |
| 33              | Canada  | 1993           | Coffee                    | 12                                                          |
| 33              | Canada  | 1993           | Cream                     | 14                                                          |
| 33              | Canada  | 1993           | Crustaceans               | 10                                                          |
| 33              | Canada  | 1993           | Dates                     | 1                                                           |
| 33              | Canada  | 1993           | Demersal Fish             | 17                                                          |
| 33              | Canada  | 1993           | Eggs                      | 28                                                          |
| 33              | Canada  | 1993           | Fats, Animals, Raw        | 16                                                          |
| 33              | Canada  | 1993           | Freshwater Fish           | 7                                                           |
| 33              | Canada  | 1993           | Fruits, Other             | 52                                                          |
| 33              | Canada  | 1993           | Grapefruit                | 11                                                          |
| 33              | Canada  | 1993           | Grapes                    | 29                                                          |
| 33              | Canada  | 1993           | Groundnuts (Shelled Eq)   | 7                                                           |
| 33              | Canada  | 1993           | Honey                     | 2                                                           |
| 33              | Canada  | 1993           | Lemons, Limes             | 6                                                           |
| 33              | Canada  | 1993           | Maize                     | 9                                                           |
| 33              | Canada  | 1993           | Maize Germ Oil            | 3                                                           |
| 33              | Canada  | 1993           | Marine Fish, Other        | 1                                                           |
| 33              | Canada  | 1993           | Milk, Whole               | 192                                                         |
| 33              | Canada  | 1993           | Molluscs, Other           | 12                                                          |
| 33              | Canada  | 1993           | Mutton & Goat Meat        | 2                                                           |
| 33              | Canada  | 1993           | Nuts                      | 8                                                           |
| 33              | Canada  | 1993           | Oats                      | 9                                                           |
| 33              | Canada  | 1993           | Offals, Edible            | 3                                                           |
| 33              | Canada  | 1993           | Olive Oil                 | 1                                                           |
| 33              | Canada  | 1993           | Olives                    | 1                                                           |
| 33              | Canada  | 1993           | Onions                    | 25                                                          |
| 33              | Canada  | 1993           | Oranges, Mandarines       | 112                                                         |
| 33              | Canada  | 1993           | Palm Oil                  | 1                                                           |

Dietary calcium and zinc deficiency risks are decreasing but remain prevalent

| FAO countrycode | Country | Reference year | Food item                 | Gross food supply (g capita <sup>-1</sup> d <sup>-1</sup> ) |
|-----------------|---------|----------------|---------------------------|-------------------------------------------------------------|
| 33              | Canada  | 1993           | Peas                      | 3                                                           |
| 33              | Canada  | 1993           | Pelagic Fish              | 17                                                          |
| 33              | Canada  | 1993           | Pigmeat                   | 80                                                          |
| 33              | Canada  | 1993           | Pineapples                | 7                                                           |
| 33              | Canada  | 1993           | Potatoes                  | 222                                                         |
| 33              | Canada  | 1993           | Poultry Meat              | 79                                                          |
| 33              | Canada  | 1993           | Pulses, Other             | 9                                                           |
| 33              | Canada  | 1993           | Rape and Mustard Oil      | 39                                                          |
| 33              | Canada  | 1993           | Rice (Milled Equivalent)  | 16                                                          |
| 33              | Canada  | 1993           | Roots, Other              | 1                                                           |
| 33              | Canada  | 1993           | Rye                       | 1                                                           |
| 33              | Canada  | 1993           | Soyabean Oil              | 11                                                          |
| 33              | Canada  | 1993           | Soyabeans                 | 1                                                           |
| 33              | Canada  | 1993           | Spices, Other             | 1                                                           |
| 33              | Canada  | 1993           | Sugar, Refined Equivalent | 105                                                         |
| 33              | Canada  | 1993           | Sunflowerseed Oil         | 2                                                           |
| 33              | Canada  | 1993           | Sweet Potatoes            | 1                                                           |
| 33              | Canada  | 1993           | Sweeteners, Other         | 8                                                           |
| 33              | Canada  | 1993           | Tea                       | 1                                                           |
| 33              | Canada  | 1993           | Tomatoes                  | 88                                                          |
| 33              | Canada  | 1993           | Vegetables, Other         | 215                                                         |
| 33              | Canada  | 1993           | Wheat                     | 207                                                         |
| 33              | Canada  | 1993           | Whey                      | 37                                                          |
| 33              | Canada  | 1993           | Wine                      | 17                                                          |
| 33              | Canada  | 1994           | Apples                    | 62                                                          |
| 33              | Canada  | 1994           | Bananas                   | 36                                                          |
| 33              | Canada  | 1994           | Barley                    | 1                                                           |
| 33              | Canada  | 1994           | Beans                     | 7                                                           |
| 33              | Canada  | 1994           | Beer                      | 202                                                         |
| 33              | Canada  | 1994           | Beverages, Alcoholic      | 4                                                           |
| 33              | Canada  | 1994           | Beverages, Fermented      | 48                                                          |
| 33              | Canada  | 1994           | Bovine Meat               | 91                                                          |
| 33              | Canada  | 1994           | Butter, Ghee              | 8                                                           |
| 33              | Canada  | 1994           | Cheese                    | 30                                                          |
| 33              | Canada  | 1994           | Cocoa Beans               | 5                                                           |
| 33              | Canada  | 1994           | Coconuts - Incl Copra     | 3                                                           |
| 33              | Canada  | 1994           | Coffee                    | 14                                                          |
| 33              | Canada  | 1994           | Cream                     | 15                                                          |
| 33              | Canada  | 1994           | Crustaceans               | 8                                                           |
| 33              | Canada  | 1994           | Dates                     | 1                                                           |
| 33              | Canada  | 1994           | Demersal Fish             | 20                                                          |
| 33              | Canada  | 1994           | Eggs                      | 28                                                          |
| 33              | Canada  | 1994           | Fats, Animals, Raw        | 16                                                          |
| 33              | Canada  | 1994           | Freshwater Fish           | 7                                                           |
| 33              | Canada  | 1994           | Fruits, Other             | 53                                                          |
| 33              | Canada  | 1994           | Grapefruit                | 12                                                          |
| 33              | Canada  | 1994           | Grapes                    | 27                                                          |
| 33              | Canada  | 1994           | Groundnuts (Shelled Eq)   | 7                                                           |
| 33              | Canada  | 1994           | Honey                     | 3                                                           |
| 33              | Canada  | 1994           | Lemons, Limes             | 6                                                           |
| 33              | Canada  | 1994           | Maize                     | 11                                                          |
| 33              | Canada  | 1994           | Maize Germ Oil            | 2                                                           |
| 33              | Canada  | 1994           | Marine Fish, Other        | 2                                                           |
| 33              | Canada  | 1994           | Milk, Whole               | 185                                                         |
| 33              | Canada  | 1994           | Molluscs, Other           | 12                                                          |
| 33              | Canada  | 1994           | Mutton & Goat Meat        | 2                                                           |
| 33              | Canada  | 1994           | Nuts                      | 7                                                           |
| 33              | Canada  | 1994           | Oats                      | 8                                                           |
| 33              | Canada  | 1994           | Offals, Edible            | 5                                                           |
| 33              | Canada  | 1994           | Olive Oil                 | 1                                                           |
| 33              | Canada  | 1994           | Olives                    | 1                                                           |
| 33              | Canada  | 1994           | Onions                    | 20                                                          |
| 33              | Canada  | 1994           | Oranges, Mandarines       | 125                                                         |
| 33              | Canada  | 1994           | Peas                      | 4                                                           |
| 33              | Canada  | 1994           | Pelagic Fish              | 15                                                          |
| 33              | Canada  | 1994           | Pigmeat                   | 82                                                          |
| 33              | Canada  | 1994           | Pineapples                | 6                                                           |
| 33              | Canada  | 1994           | Potatoes                  | 226                                                         |
| 33              | Canada  | 1994           | Poultry Meat              | 85                                                          |
| 33              | Canada  | 1994           | Pulses, Other             | 10                                                          |
| 33              | Canada  | 1994           | Rape and Mustard Oil      | 43                                                          |
| 33              | Canada  | 1994           | Rice (Milled Equivalent)  | 15                                                          |
| 33              | Canada  | 1994           | Roots, Other              | 1                                                           |
| 33              | Canada  | 1994           | Rye                       | 1                                                           |
| 33              | Canada  | 1994           | Soyabean Oil              | 8                                                           |
| 33              | Canada  | 1994           | Soyabeans                 | 1                                                           |
| 33              | Canada  | 1994           | Spices, Other             | 1                                                           |
| 33              | Canada  | 1994           | Sugar, Refined Equivalent | 104                                                         |
| 33              | Canada  | 1994           | Sunflowerseed Oil         | 2                                                           |
| 33              | Canada  | 1994           | Sweet Potatoes            | 1                                                           |
| 33              | Canada  | 1994           | Sweeteners, Other         | 12                                                          |
| 33              | Canada  | 1994           | Tea                       | 1                                                           |
| 33              | Canada  | 1994           | Tomatoes                  | 89                                                          |
| 33              | Canada  | 1994           | Vegetables, Other         | 217                                                         |
| 33              | Canada  | 1994           | Wheat                     | 237                                                         |
| 33              | Canada  | 1994           | Whey                      | 36                                                          |
| 33              | Canada  | 1994           | Wine                      | 18                                                          |
| 33              | Canada  | 1995           | Apples                    | 58                                                          |
| 33              | Canada  | 1995           | Bananas                   | 37                                                          |
| 33              | Canada  | 1995           | Barley                    | 1                                                           |
| 33              | Canada  | 1995           | Beans                     | 3                                                           |
| 33              | Canada  | 1995           | Beer                      | 205                                                         |
| 33              | Canada  | 1995           | Beverages, Alcoholic      | 5                                                           |
| 33              | Canada  | 1995           | Beverages, Fermented      | 45                                                          |
| 33              | Canada  | 1995           | Bovine Meat               | 91                                                          |
| 33              | Canada  | 1995           | Butter, Ghee              | 8                                                           |
| 33              | Canada  | 1995           | Cheese                    | 30                                                          |

Dietary calcium and zinc deficiency risks are decreasing but remain prevalent

| FAO countrycode | Country | Reference year | Food item                 | Gross food supply (g capita <sup>-1</sup> d <sup>-1</sup> ) |
|-----------------|---------|----------------|---------------------------|-------------------------------------------------------------|
| 33              | Canada  | 1995           | Cocoa Beans               | 6                                                           |
| 33              | Canada  | 1995           | Coconut Oil               | 1                                                           |
| 33              | Canada  | 1995           | Coconuts - Incl Copra     | 3                                                           |
| 33              | Canada  | 1995           | Coffee                    | 12                                                          |
| 33              | Canada  | 1995           | Cream                     | 15                                                          |
| 33              | Canada  | 1995           | Crustaceans               | 11                                                          |
| 33              | Canada  | 1995           | Demersal Fish             | 12                                                          |
| 33              | Canada  | 1995           | Eggs                      | 28                                                          |
| 33              | Canada  | 1995           | Fats, Animals, Raw        | 16                                                          |
| 33              | Canada  | 1995           | Freshwater Fish           | 10                                                          |
| 33              | Canada  | 1995           | Fruits, Other             | 55                                                          |
| 33              | Canada  | 1995           | Grapefruit                | 12                                                          |
| 33              | Canada  | 1995           | Grapes                    | 28                                                          |
| 33              | Canada  | 1995           | Groundnuts (Shelled Eq)   | 8                                                           |
| 33              | Canada  | 1995           | Honey                     | 2                                                           |
| 33              | Canada  | 1995           | Lemons, Limes             | 6                                                           |
| 33              | Canada  | 1995           | Maize                     | 11                                                          |
| 33              | Canada  | 1995           | Maize Germ Oil            | 3                                                           |
| 33              | Canada  | 1995           | Marine Fish, Other        | 1                                                           |
| 33              | Canada  | 1995           | Milk, Whole               | 182                                                         |
| 33              | Canada  | 1995           | Molluscs, Other           | 12                                                          |
| 33              | Canada  | 1995           | Mutton & Goat Meat        | 2                                                           |
| 33              | Canada  | 1995           | Nuts                      | 6                                                           |
| 33              | Canada  | 1995           | Oats                      | 5                                                           |
| 33              | Canada  | 1995           | Offals, Edible            | 4                                                           |
| 33              | Canada  | 1995           | Olive Oil                 | 1                                                           |
| 33              | Canada  | 1995           | Olives                    | 1                                                           |
| 33              | Canada  | 1995           | Onions                    | 23                                                          |
| 33              | Canada  | 1995           | Oranges, Mandarines       | 127                                                         |
| 33              | Canada  | 1995           | Palm Oil                  | 1                                                           |
| 33              | Canada  | 1995           | Peas                      | 3                                                           |
| 33              | Canada  | 1995           | Pelagic Fish              | 16                                                          |
| 33              | Canada  | 1995           | Pigmeat                   | 80                                                          |
| 33              | Canada  | 1995           | Pineapples                | 6                                                           |
| 33              | Canada  | 1995           | Potatoes                  | 224                                                         |
| 33              | Canada  | 1995           | Poultry Meat              | 83                                                          |
| 33              | Canada  | 1995           | Pulses, Other             | 11                                                          |
| 33              | Canada  | 1995           | Rape and Mustard Oil      | 46                                                          |
| 33              | Canada  | 1995           | Rice (Milled Equivalent)  | 17                                                          |
| 33              | Canada  | 1995           | Roots, Other              | 1                                                           |
| 33              | Canada  | 1995           | Rye                       | 1                                                           |
| 33              | Canada  | 1995           | Soyabean Oil              | 9                                                           |
| 33              | Canada  | 1995           | Soyabbeans                | 1                                                           |
| 33              | Canada  | 1995           | Spices, Other             | 1                                                           |
| 33              | Canada  | 1995           | Sugar, Refined Equivalent | 101                                                         |
| 33              | Canada  | 1995           | Sunflowerseed Oil         | 1                                                           |
| 33              | Canada  | 1995           | Sweet Potatoes            | 1                                                           |
| 33              | Canada  | 1995           | Sweeteners, Other         | 18                                                          |
| 33              | Canada  | 1995           | Tea                       | 1                                                           |
| 33              | Canada  | 1995           | Tomatoes                  | 86                                                          |
| 33              | Canada  | 1995           | Vegetables, Other         | 217                                                         |
| 33              | Canada  | 1995           | Wheat                     | 230                                                         |
| 33              | Canada  | 1995           | Whey                      | 35                                                          |
| 33              | Canada  | 1995           | Wine                      | 17                                                          |
| 33              | Canada  | 1996           | Apples                    | 47                                                          |
| 33              | Canada  | 1996           | Bananas                   | 37                                                          |
| 33              | Canada  | 1996           | Barley                    | 1                                                           |
| 33              | Canada  | 1996           | Beans                     | 4                                                           |
| 33              | Canada  | 1996           | Beer                      | 198                                                         |
| 33              | Canada  | 1996           | Beverages, Alcoholic      | 4                                                           |
| 33              | Canada  | 1996           | Beverages, Fermented      | 44                                                          |
| 33              | Canada  | 1996           | Bovine Meat               | 91                                                          |
| 33              | Canada  | 1996           | Butter, Ghee              | 8                                                           |
| 33              | Canada  | 1996           | Cheese                    | 30                                                          |
| 33              | Canada  | 1996           | Cocoa Beans               | 5                                                           |
| 33              | Canada  | 1996           | Coconut Oil               | 1                                                           |
| 33              | Canada  | 1996           | Coconuts - Incl Copra     | 2                                                           |
| 33              | Canada  | 1996           | Coffee                    | 13                                                          |
| 33              | Canada  | 1996           | Cottonseed Oil            | 1                                                           |
| 33              | Canada  | 1996           | Cream                     | 15                                                          |
| 33              | Canada  | 1996           | Crustaceans               | 13                                                          |
| 33              | Canada  | 1996           | Demersal Fish             | 17                                                          |
| 33              | Canada  | 1996           | Eggs                      | 29                                                          |
| 33              | Canada  | 1996           | Fats, Animals, Raw        | 13                                                          |
| 33              | Canada  | 1996           | Freshwater Fish           | 6                                                           |
| 33              | Canada  | 1996           | Fruits, Other             | 53                                                          |
| 33              | Canada  | 1996           | Grapefruit                | 12                                                          |
| 33              | Canada  | 1996           | Grapes                    | 27                                                          |
| 33              | Canada  | 1996           | Groundnuts (Shelled Eq)   | 7                                                           |
| 33              | Canada  | 1996           | Honey                     | 3                                                           |
| 33              | Canada  | 1996           | Lemons, Limes             | 6                                                           |
| 33              | Canada  | 1996           | Maize                     | 19                                                          |
| 33              | Canada  | 1996           | Maize Germ Oil            | 3                                                           |
| 33              | Canada  | 1996           | Marine Fish, Other        | 1                                                           |
| 33              | Canada  | 1996           | Milk, Whole               | 171                                                         |
| 33              | Canada  | 1996           | Molluscs, Other           | 12                                                          |
| 33              | Canada  | 1996           | Mutton & Goat Meat        | 2                                                           |
| 33              | Canada  | 1996           | Nuts                      | 6                                                           |
| 33              | Canada  | 1996           | Oats                      | 8                                                           |
| 33              | Canada  | 1996           | Offals, Edible            | 4                                                           |
| 33              | Canada  | 1996           | Olive Oil                 | 1                                                           |
| 33              | Canada  | 1996           | Olives                    | 1                                                           |
| 33              | Canada  | 1996           | Onions                    | 23                                                          |
| 33              | Canada  | 1996           | Oranges, Mandarines       | 137                                                         |
| 33              | Canada  | 1996           | Palm Oil                  | 1                                                           |
| 33              | Canada  | 1996           | Peas                      | 3                                                           |
| 33              | Canada  | 1996           | Pelagic Fish              | 15                                                          |

Dietary calcium and zinc deficiency risks are decreasing but remain prevalent

| FAO countrycode | Country | Reference year | Food item                 | Gross food supply (g capita <sup>-1</sup> d <sup>-1</sup> ) |
|-----------------|---------|----------------|---------------------------|-------------------------------------------------------------|
| 33              | Canada  | 1996           | Pigmeat                   | 74                                                          |
| 33              | Canada  | 1996           | Pineapples                | 6                                                           |
| 33              | Canada  | 1996           | Potatoes                  | 235                                                         |
| 33              | Canada  | 1996           | Poultry Meat              | 84                                                          |
| 33              | Canada  | 1996           | Pulses, Other             | 9                                                           |
| 33              | Canada  | 1996           | Rape and Mustard Oil      | 43                                                          |
| 33              | Canada  | 1996           | Rice (Milled Equivalent)  | 18                                                          |
| 33              | Canada  | 1996           | Roots, Other              | 1                                                           |
| 33              | Canada  | 1996           | Rye                       | 1                                                           |
| 33              | Canada  | 1996           | Soyabean Oil              | 15                                                          |
| 33              | Canada  | 1996           | Soyabeans                 | 1                                                           |
| 33              | Canada  | 1996           | Spices, Other             | 1                                                           |
| 33              | Canada  | 1996           | Sugar, Refined Equivalent | 97                                                          |
| 33              | Canada  | 1996           | Sunflowerseed Oil         | 1                                                           |
| 33              | Canada  | 1996           | Sweet Potatoes            | 1                                                           |
| 33              | Canada  | 1996           | Sweeteners, Other         | 28                                                          |
| 33              | Canada  | 1996           | Tea                       | 1                                                           |
| 33              | Canada  | 1996           | Tomatoes                  | 88                                                          |
| 33              | Canada  | 1996           | Vegetables, Other         | 225                                                         |
| 33              | Canada  | 1996           | Wheat                     | 244                                                         |
| 33              | Canada  | 1996           | Whey                      | 41                                                          |
| 33              | Canada  | 1996           | Wine                      | 19                                                          |
| 33              | Canada  | 1997           | Apples                    | 46                                                          |
| 33              | Canada  | 1997           | Bananas                   | 38                                                          |
| 33              | Canada  | 1997           | Barley                    | 1                                                           |
| 33              | Canada  | 1997           | Beans                     | 5                                                           |
| 33              | Canada  | 1997           | Beer                      | 194                                                         |
| 33              | Canada  | 1997           | Beverages, Alcoholic      | 4                                                           |
| 33              | Canada  | 1997           | Beverages, Fermented      | 45                                                          |
| 33              | Canada  | 1997           | Bovine Meat               | 91                                                          |
| 33              | Canada  | 1997           | Butter, Ghee              | 8                                                           |
| 33              | Canada  | 1997           | Cassava                   | 1                                                           |
| 33              | Canada  | 1997           | Cephalopods               | 1                                                           |
| 33              | Canada  | 1997           | Cheese                    | 32                                                          |
| 33              | Canada  | 1997           | Cocoa Beans               | 5                                                           |
| 33              | Canada  | 1997           | Coconut Oil               | 1                                                           |
| 33              | Canada  | 1997           | Coconuts - Incl Copra     | 3                                                           |
| 33              | Canada  | 1997           | Coffee                    | 12                                                          |
| 33              | Canada  | 1997           | Cottonseed Oil            | 1                                                           |
| 33              | Canada  | 1997           | Cream                     | 15                                                          |
| 33              | Canada  | 1997           | Crustaceans               | 12                                                          |
| 33              | Canada  | 1997           | Demersal Fish             | 17                                                          |
| 33              | Canada  | 1997           | Eggs                      | 30                                                          |
| 33              | Canada  | 1997           | Fats, Animals, Raw        | 14                                                          |
| 33              | Canada  | 1997           | Freshwater Fish           | 7                                                           |
| 33              | Canada  | 1997           | Fruits, Other             | 54                                                          |
| 33              | Canada  | 1997           | Grapefruit                | 12                                                          |
| 33              | Canada  | 1997           | Grapes                    | 30                                                          |
| 33              | Canada  | 1997           | Groundnuts (Shelled Eq)   | 7                                                           |
| 33              | Canada  | 1997           | Honey                     | 2                                                           |
| 33              | Canada  | 1997           | Lemons, Limes             | 6                                                           |
| 33              | Canada  | 1997           | Maize                     | 31                                                          |
| 33              | Canada  | 1997           | Maize Germ Oil            | 3                                                           |
| 33              | Canada  | 1997           | Marine Fish, Other        | 1                                                           |
| 33              | Canada  | 1997           | Milk, Whole               | 143                                                         |
| 33              | Canada  | 1997           | Molluscs, Other           | 12                                                          |
| 33              | Canada  | 1997           | Mutton & Goat Meat        | 2                                                           |
| 33              | Canada  | 1997           | Nuts                      | 6                                                           |
| 33              | Canada  | 1997           | Oats                      | 7                                                           |
| 33              | Canada  | 1997           | Offals, Edible            | 4                                                           |
| 33              | Canada  | 1997           | Olive Oil                 | 2                                                           |
| 33              | Canada  | 1997           | Olives                    | 1                                                           |
| 33              | Canada  | 1997           | Onions                    | 23                                                          |
| 33              | Canada  | 1997           | Oranges, Mandarines       | 146                                                         |
| 33              | Canada  | 1997           | Peas                      | 5                                                           |
| 33              | Canada  | 1997           | Pelagic Fish              | 15                                                          |
| 33              | Canada  | 1997           | Pigmeat                   | 74                                                          |
| 33              | Canada  | 1997           | Pineapples                | 7                                                           |
| 33              | Canada  | 1997           | Potatoes                  | 238                                                         |
| 33              | Canada  | 1997           | Poultry Meat              | 87                                                          |
| 33              | Canada  | 1997           | Pulses, Other             | 8                                                           |
| 33              | Canada  | 1997           | Rape and Mustard Oil      | 48                                                          |
| 33              | Canada  | 1997           | Rice (Milled Equivalent)  | 21                                                          |
| 33              | Canada  | 1997           | Roots, Other              | 1                                                           |
| 33              | Canada  | 1997           | Rye                       | 1                                                           |
| 33              | Canada  | 1997           | Soyabean Oil              | 15                                                          |
| 33              | Canada  | 1997           | Soyabeans                 | 2                                                           |
| 33              | Canada  | 1997           | Spices, Other             | 1                                                           |
| 33              | Canada  | 1997           | Sugar, Refined Equivalent | 98                                                          |
| 33              | Canada  | 1997           | Sunflowerseed Oil         | 1                                                           |
| 33              | Canada  | 1997           | Sweet Potatoes            | 1                                                           |
| 33              | Canada  | 1997           | Sweeteners, Other         | 32                                                          |
| 33              | Canada  | 1997           | Tea                       | 2                                                           |
| 33              | Canada  | 1997           | Tomatoes                  | 80                                                          |
| 33              | Canada  | 1997           | Vegetables, Other         | 230                                                         |
| 33              | Canada  | 1997           | Wheat                     | 244                                                         |
| 33              | Canada  | 1997           | Whey                      | 30                                                          |
| 33              | Canada  | 1997           | Wine                      | 20                                                          |
| 33              | Canada  | 1998           | Apples                    | 51                                                          |
| 33              | Canada  | 1998           | Bananas                   | 37                                                          |
| 33              | Canada  | 1998           | Barley                    | 1                                                           |
| 33              | Canada  | 1998           | Beans                     | 3                                                           |
| 33              | Canada  | 1998           | Beer                      | 200                                                         |
| 33              | Canada  | 1998           | Beverages, Alcoholic      | 5                                                           |
| 33              | Canada  | 1998           | Beverages, Fermented      | 40                                                          |
| 33              | Canada  | 1998           | Bovine Meat               | 93                                                          |
| 33              | Canada  | 1998           | Butter, Ghee              | 8                                                           |



Dietary calcium and zinc deficiency risks are decreasing but remain prevalent

| FAO countrycode | Country | Reference year | Food item                 | Gross food supply (g capita <sup>-1</sup> d <sup>-1</sup> ) |
|-----------------|---------|----------------|---------------------------|-------------------------------------------------------------|
| 33              | Canada  | 1998           | Cereals, Other            | 1                                                           |
| 33              | Canada  | 1998           | Cheese                    | 32                                                          |
| 33              | Canada  | 1998           | Cocoa Beans               | 6                                                           |
| 33              | Canada  | 1998           | Coconut Oil               | 1                                                           |
| 33              | Canada  | 1998           | Coconuts - Incl Copra     | 3                                                           |
| 33              | Canada  | 1998           | Coffee                    | 13                                                          |
| 33              | Canada  | 1998           | Cottonseed Oil            | 1                                                           |
| 33              | Canada  | 1998           | Cream                     | 17                                                          |
| 33              | Canada  | 1998           | Crustaceans               | 14                                                          |
| 33              | Canada  | 1998           | Dates                     | 1                                                           |
| 33              | Canada  | 1998           | Demersal Fish             | 18                                                          |
| 33              | Canada  | 1998           | Eggs                      | 31                                                          |
| 33              | Canada  | 1998           | Fats, Animals, Raw        | 17                                                          |
| 33              | Canada  | 1998           | Freshwater Fish           | 7                                                           |
| 33              | Canada  | 1998           | Fruits, Other             | 64                                                          |
| 33              | Canada  | 1998           | Grapefruit                | 9                                                           |
| 33              | Canada  | 1998           | Grapes                    | 26                                                          |
| 33              | Canada  | 1998           | Groundnuts (Shelled Eq)   | 7                                                           |
| 33              | Canada  | 1998           | Honey                     | 3                                                           |
| 33              | Canada  | 1998           | Lemons, Limes             | 7                                                           |
| 33              | Canada  | 1998           | Maize                     | 30                                                          |
| 33              | Canada  | 1998           | Maize Germ Oil            | 3                                                           |
| 33              | Canada  | 1998           | Marine Fish, Other        | 1                                                           |
| 33              | Canada  | 1998           | Milk, Whole               | 157                                                         |
| 33              | Canada  | 1998           | Molluscs, Other           | 12                                                          |
| 33              | Canada  | 1998           | Mutton & Goat Meat        | 2                                                           |
| 33              | Canada  | 1998           | Nuts                      | 7                                                           |
| 33              | Canada  | 1998           | Oats                      | 7                                                           |
| 33              | Canada  | 1998           | Offals, Edible            | 4                                                           |
| 33              | Canada  | 1998           | Olive Oil                 | 2                                                           |
| 33              | Canada  | 1998           | Olives                    | 2                                                           |
| 33              | Canada  | 1998           | Onions                    | 20                                                          |
| 33              | Canada  | 1998           | Oranges, Mandarines       | 141                                                         |
| 33              | Canada  | 1998           | Peas                      | 3                                                           |
| 33              | Canada  | 1998           | Pelagic Fish              | 14                                                          |
| 33              | Canada  | 1998           | Pigmeat                   | 82                                                          |
| 33              | Canada  | 1998           | Pineapples                | 6                                                           |
| 33              | Canada  | 1998           | Potatoes                  | 235                                                         |
| 33              | Canada  | 1998           | Poultry Meat              | 91                                                          |
| 33              | Canada  | 1998           | Pulses, Other             | 9                                                           |
| 33              | Canada  | 1998           | Rape and Mustard Oil      | 50                                                          |
| 33              | Canada  | 1998           | Rice (Milled Equivalent)  | 20                                                          |
| 33              | Canada  | 1998           | Roots, Other              | 1                                                           |
| 33              | Canada  | 1998           | Rye                       | 1                                                           |
| 33              | Canada  | 1998           | Soyabean Oil              | 14                                                          |
| 33              | Canada  | 1998           | Soyabeans                 | 2                                                           |
| 33              | Canada  | 1998           | Spices, Other             | 1                                                           |
| 33              | Canada  | 1998           | Sugar, Refined Equivalent | 90                                                          |
| 33              | Canada  | 1998           | Sunflowerseed Oil         | 1                                                           |
| 33              | Canada  | 1998           | Sweet Potatoes            | 2                                                           |
| 33              | Canada  | 1998           | Sweeteners, Other         | 42                                                          |
| 33              | Canada  | 1998           | Tea                       | 2                                                           |
| 33              | Canada  | 1998           | Tomatoes                  | 83                                                          |
| 33              | Canada  | 1998           | Vegetables, Other         | 232                                                         |
| 33              | Canada  | 1998           | Wheat                     | 254                                                         |
| 33              | Canada  | 1998           | Whey                      | 24                                                          |
| 33              | Canada  | 1998           | Wine                      | 22                                                          |
| 33              | Canada  | 1999           | Apples                    | 57                                                          |
| 33              | Canada  | 1999           | Bananas                   | 37                                                          |
| 33              | Canada  | 1999           | Barley                    | 1                                                           |
| 33              | Canada  | 1999           | Beans                     | 4                                                           |
| 33              | Canada  | 1999           | Beer                      | 203                                                         |
| 33              | Canada  | 1999           | Beverages, Alcoholic      | 5                                                           |
| 33              | Canada  | 1999           | Beverages, Fermented      | 47                                                          |
| 33              | Canada  | 1999           | Bovine Meat               | 95                                                          |
| 33              | Canada  | 1999           | Butter, Ghee              | 7                                                           |
| 33              | Canada  | 1999           | Cereals, Other            | 3                                                           |
| 33              | Canada  | 1999           | Cheese                    | 32                                                          |
| 33              | Canada  | 1999           | Cocoa Beans               | 5                                                           |
| 33              | Canada  | 1999           | Coconut Oil               | 1                                                           |
| 33              | Canada  | 1999           | Coconuts - Incl Copra     | 3                                                           |
| 33              | Canada  | 1999           | Coffee                    | 13                                                          |
| 33              | Canada  | 1999           | Cottonseed Oil            | 2                                                           |
| 33              | Canada  | 1999           | Cream                     | 17                                                          |
| 33              | Canada  | 1999           | Crustaceans               | 15                                                          |
| 33              | Canada  | 1999           | Demersal Fish             | 19                                                          |
| 33              | Canada  | 1999           | Eggs                      | 30                                                          |
| 33              | Canada  | 1999           | Fats, Animals, Raw        | 19                                                          |
| 33              | Canada  | 1999           | Freshwater Fish           | 8                                                           |
| 33              | Canada  | 1999           | Fruits, Other             | 69                                                          |
| 33              | Canada  | 1999           | Grapefruit                | 11                                                          |
| 33              | Canada  | 1999           | Grapes                    | 26                                                          |
| 33              | Canada  | 1999           | Groundnuts (Shelled Eq)   | 7                                                           |
| 33              | Canada  | 1999           | Honey                     | 2                                                           |
| 33              | Canada  | 1999           | Lemons, Limes             | 7                                                           |
| 33              | Canada  | 1999           | Maize                     | 48                                                          |
| 33              | Canada  | 1999           | Maize Germ Oil            | 3                                                           |
| 33              | Canada  | 1999           | Marine Fish, Other        | 1                                                           |
| 33              | Canada  | 1999           | Milk, Whole               | 152                                                         |
| 33              | Canada  | 1999           | Molluscs, Other           | 12                                                          |
| 33              | Canada  | 1999           | Mutton & Goat Meat        | 2                                                           |
| 33              | Canada  | 1999           | Nuts                      | 7                                                           |
| 33              | Canada  | 1999           | Oats                      | 7                                                           |
| 33              | Canada  | 1999           | Offals, Edible            | 5                                                           |
| 33              | Canada  | 1999           | Olive Oil                 | 2                                                           |
| 33              | Canada  | 1999           | Olives                    | 2                                                           |
| 33              | Canada  | 1999           | Onions                    | 24                                                          |

Dietary calcium and zinc deficiency risks are decreasing but remain prevalent

| FAO countrycode | Country | Reference year | Food item                 | Gross food supply (g capita <sup>-1</sup> d <sup>-1</sup> ) |
|-----------------|---------|----------------|---------------------------|-------------------------------------------------------------|
| 33              | Canada  | 1999           | Oranges, Mandarines       | 138                                                         |
| 33              | Canada  | 1999           | Peas                      | 3                                                           |
| 33              | Canada  | 1999           | Pelagic Fish              | 14                                                          |
| 33              | Canada  | 1999           | Pigmeat                   | 87                                                          |
| 33              | Canada  | 1999           | Pineapples                | 7                                                           |
| 33              | Canada  | 1999           | Potatoes                  | 224                                                         |
| 33              | Canada  | 1999           | Poultry Meat              | 95                                                          |
| 33              | Canada  | 1999           | Pulses, Other             | 14                                                          |
| 33              | Canada  | 1999           | Rape and Mustard Oil      | 43                                                          |
| 33              | Canada  | 1999           | Rice (Milled Equivalent)  | 21                                                          |
| 33              | Canada  | 1999           | Roots, Other              | 1                                                           |
| 33              | Canada  | 1999           | Rye                       | 1                                                           |
| 33              | Canada  | 1999           | Soyabean Oil              | 16                                                          |
| 33              | Canada  | 1999           | Soyabeans                 | 2                                                           |
| 33              | Canada  | 1999           | Spices, Other             | 1                                                           |
| 33              | Canada  | 1999           | Sugar, Refined Equivalent | 90                                                          |
| 33              | Canada  | 1999           | Sunflowerseed Oil         | 2                                                           |
| 33              | Canada  | 1999           | Sweet Potatoes            | 2                                                           |
| 33              | Canada  | 1999           | Sweeteners, Other         | 34                                                          |
| 33              | Canada  | 1999           | Tea                       | 2                                                           |
| 33              | Canada  | 1999           | Tomatoes                  | 84                                                          |
| 33              | Canada  | 1999           | Vegetables, Other         | 232                                                         |
| 33              | Canada  | 1999           | Wheat                     | 247                                                         |
| 33              | Canada  | 1999           | Whey                      | 16                                                          |
| 33              | Canada  | 1999           | Wine                      | 25                                                          |
| 33              | Canada  | 2000           | Apples                    | 46                                                          |
| 33              | Canada  | 2000           | Bananas                   | 35                                                          |
| 33              | Canada  | 2000           | Barley                    | 1                                                           |
| 33              | Canada  | 2000           | Beans                     | 3                                                           |
| 33              | Canada  | 2000           | Beer                      | 199                                                         |
| 33              | Canada  | 2000           | Beverages, Alcoholic      | 5                                                           |
| 33              | Canada  | 2000           | Beverages, Fermented      | 57                                                          |
| 33              | Canada  | 2000           | Bovine Meat               | 93                                                          |
| 33              | Canada  | 2000           | Butter, Ghee              | 8                                                           |
| 33              | Canada  | 2000           | Cereals, Other            | 3                                                           |
| 33              | Canada  | 2000           | Cheese                    | 33                                                          |
| 33              | Canada  | 2000           | Cocoa Beans               | 5                                                           |
| 33              | Canada  | 2000           | Coconut Oil               | 1                                                           |
| 33              | Canada  | 2000           | Coconuts - Incl Copra     | 3                                                           |
| 33              | Canada  | 2000           | Coffee                    | 13                                                          |
| 33              | Canada  | 2000           | Cottonseed Oil            | 2                                                           |
| 33              | Canada  | 2000           | Cream                     | 19                                                          |
| 33              | Canada  | 2000           | Crustaceans               | 14                                                          |
| 33              | Canada  | 2000           | Demersal Fish             | 14                                                          |
| 33              | Canada  | 2000           | Eggs                      | 30                                                          |
| 33              | Canada  | 2000           | Fats, Animals, Raw        | 19                                                          |
| 33              | Canada  | 2000           | Freshwater Fish           | 10                                                          |
| 33              | Canada  | 2000           | Fruits, Other             | 67                                                          |
| 33              | Canada  | 2000           | Grapefruit                | 11                                                          |
| 33              | Canada  | 2000           | Grapes                    | 28                                                          |
| 33              | Canada  | 2000           | Groundnuts (Shelled Eq)   | 7                                                           |
| 33              | Canada  | 2000           | Honey                     | 2                                                           |
| 33              | Canada  | 2000           | Lemons, Limes             | 6                                                           |
| 33              | Canada  | 2000           | Maize                     | 52                                                          |
| 33              | Canada  | 2000           | Maize Germ Oil            | 4                                                           |
| 33              | Canada  | 2000           | Marine Fish, Other        | 1                                                           |
| 33              | Canada  | 2000           | Milk, Whole               | 162                                                         |
| 33              | Canada  | 2000           | Molluscs, Other           | 11                                                          |
| 33              | Canada  | 2000           | Mutton & Goat Meat        | 2                                                           |
| 33              | Canada  | 2000           | Nuts                      | 8                                                           |
| 33              | Canada  | 2000           | Oats                      | 2                                                           |
| 33              | Canada  | 2000           | Offals, Edible            | 3                                                           |
| 33              | Canada  | 2000           | Olive Oil                 | 2                                                           |
| 33              | Canada  | 2000           | Olives                    | 2                                                           |
| 33              | Canada  | 2000           | Onions                    | 24                                                          |
| 33              | Canada  | 2000           | Oranges, Mandarines       | 144                                                         |
| 33              | Canada  | 2000           | Peas                      | 3                                                           |
| 33              | Canada  | 2000           | Pelagic Fish              | 15                                                          |
| 33              | Canada  | 2000           | Pigmeat                   | 83                                                          |
| 33              | Canada  | 2000           | Pineapples                | 8                                                           |
| 33              | Canada  | 2000           | Potatoes                  | 219                                                         |
| 33              | Canada  | 2000           | Poultry Meat              | 98                                                          |
| 33              | Canada  | 2000           | Pulses, Other             | 15                                                          |
| 33              | Canada  | 2000           | Rape and Mustard Oil      | 43                                                          |
| 33              | Canada  | 2000           | Rice (Milled Equivalent)  | 20                                                          |
| 33              | Canada  | 2000           | Roots, Other              | 1                                                           |
| 33              | Canada  | 2000           | Rye                       | 1                                                           |
| 33              | Canada  | 2000           | Soyabean Oil              | 15                                                          |
| 33              | Canada  | 2000           | Soyabeans                 | 2                                                           |
| 33              | Canada  | 2000           | Spices, Other             | 1                                                           |
| 33              | Canada  | 2000           | Sugar, Refined Equivalent | 93                                                          |
| 33              | Canada  | 2000           | Sunflowerseed Oil         | 2                                                           |
| 33              | Canada  | 2000           | Sweet Potatoes            | 2                                                           |
| 33              | Canada  | 2000           | Sweeteners, Other         | 36                                                          |
| 33              | Canada  | 2000           | Tea                       | 2                                                           |
| 33              | Canada  | 2000           | Tomatoes                  | 84                                                          |
| 33              | Canada  | 2000           | Vegetables, Other         | 222                                                         |
| 33              | Canada  | 2000           | Wheat                     | 245                                                         |
| 33              | Canada  | 2000           | Whey                      | 34                                                          |
| 33              | Canada  | 2000           | Wine                      | 25                                                          |
| 33              | Canada  | 2001           | Apples                    | 40                                                          |
| 33              | Canada  | 2001           | Bananas                   | 35                                                          |
| 33              | Canada  | 2001           | Barley                    | 2                                                           |
| 33              | Canada  | 2001           | Beans                     | 3                                                           |
| 33              | Canada  | 2001           | Beer                      | 205                                                         |
| 33              | Canada  | 2001           | Beverages, Alcoholic      | 6                                                           |
| 33              | Canada  | 2001           | Beverages, Fermented      | 49                                                          |

Dietary calcium and zinc deficiency risks are decreasing but remain prevalent

| FAO countrycode | Country | Reference year | Food item                 | Gross food supply (g capita <sup>-1</sup> d <sup>-1</sup> ) |
|-----------------|---------|----------------|---------------------------|-------------------------------------------------------------|
| 33              | Canada  | 2001           | Bovine Meat               | 90                                                          |
| 33              | Canada  | 2001           | Butter, Ghee              | 8                                                           |
| 33              | Canada  | 2001           | Cassava                   | 1                                                           |
| 33              | Canada  | 2001           | Cereals, Other            | 4                                                           |
| 33              | Canada  | 2001           | Cheese                    | 32                                                          |
| 33              | Canada  | 2001           | Cocoa Beans               | 4                                                           |
| 33              | Canada  | 2001           | Coconut Oil               | 1                                                           |
| 33              | Canada  | 2001           | Coconuts - Incl Copra     | 3                                                           |
| 33              | Canada  | 2001           | Coffee                    | 14                                                          |
| 33              | Canada  | 2001           | Cottonseed Oil            | 1                                                           |
| 33              | Canada  | 2001           | Cream                     | 19                                                          |
| 33              | Canada  | 2001           | Crustaceans               | 14                                                          |
| 33              | Canada  | 2001           | Demersal Fish             | 20                                                          |
| 33              | Canada  | 2001           | Eggs                      | 32                                                          |
| 33              | Canada  | 2001           | Fats, Animals, Raw        | 19                                                          |
| 33              | Canada  | 2001           | Freshwater Fish           | 8                                                           |
| 33              | Canada  | 2001           | Fruits, Other             | 71                                                          |
| 33              | Canada  | 2001           | Grapefruit                | 10                                                          |
| 33              | Canada  | 2001           | Grapes                    | 27                                                          |
| 33              | Canada  | 2001           | Groundnuts (Shelled Eq)   | 6                                                           |
| 33              | Canada  | 2001           | Honey                     | 2                                                           |
| 33              | Canada  | 2001           | Lemons, Limes             | 7                                                           |
| 33              | Canada  | 2001           | Maize                     | 50                                                          |
| 33              | Canada  | 2001           | Maize Germ Oil            | 4                                                           |
| 33              | Canada  | 2001           | Marine Fish, Other        | 1                                                           |
| 33              | Canada  | 2001           | Milk, Whole               | 145                                                         |
| 33              | Canada  | 2001           | Molluscs, Other           | 12                                                          |
| 33              | Canada  | 2001           | Mutton & Goat Meat        | 3                                                           |
| 33              | Canada  | 2001           | Nuts                      | 9                                                           |
| 33              | Canada  | 2001           | Oats                      | 2                                                           |
| 33              | Canada  | 2001           | Offals, Edible            | 3                                                           |
| 33              | Canada  | 2001           | Olive Oil                 | 2                                                           |
| 33              | Canada  | 2001           | Olives                    | 2                                                           |
| 33              | Canada  | 2001           | Onions                    | 24                                                          |
| 33              | Canada  | 2001           | Oranges, Mandarines       | 141                                                         |
| 33              | Canada  | 2001           | Peas                      | 4                                                           |
| 33              | Canada  | 2001           | Pelagic Fish              | 12                                                          |
| 33              | Canada  | 2001           | Pigmeat                   | 84                                                          |
| 33              | Canada  | 2001           | Pineapples                | 9                                                           |
| 33              | Canada  | 2001           | Potatoes                  | 218                                                         |
| 33              | Canada  | 2001           | Poultry Meat              | 101                                                         |
| 33              | Canada  | 2001           | Pulses, Other             | 14                                                          |
| 33              | Canada  | 2001           | Rape and Mustard Oil      | 41                                                          |
| 33              | Canada  | 2001           | Rice (Milled Equivalent)  | 19                                                          |
| 33              | Canada  | 2001           | Roots, Other              | 1                                                           |
| 33              | Canada  | 2001           | Rye                       | 1                                                           |
| 33              | Canada  | 2001           | Sesameseed                | 1                                                           |
| 33              | Canada  | 2001           | Soyabean Oil              | 16                                                          |
| 33              | Canada  | 2001           | Soyabeans                 | 2                                                           |
| 33              | Canada  | 2001           | Spices, Other             | 1                                                           |
| 33              | Canada  | 2001           | Sugar, Refined Equivalent | 99                                                          |
| 33              | Canada  | 2001           | Sunflowerseed Oil         | 2                                                           |
| 33              | Canada  | 2001           | Sweet Potatoes            | 2                                                           |
| 33              | Canada  | 2001           | Sweeteners, Other         | 35                                                          |
| 33              | Canada  | 2001           | Tea                       | 2                                                           |
| 33              | Canada  | 2001           | Tomatoes                  | 81                                                          |
| 33              | Canada  | 2001           | Vegetables, Other         | 226                                                         |
| 33              | Canada  | 2001           | Wheat                     | 242                                                         |
| 33              | Canada  | 2001           | Whey                      | 34                                                          |
| 33              | Canada  | 2001           | Wine                      | 25                                                          |
| 33              | Canada  | 2002           | Apples                    | 39                                                          |
| 33              | Canada  | 2002           | Bananas                   | 36                                                          |
| 33              | Canada  | 2002           | Barley                    | 1                                                           |
| 33              | Canada  | 2002           | Beans                     | 4                                                           |
| 33              | Canada  | 2002           | Beer                      | 207                                                         |
| 33              | Canada  | 2002           | Beverages, Alcoholic      | 6                                                           |
| 33              | Canada  | 2002           | Beverages, Fermented      | 51                                                          |
| 33              | Canada  | 2002           | Bovine Meat               | 90                                                          |
| 33              | Canada  | 2002           | Butter, Ghee              | 8                                                           |
| 33              | Canada  | 2002           | Cereals, Other            | 5                                                           |
| 33              | Canada  | 2002           | Cheese                    | 32                                                          |
| 33              | Canada  | 2002           | Citrus, Other             | 1                                                           |
| 33              | Canada  | 2002           | Cocoa Beans               | 3                                                           |
| 33              | Canada  | 2002           | Coconut Oil               | 1                                                           |
| 33              | Canada  | 2002           | Coconuts - Incl Copra     | 3                                                           |
| 33              | Canada  | 2002           | Coffee                    | 12                                                          |
| 33              | Canada  | 2002           | Cottonseed Oil            | 1                                                           |
| 33              | Canada  | 2002           | Cream                     | 20                                                          |
| 33              | Canada  | 2002           | Crustaceans               | 12                                                          |
| 33              | Canada  | 2002           | Demersal Fish             | 18                                                          |
| 33              | Canada  | 2002           | Eggs                      | 31                                                          |
| 33              | Canada  | 2002           | Fats, Animals, Raw        | 20                                                          |
| 33              | Canada  | 2002           | Freshwater Fish           | 8                                                           |
| 33              | Canada  | 2002           | Fruits, Other             | 75                                                          |
| 33              | Canada  | 2002           | Grapefruit                | 11                                                          |
| 33              | Canada  | 2002           | Grapes                    | 28                                                          |
| 33              | Canada  | 2002           | Groundnuts (Shelled Eq)   | 7                                                           |
| 33              | Canada  | 2002           | Honey                     | 2                                                           |
| 33              | Canada  | 2002           | Lemons, Limes             | 6                                                           |
| 33              | Canada  | 2002           | Maize                     | 55                                                          |
| 33              | Canada  | 2002           | Maize Germ Oil            | 3                                                           |
| 33              | Canada  | 2002           | Marine Fish, Other        | 1                                                           |
| 33              | Canada  | 2002           | Milk, Whole               | 142                                                         |
| 33              | Canada  | 2002           | Molluscs, Other           | 12                                                          |
| 33              | Canada  | 2002           | Mutton & Goat Meat        | 3                                                           |
| 33              | Canada  | 2002           | Nuts                      | 9                                                           |
| 33              | Canada  | 2002           | Oats                      | 2                                                           |

Dietary calcium and zinc deficiency risks are decreasing but remain prevalent

| FAO countrycode | Country | Reference year | Food item                 | Gross food supply (g capita <sup>-1</sup> d <sup>-1</sup> ) |
|-----------------|---------|----------------|---------------------------|-------------------------------------------------------------|
| 33              | Canada  | 2002           | Offals, Edible            | 4                                                           |
| 33              | Canada  | 2002           | Olive Oil                 | 2                                                           |
| 33              | Canada  | 2002           | Olives                    | 2                                                           |
| 33              | Canada  | 2002           | Onions                    | 22                                                          |
| 33              | Canada  | 2002           | Oranges, Mandarines       | 135                                                         |
| 33              | Canada  | 2002           | Peas                      | 3                                                           |
| 33              | Canada  | 2002           | Pelagic Fish              | 14                                                          |
| 33              | Canada  | 2002           | Pigmeat                   | 83                                                          |
| 33              | Canada  | 2002           | Pineapples                | 9                                                           |
| 33              | Canada  | 2002           | Potatoes                  | 220                                                         |
| 33              | Canada  | 2002           | Poultry Meat              | 101                                                         |
| 33              | Canada  | 2002           | Pulses, Other             | 14                                                          |
| 33              | Canada  | 2002           | Rape and Mustard Oil      | 36                                                          |
| 33              | Canada  | 2002           | Rice (Milled Equivalent)  | 18                                                          |
| 33              | Canada  | 2002           | Roots, Other              | 1                                                           |
| 33              | Canada  | 2002           | Rye                       | 1                                                           |
| 33              | Canada  | 2002           | Sesameseed                | 1                                                           |
| 33              | Canada  | 2002           | Soyabean Oil              | 17                                                          |
| 33              | Canada  | 2002           | Soyabeans                 | 2                                                           |
| 33              | Canada  | 2002           | Spices, Other             | 1                                                           |
| 33              | Canada  | 2002           | Sugar, Refined Equivalent | 107                                                         |
| 33              | Canada  | 2002           | Sunflowerseed Oil         | 2                                                           |
| 33              | Canada  | 2002           | Sweet Potatoes            | 2                                                           |
| 33              | Canada  | 2002           | Sweeteners, Other         | 40                                                          |
| 33              | Canada  | 2002           | Tea                       | 2                                                           |
| 33              | Canada  | 2002           | Tomatoes                  | 89                                                          |
| 33              | Canada  | 2002           | Vegetables, Other         | 233                                                         |
| 33              | Canada  | 2002           | Wheat                     | 243                                                         |
| 33              | Canada  | 2002           | Whey                      | 34                                                          |
| 33              | Canada  | 2002           | Wine                      | 26                                                          |
| 33              | Canada  | 2003           | Apples                    | 30                                                          |
| 33              | Canada  | 2003           | Bananas                   | 36                                                          |
| 33              | Canada  | 2003           | Barley                    | 1                                                           |
| 33              | Canada  | 2003           | Beans                     | 3                                                           |
| 33              | Canada  | 2003           | Beer                      | 174                                                         |
| 33              | Canada  | 2003           | Beverages, Alcoholic      | 5                                                           |
| 33              | Canada  | 2003           | Beverages, Fermented      | 47                                                          |
| 33              | Canada  | 2003           | Bovine Meat               | 95                                                          |
| 33              | Canada  | 2003           | Butter, Ghee              | 8                                                           |
| 33              | Canada  | 2003           | Cereals, Other            | 4                                                           |
| 33              | Canada  | 2003           | Cheese                    | 32                                                          |
| 33              | Canada  | 2003           | Citrus, Other             | 1                                                           |
| 33              | Canada  | 2003           | Cocoa Beans               | 3                                                           |
| 33              | Canada  | 2003           | Coconut Oil               | 1                                                           |
| 33              | Canada  | 2003           | Coconuts - Incl Copra     | 3                                                           |
| 33              | Canada  | 2003           | Coffee                    | 11                                                          |
| 33              | Canada  | 2003           | Cottonseed Oil            | 1                                                           |
| 33              | Canada  | 2003           | Cream                     | 22                                                          |
| 33              | Canada  | 2003           | Crustaceans               | 13                                                          |
| 33              | Canada  | 2003           | Demersal Fish             | 18                                                          |
| 33              | Canada  | 2003           | Eggs                      | 31                                                          |
| 33              | Canada  | 2003           | Fats, Animals, Raw        | 21                                                          |
| 33              | Canada  | 2003           | Freshwater Fish           | 11                                                          |
| 33              | Canada  | 2003           | Fruits, Other             | 73                                                          |
| 33              | Canada  | 2003           | Grapefruit                | 10                                                          |
| 33              | Canada  | 2003           | Grapes                    | 29                                                          |
| 33              | Canada  | 2003           | Groundnuts (Shelled Eq)   | 6                                                           |
| 33              | Canada  | 2003           | Honey                     | 2                                                           |
| 33              | Canada  | 2003           | Lemons, Limes             | 7                                                           |
| 33              | Canada  | 2003           | Maize                     | 57                                                          |
| 33              | Canada  | 2003           | Maize Germ Oil            | 3                                                           |
| 33              | Canada  | 2003           | Marine Fish, Other        | 1                                                           |
| 33              | Canada  | 2003           | Milk, Whole               | 96                                                          |
| 33              | Canada  | 2003           | Molluscs, Other           | 13                                                          |
| 33              | Canada  | 2003           | Mutton & Goat Meat        | 3                                                           |
| 33              | Canada  | 2003           | Nuts                      | 10                                                          |
| 33              | Canada  | 2003           | Oats                      | 1                                                           |
| 33              | Canada  | 2003           | Offals, Edible            | 5                                                           |
| 33              | Canada  | 2003           | Olive Oil                 | 2                                                           |
| 33              | Canada  | 2003           | Olives                    | 2                                                           |
| 33              | Canada  | 2003           | Onions                    | 23                                                          |
| 33              | Canada  | 2003           | Oranges, Mandarines       | 132                                                         |
| 33              | Canada  | 2003           | Peas                      | 3                                                           |
| 33              | Canada  | 2003           | Pelagic Fish              | 11                                                          |
| 33              | Canada  | 2003           | Pigmeat                   | 75                                                          |
| 33              | Canada  | 2003           | Pineapples                | 9                                                           |
| 33              | Canada  | 2003           | Potatoes                  | 229                                                         |
| 33              | Canada  | 2003           | Poultry Meat              | 99                                                          |
| 33              | Canada  | 2003           | Pulses, Other             | 12                                                          |
| 33              | Canada  | 2003           | Rape and Mustard Oil      | 43                                                          |
| 33              | Canada  | 2003           | Rice (Milled Equivalent)  | 16                                                          |
| 33              | Canada  | 2003           | Roots, Other              | 1                                                           |
| 33              | Canada  | 2003           | Rye                       | 2                                                           |
| 33              | Canada  | 2003           | Sesameseed                | 1                                                           |
| 33              | Canada  | 2003           | Soyabean Oil              | 18                                                          |
| 33              | Canada  | 2003           | Soyabeans                 | 2                                                           |
| 33              | Canada  | 2003           | Spices, Other             | 1                                                           |
| 33              | Canada  | 2003           | Sugar, Refined Equivalent | 107                                                         |
| 33              | Canada  | 2003           | Sunflowerseed Oil         | 2                                                           |
| 33              | Canada  | 2003           | Sweet Potatoes            | 2                                                           |
| 33              | Canada  | 2003           | Sweeteners, Other         | 40                                                          |
| 33              | Canada  | 2003           | Tea                       | 2                                                           |
| 33              | Canada  | 2003           | Tomatoes                  | 77                                                          |
| 33              | Canada  | 2003           | Vegetables, Other         | 235                                                         |
| 33              | Canada  | 2003           | Wheat                     | 237                                                         |
| 33              | Canada  | 2003           | Whey                      | 29                                                          |
| 33              | Canada  | 2003           | Wine                      | 27                                                          |

Dietary calcium and zinc deficiency risks are decreasing but remain prevalent

| FAO countrycode | Country | Reference year | Food item                 | Gross food supply (g capita <sup>-1</sup> d <sup>-1</sup> ) |
|-----------------|---------|----------------|---------------------------|-------------------------------------------------------------|
| 33              | Canada  | 2004           | Apples                    | 38                                                          |
| 33              | Canada  | 2004           | Bananas                   | 37                                                          |
| 33              | Canada  | 2004           | Barley                    | 1                                                           |
| 33              | Canada  | 2004           | Beans                     | 2                                                           |
| 33              | Canada  | 2004           | Beer                      | 199                                                         |
| 33              | Canada  | 2004           | Beverages, Alcoholic      | 5                                                           |
| 33              | Canada  | 2004           | Beverages, Fermented      | 48                                                          |
| 33              | Canada  | 2004           | Bovine Meat               | 91                                                          |
| 33              | Canada  | 2004           | Butter, Ghee              | 8                                                           |
| 33              | Canada  | 2004           | Cassava                   | 1                                                           |
| 33              | Canada  | 2004           | Cereals, Other            | 2                                                           |
| 33              | Canada  | 2004           | Cheese                    | 33                                                          |
| 33              | Canada  | 2004           | Citrus, Other             | 1                                                           |
| 33              | Canada  | 2004           | Cocoa Beans               | 5                                                           |
| 33              | Canada  | 2004           | Coconut Oil               | 1                                                           |
| 33              | Canada  | 2004           | Coconuts - Incl Copra     | 3                                                           |
| 33              | Canada  | 2004           | Coffee                    | 15                                                          |
| 33              | Canada  | 2004           | Cottonseed Oil            | 1                                                           |
| 33              | Canada  | 2004           | Cream                     | 23                                                          |
| 33              | Canada  | 2004           | Crustaceans               | 12                                                          |
| 33              | Canada  | 2004           | Demersal Fish             | 20                                                          |
| 33              | Canada  | 2004           | Eggs                      | 31                                                          |
| 33              | Canada  | 2004           | Fats, Animals, Raw        | 22                                                          |
| 33              | Canada  | 2004           | Freshwater Fish           | 8                                                           |
| 33              | Canada  | 2004           | Fruits, Other             | 70                                                          |
| 33              | Canada  | 2004           | Grapefruit                | 10                                                          |
| 33              | Canada  | 2004           | Grapes                    | 28                                                          |
| 33              | Canada  | 2004           | Groundnuts (Shelled Eq)   | 7                                                           |
| 33              | Canada  | 2004           | Honey                     | 3                                                           |
| 33              | Canada  | 2004           | Lemons, Limes             | 6                                                           |
| 33              | Canada  | 2004           | Maize                     | 54                                                          |
| 33              | Canada  | 2004           | Maize Germ Oil            | 4                                                           |
| 33              | Canada  | 2004           | Marine Fish, Other        | 1                                                           |
| 33              | Canada  | 2004           | Milk, Whole               | 104                                                         |
| 33              | Canada  | 2004           | Molluscs, Other           | 11                                                          |
| 33              | Canada  | 2004           | Mutton & Goat Meat        | 3                                                           |
| 33              | Canada  | 2004           | Nuts                      | 11                                                          |
| 33              | Canada  | 2004           | Oats                      | 1                                                           |
| 33              | Canada  | 2004           | Offals, Edible            | 5                                                           |
| 33              | Canada  | 2004           | Olive Oil                 | 2                                                           |
| 33              | Canada  | 2004           | Olives                    | 2                                                           |
| 33              | Canada  | 2004           | Onions                    | 23                                                          |
| 33              | Canada  | 2004           | Oranges, Mandarines       | 130                                                         |
| 33              | Canada  | 2004           | Peas                      | 4                                                           |
| 33              | Canada  | 2004           | Pelagic Fish              | 12                                                          |
| 33              | Canada  | 2004           | Pigmeat                   | 79                                                          |
| 33              | Canada  | 2004           | Pineapples                | 10                                                          |
| 33              | Canada  | 2004           | Potatoes                  | 212                                                         |
| 33              | Canada  | 2004           | Poultry Meat              | 100                                                         |
| 33              | Canada  | 2004           | Pulses, Other             | 13                                                          |
| 33              | Canada  | 2004           | Rape and Mustard Oil      | 39                                                          |
| 33              | Canada  | 2004           | Rice (Milled Eqivalent)   | 23                                                          |
| 33              | Canada  | 2004           | Roots, Other              | 1                                                           |
| 33              | Canada  | 2004           | Rye                       | 2                                                           |
| 33              | Canada  | 2004           | Soyabean Oil              | 17                                                          |
| 33              | Canada  | 2004           | Soyabbeans                | 2                                                           |
| 33              | Canada  | 2004           | Spices, Other             | 2                                                           |
| 33              | Canada  | 2004           | Sugar, Refined Equivalent | 104                                                         |
| 33              | Canada  | 2004           | Sunflowerseed Oil         | 2                                                           |
| 33              | Canada  | 2004           | Sweet Potatoes            | 3                                                           |
| 33              | Canada  | 2004           | Sweeteners, Other         | 38                                                          |
| 33              | Canada  | 2004           | Tea                       | 1                                                           |
| 33              | Canada  | 2004           | Tomatoes                  | 89                                                          |
| 33              | Canada  | 2004           | Vegetables, Other         | 223                                                         |
| 33              | Canada  | 2004           | Wheat                     | 241                                                         |
| 33              | Canada  | 2004           | Whey                      | 23                                                          |
| 33              | Canada  | 2004           | Wine                      | 27                                                          |
| 33              | Canada  | 2005           | Apples                    | 50                                                          |
| 33              | Canada  | 2005           | Bananas                   | 37                                                          |
| 33              | Canada  | 2005           | Barley                    | 1                                                           |
| 33              | Canada  | 2005           | Beans                     | 3                                                           |
| 33              | Canada  | 2005           | Beer                      | 207                                                         |
| 33              | Canada  | 2005           | Beverages, Alcoholic      | 3                                                           |
| 33              | Canada  | 2005           | Beverages, Fermented      | 52                                                          |
| 33              | Canada  | 2005           | Bovine Meat               | 89                                                          |
| 33              | Canada  | 2005           | Butter, Ghee              | 8                                                           |
| 33              | Canada  | 2005           | Cassava                   | 1                                                           |
| 33              | Canada  | 2005           | Cereals, Other            | 2                                                           |
| 33              | Canada  | 2005           | Cheese                    | 33                                                          |
| 33              | Canada  | 2005           | Citrus, Other             | 1                                                           |
| 33              | Canada  | 2005           | Cocoa Beans               | 2                                                           |
| 33              | Canada  | 2005           | Coconut Oil               | 1                                                           |
| 33              | Canada  | 2005           | Coconuts - Incl Copra     | 3                                                           |
| 33              | Canada  | 2005           | Coffee                    | 15                                                          |
| 33              | Canada  | 2005           | Cottonseed Oil            | 1                                                           |
| 33              | Canada  | 2005           | Cream                     | 23                                                          |
| 33              | Canada  | 2005           | Crustaceans               | 12                                                          |
| 33              | Canada  | 2005           | Dates                     | 1                                                           |
| 33              | Canada  | 2005           | Demersal Fish             | 20                                                          |
| 33              | Canada  | 2005           | Eggs                      | 31                                                          |
| 33              | Canada  | 2005           | Fats, Animals, Raw        | 21                                                          |
| 33              | Canada  | 2005           | Freshwater Fish           | 8                                                           |
| 33              | Canada  | 2005           | Fruits, Other             | 75                                                          |
| 33              | Canada  | 2005           | Grapefruit                | 9                                                           |
| 33              | Canada  | 2005           | Grapes                    | 28                                                          |
| 33              | Canada  | 2005           | Groundnuts (Shelled Eq)   | 7                                                           |
| 33              | Canada  | 2005           | Honey                     | 3                                                           |

Dietary calcium and zinc deficiency risks are decreasing but remain prevalent

| FAO countrycode | Country | Reference year | Food item                 | Gross food supply (g capita <sup>-1</sup> d <sup>-1</sup> ) |
|-----------------|---------|----------------|---------------------------|-------------------------------------------------------------|
| 33              | Canada  | 2005           | Lemons, Limes             | 7                                                           |
| 33              | Canada  | 2005           | Maize                     | 54                                                          |
| 33              | Canada  | 2005           | Maize Germ Oil            | 4                                                           |
| 33              | Canada  | 2005           | Marine Fish, Other        | 2                                                           |
| 33              | Canada  | 2005           | Milk, Whole               | 95                                                          |
| 33              | Canada  | 2005           | Molluscs, Other           | 10                                                          |
| 33              | Canada  | 2005           | Mutton & Goat Meat        | 3                                                           |
| 33              | Canada  | 2005           | Nuts                      | 10                                                          |
| 33              | Canada  | 2005           | Oats                      | 1                                                           |
| 33              | Canada  | 2005           | Offals, Edible            | 4                                                           |
| 33              | Canada  | 2005           | Olive Oil                 | 2                                                           |
| 33              | Canada  | 2005           | Olives                    | 2                                                           |
| 33              | Canada  | 2005           | Onions                    | 21                                                          |
| 33              | Canada  | 2005           | Oranges, Mandarines       | 135                                                         |
| 33              | Canada  | 2005           | Peas                      | 4                                                           |
| 33              | Canada  | 2005           | Pelagic Fish              | 12                                                          |
| 33              | Canada  | 2005           | Pigmeat                   | 69                                                          |
| 33              | Canada  | 2005           | Pineapples                | 11                                                          |
| 33              | Canada  | 2005           | Potatoes                  | 215                                                         |
| 33              | Canada  | 2005           | Poultry Meat              | 100                                                         |
| 33              | Canada  | 2005           | Pulses, Other             | 13                                                          |
| 33              | Canada  | 2005           | Rape and Mustard Oil      | 40                                                          |
| 33              | Canada  | 2005           | Rice (Milled Equivalent)  | 23                                                          |
| 33              | Canada  | 2005           | Roots, Other              | 1                                                           |
| 33              | Canada  | 2005           | Rye                       | 1                                                           |
| 33              | Canada  | 2005           | Soybean Oil               | 17                                                          |
| 33              | Canada  | 2005           | Soybeans                  | 2                                                           |
| 33              | Canada  | 2005           | Spices, Other             | 1                                                           |
| 33              | Canada  | 2005           | Sugar, Refined Equivalent | 104                                                         |
| 33              | Canada  | 2005           | Sunflowerseed Oil         | 2                                                           |
| 33              | Canada  | 2005           | Sweet Potatoes            | 2                                                           |
| 33              | Canada  | 2005           | Sweeteners, Other         | 36                                                          |
| 33              | Canada  | 2005           | Tea                       | 1                                                           |
| 33              | Canada  | 2005           | Tomatoes                  | 89                                                          |
| 33              | Canada  | 2005           | Vegetables, Other         | 216                                                         |
| 33              | Canada  | 2005           | Wheat                     | 245                                                         |
| 33              | Canada  | 2005           | Whey                      | 17                                                          |
| 33              | Canada  | 2005           | Wine                      | 26                                                          |
| 33              | Canada  | 2006           | Apples                    | 50                                                          |
| 33              | Canada  | 2006           | Bananas                   | 38                                                          |
| 33              | Canada  | 2006           | Beans                     | 3                                                           |
| 33              | Canada  | 2006           | Beer                      | 189                                                         |
| 33              | Canada  | 2006           | Beverages, Alcoholic      | 4                                                           |
| 33              | Canada  | 2006           | Beverages, Fermented      | 40                                                          |
| 33              | Canada  | 2006           | Bovine Meat               | 88                                                          |
| 33              | Canada  | 2006           | Butter, Ghee              | 6                                                           |
| 33              | Canada  | 2006           | Cassava                   | 1                                                           |
| 33              | Canada  | 2006           | Cephalopods               | 1                                                           |
| 33              | Canada  | 2006           | Cereals, Other            | 1                                                           |
| 33              | Canada  | 2006           | Cheese                    | 34                                                          |
| 33              | Canada  | 2006           | Citrus, Other             | 1                                                           |
| 33              | Canada  | 2006           | Cocoa Beans               | 4                                                           |
| 33              | Canada  | 2006           | Coconut Oil               | 1                                                           |
| 33              | Canada  | 2006           | Coconuts - Incl Copra     | 3                                                           |
| 33              | Canada  | 2006           | Coffee                    | 17                                                          |
| 33              | Canada  | 2006           | Cottonseed Oil            | 1                                                           |
| 33              | Canada  | 2006           | Cream                     | 24                                                          |
| 33              | Canada  | 2006           | Crustaceans               | 11                                                          |
| 33              | Canada  | 2006           | Dates                     | 1                                                           |
| 33              | Canada  | 2006           | Demersal Fish             | 19                                                          |
| 33              | Canada  | 2006           | Eggs                      | 30                                                          |
| 33              | Canada  | 2006           | Fats, Animals, Raw        | 19                                                          |
| 33              | Canada  | 2006           | Freshwater Fish           | 9                                                           |
| 33              | Canada  | 2006           | Fruits, Other             | 81                                                          |
| 33              | Canada  | 2006           | Grapefruit                | 8                                                           |
| 33              | Canada  | 2006           | Grapes                    | 29                                                          |
| 33              | Canada  | 2006           | Groundnuts (Shelled Eq)   | 7                                                           |
| 33              | Canada  | 2006           | Honey                     | 3                                                           |
| 33              | Canada  | 2006           | Lemons, Limes             | 7                                                           |
| 33              | Canada  | 2006           | Maize                     | 53                                                          |
| 33              | Canada  | 2006           | Maize Germ Oil            | 4                                                           |
| 33              | Canada  | 2006           | Marine Fish, Other        | 1                                                           |
| 33              | Canada  | 2006           | Milk, Whole               | 112                                                         |
| 33              | Canada  | 2006           | Molluscs, Other           | 10                                                          |
| 33              | Canada  | 2006           | Mutton & Goat Meat        | 3                                                           |
| 33              | Canada  | 2006           | Nuts                      | 10                                                          |
| 33              | Canada  | 2006           | Oats                      | 1                                                           |
| 33              | Canada  | 2006           | Offals, Edible            | 4                                                           |
| 33              | Canada  | 2006           | Olive Oil                 | 3                                                           |
| 33              | Canada  | 2006           | Olives                    | 2                                                           |
| 33              | Canada  | 2006           | Onions                    | 23                                                          |
| 33              | Canada  | 2006           | Oranges, Mandarines       | 133                                                         |
| 33              | Canada  | 2006           | Peas                      | 1                                                           |
| 33              | Canada  | 2006           | Pelagic Fish              | 13                                                          |
| 33              | Canada  | 2006           | Pigmeat                   | 69                                                          |
| 33              | Canada  | 2006           | Pimento                   | 1                                                           |
| 33              | Canada  | 2006           | Pineapples                | 13                                                          |
| 33              | Canada  | 2006           | Potatoes                  | 210                                                         |
| 33              | Canada  | 2006           | Poultry Meat              | 101                                                         |
| 33              | Canada  | 2006           | Pulses, Other             | 13                                                          |
| 33              | Canada  | 2006           | Rape and Mustard Oil      | 41                                                          |
| 33              | Canada  | 2006           | Rice (Milled Equivalent)  | 25                                                          |
| 33              | Canada  | 2006           | Roots, Other              | 1                                                           |
| 33              | Canada  | 2006           | Rye                       | 1                                                           |
| 33              | Canada  | 2006           | Sesameseed                | 1                                                           |
| 33              | Canada  | 2006           | Soybean Oil               | 15                                                          |
| 33              | Canada  | 2006           | Soybeans                  | 2                                                           |

## Dietary calcium and zinc deficiency risks are decreasing but remain prevalent

| FAO countrycode | Country | Reference year | Food item                 | Gross food supply (g capita <sup>-1</sup> d <sup>-1</sup> ) |
|-----------------|---------|----------------|---------------------------|-------------------------------------------------------------|
| 33              | Canada  | 2006           | Spices, Other             | 1                                                           |
| 33              | Canada  | 2006           | Sugar, Refined Equivalent | 98                                                          |
| 33              | Canada  | 2006           | Sunflowerseed Oil         | 2                                                           |
| 33              | Canada  | 2006           | Sweet Potatoes            | 2                                                           |
| 33              | Canada  | 2006           | Sweeteners, Other         | 36                                                          |
| 33              | Canada  | 2006           | Tea                       | 1                                                           |
| 33              | Canada  | 2006           | Tomatoes                  | 86                                                          |
| 33              | Canada  | 2006           | Vegetables, Other         | 222                                                         |
| 33              | Canada  | 2006           | Wheat                     | 244                                                         |
| 33              | Canada  | 2006           | Whey                      | 20                                                          |
| 33              | Canada  | 2006           | Wine                      | 30                                                          |
| 33              | Canada  | 2007           | Apples                    | 56                                                          |
| 33              | Canada  | 2007           | Bananas                   | 38                                                          |
| 33              | Canada  | 2007           | Barley                    | 1                                                           |
| 33              | Canada  | 2007           | Beans                     | 2                                                           |
| 33              | Canada  | 2007           | Beer                      | 190                                                         |
| 33              | Canada  | 2007           | Beverages, Alcoholic      | 1                                                           |
| 33              | Canada  | 2007           | Beverages, Fermented      | 43                                                          |
| 33              | Canada  | 2007           | Bovine Meat               | 90                                                          |
| 33              | Canada  | 2007           | Butter, Ghee              | 7                                                           |
| 33              | Canada  | 2007           | Cassava                   | 1                                                           |
| 33              | Canada  | 2007           | Cereals, Other            | 1                                                           |
| 33              | Canada  | 2007           | Cheese                    | 35                                                          |
| 33              | Canada  | 2007           | Citrus, Other             | 1                                                           |
| 33              | Canada  | 2007           | Cocoa Beans               | 2                                                           |
| 33              | Canada  | 2007           | Coconut Oil               | 1                                                           |
| 33              | Canada  | 2007           | Coconuts - Incl Copra     | 3                                                           |
| 33              | Canada  | 2007           | Coffee                    | 20                                                          |
| 33              | Canada  | 2007           | Cottonseed Oil            | 1                                                           |
| 33              | Canada  | 2007           | Cream                     | 24                                                          |
| 33              | Canada  | 2007           | Crustaceans               | 12                                                          |
| 33              | Canada  | 2007           | Dates                     | 1                                                           |
| 33              | Canada  | 2007           | Demersal Fish             | 17                                                          |
| 33              | Canada  | 2007           | Eggs                      | 30                                                          |
| 33              | Canada  | 2007           | Fats, Animals, Raw        | 19                                                          |
| 33              | Canada  | 2007           | Freshwater Fish           | 10                                                          |
| 33              | Canada  | 2007           | Fruits, Other             | 86                                                          |
| 33              | Canada  | 2007           | Grapefruit                | 8                                                           |
| 33              | Canada  | 2007           | Grapes                    | 30                                                          |
| 33              | Canada  | 2007           | Groundnuts (Shelled Eq)   | 7                                                           |
| 33              | Canada  | 2007           | Honey                     | 2                                                           |
| 33              | Canada  | 2007           | Lemons, Limes             | 8                                                           |
| 33              | Canada  | 2007           | Maize                     | 53                                                          |
| 33              | Canada  | 2007           | Maize Germ Oil            | 4                                                           |
| 33              | Canada  | 2007           | Marine Fish, Other        | 1                                                           |
| 33              | Canada  | 2007           | Milk, Whole               | 97                                                          |
| 33              | Canada  | 2007           | Molluscs, Other           | 11                                                          |
| 33              | Canada  | 2007           | Mutton & Goat Meat        | 3                                                           |
| 33              | Canada  | 2007           | Nuts                      | 12                                                          |
| 33              | Canada  | 2007           | Oats                      | 2                                                           |
| 33              | Canada  | 2007           | Offals, Edible            | 4                                                           |
| 33              | Canada  | 2007           | Olive Oil                 | 3                                                           |
| 33              | Canada  | 2007           | Olives                    | 2                                                           |
| 33              | Canada  | 2007           | Onions                    | 23                                                          |
| 33              | Canada  | 2007           | Oranges, Mandarines       | 150                                                         |
| 33              | Canada  | 2007           | Peas                      | 4                                                           |
| 33              | Canada  | 2007           | Pelagic Fish              | 12                                                          |
| 33              | Canada  | 2007           | Pigmeat                   | 75                                                          |
| 33              | Canada  | 2007           | Pineapples                | 14                                                          |
| 33              | Canada  | 2007           | Potatoes                  | 190                                                         |
| 33              | Canada  | 2007           | Poultry Meat              | 103                                                         |
| 33              | Canada  | 2007           | Pulses, Other             | 14                                                          |
| 33              | Canada  | 2007           | Rape and Mustard Oil      | 41                                                          |
| 33              | Canada  | 2007           | Rice (Milled Equivalent)  | 25                                                          |
| 33              | Canada  | 2007           | Roots, Other              | 1                                                           |
| 33              | Canada  | 2007           | Rye                       | 1                                                           |
| 33              | Canada  | 2007           | Soyabean Oil              | 16                                                          |
| 33              | Canada  | 2007           | Soyabeans                 | 2                                                           |
| 33              | Canada  | 2007           | Spices, Other             | 1                                                           |
| 33              | Canada  | 2007           | Sugar, Refined Equivalent | 97                                                          |
| 33              | Canada  | 2007           | Sunflowerseed Oil         | 2                                                           |
| 33              | Canada  | 2007           | Sweet Potatoes            | 2                                                           |
| 33              | Canada  | 2007           | Sweeteners, Other         | 39                                                          |
| 33              | Canada  | 2007           | Tea                       | 1                                                           |
| 33              | Canada  | 2007           | Tomatoes                  | 87                                                          |
| 33              | Canada  | 2007           | Vegetables, Other         | 226                                                         |
| 33              | Canada  | 2007           | Wheat                     | 244                                                         |
| 33              | Canada  | 2007           | Whey                      | 20                                                          |
| 33              | Canada  | 2007           | Wine                      | 30                                                          |
| 33              | Canada  | 2008           | Apples                    | 49                                                          |
| 33              | Canada  | 2008           | Bananas                   | 38                                                          |
| 33              | Canada  | 2008           | Beans                     | 3                                                           |
| 33              | Canada  | 2008           | Beer                      | 190                                                         |
| 33              | Canada  | 2008           | Beverages, Alcoholic      | 2                                                           |
| 33              | Canada  | 2008           | Beverages, Fermented      | 43                                                          |
| 33              | Canada  | 2008           | Bovine Meat               | 86                                                          |
| 33              | Canada  | 2008           | Butter, Ghee              | 8                                                           |
| 33              | Canada  | 2008           | Cassava                   | 1                                                           |
| 33              | Canada  | 2008           | Cheese                    | 34                                                          |
| 33              | Canada  | 2008           | Citrus, Other             | 4                                                           |
| 33              | Canada  | 2008           | Cocoa Beans               | 6                                                           |
| 33              | Canada  | 2008           | Coconut Oil               | 1                                                           |
| 33              | Canada  | 2008           | Coconuts - Incl Copra     | 3                                                           |
| 33              | Canada  | 2008           | Coffee                    | 18                                                          |
| 33              | Canada  | 2008           | Cottonseed Oil            | 1                                                           |
| 33              | Canada  | 2008           | Cream                     | 23                                                          |
| 33              | Canada  | 2008           | Crustaceans               | 15                                                          |

Dietary calcium and zinc deficiency risks are decreasing but remain prevalent

| FAO countrycode | Country | Reference year | Food item                 | Gross food supply (g capita <sup>-1</sup> d <sup>-1</sup> ) |
|-----------------|---------|----------------|---------------------------|-------------------------------------------------------------|
| 33              | Canada  | 2008           | Dates                     | 1                                                           |
| 33              | Canada  | 2008           | Demersal Fish             | 16                                                          |
| 33              | Canada  | 2008           | Eggs                      | 32                                                          |
| 33              | Canada  | 2008           | Fats, Animals, Raw        | 18                                                          |
| 33              | Canada  | 2008           | Freshwater Fish           | 9                                                           |
| 33              | Canada  | 2008           | Fruits, Other             | 89                                                          |
| 33              | Canada  | 2008           | Grapefruit                | 8                                                           |
| 33              | Canada  | 2008           | Grapes                    | 28                                                          |
| 33              | Canada  | 2008           | Groundnuts (Shelled Eq)   | 7                                                           |
| 33              | Canada  | 2008           | Honey                     | 1                                                           |
| 33              | Canada  | 2008           | Lemons, Limes             | 7                                                           |
| 33              | Canada  | 2008           | Maize                     | 53                                                          |
| 33              | Canada  | 2008           | Maize Germ Oil            | 4                                                           |
| 33              | Canada  | 2008           | Marine Fish, Other        | 1                                                           |
| 33              | Canada  | 2008           | Milk, Whole               | 96                                                          |
| 33              | Canada  | 2008           | Molluscs, Other           | 10                                                          |
| 33              | Canada  | 2008           | Mutton & Goat Meat        | 3                                                           |
| 33              | Canada  | 2008           | Nuts                      | 12                                                          |
| 33              | Canada  | 2008           | Oats                      | 2                                                           |
| 33              | Canada  | 2008           | Offals, Edible            | 3                                                           |
| 33              | Canada  | 2008           | Oilcrops, Other           | 5                                                           |
| 33              | Canada  | 2008           | Olive Oil                 | 3                                                           |
| 33              | Canada  | 2008           | Olives                    | 2                                                           |
| 33              | Canada  | 2008           | Onions                    | 21                                                          |
| 33              | Canada  | 2008           | Oranges, Mandarines       | 126                                                         |
| 33              | Canada  | 2008           | Peas                      | 6                                                           |
| 33              | Canada  | 2008           | Pelagic Fish              | 10                                                          |
| 33              | Canada  | 2008           | Pigmeat                   | 72                                                          |
| 33              | Canada  | 2008           | Pineapples                | 14                                                          |
| 33              | Canada  | 2008           | Potatoes                  | 173                                                         |
| 33              | Canada  | 2008           | Poultry Meat              | 103                                                         |
| 33              | Canada  | 2008           | Pulses, Other             | 15                                                          |
| 33              | Canada  | 2008           | Rape and Mustard Oil      | 41                                                          |
| 33              | Canada  | 2008           | Rice (Milled Equivalent)  | 27                                                          |
| 33              | Canada  | 2008           | Roots, Other              | 1                                                           |
| 33              | Canada  | 2008           | Rye                       | 2                                                           |
| 33              | Canada  | 2008           | Soybean Oil               | 16                                                          |
| 33              | Canada  | 2008           | Soybeans                  | 2                                                           |
| 33              | Canada  | 2008           | Spices, Other             | 2                                                           |
| 33              | Canada  | 2008           | Sugar, Refined Equivalent | 96                                                          |
| 33              | Canada  | 2008           | Sunflowerseed Oil         | 2                                                           |
| 33              | Canada  | 2008           | Sweet Potatoes            | 2                                                           |
| 33              | Canada  | 2008           | Sweeteners, Other         | 35                                                          |
| 33              | Canada  | 2008           | Tea                       | 1                                                           |
| 33              | Canada  | 2008           | Tomatoes                  | 80                                                          |
| 33              | Canada  | 2008           | Vegetables, Other         | 212                                                         |
| 33              | Canada  | 2008           | Wheat                     | 232                                                         |
| 33              | Canada  | 2008           | Whey                      | 22                                                          |
| 33              | Canada  | 2008           | Wine                      | 30                                                          |
| 33              | Canada  | 2009           | Apples                    | 60                                                          |
| 33              | Canada  | 2009           | Bananas                   | 38                                                          |
| 33              | Canada  | 2009           | Beans                     | 2                                                           |
| 33              | Canada  | 2009           | Beer                      | 186                                                         |
| 33              | Canada  | 2009           | Beverages, Alcoholic      | 1                                                           |
| 33              | Canada  | 2009           | Beverages, Fermented      | 40                                                          |
| 33              | Canada  | 2009           | Bovine Meat               | 84                                                          |
| 33              | Canada  | 2009           | Butter, Ghee              | 8                                                           |
| 33              | Canada  | 2009           | Cassava                   | 1                                                           |
| 33              | Canada  | 2009           | Cheese                    | 34                                                          |
| 33              | Canada  | 2009           | Citrus, Other             | 4                                                           |
| 33              | Canada  | 2009           | Cocoa Beans               | 6                                                           |
| 33              | Canada  | 2009           | Coconut Oil               | 1                                                           |
| 33              | Canada  | 2009           | Coconuts - Incl Copra     | 3                                                           |
| 33              | Canada  | 2009           | Coffee                    | 18                                                          |
| 33              | Canada  | 2009           | Cottonseed Oil            | 1                                                           |
| 33              | Canada  | 2009           | Cream                     | 23                                                          |
| 33              | Canada  | 2009           | Crustaceans               | 14                                                          |
| 33              | Canada  | 2009           | Dates                     | 1                                                           |
| 33              | Canada  | 2009           | Demersal Fish             | 15                                                          |
| 33              | Canada  | 2009           | Eggs                      | 33                                                          |
| 33              | Canada  | 2009           | Fats, Animals, Raw        | 18                                                          |
| 33              | Canada  | 2009           | Freshwater Fish           | 11                                                          |
| 33              | Canada  | 2009           | Fruits, Other             | 85                                                          |
| 33              | Canada  | 2009           | Grapefruit                | 7                                                           |
| 33              | Canada  | 2009           | Grapes                    | 26                                                          |
| 33              | Canada  | 2009           | Groundnuts (Shelled Eq)   | 7                                                           |
| 33              | Canada  | 2009           | Honey                     | 2                                                           |
| 33              | Canada  | 2009           | Lemons, Limes             | 7                                                           |
| 33              | Canada  | 2009           | Maize                     | 53                                                          |
| 33              | Canada  | 2009           | Maize Germ Oil            | 4                                                           |
| 33              | Canada  | 2009           | Marine Fish, Other        | 2                                                           |
| 33              | Canada  | 2009           | Milk, Whole               | 99                                                          |
| 33              | Canada  | 2009           | Molluscs, Other           | 9                                                           |
| 33              | Canada  | 2009           | Mutton & Goat Meat        | 3                                                           |
| 33              | Canada  | 2009           | Nuts                      | 11                                                          |
| 33              | Canada  | 2009           | Oats                      | 2                                                           |
| 33              | Canada  | 2009           | Offals, Edible            | 4                                                           |
| 33              | Canada  | 2009           | Oilcrops, Other           | 1                                                           |
| 33              | Canada  | 2009           | Olive Oil                 | 3                                                           |
| 33              | Canada  | 2009           | Olives                    | 2                                                           |
| 33              | Canada  | 2009           | Onions                    | 28                                                          |
| 33              | Canada  | 2009           | Oranges, Mandarines       | 128                                                         |
| 33              | Canada  | 2009           | Palm Oil                  | 2                                                           |
| 33              | Canada  | 2009           | Peas                      | 4                                                           |
| 33              | Canada  | 2009           | Pelagic Fish              | 12                                                          |
| 33              | Canada  | 2009           | Pigmeat                   | 70                                                          |
| 33              | Canada  | 2009           | Pimento                   | 1                                                           |



Dietary calcium and zinc deficiency risks are decreasing but remain prevalent

| FAO countrycode | Country | Reference year | Food item                 | Gross food supply (g capita <sup>-1</sup> d <sup>-1</sup> ) |
|-----------------|---------|----------------|---------------------------|-------------------------------------------------------------|
| 33              | Canada  | 2009           | Pineapples                | 12                                                          |
| 33              | Canada  | 2009           | Potatoes                  | 199                                                         |
| 33              | Canada  | 2009           | Poultry Meat              | 100                                                         |
| 33              | Canada  | 2009           | Pulses, Other             | 17                                                          |
| 33              | Canada  | 2009           | Rape and Mustard Oil      | 41                                                          |
| 33              | Canada  | 2009           | Rice (Milled Equivalent)  | 25                                                          |
| 33              | Canada  | 2009           | Roots, Other              | 1                                                           |
| 33              | Canada  | 2009           | Rye                       | 2                                                           |
| 33              | Canada  | 2009           | Sesameseed                | 1                                                           |
| 33              | Canada  | 2009           | Soyabean Oil              | 15                                                          |
| 33              | Canada  | 2009           | Soyabeans                 | 2                                                           |
| 33              | Canada  | 2009           | Spices, Other             | 2                                                           |
| 33              | Canada  | 2009           | Sugar, Refined Equivalent | 78                                                          |
| 33              | Canada  | 2009           | Sunflowerseed Oil         | 2                                                           |
| 33              | Canada  | 2009           | Sweet Potatoes            | 3                                                           |
| 33              | Canada  | 2009           | Sweeteners, Other         | 36                                                          |
| 33              | Canada  | 2009           | Tea                       | 1                                                           |
| 33              | Canada  | 2009           | Tomatoes                  | 57                                                          |
| 33              | Canada  | 2009           | Vegetables, Other         | 228                                                         |
| 33              | Canada  | 2009           | Wheat                     | 232                                                         |
| 33              | Canada  | 2009           | Whey                      | 15                                                          |
| 33              | Canada  | 2009           | Wine                      | 30                                                          |
| 33              | Canada  | 2010           | Apples                    | 56                                                          |
| 33              | Canada  | 2010           | Bananas                   | 39                                                          |
| 33              | Canada  | 2010           | Barley                    | 1                                                           |
| 33              | Canada  | 2010           | Beans                     | 2                                                           |
| 33              | Canada  | 2010           | Beer                      | 158                                                         |
| 33              | Canada  | 2010           | Beverages, Alcoholic      | 1                                                           |
| 33              | Canada  | 2010           | Beverages, Fermented      | 39                                                          |
| 33              | Canada  | 2010           | Bovine Meat               | 82                                                          |
| 33              | Canada  | 2010           | Butter, Ghee              | 7                                                           |
| 33              | Canada  | 2010           | Cassava                   | 1                                                           |
| 33              | Canada  | 2010           | Cereals, Other            | 1                                                           |
| 33              | Canada  | 2010           | Cheese                    | 35                                                          |
| 33              | Canada  | 2010           | Citrus, Other             | 4                                                           |
| 33              | Canada  | 2010           | Cocoa Beans               | 6                                                           |
| 33              | Canada  | 2010           | Coconut Oil               | 1                                                           |
| 33              | Canada  | 2010           | Coconuts - Incl Copra     | 3                                                           |
| 33              | Canada  | 2010           | Coffee                    | 21                                                          |
| 33              | Canada  | 2010           | Cottonseed Oil            | 1                                                           |
| 33              | Canada  | 2010           | Cream                     | 23                                                          |
| 33              | Canada  | 2010           | Crustaceans               | 15                                                          |
| 33              | Canada  | 2010           | Dates                     | 1                                                           |
| 33              | Canada  | 2010           | Demersal Fish             | 14                                                          |
| 33              | Canada  | 2010           | Eggs                      | 33                                                          |
| 33              | Canada  | 2010           | Fats, Animals, Raw        | 18                                                          |
| 33              | Canada  | 2010           | Freshwater Fish           | 9                                                           |
| 33              | Canada  | 2010           | Fruits, Other             | 83                                                          |
| 33              | Canada  | 2010           | Grapefruit                | 6                                                           |
| 33              | Canada  | 2010           | Grapes                    | 27                                                          |
| 33              | Canada  | 2010           | Groundnuts (Shelled Eq)   | 8                                                           |
| 33              | Canada  | 2010           | Honey                     | 2                                                           |
| 33              | Canada  | 2010           | Lemons, Limes             | 7                                                           |
| 33              | Canada  | 2010           | Maize                     | 54                                                          |
| 33              | Canada  | 2010           | Maize Germ Oil            | 5                                                           |
| 33              | Canada  | 2010           | Marine Fish, Other        | 2                                                           |
| 33              | Canada  | 2010           | Milk, Whole               | 103                                                         |
| 33              | Canada  | 2010           | Molluscs, Other           | 9                                                           |
| 33              | Canada  | 2010           | Mutton & Goat Meat        | 3                                                           |
| 33              | Canada  | 2010           | Nuts                      | 12                                                          |
| 33              | Canada  | 2010           | Oats                      | 1                                                           |
| 33              | Canada  | 2010           | Offals, Edible            | 4                                                           |
| 33              | Canada  | 2010           | Olive Oil                 | 3                                                           |
| 33              | Canada  | 2010           | Olives                    | 2                                                           |
| 33              | Canada  | 2010           | Onions                    | 23                                                          |
| 33              | Canada  | 2010           | Oranges, Mandarines       | 131                                                         |
| 33              | Canada  | 2010           | Palm Oil                  | 2                                                           |
| 33              | Canada  | 2010           | Peas                      | 3                                                           |
| 33              | Canada  | 2010           | Pelagic Fish              | 13                                                          |
| 33              | Canada  | 2010           | Pigmeat                   | 66                                                          |
| 33              | Canada  | 2010           | Pineapples                | 12                                                          |
| 33              | Canada  | 2010           | Potatoes                  | 223                                                         |
| 33              | Canada  | 2010           | Poultry Meat              | 101                                                         |
| 33              | Canada  | 2010           | Pulses, Other             | 22                                                          |
| 33              | Canada  | 2010           | Rape and Mustard Oil      | 42                                                          |
| 33              | Canada  | 2010           | Rice (Milled Equivalent)  | 24                                                          |
| 33              | Canada  | 2010           | Roots, Other              | 1                                                           |
| 33              | Canada  | 2010           | Rye                       | 2                                                           |
| 33              | Canada  | 2010           | Soyabean Oil              | 16                                                          |
| 33              | Canada  | 2010           | Soyabeans                 | 2                                                           |
| 33              | Canada  | 2010           | Spices, Other             | 2                                                           |
| 33              | Canada  | 2010           | Sugar, Refined Equivalent | 70                                                          |
| 33              | Canada  | 2010           | Sunflowerseed Oil         | 2                                                           |
| 33              | Canada  | 2010           | Sweet Potatoes            | 4                                                           |
| 33              | Canada  | 2010           | Sweeteners, Other         | 36                                                          |
| 33              | Canada  | 2010           | Tea                       | 1                                                           |
| 33              | Canada  | 2010           | Tomatoes                  | 57                                                          |
| 33              | Canada  | 2010           | Vegetables, Other         | 225                                                         |
| 33              | Canada  | 2010           | Wheat                     | 229                                                         |
| 33              | Canada  | 2010           | Whey                      | 14                                                          |
| 33              | Canada  | 2010           | Wine                      | 32                                                          |
| 33              | Canada  | 2011           | Apples                    | 58                                                          |
| 33              | Canada  | 2011           | Bananas                   | 39                                                          |
| 33              | Canada  | 2011           | Barley                    | 1                                                           |
| 33              | Canada  | 2011           | Beans                     | 3                                                           |
| 33              | Canada  | 2011           | Beer                      | 158                                                         |
| 33              | Canada  | 2011           | Beverages, Fermented      | 43                                                          |

Dietary calcium and zinc deficiency risks are decreasing but remain prevalent

| FAO countrycode | Country                  | Reference year | Food item                 | Gross food supply (g capita <sup>-1</sup> d <sup>-1</sup> ) |
|-----------------|--------------------------|----------------|---------------------------|-------------------------------------------------------------|
| 33              | Canada                   | 2011           | Bovine Meat               | 82                                                          |
| 33              | Canada                   | 2011           | Butter, Ghee              | 8                                                           |
| 33              | Canada                   | 2011           | Cassava                   | 1                                                           |
| 33              | Canada                   | 2011           | Cereals, Other            | 2                                                           |
| 33              | Canada                   | 2011           | Cheese                    | 36                                                          |
| 33              | Canada                   | 2011           | Citrus, Other             | 2                                                           |
| 33              | Canada                   | 2011           | Cocoa Beans               | 8                                                           |
| 33              | Canada                   | 2011           | Coconut Oil               | 1                                                           |
| 33              | Canada                   | 2011           | Coconuts - Incl Copra     | 3                                                           |
| 33              | Canada                   | 2011           | Coffee                    | 21                                                          |
| 33              | Canada                   | 2011           | Cottonseed Oil            | 1                                                           |
| 33              | Canada                   | 2011           | Cream                     | 24                                                          |
| 33              | Canada                   | 2011           | Crustaceans               | 15                                                          |
| 33              | Canada                   | 2011           | Dates                     | 1                                                           |
| 33              | Canada                   | 2011           | Demersal Fish             | 14                                                          |
| 33              | Canada                   | 2011           | Eggs                      | 33                                                          |
| 33              | Canada                   | 2011           | Fats, Animals, Raw        | 18                                                          |
| 33              | Canada                   | 2011           | Freshwater Fish           | 9                                                           |
| 33              | Canada                   | 2011           | Fruits, Other             | 87                                                          |
| 33              | Canada                   | 2011           | Grapefruit                | 6                                                           |
| 33              | Canada                   | 2011           | Grapes                    | 26                                                          |
| 33              | Canada                   | 2011           | Groundnuts (Shelled Eq)   | 7                                                           |
| 33              | Canada                   | 2011           | Honey                     | 2                                                           |
| 33              | Canada                   | 2011           | Lemons, Limes             | 9                                                           |
| 33              | Canada                   | 2011           | Maize                     | 53                                                          |
| 33              | Canada                   | 2011           | Maize Germ Oil            | 4                                                           |
| 33              | Canada                   | 2011           | Marine Fish, Other        | 2                                                           |
| 33              | Canada                   | 2011           | Milk, Whole               | 112                                                         |
| 33              | Canada                   | 2011           | Molluscs, Other           | 9                                                           |
| 33              | Canada                   | 2011           | Mutton & Goat Meat        | 3                                                           |
| 33              | Canada                   | 2011           | Nuts                      | 12                                                          |
| 33              | Canada                   | 2011           | Oats                      | 2                                                           |
| 33              | Canada                   | 2011           | Offals, Edible            | 2                                                           |
| 33              | Canada                   | 2011           | Olive Oil                 | 3                                                           |
| 33              | Canada                   | 2011           | Olives                    | 2                                                           |
| 33              | Canada                   | 2011           | Onions                    | 27                                                          |
| 33              | Canada                   | 2011           | Oranges, Mandarines       | 114                                                         |
| 33              | Canada                   | 2011           | Palm Oil                  | 2                                                           |
| 33              | Canada                   | 2011           | Peas                      | 5                                                           |
| 33              | Canada                   | 2011           | Pelagic Fish              | 12                                                          |
| 33              | Canada                   | 2011           | Pig meat                  | 67                                                          |
| 33              | Canada                   | 2011           | Pineapples                | 12                                                          |
| 33              | Canada                   | 2011           | Potatoes                  | 215                                                         |
| 33              | Canada                   | 2011           | Poultry Meat              | 102                                                         |
| 33              | Canada                   | 2011           | Pulses, Other             | 24                                                          |
| 33              | Canada                   | 2011           | Rape and Mustard Oil      | 42                                                          |
| 33              | Canada                   | 2011           | Rice (Milled Equivalent)  | 27                                                          |
| 33              | Canada                   | 2011           | Roots, Other              | 1                                                           |
| 33              | Canada                   | 2011           | Rye                       | 2                                                           |
| 33              | Canada                   | 2011           | Sesameseed                | 1                                                           |
| 33              | Canada                   | 2011           | Soyabean Oil              | 16                                                          |
| 33              | Canada                   | 2011           | Soybeans                  | 2                                                           |
| 33              | Canada                   | 2011           | Spices, Other             | 2                                                           |
| 33              | Canada                   | 2011           | Sugar, Refined Equivalent | 86                                                          |
| 33              | Canada                   | 2011           | Sunflowerseed Oil         | 2                                                           |
| 33              | Canada                   | 2011           | Sweet Potatoes            | 4                                                           |
| 33              | Canada                   | 2011           | Sweeteners, Other         | 37                                                          |
| 33              | Canada                   | 2011           | Tea                       | 1                                                           |
| 33              | Canada                   | 2011           | Tomatoes                  | 58                                                          |
| 33              | Canada                   | 2011           | Vegetables, Other         | 228                                                         |
| 33              | Canada                   | 2011           | Wheat                     | 191                                                         |
| 33              | Canada                   | 2011           | Whey                      | 26                                                          |
| 33              | Canada                   | 2011           | Wine                      | 31                                                          |
| 37              | Central African Republic | 1992           | Bananas                   | 76                                                          |
| 37              | Central African Republic | 1992           | Beer                      | 25                                                          |
| 37              | Central African Republic | 1992           | Beverages, Fermented      | 37                                                          |
| 37              | Central African Republic | 1992           | Bovine Meat               | 40                                                          |
| 37              | Central African Republic | 1992           | Cassava                   | 505                                                         |
| 37              | Central African Republic | 1992           | Cereals, Other            | 3                                                           |
| 37              | Central African Republic | 1992           | Coffee                    | 1                                                           |
| 37              | Central African Republic | 1992           | Cottonseed Oil            | 1                                                           |
| 37              | Central African Republic | 1992           | Eggs                      | 1                                                           |
| 37              | Central African Republic | 1992           | Fats, Animals, Raw        | 2                                                           |
| 37              | Central African Republic | 1992           | Freshwater Fish           | 12                                                          |
| 37              | Central African Republic | 1992           | Fruits, Other             | 9                                                           |
| 37              | Central African Republic | 1992           | Grapefruit                | 3                                                           |
| 37              | Central African Republic | 1992           | Groundnut Oil             | 17                                                          |
| 37              | Central African Republic | 1992           | Honey                     | 9                                                           |
| 37              | Central African Republic | 1992           | Lemons, Limes             | 1                                                           |
| 37              | Central African Republic | 1992           | Maize                     | 58                                                          |
| 37              | Central African Republic | 1992           | Marine Fish, Other        | 1                                                           |
| 37              | Central African Republic | 1992           | Meat, Other               | 17                                                          |
| 37              | Central African Republic | 1992           | Milk, Whole               | 42                                                          |
| 37              | Central African Republic | 1992           | Millet                    | 8                                                           |
| 37              | Central African Republic | 1992           | Mutton & Goat Meat        | 6                                                           |
| 37              | Central African Republic | 1992           | Offals, Edible            | 7                                                           |
| 37              | Central African Republic | 1992           | Oilcrops, Other           | 8                                                           |
| 37              | Central African Republic | 1992           | Oranges, Mandarines       | 13                                                          |
| 37              | Central African Republic | 1992           | Palm Oil                  | 6                                                           |
| 37              | Central African Republic | 1992           | Pig meat                  | 7                                                           |
| 37              | Central African Republic | 1992           | Pineapples                | 9                                                           |
| 37              | Central African Republic | 1992           | Plantains                 | 26                                                          |
| 37              | Central African Republic | 1992           | Potatoes                  | 1                                                           |
| 37              | Central African Republic | 1992           | Poultry Meat              | 2                                                           |
| 37              | Central African Republic | 1992           | Pulses, Other             | 15                                                          |
| 37              | Central African Republic | 1992           | Rice (Milled Equivalent)  | 8                                                           |
| 37              | Central African Republic | 1992           | Roots, Other              | 51                                                          |

Dietary calcium and zinc deficiency risks are decreasing but remain prevalent

| FAO countrycode | Country                  | Reference year | Food item                 | Gross food supply (g capita <sup>-1</sup> d <sup>-1</sup> ) |
|-----------------|--------------------------|----------------|---------------------------|-------------------------------------------------------------|
| 37              | Central African Republic | 1992           | Sesameseed                | 12                                                          |
| 37              | Central African Republic | 1992           | Sesameseed Oil            | 4                                                           |
| 37              | Central African Republic | 1992           | Sorghum                   | 24                                                          |
| 37              | Central African Republic | 1992           | Sugar, Refined Equivalent | 8                                                           |
| 37              | Central African Republic | 1992           | Tomatoes                  | 1                                                           |
| 37              | Central African Republic | 1992           | Vegetables, Other         | 57                                                          |
| 37              | Central African Republic | 1992           | Wheat                     | 24                                                          |
| 37              | Central African Republic | 1992           | Wine                      | 1                                                           |
| 37              | Central African Republic | 1992           | Yams                      | 198                                                         |
| 37              | Central African Republic | 1993           | Bananas                   | 76                                                          |
| 37              | Central African Republic | 1993           | Beer                      | 34                                                          |
| 37              | Central African Republic | 1993           | Beverages, Fermented      | 38                                                          |
| 37              | Central African Republic | 1993           | Bovine Meat               | 40                                                          |
| 37              | Central African Republic | 1993           | Cassava                   | 489                                                         |
| 37              | Central African Republic | 1993           | Coffee                    | 5                                                           |
| 37              | Central African Republic | 1993           | Cottonseed Oil            | 1                                                           |
| 37              | Central African Republic | 1993           | Eggs                      | 1                                                           |
| 37              | Central African Republic | 1993           | Fats, Animals, Raw        | 2                                                           |
| 37              | Central African Republic | 1993           | Freshwater Fish           | 12                                                          |
| 37              | Central African Republic | 1993           | Fruits, Other             | 10                                                          |
| 37              | Central African Republic | 1993           | Grapefruit                | 3                                                           |
| 37              | Central African Republic | 1993           | Groundnut Oil             | 17                                                          |
| 37              | Central African Republic | 1993           | Honey                     | 9                                                           |
| 37              | Central African Republic | 1993           | Lemons, Limes             | 1                                                           |
| 37              | Central African Republic | 1993           | Maize                     | 61                                                          |
| 37              | Central African Republic | 1993           | Meat, Other               | 17                                                          |
| 37              | Central African Republic | 1993           | Milk, Whole               | 46                                                          |
| 37              | Central African Republic | 1993           | Millet                    | 8                                                           |
| 37              | Central African Republic | 1993           | Mutton & Goat Meat        | 6                                                           |
| 37              | Central African Republic | 1993           | Offals, Edible            | 7                                                           |
| 37              | Central African Republic | 1993           | Oilcrops, Other           | 8                                                           |
| 37              | Central African Republic | 1993           | Oranges, Mandarines       | 14                                                          |
| 37              | Central African Republic | 1993           | Palm Oil                  | 6                                                           |
| 37              | Central African Republic | 1993           | Pigmeat                   | 8                                                           |
| 37              | Central African Republic | 1993           | Pineapples                | 9                                                           |
| 37              | Central African Republic | 1993           | Plantains                 | 26                                                          |
| 37              | Central African Republic | 1993           | Potatoes                  | 1                                                           |
| 37              | Central African Republic | 1993           | Poultry Meat              | 2                                                           |
| 37              | Central African Republic | 1993           | Pulses, Other             | 17                                                          |
| 37              | Central African Republic | 1993           | Rice (Milled Equivalent)  | 8                                                           |
| 37              | Central African Republic | 1993           | Roots, Other              | 50                                                          |
| 37              | Central African Republic | 1993           | Sesameseed                | 11                                                          |
| 37              | Central African Republic | 1993           | Sesameseed Oil            | 4                                                           |
| 37              | Central African Republic | 1993           | Sorghum                   | 23                                                          |
| 37              | Central African Republic | 1993           | Sugar, Refined Equivalent | 8                                                           |
| 37              | Central African Republic | 1993           | Tomatoes                  | 1                                                           |
| 37              | Central African Republic | 1993           | Vegetables, Other         | 58                                                          |
| 37              | Central African Republic | 1993           | Wheat                     | 27                                                          |
| 37              | Central African Republic | 1993           | Wine                      | 1                                                           |
| 37              | Central African Republic | 1993           | Yams                      | 192                                                         |
| 37              | Central African Republic | 1994           | Bananas                   | 75                                                          |
| 37              | Central African Republic | 1994           | Beer                      | 23                                                          |
| 37              | Central African Republic | 1994           | Beverages, Fermented      | 41                                                          |
| 37              | Central African Republic | 1994           | Bovine Meat               | 39                                                          |
| 37              | Central African Republic | 1994           | Cassava                   | 430                                                         |
| 37              | Central African Republic | 1994           | Coffee                    | 6                                                           |
| 37              | Central African Republic | 1994           | Cottonseed Oil            | 2                                                           |
| 37              | Central African Republic | 1994           | Eggs                      | 1                                                           |
| 37              | Central African Republic | 1994           | Fats, Animals, Raw        | 2                                                           |
| 37              | Central African Republic | 1994           | Freshwater Fish           | 12                                                          |
| 37              | Central African Republic | 1994           | Fruits, Other             | 10                                                          |
| 37              | Central African Republic | 1994           | Grapefruit                | 3                                                           |
| 37              | Central African Republic | 1994           | Groundnut Oil             | 19                                                          |
| 37              | Central African Republic | 1994           | Honey                     | 9                                                           |
| 37              | Central African Republic | 1994           | Lemons, Limes             | 1                                                           |
| 37              | Central African Republic | 1994           | Maize                     | 67                                                          |
| 37              | Central African Republic | 1994           | Meat, Other               | 17                                                          |
| 37              | Central African Republic | 1994           | Milk, Whole               | 43                                                          |
| 37              | Central African Republic | 1994           | Millet                    | 7                                                           |
| 37              | Central African Republic | 1994           | Mutton & Goat Meat        | 6                                                           |
| 37              | Central African Republic | 1994           | Offals, Edible            | 7                                                           |
| 37              | Central African Republic | 1994           | Oilcrops, Other           | 9                                                           |
| 37              | Central African Republic | 1994           | Oranges, Mandarines       | 14                                                          |
| 37              | Central African Republic | 1994           | Palm Oil                  | 6                                                           |
| 37              | Central African Republic | 1994           | Pigmeat                   | 8                                                           |
| 37              | Central African Republic | 1994           | Pineapples                | 9                                                           |
| 37              | Central African Republic | 1994           | Plantains                 | 26                                                          |
| 37              | Central African Republic | 1994           | Potatoes                  | 1                                                           |
| 37              | Central African Republic | 1994           | Poultry Meat              | 2                                                           |
| 37              | Central African Republic | 1994           | Pulses, Other             | 15                                                          |
| 37              | Central African Republic | 1994           | Rice (Milled Equivalent)  | 8                                                           |
| 37              | Central African Republic | 1994           | Roots, Other              | 57                                                          |
| 37              | Central African Republic | 1994           | Sesameseed                | 13                                                          |
| 37              | Central African Republic | 1994           | Sesameseed Oil            | 4                                                           |
| 37              | Central African Republic | 1994           | Sorghum                   | 25                                                          |
| 37              | Central African Republic | 1994           | Sugar, Refined Equivalent | 11                                                          |
| 37              | Central African Republic | 1994           | Vegetables, Other         | 59                                                          |
| 37              | Central African Republic | 1994           | Wheat                     | 18                                                          |
| 37              | Central African Republic | 1994           | Wine                      | 1                                                           |
| 37              | Central African Republic | 1994           | Yams                      | 204                                                         |
| 37              | Central African Republic | 1995           | Bananas                   | 75                                                          |
| 37              | Central African Republic | 1995           | Beer                      | 20                                                          |
| 37              | Central African Republic | 1995           | Beverages, Fermented      | 36                                                          |
| 37              | Central African Republic | 1995           | Bovine Meat               | 40                                                          |
| 37              | Central African Republic | 1995           | Cassava                   | 399                                                         |
| 37              | Central African Republic | 1995           | Coffee                    | 4                                                           |
| 37              | Central African Republic | 1995           | Cottonseed Oil            | 2                                                           |

Dietary calcium and zinc deficiency risks are decreasing but remain prevalent

| FAO countrycode | Country                  | Reference year | Food item                 | Gross food supply (g capita <sup>-1</sup> d <sup>-1</sup> ) |
|-----------------|--------------------------|----------------|---------------------------|-------------------------------------------------------------|
| 37              | Central African Republic | 1995           | Eggs                      | 1                                                           |
| 37              | Central African Republic | 1995           | Fats, Animals, Raw        | 2                                                           |
| 37              | Central African Republic | 1995           | Freshwater Fish           | 12                                                          |
| 37              | Central African Republic | 1995           | Fruits, Other             | 8                                                           |
| 37              | Central African Republic | 1995           | Grapefruit                | 3                                                           |
| 37              | Central African Republic | 1995           | Groundnut Oil             | 17                                                          |
| 37              | Central African Republic | 1995           | Honey                     | 9                                                           |
| 37              | Central African Republic | 1995           | Lemons, Limes             | 1                                                           |
| 37              | Central African Republic | 1995           | Maize                     | 60                                                          |
| 37              | Central African Republic | 1995           | Meat, Other               | 17                                                          |
| 37              | Central African Republic | 1995           | Milk, Whole               | 44                                                          |
| 37              | Central African Republic | 1995           | Millet                    | 7                                                           |
| 37              | Central African Republic | 1995           | Mutton & Goat Meat        | 6                                                           |
| 37              | Central African Republic | 1995           | Offals, Edible            | 7                                                           |
| 37              | Central African Republic | 1995           | Oilcrops, Other           | 9                                                           |
| 37              | Central African Republic | 1995           | Oranges, Mandarines       | 15                                                          |
| 37              | Central African Republic | 1995           | Palm Oil                  | 6                                                           |
| 37              | Central African Republic | 1995           | Pigmeat                   | 8                                                           |
| 37              | Central African Republic | 1995           | Pineapples                | 9                                                           |
| 37              | Central African Republic | 1995           | Plantains                 | 26                                                          |
| 37              | Central African Republic | 1995           | Potatoes                  | 1                                                           |
| 37              | Central African Republic | 1995           | Poultry Meat              | 2                                                           |
| 37              | Central African Republic | 1995           | Pulses, Other             | 16                                                          |
| 37              | Central African Republic | 1995           | Rice (Milled Equivalent)  | 8                                                           |
| 37              | Central African Republic | 1995           | Roots, Other              | 72                                                          |
| 37              | Central African Republic | 1995           | Sesameseed                | 14                                                          |
| 37              | Central African Republic | 1995           | Sesameseed Oil            | 4                                                           |
| 37              | Central African Republic | 1995           | Sorghum                   | 22                                                          |
| 37              | Central African Republic | 1995           | Sugar, Refined Equivalent | 12                                                          |
| 37              | Central African Republic | 1995           | Tomatoes                  | 1                                                           |
| 37              | Central African Republic | 1995           | Vegetables, Other         | 63                                                          |
| 37              | Central African Republic | 1995           | Wheat                     | 27                                                          |
| 37              | Central African Republic | 1995           | Wine                      | 2                                                           |
| 37              | Central African Republic | 1995           | Yams                      | 227                                                         |
| 37              | Central African Republic | 1996           | Bananas                   | 77                                                          |
| 37              | Central African Republic | 1996           | Beer                      | 9                                                           |
| 37              | Central African Republic | 1996           | Beverages, Fermented      | 45                                                          |
| 37              | Central African Republic | 1996           | Bovine Meat               | 50                                                          |
| 37              | Central African Republic | 1996           | Cassava                   | 417                                                         |
| 37              | Central African Republic | 1996           | Coffee                    | 4                                                           |
| 37              | Central African Republic | 1996           | Cottonseed Oil            | 1                                                           |
| 37              | Central African Republic | 1996           | Eggs                      | 1                                                           |
| 37              | Central African Republic | 1996           | Fats, Animals, Raw        | 2                                                           |
| 37              | Central African Republic | 1996           | Freshwater Fish           | 12                                                          |
| 37              | Central African Republic | 1996           | Fruits, Other             | 10                                                          |
| 37              | Central African Republic | 1996           | Grapefruit                | 3                                                           |
| 37              | Central African Republic | 1996           | Groundnut Oil             | 19                                                          |
| 37              | Central African Republic | 1996           | Honey                     | 9                                                           |
| 37              | Central African Republic | 1996           | Lemons, Limes             | 1                                                           |
| 37              | Central African Republic | 1996           | Maize                     | 75                                                          |
| 37              | Central African Republic | 1996           | Meat, Other               | 17                                                          |
| 37              | Central African Republic | 1996           | Milk, Whole               | 45                                                          |
| 37              | Central African Republic | 1996           | Millet                    | 7                                                           |
| 37              | Central African Republic | 1996           | Mutton & Goat Meat        | 7                                                           |
| 37              | Central African Republic | 1996           | Offals, Edible            | 7                                                           |
| 37              | Central African Republic | 1996           | Oilcrops, Other           | 10                                                          |
| 37              | Central African Republic | 1996           | Oranges, Mandarines       | 14                                                          |
| 37              | Central African Republic | 1996           | Palm Oil                  | 2                                                           |
| 37              | Central African Republic | 1996           | Pigmeat                   | 9                                                           |
| 37              | Central African Republic | 1996           | Pineapples                | 9                                                           |
| 37              | Central African Republic | 1996           | Plantains                 | 26                                                          |
| 37              | Central African Republic | 1996           | Potatoes                  | 1                                                           |
| 37              | Central African Republic | 1996           | Poultry Meat              | 3                                                           |
| 37              | Central African Republic | 1996           | Pulses, Other             | 21                                                          |
| 37              | Central African Republic | 1996           | Rice (Milled Equivalent)  | 4                                                           |
| 37              | Central African Republic | 1996           | Roots, Other              | 75                                                          |
| 37              | Central African Republic | 1996           | Sesameseed                | 14                                                          |
| 37              | Central African Republic | 1996           | Sesameseed Oil            | 4                                                           |
| 37              | Central African Republic | 1996           | Sorghum                   | 25                                                          |
| 37              | Central African Republic | 1996           | Sugar, Refined Equivalent | 7                                                           |
| 37              | Central African Republic | 1996           | Vegetables, Other         | 56                                                          |
| 37              | Central African Republic | 1996           | Wheat                     | 7                                                           |
| 37              | Central African Republic | 1996           | Yams                      | 243                                                         |
| 37              | Central African Republic | 1997           | Bananas                   | 79                                                          |
| 37              | Central African Republic | 1997           | Beer                      | 11                                                          |
| 37              | Central African Republic | 1997           | Beverages, Fermented      | 36                                                          |
| 37              | Central African Republic | 1997           | Bovine Meat               | 40                                                          |
| 37              | Central African Republic | 1997           | Cassava                   | 449                                                         |
| 37              | Central African Republic | 1997           | Coffee                    | 3                                                           |
| 37              | Central African Republic | 1997           | Cottonseed Oil            | 2                                                           |
| 37              | Central African Republic | 1997           | Eggs                      | 1                                                           |
| 37              | Central African Republic | 1997           | Fats, Animals, Raw        | 2                                                           |
| 37              | Central African Republic | 1997           | Freshwater Fish           | 11                                                          |
| 37              | Central African Republic | 1997           | Fruits, Other             | 10                                                          |
| 37              | Central African Republic | 1997           | Grapefruit                | 3                                                           |
| 37              | Central African Republic | 1997           | Groundnut Oil             | 20                                                          |
| 37              | Central African Republic | 1997           | Honey                     | 9                                                           |
| 37              | Central African Republic | 1997           | Lemons, Limes             | 1                                                           |
| 37              | Central African Republic | 1997           | Maize                     | 55                                                          |
| 37              | Central African Republic | 1997           | Meat, Other               | 17                                                          |
| 37              | Central African Republic | 1997           | Milk, Whole               | 47                                                          |
| 37              | Central African Republic | 1997           | Millet                    | 8                                                           |
| 37              | Central African Republic | 1997           | Mutton & Goat Meat        | 7                                                           |
| 37              | Central African Republic | 1997           | Offals, Edible            | 7                                                           |
| 37              | Central African Republic | 1997           | Oilcrops, Other           | 10                                                          |
| 37              | Central African Republic | 1997           | Oranges, Mandarines       | 16                                                          |
| 37              | Central African Republic | 1997           | Palm Oil                  | 3                                                           |

Dietary calcium and zinc deficiency risks are decreasing but remain prevalent

| FAO countrycode | Country                  | Reference year | Food item                 | Gross food supply (g capita <sup>-1</sup> d <sup>-1</sup> ) |
|-----------------|--------------------------|----------------|---------------------------|-------------------------------------------------------------|
| 37              | Central African Republic | 1997           | Pelagic Fish              | 1                                                           |
| 37              | Central African Republic | 1997           | Pigmeat                   | 9                                                           |
| 37              | Central African Republic | 1997           | Pineapples                | 10                                                          |
| 37              | Central African Republic | 1997           | Plantains                 | 26                                                          |
| 37              | Central African Republic | 1997           | Potatoes                  | 1                                                           |
| 37              | Central African Republic | 1997           | Poultry Meat              | 3                                                           |
| 37              | Central African Republic | 1997           | Pulses, Other             | 16                                                          |
| 37              | Central African Republic | 1997           | Rice (Milled Equivalent)  | 9                                                           |
| 37              | Central African Republic | 1997           | Roots, Other              | 76                                                          |
| 37              | Central African Republic | 1997           | Sesameseed                | 13                                                          |
| 37              | Central African Republic | 1997           | Sesameseed Oil            | 5                                                           |
| 37              | Central African Republic | 1997           | Sorghum                   | 23                                                          |
| 37              | Central African Republic | 1997           | Sugar, Refined Equivalent | 14                                                          |
| 37              | Central African Republic | 1997           | Vegetables, Other         | 60                                                          |
| 37              | Central African Republic | 1997           | Wheat                     | 12                                                          |
| 37              | Central African Republic | 1997           | Yams                      | 258                                                         |
| 37              | Central African Republic | 1998           | Bananas                   | 81                                                          |
| 37              | Central African Republic | 1998           | Beer                      | 15                                                          |
| 37              | Central African Republic | 1998           | Beverages, Fermented      | 37                                                          |
| 37              | Central African Republic | 1998           | Bovine Meat               | 40                                                          |
| 37              | Central African Republic | 1998           | Cassava                   | 462                                                         |
| 37              | Central African Republic | 1998           | Cereals, Other            | 1                                                           |
| 37              | Central African Republic | 1998           | Coffee                    | 6                                                           |
| 37              | Central African Republic | 1998           | Cottonseed Oil            | 2                                                           |
| 37              | Central African Republic | 1998           | Eggs                      | 1                                                           |
| 37              | Central African Republic | 1998           | Fats, Animals, Raw        | 3                                                           |
| 37              | Central African Republic | 1998           | Freshwater Fish           | 11                                                          |
| 37              | Central African Republic | 1998           | Fruits, Other             | 10                                                          |
| 37              | Central African Republic | 1998           | Grapefruit                | 3                                                           |
| 37              | Central African Republic | 1998           | Groundnut Oil             | 19                                                          |
| 37              | Central African Republic | 1998           | Honey                     | 9                                                           |
| 37              | Central African Republic | 1998           | Lemons, Limes             | 1                                                           |
| 37              | Central African Republic | 1998           | Maize                     | 58                                                          |
| 37              | Central African Republic | 1998           | Meat, Other               | 17                                                          |
| 37              | Central African Republic | 1998           | Milk, Whole               | 46                                                          |
| 37              | Central African Republic | 1998           | Millet                    | 10                                                          |
| 37              | Central African Republic | 1998           | Mutton & Goat Meat        | 7                                                           |
| 37              | Central African Republic | 1998           | Offals, Edible            | 7                                                           |
| 37              | Central African Republic | 1998           | Oilcrops, Other           | 11                                                          |
| 37              | Central African Republic | 1998           | Oranges, Mandarines       | 16                                                          |
| 37              | Central African Republic | 1998           | Palm Oil                  | 2                                                           |
| 37              | Central African Republic | 1998           | Pigmeat                   | 9                                                           |
| 37              | Central African Republic | 1998           | Pineapples                | 10                                                          |
| 37              | Central African Republic | 1998           | Plantains                 | 26                                                          |
| 37              | Central African Republic | 1998           | Potatoes                  | 1                                                           |
| 37              | Central African Republic | 1998           | Poultry Meat              | 2                                                           |
| 37              | Central African Republic | 1998           | Pulses, Other             | 21                                                          |
| 37              | Central African Republic | 1998           | Rice (Milled Equivalent)  | 11                                                          |
| 37              | Central African Republic | 1998           | Roots, Other              | 82                                                          |
| 37              | Central African Republic | 1998           | Sesameseed                | 12                                                          |
| 37              | Central African Republic | 1998           | Sesameseed Oil            | 5                                                           |
| 37              | Central African Republic | 1998           | Sorghum                   | 23                                                          |
| 37              | Central African Republic | 1998           | Sugar, Refined Equivalent | 14                                                          |
| 37              | Central African Republic | 1998           | Vegetables, Other         | 60                                                          |
| 37              | Central African Republic | 1998           | Wheat                     | 22                                                          |
| 37              | Central African Republic | 1998           | Yams                      | 260                                                         |
| 37              | Central African Republic | 1999           | Bananas                   | 74                                                          |
| 37              | Central African Republic | 1999           | Beer                      | 9                                                           |
| 37              | Central African Republic | 1999           | Beverages, Fermented      | 37                                                          |
| 37              | Central African Republic | 1999           | Bovine Meat               | 39                                                          |
| 37              | Central African Republic | 1999           | Cassava                   | 416                                                         |
| 37              | Central African Republic | 1999           | Coffee                    | 1                                                           |
| 37              | Central African Republic | 1999           | Cottonseed Oil            | 1                                                           |
| 37              | Central African Republic | 1999           | Eggs                      | 1                                                           |
| 37              | Central African Republic | 1999           | Fats, Animals, Raw        | 3                                                           |
| 37              | Central African Republic | 1999           | Freshwater Fish           | 12                                                          |
| 37              | Central African Republic | 1999           | Fruits, Other             | 10                                                          |
| 37              | Central African Republic | 1999           | Grapefruit                | 3                                                           |
| 37              | Central African Republic | 1999           | Groundnut Oil             | 20                                                          |
| 37              | Central African Republic | 1999           | Honey                     | 10                                                          |
| 37              | Central African Republic | 1999           | Lemons, Limes             | 1                                                           |
| 37              | Central African Republic | 1999           | Maize                     | 62                                                          |
| 37              | Central African Republic | 1999           | Meat, Other               | 17                                                          |
| 37              | Central African Republic | 1999           | Milk, Whole               | 47                                                          |
| 37              | Central African Republic | 1999           | Millet                    | 6                                                           |
| 37              | Central African Republic | 1999           | Mutton & Goat Meat        | 7                                                           |
| 37              | Central African Republic | 1999           | Offals, Edible            | 7                                                           |
| 37              | Central African Republic | 1999           | Oilcrops, Other           | 12                                                          |
| 37              | Central African Republic | 1999           | Oranges, Mandarines       | 16                                                          |
| 37              | Central African Republic | 1999           | Palm Oil                  | 2                                                           |
| 37              | Central African Republic | 1999           | Pelagic Fish              | 1                                                           |
| 37              | Central African Republic | 1999           | Pigmeat                   | 9                                                           |
| 37              | Central African Republic | 1999           | Pineapples                | 10                                                          |
| 37              | Central African Republic | 1999           | Plantains                 | 23                                                          |
| 37              | Central African Republic | 1999           | Poultry Meat              | 2                                                           |
| 37              | Central African Republic | 1999           | Pulses, Other             | 16                                                          |
| 37              | Central African Republic | 1999           | Rice (Milled Equivalent)  | 11                                                          |
| 37              | Central African Republic | 1999           | Roots, Other              | 73                                                          |
| 37              | Central African Republic | 1999           | Sesameseed                | 12                                                          |
| 37              | Central African Republic | 1999           | Sesameseed Oil            | 6                                                           |
| 37              | Central African Republic | 1999           | Sorghum                   | 28                                                          |
| 37              | Central African Republic | 1999           | Sugar, Refined Equivalent | 10                                                          |
| 37              | Central African Republic | 1999           | Tomatoes                  | 1                                                           |
| 37              | Central African Republic | 1999           | Vegetables, Other         | 61                                                          |
| 37              | Central African Republic | 1999           | Wheat                     | 26                                                          |
| 37              | Central African Republic | 1999           | Yams                      | 235                                                         |
| 37              | Central African Republic | 2000           | Bananas                   | 80                                                          |

Dietary calcium and zinc deficiency risks are decreasing but remain prevalent

| FAO countrycode | Country                  | Reference year | Food item                 | Gross food supply (g capita <sup>-1</sup> d <sup>-1</sup> ) |
|-----------------|--------------------------|----------------|---------------------------|-------------------------------------------------------------|
| 37              | Central African Republic | 2000           | Beer                      | 18                                                          |
| 37              | Central African Republic | 2000           | Beverages, Fermented      | 39                                                          |
| 37              | Central African Republic | 2000           | Bovine Meat               | 51                                                          |
| 37              | Central African Republic | 2000           | Cassava                   | 409                                                         |
| 37              | Central African Republic | 2000           | Coffee                    | 3                                                           |
| 37              | Central African Republic | 2000           | Cottonseed Oil            | 1                                                           |
| 37              | Central African Republic | 2000           | Eggs                      | 1                                                           |
| 37              | Central African Republic | 2000           | Fats, Animals, Raw        | 3                                                           |
| 37              | Central African Republic | 2000           | Freshwater Fish           | 11                                                          |
| 37              | Central African Republic | 2000           | Fruits, Other             | 10                                                          |
| 37              | Central African Republic | 2000           | Grapefruit                | 3                                                           |
| 37              | Central African Republic | 2000           | Groundnut Oil             | 18                                                          |
| 37              | Central African Republic | 2000           | Honey                     | 10                                                          |
| 37              | Central African Republic | 2000           | Lemons, Limes             | 1                                                           |
| 37              | Central African Republic | 2000           | Maize                     | 63                                                          |
| 37              | Central African Republic | 2000           | Meat, Other               | 17                                                          |
| 37              | Central African Republic | 2000           | Milk, Whole               | 47                                                          |
| 37              | Central African Republic | 2000           | Millet                    | 5                                                           |
| 37              | Central African Republic | 2000           | Mutton & Goat Meat        | 9                                                           |
| 37              | Central African Republic | 2000           | Offals, Edible            | 8                                                           |
| 37              | Central African Republic | 2000           | Oilcrops, Other           | 13                                                          |
| 37              | Central African Republic | 2000           | Oranges, Mandarines       | 16                                                          |
| 37              | Central African Republic | 2000           | Palm Oil                  | 2                                                           |
| 37              | Central African Republic | 2000           | Pigmeat                   | 9                                                           |
| 37              | Central African Republic | 2000           | Pineapples                | 9                                                           |
| 37              | Central African Republic | 2000           | Plantains                 | 25                                                          |
| 37              | Central African Republic | 2000           | Potatoes                  | 1                                                           |
| 37              | Central African Republic | 2000           | Poultry Meat              | 2                                                           |
| 37              | Central African Republic | 2000           | Pulses, Other             | 17                                                          |
| 37              | Central African Republic | 2000           | Rice (Milled Equivalent)  | 12                                                          |
| 37              | Central African Republic | 2000           | Roots, Other              | 75                                                          |
| 37              | Central African Republic | 2000           | Sesameseed                | 11                                                          |
| 37              | Central African Republic | 2000           | Sesameseed Oil            | 7                                                           |
| 37              | Central African Republic | 2000           | Sorghum                   | 25                                                          |
| 37              | Central African Republic | 2000           | Sugar, Refined Equivalent | 16                                                          |
| 37              | Central African Republic | 2000           | Tomatoes                  | 1                                                           |
| 37              | Central African Republic | 2000           | Vegetables, Other         | 61                                                          |
| 37              | Central African Republic | 2000           | Wheat                     | 29                                                          |
| 37              | Central African Republic | 2000           | Yams                      | 243                                                         |
| 37              | Central African Republic | 2001           | Bananas                   | 79                                                          |
| 37              | Central African Republic | 2001           | Beer                      | 14                                                          |
| 37              | Central African Republic | 2001           | Beverages, Fermented      | 40                                                          |
| 37              | Central African Republic | 2001           | Bovine Meat               | 50                                                          |
| 37              | Central African Republic | 2001           | Cassava                   | 403                                                         |
| 37              | Central African Republic | 2001           | Coffee                    | 3                                                           |
| 37              | Central African Republic | 2001           | Cottonseed Oil            | 1                                                           |
| 37              | Central African Republic | 2001           | Eggs                      | 1                                                           |
| 37              | Central African Republic | 2001           | Fats, Animals, Raw        | 3                                                           |
| 37              | Central African Republic | 2001           | Freshwater Fish           | 13                                                          |
| 37              | Central African Republic | 2001           | Fruits, Other             | 10                                                          |
| 37              | Central African Republic | 2001           | Grapefruit                | 3                                                           |
| 37              | Central African Republic | 2001           | Groundnut Oil             | 21                                                          |
| 37              | Central African Republic | 2001           | Honey                     | 10                                                          |
| 37              | Central African Republic | 2001           | Lemons, Limes             | 1                                                           |
| 37              | Central African Republic | 2001           | Maize                     | 66                                                          |
| 37              | Central African Republic | 2001           | Meat, Other               | 17                                                          |
| 37              | Central African Republic | 2001           | Milk, Whole               | 46                                                          |
| 37              | Central African Republic | 2001           | Millet                    | 7                                                           |
| 37              | Central African Republic | 2001           | Mutton & Goat Meat        | 9                                                           |
| 37              | Central African Republic | 2001           | Offals, Edible            | 8                                                           |
| 37              | Central African Republic | 2001           | Oilcrops, Other           | 13                                                          |
| 37              | Central African Republic | 2001           | Oranges, Mandarines       | 15                                                          |
| 37              | Central African Republic | 2001           | Palm Oil                  | 2                                                           |
| 37              | Central African Republic | 2001           | Pelagic Fish              | 1                                                           |
| 37              | Central African Republic | 2001           | Pigmeat                   | 9                                                           |
| 37              | Central African Republic | 2001           | Pineapples                | 9                                                           |
| 37              | Central African Republic | 2001           | Plantains                 | 25                                                          |
| 37              | Central African Republic | 2001           | Poultry Meat              | 2                                                           |
| 37              | Central African Republic | 2001           | Pulses, Other             | 18                                                          |
| 37              | Central African Republic | 2001           | Rice (Milled Equivalent)  | 14                                                          |
| 37              | Central African Republic | 2001           | Roots, Other              | 74                                                          |
| 37              | Central African Republic | 2001           | Rye                       | 1                                                           |
| 37              | Central African Republic | 2001           | Sesameseed                | 14                                                          |
| 37              | Central African Republic | 2001           | Sesameseed Oil            | 6                                                           |
| 37              | Central African Republic | 2001           | Sorghum                   | 26                                                          |
| 37              | Central African Republic | 2001           | Sugar, Refined Equivalent | 10                                                          |
| 37              | Central African Republic | 2001           | Vegetables, Other         | 60                                                          |
| 37              | Central African Republic | 2001           | Wheat                     | 21                                                          |
| 37              | Central African Republic | 2001           | Wine                      | 1                                                           |
| 37              | Central African Republic | 2001           | Yams                      | 239                                                         |
| 37              | Central African Republic | 2002           | Bananas                   | 75                                                          |
| 37              | Central African Republic | 2002           | Beer                      | 9                                                           |
| 37              | Central African Republic | 2002           | Beverages, Fermented      | 41                                                          |
| 37              | Central African Republic | 2002           | Bovine Meat               | 50                                                          |
| 37              | Central African Republic | 2002           | Cassava                   | 397                                                         |
| 37              | Central African Republic | 2002           | Coffee                    | 3                                                           |
| 37              | Central African Republic | 2002           | Cottonseed Oil            | 1                                                           |
| 37              | Central African Republic | 2002           | Eggs                      | 1                                                           |
| 37              | Central African Republic | 2002           | Fats, Animals, Raw        | 3                                                           |
| 37              | Central African Republic | 2002           | Freshwater Fish           | 14                                                          |
| 37              | Central African Republic | 2002           | Fruits, Other             | 9                                                           |
| 37              | Central African Republic | 2002           | Grapefruit                | 3                                                           |
| 37              | Central African Republic | 2002           | Groundnut Oil             | 22                                                          |
| 37              | Central African Republic | 2002           | Honey                     | 11                                                          |
| 37              | Central African Republic | 2002           | Lemons, Limes             | 1                                                           |
| 37              | Central African Republic | 2002           | Maize                     | 69                                                          |
| 37              | Central African Republic | 2002           | Meat, Other               | 17                                                          |

Dietary calcium and zinc deficiency risks are decreasing but remain prevalent

| FAO countrycode | Country                  | Reference year | Food item                 | Gross food supply (g capita <sup>-1</sup> d <sup>-1</sup> ) |
|-----------------|--------------------------|----------------|---------------------------|-------------------------------------------------------------|
| 37              | Central African Republic | 2002           | Milk, Whole               | 47                                                          |
| 37              | Central African Republic | 2002           | Millet                    | 7                                                           |
| 37              | Central African Republic | 2002           | Mutton & Goat Meat        | 9                                                           |
| 37              | Central African Republic | 2002           | Offals, Edible            | 8                                                           |
| 37              | Central African Republic | 2002           | Oilcrops Oil, Other       | 1                                                           |
| 37              | Central African Republic | 2002           | Oilcrops, Other           | 14                                                          |
| 37              | Central African Republic | 2002           | Oranges, Mandarines       | 14                                                          |
| 37              | Central African Republic | 2002           | Palm Oil                  | 1                                                           |
| 37              | Central African Republic | 2002           | Pigmeat                   | 9                                                           |
| 37              | Central African Republic | 2002           | Pineapples                | 9                                                           |
| 37              | Central African Republic | 2002           | Plantains                 | 24                                                          |
| 37              | Central African Republic | 2002           | Poultry Meat              | 3                                                           |
| 37              | Central African Republic | 2002           | Pulses, Other             | 19                                                          |
| 37              | Central African Republic | 2002           | Rice (Milled Equivalent)  | 14                                                          |
| 37              | Central African Republic | 2002           | Roots, Other              | 69                                                          |
| 37              | Central African Republic | 2002           | Sesameseed                | 15                                                          |
| 37              | Central African Republic | 2002           | Sesameseed Oil            | 6                                                           |
| 37              | Central African Republic | 2002           | Sorghum                   | 31                                                          |
| 37              | Central African Republic | 2002           | Sugar, Refined Equivalent | 10                                                          |
| 37              | Central African Republic | 2002           | Vegetables, Other         | 62                                                          |
| 37              | Central African Republic | 2002           | Wheat                     | 22                                                          |
| 37              | Central African Republic | 2002           | Yams                      | 216                                                         |
| 37              | Central African Republic | 2003           | Bananas                   | 71                                                          |
| 37              | Central African Republic | 2003           | Beer                      | 7                                                           |
| 37              | Central African Republic | 2003           | Beverages, Fermented      | 41                                                          |
| 37              | Central African Republic | 2003           | Bovine Meat               | 47                                                          |
| 37              | Central African Republic | 2003           | Cassava                   | 392                                                         |
| 37              | Central African Republic | 2003           | Coffee                    | 3                                                           |
| 37              | Central African Republic | 2003           | Eggs                      | 1                                                           |
| 37              | Central African Republic | 2003           | Fats, Animals, Raw        | 3                                                           |
| 37              | Central African Republic | 2003           | Freshwater Fish           | 15                                                          |
| 37              | Central African Republic | 2003           | Fruits, Other             | 9                                                           |
| 37              | Central African Republic | 2003           | Grapefruit                | 3                                                           |
| 37              | Central African Republic | 2003           | Groundnut Oil             | 23                                                          |
| 37              | Central African Republic | 2003           | Honey                     | 11                                                          |
| 37              | Central African Republic | 2003           | Lemons, Limes             | 1                                                           |
| 37              | Central African Republic | 2003           | Maize                     | 72                                                          |
| 37              | Central African Republic | 2003           | Meat, Other               | 17                                                          |
| 37              | Central African Republic | 2003           | Milk, Whole               | 47                                                          |
| 37              | Central African Republic | 2003           | Millet                    | 7                                                           |
| 37              | Central African Republic | 2003           | Mutton & Goat Meat        | 9                                                           |
| 37              | Central African Republic | 2003           | Offals, Edible            | 8                                                           |
| 37              | Central African Republic | 2003           | Oilcrops, Other           | 14                                                          |
| 37              | Central African Republic | 2003           | Oranges, Mandarines       | 13                                                          |
| 37              | Central African Republic | 2003           | Palm Oil                  | 1                                                           |
| 37              | Central African Republic | 2003           | Pelagic Fish              | 1                                                           |
| 37              | Central African Republic | 2003           | Pigmeat                   | 9                                                           |
| 37              | Central African Republic | 2003           | Pineapples                | 9                                                           |
| 37              | Central African Republic | 2003           | Plantains                 | 23                                                          |
| 37              | Central African Republic | 2003           | Poultry Meat              | 3                                                           |
| 37              | Central African Republic | 2003           | Pulses, Other             | 15                                                          |
| 37              | Central African Republic | 2003           | Rice (Milled Equivalent)  | 15                                                          |
| 37              | Central African Republic | 2003           | Roots, Other              | 54                                                          |
| 37              | Central African Republic | 2003           | Sesameseed                | 16                                                          |
| 37              | Central African Republic | 2003           | Sesameseed Oil            | 5                                                           |
| 37              | Central African Republic | 2003           | Sorghum                   | 26                                                          |
| 37              | Central African Republic | 2003           | Soyabean Oil              | 1                                                           |
| 37              | Central African Republic | 2003           | Sugar, Refined Equivalent | 14                                                          |
| 37              | Central African Republic | 2003           | Tomatoes                  | 1                                                           |
| 37              | Central African Republic | 2003           | Vegetables, Other         | 62                                                          |
| 37              | Central African Republic | 2003           | Wheat                     | 25                                                          |
| 37              | Central African Republic | 2003           | Yams                      | 201                                                         |
| 37              | Central African Republic | 2004           | Bananas                   | 73                                                          |
| 37              | Central African Republic | 2004           | Beer                      | 10                                                          |
| 37              | Central African Republic | 2004           | Beverages, Fermented      | 42                                                          |
| 37              | Central African Republic | 2004           | Bovine Meat               | 52                                                          |
| 37              | Central African Republic | 2004           | Cassava                   | 386                                                         |
| 37              | Central African Republic | 2004           | Coffee                    | 3                                                           |
| 37              | Central African Republic | 2004           | Eggs                      | 1                                                           |
| 37              | Central African Republic | 2004           | Fats, Animals, Raw        | 3                                                           |
| 37              | Central African Republic | 2004           | Freshwater Fish           | 16                                                          |
| 37              | Central African Republic | 2004           | Fruits, Other             | 9                                                           |
| 37              | Central African Republic | 2004           | Grapefruit                | 3                                                           |
| 37              | Central African Republic | 2004           | Groundnut Oil             | 23                                                          |
| 37              | Central African Republic | 2004           | Honey                     | 11                                                          |
| 37              | Central African Republic | 2004           | Lemons, Limes             | 1                                                           |
| 37              | Central African Republic | 2004           | Maize                     | 75                                                          |
| 37              | Central African Republic | 2004           | Meat, Other               | 17                                                          |
| 37              | Central African Republic | 2004           | Milk, Whole               | 48                                                          |
| 37              | Central African Republic | 2004           | Millet                    | 6                                                           |
| 37              | Central African Republic | 2004           | Mutton & Goat Meat        | 9                                                           |
| 37              | Central African Republic | 2004           | Offals, Edible            | 9                                                           |
| 37              | Central African Republic | 2004           | Oilcrops Oil, Other       | 1                                                           |
| 37              | Central African Republic | 2004           | Oilcrops, Other           | 14                                                          |
| 37              | Central African Republic | 2004           | Oranges, Mandarines       | 13                                                          |
| 37              | Central African Republic | 2004           | Palm Oil                  | 2                                                           |
| 37              | Central African Republic | 2004           | Peas                      | 1                                                           |
| 37              | Central African Republic | 2004           | Pelagic Fish              | 1                                                           |
| 37              | Central African Republic | 2004           | Pigmeat                   | 10                                                          |
| 37              | Central African Republic | 2004           | Pineapples                | 9                                                           |
| 37              | Central African Republic | 2004           | Plantains                 | 23                                                          |
| 37              | Central African Republic | 2004           | Poultry Meat              | 3                                                           |
| 37              | Central African Republic | 2004           | Pulses, Other             | 15                                                          |
| 37              | Central African Republic | 2004           | Rice (Milled Equivalent)  | 10                                                          |
| 37              | Central African Republic | 2004           | Roots, Other              | 67                                                          |
| 37              | Central African Republic | 2004           | Sesameseed                | 17                                                          |
| 37              | Central African Republic | 2004           | Sesameseed Oil            | 5                                                           |

Dietary calcium and zinc deficiency risks are decreasing but remain prevalent

| FAO countrycode | Country                  | Reference year | Food item                 | Gross food supply (g capita <sup>-1</sup> d <sup>-1</sup> ) |
|-----------------|--------------------------|----------------|---------------------------|-------------------------------------------------------------|
| 37              | Central African Republic | 2004           | Sorghum                   | 26                                                          |
| 37              | Central African Republic | 2004           | Sugar, Refined Equivalent | 16                                                          |
| 37              | Central African Republic | 2004           | Tomatoes                  | 1                                                           |
| 37              | Central African Republic | 2004           | Vegetables, Other         | 60                                                          |
| 37              | Central African Republic | 2004           | Wheat                     | 19                                                          |
| 37              | Central African Republic | 2004           | Yams                      | 209                                                         |
| 37              | Central African Republic | 2005           | Bananas                   | 70                                                          |
| 37              | Central African Republic | 2005           | Beer                      | 14                                                          |
| 37              | Central African Republic | 2005           | Beverages, Fermented      | 43                                                          |
| 37              | Central African Republic | 2005           | Bovine Meat               | 53                                                          |
| 37              | Central African Republic | 2005           | Cassava                   | 388                                                         |
| 37              | Central African Republic | 2005           | Coffee                    | 2                                                           |
| 37              | Central African Republic | 2005           | Eggs                      | 1                                                           |
| 37              | Central African Republic | 2005           | Fats, Animals, Raw        | 3                                                           |
| 37              | Central African Republic | 2005           | Freshwater Fish           | 17                                                          |
| 37              | Central African Republic | 2005           | Fruits, Other             | 9                                                           |
| 37              | Central African Republic | 2005           | Grapefruit                | 3                                                           |
| 37              | Central African Republic | 2005           | Groundnut Oil             | 24                                                          |
| 37              | Central African Republic | 2005           | Honey                     | 9                                                           |
| 37              | Central African Republic | 2005           | Lemons, Limes             | 1                                                           |
| 37              | Central African Republic | 2005           | Maize                     | 79                                                          |
| 37              | Central African Republic | 2005           | Meat, Other               | 17                                                          |
| 37              | Central African Republic | 2005           | Milk, Whole               | 47                                                          |
| 37              | Central African Republic | 2005           | Millet                    | 7                                                           |
| 37              | Central African Republic | 2005           | Mutton & Goat Meat        | 10                                                          |
| 37              | Central African Republic | 2005           | Offals, Edible            | 9                                                           |
| 37              | Central African Republic | 2005           | Oilcrops Oil, Other       | 1                                                           |
| 37              | Central African Republic | 2005           | Oilcrops, Other           | 13                                                          |
| 37              | Central African Republic | 2005           | Oranges, Mandarines       | 13                                                          |
| 37              | Central African Republic | 2005           | Palm Oil                  | 3                                                           |
| 37              | Central African Republic | 2005           | Peas                      | 1                                                           |
| 37              | Central African Republic | 2005           | Pelagic Fish              | 1                                                           |
| 37              | Central African Republic | 2005           | Pigmeat                   | 9                                                           |
| 37              | Central African Republic | 2005           | Pineapples                | 9                                                           |
| 37              | Central African Republic | 2005           | Plantains                 | 22                                                          |
| 37              | Central African Republic | 2005           | Poultry Meat              | 3                                                           |
| 37              | Central African Republic | 2005           | Pulses, Other             | 16                                                          |
| 37              | Central African Republic | 2005           | Rice (Milled Equivalent)  | 16                                                          |
| 37              | Central African Republic | 2005           | Roots, Other              | 67                                                          |
| 37              | Central African Republic | 2005           | Sesameseed                | 10                                                          |
| 37              | Central African Republic | 2005           | Sesameseed Oil            | 5                                                           |
| 37              | Central African Republic | 2005           | Sorghum                   | 28                                                          |
| 37              | Central African Republic | 2005           | Sugar, Refined Equivalent | 18                                                          |
| 37              | Central African Republic | 2005           | Tomatoes                  | 1                                                           |
| 37              | Central African Republic | 2005           | Vegetables, Other         | 61                                                          |
| 37              | Central African Republic | 2005           | Wheat                     | 24                                                          |
| 37              | Central African Republic | 2005           | Yams                      | 210                                                         |
| 37              | Central African Republic | 2006           | Bananas                   | 70                                                          |
| 37              | Central African Republic | 2006           | Beer                      | 16                                                          |
| 37              | Central African Republic | 2006           | Beverages, Fermented      | 43                                                          |
| 37              | Central African Republic | 2006           | Bovine Meat               | 53                                                          |
| 37              | Central African Republic | 2006           | Cassava                   | 377                                                         |
| 37              | Central African Republic | 2006           | Coffee                    | 1                                                           |
| 37              | Central African Republic | 2006           | Eggs                      | 1                                                           |
| 37              | Central African Republic | 2006           | Fats, Animals, Raw        | 3                                                           |
| 37              | Central African Republic | 2006           | Freshwater Fish           | 18                                                          |
| 37              | Central African Republic | 2006           | Fruits, Other             | 9                                                           |
| 37              | Central African Republic | 2006           | Grapefruit                | 3                                                           |
| 37              | Central African Republic | 2006           | Groundnut Oil             | 23                                                          |
| 37              | Central African Republic | 2006           | Honey                     | 10                                                          |
| 37              | Central African Republic | 2006           | Lemons, Limes             | 1                                                           |
| 37              | Central African Republic | 2006           | Maize                     | 79                                                          |
| 37              | Central African Republic | 2006           | Meat, Other               | 17                                                          |
| 37              | Central African Republic | 2006           | Milk, Whole               | 45                                                          |
| 37              | Central African Republic | 2006           | Millet                    | 7                                                           |
| 37              | Central African Republic | 2006           | Mutton & Goat Meat        | 10                                                          |
| 37              | Central African Republic | 2006           | Offals, Edible            | 9                                                           |
| 37              | Central African Republic | 2006           | Oilcrops Oil, Other       | 1                                                           |
| 37              | Central African Republic | 2006           | Oilcrops, Other           | 14                                                          |
| 37              | Central African Republic | 2006           | Oranges, Mandarines       | 13                                                          |
| 37              | Central African Republic | 2006           | Palm Oil                  | 1                                                           |
| 37              | Central African Republic | 2006           | Peas                      | 1                                                           |
| 37              | Central African Republic | 2006           | Pelagic Fish              | 1                                                           |
| 37              | Central African Republic | 2006           | Pigmeat                   | 9                                                           |
| 37              | Central African Republic | 2006           | Pineapples                | 9                                                           |
| 37              | Central African Republic | 2006           | Plantains                 | 24                                                          |
| 37              | Central African Republic | 2006           | Poultry Meat              | 3                                                           |
| 37              | Central African Republic | 2006           | Pulses, Other             | 16                                                          |
| 37              | Central African Republic | 2006           | Rice (Milled Equivalent)  | 18                                                          |
| 37              | Central African Republic | 2006           | Roots, Other              | 65                                                          |
| 37              | Central African Republic | 2006           | Sesameseed                | 14                                                          |
| 37              | Central African Republic | 2006           | Sesameseed Oil            | 5                                                           |
| 37              | Central African Republic | 2006           | Sorghum                   | 26                                                          |
| 37              | Central African Republic | 2006           | Sugar, Refined Equivalent | 13                                                          |
| 37              | Central African Republic | 2006           | Vegetables, Other         | 61                                                          |
| 37              | Central African Republic | 2006           | Wheat                     | 29                                                          |
| 37              | Central African Republic | 2006           | Yams                      | 214                                                         |
| 37              | Central African Republic | 2007           | Bananas                   | 72                                                          |
| 37              | Central African Republic | 2007           | Beer                      | 11                                                          |
| 37              | Central African Republic | 2007           | Beverages, Fermented      | 44                                                          |
| 37              | Central African Republic | 2007           | Bovine Meat               | 56                                                          |
| 37              | Central African Republic | 2007           | Cassava                   | 387                                                         |
| 37              | Central African Republic | 2007           | Cereals, Other            | 1                                                           |
| 37              | Central African Republic | 2007           | Coffee                    | 1                                                           |
| 37              | Central African Republic | 2007           | Eggs                      | 1                                                           |
| 37              | Central African Republic | 2007           | Fats, Animals, Raw        | 3                                                           |
| 37              | Central African Republic | 2007           | Freshwater Fish           | 19                                                          |



Dietary calcium and zinc deficiency risks are decreasing but remain prevalent

| FAO countrycode | Country                  | Reference year | Food item                 | Gross food supply (g capita <sup>-1</sup> d <sup>-1</sup> ) |
|-----------------|--------------------------|----------------|---------------------------|-------------------------------------------------------------|
| 37              | Central African Republic | 2007           | Fruits, Other             | 9                                                           |
| 37              | Central African Republic | 2007           | Grapefruit                | 3                                                           |
| 37              | Central African Republic | 2007           | Groundnut Oil             | 25                                                          |
| 37              | Central African Republic | 2007           | Honey                     | 9                                                           |
| 37              | Central African Republic | 2007           | Lemons, Limes             | 1                                                           |
| 37              | Central African Republic | 2007           | Maize                     | 83                                                          |
| 37              | Central African Republic | 2007           | Meat, Other               | 17                                                          |
| 37              | Central African Republic | 2007           | Milk, Whole               | 47                                                          |
| 37              | Central African Republic | 2007           | Millet                    | 6                                                           |
| 37              | Central African Republic | 2007           | Mutton & Goat Meat        | 10                                                          |
| 37              | Central African Republic | 2007           | Offals, Edible            | 9                                                           |
| 37              | Central African Republic | 2007           | Oilcrops Oil, Other       | 1                                                           |
| 37              | Central African Republic | 2007           | Oilcrops, Other           | 15                                                          |
| 37              | Central African Republic | 2007           | Oranges, Mandarines       | 13                                                          |
| 37              | Central African Republic | 2007           | Palm Oil                  | 3                                                           |
| 37              | Central African Republic | 2007           | Peas                      | 1                                                           |
| 37              | Central African Republic | 2007           | Pelagic Fish              | 2                                                           |
| 37              | Central African Republic | 2007           | Pigmeat                   | 9                                                           |
| 37              | Central African Republic | 2007           | Pineapples                | 9                                                           |
| 37              | Central African Republic | 2007           | Plantains                 | 22                                                          |
| 37              | Central African Republic | 2007           | Poultry Meat              | 3                                                           |
| 37              | Central African Republic | 2007           | Pulses, Other             | 13                                                          |
| 37              | Central African Republic | 2007           | Rice (Milled Equivalent)  | 19                                                          |
| 37              | Central African Republic | 2007           | Roots, Other              | 67                                                          |
| 37              | Central African Republic | 2007           | Sesameseed                | 18                                                          |
| 37              | Central African Republic | 2007           | Sesameseed Oil            | 5                                                           |
| 37              | Central African Republic | 2007           | Sorghum                   | 29                                                          |
| 37              | Central African Republic | 2007           | Sugar, Refined Equivalent | 15                                                          |
| 37              | Central African Republic | 2007           | Tomatoes                  | 1                                                           |
| 37              | Central African Republic | 2007           | Vegetables, Other         | 63                                                          |
| 37              | Central African Republic | 2007           | Wheat                     | 17                                                          |
| 37              | Central African Republic | 2007           | Yams                      | 219                                                         |
| 37              | Central African Republic | 2008           | Bananas                   | 74                                                          |
| 37              | Central African Republic | 2008           | Beer                      | 14                                                          |
| 37              | Central African Republic | 2008           | Beverages, Fermented      | 45                                                          |
| 37              | Central African Republic | 2008           | Bovine Meat               | 53                                                          |
| 37              | Central African Republic | 2008           | Cassava                   | 395                                                         |
| 37              | Central African Republic | 2008           | Coffee                    | 2                                                           |
| 37              | Central African Republic | 2008           | Eggs                      | 1                                                           |
| 37              | Central African Republic | 2008           | Fats, Animals, Raw        | 3                                                           |
| 37              | Central African Republic | 2008           | Freshwater Fish           | 20                                                          |
| 37              | Central African Republic | 2008           | Fruits, Other             | 9                                                           |
| 37              | Central African Republic | 2008           | Grapefruit                | 3                                                           |
| 37              | Central African Republic | 2008           | Groundnut Oil             | 25                                                          |
| 37              | Central African Republic | 2008           | Honey                     | 9                                                           |
| 37              | Central African Republic | 2008           | Lemons, Limes             | 1                                                           |
| 37              | Central African Republic | 2008           | Maize                     | 86                                                          |
| 37              | Central African Republic | 2008           | Meat, Other               | 16                                                          |
| 37              | Central African Republic | 2008           | Milk, Whole               | 46                                                          |
| 37              | Central African Republic | 2008           | Millet                    | 6                                                           |
| 37              | Central African Republic | 2008           | Mutton & Goat Meat        | 12                                                          |
| 37              | Central African Republic | 2008           | Offals, Edible            | 9                                                           |
| 37              | Central African Republic | 2008           | Oilcrops Oil, Other       | 1                                                           |
| 37              | Central African Republic | 2008           | Oilcrops, Other           | 15                                                          |
| 37              | Central African Republic | 2008           | Oranges, Mandarines       | 13                                                          |
| 37              | Central African Republic | 2008           | Palm Oil                  | 5                                                           |
| 37              | Central African Republic | 2008           | Peas                      | 1                                                           |
| 37              | Central African Republic | 2008           | Pelagic Fish              | 2                                                           |
| 37              | Central African Republic | 2008           | Pigmeat                   | 11                                                          |
| 37              | Central African Republic | 2008           | Pineapples                | 8                                                           |
| 37              | Central African Republic | 2008           | Plantains                 | 22                                                          |
| 37              | Central African Republic | 2008           | Poultry Meat              | 3                                                           |
| 37              | Central African Republic | 2008           | Pulses, Other             | 17                                                          |
| 37              | Central African Republic | 2008           | Rice (Milled Equivalent)  | 20                                                          |
| 37              | Central African Republic | 2008           | Roots, Other              | 68                                                          |
| 37              | Central African Republic | 2008           | Sesameseed                | 18                                                          |
| 37              | Central African Republic | 2008           | Sesameseed Oil            | 5                                                           |
| 37              | Central African Republic | 2008           | Sorghum                   | 23                                                          |
| 37              | Central African Republic | 2008           | Sugar, Refined Equivalent | 15                                                          |
| 37              | Central African Republic | 2008           | Vegetables, Other         | 62                                                          |
| 37              | Central African Republic | 2008           | Wheat                     | 18                                                          |
| 37              | Central African Republic | 2008           | Yams                      | 224                                                         |
| 37              | Central African Republic | 2009           | Bananas                   | 72                                                          |
| 37              | Central African Republic | 2009           | Beer                      | 11                                                          |
| 37              | Central African Republic | 2009           | Beverages, Fermented      | 42                                                          |
| 37              | Central African Republic | 2009           | Bovine Meat               | 53                                                          |
| 37              | Central African Republic | 2009           | Cassava                   | 401                                                         |
| 37              | Central African Republic | 2009           | Cereals, Other            | 1                                                           |
| 37              | Central African Republic | 2009           | Coffee                    | 1                                                           |
| 37              | Central African Republic | 2009           | Eggs                      | 1                                                           |
| 37              | Central African Republic | 2009           | Fats, Animals, Raw        | 3                                                           |
| 37              | Central African Republic | 2009           | Freshwater Fish           | 21                                                          |
| 37              | Central African Republic | 2009           | Fruits, Other             | 8                                                           |
| 37              | Central African Republic | 2009           | Grapefruit                | 3                                                           |
| 37              | Central African Republic | 2009           | Groundnut Oil             | 23                                                          |
| 37              | Central African Republic | 2009           | Honey                     | 9                                                           |
| 37              | Central African Republic | 2009           | Lemons, Limes             | 1                                                           |
| 37              | Central African Republic | 2009           | Maize                     | 90                                                          |
| 37              | Central African Republic | 2009           | Marine Fish, Other        | 1                                                           |
| 37              | Central African Republic | 2009           | Meat, Other               | 16                                                          |
| 37              | Central African Republic | 2009           | Milk, Whole               | 46                                                          |
| 37              | Central African Republic | 2009           | Millet                    | 6                                                           |
| 37              | Central African Republic | 2009           | Mutton & Goat Meat        | 12                                                          |
| 37              | Central African Republic | 2009           | Offals, Edible            | 9                                                           |
| 37              | Central African Republic | 2009           | Oilcrops Oil, Other       | 1                                                           |
| 37              | Central African Republic | 2009           | Oilcrops, Other           | 15                                                          |
| 37              | Central African Republic | 2009           | Oranges, Mandarines       | 13                                                          |

Dietary calcium and zinc deficiency risks are decreasing but remain prevalent

| FAO countrycode | Country                  | Reference year | Food item                 | Gross food supply (g capita <sup>-1</sup> d <sup>-1</sup> ) |
|-----------------|--------------------------|----------------|---------------------------|-------------------------------------------------------------|
| 37              | Central African Republic | 2009           | Palm Oil                  | 4                                                           |
| 37              | Central African Republic | 2009           | Peas                      | 1                                                           |
| 37              | Central African Republic | 2009           | Pelagic Fish              | 1                                                           |
| 37              | Central African Republic | 2009           | Pigmeat                   | 11                                                          |
| 37              | Central African Republic | 2009           | Pineapples                | 8                                                           |
| 37              | Central African Republic | 2009           | Plantains                 | 22                                                          |
| 37              | Central African Republic | 2009           | Poultry Meat              | 4                                                           |
| 37              | Central African Republic | 2009           | Pulses, Other             | 18                                                          |
| 37              | Central African Republic | 2009           | Rice (Milled Equivalent)  | 17                                                          |
| 37              | Central African Republic | 2009           | Roots, Other              | 69                                                          |
| 37              | Central African Republic | 2009           | Sesameseed                | 15                                                          |
| 37              | Central African Republic | 2009           | Sesameseed Oil            | 5                                                           |
| 37              | Central African Republic | 2009           | Sorghum                   | 28                                                          |
| 37              | Central African Republic | 2009           | Soyabean Oil              | 1                                                           |
| 37              | Central African Republic | 2009           | Sugar, Refined Equivalent | 14                                                          |
| 37              | Central African Republic | 2009           | Vegetables, Other         | 62                                                          |
| 37              | Central African Republic | 2009           | Wheat                     | 20                                                          |
| 37              | Central African Republic | 2009           | Yams                      | 227                                                         |
| 37              | Central African Republic | 2010           | Bananas                   | 71                                                          |
| 37              | Central African Republic | 2010           | Beer                      | 10                                                          |
| 37              | Central African Republic | 2010           | Beverages, Fermented      | 48                                                          |
| 37              | Central African Republic | 2010           | Bovine Meat               | 54                                                          |
| 37              | Central African Republic | 2010           | Cassava                   | 415                                                         |
| 37              | Central African Republic | 2010           | Coffee                    | 2                                                           |
| 37              | Central African Republic | 2010           | Eggs                      | 2                                                           |
| 37              | Central African Republic | 2010           | Fats, Animals, Raw        | 3                                                           |
| 37              | Central African Republic | 2010           | Freshwater Fish           | 22                                                          |
| 37              | Central African Republic | 2010           | Fruits, Other             | 9                                                           |
| 37              | Central African Republic | 2010           | Grapefruit                | 3                                                           |
| 37              | Central African Republic | 2010           | Groundnut Oil             | 23                                                          |
| 37              | Central African Republic | 2010           | Honey                     | 9                                                           |
| 37              | Central African Republic | 2010           | Lemons, Limes             | 1                                                           |
| 37              | Central African Republic | 2010           | Maize                     | 96                                                          |
| 37              | Central African Republic | 2010           | Marine Fish, Other        | 2                                                           |
| 37              | Central African Republic | 2010           | Meat, Other               | 20                                                          |
| 37              | Central African Republic | 2010           | Milk, Whole               | 46                                                          |
| 37              | Central African Republic | 2010           | Millet                    | 6                                                           |
| 37              | Central African Republic | 2010           | Mutton & Goat Meat        | 13                                                          |
| 37              | Central African Republic | 2010           | Offals, Edible            | 9                                                           |
| 37              | Central African Republic | 2010           | Oilcrops, Other           | 16                                                          |
| 37              | Central African Republic | 2010           | Oranges, Mandarines       | 14                                                          |
| 37              | Central African Republic | 2010           | Palm Oil                  | 4                                                           |
| 37              | Central African Republic | 2010           | Peas                      | 2                                                           |
| 37              | Central African Republic | 2010           | Pelagic Fish              | 2                                                           |
| 37              | Central African Republic | 2010           | Pigmeat                   | 12                                                          |
| 37              | Central African Republic | 2010           | Pineapples                | 8                                                           |
| 37              | Central African Republic | 2010           | Plantains                 | 22                                                          |
| 37              | Central African Republic | 2010           | Poultry Meat              | 4                                                           |
| 37              | Central African Republic | 2010           | Pulses, Other             | 21                                                          |
| 37              | Central African Republic | 2010           | Rice (Milled Equivalent)  | 19                                                          |
| 37              | Central African Republic | 2010           | Roots, Other              | 71                                                          |
| 37              | Central African Republic | 2010           | Sesameseed                | 8                                                           |
| 37              | Central African Republic | 2010           | Sesameseed Oil            | 5                                                           |
| 37              | Central African Republic | 2010           | Sorghum                   | 28                                                          |
| 37              | Central African Republic | 2010           | Soyabean Oil              | 1                                                           |
| 37              | Central African Republic | 2010           | Sugar, Refined Equivalent | 13                                                          |
| 37              | Central African Republic | 2010           | Tomatoes                  | 1                                                           |
| 37              | Central African Republic | 2010           | Vegetables, Other         | 53                                                          |
| 37              | Central African Republic | 2010           | Wheat                     | 23                                                          |
| 37              | Central African Republic | 2010           | Yams                      | 233                                                         |
| 37              | Central African Republic | 2011           | Bananas                   | 69                                                          |
| 37              | Central African Republic | 2011           | Beer                      | 11                                                          |
| 37              | Central African Republic | 2011           | Beverages, Fermented      | 47                                                          |
| 37              | Central African Republic | 2011           | Bovine Meat               | 54                                                          |
| 37              | Central African Republic | 2011           | Cassava                   | 423                                                         |
| 37              | Central African Republic | 2011           | Coffee                    | 3                                                           |
| 37              | Central African Republic | 2011           | Eggs                      | 2                                                           |
| 37              | Central African Republic | 2011           | Fats, Animals, Raw        | 3                                                           |
| 37              | Central African Republic | 2011           | Freshwater Fish           | 22                                                          |
| 37              | Central African Republic | 2011           | Fruits, Other             | 10                                                          |
| 37              | Central African Republic | 2011           | Grapefruit                | 3                                                           |
| 37              | Central African Republic | 2011           | Groundnut Oil             | 24                                                          |
| 37              | Central African Republic | 2011           | Honey                     | 10                                                          |
| 37              | Central African Republic | 2011           | Lemons, Limes             | 1                                                           |
| 37              | Central African Republic | 2011           | Maize                     | 94                                                          |
| 37              | Central African Republic | 2011           | Marine Fish, Other        | 2                                                           |
| 37              | Central African Republic | 2011           | Meat, Other               | 20                                                          |
| 37              | Central African Republic | 2011           | Milk, Whole               | 46                                                          |
| 37              | Central African Republic | 2011           | Millet                    | 6                                                           |
| 37              | Central African Republic | 2011           | Mutton & Goat Meat        | 15                                                          |
| 37              | Central African Republic | 2011           | Offals, Edible            | 9                                                           |
| 37              | Central African Republic | 2011           | Oilcrops, Other           | 15                                                          |
| 37              | Central African Republic | 2011           | Oranges, Mandarines       | 17                                                          |
| 37              | Central African Republic | 2011           | Palm Oil                  | 3                                                           |
| 37              | Central African Republic | 2011           | Peas                      | 1                                                           |
| 37              | Central African Republic | 2011           | Pelagic Fish              | 2                                                           |
| 37              | Central African Republic | 2011           | Pigmeat                   | 11                                                          |
| 37              | Central African Republic | 2011           | Pineapples                | 8                                                           |
| 37              | Central African Republic | 2011           | Plantains                 | 21                                                          |
| 37              | Central African Republic | 2011           | Poultry Meat              | 4                                                           |
| 37              | Central African Republic | 2011           | Pulses, Other             | 22                                                          |
| 37              | Central African Republic | 2011           | Rice (Milled Equivalent)  | 18                                                          |
| 37              | Central African Republic | 2011           | Roots, Other              | 72                                                          |
| 37              | Central African Republic | 2011           | Sesameseed                | 6                                                           |
| 37              | Central African Republic | 2011           | Sesameseed Oil            | 5                                                           |
| 37              | Central African Republic | 2011           | Sorghum                   | 26                                                          |
| 37              | Central African Republic | 2011           | Sugar, Refined Equivalent | 13                                                          |

Dietary calcium and zinc deficiency risks are decreasing but remain prevalent

| FAO countrycode | Country                  | Reference year | Food item                 | Gross food supply (g capita <sup>-1</sup> d <sup>-1</sup> ) |
|-----------------|--------------------------|----------------|---------------------------|-------------------------------------------------------------|
| 37              | Central African Republic | 2011           | Tomatoes                  | 1                                                           |
| 37              | Central African Republic | 2011           | Vegetables, Other         | 53                                                          |
| 37              | Central African Republic | 2011           | Wheat                     | 26                                                          |
| 37              | Central African Republic | 2011           | Yams                      | 237                                                         |
| 39              | Chad                     | 1992           | Beans                     | 5                                                           |
| 39              | Chad                     | 1992           | Beer                      | 6                                                           |
| 39              | Chad                     | 1992           | Beverages, Fermented      | 4                                                           |
| 39              | Chad                     | 1992           | Bovine Meat               | 34                                                          |
| 39              | Chad                     | 1992           | Cassava                   | 76                                                          |
| 39              | Chad                     | 1992           | Cereals, Other            | 36                                                          |
| 39              | Chad                     | 1992           | Cottonseed Oil            | 4                                                           |
| 39              | Chad                     | 1992           | Dates                     | 10                                                          |
| 39              | Chad                     | 1992           | Eggs                      | 1                                                           |
| 39              | Chad                     | 1992           | Fats, Animals, Raw        | 1                                                           |
| 39              | Chad                     | 1992           | Freshwater Fish           | 15                                                          |
| 39              | Chad                     | 1992           | Fruits, Other             | 35                                                          |
| 39              | Chad                     | 1992           | Groundnut Oil             | 7                                                           |
| 39              | Chad                     | 1992           | Groundnuts (Shelled Eq)   | 35                                                          |
| 39              | Chad                     | 1992           | Maize                     | 31                                                          |
| 39              | Chad                     | 1992           | Meat, Other               | 2                                                           |
| 39              | Chad                     | 1992           | Milk, Whole               | 65                                                          |
| 39              | Chad                     | 1992           | Millet                    | 92                                                          |
| 39              | Chad                     | 1992           | Mutton & Goat Meat        | 9                                                           |
| 39              | Chad                     | 1992           | Offals, Edible            | 7                                                           |
| 39              | Chad                     | 1992           | Oilcrops, Other           | 7                                                           |
| 39              | Chad                     | 1992           | Onions                    | 6                                                           |
| 39              | Chad                     | 1992           | Potatoes                  | 7                                                           |
| 39              | Chad                     | 1992           | Poultry Meat              | 2                                                           |
| 39              | Chad                     | 1992           | Pulses, Other             | 8                                                           |
| 39              | Chad                     | 1992           | Rice (Milled Equivalent)  | 27                                                          |
| 39              | Chad                     | 1992           | Roots, Other              | 11                                                          |
| 39              | Chad                     | 1992           | Sesameseed                | 6                                                           |
| 39              | Chad                     | 1992           | Sorghum                   | 125                                                         |
| 39              | Chad                     | 1992           | Sugar, Refined Equivalent | 13                                                          |
| 39              | Chad                     | 1992           | Sweet Potatoes            | 17                                                          |
| 39              | Chad                     | 1992           | Vegetables, Other         | 24                                                          |
| 39              | Chad                     | 1992           | Wheat                     | 18                                                          |
| 39              | Chad                     | 1992           | Yams                      | 80                                                          |
| 39              | Chad                     | 1993           | Beans                     | 3                                                           |
| 39              | Chad                     | 1993           | Beer                      | 4                                                           |
| 39              | Chad                     | 1993           | Beverages, Fermented      | 3                                                           |
| 39              | Chad                     | 1993           | Bovine Meat               | 29                                                          |
| 39              | Chad                     | 1993           | Cassava                   | 72                                                          |
| 39              | Chad                     | 1993           | Cereals, Other            | 36                                                          |
| 39              | Chad                     | 1993           | Cottonseed Oil            | 3                                                           |
| 39              | Chad                     | 1993           | Dates                     | 7                                                           |
| 39              | Chad                     | 1993           | Eggs                      | 1                                                           |
| 39              | Chad                     | 1993           | Fats, Animals, Raw        | 1                                                           |
| 39              | Chad                     | 1993           | Freshwater Fish           | 16                                                          |
| 39              | Chad                     | 1993           | Fruits, Other             | 35                                                          |
| 39              | Chad                     | 1993           | Groundnut Oil             | 7                                                           |
| 39              | Chad                     | 1993           | Groundnuts (Shelled Eq)   | 37                                                          |
| 39              | Chad                     | 1993           | Maize                     | 20                                                          |
| 39              | Chad                     | 1993           | Meat, Other               | 2                                                           |
| 39              | Chad                     | 1993           | Milk, Whole               | 66                                                          |
| 39              | Chad                     | 1993           | Millet                    | 83                                                          |
| 39              | Chad                     | 1993           | Mutton & Goat Meat        | 9                                                           |
| 39              | Chad                     | 1993           | Offals, Edible            | 6                                                           |
| 39              | Chad                     | 1993           | Oilcrops, Other           | 5                                                           |
| 39              | Chad                     | 1993           | Onions                    | 5                                                           |
| 39              | Chad                     | 1993           | Potatoes                  | 6                                                           |
| 39              | Chad                     | 1993           | Poultry Meat              | 2                                                           |
| 39              | Chad                     | 1993           | Pulses, Other             | 8                                                           |
| 39              | Chad                     | 1993           | Rice (Milled Equivalent)  | 27                                                          |
| 39              | Chad                     | 1993           | Roots, Other              | 11                                                          |
| 39              | Chad                     | 1993           | Sesameseed                | 4                                                           |
| 39              | Chad                     | 1993           | Sorghum                   | 103                                                         |
| 39              | Chad                     | 1993           | Sugar, Refined Equivalent | 15                                                          |
| 39              | Chad                     | 1993           | Sweet Potatoes            | 16                                                          |
| 39              | Chad                     | 1993           | Vegetables, Other         | 23                                                          |
| 39              | Chad                     | 1993           | Wheat                     | 19                                                          |
| 39              | Chad                     | 1993           | Yams                      | 70                                                          |
| 39              | Chad                     | 1994           | Beans                     | 8                                                           |
| 39              | Chad                     | 1994           | Beer                      | 4                                                           |
| 39              | Chad                     | 1994           | Beverages, Fermented      | 4                                                           |
| 39              | Chad                     | 1994           | Bovine Meat               | 23                                                          |
| 39              | Chad                     | 1994           | Cassava                   | 67                                                          |
| 39              | Chad                     | 1994           | Cereals, Other            | 44                                                          |
| 39              | Chad                     | 1994           | Cottonseed Oil            | 4                                                           |
| 39              | Chad                     | 1994           | Dates                     | 7                                                           |
| 39              | Chad                     | 1994           | Eggs                      | 1                                                           |
| 39              | Chad                     | 1994           | Fats, Animals, Raw        | 1                                                           |
| 39              | Chad                     | 1994           | Freshwater Fish           | 17                                                          |
| 39              | Chad                     | 1994           | Fruits, Other             | 35                                                          |
| 39              | Chad                     | 1994           | Groundnut Oil             | 6                                                           |
| 39              | Chad                     | 1994           | Groundnuts (Shelled Eq)   | 31                                                          |
| 39              | Chad                     | 1994           | Maize                     | 55                                                          |
| 39              | Chad                     | 1994           | Meat, Other               | 2                                                           |
| 39              | Chad                     | 1994           | Milk, Whole               | 63                                                          |
| 39              | Chad                     | 1994           | Millet                    | 99                                                          |
| 39              | Chad                     | 1994           | Mutton & Goat Meat        | 9                                                           |
| 39              | Chad                     | 1994           | Offals, Edible            | 5                                                           |
| 39              | Chad                     | 1994           | Oilcrops, Other           | 7                                                           |
| 39              | Chad                     | 1994           | Onions                    | 5                                                           |
| 39              | Chad                     | 1994           | Potatoes                  | 6                                                           |
| 39              | Chad                     | 1994           | Poultry Meat              | 2                                                           |
| 39              | Chad                     | 1994           | Pulses, Other             | 7                                                           |

Dietary calcium and zinc deficiency risks are decreasing but remain prevalent

| FAO countrycode | Country | Reference year | Food item                 | Gross food supply (g capita <sup>-1</sup> d <sup>-1</sup> ) |
|-----------------|---------|----------------|---------------------------|-------------------------------------------------------------|
| 39              | Chad    | 1994           | Rice (Milled Equivalent)  | 27                                                          |
| 39              | Chad    | 1994           | Roots, Other              | 12                                                          |
| 39              | Chad    | 1994           | Sesameseed                | 5                                                           |
| 39              | Chad    | 1994           | Sorghum                   | 164                                                         |
| 39              | Chad    | 1994           | Sugar, Refined Equivalent | 14                                                          |
| 39              | Chad    | 1994           | Sweet Potatoes            | 15                                                          |
| 39              | Chad    | 1994           | Tea                       | 1                                                           |
| 39              | Chad    | 1994           | Vegetables, Other         | 22                                                          |
| 39              | Chad    | 1994           | Wheat                     | 17                                                          |
| 39              | Chad    | 1994           | Yams                      | 78                                                          |
| 39              | Chad    | 1995           | Beans                     | 7                                                           |
| 39              | Chad    | 1995           | Beer                      | 3                                                           |
| 39              | Chad    | 1995           | Beverages, Fermented      | 3                                                           |
| 39              | Chad    | 1995           | Bovine Meat               | 25                                                          |
| 39              | Chad    | 1995           | Cassava                   | 95                                                          |
| 39              | Chad    | 1995           | Cereals, Other            | 33                                                          |
| 39              | Chad    | 1995           | Cottonseed Oil            | 4                                                           |
| 39              | Chad    | 1995           | Dates                     | 5                                                           |
| 39              | Chad    | 1995           | Eggs                      | 1                                                           |
| 39              | Chad    | 1995           | Fats, Animals, Raw        | 1                                                           |
| 39              | Chad    | 1995           | Freshwater Fish           | 17                                                          |
| 39              | Chad    | 1995           | Fruits, Other             | 26                                                          |
| 39              | Chad    | 1995           | Groundnut Oil             | 9                                                           |
| 39              | Chad    | 1995           | Groundnuts (Shelled Eq)   | 45                                                          |
| 39              | Chad    | 1995           | Maize                     | 21                                                          |
| 39              | Chad    | 1995           | Meat, Other               | 2                                                           |
| 39              | Chad    | 1995           | Milk, Whole               | 68                                                          |
| 39              | Chad    | 1995           | Millet                    | 78                                                          |
| 39              | Chad    | 1995           | Mutton & Goat Meat        | 9                                                           |
| 39              | Chad    | 1995           | Offals, Edible            | 6                                                           |
| 39              | Chad    | 1995           | Oilcrops, Other           | 8                                                           |
| 39              | Chad    | 1995           | Onions                    | 5                                                           |
| 39              | Chad    | 1995           | Potatoes                  | 6                                                           |
| 39              | Chad    | 1995           | Poultry Meat              | 2                                                           |
| 39              | Chad    | 1995           | Pulses, Other             | 6                                                           |
| 39              | Chad    | 1995           | Rice (Milled Equivalent)  | 25                                                          |
| 39              | Chad    | 1995           | Roots, Other              | 12                                                          |
| 39              | Chad    | 1995           | Sesameseed                | 4                                                           |
| 39              | Chad    | 1995           | Sorghum                   | 133                                                         |
| 39              | Chad    | 1995           | Sugar, Refined Equivalent | 17                                                          |
| 39              | Chad    | 1995           | Sweet Potatoes            | 18                                                          |
| 39              | Chad    | 1995           | Vegetables, Other         | 31                                                          |
| 39              | Chad    | 1995           | Wheat                     | 13                                                          |
| 39              | Chad    | 1995           | Yams                      | 68                                                          |
| 39              | Chad    | 1996           | Beans                     | 6                                                           |
| 39              | Chad    | 1996           | Beer                      | 7                                                           |
| 39              | Chad    | 1996           | Beverages, Fermented      | 3                                                           |
| 39              | Chad    | 1996           | Bovine Meat               | 25                                                          |
| 39              | Chad    | 1996           | Cassava                   | 94                                                          |
| 39              | Chad    | 1996           | Cereals, Other            | 30                                                          |
| 39              | Chad    | 1996           | Cottonseed Oil            | 4                                                           |
| 39              | Chad    | 1996           | Dates                     | 5                                                           |
| 39              | Chad    | 1996           | Eggs                      | 1                                                           |
| 39              | Chad    | 1996           | Fats, Animals, Raw        | 1                                                           |
| 39              | Chad    | 1996           | Freshwater Fish           | 18                                                          |
| 39              | Chad    | 1996           | Fruits, Other             | 25                                                          |
| 39              | Chad    | 1996           | Groundnut Oil             | 9                                                           |
| 39              | Chad    | 1996           | Groundnuts (Shelled Eq)   | 44                                                          |
| 39              | Chad    | 1996           | Maize                     | 27                                                          |
| 39              | Chad    | 1996           | Marine Fish, Other        | 1                                                           |
| 39              | Chad    | 1996           | Meat, Other               | 2                                                           |
| 39              | Chad    | 1996           | Milk, Whole               | 65                                                          |
| 39              | Chad    | 1996           | Millet                    | 82                                                          |
| 39              | Chad    | 1996           | Mutton & Goat Meat        | 9                                                           |
| 39              | Chad    | 1996           | Offals, Edible            | 6                                                           |
| 39              | Chad    | 1996           | Oilcrops, Other           | 8                                                           |
| 39              | Chad    | 1996           | Onions                    | 5                                                           |
| 39              | Chad    | 1996           | Potatoes                  | 6                                                           |
| 39              | Chad    | 1996           | Poultry Meat              | 2                                                           |
| 39              | Chad    | 1996           | Pulses, Other             | 8                                                           |
| 39              | Chad    | 1996           | Rice (Milled Equivalent)  | 23                                                          |
| 39              | Chad    | 1996           | Roots, Other              | 12                                                          |
| 39              | Chad    | 1996           | Sesameseed                | 4                                                           |
| 39              | Chad    | 1996           | Sorghum                   | 121                                                         |
| 39              | Chad    | 1996           | Sugar, Refined Equivalent | 22                                                          |
| 39              | Chad    | 1996           | Sweet Potatoes            | 18                                                          |
| 39              | Chad    | 1996           | Tea                       | 1                                                           |
| 39              | Chad    | 1996           | Vegetables, Other         | 30                                                          |
| 39              | Chad    | 1996           | Wheat                     | 16                                                          |
| 39              | Chad    | 1996           | Yams                      | 66                                                          |
| 39              | Chad    | 1997           | Beans                     | 6                                                           |
| 39              | Chad    | 1997           | Beer                      | 5                                                           |
| 39              | Chad    | 1997           | Beverages, Fermented      | 3                                                           |
| 39              | Chad    | 1997           | Bovine Meat               | 26                                                          |
| 39              | Chad    | 1997           | Cassava                   | 93                                                          |
| 39              | Chad    | 1997           | Cereals, Other            | 29                                                          |
| 39              | Chad    | 1997           | Cottonseed Oil            | 5                                                           |
| 39              | Chad    | 1997           | Dates                     | 4                                                           |
| 39              | Chad    | 1997           | Eggs                      | 1                                                           |
| 39              | Chad    | 1997           | Fats, Animals, Raw        | 1                                                           |
| 39              | Chad    | 1997           | Freshwater Fish           | 17                                                          |
| 39              | Chad    | 1997           | Fruits, Other             | 30                                                          |
| 39              | Chad    | 1997           | Groundnut Oil             | 10                                                          |
| 39              | Chad    | 1997           | Groundnuts (Shelled Eq)   | 50                                                          |
| 39              | Chad    | 1997           | Maize                     | 31                                                          |
| 39              | Chad    | 1997           | Meat, Other               | 2                                                           |
| 39              | Chad    | 1997           | Milk, Whole               | 69                                                          |

Dietary calcium and zinc deficiency risks are decreasing but remain prevalent

| FAO countrycode | Country | Reference year | Food item                 | Gross food supply (g capita <sup>-1</sup> d <sup>-1</sup> ) |
|-----------------|---------|----------------|---------------------------|-------------------------------------------------------------|
| 39              | Chad    | 1997           | Millet                    | 74                                                          |
| 39              | Chad    | 1997           | Mutton & Goat Meat        | 11                                                          |
| 39              | Chad    | 1997           | Offals, Edible            | 6                                                           |
| 39              | Chad    | 1997           | Oilcrops, Other           | 10                                                          |
| 39              | Chad    | 1997           | Onions                    | 5                                                           |
| 39              | Chad    | 1997           | Potatoes                  | 6                                                           |
| 39              | Chad    | 1997           | Poultry Meat              | 2                                                           |
| 39              | Chad    | 1997           | Pulses, Other             | 7                                                           |
| 39              | Chad    | 1997           | Rice (Milled Equivalent)  | 26                                                          |
| 39              | Chad    | 1997           | Roots, Other              | 12                                                          |
| 39              | Chad    | 1997           | Sesameseed                | 8                                                           |
| 39              | Chad    | 1997           | Sorghum                   | 131                                                         |
| 39              | Chad    | 1997           | Sugar, Refined Equivalent | 16                                                          |
| 39              | Chad    | 1997           | Sweet Potatoes            | 18                                                          |
| 39              | Chad    | 1997           | Vegetables, Other         | 29                                                          |
| 39              | Chad    | 1997           | Wheat                     | 19                                                          |
| 39              | Chad    | 1997           | Yams                      | 63                                                          |
| 39              | Chad    | 1998           | Beans                     | 11                                                          |
| 39              | Chad    | 1998           | Beer                      | 4                                                           |
| 39              | Chad    | 1998           | Beverages, Fermented      | 4                                                           |
| 39              | Chad    | 1998           | Bovine Meat               | 28                                                          |
| 39              | Chad    | 1998           | Cassava                   | 93                                                          |
| 39              | Chad    | 1998           | Cereals, Other            | 41                                                          |
| 39              | Chad    | 1998           | Cottonseed Oil            | 5                                                           |
| 39              | Chad    | 1998           | Dates                     | 4                                                           |
| 39              | Chad    | 1998           | Eggs                      | 1                                                           |
| 39              | Chad    | 1998           | Fats, Animals, Raw        | 1                                                           |
| 39              | Chad    | 1998           | Freshwater Fish           | 18                                                          |
| 39              | Chad    | 1998           | Fruits, Other             | 29                                                          |
| 39              | Chad    | 1998           | Groundnut Oil             | 10                                                          |
| 39              | Chad    | 1998           | Groundnuts (Shelled Eq)   | 48                                                          |
| 39              | Chad    | 1998           | Maize                     | 48                                                          |
| 39              | Chad    | 1998           | Meat, Other               | 2                                                           |
| 39              | Chad    | 1998           | Milk, Whole               | 68                                                          |
| 39              | Chad    | 1998           | Millet                    | 87                                                          |
| 39              | Chad    | 1998           | Mutton & Goat Meat        | 10                                                          |
| 39              | Chad    | 1998           | Offals, Edible            | 7                                                           |
| 39              | Chad    | 1998           | Oilcrops, Other           | 9                                                           |
| 39              | Chad    | 1998           | Onions                    | 4                                                           |
| 39              | Chad    | 1998           | Potatoes                  | 6                                                           |
| 39              | Chad    | 1998           | Poultry Meat              | 2                                                           |
| 39              | Chad    | 1998           | Pulses, Other             | 17                                                          |
| 39              | Chad    | 1998           | Rice (Milled Equivalent)  | 26                                                          |
| 39              | Chad    | 1998           | Roots, Other              | 11                                                          |
| 39              | Chad    | 1998           | Sesameseed                | 9                                                           |
| 39              | Chad    | 1998           | Sorghum                   | 126                                                         |
| 39              | Chad    | 1998           | Sugar, Refined Equivalent | 20                                                          |
| 39              | Chad    | 1998           | Sweet Potatoes            | 18                                                          |
| 39              | Chad    | 1998           | Vegetables, Other         | 26                                                          |
| 39              | Chad    | 1998           | Wheat                     | 14                                                          |
| 39              | Chad    | 1998           | Yams                      | 65                                                          |
| 39              | Chad    | 1999           | Beans                     | 13                                                          |
| 39              | Chad    | 1999           | Beer                      | 3                                                           |
| 39              | Chad    | 1999           | Beverages, Fermented      | 4                                                           |
| 39              | Chad    | 1999           | Bovine Meat               | 27                                                          |
| 39              | Chad    | 1999           | Cassava                   | 100                                                         |
| 39              | Chad    | 1999           | Cereals, Other            | 52                                                          |
| 39              | Chad    | 1999           | Cottonseed Oil            | 4                                                           |
| 39              | Chad    | 1999           | Dates                     | 4                                                           |
| 39              | Chad    | 1999           | Eggs                      | 1                                                           |
| 39              | Chad    | 1999           | Fats, Animals, Raw        | 1                                                           |
| 39              | Chad    | 1999           | Freshwater Fish           | 19                                                          |
| 39              | Chad    | 1999           | Fruits, Other             | 26                                                          |
| 39              | Chad    | 1999           | Groundnut Oil             | 11                                                          |
| 39              | Chad    | 1999           | Groundnuts (Shelled Eq)   | 54                                                          |
| 39              | Chad    | 1999           | Maize                     | 18                                                          |
| 39              | Chad    | 1999           | Meat, Other               | 2                                                           |
| 39              | Chad    | 1999           | Milk, Whole               | 69                                                          |
| 39              | Chad    | 1999           | Millet                    | 93                                                          |
| 39              | Chad    | 1999           | Mutton & Goat Meat        | 10                                                          |
| 39              | Chad    | 1999           | Offals, Edible            | 7                                                           |
| 39              | Chad    | 1999           | Oilcrops, Other           | 8                                                           |
| 39              | Chad    | 1999           | Onions                    | 6                                                           |
| 39              | Chad    | 1999           | Potatoes                  | 7                                                           |
| 39              | Chad    | 1999           | Poultry Meat              | 2                                                           |
| 39              | Chad    | 1999           | Pulses, Other             | 11                                                          |
| 39              | Chad    | 1999           | Rice (Milled Equivalent)  | 22                                                          |
| 39              | Chad    | 1999           | Roots, Other              | 14                                                          |
| 39              | Chad    | 1999           | Sesameseed                | 6                                                           |
| 39              | Chad    | 1999           | Sorghum                   | 127                                                         |
| 39              | Chad    | 1999           | Sugar, Refined Equivalent | 15                                                          |
| 39              | Chad    | 1999           | Sweet Potatoes            | 17                                                          |
| 39              | Chad    | 1999           | Vegetables, Other         | 25                                                          |
| 39              | Chad    | 1999           | Wheat                     | 17                                                          |
| 39              | Chad    | 1999           | Yams                      | 63                                                          |
| 39              | Chad    | 2000           | Beans                     | 18                                                          |
| 39              | Chad    | 2000           | Beer                      | 3                                                           |
| 39              | Chad    | 2000           | Beverages, Fermented      | 3                                                           |
| 39              | Chad    | 2000           | Bovine Meat               | 24                                                          |
| 39              | Chad    | 2000           | Cassava                   | 76                                                          |
| 39              | Chad    | 2000           | Cereals, Other            | 34                                                          |
| 39              | Chad    | 2000           | Cottonseed Oil            | 4                                                           |
| 39              | Chad    | 2000           | Dates                     | 4                                                           |
| 39              | Chad    | 2000           | Eggs                      | 1                                                           |
| 39              | Chad    | 2000           | Fats, Animals, Raw        | 1                                                           |
| 39              | Chad    | 2000           | Freshwater Fish           | 24                                                          |
| 39              | Chad    | 2000           | Fruits, Other             | 25                                                          |

Dietary calcium and zinc deficiency risks are decreasing but remain prevalent

| FAO countrycode | Country | Reference year | Food item                 | Gross food supply (g capita <sup>-1</sup> d <sup>-1</sup> ) |
|-----------------|---------|----------------|---------------------------|-------------------------------------------------------------|
| 39              | Chad    | 2000           | Groundnut Oil             | 6                                                           |
| 39              | Chad    | 2000           | Groundnuts (Shelled Eq)   | 56                                                          |
| 39              | Chad    | 2000           | Maize                     | 28                                                          |
| 39              | Chad    | 2000           | Meat, Other               | 2                                                           |
| 39              | Chad    | 2000           | Milk, Whole               | 68                                                          |
| 39              | Chad    | 2000           | Millet                    | 91                                                          |
| 39              | Chad    | 2000           | Mutton & Goat Meat        | 10                                                          |
| 39              | Chad    | 2000           | Offals, Edible            | 7                                                           |
| 39              | Chad    | 2000           | Oilcrops, Other           | 7                                                           |
| 39              | Chad    | 2000           | Onions                    | 4                                                           |
| 39              | Chad    | 2000           | Potatoes                  | 5                                                           |
| 39              | Chad    | 2000           | Poultry Meat              | 2                                                           |
| 39              | Chad    | 2000           | Pulses, Other             | 6                                                           |
| 39              | Chad    | 2000           | Rice (Milled Equivalent)  | 24                                                          |
| 39              | Chad    | 2000           | Roots, Other              | 13                                                          |
| 39              | Chad    | 2000           | Sesameseed                | 9                                                           |
| 39              | Chad    | 2000           | Sorghum                   | 135                                                         |
| 39              | Chad    | 2000           | Sugar, Refined Equivalent | 18                                                          |
| 39              | Chad    | 2000           | Sweet Potatoes            | 13                                                          |
| 39              | Chad    | 2000           | Vegetables, Other         | 25                                                          |
| 39              | Chad    | 2000           | Wheat                     | 17                                                          |
| 39              | Chad    | 2000           | Yams                      | 48                                                          |
| 39              | Chad    | 2001           | Beans                     | 21                                                          |
| 39              | Chad    | 2001           | Beer                      | 3                                                           |
| 39              | Chad    | 2001           | Beverages, Fermented      | 4                                                           |
| 39              | Chad    | 2001           | Bovine Meat               | 24                                                          |
| 39              | Chad    | 2001           | Cassava                   | 88                                                          |
| 39              | Chad    | 2001           | Cereals, Other            | 58                                                          |
| 39              | Chad    | 2001           | Cottonseed Oil            | 4                                                           |
| 39              | Chad    | 2001           | Dates                     | 4                                                           |
| 39              | Chad    | 2001           | Eggs                      | 1                                                           |
| 39              | Chad    | 2001           | Fats, Animals, Raw        | 1                                                           |
| 39              | Chad    | 2001           | Freshwater Fish           | 22                                                          |
| 39              | Chad    | 2001           | Fruits, Other             | 24                                                          |
| 39              | Chad    | 2001           | Groundnut Oil             | 9                                                           |
| 39              | Chad    | 2001           | Groundnuts (Shelled Eq)   | 55                                                          |
| 39              | Chad    | 2001           | Maize                     | 22                                                          |
| 39              | Chad    | 2001           | Meat, Other               | 2                                                           |
| 39              | Chad    | 2001           | Milk, Whole               | 67                                                          |
| 39              | Chad    | 2001           | Millet                    | 90                                                          |
| 39              | Chad    | 2001           | Mutton & Goat Meat        | 10                                                          |
| 39              | Chad    | 2001           | Offals, Edible            | 7                                                           |
| 39              | Chad    | 2001           | Oilcrops, Other           | 8                                                           |
| 39              | Chad    | 2001           | Onions                    | 6                                                           |
| 39              | Chad    | 2001           | Potatoes                  | 6                                                           |
| 39              | Chad    | 2001           | Poultry Meat              | 1                                                           |
| 39              | Chad    | 2001           | Pulses, Other             | 11                                                          |
| 39              | Chad    | 2001           | Rice (Milled Equivalent)  | 22                                                          |
| 39              | Chad    | 2001           | Roots, Other              | 13                                                          |
| 39              | Chad    | 2001           | Sesameseed                | 9                                                           |
| 39              | Chad    | 2001           | Sorghum                   | 129                                                         |
| 39              | Chad    | 2001           | Sugar, Refined Equivalent | 18                                                          |
| 39              | Chad    | 2001           | Sweet Potatoes            | 16                                                          |
| 39              | Chad    | 2001           | Vegetables, Other         | 24                                                          |
| 39              | Chad    | 2001           | Wheat                     | 16                                                          |
| 39              | Chad    | 2001           | Yams                      | 55                                                          |
| 39              | Chad    | 2002           | Beans                     | 19                                                          |
| 39              | Chad    | 2002           | Beer                      | 2                                                           |
| 39              | Chad    | 2002           | Beverages, Fermented      | 4                                                           |
| 39              | Chad    | 2002           | Bovine Meat               | 23                                                          |
| 39              | Chad    | 2002           | Cassava                   | 89                                                          |
| 39              | Chad    | 2002           | Cereals, Other            | 38                                                          |
| 39              | Chad    | 2002           | Cottonseed Oil            | 4                                                           |
| 39              | Chad    | 2002           | Dates                     | 4                                                           |
| 39              | Chad    | 2002           | Eggs                      | 1                                                           |
| 39              | Chad    | 2002           | Fats, Animals, Raw        | 1                                                           |
| 39              | Chad    | 2002           | Freshwater Fish           | 20                                                          |
| 39              | Chad    | 2002           | Fruits, Other             | 24                                                          |
| 39              | Chad    | 2002           | Groundnut Oil             | 9                                                           |
| 39              | Chad    | 2002           | Groundnuts (Shelled Eq)   | 54                                                          |
| 39              | Chad    | 2002           | Maize                     | 22                                                          |
| 39              | Chad    | 2002           | Meat, Other               | 2                                                           |
| 39              | Chad    | 2002           | Milk, Whole               | 65                                                          |
| 39              | Chad    | 2002           | Millet                    | 90                                                          |
| 39              | Chad    | 2002           | Mutton & Goat Meat        | 10                                                          |
| 39              | Chad    | 2002           | Offals, Edible            | 6                                                           |
| 39              | Chad    | 2002           | Oilcrops, Other           | 8                                                           |
| 39              | Chad    | 2002           | Onions                    | 7                                                           |
| 39              | Chad    | 2002           | Potatoes                  | 6                                                           |
| 39              | Chad    | 2002           | Poultry Meat              | 1                                                           |
| 39              | Chad    | 2002           | Pulses, Other             | 11                                                          |
| 39              | Chad    | 2002           | Rice (Milled Equivalent)  | 25                                                          |
| 39              | Chad    | 2002           | Roots, Other              | 13                                                          |
| 39              | Chad    | 2002           | Sesameseed                | 12                                                          |
| 39              | Chad    | 2002           | Sorghum                   | 123                                                         |
| 39              | Chad    | 2002           | Sugar, Refined Equivalent | 19                                                          |
| 39              | Chad    | 2002           | Sweet Potatoes            | 16                                                          |
| 39              | Chad    | 2002           | Vegetables, Other         | 24                                                          |
| 39              | Chad    | 2002           | Wheat                     | 18                                                          |
| 39              | Chad    | 2002           | Yams                      | 56                                                          |
| 39              | Chad    | 2003           | Beans                     | 19                                                          |
| 39              | Chad    | 2003           | Beer                      | 3                                                           |
| 39              | Chad    | 2003           | Beverages, Fermented      | 5                                                           |
| 39              | Chad    | 2003           | Bovine Meat               | 23                                                          |
| 39              | Chad    | 2003           | Cassava                   | 86                                                          |
| 39              | Chad    | 2003           | Cereals, Other            | 73                                                          |
| 39              | Chad    | 2003           | Cottonseed Oil            | 4                                                           |

Dietary calcium and zinc deficiency risks are decreasing but remain prevalent

| FAO countrycode | Country | Reference year | Food item                 | Gross food supply (g capita <sup>-1</sup> d <sup>-1</sup> ) |
|-----------------|---------|----------------|---------------------------|-------------------------------------------------------------|
| 39              | Chad    | 2003           | Dates                     | 4                                                           |
| 39              | Chad    | 2003           | Eggs                      | 1                                                           |
| 39              | Chad    | 2003           | Fats, Animals, Raw        | 1                                                           |
| 39              | Chad    | 2003           | Freshwater Fish           | 18                                                          |
| 39              | Chad    | 2003           | Fruits, Other             | 24                                                          |
| 39              | Chad    | 2003           | Groundnut Oil             | 8                                                           |
| 39              | Chad    | 2003           | Groundnuts (Shelled Eq)   | 52                                                          |
| 39              | Chad    | 2003           | Maize                     | 23                                                          |
| 39              | Chad    | 2003           | Meat, Other               | 2                                                           |
| 39              | Chad    | 2003           | Milk, Whole               | 67                                                          |
| 39              | Chad    | 2003           | Millet                    | 99                                                          |
| 39              | Chad    | 2003           | Mutton & Goat Meat        | 10                                                          |
| 39              | Chad    | 2003           | Offals, Edible            | 6                                                           |
| 39              | Chad    | 2003           | Oilcrops, Other           | 7                                                           |
| 39              | Chad    | 2003           | Onions                    | 6                                                           |
| 39              | Chad    | 2003           | Potatoes                  | 6                                                           |
| 39              | Chad    | 2003           | Poultry Meat              | 1                                                           |
| 39              | Chad    | 2003           | Pulses, Other             | 11                                                          |
| 39              | Chad    | 2003           | Rice (Milled Equivalent)  | 19                                                          |
| 39              | Chad    | 2003           | Roots, Other              | 13                                                          |
| 39              | Chad    | 2003           | Sesameseed                | 9                                                           |
| 39              | Chad    | 2003           | Sorghum                   | 123                                                         |
| 39              | Chad    | 2003           | Sugar, Refined Equivalent | 18                                                          |
| 39              | Chad    | 2003           | Sweet Potatoes            | 18                                                          |
| 39              | Chad    | 2003           | Vegetables, Other         | 24                                                          |
| 39              | Chad    | 2003           | Wheat                     | 19                                                          |
| 39              | Chad    | 2003           | Yams                      | 55                                                          |
| 39              | Chad    | 2004           | Beans                     | 18                                                          |
| 39              | Chad    | 2004           | Beer                      | 3                                                           |
| 39              | Chad    | 2004           | Beverages, Fermented      | 3                                                           |
| 39              | Chad    | 2004           | Bovine Meat               | 23                                                          |
| 39              | Chad    | 2004           | Cassava                   | 84                                                          |
| 39              | Chad    | 2004           | Cereals, Other            | 65                                                          |
| 39              | Chad    | 2004           | Cottonseed Oil            | 4                                                           |
| 39              | Chad    | 2004           | Dates                     | 3                                                           |
| 39              | Chad    | 2004           | Eggs                      | 1                                                           |
| 39              | Chad    | 2004           | Fats, Animals, Raw        | 1                                                           |
| 39              | Chad    | 2004           | Freshwater Fish           | 17                                                          |
| 39              | Chad    | 2004           | Fruits, Other             | 23                                                          |
| 39              | Chad    | 2004           | Groundnut Oil             | 8                                                           |
| 39              | Chad    | 2004           | Groundnuts (Shelled Eq)   | 50                                                          |
| 39              | Chad    | 2004           | Maize                     | 32                                                          |
| 39              | Chad    | 2004           | Meat, Other               | 2                                                           |
| 39              | Chad    | 2004           | Milk, Whole               | 63                                                          |
| 39              | Chad    | 2004           | Millet                    | 99                                                          |
| 39              | Chad    | 2004           | Mutton & Goat Meat        | 10                                                          |
| 39              | Chad    | 2004           | Offals, Edible            | 6                                                           |
| 39              | Chad    | 2004           | Oilcrops Oil, Other       | 1                                                           |
| 39              | Chad    | 2004           | Oilcrops, Other           | 8                                                           |
| 39              | Chad    | 2004           | Onions                    | 6                                                           |
| 39              | Chad    | 2004           | Potatoes                  | 6                                                           |
| 39              | Chad    | 2004           | Poultry Meat              | 1                                                           |
| 39              | Chad    | 2004           | Pulses, Other             | 11                                                          |
| 39              | Chad    | 2004           | Rice (Milled Equivalent)  | 19                                                          |
| 39              | Chad    | 2004           | Roots, Other              | 13                                                          |
| 39              | Chad    | 2004           | Sesameseed                | 9                                                           |
| 39              | Chad    | 2004           | Sorghum                   | 129                                                         |
| 39              | Chad    | 2004           | Sugar, Refined Equivalent | 21                                                          |
| 39              | Chad    | 2004           | Sweet Potatoes            | 19                                                          |
| 39              | Chad    | 2004           | Vegetables, Other         | 23                                                          |
| 39              | Chad    | 2004           | Wheat                     | 12                                                          |
| 39              | Chad    | 2004           | Yams                      | 54                                                          |
| 39              | Chad    | 2005           | Beans                     | 21                                                          |
| 39              | Chad    | 2005           | Beer                      | 3                                                           |
| 39              | Chad    | 2005           | Beverages, Fermented      | 5                                                           |
| 39              | Chad    | 2005           | Bovine Meat               | 22                                                          |
| 39              | Chad    | 2005           | Cassava                   | 74                                                          |
| 39              | Chad    | 2005           | Cereals, Other            | 79                                                          |
| 39              | Chad    | 2005           | Cottonseed Oil            | 3                                                           |
| 39              | Chad    | 2005           | Dates                     | 3                                                           |
| 39              | Chad    | 2005           | Eggs                      | 1                                                           |
| 39              | Chad    | 2005           | Fats, Animals, Raw        | 1                                                           |
| 39              | Chad    | 2005           | Freshwater Fish           | 15                                                          |
| 39              | Chad    | 2005           | Fruits, Other             | 23                                                          |
| 39              | Chad    | 2005           | Groundnut Oil             | 8                                                           |
| 39              | Chad    | 2005           | Groundnuts (Shelled Eq)   | 48                                                          |
| 39              | Chad    | 2005           | Maize                     | 32                                                          |
| 39              | Chad    | 2005           | Meat, Other               | 1                                                           |
| 39              | Chad    | 2005           | Milk, Whole               | 62                                                          |
| 39              | Chad    | 2005           | Millet                    | 102                                                         |
| 39              | Chad    | 2005           | Mutton & Goat Meat        | 10                                                          |
| 39              | Chad    | 2005           | Offals, Edible            | 6                                                           |
| 39              | Chad    | 2005           | Oilcrops Oil, Other       | 1                                                           |
| 39              | Chad    | 2005           | Oilcrops, Other           | 8                                                           |
| 39              | Chad    | 2005           | Onions                    | 6                                                           |
| 39              | Chad    | 2005           | Potatoes                  | 7                                                           |
| 39              | Chad    | 2005           | Poultry Meat              | 1                                                           |
| 39              | Chad    | 2005           | Pulses, Other             | 12                                                          |
| 39              | Chad    | 2005           | Rice (Milled Equivalent)  | 21                                                          |
| 39              | Chad    | 2005           | Roots, Other              | 8                                                           |
| 39              | Chad    | 2005           | Sesameseed                | 8                                                           |
| 39              | Chad    | 2005           | Sorghum                   | 113                                                         |
| 39              | Chad    | 2005           | Sugar, Refined Equivalent | 23                                                          |
| 39              | Chad    | 2005           | Sweet Potatoes            | 20                                                          |
| 39              | Chad    | 2005           | Vegetables, Other         | 23                                                          |
| 39              | Chad    | 2005           | Wheat                     | 17                                                          |
| 39              | Chad    | 2005           | Yams                      | 55                                                          |

Dietary calcium and zinc deficiency risks are decreasing but remain prevalent

| FAO countrycode | Country | Reference year | Food item                 | Gross food supply (g capita <sup>-1</sup> d <sup>-1</sup> ) |
|-----------------|---------|----------------|---------------------------|-------------------------------------------------------------|
| 39              | Chad    | 2006           | Beans                     | 20                                                          |
| 39              | Chad    | 2006           | Beer                      | 8                                                           |
| 39              | Chad    | 2006           | Beverages, Fermented      | 5                                                           |
| 39              | Chad    | 2006           | Bovine Meat               | 22                                                          |
| 39              | Chad    | 2006           | Cassava                   | 67                                                          |
| 39              | Chad    | 2006           | Cereals, Other            | 76                                                          |
| 39              | Chad    | 2006           | Cottonseed Oil            | 2                                                           |
| 39              | Chad    | 2006           | Dates                     | 4                                                           |
| 39              | Chad    | 2006           | Eggs                      | 1                                                           |
| 39              | Chad    | 2006           | Fats, Animals, Raw        | 1                                                           |
| 39              | Chad    | 2006           | Freshwater Fish           | 13                                                          |
| 39              | Chad    | 2006           | Fruits, Other             | 24                                                          |
| 39              | Chad    | 2006           | Groundnut Oil             | 8                                                           |
| 39              | Chad    | 2006           | Groundnuts (Shelled Eq)   | 47                                                          |
| 39              | Chad    | 2006           | Maize                     | 32                                                          |
| 39              | Chad    | 2006           | Meat, Other               | 1                                                           |
| 39              | Chad    | 2006           | Milk, Whole               | 63                                                          |
| 39              | Chad    | 2006           | Millet                    | 102                                                         |
| 39              | Chad    | 2006           | Mutton & Goat Meat        | 10                                                          |
| 39              | Chad    | 2006           | Offals, Edible            | 6                                                           |
| 39              | Chad    | 2006           | Oilcrops, Other           | 6                                                           |
| 39              | Chad    | 2006           | Onions                    | 8                                                           |
| 39              | Chad    | 2006           | Potatoes                  | 9                                                           |
| 39              | Chad    | 2006           | Poultry Meat              | 1                                                           |
| 39              | Chad    | 2006           | Pulses, Other             | 11                                                          |
| 39              | Chad    | 2006           | Rice (Milled Equivalent)  | 17                                                          |
| 39              | Chad    | 2006           | Roots, Other              | 7                                                           |
| 39              | Chad    | 2006           | Sesameseed                | 8                                                           |
| 39              | Chad    | 2006           | Sorghum                   | 123                                                         |
| 39              | Chad    | 2006           | Sugar, Refined Equivalent | 23                                                          |
| 39              | Chad    | 2006           | Sweet Potatoes            | 20                                                          |
| 39              | Chad    | 2006           | Vegetables, Other         | 27                                                          |
| 39              | Chad    | 2006           | Wheat                     | 21                                                          |
| 39              | Chad    | 2006           | Yams                      | 58                                                          |
| 39              | Chad    | 2007           | Beans                     | 14                                                          |
| 39              | Chad    | 2007           | Beer                      | 7                                                           |
| 39              | Chad    | 2007           | Beverages, Fermented      | 4                                                           |
| 39              | Chad    | 2007           | Bovine Meat               | 22                                                          |
| 39              | Chad    | 2007           | Cassava                   | 58                                                          |
| 39              | Chad    | 2007           | Cereals, Other            | 96                                                          |
| 39              | Chad    | 2007           | Cottonseed Oil            | 2                                                           |
| 39              | Chad    | 2007           | Dates                     | 4                                                           |
| 39              | Chad    | 2007           | Eggs                      | 1                                                           |
| 39              | Chad    | 2007           | Fats, Animals, Raw        | 1                                                           |
| 39              | Chad    | 2007           | Freshwater Fish           | 11                                                          |
| 39              | Chad    | 2007           | Fruits, Other             | 24                                                          |
| 39              | Chad    | 2007           | Groundnut Oil             | 7                                                           |
| 39              | Chad    | 2007           | Groundnuts (Shelled Eq)   | 32                                                          |
| 39              | Chad    | 2007           | Maize                     | 32                                                          |
| 39              | Chad    | 2007           | Meat, Other               | 1                                                           |
| 39              | Chad    | 2007           | Milk, Whole               | 62                                                          |
| 39              | Chad    | 2007           | Millet                    | 105                                                         |
| 39              | Chad    | 2007           | Mutton & Goat Meat        | 10                                                          |
| 39              | Chad    | 2007           | Offals, Edible            | 6                                                           |
| 39              | Chad    | 2007           | Oilcrops Oil, Other       | 1                                                           |
| 39              | Chad    | 2007           | Oilcrops, Other           | 4                                                           |
| 39              | Chad    | 2007           | Onions                    | 4                                                           |
| 39              | Chad    | 2007           | Potatoes                  | 14                                                          |
| 39              | Chad    | 2007           | Poultry Meat              | 1                                                           |
| 39              | Chad    | 2007           | Pulses, Other             | 11                                                          |
| 39              | Chad    | 2007           | Rice (Milled Equivalent)  | 19                                                          |
| 39              | Chad    | 2007           | Roots, Other              | 6                                                           |
| 39              | Chad    | 2007           | Sesameseed                | 9                                                           |
| 39              | Chad    | 2007           | Sorghum                   | 133                                                         |
| 39              | Chad    | 2007           | Sugar, Refined Equivalent | 23                                                          |
| 39              | Chad    | 2007           | Sweet Potatoes            | 13                                                          |
| 39              | Chad    | 2007           | Vegetables, Other         | 19                                                          |
| 39              | Chad    | 2007           | Wheat                     | 26                                                          |
| 39              | Chad    | 2007           | Yams                      | 66                                                          |
| 39              | Chad    | 2008           | Beans                     | 14                                                          |
| 39              | Chad    | 2008           | Beer                      | 8                                                           |
| 39              | Chad    | 2008           | Beverages, Fermented      | 4                                                           |
| 39              | Chad    | 2008           | Bovine Meat               | 22                                                          |
| 39              | Chad    | 2008           | Cassava                   | 36                                                          |
| 39              | Chad    | 2008           | Cereals, Other            | 87                                                          |
| 39              | Chad    | 2008           | Cottonseed Oil            | 2                                                           |
| 39              | Chad    | 2008           | Dates                     | 4                                                           |
| 39              | Chad    | 2008           | Eggs                      | 1                                                           |
| 39              | Chad    | 2008           | Fats, Animals, Raw        | 1                                                           |
| 39              | Chad    | 2008           | Freshwater Fish           | 10                                                          |
| 39              | Chad    | 2008           | Fruits, Other             | 23                                                          |
| 39              | Chad    | 2008           | Groundnut Oil             | 8                                                           |
| 39              | Chad    | 2008           | Groundnuts (Shelled Eq)   | 39                                                          |
| 39              | Chad    | 2008           | Maize                     | 32                                                          |
| 39              | Chad    | 2008           | Meat, Other               | 1                                                           |
| 39              | Chad    | 2008           | Milk, Whole               | 61                                                          |
| 39              | Chad    | 2008           | Millet                    | 113                                                         |
| 39              | Chad    | 2008           | Mutton & Goat Meat        | 10                                                          |
| 39              | Chad    | 2008           | Offals, Edible            | 6                                                           |
| 39              | Chad    | 2008           | Oilcrops Oil, Other       | 1                                                           |
| 39              | Chad    | 2008           | Oilcrops, Other           | 4                                                           |
| 39              | Chad    | 2008           | Onions                    | 4                                                           |
| 39              | Chad    | 2008           | Potatoes                  | 8                                                           |
| 39              | Chad    | 2008           | Poultry Meat              | 1                                                           |
| 39              | Chad    | 2008           | Pulses, Other             | 10                                                          |
| 39              | Chad    | 2008           | Rice (Milled Equivalent)  | 26                                                          |
| 39              | Chad    | 2008           | Roots, Other              | 5                                                           |



Dietary calcium and zinc deficiency risks are decreasing but remain prevalent

| FAO countrycode | Country | Reference year | Food item                 | Gross food supply (g capita <sup>-1</sup> d <sup>-1</sup> ) |
|-----------------|---------|----------------|---------------------------|-------------------------------------------------------------|
| 39              | Chad    | 2008           | Sesameseed                | 8                                                           |
| 39              | Chad    | 2008           | Sorghum                   | 131                                                         |
| 39              | Chad    | 2008           | Sugar, Refined Equivalent | 20                                                          |
| 39              | Chad    | 2008           | Sweet Potatoes            | 15                                                          |
| 39              | Chad    | 2008           | Vegetables, Other         | 19                                                          |
| 39              | Chad    | 2008           | Wheat                     | 26                                                          |
| 39              | Chad    | 2008           | Yams                      | 65                                                          |
| 39              | Chad    | 2009           | Beans                     | 16                                                          |
| 39              | Chad    | 2009           | Beer                      | 8                                                           |
| 39              | Chad    | 2009           | Beverages, Fermented      | 5                                                           |
| 39              | Chad    | 2009           | Bovine Meat               | 22                                                          |
| 39              | Chad    | 2009           | Cassava                   | 50                                                          |
| 39              | Chad    | 2009           | Cereals, Other            | 95                                                          |
| 39              | Chad    | 2009           | Cottonseed Oil            | 1                                                           |
| 39              | Chad    | 2009           | Dates                     | 4                                                           |
| 39              | Chad    | 2009           | Eggs                      | 1                                                           |
| 39              | Chad    | 2009           | Fats, Animals, Raw        | 1                                                           |
| 39              | Chad    | 2009           | Freshwater Fish           | 10                                                          |
| 39              | Chad    | 2009           | Fruits, Other             | 21                                                          |
| 39              | Chad    | 2009           | Groundnut Oil             | 8                                                           |
| 39              | Chad    | 2009           | Groundnuts (Shelled Eq)   | 34                                                          |
| 39              | Chad    | 2009           | Maize                     | 35                                                          |
| 39              | Chad    | 2009           | Meat, Other               | 1                                                           |
| 39              | Chad    | 2009           | Milk, Whole               | 61                                                          |
| 39              | Chad    | 2009           | Millet                    | 104                                                         |
| 39              | Chad    | 2009           | Mutton & Goat Meat        | 10                                                          |
| 39              | Chad    | 2009           | Offals, Edible            | 6                                                           |
| 39              | Chad    | 2009           | Oilcrops Oil, Other       | 1                                                           |
| 39              | Chad    | 2009           | Oilcrops, Other           | 4                                                           |
| 39              | Chad    | 2009           | Onions                    | 4                                                           |
| 39              | Chad    | 2009           | Potatoes                  | 10                                                          |
| 39              | Chad    | 2009           | Poultry Meat              | 1                                                           |
| 39              | Chad    | 2009           | Pulses, Other             | 10                                                          |
| 39              | Chad    | 2009           | Rice (Milled Equivalent)  | 26                                                          |
| 39              | Chad    | 2009           | Roots, Other              | 7                                                           |
| 39              | Chad    | 2009           | Sesameseed                | 7                                                           |
| 39              | Chad    | 2009           | Sorghum                   | 128                                                         |
| 39              | Chad    | 2009           | Sugar, Refined Equivalent | 19                                                          |
| 39              | Chad    | 2009           | Sweet Potatoes            | 17                                                          |
| 39              | Chad    | 2009           | Vegetables, Other         | 19                                                          |
| 39              | Chad    | 2009           | Wheat                     | 29                                                          |
| 39              | Chad    | 2009           | Yams                      | 64                                                          |
| 39              | Chad    | 2010           | Beans                     | 14                                                          |
| 39              | Chad    | 2010           | Beer                      | 9                                                           |
| 39              | Chad    | 2010           | Beverages, Fermented      | 5                                                           |
| 39              | Chad    | 2010           | Bovine Meat               | 22                                                          |
| 39              | Chad    | 2010           | Cassava                   | 49                                                          |
| 39              | Chad    | 2010           | Cereals, Other            | 94                                                          |
| 39              | Chad    | 2010           | Cottonseed Oil            | 1                                                           |
| 39              | Chad    | 2010           | Dates                     | 4                                                           |
| 39              | Chad    | 2010           | Eggs                      | 1                                                           |
| 39              | Chad    | 2010           | Fats, Animals, Raw        | 1                                                           |
| 39              | Chad    | 2010           | Freshwater Fish           | 12                                                          |
| 39              | Chad    | 2010           | Fruits, Other             | 20                                                          |
| 39              | Chad    | 2010           | Groundnut Oil             | 8                                                           |
| 39              | Chad    | 2010           | Groundnuts (Shelled Eq)   | 36                                                          |
| 39              | Chad    | 2010           | Maize                     | 40                                                          |
| 39              | Chad    | 2010           | Meat, Other               | 1                                                           |
| 39              | Chad    | 2010           | Milk, Whole               | 61                                                          |
| 39              | Chad    | 2010           | Millet                    | 98                                                          |
| 39              | Chad    | 2010           | Mutton & Goat Meat        | 10                                                          |
| 39              | Chad    | 2010           | Offals, Edible            | 6                                                           |
| 39              | Chad    | 2010           | Oilcrops, Other           | 4                                                           |
| 39              | Chad    | 2010           | Onions                    | 4                                                           |
| 39              | Chad    | 2010           | Potatoes                  | 9                                                           |
| 39              | Chad    | 2010           | Poultry Meat              | 1                                                           |
| 39              | Chad    | 2010           | Pulses, Other             | 10                                                          |
| 39              | Chad    | 2010           | Rice (Milled Equivalent)  | 25                                                          |
| 39              | Chad    | 2010           | Roots, Other              | 5                                                           |
| 39              | Chad    | 2010           | Sesameseed                | 8                                                           |
| 39              | Chad    | 2010           | Sorghum                   | 135                                                         |
| 39              | Chad    | 2010           | Sugar, Refined Equivalent | 23                                                          |
| 39              | Chad    | 2010           | Sweet Potatoes            | 16                                                          |
| 39              | Chad    | 2010           | Vegetables, Other         | 17                                                          |
| 39              | Chad    | 2010           | Wheat                     | 29                                                          |
| 39              | Chad    | 2010           | Wine                      | 1                                                           |
| 39              | Chad    | 2010           | Yams                      | 78                                                          |
| 39              | Chad    | 2011           | Beans                     | 13                                                          |
| 39              | Chad    | 2011           | Beer                      | 10                                                          |
| 39              | Chad    | 2011           | Beverages, Fermented      | 2                                                           |
| 39              | Chad    | 2011           | Bovine Meat               | 22                                                          |
| 39              | Chad    | 2011           | Cassava                   | 47                                                          |
| 39              | Chad    | 2011           | Cereals, Other            | 91                                                          |
| 39              | Chad    | 2011           | Cottonseed Oil            | 1                                                           |
| 39              | Chad    | 2011           | Dates                     | 4                                                           |
| 39              | Chad    | 2011           | Eggs                      | 1                                                           |
| 39              | Chad    | 2011           | Fats, Animals, Raw        | 1                                                           |
| 39              | Chad    | 2011           | Freshwater Fish           | 14                                                          |
| 39              | Chad    | 2011           | Fruits, Other             | 20                                                          |
| 39              | Chad    | 2011           | Groundnut Oil             | 8                                                           |
| 39              | Chad    | 2011           | Groundnuts (Shelled Eq)   | 37                                                          |
| 39              | Chad    | 2011           | Maize                     | 42                                                          |
| 39              | Chad    | 2011           | Meat, Other               | 1                                                           |
| 39              | Chad    | 2011           | Milk, Whole               | 59                                                          |
| 39              | Chad    | 2011           | Millet                    | 101                                                         |
| 39              | Chad    | 2011           | Mutton & Goat Meat        | 9                                                           |
| 39              | Chad    | 2011           | Offals, Edible            | 6                                                           |

Dietary calcium and zinc deficiency risks are decreasing but remain prevalent

| FAO countrycode | Country | Reference year | Food item                 | Gross food supply (g capita <sup>-1</sup> d <sup>-1</sup> ) |
|-----------------|---------|----------------|---------------------------|-------------------------------------------------------------|
| 39              | Chad    | 2011           | Oilcrops, Other           | 3                                                           |
| 39              | Chad    | 2011           | Onions                    | 4                                                           |
| 39              | Chad    | 2011           | Potatoes                  | 9                                                           |
| 39              | Chad    | 2011           | Poultry Meat              | 1                                                           |
| 39              | Chad    | 2011           | Pulses, Other             | 10                                                          |
| 39              | Chad    | 2011           | Rice (Milled Equivalent)  | 25                                                          |
| 39              | Chad    | 2011           | Roots, Other              | 5                                                           |
| 39              | Chad    | 2011           | Sesameseed                | 7                                                           |
| 39              | Chad    | 2011           | Sorghum                   | 141                                                         |
| 39              | Chad    | 2011           | Sugar, Refined Equivalent | 25                                                          |
| 39              | Chad    | 2011           | Sweet Potatoes            | 15                                                          |
| 39              | Chad    | 2011           | Vegetables, Other         | 17                                                          |
| 39              | Chad    | 2011           | Wheat                     | 26                                                          |
| 39              | Chad    | 2011           | Yams                      | 73                                                          |
| 40              | Chile   | 1992           | Apples                    | 25                                                          |
| 40              | Chile   | 1992           | Bananas                   | 16                                                          |
| 40              | Chile   | 1992           | Barley                    | 4                                                           |
| 40              | Chile   | 1992           | Beans                     | 4                                                           |
| 40              | Chile   | 1992           | Beer                      | 62                                                          |
| 40              | Chile   | 1992           | Beverages, Alcoholic      | 4                                                           |
| 40              | Chile   | 1992           | Bovine Meat               | 47                                                          |
| 40              | Chile   | 1992           | Butter, Ghee              | 2                                                           |
| 40              | Chile   | 1992           | Cheese                    | 8                                                           |
| 40              | Chile   | 1992           | Cocoa Beans               | 1                                                           |
| 40              | Chile   | 1992           | Coconuts - Incl Copra     | 1                                                           |
| 40              | Chile   | 1992           | Coffee                    | 2                                                           |
| 40              | Chile   | 1992           | Crustaceans               | 2                                                           |
| 40              | Chile   | 1992           | Demersal Fish             | 7                                                           |
| 40              | Chile   | 1992           | Eggs                      | 17                                                          |
| 40              | Chile   | 1992           | Fats, Animals, Raw        | 3                                                           |
| 40              | Chile   | 1992           | Freshwater Fish           | 2                                                           |
| 40              | Chile   | 1992           | Fruits, Other             | 39                                                          |
| 40              | Chile   | 1992           | Grapes                    | 15                                                          |
| 40              | Chile   | 1992           | Groundnuts (Shelled Eq)   | 1                                                           |
| 40              | Chile   | 1992           | Honey                     | 1                                                           |
| 40              | Chile   | 1992           | Lemons, Limes             | 16                                                          |
| 40              | Chile   | 1992           | Maize                     | 15                                                          |
| 40              | Chile   | 1992           | Meat, Other               | 1                                                           |
| 40              | Chile   | 1992           | Milk, Whole               | 187                                                         |
| 40              | Chile   | 1992           | Molluscs, Other           | 5                                                           |
| 40              | Chile   | 1992           | Mutton & Goat Meat        | 3                                                           |
| 40              | Chile   | 1992           | Oats                      | 2                                                           |
| 40              | Chile   | 1992           | Offals, Edible            | 8                                                           |
| 40              | Chile   | 1992           | Onions                    | 37                                                          |
| 40              | Chile   | 1992           | Oranges, Mandarines       | 19                                                          |
| 40              | Chile   | 1992           | Peas                      | 2                                                           |
| 40              | Chile   | 1992           | Pelagic Fish              | 32                                                          |
| 40              | Chile   | 1992           | Pigmeat                   | 26                                                          |
| 40              | Chile   | 1992           | Pineapples                | 1                                                           |
| 40              | Chile   | 1992           | Potatoes                  | 170                                                         |
| 40              | Chile   | 1992           | Poultry Meat              | 40                                                          |
| 40              | Chile   | 1992           | Pulses, Other             | 4                                                           |
| 40              | Chile   | 1992           | Rape and Mustard Oil      | 5                                                           |
| 40              | Chile   | 1992           | Rice (Milled Equivalent)  | 21                                                          |
| 40              | Chile   | 1992           | Rye                       | 1                                                           |
| 40              | Chile   | 1992           | Soyabean Oil              | 15                                                          |
| 40              | Chile   | 1992           | Sugar, Refined Equivalent | 108                                                         |
| 40              | Chile   | 1992           | Sunflowerseed Oil         | 7                                                           |
| 40              | Chile   | 1992           | Sweet Potatoes            | 2                                                           |
| 40              | Chile   | 1992           | Tea                       | 4                                                           |
| 40              | Chile   | 1992           | Tomatoes                  | 28                                                          |
| 40              | Chile   | 1992           | Vegetables, Other         | 183                                                         |
| 40              | Chile   | 1992           | Wheat                     | 341                                                         |
| 40              | Chile   | 1992           | Wine                      | 47                                                          |
| 40              | Chile   | 1993           | Apples                    | 34                                                          |
| 40              | Chile   | 1993           | Aquatic Animals, Others   | 1                                                           |
| 40              | Chile   | 1993           | Bananas                   | 24                                                          |
| 40              | Chile   | 1993           | Barley                    | 3                                                           |
| 40              | Chile   | 1993           | Beans                     | 3                                                           |
| 40              | Chile   | 1993           | Beer                      | 66                                                          |
| 40              | Chile   | 1993           | Beverages, Alcoholic      | 4                                                           |
| 40              | Chile   | 1993           | Bovine Meat               | 53                                                          |
| 40              | Chile   | 1993           | Butter, Ghee              | 2                                                           |
| 40              | Chile   | 1993           | Cheese                    | 9                                                           |
| 40              | Chile   | 1993           | Cocoa Beans               | 2                                                           |
| 40              | Chile   | 1993           | Coconuts - Incl Copra     | 1                                                           |
| 40              | Chile   | 1993           | Coffee                    | 2                                                           |
| 40              | Chile   | 1993           | Crustaceans               | 1                                                           |
| 40              | Chile   | 1993           | Demersal Fish             | 11                                                          |
| 40              | Chile   | 1993           | Eggs                      | 17                                                          |
| 40              | Chile   | 1993           | Fats, Animals, Raw        | 3                                                           |
| 40              | Chile   | 1993           | Freshwater Fish           | 2                                                           |
| 40              | Chile   | 1993           | Fruits, Other             | 51                                                          |
| 40              | Chile   | 1993           | Grapes                    | 17                                                          |
| 40              | Chile   | 1993           | Groundnuts (Shelled Eq)   | 1                                                           |
| 40              | Chile   | 1993           | Honey                     | 1                                                           |
| 40              | Chile   | 1993           | Lemons, Limes             | 16                                                          |
| 40              | Chile   | 1993           | Maize                     | 19                                                          |
| 40              | Chile   | 1993           | Meat, Other               | 1                                                           |
| 40              | Chile   | 1993           | Milk, Whole               | 195                                                         |
| 40              | Chile   | 1993           | Molluscs, Other           | 6                                                           |
| 40              | Chile   | 1993           | Mutton & Goat Meat        | 3                                                           |
| 40              | Chile   | 1993           | Nuts                      | 1                                                           |
| 40              | Chile   | 1993           | Oats                      | 1                                                           |
| 40              | Chile   | 1993           | Offals, Edible            | 9                                                           |
| 40              | Chile   | 1993           | Onions                    | 39                                                          |
| 40              | Chile   | 1993           | Oranges, Mandarines       | 20                                                          |

## Dietary calcium and zinc deficiency risks are decreasing but remain prevalent

| FAO countrycode | Country | Reference year | Food item                 | Gross food supply (g capita <sup>-1</sup> d <sup>-1</sup> ) |
|-----------------|---------|----------------|---------------------------|-------------------------------------------------------------|
| 40              | Chile   | 1993           | Peas                      | 1                                                           |
| 40              | Chile   | 1993           | Pelagic Fish              | 29                                                          |
| 40              | Chile   | 1993           | Pigmeat                   | 28                                                          |
| 40              | Chile   | 1993           | Pineapples                | 2                                                           |
| 40              | Chile   | 1993           | Potatoes                  | 151                                                         |
| 40              | Chile   | 1993           | Poultry Meat              | 47                                                          |
| 40              | Chile   | 1993           | Pulses, Other             | 4                                                           |
| 40              | Chile   | 1993           | Rape and Mustard Oil      | 2                                                           |
| 40              | Chile   | 1993           | Rice (Milled Equivalent)  | 19                                                          |
| 40              | Chile   | 1993           | Rye                       | 1                                                           |
| 40              | Chile   | 1993           | Soyabean Oil              | 16                                                          |
| 40              | Chile   | 1993           | Sugar, Refined Equivalent | 108                                                         |
| 40              | Chile   | 1993           | Sunflowerseed Oil         | 8                                                           |
| 40              | Chile   | 1993           | Sweet Potatoes            | 1                                                           |
| 40              | Chile   | 1993           | Tea                       | 4                                                           |
| 40              | Chile   | 1993           | Tomatoes                  | 68                                                          |
| 40              | Chile   | 1993           | Vegetables, Other         | 191                                                         |
| 40              | Chile   | 1993           | Wheat                     | 329                                                         |
| 40              | Chile   | 1993           | Wine                      | 44                                                          |
| 40              | Chile   | 1994           | Apples                    | 32                                                          |
| 40              | Chile   | 1994           | Aquatic Animals, Others   | 1                                                           |
| 40              | Chile   | 1994           | Bananas                   | 27                                                          |
| 40              | Chile   | 1994           | Barley                    | 2                                                           |
| 40              | Chile   | 1994           | Beans                     | 3                                                           |
| 40              | Chile   | 1994           | Beer                      | 59                                                          |
| 40              | Chile   | 1994           | Beverages, Alcoholic      | 4                                                           |
| 40              | Chile   | 1994           | Bovine Meat               | 56                                                          |
| 40              | Chile   | 1994           | Butter, Ghee              | 2                                                           |
| 40              | Chile   | 1994           | Cheese                    | 10                                                          |
| 40              | Chile   | 1994           | Cocoa Beans               | 2                                                           |
| 40              | Chile   | 1994           | Coconuts - Incl Copra     | 1                                                           |
| 40              | Chile   | 1994           | Coffee                    | 1                                                           |
| 40              | Chile   | 1994           | Crustaceans               | 1                                                           |
| 40              | Chile   | 1994           | Demersal Fish             | 6                                                           |
| 40              | Chile   | 1994           | Eggs                      | 15                                                          |
| 40              | Chile   | 1994           | Fats, Animals, Raw        | 3                                                           |
| 40              | Chile   | 1994           | Freshwater Fish           | 2                                                           |
| 40              | Chile   | 1994           | Fruits, Other             | 55                                                          |
| 40              | Chile   | 1994           | Grapes                    | 11                                                          |
| 40              | Chile   | 1994           | Groundnuts (Shelled Eq)   | 1                                                           |
| 40              | Chile   | 1994           | Lemons, Limes             | 16                                                          |
| 40              | Chile   | 1994           | Maize                     | 22                                                          |
| 40              | Chile   | 1994           | Meat, Other               | 1                                                           |
| 40              | Chile   | 1994           | Milk, Whole               | 191                                                         |
| 40              | Chile   | 1994           | Molluscs, Other           | 3                                                           |
| 40              | Chile   | 1994           | Mutton & Goat Meat        | 2                                                           |
| 40              | Chile   | 1994           | Oats                      | 1                                                           |
| 40              | Chile   | 1994           | Offals, Edible            | 9                                                           |
| 40              | Chile   | 1994           | Onions                    | 43                                                          |
| 40              | Chile   | 1994           | Oranges, Mandarines       | 20                                                          |
| 40              | Chile   | 1994           | Peas                      | 1                                                           |
| 40              | Chile   | 1994           | Pelagic Fish              | 36                                                          |
| 40              | Chile   | 1994           | Pigmeat                   | 30                                                          |
| 40              | Chile   | 1994           | Pineapples                | 2                                                           |
| 40              | Chile   | 1994           | Potatoes                  | 145                                                         |
| 40              | Chile   | 1994           | Poultry Meat              | 56                                                          |
| 40              | Chile   | 1994           | Pulses, Other             | 4                                                           |
| 40              | Chile   | 1994           | Rape and Mustard Oil      | 2                                                           |
| 40              | Chile   | 1994           | Rice (Milled Equivalent)  | 21                                                          |
| 40              | Chile   | 1994           | Soyabean Oil              | 16                                                          |
| 40              | Chile   | 1994           | Sugar, Refined Equivalent | 109                                                         |
| 40              | Chile   | 1994           | Sunflowerseed Oil         | 9                                                           |
| 40              | Chile   | 1994           | Sweet Potatoes            | 1                                                           |
| 40              | Chile   | 1994           | Tea                       | 4                                                           |
| 40              | Chile   | 1994           | Tomatoes                  | 82                                                          |
| 40              | Chile   | 1994           | Vegetables, Other         | 200                                                         |
| 40              | Chile   | 1994           | Wheat                     | 326                                                         |
| 40              | Chile   | 1994           | Wine                      | 49                                                          |
| 40              | Chile   | 1995           | Apples                    | 17                                                          |
| 40              | Chile   | 1995           | Aquatic Animals, Others   | 2                                                           |
| 40              | Chile   | 1995           | Bananas                   | 26                                                          |
| 40              | Chile   | 1995           | Barley                    | 2                                                           |
| 40              | Chile   | 1995           | Beans                     | 3                                                           |
| 40              | Chile   | 1995           | Beer                      | 63                                                          |
| 40              | Chile   | 1995           | Beverages, Alcoholic      | 4                                                           |
| 40              | Chile   | 1995           | Bovine Meat               | 61                                                          |
| 40              | Chile   | 1995           | Butter, Ghee              | 2                                                           |
| 40              | Chile   | 1995           | Cheese                    | 10                                                          |
| 40              | Chile   | 1995           | Cocoa Beans               | 2                                                           |
| 40              | Chile   | 1995           | Coconuts - Incl Copra     | 1                                                           |
| 40              | Chile   | 1995           | Coffee                    | 2                                                           |
| 40              | Chile   | 1995           | Crustaceans               | 3                                                           |
| 40              | Chile   | 1995           | Demersal Fish             | 6                                                           |
| 40              | Chile   | 1995           | Eggs                      | 14                                                          |
| 40              | Chile   | 1995           | Fats, Animals, Raw        | 3                                                           |
| 40              | Chile   | 1995           | Freshwater Fish           | 4                                                           |
| 40              | Chile   | 1995           | Fruits, Other             | 59                                                          |
| 40              | Chile   | 1995           | Grapes                    | 24                                                          |
| 40              | Chile   | 1995           | Groundnuts (Shelled Eq)   | 1                                                           |
| 40              | Chile   | 1995           | Lemons, Limes             | 18                                                          |
| 40              | Chile   | 1995           | Maize                     | 23                                                          |
| 40              | Chile   | 1995           | Meat, Other               | 1                                                           |
| 40              | Chile   | 1995           | Milk, Whole               | 208                                                         |
| 40              | Chile   | 1995           | Molluscs, Other           | 2                                                           |
| 40              | Chile   | 1995           | Mutton & Goat Meat        | 2                                                           |
| 40              | Chile   | 1995           | Nuts                      | 1                                                           |
| 40              | Chile   | 1995           | Oats                      | 1                                                           |

Dietary calcium and zinc deficiency risks are decreasing but remain prevalent

| FAO countrycode | Country | Reference year | Food item                 | Gross food supply (g capita <sup>-1</sup> d <sup>-1</sup> ) |
|-----------------|---------|----------------|---------------------------|-------------------------------------------------------------|
| 40              | Chile   | 1995           | Offals, Edible            | 9                                                           |
| 40              | Chile   | 1995           | Onions                    | 45                                                          |
| 40              | Chile   | 1995           | Oranges, Mandarines       | 19                                                          |
| 40              | Chile   | 1995           | Peas                      | 1                                                           |
| 40              | Chile   | 1995           | Pelagic Fish              | 30                                                          |
| 40              | Chile   | 1995           | Pigmeat                   | 32                                                          |
| 40              | Chile   | 1995           | Pineapples                | 2                                                           |
| 40              | Chile   | 1995           | Potatoes                  | 137                                                         |
| 40              | Chile   | 1995           | Poultry Meat              | 58                                                          |
| 40              | Chile   | 1995           | Pulses, Other             | 5                                                           |
| 40              | Chile   | 1995           | Rape and Mustard Oil      | 2                                                           |
| 40              | Chile   | 1995           | Rice (Milled Equivalent)  | 17                                                          |
| 40              | Chile   | 1995           | Soyabean Oil              | 15                                                          |
| 40              | Chile   | 1995           | Sugar, Refined Equivalent | 111                                                         |
| 40              | Chile   | 1995           | Sunflowerseed Oil         | 10                                                          |
| 40              | Chile   | 1995           | Sweet Potatoes            | 1                                                           |
| 40              | Chile   | 1995           | Sweeteners, Other         | 1                                                           |
| 40              | Chile   | 1995           | Tea                       | 4                                                           |
| 40              | Chile   | 1995           | Tomatoes                  | 72                                                          |
| 40              | Chile   | 1995           | Vegetables, Other         | 200                                                         |
| 40              | Chile   | 1995           | Wheat                     | 320                                                         |
| 40              | Chile   | 1995           | Wine                      | 40                                                          |
| 40              | Chile   | 1996           | Apples                    | 24                                                          |
| 40              | Chile   | 1996           | Aquatic Animals, Others   | 2                                                           |
| 40              | Chile   | 1996           | Bananas                   | 26                                                          |
| 40              | Chile   | 1996           | Barley                    | 3                                                           |
| 40              | Chile   | 1996           | Beans                     | 5                                                           |
| 40              | Chile   | 1996           | Beer                      | 62                                                          |
| 40              | Chile   | 1996           | Beverages, Alcoholic      | 4                                                           |
| 40              | Chile   | 1996           | Bovine Meat               | 63                                                          |
| 40              | Chile   | 1996           | Butter, Ghee              | 2                                                           |
| 40              | Chile   | 1996           | Cheese                    | 10                                                          |
| 40              | Chile   | 1996           | Cocoa Beans               | 2                                                           |
| 40              | Chile   | 1996           | Coconuts - Incl Copra     | 1                                                           |
| 40              | Chile   | 1996           | Coffee                    | 2                                                           |
| 40              | Chile   | 1996           | Crustaceans               | 3                                                           |
| 40              | Chile   | 1996           | Demersal Fish             | 7                                                           |
| 40              | Chile   | 1996           | Eggs                      | 15                                                          |
| 40              | Chile   | 1996           | Fats, Animals, Raw        | 3                                                           |
| 40              | Chile   | 1996           | Freshwater Fish           | 4                                                           |
| 40              | Chile   | 1996           | Fruits, Other             | 66                                                          |
| 40              | Chile   | 1996           | Grapes                    | 26                                                          |
| 40              | Chile   | 1996           | Groundnuts (Shelled Eq)   | 1                                                           |
| 40              | Chile   | 1996           | Lemons, Limes             | 17                                                          |
| 40              | Chile   | 1996           | Maize                     | 19                                                          |
| 40              | Chile   | 1996           | Meat, Other               | 1                                                           |
| 40              | Chile   | 1996           | Milk, Whole               | 212                                                         |
| 40              | Chile   | 1996           | Molluscs, Other           | 3                                                           |
| 40              | Chile   | 1996           | Mutton & Goat Meat        | 2                                                           |
| 40              | Chile   | 1996           | Nuts                      | 1                                                           |
| 40              | Chile   | 1996           | Oats                      | 1                                                           |
| 40              | Chile   | 1996           | Offals, Edible            | 9                                                           |
| 40              | Chile   | 1996           | Onions                    | 57                                                          |
| 40              | Chile   | 1996           | Oranges, Mandarines       | 22                                                          |
| 40              | Chile   | 1996           | Peas                      | 2                                                           |
| 40              | Chile   | 1996           | Pelagic Fish              | 28                                                          |
| 40              | Chile   | 1996           | Pigmeat                   | 34                                                          |
| 40              | Chile   | 1996           | Pineapples                | 2                                                           |
| 40              | Chile   | 1996           | Potatoes                  | 126                                                         |
| 40              | Chile   | 1996           | Poultry Meat              | 61                                                          |
| 40              | Chile   | 1996           | Pulses, Other             | 5                                                           |
| 40              | Chile   | 1996           | Rape and Mustard Oil      | 2                                                           |
| 40              | Chile   | 1996           | Rice (Milled Equivalent)  | 20                                                          |
| 40              | Chile   | 1996           | Soyabean Oil              | 15                                                          |
| 40              | Chile   | 1996           | Sugar, Refined Equivalent | 113                                                         |
| 40              | Chile   | 1996           | Sunflowerseed Oil         | 10                                                          |
| 40              | Chile   | 1996           | Sweet Potatoes            | 1                                                           |
| 40              | Chile   | 1996           | Sweeteners, Other         | 2                                                           |
| 40              | Chile   | 1996           | Tea                       | 4                                                           |
| 40              | Chile   | 1996           | Tomatoes                  | 92                                                          |
| 40              | Chile   | 1996           | Vegetables, Other         | 179                                                         |
| 40              | Chile   | 1996           | Wheat                     | 310                                                         |
| 40              | Chile   | 1996           | Wine                      | 43                                                          |
| 40              | Chile   | 1997           | Apples                    | 9                                                           |
| 40              | Chile   | 1997           | Aquatic Animals, Others   | 2                                                           |
| 40              | Chile   | 1997           | Bananas                   | 25                                                          |
| 40              | Chile   | 1997           | Barley                    | 3                                                           |
| 40              | Chile   | 1997           | Beans                     | 5                                                           |
| 40              | Chile   | 1997           | Beer                      | 64                                                          |
| 40              | Chile   | 1997           | Beverages, Alcoholic      | 4                                                           |
| 40              | Chile   | 1997           | Bovine Meat               | 67                                                          |
| 40              | Chile   | 1997           | Butter, Ghee              | 2                                                           |
| 40              | Chile   | 1997           | Cheese                    | 11                                                          |
| 40              | Chile   | 1997           | Cocoa Beans               | 2                                                           |
| 40              | Chile   | 1997           | Coconuts - Incl Copra     | 1                                                           |
| 40              | Chile   | 1997           | Coffee                    | 2                                                           |
| 40              | Chile   | 1997           | Crustaceans               | 3                                                           |
| 40              | Chile   | 1997           | Demersal Fish             | 4                                                           |
| 40              | Chile   | 1997           | Eggs                      | 15                                                          |
| 40              | Chile   | 1997           | Fats, Animals, Raw        | 4                                                           |
| 40              | Chile   | 1997           | Freshwater Fish           | 2                                                           |
| 40              | Chile   | 1997           | Fruits, Other             | 54                                                          |
| 40              | Chile   | 1997           | Grapes                    | 27                                                          |
| 40              | Chile   | 1997           | Groundnuts (Shelled Eq)   | 1                                                           |
| 40              | Chile   | 1997           | Lemons, Limes             | 19                                                          |
| 40              | Chile   | 1997           | Maize                     | 43                                                          |
| 40              | Chile   | 1997           | Meat, Other               | 1                                                           |

Dietary calcium and zinc deficiency risks are decreasing but remain prevalent

| FAO countrycode | Country | Reference year | Food item                 | Gross food supply (g capita <sup>-1</sup> d <sup>-1</sup> ) |
|-----------------|---------|----------------|---------------------------|-------------------------------------------------------------|
| 40              | Chile   | 1997           | Milk, Whole               | 197                                                         |
| 40              | Chile   | 1997           | Molluscs, Other           | 4                                                           |
| 40              | Chile   | 1997           | Mutton & Goat Meat        | 2                                                           |
| 40              | Chile   | 1997           | Nuts                      | 1                                                           |
| 40              | Chile   | 1997           | Oats                      | 1                                                           |
| 40              | Chile   | 1997           | Offals, Edible            | 9                                                           |
| 40              | Chile   | 1997           | Onions                    | 29                                                          |
| 40              | Chile   | 1997           | Oranges, Mandarines       | 16                                                          |
| 40              | Chile   | 1997           | Peas                      | 1                                                           |
| 40              | Chile   | 1997           | Pelagic Fish              | 27                                                          |
| 40              | Chile   | 1997           | Pigmeat                   | 36                                                          |
| 40              | Chile   | 1997           | Pineapples                | 2                                                           |
| 40              | Chile   | 1997           | Potatoes                  | 159                                                         |
| 40              | Chile   | 1997           | Poultry Meat              | 60                                                          |
| 40              | Chile   | 1997           | Pulses, Other             | 4                                                           |
| 40              | Chile   | 1997           | Rape and Mustard Oil      | 3                                                           |
| 40              | Chile   | 1997           | Rice (Milled Equivalent)  | 20                                                          |
| 40              | Chile   | 1997           | Rye                       | 1                                                           |
| 40              | Chile   | 1997           | Soyabean Oil              | 12                                                          |
| 40              | Chile   | 1997           | Sugar, Refined Equivalent | 114                                                         |
| 40              | Chile   | 1997           | Sunflowerseed Oil         | 11                                                          |
| 40              | Chile   | 1997           | Sweet Potatoes            | 2                                                           |
| 40              | Chile   | 1997           | Sweeteners, Other         | 2                                                           |
| 40              | Chile   | 1997           | Tea                       | 3                                                           |
| 40              | Chile   | 1997           | Tomatoes                  | 64                                                          |
| 40              | Chile   | 1997           | Vegetables, Other         | 159                                                         |
| 40              | Chile   | 1997           | Wheat                     | 296                                                         |
| 40              | Chile   | 1997           | Wine                      | 35                                                          |
| 40              | Chile   | 1998           | Apples                    | 8                                                           |
| 40              | Chile   | 1998           | Aquatic Animals, Others   | 2                                                           |
| 40              | Chile   | 1998           | Bananas                   | 24                                                          |
| 40              | Chile   | 1998           | Barley                    | 3                                                           |
| 40              | Chile   | 1998           | Beans                     | 4                                                           |
| 40              | Chile   | 1998           | Beer                      | 63                                                          |
| 40              | Chile   | 1998           | Beverages, Alcoholic      | 4                                                           |
| 40              | Chile   | 1998           | Bovine Meat               | 63                                                          |
| 40              | Chile   | 1998           | Butter, Ghee              | 2                                                           |
| 40              | Chile   | 1998           | Cheese                    | 11                                                          |
| 40              | Chile   | 1998           | Cocoa Beans               | 3                                                           |
| 40              | Chile   | 1998           | Coconuts - Incl Copra     | 1                                                           |
| 40              | Chile   | 1998           | Coffee                    | 2                                                           |
| 40              | Chile   | 1998           | Crustaceans               | 3                                                           |
| 40              | Chile   | 1998           | Demersal Fish             | 2                                                           |
| 40              | Chile   | 1998           | Eggs                      | 15                                                          |
| 40              | Chile   | 1998           | Fats, Animals, Raw        | 5                                                           |
| 40              | Chile   | 1998           | Freshwater Fish           | 2                                                           |
| 40              | Chile   | 1998           | Fruits, Other             | 44                                                          |
| 40              | Chile   | 1998           | Grapes                    | 31                                                          |
| 40              | Chile   | 1998           | Groundnuts (Shelled Eq)   | 1                                                           |
| 40              | Chile   | 1998           | Lemons, Limes             | 17                                                          |
| 40              | Chile   | 1998           | Maize                     | 39                                                          |
| 40              | Chile   | 1998           | Meat, Other               | 1                                                           |
| 40              | Chile   | 1998           | Milk, Whole               | 192                                                         |
| 40              | Chile   | 1998           | Molluscs, Other           | 4                                                           |
| 40              | Chile   | 1998           | Mutton & Goat Meat        | 2                                                           |
| 40              | Chile   | 1998           | Nuts                      | 1                                                           |
| 40              | Chile   | 1998           | Oats                      | 1                                                           |
| 40              | Chile   | 1998           | Offals, Edible            | 9                                                           |
| 40              | Chile   | 1998           | Onions                    | 32                                                          |
| 40              | Chile   | 1998           | Oranges, Mandarines       | 18                                                          |
| 40              | Chile   | 1998           | Peas                      | 1                                                           |
| 40              | Chile   | 1998           | Pelagic Fish              | 25                                                          |
| 40              | Chile   | 1998           | Pigmeat                   | 40                                                          |
| 40              | Chile   | 1998           | Pineapples                | 2                                                           |
| 40              | Chile   | 1998           | Potatoes                  | 138                                                         |
| 40              | Chile   | 1998           | Poultry Meat              | 65                                                          |
| 40              | Chile   | 1998           | Pulses, Other             | 4                                                           |
| 40              | Chile   | 1998           | Rape and Mustard Oil      | 3                                                           |
| 40              | Chile   | 1998           | Rice (Milled Equivalent)  | 18                                                          |
| 40              | Chile   | 1998           | Soyabean Oil              | 12                                                          |
| 40              | Chile   | 1998           | Sugar, Refined Equivalent | 116                                                         |
| 40              | Chile   | 1998           | Sunflowerseed Oil         | 10                                                          |
| 40              | Chile   | 1998           | Sweet Potatoes            | 1                                                           |
| 40              | Chile   | 1998           | Sweeteners, Other         | 1                                                           |
| 40              | Chile   | 1998           | Tea                       | 4                                                           |
| 40              | Chile   | 1998           | Tomatoes                  | 62                                                          |
| 40              | Chile   | 1998           | Vegetables, Other         | 163                                                         |
| 40              | Chile   | 1998           | Wheat                     | 303                                                         |
| 40              | Chile   | 1998           | Wine                      | 49                                                          |
| 40              | Chile   | 1999           | Apples                    | 12                                                          |
| 40              | Chile   | 1999           | Aquatic Animals, Others   | 4                                                           |
| 40              | Chile   | 1999           | Bananas                   | 26                                                          |
| 40              | Chile   | 1999           | Barley                    | 3                                                           |
| 40              | Chile   | 1999           | Beans                     | 4                                                           |
| 40              | Chile   | 1999           | Beer                      | 61                                                          |
| 40              | Chile   | 1999           | Beverages, Alcoholic      | 3                                                           |
| 40              | Chile   | 1999           | Bovine Meat               | 59                                                          |
| 40              | Chile   | 1999           | Butter, Ghee              | 2                                                           |
| 40              | Chile   | 1999           | Cheese                    | 10                                                          |
| 40              | Chile   | 1999           | Cocoa Beans               | 2                                                           |
| 40              | Chile   | 1999           | Coconuts - Incl Copra     | 1                                                           |
| 40              | Chile   | 1999           | Coffee                    | 1                                                           |
| 40              | Chile   | 1999           | Crustaceans               | 2                                                           |
| 40              | Chile   | 1999           | Demersal Fish             | 8                                                           |
| 40              | Chile   | 1999           | Eggs                      | 16                                                          |
| 40              | Chile   | 1999           | Fats, Animals, Raw        | 4                                                           |
| 40              | Chile   | 1999           | Freshwater Fish           | 2                                                           |

Dietary calcium and zinc deficiency risks are decreasing but remain prevalent

| FAO countrycode | Country | Reference year | Food item                 | Gross food supply (g capita <sup>-1</sup> d <sup>-1</sup> ) |
|-----------------|---------|----------------|---------------------------|-------------------------------------------------------------|
| 40              | Chile   | 1999           | Fruits, Other             | 45                                                          |
| 40              | Chile   | 1999           | Grapes                    | 30                                                          |
| 40              | Chile   | 1999           | Groundnuts (Shelled Eq)   | 1                                                           |
| 40              | Chile   | 1999           | Honey                     | 1                                                           |
| 40              | Chile   | 1999           | Lemons, Limes             | 15                                                          |
| 40              | Chile   | 1999           | Maize                     | 42                                                          |
| 40              | Chile   | 1999           | Meat, Other               | 1                                                           |
| 40              | Chile   | 1999           | Milk, Whole               | 177                                                         |
| 40              | Chile   | 1999           | Molluscs, Other           | 6                                                           |
| 40              | Chile   | 1999           | Mutton & Goat Meat        | 2                                                           |
| 40              | Chile   | 1999           | Nuts                      | 1                                                           |
| 40              | Chile   | 1999           | Oats                      | 1                                                           |
| 40              | Chile   | 1999           | Offals, Edible            | 8                                                           |
| 40              | Chile   | 1999           | Olives                    | 1                                                           |
| 40              | Chile   | 1999           | Onions                    | 35                                                          |
| 40              | Chile   | 1999           | Oranges, Mandarines       | 16                                                          |
| 40              | Chile   | 1999           | Peas                      | 1                                                           |
| 40              | Chile   | 1999           | Pelagic Fish              | 16                                                          |
| 40              | Chile   | 1999           | Pigmeat                   | 43                                                          |
| 40              | Chile   | 1999           | Pineapples                | 2                                                           |
| 40              | Chile   | 1999           | Potatoes                  | 152                                                         |
| 40              | Chile   | 1999           | Poultry Meat              | 66                                                          |
| 40              | Chile   | 1999           | Pulses, Other             | 4                                                           |
| 40              | Chile   | 1999           | Rape and Mustard Oil      | 3                                                           |
| 40              | Chile   | 1999           | Rice (Milled Equivalent)  | 18                                                          |
| 40              | Chile   | 1999           | Rye                       | 1                                                           |
| 40              | Chile   | 1999           | Soyabean Oil              | 13                                                          |
| 40              | Chile   | 1999           | Sugar, Refined Equivalent | 117                                                         |
| 40              | Chile   | 1999           | Sunflowerseed Oil         | 11                                                          |
| 40              | Chile   | 1999           | Sweet Potatoes            | 1                                                           |
| 40              | Chile   | 1999           | Sweeteners, Other         | 3                                                           |
| 40              | Chile   | 1999           | Tea                       | 3                                                           |
| 40              | Chile   | 1999           | Tomatoes                  | 58                                                          |
| 40              | Chile   | 1999           | Vegetables, Other         | 163                                                         |
| 40              | Chile   | 1999           | Wheat                     | 304                                                         |
| 40              | Chile   | 1999           | Wine                      | 36                                                          |
| 40              | Chile   | 2000           | Apples                    | 3                                                           |
| 40              | Chile   | 2000           | Aquatic Animals, Others   | 3                                                           |
| 40              | Chile   | 2000           | Bananas                   | 32                                                          |
| 40              | Chile   | 2000           | Barley                    | 3                                                           |
| 40              | Chile   | 2000           | Beans                     | 5                                                           |
| 40              | Chile   | 2000           | Beer                      | 53                                                          |
| 40              | Chile   | 2000           | Beverages, Alcoholic      | 5                                                           |
| 40              | Chile   | 2000           | Bovine Meat               | 59                                                          |
| 40              | Chile   | 2000           | Butter, Ghee              | 2                                                           |
| 40              | Chile   | 2000           | Cheese                    | 10                                                          |
| 40              | Chile   | 2000           | Cocoa Beans               | 2                                                           |
| 40              | Chile   | 2000           | Coconuts - Incl Copra     | 1                                                           |
| 40              | Chile   | 2000           | Coffee                    | 2                                                           |
| 40              | Chile   | 2000           | Crustaceans               | 1                                                           |
| 40              | Chile   | 2000           | Demersal Fish             | 5                                                           |
| 40              | Chile   | 2000           | Eggs                      | 16                                                          |
| 40              | Chile   | 2000           | Fats, Animals, Raw        | 5                                                           |
| 40              | Chile   | 2000           | Freshwater Fish           | 5                                                           |
| 40              | Chile   | 2000           | Fruits, Other             | 52                                                          |
| 40              | Chile   | 2000           | Grapes                    | 29                                                          |
| 40              | Chile   | 2000           | Groundnuts (Shelled Eq)   | 1                                                           |
| 40              | Chile   | 2000           | Honey                     | 1                                                           |
| 40              | Chile   | 2000           | Lemons, Limes             | 17                                                          |
| 40              | Chile   | 2000           | Maize                     | 43                                                          |
| 40              | Chile   | 2000           | Meat, Other               | 1                                                           |
| 40              | Chile   | 2000           | Milk, Whole               | 180                                                         |
| 40              | Chile   | 2000           | Molluscs, Other           | 8                                                           |
| 40              | Chile   | 2000           | Mutton & Goat Meat        | 2                                                           |
| 40              | Chile   | 2000           | Nuts                      | 1                                                           |
| 40              | Chile   | 2000           | Oats                      | 1                                                           |
| 40              | Chile   | 2000           | Offals, Edible            | 8                                                           |
| 40              | Chile   | 2000           | Olives                    | 1                                                           |
| 40              | Chile   | 2000           | Onions                    | 40                                                          |
| 40              | Chile   | 2000           | Oranges, Mandarines       | 17                                                          |
| 40              | Chile   | 2000           | Peas                      | 1                                                           |
| 40              | Chile   | 2000           | Pelagic Fish              | 14                                                          |
| 40              | Chile   | 2000           | Pigmeat                   | 43                                                          |
| 40              | Chile   | 2000           | Pineapples                | 2                                                           |
| 40              | Chile   | 2000           | Potatoes                  | 148                                                         |
| 40              | Chile   | 2000           | Poultry Meat              | 72                                                          |
| 40              | Chile   | 2000           | Pulses, Other             | 4                                                           |
| 40              | Chile   | 2000           | Rape and Mustard Oil      | 3                                                           |
| 40              | Chile   | 2000           | Rice (Milled Equivalent)  | 19                                                          |
| 40              | Chile   | 2000           | Soyabean Oil              | 13                                                          |
| 40              | Chile   | 2000           | Sugar, Refined Equivalent | 111                                                         |
| 40              | Chile   | 2000           | Sunflowerseed Oil         | 12                                                          |
| 40              | Chile   | 2000           | Sweet Potatoes            | 1                                                           |
| 40              | Chile   | 2000           | Sweeteners, Other         | 3                                                           |
| 40              | Chile   | 2000           | Tea                       | 3                                                           |
| 40              | Chile   | 2000           | Tomatoes                  | 74                                                          |
| 40              | Chile   | 2000           | Vegetables, Other         | 158                                                         |
| 40              | Chile   | 2000           | Wheat                     | 304                                                         |
| 40              | Chile   | 2000           | Wine                      | 35                                                          |
| 40              | Chile   | 2001           | Apples                    | 2                                                           |
| 40              | Chile   | 2001           | Aquatic Animals, Others   | 1                                                           |
| 40              | Chile   | 2001           | Bananas                   | 20                                                          |
| 40              | Chile   | 2001           | Barley                    | 3                                                           |
| 40              | Chile   | 2001           | Beans                     | 6                                                           |
| 40              | Chile   | 2001           | Beer                      | 61                                                          |
| 40              | Chile   | 2001           | Beverages, Alcoholic      | 6                                                           |
| 40              | Chile   | 2001           | Bovine Meat               | 54                                                          |

Dietary calcium and zinc deficiency risks are decreasing but remain prevalent

| FAO countrycode | Country | Reference year | Food item                 | Gross food supply (g capita <sup>-1</sup> d <sup>-1</sup> ) |
|-----------------|---------|----------------|---------------------------|-------------------------------------------------------------|
| 40              | Chile   | 2001           | Butter, Ghee              | 2                                                           |
| 40              | Chile   | 2001           | Cheese                    | 10                                                          |
| 40              | Chile   | 2001           | Cocoa Beans               | 2                                                           |
| 40              | Chile   | 2001           | Coconuts - Incl Copra     | 1                                                           |
| 40              | Chile   | 2001           | Coffee                    | 1                                                           |
| 40              | Chile   | 2001           | Crustaceans               | 1                                                           |
| 40              | Chile   | 2001           | Demersal Fish             | 9                                                           |
| 40              | Chile   | 2001           | Eggs                      | 17                                                          |
| 40              | Chile   | 2001           | Fats, Animals, Raw        | 6                                                           |
| 40              | Chile   | 2001           | Freshwater Fish           | 2                                                           |
| 40              | Chile   | 2001           | Fruits, Other             | 44                                                          |
| 40              | Chile   | 2001           | Grapes                    | 26                                                          |
| 40              | Chile   | 2001           | Groundnuts (Shelled Eq)   | 1                                                           |
| 40              | Chile   | 2001           | Lemons, Limes             | 17                                                          |
| 40              | Chile   | 2001           | Maize                     | 43                                                          |
| 40              | Chile   | 2001           | Meat, Other               | 1                                                           |
| 40              | Chile   | 2001           | Milk, Whole               | 178                                                         |
| 40              | Chile   | 2001           | Molluscs, Other           | 8                                                           |
| 40              | Chile   | 2001           | Mutton & Goat Meat        | 2                                                           |
| 40              | Chile   | 2001           | Nuts                      | 1                                                           |
| 40              | Chile   | 2001           | Oats                      | 1                                                           |
| 40              | Chile   | 2001           | Offals, Edible            | 7                                                           |
| 40              | Chile   | 2001           | Olives                    | 1                                                           |
| 40              | Chile   | 2001           | Onions                    | 39                                                          |
| 40              | Chile   | 2001           | Oranges, Mandarines       | 17                                                          |
| 40              | Chile   | 2001           | Peas                      | 1                                                           |
| 40              | Chile   | 2001           | Pelagic Fish              | 14                                                          |
| 40              | Chile   | 2001           | Pigmeat                   | 46                                                          |
| 40              | Chile   | 2001           | Pineapples                | 1                                                           |
| 40              | Chile   | 2001           | Potatoes                  | 183                                                         |
| 40              | Chile   | 2001           | Poultry Meat              | 77                                                          |
| 40              | Chile   | 2001           | Pulses, Other             | 4                                                           |
| 40              | Chile   | 2001           | Rape and Mustard Oil      | 3                                                           |
| 40              | Chile   | 2001           | Rice (Milled Equivalent)  | 19                                                          |
| 40              | Chile   | 2001           | Rye                       | 1                                                           |
| 40              | Chile   | 2001           | Soyabean Oil              | 15                                                          |
| 40              | Chile   | 2001           | Sugar, Refined Equivalent | 109                                                         |
| 40              | Chile   | 2001           | Sunflowerseed Oil         | 10                                                          |
| 40              | Chile   | 2001           | Sweet Potatoes            | 1                                                           |
| 40              | Chile   | 2001           | Sweeteners, Other         | 3                                                           |
| 40              | Chile   | 2001           | Tea                       | 3                                                           |
| 40              | Chile   | 2001           | Tomatoes                  | 67                                                          |
| 40              | Chile   | 2001           | Vegetables, Other         | 159                                                         |
| 40              | Chile   | 2001           | Wheat                     | 313                                                         |
| 40              | Chile   | 2001           | Wine                      | 39                                                          |
| 40              | Chile   | 2002           | Apples                    | 20                                                          |
| 40              | Chile   | 2002           | Aquatic Animals, Others   | 4                                                           |
| 40              | Chile   | 2002           | Bananas                   | 24                                                          |
| 40              | Chile   | 2002           | Barley                    | 3                                                           |
| 40              | Chile   | 2002           | Beans                     | 6                                                           |
| 40              | Chile   | 2002           | Beer                      | 59                                                          |
| 40              | Chile   | 2002           | Beverages, Alcoholic      | 5                                                           |
| 40              | Chile   | 2002           | Bovine Meat               | 57                                                          |
| 40              | Chile   | 2002           | Butter, Ghee              | 2                                                           |
| 40              | Chile   | 2002           | Cephalopods               | 1                                                           |
| 40              | Chile   | 2002           | Cheese                    | 10                                                          |
| 40              | Chile   | 2002           | Cocoa Beans               | 3                                                           |
| 40              | Chile   | 2002           | Coconuts - Incl Copra     | 1                                                           |
| 40              | Chile   | 2002           | Coffee                    | 1                                                           |
| 40              | Chile   | 2002           | Crustaceans               | 2                                                           |
| 40              | Chile   | 2002           | Demersal Fish             | 6                                                           |
| 40              | Chile   | 2002           | Eggs                      | 17                                                          |
| 40              | Chile   | 2002           | Fats, Animals, Raw        | 6                                                           |
| 40              | Chile   | 2002           | Freshwater Fish           | 1                                                           |
| 40              | Chile   | 2002           | Fruits, Other             | 55                                                          |
| 40              | Chile   | 2002           | Grapes                    | 20                                                          |
| 40              | Chile   | 2002           | Groundnuts (Shelled Eq)   | 1                                                           |
| 40              | Chile   | 2002           | Honey                     | 1                                                           |
| 40              | Chile   | 2002           | Lemons, Limes             | 19                                                          |
| 40              | Chile   | 2002           | Maize                     | 34                                                          |
| 40              | Chile   | 2002           | Meat, Other               | 1                                                           |
| 40              | Chile   | 2002           | Milk, Whole               | 169                                                         |
| 40              | Chile   | 2002           | Molluscs, Other           | 4                                                           |
| 40              | Chile   | 2002           | Mutton & Goat Meat        | 2                                                           |
| 40              | Chile   | 2002           | Nuts                      | 2                                                           |
| 40              | Chile   | 2002           | Oats                      | 1                                                           |
| 40              | Chile   | 2002           | Offals, Edible            | 8                                                           |
| 40              | Chile   | 2002           | Olives                    | 1                                                           |
| 40              | Chile   | 2002           | Onions                    | 42                                                          |
| 40              | Chile   | 2002           | Oranges, Mandarines       | 20                                                          |
| 40              | Chile   | 2002           | Peas                      | 1                                                           |
| 40              | Chile   | 2002           | Pelagic Fish              | 19                                                          |
| 40              | Chile   | 2002           | Pigmeat                   | 45                                                          |
| 40              | Chile   | 2002           | Pineapples                | 2                                                           |
| 40              | Chile   | 2002           | Potatoes                  | 200                                                         |
| 40              | Chile   | 2002           | Poultry Meat              | 73                                                          |
| 40              | Chile   | 2002           | Pulses, Other             | 4                                                           |
| 40              | Chile   | 2002           | Rape and Mustard Oil      | 3                                                           |
| 40              | Chile   | 2002           | Rice (Milled Equivalent)  | 19                                                          |
| 40              | Chile   | 2002           | Rye                       | 1                                                           |
| 40              | Chile   | 2002           | Soyabean Oil              | 15                                                          |
| 40              | Chile   | 2002           | Sugar, Refined Equivalent | 111                                                         |
| 40              | Chile   | 2002           | Sunflowerseed Oil         | 10                                                          |
| 40              | Chile   | 2002           | Sweet Potatoes            | 1                                                           |
| 40              | Chile   | 2002           | Sweeteners, Other         | 3                                                           |
| 40              | Chile   | 2002           | Tea                       | 4                                                           |
| 40              | Chile   | 2002           | Tomatoes                  | 75                                                          |

Dietary calcium and zinc deficiency risks are decreasing but remain prevalent

| FAO countrycode | Country | Reference year | Food item                 | Gross food supply (g capita <sup>-1</sup> d <sup>-1</sup> ) |
|-----------------|---------|----------------|---------------------------|-------------------------------------------------------------|
| 40              | Chile   | 2002           | Vegetables, Other         | 161                                                         |
| 40              | Chile   | 2002           | Wheat                     | 316                                                         |
| 40              | Chile   | 2002           | Wine                      | 38                                                          |
| 40              | Chile   | 2003           | Apples                    | 30                                                          |
| 40              | Chile   | 2003           | Aquatic Animals, Others   | 3                                                           |
| 40              | Chile   | 2003           | Bananas                   | 25                                                          |
| 40              | Chile   | 2003           | Barley                    | 3                                                           |
| 40              | Chile   | 2003           | Beans                     | 6                                                           |
| 40              | Chile   | 2003           | Beer                      | 72                                                          |
| 40              | Chile   | 2003           | Beverages, Alcoholic      | 4                                                           |
| 40              | Chile   | 2003           | Bovine Meat               | 58                                                          |
| 40              | Chile   | 2003           | Butter, Ghee              | 2                                                           |
| 40              | Chile   | 2003           | Cheese                    | 10                                                          |
| 40              | Chile   | 2003           | Cocoa Beans               | 3                                                           |
| 40              | Chile   | 2003           | Coconuts - Incl Copra     | 1                                                           |
| 40              | Chile   | 2003           | Coffee                    | 2                                                           |
| 40              | Chile   | 2003           | Crustaceans               | 1                                                           |
| 40              | Chile   | 2003           | Demersal Fish             | 11                                                          |
| 40              | Chile   | 2003           | Eggs                      | 17                                                          |
| 40              | Chile   | 2003           | Fats, Animals, Raw        | 7                                                           |
| 40              | Chile   | 2003           | Freshwater Fish           | 2                                                           |
| 40              | Chile   | 2003           | Fruits, Other             | 45                                                          |
| 40              | Chile   | 2003           | Grapes                    | 8                                                           |
| 40              | Chile   | 2003           | Groundnuts (Shelled Eq)   | 1                                                           |
| 40              | Chile   | 2003           | Lemons, Limes             | 22                                                          |
| 40              | Chile   | 2003           | Maize                     | 46                                                          |
| 40              | Chile   | 2003           | Meat, Other               | 1                                                           |
| 40              | Chile   | 2003           | Milk, Whole               | 179                                                         |
| 40              | Chile   | 2003           | Molluscs, Other           | 5                                                           |
| 40              | Chile   | 2003           | Mutton & Goat Meat        | 2                                                           |
| 40              | Chile   | 2003           | Nuts                      | 2                                                           |
| 40              | Chile   | 2003           | Oats                      | 1                                                           |
| 40              | Chile   | 2003           | Offals, Edible            | 7                                                           |
| 40              | Chile   | 2003           | Olive Oil                 | 1                                                           |
| 40              | Chile   | 2003           | Olives                    | 2                                                           |
| 40              | Chile   | 2003           | Onions                    | 43                                                          |
| 40              | Chile   | 2003           | Oranges, Mandarines       | 20                                                          |
| 40              | Chile   | 2003           | Peas                      | 1                                                           |
| 40              | Chile   | 2003           | Pelagic Fish              | 21                                                          |
| 40              | Chile   | 2003           | Pigmeat                   | 50                                                          |
| 40              | Chile   | 2003           | Pineapples                | 2                                                           |
| 40              | Chile   | 2003           | Potatoes                  | 164                                                         |
| 40              | Chile   | 2003           | Poultry Meat              | 73                                                          |
| 40              | Chile   | 2003           | Pulses, Other             | 4                                                           |
| 40              | Chile   | 2003           | Rape and Mustard Oil      | 3                                                           |
| 40              | Chile   | 2003           | Rice (Milled Equivalent)  | 20                                                          |
| 40              | Chile   | 2003           | Rye                       | 2                                                           |
| 40              | Chile   | 2003           | Soyabean Oil              | 14                                                          |
| 40              | Chile   | 2003           | Sugar, Refined Equivalent | 104                                                         |
| 40              | Chile   | 2003           | Sunflowerseed Oil         | 10                                                          |
| 40              | Chile   | 2003           | Sweet Potatoes            | 1                                                           |
| 40              | Chile   | 2003           | Sweeteners, Other         | 3                                                           |
| 40              | Chile   | 2003           | Tea                       | 4                                                           |
| 40              | Chile   | 2003           | Tomatoes                  | 96                                                          |
| 40              | Chile   | 2003           | Vegetables, Other         | 159                                                         |
| 40              | Chile   | 2003           | Wheat                     | 309                                                         |
| 40              | Chile   | 2003           | Wine                      | 40                                                          |
| 40              | Chile   | 2004           | Apples                    | 12                                                          |
| 40              | Chile   | 2004           | Aquatic Animals, Others   | 4                                                           |
| 40              | Chile   | 2004           | Bananas                   | 25                                                          |
| 40              | Chile   | 2004           | Barley                    | 3                                                           |
| 40              | Chile   | 2004           | Beans                     | 7                                                           |
| 40              | Chile   | 2004           | Beer                      | 72                                                          |
| 40              | Chile   | 2004           | Beverages, Alcoholic      | 5                                                           |
| 40              | Chile   | 2004           | Bovine Meat               | 60                                                          |
| 40              | Chile   | 2004           | Butter, Ghee              | 2                                                           |
| 40              | Chile   | 2004           | Cephalopods               | 2                                                           |
| 40              | Chile   | 2004           | Cheese                    | 10                                                          |
| 40              | Chile   | 2004           | Cocoa Beans               | 3                                                           |
| 40              | Chile   | 2004           | Coconuts - Incl Copra     | 1                                                           |
| 40              | Chile   | 2004           | Coffee                    | 2                                                           |
| 40              | Chile   | 2004           | Crustaceans               | 1                                                           |
| 40              | Chile   | 2004           | Demersal Fish             | 15                                                          |
| 40              | Chile   | 2004           | Eggs                      | 17                                                          |
| 40              | Chile   | 2004           | Fats, Animals, Raw        | 7                                                           |
| 40              | Chile   | 2004           | Freshwater Fish           | 1                                                           |
| 40              | Chile   | 2004           | Fruits, Other             | 52                                                          |
| 40              | Chile   | 2004           | Grapes                    | 24                                                          |
| 40              | Chile   | 2004           | Groundnuts (Shelled Eq)   | 1                                                           |
| 40              | Chile   | 2004           | Honey                     | 1                                                           |
| 40              | Chile   | 2004           | Lemons, Limes             | 19                                                          |
| 40              | Chile   | 2004           | Maize                     | 48                                                          |
| 40              | Chile   | 2004           | Meat, Other               | 1                                                           |
| 40              | Chile   | 2004           | Milk, Whole               | 156                                                         |
| 40              | Chile   | 2004           | Molluscs, Other           | 4                                                           |
| 40              | Chile   | 2004           | Mutton & Goat Meat        | 2                                                           |
| 40              | Chile   | 2004           | Nuts                      | 2                                                           |
| 40              | Chile   | 2004           | Oats                      | 1                                                           |
| 40              | Chile   | 2004           | Offals, Edible            | 7                                                           |
| 40              | Chile   | 2004           | Olive Oil                 | 1                                                           |
| 40              | Chile   | 2004           | Olives                    | 2                                                           |
| 40              | Chile   | 2004           | Onions                    | 42                                                          |
| 40              | Chile   | 2004           | Oranges, Mandarines       | 21                                                          |
| 40              | Chile   | 2004           | Peas                      | 1                                                           |
| 40              | Chile   | 2004           | Pelagic Fish              | 20                                                          |
| 40              | Chile   | 2004           | Pigmeat                   | 46                                                          |
| 40              | Chile   | 2004           | Pineapples                | 3                                                           |



Dietary calcium and zinc deficiency risks are decreasing but remain prevalent

| FAO countrycode | Country | Reference year | Food item                 | Gross food supply (g capita <sup>-1</sup> d <sup>-1</sup> ) |
|-----------------|---------|----------------|---------------------------|-------------------------------------------------------------|
| 40              | Chile   | 2004           | Potatoes                  | 169                                                         |
| 40              | Chile   | 2004           | Poultry Meat              | 80                                                          |
| 40              | Chile   | 2004           | Pulses, Other             | 5                                                           |
| 40              | Chile   | 2004           | Rape and Mustard Oil      | 3                                                           |
| 40              | Chile   | 2004           | Rice (Milled Equivalent)  | 23                                                          |
| 40              | Chile   | 2004           | Rye                       | 2                                                           |
| 40              | Chile   | 2004           | Soyabean Oil              | 14                                                          |
| 40              | Chile   | 2004           | Sugar, Refined Equivalent | 106                                                         |
| 40              | Chile   | 2004           | Sunflowerseed Oil         | 10                                                          |
| 40              | Chile   | 2004           | Sweet Potatoes            | 1                                                           |
| 40              | Chile   | 2004           | Sweeteners, Other         | 3                                                           |
| 40              | Chile   | 2004           | Tea                       | 4                                                           |
| 40              | Chile   | 2004           | Tomatoes                  | 90                                                          |
| 40              | Chile   | 2004           | Vegetables, Other         | 157                                                         |
| 40              | Chile   | 2004           | Wheat                     | 311                                                         |
| 40              | Chile   | 2004           | Wine                      | 39                                                          |
| 40              | Chile   | 2005           | Apples                    | 16                                                          |
| 40              | Chile   | 2005           | Aquatic Animals, Others   | 2                                                           |
| 40              | Chile   | 2005           | Bananas                   | 26                                                          |
| 40              | Chile   | 2005           | Barley                    | 3                                                           |
| 40              | Chile   | 2005           | Beans                     | 6                                                           |
| 40              | Chile   | 2005           | Beer                      | 75                                                          |
| 40              | Chile   | 2005           | Beverages, Alcoholic      | 5                                                           |
| 40              | Chile   | 2005           | Bovine Meat               | 62                                                          |
| 40              | Chile   | 2005           | Butter, Ghee              | 3                                                           |
| 40              | Chile   | 2005           | Cephalopods               | 4                                                           |
| 40              | Chile   | 2005           | Cheese                    | 11                                                          |
| 40              | Chile   | 2005           | Cocoa Beans               | 3                                                           |
| 40              | Chile   | 2005           | Coconuts - Incl Copra     | 1                                                           |
| 40              | Chile   | 2005           | Coffee                    | 2                                                           |
| 40              | Chile   | 2005           | Crustaceans               | 1                                                           |
| 40              | Chile   | 2005           | Demersal Fish             | 11                                                          |
| 40              | Chile   | 2005           | Eggs                      | 18                                                          |
| 40              | Chile   | 2005           | Fats, Animals, Raw        | 7                                                           |
| 40              | Chile   | 2005           | Freshwater Fish           | 1                                                           |
| 40              | Chile   | 2005           | Fruits, Other             | 50                                                          |
| 40              | Chile   | 2005           | Grapes                    | 22                                                          |
| 40              | Chile   | 2005           | Groundnuts (Shelled Eq)   | 1                                                           |
| 40              | Chile   | 2005           | Lemons, Limes             | 19                                                          |
| 40              | Chile   | 2005           | Maize                     | 56                                                          |
| 40              | Chile   | 2005           | Meat, Other               | 1                                                           |
| 40              | Chile   | 2005           | Milk, Whole               | 146                                                         |
| 40              | Chile   | 2005           | Molluscs, Other           | 5                                                           |
| 40              | Chile   | 2005           | Mutton & Goat Meat        | 2                                                           |
| 40              | Chile   | 2005           | Nuts                      | 1                                                           |
| 40              | Chile   | 2005           | Oats                      | 1                                                           |
| 40              | Chile   | 2005           | Offals, Edible            | 7                                                           |
| 40              | Chile   | 2005           | Olive Oil                 | 1                                                           |
| 40              | Chile   | 2005           | Olives                    | 2                                                           |
| 40              | Chile   | 2005           | Onions                    | 49                                                          |
| 40              | Chile   | 2005           | Oranges, Mandarines       | 20                                                          |
| 40              | Chile   | 2005           | Peas                      | 1                                                           |
| 40              | Chile   | 2005           | Pelagic Fish              | 19                                                          |
| 40              | Chile   | 2005           | Pigmeat                   | 49                                                          |
| 40              | Chile   | 2005           | Pineapples                | 3                                                           |
| 40              | Chile   | 2005           | Potatoes                  | 164                                                         |
| 40              | Chile   | 2005           | Poultry Meat              | 80                                                          |
| 40              | Chile   | 2005           | Pulses, Other             | 5                                                           |
| 40              | Chile   | 2005           | Rape and Mustard Oil      | 2                                                           |
| 40              | Chile   | 2005           | Rice (Milled Equivalent)  | 23                                                          |
| 40              | Chile   | 2005           | Soyabean Oil              | 14                                                          |
| 40              | Chile   | 2005           | Sugar, Refined Equivalent | 106                                                         |
| 40              | Chile   | 2005           | Sunflowerseed Oil         | 5                                                           |
| 40              | Chile   | 2005           | Sweet Potatoes            | 1                                                           |
| 40              | Chile   | 2005           | Sweeteners, Other         | 4                                                           |
| 40              | Chile   | 2005           | Tea                       | 4                                                           |
| 40              | Chile   | 2005           | Tomatoes                  | 81                                                          |
| 40              | Chile   | 2005           | Vegetables, Other         | 148                                                         |
| 40              | Chile   | 2005           | Wheat                     | 311                                                         |
| 40              | Chile   | 2005           | Wine                      | 42                                                          |
| 40              | Chile   | 2006           | Apples                    | 7                                                           |
| 40              | Chile   | 2006           | Aquatic Animals, Others   | 2                                                           |
| 40              | Chile   | 2006           | Bananas                   | 26                                                          |
| 40              | Chile   | 2006           | Barley                    | 2                                                           |
| 40              | Chile   | 2006           | Beans                     | 6                                                           |
| 40              | Chile   | 2006           | Beer                      | 93                                                          |
| 40              | Chile   | 2006           | Beverages, Alcoholic      | 6                                                           |
| 40              | Chile   | 2006           | Bovine Meat               | 56                                                          |
| 40              | Chile   | 2006           | Butter, Ghee              | 3                                                           |
| 40              | Chile   | 2006           | Cephalopods               | 1                                                           |
| 40              | Chile   | 2006           | Cheese                    | 11                                                          |
| 40              | Chile   | 2006           | Cocoa Beans               | 3                                                           |
| 40              | Chile   | 2006           | Coconuts - Incl Copra     | 1                                                           |
| 40              | Chile   | 2006           | Coffee                    | 2                                                           |
| 40              | Chile   | 2006           | Crustaceans               | 2                                                           |
| 40              | Chile   | 2006           | Demersal Fish             | 8                                                           |
| 40              | Chile   | 2006           | Eggs                      | 17                                                          |
| 40              | Chile   | 2006           | Fats, Animals, Raw        | 8                                                           |
| 40              | Chile   | 2006           | Freshwater Fish           | 1                                                           |
| 40              | Chile   | 2006           | Fruits, Other             | 63                                                          |
| 40              | Chile   | 2006           | Grapes                    | 18                                                          |
| 40              | Chile   | 2006           | Groundnuts (Shelled Eq)   | 1                                                           |
| 40              | Chile   | 2006           | Lemons, Limes             | 16                                                          |
| 40              | Chile   | 2006           | Maize                     | 57                                                          |
| 40              | Chile   | 2006           | Meat, Other               | 1                                                           |
| 40              | Chile   | 2006           | Milk, Whole               | 152                                                         |
| 40              | Chile   | 2006           | Molluscs, Other           | 4                                                           |

Dietary calcium and zinc deficiency risks are decreasing but remain prevalent

| FAO countrycode | Country | Reference year | Food item                 | Gross food supply (g capita <sup>-1</sup> d <sup>-1</sup> ) |
|-----------------|---------|----------------|---------------------------|-------------------------------------------------------------|
| 40              | Chile   | 2006           | Mutton & Goat Meat        | 2                                                           |
| 40              | Chile   | 2006           | Nuts                      | 4                                                           |
| 40              | Chile   | 2006           | Oats                      | 1                                                           |
| 40              | Chile   | 2006           | Offals, Edible            | 7                                                           |
| 40              | Chile   | 2006           | Olive Oil                 | 1                                                           |
| 40              | Chile   | 2006           | Olives                    | 2                                                           |
| 40              | Chile   | 2006           | Onions                    | 53                                                          |
| 40              | Chile   | 2006           | Oranges, Mandarines       | 20                                                          |
| 40              | Chile   | 2006           | Peas                      | 1                                                           |
| 40              | Chile   | 2006           | Pelagic Fish              | 24                                                          |
| 40              | Chile   | 2006           | Pigmeat                   | 57                                                          |
| 40              | Chile   | 2006           | Pineapples                | 4                                                           |
| 40              | Chile   | 2006           | Potatoes                  | 169                                                         |
| 40              | Chile   | 2006           | Poultry Meat              | 91                                                          |
| 40              | Chile   | 2006           | Pulses, Other             | 6                                                           |
| 40              | Chile   | 2006           | Rape and Mustard Oil      | 4                                                           |
| 40              | Chile   | 2006           | Rice (Milled Equivalent)  | 24                                                          |
| 40              | Chile   | 2006           | Soyabean Oil              | 14                                                          |
| 40              | Chile   | 2006           | Sugar, Refined Equivalent | 105                                                         |
| 40              | Chile   | 2006           | Sunflowerseed Oil         | 4                                                           |
| 40              | Chile   | 2006           | Sweet Potatoes            | 1                                                           |
| 40              | Chile   | 2006           | Sweeteners, Other         | 4                                                           |
| 40              | Chile   | 2006           | Tea                       | 4                                                           |
| 40              | Chile   | 2006           | Tomatoes                  | 79                                                          |
| 40              | Chile   | 2006           | Vegetables, Other         | 142                                                         |
| 40              | Chile   | 2006           | Wheat                     | 304                                                         |
| 40              | Chile   | 2006           | Wine                      | 42                                                          |
| 40              | Chile   | 2007           | Apples                    | 19                                                          |
| 40              | Chile   | 2007           | Aquatic Animals, Others   | 2                                                           |
| 40              | Chile   | 2007           | Bananas                   | 28                                                          |
| 40              | Chile   | 2007           | Barley                    | 2                                                           |
| 40              | Chile   | 2007           | Beans                     | 4                                                           |
| 40              | Chile   | 2007           | Beer                      | 96                                                          |
| 40              | Chile   | 2007           | Beverages, Alcoholic      | 7                                                           |
| 40              | Chile   | 2007           | Bovine Meat               | 60                                                          |
| 40              | Chile   | 2007           | Butter, Ghee              | 3                                                           |
| 40              | Chile   | 2007           | Cephalopods               | 1                                                           |
| 40              | Chile   | 2007           | Cereals, Other            | 2                                                           |
| 40              | Chile   | 2007           | Cheese                    | 10                                                          |
| 40              | Chile   | 2007           | Cocoa Beans               | 3                                                           |
| 40              | Chile   | 2007           | Coconuts - Incl Copra     | 1                                                           |
| 40              | Chile   | 2007           | Coffee                    | 2                                                           |
| 40              | Chile   | 2007           | Crustaceans               | 2                                                           |
| 40              | Chile   | 2007           | Demersal Fish             | 6                                                           |
| 40              | Chile   | 2007           | Eggs                      | 19                                                          |
| 40              | Chile   | 2007           | Fats, Animals, Raw        | 9                                                           |
| 40              | Chile   | 2007           | Fruits, Other             | 57                                                          |
| 40              | Chile   | 2007           | Grapes                    | 15                                                          |
| 40              | Chile   | 2007           | Groundnuts (Shelled Eq)   | 2                                                           |
| 40              | Chile   | 2007           | Lemons, Limes             | 15                                                          |
| 40              | Chile   | 2007           | Maize                     | 58                                                          |
| 40              | Chile   | 2007           | Meat, Other               | 1                                                           |
| 40              | Chile   | 2007           | Milk, Whole               | 141                                                         |
| 40              | Chile   | 2007           | Molluscs, Other           | 6                                                           |
| 40              | Chile   | 2007           | Mutton & Goat Meat        | 2                                                           |
| 40              | Chile   | 2007           | Nuts                      | 3                                                           |
| 40              | Chile   | 2007           | Oats                      | 1                                                           |
| 40              | Chile   | 2007           | Offals, Edible            | 7                                                           |
| 40              | Chile   | 2007           | Olive Oil                 | 1                                                           |
| 40              | Chile   | 2007           | Olives                    | 3                                                           |
| 40              | Chile   | 2007           | Onions                    | 34                                                          |
| 40              | Chile   | 2007           | Oranges, Mandarines       | 21                                                          |
| 40              | Chile   | 2007           | Peas                      | 1                                                           |
| 40              | Chile   | 2007           | Pelagic Fish              | 23                                                          |
| 40              | Chile   | 2007           | Pigmeat                   | 57                                                          |
| 40              | Chile   | 2007           | Pineapples                | 4                                                           |
| 40              | Chile   | 2007           | Potatoes                  | 144                                                         |
| 40              | Chile   | 2007           | Poultry Meat              | 94                                                          |
| 40              | Chile   | 2007           | Pulses, Other             | 5                                                           |
| 40              | Chile   | 2007           | Rape and Mustard Oil      | 4                                                           |
| 40              | Chile   | 2007           | Rice (Milled Equivalent)  | 25                                                          |
| 40              | Chile   | 2007           | Rye                       | 1                                                           |
| 40              | Chile   | 2007           | Soyabean Oil              | 16                                                          |
| 40              | Chile   | 2007           | Sugar, Refined Equivalent | 115                                                         |
| 40              | Chile   | 2007           | Sunflowerseed Oil         | 3                                                           |
| 40              | Chile   | 2007           | Sweet Potatoes            | 1                                                           |
| 40              | Chile   | 2007           | Sweeteners, Other         | 4                                                           |
| 40              | Chile   | 2007           | Tea                       | 4                                                           |
| 40              | Chile   | 2007           | Tomatoes                  | 41                                                          |
| 40              | Chile   | 2007           | Vegetables, Other         | 133                                                         |
| 40              | Chile   | 2007           | Wheat                     | 287                                                         |
| 40              | Chile   | 2007           | Wine                      | 41                                                          |
| 40              | Chile   | 2008           | Apples                    | 30                                                          |
| 40              | Chile   | 2008           | Aquatic Animals, Others   | 2                                                           |
| 40              | Chile   | 2008           | Bananas                   | 27                                                          |
| 40              | Chile   | 2008           | Barley                    | 2                                                           |
| 40              | Chile   | 2008           | Beans                     | 4                                                           |
| 40              | Chile   | 2008           | Beer                      | 100                                                         |
| 40              | Chile   | 2008           | Beverages, Alcoholic      | 7                                                           |
| 40              | Chile   | 2008           | Bovine Meat               | 57                                                          |
| 40              | Chile   | 2008           | Butter, Ghee              | 2                                                           |
| 40              | Chile   | 2008           | Cephalopods               | 4                                                           |
| 40              | Chile   | 2008           | Cereals, Other            | 2                                                           |
| 40              | Chile   | 2008           | Cheese                    | 10                                                          |
| 40              | Chile   | 2008           | Citrus, Other             | 1                                                           |
| 40              | Chile   | 2008           | Cocoa Beans               | 4                                                           |
| 40              | Chile   | 2008           | Coconuts - Incl Copra     | 1                                                           |

## Dietary calcium and zinc deficiency risks are decreasing but remain prevalent

| FAO countrycode | Country | Reference year | Food item                 | Gross food supply (g capita <sup>-1</sup> d <sup>-1</sup> ) |
|-----------------|---------|----------------|---------------------------|-------------------------------------------------------------|
| 40              | Chile   | 2008           | Coffee                    | 1                                                           |
| 40              | Chile   | 2008           | Crustaceans               | 3                                                           |
| 40              | Chile   | 2008           | Demersal Fish             | 9                                                           |
| 40              | Chile   | 2008           | Eggs                      | 19                                                          |
| 40              | Chile   | 2008           | Fats, Animals, Raw        | 9                                                           |
| 40              | Chile   | 2008           | Freshwater Fish           | 1                                                           |
| 40              | Chile   | 2008           | Fruits, Other             | 52                                                          |
| 40              | Chile   | 2008           | Grapes                    | 13                                                          |
| 40              | Chile   | 2008           | Groundnuts (Shelled Eq)   | 2                                                           |
| 40              | Chile   | 2008           | Lemons, Limes             | 18                                                          |
| 40              | Chile   | 2008           | Maize                     | 61                                                          |
| 40              | Chile   | 2008           | Meat, Other               | 1                                                           |
| 40              | Chile   | 2008           | Milk, Whole               | 171                                                         |
| 40              | Chile   | 2008           | Molluscs, Other           | 5                                                           |
| 40              | Chile   | 2008           | Mutton & Goat Meat        | 2                                                           |
| 40              | Chile   | 2008           | Nuts                      | 2                                                           |
| 40              | Chile   | 2008           | Oats                      | 4                                                           |
| 40              | Chile   | 2008           | Offals, Edible            | 9                                                           |
| 40              | Chile   | 2008           | Olives                    | 3                                                           |
| 40              | Chile   | 2008           | Onions                    | 28                                                          |
| 40              | Chile   | 2008           | Oranges, Mandarines       | 20                                                          |
| 40              | Chile   | 2008           | Peas                      | 1                                                           |
| 40              | Chile   | 2008           | Pelagic Fish              | 21                                                          |
| 40              | Chile   | 2008           | Pigmeat                   | 62                                                          |
| 40              | Chile   | 2008           | Pineapples                | 5                                                           |
| 40              | Chile   | 2008           | Potatoes                  | 144                                                         |
| 40              | Chile   | 2008           | Poultry Meat              | 91                                                          |
| 40              | Chile   | 2008           | Pulses, Other             | 5                                                           |
| 40              | Chile   | 2008           | Rape and Mustard Oil      | 4                                                           |
| 40              | Chile   | 2008           | Rice (Milled Equivalent)  | 26                                                          |
| 40              | Chile   | 2008           | Rye                       | 1                                                           |
| 40              | Chile   | 2008           | Soyabean Oil              | 13                                                          |
| 40              | Chile   | 2008           | Sugar, Refined Equivalent | 117                                                         |
| 40              | Chile   | 2008           | Sunflowerseed Oil         | 4                                                           |
| 40              | Chile   | 2008           | Sweet Potatoes            | 2                                                           |
| 40              | Chile   | 2008           | Sweeteners, Other         | 3                                                           |
| 40              | Chile   | 2008           | Tea                       | 4                                                           |
| 40              | Chile   | 2008           | Tomatoes                  | 52                                                          |
| 40              | Chile   | 2008           | Vegetables, Other         | 139                                                         |
| 40              | Chile   | 2008           | Wheat                     | 283                                                         |
| 40              | Chile   | 2008           | Wine                      | 44                                                          |
| 40              | Chile   | 2009           | Apples                    | 26                                                          |
| 40              | Chile   | 2009           | Aquatic Animals, Others   | 2                                                           |
| 40              | Chile   | 2009           | Bananas                   | 27                                                          |
| 40              | Chile   | 2009           | Barley                    | 2                                                           |
| 40              | Chile   | 2009           | Beans                     | 4                                                           |
| 40              | Chile   | 2009           | Beer                      | 99                                                          |
| 40              | Chile   | 2009           | Beverages, Alcoholic      | 8                                                           |
| 40              | Chile   | 2009           | Bovine Meat               | 57                                                          |
| 40              | Chile   | 2009           | Butter, Ghee              | 3                                                           |
| 40              | Chile   | 2009           | Cephalopods               | 1                                                           |
| 40              | Chile   | 2009           | Cereals, Other            | 3                                                           |
| 40              | Chile   | 2009           | Cheese                    | 10                                                          |
| 40              | Chile   | 2009           | Cocoa Beans               | 3                                                           |
| 40              | Chile   | 2009           | Coconuts - Incl Copra     | 1                                                           |
| 40              | Chile   | 2009           | Crustaceans               | 3                                                           |
| 40              | Chile   | 2009           | Demersal Fish             | 10                                                          |
| 40              | Chile   | 2009           | Eggs                      | 26                                                          |
| 40              | Chile   | 2009           | Fats, Animals, Raw        | 8                                                           |
| 40              | Chile   | 2009           | Freshwater Fish           | 1                                                           |
| 40              | Chile   | 2009           | Fruits, Other             | 70                                                          |
| 40              | Chile   | 2009           | Grapes                    | 11                                                          |
| 40              | Chile   | 2009           | Groundnuts (Shelled Eq)   | 2                                                           |
| 40              | Chile   | 2009           | Lemons, Limes             | 18                                                          |
| 40              | Chile   | 2009           | Maize                     | 62                                                          |
| 40              | Chile   | 2009           | Meat, Other               | 1                                                           |
| 40              | Chile   | 2009           | Milk, Whole               | 138                                                         |
| 40              | Chile   | 2009           | Molluscs, Other           | 4                                                           |
| 40              | Chile   | 2009           | Mutton & Goat Meat        | 2                                                           |
| 40              | Chile   | 2009           | Nuts                      | 2                                                           |
| 40              | Chile   | 2009           | Oats                      | 4                                                           |
| 40              | Chile   | 2009           | Offals, Edible            | 7                                                           |
| 40              | Chile   | 2009           | Olives                    | 4                                                           |
| 40              | Chile   | 2009           | Onions                    | 38                                                          |
| 40              | Chile   | 2009           | Oranges, Mandarines       | 16                                                          |
| 40              | Chile   | 2009           | Peas                      | 1                                                           |
| 40              | Chile   | 2009           | Pelagic Fish              | 20                                                          |
| 40              | Chile   | 2009           | Pigmeat                   | 58                                                          |
| 40              | Chile   | 2009           | Pineapples                | 4                                                           |
| 40              | Chile   | 2009           | Potatoes                  | 137                                                         |
| 40              | Chile   | 2009           | Poultry Meat              | 85                                                          |
| 40              | Chile   | 2009           | Pulses, Other             | 3                                                           |
| 40              | Chile   | 2009           | Rape and Mustard Oil      | 4                                                           |
| 40              | Chile   | 2009           | Rice (Milled Equivalent)  | 25                                                          |
| 40              | Chile   | 2009           | Rye                       | 1                                                           |
| 40              | Chile   | 2009           | Soyabean Oil              | 13                                                          |
| 40              | Chile   | 2009           | Sugar, Refined Equivalent | 116                                                         |
| 40              | Chile   | 2009           | Sunflowerseed Oil         | 4                                                           |
| 40              | Chile   | 2009           | Sweet Potatoes            | 2                                                           |
| 40              | Chile   | 2009           | Sweeteners, Other         | 4                                                           |
| 40              | Chile   | 2009           | Tea                       | 4                                                           |
| 40              | Chile   | 2009           | Tomatoes                  | 22                                                          |
| 40              | Chile   | 2009           | Vegetables, Other         | 154                                                         |
| 40              | Chile   | 2009           | Wheat                     | 284                                                         |
| 40              | Chile   | 2009           | Wine                      | 44                                                          |
| 40              | Chile   | 2010           | Apples                    | 41                                                          |
| 40              | Chile   | 2010           | Aquatic Animals, Others   | 2                                                           |

Dietary calcium and zinc deficiency risks are decreasing but remain prevalent

| FAO countrycode | Country | Reference year | Food item                 | Gross food supply (g capita <sup>-1</sup> d <sup>-1</sup> ) |
|-----------------|---------|----------------|---------------------------|-------------------------------------------------------------|
| 40              | Chile   | 2010           | Bananas                   | 26                                                          |
| 40              | Chile   | 2010           | Barley                    | 2                                                           |
| 40              | Chile   | 2010           | Beans                     | 3                                                           |
| 40              | Chile   | 2010           | Beer                      | 101                                                         |
| 40              | Chile   | 2010           | Beverages, Alcoholic      | 8                                                           |
| 40              | Chile   | 2010           | Bovine Meat               | 59                                                          |
| 40              | Chile   | 2010           | Butter, Ghee              | 3                                                           |
| 40              | Chile   | 2010           | Cephalopods               | 4                                                           |
| 40              | Chile   | 2010           | Cereals, Other            | 4                                                           |
| 40              | Chile   | 2010           | Cheese                    | 11                                                          |
| 40              | Chile   | 2010           | Cocoa Beans               | 4                                                           |
| 40              | Chile   | 2010           | Coconuts - Incl Copra     | 1                                                           |
| 40              | Chile   | 2010           | Coffee                    | 1                                                           |
| 40              | Chile   | 2010           | Crustaceans               | 3                                                           |
| 40              | Chile   | 2010           | Demersal Fish             | 12                                                          |
| 40              | Chile   | 2010           | Eggs                      | 26                                                          |
| 40              | Chile   | 2010           | Fats, Animals, Raw        | 9                                                           |
| 40              | Chile   | 2010           | Freshwater Fish           | 1                                                           |
| 40              | Chile   | 2010           | Fruits, Other             | 58                                                          |
| 40              | Chile   | 2010           | Grapes                    | 18                                                          |
| 40              | Chile   | 2010           | Groundnuts (Shelled Eq)   | 2                                                           |
| 40              | Chile   | 2010           | Lemons, Limes             | 16                                                          |
| 40              | Chile   | 2010           | Maize                     | 58                                                          |
| 40              | Chile   | 2010           | Meat, Other               | 1                                                           |
| 40              | Chile   | 2010           | Milk, Whole               | 136                                                         |
| 40              | Chile   | 2010           | Molluscs, Other           | 2                                                           |
| 40              | Chile   | 2010           | Mutton & Goat Meat        | 2                                                           |
| 40              | Chile   | 2010           | Nuts                      | 3                                                           |
| 40              | Chile   | 2010           | Oats                      | 5                                                           |
| 40              | Chile   | 2010           | Offals, Edible            | 6                                                           |
| 40              | Chile   | 2010           | Olives                    | 5                                                           |
| 40              | Chile   | 2010           | Onions                    | 30                                                          |
| 40              | Chile   | 2010           | Oranges, Mandarines       | 13                                                          |
| 40              | Chile   | 2010           | Peas                      | 1                                                           |
| 40              | Chile   | 2010           | Pelagic Fish              | 14                                                          |
| 40              | Chile   | 2010           | Pigmeat                   | 60                                                          |
| 40              | Chile   | 2010           | Pineapples                | 5                                                           |
| 40              | Chile   | 2010           | Potatoes                  | 160                                                         |
| 40              | Chile   | 2010           | Poultry Meat              | 90                                                          |
| 40              | Chile   | 2010           | Pulses, Other             | 6                                                           |
| 40              | Chile   | 2010           | Rape and Mustard Oil      | 4                                                           |
| 40              | Chile   | 2010           | Rice (Milled Equivalent)  | 22                                                          |
| 40              | Chile   | 2010           | Rye                       | 1                                                           |
| 40              | Chile   | 2010           | Soybean Oil               | 13                                                          |
| 40              | Chile   | 2010           | Sugar, Refined Equivalent | 116                                                         |
| 40              | Chile   | 2010           | Sunflowerseed Oil         | 4                                                           |
| 40              | Chile   | 2010           | Sweet Potatoes            | 2                                                           |
| 40              | Chile   | 2010           | Sweeteners, Other         | 7                                                           |
| 40              | Chile   | 2010           | Tea                       | 4                                                           |
| 40              | Chile   | 2010           | Tomatoes                  | 17                                                          |
| 40              | Chile   | 2010           | Vegetables, Other         | 144                                                         |
| 40              | Chile   | 2010           | Wheat                     | 290                                                         |
| 40              | Chile   | 2010           | Wine                      | 44                                                          |
| 40              | Chile   | 2011           | Apples                    | 24                                                          |
| 40              | Chile   | 2011           | Aquatic Animals, Others   | 2                                                           |
| 40              | Chile   | 2011           | Bananas                   | 27                                                          |
| 40              | Chile   | 2011           | Barley                    | 2                                                           |
| 40              | Chile   | 2011           | Beans                     | 4                                                           |
| 40              | Chile   | 2011           | Beer                      | 106                                                         |
| 40              | Chile   | 2011           | Beverages, Alcoholic      | 7                                                           |
| 40              | Chile   | 2011           | Bovine Meat               | 54                                                          |
| 40              | Chile   | 2011           | Butter, Ghee              | 3                                                           |
| 40              | Chile   | 2011           | Cephalopods               | 4                                                           |
| 40              | Chile   | 2011           | Cereals, Other            | 5                                                           |
| 40              | Chile   | 2011           | Cheese                    | 12                                                          |
| 40              | Chile   | 2011           | Cocoa Beans               | 3                                                           |
| 40              | Chile   | 2011           | Coconuts - Incl Copra     | 1                                                           |
| 40              | Chile   | 2011           | Coffee                    | 1                                                           |
| 40              | Chile   | 2011           | Crustaceans               | 3                                                           |
| 40              | Chile   | 2011           | Demersal Fish             | 12                                                          |
| 40              | Chile   | 2011           | Eggs                      | 27                                                          |
| 40              | Chile   | 2011           | Fats, Animals, Raw        | 10                                                          |
| 40              | Chile   | 2011           | Freshwater Fish           | 1                                                           |
| 40              | Chile   | 2011           | Fruits, Other             | 44                                                          |
| 40              | Chile   | 2011           | Grapes                    | 13                                                          |
| 40              | Chile   | 2011           | Groundnuts (Shelled Eq)   | 2                                                           |
| 40              | Chile   | 2011           | Lemons, Limes             | 16                                                          |
| 40              | Chile   | 2011           | Maize                     | 59                                                          |
| 40              | Chile   | 2011           | Meat, Other               | 1                                                           |
| 40              | Chile   | 2011           | Milk, Whole               | 140                                                         |
| 40              | Chile   | 2011           | Molluscs, Other           | 2                                                           |
| 40              | Chile   | 2011           | Mutton & Goat Meat        | 2                                                           |
| 40              | Chile   | 2011           | Nuts                      | 2                                                           |
| 40              | Chile   | 2011           | Oats                      | 5                                                           |
| 40              | Chile   | 2011           | Offals, Edible            | 5                                                           |
| 40              | Chile   | 2011           | Olives                    | 4                                                           |
| 40              | Chile   | 2011           | Onions                    | 29                                                          |
| 40              | Chile   | 2011           | Oranges, Mandarines       | 12                                                          |
| 40              | Chile   | 2011           | Peas                      | 1                                                           |
| 40              | Chile   | 2011           | Pelagic Fish              | 13                                                          |
| 40              | Chile   | 2011           | Pigmeat                   | 64                                                          |
| 40              | Chile   | 2011           | Pineapples                | 6                                                           |
| 40              | Chile   | 2011           | Potatoes                  | 185                                                         |
| 40              | Chile   | 2011           | Poultry Meat              | 99                                                          |
| 40              | Chile   | 2011           | Pulses, Other             | 5                                                           |
| 40              | Chile   | 2011           | Rape and Mustard Oil      | 4                                                           |
| 40              | Chile   | 2011           | Rice (Milled Equivalent)  | 22                                                          |

Dietary calcium and zinc deficiency risks are decreasing but remain prevalent

| FAO countrycode | Country | Reference year | Food item                 | Gross food supply (g capita <sup>-1</sup> d <sup>-1</sup> ) |
|-----------------|---------|----------------|---------------------------|-------------------------------------------------------------|
| 40              | Chile   | 2011           | Rye                       | 1                                                           |
| 40              | Chile   | 2011           | Soyabean Oil              | 13                                                          |
| 40              | Chile   | 2011           | Sugar, Refined Equivalent | 114                                                         |
| 40              | Chile   | 2011           | Sunflowerseed Oil         | 4                                                           |
| 40              | Chile   | 2011           | Sweet Potatoes            | 2                                                           |
| 40              | Chile   | 2011           | Sweeteners, Other         | 9                                                           |
| 40              | Chile   | 2011           | Tea                       | 4                                                           |
| 40              | Chile   | 2011           | Tomatoes                  | 14                                                          |
| 40              | Chile   | 2011           | Vegetables, Other         | 143                                                         |
| 40              | Chile   | 2011           | Wheat                     | 295                                                         |
| 40              | Chile   | 2011           | Wine                      | 47                                                          |
| 351             | China   | 1992           | Apples                    | 12                                                          |
| 351             | China   | 1992           | Aquatic Plants            | 7                                                           |
| 351             | China   | 1992           | Bananas                   | 5                                                           |
| 351             | China   | 1992           | Barley                    | 3                                                           |
| 351             | China   | 1992           | Beans                     | 1                                                           |
| 351             | China   | 1992           | Beer                      | 24                                                          |
| 351             | China   | 1992           | Beverages, Alcoholic      | 17                                                          |
| 351             | China   | 1992           | Beverages, Fermented      | 1                                                           |
| 351             | China   | 1992           | Bovine Meat               | 4                                                           |
| 351             | China   | 1992           | Cassava                   | 3                                                           |
| 351             | China   | 1992           | Cephalopods               | 1                                                           |
| 351             | China   | 1992           | Cereals, Other            | 2                                                           |
| 351             | China   | 1992           | Citrus, Other             | 1                                                           |
| 351             | China   | 1992           | Cottonseed Oil            | 2                                                           |
| 351             | China   | 1992           | Crustaceans               | 3                                                           |
| 351             | China   | 1992           | Demersal Fish             | 4                                                           |
| 351             | China   | 1992           | Eggs                      | 21                                                          |
| 351             | China   | 1992           | Fats, Animals, Raw        | 4                                                           |
| 351             | China   | 1992           | Freshwater Fish           | 14                                                          |
| 351             | China   | 1992           | Fruits, Other             | 20                                                          |
| 351             | China   | 1992           | Grapes                    | 2                                                           |
| 351             | China   | 1992           | Groundnut Oil             | 2                                                           |
| 351             | China   | 1992           | Groundnuts (Shelled Eq)   | 3                                                           |
| 351             | China   | 1992           | Maize                     | 14                                                          |
| 351             | China   | 1992           | Marine Fish, Other        | 6                                                           |
| 351             | China   | 1992           | Meat, Other               | 1                                                           |
| 351             | China   | 1992           | Milk, Whole               | 14                                                          |
| 351             | China   | 1992           | Millet                    | 5                                                           |
| 351             | China   | 1992           | Molluscs, Other           | 7                                                           |
| 351             | China   | 1992           | Mutton & Goat Meat        | 3                                                           |
| 351             | China   | 1992           | Nuts                      | 1                                                           |
| 351             | China   | 1992           | Oats                      | 1                                                           |
| 351             | China   | 1992           | Offals, Edible            | 4                                                           |
| 351             | China   | 1992           | Onions                    | 11                                                          |
| 351             | China   | 1992           | Oranges, Mandarines       | 11                                                          |
| 351             | China   | 1992           | Palm Oil                  | 2                                                           |
| 351             | China   | 1992           | Peas                      | 1                                                           |
| 351             | China   | 1992           | Pelagic Fish              | 1                                                           |
| 351             | China   | 1992           | Pigmeat                   | 59                                                          |
| 351             | China   | 1992           | Pineapples                | 1                                                           |
| 351             | China   | 1992           | Potatoes                  | 40                                                          |
| 351             | China   | 1992           | Poultry Meat              | 12                                                          |
| 351             | China   | 1992           | Pulses, Other             | 1                                                           |
| 351             | China   | 1992           | Rape and Mustard Oil      | 5                                                           |
| 351             | China   | 1992           | Rice (Milled Equivalent)  | 200                                                         |
| 351             | China   | 1992           | Roots, Other              | 3                                                           |
| 351             | China   | 1992           | Rye                       | 2                                                           |
| 351             | China   | 1992           | Sorghum                   | 5                                                           |
| 351             | China   | 1992           | Soyabean Oil              | 3                                                           |
| 351             | China   | 1992           | Soyabeans                 | 10                                                          |
| 351             | China   | 1992           | Sugar, Non-Centrifugal    | 1                                                           |
| 351             | China   | 1992           | Sugar, Refined Equivalent | 17                                                          |
| 351             | China   | 1992           | Sunflowerseed Oil         | 1                                                           |
| 351             | China   | 1992           | Sweet Potatoes            | 128                                                         |
| 351             | China   | 1992           | Tea                       | 1                                                           |
| 351             | China   | 1992           | Tomatoes                  | 17                                                          |
| 351             | China   | 1992           | Vegetables, Other         | 275                                                         |
| 351             | China   | 1992           | Wheat                     | 214                                                         |
| 351             | China   | 1992           | Wine                      | 1                                                           |
| 351             | China   | 1993           | Apples                    | 17                                                          |
| 351             | China   | 1993           | Aquatic Plants            | 9                                                           |
| 351             | China   | 1993           | Bananas                   | 6                                                           |
| 351             | China   | 1993           | Barley                    | 2                                                           |
| 351             | China   | 1993           | Beans                     | 1                                                           |
| 351             | China   | 1993           | Beer                      | 28                                                          |
| 351             | China   | 1993           | Beverages, Alcoholic      | 18                                                          |
| 351             | China   | 1993           | Beverages, Fermented      | 1                                                           |
| 351             | China   | 1993           | Bovine Meat               | 5                                                           |
| 351             | China   | 1993           | Cassava                   | 3                                                           |
| 351             | China   | 1993           | Cephalopods               | 1                                                           |
| 351             | China   | 1993           | Cereals, Other            | 2                                                           |
| 351             | China   | 1993           | Citrus, Other             | 1                                                           |
| 351             | China   | 1993           | Cottonseed Oil            | 2                                                           |
| 351             | China   | 1993           | Crustaceans               | 3                                                           |
| 351             | China   | 1993           | Demersal Fish             | 4                                                           |
| 351             | China   | 1993           | Eggs                      | 24                                                          |
| 351             | China   | 1993           | Fats, Animals, Raw        | 4                                                           |
| 351             | China   | 1993           | Freshwater Fish           | 16                                                          |
| 351             | China   | 1993           | Fruits, Other             | 23                                                          |
| 351             | China   | 1993           | Grapes                    | 2                                                           |
| 351             | China   | 1993           | Groundnut Oil             | 2                                                           |
| 351             | China   | 1993           | Groundnuts (Shelled Eq)   | 5                                                           |
| 351             | China   | 1993           | Maize                     | 15                                                          |
| 351             | China   | 1993           | Marine Fish, Other        | 6                                                           |
| 351             | China   | 1993           | Meat, Other               | 1                                                           |
| 351             | China   | 1993           | Milk, Whole               | 14                                                          |

Dietary calcium and zinc deficiency risks are decreasing but remain prevalent

| FAO countrycode | Country | Reference year | Food item                 | Gross food supply (g capita <sup>-1</sup> d <sup>-1</sup> ) |
|-----------------|---------|----------------|---------------------------|-------------------------------------------------------------|
| 351             | China   | 1993           | Millet                    | 6                                                           |
| 351             | China   | 1993           | Molluscs, Other           | 9                                                           |
| 351             | China   | 1993           | Mutton & Goat Meat        | 3                                                           |
| 351             | China   | 1993           | Nuts                      | 2                                                           |
| 351             | China   | 1993           | Oats                      | 1                                                           |
| 351             | China   | 1993           | Offals, Edible            | 4                                                           |
| 351             | China   | 1993           | Onions                    | 13                                                          |
| 351             | China   | 1993           | Oranges, Mandarines       | 14                                                          |
| 351             | China   | 1993           | Palm Oil                  | 2                                                           |
| 351             | China   | 1993           | Peas                      | 1                                                           |
| 351             | China   | 1993           | Pelagic Fish              | 2                                                           |
| 351             | China   | 1993           | Pigmeat                   | 61                                                          |
| 351             | China   | 1993           | Pineapples                | 2                                                           |
| 351             | China   | 1993           | Potatoes                  | 39                                                          |
| 351             | China   | 1993           | Poultry Meat              | 15                                                          |
| 351             | China   | 1993           | Pulses, Other             | 2                                                           |
| 351             | China   | 1993           | Rape and Mustard Oil      | 5                                                           |
| 351             | China   | 1993           | Rice (Milled Equivalent)  | 204                                                         |
| 351             | China   | 1993           | Roots, Other              | 2                                                           |
| 351             | China   | 1993           | Rye                       | 1                                                           |
| 351             | China   | 1993           | Sorghum                   | 6                                                           |
| 351             | China   | 1993           | Soyabean Oil              | 3                                                           |
| 351             | China   | 1993           | Soyabeans                 | 13                                                          |
| 351             | China   | 1993           | Sugar Cane                | 1                                                           |
| 351             | China   | 1993           | Sugar, Non-Centrifugal    | 1                                                           |
| 351             | China   | 1993           | Sugar, Refined Equivalent | 13                                                          |
| 351             | China   | 1993           | Sunflowerseed Oil         | 1                                                           |
| 351             | China   | 1993           | Sweet Potatoes            | 138                                                         |
| 351             | China   | 1993           | Tea                       | 1                                                           |
| 351             | China   | 1993           | Tomatoes                  | 21                                                          |
| 351             | China   | 1993           | Vegetables, Other         | 317                                                         |
| 351             | China   | 1993           | Wheat                     | 217                                                         |
| 351             | China   | 1993           | Wine                      | 1                                                           |
| 351             | China   | 1994           | Apples                    | 20                                                          |
| 351             | China   | 1994           | Aquatic Plants            | 9                                                           |
| 351             | China   | 1994           | Bananas                   | 6                                                           |
| 351             | China   | 1994           | Barley                    | 2                                                           |
| 351             | China   | 1994           | Beans                     | 1                                                           |
| 351             | China   | 1994           | Beer                      | 32                                                          |
| 351             | China   | 1994           | Beverages, Alcoholic      | 17                                                          |
| 351             | China   | 1994           | Beverages, Fermented      | 1                                                           |
| 351             | China   | 1994           | Bovine Meat               | 5                                                           |
| 351             | China   | 1994           | Cassava                   | 3                                                           |
| 351             | China   | 1994           | Cephalopods               | 1                                                           |
| 351             | China   | 1994           | Cereals, Other            | 2                                                           |
| 351             | China   | 1994           | Citrus, Other             | 1                                                           |
| 351             | China   | 1994           | Cottonseed Oil            | 2                                                           |
| 351             | China   | 1994           | Crustaceans               | 4                                                           |
| 351             | China   | 1994           | Demersal Fish             | 5                                                           |
| 351             | China   | 1994           | Eggs                      | 30                                                          |
| 351             | China   | 1994           | Fats, Animals, Raw        | 4                                                           |
| 351             | China   | 1994           | Freshwater Fish           | 19                                                          |
| 351             | China   | 1994           | Fruits, Other             | 27                                                          |
| 351             | China   | 1994           | Grapes                    | 2                                                           |
| 351             | China   | 1994           | Groundnut Oil             | 2                                                           |
| 351             | China   | 1994           | Groundnuts (Shelled Eq)   | 5                                                           |
| 351             | China   | 1994           | Maize                     | 17                                                          |
| 351             | China   | 1994           | Marine Fish, Other        | 7                                                           |
| 351             | China   | 1994           | Meat, Other               | 1                                                           |
| 351             | China   | 1994           | Milk, Whole               | 15                                                          |
| 351             | China   | 1994           | Millet                    | 6                                                           |
| 351             | China   | 1994           | Molluscs, Other           | 12                                                          |
| 351             | China   | 1994           | Mutton & Goat Meat        | 3                                                           |
| 351             | China   | 1994           | Nuts                      | 2                                                           |
| 351             | China   | 1994           | Oats                      | 1                                                           |
| 351             | China   | 1994           | Offals, Edible            | 5                                                           |
| 351             | China   | 1994           | Onions                    | 15                                                          |
| 351             | China   | 1994           | Oranges, Mandarines       | 14                                                          |
| 351             | China   | 1994           | Palm Oil                  | 3                                                           |
| 351             | China   | 1994           | Peas                      | 2                                                           |
| 351             | China   | 1994           | Pelagic Fish              | 2                                                           |
| 351             | China   | 1994           | Pigmeat                   | 65                                                          |
| 351             | China   | 1994           | Pineapples                | 2                                                           |
| 351             | China   | 1994           | Potatoes                  | 34                                                          |
| 351             | China   | 1994           | Poultry Meat              | 16                                                          |
| 351             | China   | 1994           | Pulses, Other             | 2                                                           |
| 351             | China   | 1994           | Rape and Mustard Oil      | 5                                                           |
| 351             | China   | 1994           | Rice (Milled Equivalent)  | 204                                                         |
| 351             | China   | 1994           | Roots, Other              | 2                                                           |
| 351             | China   | 1994           | Rye                       | 1                                                           |
| 351             | China   | 1994           | Sorghum                   | 6                                                           |
| 351             | China   | 1994           | Soyabean Oil              | 3                                                           |
| 351             | China   | 1994           | Soyabeans                 | 15                                                          |
| 351             | China   | 1994           | Sugar Cane                | 1                                                           |
| 351             | China   | 1994           | Sugar, Non-Centrifugal    | 1                                                           |
| 351             | China   | 1994           | Sugar, Refined Equivalent | 14                                                          |
| 351             | China   | 1994           | Sunflowerseed Oil         | 1                                                           |
| 351             | China   | 1994           | Sweet Potatoes            | 130                                                         |
| 351             | China   | 1994           | Tea                       | 1                                                           |
| 351             | China   | 1994           | Tomatoes                  | 24                                                          |
| 351             | China   | 1994           | Vegetables, Other         | 342                                                         |
| 351             | China   | 1994           | Wheat                     | 214                                                         |
| 351             | China   | 1994           | Wine                      | 1                                                           |
| 351             | China   | 1995           | Apples                    | 25                                                          |
| 351             | China   | 1995           | Aquatic Plants            | 9                                                           |
| 351             | China   | 1995           | Bananas                   | 7                                                           |
| 351             | China   | 1995           | Barley                    | 2                                                           |

Dietary calcium and zinc deficiency risks are decreasing but remain prevalent

| FAO countrycode | Country | Reference year | Food item                 | Gross food supply (g capita <sup>-1</sup> d <sup>-1</sup> ) |
|-----------------|---------|----------------|---------------------------|-------------------------------------------------------------|
| 351             | China   | 1995           | Beans                     | 1                                                           |
| 351             | China   | 1995           | Beer                      | 35                                                          |
| 351             | China   | 1995           | Beverages, Alcoholic      | 21                                                          |
| 351             | China   | 1995           | Beverages, Fermented      | 2                                                           |
| 351             | China   | 1995           | Bovine Meat               | 6                                                           |
| 351             | China   | 1995           | Cassava                   | 4                                                           |
| 351             | China   | 1995           | Cephalopods               | 1                                                           |
| 351             | China   | 1995           | Cereals, Other            | 2                                                           |
| 351             | China   | 1995           | Citrus, Other             | 1                                                           |
| 351             | China   | 1995           | Cottonseed Oil            | 2                                                           |
| 351             | China   | 1995           | Crustaceans               | 5                                                           |
| 351             | China   | 1995           | Demersal Fish             | 6                                                           |
| 351             | China   | 1995           | Eggs                      | 34                                                          |
| 351             | China   | 1995           | Fats, Animals, Raw        | 4                                                           |
| 351             | China   | 1995           | Freshwater Fish           | 21                                                          |
| 351             | China   | 1995           | Fruits, Other             | 31                                                          |
| 351             | China   | 1995           | Grapefruit                | 1                                                           |
| 351             | China   | 1995           | Grapes                    | 2                                                           |
| 351             | China   | 1995           | Groundnut Oil             | 3                                                           |
| 351             | China   | 1995           | Groundnuts (Shelled Eq)   | 5                                                           |
| 351             | China   | 1995           | Maize                     | 19                                                          |
| 351             | China   | 1995           | Marine Fish, Other        | 7                                                           |
| 351             | China   | 1995           | Meat, Other               | 2                                                           |
| 351             | China   | 1995           | Milk, Whole               | 16                                                          |
| 351             | China   | 1995           | Millet                    | 3                                                           |
| 351             | China   | 1995           | Molluscs, Other           | 15                                                          |
| 351             | China   | 1995           | Mutton & Goat Meat        | 4                                                           |
| 351             | China   | 1995           | Nuts                      | 2                                                           |
| 351             | China   | 1995           | Oats                      | 1                                                           |
| 351             | China   | 1995           | Offals, Edible            | 5                                                           |
| 351             | China   | 1995           | Onions                    | 16                                                          |
| 351             | China   | 1995           | Oranges, Mandarines       | 17                                                          |
| 351             | China   | 1995           | Palm Oil                  | 3                                                           |
| 351             | China   | 1995           | Peas                      | 2                                                           |
| 351             | China   | 1995           | Pelagic Fish              | 1                                                           |
| 351             | China   | 1995           | Pigmeat                   | 66                                                          |
| 351             | China   | 1995           | Pineapples                | 2                                                           |
| 351             | China   | 1995           | Potatoes                  | 40                                                          |
| 351             | China   | 1995           | Poultry Meat              | 19                                                          |
| 351             | China   | 1995           | Pulses, Other             | 2                                                           |
| 351             | China   | 1995           | Rape and Mustard Oil      | 5                                                           |
| 351             | China   | 1995           | Rice (Milled Equivalent)  | 210                                                         |
| 351             | China   | 1995           | Roots, Other              | 3                                                           |
| 351             | China   | 1995           | Rye                       | 1                                                           |
| 351             | China   | 1995           | Sorghum                   | 4                                                           |
| 351             | China   | 1995           | Soyabean Oil              | 3                                                           |
| 351             | China   | 1995           | Soyabbeans                | 13                                                          |
| 351             | China   | 1995           | Sugar, Non-Centrifugal    | 1                                                           |
| 351             | China   | 1995           | Sugar, Refined Equivalent | 17                                                          |
| 351             | China   | 1995           | Sunflowerseed Oil         | 1                                                           |
| 351             | China   | 1995           | Sweet Potatoes            | 137                                                         |
| 351             | China   | 1995           | Tea                       | 1                                                           |
| 351             | China   | 1995           | Tomatoes                  | 26                                                          |
| 351             | China   | 1995           | Vegetables, Other         | 365                                                         |
| 351             | China   | 1995           | Wheat                     | 215                                                         |
| 351             | China   | 1995           | Wine                      | 2                                                           |
| 351             | China   | 1996           | Apples                    | 30                                                          |
| 351             | China   | 1996           | Aquatic Animals, Others   | 1                                                           |
| 351             | China   | 1996           | Aquatic Plants            | 10                                                          |
| 351             | China   | 1996           | Bananas                   | 6                                                           |
| 351             | China   | 1996           | Barley                    | 2                                                           |
| 351             | China   | 1996           | Beans                     | 1                                                           |
| 351             | China   | 1996           | Beer                      | 38                                                          |
| 351             | China   | 1996           | Beverages, Alcoholic      | 16                                                          |
| 351             | China   | 1996           | Beverages, Fermented      | 2                                                           |
| 351             | China   | 1996           | Bovine Meat               | 7                                                           |
| 351             | China   | 1996           | Cassava                   | 3                                                           |
| 351             | China   | 1996           | Cephalopods               | 1                                                           |
| 351             | China   | 1996           | Cereals, Other            | 1                                                           |
| 351             | China   | 1996           | Citrus, Other             | 1                                                           |
| 351             | China   | 1996           | Cottonseed Oil            | 1                                                           |
| 351             | China   | 1996           | Crustaceans               | 6                                                           |
| 351             | China   | 1996           | Demersal Fish             | 6                                                           |
| 351             | China   | 1996           | Eggs                      | 39                                                          |
| 351             | China   | 1996           | Fats, Animals, Raw        | 4                                                           |
| 351             | China   | 1996           | Freshwater Fish           | 24                                                          |
| 351             | China   | 1996           | Fruits, Other             | 34                                                          |
| 351             | China   | 1996           | Grapefruit                | 1                                                           |
| 351             | China   | 1996           | Grapes                    | 2                                                           |
| 351             | China   | 1996           | Groundnut Oil             | 3                                                           |
| 351             | China   | 1996           | Groundnuts (Shelled Eq)   | 5                                                           |
| 351             | China   | 1996           | Maize                     | 21                                                          |
| 351             | China   | 1996           | Marine Fish, Other        | 9                                                           |
| 351             | China   | 1996           | Meat, Other               | 2                                                           |
| 351             | China   | 1996           | Milk, Whole               | 17                                                          |
| 351             | China   | 1996           | Millet                    | 4                                                           |
| 351             | China   | 1996           | Molluscs, Other           | 14                                                          |
| 351             | China   | 1996           | Mutton & Goat Meat        | 4                                                           |
| 351             | China   | 1996           | Nuts                      | 2                                                           |
| 351             | China   | 1996           | Oats                      | 1                                                           |
| 351             | China   | 1996           | Offals, Edible            | 5                                                           |
| 351             | China   | 1996           | Onions                    | 19                                                          |
| 351             | China   | 1996           | Oranges, Mandarines       | 17                                                          |
| 351             | China   | 1996           | Palm Oil                  | 2                                                           |
| 351             | China   | 1996           | Peas                      | 2                                                           |
| 351             | China   | 1996           | Pelagic Fish              | 1                                                           |
| 351             | China   | 1996           | Pigmeat                   | 66                                                          |

Dietary calcium and zinc deficiency risks are decreasing but remain prevalent

| FAO countrycode | Country | Reference year | Food item                 | Gross food supply (g capita <sup>-1</sup> d <sup>-1</sup> ) |
|-----------------|---------|----------------|---------------------------|-------------------------------------------------------------|
| 351             | China   | 1996           | Pineapples                | 2                                                           |
| 351             | China   | 1996           | Potatoes                  | 45                                                          |
| 351             | China   | 1996           | Poultry Meat              | 19                                                          |
| 351             | China   | 1996           | Pulses, Other             | 2                                                           |
| 351             | China   | 1996           | Rape and Mustard Oil      | 5                                                           |
| 351             | China   | 1996           | Rice (Milled Equivalent)  | 211                                                         |
| 351             | China   | 1996           | Roots, Other              | 3                                                           |
| 351             | China   | 1996           | Rye                       | 1                                                           |
| 351             | China   | 1996           | Sorghum                   | 5                                                           |
| 351             | China   | 1996           | Soyabean Oil              | 4                                                           |
| 351             | China   | 1996           | Soyabeans                 | 13                                                          |
| 351             | China   | 1996           | Sugar, Non-Centrifugal    | 1                                                           |
| 351             | China   | 1996           | Sugar, Refined Equivalent | 19                                                          |
| 351             | China   | 1996           | Sunflowerseed Oil         | 1                                                           |
| 351             | China   | 1996           | Sweet Potatoes            | 119                                                         |
| 351             | China   | 1996           | Tea                       | 1                                                           |
| 351             | China   | 1996           | Tomatoes                  | 31                                                          |
| 351             | China   | 1996           | Vegetables, Other         | 401                                                         |
| 351             | China   | 1996           | Wheat                     | 213                                                         |
| 351             | China   | 1996           | Wine                      | 2                                                           |
| 351             | China   | 1997           | Apples                    | 29                                                          |
| 351             | China   | 1997           | Aquatic Animals, Others   | 1                                                           |
| 351             | China   | 1997           | Aquatic Plants            | 10                                                          |
| 351             | China   | 1997           | Bananas                   | 7                                                           |
| 351             | China   | 1997           | Barley                    | 2                                                           |
| 351             | China   | 1997           | Beans                     | 1                                                           |
| 351             | China   | 1997           | Beer                      | 42                                                          |
| 351             | China   | 1997           | Beverages, Alcoholic      | 16                                                          |
| 351             | China   | 1997           | Beverages, Fermented      | 2                                                           |
| 351             | China   | 1997           | Bovine Meat               | 9                                                           |
| 351             | China   | 1997           | Cassava                   | 3                                                           |
| 351             | China   | 1997           | Cephalopods               | 1                                                           |
| 351             | China   | 1997           | Cereals, Other            | 3                                                           |
| 351             | China   | 1997           | Citrus, Other             | 1                                                           |
| 351             | China   | 1997           | Coconuts - Incl Copra     | 1                                                           |
| 351             | China   | 1997           | Cottonseed Oil            | 1                                                           |
| 351             | China   | 1997           | Crustaceans               | 6                                                           |
| 351             | China   | 1997           | Demersal Fish             | 6                                                           |
| 351             | China   | 1997           | Eggs                      | 38                                                          |
| 351             | China   | 1997           | Fats, Animals, Raw        | 4                                                           |
| 351             | China   | 1997           | Freshwater Fish           | 25                                                          |
| 351             | China   | 1997           | Fruits, Other             | 39                                                          |
| 351             | China   | 1997           | Grapefruit                | 1                                                           |
| 351             | China   | 1997           | Grapes                    | 2                                                           |
| 351             | China   | 1997           | Groundnut Oil             | 3                                                           |
| 351             | China   | 1997           | Groundnuts (Shelled Eq)   | 5                                                           |
| 351             | China   | 1997           | Maize                     | 17                                                          |
| 351             | China   | 1997           | Marine Fish, Other        | 8                                                           |
| 351             | China   | 1997           | Meat, Other               | 2                                                           |
| 351             | China   | 1997           | Milk, Whole               | 17                                                          |
| 351             | China   | 1997           | Millet                    | 3                                                           |
| 351             | China   | 1997           | Molluscs, Other           | 15                                                          |
| 351             | China   | 1997           | Mutton & Goat Meat        | 5                                                           |
| 351             | China   | 1997           | Nuts                      | 2                                                           |
| 351             | China   | 1997           | Oats                      | 1                                                           |
| 351             | China   | 1997           | Offals, Edible            | 6                                                           |
| 351             | China   | 1997           | Onions                    | 19                                                          |
| 351             | China   | 1997           | Oranges, Mandarines       | 20                                                          |
| 351             | China   | 1997           | Palm Oil                  | 2                                                           |
| 351             | China   | 1997           | Peas                      | 1                                                           |
| 351             | China   | 1997           | Pelagic Fish              | 1                                                           |
| 351             | China   | 1997           | Pigmeat                   | 68                                                          |
| 351             | China   | 1997           | Pineapples                | 2                                                           |
| 351             | China   | 1997           | Potatoes                  | 66                                                          |
| 351             | China   | 1997           | Poultry Meat              | 22                                                          |
| 351             | China   | 1997           | Pulses, Other             | 1                                                           |
| 351             | China   | 1997           | Rape and Mustard Oil      | 4                                                           |
| 351             | China   | 1997           | Rice (Milled Equivalent)  | 212                                                         |
| 351             | China   | 1997           | Roots, Other              | 3                                                           |
| 351             | China   | 1997           | Rye                       | 1                                                           |
| 351             | China   | 1997           | Sorghum                   | 3                                                           |
| 351             | China   | 1997           | Soyabean Oil              | 4                                                           |
| 351             | China   | 1997           | Soyabeans                 | 16                                                          |
| 351             | China   | 1997           | Sugar, Non-Centrifugal    | 1                                                           |
| 351             | China   | 1997           | Sugar, Refined Equivalent | 21                                                          |
| 351             | China   | 1997           | Sunflowerseed Oil         | 1                                                           |
| 351             | China   | 1997           | Sweet Potatoes            | 104                                                         |
| 351             | China   | 1997           | Tea                       | 1                                                           |
| 351             | China   | 1997           | Tomatoes                  | 32                                                          |
| 351             | China   | 1997           | Vegetables, Other         | 428                                                         |
| 351             | China   | 1997           | Wheat                     | 211                                                         |
| 351             | China   | 1997           | Wine                      | 2                                                           |
| 351             | China   | 1998           | Apples                    | 32                                                          |
| 351             | China   | 1998           | Aquatic Animals, Others   | 1                                                           |
| 351             | China   | 1998           | Aquatic Plants            | 12                                                          |
| 351             | China   | 1998           | Bananas                   | 8                                                           |
| 351             | China   | 1998           | Barley                    | 2                                                           |
| 351             | China   | 1998           | Beans                     | 1                                                           |
| 351             | China   | 1998           | Beer                      | 44                                                          |
| 351             | China   | 1998           | Beverages, Alcoholic      | 12                                                          |
| 351             | China   | 1998           | Beverages, Fermented      | 4                                                           |
| 351             | China   | 1998           | Bovine Meat               | 9                                                           |
| 351             | China   | 1998           | Cassava                   | 4                                                           |
| 351             | China   | 1998           | Cephalopods               | 1                                                           |
| 351             | China   | 1998           | Cereals, Other            | 2                                                           |
| 351             | China   | 1998           | Citrus, Other             | 1                                                           |
| 351             | China   | 1998           | Coconuts - Incl Copra     | 1                                                           |



## Dietary calcium and zinc deficiency risks are decreasing but remain prevalent

| FAO countrycode | Country | Reference year | Food item                 | Gross food supply (g capita <sup>-1</sup> d <sup>-1</sup> ) |
|-----------------|---------|----------------|---------------------------|-------------------------------------------------------------|
| 351             | China   | 1998           | Cottonseed Oil            | 1                                                           |
| 351             | China   | 1998           | Crustaceans               | 6                                                           |
| 351             | China   | 1998           | Demersal Fish             | 6                                                           |
| 351             | China   | 1998           | Eggs                      | 40                                                          |
| 351             | China   | 1998           | Fats, Animals, Raw        | 4                                                           |
| 351             | China   | 1998           | Freshwater Fish           | 25                                                          |
| 351             | China   | 1998           | Fruits, Other             | 40                                                          |
| 351             | China   | 1998           | Grapefruit                | 1                                                           |
| 351             | China   | 1998           | Grapes                    | 2                                                           |
| 351             | China   | 1998           | Groundnut Oil             | 3                                                           |
| 351             | China   | 1998           | Groundnuts (Shelled Eq)   | 7                                                           |
| 351             | China   | 1998           | Lemons, Limes             | 1                                                           |
| 351             | China   | 1998           | Maize                     | 18                                                          |
| 351             | China   | 1998           | Marine Fish, Other        | 8                                                           |
| 351             | China   | 1998           | Meat, Other               | 2                                                           |
| 351             | China   | 1998           | Milk, Whole               | 18                                                          |
| 351             | China   | 1998           | Millet                    | 3                                                           |
| 351             | China   | 1998           | Molluscs, Other           | 16                                                          |
| 351             | China   | 1998           | Mutton & Goat Meat        | 5                                                           |
| 351             | China   | 1998           | Nuts                      | 2                                                           |
| 351             | China   | 1998           | Oats                      | 1                                                           |
| 351             | China   | 1998           | Offals, Edible            | 6                                                           |
| 351             | China   | 1998           | Onions                    | 20                                                          |
| 351             | China   | 1998           | Oranges, Mandarines       | 17                                                          |
| 351             | China   | 1998           | Palm Oil                  | 3                                                           |
| 351             | China   | 1998           | Peas                      | 1                                                           |
| 351             | China   | 1998           | Pelagic Fish              | 1                                                           |
| 351             | China   | 1998           | Pigmeat                   | 72                                                          |
| 351             | China   | 1998           | Pineapples                | 2                                                           |
| 351             | China   | 1998           | Potatoes                  | 81                                                          |
| 351             | China   | 1998           | Poultry Meat              | 24                                                          |
| 351             | China   | 1998           | Pulses, Other             | 2                                                           |
| 351             | China   | 1998           | Rape and Mustard Oil      | 5                                                           |
| 351             | China   | 1998           | Rice (Milled Equivalent)  | 213                                                         |
| 351             | China   | 1998           | Roots, Other              | 3                                                           |
| 351             | China   | 1998           | Rye                       | 1                                                           |
| 351             | China   | 1998           | Sorghum                   | 3                                                           |
| 351             | China   | 1998           | Soyabean Oil              | 4                                                           |
| 351             | China   | 1998           | Soybeans                  | 13                                                          |
| 351             | China   | 1998           | Sugar, Non-Centrifugal    | 1                                                           |
| 351             | China   | 1998           | Sugar, Refined Equivalent | 20                                                          |
| 351             | China   | 1998           | Sunflowerseed Oil         | 1                                                           |
| 351             | China   | 1998           | Sweet Potatoes            | 107                                                         |
| 351             | China   | 1998           | Tea                       | 1                                                           |
| 351             | China   | 1998           | Tomatoes                  | 33                                                          |
| 351             | China   | 1998           | Vegetables, Other         | 440                                                         |
| 351             | China   | 1998           | Wheat                     | 210                                                         |
| 351             | China   | 1998           | Wine                      | 2                                                           |
| 351             | China   | 1999           | Apples                    | 32                                                          |
| 351             | China   | 1999           | Aquatic Animals, Others   | 1                                                           |
| 351             | China   | 1999           | Aquatic Plants            | 14                                                          |
| 351             | China   | 1999           | Bananas                   | 9                                                           |
| 351             | China   | 1999           | Barley                    | 1                                                           |
| 351             | China   | 1999           | Beans                     | 1                                                           |
| 351             | China   | 1999           | Beer                      | 46                                                          |
| 351             | China   | 1999           | Beverages, Alcoholic      | 11                                                          |
| 351             | China   | 1999           | Beverages, Fermented      | 4                                                           |
| 351             | China   | 1999           | Bovine Meat               | 10                                                          |
| 351             | China   | 1999           | Cassava                   | 4                                                           |
| 351             | China   | 1999           | Cephalopods               | 1                                                           |
| 351             | China   | 1999           | Cereals, Other            | 2                                                           |
| 351             | China   | 1999           | Citrus, Other             | 2                                                           |
| 351             | China   | 1999           | Coconuts - Incl Copra     | 1                                                           |
| 351             | China   | 1999           | Cottonseed Oil            | 2                                                           |
| 351             | China   | 1999           | Crustaceans               | 6                                                           |
| 351             | China   | 1999           | Demersal Fish             | 6                                                           |
| 351             | China   | 1999           | Eggs                      | 42                                                          |
| 351             | China   | 1999           | Fats, Animals, Raw        | 5                                                           |
| 351             | China   | 1999           | Freshwater Fish           | 26                                                          |
| 351             | China   | 1999           | Fruits, Other             | 47                                                          |
| 351             | China   | 1999           | Grapefruit                | 1                                                           |
| 351             | China   | 1999           | Grapes                    | 3                                                           |
| 351             | China   | 1999           | Groundnut Oil             | 3                                                           |
| 351             | China   | 1999           | Groundnuts (Shelled Eq)   | 7                                                           |
| 351             | China   | 1999           | Lemons, Limes             | 1                                                           |
| 351             | China   | 1999           | Maize                     | 18                                                          |
| 351             | China   | 1999           | Marine Fish, Other        | 7                                                           |
| 351             | China   | 1999           | Meat, Other               | 2                                                           |
| 351             | China   | 1999           | Milk, Whole               | 19                                                          |
| 351             | China   | 1999           | Millet                    | 2                                                           |
| 351             | China   | 1999           | Molluscs, Other           | 17                                                          |
| 351             | China   | 1999           | Mutton & Goat Meat        | 5                                                           |
| 351             | China   | 1999           | Nuts                      | 2                                                           |
| 351             | China   | 1999           | Oats                      | 1                                                           |
| 351             | China   | 1999           | Offals, Edible            | 7                                                           |
| 351             | China   | 1999           | Onions                    | 22                                                          |
| 351             | China   | 1999           | Oranges, Mandarines       | 20                                                          |
| 351             | China   | 1999           | Palm Oil                  | 3                                                           |
| 351             | China   | 1999           | Peas                      | 1                                                           |
| 351             | China   | 1999           | Pelagic Fish              | 1                                                           |
| 351             | China   | 1999           | Pigmeat                   | 73                                                          |
| 351             | China   | 1999           | Pineapples                | 2                                                           |
| 351             | China   | 1999           | Potatoes                  | 78                                                          |
| 351             | China   | 1999           | Poultry Meat              | 26                                                          |
| 351             | China   | 1999           | Pulses, Other             | 2                                                           |
| 351             | China   | 1999           | Rape and Mustard Oil      | 5                                                           |
| 351             | China   | 1999           | Rice (Milled Equivalent)  | 214                                                         |

Dietary calcium and zinc deficiency risks are decreasing but remain prevalent

| FAO countrycode | Country | Reference year | Food item                 | Gross food supply (g capita <sup>-1</sup> d <sup>-1</sup> ) |
|-----------------|---------|----------------|---------------------------|-------------------------------------------------------------|
| 351             | China   | 1999           | Roots, Other              | 3                                                           |
| 351             | China   | 1999           | Rye                       | 1                                                           |
| 351             | China   | 1999           | Sorghum                   | 3                                                           |
| 351             | China   | 1999           | Soyabean Oil              | 5                                                           |
| 351             | China   | 1999           | Soyabeans                 | 10                                                          |
| 351             | China   | 1999           | Sugar, Non-Centrifugal    | 1                                                           |
| 351             | China   | 1999           | Sugar, Refined Equivalent | 16                                                          |
| 351             | China   | 1999           | Sunflowerseed Oil         | 1                                                           |
| 351             | China   | 1999           | Sweet Potatoes            | 114                                                         |
| 351             | China   | 1999           | Tea                       | 1                                                           |
| 351             | China   | 1999           | Tomatoes                  | 36                                                          |
| 351             | China   | 1999           | Vegetables, Other         | 488                                                         |
| 351             | China   | 1999           | Wheat                     | 206                                                         |
| 351             | China   | 1999           | Wine                      | 2                                                           |
| 351             | China   | 2000           | Apples                    | 31                                                          |
| 351             | China   | 2000           | Aquatic Animals, Others   | 1                                                           |
| 351             | China   | 2000           | Aquatic Plants            | 15                                                          |
| 351             | China   | 2000           | Bananas                   | 11                                                          |
| 351             | China   | 2000           | Barley                    | 1                                                           |
| 351             | China   | 2000           | Beans                     | 1                                                           |
| 351             | China   | 2000           | Beer                      | 48                                                          |
| 351             | China   | 2000           | Beverages, Alcoholic      | 10                                                          |
| 351             | China   | 2000           | Beverages, Fermented      | 5                                                           |
| 351             | China   | 2000           | Bovine Meat               | 11                                                          |
| 351             | China   | 2000           | Cassava                   | 3                                                           |
| 351             | China   | 2000           | Cephalopods               | 2                                                           |
| 351             | China   | 2000           | Cereals, Other            | 2                                                           |
| 351             | China   | 2000           | Citrus, Other             | 2                                                           |
| 351             | China   | 2000           | Coconuts - Incl Copra     | 1                                                           |
| 351             | China   | 2000           | Cottonseed Oil            | 2                                                           |
| 351             | China   | 2000           | Crustaceans               | 7                                                           |
| 351             | China   | 2000           | Demersal Fish             | 7                                                           |
| 351             | China   | 2000           | Eggs                      | 42                                                          |
| 351             | China   | 2000           | Fats, Animals, Raw        | 5                                                           |
| 351             | China   | 2000           | Freshwater Fish           | 26                                                          |
| 351             | China   | 2000           | Fruits, Other             | 48                                                          |
| 351             | China   | 2000           | Grapefruit                | 1                                                           |
| 351             | China   | 2000           | Grapes                    | 4                                                           |
| 351             | China   | 2000           | Groundnut Oil             | 3                                                           |
| 351             | China   | 2000           | Groundnuts (Shelled Eq)   | 7                                                           |
| 351             | China   | 2000           | Lemons, Limes             | 1                                                           |
| 351             | China   | 2000           | Maize                     | 18                                                          |
| 351             | China   | 2000           | Marine Fish, Other        | 6                                                           |
| 351             | China   | 2000           | Meat, Other               | 2                                                           |
| 351             | China   | 2000           | Milk, Whole               | 21                                                          |
| 351             | China   | 2000           | Millet                    | 2                                                           |
| 351             | China   | 2000           | Molluscs, Other           | 17                                                          |
| 351             | China   | 2000           | Mutton & Goat Meat        | 6                                                           |
| 351             | China   | 2000           | Nuts                      | 2                                                           |
| 351             | China   | 2000           | Oats                      | 1                                                           |
| 351             | China   | 2000           | Offals, Edible            | 7                                                           |
| 351             | China   | 2000           | Onions                    | 26                                                          |
| 351             | China   | 2000           | Oranges, Mandarines       | 17                                                          |
| 351             | China   | 2000           | Palm Oil                  | 3                                                           |
| 351             | China   | 2000           | Peas                      | 1                                                           |
| 351             | China   | 2000           | Pelagic Fish              | 2                                                           |
| 351             | China   | 2000           | Pigmeat                   | 78                                                          |
| 351             | China   | 2000           | Pineapples                | 2                                                           |
| 351             | China   | 2000           | Potatoes                  | 90                                                          |
| 351             | China   | 2000           | Poultry Meat              | 28                                                          |
| 351             | China   | 2000           | Pulses, Other             | 2                                                           |
| 351             | China   | 2000           | Rape and Mustard Oil      | 4                                                           |
| 351             | China   | 2000           | Rice (Milled Equivalent)  | 214                                                         |
| 351             | China   | 2000           | Roots, Other              | 3                                                           |
| 351             | China   | 2000           | Rye                       | 1                                                           |
| 351             | China   | 2000           | Sesameseed                | 1                                                           |
| 351             | China   | 2000           | Sorghum                   | 2                                                           |
| 351             | China   | 2000           | Soyabean Oil              | 5                                                           |
| 351             | China   | 2000           | Soyabeans                 | 11                                                          |
| 351             | China   | 2000           | Sugar, Non-Centrifugal    | 1                                                           |
| 351             | China   | 2000           | Sugar, Refined Equivalent | 14                                                          |
| 351             | China   | 2000           | Sunflowerseed Oil         | 1                                                           |
| 351             | China   | 2000           | Sweet Potatoes            | 111                                                         |
| 351             | China   | 2000           | Tea                       | 1                                                           |
| 351             | China   | 2000           | Tomatoes                  | 42                                                          |
| 351             | China   | 2000           | Vegetables, Other         | 590                                                         |
| 351             | China   | 2000           | Wheat                     | 201                                                         |
| 351             | China   | 2000           | Wine                      | 2                                                           |
| 351             | China   | 2001           | Apples                    | 30                                                          |
| 351             | China   | 2001           | Aquatic Animals, Others   | 1                                                           |
| 351             | China   | 2001           | Aquatic Plants            | 15                                                          |
| 351             | China   | 2001           | Bananas                   | 11                                                          |
| 351             | China   | 2001           | Barley                    | 1                                                           |
| 351             | China   | 2001           | Beans                     | 1                                                           |
| 351             | China   | 2001           | Beer                      | 49                                                          |
| 351             | China   | 2001           | Beverages, Alcoholic      | 15                                                          |
| 351             | China   | 2001           | Beverages, Fermented      | 5                                                           |
| 351             | China   | 2001           | Bovine Meat               | 11                                                          |
| 351             | China   | 2001           | Cassava                   | 3                                                           |
| 351             | China   | 2001           | Cephalopods               | 1                                                           |
| 351             | China   | 2001           | Cereals, Other            | 2                                                           |
| 351             | China   | 2001           | Citrus, Other             | 2                                                           |
| 351             | China   | 2001           | Coconuts - Incl Copra     | 1                                                           |
| 351             | China   | 2001           | Cottonseed Oil            | 2                                                           |
| 351             | China   | 2001           | Crustaceans               | 7                                                           |
| 351             | China   | 2001           | Demersal Fish             | 7                                                           |
| 351             | China   | 2001           | Eggs                      | 43                                                          |

Dietary calcium and zinc deficiency risks are decreasing but remain prevalent

| FAO countrycode | Country | Reference year | Food item                 | Gross food supply (g capita <sup>-1</sup> d <sup>-1</sup> ) |
|-----------------|---------|----------------|---------------------------|-------------------------------------------------------------|
| 351             | China   | 2001           | Fats, Animals, Raw        | 5                                                           |
| 351             | China   | 2001           | Freshwater Fish           | 27                                                          |
| 351             | China   | 2001           | Fruits, Other             | 51                                                          |
| 351             | China   | 2001           | Grapefruit                | 1                                                           |
| 351             | China   | 2001           | Grapes                    | 5                                                           |
| 351             | China   | 2001           | Groundnut Oil             | 3                                                           |
| 351             | China   | 2001           | Groundnuts (Shelled Eq)   | 7                                                           |
| 351             | China   | 2001           | Lemons, Limes             | 1                                                           |
| 351             | China   | 2001           | Maize                     | 18                                                          |
| 351             | China   | 2001           | Marine Fish, Other        | 4                                                           |
| 351             | China   | 2001           | Meat, Other               | 2                                                           |
| 351             | China   | 2001           | Milk, Whole               | 25                                                          |
| 351             | China   | 2001           | Millet                    | 2                                                           |
| 351             | China   | 2001           | Molluscs, Other           | 17                                                          |
| 351             | China   | 2001           | Mutton & Goat Meat        | 6                                                           |
| 351             | China   | 2001           | Nuts                      | 2                                                           |
| 351             | China   | 2001           | Offals, Edible            | 7                                                           |
| 351             | China   | 2001           | Onions                    | 28                                                          |
| 351             | China   | 2001           | Oranges, Mandarines       | 22                                                          |
| 351             | China   | 2001           | Palm Oil                  | 3                                                           |
| 351             | China   | 2001           | Peas                      | 1                                                           |
| 351             | China   | 2001           | Pelagic Fish              | 1                                                           |
| 351             | China   | 2001           | Pigmeat                   | 77                                                          |
| 351             | China   | 2001           | Pineapples                | 2                                                           |
| 351             | China   | 2001           | Potatoes                  | 87                                                          |
| 351             | China   | 2001           | Poultry Meat              | 27                                                          |
| 351             | China   | 2001           | Pulses, Other             | 2                                                           |
| 351             | China   | 2001           | Rape and Mustard Oil      | 4                                                           |
| 351             | China   | 2001           | Rice (Milled Equivalent)  | 212                                                         |
| 351             | China   | 2001           | Roots, Other              | 3                                                           |
| 351             | China   | 2001           | Sorghum                   | 2                                                           |
| 351             | China   | 2001           | Soyabean Oil              | 5                                                           |
| 351             | China   | 2001           | Soyabeans                 | 11                                                          |
| 351             | China   | 2001           | Sugar, Non-Centrifugal    | 1                                                           |
| 351             | China   | 2001           | Sugar, Refined Equivalent | 15                                                          |
| 351             | China   | 2001           | Sweet Potatoes            | 113                                                         |
| 351             | China   | 2001           | Tea                       | 1                                                           |
| 351             | China   | 2001           | Tomatoes                  | 44                                                          |
| 351             | China   | 2001           | Vegetables, Other         | 616                                                         |
| 351             | China   | 2001           | Wheat                     | 197                                                         |
| 351             | China   | 2001           | Wine                      | 2                                                           |
| 351             | China   | 2002           | Apples                    | 27                                                          |
| 351             | China   | 2002           | Aquatic Animals, Others   | 1                                                           |
| 351             | China   | 2002           | Aquatic Plants            | 16                                                          |
| 351             | China   | 2002           | Bananas                   | 11                                                          |
| 351             | China   | 2002           | Barley                    | 1                                                           |
| 351             | China   | 2002           | Beans                     | 1                                                           |
| 351             | China   | 2002           | Beer                      | 51                                                          |
| 351             | China   | 2002           | Beverages, Alcoholic      | 15                                                          |
| 351             | China   | 2002           | Beverages, Fermented      | 5                                                           |
| 351             | China   | 2002           | Bovine Meat               | 11                                                          |
| 351             | China   | 2002           | Cassava                   | 3                                                           |
| 351             | China   | 2002           | Cephalopods               | 1                                                           |
| 351             | China   | 2002           | Cereals, Other            | 2                                                           |
| 351             | China   | 2002           | Cheese                    | 1                                                           |
| 351             | China   | 2002           | Citrus, Other             | 2                                                           |
| 351             | China   | 2002           | Coconuts - Incl Copra     | 1                                                           |
| 351             | China   | 2002           | Cottonseed Oil            | 2                                                           |
| 351             | China   | 2002           | Crustaceans               | 7                                                           |
| 351             | China   | 2002           | Demersal Fish             | 6                                                           |
| 351             | China   | 2002           | Eggs                      | 43                                                          |
| 351             | China   | 2002           | Fats, Animals, Raw        | 5                                                           |
| 351             | China   | 2002           | Freshwater Fish           | 28                                                          |
| 351             | China   | 2002           | Fruits, Other             | 55                                                          |
| 351             | China   | 2002           | Grapefruit                | 1                                                           |
| 351             | China   | 2002           | Grapes                    | 6                                                           |
| 351             | China   | 2002           | Groundnut Oil             | 3                                                           |
| 351             | China   | 2002           | Groundnuts (Shelled Eq)   | 7                                                           |
| 351             | China   | 2002           | Lemons, Limes             | 1                                                           |
| 351             | China   | 2002           | Maize                     | 19                                                          |
| 351             | China   | 2002           | Marine Fish, Other        | 4                                                           |
| 351             | China   | 2002           | Meat, Other               | 2                                                           |
| 351             | China   | 2002           | Milk, Whole               | 31                                                          |
| 351             | China   | 2002           | Millet                    | 2                                                           |
| 351             | China   | 2002           | Molluscs, Other           | 18                                                          |
| 351             | China   | 2002           | Mutton & Goat Meat        | 6                                                           |
| 351             | China   | 2002           | Nuts                      | 3                                                           |
| 351             | China   | 2002           | Offals, Edible            | 7                                                           |
| 351             | China   | 2002           | Onions                    | 30                                                          |
| 351             | China   | 2002           | Oranges, Mandarines       | 22                                                          |
| 351             | China   | 2002           | Palm Oil                  | 3                                                           |
| 351             | China   | 2002           | Peas                      | 1                                                           |
| 351             | China   | 2002           | Pelagic Fish              | 2                                                           |
| 351             | China   | 2002           | Pigmeat                   | 79                                                          |
| 351             | China   | 2002           | Pineapples                | 2                                                           |
| 351             | China   | 2002           | Potatoes                  | 96                                                          |
| 351             | China   | 2002           | Poultry Meat              | 27                                                          |
| 351             | China   | 2002           | Pulses, Other             | 2                                                           |
| 351             | China   | 2002           | Rape and Mustard Oil      | 4                                                           |
| 351             | China   | 2002           | Rice (Milled Equivalent)  | 211                                                         |
| 351             | China   | 2002           | Roots, Other              | 3                                                           |
| 351             | China   | 2002           | Sorghum                   | 4                                                           |
| 351             | China   | 2002           | Soyabean Oil              | 5                                                           |
| 351             | China   | 2002           | Soyabeans                 | 10                                                          |
| 351             | China   | 2002           | Sugar, Non-Centrifugal    | 1                                                           |
| 351             | China   | 2002           | Sugar, Refined Equivalent | 15                                                          |
| 351             | China   | 2002           | Sunflowerseed Oil         | 1                                                           |

Dietary calcium and zinc deficiency risks are decreasing but remain prevalent

| FAO countrycode | Country | Reference year | Food item                 | Gross food supply (g capita <sup>-1</sup> d <sup>-1</sup> ) |
|-----------------|---------|----------------|---------------------------|-------------------------------------------------------------|
| 351             | China   | 2002           | Sweet Potatoes            | 109                                                         |
| 351             | China   | 2002           | Tea                       | 1                                                           |
| 351             | China   | 2002           | Tomatoes                  | 49                                                          |
| 351             | China   | 2002           | Vegetables, Other         | 657                                                         |
| 351             | China   | 2002           | Wheat                     | 192                                                         |
| 351             | China   | 2002           | Wine                      | 2                                                           |
| 351             | China   | 2003           | Apples                    | 29                                                          |
| 351             | China   | 2003           | Aquatic Animals, Others   | 1                                                           |
| 351             | China   | 2003           | Aquatic Plants            | 18                                                          |
| 351             | China   | 2003           | Bananas                   | 12                                                          |
| 351             | China   | 2003           | Barley                    | 1                                                           |
| 351             | China   | 2003           | Beans                     | 1                                                           |
| 351             | China   | 2003           | Beer                      | 53                                                          |
| 351             | China   | 2003           | Beverages, Alcoholic      | 12                                                          |
| 351             | China   | 2003           | Beverages, Fermented      | 5                                                           |
| 351             | China   | 2003           | Bovine Meat               | 11                                                          |
| 351             | China   | 2003           | Cassava                   | 4                                                           |
| 351             | China   | 2003           | Cephalopods               | 2                                                           |
| 351             | China   | 2003           | Cereals, Other            | 1                                                           |
| 351             | China   | 2003           | Cheese                    | 1                                                           |
| 351             | China   | 2003           | Citrus, Other             | 2                                                           |
| 351             | China   | 2003           | Coconuts - Incl Copra     | 1                                                           |
| 351             | China   | 2003           | Cottonseed Oil            | 2                                                           |
| 351             | China   | 2003           | Crustaceans               | 7                                                           |
| 351             | China   | 2003           | Demersal Fish             | 9                                                           |
| 351             | China   | 2003           | Eggs                      | 44                                                          |
| 351             | China   | 2003           | Fats, Animals, Raw        | 5                                                           |
| 351             | China   | 2003           | Freshwater Fish           | 29                                                          |
| 351             | China   | 2003           | Fruits, Other             | 56                                                          |
| 351             | China   | 2003           | Grapefruit                | 1                                                           |
| 351             | China   | 2003           | Grapes                    | 7                                                           |
| 351             | China   | 2003           | Groundnut Oil             | 3                                                           |
| 351             | China   | 2003           | Groundnuts (Shelled Eq)   | 6                                                           |
| 351             | China   | 2003           | Lemons, Limes             | 1                                                           |
| 351             | China   | 2003           | Maize                     | 19                                                          |
| 351             | China   | 2003           | Marine Fish, Other        | 2                                                           |
| 351             | China   | 2003           | Meat, Other               | 2                                                           |
| 351             | China   | 2003           | Milk, Whole               | 40                                                          |
| 351             | China   | 2003           | Millet                    | 2                                                           |
| 351             | China   | 2003           | Molluscs, Other           | 17                                                          |
| 351             | China   | 2003           | Mutton & Goat Meat        | 6                                                           |
| 351             | China   | 2003           | Nuts                      | 3                                                           |
| 351             | China   | 2003           | Offals, Edible            | 7                                                           |
| 351             | China   | 2003           | Onions                    | 32                                                          |
| 351             | China   | 2003           | Oranges, Mandarines       | 25                                                          |
| 351             | China   | 2003           | Palm Oil                  | 4                                                           |
| 351             | China   | 2003           | Peas                      | 1                                                           |
| 351             | China   | 2003           | Pelagic Fish              | 3                                                           |
| 351             | China   | 2003           | Pigmeat                   | 82                                                          |
| 351             | China   | 2003           | Pineapples                | 2                                                           |
| 351             | China   | 2003           | Potatoes                  | 96                                                          |
| 351             | China   | 2003           | Poultry Meat              | 28                                                          |
| 351             | China   | 2003           | Pulses, Other             | 2                                                           |
| 351             | China   | 2003           | Rape and Mustard Oil      | 4                                                           |
| 351             | China   | 2003           | Rice (Milled Equivalent)  | 208                                                         |
| 351             | China   | 2003           | Roots, Other              | 3                                                           |
| 351             | China   | 2003           | Sorghum                   | 3                                                           |
| 351             | China   | 2003           | Soyabean Oil              | 6                                                           |
| 351             | China   | 2003           | Soyabeans                 | 10                                                          |
| 351             | China   | 2003           | Sugar, Non-Centrifugal    | 1                                                           |
| 351             | China   | 2003           | Sugar, Refined Equivalent | 16                                                          |
| 351             | China   | 2003           | Sunflowerseed Oil         | 1                                                           |
| 351             | China   | 2003           | Sweet Potatoes            | 107                                                         |
| 351             | China   | 2003           | Tea                       | 1                                                           |
| 351             | China   | 2003           | Tomatoes                  | 52                                                          |
| 351             | China   | 2003           | Vegetables, Other         | 653                                                         |
| 351             | China   | 2003           | Wheat                     | 188                                                         |
| 351             | China   | 2003           | Wine                      | 3                                                           |
| 351             | China   | 2004           | Apples                    | 33                                                          |
| 351             | China   | 2004           | Aquatic Animals, Others   | 1                                                           |
| 351             | China   | 2004           | Aquatic Plants            | 20                                                          |
| 351             | China   | 2004           | Bananas                   | 12                                                          |
| 351             | China   | 2004           | Barley                    | 1                                                           |
| 351             | China   | 2004           | Beans                     | 1                                                           |
| 351             | China   | 2004           | Beer                      | 61                                                          |
| 351             | China   | 2004           | Beverages, Alcoholic      | 13                                                          |
| 351             | China   | 2004           | Beverages, Fermented      | 5                                                           |
| 351             | China   | 2004           | Bovine Meat               | 12                                                          |
| 351             | China   | 2004           | Cassava                   | 4                                                           |
| 351             | China   | 2004           | Cephalopods               | 2                                                           |
| 351             | China   | 2004           | Cereals, Other            | 1                                                           |
| 351             | China   | 2004           | Cheese                    | 1                                                           |
| 351             | China   | 2004           | Citrus, Other             | 2                                                           |
| 351             | China   | 2004           | Coconuts - Incl Copra     | 1                                                           |
| 351             | China   | 2004           | Cottonseed Oil            | 2                                                           |
| 351             | China   | 2004           | Crustaceans               | 7                                                           |
| 351             | China   | 2004           | Demersal Fish             | 9                                                           |
| 351             | China   | 2004           | Eggs                      | 45                                                          |
| 351             | China   | 2004           | Fats, Animals, Raw        | 5                                                           |
| 351             | China   | 2004           | Freshwater Fish           | 30                                                          |
| 351             | China   | 2004           | Fruits, Other             | 63                                                          |
| 351             | China   | 2004           | Grapefruit                | 1                                                           |
| 351             | China   | 2004           | Grapes                    | 8                                                           |
| 351             | China   | 2004           | Groundnut Oil             | 2                                                           |
| 351             | China   | 2004           | Groundnuts (Shelled Eq)   | 6                                                           |
| 351             | China   | 2004           | Lemons, Limes             | 1                                                           |
| 351             | China   | 2004           | Maize                     | 19                                                          |

## Dietary calcium and zinc deficiency risks are decreasing but remain prevalent

| FAO countrycode | Country | Reference year | Food item                 | Gross food supply (g capita <sup>-1</sup> d <sup>-1</sup> ) |
|-----------------|---------|----------------|---------------------------|-------------------------------------------------------------|
| 351             | China   | 2004           | Marine Fish, Other        | 2                                                           |
| 351             | China   | 2004           | Meat, Other               | 2                                                           |
| 351             | China   | 2004           | Milk, Whole               | 51                                                          |
| 351             | China   | 2004           | Millet                    | 2                                                           |
| 351             | China   | 2004           | Molluscs, Other           | 18                                                          |
| 351             | China   | 2004           | Mutton & Goat Meat        | 7                                                           |
| 351             | China   | 2004           | Nuts                      | 3                                                           |
| 351             | China   | 2004           | Offals, Edible            | 8                                                           |
| 351             | China   | 2004           | Onions                    | 32                                                          |
| 351             | China   | 2004           | Oranges, Mandarines       | 27                                                          |
| 351             | China   | 2004           | Palm Oil                  | 4                                                           |
| 351             | China   | 2004           | Peas                      | 1                                                           |
| 351             | China   | 2004           | Pelagic Fish              | 3                                                           |
| 351             | China   | 2004           | Pigmeat                   | 82                                                          |
| 351             | China   | 2004           | Pineapples                | 2                                                           |
| 351             | China   | 2004           | Potatoes                  | 108                                                         |
| 351             | China   | 2004           | Poultry Meat              | 28                                                          |
| 351             | China   | 2004           | Pulses, Other             | 2                                                           |
| 351             | China   | 2004           | Rape and Mustard Oil      | 4                                                           |
| 351             | China   | 2004           | Rice (Milled Equivalent)  | 207                                                         |
| 351             | China   | 2004           | Roots, Other              | 3                                                           |
| 351             | China   | 2004           | Sorghum                   | 2                                                           |
| 351             | China   | 2004           | Soyabean Oil              | 6                                                           |
| 351             | China   | 2004           | Soyabeans                 | 10                                                          |
| 351             | China   | 2004           | Sugar, Non-Centrifugal    | 1                                                           |
| 351             | China   | 2004           | Sugar, Refined Equivalent | 15                                                          |
| 351             | China   | 2004           | Sweet Potatoes            | 104                                                         |
| 351             | China   | 2004           | Tea                       | 1                                                           |
| 351             | China   | 2004           | Tomatoes                  | 54                                                          |
| 351             | China   | 2004           | Vegetables, Other         | 659                                                         |
| 351             | China   | 2004           | Wheat                     | 187                                                         |
| 351             | China   | 2004           | Wine                      | 3                                                           |
| 351             | China   | 2005           | Apples                    | 32                                                          |
| 351             | China   | 2005           | Aquatic Animals, Others   | 1                                                           |
| 351             | China   | 2005           | Aquatic Plants            | 20                                                          |
| 351             | China   | 2005           | Bananas                   | 13                                                          |
| 351             | China   | 2005           | Barley                    | 1                                                           |
| 351             | China   | 2005           | Beer                      | 65                                                          |
| 351             | China   | 2005           | Beverages, Alcoholic      | 13                                                          |
| 351             | China   | 2005           | Beverages, Fermented      | 5                                                           |
| 351             | China   | 2005           | Bovine Meat               | 12                                                          |
| 351             | China   | 2005           | Cassava                   | 4                                                           |
| 351             | China   | 2005           | Cephalopods               | 2                                                           |
| 351             | China   | 2005           | Cereals, Other            | 1                                                           |
| 351             | China   | 2005           | Cheese                    | 1                                                           |
| 351             | China   | 2005           | Citrus, Other             | 2                                                           |
| 351             | China   | 2005           | Coconuts - Incl Copra     | 1                                                           |
| 351             | China   | 2005           | Cottonseed Oil            | 2                                                           |
| 351             | China   | 2005           | Crustaceans               | 7                                                           |
| 351             | China   | 2005           | Demersal Fish             | 9                                                           |
| 351             | China   | 2005           | Eggs                      | 46                                                          |
| 351             | China   | 2005           | Fats, Animals, Raw        | 5                                                           |
| 351             | China   | 2005           | Freshwater Fish           | 32                                                          |
| 351             | China   | 2005           | Fruits, Other             | 67                                                          |
| 351             | China   | 2005           | Grapefruit                | 1                                                           |
| 351             | China   | 2005           | Grapes                    | 8                                                           |
| 351             | China   | 2005           | Groundnut Oil             | 2                                                           |
| 351             | China   | 2005           | Groundnuts (Shelled Eq)   | 6                                                           |
| 351             | China   | 2005           | Lemons, Limes             | 1                                                           |
| 351             | China   | 2005           | Maize                     | 19                                                          |
| 351             | China   | 2005           | Marine Fish, Other        | 2                                                           |
| 351             | China   | 2005           | Meat, Other               | 3                                                           |
| 351             | China   | 2005           | Milk, Whole               | 58                                                          |
| 351             | China   | 2005           | Millet                    | 2                                                           |
| 351             | China   | 2005           | Molluscs, Other           | 18                                                          |
| 351             | China   | 2005           | Mutton & Goat Meat        | 7                                                           |
| 351             | China   | 2005           | Nuts                      | 4                                                           |
| 351             | China   | 2005           | Offals, Edible            | 8                                                           |
| 351             | China   | 2005           | Onions                    | 34                                                          |
| 351             | China   | 2005           | Oranges, Mandarines       | 28                                                          |
| 351             | China   | 2005           | Palm Oil                  | 4                                                           |
| 351             | China   | 2005           | Peas                      | 1                                                           |
| 351             | China   | 2005           | Pelagic Fish              | 3                                                           |
| 351             | China   | 2005           | Pigmeat                   | 85                                                          |
| 351             | China   | 2005           | Pineapples                | 2                                                           |
| 351             | China   | 2005           | Potatoes                  | 106                                                         |
| 351             | China   | 2005           | Poultry Meat              | 29                                                          |
| 351             | China   | 2005           | Pulses, Other             | 2                                                           |
| 351             | China   | 2005           | Rape and Mustard Oil      | 4                                                           |
| 351             | China   | 2005           | Rice (Milled Equivalent)  | 208                                                         |
| 351             | China   | 2005           | Roots, Other              | 3                                                           |
| 351             | China   | 2005           | Sorghum                   | 2                                                           |
| 351             | China   | 2005           | Soyabean Oil              | 6                                                           |
| 351             | China   | 2005           | Soyabeans                 | 11                                                          |
| 351             | China   | 2005           | Sugar, Non-Centrifugal    | 1                                                           |
| 351             | China   | 2005           | Sugar, Refined Equivalent | 16                                                          |
| 351             | China   | 2005           | Sweet Potatoes            | 103                                                         |
| 351             | China   | 2005           | Tea                       | 1                                                           |
| 351             | China   | 2005           | Tomatoes                  | 55                                                          |
| 351             | China   | 2005           | Vegetables, Other         | 677                                                         |
| 351             | China   | 2005           | Wheat                     | 185                                                         |
| 351             | China   | 2005           | Wine                      | 3                                                           |
| 351             | China   | 2006           | Apples                    | 37                                                          |
| 351             | China   | 2006           | Aquatic Animals, Others   | 1                                                           |
| 351             | China   | 2006           | Aquatic Plants            | 20                                                          |
| 351             | China   | 2006           | Bananas                   | 13                                                          |
| 351             | China   | 2006           | Barley                    | 1                                                           |

Dietary calcium and zinc deficiency risks are decreasing but remain prevalent

| FAO countrycode | Country | Reference year | Food item                 | Gross food supply (g capita <sup>-1</sup> d <sup>-1</sup> ) |
|-----------------|---------|----------------|---------------------------|-------------------------------------------------------------|
| 351             | China   | 2006           | Beer                      | 73                                                          |
| 351             | China   | 2006           | Beverages, Alcoholic      | 13                                                          |
| 351             | China   | 2006           | Beverages, Fermented      | 6                                                           |
| 351             | China   | 2006           | Bovine Meat               | 12                                                          |
| 351             | China   | 2006           | Cassava                   | 5                                                           |
| 351             | China   | 2006           | Cephalopods               | 2                                                           |
| 351             | China   | 2006           | Cheese                    | 1                                                           |
| 351             | China   | 2006           | Citrus, Other             | 2                                                           |
| 351             | China   | 2006           | Coconuts - Incl Copra     | 1                                                           |
| 351             | China   | 2006           | Cottonseed Oil            | 2                                                           |
| 351             | China   | 2006           | Crustaceans               | 7                                                           |
| 351             | China   | 2006           | Demersal Fish             | 10                                                          |
| 351             | China   | 2006           | Eggs                      | 45                                                          |
| 351             | China   | 2006           | Fats, Animals, Raw        | 5                                                           |
| 351             | China   | 2006           | Freshwater Fish           | 34                                                          |
| 351             | China   | 2006           | Fruits, Other             | 67                                                          |
| 351             | China   | 2006           | Grapefruit                | 1                                                           |
| 351             | China   | 2006           | Grapes                    | 9                                                           |
| 351             | China   | 2006           | Groundnut Oil             | 2                                                           |
| 351             | China   | 2006           | Groundnuts (Shelled Eq)   | 4                                                           |
| 351             | China   | 2006           | Honey                     | 1                                                           |
| 351             | China   | 2006           | Lemons, Limes             | 1                                                           |
| 351             | China   | 2006           | Maize                     | 18                                                          |
| 351             | China   | 2006           | Marine Fish, Other        | 1                                                           |
| 351             | China   | 2006           | Meat, Other               | 3                                                           |
| 351             | China   | 2006           | Milk, Whole               | 66                                                          |
| 351             | China   | 2006           | Millet                    | 2                                                           |
| 351             | China   | 2006           | Molluscs, Other           | 18                                                          |
| 351             | China   | 2006           | Mutton & Goat Meat        | 7                                                           |
| 351             | China   | 2006           | Nuts                      | 4                                                           |
| 351             | China   | 2006           | Offals, Edible            | 8                                                           |
| 351             | China   | 2006           | Onions                    | 35                                                          |
| 351             | China   | 2006           | Oranges, Mandarines       | 32                                                          |
| 351             | China   | 2006           | Palm Oil                  | 5                                                           |
| 351             | China   | 2006           | Peas                      | 1                                                           |
| 351             | China   | 2006           | Pelagic Fish              | 3                                                           |
| 351             | China   | 2006           | Pig meat                  | 88                                                          |
| 351             | China   | 2006           | Pineapples                | 2                                                           |
| 351             | China   | 2006           | Potatoes                  | 80                                                          |
| 351             | China   | 2006           | Poultry Meat              | 30                                                          |
| 351             | China   | 2006           | Pulses, Other             | 2                                                           |
| 351             | China   | 2006           | Rape and Mustard Oil      | 5                                                           |
| 351             | China   | 2006           | Rice (Milled Equivalent)  | 207                                                         |
| 351             | China   | 2006           | Roots, Other              | 3                                                           |
| 351             | China   | 2006           | Sesameseed                | 1                                                           |
| 351             | China   | 2006           | Sorghum                   | 2                                                           |
| 351             | China   | 2006           | Soyabean Oil              | 7                                                           |
| 351             | China   | 2006           | Soyabbeans                | 11                                                          |
| 351             | China   | 2006           | Sugar, Non-Centrifugal    | 1                                                           |
| 351             | China   | 2006           | Sugar, Refined Equivalent | 16                                                          |
| 351             | China   | 2006           | Sunflowerseed Oil         | 1                                                           |
| 351             | China   | 2006           | Sweet Potatoes            | 85                                                          |
| 351             | China   | 2006           | Tea                       | 2                                                           |
| 351             | China   | 2006           | Tomatoes                  | 56                                                          |
| 351             | China   | 2006           | Vegetables, Other         | 700                                                         |
| 351             | China   | 2006           | Wheat                     | 184                                                         |
| 351             | China   | 2006           | Wine                      | 3                                                           |
| 351             | China   | 2007           | Apples                    | 37                                                          |
| 351             | China   | 2007           | Aquatic Animals, Others   | 1                                                           |
| 351             | China   | 2007           | Aquatic Plants            | 20                                                          |
| 351             | China   | 2007           | Bananas                   | 14                                                          |
| 351             | China   | 2007           | Beans                     | 1                                                           |
| 351             | China   | 2007           | Beer                      | 80                                                          |
| 351             | China   | 2007           | Beverages, Alcoholic      | 15                                                          |
| 351             | China   | 2007           | Beverages, Fermented      | 6                                                           |
| 351             | China   | 2007           | Bovine Meat               | 13                                                          |
| 351             | China   | 2007           | Cassava                   | 5                                                           |
| 351             | China   | 2007           | Cephalopods               | 3                                                           |
| 351             | China   | 2007           | Cereals, Other            | 1                                                           |
| 351             | China   | 2007           | Cheese                    | 1                                                           |
| 351             | China   | 2007           | Citrus, Other             | 7                                                           |
| 351             | China   | 2007           | Coconuts - Incl Copra     | 1                                                           |
| 351             | China   | 2007           | Cottonseed Oil            | 2                                                           |
| 351             | China   | 2007           | Crustaceans               | 8                                                           |
| 351             | China   | 2007           | Demersal Fish             | 10                                                          |
| 351             | China   | 2007           | Eggs                      | 47                                                          |
| 351             | China   | 2007           | Fats, Animals, Raw        | 6                                                           |
| 351             | China   | 2007           | Freshwater Fish           | 35                                                          |
| 351             | China   | 2007           | Fruits, Other             | 70                                                          |
| 351             | China   | 2007           | Grapefruit                | 4                                                           |
| 351             | China   | 2007           | Grapes                    | 9                                                           |
| 351             | China   | 2007           | Groundnut Oil             | 2                                                           |
| 351             | China   | 2007           | Groundnuts (Shelled Eq)   | 6                                                           |
| 351             | China   | 2007           | Honey                     | 1                                                           |
| 351             | China   | 2007           | Lemons, Limes             | 2                                                           |
| 351             | China   | 2007           | Maize                     | 18                                                          |
| 351             | China   | 2007           | Marine Fish, Other        | 1                                                           |
| 351             | China   | 2007           | Meat, Other               | 3                                                           |
| 351             | China   | 2007           | Milk, Whole               | 72                                                          |
| 351             | China   | 2007           | Millet                    | 1                                                           |
| 351             | China   | 2007           | Molluscs, Other           | 18                                                          |
| 351             | China   | 2007           | Mutton & Goat Meat        | 8                                                           |
| 351             | China   | 2007           | Nuts                      | 4                                                           |
| 351             | China   | 2007           | Offals, Edible            | 8                                                           |
| 351             | China   | 2007           | Onions                    | 36                                                          |
| 351             | China   | 2007           | Oranges, Mandarines       | 22                                                          |
| 351             | China   | 2007           | Palm Oil                  | 5                                                           |

Dietary calcium and zinc deficiency risks are decreasing but remain prevalent

| FAO countrycode | Country | Reference year | Food item                 | Gross food supply (g capita <sup>-1</sup> d <sup>-1</sup> ) |
|-----------------|---------|----------------|---------------------------|-------------------------------------------------------------|
| 351             | China   | 2007           | Peas                      | 1                                                           |
| 351             | China   | 2007           | Pelagic Fish              | 3                                                           |
| 351             | China   | 2007           | Pigmeat                   | 88                                                          |
| 351             | China   | 2007           | Pineapples                | 2                                                           |
| 351             | China   | 2007           | Potatoes                  | 95                                                          |
| 351             | China   | 2007           | Poultry Meat              | 32                                                          |
| 351             | China   | 2007           | Pulses, Other             | 2                                                           |
| 351             | China   | 2007           | Rape and Mustard Oil      | 5                                                           |
| 351             | China   | 2007           | Rice (Milled Equivalent)  | 206                                                         |
| 351             | China   | 2007           | Roots, Other              | 3                                                           |
| 351             | China   | 2007           | Sesameseed                | 1                                                           |
| 351             | China   | 2007           | Sorghum                   | 1                                                           |
| 351             | China   | 2007           | Soybean Oil               | 7                                                           |
| 351             | China   | 2007           | Soybeans                  | 11                                                          |
| 351             | China   | 2007           | Sugar, Refined Equivalent | 17                                                          |
| 351             | China   | 2007           | Sweet Potatoes            | 72                                                          |
| 351             | China   | 2007           | Tea                       | 2                                                           |
| 351             | China   | 2007           | Tomatoes                  | 61                                                          |
| 351             | China   | 2007           | Vegetables, Other         | 719                                                         |
| 351             | China   | 2007           | Wheat                     | 181                                                         |
| 351             | China   | 2007           | Wine                      | 3                                                           |
| 351             | China   | 2008           | Apples                    | 39                                                          |
| 351             | China   | 2008           | Aquatic Animals, Others   | 2                                                           |
| 351             | China   | 2008           | Aquatic Plants            | 21                                                          |
| 351             | China   | 2008           | Bananas                   | 14                                                          |
| 351             | China   | 2008           | Barley                    | 1                                                           |
| 351             | China   | 2008           | Beer                      | 84                                                          |
| 351             | China   | 2008           | Beverages, Alcoholic      | 15                                                          |
| 351             | China   | 2008           | Beverages, Fermented      | 6                                                           |
| 351             | China   | 2008           | Bovine Meat               | 13                                                          |
| 351             | China   | 2008           | Cassava                   | 5                                                           |
| 351             | China   | 2008           | Cephalopods               | 3                                                           |
| 351             | China   | 2008           | Cereals, Other            | 1                                                           |
| 351             | China   | 2008           | Cheese                    | 1                                                           |
| 351             | China   | 2008           | Citrus, Other             | 8                                                           |
| 351             | China   | 2008           | Coconuts - Incl Copra     | 1                                                           |
| 351             | China   | 2008           | Cottonseed Oil            | 2                                                           |
| 351             | China   | 2008           | Crustaceans               | 8                                                           |
| 351             | China   | 2008           | Demersal Fish             | 10                                                          |
| 351             | China   | 2008           | Eggs                      | 50                                                          |
| 351             | China   | 2008           | Fats, Animals, Raw        | 5                                                           |
| 351             | China   | 2008           | Freshwater Fish           | 37                                                          |
| 351             | China   | 2008           | Fruits, Other             | 73                                                          |
| 351             | China   | 2008           | Grapefruit                | 5                                                           |
| 351             | China   | 2008           | Grapes                    | 10                                                          |
| 351             | China   | 2008           | Groundnut Oil             | 2                                                           |
| 351             | China   | 2008           | Groundnuts (Shelled Eq)   | 7                                                           |
| 351             | China   | 2008           | Honey                     | 1                                                           |
| 351             | China   | 2008           | Lemons, Limes             | 7                                                           |
| 351             | China   | 2008           | Maize                     | 19                                                          |
| 351             | China   | 2008           | Marine Fish, Other        | 2                                                           |
| 351             | China   | 2008           | Meat, Other               | 3                                                           |
| 351             | China   | 2008           | Milk, Whole               | 72                                                          |
| 351             | China   | 2008           | Millet                    | 1                                                           |
| 351             | China   | 2008           | Molluscs, Other           | 19                                                          |
| 351             | China   | 2008           | Mutton & Goat Meat        | 8                                                           |
| 351             | China   | 2008           | Nuts                      | 5                                                           |
| 351             | China   | 2008           | Offals, Edible            | 9                                                           |
| 351             | China   | 2008           | Onions                    | 36                                                          |
| 351             | China   | 2008           | Oranges, Mandarines       | 25                                                          |
| 351             | China   | 2008           | Palm Oil                  | 5                                                           |
| 351             | China   | 2008           | Peas                      | 1                                                           |
| 351             | China   | 2008           | Pelagic Fish              | 3                                                           |
| 351             | China   | 2008           | Pigmeat                   | 93                                                          |
| 351             | China   | 2008           | Pineapples                | 2                                                           |
| 351             | China   | 2008           | Potatoes                  | 103                                                         |
| 351             | China   | 2008           | Poultry Meat              | 34                                                          |
| 351             | China   | 2008           | Pulses, Other             | 2                                                           |
| 351             | China   | 2008           | Rape and Mustard Oil      | 5                                                           |
| 351             | China   | 2008           | Rice (Milled Equivalent)  | 211                                                         |
| 351             | China   | 2008           | Roots, Other              | 3                                                           |
| 351             | China   | 2008           | Sesameseed                | 1                                                           |
| 351             | China   | 2008           | Sorghum                   | 2                                                           |
| 351             | China   | 2008           | Soybean Oil               | 6                                                           |
| 351             | China   | 2008           | Soybeans                  | 11                                                          |
| 351             | China   | 2008           | Sugar, Non-Centrifugal    | 1                                                           |
| 351             | China   | 2008           | Sugar, Refined Equivalent | 16                                                          |
| 351             | China   | 2008           | Sweet Potatoes            | 76                                                          |
| 351             | China   | 2008           | Tea                       | 2                                                           |
| 351             | China   | 2008           | Tomatoes                  | 68                                                          |
| 351             | China   | 2008           | Vegetables, Other         | 751                                                         |
| 351             | China   | 2008           | Wheat                     | 176                                                         |
| 351             | China   | 2008           | Wine                      | 3                                                           |
| 351             | China   | 2009           | Apples                    | 41                                                          |
| 351             | China   | 2009           | Aquatic Animals, Others   | 2                                                           |
| 351             | China   | 2009           | Aquatic Plants            | 21                                                          |
| 351             | China   | 2009           | Bananas                   | 15                                                          |
| 351             | China   | 2009           | Barley                    | 1                                                           |
| 351             | China   | 2009           | Beer                      | 84                                                          |
| 351             | China   | 2009           | Beverages, Alcoholic      | 15                                                          |
| 351             | China   | 2009           | Beverages, Fermented      | 6                                                           |
| 351             | China   | 2009           | Bovine Meat               | 13                                                          |
| 351             | China   | 2009           | Cassava                   | 5                                                           |
| 351             | China   | 2009           | Cephalopods               | 2                                                           |
| 351             | China   | 2009           | Cereals, Other            | 1                                                           |
| 351             | China   | 2009           | Cheese                    | 1                                                           |
| 351             | China   | 2009           | Citrus, Other             | 9                                                           |

## Dietary calcium and zinc deficiency risks are decreasing but remain prevalent

| FAO countrycode | Country | Reference year | Food item                 | Gross food supply (g capita <sup>-1</sup> d <sup>-1</sup> ) |
|-----------------|---------|----------------|---------------------------|-------------------------------------------------------------|
| 351             | China   | 2009           | Coconuts - Incl Copra     | 1                                                           |
| 351             | China   | 2009           | Cottonseed Oil            | 2                                                           |
| 351             | China   | 2009           | Crustaceans               | 9                                                           |
| 351             | China   | 2009           | Demersal Fish             | 9                                                           |
| 351             | China   | 2009           | Eggs                      | 50                                                          |
| 351             | China   | 2009           | Fats, Animals, Raw        | 5                                                           |
| 351             | China   | 2009           | Freshwater Fish           | 39                                                          |
| 351             | China   | 2009           | Fruits, Other             | 78                                                          |
| 351             | China   | 2009           | Grapefruit                | 5                                                           |
| 351             | China   | 2009           | Grapes                    | 11                                                          |
| 351             | China   | 2009           | Groundnut Oil             | 2                                                           |
| 351             | China   | 2009           | Groundnuts (Shelled Eq)   | 7                                                           |
| 351             | China   | 2009           | Honey                     | 1                                                           |
| 351             | China   | 2009           | Lemons, Limes             | 7                                                           |
| 351             | China   | 2009           | Maize                     | 19                                                          |
| 351             | China   | 2009           | Marine Fish, Other        | 4                                                           |
| 351             | China   | 2009           | Meat, Other               | 3                                                           |
| 351             | China   | 2009           | Milk, Whole               | 75                                                          |
| 351             | China   | 2009           | Millet                    | 1                                                           |
| 351             | China   | 2009           | Molluscs, Other           | 21                                                          |
| 351             | China   | 2009           | Mutton & Goat Meat        | 8                                                           |
| 351             | China   | 2009           | Nuts                      | 6                                                           |
| 351             | China   | 2009           | Offals, Edible            | 9                                                           |
| 351             | China   | 2009           | Onions                    | 37                                                          |
| 351             | China   | 2009           | Oranges, Mandarines       | 27                                                          |
| 351             | China   | 2009           | Palm Oil                  | 6                                                           |
| 351             | China   | 2009           | Peas                      | 1                                                           |
| 351             | China   | 2009           | Pelagic Fish              | 2                                                           |
| 351             | China   | 2009           | Pigmeat                   | 96                                                          |
| 351             | China   | 2009           | Pineapples                | 3                                                           |
| 351             | China   | 2009           | Potatoes                  | 103                                                         |
| 351             | China   | 2009           | Poultry Meat              | 35                                                          |
| 351             | China   | 2009           | Pulses, Other             | 2                                                           |
| 351             | China   | 2009           | Rape and Mustard Oil      | 5                                                           |
| 351             | China   | 2009           | Rice (Milled Equivalent)  | 212                                                         |
| 351             | China   | 2009           | Roots, Other              | 3                                                           |
| 351             | China   | 2009           | Sesameseed                | 1                                                           |
| 351             | China   | 2009           | Sorghum                   | 2                                                           |
| 351             | China   | 2009           | Soyabean Oil              | 6                                                           |
| 351             | China   | 2009           | Soyabeans                 | 11                                                          |
| 351             | China   | 2009           | Sugar, Non-Centrifugal    | 1                                                           |
| 351             | China   | 2009           | Sugar, Refined Equivalent | 16                                                          |
| 351             | China   | 2009           | Sweet Potatoes            | 69                                                          |
| 351             | China   | 2009           | Tea                       | 2                                                           |
| 351             | China   | 2009           | Tomatoes                  | 77                                                          |
| 351             | China   | 2009           | Vegetables, Other         | 754                                                         |
| 351             | China   | 2009           | Wheat                     | 170                                                         |
| 351             | China   | 2009           | Wine                      | 3                                                           |
| 351             | China   | 2010           | Apples                    | 44                                                          |
| 351             | China   | 2010           | Aquatic Animals, Others   | 2                                                           |
| 351             | China   | 2010           | Aquatic Plants            | 23                                                          |
| 351             | China   | 2010           | Bananas                   | 17                                                          |
| 351             | China   | 2010           | Beer                      | 90                                                          |
| 351             | China   | 2010           | Beverages, Alcoholic      | 14                                                          |
| 351             | China   | 2010           | Beverages, Fermented      | 6                                                           |
| 351             | China   | 2010           | Bovine Meat               | 13                                                          |
| 351             | China   | 2010           | Cassava                   | 5                                                           |
| 351             | China   | 2010           | Cephalopods               | 2                                                           |
| 351             | China   | 2010           | Cereals, Other            | 1                                                           |
| 351             | China   | 2010           | Cheese                    | 1                                                           |
| 351             | China   | 2010           | Citrus, Other             | 10                                                          |
| 351             | China   | 2010           | Coconut Oil               | 1                                                           |
| 351             | China   | 2010           | Coconuts - Incl Copra     | 1                                                           |
| 351             | China   | 2010           | Cottonseed Oil            | 1                                                           |
| 351             | China   | 2010           | Crustaceans               | 9                                                           |
| 351             | China   | 2010           | Demersal Fish             | 9                                                           |
| 351             | China   | 2010           | Eggs                      | 50                                                          |
| 351             | China   | 2010           | Fats, Animals, Raw        | 5                                                           |
| 351             | China   | 2010           | Freshwater Fish           | 41                                                          |
| 351             | China   | 2010           | Fruits, Other             | 80                                                          |
| 351             | China   | 2010           | Grapefruit                | 5                                                           |
| 351             | China   | 2010           | Grapes                    | 12                                                          |
| 351             | China   | 2010           | Groundnut Oil             | 2                                                           |
| 351             | China   | 2010           | Groundnuts (Shelled Eq)   | 9                                                           |
| 351             | China   | 2010           | Honey                     | 1                                                           |
| 351             | China   | 2010           | Lemons, Limes             | 4                                                           |
| 351             | China   | 2010           | Maize                     | 20                                                          |
| 351             | China   | 2010           | Marine Fish, Other        | 4                                                           |
| 351             | China   | 2010           | Meat, Other               | 3                                                           |
| 351             | China   | 2010           | Milk, Whole               | 78                                                          |
| 351             | China   | 2010           | Millet                    | 1                                                           |
| 351             | China   | 2010           | Molluscs, Other           | 22                                                          |
| 351             | China   | 2010           | Mutton & Goat Meat        | 8                                                           |
| 351             | China   | 2010           | Nuts                      | 7                                                           |
| 351             | China   | 2010           | Offals, Edible            | 9                                                           |
| 351             | China   | 2010           | Onions                    | 37                                                          |
| 351             | China   | 2010           | Oranges, Mandarines       | 31                                                          |
| 351             | China   | 2010           | Palm Oil                  | 5                                                           |
| 351             | China   | 2010           | Peas                      | 1                                                           |
| 351             | China   | 2010           | Pelagic Fish              | 2                                                           |
| 351             | China   | 2010           | Pigmeat                   | 98                                                          |
| 351             | China   | 2010           | Pineapples                | 2                                                           |
| 351             | China   | 2010           | Potatoes                  | 113                                                         |
| 351             | China   | 2010           | Poultry Meat              | 35                                                          |
| 351             | China   | 2010           | Pulses, Other             | 2                                                           |
| 351             | China   | 2010           | Rape and Mustard Oil      | 5                                                           |
| 351             | China   | 2010           | Rice (Milled Equivalent)  | 212                                                         |



Dietary calcium and zinc deficiency risks are decreasing but remain prevalent

| FAO countrycode | Country  | Reference year | Food item                 | Gross food supply (g capita <sup>-1</sup> d <sup>-1</sup> ) |
|-----------------|----------|----------------|---------------------------|-------------------------------------------------------------|
| 351             | China    | 2010           | Roots, Other              | 3                                                           |
| 351             | China    | 2010           | Sesameseed                | 1                                                           |
| 351             | China    | 2010           | Sorghum                   | 2                                                           |
| 351             | China    | 2010           | Soyabean Oil              | 6                                                           |
| 351             | China    | 2010           | Soyabeans                 | 11                                                          |
| 351             | China    | 2010           | Sugar, Non-Centrifugal    | 1                                                           |
| 351             | China    | 2010           | Sugar, Refined Equivalent | 16                                                          |
| 351             | China    | 2010           | Sweet Potatoes            | 65                                                          |
| 351             | China    | 2010           | Tea                       | 2                                                           |
| 351             | China    | 2010           | Tomatoes                  | 78                                                          |
| 351             | China    | 2010           | Vegetables, Other         | 781                                                         |
| 351             | China    | 2010           | Wheat                     | 171                                                         |
| 351             | China    | 2010           | Wine                      | 4                                                           |
| 351             | China    | 2011           | Apples                    | 48                                                          |
| 351             | China    | 2011           | Aquatic Animals, Others   | 2                                                           |
| 351             | China    | 2011           | Aquatic Plants            | 23                                                          |
| 351             | China    | 2011           | Bananas                   | 18                                                          |
| 351             | China    | 2011           | Beer                      | 96                                                          |
| 351             | China    | 2011           | Beverages, Alcoholic      | 14                                                          |
| 351             | China    | 2011           | Beverages, Fermented      | 6                                                           |
| 351             | China    | 2011           | Bovine Meat               | 13                                                          |
| 351             | China    | 2011           | Cassava                   | 5                                                           |
| 351             | China    | 2011           | Cephalopods               | 2                                                           |
| 351             | China    | 2011           | Cereals, Other            | 1                                                           |
| 351             | China    | 2011           | Cheese                    | 1                                                           |
| 351             | China    | 2011           | Citrus, Other             | 11                                                          |
| 351             | China    | 2011           | Coconuts - Incl Copra     | 1                                                           |
| 351             | China    | 2011           | Cottonseed Oil            | 1                                                           |
| 351             | China    | 2011           | Crustaceans               | 10                                                          |
| 351             | China    | 2011           | Demersal Fish             | 9                                                           |
| 351             | China    | 2011           | Eggs                      | 51                                                          |
| 351             | China    | 2011           | Fats, Animals, Raw        | 5                                                           |
| 351             | China    | 2011           | Freshwater Fish           | 42                                                          |
| 351             | China    | 2011           | Fruits, Other             | 85                                                          |
| 351             | China    | 2011           | Grapefruit                | 6                                                           |
| 351             | China    | 2011           | Grapes                    | 13                                                          |
| 351             | China    | 2011           | Groundnut Oil             | 2                                                           |
| 351             | China    | 2011           | Groundnuts (Shelled Eq)   | 8                                                           |
| 351             | China    | 2011           | Honey                     | 1                                                           |
| 351             | China    | 2011           | Lemons, Limes             | 4                                                           |
| 351             | China    | 2011           | Maize                     | 20                                                          |
| 351             | China    | 2011           | Marine Fish, Other        | 4                                                           |
| 351             | China    | 2011           | Meat, Other               | 3                                                           |
| 351             | China    | 2011           | Milk, Whole               | 79                                                          |
| 351             | China    | 2011           | Millet                    | 1                                                           |
| 351             | China    | 2011           | Molluscs, Other           | 22                                                          |
| 351             | China    | 2011           | Mutton & Goat Meat        | 8                                                           |
| 351             | China    | 2011           | Nuts                      | 7                                                           |
| 351             | China    | 2011           | Offals, Edible            | 10                                                          |
| 351             | China    | 2011           | Onions                    | 38                                                          |
| 351             | China    | 2011           | Oranges, Mandarines       | 35                                                          |
| 351             | China    | 2011           | Palm Oil                  | 6                                                           |
| 351             | China    | 2011           | Peas                      | 1                                                           |
| 351             | China    | 2011           | Pelagic Fish              | 1                                                           |
| 351             | China    | 2011           | Pigmeat                   | 98                                                          |
| 351             | China    | 2011           | Pineapples                | 2                                                           |
| 351             | China    | 2011           | Potatoes                  | 113                                                         |
| 351             | China    | 2011           | Poultry Meat              | 35                                                          |
| 351             | China    | 2011           | Pulses, Other             | 2                                                           |
| 351             | China    | 2011           | Rape and Mustard Oil      | 4                                                           |
| 351             | China    | 2011           | Rice (Milled Equivalent)  | 217                                                         |
| 351             | China    | 2011           | Roots, Other              | 3                                                           |
| 351             | China    | 2011           | Sesameseed                | 1                                                           |
| 351             | China    | 2011           | Sorghum                   | 2                                                           |
| 351             | China    | 2011           | Soyabean Oil              | 6                                                           |
| 351             | China    | 2011           | Soyabeans                 | 11                                                          |
| 351             | China    | 2011           | Sugar, Non-Centrifugal    | 1                                                           |
| 351             | China    | 2011           | Sugar, Refined Equivalent | 17                                                          |
| 351             | China    | 2011           | Sweet Potatoes            | 66                                                          |
| 351             | China    | 2011           | Tea                       | 3                                                           |
| 351             | China    | 2011           | Tomatoes                  | 80                                                          |
| 351             | China    | 2011           | Vegetables, Other         | 793                                                         |
| 351             | China    | 2011           | Wheat                     | 173                                                         |
| 351             | China    | 2011           | Wine                      | 4                                                           |
| 44              | Colombia | 1992           | Apples                    | 1                                                           |
| 44              | Colombia | 1992           | Bananas                   | 24                                                          |
| 44              | Colombia | 1992           | Barley                    | 2                                                           |
| 44              | Colombia | 1992           | Beans                     | 9                                                           |
| 44              | Colombia | 1992           | Beer                      | 48                                                          |
| 44              | Colombia | 1992           | Beverages, Alcoholic      | 10                                                          |
| 44              | Colombia | 1992           | Bovine Meat               | 46                                                          |
| 44              | Colombia | 1992           | Butter, Ghee              | 1                                                           |
| 44              | Colombia | 1992           | Cassava                   | 103                                                         |
| 44              | Colombia | 1992           | Cheese                    | 4                                                           |
| 44              | Colombia | 1992           | Cocoa Beans               | 4                                                           |
| 44              | Colombia | 1992           | Coconuts - Incl Copra     | 6                                                           |
| 44              | Colombia | 1992           | Coffee                    | 7                                                           |
| 44              | Colombia | 1992           | Cottonseed Oil            | 2                                                           |
| 44              | Colombia | 1992           | Eggs                      | 18                                                          |
| 44              | Colombia | 1992           | Fats, Animals, Raw        | 3                                                           |
| 44              | Colombia | 1992           | Freshwater Fish           | 4                                                           |
| 44              | Colombia | 1992           | Fruits, Other             | 52                                                          |
| 44              | Colombia | 1992           | Grapes                    | 3                                                           |
| 44              | Colombia | 1992           | Maize                     | 96                                                          |
| 44              | Colombia | 1992           | Maize Germ Oil            | 2                                                           |
| 44              | Colombia | 1992           | Marine Fish, Other        | 1                                                           |
| 44              | Colombia | 1992           | Meat, Other               | 1                                                           |

Dietary calcium and zinc deficiency risks are decreasing but remain prevalent

| FAO countrycode | Country  | Reference year | Food item                 | Gross food supply (g capita <sup>-1</sup> d <sup>-1</sup> ) |
|-----------------|----------|----------------|---------------------------|-------------------------------------------------------------|
| 44              | Colombia | 1992           | Milk, Whole               | 252                                                         |
| 44              | Colombia | 1992           | Mutton & Goat Meat        | 1                                                           |
| 44              | Colombia | 1992           | Oats                      | 2                                                           |
| 44              | Colombia | 1992           | Offals, Edible            | 9                                                           |
| 44              | Colombia | 1992           | Oilcrops, Other           | 4                                                           |
| 44              | Colombia | 1992           | Onions                    | 12                                                          |
| 44              | Colombia | 1992           | Oranges, Mandarines       | 18                                                          |
| 44              | Colombia | 1992           | Palm Oil                  | 12                                                          |
| 44              | Colombia | 1992           | Palmkernel Oil            | 2                                                           |
| 44              | Colombia | 1992           | Peas                      | 6                                                           |
| 44              | Colombia | 1992           | Pelagic Fish              | 3                                                           |
| 44              | Colombia | 1992           | Pigmeat                   | 11                                                          |
| 44              | Colombia | 1992           | Pineapples                | 20                                                          |
| 44              | Colombia | 1992           | Plantains                 | 151                                                         |
| 44              | Colombia | 1992           | Potatoes                  | 122                                                         |
| 44              | Colombia | 1992           | Poultry Meat              | 33                                                          |
| 44              | Colombia | 1992           | Pulses, Other             | 5                                                           |
| 44              | Colombia | 1992           | Rice (Milled Equivalent)  | 83                                                          |
| 44              | Colombia | 1992           | Roots, Other              | 5                                                           |
| 44              | Colombia | 1992           | Soyabean Oil              | 7                                                           |
| 44              | Colombia | 1992           | Sugar, Non-Centrifugal    | 33                                                          |
| 44              | Colombia | 1992           | Sugar, Refined Equivalent | 89                                                          |
| 44              | Colombia | 1992           | Sunflowerseed Oil         | 1                                                           |
| 44              | Colombia | 1992           | Tomatoes                  | 23                                                          |
| 44              | Colombia | 1992           | Vegetables, Other         | 28                                                          |
| 44              | Colombia | 1992           | Wheat                     | 72                                                          |
| 44              | Colombia | 1992           | Yams                      | 5                                                           |
| 44              | Colombia | 1993           | Apples                    | 2                                                           |
| 44              | Colombia | 1993           | Bananas                   | 25                                                          |
| 44              | Colombia | 1993           | Barley                    | 5                                                           |
| 44              | Colombia | 1993           | Beans                     | 9                                                           |
| 44              | Colombia | 1993           | Beer                      | 86                                                          |
| 44              | Colombia | 1993           | Beverages, Alcoholic      | 11                                                          |
| 44              | Colombia | 1993           | Bovine Meat               | 46                                                          |
| 44              | Colombia | 1993           | Butter, Ghee              | 1                                                           |
| 44              | Colombia | 1993           | Cassava                   | 106                                                         |
| 44              | Colombia | 1993           | Cheese                    | 4                                                           |
| 44              | Colombia | 1993           | Cocoa Beans               | 3                                                           |
| 44              | Colombia | 1993           | Coconuts - Incl Copra     | 5                                                           |
| 44              | Colombia | 1993           | Coffee                    | 7                                                           |
| 44              | Colombia | 1993           | Cottonseed Oil            | 1                                                           |
| 44              | Colombia | 1993           | Eggs                      | 19                                                          |
| 44              | Colombia | 1993           | Fats, Animals, Raw        | 3                                                           |
| 44              | Colombia | 1993           | Freshwater Fish           | 4                                                           |
| 44              | Colombia | 1993           | Fruits, Other             | 42                                                          |
| 44              | Colombia | 1993           | Grapes                    | 2                                                           |
| 44              | Colombia | 1993           | Maize                     | 102                                                         |
| 44              | Colombia | 1993           | Maize Germ Oil            | 2                                                           |
| 44              | Colombia | 1993           | Marine Fish, Other        | 1                                                           |
| 44              | Colombia | 1993           | Meat, Other               | 1                                                           |
| 44              | Colombia | 1993           | Milk, Whole               | 264                                                         |
| 44              | Colombia | 1993           | Mutton & Goat Meat        | 1                                                           |
| 44              | Colombia | 1993           | Oats                      | 1                                                           |
| 44              | Colombia | 1993           | Offals, Edible            | 9                                                           |
| 44              | Colombia | 1993           | Oilcrops, Other           | 5                                                           |
| 44              | Colombia | 1993           | Onions                    | 14                                                          |
| 44              | Colombia | 1993           | Oranges, Mandarines       | 23                                                          |
| 44              | Colombia | 1993           | Palm Oil                  | 14                                                          |
| 44              | Colombia | 1993           | Palmkernel Oil            | 2                                                           |
| 44              | Colombia | 1993           | Peas                      | 4                                                           |
| 44              | Colombia | 1993           | Pelagic Fish              | 5                                                           |
| 44              | Colombia | 1993           | Pigmeat                   | 11                                                          |
| 44              | Colombia | 1993           | Pineapples                | 22                                                          |
| 44              | Colombia | 1993           | Plantains                 | 145                                                         |
| 44              | Colombia | 1993           | Potatoes                  | 155                                                         |
| 44              | Colombia | 1993           | Poultry Meat              | 35                                                          |
| 44              | Colombia | 1993           | Pulses, Other             | 5                                                           |
| 44              | Colombia | 1993           | Rice (Milled Equivalent)  | 75                                                          |
| 44              | Colombia | 1993           | Roots, Other              | 5                                                           |
| 44              | Colombia | 1993           | Soyabean Oil              | 9                                                           |
| 44              | Colombia | 1993           | Sugar, Non-Centrifugal    | 34                                                          |
| 44              | Colombia | 1993           | Sugar, Refined Equivalent | 83                                                          |
| 44              | Colombia | 1993           | Sunflowerseed Oil         | 1                                                           |
| 44              | Colombia | 1993           | Tomatoes                  | 20                                                          |
| 44              | Colombia | 1993           | Vegetables, Other         | 31                                                          |
| 44              | Colombia | 1993           | Wheat                     | 73                                                          |
| 44              | Colombia | 1993           | Yams                      | 5                                                           |
| 44              | Colombia | 1994           | Apples                    | 4                                                           |
| 44              | Colombia | 1994           | Bananas                   | 20                                                          |
| 44              | Colombia | 1994           | Barley                    | 6                                                           |
| 44              | Colombia | 1994           | Beans                     | 11                                                          |
| 44              | Colombia | 1994           | Beer                      | 76                                                          |
| 44              | Colombia | 1994           | Beverages, Alcoholic      | 9                                                           |
| 44              | Colombia | 1994           | Bovine Meat               | 48                                                          |
| 44              | Colombia | 1994           | Butter, Ghee              | 1                                                           |
| 44              | Colombia | 1994           | Cassava                   | 99                                                          |
| 44              | Colombia | 1994           | Cheese                    | 4                                                           |
| 44              | Colombia | 1994           | Cocoa Beans               | 3                                                           |
| 44              | Colombia | 1994           | Coconuts - Incl Copra     | 6                                                           |
| 44              | Colombia | 1994           | Coffee                    | 7                                                           |
| 44              | Colombia | 1994           | Cottonseed Oil            | 1                                                           |
| 44              | Colombia | 1994           | Eggs                      | 19                                                          |
| 44              | Colombia | 1994           | Fats, Animals, Raw        | 4                                                           |
| 44              | Colombia | 1994           | Freshwater Fish           | 4                                                           |
| 44              | Colombia | 1994           | Fruits, Other             | 42                                                          |
| 44              | Colombia | 1994           | Grapes                    | 3                                                           |
| 44              | Colombia | 1994           | Maize                     | 100                                                         |

Dietary calcium and zinc deficiency risks are decreasing but remain prevalent

| FAO countrycode | Country  | Reference year | Food item                 | Gross food supply (g capita <sup>-1</sup> d <sup>-1</sup> ) |
|-----------------|----------|----------------|---------------------------|-------------------------------------------------------------|
| 44              | Colombia | 1994           | Maize Germ Oil            | 2                                                           |
| 44              | Colombia | 1994           | Meat, Other               | 1                                                           |
| 44              | Colombia | 1994           | Milk, Whole               | 270                                                         |
| 44              | Colombia | 1994           | Mutton & Goat Meat        | 1                                                           |
| 44              | Colombia | 1994           | Oats                      | 1                                                           |
| 44              | Colombia | 1994           | Offals, Edible            | 9                                                           |
| 44              | Colombia | 1994           | Oilcrops, Other           | 8                                                           |
| 44              | Colombia | 1994           | Onions                    | 15                                                          |
| 44              | Colombia | 1994           | Oranges, Mandarines       | 26                                                          |
| 44              | Colombia | 1994           | Palm Oil                  | 14                                                          |
| 44              | Colombia | 1994           | Palmkernel Oil            | 2                                                           |
| 44              | Colombia | 1994           | Peas                      | 3                                                           |
| 44              | Colombia | 1994           | Pelagic Fish              | 3                                                           |
| 44              | Colombia | 1994           | Pigmeat                   | 10                                                          |
| 44              | Colombia | 1994           | Pineapples                | 22                                                          |
| 44              | Colombia | 1994           | Plantains                 | 134                                                         |
| 44              | Colombia | 1994           | Potatoes                  | 157                                                         |
| 44              | Colombia | 1994           | Poultry Meat              | 39                                                          |
| 44              | Colombia | 1994           | Pulses, Other             | 4                                                           |
| 44              | Colombia | 1994           | Rice (Milled Equivalent)  | 83                                                          |
| 44              | Colombia | 1994           | Roots, Other              | 6                                                           |
| 44              | Colombia | 1994           | Soyabean Oil              | 8                                                           |
| 44              | Colombia | 1994           | Sugar, Non-Centrifugal    | 33                                                          |
| 44              | Colombia | 1994           | Sugar, Refined Equivalent | 83                                                          |
| 44              | Colombia | 1994           | Sunflowerseed Oil         | 1                                                           |
| 44              | Colombia | 1994           | Sweeteners, Other         | 1                                                           |
| 44              | Colombia | 1994           | Tomatoes                  | 22                                                          |
| 44              | Colombia | 1994           | Vegetables, Other         | 32                                                          |
| 44              | Colombia | 1994           | Wheat                     | 72                                                          |
| 44              | Colombia | 1994           | Yams                      | 8                                                           |
| 44              | Colombia | 1995           | Apples                    | 4                                                           |
| 44              | Colombia | 1995           | Bananas                   | 22                                                          |
| 44              | Colombia | 1995           | Barley                    | 5                                                           |
| 44              | Colombia | 1995           | Beans                     | 12                                                          |
| 44              | Colombia | 1995           | Beer                      | 80                                                          |
| 44              | Colombia | 1995           | Beverages, Alcoholic      | 10                                                          |
| 44              | Colombia | 1995           | Bovine Meat               | 52                                                          |
| 44              | Colombia | 1995           | Butter, Ghee              | 1                                                           |
| 44              | Colombia | 1995           | Cassava                   | 98                                                          |
| 44              | Colombia | 1995           | Cheese                    | 4                                                           |
| 44              | Colombia | 1995           | Cocoa Beans               | 4                                                           |
| 44              | Colombia | 1995           | Coconuts - Incl Copra     | 7                                                           |
| 44              | Colombia | 1995           | Coffee                    | 6                                                           |
| 44              | Colombia | 1995           | Cottonseed Oil            | 1                                                           |
| 44              | Colombia | 1995           | Eggs                      | 20                                                          |
| 44              | Colombia | 1995           | Fats, Animals, Raw        | 4                                                           |
| 44              | Colombia | 1995           | Freshwater Fish           | 4                                                           |
| 44              | Colombia | 1995           | Fruits, Other             | 47                                                          |
| 44              | Colombia | 1995           | Grapes                    | 2                                                           |
| 44              | Colombia | 1995           | Maize                     | 99                                                          |
| 44              | Colombia | 1995           | Maize Germ Oil            | 2                                                           |
| 44              | Colombia | 1995           | Marine Fish, Other        | 1                                                           |
| 44              | Colombia | 1995           | Meat, Other               | 1                                                           |
| 44              | Colombia | 1995           | Milk, Whole               | 288                                                         |
| 44              | Colombia | 1995           | Mutton & Goat Meat        | 1                                                           |
| 44              | Colombia | 1995           | Oats                      | 1                                                           |
| 44              | Colombia | 1995           | Offals, Edible            | 10                                                          |
| 44              | Colombia | 1995           | Oilcrops, Other           | 8                                                           |
| 44              | Colombia | 1995           | Onions                    | 31                                                          |
| 44              | Colombia | 1995           | Oranges, Mandarines       | 28                                                          |
| 44              | Colombia | 1995           | Palm Oil                  | 14                                                          |
| 44              | Colombia | 1995           | Palmkernel Oil            | 2                                                           |
| 44              | Colombia | 1995           | Peas                      | 3                                                           |
| 44              | Colombia | 1995           | Pelagic Fish              | 8                                                           |
| 44              | Colombia | 1995           | Pigmeat                   | 11                                                          |
| 44              | Colombia | 1995           | Pineapples                | 22                                                          |
| 44              | Colombia | 1995           | Plantains                 | 154                                                         |
| 44              | Colombia | 1995           | Potatoes                  | 154                                                         |
| 44              | Colombia | 1995           | Poultry Meat              | 43                                                          |
| 44              | Colombia | 1995           | Pulses, Other             | 3                                                           |
| 44              | Colombia | 1995           | Rice (Milled Equivalent)  | 77                                                          |
| 44              | Colombia | 1995           | Roots, Other              | 5                                                           |
| 44              | Colombia | 1995           | Soyabean Oil              | 8                                                           |
| 44              | Colombia | 1995           | Sugar, Non-Centrifugal    | 33                                                          |
| 44              | Colombia | 1995           | Sugar, Refined Equivalent | 84                                                          |
| 44              | Colombia | 1995           | Sunflowerseed Oil         | 1                                                           |
| 44              | Colombia | 1995           | Sweeteners, Other         | 1                                                           |
| 44              | Colombia | 1995           | Tomatoes                  | 19                                                          |
| 44              | Colombia | 1995           | Vegetables, Other         | 32                                                          |
| 44              | Colombia | 1995           | Wheat                     | 79                                                          |
| 44              | Colombia | 1995           | Yams                      | 8                                                           |
| 44              | Colombia | 1996           | Apples                    | 4                                                           |
| 44              | Colombia | 1996           | Bananas                   | 2                                                           |
| 44              | Colombia | 1996           | Barley                    | 5                                                           |
| 44              | Colombia | 1996           | Beans                     | 11                                                          |
| 44              | Colombia | 1996           | Beer                      | 75                                                          |
| 44              | Colombia | 1996           | Beverages, Alcoholic      | 9                                                           |
| 44              | Colombia | 1996           | Bovine Meat               | 53                                                          |
| 44              | Colombia | 1996           | Butter, Ghee              | 1                                                           |
| 44              | Colombia | 1996           | Cassava                   | 101                                                         |
| 44              | Colombia | 1996           | Cheese                    | 4                                                           |
| 44              | Colombia | 1996           | Cocoa Beans               | 3                                                           |
| 44              | Colombia | 1996           | Coconuts - Incl Copra     | 8                                                           |
| 44              | Colombia | 1996           | Coffee                    | 3                                                           |
| 44              | Colombia | 1996           | Cottonseed Oil            | 2                                                           |
| 44              | Colombia | 1996           | Eggs                      | 21                                                          |
| 44              | Colombia | 1996           | Fats, Animals, Raw        | 4                                                           |

Dietary calcium and zinc deficiency risks are decreasing but remain prevalent

| FAO countrycode | Country  | Reference year | Food item                 | Gross food supply (g capita <sup>-1</sup> d <sup>-1</sup> ) |
|-----------------|----------|----------------|---------------------------|-------------------------------------------------------------|
| 44              | Colombia | 1996           | Freshwater Fish           | 4                                                           |
| 44              | Colombia | 1996           | Fruits, Other             | 50                                                          |
| 44              | Colombia | 1996           | Grapes                    | 2                                                           |
| 44              | Colombia | 1996           | Groundnuts (Shelled Eq)   | 1                                                           |
| 44              | Colombia | 1996           | Maize                     | 105                                                         |
| 44              | Colombia | 1996           | Maize Germ Oil            | 2                                                           |
| 44              | Colombia | 1996           | Marine Fish, Other        | 1                                                           |
| 44              | Colombia | 1996           | Meat, Other               | 1                                                           |
| 44              | Colombia | 1996           | Milk, Whole               | 300                                                         |
| 44              | Colombia | 1996           | Mutton & Goat Meat        | 1                                                           |
| 44              | Colombia | 1996           | Oats                      | 1                                                           |
| 44              | Colombia | 1996           | Offals, Edible            | 10                                                          |
| 44              | Colombia | 1996           | Oilcrops, Other           | 8                                                           |
| 44              | Colombia | 1996           | Onions                    | 46                                                          |
| 44              | Colombia | 1996           | Oranges, Mandarines       | 27                                                          |
| 44              | Colombia | 1996           | Palm Oil                  | 13                                                          |
| 44              | Colombia | 1996           | Palmkernel Oil            | 2                                                           |
| 44              | Colombia | 1996           | Peas                      | 5                                                           |
| 44              | Colombia | 1996           | Pelagic Fish              | 8                                                           |
| 44              | Colombia | 1996           | Pigmeat                   | 10                                                          |
| 44              | Colombia | 1996           | Pineapples                | 18                                                          |
| 44              | Colombia | 1996           | Plantains                 | 135                                                         |
| 44              | Colombia | 1996           | Potatoes                  | 147                                                         |
| 44              | Colombia | 1996           | Poultry Meat              | 36                                                          |
| 44              | Colombia | 1996           | Pulses, Other             | 3                                                           |
| 44              | Colombia | 1996           | Rice (Milled Equivalent)  | 80                                                          |
| 44              | Colombia | 1996           | Roots, Other              | 4                                                           |
| 44              | Colombia | 1996           | Soyabean Oil              | 10                                                          |
| 44              | Colombia | 1996           | Soyabeans                 | 3                                                           |
| 44              | Colombia | 1996           | Sugar, Non-Centrifugal    | 32                                                          |
| 44              | Colombia | 1996           | Sugar, Refined Equivalent | 78                                                          |
| 44              | Colombia | 1996           | Sunflowerseed Oil         | 1                                                           |
| 44              | Colombia | 1996           | Sweeteners, Other         | 1                                                           |
| 44              | Colombia | 1996           | Tomatoes                  | 21                                                          |
| 44              | Colombia | 1996           | Vegetables, Other         | 31                                                          |
| 44              | Colombia | 1996           | Wheat                     | 76                                                          |
| 44              | Colombia | 1996           | Yams                      | 13                                                          |
| 44              | Colombia | 1997           | Apples                    | 4                                                           |
| 44              | Colombia | 1997           | Bananas                   | 3                                                           |
| 44              | Colombia | 1997           | Barley                    | 5                                                           |
| 44              | Colombia | 1997           | Beans                     | 10                                                          |
| 44              | Colombia | 1997           | Beer                      | 75                                                          |
| 44              | Colombia | 1997           | Beverages, Alcoholic      | 9                                                           |
| 44              | Colombia | 1997           | Bovine Meat               | 54                                                          |
| 44              | Colombia | 1997           | Butter, Ghee              | 1                                                           |
| 44              | Colombia | 1997           | Cassava                   | 101                                                         |
| 44              | Colombia | 1997           | Cheese                    | 4                                                           |
| 44              | Colombia | 1997           | Cocoa Beans               | 3                                                           |
| 44              | Colombia | 1997           | Coconuts - Incl Copra     | 6                                                           |
| 44              | Colombia | 1997           | Coffee                    | 3                                                           |
| 44              | Colombia | 1997           | Cottonseed Oil            | 1                                                           |
| 44              | Colombia | 1997           | Eggs                      | 22                                                          |
| 44              | Colombia | 1997           | Fats, Animals, Raw        | 3                                                           |
| 44              | Colombia | 1997           | Freshwater Fish           | 4                                                           |
| 44              | Colombia | 1997           | Fruits, Other             | 54                                                          |
| 44              | Colombia | 1997           | Grapes                    | 3                                                           |
| 44              | Colombia | 1997           | Maize                     | 104                                                         |
| 44              | Colombia | 1997           | Maize Germ Oil            | 2                                                           |
| 44              | Colombia | 1997           | Marine Fish, Other        | 1                                                           |
| 44              | Colombia | 1997           | Meat, Other               | 1                                                           |
| 44              | Colombia | 1997           | Milk, Whole               | 306                                                         |
| 44              | Colombia | 1997           | Mutton & Goat Meat        | 1                                                           |
| 44              | Colombia | 1997           | Oats                      | 2                                                           |
| 44              | Colombia | 1997           | Offals, Edible            | 9                                                           |
| 44              | Colombia | 1997           | Oilcrops, Other           | 8                                                           |
| 44              | Colombia | 1997           | Onions                    | 56                                                          |
| 44              | Colombia | 1997           | Oranges, Mandarines       | 28                                                          |
| 44              | Colombia | 1997           | Palm Oil                  | 14                                                          |
| 44              | Colombia | 1997           | Palmkernel Oil            | 2                                                           |
| 44              | Colombia | 1997           | Peas                      | 5                                                           |
| 44              | Colombia | 1997           | Pelagic Fish              | 8                                                           |
| 44              | Colombia | 1997           | Pigmeat                   | 8                                                           |
| 44              | Colombia | 1997           | Pineapples                | 17                                                          |
| 44              | Colombia | 1997           | Plantains                 | 134                                                         |
| 44              | Colombia | 1997           | Potatoes                  | 142                                                         |
| 44              | Colombia | 1997           | Poultry Meat              | 33                                                          |
| 44              | Colombia | 1997           | Pulses, Other             | 5                                                           |
| 44              | Colombia | 1997           | Rice (Milled Equivalent)  | 82                                                          |
| 44              | Colombia | 1997           | Roots, Other              | 6                                                           |
| 44              | Colombia | 1997           | Soyabean Oil              | 9                                                           |
| 44              | Colombia | 1997           | Soyabeans                 | 2                                                           |
| 44              | Colombia | 1997           | Sugar Beet                | 1                                                           |
| 44              | Colombia | 1997           | Sugar, Non-Centrifugal    | 32                                                          |
| 44              | Colombia | 1997           | Sugar, Refined Equivalent | 80                                                          |
| 44              | Colombia | 1997           | Sunflowerseed Oil         | 2                                                           |
| 44              | Colombia | 1997           | Sweeteners, Other         | 1                                                           |
| 44              | Colombia | 1997           | Tomatoes                  | 22                                                          |
| 44              | Colombia | 1997           | Vegetables, Other         | 34                                                          |
| 44              | Colombia | 1997           | Wheat                     | 77                                                          |
| 44              | Colombia | 1997           | Yams                      | 8                                                           |
| 44              | Colombia | 1998           | Apples                    | 4                                                           |
| 44              | Colombia | 1998           | Bananas                   | 7                                                           |
| 44              | Colombia | 1998           | Barley                    | 4                                                           |
| 44              | Colombia | 1998           | Beans                     | 10                                                          |
| 44              | Colombia | 1998           | Beer                      | 73                                                          |
| 44              | Colombia | 1998           | Beverages, Alcoholic      | 8                                                           |
| 44              | Colombia | 1998           | Bovine Meat               | 53                                                          |

Dietary calcium and zinc deficiency risks are decreasing but remain prevalent

| FAO countrycode | Country  | Reference year | Food item                 | Gross food supply (g capita <sup>-1</sup> d <sup>-1</sup> ) |
|-----------------|----------|----------------|---------------------------|-------------------------------------------------------------|
| 44              | Colombia | 1998           | Butter, Ghee              | 1                                                           |
| 44              | Colombia | 1998           | Cassava                   | 99                                                          |
| 44              | Colombia | 1998           | Cheese                    | 4                                                           |
| 44              | Colombia | 1998           | Cocoa Beans               | 4                                                           |
| 44              | Colombia | 1998           | Coconuts - Incl Copra     | 5                                                           |
| 44              | Colombia | 1998           | Coffee                    | 3                                                           |
| 44              | Colombia | 1998           | Cottonseed Oil            | 1                                                           |
| 44              | Colombia | 1998           | Demersal Fish             | 1                                                           |
| 44              | Colombia | 1998           | Eggs                      | 23                                                          |
| 44              | Colombia | 1998           | Fats, Animals, Raw        | 3                                                           |
| 44              | Colombia | 1998           | Freshwater Fish           | 5                                                           |
| 44              | Colombia | 1998           | Fruits, Other             | 47                                                          |
| 44              | Colombia | 1998           | Grapes                    | 2                                                           |
| 44              | Colombia | 1998           | Maize                     | 104                                                         |
| 44              | Colombia | 1998           | Maize Germ Oil            | 2                                                           |
| 44              | Colombia | 1998           | Marine Fish, Other        | 1                                                           |
| 44              | Colombia | 1998           | Meat, Other               | 1                                                           |
| 44              | Colombia | 1998           | Milk, Whole               | 314                                                         |
| 44              | Colombia | 1998           | Mutton & Goat Meat        | 1                                                           |
| 44              | Colombia | 1998           | Oats                      | 1                                                           |
| 44              | Colombia | 1998           | Offals, Edible            | 9                                                           |
| 44              | Colombia | 1998           | Oilcrops, Other           | 7                                                           |
| 44              | Colombia | 1998           | Onions                    | 47                                                          |
| 44              | Colombia | 1998           | Oranges, Mandarines       | 20                                                          |
| 44              | Colombia | 1998           | Palm Oil                  | 15                                                          |
| 44              | Colombia | 1998           | Palmkernel Oil            | 2                                                           |
| 44              | Colombia | 1998           | Peas                      | 5                                                           |
| 44              | Colombia | 1998           | Pelagic Fish              | 7                                                           |
| 44              | Colombia | 1998           | Pigmeat                   | 6                                                           |
| 44              | Colombia | 1998           | Pineapples                | 6                                                           |
| 44              | Colombia | 1998           | Plantains                 | 119                                                         |
| 44              | Colombia | 1998           | Potatoes                  | 130                                                         |
| 44              | Colombia | 1998           | Poultry Meat              | 38                                                          |
| 44              | Colombia | 1998           | Pulses, Other             | 4                                                           |
| 44              | Colombia | 1998           | Rice (Milled Equivalent)  | 83                                                          |
| 44              | Colombia | 1998           | Roots, Other              | 5                                                           |
| 44              | Colombia | 1998           | Soyabean Oil              | 10                                                          |
| 44              | Colombia | 1998           | Soybeans                  | 2                                                           |
| 44              | Colombia | 1998           | Sugar Beet                | 1                                                           |
| 44              | Colombia | 1998           | Sugar, Non-Centrifugal    | 33                                                          |
| 44              | Colombia | 1998           | Sugar, Refined Equivalent | 80                                                          |
| 44              | Colombia | 1998           | Sunflowerseed Oil         | 2                                                           |
| 44              | Colombia | 1998           | Sweeteners, Other         | 1                                                           |
| 44              | Colombia | 1998           | Tomatoes                  | 20                                                          |
| 44              | Colombia | 1998           | Vegetables, Other         | 32                                                          |
| 44              | Colombia | 1998           | Wheat                     | 78                                                          |
| 44              | Colombia | 1998           | Yams                      | 10                                                          |
| 44              | Colombia | 1999           | Apples                    | 4                                                           |
| 44              | Colombia | 1999           | Bananas                   | 2                                                           |
| 44              | Colombia | 1999           | Barley                    | 2                                                           |
| 44              | Colombia | 1999           | Beans                     | 10                                                          |
| 44              | Colombia | 1999           | Beer                      | 65                                                          |
| 44              | Colombia | 1999           | Beverages, Alcoholic      | 10                                                          |
| 44              | Colombia | 1999           | Bovine Meat               | 49                                                          |
| 44              | Colombia | 1999           | Butter, Ghee              | 1                                                           |
| 44              | Colombia | 1999           | Cassava                   | 99                                                          |
| 44              | Colombia | 1999           | Cheese                    | 4                                                           |
| 44              | Colombia | 1999           | Citrus, Other             | 46                                                          |
| 44              | Colombia | 1999           | Cocoa Beans               | 4                                                           |
| 44              | Colombia | 1999           | Coconuts - Incl Copra     | 7                                                           |
| 44              | Colombia | 1999           | Coffee                    | 2                                                           |
| 44              | Colombia | 1999           | Cottonseed Oil            | 1                                                           |
| 44              | Colombia | 1999           | Eggs                      | 23                                                          |
| 44              | Colombia | 1999           | Fats, Animals, Raw        | 3                                                           |
| 44              | Colombia | 1999           | Freshwater Fish           | 5                                                           |
| 44              | Colombia | 1999           | Fruits, Other             | 61                                                          |
| 44              | Colombia | 1999           | Grapes                    | 2                                                           |
| 44              | Colombia | 1999           | Lemons, Limes             | 4                                                           |
| 44              | Colombia | 1999           | Maize                     | 106                                                         |
| 44              | Colombia | 1999           | Maize Germ Oil            | 2                                                           |
| 44              | Colombia | 1999           | Meat, Other               | 1                                                           |
| 44              | Colombia | 1999           | Milk, Whole               | 299                                                         |
| 44              | Colombia | 1999           | Mutton & Goat Meat        | 1                                                           |
| 44              | Colombia | 1999           | Oats                      | 2                                                           |
| 44              | Colombia | 1999           | Offals, Edible            | 9                                                           |
| 44              | Colombia | 1999           | Oilcrops, Other           | 4                                                           |
| 44              | Colombia | 1999           | Onions                    | 33                                                          |
| 44              | Colombia | 1999           | Oranges, Mandarines       | 25                                                          |
| 44              | Colombia | 1999           | Palm Oil                  | 16                                                          |
| 44              | Colombia | 1999           | Palmkernel Oil            | 2                                                           |
| 44              | Colombia | 1999           | Peas                      | 5                                                           |
| 44              | Colombia | 1999           | Pelagic Fish              | 5                                                           |
| 44              | Colombia | 1999           | Pigmeat                   | 8                                                           |
| 44              | Colombia | 1999           | Pineapples                | 20                                                          |
| 44              | Colombia | 1999           | Plantains                 | 109                                                         |
| 44              | Colombia | 1999           | Potatoes                  | 142                                                         |
| 44              | Colombia | 1999           | Poultry Meat              | 36                                                          |
| 44              | Colombia | 1999           | Pulses, Other             | 5                                                           |
| 44              | Colombia | 1999           | Rice (Milled Equivalent)  | 86                                                          |
| 44              | Colombia | 1999           | Roots, Other              | 3                                                           |
| 44              | Colombia | 1999           | Soyabean Oil              | 10                                                          |
| 44              | Colombia | 1999           | Soybeans                  | 2                                                           |
| 44              | Colombia | 1999           | Spices, Other             | 1                                                           |
| 44              | Colombia | 1999           | Sugar Beet                | 1                                                           |
| 44              | Colombia | 1999           | Sugar, Non-Centrifugal    | 32                                                          |
| 44              | Colombia | 1999           | Sugar, Refined Equivalent | 87                                                          |
| 44              | Colombia | 1999           | Sunflowerseed Oil         | 1                                                           |

## Dietary calcium and zinc deficiency risks are decreasing but remain prevalent

| FAO countrycode | Country  | Reference year | Food item                 | Gross food supply (g capita <sup>-1</sup> d <sup>-1</sup> ) |
|-----------------|----------|----------------|---------------------------|-------------------------------------------------------------|
| 44              | Colombia | 1999           | Tomatoes                  | 25                                                          |
| 44              | Colombia | 1999           | Vegetables, Other         | 38                                                          |
| 44              | Colombia | 1999           | Wheat                     | 78                                                          |
| 44              | Colombia | 1999           | Yams                      | 13                                                          |
| 44              | Colombia | 2000           | Apples                    | 4                                                           |
| 44              | Colombia | 2000           | Bananas                   | 7                                                           |
| 44              | Colombia | 2000           | Barley                    | 2                                                           |
| 44              | Colombia | 2000           | Beans                     | 10                                                          |
| 44              | Colombia | 2000           | Beer                      | 92                                                          |
| 44              | Colombia | 2000           | Beverages, Alcoholic      | 9                                                           |
| 44              | Colombia | 2000           | Bovine Meat               | 50                                                          |
| 44              | Colombia | 2000           | Butter, Ghee              | 1                                                           |
| 44              | Colombia | 2000           | Cassava                   | 99                                                          |
| 44              | Colombia | 2000           | Cheese                    | 3                                                           |
| 44              | Colombia | 2000           | Citrus, Other             | 46                                                          |
| 44              | Colombia | 2000           | Cocoa Beans               | 3                                                           |
| 44              | Colombia | 2000           | Coconuts - Incl Copra     | 6                                                           |
| 44              | Colombia | 2000           | Coffee                    | 3                                                           |
| 44              | Colombia | 2000           | Cottonseed Oil            | 1                                                           |
| 44              | Colombia | 2000           | Eggs                      | 23                                                          |
| 44              | Colombia | 2000           | Fats, Animals, Raw        | 4                                                           |
| 44              | Colombia | 2000           | Freshwater Fish           | 6                                                           |
| 44              | Colombia | 2000           | Fruits, Other             | 63                                                          |
| 44              | Colombia | 2000           | Grapes                    | 2                                                           |
| 44              | Colombia | 2000           | Lemons, Limes             | 4                                                           |
| 44              | Colombia | 2000           | Maize                     | 107                                                         |
| 44              | Colombia | 2000           | Maize Germ Oil            | 2                                                           |
| 44              | Colombia | 2000           | Marine Fish, Other        | 1                                                           |
| 44              | Colombia | 2000           | Meat, Other               | 1                                                           |
| 44              | Colombia | 2000           | Milk, Whole               | 320                                                         |
| 44              | Colombia | 2000           | Mutton & Goat Meat        | 1                                                           |
| 44              | Colombia | 2000           | Oats                      | 2                                                           |
| 44              | Colombia | 2000           | Offals, Edible            | 9                                                           |
| 44              | Colombia | 2000           | Oilcrops, Other           | 4                                                           |
| 44              | Colombia | 2000           | Onions                    | 42                                                          |
| 44              | Colombia | 2000           | Oranges, Mandarines       | 26                                                          |
| 44              | Colombia | 2000           | Palm Oil                  | 16                                                          |
| 44              | Colombia | 2000           | Palmkernel Oil            | 2                                                           |
| 44              | Colombia | 2000           | Peas                      | 6                                                           |
| 44              | Colombia | 2000           | Pelagic Fish              | 6                                                           |
| 44              | Colombia | 2000           | Pigmeat                   | 8                                                           |
| 44              | Colombia | 2000           | Pineapples                | 17                                                          |
| 44              | Colombia | 2000           | Plantains                 | 126                                                         |
| 44              | Colombia | 2000           | Potatoes                  | 66                                                          |
| 44              | Colombia | 2000           | Poultry Meat              | 37                                                          |
| 44              | Colombia | 2000           | Pulses, Other             | 5                                                           |
| 44              | Colombia | 2000           | Rice (Milled Equivalent)  | 98                                                          |
| 44              | Colombia | 2000           | Roots, Other              | 3                                                           |
| 44              | Colombia | 2000           | Soyabean Oil              | 13                                                          |
| 44              | Colombia | 2000           | Soyabeans                 | 3                                                           |
| 44              | Colombia | 2000           | Spices, Other             | 1                                                           |
| 44              | Colombia | 2000           | Sugar Beet                | 1                                                           |
| 44              | Colombia | 2000           | Sugar, Non-Centrifugal    | 32                                                          |
| 44              | Colombia | 2000           | Sugar, Refined Equivalent | 82                                                          |
| 44              | Colombia | 2000           | Sunflowerseed Oil         | 2                                                           |
| 44              | Colombia | 2000           | Sweeteners, Other         | 1                                                           |
| 44              | Colombia | 2000           | Tomatoes                  | 26                                                          |
| 44              | Colombia | 2000           | Vegetables, Other         | 40                                                          |
| 44              | Colombia | 2000           | Wheat                     | 78                                                          |
| 44              | Colombia | 2000           | Yams                      | 15                                                          |
| 44              | Colombia | 2001           | Apples                    | 4                                                           |
| 44              | Colombia | 2001           | Bananas                   | 7                                                           |
| 44              | Colombia | 2001           | Barley                    | 4                                                           |
| 44              | Colombia | 2001           | Beans                     | 10                                                          |
| 44              | Colombia | 2001           | Beer                      | 94                                                          |
| 44              | Colombia | 2001           | Beverages, Alcoholic      | 10                                                          |
| 44              | Colombia | 2001           | Bovine Meat               | 46                                                          |
| 44              | Colombia | 2001           | Butter, Ghee              | 1                                                           |
| 44              | Colombia | 2001           | Cassava                   | 101                                                         |
| 44              | Colombia | 2001           | Cheese                    | 3                                                           |
| 44              | Colombia | 2001           | Citrus, Other             | 47                                                          |
| 44              | Colombia | 2001           | Cocoa Beans               | 2                                                           |
| 44              | Colombia | 2001           | Coconuts - Incl Copra     | 6                                                           |
| 44              | Colombia | 2001           | Coffee                    | 3                                                           |
| 44              | Colombia | 2001           | Cottonseed Oil            | 1                                                           |
| 44              | Colombia | 2001           | Eggs                      | 25                                                          |
| 44              | Colombia | 2001           | Fats, Animals, Raw        | 4                                                           |
| 44              | Colombia | 2001           | Freshwater Fish           | 5                                                           |
| 44              | Colombia | 2001           | Fruits, Other             | 62                                                          |
| 44              | Colombia | 2001           | Grapes                    | 2                                                           |
| 44              | Colombia | 2001           | Lemons, Limes             | 6                                                           |
| 44              | Colombia | 2001           | Maize                     | 106                                                         |
| 44              | Colombia | 2001           | Maize Germ Oil            | 2                                                           |
| 44              | Colombia | 2001           | Marine Fish, Other        | 1                                                           |
| 44              | Colombia | 2001           | Meat, Other               | 1                                                           |
| 44              | Colombia | 2001           | Milk, Whole               | 321                                                         |
| 44              | Colombia | 2001           | Mutton & Goat Meat        | 1                                                           |
| 44              | Colombia | 2001           | Oats                      | 2                                                           |
| 44              | Colombia | 2001           | Offals, Edible            | 8                                                           |
| 44              | Colombia | 2001           | Oilcrops, Other           | 2                                                           |
| 44              | Colombia | 2001           | Onions                    | 24                                                          |
| 44              | Colombia | 2001           | Oranges, Mandarines       | 18                                                          |
| 44              | Colombia | 2001           | Palm Oil                  | 16                                                          |
| 44              | Colombia | 2001           | Palmkernel Oil            | 2                                                           |
| 44              | Colombia | 2001           | Peas                      | 6                                                           |
| 44              | Colombia | 2001           | Pelagic Fish              | 8                                                           |
| 44              | Colombia | 2001           | Pigmeat                   | 7                                                           |

## Dietary calcium and zinc deficiency risks are decreasing but remain prevalent

| FAO countrycode | Country  | Reference year | Food item                 | Gross food supply (g capita <sup>-1</sup> d <sup>-1</sup> ) |
|-----------------|----------|----------------|---------------------------|-------------------------------------------------------------|
| 44              | Colombia | 2001           | Pineapples                | 16                                                          |
| 44              | Colombia | 2001           | Plantains                 | 138                                                         |
| 44              | Colombia | 2001           | Potatoes                  | 84                                                          |
| 44              | Colombia | 2001           | Poultry Meat              | 43                                                          |
| 44              | Colombia | 2001           | Pulses, Other             | 5                                                           |
| 44              | Colombia | 2001           | Rice (Milled Equivalent)  | 97                                                          |
| 44              | Colombia | 2001           | Roots, Other              | 2                                                           |
| 44              | Colombia | 2001           | Soyabean Oil              | 13                                                          |
| 44              | Colombia | 2001           | Soyabeans                 | 4                                                           |
| 44              | Colombia | 2001           | Spices, Other             | 1                                                           |
| 44              | Colombia | 2001           | Sugar Beet                | 1                                                           |
| 44              | Colombia | 2001           | Sugar, Non-Centrifugal    | 35                                                          |
| 44              | Colombia | 2001           | Sugar, Refined Equivalent | 78                                                          |
| 44              | Colombia | 2001           | Sunflowerseed Oil         | 2                                                           |
| 44              | Colombia | 2001           | Sweeteners, Other         | 1                                                           |
| 44              | Colombia | 2001           | Tomatoes                  | 27                                                          |
| 44              | Colombia | 2001           | Vegetables, Other         | 43                                                          |
| 44              | Colombia | 2001           | Wheat                     | 82                                                          |
| 44              | Colombia | 2001           | Yams                      | 15                                                          |
| 44              | Colombia | 2002           | Apples                    | 4                                                           |
| 44              | Colombia | 2002           | Bananas                   | 5                                                           |
| 44              | Colombia | 2002           | Barley                    | 4                                                           |
| 44              | Colombia | 2002           | Beans                     | 10                                                          |
| 44              | Colombia | 2002           | Beer                      | 81                                                          |
| 44              | Colombia | 2002           | Beverages, Alcoholic      | 10                                                          |
| 44              | Colombia | 2002           | Bovine Meat               | 44                                                          |
| 44              | Colombia | 2002           | Butter, Ghee              | 1                                                           |
| 44              | Colombia | 2002           | Cassava                   | 85                                                          |
| 44              | Colombia | 2002           | Cheese                    | 4                                                           |
| 44              | Colombia | 2002           | Citrus, Other             | 47                                                          |
| 44              | Colombia | 2002           | Cocoa Beans               | 3                                                           |
| 44              | Colombia | 2002           | Coconuts - Incl Copra     | 6                                                           |
| 44              | Colombia | 2002           | Coffee                    | 4                                                           |
| 44              | Colombia | 2002           | Cottonseed Oil            | 1                                                           |
| 44              | Colombia | 2002           | Demersal Fish             | 1                                                           |
| 44              | Colombia | 2002           | Eggs                      | 24                                                          |
| 44              | Colombia | 2002           | Fats, Animals, Raw        | 4                                                           |
| 44              | Colombia | 2002           | Freshwater Fish           | 5                                                           |
| 44              | Colombia | 2002           | Fruits, Other             | 62                                                          |
| 44              | Colombia | 2002           | Grapes                    | 2                                                           |
| 44              | Colombia | 2002           | Lemons, Limes             | 5                                                           |
| 44              | Colombia | 2002           | Maize                     | 107                                                         |
| 44              | Colombia | 2002           | Maize Germ Oil            | 2                                                           |
| 44              | Colombia | 2002           | Marine Fish, Other        | 1                                                           |
| 44              | Colombia | 2002           | Meat, Other               | 1                                                           |
| 44              | Colombia | 2002           | Milk, Whole               | 327                                                         |
| 44              | Colombia | 2002           | Mutton & Goat Meat        | 1                                                           |
| 44              | Colombia | 2002           | Oats                      | 2                                                           |
| 44              | Colombia | 2002           | Offals, Edible            | 8                                                           |
| 44              | Colombia | 2002           | Oilcrops, Other           | 1                                                           |
| 44              | Colombia | 2002           | Onions                    | 25                                                          |
| 44              | Colombia | 2002           | Oranges, Mandarines       | 21                                                          |
| 44              | Colombia | 2002           | Palm Oil                  | 16                                                          |
| 44              | Colombia | 2002           | Palmkernel Oil            | 2                                                           |
| 44              | Colombia | 2002           | Peas                      | 6                                                           |
| 44              | Colombia | 2002           | Pelagic Fish              | 7                                                           |
| 44              | Colombia | 2002           | Pigmeat                   | 8                                                           |
| 44              | Colombia | 2002           | Pineapples                | 18                                                          |
| 44              | Colombia | 2002           | Plantains                 | 137                                                         |
| 44              | Colombia | 2002           | Potatoes                  | 81                                                          |
| 44              | Colombia | 2002           | Poultry Meat              | 45                                                          |
| 44              | Colombia | 2002           | Pulses, Other             | 5                                                           |
| 44              | Colombia | 2002           | Rice (Milled Equivalent)  | 91                                                          |
| 44              | Colombia | 2002           | Roots, Other              | 4                                                           |
| 44              | Colombia | 2002           | Soyabean Oil              | 13                                                          |
| 44              | Colombia | 2002           | Soyabeans                 | 5                                                           |
| 44              | Colombia | 2002           | Spices, Other             | 1                                                           |
| 44              | Colombia | 2002           | Sugar Beet                | 1                                                           |
| 44              | Colombia | 2002           | Sugar, Non-Centrifugal    | 33                                                          |
| 44              | Colombia | 2002           | Sugar, Refined Equivalent | 79                                                          |
| 44              | Colombia | 2002           | Sunflowerseed Oil         | 1                                                           |
| 44              | Colombia | 2002           | Tomatoes                  | 28                                                          |
| 44              | Colombia | 2002           | Vegetables, Other         | 43                                                          |
| 44              | Colombia | 2002           | Wheat                     | 81                                                          |
| 44              | Colombia | 2002           | Wine                      | 1                                                           |
| 44              | Colombia | 2002           | Yams                      | 14                                                          |
| 44              | Colombia | 2003           | Apples                    | 3                                                           |
| 44              | Colombia | 2003           | Bananas                   | 13                                                          |
| 44              | Colombia | 2003           | Barley                    | 4                                                           |
| 44              | Colombia | 2003           | Beans                     | 8                                                           |
| 44              | Colombia | 2003           | Beer                      | 99                                                          |
| 44              | Colombia | 2003           | Beverages, Alcoholic      | 10                                                          |
| 44              | Colombia | 2003           | Bovine Meat               | 41                                                          |
| 44              | Colombia | 2003           | Butter, Ghee              | 1                                                           |
| 44              | Colombia | 2003           | Cassava                   | 78                                                          |
| 44              | Colombia | 2003           | Cheese                    | 3                                                           |
| 44              | Colombia | 2003           | Citrus, Other             | 46                                                          |
| 44              | Colombia | 2003           | Cocoa Beans               | 2                                                           |
| 44              | Colombia | 2003           | Coconuts - Incl Copra     | 7                                                           |
| 44              | Colombia | 2003           | Coffee                    | 6                                                           |
| 44              | Colombia | 2003           | Demersal Fish             | 1                                                           |
| 44              | Colombia | 2003           | Eggs                      | 26                                                          |
| 44              | Colombia | 2003           | Fats, Animals, Raw        | 4                                                           |
| 44              | Colombia | 2003           | Freshwater Fish           | 5                                                           |
| 44              | Colombia | 2003           | Fruits, Other             | 65                                                          |
| 44              | Colombia | 2003           | Grapes                    | 3                                                           |
| 44              | Colombia | 2003           | Lemons, Limes             | 5                                                           |

## Dietary calcium and zinc deficiency risks are decreasing but remain prevalent

| FAO countrycode | Country  | Reference year | Food item                 | Gross food supply (g capita <sup>-1</sup> d <sup>-1</sup> ) |
|-----------------|----------|----------------|---------------------------|-------------------------------------------------------------|
| 44              | Colombia | 2003           | Maize                     | 107                                                         |
| 44              | Colombia | 2003           | Maize Germ Oil            | 2                                                           |
| 44              | Colombia | 2003           | Marine Fish, Other        | 1                                                           |
| 44              | Colombia | 2003           | Meat, Other               | 1                                                           |
| 44              | Colombia | 2003           | Milk, Whole               | 324                                                         |
| 44              | Colombia | 2003           | Mutton & Goat Meat        | 1                                                           |
| 44              | Colombia | 2003           | Oats                      | 2                                                           |
| 44              | Colombia | 2003           | Offals, Edible            | 7                                                           |
| 44              | Colombia | 2003           | Onions                    | 32                                                          |
| 44              | Colombia | 2003           | Oranges, Mandarines       | 8                                                           |
| 44              | Colombia | 2003           | Palm Oil                  | 16                                                          |
| 44              | Colombia | 2003           | Palmkernel Oil            | 2                                                           |
| 44              | Colombia | 2003           | Peas                      | 6                                                           |
| 44              | Colombia | 2003           | Pelagic Fish              | 8                                                           |
| 44              | Colombia | 2003           | Pigmeat                   | 8                                                           |
| 44              | Colombia | 2003           | Pineapples                | 19                                                          |
| 44              | Colombia | 2003           | Plantains                 | 129                                                         |
| 44              | Colombia | 2003           | Potatoes                  | 100                                                         |
| 44              | Colombia | 2003           | Poultry Meat              | 46                                                          |
| 44              | Colombia | 2003           | Pulses, Other             | 5                                                           |
| 44              | Colombia | 2003           | Rice (Milled Equivalent)  | 92                                                          |
| 44              | Colombia | 2003           | Roots, Other              | 6                                                           |
| 44              | Colombia | 2003           | Soyabean Oil              | 13                                                          |
| 44              | Colombia | 2003           | Soyabeans                 | 3                                                           |
| 44              | Colombia | 2003           | Spices, Other             | 1                                                           |
| 44              | Colombia | 2003           | Sugar Beet                | 1                                                           |
| 44              | Colombia | 2003           | Sugar, Non-Centrifugal    | 34                                                          |
| 44              | Colombia | 2003           | Sugar, Refined Equivalent | 80                                                          |
| 44              | Colombia | 2003           | Sunflowerseed Oil         | 2                                                           |
| 44              | Colombia | 2003           | Tomatoes                  | 26                                                          |
| 44              | Colombia | 2003           | Vegetables, Other         | 46                                                          |
| 44              | Colombia | 2003           | Wheat                     | 82                                                          |
| 44              | Colombia | 2003           | Wine                      | 1                                                           |
| 44              | Colombia | 2003           | Yams                      | 16                                                          |
| 44              | Colombia | 2004           | Apples                    | 4                                                           |
| 44              | Colombia | 2004           | Bananas                   | 13                                                          |
| 44              | Colombia | 2004           | Barley                    | 4                                                           |
| 44              | Colombia | 2004           | Beans                     | 8                                                           |
| 44              | Colombia | 2004           | Beer                      | 103                                                         |
| 44              | Colombia | 2004           | Beverages, Alcoholic      | 9                                                           |
| 44              | Colombia | 2004           | Bovine Meat               | 44                                                          |
| 44              | Colombia | 2004           | Butter, Ghee              | 1                                                           |
| 44              | Colombia | 2004           | Cassava                   | 78                                                          |
| 44              | Colombia | 2004           | Cheese                    | 3                                                           |
| 44              | Colombia | 2004           | Citrus, Other             | 46                                                          |
| 44              | Colombia | 2004           | Cocoa Beans               | 2                                                           |
| 44              | Colombia | 2004           | Coconuts - Incl Copra     | 6                                                           |
| 44              | Colombia | 2004           | Coffee                    | 5                                                           |
| 44              | Colombia | 2004           | Cottonseed Oil            | 1                                                           |
| 44              | Colombia | 2004           | Demersal Fish             | 1                                                           |
| 44              | Colombia | 2004           | Eggs                      | 25                                                          |
| 44              | Colombia | 2004           | Fats, Animals, Raw        | 4                                                           |
| 44              | Colombia | 2004           | Freshwater Fish           | 5                                                           |
| 44              | Colombia | 2004           | Fruits, Other             | 66                                                          |
| 44              | Colombia | 2004           | Grapes                    | 3                                                           |
| 44              | Colombia | 2004           | Lemons, Limes             | 6                                                           |
| 44              | Colombia | 2004           | Maize                     | 107                                                         |
| 44              | Colombia | 2004           | Maize Germ Oil            | 2                                                           |
| 44              | Colombia | 2004           | Marine Fish, Other        | 1                                                           |
| 44              | Colombia | 2004           | Meat, Other               | 2                                                           |
| 44              | Colombia | 2004           | Milk, Whole               | 306                                                         |
| 44              | Colombia | 2004           | Mutton & Goat Meat        | 1                                                           |
| 44              | Colombia | 2004           | Oats                      | 2                                                           |
| 44              | Colombia | 2004           | Offals, Edible            | 8                                                           |
| 44              | Colombia | 2004           | Onions                    | 27                                                          |
| 44              | Colombia | 2004           | Oranges, Mandarines       | 10                                                          |
| 44              | Colombia | 2004           | Palm Oil                  | 15                                                          |
| 44              | Colombia | 2004           | Palmkernel Oil            | 3                                                           |
| 44              | Colombia | 2004           | Peas                      | 5                                                           |
| 44              | Colombia | 2004           | Pelagic Fish              | 7                                                           |
| 44              | Colombia | 2004           | Pigmeat                   | 9                                                           |
| 44              | Colombia | 2004           | Pineapples                | 19                                                          |
| 44              | Colombia | 2004           | Plantains                 | 134                                                         |
| 44              | Colombia | 2004           | Potatoes                  | 93                                                          |
| 44              | Colombia | 2004           | Poultry Meat              | 47                                                          |
| 44              | Colombia | 2004           | Pulses, Other             | 5                                                           |
| 44              | Colombia | 2004           | Rice (Milled Equivalent)  | 92                                                          |
| 44              | Colombia | 2004           | Roots, Other              | 6                                                           |
| 44              | Colombia | 2004           | Soyabean Oil              | 13                                                          |
| 44              | Colombia | 2004           | Soyabeans                 | 1                                                           |
| 44              | Colombia | 2004           | Spices, Other             | 1                                                           |
| 44              | Colombia | 2004           | Sugar Beet                | 1                                                           |
| 44              | Colombia | 2004           | Sugar, Non-Centrifugal    | 33                                                          |
| 44              | Colombia | 2004           | Sugar, Refined Equivalent | 81                                                          |
| 44              | Colombia | 2004           | Sunflowerseed Oil         | 2                                                           |
| 44              | Colombia | 2004           | Tomatoes                  | 27                                                          |
| 44              | Colombia | 2004           | Vegetables, Other         | 47                                                          |
| 44              | Colombia | 2004           | Wheat                     | 82                                                          |
| 44              | Colombia | 2004           | Wine                      | 1                                                           |
| 44              | Colombia | 2004           | Yams                      | 17                                                          |
| 44              | Colombia | 2005           | Apples                    | 4                                                           |
| 44              | Colombia | 2005           | Bananas                   | 9                                                           |
| 44              | Colombia | 2005           | Barley                    | 4                                                           |
| 44              | Colombia | 2005           | Beans                     | 10                                                          |
| 44              | Colombia | 2005           | Beer                      | 105                                                         |
| 44              | Colombia | 2005           | Beverages, Alcoholic      | 10                                                          |
| 44              | Colombia | 2005           | Bovine Meat               | 49                                                          |



Dietary calcium and zinc deficiency risks are decreasing but remain prevalent

| FAO countrycode | Country  | Reference year | Food item                 | Gross food supply (g capita <sup>-1</sup> d <sup>-1</sup> ) |
|-----------------|----------|----------------|---------------------------|-------------------------------------------------------------|
| 44              | Colombia | 2005           | Butter, Ghee              | 1                                                           |
| 44              | Colombia | 2005           | Cassava                   | 74                                                          |
| 44              | Colombia | 2005           | Cheese                    | 3                                                           |
| 44              | Colombia | 2005           | Citrus, Other             | 47                                                          |
| 44              | Colombia | 2005           | Cocoa Beans               | 2                                                           |
| 44              | Colombia | 2005           | Coconuts - Incl Copra     | 7                                                           |
| 44              | Colombia | 2005           | Coffee                    | 5                                                           |
| 44              | Colombia | 2005           | Cottonseed Oil            | 1                                                           |
| 44              | Colombia | 2005           | Demersal Fish             | 1                                                           |
| 44              | Colombia | 2005           | Eggs                      | 27                                                          |
| 44              | Colombia | 2005           | Fats, Animals, Raw        | 4                                                           |
| 44              | Colombia | 2005           | Freshwater Fish           | 4                                                           |
| 44              | Colombia | 2005           | Fruits, Other             | 67                                                          |
| 44              | Colombia | 2005           | Grapes                    | 3                                                           |
| 44              | Colombia | 2005           | Lemons, Limes             | 6                                                           |
| 44              | Colombia | 2005           | Maize                     | 102                                                         |
| 44              | Colombia | 2005           | Maize Germ Oil            | 2                                                           |
| 44              | Colombia | 2005           | Marine Fish, Other        | 2                                                           |
| 44              | Colombia | 2005           | Meat, Other               | 2                                                           |
| 44              | Colombia | 2005           | Milk, Whole               | 293                                                         |
| 44              | Colombia | 2005           | Mutton & Goat Meat        | 1                                                           |
| 44              | Colombia | 2005           | Oats                      | 2                                                           |
| 44              | Colombia | 2005           | Offals, Edible            | 9                                                           |
| 44              | Colombia | 2005           | Onions                    | 27                                                          |
| 44              | Colombia | 2005           | Oranges, Mandarines       | 11                                                          |
| 44              | Colombia | 2005           | Palm Oil                  | 16                                                          |
| 44              | Colombia | 2005           | Palmkernel Oil            | 3                                                           |
| 44              | Colombia | 2005           | Peas                      | 5                                                           |
| 44              | Colombia | 2005           | Pelagic Fish              | 8                                                           |
| 44              | Colombia | 2005           | Pigmeat                   | 8                                                           |
| 44              | Colombia | 2005           | Pineapples                | 18                                                          |
| 44              | Colombia | 2005           | Plantains                 | 129                                                         |
| 44              | Colombia | 2005           | Potatoes                  | 81                                                          |
| 44              | Colombia | 2005           | Poultry Meat              | 50                                                          |
| 44              | Colombia | 2005           | Pulses, Other             | 5                                                           |
| 44              | Colombia | 2005           | Rice (Milled Equivalent)  | 89                                                          |
| 44              | Colombia | 2005           | Roots, Other              | 6                                                           |
| 44              | Colombia | 2005           | Soyabean Oil              | 13                                                          |
| 44              | Colombia | 2005           | Soyabeans                 | 1                                                           |
| 44              | Colombia | 2005           | Spices, Other             | 1                                                           |
| 44              | Colombia | 2005           | Sugar Beet                | 1                                                           |
| 44              | Colombia | 2005           | Sugar, Non-Centrifugal    | 31                                                          |
| 44              | Colombia | 2005           | Sugar, Refined Equivalent | 81                                                          |
| 44              | Colombia | 2005           | Sunflowerseed Oil         | 1                                                           |
| 44              | Colombia | 2005           | Tomatoes                  | 27                                                          |
| 44              | Colombia | 2005           | Vegetables, Other         | 47                                                          |
| 44              | Colombia | 2005           | Wheat                     | 80                                                          |
| 44              | Colombia | 2005           | Wine                      | 1                                                           |
| 44              | Colombia | 2005           | Yams                      | 15                                                          |
| 44              | Colombia | 2006           | Apples                    | 4                                                           |
| 44              | Colombia | 2006           | Bananas                   | 16                                                          |
| 44              | Colombia | 2006           | Barley                    | 4                                                           |
| 44              | Colombia | 2006           | Beans                     | 9                                                           |
| 44              | Colombia | 2006           | Beer                      | 112                                                         |
| 44              | Colombia | 2006           | Beverages, Alcoholic      | 7                                                           |
| 44              | Colombia | 2006           | Bovine Meat               | 49                                                          |
| 44              | Colombia | 2006           | Butter, Ghee              | 1                                                           |
| 44              | Colombia | 2006           | Cassava                   | 75                                                          |
| 44              | Colombia | 2006           | Cheese                    | 3                                                           |
| 44              | Colombia | 2006           | Citrus, Other             | 46                                                          |
| 44              | Colombia | 2006           | Cocoa Beans               | 3                                                           |
| 44              | Colombia | 2006           | Coconuts - Incl Copra     | 7                                                           |
| 44              | Colombia | 2006           | Coffee                    | 5                                                           |
| 44              | Colombia | 2006           | Cottonseed Oil            | 1                                                           |
| 44              | Colombia | 2006           | Demersal Fish             | 1                                                           |
| 44              | Colombia | 2006           | Eggs                      | 29                                                          |
| 44              | Colombia | 2006           | Fats, Animals, Raw        | 4                                                           |
| 44              | Colombia | 2006           | Freshwater Fish           | 5                                                           |
| 44              | Colombia | 2006           | Fruits, Other             | 74                                                          |
| 44              | Colombia | 2006           | Grapes                    | 3                                                           |
| 44              | Colombia | 2006           | Lemons, Limes             | 6                                                           |
| 44              | Colombia | 2006           | Maize                     | 99                                                          |
| 44              | Colombia | 2006           | Maize Germ Oil            | 2                                                           |
| 44              | Colombia | 2006           | Marine Fish, Other        | 1                                                           |
| 44              | Colombia | 2006           | Meat, Other               | 2                                                           |
| 44              | Colombia | 2006           | Milk, Whole               | 320                                                         |
| 44              | Colombia | 2006           | Mutton & Goat Meat        | 1                                                           |
| 44              | Colombia | 2006           | Oats                      | 2                                                           |
| 44              | Colombia | 2006           | Offals, Edible            | 9                                                           |
| 44              | Colombia | 2006           | Onions                    | 17                                                          |
| 44              | Colombia | 2006           | Oranges, Mandarines       | 29                                                          |
| 44              | Colombia | 2006           | Palm Oil                  | 16                                                          |
| 44              | Colombia | 2006           | Palmkernel Oil            | 3                                                           |
| 44              | Colombia | 2006           | Peas                      | 4                                                           |
| 44              | Colombia | 2006           | Pelagic Fish              | 9                                                           |
| 44              | Colombia | 2006           | Pigmeat                   | 10                                                          |
| 44              | Colombia | 2006           | Pineapples                | 19                                                          |
| 44              | Colombia | 2006           | Plantains                 | 131                                                         |
| 44              | Colombia | 2006           | Potatoes                  | 96                                                          |
| 44              | Colombia | 2006           | Poultry Meat              | 55                                                          |
| 44              | Colombia | 2006           | Pulses, Other             | 6                                                           |
| 44              | Colombia | 2006           | Rice (Milled Equivalent)  | 86                                                          |
| 44              | Colombia | 2006           | Roots, Other              | 6                                                           |
| 44              | Colombia | 2006           | Soyabean Oil              | 13                                                          |
| 44              | Colombia | 2006           | Soyabeans                 | 1                                                           |
| 44              | Colombia | 2006           | Spices, Other             | 1                                                           |
| 44              | Colombia | 2006           | Sugar Beet                | 1                                                           |

## Dietary calcium and zinc deficiency risks are decreasing but remain prevalent

| FAO countrycode | Country  | Reference year | Food item                 | Gross food supply (g capita <sup>-1</sup> d <sup>-1</sup> ) |
|-----------------|----------|----------------|---------------------------|-------------------------------------------------------------|
| 44              | Colombia | 2006           | Sugar, Non-Centrifugal    | 31                                                          |
| 44              | Colombia | 2006           | Sugar, Refined Equivalent | 71                                                          |
| 44              | Colombia | 2006           | Sunflowerseed Oil         | 1                                                           |
| 44              | Colombia | 2006           | Tomatoes                  | 29                                                          |
| 44              | Colombia | 2006           | Vegetables, Other         | 45                                                          |
| 44              | Colombia | 2006           | Wheat                     | 83                                                          |
| 44              | Colombia | 2006           | Wine                      | 1                                                           |
| 44              | Colombia | 2006           | Yams                      | 14                                                          |
| 44              | Colombia | 2007           | Apples                    | 4                                                           |
| 44              | Colombia | 2007           | Bananas                   | 9                                                           |
| 44              | Colombia | 2007           | Barley                    | 4                                                           |
| 44              | Colombia | 2007           | Beans                     | 7                                                           |
| 44              | Colombia | 2007           | Beer                      | 112                                                         |
| 44              | Colombia | 2007           | Beverages, Alcoholic      | 7                                                           |
| 44              | Colombia | 2007           | Bovine Meat               | 47                                                          |
| 44              | Colombia | 2007           | Butter, Ghee              | 1                                                           |
| 44              | Colombia | 2007           | Cassava                   | 93                                                          |
| 44              | Colombia | 2007           | Cheese                    | 3                                                           |
| 44              | Colombia | 2007           | Citrus, Other             | 46                                                          |
| 44              | Colombia | 2007           | Cocoa Beans               | 3                                                           |
| 44              | Colombia | 2007           | Coconuts - Incl Copra     | 6                                                           |
| 44              | Colombia | 2007           | Coffee                    | 3                                                           |
| 44              | Colombia | 2007           | Cottonseed Oil            | 1                                                           |
| 44              | Colombia | 2007           | Demersal Fish             | 1                                                           |
| 44              | Colombia | 2007           | Eggs                      | 26                                                          |
| 44              | Colombia | 2007           | Fats, Animals, Raw        | 4                                                           |
| 44              | Colombia | 2007           | Freshwater Fish           | 5                                                           |
| 44              | Colombia | 2007           | Fruits, Other             | 78                                                          |
| 44              | Colombia | 2007           | Grapes                    | 4                                                           |
| 44              | Colombia | 2007           | Lemons, Limes             | 6                                                           |
| 44              | Colombia | 2007           | Maize                     | 98                                                          |
| 44              | Colombia | 2007           | Maize Germ Oil            | 2                                                           |
| 44              | Colombia | 2007           | Marine Fish, Other        | 2                                                           |
| 44              | Colombia | 2007           | Meat, Other               | 2                                                           |
| 44              | Colombia | 2007           | Milk, Whole               | 312                                                         |
| 44              | Colombia | 2007           | Mutton & Goat Meat        | 1                                                           |
| 44              | Colombia | 2007           | Oats                      | 2                                                           |
| 44              | Colombia | 2007           | Offals, Edible            | 9                                                           |
| 44              | Colombia | 2007           | Onions                    | 18                                                          |
| 44              | Colombia | 2007           | Oranges, Mandarines       | 24                                                          |
| 44              | Colombia | 2007           | Palm Oil                  | 16                                                          |
| 44              | Colombia | 2007           | Palmkernel Oil            | 3                                                           |
| 44              | Colombia | 2007           | Peas                      | 5                                                           |
| 44              | Colombia | 2007           | Pelagic Fish              | 9                                                           |
| 44              | Colombia | 2007           | Pigmeat                   | 12                                                          |
| 44              | Colombia | 2007           | Pineapples                | 20                                                          |
| 44              | Colombia | 2007           | Plantains                 | 136                                                         |
| 44              | Colombia | 2007           | Potatoes                  | 130                                                         |
| 44              | Colombia | 2007           | Poultry Meat              | 59                                                          |
| 44              | Colombia | 2007           | Pulses, Other             | 6                                                           |
| 44              | Colombia | 2007           | Rice (Milled Equivalent)  | 83                                                          |
| 44              | Colombia | 2007           | Roots, Other              | 6                                                           |
| 44              | Colombia | 2007           | Soyabean Oil              | 13                                                          |
| 44              | Colombia | 2007           | Soybeans                  | 1                                                           |
| 44              | Colombia | 2007           | Spices, Other             | 1                                                           |
| 44              | Colombia | 2007           | Sugar Beet                | 1                                                           |
| 44              | Colombia | 2007           | Sugar, Non-Centrifugal    | 30                                                          |
| 44              | Colombia | 2007           | Sugar, Refined Equivalent | 71                                                          |
| 44              | Colombia | 2007           | Sunflowerseed Oil         | 2                                                           |
| 44              | Colombia | 2007           | Sweeteners, Other         | 1                                                           |
| 44              | Colombia | 2007           | Tomatoes                  | 30                                                          |
| 44              | Colombia | 2007           | Vegetables, Other         | 47                                                          |
| 44              | Colombia | 2007           | Wheat                     | 79                                                          |
| 44              | Colombia | 2007           | Wine                      | 1                                                           |
| 44              | Colombia | 2007           | Yams                      | 14                                                          |
| 44              | Colombia | 2008           | Apples                    | 4                                                           |
| 44              | Colombia | 2008           | Bananas                   | 16                                                          |
| 44              | Colombia | 2008           | Barley                    | 4                                                           |
| 44              | Colombia | 2008           | Beans                     | 8                                                           |
| 44              | Colombia | 2008           | Beer                      | 115                                                         |
| 44              | Colombia | 2008           | Beverages, Alcoholic      | 6                                                           |
| 44              | Colombia | 2008           | Bovine Meat               | 45                                                          |
| 44              | Colombia | 2008           | Butter, Ghee              | 1                                                           |
| 44              | Colombia | 2008           | Cassava                   | 88                                                          |
| 44              | Colombia | 2008           | Cheese                    | 3                                                           |
| 44              | Colombia | 2008           | Citrus, Other             | 47                                                          |
| 44              | Colombia | 2008           | Cocoa Beans               | 3                                                           |
| 44              | Colombia | 2008           | Coconuts - Incl Copra     | 6                                                           |
| 44              | Colombia | 2008           | Coffee                    | 2                                                           |
| 44              | Colombia | 2008           | Cottonseed Oil            | 1                                                           |
| 44              | Colombia | 2008           | Demersal Fish             | 1                                                           |
| 44              | Colombia | 2008           | Eggs                      | 28                                                          |
| 44              | Colombia | 2008           | Fats, Animals, Raw        | 4                                                           |
| 44              | Colombia | 2008           | Freshwater Fish           | 5                                                           |
| 44              | Colombia | 2008           | Fruits, Other             | 75                                                          |
| 44              | Colombia | 2008           | Grapes                    | 4                                                           |
| 44              | Colombia | 2008           | Groundnuts (Shelled Eq)   | 1                                                           |
| 44              | Colombia | 2008           | Lemons, Limes             | 4                                                           |
| 44              | Colombia | 2008           | Maize                     | 93                                                          |
| 44              | Colombia | 2008           | Maize Germ Oil            | 2                                                           |
| 44              | Colombia | 2008           | Marine Fish, Other        | 1                                                           |
| 44              | Colombia | 2008           | Meat, Other               | 2                                                           |
| 44              | Colombia | 2008           | Milk, Whole               | 344                                                         |
| 44              | Colombia | 2008           | Mutton & Goat Meat        | 1                                                           |
| 44              | Colombia | 2008           | Oats                      | 1                                                           |
| 44              | Colombia | 2008           | Offals, Edible            | 9                                                           |
| 44              | Colombia | 2008           | Onions                    | 19                                                          |

Dietary calcium and zinc deficiency risks are decreasing but remain prevalent

| FAO countrycode | Country  | Reference year | Food item                 | Gross food supply (g capita <sup>-1</sup> d <sup>-1</sup> ) |
|-----------------|----------|----------------|---------------------------|-------------------------------------------------------------|
| 44              | Colombia | 2008           | Oranges, Mandarines       | 18                                                          |
| 44              | Colombia | 2008           | Palm Oil                  | 16                                                          |
| 44              | Colombia | 2008           | Palmkernel Oil            | 3                                                           |
| 44              | Colombia | 2008           | Peas                      | 5                                                           |
| 44              | Colombia | 2008           | Pelagic Fish              | 9                                                           |
| 44              | Colombia | 2008           | Pigmeat                   | 11                                                          |
| 44              | Colombia | 2008           | Pineapples                | 20                                                          |
| 44              | Colombia | 2008           | Plantains                 | 140                                                         |
| 44              | Colombia | 2008           | Potatoes                  | 108                                                         |
| 44              | Colombia | 2008           | Poultry Meat              | 64                                                          |
| 44              | Colombia | 2008           | Pulses, Other             | 5                                                           |
| 44              | Colombia | 2008           | Rice (Milled Equivalent)  | 84                                                          |
| 44              | Colombia | 2008           | Roots, Other              | 5                                                           |
| 44              | Colombia | 2008           | Soyabean Oil              | 13                                                          |
| 44              | Colombia | 2008           | Soyabbeans                | 1                                                           |
| 44              | Colombia | 2008           | Spices, Other             | 1                                                           |
| 44              | Colombia | 2008           | Sugar Beet                | 2                                                           |
| 44              | Colombia | 2008           | Sugar, Non-Centrifugal    | 30                                                          |
| 44              | Colombia | 2008           | Sugar, Refined Equivalent | 75                                                          |
| 44              | Colombia | 2008           | Sunflowerseed Oil         | 1                                                           |
| 44              | Colombia | 2008           | Sweeteners, Other         | 1                                                           |
| 44              | Colombia | 2008           | Tomatoes                  | 31                                                          |
| 44              | Colombia | 2008           | Vegetables, Other         | 54                                                          |
| 44              | Colombia | 2008           | Wheat                     | 84                                                          |
| 44              | Colombia | 2008           | Wine                      | 1                                                           |
| 44              | Colombia | 2008           | Yams                      | 14                                                          |
| 44              | Colombia | 2009           | Apples                    | 5                                                           |
| 44              | Colombia | 2009           | Bananas                   | 7                                                           |
| 44              | Colombia | 2009           | Barley                    | 4                                                           |
| 44              | Colombia | 2009           | Beans                     | 9                                                           |
| 44              | Colombia | 2009           | Beer                      | 115                                                         |
| 44              | Colombia | 2009           | Beverages, Alcoholic      | 6                                                           |
| 44              | Colombia | 2009           | Bovine Meat               | 41                                                          |
| 44              | Colombia | 2009           | Butter, Ghee              | 1                                                           |
| 44              | Colombia | 2009           | Cassava                   | 106                                                         |
| 44              | Colombia | 2009           | Cheese                    | 3                                                           |
| 44              | Colombia | 2009           | Citrus, Other             | 44                                                          |
| 44              | Colombia | 2009           | Cocoa Beans               | 3                                                           |
| 44              | Colombia | 2009           | Coconuts - Incl Copra     | 5                                                           |
| 44              | Colombia | 2009           | Coffee                    | 1                                                           |
| 44              | Colombia | 2009           | Demersal Fish             | 1                                                           |
| 44              | Colombia | 2009           | Eggs                      | 30                                                          |
| 44              | Colombia | 2009           | Fats, Animals, Raw        | 3                                                           |
| 44              | Colombia | 2009           | Freshwater Fish           | 5                                                           |
| 44              | Colombia | 2009           | Fruits, Other             | 75                                                          |
| 44              | Colombia | 2009           | Grapes                    | 4                                                           |
| 44              | Colombia | 2009           | Groundnuts (Shelled Eq)   | 1                                                           |
| 44              | Colombia | 2009           | Lemons, Limes             | 5                                                           |
| 44              | Colombia | 2009           | Maize                     | 84                                                          |
| 44              | Colombia | 2009           | Maize Germ Oil            | 1                                                           |
| 44              | Colombia | 2009           | Marine Fish, Other        | 1                                                           |
| 44              | Colombia | 2009           | Meat, Other               | 3                                                           |
| 44              | Colombia | 2009           | Milk, Whole               | 281                                                         |
| 44              | Colombia | 2009           | Mutton & Goat Meat        | 1                                                           |
| 44              | Colombia | 2009           | Offals, Edible            | 8                                                           |
| 44              | Colombia | 2009           | Onions                    | 24                                                          |
| 44              | Colombia | 2009           | Oranges, Mandarines       | 17                                                          |
| 44              | Colombia | 2009           | Palm Oil                  | 16                                                          |
| 44              | Colombia | 2009           | Palmkernel Oil            | 3                                                           |
| 44              | Colombia | 2009           | Peas                      | 5                                                           |
| 44              | Colombia | 2009           | Pelagic Fish              | 8                                                           |
| 44              | Colombia | 2009           | Pigmeat                   | 11                                                          |
| 44              | Colombia | 2009           | Pineapples                | 15                                                          |
| 44              | Colombia | 2009           | Plantains                 | 127                                                         |
| 44              | Colombia | 2009           | Potatoes                  | 102                                                         |
| 44              | Colombia | 2009           | Poultry Meat              | 63                                                          |
| 44              | Colombia | 2009           | Pulses, Other             | 4                                                           |
| 44              | Colombia | 2009           | Rape and Mustard Oil      | 1                                                           |
| 44              | Colombia | 2009           | Rice (Milled Equivalent)  | 84                                                          |
| 44              | Colombia | 2009           | Roots, Other              | 3                                                           |
| 44              | Colombia | 2009           | Soyabean Oil              | 13                                                          |
| 44              | Colombia | 2009           | Soyabbeans                | 2                                                           |
| 44              | Colombia | 2009           | Spices, Other             | 1                                                           |
| 44              | Colombia | 2009           | Sugar Beet                | 1                                                           |
| 44              | Colombia | 2009           | Sugar, Non-Centrifugal    | 27                                                          |
| 44              | Colombia | 2009           | Sugar, Refined Equivalent | 75                                                          |
| 44              | Colombia | 2009           | Sunflowerseed Oil         | 1                                                           |
| 44              | Colombia | 2009           | Tomatoes                  | 32                                                          |
| 44              | Colombia | 2009           | Vegetables, Other         | 51                                                          |
| 44              | Colombia | 2009           | Wheat                     | 81                                                          |
| 44              | Colombia | 2009           | Wine                      | 1                                                           |
| 44              | Colombia | 2009           | Yams                      | 20                                                          |
| 44              | Colombia | 2010           | Apples                    | 5                                                           |
| 44              | Colombia | 2010           | Bananas                   | 17                                                          |
| 44              | Colombia | 2010           | Barley                    | 3                                                           |
| 44              | Colombia | 2010           | Beans                     | 9                                                           |
| 44              | Colombia | 2010           | Beer                      | 109                                                         |
| 44              | Colombia | 2010           | Beverages, Alcoholic      | 6                                                           |
| 44              | Colombia | 2010           | Bovine Meat               | 44                                                          |
| 44              | Colombia | 2010           | Butter, Ghee              | 1                                                           |
| 44              | Colombia | 2010           | Cassava                   | 105                                                         |
| 44              | Colombia | 2010           | Cheese                    | 3                                                           |
| 44              | Colombia | 2010           | Citrus, Other             | 43                                                          |
| 44              | Colombia | 2010           | Cocoa Beans               | 3                                                           |
| 44              | Colombia | 2010           | Coconuts - Incl Copra     | 6                                                           |
| 44              | Colombia | 2010           | Coffee                    | 4                                                           |
| 44              | Colombia | 2010           | Eggs                      | 30                                                          |

## Dietary calcium and zinc deficiency risks are decreasing but remain prevalent

| FAO countrycode | Country  | Reference year | Food item                 | Gross food supply (g capita <sup>-1</sup> d <sup>-1</sup> ) |
|-----------------|----------|----------------|---------------------------|-------------------------------------------------------------|
| 44              | Colombia | 2010           | Fats, Animals, Raw        | 3                                                           |
| 44              | Colombia | 2010           | Freshwater Fish           | 5                                                           |
| 44              | Colombia | 2010           | Fruits, Other             | 71                                                          |
| 44              | Colombia | 2010           | Grapes                    | 4                                                           |
| 44              | Colombia | 2010           | Groundnuts (Shelled Eq)   | 1                                                           |
| 44              | Colombia | 2010           | Lemons, Limes             | 5                                                           |
| 44              | Colombia | 2010           | Maize                     | 77                                                          |
| 44              | Colombia | 2010           | Maize Germ Oil            | 1                                                           |
| 44              | Colombia | 2010           | Marine Fish, Other        | 1                                                           |
| 44              | Colombia | 2010           | Meat, Other               | 3                                                           |
| 44              | Colombia | 2010           | Milk, Whole               | 276                                                         |
| 44              | Colombia | 2010           | Mutton & Goat Meat        | 1                                                           |
| 44              | Colombia | 2010           | Offals, Edible            | 8                                                           |
| 44              | Colombia | 2010           | Onions                    | 27                                                          |
| 44              | Colombia | 2010           | Oranges, Mandarines       | 19                                                          |
| 44              | Colombia | 2010           | Palm Oil                  | 26                                                          |
| 44              | Colombia | 2010           | Palmkernel Oil            | 3                                                           |
| 44              | Colombia | 2010           | Peas                      | 5                                                           |
| 44              | Colombia | 2010           | Pelagic Fish              | 8                                                           |
| 44              | Colombia | 2010           | Pigmeat                   | 12                                                          |
| 44              | Colombia | 2010           | Pineapples                | 20                                                          |
| 44              | Colombia | 2010           | Plantains                 | 135                                                         |
| 44              | Colombia | 2010           | Potatoes                  | 83                                                          |
| 44              | Colombia | 2010           | Poultry Meat              | 66                                                          |
| 44              | Colombia | 2010           | Pulses, Other             | 5                                                           |
| 44              | Colombia | 2010           | Rape and Mustard Oil      | 1                                                           |
| 44              | Colombia | 2010           | Rice (Milled Equivalent)  | 80                                                          |
| 44              | Colombia | 2010           | Roots, Other              | 3                                                           |
| 44              | Colombia | 2010           | Soyabean Oil              | 15                                                          |
| 44              | Colombia | 2010           | Soyabeans                 | 2                                                           |
| 44              | Colombia | 2010           | Spices, Other             | 1                                                           |
| 44              | Colombia | 2010           | Sugar Beet                | 1                                                           |
| 44              | Colombia | 2010           | Sugar, Non-Centrifugal    | 26                                                          |
| 44              | Colombia | 2010           | Sugar, Refined Equivalent | 58                                                          |
| 44              | Colombia | 2010           | Sunflowerseed Oil         | 2                                                           |
| 44              | Colombia | 2010           | Sweeteners, Other         | 1                                                           |
| 44              | Colombia | 2010           | Tomatoes                  | 32                                                          |
| 44              | Colombia | 2010           | Vegetables, Other         | 47                                                          |
| 44              | Colombia | 2010           | Wheat                     | 84                                                          |
| 44              | Colombia | 2010           | Wine                      | 1                                                           |
| 44              | Colombia | 2010           | Yams                      | 19                                                          |
| 44              | Colombia | 2011           | Apples                    | 6                                                           |
| 44              | Colombia | 2011           | Bananas                   | 10                                                          |
| 44              | Colombia | 2011           | Barley                    | 3                                                           |
| 44              | Colombia | 2011           | Beans                     | 9                                                           |
| 44              | Colombia | 2011           | Beer                      | 111                                                         |
| 44              | Colombia | 2011           | Beverages, Alcoholic      | 6                                                           |
| 44              | Colombia | 2011           | Bovine Meat               | 47                                                          |
| 44              | Colombia | 2011           | Butter, Ghee              | 1                                                           |
| 44              | Colombia | 2011           | Cassava                   | 100                                                         |
| 44              | Colombia | 2011           | Cheese                    | 3                                                           |
| 44              | Colombia | 2011           | Citrus, Other             | 44                                                          |
| 44              | Colombia | 2011           | Cocoa Beans               | 3                                                           |
| 44              | Colombia | 2011           | Coconuts - Incl Copra     | 6                                                           |
| 44              | Colombia | 2011           | Coffee                    | 2                                                           |
| 44              | Colombia | 2011           | Cottonseed Oil            | 1                                                           |
| 44              | Colombia | 2011           | Eggs                      | 33                                                          |
| 44              | Colombia | 2011           | Fats, Animals, Raw        | 3                                                           |
| 44              | Colombia | 2011           | Freshwater Fish           | 5                                                           |
| 44              | Colombia | 2011           | Fruits, Other             | 74                                                          |
| 44              | Colombia | 2011           | Grapes                    | 3                                                           |
| 44              | Colombia | 2011           | Groundnuts (Shelled Eq)   | 1                                                           |
| 44              | Colombia | 2011           | Lemons, Limes             | 5                                                           |
| 44              | Colombia | 2011           | Maize                     | 79                                                          |
| 44              | Colombia | 2011           | Maize Germ Oil            | 1                                                           |
| 44              | Colombia | 2011           | Marine Fish, Other        | 1                                                           |
| 44              | Colombia | 2011           | Meat, Other               | 3                                                           |
| 44              | Colombia | 2011           | Milk, Whole               | 276                                                         |
| 44              | Colombia | 2011           | Mutton & Goat Meat        | 2                                                           |
| 44              | Colombia | 2011           | Offals, Edible            | 8                                                           |
| 44              | Colombia | 2011           | Onions                    | 24                                                          |
| 44              | Colombia | 2011           | Oranges, Mandarines       | 22                                                          |
| 44              | Colombia | 2011           | Palm Oil                  | 27                                                          |
| 44              | Colombia | 2011           | Palmkernel Oil            | 3                                                           |
| 44              | Colombia | 2011           | Peas                      | 4                                                           |
| 44              | Colombia | 2011           | Pelagic Fish              | 8                                                           |
| 44              | Colombia | 2011           | Pigmeat                   | 14                                                          |
| 44              | Colombia | 2011           | Pineapples                | 22                                                          |
| 44              | Colombia | 2011           | Plantains                 | 134                                                         |
| 44              | Colombia | 2011           | Potatoes                  | 75                                                          |
| 44              | Colombia | 2011           | Poultry Meat              | 66                                                          |
| 44              | Colombia | 2011           | Pulses, Other             | 5                                                           |
| 44              | Colombia | 2011           | Rape and Mustard Oil      | 1                                                           |
| 44              | Colombia | 2011           | Rice (Milled Equivalent)  | 77                                                          |
| 44              | Colombia | 2011           | Roots, Other              | 4                                                           |
| 44              | Colombia | 2011           | Soyabean Oil              | 15                                                          |
| 44              | Colombia | 2011           | Spices, Other             | 1                                                           |
| 44              | Colombia | 2011           | Sugar Beet                | 1                                                           |
| 44              | Colombia | 2011           | Sugar, Non-Centrifugal    | 26                                                          |
| 44              | Colombia | 2011           | Sugar, Refined Equivalent | 64                                                          |
| 44              | Colombia | 2011           | Sunflowerseed Oil         | 1                                                           |
| 44              | Colombia | 2011           | Sweeteners, Other         | 1                                                           |
| 44              | Colombia | 2011           | Tomatoes                  | 36                                                          |
| 44              | Colombia | 2011           | Vegetables, Other         | 46                                                          |
| 44              | Colombia | 2011           | Wheat                     | 90                                                          |
| 44              | Colombia | 2011           | Wine                      | 1                                                           |
| 44              | Colombia | 2011           | Yams                      | 18                                                          |

Dietary calcium and zinc deficiency risks are decreasing but remain prevalent

| FAO countrycode | Country | Reference year | Food item                 | Gross food supply (g capita <sup>-1</sup> d <sup>-1</sup> ) |
|-----------------|---------|----------------|---------------------------|-------------------------------------------------------------|
| 46              | Congo   | 1992           | Bananas                   | 37                                                          |
| 46              | Congo   | 1992           | Beans                     | 6                                                           |
| 46              | Congo   | 1992           | Beer                      | 77                                                          |
| 46              | Congo   | 1992           | Bovine Meat               | 35                                                          |
| 46              | Congo   | 1992           | Butter, Ghee              | 1                                                           |
| 46              | Congo   | 1992           | Cassava                   | 641                                                         |
| 46              | Congo   | 1992           | Cereals, Other            | 4                                                           |
| 46              | Congo   | 1992           | Demersal Fish             | 21                                                          |
| 46              | Congo   | 1992           | Eggs                      | 1                                                           |
| 46              | Congo   | 1992           | Freshwater Fish           | 23                                                          |
| 46              | Congo   | 1992           | Fruits, Other             | 27                                                          |
| 46              | Congo   | 1992           | Groundnut Oil             | 2                                                           |
| 46              | Congo   | 1992           | Groundnuts (Shelled Eq)   | 14                                                          |
| 46              | Congo   | 1992           | Maize                     | 7                                                           |
| 46              | Congo   | 1992           | Marine Fish, Other        | 1                                                           |
| 46              | Congo   | 1992           | Meat, Other               | 13                                                          |
| 46              | Congo   | 1992           | Milk, Whole               | 21                                                          |
| 46              | Congo   | 1992           | Mutton & Goat Meat        | 1                                                           |
| 46              | Congo   | 1992           | Offals, Edible            | 1                                                           |
| 46              | Congo   | 1992           | Oilcrops Oil, Other       | 9                                                           |
| 46              | Congo   | 1992           | Oilcrops, Other           | 3                                                           |
| 46              | Congo   | 1992           | Onions                    | 5                                                           |
| 46              | Congo   | 1992           | Oranges, Mandarines       | 3                                                           |
| 46              | Congo   | 1992           | Palm Oil                  | 16                                                          |
| 46              | Congo   | 1992           | Peas                      | 4                                                           |
| 46              | Congo   | 1992           | Pelagic Fish              | 39                                                          |
| 46              | Congo   | 1992           | Pigmeat                   | 7                                                           |
| 46              | Congo   | 1992           | Pineapples                | 5                                                           |
| 46              | Congo   | 1992           | Plantains                 | 72                                                          |
| 46              | Congo   | 1992           | Potatoes                  | 3                                                           |
| 46              | Congo   | 1992           | Poultry Meat              | 20                                                          |
| 46              | Congo   | 1992           | Rape and Mustard Oil      | 2                                                           |
| 46              | Congo   | 1992           | Rice (Milled Equivalent)  | 33                                                          |
| 46              | Congo   | 1992           | Roots, Other              | 34                                                          |
| 46              | Congo   | 1992           | Soyabean Oil              | 2                                                           |
| 46              | Congo   | 1992           | Sugar Cane                | 5                                                           |
| 46              | Congo   | 1992           | Sugar, Refined Equivalent | 17                                                          |
| 46              | Congo   | 1992           | Sunflowerseed Oil         | 1                                                           |
| 46              | Congo   | 1992           | Sweet Potatoes            | 10                                                          |
| 46              | Congo   | 1992           | Tomatoes                  | 12                                                          |
| 46              | Congo   | 1992           | Vegetables, Other         | 79                                                          |
| 46              | Congo   | 1992           | Wheat                     | 98                                                          |
| 46              | Congo   | 1992           | Wine                      | 4                                                           |
| 46              | Congo   | 1992           | Yams                      | 11                                                          |
| 46              | Congo   | 1993           | Apples                    | 1                                                           |
| 46              | Congo   | 1993           | Bananas                   | 38                                                          |
| 46              | Congo   | 1993           | Beans                     | 2                                                           |
| 46              | Congo   | 1993           | Beer                      | 81                                                          |
| 46              | Congo   | 1993           | Bovine Meat               | 25                                                          |
| 46              | Congo   | 1993           | Cassava                   | 708                                                         |
| 46              | Congo   | 1993           | Cereals, Other            | 5                                                           |
| 46              | Congo   | 1993           | Demersal Fish             | 22                                                          |
| 46              | Congo   | 1993           | Eggs                      | 1                                                           |
| 46              | Congo   | 1993           | Freshwater Fish           | 29                                                          |
| 46              | Congo   | 1993           | Fruits, Other             | 26                                                          |
| 46              | Congo   | 1993           | Groundnut Oil             | 2                                                           |
| 46              | Congo   | 1993           | Groundnuts (Shelled Eq)   | 14                                                          |
| 46              | Congo   | 1993           | Maize                     | 5                                                           |
| 46              | Congo   | 1993           | Marine Fish, Other        | 1                                                           |
| 46              | Congo   | 1993           | Meat, Other               | 13                                                          |
| 46              | Congo   | 1993           | Milk, Whole               | 33                                                          |
| 46              | Congo   | 1993           | Mutton & Goat Meat        | 1                                                           |
| 46              | Congo   | 1993           | Offals, Edible            | 2                                                           |
| 46              | Congo   | 1993           | Oilcrops Oil, Other       | 6                                                           |
| 46              | Congo   | 1993           | Oilcrops, Other           | 3                                                           |
| 46              | Congo   | 1993           | Onions                    | 4                                                           |
| 46              | Congo   | 1993           | Oranges, Mandarines       | 3                                                           |
| 46              | Congo   | 1993           | Palm Oil                  | 15                                                          |
| 46              | Congo   | 1993           | Peas                      | 4                                                           |
| 46              | Congo   | 1993           | Pelagic Fish              | 36                                                          |
| 46              | Congo   | 1993           | Pigmeat                   | 7                                                           |
| 46              | Congo   | 1993           | Pineapples                | 5                                                           |
| 46              | Congo   | 1993           | Plantains                 | 72                                                          |
| 46              | Congo   | 1993           | Potatoes                  | 3                                                           |
| 46              | Congo   | 1993           | Poultry Meat              | 20                                                          |
| 46              | Congo   | 1993           | Rape and Mustard Oil      | 1                                                           |
| 46              | Congo   | 1993           | Rice (Milled Equivalent)  | 23                                                          |
| 46              | Congo   | 1993           | Roots, Other              | 35                                                          |
| 46              | Congo   | 1993           | Soyabean Oil              | 2                                                           |
| 46              | Congo   | 1993           | Sugar Cane                | 5                                                           |
| 46              | Congo   | 1993           | Sugar, Refined Equivalent | 16                                                          |
| 46              | Congo   | 1993           | Sweet Potatoes            | 11                                                          |
| 46              | Congo   | 1993           | Tomatoes                  | 10                                                          |
| 46              | Congo   | 1993           | Vegetables, Other         | 79                                                          |
| 46              | Congo   | 1993           | Wheat                     | 101                                                         |
| 46              | Congo   | 1993           | Wine                      | 4                                                           |
| 46              | Congo   | 1993           | Yams                      | 11                                                          |
| 46              | Congo   | 1994           | Bananas                   | 39                                                          |
| 46              | Congo   | 1994           | Beans                     | 2                                                           |
| 46              | Congo   | 1994           | Beer                      | 56                                                          |
| 46              | Congo   | 1994           | Bovine Meat               | 20                                                          |
| 46              | Congo   | 1994           | Cassava                   | 737                                                         |
| 46              | Congo   | 1994           | Cereals, Other            | 4                                                           |
| 46              | Congo   | 1994           | Demersal Fish             | 15                                                          |
| 46              | Congo   | 1994           | Eggs                      | 1                                                           |
| 46              | Congo   | 1994           | Freshwater Fish           | 25                                                          |
| 46              | Congo   | 1994           | Fruits, Other             | 26                                                          |

Dietary calcium and zinc deficiency risks are decreasing but remain prevalent

| FAO countrycode | Country | Reference year | Food item                 | Gross food supply (g capita <sup>-1</sup> d <sup>-1</sup> ) |
|-----------------|---------|----------------|---------------------------|-------------------------------------------------------------|
| 46              | Congo   | 1994           | Groundnut Oil             | 2                                                           |
| 46              | Congo   | 1994           | Groundnuts (Shelled Eq)   | 15                                                          |
| 46              | Congo   | 1994           | Maize                     | 5                                                           |
| 46              | Congo   | 1994           | Marine Fish, Other        | 1                                                           |
| 46              | Congo   | 1994           | Meat, Other               | 13                                                          |
| 46              | Congo   | 1994           | Milk, Whole               | 21                                                          |
| 46              | Congo   | 1994           | Mutton & Goat Meat        | 1                                                           |
| 46              | Congo   | 1994           | Offals, Edible            | 1                                                           |
| 46              | Congo   | 1994           | Oilcrops Oil, Other       | 4                                                           |
| 46              | Congo   | 1994           | Oilcrops, Other           | 3                                                           |
| 46              | Congo   | 1994           | Onions                    | 1                                                           |
| 46              | Congo   | 1994           | Oranges, Mandarines       | 3                                                           |
| 46              | Congo   | 1994           | Palm Oil                  | 14                                                          |
| 46              | Congo   | 1994           | Peas                      | 4                                                           |
| 46              | Congo   | 1994           | Pelagic Fish              | 32                                                          |
| 46              | Congo   | 1994           | Pigmeat                   | 6                                                           |
| 46              | Congo   | 1994           | Pineapples                | 5                                                           |
| 46              | Congo   | 1994           | Plantains                 | 72                                                          |
| 46              | Congo   | 1994           | Potatoes                  | 2                                                           |
| 46              | Congo   | 1994           | Poultry Meat              | 12                                                          |
| 46              | Congo   | 1994           | Rape and Mustard Oil      | 1                                                           |
| 46              | Congo   | 1994           | Rice (Milled Equivalent)  | 30                                                          |
| 46              | Congo   | 1994           | Roots, Other              | 36                                                          |
| 46              | Congo   | 1994           | Soyabean Oil              | 3                                                           |
| 46              | Congo   | 1994           | Sugar Cane                | 5                                                           |
| 46              | Congo   | 1994           | Sugar, Refined Equivalent | 19                                                          |
| 46              | Congo   | 1994           | Sunflowerseed Oil         | 1                                                           |
| 46              | Congo   | 1994           | Sweet Potatoes            | 12                                                          |
| 46              | Congo   | 1994           | Tomatoes                  | 9                                                           |
| 46              | Congo   | 1994           | Vegetables, Other         | 78                                                          |
| 46              | Congo   | 1994           | Wheat                     | 90                                                          |
| 46              | Congo   | 1994           | Wine                      | 3                                                           |
| 46              | Congo   | 1994           | Yams                      | 11                                                          |
| 46              | Congo   | 1995           | Apples                    | 1                                                           |
| 46              | Congo   | 1995           | Bananas                   | 40                                                          |
| 46              | Congo   | 1995           | Beans                     | 2                                                           |
| 46              | Congo   | 1995           | Beer                      | 51                                                          |
| 46              | Congo   | 1995           | Bovine Meat               | 17                                                          |
| 46              | Congo   | 1995           | Cassava                   | 763                                                         |
| 46              | Congo   | 1995           | Demersal Fish             | 7                                                           |
| 46              | Congo   | 1995           | Eggs                      | 1                                                           |
| 46              | Congo   | 1995           | Freshwater Fish           | 26                                                          |
| 46              | Congo   | 1995           | Fruits, Other             | 45                                                          |
| 46              | Congo   | 1995           | Groundnut Oil             | 2                                                           |
| 46              | Congo   | 1995           | Groundnuts (Shelled Eq)   | 13                                                          |
| 46              | Congo   | 1995           | Maize                     | 11                                                          |
| 46              | Congo   | 1995           | Marine Fish, Other        | 1                                                           |
| 46              | Congo   | 1995           | Meat, Other               | 13                                                          |
| 46              | Congo   | 1995           | Milk, Whole               | 27                                                          |
| 46              | Congo   | 1995           | Mutton & Goat Meat        | 1                                                           |
| 46              | Congo   | 1995           | Offals, Edible            | 1                                                           |
| 46              | Congo   | 1995           | Oilcrops Oil, Other       | 5                                                           |
| 46              | Congo   | 1995           | Oilcrops, Other           | 3                                                           |
| 46              | Congo   | 1995           | Onions                    | 2                                                           |
| 46              | Congo   | 1995           | Oranges, Mandarines       | 2                                                           |
| 46              | Congo   | 1995           | Palm Oil                  | 13                                                          |
| 46              | Congo   | 1995           | Peas                      | 4                                                           |
| 46              | Congo   | 1995           | Pelagic Fish              | 27                                                          |
| 46              | Congo   | 1995           | Pigmeat                   | 7                                                           |
| 46              | Congo   | 1995           | Pineapples                | 3                                                           |
| 46              | Congo   | 1995           | Plantains                 | 70                                                          |
| 46              | Congo   | 1995           | Potatoes                  | 2                                                           |
| 46              | Congo   | 1995           | Poultry Meat              | 15                                                          |
| 46              | Congo   | 1995           | Rice (Milled Equivalent)  | 35                                                          |
| 46              | Congo   | 1995           | Roots, Other              | 37                                                          |
| 46              | Congo   | 1995           | Soyabean Oil              | 5                                                           |
| 46              | Congo   | 1995           | Sugar Cane                | 5                                                           |
| 46              | Congo   | 1995           | Sugar, Refined Equivalent | 20                                                          |
| 46              | Congo   | 1995           | Sweet Potatoes            | 12                                                          |
| 46              | Congo   | 1995           | Tomatoes                  | 7                                                           |
| 46              | Congo   | 1995           | Vegetables, Other         | 78                                                          |
| 46              | Congo   | 1995           | Wheat                     | 74                                                          |
| 46              | Congo   | 1995           | Wine                      | 4                                                           |
| 46              | Congo   | 1995           | Yams                      | 11                                                          |
| 46              | Congo   | 1996           | Bananas                   | 43                                                          |
| 46              | Congo   | 1996           | Beans                     | 3                                                           |
| 46              | Congo   | 1996           | Beer                      | 50                                                          |
| 46              | Congo   | 1996           | Beverages, Alcoholic      | 1                                                           |
| 46              | Congo   | 1996           | Bovine Meat               | 5                                                           |
| 46              | Congo   | 1996           | Cassava                   | 786                                                         |
| 46              | Congo   | 1996           | Coconuts - Incl Copra     | 4                                                           |
| 46              | Congo   | 1996           | Demersal Fish             | 6                                                           |
| 46              | Congo   | 1996           | Eggs                      | 1                                                           |
| 46              | Congo   | 1996           | Freshwater Fish           | 25                                                          |
| 46              | Congo   | 1996           | Fruits, Other             | 46                                                          |
| 46              | Congo   | 1996           | Grapefruit                | 3                                                           |
| 46              | Congo   | 1996           | Groundnut Oil             | 2                                                           |
| 46              | Congo   | 1996           | Groundnuts (Shelled Eq)   | 9                                                           |
| 46              | Congo   | 1996           | Lemons, Limes             | 3                                                           |
| 46              | Congo   | 1996           | Maize                     | 10                                                          |
| 46              | Congo   | 1996           | Marine Fish, Other        | 2                                                           |
| 46              | Congo   | 1996           | Meat, Other               | 12                                                          |
| 46              | Congo   | 1996           | Milk, Whole               | 35                                                          |
| 46              | Congo   | 1996           | Mutton & Goat Meat        | 1                                                           |
| 46              | Congo   | 1996           | Offals, Edible            | 2                                                           |
| 46              | Congo   | 1996           | Oilcrops Oil, Other       | 2                                                           |
| 46              | Congo   | 1996           | Oilcrops, Other           | 3                                                           |

Dietary calcium and zinc deficiency risks are decreasing but remain prevalent

| FAO countrycode | Country | Reference year | Food item                 | Gross food supply (g capita <sup>-1</sup> d <sup>-1</sup> ) |
|-----------------|---------|----------------|---------------------------|-------------------------------------------------------------|
| 46              | Congo   | 1996           | Onions                    | 2                                                           |
| 46              | Congo   | 1996           | Oranges, Mandarines       | 5                                                           |
| 46              | Congo   | 1996           | Palm Oil                  | 14                                                          |
| 46              | Congo   | 1996           | Peas                      | 4                                                           |
| 46              | Congo   | 1996           | Pelagic Fish              | 30                                                          |
| 46              | Congo   | 1996           | Pigmeat                   | 9                                                           |
| 46              | Congo   | 1996           | Pineapples                | 2                                                           |
| 46              | Congo   | 1996           | Plantains                 | 67                                                          |
| 46              | Congo   | 1996           | Potatoes                  | 3                                                           |
| 46              | Congo   | 1996           | Poultry Meat              | 19                                                          |
| 46              | Congo   | 1996           | Rape and Mustard Oil      | 2                                                           |
| 46              | Congo   | 1996           | Rice (Milled Equivalent)  | 18                                                          |
| 46              | Congo   | 1996           | Roots, Other              | 37                                                          |
| 46              | Congo   | 1996           | Soyabean Oil              | 7                                                           |
| 46              | Congo   | 1996           | Sugar Cane                | 5                                                           |
| 46              | Congo   | 1996           | Sugar, Refined Equivalent | 20                                                          |
| 46              | Congo   | 1996           | Sunflowerseed Oil         | 1                                                           |
| 46              | Congo   | 1996           | Sweet Potatoes            | 9                                                           |
| 46              | Congo   | 1996           | Tomatoes                  | 8                                                           |
| 46              | Congo   | 1996           | Vegetables, Other         | 83                                                          |
| 46              | Congo   | 1996           | Wheat                     | 77                                                          |
| 46              | Congo   | 1996           | Wine                      | 4                                                           |
| 46              | Congo   | 1996           | Yams                      | 7                                                           |
| 46              | Congo   | 1997           | Bananas                   | 43                                                          |
| 46              | Congo   | 1997           | Beans                     | 4                                                           |
| 46              | Congo   | 1997           | Beer                      | 33                                                          |
| 46              | Congo   | 1997           | Beverages, Alcoholic      | 2                                                           |
| 46              | Congo   | 1997           | Bovine Meat               | 7                                                           |
| 46              | Congo   | 1997           | Cassava                   | 774                                                         |
| 46              | Congo   | 1997           | Coconuts - Incl Copra     | 4                                                           |
| 46              | Congo   | 1997           | Cottonseed Oil            | 3                                                           |
| 46              | Congo   | 1997           | Demersal Fish             | 10                                                          |
| 46              | Congo   | 1997           | Eggs                      | 1                                                           |
| 46              | Congo   | 1997           | Freshwater Fish           | 18                                                          |
| 46              | Congo   | 1997           | Fruits, Other             | 46                                                          |
| 46              | Congo   | 1997           | Grapefruit                | 3                                                           |
| 46              | Congo   | 1997           | Groundnut Oil             | 2                                                           |
| 46              | Congo   | 1997           | Groundnuts (Shelled Eq)   | 9                                                           |
| 46              | Congo   | 1997           | Lemons, Limes             | 3                                                           |
| 46              | Congo   | 1997           | Maize                     | 11                                                          |
| 46              | Congo   | 1997           | Marine Fish, Other        | 2                                                           |
| 46              | Congo   | 1997           | Meat, Other               | 12                                                          |
| 46              | Congo   | 1997           | Milk, Whole               | 30                                                          |
| 46              | Congo   | 1997           | Mutton & Goat Meat        | 1                                                           |
| 46              | Congo   | 1997           | Offals, Edible            | 2                                                           |
| 46              | Congo   | 1997           | Oilcrops Oil, Other       | 2                                                           |
| 46              | Congo   | 1997           | Oilcrops, Other           | 3                                                           |
| 46              | Congo   | 1997           | Onions                    | 2                                                           |
| 46              | Congo   | 1997           | Oranges, Mandarines       | 5                                                           |
| 46              | Congo   | 1997           | Palm Oil                  | 12                                                          |
| 46              | Congo   | 1997           | Peas                      | 4                                                           |
| 46              | Congo   | 1997           | Pelagic Fish              | 27                                                          |
| 46              | Congo   | 1997           | Pigmeat                   | 7                                                           |
| 46              | Congo   | 1997           | Pineapples                | 3                                                           |
| 46              | Congo   | 1997           | Plantains                 | 65                                                          |
| 46              | Congo   | 1997           | Potatoes                  | 3                                                           |
| 46              | Congo   | 1997           | Poultry Meat              | 11                                                          |
| 46              | Congo   | 1997           | Rape and Mustard Oil      | 1                                                           |
| 46              | Congo   | 1997           | Rice (Milled Equivalent)  | 24                                                          |
| 46              | Congo   | 1997           | Roots, Other              | 34                                                          |
| 46              | Congo   | 1997           | Soyabean Oil              | 8                                                           |
| 46              | Congo   | 1997           | Sugar Cane                | 5                                                           |
| 46              | Congo   | 1997           | Sugar, Refined Equivalent | 15                                                          |
| 46              | Congo   | 1997           | Sunflowerseed Oil         | 1                                                           |
| 46              | Congo   | 1997           | Sweet Potatoes            | 9                                                           |
| 46              | Congo   | 1997           | Tomatoes                  | 16                                                          |
| 46              | Congo   | 1997           | Vegetables, Other         | 79                                                          |
| 46              | Congo   | 1997           | Wheat                     | 97                                                          |
| 46              | Congo   | 1997           | Wine                      | 4                                                           |
| 46              | Congo   | 1997           | Yams                      | 8                                                           |
| 46              | Congo   | 1998           | Bananas                   | 43                                                          |
| 46              | Congo   | 1998           | Beans                     | 6                                                           |
| 46              | Congo   | 1998           | Beer                      | 46                                                          |
| 46              | Congo   | 1998           | Beverages, Alcoholic      | 1                                                           |
| 46              | Congo   | 1998           | Bovine Meat               | 5                                                           |
| 46              | Congo   | 1998           | Cassava                   | 706                                                         |
| 46              | Congo   | 1998           | Coconuts - Incl Copra     | 3                                                           |
| 46              | Congo   | 1998           | Cottonseed Oil            | 1                                                           |
| 46              | Congo   | 1998           | Demersal Fish             | 8                                                           |
| 46              | Congo   | 1998           | Eggs                      | 2                                                           |
| 46              | Congo   | 1998           | Freshwater Fish           | 24                                                          |
| 46              | Congo   | 1998           | Fruits, Other             | 47                                                          |
| 46              | Congo   | 1998           | Grapefruit                | 3                                                           |
| 46              | Congo   | 1998           | Groundnut Oil             | 1                                                           |
| 46              | Congo   | 1998           | Groundnuts (Shelled Eq)   | 6                                                           |
| 46              | Congo   | 1998           | Lemons, Limes             | 3                                                           |
| 46              | Congo   | 1998           | Maize                     | 15                                                          |
| 46              | Congo   | 1998           | Marine Fish, Other        | 2                                                           |
| 46              | Congo   | 1998           | Meat, Other               | 14                                                          |
| 46              | Congo   | 1998           | Milk, Whole               | 38                                                          |
| 46              | Congo   | 1998           | Mutton & Goat Meat        | 1                                                           |
| 46              | Congo   | 1998           | Offals, Edible            | 2                                                           |
| 46              | Congo   | 1998           | Oilcrops Oil, Other       | 2                                                           |
| 46              | Congo   | 1998           | Oilcrops, Other           | 3                                                           |
| 46              | Congo   | 1998           | Onions                    | 2                                                           |
| 46              | Congo   | 1998           | Oranges, Mandarines       | 66                                                          |
| 46              | Congo   | 1998           | Palm Oil                  | 13                                                          |

Dietary calcium and zinc deficiency risks are decreasing but remain prevalent

| FAO countrycode | Country | Reference year | Food item                 | Gross food supply (g capita <sup>-1</sup> d <sup>-1</sup> ) |
|-----------------|---------|----------------|---------------------------|-------------------------------------------------------------|
| 46              | Congo   | 1998           | Peas                      | 4                                                           |
| 46              | Congo   | 1998           | Pelagic Fish              | 21                                                          |
| 46              | Congo   | 1998           | Pigmeat                   | 10                                                          |
| 46              | Congo   | 1998           | Pineapples                | 3                                                           |
| 46              | Congo   | 1998           | Plantains                 | 59                                                          |
| 46              | Congo   | 1998           | Potatoes                  | 3                                                           |
| 46              | Congo   | 1998           | Poultry Meat              | 15                                                          |
| 46              | Congo   | 1998           | Rape and Mustard Oil      | 1                                                           |
| 46              | Congo   | 1998           | Rice (Milled Equivalent)  | 34                                                          |
| 46              | Congo   | 1998           | Roots, Other              | 32                                                          |
| 46              | Congo   | 1998           | Soyabean Oil              | 10                                                          |
| 46              | Congo   | 1998           | Sugar Cane                | 5                                                           |
| 46              | Congo   | 1998           | Sugar, Refined Equivalent | 21                                                          |
| 46              | Congo   | 1998           | Sweet Potatoes            | 9                                                           |
| 46              | Congo   | 1998           | Tomatoes                  | 16                                                          |
| 46              | Congo   | 1998           | Vegetables, Other         | 75                                                          |
| 46              | Congo   | 1998           | Wheat                     | 114                                                         |
| 46              | Congo   | 1998           | Wine                      | 4                                                           |
| 46              | Congo   | 1998           | Yams                      | 8                                                           |
| 46              | Congo   | 1999           | Bananas                   | 64                                                          |
| 46              | Congo   | 1999           | Beans                     | 4                                                           |
| 46              | Congo   | 1999           | Beer                      | 45                                                          |
| 46              | Congo   | 1999           | Beverages, Alcoholic      | 2                                                           |
| 46              | Congo   | 1999           | Bovine Meat               | 3                                                           |
| 46              | Congo   | 1999           | Cassava                   | 711                                                         |
| 46              | Congo   | 1999           | Coconuts - Incl Copra     | 3                                                           |
| 46              | Congo   | 1999           | Cottonseed Oil            | 1                                                           |
| 46              | Congo   | 1999           | Demersal Fish             | 6                                                           |
| 46              | Congo   | 1999           | Eggs                      | 1                                                           |
| 46              | Congo   | 1999           | Freshwater Fish           | 23                                                          |
| 46              | Congo   | 1999           | Fruits, Other             | 47                                                          |
| 46              | Congo   | 1999           | Grapefruit                | 3                                                           |
| 46              | Congo   | 1999           | Groundnut Oil             | 2                                                           |
| 46              | Congo   | 1999           | Groundnuts (Shelled Eq)   | 8                                                           |
| 46              | Congo   | 1999           | Lemons, Limes             | 4                                                           |
| 46              | Congo   | 1999           | Maize                     | 17                                                          |
| 46              | Congo   | 1999           | Marine Fish, Other        | 3                                                           |
| 46              | Congo   | 1999           | Meat, Other               | 14                                                          |
| 46              | Congo   | 1999           | Milk, Whole               | 30                                                          |
| 46              | Congo   | 1999           | Mutton & Goat Meat        | 1                                                           |
| 46              | Congo   | 1999           | Offals, Edible            | 1                                                           |
| 46              | Congo   | 1999           | Oilcrops Oil, Other       | 3                                                           |
| 46              | Congo   | 1999           | Oilcrops, Other           | 3                                                           |
| 46              | Congo   | 1999           | Onions                    | 2                                                           |
| 46              | Congo   | 1999           | Oranges, Mandarines       | 5                                                           |
| 46              | Congo   | 1999           | Palm Oil                  | 15                                                          |
| 46              | Congo   | 1999           | Peas                      | 4                                                           |
| 46              | Congo   | 1999           | Pelagic Fish              | 21                                                          |
| 46              | Congo   | 1999           | Pigmeat                   | 6                                                           |
| 46              | Congo   | 1999           | Pineapples                | 3                                                           |
| 46              | Congo   | 1999           | Plantains                 | 55                                                          |
| 46              | Congo   | 1999           | Potatoes                  | 3                                                           |
| 46              | Congo   | 1999           | Poultry Meat              | 12                                                          |
| 46              | Congo   | 1999           | Rape and Mustard Oil      | 5                                                           |
| 46              | Congo   | 1999           | Rice (Milled Equivalent)  | 33                                                          |
| 46              | Congo   | 1999           | Roots, Other              | 38                                                          |
| 46              | Congo   | 1999           | Soyabean Oil              | 8                                                           |
| 46              | Congo   | 1999           | Sugar Cane                | 5                                                           |
| 46              | Congo   | 1999           | Sugar, Refined Equivalent | 22                                                          |
| 46              | Congo   | 1999           | Sweet Potatoes            | 7                                                           |
| 46              | Congo   | 1999           | Tomatoes                  | 17                                                          |
| 46              | Congo   | 1999           | Vegetables, Other         | 78                                                          |
| 46              | Congo   | 1999           | Wheat                     | 121                                                         |
| 46              | Congo   | 1999           | Wine                      | 2                                                           |
| 46              | Congo   | 1999           | Yams                      | 7                                                           |
| 46              | Congo   | 2000           | Bananas                   | 64                                                          |
| 46              | Congo   | 2000           | Beans                     | 4                                                           |
| 46              | Congo   | 2000           | Beer                      | 51                                                          |
| 46              | Congo   | 2000           | Beverages, Alcoholic      | 2                                                           |
| 46              | Congo   | 2000           | Bovine Meat               | 4                                                           |
| 46              | Congo   | 2000           | Cassava                   | 726                                                         |
| 46              | Congo   | 2000           | Coconuts - Incl Copra     | 3                                                           |
| 46              | Congo   | 2000           | Cottonseed Oil            | 1                                                           |
| 46              | Congo   | 2000           | Crustaceans               | 1                                                           |
| 46              | Congo   | 2000           | Demersal Fish             | 7                                                           |
| 46              | Congo   | 2000           | Eggs                      | 1                                                           |
| 46              | Congo   | 2000           | Freshwater Fish           | 22                                                          |
| 46              | Congo   | 2000           | Fruits, Other             | 46                                                          |
| 46              | Congo   | 2000           | Grapefruit                | 3                                                           |
| 46              | Congo   | 2000           | Groundnut Oil             | 2                                                           |
| 46              | Congo   | 2000           | Groundnuts (Shelled Eq)   | 7                                                           |
| 46              | Congo   | 2000           | Lemons, Limes             | 3                                                           |
| 46              | Congo   | 2000           | Maize                     | 17                                                          |
| 46              | Congo   | 2000           | Marine Fish, Other        | 4                                                           |
| 46              | Congo   | 2000           | Meat, Other               | 14                                                          |
| 46              | Congo   | 2000           | Milk, Whole               | 41                                                          |
| 46              | Congo   | 2000           | Mutton & Goat Meat        | 1                                                           |
| 46              | Congo   | 2000           | Offals, Edible            | 3                                                           |
| 46              | Congo   | 2000           | Oilcrops Oil, Other       | 4                                                           |
| 46              | Congo   | 2000           | Oilcrops, Other           | 3                                                           |
| 46              | Congo   | 2000           | Onions                    | 3                                                           |
| 46              | Congo   | 2000           | Oranges, Mandarines       | 5                                                           |
| 46              | Congo   | 2000           | Palm Oil                  | 14                                                          |
| 46              | Congo   | 2000           | Peas                      | 4                                                           |
| 46              | Congo   | 2000           | Pelagic Fish              | 21                                                          |
| 46              | Congo   | 2000           | Pigmeat                   | 7                                                           |
| 46              | Congo   | 2000           | Pineapples                | 2                                                           |



Dietary calcium and zinc deficiency risks are decreasing but remain prevalent

| FAO countrycode | Country | Reference year | Food item                 | Gross food supply (g capita <sup>-1</sup> d <sup>-1</sup> ) |
|-----------------|---------|----------------|---------------------------|-------------------------------------------------------------|
| 46              | Congo   | 2000           | Plantains                 | 55                                                          |
| 46              | Congo   | 2000           | Potatoes                  | 3                                                           |
| 46              | Congo   | 2000           | Poultry Meat              | 14                                                          |
| 46              | Congo   | 2000           | Rape and Mustard Oil      | 3                                                           |
| 46              | Congo   | 2000           | Rice (Milled Equivalent)  | 33                                                          |
| 46              | Congo   | 2000           | Roots, Other              | 31                                                          |
| 46              | Congo   | 2000           | Soyabean Oil              | 11                                                          |
| 46              | Congo   | 2000           | Sugar Cane                | 4                                                           |
| 46              | Congo   | 2000           | Sugar, Refined Equivalent | 25                                                          |
| 46              | Congo   | 2000           | Sunflowerseed Oil         | 1                                                           |
| 46              | Congo   | 2000           | Sweet Potatoes            | 6                                                           |
| 46              | Congo   | 2000           | Tomatoes                  | 34                                                          |
| 46              | Congo   | 2000           | Vegetables, Other         | 78                                                          |
| 46              | Congo   | 2000           | Wheat                     | 123                                                         |
| 46              | Congo   | 2000           | Wine                      | 3                                                           |
| 46              | Congo   | 2000           | Yams                      | 8                                                           |
| 46              | Congo   | 2001           | Bananas                   | 64                                                          |
| 46              | Congo   | 2001           | Beans                     | 5                                                           |
| 46              | Congo   | 2001           | Beer                      | 49                                                          |
| 46              | Congo   | 2001           | Beverages, Alcoholic      | 2                                                           |
| 46              | Congo   | 2001           | Bovine Meat               | 2                                                           |
| 46              | Congo   | 2001           | Cassava                   | 716                                                         |
| 46              | Congo   | 2001           | Coconuts - Incl Copra     | 3                                                           |
| 46              | Congo   | 2001           | Demersal Fish             | 14                                                          |
| 46              | Congo   | 2001           | Eggs                      | 2                                                           |
| 46              | Congo   | 2001           | Freshwater Fish           | 23                                                          |
| 46              | Congo   | 2001           | Fruits, Other             | 46                                                          |
| 46              | Congo   | 2001           | Grapefruit                | 3                                                           |
| 46              | Congo   | 2001           | Groundnut Oil             | 2                                                           |
| 46              | Congo   | 2001           | Groundnuts (Shelled Eq)   | 8                                                           |
| 46              | Congo   | 2001           | Lemons, Limes             | 3                                                           |
| 46              | Congo   | 2001           | Maize                     | 17                                                          |
| 46              | Congo   | 2001           | Marine Fish, Other        | 5                                                           |
| 46              | Congo   | 2001           | Meat, Other               | 14                                                          |
| 46              | Congo   | 2001           | Milk, Whole               | 34                                                          |
| 46              | Congo   | 2001           | Mutton & Goat Meat        | 1                                                           |
| 46              | Congo   | 2001           | Offals, Edible            | 4                                                           |
| 46              | Congo   | 2001           | Oilcrops Oil, Other       | 5                                                           |
| 46              | Congo   | 2001           | Oilcrops, Other           | 3                                                           |
| 46              | Congo   | 2001           | Onions                    | 3                                                           |
| 46              | Congo   | 2001           | Oranges, Mandarines       | 5                                                           |
| 46              | Congo   | 2001           | Palm Oil                  | 17                                                          |
| 46              | Congo   | 2001           | Peas                      | 4                                                           |
| 46              | Congo   | 2001           | Pelagic Fish              | 24                                                          |
| 46              | Congo   | 2001           | Pigmeat                   | 7                                                           |
| 46              | Congo   | 2001           | Pineapples                | 2                                                           |
| 46              | Congo   | 2001           | Plantains                 | 55                                                          |
| 46              | Congo   | 2001           | Potatoes                  | 3                                                           |
| 46              | Congo   | 2001           | Poultry Meat              | 12                                                          |
| 46              | Congo   | 2001           | Pulses, Other             | 2                                                           |
| 46              | Congo   | 2001           | Rice (Milled Equivalent)  | 35                                                          |
| 46              | Congo   | 2001           | Roots, Other              | 29                                                          |
| 46              | Congo   | 2001           | Soyabean Oil              | 13                                                          |
| 46              | Congo   | 2001           | Sugar Cane                | 4                                                           |
| 46              | Congo   | 2001           | Sugar, Refined Equivalent | 29                                                          |
| 46              | Congo   | 2001           | Sunflowerseed Oil         | 1                                                           |
| 46              | Congo   | 2001           | Sweet Potatoes            | 5                                                           |
| 46              | Congo   | 2001           | Tomatoes                  | 24                                                          |
| 46              | Congo   | 2001           | Vegetables, Other         | 77                                                          |
| 46              | Congo   | 2001           | Wheat                     | 129                                                         |
| 46              | Congo   | 2001           | Wine                      | 4                                                           |
| 46              | Congo   | 2001           | Yams                      | 6                                                           |
| 46              | Congo   | 2002           | Bananas                   | 63                                                          |
| 46              | Congo   | 2002           | Beans                     | 5                                                           |
| 46              | Congo   | 2002           | Beer                      | 56                                                          |
| 46              | Congo   | 2002           | Beverages, Alcoholic      | 2                                                           |
| 46              | Congo   | 2002           | Bovine Meat               | 4                                                           |
| 46              | Congo   | 2002           | Cassava                   | 712                                                         |
| 46              | Congo   | 2002           | Coconuts - Incl Copra     | 3                                                           |
| 46              | Congo   | 2002           | Demersal Fish             | 8                                                           |
| 46              | Congo   | 2002           | Eggs                      | 2                                                           |
| 46              | Congo   | 2002           | Freshwater Fish           | 25                                                          |
| 46              | Congo   | 2002           | Fruits, Other             | 47                                                          |
| 46              | Congo   | 2002           | Grapefruit                | 3                                                           |
| 46              | Congo   | 2002           | Groundnut Oil             | 2                                                           |
| 46              | Congo   | 2002           | Groundnuts (Shelled Eq)   | 8                                                           |
| 46              | Congo   | 2002           | Lemons, Limes             | 2                                                           |
| 46              | Congo   | 2002           | Maize                     | 17                                                          |
| 46              | Congo   | 2002           | Marine Fish, Other        | 3                                                           |
| 46              | Congo   | 2002           | Meat, Other               | 15                                                          |
| 46              | Congo   | 2002           | Milk, Whole               | 40                                                          |
| 46              | Congo   | 2002           | Mutton & Goat Meat        | 1                                                           |
| 46              | Congo   | 2002           | Offals, Edible            | 6                                                           |
| 46              | Congo   | 2002           | Oilcrops Oil, Other       | 6                                                           |
| 46              | Congo   | 2002           | Oilcrops, Other           | 4                                                           |
| 46              | Congo   | 2002           | Onions                    | 3                                                           |
| 46              | Congo   | 2002           | Oranges, Mandarines       | 4                                                           |
| 46              | Congo   | 2002           | Palm Oil                  | 18                                                          |
| 46              | Congo   | 2002           | Peas                      | 4                                                           |
| 46              | Congo   | 2002           | Pelagic Fish              | 18                                                          |
| 46              | Congo   | 2002           | Pigmeat                   | 8                                                           |
| 46              | Congo   | 2002           | Pineapples                | 2                                                           |
| 46              | Congo   | 2002           | Plantains                 | 45                                                          |
| 46              | Congo   | 2002           | Potatoes                  | 4                                                           |
| 46              | Congo   | 2002           | Poultry Meat              | 13                                                          |
| 46              | Congo   | 2002           | Pulses, Other             | 1                                                           |
| 46              | Congo   | 2002           | Rice (Milled Equivalent)  | 38                                                          |

Dietary calcium and zinc deficiency risks are decreasing but remain prevalent

| FAO countrycode | Country | Reference year | Food item                 | Gross food supply (g capita <sup>-1</sup> d <sup>-1</sup> ) |
|-----------------|---------|----------------|---------------------------|-------------------------------------------------------------|
| 46              | Congo   | 2002           | Roots, Other              | 30                                                          |
| 46              | Congo   | 2002           | Soyabean Oil              | 12                                                          |
| 46              | Congo   | 2002           | Sugar Cane                | 4                                                           |
| 46              | Congo   | 2002           | Sugar, Refined Equivalent | 32                                                          |
| 46              | Congo   | 2002           | Sweet Potatoes            | 4                                                           |
| 46              | Congo   | 2002           | Tomatoes                  | 20                                                          |
| 46              | Congo   | 2002           | Vegetables, Other         | 80                                                          |
| 46              | Congo   | 2002           | Wheat                     | 127                                                         |
| 46              | Congo   | 2002           | Wine                      | 3                                                           |
| 46              | Congo   | 2002           | Yams                      | 8                                                           |
| 46              | Congo   | 2003           | Bananas                   | 59                                                          |
| 46              | Congo   | 2003           | Beans                     | 4                                                           |
| 46              | Congo   | 2003           | Beer                      | 55                                                          |
| 46              | Congo   | 2003           | Beverages, Alcoholic      | 2                                                           |
| 46              | Congo   | 2003           | Bovine Meat               | 4                                                           |
| 46              | Congo   | 2003           | Cassava                   | 709                                                         |
| 46              | Congo   | 2003           | Coconuts - Incl Copra     | 3                                                           |
| 46              | Congo   | 2003           | Coffee                    | 1                                                           |
| 46              | Congo   | 2003           | Demersal Fish             | 12                                                          |
| 46              | Congo   | 2003           | Eggs                      | 2                                                           |
| 46              | Congo   | 2003           | Freshwater Fish           | 26                                                          |
| 46              | Congo   | 2003           | Fruits, Other             | 47                                                          |
| 46              | Congo   | 2003           | Grapefruit                | 3                                                           |
| 46              | Congo   | 2003           | Groundnut Oil             | 2                                                           |
| 46              | Congo   | 2003           | Groundnuts (Shelled Eq)   | 7                                                           |
| 46              | Congo   | 2003           | Lemons, Limes             | 3                                                           |
| 46              | Congo   | 2003           | Maize                     | 17                                                          |
| 46              | Congo   | 2003           | Marine Fish, Other        | 1                                                           |
| 46              | Congo   | 2003           | Meat, Other               | 15                                                          |
| 46              | Congo   | 2003           | Milk, Whole               | 43                                                          |
| 46              | Congo   | 2003           | Mutton & Goat Meat        | 1                                                           |
| 46              | Congo   | 2003           | Offals, Edible            | 9                                                           |
| 46              | Congo   | 2003           | Oilcrops Oil, Other       | 4                                                           |
| 46              | Congo   | 2003           | Oilcrops, Other           | 3                                                           |
| 46              | Congo   | 2003           | Onions                    | 3                                                           |
| 46              | Congo   | 2003           | Oranges, Mandarines       | 4                                                           |
| 46              | Congo   | 2003           | Palm Oil                  | 19                                                          |
| 46              | Congo   | 2003           | Peas                      | 4                                                           |
| 46              | Congo   | 2003           | Pelagic Fish              | 15                                                          |
| 46              | Congo   | 2003           | Pigmeat                   | 5                                                           |
| 46              | Congo   | 2003           | Pineapples                | 2                                                           |
| 46              | Congo   | 2003           | Plantains                 | 43                                                          |
| 46              | Congo   | 2003           | Potatoes                  | 3                                                           |
| 46              | Congo   | 2003           | Poultry Meat              | 34                                                          |
| 46              | Congo   | 2003           | Pulses, Other             | 2                                                           |
| 46              | Congo   | 2003           | Rape and Mustard Oil      | 1                                                           |
| 46              | Congo   | 2003           | Rice (Milled Equivalent)  | 35                                                          |
| 46              | Congo   | 2003           | Roots, Other              | 29                                                          |
| 46              | Congo   | 2003           | Soyabean Oil              | 10                                                          |
| 46              | Congo   | 2003           | Sugar Cane                | 4                                                           |
| 46              | Congo   | 2003           | Sugar, Refined Equivalent | 34                                                          |
| 46              | Congo   | 2003           | Sweet Potatoes            | 4                                                           |
| 46              | Congo   | 2003           | Tomatoes                  | 27                                                          |
| 46              | Congo   | 2003           | Vegetables, Other         | 79                                                          |
| 46              | Congo   | 2003           | Wheat                     | 125                                                         |
| 46              | Congo   | 2003           | Wine                      | 2                                                           |
| 46              | Congo   | 2003           | Yams                      | 8                                                           |
| 46              | Congo   | 2004           | Bananas                   | 56                                                          |
| 46              | Congo   | 2004           | Beans                     | 5                                                           |
| 46              | Congo   | 2004           | Beer                      | 54                                                          |
| 46              | Congo   | 2004           | Beverages, Alcoholic      | 2                                                           |
| 46              | Congo   | 2004           | Bovine Meat               | 7                                                           |
| 46              | Congo   | 2004           | Cassava                   | 735                                                         |
| 46              | Congo   | 2004           | Coconuts - Incl Copra     | 2                                                           |
| 46              | Congo   | 2004           | Coffee                    | 1                                                           |
| 46              | Congo   | 2004           | Demersal Fish             | 15                                                          |
| 46              | Congo   | 2004           | Eggs                      | 2                                                           |
| 46              | Congo   | 2004           | Freshwater Fish           | 26                                                          |
| 46              | Congo   | 2004           | Fruits, Other             | 48                                                          |
| 46              | Congo   | 2004           | Grapefruit                | 3                                                           |
| 46              | Congo   | 2004           | Groundnut Oil             | 2                                                           |
| 46              | Congo   | 2004           | Groundnuts (Shelled Eq)   | 7                                                           |
| 46              | Congo   | 2004           | Lemons, Limes             | 3                                                           |
| 46              | Congo   | 2004           | Maize                     | 16                                                          |
| 46              | Congo   | 2004           | Marine Fish, Other        | 2                                                           |
| 46              | Congo   | 2004           | Meat, Other               | 17                                                          |
| 46              | Congo   | 2004           | Milk, Whole               | 63                                                          |
| 46              | Congo   | 2004           | Mutton & Goat Meat        | 1                                                           |
| 46              | Congo   | 2004           | Offals, Edible            | 11                                                          |
| 46              | Congo   | 2004           | Oilcrops Oil, Other       | 5                                                           |
| 46              | Congo   | 2004           | Oilcrops, Other           | 3                                                           |
| 46              | Congo   | 2004           | Onions                    | 3                                                           |
| 46              | Congo   | 2004           | Oranges, Mandarines       | 4                                                           |
| 46              | Congo   | 2004           | Palm Oil                  | 20                                                          |
| 46              | Congo   | 2004           | Peas                      | 4                                                           |
| 46              | Congo   | 2004           | Pelagic Fish              | 21                                                          |
| 46              | Congo   | 2004           | Pigmeat                   | 5                                                           |
| 46              | Congo   | 2004           | Pineapples                | 2                                                           |
| 46              | Congo   | 2004           | Plantains                 | 44                                                          |
| 46              | Congo   | 2004           | Potatoes                  | 3                                                           |
| 46              | Congo   | 2004           | Poultry Meat              | 26                                                          |
| 46              | Congo   | 2004           | Rice (Milled Equivalent)  | 35                                                          |
| 46              | Congo   | 2004           | Roots, Other              | 29                                                          |
| 46              | Congo   | 2004           | Soyabean Oil              | 6                                                           |
| 46              | Congo   | 2004           | Sugar Cane                | 4                                                           |
| 46              | Congo   | 2004           | Sugar, Refined Equivalent | 38                                                          |
| 46              | Congo   | 2004           | Sweet Potatoes            | 5                                                           |

Dietary calcium and zinc deficiency risks are decreasing but remain prevalent

| FAO countrycode | Country | Reference year | Food item                 | Gross food supply (g capita <sup>-1</sup> d <sup>-1</sup> ) |
|-----------------|---------|----------------|---------------------------|-------------------------------------------------------------|
| 46              | Congo   | 2004           | Tomatoes                  | 44                                                          |
| 46              | Congo   | 2004           | Vegetables, Other         | 79                                                          |
| 46              | Congo   | 2004           | Wheat                     | 119                                                         |
| 46              | Congo   | 2004           | Wine                      | 4                                                           |
| 46              | Congo   | 2004           | Yams                      | 8                                                           |
| 46              | Congo   | 2005           | Bananas                   | 52                                                          |
| 46              | Congo   | 2005           | Beans                     | 5                                                           |
| 46              | Congo   | 2005           | Beer                      | 49                                                          |
| 46              | Congo   | 2005           | Beverages, Alcoholic      | 1                                                           |
| 46              | Congo   | 2005           | Bovine Meat               | 7                                                           |
| 46              | Congo   | 2005           | Cassava                   | 719                                                         |
| 46              | Congo   | 2005           | Coconuts - Incl Copra     | 2                                                           |
| 46              | Congo   | 2005           | Cottonseed Oil            | 1                                                           |
| 46              | Congo   | 2005           | Crustaceans               | 1                                                           |
| 46              | Congo   | 2005           | Demersal Fish             | 15                                                          |
| 46              | Congo   | 2005           | Eggs                      | 2                                                           |
| 46              | Congo   | 2005           | Freshwater Fish           | 25                                                          |
| 46              | Congo   | 2005           | Fruits, Other             | 50                                                          |
| 46              | Congo   | 2005           | Grapefruit                | 3                                                           |
| 46              | Congo   | 2005           | Groundnut Oil             | 2                                                           |
| 46              | Congo   | 2005           | Groundnuts (Shelled Eq)   | 6                                                           |
| 46              | Congo   | 2005           | Lemons, Limes             | 3                                                           |
| 46              | Congo   | 2005           | Maize                     | 13                                                          |
| 46              | Congo   | 2005           | Marine Fish, Other        | 1                                                           |
| 46              | Congo   | 2005           | Meat, Other               | 19                                                          |
| 46              | Congo   | 2005           | Milk, Whole               | 25                                                          |
| 46              | Congo   | 2005           | Mutton & Goat Meat        | 1                                                           |
| 46              | Congo   | 2005           | Offals, Edible            | 3                                                           |
| 46              | Congo   | 2005           | Oilcrops Oil, Other       | 5                                                           |
| 46              | Congo   | 2005           | Oilcrops, Other           | 3                                                           |
| 46              | Congo   | 2005           | Onions                    | 4                                                           |
| 46              | Congo   | 2005           | Oranges, Mandarines       | 4                                                           |
| 46              | Congo   | 2005           | Palm Oil                  | 19                                                          |
| 46              | Congo   | 2005           | Peas                      | 5                                                           |
| 46              | Congo   | 2005           | Pelagic Fish              | 14                                                          |
| 46              | Congo   | 2005           | Pigmeat                   | 3                                                           |
| 46              | Congo   | 2005           | Pineapples                | 2                                                           |
| 46              | Congo   | 2005           | Plantains                 | 45                                                          |
| 46              | Congo   | 2005           | Potatoes                  | 3                                                           |
| 46              | Congo   | 2005           | Poultry Meat              | 14                                                          |
| 46              | Congo   | 2005           | Rice (Milled Equivalent)  | 46                                                          |
| 46              | Congo   | 2005           | Roots, Other              | 28                                                          |
| 46              | Congo   | 2005           | Soyabean Oil              | 4                                                           |
| 46              | Congo   | 2005           | Sugar Cane                | 4                                                           |
| 46              | Congo   | 2005           | Sugar, Refined Equivalent | 36                                                          |
| 46              | Congo   | 2005           | Sweet Potatoes            | 5                                                           |
| 46              | Congo   | 2005           | Tomatoes                  | 4                                                           |
| 46              | Congo   | 2005           | Vegetables, Other         | 79                                                          |
| 46              | Congo   | 2005           | Wheat                     | 76                                                          |
| 46              | Congo   | 2005           | Wine                      | 3                                                           |
| 46              | Congo   | 2005           | Yams                      | 8                                                           |
| 46              | Congo   | 2006           | Bananas                   | 51                                                          |
| 46              | Congo   | 2006           | Beans                     | 4                                                           |
| 46              | Congo   | 2006           | Beer                      | 56                                                          |
| 46              | Congo   | 2006           | Beverages, Alcoholic      | 1                                                           |
| 46              | Congo   | 2006           | Bovine Meat               | 5                                                           |
| 46              | Congo   | 2006           | Cassava                   | 721                                                         |
| 46              | Congo   | 2006           | Coconuts - Incl Copra     | 3                                                           |
| 46              | Congo   | 2006           | Cottonseed Oil            | 1                                                           |
| 46              | Congo   | 2006           | Crustaceans               | 1                                                           |
| 46              | Congo   | 2006           | Demersal Fish             | 15                                                          |
| 46              | Congo   | 2006           | Eggs                      | 1                                                           |
| 46              | Congo   | 2006           | Freshwater Fish           | 23                                                          |
| 46              | Congo   | 2006           | Fruits, Other             | 51                                                          |
| 46              | Congo   | 2006           | Grapefruit                | 3                                                           |
| 46              | Congo   | 2006           | Groundnut Oil             | 2                                                           |
| 46              | Congo   | 2006           | Groundnuts (Shelled Eq)   | 6                                                           |
| 46              | Congo   | 2006           | Lemons, Limes             | 3                                                           |
| 46              | Congo   | 2006           | Maize                     | 10                                                          |
| 46              | Congo   | 2006           | Marine Fish, Other        | 3                                                           |
| 46              | Congo   | 2006           | Meat, Other               | 20                                                          |
| 46              | Congo   | 2006           | Milk, Whole               | 61                                                          |
| 46              | Congo   | 2006           | Mutton & Goat Meat        | 1                                                           |
| 46              | Congo   | 2006           | Offals, Edible            | 13                                                          |
| 46              | Congo   | 2006           | Oilcrops Oil, Other       | 3                                                           |
| 46              | Congo   | 2006           | Oilcrops, Other           | 2                                                           |
| 46              | Congo   | 2006           | Onions                    | 3                                                           |
| 46              | Congo   | 2006           | Oranges, Mandarines       | 4                                                           |
| 46              | Congo   | 2006           | Palm Oil                  | 25                                                          |
| 46              | Congo   | 2006           | Peas                      | 5                                                           |
| 46              | Congo   | 2006           | Pelagic Fish              | 13                                                          |
| 46              | Congo   | 2006           | Pigmeat                   | 5                                                           |
| 46              | Congo   | 2006           | Pineapples                | 2                                                           |
| 46              | Congo   | 2006           | Plantains                 | 47                                                          |
| 46              | Congo   | 2006           | Potatoes                  | 3                                                           |
| 46              | Congo   | 2006           | Poultry Meat              | 22                                                          |
| 46              | Congo   | 2006           | Rice (Milled Equivalent)  | 52                                                          |
| 46              | Congo   | 2006           | Roots, Other              | 28                                                          |
| 46              | Congo   | 2006           | Soyabean Oil              | 3                                                           |
| 46              | Congo   | 2006           | Sugar Cane                | 4                                                           |
| 46              | Congo   | 2006           | Sugar, Refined Equivalent | 38                                                          |
| 46              | Congo   | 2006           | Sweet Potatoes            | 5                                                           |
| 46              | Congo   | 2006           | Tomatoes                  | 7                                                           |
| 46              | Congo   | 2006           | Vegetables, Other         | 83                                                          |
| 46              | Congo   | 2006           | Wheat                     | 80                                                          |
| 46              | Congo   | 2006           | Wine                      | 3                                                           |
| 46              | Congo   | 2006           | Yams                      | 8                                                           |

Dietary calcium and zinc deficiency risks are decreasing but remain prevalent

| FAO countrycode | Country | Reference year | Food item                 | Gross food supply (g capita <sup>-1</sup> d <sup>-1</sup> ) |
|-----------------|---------|----------------|---------------------------|-------------------------------------------------------------|
| 46              | Congo   | 2007           | Bananas                   | 50                                                          |
| 46              | Congo   | 2007           | Beans                     | 6                                                           |
| 46              | Congo   | 2007           | Beer                      | 68                                                          |
| 46              | Congo   | 2007           | Beverages, Alcoholic      | 1                                                           |
| 46              | Congo   | 2007           | Bovine Meat               | 5                                                           |
| 46              | Congo   | 2007           | Cassava                   | 692                                                         |
| 46              | Congo   | 2007           | Coconuts - Incl Copra     | 2                                                           |
| 46              | Congo   | 2007           | Coffee                    | 1                                                           |
| 46              | Congo   | 2007           | Crustaceans               | 1                                                           |
| 46              | Congo   | 2007           | Demersal Fish             | 16                                                          |
| 46              | Congo   | 2007           | Eggs                      | 1                                                           |
| 46              | Congo   | 2007           | Freshwater Fish           | 22                                                          |
| 46              | Congo   | 2007           | Fruits, Other             | 51                                                          |
| 46              | Congo   | 2007           | Grapefruit                | 3                                                           |
| 46              | Congo   | 2007           | Groundnut Oil             | 2                                                           |
| 46              | Congo   | 2007           | Groundnuts (Shelled Eq)   | 6                                                           |
| 46              | Congo   | 2007           | Lemons, Limes             | 3                                                           |
| 46              | Congo   | 2007           | Maize                     | 10                                                          |
| 46              | Congo   | 2007           | Marine Fish, Other        | 2                                                           |
| 46              | Congo   | 2007           | Meat, Other               | 20                                                          |
| 46              | Congo   | 2007           | Milk, Whole               | 26                                                          |
| 46              | Congo   | 2007           | Mutton & Goat Meat        | 1                                                           |
| 46              | Congo   | 2007           | Offals, Edible            | 14                                                          |
| 46              | Congo   | 2007           | Oilcrops Oil, Other       | 6                                                           |
| 46              | Congo   | 2007           | Oilcrops, Other           | 2                                                           |
| 46              | Congo   | 2007           | Onions                    | 3                                                           |
| 46              | Congo   | 2007           | Oranges, Mandarines       | 4                                                           |
| 46              | Congo   | 2007           | Palm Oil                  | 21                                                          |
| 46              | Congo   | 2007           | Peas                      | 4                                                           |
| 46              | Congo   | 2007           | Pelagic Fish              | 11                                                          |
| 46              | Congo   | 2007           | Pigmeat                   | 7                                                           |
| 46              | Congo   | 2007           | Pineapples                | 3                                                           |
| 46              | Congo   | 2007           | Plantains                 | 48                                                          |
| 46              | Congo   | 2007           | Potatoes                  | 3                                                           |
| 46              | Congo   | 2007           | Poultry Meat              | 26                                                          |
| 46              | Congo   | 2007           | Rice (Milled Eq uivalent) | 53                                                          |
| 46              | Congo   | 2007           | Roots, Other              | 26                                                          |
| 46              | Congo   | 2007           | Soyabean Oil              | 2                                                           |
| 46              | Congo   | 2007           | Sugar Cane                | 4                                                           |
| 46              | Congo   | 2007           | Sugar, Refined Equivalent | 48                                                          |
| 46              | Congo   | 2007           | Sweet Potatoes            | 4                                                           |
| 46              | Congo   | 2007           | Tomatoes                  | 5                                                           |
| 46              | Congo   | 2007           | Vegetables, Other         | 79                                                          |
| 46              | Congo   | 2007           | Wheat                     | 82                                                          |
| 46              | Congo   | 2007           | Wine                      | 3                                                           |
| 46              | Congo   | 2007           | Yams                      | 8                                                           |
| 46              | Congo   | 2008           | Bananas                   | 51                                                          |
| 46              | Congo   | 2008           | Beans                     | 5                                                           |
| 46              | Congo   | 2008           | Beer                      | 62                                                          |
| 46              | Congo   | 2008           | Beverages, Alcoholic      | 1                                                           |
| 46              | Congo   | 2008           | Bovine Meat               | 10                                                          |
| 46              | Congo   | 2008           | Cassava                   | 710                                                         |
| 46              | Congo   | 2008           | Coconuts - Incl Copra     | 2                                                           |
| 46              | Congo   | 2008           | Coffee                    | 1                                                           |
| 46              | Congo   | 2008           | Cottonseed Oil            | 1                                                           |
| 46              | Congo   | 2008           | Crustaceans               | 1                                                           |
| 46              | Congo   | 2008           | Demersal Fish             | 11                                                          |
| 46              | Congo   | 2008           | Eggs                      | 1                                                           |
| 46              | Congo   | 2008           | Freshwater Fish           | 21                                                          |
| 46              | Congo   | 2008           | Fruits, Other             | 52                                                          |
| 46              | Congo   | 2008           | Grapefruit                | 3                                                           |
| 46              | Congo   | 2008           | Groundnut Oil             | 2                                                           |
| 46              | Congo   | 2008           | Groundnuts (Shelled Eq)   | 8                                                           |
| 46              | Congo   | 2008           | Lemons, Limes             | 3                                                           |
| 46              | Congo   | 2008           | Maize                     | 10                                                          |
| 46              | Congo   | 2008           | Marine Fish, Other        | 3                                                           |
| 46              | Congo   | 2008           | Meat, Other               | 21                                                          |
| 46              | Congo   | 2008           | Milk, Whole               | 22                                                          |
| 46              | Congo   | 2008           | Mutton & Goat Meat        | 1                                                           |
| 46              | Congo   | 2008           | Offals, Edible            | 5                                                           |
| 46              | Congo   | 2008           | Oilcrops Oil, Other       | 1                                                           |
| 46              | Congo   | 2008           | Oilcrops, Other           | 2                                                           |
| 46              | Congo   | 2008           | Onions                    | 5                                                           |
| 46              | Congo   | 2008           | Oranges, Mandarines       | 6                                                           |
| 46              | Congo   | 2008           | Palm Oil                  | 20                                                          |
| 46              | Congo   | 2008           | Peas                      | 3                                                           |
| 46              | Congo   | 2008           | Pelagic Fish              | 24                                                          |
| 46              | Congo   | 2008           | Pigmeat                   | 3                                                           |
| 46              | Congo   | 2008           | Pineapples                | 3                                                           |
| 46              | Congo   | 2008           | Plantains                 | 50                                                          |
| 46              | Congo   | 2008           | Potatoes                  | 3                                                           |
| 46              | Congo   | 2008           | Poultry Meat              | 24                                                          |
| 46              | Congo   | 2008           | Rice (Milled Equivalent)  | 51                                                          |
| 46              | Congo   | 2008           | Roots, Other              | 25                                                          |
| 46              | Congo   | 2008           | Soyabean Oil              | 2                                                           |
| 46              | Congo   | 2008           | Sugar Cane                | 4                                                           |
| 46              | Congo   | 2008           | Sugar, Refined Equivalent | 48                                                          |
| 46              | Congo   | 2008           | Sweet Potatoes            | 4                                                           |
| 46              | Congo   | 2008           | Tomatoes                  | 6                                                           |
| 46              | Congo   | 2008           | Vegetables, Other         | 81                                                          |
| 46              | Congo   | 2008           | Wheat                     | 83                                                          |
| 46              | Congo   | 2008           | Wine                      | 4                                                           |
| 46              | Congo   | 2008           | Yams                      | 8                                                           |
| 46              | Congo   | 2009           | Bananas                   | 50                                                          |
| 46              | Congo   | 2009           | Barley                    | 5                                                           |
| 46              | Congo   | 2009           | Beans                     | 5                                                           |
| 46              | Congo   | 2009           | Beer                      | 91                                                          |

Dietary calcium and zinc deficiency risks are decreasing but remain prevalent

| FAO countrycode | Country | Reference year | Food item                 | Gross food supply (g capita <sup>-1</sup> d <sup>-1</sup> ) |
|-----------------|---------|----------------|---------------------------|-------------------------------------------------------------|
| 46              | Congo   | 2009           | Beverages, Alcoholic      | 1                                                           |
| 46              | Congo   | 2009           | Bovine Meat               | 10                                                          |
| 46              | Congo   | 2009           | Cassava                   | 706                                                         |
| 46              | Congo   | 2009           | Coconuts - Incl Copra     | 2                                                           |
| 46              | Congo   | 2009           | Coffee                    | 1                                                           |
| 46              | Congo   | 2009           | Cottonseed Oil            | 1                                                           |
| 46              | Congo   | 2009           | Crustaceans               | 1                                                           |
| 46              | Congo   | 2009           | Demersal Fish             | 15                                                          |
| 46              | Congo   | 2009           | Eggs                      | 1                                                           |
| 46              | Congo   | 2009           | Freshwater Fish           | 20                                                          |
| 46              | Congo   | 2009           | Fruits, Other             | 51                                                          |
| 46              | Congo   | 2009           | Grapefruit                | 3                                                           |
| 46              | Congo   | 2009           | Groundnut Oil             | 2                                                           |
| 46              | Congo   | 2009           | Groundnuts (Shelled Eq)   | 8                                                           |
| 46              | Congo   | 2009           | Lemons, Limes             | 3                                                           |
| 46              | Congo   | 2009           | Maize                     | 10                                                          |
| 46              | Congo   | 2009           | Marine Fish, Other        | 2                                                           |
| 46              | Congo   | 2009           | Meat, Other               | 22                                                          |
| 46              | Congo   | 2009           | Milk, Whole               | 30                                                          |
| 46              | Congo   | 2009           | Mutton & Goat Meat        | 1                                                           |
| 46              | Congo   | 2009           | Offals, Edible            | 4                                                           |
| 46              | Congo   | 2009           | Oilcrops Oil, Other       | 1                                                           |
| 46              | Congo   | 2009           | Oilcrops, Other           | 2                                                           |
| 46              | Congo   | 2009           | Onions                    | 6                                                           |
| 46              | Congo   | 2009           | Oranges, Mandarines       | 5                                                           |
| 46              | Congo   | 2009           | Palm Oil                  | 19                                                          |
| 46              | Congo   | 2009           | Peas                      | 4                                                           |
| 46              | Congo   | 2009           | Pelagic Fish              | 24                                                          |
| 46              | Congo   | 2009           | Pigmeat                   | 5                                                           |
| 46              | Congo   | 2009           | Pineapples                | 3                                                           |
| 46              | Congo   | 2009           | Plantains                 | 50                                                          |
| 46              | Congo   | 2009           | Potatoes                  | 4                                                           |
| 46              | Congo   | 2009           | Poultry Meat              | 27                                                          |
| 46              | Congo   | 2009           | Rice (Milled Equivalent)  | 50                                                          |
| 46              | Congo   | 2009           | Roots, Other              | 32                                                          |
| 46              | Congo   | 2009           | Soyabean Oil              | 2                                                           |
| 46              | Congo   | 2009           | Sugar Cane                | 3                                                           |
| 46              | Congo   | 2009           | Sugar, Refined Equivalent | 35                                                          |
| 46              | Congo   | 2009           | Sweet Potatoes            | 4                                                           |
| 46              | Congo   | 2009           | Tomatoes                  | 8                                                           |
| 46              | Congo   | 2009           | Vegetables, Other         | 84                                                          |
| 46              | Congo   | 2009           | Wheat                     | 104                                                         |
| 46              | Congo   | 2009           | Wine                      | 3                                                           |
| 46              | Congo   | 2009           | Yams                      | 8                                                           |
| 46              | Congo   | 2010           | Bananas                   | 51                                                          |
| 46              | Congo   | 2010           | Barley                    | 5                                                           |
| 46              | Congo   | 2010           | Beans                     | 5                                                           |
| 46              | Congo   | 2010           | Beer                      | 92                                                          |
| 46              | Congo   | 2010           | Beverages, Alcoholic      | 1                                                           |
| 46              | Congo   | 2010           | Bovine Meat               | 7                                                           |
| 46              | Congo   | 2010           | Cassava                   | 693                                                         |
| 46              | Congo   | 2010           | Coconuts - Incl Copra     | 2                                                           |
| 46              | Congo   | 2010           | Crustaceans               | 1                                                           |
| 46              | Congo   | 2010           | Demersal Fish             | 19                                                          |
| 46              | Congo   | 2010           | Eggs                      | 1                                                           |
| 46              | Congo   | 2010           | Freshwater Fish           | 21                                                          |
| 46              | Congo   | 2010           | Fruits, Other             | 52                                                          |
| 46              | Congo   | 2010           | Grapefruit                | 3                                                           |
| 46              | Congo   | 2010           | Groundnut Oil             | 2                                                           |
| 46              | Congo   | 2010           | Groundnuts (Shelled Eq)   | 7                                                           |
| 46              | Congo   | 2010           | Lemons, Limes             | 3                                                           |
| 46              | Congo   | 2010           | Maize                     | 10                                                          |
| 46              | Congo   | 2010           | Marine Fish, Other        | 1                                                           |
| 46              | Congo   | 2010           | Meat, Other               | 26                                                          |
| 46              | Congo   | 2010           | Milk, Whole               | 29                                                          |
| 46              | Congo   | 2010           | Mutton & Goat Meat        | 1                                                           |
| 46              | Congo   | 2010           | Offals, Edible            | 2                                                           |
| 46              | Congo   | 2010           | Oilcrops Oil, Other       | 1                                                           |
| 46              | Congo   | 2010           | Oilcrops, Other           | 2                                                           |
| 46              | Congo   | 2010           | Onions                    | 6                                                           |
| 46              | Congo   | 2010           | Oranges, Mandarines       | 6                                                           |
| 46              | Congo   | 2010           | Palm Oil                  | 21                                                          |
| 46              | Congo   | 2010           | Peas                      | 4                                                           |
| 46              | Congo   | 2010           | Pelagic Fish              | 13                                                          |
| 46              | Congo   | 2010           | Pigmeat                   | 3                                                           |
| 46              | Congo   | 2010           | Pineapples                | 3                                                           |
| 46              | Congo   | 2010           | Plantains                 | 49                                                          |
| 46              | Congo   | 2010           | Potatoes                  | 4                                                           |
| 46              | Congo   | 2010           | Poultry Meat              | 33                                                          |
| 46              | Congo   | 2010           | Rice (Milled Equivalent)  | 54                                                          |
| 46              | Congo   | 2010           | Roots, Other              | 33                                                          |
| 46              | Congo   | 2010           | Sugar Cane                | 3                                                           |
| 46              | Congo   | 2010           | Sugar, Refined Equivalent | 34                                                          |
| 46              | Congo   | 2010           | Sweet Potatoes            | 5                                                           |
| 46              | Congo   | 2010           | Tomatoes                  | 10                                                          |
| 46              | Congo   | 2010           | Vegetables, Other         | 90                                                          |
| 46              | Congo   | 2010           | Wheat                     | 109                                                         |
| 46              | Congo   | 2010           | Wine                      | 3                                                           |
| 46              | Congo   | 2010           | Yams                      | 8                                                           |
| 46              | Congo   | 2011           | Apples                    | 1                                                           |
| 46              | Congo   | 2011           | Bananas                   | 54                                                          |
| 46              | Congo   | 2011           | Barley                    | 5                                                           |
| 46              | Congo   | 2011           | Beans                     | 6                                                           |
| 46              | Congo   | 2011           | Beer                      | 103                                                         |
| 46              | Congo   | 2011           | Beverages, Alcoholic      | 1                                                           |
| 46              | Congo   | 2011           | Bovine Meat               | 7                                                           |
| 46              | Congo   | 2011           | Cassava                   | 674                                                         |

Dietary calcium and zinc deficiency risks are decreasing but remain prevalent

| FAO countrycode | Country    | Reference year | Food item                 | Gross food supply (g capita <sup>-1</sup> d <sup>-1</sup> ) |
|-----------------|------------|----------------|---------------------------|-------------------------------------------------------------|
| 46              | Congo      | 2011           | Cocoa Beans               | 1                                                           |
| 46              | Congo      | 2011           | Coconuts - Incl Copra     | 2                                                           |
| 46              | Congo      | 2011           | Demersal Fish             | 23                                                          |
| 46              | Congo      | 2011           | Eggs                      | 2                                                           |
| 46              | Congo      | 2011           | Freshwater Fish           | 22                                                          |
| 46              | Congo      | 2011           | Fruits, Other             | 50                                                          |
| 46              | Congo      | 2011           | Grapefruit                | 3                                                           |
| 46              | Congo      | 2011           | Groundnut Oil             | 2                                                           |
| 46              | Congo      | 2011           | Groundnuts (Shelled Eq)   | 7                                                           |
| 46              | Congo      | 2011           | Lemons, Limes             | 3                                                           |
| 46              | Congo      | 2011           | Maize                     | 10                                                          |
| 46              | Congo      | 2011           | Marine Fish, Other        | 4                                                           |
| 46              | Congo      | 2011           | Meat, Other               | 27                                                          |
| 46              | Congo      | 2011           | Milk, Whole               | 32                                                          |
| 46              | Congo      | 2011           | Molluscs, Other           | 1                                                           |
| 46              | Congo      | 2011           | Mutton & Goat Meat        | 1                                                           |
| 46              | Congo      | 2011           | Offals, Edible            | 8                                                           |
| 46              | Congo      | 2011           | Oilcrops Oil, Other       | 2                                                           |
| 46              | Congo      | 2011           | Oilcrops, Other           | 2                                                           |
| 46              | Congo      | 2011           | Onions                    | 6                                                           |
| 46              | Congo      | 2011           | Oranges, Mandarines       | 6                                                           |
| 46              | Congo      | 2011           | Palm Oil                  | 20                                                          |
| 46              | Congo      | 2011           | Peas                      | 4                                                           |
| 46              | Congo      | 2011           | Pelagic Fish              | 22                                                          |
| 46              | Congo      | 2011           | Pigmeat                   | 7                                                           |
| 46              | Congo      | 2011           | Pineapples                | 3                                                           |
| 46              | Congo      | 2011           | Plantains                 | 48                                                          |
| 46              | Congo      | 2011           | Potatoes                  | 4                                                           |
| 46              | Congo      | 2011           | Poultry Meat              | 61                                                          |
| 46              | Congo      | 2011           | Rice (Milled Equivalent)  | 54                                                          |
| 46              | Congo      | 2011           | Roots, Other              | 33                                                          |
| 46              | Congo      | 2011           | Sugar Cane                | 3                                                           |
| 46              | Congo      | 2011           | Sugar, Refined Equivalent | 34                                                          |
| 46              | Congo      | 2011           | Sweet Potatoes            | 5                                                           |
| 46              | Congo      | 2011           | Sweeteners, Other         | 1                                                           |
| 46              | Congo      | 2011           | Tomatoes                  | 7                                                           |
| 46              | Congo      | 2011           | Vegetables, Other         | 88                                                          |
| 46              | Congo      | 2011           | Wheat                     | 110                                                         |
| 46              | Congo      | 2011           | Wine                      | 2                                                           |
| 46              | Congo      | 2011           | Yams                      | 8                                                           |
| 48              | Costa Rica | 1992           | Apples                    | 1                                                           |
| 48              | Costa Rica | 1992           | Bananas                   | 76                                                          |
| 48              | Costa Rica | 1992           | Barley                    | 4                                                           |
| 48              | Costa Rica | 1992           | Beans                     | 25                                                          |
| 48              | Costa Rica | 1992           | Beer                      | 28                                                          |
| 48              | Costa Rica | 1992           | Beverages, Alcoholic      | 21                                                          |
| 48              | Costa Rica | 1992           | Bovine Meat               | 59                                                          |
| 48              | Costa Rica | 1992           | Butter, Ghee              | 3                                                           |
| 48              | Costa Rica | 1992           | Cassava                   | 2                                                           |
| 48              | Costa Rica | 1992           | Cereals, Other            | 2                                                           |
| 48              | Costa Rica | 1992           | Cheese                    | 5                                                           |
| 48              | Costa Rica | 1992           | Cocoa Beans               | 2                                                           |
| 48              | Costa Rica | 1992           | Coconut Oil               | 1                                                           |
| 48              | Costa Rica | 1992           | Coconuts - Incl Copra     | 4                                                           |
| 48              | Costa Rica | 1992           | Coffee                    | 22                                                          |
| 48              | Costa Rica | 1992           | Crustaceans               | 2                                                           |
| 48              | Costa Rica | 1992           | Demersal Fish             | 3                                                           |
| 48              | Costa Rica | 1992           | Eggs                      | 30                                                          |
| 48              | Costa Rica | 1992           | Fats, Animals, Raw        | 3                                                           |
| 48              | Costa Rica | 1992           | Freshwater Fish           | 2                                                           |
| 48              | Costa Rica | 1992           | Fruits, Other             | 63                                                          |
| 48              | Costa Rica | 1992           | Grapefruit                | 12                                                          |
| 48              | Costa Rica | 1992           | Grapes                    | 1                                                           |
| 48              | Costa Rica | 1992           | Groundnuts (Shelled Eq)   | 1                                                           |
| 48              | Costa Rica | 1992           | Honey                     | 1                                                           |
| 48              | Costa Rica | 1992           | Maize                     | 50                                                          |
| 48              | Costa Rica | 1992           | Marine Fish, Other        | 2                                                           |
| 48              | Costa Rica | 1992           | Milk, Whole               | 337                                                         |
| 48              | Costa Rica | 1992           | Nuts                      | 1                                                           |
| 48              | Costa Rica | 1992           | Offals, Edible            | 8                                                           |
| 48              | Costa Rica | 1992           | Onions                    | 16                                                          |
| 48              | Costa Rica | 1992           | Oranges, Mandarines       | 38                                                          |
| 48              | Costa Rica | 1992           | Palm Oil                  | 26                                                          |
| 48              | Costa Rica | 1992           | Pelagic Fish              | 3                                                           |
| 48              | Costa Rica | 1992           | Pepper                    | 1                                                           |
| 48              | Costa Rica | 1992           | Pigmeat                   | 16                                                          |
| 48              | Costa Rica | 1992           | Pineapples                | 253                                                         |
| 48              | Costa Rica | 1992           | Plantains                 | 27                                                          |
| 48              | Costa Rica | 1992           | Potatoes                  | 45                                                          |
| 48              | Costa Rica | 1992           | Poultry Meat              | 42                                                          |
| 48              | Costa Rica | 1992           | Pulses, Other             | 1                                                           |
| 48              | Costa Rica | 1992           | Rice (Milled Equivalent)  | 130                                                         |
| 48              | Costa Rica | 1992           | Roots, Other              | 12                                                          |
| 48              | Costa Rica | 1992           | Soyabean Oil              | 12                                                          |
| 48              | Costa Rica | 1992           | Spices, Other             | 5                                                           |
| 48              | Costa Rica | 1992           | Sugar, Non-Centrifugal    | 10                                                          |
| 48              | Costa Rica | 1992           | Sugar, Refined Equivalent | 140                                                         |
| 48              | Costa Rica | 1992           | Sweeteners, Other         | 2                                                           |
| 48              | Costa Rica | 1992           | Tomatoes                  | 8                                                           |
| 48              | Costa Rica | 1992           | Vegetables, Other         | 78                                                          |
| 48              | Costa Rica | 1992           | Wheat                     | 79                                                          |
| 48              | Costa Rica | 1992           | Wine                      | 1                                                           |
| 48              | Costa Rica | 1993           | Apples                    | 2                                                           |
| 48              | Costa Rica | 1993           | Barley                    | 4                                                           |
| 48              | Costa Rica | 1993           | Beans                     | 23                                                          |
| 48              | Costa Rica | 1993           | Beer                      | 30                                                          |
| 48              | Costa Rica | 1993           | Beverages, Alcoholic      | 21                                                          |

Dietary calcium and zinc deficiency risks are decreasing but remain prevalent

| FAO countrycode | Country    | Reference year | Food item                 | Gross food supply (g capita <sup>-1</sup> d <sup>-1</sup> ) |
|-----------------|------------|----------------|---------------------------|-------------------------------------------------------------|
| 48              | Costa Rica | 1993           | Bovine Meat               | 57                                                          |
| 48              | Costa Rica | 1993           | Butter, Ghee              | 3                                                           |
| 48              | Costa Rica | 1993           | Cassava                   | 3                                                           |
| 48              | Costa Rica | 1993           | Cereals, Other            | 3                                                           |
| 48              | Costa Rica | 1993           | Cheese                    | 5                                                           |
| 48              | Costa Rica | 1993           | Cocoa Beans               | 2                                                           |
| 48              | Costa Rica | 1993           | Coconut Oil               | 1                                                           |
| 48              | Costa Rica | 1993           | Coconuts - Incl Copra     | 2                                                           |
| 48              | Costa Rica | 1993           | Coffee                    | 22                                                          |
| 48              | Costa Rica | 1993           | Crustaceans               | 3                                                           |
| 48              | Costa Rica | 1993           | Demersal Fish             | 3                                                           |
| 48              | Costa Rica | 1993           | Eggs                      | 32                                                          |
| 48              | Costa Rica | 1993           | Fats, Animals, Raw        | 3                                                           |
| 48              | Costa Rica | 1993           | Freshwater Fish           | 3                                                           |
| 48              | Costa Rica | 1993           | Fruits, Other             | 80                                                          |
| 48              | Costa Rica | 1993           | Grapefruit                | 15                                                          |
| 48              | Costa Rica | 1993           | Grapes                    | 1                                                           |
| 48              | Costa Rica | 1993           | Groundnuts (Shelled Eq)   | 1                                                           |
| 48              | Costa Rica | 1993           | Honey                     | 1                                                           |
| 48              | Costa Rica | 1993           | Maize                     | 46                                                          |
| 48              | Costa Rica | 1993           | Marine Fish, Other        | 6                                                           |
| 48              | Costa Rica | 1993           | Milk, Whole               | 367                                                         |
| 48              | Costa Rica | 1993           | Nuts                      | 2                                                           |
| 48              | Costa Rica | 1993           | Offals, Edible            | 8                                                           |
| 48              | Costa Rica | 1993           | Onions                    | 19                                                          |
| 48              | Costa Rica | 1993           | Oranges, Mandarines       | 44                                                          |
| 48              | Costa Rica | 1993           | Palm Oil                  | 25                                                          |
| 48              | Costa Rica | 1993           | Pelagic Fish              | 2                                                           |
| 48              | Costa Rica | 1993           | Pepper                    | 1                                                           |
| 48              | Costa Rica | 1993           | Pigmeat                   | 16                                                          |
| 48              | Costa Rica | 1993           | Pineapples                | 244                                                         |
| 48              | Costa Rica | 1993           | Plantains                 | 28                                                          |
| 48              | Costa Rica | 1993           | Potatoes                  | 36                                                          |
| 48              | Costa Rica | 1993           | Poultry Meat              | 43                                                          |
| 48              | Costa Rica | 1993           | Pulses, Other             | 1                                                           |
| 48              | Costa Rica | 1993           | Rice (Milled Equivalent)  | 172                                                         |
| 48              | Costa Rica | 1993           | Roots, Other              | 22                                                          |
| 48              | Costa Rica | 1993           | Soyabean Oil              | 11                                                          |
| 48              | Costa Rica | 1993           | Soyabeans                 | 1                                                           |
| 48              | Costa Rica | 1993           | Spices, Other             | 2                                                           |
| 48              | Costa Rica | 1993           | Sugar, Non-Centrifugal    | 10                                                          |
| 48              | Costa Rica | 1993           | Sugar, Refined Equivalent | 141                                                         |
| 48              | Costa Rica | 1993           | Sweeteners, Other         | 2                                                           |
| 48              | Costa Rica | 1993           | Tomatoes                  | 8                                                           |
| 48              | Costa Rica | 1993           | Vegetables, Other         | 73                                                          |
| 48              | Costa Rica | 1993           | Wheat                     | 65                                                          |
| 48              | Costa Rica | 1993           | Wine                      | 1                                                           |
| 48              | Costa Rica | 1994           | Apples                    | 7                                                           |
| 48              | Costa Rica | 1994           | Bananas                   | 1                                                           |
| 48              | Costa Rica | 1994           | Barley                    | 9                                                           |
| 48              | Costa Rica | 1994           | Beans                     | 26                                                          |
| 48              | Costa Rica | 1994           | Beer                      | 34                                                          |
| 48              | Costa Rica | 1994           | Beverages, Alcoholic      | 22                                                          |
| 48              | Costa Rica | 1994           | Bovine Meat               | 54                                                          |
| 48              | Costa Rica | 1994           | Butter, Ghee              | 3                                                           |
| 48              | Costa Rica | 1994           | Cassava                   | 2                                                           |
| 48              | Costa Rica | 1994           | Cheese                    | 5                                                           |
| 48              | Costa Rica | 1994           | Cocoa Beans               | 1                                                           |
| 48              | Costa Rica | 1994           | Coconut Oil               | 1                                                           |
| 48              | Costa Rica | 1994           | Coconuts - Incl Copra     | 2                                                           |
| 48              | Costa Rica | 1994           | Coffee                    | 15                                                          |
| 48              | Costa Rica | 1994           | Crustaceans               | 2                                                           |
| 48              | Costa Rica | 1994           | Eggs                      | 31                                                          |
| 48              | Costa Rica | 1994           | Fats, Animals, Raw        | 6                                                           |
| 48              | Costa Rica | 1994           | Freshwater Fish           | 3                                                           |
| 48              | Costa Rica | 1994           | Fruits, Other             | 93                                                          |
| 48              | Costa Rica | 1994           | Grapefruit                | 10                                                          |
| 48              | Costa Rica | 1994           | Grapes                    | 4                                                           |
| 48              | Costa Rica | 1994           | Groundnuts (Shelled Eq)   | 1                                                           |
| 48              | Costa Rica | 1994           | Honey                     | 1                                                           |
| 48              | Costa Rica | 1994           | Maize                     | 24                                                          |
| 48              | Costa Rica | 1994           | Marine Fish, Other        | 5                                                           |
| 48              | Costa Rica | 1994           | Milk, Whole               | 364                                                         |
| 48              | Costa Rica | 1994           | Molluscs, Other           | 1                                                           |
| 48              | Costa Rica | 1994           | Nuts                      | 1                                                           |
| 48              | Costa Rica | 1994           | Oats                      | 3                                                           |
| 48              | Costa Rica | 1994           | Offals, Edible            | 8                                                           |
| 48              | Costa Rica | 1994           | Onions                    | 18                                                          |
| 48              | Costa Rica | 1994           | Oranges, Mandarines       | 63                                                          |
| 48              | Costa Rica | 1994           | Palm Oil                  | 20                                                          |
| 48              | Costa Rica | 1994           | Palmkernel Oil            | 1                                                           |
| 48              | Costa Rica | 1994           | Pelagic Fish              | 2                                                           |
| 48              | Costa Rica | 1994           | Pepper                    | 1                                                           |
| 48              | Costa Rica | 1994           | Pigmeat                   | 18                                                          |
| 48              | Costa Rica | 1994           | Pineapples                | 247                                                         |
| 48              | Costa Rica | 1994           | Plantains                 | 19                                                          |
| 48              | Costa Rica | 1994           | Potatoes                  | 28                                                          |
| 48              | Costa Rica | 1994           | Poultry Meat              | 43                                                          |
| 48              | Costa Rica | 1994           | Pulses, Other             | 1                                                           |
| 48              | Costa Rica | 1994           | Rice (Milled Equivalent)  | 130                                                         |
| 48              | Costa Rica | 1994           | Roots, Other              | 27                                                          |
| 48              | Costa Rica | 1994           | Soyabean Oil              | 12                                                          |
| 48              | Costa Rica | 1994           | Soyabeans                 | 6                                                           |
| 48              | Costa Rica | 1994           | Spices, Other             | 7                                                           |
| 48              | Costa Rica | 1994           | Sugar, Non-Centrifugal    | 9                                                           |
| 48              | Costa Rica | 1994           | Sugar, Refined Equivalent | 138                                                         |
| 48              | Costa Rica | 1994           | Sweeteners, Other         | 3                                                           |

Dietary calcium and zinc deficiency risks are decreasing but remain prevalent

| FAO countrycode | Country    | Reference year | Food item                 | Gross food supply (g capita <sup>-1</sup> d <sup>-1</sup> ) |
|-----------------|------------|----------------|---------------------------|-------------------------------------------------------------|
| 48              | Costa Rica | 1994           | Tomatoes                  | 13                                                          |
| 48              | Costa Rica | 1994           | Vegetables, Other         | 70                                                          |
| 48              | Costa Rica | 1994           | Wheat                     | 117                                                         |
| 48              | Costa Rica | 1994           | Wine                      | 2                                                           |
| 48              | Costa Rica | 1995           | Apples                    | 8                                                           |
| 48              | Costa Rica | 1995           | Barley                    | 10                                                          |
| 48              | Costa Rica | 1995           | Beans                     | 29                                                          |
| 48              | Costa Rica | 1995           | Beer                      | 34                                                          |
| 48              | Costa Rica | 1995           | Beverages, Alcoholic      | 22                                                          |
| 48              | Costa Rica | 1995           | Bovine Meat               | 53                                                          |
| 48              | Costa Rica | 1995           | Butter, Ghee              | 3                                                           |
| 48              | Costa Rica | 1995           | Cassava                   | 3                                                           |
| 48              | Costa Rica | 1995           | Cheese                    | 5                                                           |
| 48              | Costa Rica | 1995           | Cocoa Beans               | 1                                                           |
| 48              | Costa Rica | 1995           | Coconut Oil               | 1                                                           |
| 48              | Costa Rica | 1995           | Coconuts - Incl Copra     | 3                                                           |
| 48              | Costa Rica | 1995           | Coffee                    | 12                                                          |
| 48              | Costa Rica | 1995           | Crustaceans               | 3                                                           |
| 48              | Costa Rica | 1995           | Eggs                      | 36                                                          |
| 48              | Costa Rica | 1995           | Fats, Animals, Raw        | 6                                                           |
| 48              | Costa Rica | 1995           | Freshwater Fish           | 4                                                           |
| 48              | Costa Rica | 1995           | Fruits, Other             | 91                                                          |
| 48              | Costa Rica | 1995           | Grapefruit                | 11                                                          |
| 48              | Costa Rica | 1995           | Grapes                    | 4                                                           |
| 48              | Costa Rica | 1995           | Groundnuts (Shelled Eq)   | 1                                                           |
| 48              | Costa Rica | 1995           | Honey                     | 1                                                           |
| 48              | Costa Rica | 1995           | Maize                     | 25                                                          |
| 48              | Costa Rica | 1995           | Maize Germ Oil            | 1                                                           |
| 48              | Costa Rica | 1995           | Marine Fish, Other        | 5                                                           |
| 48              | Costa Rica | 1995           | Milk, Whole               | 377                                                         |
| 48              | Costa Rica | 1995           | Molluscs, Other           | 1                                                           |
| 48              | Costa Rica | 1995           | Nuts                      | 1                                                           |
| 48              | Costa Rica | 1995           | Oats                      | 2                                                           |
| 48              | Costa Rica | 1995           | Offals, Edible            | 8                                                           |
| 48              | Costa Rica | 1995           | Onions                    | 11                                                          |
| 48              | Costa Rica | 1995           | Oranges, Mandarines       | 34                                                          |
| 48              | Costa Rica | 1995           | Palm Oil                  | 22                                                          |
| 48              | Costa Rica | 1995           | Pelagic Fish              | 2                                                           |
| 48              | Costa Rica | 1995           | Pepper                    | 2                                                           |
| 48              | Costa Rica | 1995           | Pigmeat                   | 18                                                          |
| 48              | Costa Rica | 1995           | Pineapples                | 120                                                         |
| 48              | Costa Rica | 1995           | Plantains                 | 15                                                          |
| 48              | Costa Rica | 1995           | Potatoes                  | 30                                                          |
| 48              | Costa Rica | 1995           | Poultry Meat              | 46                                                          |
| 48              | Costa Rica | 1995           | Pulses, Other             | 1                                                           |
| 48              | Costa Rica | 1995           | Rice (Milled Equivalent)  | 133                                                         |
| 48              | Costa Rica | 1995           | Roots, Other              | 34                                                          |
| 48              | Costa Rica | 1995           | Soyabean Oil              | 13                                                          |
| 48              | Costa Rica | 1995           | Soyabeans                 | 11                                                          |
| 48              | Costa Rica | 1995           | Spices, Other             | 8                                                           |
| 48              | Costa Rica | 1995           | Sugar, Non-Centrifugal    | 9                                                           |
| 48              | Costa Rica | 1995           | Sugar, Refined Equivalent | 136                                                         |
| 48              | Costa Rica | 1995           | Sweeteners, Other         | 3                                                           |
| 48              | Costa Rica | 1995           | Tomatoes                  | 14                                                          |
| 48              | Costa Rica | 1995           | Vegetables, Other         | 69                                                          |
| 48              | Costa Rica | 1995           | Wheat                     | 118                                                         |
| 48              | Costa Rica | 1995           | Wine                      | 2                                                           |
| 48              | Costa Rica | 1996           | Apples                    | 7                                                           |
| 48              | Costa Rica | 1996           | Bananas                   | 1                                                           |
| 48              | Costa Rica | 1996           | Barley                    | 5                                                           |
| 48              | Costa Rica | 1996           | Beans                     | 14                                                          |
| 48              | Costa Rica | 1996           | Beer                      | 33                                                          |
| 48              | Costa Rica | 1996           | Beverages, Alcoholic      | 21                                                          |
| 48              | Costa Rica | 1996           | Bovine Meat               | 54                                                          |
| 48              | Costa Rica | 1996           | Butter, Ghee              | 3                                                           |
| 48              | Costa Rica | 1996           | Cassava                   | 3                                                           |
| 48              | Costa Rica | 1996           | Cheese                    | 4                                                           |
| 48              | Costa Rica | 1996           | Coconut Oil               | 1                                                           |
| 48              | Costa Rica | 1996           | Coconuts - Incl Copra     | 3                                                           |
| 48              | Costa Rica | 1996           | Coffee                    | 13                                                          |
| 48              | Costa Rica | 1996           | Eggs                      | 30                                                          |
| 48              | Costa Rica | 1996           | Fats, Animals, Raw        | 5                                                           |
| 48              | Costa Rica | 1996           | Freshwater Fish           | 4                                                           |
| 48              | Costa Rica | 1996           | Fruits, Other             | 91                                                          |
| 48              | Costa Rica | 1996           | Grapefruit                | 10                                                          |
| 48              | Costa Rica | 1996           | Grapes                    | 4                                                           |
| 48              | Costa Rica | 1996           | Groundnuts (Shelled Eq)   | 1                                                           |
| 48              | Costa Rica | 1996           | Honey                     | 1                                                           |
| 48              | Costa Rica | 1996           | Lemons, Limes             | 1                                                           |
| 48              | Costa Rica | 1996           | Maize                     | 18                                                          |
| 48              | Costa Rica | 1996           | Maize Germ Oil            | 1                                                           |
| 48              | Costa Rica | 1996           | Marine Fish, Other        | 4                                                           |
| 48              | Costa Rica | 1996           | Milk, Whole               | 342                                                         |
| 48              | Costa Rica | 1996           | Molluscs, Other           | 1                                                           |
| 48              | Costa Rica | 1996           | Nuts                      | 2                                                           |
| 48              | Costa Rica | 1996           | Oats                      | 2                                                           |
| 48              | Costa Rica | 1996           | Offals, Edible            | 8                                                           |
| 48              | Costa Rica | 1996           | Onions                    | 12                                                          |
| 48              | Costa Rica | 1996           | Oranges, Mandarines       | 40                                                          |
| 48              | Costa Rica | 1996           | Palm Oil                  | 22                                                          |
| 48              | Costa Rica | 1996           | Palmkernel Oil            | 1                                                           |
| 48              | Costa Rica | 1996           | Pelagic Fish              | 2                                                           |
| 48              | Costa Rica | 1996           | Pepper                    | 1                                                           |
| 48              | Costa Rica | 1996           | Pigmeat                   | 15                                                          |
| 48              | Costa Rica | 1996           | Pineapples                | 207                                                         |
| 48              | Costa Rica | 1996           | Plantains                 | 13                                                          |
| 48              | Costa Rica | 1996           | Potatoes                  | 39                                                          |



Dietary calcium and zinc deficiency risks are decreasing but remain prevalent

| FAO countrycode | Country    | Reference year | Food item                 | Gross food supply (g capita <sup>-1</sup> d <sup>-1</sup> ) |
|-----------------|------------|----------------|---------------------------|-------------------------------------------------------------|
| 48              | Costa Rica | 1996           | Poultry Meat              | 50                                                          |
| 48              | Costa Rica | 1996           | Pulses, Other             | 1                                                           |
| 48              | Costa Rica | 1996           | Rice (Milled Equivalent)  | 116                                                         |
| 48              | Costa Rica | 1996           | Roots, Other              | 17                                                          |
| 48              | Costa Rica | 1996           | Soyabean Oil              | 16                                                          |
| 48              | Costa Rica | 1996           | Soyabeans                 | 10                                                          |
| 48              | Costa Rica | 1996           | Spices, Other             | 5                                                           |
| 48              | Costa Rica | 1996           | Sugar, Non-Centrifugal    | 9                                                           |
| 48              | Costa Rica | 1996           | Sugar, Refined Equivalent | 135                                                         |
| 48              | Costa Rica | 1996           | Sweeteners, Other         | 3                                                           |
| 48              | Costa Rica | 1996           | Tomatoes                  | 12                                                          |
| 48              | Costa Rica | 1996           | Vegetables, Other         | 68                                                          |
| 48              | Costa Rica | 1996           | Wheat                     | 159                                                         |
| 48              | Costa Rica | 1996           | Wine                      | 2                                                           |
| 48              | Costa Rica | 1997           | Apples                    | 9                                                           |
| 48              | Costa Rica | 1997           | Bananas                   | 1                                                           |
| 48              | Costa Rica | 1997           | Barley                    | 7                                                           |
| 48              | Costa Rica | 1997           | Beans                     | 23                                                          |
| 48              | Costa Rica | 1997           | Beer                      | 33                                                          |
| 48              | Costa Rica | 1997           | Beverages, Alcoholic      | 21                                                          |
| 48              | Costa Rica | 1997           | Bovine Meat               | 52                                                          |
| 48              | Costa Rica | 1997           | Butter, Ghee              | 3                                                           |
| 48              | Costa Rica | 1997           | Cassava                   | 4                                                           |
| 48              | Costa Rica | 1997           | Cephalopods               | 1                                                           |
| 48              | Costa Rica | 1997           | Cheese                    | 5                                                           |
| 48              | Costa Rica | 1997           | Citrus, Other             | 1                                                           |
| 48              | Costa Rica | 1997           | Coconuts - Incl Copra     | 3                                                           |
| 48              | Costa Rica | 1997           | Coffee                    | 13                                                          |
| 48              | Costa Rica | 1997           | Eggs                      | 31                                                          |
| 48              | Costa Rica | 1997           | Fats, Animals, Raw        | 5                                                           |
| 48              | Costa Rica | 1997           | Freshwater Fish           | 3                                                           |
| 48              | Costa Rica | 1997           | Fruits, Other             | 80                                                          |
| 48              | Costa Rica | 1997           | Grapefruit                | 13                                                          |
| 48              | Costa Rica | 1997           | Grapes                    | 4                                                           |
| 48              | Costa Rica | 1997           | Groundnuts (Shelled Eq)   | 2                                                           |
| 48              | Costa Rica | 1997           | Honey                     | 1                                                           |
| 48              | Costa Rica | 1997           | Lemons, Limes             | 1                                                           |
| 48              | Costa Rica | 1997           | Maize                     | 17                                                          |
| 48              | Costa Rica | 1997           | Maize Germ Oil            | 1                                                           |
| 48              | Costa Rica | 1997           | Marine Fish, Other        | 6                                                           |
| 48              | Costa Rica | 1997           | Milk, Whole               | 360                                                         |
| 48              | Costa Rica | 1997           | Molluscs, Other           | 1                                                           |
| 48              | Costa Rica | 1997           | Nuts                      | 1                                                           |
| 48              | Costa Rica | 1997           | Oats                      | 3                                                           |
| 48              | Costa Rica | 1997           | Offals, Edible            | 7                                                           |
| 48              | Costa Rica | 1997           | Onions                    | 10                                                          |
| 48              | Costa Rica | 1997           | Oranges, Mandarines       | 69                                                          |
| 48              | Costa Rica | 1997           | Palm Oil                  | 15                                                          |
| 48              | Costa Rica | 1997           | Palmkernel Oil            | 1                                                           |
| 48              | Costa Rica | 1997           | Pelagic Fish              | 2                                                           |
| 48              | Costa Rica | 1997           | Pepper                    | 2                                                           |
| 48              | Costa Rica | 1997           | Pigmeat                   | 16                                                          |
| 48              | Costa Rica | 1997           | Pineapples                | 188                                                         |
| 48              | Costa Rica | 1997           | Plantains                 | 13                                                          |
| 48              | Costa Rica | 1997           | Potatoes                  | 37                                                          |
| 48              | Costa Rica | 1997           | Poultry Meat              | 46                                                          |
| 48              | Costa Rica | 1997           | Pulses, Other             | 1                                                           |
| 48              | Costa Rica | 1997           | Rice (Milled Equivalent)  | 145                                                         |
| 48              | Costa Rica | 1997           | Roots, Other              | 14                                                          |
| 48              | Costa Rica | 1997           | Soyabean Oil              | 17                                                          |
| 48              | Costa Rica | 1997           | Soyabeans                 | 10                                                          |
| 48              | Costa Rica | 1997           | Spices, Other             | 5                                                           |
| 48              | Costa Rica | 1997           | Sugar, Non-Centrifugal    | 9                                                           |
| 48              | Costa Rica | 1997           | Sugar, Refined Equivalent | 133                                                         |
| 48              | Costa Rica | 1997           | Sweeteners, Other         | 3                                                           |
| 48              | Costa Rica | 1997           | Tomatoes                  | 16                                                          |
| 48              | Costa Rica | 1997           | Vegetables, Other         | 83                                                          |
| 48              | Costa Rica | 1997           | Wheat                     | 128                                                         |
| 48              | Costa Rica | 1997           | Wine                      | 2                                                           |
| 48              | Costa Rica | 1998           | Apples                    | 10                                                          |
| 48              | Costa Rica | 1998           | Bananas                   | 1                                                           |
| 48              | Costa Rica | 1998           | Barley                    | 8                                                           |
| 48              | Costa Rica | 1998           | Beans                     | 20                                                          |
| 48              | Costa Rica | 1998           | Beer                      | 32                                                          |
| 48              | Costa Rica | 1998           | Beverages, Alcoholic      | 21                                                          |
| 48              | Costa Rica | 1998           | Bovine Meat               | 51                                                          |
| 48              | Costa Rica | 1998           | Butter, Ghee              | 3                                                           |
| 48              | Costa Rica | 1998           | Cassava                   | 15                                                          |
| 48              | Costa Rica | 1998           | Cephalopods               | 2                                                           |
| 48              | Costa Rica | 1998           | Cheese                    | 5                                                           |
| 48              | Costa Rica | 1998           | Coconuts - Incl Copra     | 4                                                           |
| 48              | Costa Rica | 1998           | Coffee                    | 13                                                          |
| 48              | Costa Rica | 1998           | Demersal Fish             | 3                                                           |
| 48              | Costa Rica | 1998           | Eggs                      | 26                                                          |
| 48              | Costa Rica | 1998           | Fats, Animals, Raw        | 5                                                           |
| 48              | Costa Rica | 1998           | Freshwater Fish           | 5                                                           |
| 48              | Costa Rica | 1998           | Fruits, Other             | 55                                                          |
| 48              | Costa Rica | 1998           | Grapefruit                | 10                                                          |
| 48              | Costa Rica | 1998           | Grapes                    | 4                                                           |
| 48              | Costa Rica | 1998           | Groundnuts (Shelled Eq)   | 1                                                           |
| 48              | Costa Rica | 1998           | Honey                     | 1                                                           |
| 48              | Costa Rica | 1998           | Lemons, Limes             | 1                                                           |
| 48              | Costa Rica | 1998           | Maize                     | 12                                                          |
| 48              | Costa Rica | 1998           | Maize Germ Oil            | 1                                                           |
| 48              | Costa Rica | 1998           | Marine Fish, Other        | 2                                                           |
| 48              | Costa Rica | 1998           | Milk, Whole               | 393                                                         |
| 48              | Costa Rica | 1998           | Molluscs, Other           | 1                                                           |

Dietary calcium and zinc deficiency risks are decreasing but remain prevalent

| FAO countrycode | Country    | Reference year | Food item                 | Gross food supply (g capita <sup>-1</sup> d <sup>-1</sup> ) |
|-----------------|------------|----------------|---------------------------|-------------------------------------------------------------|
| 48              | Costa Rica | 1998           | Nuts                      | 1                                                           |
| 48              | Costa Rica | 1998           | Oats                      | 3                                                           |
| 48              | Costa Rica | 1998           | Offals, Edible            | 7                                                           |
| 48              | Costa Rica | 1998           | Onions                    | 12                                                          |
| 48              | Costa Rica | 1998           | Oranges, Mandarines       | 76                                                          |
| 48              | Costa Rica | 1998           | Palm Oil                  | 13                                                          |
| 48              | Costa Rica | 1998           | Pelagic Fish              | 2                                                           |
| 48              | Costa Rica | 1998           | Pigmeat                   | 17                                                          |
| 48              | Costa Rica | 1998           | Pineapples                | 175                                                         |
| 48              | Costa Rica | 1998           | Plantains                 | 17                                                          |
| 48              | Costa Rica | 1998           | Potatoes                  | 57                                                          |
| 48              | Costa Rica | 1998           | Poultry Meat              | 47                                                          |
| 48              | Costa Rica | 1998           | Pulses, Other             | 1                                                           |
| 48              | Costa Rica | 1998           | Rice (Milled Equivalent)  | 154                                                         |
| 48              | Costa Rica | 1998           | Roots, Other              | 10                                                          |
| 48              | Costa Rica | 1998           | Soyabean Oil              | 17                                                          |
| 48              | Costa Rica | 1998           | Soyabeans                 | 3                                                           |
| 48              | Costa Rica | 1998           | Spices, Other             | 5                                                           |
| 48              | Costa Rica | 1998           | Sugar, Non-Centrifugal    | 8                                                           |
| 48              | Costa Rica | 1998           | Sugar, Refined Equivalent | 134                                                         |
| 48              | Costa Rica | 1998           | Sunflowerseed Oil         | 1                                                           |
| 48              | Costa Rica | 1998           | Sweeteners, Other         | 3                                                           |
| 48              | Costa Rica | 1998           | Tomatoes                  | 31                                                          |
| 48              | Costa Rica | 1998           | Vegetables, Other         | 84                                                          |
| 48              | Costa Rica | 1998           | Wheat                     | 135                                                         |
| 48              | Costa Rica | 1998           | Wine                      | 2                                                           |
| 48              | Costa Rica | 1999           | Apples                    | 10                                                          |
| 48              | Costa Rica | 1999           | Bananas                   | 1                                                           |
| 48              | Costa Rica | 1999           | Barley                    | 9                                                           |
| 48              | Costa Rica | 1999           | Beans                     | 27                                                          |
| 48              | Costa Rica | 1999           | Beer                      | 31                                                          |
| 48              | Costa Rica | 1999           | Beverages, Alcoholic      | 20                                                          |
| 48              | Costa Rica | 1999           | Bovine Meat               | 49                                                          |
| 48              | Costa Rica | 1999           | Butter, Ghee              | 3                                                           |
| 48              | Costa Rica | 1999           | Cassava                   | 15                                                          |
| 48              | Costa Rica | 1999           | Cephalopods               | 2                                                           |
| 48              | Costa Rica | 1999           | Cheese                    | 6                                                           |
| 48              | Costa Rica | 1999           | Coconuts - Incl Copra     | 4                                                           |
| 48              | Costa Rica | 1999           | Coffee                    | 17                                                          |
| 48              | Costa Rica | 1999           | Crustaceans               | 1                                                           |
| 48              | Costa Rica | 1999           | Demersal Fish             | 5                                                           |
| 48              | Costa Rica | 1999           | Eggs                      | 25                                                          |
| 48              | Costa Rica | 1999           | Fats, Animals, Raw        | 6                                                           |
| 48              | Costa Rica | 1999           | Freshwater Fish           | 6                                                           |
| 48              | Costa Rica | 1999           | Fruits, Other             | 67                                                          |
| 48              | Costa Rica | 1999           | Grapefruit                | 12                                                          |
| 48              | Costa Rica | 1999           | Grapes                    | 5                                                           |
| 48              | Costa Rica | 1999           | Groundnuts (Shelled Eq)   | 1                                                           |
| 48              | Costa Rica | 1999           | Honey                     | 1                                                           |
| 48              | Costa Rica | 1999           | Lemons, Limes             | 1                                                           |
| 48              | Costa Rica | 1999           | Maize                     | 13                                                          |
| 48              | Costa Rica | 1999           | Maize Germ Oil            | 1                                                           |
| 48              | Costa Rica | 1999           | Marine Fish, Other        | 1                                                           |
| 48              | Costa Rica | 1999           | Milk, Whole               | 403                                                         |
| 48              | Costa Rica | 1999           | Molluscs, Other           | 1                                                           |
| 48              | Costa Rica | 1999           | Nuts                      | 1                                                           |
| 48              | Costa Rica | 1999           | Oats                      | 3                                                           |
| 48              | Costa Rica | 1999           | Offals, Edible            | 7                                                           |
| 48              | Costa Rica | 1999           | Onions                    | 19                                                          |
| 48              | Costa Rica | 1999           | Oranges, Mandarines       | 78                                                          |
| 48              | Costa Rica | 1999           | Palm Oil                  | 14                                                          |
| 48              | Costa Rica | 1999           | Palmkernel Oil            | 1                                                           |
| 48              | Costa Rica | 1999           | Pelagic Fish              | 1                                                           |
| 48              | Costa Rica | 1999           | Pigmeat                   | 20                                                          |
| 48              | Costa Rica | 1999           | Pineapples                | 266                                                         |
| 48              | Costa Rica | 1999           | Plantains                 | 19                                                          |
| 48              | Costa Rica | 1999           | Potatoes                  | 50                                                          |
| 48              | Costa Rica | 1999           | Poultry Meat              | 52                                                          |
| 48              | Costa Rica | 1999           | Pulses, Other             | 1                                                           |
| 48              | Costa Rica | 1999           | Rice (Milled Equivalent)  | 141                                                         |
| 48              | Costa Rica | 1999           | Roots, Other              | 29                                                          |
| 48              | Costa Rica | 1999           | Soyabean Oil              | 17                                                          |
| 48              | Costa Rica | 1999           | Soyabeans                 | 5                                                           |
| 48              | Costa Rica | 1999           | Spices, Other             | 3                                                           |
| 48              | Costa Rica | 1999           | Sugar, Non-Centrifugal    | 8                                                           |
| 48              | Costa Rica | 1999           | Sugar, Refined Equivalent | 134                                                         |
| 48              | Costa Rica | 1999           | Sunflowerseed Oil         | 1                                                           |
| 48              | Costa Rica | 1999           | Sweeteners, Other         | 4                                                           |
| 48              | Costa Rica | 1999           | Tomatoes                  | 24                                                          |
| 48              | Costa Rica | 1999           | Vegetables, Other         | 62                                                          |
| 48              | Costa Rica | 1999           | Wheat                     | 132                                                         |
| 48              | Costa Rica | 1999           | Wine                      | 3                                                           |
| 48              | Costa Rica | 2000           | Apples                    | 12                                                          |
| 48              | Costa Rica | 2000           | Bananas                   | 1                                                           |
| 48              | Costa Rica | 2000           | Barley                    | 8                                                           |
| 48              | Costa Rica | 2000           | Beans                     | 28                                                          |
| 48              | Costa Rica | 2000           | Beer                      | 32                                                          |
| 48              | Costa Rica | 2000           | Beverages, Alcoholic      | 21                                                          |
| 48              | Costa Rica | 2000           | Bovine Meat               | 46                                                          |
| 48              | Costa Rica | 2000           | Butter, Ghee              | 3                                                           |
| 48              | Costa Rica | 2000           | Cassava                   | 9                                                           |
| 48              | Costa Rica | 2000           | Cephalopods               | 1                                                           |
| 48              | Costa Rica | 2000           | Cheese                    | 5                                                           |
| 48              | Costa Rica | 2000           | Cocoa Beans               | 1                                                           |
| 48              | Costa Rica | 2000           | Coconuts - Incl Copra     | 4                                                           |
| 48              | Costa Rica | 2000           | Coffee                    | 15                                                          |
| 48              | Costa Rica | 2000           | Crustaceans               | 2                                                           |

Dietary calcium and zinc deficiency risks are decreasing but remain prevalent

| FAO countrycode | Country    | Reference year | Food item                 | Gross food supply (g capita <sup>-1</sup> d <sup>-1</sup> ) |
|-----------------|------------|----------------|---------------------------|-------------------------------------------------------------|
| 48              | Costa Rica | 2000           | Demersal Fish             | 1                                                           |
| 48              | Costa Rica | 2000           | Eggs                      | 25                                                          |
| 48              | Costa Rica | 2000           | Fats, Animals, Raw        | 7                                                           |
| 48              | Costa Rica | 2000           | Freshwater Fish           | 3                                                           |
| 48              | Costa Rica | 2000           | Fruits, Other             | 81                                                          |
| 48              | Costa Rica | 2000           | Grapefruit                | 10                                                          |
| 48              | Costa Rica | 2000           | Grapes                    | 5                                                           |
| 48              | Costa Rica | 2000           | Groundnuts (Shelled Eq)   | 1                                                           |
| 48              | Costa Rica | 2000           | Honey                     | 1                                                           |
| 48              | Costa Rica | 2000           | Lemons, Limes             | 4                                                           |
| 48              | Costa Rica | 2000           | Maize                     | 8                                                           |
| 48              | Costa Rica | 2000           | Marine Fish, Other        | 2                                                           |
| 48              | Costa Rica | 2000           | Milk, Whole               | 403                                                         |
| 48              | Costa Rica | 2000           | Molluscs, Other           | 2                                                           |
| 48              | Costa Rica | 2000           | Nuts                      | 1                                                           |
| 48              | Costa Rica | 2000           | Oats                      | 2                                                           |
| 48              | Costa Rica | 2000           | Offals, Edible            | 6                                                           |
| 48              | Costa Rica | 2000           | Onions                    | 14                                                          |
| 48              | Costa Rica | 2000           | Oranges, Mandarines       | 29                                                          |
| 48              | Costa Rica | 2000           | Palm Oil                  | 14                                                          |
| 48              | Costa Rica | 2000           | Palmkernel Oil            | 1                                                           |
| 48              | Costa Rica | 2000           | Pelagic Fish              | 1                                                           |
| 48              | Costa Rica | 2000           | Pigmeat                   | 21                                                          |
| 48              | Costa Rica | 2000           | Pineapples                | 269                                                         |
| 48              | Costa Rica | 2000           | Plantains                 | 20                                                          |
| 48              | Costa Rica | 2000           | Potatoes                  | 54                                                          |
| 48              | Costa Rica | 2000           | Poultry Meat              | 50                                                          |
| 48              | Costa Rica | 2000           | Pulses, Other             | 1                                                           |
| 48              | Costa Rica | 2000           | Rice (Milled Equivalent)  | 145                                                         |
| 48              | Costa Rica | 2000           | Roots, Other              | 14                                                          |
| 48              | Costa Rica | 2000           | Soyabean Oil              | 17                                                          |
| 48              | Costa Rica | 2000           | Soyabeans                 | 17                                                          |
| 48              | Costa Rica | 2000           | Spices, Other             | 2                                                           |
| 48              | Costa Rica | 2000           | Sugar, Non-Centrifugal    | 8                                                           |
| 48              | Costa Rica | 2000           | Sugar, Refined Equivalent | 131                                                         |
| 48              | Costa Rica | 2000           | Sunflowerseed Oil         | 1                                                           |
| 48              | Costa Rica | 2000           | Sweeteners, Other         | 3                                                           |
| 48              | Costa Rica | 2000           | Tomatoes                  | 29                                                          |
| 48              | Costa Rica | 2000           | Vegetables, Other         | 66                                                          |
| 48              | Costa Rica | 2000           | Wheat                     | 128                                                         |
| 48              | Costa Rica | 2000           | Wine                      | 3                                                           |
| 48              | Costa Rica | 2000           | Yams                      | 1                                                           |
| 48              | Costa Rica | 2001           | Apples                    | 11                                                          |
| 48              | Costa Rica | 2001           | Bananas                   | 1                                                           |
| 48              | Costa Rica | 2001           | Barley                    | 9                                                           |
| 48              | Costa Rica | 2001           | Beans                     | 27                                                          |
| 48              | Costa Rica | 2001           | Beer                      | 33                                                          |
| 48              | Costa Rica | 2001           | Beverages, Alcoholic      | 21                                                          |
| 48              | Costa Rica | 2001           | Bovine Meat               | 43                                                          |
| 48              | Costa Rica | 2001           | Butter, Ghee              | 3                                                           |
| 48              | Costa Rica | 2001           | Cassava                   | 11                                                          |
| 48              | Costa Rica | 2001           | Cephalopods               | 1                                                           |
| 48              | Costa Rica | 2001           | Cheese                    | 6                                                           |
| 48              | Costa Rica | 2001           | Cocoa Beans               | 1                                                           |
| 48              | Costa Rica | 2001           | Coconuts - Incl Copra     | 5                                                           |
| 48              | Costa Rica | 2001           | Coffee                    | 12                                                          |
| 48              | Costa Rica | 2001           | Crustaceans               | 1                                                           |
| 48              | Costa Rica | 2001           | Demersal Fish             | 1                                                           |
| 48              | Costa Rica | 2001           | Eggs                      | 28                                                          |
| 48              | Costa Rica | 2001           | Fats, Animals, Raw        | 8                                                           |
| 48              | Costa Rica | 2001           | Freshwater Fish           | 3                                                           |
| 48              | Costa Rica | 2001           | Fruits, Other             | 75                                                          |
| 48              | Costa Rica | 2001           | Grapefruit                | 11                                                          |
| 48              | Costa Rica | 2001           | Grapes                    | 5                                                           |
| 48              | Costa Rica | 2001           | Groundnuts (Shelled Eq)   | 1                                                           |
| 48              | Costa Rica | 2001           | Honey                     | 1                                                           |
| 48              | Costa Rica | 2001           | Lemons, Limes             | 8                                                           |
| 48              | Costa Rica | 2001           | Maize                     | 9                                                           |
| 48              | Costa Rica | 2001           | Maize Germ Oil            | 1                                                           |
| 48              | Costa Rica | 2001           | Marine Fish, Other        | 1                                                           |
| 48              | Costa Rica | 2001           | Milk, Whole               | 407                                                         |
| 48              | Costa Rica | 2001           | Molluscs, Other           | 2                                                           |
| 48              | Costa Rica | 2001           | Nuts                      | 1                                                           |
| 48              | Costa Rica | 2001           | Oats                      | 3                                                           |
| 48              | Costa Rica | 2001           | Offals, Edible            | 6                                                           |
| 48              | Costa Rica | 2001           | Onions                    | 19                                                          |
| 48              | Costa Rica | 2001           | Oranges, Mandarines       | 76                                                          |
| 48              | Costa Rica | 2001           | Palm Oil                  | 14                                                          |
| 48              | Costa Rica | 2001           | Pelagic Fish              | 2                                                           |
| 48              | Costa Rica | 2001           | Pigmeat                   | 23                                                          |
| 48              | Costa Rica | 2001           | Pineapples                | 244                                                         |
| 48              | Costa Rica | 2001           | Plantains                 | 31                                                          |
| 48              | Costa Rica | 2001           | Potatoes                  | 58                                                          |
| 48              | Costa Rica | 2001           | Poultry Meat              | 51                                                          |
| 48              | Costa Rica | 2001           | Pulses, Other             | 1                                                           |
| 48              | Costa Rica | 2001           | Rice (Milled Equivalent)  | 147                                                         |
| 48              | Costa Rica | 2001           | Roots, Other              | 21                                                          |
| 48              | Costa Rica | 2001           | Soyabean Oil              | 17                                                          |
| 48              | Costa Rica | 2001           | Soyabeans                 | 4                                                           |
| 48              | Costa Rica | 2001           | Spices, Other             | 1                                                           |
| 48              | Costa Rica | 2001           | Sugar, Non-Centrifugal    | 8                                                           |
| 48              | Costa Rica | 2001           | Sugar, Refined Equivalent | 128                                                         |
| 48              | Costa Rica | 2001           | Sunflowerseed Oil         | 1                                                           |
| 48              | Costa Rica | 2001           | Sweeteners, Other         | 3                                                           |
| 48              | Costa Rica | 2001           | Tomatoes                  | 41                                                          |
| 48              | Costa Rica | 2001           | Vegetables, Other         | 64                                                          |
| 48              | Costa Rica | 2001           | Wheat                     | 130                                                         |

Dietary calcium and zinc deficiency risks are decreasing but remain prevalent

| FAO countrycode | Country    | Reference year | Food item                 | Gross food supply (g capita <sup>-1</sup> d <sup>-1</sup> ) |
|-----------------|------------|----------------|---------------------------|-------------------------------------------------------------|
| 48              | Costa Rica | 2001           | Wine                      | 3                                                           |
| 48              | Costa Rica | 2001           | Yams                      | 1                                                           |
| 48              | Costa Rica | 2002           | Apples                    | 14                                                          |
| 48              | Costa Rica | 2002           | Bananas                   | 1                                                           |
| 48              | Costa Rica | 2002           | Barley                    | 10                                                          |
| 48              | Costa Rica | 2002           | Beans                     | 27                                                          |
| 48              | Costa Rica | 2002           | Beer                      | 32                                                          |
| 48              | Costa Rica | 2002           | Beverages, Alcoholic      | 21                                                          |
| 48              | Costa Rica | 2002           | Bovine Meat               | 33                                                          |
| 48              | Costa Rica | 2002           | Butter, Ghee              | 3                                                           |
| 48              | Costa Rica | 2002           | Cassava                   | 5                                                           |
| 48              | Costa Rica | 2002           | Cephalopods               | 1                                                           |
| 48              | Costa Rica | 2002           | Cheese                    | 6                                                           |
| 48              | Costa Rica | 2002           | Cocoa Beans               | 1                                                           |
| 48              | Costa Rica | 2002           | Coconuts - Incl Copra     | 4                                                           |
| 48              | Costa Rica | 2002           | Coffee                    | 11                                                          |
| 48              | Costa Rica | 2002           | Crustaceans               | 2                                                           |
| 48              | Costa Rica | 2002           | Demersal Fish             | 1                                                           |
| 48              | Costa Rica | 2002           | Eggs                      | 28                                                          |
| 48              | Costa Rica | 2002           | Fats, Animals, Raw        | 8                                                           |
| 48              | Costa Rica | 2002           | Freshwater Fish           | 8                                                           |
| 48              | Costa Rica | 2002           | Fruits, Other             | 80                                                          |
| 48              | Costa Rica | 2002           | Grapefruit                | 11                                                          |
| 48              | Costa Rica | 2002           | Grapes                    | 5                                                           |
| 48              | Costa Rica | 2002           | Groundnuts (Shelled Eq)   | 1                                                           |
| 48              | Costa Rica | 2002           | Honey                     | 1                                                           |
| 48              | Costa Rica | 2002           | Lemons, Limes             | 7                                                           |
| 48              | Costa Rica | 2002           | Maize                     | 10                                                          |
| 48              | Costa Rica | 2002           | Marine Fish, Other        | 1                                                           |
| 48              | Costa Rica | 2002           | Milk, Whole               | 416                                                         |
| 48              | Costa Rica | 2002           | Molluscs, Other           | 2                                                           |
| 48              | Costa Rica | 2002           | Nuts                      | 2                                                           |
| 48              | Costa Rica | 2002           | Oats                      | 3                                                           |
| 48              | Costa Rica | 2002           | Offals, Edible            | 5                                                           |
| 48              | Costa Rica | 2002           | Olive Oil                 | 1                                                           |
| 48              | Costa Rica | 2002           | Onions                    | 18                                                          |
| 48              | Costa Rica | 2002           | Oranges, Mandarines       | 106                                                         |
| 48              | Costa Rica | 2002           | Palm Oil                  | 14                                                          |
| 48              | Costa Rica | 2002           | Pelagic Fish              | 2                                                           |
| 48              | Costa Rica | 2002           | Pigmeat                   | 23                                                          |
| 48              | Costa Rica | 2002           | Pineapples                | 185                                                         |
| 48              | Costa Rica | 2002           | Plantains                 | 20                                                          |
| 48              | Costa Rica | 2002           | Potatoes                  | 56                                                          |
| 48              | Costa Rica | 2002           | Poultry Meat              | 52                                                          |
| 48              | Costa Rica | 2002           | Pulses, Other             | 1                                                           |
| 48              | Costa Rica | 2002           | Rice (Milled Equivalent)  | 143                                                         |
| 48              | Costa Rica | 2002           | Roots, Other              | 28                                                          |
| 48              | Costa Rica | 2002           | Soyabean Oil              | 17                                                          |
| 48              | Costa Rica | 2002           | Soyabeans                 | 8                                                           |
| 48              | Costa Rica | 2002           | Sugar, Non-Centrifugal    | 8                                                           |
| 48              | Costa Rica | 2002           | Sugar, Refined Equivalent | 128                                                         |
| 48              | Costa Rica | 2002           | Sunflowerseed             | 1                                                           |
| 48              | Costa Rica | 2002           | Sunflowerseed Oil         | 1                                                           |
| 48              | Costa Rica | 2002           | Sweeteners, Other         | 4                                                           |
| 48              | Costa Rica | 2002           | Tomatoes                  | 47                                                          |
| 48              | Costa Rica | 2002           | Vegetables, Other         | 61                                                          |
| 48              | Costa Rica | 2002           | Wheat                     | 113                                                         |
| 48              | Costa Rica | 2002           | Wine                      | 3                                                           |
| 48              | Costa Rica | 2003           | Apples                    | 15                                                          |
| 48              | Costa Rica | 2003           | Bananas                   | 1                                                           |
| 48              | Costa Rica | 2003           | Barley                    | 9                                                           |
| 48              | Costa Rica | 2003           | Beans                     | 27                                                          |
| 48              | Costa Rica | 2003           | Beer                      | 31                                                          |
| 48              | Costa Rica | 2003           | Beverages, Alcoholic      | 20                                                          |
| 48              | Costa Rica | 2003           | Bovine Meat               | 40                                                          |
| 48              | Costa Rica | 2003           | Butter, Ghee              | 3                                                           |
| 48              | Costa Rica | 2003           | Cassava                   | 5                                                           |
| 48              | Costa Rica | 2003           | Cephalopods               | 1                                                           |
| 48              | Costa Rica | 2003           | Cheese                    | 6                                                           |
| 48              | Costa Rica | 2003           | Citrus, Other             | 1                                                           |
| 48              | Costa Rica | 2003           | Cocoa Beans               | 2                                                           |
| 48              | Costa Rica | 2003           | Coconuts - Incl Copra     | 5                                                           |
| 48              | Costa Rica | 2003           | Coffee                    | 6                                                           |
| 48              | Costa Rica | 2003           | Crustaceans               | 4                                                           |
| 48              | Costa Rica | 2003           | Demersal Fish             | 1                                                           |
| 48              | Costa Rica | 2003           | Eggs                      | 26                                                          |
| 48              | Costa Rica | 2003           | Fats, Animals, Raw        | 7                                                           |
| 48              | Costa Rica | 2003           | Freshwater Fish           | 11                                                          |
| 48              | Costa Rica | 2003           | Fruits, Other             | 78                                                          |
| 48              | Costa Rica | 2003           | Grapefruit                | 11                                                          |
| 48              | Costa Rica | 2003           | Grapes                    | 6                                                           |
| 48              | Costa Rica | 2003           | Groundnuts (Shelled Eq)   | 2                                                           |
| 48              | Costa Rica | 2003           | Honey                     | 1                                                           |
| 48              | Costa Rica | 2003           | Lemons, Limes             | 7                                                           |
| 48              | Costa Rica | 2003           | Maize                     | 18                                                          |
| 48              | Costa Rica | 2003           | Milk, Whole               | 409                                                         |
| 48              | Costa Rica | 2003           | Molluscs, Other           | 1                                                           |
| 48              | Costa Rica | 2003           | Nuts                      | 3                                                           |
| 48              | Costa Rica | 2003           | Oats                      | 3                                                           |
| 48              | Costa Rica | 2003           | Offals, Edible            | 5                                                           |
| 48              | Costa Rica | 2003           | Olive Oil                 | 1                                                           |
| 48              | Costa Rica | 2003           | Onions                    | 16                                                          |
| 48              | Costa Rica | 2003           | Oranges, Mandarines       | 57                                                          |
| 48              | Costa Rica | 2003           | Palm Oil                  | 14                                                          |
| 48              | Costa Rica | 2003           | Pelagic Fish              | 2                                                           |
| 48              | Costa Rica | 2003           | Pepper                    | 1                                                           |
| 48              | Costa Rica | 2003           | Pigmeat                   | 24                                                          |

Dietary calcium and zinc deficiency risks are decreasing but remain prevalent

| FAO countrycode | Country    | Reference year | Food item                 | Gross food supply (g capita <sup>-1</sup> d <sup>-1</sup> ) |
|-----------------|------------|----------------|---------------------------|-------------------------------------------------------------|
| 48              | Costa Rica | 2003           | Pineapples                | 134                                                         |
| 48              | Costa Rica | 2003           | Plantains                 | 20                                                          |
| 48              | Costa Rica | 2003           | Potatoes                  | 52                                                          |
| 48              | Costa Rica | 2003           | Poultry Meat              | 48                                                          |
| 48              | Costa Rica | 2003           | Pulses, Other             | 1                                                           |
| 48              | Costa Rica | 2003           | Rice (Milled Equivalent)  | 142                                                         |
| 48              | Costa Rica | 2003           | Roots, Other              | 28                                                          |
| 48              | Costa Rica | 2003           | Soyabean Oil              | 17                                                          |
| 48              | Costa Rica | 2003           | Soyabeans                 | 7                                                           |
| 48              | Costa Rica | 2003           | Spices, Other             | 1                                                           |
| 48              | Costa Rica | 2003           | Sugar, Non-Centrifugal    | 8                                                           |
| 48              | Costa Rica | 2003           | Sugar, Refined Equivalent | 130                                                         |
| 48              | Costa Rica | 2003           | Sunflowerseed Oil         | 1                                                           |
| 48              | Costa Rica | 2003           | Sweeteners, Other         | 4                                                           |
| 48              | Costa Rica | 2003           | Tomatoes                  | 40                                                          |
| 48              | Costa Rica | 2003           | Vegetables, Other         | 65                                                          |
| 48              | Costa Rica | 2003           | Wheat                     | 114                                                         |
| 48              | Costa Rica | 2003           | Wine                      | 3                                                           |
| 48              | Costa Rica | 2004           | Apples                    | 15                                                          |
| 48              | Costa Rica | 2004           | Bananas                   | 2                                                           |
| 48              | Costa Rica | 2004           | Barley                    | 7                                                           |
| 48              | Costa Rica | 2004           | Beans                     | 27                                                          |
| 48              | Costa Rica | 2004           | Beer                      | 30                                                          |
| 48              | Costa Rica | 2004           | Beverages, Alcoholic      | 21                                                          |
| 48              | Costa Rica | 2004           | Bovine Meat               | 36                                                          |
| 48              | Costa Rica | 2004           | Butter, Ghee              | 3                                                           |
| 48              | Costa Rica | 2004           | Cassava                   | 6                                                           |
| 48              | Costa Rica | 2004           | Cephalopods               | 1                                                           |
| 48              | Costa Rica | 2004           | Cheese                    | 5                                                           |
| 48              | Costa Rica | 2004           | Cocoa Beans               | 3                                                           |
| 48              | Costa Rica | 2004           | Coconuts - Incl Copra     | 6                                                           |
| 48              | Costa Rica | 2004           | Coffee                    | 11                                                          |
| 48              | Costa Rica | 2004           | Crustaceans               | 4                                                           |
| 48              | Costa Rica | 2004           | Demersal Fish             | 1                                                           |
| 48              | Costa Rica | 2004           | Eggs                      | 28                                                          |
| 48              | Costa Rica | 2004           | Fats, Animals, Raw        | 8                                                           |
| 48              | Costa Rica | 2004           | Freshwater Fish           | 12                                                          |
| 48              | Costa Rica | 2004           | Fruits, Other             | 83                                                          |
| 48              | Costa Rica | 2004           | Grapefruit                | 13                                                          |
| 48              | Costa Rica | 2004           | Grapes                    | 6                                                           |
| 48              | Costa Rica | 2004           | Groundnuts (Shelled Eq)   | 1                                                           |
| 48              | Costa Rica | 2004           | Honey                     | 1                                                           |
| 48              | Costa Rica | 2004           | Lemons, Limes             | 6                                                           |
| 48              | Costa Rica | 2004           | Maize                     | 32                                                          |
| 48              | Costa Rica | 2004           | Milk, Whole               | 382                                                         |
| 48              | Costa Rica | 2004           | Molluscs, Other           | 2                                                           |
| 48              | Costa Rica | 2004           | Nuts                      | 2                                                           |
| 48              | Costa Rica | 2004           | Oats                      | 3                                                           |
| 48              | Costa Rica | 2004           | Offals, Edible            | 5                                                           |
| 48              | Costa Rica | 2004           | Olive Oil                 | 1                                                           |
| 48              | Costa Rica | 2004           | Onions                    | 20                                                          |
| 48              | Costa Rica | 2004           | Oranges, Mandarines       | 5                                                           |
| 48              | Costa Rica | 2004           | Palm Oil                  | 15                                                          |
| 48              | Costa Rica | 2004           | Pelagic Fish              | 2                                                           |
| 48              | Costa Rica | 2004           | Pepper                    | 1                                                           |
| 48              | Costa Rica | 2004           | Pigmeat                   | 23                                                          |
| 48              | Costa Rica | 2004           | Pineapples                | 81                                                          |
| 48              | Costa Rica | 2004           | Plantains                 | 19                                                          |
| 48              | Costa Rica | 2004           | Potatoes                  | 50                                                          |
| 48              | Costa Rica | 2004           | Poultry Meat              | 54                                                          |
| 48              | Costa Rica | 2004           | Pulses, Other             | 1                                                           |
| 48              | Costa Rica | 2004           | Rice (Milled Equivalent)  | 147                                                         |
| 48              | Costa Rica | 2004           | Roots, Other              | 24                                                          |
| 48              | Costa Rica | 2004           | Soyabean Oil              | 18                                                          |
| 48              | Costa Rica | 2004           | Soyabeans                 | 7                                                           |
| 48              | Costa Rica | 2004           | Sugar, Non-Centrifugal    | 7                                                           |
| 48              | Costa Rica | 2004           | Sugar, Refined Equivalent | 128                                                         |
| 48              | Costa Rica | 2004           | Sunflowerseed Oil         | 2                                                           |
| 48              | Costa Rica | 2004           | Sweeteners, Other         | 4                                                           |
| 48              | Costa Rica | 2004           | Tea                       | 1                                                           |
| 48              | Costa Rica | 2004           | Tomatoes                  | 60                                                          |
| 48              | Costa Rica | 2004           | Vegetables, Other         | 46                                                          |
| 48              | Costa Rica | 2004           | Wheat                     | 97                                                          |
| 48              | Costa Rica | 2004           | Wine                      | 3                                                           |
| 48              | Costa Rica | 2005           | Apples                    | 12                                                          |
| 48              | Costa Rica | 2005           | Bananas                   | 2                                                           |
| 48              | Costa Rica | 2005           | Barley                    | 6                                                           |
| 48              | Costa Rica | 2005           | Beans                     | 28                                                          |
| 48              | Costa Rica | 2005           | Beer                      | 27                                                          |
| 48              | Costa Rica | 2005           | Beverages, Alcoholic      | 20                                                          |
| 48              | Costa Rica | 2005           | Bovine Meat               | 40                                                          |
| 48              | Costa Rica | 2005           | Butter, Ghee              | 3                                                           |
| 48              | Costa Rica | 2005           | Cassava                   | 2                                                           |
| 48              | Costa Rica | 2005           | Cephalopods               | 1                                                           |
| 48              | Costa Rica | 2005           | Cheese                    | 6                                                           |
| 48              | Costa Rica | 2005           | Citrus, Other             | 1                                                           |
| 48              | Costa Rica | 2005           | Cocoa Beans               | 2                                                           |
| 48              | Costa Rica | 2005           | Coconut Oil               | 1                                                           |
| 48              | Costa Rica | 2005           | Coconuts - Incl Copra     | 5                                                           |
| 48              | Costa Rica | 2005           | Coffee                    | 8                                                           |
| 48              | Costa Rica | 2005           | Crustaceans               | 4                                                           |
| 48              | Costa Rica | 2005           | Demersal Fish             | 1                                                           |
| 48              | Costa Rica | 2005           | Eggs                      | 25                                                          |
| 48              | Costa Rica | 2005           | Fats, Animals, Raw        | 7                                                           |
| 48              | Costa Rica | 2005           | Freshwater Fish           | 12                                                          |
| 48              | Costa Rica | 2005           | Fruits, Other             | 76                                                          |
| 48              | Costa Rica | 2005           | Grapefruit                | 11                                                          |

## Dietary calcium and zinc deficiency risks are decreasing but remain prevalent

| FAO countrycode | Country    | Reference year | Food item                 | Gross food supply (g capita <sup>-1</sup> d <sup>-1</sup> ) |
|-----------------|------------|----------------|---------------------------|-------------------------------------------------------------|
| 48              | Costa Rica | 2005           | Grapes                    | 3                                                           |
| 48              | Costa Rica | 2005           | Groundnuts (Shelled Eq)   | 1                                                           |
| 48              | Costa Rica | 2005           | Honey                     | 1                                                           |
| 48              | Costa Rica | 2005           | Lemons, Limes             | 15                                                          |
| 48              | Costa Rica | 2005           | Maize                     | 33                                                          |
| 48              | Costa Rica | 2005           | Milk, Whole               | 386                                                         |
| 48              | Costa Rica | 2005           | Molluscs, Other           | 2                                                           |
| 48              | Costa Rica | 2005           | Nuts                      | 2                                                           |
| 48              | Costa Rica | 2005           | Oats                      | 1                                                           |
| 48              | Costa Rica | 2005           | Offals, Edible            | 4                                                           |
| 48              | Costa Rica | 2005           | Olive Oil                 | 1                                                           |
| 48              | Costa Rica | 2005           | Onions                    | 18                                                          |
| 48              | Costa Rica | 2005           | Oranges, Mandarines       | 79                                                          |
| 48              | Costa Rica | 2005           | Palm Oil                  | 15                                                          |
| 48              | Costa Rica | 2005           | Pelagic Fish              | 2                                                           |
| 48              | Costa Rica | 2005           | Pigmeat                   | 22                                                          |
| 48              | Costa Rica | 2005           | Pineapples                | 200                                                         |
| 48              | Costa Rica | 2005           | Plantains                 | 15                                                          |
| 48              | Costa Rica | 2005           | Potatoes                  | 47                                                          |
| 48              | Costa Rica | 2005           | Poultry Meat              | 56                                                          |
| 48              | Costa Rica | 2005           | Pulses, Other             | 1                                                           |
| 48              | Costa Rica | 2005           | Rice (Milled Equivalent)  | 146                                                         |
| 48              | Costa Rica | 2005           | Roots, Other              | 22                                                          |
| 48              | Costa Rica | 2005           | Soyabean Oil              | 18                                                          |
| 48              | Costa Rica | 2005           | Soyabeans                 | 8                                                           |
| 48              | Costa Rica | 2005           | Spices, Other             | 2                                                           |
| 48              | Costa Rica | 2005           | Sugar, Non-Centrifugal    | 7                                                           |
| 48              | Costa Rica | 2005           | Sugar, Refined Equivalent | 133                                                         |
| 48              | Costa Rica | 2005           | Sunflowerseed Oil         | 4                                                           |
| 48              | Costa Rica | 2005           | Sweeteners, Other         | 4                                                           |
| 48              | Costa Rica | 2005           | Tomatoes                  | 57                                                          |
| 48              | Costa Rica | 2005           | Vegetables, Other         | 32                                                          |
| 48              | Costa Rica | 2005           | Wheat                     | 95                                                          |
| 48              | Costa Rica | 2005           | Wine                      | 3                                                           |
| 48              | Costa Rica | 2005           | Yams                      | 1                                                           |
| 48              | Costa Rica | 2006           | Apples                    | 15                                                          |
| 48              | Costa Rica | 2006           | Bananas                   | 1                                                           |
| 48              | Costa Rica | 2006           | Barley                    | 11                                                          |
| 48              | Costa Rica | 2006           | Beans                     | 30                                                          |
| 48              | Costa Rica | 2006           | Beer                      | 44                                                          |
| 48              | Costa Rica | 2006           | Beverages, Alcoholic      | 20                                                          |
| 48              | Costa Rica | 2006           | Bovine Meat               | 39                                                          |
| 48              | Costa Rica | 2006           | Butter, Ghee              | 3                                                           |
| 48              | Costa Rica | 2006           | Cassava                   | 1                                                           |
| 48              | Costa Rica | 2006           | Cephalopods               | 1                                                           |
| 48              | Costa Rica | 2006           | Cereals, Other            | 1                                                           |
| 48              | Costa Rica | 2006           | Cheese                    | 6                                                           |
| 48              | Costa Rica | 2006           | Citrus, Other             | 1                                                           |
| 48              | Costa Rica | 2006           | Cocoa Beans               | 4                                                           |
| 48              | Costa Rica | 2006           | Coconuts - Incl Copra     | 5                                                           |
| 48              | Costa Rica | 2006           | Coffee                    | 2                                                           |
| 48              | Costa Rica | 2006           | Crustaceans               | 5                                                           |
| 48              | Costa Rica | 2006           | Demersal Fish             | 1                                                           |
| 48              | Costa Rica | 2006           | Eggs                      | 24                                                          |
| 48              | Costa Rica | 2006           | Fats, Animals, Raw        | 8                                                           |
| 48              | Costa Rica | 2006           | Freshwater Fish           | 10                                                          |
| 48              | Costa Rica | 2006           | Fruits, Other             | 83                                                          |
| 48              | Costa Rica | 2006           | Grapefruit                | 13                                                          |
| 48              | Costa Rica | 2006           | Grapes                    | 7                                                           |
| 48              | Costa Rica | 2006           | Groundnuts (Shelled Eq)   | 2                                                           |
| 48              | Costa Rica | 2006           | Honey                     | 1                                                           |
| 48              | Costa Rica | 2006           | Lemons, Limes             | 18                                                          |
| 48              | Costa Rica | 2006           | Maize                     | 32                                                          |
| 48              | Costa Rica | 2006           | Marine Fish, Other        | 1                                                           |
| 48              | Costa Rica | 2006           | Milk, Whole               | 397                                                         |
| 48              | Costa Rica | 2006           | Molluscs, Other           | 3                                                           |
| 48              | Costa Rica | 2006           | Nuts                      | 2                                                           |
| 48              | Costa Rica | 2006           | Oats                      | 3                                                           |
| 48              | Costa Rica | 2006           | Offals, Edible            | 5                                                           |
| 48              | Costa Rica | 2006           | Olive Oil                 | 1                                                           |
| 48              | Costa Rica | 2006           | Onions                    | 27                                                          |
| 48              | Costa Rica | 2006           | Oranges, Mandarines       | 98                                                          |
| 48              | Costa Rica | 2006           | Palm Oil                  | 16                                                          |
| 48              | Costa Rica | 2006           | Peas                      | 1                                                           |
| 48              | Costa Rica | 2006           | Pelagic Fish              | 3                                                           |
| 48              | Costa Rica | 2006           | Pepper                    | 1                                                           |
| 48              | Costa Rica | 2006           | Pigmeat                   | 23                                                          |
| 48              | Costa Rica | 2006           | Pineapples                | 182                                                         |
| 48              | Costa Rica | 2006           | Plantains                 | 17                                                          |
| 48              | Costa Rica | 2006           | Potatoes                  | 43                                                          |
| 48              | Costa Rica | 2006           | Poultry Meat              | 62                                                          |
| 48              | Costa Rica | 2006           | Pulses, Other             | 1                                                           |
| 48              | Costa Rica | 2006           | Rice (Milled Equivalent)  | 133                                                         |
| 48              | Costa Rica | 2006           | Roots, Other              | 17                                                          |
| 48              | Costa Rica | 2006           | Soyabean Oil              | 18                                                          |
| 48              | Costa Rica | 2006           | Soyabeans                 | 8                                                           |
| 48              | Costa Rica | 2006           | Spices, Other             | 1                                                           |
| 48              | Costa Rica | 2006           | Sugar, Non-Centrifugal    | 7                                                           |
| 48              | Costa Rica | 2006           | Sugar, Refined Equivalent | 133                                                         |
| 48              | Costa Rica | 2006           | Sunflowerseed             | 1                                                           |
| 48              | Costa Rica | 2006           | Sunflowerseed Oil         | 4                                                           |
| 48              | Costa Rica | 2006           | Sweeteners, Other         | 4                                                           |
| 48              | Costa Rica | 2006           | Tomatoes                  | 69                                                          |
| 48              | Costa Rica | 2006           | Vegetables, Other         | 61                                                          |
| 48              | Costa Rica | 2006           | Wheat                     | 95                                                          |
| 48              | Costa Rica | 2006           | Wine                      | 5                                                           |
| 48              | Costa Rica | 2006           | Yams                      | 7                                                           |

Dietary calcium and zinc deficiency risks are decreasing but remain prevalent

| FAO countrycode | Country    | Reference year | Food item                 | Gross food supply (g capita <sup>-1</sup> d <sup>-1</sup> ) |
|-----------------|------------|----------------|---------------------------|-------------------------------------------------------------|
| 48              | Costa Rica | 2007           | Apples                    | 13                                                          |
| 48              | Costa Rica | 2007           | Bananas                   | 1                                                           |
| 48              | Costa Rica | 2007           | Barley                    | 12                                                          |
| 48              | Costa Rica | 2007           | Beans                     | 30                                                          |
| 48              | Costa Rica | 2007           | Beer                      | 42                                                          |
| 48              | Costa Rica | 2007           | Beverages, Alcoholic      | 22                                                          |
| 48              | Costa Rica | 2007           | Bovine Meat               | 43                                                          |
| 48              | Costa Rica | 2007           | Butter, Ghee              | 4                                                           |
| 48              | Costa Rica | 2007           | Cassava                   | 1                                                           |
| 48              | Costa Rica | 2007           | Cephalopods               | 1                                                           |
| 48              | Costa Rica | 2007           | Cereals, Other            | 1                                                           |
| 48              | Costa Rica | 2007           | Cheese                    | 7                                                           |
| 48              | Costa Rica | 2007           | Cocoa Beans               | 3                                                           |
| 48              | Costa Rica | 2007           | Coconuts - Incl Copra     | 4                                                           |
| 48              | Costa Rica | 2007           | Coffee                    | 11                                                          |
| 48              | Costa Rica | 2007           | Crustaceans               | 5                                                           |
| 48              | Costa Rica | 2007           | Demersal Fish             | 1                                                           |
| 48              | Costa Rica | 2007           | Eggs                      | 21                                                          |
| 48              | Costa Rica | 2007           | Fats, Animals, Raw        | 9                                                           |
| 48              | Costa Rica | 2007           | Freshwater Fish           | 13                                                          |
| 48              | Costa Rica | 2007           | Fruits, Other             | 90                                                          |
| 48              | Costa Rica | 2007           | Grapefruit                | 11                                                          |
| 48              | Costa Rica | 2007           | Grapes                    | 6                                                           |
| 48              | Costa Rica | 2007           | Groundnuts (Shelled Eq)   | 2                                                           |
| 48              | Costa Rica | 2007           | Honey                     | 1                                                           |
| 48              | Costa Rica | 2007           | Lemons, Limes             | 16                                                          |
| 48              | Costa Rica | 2007           | Maize                     | 29                                                          |
| 48              | Costa Rica | 2007           | Marine Fish, Other        | 2                                                           |
| 48              | Costa Rica | 2007           | Milk, Whole               | 400                                                         |
| 48              | Costa Rica | 2007           | Molluscs, Other           | 2                                                           |
| 48              | Costa Rica | 2007           | Nuts                      | 2                                                           |
| 48              | Costa Rica | 2007           | Oats                      | 4                                                           |
| 48              | Costa Rica | 2007           | Offals, Edible            | 5                                                           |
| 48              | Costa Rica | 2007           | Olive Oil                 | 1                                                           |
| 48              | Costa Rica | 2007           | Onions                    | 19                                                          |
| 48              | Costa Rica | 2007           | Oranges, Mandarines       | 76                                                          |
| 48              | Costa Rica | 2007           | Palm Oil                  | 16                                                          |
| 48              | Costa Rica | 2007           | Pelagic Fish              | 4                                                           |
| 48              | Costa Rica | 2007           | Pepper                    | 1                                                           |
| 48              | Costa Rica | 2007           | Pigmeat                   | 26                                                          |
| 48              | Costa Rica | 2007           | Pineapples                | 38                                                          |
| 48              | Costa Rica | 2007           | Plantains                 | 24                                                          |
| 48              | Costa Rica | 2007           | Potatoes                  | 45                                                          |
| 48              | Costa Rica | 2007           | Poultry Meat              | 67                                                          |
| 48              | Costa Rica | 2007           | Pulses, Other             | 1                                                           |
| 48              | Costa Rica | 2007           | Rice (Milled Equivalent)  | 135                                                         |
| 48              | Costa Rica | 2007           | Roots, Other              | 6                                                           |
| 48              | Costa Rica | 2007           | Soyabean Oil              | 18                                                          |
| 48              | Costa Rica | 2007           | Soyabeans                 | 8                                                           |
| 48              | Costa Rica | 2007           | Spices, Other             | 1                                                           |
| 48              | Costa Rica | 2007           | Sugar, Non-Centrifugal    | 7                                                           |
| 48              | Costa Rica | 2007           | Sugar, Refined Equivalent | 135                                                         |
| 48              | Costa Rica | 2007           | Sunflowerseed Oil         | 4                                                           |
| 48              | Costa Rica | 2007           | Sweeteners, Other         | 6                                                           |
| 48              | Costa Rica | 2007           | Tomatoes                  | 65                                                          |
| 48              | Costa Rica | 2007           | Vegetables, Other         | 61                                                          |
| 48              | Costa Rica | 2007           | Wheat                     | 103                                                         |
| 48              | Costa Rica | 2007           | Wine                      | 5                                                           |
| 48              | Costa Rica | 2007           | Yams                      | 7                                                           |
| 48              | Costa Rica | 2008           | Apples                    | 18                                                          |
| 48              | Costa Rica | 2008           | Bananas                   | 1                                                           |
| 48              | Costa Rica | 2008           | Barley                    | 10                                                          |
| 48              | Costa Rica | 2008           | Beans                     | 29                                                          |
| 48              | Costa Rica | 2008           | Beer                      | 38                                                          |
| 48              | Costa Rica | 2008           | Beverages, Alcoholic      | 21                                                          |
| 48              | Costa Rica | 2008           | Bovine Meat               | 43                                                          |
| 48              | Costa Rica | 2008           | Butter, Ghee              | 4                                                           |
| 48              | Costa Rica | 2008           | Cassava                   | 2                                                           |
| 48              | Costa Rica | 2008           | Cephalopods               | 1                                                           |
| 48              | Costa Rica | 2008           | Cereals, Other            | 1                                                           |
| 48              | Costa Rica | 2008           | Cheese                    | 7                                                           |
| 48              | Costa Rica | 2008           | Citrus, Other             | 1                                                           |
| 48              | Costa Rica | 2008           | Cocoa Beans               | 2                                                           |
| 48              | Costa Rica | 2008           | Coconuts - Incl Copra     | 5                                                           |
| 48              | Costa Rica | 2008           | Coffee                    | 6                                                           |
| 48              | Costa Rica | 2008           | Crustaceans               | 5                                                           |
| 48              | Costa Rica | 2008           | Demersal Fish             | 1                                                           |
| 48              | Costa Rica | 2008           | Eggs                      | 27                                                          |
| 48              | Costa Rica | 2008           | Fats, Animals, Raw        | 9                                                           |
| 48              | Costa Rica | 2008           | Freshwater Fish           | 15                                                          |
| 48              | Costa Rica | 2008           | Fruits, Other             | 94                                                          |
| 48              | Costa Rica | 2008           | Grapefruit                | 9                                                           |
| 48              | Costa Rica | 2008           | Grapes                    | 6                                                           |
| 48              | Costa Rica | 2008           | Groundnuts (Shelled Eq)   | 2                                                           |
| 48              | Costa Rica | 2008           | Honey                     | 1                                                           |
| 48              | Costa Rica | 2008           | Lemons, Limes             | 13                                                          |
| 48              | Costa Rica | 2008           | Maize                     | 29                                                          |
| 48              | Costa Rica | 2008           | Marine Fish, Other        | 2                                                           |
| 48              | Costa Rica | 2008           | Milk, Whole               | 419                                                         |
| 48              | Costa Rica | 2008           | Molluscs, Other           | 2                                                           |
| 48              | Costa Rica | 2008           | Nuts                      | 1                                                           |
| 48              | Costa Rica | 2008           | Oats                      | 4                                                           |
| 48              | Costa Rica | 2008           | Offals, Edible            | 5                                                           |
| 48              | Costa Rica | 2008           | Olive Oil                 | 1                                                           |
| 48              | Costa Rica | 2008           | Onions                    | 22                                                          |
| 48              | Costa Rica | 2008           | Oranges, Mandarines       | 18                                                          |
| 48              | Costa Rica | 2008           | Palm Oil                  | 17                                                          |

Dietary calcium and zinc deficiency risks are decreasing but remain prevalent

| FAO countrycode | Country    | Reference year | Food item                 | Gross food supply (g capita <sup>-1</sup> d <sup>-1</sup> ) |
|-----------------|------------|----------------|---------------------------|-------------------------------------------------------------|
| 48              | Costa Rica | 2008           | Pelagic Fish              | 4                                                           |
| 48              | Costa Rica | 2008           | Pepper                    | 1                                                           |
| 48              | Costa Rica | 2008           | Pigmeat                   | 27                                                          |
| 48              | Costa Rica | 2008           | Pineapples                | 43                                                          |
| 48              | Costa Rica | 2008           | Plantains                 | 30                                                          |
| 48              | Costa Rica | 2008           | Potatoes                  | 47                                                          |
| 48              | Costa Rica | 2008           | Poultry Meat              | 64                                                          |
| 48              | Costa Rica | 2008           | Pulses, Other             | 1                                                           |
| 48              | Costa Rica | 2008           | Rice (Milled Equivalent)  | 133                                                         |
| 48              | Costa Rica | 2008           | Roots, Other              | 16                                                          |
| 48              | Costa Rica | 2008           | Soyabean Oil              | 18                                                          |
| 48              | Costa Rica | 2008           | Soyabeans                 | 7                                                           |
| 48              | Costa Rica | 2008           | Sugar, Non-Centrifugal    | 7                                                           |
| 48              | Costa Rica | 2008           | Sugar, Refined Equivalent | 130                                                         |
| 48              | Costa Rica | 2008           | Sunflowerseed             | 1                                                           |
| 48              | Costa Rica | 2008           | Sunflowerseed Oil         | 2                                                           |
| 48              | Costa Rica | 2008           | Sweeteners, Other         | 4                                                           |
| 48              | Costa Rica | 2008           | Tomatoes                  | 59                                                          |
| 48              | Costa Rica | 2008           | Vegetables, Other         | 74                                                          |
| 48              | Costa Rica | 2008           | Wheat                     | 107                                                         |
| 48              | Costa Rica | 2008           | Wine                      | 5                                                           |
| 48              | Costa Rica | 2008           | Yams                      | 7                                                           |
| 48              | Costa Rica | 2009           | Apples                    | 18                                                          |
| 48              | Costa Rica | 2009           | Bananas                   | 1                                                           |
| 48              | Costa Rica | 2009           | Barley                    | 8                                                           |
| 48              | Costa Rica | 2009           | Beans                     | 29                                                          |
| 48              | Costa Rica | 2009           | Beer                      | 39                                                          |
| 48              | Costa Rica | 2009           | Beverages, Alcoholic      | 21                                                          |
| 48              | Costa Rica | 2009           | Bovine Meat               | 45                                                          |
| 48              | Costa Rica | 2009           | Butter, Ghee              | 4                                                           |
| 48              | Costa Rica | 2009           | Cassava                   | 6                                                           |
| 48              | Costa Rica | 2009           | Cephalopods               | 1                                                           |
| 48              | Costa Rica | 2009           | Cereals, Other            | 1                                                           |
| 48              | Costa Rica | 2009           | Cheese                    | 7                                                           |
| 48              | Costa Rica | 2009           | Cocoa Beans               | 3                                                           |
| 48              | Costa Rica | 2009           | Coconuts - Incl Copra     | 6                                                           |
| 48              | Costa Rica | 2009           | Coffee                    | 9                                                           |
| 48              | Costa Rica | 2009           | Crustaceans               | 4                                                           |
| 48              | Costa Rica | 2009           | Demersal Fish             | 2                                                           |
| 48              | Costa Rica | 2009           | Eggs                      | 26                                                          |
| 48              | Costa Rica | 2009           | Fats, Animals, Raw        | 9                                                           |
| 48              | Costa Rica | 2009           | Freshwater Fish           | 14                                                          |
| 48              | Costa Rica | 2009           | Fruits, Other             | 98                                                          |
| 48              | Costa Rica | 2009           | Grapefruit                | 9                                                           |
| 48              | Costa Rica | 2009           | Grapes                    | 6                                                           |
| 48              | Costa Rica | 2009           | Groundnuts (Shelled Eq)   | 2                                                           |
| 48              | Costa Rica | 2009           | Honey                     | 1                                                           |
| 48              | Costa Rica | 2009           | Lemons, Limes             | 14                                                          |
| 48              | Costa Rica | 2009           | Maize                     | 26                                                          |
| 48              | Costa Rica | 2009           | Marine Fish, Other        | 4                                                           |
| 48              | Costa Rica | 2009           | Milk, Whole               | 411                                                         |
| 48              | Costa Rica | 2009           | Molluscs, Other           | 2                                                           |
| 48              | Costa Rica | 2009           | Nuts                      | 2                                                           |
| 48              | Costa Rica | 2009           | Oats                      | 4                                                           |
| 48              | Costa Rica | 2009           | Offals, Edible            | 5                                                           |
| 48              | Costa Rica | 2009           | Olive Oil                 | 1                                                           |
| 48              | Costa Rica | 2009           | Onions                    | 21                                                          |
| 48              | Costa Rica | 2009           | Oranges, Mandarines       | 13                                                          |
| 48              | Costa Rica | 2009           | Palm Oil                  | 17                                                          |
| 48              | Costa Rica | 2009           | Pelagic Fish              | 4                                                           |
| 48              | Costa Rica | 2009           | Pepper                    | 1                                                           |
| 48              | Costa Rica | 2009           | Pigmeat                   | 27                                                          |
| 48              | Costa Rica | 2009           | Pineapples                | 43                                                          |
| 48              | Costa Rica | 2009           | Plantains                 | 30                                                          |
| 48              | Costa Rica | 2009           | Potatoes                  | 51                                                          |
| 48              | Costa Rica | 2009           | Poultry Meat              | 66                                                          |
| 48              | Costa Rica | 2009           | Pulses, Other             | 1                                                           |
| 48              | Costa Rica | 2009           | Rice (Milled Equivalent)  | 135                                                         |
| 48              | Costa Rica | 2009           | Roots, Other              | 18                                                          |
| 48              | Costa Rica | 2009           | Soyabean Oil              | 18                                                          |
| 48              | Costa Rica | 2009           | Soyabeans                 | 8                                                           |
| 48              | Costa Rica | 2009           | Spices, Other             | 1                                                           |
| 48              | Costa Rica | 2009           | Sugar, Non-Centrifugal    | 7                                                           |
| 48              | Costa Rica | 2009           | Sugar, Refined Equivalent | 128                                                         |
| 48              | Costa Rica | 2009           | Sunflowerseed Oil         | 2                                                           |
| 48              | Costa Rica | 2009           | Sweeteners, Other         | 4                                                           |
| 48              | Costa Rica | 2009           | Tomatoes                  | 55                                                          |
| 48              | Costa Rica | 2009           | Vegetables, Other         | 70                                                          |
| 48              | Costa Rica | 2009           | Wheat                     | 109                                                         |
| 48              | Costa Rica | 2009           | Wine                      | 4                                                           |
| 48              | Costa Rica | 2009           | Yams                      | 7                                                           |
| 48              | Costa Rica | 2010           | Apples                    | 28                                                          |
| 48              | Costa Rica | 2010           | Bananas                   | 1                                                           |
| 48              | Costa Rica | 2010           | Barley                    | 8                                                           |
| 48              | Costa Rica | 2010           | Beans                     | 29                                                          |
| 48              | Costa Rica | 2010           | Beer                      | 36                                                          |
| 48              | Costa Rica | 2010           | Beverages, Alcoholic      | 22                                                          |
| 48              | Costa Rica | 2010           | Bovine Meat               | 49                                                          |
| 48              | Costa Rica | 2010           | Butter, Ghee              | 3                                                           |
| 48              | Costa Rica | 2010           | Cassava                   | 5                                                           |
| 48              | Costa Rica | 2010           | Cephalopods               | 1                                                           |
| 48              | Costa Rica | 2010           | Cereals, Other            | 1                                                           |
| 48              | Costa Rica | 2010           | Cheese                    | 7                                                           |
| 48              | Costa Rica | 2010           | Cocoa Beans               | 2                                                           |
| 48              | Costa Rica | 2010           | Coconuts - Incl Copra     | 6                                                           |
| 48              | Costa Rica | 2010           | Coffee                    | 18                                                          |
| 48              | Costa Rica | 2010           | Crustaceans               | 4                                                           |



Dietary calcium and zinc deficiency risks are decreasing but remain prevalent

| FAO countrycode | Country    | Reference year | Food item                 | Gross food supply (g capita <sup>-1</sup> d <sup>-1</sup> ) |
|-----------------|------------|----------------|---------------------------|-------------------------------------------------------------|
| 48              | Costa Rica | 2010           | Demersal Fish             | 1                                                           |
| 48              | Costa Rica | 2010           | Eggs                      | 26                                                          |
| 48              | Costa Rica | 2010           | Fats, Animals, Raw        | 9                                                           |
| 48              | Costa Rica | 2010           | Freshwater Fish           | 14                                                          |
| 48              | Costa Rica | 2010           | Fruits, Other             | 98                                                          |
| 48              | Costa Rica | 2010           | Grapefruit                | 11                                                          |
| 48              | Costa Rica | 2010           | Grapes                    | 6                                                           |
| 48              | Costa Rica | 2010           | Groundnuts (Shelled Eq)   | 2                                                           |
| 48              | Costa Rica | 2010           | Honey                     | 1                                                           |
| 48              | Costa Rica | 2010           | Lemons, Limes             | 16                                                          |
| 48              | Costa Rica | 2010           | Maize                     | 29                                                          |
| 48              | Costa Rica | 2010           | Marine Fish, Other        | 3                                                           |
| 48              | Costa Rica | 2010           | Milk, Whole               | 389                                                         |
| 48              | Costa Rica | 2010           | Molluscs, Other           | 2                                                           |
| 48              | Costa Rica | 2010           | Nuts                      | 2                                                           |
| 48              | Costa Rica | 2010           | Oats                      | 4                                                           |
| 48              | Costa Rica | 2010           | Offals, Edible            | 5                                                           |
| 48              | Costa Rica | 2010           | Olive Oil                 | 1                                                           |
| 48              | Costa Rica | 2010           | Onions                    | 21                                                          |
| 48              | Costa Rica | 2010           | Oranges, Mandarines       | 6                                                           |
| 48              | Costa Rica | 2010           | Palm Oil                  | 17                                                          |
| 48              | Costa Rica | 2010           | Pelagic Fish              | 6                                                           |
| 48              | Costa Rica | 2010           | Pepper                    | 1                                                           |
| 48              | Costa Rica | 2010           | Pigmeat                   | 27                                                          |
| 48              | Costa Rica | 2010           | Pineapples                | 99                                                          |
| 48              | Costa Rica | 2010           | Plantains                 | 39                                                          |
| 48              | Costa Rica | 2010           | Potatoes                  | 42                                                          |
| 48              | Costa Rica | 2010           | Poultry Meat              | 61                                                          |
| 48              | Costa Rica | 2010           | Pulses, Other             | 1                                                           |
| 48              | Costa Rica | 2010           | Rice (Milled Equivalent)  | 136                                                         |
| 48              | Costa Rica | 2010           | Roots, Other              | 12                                                          |
| 48              | Costa Rica | 2010           | Soyabean Oil              | 18                                                          |
| 48              | Costa Rica | 2010           | Soyabeans                 | 7                                                           |
| 48              | Costa Rica | 2010           | Spices, Other             | 1                                                           |
| 48              | Costa Rica | 2010           | Sugar, Non-Centrifugal    | 6                                                           |
| 48              | Costa Rica | 2010           | Sugar, Refined Equivalent | 131                                                         |
| 48              | Costa Rica | 2010           | Sunflowerseed Oil         | 2                                                           |
| 48              | Costa Rica | 2010           | Sweeteners, Other         | 5                                                           |
| 48              | Costa Rica | 2010           | Tomatoes                  | 51                                                          |
| 48              | Costa Rica | 2010           | Vegetables, Other         | 59                                                          |
| 48              | Costa Rica | 2010           | Wheat                     | 108                                                         |
| 48              | Costa Rica | 2010           | Wine                      | 5                                                           |
| 48              | Costa Rica | 2010           | Yams                      | 7                                                           |
| 48              | Costa Rica | 2011           | Apples                    | 29                                                          |
| 48              | Costa Rica | 2011           | Bananas                   | 1                                                           |
| 48              | Costa Rica | 2011           | Barley                    | 11                                                          |
| 48              | Costa Rica | 2011           | Beans                     | 29                                                          |
| 48              | Costa Rica | 2011           | Beer                      | 40                                                          |
| 48              | Costa Rica | 2011           | Beverages, Alcoholic      | 22                                                          |
| 48              | Costa Rica | 2011           | Bovine Meat               | 49                                                          |
| 48              | Costa Rica | 2011           | Butter, Ghee              | 4                                                           |
| 48              | Costa Rica | 2011           | Cassava                   | 16                                                          |
| 48              | Costa Rica | 2011           | Cephalopods               | 1                                                           |
| 48              | Costa Rica | 2011           | Cereals, Other            | 1                                                           |
| 48              | Costa Rica | 2011           | Cheese                    | 7                                                           |
| 48              | Costa Rica | 2011           | Citrus, Other             | 1                                                           |
| 48              | Costa Rica | 2011           | Cocoa Beans               | 3                                                           |
| 48              | Costa Rica | 2011           | Coconuts - Incl Copra     | 7                                                           |
| 48              | Costa Rica | 2011           | Coffee                    | 20                                                          |
| 48              | Costa Rica | 2011           | Crustaceans               | 4                                                           |
| 48              | Costa Rica | 2011           | Demersal Fish             | 1                                                           |
| 48              | Costa Rica | 2011           | Eggs                      | 26                                                          |
| 48              | Costa Rica | 2011           | Fats, Animals, Raw        | 10                                                          |
| 48              | Costa Rica | 2011           | Freshwater Fish           | 14                                                          |
| 48              | Costa Rica | 2011           | Fruits, Other             | 94                                                          |
| 48              | Costa Rica | 2011           | Grapefruit                | 11                                                          |
| 48              | Costa Rica | 2011           | Grapes                    | 7                                                           |
| 48              | Costa Rica | 2011           | Groundnuts (Shelled Eq)   | 2                                                           |
| 48              | Costa Rica | 2011           | Honey                     | 1                                                           |
| 48              | Costa Rica | 2011           | Lemons, Limes             | 17                                                          |
| 48              | Costa Rica | 2011           | Maize                     | 29                                                          |
| 48              | Costa Rica | 2011           | Marine Fish, Other        | 3                                                           |
| 48              | Costa Rica | 2011           | Milk, Whole               | 369                                                         |
| 48              | Costa Rica | 2011           | Molluscs, Other           | 2                                                           |
| 48              | Costa Rica | 2011           | Nuts                      | 2                                                           |
| 48              | Costa Rica | 2011           | Oats                      | 4                                                           |
| 48              | Costa Rica | 2011           | Offals, Edible            | 4                                                           |
| 48              | Costa Rica | 2011           | Olive Oil                 | 1                                                           |
| 48              | Costa Rica | 2011           | Onions                    | 22                                                          |
| 48              | Costa Rica | 2011           | Oranges, Mandarines       | 6                                                           |
| 48              | Costa Rica | 2011           | Palm Oil                  | 18                                                          |
| 48              | Costa Rica | 2011           | Pelagic Fish              | 6                                                           |
| 48              | Costa Rica | 2011           | Pepper                    | 1                                                           |
| 48              | Costa Rica | 2011           | Pigmeat                   | 28                                                          |
| 48              | Costa Rica | 2011           | Pineapples                | 132                                                         |
| 48              | Costa Rica | 2011           | Plantains                 | 40                                                          |
| 48              | Costa Rica | 2011           | Potatoes                  | 46                                                          |
| 48              | Costa Rica | 2011           | Poultry Meat              | 58                                                          |
| 48              | Costa Rica | 2011           | Pulses, Other             | 1                                                           |
| 48              | Costa Rica | 2011           | Rice (Milled Equivalent)  | 135                                                         |
| 48              | Costa Rica | 2011           | Roots, Other              | 18                                                          |
| 48              | Costa Rica | 2011           | Soyabean Oil              | 18                                                          |
| 48              | Costa Rica | 2011           | Soyabeans                 | 8                                                           |
| 48              | Costa Rica | 2011           | Spices, Other             | 1                                                           |
| 48              | Costa Rica | 2011           | Sugar, Non-Centrifugal    | 6                                                           |
| 48              | Costa Rica | 2011           | Sugar, Refined Equivalent | 129                                                         |
| 48              | Costa Rica | 2011           | Sunflowerseed Oil         | 2                                                           |

Dietary calcium and zinc deficiency risks are decreasing but remain prevalent

| FAO countrycode | Country       | Reference year | Food item                 | Gross food supply (g capita <sup>-1</sup> d <sup>-1</sup> ) |
|-----------------|---------------|----------------|---------------------------|-------------------------------------------------------------|
| 48              | Costa Rica    | 2011           | Sweeteners, Other         | 4                                                           |
| 48              | Costa Rica    | 2011           | Tomatoes                  | 60                                                          |
| 48              | Costa Rica    | 2011           | Vegetables, Other         | 50                                                          |
| 48              | Costa Rica    | 2011           | Wheat                     | 110                                                         |
| 48              | Costa Rica    | 2011           | Wine                      | 5                                                           |
| 48              | Costa Rica    | 2011           | Yams                      | 6                                                           |
| 107             | Côte d'Ivoire | 1992           | Bananas                   | 6                                                           |
| 107             | Côte d'Ivoire | 1992           | Beer                      | 28                                                          |
| 107             | Côte d'Ivoire | 1992           | Beverages, Fermented      | 57                                                          |
| 107             | Côte d'Ivoire | 1992           | Bovine Meat               | 15                                                          |
| 107             | Côte d'Ivoire | 1992           | Cassava                   | 286                                                         |
| 107             | Côte d'Ivoire | 1992           | Cereals, Other            | 2                                                           |
| 107             | Côte d'Ivoire | 1992           | Citrus, Other             | 2                                                           |
| 107             | Côte d'Ivoire | 1992           | Cocoa Beans               | 2                                                           |
| 107             | Côte d'Ivoire | 1992           | Coconut Oil               | 1                                                           |
| 107             | Côte d'Ivoire | 1992           | Coconuts - Incl Copra     | 3                                                           |
| 107             | Côte d'Ivoire | 1992           | Coffee                    | 2                                                           |
| 107             | Côte d'Ivoire | 1992           | Cottonseed Oil            | 3                                                           |
| 107             | Côte d'Ivoire | 1992           | Demersal Fish             | 4                                                           |
| 107             | Côte d'Ivoire | 1992           | Eggs                      | 3                                                           |
| 107             | Côte d'Ivoire | 1992           | Freshwater Fish           | 3                                                           |
| 107             | Côte d'Ivoire | 1992           | Fruits, Other             | 10                                                          |
| 107             | Côte d'Ivoire | 1992           | Grapefruit                | 3                                                           |
| 107             | Côte d'Ivoire | 1992           | Groundnuts (Shelled Eq)   | 8                                                           |
| 107             | Côte d'Ivoire | 1992           | Maize                     | 75                                                          |
| 107             | Côte d'Ivoire | 1992           | Marine Fish, Other        | 6                                                           |
| 107             | Côte d'Ivoire | 1992           | Meat, Other               | 25                                                          |
| 107             | Côte d'Ivoire | 1992           | Milk, Whole               | 10                                                          |
| 107             | Côte d'Ivoire | 1992           | Millet                    | 5                                                           |
| 107             | Côte d'Ivoire | 1992           | Mutton & Goat Meat        | 2                                                           |
| 107             | Côte d'Ivoire | 1992           | Nuts                      | 6                                                           |
| 107             | Côte d'Ivoire | 1992           | Offals, Edible            | 3                                                           |
| 107             | Côte d'Ivoire | 1992           | Oranges, Mandarines       | 5                                                           |
| 107             | Côte d'Ivoire | 1992           | Palm Oil                  | 23                                                          |
| 107             | Côte d'Ivoire | 1992           | Pelagic Fish              | 33                                                          |
| 107             | Côte d'Ivoire | 1992           | Pigmeat                   | 2                                                           |
| 107             | Côte d'Ivoire | 1992           | Pimento                   | 3                                                           |
| 107             | Côte d'Ivoire | 1992           | Pineapples                | 9                                                           |
| 107             | Côte d'Ivoire | 1992           | Plantains                 | 207                                                         |
| 107             | Côte d'Ivoire | 1992           | Potatoes                  | 2                                                           |
| 107             | Côte d'Ivoire | 1992           | Poultry Meat              | 5                                                           |
| 107             | Côte d'Ivoire | 1992           | Pulses, Other             | 2                                                           |
| 107             | Côte d'Ivoire | 1992           | Rape and Mustard Oil      | 1                                                           |
| 107             | Côte d'Ivoire | 1992           | Rice (Milled Equivalent)  | 150                                                         |
| 107             | Côte d'Ivoire | 1992           | Roots, Other              | 10                                                          |
| 107             | Côte d'Ivoire | 1992           | Sorghum                   | 3                                                           |
| 107             | Côte d'Ivoire | 1992           | Soyabean Oil              | 1                                                           |
| 107             | Côte d'Ivoire | 1992           | Soyabbeans                | 1                                                           |
| 107             | Côte d'Ivoire | 1992           | Sugar Cane                | 2                                                           |
| 107             | Côte d'Ivoire | 1992           | Sugar, Refined Equivalent | 27                                                          |
| 107             | Côte d'Ivoire | 1992           | Sweet Potatoes            | 6                                                           |
| 107             | Côte d'Ivoire | 1992           | Tomatoes                  | 11                                                          |
| 107             | Côte d'Ivoire | 1992           | Vegetables, Other         | 118                                                         |
| 107             | Côte d'Ivoire | 1992           | Wheat                     | 46                                                          |
| 107             | Côte d'Ivoire | 1992           | Wine                      | 4                                                           |
| 107             | Côte d'Ivoire | 1992           | Yams                      | 492                                                         |
| 107             | Côte d'Ivoire | 1993           | Apples                    | 1                                                           |
| 107             | Côte d'Ivoire | 1993           | Bananas                   | 7                                                           |
| 107             | Côte d'Ivoire | 1993           | Beer                      | 30                                                          |
| 107             | Côte d'Ivoire | 1993           | Beverages, Fermented      | 58                                                          |
| 107             | Côte d'Ivoire | 1993           | Bovine Meat               | 12                                                          |
| 107             | Côte d'Ivoire | 1993           | Cassava                   | 278                                                         |
| 107             | Côte d'Ivoire | 1993           | Cereals, Other            | 3                                                           |
| 107             | Côte d'Ivoire | 1993           | Citrus, Other             | 2                                                           |
| 107             | Côte d'Ivoire | 1993           | Cocoa Beans               | 2                                                           |
| 107             | Côte d'Ivoire | 1993           | Coconut Oil               | 1                                                           |
| 107             | Côte d'Ivoire | 1993           | Coconuts - Incl Copra     | 2                                                           |
| 107             | Côte d'Ivoire | 1993           | Coffee                    | 1                                                           |
| 107             | Côte d'Ivoire | 1993           | Cottonseed Oil            | 3                                                           |
| 107             | Côte d'Ivoire | 1993           | Demersal Fish             | 3                                                           |
| 107             | Côte d'Ivoire | 1993           | Eggs                      | 3                                                           |
| 107             | Côte d'Ivoire | 1993           | Freshwater Fish           | 3                                                           |
| 107             | Côte d'Ivoire | 1993           | Fruits, Other             | 10                                                          |
| 107             | Côte d'Ivoire | 1993           | Grapefruit                | 3                                                           |
| 107             | Côte d'Ivoire | 1993           | Groundnuts (Shelled Eq)   | 8                                                           |
| 107             | Côte d'Ivoire | 1993           | Maize                     | 73                                                          |
| 107             | Côte d'Ivoire | 1993           | Marine Fish, Other        | 7                                                           |
| 107             | Côte d'Ivoire | 1993           | Meat, Other               | 27                                                          |
| 107             | Côte d'Ivoire | 1993           | Milk, Whole               | 15                                                          |
| 107             | Côte d'Ivoire | 1993           | Millet                    | 5                                                           |
| 107             | Côte d'Ivoire | 1993           | Mutton & Goat Meat        | 2                                                           |
| 107             | Côte d'Ivoire | 1993           | Nuts                      | 6                                                           |
| 107             | Côte d'Ivoire | 1993           | Offals, Edible            | 3                                                           |
| 107             | Côte d'Ivoire | 1993           | Oranges, Mandarines       | 5                                                           |
| 107             | Côte d'Ivoire | 1993           | Palm Oil                  | 20                                                          |
| 107             | Côte d'Ivoire | 1993           | Pelagic Fish              | 27                                                          |
| 107             | Côte d'Ivoire | 1993           | Pigmeat                   | 2                                                           |
| 107             | Côte d'Ivoire | 1993           | Pimento                   | 3                                                           |
| 107             | Côte d'Ivoire | 1993           | Pineapples                | 13                                                          |
| 107             | Côte d'Ivoire | 1993           | Plantains                 | 202                                                         |
| 107             | Côte d'Ivoire | 1993           | Potatoes                  | 2                                                           |
| 107             | Côte d'Ivoire | 1993           | Poultry Meat              | 5                                                           |
| 107             | Côte d'Ivoire | 1993           | Pulses, Other             | 1                                                           |
| 107             | Côte d'Ivoire | 1993           | Rape and Mustard Oil      | 1                                                           |
| 107             | Côte d'Ivoire | 1993           | Rice (Milled Equivalent)  | 155                                                         |
| 107             | Côte d'Ivoire | 1993           | Roots, Other              | 8                                                           |
| 107             | Côte d'Ivoire | 1993           | Sorghum                   | 3                                                           |

## Dietary calcium and zinc deficiency risks are decreasing but remain prevalent

| FAO countrycode | Country       | Reference year | Food item                 | Gross food supply (g capita <sup>-1</sup> d <sup>-1</sup> ) |
|-----------------|---------------|----------------|---------------------------|-------------------------------------------------------------|
| 107             | Côte d'Ivoire | 1993           | Soyabbeans                | 1                                                           |
| 107             | Côte d'Ivoire | 1993           | Sugar Cane                | 2                                                           |
| 107             | Côte d'Ivoire | 1993           | Sugar, Refined Equivalent | 26                                                          |
| 107             | Côte d'Ivoire | 1993           | Sweet Potatoes            | 6                                                           |
| 107             | Côte d'Ivoire | 1993           | Tomatoes                  | 9                                                           |
| 107             | Côte d'Ivoire | 1993           | Vegetables, Other         | 119                                                         |
| 107             | Côte d'Ivoire | 1993           | Wheat                     | 44                                                          |
| 107             | Côte d'Ivoire | 1993           | Wine                      | 3                                                           |
| 107             | Côte d'Ivoire | 1993           | Yams                      | 465                                                         |
| 107             | Côte d'Ivoire | 1994           | Bananas                   | 4                                                           |
| 107             | Côte d'Ivoire | 1994           | Beer                      | 26                                                          |
| 107             | Côte d'Ivoire | 1994           | Beverages, Fermented      | 56                                                          |
| 107             | Côte d'Ivoire | 1994           | Bovine Meat               | 8                                                           |
| 107             | Côte d'Ivoire | 1994           | Cassava                   | 279                                                         |
| 107             | Côte d'Ivoire | 1994           | Cereals, Other            | 4                                                           |
| 107             | Côte d'Ivoire | 1994           | Citrus, Other             | 2                                                           |
| 107             | Côte d'Ivoire | 1994           | Cocoa Beans               | 3                                                           |
| 107             | Côte d'Ivoire | 1994           | Coconut Oil               | 1                                                           |
| 107             | Côte d'Ivoire | 1994           | Coconuts - Incl Copra     | 1                                                           |
| 107             | Côte d'Ivoire | 1994           | Coffee                    | 1                                                           |
| 107             | Côte d'Ivoire | 1994           | Cottonseed Oil            | 3                                                           |
| 107             | Côte d'Ivoire | 1994           | Demersal Fish             | 2                                                           |
| 107             | Côte d'Ivoire | 1994           | Eggs                      | 3                                                           |
| 107             | Côte d'Ivoire | 1994           | Freshwater Fish           | 3                                                           |
| 107             | Côte d'Ivoire | 1994           | Fruits, Other             | 11                                                          |
| 107             | Côte d'Ivoire | 1994           | Grapefruit                | 3                                                           |
| 107             | Côte d'Ivoire | 1994           | Groundnuts (Shelled Eq)   | 7                                                           |
| 107             | Côte d'Ivoire | 1994           | Maize                     | 72                                                          |
| 107             | Côte d'Ivoire | 1994           | Marine Fish, Other        | 9                                                           |
| 107             | Côte d'Ivoire | 1994           | Meat, Other               | 29                                                          |
| 107             | Côte d'Ivoire | 1994           | Milk, Whole               | 12                                                          |
| 107             | Côte d'Ivoire | 1994           | Millet                    | 5                                                           |
| 107             | Côte d'Ivoire | 1994           | Mutton & Goat Meat        | 2                                                           |
| 107             | Côte d'Ivoire | 1994           | Nuts                      | 6                                                           |
| 107             | Côte d'Ivoire | 1994           | Offals, Edible            | 3                                                           |
| 107             | Côte d'Ivoire | 1994           | Oranges, Mandarines       | 4                                                           |
| 107             | Côte d'Ivoire | 1994           | Palm Oil                  | 25                                                          |
| 107             | Côte d'Ivoire | 1994           | Pelagic Fish              | 20                                                          |
| 107             | Côte d'Ivoire | 1994           | Pigmeat                   | 2                                                           |
| 107             | Côte d'Ivoire | 1994           | Pimento                   | 3                                                           |
| 107             | Côte d'Ivoire | 1994           | Pineapples                | 13                                                          |
| 107             | Côte d'Ivoire | 1994           | Plantains                 | 233                                                         |
| 107             | Côte d'Ivoire | 1994           | Potatoes                  | 1                                                           |
| 107             | Côte d'Ivoire | 1994           | Poultry Meat              | 5                                                           |
| 107             | Côte d'Ivoire | 1994           | Pulses, Other             | 1                                                           |
| 107             | Côte d'Ivoire | 1994           | Rice (Milled Equivalent)  | 151                                                         |
| 107             | Côte d'Ivoire | 1994           | Roots, Other              | 8                                                           |
| 107             | Côte d'Ivoire | 1994           | Sorghum                   | 4                                                           |
| 107             | Côte d'Ivoire | 1994           | Soyabbeans                | 1                                                           |
| 107             | Côte d'Ivoire | 1994           | Sugar Cane                | 2                                                           |
| 107             | Côte d'Ivoire | 1994           | Sugar, Refined Equivalent | 26                                                          |
| 107             | Côte d'Ivoire | 1994           | Sweet Potatoes            | 6                                                           |
| 107             | Côte d'Ivoire | 1994           | Tomatoes                  | 7                                                           |
| 107             | Côte d'Ivoire | 1994           | Vegetables, Other         | 126                                                         |
| 107             | Côte d'Ivoire | 1994           | Wheat                     | 43                                                          |
| 107             | Côte d'Ivoire | 1994           | Wine                      | 3                                                           |
| 107             | Côte d'Ivoire | 1994           | Yams                      | 462                                                         |
| 107             | Côte d'Ivoire | 1995           | Bananas                   | 3                                                           |
| 107             | Côte d'Ivoire | 1995           | Beer                      | 40                                                          |
| 107             | Côte d'Ivoire | 1995           | Beverages, Fermented      | 58                                                          |
| 107             | Côte d'Ivoire | 1995           | Bovine Meat               | 8                                                           |
| 107             | Côte d'Ivoire | 1995           | Cassava                   | 279                                                         |
| 107             | Côte d'Ivoire | 1995           | Cereals, Other            | 2                                                           |
| 107             | Côte d'Ivoire | 1995           | Citrus, Other             | 2                                                           |
| 107             | Côte d'Ivoire | 1995           | Cocoa Beans               | 4                                                           |
| 107             | Côte d'Ivoire | 1995           | Coconut Oil               | 1                                                           |
| 107             | Côte d'Ivoire | 1995           | Coconuts - Incl Copra     | 3                                                           |
| 107             | Côte d'Ivoire | 1995           | Coffee                    | 1                                                           |
| 107             | Côte d'Ivoire | 1995           | Cottonseed Oil            | 2                                                           |
| 107             | Côte d'Ivoire | 1995           | Demersal Fish             | 1                                                           |
| 107             | Côte d'Ivoire | 1995           | Eggs                      | 3                                                           |
| 107             | Côte d'Ivoire | 1995           | Freshwater Fish           | 2                                                           |
| 107             | Côte d'Ivoire | 1995           | Fruits, Other             | 10                                                          |
| 107             | Côte d'Ivoire | 1995           | Grapefruit                | 3                                                           |
| 107             | Côte d'Ivoire | 1995           | Groundnuts (Shelled Eq)   | 7                                                           |
| 107             | Côte d'Ivoire | 1995           | Maize                     | 76                                                          |
| 107             | Côte d'Ivoire | 1995           | Marine Fish, Other        | 19                                                          |
| 107             | Côte d'Ivoire | 1995           | Meat, Other               | 28                                                          |
| 107             | Côte d'Ivoire | 1995           | Milk, Whole               | 24                                                          |
| 107             | Côte d'Ivoire | 1995           | Millet                    | 4                                                           |
| 107             | Côte d'Ivoire | 1995           | Mutton & Goat Meat        | 2                                                           |
| 107             | Côte d'Ivoire | 1995           | Nuts                      | 6                                                           |
| 107             | Côte d'Ivoire | 1995           | Offals, Edible            | 3                                                           |
| 107             | Côte d'Ivoire | 1995           | Oilcrops Oil, Other       | 1                                                           |
| 107             | Côte d'Ivoire | 1995           | Oranges, Mandarines       | 4                                                           |
| 107             | Côte d'Ivoire | 1995           | Palm Oil                  | 25                                                          |
| 107             | Côte d'Ivoire | 1995           | Pelagic Fish              | 14                                                          |
| 107             | Côte d'Ivoire | 1995           | Pigmeat                   | 3                                                           |
| 107             | Côte d'Ivoire | 1995           | Pimento                   | 4                                                           |
| 107             | Côte d'Ivoire | 1995           | Pineapples                | 13                                                          |
| 107             | Côte d'Ivoire | 1995           | Plantains                 | 224                                                         |
| 107             | Côte d'Ivoire | 1995           | Potatoes                  | 1                                                           |
| 107             | Côte d'Ivoire | 1995           | Poultry Meat              | 5                                                           |
| 107             | Côte d'Ivoire | 1995           | Pulses, Other             | 1                                                           |
| 107             | Côte d'Ivoire | 1995           | Rape and Mustard Oil      | 1                                                           |
| 107             | Côte d'Ivoire | 1995           | Rice (Milled Equivalent)  | 155                                                         |
| 107             | Côte d'Ivoire | 1995           | Roots, Other              | 7                                                           |

Dietary calcium and zinc deficiency risks are decreasing but remain prevalent

| FAO countrycode | Country       | Reference year | Food item                 | Gross food supply (g capita <sup>-1</sup> d <sup>-1</sup> ) |
|-----------------|---------------|----------------|---------------------------|-------------------------------------------------------------|
| 107             | Côte d'Ivoire | 1995           | Sorghum                   | 4                                                           |
| 107             | Côte d'Ivoire | 1995           | Sugar Cane                | 2                                                           |
| 107             | Côte d'Ivoire | 1995           | Sugar, Refined Equivalent | 25                                                          |
| 107             | Côte d'Ivoire | 1995           | Sweet Potatoes            | 6                                                           |
| 107             | Côte d'Ivoire | 1995           | Tomatoes                  | 8                                                           |
| 107             | Côte d'Ivoire | 1995           | Vegetables, Other         | 118                                                         |
| 107             | Côte d'Ivoire | 1995           | Wheat                     | 43                                                          |
| 107             | Côte d'Ivoire | 1995           | Wine                      | 4                                                           |
| 107             | Côte d'Ivoire | 1995           | Yams                      | 460                                                         |
| 107             | Côte d'Ivoire | 1996           | Bananas                   | 3                                                           |
| 107             | Côte d'Ivoire | 1996           | Beer                      | 42                                                          |
| 107             | Côte d'Ivoire | 1996           | Beverages, Fermented      | 56                                                          |
| 107             | Côte d'Ivoire | 1996           | Bovine Meat               | 7                                                           |
| 107             | Côte d'Ivoire | 1996           | Cassava                   | 278                                                         |
| 107             | Côte d'Ivoire | 1996           | Cereals, Other            | 2                                                           |
| 107             | Côte d'Ivoire | 1996           | Citrus, Other             | 2                                                           |
| 107             | Côte d'Ivoire | 1996           | Cocoa Beans               | 5                                                           |
| 107             | Côte d'Ivoire | 1996           | Coconut Oil               | 1                                                           |
| 107             | Côte d'Ivoire | 1996           | Coconuts - Incl Copra     | 2                                                           |
| 107             | Côte d'Ivoire | 1996           | Coffee                    | 1                                                           |
| 107             | Côte d'Ivoire | 1996           | Cottonseed Oil            | 2                                                           |
| 107             | Côte d'Ivoire | 1996           | Demersal Fish             | 1                                                           |
| 107             | Côte d'Ivoire | 1996           | Eggs                      | 3                                                           |
| 107             | Côte d'Ivoire | 1996           | Freshwater Fish           | 2                                                           |
| 107             | Côte d'Ivoire | 1996           | Fruits, Other             | 10                                                          |
| 107             | Côte d'Ivoire | 1996           | Grapefruit                | 3                                                           |
| 107             | Côte d'Ivoire | 1996           | Groundnuts (Shelled Eq)   | 6                                                           |
| 107             | Côte d'Ivoire | 1996           | Maize                     | 75                                                          |
| 107             | Côte d'Ivoire | 1996           | Marine Fish, Other        | 16                                                          |
| 107             | Côte d'Ivoire | 1996           | Meat, Other               | 28                                                          |
| 107             | Côte d'Ivoire | 1996           | Milk, Whole               | 23                                                          |
| 107             | Côte d'Ivoire | 1996           | Millet                    | 4                                                           |
| 107             | Côte d'Ivoire | 1996           | Mutton & Goat Meat        | 2                                                           |
| 107             | Côte d'Ivoire | 1996           | Nuts                      | 4                                                           |
| 107             | Côte d'Ivoire | 1996           | Offals, Edible            | 3                                                           |
| 107             | Côte d'Ivoire | 1996           | Oranges, Mandarines       | 4                                                           |
| 107             | Côte d'Ivoire | 1996           | Palm Oil                  | 29                                                          |
| 107             | Côte d'Ivoire | 1996           | Pelagic Fish              | 18                                                          |
| 107             | Côte d'Ivoire | 1996           | Pigmeat                   | 1                                                           |
| 107             | Côte d'Ivoire | 1996           | Pimento                   | 4                                                           |
| 107             | Côte d'Ivoire | 1996           | Pineapples                | 12                                                          |
| 107             | Côte d'Ivoire | 1996           | Plantains                 | 217                                                         |
| 107             | Côte d'Ivoire | 1996           | Potatoes                  | 2                                                           |
| 107             | Côte d'Ivoire | 1996           | Poultry Meat              | 4                                                           |
| 107             | Côte d'Ivoire | 1996           | Pulses, Other             | 1                                                           |
| 107             | Côte d'Ivoire | 1996           | Rice (Milled Equivalent)  | 163                                                         |
| 107             | Côte d'Ivoire | 1996           | Roots, Other              | 7                                                           |
| 107             | Côte d'Ivoire | 1996           | Sorghum                   | 4                                                           |
| 107             | Côte d'Ivoire | 1996           | Sugar Cane                | 2                                                           |
| 107             | Côte d'Ivoire | 1996           | Sugar, Refined Equivalent | 22                                                          |
| 107             | Côte d'Ivoire | 1996           | Sweet Potatoes            | 6                                                           |
| 107             | Côte d'Ivoire | 1996           | Sweeteners, Other         | 1                                                           |
| 107             | Côte d'Ivoire | 1996           | Tomatoes                  | 8                                                           |
| 107             | Côte d'Ivoire | 1996           | Vegetables, Other         | 141                                                         |
| 107             | Côte d'Ivoire | 1996           | Wheat                     | 41                                                          |
| 107             | Côte d'Ivoire | 1996           | Wine                      | 4                                                           |
| 107             | Côte d'Ivoire | 1996           | Yams                      | 457                                                         |
| 107             | Côte d'Ivoire | 1997           | Apples                    | 1                                                           |
| 107             | Côte d'Ivoire | 1997           | Bananas                   | 3                                                           |
| 107             | Côte d'Ivoire | 1997           | Beans                     | 3                                                           |
| 107             | Côte d'Ivoire | 1997           | Beer                      | 34                                                          |
| 107             | Côte d'Ivoire | 1997           | Beverages, Fermented      | 61                                                          |
| 107             | Côte d'Ivoire | 1997           | Bovine Meat               | 8                                                           |
| 107             | Côte d'Ivoire | 1997           | Cassava                   | 322                                                         |
| 107             | Côte d'Ivoire | 1997           | Cereals, Other            | 2                                                           |
| 107             | Côte d'Ivoire | 1997           | Citrus, Other             | 2                                                           |
| 107             | Côte d'Ivoire | 1997           | Cocoa Beans               | 5                                                           |
| 107             | Côte d'Ivoire | 1997           | Coconut Oil               | 1                                                           |
| 107             | Côte d'Ivoire | 1997           | Coconuts - Incl Copra     | 8                                                           |
| 107             | Côte d'Ivoire | 1997           | Coffee                    | 2                                                           |
| 107             | Côte d'Ivoire | 1997           | Cottonseed Oil            | 3                                                           |
| 107             | Côte d'Ivoire | 1997           | Demersal Fish             | 2                                                           |
| 107             | Côte d'Ivoire | 1997           | Eggs                      | 4                                                           |
| 107             | Côte d'Ivoire | 1997           | Freshwater Fish           | 2                                                           |
| 107             | Côte d'Ivoire | 1997           | Fruits, Other             | 11                                                          |
| 107             | Côte d'Ivoire | 1997           | Groundnuts (Shelled Eq)   | 7                                                           |
| 107             | Côte d'Ivoire | 1997           | Maize                     | 72                                                          |
| 107             | Côte d'Ivoire | 1997           | Marine Fish, Other        | 19                                                          |
| 107             | Côte d'Ivoire | 1997           | Meat, Other               | 29                                                          |
| 107             | Côte d'Ivoire | 1997           | Milk, Whole               | 22                                                          |
| 107             | Côte d'Ivoire | 1997           | Millet                    | 5                                                           |
| 107             | Côte d'Ivoire | 1997           | Mutton & Goat Meat        | 2                                                           |
| 107             | Côte d'Ivoire | 1997           | Nuts                      | 10                                                          |
| 107             | Côte d'Ivoire | 1997           | Offals, Edible            | 3                                                           |
| 107             | Côte d'Ivoire | 1997           | Oilcrops Oil, Other       | 1                                                           |
| 107             | Côte d'Ivoire | 1997           | Oranges, Mandarines       | 4                                                           |
| 107             | Côte d'Ivoire | 1997           | Palm Oil                  | 30                                                          |
| 107             | Côte d'Ivoire | 1997           | Pelagic Fish              | 13                                                          |
| 107             | Côte d'Ivoire | 1997           | Pigmeat                   | 1                                                           |
| 107             | Côte d'Ivoire | 1997           | Pimento                   | 4                                                           |
| 107             | Côte d'Ivoire | 1997           | Pineapples                | 12                                                          |
| 107             | Côte d'Ivoire | 1997           | Plantains                 | 242                                                         |
| 107             | Côte d'Ivoire | 1997           | Potatoes                  | 3                                                           |
| 107             | Côte d'Ivoire | 1997           | Poultry Meat              | 5                                                           |
| 107             | Côte d'Ivoire | 1997           | Pulses, Other             | 1                                                           |
| 107             | Côte d'Ivoire | 1997           | Rape and Mustard Oil      | 1                                                           |
| 107             | Côte d'Ivoire | 1997           | Rice (Milled Equivalent)  | 140                                                         |

## Dietary calcium and zinc deficiency risks are decreasing but remain prevalent

| FAO countrycode | Country       | Reference year | Food item                 | Gross food supply (g capita <sup>-1</sup> d <sup>-1</sup> ) |
|-----------------|---------------|----------------|---------------------------|-------------------------------------------------------------|
| 107             | Côte d'Ivoire | 1997           | Roots, Other              | 8                                                           |
| 107             | Côte d'Ivoire | 1997           | Sesameseed                | 1                                                           |
| 107             | Côte d'Ivoire | 1997           | Sorghum                   | 4                                                           |
| 107             | Côte d'Ivoire | 1997           | Spices, Other             | 1                                                           |
| 107             | Côte d'Ivoire | 1997           | Sugar Cane                | 2                                                           |
| 107             | Côte d'Ivoire | 1997           | Sugar, Refined Equivalent | 21                                                          |
| 107             | Côte d'Ivoire | 1997           | Sweet Potatoes            | 8                                                           |
| 107             | Côte d'Ivoire | 1997           | Sweeteners, Other         | 1                                                           |
| 107             | Côte d'Ivoire | 1997           | Tomatoes                  | 8                                                           |
| 107             | Côte d'Ivoire | 1997           | Vegetables, Other         | 136                                                         |
| 107             | Côte d'Ivoire | 1997           | Wheat                     | 38                                                          |
| 107             | Côte d'Ivoire | 1997           | Wine                      | 4                                                           |
| 107             | Côte d'Ivoire | 1997           | Yams                      | 493                                                         |
| 107             | Côte d'Ivoire | 1998           | Apples                    | 1                                                           |
| 107             | Côte d'Ivoire | 1998           | Bananas                   | 3                                                           |
| 107             | Côte d'Ivoire | 1998           | Beans                     | 3                                                           |
| 107             | Côte d'Ivoire | 1998           | Beer                      | 36                                                          |
| 107             | Côte d'Ivoire | 1998           | Beverages, Fermented      | 59                                                          |
| 107             | Côte d'Ivoire | 1998           | Bovine Meat               | 7                                                           |
| 107             | Côte d'Ivoire | 1998           | Cassava                   | 311                                                         |
| 107             | Côte d'Ivoire | 1998           | Cereals, Other            | 2                                                           |
| 107             | Côte d'Ivoire | 1998           | Citrus, Other             | 3                                                           |
| 107             | Côte d'Ivoire | 1998           | Cocoa Beans               | 4                                                           |
| 107             | Côte d'Ivoire | 1998           | Coconut Oil               | 1                                                           |
| 107             | Côte d'Ivoire | 1998           | Coconuts - Incl Copra     | 8                                                           |
| 107             | Côte d'Ivoire | 1998           | Coffee                    | 3                                                           |
| 107             | Côte d'Ivoire | 1998           | Cottonseed Oil            | 4                                                           |
| 107             | Côte d'Ivoire | 1998           | Demersal Fish             | 1                                                           |
| 107             | Côte d'Ivoire | 1998           | Eggs                      | 6                                                           |
| 107             | Côte d'Ivoire | 1998           | Freshwater Fish           | 2                                                           |
| 107             | Côte d'Ivoire | 1998           | Fruits, Other             | 12                                                          |
| 107             | Côte d'Ivoire | 1998           | Grapefruit                | 3                                                           |
| 107             | Côte d'Ivoire | 1998           | Groundnuts (Shelled Eq)   | 6                                                           |
| 107             | Côte d'Ivoire | 1998           | Maize                     | 72                                                          |
| 107             | Côte d'Ivoire | 1998           | Marine Fish, Other        | 21                                                          |
| 107             | Côte d'Ivoire | 1998           | Meat, Other               | 22                                                          |
| 107             | Côte d'Ivoire | 1998           | Milk, Whole               | 24                                                          |
| 107             | Côte d'Ivoire | 1998           | Millet                    | 5                                                           |
| 107             | Côte d'Ivoire | 1998           | Mutton & Goat Meat        | 2                                                           |
| 107             | Côte d'Ivoire | 1998           | Nuts                      | 9                                                           |
| 107             | Côte d'Ivoire | 1998           | Offals, Edible            | 3                                                           |
| 107             | Côte d'Ivoire | 1998           | Oilcrops Oil, Other       | 1                                                           |
| 107             | Côte d'Ivoire | 1998           | Oranges, Mandarines       | 4                                                           |
| 107             | Côte d'Ivoire | 1998           | Palm Oil                  | 27                                                          |
| 107             | Côte d'Ivoire | 1998           | Pelagic Fish              | 16                                                          |
| 107             | Côte d'Ivoire | 1998           | Pigmeat                   | 1                                                           |
| 107             | Côte d'Ivoire | 1998           | Pimento                   | 3                                                           |
| 107             | Côte d'Ivoire | 1998           | Pineapples                | 10                                                          |
| 107             | Côte d'Ivoire | 1998           | Plantains                 | 243                                                         |
| 107             | Côte d'Ivoire | 1998           | Potatoes                  | 3                                                           |
| 107             | Côte d'Ivoire | 1998           | Poultry Meat              | 4                                                           |
| 107             | Côte d'Ivoire | 1998           | Pulses, Other             | 1                                                           |
| 107             | Côte d'Ivoire | 1998           | Rape and Mustard Oil      | 1                                                           |
| 107             | Côte d'Ivoire | 1998           | Rice (Milled Equivalent)  | 132                                                         |
| 107             | Côte d'Ivoire | 1998           | Roots, Other              | 9                                                           |
| 107             | Côte d'Ivoire | 1998           | Sesameseed                | 1                                                           |
| 107             | Côte d'Ivoire | 1998           | Sorghum                   | 4                                                           |
| 107             | Côte d'Ivoire | 1998           | Spices, Other             | 1                                                           |
| 107             | Côte d'Ivoire | 1998           | Sugar Cane                | 2                                                           |
| 107             | Côte d'Ivoire | 1998           | Sugar, Refined Equivalent | 22                                                          |
| 107             | Côte d'Ivoire | 1998           | Sweet Potatoes            | 8                                                           |
| 107             | Côte d'Ivoire | 1998           | Sweeteners, Other         | 1                                                           |
| 107             | Côte d'Ivoire | 1998           | Tomatoes                  | 5                                                           |
| 107             | Côte d'Ivoire | 1998           | Vegetables, Other         | 133                                                         |
| 107             | Côte d'Ivoire | 1998           | Wheat                     | 48                                                          |
| 107             | Côte d'Ivoire | 1998           | Wine                      | 4                                                           |
| 107             | Côte d'Ivoire | 1998           | Yams                      | 494                                                         |
| 107             | Côte d'Ivoire | 1999           | Apples                    | 1                                                           |
| 107             | Côte d'Ivoire | 1999           | Bananas                   | 2                                                           |
| 107             | Côte d'Ivoire | 1999           | Beans                     | 3                                                           |
| 107             | Côte d'Ivoire | 1999           | Beer                      | 35                                                          |
| 107             | Côte d'Ivoire | 1999           | Beverages, Fermented      | 63                                                          |
| 107             | Côte d'Ivoire | 1999           | Bovine Meat               | 7                                                           |
| 107             | Côte d'Ivoire | 1999           | Cassava                   | 330                                                         |
| 107             | Côte d'Ivoire | 1999           | Cereals, Other            | 2                                                           |
| 107             | Côte d'Ivoire | 1999           | Citrus, Other             | 2                                                           |
| 107             | Côte d'Ivoire | 1999           | Cocoa Beans               | 4                                                           |
| 107             | Côte d'Ivoire | 1999           | Coconut Oil               | 2                                                           |
| 107             | Côte d'Ivoire | 1999           | Coconuts - Incl Copra     | 7                                                           |
| 107             | Côte d'Ivoire | 1999           | Coffee                    | 4                                                           |
| 107             | Côte d'Ivoire | 1999           | Cottonseed Oil            | 4                                                           |
| 107             | Côte d'Ivoire | 1999           | Demersal Fish             | 1                                                           |
| 107             | Côte d'Ivoire | 1999           | Eggs                      | 5                                                           |
| 107             | Côte d'Ivoire | 1999           | Freshwater Fish           | 2                                                           |
| 107             | Côte d'Ivoire | 1999           | Fruits, Other             | 10                                                          |
| 107             | Côte d'Ivoire | 1999           | Grapefruit                | 3                                                           |
| 107             | Côte d'Ivoire | 1999           | Groundnuts (Shelled Eq)   | 6                                                           |
| 107             | Côte d'Ivoire | 1999           | Maize                     | 65                                                          |
| 107             | Côte d'Ivoire | 1999           | Marine Fish, Other        | 23                                                          |
| 107             | Côte d'Ivoire | 1999           | Meat, Other               | 22                                                          |
| 107             | Côte d'Ivoire | 1999           | Milk, Whole               | 19                                                          |
| 107             | Côte d'Ivoire | 1999           | Millet                    | 5                                                           |
| 107             | Côte d'Ivoire | 1999           | Mutton & Goat Meat        | 2                                                           |
| 107             | Côte d'Ivoire | 1999           | Nuts                      | 10                                                          |
| 107             | Côte d'Ivoire | 1999           | Offals, Edible            | 3                                                           |
| 107             | Côte d'Ivoire | 1999           | Oilcrops Oil, Other       | 1                                                           |
| 107             | Côte d'Ivoire | 1999           | Oranges, Mandarines       | 3                                                           |

Dietary calcium and zinc deficiency risks are decreasing but remain prevalent

| FAO countrycode | Country       | Reference year | Food item                 | Gross food supply (g capita <sup>-1</sup> d <sup>-1</sup> ) |
|-----------------|---------------|----------------|---------------------------|-------------------------------------------------------------|
| 107             | Côte d'Ivoire | 1999           | Palm Oil                  | 27                                                          |
| 107             | Côte d'Ivoire | 1999           | Pelagic Fish              | 23                                                          |
| 107             | Côte d'Ivoire | 1999           | Pigmeat                   | 1                                                           |
| 107             | Côte d'Ivoire | 1999           | Pimento                   | 3                                                           |
| 107             | Côte d'Ivoire | 1999           | Pineapples                | 8                                                           |
| 107             | Côte d'Ivoire | 1999           | Plantains                 | 231                                                         |
| 107             | Côte d'Ivoire | 1999           | Potatoes                  | 2                                                           |
| 107             | Côte d'Ivoire | 1999           | Poultry Meat              | 4                                                           |
| 107             | Côte d'Ivoire | 1999           | Pulses, Other             | 1                                                           |
| 107             | Côte d'Ivoire | 1999           | Rape and Mustard Oil      | 1                                                           |
| 107             | Côte d'Ivoire | 1999           | Rice (Milled Equivalent)  | 133                                                         |
| 107             | Côte d'Ivoire | 1999           | Roots, Other              | 8                                                           |
| 107             | Côte d'Ivoire | 1999           | Sesameseed                | 1                                                           |
| 107             | Côte d'Ivoire | 1999           | Sorghum                   | 4                                                           |
| 107             | Côte d'Ivoire | 1999           | Spices, Other             | 1                                                           |
| 107             | Côte d'Ivoire | 1999           | Sugar Cane                | 2                                                           |
| 107             | Côte d'Ivoire | 1999           | Sugar, Refined Equivalent | 22                                                          |
| 107             | Côte d'Ivoire | 1999           | Sweet Potatoes            | 7                                                           |
| 107             | Côte d'Ivoire | 1999           | Sweeteners, Other         | 1                                                           |
| 107             | Côte d'Ivoire | 1999           | Tomatoes                  | 6                                                           |
| 107             | Côte d'Ivoire | 1999           | Vegetables, Other         | 130                                                         |
| 107             | Côte d'Ivoire | 1999           | Wheat                     | 48                                                          |
| 107             | Côte d'Ivoire | 1999           | Wine                      | 4                                                           |
| 107             | Côte d'Ivoire | 1999           | Yams                      | 496                                                         |
| 107             | Côte d'Ivoire | 2000           | Apples                    | 1                                                           |
| 107             | Côte d'Ivoire | 2000           | Bananas                   | 2                                                           |
| 107             | Côte d'Ivoire | 2000           | Beans                     | 3                                                           |
| 107             | Côte d'Ivoire | 2000           | Beer                      | 32                                                          |
| 107             | Côte d'Ivoire | 2000           | Beverages, Fermented      | 62                                                          |
| 107             | Côte d'Ivoire | 2000           | Bovine Meat               | 7                                                           |
| 107             | Côte d'Ivoire | 2000           | Cassava                   | 321                                                         |
| 107             | Côte d'Ivoire | 2000           | Cereals, Other            | 2                                                           |
| 107             | Côte d'Ivoire | 2000           | Citrus, Other             | 1                                                           |
| 107             | Côte d'Ivoire | 2000           | Cocoa Beans               | 3                                                           |
| 107             | Côte d'Ivoire | 2000           | Coconut Oil               | 2                                                           |
| 107             | Côte d'Ivoire | 2000           | Coconuts - Incl Copra     | 9                                                           |
| 107             | Côte d'Ivoire | 2000           | Coffee                    | 4                                                           |
| 107             | Côte d'Ivoire | 2000           | Cottonseed Oil            | 4                                                           |
| 107             | Côte d'Ivoire | 2000           | Demersal Fish             | 2                                                           |
| 107             | Côte d'Ivoire | 2000           | Eggs                      | 5                                                           |
| 107             | Côte d'Ivoire | 2000           | Freshwater Fish           | 2                                                           |
| 107             | Côte d'Ivoire | 2000           | Fruits, Other             | 10                                                          |
| 107             | Côte d'Ivoire | 2000           | Grapefruit                | 3                                                           |
| 107             | Côte d'Ivoire | 2000           | Groundnuts (Shelled Eq)   | 6                                                           |
| 107             | Côte d'Ivoire | 2000           | Maize                     | 63                                                          |
| 107             | Côte d'Ivoire | 2000           | Marine Fish, Other        | 21                                                          |
| 107             | Côte d'Ivoire | 2000           | Meat, Other               | 22                                                          |
| 107             | Côte d'Ivoire | 2000           | Milk, Whole               | 15                                                          |
| 107             | Côte d'Ivoire | 2000           | Millet                    | 5                                                           |
| 107             | Côte d'Ivoire | 2000           | Mutton & Goat Meat        | 2                                                           |
| 107             | Côte d'Ivoire | 2000           | Nuts                      | 11                                                          |
| 107             | Côte d'Ivoire | 2000           | Offals, Edible            | 3                                                           |
| 107             | Côte d'Ivoire | 2000           | Oilcrops Oil, Other       | 2                                                           |
| 107             | Côte d'Ivoire | 2000           | Oranges, Mandarines       | 3                                                           |
| 107             | Côte d'Ivoire | 2000           | Palm Oil                  | 27                                                          |
| 107             | Côte d'Ivoire | 2000           | Pelagic Fish              | 11                                                          |
| 107             | Côte d'Ivoire | 2000           | Pigmeat                   | 1                                                           |
| 107             | Côte d'Ivoire | 2000           | Pimento                   | 3                                                           |
| 107             | Côte d'Ivoire | 2000           | Pineapples                | 5                                                           |
| 107             | Côte d'Ivoire | 2000           | Plantains                 | 220                                                         |
| 107             | Côte d'Ivoire | 2000           | Potatoes                  | 3                                                           |
| 107             | Côte d'Ivoire | 2000           | Poultry Meat              | 4                                                           |
| 107             | Côte d'Ivoire | 2000           | Pulses, Other             | 1                                                           |
| 107             | Côte d'Ivoire | 2000           | Rice (Milled Equivalent)  | 139                                                         |
| 107             | Côte d'Ivoire | 2000           | Roots, Other              | 8                                                           |
| 107             | Côte d'Ivoire | 2000           | Sesameseed                | 1                                                           |
| 107             | Côte d'Ivoire | 2000           | Sorghum                   | 4                                                           |
| 107             | Côte d'Ivoire | 2000           | Soybeans                  | 1                                                           |
| 107             | Côte d'Ivoire | 2000           | Spices, Other             | 1                                                           |
| 107             | Côte d'Ivoire | 2000           | Sugar Cane                | 2                                                           |
| 107             | Côte d'Ivoire | 2000           | Sugar, Refined Equivalent | 19                                                          |
| 107             | Côte d'Ivoire | 2000           | Sweet Potatoes            | 7                                                           |
| 107             | Côte d'Ivoire | 2000           | Sweeteners, Other         | 1                                                           |
| 107             | Côte d'Ivoire | 2000           | Tomatoes                  | 5                                                           |
| 107             | Côte d'Ivoire | 2000           | Vegetables, Other         | 132                                                         |
| 107             | Côte d'Ivoire | 2000           | Wheat                     | 46                                                          |
| 107             | Côte d'Ivoire | 2000           | Whey                      | 1                                                           |
| 107             | Côte d'Ivoire | 2000           | Wine                      | 4                                                           |
| 107             | Côte d'Ivoire | 2000           | Yams                      | 499                                                         |
| 107             | Côte d'Ivoire | 2001           | Apples                    | 1                                                           |
| 107             | Côte d'Ivoire | 2001           | Bananas                   | 3                                                           |
| 107             | Côte d'Ivoire | 2001           | Beans                     | 3                                                           |
| 107             | Côte d'Ivoire | 2001           | Beer                      | 42                                                          |
| 107             | Côte d'Ivoire | 2001           | Beverages, Fermented      | 69                                                          |
| 107             | Côte d'Ivoire | 2001           | Bovine Meat               | 6                                                           |
| 107             | Côte d'Ivoire | 2001           | Cassava                   | 313                                                         |
| 107             | Côte d'Ivoire | 2001           | Cereals, Other            | 2                                                           |
| 107             | Côte d'Ivoire | 2001           | Citrus, Other             | 2                                                           |
| 107             | Côte d'Ivoire | 2001           | Cocoa Beans               | 4                                                           |
| 107             | Côte d'Ivoire | 2001           | Coconut Oil               | 3                                                           |
| 107             | Côte d'Ivoire | 2001           | Coconuts - Incl Copra     | 6                                                           |
| 107             | Côte d'Ivoire | 2001           | Coffee                    | 5                                                           |
| 107             | Côte d'Ivoire | 2001           | Cottonseed Oil            | 3                                                           |
| 107             | Côte d'Ivoire | 2001           | Demersal Fish             | 1                                                           |
| 107             | Côte d'Ivoire | 2001           | Eggs                      | 5                                                           |
| 107             | Côte d'Ivoire | 2001           | Freshwater Fish           | 2                                                           |
| 107             | Côte d'Ivoire | 2001           | Fruits, Other             | 11                                                          |

Dietary calcium and zinc deficiency risks are decreasing but remain prevalent

| FAO countrycode | Country       | Reference year | Food item                 | Gross food supply (g capita <sup>-1</sup> d <sup>-1</sup> ) |
|-----------------|---------------|----------------|---------------------------|-------------------------------------------------------------|
| 107             | Côte d'Ivoire | 2001           | Grapefruit                | 3                                                           |
| 107             | Côte d'Ivoire | 2001           | Groundnuts (Shelled Eq)   | 6                                                           |
| 107             | Côte d'Ivoire | 2001           | Maize                     | 64                                                          |
| 107             | Côte d'Ivoire | 2001           | Marine Fish, Other        | 20                                                          |
| 107             | Côte d'Ivoire | 2001           | Meat, Other               | 21                                                          |
| 107             | Côte d'Ivoire | 2001           | Milk, Whole               | 17                                                          |
| 107             | Côte d'Ivoire | 2001           | Millet                    | 5                                                           |
| 107             | Côte d'Ivoire | 2001           | Mutton & Goat Meat        | 2                                                           |
| 107             | Côte d'Ivoire | 2001           | Nuts                      | 14                                                          |
| 107             | Côte d'Ivoire | 2001           | Offals, Edible            | 5                                                           |
| 107             | Côte d'Ivoire | 2001           | Oilcrops Oil, Other       | 1                                                           |
| 107             | Côte d'Ivoire | 2001           | Onions                    | 2                                                           |
| 107             | Côte d'Ivoire | 2001           | Oranges, Mandarines       | 3                                                           |
| 107             | Côte d'Ivoire | 2001           | Palm Oil                  | 27                                                          |
| 107             | Côte d'Ivoire | 2001           | Palmkernel Oil            | 1                                                           |
| 107             | Côte d'Ivoire | 2001           | Pelagic Fish              | 17                                                          |
| 107             | Côte d'Ivoire | 2001           | Pigmeat                   | 1                                                           |
| 107             | Côte d'Ivoire | 2001           | Pimento                   | 3                                                           |
| 107             | Côte d'Ivoire | 2001           | Pineapples                | 6                                                           |
| 107             | Côte d'Ivoire | 2001           | Plantains                 | 169                                                         |
| 107             | Côte d'Ivoire | 2001           | Potatoes                  | 3                                                           |
| 107             | Côte d'Ivoire | 2001           | Poultry Meat              | 4                                                           |
| 107             | Côte d'Ivoire | 2001           | Pulses, Other             | 1                                                           |
| 107             | Côte d'Ivoire | 2001           | Rape and Mustard Oil      | 1                                                           |
| 107             | Côte d'Ivoire | 2001           | Rice (Milled Equivalent)  | 147                                                         |
| 107             | Côte d'Ivoire | 2001           | Roots, Other              | 8                                                           |
| 107             | Côte d'Ivoire | 2001           | Sesameseed                | 1                                                           |
| 107             | Côte d'Ivoire | 2001           | Sorghum                   | 4                                                           |
| 107             | Côte d'Ivoire | 2001           | Spices, Other             | 1                                                           |
| 107             | Côte d'Ivoire | 2001           | Sugar Cane                | 2                                                           |
| 107             | Côte d'Ivoire | 2001           | Sugar, Refined Equivalent | 20                                                          |
| 107             | Côte d'Ivoire | 2001           | Sweet Potatoes            | 8                                                           |
| 107             | Côte d'Ivoire | 2001           | Sweeteners, Other         | 1                                                           |
| 107             | Côte d'Ivoire | 2001           | Tomatoes                  | 8                                                           |
| 107             | Côte d'Ivoire | 2001           | Vegetables, Other         | 109                                                         |
| 107             | Côte d'Ivoire | 2001           | Wheat                     | 48                                                          |
| 107             | Côte d'Ivoire | 2001           | Whey                      | 2                                                           |
| 107             | Côte d'Ivoire | 2001           | Wine                      | 4                                                           |
| 107             | Côte d'Ivoire | 2001           | Yams                      | 504                                                         |
| 107             | Côte d'Ivoire | 2002           | Apples                    | 1                                                           |
| 107             | Côte d'Ivoire | 2002           | Bananas                   | 2                                                           |
| 107             | Côte d'Ivoire | 2002           | Barley                    | 1                                                           |
| 107             | Côte d'Ivoire | 2002           | Beans                     | 3                                                           |
| 107             | Côte d'Ivoire | 2002           | Beer                      | 49                                                          |
| 107             | Côte d'Ivoire | 2002           | Beverages, Fermented      | 70                                                          |
| 107             | Côte d'Ivoire | 2002           | Bovine Meat               | 5                                                           |
| 107             | Côte d'Ivoire | 2002           | Cassava                   | 306                                                         |
| 107             | Côte d'Ivoire | 2002           | Cereals, Other            | 2                                                           |
| 107             | Côte d'Ivoire | 2002           | Citrus, Other             | 3                                                           |
| 107             | Côte d'Ivoire | 2002           | Cocoa Beans               | 5                                                           |
| 107             | Côte d'Ivoire | 2002           | Coconut Oil               | 3                                                           |
| 107             | Côte d'Ivoire | 2002           | Coconuts - Incl Copra     | 5                                                           |
| 107             | Côte d'Ivoire | 2002           | Coffee                    | 6                                                           |
| 107             | Côte d'Ivoire | 2002           | Cottonseed Oil            | 3                                                           |
| 107             | Côte d'Ivoire | 2002           | Demersal Fish             | 1                                                           |
| 107             | Côte d'Ivoire | 2002           | Eggs                      | 5                                                           |
| 107             | Côte d'Ivoire | 2002           | Freshwater Fish           | 4                                                           |
| 107             | Côte d'Ivoire | 2002           | Fruits, Other             | 12                                                          |
| 107             | Côte d'Ivoire | 2002           | Grapefruit                | 3                                                           |
| 107             | Côte d'Ivoire | 2002           | Groundnuts (Shelled Eq)   | 5                                                           |
| 107             | Côte d'Ivoire | 2002           | Maize                     | 61                                                          |
| 107             | Côte d'Ivoire | 2002           | Marine Fish, Other        | 16                                                          |
| 107             | Côte d'Ivoire | 2002           | Meat, Other               | 22                                                          |
| 107             | Côte d'Ivoire | 2002           | Milk, Whole               | 16                                                          |
| 107             | Côte d'Ivoire | 2002           | Millet                    | 5                                                           |
| 107             | Côte d'Ivoire | 2002           | Mutton & Goat Meat        | 2                                                           |
| 107             | Côte d'Ivoire | 2002           | Nuts                      | 15                                                          |
| 107             | Côte d'Ivoire | 2002           | Offals, Edible            | 6                                                           |
| 107             | Côte d'Ivoire | 2002           | Oilcrops Oil, Other       | 1                                                           |
| 107             | Côte d'Ivoire | 2002           | Onions                    | 3                                                           |
| 107             | Côte d'Ivoire | 2002           | Oranges, Mandarines       | 4                                                           |
| 107             | Côte d'Ivoire | 2002           | Palm Oil                  | 27                                                          |
| 107             | Côte d'Ivoire | 2002           | Palmkernel Oil            | 1                                                           |
| 107             | Côte d'Ivoire | 2002           | Pelagic Fish              | 18                                                          |
| 107             | Côte d'Ivoire | 2002           | Pigmeat                   | 1                                                           |
| 107             | Côte d'Ivoire | 2002           | Pimento                   | 3                                                           |
| 107             | Côte d'Ivoire | 2002           | Pineapples                | 7                                                           |
| 107             | Côte d'Ivoire | 2002           | Plantains                 | 202                                                         |
| 107             | Côte d'Ivoire | 2002           | Potatoes                  | 3                                                           |
| 107             | Côte d'Ivoire | 2002           | Poultry Meat              | 5                                                           |
| 107             | Côte d'Ivoire | 2002           | Pulses, Other             | 1                                                           |
| 107             | Côte d'Ivoire | 2002           | Rape and Mustard Oil      | 1                                                           |
| 107             | Côte d'Ivoire | 2002           | Rice (Milled Equivalent)  | 143                                                         |
| 107             | Côte d'Ivoire | 2002           | Roots, Other              | 9                                                           |
| 107             | Côte d'Ivoire | 2002           | Sesameseed                | 1                                                           |
| 107             | Côte d'Ivoire | 2002           | Sorghum                   | 4                                                           |
| 107             | Côte d'Ivoire | 2002           | Spices, Other             | 1                                                           |
| 107             | Côte d'Ivoire | 2002           | Sugar Cane                | 2                                                           |
| 107             | Côte d'Ivoire | 2002           | Sugar, Refined Equivalent | 25                                                          |
| 107             | Côte d'Ivoire | 2002           | Sweet Potatoes            | 8                                                           |
| 107             | Côte d'Ivoire | 2002           | Sweeteners, Other         | 1                                                           |
| 107             | Côte d'Ivoire | 2002           | Tomatoes                  | 8                                                           |
| 107             | Côte d'Ivoire | 2002           | Vegetables, Other         | 109                                                         |
| 107             | Côte d'Ivoire | 2002           | Wheat                     | 48                                                          |
| 107             | Côte d'Ivoire | 2002           | Whey                      | 2                                                           |
| 107             | Côte d'Ivoire | 2002           | Wine                      | 5                                                           |
| 107             | Côte d'Ivoire | 2002           | Yams                      | 510                                                         |

Dietary calcium and zinc deficiency risks are decreasing but remain prevalent

| FAO countrycode | Country       | Reference year | Food item                 | Gross food supply (g capita <sup>-1</sup> d <sup>-1</sup> ) |
|-----------------|---------------|----------------|---------------------------|-------------------------------------------------------------|
| 107             | Côte d'Ivoire | 2003           | Apples                    | 1                                                           |
| 107             | Côte d'Ivoire | 2003           | Bananas                   | 2                                                           |
| 107             | Côte d'Ivoire | 2003           | Beans                     | 4                                                           |
| 107             | Côte d'Ivoire | 2003           | Beer                      | 45                                                          |
| 107             | Côte d'Ivoire | 2003           | Beverages, Fermented      | 70                                                          |
| 107             | Côte d'Ivoire | 2003           | Bovine Meat               | 6                                                           |
| 107             | Côte d'Ivoire | 2003           | Cassava                   | 300                                                         |
| 107             | Côte d'Ivoire | 2003           | Cereals, Other            | 2                                                           |
| 107             | Côte d'Ivoire | 2003           | Citrus, Other             | 3                                                           |
| 107             | Côte d'Ivoire | 2003           | Cocoa Beans               | 5                                                           |
| 107             | Côte d'Ivoire | 2003           | Coconut Oil               | 3                                                           |
| 107             | Côte d'Ivoire | 2003           | Coconuts - Incl Copra     | 10                                                          |
| 107             | Côte d'Ivoire | 2003           | Coffee                    | 6                                                           |
| 107             | Côte d'Ivoire | 2003           | Cottonseed Oil            | 3                                                           |
| 107             | Côte d'Ivoire | 2003           | Demersal Fish             | 1                                                           |
| 107             | Côte d'Ivoire | 2003           | Eggs                      | 5                                                           |
| 107             | Côte d'Ivoire | 2003           | Freshwater Fish           | 4                                                           |
| 107             | Côte d'Ivoire | 2003           | Fruits, Other             | 12                                                          |
| 107             | Côte d'Ivoire | 2003           | Grapefruit                | 3                                                           |
| 107             | Côte d'Ivoire | 2003           | Groundnuts (Shelled Eq)   | 5                                                           |
| 107             | Côte d'Ivoire | 2003           | Maize                     | 59                                                          |
| 107             | Côte d'Ivoire | 2003           | Marine Fish, Other        | 18                                                          |
| 107             | Côte d'Ivoire | 2003           | Meat, Other               | 22                                                          |
| 107             | Côte d'Ivoire | 2003           | Milk, Whole               | 20                                                          |
| 107             | Côte d'Ivoire | 2003           | Millet                    | 4                                                           |
| 107             | Côte d'Ivoire | 2003           | Mutton & Goat Meat        | 2                                                           |
| 107             | Côte d'Ivoire | 2003           | Nuts                      | 12                                                          |
| 107             | Côte d'Ivoire | 2003           | Offals, Edible            | 9                                                           |
| 107             | Côte d'Ivoire | 2003           | Oilcrops Oil, Other       | 1                                                           |
| 107             | Côte d'Ivoire | 2003           | Onions                    | 3                                                           |
| 107             | Côte d'Ivoire | 2003           | Oranges, Mandarines       | 4                                                           |
| 107             | Côte d'Ivoire | 2003           | Palm Oil                  | 28                                                          |
| 107             | Côte d'Ivoire | 2003           | Palmkernel Oil            | 2                                                           |
| 107             | Côte d'Ivoire | 2003           | Pelagic Fish              | 20                                                          |
| 107             | Côte d'Ivoire | 2003           | Pigmeat                   | 2                                                           |
| 107             | Côte d'Ivoire | 2003           | Pimento                   | 3                                                           |
| 107             | Côte d'Ivoire | 2003           | Pineapples                | 7                                                           |
| 107             | Côte d'Ivoire | 2003           | Plantains                 | 194                                                         |
| 107             | Côte d'Ivoire | 2003           | Potatoes                  | 3                                                           |
| 107             | Côte d'Ivoire | 2003           | Poultry Meat              | 6                                                           |
| 107             | Côte d'Ivoire | 2003           | Pulses, Other             | 2                                                           |
| 107             | Côte d'Ivoire | 2003           | Rice (Milled Equivalent)  | 153                                                         |
| 107             | Côte d'Ivoire | 2003           | Roots, Other              | 7                                                           |
| 107             | Côte d'Ivoire | 2003           | Sesameseed                | 1                                                           |
| 107             | Côte d'Ivoire | 2003           | Sorghum                   | 4                                                           |
| 107             | Côte d'Ivoire | 2003           | Spices, Other             | 1                                                           |
| 107             | Côte d'Ivoire | 2003           | Sugar Cane                | 2                                                           |
| 107             | Côte d'Ivoire | 2003           | Sugar, Refined Equivalent | 26                                                          |
| 107             | Côte d'Ivoire | 2003           | Sweet Potatoes            | 6                                                           |
| 107             | Côte d'Ivoire | 2003           | Sweeteners, Other         | 1                                                           |
| 107             | Côte d'Ivoire | 2003           | Tomatoes                  | 8                                                           |
| 107             | Côte d'Ivoire | 2003           | Vegetables, Other         | 81                                                          |
| 107             | Côte d'Ivoire | 2003           | Wheat                     | 49                                                          |
| 107             | Côte d'Ivoire | 2003           | Whey                      | 4                                                           |
| 107             | Côte d'Ivoire | 2003           | Wine                      | 5                                                           |
| 107             | Côte d'Ivoire | 2003           | Yams                      | 517                                                         |
| 107             | Côte d'Ivoire | 2004           | Apples                    | 1                                                           |
| 107             | Côte d'Ivoire | 2004           | Bananas                   | 2                                                           |
| 107             | Côte d'Ivoire | 2004           | Barley                    | 1                                                           |
| 107             | Côte d'Ivoire | 2004           | Beans                     | 4                                                           |
| 107             | Côte d'Ivoire | 2004           | Beer                      | 51                                                          |
| 107             | Côte d'Ivoire | 2004           | Beverages, Fermented      | 71                                                          |
| 107             | Côte d'Ivoire | 2004           | Bovine Meat               | 6                                                           |
| 107             | Côte d'Ivoire | 2004           | Cassava                   | 298                                                         |
| 107             | Côte d'Ivoire | 2004           | Cereals, Other            | 2                                                           |
| 107             | Côte d'Ivoire | 2004           | Citrus, Other             | 3                                                           |
| 107             | Côte d'Ivoire | 2004           | Cocoa Beans               | 6                                                           |
| 107             | Côte d'Ivoire | 2004           | Coconut Oil               | 2                                                           |
| 107             | Côte d'Ivoire | 2004           | Coconuts - Incl Copra     | 9                                                           |
| 107             | Côte d'Ivoire | 2004           | Coffee                    | 6                                                           |
| 107             | Côte d'Ivoire | 2004           | Cottonseed Oil            | 1                                                           |
| 107             | Côte d'Ivoire | 2004           | Demersal Fish             | 1                                                           |
| 107             | Côte d'Ivoire | 2004           | Eggs                      | 5                                                           |
| 107             | Côte d'Ivoire | 2004           | Freshwater Fish           | 1                                                           |
| 107             | Côte d'Ivoire | 2004           | Fruits, Other             | 13                                                          |
| 107             | Côte d'Ivoire | 2004           | Grapefruit                | 3                                                           |
| 107             | Côte d'Ivoire | 2004           | Groundnuts (Shelled Eq)   | 5                                                           |
| 107             | Côte d'Ivoire | 2004           | Maize                     | 59                                                          |
| 107             | Côte d'Ivoire | 2004           | Marine Fish, Other        | 19                                                          |
| 107             | Côte d'Ivoire | 2004           | Meat, Other               | 23                                                          |
| 107             | Côte d'Ivoire | 2004           | Milk, Whole               | 22                                                          |
| 107             | Côte d'Ivoire | 2004           | Millet                    | 4                                                           |
| 107             | Côte d'Ivoire | 2004           | Mutton & Goat Meat        | 2                                                           |
| 107             | Côte d'Ivoire | 2004           | Nuts                      | 13                                                          |
| 107             | Côte d'Ivoire | 2004           | Offals, Edible            | 8                                                           |
| 107             | Côte d'Ivoire | 2004           | Oilcrops Oil, Other       | 1                                                           |
| 107             | Côte d'Ivoire | 2004           | Onions                    | 4                                                           |
| 107             | Côte d'Ivoire | 2004           | Oranges, Mandarines       | 4                                                           |
| 107             | Côte d'Ivoire | 2004           | Palm Oil                  | 28                                                          |
| 107             | Côte d'Ivoire | 2004           | Palmkernel Oil            | 2                                                           |
| 107             | Côte d'Ivoire | 2004           | Pelagic Fish              | 16                                                          |
| 107             | Côte d'Ivoire | 2004           | Pigmeat                   | 2                                                           |
| 107             | Côte d'Ivoire | 2004           | Pimento                   | 3                                                           |
| 107             | Côte d'Ivoire | 2004           | Pineapples                | 7                                                           |
| 107             | Côte d'Ivoire | 2004           | Plantains                 | 194                                                         |
| 107             | Côte d'Ivoire | 2004           | Potatoes                  | 3                                                           |
| 107             | Côte d'Ivoire | 2004           | Poultry Meat              | 6                                                           |



Dietary calcium and zinc deficiency risks are decreasing but remain prevalent

| FAO countrycode | Country       | Reference year | Food item                 | Gross food supply (g capita <sup>-1</sup> d <sup>-1</sup> ) |
|-----------------|---------------|----------------|---------------------------|-------------------------------------------------------------|
| 107             | Côte d'Ivoire | 2004           | Pulses, Other             | 1                                                           |
| 107             | Côte d'Ivoire | 2004           | Rape and Mustard Oil      | 1                                                           |
| 107             | Côte d'Ivoire | 2004           | Rice (Milled Equivalent)  | 173                                                         |
| 107             | Côte d'Ivoire | 2004           | Roots, Other              | 7                                                           |
| 107             | Côte d'Ivoire | 2004           | Sorghum                   | 4                                                           |
| 107             | Côte d'Ivoire | 2004           | Spices, Other             | 1                                                           |
| 107             | Côte d'Ivoire | 2004           | Sugar Cane                | 2                                                           |
| 107             | Côte d'Ivoire | 2004           | Sugar, Refined Equivalent | 24                                                          |
| 107             | Côte d'Ivoire | 2004           | Sweet Potatoes            | 6                                                           |
| 107             | Côte d'Ivoire | 2004           | Sweeteners, Other         | 1                                                           |
| 107             | Côte d'Ivoire | 2004           | Tomatoes                  | 7                                                           |
| 107             | Côte d'Ivoire | 2004           | Vegetables, Other         | 88                                                          |
| 107             | Côte d'Ivoire | 2004           | Wheat                     | 45                                                          |
| 107             | Côte d'Ivoire | 2004           | Whey                      | 2                                                           |
| 107             | Côte d'Ivoire | 2004           | Wine                      | 3                                                           |
| 107             | Côte d'Ivoire | 2004           | Yams                      | 527                                                         |
| 107             | Côte d'Ivoire | 2005           | Apples                    | 1                                                           |
| 107             | Côte d'Ivoire | 2005           | Bananas                   | 2                                                           |
| 107             | Côte d'Ivoire | 2005           | Beans                     | 4                                                           |
| 107             | Côte d'Ivoire | 2005           | Beer                      | 49                                                          |
| 107             | Côte d'Ivoire | 2005           | Beverages, Fermented      | 73                                                          |
| 107             | Côte d'Ivoire | 2005           | Bovine Meat               | 6                                                           |
| 107             | Côte d'Ivoire | 2005           | Cassava                   | 311                                                         |
| 107             | Côte d'Ivoire | 2005           | Cereals, Other            | 2                                                           |
| 107             | Côte d'Ivoire | 2005           | Citrus, Other             | 3                                                           |
| 107             | Côte d'Ivoire | 2005           | Cocoa Beans               | 6                                                           |
| 107             | Côte d'Ivoire | 2005           | Coconut Oil               | 2                                                           |
| 107             | Côte d'Ivoire | 2005           | Coconuts - Incl Copra     | 8                                                           |
| 107             | Côte d'Ivoire | 2005           | Coffee                    | 5                                                           |
| 107             | Côte d'Ivoire | 2005           | Cottonseed Oil            | 3                                                           |
| 107             | Côte d'Ivoire | 2005           | Demersal Fish             | 1                                                           |
| 107             | Côte d'Ivoire | 2005           | Eggs                      | 4                                                           |
| 107             | Côte d'Ivoire | 2005           | Freshwater Fish           | 2                                                           |
| 107             | Côte d'Ivoire | 2005           | Fruits, Other             | 13                                                          |
| 107             | Côte d'Ivoire | 2005           | Grapefruit                | 3                                                           |
| 107             | Côte d'Ivoire | 2005           | Groundnuts (Shelled Eq)   | 5                                                           |
| 107             | Côte d'Ivoire | 2005           | Maize                     | 64                                                          |
| 107             | Côte d'Ivoire | 2005           | Marine Fish, Other        | 20                                                          |
| 107             | Côte d'Ivoire | 2005           | Meat, Other               | 23                                                          |
| 107             | Côte d'Ivoire | 2005           | Milk, Whole               | 23                                                          |
| 107             | Côte d'Ivoire | 2005           | Millet                    | 4                                                           |
| 107             | Côte d'Ivoire | 2005           | Mutton & Goat Meat        | 2                                                           |
| 107             | Côte d'Ivoire | 2005           | Nuts                      | 15                                                          |
| 107             | Côte d'Ivoire | 2005           | Offals, Edible            | 8                                                           |
| 107             | Côte d'Ivoire | 2005           | Oilcrops Oil, Other       | 1                                                           |
| 107             | Côte d'Ivoire | 2005           | Onions                    | 3                                                           |
| 107             | Côte d'Ivoire | 2005           | Oranges, Mandarines       | 5                                                           |
| 107             | Côte d'Ivoire | 2005           | Palm Oil                  | 28                                                          |
| 107             | Côte d'Ivoire | 2005           | Palmkernel Oil            | 1                                                           |
| 107             | Côte d'Ivoire | 2005           | Pelagic Fish              | 19                                                          |
| 107             | Côte d'Ivoire | 2005           | Pigmeat                   | 2                                                           |
| 107             | Côte d'Ivoire | 2005           | Pimento                   | 3                                                           |
| 107             | Côte d'Ivoire | 2005           | Pineapples                | 7                                                           |
| 107             | Côte d'Ivoire | 2005           | Plantains                 | 198                                                         |
| 107             | Côte d'Ivoire | 2005           | Potatoes                  | 3                                                           |
| 107             | Côte d'Ivoire | 2005           | Poultry Meat              | 5                                                           |
| 107             | Côte d'Ivoire | 2005           | Pulses, Other             | 2                                                           |
| 107             | Côte d'Ivoire | 2005           | Rape and Mustard Oil      | 1                                                           |
| 107             | Côte d'Ivoire | 2005           | Rice (Milled Equivalent)  | 166                                                         |
| 107             | Côte d'Ivoire | 2005           | Roots, Other              | 9                                                           |
| 107             | Côte d'Ivoire | 2005           | Sesameseed                | 1                                                           |
| 107             | Côte d'Ivoire | 2005           | Sorghum                   | 4                                                           |
| 107             | Côte d'Ivoire | 2005           | Spices, Other             | 1                                                           |
| 107             | Côte d'Ivoire | 2005           | Sugar Cane                | 2                                                           |
| 107             | Côte d'Ivoire | 2005           | Sugar, Refined Equivalent | 24                                                          |
| 107             | Côte d'Ivoire | 2005           | Sweet Potatoes            | 6                                                           |
| 107             | Côte d'Ivoire | 2005           | Sweeteners, Other         | 1                                                           |
| 107             | Côte d'Ivoire | 2005           | Tomatoes                  | 11                                                          |
| 107             | Côte d'Ivoire | 2005           | Vegetables, Other         | 98                                                          |
| 107             | Côte d'Ivoire | 2005           | Wheat                     | 46                                                          |
| 107             | Côte d'Ivoire | 2005           | Whey                      | 2                                                           |
| 107             | Côte d'Ivoire | 2005           | Wine                      | 2                                                           |
| 107             | Côte d'Ivoire | 2005           | Yams                      | 536                                                         |
| 107             | Côte d'Ivoire | 2006           | Apples                    | 1                                                           |
| 107             | Côte d'Ivoire | 2006           | Bananas                   | 3                                                           |
| 107             | Côte d'Ivoire | 2006           | Beans                     | 4                                                           |
| 107             | Côte d'Ivoire | 2006           | Beer                      | 45                                                          |
| 107             | Côte d'Ivoire | 2006           | Beverages, Fermented      | 70                                                          |
| 107             | Côte d'Ivoire | 2006           | Bovine Meat               | 7                                                           |
| 107             | Côte d'Ivoire | 2006           | Cassava                   | 316                                                         |
| 107             | Côte d'Ivoire | 2006           | Cereals, Other            | 2                                                           |
| 107             | Côte d'Ivoire | 2006           | Citrus, Other             | 3                                                           |
| 107             | Côte d'Ivoire | 2006           | Cocoa Beans               | 5                                                           |
| 107             | Côte d'Ivoire | 2006           | Coconut Oil               | 1                                                           |
| 107             | Côte d'Ivoire | 2006           | Coconuts - Incl Copra     | 3                                                           |
| 107             | Côte d'Ivoire | 2006           | Coffee                    | 5                                                           |
| 107             | Côte d'Ivoire | 2006           | Cottonseed Oil            | 3                                                           |
| 107             | Côte d'Ivoire | 2006           | Demersal Fish             | 1                                                           |
| 107             | Côte d'Ivoire | 2006           | Eggs                      | 4                                                           |
| 107             | Côte d'Ivoire | 2006           | Freshwater Fish           | 1                                                           |
| 107             | Côte d'Ivoire | 2006           | Fruits, Other             | 14                                                          |
| 107             | Côte d'Ivoire | 2006           | Grapefruit                | 3                                                           |
| 107             | Côte d'Ivoire | 2006           | Groundnuts (Shelled Eq)   | 6                                                           |
| 107             | Côte d'Ivoire | 2006           | Maize                     | 61                                                          |
| 107             | Côte d'Ivoire | 2006           | Marine Fish, Other        | 20                                                          |
| 107             | Côte d'Ivoire | 2006           | Meat, Other               | 24                                                          |
| 107             | Côte d'Ivoire | 2006           | Milk, Whole               | 16                                                          |

Dietary calcium and zinc deficiency risks are decreasing but remain prevalent

| FAO countrycode | Country       | Reference year | Food item                 | Gross food supply (g capita <sup>-1</sup> d <sup>-1</sup> ) |
|-----------------|---------------|----------------|---------------------------|-------------------------------------------------------------|
| 107             | Côte d'Ivoire | 2006           | Millet                    | 4                                                           |
| 107             | Côte d'Ivoire | 2006           | Mutton & Goat Meat        | 2                                                           |
| 107             | Côte d'Ivoire | 2006           | Nuts                      | 15                                                          |
| 107             | Côte d'Ivoire | 2006           | Offals, Edible            | 9                                                           |
| 107             | Côte d'Ivoire | 2006           | Oilcrops Oil, Other       | 1                                                           |
| 107             | Côte d'Ivoire | 2006           | Oranges, Mandarines       | 4                                                           |
| 107             | Côte d'Ivoire | 2006           | Palm Oil                  | 28                                                          |
| 107             | Côte d'Ivoire | 2006           | Palmkernel Oil            | 2                                                           |
| 107             | Côte d'Ivoire | 2006           | Pelagic Fish              | 19                                                          |
| 107             | Côte d'Ivoire | 2006           | Pigmeat                   | 2                                                           |
| 107             | Côte d'Ivoire | 2006           | Pimento                   | 3                                                           |
| 107             | Côte d'Ivoire | 2006           | Pineapples                | 7                                                           |
| 107             | Côte d'Ivoire | 2006           | Plantains                 | 191                                                         |
| 107             | Côte d'Ivoire | 2006           | Potatoes                  | 2                                                           |
| 107             | Côte d'Ivoire | 2006           | Poultry Meat              | 4                                                           |
| 107             | Côte d'Ivoire | 2006           | Pulses, Other             | 2                                                           |
| 107             | Côte d'Ivoire | 2006           | Rice (Milled Equivalent)  | 170                                                         |
| 107             | Côte d'Ivoire | 2006           | Roots, Other              | 9                                                           |
| 107             | Côte d'Ivoire | 2006           | Sorghum                   | 3                                                           |
| 107             | Côte d'Ivoire | 2006           | Spices, Other             | 1                                                           |
| 107             | Côte d'Ivoire | 2006           | Sugar Cane                | 2                                                           |
| 107             | Côte d'Ivoire | 2006           | Sugar, Refined Equivalent | 23                                                          |
| 107             | Côte d'Ivoire | 2006           | Sweet Potatoes            | 6                                                           |
| 107             | Côte d'Ivoire | 2006           | Sweeteners, Other         | 1                                                           |
| 107             | Côte d'Ivoire | 2006           | Tomatoes                  | 11                                                          |
| 107             | Côte d'Ivoire | 2006           | Vegetables, Other         | 97                                                          |
| 107             | Côte d'Ivoire | 2006           | Wheat                     | 48                                                          |
| 107             | Côte d'Ivoire | 2006           | Whey                      | 3                                                           |
| 107             | Côte d'Ivoire | 2006           | Wine                      | 2                                                           |
| 107             | Côte d'Ivoire | 2006           | Yams                      | 570                                                         |
| 107             | Côte d'Ivoire | 2007           | Apples                    | 1                                                           |
| 107             | Côte d'Ivoire | 2007           | Bananas                   | 3                                                           |
| 107             | Côte d'Ivoire | 2007           | Beans                     | 4                                                           |
| 107             | Côte d'Ivoire | 2007           | Beer                      | 42                                                          |
| 107             | Côte d'Ivoire | 2007           | Beverages, Fermented      | 69                                                          |
| 107             | Côte d'Ivoire | 2007           | Bovine Meat               | 6                                                           |
| 107             | Côte d'Ivoire | 2007           | Cassava                   | 322                                                         |
| 107             | Côte d'Ivoire | 2007           | Cereals, Other            | 2                                                           |
| 107             | Côte d'Ivoire | 2007           | Citrus, Other             | 3                                                           |
| 107             | Côte d'Ivoire | 2007           | Cocoa Beans               | 9                                                           |
| 107             | Côte d'Ivoire | 2007           | Coconuts - Incl Copra     | 4                                                           |
| 107             | Côte d'Ivoire | 2007           | Coffee                    | 5                                                           |
| 107             | Côte d'Ivoire | 2007           | Cottonseed Oil            | 5                                                           |
| 107             | Côte d'Ivoire | 2007           | Demersal Fish             | 1                                                           |
| 107             | Côte d'Ivoire | 2007           | Eggs                      | 3                                                           |
| 107             | Côte d'Ivoire | 2007           | Freshwater Fish           | 1                                                           |
| 107             | Côte d'Ivoire | 2007           | Fruits, Other             | 15                                                          |
| 107             | Côte d'Ivoire | 2007           | Grapefruit                | 3                                                           |
| 107             | Côte d'Ivoire | 2007           | Groundnuts (Shelled Eq)   | 5                                                           |
| 107             | Côte d'Ivoire | 2007           | Maize                     | 49                                                          |
| 107             | Côte d'Ivoire | 2007           | Marine Fish, Other        | 20                                                          |
| 107             | Côte d'Ivoire | 2007           | Meat, Other               | 24                                                          |
| 107             | Côte d'Ivoire | 2007           | Milk, Whole               | 14                                                          |
| 107             | Côte d'Ivoire | 2007           | Millet                    | 3                                                           |
| 107             | Côte d'Ivoire | 2007           | Mutton & Goat Meat        | 2                                                           |
| 107             | Côte d'Ivoire | 2007           | Nuts                      | 15                                                          |
| 107             | Côte d'Ivoire | 2007           | Offals, Edible            | 9                                                           |
| 107             | Côte d'Ivoire | 2007           | Oilcrops Oil, Other       | 1                                                           |
| 107             | Côte d'Ivoire | 2007           | Oranges, Mandarines       | 5                                                           |
| 107             | Côte d'Ivoire | 2007           | Palm Oil                  | 28                                                          |
| 107             | Côte d'Ivoire | 2007           | Palmkernel Oil            | 2                                                           |
| 107             | Côte d'Ivoire | 2007           | Pelagic Fish              | 19                                                          |
| 107             | Côte d'Ivoire | 2007           | Pigmeat                   | 2                                                           |
| 107             | Côte d'Ivoire | 2007           | Pimento                   | 3                                                           |
| 107             | Côte d'Ivoire | 2007           | Pineapples                | 7                                                           |
| 107             | Côte d'Ivoire | 2007           | Plantains                 | 184                                                         |
| 107             | Côte d'Ivoire | 2007           | Potatoes                  | 2                                                           |
| 107             | Côte d'Ivoire | 2007           | Poultry Meat              | 4                                                           |
| 107             | Côte d'Ivoire | 2007           | Pulses, Other             | 2                                                           |
| 107             | Côte d'Ivoire | 2007           | Rice (Milled Equivalent)  | 187                                                         |
| 107             | Côte d'Ivoire | 2007           | Roots, Other              | 9                                                           |
| 107             | Côte d'Ivoire | 2007           | Sorghum                   | 3                                                           |
| 107             | Côte d'Ivoire | 2007           | Spices, Other             | 1                                                           |
| 107             | Côte d'Ivoire | 2007           | Sugar Cane                | 2                                                           |
| 107             | Côte d'Ivoire | 2007           | Sugar, Refined Equivalent | 25                                                          |
| 107             | Côte d'Ivoire | 2007           | Sweet Potatoes            | 6                                                           |
| 107             | Côte d'Ivoire | 2007           | Sweeteners, Other         | 1                                                           |
| 107             | Côte d'Ivoire | 2007           | Tomatoes                  | 10                                                          |
| 107             | Côte d'Ivoire | 2007           | Vegetables, Other         | 96                                                          |
| 107             | Côte d'Ivoire | 2007           | Wheat                     | 48                                                          |
| 107             | Côte d'Ivoire | 2007           | Whey                      | 2                                                           |
| 107             | Côte d'Ivoire | 2007           | Wine                      | 3                                                           |
| 107             | Côte d'Ivoire | 2007           | Yams                      | 554                                                         |
| 107             | Côte d'Ivoire | 2008           | Apples                    | 1                                                           |
| 107             | Côte d'Ivoire | 2008           | Bananas                   | 1                                                           |
| 107             | Côte d'Ivoire | 2008           | Beans                     | 5                                                           |
| 107             | Côte d'Ivoire | 2008           | Beer                      | 47                                                          |
| 107             | Côte d'Ivoire | 2008           | Beverages, Fermented      | 69                                                          |
| 107             | Côte d'Ivoire | 2008           | Bovine Meat               | 6                                                           |
| 107             | Côte d'Ivoire | 2008           | Cassava                   | 306                                                         |
| 107             | Côte d'Ivoire | 2008           | Cereals, Other            | 2                                                           |
| 107             | Côte d'Ivoire | 2008           | Citrus, Other             | 2                                                           |
| 107             | Côte d'Ivoire | 2008           | Cocoa Beans               | 9                                                           |
| 107             | Côte d'Ivoire | 2008           | Coconut Oil               | 1                                                           |
| 107             | Côte d'Ivoire | 2008           | Coconuts - Incl Copra     | 1                                                           |
| 107             | Côte d'Ivoire | 2008           | Coffee                    | 5                                                           |
| 107             | Côte d'Ivoire | 2008           | Cottonseed Oil            | 1                                                           |

Dietary calcium and zinc deficiency risks are decreasing but remain prevalent

| FAO countrycode | Country       | Reference year | Food item                 | Gross food supply (g capita <sup>-1</sup> d <sup>-1</sup> ) |
|-----------------|---------------|----------------|---------------------------|-------------------------------------------------------------|
| 107             | Côte d'Ivoire | 2008           | Demersal Fish             | 1                                                           |
| 107             | Côte d'Ivoire | 2008           | Eggs                      | 4                                                           |
| 107             | Côte d'Ivoire | 2008           | Freshwater Fish           | 1                                                           |
| 107             | Côte d'Ivoire | 2008           | Fruits, Other             | 15                                                          |
| 107             | Côte d'Ivoire | 2008           | Grapefruit                | 3                                                           |
| 107             | Côte d'Ivoire | 2008           | Groundnuts (Shelled Eq)   | 6                                                           |
| 107             | Côte d'Ivoire | 2008           | Maize                     | 62                                                          |
| 107             | Côte d'Ivoire | 2008           | Marine Fish, Other        | 23                                                          |
| 107             | Côte d'Ivoire | 2008           | Meat, Other               | 24                                                          |
| 107             | Côte d'Ivoire | 2008           | Milk, Whole               | 20                                                          |
| 107             | Côte d'Ivoire | 2008           | Millet                    | 4                                                           |
| 107             | Côte d'Ivoire | 2008           | Mutton & Goat Meat        | 2                                                           |
| 107             | Côte d'Ivoire | 2008           | Nuts                      | 14                                                          |
| 107             | Côte d'Ivoire | 2008           | Offals, Edible            | 8                                                           |
| 107             | Côte d'Ivoire | 2008           | Oilcrops Oil, Other       | 1                                                           |
| 107             | Côte d'Ivoire | 2008           | Oranges, Mandarines       | 5                                                           |
| 107             | Côte d'Ivoire | 2008           | Palm Oil                  | 26                                                          |
| 107             | Côte d'Ivoire | 2008           | Palmkernel Oil            | 1                                                           |
| 107             | Côte d'Ivoire | 2008           | Pelagic Fish              | 23                                                          |
| 107             | Côte d'Ivoire | 2008           | Pigmeat                   | 2                                                           |
| 107             | Côte d'Ivoire | 2008           | Pimento                   | 4                                                           |
| 107             | Côte d'Ivoire | 2008           | Pineapples                | 2                                                           |
| 107             | Côte d'Ivoire | 2008           | Plantains                 | 201                                                         |
| 107             | Côte d'Ivoire | 2008           | Potatoes                  | 2                                                           |
| 107             | Côte d'Ivoire | 2008           | Poultry Meat              | 4                                                           |
| 107             | Côte d'Ivoire | 2008           | Pulses, Other             | 2                                                           |
| 107             | Côte d'Ivoire | 2008           | Rice (Milled Equivalent)  | 181                                                         |
| 107             | Côte d'Ivoire | 2008           | Roots, Other              | 10                                                          |
| 107             | Côte d'Ivoire | 2008           | Sorghum                   | 4                                                           |
| 107             | Côte d'Ivoire | 2008           | Spices, Other             | 1                                                           |
| 107             | Côte d'Ivoire | 2008           | Sugar Cane                | 4                                                           |
| 107             | Côte d'Ivoire | 2008           | Sugar, Refined Equivalent | 24                                                          |
| 107             | Côte d'Ivoire | 2008           | Sweet Potatoes            | 7                                                           |
| 107             | Côte d'Ivoire | 2008           | Sweeteners, Other         | 1                                                           |
| 107             | Côte d'Ivoire | 2008           | Tomatoes                  | 15                                                          |
| 107             | Côte d'Ivoire | 2008           | Vegetables, Other         | 91                                                          |
| 107             | Côte d'Ivoire | 2008           | Wheat                     | 40                                                          |
| 107             | Côte d'Ivoire | 2008           | Whey                      | 2                                                           |
| 107             | Côte d'Ivoire | 2008           | Wine                      | 4                                                           |
| 107             | Côte d'Ivoire | 2008           | Yams                      | 544                                                         |
| 107             | Côte d'Ivoire | 2009           | Apples                    | 1                                                           |
| 107             | Côte d'Ivoire | 2009           | Bananas                   | 1                                                           |
| 107             | Côte d'Ivoire | 2009           | Beans                     | 5                                                           |
| 107             | Côte d'Ivoire | 2009           | Beer                      | 48                                                          |
| 107             | Côte d'Ivoire | 2009           | Beverages, Fermented      | 70                                                          |
| 107             | Côte d'Ivoire | 2009           | Bovine Meat               | 6                                                           |
| 107             | Côte d'Ivoire | 2009           | Cassava                   | 301                                                         |
| 107             | Côte d'Ivoire | 2009           | Cereals, Other            | 2                                                           |
| 107             | Côte d'Ivoire | 2009           | Citrus, Other             | 3                                                           |
| 107             | Côte d'Ivoire | 2009           | Cocoa Beans               | 13                                                          |
| 107             | Côte d'Ivoire | 2009           | Coconut Oil               | 3                                                           |
| 107             | Côte d'Ivoire | 2009           | Coconuts - Incl Copra     | 3                                                           |
| 107             | Côte d'Ivoire | 2009           | Coffee                    | 5                                                           |
| 107             | Côte d'Ivoire | 2009           | Cottonseed Oil            | 2                                                           |
| 107             | Côte d'Ivoire | 2009           | Demersal Fish             | 1                                                           |
| 107             | Côte d'Ivoire | 2009           | Eggs                      | 4                                                           |
| 107             | Côte d'Ivoire | 2009           | Freshwater Fish           | 1                                                           |
| 107             | Côte d'Ivoire | 2009           | Fruits, Other             | 16                                                          |
| 107             | Côte d'Ivoire | 2009           | Grapefruit                | 3                                                           |
| 107             | Côte d'Ivoire | 2009           | Groundnuts (Shelled Eq)   | 7                                                           |
| 107             | Côte d'Ivoire | 2009           | Maize                     | 60                                                          |
| 107             | Côte d'Ivoire | 2009           | Marine Fish, Other        | 25                                                          |
| 107             | Côte d'Ivoire | 2009           | Meat, Other               | 24                                                          |
| 107             | Côte d'Ivoire | 2009           | Milk, Whole               | 18                                                          |
| 107             | Côte d'Ivoire | 2009           | Millet                    | 4                                                           |
| 107             | Côte d'Ivoire | 2009           | Mutton & Goat Meat        | 2                                                           |
| 107             | Côte d'Ivoire | 2009           | Nuts                      | 12                                                          |
| 107             | Côte d'Ivoire | 2009           | Offals, Edible            | 9                                                           |
| 107             | Côte d'Ivoire | 2009           | Oilcrops Oil, Other       | 1                                                           |
| 107             | Côte d'Ivoire | 2009           | Oilcrops, Other           | 1                                                           |
| 107             | Côte d'Ivoire | 2009           | Oranges, Mandarines       | 4                                                           |
| 107             | Côte d'Ivoire | 2009           | Palm Oil                  | 24                                                          |
| 107             | Côte d'Ivoire | 2009           | Palmkernel Oil            | 3                                                           |
| 107             | Côte d'Ivoire | 2009           | Peas                      | 1                                                           |
| 107             | Côte d'Ivoire | 2009           | Pelagic Fish              | 26                                                          |
| 107             | Côte d'Ivoire | 2009           | Pigmeat                   | 2                                                           |
| 107             | Côte d'Ivoire | 2009           | Pimento                   | 3                                                           |
| 107             | Côte d'Ivoire | 2009           | Pineapples                | 2                                                           |
| 107             | Côte d'Ivoire | 2009           | Plantains                 | 176                                                         |
| 107             | Côte d'Ivoire | 2009           | Potatoes                  | 3                                                           |
| 107             | Côte d'Ivoire | 2009           | Poultry Meat              | 4                                                           |
| 107             | Côte d'Ivoire | 2009           | Pulses, Other             | 2                                                           |
| 107             | Côte d'Ivoire | 2009           | Rice (Milled Equivalent)  | 177                                                         |
| 107             | Côte d'Ivoire | 2009           | Roots, Other              | 8                                                           |
| 107             | Côte d'Ivoire | 2009           | Sorghum                   | 4                                                           |
| 107             | Côte d'Ivoire | 2009           | Spices, Other             | 1                                                           |
| 107             | Côte d'Ivoire | 2009           | Sugar Cane                | 4                                                           |
| 107             | Côte d'Ivoire | 2009           | Sugar, Refined Equivalent | 22                                                          |
| 107             | Côte d'Ivoire | 2009           | Sweet Potatoes            | 6                                                           |
| 107             | Côte d'Ivoire | 2009           | Sweeteners, Other         | 1                                                           |
| 107             | Côte d'Ivoire | 2009           | Tomatoes                  | 11                                                          |
| 107             | Côte d'Ivoire | 2009           | Vegetables, Other         | 98                                                          |
| 107             | Côte d'Ivoire | 2009           | Wheat                     | 50                                                          |
| 107             | Côte d'Ivoire | 2009           | Whey                      | 2                                                           |
| 107             | Côte d'Ivoire | 2009           | Wine                      | 4                                                           |
| 107             | Côte d'Ivoire | 2009           | Yams                      | 526                                                         |
| 107             | Côte d'Ivoire | 2010           | Apples                    | 1                                                           |

Dietary calcium and zinc deficiency risks are decreasing but remain prevalent

| FAO countrycode | Country       | Reference year | Food item                 | Gross food supply (g capita <sup>-1</sup> d <sup>-1</sup> ) |
|-----------------|---------------|----------------|---------------------------|-------------------------------------------------------------|
| 107             | Côte d'Ivoire | 2010           | Bananas                   | 3                                                           |
| 107             | Côte d'Ivoire | 2010           | Beans                     | 5                                                           |
| 107             | Côte d'Ivoire | 2010           | Beer                      | 51                                                          |
| 107             | Côte d'Ivoire | 2010           | Beverages, Fermented      | 69                                                          |
| 107             | Côte d'Ivoire | 2010           | Bovine Meat               | 6                                                           |
| 107             | Côte d'Ivoire | 2010           | Cassava                   | 300                                                         |
| 107             | Côte d'Ivoire | 2010           | Cereals, Other            | 2                                                           |
| 107             | Côte d'Ivoire | 2010           | Citrus, Other             | 1                                                           |
| 107             | Côte d'Ivoire | 2010           | Cocoa Beans               | 13                                                          |
| 107             | Côte d'Ivoire | 2010           | Coconut Oil               | 3                                                           |
| 107             | Côte d'Ivoire | 2010           | Coconuts - Incl Copra     | 3                                                           |
| 107             | Côte d'Ivoire | 2010           | Coffee                    | 6                                                           |
| 107             | Côte d'Ivoire | 2010           | Cottonseed Oil            | 1                                                           |
| 107             | Côte d'Ivoire | 2010           | Demersal Fish             | 1                                                           |
| 107             | Côte d'Ivoire | 2010           | Eggs                      | 4                                                           |
| 107             | Côte d'Ivoire | 2010           | Freshwater Fish           | 1                                                           |
| 107             | Côte d'Ivoire | 2010           | Fruits, Other             | 18                                                          |
| 107             | Côte d'Ivoire | 2010           | Grapefruit                | 3                                                           |
| 107             | Côte d'Ivoire | 2010           | Groundnuts (Shelled Eq)   | 7                                                           |
| 107             | Côte d'Ivoire | 2010           | Maize                     | 66                                                          |
| 107             | Côte d'Ivoire | 2010           | Marine Fish, Other        | 24                                                          |
| 107             | Côte d'Ivoire | 2010           | Meat, Other               | 24                                                          |
| 107             | Côte d'Ivoire | 2010           | Milk, Whole               | 23                                                          |
| 107             | Côte d'Ivoire | 2010           | Millet                    | 4                                                           |
| 107             | Côte d'Ivoire | 2010           | Mutton & Goat Meat        | 2                                                           |
| 107             | Côte d'Ivoire | 2010           | Nuts                      | 15                                                          |
| 107             | Côte d'Ivoire | 2010           | Offals, Edible            | 9                                                           |
| 107             | Côte d'Ivoire | 2010           | Oilcrops Oil, Other       | 1                                                           |
| 107             | Côte d'Ivoire | 2010           | Oranges, Mandarines       | 6                                                           |
| 107             | Côte d'Ivoire | 2010           | Palm Oil                  | 25                                                          |
| 107             | Côte d'Ivoire | 2010           | Palmkernel Oil            | 2                                                           |
| 107             | Côte d'Ivoire | 2010           | Pelagic Fish              | 29                                                          |
| 107             | Côte d'Ivoire | 2010           | Pigmeat                   | 3                                                           |
| 107             | Côte d'Ivoire | 2010           | Pimento                   | 3                                                           |
| 107             | Côte d'Ivoire | 2010           | Pineapples                | 1                                                           |
| 107             | Côte d'Ivoire | 2010           | Plantains                 | 178                                                         |
| 107             | Côte d'Ivoire | 2010           | Potatoes                  | 2                                                           |
| 107             | Côte d'Ivoire | 2010           | Poultry Meat              | 5                                                           |
| 107             | Côte d'Ivoire | 2010           | Pulses, Other             | 2                                                           |
| 107             | Côte d'Ivoire | 2010           | Rice (Milled Equivalent)  | 167                                                         |
| 107             | Côte d'Ivoire | 2010           | Roots, Other              | 9                                                           |
| 107             | Côte d'Ivoire | 2010           | Sorghum                   | 5                                                           |
| 107             | Côte d'Ivoire | 2010           | Spices, Other             | 1                                                           |
| 107             | Côte d'Ivoire | 2010           | Sugar Cane                | 4                                                           |
| 107             | Côte d'Ivoire | 2010           | Sugar, Refined Equivalent | 21                                                          |
| 107             | Côte d'Ivoire | 2010           | Sweet Potatoes            | 6                                                           |
| 107             | Côte d'Ivoire | 2010           | Sweeteners, Other         | 1                                                           |
| 107             | Côte d'Ivoire | 2010           | Tomatoes                  | 12                                                          |
| 107             | Côte d'Ivoire | 2010           | Vegetables, Other         | 92                                                          |
| 107             | Côte d'Ivoire | 2010           | Wheat                     | 52                                                          |
| 107             | Côte d'Ivoire | 2010           | Whey                      | 2                                                           |
| 107             | Côte d'Ivoire | 2010           | Wine                      | 4                                                           |
| 107             | Côte d'Ivoire | 2010           | Yams                      | 525                                                         |
| 107             | Côte d'Ivoire | 2011           | Apples                    | 1                                                           |
| 107             | Côte d'Ivoire | 2011           | Bananas                   | 3                                                           |
| 107             | Côte d'Ivoire | 2011           | Beans                     | 5                                                           |
| 107             | Côte d'Ivoire | 2011           | Beer                      | 59                                                          |
| 107             | Côte d'Ivoire | 2011           | Beverages, Fermented      | 66                                                          |
| 107             | Côte d'Ivoire | 2011           | Bovine Meat               | 5                                                           |
| 107             | Côte d'Ivoire | 2011           | Cassava                   | 301                                                         |
| 107             | Côte d'Ivoire | 2011           | Cereals, Other            | 2                                                           |
| 107             | Côte d'Ivoire | 2011           | Cocoa Beans               | 17                                                          |
| 107             | Côte d'Ivoire | 2011           | Coconut Oil               | 4                                                           |
| 107             | Côte d'Ivoire | 2011           | Coconuts - Incl Copra     | 6                                                           |
| 107             | Côte d'Ivoire | 2011           | Coffee                    | 6                                                           |
| 107             | Côte d'Ivoire | 2011           | Cottonseed Oil            | 3                                                           |
| 107             | Côte d'Ivoire | 2011           | Demersal Fish             | 1                                                           |
| 107             | Côte d'Ivoire | 2011           | Eggs                      | 4                                                           |
| 107             | Côte d'Ivoire | 2011           | Freshwater Fish           | 1                                                           |
| 107             | Côte d'Ivoire | 2011           | Fruits, Other             | 18                                                          |
| 107             | Côte d'Ivoire | 2011           | Grapefruit                | 3                                                           |
| 107             | Côte d'Ivoire | 2011           | Groundnuts (Shelled Eq)   | 7                                                           |
| 107             | Côte d'Ivoire | 2011           | Maize                     | 60                                                          |
| 107             | Côte d'Ivoire | 2011           | Marine Fish, Other        | 24                                                          |
| 107             | Côte d'Ivoire | 2011           | Meat, Other               | 24                                                          |
| 107             | Côte d'Ivoire | 2011           | Milk, Whole               | 18                                                          |
| 107             | Côte d'Ivoire | 2011           | Millet                    | 4                                                           |
| 107             | Côte d'Ivoire | 2011           | Mutton & Goat Meat        | 2                                                           |
| 107             | Côte d'Ivoire | 2011           | Nuts                      | 17                                                          |
| 107             | Côte d'Ivoire | 2011           | Offals, Edible            | 8                                                           |
| 107             | Côte d'Ivoire | 2011           | Oilcrops Oil, Other       | 1                                                           |
| 107             | Côte d'Ivoire | 2011           | Onions                    | 10                                                          |
| 107             | Côte d'Ivoire | 2011           | Oranges, Mandarines       | 5                                                           |
| 107             | Côte d'Ivoire | 2011           | Palm Oil                  | 24                                                          |
| 107             | Côte d'Ivoire | 2011           | Palmkernel Oil            | 3                                                           |
| 107             | Côte d'Ivoire | 2011           | Pelagic Fish              | 28                                                          |
| 107             | Côte d'Ivoire | 2011           | Pigmeat                   | 3                                                           |
| 107             | Côte d'Ivoire | 2011           | Pimento                   | 4                                                           |
| 107             | Côte d'Ivoire | 2011           | Pineapples                | 1                                                           |
| 107             | Côte d'Ivoire | 2011           | Plantains                 | 176                                                         |
| 107             | Côte d'Ivoire | 2011           | Potatoes                  | 3                                                           |
| 107             | Côte d'Ivoire | 2011           | Poultry Meat              | 5                                                           |
| 107             | Côte d'Ivoire | 2011           | Pulses, Other             | 2                                                           |
| 107             | Côte d'Ivoire | 2011           | Rice (Milled Equivalent)  | 167                                                         |
| 107             | Côte d'Ivoire | 2011           | Roots, Other              | 8                                                           |
| 107             | Côte d'Ivoire | 2011           | Sorghum                   | 4                                                           |
| 107             | Côte d'Ivoire | 2011           | Spices, Other             | 1                                                           |

Dietary calcium and zinc deficiency risks are decreasing but remain prevalent

| FAO countrycode | Country       | Reference year | Food item                 | Gross food supply (g capita <sup>-1</sup> d <sup>-1</sup> ) |
|-----------------|---------------|----------------|---------------------------|-------------------------------------------------------------|
| 107             | Côte d'Ivoire | 2011           | Sugar Cane                | 4                                                           |
| 107             | Côte d'Ivoire | 2011           | Sugar, Refined Equivalent | 25                                                          |
| 107             | Côte d'Ivoire | 2011           | Sweet Potatoes            | 5                                                           |
| 107             | Côte d'Ivoire | 2011           | Sweeteners, Other         | 1                                                           |
| 107             | Côte d'Ivoire | 2011           | Tomatoes                  | 11                                                          |
| 107             | Côte d'Ivoire | 2011           | Vegetables, Other         | 83                                                          |
| 107             | Côte d'Ivoire | 2011           | Wheat                     | 55                                                          |
| 107             | Côte d'Ivoire | 2011           | Whey                      | 1                                                           |
| 107             | Côte d'Ivoire | 2011           | Wine                      | 4                                                           |
| 107             | Côte d'Ivoire | 2011           | Yams                      | 523                                                         |
| 98              | Croatia       | 1992           | Apples                    | 35                                                          |
| 98              | Croatia       | 1992           | Bananas                   | 13                                                          |
| 98              | Croatia       | 1992           | Beans                     | 7                                                           |
| 98              | Croatia       | 1992           | Beer                      | 147                                                         |
| 98              | Croatia       | 1992           | Beverages, Alcoholic      | 3                                                           |
| 98              | Croatia       | 1992           | Bovine Meat               | 22                                                          |
| 98              | Croatia       | 1992           | Butter, Ghee              | 1                                                           |
| 98              | Croatia       | 1992           | Cephalopods               | 1                                                           |
| 98              | Croatia       | 1992           | Cereals, Other            | 1                                                           |
| 98              | Croatia       | 1992           | Cheese                    | 10                                                          |
| 98              | Croatia       | 1992           | Cocoa Beans               | 1                                                           |
| 98              | Croatia       | 1992           | Coffee                    | 4                                                           |
| 98              | Croatia       | 1992           | Cream                     | 1                                                           |
| 98              | Croatia       | 1992           | Demersal Fish             | 3                                                           |
| 98              | Croatia       | 1992           | Eggs                      | 27                                                          |
| 98              | Croatia       | 1992           | Fats, Animals, Raw        | 10                                                          |
| 98              | Croatia       | 1992           | Freshwater Fish           | 2                                                           |
| 98              | Croatia       | 1992           | Fruits, Other             | 45                                                          |
| 98              | Croatia       | 1992           | Grapefruit                | 1                                                           |
| 98              | Croatia       | 1992           | Grapes                    | 45                                                          |
| 98              | Croatia       | 1992           | Honey                     | 1                                                           |
| 98              | Croatia       | 1992           | Lemons, Limes             | 4                                                           |
| 98              | Croatia       | 1992           | Maize                     | 14                                                          |
| 98              | Croatia       | 1992           | Meat, Other               | 2                                                           |
| 98              | Croatia       | 1992           | Milk, Whole               | 330                                                         |
| 98              | Croatia       | 1992           | Mutton & Goat Meat        | 2                                                           |
| 98              | Croatia       | 1992           | Nuts                      | 4                                                           |
| 98              | Croatia       | 1992           | Offals, Edible            | 4                                                           |
| 98              | Croatia       | 1992           | Oilcrops Oil, Other       | 1                                                           |
| 98              | Croatia       | 1992           | Olive Oil                 | 2                                                           |
| 98              | Croatia       | 1992           | Olives                    | 3                                                           |
| 98              | Croatia       | 1992           | Onions                    | 20                                                          |
| 98              | Croatia       | 1992           | Oranges, Mandarines       | 17                                                          |
| 98              | Croatia       | 1992           | Pelagic Fish              | 1                                                           |
| 98              | Croatia       | 1992           | Pigmeat                   | 49                                                          |
| 98              | Croatia       | 1992           | Potatoes                  | 192                                                         |
| 98              | Croatia       | 1992           | Poultry Meat              | 23                                                          |
| 98              | Croatia       | 1992           | Rice (Milled Equivalent)  | 2                                                           |
| 98              | Croatia       | 1992           | Rye                       | 1                                                           |
| 98              | Croatia       | 1992           | Soyabean Oil              | 10                                                          |
| 98              | Croatia       | 1992           | Sugar, Refined Equivalent | 98                                                          |
| 98              | Croatia       | 1992           | Sunflowerseed Oil         | 10                                                          |
| 98              | Croatia       | 1992           | Sweeteners, Other         | 15                                                          |
| 98              | Croatia       | 1992           | Tomatoes                  | 27                                                          |
| 98              | Croatia       | 1992           | Vegetables, Other         | 100                                                         |
| 98              | Croatia       | 1992           | Wheat                     | 252                                                         |
| 98              | Croatia       | 1992           | Wine                      | 111                                                         |
| 98              | Croatia       | 1993           | Apples                    | 39                                                          |
| 98              | Croatia       | 1993           | Bananas                   | 12                                                          |
| 98              | Croatia       | 1993           | Beans                     | 9                                                           |
| 98              | Croatia       | 1993           | Beer                      | 141                                                         |
| 98              | Croatia       | 1993           | Beverages, Alcoholic      | 5                                                           |
| 98              | Croatia       | 1993           | Bovine Meat               | 22                                                          |
| 98              | Croatia       | 1993           | Butter, Ghee              | 1                                                           |
| 98              | Croatia       | 1993           | Cephalopods               | 1                                                           |
| 98              | Croatia       | 1993           | Cheese                    | 11                                                          |
| 98              | Croatia       | 1993           | Cocoa Beans               | 1                                                           |
| 98              | Croatia       | 1993           | Coffee                    | 4                                                           |
| 98              | Croatia       | 1993           | Cream                     | 1                                                           |
| 98              | Croatia       | 1993           | Demersal Fish             | 1                                                           |
| 98              | Croatia       | 1993           | Eggs                      | 27                                                          |
| 98              | Croatia       | 1993           | Fats, Animals, Raw        | 11                                                          |
| 98              | Croatia       | 1993           | Freshwater Fish           | 2                                                           |
| 98              | Croatia       | 1993           | Fruits, Other             | 51                                                          |
| 98              | Croatia       | 1993           | Grapes                    | 53                                                          |
| 98              | Croatia       | 1993           | Honey                     | 1                                                           |
| 98              | Croatia       | 1993           | Lemons, Limes             | 3                                                           |
| 98              | Croatia       | 1993           | Maize                     | 17                                                          |
| 98              | Croatia       | 1993           | Meat, Other               | 2                                                           |
| 98              | Croatia       | 1993           | Milk, Whole               | 276                                                         |
| 98              | Croatia       | 1993           | Mutton & Goat Meat        | 2                                                           |
| 98              | Croatia       | 1993           | Nuts                      | 4                                                           |
| 98              | Croatia       | 1993           | Offals, Edible            | 4                                                           |
| 98              | Croatia       | 1993           | Olive Oil                 | 1                                                           |
| 98              | Croatia       | 1993           | Olives                    | 1                                                           |
| 98              | Croatia       | 1993           | Onions                    | 23                                                          |
| 98              | Croatia       | 1993           | Oranges, Mandarines       | 28                                                          |
| 98              | Croatia       | 1993           | Pelagic Fish              | 1                                                           |
| 98              | Croatia       | 1993           | Pigmeat                   | 40                                                          |
| 98              | Croatia       | 1993           | Potatoes                  | 222                                                         |
| 98              | Croatia       | 1993           | Poultry Meat              | 18                                                          |
| 98              | Croatia       | 1993           | Rice (Milled Equivalent)  | 2                                                           |
| 98              | Croatia       | 1993           | Rye                       | 1                                                           |
| 98              | Croatia       | 1993           | Soyabean Oil              | 8                                                           |
| 98              | Croatia       | 1993           | Sugar, Refined Equivalent | 91                                                          |
| 98              | Croatia       | 1993           | Sunflowerseed Oil         | 10                                                          |
| 98              | Croatia       | 1993           | Sweeteners, Other         | 14                                                          |

## Dietary calcium and zinc deficiency risks are decreasing but remain prevalent

| FAO countrycode | Country | Reference year | Food item                 | Gross food supply (g capita <sup>-1</sup> d <sup>-1</sup> ) |
|-----------------|---------|----------------|---------------------------|-------------------------------------------------------------|
| 98              | Croatia | 1993           | Tomatoes                  | 29                                                          |
| 98              | Croatia | 1993           | Vegetables, Other         | 125                                                         |
| 98              | Croatia | 1993           | Wheat                     | 250                                                         |
| 98              | Croatia | 1993           | Wine                      | 108                                                         |
| 98              | Croatia | 1994           | Apples                    | 33                                                          |
| 98              | Croatia | 1994           | Bananas                   | 24                                                          |
| 98              | Croatia | 1994           | Beans                     | 10                                                          |
| 98              | Croatia | 1994           | Beer                      | 179                                                         |
| 98              | Croatia | 1994           | Beverages, Alcoholic      | 5                                                           |
| 98              | Croatia | 1994           | Bovine Meat               | 21                                                          |
| 98              | Croatia | 1994           | Butter, Ghee              | 1                                                           |
| 98              | Croatia | 1994           | Cephalopods               | 2                                                           |
| 98              | Croatia | 1994           | Cereals, Other            | 1                                                           |
| 98              | Croatia | 1994           | Cheese                    | 12                                                          |
| 98              | Croatia | 1994           | Citrus, Other             | 2                                                           |
| 98              | Croatia | 1994           | Cocoa Beans               | 1                                                           |
| 98              | Croatia | 1994           | Coffee                    | 5                                                           |
| 98              | Croatia | 1994           | Cream                     | 2                                                           |
| 98              | Croatia | 1994           | Demersal Fish             | 2                                                           |
| 98              | Croatia | 1994           | Eggs                      | 26                                                          |
| 98              | Croatia | 1994           | Fats, Animals, Raw        | 10                                                          |
| 98              | Croatia | 1994           | Freshwater Fish           | 2                                                           |
| 98              | Croatia | 1994           | Fruits, Other             | 49                                                          |
| 98              | Croatia | 1994           | Grapefruit                | 1                                                           |
| 98              | Croatia | 1994           | Grapes                    | 55                                                          |
| 98              | Croatia | 1994           | Groundnuts (Shelled Eq)   | 1                                                           |
| 98              | Croatia | 1994           | Lemons, Limes             | 5                                                           |
| 98              | Croatia | 1994           | Maize                     | 20                                                          |
| 98              | Croatia | 1994           | Meat, Other               | 2                                                           |
| 98              | Croatia | 1994           | Milk, Whole               | 269                                                         |
| 98              | Croatia | 1994           | Mutton & Goat Meat        | 2                                                           |
| 98              | Croatia | 1994           | Nuts                      | 5                                                           |
| 98              | Croatia | 1994           | Offals, Edible            | 3                                                           |
| 98              | Croatia | 1994           | Olive Oil                 | 2                                                           |
| 98              | Croatia | 1994           | Olives                    | 3                                                           |
| 98              | Croatia | 1994           | Onions                    | 27                                                          |
| 98              | Croatia | 1994           | Oranges, Mandarines       | 43                                                          |
| 98              | Croatia | 1994           | Pelagic Fish              | 1                                                           |
| 98              | Croatia | 1994           | Pigmeat                   | 45                                                          |
| 98              | Croatia | 1994           | Pineapples                | 1                                                           |
| 98              | Croatia | 1994           | Potatoes                  | 239                                                         |
| 98              | Croatia | 1994           | Poultry Meat              | 20                                                          |
| 98              | Croatia | 1994           | Rice (Milled Equivalent)  | 4                                                           |
| 98              | Croatia | 1994           | Rye                       | 1                                                           |
| 98              | Croatia | 1994           | Soyabean Oil              | 7                                                           |
| 98              | Croatia | 1994           | Sugar, Refined Equivalent | 93                                                          |
| 98              | Croatia | 1994           | Sunflowerseed Oil         | 11                                                          |
| 98              | Croatia | 1994           | Sweeteners, Other         | 27                                                          |
| 98              | Croatia | 1994           | Tomatoes                  | 34                                                          |
| 98              | Croatia | 1994           | Vegetables, Other         | 151                                                         |
| 98              | Croatia | 1994           | Wheat                     | 245                                                         |
| 98              | Croatia | 1994           | Wine                      | 97                                                          |
| 98              | Croatia | 1995           | Apples                    | 36                                                          |
| 98              | Croatia | 1995           | Bananas                   | 37                                                          |
| 98              | Croatia | 1995           | Beans                     | 12                                                          |
| 98              | Croatia | 1995           | Beer                      | 184                                                         |
| 98              | Croatia | 1995           | Beverages, Alcoholic      | 5                                                           |
| 98              | Croatia | 1995           | Bovine Meat               | 19                                                          |
| 98              | Croatia | 1995           | Butter, Ghee              | 1                                                           |
| 98              | Croatia | 1995           | Cephalopods               | 2                                                           |
| 98              | Croatia | 1995           | Cereals, Other            | 1                                                           |
| 98              | Croatia | 1995           | Cheese                    | 13                                                          |
| 98              | Croatia | 1995           | Citrus, Other             | 2                                                           |
| 98              | Croatia | 1995           | Cocoa Beans               | 3                                                           |
| 98              | Croatia | 1995           | Coffee                    | 9                                                           |
| 98              | Croatia | 1995           | Cream                     | 3                                                           |
| 98              | Croatia | 1995           | Demersal Fish             | 2                                                           |
| 98              | Croatia | 1995           | Eggs                      | 26                                                          |
| 98              | Croatia | 1995           | Fats, Animals, Raw        | 11                                                          |
| 98              | Croatia | 1995           | Freshwater Fish           | 2                                                           |
| 98              | Croatia | 1995           | Fruits, Other             | 55                                                          |
| 98              | Croatia | 1995           | Grapefruit                | 1                                                           |
| 98              | Croatia | 1995           | Grapes                    | 48                                                          |
| 98              | Croatia | 1995           | Groundnuts (Shelled Eq)   | 1                                                           |
| 98              | Croatia | 1995           | Lemons, Limes             | 5                                                           |
| 98              | Croatia | 1995           | Maize                     | 21                                                          |
| 98              | Croatia | 1995           | Maize Germ Oil            | 1                                                           |
| 98              | Croatia | 1995           | Meat, Other               | 2                                                           |
| 98              | Croatia | 1995           | Milk, Whole               | 299                                                         |
| 98              | Croatia | 1995           | Mutton & Goat Meat        | 4                                                           |
| 98              | Croatia | 1995           | Nuts                      | 6                                                           |
| 98              | Croatia | 1995           | Offals, Edible            | 3                                                           |
| 98              | Croatia | 1995           | Oilcrops Oil, Other       | 1                                                           |
| 98              | Croatia | 1995           | Olive Oil                 | 4                                                           |
| 98              | Croatia | 1995           | Olives                    | 4                                                           |
| 98              | Croatia | 1995           | Onions                    | 28                                                          |
| 98              | Croatia | 1995           | Oranges, Mandarines       | 66                                                          |
| 98              | Croatia | 1995           | Pigmeat                   | 50                                                          |
| 98              | Croatia | 1995           | Pineapples                | 1                                                           |
| 98              | Croatia | 1995           | Potatoes                  | 315                                                         |
| 98              | Croatia | 1995           | Poultry Meat              | 22                                                          |
| 98              | Croatia | 1995           | Rice (Milled Equivalent)  | 3                                                           |
| 98              | Croatia | 1995           | Rye                       | 1                                                           |
| 98              | Croatia | 1995           | Soyabean Oil              | 7                                                           |
| 98              | Croatia | 1995           | Sugar, Refined Equivalent | 93                                                          |
| 98              | Croatia | 1995           | Sunflowerseed Oil         | 12                                                          |
| 98              | Croatia | 1995           | Sweeteners, Other         | 29                                                          |

Dietary calcium and zinc deficiency risks are decreasing but remain prevalent

| FAO countrycode | Country | Reference year | Food item                 | Gross food supply (g capita <sup>-1</sup> d <sup>-1</sup> ) |
|-----------------|---------|----------------|---------------------------|-------------------------------------------------------------|
| 98              | Croatia | 1995           | Tomatoes                  | 42                                                          |
| 98              | Croatia | 1995           | Vegetables, Other         | 167                                                         |
| 98              | Croatia | 1995           | Wheat                     | 248                                                         |
| 98              | Croatia | 1995           | Wine                      | 92                                                          |
| 98              | Croatia | 1996           | Apples                    | 47                                                          |
| 98              | Croatia | 1996           | Bananas                   | 22                                                          |
| 98              | Croatia | 1996           | Beans                     | 11                                                          |
| 98              | Croatia | 1996           | Beer                      | 184                                                         |
| 98              | Croatia | 1996           | Beverages, Alcoholic      | 5                                                           |
| 98              | Croatia | 1996           | Bovine Meat               | 12                                                          |
| 98              | Croatia | 1996           | Butter, Ghee              | 2                                                           |
| 98              | Croatia | 1996           | Cephalopods               | 3                                                           |
| 98              | Croatia | 1996           | Cereals, Other            | 1                                                           |
| 98              | Croatia | 1996           | Cheese                    | 13                                                          |
| 98              | Croatia | 1996           | Cocoa Beans               | 2                                                           |
| 98              | Croatia | 1996           | Coffee                    | 9                                                           |
| 98              | Croatia | 1996           | Demersal Fish             | 4                                                           |
| 98              | Croatia | 1996           | Eggs                      | 29                                                          |
| 98              | Croatia | 1996           | Fats, Animals, Raw        | 11                                                          |
| 98              | Croatia | 1996           | Freshwater Fish           | 1                                                           |
| 98              | Croatia | 1996           | Fruits, Other             | 76                                                          |
| 98              | Croatia | 1996           | Grapefruit                | 1                                                           |
| 98              | Croatia | 1996           | Grapes                    | 58                                                          |
| 98              | Croatia | 1996           | Groundnuts (Shelled Eq)   | 1                                                           |
| 98              | Croatia | 1996           | Honey                     | 1                                                           |
| 98              | Croatia | 1996           | Lemons, Limes             | 5                                                           |
| 98              | Croatia | 1996           | Maize                     | 23                                                          |
| 98              | Croatia | 1996           | Maize Germ Oil            | 1                                                           |
| 98              | Croatia | 1996           | Marine Fish, Other        | 1                                                           |
| 98              | Croatia | 1996           | Meat, Other               | 2                                                           |
| 98              | Croatia | 1996           | Milk, Whole               | 298                                                         |
| 98              | Croatia | 1996           | Molluscs, Other           | 1                                                           |
| 98              | Croatia | 1996           | Mutton & Goat Meat        | 2                                                           |
| 98              | Croatia | 1996           | Nuts                      | 7                                                           |
| 98              | Croatia | 1996           | Offals, Edible            | 3                                                           |
| 98              | Croatia | 1996           | Oilcrops Oil, Other       | 1                                                           |
| 98              | Croatia | 1996           | Olive Oil                 | 1                                                           |
| 98              | Croatia | 1996           | Olives                    | 3                                                           |
| 98              | Croatia | 1996           | Onions                    | 28                                                          |
| 98              | Croatia | 1996           | Oranges, Mandarines       | 55                                                          |
| 98              | Croatia | 1996           | Palm Oil                  | 1                                                           |
| 98              | Croatia | 1996           | Peas                      | 1                                                           |
| 98              | Croatia | 1996           | Pelagic Fish              | 1                                                           |
| 98              | Croatia | 1996           | Pigmeat                   | 47                                                          |
| 98              | Croatia | 1996           | Pineapples                | 1                                                           |
| 98              | Croatia | 1996           | Potatoes                  | 300                                                         |
| 98              | Croatia | 1996           | Poultry Meat              | 18                                                          |
| 98              | Croatia | 1996           | Rice (Milled Equivalent)  | 4                                                           |
| 98              | Croatia | 1996           | Rye                       | 1                                                           |
| 98              | Croatia | 1996           | Soyabean Oil              | 8                                                           |
| 98              | Croatia | 1996           | Sugar, Refined Equivalent | 100                                                         |
| 98              | Croatia | 1996           | Sunflowerseed Oil         | 13                                                          |
| 98              | Croatia | 1996           | Sweeteners, Other         | 17                                                          |
| 98              | Croatia | 1996           | Tomatoes                  | 42                                                          |
| 98              | Croatia | 1996           | Vegetables, Other         | 182                                                         |
| 98              | Croatia | 1996           | Wheat                     | 256                                                         |
| 98              | Croatia | 1996           | Wine                      | 101                                                         |
| 98              | Croatia | 1997           | Apples                    | 35                                                          |
| 98              | Croatia | 1997           | Bananas                   | 33                                                          |
| 98              | Croatia | 1997           | Beans                     | 12                                                          |
| 98              | Croatia | 1997           | Beer                      | 199                                                         |
| 98              | Croatia | 1997           | Beverages, Alcoholic      | 6                                                           |
| 98              | Croatia | 1997           | Bovine Meat               | 20                                                          |
| 98              | Croatia | 1997           | Butter, Ghee              | 1                                                           |
| 98              | Croatia | 1997           | Cephalopods               | 2                                                           |
| 98              | Croatia | 1997           | Cereals, Other            | 1                                                           |
| 98              | Croatia | 1997           | Cheese                    | 12                                                          |
| 98              | Croatia | 1997           | Cocoa Beans               | 3                                                           |
| 98              | Croatia | 1997           | Coffee                    | 12                                                          |
| 98              | Croatia | 1997           | Demersal Fish             | 3                                                           |
| 98              | Croatia | 1997           | Eggs                      | 26                                                          |
| 98              | Croatia | 1997           | Fats, Animals, Raw        | 12                                                          |
| 98              | Croatia | 1997           | Freshwater Fish           | 2                                                           |
| 98              | Croatia | 1997           | Fruits, Other             | 59                                                          |
| 98              | Croatia | 1997           | Grapefruit                | 1                                                           |
| 98              | Croatia | 1997           | Grapes                    | 53                                                          |
| 98              | Croatia | 1997           | Groundnuts (Shelled Eq)   | 1                                                           |
| 98              | Croatia | 1997           | Honey                     | 1                                                           |
| 98              | Croatia | 1997           | Lemons, Limes             | 6                                                           |
| 98              | Croatia | 1997           | Maize                     | 32                                                          |
| 98              | Croatia | 1997           | Meat, Other               | 2                                                           |
| 98              | Croatia | 1997           | Milk, Whole               | 237                                                         |
| 98              | Croatia | 1997           | Molluscs, Other           | 1                                                           |
| 98              | Croatia | 1997           | Mutton & Goat Meat        | 2                                                           |
| 98              | Croatia | 1997           | Nuts                      | 6                                                           |
| 98              | Croatia | 1997           | Offals, Edible            | 3                                                           |
| 98              | Croatia | 1997           | Oilcrops Oil, Other       | 1                                                           |
| 98              | Croatia | 1997           | Olive Oil                 | 1                                                           |
| 98              | Croatia | 1997           | Olives                    | 2                                                           |
| 98              | Croatia | 1997           | Onions                    | 30                                                          |
| 98              | Croatia | 1997           | Oranges, Mandarines       | 42                                                          |
| 98              | Croatia | 1997           | Peas                      | 1                                                           |
| 98              | Croatia | 1997           | Pelagic Fish              | 1                                                           |
| 98              | Croatia | 1997           | Pigmeat                   | 47                                                          |
| 98              | Croatia | 1997           | Pineapples                | 1                                                           |
| 98              | Croatia | 1997           | Potatoes                  | 280                                                         |
| 98              | Croatia | 1997           | Poultry Meat              | 20                                                          |

Dietary calcium and zinc deficiency risks are decreasing but remain prevalent

| FAO countrycode | Country | Reference year | Food item                 | Gross food supply (g capita <sup>-1</sup> d <sup>-1</sup> ) |
|-----------------|---------|----------------|---------------------------|-------------------------------------------------------------|
| 98              | Croatia | 1997           | Rice (Milled Equivalent)  | 5                                                           |
| 98              | Croatia | 1997           | Rye                       | 1                                                           |
| 98              | Croatia | 1997           | Soyabean Oil              | 9                                                           |
| 98              | Croatia | 1997           | Sugar, Refined Equivalent | 86                                                          |
| 98              | Croatia | 1997           | Sunflowerseed Oil         | 14                                                          |
| 98              | Croatia | 1997           | Sweeteners, Other         | 20                                                          |
| 98              | Croatia | 1997           | Tomatoes                  | 41                                                          |
| 98              | Croatia | 1997           | Vegetables, Other         | 191                                                         |
| 98              | Croatia | 1997           | Wheat                     | 256                                                         |
| 98              | Croatia | 1997           | Wine                      | 128                                                         |
| 98              | Croatia | 1998           | Apples                    | 41                                                          |
| 98              | Croatia | 1998           | Bananas                   | 22                                                          |
| 98              | Croatia | 1998           | Beans                     | 11                                                          |
| 98              | Croatia | 1998           | Beer                      | 198                                                         |
| 98              | Croatia | 1998           | Beverages, Alcoholic      | 13                                                          |
| 98              | Croatia | 1998           | Bovine Meat               | 15                                                          |
| 98              | Croatia | 1998           | Butter, Ghee              | 1                                                           |
| 98              | Croatia | 1998           | Cephalopods               | 2                                                           |
| 98              | Croatia | 1998           | Cereals, Other            | 1                                                           |
| 98              | Croatia | 1998           | Cheese                    | 11                                                          |
| 98              | Croatia | 1998           | Cocoa Beans               | 2                                                           |
| 98              | Croatia | 1998           | Coffee                    | 9                                                           |
| 98              | Croatia | 1998           | Cream                     | 1                                                           |
| 98              | Croatia | 1998           | Demersal Fish             | 4                                                           |
| 98              | Croatia | 1998           | Eggs                      | 28                                                          |
| 98              | Croatia | 1998           | Fats, Animals, Raw        | 8                                                           |
| 98              | Croatia | 1998           | Freshwater Fish           | 2                                                           |
| 98              | Croatia | 1998           | Fruits, Other             | 66                                                          |
| 98              | Croatia | 1998           | Grapefruit                | 1                                                           |
| 98              | Croatia | 1998           | Grapes                    | 59                                                          |
| 98              | Croatia | 1998           | Groundnuts (Shelled Eq)   | 1                                                           |
| 98              | Croatia | 1998           | Honey                     | 1                                                           |
| 98              | Croatia | 1998           | Lemons, Limes             | 2                                                           |
| 98              | Croatia | 1998           | Maize                     | 34                                                          |
| 98              | Croatia | 1998           | Meat, Other               | 2                                                           |
| 98              | Croatia | 1998           | Milk, Whole               | 276                                                         |
| 98              | Croatia | 1998           | Molluscs, Other           | 1                                                           |
| 98              | Croatia | 1998           | Mutton & Goat Meat        | 1                                                           |
| 98              | Croatia | 1998           | Nuts                      | 6                                                           |
| 98              | Croatia | 1998           | Offals, Edible            | 3                                                           |
| 98              | Croatia | 1998           | Oilcrops Oil, Other       | 1                                                           |
| 98              | Croatia | 1998           | Olive Oil                 | 3                                                           |
| 98              | Croatia | 1998           | Olives                    | 3                                                           |
| 98              | Croatia | 1998           | Onions                    | 33                                                          |
| 98              | Croatia | 1998           | Oranges, Mandarines       | 40                                                          |
| 98              | Croatia | 1998           | Palm Oil                  | 1                                                           |
| 98              | Croatia | 1998           | Pelagic Fish              | 1                                                           |
| 98              | Croatia | 1998           | Pigmeat                   | 43                                                          |
| 98              | Croatia | 1998           | Potatoes                  | 306                                                         |
| 98              | Croatia | 1998           | Poultry Meat              | 17                                                          |
| 98              | Croatia | 1998           | Rice (Milled Equivalent)  | 4                                                           |
| 98              | Croatia | 1998           | Rye                       | 1                                                           |
| 98              | Croatia | 1998           | Soyabean Oil              | 8                                                           |
| 98              | Croatia | 1998           | Sugar, Refined Equivalent | 87                                                          |
| 98              | Croatia | 1998           | Sunflowerseed Oil         | 15                                                          |
| 98              | Croatia | 1998           | Sweeteners, Other         | 18                                                          |
| 98              | Croatia | 1998           | Tomatoes                  | 47                                                          |
| 98              | Croatia | 1998           | Vegetables, Other         | 208                                                         |
| 98              | Croatia | 1998           | Wheat                     | 246                                                         |
| 98              | Croatia | 1998           | Wine                      | 128                                                         |
| 98              | Croatia | 1999           | Apples                    | 43                                                          |
| 98              | Croatia | 1999           | Bananas                   | 27                                                          |
| 98              | Croatia | 1999           | Beans                     | 12                                                          |
| 98              | Croatia | 1999           | Beer                      | 207                                                         |
| 98              | Croatia | 1999           | Beverages, Alcoholic      | 2                                                           |
| 98              | Croatia | 1999           | Bovine Meat               | 18                                                          |
| 98              | Croatia | 1999           | Butter, Ghee              | 1                                                           |
| 98              | Croatia | 1999           | Cephalopods               | 2                                                           |
| 98              | Croatia | 1999           | Cereals, Other            | 1                                                           |
| 98              | Croatia | 1999           | Cheese                    | 13                                                          |
| 98              | Croatia | 1999           | Cocoa Beans               | 3                                                           |
| 98              | Croatia | 1999           | Coffee                    | 12                                                          |
| 98              | Croatia | 1999           | Cream                     | 1                                                           |
| 98              | Croatia | 1999           | Demersal Fish             | 4                                                           |
| 98              | Croatia | 1999           | Eggs                      | 28                                                          |
| 98              | Croatia | 1999           | Fats, Animals, Raw        | 9                                                           |
| 98              | Croatia | 1999           | Freshwater Fish           | 2                                                           |
| 98              | Croatia | 1999           | Fruits, Other             | 55                                                          |
| 98              | Croatia | 1999           | Grapefruit                | 2                                                           |
| 98              | Croatia | 1999           | Grapes                    | 59                                                          |
| 98              | Croatia | 1999           | Groundnuts (Shelled Eq)   | 1                                                           |
| 98              | Croatia | 1999           | Honey                     | 1                                                           |
| 98              | Croatia | 1999           | Lemons, Limes             | 7                                                           |
| 98              | Croatia | 1999           | Maize                     | 34                                                          |
| 98              | Croatia | 1999           | Meat, Other               | 2                                                           |
| 98              | Croatia | 1999           | Milk, Whole               | 295                                                         |
| 98              | Croatia | 1999           | Molluscs, Other           | 1                                                           |
| 98              | Croatia | 1999           | Mutton & Goat Meat        | 3                                                           |
| 98              | Croatia | 1999           | Nuts                      | 8                                                           |
| 98              | Croatia | 1999           | Offals, Edible            | 5                                                           |
| 98              | Croatia | 1999           | Oilcrops Oil, Other       | 1                                                           |
| 98              | Croatia | 1999           | Olive Oil                 | 4                                                           |
| 98              | Croatia | 1999           | Olives                    | 5                                                           |
| 98              | Croatia | 1999           | Onions                    | 39                                                          |
| 98              | Croatia | 1999           | Oranges, Mandarines       | 44                                                          |
| 98              | Croatia | 1999           | Palm Oil                  | 1                                                           |
| 98              | Croatia | 1999           | Peas                      | 1                                                           |



Dietary calcium and zinc deficiency risks are decreasing but remain prevalent

| FAO countrycode | Country | Reference year | Food item                 | Gross food supply (g capita <sup>-1</sup> d <sup>-1</sup> ) |
|-----------------|---------|----------------|---------------------------|-------------------------------------------------------------|
| 98              | Croatia | 1999           | Pelagic Fish              | 2                                                           |
| 98              | Croatia | 1999           | Pigmeat                   | 51                                                          |
| 98              | Croatia | 1999           | Pineapples                | 1                                                           |
| 98              | Croatia | 1999           | Potatoes                  | 311                                                         |
| 98              | Croatia | 1999           | Poultry Meat              | 18                                                          |
| 98              | Croatia | 1999           | Rice (Milled Equivalent)  | 5                                                           |
| 98              | Croatia | 1999           | Rye                       | 1                                                           |
| 98              | Croatia | 1999           | Soyabean Oil              | 8                                                           |
| 98              | Croatia | 1999           | Sugar, Refined Equivalent | 70                                                          |
| 98              | Croatia | 1999           | Sunflowerseed Oil         | 17                                                          |
| 98              | Croatia | 1999           | Sweeteners, Other         | 27                                                          |
| 98              | Croatia | 1999           | Tomatoes                  | 54                                                          |
| 98              | Croatia | 1999           | Vegetables, Other         | 228                                                         |
| 98              | Croatia | 1999           | Wheat                     | 237                                                         |
| 98              | Croatia | 1999           | Wine                      | 125                                                         |
| 98              | Croatia | 2000           | Apples                    | 43                                                          |
| 98              | Croatia | 2000           | Bananas                   | 24                                                          |
| 98              | Croatia | 2000           | Beans                     | 6                                                           |
| 98              | Croatia | 2000           | Beer                      | 231                                                         |
| 98              | Croatia | 2000           | Beverages, Alcoholic      | 3                                                           |
| 98              | Croatia | 2000           | Bovine Meat               | 19                                                          |
| 98              | Croatia | 2000           | Butter, Ghee              | 1                                                           |
| 98              | Croatia | 2000           | Cephalopods               | 3                                                           |
| 98              | Croatia | 2000           | Cereals, Other            | 1                                                           |
| 98              | Croatia | 2000           | Cheese                    | 15                                                          |
| 98              | Croatia | 2000           | Cocoa Beans               | 3                                                           |
| 98              | Croatia | 2000           | Coffee                    | 12                                                          |
| 98              | Croatia | 2000           | Cream                     | 2                                                           |
| 98              | Croatia | 2000           | Demersal Fish             | 4                                                           |
| 98              | Croatia | 2000           | Eggs                      | 27                                                          |
| 98              | Croatia | 2000           | Fats, Animals, Raw        | 10                                                          |
| 98              | Croatia | 2000           | Freshwater Fish           | 2                                                           |
| 98              | Croatia | 2000           | Fruits, Other             | 58                                                          |
| 98              | Croatia | 2000           | Grapefruit                | 2                                                           |
| 98              | Croatia | 2000           | Grapes                    | 48                                                          |
| 98              | Croatia | 2000           | Groundnuts (Shelled Eq)   | 1                                                           |
| 98              | Croatia | 2000           | Honey                     | 1                                                           |
| 98              | Croatia | 2000           | Lemons, Limes             | 7                                                           |
| 98              | Croatia | 2000           | Maize                     | 36                                                          |
| 98              | Croatia | 2000           | Marine Fish, Other        | 1                                                           |
| 98              | Croatia | 2000           | Meat, Other               | 2                                                           |
| 98              | Croatia | 2000           | Milk, Whole               | 287                                                         |
| 98              | Croatia | 2000           | Molluscs, Other           | 2                                                           |
| 98              | Croatia | 2000           | Mutton & Goat Meat        | 2                                                           |
| 98              | Croatia | 2000           | Nuts                      | 8                                                           |
| 98              | Croatia | 2000           | Offals, Edible            | 4                                                           |
| 98              | Croatia | 2000           | Oilcrops Oil, Other       | 1                                                           |
| 98              | Croatia | 2000           | Olive Oil                 | 2                                                           |
| 98              | Croatia | 2000           | Olives                    | 3                                                           |
| 98              | Croatia | 2000           | Onions                    | 33                                                          |
| 98              | Croatia | 2000           | Oranges, Mandarines       | 44                                                          |
| 98              | Croatia | 2000           | Palm Oil                  | 1                                                           |
| 98              | Croatia | 2000           | Pelagic Fish              | 9                                                           |
| 98              | Croatia | 2000           | Pigmeat                   | 56                                                          |
| 98              | Croatia | 2000           | Pineapples                | 1                                                           |
| 98              | Croatia | 2000           | Potatoes                  | 290                                                         |
| 98              | Croatia | 2000           | Poultry Meat              | 19                                                          |
| 98              | Croatia | 2000           | Rice (Milled Equivalent)  | 5                                                           |
| 98              | Croatia | 2000           | Rye                       | 1                                                           |
| 98              | Croatia | 2000           | Soyabean Oil              | 13                                                          |
| 98              | Croatia | 2000           | Sugar, Refined Equivalent | 67                                                          |
| 98              | Croatia | 2000           | Sunflowerseed Oil         | 15                                                          |
| 98              | Croatia | 2000           | Sweeteners, Other         | 51                                                          |
| 98              | Croatia | 2000           | Tomatoes                  | 55                                                          |
| 98              | Croatia | 2000           | Vegetables, Other         | 183                                                         |
| 98              | Croatia | 2000           | Wheat                     | 243                                                         |
| 98              | Croatia | 2000           | Wine                      | 111                                                         |
| 98              | Croatia | 2001           | Apples                    | 43                                                          |
| 98              | Croatia | 2001           | Bananas                   | 25                                                          |
| 98              | Croatia | 2001           | Beans                     | 11                                                          |
| 98              | Croatia | 2001           | Beer                      | 236                                                         |
| 98              | Croatia | 2001           | Beverages, Alcoholic      | 4                                                           |
| 98              | Croatia | 2001           | Bovine Meat               | 15                                                          |
| 98              | Croatia | 2001           | Butter, Ghee              | 1                                                           |
| 98              | Croatia | 2001           | Cephalopods               | 3                                                           |
| 98              | Croatia | 2001           | Cereals, Other            | 1                                                           |
| 98              | Croatia | 2001           | Cheese                    | 18                                                          |
| 98              | Croatia | 2001           | Citrus, Other             | 1                                                           |
| 98              | Croatia | 2001           | Cocoa Beans               | 4                                                           |
| 98              | Croatia | 2001           | Coffee                    | 12                                                          |
| 98              | Croatia | 2001           | Cream                     | 1                                                           |
| 98              | Croatia | 2001           | Crustaceans               | 1                                                           |
| 98              | Croatia | 2001           | Demersal Fish             | 4                                                           |
| 98              | Croatia | 2001           | Eggs                      | 27                                                          |
| 98              | Croatia | 2001           | Fats, Animals, Raw        | 10                                                          |
| 98              | Croatia | 2001           | Freshwater Fish           | 2                                                           |
| 98              | Croatia | 2001           | Fruits, Other             | 58                                                          |
| 98              | Croatia | 2001           | Grapefruit                | 1                                                           |
| 98              | Croatia | 2001           | Grapes                    | 51                                                          |
| 98              | Croatia | 2001           | Groundnuts (Shelled Eq)   | 1                                                           |
| 98              | Croatia | 2001           | Honey                     | 1                                                           |
| 98              | Croatia | 2001           | Lemons, Limes             | 6                                                           |
| 98              | Croatia | 2001           | Maize                     | 37                                                          |
| 98              | Croatia | 2001           | Marine Fish, Other        | 1                                                           |
| 98              | Croatia | 2001           | Meat, Other               | 2                                                           |
| 98              | Croatia | 2001           | Milk, Whole               | 296                                                         |
| 98              | Croatia | 2001           | Molluscs, Other           | 3                                                           |

Dietary calcium and zinc deficiency risks are decreasing but remain prevalent

| FAO countrycode | Country | Reference year | Food item                 | Gross food supply (g capita <sup>-1</sup> d <sup>-1</sup> ) |
|-----------------|---------|----------------|---------------------------|-------------------------------------------------------------|
| 98              | Croatia | 2001           | Mutton & Goat Meat        | 2                                                           |
| 98              | Croatia | 2001           | Nuts                      | 7                                                           |
| 98              | Croatia | 2001           | Offals, Edible            | 4                                                           |
| 98              | Croatia | 2001           | Oilcrops Oil, Other       | 1                                                           |
| 98              | Croatia | 2001           | Olive Oil                 | 3                                                           |
| 98              | Croatia | 2001           | Olives                    | 4                                                           |
| 98              | Croatia | 2001           | Onions                    | 40                                                          |
| 98              | Croatia | 2001           | Oranges, Mandarines       | 44                                                          |
| 98              | Croatia | 2001           | Palm Oil                  | 2                                                           |
| 98              | Croatia | 2001           | Peas                      | 1                                                           |
| 98              | Croatia | 2001           | Pelagic Fish              | 14                                                          |
| 98              | Croatia | 2001           | Pigmeat                   | 59                                                          |
| 98              | Croatia | 2001           | Pineapples                | 1                                                           |
| 98              | Croatia | 2001           | Potatoes                  | 343                                                         |
| 98              | Croatia | 2001           | Poultry Meat              | 20                                                          |
| 98              | Croatia | 2001           | Rice (Milled Equivalent)  | 6                                                           |
| 98              | Croatia | 2001           | Rye                       | 1                                                           |
| 98              | Croatia | 2001           | Soyabean Oil              | 11                                                          |
| 98              | Croatia | 2001           | Sugar, Refined Equivalent | 73                                                          |
| 98              | Croatia | 2001           | Sunflowerseed Oil         | 15                                                          |
| 98              | Croatia | 2001           | Sweeteners, Other         | 77                                                          |
| 98              | Croatia | 2001           | Tomatoes                  | 60                                                          |
| 98              | Croatia | 2001           | Vegetables, Other         | 206                                                         |
| 98              | Croatia | 2001           | Wheat                     | 256                                                         |
| 98              | Croatia | 2001           | Wine                      | 117                                                         |
| 98              | Croatia | 2002           | Apples                    | 61                                                          |
| 98              | Croatia | 2002           | Bananas                   | 26                                                          |
| 98              | Croatia | 2002           | Beans                     | 6                                                           |
| 98              | Croatia | 2002           | Beer                      | 228                                                         |
| 98              | Croatia | 2002           | Beverages, Alcoholic      | 5                                                           |
| 98              | Croatia | 2002           | Bovine Meat               | 16                                                          |
| 98              | Croatia | 2002           | Butter, Ghee              | 1                                                           |
| 98              | Croatia | 2002           | Cephalopods               | 3                                                           |
| 98              | Croatia | 2002           | Cereals, Other            | 2                                                           |
| 98              | Croatia | 2002           | Cheese                    | 19                                                          |
| 98              | Croatia | 2002           | Citrus, Other             | 1                                                           |
| 98              | Croatia | 2002           | Cocoa Beans               | 5                                                           |
| 98              | Croatia | 2002           | Coffee                    | 13                                                          |
| 98              | Croatia | 2002           | Cream                     | 1                                                           |
| 98              | Croatia | 2002           | Demersal Fish             | 4                                                           |
| 98              | Croatia | 2002           | Eggs                      | 27                                                          |
| 98              | Croatia | 2002           | Fats, Animals, Raw        | 8                                                           |
| 98              | Croatia | 2002           | Freshwater Fish           | 2                                                           |
| 98              | Croatia | 2002           | Fruits, Other             | 52                                                          |
| 98              | Croatia | 2002           | Grapefruit                | 2                                                           |
| 98              | Croatia | 2002           | Grapes                    | 41                                                          |
| 98              | Croatia | 2002           | Groundnuts (Shelled Eq)   | 2                                                           |
| 98              | Croatia | 2002           | Honey                     | 1                                                           |
| 98              | Croatia | 2002           | Lemons, Limes             | 7                                                           |
| 98              | Croatia | 2002           | Maize                     | 35                                                          |
| 98              | Croatia | 2002           | Marine Fish, Other        | 2                                                           |
| 98              | Croatia | 2002           | Meat, Other               | 2                                                           |
| 98              | Croatia | 2002           | Milk, Whole               | 308                                                         |
| 98              | Croatia | 2002           | Molluscs, Other           | 3                                                           |
| 98              | Croatia | 2002           | Mutton & Goat Meat        | 2                                                           |
| 98              | Croatia | 2002           | Nuts                      | 8                                                           |
| 98              | Croatia | 2002           | Offals, Edible            | 5                                                           |
| 98              | Croatia | 2002           | Oilcrops Oil, Other       | 1                                                           |
| 98              | Croatia | 2002           | Olive Oil                 | 3                                                           |
| 98              | Croatia | 2002           | Olives                    | 7                                                           |
| 98              | Croatia | 2002           | Onions                    | 40                                                          |
| 98              | Croatia | 2002           | Oranges, Mandarines       | 34                                                          |
| 98              | Croatia | 2002           | Palm Oil                  | 3                                                           |
| 98              | Croatia | 2002           | Peas                      | 1                                                           |
| 98              | Croatia | 2002           | Pelagic Fish              | 24                                                          |
| 98              | Croatia | 2002           | Pigmeat                   | 65                                                          |
| 98              | Croatia | 2002           | Pineapples                | 1                                                           |
| 98              | Croatia | 2002           | Potatoes                  | 302                                                         |
| 98              | Croatia | 2002           | Poultry Meat              | 26                                                          |
| 98              | Croatia | 2002           | Rice (Milled Equivalent)  | 6                                                           |
| 98              | Croatia | 2002           | Rye                       | 1                                                           |
| 98              | Croatia | 2002           | Soyabean Oil              | 14                                                          |
| 98              | Croatia | 2002           | Sugar, Refined Equivalent | 70                                                          |
| 98              | Croatia | 2002           | Sunflowerseed Oil         | 14                                                          |
| 98              | Croatia | 2002           | Sweeteners, Other         | 93                                                          |
| 98              | Croatia | 2002           | Tomatoes                  | 63                                                          |
| 98              | Croatia | 2002           | Vegetables, Other         | 228                                                         |
| 98              | Croatia | 2002           | Wheat                     | 281                                                         |
| 98              | Croatia | 2002           | Wine                      | 115                                                         |
| 98              | Croatia | 2003           | Apples                    | 54                                                          |
| 98              | Croatia | 2003           | Bananas                   | 30                                                          |
| 98              | Croatia | 2003           | Beans                     | 6                                                           |
| 98              | Croatia | 2003           | Beer                      | 234                                                         |
| 98              | Croatia | 2003           | Beverages, Alcoholic      | 7                                                           |
| 98              | Croatia | 2003           | Bovine Meat               | 17                                                          |
| 98              | Croatia | 2003           | Butter, Ghee              | 1                                                           |
| 98              | Croatia | 2003           | Cephalopods               | 3                                                           |
| 98              | Croatia | 2003           | Cereals, Other            | 3                                                           |
| 98              | Croatia | 2003           | Cheese                    | 20                                                          |
| 98              | Croatia | 2003           | Cocoa Beans               | 5                                                           |
| 98              | Croatia | 2003           | Coffee                    | 14                                                          |
| 98              | Croatia | 2003           | Cream                     | 1                                                           |
| 98              | Croatia | 2003           | Crustaceans               | 1                                                           |
| 98              | Croatia | 2003           | Demersal Fish             | 3                                                           |
| 98              | Croatia | 2003           | Eggs                      | 31                                                          |
| 98              | Croatia | 2003           | Fats, Animals, Raw        | 7                                                           |
| 98              | Croatia | 2003           | Freshwater Fish           | 2                                                           |

Dietary calcium and zinc deficiency risks are decreasing but remain prevalent

| FAO countrycode | Country | Reference year | Food item                 | Gross food supply (g capita <sup>-1</sup> d <sup>-1</sup> ) |
|-----------------|---------|----------------|---------------------------|-------------------------------------------------------------|
| 98              | Croatia | 2003           | Fruits, Other             | 63                                                          |
| 98              | Croatia | 2003           | Grapefruit                | 2                                                           |
| 98              | Croatia | 2003           | Grapes                    | 51                                                          |
| 98              | Croatia | 2003           | Groundnuts (Shelled Eq)   | 2                                                           |
| 98              | Croatia | 2003           | Lemons, Limes             | 7                                                           |
| 98              | Croatia | 2003           | Maize                     | 22                                                          |
| 98              | Croatia | 2003           | Maize Germ Oil            | 4                                                           |
| 98              | Croatia | 2003           | Marine Fish, Other        | 1                                                           |
| 98              | Croatia | 2003           | Meat, Other               | 2                                                           |
| 98              | Croatia | 2003           | Milk, Whole               | 274                                                         |
| 98              | Croatia | 2003           | Molluscs, Other           | 5                                                           |
| 98              | Croatia | 2003           | Mutton & Goat Meat        | 3                                                           |
| 98              | Croatia | 2003           | Nuts                      | 8                                                           |
| 98              | Croatia | 2003           | Offals, Edible            | 4                                                           |
| 98              | Croatia | 2003           | Oilcrops Oil, Other       | 1                                                           |
| 98              | Croatia | 2003           | Olive Oil                 | 3                                                           |
| 98              | Croatia | 2003           | Olives                    | 2                                                           |
| 98              | Croatia | 2003           | Onions                    | 35                                                          |
| 98              | Croatia | 2003           | Oranges, Mandarines       | 41                                                          |
| 98              | Croatia | 2003           | Palm Oil                  | 3                                                           |
| 98              | Croatia | 2003           | Peas                      | 1                                                           |
| 98              | Croatia | 2003           | Pelagic Fish              | 26                                                          |
| 98              | Croatia | 2003           | Pigmeat                   | 64                                                          |
| 98              | Croatia | 2003           | Pineapples                | 2                                                           |
| 98              | Croatia | 2003           | Potatoes                  | 281                                                         |
| 98              | Croatia | 2003           | Poultry Meat              | 30                                                          |
| 98              | Croatia | 2003           | Rice (Milled Equivalent)  | 6                                                           |
| 98              | Croatia | 2003           | Rye                       | 1                                                           |
| 98              | Croatia | 2003           | Soyabean Oil              | 13                                                          |
| 98              | Croatia | 2003           | Sugar, Refined Equivalent | 83                                                          |
| 98              | Croatia | 2003           | Sunflowerseed Oil         | 13                                                          |
| 98              | Croatia | 2003           | Sweeteners, Other         | 96                                                          |
| 98              | Croatia | 2003           | Tomatoes                  | 57                                                          |
| 98              | Croatia | 2003           | Vegetables, Other         | 188                                                         |
| 98              | Croatia | 2003           | Wheat                     | 284                                                         |
| 98              | Croatia | 2003           | Wine                      | 110                                                         |
| 98              | Croatia | 2004           | Apples                    | 50                                                          |
| 98              | Croatia | 2004           | Bananas                   | 30                                                          |
| 98              | Croatia | 2004           | Beans                     | 3                                                           |
| 98              | Croatia | 2004           | Beer                      | 225                                                         |
| 98              | Croatia | 2004           | Beverages, Alcoholic      | 8                                                           |
| 98              | Croatia | 2004           | Bovine Meat               | 21                                                          |
| 98              | Croatia | 2004           | Butter, Ghee              | 1                                                           |
| 98              | Croatia | 2004           | Cephalopods               | 4                                                           |
| 98              | Croatia | 2004           | Cereals, Other            | 5                                                           |
| 98              | Croatia | 2004           | Cheese                    | 20                                                          |
| 98              | Croatia | 2004           | Citrus, Other             | 1                                                           |
| 98              | Croatia | 2004           | Cocoa Beans               | 3                                                           |
| 98              | Croatia | 2004           | Coffee                    | 15                                                          |
| 98              | Croatia | 2004           | Crustaceans               | 1                                                           |
| 98              | Croatia | 2004           | Demersal Fish             | 6                                                           |
| 98              | Croatia | 2004           | Eggs                      | 28                                                          |
| 98              | Croatia | 2004           | Fats, Animals, Raw        | 14                                                          |
| 98              | Croatia | 2004           | Freshwater Fish           | 2                                                           |
| 98              | Croatia | 2004           | Fruits, Other             | 77                                                          |
| 98              | Croatia | 2004           | Grapefruit                | 2                                                           |
| 98              | Croatia | 2004           | Grapes                    | 26                                                          |
| 98              | Croatia | 2004           | Groundnuts (Shelled Eq)   | 2                                                           |
| 98              | Croatia | 2004           | Honey                     | 1                                                           |
| 98              | Croatia | 2004           | Lemons, Limes             | 7                                                           |
| 98              | Croatia | 2004           | Maize                     | 19                                                          |
| 98              | Croatia | 2004           | Maize Germ Oil            | 4                                                           |
| 98              | Croatia | 2004           | Marine Fish, Other        | 3                                                           |
| 98              | Croatia | 2004           | Meat, Other               | 2                                                           |
| 98              | Croatia | 2004           | Milk, Whole               | 321                                                         |
| 98              | Croatia | 2004           | Molluscs, Other           | 2                                                           |
| 98              | Croatia | 2004           | Mutton & Goat Meat        | 3                                                           |
| 98              | Croatia | 2004           | Nuts                      | 9                                                           |
| 98              | Croatia | 2004           | Offals, Edible            | 4                                                           |
| 98              | Croatia | 2004           | Oilcrops Oil, Other       | 1                                                           |
| 98              | Croatia | 2004           | Olive Oil                 | 4                                                           |
| 98              | Croatia | 2004           | Olives                    | 11                                                          |
| 98              | Croatia | 2004           | Onions                    | 14                                                          |
| 98              | Croatia | 2004           | Oranges, Mandarines       | 28                                                          |
| 98              | Croatia | 2004           | Palm Oil                  | 4                                                           |
| 98              | Croatia | 2004           | Peas                      | 1                                                           |
| 98              | Croatia | 2004           | Pelagic Fish              | 19                                                          |
| 98              | Croatia | 2004           | Pigmeat                   | 77                                                          |
| 98              | Croatia | 2004           | Pineapples                | 2                                                           |
| 98              | Croatia | 2004           | Potatoes                  | 183                                                         |
| 98              | Croatia | 2004           | Poultry Meat              | 31                                                          |
| 98              | Croatia | 2004           | Rice (Milled Equivalent)  | 6                                                           |
| 98              | Croatia | 2004           | Rye                       | 1                                                           |
| 98              | Croatia | 2004           | Soyabean Oil              | 12                                                          |
| 98              | Croatia | 2004           | Sugar, Refined Equivalent | 97                                                          |
| 98              | Croatia | 2004           | Sunflowerseed Oil         | 15                                                          |
| 98              | Croatia | 2004           | Sweeteners, Other         | 71                                                          |
| 98              | Croatia | 2004           | Tomatoes                  | 38                                                          |
| 98              | Croatia | 2004           | Vegetables, Other         | 145                                                         |
| 98              | Croatia | 2004           | Wheat                     | 289                                                         |
| 98              | Croatia | 2004           | Wine                      | 116                                                         |
| 98              | Croatia | 2005           | Apples                    | 30                                                          |
| 98              | Croatia | 2005           | Bananas                   | 32                                                          |
| 98              | Croatia | 2005           | Beans                     | 5                                                           |
| 98              | Croatia | 2005           | Beer                      | 220                                                         |
| 98              | Croatia | 2005           | Beverages, Alcoholic      | 6                                                           |
| 98              | Croatia | 2005           | Bovine Meat               | 20                                                          |

Dietary calcium and zinc deficiency risks are decreasing but remain prevalent

| FAO countrycode | Country | Reference year | Food item                 | Gross food supply (g capita <sup>-1</sup> d <sup>-1</sup> ) |
|-----------------|---------|----------------|---------------------------|-------------------------------------------------------------|
| 98              | Croatia | 2005           | Butter, Ghee              | 1                                                           |
| 98              | Croatia | 2005           | Cephalopods               | 4                                                           |
| 98              | Croatia | 2005           | Cereals, Other            | 9                                                           |
| 98              | Croatia | 2005           | Cheese                    | 19                                                          |
| 98              | Croatia | 2005           | Citrus, Other             | 1                                                           |
| 98              | Croatia | 2005           | Cocoa Beans               | 4                                                           |
| 98              | Croatia | 2005           | Coffee                    | 15                                                          |
| 98              | Croatia | 2005           | Crustaceans               | 1                                                           |
| 98              | Croatia | 2005           | Demersal Fish             | 6                                                           |
| 98              | Croatia | 2005           | Eggs                      | 29                                                          |
| 98              | Croatia | 2005           | Fats, Animals, Raw        | 18                                                          |
| 98              | Croatia | 2005           | Freshwater Fish           | 3                                                           |
| 98              | Croatia | 2005           | Fruits, Other             | 48                                                          |
| 98              | Croatia | 2005           | Grapefruit                | 2                                                           |
| 98              | Croatia | 2005           | Grapes                    | 55                                                          |
| 98              | Croatia | 2005           | Groundnuts (Shelled Eq)   | 2                                                           |
| 98              | Croatia | 2005           | Honey                     | 2                                                           |
| 98              | Croatia | 2005           | Lemons, Limes             | 7                                                           |
| 98              | Croatia | 2005           | Maize                     | 15                                                          |
| 98              | Croatia | 2005           | Maize Germ Oil            | 4                                                           |
| 98              | Croatia | 2005           | Marine Fish, Other        | 2                                                           |
| 98              | Croatia | 2005           | Meat, Other               | 2                                                           |
| 98              | Croatia | 2005           | Milk, Whole               | 361                                                         |
| 98              | Croatia | 2005           | Molluscs, Other           | 3                                                           |
| 98              | Croatia | 2005           | Mutton & Goat Meat        | 3                                                           |
| 98              | Croatia | 2005           | Nuts                      | 11                                                          |
| 98              | Croatia | 2005           | Offals, Edible            | 6                                                           |
| 98              | Croatia | 2005           | Oilcrops Oil, Other       | 1                                                           |
| 98              | Croatia | 2005           | Olive Oil                 | 4                                                           |
| 98              | Croatia | 2005           | Olives                    | 8                                                           |
| 98              | Croatia | 2005           | Onions                    | 15                                                          |
| 98              | Croatia | 2005           | Oranges, Mandarines       | 27                                                          |
| 98              | Croatia | 2005           | Palm Oil                  | 8                                                           |
| 98              | Croatia | 2005           | Peas                      | 1                                                           |
| 98              | Croatia | 2005           | Pelagic Fish              | 29                                                          |
| 98              | Croatia | 2005           | Pigmeat                   | 87                                                          |
| 98              | Croatia | 2005           | Pineapples                | 2                                                           |
| 98              | Croatia | 2005           | Potatoes                  | 178                                                         |
| 98              | Croatia | 2005           | Poultry Meat              | 24                                                          |
| 98              | Croatia | 2005           | Rice (Milled Equivalent)  | 7                                                           |
| 98              | Croatia | 2005           | Rye                       | 1                                                           |
| 98              | Croatia | 2005           | Soyabean Oil              | 9                                                           |
| 98              | Croatia | 2005           | Sugar, Refined Equivalent | 98                                                          |
| 98              | Croatia | 2005           | Sunflowerseed Oil         | 13                                                          |
| 98              | Croatia | 2005           | Sweeteners, Other         | 60                                                          |
| 98              | Croatia | 2005           | Tomatoes                  | 38                                                          |
| 98              | Croatia | 2005           | Vegetables, Other         | 132                                                         |
| 98              | Croatia | 2005           | Wheat                     | 291                                                         |
| 98              | Croatia | 2005           | Wine                      | 80                                                          |
| 98              | Croatia | 2006           | Apples                    | 55                                                          |
| 98              | Croatia | 2006           | Bananas                   | 31                                                          |
| 98              | Croatia | 2006           | Beans                     | 3                                                           |
| 98              | Croatia | 2006           | Beer                      | 222                                                         |
| 98              | Croatia | 2006           | Beverages, Alcoholic      | 8                                                           |
| 98              | Croatia | 2006           | Bovine Meat               | 24                                                          |
| 98              | Croatia | 2006           | Butter, Ghee              | 1                                                           |
| 98              | Croatia | 2006           | Cephalopods               | 5                                                           |
| 98              | Croatia | 2006           | Cereals, Other            | 5                                                           |
| 98              | Croatia | 2006           | Cheese                    | 20                                                          |
| 98              | Croatia | 2006           | Citrus, Other             | 1                                                           |
| 98              | Croatia | 2006           | Coffee                    | 16                                                          |
| 98              | Croatia | 2006           | Crustaceans               | 1                                                           |
| 98              | Croatia | 2006           | Demersal Fish             | 6                                                           |
| 98              | Croatia | 2006           | Eggs                      | 30                                                          |
| 98              | Croatia | 2006           | Fats, Animals, Raw        | 22                                                          |
| 98              | Croatia | 2006           | Freshwater Fish           | 3                                                           |
| 98              | Croatia | 2006           | Fruits, Other             | 65                                                          |
| 98              | Croatia | 2006           | Grapefruit                | 2                                                           |
| 98              | Croatia | 2006           | Grapes                    | 59                                                          |
| 98              | Croatia | 2006           | Groundnuts (Shelled Eq)   | 2                                                           |
| 98              | Croatia | 2006           | Honey                     | 1                                                           |
| 98              | Croatia | 2006           | Lemons, Limes             | 7                                                           |
| 98              | Croatia | 2006           | Maize                     | 15                                                          |
| 98              | Croatia | 2006           | Maize Germ Oil            | 5                                                           |
| 98              | Croatia | 2006           | Marine Fish, Other        | 2                                                           |
| 98              | Croatia | 2006           | Meat, Other               | 2                                                           |
| 98              | Croatia | 2006           | Milk, Whole               | 401                                                         |
| 98              | Croatia | 2006           | Molluscs, Other           | 5                                                           |
| 98              | Croatia | 2006           | Mutton & Goat Meat        | 3                                                           |
| 98              | Croatia | 2006           | Nuts                      | 11                                                          |
| 98              | Croatia | 2006           | Offals, Edible            | 5                                                           |
| 98              | Croatia | 2006           | Oilcrops Oil, Other       | 1                                                           |
| 98              | Croatia | 2006           | Olive Oil                 | 4                                                           |
| 98              | Croatia | 2006           | Olives                    | 4                                                           |
| 98              | Croatia | 2006           | Onions                    | 15                                                          |
| 98              | Croatia | 2006           | Oranges, Mandarines       | 45                                                          |
| 98              | Croatia | 2006           | Palm Oil                  | 7                                                           |
| 98              | Croatia | 2006           | Pelagic Fish              | 28                                                          |
| 98              | Croatia | 2006           | Pigmeat                   | 104                                                         |
| 98              | Croatia | 2006           | Pineapples                | 3                                                           |
| 98              | Croatia | 2006           | Potatoes                  | 181                                                         |
| 98              | Croatia | 2006           | Poultry Meat              | 25                                                          |
| 98              | Croatia | 2006           | Rice (Milled Equivalent)  | 7                                                           |
| 98              | Croatia | 2006           | Rye                       | 2                                                           |
| 98              | Croatia | 2006           | Soyabean Oil              | 9                                                           |
| 98              | Croatia | 2006           | Sugar, Refined Equivalent | 95                                                          |
| 98              | Croatia | 2006           | Sunflowerseed Oil         | 16                                                          |

Dietary calcium and zinc deficiency risks are decreasing but remain prevalent

| FAO countrycode | Country | Reference year | Food item                 | Gross food supply (g capita <sup>-1</sup> d <sup>-1</sup> ) |
|-----------------|---------|----------------|---------------------------|-------------------------------------------------------------|
| 98              | Croatia | 2006           | Sweeteners, Other         | 66                                                          |
| 98              | Croatia | 2006           | Tomatoes                  | 49                                                          |
| 98              | Croatia | 2006           | Vegetables, Other         | 157                                                         |
| 98              | Croatia | 2006           | Wheat                     | 285                                                         |
| 98              | Croatia | 2006           | Wine                      | 51                                                          |
| 98              | Croatia | 2007           | Apples                    | 47                                                          |
| 98              | Croatia | 2007           | Bananas                   | 33                                                          |
| 98              | Croatia | 2007           | Beans                     | 3                                                           |
| 98              | Croatia | 2007           | Beer                      | 237                                                         |
| 98              | Croatia | 2007           | Beverages, Alcoholic      | 10                                                          |
| 98              | Croatia | 2007           | Bovine Meat               | 24                                                          |
| 98              | Croatia | 2007           | Butter, Ghee              | 2                                                           |
| 98              | Croatia | 2007           | Cephalopods               | 6                                                           |
| 98              | Croatia | 2007           | Cereals, Other            | 6                                                           |
| 98              | Croatia | 2007           | Cheese                    | 24                                                          |
| 98              | Croatia | 2007           | Citrus, Other             | 1                                                           |
| 98              | Croatia | 2007           | Cocoa Beans               | 3                                                           |
| 98              | Croatia | 2007           | Coffee                    | 16                                                          |
| 98              | Croatia | 2007           | Crustaceans               | 1                                                           |
| 98              | Croatia | 2007           | Demersal Fish             | 7                                                           |
| 98              | Croatia | 2007           | Eggs                      | 30                                                          |
| 98              | Croatia | 2007           | Fats, Animals, Raw        | 26                                                          |
| 98              | Croatia | 2007           | Freshwater Fish           | 3                                                           |
| 98              | Croatia | 2007           | Fruits, Other             | 76                                                          |
| 98              | Croatia | 2007           | Grapefruit                | 3                                                           |
| 98              | Croatia | 2007           | Grapes                    | 74                                                          |
| 98              | Croatia | 2007           | Groundnuts (Shelled Eq)   | 2                                                           |
| 98              | Croatia | 2007           | Honey                     | 1                                                           |
| 98              | Croatia | 2007           | Lemons, Limes             | 8                                                           |
| 98              | Croatia | 2007           | Maize                     | 22                                                          |
| 98              | Croatia | 2007           | Maize Germ Oil            | 5                                                           |
| 98              | Croatia | 2007           | Marine Fish, Other        | 1                                                           |
| 98              | Croatia | 2007           | Meat, Other               | 2                                                           |
| 98              | Croatia | 2007           | Milk, Whole               | 350                                                         |
| 98              | Croatia | 2007           | Molluscs, Other           | 6                                                           |
| 98              | Croatia | 2007           | Mutton & Goat Meat        | 3                                                           |
| 98              | Croatia | 2007           | Nuts                      | 12                                                          |
| 98              | Croatia | 2007           | Offals, Edible            | 6                                                           |
| 98              | Croatia | 2007           | Oilcrops Oil, Other       | 1                                                           |
| 98              | Croatia | 2007           | Olive Oil                 | 4                                                           |
| 98              | Croatia | 2007           | Olives                    | 9                                                           |
| 98              | Croatia | 2007           | Onions                    | 22                                                          |
| 98              | Croatia | 2007           | Oranges, Mandarines       | 49                                                          |
| 98              | Croatia | 2007           | Palm Oil                  | 6                                                           |
| 98              | Croatia | 2007           | Peas                      | 1                                                           |
| 98              | Croatia | 2007           | Pelagic Fish              | 21                                                          |
| 98              | Croatia | 2007           | Pigmeat                   | 114                                                         |
| 98              | Croatia | 2007           | Pineapples                | 3                                                           |
| 98              | Croatia | 2007           | Potatoes                  | 191                                                         |
| 98              | Croatia | 2007           | Poultry Meat              | 29                                                          |
| 98              | Croatia | 2007           | Rice (Milled Equivalent)  | 7                                                           |
| 98              | Croatia | 2007           | Rye                       | 2                                                           |
| 98              | Croatia | 2007           | Soyabean Oil              | 7                                                           |
| 98              | Croatia | 2007           | Sugar, Refined Equivalent | 85                                                          |
| 98              | Croatia | 2007           | Sunflowerseed Oil         | 16                                                          |
| 98              | Croatia | 2007           | Sweeteners, Other         | 44                                                          |
| 98              | Croatia | 2007           | Tomatoes                  | 58                                                          |
| 98              | Croatia | 2007           | Vegetables, Other         | 161                                                         |
| 98              | Croatia | 2007           | Wheat                     | 267                                                         |
| 98              | Croatia | 2007           | Wine                      | 49                                                          |
| 98              | Croatia | 2008           | Apples                    | 56                                                          |
| 98              | Croatia | 2008           | Bananas                   | 34                                                          |
| 98              | Croatia | 2008           | Barley                    | 2                                                           |
| 98              | Croatia | 2008           | Beans                     | 3                                                           |
| 98              | Croatia | 2008           | Beer                      | 233                                                         |
| 98              | Croatia | 2008           | Beverages, Alcoholic      | 8                                                           |
| 98              | Croatia | 2008           | Bovine Meat               | 27                                                          |
| 98              | Croatia | 2008           | Butter, Ghee              | 3                                                           |
| 98              | Croatia | 2008           | Cephalopods               | 6                                                           |
| 98              | Croatia | 2008           | Cereals, Other            | 8                                                           |
| 98              | Croatia | 2008           | Cheese                    | 26                                                          |
| 98              | Croatia | 2008           | Citrus, Other             | 1                                                           |
| 98              | Croatia | 2008           | Cocoa Beans               | 7                                                           |
| 98              | Croatia | 2008           | Coffee                    | 16                                                          |
| 98              | Croatia | 2008           | Cream                     | 1                                                           |
| 98              | Croatia | 2008           | Crustaceans               | 1                                                           |
| 98              | Croatia | 2008           | Demersal Fish             | 8                                                           |
| 98              | Croatia | 2008           | Eggs                      | 29                                                          |
| 98              | Croatia | 2008           | Fats, Animals, Raw        | 22                                                          |
| 98              | Croatia | 2008           | Freshwater Fish           | 3                                                           |
| 98              | Croatia | 2008           | Fruits, Other             | 68                                                          |
| 98              | Croatia | 2008           | Grapefruit                | 2                                                           |
| 98              | Croatia | 2008           | Grapes                    | 77                                                          |
| 98              | Croatia | 2008           | Groundnuts (Shelled Eq)   | 2                                                           |
| 98              | Croatia | 2008           | Honey                     | 1                                                           |
| 98              | Croatia | 2008           | Lemons, Limes             | 7                                                           |
| 98              | Croatia | 2008           | Maize                     | 22                                                          |
| 98              | Croatia | 2008           | Maize Germ Oil            | 5                                                           |
| 98              | Croatia | 2008           | Marine Fish, Other        | 6                                                           |
| 98              | Croatia | 2008           | Meat, Other               | 2                                                           |
| 98              | Croatia | 2008           | Milk, Whole               | 322                                                         |
| 98              | Croatia | 2008           | Molluscs, Other           | 5                                                           |
| 98              | Croatia | 2008           | Mutton & Goat Meat        | 3                                                           |
| 98              | Croatia | 2008           | Nuts                      | 11                                                          |
| 98              | Croatia | 2008           | Offals, Edible            | 6                                                           |
| 98              | Croatia | 2008           | Oilcrops Oil, Other       | 1                                                           |
| 98              | Croatia | 2008           | Oilcrops, Other           | 1                                                           |

Dietary calcium and zinc deficiency risks are decreasing but remain prevalent

| FAO countrycode | Country | Reference year | Food item                 | Gross food supply (g capita <sup>-1</sup> d <sup>-1</sup> ) |
|-----------------|---------|----------------|---------------------------|-------------------------------------------------------------|
| 98              | Croatia | 2008           | Olive Oil                 | 4                                                           |
| 98              | Croatia | 2008           | Olives                    | 8                                                           |
| 98              | Croatia | 2008           | Onions                    | 27                                                          |
| 98              | Croatia | 2008           | Oranges, Mandarines       | 43                                                          |
| 98              | Croatia | 2008           | Palm Oil                  | 8                                                           |
| 98              | Croatia | 2008           | Peas                      | 1                                                           |
| 98              | Croatia | 2008           | Pelagic Fish              | 24                                                          |
| 98              | Croatia | 2008           | Pigmeat                   | 111                                                         |
| 98              | Croatia | 2008           | Pineapples                | 4                                                           |
| 98              | Croatia | 2008           | Potatoes                  | 168                                                         |
| 98              | Croatia | 2008           | Poultry Meat              | 29                                                          |
| 98              | Croatia | 2008           | Rice (Milled Equivalent)  | 7                                                           |
| 98              | Croatia | 2008           | Rye                       | 2                                                           |
| 98              | Croatia | 2008           | Soyabean Oil              | 8                                                           |
| 98              | Croatia | 2008           | Sugar, Refined Equivalent | 88                                                          |
| 98              | Croatia | 2008           | Sunflowerseed Oil         | 17                                                          |
| 98              | Croatia | 2008           | Sweeteners, Other         | 53                                                          |
| 98              | Croatia | 2008           | Tomatoes                  | 49                                                          |
| 98              | Croatia | 2008           | Vegetables, Other         | 168                                                         |
| 98              | Croatia | 2008           | Wheat                     | 272                                                         |
| 98              | Croatia | 2008           | Wine                      | 39                                                          |
| 98              | Croatia | 2009           | Apples                    | 64                                                          |
| 98              | Croatia | 2009           | Bananas                   | 31                                                          |
| 98              | Croatia | 2009           | Barley                    | 2                                                           |
| 98              | Croatia | 2009           | Beans                     | 2                                                           |
| 98              | Croatia | 2009           | Beer                      | 220                                                         |
| 98              | Croatia | 2009           | Beverages, Alcoholic      | 7                                                           |
| 98              | Croatia | 2009           | Bovine Meat               | 28                                                          |
| 98              | Croatia | 2009           | Butter, Ghee              | 3                                                           |
| 98              | Croatia | 2009           | Cephalopods               | 6                                                           |
| 98              | Croatia | 2009           | Cereals, Other            | 8                                                           |
| 98              | Croatia | 2009           | Cheese                    | 24                                                          |
| 98              | Croatia | 2009           | Citrus, Other             | 1                                                           |
| 98              | Croatia | 2009           | Cocoa Beans               | 6                                                           |
| 98              | Croatia | 2009           | Coffee                    | 15                                                          |
| 98              | Croatia | 2009           | Crustaceans               | 1                                                           |
| 98              | Croatia | 2009           | Demersal Fish             | 7                                                           |
| 98              | Croatia | 2009           | Eggs                      | 30                                                          |
| 98              | Croatia | 2009           | Fats, Animals, Raw        | 21                                                          |
| 98              | Croatia | 2009           | Freshwater Fish           | 4                                                           |
| 98              | Croatia | 2009           | Fruits, Other             | 66                                                          |
| 98              | Croatia | 2009           | Grapefruit                | 2                                                           |
| 98              | Croatia | 2009           | Grapes                    | 85                                                          |
| 98              | Croatia | 2009           | Groundnuts (Shelled Eq)   | 2                                                           |
| 98              | Croatia | 2009           | Honey                     | 1                                                           |
| 98              | Croatia | 2009           | Lemons, Limes             | 8                                                           |
| 98              | Croatia | 2009           | Maize                     | 24                                                          |
| 98              | Croatia | 2009           | Maize Germ Oil            | 5                                                           |
| 98              | Croatia | 2009           | Marine Fish, Other        | 1                                                           |
| 98              | Croatia | 2009           | Meat, Other               | 2                                                           |
| 98              | Croatia | 2009           | Milk, Whole               | 299                                                         |
| 98              | Croatia | 2009           | Molluscs, Other           | 5                                                           |
| 98              | Croatia | 2009           | Mutton & Goat Meat        | 3                                                           |
| 98              | Croatia | 2009           | Nuts                      | 12                                                          |
| 98              | Croatia | 2009           | Offals, Edible            | 7                                                           |
| 98              | Croatia | 2009           | Oilcrops Oil, Other       | 1                                                           |
| 98              | Croatia | 2009           | Oilcrops, Other           | 1                                                           |
| 98              | Croatia | 2009           | Olive Oil                 | 2                                                           |
| 98              | Croatia | 2009           | Olives                    | 18                                                          |
| 98              | Croatia | 2009           | Onions                    | 26                                                          |
| 98              | Croatia | 2009           | Oranges, Mandarines       | 41                                                          |
| 98              | Croatia | 2009           | Palm Oil                  | 7                                                           |
| 98              | Croatia | 2009           | Peas                      | 1                                                           |
| 98              | Croatia | 2009           | Pelagic Fish              | 29                                                          |
| 98              | Croatia | 2009           | Pigmeat                   | 123                                                         |
| 98              | Croatia | 2009           | Pineapples                | 3                                                           |
| 98              | Croatia | 2009           | Potatoes                  | 174                                                         |
| 98              | Croatia | 2009           | Poultry Meat              | 28                                                          |
| 98              | Croatia | 2009           | Rice (Milled Equivalent)  | 7                                                           |
| 98              | Croatia | 2009           | Rye                       | 2                                                           |
| 98              | Croatia | 2009           | Soyabean Oil              | 9                                                           |
| 98              | Croatia | 2009           | Sugar, Refined Equivalent | 88                                                          |
| 98              | Croatia | 2009           | Sunflowerseed Oil         | 13                                                          |
| 98              | Croatia | 2009           | Sweeteners, Other         | 51                                                          |
| 98              | Croatia | 2009           | Tomatoes                  | 53                                                          |
| 98              | Croatia | 2009           | Vegetables, Other         | 187                                                         |
| 98              | Croatia | 2009           | Wheat                     | 282                                                         |
| 98              | Croatia | 2009           | Wine                      | 42                                                          |
| 98              | Croatia | 2010           | Apples                    | 56                                                          |
| 98              | Croatia | 2010           | Bananas                   | 30                                                          |
| 98              | Croatia | 2010           | Barley                    | 2                                                           |
| 98              | Croatia | 2010           | Beans                     | 1                                                           |
| 98              | Croatia | 2010           | Beer                      | 210                                                         |
| 98              | Croatia | 2010           | Beverages, Alcoholic      | 8                                                           |
| 98              | Croatia | 2010           | Beverages, Fermented      | 1                                                           |
| 98              | Croatia | 2010           | Bovine Meat               | 25                                                          |
| 98              | Croatia | 2010           | Butter, Ghee              | 2                                                           |
| 98              | Croatia | 2010           | Cephalopods               | 5                                                           |
| 98              | Croatia | 2010           | Cereals, Other            | 1                                                           |
| 98              | Croatia | 2010           | Cheese                    | 25                                                          |
| 98              | Croatia | 2010           | Cocoa Beans               | 7                                                           |
| 98              | Croatia | 2010           | Coffee                    | 15                                                          |
| 98              | Croatia | 2010           | Cream                     | 1                                                           |
| 98              | Croatia | 2010           | Crustaceans               | 1                                                           |
| 98              | Croatia | 2010           | Demersal Fish             | 10                                                          |
| 98              | Croatia | 2010           | Eggs                      | 27                                                          |
| 98              | Croatia | 2010           | Fats, Animals, Raw        | 19                                                          |

## Dietary calcium and zinc deficiency risks are decreasing but remain prevalent

| FAO countrycode | Country | Reference year | Food item                 | Gross food supply (g capita <sup>-1</sup> d <sup>-1</sup> ) |
|-----------------|---------|----------------|---------------------------|-------------------------------------------------------------|
| 98              | Croatia | 2010           | Freshwater Fish           | 4                                                           |
| 98              | Croatia | 2010           | Fruits, Other             | 59                                                          |
| 98              | Croatia | 2010           | Grapefruit                | 2                                                           |
| 98              | Croatia | 2010           | Grapes                    | 94                                                          |
| 98              | Croatia | 2010           | Groundnuts (Shelled Eq)   | 2                                                           |
| 98              | Croatia | 2010           | Honey                     | 1                                                           |
| 98              | Croatia | 2010           | Lemons, Limes             | 7                                                           |
| 98              | Croatia | 2010           | Maize                     | 20                                                          |
| 98              | Croatia | 2010           | Maize Germ Oil            | 5                                                           |
| 98              | Croatia | 2010           | Marine Fish, Other        | 1                                                           |
| 98              | Croatia | 2010           | Meat, Other               | 2                                                           |
| 98              | Croatia | 2010           | Milk, Whole               | 308                                                         |
| 98              | Croatia | 2010           | Molluscs, Other           | 5                                                           |
| 98              | Croatia | 2010           | Mutton & Goat Meat        | 2                                                           |
| 98              | Croatia | 2010           | Nuts                      | 13                                                          |
| 98              | Croatia | 2010           | Offals, Edible            | 6                                                           |
| 98              | Croatia | 2010           | Oilcrops Oil, Other       | 2                                                           |
| 98              | Croatia | 2010           | Oilcrops, Other           | 1                                                           |
| 98              | Croatia | 2010           | Olive Oil                 | 2                                                           |
| 98              | Croatia | 2010           | Olives                    | 20                                                          |
| 98              | Croatia | 2010           | Onions                    | 23                                                          |
| 98              | Croatia | 2010           | Oranges, Mandarines       | 39                                                          |
| 98              | Croatia | 2010           | Palm Oil                  | 6                                                           |
| 98              | Croatia | 2010           | Pelagic Fish              | 24                                                          |
| 98              | Croatia | 2010           | Pigmeat                   | 115                                                         |
| 98              | Croatia | 2010           | Pineapples                | 3                                                           |
| 98              | Croatia | 2010           | Potatoes                  | 129                                                         |
| 98              | Croatia | 2010           | Poultry Meat              | 22                                                          |
| 98              | Croatia | 2010           | Rice (Milled Equivalent)  | 7                                                           |
| 98              | Croatia | 2010           | Rye                       | 2                                                           |
| 98              | Croatia | 2010           | Soyabean Oil              | 8                                                           |
| 98              | Croatia | 2010           | Sugar, Refined Equivalent | 96                                                          |
| 98              | Croatia | 2010           | Sunflowerseed Oil         | 8                                                           |
| 98              | Croatia | 2010           | Sweeteners, Other         | 60                                                          |
| 98              | Croatia | 2010           | Tomatoes                  | 51                                                          |
| 98              | Croatia | 2010           | Vegetables, Other         | 148                                                         |
| 98              | Croatia | 2010           | Wheat                     | 292                                                         |
| 98              | Croatia | 2010           | Wine                      | 37                                                          |
| 98              | Croatia | 2011           | Apples                    | 69                                                          |
| 98              | Croatia | 2011           | Bananas                   | 29                                                          |
| 98              | Croatia | 2011           | Barley                    | 2                                                           |
| 98              | Croatia | 2011           | Beans                     | 2                                                           |
| 98              | Croatia | 2011           | Beer                      | 230                                                         |
| 98              | Croatia | 2011           | Beverages, Alcoholic      | 9                                                           |
| 98              | Croatia | 2011           | Beverages, Fermented      | 5                                                           |
| 98              | Croatia | 2011           | Bovine Meat               | 25                                                          |
| 98              | Croatia | 2011           | Butter, Ghee              | 2                                                           |
| 98              | Croatia | 2011           | Cephalopods               | 7                                                           |
| 98              | Croatia | 2011           | Cereals, Other            | 2                                                           |
| 98              | Croatia | 2011           | Cheese                    | 26                                                          |
| 98              | Croatia | 2011           | Cocoa Beans               | 7                                                           |
| 98              | Croatia | 2011           | Coffee                    | 15                                                          |
| 98              | Croatia | 2011           | Cream                     | 1                                                           |
| 98              | Croatia | 2011           | Crustaceans               | 1                                                           |
| 98              | Croatia | 2011           | Demersal Fish             | 10                                                          |
| 98              | Croatia | 2011           | Eggs                      | 26                                                          |
| 98              | Croatia | 2011           | Fats, Animals, Raw        | 19                                                          |
| 98              | Croatia | 2011           | Freshwater Fish           | 4                                                           |
| 98              | Croatia | 2011           | Fruits, Other             | 62                                                          |
| 98              | Croatia | 2011           | Grapefruit                | 2                                                           |
| 98              | Croatia | 2011           | Grapes                    | 93                                                          |
| 98              | Croatia | 2011           | Groundnuts (Shelled Eq)   | 2                                                           |
| 98              | Croatia | 2011           | Honey                     | 2                                                           |
| 98              | Croatia | 2011           | Lemons, Limes             | 8                                                           |
| 98              | Croatia | 2011           | Maize                     | 22                                                          |
| 98              | Croatia | 2011           | Maize Germ Oil            | 5                                                           |
| 98              | Croatia | 2011           | Marine Fish, Other        | 2                                                           |
| 98              | Croatia | 2011           | Meat, Other               | 2                                                           |
| 98              | Croatia | 2011           | Milk, Whole               | 322                                                         |
| 98              | Croatia | 2011           | Molluscs, Other           | 4                                                           |
| 98              | Croatia | 2011           | Mutton & Goat Meat        | 2                                                           |
| 98              | Croatia | 2011           | Nuts                      | 10                                                          |
| 98              | Croatia | 2011           | Offals, Edible            | 5                                                           |
| 98              | Croatia | 2011           | Oilcrops Oil, Other       | 1                                                           |
| 98              | Croatia | 2011           | Oilcrops, Other           | 1                                                           |
| 98              | Croatia | 2011           | Olive Oil                 | 2                                                           |
| 98              | Croatia | 2011           | Olives                    | 19                                                          |
| 98              | Croatia | 2011           | Onions                    | 24                                                          |
| 98              | Croatia | 2011           | Oranges, Mandarines       | 43                                                          |
| 98              | Croatia | 2011           | Palm Oil                  | 6                                                           |
| 98              | Croatia | 2011           | Pelagic Fish              | 27                                                          |
| 98              | Croatia | 2011           | Pigmeat                   | 117                                                         |
| 98              | Croatia | 2011           | Pineapples                | 2                                                           |
| 98              | Croatia | 2011           | Potatoes                  | 116                                                         |
| 98              | Croatia | 2011           | Poultry Meat              | 24                                                          |
| 98              | Croatia | 2011           | Rice (Milled Equivalent)  | 7                                                           |
| 98              | Croatia | 2011           | Rye                       | 2                                                           |
| 98              | Croatia | 2011           | Soyabean Oil              | 8                                                           |
| 98              | Croatia | 2011           | Sugar, Refined Equivalent | 93                                                          |
| 98              | Croatia | 2011           | Sunflowerseed Oil         | 9                                                           |
| 98              | Croatia | 2011           | Sweeteners, Other         | 42                                                          |
| 98              | Croatia | 2011           | Tomatoes                  | 50                                                          |
| 98              | Croatia | 2011           | Vegetables, Other         | 149                                                         |
| 98              | Croatia | 2011           | Wheat                     | 291                                                         |
| 98              | Croatia | 2011           | Wine                      | 38                                                          |
| 49              | Cuba    | 1992           | Bananas                   | 64                                                          |
| 49              | Cuba    | 1992           | Beans                     | 4                                                           |

Dietary calcium and zinc deficiency risks are decreasing but remain prevalent

| FAO countrycode | Country | Reference year | Food item                 | Gross food supply (g capita <sup>-1</sup> d <sup>-1</sup> ) |
|-----------------|---------|----------------|---------------------------|-------------------------------------------------------------|
| 49              | Cuba    | 1992           | Beer                      | 49                                                          |
| 49              | Cuba    | 1992           | Beverages, Alcoholic      | 14                                                          |
| 49              | Cuba    | 1992           | Bovine Meat               | 20                                                          |
| 49              | Cuba    | 1992           | Butter, Ghee              | 4                                                           |
| 49              | Cuba    | 1992           | Cassava                   | 46                                                          |
| 49              | Cuba    | 1992           | Cheese                    | 4                                                           |
| 49              | Cuba    | 1992           | Citrus, Other             | 1                                                           |
| 49              | Cuba    | 1992           | Cocoa Beans               | 1                                                           |
| 49              | Cuba    | 1992           | Coconuts - Incl Copra     | 2                                                           |
| 49              | Cuba    | 1992           | Coffee                    | 2                                                           |
| 49              | Cuba    | 1992           | Demersal Fish             | 19                                                          |
| 49              | Cuba    | 1992           | Eggs                      | 24                                                          |
| 49              | Cuba    | 1992           | Fats, Animals, Raw        | 8                                                           |
| 49              | Cuba    | 1992           | Freshwater Fish           | 6                                                           |
| 49              | Cuba    | 1992           | Fruits, Other             | 37                                                          |
| 49              | Cuba    | 1992           | Grapefruit                | 43                                                          |
| 49              | Cuba    | 1992           | Groundnuts (Shelled Eq)   | 1                                                           |
| 49              | Cuba    | 1992           | Honey                     | 1                                                           |
| 49              | Cuba    | 1992           | Lemons, Limes             | 4                                                           |
| 49              | Cuba    | 1992           | Maize                     | 8                                                           |
| 49              | Cuba    | 1992           | Marine Fish, Other        | 6                                                           |
| 49              | Cuba    | 1992           | Meat, Other               | 3                                                           |
| 49              | Cuba    | 1992           | Milk, Whole               | 83                                                          |
| 49              | Cuba    | 1992           | Molluscs, Other           | 1                                                           |
| 49              | Cuba    | 1992           | Mutton & Goat Meat        | 2                                                           |
| 49              | Cuba    | 1992           | Offals, Edible            | 7                                                           |
| 49              | Cuba    | 1992           | Onions                    | 4                                                           |
| 49              | Cuba    | 1992           | Oranges, Mandarines       | 85                                                          |
| 49              | Cuba    | 1992           | Palm Oil                  | 4                                                           |
| 49              | Cuba    | 1992           | Pelagic Fish              | 2                                                           |
| 49              | Cuba    | 1992           | Pigmeat                   | 21                                                          |
| 49              | Cuba    | 1992           | Pineapples                | 5                                                           |
| 49              | Cuba    | 1992           | Plantains                 | 69                                                          |
| 49              | Cuba    | 1992           | Potatoes                  | 67                                                          |
| 49              | Cuba    | 1992           | Poultry Meat              | 18                                                          |
| 49              | Cuba    | 1992           | Pulses, Other             | 40                                                          |
| 49              | Cuba    | 1992           | Rice (Milled Equivalent)  | 127                                                         |
| 49              | Cuba    | 1992           | Roots, Other              | 4                                                           |
| 49              | Cuba    | 1992           | Soyabean Oil              | 9                                                           |
| 49              | Cuba    | 1992           | Sugar, Refined Equivalent | 147                                                         |
| 49              | Cuba    | 1992           | Sunflowerseed Oil         | 8                                                           |
| 49              | Cuba    | 1992           | Sweet Potatoes            | 51                                                          |
| 49              | Cuba    | 1992           | Tomatoes                  | 60                                                          |
| 49              | Cuba    | 1992           | Vegetables, Other         | 74                                                          |
| 49              | Cuba    | 1992           | Wheat                     | 129                                                         |
| 49              | Cuba    | 1992           | Yams                      | 2                                                           |
| 49              | Cuba    | 1993           | Bananas                   | 38                                                          |
| 49              | Cuba    | 1993           | Beans                     | 3                                                           |
| 49              | Cuba    | 1993           | Beer                      | 35                                                          |
| 49              | Cuba    | 1993           | Beverages, Alcoholic      | 11                                                          |
| 49              | Cuba    | 1993           | Bovine Meat               | 17                                                          |
| 49              | Cuba    | 1993           | Butter, Ghee              | 4                                                           |
| 49              | Cuba    | 1993           | Cassava                   | 34                                                          |
| 49              | Cuba    | 1993           | Cephalopods               | 1                                                           |
| 49              | Cuba    | 1993           | Cheese                    | 4                                                           |
| 49              | Cuba    | 1993           | Citrus, Other             | 1                                                           |
| 49              | Cuba    | 1993           | Coconuts - Incl Copra     | 3                                                           |
| 49              | Cuba    | 1993           | Coffee                    | 2                                                           |
| 49              | Cuba    | 1993           | Demersal Fish             | 25                                                          |
| 49              | Cuba    | 1993           | Eggs                      | 16                                                          |
| 49              | Cuba    | 1993           | Fats, Animals, Raw        | 6                                                           |
| 49              | Cuba    | 1993           | Freshwater Fish           | 6                                                           |
| 49              | Cuba    | 1993           | Fruits, Other             | 24                                                          |
| 49              | Cuba    | 1993           | Grapefruit                | 47                                                          |
| 49              | Cuba    | 1993           | Groundnuts (Shelled Eq)   | 1                                                           |
| 49              | Cuba    | 1993           | Lemons, Limes             | 3                                                           |
| 49              | Cuba    | 1993           | Maize                     | 8                                                           |
| 49              | Cuba    | 1993           | Marine Fish, Other        | 4                                                           |
| 49              | Cuba    | 1993           | Meat, Other               | 3                                                           |
| 49              | Cuba    | 1993           | Milk, Whole               | 75                                                          |
| 49              | Cuba    | 1993           | Molluscs, Other           | 1                                                           |
| 49              | Cuba    | 1993           | Mutton & Goat Meat        | 1                                                           |
| 49              | Cuba    | 1993           | Offals, Edible            | 6                                                           |
| 49              | Cuba    | 1993           | Onions                    | 2                                                           |
| 49              | Cuba    | 1993           | Oranges, Mandarines       | 79                                                          |
| 49              | Cuba    | 1993           | Palm Oil                  | 8                                                           |
| 49              | Cuba    | 1993           | Pelagic Fish              | 1                                                           |
| 49              | Cuba    | 1993           | Pigmeat                   | 28                                                          |
| 49              | Cuba    | 1993           | Pineapples                | 2                                                           |
| 49              | Cuba    | 1993           | Plantains                 | 54                                                          |
| 49              | Cuba    | 1993           | Potatoes                  | 65                                                          |
| 49              | Cuba    | 1993           | Poultry Meat              | 17                                                          |
| 49              | Cuba    | 1993           | Pulses, Other             | 29                                                          |
| 49              | Cuba    | 1993           | Rice (Milled Equivalent)  | 122                                                         |
| 49              | Cuba    | 1993           | Roots, Other              | 2                                                           |
| 49              | Cuba    | 1993           | Soyabean Oil              | 10                                                          |
| 49              | Cuba    | 1993           | Sugar, Refined Equivalent | 147                                                         |
| 49              | Cuba    | 1993           | Sunflowerseed Oil         | 5                                                           |
| 49              | Cuba    | 1993           | Sweet Potatoes            | 33                                                          |
| 49              | Cuba    | 1993           | Tomatoes                  | 38                                                          |
| 49              | Cuba    | 1993           | Vegetables, Other         | 64                                                          |
| 49              | Cuba    | 1993           | Wheat                     | 115                                                         |
| 49              | Cuba    | 1993           | Yams                      | 2                                                           |
| 49              | Cuba    | 1994           | Bananas                   | 37                                                          |
| 49              | Cuba    | 1994           | Beans                     | 4                                                           |
| 49              | Cuba    | 1994           | Beer                      | 32                                                          |
| 49              | Cuba    | 1994           | Beverages, Alcoholic      | 16                                                          |



## Dietary calcium and zinc deficiency risks are decreasing but remain prevalent

| FAO countrycode | Country | Reference year | Food item                 | Gross food supply (g capita <sup>-1</sup> d <sup>-1</sup> ) |
|-----------------|---------|----------------|---------------------------|-------------------------------------------------------------|
| 49              | Cuba    | 1994           | Bovine Meat               | 16                                                          |
| 49              | Cuba    | 1994           | Butter, Ghee              | 4                                                           |
| 49              | Cuba    | 1994           | Cassava                   | 28                                                          |
| 49              | Cuba    | 1994           | Cephalopods               | 1                                                           |
| 49              | Cuba    | 1994           | Cheese                    | 4                                                           |
| 49              | Cuba    | 1994           | Citrus, Other             | 1                                                           |
| 49              | Cuba    | 1994           | Coconuts - Incl Copra     | 2                                                           |
| 49              | Cuba    | 1994           | Coffee                    | 2                                                           |
| 49              | Cuba    | 1994           | Demersal Fish             | 19                                                          |
| 49              | Cuba    | 1994           | Eggs                      | 16                                                          |
| 49              | Cuba    | 1994           | Fats, Animals, Raw        | 6                                                           |
| 49              | Cuba    | 1994           | Freshwater Fish           | 6                                                           |
| 49              | Cuba    | 1994           | Fruits, Other             | 30                                                          |
| 49              | Cuba    | 1994           | Grapefruit                | 45                                                          |
| 49              | Cuba    | 1994           | Groundnuts (Shelled Eq)   | 1                                                           |
| 49              | Cuba    | 1994           | Lemons, Limes             | 3                                                           |
| 49              | Cuba    | 1994           | Maize                     | 6                                                           |
| 49              | Cuba    | 1994           | Marine Fish, Other        | 5                                                           |
| 49              | Cuba    | 1994           | Meat, Other               | 3                                                           |
| 49              | Cuba    | 1994           | Milk, Whole               | 86                                                          |
| 49              | Cuba    | 1994           | Molluscs, Other           | 1                                                           |
| 49              | Cuba    | 1994           | Mutton & Goat Meat        | 2                                                           |
| 49              | Cuba    | 1994           | Offals, Edible            | 5                                                           |
| 49              | Cuba    | 1994           | Onions                    | 2                                                           |
| 49              | Cuba    | 1994           | Oranges, Mandarines       | 61                                                          |
| 49              | Cuba    | 1994           | Palm Oil                  | 11                                                          |
| 49              | Cuba    | 1994           | Pelagic Fish              | 1                                                           |
| 49              | Cuba    | 1994           | Pigmeat                   | 30                                                          |
| 49              | Cuba    | 1994           | Pineapples                | 2                                                           |
| 49              | Cuba    | 1994           | Plantains                 | 53                                                          |
| 49              | Cuba    | 1994           | Potatoes                  | 51                                                          |
| 49              | Cuba    | 1994           | Poultry Meat              | 17                                                          |
| 49              | Cuba    | 1994           | Pulses, Other             | 42                                                          |
| 49              | Cuba    | 1994           | Rice (Milled Equivalent)  | 134                                                         |
| 49              | Cuba    | 1994           | Roots, Other              | 2                                                           |
| 49              | Cuba    | 1994           | Soyabean Oil              | 11                                                          |
| 49              | Cuba    | 1994           | Sugar, Refined Equivalent | 138                                                         |
| 49              | Cuba    | 1994           | Sunflowerseed Oil         | 1                                                           |
| 49              | Cuba    | 1994           | Sweet Potatoes            | 36                                                          |
| 49              | Cuba    | 1994           | Tomatoes                  | 21                                                          |
| 49              | Cuba    | 1994           | Vegetables, Other         | 63                                                          |
| 49              | Cuba    | 1994           | Wheat                     | 119                                                         |
| 49              | Cuba    | 1994           | Yams                      | 2                                                           |
| 49              | Cuba    | 1995           | Bananas                   | 41                                                          |
| 49              | Cuba    | 1995           | Beans                     | 5                                                           |
| 49              | Cuba    | 1995           | Beer                      | 35                                                          |
| 49              | Cuba    | 1995           | Beverages, Alcoholic      | 15                                                          |
| 49              | Cuba    | 1995           | Bovine Meat               | 17                                                          |
| 49              | Cuba    | 1995           | Butter, Ghee              | 1                                                           |
| 49              | Cuba    | 1995           | Cassava                   | 31                                                          |
| 49              | Cuba    | 1995           | Cheese                    | 4                                                           |
| 49              | Cuba    | 1995           | Citrus, Other             | 1                                                           |
| 49              | Cuba    | 1995           | Cocoa Beans               | 1                                                           |
| 49              | Cuba    | 1995           | Coconuts - Incl Copra     | 3                                                           |
| 49              | Cuba    | 1995           | Coffee                    | 2                                                           |
| 49              | Cuba    | 1995           | Demersal Fish             | 23                                                          |
| 49              | Cuba    | 1995           | Eggs                      | 15                                                          |
| 49              | Cuba    | 1995           | Fats, Animals, Raw        | 3                                                           |
| 49              | Cuba    | 1995           | Freshwater Fish           | 7                                                           |
| 49              | Cuba    | 1995           | Fruits, Other             | 45                                                          |
| 49              | Cuba    | 1995           | Grapefruit                | 54                                                          |
| 49              | Cuba    | 1995           | Groundnut Oil             | 1                                                           |
| 49              | Cuba    | 1995           | Groundnuts (Shelled Eq)   | 2                                                           |
| 49              | Cuba    | 1995           | Lemons, Limes             | 4                                                           |
| 49              | Cuba    | 1995           | Maize                     | 7                                                           |
| 49              | Cuba    | 1995           | Marine Fish, Other        | 5                                                           |
| 49              | Cuba    | 1995           | Meat, Other               | 4                                                           |
| 49              | Cuba    | 1995           | Milk, Whole               | 125                                                         |
| 49              | Cuba    | 1995           | Molluscs, Other           | 1                                                           |
| 49              | Cuba    | 1995           | Mutton & Goat Meat        | 1                                                           |
| 49              | Cuba    | 1995           | Offals, Edible            | 5                                                           |
| 49              | Cuba    | 1995           | Onions                    | 2                                                           |
| 49              | Cuba    | 1995           | Oranges, Mandarines       | 65                                                          |
| 49              | Cuba    | 1995           | Palm Oil                  | 7                                                           |
| 49              | Cuba    | 1995           | Pelagic Fish              | 1                                                           |
| 49              | Cuba    | 1995           | Pigmeat                   | 27                                                          |
| 49              | Cuba    | 1995           | Pineapples                | 2                                                           |
| 49              | Cuba    | 1995           | Plantains                 | 57                                                          |
| 49              | Cuba    | 1995           | Potatoes                  | 69                                                          |
| 49              | Cuba    | 1995           | Poultry Meat              | 18                                                          |
| 49              | Cuba    | 1995           | Pulses, Other             | 32                                                          |
| 49              | Cuba    | 1995           | Rice (Milled Equivalent)  | 135                                                         |
| 49              | Cuba    | 1995           | Roots, Other              | 2                                                           |
| 49              | Cuba    | 1995           | Soyabean Oil              | 8                                                           |
| 49              | Cuba    | 1995           | Sugar, Refined Equivalent | 147                                                         |
| 49              | Cuba    | 1995           | Sunflowerseed Oil         | 2                                                           |
| 49              | Cuba    | 1995           | Sweet Potatoes            | 39                                                          |
| 49              | Cuba    | 1995           | Tomatoes                  | 40                                                          |
| 49              | Cuba    | 1995           | Vegetables, Other         | 68                                                          |
| 49              | Cuba    | 1995           | Wheat                     | 120                                                         |
| 49              | Cuba    | 1995           | Yams                      | 1                                                           |
| 49              | Cuba    | 1996           | Bananas                   | 44                                                          |
| 49              | Cuba    | 1996           | Beans                     | 6                                                           |
| 49              | Cuba    | 1996           | Beer                      | 40                                                          |
| 49              | Cuba    | 1996           | Beverages, Alcoholic      | 13                                                          |
| 49              | Cuba    | 1996           | Bovine Meat               | 18                                                          |
| 49              | Cuba    | 1996           | Cassava                   | 37                                                          |

Dietary calcium and zinc deficiency risks are decreasing but remain prevalent

| FAO countrycode | Country | Reference year | Food item                 | Gross food supply (g capita <sup>-1</sup> d <sup>-1</sup> ) |
|-----------------|---------|----------------|---------------------------|-------------------------------------------------------------|
| 49              | Cuba    | 1996           | Cheese                    | 4                                                           |
| 49              | Cuba    | 1996           | Citrus, Other             | 1                                                           |
| 49              | Cuba    | 1996           | Cocoa Beans               | 1                                                           |
| 49              | Cuba    | 1996           | Coconuts - Incl Copra     | 4                                                           |
| 49              | Cuba    | 1996           | Coffee                    | 2                                                           |
| 49              | Cuba    | 1996           | Demersal Fish             | 19                                                          |
| 49              | Cuba    | 1996           | Eggs                      | 14                                                          |
| 49              | Cuba    | 1996           | Fats, Animals, Raw        | 3                                                           |
| 49              | Cuba    | 1996           | Freshwater Fish           | 11                                                          |
| 49              | Cuba    | 1996           | Fruits, Other             | 42                                                          |
| 49              | Cuba    | 1996           | Grapefruit                | 74                                                          |
| 49              | Cuba    | 1996           | Groundnuts (Shelled Eq)   | 2                                                           |
| 49              | Cuba    | 1996           | Lemons, Limes             | 4                                                           |
| 49              | Cuba    | 1996           | Maize                     | 7                                                           |
| 49              | Cuba    | 1996           | Marine Fish, Other        | 4                                                           |
| 49              | Cuba    | 1996           | Meat, Other               | 4                                                           |
| 49              | Cuba    | 1996           | Milk, Whole               | 124                                                         |
| 49              | Cuba    | 1996           | Molluscs, Other           | 1                                                           |
| 49              | Cuba    | 1996           | Mutton & Goat Meat        | 1                                                           |
| 49              | Cuba    | 1996           | Offals, Edible            | 5                                                           |
| 49              | Cuba    | 1996           | Onions                    | 3                                                           |
| 49              | Cuba    | 1996           | Oranges, Mandarines       | 68                                                          |
| 49              | Cuba    | 1996           | Palm Oil                  | 6                                                           |
| 49              | Cuba    | 1996           | Pelagic Fish              | 1                                                           |
| 49              | Cuba    | 1996           | Pigmeat                   | 28                                                          |
| 49              | Cuba    | 1996           | Pineapples                | 2                                                           |
| 49              | Cuba    | 1996           | Plantains                 | 88                                                          |
| 49              | Cuba    | 1996           | Potatoes                  | 90                                                          |
| 49              | Cuba    | 1996           | Poultry Meat              | 19                                                          |
| 49              | Cuba    | 1996           | Pulses, Other             | 33                                                          |
| 49              | Cuba    | 1996           | Rice (Milled Equivalent)  | 143                                                         |
| 49              | Cuba    | 1996           | Roots, Other              | 3                                                           |
| 49              | Cuba    | 1996           | Soyabean Oil              | 8                                                           |
| 49              | Cuba    | 1996           | Sugar, Refined Equivalent | 154                                                         |
| 49              | Cuba    | 1996           | Sunflowerseed Oil         | 2                                                           |
| 49              | Cuba    | 1996           | Sweet Potatoes            | 39                                                          |
| 49              | Cuba    | 1996           | Tomatoes                  | 46                                                          |
| 49              | Cuba    | 1996           | Vegetables, Other         | 89                                                          |
| 49              | Cuba    | 1996           | Wheat                     | 127                                                         |
| 49              | Cuba    | 1996           | Yams                      | 1                                                           |
| 49              | Cuba    | 1997           | Bananas                   | 33                                                          |
| 49              | Cuba    | 1997           | Beans                     | 7                                                           |
| 49              | Cuba    | 1997           | Beer                      | 37                                                          |
| 49              | Cuba    | 1997           | Beverages, Alcoholic      | 13                                                          |
| 49              | Cuba    | 1997           | Bovine Meat               | 18                                                          |
| 49              | Cuba    | 1997           | Cassava                   | 37                                                          |
| 49              | Cuba    | 1997           | Cephalopods               | 1                                                           |
| 49              | Cuba    | 1997           | Cheese                    | 5                                                           |
| 49              | Cuba    | 1997           | Citrus, Other             | 1                                                           |
| 49              | Cuba    | 1997           | Coconuts - Incl Copra     | 5                                                           |
| 49              | Cuba    | 1997           | Coffee                    | 4                                                           |
| 49              | Cuba    | 1997           | Crustaceans               | 1                                                           |
| 49              | Cuba    | 1997           | Demersal Fish             | 15                                                          |
| 49              | Cuba    | 1997           | Eggs                      | 16                                                          |
| 49              | Cuba    | 1997           | Fats, Animals, Raw        | 3                                                           |
| 49              | Cuba    | 1997           | Freshwater Fish           | 10                                                          |
| 49              | Cuba    | 1997           | Fruits, Other             | 41                                                          |
| 49              | Cuba    | 1997           | Grapefruit                | 60                                                          |
| 49              | Cuba    | 1997           | Groundnut Oil             | 1                                                           |
| 49              | Cuba    | 1997           | Groundnuts (Shelled Eq)   | 2                                                           |
| 49              | Cuba    | 1997           | Lemons, Limes             | 4                                                           |
| 49              | Cuba    | 1997           | Maize                     | 9                                                           |
| 49              | Cuba    | 1997           | Marine Fish, Other        | 4                                                           |
| 49              | Cuba    | 1997           | Meat, Other               | 4                                                           |
| 49              | Cuba    | 1997           | Milk, Whole               | 126                                                         |
| 49              | Cuba    | 1997           | Molluscs, Other           | 1                                                           |
| 49              | Cuba    | 1997           | Mutton & Goat Meat        | 1                                                           |
| 49              | Cuba    | 1997           | Offals, Edible            | 4                                                           |
| 49              | Cuba    | 1997           | Onions                    | 3                                                           |
| 49              | Cuba    | 1997           | Oranges, Mandarines       | 114                                                         |
| 49              | Cuba    | 1997           | Palm Oil                  | 6                                                           |
| 49              | Cuba    | 1997           | Pelagic Fish              | 1                                                           |
| 49              | Cuba    | 1997           | Pigmeat                   | 21                                                          |
| 49              | Cuba    | 1997           | Pineapples                | 1                                                           |
| 49              | Cuba    | 1997           | Plantains                 | 73                                                          |
| 49              | Cuba    | 1997           | Potatoes                  | 84                                                          |
| 49              | Cuba    | 1997           | Poultry Meat              | 23                                                          |
| 49              | Cuba    | 1997           | Pulses, Other             | 37                                                          |
| 49              | Cuba    | 1997           | Rice (Milled Equivalent)  | 151                                                         |
| 49              | Cuba    | 1997           | Roots, Other              | 5                                                           |
| 49              | Cuba    | 1997           | Soyabean Oil              | 8                                                           |
| 49              | Cuba    | 1997           | Sugar, Refined Equivalent | 168                                                         |
| 49              | Cuba    | 1997           | Sunflowerseed Oil         | 2                                                           |
| 49              | Cuba    | 1997           | Sweet Potatoes            | 38                                                          |
| 49              | Cuba    | 1997           | Tomatoes                  | 41                                                          |
| 49              | Cuba    | 1997           | Vegetables, Other         | 86                                                          |
| 49              | Cuba    | 1997           | Wheat                     | 137                                                         |
| 49              | Cuba    | 1998           | Bananas                   | 37                                                          |
| 49              | Cuba    | 1998           | Beans                     | 9                                                           |
| 49              | Cuba    | 1998           | Beer                      | 49                                                          |
| 49              | Cuba    | 1998           | Beverages, Alcoholic      | 14                                                          |
| 49              | Cuba    | 1998           | Bovine Meat               | 18                                                          |
| 49              | Cuba    | 1998           | Butter, Ghee              | 1                                                           |
| 49              | Cuba    | 1998           | Cassava                   | 56                                                          |
| 49              | Cuba    | 1998           | Cheese                    | 4                                                           |
| 49              | Cuba    | 1998           | Citrus, Other             | 1                                                           |
| 49              | Cuba    | 1998           | Cocoa Beans               | 1                                                           |

Dietary calcium and zinc deficiency risks are decreasing but remain prevalent

| FAO countrycode | Country | Reference year | Food item                 | Gross food supply (g capita <sup>-1</sup> d <sup>-1</sup> ) |
|-----------------|---------|----------------|---------------------------|-------------------------------------------------------------|
| 49              | Cuba    | 1998           | Coconuts - Incl Copra     | 8                                                           |
| 49              | Cuba    | 1998           | Coffee                    | 2                                                           |
| 49              | Cuba    | 1998           | Demersal Fish             | 14                                                          |
| 49              | Cuba    | 1998           | Eggs                      | 14                                                          |
| 49              | Cuba    | 1998           | Fats, Animals, Raw        | 3                                                           |
| 49              | Cuba    | 1998           | Freshwater Fish           | 10                                                          |
| 49              | Cuba    | 1998           | Fruits, Other             | 57                                                          |
| 49              | Cuba    | 1998           | Grapefruit                | 69                                                          |
| 49              | Cuba    | 1998           | Groundnut Oil             | 1                                                           |
| 49              | Cuba    | 1998           | Groundnuts (Shelled Eq)   | 2                                                           |
| 49              | Cuba    | 1998           | Lemons, Limes             | 4                                                           |
| 49              | Cuba    | 1998           | Maize                     | 13                                                          |
| 49              | Cuba    | 1998           | Marine Fish, Other        | 3                                                           |
| 49              | Cuba    | 1998           | Meat, Other               | 4                                                           |
| 49              | Cuba    | 1998           | Milk, Whole               | 127                                                         |
| 49              | Cuba    | 1998           | Molluscs, Other           | 1                                                           |
| 49              | Cuba    | 1998           | Mutton & Goat Meat        | 1                                                           |
| 49              | Cuba    | 1998           | Offals, Edible            | 5                                                           |
| 49              | Cuba    | 1998           | Oilcrops Oil, Other       | 1                                                           |
| 49              | Cuba    | 1998           | Onions                    | 5                                                           |
| 49              | Cuba    | 1998           | Oranges, Mandarines       | 87                                                          |
| 49              | Cuba    | 1998           | Palm Oil                  | 7                                                           |
| 49              | Cuba    | 1998           | Pelagic Fish              | 3                                                           |
| 49              | Cuba    | 1998           | Pigmeat                   | 22                                                          |
| 49              | Cuba    | 1998           | Pineapples                | 2                                                           |
| 49              | Cuba    | 1998           | Plantains                 | 75                                                          |
| 49              | Cuba    | 1998           | Potatoes                  | 54                                                          |
| 49              | Cuba    | 1998           | Poultry Meat              | 27                                                          |
| 49              | Cuba    | 1998           | Pulses, Other             | 40                                                          |
| 49              | Cuba    | 1998           | Rice (Milled Equivalent)  | 153                                                         |
| 49              | Cuba    | 1998           | Roots, Other              | 9                                                           |
| 49              | Cuba    | 1998           | Soyabean Oil              | 9                                                           |
| 49              | Cuba    | 1998           | Soyabeans                 | 1                                                           |
| 49              | Cuba    | 1998           | Sugar, Refined Equivalent | 162                                                         |
| 49              | Cuba    | 1998           | Sunflowerseed Oil         | 2                                                           |
| 49              | Cuba    | 1998           | Sweet Potatoes            | 45                                                          |
| 49              | Cuba    | 1998           | Tomatoes                  | 32                                                          |
| 49              | Cuba    | 1998           | Vegetables, Other         | 125                                                         |
| 49              | Cuba    | 1998           | Wheat                     | 138                                                         |
| 49              | Cuba    | 1998           | Yams                      | 2                                                           |
| 49              | Cuba    | 1999           | Bananas                   | 34                                                          |
| 49              | Cuba    | 1999           | Beans                     | 34                                                          |
| 49              | Cuba    | 1999           | Beer                      | 51                                                          |
| 49              | Cuba    | 1999           | Beverages, Alcoholic      | 15                                                          |
| 49              | Cuba    | 1999           | Bovine Meat               | 20                                                          |
| 49              | Cuba    | 1999           | Butter, Ghee              | 1                                                           |
| 49              | Cuba    | 1999           | Cassava                   | 68                                                          |
| 49              | Cuba    | 1999           | Cheese                    | 4                                                           |
| 49              | Cuba    | 1999           | Citrus, Other             | 1                                                           |
| 49              | Cuba    | 1999           | Cocoa Beans               | 1                                                           |
| 49              | Cuba    | 1999           | Coconuts - Incl Copra     | 10                                                          |
| 49              | Cuba    | 1999           | Coffee                    | 5                                                           |
| 49              | Cuba    | 1999           | Crustaceans               | 1                                                           |
| 49              | Cuba    | 1999           | Demersal Fish             | 4                                                           |
| 49              | Cuba    | 1999           | Eggs                      | 17                                                          |
| 49              | Cuba    | 1999           | Fats, Animals, Raw        | 3                                                           |
| 49              | Cuba    | 1999           | Freshwater Fish           | 10                                                          |
| 49              | Cuba    | 1999           | Fruits, Other             | 104                                                         |
| 49              | Cuba    | 1999           | Grapefruit                | 25                                                          |
| 49              | Cuba    | 1999           | Grapes                    | 1                                                           |
| 49              | Cuba    | 1999           | Groundnuts (Shelled Eq)   | 1                                                           |
| 49              | Cuba    | 1999           | Lemons, Limes             | 5                                                           |
| 49              | Cuba    | 1999           | Maize                     | 19                                                          |
| 49              | Cuba    | 1999           | Marine Fish, Other        | 9                                                           |
| 49              | Cuba    | 1999           | Milk, Whole               | 165                                                         |
| 49              | Cuba    | 1999           | Molluscs, Other           | 1                                                           |
| 49              | Cuba    | 1999           | Mutton & Goat Meat        | 2                                                           |
| 49              | Cuba    | 1999           | Offals, Edible            | 6                                                           |
| 49              | Cuba    | 1999           | Oilcrops Oil, Other       | 1                                                           |
| 49              | Cuba    | 1999           | Onions                    | 10                                                          |
| 49              | Cuba    | 1999           | Oranges, Mandarines       | 67                                                          |
| 49              | Cuba    | 1999           | Pelagic Fish              | 3                                                           |
| 49              | Cuba    | 1999           | Pigmeat                   | 29                                                          |
| 49              | Cuba    | 1999           | Pineapples                | 3                                                           |
| 49              | Cuba    | 1999           | Plantains                 | 84                                                          |
| 49              | Cuba    | 1999           | Potatoes                  | 85                                                          |
| 49              | Cuba    | 1999           | Poultry Meat              | 30                                                          |
| 49              | Cuba    | 1999           | Pulses, Other             | 32                                                          |
| 49              | Cuba    | 1999           | Rice (Milled Equivalent)  | 164                                                         |
| 49              | Cuba    | 1999           | Roots, Other              | 17                                                          |
| 49              | Cuba    | 1999           | Soyabean Oil              | 7                                                           |
| 49              | Cuba    | 1999           | Soyabeans                 | 1                                                           |
| 49              | Cuba    | 1999           | Sugar, Refined Equivalent | 171                                                         |
| 49              | Cuba    | 1999           | Sunflowerseed Oil         | 7                                                           |
| 49              | Cuba    | 1999           | Sweet Potatoes            | 47                                                          |
| 49              | Cuba    | 1999           | Sweeteners, Other         | 1                                                           |
| 49              | Cuba    | 1999           | Tomatoes                  | 90                                                          |
| 49              | Cuba    | 1999           | Vegetables, Other         | 168                                                         |
| 49              | Cuba    | 1999           | Wheat                     | 144                                                         |
| 49              | Cuba    | 1999           | Wine                      | 4                                                           |
| 49              | Cuba    | 1999           | Yams                      | 2                                                           |
| 49              | Cuba    | 2000           | Bananas                   | 49                                                          |
| 49              | Cuba    | 2000           | Beans                     | 36                                                          |
| 49              | Cuba    | 2000           | Beer                      | 53                                                          |
| 49              | Cuba    | 2000           | Beverages, Alcoholic      | 14                                                          |
| 49              | Cuba    | 2000           | Bovine Meat               | 20                                                          |
| 49              | Cuba    | 2000           | Butter, Ghee              | 1                                                           |

Dietary calcium and zinc deficiency risks are decreasing but remain prevalent

| FAO countrycode | Country | Reference year | Food item                 | Gross food supply (g capita <sup>-1</sup> d <sup>-1</sup> ) |
|-----------------|---------|----------------|---------------------------|-------------------------------------------------------------|
| 49              | Cuba    | 2000           | Cassava                   | 69                                                          |
| 49              | Cuba    | 2000           | Cheese                    | 4                                                           |
| 49              | Cuba    | 2000           | Cocoa Beans               | 1                                                           |
| 49              | Cuba    | 2000           | Coconuts - Incl Copra     | 18                                                          |
| 49              | Cuba    | 2000           | Coffee                    | 3                                                           |
| 49              | Cuba    | 2000           | Demersal Fish             | 3                                                           |
| 49              | Cuba    | 2000           | Eggs                      | 17                                                          |
| 49              | Cuba    | 2000           | Fats, Animals, Raw        | 2                                                           |
| 49              | Cuba    | 2000           | Freshwater Fish           | 8                                                           |
| 49              | Cuba    | 2000           | Fruits, Other             | 123                                                         |
| 49              | Cuba    | 2000           | Grapefruit                | 36                                                          |
| 49              | Cuba    | 2000           | Grapes                    | 1                                                           |
| 49              | Cuba    | 2000           | Groundnuts (Shelled Eq)   | 1                                                           |
| 49              | Cuba    | 2000           | Lemons, Limes             | 4                                                           |
| 49              | Cuba    | 2000           | Maize                     | 30                                                          |
| 49              | Cuba    | 2000           | Marine Fish, Other        | 13                                                          |
| 49              | Cuba    | 2000           | Milk, Whole               | 170                                                         |
| 49              | Cuba    | 2000           | Molluscs, Other           | 2                                                           |
| 49              | Cuba    | 2000           | Mutton & Goat Meat        | 2                                                           |
| 49              | Cuba    | 2000           | Offals, Edible            | 5                                                           |
| 49              | Cuba    | 2000           | Oilcrops Oil, Other       | 1                                                           |
| 49              | Cuba    | 2000           | Onions                    | 16                                                          |
| 49              | Cuba    | 2000           | Oranges, Mandarines       | 64                                                          |
| 49              | Cuba    | 2000           | Pelagic Fish              | 6                                                           |
| 49              | Cuba    | 2000           | Pigmeat                   | 29                                                          |
| 49              | Cuba    | 2000           | Pineapples                | 5                                                           |
| 49              | Cuba    | 2000           | Plantains                 | 117                                                         |
| 49              | Cuba    | 2000           | Potatoes                  | 91                                                          |
| 49              | Cuba    | 2000           | Poultry Meat              | 30                                                          |
| 49              | Cuba    | 2000           | Pulses, Other             | 22                                                          |
| 49              | Cuba    | 2000           | Rice (Milled Equivalent)  | 163                                                         |
| 49              | Cuba    | 2000           | Roots, Other              | 14                                                          |
| 49              | Cuba    | 2000           | Soyabean Oil              | 10                                                          |
| 49              | Cuba    | 2000           | Soyabean                  | 1                                                           |
| 49              | Cuba    | 2000           | Sugar, Refined Equivalent | 164                                                         |
| 49              | Cuba    | 2000           | Sunflowerseed Oil         | 8                                                           |
| 49              | Cuba    | 2000           | Sweet Potatoes            | 54                                                          |
| 49              | Cuba    | 2000           | Sweeteners, Other         | 1                                                           |
| 49              | Cuba    | 2000           | Tomatoes                  | 122                                                         |
| 49              | Cuba    | 2000           | Vegetables, Other         | 210                                                         |
| 49              | Cuba    | 2000           | Wheat                     | 154                                                         |
| 49              | Cuba    | 2000           | Whey                      | 1                                                           |
| 49              | Cuba    | 2000           | Wine                      | 5                                                           |
| 49              | Cuba    | 2000           | Yams                      | 5                                                           |
| 49              | Cuba    | 2001           | Apples                    | 1                                                           |
| 49              | Cuba    | 2001           | Bananas                   | 58                                                          |
| 49              | Cuba    | 2001           | Beans                     | 48                                                          |
| 49              | Cuba    | 2001           | Beer                      | 55                                                          |
| 49              | Cuba    | 2001           | Beverages, Alcoholic      | 14                                                          |
| 49              | Cuba    | 2001           | Bovine Meat               | 19                                                          |
| 49              | Cuba    | 2001           | Butter, Ghee              | 1                                                           |
| 49              | Cuba    | 2001           | Cassava                   | 68                                                          |
| 49              | Cuba    | 2001           | Cheese                    | 4                                                           |
| 49              | Cuba    | 2001           | Cocoa Beans               | 1                                                           |
| 49              | Cuba    | 2001           | Coconuts - Incl Copra     | 20                                                          |
| 49              | Cuba    | 2001           | Coffee                    | 3                                                           |
| 49              | Cuba    | 2001           | Demersal Fish             | 2                                                           |
| 49              | Cuba    | 2001           | Eggs                      | 15                                                          |
| 49              | Cuba    | 2001           | Fats, Animals, Raw        | 2                                                           |
| 49              | Cuba    | 2001           | Freshwater Fish           | 6                                                           |
| 49              | Cuba    | 2001           | Fruits, Other             | 130                                                         |
| 49              | Cuba    | 2001           | Grapefruit                | 31                                                          |
| 49              | Cuba    | 2001           | Grapes                    | 1                                                           |
| 49              | Cuba    | 2001           | Groundnuts (Shelled Eq)   | 1                                                           |
| 49              | Cuba    | 2001           | Lemons, Limes             | 4                                                           |
| 49              | Cuba    | 2001           | Maize                     | 39                                                          |
| 49              | Cuba    | 2001           | Marine Fish, Other        | 7                                                           |
| 49              | Cuba    | 2001           | Milk, Whole               | 162                                                         |
| 49              | Cuba    | 2001           | Molluscs, Other           | 3                                                           |
| 49              | Cuba    | 2001           | Mutton & Goat Meat        | 2                                                           |
| 49              | Cuba    | 2001           | Offals, Edible            | 6                                                           |
| 49              | Cuba    | 2001           | Oilcrops Oil, Other       | 1                                                           |
| 49              | Cuba    | 2001           | Onions                    | 20                                                          |
| 49              | Cuba    | 2001           | Oranges, Mandarines       | 94                                                          |
| 49              | Cuba    | 2001           | Pelagic Fish              | 9                                                           |
| 49              | Cuba    | 2001           | Pigmeat                   | 26                                                          |
| 49              | Cuba    | 2001           | Pineapples                | 7                                                           |
| 49              | Cuba    | 2001           | Plantains                 | 131                                                         |
| 49              | Cuba    | 2001           | Potatoes                  | 84                                                          |
| 49              | Cuba    | 2001           | Poultry Meat              | 33                                                          |
| 49              | Cuba    | 2001           | Pulses, Other             | 16                                                          |
| 49              | Cuba    | 2001           | Rice (Milled Equivalent)  | 163                                                         |
| 49              | Cuba    | 2001           | Roots, Other              | 15                                                          |
| 49              | Cuba    | 2001           | Soyabean Oil              | 15                                                          |
| 49              | Cuba    | 2001           | Soyabean                  | 1                                                           |
| 49              | Cuba    | 2001           | Sugar, Refined Equivalent | 156                                                         |
| 49              | Cuba    | 2001           | Sunflowerseed Oil         | 2                                                           |
| 49              | Cuba    | 2001           | Sweet Potatoes            | 64                                                          |
| 49              | Cuba    | 2001           | Sweeteners, Other         | 1                                                           |
| 49              | Cuba    | 2001           | Tomatoes                  | 101                                                         |
| 49              | Cuba    | 2001           | Vegetables, Other         | 265                                                         |
| 49              | Cuba    | 2001           | Wheat                     | 159                                                         |
| 49              | Cuba    | 2001           | Wine                      | 4                                                           |
| 49              | Cuba    | 2001           | Yams                      | 7                                                           |
| 49              | Cuba    | 2002           | Apples                    | 1                                                           |
| 49              | Cuba    | 2002           | Bananas                   | 38                                                          |
| 49              | Cuba    | 2002           | Beans                     | 28                                                          |

## Dietary calcium and zinc deficiency risks are decreasing but remain prevalent

| FAO countrycode | Country | Reference year | Food item                 | Gross food supply (g capita <sup>-1</sup> d <sup>-1</sup> ) |
|-----------------|---------|----------------|---------------------------|-------------------------------------------------------------|
| 49              | Cuba    | 2002           | Beer                      | 58                                                          |
| 49              | Cuba    | 2002           | Beverages, Alcoholic      | 15                                                          |
| 49              | Cuba    | 2002           | Bovine Meat               | 17                                                          |
| 49              | Cuba    | 2002           | Butter, Ghee              | 1                                                           |
| 49              | Cuba    | 2002           | Cassava                   | 57                                                          |
| 49              | Cuba    | 2002           | Cephalopods               | 2                                                           |
| 49              | Cuba    | 2002           | Cheese                    | 4                                                           |
| 49              | Cuba    | 2002           | Coconuts - Incl Copra     | 24                                                          |
| 49              | Cuba    | 2002           | Coffee                    | 3                                                           |
| 49              | Cuba    | 2002           | Demersal Fish             | 3                                                           |
| 49              | Cuba    | 2002           | Eggs                      | 18                                                          |
| 49              | Cuba    | 2002           | Fats, Animals, Raw        | 2                                                           |
| 49              | Cuba    | 2002           | Freshwater Fish           | 6                                                           |
| 49              | Cuba    | 2002           | Fruits, Other             | 137                                                         |
| 49              | Cuba    | 2002           | Grapefruit                | 17                                                          |
| 49              | Cuba    | 2002           | Grapes                    | 1                                                           |
| 49              | Cuba    | 2002           | Groundnut Oil             | 1                                                           |
| 49              | Cuba    | 2002           | Groundnuts (Shelled Eq)   | 2                                                           |
| 49              | Cuba    | 2002           | Lemons, Limes             | 4                                                           |
| 49              | Cuba    | 2002           | Maize                     | 50                                                          |
| 49              | Cuba    | 2002           | Marine Fish, Other        | 5                                                           |
| 49              | Cuba    | 2002           | Milk, Whole               | 143                                                         |
| 49              | Cuba    | 2002           | Molluscs, Other           | 1                                                           |
| 49              | Cuba    | 2002           | Mutton & Goat Meat        | 2                                                           |
| 49              | Cuba    | 2002           | Offals, Edible            | 5                                                           |
| 49              | Cuba    | 2002           | Onions                    | 21                                                          |
| 49              | Cuba    | 2002           | Oranges, Mandarines       | 51                                                          |
| 49              | Cuba    | 2002           | Pelagic Fish              | 1                                                           |
| 49              | Cuba    | 2002           | Pig meat                  | 28                                                          |
| 49              | Cuba    | 2002           | Pineapples                | 8                                                           |
| 49              | Cuba    | 2002           | Plantains                 | 105                                                         |
| 49              | Cuba    | 2002           | Potatoes                  | 81                                                          |
| 49              | Cuba    | 2002           | Poultry Meat              | 38                                                          |
| 49              | Cuba    | 2002           | Pulses, Other             | 14                                                          |
| 49              | Cuba    | 2002           | Rice (Milled Equivalent)  | 210                                                         |
| 49              | Cuba    | 2002           | Roots, Other              | 31                                                          |
| 49              | Cuba    | 2002           | Soyabean Oil              | 18                                                          |
| 49              | Cuba    | 2002           | Sugar, Refined Equivalent | 143                                                         |
| 49              | Cuba    | 2002           | Sweet Potatoes            | 72                                                          |
| 49              | Cuba    | 2002           | Tomatoes                  | 109                                                         |
| 49              | Cuba    | 2002           | Vegetables, Other         | 262                                                         |
| 49              | Cuba    | 2002           | Wheat                     | 161                                                         |
| 49              | Cuba    | 2002           | Wine                      | 3                                                           |
| 49              | Cuba    | 2002           | Yams                      | 22                                                          |
| 49              | Cuba    | 2003           | Apples                    | 1                                                           |
| 49              | Cuba    | 2003           | Bananas                   | 57                                                          |
| 49              | Cuba    | 2003           | Beans                     | 62                                                          |
| 49              | Cuba    | 2003           | Beer                      | 57                                                          |
| 49              | Cuba    | 2003           | Beverages, Alcoholic      | 14                                                          |
| 49              | Cuba    | 2003           | Bovine Meat               | 15                                                          |
| 49              | Cuba    | 2003           | Butter, Ghee              | 1                                                           |
| 49              | Cuba    | 2003           | Cassava                   | 117                                                         |
| 49              | Cuba    | 2003           | Cephalopods               | 2                                                           |
| 49              | Cuba    | 2003           | Cheese                    | 4                                                           |
| 49              | Cuba    | 2003           | Citrus, Other             | 1                                                           |
| 49              | Cuba    | 2003           | Cocoa Beans               | 1                                                           |
| 49              | Cuba    | 2003           | Coconuts - Incl Copra     | 24                                                          |
| 49              | Cuba    | 2003           | Coffee                    | 3                                                           |
| 49              | Cuba    | 2003           | Demersal Fish             | 2                                                           |
| 49              | Cuba    | 2003           | Eggs                      | 18                                                          |
| 49              | Cuba    | 2003           | Fats, Animals, Raw        | 2                                                           |
| 49              | Cuba    | 2003           | Freshwater Fish           | 7                                                           |
| 49              | Cuba    | 2003           | Fruits, Other             | 154                                                         |
| 49              | Cuba    | 2003           | Grapefruit                | 32                                                          |
| 49              | Cuba    | 2003           | Grapes                    | 1                                                           |
| 49              | Cuba    | 2003           | Groundnuts (Shelled Eq)   | 3                                                           |
| 49              | Cuba    | 2003           | Lemons, Limes             | 6                                                           |
| 49              | Cuba    | 2003           | Maize                     | 66                                                          |
| 49              | Cuba    | 2003           | Marine Fish, Other        | 9                                                           |
| 49              | Cuba    | 2003           | Milk, Whole               | 145                                                         |
| 49              | Cuba    | 2003           | Molluscs, Other           | 1                                                           |
| 49              | Cuba    | 2003           | Mutton & Goat Meat        | 2                                                           |
| 49              | Cuba    | 2003           | Offals, Edible            | 4                                                           |
| 49              | Cuba    | 2003           | Onions                    | 23                                                          |
| 49              | Cuba    | 2003           | Oranges, Mandarines       | 84                                                          |
| 49              | Cuba    | 2003           | Pelagic Fish              | 2                                                           |
| 49              | Cuba    | 2003           | Pig meat                  | 28                                                          |
| 49              | Cuba    | 2003           | Pineapples                | 9                                                           |
| 49              | Cuba    | 2003           | Plantains                 | 159                                                         |
| 49              | Cuba    | 2003           | Potatoes                  | 77                                                          |
| 49              | Cuba    | 2003           | Poultry Meat              | 38                                                          |
| 49              | Cuba    | 2003           | Pulses, Other             | 5                                                           |
| 49              | Cuba    | 2003           | Rice (Milled Equivalent)  | 163                                                         |
| 49              | Cuba    | 2003           | Roots, Other              | 29                                                          |
| 49              | Cuba    | 2003           | Soyabean Oil              | 14                                                          |
| 49              | Cuba    | 2003           | Sugar, Refined Equivalent | 136                                                         |
| 49              | Cuba    | 2003           | Sweet Potatoes            | 92                                                          |
| 49              | Cuba    | 2003           | Sweeteners, Other         | 1                                                           |
| 49              | Cuba    | 2003           | Tomatoes                  | 142                                                         |
| 49              | Cuba    | 2003           | Vegetables, Other         | 307                                                         |
| 49              | Cuba    | 2003           | Wheat                     | 170                                                         |
| 49              | Cuba    | 2003           | Wine                      | 4                                                           |
| 49              | Cuba    | 2003           | Yams                      | 16                                                          |
| 49              | Cuba    | 2004           | Apples                    | 1                                                           |
| 49              | Cuba    | 2004           | Bananas                   | 82                                                          |
| 49              | Cuba    | 2004           | Beans                     | 53                                                          |
| 49              | Cuba    | 2004           | Beer                      | 55                                                          |

Dietary calcium and zinc deficiency risks are decreasing but remain prevalent

| FAO countrycode | Country | Reference year | Food item                 | Gross food supply (g capita <sup>-1</sup> d <sup>-1</sup> ) |
|-----------------|---------|----------------|---------------------------|-------------------------------------------------------------|
| 49              | Cuba    | 2004           | Beverages, Alcoholic      | 13                                                          |
| 49              | Cuba    | 2004           | Bovine Meat               | 16                                                          |
| 49              | Cuba    | 2004           | Butter, Ghee              | 1                                                           |
| 49              | Cuba    | 2004           | Cassava                   | 77                                                          |
| 49              | Cuba    | 2004           | Cheese                    | 4                                                           |
| 49              | Cuba    | 2004           | Citrus, Other             | 1                                                           |
| 49              | Cuba    | 2004           | Cocoa Beans               | 1                                                           |
| 49              | Cuba    | 2004           | Coconuts - Incl Copra     | 26                                                          |
| 49              | Cuba    | 2004           | Coffee                    | 4                                                           |
| 49              | Cuba    | 2004           | Demersal Fish             | 2                                                           |
| 49              | Cuba    | 2004           | Eggs                      | 18                                                          |
| 49              | Cuba    | 2004           | Fats, Animals, Raw        | 2                                                           |
| 49              | Cuba    | 2004           | Freshwater Fish           | 7                                                           |
| 49              | Cuba    | 2004           | Fruits, Other             | 157                                                         |
| 49              | Cuba    | 2004           | Grapefruit                | 27                                                          |
| 49              | Cuba    | 2004           | Grapes                    | 1                                                           |
| 49              | Cuba    | 2004           | Groundnuts (Shelled Eq)   | 3                                                           |
| 49              | Cuba    | 2004           | Lemons, Limes             | 5                                                           |
| 49              | Cuba    | 2004           | Maize                     | 74                                                          |
| 49              | Cuba    | 2004           | Marine Fish, Other        | 15                                                          |
| 49              | Cuba    | 2004           | Milk, Whole               | 133                                                         |
| 49              | Cuba    | 2004           | Molluscs, Other           | 1                                                           |
| 49              | Cuba    | 2004           | Mutton & Goat Meat        | 2                                                           |
| 49              | Cuba    | 2004           | Offals, Edible            | 4                                                           |
| 49              | Cuba    | 2004           | Oilcrops Oil, Other       | 1                                                           |
| 49              | Cuba    | 2004           | Onions                    | 32                                                          |
| 49              | Cuba    | 2004           | Oranges, Mandarines       | 69                                                          |
| 49              | Cuba    | 2004           | Pelagic Fish              | 2                                                           |
| 49              | Cuba    | 2004           | Pig meat                  | 31                                                          |
| 49              | Cuba    | 2004           | Pineapples                | 10                                                          |
| 49              | Cuba    | 2004           | Plantains                 | 152                                                         |
| 49              | Cuba    | 2004           | Potatoes                  | 81                                                          |
| 49              | Cuba    | 2004           | Poultry Meat              | 44                                                          |
| 49              | Cuba    | 2004           | Pulses, Other             | 10                                                          |
| 49              | Cuba    | 2004           | Rice (Milled Equivalent)  | 183                                                         |
| 49              | Cuba    | 2004           | Roots, Other              | 19                                                          |
| 49              | Cuba    | 2004           | Soyabean Oil              | 21                                                          |
| 49              | Cuba    | 2004           | Sugar, Refined Equivalent | 155                                                         |
| 49              | Cuba    | 2004           | Sweet Potatoes            | 88                                                          |
| 49              | Cuba    | 2004           | Sweeteners, Other         | 1                                                           |
| 49              | Cuba    | 2004           | Tomatoes                  | 173                                                         |
| 49              | Cuba    | 2004           | Vegetables, Other         | 227                                                         |
| 49              | Cuba    | 2004           | Wheat                     | 140                                                         |
| 49              | Cuba    | 2004           | Wine                      | 3                                                           |
| 49              | Cuba    | 2004           | Yams                      | 13                                                          |
| 49              | Cuba    | 2005           | Apples                    | 1                                                           |
| 49              | Cuba    | 2005           | Bananas                   | 57                                                          |
| 49              | Cuba    | 2005           | Beans                     | 49                                                          |
| 49              | Cuba    | 2005           | Beer                      | 55                                                          |
| 49              | Cuba    | 2005           | Beverages, Alcoholic      | 16                                                          |
| 49              | Cuba    | 2005           | Bovine Meat               | 18                                                          |
| 49              | Cuba    | 2005           | Butter, Ghee              | 1                                                           |
| 49              | Cuba    | 2005           | Cassava                   | 70                                                          |
| 49              | Cuba    | 2005           | Cheese                    | 4                                                           |
| 49              | Cuba    | 2005           | Citrus, Other             | 1                                                           |
| 49              | Cuba    | 2005           | Cocoa Beans               | 1                                                           |
| 49              | Cuba    | 2005           | Coconuts - Incl Copra     | 25                                                          |
| 49              | Cuba    | 2005           | Coffee                    | 6                                                           |
| 49              | Cuba    | 2005           | Demersal Fish             | 1                                                           |
| 49              | Cuba    | 2005           | Eggs                      | 21                                                          |
| 49              | Cuba    | 2005           | Fats, Animals, Raw        | 1                                                           |
| 49              | Cuba    | 2005           | Freshwater Fish           | 5                                                           |
| 49              | Cuba    | 2005           | Fruits, Other             | 137                                                         |
| 49              | Cuba    | 2005           | Grapefruit                | 20                                                          |
| 49              | Cuba    | 2005           | Grapes                    | 1                                                           |
| 49              | Cuba    | 2005           | Groundnuts (Shelled Eq)   | 3                                                           |
| 49              | Cuba    | 2005           | Lemons, Limes             | 2                                                           |
| 49              | Cuba    | 2005           | Maize                     | 84                                                          |
| 49              | Cuba    | 2005           | Marine Fish, Other        | 13                                                          |
| 49              | Cuba    | 2005           | Milk, Whole               | 149                                                         |
| 49              | Cuba    | 2005           | Molluscs, Other           | 1                                                           |
| 49              | Cuba    | 2005           | Mutton & Goat Meat        | 2                                                           |
| 49              | Cuba    | 2005           | Offals, Edible            | 5                                                           |
| 49              | Cuba    | 2005           | Oilcrops Oil, Other       | 1                                                           |
| 49              | Cuba    | 2005           | Onions                    | 29                                                          |
| 49              | Cuba    | 2005           | Oranges, Mandarines       | 48                                                          |
| 49              | Cuba    | 2005           | Pelagic Fish              | 3                                                           |
| 49              | Cuba    | 2005           | Pig meat                  | 30                                                          |
| 49              | Cuba    | 2005           | Pineapples                | 9                                                           |
| 49              | Cuba    | 2005           | Plantains                 | 107                                                         |
| 49              | Cuba    | 2005           | Potatoes                  | 78                                                          |
| 49              | Cuba    | 2005           | Poultry Meat              | 32                                                          |
| 49              | Cuba    | 2005           | Pulses, Other             | 17                                                          |
| 49              | Cuba    | 2005           | Rice (Milled Equivalent)  | 180                                                         |
| 49              | Cuba    | 2005           | Roots, Other              | 19                                                          |
| 49              | Cuba    | 2005           | Soyabean Oil              | 23                                                          |
| 49              | Cuba    | 2005           | Soyabeans                 | 5                                                           |
| 49              | Cuba    | 2005           | Sugar, Refined Equivalent | 136                                                         |
| 49              | Cuba    | 2005           | Sunflowerseed Oil         | 2                                                           |
| 49              | Cuba    | 2005           | Sweet Potatoes            | 82                                                          |
| 49              | Cuba    | 2005           | Tomatoes                  | 177                                                         |
| 49              | Cuba    | 2005           | Vegetables, Other         | 243                                                         |
| 49              | Cuba    | 2005           | Wheat                     | 136                                                         |
| 49              | Cuba    | 2005           | Wine                      | 3                                                           |
| 49              | Cuba    | 2005           | Yams                      | 12                                                          |
| 49              | Cuba    | 2006           | Apples                    | 1                                                           |
| 49              | Cuba    | 2006           | Bananas                   | 74                                                          |

Dietary calcium and zinc deficiency risks are decreasing but remain prevalent

| FAO countrycode | Country | Reference year | Food item                 | Gross food supply (g capita <sup>-1</sup> d <sup>-1</sup> ) |
|-----------------|---------|----------------|---------------------------|-------------------------------------------------------------|
| 49              | Cuba    | 2006           | Beans                     | 49                                                          |
| 49              | Cuba    | 2006           | Beer                      | 56                                                          |
| 49              | Cuba    | 2006           | Beverages, Alcoholic      | 16                                                          |
| 49              | Cuba    | 2006           | Bovine Meat               | 19                                                          |
| 49              | Cuba    | 2006           | Butter, Ghee              | 1                                                           |
| 49              | Cuba    | 2006           | Cassava                   | 73                                                          |
| 49              | Cuba    | 2006           | Cereals, Other            | 1                                                           |
| 49              | Cuba    | 2006           | Cheese                    | 4                                                           |
| 49              | Cuba    | 2006           | Citrus, Other             | 1                                                           |
| 49              | Cuba    | 2006           | Coconuts - Incl Copra     | 23                                                          |
| 49              | Cuba    | 2006           | Coffee                    | 4                                                           |
| 49              | Cuba    | 2006           | Demersal Fish             | 3                                                           |
| 49              | Cuba    | 2006           | Eggs                      | 23                                                          |
| 49              | Cuba    | 2006           | Fats, Animals, Raw        | 1                                                           |
| 49              | Cuba    | 2006           | Freshwater Fish           | 6                                                           |
| 49              | Cuba    | 2006           | Fruits, Other             | 132                                                         |
| 49              | Cuba    | 2006           | Grapefruit                | 31                                                          |
| 49              | Cuba    | 2006           | Grapes                    | 1                                                           |
| 49              | Cuba    | 2006           | Groundnuts (Shelled Eq)   | 2                                                           |
| 49              | Cuba    | 2006           | Honey                     | 1                                                           |
| 49              | Cuba    | 2006           | Lemons, Limes             | 1                                                           |
| 49              | Cuba    | 2006           | Maize                     | 73                                                          |
| 49              | Cuba    | 2006           | Marine Fish, Other        | 7                                                           |
| 49              | Cuba    | 2006           | Milk, Whole               | 149                                                         |
| 49              | Cuba    | 2006           | Molluscs, Other           | 1                                                           |
| 49              | Cuba    | 2006           | Mutton & Goat Meat        | 2                                                           |
| 49              | Cuba    | 2006           | Offals, Edible            | 5                                                           |
| 49              | Cuba    | 2006           | Onions                    | 25                                                          |
| 49              | Cuba    | 2006           | Oranges, Mandarines       | 37                                                          |
| 49              | Cuba    | 2006           | Pelagic Fish              | 3                                                           |
| 49              | Cuba    | 2006           | Pigmeat                   | 33                                                          |
| 49              | Cuba    | 2006           | Pineapples                | 10                                                          |
| 49              | Cuba    | 2006           | Plantains                 | 125                                                         |
| 49              | Cuba    | 2006           | Potatoes                  | 66                                                          |
| 49              | Cuba    | 2006           | Poultry Meat              | 48                                                          |
| 49              | Cuba    | 2006           | Pulses, Other             | 17                                                          |
| 49              | Cuba    | 2006           | Rice (Milled Equivalent)  | 180                                                         |
| 49              | Cuba    | 2006           | Roots, Other              | 31                                                          |
| 49              | Cuba    | 2006           | Soyabean Oil              | 23                                                          |
| 49              | Cuba    | 2006           | Soyabeans                 | 7                                                           |
| 49              | Cuba    | 2006           | Sugar, Refined Equivalent | 128                                                         |
| 49              | Cuba    | 2006           | Sunflowerseed Oil         | 1                                                           |
| 49              | Cuba    | 2006           | Sweet Potatoes            | 66                                                          |
| 49              | Cuba    | 2006           | Tomatoes                  | 152                                                         |
| 49              | Cuba    | 2006           | Vegetables, Other         | 257                                                         |
| 49              | Cuba    | 2006           | Wheat                     | 153                                                         |
| 49              | Cuba    | 2006           | Whey                      | 1                                                           |
| 49              | Cuba    | 2006           | Wine                      | 3                                                           |
| 49              | Cuba    | 2006           | Yams                      | 22                                                          |
| 49              | Cuba    | 2007           | Apples                    | 2                                                           |
| 49              | Cuba    | 2007           | Bananas                   | 84                                                          |
| 49              | Cuba    | 2007           | Beans                     | 54                                                          |
| 49              | Cuba    | 2007           | Beer                      | 60                                                          |
| 49              | Cuba    | 2007           | Beverages, Alcoholic      | 18                                                          |
| 49              | Cuba    | 2007           | Bovine Meat               | 16                                                          |
| 49              | Cuba    | 2007           | Butter, Ghee              | 1                                                           |
| 49              | Cuba    | 2007           | Cassava                   | 54                                                          |
| 49              | Cuba    | 2007           | Cephalopods               | 3                                                           |
| 49              | Cuba    | 2007           | Cheese                    | 5                                                           |
| 49              | Cuba    | 2007           | Citrus, Other             | 1                                                           |
| 49              | Cuba    | 2007           | Coconuts - Incl Copra     | 27                                                          |
| 49              | Cuba    | 2007           | Coffee                    | 7                                                           |
| 49              | Cuba    | 2007           | Demersal Fish             | 2                                                           |
| 49              | Cuba    | 2007           | Eggs                      | 24                                                          |
| 49              | Cuba    | 2007           | Fats, Animals, Raw        | 2                                                           |
| 49              | Cuba    | 2007           | Freshwater Fish           | 9                                                           |
| 49              | Cuba    | 2007           | Fruits, Other             | 123                                                         |
| 49              | Cuba    | 2007           | Grapefruit                | 26                                                          |
| 49              | Cuba    | 2007           | Grapes                    | 1                                                           |
| 49              | Cuba    | 2007           | Groundnuts (Shelled Eq)   | 1                                                           |
| 49              | Cuba    | 2007           | Lemons, Limes             | 1                                                           |
| 49              | Cuba    | 2007           | Maize                     | 88                                                          |
| 49              | Cuba    | 2007           | Marine Fish, Other        | 8                                                           |
| 49              | Cuba    | 2007           | Milk, Whole               | 147                                                         |
| 49              | Cuba    | 2007           | Molluscs, Other           | 1                                                           |
| 49              | Cuba    | 2007           | Mutton & Goat Meat        | 3                                                           |
| 49              | Cuba    | 2007           | Offals, Edible            | 5                                                           |
| 49              | Cuba    | 2007           | Onions                    | 23                                                          |
| 49              | Cuba    | 2007           | Oranges, Mandarines       | 46                                                          |
| 49              | Cuba    | 2007           | Pelagic Fish              | 2                                                           |
| 49              | Cuba    | 2007           | Pigmeat                   | 53                                                          |
| 49              | Cuba    | 2007           | Pineapples                | 12                                                          |
| 49              | Cuba    | 2007           | Plantains                 | 142                                                         |
| 49              | Cuba    | 2007           | Potatoes                  | 33                                                          |
| 49              | Cuba    | 2007           | Poultry Meat              | 41                                                          |
| 49              | Cuba    | 2007           | Pulses, Other             | 17                                                          |
| 49              | Cuba    | 2007           | Rice (Milled Equivalent)  | 174                                                         |
| 49              | Cuba    | 2007           | Roots, Other              | 22                                                          |
| 49              | Cuba    | 2007           | Soyabean Oil              | 17                                                          |
| 49              | Cuba    | 2007           | Soyabeans                 | 3                                                           |
| 49              | Cuba    | 2007           | Sugar, Refined Equivalent | 126                                                         |
| 49              | Cuba    | 2007           | Sunflowerseed Oil         | 2                                                           |
| 49              | Cuba    | 2007           | Sweet Potatoes            | 79                                                          |
| 49              | Cuba    | 2007           | Tomatoes                  | 150                                                         |
| 49              | Cuba    | 2007           | Vegetables, Other         | 247                                                         |
| 49              | Cuba    | 2007           | Wheat                     | 138                                                         |
| 49              | Cuba    | 2007           | Whey                      | 1                                                           |

## Dietary calcium and zinc deficiency risks are decreasing but remain prevalent

| FAO countrycode | Country | Reference year | Food item                 | Gross food supply (g capita <sup>-1</sup> d <sup>-1</sup> ) |
|-----------------|---------|----------------|---------------------------|-------------------------------------------------------------|
| 49              | Cuba    | 2007           | Wine                      | 4                                                           |
| 49              | Cuba    | 2007           | Yams                      | 27                                                          |
| 49              | Cuba    | 2008           | Apples                    | 1                                                           |
| 49              | Cuba    | 2008           | Bananas                   | 55                                                          |
| 49              | Cuba    | 2008           | Beans                     | 34                                                          |
| 49              | Cuba    | 2008           | Beer                      | 62                                                          |
| 49              | Cuba    | 2008           | Beverages, Alcoholic      | 22                                                          |
| 49              | Cuba    | 2008           | Bovine Meat               | 19                                                          |
| 49              | Cuba    | 2008           | Butter, Ghee              | 1                                                           |
| 49              | Cuba    | 2008           | Cassava                   | 57                                                          |
| 49              | Cuba    | 2008           | Cephalopods               | 3                                                           |
| 49              | Cuba    | 2008           | Cereals, Other            | 4                                                           |
| 49              | Cuba    | 2008           | Cheese                    | 4                                                           |
| 49              | Cuba    | 2008           | Citrus, Other             | 1                                                           |
| 49              | Cuba    | 2008           | Cocoa Beans               | 1                                                           |
| 49              | Cuba    | 2008           | Coconuts - Incl Copra     | 23                                                          |
| 49              | Cuba    | 2008           | Coffee                    | 9                                                           |
| 49              | Cuba    | 2008           | Demersal Fish             | 2                                                           |
| 49              | Cuba    | 2008           | Eggs                      | 24                                                          |
| 49              | Cuba    | 2008           | Fats, Animals, Raw        | 2                                                           |
| 49              | Cuba    | 2008           | Freshwater Fish           | 9                                                           |
| 49              | Cuba    | 2008           | Fruits, Other             | 126                                                         |
| 49              | Cuba    | 2008           | Grapefruit                | 28                                                          |
| 49              | Cuba    | 2008           | Grapes                    | 1                                                           |
| 49              | Cuba    | 2008           | Groundnuts (Shelled Eq)   | 1                                                           |
| 49              | Cuba    | 2008           | Lemons, Limes             | 1                                                           |
| 49              | Cuba    | 2008           | Maize                     | 51                                                          |
| 49              | Cuba    | 2008           | Maize Germ Oil            | 1                                                           |
| 49              | Cuba    | 2008           | Marine Fish, Other        | 7                                                           |
| 49              | Cuba    | 2008           | Meat, Other               | 15                                                          |
| 49              | Cuba    | 2008           | Milk, Whole               | 212                                                         |
| 49              | Cuba    | 2008           | Molluscs, Other           | 1                                                           |
| 49              | Cuba    | 2008           | Mutton & Goat Meat        | 3                                                           |
| 49              | Cuba    | 2008           | Offals, Edible            | 5                                                           |
| 49              | Cuba    | 2008           | Onions                    | 28                                                          |
| 49              | Cuba    | 2008           | Oranges, Mandarines       | 43                                                          |
| 49              | Cuba    | 2008           | Pelagic Fish              | 4                                                           |
| 49              | Cuba    | 2008           | Pigmeat                   | 56                                                          |
| 49              | Cuba    | 2008           | Pineapples                | 12                                                          |
| 49              | Cuba    | 2008           | Plantains                 | 115                                                         |
| 49              | Cuba    | 2008           | Potatoes                  | 46                                                          |
| 49              | Cuba    | 2008           | Poultry Meat              | 43                                                          |
| 49              | Cuba    | 2008           | Pulses, Other             | 36                                                          |
| 49              | Cuba    | 2008           | Rice (Milled Equivalent)  | 167                                                         |
| 49              | Cuba    | 2008           | Roots, Other              | 38                                                          |
| 49              | Cuba    | 2008           | Soyabean Oil              | 8                                                           |
| 49              | Cuba    | 2008           | Soybeans                  | 17                                                          |
| 49              | Cuba    | 2008           | Sugar, Refined Equivalent | 112                                                         |
| 49              | Cuba    | 2008           | Sweet Potatoes            | 62                                                          |
| 49              | Cuba    | 2008           | Sweeteners, Other         | 1                                                           |
| 49              | Cuba    | 2008           | Tomatoes                  | 128                                                         |
| 49              | Cuba    | 2008           | Vegetables, Other         | 250                                                         |
| 49              | Cuba    | 2008           | Wheat                     | 154                                                         |
| 49              | Cuba    | 2008           | Whey                      | 1                                                           |
| 49              | Cuba    | 2008           | Wine                      | 4                                                           |
| 49              | Cuba    | 2008           | Yams                      | 40                                                          |
| 49              | Cuba    | 2009           | Apples                    | 1                                                           |
| 49              | Cuba    | 2009           | Bananas                   | 48                                                          |
| 49              | Cuba    | 2009           | Beans                     | 35                                                          |
| 49              | Cuba    | 2009           | Beer                      | 60                                                          |
| 49              | Cuba    | 2009           | Beverages, Alcoholic      | 19                                                          |
| 49              | Cuba    | 2009           | Bovine Meat               | 18                                                          |
| 49              | Cuba    | 2009           | Butter, Ghee              | 1                                                           |
| 49              | Cuba    | 2009           | Cassava                   | 53                                                          |
| 49              | Cuba    | 2009           | Cephalopods               | 2                                                           |
| 49              | Cuba    | 2009           | Cheese                    | 4                                                           |
| 49              | Cuba    | 2009           | Citrus, Other             | 1                                                           |
| 49              | Cuba    | 2009           | Cocoa Beans               | 1                                                           |
| 49              | Cuba    | 2009           | Coconuts - Incl Copra     | 17                                                          |
| 49              | Cuba    | 2009           | Coffee                    | 6                                                           |
| 49              | Cuba    | 2009           | Demersal Fish             | 2                                                           |
| 49              | Cuba    | 2009           | Eggs                      | 24                                                          |
| 49              | Cuba    | 2009           | Fats, Animals, Raw        | 2                                                           |
| 49              | Cuba    | 2009           | Freshwater Fish           | 8                                                           |
| 49              | Cuba    | 2009           | Fruits, Other             | 130                                                         |
| 49              | Cuba    | 2009           | Grapefruit                | 14                                                          |
| 49              | Cuba    | 2009           | Grapes                    | 1                                                           |
| 49              | Cuba    | 2009           | Groundnuts (Shelled Eq)   | 1                                                           |
| 49              | Cuba    | 2009           | Lemons, Limes             | 2                                                           |
| 49              | Cuba    | 2009           | Maize                     | 49                                                          |
| 49              | Cuba    | 2009           | Marine Fish, Other        | 3                                                           |
| 49              | Cuba    | 2009           | Meat, Other               | 18                                                          |
| 49              | Cuba    | 2009           | Milk, Whole               | 212                                                         |
| 49              | Cuba    | 2009           | Molluscs, Other           | 1                                                           |
| 49              | Cuba    | 2009           | Mutton & Goat Meat        | 3                                                           |
| 49              | Cuba    | 2009           | Offals, Edible            | 5                                                           |
| 49              | Cuba    | 2009           | Onions                    | 29                                                          |
| 49              | Cuba    | 2009           | Oranges, Mandarines       | 60                                                          |
| 49              | Cuba    | 2009           | Pelagic Fish              | 6                                                           |
| 49              | Cuba    | 2009           | Pigmeat                   | 54                                                          |
| 49              | Cuba    | 2009           | Pineapples                | 16                                                          |
| 49              | Cuba    | 2009           | Plantains                 | 102                                                         |
| 49              | Cuba    | 2009           | Potatoes                  | 68                                                          |
| 49              | Cuba    | 2009           | Poultry Meat              | 54                                                          |
| 49              | Cuba    | 2009           | Pulses, Other             | 25                                                          |
| 49              | Cuba    | 2009           | Rice (Milled Equivalent)  | 170                                                         |
| 49              | Cuba    | 2009           | Roots, Other              | 31                                                          |



Dietary calcium and zinc deficiency risks are decreasing but remain prevalent

| FAO countrycode | Country | Reference year | Food item                 | Gross food supply (g capita <sup>-1</sup> d <sup>-1</sup> ) |
|-----------------|---------|----------------|---------------------------|-------------------------------------------------------------|
| 49              | Cuba    | 2009           | Soyabean Oil              | 15                                                          |
| 49              | Cuba    | 2009           | Soyabeans                 | 16                                                          |
| 49              | Cuba    | 2009           | Sugar, Refined Equivalent | 148                                                         |
| 49              | Cuba    | 2009           | Sweet Potatoes            | 73                                                          |
| 49              | Cuba    | 2009           | Tomatoes                  | 164                                                         |
| 49              | Cuba    | 2009           | Vegetables, Other         | 236                                                         |
| 49              | Cuba    | 2009           | Wheat                     | 135                                                         |
| 49              | Cuba    | 2009           | Whey                      | 2                                                           |
| 49              | Cuba    | 2009           | Wine                      | 4                                                           |
| 49              | Cuba    | 2009           | Yams                      | 56                                                          |
| 49              | Cuba    | 2010           | Apples                    | 1                                                           |
| 49              | Cuba    | 2010           | Bananas                   | 48                                                          |
| 49              | Cuba    | 2010           | Beans                     | 33                                                          |
| 49              | Cuba    | 2010           | Beer                      | 63                                                          |
| 49              | Cuba    | 2010           | Beverages, Alcoholic      | 21                                                          |
| 49              | Cuba    | 2010           | Bovine Meat               | 18                                                          |
| 49              | Cuba    | 2010           | Butter, Ghee              | 1                                                           |
| 49              | Cuba    | 2010           | Cassava                   | 53                                                          |
| 49              | Cuba    | 2010           | Cheese                    | 4                                                           |
| 49              | Cuba    | 2010           | Citrus, Other             | 1                                                           |
| 49              | Cuba    | 2010           | Cocoa Beans               | 2                                                           |
| 49              | Cuba    | 2010           | Coconuts - Incl Copra     | 16                                                          |
| 49              | Cuba    | 2010           | Coffee                    | 6                                                           |
| 49              | Cuba    | 2010           | Crustaceans               | 1                                                           |
| 49              | Cuba    | 2010           | Demersal Fish             | 2                                                           |
| 49              | Cuba    | 2010           | Eggs                      | 24                                                          |
| 49              | Cuba    | 2010           | Fats, Animals, Raw        | 2                                                           |
| 49              | Cuba    | 2010           | Freshwater Fish           | 7                                                           |
| 49              | Cuba    | 2010           | Fruits, Other             | 152                                                         |
| 49              | Cuba    | 2010           | Grapefruit                | 20                                                          |
| 49              | Cuba    | 2010           | Grapes                    | 1                                                           |
| 49              | Cuba    | 2010           | Groundnuts (Shelled Eq)   | 1                                                           |
| 49              | Cuba    | 2010           | Lemons, Limes             | 1                                                           |
| 49              | Cuba    | 2010           | Maize                     | 54                                                          |
| 49              | Cuba    | 2010           | Marine Fish, Other        | 3                                                           |
| 49              | Cuba    | 2010           | Meat, Other               | 18                                                          |
| 49              | Cuba    | 2010           | Milk, Whole               | 197                                                         |
| 49              | Cuba    | 2010           | Molluscs, Other           | 1                                                           |
| 49              | Cuba    | 2010           | Mutton & Goat Meat        | 3                                                           |
| 49              | Cuba    | 2010           | Offals, Edible            | 5                                                           |
| 49              | Cuba    | 2010           | Onions                    | 25                                                          |
| 49              | Cuba    | 2010           | Oranges, Mandarines       | 39                                                          |
| 49              | Cuba    | 2010           | Pelagic Fish              | 2                                                           |
| 49              | Cuba    | 2010           | Pigmeat                   | 55                                                          |
| 49              | Cuba    | 2010           | Pineapples                | 14                                                          |
| 49              | Cuba    | 2010           | Plantains                 | 117                                                         |
| 49              | Cuba    | 2010           | Potatoes                  | 47                                                          |
| 49              | Cuba    | 2010           | Poultry Meat              | 44                                                          |
| 49              | Cuba    | 2010           | Pulses, Other             | 6                                                           |
| 49              | Cuba    | 2010           | Rice (Milled Equivalent)  | 153                                                         |
| 49              | Cuba    | 2010           | Roots, Other              | 25                                                          |
| 49              | Cuba    | 2010           | Soyabean Oil              | 17                                                          |
| 49              | Cuba    | 2010           | Soyabeans                 | 14                                                          |
| 49              | Cuba    | 2010           | Sugar, Refined Equivalent | 151                                                         |
| 49              | Cuba    | 2010           | Sweet Potatoes            | 73                                                          |
| 49              | Cuba    | 2010           | Sweeteners, Other         | 1                                                           |
| 49              | Cuba    | 2010           | Tomatoes                  | 115                                                         |
| 49              | Cuba    | 2010           | Vegetables, Other         | 204                                                         |
| 49              | Cuba    | 2010           | Wheat                     | 150                                                         |
| 49              | Cuba    | 2010           | Wine                      | 4                                                           |
| 49              | Cuba    | 2010           | Yams                      | 67                                                          |
| 49              | Cuba    | 2011           | Apples                    | 1                                                           |
| 49              | Cuba    | 2011           | Bananas                   | 49                                                          |
| 49              | Cuba    | 2011           | Beans                     | 43                                                          |
| 49              | Cuba    | 2011           | Beer                      | 63                                                          |
| 49              | Cuba    | 2011           | Beverages, Alcoholic      | 21                                                          |
| 49              | Cuba    | 2011           | Bovine Meat               | 17                                                          |
| 49              | Cuba    | 2011           | Butter, Ghee              | 1                                                           |
| 49              | Cuba    | 2011           | Cassava                   | 64                                                          |
| 49              | Cuba    | 2011           | Cheese                    | 4                                                           |
| 49              | Cuba    | 2011           | Citrus, Other             | 1                                                           |
| 49              | Cuba    | 2011           | Cocoa Beans               | 1                                                           |
| 49              | Cuba    | 2011           | Coconuts - Incl Copra     | 14                                                          |
| 49              | Cuba    | 2011           | Coffee                    | 4                                                           |
| 49              | Cuba    | 2011           | Crustaceans               | 1                                                           |
| 49              | Cuba    | 2011           | Demersal Fish             | 2                                                           |
| 49              | Cuba    | 2011           | Eggs                      | 26                                                          |
| 49              | Cuba    | 2011           | Fats, Animals, Raw        | 2                                                           |
| 49              | Cuba    | 2011           | Freshwater Fish           | 7                                                           |
| 49              | Cuba    | 2011           | Fruits, Other             | 169                                                         |
| 49              | Cuba    | 2011           | Grapefruit                | 16                                                          |
| 49              | Cuba    | 2011           | Grapes                    | 1                                                           |
| 49              | Cuba    | 2011           | Lemons, Limes             | 2                                                           |
| 49              | Cuba    | 2011           | Maize                     | 65                                                          |
| 49              | Cuba    | 2011           | Marine Fish, Other        | 3                                                           |
| 49              | Cuba    | 2011           | Meat, Other               | 16                                                          |
| 49              | Cuba    | 2011           | Milk, Whole               | 209                                                         |
| 49              | Cuba    | 2011           | Molluscs, Other           | 1                                                           |
| 49              | Cuba    | 2011           | Mutton & Goat Meat        | 3                                                           |
| 49              | Cuba    | 2011           | Offals, Edible            | 5                                                           |
| 49              | Cuba    | 2011           | Onions                    | 31                                                          |
| 49              | Cuba    | 2011           | Oranges, Mandarines       | 31                                                          |
| 49              | Cuba    | 2011           | Pelagic Fish              | 2                                                           |
| 49              | Cuba    | 2011           | Pigmeat                   | 52                                                          |
| 49              | Cuba    | 2011           | Pineapples                | 17                                                          |
| 49              | Cuba    | 2011           | Plantains                 | 141                                                         |
| 49              | Cuba    | 2011           | Potatoes                  | 41                                                          |

Dietary calcium and zinc deficiency risks are decreasing but remain prevalent

| FAO countrycode | Country | Reference year | Food item                 | Gross food supply (g capita <sup>-1</sup> d <sup>-1</sup> ) |
|-----------------|---------|----------------|---------------------------|-------------------------------------------------------------|
| 49              | Cuba    | 2011           | Poultry Meat              | 47                                                          |
| 49              | Cuba    | 2011           | Pulses, Other             | 8                                                           |
| 49              | Cuba    | 2011           | Rice (Milled Equivalent)  | 174                                                         |
| 49              | Cuba    | 2011           | Roots, Other              | 24                                                          |
| 49              | Cuba    | 2011           | Soyabean Oil              | 19                                                          |
| 49              | Cuba    | 2011           | Soyabeans                 | 15                                                          |
| 49              | Cuba    | 2011           | Sugar, Refined Equivalent | 141                                                         |
| 49              | Cuba    | 2011           | Sweet Potatoes            | 60                                                          |
| 49              | Cuba    | 2011           | Tomatoes                  | 132                                                         |
| 49              | Cuba    | 2011           | Vegetables, Other         | 192                                                         |
| 49              | Cuba    | 2011           | Wheat                     | 142                                                         |
| 49              | Cuba    | 2011           | Wine                      | 4                                                           |
| 49              | Cuba    | 2011           | Yams                      | 58                                                          |
| 50              | Cyprus  | 2004           | Apples                    | 35                                                          |
| 50              | Cyprus  | 2004           | Bananas                   | 22                                                          |
| 50              | Cyprus  | 2004           | Beans                     | 5                                                           |
| 50              | Cyprus  | 2004           | Beer                      | 97                                                          |
| 50              | Cyprus  | 2004           | Beverages, Alcoholic      | 8                                                           |
| 50              | Cyprus  | 2004           | Beverages, Fermented      | 1                                                           |
| 50              | Cyprus  | 2004           | Bovine Meat               | 13                                                          |
| 50              | Cyprus  | 2004           | Butter, Ghee              | 2                                                           |
| 50              | Cyprus  | 2004           | Cephalopods               | 8                                                           |
| 50              | Cyprus  | 2004           | Cheese                    | 16                                                          |
| 50              | Cyprus  | 2004           | Citrus, Other             | 1                                                           |
| 50              | Cyprus  | 2004           | Cocoa Beans               | 6                                                           |
| 50              | Cyprus  | 2004           | Coconuts - Incl Copra     | 2                                                           |
| 50              | Cyprus  | 2004           | Coffee                    | 11                                                          |
| 50              | Cyprus  | 2004           | Cream                     | 1                                                           |
| 50              | Cyprus  | 2004           | Crustaceans               | 4                                                           |
| 50              | Cyprus  | 2004           | Dates                     | 1                                                           |
| 50              | Cyprus  | 2004           | Demersal Fish             | 16                                                          |
| 50              | Cyprus  | 2004           | Eggs                      | 25                                                          |
| 50              | Cyprus  | 2004           | Fats, Animals, Raw        | 3                                                           |
| 50              | Cyprus  | 2004           | Freshwater Fish           | 3                                                           |
| 50              | Cyprus  | 2004           | Fruits, Other             | 51                                                          |
| 50              | Cyprus  | 2004           | Grapefruit                | 19                                                          |
| 50              | Cyprus  | 2004           | Grapes                    | 15                                                          |
| 50              | Cyprus  | 2004           | Groundnuts (Shelled Eq)   | 4                                                           |
| 50              | Cyprus  | 2004           | Honey                     | 2                                                           |
| 50              | Cyprus  | 2004           | Lemons, Limes             | 19                                                          |
| 50              | Cyprus  | 2004           | Maize                     | 3                                                           |
| 50              | Cyprus  | 2004           | Maize Germ Oil            | 4                                                           |
| 50              | Cyprus  | 2004           | Marine Fish, Other        | 3                                                           |
| 50              | Cyprus  | 2004           | Meat, Other               | 6                                                           |
| 50              | Cyprus  | 2004           | Milk, Whole               | 312                                                         |
| 50              | Cyprus  | 2004           | Molluscs, Other           | 1                                                           |
| 50              | Cyprus  | 2004           | Mutton & Goat Meat        | 21                                                          |
| 50              | Cyprus  | 2004           | Nuts                      | 11                                                          |
| 50              | Cyprus  | 2004           | Oats                      | 1                                                           |
| 50              | Cyprus  | 2004           | Offals, Edible            | 10                                                          |
| 50              | Cyprus  | 2004           | Oilcrops Oil, Other       | 2                                                           |
| 50              | Cyprus  | 2004           | Olive Oil                 | 6                                                           |
| 50              | Cyprus  | 2004           | Olives                    | 22                                                          |
| 50              | Cyprus  | 2004           | Onions                    | 17                                                          |
| 50              | Cyprus  | 2004           | Oranges, Mandarines       | 97                                                          |
| 50              | Cyprus  | 2004           | Pelagic Fish              | 14                                                          |
| 50              | Cyprus  | 2004           | Pigmeat                   | 104                                                         |
| 50              | Cyprus  | 2004           | Pineapples                | 1                                                           |
| 50              | Cyprus  | 2004           | Potatoes                  | 101                                                         |
| 50              | Cyprus  | 2004           | Poultry Meat              | 78                                                          |
| 50              | Cyprus  | 2004           | Pulses, Other             | 5                                                           |
| 50              | Cyprus  | 2004           | Rape and Mustard Oil      | 4                                                           |
| 50              | Cyprus  | 2004           | Rice (Milled Equivalent)  | 10                                                          |
| 50              | Cyprus  | 2004           | Roots, Other              | 4                                                           |
| 50              | Cyprus  | 2004           | Sesameseed                | 4                                                           |
| 50              | Cyprus  | 2004           | Soyabean Oil              | 9                                                           |
| 50              | Cyprus  | 2004           | Spices, Other             | 1                                                           |
| 50              | Cyprus  | 2004           | Sugar, Refined Equivalent | 91                                                          |
| 50              | Cyprus  | 2004           | Sunflowerseed Oil         | 6                                                           |
| 50              | Cyprus  | 2004           | Sweeteners, Other         | 13                                                          |
| 50              | Cyprus  | 2004           | Tea                       | 1                                                           |
| 50              | Cyprus  | 2004           | Tomatoes                  | 95                                                          |
| 50              | Cyprus  | 2004           | Vegetables, Other         | 228                                                         |
| 50              | Cyprus  | 2004           | Wheat                     | 184                                                         |
| 50              | Cyprus  | 2004           | Wine                      | 45                                                          |
| 50              | Cyprus  | 2005           | Apples                    | 43                                                          |
| 50              | Cyprus  | 2005           | Bananas                   | 22                                                          |
| 50              | Cyprus  | 2005           | Beans                     | 5                                                           |
| 50              | Cyprus  | 2005           | Beer                      | 96                                                          |
| 50              | Cyprus  | 2005           | Beverages, Alcoholic      | 7                                                           |
| 50              | Cyprus  | 2005           | Beverages, Fermented      | 1                                                           |
| 50              | Cyprus  | 2005           | Bovine Meat               | 15                                                          |
| 50              | Cyprus  | 2005           | Butter, Ghee              | 2                                                           |
| 50              | Cyprus  | 2005           | Cephalopods               | 7                                                           |
| 50              | Cyprus  | 2005           | Cheese                    | 15                                                          |
| 50              | Cyprus  | 2005           | Citrus, Other             | 1                                                           |
| 50              | Cyprus  | 2005           | Cocoa Beans               | 6                                                           |
| 50              | Cyprus  | 2005           | Coconuts - Incl Copra     | 2                                                           |
| 50              | Cyprus  | 2005           | Coffee                    | 12                                                          |
| 50              | Cyprus  | 2005           | Cream                     | 1                                                           |
| 50              | Cyprus  | 2005           | Crustaceans               | 4                                                           |
| 50              | Cyprus  | 2005           | Dates                     | 1                                                           |
| 50              | Cyprus  | 2005           | Demersal Fish             | 17                                                          |
| 50              | Cyprus  | 2005           | Eggs                      | 22                                                          |
| 50              | Cyprus  | 2005           | Fats, Animals, Raw        | 2                                                           |
| 50              | Cyprus  | 2005           | Freshwater Fish           | 4                                                           |
| 50              | Cyprus  | 2005           | Fruits, Other             | 55                                                          |

Dietary calcium and zinc deficiency risks are decreasing but remain prevalent

| FAO countrycode | Country | Reference year | Food item                 | Gross food supply (g capita <sup>-1</sup> d <sup>-1</sup> ) |
|-----------------|---------|----------------|---------------------------|-------------------------------------------------------------|
| 50              | Cyprus  | 2005           | Grapefruit                | 20                                                          |
| 50              | Cyprus  | 2005           | Grapes                    | 16                                                          |
| 50              | Cyprus  | 2005           | Groundnuts (Shelled Eq)   | 4                                                           |
| 50              | Cyprus  | 2005           | Honey                     | 2                                                           |
| 50              | Cyprus  | 2005           | Lemons, Limes             | 24                                                          |
| 50              | Cyprus  | 2005           | Maize                     | 3                                                           |
| 50              | Cyprus  | 2005           | Maize Germ Oil            | 4                                                           |
| 50              | Cyprus  | 2005           | Marine Fish, Other        | 3                                                           |
| 50              | Cyprus  | 2005           | Meat, Other               | 4                                                           |
| 50              | Cyprus  | 2005           | Milk, Whole               | 269                                                         |
| 50              | Cyprus  | 2005           | Molluscs, Other           | 2                                                           |
| 50              | Cyprus  | 2005           | Mutton & Goat Meat        | 19                                                          |
| 50              | Cyprus  | 2005           | Nuts                      | 10                                                          |
| 50              | Cyprus  | 2005           | Oats                      | 1                                                           |
| 50              | Cyprus  | 2005           | Offals, Edible            | 9                                                           |
| 50              | Cyprus  | 2005           | Oilcrops Oil, Other       | 3                                                           |
| 50              | Cyprus  | 2005           | Olive Oil                 | 4                                                           |
| 50              | Cyprus  | 2005           | Olives                    | 21                                                          |
| 50              | Cyprus  | 2005           | Onions                    | 24                                                          |
| 50              | Cyprus  | 2005           | Oranges, Mandarines       | 85                                                          |
| 50              | Cyprus  | 2005           | Pelagic Fish              | 16                                                          |
| 50              | Cyprus  | 2005           | Pigmeat                   | 111                                                         |
| 50              | Cyprus  | 2005           | Pineapples                | 1                                                           |
| 50              | Cyprus  | 2005           | Potatoes                  | 99                                                          |
| 50              | Cyprus  | 2005           | Poultry Meat              | 81                                                          |
| 50              | Cyprus  | 2005           | Pulses, Other             | 6                                                           |
| 50              | Cyprus  | 2005           | Rape and Mustard Oil      | 3                                                           |
| 50              | Cyprus  | 2005           | Rice (Milled Equivalent)  | 12                                                          |
| 50              | Cyprus  | 2005           | Roots, Other              | 4                                                           |
| 50              | Cyprus  | 2005           | Sesameseed                | 5                                                           |
| 50              | Cyprus  | 2005           | Soyabean Oil              | 12                                                          |
| 50              | Cyprus  | 2005           | Spices, Other             | 1                                                           |
| 50              | Cyprus  | 2005           | Sugar, Refined Equivalent | 77                                                          |
| 50              | Cyprus  | 2005           | Sunflowerseed Oil         | 12                                                          |
| 50              | Cyprus  | 2005           | Sweeteners, Other         | 19                                                          |
| 50              | Cyprus  | 2005           | Tea                       | 1                                                           |
| 50              | Cyprus  | 2005           | Tomatoes                  | 96                                                          |
| 50              | Cyprus  | 2005           | Vegetables, Other         | 234                                                         |
| 50              | Cyprus  | 2005           | Wheat                     | 170                                                         |
| 50              | Cyprus  | 2005           | Wine                      | 42                                                          |
| 50              | Cyprus  | 2006           | Apples                    | 44                                                          |
| 50              | Cyprus  | 2006           | Bananas                   | 22                                                          |
| 50              | Cyprus  | 2006           | Beans                     | 4                                                           |
| 50              | Cyprus  | 2006           | Beer                      | 88                                                          |
| 50              | Cyprus  | 2006           | Beverages, Alcoholic      | 7                                                           |
| 50              | Cyprus  | 2006           | Beverages, Fermented      | 1                                                           |
| 50              | Cyprus  | 2006           | Bovine Meat               | 14                                                          |
| 50              | Cyprus  | 2006           | Butter, Ghee              | 2                                                           |
| 50              | Cyprus  | 2006           | Cephalopods               | 9                                                           |
| 50              | Cyprus  | 2006           | Cheese                    | 13                                                          |
| 50              | Cyprus  | 2006           | Citrus, Other             | 1                                                           |
| 50              | Cyprus  | 2006           | Cocoa Beans               | 6                                                           |
| 50              | Cyprus  | 2006           | Coconuts - Incl Copra     | 2                                                           |
| 50              | Cyprus  | 2006           | Coffee                    | 9                                                           |
| 50              | Cyprus  | 2006           | Cream                     | 1                                                           |
| 50              | Cyprus  | 2006           | Crustaceans               | 6                                                           |
| 50              | Cyprus  | 2006           | Dates                     | 1                                                           |
| 50              | Cyprus  | 2006           | Demersal Fish             | 16                                                          |
| 50              | Cyprus  | 2006           | Eggs                      | 22                                                          |
| 50              | Cyprus  | 2006           | Fats, Animals, Raw        | 2                                                           |
| 50              | Cyprus  | 2006           | Freshwater Fish           | 5                                                           |
| 50              | Cyprus  | 2006           | Fruits, Other             | 60                                                          |
| 50              | Cyprus  | 2006           | Grapefruit                | 14                                                          |
| 50              | Cyprus  | 2006           | Grapes                    | 46                                                          |
| 50              | Cyprus  | 2006           | Groundnuts (Shelled Eq)   | 4                                                           |
| 50              | Cyprus  | 2006           | Honey                     | 2                                                           |
| 50              | Cyprus  | 2006           | Lemons, Limes             | 31                                                          |
| 50              | Cyprus  | 2006           | Maize                     | 5                                                           |
| 50              | Cyprus  | 2006           | Maize Germ Oil            | 4                                                           |
| 50              | Cyprus  | 2006           | Marine Fish, Other        | 2                                                           |
| 50              | Cyprus  | 2006           | Meat, Other               | 5                                                           |
| 50              | Cyprus  | 2006           | Milk, Whole               | 261                                                         |
| 50              | Cyprus  | 2006           | Molluscs, Other           | 2                                                           |
| 50              | Cyprus  | 2006           | Mutton & Goat Meat        | 22                                                          |
| 50              | Cyprus  | 2006           | Nuts                      | 14                                                          |
| 50              | Cyprus  | 2006           | Oats                      | 1                                                           |
| 50              | Cyprus  | 2006           | Offals, Edible            | 9                                                           |
| 50              | Cyprus  | 2006           | Oilcrops Oil, Other       | 3                                                           |
| 50              | Cyprus  | 2006           | Olive Oil                 | 5                                                           |
| 50              | Cyprus  | 2006           | Olives                    | 36                                                          |
| 50              | Cyprus  | 2006           | Onions                    | 23                                                          |
| 50              | Cyprus  | 2006           | Oranges, Mandarines       | 69                                                          |
| 50              | Cyprus  | 2006           | Pelagic Fish              | 14                                                          |
| 50              | Cyprus  | 2006           | Pigmeat                   | 115                                                         |
| 50              | Cyprus  | 2006           | Pineapples                | 2                                                           |
| 50              | Cyprus  | 2006           | Plantains                 | 1                                                           |
| 50              | Cyprus  | 2006           | Potatoes                  | 95                                                          |
| 50              | Cyprus  | 2006           | Poultry Meat              | 66                                                          |
| 50              | Cyprus  | 2006           | Pulses, Other             | 5                                                           |
| 50              | Cyprus  | 2006           | Rape and Mustard Oil      | 4                                                           |
| 50              | Cyprus  | 2006           | Rice (Milled Equivalent)  | 14                                                          |
| 50              | Cyprus  | 2006           | Roots, Other              | 4                                                           |
| 50              | Cyprus  | 2006           | Sesameseed                | 5                                                           |
| 50              | Cyprus  | 2006           | Soyabean Oil              | 11                                                          |
| 50              | Cyprus  | 2006           | Spices, Other             | 1                                                           |
| 50              | Cyprus  | 2006           | Sugar, Refined Equivalent | 67                                                          |
| 50              | Cyprus  | 2006           | Sunflowerseed             | 1                                                           |

Dietary calcium and zinc deficiency risks are decreasing but remain prevalent

| FAO countrycode | Country | Reference year | Food item                 | Gross food supply (g capita <sup>-1</sup> d <sup>-1</sup> ) |
|-----------------|---------|----------------|---------------------------|-------------------------------------------------------------|
| 50              | Cyprus  | 2006           | Sunflowerseed Oil         | 15                                                          |
| 50              | Cyprus  | 2006           | Sweeteners, Other         | 16                                                          |
| 50              | Cyprus  | 2006           | Tea                       | 1                                                           |
| 50              | Cyprus  | 2006           | Tomatoes                  | 85                                                          |
| 50              | Cyprus  | 2006           | Vegetables, Other         | 234                                                         |
| 50              | Cyprus  | 2006           | Wheat                     | 163                                                         |
| 50              | Cyprus  | 2006           | Wine                      | 34                                                          |
| 50              | Cyprus  | 2007           | Apples                    | 41                                                          |
| 50              | Cyprus  | 2007           | Bananas                   | 24                                                          |
| 50              | Cyprus  | 2007           | Beans                     | 5                                                           |
| 50              | Cyprus  | 2007           | Beer                      | 88                                                          |
| 50              | Cyprus  | 2007           | Beverages, Alcoholic      | 7                                                           |
| 50              | Cyprus  | 2007           | Beverages, Fermented      | 2                                                           |
| 50              | Cyprus  | 2007           | Bovine Meat               | 16                                                          |
| 50              | Cyprus  | 2007           | Butter, Ghee              | 2                                                           |
| 50              | Cyprus  | 2007           | Cephalopods               | 9                                                           |
| 50              | Cyprus  | 2007           | Cereals, Other            | 1                                                           |
| 50              | Cyprus  | 2007           | Cheese                    | 13                                                          |
| 50              | Cyprus  | 2007           | Citrus, Other             | 1                                                           |
| 50              | Cyprus  | 2007           | Cocoa Beans               | 6                                                           |
| 50              | Cyprus  | 2007           | Coconuts - Incl Copra     | 2                                                           |
| 50              | Cyprus  | 2007           | Coffee                    | 11                                                          |
| 50              | Cyprus  | 2007           | Cream                     | 4                                                           |
| 50              | Cyprus  | 2007           | Crustaceans               | 6                                                           |
| 50              | Cyprus  | 2007           | Dates                     | 2                                                           |
| 50              | Cyprus  | 2007           | Demersal Fish             | 15                                                          |
| 50              | Cyprus  | 2007           | Eggs                      | 23                                                          |
| 50              | Cyprus  | 2007           | Fats, Animals, Raw        | 2                                                           |
| 50              | Cyprus  | 2007           | Freshwater Fish           | 7                                                           |
| 50              | Cyprus  | 2007           | Fruits, Other             | 62                                                          |
| 50              | Cyprus  | 2007           | Grapefruit                | 21                                                          |
| 50              | Cyprus  | 2007           | Grapes                    | 54                                                          |
| 50              | Cyprus  | 2007           | Groundnuts (Shelled Eq)   | 4                                                           |
| 50              | Cyprus  | 2007           | Honey                     | 3                                                           |
| 50              | Cyprus  | 2007           | Lemons, Limes             | 25                                                          |
| 50              | Cyprus  | 2007           | Maize                     | 3                                                           |
| 50              | Cyprus  | 2007           | Maize Germ Oil            | 4                                                           |
| 50              | Cyprus  | 2007           | Marine Fish, Other        | 3                                                           |
| 50              | Cyprus  | 2007           | Meat, Other               | 7                                                           |
| 50              | Cyprus  | 2007           | Milk, Whole               | 254                                                         |
| 50              | Cyprus  | 2007           | Molluscs, Other           | 2                                                           |
| 50              | Cyprus  | 2007           | Mutton & Goat Meat        | 21                                                          |
| 50              | Cyprus  | 2007           | Nuts                      | 14                                                          |
| 50              | Cyprus  | 2007           | Oats                      | 1                                                           |
| 50              | Cyprus  | 2007           | Offals, Edible            | 10                                                          |
| 50              | Cyprus  | 2007           | Oilcrops Oil, Other       | 3                                                           |
| 50              | Cyprus  | 2007           | Olive Oil                 | 4                                                           |
| 50              | Cyprus  | 2007           | Olives                    | 18                                                          |
| 50              | Cyprus  | 2007           | Onions                    | 22                                                          |
| 50              | Cyprus  | 2007           | Oranges, Mandarines       | 69                                                          |
| 50              | Cyprus  | 2007           | Pelagic Fish              | 17                                                          |
| 50              | Cyprus  | 2007           | Pigmeat                   | 111                                                         |
| 50              | Cyprus  | 2007           | Pineapples                | 2                                                           |
| 50              | Cyprus  | 2007           | Plantains                 | 1                                                           |
| 50              | Cyprus  | 2007           | Potatoes                  | 99                                                          |
| 50              | Cyprus  | 2007           | Poultry Meat              | 71                                                          |
| 50              | Cyprus  | 2007           | Pulses, Other             | 5                                                           |
| 50              | Cyprus  | 2007           | Rape and Mustard Oil      | 2                                                           |
| 50              | Cyprus  | 2007           | Rice (Milled Equivalent)  | 15                                                          |
| 50              | Cyprus  | 2007           | Roots, Other              | 4                                                           |
| 50              | Cyprus  | 2007           | Rye                       | 1                                                           |
| 50              | Cyprus  | 2007           | Sesameseed                | 4                                                           |
| 50              | Cyprus  | 2007           | Soyabean Oil              | 9                                                           |
| 50              | Cyprus  | 2007           | Spices, Other             | 1                                                           |
| 50              | Cyprus  | 2007           | Sugar, Refined Equivalent | 70                                                          |
| 50              | Cyprus  | 2007           | Sunflowerseed Oil         | 16                                                          |
| 50              | Cyprus  | 2007           | Sweeteners, Other         | 22                                                          |
| 50              | Cyprus  | 2007           | Tea                       | 1                                                           |
| 50              | Cyprus  | 2007           | Tomatoes                  | 84                                                          |
| 50              | Cyprus  | 2007           | Vegetables, Other         | 224                                                         |
| 50              | Cyprus  | 2007           | Wheat                     | 192                                                         |
| 50              | Cyprus  | 2007           | Wine                      | 42                                                          |
| 50              | Cyprus  | 2008           | Apples                    | 38                                                          |
| 50              | Cyprus  | 2008           | Bananas                   | 21                                                          |
| 50              | Cyprus  | 2008           | Barley                    | 1                                                           |
| 50              | Cyprus  | 2008           | Beans                     | 6                                                           |
| 50              | Cyprus  | 2008           | Beer                      | 88                                                          |
| 50              | Cyprus  | 2008           | Beverages, Alcoholic      | 7                                                           |
| 50              | Cyprus  | 2008           | Beverages, Fermented      | 2                                                           |
| 50              | Cyprus  | 2008           | Bovine Meat               | 16                                                          |
| 50              | Cyprus  | 2008           | Butter, Ghee              | 2                                                           |
| 50              | Cyprus  | 2008           | Cephalopods               | 10                                                          |
| 50              | Cyprus  | 2008           | Cereals, Other            | 1                                                           |
| 50              | Cyprus  | 2008           | Cheese                    | 15                                                          |
| 50              | Cyprus  | 2008           | Citrus, Other             | 1                                                           |
| 50              | Cyprus  | 2008           | Cocoa Beans               | 7                                                           |
| 50              | Cyprus  | 2008           | Coconuts - Incl Copra     | 2                                                           |
| 50              | Cyprus  | 2008           | Coffee                    | 13                                                          |
| 50              | Cyprus  | 2008           | Crustaceans               | 8                                                           |
| 50              | Cyprus  | 2008           | Dates                     | 2                                                           |
| 50              | Cyprus  | 2008           | Demersal Fish             | 16                                                          |
| 50              | Cyprus  | 2008           | Eggs                      | 25                                                          |
| 50              | Cyprus  | 2008           | Fats, Animals, Raw        | 1                                                           |
| 50              | Cyprus  | 2008           | Freshwater Fish           | 9                                                           |
| 50              | Cyprus  | 2008           | Fruits, Other             | 63                                                          |
| 50              | Cyprus  | 2008           | Grapefruit                | 26                                                          |
| 50              | Cyprus  | 2008           | Grapes                    | 23                                                          |

Dietary calcium and zinc deficiency risks are decreasing but remain prevalent

| FAO countrycode | Country | Reference year | Food item                 | Gross food supply (g capita <sup>-1</sup> d <sup>-1</sup> ) |
|-----------------|---------|----------------|---------------------------|-------------------------------------------------------------|
| 50              | Cyprus  | 2008           | Groundnuts (Shelled Eq)   | 3                                                           |
| 50              | Cyprus  | 2008           | Honey                     | 2                                                           |
| 50              | Cyprus  | 2008           | Lemons, Limes             | 29                                                          |
| 50              | Cyprus  | 2008           | Maize                     | 4                                                           |
| 50              | Cyprus  | 2008           | Maize Germ Oil            | 2                                                           |
| 50              | Cyprus  | 2008           | Marine Fish, Other        | 2                                                           |
| 50              | Cyprus  | 2008           | Meat, Other               | 7                                                           |
| 50              | Cyprus  | 2008           | Milk, Whole               | 264                                                         |
| 50              | Cyprus  | 2008           | Molluscs, Other           | 2                                                           |
| 50              | Cyprus  | 2008           | Mutton & Goat Meat        | 20                                                          |
| 50              | Cyprus  | 2008           | Nuts                      | 15                                                          |
| 50              | Cyprus  | 2008           | Oats                      | 1                                                           |
| 50              | Cyprus  | 2008           | Offals, Edible            | 9                                                           |
| 50              | Cyprus  | 2008           | Oilcrops Oil, Other       | 3                                                           |
| 50              | Cyprus  | 2008           | Olive Oil                 | 6                                                           |
| 50              | Cyprus  | 2008           | Olives                    | 19                                                          |
| 50              | Cyprus  | 2008           | Onions                    | 26                                                          |
| 50              | Cyprus  | 2008           | Oranges, Mandarines       | 47                                                          |
| 50              | Cyprus  | 2008           | Peas                      | 1                                                           |
| 50              | Cyprus  | 2008           | Pelagic Fish              | 14                                                          |
| 50              | Cyprus  | 2008           | Pigmeat                   | 102                                                         |
| 50              | Cyprus  | 2008           | Pineapples                | 2                                                           |
| 50              | Cyprus  | 2008           | Potatoes                  | 88                                                          |
| 50              | Cyprus  | 2008           | Poultry Meat              | 75                                                          |
| 50              | Cyprus  | 2008           | Pulses, Other             | 6                                                           |
| 50              | Cyprus  | 2008           | Rape and Mustard Oil      | 2                                                           |
| 50              | Cyprus  | 2008           | Rice (Milled Equivalent)  | 18                                                          |
| 50              | Cyprus  | 2008           | Roots, Other              | 4                                                           |
| 50              | Cyprus  | 2008           | Sesameseed                | 4                                                           |
| 50              | Cyprus  | 2008           | Soyabean Oil              | 12                                                          |
| 50              | Cyprus  | 2008           | Spices, Other             | 1                                                           |
| 50              | Cyprus  | 2008           | Sugar, Refined Equivalent | 67                                                          |
| 50              | Cyprus  | 2008           | Sunflowerseed Oil         | 16                                                          |
| 50              | Cyprus  | 2008           | Sweeteners, Other         | 21                                                          |
| 50              | Cyprus  | 2008           | Tea                       | 2                                                           |
| 50              | Cyprus  | 2008           | Tomatoes                  | 72                                                          |
| 50              | Cyprus  | 2008           | Vegetables, Other         | 198                                                         |
| 50              | Cyprus  | 2008           | Wheat                     | 198                                                         |
| 50              | Cyprus  | 2008           | Wine                      | 51                                                          |
| 50              | Cyprus  | 2009           | Apples                    | 42                                                          |
| 50              | Cyprus  | 2009           | Bananas                   | 24                                                          |
| 50              | Cyprus  | 2009           | Beans                     | 4                                                           |
| 50              | Cyprus  | 2009           | Beer                      | 88                                                          |
| 50              | Cyprus  | 2009           | Beverages, Alcoholic      | 7                                                           |
| 50              | Cyprus  | 2009           | Beverages, Fermented      | 1                                                           |
| 50              | Cyprus  | 2009           | Bovine Meat               | 17                                                          |
| 50              | Cyprus  | 2009           | Butter, Ghee              | 3                                                           |
| 50              | Cyprus  | 2009           | Cephalopods               | 9                                                           |
| 50              | Cyprus  | 2009           | Cereals, Other            | 1                                                           |
| 50              | Cyprus  | 2009           | Cheese                    | 15                                                          |
| 50              | Cyprus  | 2009           | Citrus, Other             | 1                                                           |
| 50              | Cyprus  | 2009           | Cocoa Beans               | 7                                                           |
| 50              | Cyprus  | 2009           | Coconuts - Incl Copra     | 2                                                           |
| 50              | Cyprus  | 2009           | Coffee                    | 17                                                          |
| 50              | Cyprus  | 2009           | Crustaceans               | 8                                                           |
| 50              | Cyprus  | 2009           | Dates                     | 1                                                           |
| 50              | Cyprus  | 2009           | Demersal Fish             | 13                                                          |
| 50              | Cyprus  | 2009           | Eggs                      | 23                                                          |
| 50              | Cyprus  | 2009           | Fats, Animals, Raw        | 2                                                           |
| 50              | Cyprus  | 2009           | Freshwater Fish           | 12                                                          |
| 50              | Cyprus  | 2009           | Fruits, Other             | 64                                                          |
| 50              | Cyprus  | 2009           | Grapefruit                | 23                                                          |
| 50              | Cyprus  | 2009           | Grapes                    | 22                                                          |
| 50              | Cyprus  | 2009           | Groundnuts (Shelled Eq)   | 3                                                           |
| 50              | Cyprus  | 2009           | Honey                     | 2                                                           |
| 50              | Cyprus  | 2009           | Lemons, Limes             | 28                                                          |
| 50              | Cyprus  | 2009           | Maize                     | 4                                                           |
| 50              | Cyprus  | 2009           | Maize Germ Oil            | 3                                                           |
| 50              | Cyprus  | 2009           | Marine Fish, Other        | 2                                                           |
| 50              | Cyprus  | 2009           | Meat, Other               | 5                                                           |
| 50              | Cyprus  | 2009           | Milk, Whole               | 237                                                         |
| 50              | Cyprus  | 2009           | Molluscs, Other           | 2                                                           |
| 50              | Cyprus  | 2009           | Mutton & Goat Meat        | 16                                                          |
| 50              | Cyprus  | 2009           | Nuts                      | 13                                                          |
| 50              | Cyprus  | 2009           | Oats                      | 1                                                           |
| 50              | Cyprus  | 2009           | Offals, Edible            | 9                                                           |
| 50              | Cyprus  | 2009           | Oilcrops Oil, Other       | 3                                                           |
| 50              | Cyprus  | 2009           | Olive Oil                 | 7                                                           |
| 50              | Cyprus  | 2009           | Olives                    | 12                                                          |
| 50              | Cyprus  | 2009           | Onions                    | 27                                                          |
| 50              | Cyprus  | 2009           | Oranges, Mandarines       | 53                                                          |
| 50              | Cyprus  | 2009           | Peas                      | 1                                                           |
| 50              | Cyprus  | 2009           | Pelagic Fish              | 14                                                          |
| 50              | Cyprus  | 2009           | Pigmeat                   | 105                                                         |
| 50              | Cyprus  | 2009           | Pineapples                | 2                                                           |
| 50              | Cyprus  | 2009           | Plantains                 | 1                                                           |
| 50              | Cyprus  | 2009           | Potatoes                  | 83                                                          |
| 50              | Cyprus  | 2009           | Poultry Meat              | 72                                                          |
| 50              | Cyprus  | 2009           | Pulses, Other             | 5                                                           |
| 50              | Cyprus  | 2009           | Rape and Mustard Oil      | 4                                                           |
| 50              | Cyprus  | 2009           | Rice (Milled Equivalent)  | 12                                                          |
| 50              | Cyprus  | 2009           | Roots, Other              | 3                                                           |
| 50              | Cyprus  | 2009           | Sesameseed                | 5                                                           |
| 50              | Cyprus  | 2009           | Soyabean Oil              | 12                                                          |
| 50              | Cyprus  | 2009           | Spices, Other             | 1                                                           |
| 50              | Cyprus  | 2009           | Sugar, Refined Equivalent | 64                                                          |
| 50              | Cyprus  | 2009           | Sunflowerseed Oil         | 17                                                          |

Dietary calcium and zinc deficiency risks are decreasing but remain prevalent

| FAO countrycode | Country | Reference year | Food item                 | Gross food supply (g capita <sup>-1</sup> d <sup>-1</sup> ) |
|-----------------|---------|----------------|---------------------------|-------------------------------------------------------------|
| 50              | Cyprus  | 2009           | Sweeteners, Other         | 19                                                          |
| 50              | Cyprus  | 2009           | Tea                       | 1                                                           |
| 50              | Cyprus  | 2009           | Tomatoes                  | 61                                                          |
| 50              | Cyprus  | 2009           | Vegetables, Other         | 199                                                         |
| 50              | Cyprus  | 2009           | Wheat                     | 209                                                         |
| 50              | Cyprus  | 2009           | Wine                      | 41                                                          |
| 50              | Cyprus  | 2010           | Apples                    | 33                                                          |
| 50              | Cyprus  | 2010           | Bananas                   | 28                                                          |
| 50              | Cyprus  | 2010           | Barley                    | 1                                                           |
| 50              | Cyprus  | 2010           | Beans                     | 4                                                           |
| 50              | Cyprus  | 2010           | Beer                      | 88                                                          |
| 50              | Cyprus  | 2010           | Beverages, Alcoholic      | 7                                                           |
| 50              | Cyprus  | 2010           | Beverages, Fermented      | 2                                                           |
| 50              | Cyprus  | 2010           | Bovine Meat               | 18                                                          |
| 50              | Cyprus  | 2010           | Butter, Ghee              | 3                                                           |
| 50              | Cyprus  | 2010           | Cephalopods               | 8                                                           |
| 50              | Cyprus  | 2010           | Cheese                    | 15                                                          |
| 50              | Cyprus  | 2010           | Citrus, Other             | 1                                                           |
| 50              | Cyprus  | 2010           | Cocoa Beans               | 8                                                           |
| 50              | Cyprus  | 2010           | Coconuts - Incl Copra     | 1                                                           |
| 50              | Cyprus  | 2010           | Coffee                    | 15                                                          |
| 50              | Cyprus  | 2010           | Crustaceans               | 8                                                           |
| 50              | Cyprus  | 2010           | Dates                     | 1                                                           |
| 50              | Cyprus  | 2010           | Demersal Fish             | 13                                                          |
| 50              | Cyprus  | 2010           | Eggs                      | 21                                                          |
| 50              | Cyprus  | 2010           | Fats, Animals, Raw        | 2                                                           |
| 50              | Cyprus  | 2010           | Freshwater Fish           | 15                                                          |
| 50              | Cyprus  | 2010           | Fruits, Other             | 55                                                          |
| 50              | Cyprus  | 2010           | Grapefruit                | 13                                                          |
| 50              | Cyprus  | 2010           | Grapes                    | 25                                                          |
| 50              | Cyprus  | 2010           | Groundnuts (Shelled Eq)   | 3                                                           |
| 50              | Cyprus  | 2010           | Honey                     | 2                                                           |
| 50              | Cyprus  | 2010           | Lemons, Limes             | 26                                                          |
| 50              | Cyprus  | 2010           | Maize                     | 3                                                           |
| 50              | Cyprus  | 2010           | Maize Germ Oil            | 2                                                           |
| 50              | Cyprus  | 2010           | Marine Fish, Other        | 2                                                           |
| 50              | Cyprus  | 2010           | Meat, Other               | 7                                                           |
| 50              | Cyprus  | 2010           | Milk, Whole               | 247                                                         |
| 50              | Cyprus  | 2010           | Molluscs, Other           | 2                                                           |
| 50              | Cyprus  | 2010           | Mutton & Goat Meat        | 15                                                          |
| 50              | Cyprus  | 2010           | Nuts                      | 13                                                          |
| 50              | Cyprus  | 2010           | Oats                      | 1                                                           |
| 50              | Cyprus  | 2010           | Offals, Edible            | 9                                                           |
| 50              | Cyprus  | 2010           | Oilcrops Oil, Other       | 4                                                           |
| 50              | Cyprus  | 2010           | Olive Oil                 | 8                                                           |
| 50              | Cyprus  | 2010           | Olives                    | 11                                                          |
| 50              | Cyprus  | 2010           | Onions                    | 30                                                          |
| 50              | Cyprus  | 2010           | Oranges, Mandarines       | 48                                                          |
| 50              | Cyprus  | 2010           | Peas                      | 1                                                           |
| 50              | Cyprus  | 2010           | Pelagic Fish              | 12                                                          |
| 50              | Cyprus  | 2010           | Pigmeat                   | 103                                                         |
| 50              | Cyprus  | 2010           | Pineapples                | 2                                                           |
| 50              | Cyprus  | 2010           | Plantains                 | 1                                                           |
| 50              | Cyprus  | 2010           | Potatoes                  | 84                                                          |
| 50              | Cyprus  | 2010           | Poultry Meat              | 73                                                          |
| 50              | Cyprus  | 2010           | Pulses, Other             | 6                                                           |
| 50              | Cyprus  | 2010           | Rape and Mustard Oil      | 9                                                           |
| 50              | Cyprus  | 2010           | Rice (Milled Equivalent)  | 16                                                          |
| 50              | Cyprus  | 2010           | Roots, Other              | 4                                                           |
| 50              | Cyprus  | 2010           | Sesameseed                | 4                                                           |
| 50              | Cyprus  | 2010           | Soyabean Oil              | 9                                                           |
| 50              | Cyprus  | 2010           | Spices, Other             | 1                                                           |
| 50              | Cyprus  | 2010           | Sugar, Refined Equivalent | 61                                                          |
| 50              | Cyprus  | 2010           | Sunflowerseed             | 1                                                           |
| 50              | Cyprus  | 2010           | Sunflowerseed Oil         | 15                                                          |
| 50              | Cyprus  | 2010           | Sweeteners, Other         | 20                                                          |
| 50              | Cyprus  | 2010           | Tea                       | 1                                                           |
| 50              | Cyprus  | 2010           | Tomatoes                  | 61                                                          |
| 50              | Cyprus  | 2010           | Vegetables, Other         | 204                                                         |
| 50              | Cyprus  | 2010           | Wheat                     | 211                                                         |
| 50              | Cyprus  | 2010           | Wine                      | 41                                                          |
| 50              | Cyprus  | 2011           | Apples                    | 37                                                          |
| 50              | Cyprus  | 2011           | Aquatic Animals, Others   | 1                                                           |
| 50              | Cyprus  | 2011           | Bananas                   | 23                                                          |
| 50              | Cyprus  | 2011           | Barley                    | 1                                                           |
| 50              | Cyprus  | 2011           | Beans                     | 3                                                           |
| 50              | Cyprus  | 2011           | Beer                      | 88                                                          |
| 50              | Cyprus  | 2011           | Beverages, Alcoholic      | 7                                                           |
| 50              | Cyprus  | 2011           | Beverages, Fermented      | 3                                                           |
| 50              | Cyprus  | 2011           | Bovine Meat               | 19                                                          |
| 50              | Cyprus  | 2011           | Butter, Ghee              | 3                                                           |
| 50              | Cyprus  | 2011           | Cephalopods               | 9                                                           |
| 50              | Cyprus  | 2011           | Cereals, Other            | 2                                                           |
| 50              | Cyprus  | 2011           | Cheese                    | 10                                                          |
| 50              | Cyprus  | 2011           | Citrus, Other             | 1                                                           |
| 50              | Cyprus  | 2011           | Cocoa Beans               | 8                                                           |
| 50              | Cyprus  | 2011           | Coconuts - Incl Copra     | 2                                                           |
| 50              | Cyprus  | 2011           | Coffee                    | 15                                                          |
| 50              | Cyprus  | 2011           | Crustaceans               | 8                                                           |
| 50              | Cyprus  | 2011           | Dates                     | 1                                                           |
| 50              | Cyprus  | 2011           | Demersal Fish             | 12                                                          |
| 50              | Cyprus  | 2011           | Eggs                      | 21                                                          |
| 50              | Cyprus  | 2011           | Fats, Animals, Raw        | 2                                                           |
| 50              | Cyprus  | 2011           | Freshwater Fish           | 16                                                          |
| 50              | Cyprus  | 2011           | Fruits, Other             | 55                                                          |
| 50              | Cyprus  | 2011           | Grapefruit                | 18                                                          |
| 50              | Cyprus  | 2011           | Grapes                    | 15                                                          |

Dietary calcium and zinc deficiency risks are decreasing but remain prevalent

| FAO countrycode | Country        | Reference year | Food item                 | Gross food supply (g capita <sup>-1</sup> d <sup>-1</sup> ) |
|-----------------|----------------|----------------|---------------------------|-------------------------------------------------------------|
| 50              | Cyprus         | 2011           | Groundnuts (Shelled Eq)   | 4                                                           |
| 50              | Cyprus         | 2011           | Honey                     | 2                                                           |
| 50              | Cyprus         | 2011           | Lemons, Limes             | 28                                                          |
| 50              | Cyprus         | 2011           | Maize                     | 3                                                           |
| 50              | Cyprus         | 2011           | Maize Germ Oil            | 2                                                           |
| 50              | Cyprus         | 2011           | Marine Fish, Other        | 2                                                           |
| 50              | Cyprus         | 2011           | Meat, Other               | 6                                                           |
| 50              | Cyprus         | 2011           | Milk, Whole               | 258                                                         |
| 50              | Cyprus         | 2011           | Molluscs, Other           | 2                                                           |
| 50              | Cyprus         | 2011           | Mutton & Goat Meat        | 15                                                          |
| 50              | Cyprus         | 2011           | Nuts                      | 11                                                          |
| 50              | Cyprus         | 2011           | Oats                      | 1                                                           |
| 50              | Cyprus         | 2011           | Offals, Edible            | 8                                                           |
| 50              | Cyprus         | 2011           | Oilcrops Oil, Other       | 3                                                           |
| 50              | Cyprus         | 2011           | Olive Oil                 | 8                                                           |
| 50              | Cyprus         | 2011           | Olives                    | 11                                                          |
| 50              | Cyprus         | 2011           | Onions                    | 28                                                          |
| 50              | Cyprus         | 2011           | Oranges, Mandarines       | 46                                                          |
| 50              | Cyprus         | 2011           | Peas                      | 1                                                           |
| 50              | Cyprus         | 2011           | Pelagic Fish              | 12                                                          |
| 50              | Cyprus         | 2011           | Pigmeat                   | 105                                                         |
| 50              | Cyprus         | 2011           | Pineapples                | 3                                                           |
| 50              | Cyprus         | 2011           | Potatoes                  | 65                                                          |
| 50              | Cyprus         | 2011           | Poultry Meat              | 73                                                          |
| 50              | Cyprus         | 2011           | Pulses, Other             | 5                                                           |
| 50              | Cyprus         | 2011           | Rape and Mustard Oil      | 11                                                          |
| 50              | Cyprus         | 2011           | Rice (Milled Equivalent)  | 14                                                          |
| 50              | Cyprus         | 2011           | Roots, Other              | 5                                                           |
| 50              | Cyprus         | 2011           | Sesameseed                | 3                                                           |
| 50              | Cyprus         | 2011           | Soyabean Oil              | 9                                                           |
| 50              | Cyprus         | 2011           | Spices, Other             | 1                                                           |
| 50              | Cyprus         | 2011           | Sugar, Refined Equivalent | 58                                                          |
| 50              | Cyprus         | 2011           | Sunflowerseed Oil         | 17                                                          |
| 50              | Cyprus         | 2011           | Sweeteners, Other         | 28                                                          |
| 50              | Cyprus         | 2011           | Tea                       | 1                                                           |
| 50              | Cyprus         | 2011           | Tomatoes                  | 51                                                          |
| 50              | Cyprus         | 2011           | Vegetables, Other         | 203                                                         |
| 50              | Cyprus         | 2011           | Wheat                     | 212                                                         |
| 50              | Cyprus         | 2011           | Wine                      | 40                                                          |
| 167             | Czech Republic | 1993           | Apples                    | 61                                                          |
| 167             | Czech Republic | 1993           | Bananas                   | 24                                                          |
| 167             | Czech Republic | 1993           | Beer                      | 408                                                         |
| 167             | Czech Republic | 1993           | Beverages, Alcoholic      | 15                                                          |
| 167             | Czech Republic | 1993           | Bovine Meat               | 56                                                          |
| 167             | Czech Republic | 1993           | Butter, Ghee              | 13                                                          |
| 167             | Czech Republic | 1993           | Cereals, Other            | 1                                                           |
| 167             | Czech Republic | 1993           | Cheese                    | 28                                                          |
| 167             | Czech Republic | 1993           | Citrus, Other             | 2                                                           |
| 167             | Czech Republic | 1993           | Cocoa Beans               | 4                                                           |
| 167             | Czech Republic | 1993           | Coconuts - Incl Copra     | 1                                                           |
| 167             | Czech Republic | 1993           | Coffee                    | 7                                                           |
| 167             | Czech Republic | 1993           | Cream                     | 5                                                           |
| 167             | Czech Republic | 1993           | Eggs                      | 35                                                          |
| 167             | Czech Republic | 1993           | Fats, Animals, Raw        | 12                                                          |
| 167             | Czech Republic | 1993           | Freshwater Fish           | 4                                                           |
| 167             | Czech Republic | 1993           | Fruits, Other             | 43                                                          |
| 167             | Czech Republic | 1993           | Grapefruit                | 2                                                           |
| 167             | Czech Republic | 1993           | Grapes                    | 9                                                           |
| 167             | Czech Republic | 1993           | Groundnuts (Shelled Eq)   | 2                                                           |
| 167             | Czech Republic | 1993           | Honey                     | 2                                                           |
| 167             | Czech Republic | 1993           | Lemons, Limes             | 5                                                           |
| 167             | Czech Republic | 1993           | Marine Fish, Other        | 7                                                           |
| 167             | Czech Republic | 1993           | Meat, Other               | 9                                                           |
| 167             | Czech Republic | 1993           | Milk, Whole               | 200                                                         |
| 167             | Czech Republic | 1993           | Mutton & Goat Meat        | 1                                                           |
| 167             | Czech Republic | 1993           | Nuts                      | 3                                                           |
| 167             | Czech Republic | 1993           | Offals, Edible            | 14                                                          |
| 167             | Czech Republic | 1993           | Oilcrops Oil, Other       | 1                                                           |
| 167             | Czech Republic | 1993           | Onions                    | 25                                                          |
| 167             | Czech Republic | 1993           | Oranges, Mandarines       | 34                                                          |
| 167             | Czech Republic | 1993           | Peas                      | 2                                                           |
| 167             | Czech Republic | 1993           | Pelagic Fish              | 7                                                           |
| 167             | Czech Republic | 1993           | Pigmeat                   | 160                                                         |
| 167             | Czech Republic | 1993           | Pimento                   | 1                                                           |
| 167             | Czech Republic | 1993           | Pineapples                | 1                                                           |
| 167             | Czech Republic | 1993           | Potatoes                  | 232                                                         |
| 167             | Czech Republic | 1993           | Poultry Meat              | 33                                                          |
| 167             | Czech Republic | 1993           | Pulses, Other             | 3                                                           |
| 167             | Czech Republic | 1993           | Rape and Mustard Oil      | 32                                                          |
| 167             | Czech Republic | 1993           | Rice (Milled Equivalent)  | 8                                                           |
| 167             | Czech Republic | 1993           | Rye                       | 21                                                          |
| 167             | Czech Republic | 1993           | Soyabean Oil              | 3                                                           |
| 167             | Czech Republic | 1993           | Sugar, Refined Equivalent | 95                                                          |
| 167             | Czech Republic | 1993           | Sunflowerseed Oil         | 5                                                           |
| 167             | Czech Republic | 1993           | Sweeteners, Other         | 7                                                           |
| 167             | Czech Republic | 1993           | Tea                       | 1                                                           |
| 167             | Czech Republic | 1993           | Tomatoes                  | 19                                                          |
| 167             | Czech Republic | 1993           | Vegetables, Other         | 150                                                         |
| 167             | Czech Republic | 1993           | Wheat                     | 267                                                         |
| 167             | Czech Republic | 1993           | Wine                      | 17                                                          |
| 167             | Czech Republic | 1994           | Apples                    | 34                                                          |
| 167             | Czech Republic | 1994           | Bananas                   | 29                                                          |
| 167             | Czech Republic | 1994           | Beer                      | 437                                                         |
| 167             | Czech Republic | 1994           | Beverages, Alcoholic      | 16                                                          |
| 167             | Czech Republic | 1994           | Bovine Meat               | 46                                                          |
| 167             | Czech Republic | 1994           | Butter, Ghee              | 13                                                          |
| 167             | Czech Republic | 1994           | Cereals, Other            | 2                                                           |

## Dietary calcium and zinc deficiency risks are decreasing but remain prevalent

| FAO countrycode | Country        | Reference year | Food item                 | Gross food supply (g capita <sup>-1</sup> d <sup>-1</sup> ) |
|-----------------|----------------|----------------|---------------------------|-------------------------------------------------------------|
| 167             | Czech Republic | 1994           | Cheese                    | 25                                                          |
| 167             | Czech Republic | 1994           | Citrus, Other             | 2                                                           |
| 167             | Czech Republic | 1994           | Cocoa Beans               | 5                                                           |
| 167             | Czech Republic | 1994           | Coconuts - Incl Copra     | 1                                                           |
| 167             | Czech Republic | 1994           | Coffee                    | 8                                                           |
| 167             | Czech Republic | 1994           | Cream                     | 5                                                           |
| 167             | Czech Republic | 1994           | Eggs                      | 37                                                          |
| 167             | Czech Republic | 1994           | Fats, Animals, Raw        | 10                                                          |
| 167             | Czech Republic | 1994           | Freshwater Fish           | 3                                                           |
| 167             | Czech Republic | 1994           | Fruits, Other             | 49                                                          |
| 167             | Czech Republic | 1994           | Grapefruit                | 4                                                           |
| 167             | Czech Republic | 1994           | Grapes                    | 12                                                          |
| 167             | Czech Republic | 1994           | Groundnuts (Shelled Eq)   | 1                                                           |
| 167             | Czech Republic | 1994           | Honey                     | 1                                                           |
| 167             | Czech Republic | 1994           | Lemons, Limes             | 5                                                           |
| 167             | Czech Republic | 1994           | Marine Fish, Other        | 12                                                          |
| 167             | Czech Republic | 1994           | Meat, Other               | 9                                                           |
| 167             | Czech Republic | 1994           | Milk, Whole               | 169                                                         |
| 167             | Czech Republic | 1994           | Mutton & Goat Meat        | 1                                                           |
| 167             | Czech Republic | 1994           | Nuts                      | 3                                                           |
| 167             | Czech Republic | 1994           | Oats                      | 1                                                           |
| 167             | Czech Republic | 1994           | Offals, Edible            | 13                                                          |
| 167             | Czech Republic | 1994           | Oilcrops Oil, Other       | 1                                                           |
| 167             | Czech Republic | 1994           | Olives                    | 1                                                           |
| 167             | Czech Republic | 1994           | Onions                    | 26                                                          |
| 167             | Czech Republic | 1994           | Oranges, Mandarines       | 67                                                          |
| 167             | Czech Republic | 1994           | Peas                      | 2                                                           |
| 167             | Czech Republic | 1994           | Pelagic Fish              | 7                                                           |
| 167             | Czech Republic | 1994           | Pigmeat                   | 127                                                         |
| 167             | Czech Republic | 1994           | Pimento                   | 1                                                           |
| 167             | Czech Republic | 1994           | Pineapples                | 2                                                           |
| 167             | Czech Republic | 1994           | Potatoes                  | 217                                                         |
| 167             | Czech Republic | 1994           | Poultry Meat              | 32                                                          |
| 167             | Czech Republic | 1994           | Pulses, Other             | 2                                                           |
| 167             | Czech Republic | 1994           | Rape and Mustard Oil      | 23                                                          |
| 167             | Czech Republic | 1994           | Rice (Milled Equivalent)  | 9                                                           |
| 167             | Czech Republic | 1994           | Rye                       | 45                                                          |
| 167             | Czech Republic | 1994           | Soyabean Oil              | 8                                                           |
| 167             | Czech Republic | 1994           | Sugar, Refined Equivalent | 93                                                          |
| 167             | Czech Republic | 1994           | Sunflowerseed Oil         | 6                                                           |
| 167             | Czech Republic | 1994           | Sweeteners, Other         | 6                                                           |
| 167             | Czech Republic | 1994           | Tomatoes                  | 19                                                          |
| 167             | Czech Republic | 1994           | Vegetables, Other         | 145                                                         |
| 167             | Czech Republic | 1994           | Wheat                     | 278                                                         |
| 167             | Czech Republic | 1994           | Wine                      | 17                                                          |
| 167             | Czech Republic | 1995           | Apples                    | 40                                                          |
| 167             | Czech Republic | 1995           | Bananas                   | 38                                                          |
| 167             | Czech Republic | 1995           | Beans                     | 1                                                           |
| 167             | Czech Republic | 1995           | Beer                      | 427                                                         |
| 167             | Czech Republic | 1995           | Beverages, Alcoholic      | 17                                                          |
| 167             | Czech Republic | 1995           | Bovine Meat               | 44                                                          |
| 167             | Czech Republic | 1995           | Butter, Ghee              | 12                                                          |
| 167             | Czech Republic | 1995           | Cereals, Other            | 2                                                           |
| 167             | Czech Republic | 1995           | Cheese                    | 25                                                          |
| 167             | Czech Republic | 1995           | Cocoa Beans               | 4                                                           |
| 167             | Czech Republic | 1995           | Coconuts - Incl Copra     | 1                                                           |
| 167             | Czech Republic | 1995           | Coffee                    | 8                                                           |
| 167             | Czech Republic | 1995           | Cream                     | 6                                                           |
| 167             | Czech Republic | 1995           | Eggs                      | 36                                                          |
| 167             | Czech Republic | 1995           | Fats, Animals, Raw        | 12                                                          |
| 167             | Czech Republic | 1995           | Freshwater Fish           | 4                                                           |
| 167             | Czech Republic | 1995           | Fruits, Other             | 47                                                          |
| 167             | Czech Republic | 1995           | Grapefruit                | 3                                                           |
| 167             | Czech Republic | 1995           | Grapes                    | 8                                                           |
| 167             | Czech Republic | 1995           | Groundnut Oil             | 1                                                           |
| 167             | Czech Republic | 1995           | Honey                     | 1                                                           |
| 167             | Czech Republic | 1995           | Lemons, Limes             | 3                                                           |
| 167             | Czech Republic | 1995           | Marine Fish, Other        | 12                                                          |
| 167             | Czech Republic | 1995           | Meat, Other               | 9                                                           |
| 167             | Czech Republic | 1995           | Milk, Whole               | 168                                                         |
| 167             | Czech Republic | 1995           | Mutton & Goat Meat        | 1                                                           |
| 167             | Czech Republic | 1995           | Nuts                      | 3                                                           |
| 167             | Czech Republic | 1995           | Oats                      | 1                                                           |
| 167             | Czech Republic | 1995           | Offals, Edible            | 14                                                          |
| 167             | Czech Republic | 1995           | Onions                    | 30                                                          |
| 167             | Czech Republic | 1995           | Oranges, Mandarines       | 74                                                          |
| 167             | Czech Republic | 1995           | Peas                      | 3                                                           |
| 167             | Czech Republic | 1995           | Pelagic Fish              | 6                                                           |
| 167             | Czech Republic | 1995           | Pigmeat                   | 136                                                         |
| 167             | Czech Republic | 1995           | Pimento                   | 1                                                           |
| 167             | Czech Republic | 1995           | Pineapples                | 2                                                           |
| 167             | Czech Republic | 1995           | Potatoes                  | 219                                                         |
| 167             | Czech Republic | 1995           | Poultry Meat              | 41                                                          |
| 167             | Czech Republic | 1995           | Pulses, Other             | 2                                                           |
| 167             | Czech Republic | 1995           | Rape and Mustard Oil      | 33                                                          |
| 167             | Czech Republic | 1995           | Rice (Milled Equivalent)  | 12                                                          |
| 167             | Czech Republic | 1995           | Rye                       | 73                                                          |
| 167             | Czech Republic | 1995           | Soyabean Oil              | 2                                                           |
| 167             | Czech Republic | 1995           | Soyabeans                 | 1                                                           |
| 167             | Czech Republic | 1995           | Sugar, Refined Equivalent | 107                                                         |
| 167             | Czech Republic | 1995           | Sunflowerseed Oil         | 4                                                           |
| 167             | Czech Republic | 1995           | Sweeteners, Other         | 10                                                          |
| 167             | Czech Republic | 1995           | Tea                       | 1                                                           |
| 167             | Czech Republic | 1995           | Tomatoes                  | 23                                                          |
| 167             | Czech Republic | 1995           | Vegetables, Other         | 149                                                         |
| 167             | Czech Republic | 1995           | Wheat                     | 277                                                         |
| 167             | Czech Republic | 1995           | Wine                      | 17                                                          |



Dietary calcium and zinc deficiency risks are decreasing but remain prevalent

| FAO countrycode | Country        | Reference year | Food item                 | Gross food supply (g capita <sup>-1</sup> d <sup>-1</sup> ) |
|-----------------|----------------|----------------|---------------------------|-------------------------------------------------------------|
| 167             | Czech Republic | 1996           | Apples                    | 49                                                          |
| 167             | Czech Republic | 1996           | Bananas                   | 35                                                          |
| 167             | Czech Republic | 1996           | Beans                     | 1                                                           |
| 167             | Czech Republic | 1996           | Beer                      | 427                                                         |
| 167             | Czech Republic | 1996           | Beverages, Alcoholic      | 22                                                          |
| 167             | Czech Republic | 1996           | Bovine Meat               | 42                                                          |
| 167             | Czech Republic | 1996           | Butter, Ghee              | 11                                                          |
| 167             | Czech Republic | 1996           | Cereals, Other            | 2                                                           |
| 167             | Czech Republic | 1996           | Cheese                    | 31                                                          |
| 167             | Czech Republic | 1996           | Cocoa Beans               | 5                                                           |
| 167             | Czech Republic | 1996           | Coconuts - Incl Copra     | 2                                                           |
| 167             | Czech Republic | 1996           | Coffee                    | 9                                                           |
| 167             | Czech Republic | 1996           | Cream                     | 6                                                           |
| 167             | Czech Republic | 1996           | Demersal Fish             | 9                                                           |
| 167             | Czech Republic | 1996           | Eggs                      | 34                                                          |
| 167             | Czech Republic | 1996           | Fats, Animals, Raw        | 10                                                          |
| 167             | Czech Republic | 1996           | Freshwater Fish           | 4                                                           |
| 167             | Czech Republic | 1996           | Fruits, Other             | 56                                                          |
| 167             | Czech Republic | 1996           | Grapefruit                | 2                                                           |
| 167             | Czech Republic | 1996           | Grapes                    | 16                                                          |
| 167             | Czech Republic | 1996           | Groundnut Oil             | 1                                                           |
| 167             | Czech Republic | 1996           | Groundnuts (Shelled Eq)   | 2                                                           |
| 167             | Czech Republic | 1996           | Honey                     | 1                                                           |
| 167             | Czech Republic | 1996           | Lemons, Limes             | 4                                                           |
| 167             | Czech Republic | 1996           | Marine Fish, Other        | 5                                                           |
| 167             | Czech Republic | 1996           | Meat, Other               | 9                                                           |
| 167             | Czech Republic | 1996           | Milk, Whole               | 133                                                         |
| 167             | Czech Republic | 1996           | Mutton & Goat Meat        | 1                                                           |
| 167             | Czech Republic | 1996           | Nuts                      | 4                                                           |
| 167             | Czech Republic | 1996           | Oats                      | 1                                                           |
| 167             | Czech Republic | 1996           | Offals, Edible            | 15                                                          |
| 167             | Czech Republic | 1996           | Oilcrops Oil, Other       | 1                                                           |
| 167             | Czech Republic | 1996           | Onions                    | 31                                                          |
| 167             | Czech Republic | 1996           | Oranges, Mandarines       | 65                                                          |
| 167             | Czech Republic | 1996           | Palm Oil                  | 4                                                           |
| 167             | Czech Republic | 1996           | Peas                      | 2                                                           |
| 167             | Czech Republic | 1996           | Pelagic Fish              | 9                                                           |
| 167             | Czech Republic | 1996           | Pigmeat                   | 136                                                         |
| 167             | Czech Republic | 1996           | Pimento                   | 2                                                           |
| 167             | Czech Republic | 1996           | Pineapples                | 2                                                           |
| 167             | Czech Republic | 1996           | Potatoes                  | 221                                                         |
| 167             | Czech Republic | 1996           | Poultry Meat              | 41                                                          |
| 167             | Czech Republic | 1996           | Pulses, Other             | 2                                                           |
| 167             | Czech Republic | 1996           | Rape and Mustard Oil      | 30                                                          |
| 167             | Czech Republic | 1996           | Rice (Milled Equivalent)  | 13                                                          |
| 167             | Czech Republic | 1996           | Rye                       | 64                                                          |
| 167             | Czech Republic | 1996           | Soyabean Oil              | 5                                                           |
| 167             | Czech Republic | 1996           | Sugar, Refined Equivalent | 109                                                         |
| 167             | Czech Republic | 1996           | Sunflowerseed Oil         | 3                                                           |
| 167             | Czech Republic | 1996           | Sweeteners, Other         | 21                                                          |
| 167             | Czech Republic | 1996           | Tea                       | 1                                                           |
| 167             | Czech Republic | 1996           | Tomatoes                  | 19                                                          |
| 167             | Czech Republic | 1996           | Vegetables, Other         | 163                                                         |
| 167             | Czech Republic | 1996           | Wheat                     | 287                                                         |
| 167             | Czech Republic | 1996           | Wine                      | 18                                                          |
| 167             | Czech Republic | 1997           | Apples                    | 43                                                          |
| 167             | Czech Republic | 1997           | Bananas                   | 31                                                          |
| 167             | Czech Republic | 1997           | Beer                      | 440                                                         |
| 167             | Czech Republic | 1997           | Beverages, Alcoholic      | 24                                                          |
| 167             | Czech Republic | 1997           | Bovine Meat               | 36                                                          |
| 167             | Czech Republic | 1997           | Butter, Ghee              | 10                                                          |
| 167             | Czech Republic | 1997           | Cereals, Other            | 2                                                           |
| 167             | Czech Republic | 1997           | Cheese                    | 32                                                          |
| 167             | Czech Republic | 1997           | Cocoa Beans               | 6                                                           |
| 167             | Czech Republic | 1997           | Coconuts - Incl Copra     | 3                                                           |
| 167             | Czech Republic | 1997           | Coffee                    | 11                                                          |
| 167             | Czech Republic | 1997           | Cream                     | 5                                                           |
| 167             | Czech Republic | 1997           | Demersal Fish             | 10                                                          |
| 167             | Czech Republic | 1997           | Eggs                      | 39                                                          |
| 167             | Czech Republic | 1997           | Fats, Animals, Raw        | 9                                                           |
| 167             | Czech Republic | 1997           | Freshwater Fish           | 4                                                           |
| 167             | Czech Republic | 1997           | Fruits, Other             | 48                                                          |
| 167             | Czech Republic | 1997           | Grapefruit                | 3                                                           |
| 167             | Czech Republic | 1997           | Grapes                    | 14                                                          |
| 167             | Czech Republic | 1997           | Groundnut Oil             | 1                                                           |
| 167             | Czech Republic | 1997           | Groundnuts (Shelled Eq)   | 2                                                           |
| 167             | Czech Republic | 1997           | Honey                     | 1                                                           |
| 167             | Czech Republic | 1997           | Lemons, Limes             | 6                                                           |
| 167             | Czech Republic | 1997           | Marine Fish, Other        | 3                                                           |
| 167             | Czech Republic | 1997           | Meat, Other               | 9                                                           |
| 167             | Czech Republic | 1997           | Milk, Whole               | 105                                                         |
| 167             | Czech Republic | 1997           | Mutton & Goat Meat        | 1                                                           |
| 167             | Czech Republic | 1997           | Nuts                      | 4                                                           |
| 167             | Czech Republic | 1997           | Oats                      | 1                                                           |
| 167             | Czech Republic | 1997           | Offals, Edible            | 14                                                          |
| 167             | Czech Republic | 1997           | Onions                    | 27                                                          |
| 167             | Czech Republic | 1997           | Oranges, Mandarines       | 56                                                          |
| 167             | Czech Republic | 1997           | Peas                      | 3                                                           |
| 167             | Czech Republic | 1997           | Pelagic Fish              | 8                                                           |
| 167             | Czech Republic | 1997           | Pigmeat                   | 122                                                         |
| 167             | Czech Republic | 1997           | Pimento                   | 2                                                           |
| 167             | Czech Republic | 1997           | Pineapples                | 2                                                           |
| 167             | Czech Republic | 1997           | Potatoes                  | 220                                                         |
| 167             | Czech Republic | 1997           | Poultry Meat              | 51                                                          |
| 167             | Czech Republic | 1997           | Pulses, Other             | 2                                                           |
| 167             | Czech Republic | 1997           | Rape and Mustard Oil      | 35                                                          |
| 167             | Czech Republic | 1997           | Rice (Milled Equivalent)  | 11                                                          |

Dietary calcium and zinc deficiency risks are decreasing but remain prevalent

| FAO countrycode | Country        | Reference year | Food item                 | Gross food supply (g capita <sup>-1</sup> d <sup>-1</sup> ) |
|-----------------|----------------|----------------|---------------------------|-------------------------------------------------------------|
| 167             | Czech Republic | 1997           | Rye                       | 56                                                          |
| 167             | Czech Republic | 1997           | Soyabean Oil              | 4                                                           |
| 167             | Czech Republic | 1997           | Soyabeans                 | 1                                                           |
| 167             | Czech Republic | 1997           | Sugar, Refined Equivalent | 108                                                         |
| 167             | Czech Republic | 1997           | Sunflowerseed Oil         | 4                                                           |
| 167             | Czech Republic | 1997           | Sweeteners, Other         | 11                                                          |
| 167             | Czech Republic | 1997           | Tea                       | 1                                                           |
| 167             | Czech Republic | 1997           | Tomatoes                  | 20                                                          |
| 167             | Czech Republic | 1997           | Vegetables, Other         | 159                                                         |
| 167             | Czech Republic | 1997           | Wheat                     | 302                                                         |
| 167             | Czech Republic | 1997           | Wine                      | 18                                                          |
| 167             | Czech Republic | 1998           | Apples                    | 57                                                          |
| 167             | Czech Republic | 1998           | Bananas                   | 27                                                          |
| 167             | Czech Republic | 1998           | Beer                      | 440                                                         |
| 167             | Czech Republic | 1998           | Beverages, Alcoholic      | 19                                                          |
| 167             | Czech Republic | 1998           | Bovine Meat               | 30                                                          |
| 167             | Czech Republic | 1998           | Butter, Ghee              | 11                                                          |
| 167             | Czech Republic | 1998           | Cereals, Other            | 2                                                           |
| 167             | Czech Republic | 1998           | Cheese                    | 35                                                          |
| 167             | Czech Republic | 1998           | Cocoa Beans               | 5                                                           |
| 167             | Czech Republic | 1998           | Coconuts - Incl Copra     | 3                                                           |
| 167             | Czech Republic | 1998           | Coffee                    | 8                                                           |
| 167             | Czech Republic | 1998           | Cream                     | 4                                                           |
| 167             | Czech Republic | 1998           | Demersal Fish             | 9                                                           |
| 167             | Czech Republic | 1998           | Eggs                      | 53                                                          |
| 167             | Czech Republic | 1998           | Fats, Animals, Raw        | 10                                                          |
| 167             | Czech Republic | 1998           | Freshwater Fish           | 4                                                           |
| 167             | Czech Republic | 1998           | Fruits, Other             | 44                                                          |
| 167             | Czech Republic | 1998           | Grapefruit                | 3                                                           |
| 167             | Czech Republic | 1998           | Grapes                    | 15                                                          |
| 167             | Czech Republic | 1998           | Groundnut Oil             | 1                                                           |
| 167             | Czech Republic | 1998           | Groundnuts (Shelled Eq)   | 2                                                           |
| 167             | Czech Republic | 1998           | Honey                     | 2                                                           |
| 167             | Czech Republic | 1998           | Lemons, Limes             | 5                                                           |
| 167             | Czech Republic | 1998           | Marine Fish, Other        | 3                                                           |
| 167             | Czech Republic | 1998           | Meat, Other               | 11                                                          |
| 167             | Czech Republic | 1998           | Milk, Whole               | 97                                                          |
| 167             | Czech Republic | 1998           | Mutton & Goat Meat        | 1                                                           |
| 167             | Czech Republic | 1998           | Nuts                      | 4                                                           |
| 167             | Czech Republic | 1998           | Oats                      | 1                                                           |
| 167             | Czech Republic | 1998           | Offals, Edible            | 14                                                          |
| 167             | Czech Republic | 1998           | Onions                    | 31                                                          |
| 167             | Czech Republic | 1998           | Oranges, Mandarines       | 50                                                          |
| 167             | Czech Republic | 1998           | Peas                      | 3                                                           |
| 167             | Czech Republic | 1998           | Pelagic Fish              | 8                                                           |
| 167             | Czech Republic | 1998           | Pigmeat                   | 128                                                         |
| 167             | Czech Republic | 1998           | Pimento                   | 1                                                           |
| 167             | Czech Republic | 1998           | Pineapples                | 2                                                           |
| 167             | Czech Republic | 1998           | Potatoes                  | 220                                                         |
| 167             | Czech Republic | 1998           | Poultry Meat              | 56                                                          |
| 167             | Czech Republic | 1998           | Pulses, Other             | 2                                                           |
| 167             | Czech Republic | 1998           | Rape and Mustard Oil      | 37                                                          |
| 167             | Czech Republic | 1998           | Rice (Milled Equivalent)  | 12                                                          |
| 167             | Czech Republic | 1998           | Rye                       | 48                                                          |
| 167             | Czech Republic | 1998           | Soyabean Oil              | 2                                                           |
| 167             | Czech Republic | 1998           | Soyabeans                 | 1                                                           |
| 167             | Czech Republic | 1998           | Sugar, Refined Equivalent | 103                                                         |
| 167             | Czech Republic | 1998           | Sunflowerseed Oil         | 5                                                           |
| 167             | Czech Republic | 1998           | Sweeteners, Other         | 14                                                          |
| 167             | Czech Republic | 1998           | Tea                       | 1                                                           |
| 167             | Czech Republic | 1998           | Tomatoes                  | 24                                                          |
| 167             | Czech Republic | 1998           | Vegetables, Other         | 159                                                         |
| 167             | Czech Republic | 1998           | Wheat                     | 276                                                         |
| 167             | Czech Republic | 1998           | Wine                      | 18                                                          |
| 167             | Czech Republic | 1999           | Apples                    | 56                                                          |
| 167             | Czech Republic | 1999           | Bananas                   | 31                                                          |
| 167             | Czech Republic | 1999           | Beer                      | 443                                                         |
| 167             | Czech Republic | 1999           | Beverages, Alcoholic      | 20                                                          |
| 167             | Czech Republic | 1999           | Bovine Meat               | 27                                                          |
| 167             | Czech Republic | 1999           | Butter, Ghee              | 11                                                          |
| 167             | Czech Republic | 1999           | Cereals, Other            | 2                                                           |
| 167             | Czech Republic | 1999           | Cheese                    | 35                                                          |
| 167             | Czech Republic | 1999           | Cocoa Beans               | 6                                                           |
| 167             | Czech Republic | 1999           | Coconuts - Incl Copra     | 3                                                           |
| 167             | Czech Republic | 1999           | Coffee                    | 10                                                          |
| 167             | Czech Republic | 1999           | Cream                     | 5                                                           |
| 167             | Czech Republic | 1999           | Demersal Fish             | 9                                                           |
| 167             | Czech Republic | 1999           | Eggs                      | 48                                                          |
| 167             | Czech Republic | 1999           | Fats, Animals, Raw        | 10                                                          |
| 167             | Czech Republic | 1999           | Freshwater Fish           | 4                                                           |
| 167             | Czech Republic | 1999           | Fruits, Other             | 51                                                          |
| 167             | Czech Republic | 1999           | Grapefruit                | 3                                                           |
| 167             | Czech Republic | 1999           | Grapes                    | 11                                                          |
| 167             | Czech Republic | 1999           | Groundnut Oil             | 1                                                           |
| 167             | Czech Republic | 1999           | Groundnuts (Shelled Eq)   | 2                                                           |
| 167             | Czech Republic | 1999           | Honey                     | 2                                                           |
| 167             | Czech Republic | 1999           | Lemons, Limes             | 5                                                           |
| 167             | Czech Republic | 1999           | Marine Fish, Other        | 4                                                           |
| 167             | Czech Republic | 1999           | Meat, Other               | 11                                                          |
| 167             | Czech Republic | 1999           | Milk, Whole               | 96                                                          |
| 167             | Czech Republic | 1999           | Mutton & Goat Meat        | 1                                                           |
| 167             | Czech Republic | 1999           | Nuts                      | 4                                                           |
| 167             | Czech Republic | 1999           | Oats                      | 1                                                           |
| 167             | Czech Republic | 1999           | Offals, Edible            | 13                                                          |
| 167             | Czech Republic | 1999           | Onions                    | 29                                                          |
| 167             | Czech Republic | 1999           | Oranges, Mandarines       | 43                                                          |
| 167             | Czech Republic | 1999           | Peas                      | 3                                                           |

Dietary calcium and zinc deficiency risks are decreasing but remain prevalent

| FAO countrycode | Country        | Reference year | Food item                 | Gross food supply (g capita <sup>-1</sup> d <sup>-1</sup> ) |
|-----------------|----------------|----------------|---------------------------|-------------------------------------------------------------|
| 167             | Czech Republic | 1999           | Pelagic Fish              | 8                                                           |
| 167             | Czech Republic | 1999           | Pigmeat                   | 125                                                         |
| 167             | Czech Republic | 1999           | Pimento                   | 1                                                           |
| 167             | Czech Republic | 1999           | Pineapples                | 2                                                           |
| 167             | Czech Republic | 1999           | Potatoes                  | 217                                                         |
| 167             | Czech Republic | 1999           | Poultry Meat              | 58                                                          |
| 167             | Czech Republic | 1999           | Pulses, Other             | 2                                                           |
| 167             | Czech Republic | 1999           | Rape and Mustard Oil      | 36                                                          |
| 167             | Czech Republic | 1999           | Rice (Milled Equivalent)  | 12                                                          |
| 167             | Czech Republic | 1999           | Rye                       | 38                                                          |
| 167             | Czech Republic | 1999           | Soyabean Oil              | 4                                                           |
| 167             | Czech Republic | 1999           | Sugar, Refined Equivalent | 97                                                          |
| 167             | Czech Republic | 1999           | Sunflowerseed Oil         | 4                                                           |
| 167             | Czech Republic | 1999           | Sweeteners, Other         | 14                                                          |
| 167             | Czech Republic | 1999           | Tea                       | 1                                                           |
| 167             | Czech Republic | 1999           | Tomatoes                  | 28                                                          |
| 167             | Czech Republic | 1999           | Vegetables, Other         | 167                                                         |
| 167             | Czech Republic | 1999           | Wheat                     | 247                                                         |
| 167             | Czech Republic | 1999           | Wine                      | 18                                                          |
| 167             | Czech Republic | 2000           | Apples                    | 52                                                          |
| 167             | Czech Republic | 2000           | Bananas                   | 25                                                          |
| 167             | Czech Republic | 2000           | Barley                    | 1                                                           |
| 167             | Czech Republic | 2000           | Beer                      | 435                                                         |
| 167             | Czech Republic | 2000           | Beverages, Alcoholic      | 19                                                          |
| 167             | Czech Republic | 2000           | Bovine Meat               | 22                                                          |
| 167             | Czech Republic | 2000           | Butter, Ghee              | 11                                                          |
| 167             | Czech Republic | 2000           | Cereals, Other            | 2                                                           |
| 167             | Czech Republic | 2000           | Cheese                    | 37                                                          |
| 167             | Czech Republic | 2000           | Cocoa Beans               | 6                                                           |
| 167             | Czech Republic | 2000           | Coconuts - Incl Copra     | 3                                                           |
| 167             | Czech Republic | 2000           | Coffee                    | 10                                                          |
| 167             | Czech Republic | 2000           | Cream                     | 3                                                           |
| 167             | Czech Republic | 2000           | Demersal Fish             | 10                                                          |
| 167             | Czech Republic | 2000           | Eggs                      | 45                                                          |
| 167             | Czech Republic | 2000           | Fats, Animals, Raw        | 10                                                          |
| 167             | Czech Republic | 2000           | Freshwater Fish           | 5                                                           |
| 167             | Czech Republic | 2000           | Fruits, Other             | 53                                                          |
| 167             | Czech Republic | 2000           | Grapefruit                | 3                                                           |
| 167             | Czech Republic | 2000           | Grapes                    | 13                                                          |
| 167             | Czech Republic | 2000           | Groundnuts (Shelled Eq)   | 2                                                           |
| 167             | Czech Republic | 2000           | Honey                     | 2                                                           |
| 167             | Czech Republic | 2000           | Lemons, Limes             | 4                                                           |
| 167             | Czech Republic | 2000           | Maize                     | 1                                                           |
| 167             | Czech Republic | 2000           | Marine Fish, Other        | 5                                                           |
| 167             | Czech Republic | 2000           | Meat, Other               | 11                                                          |
| 167             | Czech Republic | 2000           | Milk, Whole               | 129                                                         |
| 167             | Czech Republic | 2000           | Nuts                      | 4                                                           |
| 167             | Czech Republic | 2000           | Oats                      | 1                                                           |
| 167             | Czech Republic | 2000           | Offals, Edible            | 13                                                          |
| 167             | Czech Republic | 2000           | Onions                    | 27                                                          |
| 167             | Czech Republic | 2000           | Oranges, Mandarines       | 43                                                          |
| 167             | Czech Republic | 2000           | Palm Oil                  | 3                                                           |
| 167             | Czech Republic | 2000           | Peas                      | 2                                                           |
| 167             | Czech Republic | 2000           | Pelagic Fish              | 8                                                           |
| 167             | Czech Republic | 2000           | Pigmeat                   | 116                                                         |
| 167             | Czech Republic | 2000           | Pimento                   | 1                                                           |
| 167             | Czech Republic | 2000           | Pineapples                | 2                                                           |
| 167             | Czech Republic | 2000           | Potatoes                  | 219                                                         |
| 167             | Czech Republic | 2000           | Poultry Meat              | 61                                                          |
| 167             | Czech Republic | 2000           | Pulses, Other             | 2                                                           |
| 167             | Czech Republic | 2000           | Rape and Mustard Oil      | 36                                                          |
| 167             | Czech Republic | 2000           | Rice (Milled Equivalent)  | 13                                                          |
| 167             | Czech Republic | 2000           | Rye                       | 20                                                          |
| 167             | Czech Republic | 2000           | Soyabean Oil              | 4                                                           |
| 167             | Czech Republic | 2000           | Soyabeans                 | 1                                                           |
| 167             | Czech Republic | 2000           | Sugar, Refined Equivalent | 99                                                          |
| 167             | Czech Republic | 2000           | Sunflowerseed Oil         | 1                                                           |
| 167             | Czech Republic | 2000           | Sweeteners, Other         | 12                                                          |
| 167             | Czech Republic | 2000           | Tea                       | 1                                                           |
| 167             | Czech Republic | 2000           | Tomatoes                  | 30                                                          |
| 167             | Czech Republic | 2000           | Vegetables, Other         | 152                                                         |
| 167             | Czech Republic | 2000           | Wheat                     | 264                                                         |
| 167             | Czech Republic | 2000           | Wine                      | 18                                                          |
| 167             | Czech Republic | 2001           | Apples                    | 40                                                          |
| 167             | Czech Republic | 2001           | Bananas                   | 24                                                          |
| 167             | Czech Republic | 2001           | Beans                     | 1                                                           |
| 167             | Czech Republic | 2001           | Beer                      | 428                                                         |
| 167             | Czech Republic | 2001           | Beverages, Alcoholic      | 18                                                          |
| 167             | Czech Republic | 2001           | Bovine Meat               | 18                                                          |
| 167             | Czech Republic | 2001           | Butter, Ghee              | 11                                                          |
| 167             | Czech Republic | 2001           | Cereals, Other            | 3                                                           |
| 167             | Czech Republic | 2001           | Cheese                    | 37                                                          |
| 167             | Czech Republic | 2001           | Cocoa Beans               | 8                                                           |
| 167             | Czech Republic | 2001           | Coconuts - Incl Copra     | 3                                                           |
| 167             | Czech Republic | 2001           | Coffee                    | 11                                                          |
| 167             | Czech Republic | 2001           | Cream                     | 4                                                           |
| 167             | Czech Republic | 2001           | Demersal Fish             | 10                                                          |
| 167             | Czech Republic | 2001           | Eggs                      | 46                                                          |
| 167             | Czech Republic | 2001           | Fats, Animals, Raw        | 10                                                          |
| 167             | Czech Republic | 2001           | Freshwater Fish           | 5                                                           |
| 167             | Czech Republic | 2001           | Fruits, Other             | 47                                                          |
| 167             | Czech Republic | 2001           | Grapefruit                | 3                                                           |
| 167             | Czech Republic | 2001           | Grapes                    | 13                                                          |
| 167             | Czech Republic | 2001           | Groundnuts (Shelled Eq)   | 3                                                           |
| 167             | Czech Republic | 2001           | Honey                     | 1                                                           |
| 167             | Czech Republic | 2001           | Lemons, Limes             | 5                                                           |
| 167             | Czech Republic | 2001           | Marine Fish, Other        | 5                                                           |

## Dietary calcium and zinc deficiency risks are decreasing but remain prevalent

| FAO countrycode | Country        | Reference year | Food item                 | Gross food supply (g capita <sup>-1</sup> d <sup>-1</sup> ) |
|-----------------|----------------|----------------|---------------------------|-------------------------------------------------------------|
| 167             | Czech Republic | 2001           | Meat, Other               | 11                                                          |
| 167             | Czech Republic | 2001           | Milk, Whole               | 92                                                          |
| 167             | Czech Republic | 2001           | Nuts                      | 4                                                           |
| 167             | Czech Republic | 2001           | Oats                      | 1                                                           |
| 167             | Czech Republic | 2001           | Offals, Edible            | 12                                                          |
| 167             | Czech Republic | 2001           | Olives                    | 1                                                           |
| 167             | Czech Republic | 2001           | Onions                    | 29                                                          |
| 167             | Czech Republic | 2001           | Oranges, Mandarines       | 39                                                          |
| 167             | Czech Republic | 2001           | Peas                      | 2                                                           |
| 167             | Czech Republic | 2001           | Pelagic Fish              | 7                                                           |
| 167             | Czech Republic | 2001           | Pigmeat                   | 114                                                         |
| 167             | Czech Republic | 2001           | Pimento                   | 1                                                           |
| 167             | Czech Republic | 2001           | Pineapples                | 3                                                           |
| 167             | Czech Republic | 2001           | Potatoes                  | 223                                                         |
| 167             | Czech Republic | 2001           | Poultry Meat              | 66                                                          |
| 167             | Czech Republic | 2001           | Pulses, Other             | 2                                                           |
| 167             | Czech Republic | 2001           | Rape and Mustard Oil      | 33                                                          |
| 167             | Czech Republic | 2001           | Rice (Milled Equivalent)  | 12                                                          |
| 167             | Czech Republic | 2001           | Rye                       | 37                                                          |
| 167             | Czech Republic | 2001           | Soyabean Oil              | 7                                                           |
| 167             | Czech Republic | 2001           | Soyabeans                 | 3                                                           |
| 167             | Czech Republic | 2001           | Sugar, Refined Equivalent | 108                                                         |
| 167             | Czech Republic | 2001           | Sunflowerseed Oil         | 4                                                           |
| 167             | Czech Republic | 2001           | Sweeteners, Other         | 8                                                           |
| 167             | Czech Republic | 2001           | Tea                       | 1                                                           |
| 167             | Czech Republic | 2001           | Tomatoes                  | 31                                                          |
| 167             | Czech Republic | 2001           | Vegetables, Other         | 146                                                         |
| 167             | Czech Republic | 2001           | Wheat                     | 260                                                         |
| 167             | Czech Republic | 2001           | Wine                      | 24                                                          |
| 167             | Czech Republic | 2002           | Apples                    | 25                                                          |
| 167             | Czech Republic | 2002           | Bananas                   | 24                                                          |
| 167             | Czech Republic | 2002           | Beer                      | 431                                                         |
| 167             | Czech Republic | 2002           | Beverages, Alcoholic      | 17                                                          |
| 167             | Czech Republic | 2002           | Bovine Meat               | 22                                                          |
| 167             | Czech Republic | 2002           | Butter, Ghee              | 13                                                          |
| 167             | Czech Republic | 2002           | Cereals, Other            | 4                                                           |
| 167             | Czech Republic | 2002           | Cheese                    | 37                                                          |
| 167             | Czech Republic | 2002           | Cocoa Beans               | 9                                                           |
| 167             | Czech Republic | 2002           | Coconuts - Incl Copra     | 2                                                           |
| 167             | Czech Republic | 2002           | Coffee                    | 11                                                          |
| 167             | Czech Republic | 2002           | Cream                     | 4                                                           |
| 167             | Czech Republic | 2002           | Demersal Fish             | 9                                                           |
| 167             | Czech Republic | 2002           | Eggs                      | 41                                                          |
| 167             | Czech Republic | 2002           | Fats, Animals, Raw        | 10                                                          |
| 167             | Czech Republic | 2002           | Freshwater Fish           | 5                                                           |
| 167             | Czech Republic | 2002           | Fruits, Other             | 44                                                          |
| 167             | Czech Republic | 2002           | Grapefruit                | 4                                                           |
| 167             | Czech Republic | 2002           | Grapes                    | 5                                                           |
| 167             | Czech Republic | 2002           | Groundnuts (Shelled Eq)   | 3                                                           |
| 167             | Czech Republic | 2002           | Honey                     | 1                                                           |
| 167             | Czech Republic | 2002           | Lemons, Limes             | 5                                                           |
| 167             | Czech Republic | 2002           | Marine Fish, Other        | 5                                                           |
| 167             | Czech Republic | 2002           | Meat, Other               | 11                                                          |
| 167             | Czech Republic | 2002           | Milk, Whole               | 79                                                          |
| 167             | Czech Republic | 2002           | Nuts                      | 5                                                           |
| 167             | Czech Republic | 2002           | Oats                      | 1                                                           |
| 167             | Czech Republic | 2002           | Offals, Edible            | 12                                                          |
| 167             | Czech Republic | 2002           | Olives                    | 1                                                           |
| 167             | Czech Republic | 2002           | Onions                    | 23                                                          |
| 167             | Czech Republic | 2002           | Oranges, Mandarines       | 48                                                          |
| 167             | Czech Republic | 2002           | Peas                      | 1                                                           |
| 167             | Czech Republic | 2002           | Pelagic Fish              | 7                                                           |
| 167             | Czech Republic | 2002           | Pigmeat                   | 116                                                         |
| 167             | Czech Republic | 2002           | Pimento                   | 2                                                           |
| 167             | Czech Republic | 2002           | Pineapples                | 2                                                           |
| 167             | Czech Republic | 2002           | Potatoes                  | 222                                                         |
| 167             | Czech Republic | 2002           | Poultry Meat              | 63                                                          |
| 167             | Czech Republic | 2002           | Pulses, Other             | 2                                                           |
| 167             | Czech Republic | 2002           | Rape and Mustard Oil      | 32                                                          |
| 167             | Czech Republic | 2002           | Rice (Milled Equivalent)  | 13                                                          |
| 167             | Czech Republic | 2002           | Rye                       | 33                                                          |
| 167             | Czech Republic | 2002           | Soyabean Oil              | 6                                                           |
| 167             | Czech Republic | 2002           | Soyabeans                 | 2                                                           |
| 167             | Czech Republic | 2002           | Sugar, Refined Equivalent | 115                                                         |
| 167             | Czech Republic | 2002           | Sunflowerseed Oil         | 6                                                           |
| 167             | Czech Republic | 2002           | Sweeteners, Other         | 14                                                          |
| 167             | Czech Republic | 2002           | Tea                       | 1                                                           |
| 167             | Czech Republic | 2002           | Tomatoes                  | 33                                                          |
| 167             | Czech Republic | 2002           | Vegetables, Other         | 144                                                         |
| 167             | Czech Republic | 2002           | Wheat                     | 277                                                         |
| 167             | Czech Republic | 2002           | Wine                      | 30                                                          |
| 167             | Czech Republic | 2003           | Apples                    | 31                                                          |
| 167             | Czech Republic | 2003           | Bananas                   | 26                                                          |
| 167             | Czech Republic | 2003           | Beer                      | 434                                                         |
| 167             | Czech Republic | 2003           | Beverages, Alcoholic      | 18                                                          |
| 167             | Czech Republic | 2003           | Bovine Meat               | 24                                                          |
| 167             | Czech Republic | 2003           | Butter, Ghee              | 11                                                          |
| 167             | Czech Republic | 2003           | Cereals, Other            | 7                                                           |
| 167             | Czech Republic | 2003           | Cheese                    | 37                                                          |
| 167             | Czech Republic | 2003           | Cocoa Beans               | 8                                                           |
| 167             | Czech Republic | 2003           | Coconuts - Incl Copra     | 3                                                           |
| 167             | Czech Republic | 2003           | Coffee                    | 9                                                           |
| 167             | Czech Republic | 2003           | Cream                     | 4                                                           |
| 167             | Czech Republic | 2003           | Demersal Fish             | 9                                                           |
| 167             | Czech Republic | 2003           | Eggs                      | 40                                                          |
| 167             | Czech Republic | 2003           | Fats, Animals, Raw        | 10                                                          |
| 167             | Czech Republic | 2003           | Freshwater Fish           | 5                                                           |

Dietary calcium and zinc deficiency risks are decreasing but remain prevalent

| FAO countrycode | Country        | Reference year | Food item                 | Gross food supply (g capita <sup>-1</sup> d <sup>-1</sup> ) |
|-----------------|----------------|----------------|---------------------------|-------------------------------------------------------------|
| 167             | Czech Republic | 2003           | Fruits, Other             | 46                                                          |
| 167             | Czech Republic | 2003           | Grapefruit                | 4                                                           |
| 167             | Czech Republic | 2003           | Grapes                    | 9                                                           |
| 167             | Czech Republic | 2003           | Groundnuts (Shelled Eq)   | 3                                                           |
| 167             | Czech Republic | 2003           | Honey                     | 2                                                           |
| 167             | Czech Republic | 2003           | Lemons, Limes             | 5                                                           |
| 167             | Czech Republic | 2003           | Marine Fish, Other        | 5                                                           |
| 167             | Czech Republic | 2003           | Meat, Other               | 11                                                          |
| 167             | Czech Republic | 2003           | Milk, Whole               | 94                                                          |
| 167             | Czech Republic | 2003           | Nuts                      | 5                                                           |
| 167             | Czech Republic | 2003           | Oats                      | 1                                                           |
| 167             | Czech Republic | 2003           | Offals, Edible            | 12                                                          |
| 167             | Czech Republic | 2003           | Olives                    | 1                                                           |
| 167             | Czech Republic | 2003           | Onions                    | 22                                                          |
| 167             | Czech Republic | 2003           | Oranges, Mandarines       | 58                                                          |
| 167             | Czech Republic | 2003           | Peas                      | 3                                                           |
| 167             | Czech Republic | 2003           | Pelagic Fish              | 7                                                           |
| 167             | Czech Republic | 2003           | Pigmeat                   | 119                                                         |
| 167             | Czech Republic | 2003           | Pimento                   | 2                                                           |
| 167             | Czech Republic | 2003           | Pineapples                | 3                                                           |
| 167             | Czech Republic | 2003           | Potatoes                  | 216                                                         |
| 167             | Czech Republic | 2003           | Poultry Meat              | 65                                                          |
| 167             | Czech Republic | 2003           | Pulses, Other             | 2                                                           |
| 167             | Czech Republic | 2003           | Rape and Mustard Oil      | 29                                                          |
| 167             | Czech Republic | 2003           | Rice (Milled Equivalent)  | 13                                                          |
| 167             | Czech Republic | 2003           | Rye                       | 39                                                          |
| 167             | Czech Republic | 2003           | Soyabean Oil              | 11                                                          |
| 167             | Czech Republic | 2003           | Soyabeans                 | 1                                                           |
| 167             | Czech Republic | 2003           | Sugar, Refined Equivalent | 121                                                         |
| 167             | Czech Republic | 2003           | Sunflowerseed Oil         | 8                                                           |
| 167             | Czech Republic | 2003           | Sweeteners, Other         | 17                                                          |
| 167             | Czech Republic | 2003           | Tea                       | 1                                                           |
| 167             | Czech Republic | 2003           | Tomatoes                  | 32                                                          |
| 167             | Czech Republic | 2003           | Vegetables, Other         | 140                                                         |
| 167             | Czech Republic | 2003           | Wheat                     | 267                                                         |
| 167             | Czech Republic | 2003           | Wine                      | 32                                                          |
| 167             | Czech Republic | 2004           | Apples                    | 21                                                          |
| 167             | Czech Republic | 2004           | Bananas                   | 25                                                          |
| 167             | Czech Republic | 2004           | Beans                     | 1                                                           |
| 167             | Czech Republic | 2004           | Beer                      | 438                                                         |
| 167             | Czech Republic | 2004           | Beverages, Alcoholic      | 21                                                          |
| 167             | Czech Republic | 2004           | Bovine Meat               | 23                                                          |
| 167             | Czech Republic | 2004           | Butter, Ghee              | 9                                                           |
| 167             | Czech Republic | 2004           | Cereals, Other            | 5                                                           |
| 167             | Czech Republic | 2004           | Cheese                    | 39                                                          |
| 167             | Czech Republic | 2004           | Cocoa Beans               | 8                                                           |
| 167             | Czech Republic | 2004           | Coconuts - Incl Copra     | 3                                                           |
| 167             | Czech Republic | 2004           | Coffee                    | 8                                                           |
| 167             | Czech Republic | 2004           | Cream                     | 4                                                           |
| 167             | Czech Republic | 2004           | Demersal Fish             | 7                                                           |
| 167             | Czech Republic | 2004           | Eggs                      | 39                                                          |
| 167             | Czech Republic | 2004           | Fats, Animals, Raw        | 11                                                          |
| 167             | Czech Republic | 2004           | Freshwater Fish           | 5                                                           |
| 167             | Czech Republic | 2004           | Fruits, Other             | 46                                                          |
| 167             | Czech Republic | 2004           | Grapefruit                | 5                                                           |
| 167             | Czech Republic | 2004           | Grapes                    | 10                                                          |
| 167             | Czech Republic | 2004           | Groundnuts (Shelled Eq)   | 3                                                           |
| 167             | Czech Republic | 2004           | Honey                     | 2                                                           |
| 167             | Czech Republic | 2004           | Lemons, Limes             | 6                                                           |
| 167             | Czech Republic | 2004           | Marine Fish, Other        | 5                                                           |
| 167             | Czech Republic | 2004           | Meat, Other               | 11                                                          |
| 167             | Czech Republic | 2004           | Milk, Whole               | 75                                                          |
| 167             | Czech Republic | 2004           | Nuts                      | 5                                                           |
| 167             | Czech Republic | 2004           | Oats                      | 1                                                           |
| 167             | Czech Republic | 2004           | Offals, Edible            | 14                                                          |
| 167             | Czech Republic | 2004           | Oilcrops Oil, Other       | 1                                                           |
| 167             | Czech Republic | 2004           | Olive Oil                 | 1                                                           |
| 167             | Czech Republic | 2004           | Olives                    | 6                                                           |
| 167             | Czech Republic | 2004           | Onions                    | 28                                                          |
| 167             | Czech Republic | 2004           | Oranges, Mandarines       | 85                                                          |
| 167             | Czech Republic | 2004           | Peas                      | 3                                                           |
| 167             | Czech Republic | 2004           | Pelagic Fish              | 9                                                           |
| 167             | Czech Republic | 2004           | Pigmeat                   | 133                                                         |
| 167             | Czech Republic | 2004           | Pimento                   | 2                                                           |
| 167             | Czech Republic | 2004           | Pineapples                | 4                                                           |
| 167             | Czech Republic | 2004           | Potatoes                  | 199                                                         |
| 167             | Czech Republic | 2004           | Poultry Meat              | 70                                                          |
| 167             | Czech Republic | 2004           | Pulses, Other             | 2                                                           |
| 167             | Czech Republic | 2004           | Rape and Mustard Oil      | 26                                                          |
| 167             | Czech Republic | 2004           | Rice (Milled Equivalent)  | 13                                                          |
| 167             | Czech Republic | 2004           | Rye                       | 46                                                          |
| 167             | Czech Republic | 2004           | Soyabean Oil              | 7                                                           |
| 167             | Czech Republic | 2004           | Soyabeans                 | 2                                                           |
| 167             | Czech Republic | 2004           | Sugar, Refined Equivalent | 118                                                         |
| 167             | Czech Republic | 2004           | Sunflowerseed Oil         | 7                                                           |
| 167             | Czech Republic | 2004           | Sweeteners, Other         | 21                                                          |
| 167             | Czech Republic | 2004           | Tea                       | 1                                                           |
| 167             | Czech Republic | 2004           | Tomatoes                  | 31                                                          |
| 167             | Czech Republic | 2004           | Vegetables, Other         | 133                                                         |
| 167             | Czech Republic | 2004           | Wheat                     | 272                                                         |
| 167             | Czech Republic | 2004           | Wine                      | 36                                                          |
| 167             | Czech Republic | 2005           | Apples                    | 40                                                          |
| 167             | Czech Republic | 2005           | Bananas                   | 20                                                          |
| 167             | Czech Republic | 2005           | Beans                     | 1                                                           |
| 167             | Czech Republic | 2005           | Beer                      | 444                                                         |
| 167             | Czech Republic | 2005           | Beverages, Alcoholic      | 14                                                          |
| 167             | Czech Republic | 2005           | Bovine Meat               | 22                                                          |

## Dietary calcium and zinc deficiency risks are decreasing but remain prevalent

| FAO countrycode | Country        | Reference year | Food item                 | Gross food supply (g capita <sup>-1</sup> d <sup>-1</sup> ) |
|-----------------|----------------|----------------|---------------------------|-------------------------------------------------------------|
| 167             | Czech Republic | 2005           | Butter, Ghee              | 12                                                          |
| 167             | Czech Republic | 2005           | Cereals, Other            | 4                                                           |
| 167             | Czech Republic | 2005           | Cheese                    | 41                                                          |
| 167             | Czech Republic | 2005           | Cocoa Beans               | 8                                                           |
| 167             | Czech Republic | 2005           | Coconuts - Incl Copra     | 3                                                           |
| 167             | Czech Republic | 2005           | Coffee                    | 8                                                           |
| 167             | Czech Republic | 2005           | Cream                     | 11                                                          |
| 167             | Czech Republic | 2005           | Demersal Fish             | 8                                                           |
| 167             | Czech Republic | 2005           | Eggs                      | 38                                                          |
| 167             | Czech Republic | 2005           | Fats, Animals, Raw        | 12                                                          |
| 167             | Czech Republic | 2005           | Freshwater Fish           | 6                                                           |
| 167             | Czech Republic | 2005           | Fruits, Other             | 48                                                          |
| 167             | Czech Republic | 2005           | Grapefruit                | 5                                                           |
| 167             | Czech Republic | 2005           | Grapes                    | 9                                                           |
| 167             | Czech Republic | 2005           | Groundnuts (Shelled Eq)   | 2                                                           |
| 167             | Czech Republic | 2005           | Honey                     | 2                                                           |
| 167             | Czech Republic | 2005           | Lemons, Limes             | 7                                                           |
| 167             | Czech Republic | 2005           | Marine Fish, Other        | 4                                                           |
| 167             | Czech Republic | 2005           | Meat, Other               | 11                                                          |
| 167             | Czech Republic | 2005           | Milk, Whole               | 130                                                         |
| 167             | Czech Republic | 2005           | Mutton & Goat Meat        | 1                                                           |
| 167             | Czech Republic | 2005           | Nuts                      | 5                                                           |
| 167             | Czech Republic | 2005           | Oats                      | 3                                                           |
| 167             | Czech Republic | 2005           | Offals, Edible            | 13                                                          |
| 167             | Czech Republic | 2005           | Olive Oil                 | 1                                                           |
| 167             | Czech Republic | 2005           | Olives                    | 1                                                           |
| 167             | Czech Republic | 2005           | Onions                    | 23                                                          |
| 167             | Czech Republic | 2005           | Oranges, Mandarines       | 58                                                          |
| 167             | Czech Republic | 2005           | Palm Oil                  | 7                                                           |
| 167             | Czech Republic | 2005           | Peas                      | 5                                                           |
| 167             | Czech Republic | 2005           | Pelagic Fish              | 9                                                           |
| 167             | Czech Republic | 2005           | Pigmeat                   | 134                                                         |
| 167             | Czech Republic | 2005           | Pimento                   | 2                                                           |
| 167             | Czech Republic | 2005           | Pineapples                | 4                                                           |
| 167             | Czech Republic | 2005           | Potatoes                  | 213                                                         |
| 167             | Czech Republic | 2005           | Poultry Meat              | 72                                                          |
| 167             | Czech Republic | 2005           | Pulses, Other             | 2                                                           |
| 167             | Czech Republic | 2005           | Rape and Mustard Oil      | 24                                                          |
| 167             | Czech Republic | 2005           | Rice (Milled Equivalent)  | 11                                                          |
| 167             | Czech Republic | 2005           | Rye                       | 38                                                          |
| 167             | Czech Republic | 2005           | Soyabean Oil              | 6                                                           |
| 167             | Czech Republic | 2005           | Soyabean                  | 1                                                           |
| 167             | Czech Republic | 2005           | Sugar, Refined Equivalent | 78                                                          |
| 167             | Czech Republic | 2005           | Sunflowerseed Oil         | 9                                                           |
| 167             | Czech Republic | 2005           | Sweeteners, Other         | 16                                                          |
| 167             | Czech Republic | 2005           | Tea                       | 1                                                           |
| 167             | Czech Republic | 2005           | Tomatoes                  | 35                                                          |
| 167             | Czech Republic | 2005           | Vegetables, Other         | 159                                                         |
| 167             | Czech Republic | 2005           | Wheat                     | 301                                                         |
| 167             | Czech Republic | 2005           | Wine                      | 33                                                          |
| 167             | Czech Republic | 2006           | Apples                    | 36                                                          |
| 167             | Czech Republic | 2006           | Bananas                   | 20                                                          |
| 167             | Czech Republic | 2006           | Beer                      | 445                                                         |
| 167             | Czech Republic | 2006           | Beverages, Alcoholic      | 19                                                          |
| 167             | Czech Republic | 2006           | Bovine Meat               | 21                                                          |
| 167             | Czech Republic | 2006           | Butter, Ghee              | 11                                                          |
| 167             | Czech Republic | 2006           | Cereals, Other            | 4                                                           |
| 167             | Czech Republic | 2006           | Cheese                    | 43                                                          |
| 167             | Czech Republic | 2006           | Citrus, Other             | 1                                                           |
| 167             | Czech Republic | 2006           | Cocoa Beans               | 9                                                           |
| 167             | Czech Republic | 2006           | Coconuts - Incl Copra     | 3                                                           |
| 167             | Czech Republic | 2006           | Coffee                    | 8                                                           |
| 167             | Czech Republic | 2006           | Cream                     | 12                                                          |
| 167             | Czech Republic | 2006           | Demersal Fish             | 6                                                           |
| 167             | Czech Republic | 2006           | Eggs                      | 43                                                          |
| 167             | Czech Republic | 2006           | Fats, Animals, Raw        | 12                                                          |
| 167             | Czech Republic | 2006           | Freshwater Fish           | 6                                                           |
| 167             | Czech Republic | 2006           | Fruits, Other             | 48                                                          |
| 167             | Czech Republic | 2006           | Grapefruit                | 4                                                           |
| 167             | Czech Republic | 2006           | Grapes                    | 8                                                           |
| 167             | Czech Republic | 2006           | Groundnuts (Shelled Eq)   | 2                                                           |
| 167             | Czech Republic | 2006           | Honey                     | 2                                                           |
| 167             | Czech Republic | 2006           | Lemons, Limes             | 7                                                           |
| 167             | Czech Republic | 2006           | Marine Fish, Other        | 4                                                           |
| 167             | Czech Republic | 2006           | Meat, Other               | 11                                                          |
| 167             | Czech Republic | 2006           | Milk, Whole               | 96                                                          |
| 167             | Czech Republic | 2006           | Mutton & Goat Meat        | 1                                                           |
| 167             | Czech Republic | 2006           | Nuts                      | 7                                                           |
| 167             | Czech Republic | 2006           | Oats                      | 5                                                           |
| 167             | Czech Republic | 2006           | Offals, Edible            | 11                                                          |
| 167             | Czech Republic | 2006           | Oilcrops Oil, Other       | 1                                                           |
| 167             | Czech Republic | 2006           | Olive Oil                 | 1                                                           |
| 167             | Czech Republic | 2006           | Olives                    | 1                                                           |
| 167             | Czech Republic | 2006           | Onions                    | 25                                                          |
| 167             | Czech Republic | 2006           | Oranges, Mandarines       | 58                                                          |
| 167             | Czech Republic | 2006           | Palm Oil                  | 3                                                           |
| 167             | Czech Republic | 2006           | Peas                      | 5                                                           |
| 167             | Czech Republic | 2006           | Pelagic Fish              | 9                                                           |
| 167             | Czech Republic | 2006           | Pigmeat                   | 127                                                         |
| 167             | Czech Republic | 2006           | Pimento                   | 1                                                           |
| 167             | Czech Republic | 2006           | Pineapples                | 6                                                           |
| 167             | Czech Republic | 2006           | Potatoes                  | 174                                                         |
| 167             | Czech Republic | 2006           | Poultry Meat              | 72                                                          |
| 167             | Czech Republic | 2006           | Pulses, Other             | 2                                                           |
| 167             | Czech Republic | 2006           | Rape and Mustard Oil      | 31                                                          |
| 167             | Czech Republic | 2006           | Rice (Milled Equivalent)  | 14                                                          |
| 167             | Czech Republic | 2006           | Rye                       | 10                                                          |

## Dietary calcium and zinc deficiency risks are decreasing but remain prevalent

| FAO countrycode | Country        | Reference year | Food item                 | Gross food supply (g capita <sup>-1</sup> d <sup>-1</sup> ) |
|-----------------|----------------|----------------|---------------------------|-------------------------------------------------------------|
| 167             | Czech Republic | 2006           | Soyabean Oil              | 11                                                          |
| 167             | Czech Republic | 2006           | Soyabeans                 | 1                                                           |
| 167             | Czech Republic | 2006           | Sugar, Refined Equivalent | 64                                                          |
| 167             | Czech Republic | 2006           | Sunflowerseed Oil         | 12                                                          |
| 167             | Czech Republic | 2006           | Sweeteners, Other         | 16                                                          |
| 167             | Czech Republic | 2006           | Tea                       | 1                                                           |
| 167             | Czech Republic | 2006           | Tomatoes                  | 37                                                          |
| 167             | Czech Republic | 2006           | Vegetables, Other         | 151                                                         |
| 167             | Czech Republic | 2006           | Wheat                     | 305                                                         |
| 167             | Czech Republic | 2006           | Wine                      | 34                                                          |
| 167             | Czech Republic | 2007           | Apples                    | 34                                                          |
| 167             | Czech Republic | 2007           | Bananas                   | 22                                                          |
| 167             | Czech Republic | 2007           | Beer                      | 402                                                         |
| 167             | Czech Republic | 2007           | Beverages, Alcoholic      | 20                                                          |
| 167             | Czech Republic | 2007           | Beverages, Fermented      | 1                                                           |
| 167             | Czech Republic | 2007           | Bovine Meat               | 22                                                          |
| 167             | Czech Republic | 2007           | Butter, Ghee              | 12                                                          |
| 167             | Czech Republic | 2007           | Cereals, Other            | 3                                                           |
| 167             | Czech Republic | 2007           | Cheese                    | 44                                                          |
| 167             | Czech Republic | 2007           | Citrus, Other             | 1                                                           |
| 167             | Czech Republic | 2007           | Cocoa Beans               | 8                                                           |
| 167             | Czech Republic | 2007           | Coconuts - Incl Copra     | 2                                                           |
| 167             | Czech Republic | 2007           | Coffee                    | 10                                                          |
| 167             | Czech Republic | 2007           | Cream                     | 11                                                          |
| 167             | Czech Republic | 2007           | Demersal Fish             | 6                                                           |
| 167             | Czech Republic | 2007           | Eggs                      | 41                                                          |
| 167             | Czech Republic | 2007           | Fats, Animals, Raw        | 11                                                          |
| 167             | Czech Republic | 2007           | Freshwater Fish           | 7                                                           |
| 167             | Czech Republic | 2007           | Fruits, Other             | 48                                                          |
| 167             | Czech Republic | 2007           | Grapefruit                | 5                                                           |
| 167             | Czech Republic | 2007           | Grapes                    | 19                                                          |
| 167             | Czech Republic | 2007           | Groundnuts (Shelled Eq)   | 2                                                           |
| 167             | Czech Republic | 2007           | Honey                     | 2                                                           |
| 167             | Czech Republic | 2007           | Lemons, Limes             | 6                                                           |
| 167             | Czech Republic | 2007           | Marine Fish, Other        | 4                                                           |
| 167             | Czech Republic | 2007           | Meat, Other               | 15                                                          |
| 167             | Czech Republic | 2007           | Milk, Whole               | 123                                                         |
| 167             | Czech Republic | 2007           | Mutton & Goat Meat        | 1                                                           |
| 167             | Czech Republic | 2007           | Nuts                      | 7                                                           |
| 167             | Czech Republic | 2007           | Oats                      | 3                                                           |
| 167             | Czech Republic | 2007           | Offals, Edible            | 11                                                          |
| 167             | Czech Republic | 2007           | Olive Oil                 | 1                                                           |
| 167             | Czech Republic | 2007           | Onions                    | 25                                                          |
| 167             | Czech Republic | 2007           | Oranges, Mandarines       | 50                                                          |
| 167             | Czech Republic | 2007           | Peas                      | 5                                                           |
| 167             | Czech Republic | 2007           | Pelagic Fish              | 9                                                           |
| 167             | Czech Republic | 2007           | Pigmeat                   | 129                                                         |
| 167             | Czech Republic | 2007           | Pimento                   | 1                                                           |
| 167             | Czech Republic | 2007           | Pineapples                | 5                                                           |
| 167             | Czech Republic | 2007           | Potatoes                  | 186                                                         |
| 167             | Czech Republic | 2007           | Poultry Meat              | 67                                                          |
| 167             | Czech Republic | 2007           | Pulses, Other             | 2                                                           |
| 167             | Czech Republic | 2007           | Rape and Mustard Oil      | 41                                                          |
| 167             | Czech Republic | 2007           | Rice (Milled Equivalent)  | 13                                                          |
| 167             | Czech Republic | 2007           | Rye                       | 26                                                          |
| 167             | Czech Republic | 2007           | Soyabean Oil              | 5                                                           |
| 167             | Czech Republic | 2007           | Sugar, Refined Equivalent | 75                                                          |
| 167             | Czech Republic | 2007           | Sunflowerseed Oil         | 8                                                           |
| 167             | Czech Republic | 2007           | Sweeteners, Other         | 12                                                          |
| 167             | Czech Republic | 2007           | Tea                       | 2                                                           |
| 167             | Czech Republic | 2007           | Tomatoes                  | 37                                                          |
| 167             | Czech Republic | 2007           | Vegetables, Other         | 145                                                         |
| 167             | Czech Republic | 2007           | Wheat                     | 283                                                         |
| 167             | Czech Republic | 2007           | Wine                      | 33                                                          |
| 167             | Czech Republic | 2008           | Apples                    | 43                                                          |
| 167             | Czech Republic | 2008           | Bananas                   | 27                                                          |
| 167             | Czech Republic | 2008           | Barley                    | 1                                                           |
| 167             | Czech Republic | 2008           | Beans                     | 1                                                           |
| 167             | Czech Republic | 2008           | Beer                      | 416                                                         |
| 167             | Czech Republic | 2008           | Beverages, Alcoholic      | 20                                                          |
| 167             | Czech Republic | 2008           | Bovine Meat               | 21                                                          |
| 167             | Czech Republic | 2008           | Butter, Ghee              | 12                                                          |
| 167             | Czech Republic | 2008           | Cereals, Other            | 2                                                           |
| 167             | Czech Republic | 2008           | Cheese                    | 43                                                          |
| 167             | Czech Republic | 2008           | Citrus, Other             | 1                                                           |
| 167             | Czech Republic | 2008           | Cocoa Beans               | 9                                                           |
| 167             | Czech Republic | 2008           | Coconuts - Incl Copra     | 2                                                           |
| 167             | Czech Republic | 2008           | Coffee                    | 7                                                           |
| 167             | Czech Republic | 2008           | Cream                     | 11                                                          |
| 167             | Czech Republic | 2008           | Demersal Fish             | 6                                                           |
| 167             | Czech Republic | 2008           | Eggs                      | 41                                                          |
| 167             | Czech Republic | 2008           | Fats, Animals, Raw        | 12                                                          |
| 167             | Czech Republic | 2008           | Freshwater Fish           | 10                                                          |
| 167             | Czech Republic | 2008           | Fruits, Other             | 51                                                          |
| 167             | Czech Republic | 2008           | Grapefruit                | 5                                                           |
| 167             | Czech Republic | 2008           | Grapes                    | 25                                                          |
| 167             | Czech Republic | 2008           | Groundnuts (Shelled Eq)   | 2                                                           |
| 167             | Czech Republic | 2008           | Honey                     | 1                                                           |
| 167             | Czech Republic | 2008           | Lemons, Limes             | 6                                                           |
| 167             | Czech Republic | 2008           | Marine Fish, Other        | 3                                                           |
| 167             | Czech Republic | 2008           | Meat, Other               | 15                                                          |
| 167             | Czech Republic | 2008           | Milk, Whole               | 109                                                         |
| 167             | Czech Republic | 2008           | Molluscs, Other           | 1                                                           |
| 167             | Czech Republic | 2008           | Mutton & Goat Meat        | 1                                                           |
| 167             | Czech Republic | 2008           | Nuts                      | 7                                                           |
| 167             | Czech Republic | 2008           | Oats                      | 4                                                           |
| 167             | Czech Republic | 2008           | Offals, Edible            | 11                                                          |

## Dietary calcium and zinc deficiency risks are decreasing but remain prevalent

| FAO countrycode | Country        | Reference year | Food item                 | Gross food supply (g capita <sup>-1</sup> d <sup>-1</sup> ) |
|-----------------|----------------|----------------|---------------------------|-------------------------------------------------------------|
| 167             | Czech Republic | 2008           | Olive Oil                 | 1                                                           |
| 167             | Czech Republic | 2008           | Olives                    | 1                                                           |
| 167             | Czech Republic | 2008           | Onions                    | 23                                                          |
| 167             | Czech Republic | 2008           | Oranges, Mandarines       | 45                                                          |
| 167             | Czech Republic | 2008           | Palm Oil                  | 4                                                           |
| 167             | Czech Republic | 2008           | Peas                      | 5                                                           |
| 167             | Czech Republic | 2008           | Pelagic Fish              | 10                                                          |
| 167             | Czech Republic | 2008           | Pigmeat                   | 126                                                         |
| 167             | Czech Republic | 2008           | Pimento                   | 1                                                           |
| 167             | Czech Republic | 2008           | Pineapples                | 7                                                           |
| 167             | Czech Republic | 2008           | Potatoes                  | 188                                                         |
| 167             | Czech Republic | 2008           | Poultry Meat              | 68                                                          |
| 167             | Czech Republic | 2008           | Pulses, Other             | 2                                                           |
| 167             | Czech Republic | 2008           | Rape and Mustard Oil      | 38                                                          |
| 167             | Czech Republic | 2008           | Rice (Milled Equivalent)  | 13                                                          |
| 167             | Czech Republic | 2008           | Rye                       | 28                                                          |
| 167             | Czech Republic | 2008           | Soyabean Oil              | 10                                                          |
| 167             | Czech Republic | 2008           | Soyabeans                 | 1                                                           |
| 167             | Czech Republic | 2008           | Sugar, Refined Equivalent | 76                                                          |
| 167             | Czech Republic | 2008           | Sunflowerseed Oil         | 5                                                           |
| 167             | Czech Republic | 2008           | Sweeteners, Other         | 13                                                          |
| 167             | Czech Republic | 2008           | Tea                       | 4                                                           |
| 167             | Czech Republic | 2008           | Tomatoes                  | 40                                                          |
| 167             | Czech Republic | 2008           | Vegetables, Other         | 149                                                         |
| 167             | Czech Republic | 2008           | Wheat                     | 269                                                         |
| 167             | Czech Republic | 2008           | Wine                      | 33                                                          |
| 167             | Czech Republic | 2009           | Apples                    | 42                                                          |
| 167             | Czech Republic | 2009           | Bananas                   | 28                                                          |
| 167             | Czech Republic | 2009           | Barley                    | 1                                                           |
| 167             | Czech Republic | 2009           | Beer                      | 393                                                         |
| 167             | Czech Republic | 2009           | Beverages, Alcoholic      | 23                                                          |
| 167             | Czech Republic | 2009           | Beverages, Fermented      | 1                                                           |
| 167             | Czech Republic | 2009           | Bovine Meat               | 22                                                          |
| 167             | Czech Republic | 2009           | Butter, Ghee              | 13                                                          |
| 167             | Czech Republic | 2009           | Cereals, Other            | 2                                                           |
| 167             | Czech Republic | 2009           | Cheese                    | 44                                                          |
| 167             | Czech Republic | 2009           | Citrus, Other             | 1                                                           |
| 167             | Czech Republic | 2009           | Cocoa Beans               | 9                                                           |
| 167             | Czech Republic | 2009           | Coconuts - Incl Copra     | 3                                                           |
| 167             | Czech Republic | 2009           | Coffee                    | 8                                                           |
| 167             | Czech Republic | 2009           | Cream                     | 14                                                          |
| 167             | Czech Republic | 2009           | Demersal Fish             | 5                                                           |
| 167             | Czech Republic | 2009           | Eggs                      | 42                                                          |
| 167             | Czech Republic | 2009           | Fats, Animals, Raw        | 12                                                          |
| 167             | Czech Republic | 2009           | Freshwater Fish           | 11                                                          |
| 167             | Czech Republic | 2009           | Fruits, Other             | 49                                                          |
| 167             | Czech Republic | 2009           | Grapefruit                | 5                                                           |
| 167             | Czech Republic | 2009           | Grapes                    | 16                                                          |
| 167             | Czech Republic | 2009           | Groundnuts (Shelled Eq)   | 2                                                           |
| 167             | Czech Republic | 2009           | Honey                     | 2                                                           |
| 167             | Czech Republic | 2009           | Lemons, Limes             | 7                                                           |
| 167             | Czech Republic | 2009           | Marine Fish, Other        | 2                                                           |
| 167             | Czech Republic | 2009           | Meat, Other               | 15                                                          |
| 167             | Czech Republic | 2009           | Milk, Whole               | 72                                                          |
| 167             | Czech Republic | 2009           | Molluscs, Other           | 1                                                           |
| 167             | Czech Republic | 2009           | Mutton & Goat Meat        | 1                                                           |
| 167             | Czech Republic | 2009           | Nuts                      | 7                                                           |
| 167             | Czech Republic | 2009           | Oats                      | 6                                                           |
| 167             | Czech Republic | 2009           | Offals, Edible            | 11                                                          |
| 167             | Czech Republic | 2009           | Olive Oil                 | 1                                                           |
| 167             | Czech Republic | 2009           | Olives                    | 2                                                           |
| 167             | Czech Republic | 2009           | Onions                    | 23                                                          |
| 167             | Czech Republic | 2009           | Oranges, Mandarines       | 56                                                          |
| 167             | Czech Republic | 2009           | Peas                      | 5                                                           |
| 167             | Czech Republic | 2009           | Pelagic Fish              | 8                                                           |
| 167             | Czech Republic | 2009           | Pigmeat                   | 124                                                         |
| 167             | Czech Republic | 2009           | Pimento                   | 1                                                           |
| 167             | Czech Republic | 2009           | Pineapples                | 4                                                           |
| 167             | Czech Republic | 2009           | Potatoes                  | 180                                                         |
| 167             | Czech Republic | 2009           | Poultry Meat              | 69                                                          |
| 167             | Czech Republic | 2009           | Pulses, Other             | 2                                                           |
| 167             | Czech Republic | 2009           | Rape and Mustard Oil      | 45                                                          |
| 167             | Czech Republic | 2009           | Rice (Milled Equivalent)  | 11                                                          |
| 167             | Czech Republic | 2009           | Rye                       | 30                                                          |
| 167             | Czech Republic | 2009           | Soyabean Oil              | 6                                                           |
| 167             | Czech Republic | 2009           | Sugar, Refined Equivalent | 86                                                          |
| 167             | Czech Republic | 2009           | Sunflowerseed Oil         | 5                                                           |
| 167             | Czech Republic | 2009           | Sweeteners, Other         | 14                                                          |
| 167             | Czech Republic | 2009           | Tea                       | 1                                                           |
| 167             | Czech Republic | 2009           | Tomatoes                  | 32                                                          |
| 167             | Czech Republic | 2009           | Vegetables, Other         | 142                                                         |
| 167             | Czech Republic | 2009           | Wheat                     | 271                                                         |
| 167             | Czech Republic | 2009           | Wine                      | 33                                                          |
| 167             | Czech Republic | 2010           | Apples                    | 33                                                          |
| 167             | Czech Republic | 2010           | Bananas                   | 28                                                          |
| 167             | Czech Republic | 2010           | Beer                      | 374                                                         |
| 167             | Czech Republic | 2010           | Beverages, Alcoholic      | 13                                                          |
| 167             | Czech Republic | 2010           | Beverages, Fermented      | 1                                                           |
| 167             | Czech Republic | 2010           | Bovine Meat               | 21                                                          |
| 167             | Czech Republic | 2010           | Butter, Ghee              | 13                                                          |
| 167             | Czech Republic | 2010           | Cereals, Other            | 1                                                           |
| 167             | Czech Republic | 2010           | Cheese                    | 46                                                          |
| 167             | Czech Republic | 2010           | Citrus, Other             | 2                                                           |
| 167             | Czech Republic | 2010           | Cocoa Beans               | 6                                                           |
| 167             | Czech Republic | 2010           | Coconuts - Incl Copra     | 2                                                           |
| 167             | Czech Republic | 2010           | Coffee                    | 7                                                           |
| 167             | Czech Republic | 2010           | Cream                     | 11                                                          |



Dietary calcium and zinc deficiency risks are decreasing but remain prevalent

| FAO countrycode | Country        | Reference year | Food item                 | Gross food supply (g capita <sup>-1</sup> d <sup>-1</sup> ) |
|-----------------|----------------|----------------|---------------------------|-------------------------------------------------------------|
| 167             | Czech Republic | 2010           | Demersal Fish             | 6                                                           |
| 167             | Czech Republic | 2010           | Eggs                      | 35                                                          |
| 167             | Czech Republic | 2010           | Fats, Animals, Raw        | 11                                                          |
| 167             | Czech Republic | 2010           | Freshwater Fish           | 10                                                          |
| 167             | Czech Republic | 2010           | Fruits, Other             | 47                                                          |
| 167             | Czech Republic | 2010           | Grapefruit                | 5                                                           |
| 167             | Czech Republic | 2010           | Grapes                    | 9                                                           |
| 167             | Czech Republic | 2010           | Groundnuts (Shelled Eq)   | 2                                                           |
| 167             | Czech Republic | 2010           | Honey                     | 2                                                           |
| 167             | Czech Republic | 2010           | Lemons, Limes             | 6                                                           |
| 167             | Czech Republic | 2010           | Marine Fish, Other        | 2                                                           |
| 167             | Czech Republic | 2010           | Meat, Other               | 14                                                          |
| 167             | Czech Republic | 2010           | Milk, Whole               | 67                                                          |
| 167             | Czech Republic | 2010           | Molluscs, Other           | 1                                                           |
| 167             | Czech Republic | 2010           | Mutton & Goat Meat        | 1                                                           |
| 167             | Czech Republic | 2010           | Nuts                      | 6                                                           |
| 167             | Czech Republic | 2010           | Oats                      | 5                                                           |
| 167             | Czech Republic | 2010           | Offals, Edible            | 11                                                          |
| 167             | Czech Republic | 2010           | Olive Oil                 | 1                                                           |
| 167             | Czech Republic | 2010           | Olives                    | 1                                                           |
| 167             | Czech Republic | 2010           | Onions                    | 22                                                          |
| 167             | Czech Republic | 2010           | Oranges, Mandarines       | 61                                                          |
| 167             | Czech Republic | 2010           | Peas                      | 5                                                           |
| 167             | Czech Republic | 2010           | Pelagic Fish              | 8                                                           |
| 167             | Czech Republic | 2010           | Pigmeat                   | 126                                                         |
| 167             | Czech Republic | 2010           | Pimento                   | 1                                                           |
| 167             | Czech Republic | 2010           | Pineapples                | 4                                                           |
| 167             | Czech Republic | 2010           | Potatoes                  | 170                                                         |
| 167             | Czech Republic | 2010           | Poultry Meat              | 66                                                          |
| 167             | Czech Republic | 2010           | Pulses, Other             | 2                                                           |
| 167             | Czech Republic | 2010           | Rape and Mustard Oil      | 44                                                          |
| 167             | Czech Republic | 2010           | Rice (Milled Equivalent)  | 12                                                          |
| 167             | Czech Republic | 2010           | Rye                       | 28                                                          |
| 167             | Czech Republic | 2010           | Soyabean Oil              | 10                                                          |
| 167             | Czech Republic | 2010           | Soyabeans                 | 1                                                           |
| 167             | Czech Republic | 2010           | Sugar, Refined Equivalent | 90                                                          |
| 167             | Czech Republic | 2010           | Sunflowerseed Oil         | 9                                                           |
| 167             | Czech Republic | 2010           | Sweeteners, Other         | 12                                                          |
| 167             | Czech Republic | 2010           | Tea                       | 1                                                           |
| 167             | Czech Republic | 2010           | Tomatoes                  | 34                                                          |
| 167             | Czech Republic | 2010           | Vegetables, Other         | 137                                                         |
| 167             | Czech Republic | 2010           | Wheat                     | 273                                                         |
| 167             | Czech Republic | 2010           | Wine                      | 33                                                          |
| 167             | Czech Republic | 2011           | Apples                    | 32                                                          |
| 167             | Czech Republic | 2011           | Bananas                   | 22                                                          |
| 167             | Czech Republic | 2011           | Beer                      | 374                                                         |
| 167             | Czech Republic | 2011           | Beverages, Alcoholic      | 18                                                          |
| 167             | Czech Republic | 2011           | Beverages, Fermented      | 1                                                           |
| 167             | Czech Republic | 2011           | Bovine Meat               | 20                                                          |
| 167             | Czech Republic | 2011           | Butter, Ghee              | 14                                                          |
| 167             | Czech Republic | 2011           | Cereals, Other            | 1                                                           |
| 167             | Czech Republic | 2011           | Cheese                    | 45                                                          |
| 167             | Czech Republic | 2011           | Citrus, Other             | 1                                                           |
| 167             | Czech Republic | 2011           | Cocoa Beans               | 7                                                           |
| 167             | Czech Republic | 2011           | Coconuts - Incl Copra     | 2                                                           |
| 167             | Czech Republic | 2011           | Coffee                    | 10                                                          |
| 167             | Czech Republic | 2011           | Cream                     | 9                                                           |
| 167             | Czech Republic | 2011           | Demersal Fish             | 6                                                           |
| 167             | Czech Republic | 2011           | Eggs                      | 36                                                          |
| 167             | Czech Republic | 2011           | Fats, Animals, Raw        | 12                                                          |
| 167             | Czech Republic | 2011           | Freshwater Fish           | 10                                                          |
| 167             | Czech Republic | 2011           | Fruits, Other             | 50                                                          |
| 167             | Czech Republic | 2011           | Grapefruit                | 5                                                           |
| 167             | Czech Republic | 2011           | Grapes                    | 21                                                          |
| 167             | Czech Republic | 2011           | Groundnuts (Shelled Eq)   | 2                                                           |
| 167             | Czech Republic | 2011           | Honey                     | 3                                                           |
| 167             | Czech Republic | 2011           | Lemons, Limes             | 7                                                           |
| 167             | Czech Republic | 2011           | Marine Fish, Other        | 2                                                           |
| 167             | Czech Republic | 2011           | Meat, Other               | 13                                                          |
| 167             | Czech Republic | 2011           | Milk, Whole               | 62                                                          |
| 167             | Czech Republic | 2011           | Molluscs, Other           | 1                                                           |
| 167             | Czech Republic | 2011           | Mutton & Goat Meat        | 1                                                           |
| 167             | Czech Republic | 2011           | Nuts                      | 5                                                           |
| 167             | Czech Republic | 2011           | Oats                      | 5                                                           |
| 167             | Czech Republic | 2011           | Offals, Edible            | 10                                                          |
| 167             | Czech Republic | 2011           | Olive Oil                 | 1                                                           |
| 167             | Czech Republic | 2011           | Olives                    | 2                                                           |
| 167             | Czech Republic | 2011           | Onions                    | 24                                                          |
| 167             | Czech Republic | 2011           | Oranges, Mandarines       | 44                                                          |
| 167             | Czech Republic | 2011           | Peas                      | 5                                                           |
| 167             | Czech Republic | 2011           | Pelagic Fish              | 8                                                           |
| 167             | Czech Republic | 2011           | Pigmeat                   | 124                                                         |
| 167             | Czech Republic | 2011           | Pimento                   | 2                                                           |
| 167             | Czech Republic | 2011           | Pineapples                | 5                                                           |
| 167             | Czech Republic | 2011           | Potatoes                  | 181                                                         |
| 167             | Czech Republic | 2011           | Poultry Meat              | 63                                                          |
| 167             | Czech Republic | 2011           | Pulses, Other             | 2                                                           |
| 167             | Czech Republic | 2011           | Rape and Mustard Oil      | 48                                                          |
| 167             | Czech Republic | 2011           | Rice (Milled Equivalent)  | 12                                                          |
| 167             | Czech Republic | 2011           | Rye                       | 29                                                          |
| 167             | Czech Republic | 2011           | Soyabean Oil              | 5                                                           |
| 167             | Czech Republic | 2011           | Soyabeans                 | 2                                                           |
| 167             | Czech Republic | 2011           | Sugar, Refined Equivalent | 84                                                          |
| 167             | Czech Republic | 2011           | Sunflowerseed Oil         | 5                                                           |
| 167             | Czech Republic | 2011           | Sweeteners, Other         | 22                                                          |
| 167             | Czech Republic | 2011           | Tea                       | 1                                                           |
| 167             | Czech Republic | 2011           | Tomatoes                  | 36                                                          |

Dietary calcium and zinc deficiency risks are decreasing but remain prevalent

| FAO countrycode | Country                               | Reference year | Food item                 | Gross food supply(g capita <sup>-1</sup> d <sup>-1</sup> ) |
|-----------------|---------------------------------------|----------------|---------------------------|------------------------------------------------------------|
| 167             | Czech Republic                        | 2011           | Vegetables, Other         | 143                                                        |
| 167             | Czech Republic                        | 2011           | Wheat                     | 279                                                        |
| 167             | Czech Republic                        | 2011           | Wine                      | 34                                                         |
| 116             | Democratic People's Republic of Korea | 1992           | Apples                    | 77                                                         |
| 116             | Democratic People's Republic of Korea | 1992           | Barley                    | 11                                                         |
| 116             | Democratic People's Republic of Korea | 1992           | Beans                     | 36                                                         |
| 116             | Democratic People's Republic of Korea | 1992           | Beer                      | 15                                                         |
| 116             | Democratic People's Republic of Korea | 1992           | Beverages, Alcoholic      | 16                                                         |
| 116             | Democratic People's Republic of Korea | 1992           | Bovine Meat               | 4                                                          |
| 116             | Democratic People's Republic of Korea | 1992           | Crustaceans               | 1                                                          |
| 116             | Democratic People's Republic of Korea | 1992           | Demersal Fish             | 1                                                          |
| 116             | Democratic People's Republic of Korea | 1992           | Eggs                      | 14                                                         |
| 116             | Democratic People's Republic of Korea | 1992           | Fats, Animals, Raw        | 2                                                          |
| 116             | Democratic People's Republic of Korea | 1992           | Freshwater Fish           | 4                                                          |
| 116             | Democratic People's Republic of Korea | 1992           | Fruits, Other             | 82                                                         |
| 116             | Democratic People's Republic of Korea | 1992           | Maize                     | 149                                                        |
| 116             | Democratic People's Republic of Korea | 1992           | Maize Germ Oil            | 3                                                          |
| 116             | Democratic People's Republic of Korea | 1992           | Marine Fish, Other        | 36                                                         |
| 116             | Democratic People's Republic of Korea | 1992           | Milk, Whole               | 12                                                         |
| 116             | Democratic People's Republic of Korea | 1992           | Millet                    | 4                                                          |
| 116             | Democratic People's Republic of Korea | 1992           | Molluscs, Other           | 5                                                          |
| 116             | Democratic People's Republic of Korea | 1992           | Mutton & Goat Meat        | 1                                                          |
| 116             | Democratic People's Republic of Korea | 1992           | Nuts                      | 1                                                          |
| 116             | Democratic People's Republic of Korea | 1992           | Oats                      | 4                                                          |
| 116             | Democratic People's Republic of Korea | 1992           | Offals, Edible            | 3                                                          |
| 116             | Democratic People's Republic of Korea | 1992           | Onions                    | 13                                                         |
| 116             | Democratic People's Republic of Korea | 1992           | Palm Oil                  | 1                                                          |
| 116             | Democratic People's Republic of Korea | 1992           | Pigmeat                   | 24                                                         |
| 116             | Democratic People's Republic of Korea | 1992           | Potatoes                  | 78                                                         |
| 116             | Democratic People's Republic of Korea | 1992           | Poultry Meat              | 6                                                          |
| 116             | Democratic People's Republic of Korea | 1992           | Rice (Milled Equivalent)  | 192                                                        |
| 116             | Democratic People's Republic of Korea | 1992           | Rye                       | 9                                                          |
| 116             | Democratic People's Republic of Korea | 1992           | Sorghum                   | 1                                                          |
| 116             | Democratic People's Republic of Korea | 1992           | Soyabean Oil              | 7                                                          |
| 116             | Democratic People's Republic of Korea | 1992           | Soybeans                  | 26                                                         |
| 116             | Democratic People's Republic of Korea | 1992           | Sugar, Refined Equivalent | 11                                                         |
| 116             | Democratic People's Republic of Korea | 1992           | Sweet Potatoes            | 30                                                         |
| 116             | Democratic People's Republic of Korea | 1992           | Tomatoes                  | 8                                                          |
| 116             | Democratic People's Republic of Korea | 1992           | Vegetables, Other         | 454                                                        |
| 116             | Democratic People's Republic of Korea | 1992           | Wheat                     | 52                                                         |
| 116             | Democratic People's Republic of Korea | 1993           | Apples                    | 70                                                         |
| 116             | Democratic People's Republic of Korea | 1993           | Barley                    | 9                                                          |
| 116             | Democratic People's Republic of Korea | 1993           | Beans                     | 33                                                         |
| 116             | Democratic People's Republic of Korea | 1993           | Beer                      | 12                                                         |
| 116             | Democratic People's Republic of Korea | 1993           | Beverages, Alcoholic      | 19                                                         |
| 116             | Democratic People's Republic of Korea | 1993           | Bovine Meat               | 4                                                          |
| 116             | Democratic People's Republic of Korea | 1993           | Crustaceans               | 3                                                          |
| 116             | Democratic People's Republic of Korea | 1993           | Eggs                      | 12                                                         |
| 116             | Democratic People's Republic of Korea | 1993           | Fats, Animals, Raw        | 1                                                          |
| 116             | Democratic People's Republic of Korea | 1993           | Freshwater Fish           | 4                                                          |
| 116             | Democratic People's Republic of Korea | 1993           | Fruits, Other             | 77                                                         |
| 116             | Democratic People's Republic of Korea | 1993           | Maize                     | 176                                                        |
| 116             | Democratic People's Republic of Korea | 1993           | Maize Germ Oil            | 3                                                          |
| 116             | Democratic People's Republic of Korea | 1993           | Marine Fish, Other        | 38                                                         |
| 116             | Democratic People's Republic of Korea | 1993           | Milk, Whole               | 10                                                         |
| 116             | Democratic People's Republic of Korea | 1993           | Millet                    | 3                                                          |
| 116             | Democratic People's Republic of Korea | 1993           | Molasses                  | 2                                                          |
| 116             | Democratic People's Republic of Korea | 1993           | Molluscs, Other           | 5                                                          |
| 116             | Democratic People's Republic of Korea | 1993           | Mutton & Goat Meat        | 1                                                          |
| 116             | Democratic People's Republic of Korea | 1993           | Nuts                      | 1                                                          |
| 116             | Democratic People's Republic of Korea | 1993           | Oats                      | 3                                                          |
| 116             | Democratic People's Republic of Korea | 1993           | Offals, Edible            | 2                                                          |
| 116             | Democratic People's Republic of Korea | 1993           | Onions                    | 9                                                          |
| 116             | Democratic People's Republic of Korea | 1993           | Oranges, Mandarines       | 1                                                          |
| 116             | Democratic People's Republic of Korea | 1993           | Palm Oil                  | 2                                                          |
| 116             | Democratic People's Republic of Korea | 1993           | Pigmeat                   | 21                                                         |
| 116             | Democratic People's Republic of Korea | 1993           | Potatoes                  | 32                                                         |
| 116             | Democratic People's Republic of Korea | 1993           | Poultry Meat              | 4                                                          |
| 116             | Democratic People's Republic of Korea | 1993           | Rice (Milled Equivalent)  | 195                                                        |
| 116             | Democratic People's Republic of Korea | 1993           | Rye                       | 7                                                          |
| 116             | Democratic People's Republic of Korea | 1993           | Sorghum                   | 2                                                          |
| 116             | Democratic People's Republic of Korea | 1993           | Soyabean Oil              | 7                                                          |
| 116             | Democratic People's Republic of Korea | 1993           | Soybeans                  | 22                                                         |
| 116             | Democratic People's Republic of Korea | 1993           | Sugar, Refined Equivalent | 12                                                         |
| 116             | Democratic People's Republic of Korea | 1993           | Sweet Potatoes            | 14                                                         |
| 116             | Democratic People's Republic of Korea | 1993           | Tomatoes                  | 7                                                          |
| 116             | Democratic People's Republic of Korea | 1993           | Vegetables, Other         | 402                                                        |
| 116             | Democratic People's Republic of Korea | 1993           | Wheat                     | 73                                                         |
| 116             | Democratic People's Republic of Korea | 1994           | Apples                    | 75                                                         |
| 116             | Democratic People's Republic of Korea | 1994           | Barley                    | 13                                                         |
| 116             | Democratic People's Republic of Korea | 1994           | Beans                     | 34                                                         |
| 116             | Democratic People's Republic of Korea | 1994           | Beer                      | 18                                                         |
| 116             | Democratic People's Republic of Korea | 1994           | Beverages, Alcoholic      | 20                                                         |
| 116             | Democratic People's Republic of Korea | 1994           | Bovine Meat               | 4                                                          |
| 116             | Democratic People's Republic of Korea | 1994           | Crustaceans               | 3                                                          |
| 116             | Democratic People's Republic of Korea | 1994           | Demersal Fish             | 5                                                          |
| 116             | Democratic People's Republic of Korea | 1994           | Eggs                      | 11                                                         |
| 116             | Democratic People's Republic of Korea | 1994           | Fats, Animals, Raw        | 1                                                          |
| 116             | Democratic People's Republic of Korea | 1994           | Freshwater Fish           | 3                                                          |
| 116             | Democratic People's Republic of Korea | 1994           | Fruits, Other             | 83                                                         |
| 116             | Democratic People's Republic of Korea | 1994           | Maize                     | 168                                                        |
| 116             | Democratic People's Republic of Korea | 1994           | Maize Germ Oil            | 3                                                          |
| 116             | Democratic People's Republic of Korea | 1994           | Marine Fish, Other        | 27                                                         |
| 116             | Democratic People's Republic of Korea | 1994           | Milk, Whole               | 11                                                         |
| 116             | Democratic People's Republic of Korea | 1994           | Millet                    | 3                                                          |
| 116             | Democratic People's Republic of Korea | 1994           | Molasses                  | 1                                                          |
| 116             | Democratic People's Republic of Korea | 1994           | Molluscs, Other           | 8                                                          |

Dietary calcium and zinc deficiency risks are decreasing but remain prevalent

| FAO countrycode | Country                               | Reference year | Food item                 | Gross food supply (g capita <sup>-1</sup> d <sup>-1</sup> ) |
|-----------------|---------------------------------------|----------------|---------------------------|-------------------------------------------------------------|
| 116             | Democratic People's Republic of Korea | 1994           | Mutton & Goat Meat        | 1                                                           |
| 116             | Democratic People's Republic of Korea | 1994           | Nuts                      | 1                                                           |
| 116             | Democratic People's Republic of Korea | 1994           | Oats                      | 2                                                           |
| 116             | Democratic People's Republic of Korea | 1994           | Offals, Edible            | 2                                                           |
| 116             | Democratic People's Republic of Korea | 1994           | Onions                    | 10                                                          |
| 116             | Democratic People's Republic of Korea | 1994           | Palm Oil                  | 3                                                           |
| 116             | Democratic People's Republic of Korea | 1994           | Pelagic Fish              | 2                                                           |
| 116             | Democratic People's Republic of Korea | 1994           | Pigmeat                   | 17                                                          |
| 116             | Democratic People's Republic of Korea | 1994           | Potatoes                  | 48                                                          |
| 116             | Democratic People's Republic of Korea | 1994           | Poultry Meat              | 3                                                           |
| 116             | Democratic People's Republic of Korea | 1994           | Rice (Milled Equivalent)  | 207                                                         |
| 116             | Democratic People's Republic of Korea | 1994           | Rye                       | 7                                                           |
| 116             | Democratic People's Republic of Korea | 1994           | Soyabean Oil              | 6                                                           |
| 116             | Democratic People's Republic of Korea | 1994           | Soyabeans                 | 25                                                          |
| 116             | Democratic People's Republic of Korea | 1994           | Sugar, Refined Equivalent | 9                                                           |
| 116             | Democratic People's Republic of Korea | 1994           | Sweet Potatoes            | 19                                                          |
| 116             | Democratic People's Republic of Korea | 1994           | Tomatoes                  | 7                                                           |
| 116             | Democratic People's Republic of Korea | 1994           | Vegetables, Other         | 410                                                         |
| 116             | Democratic People's Republic of Korea | 1994           | Wheat                     | 55                                                          |
| 116             | Democratic People's Republic of Korea | 1995           | Apples                    | 71                                                          |
| 116             | Democratic People's Republic of Korea | 1995           | Barley                    | 12                                                          |
| 116             | Democratic People's Republic of Korea | 1995           | Beans                     | 32                                                          |
| 116             | Democratic People's Republic of Korea | 1995           | Beer                      | 20                                                          |
| 116             | Democratic People's Republic of Korea | 1995           | Beverages, Alcoholic      | 18                                                          |
| 116             | Democratic People's Republic of Korea | 1995           | Bovine Meat               | 5                                                           |
| 116             | Democratic People's Republic of Korea | 1995           | Crustaceans               | 2                                                           |
| 116             | Democratic People's Republic of Korea | 1995           | Demersal Fish             | 11                                                          |
| 116             | Democratic People's Republic of Korea | 1995           | Eggs                      | 9                                                           |
| 116             | Democratic People's Republic of Korea | 1995           | Fats, Animals, Raw        | 1                                                           |
| 116             | Democratic People's Republic of Korea | 1995           | Freshwater Fish           | 3                                                           |
| 116             | Democratic People's Republic of Korea | 1995           | Fruits, Other             | 75                                                          |
| 116             | Democratic People's Republic of Korea | 1995           | Maize                     | 127                                                         |
| 116             | Democratic People's Republic of Korea | 1995           | Maize Germ Oil            | 3                                                           |
| 116             | Democratic People's Republic of Korea | 1995           | Marine Fish, Other        | 19                                                          |
| 116             | Democratic People's Republic of Korea | 1995           | Milk, Whole               | 10                                                          |
| 116             | Democratic People's Republic of Korea | 1995           | Millet                    | 2                                                           |
| 116             | Democratic People's Republic of Korea | 1995           | Molasses                  | 2                                                           |
| 116             | Democratic People's Republic of Korea | 1995           | Molluscs, Other           | 6                                                           |
| 116             | Democratic People's Republic of Korea | 1995           | Mutton & Goat Meat        | 1                                                           |
| 116             | Democratic People's Republic of Korea | 1995           | Nuts                      | 1                                                           |
| 116             | Democratic People's Republic of Korea | 1995           | Offals, Edible            | 2                                                           |
| 116             | Democratic People's Republic of Korea | 1995           | Onions                    | 9                                                           |
| 116             | Democratic People's Republic of Korea | 1995           | Palm Oil                  | 4                                                           |
| 116             | Democratic People's Republic of Korea | 1995           | Pigmeat                   | 15                                                          |
| 116             | Democratic People's Republic of Korea | 1995           | Potatoes                  | 37                                                          |
| 116             | Democratic People's Republic of Korea | 1995           | Poultry Meat              | 3                                                           |
| 116             | Democratic People's Republic of Korea | 1995           | Rice (Milled Equivalent)  | 216                                                         |
| 116             | Democratic People's Republic of Korea | 1995           | Rye                       | 6                                                           |
| 116             | Democratic People's Republic of Korea | 1995           | Sorghum                   | 2                                                           |
| 116             | Democratic People's Republic of Korea | 1995           | Soyabean Oil              | 7                                                           |
| 116             | Democratic People's Republic of Korea | 1995           | Soyabeans                 | 23                                                          |
| 116             | Democratic People's Republic of Korea | 1995           | Sugar, Refined Equivalent | 6                                                           |
| 116             | Democratic People's Republic of Korea | 1995           | Sweet Potatoes            | 14                                                          |
| 116             | Democratic People's Republic of Korea | 1995           | Tomatoes                  | 7                                                           |
| 116             | Democratic People's Republic of Korea | 1995           | Vegetables, Other         | 362                                                         |
| 116             | Democratic People's Republic of Korea | 1995           | Wheat                     | 62                                                          |
| 116             | Democratic People's Republic of Korea | 1996           | Apples                    | 84                                                          |
| 116             | Democratic People's Republic of Korea | 1996           | Barley                    | 12                                                          |
| 116             | Democratic People's Republic of Korea | 1996           | Beans                     | 30                                                          |
| 116             | Democratic People's Republic of Korea | 1996           | Beer                      | 17                                                          |
| 116             | Democratic People's Republic of Korea | 1996           | Beverages, Alcoholic      | 18                                                          |
| 116             | Democratic People's Republic of Korea | 1996           | Bovine Meat               | 3                                                           |
| 116             | Democratic People's Republic of Korea | 1996           | Cephalopods               | 1                                                           |
| 116             | Democratic People's Republic of Korea | 1996           | Crustaceans               | 4                                                           |
| 116             | Democratic People's Republic of Korea | 1996           | Demersal Fish             | 2                                                           |
| 116             | Democratic People's Republic of Korea | 1996           | Eggs                      | 11                                                          |
| 116             | Democratic People's Republic of Korea | 1996           | Fats, Animals, Raw        | 1                                                           |
| 116             | Democratic People's Republic of Korea | 1996           | Freshwater Fish           | 3                                                           |
| 116             | Democratic People's Republic of Korea | 1996           | Fruits, Other             | 80                                                          |
| 116             | Democratic People's Republic of Korea | 1996           | Maize                     | 129                                                         |
| 116             | Democratic People's Republic of Korea | 1996           | Maize Germ Oil            | 3                                                           |
| 116             | Democratic People's Republic of Korea | 1996           | Marine Fish, Other        | 20                                                          |
| 116             | Democratic People's Republic of Korea | 1996           | Meat, Other               | 2                                                           |
| 116             | Democratic People's Republic of Korea | 1996           | Milk, Whole               | 9                                                           |
| 116             | Democratic People's Republic of Korea | 1996           | Millet                    | 2                                                           |
| 116             | Democratic People's Republic of Korea | 1996           | Molasses                  | 3                                                           |
| 116             | Democratic People's Republic of Korea | 1996           | Molluscs, Other           | 6                                                           |
| 116             | Democratic People's Republic of Korea | 1996           | Mutton & Goat Meat        | 1                                                           |
| 116             | Democratic People's Republic of Korea | 1996           | Nuts                      | 1                                                           |
| 116             | Democratic People's Republic of Korea | 1996           | Offals, Edible            | 2                                                           |
| 116             | Democratic People's Republic of Korea | 1996           | Onions                    | 7                                                           |
| 116             | Democratic People's Republic of Korea | 1996           | Palm Oil                  | 2                                                           |
| 116             | Democratic People's Republic of Korea | 1996           | Pigmeat                   | 13                                                          |
| 116             | Democratic People's Republic of Korea | 1996           | Potatoes                  | 43                                                          |
| 116             | Democratic People's Republic of Korea | 1996           | Poultry Meat              | 3                                                           |
| 116             | Democratic People's Republic of Korea | 1996           | Rice (Milled Equivalent)  | 216                                                         |
| 116             | Democratic People's Republic of Korea | 1996           | Rye                       | 5                                                           |
| 116             | Democratic People's Republic of Korea | 1996           | Sorghum                   | 1                                                           |
| 116             | Democratic People's Republic of Korea | 1996           | Soyabean Oil              | 7                                                           |
| 116             | Democratic People's Republic of Korea | 1996           | Soyabeans                 | 23                                                          |
| 116             | Democratic People's Republic of Korea | 1996           | Sugar, Refined Equivalent | 5                                                           |
| 116             | Democratic People's Republic of Korea | 1996           | Sweet Potatoes            | 17                                                          |
| 116             | Democratic People's Republic of Korea | 1996           | Tomatoes                  | 7                                                           |
| 116             | Democratic People's Republic of Korea | 1996           | Vegetables, Other         | 360                                                         |
| 116             | Democratic People's Republic of Korea | 1996           | Wheat                     | 64                                                          |
| 116             | Democratic People's Republic of Korea | 1997           | Apples                    | 84                                                          |
| 116             | Democratic People's Republic of Korea | 1997           | Barley                    | 8                                                           |

Dietary calcium and zinc deficiency risks are decreasing but remain prevalent

| FAO countrycode | Country                               | Reference year | Food item                 | Gross food supply (g capita <sup>-1</sup> d <sup>-1</sup> ) |
|-----------------|---------------------------------------|----------------|---------------------------|-------------------------------------------------------------|
| 116             | Democratic People's Republic of Korea | 1997           | Beans                     | 30                                                          |
| 116             | Democratic People's Republic of Korea | 1997           | Beer                      | 13                                                          |
| 116             | Democratic People's Republic of Korea | 1997           | Beverages, Alcoholic      | 18                                                          |
| 116             | Democratic People's Republic of Korea | 1997           | Bovine Meat               | 2                                                           |
| 116             | Democratic People's Republic of Korea | 1997           | Cephalopods               | 2                                                           |
| 116             | Democratic People's Republic of Korea | 1997           | Crustaceans               | 2                                                           |
| 116             | Democratic People's Republic of Korea | 1997           | Demersal Fish             | 9                                                           |
| 116             | Democratic People's Republic of Korea | 1997           | Eggs                      | 8                                                           |
| 116             | Democratic People's Republic of Korea | 1997           | Fats, Animals, Raw        | 1                                                           |
| 116             | Democratic People's Republic of Korea | 1997           | Freshwater Fish           | 3                                                           |
| 116             | Democratic People's Republic of Korea | 1997           | Fruits, Other             | 90                                                          |
| 116             | Democratic People's Republic of Korea | 1997           | Maize                     | 132                                                         |
| 116             | Democratic People's Republic of Korea | 1997           | Maize Germ Oil            | 3                                                           |
| 116             | Democratic People's Republic of Korea | 1997           | Marine Fish, Other        | 13                                                          |
| 116             | Democratic People's Republic of Korea | 1997           | Meat, Other               | 2                                                           |
| 116             | Democratic People's Republic of Korea | 1997           | Milk, Whole               | 9                                                           |
| 116             | Democratic People's Republic of Korea | 1997           | Millet                    | 2                                                           |
| 116             | Democratic People's Republic of Korea | 1997           | Molluscs, Other           | 4                                                           |
| 116             | Democratic People's Republic of Korea | 1997           | Mutton & Goat Meat        | 1                                                           |
| 116             | Democratic People's Republic of Korea | 1997           | Nuts                      | 1                                                           |
| 116             | Democratic People's Republic of Korea | 1997           | Oats                      | 1                                                           |
| 116             | Democratic People's Republic of Korea | 1997           | Offals, Edible            | 1                                                           |
| 116             | Democratic People's Republic of Korea | 1997           | Onions                    | 8                                                           |
| 116             | Democratic People's Republic of Korea | 1997           | Palm Oil                  | 3                                                           |
| 116             | Democratic People's Republic of Korea | 1997           | Pigmeat                   | 11                                                          |
| 116             | Democratic People's Republic of Korea | 1997           | Potatoes                  | 67                                                          |
| 116             | Democratic People's Republic of Korea | 1997           | Poultry Meat              | 3                                                           |
| 116             | Democratic People's Republic of Korea | 1997           | Rape and Mustard Oil      | 1                                                           |
| 116             | Democratic People's Republic of Korea | 1997           | Rice (Milled Equivalent)  | 217                                                         |
| 116             | Democratic People's Republic of Korea | 1997           | Rye                       | 4                                                           |
| 116             | Democratic People's Republic of Korea | 1997           | Sorghum                   | 5                                                           |
| 116             | Democratic People's Republic of Korea | 1997           | Soyabean Oil              | 7                                                           |
| 116             | Democratic People's Republic of Korea | 1997           | Soyabeans                 | 25                                                          |
| 116             | Democratic People's Republic of Korea | 1997           | Sugar, Refined Equivalent | 5                                                           |
| 116             | Democratic People's Republic of Korea | 1997           | Sweet Potatoes            | 29                                                          |
| 116             | Democratic People's Republic of Korea | 1997           | Tomatoes                  | 7                                                           |
| 116             | Democratic People's Republic of Korea | 1997           | Vegetables, Other         | 345                                                         |
| 116             | Democratic People's Republic of Korea | 1997           | Wheat                     | 67                                                          |
| 116             | Democratic People's Republic of Korea | 1998           | Apples                    | 70                                                          |
| 116             | Democratic People's Republic of Korea | 1998           | Barley                    | 7                                                           |
| 116             | Democratic People's Republic of Korea | 1998           | Beans                     | 30                                                          |
| 116             | Democratic People's Republic of Korea | 1998           | Beer                      | 10                                                          |
| 116             | Democratic People's Republic of Korea | 1998           | Beverages, Alcoholic      | 17                                                          |
| 116             | Democratic People's Republic of Korea | 1998           | Bovine Meat               | 3                                                           |
| 116             | Democratic People's Republic of Korea | 1998           | Cephalopods               | 1                                                           |
| 116             | Democratic People's Republic of Korea | 1998           | Crustaceans               | 2                                                           |
| 116             | Democratic People's Republic of Korea | 1998           | Demersal Fish             | 8                                                           |
| 116             | Democratic People's Republic of Korea | 1998           | Eggs                      | 9                                                           |
| 116             | Democratic People's Republic of Korea | 1998           | Fats, Animals, Raw        | 1                                                           |
| 116             | Democratic People's Republic of Korea | 1998           | Freshwater Fish           | 2                                                           |
| 116             | Democratic People's Republic of Korea | 1998           | Fruits, Other             | 76                                                          |
| 116             | Democratic People's Republic of Korea | 1998           | Maize                     | 129                                                         |
| 116             | Democratic People's Republic of Korea | 1998           | Maize Germ Oil            | 3                                                           |
| 116             | Democratic People's Republic of Korea | 1998           | Marine Fish, Other        | 13                                                          |
| 116             | Democratic People's Republic of Korea | 1998           | Meat, Other               | 2                                                           |
| 116             | Democratic People's Republic of Korea | 1998           | Milk, Whole               | 10                                                          |
| 116             | Democratic People's Republic of Korea | 1998           | Millet                    | 2                                                           |
| 116             | Democratic People's Republic of Korea | 1998           | Molluscs, Other           | 3                                                           |
| 116             | Democratic People's Republic of Korea | 1998           | Mutton & Goat Meat        | 1                                                           |
| 116             | Democratic People's Republic of Korea | 1998           | Nuts                      | 1                                                           |
| 116             | Democratic People's Republic of Korea | 1998           | Oats                      | 1                                                           |
| 116             | Democratic People's Republic of Korea | 1998           | Offals, Edible            | 2                                                           |
| 116             | Democratic People's Republic of Korea | 1998           | Onions                    | 9                                                           |
| 116             | Democratic People's Republic of Korea | 1998           | Palm Oil                  | 1                                                           |
| 116             | Democratic People's Republic of Korea | 1998           | Pigmeat                   | 14                                                          |
| 116             | Democratic People's Republic of Korea | 1998           | Potatoes                  | 105                                                         |
| 116             | Democratic People's Republic of Korea | 1998           | Poultry Meat              | 3                                                           |
| 116             | Democratic People's Republic of Korea | 1998           | Rape and Mustard Oil      | 2                                                           |
| 116             | Democratic People's Republic of Korea | 1998           | Rice (Milled Equivalent)  | 221                                                         |
| 116             | Democratic People's Republic of Korea | 1998           | Rye                       | 4                                                           |
| 116             | Democratic People's Republic of Korea | 1998           | Sorghum                   | 1                                                           |
| 116             | Democratic People's Republic of Korea | 1998           | Soyabean Oil              | 7                                                           |
| 116             | Democratic People's Republic of Korea | 1998           | Soyabeans                 | 18                                                          |
| 116             | Democratic People's Republic of Korea | 1998           | Sugar, Refined Equivalent | 4                                                           |
| 116             | Democratic People's Republic of Korea | 1998           | Sweet Potatoes            | 40                                                          |
| 116             | Democratic People's Republic of Korea | 1998           | Tomatoes                  | 7                                                           |
| 116             | Democratic People's Republic of Korea | 1998           | Vegetables, Other         | 373                                                         |
| 116             | Democratic People's Republic of Korea | 1998           | Wheat                     | 64                                                          |
| 116             | Democratic People's Republic of Korea | 1999           | Apples                    | 71                                                          |
| 116             | Democratic People's Republic of Korea | 1999           | Barley                    | 5                                                           |
| 116             | Democratic People's Republic of Korea | 1999           | Beans                     | 30                                                          |
| 116             | Democratic People's Republic of Korea | 1999           | Beer                      | 7                                                           |
| 116             | Democratic People's Republic of Korea | 1999           | Beverages, Alcoholic      | 18                                                          |
| 116             | Democratic People's Republic of Korea | 1999           | Bovine Meat               | 2                                                           |
| 116             | Democratic People's Republic of Korea | 1999           | Cephalopods               | 1                                                           |
| 116             | Democratic People's Republic of Korea | 1999           | Crustaceans               | 1                                                           |
| 116             | Democratic People's Republic of Korea | 1999           | Demersal Fish             | 8                                                           |
| 116             | Democratic People's Republic of Korea | 1999           | Eggs                      | 11                                                          |
| 116             | Democratic People's Republic of Korea | 1999           | Fats, Animals, Raw        | 1                                                           |
| 116             | Democratic People's Republic of Korea | 1999           | Freshwater Fish           | 2                                                           |
| 116             | Democratic People's Republic of Korea | 1999           | Fruits, Other             | 76                                                          |
| 116             | Democratic People's Republic of Korea | 1999           | Maize                     | 125                                                         |
| 116             | Democratic People's Republic of Korea | 1999           | Maize Germ Oil            | 3                                                           |
| 116             | Democratic People's Republic of Korea | 1999           | Marine Fish, Other        | 13                                                          |
| 116             | Democratic People's Republic of Korea | 1999           | Meat, Other               | 3                                                           |
| 116             | Democratic People's Republic of Korea | 1999           | Milk, Whole               | 10                                                          |
| 116             | Democratic People's Republic of Korea | 1999           | Millet                    | 3                                                           |

Dietary calcium and zinc deficiency risks are decreasing but remain prevalent

| FAO countrycode | Country                               | Reference year | Food item                 | Gross food supply(g capita <sup>-1</sup> d <sup>-1</sup> ) |
|-----------------|---------------------------------------|----------------|---------------------------|------------------------------------------------------------|
| 116             | Democratic People's Republic of Korea | 1999           | Molasses                  | 3                                                          |
| 116             | Democratic People's Republic of Korea | 1999           | Molluscs, Other           | 2                                                          |
| 116             | Democratic People's Republic of Korea | 1999           | Mutton & Goat Meat        | 1                                                          |
| 116             | Democratic People's Republic of Korea | 1999           | Nuts                      | 1                                                          |
| 116             | Democratic People's Republic of Korea | 1999           | Oats                      | 1                                                          |
| 116             | Democratic People's Republic of Korea | 1999           | Offals, Edible            | 2                                                          |
| 116             | Democratic People's Republic of Korea | 1999           | Onions                    | 9                                                          |
| 116             | Democratic People's Republic of Korea | 1999           | Palm Oil                  | 1                                                          |
| 116             | Democratic People's Republic of Korea | 1999           | Pigmeat                   | 16                                                         |
| 116             | Democratic People's Republic of Korea | 1999           | Potatoes                  | 121                                                        |
| 116             | Democratic People's Republic of Korea | 1999           | Poultry Meat              | 3                                                          |
| 116             | Democratic People's Republic of Korea | 1999           | Pulses, Other             | 2                                                          |
| 116             | Democratic People's Republic of Korea | 1999           | Rape and Mustard Oil      | 1                                                          |
| 116             | Democratic People's Republic of Korea | 1999           | Rice (Milled Equivalent)  | 214                                                        |
| 116             | Democratic People's Republic of Korea | 1999           | Rye                       | 5                                                          |
| 116             | Democratic People's Republic of Korea | 1999           | Sorghum                   | 1                                                          |
| 116             | Democratic People's Republic of Korea | 1999           | Soyabean Oil              | 6                                                          |
| 116             | Democratic People's Republic of Korea | 1999           | Soybeans                  | 16                                                         |
| 116             | Democratic People's Republic of Korea | 1999           | Sugar, Refined Equivalent | 6                                                          |
| 116             | Democratic People's Republic of Korea | 1999           | Sweet Potatoes            | 46                                                         |
| 116             | Democratic People's Republic of Korea | 1999           | Tomatoes                  | 7                                                          |
| 116             | Democratic People's Republic of Korea | 1999           | Vegetables, Other         | 379                                                        |
| 116             | Democratic People's Republic of Korea | 1999           | Wheat                     | 65                                                         |
| 116             | Democratic People's Republic of Korea | 2000           | Apples                    | 69                                                         |
| 116             | Democratic People's Republic of Korea | 2000           | Barley                    | 5                                                          |
| 116             | Democratic People's Republic of Korea | 2000           | Beans                     | 37                                                         |
| 116             | Democratic People's Republic of Korea | 2000           | Beer                      | 9                                                          |
| 116             | Democratic People's Republic of Korea | 2000           | Beverages, Alcoholic      | 16                                                         |
| 116             | Democratic People's Republic of Korea | 2000           | Bovine Meat               | 2                                                          |
| 116             | Democratic People's Republic of Korea | 2000           | Cephalopods               | 1                                                          |
| 116             | Democratic People's Republic of Korea | 2000           | Crustaceans               | 1                                                          |
| 116             | Democratic People's Republic of Korea | 2000           | Demersal Fish             | 8                                                          |
| 116             | Democratic People's Republic of Korea | 2000           | Eggs                      | 12                                                         |
| 116             | Democratic People's Republic of Korea | 2000           | Fats, Animals, Raw        | 1                                                          |
| 116             | Democratic People's Republic of Korea | 2000           | Freshwater Fish           | 1                                                          |
| 116             | Democratic People's Republic of Korea | 2000           | Fruits, Other             | 75                                                         |
| 116             | Democratic People's Republic of Korea | 2000           | Maize                     | 117                                                        |
| 116             | Democratic People's Republic of Korea | 2000           | Maize Germ Oil            | 3                                                          |
| 116             | Democratic People's Republic of Korea | 2000           | Marine Fish, Other        | 13                                                         |
| 116             | Democratic People's Republic of Korea | 2000           | Meat, Other               | 6                                                          |
| 116             | Democratic People's Republic of Korea | 2000           | Milk, Whole               | 10                                                         |
| 116             | Democratic People's Republic of Korea | 2000           | Millet                    | 3                                                          |
| 116             | Democratic People's Republic of Korea | 2000           | Molluscs, Other           | 2                                                          |
| 116             | Democratic People's Republic of Korea | 2000           | Mutton & Goat Meat        | 1                                                          |
| 116             | Democratic People's Republic of Korea | 2000           | Nuts                      | 1                                                          |
| 116             | Democratic People's Republic of Korea | 2000           | Oats                      | 1                                                          |
| 116             | Democratic People's Republic of Korea | 2000           | Offals, Edible            | 2                                                          |
| 116             | Democratic People's Republic of Korea | 2000           | Oilcrops Oil, Other       | 2                                                          |
| 116             | Democratic People's Republic of Korea | 2000           | Onions                    | 9                                                          |
| 116             | Democratic People's Republic of Korea | 2000           | Pigmeat                   | 17                                                         |
| 116             | Democratic People's Republic of Korea | 2000           | Potatoes                  | 152                                                        |
| 116             | Democratic People's Republic of Korea | 2000           | Poultry Meat              | 4                                                          |
| 116             | Democratic People's Republic of Korea | 2000           | Pulses, Other             | 3                                                          |
| 116             | Democratic People's Republic of Korea | 2000           | Rape and Mustard Oil      | 1                                                          |
| 116             | Democratic People's Republic of Korea | 2000           | Rice (Milled Equivalent)  | 208                                                        |
| 116             | Democratic People's Republic of Korea | 2000           | Ricebran Oil              | 1                                                          |
| 116             | Democratic People's Republic of Korea | 2000           | Rye                       | 5                                                          |
| 116             | Democratic People's Republic of Korea | 2000           | Sorghum                   | 1                                                          |
| 116             | Democratic People's Republic of Korea | 2000           | Soyabean Oil              | 7                                                          |
| 116             | Democratic People's Republic of Korea | 2000           | Soybeans                  | 20                                                         |
| 116             | Democratic People's Republic of Korea | 2000           | Sugar, Refined Equivalent | 7                                                          |
| 116             | Democratic People's Republic of Korea | 2000           | Sweet Potatoes            | 27                                                         |
| 116             | Democratic People's Republic of Korea | 2000           | Tomatoes                  | 7                                                          |
| 116             | Democratic People's Republic of Korea | 2000           | Vegetables, Other         | 391                                                        |
| 116             | Democratic People's Republic of Korea | 2000           | Wheat                     | 68                                                         |
| 116             | Democratic People's Republic of Korea | 2001           | Apples                    | 71                                                         |
| 116             | Democratic People's Republic of Korea | 2001           | Barley                    | 5                                                          |
| 116             | Democratic People's Republic of Korea | 2001           | Beans                     | 34                                                         |
| 116             | Democratic People's Republic of Korea | 2001           | Beer                      | 8                                                          |
| 116             | Democratic People's Republic of Korea | 2001           | Beverages, Alcoholic      | 12                                                         |
| 116             | Democratic People's Republic of Korea | 2001           | Bovine Meat               | 3                                                          |
| 116             | Democratic People's Republic of Korea | 2001           | Cephalopods               | 1                                                          |
| 116             | Democratic People's Republic of Korea | 2001           | Cottonseed Oil            | 1                                                          |
| 116             | Democratic People's Republic of Korea | 2001           | Crustaceans               | 1                                                          |
| 116             | Democratic People's Republic of Korea | 2001           | Demersal Fish             | 8                                                          |
| 116             | Democratic People's Republic of Korea | 2001           | Eggs                      | 13                                                         |
| 116             | Democratic People's Republic of Korea | 2001           | Fats, Animals, Raw        | 1                                                          |
| 116             | Democratic People's Republic of Korea | 2001           | Freshwater Fish           | 1                                                          |
| 116             | Democratic People's Republic of Korea | 2001           | Fruits, Other             | 78                                                         |
| 116             | Democratic People's Republic of Korea | 2001           | Maize                     | 93                                                         |
| 116             | Democratic People's Republic of Korea | 2001           | Maize Germ Oil            | 2                                                          |
| 116             | Democratic People's Republic of Korea | 2001           | Marine Fish, Other        | 14                                                         |
| 116             | Democratic People's Republic of Korea | 2001           | Meat, Other               | 11                                                         |
| 116             | Democratic People's Republic of Korea | 2001           | Milk, Whole               | 10                                                         |
| 116             | Democratic People's Republic of Korea | 2001           | Millet                    | 4                                                          |
| 116             | Democratic People's Republic of Korea | 2001           | Molluscs, Other           | 1                                                          |
| 116             | Democratic People's Republic of Korea | 2001           | Mutton & Goat Meat        | 1                                                          |
| 116             | Democratic People's Republic of Korea | 2001           | Nuts                      | 1                                                          |
| 116             | Democratic People's Republic of Korea | 2001           | Offals, Edible            | 2                                                          |
| 116             | Democratic People's Republic of Korea | 2001           | Oilcrops Oil, Other       | 2                                                          |
| 116             | Democratic People's Republic of Korea | 2001           | Onions                    | 9                                                          |
| 116             | Democratic People's Republic of Korea | 2001           | Palm Oil                  | 3                                                          |
| 116             | Democratic People's Republic of Korea | 2001           | Pigmeat                   | 17                                                         |
| 116             | Democratic People's Republic of Korea | 2001           | Potatoes                  | 184                                                        |
| 116             | Democratic People's Republic of Korea | 2001           | Poultry Meat              | 4                                                          |
| 116             | Democratic People's Republic of Korea | 2001           | Pulses, Other             | 2                                                          |
| 116             | Democratic People's Republic of Korea | 2001           | Rice (Milled Equivalent)  | 209                                                        |

Dietary calcium and zinc deficiency risks are decreasing but remain prevalent

| FAO countrycode | Country                               | Reference year | Food item                 | Gross food supply (g capita <sup>-1</sup> d <sup>-1</sup> ) |
|-----------------|---------------------------------------|----------------|---------------------------|-------------------------------------------------------------|
| 116             | Democratic People's Republic of Korea | 2001           | Ricebran Oil              | 1                                                           |
| 116             | Democratic People's Republic of Korea | 2001           | Rye                       | 5                                                           |
| 116             | Democratic People's Republic of Korea | 2001           | Sorghum                   | 1                                                           |
| 116             | Democratic People's Republic of Korea | 2001           | Soyabean Oil              | 6                                                           |
| 116             | Democratic People's Republic of Korea | 2001           | Soyabeans                 | 14                                                          |
| 116             | Democratic People's Republic of Korea | 2001           | Sugar, Refined Equivalent | 7                                                           |
| 116             | Democratic People's Republic of Korea | 2001           | Sweet Potatoes            | 30                                                          |
| 116             | Democratic People's Republic of Korea | 2001           | Tomatoes                  | 7                                                           |
| 116             | Democratic People's Republic of Korea | 2001           | Vegetables, Other         | 391                                                         |
| 116             | Democratic People's Republic of Korea | 2001           | Wheat                     | 71                                                          |
| 116             | Democratic People's Republic of Korea | 2002           | Apples                    | 68                                                          |
| 116             | Democratic People's Republic of Korea | 2002           | Barley                    | 5                                                           |
| 116             | Democratic People's Republic of Korea | 2002           | Beans                     | 35                                                          |
| 116             | Democratic People's Republic of Korea | 2002           | Beer                      | 8                                                           |
| 116             | Democratic People's Republic of Korea | 2002           | Beverages, Alcoholic      | 15                                                          |
| 116             | Democratic People's Republic of Korea | 2002           | Bovine Meat               | 3                                                           |
| 116             | Democratic People's Republic of Korea | 2002           | Cephalopods               | 1                                                           |
| 116             | Democratic People's Republic of Korea | 2002           | Coffee                    | 1                                                           |
| 116             | Democratic People's Republic of Korea | 2002           | Crustaceans               | 1                                                           |
| 116             | Democratic People's Republic of Korea | 2002           | Demersal Fish             | 8                                                           |
| 116             | Democratic People's Republic of Korea | 2002           | Eggs                      | 14                                                          |
| 116             | Democratic People's Republic of Korea | 2002           | Fats, Animals, Raw        | 1                                                           |
| 116             | Democratic People's Republic of Korea | 2002           | Freshwater Fish           | 1                                                           |
| 116             | Democratic People's Republic of Korea | 2002           | Fruits, Other             | 81                                                          |
| 116             | Democratic People's Republic of Korea | 2002           | Maize                     | 110                                                         |
| 116             | Democratic People's Republic of Korea | 2002           | Maize Germ Oil            | 2                                                           |
| 116             | Democratic People's Republic of Korea | 2002           | Marine Fish, Other        | 10                                                          |
| 116             | Democratic People's Republic of Korea | 2002           | Meat, Other               | 11                                                          |
| 116             | Democratic People's Republic of Korea | 2002           | Milk, Whole               | 12                                                          |
| 116             | Democratic People's Republic of Korea | 2002           | Millet                    | 5                                                           |
| 116             | Democratic People's Republic of Korea | 2002           | Molluscs, Other           | 1                                                           |
| 116             | Democratic People's Republic of Korea | 2002           | Mutton & Goat Meat        | 1                                                           |
| 116             | Democratic People's Republic of Korea | 2002           | Nuts                      | 2                                                           |
| 116             | Democratic People's Republic of Korea | 2002           | Oats                      | 1                                                           |
| 116             | Democratic People's Republic of Korea | 2002           | Offals, Edible            | 2                                                           |
| 116             | Democratic People's Republic of Korea | 2002           | Oilcrops Oil, Other       | 3                                                           |
| 116             | Democratic People's Republic of Korea | 2002           | Onions                    | 9                                                           |
| 116             | Democratic People's Republic of Korea | 2002           | Palm Oil                  | 1                                                           |
| 116             | Democratic People's Republic of Korea | 2002           | Pigmeat                   | 24                                                          |
| 116             | Democratic People's Republic of Korea | 2002           | Potatoes                  | 151                                                         |
| 116             | Democratic People's Republic of Korea | 2002           | Poultry Meat              | 5                                                           |
| 116             | Democratic People's Republic of Korea | 2002           | Pulses, Other             | 5                                                           |
| 116             | Democratic People's Republic of Korea | 2002           | Rice (Milled Equivalent)  | 211                                                         |
| 116             | Democratic People's Republic of Korea | 2002           | Ricebran Oil              | 1                                                           |
| 116             | Democratic People's Republic of Korea | 2002           | Rye                       | 5                                                           |
| 116             | Democratic People's Republic of Korea | 2002           | Sorghum                   | 2                                                           |
| 116             | Democratic People's Republic of Korea | 2002           | Soyabean Oil              | 6                                                           |
| 116             | Democratic People's Republic of Korea | 2002           | Soyabeans                 | 16                                                          |
| 116             | Democratic People's Republic of Korea | 2002           | Sugar, Refined Equivalent | 7                                                           |
| 116             | Democratic People's Republic of Korea | 2002           | Sweet Potatoes            | 31                                                          |
| 116             | Democratic People's Republic of Korea | 2002           | Tomatoes                  | 8                                                           |
| 116             | Democratic People's Republic of Korea | 2002           | Vegetables, Other         | 393                                                         |
| 116             | Democratic People's Republic of Korea | 2002           | Wheat                     | 74                                                          |
| 116             | Democratic People's Republic of Korea | 2003           | Apples                    | 70                                                          |
| 116             | Democratic People's Republic of Korea | 2003           | Barley                    | 5                                                           |
| 116             | Democratic People's Republic of Korea | 2003           | Beans                     | 32                                                          |
| 116             | Democratic People's Republic of Korea | 2003           | Beer                      | 9                                                           |
| 116             | Democratic People's Republic of Korea | 2003           | Beverages, Alcoholic      | 15                                                          |
| 116             | Democratic People's Republic of Korea | 2003           | Bovine Meat               | 3                                                           |
| 116             | Democratic People's Republic of Korea | 2003           | Cephalopods               | 1                                                           |
| 116             | Democratic People's Republic of Korea | 2003           | Demersal Fish             | 8                                                           |
| 116             | Democratic People's Republic of Korea | 2003           | Eggs                      | 15                                                          |
| 116             | Democratic People's Republic of Korea | 2003           | Fats, Animals, Raw        | 1                                                           |
| 116             | Democratic People's Republic of Korea | 2003           | Freshwater Fish           | 1                                                           |
| 116             | Democratic People's Republic of Korea | 2003           | Fruits, Other             | 80                                                          |
| 116             | Democratic People's Republic of Korea | 2003           | Maize                     | 111                                                         |
| 116             | Democratic People's Republic of Korea | 2003           | Maize Germ Oil            | 3                                                           |
| 116             | Democratic People's Republic of Korea | 2003           | Marine Fish, Other        | 8                                                           |
| 116             | Democratic People's Republic of Korea | 2003           | Meat, Other               | 11                                                          |
| 116             | Democratic People's Republic of Korea | 2003           | Milk, Whole               | 10                                                          |
| 116             | Democratic People's Republic of Korea | 2003           | Millet                    | 7                                                           |
| 116             | Democratic People's Republic of Korea | 2003           | Molasses                  | 3                                                           |
| 116             | Democratic People's Republic of Korea | 2003           | Mutton & Goat Meat        | 1                                                           |
| 116             | Democratic People's Republic of Korea | 2003           | Nuts                      | 2                                                           |
| 116             | Democratic People's Republic of Korea | 2003           | Oats                      | 1                                                           |
| 116             | Democratic People's Republic of Korea | 2003           | Offals, Edible            | 2                                                           |
| 116             | Democratic People's Republic of Korea | 2003           | Oilcrops Oil, Other       | 1                                                           |
| 116             | Democratic People's Republic of Korea | 2003           | Onions                    | 10                                                          |
| 116             | Democratic People's Republic of Korea | 2003           | Palm Oil                  | 1                                                           |
| 116             | Democratic People's Republic of Korea | 2003           | Pigmeat                   | 19                                                          |
| 116             | Democratic People's Republic of Korea | 2003           | Potatoes                  | 161                                                         |
| 116             | Democratic People's Republic of Korea | 2003           | Poultry Meat              | 5                                                           |
| 116             | Democratic People's Republic of Korea | 2003           | Pulses, Other             | 3                                                           |
| 116             | Democratic People's Republic of Korea | 2003           | Rice (Milled Equivalent)  | 214                                                         |
| 116             | Democratic People's Republic of Korea | 2003           | Ricebran Oil              | 1                                                           |
| 116             | Democratic People's Republic of Korea | 2003           | Rye                       | 5                                                           |
| 116             | Democratic People's Republic of Korea | 2003           | Sorghum                   | 3                                                           |
| 116             | Democratic People's Republic of Korea | 2003           | Soyabean Oil              | 8                                                           |
| 116             | Democratic People's Republic of Korea | 2003           | Soyabeans                 | 12                                                          |
| 116             | Democratic People's Republic of Korea | 2003           | Sugar, Refined Equivalent | 8                                                           |
| 116             | Democratic People's Republic of Korea | 2003           | Sweet Potatoes            | 32                                                          |
| 116             | Democratic People's Republic of Korea | 2003           | Tomatoes                  | 7                                                           |
| 116             | Democratic People's Republic of Korea | 2003           | Vegetables, Other         | 395                                                         |
| 116             | Democratic People's Republic of Korea | 2003           | Wheat                     | 77                                                          |
| 116             | Democratic People's Republic of Korea | 2004           | Apples                    | 72                                                          |
| 116             | Democratic People's Republic of Korea | 2004           | Barley                    | 5                                                           |
| 116             | Democratic People's Republic of Korea | 2004           | Beans                     | 34                                                          |

Dietary calcium and zinc deficiency risks are decreasing but remain prevalent

| FAO countrycode | Country                               | Reference year | Food item                 | Gross food supply (g capita <sup>-1</sup> d <sup>-1</sup> ) |
|-----------------|---------------------------------------|----------------|---------------------------|-------------------------------------------------------------|
| 116             | Democratic People's Republic of Korea | 2004           | Beer                      | 7                                                           |
| 116             | Democratic People's Republic of Korea | 2004           | Beverages, Alcoholic      | 15                                                          |
| 116             | Democratic People's Republic of Korea | 2004           | Bovine Meat               | 2                                                           |
| 116             | Democratic People's Republic of Korea | 2004           | Cephalopods               | 1                                                           |
| 116             | Democratic People's Republic of Korea | 2004           | Demersal Fish             | 8                                                           |
| 116             | Democratic People's Republic of Korea | 2004           | Eggs                      | 15                                                          |
| 116             | Democratic People's Republic of Korea | 2004           | Fats, Animals, Raw        | 1                                                           |
| 116             | Democratic People's Republic of Korea | 2004           | Freshwater Fish           | 1                                                           |
| 116             | Democratic People's Republic of Korea | 2004           | Fruits, Other             | 90                                                          |
| 116             | Democratic People's Republic of Korea | 2004           | Maize                     | 111                                                         |
| 116             | Democratic People's Republic of Korea | 2004           | Maize Germ Oil            | 3                                                           |
| 116             | Democratic People's Republic of Korea | 2004           | Marine Fish, Other        | 7                                                           |
| 116             | Democratic People's Republic of Korea | 2004           | Meat, Other               | 11                                                          |
| 116             | Democratic People's Republic of Korea | 2004           | Milk, Whole               | 12                                                          |
| 116             | Democratic People's Republic of Korea | 2004           | Millet                    | 4                                                           |
| 116             | Democratic People's Republic of Korea | 2004           | Molasses                  | 3                                                           |
| 116             | Democratic People's Republic of Korea | 2004           | Mutton & Goat Meat        | 1                                                           |
| 116             | Democratic People's Republic of Korea | 2004           | Nuts                      | 2                                                           |
| 116             | Democratic People's Republic of Korea | 2004           | Oats                      | 1                                                           |
| 116             | Democratic People's Republic of Korea | 2004           | Offals, Edible            | 2                                                           |
| 116             | Democratic People's Republic of Korea | 2004           | Oilcrops Oil, Other       | 2                                                           |
| 116             | Democratic People's Republic of Korea | 2004           | Onions                    | 10                                                          |
| 116             | Democratic People's Republic of Korea | 2004           | Palm Oil                  | 1                                                           |
| 116             | Democratic People's Republic of Korea | 2004           | Pigmeat                   | 19                                                          |
| 116             | Democratic People's Republic of Korea | 2004           | Potatoes                  | 162                                                         |
| 116             | Democratic People's Republic of Korea | 2004           | Poultry Meat              | 5                                                           |
| 116             | Democratic People's Republic of Korea | 2004           | Pulses, Other             | 1                                                           |
| 116             | Democratic People's Republic of Korea | 2004           | Rice (Milled Equivalent)  | 215                                                         |
| 116             | Democratic People's Republic of Korea | 2004           | Ricebran Oil              | 1                                                           |
| 116             | Democratic People's Republic of Korea | 2004           | Rye                       | 5                                                           |
| 116             | Democratic People's Republic of Korea | 2004           | Sorghum                   | 3                                                           |
| 116             | Democratic People's Republic of Korea | 2004           | Soyabean Oil              | 8                                                           |
| 116             | Democratic People's Republic of Korea | 2004           | Soyabeans                 | 14                                                          |
| 116             | Democratic People's Republic of Korea | 2004           | Sugar, Refined Equivalent | 8                                                           |
| 116             | Democratic People's Republic of Korea | 2004           | Sweet Potatoes            | 33                                                          |
| 116             | Democratic People's Republic of Korea | 2004           | Tomatoes                  | 8                                                           |
| 116             | Democratic People's Republic of Korea | 2004           | Vegetables, Other         | 390                                                         |
| 116             | Democratic People's Republic of Korea | 2004           | Wheat                     | 77                                                          |
| 116             | Democratic People's Republic of Korea | 2005           | Apples                    | 71                                                          |
| 116             | Democratic People's Republic of Korea | 2005           | Barley                    | 5                                                           |
| 116             | Democratic People's Republic of Korea | 2005           | Beans                     | 33                                                          |
| 116             | Democratic People's Republic of Korea | 2005           | Beer                      | 7                                                           |
| 116             | Democratic People's Republic of Korea | 2005           | Beverages, Alcoholic      | 16                                                          |
| 116             | Democratic People's Republic of Korea | 2005           | Bovine Meat               | 2                                                           |
| 116             | Democratic People's Republic of Korea | 2005           | Cephalopods               | 1                                                           |
| 116             | Democratic People's Republic of Korea | 2005           | Crustaceans               | 1                                                           |
| 116             | Democratic People's Republic of Korea | 2005           | Demersal Fish             | 8                                                           |
| 116             | Democratic People's Republic of Korea | 2005           | Eggs                      | 14                                                          |
| 116             | Democratic People's Republic of Korea | 2005           | Fats, Animals, Raw        | 1                                                           |
| 116             | Democratic People's Republic of Korea | 2005           | Freshwater Fish           | 1                                                           |
| 116             | Democratic People's Republic of Korea | 2005           | Fruits, Other             | 78                                                          |
| 116             | Democratic People's Republic of Korea | 2005           | Maize                     | 114                                                         |
| 116             | Democratic People's Republic of Korea | 2005           | Maize Germ Oil            | 3                                                           |
| 116             | Democratic People's Republic of Korea | 2005           | Marine Fish, Other        | 12                                                          |
| 116             | Democratic People's Republic of Korea | 2005           | Meat, Other               | 11                                                          |
| 116             | Democratic People's Republic of Korea | 2005           | Milk, Whole               | 14                                                          |
| 116             | Democratic People's Republic of Korea | 2005           | Millet                    | 4                                                           |
| 116             | Democratic People's Republic of Korea | 2005           | Molasses                  | 1                                                           |
| 116             | Democratic People's Republic of Korea | 2005           | Mutton & Goat Meat        | 1                                                           |
| 116             | Democratic People's Republic of Korea | 2005           | Nuts                      | 2                                                           |
| 116             | Democratic People's Republic of Korea | 2005           | Oats                      | 1                                                           |
| 116             | Democratic People's Republic of Korea | 2005           | Offals, Edible            | 2                                                           |
| 116             | Democratic People's Republic of Korea | 2005           | Onions                    | 10                                                          |
| 116             | Democratic People's Republic of Korea | 2005           | Palm Oil                  | 1                                                           |
| 116             | Democratic People's Republic of Korea | 2005           | Pigmeat                   | 20                                                          |
| 116             | Democratic People's Republic of Korea | 2005           | Potatoes                  | 162                                                         |
| 116             | Democratic People's Republic of Korea | 2005           | Poultry Meat              | 5                                                           |
| 116             | Democratic People's Republic of Korea | 2005           | Rice (Milled Equivalent)  | 215                                                         |
| 116             | Democratic People's Republic of Korea | 2005           | Ricebran Oil              | 2                                                           |
| 116             | Democratic People's Republic of Korea | 2005           | Rye                       | 5                                                           |
| 116             | Democratic People's Republic of Korea | 2005           | Sorghum                   | 3                                                           |
| 116             | Democratic People's Republic of Korea | 2005           | Soyabean Oil              | 9                                                           |
| 116             | Democratic People's Republic of Korea | 2005           | Soyabeans                 | 11                                                          |
| 116             | Democratic People's Republic of Korea | 2005           | Sugar, Refined Equivalent | 6                                                           |
| 116             | Democratic People's Republic of Korea | 2005           | Sweet Potatoes            | 31                                                          |
| 116             | Democratic People's Republic of Korea | 2005           | Tomatoes                  | 8                                                           |
| 116             | Democratic People's Republic of Korea | 2005           | Vegetables, Other         | 392                                                         |
| 116             | Democratic People's Republic of Korea | 2005           | Wheat                     | 77                                                          |
| 116             | Democratic People's Republic of Korea | 2006           | Apples                    | 70                                                          |
| 116             | Democratic People's Republic of Korea | 2006           | Barley                    | 5                                                           |
| 116             | Democratic People's Republic of Korea | 2006           | Beans                     | 33                                                          |
| 116             | Democratic People's Republic of Korea | 2006           | Beer                      | 8                                                           |
| 116             | Democratic People's Republic of Korea | 2006           | Beverages, Alcoholic      | 16                                                          |
| 116             | Democratic People's Republic of Korea | 2006           | Bovine Meat               | 2                                                           |
| 116             | Democratic People's Republic of Korea | 2006           | Cephalopods               | 1                                                           |
| 116             | Democratic People's Republic of Korea | 2006           | Coffee                    | 1                                                           |
| 116             | Democratic People's Republic of Korea | 2006           | Crustaceans               | 2                                                           |
| 116             | Democratic People's Republic of Korea | 2006           | Demersal Fish             | 8                                                           |
| 116             | Democratic People's Republic of Korea | 2006           | Eggs                      | 12                                                          |
| 116             | Democratic People's Republic of Korea | 2006           | Fats, Animals, Raw        | 1                                                           |
| 116             | Democratic People's Republic of Korea | 2006           | Freshwater Fish           | 1                                                           |
| 116             | Democratic People's Republic of Korea | 2006           | Fruits, Other             | 78                                                          |
| 116             | Democratic People's Republic of Korea | 2006           | Maize                     | 116                                                         |
| 116             | Democratic People's Republic of Korea | 2006           | Maize Germ Oil            | 3                                                           |
| 116             | Democratic People's Republic of Korea | 2006           | Marine Fish, Other        | 12                                                          |
| 116             | Democratic People's Republic of Korea | 2006           | Meat, Other               | 12                                                          |
| 116             | Democratic People's Republic of Korea | 2006           | Milk, Whole               | 10                                                          |

Dietary calcium and zinc deficiency risks are decreasing but remain prevalent

| FAO countrycode | Country                               | Reference year | Food item                 | Gross food supply(g capita <sup>-1</sup> d <sup>-1</sup> ) |
|-----------------|---------------------------------------|----------------|---------------------------|------------------------------------------------------------|
| 116             | Democratic People's Republic of Korea | 2006           | Millet                    | 5                                                          |
| 116             | Democratic People's Republic of Korea | 2006           | Molluscs, Other           | 1                                                          |
| 116             | Democratic People's Republic of Korea | 2006           | Mutton & Goat Meat        | 2                                                          |
| 116             | Democratic People's Republic of Korea | 2006           | Nuts                      | 1                                                          |
| 116             | Democratic People's Republic of Korea | 2006           | Oats                      | 1                                                          |
| 116             | Democratic People's Republic of Korea | 2006           | Offals, Edible            | 2                                                          |
| 116             | Democratic People's Republic of Korea | 2006           | Onions                    | 9                                                          |
| 116             | Democratic People's Republic of Korea | 2006           | Pigmeat                   | 17                                                         |
| 116             | Democratic People's Republic of Korea | 2006           | Potatoes                  | 155                                                        |
| 116             | Democratic People's Republic of Korea | 2006           | Poultry Meat              | 5                                                          |
| 116             | Democratic People's Republic of Korea | 2006           | Rice (Milled Equivalent)  | 213                                                        |
| 116             | Democratic People's Republic of Korea | 2006           | Ricebran Oil              | 1                                                          |
| 116             | Democratic People's Republic of Korea | 2006           | Rye                       | 5                                                          |
| 116             | Democratic People's Republic of Korea | 2006           | Sorghum                   | 3                                                          |
| 116             | Democratic People's Republic of Korea | 2006           | Soyabean Oil              | 9                                                          |
| 116             | Democratic People's Republic of Korea | 2006           | Soyabeans                 | 9                                                          |
| 116             | Democratic People's Republic of Korea | 2006           | Sugar, Refined Equivalent | 7                                                          |
| 116             | Democratic People's Republic of Korea | 2006           | Sweet Potatoes            | 32                                                         |
| 116             | Democratic People's Republic of Korea | 2006           | Tomatoes                  | 7                                                          |
| 116             | Democratic People's Republic of Korea | 2006           | Vegetables, Other         | 378                                                        |
| 116             | Democratic People's Republic of Korea | 2006           | Wheat                     | 73                                                         |
| 116             | Democratic People's Republic of Korea | 2007           | Apples                    | 66                                                         |
| 116             | Democratic People's Republic of Korea | 2007           | Barley                    | 5                                                          |
| 116             | Democratic People's Republic of Korea | 2007           | Beans                     | 31                                                         |
| 116             | Democratic People's Republic of Korea | 2007           | Beer                      | 8                                                          |
| 116             | Democratic People's Republic of Korea | 2007           | Beverages, Alcoholic      | 15                                                         |
| 116             | Democratic People's Republic of Korea | 2007           | Bovine Meat               | 2                                                          |
| 116             | Democratic People's Republic of Korea | 2007           | Cephalopods               | 1                                                          |
| 116             | Democratic People's Republic of Korea | 2007           | Coffee                    | 1                                                          |
| 116             | Democratic People's Republic of Korea | 2007           | Cottonseed Oil            | 1                                                          |
| 116             | Democratic People's Republic of Korea | 2007           | Crustaceans               | 3                                                          |
| 116             | Democratic People's Republic of Korea | 2007           | Demersal Fish             | 8                                                          |
| 116             | Democratic People's Republic of Korea | 2007           | Eggs                      | 11                                                         |
| 116             | Democratic People's Republic of Korea | 2007           | Fats, Animals, Raw        | 1                                                          |
| 116             | Democratic People's Republic of Korea | 2007           | Freshwater Fish           | 1                                                          |
| 116             | Democratic People's Republic of Korea | 2007           | Fruits, Other             | 77                                                         |
| 116             | Democratic People's Republic of Korea | 2007           | Maize                     | 112                                                        |
| 116             | Democratic People's Republic of Korea | 2007           | Maize Germ Oil            | 3                                                          |
| 116             | Democratic People's Republic of Korea | 2007           | Marine Fish, Other        | 12                                                         |
| 116             | Democratic People's Republic of Korea | 2007           | Meat, Other               | 13                                                         |
| 116             | Democratic People's Republic of Korea | 2007           | Milk, Whole               | 10                                                         |
| 116             | Democratic People's Republic of Korea | 2007           | Millet                    | 4                                                          |
| 116             | Democratic People's Republic of Korea | 2007           | Molluscs, Other           | 7                                                          |
| 116             | Democratic People's Republic of Korea | 2007           | Mutton & Goat Meat        | 2                                                          |
| 116             | Democratic People's Republic of Korea | 2007           | Nuts                      | 2                                                          |
| 116             | Democratic People's Republic of Korea | 2007           | Oats                      | 1                                                          |
| 116             | Democratic People's Republic of Korea | 2007           | Offals, Edible            | 2                                                          |
| 116             | Democratic People's Republic of Korea | 2007           | Onions                    | 9                                                          |
| 116             | Democratic People's Republic of Korea | 2007           | Palm Oil                  | 1                                                          |
| 116             | Democratic People's Republic of Korea | 2007           | Pigmeat                   | 15                                                         |
| 116             | Democratic People's Republic of Korea | 2007           | Potatoes                  | 146                                                        |
| 116             | Democratic People's Republic of Korea | 2007           | Poultry Meat              | 5                                                          |
| 116             | Democratic People's Republic of Korea | 2007           | Rice (Milled Equivalent)  | 209                                                        |
| 116             | Democratic People's Republic of Korea | 2007           | Ricebran Oil              | 1                                                          |
| 116             | Democratic People's Republic of Korea | 2007           | Rye                       | 5                                                          |
| 116             | Democratic People's Republic of Korea | 2007           | Sorghum                   | 3                                                          |
| 116             | Democratic People's Republic of Korea | 2007           | Soyabean Oil              | 9                                                          |
| 116             | Democratic People's Republic of Korea | 2007           | Soyabeans                 | 11                                                         |
| 116             | Democratic People's Republic of Korea | 2007           | Sugar, Refined Equivalent | 12                                                         |
| 116             | Democratic People's Republic of Korea | 2007           | Sweet Potatoes            | 33                                                         |
| 116             | Democratic People's Republic of Korea | 2007           | Tomatoes                  | 7                                                          |
| 116             | Democratic People's Republic of Korea | 2007           | Vegetables, Other         | 365                                                        |
| 116             | Democratic People's Republic of Korea | 2007           | Wheat                     | 71                                                         |
| 116             | Democratic People's Republic of Korea | 2008           | Apples                    | 70                                                         |
| 116             | Democratic People's Republic of Korea | 2008           | Barley                    | 4                                                          |
| 116             | Democratic People's Republic of Korea | 2008           | Beans                     | 33                                                         |
| 116             | Democratic People's Republic of Korea | 2008           | Beer                      | 6                                                          |
| 116             | Democratic People's Republic of Korea | 2008           | Beverages, Alcoholic      | 16                                                         |
| 116             | Democratic People's Republic of Korea | 2008           | Bovine Meat               | 2                                                          |
| 116             | Democratic People's Republic of Korea | 2008           | Cephalopods               | 1                                                          |
| 116             | Democratic People's Republic of Korea | 2008           | Coffee                    | 1                                                          |
| 116             | Democratic People's Republic of Korea | 2008           | Crustaceans               | 3                                                          |
| 116             | Democratic People's Republic of Korea | 2008           | Demersal Fish             | 8                                                          |
| 116             | Democratic People's Republic of Korea | 2008           | Eggs                      | 11                                                         |
| 116             | Democratic People's Republic of Korea | 2008           | Fats, Animals, Raw        | 1                                                          |
| 116             | Democratic People's Republic of Korea | 2008           | Freshwater Fish           | 1                                                          |
| 116             | Democratic People's Republic of Korea | 2008           | Fruits, Other             | 77                                                         |
| 116             | Democratic People's Republic of Korea | 2008           | Maize                     | 114                                                        |
| 116             | Democratic People's Republic of Korea | 2008           | Maize Germ Oil            | 3                                                          |
| 116             | Democratic People's Republic of Korea | 2008           | Marine Fish, Other        | 12                                                         |
| 116             | Democratic People's Republic of Korea | 2008           | Meat, Other               | 14                                                         |
| 116             | Democratic People's Republic of Korea | 2008           | Milk, Whole               | 10                                                         |
| 116             | Democratic People's Republic of Korea | 2008           | Millet                    | 4                                                          |
| 116             | Democratic People's Republic of Korea | 2008           | Molluscs, Other           | 6                                                          |
| 116             | Democratic People's Republic of Korea | 2008           | Mutton & Goat Meat        | 2                                                          |
| 116             | Democratic People's Republic of Korea | 2008           | Nuts                      | 2                                                          |
| 116             | Democratic People's Republic of Korea | 2008           | Oats                      | 1                                                          |
| 116             | Democratic People's Republic of Korea | 2008           | Offals, Edible            | 2                                                          |
| 116             | Democratic People's Republic of Korea | 2008           | Onions                    | 8                                                          |
| 116             | Democratic People's Republic of Korea | 2008           | Palm Oil                  | 1                                                          |
| 116             | Democratic People's Republic of Korea | 2008           | Pigmeat                   | 13                                                         |
| 116             | Democratic People's Republic of Korea | 2008           | Potatoes                  | 115                                                        |
| 116             | Democratic People's Republic of Korea | 2008           | Poultry Meat              | 5                                                          |
| 116             | Democratic People's Republic of Korea | 2008           | Rice (Milled Equivalent)  | 206                                                        |
| 116             | Democratic People's Republic of Korea | 2008           | Ricebran Oil              | 1                                                          |
| 116             | Democratic People's Republic of Korea | 2008           | Rye                       | 6                                                          |
| 116             | Democratic People's Republic of Korea | 2008           | Sorghum                   | 3                                                          |



Dietary calcium and zinc deficiency risks are decreasing but remain prevalent

| FAO countrycode | Country                               | Reference year | Food item                 | Gross food supply(g capita <sup>-1</sup> d <sup>-1</sup> ) |
|-----------------|---------------------------------------|----------------|---------------------------|------------------------------------------------------------|
| 116             | Democratic People's Republic of Korea | 2008           | Soyabean Oil              | 10                                                         |
| 116             | Democratic People's Republic of Korea | 2008           | Soyabean Oil              | 11                                                         |
| 116             | Democratic People's Republic of Korea | 2008           | Soybeans                  | 14                                                         |
| 116             | Democratic People's Republic of Korea | 2008           | Sugar, Refined Equivalent | 34                                                         |
| 116             | Democratic People's Republic of Korea | 2008           | Sweet Potatoes            | 6                                                          |
| 116             | Democratic People's Republic of Korea | 2008           | Tomatoes                  | 384                                                        |
| 116             | Democratic People's Republic of Korea | 2008           | Vegetables, Other         | 68                                                         |
| 116             | Democratic People's Republic of Korea | 2008           | Wheat                     | 74                                                         |
| 116             | Democratic People's Republic of Korea | 2009           | Apples                    | 4                                                          |
| 116             | Democratic People's Republic of Korea | 2009           | Barley                    | 33                                                         |
| 116             | Democratic People's Republic of Korea | 2009           | Beans                     | 6                                                          |
| 116             | Democratic People's Republic of Korea | 2009           | Beer                      | 17                                                         |
| 116             | Democratic People's Republic of Korea | 2009           | Beverages, Alcoholic      | 2                                                          |
| 116             | Democratic People's Republic of Korea | 2009           | Bovine Meat               | 1                                                          |
| 116             | Democratic People's Republic of Korea | 2009           | Cephalopods               | 1                                                          |
| 116             | Democratic People's Republic of Korea | 2009           | Coffee                    | 1                                                          |
| 116             | Democratic People's Republic of Korea | 2009           | Crustaceans               | 3                                                          |
| 116             | Democratic People's Republic of Korea | 2009           | Demersal Fish             | 9                                                          |
| 116             | Democratic People's Republic of Korea | 2009           | Eggs                      | 11                                                         |
| 116             | Democratic People's Republic of Korea | 2009           | Fats, Animals, Raw        | 1                                                          |
| 116             | Democratic People's Republic of Korea | 2009           | Freshwater Fish           | 1                                                          |
| 116             | Democratic People's Republic of Korea | 2009           | Fruits, Other             | 82                                                         |
| 116             | Democratic People's Republic of Korea | 2009           | Maize                     | 122                                                        |
| 116             | Democratic People's Republic of Korea | 2009           | Maize Germ Oil            | 3                                                          |
| 116             | Democratic People's Republic of Korea | 2009           | Marine Fish, Other        | 12                                                         |
| 116             | Democratic People's Republic of Korea | 2009           | Meat, Other               | 15                                                         |
| 116             | Democratic People's Republic of Korea | 2009           | Milk, Whole               | 10                                                         |
| 116             | Democratic People's Republic of Korea | 2009           | Millet                    | 4                                                          |
| 116             | Democratic People's Republic of Korea | 2009           | Molluscs, Other           | 3                                                          |
| 116             | Democratic People's Republic of Korea | 2009           | Mutton & Goat Meat        | 2                                                          |
| 116             | Democratic People's Republic of Korea | 2009           | Nuts                      | 2                                                          |
| 116             | Democratic People's Republic of Korea | 2009           | Oats                      | 1                                                          |
| 116             | Democratic People's Republic of Korea | 2009           | Offals, Edible            | 2                                                          |
| 116             | Democratic People's Republic of Korea | 2009           | Onions                    | 9                                                          |
| 116             | Democratic People's Republic of Korea | 2009           | Palm Oil                  | 1                                                          |
| 116             | Democratic People's Republic of Korea | 2009           | Pigmeat                   | 12                                                         |
| 116             | Democratic People's Republic of Korea | 2009           | Potatoes                  | 118                                                        |
| 116             | Democratic People's Republic of Korea | 2009           | Poultry Meat              | 5                                                          |
| 116             | Democratic People's Republic of Korea | 2009           | Rice (Milled Equivalent)  | 204                                                        |
| 116             | Democratic People's Republic of Korea | 2009           | Ricebran Oil              | 1                                                          |
| 116             | Democratic People's Republic of Korea | 2009           | Rye                       | 5                                                          |
| 116             | Democratic People's Republic of Korea | 2009           | Sorghum                   | 3                                                          |
| 116             | Democratic People's Republic of Korea | 2009           | Soyabean Oil              | 9                                                          |
| 116             | Democratic People's Republic of Korea | 2009           | Soybeans                  | 9                                                          |
| 116             | Democratic People's Republic of Korea | 2009           | Sugar, Refined Equivalent | 12                                                         |
| 116             | Democratic People's Republic of Korea | 2009           | Sweet Potatoes            | 34                                                         |
| 116             | Democratic People's Republic of Korea | 2009           | Tomatoes                  | 7                                                          |
| 116             | Democratic People's Republic of Korea | 2009           | Vegetables, Other         | 384                                                        |
| 116             | Democratic People's Republic of Korea | 2009           | Wheat                     | 64                                                         |
| 116             | Democratic People's Republic of Korea | 2010           | Apples                    | 76                                                         |
| 116             | Democratic People's Republic of Korea | 2010           | Barley                    | 5                                                          |
| 116             | Democratic People's Republic of Korea | 2010           | Beans                     | 30                                                         |
| 116             | Democratic People's Republic of Korea | 2010           | Beer                      | 7                                                          |
| 116             | Democratic People's Republic of Korea | 2010           | Beverages, Alcoholic      | 16                                                         |
| 116             | Democratic People's Republic of Korea | 2010           | Bovine Meat               | 2                                                          |
| 116             | Democratic People's Republic of Korea | 2010           | Cephalopods               | 1                                                          |
| 116             | Democratic People's Republic of Korea | 2010           | Coffee                    | 1                                                          |
| 116             | Democratic People's Republic of Korea | 2010           | Crustaceans               | 2                                                          |
| 116             | Democratic People's Republic of Korea | 2010           | Demersal Fish             | 9                                                          |
| 116             | Democratic People's Republic of Korea | 2010           | Eggs                      | 12                                                         |
| 116             | Democratic People's Republic of Korea | 2010           | Fats, Animals, Raw        | 1                                                          |
| 116             | Democratic People's Republic of Korea | 2010           | Freshwater Fish           | 1                                                          |
| 116             | Democratic People's Republic of Korea | 2010           | Fruits, Other             | 81                                                         |
| 116             | Democratic People's Republic of Korea | 2010           | Maize                     | 127                                                        |
| 116             | Democratic People's Republic of Korea | 2010           | Maize Germ Oil            | 3                                                          |
| 116             | Democratic People's Republic of Korea | 2010           | Marine Fish, Other        | 11                                                         |
| 116             | Democratic People's Republic of Korea | 2010           | Meat, Other               | 15                                                         |
| 116             | Democratic People's Republic of Korea | 2010           | Milk, Whole               | 10                                                         |
| 116             | Democratic People's Republic of Korea | 2010           | Millet                    | 5                                                          |
| 116             | Democratic People's Republic of Korea | 2010           | Molluscs, Other           | 1                                                          |
| 116             | Democratic People's Republic of Korea | 2010           | Mutton & Goat Meat        | 2                                                          |
| 116             | Democratic People's Republic of Korea | 2010           | Nuts                      | 2                                                          |
| 116             | Democratic People's Republic of Korea | 2010           | Oats                      | 1                                                          |
| 116             | Democratic People's Republic of Korea | 2010           | Offals, Edible            | 2                                                          |
| 116             | Democratic People's Republic of Korea | 2010           | Onions                    | 9                                                          |
| 116             | Democratic People's Republic of Korea | 2010           | Palm Oil                  | 1                                                          |
| 116             | Democratic People's Republic of Korea | 2010           | Pigmeat                   | 13                                                         |
| 116             | Democratic People's Republic of Korea | 2010           | Potatoes                  | 129                                                        |
| 116             | Democratic People's Republic of Korea | 2010           | Poultry Meat              | 5                                                          |
| 116             | Democratic People's Republic of Korea | 2010           | Rice (Milled Equivalent)  | 203                                                        |
| 116             | Democratic People's Republic of Korea | 2010           | Ricebran Oil              | 1                                                          |
| 116             | Democratic People's Republic of Korea | 2010           | Rye                       | 5                                                          |
| 116             | Democratic People's Republic of Korea | 2010           | Sorghum                   | 3                                                          |
| 116             | Democratic People's Republic of Korea | 2010           | Soyabean Oil              | 9                                                          |
| 116             | Democratic People's Republic of Korea | 2010           | Soybeans                  | 9                                                          |
| 116             | Democratic People's Republic of Korea | 2010           | Sugar, Refined Equivalent | 12                                                         |
| 116             | Democratic People's Republic of Korea | 2010           | Sweet Potatoes            | 37                                                         |
| 116             | Democratic People's Republic of Korea | 2010           | Tomatoes                  | 7                                                          |
| 116             | Democratic People's Republic of Korea | 2010           | Vegetables, Other         | 366                                                        |
| 116             | Democratic People's Republic of Korea | 2010           | Wheat                     | 62                                                         |
| 116             | Democratic People's Republic of Korea | 2011           | Apples                    | 76                                                         |
| 116             | Democratic People's Republic of Korea | 2011           | Barley                    | 4                                                          |
| 116             | Democratic People's Republic of Korea | 2011           | Beans                     | 34                                                         |
| 116             | Democratic People's Republic of Korea | 2011           | Beer                      | 7                                                          |
| 116             | Democratic People's Republic of Korea | 2011           | Beverages, Alcoholic      | 17                                                         |
| 116             | Democratic People's Republic of Korea | 2011           | Bovine Meat               | 2                                                          |
| 116             | Democratic People's Republic of Korea | 2011           | Cephalopods               | 1                                                          |
| 116             | Democratic People's Republic of Korea | 2011           | Crustaceans               | 2                                                          |

Dietary calcium and zinc deficiency risks are decreasing but remain prevalent

| FAO countrycode | Country                               | Reference year | Food item                 | Gross food supply (g capita <sup>-1</sup> d <sup>-1</sup> ) |
|-----------------|---------------------------------------|----------------|---------------------------|-------------------------------------------------------------|
| 116             | Democratic People's Republic of Korea | 2011           | Demersal Fish             | 10                                                          |
| 116             | Democratic People's Republic of Korea | 2011           | Eggs                      | 12                                                          |
| 116             | Democratic People's Republic of Korea | 2011           | Fats, Animals, Raw        | 1                                                           |
| 116             | Democratic People's Republic of Korea | 2011           | Freshwater Fish           | 1                                                           |
| 116             | Democratic People's Republic of Korea | 2011           | Fruits, Other             | 81                                                          |
| 116             | Democratic People's Republic of Korea | 2011           | Maize                     | 124                                                         |
| 116             | Democratic People's Republic of Korea | 2011           | Maize Germ Oil            | 3                                                           |
| 116             | Democratic People's Republic of Korea | 2011           | Marine Fish, Other        | 11                                                          |
| 116             | Democratic People's Republic of Korea | 2011           | Meat, Other               | 17                                                          |
| 116             | Democratic People's Republic of Korea | 2011           | Milk, Whole               | 10                                                          |
| 116             | Democratic People's Republic of Korea | 2011           | Millet                    | 5                                                           |
| 116             | Democratic People's Republic of Korea | 2011           | Molluscs, Other           | 1                                                           |
| 116             | Democratic People's Republic of Korea | 2011           | Mutton & Goat Meat        | 2                                                           |
| 116             | Democratic People's Republic of Korea | 2011           | Nuts                      | 2                                                           |
| 116             | Democratic People's Republic of Korea | 2011           | Oats                      | 1                                                           |
| 116             | Democratic People's Republic of Korea | 2011           | Offals, Edible            | 2                                                           |
| 116             | Democratic People's Republic of Korea | 2011           | Onions                    | 9                                                           |
| 116             | Democratic People's Republic of Korea | 2011           | Palm Oil                  | 1                                                           |
| 116             | Democratic People's Republic of Korea | 2011           | Pigmeat                   | 12                                                          |
| 116             | Democratic People's Republic of Korea | 2011           | Potatoes                  | 132                                                         |
| 116             | Democratic People's Republic of Korea | 2011           | Poultry Meat              | 5                                                           |
| 116             | Democratic People's Republic of Korea | 2011           | Rice (Milled Equivalent)  | 205                                                         |
| 116             | Democratic People's Republic of Korea | 2011           | Ricebran Oil              | 1                                                           |
| 116             | Democratic People's Republic of Korea | 2011           | Rye                       | 5                                                           |
| 116             | Democratic People's Republic of Korea | 2011           | Sorghum                   | 3                                                           |
| 116             | Democratic People's Republic of Korea | 2011           | Soybean Oil               | 9                                                           |
| 116             | Democratic People's Republic of Korea | 2011           | Soybeans                  | 9                                                           |
| 116             | Democratic People's Republic of Korea | 2011           | Sugar, Refined Equivalent | 10                                                          |
| 116             | Democratic People's Republic of Korea | 2011           | Sweet Potatoes            | 38                                                          |
| 116             | Democratic People's Republic of Korea | 2011           | Tomatoes                  | 6                                                           |
| 116             | Democratic People's Republic of Korea | 2011           | Vegetables, Other         | 319                                                         |
| 116             | Democratic People's Republic of Korea | 2011           | Wheat                     | 64                                                          |
| 54              | Denmark                               | 1992           | Apples                    | 68                                                          |
| 54              | Denmark                               | 1992           | Bananas                   | 29                                                          |
| 54              | Denmark                               | 1992           | Beer                      | 332                                                         |
| 54              | Denmark                               | 1992           | Beverages, Alcoholic      | 8                                                           |
| 54              | Denmark                               | 1992           | Bovine Meat               | 58                                                          |
| 54              | Denmark                               | 1992           | Butter, Ghee              | 8                                                           |
| 54              | Denmark                               | 1992           | Cheese                    | 42                                                          |
| 54              | Denmark                               | 1992           | Cocoa Beans               | 9                                                           |
| 54              | Denmark                               | 1992           | Coffee                    | 30                                                          |
| 54              | Denmark                               | 1992           | Cream                     | 26                                                          |
| 54              | Denmark                               | 1992           | Crustaceans               | 9                                                           |
| 54              | Denmark                               | 1992           | Dates                     | 1                                                           |
| 54              | Denmark                               | 1992           | Demersal Fish             | 18                                                          |
| 54              | Denmark                               | 1992           | Eggs                      | 42                                                          |
| 54              | Denmark                               | 1992           | Fats, Animals, Raw        | 34                                                          |
| 54              | Denmark                               | 1992           | Fish, Body Oil            | 14                                                          |
| 54              | Denmark                               | 1992           | Freshwater Fish           | 6                                                           |
| 54              | Denmark                               | 1992           | Fruits, Other             | 49                                                          |
| 54              | Denmark                               | 1992           | Grapefruit                | 3                                                           |
| 54              | Denmark                               | 1992           | Grapes                    | 20                                                          |
| 54              | Denmark                               | 1992           | Honey                     | 1                                                           |
| 54              | Denmark                               | 1992           | Lemons, Limes             | 6                                                           |
| 54              | Denmark                               | 1992           | Maize                     | 34                                                          |
| 54              | Denmark                               | 1992           | Maize Germ Oil            | 1                                                           |
| 54              | Denmark                               | 1992           | Meat, Other               | 2                                                           |
| 54              | Denmark                               | 1992           | Milk, Whole               | 98                                                          |
| 54              | Denmark                               | 1992           | Molluscs, Other           | 6                                                           |
| 54              | Denmark                               | 1992           | Mutton & Goat Meat        | 3                                                           |
| 54              | Denmark                               | 1992           | Nuts                      | 10                                                          |
| 54              | Denmark                               | 1992           | Oats                      | 7                                                           |
| 54              | Denmark                               | 1992           | Offals, Edible            | 32                                                          |
| 54              | Denmark                               | 1992           | Oilcrops Oil, Other       | 1                                                           |
| 54              | Denmark                               | 1992           | Olive Oil                 | 1                                                           |
| 54              | Denmark                               | 1992           | Olives                    | 1                                                           |
| 54              | Denmark                               | 1992           | Onions                    | 22                                                          |
| 54              | Denmark                               | 1992           | Oranges, Mandarines       | 27                                                          |
| 54              | Denmark                               | 1992           | Palmkernel Oil            | 6                                                           |
| 54              | Denmark                               | 1992           | Peas                      | 2                                                           |
| 54              | Denmark                               | 1992           | Pelagic Fish              | 27                                                          |
| 54              | Denmark                               | 1992           | Pigmeat                   | 178                                                         |
| 54              | Denmark                               | 1992           | Pineapples                | 3                                                           |
| 54              | Denmark                               | 1992           | Potatoes                  | 206                                                         |
| 54              | Denmark                               | 1992           | Poultry Meat              | 40                                                          |
| 54              | Denmark                               | 1992           | Rape and Mustard Oil      | 1                                                           |
| 54              | Denmark                               | 1992           | Rice (Milled Equivalent)  | 3                                                           |
| 54              | Denmark                               | 1992           | Rye                       | 46                                                          |
| 54              | Denmark                               | 1992           | Soybean Oil               | 14                                                          |
| 54              | Denmark                               | 1992           | Spices, Other             | 1                                                           |
| 54              | Denmark                               | 1992           | Sugar, Refined Equivalent | 110                                                         |
| 54              | Denmark                               | 1992           | Sunflowerseed Oil         | 2                                                           |
| 54              | Denmark                               | 1992           | Sweet Potatoes            | 8                                                           |
| 54              | Denmark                               | 1992           | Sweeteners, Other         | 14                                                          |
| 54              | Denmark                               | 1992           | Tea                       | 1                                                           |
| 54              | Denmark                               | 1992           | Tomatoes                  | 36                                                          |
| 54              | Denmark                               | 1992           | Vegetables, Other         | 162                                                         |
| 54              | Denmark                               | 1992           | Wheat                     | 177                                                         |
| 54              | Denmark                               | 1992           | Wine                      | 68                                                          |
| 54              | Denmark                               | 1993           | Apples                    | 63                                                          |
| 54              | Denmark                               | 1993           | Bananas                   | 23                                                          |
| 54              | Denmark                               | 1993           | Beer                      | 329                                                         |
| 54              | Denmark                               | 1993           | Beverages, Alcoholic      | 7                                                           |
| 54              | Denmark                               | 1993           | Bovine Meat               | 56                                                          |
| 54              | Denmark                               | 1993           | Butter, Ghee              | 7                                                           |
| 54              | Denmark                               | 1993           | Cheese                    | 44                                                          |
| 54              | Denmark                               | 1993           | Cocoa Beans               | 10                                                          |

Dietary calcium and zinc deficiency risks are decreasing but remain prevalent

| FAO countrycode | Country | Reference year | Food item                 | Gross food supply (g capita <sup>-1</sup> d <sup>-1</sup> ) |
|-----------------|---------|----------------|---------------------------|-------------------------------------------------------------|
| 54              | Denmark | 1993           | Coffee                    | 28                                                          |
| 54              | Denmark | 1993           | Cream                     | 20                                                          |
| 54              | Denmark | 1993           | Crustaceans               | 7                                                           |
| 54              | Denmark | 1993           | Demersal Fish             | 25                                                          |
| 54              | Denmark | 1993           | Eggs                      | 42                                                          |
| 54              | Denmark | 1993           | Fats, Animals, Raw        | 34                                                          |
| 54              | Denmark | 1993           | Fish, Body Oil            | 14                                                          |
| 54              | Denmark | 1993           | Freshwater Fish           | 4                                                           |
| 54              | Denmark | 1993           | Fruits, Other             | 36                                                          |
| 54              | Denmark | 1993           | Grapefruit                | 3                                                           |
| 54              | Denmark | 1993           | Grapes                    | 20                                                          |
| 54              | Denmark | 1993           | Honey                     | 1                                                           |
| 54              | Denmark | 1993           | Lemons, Limes             | 4                                                           |
| 54              | Denmark | 1993           | Maize                     | 36                                                          |
| 54              | Denmark | 1993           | Maize Germ Oil            | 1                                                           |
| 54              | Denmark | 1993           | Meat, Other               | 3                                                           |
| 54              | Denmark | 1993           | Milk, Whole               | 113                                                         |
| 54              | Denmark | 1993           | Molluscs, Other           | 5                                                           |
| 54              | Denmark | 1993           | Mutton & Goat Meat        | 3                                                           |
| 54              | Denmark | 1993           | Nuts                      | 10                                                          |
| 54              | Denmark | 1993           | Oats                      | 10                                                          |
| 54              | Denmark | 1993           | Offals, Edible            | 35                                                          |
| 54              | Denmark | 1993           | Oilcrops Oil, Other       | 1                                                           |
| 54              | Denmark | 1993           | Olive Oil                 | 1                                                           |
| 54              | Denmark | 1993           | Onions                    | 25                                                          |
| 54              | Denmark | 1993           | Oranges, Mandarines       | 30                                                          |
| 54              | Denmark | 1993           | Palmkernel Oil            | 2                                                           |
| 54              | Denmark | 1993           | Peas                      | 2                                                           |
| 54              | Denmark | 1993           | Pelagic Fish              | 23                                                          |
| 54              | Denmark | 1993           | Pepper                    | 1                                                           |
| 54              | Denmark | 1993           | Pigmeat                   | 178                                                         |
| 54              | Denmark | 1993           | Pineapples                | 4                                                           |
| 54              | Denmark | 1993           | Potatoes                  | 208                                                         |
| 54              | Denmark | 1993           | Poultry Meat              | 36                                                          |
| 54              | Denmark | 1993           | Rape and Mustard Oil      | 2                                                           |
| 54              | Denmark | 1993           | Rice (Milled Equivalent)  | 4                                                           |
| 54              | Denmark | 1993           | Rye                       | 44                                                          |
| 54              | Denmark | 1993           | Soyabean Oil              | 15                                                          |
| 54              | Denmark | 1993           | Spices, Other             | 1                                                           |
| 54              | Denmark | 1993           | Sugar, Refined Equivalent | 114                                                         |
| 54              | Denmark | 1993           | Sunflowerseed Oil         | 2                                                           |
| 54              | Denmark | 1993           | Sweet Potatoes            | 6                                                           |
| 54              | Denmark | 1993           | Sweeteners, Other         | 16                                                          |
| 54              | Denmark | 1993           | Tea                       | 1                                                           |
| 54              | Denmark | 1993           | Tomatoes                  | 33                                                          |
| 54              | Denmark | 1993           | Vegetables, Other         | 149                                                         |
| 54              | Denmark | 1993           | Wheat                     | 186                                                         |
| 54              | Denmark | 1993           | Wine                      | 62                                                          |
| 54              | Denmark | 1994           | Apples                    | 40                                                          |
| 54              | Denmark | 1994           | Bananas                   | 19                                                          |
| 54              | Denmark | 1994           | Beer                      | 332                                                         |
| 54              | Denmark | 1994           | Beverages, Alcoholic      | 7                                                           |
| 54              | Denmark | 1994           | Bovine Meat               | 53                                                          |
| 54              | Denmark | 1994           | Butter, Ghee              | 6                                                           |
| 54              | Denmark | 1994           | Cheese                    | 39                                                          |
| 54              | Denmark | 1994           | Cocoa Beans               | 10                                                          |
| 54              | Denmark | 1994           | Coffee                    | 29                                                          |
| 54              | Denmark | 1994           | Cream                     | 20                                                          |
| 54              | Denmark | 1994           | Crustaceans               | 17                                                          |
| 54              | Denmark | 1994           | Dates                     | 1                                                           |
| 54              | Denmark | 1994           | Demersal Fish             | 13                                                          |
| 54              | Denmark | 1994           | Eggs                      | 43                                                          |
| 54              | Denmark | 1994           | Fats, Animals, Raw        | 34                                                          |
| 54              | Denmark | 1994           | Fish, Body Oil            | 14                                                          |
| 54              | Denmark | 1994           | Freshwater Fish           | 9                                                           |
| 54              | Denmark | 1994           | Fruits, Other             | 40                                                          |
| 54              | Denmark | 1994           | Grapefruit                | 3                                                           |
| 54              | Denmark | 1994           | Grapes                    | 21                                                          |
| 54              | Denmark | 1994           | Groundnut Oil             | 1                                                           |
| 54              | Denmark | 1994           | Honey                     | 1                                                           |
| 54              | Denmark | 1994           | Lemons, Limes             | 4                                                           |
| 54              | Denmark | 1994           | Maize                     | 33                                                          |
| 54              | Denmark | 1994           | Maize Germ Oil            | 1                                                           |
| 54              | Denmark | 1994           | Meat, Other               | 3                                                           |
| 54              | Denmark | 1994           | Milk, Whole               | 134                                                         |
| 54              | Denmark | 1994           | Molluscs, Other           | 6                                                           |
| 54              | Denmark | 1994           | Mutton & Goat Meat        | 3                                                           |
| 54              | Denmark | 1994           | Nuts                      | 9                                                           |
| 54              | Denmark | 1994           | Oats                      | 12                                                          |
| 54              | Denmark | 1994           | Offals, Edible            | 30                                                          |
| 54              | Denmark | 1994           | Oilcrops Oil, Other       | 1                                                           |
| 54              | Denmark | 1994           | Olive Oil                 | 1                                                           |
| 54              | Denmark | 1994           | Onions                    | 27                                                          |
| 54              | Denmark | 1994           | Oranges, Mandarines       | 39                                                          |
| 54              | Denmark | 1994           | Palmkernel Oil            | 3                                                           |
| 54              | Denmark | 1994           | Peas                      | 2                                                           |
| 54              | Denmark | 1994           | Pelagic Fish              | 25                                                          |
| 54              | Denmark | 1994           | Pepper                    | 1                                                           |
| 54              | Denmark | 1994           | Pigmeat                   | 174                                                         |
| 54              | Denmark | 1994           | Pineapples                | 3                                                           |
| 54              | Denmark | 1994           | Potatoes                  | 199                                                         |
| 54              | Denmark | 1994           | Poultry Meat              | 42                                                          |
| 54              | Denmark | 1994           | Rape and Mustard Oil      | 1                                                           |
| 54              | Denmark | 1994           | Rice (Milled Equivalent)  | 4                                                           |
| 54              | Denmark | 1994           | Rye                       | 44                                                          |
| 54              | Denmark | 1994           | Soyabean Oil              | 11                                                          |
| 54              | Denmark | 1994           | Spices, Other             | 1                                                           |

Dietary calcium and zinc deficiency risks are decreasing but remain prevalent

| FAO countrycode | Country | Reference year | Food item                 | Gross food supply (g capita <sup>-1</sup> d <sup>-1</sup> ) |
|-----------------|---------|----------------|---------------------------|-------------------------------------------------------------|
| 54              | Denmark | 1994           | Sugar, Refined Equivalent | 115                                                         |
| 54              | Denmark | 1994           | Sunflowerseed Oil         | 2                                                           |
| 54              | Denmark | 1994           | Sweet Potatoes            | 3                                                           |
| 54              | Denmark | 1994           | Sweeteners, Other         | 16                                                          |
| 54              | Denmark | 1994           | Tea                       | 1                                                           |
| 54              | Denmark | 1994           | Tomatoes                  | 39                                                          |
| 54              | Denmark | 1994           | Vegetables, Other         | 145                                                         |
| 54              | Denmark | 1994           | Wheat                     | 190                                                         |
| 54              | Denmark | 1994           | Whey                      | 1                                                           |
| 54              | Denmark | 1994           | Wine                      | 64                                                          |
| 54              | Denmark | 1995           | Apples                    | 48                                                          |
| 54              | Denmark | 1995           | Bananas                   | 20                                                          |
| 54              | Denmark | 1995           | Beer                      | 329                                                         |
| 54              | Denmark | 1995           | Beverages, Alcoholic      | 7                                                           |
| 54              | Denmark | 1995           | Bovine Meat               | 50                                                          |
| 54              | Denmark | 1995           | Butter, Ghee              | 6                                                           |
| 54              | Denmark | 1995           | Cheese                    | 47                                                          |
| 54              | Denmark | 1995           | Cocoa Beans               | 10                                                          |
| 54              | Denmark | 1995           | Coffee                    | 24                                                          |
| 54              | Denmark | 1995           | Cream                     | 21                                                          |
| 54              | Denmark | 1995           | Crustaceans               | 16                                                          |
| 54              | Denmark | 1995           | Dates                     | 1                                                           |
| 54              | Denmark | 1995           | Demersal Fish             | 9                                                           |
| 54              | Denmark | 1995           | Eggs                      | 44                                                          |
| 54              | Denmark | 1995           | Fats, Animals, Raw        | 34                                                          |
| 54              | Denmark | 1995           | Fish, Body Oil            | 13                                                          |
| 54              | Denmark | 1995           | Freshwater Fish           | 12                                                          |
| 54              | Denmark | 1995           | Fruits, Other             | 39                                                          |
| 54              | Denmark | 1995           | Grapefruit                | 2                                                           |
| 54              | Denmark | 1995           | Grapes                    | 18                                                          |
| 54              | Denmark | 1995           | Honey                     | 1                                                           |
| 54              | Denmark | 1995           | Lemons, Limes             | 4                                                           |
| 54              | Denmark | 1995           | Maize                     | 38                                                          |
| 54              | Denmark | 1995           | Maize Germ Oil            | 1                                                           |
| 54              | Denmark | 1995           | Meat, Other               | 3                                                           |
| 54              | Denmark | 1995           | Milk, Whole               | 224                                                         |
| 54              | Denmark | 1995           | Molluscs, Other           | 6                                                           |
| 54              | Denmark | 1995           | Mutton & Goat Meat        | 3                                                           |
| 54              | Denmark | 1995           | Nuts                      | 9                                                           |
| 54              | Denmark | 1995           | Oats                      | 13                                                          |
| 54              | Denmark | 1995           | Offals, Edible            | 23                                                          |
| 54              | Denmark | 1995           | Oilcrops Oil, Other       | 1                                                           |
| 54              | Denmark | 1995           | Olives                    | 1                                                           |
| 54              | Denmark | 1995           | Onions                    | 25                                                          |
| 54              | Denmark | 1995           | Oranges, Mandarines       | 51                                                          |
| 54              | Denmark | 1995           | Palmkernel Oil            | 7                                                           |
| 54              | Denmark | 1995           | Peas                      | 2                                                           |
| 54              | Denmark | 1995           | Pelagic Fish              | 26                                                          |
| 54              | Denmark | 1995           | Pepper                    | 1                                                           |
| 54              | Denmark | 1995           | Pigmeat                   | 177                                                         |
| 54              | Denmark | 1995           | Pineapples                | 4                                                           |
| 54              | Denmark | 1995           | Potatoes                  | 203                                                         |
| 54              | Denmark | 1995           | Poultry Meat              | 46                                                          |
| 54              | Denmark | 1995           | Rape and Mustard Oil      | 1                                                           |
| 54              | Denmark | 1995           | Rice (Milled Equivalent)  | 3                                                           |
| 54              | Denmark | 1995           | Rye                       | 42                                                          |
| 54              | Denmark | 1995           | Soyabean Oil              | 13                                                          |
| 54              | Denmark | 1995           | Spices, Other             | 1                                                           |
| 54              | Denmark | 1995           | Sugar, Refined Equivalent | 111                                                         |
| 54              | Denmark | 1995           | Sunflowerseed Oil         | 1                                                           |
| 54              | Denmark | 1995           | Sweeteners, Other         | 16                                                          |
| 54              | Denmark | 1995           | Tea                       | 1                                                           |
| 54              | Denmark | 1995           | Tomatoes                  | 35                                                          |
| 54              | Denmark | 1995           | Vegetables, Other         | 136                                                         |
| 54              | Denmark | 1995           | Wheat                     | 204                                                         |
| 54              | Denmark | 1995           | Wine                      | 68                                                          |
| 54              | Denmark | 1996           | Apples                    | 42                                                          |
| 54              | Denmark | 1996           | Bananas                   | 27                                                          |
| 54              | Denmark | 1996           | Beer                      | 323                                                         |
| 54              | Denmark | 1996           | Beverages, Alcoholic      | 8                                                           |
| 54              | Denmark | 1996           | Beverages, Fermented      | 1                                                           |
| 54              | Denmark | 1996           | Bovine Meat               | 53                                                          |
| 54              | Denmark | 1996           | Butter, Ghee              | 6                                                           |
| 54              | Denmark | 1996           | Cheese                    | 47                                                          |
| 54              | Denmark | 1996           | Cocoa Beans               | 10                                                          |
| 54              | Denmark | 1996           | Coconuts - Incl Copra     | 1                                                           |
| 54              | Denmark | 1996           | Coffee                    | 27                                                          |
| 54              | Denmark | 1996           | Cream                     | 22                                                          |
| 54              | Denmark | 1996           | Crustaceans               | 16                                                          |
| 54              | Denmark | 1996           | Dates                     | 1                                                           |
| 54              | Denmark | 1996           | Demersal Fish             | 9                                                           |
| 54              | Denmark | 1996           | Eggs                      | 37                                                          |
| 54              | Denmark | 1996           | Fats, Animals, Raw        | 32                                                          |
| 54              | Denmark | 1996           | Fish, Body Oil            | 14                                                          |
| 54              | Denmark | 1996           | Freshwater Fish           | 12                                                          |
| 54              | Denmark | 1996           | Fruits, Other             | 42                                                          |
| 54              | Denmark | 1996           | Grapefruit                | 2                                                           |
| 54              | Denmark | 1996           | Grapes                    | 20                                                          |
| 54              | Denmark | 1996           | Groundnut Oil             | 1                                                           |
| 54              | Denmark | 1996           | Honey                     | 1                                                           |
| 54              | Denmark | 1996           | Lemons, Limes             | 3                                                           |
| 54              | Denmark | 1996           | Maize                     | 27                                                          |
| 54              | Denmark | 1996           | Maize Germ Oil            | 1                                                           |
| 54              | Denmark | 1996           | Meat, Other               | 3                                                           |
| 54              | Denmark | 1996           | Milk, Whole               | 197                                                         |
| 54              | Denmark | 1996           | Molluscs, Other           | 11                                                          |
| 54              | Denmark | 1996           | Mutton & Goat Meat        | 2                                                           |

Dietary calcium and zinc deficiency risks are decreasing but remain prevalent

| FAO countrycode | Country | Reference year | Food item                 | Gross food supply (g capita <sup>-1</sup> d <sup>-1</sup> ) |
|-----------------|---------|----------------|---------------------------|-------------------------------------------------------------|
| 54              | Denmark | 1996           | Nuts                      | 10                                                          |
| 54              | Denmark | 1996           | Oats                      | 12                                                          |
| 54              | Denmark | 1996           | Offals, Edible            | 22                                                          |
| 54              | Denmark | 1996           | Oilcrops Oil, Other       | 1                                                           |
| 54              | Denmark | 1996           | Olive Oil                 | 1                                                           |
| 54              | Denmark | 1996           | Olives                    | 1                                                           |
| 54              | Denmark | 1996           | Onions                    | 26                                                          |
| 54              | Denmark | 1996           | Oranges, Mandarines       | 60                                                          |
| 54              | Denmark | 1996           | Peas                      | 2                                                           |
| 54              | Denmark | 1996           | Pelagic Fish              | 16                                                          |
| 54              | Denmark | 1996           | Pepper                    | 1                                                           |
| 54              | Denmark | 1996           | Pigmeat                   | 179                                                         |
| 54              | Denmark | 1996           | Pineapples                | 4                                                           |
| 54              | Denmark | 1996           | Potatoes                  | 210                                                         |
| 54              | Denmark | 1996           | Poultry Meat              | 44                                                          |
| 54              | Denmark | 1996           | Rape and Mustard Oil      | 4                                                           |
| 54              | Denmark | 1996           | Rice (Milled Equivalent)  | 3                                                           |
| 54              | Denmark | 1996           | Rye                       | 44                                                          |
| 54              | Denmark | 1996           | Soyabean Oil              | 11                                                          |
| 54              | Denmark | 1996           | Spices, Other             | 1                                                           |
| 54              | Denmark | 1996           | Sugar, Refined Equivalent | 106                                                         |
| 54              | Denmark | 1996           | Sweeteners, Other         | 16                                                          |
| 54              | Denmark | 1996           | Tea                       | 1                                                           |
| 54              | Denmark | 1996           | Tomatoes                  | 35                                                          |
| 54              | Denmark | 1996           | Vegetables, Other         | 148                                                         |
| 54              | Denmark | 1996           | Wheat                     | 203                                                         |
| 54              | Denmark | 1996           | Whey                      | 1                                                           |
| 54              | Denmark | 1996           | Wine                      | 77                                                          |
| 54              | Denmark | 1997           | Apples                    | 58                                                          |
| 54              | Denmark | 1997           | Bananas                   | 26                                                          |
| 54              | Denmark | 1997           | Beer                      | 312                                                         |
| 54              | Denmark | 1997           | Beverages, Alcoholic      | 8                                                           |
| 54              | Denmark | 1997           | Beverages, Fermented      | 1                                                           |
| 54              | Denmark | 1997           | Bovine Meat               | 54                                                          |
| 54              | Denmark | 1997           | Butter, Ghee              | 5                                                           |
| 54              | Denmark | 1997           | Cheese                    | 38                                                          |
| 54              | Denmark | 1997           | Cocoa Beans               | 14                                                          |
| 54              | Denmark | 1997           | Coconuts - Incl Copra     | 2                                                           |
| 54              | Denmark | 1997           | Coffee                    | 25                                                          |
| 54              | Denmark | 1997           | Cream                     | 22                                                          |
| 54              | Denmark | 1997           | Crustaceans               | 12                                                          |
| 54              | Denmark | 1997           | Dates                     | 1                                                           |
| 54              | Denmark | 1997           | Demersal Fish             | 14                                                          |
| 54              | Denmark | 1997           | Eggs                      | 44                                                          |
| 54              | Denmark | 1997           | Fats, Animals, Raw        | 32                                                          |
| 54              | Denmark | 1997           | Fish, Body Oil            | 14                                                          |
| 54              | Denmark | 1997           | Freshwater Fish           | 4                                                           |
| 54              | Denmark | 1997           | Fruits, Other             | 49                                                          |
| 54              | Denmark | 1997           | Grapefruit                | 2                                                           |
| 54              | Denmark | 1997           | Grapes                    | 23                                                          |
| 54              | Denmark | 1997           | Honey                     | 1                                                           |
| 54              | Denmark | 1997           | Lemons, Limes             | 5                                                           |
| 54              | Denmark | 1997           | Maize                     | 27                                                          |
| 54              | Denmark | 1997           | Maize Germ Oil            | 1                                                           |
| 54              | Denmark | 1997           | Meat, Other               | 3                                                           |
| 54              | Denmark | 1997           | Milk, Whole               | 160                                                         |
| 54              | Denmark | 1997           | Molluscs, Other           | 13                                                          |
| 54              | Denmark | 1997           | Mutton & Goat Meat        | 2                                                           |
| 54              | Denmark | 1997           | Nuts                      | 11                                                          |
| 54              | Denmark | 1997           | Oats                      | 11                                                          |
| 54              | Denmark | 1997           | Offals, Edible            | 12                                                          |
| 54              | Denmark | 1997           | Oilcrops Oil, Other       | 2                                                           |
| 54              | Denmark | 1997           | Olive Oil                 | 1                                                           |
| 54              | Denmark | 1997           | Olives                    | 1                                                           |
| 54              | Denmark | 1997           | Onions                    | 27                                                          |
| 54              | Denmark | 1997           | Oranges, Mandarines       | 88                                                          |
| 54              | Denmark | 1997           | Palmkernel Oil            | 5                                                           |
| 54              | Denmark | 1997           | Peas                      | 2                                                           |
| 54              | Denmark | 1997           | Pelagic Fish              | 21                                                          |
| 54              | Denmark | 1997           | Pepper                    | 1                                                           |
| 54              | Denmark | 1997           | Pigmeat                   | 159                                                         |
| 54              | Denmark | 1997           | Pineapples                | 4                                                           |
| 54              | Denmark | 1997           | Potatoes                  | 217                                                         |
| 54              | Denmark | 1997           | Poultry Meat              | 50                                                          |
| 54              | Denmark | 1997           | Rice (Milled Equivalent)  | 3                                                           |
| 54              | Denmark | 1997           | Rye                       | 45                                                          |
| 54              | Denmark | 1997           | Sesameseed Oil            | 1                                                           |
| 54              | Denmark | 1997           | Soyabean Oil              | 7                                                           |
| 54              | Denmark | 1997           | Spices, Other             | 1                                                           |
| 54              | Denmark | 1997           | Sugar, Refined Equivalent | 115                                                         |
| 54              | Denmark | 1997           | Sunflowerseed Oil         | 2                                                           |
| 54              | Denmark | 1997           | Sweeteners, Other         | 20                                                          |
| 54              | Denmark | 1997           | Tea                       | 1                                                           |
| 54              | Denmark | 1997           | Tomatoes                  | 44                                                          |
| 54              | Denmark | 1997           | Vegetables, Other         | 164                                                         |
| 54              | Denmark | 1997           | Wheat                     | 225                                                         |
| 54              | Denmark | 1997           | Whey                      | 1                                                           |
| 54              | Denmark | 1997           | Wine                      | 86                                                          |
| 54              | Denmark | 1998           | Apples                    | 41                                                          |
| 54              | Denmark | 1998           | Bananas                   | 21                                                          |
| 54              | Denmark | 1998           | Beer                      | 288                                                         |
| 54              | Denmark | 1998           | Beverages, Alcoholic      | 8                                                           |
| 54              | Denmark | 1998           | Beverages, Fermented      | 2                                                           |
| 54              | Denmark | 1998           | Bovine Meat               | 59                                                          |
| 54              | Denmark | 1998           | Butter, Ghee              | 5                                                           |
| 54              | Denmark | 1998           | Cheese                    | 39                                                          |
| 54              | Denmark | 1998           | Cocoa Beans               | 16                                                          |

Dietary calcium and zinc deficiency risks are decreasing but remain prevalent

| FAO countrycode | Country | Reference year | Food item                 | Gross food supply (g capita <sup>-1</sup> d <sup>-1</sup> ) |
|-----------------|---------|----------------|---------------------------|-------------------------------------------------------------|
| 54              | Denmark | 1998           | Coconuts - Incl Copra     | 2                                                           |
| 54              | Denmark | 1998           | Coffee                    | 26                                                          |
| 54              | Denmark | 1998           | Cream                     | 24                                                          |
| 54              | Denmark | 1998           | Crustaceans               | 8                                                           |
| 54              | Denmark | 1998           | Dates                     | 1                                                           |
| 54              | Denmark | 1998           | Demersal Fish             | 14                                                          |
| 54              | Denmark | 1998           | Eggs                      | 42                                                          |
| 54              | Denmark | 1998           | Fats, Animals, Raw        | 32                                                          |
| 54              | Denmark | 1998           | Fish, Body Oil            | 14                                                          |
| 54              | Denmark | 1998           | Freshwater Fish           | 5                                                           |
| 54              | Denmark | 1998           | Fruits, Other             | 36                                                          |
| 54              | Denmark | 1998           | Grapefruit                | 2                                                           |
| 54              | Denmark | 1998           | Grapes                    | 20                                                          |
| 54              | Denmark | 1998           | Honey                     | 3                                                           |
| 54              | Denmark | 1998           | Lemons, Limes             | 3                                                           |
| 54              | Denmark | 1998           | Maize                     | 23                                                          |
| 54              | Denmark | 1998           | Maize Germ Oil            | 1                                                           |
| 54              | Denmark | 1998           | Meat, Other               | 2                                                           |
| 54              | Denmark | 1998           | Milk, Whole               | 165                                                         |
| 54              | Denmark | 1998           | Molluscs, Other           | 19                                                          |
| 54              | Denmark | 1998           | Mutton & Goat Meat        | 3                                                           |
| 54              | Denmark | 1998           | Nuts                      | 10                                                          |
| 54              | Denmark | 1998           | Oats                      | 17                                                          |
| 54              | Denmark | 1998           | Offals, Edible            | 15                                                          |
| 54              | Denmark | 1998           | Oilcrops Oil, Other       | 2                                                           |
| 54              | Denmark | 1998           | Olive Oil                 | 1                                                           |
| 54              | Denmark | 1998           | Olives                    | 1                                                           |
| 54              | Denmark | 1998           | Onions                    | 25                                                          |
| 54              | Denmark | 1998           | Oranges, Mandarines       | 82                                                          |
| 54              | Denmark | 1998           | Palmkernel Oil            | 3                                                           |
| 54              | Denmark | 1998           | Peas                      | 2                                                           |
| 54              | Denmark | 1998           | Pelagic Fish              | 17                                                          |
| 54              | Denmark | 1998           | Pigmeat                   | 188                                                         |
| 54              | Denmark | 1998           | Pineapples                | 4                                                           |
| 54              | Denmark | 1998           | Potatoes                  | 222                                                         |
| 54              | Denmark | 1998           | Poultry Meat              | 45                                                          |
| 54              | Denmark | 1998           | Rape and Mustard Oil      | 2                                                           |
| 54              | Denmark | 1998           | Rice (Milled Equivalent)  | 5                                                           |
| 54              | Denmark | 1998           | Rye                       | 42                                                          |
| 54              | Denmark | 1998           | Sesameseed Oil            | 1                                                           |
| 54              | Denmark | 1998           | Soyabean Oil              | 7                                                           |
| 54              | Denmark | 1998           | Spices, Other             | 1                                                           |
| 54              | Denmark | 1998           | Sugar, Refined Equivalent | 101                                                         |
| 54              | Denmark | 1998           | Sunflowerseed Oil         | 3                                                           |
| 54              | Denmark | 1998           | Sweeteners, Other         | 26                                                          |
| 54              | Denmark | 1998           | Tea                       | 1                                                           |
| 54              | Denmark | 1998           | Tomatoes                  | 39                                                          |
| 54              | Denmark | 1998           | Vegetables, Other         | 157                                                         |
| 54              | Denmark | 1998           | Wheat                     | 235                                                         |
| 54              | Denmark | 1998           | Wine                      | 85                                                          |
| 54              | Denmark | 1999           | Apples                    | 68                                                          |
| 54              | Denmark | 1999           | Bananas                   | 31                                                          |
| 54              | Denmark | 1999           | Beer                      | 279                                                         |
| 54              | Denmark | 1999           | Beverages, Alcoholic      | 8                                                           |
| 54              | Denmark | 1999           | Beverages, Fermented      | 2                                                           |
| 54              | Denmark | 1999           | Bovine Meat               | 69                                                          |
| 54              | Denmark | 1999           | Butter, Ghee              | 5                                                           |
| 54              | Denmark | 1999           | Cheese                    | 40                                                          |
| 54              | Denmark | 1999           | Cocoa Beans               | 16                                                          |
| 54              | Denmark | 1999           | Coconuts - Incl Copra     | 2                                                           |
| 54              | Denmark | 1999           | Coffee                    | 26                                                          |
| 54              | Denmark | 1999           | Cream                     | 26                                                          |
| 54              | Denmark | 1999           | Crustaceans               | 14                                                          |
| 54              | Denmark | 1999           | Dates                     | 1                                                           |
| 54              | Denmark | 1999           | Demersal Fish             | 14                                                          |
| 54              | Denmark | 1999           | Eggs                      | 40                                                          |
| 54              | Denmark | 1999           | Fats, Animals, Raw        | 35                                                          |
| 54              | Denmark | 1999           | Fish, Body Oil            | 14                                                          |
| 54              | Denmark | 1999           | Freshwater Fish           | 5                                                           |
| 54              | Denmark | 1999           | Fruits, Other             | 53                                                          |
| 54              | Denmark | 1999           | Grapefruit                | 3                                                           |
| 54              | Denmark | 1999           | Grapes                    | 20                                                          |
| 54              | Denmark | 1999           | Honey                     | 1                                                           |
| 54              | Denmark | 1999           | Lemons, Limes             | 5                                                           |
| 54              | Denmark | 1999           | Maize                     | 14                                                          |
| 54              | Denmark | 1999           | Maize Germ Oil            | 1                                                           |
| 54              | Denmark | 1999           | Meat, Other               | 2                                                           |
| 54              | Denmark | 1999           | Milk, Whole               | 181                                                         |
| 54              | Denmark | 1999           | Molluscs, Other           | 14                                                          |
| 54              | Denmark | 1999           | Mutton & Goat Meat        | 3                                                           |
| 54              | Denmark | 1999           | Nuts                      | 10                                                          |
| 54              | Denmark | 1999           | Oats                      | 14                                                          |
| 54              | Denmark | 1999           | Offals, Edible            | 42                                                          |
| 54              | Denmark | 1999           | Oilcrops Oil, Other       | 3                                                           |
| 54              | Denmark | 1999           | Olive Oil                 | 1                                                           |
| 54              | Denmark | 1999           | Olives                    | 1                                                           |
| 54              | Denmark | 1999           | Onions                    | 28                                                          |
| 54              | Denmark | 1999           | Oranges, Mandarines       | 74                                                          |
| 54              | Denmark | 1999           | Palmkernel Oil            | 2                                                           |
| 54              | Denmark | 1999           | Peas                      | 4                                                           |
| 54              | Denmark | 1999           | Pelagic Fish              | 16                                                          |
| 54              | Denmark | 1999           | Pepper                    | 1                                                           |
| 54              | Denmark | 1999           | Pigmeat                   | 65                                                          |
| 54              | Denmark | 1999           | Pineapples                | 4                                                           |
| 54              | Denmark | 1999           | Potatoes                  | 215                                                         |
| 54              | Denmark | 1999           | Poultry Meat              | 48                                                          |
| 54              | Denmark | 1999           | Rape and Mustard Oil      | 3                                                           |

Dietary calcium and zinc deficiency risks are decreasing but remain prevalent

| FAO countrycode | Country | Reference year | Food item                 | Gross food supply (g capita <sup>-1</sup> d <sup>-1</sup> ) |
|-----------------|---------|----------------|---------------------------|-------------------------------------------------------------|
| 54              | Denmark | 1999           | Rice (Milled Equivalent)  | 11                                                          |
| 54              | Denmark | 1999           | Rye                       | 39                                                          |
| 54              | Denmark | 1999           | Sesameseed Oil            | 1                                                           |
| 54              | Denmark | 1999           | Soyabean Oil              | 12                                                          |
| 54              | Denmark | 1999           | Spices, Other             | 1                                                           |
| 54              | Denmark | 1999           | Sugar, Refined Equivalent | 93                                                          |
| 54              | Denmark | 1999           | Sunflowerseed Oil         | 2                                                           |
| 54              | Denmark | 1999           | Sweeteners, Other         | 34                                                          |
| 54              | Denmark | 1999           | Tea                       | 1                                                           |
| 54              | Denmark | 1999           | Tomatoes                  | 47                                                          |
| 54              | Denmark | 1999           | Vegetables, Other         | 179                                                         |
| 54              | Denmark | 1999           | Wheat                     | 237                                                         |
| 54              | Denmark | 1999           | Wine                      | 83                                                          |
| 54              | Denmark | 2000           | Apples                    | 80                                                          |
| 54              | Denmark | 2000           | Aquatic Animals, Others   | 1                                                           |
| 54              | Denmark | 2000           | Bananas                   | 31                                                          |
| 54              | Denmark | 2000           | Beans                     | 1                                                           |
| 54              | Denmark | 2000           | Beer                      | 273                                                         |
| 54              | Denmark | 2000           | Beverages, Alcoholic      | 8                                                           |
| 54              | Denmark | 2000           | Beverages, Fermented      | 2                                                           |
| 54              | Denmark | 2000           | Bovine Meat               | 65                                                          |
| 54              | Denmark | 2000           | Butter, Ghee              | 4                                                           |
| 54              | Denmark | 2000           | Cheese                    | 45                                                          |
| 54              | Denmark | 2000           | Cocoa Beans               | 16                                                          |
| 54              | Denmark | 2000           | Coconuts - Incl Copra     | 3                                                           |
| 54              | Denmark | 2000           | Coffee                    | 23                                                          |
| 54              | Denmark | 2000           | Cream                     | 25                                                          |
| 54              | Denmark | 2000           | Crustaceans               | 12                                                          |
| 54              | Denmark | 2000           | Dates                     | 1                                                           |
| 54              | Denmark | 2000           | Demersal Fish             | 4                                                           |
| 54              | Denmark | 2000           | Eggs                      | 38                                                          |
| 54              | Denmark | 2000           | Fats, Animals, Raw        | 30                                                          |
| 54              | Denmark | 2000           | Fish, Body Oil            | 8                                                           |
| 54              | Denmark | 2000           | Freshwater Fish           | 9                                                           |
| 54              | Denmark | 2000           | Fruits, Other             | 52                                                          |
| 54              | Denmark | 2000           | Grapefruit                | 3                                                           |
| 54              | Denmark | 2000           | Grapes                    | 22                                                          |
| 54              | Denmark | 2000           | Honey                     | 2                                                           |
| 54              | Denmark | 2000           | Lemons, Limes             | 5                                                           |
| 54              | Denmark | 2000           | Maize                     | 8                                                           |
| 54              | Denmark | 2000           | Maize Germ Oil            | 1                                                           |
| 54              | Denmark | 2000           | Meat, Other               | 2                                                           |
| 54              | Denmark | 2000           | Milk, Whole               | 184                                                         |
| 54              | Denmark | 2000           | Molluscs, Other           | 19                                                          |
| 54              | Denmark | 2000           | Mutton & Goat Meat        | 3                                                           |
| 54              | Denmark | 2000           | Nuts                      | 12                                                          |
| 54              | Denmark | 2000           | Oats                      | 14                                                          |
| 54              | Denmark | 2000           | Offals, Edible            | 34                                                          |
| 54              | Denmark | 2000           | Oilcrops Oil, Other       | 2                                                           |
| 54              | Denmark | 2000           | Olive Oil                 | 1                                                           |
| 54              | Denmark | 2000           | Olives                    | 2                                                           |
| 54              | Denmark | 2000           | Onions                    | 20                                                          |
| 54              | Denmark | 2000           | Oranges, Mandarines       | 83                                                          |
| 54              | Denmark | 2000           | Palm Oil                  | 4                                                           |
| 54              | Denmark | 2000           | Palmkernel Oil            | 4                                                           |
| 54              | Denmark | 2000           | Peas                      | 2                                                           |
| 54              | Denmark | 2000           | Pelagic Fish              | 16                                                          |
| 54              | Denmark | 2000           | Pepper                    | 1                                                           |
| 54              | Denmark | 2000           | Pigmeat                   | 74                                                          |
| 54              | Denmark | 2000           | Pineapples                | 5                                                           |
| 54              | Denmark | 2000           | Potatoes                  | 218                                                         |
| 54              | Denmark | 2000           | Poultry Meat              | 48                                                          |
| 54              | Denmark | 2000           | Rape and Mustard Oil      | 5                                                           |
| 54              | Denmark | 2000           | Rice (Milled Equivalent)  | 9                                                           |
| 54              | Denmark | 2000           | Rye                       | 36                                                          |
| 54              | Denmark | 2000           | Soyabean Oil              | 13                                                          |
| 54              | Denmark | 2000           | Spices, Other             | 1                                                           |
| 54              | Denmark | 2000           | Sugar, Refined Equivalent | 101                                                         |
| 54              | Denmark | 2000           | Sunflowerseed Oil         | 4                                                           |
| 54              | Denmark | 2000           | Sweeteners, Other         | 35                                                          |
| 54              | Denmark | 2000           | Tea                       | 1                                                           |
| 54              | Denmark | 2000           | Tomatoes                  | 47                                                          |
| 54              | Denmark | 2000           | Vegetables, Other         | 178                                                         |
| 54              | Denmark | 2000           | Wheat                     | 227                                                         |
| 54              | Denmark | 2000           | Wine                      | 86                                                          |
| 54              | Denmark | 2001           | Apples                    | 81                                                          |
| 54              | Denmark | 2001           | Bananas                   | 30                                                          |
| 54              | Denmark | 2001           | Beer                      | 264                                                         |
| 54              | Denmark | 2001           | Beverages, Alcoholic      | 8                                                           |
| 54              | Denmark | 2001           | Beverages, Fermented      | 2                                                           |
| 54              | Denmark | 2001           | Bovine Meat               | 67                                                          |
| 54              | Denmark | 2001           | Butter, Ghee              | 4                                                           |
| 54              | Denmark | 2001           | Cheese                    | 59                                                          |
| 54              | Denmark | 2001           | Cocoa Beans               | 12                                                          |
| 54              | Denmark | 2001           | Coconuts - Incl Copra     | 3                                                           |
| 54              | Denmark | 2001           | Coffee                    | 26                                                          |
| 54              | Denmark | 2001           | Cream                     | 28                                                          |
| 54              | Denmark | 2001           | Crustaceans               | 6                                                           |
| 54              | Denmark | 2001           | Dates                     | 1                                                           |
| 54              | Denmark | 2001           | Demersal Fish             | 6                                                           |
| 54              | Denmark | 2001           | Eggs                      | 44                                                          |
| 54              | Denmark | 2001           | Fats, Animals, Raw        | 28                                                          |
| 54              | Denmark | 2001           | Fish, Body Oil            | 11                                                          |
| 54              | Denmark | 2001           | Freshwater Fish           | 6                                                           |
| 54              | Denmark | 2001           | Fruits, Other             | 48                                                          |
| 54              | Denmark | 2001           | Grapefruit                | 3                                                           |
| 54              | Denmark | 2001           | Grapes                    | 21                                                          |

Dietary calcium and zinc deficiency risks are decreasing but remain prevalent

| FAO countrycode | Country | Reference year | Food item                 | Gross food supply (g capita <sup>-1</sup> d <sup>-1</sup> ) |
|-----------------|---------|----------------|---------------------------|-------------------------------------------------------------|
| 54              | Denmark | 2001           | Honey                     | 2                                                           |
| 54              | Denmark | 2001           | Lemons, Limes             | 5                                                           |
| 54              | Denmark | 2001           | Maize                     | 8                                                           |
| 54              | Denmark | 2001           | Maize Germ Oil            | 1                                                           |
| 54              | Denmark | 2001           | Meat, Other               | 2                                                           |
| 54              | Denmark | 2001           | Milk, Whole               | 106                                                         |
| 54              | Denmark | 2001           | Molluscs, Other           | 23                                                          |
| 54              | Denmark | 2001           | Mutton & Goat Meat        | 3                                                           |
| 54              | Denmark | 2001           | Nuts                      | 13                                                          |
| 54              | Denmark | 2001           | Oats                      | 14                                                          |
| 54              | Denmark | 2001           | Offals, Edible            | 51                                                          |
| 54              | Denmark | 2001           | Oilcrops Oil, Other       | 2                                                           |
| 54              | Denmark | 2001           | Olive Oil                 | 1                                                           |
| 54              | Denmark | 2001           | Olives                    | 2                                                           |
| 54              | Denmark | 2001           | Onions                    | 19                                                          |
| 54              | Denmark | 2001           | Oranges, Mandarines       | 63                                                          |
| 54              | Denmark | 2001           | Palm Oil                  | 3                                                           |
| 54              | Denmark | 2001           | Peas                      | 2                                                           |
| 54              | Denmark | 2001           | Pelagic Fish              | 18                                                          |
| 54              | Denmark | 2001           | Pigmeat                   | 72                                                          |
| 54              | Denmark | 2001           | Pineapples                | 6                                                           |
| 54              | Denmark | 2001           | Potatoes                  | 223                                                         |
| 54              | Denmark | 2001           | Poultry Meat              | 56                                                          |
| 54              | Denmark | 2001           | Rape and Mustard Oil      | 7                                                           |
| 54              | Denmark | 2001           | Rice (Milled Equivalent)  | 9                                                           |
| 54              | Denmark | 2001           | Rye                       | 41                                                          |
| 54              | Denmark | 2001           | Soyabean Oil              | 13                                                          |
| 54              | Denmark | 2001           | Spices, Other             | 1                                                           |
| 54              | Denmark | 2001           | Sugar, Refined Equivalent | 96                                                          |
| 54              | Denmark | 2001           | Sunflowerseed Oil         | 3                                                           |
| 54              | Denmark | 2001           | Sweeteners, Other         | 36                                                          |
| 54              | Denmark | 2001           | Tea                       | 1                                                           |
| 54              | Denmark | 2001           | Tomatoes                  | 46                                                          |
| 54              | Denmark | 2001           | Vegetables, Other         | 181                                                         |
| 54              | Denmark | 2001           | Wheat                     | 270                                                         |
| 54              | Denmark | 2001           | Wine                      | 93                                                          |
| 54              | Denmark | 2002           | Apples                    | 132                                                         |
| 54              | Denmark | 2002           | Bananas                   | 39                                                          |
| 54              | Denmark | 2002           | Beer                      | 259                                                         |
| 54              | Denmark | 2002           | Beverages, Alcoholic      | 10                                                          |
| 54              | Denmark | 2002           | Beverages, Fermented      | 1                                                           |
| 54              | Denmark | 2002           | Bovine Meat               | 75                                                          |
| 54              | Denmark | 2002           | Butter, Ghee              | 5                                                           |
| 54              | Denmark | 2002           | Cheese                    | 53                                                          |
| 54              | Denmark | 2002           | Cocoa Beans               | 9                                                           |
| 54              | Denmark | 2002           | Coconuts - Incl Copra     | 3                                                           |
| 54              | Denmark | 2002           | Coffee                    | 24                                                          |
| 54              | Denmark | 2002           | Cream                     | 30                                                          |
| 54              | Denmark | 2002           | Crustaceans               | 9                                                           |
| 54              | Denmark | 2002           | Dates                     | 1                                                           |
| 54              | Denmark | 2002           | Demersal Fish             | 4                                                           |
| 54              | Denmark | 2002           | Eggs                      | 45                                                          |
| 54              | Denmark | 2002           | Fats, Animals, Raw        | 23                                                          |
| 54              | Denmark | 2002           | Fish, Body Oil            | 11                                                          |
| 54              | Denmark | 2002           | Freshwater Fish           | 3                                                           |
| 54              | Denmark | 2002           | Fruits, Other             | 51                                                          |
| 54              | Denmark | 2002           | Grapefruit                | 2                                                           |
| 54              | Denmark | 2002           | Grapes                    | 24                                                          |
| 54              | Denmark | 2002           | Honey                     | 1                                                           |
| 54              | Denmark | 2002           | Lemons, Limes             | 5                                                           |
| 54              | Denmark | 2002           | Maize                     | 8                                                           |
| 54              | Denmark | 2002           | Maize Germ Oil            | 1                                                           |
| 54              | Denmark | 2002           | Meat, Other               | 2                                                           |
| 54              | Denmark | 2002           | Milk, Whole               | 99                                                          |
| 54              | Denmark | 2002           | Molluscs, Other           | 18                                                          |
| 54              | Denmark | 2002           | Mutton & Goat Meat        | 3                                                           |
| 54              | Denmark | 2002           | Nuts                      | 11                                                          |
| 54              | Denmark | 2002           | Oats                      | 16                                                          |
| 54              | Denmark | 2002           | Offals, Edible            | 46                                                          |
| 54              | Denmark | 2002           | Oilcrops Oil, Other       | 2                                                           |
| 54              | Denmark | 2002           | Olive Oil                 | 1                                                           |
| 54              | Denmark | 2002           | Olives                    | 2                                                           |
| 54              | Denmark | 2002           | Onions                    | 19                                                          |
| 54              | Denmark | 2002           | Oranges, Mandarines       | 183                                                         |
| 54              | Denmark | 2002           | Palmkernel Oil            | 2                                                           |
| 54              | Denmark | 2002           | Peas                      | 2                                                           |
| 54              | Denmark | 2002           | Pelagic Fish              | 22                                                          |
| 54              | Denmark | 2002           | Pepper                    | 1                                                           |
| 54              | Denmark | 2002           | Pigmeat                   | 94                                                          |
| 54              | Denmark | 2002           | Pineapples                | 13                                                          |
| 54              | Denmark | 2002           | Potatoes                  | 211                                                         |
| 54              | Denmark | 2002           | Poultry Meat              | 55                                                          |
| 54              | Denmark | 2002           | Rape and Mustard Oil      | 8                                                           |
| 54              | Denmark | 2002           | Rice (Milled Equivalent)  | 10                                                          |
| 54              | Denmark | 2002           | Rye                       | 39                                                          |
| 54              | Denmark | 2002           | Soyabean Oil              | 9                                                           |
| 54              | Denmark | 2002           | Spices, Other             | 1                                                           |
| 54              | Denmark | 2002           | Sugar, Refined Equivalent | 110                                                         |
| 54              | Denmark | 2002           | Sunflowerseed Oil         | 2                                                           |
| 54              | Denmark | 2002           | Sweeteners, Other         | 37                                                          |
| 54              | Denmark | 2002           | Tea                       | 1                                                           |
| 54              | Denmark | 2002           | Tomatoes                  | 51                                                          |
| 54              | Denmark | 2002           | Vegetables, Other         | 190                                                         |
| 54              | Denmark | 2002           | Wheat                     | 297                                                         |
| 54              | Denmark | 2002           | Whey                      | 13                                                          |
| 54              | Denmark | 2002           | Wine                      | 89                                                          |
| 54              | Denmark | 2003           | Apples                    | 144                                                         |



Dietary calcium and zinc deficiency risks are decreasing but remain prevalent

| FAO countrycode | Country | Reference year | Food item                 | Gross food supply (g capita <sup>-1</sup> d <sup>-1</sup> ) |
|-----------------|---------|----------------|---------------------------|-------------------------------------------------------------|
| 54              | Denmark | 2003           | Bananas                   | 39                                                          |
| 54              | Denmark | 2003           | Beer                      | 258                                                         |
| 54              | Denmark | 2003           | Beverages, Alcoholic      | 13                                                          |
| 54              | Denmark | 2003           | Beverages, Fermented      | 1                                                           |
| 54              | Denmark | 2003           | Bovine Meat               | 78                                                          |
| 54              | Denmark | 2003           | Butter, Ghee              | 5                                                           |
| 54              | Denmark | 2003           | Cheese                    | 55                                                          |
| 54              | Denmark | 2003           | Cocoa Beans               | 9                                                           |
| 54              | Denmark | 2003           | Coconuts - Incl Copra     | 3                                                           |
| 54              | Denmark | 2003           | Coffee                    | 22                                                          |
| 54              | Denmark | 2003           | Cream                     | 31                                                          |
| 54              | Denmark | 2003           | Crustaceans               | 10                                                          |
| 54              | Denmark | 2003           | Dates                     | 1                                                           |
| 54              | Denmark | 2003           | Demersal Fish             | 9                                                           |
| 54              | Denmark | 2003           | Eggs                      | 48                                                          |
| 54              | Denmark | 2003           | Fats, Animals, Raw        | 22                                                          |
| 54              | Denmark | 2003           | Fish, Body Oil            | 12                                                          |
| 54              | Denmark | 2003           | Freshwater Fish           | 4                                                           |
| 54              | Denmark | 2003           | Fruits, Other             | 54                                                          |
| 54              | Denmark | 2003           | Grapefruit                | 2                                                           |
| 54              | Denmark | 2003           | Grapes                    | 24                                                          |
| 54              | Denmark | 2003           | Honey                     | 1                                                           |
| 54              | Denmark | 2003           | Lemons, Limes             | 5                                                           |
| 54              | Denmark | 2003           | Maize                     | 7                                                           |
| 54              | Denmark | 2003           | Maize Germ Oil            | 1                                                           |
| 54              | Denmark | 2003           | Meat, Other               | 2                                                           |
| 54              | Denmark | 2003           | Milk, Whole               | 40                                                          |
| 54              | Denmark | 2003           | Molluscs, Other           | 18                                                          |
| 54              | Denmark | 2003           | Mutton & Goat Meat        | 3                                                           |
| 54              | Denmark | 2003           | Nuts                      | 12                                                          |
| 54              | Denmark | 2003           | Oats                      | 16                                                          |
| 54              | Denmark | 2003           | Offals, Edible            | 41                                                          |
| 54              | Denmark | 2003           | Oilcrops Oil, Other       | 1                                                           |
| 54              | Denmark | 2003           | Olive Oil                 | 2                                                           |
| 54              | Denmark | 2003           | Olives                    | 2                                                           |
| 54              | Denmark | 2003           | Onions                    | 22                                                          |
| 54              | Denmark | 2003           | Oranges, Mandarines       | 99                                                          |
| 54              | Denmark | 2003           | Palm Oil                  | 2                                                           |
| 54              | Denmark | 2003           | Palmkernel Oil            | 3                                                           |
| 54              | Denmark | 2003           | Peas                      | 2                                                           |
| 54              | Denmark | 2003           | Pelagic Fish              | 20                                                          |
| 54              | Denmark | 2003           | Pigmeat                   | 79                                                          |
| 54              | Denmark | 2003           | Pineapples                | 8                                                           |
| 54              | Denmark | 2003           | Plantains                 | 1                                                           |
| 54              | Denmark | 2003           | Potatoes                  | 210                                                         |
| 54              | Denmark | 2003           | Poultry Meat              | 50                                                          |
| 54              | Denmark | 2003           | Rape and Mustard Oil      | 3                                                           |
| 54              | Denmark | 2003           | Rice (Milled Equivalent)  | 12                                                          |
| 54              | Denmark | 2003           | Rye                       | 35                                                          |
| 54              | Denmark | 2003           | Soyabean Oil              | 13                                                          |
| 54              | Denmark | 2003           | Spices, Other             | 2                                                           |
| 54              | Denmark | 2003           | Sugar, Refined Equivalent | 111                                                         |
| 54              | Denmark | 2003           | Sunflowerseed Oil         | 2                                                           |
| 54              | Denmark | 2003           | Sweeteners, Other         | 36                                                          |
| 54              | Denmark | 2003           | Tea                       | 1                                                           |
| 54              | Denmark | 2003           | Tomatoes                  | 50                                                          |
| 54              | Denmark | 2003           | Vegetables, Other         | 201                                                         |
| 54              | Denmark | 2003           | Wheat                     | 298                                                         |
| 54              | Denmark | 2003           | Whey                      | 12                                                          |
| 54              | Denmark | 2003           | Wine                      | 89                                                          |
| 54              | Denmark | 2004           | Apples                    | 122                                                         |
| 54              | Denmark | 2004           | Bananas                   | 37                                                          |
| 54              | Denmark | 2004           | Beer                      | 242                                                         |
| 54              | Denmark | 2004           | Beverages, Alcoholic      | 13                                                          |
| 54              | Denmark | 2004           | Bovine Meat               | 79                                                          |
| 54              | Denmark | 2004           | Butter, Ghee              | 5                                                           |
| 54              | Denmark | 2004           | Cheese                    | 52                                                          |
| 54              | Denmark | 2004           | Cocoa Beans               | 12                                                          |
| 54              | Denmark | 2004           | Coconuts - Incl Copra     | 2                                                           |
| 54              | Denmark | 2004           | Coffee                    | 25                                                          |
| 54              | Denmark | 2004           | Cream                     | 32                                                          |
| 54              | Denmark | 2004           | Crustaceans               | 13                                                          |
| 54              | Denmark | 2004           | Dates                     | 1                                                           |
| 54              | Denmark | 2004           | Demersal Fish             | 9                                                           |
| 54              | Denmark | 2004           | Eggs                      | 55                                                          |
| 54              | Denmark | 2004           | Fats, Animals, Raw        | 23                                                          |
| 54              | Denmark | 2004           | Fish, Body Oil            | 12                                                          |
| 54              | Denmark | 2004           | Freshwater Fish           | 7                                                           |
| 54              | Denmark | 2004           | Fruits, Other             | 64                                                          |
| 54              | Denmark | 2004           | Grapefruit                | 3                                                           |
| 54              | Denmark | 2004           | Grapes                    | 22                                                          |
| 54              | Denmark | 2004           | Honey                     | 2                                                           |
| 54              | Denmark | 2004           | Lemons, Limes             | 5                                                           |
| 54              | Denmark | 2004           | Maize                     | 7                                                           |
| 54              | Denmark | 2004           | Maize Germ Oil            | 1                                                           |
| 54              | Denmark | 2004           | Meat, Other               | 2                                                           |
| 54              | Denmark | 2004           | Milk, Whole               | 84                                                          |
| 54              | Denmark | 2004           | Molluscs, Other           | 10                                                          |
| 54              | Denmark | 2004           | Mutton & Goat Meat        | 3                                                           |
| 54              | Denmark | 2004           | Nuts                      | 13                                                          |
| 54              | Denmark | 2004           | Oats                      | 17                                                          |
| 54              | Denmark | 2004           | Offals, Edible            | 44                                                          |
| 54              | Denmark | 2004           | Oilcrops Oil, Other       | 3                                                           |
| 54              | Denmark | 2004           | Olive Oil                 | 2                                                           |
| 54              | Denmark | 2004           | Olives                    | 2                                                           |
| 54              | Denmark | 2004           | Onions                    | 22                                                          |
| 54              | Denmark | 2004           | Oranges, Mandarines       | 103                                                         |

Dietary calcium and zinc deficiency risks are decreasing but remain prevalent

| FAO countrycode | Country | Reference year | Food item                 | Gross food supply (g capita <sup>-1</sup> d <sup>-1</sup> ) |
|-----------------|---------|----------------|---------------------------|-------------------------------------------------------------|
| 54              | Denmark | 2004           | Palm Oil                  | 12                                                          |
| 54              | Denmark | 2004           | Peas                      | 2                                                           |
| 54              | Denmark | 2004           | Pelagic Fish              | 25                                                          |
| 54              | Denmark | 2004           | Pepper                    | 1                                                           |
| 54              | Denmark | 2004           | Pigmeat                   | 67                                                          |
| 54              | Denmark | 2004           | Pineapples                | 10                                                          |
| 54              | Denmark | 2004           | Plantains                 | 3                                                           |
| 54              | Denmark | 2004           | Potatoes                  | 207                                                         |
| 54              | Denmark | 2004           | Poultry Meat              | 46                                                          |
| 54              | Denmark | 2004           | Rape and Mustard Oil      | 5                                                           |
| 54              | Denmark | 2004           | Rice (Milled Equivalent)  | 12                                                          |
| 54              | Denmark | 2004           | Rye                       | 37                                                          |
| 54              | Denmark | 2004           | Soyabean Oil              | 6                                                           |
| 54              | Denmark | 2004           | Spices, Other             | 2                                                           |
| 54              | Denmark | 2004           | Sugar, Refined Equivalent | 112                                                         |
| 54              | Denmark | 2004           | Sunflowerseed Oil         | 2                                                           |
| 54              | Denmark | 2004           | Sweeteners, Other         | 35                                                          |
| 54              | Denmark | 2004           | Tea                       | 1                                                           |
| 54              | Denmark | 2004           | Tomatoes                  | 57                                                          |
| 54              | Denmark | 2004           | Vegetables, Other         | 202                                                         |
| 54              | Denmark | 2004           | Wheat                     | 280                                                         |
| 54              | Denmark | 2004           | Whey                      | 27                                                          |
| 54              | Denmark | 2004           | Wine                      | 84                                                          |
| 54              | Denmark | 2005           | Apples                    | 136                                                         |
| 54              | Denmark | 2005           | Bananas                   | 33                                                          |
| 54              | Denmark | 2005           | Beer                      | 240                                                         |
| 54              | Denmark | 2005           | Beverages, Alcoholic      | 14                                                          |
| 54              | Denmark | 2005           | Bovine Meat               | 74                                                          |
| 54              | Denmark | 2005           | Butter, Ghee              | 5                                                           |
| 54              | Denmark | 2005           | Cheese                    | 72                                                          |
| 54              | Denmark | 2005           | Citrus, Other             | 1                                                           |
| 54              | Denmark | 2005           | Cocoa Beans               | 18                                                          |
| 54              | Denmark | 2005           | Coconuts - Incl Copra     | 3                                                           |
| 54              | Denmark | 2005           | Coffee                    | 24                                                          |
| 54              | Denmark | 2005           | Cream                     | 28                                                          |
| 54              | Denmark | 2005           | Crustaceans               | 17                                                          |
| 54              | Denmark | 2005           | Dates                     | 1                                                           |
| 54              | Denmark | 2005           | Demersal Fish             | 8                                                           |
| 54              | Denmark | 2005           | Eggs                      | 52                                                          |
| 54              | Denmark | 2005           | Fats, Animals, Raw        | 26                                                          |
| 54              | Denmark | 2005           | Fish, Body Oil            | 12                                                          |
| 54              | Denmark | 2005           | Freshwater Fish           | 12                                                          |
| 54              | Denmark | 2005           | Fruits, Other             | 60                                                          |
| 54              | Denmark | 2005           | Grapefruit                | 2                                                           |
| 54              | Denmark | 2005           | Grapes                    | 23                                                          |
| 54              | Denmark | 2005           | Honey                     | 2                                                           |
| 54              | Denmark | 2005           | Lemons, Limes             | 5                                                           |
| 54              | Denmark | 2005           | Maize                     | 7                                                           |
| 54              | Denmark | 2005           | Maize Germ Oil            | 2                                                           |
| 54              | Denmark | 2005           | Meat, Other               | 2                                                           |
| 54              | Denmark | 2005           | Milk, Whole               | 89                                                          |
| 54              | Denmark | 2005           | Molluscs, Other           | 7                                                           |
| 54              | Denmark | 2005           | Mutton & Goat Meat        | 3                                                           |
| 54              | Denmark | 2005           | Nuts                      | 11                                                          |
| 54              | Denmark | 2005           | Oats                      | 19                                                          |
| 54              | Denmark | 2005           | Offals, Edible            | 33                                                          |
| 54              | Denmark | 2005           | Oilcrops Oil, Other       | 5                                                           |
| 54              | Denmark | 2005           | Olive Oil                 | 1                                                           |
| 54              | Denmark | 2005           | Olives                    | 2                                                           |
| 54              | Denmark | 2005           | Onions                    | 27                                                          |
| 54              | Denmark | 2005           | Oranges, Mandarines       | 102                                                         |
| 54              | Denmark | 2005           | Palm Oil                  | 3                                                           |
| 54              | Denmark | 2005           | Palmkernel Oil            | 2                                                           |
| 54              | Denmark | 2005           | Peas                      | 2                                                           |
| 54              | Denmark | 2005           | Pelagic Fish              | 23                                                          |
| 54              | Denmark | 2005           | Pigmeat                   | 121                                                         |
| 54              | Denmark | 2005           | Pineapples                | 10                                                          |
| 54              | Denmark | 2005           | Plantains                 | 1                                                           |
| 54              | Denmark | 2005           | Potatoes                  | 208                                                         |
| 54              | Denmark | 2005           | Poultry Meat              | 54                                                          |
| 54              | Denmark | 2005           | Rape and Mustard Oil      | 2                                                           |
| 54              | Denmark | 2005           | Rice (Milled Equivalent)  | 14                                                          |
| 54              | Denmark | 2005           | Rye                       | 36                                                          |
| 54              | Denmark | 2005           | Soyabean Oil              | 6                                                           |
| 54              | Denmark | 2005           | Spices, Other             | 1                                                           |
| 54              | Denmark | 2005           | Sugar, Refined Equivalent | 94                                                          |
| 54              | Denmark | 2005           | Sweeteners, Other         | 34                                                          |
| 54              | Denmark | 2005           | Tea                       | 2                                                           |
| 54              | Denmark | 2005           | Tomatoes                  | 48                                                          |
| 54              | Denmark | 2005           | Vegetables, Other         | 193                                                         |
| 54              | Denmark | 2005           | Wheat                     | 291                                                         |
| 54              | Denmark | 2005           | Whey                      | 31                                                          |
| 54              | Denmark | 2005           | Wine                      | 77                                                          |
| 54              | Denmark | 2006           | Apples                    | 96                                                          |
| 54              | Denmark | 2006           | Bananas                   | 36                                                          |
| 54              | Denmark | 2006           | Beer                      | 234                                                         |
| 54              | Denmark | 2006           | Beverages, Alcoholic      | 12                                                          |
| 54              | Denmark | 2006           | Beverages, Fermented      | 2                                                           |
| 54              | Denmark | 2006           | Bovine Meat               | 71                                                          |
| 54              | Denmark | 2006           | Butter, Ghee              | 5                                                           |
| 54              | Denmark | 2006           | Cheese                    | 67                                                          |
| 54              | Denmark | 2006           | Citrus, Other             | 1                                                           |
| 54              | Denmark | 2006           | Cocoa Beans               | 11                                                          |
| 54              | Denmark | 2006           | Coconuts - Incl Copra     | 3                                                           |
| 54              | Denmark | 2006           | Coffee                    | 23                                                          |
| 54              | Denmark | 2006           | Cream                     | 20                                                          |
| 54              | Denmark | 2006           | Crustaceans               | 14                                                          |

Dietary calcium and zinc deficiency risks are decreasing but remain prevalent

| FAO countrycode | Country | Reference year | Food item                 | Gross food supply (g capita <sup>-1</sup> d <sup>-1</sup> ) |
|-----------------|---------|----------------|---------------------------|-------------------------------------------------------------|
| 54              | Denmark | 2006           | Dates                     | 1                                                           |
| 54              | Denmark | 2006           | Demersal Fish             | 12                                                          |
| 54              | Denmark | 2006           | Eggs                      | 53                                                          |
| 54              | Denmark | 2006           | Fats, Animals, Raw        | 23                                                          |
| 54              | Denmark | 2006           | Fish, Body Oil            | 12                                                          |
| 54              | Denmark | 2006           | Freshwater Fish           | 9                                                           |
| 54              | Denmark | 2006           | Fruits, Other             | 64                                                          |
| 54              | Denmark | 2006           | Grapefruit                | 2                                                           |
| 54              | Denmark | 2006           | Grapes                    | 23                                                          |
| 54              | Denmark | 2006           | Honey                     | 2                                                           |
| 54              | Denmark | 2006           | Lemons, Limes             | 5                                                           |
| 54              | Denmark | 2006           | Maize                     | 6                                                           |
| 54              | Denmark | 2006           | Maize Germ Oil            | 1                                                           |
| 54              | Denmark | 2006           | Meat, Other               | 3                                                           |
| 54              | Denmark | 2006           | Milk, Whole               | 98                                                          |
| 54              | Denmark | 2006           | Molluscs, Other           | 4                                                           |
| 54              | Denmark | 2006           | Mutton & Goat Meat        | 3                                                           |
| 54              | Denmark | 2006           | Nuts                      | 12                                                          |
| 54              | Denmark | 2006           | Oats                      | 22                                                          |
| 54              | Denmark | 2006           | Offals, Edible            | 35                                                          |
| 54              | Denmark | 2006           | Oilcrops Oil, Other       | 4                                                           |
| 54              | Denmark | 2006           | Olive Oil                 | 1                                                           |
| 54              | Denmark | 2006           | Olives                    | 2                                                           |
| 54              | Denmark | 2006           | Onions                    | 27                                                          |
| 54              | Denmark | 2006           | Oranges, Mandarines       | 108                                                         |
| 54              | Denmark | 2006           | Palm Oil                  | 4                                                           |
| 54              | Denmark | 2006           | Peas                      | 2                                                           |
| 54              | Denmark | 2006           | Pelagic Fish              | 24                                                          |
| 54              | Denmark | 2006           | Pepper                    | 1                                                           |
| 54              | Denmark | 2006           | Pigmeat                   | 88                                                          |
| 54              | Denmark | 2006           | Pimento                   | 1                                                           |
| 54              | Denmark | 2006           | Pineapples                | 12                                                          |
| 54              | Denmark | 2006           | Plantains                 | 2                                                           |
| 54              | Denmark | 2006           | Potatoes                  | 230                                                         |
| 54              | Denmark | 2006           | Poultry Meat              | 52                                                          |
| 54              | Denmark | 2006           | Rape and Mustard Oil      | 1                                                           |
| 54              | Denmark | 2006           | Rice (Milled Equivalent)  | 17                                                          |
| 54              | Denmark | 2006           | Rye                       | 35                                                          |
| 54              | Denmark | 2006           | Soyabean Oil              | 10                                                          |
| 54              | Denmark | 2006           | Spices, Other             | 2                                                           |
| 54              | Denmark | 2006           | Sugar, Refined Equivalent | 104                                                         |
| 54              | Denmark | 2006           | Sunflowerseed Oil         | 1                                                           |
| 54              | Denmark | 2006           | Sweeteners, Other         | 33                                                          |
| 54              | Denmark | 2006           | Tea                       | 1                                                           |
| 54              | Denmark | 2006           | Tomatoes                  | 49                                                          |
| 54              | Denmark | 2006           | Vegetables, Other         | 196                                                         |
| 54              | Denmark | 2006           | Wheat                     | 288                                                         |
| 54              | Denmark | 2006           | Whey                      | 26                                                          |
| 54              | Denmark | 2006           | Wine                      | 78                                                          |
| 54              | Denmark | 2007           | Apples                    | 57                                                          |
| 54              | Denmark | 2007           | Bananas                   | 39                                                          |
| 54              | Denmark | 2007           | Beer                      | 227                                                         |
| 54              | Denmark | 2007           | Beverages, Alcoholic      | 12                                                          |
| 54              | Denmark | 2007           | Beverages, Fermented      | 3                                                           |
| 54              | Denmark | 2007           | Bovine Meat               | 72                                                          |
| 54              | Denmark | 2007           | Butter, Ghee              | 5                                                           |
| 54              | Denmark | 2007           | Cheese                    | 58                                                          |
| 54              | Denmark | 2007           | Citrus, Other             | 2                                                           |
| 54              | Denmark | 2007           | Cocoa Beans               | 12                                                          |
| 54              | Denmark | 2007           | Coconuts - Incl Copra     | 4                                                           |
| 54              | Denmark | 2007           | Coffee                    | 21                                                          |
| 54              | Denmark | 2007           | Cream                     | 30                                                          |
| 54              | Denmark | 2007           | Crustaceans               | 11                                                          |
| 54              | Denmark | 2007           | Dates                     | 1                                                           |
| 54              | Denmark | 2007           | Demersal Fish             | 12                                                          |
| 54              | Denmark | 2007           | Eggs                      | 52                                                          |
| 54              | Denmark | 2007           | Fats, Animals, Raw        | 19                                                          |
| 54              | Denmark | 2007           | Fish, Body Oil            | 12                                                          |
| 54              | Denmark | 2007           | Freshwater Fish           | 6                                                           |
| 54              | Denmark | 2007           | Fruits, Other             | 59                                                          |
| 54              | Denmark | 2007           | Grapefruit                | 2                                                           |
| 54              | Denmark | 2007           | Grapes                    | 25                                                          |
| 54              | Denmark | 2007           | Honey                     | 2                                                           |
| 54              | Denmark | 2007           | Lemons, Limes             | 4                                                           |
| 54              | Denmark | 2007           | Maize                     | 17                                                          |
| 54              | Denmark | 2007           | Maize Germ Oil            | 1                                                           |
| 54              | Denmark | 2007           | Meat, Other               | 6                                                           |
| 54              | Denmark | 2007           | Milk, Whole               | 85                                                          |
| 54              | Denmark | 2007           | Molluscs, Other           | 5                                                           |
| 54              | Denmark | 2007           | Mutton & Goat Meat        | 3                                                           |
| 54              | Denmark | 2007           | Nuts                      | 11                                                          |
| 54              | Denmark | 2007           | Oats                      | 21                                                          |
| 54              | Denmark | 2007           | Offals, Edible            | 19                                                          |
| 54              | Denmark | 2007           | Oilcrops Oil, Other       | 3                                                           |
| 54              | Denmark | 2007           | Olive Oil                 | 2                                                           |
| 54              | Denmark | 2007           | Olives                    | 2                                                           |
| 54              | Denmark | 2007           | Onions                    | 27                                                          |
| 54              | Denmark | 2007           | Oranges, Mandarines       | 105                                                         |
| 54              | Denmark | 2007           | Palm Oil                  | 4                                                           |
| 54              | Denmark | 2007           | Peas                      | 2                                                           |
| 54              | Denmark | 2007           | Pelagic Fish              | 26                                                          |
| 54              | Denmark | 2007           | Pepper                    | 1                                                           |
| 54              | Denmark | 2007           | Pigmeat                   | 110                                                         |
| 54              | Denmark | 2007           | Pineapples                | 11                                                          |
| 54              | Denmark | 2007           | Plantains                 | 1                                                           |
| 54              | Denmark | 2007           | Potatoes                  | 223                                                         |
| 54              | Denmark | 2007           | Poultry Meat              | 55                                                          |

Dietary calcium and zinc deficiency risks are decreasing but remain prevalent

| FAO countrycode | Country | Reference year | Food item                 | Gross food supply (g capita <sup>-1</sup> d <sup>-1</sup> ) |
|-----------------|---------|----------------|---------------------------|-------------------------------------------------------------|
| 54              | Denmark | 2007           | Rape and Mustard Oil      | 2                                                           |
| 54              | Denmark | 2007           | Rice (Milled Equivalent)  | 14                                                          |
| 54              | Denmark | 2007           | Rye                       | 46                                                          |
| 54              | Denmark | 2007           | Soyabean Oil              | 9                                                           |
| 54              | Denmark | 2007           | Spices, Other             | 1                                                           |
| 54              | Denmark | 2007           | Sugar, Refined Equivalent | 124                                                         |
| 54              | Denmark | 2007           | Sunflowerseed Oil         | 1                                                           |
| 54              | Denmark | 2007           | Sweeteners, Other         | 36                                                          |
| 54              | Denmark | 2007           | Tea                       | 1                                                           |
| 54              | Denmark | 2007           | Tomatoes                  | 46                                                          |
| 54              | Denmark | 2007           | Vegetables, Other         | 193                                                         |
| 54              | Denmark | 2007           | Wheat                     | 257                                                         |
| 54              | Denmark | 2007           | Whey                      | 27                                                          |
| 54              | Denmark | 2007           | Wine                      | 78                                                          |
| 54              | Denmark | 2008           | Apples                    | 57                                                          |
| 54              | Denmark | 2008           | Bananas                   | 43                                                          |
| 54              | Denmark | 2008           | Beer                      | 215                                                         |
| 54              | Denmark | 2008           | Beverages, Alcoholic      | 12                                                          |
| 54              | Denmark | 2008           | Beverages, Fermented      | 9                                                           |
| 54              | Denmark | 2008           | Bovine Meat               | 75                                                          |
| 54              | Denmark | 2008           | Butter, Ghee              | 5                                                           |
| 54              | Denmark | 2008           | Cheese                    | 64                                                          |
| 54              | Denmark | 2008           | Citrus, Other             | 7                                                           |
| 54              | Denmark | 2008           | Cocoa Beans               | 10                                                          |
| 54              | Denmark | 2008           | Coconuts - Incl Copra     | 4                                                           |
| 54              | Denmark | 2008           | Coffee                    | 22                                                          |
| 54              | Denmark | 2008           | Cream                     | 28                                                          |
| 54              | Denmark | 2008           | Crustaceans               | 21                                                          |
| 54              | Denmark | 2008           | Dates                     | 1                                                           |
| 54              | Denmark | 2008           | Demersal Fish             | 7                                                           |
| 54              | Denmark | 2008           | Eggs                      | 52                                                          |
| 54              | Denmark | 2008           | Fats, Animals, Raw        | 25                                                          |
| 54              | Denmark | 2008           | Fish, Body Oil            | 10                                                          |
| 54              | Denmark | 2008           | Freshwater Fish           | 11                                                          |
| 54              | Denmark | 2008           | Fruits, Other             | 51                                                          |
| 54              | Denmark | 2008           | Grapefruit                | 2                                                           |
| 54              | Denmark | 2008           | Grapes                    | 27                                                          |
| 54              | Denmark | 2008           | Groundnut Oil             | 1                                                           |
| 54              | Denmark | 2008           | Groundnuts (Shelled Eq)   | 1                                                           |
| 54              | Denmark | 2008           | Honey                     | 2                                                           |
| 54              | Denmark | 2008           | Lemons, Limes             | 5                                                           |
| 54              | Denmark | 2008           | Maize                     | 7                                                           |
| 54              | Denmark | 2008           | Meat, Other               | 3                                                           |
| 54              | Denmark | 2008           | Milk, Whole               | 106                                                         |
| 54              | Denmark | 2008           | Molluscs, Other           | 4                                                           |
| 54              | Denmark | 2008           | Mutton & Goat Meat        | 3                                                           |
| 54              | Denmark | 2008           | Nuts                      | 11                                                          |
| 54              | Denmark | 2008           | Oats                      | 28                                                          |
| 54              | Denmark | 2008           | Offals, Edible            | 27                                                          |
| 54              | Denmark | 2008           | Oilcrops Oil, Other       | 2                                                           |
| 54              | Denmark | 2008           | Olive Oil                 | 2                                                           |
| 54              | Denmark | 2008           | Olives                    | 2                                                           |
| 54              | Denmark | 2008           | Onions                    | 27                                                          |
| 54              | Denmark | 2008           | Oranges, Mandarines       | 100                                                         |
| 54              | Denmark | 2008           | Palm Oil                  | 4                                                           |
| 54              | Denmark | 2008           | Peas                      | 2                                                           |
| 54              | Denmark | 2008           | Pelagic Fish              | 19                                                          |
| 54              | Denmark | 2008           | Pigmeat                   | 72                                                          |
| 54              | Denmark | 2008           | Pineapples                | 13                                                          |
| 54              | Denmark | 2008           | Potatoes                  | 204                                                         |
| 54              | Denmark | 2008           | Poultry Meat              | 62                                                          |
| 54              | Denmark | 2008           | Rape and Mustard Oil      | 3                                                           |
| 54              | Denmark | 2008           | Rice (Milled Equivalent)  | 13                                                          |
| 54              | Denmark | 2008           | Rye                       | 35                                                          |
| 54              | Denmark | 2008           | Soyabean Oil              | 5                                                           |
| 54              | Denmark | 2008           | Spices, Other             | 1                                                           |
| 54              | Denmark | 2008           | Sugar, Refined Equivalent | 105                                                         |
| 54              | Denmark | 2008           | Sunflowerseed Oil         | 2                                                           |
| 54              | Denmark | 2008           | Sweeteners, Other         | 30                                                          |
| 54              | Denmark | 2008           | Tea                       | 1                                                           |
| 54              | Denmark | 2008           | Tomatoes                  | 49                                                          |
| 54              | Denmark | 2008           | Vegetables, Other         | 199                                                         |
| 54              | Denmark | 2008           | Wheat                     | 287                                                         |
| 54              | Denmark | 2008           | Whey                      | 28                                                          |
| 54              | Denmark | 2008           | Wine                      | 74                                                          |
| 54              | Denmark | 2009           | Apples                    | 48                                                          |
| 54              | Denmark | 2009           | Bananas                   | 45                                                          |
| 54              | Denmark | 2009           | Beer                      | 197                                                         |
| 54              | Denmark | 2009           | Beverages, Alcoholic      | 9                                                           |
| 54              | Denmark | 2009           | Beverages, Fermented      | 5                                                           |
| 54              | Denmark | 2009           | Bovine Meat               | 71                                                          |
| 54              | Denmark | 2009           | Butter, Ghee              | 5                                                           |
| 54              | Denmark | 2009           | Cheese                    | 63                                                          |
| 54              | Denmark | 2009           | Citrus, Other             | 2                                                           |
| 54              | Denmark | 2009           | Cocoa Beans               | 9                                                           |
| 54              | Denmark | 2009           | Coconuts - Incl Copra     | 4                                                           |
| 54              | Denmark | 2009           | Coffee                    | 22                                                          |
| 54              | Denmark | 2009           | Cream                     | 30                                                          |
| 54              | Denmark | 2009           | Crustaceans               | 14                                                          |
| 54              | Denmark | 2009           | Dates                     | 1                                                           |
| 54              | Denmark | 2009           | Demersal Fish             | 7                                                           |
| 54              | Denmark | 2009           | Eggs                      | 46                                                          |
| 54              | Denmark | 2009           | Fats, Animals, Raw        | 26                                                          |
| 54              | Denmark | 2009           | Fish, Body Oil            | 10                                                          |
| 54              | Denmark | 2009           | Freshwater Fish           | 5                                                           |
| 54              | Denmark | 2009           | Fruits, Other             | 69                                                          |
| 54              | Denmark | 2009           | Grapefruit                | 2                                                           |

Dietary calcium and zinc deficiency risks are decreasing but remain prevalent

| FAO countrycode | Country | Reference year | Food item                 | Gross food supply (g capita <sup>-1</sup> d <sup>-1</sup> ) |
|-----------------|---------|----------------|---------------------------|-------------------------------------------------------------|
| 54              | Denmark | 2009           | Grapes                    | 30                                                          |
| 54              | Denmark | 2009           | Groundnuts (Shelled Eq)   | 1                                                           |
| 54              | Denmark | 2009           | Honey                     | 2                                                           |
| 54              | Denmark | 2009           | Lemons, Limes             | 5                                                           |
| 54              | Denmark | 2009           | Maize                     | 13                                                          |
| 54              | Denmark | 2009           | Meat, Other               | 3                                                           |
| 54              | Denmark | 2009           | Milk, Whole               | 98                                                          |
| 54              | Denmark | 2009           | Molluscs, Other           | 4                                                           |
| 54              | Denmark | 2009           | Mutton & Goat Meat        | 3                                                           |
| 54              | Denmark | 2009           | Nuts                      | 12                                                          |
| 54              | Denmark | 2009           | Oats                      | 27                                                          |
| 54              | Denmark | 2009           | Offals, Edible            | 8                                                           |
| 54              | Denmark | 2009           | Oilcrops Oil, Other       | 1                                                           |
| 54              | Denmark | 2009           | Olive Oil                 | 2                                                           |
| 54              | Denmark | 2009           | Olives                    | 2                                                           |
| 54              | Denmark | 2009           | Onions                    | 25                                                          |
| 54              | Denmark | 2009           | Oranges, Mandarines       | 120                                                         |
| 54              | Denmark | 2009           | Palm Oil                  | 8                                                           |
| 54              | Denmark | 2009           | Peas                      | 2                                                           |
| 54              | Denmark | 2009           | Pelagic Fish              | 33                                                          |
| 54              | Denmark | 2009           | Pigmeat                   | 53                                                          |
| 54              | Denmark | 2009           | Pimento                   | 1                                                           |
| 54              | Denmark | 2009           | Pineapples                | 13                                                          |
| 54              | Denmark | 2009           | Plantains                 | 1                                                           |
| 54              | Denmark | 2009           | Potatoes                  | 208                                                         |
| 54              | Denmark | 2009           | Poultry Meat              | 52                                                          |
| 54              | Denmark | 2009           | Rape and Mustard Oil      | 2                                                           |
| 54              | Denmark | 2009           | Rice (Milled Equivalent)  | 14                                                          |
| 54              | Denmark | 2009           | Rye                       | 47                                                          |
| 54              | Denmark | 2009           | Soyabean Oil              | 4                                                           |
| 54              | Denmark | 2009           | Spices, Other             | 2                                                           |
| 54              | Denmark | 2009           | Sugar, Refined Equivalent | 105                                                         |
| 54              | Denmark | 2009           | Sunflowerseed Oil         | 3                                                           |
| 54              | Denmark | 2009           | Sweeteners, Other         | 28                                                          |
| 54              | Denmark | 2009           | Tea                       | 1                                                           |
| 54              | Denmark | 2009           | Tomatoes                  | 55                                                          |
| 54              | Denmark | 2009           | Vegetables, Other         | 241                                                         |
| 54              | Denmark | 2009           | Wheat                     | 280                                                         |
| 54              | Denmark | 2009           | Whey                      | 9                                                           |
| 54              | Denmark | 2009           | Wine                      | 77                                                          |
| 54              | Denmark | 2010           | Apples                    | 54                                                          |
| 54              | Denmark | 2010           | Bananas                   | 37                                                          |
| 54              | Denmark | 2010           | Beans                     | 1                                                           |
| 54              | Denmark | 2010           | Beer                      | 185                                                         |
| 54              | Denmark | 2010           | Beverages, Alcoholic      | 8                                                           |
| 54              | Denmark | 2010           | Beverages, Fermented      | 5                                                           |
| 54              | Denmark | 2010           | Bovine Meat               | 80                                                          |
| 54              | Denmark | 2010           | Butter, Ghee              | 5                                                           |
| 54              | Denmark | 2010           | Cheese                    | 52                                                          |
| 54              | Denmark | 2010           | Cocoa Beans               | 10                                                          |
| 54              | Denmark | 2010           | Coconuts - Incl Copra     | 4                                                           |
| 54              | Denmark | 2010           | Coffee                    | 27                                                          |
| 54              | Denmark | 2010           | Cream                     | 28                                                          |
| 54              | Denmark | 2010           | Crustaceans               | 11                                                          |
| 54              | Denmark | 2010           | Dates                     | 1                                                           |
| 54              | Denmark | 2010           | Demersal Fish             | 7                                                           |
| 54              | Denmark | 2010           | Eggs                      | 45                                                          |
| 54              | Denmark | 2010           | Fats, Animals, Raw        | 26                                                          |
| 54              | Denmark | 2010           | Fish, Body Oil            | 10                                                          |
| 54              | Denmark | 2010           | Freshwater Fish           | 6                                                           |
| 54              | Denmark | 2010           | Fruits, Other             | 74                                                          |
| 54              | Denmark | 2010           | Grapefruit                | 2                                                           |
| 54              | Denmark | 2010           | Grapes                    | 30                                                          |
| 54              | Denmark | 2010           | Groundnuts (Shelled Eq)   | 1                                                           |
| 54              | Denmark | 2010           | Honey                     | 2                                                           |
| 54              | Denmark | 2010           | Lemons, Limes             | 6                                                           |
| 54              | Denmark | 2010           | Maize                     | 13                                                          |
| 54              | Denmark | 2010           | Maize Germ Oil            | 1                                                           |
| 54              | Denmark | 2010           | Meat, Other               | 3                                                           |
| 54              | Denmark | 2010           | Milk, Whole               | 117                                                         |
| 54              | Denmark | 2010           | Molluscs, Other           | 2                                                           |
| 54              | Denmark | 2010           | Mutton & Goat Meat        | 3                                                           |
| 54              | Denmark | 2010           | Nuts                      | 12                                                          |
| 54              | Denmark | 2010           | Oats                      | 27                                                          |
| 54              | Denmark | 2010           | Offals, Edible            | 23                                                          |
| 54              | Denmark | 2010           | Oilcrops Oil, Other       | 2                                                           |
| 54              | Denmark | 2010           | Olive Oil                 | 2                                                           |
| 54              | Denmark | 2010           | Olives                    | 2                                                           |
| 54              | Denmark | 2010           | Onions                    | 24                                                          |
| 54              | Denmark | 2010           | Oranges, Mandarines       | 58                                                          |
| 54              | Denmark | 2010           | Palm Oil                  | 9                                                           |
| 54              | Denmark | 2010           | Peas                      | 2                                                           |
| 54              | Denmark | 2010           | Pelagic Fish              | 36                                                          |
| 54              | Denmark | 2010           | Pigmeat                   | 62                                                          |
| 54              | Denmark | 2010           | Pineapples                | 12                                                          |
| 54              | Denmark | 2010           | Plantains                 | 1                                                           |
| 54              | Denmark | 2010           | Potatoes                  | 161                                                         |
| 54              | Denmark | 2010           | Poultry Meat              | 60                                                          |
| 54              | Denmark | 2010           | Pulses, Other             | 1                                                           |
| 54              | Denmark | 2010           | Rice (Milled Equivalent)  | 13                                                          |
| 54              | Denmark | 2010           | Rye                       | 48                                                          |
| 54              | Denmark | 2010           | Soyabean Oil              | 3                                                           |
| 54              | Denmark | 2010           | Spices, Other             | 2                                                           |
| 54              | Denmark | 2010           | Sugar, Refined Equivalent | 104                                                         |
| 54              | Denmark | 2010           | Sunflowerseed Oil         | 1                                                           |
| 54              | Denmark | 2010           | Sweeteners, Other         | 31                                                          |
| 54              | Denmark | 2010           | Tea                       | 1                                                           |

## Dietary calcium and zinc deficiency risks are decreasing but remain prevalent

| FAO countrycode | Country            | Reference year | Food item                 | Gross food supply (g capita <sup>-1</sup> d <sup>-1</sup> ) |
|-----------------|--------------------|----------------|---------------------------|-------------------------------------------------------------|
| 54              | Denmark            | 2010           | Tomatoes                  | 56                                                          |
| 54              | Denmark            | 2010           | Vegetables, Other         | 250                                                         |
| 54              | Denmark            | 2010           | Wheat                     | 297                                                         |
| 54              | Denmark            | 2010           | Whey                      | 19                                                          |
| 54              | Denmark            | 2010           | Wine                      | 80                                                          |
| 54              | Denmark            | 2011           | Apples                    | 45                                                          |
| 54              | Denmark            | 2011           | Bananas                   | 35                                                          |
| 54              | Denmark            | 2011           | Beer                      | 183                                                         |
| 54              | Denmark            | 2011           | Beverages, Alcoholic      | 9                                                           |
| 54              | Denmark            | 2011           | Beverages, Fermented      | 1                                                           |
| 54              | Denmark            | 2011           | Bovine Meat               | 81                                                          |
| 54              | Denmark            | 2011           | Butter, Ghee              | 5                                                           |
| 54              | Denmark            | 2011           | Cheese                    | 45                                                          |
| 54              | Denmark            | 2011           | Citrus, Other             | 1                                                           |
| 54              | Denmark            | 2011           | Cocoa Beans               | 11                                                          |
| 54              | Denmark            | 2011           | Coconuts - Incl Copra     | 4                                                           |
| 54              | Denmark            | 2011           | Coffee                    | 26                                                          |
| 54              | Denmark            | 2011           | Cream                     | 27                                                          |
| 54              | Denmark            | 2011           | Crustaceans               | 11                                                          |
| 54              | Denmark            | 2011           | Dates                     | 1                                                           |
| 54              | Denmark            | 2011           | Demersal Fish             | 7                                                           |
| 54              | Denmark            | 2011           | Eggs                      | 42                                                          |
| 54              | Denmark            | 2011           | Fats, Animals, Raw        | 26                                                          |
| 54              | Denmark            | 2011           | Fish, Body Oil            | 10                                                          |
| 54              | Denmark            | 2011           | Freshwater Fish           | 6                                                           |
| 54              | Denmark            | 2011           | Fruits, Other             | 78                                                          |
| 54              | Denmark            | 2011           | Grapefruit                | 1                                                           |
| 54              | Denmark            | 2011           | Grapes                    | 26                                                          |
| 54              | Denmark            | 2011           | Groundnuts (Shelled Eq)   | 1                                                           |
| 54              | Denmark            | 2011           | Honey                     | 2                                                           |
| 54              | Denmark            | 2011           | Lemons, Limes             | 6                                                           |
| 54              | Denmark            | 2011           | Maize                     | 13                                                          |
| 54              | Denmark            | 2011           | Maize Germ Oil            | 1                                                           |
| 54              | Denmark            | 2011           | Meat, Other               | 2                                                           |
| 54              | Denmark            | 2011           | Milk, Whole               | 154                                                         |
| 54              | Denmark            | 2011           | Molluscs, Other           | 2                                                           |
| 54              | Denmark            | 2011           | Mutton & Goat Meat        | 3                                                           |
| 54              | Denmark            | 2011           | Nuts                      | 14                                                          |
| 54              | Denmark            | 2011           | Oats                      | 28                                                          |
| 54              | Denmark            | 2011           | Offals, Edible            | 14                                                          |
| 54              | Denmark            | 2011           | Oilcrops Oil, Other       | 2                                                           |
| 54              | Denmark            | 2011           | Olive Oil                 | 3                                                           |
| 54              | Denmark            | 2011           | Olives                    | 2                                                           |
| 54              | Denmark            | 2011           | Onions                    | 28                                                          |
| 54              | Denmark            | 2011           | Oranges, Mandarines       | 67                                                          |
| 54              | Denmark            | 2011           | Palm Oil                  | 9                                                           |
| 54              | Denmark            | 2011           | Peas                      | 2                                                           |
| 54              | Denmark            | 2011           | Pelagic Fish              | 36                                                          |
| 54              | Denmark            | 2011           | Pepper                    | 1                                                           |
| 54              | Denmark            | 2011           | Pig meat                  | 50                                                          |
| 54              | Denmark            | 2011           | Pineapples                | 11                                                          |
| 54              | Denmark            | 2011           | Plantains                 | 1                                                           |
| 54              | Denmark            | 2011           | Potatoes                  | 164                                                         |
| 54              | Denmark            | 2011           | Poultry Meat              | 70                                                          |
| 54              | Denmark            | 2011           | Rice (Milled Equivalent)  | 15                                                          |
| 54              | Denmark            | 2011           | Rye                       | 45                                                          |
| 54              | Denmark            | 2011           | Soyabean Oil              | 6                                                           |
| 54              | Denmark            | 2011           | Spices, Other             | 2                                                           |
| 54              | Denmark            | 2011           | Sugar, Refined Equivalent | 104                                                         |
| 54              | Denmark            | 2011           | Sunflowerseed Oil         | 2                                                           |
| 54              | Denmark            | 2011           | Sweeteners, Other         | 31                                                          |
| 54              | Denmark            | 2011           | Tea                       | 1                                                           |
| 54              | Denmark            | 2011           | Tomatoes                  | 57                                                          |
| 54              | Denmark            | 2011           | Vegetables, Other         | 249                                                         |
| 54              | Denmark            | 2011           | Wheat                     | 276                                                         |
| 54              | Denmark            | 2011           | Whey                      | 46                                                          |
| 54              | Denmark            | 2011           | Wine                      | 84                                                          |
| 56              | Dominican Republic | 1992           | Apples                    | 1                                                           |
| 56              | Dominican Republic | 1992           | Bananas                   | 117                                                         |
| 56              | Dominican Republic | 1992           | Beans                     | 17                                                          |
| 56              | Dominican Republic | 1992           | Beer                      | 75                                                          |
| 56              | Dominican Republic | 1992           | Beverages, Alcoholic      | 17                                                          |
| 56              | Dominican Republic | 1992           | Bovine Meat               | 27                                                          |
| 56              | Dominican Republic | 1992           | Butter, Ghee              | 1                                                           |
| 56              | Dominican Republic | 1992           | Cassava                   | 46                                                          |
| 56              | Dominican Republic | 1992           | Cheese                    | 1                                                           |
| 56              | Dominican Republic | 1992           | Cocoa Beans               | 3                                                           |
| 56              | Dominican Republic | 1992           | Coconut Oil               | 6                                                           |
| 56              | Dominican Republic | 1992           | Coconuts - Incl Copra     | 10                                                          |
| 56              | Dominican Republic | 1992           | Coffee                    | 7                                                           |
| 56              | Dominican Republic | 1992           | Cottonseed Oil            | 1                                                           |
| 56              | Dominican Republic | 1992           | Demersal Fish             | 8                                                           |
| 56              | Dominican Republic | 1992           | Eggs                      | 12                                                          |
| 56              | Dominican Republic | 1992           | Fats, Animals, Raw        | 3                                                           |
| 56              | Dominican Republic | 1992           | Freshwater Fish           | 1                                                           |
| 56              | Dominican Republic | 1992           | Fruits, Other             | 80                                                          |
| 56              | Dominican Republic | 1992           | Grapefruit                | 1                                                           |
| 56              | Dominican Republic | 1992           | Grapes                    | 1                                                           |
| 56              | Dominican Republic | 1992           | Groundnut Oil             | 1                                                           |
| 56              | Dominican Republic | 1992           | Lemons, Limes             | 3                                                           |
| 56              | Dominican Republic | 1992           | Maize                     | 9                                                           |
| 56              | Dominican Republic | 1992           | Milk, Whole               | 107                                                         |
| 56              | Dominican Republic | 1992           | Molluscs, Other           | 1                                                           |
| 56              | Dominican Republic | 1992           | Mutton & Goat Meat        | 1                                                           |
| 56              | Dominican Republic | 1992           | Oats                      | 1                                                           |
| 56              | Dominican Republic | 1992           | Offals, Edible            | 5                                                           |
| 56              | Dominican Republic | 1992           | Onions                    | 7                                                           |

Dietary calcium and zinc deficiency risks are decreasing but remain prevalent

| FAO countrycode | Country            | Reference year | Food item                 | Gross food supply (g capita <sup>-1</sup> d <sup>-1</sup> ) |
|-----------------|--------------------|----------------|---------------------------|-------------------------------------------------------------|
| 56              | Dominican Republic | 1992           | Oranges, Mandarines       | 17                                                          |
| 56              | Dominican Republic | 1992           | Palm Oil                  | 6                                                           |
| 56              | Dominican Republic | 1992           | Pelagic Fish              | 6                                                           |
| 56              | Dominican Republic | 1992           | Pigmeat                   | 16                                                          |
| 56              | Dominican Republic | 1992           | Pineapples                | 3                                                           |
| 56              | Dominican Republic | 1992           | Plantains                 | 105                                                         |
| 56              | Dominican Republic | 1992           | Potatoes                  | 11                                                          |
| 56              | Dominican Republic | 1992           | Poultry Meat              | 44                                                          |
| 56              | Dominican Republic | 1992           | Pulses, Other             | 10                                                          |
| 56              | Dominican Republic | 1992           | Rice (Milled Equivalent)  | 123                                                         |
| 56              | Dominican Republic | 1992           | Roots, Other              | 4                                                           |
| 56              | Dominican Republic | 1992           | Soyabean Oil              | 20                                                          |
| 56              | Dominican Republic | 1992           | Spices, Other             | 1                                                           |
| 56              | Dominican Republic | 1992           | Sugar, Refined Equivalent | 93                                                          |
| 56              | Dominican Republic | 1992           | Sunflowerseed Oil         | 3                                                           |
| 56              | Dominican Republic | 1992           | Sweet Potatoes            | 14                                                          |
| 56              | Dominican Republic | 1992           | Tomatoes                  | 33                                                          |
| 56              | Dominican Republic | 1992           | Vegetables, Other         | 31                                                          |
| 56              | Dominican Republic | 1992           | Wheat                     | 71                                                          |
| 56              | Dominican Republic | 1992           | Wine                      | 1                                                           |
| 56              | Dominican Republic | 1992           | Yams                      | 2                                                           |
| 56              | Dominican Republic | 1993           | Apples                    | 1                                                           |
| 56              | Dominican Republic | 1993           | Bananas                   | 122                                                         |
| 56              | Dominican Republic | 1993           | Beans                     | 17                                                          |
| 56              | Dominican Republic | 1993           | Beer                      | 67                                                          |
| 56              | Dominican Republic | 1993           | Beverages, Alcoholic      | 16                                                          |
| 56              | Dominican Republic | 1993           | Bovine Meat               | 28                                                          |
| 56              | Dominican Republic | 1993           | Butter, Ghee              | 1                                                           |
| 56              | Dominican Republic | 1993           | Cassava                   | 30                                                          |
| 56              | Dominican Republic | 1993           | Cheese                    | 1                                                           |
| 56              | Dominican Republic | 1993           | Cocoa Beans               | 3                                                           |
| 56              | Dominican Republic | 1993           | Coconut Oil               | 2                                                           |
| 56              | Dominican Republic | 1993           | Coconuts - Incl Copra     | 22                                                          |
| 56              | Dominican Republic | 1993           | Coffee                    | 6                                                           |
| 56              | Dominican Republic | 1993           | Crustaceans               | 1                                                           |
| 56              | Dominican Republic | 1993           | Demersal Fish             | 9                                                           |
| 56              | Dominican Republic | 1993           | Eggs                      | 12                                                          |
| 56              | Dominican Republic | 1993           | Fats, Animals, Raw        | 3                                                           |
| 56              | Dominican Republic | 1993           | Freshwater Fish           | 1                                                           |
| 56              | Dominican Republic | 1993           | Fruits, Other             | 82                                                          |
| 56              | Dominican Republic | 1993           | Grapefruit                | 1                                                           |
| 56              | Dominican Republic | 1993           | Grapes                    | 1                                                           |
| 56              | Dominican Republic | 1993           | Lemons, Limes             | 3                                                           |
| 56              | Dominican Republic | 1993           | Maize                     | 27                                                          |
| 56              | Dominican Republic | 1993           | Maize Germ Oil            | 1                                                           |
| 56              | Dominican Republic | 1993           | Milk, Whole               | 111                                                         |
| 56              | Dominican Republic | 1993           | Molluscs, Other           | 1                                                           |
| 56              | Dominican Republic | 1993           | Mutton & Goat Meat        | 1                                                           |
| 56              | Dominican Republic | 1993           | Oats                      | 2                                                           |
| 56              | Dominican Republic | 1993           | Offals, Edible            | 5                                                           |
| 56              | Dominican Republic | 1993           | Onions                    | 8                                                           |
| 56              | Dominican Republic | 1993           | Oranges, Mandarines       | 20                                                          |
| 56              | Dominican Republic | 1993           | Palm Oil                  | 7                                                           |
| 56              | Dominican Republic | 1993           | Pelagic Fish              | 8                                                           |
| 56              | Dominican Republic | 1993           | Pigmeat                   | 19                                                          |
| 56              | Dominican Republic | 1993           | Pineapples                | 9                                                           |
| 56              | Dominican Republic | 1993           | Plantains                 | 132                                                         |
| 56              | Dominican Republic | 1993           | Potatoes                  | 6                                                           |
| 56              | Dominican Republic | 1993           | Poultry Meat              | 46                                                          |
| 56              | Dominican Republic | 1993           | Pulses, Other             | 10                                                          |
| 56              | Dominican Republic | 1993           | Rice (Milled Equivalent)  | 118                                                         |
| 56              | Dominican Republic | 1993           | Roots, Other              | 5                                                           |
| 56              | Dominican Republic | 1993           | Soyabean Oil              | 24                                                          |
| 56              | Dominican Republic | 1993           | Spices, Other             | 1                                                           |
| 56              | Dominican Republic | 1993           | Sugar, Refined Equivalent | 100                                                         |
| 56              | Dominican Republic | 1993           | Sunflowerseed Oil         | 3                                                           |
| 56              | Dominican Republic | 1993           | Sweet Potatoes            | 7                                                           |
| 56              | Dominican Republic | 1993           | Tomatoes                  | 28                                                          |
| 56              | Dominican Republic | 1993           | Vegetables, Other         | 29                                                          |
| 56              | Dominican Republic | 1993           | Wheat                     | 64                                                          |
| 56              | Dominican Republic | 1993           | Wine                      | 1                                                           |
| 56              | Dominican Republic | 1993           | Yams                      | 2                                                           |
| 56              | Dominican Republic | 1994           | Apples                    | 1                                                           |
| 56              | Dominican Republic | 1994           | Bananas                   | 106                                                         |
| 56              | Dominican Republic | 1994           | Beans                     | 15                                                          |
| 56              | Dominican Republic | 1994           | Beer                      | 77                                                          |
| 56              | Dominican Republic | 1994           | Beverages, Alcoholic      | 16                                                          |
| 56              | Dominican Republic | 1994           | Bovine Meat               | 27                                                          |
| 56              | Dominican Republic | 1994           | Butter, Ghee              | 1                                                           |
| 56              | Dominican Republic | 1994           | Cassava                   | 30                                                          |
| 56              | Dominican Republic | 1994           | Cheese                    | 1                                                           |
| 56              | Dominican Republic | 1994           | Cocoa Beans               | 4                                                           |
| 56              | Dominican Republic | 1994           | Coconut Oil               | 2                                                           |
| 56              | Dominican Republic | 1994           | Coconuts - Incl Copra     | 23                                                          |
| 56              | Dominican Republic | 1994           | Coffee                    | 6                                                           |
| 56              | Dominican Republic | 1994           | Crustaceans               | 1                                                           |
| 56              | Dominican Republic | 1994           | Demersal Fish             | 11                                                          |
| 56              | Dominican Republic | 1994           | Eggs                      | 12                                                          |
| 56              | Dominican Republic | 1994           | Fats, Animals, Raw        | 3                                                           |
| 56              | Dominican Republic | 1994           | Freshwater Fish           | 2                                                           |
| 56              | Dominican Republic | 1994           | Fruits, Other             | 90                                                          |
| 56              | Dominican Republic | 1994           | Grapefruit                | 1                                                           |
| 56              | Dominican Republic | 1994           | Grapes                    | 1                                                           |
| 56              | Dominican Republic | 1994           | Lemons, Limes             | 3                                                           |
| 56              | Dominican Republic | 1994           | Maize                     | 30                                                          |
| 56              | Dominican Republic | 1994           | Maize Germ Oil            | 1                                                           |
| 56              | Dominican Republic | 1994           | Milk, Whole               | 105                                                         |

Dietary calcium and zinc deficiency risks are decreasing but remain prevalent

| FAO countrycode | Country            | Reference year | Food item                 | Gross food supply (g capita <sup>-1</sup> d <sup>-1</sup> ) |
|-----------------|--------------------|----------------|---------------------------|-------------------------------------------------------------|
| 56              | Dominican Republic | 1994           | Molluscs, Other           | 2                                                           |
| 56              | Dominican Republic | 1994           | Mutton & Goat Meat        | 1                                                           |
| 56              | Dominican Republic | 1994           | Oats                      | 1                                                           |
| 56              | Dominican Republic | 1994           | Offals, Edible            | 5                                                           |
| 56              | Dominican Republic | 1994           | Onions                    | 7                                                           |
| 56              | Dominican Republic | 1994           | Oranges, Mandarines       | 20                                                          |
| 56              | Dominican Republic | 1994           | Palm Oil                  | 9                                                           |
| 56              | Dominican Republic | 1994           | Pelagic Fish              | 8                                                           |
| 56              | Dominican Republic | 1994           | Pigmeat                   | 20                                                          |
| 56              | Dominican Republic | 1994           | Pineapples                | 37                                                          |
| 56              | Dominican Republic | 1994           | Plantains                 | 89                                                          |
| 56              | Dominican Republic | 1994           | Potatoes                  | 6                                                           |
| 56              | Dominican Republic | 1994           | Poultry Meat              | 46                                                          |
| 56              | Dominican Republic | 1994           | Pulses, Other             | 9                                                           |
| 56              | Dominican Republic | 1994           | Rice (Milled Equivalent)  | 117                                                         |
| 56              | Dominican Republic | 1994           | Roots, Other              | 6                                                           |
| 56              | Dominican Republic | 1994           | Soyabean Oil              | 25                                                          |
| 56              | Dominican Republic | 1994           | Spices, Other             | 1                                                           |
| 56              | Dominican Republic | 1994           | Sugar, Refined Equivalent | 100                                                         |
| 56              | Dominican Republic | 1994           | Sunflowerseed Oil         | 4                                                           |
| 56              | Dominican Republic | 1994           | Sweet Potatoes            | 9                                                           |
| 56              | Dominican Republic | 1994           | Sweeteners, Other         | 1                                                           |
| 56              | Dominican Republic | 1994           | Tomatoes                  | 25                                                          |
| 56              | Dominican Republic | 1994           | Vegetables, Other         | 33                                                          |
| 56              | Dominican Republic | 1994           | Wheat                     | 77                                                          |
| 56              | Dominican Republic | 1994           | Wine                      | 1                                                           |
| 56              | Dominican Republic | 1994           | Yams                      | 2                                                           |
| 56              | Dominican Republic | 1995           | Apples                    | 1                                                           |
| 56              | Dominican Republic | 1995           | Bananas                   | 87                                                          |
| 56              | Dominican Republic | 1995           | Beans                     | 15                                                          |
| 56              | Dominican Republic | 1995           | Beer                      | 71                                                          |
| 56              | Dominican Republic | 1995           | Beverages, Alcoholic      | 15                                                          |
| 56              | Dominican Republic | 1995           | Bovine Meat               | 27                                                          |
| 56              | Dominican Republic | 1995           | Butter, Ghee              | 1                                                           |
| 56              | Dominican Republic | 1995           | Cassava                   | 42                                                          |
| 56              | Dominican Republic | 1995           | Cheese                    | 1                                                           |
| 56              | Dominican Republic | 1995           | Cocoa Beans               | 4                                                           |
| 56              | Dominican Republic | 1995           | Coconut Oil               | 2                                                           |
| 56              | Dominican Republic | 1995           | Coconuts - Incl Copra     | 22                                                          |
| 56              | Dominican Republic | 1995           | Coffee                    | 6                                                           |
| 56              | Dominican Republic | 1995           | Demersal Fish             | 11                                                          |
| 56              | Dominican Republic | 1995           | Eggs                      | 12                                                          |
| 56              | Dominican Republic | 1995           | Fats, Animals, Raw        | 3                                                           |
| 56              | Dominican Republic | 1995           | Freshwater Fish           | 1                                                           |
| 56              | Dominican Republic | 1995           | Fruits, Other             | 87                                                          |
| 56              | Dominican Republic | 1995           | Grapefruit                | 1                                                           |
| 56              | Dominican Republic | 1995           | Grapes                    | 1                                                           |
| 56              | Dominican Republic | 1995           | Lemons, Limes             | 2                                                           |
| 56              | Dominican Republic | 1995           | Maize                     | 19                                                          |
| 56              | Dominican Republic | 1995           | Maize Germ Oil            | 1                                                           |
| 56              | Dominican Republic | 1995           | Milk, Whole               | 105                                                         |
| 56              | Dominican Republic | 1995           | Molluscs, Other           | 1                                                           |
| 56              | Dominican Republic | 1995           | Mutton & Goat Meat        | 1                                                           |
| 56              | Dominican Republic | 1995           | Oats                      | 1                                                           |
| 56              | Dominican Republic | 1995           | Offals, Edible            | 5                                                           |
| 56              | Dominican Republic | 1995           | Oilcrops Oil, Other       | 1                                                           |
| 56              | Dominican Republic | 1995           | Onions                    | 9                                                           |
| 56              | Dominican Republic | 1995           | Oranges, Mandarines       | 20                                                          |
| 56              | Dominican Republic | 1995           | Palm Oil                  | 8                                                           |
| 56              | Dominican Republic | 1995           | Pelagic Fish              | 8                                                           |
| 56              | Dominican Republic | 1995           | Pigmeat                   | 21                                                          |
| 56              | Dominican Republic | 1995           | Pineapples                | 28                                                          |
| 56              | Dominican Republic | 1995           | Plantains                 | 98                                                          |
| 56              | Dominican Republic | 1995           | Potatoes                  | 9                                                           |
| 56              | Dominican Republic | 1995           | Poultry Meat              | 47                                                          |
| 56              | Dominican Republic | 1995           | Pulses, Other             | 10                                                          |
| 56              | Dominican Republic | 1995           | Rice (Milled Equivalent)  | 118                                                         |
| 56              | Dominican Republic | 1995           | Roots, Other              | 9                                                           |
| 56              | Dominican Republic | 1995           | Soyabean Oil              | 26                                                          |
| 56              | Dominican Republic | 1995           | Spices, Other             | 1                                                           |
| 56              | Dominican Republic | 1995           | Sugar, Refined Equivalent | 99                                                          |
| 56              | Dominican Republic | 1995           | Sunflowerseed Oil         | 4                                                           |
| 56              | Dominican Republic | 1995           | Sweet Potatoes            | 10                                                          |
| 56              | Dominican Republic | 1995           | Sweeteners, Other         | 2                                                           |
| 56              | Dominican Republic | 1995           | Tomatoes                  | 28                                                          |
| 56              | Dominican Republic | 1995           | Vegetables, Other         | 28                                                          |
| 56              | Dominican Republic | 1995           | Wheat                     | 82                                                          |
| 56              | Dominican Republic | 1995           | Wine                      | 1                                                           |
| 56              | Dominican Republic | 1995           | Yams                      | 3                                                           |
| 56              | Dominican Republic | 1996           | Apples                    | 2                                                           |
| 56              | Dominican Republic | 1996           | Bananas                   | 92                                                          |
| 56              | Dominican Republic | 1996           | Beans                     | 12                                                          |
| 56              | Dominican Republic | 1996           | Beer                      | 69                                                          |
| 56              | Dominican Republic | 1996           | Beverages, Alcoholic      | 16                                                          |
| 56              | Dominican Republic | 1996           | Bovine Meat               | 27                                                          |
| 56              | Dominican Republic | 1996           | Butter, Ghee              | 1                                                           |
| 56              | Dominican Republic | 1996           | Cassava                   | 39                                                          |
| 56              | Dominican Republic | 1996           | Cheese                    | 1                                                           |
| 56              | Dominican Republic | 1996           | Cocoa Beans               | 4                                                           |
| 56              | Dominican Republic | 1996           | Coconut Oil               | 2                                                           |
| 56              | Dominican Republic | 1996           | Coconuts - Incl Copra     | 27                                                          |
| 56              | Dominican Republic | 1996           | Coffee                    | 5                                                           |
| 56              | Dominican Republic | 1996           | Demersal Fish             | 9                                                           |
| 56              | Dominican Republic | 1996           | Eggs                      | 12                                                          |
| 56              | Dominican Republic | 1996           | Fats, Animals, Raw        | 3                                                           |
| 56              | Dominican Republic | 1996           | Fruits, Other             | 78                                                          |
| 56              | Dominican Republic | 1996           | Grapefruit                | 1                                                           |



Dietary calcium and zinc deficiency risks are decreasing but remain prevalent

| FAO countrycode | Country            | Reference year | Food item                 | Gross food supply (g capita <sup>-1</sup> d <sup>-1</sup> ) |
|-----------------|--------------------|----------------|---------------------------|-------------------------------------------------------------|
| 56              | Dominican Republic | 1996           | Grapes                    | 1                                                           |
| 56              | Dominican Republic | 1996           | Lemons, Limes             | 2                                                           |
| 56              | Dominican Republic | 1996           | Maize                     | 22                                                          |
| 56              | Dominican Republic | 1996           | Maize Germ Oil            | 1                                                           |
| 56              | Dominican Republic | 1996           | Marine Fish, Other        | 1                                                           |
| 56              | Dominican Republic | 1996           | Milk, Whole               | 105                                                         |
| 56              | Dominican Republic | 1996           | Molluscs, Other           | 1                                                           |
| 56              | Dominican Republic | 1996           | Mutton & Goat Meat        | 1                                                           |
| 56              | Dominican Republic | 1996           | Oats                      | 3                                                           |
| 56              | Dominican Republic | 1996           | Offals, Edible            | 5                                                           |
| 56              | Dominican Republic | 1996           | Onions                    | 8                                                           |
| 56              | Dominican Republic | 1996           | Oranges, Mandarines       | 26                                                          |
| 56              | Dominican Republic | 1996           | Palm Oil                  | 9                                                           |
| 56              | Dominican Republic | 1996           | Pelagic Fish              | 9                                                           |
| 56              | Dominican Republic | 1996           | Pigmeat                   | 21                                                          |
| 56              | Dominican Republic | 1996           | Pineapples                | 8                                                           |
| 56              | Dominican Republic | 1996           | Plantains                 | 94                                                          |
| 56              | Dominican Republic | 1996           | Potatoes                  | 7                                                           |
| 56              | Dominican Republic | 1996           | Poultry Meat              | 50                                                          |
| 56              | Dominican Republic | 1996           | Pulses, Other             | 9                                                           |
| 56              | Dominican Republic | 1996           | Rice (Milled Equivalent)  | 114                                                         |
| 56              | Dominican Republic | 1996           | Roots, Other              | 7                                                           |
| 56              | Dominican Republic | 1996           | Soyabean Oil              | 24                                                          |
| 56              | Dominican Republic | 1996           | Spices, Other             | 1                                                           |
| 56              | Dominican Republic | 1996           | Sugar, Refined Equivalent | 98                                                          |
| 56              | Dominican Republic | 1996           | Sunflowerseed Oil         | 3                                                           |
| 56              | Dominican Republic | 1996           | Sweet Potatoes            | 10                                                          |
| 56              | Dominican Republic | 1996           | Sweeteners, Other         | 1                                                           |
| 56              | Dominican Republic | 1996           | Tomatoes                  | 60                                                          |
| 56              | Dominican Republic | 1996           | Vegetables, Other         | 30                                                          |
| 56              | Dominican Republic | 1996           | Wheat                     | 64                                                          |
| 56              | Dominican Republic | 1996           | Wine                      | 1                                                           |
| 56              | Dominican Republic | 1996           | Yams                      | 3                                                           |
| 56              | Dominican Republic | 1997           | Apples                    | 1                                                           |
| 56              | Dominican Republic | 1997           | Bananas                   | 93                                                          |
| 56              | Dominican Republic | 1997           | Beans                     | 10                                                          |
| 56              | Dominican Republic | 1997           | Beer                      | 78                                                          |
| 56              | Dominican Republic | 1997           | Beverages, Alcoholic      | 16                                                          |
| 56              | Dominican Republic | 1997           | Bovine Meat               | 26                                                          |
| 56              | Dominican Republic | 1997           | Butter, Ghee              | 1                                                           |
| 56              | Dominican Republic | 1997           | Cassava                   | 29                                                          |
| 56              | Dominican Republic | 1997           | Cheese                    | 1                                                           |
| 56              | Dominican Republic | 1997           | Cocoa Beans               | 3                                                           |
| 56              | Dominican Republic | 1997           | Coconut Oil               | 2                                                           |
| 56              | Dominican Republic | 1997           | Coconuts - Incl Copra     | 18                                                          |
| 56              | Dominican Republic | 1997           | Coffee                    | 8                                                           |
| 56              | Dominican Republic | 1997           | Demersal Fish             | 10                                                          |
| 56              | Dominican Republic | 1997           | Eggs                      | 12                                                          |
| 56              | Dominican Republic | 1997           | Fats, Animals, Raw        | 3                                                           |
| 56              | Dominican Republic | 1997           | Freshwater Fish           | 1                                                           |
| 56              | Dominican Republic | 1997           | Fruits, Other             | 96                                                          |
| 56              | Dominican Republic | 1997           | Grapefruit                | 1                                                           |
| 56              | Dominican Republic | 1997           | Grapes                    | 2                                                           |
| 56              | Dominican Republic | 1997           | Honey                     | 1                                                           |
| 56              | Dominican Republic | 1997           | Lemons, Limes             | 2                                                           |
| 56              | Dominican Republic | 1997           | Maize                     | 21                                                          |
| 56              | Dominican Republic | 1997           | Maize Germ Oil            | 1                                                           |
| 56              | Dominican Republic | 1997           | Marine Fish, Other        | 1                                                           |
| 56              | Dominican Republic | 1997           | Milk, Whole               | 102                                                         |
| 56              | Dominican Republic | 1997           | Molluscs, Other           | 1                                                           |
| 56              | Dominican Republic | 1997           | Oats                      | 2                                                           |
| 56              | Dominican Republic | 1997           | Offals, Edible            | 6                                                           |
| 56              | Dominican Republic | 1997           | Oilcrops Oil, Other       | 1                                                           |
| 56              | Dominican Republic | 1997           | Onions                    | 8                                                           |
| 56              | Dominican Republic | 1997           | Oranges, Mandarines       | 26                                                          |
| 56              | Dominican Republic | 1997           | Palm Oil                  | 9                                                           |
| 56              | Dominican Republic | 1997           | Pelagic Fish              | 10                                                          |
| 56              | Dominican Republic | 1997           | Pigmeat                   | 21                                                          |
| 56              | Dominican Republic | 1997           | Pineapples                | 25                                                          |
| 56              | Dominican Republic | 1997           | Plantains                 | 84                                                          |
| 56              | Dominican Republic | 1997           | Potatoes                  | 6                                                           |
| 56              | Dominican Republic | 1997           | Poultry Meat              | 54                                                          |
| 56              | Dominican Republic | 1997           | Pulses, Other             | 7                                                           |
| 56              | Dominican Republic | 1997           | Rice (Milled Equivalent)  | 116                                                         |
| 56              | Dominican Republic | 1997           | Roots, Other              | 8                                                           |
| 56              | Dominican Republic | 1997           | Soyabean Oil              | 26                                                          |
| 56              | Dominican Republic | 1997           | Spices, Other             | 1                                                           |
| 56              | Dominican Republic | 1997           | Sugar, Refined Equivalent | 95                                                          |
| 56              | Dominican Republic | 1997           | Sunflowerseed Oil         | 3                                                           |
| 56              | Dominican Republic | 1997           | Sweet Potatoes            | 6                                                           |
| 56              | Dominican Republic | 1997           | Sweeteners, Other         | 1                                                           |
| 56              | Dominican Republic | 1997           | Tomatoes                  | 76                                                          |
| 56              | Dominican Republic | 1997           | Vegetables, Other         | 29                                                          |
| 56              | Dominican Republic | 1997           | Wheat                     | 56                                                          |
| 56              | Dominican Republic | 1997           | Wine                      | 1                                                           |
| 56              | Dominican Republic | 1997           | Yams                      | 3                                                           |
| 56              | Dominican Republic | 1998           | Apples                    | 2                                                           |
| 56              | Dominican Republic | 1998           | Bananas                   | 72                                                          |
| 56              | Dominican Republic | 1998           | Beans                     | 12                                                          |
| 56              | Dominican Republic | 1998           | Beer                      | 91                                                          |
| 56              | Dominican Republic | 1998           | Beverages, Alcoholic      | 15                                                          |
| 56              | Dominican Republic | 1998           | Bovine Meat               | 26                                                          |
| 56              | Dominican Republic | 1998           | Butter, Ghee              | 1                                                           |
| 56              | Dominican Republic | 1998           | Cassava                   | 37                                                          |
| 56              | Dominican Republic | 1998           | Cheese                    | 2                                                           |
| 56              | Dominican Republic | 1998           | Cocoa Beans               | 3                                                           |
| 56              | Dominican Republic | 1998           | Coconut Oil               | 2                                                           |

Dietary calcium and zinc deficiency risks are decreasing but remain prevalent

| FAO countrycode | Country            | Reference year | Food item                 | Gross food supply (g capita <sup>-1</sup> d <sup>-1</sup> ) |
|-----------------|--------------------|----------------|---------------------------|-------------------------------------------------------------|
| 56              | Dominican Republic | 1998           | Coconuts - Incl Copra     | 26                                                          |
| 56              | Dominican Republic | 1998           | Coffee                    | 11                                                          |
| 56              | Dominican Republic | 1998           | Demersal Fish             | 9                                                           |
| 56              | Dominican Republic | 1998           | Eggs                      | 13                                                          |
| 56              | Dominican Republic | 1998           | Fats, Animals, Raw        | 4                                                           |
| 56              | Dominican Republic | 1998           | Freshwater Fish           | 1                                                           |
| 56              | Dominican Republic | 1998           | Fruits, Other             | 94                                                          |
| 56              | Dominican Republic | 1998           | Grapefruit                | 2                                                           |
| 56              | Dominican Republic | 1998           | Grapes                    | 2                                                           |
| 56              | Dominican Republic | 1998           | Groundnut Oil             | 1                                                           |
| 56              | Dominican Republic | 1998           | Lemons, Limes             | 2                                                           |
| 56              | Dominican Republic | 1998           | Maize                     | 20                                                          |
| 56              | Dominican Republic | 1998           | Maize Germ Oil            | 1                                                           |
| 56              | Dominican Republic | 1998           | Milk, Whole               | 103                                                         |
| 56              | Dominican Republic | 1998           | Molluscs, Other           | 1                                                           |
| 56              | Dominican Republic | 1998           | Oats                      | 3                                                           |
| 56              | Dominican Republic | 1998           | Offals, Edible            | 6                                                           |
| 56              | Dominican Republic | 1998           | Oilcrops Oil, Other       | 1                                                           |
| 56              | Dominican Republic | 1998           | Onions                    | 8                                                           |
| 56              | Dominican Republic | 1998           | Oranges, Mandarines       | 21                                                          |
| 56              | Dominican Republic | 1998           | Palm Oil                  | 9                                                           |
| 56              | Dominican Republic | 1998           | Pelagic Fish              | 8                                                           |
| 56              | Dominican Republic | 1998           | Pigmeat                   | 22                                                          |
| 56              | Dominican Republic | 1998           | Pineapples                | 18                                                          |
| 56              | Dominican Republic | 1998           | Plantains                 | 78                                                          |
| 56              | Dominican Republic | 1998           | Potatoes                  | 5                                                           |
| 56              | Dominican Republic | 1998           | Poultry Meat              | 62                                                          |
| 56              | Dominican Republic | 1998           | Pulses, Other             | 4                                                           |
| 56              | Dominican Republic | 1998           | Rice (Milled Equivalent)  | 115                                                         |
| 56              | Dominican Republic | 1998           | Roots, Other              | 4                                                           |
| 56              | Dominican Republic | 1998           | Soybean Oil               | 26                                                          |
| 56              | Dominican Republic | 1998           | Spices, Other             | 1                                                           |
| 56              | Dominican Republic | 1998           | Sugar, Refined Equivalent | 88                                                          |
| 56              | Dominican Republic | 1998           | Sunflowerseed Oil         | 3                                                           |
| 56              | Dominican Republic | 1998           | Sweet Potatoes            | 10                                                          |
| 56              | Dominican Republic | 1998           | Sweeteners, Other         | 1                                                           |
| 56              | Dominican Republic | 1998           | Tomatoes                  | 81                                                          |
| 56              | Dominican Republic | 1998           | Vegetables, Other         | 24                                                          |
| 56              | Dominican Republic | 1998           | Wheat                     | 59                                                          |
| 56              | Dominican Republic | 1998           | Wine                      | 2                                                           |
| 56              | Dominican Republic | 1998           | Yams                      | 4                                                           |
| 56              | Dominican Republic | 1999           | Apples                    | 2                                                           |
| 56              | Dominican Republic | 1999           | Bananas                   | 105                                                         |
| 56              | Dominican Republic | 1999           | Beans                     | 11                                                          |
| 56              | Dominican Republic | 1999           | Beer                      | 100                                                         |
| 56              | Dominican Republic | 1999           | Beverages, Alcoholic      | 15                                                          |
| 56              | Dominican Republic | 1999           | Bovine Meat               | 21                                                          |
| 56              | Dominican Republic | 1999           | Butter, Ghee              | 1                                                           |
| 56              | Dominican Republic | 1999           | Cassava                   | 37                                                          |
| 56              | Dominican Republic | 1999           | Cheese                    | 2                                                           |
| 56              | Dominican Republic | 1999           | Coconut Oil               | 1                                                           |
| 56              | Dominican Republic | 1999           | Coconuts - Incl Copra     | 24                                                          |
| 56              | Dominican Republic | 1999           | Coffee                    | 8                                                           |
| 56              | Dominican Republic | 1999           | Demersal Fish             | 9                                                           |
| 56              | Dominican Republic | 1999           | Eggs                      | 13                                                          |
| 56              | Dominican Republic | 1999           | Fats, Animals, Raw        | 4                                                           |
| 56              | Dominican Republic | 1999           | Freshwater Fish           | 1                                                           |
| 56              | Dominican Republic | 1999           | Fruits, Other             | 90                                                          |
| 56              | Dominican Republic | 1999           | Grapefruit                | 2                                                           |
| 56              | Dominican Republic | 1999           | Grapes                    | 1                                                           |
| 56              | Dominican Republic | 1999           | Lemons, Limes             | 2                                                           |
| 56              | Dominican Republic | 1999           | Maize                     | 29                                                          |
| 56              | Dominican Republic | 1999           | Maize Germ Oil            | 1                                                           |
| 56              | Dominican Republic | 1999           | Marine Fish, Other        | 1                                                           |
| 56              | Dominican Republic | 1999           | Milk, Whole               | 107                                                         |
| 56              | Dominican Republic | 1999           | Molluscs, Other           | 1                                                           |
| 56              | Dominican Republic | 1999           | Oats                      | 1                                                           |
| 56              | Dominican Republic | 1999           | Offals, Edible            | 6                                                           |
| 56              | Dominican Republic | 1999           | Oilcrops Oil, Other       | 1                                                           |
| 56              | Dominican Republic | 1999           | Onions                    | 13                                                          |
| 56              | Dominican Republic | 1999           | Oranges, Mandarines       | 22                                                          |
| 56              | Dominican Republic | 1999           | Palm Oil                  | 10                                                          |
| 56              | Dominican Republic | 1999           | Pelagic Fish              | 10                                                          |
| 56              | Dominican Republic | 1999           | Pigmeat                   | 20                                                          |
| 56              | Dominican Republic | 1999           | Pineapples                | 20                                                          |
| 56              | Dominican Republic | 1999           | Plantains                 | 56                                                          |
| 56              | Dominican Republic | 1999           | Potatoes                  | 8                                                           |
| 56              | Dominican Republic | 1999           | Poultry Meat              | 61                                                          |
| 56              | Dominican Republic | 1999           | Pulses, Other             | 8                                                           |
| 56              | Dominican Republic | 1999           | Rice (Milled Equivalent)  | 117                                                         |
| 56              | Dominican Republic | 1999           | Roots, Other              | 11                                                          |
| 56              | Dominican Republic | 1999           | Soybean Oil               | 29                                                          |
| 56              | Dominican Republic | 1999           | Spices, Other             | 1                                                           |
| 56              | Dominican Republic | 1999           | Sugar, Refined Equivalent | 90                                                          |
| 56              | Dominican Republic | 1999           | Sunflowerseed Oil         | 3                                                           |
| 56              | Dominican Republic | 1999           | Sweet Potatoes            | 12                                                          |
| 56              | Dominican Republic | 1999           | Sweeteners, Other         | 1                                                           |
| 56              | Dominican Republic | 1999           | Tomatoes                  | 81                                                          |
| 56              | Dominican Republic | 1999           | Vegetables, Other         | 31                                                          |
| 56              | Dominican Republic | 1999           | Wheat                     | 33                                                          |
| 56              | Dominican Republic | 1999           | Wine                      | 1                                                           |
| 56              | Dominican Republic | 1999           | Yams                      | 3                                                           |
| 56              | Dominican Republic | 2000           | Apples                    | 3                                                           |
| 56              | Dominican Republic | 2000           | Bananas                   | 95                                                          |
| 56              | Dominican Republic | 2000           | Beans                     | 10                                                          |
| 56              | Dominican Republic | 2000           | Beer                      | 109                                                         |
| 56              | Dominican Republic | 2000           | Beverages, Alcoholic      | 18                                                          |

Dietary calcium and zinc deficiency risks are decreasing but remain prevalent

| FAO countrycode | Country            | Reference year | Food item                 | Gross food supply (g capita <sup>-1</sup> d <sup>-1</sup> ) |
|-----------------|--------------------|----------------|---------------------------|-------------------------------------------------------------|
| 56              | Dominican Republic | 2000           | Bovine Meat               | 22                                                          |
| 56              | Dominican Republic | 2000           | Butter, Ghee              | 1                                                           |
| 56              | Dominican Republic | 2000           | Cassava                   | 36                                                          |
| 56              | Dominican Republic | 2000           | Cheese                    | 2                                                           |
| 56              | Dominican Republic | 2000           | Coconut Oil               | 1                                                           |
| 56              | Dominican Republic | 2000           | Coconuts - Incl Copra     | 38                                                          |
| 56              | Dominican Republic | 2000           | Coffee                    | 10                                                          |
| 56              | Dominican Republic | 2000           | Crustaceans               | 1                                                           |
| 56              | Dominican Republic | 2000           | Demersal Fish             | 12                                                          |
| 56              | Dominican Republic | 2000           | Eggs                      | 14                                                          |
| 56              | Dominican Republic | 2000           | Fats, Animals, Raw        | 4                                                           |
| 56              | Dominican Republic | 2000           | Freshwater Fish           | 1                                                           |
| 56              | Dominican Republic | 2000           | Fruits, Other             | 115                                                         |
| 56              | Dominican Republic | 2000           | Grapefruit                | 2                                                           |
| 56              | Dominican Republic | 2000           | Grapes                    | 2                                                           |
| 56              | Dominican Republic | 2000           | Lemons, Limes             | 2                                                           |
| 56              | Dominican Republic | 2000           | Maize                     | 23                                                          |
| 56              | Dominican Republic | 2000           | Maize Germ Oil            | 1                                                           |
| 56              | Dominican Republic | 2000           | Marine Fish, Other        | 1                                                           |
| 56              | Dominican Republic | 2000           | Milk, Whole               | 110                                                         |
| 56              | Dominican Republic | 2000           | Molluscs, Other           | 1                                                           |
| 56              | Dominican Republic | 2000           | Oats                      | 2                                                           |
| 56              | Dominican Republic | 2000           | Offals, Edible            | 5                                                           |
| 56              | Dominican Republic | 2000           | Oilcrops Oil, Other       | 1                                                           |
| 56              | Dominican Republic | 2000           | Onions                    | 10                                                          |
| 56              | Dominican Republic | 2000           | Oranges, Mandarines       | 36                                                          |
| 56              | Dominican Republic | 2000           | Palm Oil                  | 12                                                          |
| 56              | Dominican Republic | 2000           | Pelagic Fish              | 10                                                          |
| 56              | Dominican Republic | 2000           | Pig meat                  | 20                                                          |
| 56              | Dominican Republic | 2000           | Pineapples                | 17                                                          |
| 56              | Dominican Republic | 2000           | Plantains                 | 50                                                          |
| 56              | Dominican Republic | 2000           | Potatoes                  | 6                                                           |
| 56              | Dominican Republic | 2000           | Poultry Meat              | 67                                                          |
| 56              | Dominican Republic | 2000           | Pulses, Other             | 5                                                           |
| 56              | Dominican Republic | 2000           | Rice (Milled Equivalent)  | 122                                                         |
| 56              | Dominican Republic | 2000           | Roots, Other              | 7                                                           |
| 56              | Dominican Republic | 2000           | Soyabean Oil              | 28                                                          |
| 56              | Dominican Republic | 2000           | Spices, Other             | 1                                                           |
| 56              | Dominican Republic | 2000           | Sugar, Refined Equivalent | 87                                                          |
| 56              | Dominican Republic | 2000           | Sunflowerseed Oil         | 3                                                           |
| 56              | Dominican Republic | 2000           | Sweet Potatoes            | 7                                                           |
| 56              | Dominican Republic | 2000           | Sweeteners, Other         | 2                                                           |
| 56              | Dominican Republic | 2000           | Tomatoes                  | 81                                                          |
| 56              | Dominican Republic | 2000           | Vegetables, Other         | 26                                                          |
| 56              | Dominican Republic | 2000           | Wheat                     | 63                                                          |
| 56              | Dominican Republic | 2000           | Wine                      | 3                                                           |
| 56              | Dominican Republic | 2000           | Yams                      | 4                                                           |
| 56              | Dominican Republic | 2001           | Apples                    | 3                                                           |
| 56              | Dominican Republic | 2001           | Bananas                   | 83                                                          |
| 56              | Dominican Republic | 2001           | Beans                     | 13                                                          |
| 56              | Dominican Republic | 2001           | Beer                      | 90                                                          |
| 56              | Dominican Republic | 2001           | Beverages, Alcoholic      | 15                                                          |
| 56              | Dominican Republic | 2001           | Bovine Meat               | 22                                                          |
| 56              | Dominican Republic | 2001           | Butter, Ghee              | 1                                                           |
| 56              | Dominican Republic | 2001           | Cassava                   | 35                                                          |
| 56              | Dominican Republic | 2001           | Cheese                    | 2                                                           |
| 56              | Dominican Republic | 2001           | Coconut Oil               | 1                                                           |
| 56              | Dominican Republic | 2001           | Coconuts - Incl Copra     | 30                                                          |
| 56              | Dominican Republic | 2001           | Coffee                    | 9                                                           |
| 56              | Dominican Republic | 2001           | Crustaceans               | 1                                                           |
| 56              | Dominican Republic | 2001           | Demersal Fish             | 12                                                          |
| 56              | Dominican Republic | 2001           | Eggs                      | 16                                                          |
| 56              | Dominican Republic | 2001           | Fats, Animals, Raw        | 4                                                           |
| 56              | Dominican Republic | 2001           | Freshwater Fish           | 1                                                           |
| 56              | Dominican Republic | 2001           | Fruits, Other             | 154                                                         |
| 56              | Dominican Republic | 2001           | Grapefruit                | 2                                                           |
| 56              | Dominican Republic | 2001           | Grapes                    | 2                                                           |
| 56              | Dominican Republic | 2001           | Maize                     | 19                                                          |
| 56              | Dominican Republic | 2001           | Maize Germ Oil            | 1                                                           |
| 56              | Dominican Republic | 2001           | Marine Fish, Other        | 2                                                           |
| 56              | Dominican Republic | 2001           | Milk, Whole               | 117                                                         |
| 56              | Dominican Republic | 2001           | Molluscs, Other           | 1                                                           |
| 56              | Dominican Republic | 2001           | Oats                      | 2                                                           |
| 56              | Dominican Republic | 2001           | Offals, Edible            | 6                                                           |
| 56              | Dominican Republic | 2001           | Oilcrops Oil, Other       | 1                                                           |
| 56              | Dominican Republic | 2001           | Onions                    | 12                                                          |
| 56              | Dominican Republic | 2001           | Oranges, Mandarines       | 17                                                          |
| 56              | Dominican Republic | 2001           | Palm Oil                  | 11                                                          |
| 56              | Dominican Republic | 2001           | Pelagic Fish              | 9                                                           |
| 56              | Dominican Republic | 2001           | Pig meat                  | 20                                                          |
| 56              | Dominican Republic | 2001           | Pineapples                | 37                                                          |
| 56              | Dominican Republic | 2001           | Plantains                 | 92                                                          |
| 56              | Dominican Republic | 2001           | Potatoes                  | 17                                                          |
| 56              | Dominican Republic | 2001           | Poultry Meat              | 64                                                          |
| 56              | Dominican Republic | 2001           | Pulses, Other             | 9                                                           |
| 56              | Dominican Republic | 2001           | Rice (Milled Equivalent)  | 129                                                         |
| 56              | Dominican Republic | 2001           | Roots, Other              | 3                                                           |
| 56              | Dominican Republic | 2001           | Soyabean Oil              | 26                                                          |
| 56              | Dominican Republic | 2001           | Spices, Other             | 1                                                           |
| 56              | Dominican Republic | 2001           | Sugar, Refined Equivalent | 101                                                         |
| 56              | Dominican Republic | 2001           | Sunflowerseed Oil         | 3                                                           |
| 56              | Dominican Republic | 2001           | Sweet Potatoes            | 6                                                           |
| 56              | Dominican Republic | 2001           | Sweeteners, Other         | 1                                                           |
| 56              | Dominican Republic | 2001           | Tomatoes                  | 89                                                          |
| 56              | Dominican Republic | 2001           | Vegetables, Other         | 40                                                          |
| 56              | Dominican Republic | 2001           | Wheat                     | 41                                                          |
| 56              | Dominican Republic | 2001           | Wine                      | 3                                                           |

Dietary calcium and zinc deficiency risks are decreasing but remain prevalent

| FAO countrycode | Country            | Reference year | Food item                 | Gross food supply (g capita <sup>-1</sup> d <sup>-1</sup> ) |
|-----------------|--------------------|----------------|---------------------------|-------------------------------------------------------------|
| 56              | Dominican Republic | 2001           | Yams                      | 5                                                           |
| 56              | Dominican Republic | 2002           | Apples                    | 2                                                           |
| 56              | Dominican Republic | 2002           | Bananas                   | 104                                                         |
| 56              | Dominican Republic | 2002           | Beans                     | 12                                                          |
| 56              | Dominican Republic | 2002           | Beer                      | 101                                                         |
| 56              | Dominican Republic | 2002           | Beverages, Alcoholic      | 16                                                          |
| 56              | Dominican Republic | 2002           | Bovine Meat               | 22                                                          |
| 56              | Dominican Republic | 2002           | Butter, Ghee              | 1                                                           |
| 56              | Dominican Republic | 2002           | Cassava                   | 33                                                          |
| 56              | Dominican Republic | 2002           | Cheese                    | 2                                                           |
| 56              | Dominican Republic | 2002           | Cocoa Beans               | 2                                                           |
| 56              | Dominican Republic | 2002           | Coconut Oil               | 4                                                           |
| 56              | Dominican Republic | 2002           | Coconuts - Incl Copra     | 34                                                          |
| 56              | Dominican Republic | 2002           | Coffee                    | 9                                                           |
| 56              | Dominican Republic | 2002           | Crustaceans               | 1                                                           |
| 56              | Dominican Republic | 2002           | Demersal Fish             | 8                                                           |
| 56              | Dominican Republic | 2002           | Eggs                      | 19                                                          |
| 56              | Dominican Republic | 2002           | Fats, Animals, Raw        | 3                                                           |
| 56              | Dominican Republic | 2002           | Freshwater Fish           | 2                                                           |
| 56              | Dominican Republic | 2002           | Fruits, Other             | 169                                                         |
| 56              | Dominican Republic | 2002           | Grapefruit                | 3                                                           |
| 56              | Dominican Republic | 2002           | Grapes                    | 2                                                           |
| 56              | Dominican Republic | 2002           | Lemons, Limes             | 1                                                           |
| 56              | Dominican Republic | 2002           | Maize                     | 19                                                          |
| 56              | Dominican Republic | 2002           | Maize Germ Oil            | 1                                                           |
| 56              | Dominican Republic | 2002           | Marine Fish, Other        | 1                                                           |
| 56              | Dominican Republic | 2002           | Milk, Whole               | 141                                                         |
| 56              | Dominican Republic | 2002           | Molluscs, Other           | 1                                                           |
| 56              | Dominican Republic | 2002           | Oats                      | 1                                                           |
| 56              | Dominican Republic | 2002           | Offals, Edible            | 6                                                           |
| 56              | Dominican Republic | 2002           | Oilcrops Oil, Other       | 1                                                           |
| 56              | Dominican Republic | 2002           | Olives                    | 1                                                           |
| 56              | Dominican Republic | 2002           | Onions                    | 12                                                          |
| 56              | Dominican Republic | 2002           | Oranges, Mandarines       | 23                                                          |
| 56              | Dominican Republic | 2002           | Palm Oil                  | 11                                                          |
| 56              | Dominican Republic | 2002           | Pelagic Fish              | 13                                                          |
| 56              | Dominican Republic | 2002           | Pig meat                  | 20                                                          |
| 56              | Dominican Republic | 2002           | Pineapples                | 30                                                          |
| 56              | Dominican Republic | 2002           | Plantains                 | 89                                                          |
| 56              | Dominican Republic | 2002           | Potatoes                  | 14                                                          |
| 56              | Dominican Republic | 2002           | Poultry Meat              | 57                                                          |
| 56              | Dominican Republic | 2002           | Pulses, Other             | 10                                                          |
| 56              | Dominican Republic | 2002           | Rice (Milled Equivalent)  | 115                                                         |
| 56              | Dominican Republic | 2002           | Roots, Other              | 11                                                          |
| 56              | Dominican Republic | 2002           | Soybean Oil               | 21                                                          |
| 56              | Dominican Republic | 2002           | Spices, Other             | 1                                                           |
| 56              | Dominican Republic | 2002           | Sugar, Refined Equivalent | 101                                                         |
| 56              | Dominican Republic | 2002           | Sunflowerseed Oil         | 3                                                           |
| 56              | Dominican Republic | 2002           | Sweet Potatoes            | 7                                                           |
| 56              | Dominican Republic | 2002           | Sweeteners, Other         | 1                                                           |
| 56              | Dominican Republic | 2002           | Tomatoes                  | 69                                                          |
| 56              | Dominican Republic | 2002           | Vegetables, Other         | 44                                                          |
| 56              | Dominican Republic | 2002           | Wheat                     | 62                                                          |
| 56              | Dominican Republic | 2002           | Wine                      | 1                                                           |
| 56              | Dominican Republic | 2002           | Yams                      | 6                                                           |
| 56              | Dominican Republic | 2003           | Apples                    | 2                                                           |
| 56              | Dominican Republic | 2003           | Bananas                   | 102                                                         |
| 56              | Dominican Republic | 2003           | Beans                     | 15                                                          |
| 56              | Dominican Republic | 2003           | Beer                      | 102                                                         |
| 56              | Dominican Republic | 2003           | Beverages, Alcoholic      | 16                                                          |
| 56              | Dominican Republic | 2003           | Bovine Meat               | 21                                                          |
| 56              | Dominican Republic | 2003           | Butter, Ghee              | 1                                                           |
| 56              | Dominican Republic | 2003           | Cassava                   | 33                                                          |
| 56              | Dominican Republic | 2003           | Cereals, Other            | 1                                                           |
| 56              | Dominican Republic | 2003           | Cheese                    | 2                                                           |
| 56              | Dominican Republic | 2003           | Cocoa Beans               | 3                                                           |
| 56              | Dominican Republic | 2003           | Coconut Oil               | 3                                                           |
| 56              | Dominican Republic | 2003           | Coconuts - Incl Copra     | 28                                                          |
| 56              | Dominican Republic | 2003           | Coffee                    | 8                                                           |
| 56              | Dominican Republic | 2003           | Crustaceans               | 1                                                           |
| 56              | Dominican Republic | 2003           | Demersal Fish             | 6                                                           |
| 56              | Dominican Republic | 2003           | Eggs                      | 16                                                          |
| 56              | Dominican Republic | 2003           | Fats, Animals, Raw        | 3                                                           |
| 56              | Dominican Republic | 2003           | Freshwater Fish           | 1                                                           |
| 56              | Dominican Republic | 2003           | Fruits, Other             | 179                                                         |
| 56              | Dominican Republic | 2003           | Grapefruit                | 3                                                           |
| 56              | Dominican Republic | 2003           | Grapes                    | 2                                                           |
| 56              | Dominican Republic | 2003           | Honey                     | 1                                                           |
| 56              | Dominican Republic | 2003           | Lemons, Limes             | 1                                                           |
| 56              | Dominican Republic | 2003           | Maize                     | 16                                                          |
| 56              | Dominican Republic | 2003           | Maize Germ Oil            | 1                                                           |
| 56              | Dominican Republic | 2003           | Marine Fish, Other        | 2                                                           |
| 56              | Dominican Republic | 2003           | Milk, Whole               | 85                                                          |
| 56              | Dominican Republic | 2003           | Oats                      | 1                                                           |
| 56              | Dominican Republic | 2003           | Offals, Edible            | 5                                                           |
| 56              | Dominican Republic | 2003           | Onions                    | 13                                                          |
| 56              | Dominican Republic | 2003           | Oranges, Mandarines       | 42                                                          |
| 56              | Dominican Republic | 2003           | Palm Oil                  | 10                                                          |
| 56              | Dominican Republic | 2003           | Pelagic Fish              | 9                                                           |
| 56              | Dominican Republic | 2003           | Pig meat                  | 20                                                          |
| 56              | Dominican Republic | 2003           | Pineapples                | 26                                                          |
| 56              | Dominican Republic | 2003           | Plantains                 | 93                                                          |
| 56              | Dominican Republic | 2003           | Potatoes                  | 14                                                          |
| 56              | Dominican Republic | 2003           | Poultry Meat              | 47                                                          |
| 56              | Dominican Republic | 2003           | Pulses, Other             | 10                                                          |
| 56              | Dominican Republic | 2003           | Rice (Milled Equivalent)  | 93                                                          |
| 56              | Dominican Republic | 2003           | Roots, Other              | 15                                                          |

Dietary calcium and zinc deficiency risks are decreasing but remain prevalent

| FAO countrycode | Country            | Reference year | Food item                 | Gross food supply (g capita <sup>-1</sup> d <sup>-1</sup> ) |
|-----------------|--------------------|----------------|---------------------------|-------------------------------------------------------------|
| 56              | Dominican Republic | 2003           | Soyabean Oil              | 25                                                          |
| 56              | Dominican Republic | 2003           | Spices, Other             | 1                                                           |
| 56              | Dominican Republic | 2003           | Sugar, Refined Equivalent | 96                                                          |
| 56              | Dominican Republic | 2003           | Sunflowerseed Oil         | 3                                                           |
| 56              | Dominican Republic | 2003           | Sweet Potatoes            | 7                                                           |
| 56              | Dominican Republic | 2003           | Sweeteners, Other         | 1                                                           |
| 56              | Dominican Republic | 2003           | Tomatoes                  | 78                                                          |
| 56              | Dominican Republic | 2003           | Vegetables, Other         | 49                                                          |
| 56              | Dominican Republic | 2003           | Wheat                     | 51                                                          |
| 56              | Dominican Republic | 2003           | Wine                      | 2                                                           |
| 56              | Dominican Republic | 2003           | Yams                      | 7                                                           |
| 56              | Dominican Republic | 2004           | Apples                    | 2                                                           |
| 56              | Dominican Republic | 2004           | Bananas                   | 95                                                          |
| 56              | Dominican Republic | 2004           | Beans                     | 13                                                          |
| 56              | Dominican Republic | 2004           | Beer                      | 102                                                         |
| 56              | Dominican Republic | 2004           | Beverages, Alcoholic      | 16                                                          |
| 56              | Dominican Republic | 2004           | Bovine Meat               | 21                                                          |
| 56              | Dominican Republic | 2004           | Butter, Ghee              | 1                                                           |
| 56              | Dominican Republic | 2004           | Cassava                   | 24                                                          |
| 56              | Dominican Republic | 2004           | Cereals, Other            | 1                                                           |
| 56              | Dominican Republic | 2004           | Cheese                    | 2                                                           |
| 56              | Dominican Republic | 2004           | Cocoa Beans               | 1                                                           |
| 56              | Dominican Republic | 2004           | Coconut Oil               | 2                                                           |
| 56              | Dominican Republic | 2004           | Coconuts - Incl Copra     | 28                                                          |
| 56              | Dominican Republic | 2004           | Coffee                    | 10                                                          |
| 56              | Dominican Republic | 2004           | Crustaceans               | 1                                                           |
| 56              | Dominican Republic | 2004           | Demersal Fish             | 5                                                           |
| 56              | Dominican Republic | 2004           | Eggs                      | 14                                                          |
| 56              | Dominican Republic | 2004           | Fats, Animals, Raw        | 3                                                           |
| 56              | Dominican Republic | 2004           | Freshwater Fish           | 1                                                           |
| 56              | Dominican Republic | 2004           | Fruits, Other             | 142                                                         |
| 56              | Dominican Republic | 2004           | Grapefruit                | 3                                                           |
| 56              | Dominican Republic | 2004           | Grapes                    | 1                                                           |
| 56              | Dominican Republic | 2004           | Honey                     | 1                                                           |
| 56              | Dominican Republic | 2004           | Lemons, Limes             | 1                                                           |
| 56              | Dominican Republic | 2004           | Maize                     | 15                                                          |
| 56              | Dominican Republic | 2004           | Maize Germ Oil            | 1                                                           |
| 56              | Dominican Republic | 2004           | Marine Fish, Other        | 2                                                           |
| 56              | Dominican Republic | 2004           | Milk, Whole               | 90                                                          |
| 56              | Dominican Republic | 2004           | Oats                      | 1                                                           |
| 56              | Dominican Republic | 2004           | Offals, Edible            | 5                                                           |
| 56              | Dominican Republic | 2004           | Olive Oil                 | 1                                                           |
| 56              | Dominican Republic | 2004           | Onions                    | 11                                                          |
| 56              | Dominican Republic | 2004           | Oranges, Mandarines       | 36                                                          |
| 56              | Dominican Republic | 2004           | Palm Oil                  | 12                                                          |
| 56              | Dominican Republic | 2004           | Pelagic Fish              | 12                                                          |
| 56              | Dominican Republic | 2004           | Pigmeat                   | 16                                                          |
| 56              | Dominican Republic | 2004           | Pineapples                | 25                                                          |
| 56              | Dominican Republic | 2004           | Plantains                 | 82                                                          |
| 56              | Dominican Republic | 2004           | Potatoes                  | 11                                                          |
| 56              | Dominican Republic | 2004           | Poultry Meat              | 71                                                          |
| 56              | Dominican Republic | 2004           | Pulses, Other             | 9                                                           |
| 56              | Dominican Republic | 2004           | Rice (Milled Equivalent)  | 113                                                         |
| 56              | Dominican Republic | 2004           | Roots, Other              | 13                                                          |
| 56              | Dominican Republic | 2004           | Soyabean Oil              | 29                                                          |
| 56              | Dominican Republic | 2004           | Spices, Other             | 1                                                           |
| 56              | Dominican Republic | 2004           | Sugar, Refined Equivalent | 96                                                          |
| 56              | Dominican Republic | 2004           | Sunflowerseed Oil         | 3                                                           |
| 56              | Dominican Republic | 2004           | Sweet Potatoes            | 6                                                           |
| 56              | Dominican Republic | 2004           | Sweeteners, Other         | 1                                                           |
| 56              | Dominican Republic | 2004           | Tomatoes                  | 76                                                          |
| 56              | Dominican Republic | 2004           | Vegetables, Other         | 46                                                          |
| 56              | Dominican Republic | 2004           | Wheat                     | 54                                                          |
| 56              | Dominican Republic | 2004           | Wine                      | 2                                                           |
| 56              | Dominican Republic | 2004           | Yams                      | 4                                                           |
| 56              | Dominican Republic | 2005           | Apples                    | 4                                                           |
| 56              | Dominican Republic | 2005           | Bananas                   | 96                                                          |
| 56              | Dominican Republic | 2005           | Beans                     | 16                                                          |
| 56              | Dominican Republic | 2005           | Beer                      | 127                                                         |
| 56              | Dominican Republic | 2005           | Beverages, Alcoholic      | 14                                                          |
| 56              | Dominican Republic | 2005           | Bovine Meat               | 22                                                          |
| 56              | Dominican Republic | 2005           | Butter, Ghee              | 1                                                           |
| 56              | Dominican Republic | 2005           | Cassava                   | 26                                                          |
| 56              | Dominican Republic | 2005           | Cereals, Other            | 1                                                           |
| 56              | Dominican Republic | 2005           | Cheese                    | 2                                                           |
| 56              | Dominican Republic | 2005           | Cocoa Beans               | 1                                                           |
| 56              | Dominican Republic | 2005           | Coconut Oil               | 2                                                           |
| 56              | Dominican Republic | 2005           | Coconuts - Incl Copra     | 25                                                          |
| 56              | Dominican Republic | 2005           | Coffee                    | 11                                                          |
| 56              | Dominican Republic | 2005           | Crustaceans               | 1                                                           |
| 56              | Dominican Republic | 2005           | Demersal Fish             | 7                                                           |
| 56              | Dominican Republic | 2005           | Eggs                      | 17                                                          |
| 56              | Dominican Republic | 2005           | Fats, Animals, Raw        | 4                                                           |
| 56              | Dominican Republic | 2005           | Freshwater Fish           | 1                                                           |
| 56              | Dominican Republic | 2005           | Fruits, Other             | 134                                                         |
| 56              | Dominican Republic | 2005           | Grapefruit                | 3                                                           |
| 56              | Dominican Republic | 2005           | Grapes                    | 2                                                           |
| 56              | Dominican Republic | 2005           | Honey                     | 1                                                           |
| 56              | Dominican Republic | 2005           | Lemons, Limes             | 1                                                           |
| 56              | Dominican Republic | 2005           | Maize                     | 16                                                          |
| 56              | Dominican Republic | 2005           | Maize Germ Oil            | 1                                                           |
| 56              | Dominican Republic | 2005           | Marine Fish, Other        | 2                                                           |
| 56              | Dominican Republic | 2005           | Milk, Whole               | 110                                                         |
| 56              | Dominican Republic | 2005           | Mutton & Goat Meat        | 1                                                           |
| 56              | Dominican Republic | 2005           | Oats                      | 1                                                           |
| 56              | Dominican Republic | 2005           | Offals, Edible            | 5                                                           |
| 56              | Dominican Republic | 2005           | Onions                    | 16                                                          |

Dietary calcium and zinc deficiency risks are decreasing but remain prevalent

| FAO countrycode | Country            | Reference year | Food item                 | Gross food supply (g capita <sup>-1</sup> d <sup>-1</sup> ) |
|-----------------|--------------------|----------------|---------------------------|-------------------------------------------------------------|
| 56              | Dominican Republic | 2005           | Oranges, Mandarines       | 27                                                          |
| 56              | Dominican Republic | 2005           | Palm Oil                  | 12                                                          |
| 56              | Dominican Republic | 2005           | Pelagic Fish              | 8                                                           |
| 56              | Dominican Republic | 2005           | Pigmeat                   | 25                                                          |
| 56              | Dominican Republic | 2005           | Pineapples                | 17                                                          |
| 56              | Dominican Republic | 2005           | Plantains                 | 108                                                         |
| 56              | Dominican Republic | 2005           | Potatoes                  | 16                                                          |
| 56              | Dominican Republic | 2005           | Poultry Meat              | 87                                                          |
| 56              | Dominican Republic | 2005           | Pulses, Other             | 8                                                           |
| 56              | Dominican Republic | 2005           | Rice (Milled Equivalent)  | 129                                                         |
| 56              | Dominican Republic | 2005           | Roots, Other              | 5                                                           |
| 56              | Dominican Republic | 2005           | Soyabean Oil              | 26                                                          |
| 56              | Dominican Republic | 2005           | Spices, Other             | 1                                                           |
| 56              | Dominican Republic | 2005           | Sugar, Refined Equivalent | 97                                                          |
| 56              | Dominican Republic | 2005           | Sunflowerseed Oil         | 3                                                           |
| 56              | Dominican Republic | 2005           | Sweet Potatoes            | 7                                                           |
| 56              | Dominican Republic | 2005           | Sweeteners, Other         | 1                                                           |
| 56              | Dominican Republic | 2005           | Tomatoes                  | 77                                                          |
| 56              | Dominican Republic | 2005           | Vegetables, Other         | 55                                                          |
| 56              | Dominican Republic | 2005           | Wheat                     | 56                                                          |
| 56              | Dominican Republic | 2005           | Wine                      | 2                                                           |
| 56              | Dominican Republic | 2005           | Yams                      | 4                                                           |
| 56              | Dominican Republic | 2006           | Apples                    | 3                                                           |
| 56              | Dominican Republic | 2006           | Bananas                   | 71                                                          |
| 56              | Dominican Republic | 2006           | Beans                     | 14                                                          |
| 56              | Dominican Republic | 2006           | Beer                      | 131                                                         |
| 56              | Dominican Republic | 2006           | Beverages, Alcoholic      | 13                                                          |
| 56              | Dominican Republic | 2006           | Bovine Meat               | 28                                                          |
| 56              | Dominican Republic | 2006           | Butter, Ghee              | 1                                                           |
| 56              | Dominican Republic | 2006           | Cassava                   | 33                                                          |
| 56              | Dominican Republic | 2006           | Cheese                    | 2                                                           |
| 56              | Dominican Republic | 2006           | Cocoa Beans               | 1                                                           |
| 56              | Dominican Republic | 2006           | Coconut Oil               | 2                                                           |
| 56              | Dominican Republic | 2006           | Coconuts - Incl Copra     | 7                                                           |
| 56              | Dominican Republic | 2006           | Coffee                    | 13                                                          |
| 56              | Dominican Republic | 2006           | Crustaceans               | 1                                                           |
| 56              | Dominican Republic | 2006           | Demersal Fish             | 7                                                           |
| 56              | Dominican Republic | 2006           | Eggs                      | 19                                                          |
| 56              | Dominican Republic | 2006           | Fats, Animals, Raw        | 4                                                           |
| 56              | Dominican Republic | 2006           | Freshwater Fish           | 1                                                           |
| 56              | Dominican Republic | 2006           | Fruits, Other             | 147                                                         |
| 56              | Dominican Republic | 2006           | Grapefruit                | 3                                                           |
| 56              | Dominican Republic | 2006           | Grapes                    | 2                                                           |
| 56              | Dominican Republic | 2006           | Honey                     | 1                                                           |
| 56              | Dominican Republic | 2006           | Lemons, Limes             | 1                                                           |
| 56              | Dominican Republic | 2006           | Maize                     | 9                                                           |
| 56              | Dominican Republic | 2006           | Maize Germ Oil            | 2                                                           |
| 56              | Dominican Republic | 2006           | Marine Fish, Other        | 3                                                           |
| 56              | Dominican Republic | 2006           | Milk, Whole               | 121                                                         |
| 56              | Dominican Republic | 2006           | Mutton & Goat Meat        | 1                                                           |
| 56              | Dominican Republic | 2006           | Oats                      | 1                                                           |
| 56              | Dominican Republic | 2006           | Offals, Edible            | 6                                                           |
| 56              | Dominican Republic | 2006           | Olive Oil                 | 1                                                           |
| 56              | Dominican Republic | 2006           | Onions                    | 12                                                          |
| 56              | Dominican Republic | 2006           | Oranges, Mandarines       | 30                                                          |
| 56              | Dominican Republic | 2006           | Palm Oil                  | 12                                                          |
| 56              | Dominican Republic | 2006           | Pelagic Fish              | 10                                                          |
| 56              | Dominican Republic | 2006           | Pigmeat                   | 30                                                          |
| 56              | Dominican Republic | 2006           | Pineapples                | 18                                                          |
| 56              | Dominican Republic | 2006           | Plantains                 | 140                                                         |
| 56              | Dominican Republic | 2006           | Potatoes                  | 13                                                          |
| 56              | Dominican Republic | 2006           | Poultry Meat              | 92                                                          |
| 56              | Dominican Republic | 2006           | Pulses, Other             | 10                                                          |
| 56              | Dominican Republic | 2006           | Rice (Milled Equivalent)  | 133                                                         |
| 56              | Dominican Republic | 2006           | Roots, Other              | 6                                                           |
| 56              | Dominican Republic | 2006           | Soyabean Oil              | 25                                                          |
| 56              | Dominican Republic | 2006           | Spices, Other             | 1                                                           |
| 56              | Dominican Republic | 2006           | Sugar, Refined Equivalent | 92                                                          |
| 56              | Dominican Republic | 2006           | Sunflowerseed Oil         | 2                                                           |
| 56              | Dominican Republic | 2006           | Sweet Potatoes            | 5                                                           |
| 56              | Dominican Republic | 2006           | Sweeteners, Other         | 1                                                           |
| 56              | Dominican Republic | 2006           | Tomatoes                  | 65                                                          |
| 56              | Dominican Republic | 2006           | Vegetables, Other         | 47                                                          |
| 56              | Dominican Republic | 2006           | Wheat                     | 66                                                          |
| 56              | Dominican Republic | 2006           | Wine                      | 2                                                           |
| 56              | Dominican Republic | 2006           | Yams                      | 6                                                           |
| 56              | Dominican Republic | 2007           | Apples                    | 3                                                           |
| 56              | Dominican Republic | 2007           | Bananas                   | 73                                                          |
| 56              | Dominican Republic | 2007           | Beans                     | 15                                                          |
| 56              | Dominican Republic | 2007           | Beer                      | 110                                                         |
| 56              | Dominican Republic | 2007           | Beverages, Alcoholic      | 14                                                          |
| 56              | Dominican Republic | 2007           | Bovine Meat               | 29                                                          |
| 56              | Dominican Republic | 2007           | Butter, Ghee              | 1                                                           |
| 56              | Dominican Republic | 2007           | Cassava                   | 33                                                          |
| 56              | Dominican Republic | 2007           | Cereals, Other            | 2                                                           |
| 56              | Dominican Republic | 2007           | Cheese                    | 2                                                           |
| 56              | Dominican Republic | 2007           | Cocoa Beans               | 1                                                           |
| 56              | Dominican Republic | 2007           | Coconut Oil               | 2                                                           |
| 56              | Dominican Republic | 2007           | Coconuts - Incl Copra     | 7                                                           |
| 56              | Dominican Republic | 2007           | Coffee                    | 13                                                          |
| 56              | Dominican Republic | 2007           | Crustaceans               | 1                                                           |
| 56              | Dominican Republic | 2007           | Demersal Fish             | 6                                                           |
| 56              | Dominican Republic | 2007           | Eggs                      | 17                                                          |
| 56              | Dominican Republic | 2007           | Fats, Animals, Raw        | 4                                                           |
| 56              | Dominican Republic | 2007           | Freshwater Fish           | 1                                                           |
| 56              | Dominican Republic | 2007           | Fruits, Other             | 172                                                         |
| 56              | Dominican Republic | 2007           | Grapefruit                | 2                                                           |

Dietary calcium and zinc deficiency risks are decreasing but remain prevalent

| FAO countrycode | Country            | Reference year | Food item                 | Gross food supply (g capita <sup>-1</sup> d <sup>-1</sup> ) |
|-----------------|--------------------|----------------|---------------------------|-------------------------------------------------------------|
| 56              | Dominican Republic | 2007           | Grapes                    | 2                                                           |
| 56              | Dominican Republic | 2007           | Honey                     | 1                                                           |
| 56              | Dominican Republic | 2007           | Lemons, Limes             | 1                                                           |
| 56              | Dominican Republic | 2007           | Maize                     | 12                                                          |
| 56              | Dominican Republic | 2007           | Maize Germ Oil            | 2                                                           |
| 56              | Dominican Republic | 2007           | Marine Fish, Other        | 3                                                           |
| 56              | Dominican Republic | 2007           | Milk, Whole               | 129                                                         |
| 56              | Dominican Republic | 2007           | Molluscs, Other           | 1                                                           |
| 56              | Dominican Republic | 2007           | Mutton & Goat Meat        | 1                                                           |
| 56              | Dominican Republic | 2007           | Oats                      | 1                                                           |
| 56              | Dominican Republic | 2007           | Offals, Edible            | 6                                                           |
| 56              | Dominican Republic | 2007           | Onions                    | 14                                                          |
| 56              | Dominican Republic | 2007           | Oranges, Mandarines       | 31                                                          |
| 56              | Dominican Republic | 2007           | Palm Oil                  | 12                                                          |
| 56              | Dominican Republic | 2007           | Pelagic Fish              | 10                                                          |
| 56              | Dominican Republic | 2007           | Pigmeat                   | 28                                                          |
| 56              | Dominican Republic | 2007           | Pineapples                | 24                                                          |
| 56              | Dominican Republic | 2007           | Plantains                 | 128                                                         |
| 56              | Dominican Republic | 2007           | Potatoes                  | 13                                                          |
| 56              | Dominican Republic | 2007           | Poultry Meat              | 95                                                          |
| 56              | Dominican Republic | 2007           | Pulses, Other             | 8                                                           |
| 56              | Dominican Republic | 2007           | Rice (Milled Equivalent)  | 126                                                         |
| 56              | Dominican Republic | 2007           | Roots, Other              | 7                                                           |
| 56              | Dominican Republic | 2007           | Soyabean Oil              | 28                                                          |
| 56              | Dominican Republic | 2007           | Spices, Other             | 1                                                           |
| 56              | Dominican Republic | 2007           | Sugar, Refined Equivalent | 94                                                          |
| 56              | Dominican Republic | 2007           | Sunflowerseed Oil         | 2                                                           |
| 56              | Dominican Republic | 2007           | Sweet Potatoes            | 7                                                           |
| 56              | Dominican Republic | 2007           | Sweeteners, Other         | 2                                                           |
| 56              | Dominican Republic | 2007           | Tomatoes                  | 54                                                          |
| 56              | Dominican Republic | 2007           | Vegetables, Other         | 45                                                          |
| 56              | Dominican Republic | 2007           | Wheat                     | 70                                                          |
| 56              | Dominican Republic | 2007           | Wine                      | 3                                                           |
| 56              | Dominican Republic | 2007           | Yams                      | 7                                                           |
| 56              | Dominican Republic | 2008           | Apples                    | 3                                                           |
| 56              | Dominican Republic | 2008           | Bananas                   | 57                                                          |
| 56              | Dominican Republic | 2008           | Beans                     | 14                                                          |
| 56              | Dominican Republic | 2008           | Beer                      | 122                                                         |
| 56              | Dominican Republic | 2008           | Beverages, Alcoholic      | 13                                                          |
| 56              | Dominican Republic | 2008           | Bovine Meat               | 29                                                          |
| 56              | Dominican Republic | 2008           | Butter, Ghee              | 1                                                           |
| 56              | Dominican Republic | 2008           | Cassava                   | 27                                                          |
| 56              | Dominican Republic | 2008           | Cheese                    | 2                                                           |
| 56              | Dominican Republic | 2008           | Cocoa Beans               | 2                                                           |
| 56              | Dominican Republic | 2008           | Coconut Oil               | 2                                                           |
| 56              | Dominican Republic | 2008           | Coconuts - Incl Copra     | 8                                                           |
| 56              | Dominican Republic | 2008           | Coffee                    | 12                                                          |
| 56              | Dominican Republic | 2008           | Crustaceans               | 1                                                           |
| 56              | Dominican Republic | 2008           | Demersal Fish             | 7                                                           |
| 56              | Dominican Republic | 2008           | Eggs                      | 18                                                          |
| 56              | Dominican Republic | 2008           | Fats, Animals, Raw        | 4                                                           |
| 56              | Dominican Republic | 2008           | Freshwater Fish           | 1                                                           |
| 56              | Dominican Republic | 2008           | Fruits, Other             | 126                                                         |
| 56              | Dominican Republic | 2008           | Grapefruit                | 3                                                           |
| 56              | Dominican Republic | 2008           | Grapes                    | 2                                                           |
| 56              | Dominican Republic | 2008           | Honey                     | 1                                                           |
| 56              | Dominican Republic | 2008           | Lemons, Limes             | 1                                                           |
| 56              | Dominican Republic | 2008           | Maize                     | 19                                                          |
| 56              | Dominican Republic | 2008           | Maize Germ Oil            | 3                                                           |
| 56              | Dominican Republic | 2008           | Marine Fish, Other        | 3                                                           |
| 56              | Dominican Republic | 2008           | Milk, Whole               | 141                                                         |
| 56              | Dominican Republic | 2008           | Molluscs, Other           | 1                                                           |
| 56              | Dominican Republic | 2008           | Mutton & Goat Meat        | 1                                                           |
| 56              | Dominican Republic | 2008           | Oats                      | 1                                                           |
| 56              | Dominican Republic | 2008           | Offals, Edible            | 6                                                           |
| 56              | Dominican Republic | 2008           | Oilcrops Oil, Other       | 1                                                           |
| 56              | Dominican Republic | 2008           | Onions                    | 15                                                          |
| 56              | Dominican Republic | 2008           | Oranges, Mandarines       | 27                                                          |
| 56              | Dominican Republic | 2008           | Palm Oil                  | 13                                                          |
| 56              | Dominican Republic | 2008           | Pelagic Fish              | 11                                                          |
| 56              | Dominican Republic | 2008           | Pigmeat                   | 28                                                          |
| 56              | Dominican Republic | 2008           | Pineapples                | 27                                                          |
| 56              | Dominican Republic | 2008           | Plantains                 | 88                                                          |
| 56              | Dominican Republic | 2008           | Potatoes                  | 11                                                          |
| 56              | Dominican Republic | 2008           | Poultry Meat              | 87                                                          |
| 56              | Dominican Republic | 2008           | Pulses, Other             | 7                                                           |
| 56              | Dominican Republic | 2008           | Rice (Milled Equivalent)  | 123                                                         |
| 56              | Dominican Republic | 2008           | Roots, Other              | 5                                                           |
| 56              | Dominican Republic | 2008           | Soyabean Oil              | 28                                                          |
| 56              | Dominican Republic | 2008           | Spices, Other             | 1                                                           |
| 56              | Dominican Republic | 2008           | Sugar, Refined Equivalent | 92                                                          |
| 56              | Dominican Republic | 2008           | Sunflowerseed Oil         | 2                                                           |
| 56              | Dominican Republic | 2008           | Sweet Potatoes            | 4                                                           |
| 56              | Dominican Republic | 2008           | Sweeteners, Other         | 2                                                           |
| 56              | Dominican Republic | 2008           | Tomatoes                  | 61                                                          |
| 56              | Dominican Republic | 2008           | Vegetables, Other         | 46                                                          |
| 56              | Dominican Republic | 2008           | Wheat                     | 68                                                          |
| 56              | Dominican Republic | 2008           | Wine                      | 2                                                           |
| 56              | Dominican Republic | 2008           | Yams                      | 7                                                           |
| 56              | Dominican Republic | 2009           | Apples                    | 3                                                           |
| 56              | Dominican Republic | 2009           | Bananas                   | 69                                                          |
| 56              | Dominican Republic | 2009           | Beans                     | 14                                                          |
| 56              | Dominican Republic | 2009           | Beer                      | 106                                                         |
| 56              | Dominican Republic | 2009           | Beverages, Alcoholic      | 10                                                          |
| 56              | Dominican Republic | 2009           | Bovine Meat               | 29                                                          |
| 56              | Dominican Republic | 2009           | Butter, Ghee              | 1                                                           |
| 56              | Dominican Republic | 2009           | Cassava                   | 41                                                          |

Dietary calcium and zinc deficiency risks are decreasing but remain prevalent

| FAO countrycode | Country            | Reference year | Food item                 | Gross food supply (g capita <sup>-1</sup> d <sup>-1</sup> ) |
|-----------------|--------------------|----------------|---------------------------|-------------------------------------------------------------|
| 56              | Dominican Republic | 2009           | Cheese                    | 2                                                           |
| 56              | Dominican Republic | 2009           | Cocoa Beans               | 2                                                           |
| 56              | Dominican Republic | 2009           | Coconut Oil               | 2                                                           |
| 56              | Dominican Republic | 2009           | Coconuts - Incl Copra     | 8                                                           |
| 56              | Dominican Republic | 2009           | Coffee                    | 9                                                           |
| 56              | Dominican Republic | 2009           | Crustaceans               | 1                                                           |
| 56              | Dominican Republic | 2009           | Demersal Fish             | 7                                                           |
| 56              | Dominican Republic | 2009           | Eggs                      | 19                                                          |
| 56              | Dominican Republic | 2009           | Fats, Animals, Raw        | 4                                                           |
| 56              | Dominican Republic | 2009           | Freshwater Fish           | 1                                                           |
| 56              | Dominican Republic | 2009           | Fruits, Other             | 223                                                         |
| 56              | Dominican Republic | 2009           | Grapefruit                | 3                                                           |
| 56              | Dominican Republic | 2009           | Grapes                    | 3                                                           |
| 56              | Dominican Republic | 2009           | Honey                     | 1                                                           |
| 56              | Dominican Republic | 2009           | Lemons, Limes             | 2                                                           |
| 56              | Dominican Republic | 2009           | Maize                     | 18                                                          |
| 56              | Dominican Republic | 2009           | Maize Germ Oil            | 1                                                           |
| 56              | Dominican Republic | 2009           | Marine Fish, Other        | 2                                                           |
| 56              | Dominican Republic | 2009           | Milk, Whole               | 137                                                         |
| 56              | Dominican Republic | 2009           | Molluscs, Other           | 1                                                           |
| 56              | Dominican Republic | 2009           | Mutton & Goat Meat        | 1                                                           |
| 56              | Dominican Republic | 2009           | Oats                      | 2                                                           |
| 56              | Dominican Republic | 2009           | Offals, Edible            | 6                                                           |
| 56              | Dominican Republic | 2009           | Oilcrops Oil, Other       | 1                                                           |
| 56              | Dominican Republic | 2009           | Onions                    | 15                                                          |
| 56              | Dominican Republic | 2009           | Oranges, Mandarines       | 32                                                          |
| 56              | Dominican Republic | 2009           | Palm Oil                  | 14                                                          |
| 56              | Dominican Republic | 2009           | Pelagic Fish              | 13                                                          |
| 56              | Dominican Republic | 2009           | Pig meat                  | 28                                                          |
| 56              | Dominican Republic | 2009           | Pineapples                | 31                                                          |
| 56              | Dominican Republic | 2009           | Plantains                 | 128                                                         |
| 56              | Dominican Republic | 2009           | Potatoes                  | 11                                                          |
| 56              | Dominican Republic | 2009           | Poultry Meat              | 93                                                          |
| 56              | Dominican Republic | 2009           | Pulses, Other             | 10                                                          |
| 56              | Dominican Republic | 2009           | Rice (Milled Equivalent)  | 133                                                         |
| 56              | Dominican Republic | 2009           | Roots, Other              | 6                                                           |
| 56              | Dominican Republic | 2009           | Soyabean Oil              | 28                                                          |
| 56              | Dominican Republic | 2009           | Spices, Other             | 1                                                           |
| 56              | Dominican Republic | 2009           | Sugar, Refined Equivalent | 85                                                          |
| 56              | Dominican Republic | 2009           | Sunflowerseed Oil         | 2                                                           |
| 56              | Dominican Republic | 2009           | Sweet Potatoes            | 9                                                           |
| 56              | Dominican Republic | 2009           | Sweeteners, Other         | 2                                                           |
| 56              | Dominican Republic | 2009           | Tomatoes                  | 58                                                          |
| 56              | Dominican Republic | 2009           | Vegetables, Other         | 52                                                          |
| 56              | Dominican Republic | 2009           | Wheat                     | 52                                                          |
| 56              | Dominican Republic | 2009           | Wine                      | 2                                                           |
| 56              | Dominican Republic | 2009           | Yams                      | 7                                                           |
| 56              | Dominican Republic | 2010           | Apples                    | 4                                                           |
| 56              | Dominican Republic | 2010           | Bananas                   | 88                                                          |
| 56              | Dominican Republic | 2010           | Beans                     | 16                                                          |
| 56              | Dominican Republic | 2010           | Beer                      | 130                                                         |
| 56              | Dominican Republic | 2010           | Beverages, Alcoholic      | 11                                                          |
| 56              | Dominican Republic | 2010           | Bovine Meat               | 32                                                          |
| 56              | Dominican Republic | 2010           | Butter, Ghee              | 1                                                           |
| 56              | Dominican Republic | 2010           | Cassava                   | 52                                                          |
| 56              | Dominican Republic | 2010           | Cheese                    | 3                                                           |
| 56              | Dominican Republic | 2010           | Cocoa Beans               | 2                                                           |
| 56              | Dominican Republic | 2010           | Coconut Oil               | 2                                                           |
| 56              | Dominican Republic | 2010           | Coconuts - Incl Copra     | 19                                                          |
| 56              | Dominican Republic | 2010           | Coffee                    | 5                                                           |
| 56              | Dominican Republic | 2010           | Crustaceans               | 1                                                           |
| 56              | Dominican Republic | 2010           | Demersal Fish             | 7                                                           |
| 56              | Dominican Republic | 2010           | Eggs                      | 22                                                          |
| 56              | Dominican Republic | 2010           | Fats, Animals, Raw        | 4                                                           |
| 56              | Dominican Republic | 2010           | Freshwater Fish           | 1                                                           |
| 56              | Dominican Republic | 2010           | Fruits, Other             | 304                                                         |
| 56              | Dominican Republic | 2010           | Grapefruit                | 5                                                           |
| 56              | Dominican Republic | 2010           | Grapes                    | 3                                                           |
| 56              | Dominican Republic | 2010           | Honey                     | 1                                                           |
| 56              | Dominican Republic | 2010           | Lemons, Limes             | 1                                                           |
| 56              | Dominican Republic | 2010           | Maize                     | 17                                                          |
| 56              | Dominican Republic | 2010           | Maize Germ Oil            | 1                                                           |
| 56              | Dominican Republic | 2010           | Marine Fish, Other        | 2                                                           |
| 56              | Dominican Republic | 2010           | Milk, Whole               | 117                                                         |
| 56              | Dominican Republic | 2010           | Molluscs, Other           | 1                                                           |
| 56              | Dominican Republic | 2010           | Mutton & Goat Meat        | 1                                                           |
| 56              | Dominican Republic | 2010           | Oats                      | 1                                                           |
| 56              | Dominican Republic | 2010           | Offals, Edible            | 7                                                           |
| 56              | Dominican Republic | 2010           | Onions                    | 16                                                          |
| 56              | Dominican Republic | 2010           | Oranges, Mandarines       | 33                                                          |
| 56              | Dominican Republic | 2010           | Palm Oil                  | 16                                                          |
| 56              | Dominican Republic | 2010           | Pelagic Fish              | 13                                                          |
| 56              | Dominican Republic | 2010           | Pigmeat                   | 29                                                          |
| 56              | Dominican Republic | 2010           | Pineapples                | 38                                                          |
| 56              | Dominican Republic | 2010           | Plantains                 | 119                                                         |
| 56              | Dominican Republic | 2010           | Potatoes                  | 13                                                          |
| 56              | Dominican Republic | 2010           | Poultry Meat              | 96                                                          |
| 56              | Dominican Republic | 2010           | Pulses, Other             | 10                                                          |
| 56              | Dominican Republic | 2010           | Rice (Milled Equivalent)  | 135                                                         |
| 56              | Dominican Republic | 2010           | Roots, Other              | 7                                                           |
| 56              | Dominican Republic | 2010           | Soyabean Oil              | 26                                                          |
| 56              | Dominican Republic | 2010           | Spices, Other             | 1                                                           |
| 56              | Dominican Republic | 2010           | Sugar, Refined Equivalent | 79                                                          |
| 56              | Dominican Republic | 2010           | Sunflowerseed Oil         | 1                                                           |
| 56              | Dominican Republic | 2010           | Sweet Potatoes            | 11                                                          |
| 56              | Dominican Republic | 2010           | Sweeteners, Other         | 3                                                           |
| 56              | Dominican Republic | 2010           | Tomatoes                  | 58                                                          |



Dietary calcium and zinc deficiency risks are decreasing but remain prevalent

| FAO countrycode | Country            | Reference year | Food item                 | Gross food supply (g capita <sup>-1</sup> d <sup>-1</sup> ) |
|-----------------|--------------------|----------------|---------------------------|-------------------------------------------------------------|
| 56              | Dominican Republic | 2010           | Vegetables, Other         | 53                                                          |
| 56              | Dominican Republic | 2010           | Wheat                     | 79                                                          |
| 56              | Dominican Republic | 2010           | Wine                      | 2                                                           |
| 56              | Dominican Republic | 2010           | Yams                      | 7                                                           |
| 56              | Dominican Republic | 2011           | Apples                    | 4                                                           |
| 56              | Dominican Republic | 2011           | Bananas                   | 120                                                         |
| 56              | Dominican Republic | 2011           | Beans                     | 21                                                          |
| 56              | Dominican Republic | 2011           | Beer                      | 130                                                         |
| 56              | Dominican Republic | 2011           | Beverages, Alcoholic      | 10                                                          |
| 56              | Dominican Republic | 2011           | Bovine Meat               | 28                                                          |
| 56              | Dominican Republic | 2011           | Butter, Ghee              | 1                                                           |
| 56              | Dominican Republic | 2011           | Cassava                   | 45                                                          |
| 56              | Dominican Republic | 2011           | Cheese                    | 3                                                           |
| 56              | Dominican Republic | 2011           | Cocoa Beans               | 2                                                           |
| 56              | Dominican Republic | 2011           | Coconut Oil               | 2                                                           |
| 56              | Dominican Republic | 2011           | Coconuts - Incl Copra     | 23                                                          |
| 56              | Dominican Republic | 2011           | Coffee                    | 6                                                           |
| 56              | Dominican Republic | 2011           | Crustaceans               | 1                                                           |
| 56              | Dominican Republic | 2011           | Demersal Fish             | 7                                                           |
| 56              | Dominican Republic | 2011           | Eggs                      | 19                                                          |
| 56              | Dominican Republic | 2011           | Fats, Animals, Raw        | 4                                                           |
| 56              | Dominican Republic | 2011           | Freshwater Fish           | 1                                                           |
| 56              | Dominican Republic | 2011           | Fruits, Other             | 293                                                         |
| 56              | Dominican Republic | 2011           | Grapefruit                | 3                                                           |
| 56              | Dominican Republic | 2011           | Grapes                    | 2                                                           |
| 56              | Dominican Republic | 2011           | Honey                     | 1                                                           |
| 56              | Dominican Republic | 2011           | Lemons, Limes             | 2                                                           |
| 56              | Dominican Republic | 2011           | Maize                     | 17                                                          |
| 56              | Dominican Republic | 2011           | Maize Germ Oil            | 1                                                           |
| 56              | Dominican Republic | 2011           | Marine Fish, Other        | 2                                                           |
| 56              | Dominican Republic | 2011           | Milk, Whole               | 110                                                         |
| 56              | Dominican Republic | 2011           | Molluscs, Other           | 1                                                           |
| 56              | Dominican Republic | 2011           | Mutton & Goat Meat        | 1                                                           |
| 56              | Dominican Republic | 2011           | Oats                      | 1                                                           |
| 56              | Dominican Republic | 2011           | Offals, Edible            | 6                                                           |
| 56              | Dominican Republic | 2011           | Olive Oil                 | 1                                                           |
| 56              | Dominican Republic | 2011           | Onions                    | 21                                                          |
| 56              | Dominican Republic | 2011           | Oranges, Mandarines       | 33                                                          |
| 56              | Dominican Republic | 2011           | Palm Oil                  | 21                                                          |
| 56              | Dominican Republic | 2011           | Pelagic Fish              | 13                                                          |
| 56              | Dominican Republic | 2011           | Pigmeat                   | 32                                                          |
| 56              | Dominican Republic | 2011           | Pineapples                | 52                                                          |
| 56              | Dominican Republic | 2011           | Plantains                 | 120                                                         |
| 56              | Dominican Republic | 2011           | Potatoes                  | 14                                                          |
| 56              | Dominican Republic | 2011           | Poultry Meat              | 92                                                          |
| 56              | Dominican Republic | 2011           | Pulses, Other             | 10                                                          |
| 56              | Dominican Republic | 2011           | Rice (Milled Equivalent)  | 135                                                         |
| 56              | Dominican Republic | 2011           | Roots, Other              | 8                                                           |
| 56              | Dominican Republic | 2011           | Soyabean Oil              | 26                                                          |
| 56              | Dominican Republic | 2011           | Spices, Other             | 1                                                           |
| 56              | Dominican Republic | 2011           | Sugar, Refined Equivalent | 79                                                          |
| 56              | Dominican Republic | 2011           | Sunflowerseed Oil         | 1                                                           |
| 56              | Dominican Republic | 2011           | Sweet Potatoes            | 9                                                           |
| 56              | Dominican Republic | 2011           | Sweeteners, Other         | 1                                                           |
| 56              | Dominican Republic | 2011           | Tomatoes                  | 69                                                          |
| 56              | Dominican Republic | 2011           | Vegetables, Other         | 57                                                          |
| 56              | Dominican Republic | 2011           | Wheat                     | 83                                                          |
| 56              | Dominican Republic | 2011           | Wine                      | 3                                                           |
| 56              | Dominican Republic | 2011           | Yams                      | 7                                                           |
| 58              | Ecuador            | 1992           | Apples                    | 6                                                           |
| 58              | Ecuador            | 1992           | Bananas                   | 220                                                         |
| 58              | Ecuador            | 1992           | Barley                    | 7                                                           |
| 58              | Ecuador            | 1992           | Beans                     | 8                                                           |
| 58              | Ecuador            | 1992           | Beer                      | 47                                                          |
| 58              | Ecuador            | 1992           | Beverages, Alcoholic      | 4                                                           |
| 58              | Ecuador            | 1992           | Bovine Meat               | 29                                                          |
| 58              | Ecuador            | 1992           | Butter, Ghee              | 2                                                           |
| 58              | Ecuador            | 1992           | Cassava                   | 15                                                          |
| 58              | Ecuador            | 1992           | Cheese                    | 2                                                           |
| 58              | Ecuador            | 1992           | Citrus, Other             | 10                                                          |
| 58              | Ecuador            | 1992           | Cocoa Beans               | 4                                                           |
| 58              | Ecuador            | 1992           | Coconut Oil               | 1                                                           |
| 58              | Ecuador            | 1992           | Coconuts - Incl Copra     | 2                                                           |
| 58              | Ecuador            | 1992           | Coffee                    | 11                                                          |
| 58              | Ecuador            | 1992           | Cottonseed Oil            | 1                                                           |
| 58              | Ecuador            | 1992           | Crustaceans               | 6                                                           |
| 58              | Ecuador            | 1992           | Demersal Fish             | 1                                                           |
| 58              | Ecuador            | 1992           | Eggs                      | 12                                                          |
| 58              | Ecuador            | 1992           | Fats, Animals, Raw        | 7                                                           |
| 58              | Ecuador            | 1992           | Freshwater Fish           | 1                                                           |
| 58              | Ecuador            | 1992           | Fruits, Other             | 35                                                          |
| 58              | Ecuador            | 1992           | Grapes                    | 1                                                           |
| 58              | Ecuador            | 1992           | Groundnuts (Shelled Eq)   | 1                                                           |
| 58              | Ecuador            | 1992           | Lemons, Limes             | 2                                                           |
| 58              | Ecuador            | 1992           | Maize                     | 15                                                          |
| 58              | Ecuador            | 1992           | Marine Fish, Other        | 1                                                           |
| 58              | Ecuador            | 1992           | Meat, Other               | 2                                                           |
| 58              | Ecuador            | 1992           | Milk, Whole               | 223                                                         |
| 58              | Ecuador            | 1992           | Mutton & Goat Meat        | 1                                                           |
| 58              | Ecuador            | 1992           | Oats                      | 6                                                           |
| 58              | Ecuador            | 1992           | Offals, Edible            | 7                                                           |
| 58              | Ecuador            | 1992           | Oranges, Mandarines       | 23                                                          |
| 58              | Ecuador            | 1992           | Palm Oil                  | 26                                                          |
| 58              | Ecuador            | 1992           | Palmkernel Oil            | 1                                                           |
| 58              | Ecuador            | 1992           | Peas                      | 2                                                           |
| 58              | Ecuador            | 1992           | Pelagic Fish              | 11                                                          |
| 58              | Ecuador            | 1992           | Pigmeat                   | 21                                                          |

Dietary calcium and zinc deficiency risks are decreasing but remain prevalent

| FAO countrycode | Country | Reference year | Food item                 | Gross food supply (g capita <sup>-1</sup> d <sup>-1</sup> ) |
|-----------------|---------|----------------|---------------------------|-------------------------------------------------------------|
| 58              | Ecuador | 1992           | Pineapples                | 10                                                          |
| 58              | Ecuador | 1992           | Plantains                 | 177                                                         |
| 58              | Ecuador | 1992           | Potatoes                  | 97                                                          |
| 58              | Ecuador | 1992           | Poultry Meat              | 21                                                          |
| 58              | Ecuador | 1992           | Pulses, Other             | 4                                                           |
| 58              | Ecuador | 1992           | Rice (Milled Equivalent)  | 131                                                         |
| 58              | Ecuador | 1992           | Roots, Other              | 1                                                           |
| 58              | Ecuador | 1992           | Soyabean Oil              | 13                                                          |
| 58              | Ecuador | 1992           | Sugar, Refined Equivalent | 66                                                          |
| 58              | Ecuador | 1992           | Sunflowerseed Oil         | 3                                                           |
| 58              | Ecuador | 1992           | Sweeteners, Other         | 6                                                           |
| 58              | Ecuador | 1992           | Tomatoes                  | 25                                                          |
| 58              | Ecuador | 1992           | Vegetables, Other         | 57                                                          |
| 58              | Ecuador | 1992           | Wheat                     | 95                                                          |
| 58              | Ecuador | 1992           | Wine                      | 1                                                           |
| 58              | Ecuador | 1993           | Apples                    | 8                                                           |
| 58              | Ecuador | 1993           | Bananas                   | 345                                                         |
| 58              | Ecuador | 1993           | Barley                    | 6                                                           |
| 58              | Ecuador | 1993           | Beans                     | 8                                                           |
| 58              | Ecuador | 1993           | Beer                      | 42                                                          |
| 58              | Ecuador | 1993           | Beverages, Alcoholic      | 4                                                           |
| 58              | Ecuador | 1993           | Bovine Meat               | 32                                                          |
| 58              | Ecuador | 1993           | Butter, Ghee              | 2                                                           |
| 58              | Ecuador | 1993           | Cassava                   | 14                                                          |
| 58              | Ecuador | 1993           | Cheese                    | 3                                                           |
| 58              | Ecuador | 1993           | Citrus, Other             | 6                                                           |
| 58              | Ecuador | 1993           | Cocoa Beans               | 4                                                           |
| 58              | Ecuador | 1993           | Coconut Oil               | 1                                                           |
| 58              | Ecuador | 1993           | Coconuts - Incl Copra     | 2                                                           |
| 58              | Ecuador | 1993           | Coffee                    | 9                                                           |
| 58              | Ecuador | 1993           | Crustaceans               | 7                                                           |
| 58              | Ecuador | 1993           | Demersal Fish             | 1                                                           |
| 58              | Ecuador | 1993           | Eggs                      | 11                                                          |
| 58              | Ecuador | 1993           | Fats, Animals, Raw        | 7                                                           |
| 58              | Ecuador | 1993           | Freshwater Fish           | 1                                                           |
| 58              | Ecuador | 1993           | Fruits, Other             | 21                                                          |
| 58              | Ecuador | 1993           | Grapefruit                | 1                                                           |
| 58              | Ecuador | 1993           | Grapes                    | 1                                                           |
| 58              | Ecuador | 1993           | Groundnuts (Shelled Eq)   | 1                                                           |
| 58              | Ecuador | 1993           | Lemons, Limes             | 3                                                           |
| 58              | Ecuador | 1993           | Maize                     | 13                                                          |
| 58              | Ecuador | 1993           | Marine Fish, Other        | 1                                                           |
| 58              | Ecuador | 1993           | Meat, Other               | 2                                                           |
| 58              | Ecuador | 1993           | Milk, Whole               | 228                                                         |
| 58              | Ecuador | 1993           | Mutton & Goat Meat        | 2                                                           |
| 58              | Ecuador | 1993           | Oats                      | 5                                                           |
| 58              | Ecuador | 1993           | Offals, Edible            | 8                                                           |
| 58              | Ecuador | 1993           | Oranges, Mandarines       | 26                                                          |
| 58              | Ecuador | 1993           | Palm Oil                  | 28                                                          |
| 58              | Ecuador | 1993           | Palmkernel Oil            | 1                                                           |
| 58              | Ecuador | 1993           | Peas                      | 2                                                           |
| 58              | Ecuador | 1993           | Pelagic Fish              | 10                                                          |
| 58              | Ecuador | 1993           | Pigmeat                   | 21                                                          |
| 58              | Ecuador | 1993           | Pineapples                | 11                                                          |
| 58              | Ecuador | 1993           | Plantains                 | 145                                                         |
| 58              | Ecuador | 1993           | Potatoes                  | 79                                                          |
| 58              | Ecuador | 1993           | Poultry Meat              | 20                                                          |
| 58              | Ecuador | 1993           | Pulses, Other             | 3                                                           |
| 58              | Ecuador | 1993           | Rice (Milled Equivalent)  | 159                                                         |
| 58              | Ecuador | 1993           | Soyabean Oil              | 9                                                           |
| 58              | Ecuador | 1993           | Sugar, Refined Equivalent | 66                                                          |
| 58              | Ecuador | 1993           | Sweeteners, Other         | 1                                                           |
| 58              | Ecuador | 1993           | Tomatoes                  | 21                                                          |
| 58              | Ecuador | 1993           | Vegetables, Other         | 58                                                          |
| 58              | Ecuador | 1993           | Wheat                     | 88                                                          |
| 58              | Ecuador | 1993           | Wine                      | 2                                                           |
| 58              | Ecuador | 1994           | Apples                    | 10                                                          |
| 58              | Ecuador | 1994           | Bananas                   | 377                                                         |
| 58              | Ecuador | 1994           | Barley                    | 4                                                           |
| 58              | Ecuador | 1994           | Beans                     | 6                                                           |
| 58              | Ecuador | 1994           | Beer                      | 25                                                          |
| 58              | Ecuador | 1994           | Beverages, Alcoholic      | 5                                                           |
| 58              | Ecuador | 1994           | Bovine Meat               | 32                                                          |
| 58              | Ecuador | 1994           | Butter, Ghee              | 2                                                           |
| 58              | Ecuador | 1994           | Cassava                   | 14                                                          |
| 58              | Ecuador | 1994           | Cheese                    | 3                                                           |
| 58              | Ecuador | 1994           | Citrus, Other             | 5                                                           |
| 58              | Ecuador | 1994           | Cocoa Beans               | 2                                                           |
| 58              | Ecuador | 1994           | Coconut Oil               | 1                                                           |
| 58              | Ecuador | 1994           | Coconuts - Incl Copra     | 2                                                           |
| 58              | Ecuador | 1994           | Coffee                    | 9                                                           |
| 58              | Ecuador | 1994           | Crustaceans               | 6                                                           |
| 58              | Ecuador | 1994           | Demersal Fish             | 3                                                           |
| 58              | Ecuador | 1994           | Eggs                      | 11                                                          |
| 58              | Ecuador | 1994           | Fats, Animals, Raw        | 7                                                           |
| 58              | Ecuador | 1994           | Fruits, Other             | 29                                                          |
| 58              | Ecuador | 1994           | Grapefruit                | 1                                                           |
| 58              | Ecuador | 1994           | Grapes                    | 2                                                           |
| 58              | Ecuador | 1994           | Groundnuts (Shelled Eq)   | 1                                                           |
| 58              | Ecuador | 1994           | Lemons, Limes             | 3                                                           |
| 58              | Ecuador | 1994           | Maize                     | 11                                                          |
| 58              | Ecuador | 1994           | Meat, Other               | 2                                                           |
| 58              | Ecuador | 1994           | Milk, Whole               | 247                                                         |
| 58              | Ecuador | 1994           | Mutton & Goat Meat        | 2                                                           |
| 58              | Ecuador | 1994           | Oats                      | 6                                                           |
| 58              | Ecuador | 1994           | Offals, Edible            | 8                                                           |
| 58              | Ecuador | 1994           | Oranges, Mandarines       | 26                                                          |

Dietary calcium and zinc deficiency risks are decreasing but remain prevalent

| FAO countrycode | Country | Reference year | Food item                 | Gross food supply (g capita <sup>-1</sup> d <sup>-1</sup> ) |
|-----------------|---------|----------------|---------------------------|-------------------------------------------------------------|
| 58              | Ecuador | 1994           | Palm Oil                  | 26                                                          |
| 58              | Ecuador | 1994           | Palmkernel Oil            | 1                                                           |
| 58              | Ecuador | 1994           | Peas                      | 2                                                           |
| 58              | Ecuador | 1994           | Pelagic Fish              | 10                                                          |
| 58              | Ecuador | 1994           | Pigmeat                   | 21                                                          |
| 58              | Ecuador | 1994           | Pineapples                | 13                                                          |
| 58              | Ecuador | 1994           | Plantains                 | 159                                                         |
| 58              | Ecuador | 1994           | Potatoes                  | 100                                                         |
| 58              | Ecuador | 1994           | Poultry Meat              | 26                                                          |
| 58              | Ecuador | 1994           | Pulses, Other             | 4                                                           |
| 58              | Ecuador | 1994           | Rice (Milled Equivalent)  | 170                                                         |
| 58              | Ecuador | 1994           | Roots, Other              | 1                                                           |
| 58              | Ecuador | 1994           | Soyabean Oil              | 8                                                           |
| 58              | Ecuador | 1994           | Sugar, Refined Equivalent | 67                                                          |
| 58              | Ecuador | 1994           | Sweeteners, Other         | 2                                                           |
| 58              | Ecuador | 1994           | Tomatoes                  | 18                                                          |
| 58              | Ecuador | 1994           | Vegetables, Other         | 52                                                          |
| 58              | Ecuador | 1994           | Wheat                     | 89                                                          |
| 58              | Ecuador | 1994           | Wine                      | 4                                                           |
| 58              | Ecuador | 1995           | Apples                    | 8                                                           |
| 58              | Ecuador | 1995           | Bananas                   | 272                                                         |
| 58              | Ecuador | 1995           | Barley                    | 9                                                           |
| 58              | Ecuador | 1995           | Beans                     | 6                                                           |
| 58              | Ecuador | 1995           | Beer                      | 21                                                          |
| 58              | Ecuador | 1995           | Beverages, Alcoholic      | 7                                                           |
| 58              | Ecuador | 1995           | Bovine Meat               | 36                                                          |
| 58              | Ecuador | 1995           | Butter, Ghee              | 2                                                           |
| 58              | Ecuador | 1995           | Cassava                   | 14                                                          |
| 58              | Ecuador | 1995           | Cheese                    | 3                                                           |
| 58              | Ecuador | 1995           | Citrus, Other             | 5                                                           |
| 58              | Ecuador | 1995           | Cocoa Beans               | 4                                                           |
| 58              | Ecuador | 1995           | Coconut Oil               | 1                                                           |
| 58              | Ecuador | 1995           | Coconuts - Incl Copra     | 2                                                           |
| 58              | Ecuador | 1995           | Coffee                    | 8                                                           |
| 58              | Ecuador | 1995           | Crustaceans               | 6                                                           |
| 58              | Ecuador | 1995           | Eggs                      | 12                                                          |
| 58              | Ecuador | 1995           | Fats, Animals, Raw        | 8                                                           |
| 58              | Ecuador | 1995           | Fruits, Other             | 27                                                          |
| 58              | Ecuador | 1995           | Grapefruit                | 1                                                           |
| 58              | Ecuador | 1995           | Grapes                    | 2                                                           |
| 58              | Ecuador | 1995           | Groundnuts (Shelled Eq)   | 1                                                           |
| 58              | Ecuador | 1995           | Lemons, Limes             | 3                                                           |
| 58              | Ecuador | 1995           | Maize                     | 10                                                          |
| 58              | Ecuador | 1995           | Marine Fish, Other        | 4                                                           |
| 58              | Ecuador | 1995           | Meat, Other               | 2                                                           |
| 58              | Ecuador | 1995           | Milk, Whole               | 265                                                         |
| 58              | Ecuador | 1995           | Mutton & Goat Meat        | 2                                                           |
| 58              | Ecuador | 1995           | Oats                      | 3                                                           |
| 58              | Ecuador | 1995           | Offals, Edible            | 9                                                           |
| 58              | Ecuador | 1995           | Oranges, Mandarines       | 25                                                          |
| 58              | Ecuador | 1995           | Palm Oil                  | 27                                                          |
| 58              | Ecuador | 1995           | Peas                      | 2                                                           |
| 58              | Ecuador | 1995           | Pelagic Fish              | 11                                                          |
| 58              | Ecuador | 1995           | Pigmeat                   | 22                                                          |
| 58              | Ecuador | 1995           | Pineapples                | 10                                                          |
| 58              | Ecuador | 1995           | Plantains                 | 107                                                         |
| 58              | Ecuador | 1995           | Potatoes                  | 84                                                          |
| 58              | Ecuador | 1995           | Poultry Meat              | 26                                                          |
| 58              | Ecuador | 1995           | Pulses, Other             | 4                                                           |
| 58              | Ecuador | 1995           | Rice (Milled Equivalent)  | 152                                                         |
| 58              | Ecuador | 1995           | Roots, Other              | 1                                                           |
| 58              | Ecuador | 1995           | Soyabean Oil              | 15                                                          |
| 58              | Ecuador | 1995           | Sugar, Refined Equivalent | 62                                                          |
| 58              | Ecuador | 1995           | Sweeteners, Other         | 1                                                           |
| 58              | Ecuador | 1995           | Tea                       | 1                                                           |
| 58              | Ecuador | 1995           | Tomatoes                  | 14                                                          |
| 58              | Ecuador | 1995           | Vegetables, Other         | 49                                                          |
| 58              | Ecuador | 1995           | Wheat                     | 88                                                          |
| 58              | Ecuador | 1995           | Wine                      | 2                                                           |
| 58              | Ecuador | 1996           | Apples                    | 14                                                          |
| 58              | Ecuador | 1996           | Bananas                   | 271                                                         |
| 58              | Ecuador | 1996           | Barley                    | 10                                                          |
| 58              | Ecuador | 1996           | Beans                     | 5                                                           |
| 58              | Ecuador | 1996           | Beer                      | 23                                                          |
| 58              | Ecuador | 1996           | Beverages, Alcoholic      | 4                                                           |
| 58              | Ecuador | 1996           | Bovine Meat               | 36                                                          |
| 58              | Ecuador | 1996           | Butter, Ghee              | 2                                                           |
| 58              | Ecuador | 1996           | Cassava                   | 14                                                          |
| 58              | Ecuador | 1996           | Cheese                    | 4                                                           |
| 58              | Ecuador | 1996           | Citrus, Other             | 7                                                           |
| 58              | Ecuador | 1996           | Cocoa Beans               | 6                                                           |
| 58              | Ecuador | 1996           | Coconut Oil               | 1                                                           |
| 58              | Ecuador | 1996           | Coconuts - Incl Copra     | 2                                                           |
| 58              | Ecuador | 1996           | Coffee                    | 10                                                          |
| 58              | Ecuador | 1996           | Crustaceans               | 6                                                           |
| 58              | Ecuador | 1996           | Eggs                      | 10                                                          |
| 58              | Ecuador | 1996           | Fats, Animals, Raw        | 9                                                           |
| 58              | Ecuador | 1996           | Fruits, Other             | 38                                                          |
| 58              | Ecuador | 1996           | Grapefruit                | 1                                                           |
| 58              | Ecuador | 1996           | Grapes                    | 2                                                           |
| 58              | Ecuador | 1996           | Groundnuts (Shelled Eq)   | 1                                                           |
| 58              | Ecuador | 1996           | Lemons, Limes             | 5                                                           |
| 58              | Ecuador | 1996           | Maize                     | 11                                                          |
| 58              | Ecuador | 1996           | Marine Fish, Other        | 1                                                           |
| 58              | Ecuador | 1996           | Meat, Other               | 2                                                           |
| 58              | Ecuador | 1996           | Milk, Whole               | 302                                                         |
| 58              | Ecuador | 1996           | Mutton & Goat Meat        | 2                                                           |

Dietary calcium and zinc deficiency risks are decreasing but remain prevalent

| FAO countrycode | Country | Reference year | Food item                 | Gross food supply (g capita <sup>-1</sup> d <sup>-1</sup> ) |
|-----------------|---------|----------------|---------------------------|-------------------------------------------------------------|
| 58              | Ecuador | 1996           | Oats                      | 8                                                           |
| 58              | Ecuador | 1996           | Offals, Edible            | 9                                                           |
| 58              | Ecuador | 1996           | Oranges, Mandarines       | 25                                                          |
| 58              | Ecuador | 1996           | Palm Oil                  | 25                                                          |
| 58              | Ecuador | 1996           | Peas                      | 2                                                           |
| 58              | Ecuador | 1996           | Pelagic Fish              | 15                                                          |
| 58              | Ecuador | 1996           | Pigmeat                   | 25                                                          |
| 58              | Ecuador | 1996           | Pineapples                | 10                                                          |
| 58              | Ecuador | 1996           | Plantains                 | 141                                                         |
| 58              | Ecuador | 1996           | Potatoes                  | 79                                                          |
| 58              | Ecuador | 1996           | Poultry Meat              | 36                                                          |
| 58              | Ecuador | 1996           | Pulses, Other             | 5                                                           |
| 58              | Ecuador | 1996           | Rice (Milled Equivalent)  | 151                                                         |
| 58              | Ecuador | 1996           | Roots, Other              | 1                                                           |
| 58              | Ecuador | 1996           | Soybean Oil               | 13                                                          |
| 58              | Ecuador | 1996           | Sugar, Refined Equivalent | 52                                                          |
| 58              | Ecuador | 1996           | Sweeteners, Other         | 1                                                           |
| 58              | Ecuador | 1996           | Tomatoes                  | 15                                                          |
| 58              | Ecuador | 1996           | Vegetables, Other         | 50                                                          |
| 58              | Ecuador | 1996           | Wheat                     | 91                                                          |
| 58              | Ecuador | 1996           | Wine                      | 2                                                           |
| 58              | Ecuador | 1997           | Apples                    | 11                                                          |
| 58              | Ecuador | 1997           | Bananas                   | 414                                                         |
| 58              | Ecuador | 1997           | Barley                    | 5                                                           |
| 58              | Ecuador | 1997           | Beans                     | 4                                                           |
| 58              | Ecuador | 1997           | Beer                      | 41                                                          |
| 58              | Ecuador | 1997           | Beverages, Alcoholic      | 1                                                           |
| 58              | Ecuador | 1997           | Bovine Meat               | 36                                                          |
| 58              | Ecuador | 1997           | Butter, Ghee              | 2                                                           |
| 58              | Ecuador | 1997           | Cassava                   | 19                                                          |
| 58              | Ecuador | 1997           | Cheese                    | 5                                                           |
| 58              | Ecuador | 1997           | Citrus, Other             | 16                                                          |
| 58              | Ecuador | 1997           | Cocoa Beans               | 5                                                           |
| 58              | Ecuador | 1997           | Coconut Oil               | 1                                                           |
| 58              | Ecuador | 1997           | Coconuts - Incl Copra     | 2                                                           |
| 58              | Ecuador | 1997           | Coffee                    | 8                                                           |
| 58              | Ecuador | 1997           | Crustaceans               | 7                                                           |
| 58              | Ecuador | 1997           | Eggs                      | 10                                                          |
| 58              | Ecuador | 1997           | Fats, Animals, Raw        | 9                                                           |
| 58              | Ecuador | 1997           | Fruits, Other             | 50                                                          |
| 58              | Ecuador | 1997           | Grapefruit                | 1                                                           |
| 58              | Ecuador | 1997           | Grapes                    | 2                                                           |
| 58              | Ecuador | 1997           | Groundnuts (Shelled Eq)   | 2                                                           |
| 58              | Ecuador | 1997           | Lemons, Limes             | 3                                                           |
| 58              | Ecuador | 1997           | Maize                     | 14                                                          |
| 58              | Ecuador | 1997           | Marine Fish, Other        | 1                                                           |
| 58              | Ecuador | 1997           | Meat, Other               | 2                                                           |
| 58              | Ecuador | 1997           | Milk, Whole               | 286                                                         |
| 58              | Ecuador | 1997           | Mutton & Goat Meat        | 2                                                           |
| 58              | Ecuador | 1997           | Oats                      | 5                                                           |
| 58              | Ecuador | 1997           | Offals, Edible            | 9                                                           |
| 58              | Ecuador | 1997           | Oranges, Mandarines       | 49                                                          |
| 58              | Ecuador | 1997           | Palm Oil                  | 26                                                          |
| 58              | Ecuador | 1997           | Palmkernel Oil            | 1                                                           |
| 58              | Ecuador | 1997           | Peas                      | 3                                                           |
| 58              | Ecuador | 1997           | Pelagic Fish              | 16                                                          |
| 58              | Ecuador | 1997           | Pigmeat                   | 25                                                          |
| 58              | Ecuador | 1997           | Pineapples                | 4                                                           |
| 58              | Ecuador | 1997           | Plantains                 | 134                                                         |
| 58              | Ecuador | 1997           | Potatoes                  | 110                                                         |
| 58              | Ecuador | 1997           | Poultry Meat              | 41                                                          |
| 58              | Ecuador | 1997           | Pulses, Other             | 5                                                           |
| 58              | Ecuador | 1997           | Rice (Milled Equivalent)  | 125                                                         |
| 58              | Ecuador | 1997           | Roots, Other              | 1                                                           |
| 58              | Ecuador | 1997           | Soybean Oil               | 11                                                          |
| 58              | Ecuador | 1997           | Sugar, Refined Equivalent | 50                                                          |
| 58              | Ecuador | 1997           | Sweeteners, Other         | 1                                                           |
| 58              | Ecuador | 1997           | Tomatoes                  | 11                                                          |
| 58              | Ecuador | 1997           | Vegetables, Other         | 56                                                          |
| 58              | Ecuador | 1997           | Wheat                     | 119                                                         |
| 58              | Ecuador | 1997           | Wine                      | 1                                                           |
| 58              | Ecuador | 1998           | Apples                    | 14                                                          |
| 58              | Ecuador | 1998           | Bananas                   | 325                                                         |
| 58              | Ecuador | 1998           | Barley                    | 5                                                           |
| 58              | Ecuador | 1998           | Beans                     | 4                                                           |
| 58              | Ecuador | 1998           | Beer                      | 49                                                          |
| 58              | Ecuador | 1998           | Beverages, Alcoholic      | 2                                                           |
| 58              | Ecuador | 1998           | Bovine Meat               | 36                                                          |
| 58              | Ecuador | 1998           | Butter, Ghee              | 2                                                           |
| 58              | Ecuador | 1998           | Cassava                   | 14                                                          |
| 58              | Ecuador | 1998           | Cheese                    | 6                                                           |
| 58              | Ecuador | 1998           | Citrus, Other             | 4                                                           |
| 58              | Ecuador | 1998           | Cocoa Beans               | 2                                                           |
| 58              | Ecuador | 1998           | Coconuts - Incl Copra     | 1                                                           |
| 58              | Ecuador | 1998           | Coffee                    | 8                                                           |
| 58              | Ecuador | 1998           | Crustaceans               | 7                                                           |
| 58              | Ecuador | 1998           | Demersal Fish             | 1                                                           |
| 58              | Ecuador | 1998           | Eggs                      | 11                                                          |
| 58              | Ecuador | 1998           | Fats, Animals, Raw        | 8                                                           |
| 58              | Ecuador | 1998           | Freshwater Fish           | 1                                                           |
| 58              | Ecuador | 1998           | Fruits, Other             | 57                                                          |
| 58              | Ecuador | 1998           | Grapefruit                | 1                                                           |
| 58              | Ecuador | 1998           | Grapes                    | 3                                                           |
| 58              | Ecuador | 1998           | Lemons, Limes             | 3                                                           |
| 58              | Ecuador | 1998           | Maize                     | 13                                                          |
| 58              | Ecuador | 1998           | Marine Fish, Other        | 1                                                           |
| 58              | Ecuador | 1998           | Meat, Other               | 2                                                           |

Dietary calcium and zinc deficiency risks are decreasing but remain prevalent

| FAO countrycode | Country | Reference year | Food item                 | Gross food supply (g capita <sup>-1</sup> d <sup>-1</sup> ) |
|-----------------|---------|----------------|---------------------------|-------------------------------------------------------------|
| 58              | Ecuador | 1998           | Milk, Whole               | 300                                                         |
| 58              | Ecuador | 1998           | Mutton & Goat Meat        | 3                                                           |
| 58              | Ecuador | 1998           | Oats                      | 4                                                           |
| 58              | Ecuador | 1998           | Offals, Edible            | 9                                                           |
| 58              | Ecuador | 1998           | Oranges, Mandarines       | 28                                                          |
| 58              | Ecuador | 1998           | Palm Oil                  | 26                                                          |
| 58              | Ecuador | 1998           | Palmkernel Oil            | 2                                                           |
| 58              | Ecuador | 1998           | Peas                      | 4                                                           |
| 58              | Ecuador | 1998           | Pelagic Fish              | 12                                                          |
| 58              | Ecuador | 1998           | Pigmeat                   | 23                                                          |
| 58              | Ecuador | 1998           | Pineapples                | 15                                                          |
| 58              | Ecuador | 1998           | Plantains                 | 70                                                          |
| 58              | Ecuador | 1998           | Potatoes                  | 83                                                          |
| 58              | Ecuador | 1998           | Poultry Meat              | 25                                                          |
| 58              | Ecuador | 1998           | Pulses, Other             | 5                                                           |
| 58              | Ecuador | 1998           | Rice (Milled Equivalent)  | 128                                                         |
| 58              | Ecuador | 1998           | Roots, Other              | 1                                                           |
| 58              | Ecuador | 1998           | Soyabean Oil              | 11                                                          |
| 58              | Ecuador | 1998           | Sugar, Refined Equivalent | 51                                                          |
| 58              | Ecuador | 1998           | Sweeteners, Other         | 1                                                           |
| 58              | Ecuador | 1998           | Tomatoes                  | 15                                                          |
| 58              | Ecuador | 1998           | Vegetables, Other         | 56                                                          |
| 58              | Ecuador | 1998           | Wheat                     | 119                                                         |
| 58              | Ecuador | 1998           | Wine                      | 1                                                           |
| 58              | Ecuador | 1999           | Apples                    | 7                                                           |
| 58              | Ecuador | 1999           | Bananas                   | 352                                                         |
| 58              | Ecuador | 1999           | Barley                    | 4                                                           |
| 58              | Ecuador | 1999           | Beans                     | 4                                                           |
| 58              | Ecuador | 1999           | Beer                      | 45                                                          |
| 58              | Ecuador | 1999           | Beverages, Alcoholic      | 1                                                           |
| 58              | Ecuador | 1999           | Bovine Meat               | 37                                                          |
| 58              | Ecuador | 1999           | Butter, Ghee              | 2                                                           |
| 58              | Ecuador | 1999           | Cassava                   | 16                                                          |
| 58              | Ecuador | 1999           | Cheese                    | 7                                                           |
| 58              | Ecuador | 1999           | Citrus, Other             | 3                                                           |
| 58              | Ecuador | 1999           | Cocoa Beans               | 3                                                           |
| 58              | Ecuador | 1999           | Coconuts - Incl Copra     | 1                                                           |
| 58              | Ecuador | 1999           | Coffee                    | 10                                                          |
| 58              | Ecuador | 1999           | Crustaceans               | 6                                                           |
| 58              | Ecuador | 1999           | Demersal Fish             | 7                                                           |
| 58              | Ecuador | 1999           | Eggs                      | 10                                                          |
| 58              | Ecuador | 1999           | Fats, Animals, Raw        | 8                                                           |
| 58              | Ecuador | 1999           | Freshwater Fish           | 1                                                           |
| 58              | Ecuador | 1999           | Fruits, Other             | 118                                                         |
| 58              | Ecuador | 1999           | Grapefruit                | 1                                                           |
| 58              | Ecuador | 1999           | Grapes                    | 1                                                           |
| 58              | Ecuador | 1999           | Groundnuts (Shelled Eq)   | 2                                                           |
| 58              | Ecuador | 1999           | Lemons, Limes             | 6                                                           |
| 58              | Ecuador | 1999           | Maize                     | 11                                                          |
| 58              | Ecuador | 1999           | Meat, Other               | 2                                                           |
| 58              | Ecuador | 1999           | Milk, Whole               | 264                                                         |
| 58              | Ecuador | 1999           | Mutton & Goat Meat        | 2                                                           |
| 58              | Ecuador | 1999           | Oats                      | 7                                                           |
| 58              | Ecuador | 1999           | Offals, Edible            | 9                                                           |
| 58              | Ecuador | 1999           | Oranges, Mandarines       | 27                                                          |
| 58              | Ecuador | 1999           | Palm Oil                  | 27                                                          |
| 58              | Ecuador | 1999           | Palmkernel Oil            | 1                                                           |
| 58              | Ecuador | 1999           | Peas                      | 3                                                           |
| 58              | Ecuador | 1999           | Pelagic Fish              | 5                                                           |
| 58              | Ecuador | 1999           | Pepper                    | 1                                                           |
| 58              | Ecuador | 1999           | Pigmeat                   | 25                                                          |
| 58              | Ecuador | 1999           | Pineapples                | 12                                                          |
| 58              | Ecuador | 1999           | Plantains                 | 91                                                          |
| 58              | Ecuador | 1999           | Potatoes                  | 99                                                          |
| 58              | Ecuador | 1999           | Poultry Meat              | 33                                                          |
| 58              | Ecuador | 1999           | Pulses, Other             | 4                                                           |
| 58              | Ecuador | 1999           | Rice (Milled Equivalent)  | 140                                                         |
| 58              | Ecuador | 1999           | Roots, Other              | 1                                                           |
| 58              | Ecuador | 1999           | Soyabean Oil              | 12                                                          |
| 58              | Ecuador | 1999           | Sugar, Refined Equivalent | 48                                                          |
| 58              | Ecuador | 1999           | Sweeteners, Other         | 1                                                           |
| 58              | Ecuador | 1999           | Tomatoes                  | 14                                                          |
| 58              | Ecuador | 1999           | Vegetables, Other         | 40                                                          |
| 58              | Ecuador | 1999           | Wheat                     | 106                                                         |
| 58              | Ecuador | 2000           | Apples                    | 6                                                           |
| 58              | Ecuador | 2000           | Bananas                   | 356                                                         |
| 58              | Ecuador | 2000           | Barley                    | 4                                                           |
| 58              | Ecuador | 2000           | Beans                     | 4                                                           |
| 58              | Ecuador | 2000           | Beer                      | 36                                                          |
| 58              | Ecuador | 2000           | Beverages, Alcoholic      | 1                                                           |
| 58              | Ecuador | 2000           | Bovine Meat               | 37                                                          |
| 58              | Ecuador | 2000           | Butter, Ghee              | 2                                                           |
| 58              | Ecuador | 2000           | Cassava                   | 15                                                          |
| 58              | Ecuador | 2000           | Cheese                    | 7                                                           |
| 58              | Ecuador | 2000           | Citrus, Other             | 3                                                           |
| 58              | Ecuador | 2000           | Cocoa Beans               | 4                                                           |
| 58              | Ecuador | 2000           | Coconuts - Incl Copra     | 1                                                           |
| 58              | Ecuador | 2000           | Coffee                    | 1                                                           |
| 58              | Ecuador | 2000           | Crustaceans               | 2                                                           |
| 58              | Ecuador | 2000           | Demersal Fish             | 10                                                          |
| 58              | Ecuador | 2000           | Eggs                      | 12                                                          |
| 58              | Ecuador | 2000           | Fats, Animals, Raw        | 9                                                           |
| 58              | Ecuador | 2000           | Freshwater Fish           | 2                                                           |
| 58              | Ecuador | 2000           | Fruits, Other             | 66                                                          |
| 58              | Ecuador | 2000           | Grapefruit                | 1                                                           |
| 58              | Ecuador | 2000           | Grapes                    | 1                                                           |
| 58              | Ecuador | 2000           | Groundnuts (Shelled Eq)   | 1                                                           |

Dietary calcium and zinc deficiency risks are decreasing but remain prevalent

| FAO countrycode | Country | Reference year | Food item                 | Gross food supply (g capita <sup>-1</sup> d <sup>-1</sup> ) |
|-----------------|---------|----------------|---------------------------|-------------------------------------------------------------|
| 58              | Ecuador | 2000           | Lemons, Limes             | 7                                                           |
| 58              | Ecuador | 2000           | Maize                     | 11                                                          |
| 58              | Ecuador | 2000           | Marine Fish, Other        | 1                                                           |
| 58              | Ecuador | 2000           | Meat, Other               | 2                                                           |
| 58              | Ecuador | 2000           | Milk, Whole               | 307                                                         |
| 58              | Ecuador | 2000           | Mutton & Goat Meat        | 2                                                           |
| 58              | Ecuador | 2000           | Oats                      | 8                                                           |
| 58              | Ecuador | 2000           | Offals, Edible            | 10                                                          |
| 58              | Ecuador | 2000           | Oranges, Mandarines       | 33                                                          |
| 58              | Ecuador | 2000           | Palm Oil                  | 28                                                          |
| 58              | Ecuador | 2000           | Palmkernel Oil            | 1                                                           |
| 58              | Ecuador | 2000           | Peas                      | 3                                                           |
| 58              | Ecuador | 2000           | Pelagic Fish              | 4                                                           |
| 58              | Ecuador | 2000           | Pepper                    | 1                                                           |
| 58              | Ecuador | 2000           | Pigmeat                   | 25                                                          |
| 58              | Ecuador | 2000           | Pineapples                | 7                                                           |
| 58              | Ecuador | 2000           | Plantains                 | 75                                                          |
| 58              | Ecuador | 2000           | Potatoes                  | 29                                                          |
| 58              | Ecuador | 2000           | Poultry Meat              | 42                                                          |
| 58              | Ecuador | 2000           | Pulses, Other             | 4                                                           |
| 58              | Ecuador | 2000           | Rice (Milled Equivalent)  | 152                                                         |
| 58              | Ecuador | 2000           | Roots, Other              | 1                                                           |
| 58              | Ecuador | 2000           | Soyabean Oil              | 8                                                           |
| 58              | Ecuador | 2000           | Sugar, Refined Equivalent | 46                                                          |
| 58              | Ecuador | 2000           | Sweeteners, Other         | 2                                                           |
| 58              | Ecuador | 2000           | Tomatoes                  | 14                                                          |
| 58              | Ecuador | 2000           | Vegetables, Other         | 47                                                          |
| 58              | Ecuador | 2000           | Wheat                     | 93                                                          |
| 58              | Ecuador | 2001           | Apples                    | 11                                                          |
| 58              | Ecuador | 2001           | Bananas                   | 281                                                         |
| 58              | Ecuador | 2001           | Barley                    | 3                                                           |
| 58              | Ecuador | 2001           | Beans                     | 1                                                           |
| 58              | Ecuador | 2001           | Beer                      | 37                                                          |
| 58              | Ecuador | 2001           | Beverages, Alcoholic      | 1                                                           |
| 58              | Ecuador | 2001           | Bovine Meat               | 40                                                          |
| 58              | Ecuador | 2001           | Butter, Ghee              | 3                                                           |
| 58              | Ecuador | 2001           | Cassava                   | 14                                                          |
| 58              | Ecuador | 2001           | Cheese                    | 8                                                           |
| 58              | Ecuador | 2001           | Citrus, Other             | 4                                                           |
| 58              | Ecuador | 2001           | Cocoa Beans               | 2                                                           |
| 58              | Ecuador | 2001           | Coconut Oil               | 1                                                           |
| 58              | Ecuador | 2001           | Coconuts - Incl Copra     | 1                                                           |
| 58              | Ecuador | 2001           | Coffee                    | 1                                                           |
| 58              | Ecuador | 2001           | Crustaceans               | 1                                                           |
| 58              | Ecuador | 2001           | Demersal Fish             | 2                                                           |
| 58              | Ecuador | 2001           | Eggs                      | 12                                                          |
| 58              | Ecuador | 2001           | Fats, Animals, Raw        | 10                                                          |
| 58              | Ecuador | 2001           | Freshwater Fish           | 2                                                           |
| 58              | Ecuador | 2001           | Fruits, Other             | 73                                                          |
| 58              | Ecuador | 2001           | Grapefruit                | 1                                                           |
| 58              | Ecuador | 2001           | Grapes                    | 2                                                           |
| 58              | Ecuador | 2001           | Groundnuts (Shelled Eq)   | 1                                                           |
| 58              | Ecuador | 2001           | Lemons, Limes             | 1                                                           |
| 58              | Ecuador | 2001           | Maize                     | 12                                                          |
| 58              | Ecuador | 2001           | Marine Fish, Other        | 5                                                           |
| 58              | Ecuador | 2001           | Meat, Other               | 2                                                           |
| 58              | Ecuador | 2001           | Milk, Whole               | 328                                                         |
| 58              | Ecuador | 2001           | Mutton & Goat Meat        | 2                                                           |
| 58              | Ecuador | 2001           | Oats                      | 5                                                           |
| 58              | Ecuador | 2001           | Offals, Edible            | 9                                                           |
| 58              | Ecuador | 2001           | Oranges, Mandarines       | 33                                                          |
| 58              | Ecuador | 2001           | Palm Oil                  | 27                                                          |
| 58              | Ecuador | 2001           | Palmkernel Oil            | 2                                                           |
| 58              | Ecuador | 2001           | Peas                      | 2                                                           |
| 58              | Ecuador | 2001           | Pelagic Fish              | 2                                                           |
| 58              | Ecuador | 2001           | Pepper                    | 1                                                           |
| 58              | Ecuador | 2001           | Pigmeat                   | 30                                                          |
| 58              | Ecuador | 2001           | Pineapples                | 5                                                           |
| 58              | Ecuador | 2001           | Plantains                 | 103                                                         |
| 58              | Ecuador | 2001           | Potatoes                  | 71                                                          |
| 58              | Ecuador | 2001           | Poultry Meat              | 44                                                          |
| 58              | Ecuador | 2001           | Pulses, Other             | 5                                                           |
| 58              | Ecuador | 2001           | Rice (Milled Equivalent)  | 119                                                         |
| 58              | Ecuador | 2001           | Roots, Other              | 1                                                           |
| 58              | Ecuador | 2001           | Soyabean Oil              | 7                                                           |
| 58              | Ecuador | 2001           | Sugar, Refined Equivalent | 44                                                          |
| 58              | Ecuador | 2001           | Sweeteners, Other         | 2                                                           |
| 58              | Ecuador | 2001           | Tomatoes                  | 8                                                           |
| 58              | Ecuador | 2001           | Vegetables, Other         | 42                                                          |
| 58              | Ecuador | 2001           | Wheat                     | 119                                                         |
| 58              | Ecuador | 2001           | Wine                      | 1                                                           |
| 58              | Ecuador | 2002           | Apples                    | 10                                                          |
| 58              | Ecuador | 2002           | Bananas                   | 243                                                         |
| 58              | Ecuador | 2002           | Barley                    | 5                                                           |
| 58              | Ecuador | 2002           | Beer                      | 40                                                          |
| 58              | Ecuador | 2002           | Beverages, Alcoholic      | 2                                                           |
| 58              | Ecuador | 2002           | Bovine Meat               | 43                                                          |
| 58              | Ecuador | 2002           | Butter, Ghee              | 3                                                           |
| 58              | Ecuador | 2002           | Cassava                   | 14                                                          |
| 58              | Ecuador | 2002           | Cheese                    | 10                                                          |
| 58              | Ecuador | 2002           | Citrus, Other             | 3                                                           |
| 58              | Ecuador | 2002           | Cocoa Beans               | 1                                                           |
| 58              | Ecuador | 2002           | Coconuts - Incl Copra     | 1                                                           |
| 58              | Ecuador | 2002           | Coffee                    | 1                                                           |
| 58              | Ecuador | 2002           | Crustaceans               | 3                                                           |
| 58              | Ecuador | 2002           | Demersal Fish             | 2                                                           |
| 58              | Ecuador | 2002           | Eggs                      | 12                                                          |

Dietary calcium and zinc deficiency risks are decreasing but remain prevalent

| FAO countrycode | Country | Reference year | Food item                 | Gross food supply (g capita <sup>-1</sup> d <sup>-1</sup> ) |
|-----------------|---------|----------------|---------------------------|-------------------------------------------------------------|
| 58              | Ecuador | 2002           | Fats, Animals, Raw        | 10                                                          |
| 58              | Ecuador | 2002           | Freshwater Fish           | 3                                                           |
| 58              | Ecuador | 2002           | Fruits, Other             | 72                                                          |
| 58              | Ecuador | 2002           | Grapefruit                | 1                                                           |
| 58              | Ecuador | 2002           | Grapes                    | 5                                                           |
| 58              | Ecuador | 2002           | Groundnuts (Shelled Eq)   | 1                                                           |
| 58              | Ecuador | 2002           | Lemons, Limes             | 2                                                           |
| 58              | Ecuador | 2002           | Maize                     | 11                                                          |
| 58              | Ecuador | 2002           | Meat, Other               | 2                                                           |
| 58              | Ecuador | 2002           | Milk, Whole               | 344                                                         |
| 58              | Ecuador | 2002           | Mutton & Goat Meat        | 2                                                           |
| 58              | Ecuador | 2002           | Oats                      | 8                                                           |
| 58              | Ecuador | 2002           | Offals, Edible            | 9                                                           |
| 58              | Ecuador | 2002           | Oranges, Mandarines       | 29                                                          |
| 58              | Ecuador | 2002           | Palm Oil                  | 28                                                          |
| 58              | Ecuador | 2002           | Palmkernel Oil            | 2                                                           |
| 58              | Ecuador | 2002           | Peas                      | 2                                                           |
| 58              | Ecuador | 2002           | Pelagic Fish              | 4                                                           |
| 58              | Ecuador | 2002           | Pigmeat                   | 31                                                          |
| 58              | Ecuador | 2002           | Pineapples                | 8                                                           |
| 58              | Ecuador | 2002           | Plantains                 | 116                                                         |
| 58              | Ecuador | 2002           | Potatoes                  | 83                                                          |
| 58              | Ecuador | 2002           | Poultry Meat              | 44                                                          |
| 58              | Ecuador | 2002           | Pulses, Other             | 5                                                           |
| 58              | Ecuador | 2002           | Rice (Milled Equivalent)  | 127                                                         |
| 58              | Ecuador | 2002           | Roots, Other              | 1                                                           |
| 58              | Ecuador | 2002           | Soyabean Oil              | 14                                                          |
| 58              | Ecuador | 2002           | Sugar, Refined Equivalent | 43                                                          |
| 58              | Ecuador | 2002           | Sweet Potatoes            | 1                                                           |
| 58              | Ecuador | 2002           | Sweeteners, Other         | 2                                                           |
| 58              | Ecuador | 2002           | Tomatoes                  | 13                                                          |
| 58              | Ecuador | 2002           | Vegetables, Other         | 43                                                          |
| 58              | Ecuador | 2002           | Wheat                     | 83                                                          |
| 58              | Ecuador | 2002           | Wine                      | 1                                                           |
| 58              | Ecuador | 2003           | Apples                    | 11                                                          |
| 58              | Ecuador | 2003           | Bananas                   | 228                                                         |
| 58              | Ecuador | 2003           | Barley                    | 4                                                           |
| 58              | Ecuador | 2003           | Beer                      | 44                                                          |
| 58              | Ecuador | 2003           | Beverages, Alcoholic      | 2                                                           |
| 58              | Ecuador | 2003           | Bovine Meat               | 43                                                          |
| 58              | Ecuador | 2003           | Butter, Ghee              | 4                                                           |
| 58              | Ecuador | 2003           | Cassava                   | 16                                                          |
| 58              | Ecuador | 2003           | Cheese                    | 11                                                          |
| 58              | Ecuador | 2003           | Citrus, Other             | 4                                                           |
| 58              | Ecuador | 2003           | Cocoa Beans               | 2                                                           |
| 58              | Ecuador | 2003           | Coconuts - Incl Copra     | 1                                                           |
| 58              | Ecuador | 2003           | Coffee                    | 1                                                           |
| 58              | Ecuador | 2003           | Crustaceans               | 5                                                           |
| 58              | Ecuador | 2003           | Demersal Fish             | 1                                                           |
| 58              | Ecuador | 2003           | Eggs                      | 13                                                          |
| 58              | Ecuador | 2003           | Fats, Animals, Raw        | 10                                                          |
| 58              | Ecuador | 2003           | Freshwater Fish           | 4                                                           |
| 58              | Ecuador | 2003           | Fruits, Other             | 52                                                          |
| 58              | Ecuador | 2003           | Grapefruit                | 1                                                           |
| 58              | Ecuador | 2003           | Grapes                    | 5                                                           |
| 58              | Ecuador | 2003           | Groundnuts (Shelled Eq)   | 1                                                           |
| 58              | Ecuador | 2003           | Lemons, Limes             | 1                                                           |
| 58              | Ecuador | 2003           | Maize                     | 11                                                          |
| 58              | Ecuador | 2003           | Marine Fish, Other        | 3                                                           |
| 58              | Ecuador | 2003           | Meat, Other               | 2                                                           |
| 58              | Ecuador | 2003           | Milk, Whole               | 352                                                         |
| 58              | Ecuador | 2003           | Mutton & Goat Meat        | 3                                                           |
| 58              | Ecuador | 2003           | Oats                      | 4                                                           |
| 58              | Ecuador | 2003           | Offals, Edible            | 9                                                           |
| 58              | Ecuador | 2003           | Oranges, Mandarines       | 20                                                          |
| 58              | Ecuador | 2003           | Palm Oil                  | 24                                                          |
| 58              | Ecuador | 2003           | Palmkernel Oil            | 1                                                           |
| 58              | Ecuador | 2003           | Peas                      | 2                                                           |
| 58              | Ecuador | 2003           | Pelagic Fish              | 4                                                           |
| 58              | Ecuador | 2003           | Pigmeat                   | 32                                                          |
| 58              | Ecuador | 2003           | Pineapples                | 2                                                           |
| 58              | Ecuador | 2003           | Plantains                 | 120                                                         |
| 58              | Ecuador | 2003           | Potatoes                  | 65                                                          |
| 58              | Ecuador | 2003           | Poultry Meat              | 44                                                          |
| 58              | Ecuador | 2003           | Pulses, Other             | 4                                                           |
| 58              | Ecuador | 2003           | Rice (Milled Equivalent)  | 125                                                         |
| 58              | Ecuador | 2003           | Soyabean Oil              | 13                                                          |
| 58              | Ecuador | 2003           | Sugar, Refined Equivalent | 44                                                          |
| 58              | Ecuador | 2003           | Sweeteners, Other         | 3                                                           |
| 58              | Ecuador | 2003           | Tomatoes                  | 11                                                          |
| 58              | Ecuador | 2003           | Vegetables, Other         | 38                                                          |
| 58              | Ecuador | 2003           | Wheat                     | 91                                                          |
| 58              | Ecuador | 2003           | Wine                      | 1                                                           |
| 58              | Ecuador | 2004           | Apples                    | 10                                                          |
| 58              | Ecuador | 2004           | Bananas                   | 238                                                         |
| 58              | Ecuador | 2004           | Barley                    | 1                                                           |
| 58              | Ecuador | 2004           | Beer                      | 47                                                          |
| 58              | Ecuador | 2004           | Beverages, Alcoholic      | 3                                                           |
| 58              | Ecuador | 2004           | Bovine Meat               | 42                                                          |
| 58              | Ecuador | 2004           | Butter, Ghee              | 4                                                           |
| 58              | Ecuador | 2004           | Cassava                   | 14                                                          |
| 58              | Ecuador | 2004           | Cheese                    | 12                                                          |
| 58              | Ecuador | 2004           | Citrus, Other             | 3                                                           |
| 58              | Ecuador | 2004           | Cocoa Beans               | 2                                                           |
| 58              | Ecuador | 2004           | Coconuts - Incl Copra     | 1                                                           |
| 58              | Ecuador | 2004           | Crustaceans               | 4                                                           |
| 58              | Ecuador | 2004           | Demersal Fish             | 1                                                           |

Dietary calcium and zinc deficiency risks are decreasing but remain prevalent

| FAO countrycode | Country | Reference year | Food item                 | Gross food supply (g capita <sup>-1</sup> d <sup>-1</sup> ) |
|-----------------|---------|----------------|---------------------------|-------------------------------------------------------------|
| 58              | Ecuador | 2004           | Eggs                      | 13                                                          |
| 58              | Ecuador | 2004           | Fats, Animals, Raw        | 11                                                          |
| 58              | Ecuador | 2004           | Freshwater Fish           | 3                                                           |
| 58              | Ecuador | 2004           | Fruits, Other             | 53                                                          |
| 58              | Ecuador | 2004           | Grapefruit                | 1                                                           |
| 58              | Ecuador | 2004           | Grapes                    | 4                                                           |
| 58              | Ecuador | 2004           | Groundnuts (Shelled Eq)   | 2                                                           |
| 58              | Ecuador | 2004           | Lemons, Limes             | 1                                                           |
| 58              | Ecuador | 2004           | Maize                     | 11                                                          |
| 58              | Ecuador | 2004           | Marine Fish, Other        | 3                                                           |
| 58              | Ecuador | 2004           | Meat, Other               | 2                                                           |
| 58              | Ecuador | 2004           | Milk, Whole               | 366                                                         |
| 58              | Ecuador | 2004           | Mutton & Goat Meat        | 3                                                           |
| 58              | Ecuador | 2004           | Oats                      | 9                                                           |
| 58              | Ecuador | 2004           | Offals, Edible            | 9                                                           |
| 58              | Ecuador | 2004           | Onions                    | 1                                                           |
| 58              | Ecuador | 2004           | Oranges, Mandarines       | 29                                                          |
| 58              | Ecuador | 2004           | Palm Oil                  | 25                                                          |
| 58              | Ecuador | 2004           | Palmkernel Oil            | 1                                                           |
| 58              | Ecuador | 2004           | Peas                      | 1                                                           |
| 58              | Ecuador | 2004           | Pelagic Fish              | 5                                                           |
| 58              | Ecuador | 2004           | Pigmeat                   | 33                                                          |
| 58              | Ecuador | 2004           | Pineapples                | 1                                                           |
| 58              | Ecuador | 2004           | Plantains                 | 117                                                         |
| 58              | Ecuador | 2004           | Potatoes                  | 79                                                          |
| 58              | Ecuador | 2004           | Poultry Meat              | 43                                                          |
| 58              | Ecuador | 2004           | Pulses, Other             | 4                                                           |
| 58              | Ecuador | 2004           | Rice (Milled Equivalent)  | 115                                                         |
| 58              | Ecuador | 2004           | Roots, Other              | 1                                                           |
| 58              | Ecuador | 2004           | Soyabean Oil              | 13                                                          |
| 58              | Ecuador | 2004           | Spices, Other             | 1                                                           |
| 58              | Ecuador | 2004           | Sugar, Refined Equivalent | 42                                                          |
| 58              | Ecuador | 2004           | Sunflowerseed Oil         | 1                                                           |
| 58              | Ecuador | 2004           | Sweeteners, Other         | 4                                                           |
| 58              | Ecuador | 2004           | Tomatoes                  | 18                                                          |
| 58              | Ecuador | 2004           | Vegetables, Other         | 43                                                          |
| 58              | Ecuador | 2004           | Wheat                     | 94                                                          |
| 58              | Ecuador | 2004           | Wine                      | 1                                                           |
| 58              | Ecuador | 2005           | Apples                    | 12                                                          |
| 58              | Ecuador | 2005           | Bananas                   | 207                                                         |
| 58              | Ecuador | 2005           | Barley                    | 1                                                           |
| 58              | Ecuador | 2005           | Beans                     | 1                                                           |
| 58              | Ecuador | 2005           | Beer                      | 51                                                          |
| 58              | Ecuador | 2005           | Beverages, Alcoholic      | 3                                                           |
| 58              | Ecuador | 2005           | Bovine Meat               | 42                                                          |
| 58              | Ecuador | 2005           | Butter, Ghee              | 4                                                           |
| 58              | Ecuador | 2005           | Cassava                   | 28                                                          |
| 58              | Ecuador | 2005           | Cheese                    | 13                                                          |
| 58              | Ecuador | 2005           | Citrus, Other             | 4                                                           |
| 58              | Ecuador | 2005           | Cocoa Beans               | 1                                                           |
| 58              | Ecuador | 2005           | Coconuts - Incl Copra     | 1                                                           |
| 58              | Ecuador | 2005           | Crustaceans               | 5                                                           |
| 58              | Ecuador | 2005           | Eggs                      | 13                                                          |
| 58              | Ecuador | 2005           | Fats, Animals, Raw        | 10                                                          |
| 58              | Ecuador | 2005           | Freshwater Fish           | 4                                                           |
| 58              | Ecuador | 2005           | Fruits, Other             | 59                                                          |
| 58              | Ecuador | 2005           | Grapefruit                | 1                                                           |
| 58              | Ecuador | 2005           | Grapes                    | 3                                                           |
| 58              | Ecuador | 2005           | Groundnuts (Shelled Eq)   | 2                                                           |
| 58              | Ecuador | 2005           | Lemons, Limes             | 3                                                           |
| 58              | Ecuador | 2005           | Maize                     | 12                                                          |
| 58              | Ecuador | 2005           | Marine Fish, Other        | 1                                                           |
| 58              | Ecuador | 2005           | Meat, Other               | 2                                                           |
| 58              | Ecuador | 2005           | Milk, Whole               | 375                                                         |
| 58              | Ecuador | 2005           | Mutton & Goat Meat        | 2                                                           |
| 58              | Ecuador | 2005           | Oats                      | 4                                                           |
| 58              | Ecuador | 2005           | Offals, Edible            | 9                                                           |
| 58              | Ecuador | 2005           | Oranges, Mandarines       | 20                                                          |
| 58              | Ecuador | 2005           | Palm Oil                  | 26                                                          |
| 58              | Ecuador | 2005           | Palmkernel Oil            | 1                                                           |
| 58              | Ecuador | 2005           | Peas                      | 1                                                           |
| 58              | Ecuador | 2005           | Pelagic Fish              | 7                                                           |
| 58              | Ecuador | 2005           | Pigmeat                   | 33                                                          |
| 58              | Ecuador | 2005           | Pineapples                | 2                                                           |
| 58              | Ecuador | 2005           | Plantains                 | 95                                                          |
| 58              | Ecuador | 2005           | Potatoes                  | 73                                                          |
| 58              | Ecuador | 2005           | Poultry Meat              | 42                                                          |
| 58              | Ecuador | 2005           | Pulses, Other             | 5                                                           |
| 58              | Ecuador | 2005           | Rice (Milled Equivalent)  | 125                                                         |
| 58              | Ecuador | 2005           | Soyabean Oil              | 14                                                          |
| 58              | Ecuador | 2005           | Spices, Other             | 1                                                           |
| 58              | Ecuador | 2005           | Sugar, Refined Equivalent | 42                                                          |
| 58              | Ecuador | 2005           | Sunflowerseed Oil         | 1                                                           |
| 58              | Ecuador | 2005           | Sweet Potatoes            | 1                                                           |
| 58              | Ecuador | 2005           | Sweeteners, Other         | 4                                                           |
| 58              | Ecuador | 2005           | Tomatoes                  | 15                                                          |
| 58              | Ecuador | 2005           | Vegetables, Other         | 48                                                          |
| 58              | Ecuador | 2005           | Wheat                     | 99                                                          |
| 58              | Ecuador | 2005           | Wine                      | 1                                                           |
| 58              | Ecuador | 2006           | Apples                    | 12                                                          |
| 58              | Ecuador | 2006           | Bananas                   | 181                                                         |
| 58              | Ecuador | 2006           | Barley                    | 1                                                           |
| 58              | Ecuador | 2006           | Beans                     | 1                                                           |
| 58              | Ecuador | 2006           | Beer                      | 51                                                          |
| 58              | Ecuador | 2006           | Beverages, Alcoholic      | 3                                                           |
| 58              | Ecuador | 2006           | Bovine Meat               | 41                                                          |
| 58              | Ecuador | 2006           | Butter, Ghee              | 4                                                           |



Dietary calcium and zinc deficiency risks are decreasing but remain prevalent

| FAO countrycode | Country | Reference year | Food item                 | Gross food supply (g capita <sup>-1</sup> d <sup>-1</sup> ) |
|-----------------|---------|----------------|---------------------------|-------------------------------------------------------------|
| 58              | Ecuador | 2006           | Cassava                   | 11                                                          |
| 58              | Ecuador | 2006           | Cheese                    | 14                                                          |
| 58              | Ecuador | 2006           | Citrus, Other             | 4                                                           |
| 58              | Ecuador | 2006           | Cocoa Beans               | 1                                                           |
| 58              | Ecuador | 2006           | Coconuts - Incl Copra     | 1                                                           |
| 58              | Ecuador | 2006           | Crustaceans               | 6                                                           |
| 58              | Ecuador | 2006           | Demersal Fish             | 2                                                           |
| 58              | Ecuador | 2006           | Eggs                      | 14                                                          |
| 58              | Ecuador | 2006           | Fats, Animals, Raw        | 10                                                          |
| 58              | Ecuador | 2006           | Freshwater Fish           | 3                                                           |
| 58              | Ecuador | 2006           | Fruits, Other             | 60                                                          |
| 58              | Ecuador | 2006           | Grapefruit                | 1                                                           |
| 58              | Ecuador | 2006           | Grapes                    | 3                                                           |
| 58              | Ecuador | 2006           | Groundnuts (Shelled Eq)   | 2                                                           |
| 58              | Ecuador | 2006           | Maize                     | 12                                                          |
| 58              | Ecuador | 2006           | Marine Fish, Other        | 1                                                           |
| 58              | Ecuador | 2006           | Meat, Other               | 2                                                           |
| 58              | Ecuador | 2006           | Milk, Whole               | 383                                                         |
| 58              | Ecuador | 2006           | Mutton & Goat Meat        | 2                                                           |
| 58              | Ecuador | 2006           | Oats                      | 7                                                           |
| 58              | Ecuador | 2006           | Offals, Edible            | 9                                                           |
| 58              | Ecuador | 2006           | Oranges, Mandarines       | 14                                                          |
| 58              | Ecuador | 2006           | Palm Oil                  | 24                                                          |
| 58              | Ecuador | 2006           | Palmkernel Oil            | 1                                                           |
| 58              | Ecuador | 2006           | Peas                      | 1                                                           |
| 58              | Ecuador | 2006           | Pelagic Fish              | 7                                                           |
| 58              | Ecuador | 2006           | Pigmeat                   | 33                                                          |
| 58              | Ecuador | 2006           | Pineapples                | 1                                                           |
| 58              | Ecuador | 2006           | Plantains                 | 95                                                          |
| 58              | Ecuador | 2006           | Potatoes                  | 61                                                          |
| 58              | Ecuador | 2006           | Poultry Meat              | 59                                                          |
| 58              | Ecuador | 2006           | Pulses, Other             | 4                                                           |
| 58              | Ecuador | 2006           | Rice (Milled Equivalent)  | 122                                                         |
| 58              | Ecuador | 2006           | Soyabean Oil              | 12                                                          |
| 58              | Ecuador | 2006           | Spices, Other             | 1                                                           |
| 58              | Ecuador | 2006           | Sugar, Refined Equivalent | 43                                                          |
| 58              | Ecuador | 2006           | Sunflowerseed Oil         | 1                                                           |
| 58              | Ecuador | 2006           | Sweeteners, Other         | 3                                                           |
| 58              | Ecuador | 2006           | Tomatoes                  | 13                                                          |
| 58              | Ecuador | 2006           | Vegetables, Other         | 48                                                          |
| 58              | Ecuador | 2006           | Wheat                     | 100                                                         |
| 58              | Ecuador | 2006           | Wine                      | 1                                                           |
| 58              | Ecuador | 2007           | Apples                    | 12                                                          |
| 58              | Ecuador | 2007           | Bananas                   | 165                                                         |
| 58              | Ecuador | 2007           | Barley                    | 1                                                           |
| 58              | Ecuador | 2007           | Beans                     | 1                                                           |
| 58              | Ecuador | 2007           | Beer                      | 67                                                          |
| 58              | Ecuador | 2007           | Beverages, Alcoholic      | 3                                                           |
| 58              | Ecuador | 2007           | Bovine Meat               | 45                                                          |
| 58              | Ecuador | 2007           | Butter, Ghee              | 4                                                           |
| 58              | Ecuador | 2007           | Cassava                   | 2                                                           |
| 58              | Ecuador | 2007           | Cheese                    | 15                                                          |
| 58              | Ecuador | 2007           | Citrus, Other             | 4                                                           |
| 58              | Ecuador | 2007           | Cocoa Beans               | 1                                                           |
| 58              | Ecuador | 2007           | Coconuts - Incl Copra     | 1                                                           |
| 58              | Ecuador | 2007           | Crustaceans               | 5                                                           |
| 58              | Ecuador | 2007           | Demersal Fish             | 1                                                           |
| 58              | Ecuador | 2007           | Eggs                      | 14                                                          |
| 58              | Ecuador | 2007           | Fats, Animals, Raw        | 11                                                          |
| 58              | Ecuador | 2007           | Freshwater Fish           | 2                                                           |
| 58              | Ecuador | 2007           | Fruits, Other             | 59                                                          |
| 58              | Ecuador | 2007           | Grapefruit                | 1                                                           |
| 58              | Ecuador | 2007           | Grapes                    | 4                                                           |
| 58              | Ecuador | 2007           | Groundnuts (Shelled Eq)   | 2                                                           |
| 58              | Ecuador | 2007           | Lemons, Limes             | 1                                                           |
| 58              | Ecuador | 2007           | Maize                     | 11                                                          |
| 58              | Ecuador | 2007           | Marine Fish, Other        | 1                                                           |
| 58              | Ecuador | 2007           | Meat, Other               | 2                                                           |
| 58              | Ecuador | 2007           | Milk, Whole               | 388                                                         |
| 58              | Ecuador | 2007           | Mutton & Goat Meat        | 2                                                           |
| 58              | Ecuador | 2007           | Oats                      | 9                                                           |
| 58              | Ecuador | 2007           | Offals, Edible            | 9                                                           |
| 58              | Ecuador | 2007           | Oranges, Mandarines       | 16                                                          |
| 58              | Ecuador | 2007           | Palm Oil                  | 25                                                          |
| 58              | Ecuador | 2007           | Palmkernel Oil            | 2                                                           |
| 58              | Ecuador | 2007           | Peas                      | 1                                                           |
| 58              | Ecuador | 2007           | Pelagic Fish              | 9                                                           |
| 58              | Ecuador | 2007           | Pigmeat                   | 37                                                          |
| 58              | Ecuador | 2007           | Pineapples                | 1                                                           |
| 58              | Ecuador | 2007           | Plantains                 | 87                                                          |
| 58              | Ecuador | 2007           | Potatoes                  | 53                                                          |
| 58              | Ecuador | 2007           | Poultry Meat              | 65                                                          |
| 58              | Ecuador | 2007           | Pulses, Other             | 5                                                           |
| 58              | Ecuador | 2007           | Rice (Milled Equivalent)  | 120                                                         |
| 58              | Ecuador | 2007           | Soyabean Oil              | 12                                                          |
| 58              | Ecuador | 2007           | Spices, Other             | 1                                                           |
| 58              | Ecuador | 2007           | Sugar, Refined Equivalent | 43                                                          |
| 58              | Ecuador | 2007           | Sunflowerseed Oil         | 2                                                           |
| 58              | Ecuador | 2007           | Sweet Potatoes            | 1                                                           |
| 58              | Ecuador | 2007           | Sweeteners, Other         | 4                                                           |
| 58              | Ecuador | 2007           | Tomatoes                  | 14                                                          |
| 58              | Ecuador | 2007           | Vegetables, Other         | 47                                                          |
| 58              | Ecuador | 2007           | Wheat                     | 97                                                          |
| 58              | Ecuador | 2007           | Wine                      | 1                                                           |
| 58              | Ecuador | 2008           | Apples                    | 10                                                          |
| 58              | Ecuador | 2008           | Bananas                   | 181                                                         |
| 58              | Ecuador | 2008           | Barley                    | 1                                                           |

## Dietary calcium and zinc deficiency risks are decreasing but remain prevalent

| FAO countrycode | Country | Reference year | Food item                 | Gross food supply (g capita <sup>-1</sup> d <sup>-1</sup> ) |
|-----------------|---------|----------------|---------------------------|-------------------------------------------------------------|
| 58              | Ecuador | 2008           | Beans                     | 1                                                           |
| 58              | Ecuador | 2008           | Beer                      | 69                                                          |
| 58              | Ecuador | 2008           | Beverages, Alcoholic      | 3                                                           |
| 58              | Ecuador | 2008           | Bovine Meat               | 47                                                          |
| 58              | Ecuador | 2008           | Butter, Ghee              | 4                                                           |
| 58              | Ecuador | 2008           | Cassava                   | 15                                                          |
| 58              | Ecuador | 2008           | Cheese                    | 16                                                          |
| 58              | Ecuador | 2008           | Citrus, Other             | 4                                                           |
| 58              | Ecuador | 2008           | Cocoa Beans               | 1                                                           |
| 58              | Ecuador | 2008           | Coconuts - Incl Copra     | 2                                                           |
| 58              | Ecuador | 2008           | Crustaceans               | 6                                                           |
| 58              | Ecuador | 2008           | Demersal Fish             | 1                                                           |
| 58              | Ecuador | 2008           | Eggs                      | 15                                                          |
| 58              | Ecuador | 2008           | Fats, Animals, Raw        | 12                                                          |
| 58              | Ecuador | 2008           | Freshwater Fish           | 3                                                           |
| 58              | Ecuador | 2008           | Fruits, Other             | 71                                                          |
| 58              | Ecuador | 2008           | Grapefruit                | 1                                                           |
| 58              | Ecuador | 2008           | Grapes                    | 4                                                           |
| 58              | Ecuador | 2008           | Groundnuts (Shelled Eq)   | 2                                                           |
| 58              | Ecuador | 2008           | Lemons, Limes             | 2                                                           |
| 58              | Ecuador | 2008           | Maize                     | 11                                                          |
| 58              | Ecuador | 2008           | Marine Fish, Other        | 1                                                           |
| 58              | Ecuador | 2008           | Meat, Other               | 2                                                           |
| 58              | Ecuador | 2008           | Milk, Whole               | 392                                                         |
| 58              | Ecuador | 2008           | Mutton & Goat Meat        | 2                                                           |
| 58              | Ecuador | 2008           | Oats                      | 4                                                           |
| 58              | Ecuador | 2008           | Offals, Edible            | 10                                                          |
| 58              | Ecuador | 2008           | Oranges, Mandarines       | 15                                                          |
| 58              | Ecuador | 2008           | Palm Oil                  | 25                                                          |
| 58              | Ecuador | 2008           | Palmkernel Oil            | 2                                                           |
| 58              | Ecuador | 2008           | Peas                      | 1                                                           |
| 58              | Ecuador | 2008           | Pelagic Fish              | 10                                                          |
| 58              | Ecuador | 2008           | Pigmeat                   | 41                                                          |
| 58              | Ecuador | 2008           | Pineapples                | 4                                                           |
| 58              | Ecuador | 2008           | Plantains                 | 76                                                          |
| 58              | Ecuador | 2008           | Potatoes                  | 43                                                          |
| 58              | Ecuador | 2008           | Poultry Meat              | 63                                                          |
| 58              | Ecuador | 2008           | Pulses, Other             | 5                                                           |
| 58              | Ecuador | 2008           | Rice (Milled Equivalent)  | 120                                                         |
| 58              | Ecuador | 2008           | Soyabean Oil              | 14                                                          |
| 58              | Ecuador | 2008           | Spices, Other             | 1                                                           |
| 58              | Ecuador | 2008           | Sugar, Refined Equivalent | 43                                                          |
| 58              | Ecuador | 2008           | Sunflowerseed Oil         | 2                                                           |
| 58              | Ecuador | 2008           | Sweet Potatoes            | 1                                                           |
| 58              | Ecuador | 2008           | Sweeteners, Other         | 4                                                           |
| 58              | Ecuador | 2008           | Tomatoes                  | 11                                                          |
| 58              | Ecuador | 2008           | Vegetables, Other         | 53                                                          |
| 58              | Ecuador | 2008           | Wheat                     | 101                                                         |
| 58              | Ecuador | 2008           | Whey                      | 1                                                           |
| 58              | Ecuador | 2008           | Wine                      | 1                                                           |
| 58              | Ecuador | 2009           | Apples                    | 10                                                          |
| 58              | Ecuador | 2009           | Bananas                   | 250                                                         |
| 58              | Ecuador | 2009           | Barley                    | 1                                                           |
| 58              | Ecuador | 2009           | Beans                     | 1                                                           |
| 58              | Ecuador | 2009           | Beer                      | 57                                                          |
| 58              | Ecuador | 2009           | Beverages, Alcoholic      | 3                                                           |
| 58              | Ecuador | 2009           | Bovine Meat               | 49                                                          |
| 58              | Ecuador | 2009           | Butter, Ghee              | 4                                                           |
| 58              | Ecuador | 2009           | Cassava                   | 9                                                           |
| 58              | Ecuador | 2009           | Cheese                    | 16                                                          |
| 58              | Ecuador | 2009           | Citrus, Other             | 5                                                           |
| 58              | Ecuador | 2009           | Cocoa Beans               | 1                                                           |
| 58              | Ecuador | 2009           | Coconuts - Incl Copra     | 1                                                           |
| 58              | Ecuador | 2009           | Crustaceans               | 9                                                           |
| 58              | Ecuador | 2009           | Demersal Fish             | 2                                                           |
| 58              | Ecuador | 2009           | Eggs                      | 15                                                          |
| 58              | Ecuador | 2009           | Fats, Animals, Raw        | 11                                                          |
| 58              | Ecuador | 2009           | Freshwater Fish           | 2                                                           |
| 58              | Ecuador | 2009           | Fruits, Other             | 71                                                          |
| 58              | Ecuador | 2009           | Grapefruit                | 1                                                           |
| 58              | Ecuador | 2009           | Grapes                    | 4                                                           |
| 58              | Ecuador | 2009           | Groundnuts (Shelled Eq)   | 2                                                           |
| 58              | Ecuador | 2009           | Maize                     | 11                                                          |
| 58              | Ecuador | 2009           | Meat, Other               | 2                                                           |
| 58              | Ecuador | 2009           | Milk, Whole               | 399                                                         |
| 58              | Ecuador | 2009           | Mutton & Goat Meat        | 2                                                           |
| 58              | Ecuador | 2009           | Oats                      | 6                                                           |
| 58              | Ecuador | 2009           | Offals, Edible            | 10                                                          |
| 58              | Ecuador | 2009           | Onions                    | 6                                                           |
| 58              | Ecuador | 2009           | Oranges, Mandarines       | 14                                                          |
| 58              | Ecuador | 2009           | Palm Oil                  | 25                                                          |
| 58              | Ecuador | 2009           | Palmkernel Oil            | 1                                                           |
| 58              | Ecuador | 2009           | Peas                      | 1                                                           |
| 58              | Ecuador | 2009           | Pelagic Fish              | 8                                                           |
| 58              | Ecuador | 2009           | Pigmeat                   | 34                                                          |
| 58              | Ecuador | 2009           | Pineapples                | 2                                                           |
| 58              | Ecuador | 2009           | Plantains                 | 87                                                          |
| 58              | Ecuador | 2009           | Potatoes                  | 44                                                          |
| 58              | Ecuador | 2009           | Poultry Meat              | 58                                                          |
| 58              | Ecuador | 2009           | Pulses, Other             | 5                                                           |
| 58              | Ecuador | 2009           | Rice (Milled Equivalent)  | 121                                                         |
| 58              | Ecuador | 2009           | Soyabean Oil              | 14                                                          |
| 58              | Ecuador | 2009           | Sugar, Refined Equivalent | 44                                                          |
| 58              | Ecuador | 2009           | Sunflowerseed Oil         | 1                                                           |
| 58              | Ecuador | 2009           | Sweet Potatoes            | 1                                                           |
| 58              | Ecuador | 2009           | Sweeteners, Other         | 4                                                           |
| 58              | Ecuador | 2009           | Tomatoes                  | 10                                                          |

Dietary calcium and zinc deficiency risks are decreasing but remain prevalent

| FAO countrycode | Country | Reference year | Food item                 | Gross food supply (g capita <sup>-1</sup> d <sup>-1</sup> ) |
|-----------------|---------|----------------|---------------------------|-------------------------------------------------------------|
| 58              | Ecuador | 2009           | Vegetables, Other         | 55                                                          |
| 58              | Ecuador | 2009           | Wheat                     | 101                                                         |
| 58              | Ecuador | 2009           | Wine                      | 1                                                           |
| 58              | Ecuador | 2010           | Apples                    | 11                                                          |
| 58              | Ecuador | 2010           | Bananas                   | 270                                                         |
| 58              | Ecuador | 2010           | Barley                    | 1                                                           |
| 58              | Ecuador | 2010           | Beans                     | 1                                                           |
| 58              | Ecuador | 2010           | Beer                      | 63                                                          |
| 58              | Ecuador | 2010           | Beverages, Alcoholic      | 3                                                           |
| 58              | Ecuador | 2010           | Bovine Meat               | 48                                                          |
| 58              | Ecuador | 2010           | Butter, Ghee              | 4                                                           |
| 58              | Ecuador | 2010           | Cassava                   | 8                                                           |
| 58              | Ecuador | 2010           | Cheese                    | 17                                                          |
| 58              | Ecuador | 2010           | Citrus, Other             | 5                                                           |
| 58              | Ecuador | 2010           | Cocoa Beans               | 1                                                           |
| 58              | Ecuador | 2010           | Coconuts - Incl Copra     | 1                                                           |
| 58              | Ecuador | 2010           | Crustaceans               | 9                                                           |
| 58              | Ecuador | 2010           | Demersal Fish             | 2                                                           |
| 58              | Ecuador | 2010           | Eggs                      | 18                                                          |
| 58              | Ecuador | 2010           | Fats, Animals, Raw        | 11                                                          |
| 58              | Ecuador | 2010           | Freshwater Fish           | 2                                                           |
| 58              | Ecuador | 2010           | Fruits, Other             | 82                                                          |
| 58              | Ecuador | 2010           | Grapefruit                | 1                                                           |
| 58              | Ecuador | 2010           | Grapes                    | 5                                                           |
| 58              | Ecuador | 2010           | Groundnuts (Shelled Eq)   | 2                                                           |
| 58              | Ecuador | 2010           | Lemons, Limes             | 1                                                           |
| 58              | Ecuador | 2010           | Maize                     | 15                                                          |
| 58              | Ecuador | 2010           | Meat, Other               | 2                                                           |
| 58              | Ecuador | 2010           | Milk, Whole               | 402                                                         |
| 58              | Ecuador | 2010           | Mutton & Goat Meat        | 1                                                           |
| 58              | Ecuador | 2010           | Oats                      | 5                                                           |
| 58              | Ecuador | 2010           | Offals, Edible            | 10                                                          |
| 58              | Ecuador | 2010           | Onions                    | 7                                                           |
| 58              | Ecuador | 2010           | Oranges, Mandarines       | 15                                                          |
| 58              | Ecuador | 2010           | Palm Oil                  | 25                                                          |
| 58              | Ecuador | 2010           | Palmkernel Oil            | 1                                                           |
| 58              | Ecuador | 2010           | Peas                      | 1                                                           |
| 58              | Ecuador | 2010           | Pelagic Fish              | 8                                                           |
| 58              | Ecuador | 2010           | Pigmeat                   | 35                                                          |
| 58              | Ecuador | 2010           | Pineapples                | 3                                                           |
| 58              | Ecuador | 2010           | Plantains                 | 88                                                          |
| 58              | Ecuador | 2010           | Potatoes                  | 60                                                          |
| 58              | Ecuador | 2010           | Poultry Meat              | 63                                                          |
| 58              | Ecuador | 2010           | Pulses, Other             | 5                                                           |
| 58              | Ecuador | 2010           | Rice (Milled Equivalent)  | 122                                                         |
| 58              | Ecuador | 2010           | Soyabean Oil              | 14                                                          |
| 58              | Ecuador | 2010           | Sugar, Refined Equivalent | 44                                                          |
| 58              | Ecuador | 2010           | Sunflowerseed Oil         | 2                                                           |
| 58              | Ecuador | 2010           | Sweet Potatoes            | 1                                                           |
| 58              | Ecuador | 2010           | Sweeteners, Other         | 4                                                           |
| 58              | Ecuador | 2010           | Tomatoes                  | 11                                                          |
| 58              | Ecuador | 2010           | Vegetables, Other         | 59                                                          |
| 58              | Ecuador | 2010           | Wheat                     | 107                                                         |
| 58              | Ecuador | 2010           | Wine                      | 1                                                           |
| 58              | Ecuador | 2011           | Apples                    | 11                                                          |
| 58              | Ecuador | 2011           | Bananas                   | 278                                                         |
| 58              | Ecuador | 2011           | Barley                    | 1                                                           |
| 58              | Ecuador | 2011           | Beans                     | 1                                                           |
| 58              | Ecuador | 2011           | Beer                      | 60                                                          |
| 58              | Ecuador | 2011           | Beverages, Alcoholic      | 3                                                           |
| 58              | Ecuador | 2011           | Bovine Meat               | 48                                                          |
| 58              | Ecuador | 2011           | Butter, Ghee              | 4                                                           |
| 58              | Ecuador | 2011           | Cassava                   | 8                                                           |
| 58              | Ecuador | 2011           | Cheese                    | 18                                                          |
| 58              | Ecuador | 2011           | Citrus, Other             | 4                                                           |
| 58              | Ecuador | 2011           | Cocoa Beans               | 1                                                           |
| 58              | Ecuador | 2011           | Coconuts - Incl Copra     | 1                                                           |
| 58              | Ecuador | 2011           | Crustaceans               | 9                                                           |
| 58              | Ecuador | 2011           | Demersal Fish             | 2                                                           |
| 58              | Ecuador | 2011           | Eggs                      | 20                                                          |
| 58              | Ecuador | 2011           | Fats, Animals, Raw        | 11                                                          |
| 58              | Ecuador | 2011           | Freshwater Fish           | 2                                                           |
| 58              | Ecuador | 2011           | Fruits, Other             | 68                                                          |
| 58              | Ecuador | 2011           | Grapefruit                | 1                                                           |
| 58              | Ecuador | 2011           | Grapes                    | 6                                                           |
| 58              | Ecuador | 2011           | Groundnuts (Shelled Eq)   | 2                                                           |
| 58              | Ecuador | 2011           | Lemons, Limes             | 1                                                           |
| 58              | Ecuador | 2011           | Maize                     | 16                                                          |
| 58              | Ecuador | 2011           | Meat, Other               | 2                                                           |
| 58              | Ecuador | 2011           | Milk, Whole               | 408                                                         |
| 58              | Ecuador | 2011           | Mutton & Goat Meat        | 1                                                           |
| 58              | Ecuador | 2011           | Oats                      | 7                                                           |
| 58              | Ecuador | 2011           | Offals, Edible            | 10                                                          |
| 58              | Ecuador | 2011           | Onions                    | 3                                                           |
| 58              | Ecuador | 2011           | Oranges, Mandarines       | 8                                                           |
| 58              | Ecuador | 2011           | Palm Oil                  | 25                                                          |
| 58              | Ecuador | 2011           | Palmkernel Oil            | 2                                                           |
| 58              | Ecuador | 2011           | Peas                      | 1                                                           |
| 58              | Ecuador | 2011           | Pelagic Fish              | 7                                                           |
| 58              | Ecuador | 2011           | Pigmeat                   | 38                                                          |
| 58              | Ecuador | 2011           | Pineapples                | 4                                                           |
| 58              | Ecuador | 2011           | Plantains                 | 90                                                          |
| 58              | Ecuador | 2011           | Potatoes                  | 52                                                          |
| 58              | Ecuador | 2011           | Poultry Meat              | 60                                                          |
| 58              | Ecuador | 2011           | Pulses, Other             | 5                                                           |
| 58              | Ecuador | 2011           | Rice (Milled Equivalent)  | 122                                                         |
| 58              | Ecuador | 2011           | Soyabean Oil              | 14                                                          |

Dietary calcium and zinc deficiency risks are decreasing but remain prevalent

| FAO countrycode | Country | Reference year | Food item                 | Gross food supply (g capita <sup>-1</sup> d <sup>-1</sup> ) |
|-----------------|---------|----------------|---------------------------|-------------------------------------------------------------|
| 58              | Ecuador | 2011           | Spices, Other             | 1                                                           |
| 58              | Ecuador | 2011           | Sugar, Refined Equivalent | 45                                                          |
| 58              | Ecuador | 2011           | Sunflowerseed Oil         | 3                                                           |
| 58              | Ecuador | 2011           | Sweet Potatoes            | 1                                                           |
| 58              | Ecuador | 2011           | Sweeteners, Other         | 3                                                           |
| 58              | Ecuador | 2011           | Tomatoes                  | 9                                                           |
| 58              | Ecuador | 2011           | Vegetables, Other         | 59                                                          |
| 58              | Ecuador | 2011           | Wheat                     | 108                                                         |
| 58              | Ecuador | 2011           | Wine                      | 1                                                           |
| 59              | Egypt   | 1992           | Apples                    | 11                                                          |
| 59              | Egypt   | 1992           | Bananas                   | 17                                                          |
| 59              | Egypt   | 1992           | Barley                    | 1                                                           |
| 59              | Egypt   | 1992           | Beans                     | 1                                                           |
| 59              | Egypt   | 1992           | Beer                      | 2                                                           |
| 59              | Egypt   | 1992           | Bovine Meat               | 22                                                          |
| 59              | Egypt   | 1992           | Butter, Ghee              | 6                                                           |
| 59              | Egypt   | 1992           | Cereals, Other            | 1                                                           |
| 59              | Egypt   | 1992           | Cheese                    | 14                                                          |
| 59              | Egypt   | 1992           | Coconuts - Incl Copra     | 1                                                           |
| 59              | Egypt   | 1992           | Cottonseed Oil            | 9                                                           |
| 59              | Egypt   | 1992           | Dates                     | 26                                                          |
| 59              | Egypt   | 1992           | Demersal Fish             | 2                                                           |
| 59              | Egypt   | 1992           | Eggs                      | 5                                                           |
| 59              | Egypt   | 1992           | Fats, Animals, Raw        | 2                                                           |
| 59              | Egypt   | 1992           | Freshwater Fish           | 11                                                          |
| 59              | Egypt   | 1992           | Fruits, Other             | 40                                                          |
| 59              | Egypt   | 1992           | Grapes                    | 28                                                          |
| 59              | Egypt   | 1992           | Groundnuts (Shelled Eq)   | 1                                                           |
| 59              | Egypt   | 1992           | Lemons, Limes             | 13                                                          |
| 59              | Egypt   | 1992           | Maize                     | 156                                                         |
| 59              | Egypt   | 1992           | Marine Fish, Other        | 8                                                           |
| 59              | Egypt   | 1992           | Meat, Other               | 5                                                           |
| 59              | Egypt   | 1992           | Milk, Whole               | 23                                                          |
| 59              | Egypt   | 1992           | Mutton & Goat Meat        | 4                                                           |
| 59              | Egypt   | 1992           | Offals, Edible            | 4                                                           |
| 59              | Egypt   | 1992           | Olives                    | 4                                                           |
| 59              | Egypt   | 1992           | Onions                    | 23                                                          |
| 59              | Egypt   | 1992           | Oranges, Mandarines       | 84                                                          |
| 59              | Egypt   | 1992           | Pelagic Fish              | 2                                                           |
| 59              | Egypt   | 1992           | Pimento                   | 2                                                           |
| 59              | Egypt   | 1992           | Potatoes                  | 52                                                          |
| 59              | Egypt   | 1992           | Poultry Meat              | 14                                                          |
| 59              | Egypt   | 1992           | Pulses, Other             | 20                                                          |
| 59              | Egypt   | 1992           | Rice (Milled Equivalent)  | 94                                                          |
| 59              | Egypt   | 1992           | Roots, Other              | 5                                                           |
| 59              | Egypt   | 1992           | Sesameseed                | 2                                                           |
| 59              | Egypt   | 1992           | Sorghum                   | 12                                                          |
| 59              | Egypt   | 1992           | Soyabean Oil              | 1                                                           |
| 59              | Egypt   | 1992           | Soyabeans                 | 1                                                           |
| 59              | Egypt   | 1992           | Sugar Cane                | 69                                                          |
| 59              | Egypt   | 1992           | Sugar, Refined Equivalent | 76                                                          |
| 59              | Egypt   | 1992           | Sunflowerseed Oil         | 8                                                           |
| 59              | Egypt   | 1992           | Sweet Potatoes            | 3                                                           |
| 59              | Egypt   | 1992           | Sweeteners, Other         | 2                                                           |
| 59              | Egypt   | 1992           | Tea                       | 4                                                           |
| 59              | Egypt   | 1992           | Tomatoes                  | 198                                                         |
| 59              | Egypt   | 1992           | Vegetables, Other         | 167                                                         |
| 59              | Egypt   | 1992           | Wheat                     | 399                                                         |
| 59              | Egypt   | 1993           | Apples                    | 15                                                          |
| 59              | Egypt   | 1993           | Bananas                   | 17                                                          |
| 59              | Egypt   | 1993           | Barley                    | 1                                                           |
| 59              | Egypt   | 1993           | Beans                     | 1                                                           |
| 59              | Egypt   | 1993           | Beer                      | 2                                                           |
| 59              | Egypt   | 1993           | Bovine Meat               | 22                                                          |
| 59              | Egypt   | 1993           | Butter, Ghee              | 6                                                           |
| 59              | Egypt   | 1993           | Cereals, Other            | 1                                                           |
| 59              | Egypt   | 1993           | Cheese                    | 14                                                          |
| 59              | Egypt   | 1993           | Coconuts - Incl Copra     | 1                                                           |
| 59              | Egypt   | 1993           | Cottonseed Oil            | 9                                                           |
| 59              | Egypt   | 1993           | Dates                     | 26                                                          |
| 59              | Egypt   | 1993           | Demersal Fish             | 2                                                           |
| 59              | Egypt   | 1993           | Eggs                      | 5                                                           |
| 59              | Egypt   | 1993           | Fats, Animals, Raw        | 1                                                           |
| 59              | Egypt   | 1993           | Freshwater Fish           | 11                                                          |
| 59              | Egypt   | 1993           | Fruits, Other             | 42                                                          |
| 59              | Egypt   | 1993           | Grapes                    | 30                                                          |
| 59              | Egypt   | 1993           | Groundnuts (Shelled Eq)   | 1                                                           |
| 59              | Egypt   | 1993           | Lemons, Limes             | 13                                                          |
| 59              | Egypt   | 1993           | Maize                     | 162                                                         |
| 59              | Egypt   | 1993           | Marine Fish, Other        | 5                                                           |
| 59              | Egypt   | 1993           | Meat, Other               | 4                                                           |
| 59              | Egypt   | 1993           | Milk, Whole               | 25                                                          |
| 59              | Egypt   | 1993           | Mutton & Goat Meat        | 4                                                           |
| 59              | Egypt   | 1993           | Offals, Edible            | 5                                                           |
| 59              | Egypt   | 1993           | Olives                    | 5                                                           |
| 59              | Egypt   | 1993           | Onions                    | 24                                                          |
| 59              | Egypt   | 1993           | Oranges, Mandarines       | 61                                                          |
| 59              | Egypt   | 1993           | Palmkernel Oil            | 1                                                           |
| 59              | Egypt   | 1993           | Pelagic Fish              | 3                                                           |
| 59              | Egypt   | 1993           | Pimento                   | 2                                                           |
| 59              | Egypt   | 1993           | Potatoes                  | 52                                                          |
| 59              | Egypt   | 1993           | Poultry Meat              | 14                                                          |
| 59              | Egypt   | 1993           | Pulses, Other             | 20                                                          |
| 59              | Egypt   | 1993           | Rice (Milled Equivalent)  | 100                                                         |
| 59              | Egypt   | 1993           | Roots, Other              | 5                                                           |
| 59              | Egypt   | 1993           | Sesameseed                | 2                                                           |
| 59              | Egypt   | 1993           | Sorghum                   | 12                                                          |

Dietary calcium and zinc deficiency risks are decreasing but remain prevalent

| FAO countrycode | Country | Reference year | Food item                 | Gross food supply (g capita <sup>-1</sup> d <sup>-1</sup> ) |
|-----------------|---------|----------------|---------------------------|-------------------------------------------------------------|
| 59              | Egypt   | 1993           | Soyabean Oil              | 1                                                           |
| 59              | Egypt   | 1993           | Soyabean                  | 1                                                           |
| 59              | Egypt   | 1993           | Sugar Cane                | 69                                                          |
| 59              | Egypt   | 1993           | Sugar, Refined Equivalent | 71                                                          |
| 59              | Egypt   | 1993           | Sunflowerseed Oil         | 7                                                           |
| 59              | Egypt   | 1993           | Sweet Potatoes            | 5                                                           |
| 59              | Egypt   | 1993           | Sweeteners, Other         | 2                                                           |
| 59              | Egypt   | 1993           | Tea                       | 3                                                           |
| 59              | Egypt   | 1993           | Tomatoes                  | 197                                                         |
| 59              | Egypt   | 1993           | Vegetables, Other         | 162                                                         |
| 59              | Egypt   | 1993           | Wheat                     | 394                                                         |
| 59              | Egypt   | 1994           | Apples                    | 14                                                          |
| 59              | Egypt   | 1994           | Bananas                   | 19                                                          |
| 59              | Egypt   | 1994           | Barley                    | 1                                                           |
| 59              | Egypt   | 1994           | Beans                     | 1                                                           |
| 59              | Egypt   | 1994           | Beer                      | 2                                                           |
| 59              | Egypt   | 1994           | Bovine Meat               | 26                                                          |
| 59              | Egypt   | 1994           | Butter, Ghee              | 6                                                           |
| 59              | Egypt   | 1994           | Cheese                    | 16                                                          |
| 59              | Egypt   | 1994           | Coconuts - Incl Copra     | 2                                                           |
| 59              | Egypt   | 1994           | Cottonseed Oil            | 7                                                           |
| 59              | Egypt   | 1994           | Dates                     | 27                                                          |
| 59              | Egypt   | 1994           | Demersal Fish             | 3                                                           |
| 59              | Egypt   | 1994           | Eggs                      | 6                                                           |
| 59              | Egypt   | 1994           | Fats, Animals, Raw        | 1                                                           |
| 59              | Egypt   | 1994           | Freshwater Fish           | 11                                                          |
| 59              | Egypt   | 1994           | Fruits, Other             | 45                                                          |
| 59              | Egypt   | 1994           | Grapes                    | 29                                                          |
| 59              | Egypt   | 1994           | Groundnuts (Shelled Eq)   | 2                                                           |
| 59              | Egypt   | 1994           | Lemons, Limes             | 12                                                          |
| 59              | Egypt   | 1994           | Maize                     | 158                                                         |
| 59              | Egypt   | 1994           | Marine Fish, Other        | 3                                                           |
| 59              | Egypt   | 1994           | Meat, Other               | 4                                                           |
| 59              | Egypt   | 1994           | Milk, Whole               | 28                                                          |
| 59              | Egypt   | 1994           | Mutton & Goat Meat        | 4                                                           |
| 59              | Egypt   | 1994           | Offals, Edible            | 5                                                           |
| 59              | Egypt   | 1994           | Olives                    | 6                                                           |
| 59              | Egypt   | 1994           | Onions                    | 14                                                          |
| 59              | Egypt   | 1994           | Oranges, Mandarines       | 71                                                          |
| 59              | Egypt   | 1994           | Palmkernel Oil            | 1                                                           |
| 59              | Egypt   | 1994           | Pelagic Fish              | 7                                                           |
| 59              | Egypt   | 1994           | Pimento                   | 2                                                           |
| 59              | Egypt   | 1994           | Potatoes                  | 44                                                          |
| 59              | Egypt   | 1994           | Poultry Meat              | 15                                                          |
| 59              | Egypt   | 1994           | Pulses, Other             | 20                                                          |
| 59              | Egypt   | 1994           | Rice (Milled Equivalent)  | 106                                                         |
| 59              | Egypt   | 1994           | Roots, Other              | 5                                                           |
| 59              | Egypt   | 1994           | Sesameseed                | 3                                                           |
| 59              | Egypt   | 1994           | Sorghum                   | 13                                                          |
| 59              | Egypt   | 1994           | Soyabean Oil              | 2                                                           |
| 59              | Egypt   | 1994           | Soyabean                  | 1                                                           |
| 59              | Egypt   | 1994           | Sugar Cane                | 73                                                          |
| 59              | Egypt   | 1994           | Sugar, Refined Equivalent | 70                                                          |
| 59              | Egypt   | 1994           | Sunflowerseed Oil         | 7                                                           |
| 59              | Egypt   | 1994           | Sweet Potatoes            | 6                                                           |
| 59              | Egypt   | 1994           | Sweeteners, Other         | 2                                                           |
| 59              | Egypt   | 1994           | Tea                       | 3                                                           |
| 59              | Egypt   | 1994           | Tomatoes                  | 204                                                         |
| 59              | Egypt   | 1994           | Vegetables, Other         | 170                                                         |
| 59              | Egypt   | 1994           | Wheat                     | 414                                                         |
| 59              | Egypt   | 1995           | Apples                    | 18                                                          |
| 59              | Egypt   | 1995           | Bananas                   | 20                                                          |
| 59              | Egypt   | 1995           | Barley                    | 1                                                           |
| 59              | Egypt   | 1995           | Beans                     | 1                                                           |
| 59              | Egypt   | 1995           | Beer                      | 2                                                           |
| 59              | Egypt   | 1995           | Bovine Meat               | 26                                                          |
| 59              | Egypt   | 1995           | Butter, Ghee              | 6                                                           |
| 59              | Egypt   | 1995           | Cheese                    | 16                                                          |
| 59              | Egypt   | 1995           | Coconuts - Incl Copra     | 1                                                           |
| 59              | Egypt   | 1995           | Cottonseed Oil            | 7                                                           |
| 59              | Egypt   | 1995           | Crustaceans               | 1                                                           |
| 59              | Egypt   | 1995           | Dates                     | 27                                                          |
| 59              | Egypt   | 1995           | Demersal Fish             | 3                                                           |
| 59              | Egypt   | 1995           | Eggs                      | 6                                                           |
| 59              | Egypt   | 1995           | Fats, Animals, Raw        | 1                                                           |
| 59              | Egypt   | 1995           | Freshwater Fish           | 12                                                          |
| 59              | Egypt   | 1995           | Fruits, Other             | 51                                                          |
| 59              | Egypt   | 1995           | Grapes                    | 30                                                          |
| 59              | Egypt   | 1995           | Groundnuts (Shelled Eq)   | 2                                                           |
| 59              | Egypt   | 1995           | Lemons, Limes             | 12                                                          |
| 59              | Egypt   | 1995           | Maize                     | 154                                                         |
| 59              | Egypt   | 1995           | Maize Germ Oil            | 1                                                           |
| 59              | Egypt   | 1995           | Marine Fish, Other        | 2                                                           |
| 59              | Egypt   | 1995           | Meat, Other               | 4                                                           |
| 59              | Egypt   | 1995           | Milk, Whole               | 30                                                          |
| 59              | Egypt   | 1995           | Mutton & Goat Meat        | 4                                                           |
| 59              | Egypt   | 1995           | Offals, Edible            | 5                                                           |
| 59              | Egypt   | 1995           | Olives                    | 9                                                           |
| 59              | Egypt   | 1995           | Onions                    | 10                                                          |
| 59              | Egypt   | 1995           | Oranges, Mandarines       | 77                                                          |
| 59              | Egypt   | 1995           | Palmkernel Oil            | 1                                                           |
| 59              | Egypt   | 1995           | Pelagic Fish              | 6                                                           |
| 59              | Egypt   | 1995           | Pimento                   | 2                                                           |
| 59              | Egypt   | 1995           | Potatoes                  | 57                                                          |
| 59              | Egypt   | 1995           | Poultry Meat              | 17                                                          |
| 59              | Egypt   | 1995           | Pulses, Other             | 20                                                          |
| 59              | Egypt   | 1995           | Rice (Milled Equivalent)  | 113                                                         |

Dietary calcium and zinc deficiency risks are decreasing but remain prevalent

| FAO countrycode | Country | Reference year | Food item                 | Gross food supply (g capita <sup>-1</sup> d <sup>-1</sup> ) |
|-----------------|---------|----------------|---------------------------|-------------------------------------------------------------|
| 59              | Egypt   | 1995           | Roots, Other              | 5                                                           |
| 59              | Egypt   | 1995           | Sesameseed                | 3                                                           |
| 59              | Egypt   | 1995           | Sorghum                   | 12                                                          |
| 59              | Egypt   | 1995           | Soyabean Oil              | 3                                                           |
| 59              | Egypt   | 1995           | Sugar Cane                | 74                                                          |
| 59              | Egypt   | 1995           | Sugar, Refined Equivalent | 70                                                          |
| 59              | Egypt   | 1995           | Sunflowerseed Oil         | 6                                                           |
| 59              | Egypt   | 1995           | Sweet Potatoes            | 6                                                           |
| 59              | Egypt   | 1995           | Sweeteners, Other         | 3                                                           |
| 59              | Egypt   | 1995           | Tea                       | 3                                                           |
| 59              | Egypt   | 1995           | Tomatoes                  | 203                                                         |
| 59              | Egypt   | 1995           | Vegetables, Other         | 195                                                         |
| 59              | Egypt   | 1995           | Wheat                     | 412                                                         |
| 59              | Egypt   | 1995           | Whey                      | 1                                                           |
| 59              | Egypt   | 1996           | Apples                    | 17                                                          |
| 59              | Egypt   | 1996           | Bananas                   | 23                                                          |
| 59              | Egypt   | 1996           | Barley                    | 1                                                           |
| 59              | Egypt   | 1996           | Beans                     | 1                                                           |
| 59              | Egypt   | 1996           | Beer                      | 2                                                           |
| 59              | Egypt   | 1996           | Bovine Meat               | 25                                                          |
| 59              | Egypt   | 1996           | Butter, Ghee              | 6                                                           |
| 59              | Egypt   | 1996           | Cheese                    | 17                                                          |
| 59              | Egypt   | 1996           | Coconuts - Incl Copra     | 2                                                           |
| 59              | Egypt   | 1996           | Cottonseed Oil            | 5                                                           |
| 59              | Egypt   | 1996           | Dates                     | 29                                                          |
| 59              | Egypt   | 1996           | Demersal Fish             | 3                                                           |
| 59              | Egypt   | 1996           | Eggs                      | 6                                                           |
| 59              | Egypt   | 1996           | Fats, Animals, Raw        | 1                                                           |
| 59              | Egypt   | 1996           | Freshwater Fish           | 13                                                          |
| 59              | Egypt   | 1996           | Fruits, Other             | 50                                                          |
| 59              | Egypt   | 1996           | Grapes                    | 38                                                          |
| 59              | Egypt   | 1996           | Groundnuts (Shelled Eq)   | 2                                                           |
| 59              | Egypt   | 1996           | Lemons, Limes             | 12                                                          |
| 59              | Egypt   | 1996           | Maize                     | 151                                                         |
| 59              | Egypt   | 1996           | Marine Fish, Other        | 1                                                           |
| 59              | Egypt   | 1996           | Meat, Other               | 4                                                           |
| 59              | Egypt   | 1996           | Milk, Whole               | 33                                                          |
| 59              | Egypt   | 1996           | Mutton & Goat Meat        | 4                                                           |
| 59              | Egypt   | 1996           | Offals, Edible            | 5                                                           |
| 59              | Egypt   | 1996           | Olives                    | 9                                                           |
| 59              | Egypt   | 1996           | Onions                    | 13                                                          |
| 59              | Egypt   | 1996           | Oranges, Mandarines       | 79                                                          |
| 59              | Egypt   | 1996           | Palmkernel Oil            | 1                                                           |
| 59              | Egypt   | 1996           | Pelagic Fish              | 11                                                          |
| 59              | Egypt   | 1996           | Pimento                   | 2                                                           |
| 59              | Egypt   | 1996           | Potatoes                  | 59                                                          |
| 59              | Egypt   | 1996           | Poultry Meat              | 17                                                          |
| 59              | Egypt   | 1996           | Pulses, Other             | 20                                                          |
| 59              | Egypt   | 1996           | Rice (Milled Equivalent)  | 113                                                         |
| 59              | Egypt   | 1996           | Roots, Other              | 6                                                           |
| 59              | Egypt   | 1996           | Sesameseed                | 3                                                           |
| 59              | Egypt   | 1996           | Sorghum                   | 12                                                          |
| 59              | Egypt   | 1996           | Soyabean Oil              | 4                                                           |
| 59              | Egypt   | 1996           | Sugar Cane                | 70                                                          |
| 59              | Egypt   | 1996           | Sugar, Refined Equivalent | 71                                                          |
| 59              | Egypt   | 1996           | Sunflowerseed Oil         | 6                                                           |
| 59              | Egypt   | 1996           | Sweet Potatoes            | 5                                                           |
| 59              | Egypt   | 1996           | Sweeteners, Other         | 3                                                           |
| 59              | Egypt   | 1996           | Tea                       | 3                                                           |
| 59              | Egypt   | 1996           | Tomatoes                  | 238                                                         |
| 59              | Egypt   | 1996           | Vegetables, Other         | 211                                                         |
| 59              | Egypt   | 1996           | Wheat                     | 414                                                         |
| 59              | Egypt   | 1996           | Whey                      | 1                                                           |
| 59              | Egypt   | 1997           | Apples                    | 17                                                          |
| 59              | Egypt   | 1997           | Bananas                   | 25                                                          |
| 59              | Egypt   | 1997           | Barley                    | 1                                                           |
| 59              | Egypt   | 1997           | Beans                     | 1                                                           |
| 59              | Egypt   | 1997           | Beer                      | 2                                                           |
| 59              | Egypt   | 1997           | Bovine Meat               | 27                                                          |
| 59              | Egypt   | 1997           | Butter, Ghee              | 6                                                           |
| 59              | Egypt   | 1997           | Cheese                    | 18                                                          |
| 59              | Egypt   | 1997           | Coconuts - Incl Copra     | 2                                                           |
| 59              | Egypt   | 1997           | Cottonseed Oil            | 4                                                           |
| 59              | Egypt   | 1997           | Dates                     | 29                                                          |
| 59              | Egypt   | 1997           | Demersal Fish             | 3                                                           |
| 59              | Egypt   | 1997           | Eggs                      | 6                                                           |
| 59              | Egypt   | 1997           | Fats, Animals, Raw        | 1                                                           |
| 59              | Egypt   | 1997           | Freshwater Fish           | 13                                                          |
| 59              | Egypt   | 1997           | Fruits, Other             | 52                                                          |
| 59              | Egypt   | 1997           | Grapes                    | 34                                                          |
| 59              | Egypt   | 1997           | Groundnut Oil             | 1                                                           |
| 59              | Egypt   | 1997           | Groundnuts (Shelled Eq)   | 3                                                           |
| 59              | Egypt   | 1997           | Lemons, Limes             | 10                                                          |
| 59              | Egypt   | 1997           | Maize                     | 159                                                         |
| 59              | Egypt   | 1997           | Marine Fish, Other        | 2                                                           |
| 59              | Egypt   | 1997           | Meat, Other               | 4                                                           |
| 59              | Egypt   | 1997           | Milk, Whole               | 35                                                          |
| 59              | Egypt   | 1997           | Mutton & Goat Meat        | 4                                                           |
| 59              | Egypt   | 1997           | Offals, Edible            | 5                                                           |
| 59              | Egypt   | 1997           | Oilcrops, Other           | 1                                                           |
| 59              | Egypt   | 1997           | Olives                    | 8                                                           |
| 59              | Egypt   | 1997           | Onions                    | 11                                                          |
| 59              | Egypt   | 1997           | Oranges, Mandarines       | 75                                                          |
| 59              | Egypt   | 1997           | Palmkernel Oil            | 1                                                           |
| 59              | Egypt   | 1997           | Pelagic Fish              | 9                                                           |
| 59              | Egypt   | 1997           | Pimento                   | 2                                                           |
| 59              | Egypt   | 1997           | Potatoes                  | 52                                                          |

Dietary calcium and zinc deficiency risks are decreasing but remain prevalent

| FAO countrycode | Country | Reference year | Food item                 | Gross food supply (g capita <sup>-1</sup> d <sup>-1</sup> ) |
|-----------------|---------|----------------|---------------------------|-------------------------------------------------------------|
| 59              | Egypt   | 1997           | Poultry Meat              | 22                                                          |
| 59              | Egypt   | 1997           | Pulses, Other             | 20                                                          |
| 59              | Egypt   | 1997           | Rice (Milled Equivalent)  | 112                                                         |
| 59              | Egypt   | 1997           | Roots, Other              | 4                                                           |
| 59              | Egypt   | 1997           | Sesameseed                | 3                                                           |
| 59              | Egypt   | 1997           | Sorghum                   | 12                                                          |
| 59              | Egypt   | 1997           | Soyabean Oil              | 3                                                           |
| 59              | Egypt   | 1997           | Spices, Other             | 1                                                           |
| 59              | Egypt   | 1997           | Sugar Cane                | 91                                                          |
| 59              | Egypt   | 1997           | Sugar, Refined Equivalent | 74                                                          |
| 59              | Egypt   | 1997           | Sunflowerseed Oil         | 6                                                           |
| 59              | Egypt   | 1997           | Sweet Potatoes            | 7                                                           |
| 59              | Egypt   | 1997           | Sweeteners, Other         | 3                                                           |
| 59              | Egypt   | 1997           | Tea                       | 3                                                           |
| 59              | Egypt   | 1997           | Tomatoes                  | 229                                                         |
| 59              | Egypt   | 1997           | Vegetables, Other         | 240                                                         |
| 59              | Egypt   | 1997           | Wheat                     | 414                                                         |
| 59              | Egypt   | 1997           | Whey                      | 1                                                           |
| 59              | Egypt   | 1998           | Apples                    | 16                                                          |
| 59              | Egypt   | 1998           | Bananas                   | 26                                                          |
| 59              | Egypt   | 1998           | Barley                    | 1                                                           |
| 59              | Egypt   | 1998           | Beans                     | 1                                                           |
| 59              | Egypt   | 1998           | Beer                      | 2                                                           |
| 59              | Egypt   | 1998           | Bovine Meat               | 29                                                          |
| 59              | Egypt   | 1998           | Butter, Ghee              | 6                                                           |
| 59              | Egypt   | 1998           | Cheese                    | 19                                                          |
| 59              | Egypt   | 1998           | Coconuts - Incl Copra     | 2                                                           |
| 59              | Egypt   | 1998           | Cottonseed Oil            | 3                                                           |
| 59              | Egypt   | 1998           | Dates                     | 32                                                          |
| 59              | Egypt   | 1998           | Demersal Fish             | 4                                                           |
| 59              | Egypt   | 1998           | Eggs                      | 6                                                           |
| 59              | Egypt   | 1998           | Fats, Animals, Raw        | 1                                                           |
| 59              | Egypt   | 1998           | Freshwater Fish           | 15                                                          |
| 59              | Egypt   | 1998           | Fruits, Other             | 53                                                          |
| 59              | Egypt   | 1998           | Grapes                    | 37                                                          |
| 59              | Egypt   | 1998           | Groundnut Oil             | 1                                                           |
| 59              | Egypt   | 1998           | Groundnuts (Shelled Eq)   | 2                                                           |
| 59              | Egypt   | 1998           | Lemons, Limes             | 9                                                           |
| 59              | Egypt   | 1998           | Maize                     | 165                                                         |
| 59              | Egypt   | 1998           | Maize Germ Oil            | 1                                                           |
| 59              | Egypt   | 1998           | Marine Fish, Other        | 2                                                           |
| 59              | Egypt   | 1998           | Meat, Other               | 4                                                           |
| 59              | Egypt   | 1998           | Milk, Whole               | 37                                                          |
| 59              | Egypt   | 1998           | Mutton & Goat Meat        | 4                                                           |
| 59              | Egypt   | 1998           | Nuts                      | 1                                                           |
| 59              | Egypt   | 1998           | Offals, Edible            | 5                                                           |
| 59              | Egypt   | 1998           | Olives                    | 8                                                           |
| 59              | Egypt   | 1998           | Onions                    | 21                                                          |
| 59              | Egypt   | 1998           | Oranges, Mandarines       | 62                                                          |
| 59              | Egypt   | 1998           | Palmkernel Oil            | 1                                                           |
| 59              | Egypt   | 1998           | Pelagic Fish              | 12                                                          |
| 59              | Egypt   | 1998           | Pimento                   | 2                                                           |
| 59              | Egypt   | 1998           | Potatoes                  | 56                                                          |
| 59              | Egypt   | 1998           | Poultry Meat              | 21                                                          |
| 59              | Egypt   | 1998           | Pulses, Other             | 20                                                          |
| 59              | Egypt   | 1998           | Rice (Milled Equivalent)  | 108                                                         |
| 59              | Egypt   | 1998           | Roots, Other              | 3                                                           |
| 59              | Egypt   | 1998           | Sesameseed                | 3                                                           |
| 59              | Egypt   | 1998           | Sorghum                   | 13                                                          |
| 59              | Egypt   | 1998           | Soyabean Oil              | 4                                                           |
| 59              | Egypt   | 1998           | Spices, Other             | 1                                                           |
| 59              | Egypt   | 1998           | Sugar Cane                | 113                                                         |
| 59              | Egypt   | 1998           | Sugar, Refined Equivalent | 70                                                          |
| 59              | Egypt   | 1998           | Sunflowerseed Oil         | 6                                                           |
| 59              | Egypt   | 1998           | Sweet Potatoes            | 8                                                           |
| 59              | Egypt   | 1998           | Sweeteners, Other         | 3                                                           |
| 59              | Egypt   | 1998           | Tea                       | 3                                                           |
| 59              | Egypt   | 1998           | Tomatoes                  | 221                                                         |
| 59              | Egypt   | 1998           | Vegetables, Other         | 230                                                         |
| 59              | Egypt   | 1998           | Wheat                     | 401                                                         |
| 59              | Egypt   | 1998           | Whey                      | 1                                                           |
| 59              | Egypt   | 1999           | Apples                    | 17                                                          |
| 59              | Egypt   | 1999           | Bananas                   | 28                                                          |
| 59              | Egypt   | 1999           | Barley                    | 1                                                           |
| 59              | Egypt   | 1999           | Beans                     | 1                                                           |
| 59              | Egypt   | 1999           | Beer                      | 2                                                           |
| 59              | Egypt   | 1999           | Bovine Meat               | 29                                                          |
| 59              | Egypt   | 1999           | Butter, Ghee              | 6                                                           |
| 59              | Egypt   | 1999           | Cheese                    | 20                                                          |
| 59              | Egypt   | 1999           | Cocoa Beans               | 1                                                           |
| 59              | Egypt   | 1999           | Coconuts - Incl Copra     | 1                                                           |
| 59              | Egypt   | 1999           | Cottonseed Oil            | 2                                                           |
| 59              | Egypt   | 1999           | Crustaceans               | 1                                                           |
| 59              | Egypt   | 1999           | Dates                     | 34                                                          |
| 59              | Egypt   | 1999           | Demersal Fish             | 5                                                           |
| 59              | Egypt   | 1999           | Eggs                      | 5                                                           |
| 59              | Egypt   | 1999           | Fats, Animals, Raw        | 1                                                           |
| 59              | Egypt   | 1999           | Freshwater Fish           | 17                                                          |
| 59              | Egypt   | 1999           | Fruits, Other             | 49                                                          |
| 59              | Egypt   | 1999           | Grapes                    | 38                                                          |
| 59              | Egypt   | 1999           | Groundnut Oil             | 1                                                           |
| 59              | Egypt   | 1999           | Groundnuts (Shelled Eq)   | 3                                                           |
| 59              | Egypt   | 1999           | Lemons, Limes             | 10                                                          |
| 59              | Egypt   | 1999           | Maize                     | 171                                                         |
| 59              | Egypt   | 1999           | Marine Fish, Other        | 4                                                           |
| 59              | Egypt   | 1999           | Meat, Other               | 5                                                           |
| 59              | Egypt   | 1999           | Milk, Whole               | 37                                                          |

Dietary calcium and zinc deficiency risks are decreasing but remain prevalent

| FAO countrycode | Country | Reference year | Food item                 | Gross food supply (g capita <sup>-1</sup> d <sup>-1</sup> ) |
|-----------------|---------|----------------|---------------------------|-------------------------------------------------------------|
| 59              | Egypt   | 1999           | Mutton & Goat Meat        | 3                                                           |
| 59              | Egypt   | 1999           | Nuts                      | 1                                                           |
| 59              | Egypt   | 1999           | Offals, Edible            | 6                                                           |
| 59              | Egypt   | 1999           | Olives                    | 12                                                          |
| 59              | Egypt   | 1999           | Onions                    | 29                                                          |
| 59              | Egypt   | 1999           | Oranges, Mandarines       | 79                                                          |
| 59              | Egypt   | 1999           | Palmkernel Oil            | 1                                                           |
| 59              | Egypt   | 1999           | Pelagic Fish              | 11                                                          |
| 59              | Egypt   | 1999           | Pimento                   | 2                                                           |
| 59              | Egypt   | 1999           | Potatoes                  | 51                                                          |
| 59              | Egypt   | 1999           | Poultry Meat              | 23                                                          |
| 59              | Egypt   | 1999           | Pulses, Other             | 19                                                          |
| 59              | Egypt   | 1999           | Rice (Milled Equivalent)  | 111                                                         |
| 59              | Egypt   | 1999           | Roots, Other              | 2                                                           |
| 59              | Egypt   | 1999           | Sesameseed                | 3                                                           |
| 59              | Egypt   | 1999           | Sorghum                   | 18                                                          |
| 59              | Egypt   | 1999           | Soyabean Oil              | 4                                                           |
| 59              | Egypt   | 1999           | Spices, Other             | 1                                                           |
| 59              | Egypt   | 1999           | Sugar Cane                | 126                                                         |
| 59              | Egypt   | 1999           | Sugar, Refined Equivalent | 71                                                          |
| 59              | Egypt   | 1999           | Sunflowerseed Oil         | 6                                                           |
| 59              | Egypt   | 1999           | Sweet Potatoes            | 9                                                           |
| 59              | Egypt   | 1999           | Sweeteners, Other         | 3                                                           |
| 59              | Egypt   | 1999           | Tea                       | 3                                                           |
| 59              | Egypt   | 1999           | Tomatoes                  | 237                                                         |
| 59              | Egypt   | 1999           | Vegetables, Other         | 256                                                         |
| 59              | Egypt   | 1999           | Wheat                     | 377                                                         |
| 59              | Egypt   | 1999           | Whey                      | 2                                                           |
| 59              | Egypt   | 2000           | Apples                    | 19                                                          |
| 59              | Egypt   | 2000           | Bananas                   | 29                                                          |
| 59              | Egypt   | 2000           | Barley                    | 1                                                           |
| 59              | Egypt   | 2000           | Beans                     | 1                                                           |
| 59              | Egypt   | 2000           | Beer                      | 2                                                           |
| 59              | Egypt   | 2000           | Bovine Meat               | 30                                                          |
| 59              | Egypt   | 2000           | Butter, Ghee              | 7                                                           |
| 59              | Egypt   | 2000           | Cheese                    | 20                                                          |
| 59              | Egypt   | 2000           | Cocoa Beans               | 1                                                           |
| 59              | Egypt   | 2000           | Coconuts - Incl Copra     | 2                                                           |
| 59              | Egypt   | 2000           | Cottonseed Oil            | 2                                                           |
| 59              | Egypt   | 2000           | Crustaceans               | 1                                                           |
| 59              | Egypt   | 2000           | Dates                     | 37                                                          |
| 59              | Egypt   | 2000           | Demersal Fish             | 8                                                           |
| 59              | Egypt   | 2000           | Eggs                      | 6                                                           |
| 59              | Egypt   | 2000           | Fats, Animals, Raw        | 1                                                           |
| 59              | Egypt   | 2000           | Freshwater Fish           | 19                                                          |
| 59              | Egypt   | 2000           | Fruits, Other             | 48                                                          |
| 59              | Egypt   | 2000           | Grapes                    | 40                                                          |
| 59              | Egypt   | 2000           | Groundnut Oil             | 1                                                           |
| 59              | Egypt   | 2000           | Groundnuts (Shelled Eq)   | 3                                                           |
| 59              | Egypt   | 2000           | Lemons, Limes             | 10                                                          |
| 59              | Egypt   | 2000           | Maize                     | 167                                                         |
| 59              | Egypt   | 2000           | Marine Fish, Other        | 3                                                           |
| 59              | Egypt   | 2000           | Meat, Other               | 5                                                           |
| 59              | Egypt   | 2000           | Milk, Whole               | 38                                                          |
| 59              | Egypt   | 2000           | Mutton & Goat Meat        | 3                                                           |
| 59              | Egypt   | 2000           | Nuts                      | 2                                                           |
| 59              | Egypt   | 2000           | Offals, Edible            | 6                                                           |
| 59              | Egypt   | 2000           | Olives                    | 11                                                          |
| 59              | Egypt   | 2000           | Onions                    | 22                                                          |
| 59              | Egypt   | 2000           | Oranges, Mandarines       | 74                                                          |
| 59              | Egypt   | 2000           | Palmkernel Oil            | 1                                                           |
| 59              | Egypt   | 2000           | Pelagic Fish              | 10                                                          |
| 59              | Egypt   | 2000           | Pimento                   | 2                                                           |
| 59              | Egypt   | 2000           | Potatoes                  | 53                                                          |
| 59              | Egypt   | 2000           | Poultry Meat              | 24                                                          |
| 59              | Egypt   | 2000           | Pulses, Other             | 21                                                          |
| 59              | Egypt   | 2000           | Rice (Milled Equivalent)  | 111                                                         |
| 59              | Egypt   | 2000           | Roots, Other              | 2                                                           |
| 59              | Egypt   | 2000           | Sesameseed                | 4                                                           |
| 59              | Egypt   | 2000           | Sorghum                   | 16                                                          |
| 59              | Egypt   | 2000           | Soyabean Oil              | 4                                                           |
| 59              | Egypt   | 2000           | Sugar Cane                | 147                                                         |
| 59              | Egypt   | 2000           | Sugar, Refined Equivalent | 73                                                          |
| 59              | Egypt   | 2000           | Sunflowerseed Oil         | 6                                                           |
| 59              | Egypt   | 2000           | Sweet Potatoes            | 9                                                           |
| 59              | Egypt   | 2000           | Sweeteners, Other         | 2                                                           |
| 59              | Egypt   | 2000           | Tea                       | 3                                                           |
| 59              | Egypt   | 2000           | Tomatoes                  | 253                                                         |
| 59              | Egypt   | 2000           | Vegetables, Other         | 279                                                         |
| 59              | Egypt   | 2000           | Wheat                     | 373                                                         |
| 59              | Egypt   | 2000           | Whey                      | 2                                                           |
| 59              | Egypt   | 2001           | Apples                    | 19                                                          |
| 59              | Egypt   | 2001           | Bananas                   | 31                                                          |
| 59              | Egypt   | 2001           | Barley                    | 1                                                           |
| 59              | Egypt   | 2001           | Beans                     | 1                                                           |
| 59              | Egypt   | 2001           | Beer                      | 6                                                           |
| 59              | Egypt   | 2001           | Bovine Meat               | 22                                                          |
| 59              | Egypt   | 2001           | Butter, Ghee              | 6                                                           |
| 59              | Egypt   | 2001           | Cheese                    | 19                                                          |
| 59              | Egypt   | 2001           | Coconuts - Incl Copra     | 1                                                           |
| 59              | Egypt   | 2001           | Cottonseed Oil            | 2                                                           |
| 59              | Egypt   | 2001           | Crustaceans               | 1                                                           |
| 59              | Egypt   | 2001           | Dates                     | 41                                                          |
| 59              | Egypt   | 2001           | Demersal Fish             | 8                                                           |
| 59              | Egypt   | 2001           | Eggs                      | 7                                                           |
| 59              | Egypt   | 2001           | Fats, Animals, Raw        | 1                                                           |
| 59              | Egypt   | 2001           | Freshwater Fish           | 20                                                          |



Dietary calcium and zinc deficiency risks are decreasing but remain prevalent

| FAO countrycode | Country | Reference year | Food item                 | Gross food supply (g capita <sup>-1</sup> d <sup>-1</sup> ) |
|-----------------|---------|----------------|---------------------------|-------------------------------------------------------------|
| 59              | Egypt   | 2001           | Fruits, Other             | 47                                                          |
| 59              | Egypt   | 2001           | Grapes                    | 41                                                          |
| 59              | Egypt   | 2001           | Groundnut Oil             | 1                                                           |
| 59              | Egypt   | 2001           | Groundnuts (Shelled Eq)   | 3                                                           |
| 59              | Egypt   | 2001           | Lemons, Limes             | 10                                                          |
| 59              | Egypt   | 2001           | Maize                     | 162                                                         |
| 59              | Egypt   | 2001           | Marine Fish, Other        | 3                                                           |
| 59              | Egypt   | 2001           | Meat, Other               | 5                                                           |
| 59              | Egypt   | 2001           | Milk, Whole               | 45                                                          |
| 59              | Egypt   | 2001           | Mutton & Goat Meat        | 3                                                           |
| 59              | Egypt   | 2001           | Nuts                      | 2                                                           |
| 59              | Egypt   | 2001           | Offals, Edible            | 4                                                           |
| 59              | Egypt   | 2001           | Oilcrops, Other           | 1                                                           |
| 59              | Egypt   | 2001           | Olives                    | 12                                                          |
| 59              | Egypt   | 2001           | Onions                    | 16                                                          |
| 59              | Egypt   | 2001           | Oranges, Mandarines       | 72                                                          |
| 59              | Egypt   | 2001           | Palmkernel Oil            | 1                                                           |
| 59              | Egypt   | 2001           | Pelagic Fish              | 10                                                          |
| 59              | Egypt   | 2001           | Pimento                   | 2                                                           |
| 59              | Egypt   | 2001           | Potatoes                  | 54                                                          |
| 59              | Egypt   | 2001           | Poultry Meat              | 25                                                          |
| 59              | Egypt   | 2001           | Pulses, Other             | 25                                                          |
| 59              | Egypt   | 2001           | Rice (Milled Equivalent)  | 109                                                         |
| 59              | Egypt   | 2001           | Roots, Other              | 2                                                           |
| 59              | Egypt   | 2001           | Sesameseed                | 3                                                           |
| 59              | Egypt   | 2001           | Sorghum                   | 12                                                          |
| 59              | Egypt   | 2001           | Soyabean Oil              | 4                                                           |
| 59              | Egypt   | 2001           | Spices, Other             | 1                                                           |
| 59              | Egypt   | 2001           | Sugar Cane                | 145                                                         |
| 59              | Egypt   | 2001           | Sugar, Refined Equivalent | 78                                                          |
| 59              | Egypt   | 2001           | Sunflowerseed Oil         | 5                                                           |
| 59              | Egypt   | 2001           | Sweet Potatoes            | 11                                                          |
| 59              | Egypt   | 2001           | Sweeteners, Other         | 3                                                           |
| 59              | Egypt   | 2001           | Tea                       | 3                                                           |
| 59              | Egypt   | 2001           | Tomatoes                  | 231                                                         |
| 59              | Egypt   | 2001           | Vegetables, Other         | 256                                                         |
| 59              | Egypt   | 2001           | Wheat                     | 395                                                         |
| 59              | Egypt   | 2001           | Whey                      | 3                                                           |
| 59              | Egypt   | 2002           | Apples                    | 20                                                          |
| 59              | Egypt   | 2002           | Bananas                   | 32                                                          |
| 59              | Egypt   | 2002           | Barley                    | 1                                                           |
| 59              | Egypt   | 2002           | Beans                     | 1                                                           |
| 59              | Egypt   | 2002           | Beer                      | 5                                                           |
| 59              | Egypt   | 2002           | Bovine Meat               | 24                                                          |
| 59              | Egypt   | 2002           | Butter, Ghee              | 6                                                           |
| 59              | Egypt   | 2002           | Cheese                    | 22                                                          |
| 59              | Egypt   | 2002           | Coconuts - Incl Copra     | 2                                                           |
| 59              | Egypt   | 2002           | Cottonseed Oil            | 3                                                           |
| 59              | Egypt   | 2002           | Crustaceans               | 1                                                           |
| 59              | Egypt   | 2002           | Dates                     | 39                                                          |
| 59              | Egypt   | 2002           | Demersal Fish             | 8                                                           |
| 59              | Egypt   | 2002           | Eggs                      | 10                                                          |
| 59              | Egypt   | 2002           | Fats, Animals, Raw        | 1                                                           |
| 59              | Egypt   | 2002           | Freshwater Fish           | 21                                                          |
| 59              | Egypt   | 2002           | Fruits, Other             | 51                                                          |
| 59              | Egypt   | 2002           | Grapes                    | 39                                                          |
| 59              | Egypt   | 2002           | Groundnut Oil             | 1                                                           |
| 59              | Egypt   | 2002           | Groundnuts (Shelled Eq)   | 3                                                           |
| 59              | Egypt   | 2002           | Lemons, Limes             | 11                                                          |
| 59              | Egypt   | 2002           | Maize                     | 167                                                         |
| 59              | Egypt   | 2002           | Maize Germ Oil            | 1                                                           |
| 59              | Egypt   | 2002           | Marine Fish, Other        | 2                                                           |
| 59              | Egypt   | 2002           | Meat, Other               | 5                                                           |
| 59              | Egypt   | 2002           | Milk, Whole               | 41                                                          |
| 59              | Egypt   | 2002           | Mutton & Goat Meat        | 3                                                           |
| 59              | Egypt   | 2002           | Nuts                      | 2                                                           |
| 59              | Egypt   | 2002           | Offals, Edible            | 5                                                           |
| 59              | Egypt   | 2002           | Oilcrops, Other           | 1                                                           |
| 59              | Egypt   | 2002           | Olive Oil                 | 1                                                           |
| 59              | Egypt   | 2002           | Olives                    | 13                                                          |
| 59              | Egypt   | 2002           | Onions                    | 15                                                          |
| 59              | Egypt   | 2002           | Oranges, Mandarines       | 82                                                          |
| 59              | Egypt   | 2002           | Palmkernel Oil            | 1                                                           |
| 59              | Egypt   | 2002           | Pelagic Fish              | 8                                                           |
| 59              | Egypt   | 2002           | Pimento                   | 2                                                           |
| 59              | Egypt   | 2002           | Potatoes                  | 55                                                          |
| 59              | Egypt   | 2002           | Poultry Meat              | 25                                                          |
| 59              | Egypt   | 2002           | Pulses, Other             | 24                                                          |
| 59              | Egypt   | 2002           | Rice (Milled Equivalent)  | 123                                                         |
| 59              | Egypt   | 2002           | Roots, Other              | 2                                                           |
| 59              | Egypt   | 2002           | Sesameseed                | 3                                                           |
| 59              | Egypt   | 2002           | Sorghum                   | 13                                                          |
| 59              | Egypt   | 2002           | Soyabean Oil              | 5                                                           |
| 59              | Egypt   | 2002           | Spices, Other             | 1                                                           |
| 59              | Egypt   | 2002           | Sugar Cane                | 150                                                         |
| 59              | Egypt   | 2002           | Sugar, Refined Equivalent | 74                                                          |
| 59              | Egypt   | 2002           | Sunflowerseed Oil         | 5                                                           |
| 59              | Egypt   | 2002           | Sweet Potatoes            | 8                                                           |
| 59              | Egypt   | 2002           | Sweeteners, Other         | 3                                                           |
| 59              | Egypt   | 2002           | Tea                       | 3                                                           |
| 59              | Egypt   | 2002           | Tomatoes                  | 243                                                         |
| 59              | Egypt   | 2002           | Vegetables, Other         | 253                                                         |
| 59              | Egypt   | 2002           | Wheat                     | 377                                                         |
| 59              | Egypt   | 2002           | Whey                      | 3                                                           |
| 59              | Egypt   | 2003           | Apples                    | 20                                                          |
| 59              | Egypt   | 2003           | Bananas                   | 31                                                          |
| 59              | Egypt   | 2003           | Barley                    | 1                                                           |

Dietary calcium and zinc deficiency risks are decreasing but remain prevalent

| FAO countrycode | Country | Reference year | Food item                 | Gross food supply (g capita <sup>-1</sup> d <sup>-1</sup> ) |
|-----------------|---------|----------------|---------------------------|-------------------------------------------------------------|
| 59              | Egypt   | 2003           | Beans                     | 2                                                           |
| 59              | Egypt   | 2003           | Beer                      | 6                                                           |
| 59              | Egypt   | 2003           | Bovine Meat               | 25                                                          |
| 59              | Egypt   | 2003           | Butter, Ghee              | 6                                                           |
| 59              | Egypt   | 2003           | Cheese                    | 26                                                          |
| 59              | Egypt   | 2003           | Coconuts - Incl Copra     | 2                                                           |
| 59              | Egypt   | 2003           | Cottonseed Oil            | 2                                                           |
| 59              | Egypt   | 2003           | Dates                     | 40                                                          |
| 59              | Egypt   | 2003           | Demersal Fish             | 9                                                           |
| 59              | Egypt   | 2003           | Eggs                      | 9                                                           |
| 59              | Egypt   | 2003           | Fats, Animals, Raw        | 1                                                           |
| 59              | Egypt   | 2003           | Freshwater Fish           | 23                                                          |
| 59              | Egypt   | 2003           | Fruits, Other             | 44                                                          |
| 59              | Egypt   | 2003           | Grapes                    | 42                                                          |
| 59              | Egypt   | 2003           | Groundnut Oil             | 1                                                           |
| 59              | Egypt   | 2003           | Groundnuts (Shelled Eq)   | 3                                                           |
| 59              | Egypt   | 2003           | Lemons, Limes             | 11                                                          |
| 59              | Egypt   | 2003           | Maize                     | 170                                                         |
| 59              | Egypt   | 2003           | Marine Fish, Other        | 3                                                           |
| 59              | Egypt   | 2003           | Meat, Other               | 5                                                           |
| 59              | Egypt   | 2003           | Milk, Whole               | 50                                                          |
| 59              | Egypt   | 2003           | Mutton & Goat Meat        | 3                                                           |
| 59              | Egypt   | 2003           | Nuts                      | 2                                                           |
| 59              | Egypt   | 2003           | Offals, Edible            | 5                                                           |
| 59              | Egypt   | 2003           | Oilcrops, Other           | 1                                                           |
| 59              | Egypt   | 2003           | Olives                    | 8                                                           |
| 59              | Egypt   | 2003           | Onions                    | 12                                                          |
| 59              | Egypt   | 2003           | Oranges, Mandarines       | 78                                                          |
| 59              | Egypt   | 2003           | Palmkernel Oil            | 1                                                           |
| 59              | Egypt   | 2003           | Pelagic Fish              | 7                                                           |
| 59              | Egypt   | 2003           | Pimento                   | 2                                                           |
| 59              | Egypt   | 2003           | Potatoes                  | 53                                                          |
| 59              | Egypt   | 2003           | Poultry Meat              | 25                                                          |
| 59              | Egypt   | 2003           | Pulses, Other             | 22                                                          |
| 59              | Egypt   | 2003           | Rice (Milled Equivalent)  | 119                                                         |
| 59              | Egypt   | 2003           | Roots, Other              | 4                                                           |
| 59              | Egypt   | 2003           | Sesameseed                | 3                                                           |
| 59              | Egypt   | 2003           | Sorghum                   | 12                                                          |
| 59              | Egypt   | 2003           | Soyabean Oil              | 5                                                           |
| 59              | Egypt   | 2003           | Spices, Other             | 1                                                           |
| 59              | Egypt   | 2003           | Sugar Cane                | 136                                                         |
| 59              | Egypt   | 2003           | Sugar, Refined Equivalent | 67                                                          |
| 59              | Egypt   | 2003           | Sunflowerseed Oil         | 5                                                           |
| 59              | Egypt   | 2003           | Sweet Potatoes            | 10                                                          |
| 59              | Egypt   | 2003           | Sweeteners, Other         | 3                                                           |
| 59              | Egypt   | 2003           | Tea                       | 3                                                           |
| 59              | Egypt   | 2003           | Tomatoes                  | 252                                                         |
| 59              | Egypt   | 2003           | Vegetables, Other         | 278                                                         |
| 59              | Egypt   | 2003           | Wheat                     | 364                                                         |
| 59              | Egypt   | 2003           | Whey                      | 2                                                           |
| 59              | Egypt   | 2004           | Apples                    | 21                                                          |
| 59              | Egypt   | 2004           | Bananas                   | 31                                                          |
| 59              | Egypt   | 2004           | Barley                    | 1                                                           |
| 59              | Egypt   | 2004           | Beans                     | 1                                                           |
| 59              | Egypt   | 2004           | Beer                      | 10                                                          |
| 59              | Egypt   | 2004           | Bovine Meat               | 28                                                          |
| 59              | Egypt   | 2004           | Butter, Ghee              | 6                                                           |
| 59              | Egypt   | 2004           | Cheese                    | 24                                                          |
| 59              | Egypt   | 2004           | Cocoa Beans               | 1                                                           |
| 59              | Egypt   | 2004           | Coconuts - Incl Copra     | 2                                                           |
| 59              | Egypt   | 2004           | Cottonseed Oil            | 2                                                           |
| 59              | Egypt   | 2004           | Crustaceans               | 1                                                           |
| 59              | Egypt   | 2004           | Dates                     | 41                                                          |
| 59              | Egypt   | 2004           | Demersal Fish             | 8                                                           |
| 59              | Egypt   | 2004           | Eggs                      | 8                                                           |
| 59              | Egypt   | 2004           | Fats, Animals, Raw        | 1                                                           |
| 59              | Egypt   | 2004           | Freshwater Fish           | 22                                                          |
| 59              | Egypt   | 2004           | Fruits, Other             | 50                                                          |
| 59              | Egypt   | 2004           | Grapes                    | 44                                                          |
| 59              | Egypt   | 2004           | Groundnut Oil             | 1                                                           |
| 59              | Egypt   | 2004           | Groundnuts (Shelled Eq)   | 2                                                           |
| 59              | Egypt   | 2004           | Lemons, Limes             | 10                                                          |
| 59              | Egypt   | 2004           | Maize                     | 163                                                         |
| 59              | Egypt   | 2004           | Marine Fish, Other        | 4                                                           |
| 59              | Egypt   | 2004           | Meat, Other               | 5                                                           |
| 59              | Egypt   | 2004           | Milk, Whole               | 27                                                          |
| 59              | Egypt   | 2004           | Mutton & Goat Meat        | 2                                                           |
| 59              | Egypt   | 2004           | Nuts                      | 1                                                           |
| 59              | Egypt   | 2004           | Offals, Edible            | 4                                                           |
| 59              | Egypt   | 2004           | Oilcrops, Other           | 1                                                           |
| 59              | Egypt   | 2004           | Olives                    | 12                                                          |
| 59              | Egypt   | 2004           | Onions                    | 18                                                          |
| 59              | Egypt   | 2004           | Oranges, Mandarines       | 78                                                          |
| 59              | Egypt   | 2004           | Palmkernel Oil            | 1                                                           |
| 59              | Egypt   | 2004           | Pelagic Fish              | 8                                                           |
| 59              | Egypt   | 2004           | Pimento                   | 2                                                           |
| 59              | Egypt   | 2004           | Potatoes                  | 65                                                          |
| 59              | Egypt   | 2004           | Poultry Meat              | 25                                                          |
| 59              | Egypt   | 2004           | Pulses, Other             | 22                                                          |
| 59              | Egypt   | 2004           | Rice (Milled Equivalent)  | 113                                                         |
| 59              | Egypt   | 2004           | Roots, Other              | 4                                                           |
| 59              | Egypt   | 2004           | Sesameseed                | 3                                                           |
| 59              | Egypt   | 2004           | Sorghum                   | 9                                                           |
| 59              | Egypt   | 2004           | Soyabean Oil              | 4                                                           |
| 59              | Egypt   | 2004           | Spices, Other             | 1                                                           |
| 59              | Egypt   | 2004           | Sugar Cane                | 132                                                         |
| 59              | Egypt   | 2004           | Sugar, Refined Equivalent | 68                                                          |

Dietary calcium and zinc deficiency risks are decreasing but remain prevalent

| FAO countrycode | Country | Reference year | Food item                 | Gross food supply (g capita <sup>-1</sup> d <sup>-1</sup> ) |
|-----------------|---------|----------------|---------------------------|-------------------------------------------------------------|
| 59              | Egypt   | 2004           | Sunflowerseed Oil         | 5                                                           |
| 59              | Egypt   | 2004           | Sweet Potatoes            | 8                                                           |
| 59              | Egypt   | 2004           | Sweeteners, Other         | 2                                                           |
| 59              | Egypt   | 2004           | Tomatoes                  | 266                                                         |
| 59              | Egypt   | 2004           | Vegetables, Other         | 261                                                         |
| 59              | Egypt   | 2004           | Wheat                     | 371                                                         |
| 59              | Egypt   | 2004           | Whey                      | 4                                                           |
| 59              | Egypt   | 2005           | Apples                    | 22                                                          |
| 59              | Egypt   | 2005           | Bananas                   | 31                                                          |
| 59              | Egypt   | 2005           | Barley                    | 1                                                           |
| 59              | Egypt   | 2005           | Beans                     | 1                                                           |
| 59              | Egypt   | 2005           | Beer                      | 10                                                          |
| 59              | Egypt   | 2005           | Bovine Meat               | 31                                                          |
| 59              | Egypt   | 2005           | Butter, Ghee              | 6                                                           |
| 59              | Egypt   | 2005           | Cheese                    | 23                                                          |
| 59              | Egypt   | 2005           | Coconuts - Incl Copra     | 3                                                           |
| 59              | Egypt   | 2005           | Cottonseed Oil            | 2                                                           |
| 59              | Egypt   | 2005           | Crustaceans               | 1                                                           |
| 59              | Egypt   | 2005           | Dates                     | 40                                                          |
| 59              | Egypt   | 2005           | Demersal Fish             | 9                                                           |
| 59              | Egypt   | 2005           | Eggs                      | 7                                                           |
| 59              | Egypt   | 2005           | Fats, Animals, Raw        | 1                                                           |
| 59              | Egypt   | 2005           | Freshwater Fish           | 22                                                          |
| 59              | Egypt   | 2005           | Fruits, Other             | 46                                                          |
| 59              | Egypt   | 2005           | Grapes                    | 47                                                          |
| 59              | Egypt   | 2005           | Groundnut Oil             | 1                                                           |
| 59              | Egypt   | 2005           | Groundnuts (Shelled Eq)   | 2                                                           |
| 59              | Egypt   | 2005           | Lemons, Limes             | 11                                                          |
| 59              | Egypt   | 2005           | Maize                     | 161                                                         |
| 59              | Egypt   | 2005           | Maize Germ Oil            | 1                                                           |
| 59              | Egypt   | 2005           | Marine Fish, Other        | 5                                                           |
| 59              | Egypt   | 2005           | Meat, Other               | 5                                                           |
| 59              | Egypt   | 2005           | Milk, Whole               | 39                                                          |
| 59              | Egypt   | 2005           | Mutton & Goat Meat        | 3                                                           |
| 59              | Egypt   | 2005           | Nuts                      | 2                                                           |
| 59              | Egypt   | 2005           | Offals, Edible            | 5                                                           |
| 59              | Egypt   | 2005           | Olives                    | 11                                                          |
| 59              | Egypt   | 2005           | Onions                    | 33                                                          |
| 59              | Egypt   | 2005           | Oranges, Mandarines       | 83                                                          |
| 59              | Egypt   | 2005           | Palmkernel Oil            | 2                                                           |
| 59              | Egypt   | 2005           | Pelagic Fish              | 7                                                           |
| 59              | Egypt   | 2005           | Pimento                   | 2                                                           |
| 59              | Egypt   | 2005           | Potatoes                  | 86                                                          |
| 59              | Egypt   | 2005           | Poultry Meat              | 25                                                          |
| 59              | Egypt   | 2005           | Pulses, Other             | 24                                                          |
| 59              | Egypt   | 2005           | Rice (Milled Equivalent)  | 101                                                         |
| 59              | Egypt   | 2005           | Roots, Other              | 3                                                           |
| 59              | Egypt   | 2005           | Sesameseed                | 2                                                           |
| 59              | Egypt   | 2005           | Sorghum                   | 8                                                           |
| 59              | Egypt   | 2005           | Soyabean Oil              | 4                                                           |
| 59              | Egypt   | 2005           | Spices, Other             | 1                                                           |
| 59              | Egypt   | 2005           | Sugar Cane                | 122                                                         |
| 59              | Egypt   | 2005           | Sugar, Refined Equivalent | 66                                                          |
| 59              | Egypt   | 2005           | Sunflowerseed Oil         | 4                                                           |
| 59              | Egypt   | 2005           | Sweet Potatoes            | 11                                                          |
| 59              | Egypt   | 2005           | Sweeteners, Other         | 3                                                           |
| 59              | Egypt   | 2005           | Tomatoes                  | 260                                                         |
| 59              | Egypt   | 2005           | Vegetables, Other         | 267                                                         |
| 59              | Egypt   | 2005           | Wheat                     | 396                                                         |
| 59              | Egypt   | 2005           | Whey                      | 4                                                           |
| 59              | Egypt   | 2006           | Apples                    | 21                                                          |
| 59              | Egypt   | 2006           | Bananas                   | 29                                                          |
| 59              | Egypt   | 2006           | Barley                    | 1                                                           |
| 59              | Egypt   | 2006           | Beans                     | 1                                                           |
| 59              | Egypt   | 2006           | Beer                      | 7                                                           |
| 59              | Egypt   | 2006           | Bovine Meat               | 36                                                          |
| 59              | Egypt   | 2006           | Butter, Ghee              | 5                                                           |
| 59              | Egypt   | 2006           | Cheese                    | 23                                                          |
| 59              | Egypt   | 2006           | Coconuts - Incl Copra     | 1                                                           |
| 59              | Egypt   | 2006           | Cottonseed Oil            | 2                                                           |
| 59              | Egypt   | 2006           | Crustaceans               | 1                                                           |
| 59              | Egypt   | 2006           | Dates                     | 45                                                          |
| 59              | Egypt   | 2006           | Demersal Fish             | 12                                                          |
| 59              | Egypt   | 2006           | Eggs                      | 7                                                           |
| 59              | Egypt   | 2006           | Fats, Animals, Raw        | 1                                                           |
| 59              | Egypt   | 2006           | Freshwater Fish           | 21                                                          |
| 59              | Egypt   | 2006           | Fruits, Other             | 62                                                          |
| 59              | Egypt   | 2006           | Grapes                    | 47                                                          |
| 59              | Egypt   | 2006           | Groundnut Oil             | 1                                                           |
| 59              | Egypt   | 2006           | Groundnuts (Shelled Eq)   | 2                                                           |
| 59              | Egypt   | 2006           | Lemons, Limes             | 10                                                          |
| 59              | Egypt   | 2006           | Maize                     | 162                                                         |
| 59              | Egypt   | 2006           | Maize Germ Oil            | 1                                                           |
| 59              | Egypt   | 2006           | Marine Fish, Other        | 6                                                           |
| 59              | Egypt   | 2006           | Meat, Other               | 5                                                           |
| 59              | Egypt   | 2006           | Milk, Whole               | 51                                                          |
| 59              | Egypt   | 2006           | Mutton & Goat Meat        | 4                                                           |
| 59              | Egypt   | 2006           | Nuts                      | 2                                                           |
| 59              | Egypt   | 2006           | Offals, Edible            | 6                                                           |
| 59              | Egypt   | 2006           | Olives                    | 18                                                          |
| 59              | Egypt   | 2006           | Onions                    | 30                                                          |
| 59              | Egypt   | 2006           | Oranges, Mandarines       | 86                                                          |
| 59              | Egypt   | 2006           | Palmkernel Oil            | 1                                                           |
| 59              | Egypt   | 2006           | Pelagic Fish              | 7                                                           |
| 59              | Egypt   | 2006           | Pimento                   | 2                                                           |
| 59              | Egypt   | 2006           | Potatoes                  | 57                                                          |
| 59              | Egypt   | 2006           | Poultry Meat              | 27                                                          |

Dietary calcium and zinc deficiency risks are decreasing but remain prevalent

| FAO countrycode | Country | Reference year | Food item                 | Gross food supply (g capita <sup>-1</sup> d <sup>-1</sup> ) |
|-----------------|---------|----------------|---------------------------|-------------------------------------------------------------|
| 59              | Egypt   | 2006           | Pulses, Other             | 23                                                          |
| 59              | Egypt   | 2006           | Rice (Milled Equivalent)  | 107                                                         |
| 59              | Egypt   | 2006           | Roots, Other              | 4                                                           |
| 59              | Egypt   | 2006           | Sesameseed                | 2                                                           |
| 59              | Egypt   | 2006           | Sorghum                   | 9                                                           |
| 59              | Egypt   | 2006           | Soyabean Oil              | 4                                                           |
| 59              | Egypt   | 2006           | Soyabean                  | 1                                                           |
| 59              | Egypt   | 2006           | Spices, Other             | 1                                                           |
| 59              | Egypt   | 2006           | Sugar Cane                | 120                                                         |
| 59              | Egypt   | 2006           | Sugar, Refined Equivalent | 63                                                          |
| 59              | Egypt   | 2006           | Sunflowerseed Oil         | 4                                                           |
| 59              | Egypt   | 2006           | Sweet Potatoes            | 11                                                          |
| 59              | Egypt   | 2006           | Sweeteners, Other         | 3                                                           |
| 59              | Egypt   | 2006           | Tomatoes                  | 287                                                         |
| 59              | Egypt   | 2006           | Vegetables, Other         | 284                                                         |
| 59              | Egypt   | 2006           | Wheat                     | 391                                                         |
| 59              | Egypt   | 2006           | Whey                      | 5                                                           |
| 59              | Egypt   | 2007           | Apples                    | 20                                                          |
| 59              | Egypt   | 2007           | Bananas                   | 31                                                          |
| 59              | Egypt   | 2007           | Barley                    | 1                                                           |
| 59              | Egypt   | 2007           | Beer                      | 10                                                          |
| 59              | Egypt   | 2007           | Bovine Meat               | 39                                                          |
| 59              | Egypt   | 2007           | Butter, Ghee              | 6                                                           |
| 59              | Egypt   | 2007           | Cheese                    | 23                                                          |
| 59              | Egypt   | 2007           | Coconuts - Incl Copra     | 1                                                           |
| 59              | Egypt   | 2007           | Cottonseed Oil            | 2                                                           |
| 59              | Egypt   | 2007           | Crustaceans               | 1                                                           |
| 59              | Egypt   | 2007           | Dates                     | 44                                                          |
| 59              | Egypt   | 2007           | Demersal Fish             | 13                                                          |
| 59              | Egypt   | 2007           | Eggs                      | 8                                                           |
| 59              | Egypt   | 2007           | Fats, Animals, Raw        | 1                                                           |
| 59              | Egypt   | 2007           | Freshwater Fish           | 21                                                          |
| 59              | Egypt   | 2007           | Fruits, Other             | 59                                                          |
| 59              | Egypt   | 2007           | Grapes                    | 47                                                          |
| 59              | Egypt   | 2007           | Groundnut Oil             | 1                                                           |
| 59              | Egypt   | 2007           | Groundnuts (Shelled Eq)   | 3                                                           |
| 59              | Egypt   | 2007           | Lemons, Limes             | 10                                                          |
| 59              | Egypt   | 2007           | Maize                     | 163                                                         |
| 59              | Egypt   | 2007           | Maize Germ Oil            | 1                                                           |
| 59              | Egypt   | 2007           | Marine Fish, Other        | 5                                                           |
| 59              | Egypt   | 2007           | Meat, Other               | 4                                                           |
| 59              | Egypt   | 2007           | Milk, Whole               | 69                                                          |
| 59              | Egypt   | 2007           | Mutton & Goat Meat        | 5                                                           |
| 59              | Egypt   | 2007           | Nuts                      | 2                                                           |
| 59              | Egypt   | 2007           | Offals, Edible            | 6                                                           |
| 59              | Egypt   | 2007           | Olives                    | 18                                                          |
| 59              | Egypt   | 2007           | Onions                    | 42                                                          |
| 59              | Egypt   | 2007           | Oranges, Mandarines       | 83                                                          |
| 59              | Egypt   | 2007           | Pelagic Fish              | 9                                                           |
| 59              | Egypt   | 2007           | Pimento                   | 2                                                           |
| 59              | Egypt   | 2007           | Potatoes                  | 71                                                          |
| 59              | Egypt   | 2007           | Poultry Meat              | 30                                                          |
| 59              | Egypt   | 2007           | Pulses, Other             | 19                                                          |
| 59              | Egypt   | 2007           | Rice (Milled Equivalent)  | 109                                                         |
| 59              | Egypt   | 2007           | Roots, Other              | 4                                                           |
| 59              | Egypt   | 2007           | Sesameseed                | 2                                                           |
| 59              | Egypt   | 2007           | Sorghum                   | 8                                                           |
| 59              | Egypt   | 2007           | Soyabean Oil              | 6                                                           |
| 59              | Egypt   | 2007           | Soyabean                  | 2                                                           |
| 59              | Egypt   | 2007           | Spices, Other             | 1                                                           |
| 59              | Egypt   | 2007           | Sugar Cane                | 124                                                         |
| 59              | Egypt   | 2007           | Sugar, Refined Equivalent | 64                                                          |
| 59              | Egypt   | 2007           | Sunflowerseed Oil         | 5                                                           |
| 59              | Egypt   | 2007           | Sweet Potatoes            | 11                                                          |
| 59              | Egypt   | 2007           | Sweeteners, Other         | 3                                                           |
| 59              | Egypt   | 2007           | Tea                       | 1                                                           |
| 59              | Egypt   | 2007           | Tomatoes                  | 286                                                         |
| 59              | Egypt   | 2007           | Vegetables, Other         | 288                                                         |
| 59              | Egypt   | 2007           | Wheat                     | 389                                                         |
| 59              | Egypt   | 2007           | Whey                      | 6                                                           |
| 59              | Egypt   | 2008           | Apples                    | 20                                                          |
| 59              | Egypt   | 2008           | Bananas                   | 35                                                          |
| 59              | Egypt   | 2008           | Barley                    | 1                                                           |
| 59              | Egypt   | 2008           | Beans                     | 1                                                           |
| 59              | Egypt   | 2008           | Beer                      | 7                                                           |
| 59              | Egypt   | 2008           | Bovine Meat               | 33                                                          |
| 59              | Egypt   | 2008           | Butter, Ghee              | 6                                                           |
| 59              | Egypt   | 2008           | Cheese                    | 23                                                          |
| 59              | Egypt   | 2008           | Cocoa Beans               | 1                                                           |
| 59              | Egypt   | 2008           | Coconuts - Incl Copra     | 1                                                           |
| 59              | Egypt   | 2008           | Coffee                    | 1                                                           |
| 59              | Egypt   | 2008           | Cottonseed Oil            | 1                                                           |
| 59              | Egypt   | 2008           | Crustaceans               | 1                                                           |
| 59              | Egypt   | 2008           | Dates                     | 43                                                          |
| 59              | Egypt   | 2008           | Demersal Fish             | 13                                                          |
| 59              | Egypt   | 2008           | Eggs                      | 10                                                          |
| 59              | Egypt   | 2008           | Fats, Animals, Raw        | 1                                                           |
| 59              | Egypt   | 2008           | Freshwater Fish           | 24                                                          |
| 59              | Egypt   | 2008           | Fruits, Other             | 61                                                          |
| 59              | Egypt   | 2008           | Grapes                    | 48                                                          |
| 59              | Egypt   | 2008           | Groundnut Oil             | 1                                                           |
| 59              | Egypt   | 2008           | Groundnuts (Shelled Eq)   | 3                                                           |
| 59              | Egypt   | 2008           | Lemons, Limes             | 11                                                          |
| 59              | Egypt   | 2008           | Maize                     | 164                                                         |
| 59              | Egypt   | 2008           | Maize Germ Oil            | 1                                                           |
| 59              | Egypt   | 2008           | Marine Fish, Other        | 3                                                           |
| 59              | Egypt   | 2008           | Meat, Other               | 4                                                           |

Dietary calcium and zinc deficiency risks are decreasing but remain prevalent

| FAO countrycode | Country | Reference year | Food item                 | Gross food supply (g capita <sup>-1</sup> d <sup>-1</sup> ) |
|-----------------|---------|----------------|---------------------------|-------------------------------------------------------------|
| 59              | Egypt   | 2008           | Milk, Whole               | 69                                                          |
| 59              | Egypt   | 2008           | Mutton & Goat Meat        | 6                                                           |
| 59              | Egypt   | 2008           | Nuts                      | 2                                                           |
| 59              | Egypt   | 2008           | Offals, Edible            | 6                                                           |
| 59              | Egypt   | 2008           | Oilcrops Oil, Other       | 1                                                           |
| 59              | Egypt   | 2008           | Olives                    | 16                                                          |
| 59              | Egypt   | 2008           | Onions                    | 60                                                          |
| 59              | Egypt   | 2008           | Oranges, Mandarines       | 78                                                          |
| 59              | Egypt   | 2008           | Palmkernel Oil            | 1                                                           |
| 59              | Egypt   | 2008           | Pelagic Fish              | 8                                                           |
| 59              | Egypt   | 2008           | Pimento                   | 2                                                           |
| 59              | Egypt   | 2008           | Potatoes                  | 89                                                          |
| 59              | Egypt   | 2008           | Poultry Meat              | 27                                                          |
| 59              | Egypt   | 2008           | Pulses, Other             | 14                                                          |
| 59              | Egypt   | 2008           | Rice (Milled Equivalent)  | 111                                                         |
| 59              | Egypt   | 2008           | Roots, Other              | 4                                                           |
| 59              | Egypt   | 2008           | Sesameseed                | 2                                                           |
| 59              | Egypt   | 2008           | Sorghum                   | 9                                                           |
| 59              | Egypt   | 2008           | Soyabean Oil              | 7                                                           |
| 59              | Egypt   | 2008           | Soyabeans                 | 2                                                           |
| 59              | Egypt   | 2008           | Spices, Other             | 1                                                           |
| 59              | Egypt   | 2008           | Sugar Cane                | 118                                                         |
| 59              | Egypt   | 2008           | Sugar, Refined Equivalent | 65                                                          |
| 59              | Egypt   | 2008           | Sunflowerseed Oil         | 4                                                           |
| 59              | Egypt   | 2008           | Sweet Potatoes            | 8                                                           |
| 59              | Egypt   | 2008           | Sweeteners, Other         | 4                                                           |
| 59              | Egypt   | 2008           | Tea                       | 4                                                           |
| 59              | Egypt   | 2008           | Tomatoes                  | 300                                                         |
| 59              | Egypt   | 2008           | Vegetables, Other         | 273                                                         |
| 59              | Egypt   | 2008           | Wheat                     | 399                                                         |
| 59              | Egypt   | 2008           | Whey                      | 5                                                           |
| 59              | Egypt   | 2008           | Wine                      | 1                                                           |
| 59              | Egypt   | 2009           | Apples                    | 18                                                          |
| 59              | Egypt   | 2009           | Bananas                   | 35                                                          |
| 59              | Egypt   | 2009           | Barley                    | 1                                                           |
| 59              | Egypt   | 2009           | Beans                     | 1                                                           |
| 59              | Egypt   | 2009           | Beer                      | 7                                                           |
| 59              | Egypt   | 2009           | Bovine Meat               | 35                                                          |
| 59              | Egypt   | 2009           | Butter, Ghee              | 6                                                           |
| 59              | Egypt   | 2009           | Cheese                    | 19                                                          |
| 59              | Egypt   | 2009           | Cocoa Beans               | 1                                                           |
| 59              | Egypt   | 2009           | Coffee                    | 1                                                           |
| 59              | Egypt   | 2009           | Cottonseed Oil            | 1                                                           |
| 59              | Egypt   | 2009           | Crustaceans               | 2                                                           |
| 59              | Egypt   | 2009           | Dates                     | 40                                                          |
| 59              | Egypt   | 2009           | Demersal Fish             | 12                                                          |
| 59              | Egypt   | 2009           | Eggs                      | 7                                                           |
| 59              | Egypt   | 2009           | Fats, Animals, Raw        | 1                                                           |
| 59              | Egypt   | 2009           | Freshwater Fish           | 25                                                          |
| 59              | Egypt   | 2009           | Fruits, Other             | 58                                                          |
| 59              | Egypt   | 2009           | Grapes                    | 39                                                          |
| 59              | Egypt   | 2009           | Groundnut Oil             | 1                                                           |
| 59              | Egypt   | 2009           | Groundnuts (Shelled Eq)   | 2                                                           |
| 59              | Egypt   | 2009           | Lemons, Limes             | 25                                                          |
| 59              | Egypt   | 2009           | Maize                     | 172                                                         |
| 59              | Egypt   | 2009           | Maize Germ Oil            | 1                                                           |
| 59              | Egypt   | 2009           | Marine Fish, Other        | 4                                                           |
| 59              | Egypt   | 2009           | Meat, Other               | 4                                                           |
| 59              | Egypt   | 2009           | Milk, Whole               | 55                                                          |
| 59              | Egypt   | 2009           | Mutton & Goat Meat        | 5                                                           |
| 59              | Egypt   | 2009           | Nuts                      | 2                                                           |
| 59              | Egypt   | 2009           | Offals, Edible            | 4                                                           |
| 59              | Egypt   | 2009           | Oilcrops Oil, Other       | 1                                                           |
| 59              | Egypt   | 2009           | Olives                    | 13                                                          |
| 59              | Egypt   | 2009           | Onions                    | 60                                                          |
| 59              | Egypt   | 2009           | Oranges, Mandarines       | 73                                                          |
| 59              | Egypt   | 2009           | Palmkernel Oil            | 1                                                           |
| 59              | Egypt   | 2009           | Pelagic Fish              | 7                                                           |
| 59              | Egypt   | 2009           | Pimento                   | 1                                                           |
| 59              | Egypt   | 2009           | Potatoes                  | 94                                                          |
| 59              | Egypt   | 2009           | Poultry Meat              | 29                                                          |
| 59              | Egypt   | 2009           | Pulses, Other             | 15                                                          |
| 59              | Egypt   | 2009           | Rice (Milled Equivalent)  | 107                                                         |
| 59              | Egypt   | 2009           | Roots, Other              | 3                                                           |
| 59              | Egypt   | 2009           | Sesameseed                | 2                                                           |
| 59              | Egypt   | 2009           | Sorghum                   | 8                                                           |
| 59              | Egypt   | 2009           | Soyabean Oil              | 7                                                           |
| 59              | Egypt   | 2009           | Soyabeans                 | 3                                                           |
| 59              | Egypt   | 2009           | Sugar Cane                | 109                                                         |
| 59              | Egypt   | 2009           | Sugar, Refined Equivalent | 60                                                          |
| 59              | Egypt   | 2009           | Sunflowerseed Oil         | 4                                                           |
| 59              | Egypt   | 2009           | Sweet Potatoes            | 11                                                          |
| 59              | Egypt   | 2009           | Sweeteners, Other         | 3                                                           |
| 59              | Egypt   | 2009           | Tea                       | 3                                                           |
| 59              | Egypt   | 2009           | Tomatoes                  | 330                                                         |
| 59              | Egypt   | 2009           | Vegetables, Other         | 282                                                         |
| 59              | Egypt   | 2009           | Wheat                     | 398                                                         |
| 59              | Egypt   | 2009           | Whey                      | 2                                                           |
| 59              | Egypt   | 2010           | Apples                    | 19                                                          |
| 59              | Egypt   | 2010           | Bananas                   | 33                                                          |
| 59              | Egypt   | 2010           | Beans                     | 1                                                           |
| 59              | Egypt   | 2010           | Beer                      | 7                                                           |
| 59              | Egypt   | 2010           | Bovine Meat               | 37                                                          |
| 59              | Egypt   | 2010           | Butter, Ghee              | 6                                                           |
| 59              | Egypt   | 2010           | Cheese                    | 22                                                          |
| 59              | Egypt   | 2010           | Cocoa Beans               | 1                                                           |
| 59              | Egypt   | 2010           | Coconuts - Incl Copra     | 1                                                           |

Dietary calcium and zinc deficiency risks are decreasing but remain prevalent

| FAO countrycode | Country | Reference year | Food item                 | Gross food supply (g capita <sup>-1</sup> d <sup>-1</sup> ) |
|-----------------|---------|----------------|---------------------------|-------------------------------------------------------------|
| 59              | Egypt   | 2010           | Coffee                    | 1                                                           |
| 59              | Egypt   | 2010           | Cottonseed Oil            | 1                                                           |
| 59              | Egypt   | 2010           | Crustaceans               | 2                                                           |
| 59              | Egypt   | 2010           | Dates                     | 42                                                          |
| 59              | Egypt   | 2010           | Demersal Fish             | 10                                                          |
| 59              | Egypt   | 2010           | Eggs                      | 8                                                           |
| 59              | Egypt   | 2010           | Fats, Animals, Raw        | 1                                                           |
| 59              | Egypt   | 2010           | Freshwater Fish           | 34                                                          |
| 59              | Egypt   | 2010           | Fruits, Other             | 56                                                          |
| 59              | Egypt   | 2010           | Grapes                    | 42                                                          |
| 59              | Egypt   | 2010           | Groundnut Oil             | 1                                                           |
| 59              | Egypt   | 2010           | Groundnuts (Shelled Eq)   | 3                                                           |
| 59              | Egypt   | 2010           | Lemons, Limes             | 9                                                           |
| 59              | Egypt   | 2010           | Maize                     | 171                                                         |
| 59              | Egypt   | 2010           | Maize Germ Oil            | 1                                                           |
| 59              | Egypt   | 2010           | Marine Fish, Other        | 2                                                           |
| 59              | Egypt   | 2010           | Meat, Other               | 5                                                           |
| 59              | Egypt   | 2010           | Milk, Whole               | 63                                                          |
| 59              | Egypt   | 2010           | Mutton & Goat Meat        | 5                                                           |
| 59              | Egypt   | 2010           | Nuts                      | 3                                                           |
| 59              | Egypt   | 2010           | Offals, Edible            | 6                                                           |
| 59              | Egypt   | 2010           | Olives                    | 13                                                          |
| 59              | Egypt   | 2010           | Onions                    | 55                                                          |
| 59              | Egypt   | 2010           | Oranges, Mandarines       | 78                                                          |
| 59              | Egypt   | 2010           | Pelagic Fish              | 12                                                          |
| 59              | Egypt   | 2010           | Pimento                   | 2                                                           |
| 59              | Egypt   | 2010           | Potatoes                  | 92                                                          |
| 59              | Egypt   | 2010           | Poultry Meat              | 34                                                          |
| 59              | Egypt   | 2010           | Pulses, Other             | 22                                                          |
| 59              | Egypt   | 2010           | Rice (Milled Equivalent)  | 100                                                         |
| 59              | Egypt   | 2010           | Roots, Other              | 3                                                           |
| 59              | Egypt   | 2010           | Sesameseed                | 2                                                           |
| 59              | Egypt   | 2010           | Sorghum                   | 7                                                           |
| 59              | Egypt   | 2010           | Soyabean Oil              | 7                                                           |
| 59              | Egypt   | 2010           | Soybeans                  | 3                                                           |
| 59              | Egypt   | 2010           | Sugar Cane                | 109                                                         |
| 59              | Egypt   | 2010           | Sugar, Refined Equivalent | 71                                                          |
| 59              | Egypt   | 2010           | Sunflowerseed Oil         | 5                                                           |
| 59              | Egypt   | 2010           | Sweet Potatoes            | 11                                                          |
| 59              | Egypt   | 2010           | Sweeteners, Other         | 4                                                           |
| 59              | Egypt   | 2010           | Tea                       | 3                                                           |
| 59              | Egypt   | 2010           | Tomatoes                  | 270                                                         |
| 59              | Egypt   | 2010           | Vegetables, Other         | 269                                                         |
| 59              | Egypt   | 2010           | Wheat                     | 399                                                         |
| 59              | Egypt   | 2010           | Whey                      | 7                                                           |
| 59              | Egypt   | 2011           | Apples                    | 19                                                          |
| 59              | Egypt   | 2011           | Bananas                   | 33                                                          |
| 59              | Egypt   | 2011           | Barley                    | 1                                                           |
| 59              | Egypt   | 2011           | Beans                     | 2                                                           |
| 59              | Egypt   | 2011           | Beer                      | 4                                                           |
| 59              | Egypt   | 2011           | Bovine Meat               | 36                                                          |
| 59              | Egypt   | 2011           | Butter, Ghee              | 8                                                           |
| 59              | Egypt   | 2011           | Cheese                    | 18                                                          |
| 59              | Egypt   | 2011           | Cocoa Beans               | 1                                                           |
| 59              | Egypt   | 2011           | Coffee                    | 1                                                           |
| 59              | Egypt   | 2011           | Cottonseed Oil            | 1                                                           |
| 59              | Egypt   | 2011           | Crustaceans               | 2                                                           |
| 59              | Egypt   | 2011           | Dates                     | 42                                                          |
| 59              | Egypt   | 2011           | Demersal Fish             | 12                                                          |
| 59              | Egypt   | 2011           | Eggs                      | 8                                                           |
| 59              | Egypt   | 2011           | Fats, Animals, Raw        | 1                                                           |
| 59              | Egypt   | 2011           | Freshwater Fish           | 36                                                          |
| 59              | Egypt   | 2011           | Fruits, Other             | 50                                                          |
| 59              | Egypt   | 2011           | Grapes                    | 39                                                          |
| 59              | Egypt   | 2011           | Groundnut Oil             | 1                                                           |
| 59              | Egypt   | 2011           | Groundnuts (Shelled Eq)   | 3                                                           |
| 59              | Egypt   | 2011           | Lemons, Limes             | 9                                                           |
| 59              | Egypt   | 2011           | Maize                     | 173                                                         |
| 59              | Egypt   | 2011           | Maize Germ Oil            | 1                                                           |
| 59              | Egypt   | 2011           | Marine Fish, Other        | 2                                                           |
| 59              | Egypt   | 2011           | Meat, Other               | 4                                                           |
| 59              | Egypt   | 2011           | Milk, Whole               | 73                                                          |
| 59              | Egypt   | 2011           | Mutton & Goat Meat        | 4                                                           |
| 59              | Egypt   | 2011           | Nuts                      | 2                                                           |
| 59              | Egypt   | 2011           | Offals, Edible            | 5                                                           |
| 59              | Egypt   | 2011           | Oilcrops Oil, Other       | 1                                                           |
| 59              | Egypt   | 2011           | Olives                    | 13                                                          |
| 59              | Egypt   | 2011           | Onions                    | 55                                                          |
| 59              | Egypt   | 2011           | Oranges, Mandarines       | 70                                                          |
| 59              | Egypt   | 2011           | Pelagic Fish              | 8                                                           |
| 59              | Egypt   | 2011           | Pimento                   | 2                                                           |
| 59              | Egypt   | 2011           | Potatoes                  | 95                                                          |
| 59              | Egypt   | 2011           | Poultry Meat              | 32                                                          |
| 59              | Egypt   | 2011           | Pulses, Other             | 14                                                          |
| 59              | Egypt   | 2011           | Rice (Milled Equivalent)  | 108                                                         |
| 59              | Egypt   | 2011           | Roots, Other              | 3                                                           |
| 59              | Egypt   | 2011           | Sesameseed                | 2                                                           |
| 59              | Egypt   | 2011           | Sorghum                   | 9                                                           |
| 59              | Egypt   | 2011           | Soyabean Oil              | 8                                                           |
| 59              | Egypt   | 2011           | Soybeans                  | 3                                                           |
| 59              | Egypt   | 2011           | Spices, Other             | 1                                                           |
| 59              | Egypt   | 2011           | Sugar Cane                | 107                                                         |
| 59              | Egypt   | 2011           | Sugar, Refined Equivalent | 72                                                          |
| 59              | Egypt   | 2011           | Sunflowerseed Oil         | 5                                                           |
| 59              | Egypt   | 2011           | Sweet Potatoes            | 8                                                           |
| 59              | Egypt   | 2011           | Sweeteners, Other         | 4                                                           |
| 59              | Egypt   | 2011           | Tea                       | 3                                                           |

Dietary calcium and zinc deficiency risks are decreasing but remain prevalent

| FAO countrycode | Country     | Reference year | Food item                 | Gross food supply (g capita <sup>-1</sup> d <sup>-1</sup> ) |
|-----------------|-------------|----------------|---------------------------|-------------------------------------------------------------|
| 59              | Egypt       | 2011           | Tomatoes                  | 250                                                         |
| 59              | Egypt       | 2011           | Vegetables, Other         | 260                                                         |
| 59              | Egypt       | 2011           | Wheat                     | 400                                                         |
| 59              | Egypt       | 2011           | Whey                      | 6                                                           |
| 60              | El Salvador | 1992           | Apples                    | 3                                                           |
| 60              | El Salvador | 1992           | Bananas                   | 13                                                          |
| 60              | El Salvador | 1992           | Beans                     | 30                                                          |
| 60              | El Salvador | 1992           | Beer                      | 40                                                          |
| 60              | El Salvador | 1992           | Beverages, Alcoholic      | 4                                                           |
| 60              | El Salvador | 1992           | Bovine Meat               | 12                                                          |
| 60              | El Salvador | 1992           | Cassava                   | 20                                                          |
| 60              | El Salvador | 1992           | Cereals, Other            | 1                                                           |
| 60              | El Salvador | 1992           | Cheese                    | 2                                                           |
| 60              | El Salvador | 1992           | Cocoa Beans               | 1                                                           |
| 60              | El Salvador | 1992           | Coconut Oil               | 1                                                           |
| 60              | El Salvador | 1992           | Coconuts - Incl Copra     | 21                                                          |
| 60              | El Salvador | 1992           | Coffee                    | 4                                                           |
| 60              | El Salvador | 1992           | Cottonseed Oil            | 9                                                           |
| 60              | El Salvador | 1992           | Demersal Fish             | 1                                                           |
| 60              | El Salvador | 1992           | Eggs                      | 21                                                          |
| 60              | El Salvador | 1992           | Fats, Animals, Raw        | 8                                                           |
| 60              | El Salvador | 1992           | Freshwater Fish           | 3                                                           |
| 60              | El Salvador | 1992           | Fruits, Other             | 42                                                          |
| 60              | El Salvador | 1992           | Grapes                    | 1                                                           |
| 60              | El Salvador | 1992           | Honey                     | 1                                                           |
| 60              | El Salvador | 1992           | Lemons, Limes             | 12                                                          |
| 60              | El Salvador | 1992           | Maize                     | 236                                                         |
| 60              | El Salvador | 1992           | Marine Fish, Other        | 3                                                           |
| 60              | El Salvador | 1992           | Milk, Whole               | 197                                                         |
| 60              | El Salvador | 1992           | Nuts                      | 1                                                           |
| 60              | El Salvador | 1992           | Offals, Edible            | 2                                                           |
| 60              | El Salvador | 1992           | Oilcrops Oil, Other       | 1                                                           |
| 60              | El Salvador | 1992           | Onions                    | 4                                                           |
| 60              | El Salvador | 1992           | Oranges, Mandarines       | 62                                                          |
| 60              | El Salvador | 1992           | Pigmeat                   | 6                                                           |
| 60              | El Salvador | 1992           | Pineapples                | 7                                                           |
| 60              | El Salvador | 1992           | Plantains                 | 38                                                          |
| 60              | El Salvador | 1992           | Potatoes                  | 12                                                          |
| 60              | El Salvador | 1992           | Poultry Meat              | 20                                                          |
| 60              | El Salvador | 1992           | Rice (Milled Equivalent)  | 23                                                          |
| 60              | El Salvador | 1992           | Sesameseed                | 1                                                           |
| 60              | El Salvador | 1992           | Sorghum                   | 61                                                          |
| 60              | El Salvador | 1992           | Soyabean Oil              | 1                                                           |
| 60              | El Salvador | 1992           | Soyabeans                 | 1                                                           |
| 60              | El Salvador | 1992           | Sugar, Non-Centrifugal    | 7                                                           |
| 60              | El Salvador | 1992           | Sugar, Refined Equivalent | 85                                                          |
| 60              | El Salvador | 1992           | Sweeteners, Other         | 1                                                           |
| 60              | El Salvador | 1992           | Tomatoes                  | 13                                                          |
| 60              | El Salvador | 1992           | Vegetables, Other         | 64                                                          |
| 60              | El Salvador | 1992           | Wheat                     | 91                                                          |
| 60              | El Salvador | 1993           | Apples                    | 2                                                           |
| 60              | El Salvador | 1993           | Bananas                   | 11                                                          |
| 60              | El Salvador | 1993           | Beans                     | 29                                                          |
| 60              | El Salvador | 1993           | Beer                      | 44                                                          |
| 60              | El Salvador | 1993           | Beverages, Alcoholic      | 4                                                           |
| 60              | El Salvador | 1993           | Bovine Meat               | 14                                                          |
| 60              | El Salvador | 1993           | Cassava                   | 19                                                          |
| 60              | El Salvador | 1993           | Cheese                    | 2                                                           |
| 60              | El Salvador | 1993           | Cocoa Beans               | 1                                                           |
| 60              | El Salvador | 1993           | Coconut Oil               | 1                                                           |
| 60              | El Salvador | 1993           | Coconuts - Incl Copra     | 20                                                          |
| 60              | El Salvador | 1993           | Coffee                    | 4                                                           |
| 60              | El Salvador | 1993           | Cottonseed Oil            | 11                                                          |
| 60              | El Salvador | 1993           | Crustaceans               | 1                                                           |
| 60              | El Salvador | 1993           | Eggs                      | 18                                                          |
| 60              | El Salvador | 1993           | Fats, Animals, Raw        | 7                                                           |
| 60              | El Salvador | 1993           | Freshwater Fish           | 2                                                           |
| 60              | El Salvador | 1993           | Fruits, Other             | 40                                                          |
| 60              | El Salvador | 1993           | Grapes                    | 1                                                           |
| 60              | El Salvador | 1993           | Honey                     | 1                                                           |
| 60              | El Salvador | 1993           | Lemons, Limes             | 11                                                          |
| 60              | El Salvador | 1993           | Maize                     | 231                                                         |
| 60              | El Salvador | 1993           | Milk, Whole               | 186                                                         |
| 60              | El Salvador | 1993           | Nuts                      | 1                                                           |
| 60              | El Salvador | 1993           | Offals, Edible            | 2                                                           |
| 60              | El Salvador | 1993           | Oilcrops Oil, Other       | 1                                                           |
| 60              | El Salvador | 1993           | Onions                    | 3                                                           |
| 60              | El Salvador | 1993           | Oranges, Mandarines       | 62                                                          |
| 60              | El Salvador | 1993           | Pelagic Fish              | 2                                                           |
| 60              | El Salvador | 1993           | Pigmeat                   | 6                                                           |
| 60              | El Salvador | 1993           | Pineapples                | 7                                                           |
| 60              | El Salvador | 1993           | Plantains                 | 37                                                          |
| 60              | El Salvador | 1993           | Potatoes                  | 6                                                           |
| 60              | El Salvador | 1993           | Poultry Meat              | 22                                                          |
| 60              | El Salvador | 1993           | Rice (Milled Equivalent)  | 26                                                          |
| 60              | El Salvador | 1993           | Sesameseed                | 1                                                           |
| 60              | El Salvador | 1993           | Sorghum                   | 60                                                          |
| 60              | El Salvador | 1993           | Soyabean Oil              | 1                                                           |
| 60              | El Salvador | 1993           | Soyabeans                 | 1                                                           |
| 60              | El Salvador | 1993           | Sugar, Non-Centrifugal    | 6                                                           |
| 60              | El Salvador | 1993           | Sugar, Refined Equivalent | 87                                                          |
| 60              | El Salvador | 1993           | Sweeteners, Other         | 1                                                           |
| 60              | El Salvador | 1993           | Tomatoes                  | 16                                                          |
| 60              | El Salvador | 1993           | Vegetables, Other         | 44                                                          |
| 60              | El Salvador | 1993           | Wheat                     | 89                                                          |
| 60              | El Salvador | 1994           | Apples                    | 4                                                           |
| 60              | El Salvador | 1994           | Bananas                   | 10                                                          |

Dietary calcium and zinc deficiency risks are decreasing but remain prevalent

| FAO countrycode | Country     | Reference year | Food item                 | Gross food supply (g capita <sup>-1</sup> d <sup>-1</sup> ) |
|-----------------|-------------|----------------|---------------------------|-------------------------------------------------------------|
| 60              | El Salvador | 1994           | Beans                     | 28                                                          |
| 60              | El Salvador | 1994           | Beer                      | 42                                                          |
| 60              | El Salvador | 1994           | Beverages, Alcoholic      | 5                                                           |
| 60              | El Salvador | 1994           | Bovine Meat               | 15                                                          |
| 60              | El Salvador | 1994           | Cassava                   | 21                                                          |
| 60              | El Salvador | 1994           | Cheese                    | 2                                                           |
| 60              | El Salvador | 1994           | Cocoa Beans               | 1                                                           |
| 60              | El Salvador | 1994           | Coconut Oil               | 1                                                           |
| 60              | El Salvador | 1994           | Coconuts - Incl Copra     | 17                                                          |
| 60              | El Salvador | 1994           | Coffee                    | 3                                                           |
| 60              | El Salvador | 1994           | Cottonseed Oil            | 10                                                          |
| 60              | El Salvador | 1994           | Demersal Fish             | 1                                                           |
| 60              | El Salvador | 1994           | Eggs                      | 19                                                          |
| 60              | El Salvador | 1994           | Fats, Animals, Raw        | 8                                                           |
| 60              | El Salvador | 1994           | Freshwater Fish           | 1                                                           |
| 60              | El Salvador | 1994           | Fruits, Other             | 45                                                          |
| 60              | El Salvador | 1994           | Grapes                    | 1                                                           |
| 60              | El Salvador | 1994           | Honey                     | 1                                                           |
| 60              | El Salvador | 1994           | Lemons, Limes             | 11                                                          |
| 60              | El Salvador | 1994           | Maize                     | 231                                                         |
| 60              | El Salvador | 1994           | Marine Fish, Other        | 1                                                           |
| 60              | El Salvador | 1994           | Milk, Whole               | 179                                                         |
| 60              | El Salvador | 1994           | Nuts                      | 1                                                           |
| 60              | El Salvador | 1994           | Offals, Edible            | 3                                                           |
| 60              | El Salvador | 1994           | Oilcrops Oil, Other       | 1                                                           |
| 60              | El Salvador | 1994           | Onions                    | 3                                                           |
| 60              | El Salvador | 1994           | Oranges, Mandarines       | 59                                                          |
| 60              | El Salvador | 1994           | Pelagic Fish              | 2                                                           |
| 60              | El Salvador | 1994           | Pigmeat                   | 7                                                           |
| 60              | El Salvador | 1994           | Pineapples                | 10                                                          |
| 60              | El Salvador | 1994           | Plantains                 | 32                                                          |
| 60              | El Salvador | 1994           | Potatoes                  | 7                                                           |
| 60              | El Salvador | 1994           | Poultry Meat              | 18                                                          |
| 60              | El Salvador | 1994           | Rice (Milled Equivalent)  | 26                                                          |
| 60              | El Salvador | 1994           | Roots, Other              | 26                                                          |
| 60              | El Salvador | 1994           | Sesamseed                 | 1                                                           |
| 60              | El Salvador | 1994           | Sorghum                   | 58                                                          |
| 60              | El Salvador | 1994           | Soyabean Oil              | 1                                                           |
| 60              | El Salvador | 1994           | Soyabeans                 | 1                                                           |
| 60              | El Salvador | 1994           | Sugar, Non-Centrifugal    | 6                                                           |
| 60              | El Salvador | 1994           | Sugar, Refined Equivalent | 78                                                          |
| 60              | El Salvador | 1994           | Sunflowerseed Oil         | 1                                                           |
| 60              | El Salvador | 1994           | Sweeteners, Other         | 1                                                           |
| 60              | El Salvador | 1994           | Tomatoes                  | 11                                                          |
| 60              | El Salvador | 1994           | Vegetables, Other         | 46                                                          |
| 60              | El Salvador | 1994           | Wheat                     | 90                                                          |
| 60              | El Salvador | 1994           | Wine                      | 1                                                           |
| 60              | El Salvador | 1995           | Apples                    | 3                                                           |
| 60              | El Salvador | 1995           | Bananas                   | 7                                                           |
| 60              | El Salvador | 1995           | Beans                     | 26                                                          |
| 60              | El Salvador | 1995           | Beer                      | 47                                                          |
| 60              | El Salvador | 1995           | Beverages, Alcoholic      | 6                                                           |
| 60              | El Salvador | 1995           | Bovine Meat               | 18                                                          |
| 60              | El Salvador | 1995           | Cassava                   | 14                                                          |
| 60              | El Salvador | 1995           | Cereals, Other            | 1                                                           |
| 60              | El Salvador | 1995           | Cheese                    | 4                                                           |
| 60              | El Salvador | 1995           | Cocoa Beans               | 1                                                           |
| 60              | El Salvador | 1995           | Coconut Oil               | 2                                                           |
| 60              | El Salvador | 1995           | Coconuts - Incl Copra     | 17                                                          |
| 60              | El Salvador | 1995           | Coffee                    | 4                                                           |
| 60              | El Salvador | 1995           | Cottonseed Oil            | 7                                                           |
| 60              | El Salvador | 1995           | Demersal Fish             | 1                                                           |
| 60              | El Salvador | 1995           | Eggs                      | 17                                                          |
| 60              | El Salvador | 1995           | Fats, Animals, Raw        | 8                                                           |
| 60              | El Salvador | 1995           | Freshwater Fish           | 2                                                           |
| 60              | El Salvador | 1995           | Fruits, Other             | 46                                                          |
| 60              | El Salvador | 1995           | Grapes                    | 2                                                           |
| 60              | El Salvador | 1995           | Groundnuts (Shelled Eq)   | 1                                                           |
| 60              | El Salvador | 1995           | Honey                     | 1                                                           |
| 60              | El Salvador | 1995           | Lemons, Limes             | 10                                                          |
| 60              | El Salvador | 1995           | Maize                     | 248                                                         |
| 60              | El Salvador | 1995           | Marine Fish, Other        | 1                                                           |
| 60              | El Salvador | 1995           | Milk, Whole               | 161                                                         |
| 60              | El Salvador | 1995           | Offals, Edible            | 3                                                           |
| 60              | El Salvador | 1995           | Oilcrops Oil, Other       | 1                                                           |
| 60              | El Salvador | 1995           | Onions                    | 3                                                           |
| 60              | El Salvador | 1995           | Oranges, Mandarines       | 48                                                          |
| 60              | El Salvador | 1995           | Pelagic Fish              | 3                                                           |
| 60              | El Salvador | 1995           | Pigmeat                   | 6                                                           |
| 60              | El Salvador | 1995           | Pineapples                | 7                                                           |
| 60              | El Salvador | 1995           | Plantains                 | 37                                                          |
| 60              | El Salvador | 1995           | Potatoes                  | 5                                                           |
| 60              | El Salvador | 1995           | Poultry Meat              | 19                                                          |
| 60              | El Salvador | 1995           | Rice (Milled Equivalent)  | 21                                                          |
| 60              | El Salvador | 1995           | Roots, Other              | 24                                                          |
| 60              | El Salvador | 1995           | Sesamseed                 | 1                                                           |
| 60              | El Salvador | 1995           | Sorghum                   | 61                                                          |
| 60              | El Salvador | 1995           | Soyabean Oil              | 1                                                           |
| 60              | El Salvador | 1995           | Soyabeans                 | 1                                                           |
| 60              | El Salvador | 1995           | Sugar, Non-Centrifugal    | 6                                                           |
| 60              | El Salvador | 1995           | Sugar, Refined Equivalent | 83                                                          |
| 60              | El Salvador | 1995           | Sunflowerseed Oil         | 1                                                           |
| 60              | El Salvador | 1995           | Sweeteners, Other         | 1                                                           |
| 60              | El Salvador | 1995           | Tomatoes                  | 25                                                          |
| 60              | El Salvador | 1995           | Vegetables, Other         | 47                                                          |
| 60              | El Salvador | 1995           | Wheat                     | 83                                                          |
| 60              | El Salvador | 1995           | Wine                      | 1                                                           |



Dietary calcium and zinc deficiency risks are decreasing but remain prevalent

| FAO countrycode | Country     | Reference year | Food item                 | Gross food supply (g capita <sup>-1</sup> d <sup>-1</sup> ) |
|-----------------|-------------|----------------|---------------------------|-------------------------------------------------------------|
| 60              | El Salvador | 1996           | Apples                    | 5                                                           |
| 60              | El Salvador | 1996           | Bananas                   | 8                                                           |
| 60              | El Salvador | 1996           | Beans                     | 26                                                          |
| 60              | El Salvador | 1996           | Beer                      | 45                                                          |
| 60              | El Salvador | 1996           | Beverages, Alcoholic      | 5                                                           |
| 60              | El Salvador | 1996           | Bovine Meat               | 19                                                          |
| 60              | El Salvador | 1996           | Cassava                   | 13                                                          |
| 60              | El Salvador | 1996           | Cheese                    | 6                                                           |
| 60              | El Salvador | 1996           | Cocoa Beans               | 1                                                           |
| 60              | El Salvador | 1996           | Coconut Oil               | 2                                                           |
| 60              | El Salvador | 1996           | Coconuts - Incl Copra     | 17                                                          |
| 60              | El Salvador | 1996           | Coffee                    | 4                                                           |
| 60              | El Salvador | 1996           | Cottonseed Oil            | 6                                                           |
| 60              | El Salvador | 1996           | Eggs                      | 16                                                          |
| 60              | El Salvador | 1996           | Fats, Animals, Raw        | 9                                                           |
| 60              | El Salvador | 1996           | Freshwater Fish           | 1                                                           |
| 60              | El Salvador | 1996           | Fruits, Other             | 46                                                          |
| 60              | El Salvador | 1996           | Grapefruit                | 1                                                           |
| 60              | El Salvador | 1996           | Grapes                    | 2                                                           |
| 60              | El Salvador | 1996           | Groundnuts (Shelled Eq)   | 1                                                           |
| 60              | El Salvador | 1996           | Honey                     | 1                                                           |
| 60              | El Salvador | 1996           | Lemons, Limes             | 10                                                          |
| 60              | El Salvador | 1996           | Maize                     | 240                                                         |
| 60              | El Salvador | 1996           | Marine Fish, Other        | 1                                                           |
| 60              | El Salvador | 1996           | Milk, Whole               | 177                                                         |
| 60              | El Salvador | 1996           | Nuts                      | 1                                                           |
| 60              | El Salvador | 1996           | Offals, Edible            | 3                                                           |
| 60              | El Salvador | 1996           | Oilcrops Oil, Other       | 1                                                           |
| 60              | El Salvador | 1996           | Onions                    | 3                                                           |
| 60              | El Salvador | 1996           | Oranges, Mandarines       | 21                                                          |
| 60              | El Salvador | 1996           | Pelagic Fish              | 3                                                           |
| 60              | El Salvador | 1996           | Pigmeat                   | 6                                                           |
| 60              | El Salvador | 1996           | Pineapples                | 4                                                           |
| 60              | El Salvador | 1996           | Plantains                 | 22                                                          |
| 60              | El Salvador | 1996           | Potatoes                  | 8                                                           |
| 60              | El Salvador | 1996           | Poultry Meat              | 19                                                          |
| 60              | El Salvador | 1996           | Rice (Milled Equivalent)  | 23                                                          |
| 60              | El Salvador | 1996           | Roots, Other              | 22                                                          |
| 60              | El Salvador | 1996           | Sesameseed                | 1                                                           |
| 60              | El Salvador | 1996           | Sorghum                   | 59                                                          |
| 60              | El Salvador | 1996           | Soyabean Oil              | 1                                                           |
| 60              | El Salvador | 1996           | Soybeans                  | 1                                                           |
| 60              | El Salvador | 1996           | Sugar, Non-Centrifugal    | 6                                                           |
| 60              | El Salvador | 1996           | Sugar, Refined Equivalent | 91                                                          |
| 60              | El Salvador | 1996           | Sunflowerseed Oil         | 1                                                           |
| 60              | El Salvador | 1996           | Tomatoes                  | 18                                                          |
| 60              | El Salvador | 1996           | Vegetables, Other         | 46                                                          |
| 60              | El Salvador | 1996           | Wheat                     | 90                                                          |
| 60              | El Salvador | 1997           | Apples                    | 6                                                           |
| 60              | El Salvador | 1997           | Bananas                   | 14                                                          |
| 60              | El Salvador | 1997           | Beans                     | 26                                                          |
| 60              | El Salvador | 1997           | Beer                      | 42                                                          |
| 60              | El Salvador | 1997           | Beverages, Alcoholic      | 7                                                           |
| 60              | El Salvador | 1997           | Bovine Meat               | 21                                                          |
| 60              | El Salvador | 1997           | Cassava                   | 9                                                           |
| 60              | El Salvador | 1997           | Cheese                    | 4                                                           |
| 60              | El Salvador | 1997           | Cocoa Beans               | 1                                                           |
| 60              | El Salvador | 1997           | Coconut Oil               | 2                                                           |
| 60              | El Salvador | 1997           | Coconuts - Incl Copra     | 17                                                          |
| 60              | El Salvador | 1997           | Coffee                    | 4                                                           |
| 60              | El Salvador | 1997           | Cottonseed Oil            | 5                                                           |
| 60              | El Salvador | 1997           | Demersal Fish             | 1                                                           |
| 60              | El Salvador | 1997           | Eggs                      | 18                                                          |
| 60              | El Salvador | 1997           | Fats, Animals, Raw        | 8                                                           |
| 60              | El Salvador | 1997           | Freshwater Fish           | 1                                                           |
| 60              | El Salvador | 1997           | Fruits, Other             | 53                                                          |
| 60              | El Salvador | 1997           | Grapefruit                | 1                                                           |
| 60              | El Salvador | 1997           | Grapes                    | 2                                                           |
| 60              | El Salvador | 1997           | Groundnuts (Shelled Eq)   | 1                                                           |
| 60              | El Salvador | 1997           | Honey                     | 1                                                           |
| 60              | El Salvador | 1997           | Lemons, Limes             | 13                                                          |
| 60              | El Salvador | 1997           | Maize                     | 228                                                         |
| 60              | El Salvador | 1997           | Marine Fish, Other        | 1                                                           |
| 60              | El Salvador | 1997           | Milk, Whole               | 196                                                         |
| 60              | El Salvador | 1997           | Nuts                      | 1                                                           |
| 60              | El Salvador | 1997           | Offals, Edible            | 3                                                           |
| 60              | El Salvador | 1997           | Oilcrops Oil, Other       | 1                                                           |
| 60              | El Salvador | 1997           | Onions                    | 4                                                           |
| 60              | El Salvador | 1997           | Oranges, Mandarines       | 23                                                          |
| 60              | El Salvador | 1997           | Pelagic Fish              | 3                                                           |
| 60              | El Salvador | 1997           | Pigmeat                   | 6                                                           |
| 60              | El Salvador | 1997           | Pineapples                | 4                                                           |
| 60              | El Salvador | 1997           | Plantains                 | 16                                                          |
| 60              | El Salvador | 1997           | Potatoes                  | 11                                                          |
| 60              | El Salvador | 1997           | Poultry Meat              | 20                                                          |
| 60              | El Salvador | 1997           | Rice (Milled Equivalent)  | 25                                                          |
| 60              | El Salvador | 1997           | Roots, Other              | 23                                                          |
| 60              | El Salvador | 1997           | Sesameseed                | 1                                                           |
| 60              | El Salvador | 1997           | Sorghum                   | 63                                                          |
| 60              | El Salvador | 1997           | Soyabean Oil              | 1                                                           |
| 60              | El Salvador | 1997           | Soybeans                  | 1                                                           |
| 60              | El Salvador | 1997           | Sugar, Non-Centrifugal    | 6                                                           |
| 60              | El Salvador | 1997           | Sugar, Refined Equivalent | 100                                                         |
| 60              | El Salvador | 1997           | Sunflowerseed Oil         | 1                                                           |
| 60              | El Salvador | 1997           | Tomatoes                  | 19                                                          |
| 60              | El Salvador | 1997           | Vegetables, Other         | 54                                                          |
| 60              | El Salvador | 1997           | Wheat                     | 89                                                          |

Dietary calcium and zinc deficiency risks are decreasing but remain prevalent

| FAO countrycode | Country     | Reference year | Food item                 | Gross food supply (g capita <sup>-1</sup> d <sup>-1</sup> ) |
|-----------------|-------------|----------------|---------------------------|-------------------------------------------------------------|
| 60              | El Salvador | 1998           | Apples                    | 5                                                           |
| 60              | El Salvador | 1998           | Bananas                   | 17                                                          |
| 60              | El Salvador | 1998           | Beans                     | 26                                                          |
| 60              | El Salvador | 1998           | Beer                      | 40                                                          |
| 60              | El Salvador | 1998           | Beverages, Alcoholic      | 7                                                           |
| 60              | El Salvador | 1998           | Bovine Meat               | 18                                                          |
| 60              | El Salvador | 1998           | Cassava                   | 3                                                           |
| 60              | El Salvador | 1998           | Cheese                    | 3                                                           |
| 60              | El Salvador | 1998           | Cocoa Beans               | 1                                                           |
| 60              | El Salvador | 1998           | Coconut Oil               | 2                                                           |
| 60              | El Salvador | 1998           | Coconuts - Incl Copra     | 17                                                          |
| 60              | El Salvador | 1998           | Coffee                    | 4                                                           |
| 60              | El Salvador | 1998           | Cottonseed Oil            | 4                                                           |
| 60              | El Salvador | 1998           | Eggs                      | 17                                                          |
| 60              | El Salvador | 1998           | Fats, Animals, Raw        | 9                                                           |
| 60              | El Salvador | 1998           | Freshwater Fish           | 1                                                           |
| 60              | El Salvador | 1998           | Fruits, Other             | 46                                                          |
| 60              | El Salvador | 1998           | Grapefruit                | 1                                                           |
| 60              | El Salvador | 1998           | Grapes                    | 2                                                           |
| 60              | El Salvador | 1998           | Groundnuts (Shelled Eq)   | 1                                                           |
| 60              | El Salvador | 1998           | Honey                     | 1                                                           |
| 60              | El Salvador | 1998           | Lemons, Limes             | 9                                                           |
| 60              | El Salvador | 1998           | Maize                     | 219                                                         |
| 60              | El Salvador | 1998           | Milk, Whole               | 189                                                         |
| 60              | El Salvador | 1998           | Offals, Edible            | 3                                                           |
| 60              | El Salvador | 1998           | Oilcrops Oil, Other       | 1                                                           |
| 60              | El Salvador | 1998           | Onions                    | 2                                                           |
| 60              | El Salvador | 1998           | Oranges, Mandarines       | 16                                                          |
| 60              | El Salvador | 1998           | Pelagic Fish              | 2                                                           |
| 60              | El Salvador | 1998           | Pigmeat                   | 7                                                           |
| 60              | El Salvador | 1998           | Pineapples                | 2                                                           |
| 60              | El Salvador | 1998           | Plantains                 | 14                                                          |
| 60              | El Salvador | 1998           | Potatoes                  | 7                                                           |
| 60              | El Salvador | 1998           | Poultry Meat              | 23                                                          |
| 60              | El Salvador | 1998           | Rice (Milled Equivalent)  | 27                                                          |
| 60              | El Salvador | 1998           | Roots, Other              | 22                                                          |
| 60              | El Salvador | 1998           | Sesameseed                | 2                                                           |
| 60              | El Salvador | 1998           | Sorghum                   | 60                                                          |
| 60              | El Salvador | 1998           | Soyabean Oil              | 5                                                           |
| 60              | El Salvador | 1998           | Soyabeans                 | 1                                                           |
| 60              | El Salvador | 1998           | Sugar, Non-Centrifugal    | 6                                                           |
| 60              | El Salvador | 1998           | Sugar, Refined Equivalent | 102                                                         |
| 60              | El Salvador | 1998           | Sunflowerseed Oil         | 3                                                           |
| 60              | El Salvador | 1998           | Sweeteners, Other         | 1                                                           |
| 60              | El Salvador | 1998           | Tomatoes                  | 24                                                          |
| 60              | El Salvador | 1998           | Vegetables, Other         | 50                                                          |
| 60              | El Salvador | 1998           | Wheat                     | 90                                                          |
| 60              | El Salvador | 1998           | Wine                      | 1                                                           |
| 60              | El Salvador | 1999           | Apples                    | 7                                                           |
| 60              | El Salvador | 1999           | Bananas                   | 13                                                          |
| 60              | El Salvador | 1999           | Beans                     | 30                                                          |
| 60              | El Salvador | 1999           | Beer                      | 46                                                          |
| 60              | El Salvador | 1999           | Beverages, Alcoholic      | 8                                                           |
| 60              | El Salvador | 1999           | Bovine Meat               | 18                                                          |
| 60              | El Salvador | 1999           | Cassava                   | 9                                                           |
| 60              | El Salvador | 1999           | Cheese                    | 4                                                           |
| 60              | El Salvador | 1999           | Cocoa Beans               | 1                                                           |
| 60              | El Salvador | 1999           | Coconut Oil               | 2                                                           |
| 60              | El Salvador | 1999           | Coconuts - Incl Copra     | 22                                                          |
| 60              | El Salvador | 1999           | Coffee                    | 4                                                           |
| 60              | El Salvador | 1999           | Cottonseed Oil            | 3                                                           |
| 60              | El Salvador | 1999           | Eggs                      | 19                                                          |
| 60              | El Salvador | 1999           | Fats, Animals, Raw        | 9                                                           |
| 60              | El Salvador | 1999           | Freshwater Fish           | 1                                                           |
| 60              | El Salvador | 1999           | Fruits, Other             | 51                                                          |
| 60              | El Salvador | 1999           | Grapes                    | 3                                                           |
| 60              | El Salvador | 1999           | Groundnuts (Shelled Eq)   | 1                                                           |
| 60              | El Salvador | 1999           | Honey                     | 1                                                           |
| 60              | El Salvador | 1999           | Lemons, Limes             | 8                                                           |
| 60              | El Salvador | 1999           | Maize                     | 209                                                         |
| 60              | El Salvador | 1999           | Milk, Whole               | 209                                                         |
| 60              | El Salvador | 1999           | Molluscs, Other           | 1                                                           |
| 60              | El Salvador | 1999           | Offals, Edible            | 3                                                           |
| 60              | El Salvador | 1999           | Oilcrops Oil, Other       | 1                                                           |
| 60              | El Salvador | 1999           | Olive Oil                 | 1                                                           |
| 60              | El Salvador | 1999           | Onions                    | 5                                                           |
| 60              | El Salvador | 1999           | Oranges, Mandarines       | 21                                                          |
| 60              | El Salvador | 1999           | Pelagic Fish              | 3                                                           |
| 60              | El Salvador | 1999           | Pigmeat                   | 8                                                           |
| 60              | El Salvador | 1999           | Pineapples                | 4                                                           |
| 60              | El Salvador | 1999           | Plantains                 | 22                                                          |
| 60              | El Salvador | 1999           | Potatoes                  | 14                                                          |
| 60              | El Salvador | 1999           | Poultry Meat              | 21                                                          |
| 60              | El Salvador | 1999           | Rice (Milled Equivalent)  | 24                                                          |
| 60              | El Salvador | 1999           | Roots, Other              | 24                                                          |
| 60              | El Salvador | 1999           | Sesameseed                | 2                                                           |
| 60              | El Salvador | 1999           | Sorghum                   | 47                                                          |
| 60              | El Salvador | 1999           | Soyabean Oil              | 7                                                           |
| 60              | El Salvador | 1999           | Soyabeans                 | 1                                                           |
| 60              | El Salvador | 1999           | Sugar, Non-Centrifugal    | 6                                                           |
| 60              | El Salvador | 1999           | Sugar, Refined Equivalent | 100                                                         |
| 60              | El Salvador | 1999           | Sunflowerseed Oil         | 3                                                           |
| 60              | El Salvador | 1999           | Tomatoes                  | 22                                                          |
| 60              | El Salvador | 1999           | Vegetables, Other         | 63                                                          |
| 60              | El Salvador | 1999           | Wheat                     | 87                                                          |
| 60              | El Salvador | 1999           | Wine                      | 1                                                           |
| 60              | El Salvador | 2000           | Apples                    | 8                                                           |

Dietary calcium and zinc deficiency risks are decreasing but remain prevalent

| FAO countrycode | Country     | Reference year | Food item                 | Gross food supply (g capita <sup>-1</sup> d <sup>-1</sup> ) |
|-----------------|-------------|----------------|---------------------------|-------------------------------------------------------------|
| 60              | El Salvador | 2000           | Bananas                   | 22                                                          |
| 60              | El Salvador | 2000           | Beans                     | 36                                                          |
| 60              | El Salvador | 2000           | Beer                      | 44                                                          |
| 60              | El Salvador | 2000           | Beverages, Alcoholic      | 11                                                          |
| 60              | El Salvador | 2000           | Bovine Meat               | 22                                                          |
| 60              | El Salvador | 2000           | Butter, Ghee              | 1                                                           |
| 60              | El Salvador | 2000           | Cassava                   | 8                                                           |
| 60              | El Salvador | 2000           | Cheese                    | 5                                                           |
| 60              | El Salvador | 2000           | Cocoa Beans               | 1                                                           |
| 60              | El Salvador | 2000           | Coconut Oil               | 2                                                           |
| 60              | El Salvador | 2000           | Coconuts - Incl Copra     | 23                                                          |
| 60              | El Salvador | 2000           | Coffee                    | 4                                                           |
| 60              | El Salvador | 2000           | Cottonseed Oil            | 3                                                           |
| 60              | El Salvador | 2000           | Demersal Fish             | 1                                                           |
| 60              | El Salvador | 2000           | Eggs                      | 21                                                          |
| 60              | El Salvador | 2000           | Fats, Animals, Raw        | 8                                                           |
| 60              | El Salvador | 2000           | Freshwater Fish           | 1                                                           |
| 60              | El Salvador | 2000           | Fruits, Other             | 54                                                          |
| 60              | El Salvador | 2000           | Grapefruit                | 1                                                           |
| 60              | El Salvador | 2000           | Grapes                    | 3                                                           |
| 60              | El Salvador | 2000           | Groundnuts (Shelled Eq)   | 1                                                           |
| 60              | El Salvador | 2000           | Lemons, Limes             | 7                                                           |
| 60              | El Salvador | 2000           | Maize                     | 214                                                         |
| 60              | El Salvador | 2000           | Marine Fish, Other        | 1                                                           |
| 60              | El Salvador | 2000           | Milk, Whole               | 210                                                         |
| 60              | El Salvador | 2000           | Molluscs, Other           | 1                                                           |
| 60              | El Salvador | 2000           | Offals, Edible            | 3                                                           |
| 60              | El Salvador | 2000           | Oilcrops Oil, Other       | 1                                                           |
| 60              | El Salvador | 2000           | Onions                    | 5                                                           |
| 60              | El Salvador | 2000           | Oranges, Mandarines       | 19                                                          |
| 60              | El Salvador | 2000           | Pelagic Fish              | 3                                                           |
| 60              | El Salvador | 2000           | Pigmeat                   | 7                                                           |
| 60              | El Salvador | 2000           | Pineapples                | 2                                                           |
| 60              | El Salvador | 2000           | Plantains                 | 40                                                          |
| 60              | El Salvador | 2000           | Potatoes                  | 29                                                          |
| 60              | El Salvador | 2000           | Poultry Meat              | 29                                                          |
| 60              | El Salvador | 2000           | Rice (Milled Equivalent)  | 30                                                          |
| 60              | El Salvador | 2000           | Roots, Other              | 22                                                          |
| 60              | El Salvador | 2000           | Sesameseed                | 2                                                           |
| 60              | El Salvador | 2000           | Sorghum                   | 47                                                          |
| 60              | El Salvador | 2000           | Soyabean Oil              | 8                                                           |
| 60              | El Salvador | 2000           | Soyabeans                 | 1                                                           |
| 60              | El Salvador | 2000           | Sugar, Non-Centrifugal    | 6                                                           |
| 60              | El Salvador | 2000           | Sugar, Refined Equivalent | 100                                                         |
| 60              | El Salvador | 2000           | Sunflowerseed Oil         | 2                                                           |
| 60              | El Salvador | 2000           | Tomatoes                  | 22                                                          |
| 60              | El Salvador | 2000           | Vegetables, Other         | 105                                                         |
| 60              | El Salvador | 2000           | Wheat                     | 91                                                          |
| 60              | El Salvador | 2000           | Wine                      | 1                                                           |
| 60              | El Salvador | 2001           | Apples                    | 5                                                           |
| 60              | El Salvador | 2001           | Bananas                   | 23                                                          |
| 60              | El Salvador | 2001           | Beans                     | 38                                                          |
| 60              | El Salvador | 2001           | Beer                      | 41                                                          |
| 60              | El Salvador | 2001           | Beverages, Alcoholic      | 11                                                          |
| 60              | El Salvador | 2001           | Bovine Meat               | 21                                                          |
| 60              | El Salvador | 2001           | Butter, Ghee              | 1                                                           |
| 60              | El Salvador | 2001           | Cassava                   | 8                                                           |
| 60              | El Salvador | 2001           | Cereals, Other            | 2                                                           |
| 60              | El Salvador | 2001           | Cheese                    | 5                                                           |
| 60              | El Salvador | 2001           | Citrus, Other             | 3                                                           |
| 60              | El Salvador | 2001           | Cocoa Beans               | 1                                                           |
| 60              | El Salvador | 2001           | Coconut Oil               | 2                                                           |
| 60              | El Salvador | 2001           | Coconuts - Incl Copra     | 23                                                          |
| 60              | El Salvador | 2001           | Coffee                    | 4                                                           |
| 60              | El Salvador | 2001           | Cottonseed Oil            | 3                                                           |
| 60              | El Salvador | 2001           | Demersal Fish             | 1                                                           |
| 60              | El Salvador | 2001           | Eggs                      | 23                                                          |
| 60              | El Salvador | 2001           | Fats, Animals, Raw        | 9                                                           |
| 60              | El Salvador | 2001           | Freshwater Fish           | 1                                                           |
| 60              | El Salvador | 2001           | Fruits, Other             | 49                                                          |
| 60              | El Salvador | 2001           | Grapefruit                | 1                                                           |
| 60              | El Salvador | 2001           | Grapes                    | 3                                                           |
| 60              | El Salvador | 2001           | Groundnuts (Shelled Eq)   | 1                                                           |
| 60              | El Salvador | 2001           | Lemons, Limes             | 9                                                           |
| 60              | El Salvador | 2001           | Maize                     | 220                                                         |
| 60              | El Salvador | 2001           | Maize Germ Oil            | 2                                                           |
| 60              | El Salvador | 2001           | Marine Fish, Other        | 1                                                           |
| 60              | El Salvador | 2001           | Milk, Whole               | 211                                                         |
| 60              | El Salvador | 2001           | Molluscs, Other           | 1                                                           |
| 60              | El Salvador | 2001           | Nuts                      | 1                                                           |
| 60              | El Salvador | 2001           | Offals, Edible            | 3                                                           |
| 60              | El Salvador | 2001           | Oilcrops Oil, Other       | 1                                                           |
| 60              | El Salvador | 2001           | Olive Oil                 | 1                                                           |
| 60              | El Salvador | 2001           | Onions                    | 6                                                           |
| 60              | El Salvador | 2001           | Oranges, Mandarines       | 22                                                          |
| 60              | El Salvador | 2001           | Pelagic Fish              | 8                                                           |
| 60              | El Salvador | 2001           | Pigmeat                   | 6                                                           |
| 60              | El Salvador | 2001           | Pineapples                | 4                                                           |
| 60              | El Salvador | 2001           | Plantains                 | 45                                                          |
| 60              | El Salvador | 2001           | Potatoes                  | 41                                                          |
| 60              | El Salvador | 2001           | Poultry Meat              | 36                                                          |
| 60              | El Salvador | 2001           | Rice (Milled Equivalent)  | 29                                                          |
| 60              | El Salvador | 2001           | Roots, Other              | 23                                                          |
| 60              | El Salvador | 2001           | Sesameseed                | 2                                                           |
| 60              | El Salvador | 2001           | Sorghum                   | 47                                                          |
| 60              | El Salvador | 2001           | Soyabean Oil              | 8                                                           |
| 60              | El Salvador | 2001           | Soyabeans                 | 2                                                           |

Dietary calcium and zinc deficiency risks are decreasing but remain prevalent

| FAO countrycode | Country     | Reference year | Food item                 | Gross food supply (g capita <sup>-1</sup> d <sup>-1</sup> ) |
|-----------------|-------------|----------------|---------------------------|-------------------------------------------------------------|
| 60              | El Salvador | 2001           | Sugar, Non-Centrifugal    | 6                                                           |
| 60              | El Salvador | 2001           | Sugar, Refined Equivalent | 97                                                          |
| 60              | El Salvador | 2001           | Sunflowerseed Oil         | 2                                                           |
| 60              | El Salvador | 2001           | Tomatoes                  | 28                                                          |
| 60              | El Salvador | 2001           | Vegetables, Other         | 103                                                         |
| 60              | El Salvador | 2001           | Wheat                     | 93                                                          |
| 60              | El Salvador | 2001           | Wine                      | 1                                                           |
| 60              | El Salvador | 2002           | Apples                    | 21                                                          |
| 60              | El Salvador | 2002           | Bananas                   | 22                                                          |
| 60              | El Salvador | 2002           | Beans                     | 45                                                          |
| 60              | El Salvador | 2002           | Beer                      | 41                                                          |
| 60              | El Salvador | 2002           | Beverages, Alcoholic      | 11                                                          |
| 60              | El Salvador | 2002           | Bovine Meat               | 25                                                          |
| 60              | El Salvador | 2002           | Butter, Ghee              | 1                                                           |
| 60              | El Salvador | 2002           | Cassava                   | 8                                                           |
| 60              | El Salvador | 2002           | Cereals, Other            | 2                                                           |
| 60              | El Salvador | 2002           | Cheese                    | 8                                                           |
| 60              | El Salvador | 2002           | Citrus, Other             | 4                                                           |
| 60              | El Salvador | 2002           | Cocoa Beans               | 1                                                           |
| 60              | El Salvador | 2002           | Coconut Oil               | 2                                                           |
| 60              | El Salvador | 2002           | Coconuts - Incl Copra     | 24                                                          |
| 60              | El Salvador | 2002           | Coffee                    | 4                                                           |
| 60              | El Salvador | 2002           | Cottonseed Oil            | 3                                                           |
| 60              | El Salvador | 2002           | Crustaceans               | 4                                                           |
| 60              | El Salvador | 2002           | Demersal Fish             | 1                                                           |
| 60              | El Salvador | 2002           | Eggs                      | 26                                                          |
| 60              | El Salvador | 2002           | Fats, Animals, Raw        | 8                                                           |
| 60              | El Salvador | 2002           | Freshwater Fish           | 2                                                           |
| 60              | El Salvador | 2002           | Fruits, Other             | 45                                                          |
| 60              | El Salvador | 2002           | Grapes                    | 3                                                           |
| 60              | El Salvador | 2002           | Groundnuts (Shelled Eq)   | 2                                                           |
| 60              | El Salvador | 2002           | Lemons, Limes             | 8                                                           |
| 60              | El Salvador | 2002           | Maize                     | 215                                                         |
| 60              | El Salvador | 2002           | Maize Germ Oil            | 1                                                           |
| 60              | El Salvador | 2002           | Marine Fish, Other        | 2                                                           |
| 60              | El Salvador | 2002           | Milk, Whole               | 211                                                         |
| 60              | El Salvador | 2002           | Molluscs, Other           | 1                                                           |
| 60              | El Salvador | 2002           | Nuts                      | 1                                                           |
| 60              | El Salvador | 2002           | Offals, Edible            | 4                                                           |
| 60              | El Salvador | 2002           | Oilcrops Oil, Other       | 1                                                           |
| 60              | El Salvador | 2002           | Onions                    | 6                                                           |
| 60              | El Salvador | 2002           | Oranges, Mandarines       | 25                                                          |
| 60              | El Salvador | 2002           | Pelagic Fish              | 7                                                           |
| 60              | El Salvador | 2002           | Pigmeat                   | 6                                                           |
| 60              | El Salvador | 2002           | Pineapples                | 2                                                           |
| 60              | El Salvador | 2002           | Plantains                 | 45                                                          |
| 60              | El Salvador | 2002           | Potatoes                  | 46                                                          |
| 60              | El Salvador | 2002           | Poultry Meat              | 39                                                          |
| 60              | El Salvador | 2002           | Rice (Milled Equivalent)  | 31                                                          |
| 60              | El Salvador | 2002           | Roots, Other              | 24                                                          |
| 60              | El Salvador | 2002           | Sesameseed                | 2                                                           |
| 60              | El Salvador | 2002           | Sorghum                   | 47                                                          |
| 60              | El Salvador | 2002           | Soyabean Oil              | 9                                                           |
| 60              | El Salvador | 2002           | Soybeans                  | 2                                                           |
| 60              | El Salvador | 2002           | Sugar, Non-Centrifugal    | 6                                                           |
| 60              | El Salvador | 2002           | Sugar, Refined Equivalent | 91                                                          |
| 60              | El Salvador | 2002           | Sunflowerseed Oil         | 2                                                           |
| 60              | El Salvador | 2002           | Sweeteners, Other         | 4                                                           |
| 60              | El Salvador | 2002           | Tomatoes                  | 33                                                          |
| 60              | El Salvador | 2002           | Vegetables, Other         | 110                                                         |
| 60              | El Salvador | 2002           | Wheat                     | 93                                                          |
| 60              | El Salvador | 2002           | Wine                      | 1                                                           |
| 60              | El Salvador | 2003           | Apples                    | 20                                                          |
| 60              | El Salvador | 2003           | Bananas                   | 21                                                          |
| 60              | El Salvador | 2003           | Beans                     | 43                                                          |
| 60              | El Salvador | 2003           | Beer                      | 48                                                          |
| 60              | El Salvador | 2003           | Beverages, Alcoholic      | 11                                                          |
| 60              | El Salvador | 2003           | Bovine Meat               | 21                                                          |
| 60              | El Salvador | 2003           | Butter, Ghee              | 1                                                           |
| 60              | El Salvador | 2003           | Cassava                   | 7                                                           |
| 60              | El Salvador | 2003           | Cereals, Other            | 2                                                           |
| 60              | El Salvador | 2003           | Cheese                    | 9                                                           |
| 60              | El Salvador | 2003           | Citrus, Other             | 1                                                           |
| 60              | El Salvador | 2003           | Cocoa Beans               | 1                                                           |
| 60              | El Salvador | 2003           | Coconut Oil               | 1                                                           |
| 60              | El Salvador | 2003           | Coconuts - Incl Copra     | 24                                                          |
| 60              | El Salvador | 2003           | Coffee                    | 7                                                           |
| 60              | El Salvador | 2003           | Cottonseed Oil            | 1                                                           |
| 60              | El Salvador | 2003           | Crustaceans               | 6                                                           |
| 60              | El Salvador | 2003           | Demersal Fish             | 1                                                           |
| 60              | El Salvador | 2003           | Eggs                      | 26                                                          |
| 60              | El Salvador | 2003           | Fats, Animals, Raw        | 9                                                           |
| 60              | El Salvador | 2003           | Freshwater Fish           | 2                                                           |
| 60              | El Salvador | 2003           | Fruits, Other             | 49                                                          |
| 60              | El Salvador | 2003           | Grapes                    | 3                                                           |
| 60              | El Salvador | 2003           | Groundnuts (Shelled Eq)   | 1                                                           |
| 60              | El Salvador | 2003           | Lemons, Limes             | 6                                                           |
| 60              | El Salvador | 2003           | Maize                     | 221                                                         |
| 60              | El Salvador | 2003           | Marine Fish, Other        | 2                                                           |
| 60              | El Salvador | 2003           | Milk, Whole               | 203                                                         |
| 60              | El Salvador | 2003           | Molluscs, Other           | 1                                                           |
| 60              | El Salvador | 2003           | Nuts                      | 1                                                           |
| 60              | El Salvador | 2003           | Offals, Edible            | 4                                                           |
| 60              | El Salvador | 2003           | Oilcrops Oil, Other       | 1                                                           |
| 60              | El Salvador | 2003           | Olive Oil                 | 1                                                           |
| 60              | El Salvador | 2003           | Onions                    | 8                                                           |
| 60              | El Salvador | 2003           | Oranges, Mandarines       | 31                                                          |

## Dietary calcium and zinc deficiency risks are decreasing but remain prevalent

| FAO countrycode | Country     | Reference year | Food item                 | Gross food supply (g capita <sup>-1</sup> d <sup>-1</sup> ) |
|-----------------|-------------|----------------|---------------------------|-------------------------------------------------------------|
| 60              | El Salvador | 2003           | Pelagic Fish              | 4                                                           |
| 60              | El Salvador | 2003           | Pigmeat                   | 6                                                           |
| 60              | El Salvador | 2003           | Pineapples                | 3                                                           |
| 60              | El Salvador | 2003           | Plantains                 | 46                                                          |
| 60              | El Salvador | 2003           | Potatoes                  | 41                                                          |
| 60              | El Salvador | 2003           | Poultry Meat              | 37                                                          |
| 60              | El Salvador | 2003           | Rice (Milled Equivalent)  | 31                                                          |
| 60              | El Salvador | 2003           | Roots, Other              | 20                                                          |
| 60              | El Salvador | 2003           | Sesameseed                | 1                                                           |
| 60              | El Salvador | 2003           | Sorghum                   | 47                                                          |
| 60              | El Salvador | 2003           | Soyabean Oil              | 9                                                           |
| 60              | El Salvador | 2003           | Soyabeans                 | 2                                                           |
| 60              | El Salvador | 2003           | Sugar, Non-Centrifugal    | 6                                                           |
| 60              | El Salvador | 2003           | Sugar, Refined Equivalent | 87                                                          |
| 60              | El Salvador | 2003           | Sunflowerseed Oil         | 3                                                           |
| 60              | El Salvador | 2003           | Sweeteners, Other         | 4                                                           |
| 60              | El Salvador | 2003           | Tomatoes                  | 37                                                          |
| 60              | El Salvador | 2003           | Vegetables, Other         | 100                                                         |
| 60              | El Salvador | 2003           | Wheat                     | 81                                                          |
| 60              | El Salvador | 2004           | Apples                    | 13                                                          |
| 60              | El Salvador | 2004           | Bananas                   | 19                                                          |
| 60              | El Salvador | 2004           | Beans                     | 40                                                          |
| 60              | El Salvador | 2004           | Beer                      | 54                                                          |
| 60              | El Salvador | 2004           | Beverages, Alcoholic      | 12                                                          |
| 60              | El Salvador | 2004           | Bovine Meat               | 20                                                          |
| 60              | El Salvador | 2004           | Butter, Ghee              | 1                                                           |
| 60              | El Salvador | 2004           | Cassava                   | 9                                                           |
| 60              | El Salvador | 2004           | Cereals, Other            | 1                                                           |
| 60              | El Salvador | 2004           | Cheese                    | 9                                                           |
| 60              | El Salvador | 2004           | Citrus, Other             | 1                                                           |
| 60              | El Salvador | 2004           | Cocoa Beans               | 1                                                           |
| 60              | El Salvador | 2004           | Coconut Oil               | 1                                                           |
| 60              | El Salvador | 2004           | Coconuts - Incl Copra     | 25                                                          |
| 60              | El Salvador | 2004           | Coffee                    | 7                                                           |
| 60              | El Salvador | 2004           | Cottonseed Oil            | 1                                                           |
| 60              | El Salvador | 2004           | Crustaceans               | 5                                                           |
| 60              | El Salvador | 2004           | Demersal Fish             | 1                                                           |
| 60              | El Salvador | 2004           | Eggs                      | 27                                                          |
| 60              | El Salvador | 2004           | Fats, Animals, Raw        | 8                                                           |
| 60              | El Salvador | 2004           | Freshwater Fish           | 2                                                           |
| 60              | El Salvador | 2004           | Fruits, Other             | 54                                                          |
| 60              | El Salvador | 2004           | Grapes                    | 3                                                           |
| 60              | El Salvador | 2004           | Groundnuts (Shelled Eq)   | 1                                                           |
| 60              | El Salvador | 2004           | Lemons, Limes             | 8                                                           |
| 60              | El Salvador | 2004           | Maize                     | 235                                                         |
| 60              | El Salvador | 2004           | Maize Germ Oil            | 1                                                           |
| 60              | El Salvador | 2004           | Marine Fish, Other        | 2                                                           |
| 60              | El Salvador | 2004           | Milk, Whole               | 208                                                         |
| 60              | El Salvador | 2004           | Molluscs, Other           | 1                                                           |
| 60              | El Salvador | 2004           | Nuts                      | 1                                                           |
| 60              | El Salvador | 2004           | Oats                      | 1                                                           |
| 60              | El Salvador | 2004           | Offals, Edible            | 3                                                           |
| 60              | El Salvador | 2004           | Oilcrops Oil, Other       | 2                                                           |
| 60              | El Salvador | 2004           | Olive Oil                 | 1                                                           |
| 60              | El Salvador | 2004           | Onions                    | 10                                                          |
| 60              | El Salvador | 2004           | Oranges, Mandarines       | 35                                                          |
| 60              | El Salvador | 2004           | Pelagic Fish              | 6                                                           |
| 60              | El Salvador | 2004           | Pigmeat                   | 7                                                           |
| 60              | El Salvador | 2004           | Pineapples                | 4                                                           |
| 60              | El Salvador | 2004           | Plantains                 | 47                                                          |
| 60              | El Salvador | 2004           | Potatoes                  | 33                                                          |
| 60              | El Salvador | 2004           | Poultry Meat              | 43                                                          |
| 60              | El Salvador | 2004           | Rice (Milled Equivalent)  | 26                                                          |
| 60              | El Salvador | 2004           | Roots, Other              | 13                                                          |
| 60              | El Salvador | 2004           | Sesameseed                | 1                                                           |
| 60              | El Salvador | 2004           | Sorghum                   | 45                                                          |
| 60              | El Salvador | 2004           | Soyabean Oil              | 6                                                           |
| 60              | El Salvador | 2004           | Soyabeans                 | 2                                                           |
| 60              | El Salvador | 2004           | Sugar, Refined Equivalent | 90                                                          |
| 60              | El Salvador | 2004           | Sunflowerseed Oil         | 3                                                           |
| 60              | El Salvador | 2004           | Sweeteners, Other         | 5                                                           |
| 60              | El Salvador | 2004           | Tomatoes                  | 41                                                          |
| 60              | El Salvador | 2004           | Vegetables, Other         | 104                                                         |
| 60              | El Salvador | 2004           | Wheat                     | 79                                                          |
| 60              | El Salvador | 2004           | Wine                      | 1                                                           |
| 60              | El Salvador | 2005           | Apples                    | 14                                                          |
| 60              | El Salvador | 2005           | Bananas                   | 19                                                          |
| 60              | El Salvador | 2005           | Beans                     | 36                                                          |
| 60              | El Salvador | 2005           | Beer                      | 59                                                          |
| 60              | El Salvador | 2005           | Beverages, Alcoholic      | 10                                                          |
| 60              | El Salvador | 2005           | Bovine Meat               | 21                                                          |
| 60              | El Salvador | 2005           | Cassava                   | 11                                                          |
| 60              | El Salvador | 2005           | Cereals, Other            | 1                                                           |
| 60              | El Salvador | 2005           | Cheese                    | 8                                                           |
| 60              | El Salvador | 2005           | Citrus, Other             | 1                                                           |
| 60              | El Salvador | 2005           | Cocoa Beans               | 1                                                           |
| 60              | El Salvador | 2005           | Coconut Oil               | 1                                                           |
| 60              | El Salvador | 2005           | Coconuts - Incl Copra     | 24                                                          |
| 60              | El Salvador | 2005           | Coffee                    | 6                                                           |
| 60              | El Salvador | 2005           | Crustaceans               | 8                                                           |
| 60              | El Salvador | 2005           | Demersal Fish             | 2                                                           |
| 60              | El Salvador | 2005           | Eggs                      | 26                                                          |
| 60              | El Salvador | 2005           | Fats, Animals, Raw        | 9                                                           |
| 60              | El Salvador | 2005           | Freshwater Fish           | 2                                                           |
| 60              | El Salvador | 2005           | Fruits, Other             | 57                                                          |
| 60              | El Salvador | 2005           | Grapes                    | 3                                                           |
| 60              | El Salvador | 2005           | Groundnuts (Shelled Eq)   | 1                                                           |

Dietary calcium and zinc deficiency risks are decreasing but remain prevalent

| FAO countrycode | Country     | Reference year | Food item                 | Gross food supply (g capita <sup>-1</sup> d <sup>-1</sup> ) |
|-----------------|-------------|----------------|---------------------------|-------------------------------------------------------------|
| 60              | El Salvador | 2005           | Honey                     | 1                                                           |
| 60              | El Salvador | 2005           | Lemons, Limes             | 8                                                           |
| 60              | El Salvador | 2005           | Maize                     | 221                                                         |
| 60              | El Salvador | 2005           | Marine Fish, Other        | 2                                                           |
| 60              | El Salvador | 2005           | Milk, Whole               | 239                                                         |
| 60              | El Salvador | 2005           | Nuts                      | 1                                                           |
| 60              | El Salvador | 2005           | Oats                      | 1                                                           |
| 60              | El Salvador | 2005           | Offals, Edible            | 3                                                           |
| 60              | El Salvador | 2005           | Oilcrops Oil, Other       | 4                                                           |
| 60              | El Salvador | 2005           | Olive Oil                 | 1                                                           |
| 60              | El Salvador | 2005           | Onions                    | 11                                                          |
| 60              | El Salvador | 2005           | Oranges, Mandarines       | 51                                                          |
| 60              | El Salvador | 2005           | Pelagic Fish              | 7                                                           |
| 60              | El Salvador | 2005           | Pigmeat                   | 8                                                           |
| 60              | El Salvador | 2005           | Pineapples                | 4                                                           |
| 60              | El Salvador | 2005           | Plantains                 | 48                                                          |
| 60              | El Salvador | 2005           | Potatoes                  | 29                                                          |
| 60              | El Salvador | 2005           | Poultry Meat              | 46                                                          |
| 60              | El Salvador | 2005           | Rice (Milled Equivalent)  | 28                                                          |
| 60              | El Salvador | 2005           | Roots, Other              | 15                                                          |
| 60              | El Salvador | 2005           | Sesameseed                | 1                                                           |
| 60              | El Salvador | 2005           | Sorghum                   | 42                                                          |
| 60              | El Salvador | 2005           | Soyabean Oil              | 7                                                           |
| 60              | El Salvador | 2005           | Soyabeans                 | 2                                                           |
| 60              | El Salvador | 2005           | Sugar, Refined Equivalent | 94                                                          |
| 60              | El Salvador | 2005           | Sunflowerseed Oil         | 3                                                           |
| 60              | El Salvador | 2005           | Sweeteners, Other         | 7                                                           |
| 60              | El Salvador | 2005           | Tomatoes                  | 45                                                          |
| 60              | El Salvador | 2005           | Vegetables, Other         | 132                                                         |
| 60              | El Salvador | 2005           | Wheat                     | 73                                                          |
| 60              | El Salvador | 2005           | Wine                      | 1                                                           |
| 60              | El Salvador | 2006           | Apples                    | 14                                                          |
| 60              | El Salvador | 2006           | Bananas                   | 18                                                          |
| 60              | El Salvador | 2006           | Beans                     | 48                                                          |
| 60              | El Salvador | 2006           | Beer                      | 65                                                          |
| 60              | El Salvador | 2006           | Beverages, Alcoholic      | 9                                                           |
| 60              | El Salvador | 2006           | Bovine Meat               | 24                                                          |
| 60              | El Salvador | 2006           | Cassava                   | 10                                                          |
| 60              | El Salvador | 2006           | Cereals, Other            | 1                                                           |
| 60              | El Salvador | 2006           | Cheese                    | 9                                                           |
| 60              | El Salvador | 2006           | Cocoa Beans               | 1                                                           |
| 60              | El Salvador | 2006           | Coconut Oil               | 1                                                           |
| 60              | El Salvador | 2006           | Coconuts - Incl Copra     | 24                                                          |
| 60              | El Salvador | 2006           | Coffee                    | 7                                                           |
| 60              | El Salvador | 2006           | Crustaceans               | 7                                                           |
| 60              | El Salvador | 2006           | Demersal Fish             | 2                                                           |
| 60              | El Salvador | 2006           | Eggs                      | 27                                                          |
| 60              | El Salvador | 2006           | Fats, Animals, Raw        | 10                                                          |
| 60              | El Salvador | 2006           | Freshwater Fish           | 2                                                           |
| 60              | El Salvador | 2006           | Fruits, Other             | 54                                                          |
| 60              | El Salvador | 2006           | Grapes                    | 3                                                           |
| 60              | El Salvador | 2006           | Groundnuts (Shelled Eq)   | 1                                                           |
| 60              | El Salvador | 2006           | Lemons, Limes             | 8                                                           |
| 60              | El Salvador | 2006           | Maize                     | 190                                                         |
| 60              | El Salvador | 2006           | Maize Germ Oil            | 1                                                           |
| 60              | El Salvador | 2006           | Marine Fish, Other        | 3                                                           |
| 60              | El Salvador | 2006           | Milk, Whole               | 219                                                         |
| 60              | El Salvador | 2006           | Nuts                      | 2                                                           |
| 60              | El Salvador | 2006           | Oats                      | 1                                                           |
| 60              | El Salvador | 2006           | Offals, Edible            | 4                                                           |
| 60              | El Salvador | 2006           | Oilcrops Oil, Other       | 4                                                           |
| 60              | El Salvador | 2006           | Olive Oil                 | 1                                                           |
| 60              | El Salvador | 2006           | Onions                    | 13                                                          |
| 60              | El Salvador | 2006           | Oranges, Mandarines       | 51                                                          |
| 60              | El Salvador | 2006           | Pelagic Fish              | 3                                                           |
| 60              | El Salvador | 2006           | Pigmeat                   | 10                                                          |
| 60              | El Salvador | 2006           | Pineapples                | 4                                                           |
| 60              | El Salvador | 2006           | Plantains                 | 50                                                          |
| 60              | El Salvador | 2006           | Potatoes                  | 35                                                          |
| 60              | El Salvador | 2006           | Poultry Meat              | 47                                                          |
| 60              | El Salvador | 2006           | Rice (Milled Equivalent)  | 29                                                          |
| 60              | El Salvador | 2006           | Roots, Other              | 13                                                          |
| 60              | El Salvador | 2006           | Sesameseed                | 1                                                           |
| 60              | El Salvador | 2006           | Sorghum                   | 45                                                          |
| 60              | El Salvador | 2006           | Soyabean Oil              | 8                                                           |
| 60              | El Salvador | 2006           | Soyabeans                 | 2                                                           |
| 60              | El Salvador | 2006           | Sugar, Refined Equivalent | 100                                                         |
| 60              | El Salvador | 2006           | Sunflowerseed Oil         | 4                                                           |
| 60              | El Salvador | 2006           | Sweeteners, Other         | 7                                                           |
| 60              | El Salvador | 2006           | Tomatoes                  | 52                                                          |
| 60              | El Salvador | 2006           | Vegetables, Other         | 149                                                         |
| 60              | El Salvador | 2006           | Wheat                     | 74                                                          |
| 60              | El Salvador | 2006           | Wine                      | 1                                                           |
| 60              | El Salvador | 2007           | Apples                    | 14                                                          |
| 60              | El Salvador | 2007           | Bananas                   | 19                                                          |
| 60              | El Salvador | 2007           | Beans                     | 36                                                          |
| 60              | El Salvador | 2007           | Beer                      | 65                                                          |
| 60              | El Salvador | 2007           | Beverages, Alcoholic      | 9                                                           |
| 60              | El Salvador | 2007           | Bovine Meat               | 25                                                          |
| 60              | El Salvador | 2007           | Cassava                   | 13                                                          |
| 60              | El Salvador | 2007           | Cereals, Other            | 2                                                           |
| 60              | El Salvador | 2007           | Cheese                    | 11                                                          |
| 60              | El Salvador | 2007           | Cocoa Beans               | 1                                                           |
| 60              | El Salvador | 2007           | Coconut Oil               | 1                                                           |
| 60              | El Salvador | 2007           | Coconuts - Incl Copra     | 27                                                          |
| 60              | El Salvador | 2007           | Coffee                    | 8                                                           |
| 60              | El Salvador | 2007           | Crustaceans               | 7                                                           |

Dietary calcium and zinc deficiency risks are decreasing but remain prevalent

| FAO countrycode | Country     | Reference year | Food item                 | Gross food supply (g capita <sup>-1</sup> d <sup>-1</sup> ) |
|-----------------|-------------|----------------|---------------------------|-------------------------------------------------------------|
| 60              | El Salvador | 2007           | Demersal Fish             | 2                                                           |
| 60              | El Salvador | 2007           | Eggs                      | 26                                                          |
| 60              | El Salvador | 2007           | Fats, Animals, Raw        | 9                                                           |
| 60              | El Salvador | 2007           | Freshwater Fish           | 3                                                           |
| 60              | El Salvador | 2007           | Fruits, Other             | 55                                                          |
| 60              | El Salvador | 2007           | Grapes                    | 3                                                           |
| 60              | El Salvador | 2007           | Groundnuts (Shelled Eq)   | 1                                                           |
| 60              | El Salvador | 2007           | Lemons, Limes             | 9                                                           |
| 60              | El Salvador | 2007           | Maize                     | 193                                                         |
| 60              | El Salvador | 2007           | Marine Fish, Other        | 3                                                           |
| 60              | El Salvador | 2007           | Milk, Whole               | 226                                                         |
| 60              | El Salvador | 2007           | Molluscs, Other           | 1                                                           |
| 60              | El Salvador | 2007           | Nuts                      | 1                                                           |
| 60              | El Salvador | 2007           | Oats                      | 1                                                           |
| 60              | El Salvador | 2007           | Offals, Edible            | 3                                                           |
| 60              | El Salvador | 2007           | Oilcrops Oil, Other       | 3                                                           |
| 60              | El Salvador | 2007           | Olive Oil                 | 1                                                           |
| 60              | El Salvador | 2007           | Onions                    | 12                                                          |
| 60              | El Salvador | 2007           | Oranges, Mandarines       | 54                                                          |
| 60              | El Salvador | 2007           | Pelagic Fish              | 3                                                           |
| 60              | El Salvador | 2007           | Pigmeat                   | 8                                                           |
| 60              | El Salvador | 2007           | Pineapples                | 5                                                           |
| 60              | El Salvador | 2007           | Plantains                 | 55                                                          |
| 60              | El Salvador | 2007           | Potatoes                  | 39                                                          |
| 60              | El Salvador | 2007           | Poultry Meat              | 50                                                          |
| 60              | El Salvador | 2007           | Rice (Milled Equivalent)  | 28                                                          |
| 60              | El Salvador | 2007           | Roots, Other              | 16                                                          |
| 60              | El Salvador | 2007           | Sesameseed                | 1                                                           |
| 60              | El Salvador | 2007           | Sorghum                   | 45                                                          |
| 60              | El Salvador | 2007           | Soyabean Oil              | 9                                                           |
| 60              | El Salvador | 2007           | Soyabeans                 | 2                                                           |
| 60              | El Salvador | 2007           | Sugar, Refined Equivalent | 98                                                          |
| 60              | El Salvador | 2007           | Sunflowerseed Oil         | 4                                                           |
| 60              | El Salvador | 2007           | Sweeteners, Other         | 6                                                           |
| 60              | El Salvador | 2007           | Tomatoes                  | 50                                                          |
| 60              | El Salvador | 2007           | Vegetables, Other         | 154                                                         |
| 60              | El Salvador | 2007           | Wheat                     | 75                                                          |
| 60              | El Salvador | 2007           | Wine                      | 1                                                           |
| 60              | El Salvador | 2008           | Apples                    | 14                                                          |
| 60              | El Salvador | 2008           | Bananas                   | 19                                                          |
| 60              | El Salvador | 2008           | Beans                     | 47                                                          |
| 60              | El Salvador | 2008           | Beer                      | 58                                                          |
| 60              | El Salvador | 2008           | Beverages, Alcoholic      | 8                                                           |
| 60              | El Salvador | 2008           | Bovine Meat               | 25                                                          |
| 60              | El Salvador | 2008           | Cassava                   | 12                                                          |
| 60              | El Salvador | 2008           | Cereals, Other            | 3                                                           |
| 60              | El Salvador | 2008           | Cheese                    | 11                                                          |
| 60              | El Salvador | 2008           | Cocoa Beans               | 1                                                           |
| 60              | El Salvador | 2008           | Coconut Oil               | 1                                                           |
| 60              | El Salvador | 2008           | Coconuts - Incl Copra     | 23                                                          |
| 60              | El Salvador | 2008           | Coffee                    | 8                                                           |
| 60              | El Salvador | 2008           | Crustaceans               | 3                                                           |
| 60              | El Salvador | 2008           | Eggs                      | 24                                                          |
| 60              | El Salvador | 2008           | Fats, Animals, Raw        | 6                                                           |
| 60              | El Salvador | 2008           | Freshwater Fish           | 3                                                           |
| 60              | El Salvador | 2008           | Fruits, Other             | 74                                                          |
| 60              | El Salvador | 2008           | Grapes                    | 3                                                           |
| 60              | El Salvador | 2008           | Groundnuts (Shelled Eq)   | 1                                                           |
| 60              | El Salvador | 2008           | Honey                     | 1                                                           |
| 60              | El Salvador | 2008           | Lemons, Limes             | 8                                                           |
| 60              | El Salvador | 2008           | Maize                     | 195                                                         |
| 60              | El Salvador | 2008           | Marine Fish, Other        | 1                                                           |
| 60              | El Salvador | 2008           | Milk, Whole               | 228                                                         |
| 60              | El Salvador | 2008           | Nuts                      | 2                                                           |
| 60              | El Salvador | 2008           | Oats                      | 1                                                           |
| 60              | El Salvador | 2008           | Offals, Edible            | 4                                                           |
| 60              | El Salvador | 2008           | Oilcrops Oil, Other       | 3                                                           |
| 60              | El Salvador | 2008           | Olive Oil                 | 1                                                           |
| 60              | El Salvador | 2008           | Onions                    | 12                                                          |
| 60              | El Salvador | 2008           | Oranges, Mandarines       | 48                                                          |
| 60              | El Salvador | 2008           | Pelagic Fish              | 3                                                           |
| 60              | El Salvador | 2008           | Pigmeat                   | 8                                                           |
| 60              | El Salvador | 2008           | Pineapples                | 6                                                           |
| 60              | El Salvador | 2008           | Plantains                 | 56                                                          |
| 60              | El Salvador | 2008           | Potatoes                  | 29                                                          |
| 60              | El Salvador | 2008           | Poultry Meat              | 44                                                          |
| 60              | El Salvador | 2008           | Rice (Milled Equivalent)  | 30                                                          |
| 60              | El Salvador | 2008           | Roots, Other              | 17                                                          |
| 60              | El Salvador | 2008           | Sesameseed                | 1                                                           |
| 60              | El Salvador | 2008           | Sorghum                   | 45                                                          |
| 60              | El Salvador | 2008           | Soyabean Oil              | 8                                                           |
| 60              | El Salvador | 2008           | Soyabeans                 | 2                                                           |
| 60              | El Salvador | 2008           | Sugar, Refined Equivalent | 99                                                          |
| 60              | El Salvador | 2008           | Sunflowerseed Oil         | 3                                                           |
| 60              | El Salvador | 2008           | Sweeteners, Other         | 4                                                           |
| 60              | El Salvador | 2008           | Tomatoes                  | 53                                                          |
| 60              | El Salvador | 2008           | Vegetables, Other         | 160                                                         |
| 60              | El Salvador | 2008           | Wheat                     | 77                                                          |
| 60              | El Salvador | 2008           | Wine                      | 1                                                           |
| 60              | El Salvador | 2009           | Apples                    | 2                                                           |
| 60              | El Salvador | 2009           | Bananas                   | 15                                                          |
| 60              | El Salvador | 2009           | Beans                     | 42                                                          |
| 60              | El Salvador | 2009           | Beer                      | 57                                                          |
| 60              | El Salvador | 2009           | Beverages, Alcoholic      | 9                                                           |
| 60              | El Salvador | 2009           | Bovine Meat               | 24                                                          |
| 60              | El Salvador | 2009           | Cassava                   | 11                                                          |
| 60              | El Salvador | 2009           | Cereals, Other            | 2                                                           |

Dietary calcium and zinc deficiency risks are decreasing but remain prevalent

| FAO countrycode | Country     | Reference year | Food item                 | Gross food supply (g capita <sup>-1</sup> d <sup>-1</sup> ) |
|-----------------|-------------|----------------|---------------------------|-------------------------------------------------------------|
| 60              | El Salvador | 2009           | Cheese                    | 10                                                          |
| 60              | El Salvador | 2009           | Citrus, Other             | 1                                                           |
| 60              | El Salvador | 2009           | Cocoa Beans               | 1                                                           |
| 60              | El Salvador | 2009           | Coconut Oil               | 1                                                           |
| 60              | El Salvador | 2009           | Coconuts - Incl Copra     | 22                                                          |
| 60              | El Salvador | 2009           | Coffee                    | 6                                                           |
| 60              | El Salvador | 2009           | Crustaceans               | 5                                                           |
| 60              | El Salvador | 2009           | Eggs                      | 24                                                          |
| 60              | El Salvador | 2009           | Fats, Animals, Raw        | 9                                                           |
| 60              | El Salvador | 2009           | Freshwater Fish           | 3                                                           |
| 60              | El Salvador | 2009           | Fruits, Other             | 76                                                          |
| 60              | El Salvador | 2009           | Grapes                    | 3                                                           |
| 60              | El Salvador | 2009           | Groundnuts (Shelled Eq)   | 1                                                           |
| 60              | El Salvador | 2009           | Lemons, Limes             | 13                                                          |
| 60              | El Salvador | 2009           | Maize                     | 199                                                         |
| 60              | El Salvador | 2009           | Milk, Whole               | 249                                                         |
| 60              | El Salvador | 2009           | Nuts                      | 2                                                           |
| 60              | El Salvador | 2009           | Oats                      | 1                                                           |
| 60              | El Salvador | 2009           | Offals, Edible            | 3                                                           |
| 60              | El Salvador | 2009           | Oilcrops Oil, Other       | 3                                                           |
| 60              | El Salvador | 2009           | Olive Oil                 | 1                                                           |
| 60              | El Salvador | 2009           | Onions                    | 12                                                          |
| 60              | El Salvador | 2009           | Oranges, Mandarines       | 45                                                          |
| 60              | El Salvador | 2009           | Pelagic Fish              | 11                                                          |
| 60              | El Salvador | 2009           | Pigmeat                   | 8                                                           |
| 60              | El Salvador | 2009           | Pineapples                | 4                                                           |
| 60              | El Salvador | 2009           | Plantains                 | 53                                                          |
| 60              | El Salvador | 2009           | Potatoes                  | 31                                                          |
| 60              | El Salvador | 2009           | Poultry Meat              | 45                                                          |
| 60              | El Salvador | 2009           | Rice (Milled Equivalent)  | 27                                                          |
| 60              | El Salvador | 2009           | Roots, Other              | 16                                                          |
| 60              | El Salvador | 2009           | Sorghum                   | 46                                                          |
| 60              | El Salvador | 2009           | Soyabean Oil              | 8                                                           |
| 60              | El Salvador | 2009           | Soybeans                  | 2                                                           |
| 60              | El Salvador | 2009           | Sugar, Refined Equivalent | 99                                                          |
| 60              | El Salvador | 2009           | Sunflowerseed Oil         | 3                                                           |
| 60              | El Salvador | 2009           | Sweeteners, Other         | 4                                                           |
| 60              | El Salvador | 2009           | Tomatoes                  | 45                                                          |
| 60              | El Salvador | 2009           | Vegetables, Other         | 121                                                         |
| 60              | El Salvador | 2009           | Wheat                     | 77                                                          |
| 60              | El Salvador | 2009           | Wine                      | 1                                                           |
| 60              | El Salvador | 2010           | Apples                    | 2                                                           |
| 60              | El Salvador | 2010           | Bananas                   | 17                                                          |
| 60              | El Salvador | 2010           | Beans                     | 37                                                          |
| 60              | El Salvador | 2010           | Beer                      | 57                                                          |
| 60              | El Salvador | 2010           | Beverages, Alcoholic      | 7                                                           |
| 60              | El Salvador | 2010           | Bovine Meat               | 25                                                          |
| 60              | El Salvador | 2010           | Cassava                   | 11                                                          |
| 60              | El Salvador | 2010           | Cheese                    | 11                                                          |
| 60              | El Salvador | 2010           | Citrus, Other             | 1                                                           |
| 60              | El Salvador | 2010           | Cocoa Beans               | 1                                                           |
| 60              | El Salvador | 2010           | Coconut Oil               | 1                                                           |
| 60              | El Salvador | 2010           | Coconuts - Incl Copra     | 20                                                          |
| 60              | El Salvador | 2010           | Coffee                    | 8                                                           |
| 60              | El Salvador | 2010           | Crustaceans               | 2                                                           |
| 60              | El Salvador | 2010           | Eggs                      | 24                                                          |
| 60              | El Salvador | 2010           | Fats, Animals, Raw        | 8                                                           |
| 60              | El Salvador | 2010           | Freshwater Fish           | 3                                                           |
| 60              | El Salvador | 2010           | Fruits, Other             | 69                                                          |
| 60              | El Salvador | 2010           | Grapes                    | 3                                                           |
| 60              | El Salvador | 2010           | Groundnuts (Shelled Eq)   | 1                                                           |
| 60              | El Salvador | 2010           | Lemons, Limes             | 10                                                          |
| 60              | El Salvador | 2010           | Maize                     | 210                                                         |
| 60              | El Salvador | 2010           | Marine Fish, Other        | 7                                                           |
| 60              | El Salvador | 2010           | Milk, Whole               | 216                                                         |
| 60              | El Salvador | 2010           | Nuts                      | 2                                                           |
| 60              | El Salvador | 2010           | Oats                      | 1                                                           |
| 60              | El Salvador | 2010           | Offals, Edible            | 3                                                           |
| 60              | El Salvador | 2010           | Oilcrops Oil, Other       | 2                                                           |
| 60              | El Salvador | 2010           | Olive Oil                 | 1                                                           |
| 60              | El Salvador | 2010           | Onions                    | 11                                                          |
| 60              | El Salvador | 2010           | Oranges, Mandarines       | 42                                                          |
| 60              | El Salvador | 2010           | Pelagic Fish              | 6                                                           |
| 60              | El Salvador | 2010           | Pigmeat                   | 8                                                           |
| 60              | El Salvador | 2010           | Pineapples                | 2                                                           |
| 60              | El Salvador | 2010           | Plantains                 | 29                                                          |
| 60              | El Salvador | 2010           | Potatoes                  | 29                                                          |
| 60              | El Salvador | 2010           | Poultry Meat              | 48                                                          |
| 60              | El Salvador | 2010           | Rice (Milled Equivalent)  | 28                                                          |
| 60              | El Salvador | 2010           | Roots, Other              | 16                                                          |
| 60              | El Salvador | 2010           | Sorghum                   | 46                                                          |
| 60              | El Salvador | 2010           | Soyabean Oil              | 7                                                           |
| 60              | El Salvador | 2010           | Soybeans                  | 2                                                           |
| 60              | El Salvador | 2010           | Sugar, Refined Equivalent | 98                                                          |
| 60              | El Salvador | 2010           | Sunflowerseed Oil         | 3                                                           |
| 60              | El Salvador | 2010           | Sweeteners, Other         | 2                                                           |
| 60              | El Salvador | 2010           | Tomatoes                  | 37                                                          |
| 60              | El Salvador | 2010           | Vegetables, Other         | 118                                                         |
| 60              | El Salvador | 2010           | Wheat                     | 78                                                          |
| 60              | El Salvador | 2010           | Wine                      | 1                                                           |
| 60              | El Salvador | 2011           | Apples                    | 2                                                           |
| 60              | El Salvador | 2011           | Bananas                   | 16                                                          |
| 60              | El Salvador | 2011           | Beans                     | 42                                                          |
| 60              | El Salvador | 2011           | Beer                      | 52                                                          |
| 60              | El Salvador | 2011           | Beverages, Alcoholic      | 8                                                           |
| 60              | El Salvador | 2011           | Bovine Meat               | 20                                                          |
| 60              | El Salvador | 2011           | Cassava                   | 15                                                          |



Dietary calcium and zinc deficiency risks are decreasing but remain prevalent

| FAO countrycode | Country     | Reference year | Food item                 | Gross food supply (g capita <sup>-1</sup> d <sup>-1</sup> ) |
|-----------------|-------------|----------------|---------------------------|-------------------------------------------------------------|
| 60              | El Salvador | 2011           | Cereals, Other            | 1                                                           |
| 60              | El Salvador | 2011           | Cheese                    | 11                                                          |
| 60              | El Salvador | 2011           | Cocoa Beans               | 1                                                           |
| 60              | El Salvador | 2011           | Coconut Oil               | 1                                                           |
| 60              | El Salvador | 2011           | Coconuts - Incl Copra     | 19                                                          |
| 60              | El Salvador | 2011           | Coffee                    | 8                                                           |
| 60              | El Salvador | 2011           | Crustaceans               | 2                                                           |
| 60              | El Salvador | 2011           | Eggs                      | 22                                                          |
| 60              | El Salvador | 2011           | Fats, Animals, Raw        | 8                                                           |
| 60              | El Salvador | 2011           | Freshwater Fish           | 3                                                           |
| 60              | El Salvador | 2011           | Fruits, Other             | 73                                                          |
| 60              | El Salvador | 2011           | Grapes                    | 3                                                           |
| 60              | El Salvador | 2011           | Groundnuts (Shelled Eq)   | 1                                                           |
| 60              | El Salvador | 2011           | Lemons, Limes             | 9                                                           |
| 60              | El Salvador | 2011           | Maize                     | 199                                                         |
| 60              | El Salvador | 2011           | Marine Fish, Other        | 7                                                           |
| 60              | El Salvador | 2011           | Milk, Whole               | 191                                                         |
| 60              | El Salvador | 2011           | Nuts                      | 2                                                           |
| 60              | El Salvador | 2011           | Oats                      | 1                                                           |
| 60              | El Salvador | 2011           | Offals, Edible            | 3                                                           |
| 60              | El Salvador | 2011           | Oilcrops Oil, Other       | 3                                                           |
| 60              | El Salvador | 2011           | Olive Oil                 | 1                                                           |
| 60              | El Salvador | 2011           | Onions                    | 12                                                          |
| 60              | El Salvador | 2011           | Oranges, Mandarines       | 46                                                          |
| 60              | El Salvador | 2011           | Pelagic Fish              | 6                                                           |
| 60              | El Salvador | 2011           | Pigmeat                   | 7                                                           |
| 60              | El Salvador | 2011           | Pineapples                | 2                                                           |
| 60              | El Salvador | 2011           | Plantains                 | 26                                                          |
| 60              | El Salvador | 2011           | Potatoes                  | 35                                                          |
| 60              | El Salvador | 2011           | Poultry Meat              | 50                                                          |
| 60              | El Salvador | 2011           | Rice (Milled Equivalent)  | 28                                                          |
| 60              | El Salvador | 2011           | Roots, Other              | 17                                                          |
| 60              | El Salvador | 2011           | Sesameseed                | 1                                                           |
| 60              | El Salvador | 2011           | Sorghum                   | 45                                                          |
| 60              | El Salvador | 2011           | Soyabean Oil              | 8                                                           |
| 60              | El Salvador | 2011           | Soyabeans                 | 2                                                           |
| 60              | El Salvador | 2011           | Sugar, Refined Equivalent | 100                                                         |
| 60              | El Salvador | 2011           | Sunflowerseed Oil         | 3                                                           |
| 60              | El Salvador | 2011           | Sweeteners, Other         | 3                                                           |
| 60              | El Salvador | 2011           | Tomatoes                  | 45                                                          |
| 60              | El Salvador | 2011           | Vegetables, Other         | 118                                                         |
| 60              | El Salvador | 2011           | Wheat                     | 77                                                          |
| 60              | El Salvador | 2011           | Wine                      | 1                                                           |
| 63              | Estonia     | 1992           | Apples                    | 36                                                          |
| 63              | Estonia     | 1992           | Bananas                   | 3                                                           |
| 63              | Estonia     | 1992           | Barley                    | 17                                                          |
| 63              | Estonia     | 1992           | Beer                      | 80                                                          |
| 63              | Estonia     | 1992           | Beverages, Alcoholic      | 30                                                          |
| 63              | Estonia     | 1992           | Beverages, Fermented      | 1                                                           |
| 63              | Estonia     | 1992           | Bovine Meat               | 68                                                          |
| 63              | Estonia     | 1992           | Butter, Ghee              | 14                                                          |
| 63              | Estonia     | 1992           | Cephalopods               | 10                                                          |
| 63              | Estonia     | 1992           | Cereals, Other            | 1                                                           |
| 63              | Estonia     | 1992           | Cheese                    | 28                                                          |
| 63              | Estonia     | 1992           | Coffee                    | 2                                                           |
| 63              | Estonia     | 1992           | Cream                     | 6                                                           |
| 63              | Estonia     | 1992           | Crustaceans               | 1                                                           |
| 63              | Estonia     | 1992           | Demersal Fish             | 14                                                          |
| 63              | Estonia     | 1992           | Eggs                      | 42                                                          |
| 63              | Estonia     | 1992           | Fats, Animals, Raw        | 4                                                           |
| 63              | Estonia     | 1992           | Freshwater Fish           | 10                                                          |
| 63              | Estonia     | 1992           | Fruits, Other             | 19                                                          |
| 63              | Estonia     | 1992           | Grapes                    | 1                                                           |
| 63              | Estonia     | 1992           | Honey                     | 1                                                           |
| 63              | Estonia     | 1992           | Marine Fish, Other        | 4                                                           |
| 63              | Estonia     | 1992           | Meat, Other               | 1                                                           |
| 63              | Estonia     | 1992           | Milk, Whole               | 576                                                         |
| 63              | Estonia     | 1992           | Mutton & Goat Meat        | 3                                                           |
| 63              | Estonia     | 1992           | Oats                      | 6                                                           |
| 63              | Estonia     | 1992           | Offals, Edible            | 17                                                          |
| 63              | Estonia     | 1992           | Oilcrops Oil, Other       | 1                                                           |
| 63              | Estonia     | 1992           | Onions                    | 4                                                           |
| 63              | Estonia     | 1992           | Oranges, Mandarines       | 17                                                          |
| 63              | Estonia     | 1992           | Peas                      | 1                                                           |
| 63              | Estonia     | 1992           | Pelagic Fish              | 31                                                          |
| 63              | Estonia     | 1992           | Pigmeat                   | 77                                                          |
| 63              | Estonia     | 1992           | Potatoes                  | 295                                                         |
| 63              | Estonia     | 1992           | Poultry Meat              | 18                                                          |
| 63              | Estonia     | 1992           | Rye                       | 83                                                          |
| 63              | Estonia     | 1992           | Sugar, Refined Equivalent | 47                                                          |
| 63              | Estonia     | 1992           | Sunflowerseed Oil         | 5                                                           |
| 63              | Estonia     | 1992           | Sweeteners, Other         | 1                                                           |
| 63              | Estonia     | 1992           | Tomatoes                  | 14                                                          |
| 63              | Estonia     | 1992           | Vegetables, Other         | 150                                                         |
| 63              | Estonia     | 1992           | Wheat                     | 193                                                         |
| 63              | Estonia     | 1992           | Wine                      | 1                                                           |
| 63              | Estonia     | 1993           | Apples                    | 72                                                          |
| 63              | Estonia     | 1993           | Bananas                   | 4                                                           |
| 63              | Estonia     | 1993           | Barley                    | 17                                                          |
| 63              | Estonia     | 1993           | Beer                      | 80                                                          |
| 63              | Estonia     | 1993           | Beverages, Alcoholic      | 32                                                          |
| 63              | Estonia     | 1993           | Beverages, Fermented      | 1                                                           |
| 63              | Estonia     | 1993           | Bovine Meat               | 71                                                          |
| 63              | Estonia     | 1993           | Butter, Ghee              | 15                                                          |
| 63              | Estonia     | 1993           | Cephalopods               | 2                                                           |
| 63              | Estonia     | 1993           | Cereals, Other            | 3                                                           |
| 63              | Estonia     | 1993           | Cheese                    | 27                                                          |

Dietary calcium and zinc deficiency risks are decreasing but remain prevalent

| FAO countrycode | Country | Reference year | Food item                 | Gross food supply (g capita <sup>-1</sup> d <sup>-1</sup> ) |
|-----------------|---------|----------------|---------------------------|-------------------------------------------------------------|
| 63              | Estonia | 1993           | Citrus, Other             | 7                                                           |
| 63              | Estonia | 1993           | Cocoa Beans               | 1                                                           |
| 63              | Estonia | 1993           | Coffee                    | 5                                                           |
| 63              | Estonia | 1993           | Cream                     | 7                                                           |
| 63              | Estonia | 1993           | Crustaceans               | 2                                                           |
| 63              | Estonia | 1993           | Demersal Fish             | 13                                                          |
| 63              | Estonia | 1993           | Eggs                      | 37                                                          |
| 63              | Estonia | 1993           | Fats, Animals, Raw        | 5                                                           |
| 63              | Estonia | 1993           | Freshwater Fish           | 7                                                           |
| 63              | Estonia | 1993           | Fruits, Other             | 19                                                          |
| 63              | Estonia | 1993           | Grapes                    | 4                                                           |
| 63              | Estonia | 1993           | Honey                     | 1                                                           |
| 63              | Estonia | 1993           | Lemons, Limes             | 1                                                           |
| 63              | Estonia | 1993           | Marine Fish, Other        | 4                                                           |
| 63              | Estonia | 1993           | Meat, Other               | 2                                                           |
| 63              | Estonia | 1993           | Milk, Whole               | 542                                                         |
| 63              | Estonia | 1993           | Mutton & Goat Meat        | 2                                                           |
| 63              | Estonia | 1993           | Nuts                      | 1                                                           |
| 63              | Estonia | 1993           | Oats                      | 18                                                          |
| 63              | Estonia | 1993           | Offals, Edible            | 13                                                          |
| 63              | Estonia | 1993           | Oilcrops Oil, Other       | 1                                                           |
| 63              | Estonia | 1993           | Onions                    | 5                                                           |
| 63              | Estonia | 1993           | Oranges, Mandarines       | 20                                                          |
| 63              | Estonia | 1993           | Peas                      | 2                                                           |
| 63              | Estonia | 1993           | Pelagic Fish              | 48                                                          |
| 63              | Estonia | 1993           | Pigmeat                   | 55                                                          |
| 63              | Estonia | 1993           | Potatoes                  | 316                                                         |
| 63              | Estonia | 1993           | Poultry Meat              | 10                                                          |
| 63              | Estonia | 1993           | Rice (Milled Equivalent)  | 3                                                           |
| 63              | Estonia | 1993           | Rye                       | 68                                                          |
| 63              | Estonia | 1993           | Soyabean Oil              | 1                                                           |
| 63              | Estonia | 1993           | Sugar, Refined Equivalent | 52                                                          |
| 63              | Estonia | 1993           | Sunflowerseed Oil         | 8                                                           |
| 63              | Estonia | 1993           | Tea                       | 1                                                           |
| 63              | Estonia | 1993           | Tomatoes                  | 15                                                          |
| 63              | Estonia | 1993           | Vegetables, Other         | 115                                                         |
| 63              | Estonia | 1993           | Wheat                     | 199                                                         |
| 63              | Estonia | 1993           | Wine                      | 4                                                           |
| 63              | Estonia | 1994           | Apples                    | 28                                                          |
| 63              | Estonia | 1994           | Bananas                   | 8                                                           |
| 63              | Estonia | 1994           | Barley                    | 17                                                          |
| 63              | Estonia | 1994           | Beer                      | 95                                                          |
| 63              | Estonia | 1994           | Beverages, Alcoholic      | 31                                                          |
| 63              | Estonia | 1994           | Beverages, Fermented      | 1                                                           |
| 63              | Estonia | 1994           | Bovine Meat               | 57                                                          |
| 63              | Estonia | 1994           | Butter, Ghee              | 15                                                          |
| 63              | Estonia | 1994           | Cereals, Other            | 3                                                           |
| 63              | Estonia | 1994           | Cheese                    | 32                                                          |
| 63              | Estonia | 1994           | Citrus, Other             | 4                                                           |
| 63              | Estonia | 1994           | Cocoa Beans               | 1                                                           |
| 63              | Estonia | 1994           | Coffee                    | 7                                                           |
| 63              | Estonia | 1994           | Cream                     | 7                                                           |
| 63              | Estonia | 1994           | Crustaceans               | 3                                                           |
| 63              | Estonia | 1994           | Demersal Fish             | 19                                                          |
| 63              | Estonia | 1994           | Eggs                      | 39                                                          |
| 63              | Estonia | 1994           | Fats, Animals, Raw        | 4                                                           |
| 63              | Estonia | 1994           | Freshwater Fish           | 4                                                           |
| 63              | Estonia | 1994           | Fruits, Other             | 18                                                          |
| 63              | Estonia | 1994           | Grapefruit                | 1                                                           |
| 63              | Estonia | 1994           | Grapes                    | 6                                                           |
| 63              | Estonia | 1994           | Groundnuts (Shelled Eq)   | 1                                                           |
| 63              | Estonia | 1994           | Honey                     | 1                                                           |
| 63              | Estonia | 1994           | Lemons, Limes             | 1                                                           |
| 63              | Estonia | 1994           | Marine Fish, Other        | 4                                                           |
| 63              | Estonia | 1994           | Meat, Other               | 2                                                           |
| 63              | Estonia | 1994           | Milk, Whole               | 614                                                         |
| 63              | Estonia | 1994           | Mutton & Goat Meat        | 2                                                           |
| 63              | Estonia | 1994           | Nuts                      | 2                                                           |
| 63              | Estonia | 1994           | Oats                      | 35                                                          |
| 63              | Estonia | 1994           | Offals, Edible            | 12                                                          |
| 63              | Estonia | 1994           | Oilcrops Oil, Other       | 3                                                           |
| 63              | Estonia | 1994           | Onions                    | 8                                                           |
| 63              | Estonia | 1994           | Oranges, Mandarines       | 11                                                          |
| 63              | Estonia | 1994           | Peas                      | 2                                                           |
| 63              | Estonia | 1994           | Pelagic Fish              | 18                                                          |
| 63              | Estonia | 1994           | Pigmeat                   | 65                                                          |
| 63              | Estonia | 1994           | Potatoes                  | 330                                                         |
| 63              | Estonia | 1994           | Poultry Meat              | 18                                                          |
| 63              | Estonia | 1994           | Rice (Milled Equivalent)  | 2                                                           |
| 63              | Estonia | 1994           | Rye                       | 89                                                          |
| 63              | Estonia | 1994           | Soyabean Oil              | 1                                                           |
| 63              | Estonia | 1994           | Sugar, Refined Equivalent | 69                                                          |
| 63              | Estonia | 1994           | Sunflowerseed Oil         | 14                                                          |
| 63              | Estonia | 1994           | Sweeteners, Other         | 2                                                           |
| 63              | Estonia | 1994           | Tea                       | 1                                                           |
| 63              | Estonia | 1994           | Tomatoes                  | 12                                                          |
| 63              | Estonia | 1994           | Vegetables, Other         | 152                                                         |
| 63              | Estonia | 1994           | Wheat                     | 182                                                         |
| 63              | Estonia | 1994           | Wine                      | 4                                                           |
| 63              | Estonia | 1995           | Apples                    | 52                                                          |
| 63              | Estonia | 1995           | Bananas                   | 12                                                          |
| 63              | Estonia | 1995           | Barley                    | 41                                                          |
| 63              | Estonia | 1995           | Beer                      | 100                                                         |
| 63              | Estonia | 1995           | Beverages, Alcoholic      | 29                                                          |
| 63              | Estonia | 1995           | Beverages, Fermented      | 1                                                           |
| 63              | Estonia | 1995           | Bovine Meat               | 46                                                          |
| 63              | Estonia | 1995           | Butter, Ghee              | 15                                                          |

Dietary calcium and zinc deficiency risks are decreasing but remain prevalent

| FAO countrycode | Country | Reference year | Food item                 | Gross food supply (g capita <sup>-1</sup> d <sup>-1</sup> ) |
|-----------------|---------|----------------|---------------------------|-------------------------------------------------------------|
| 63              | Estonia | 1995           | Cereals, Other            | 9                                                           |
| 63              | Estonia | 1995           | Cheese                    | 25                                                          |
| 63              | Estonia | 1995           | Citrus, Other             | 12                                                          |
| 63              | Estonia | 1995           | Cocoa Beans               | 4                                                           |
| 63              | Estonia | 1995           | Coffee                    | 10                                                          |
| 63              | Estonia | 1995           | Cream                     | 6                                                           |
| 63              | Estonia | 1995           | Crustaceans               | 7                                                           |
| 63              | Estonia | 1995           | Demersal Fish             | 32                                                          |
| 63              | Estonia | 1995           | Eggs                      | 37                                                          |
| 63              | Estonia | 1995           | Fats, Animals, Raw        | 4                                                           |
| 63              | Estonia | 1995           | Freshwater Fish           | 7                                                           |
| 63              | Estonia | 1995           | Fruits, Other             | 40                                                          |
| 63              | Estonia | 1995           | Grapefruit                | 1                                                           |
| 63              | Estonia | 1995           | Grapes                    | 9                                                           |
| 63              | Estonia | 1995           | Groundnuts (Shelled Eq)   | 1                                                           |
| 63              | Estonia | 1995           | Honey                     | 1                                                           |
| 63              | Estonia | 1995           | Lemons, Limes             | 1                                                           |
| 63              | Estonia | 1995           | Maize                     | 21                                                          |
| 63              | Estonia | 1995           | Meat, Other               | 1                                                           |
| 63              | Estonia | 1995           | Milk, Whole               | 555                                                         |
| 63              | Estonia | 1995           | Mutton & Goat Meat        | 2                                                           |
| 63              | Estonia | 1995           | Nuts                      | 3                                                           |
| 63              | Estonia | 1995           | Oats                      | 46                                                          |
| 63              | Estonia | 1995           | Offals, Edible            | 12                                                          |
| 63              | Estonia | 1995           | Oilcrops Oil, Other       | 2                                                           |
| 63              | Estonia | 1995           | Onions                    | 10                                                          |
| 63              | Estonia | 1995           | Oranges, Mandarines       | 26                                                          |
| 63              | Estonia | 1995           | Peas                      | 8                                                           |
| 63              | Estonia | 1995           | Pelagic Fish              | 11                                                          |
| 63              | Estonia | 1995           | Pigmeat                   | 67                                                          |
| 63              | Estonia | 1995           | Pineapples                | 1                                                           |
| 63              | Estonia | 1995           | Potatoes                  | 384                                                         |
| 63              | Estonia | 1995           | Poultry Meat              | 20                                                          |
| 63              | Estonia | 1995           | Pulses, Other             | 1                                                           |
| 63              | Estonia | 1995           | Rice (Milled Equivalent)  | 4                                                           |
| 63              | Estonia | 1995           | Rye                       | 59                                                          |
| 63              | Estonia | 1995           | Soyabean Oil              | 2                                                           |
| 63              | Estonia | 1995           | Spices, Other             | 1                                                           |
| 63              | Estonia | 1995           | Sugar, Refined Equivalent | 60                                                          |
| 63              | Estonia | 1995           | Sunflowerseed Oil         | 15                                                          |
| 63              | Estonia | 1995           | Sweeteners, Other         | 2                                                           |
| 63              | Estonia | 1995           | Tea                       | 1                                                           |
| 63              | Estonia | 1995           | Tomatoes                  | 18                                                          |
| 63              | Estonia | 1995           | Vegetables, Other         | 118                                                         |
| 63              | Estonia | 1995           | Wheat                     | 211                                                         |
| 63              | Estonia | 1995           | Wine                      | 9                                                           |
| 63              | Estonia | 1996           | Apples                    | 47                                                          |
| 63              | Estonia | 1996           | Bananas                   | 11                                                          |
| 63              | Estonia | 1996           | Barley                    | 55                                                          |
| 63              | Estonia | 1996           | Beer                      | 98                                                          |
| 63              | Estonia | 1996           | Beverages, Alcoholic      | 26                                                          |
| 63              | Estonia | 1996           | Beverages, Fermented      | 2                                                           |
| 63              | Estonia | 1996           | Bovine Meat               | 50                                                          |
| 63              | Estonia | 1996           | Butter, Ghee              | 14                                                          |
| 63              | Estonia | 1996           | Cephalopods               | 5                                                           |
| 63              | Estonia | 1996           | Cereals, Other            | 17                                                          |
| 63              | Estonia | 1996           | Cheese                    | 20                                                          |
| 63              | Estonia | 1996           | Citrus, Other             | 8                                                           |
| 63              | Estonia | 1996           | Cocoa Beans               | 15                                                          |
| 63              | Estonia | 1996           | Coffee                    | 10                                                          |
| 63              | Estonia | 1996           | Cream                     | 4                                                           |
| 63              | Estonia | 1996           | Crustaceans               | 7                                                           |
| 63              | Estonia | 1996           | Demersal Fish             | 20                                                          |
| 63              | Estonia | 1996           | Eggs                      | 33                                                          |
| 63              | Estonia | 1996           | Fats, Animals, Raw        | 5                                                           |
| 63              | Estonia | 1996           | Freshwater Fish           | 9                                                           |
| 63              | Estonia | 1996           | Fruits, Other             | 45                                                          |
| 63              | Estonia | 1996           | Grapefruit                | 1                                                           |
| 63              | Estonia | 1996           | Grapes                    | 12                                                          |
| 63              | Estonia | 1996           | Groundnuts (Shelled Eq)   | 1                                                           |
| 63              | Estonia | 1996           | Honey                     | 1                                                           |
| 63              | Estonia | 1996           | Lemons, Limes             | 1                                                           |
| 63              | Estonia | 1996           | Maize                     | 9                                                           |
| 63              | Estonia | 1996           | Meat, Other               | 2                                                           |
| 63              | Estonia | 1996           | Milk, Whole               | 451                                                         |
| 63              | Estonia | 1996           | Molluscs, Other           | 1                                                           |
| 63              | Estonia | 1996           | Mutton & Goat Meat        | 1                                                           |
| 63              | Estonia | 1996           | Nuts                      | 5                                                           |
| 63              | Estonia | 1996           | Oats                      | 23                                                          |
| 63              | Estonia | 1996           | Offals, Edible            | 12                                                          |
| 63              | Estonia | 1996           | Oilcrops Oil, Other       | 6                                                           |
| 63              | Estonia | 1996           | Onions                    | 11                                                          |
| 63              | Estonia | 1996           | Oranges, Mandarines       | 20                                                          |
| 63              | Estonia | 1996           | Peas                      | 6                                                           |
| 63              | Estonia | 1996           | Pelagic Fish              | 8                                                           |
| 63              | Estonia | 1996           | Pigmeat                   | 72                                                          |
| 63              | Estonia | 1996           | Pineapples                | 1                                                           |
| 63              | Estonia | 1996           | Potatoes                  | 416                                                         |
| 63              | Estonia | 1996           | Poultry Meat              | 33                                                          |
| 63              | Estonia | 1996           | Rice (Milled Equivalent)  | 8                                                           |
| 63              | Estonia | 1996           | Rye                       | 60                                                          |
| 63              | Estonia | 1996           | Soyabean Oil              | 2                                                           |
| 63              | Estonia | 1996           | Spices, Other             | 1                                                           |
| 63              | Estonia | 1996           | Sugar, Refined Equivalent | 82                                                          |
| 63              | Estonia | 1996           | Sunflowerseed Oil         | 13                                                          |
| 63              | Estonia | 1996           | Sweeteners, Other         | 3                                                           |
| 63              | Estonia | 1996           | Tea                       | 1                                                           |

Dietary calcium and zinc deficiency risks are decreasing but remain prevalent

| FAO countrycode | Country | Reference year | Food item                 | Gross food supply (g capita <sup>-1</sup> d <sup>-1</sup> ) |
|-----------------|---------|----------------|---------------------------|-------------------------------------------------------------|
| 63              | Estonia | 1996           | Tomatoes                  | 17                                                          |
| 63              | Estonia | 1996           | Vegetables, Other         | 141                                                         |
| 63              | Estonia | 1996           | Wheat                     | 224                                                         |
| 63              | Estonia | 1996           | Wine                      | 12                                                          |
| 63              | Estonia | 1997           | Apples                    | 55                                                          |
| 63              | Estonia | 1997           | Bananas                   | 21                                                          |
| 63              | Estonia | 1997           | Barley                    | 48                                                          |
| 63              | Estonia | 1997           | Beer                      | 120                                                         |
| 63              | Estonia | 1997           | Beverages, Alcoholic      | 25                                                          |
| 63              | Estonia | 1997           | Beverages, Fermented      | 3                                                           |
| 63              | Estonia | 1997           | Bovine Meat               | 40                                                          |
| 63              | Estonia | 1997           | Butter, Ghee              | 12                                                          |
| 63              | Estonia | 1997           | Cereals, Other            | 29                                                          |
| 63              | Estonia | 1997           | Cheese                    | 16                                                          |
| 63              | Estonia | 1997           | Citrus, Other             | 8                                                           |
| 63              | Estonia | 1997           | Cocoa Beans               | 10                                                          |
| 63              | Estonia | 1997           | Coconuts - Incl Copra     | 1                                                           |
| 63              | Estonia | 1997           | Coffee                    | 9                                                           |
| 63              | Estonia | 1997           | Cottonseed Oil            | 2                                                           |
| 63              | Estonia | 1997           | Cream                     | 5                                                           |
| 63              | Estonia | 1997           | Crustaceans               | 10                                                          |
| 63              | Estonia | 1997           | Demersal Fish             | 27                                                          |
| 63              | Estonia | 1997           | Eggs                      | 31                                                          |
| 63              | Estonia | 1997           | Fats, Animals, Raw        | 4                                                           |
| 63              | Estonia | 1997           | Freshwater Fish           | 9                                                           |
| 63              | Estonia | 1997           | Fruits, Other             | 51                                                          |
| 63              | Estonia | 1997           | Grapefruit                | 2                                                           |
| 63              | Estonia | 1997           | Grapes                    | 13                                                          |
| 63              | Estonia | 1997           | Honey                     | 1                                                           |
| 63              | Estonia | 1997           | Lemons, Limes             | 2                                                           |
| 63              | Estonia | 1997           | Maize                     | 2                                                           |
| 63              | Estonia | 1997           | Meat, Other               | 2                                                           |
| 63              | Estonia | 1997           | Milk, Whole               | 407                                                         |
| 63              | Estonia | 1997           | Molluscs, Other           | 1                                                           |
| 63              | Estonia | 1997           | Mutton & Goat Meat        | 1                                                           |
| 63              | Estonia | 1997           | Nuts                      | 5                                                           |
| 63              | Estonia | 1997           | Oats                      | 21                                                          |
| 63              | Estonia | 1997           | Offals, Edible            | 10                                                          |
| 63              | Estonia | 1997           | Oilcrops Oil, Other       | 14                                                          |
| 63              | Estonia | 1997           | Onions                    | 13                                                          |
| 63              | Estonia | 1997           | Oranges, Mandarines       | 33                                                          |
| 63              | Estonia | 1997           | Peas                      | 8                                                           |
| 63              | Estonia | 1997           | Pelagic Fish              | 6                                                           |
| 63              | Estonia | 1997           | Pigmeat                   | 60                                                          |
| 63              | Estonia | 1997           | Pineapples                | 1                                                           |
| 63              | Estonia | 1997           | Potatoes                  | 344                                                         |
| 63              | Estonia | 1997           | Poultry Meat              | 46                                                          |
| 63              | Estonia | 1997           | Rice (Milled Equivalent)  | 6                                                           |
| 63              | Estonia | 1997           | Rye                       | 62                                                          |
| 63              | Estonia | 1997           | Soyabean Oil              | 4                                                           |
| 63              | Estonia | 1997           | Sugar, Refined Equivalent | 89                                                          |
| 63              | Estonia | 1997           | Sunflowerseed Oil         | 8                                                           |
| 63              | Estonia | 1997           | Sweeteners, Other         | 6                                                           |
| 63              | Estonia | 1997           | Tea                       | 1                                                           |
| 63              | Estonia | 1997           | Tomatoes                  | 20                                                          |
| 63              | Estonia | 1997           | Vegetables, Other         | 148                                                         |
| 63              | Estonia | 1997           | Wheat                     | 215                                                         |
| 63              | Estonia | 1997           | Wine                      | 16                                                          |
| 63              | Estonia | 1998           | Apples                    | 38                                                          |
| 63              | Estonia | 1998           | Bananas                   | 24                                                          |
| 63              | Estonia | 1998           | Barley                    | 43                                                          |
| 63              | Estonia | 1998           | Beer                      | 141                                                         |
| 63              | Estonia | 1998           | Beverages, Alcoholic      | 19                                                          |
| 63              | Estonia | 1998           | Beverages, Fermented      | 6                                                           |
| 63              | Estonia | 1998           | Bovine Meat               | 45                                                          |
| 63              | Estonia | 1998           | Butter, Ghee              | 16                                                          |
| 63              | Estonia | 1998           | Cereals, Other            | 27                                                          |
| 63              | Estonia | 1998           | Cheese                    | 11                                                          |
| 63              | Estonia | 1998           | Citrus, Other             | 3                                                           |
| 63              | Estonia | 1998           | Cocoa Beans               | 16                                                          |
| 63              | Estonia | 1998           | Coffee                    | 9                                                           |
| 63              | Estonia | 1998           | Cottonseed Oil            | 2                                                           |
| 63              | Estonia | 1998           | Cream                     | 5                                                           |
| 63              | Estonia | 1998           | Crustaceans               | 10                                                          |
| 63              | Estonia | 1998           | Demersal Fish             | 22                                                          |
| 63              | Estonia | 1998           | Eggs                      | 35                                                          |
| 63              | Estonia | 1998           | Fats, Animals, Raw        | 3                                                           |
| 63              | Estonia | 1998           | Freshwater Fish           | 11                                                          |
| 63              | Estonia | 1998           | Fruits, Other             | 52                                                          |
| 63              | Estonia | 1998           | Grapefruit                | 4                                                           |
| 63              | Estonia | 1998           | Grapes                    | 18                                                          |
| 63              | Estonia | 1998           | Honey                     | 1                                                           |
| 63              | Estonia | 1998           | Lemons, Limes             | 2                                                           |
| 63              | Estonia | 1998           | Maize                     | 15                                                          |
| 63              | Estonia | 1998           | Marine Fish, Other        | 1                                                           |
| 63              | Estonia | 1998           | Meat, Other               | 1                                                           |
| 63              | Estonia | 1998           | Milk, Whole               | 395                                                         |
| 63              | Estonia | 1998           | Mutton & Goat Meat        | 1                                                           |
| 63              | Estonia | 1998           | Nuts                      | 6                                                           |
| 63              | Estonia | 1998           | Oats                      | 21                                                          |
| 63              | Estonia | 1998           | Offals, Edible            | 12                                                          |
| 63              | Estonia | 1998           | Oilcrops Oil, Other       | 15                                                          |
| 63              | Estonia | 1998           | Onions                    | 14                                                          |
| 63              | Estonia | 1998           | Oranges, Mandarines       | 55                                                          |
| 63              | Estonia | 1998           | Peas                      | 6                                                           |
| 63              | Estonia | 1998           | Pelagic Fish              | 2                                                           |
| 63              | Estonia | 1998           | Pigmeat                   | 65                                                          |

Dietary calcium and zinc deficiency risks are decreasing but remain prevalent

| FAO countrycode | Country | Reference year | Food item                 | Gross food supply (g capita <sup>-1</sup> d <sup>-1</sup> ) |
|-----------------|---------|----------------|---------------------------|-------------------------------------------------------------|
| 63              | Estonia | 1998           | Pineapples                | 2                                                           |
| 63              | Estonia | 1998           | Potatoes                  | 255                                                         |
| 63              | Estonia | 1998           | Poultry Meat              | 57                                                          |
| 63              | Estonia | 1998           | Rice (Milled Equivalent)  | 6                                                           |
| 63              | Estonia | 1998           | Rye                       | 76                                                          |
| 63              | Estonia | 1998           | Soyabean Oil              | 5                                                           |
| 63              | Estonia | 1998           | Sugar, Refined Equivalent | 86                                                          |
| 63              | Estonia | 1998           | Sunflowerseed Oil         | 1                                                           |
| 63              | Estonia | 1998           | Sweeteners, Other         | 7                                                           |
| 63              | Estonia | 1998           | Tea                       | 1                                                           |
| 63              | Estonia | 1998           | Tomatoes                  | 24                                                          |
| 63              | Estonia | 1998           | Vegetables, Other         | 148                                                         |
| 63              | Estonia | 1998           | Wheat                     | 202                                                         |
| 63              | Estonia | 1998           | Wine                      | 16                                                          |
| 63              | Estonia | 1999           | Apples                    | 62                                                          |
| 63              | Estonia | 1999           | Bananas                   | 26                                                          |
| 63              | Estonia | 1999           | Barley                    | 19                                                          |
| 63              | Estonia | 1999           | Beans                     | 1                                                           |
| 63              | Estonia | 1999           | Beer                      | 175                                                         |
| 63              | Estonia | 1999           | Beverages, Alcoholic      | 19                                                          |
| 63              | Estonia | 1999           | Beverages, Fermented      | 15                                                          |
| 63              | Estonia | 1999           | Bovine Meat               | 41                                                          |
| 63              | Estonia | 1999           | Butter, Ghee              | 16                                                          |
| 63              | Estonia | 1999           | Cereals, Other            | 20                                                          |
| 63              | Estonia | 1999           | Cheese                    | 36                                                          |
| 63              | Estonia | 1999           | Citrus, Other             | 2                                                           |
| 63              | Estonia | 1999           | Cocoa Beans               | 17                                                          |
| 63              | Estonia | 1999           | Coconuts - Incl Copra     | 1                                                           |
| 63              | Estonia | 1999           | Coffee                    | 12                                                          |
| 63              | Estonia | 1999           | Cottonseed Oil            | 2                                                           |
| 63              | Estonia | 1999           | Cream                     | 4                                                           |
| 63              | Estonia | 1999           | Crustaceans               | 25                                                          |
| 63              | Estonia | 1999           | Demersal Fish             | 5                                                           |
| 63              | Estonia | 1999           | Eggs                      | 31                                                          |
| 63              | Estonia | 1999           | Fats, Animals, Raw        | 4                                                           |
| 63              | Estonia | 1999           | Freshwater Fish           | 10                                                          |
| 63              | Estonia | 1999           | Fruits, Other             | 50                                                          |
| 63              | Estonia | 1999           | Grapefruit                | 2                                                           |
| 63              | Estonia | 1999           | Grapes                    | 18                                                          |
| 63              | Estonia | 1999           | Honey                     | 1                                                           |
| 63              | Estonia | 1999           | Lemons, Limes             | 2                                                           |
| 63              | Estonia | 1999           | Maize                     | 6                                                           |
| 63              | Estonia | 1999           | Milk, Whole               | 434                                                         |
| 63              | Estonia | 1999           | Mutton & Goat Meat        | 1                                                           |
| 63              | Estonia | 1999           | Nuts                      | 2                                                           |
| 63              | Estonia | 1999           | Oats                      | 9                                                           |
| 63              | Estonia | 1999           | Offals, Edible            | 11                                                          |
| 63              | Estonia | 1999           | Oilcrops Oil, Other       | 13                                                          |
| 63              | Estonia | 1999           | Onions                    | 16                                                          |
| 63              | Estonia | 1999           | Oranges, Mandarines       | 36                                                          |
| 63              | Estonia | 1999           | Peas                      | 1                                                           |
| 63              | Estonia | 1999           | Pelagic Fish              | 4                                                           |
| 63              | Estonia | 1999           | Pigmeat                   | 83                                                          |
| 63              | Estonia | 1999           | Pineapples                | 2                                                           |
| 63              | Estonia | 1999           | Potatoes                  | 377                                                         |
| 63              | Estonia | 1999           | Poultry Meat              | 37                                                          |
| 63              | Estonia | 1999           | Rice (Milled Equivalent)  | 7                                                           |
| 63              | Estonia | 1999           | Rye                       | 83                                                          |
| 63              | Estonia | 1999           | Soyabean Oil              | 3                                                           |
| 63              | Estonia | 1999           | Spices, Other             | 1                                                           |
| 63              | Estonia | 1999           | Sugar, Refined Equivalent | 117                                                         |
| 63              | Estonia | 1999           | Sunflowerseed Oil         | 1                                                           |
| 63              | Estonia | 1999           | Sweeteners, Other         | 10                                                          |
| 63              | Estonia | 1999           | Tea                       | 1                                                           |
| 63              | Estonia | 1999           | Tomatoes                  | 29                                                          |
| 63              | Estonia | 1999           | Vegetables, Other         | 149                                                         |
| 63              | Estonia | 1999           | Wheat                     | 178                                                         |
| 63              | Estonia | 1999           | Wine                      | 15                                                          |
| 63              | Estonia | 2000           | Apples                    | 75                                                          |
| 63              | Estonia | 2000           | Bananas                   | 22                                                          |
| 63              | Estonia | 2000           | Barley                    | 22                                                          |
| 63              | Estonia | 2000           | Beer                      | 178                                                         |
| 63              | Estonia | 2000           | Beverages, Alcoholic      | 19                                                          |
| 63              | Estonia | 2000           | Beverages, Fermented      | 17                                                          |
| 63              | Estonia | 2000           | Bovine Meat               | 37                                                          |
| 63              | Estonia | 2000           | Butter, Ghee              | 10                                                          |
| 63              | Estonia | 2000           | Cereals, Other            | 14                                                          |
| 63              | Estonia | 2000           | Cheese                    | 27                                                          |
| 63              | Estonia | 2000           | Citrus, Other             | 5                                                           |
| 63              | Estonia | 2000           | Cocoa Beans               | 11                                                          |
| 63              | Estonia | 2000           | Coffee                    | 12                                                          |
| 63              | Estonia | 2000           | Cream                     | 3                                                           |
| 63              | Estonia | 2000           | Crustaceans               | 7                                                           |
| 63              | Estonia | 2000           | Demersal Fish             | 16                                                          |
| 63              | Estonia | 2000           | Eggs                      | 33                                                          |
| 63              | Estonia | 2000           | Fats, Animals, Raw        | 5                                                           |
| 63              | Estonia | 2000           | Freshwater Fish           | 10                                                          |
| 63              | Estonia | 2000           | Fruits, Other             | 57                                                          |
| 63              | Estonia | 2000           | Grapefruit                | 2                                                           |
| 63              | Estonia | 2000           | Grapes                    | 19                                                          |
| 63              | Estonia | 2000           | Honey                     | 1                                                           |
| 63              | Estonia | 2000           | Lemons, Limes             | 3                                                           |
| 63              | Estonia | 2000           | Maize                     | 19                                                          |
| 63              | Estonia | 2000           | Milk, Whole               | 313                                                         |
| 63              | Estonia | 2000           | Mutton & Goat Meat        | 1                                                           |
| 63              | Estonia | 2000           | Nuts                      | 3                                                           |
| 63              | Estonia | 2000           | Oats                      | 7                                                           |

Dietary calcium and zinc deficiency risks are decreasing but remain prevalent

| FAO countrycode | Country | Reference year | Food item                 | Gross food supply (g capita <sup>-1</sup> d <sup>-1</sup> ) |
|-----------------|---------|----------------|---------------------------|-------------------------------------------------------------|
| 63              | Estonia | 2000           | Offals, Edible            | 8                                                           |
| 63              | Estonia | 2000           | Oilcrops Oil, Other       | 13                                                          |
| 63              | Estonia | 2000           | Onions                    | 15                                                          |
| 63              | Estonia | 2000           | Oranges, Mandarines       | 41                                                          |
| 63              | Estonia | 2000           | Peas                      | 4                                                           |
| 63              | Estonia | 2000           | Pelagic Fish              | 16                                                          |
| 63              | Estonia | 2000           | Pigmeat                   | 76                                                          |
| 63              | Estonia | 2000           | Pineapples                | 5                                                           |
| 63              | Estonia | 2000           | Potatoes                  | 389                                                         |
| 63              | Estonia | 2000           | Poultry Meat              | 49                                                          |
| 63              | Estonia | 2000           | Rice (Milled Equivalent)  | 6                                                           |
| 63              | Estonia | 2000           | Rye                       | 90                                                          |
| 63              | Estonia | 2000           | Soyabean Oil              | 5                                                           |
| 63              | Estonia | 2000           | Sugar, Refined Equivalent | 133                                                         |
| 63              | Estonia | 2000           | Sunflowerseed Oil         | 1                                                           |
| 63              | Estonia | 2000           | Sweeteners, Other         | 5                                                           |
| 63              | Estonia | 2000           | Tea                       | 2                                                           |
| 63              | Estonia | 2000           | Tomatoes                  | 18                                                          |
| 63              | Estonia | 2000           | Vegetables, Other         | 155                                                         |
| 63              | Estonia | 2000           | Wheat                     | 182                                                         |
| 63              | Estonia | 2000           | Wine                      | 16                                                          |
| 63              | Estonia | 2001           | Apples                    | 65                                                          |
| 63              | Estonia | 2001           | Bananas                   | 20                                                          |
| 63              | Estonia | 2001           | Barley                    | 20                                                          |
| 63              | Estonia | 2001           | Beans                     | 2                                                           |
| 63              | Estonia | 2001           | Beer                      | 190                                                         |
| 63              | Estonia | 2001           | Beverages, Alcoholic      | 24                                                          |
| 63              | Estonia | 2001           | Beverages, Fermented      | 16                                                          |
| 63              | Estonia | 2001           | Bovine Meat               | 34                                                          |
| 63              | Estonia | 2001           | Butter, Ghee              | 7                                                           |
| 63              | Estonia | 2001           | Cephalopods               | 4                                                           |
| 63              | Estonia | 2001           | Cereals, Other            | 11                                                          |
| 63              | Estonia | 2001           | Cheese                    | 28                                                          |
| 63              | Estonia | 2001           | Citrus, Other             | 3                                                           |
| 63              | Estonia | 2001           | Cocoa Beans               | 14                                                          |
| 63              | Estonia | 2001           | Coffee                    | 13                                                          |
| 63              | Estonia | 2001           | Cream                     | 3                                                           |
| 63              | Estonia | 2001           | Crustaceans               | 21                                                          |
| 63              | Estonia | 2001           | Demersal Fish             | 9                                                           |
| 63              | Estonia | 2001           | Eggs                      | 35                                                          |
| 63              | Estonia | 2001           | Fats, Animals, Raw        | 3                                                           |
| 63              | Estonia | 2001           | Freshwater Fish           | 10                                                          |
| 63              | Estonia | 2001           | Fruits, Other             | 63                                                          |
| 63              | Estonia | 2001           | Grapefruit                | 2                                                           |
| 63              | Estonia | 2001           | Grapes                    | 18                                                          |
| 63              | Estonia | 2001           | Honey                     | 1                                                           |
| 63              | Estonia | 2001           | Lemons, Limes             | 3                                                           |
| 63              | Estonia | 2001           | Maize                     | 8                                                           |
| 63              | Estonia | 2001           | Milk, Whole               | 394                                                         |
| 63              | Estonia | 2001           | Mutton & Goat Meat        | 1                                                           |
| 63              | Estonia | 2001           | Nuts                      | 3                                                           |
| 63              | Estonia | 2001           | Oats                      | 6                                                           |
| 63              | Estonia | 2001           | Offals, Edible            | 8                                                           |
| 63              | Estonia | 2001           | Oilcrops Oil, Other       | 14                                                          |
| 63              | Estonia | 2001           | Onions                    | 19                                                          |
| 63              | Estonia | 2001           | Oranges, Mandarines       | 40                                                          |
| 63              | Estonia | 2001           | Peas                      | 2                                                           |
| 63              | Estonia | 2001           | Pelagic Fish              | 2                                                           |
| 63              | Estonia | 2001           | Pigmeat                   | 78                                                          |
| 63              | Estonia | 2001           | Pineapples                | 5                                                           |
| 63              | Estonia | 2001           | Potatoes                  | 361                                                         |
| 63              | Estonia | 2001           | Poultry Meat              | 54                                                          |
| 63              | Estonia | 2001           | Rice (Milled Equivalent)  | 7                                                           |
| 63              | Estonia | 2001           | Rye                       | 90                                                          |
| 63              | Estonia | 2001           | Soyabean Oil              | 8                                                           |
| 63              | Estonia | 2001           | Sugar, Refined Equivalent | 125                                                         |
| 63              | Estonia | 2001           | Sunflowerseed Oil         | 1                                                           |
| 63              | Estonia | 2001           | Sweeteners, Other         | 14                                                          |
| 63              | Estonia | 2001           | Tea                       | 1                                                           |
| 63              | Estonia | 2001           | Tomatoes                  | 34                                                          |
| 63              | Estonia | 2001           | Vegetables, Other         | 163                                                         |
| 63              | Estonia | 2001           | Wheat                     | 192                                                         |
| 63              | Estonia | 2001           | Wine                      | 14                                                          |
| 63              | Estonia | 2002           | Apples                    | 64                                                          |
| 63              | Estonia | 2002           | Bananas                   | 19                                                          |
| 63              | Estonia | 2002           | Barley                    | 28                                                          |
| 63              | Estonia | 2002           | Beer                      | 208                                                         |
| 63              | Estonia | 2002           | Beverages, Alcoholic      | 29                                                          |
| 63              | Estonia | 2002           | Beverages, Fermented      | 16                                                          |
| 63              | Estonia | 2002           | Bovine Meat               | 37                                                          |
| 63              | Estonia | 2002           | Butter, Ghee              | 10                                                          |
| 63              | Estonia | 2002           | Cephalopods               | 1                                                           |
| 63              | Estonia | 2002           | Cereals, Other            | 12                                                          |
| 63              | Estonia | 2002           | Cheese                    | 46                                                          |
| 63              | Estonia | 2002           | Citrus, Other             | 1                                                           |
| 63              | Estonia | 2002           | Cocoa Beans               | 12                                                          |
| 63              | Estonia | 2002           | Coffee                    | 15                                                          |
| 63              | Estonia | 2002           | Cream                     | 4                                                           |
| 63              | Estonia | 2002           | Crustaceans               | 27                                                          |
| 63              | Estonia | 2002           | Demersal Fish             | 4                                                           |
| 63              | Estonia | 2002           | Eggs                      | 31                                                          |
| 63              | Estonia | 2002           | Fats, Animals, Raw        | 3                                                           |
| 63              | Estonia | 2002           | Freshwater Fish           | 16                                                          |
| 63              | Estonia | 2002           | Fruits, Other             | 52                                                          |
| 63              | Estonia | 2002           | Grapefruit                | 1                                                           |
| 63              | Estonia | 2002           | Grapes                    | 16                                                          |
| 63              | Estonia | 2002           | Honey                     | 2                                                           |

Dietary calcium and zinc deficiency risks are decreasing but remain prevalent

| FAO countrycode | Country | Reference year | Food item                 | Gross food supply (g capita <sup>-1</sup> d <sup>-1</sup> ) |
|-----------------|---------|----------------|---------------------------|-------------------------------------------------------------|
| 63              | Estonia | 2002           | Lemons, Limes             | 2                                                           |
| 63              | Estonia | 2002           | Maize                     | 11                                                          |
| 63              | Estonia | 2002           | Milk, Whole               | 308                                                         |
| 63              | Estonia | 2002           | Molluscs, Other           | 1                                                           |
| 63              | Estonia | 2002           | Mutton & Goat Meat        | 1                                                           |
| 63              | Estonia | 2002           | Nuts                      | 3                                                           |
| 63              | Estonia | 2002           | Oats                      | 7                                                           |
| 63              | Estonia | 2002           | Offals, Edible            | 10                                                          |
| 63              | Estonia | 2002           | Oilcrops Oil, Other       | 12                                                          |
| 63              | Estonia | 2002           | Onions                    | 17                                                          |
| 63              | Estonia | 2002           | Oranges, Mandarines       | 36                                                          |
| 63              | Estonia | 2002           | Peas                      | 3                                                           |
| 63              | Estonia | 2002           | Pelagic Fish              | 1                                                           |
| 63              | Estonia | 2002           | Pigmeat                   | 80                                                          |
| 63              | Estonia | 2002           | Pineapples                | 5                                                           |
| 63              | Estonia | 2002           | Potatoes                  | 310                                                         |
| 63              | Estonia | 2002           | Poultry Meat              | 59                                                          |
| 63              | Estonia | 2002           | Rice (Milled Equivalent)  | 7                                                           |
| 63              | Estonia | 2002           | Rye                       | 86                                                          |
| 63              | Estonia | 2002           | Soyabean Oil              | 9                                                           |
| 63              | Estonia | 2002           | Sugar, Refined Equivalent | 99                                                          |
| 63              | Estonia | 2002           | Sunflowerseed Oil         | 1                                                           |
| 63              | Estonia | 2002           | Sweeteners, Other         | 9                                                           |
| 63              | Estonia | 2002           | Tea                       | 1                                                           |
| 63              | Estonia | 2002           | Tomatoes                  | 34                                                          |
| 63              | Estonia | 2002           | Vegetables, Other         | 163                                                         |
| 63              | Estonia | 2002           | Wheat                     | 183                                                         |
| 63              | Estonia | 2002           | Wine                      | 17                                                          |
| 63              | Estonia | 2003           | Apples                    | 63                                                          |
| 63              | Estonia | 2003           | Bananas                   | 25                                                          |
| 63              | Estonia | 2003           | Barley                    | 28                                                          |
| 63              | Estonia | 2003           | Beans                     | 1                                                           |
| 63              | Estonia | 2003           | Beer                      | 202                                                         |
| 63              | Estonia | 2003           | Beverages, Alcoholic      | 34                                                          |
| 63              | Estonia | 2003           | Beverages, Fermented      | 11                                                          |
| 63              | Estonia | 2003           | Bovine Meat               | 29                                                          |
| 63              | Estonia | 2003           | Butter, Ghee              | 15                                                          |
| 63              | Estonia | 2003           | Cereals, Other            | 16                                                          |
| 63              | Estonia | 2003           | Cheese                    | 40                                                          |
| 63              | Estonia | 2003           | Citrus, Other             | 1                                                           |
| 63              | Estonia | 2003           | Cocoa Beans               | 14                                                          |
| 63              | Estonia | 2003           | Coconuts - Incl Copra     | 1                                                           |
| 63              | Estonia | 2003           | Coffee                    | 16                                                          |
| 63              | Estonia | 2003           | Cream                     | 5                                                           |
| 63              | Estonia | 2003           | Crustaceans               | 25                                                          |
| 63              | Estonia | 2003           | Demersal Fish             | 3                                                           |
| 63              | Estonia | 2003           | Eggs                      | 29                                                          |
| 63              | Estonia | 2003           | Fats, Animals, Raw        | 3                                                           |
| 63              | Estonia | 2003           | Freshwater Fish           | 11                                                          |
| 63              | Estonia | 2003           | Fruits, Other             | 42                                                          |
| 63              | Estonia | 2003           | Grapefruit                | 1                                                           |
| 63              | Estonia | 2003           | Grapes                    | 22                                                          |
| 63              | Estonia | 2003           | Honey                     | 1                                                           |
| 63              | Estonia | 2003           | Lemons, Limes             | 3                                                           |
| 63              | Estonia | 2003           | Maize                     | 11                                                          |
| 63              | Estonia | 2003           | Milk, Whole               | 306                                                         |
| 63              | Estonia | 2003           | Mutton & Goat Meat        | 1                                                           |
| 63              | Estonia | 2003           | Nuts                      | 5                                                           |
| 63              | Estonia | 2003           | Oats                      | 7                                                           |
| 63              | Estonia | 2003           | Offals, Edible            | 10                                                          |
| 63              | Estonia | 2003           | Oilcrops Oil, Other       | 12                                                          |
| 63              | Estonia | 2003           | Olives                    | 1                                                           |
| 63              | Estonia | 2003           | Onions                    | 18                                                          |
| 63              | Estonia | 2003           | Oranges, Mandarines       | 36                                                          |
| 63              | Estonia | 2003           | Peas                      | 2                                                           |
| 63              | Estonia | 2003           | Pelagic Fish              | 7                                                           |
| 63              | Estonia | 2003           | Pigmeat                   | 80                                                          |
| 63              | Estonia | 2003           | Pineapples                | 3                                                           |
| 63              | Estonia | 2003           | Potatoes                  | 327                                                         |
| 63              | Estonia | 2003           | Poultry Meat              | 58                                                          |
| 63              | Estonia | 2003           | Rice (Milled Equivalent)  | 8                                                           |
| 63              | Estonia | 2003           | Rye                       | 80                                                          |
| 63              | Estonia | 2003           | Soyabean Oil              | 9                                                           |
| 63              | Estonia | 2003           | Spices, Other             | 1                                                           |
| 63              | Estonia | 2003           | Sugar, Refined Equivalent | 101                                                         |
| 63              | Estonia | 2003           | Sunflowerseed Oil         | 2                                                           |
| 63              | Estonia | 2003           | Sweeteners, Other         | 9                                                           |
| 63              | Estonia | 2003           | Tea                       | 1                                                           |
| 63              | Estonia | 2003           | Tomatoes                  | 38                                                          |
| 63              | Estonia | 2003           | Vegetables, Other         | 215                                                         |
| 63              | Estonia | 2003           | Wheat                     | 186                                                         |
| 63              | Estonia | 2003           | Wine                      | 18                                                          |
| 63              | Estonia | 2004           | Apples                    | 59                                                          |
| 63              | Estonia | 2004           | Bananas                   | 28                                                          |
| 63              | Estonia | 2004           | Barley                    | 22                                                          |
| 63              | Estonia | 2004           | Beer                      | 255                                                         |
| 63              | Estonia | 2004           | Beverages, Alcoholic      | 42                                                          |
| 63              | Estonia | 2004           | Beverages, Fermented      | 15                                                          |
| 63              | Estonia | 2004           | Bovine Meat               | 34                                                          |
| 63              | Estonia | 2004           | Butter, Ghee              | 16                                                          |
| 63              | Estonia | 2004           | Cephalopods               | 1                                                           |
| 63              | Estonia | 2004           | Cereals, Other            | 10                                                          |
| 63              | Estonia | 2004           | Cheese                    | 22                                                          |
| 63              | Estonia | 2004           | Citrus, Other             | 2                                                           |
| 63              | Estonia | 2004           | Cocoa Beans               | 23                                                          |
| 63              | Estonia | 2004           | Coffee                    | 16                                                          |
| 63              | Estonia | 2004           | Cream                     | 3                                                           |

Dietary calcium and zinc deficiency risks are decreasing but remain prevalent

| FAO countrycode | Country | Reference year | Food item                 | Gross food supply (g capita <sup>-1</sup> d <sup>-1</sup> ) |
|-----------------|---------|----------------|---------------------------|-------------------------------------------------------------|
| 63              | Estonia | 2004           | Crustaceans               | 22                                                          |
| 63              | Estonia | 2004           | Demersal Fish             | 5                                                           |
| 63              | Estonia | 2004           | Eggs                      | 28                                                          |
| 63              | Estonia | 2004           | Fats, Animals, Raw        | 4                                                           |
| 63              | Estonia | 2004           | Freshwater Fish           | 5                                                           |
| 63              | Estonia | 2004           | Fruits, Other             | 52                                                          |
| 63              | Estonia | 2004           | Grapefruit                | 2                                                           |
| 63              | Estonia | 2004           | Grapes                    | 24                                                          |
| 63              | Estonia | 2004           | Groundnuts (Shelled Eq)   | 1                                                           |
| 63              | Estonia | 2004           | Honey                     | 2                                                           |
| 63              | Estonia | 2004           | Lemons, Limes             | 3                                                           |
| 63              | Estonia | 2004           | Maize                     | 17                                                          |
| 63              | Estonia | 2004           | Maize Germ Oil            | 1                                                           |
| 63              | Estonia | 2004           | Marine Fish, Other        | 1                                                           |
| 63              | Estonia | 2004           | Milk, Whole               | 314                                                         |
| 63              | Estonia | 2004           | Mutton & Goat Meat        | 1                                                           |
| 63              | Estonia | 2004           | Nuts                      | 5                                                           |
| 63              | Estonia | 2004           | Oats                      | 6                                                           |
| 63              | Estonia | 2004           | Offals, Edible            | 14                                                          |
| 63              | Estonia | 2004           | Oilcrops Oil, Other       | 12                                                          |
| 63              | Estonia | 2004           | Onions                    | 17                                                          |
| 63              | Estonia | 2004           | Oranges, Mandarines       | 35                                                          |
| 63              | Estonia | 2004           | Peas                      | 2                                                           |
| 63              | Estonia | 2004           | Pelagic Fish              | 4                                                           |
| 63              | Estonia | 2004           | Pigmeat                   | 72                                                          |
| 63              | Estonia | 2004           | Pineapples                | 3                                                           |
| 63              | Estonia | 2004           | Potatoes                  | 201                                                         |
| 63              | Estonia | 2004           | Poultry Meat              | 43                                                          |
| 63              | Estonia | 2004           | Pulses, Other             | 5                                                           |
| 63              | Estonia | 2004           | Rice (Milled Equivalent)  | 8                                                           |
| 63              | Estonia | 2004           | Rye                       | 44                                                          |
| 63              | Estonia | 2004           | Soyabean Oil              | 9                                                           |
| 63              | Estonia | 2004           | Spices, Other             | 1                                                           |
| 63              | Estonia | 2004           | Sugar, Refined Equivalent | 123                                                         |
| 63              | Estonia | 2004           | Sunflowerseed Oil         | 1                                                           |
| 63              | Estonia | 2004           | Sweeteners, Other         | 9                                                           |
| 63              | Estonia | 2004           | Tea                       | 1                                                           |
| 63              | Estonia | 2004           | Tomatoes                  | 41                                                          |
| 63              | Estonia | 2004           | Vegetables, Other         | 170                                                         |
| 63              | Estonia | 2004           | Wheat                     | 216                                                         |
| 63              | Estonia | 2004           | Wine                      | 22                                                          |
| 63              | Estonia | 2005           | Apples                    | 59                                                          |
| 63              | Estonia | 2005           | Bananas                   | 19                                                          |
| 63              | Estonia | 2005           | Barley                    | 27                                                          |
| 63              | Estonia | 2005           | Beer                      | 258                                                         |
| 63              | Estonia | 2005           | Beverages, Alcoholic      | 37                                                          |
| 63              | Estonia | 2005           | Beverages, Fermented      | 2                                                           |
| 63              | Estonia | 2005           | Bovine Meat               | 35                                                          |
| 63              | Estonia | 2005           | Butter, Ghee              | 10                                                          |
| 63              | Estonia | 2005           | Cephalopods               | 1                                                           |
| 63              | Estonia | 2005           | Cereals, Other            | 7                                                           |
| 63              | Estonia | 2005           | Cheese                    | 20                                                          |
| 63              | Estonia | 2005           | Citrus, Other             | 1                                                           |
| 63              | Estonia | 2005           | Cocoa Beans               | 20                                                          |
| 63              | Estonia | 2005           | Coconuts - Incl Copra     | 1                                                           |
| 63              | Estonia | 2005           | Coffee                    | 14                                                          |
| 63              | Estonia | 2005           | Cream                     | 3                                                           |
| 63              | Estonia | 2005           | Crustaceans               | 22                                                          |
| 63              | Estonia | 2005           | Demersal Fish             | 6                                                           |
| 63              | Estonia | 2005           | Eggs                      | 29                                                          |
| 63              | Estonia | 2005           | Fats, Animals, Raw        | 4                                                           |
| 63              | Estonia | 2005           | Freshwater Fish           | 7                                                           |
| 63              | Estonia | 2005           | Fruits, Other             | 52                                                          |
| 63              | Estonia | 2005           | Grapefruit                | 2                                                           |
| 63              | Estonia | 2005           | Grapes                    | 15                                                          |
| 63              | Estonia | 2005           | Groundnuts (Shelled Eq)   | 1                                                           |
| 63              | Estonia | 2005           | Honey                     | 2                                                           |
| 63              | Estonia | 2005           | Lemons, Limes             | 2                                                           |
| 63              | Estonia | 2005           | Maize                     | 17                                                          |
| 63              | Estonia | 2005           | Maize Germ Oil            | 1                                                           |
| 63              | Estonia | 2005           | Meat, Other               | 13                                                          |
| 63              | Estonia | 2005           | Milk, Whole               | 326                                                         |
| 63              | Estonia | 2005           | Molluscs, Other           | 1                                                           |
| 63              | Estonia | 2005           | Mutton & Goat Meat        | 1                                                           |
| 63              | Estonia | 2005           | Nuts                      | 5                                                           |
| 63              | Estonia | 2005           | Oats                      | 7                                                           |
| 63              | Estonia | 2005           | Offals, Edible            | 12                                                          |
| 63              | Estonia | 2005           | Oilcrops Oil, Other       | 12                                                          |
| 63              | Estonia | 2005           | Onions                    | 12                                                          |
| 63              | Estonia | 2005           | Oranges, Mandarines       | 39                                                          |
| 63              | Estonia | 2005           | Peas                      | 1                                                           |
| 63              | Estonia | 2005           | Pelagic Fish              | 4                                                           |
| 63              | Estonia | 2005           | Pigmeat                   | 72                                                          |
| 63              | Estonia | 2005           | Pineapples                | 5                                                           |
| 63              | Estonia | 2005           | Potatoes                  | 328                                                         |
| 63              | Estonia | 2005           | Poultry Meat              | 45                                                          |
| 63              | Estonia | 2005           | Pulses, Other             | 5                                                           |
| 63              | Estonia | 2005           | Rice (Milled Equivalent)  | 5                                                           |
| 63              | Estonia | 2005           | Rye                       | 52                                                          |
| 63              | Estonia | 2005           | Soyabean Oil              | 9                                                           |
| 63              | Estonia | 2005           | Spices, Other             | 1                                                           |
| 63              | Estonia | 2005           | Sugar, Refined Equivalent | 122                                                         |
| 63              | Estonia | 2005           | Sunflowerseed Oil         | 1                                                           |
| 63              | Estonia | 2005           | Sweeteners, Other         | 10                                                          |
| 63              | Estonia | 2005           | Tea                       | 1                                                           |
| 63              | Estonia | 2005           | Tomatoes                  | 38                                                          |
| 63              | Estonia | 2005           | Vegetables, Other         | 179                                                         |



Dietary calcium and zinc deficiency risks are decreasing but remain prevalent

| FAO countrycode | Country | Reference year | Food item                 | Gross food supply (g capita <sup>-1</sup> d <sup>-1</sup> ) |
|-----------------|---------|----------------|---------------------------|-------------------------------------------------------------|
| 63              | Estonia | 2005           | Wheat                     | 232                                                         |
| 63              | Estonia | 2005           | Wine                      | 24                                                          |
| 63              | Estonia | 2006           | Apples                    | 24                                                          |
| 63              | Estonia | 2006           | Bananas                   | 21                                                          |
| 63              | Estonia | 2006           | Barley                    | 7                                                           |
| 63              | Estonia | 2006           | Beer                      | 282                                                         |
| 63              | Estonia | 2006           | Beverages, Alcoholic      | 45                                                          |
| 63              | Estonia | 2006           | Beverages, Fermented      | 1                                                           |
| 63              | Estonia | 2006           | Bovine Meat               | 38                                                          |
| 63              | Estonia | 2006           | Butter, Ghee              | 10                                                          |
| 63              | Estonia | 2006           | Cephalopods               | 2                                                           |
| 63              | Estonia | 2006           | Cereals, Other            | 2                                                           |
| 63              | Estonia | 2006           | Cheese                    | 24                                                          |
| 63              | Estonia | 2006           | Citrus, Other             | 1                                                           |
| 63              | Estonia | 2006           | Cocoa Beans               | 20                                                          |
| 63              | Estonia | 2006           | Coconuts - Incl Copra     | 1                                                           |
| 63              | Estonia | 2006           | Coffee                    | 14                                                          |
| 63              | Estonia | 2006           | Cream                     | 2                                                           |
| 63              | Estonia | 2006           | Crustaceans               | 9                                                           |
| 63              | Estonia | 2006           | Demersal Fish             | 6                                                           |
| 63              | Estonia | 2006           | Eggs                      | 28                                                          |
| 63              | Estonia | 2006           | Fats, Animals, Raw        | 3                                                           |
| 63              | Estonia | 2006           | Freshwater Fish           | 8                                                           |
| 63              | Estonia | 2006           | Fruits, Other             | 50                                                          |
| 63              | Estonia | 2006           | Grapefruit                | 3                                                           |
| 63              | Estonia | 2006           | Grapes                    | 22                                                          |
| 63              | Estonia | 2006           | Groundnuts (Shelled Eq)   | 1                                                           |
| 63              | Estonia | 2006           | Honey                     | 3                                                           |
| 63              | Estonia | 2006           | Lemons, Limes             | 3                                                           |
| 63              | Estonia | 2006           | Maize                     | 17                                                          |
| 63              | Estonia | 2006           | Maize Germ Oil            | 1                                                           |
| 63              | Estonia | 2006           | Meat, Other               | 2                                                           |
| 63              | Estonia | 2006           | Milk, Whole               | 325                                                         |
| 63              | Estonia | 2006           | Molluscs, Other           | 1                                                           |
| 63              | Estonia | 2006           | Mutton & Goat Meat        | 1                                                           |
| 63              | Estonia | 2006           | Nuts                      | 5                                                           |
| 63              | Estonia | 2006           | Oats                      | 4                                                           |
| 63              | Estonia | 2006           | Offals, Edible            | 12                                                          |
| 63              | Estonia | 2006           | Oilcrops Oil, Other       | 14                                                          |
| 63              | Estonia | 2006           | Onions                    | 12                                                          |
| 63              | Estonia | 2006           | Oranges, Mandarines       | 49                                                          |
| 63              | Estonia | 2006           | Peas                      | 3                                                           |
| 63              | Estonia | 2006           | Pelagic Fish              | 6                                                           |
| 63              | Estonia | 2006           | Pepper                    | 1                                                           |
| 63              | Estonia | 2006           | Pig meat                  | 73                                                          |
| 63              | Estonia | 2006           | Pineapples                | 6                                                           |
| 63              | Estonia | 2006           | Potatoes                  | 344                                                         |
| 63              | Estonia | 2006           | Poultry Meat              | 45                                                          |
| 63              | Estonia | 2006           | Pulses, Other             | 13                                                          |
| 63              | Estonia | 2006           | Rice (Milled Equivalent)  | 6                                                           |
| 63              | Estonia | 2006           | Rye                       | 42                                                          |
| 63              | Estonia | 2006           | Soyabean Oil              | 8                                                           |
| 63              | Estonia | 2006           | Spices, Other             | 1                                                           |
| 63              | Estonia | 2006           | Sugar, Refined Equivalent | 107                                                         |
| 63              | Estonia | 2006           | Sunflowerseed Oil         | 1                                                           |
| 63              | Estonia | 2006           | Sweeteners, Other         | 12                                                          |
| 63              | Estonia | 2006           | Tea                       | 1                                                           |
| 63              | Estonia | 2006           | Tomatoes                  | 42                                                          |
| 63              | Estonia | 2006           | Vegetables, Other         | 171                                                         |
| 63              | Estonia | 2006           | Wheat                     | 268                                                         |
| 63              | Estonia | 2006           | Wine                      | 21                                                          |
| 63              | Estonia | 2007           | Apples                    | 41                                                          |
| 63              | Estonia | 2007           | Bananas                   | 23                                                          |
| 63              | Estonia | 2007           | Barley                    | 7                                                           |
| 63              | Estonia | 2007           | Beer                      | 279                                                         |
| 63              | Estonia | 2007           | Beverages, Alcoholic      | 42                                                          |
| 63              | Estonia | 2007           | Beverages, Fermented      | 2                                                           |
| 63              | Estonia | 2007           | Bovine Meat               | 39                                                          |
| 63              | Estonia | 2007           | Butter, Ghee              | 5                                                           |
| 63              | Estonia | 2007           | Cephalopods               | 1                                                           |
| 63              | Estonia | 2007           | Cereals, Other            | 3                                                           |
| 63              | Estonia | 2007           | Cheese                    | 19                                                          |
| 63              | Estonia | 2007           | Citrus, Other             | 1                                                           |
| 63              | Estonia | 2007           | Cocoa Beans               | 23                                                          |
| 63              | Estonia | 2007           | Coffee                    | 17                                                          |
| 63              | Estonia | 2007           | Cream                     | 2                                                           |
| 63              | Estonia | 2007           | Crustaceans               | 9                                                           |
| 63              | Estonia | 2007           | Demersal Fish             | 16                                                          |
| 63              | Estonia | 2007           | Eggs                      | 30                                                          |
| 63              | Estonia | 2007           | Fats, Animals, Raw        | 4                                                           |
| 63              | Estonia | 2007           | Freshwater Fish           | 10                                                          |
| 63              | Estonia | 2007           | Fruits, Other             | 66                                                          |
| 63              | Estonia | 2007           | Grapefruit                | 4                                                           |
| 63              | Estonia | 2007           | Grapes                    | 21                                                          |
| 63              | Estonia | 2007           | Groundnuts (Shelled Eq)   | 1                                                           |
| 63              | Estonia | 2007           | Honey                     | 2                                                           |
| 63              | Estonia | 2007           | Lemons, Limes             | 3                                                           |
| 63              | Estonia | 2007           | Maize                     | 17                                                          |
| 63              | Estonia | 2007           | Maize Germ Oil            | 1                                                           |
| 63              | Estonia | 2007           | Meat, Other               | 1                                                           |
| 63              | Estonia | 2007           | Milk, Whole               | 340                                                         |
| 63              | Estonia | 2007           | Mutton & Goat Meat        | 1                                                           |
| 63              | Estonia | 2007           | Nuts                      | 8                                                           |
| 63              | Estonia | 2007           | Oats                      | 7                                                           |
| 63              | Estonia | 2007           | Offals, Edible            | 14                                                          |
| 63              | Estonia | 2007           | Oilcrops Oil, Other       | 12                                                          |
| 63              | Estonia | 2007           | Olive Oil                 | 1                                                           |

## Dietary calcium and zinc deficiency risks are decreasing but remain prevalent

| FAO countrycode | Country | Reference year | Food item                 | Gross food supply (g capita <sup>-1</sup> d <sup>-1</sup> ) |
|-----------------|---------|----------------|---------------------------|-------------------------------------------------------------|
| 63              | Estonia | 2007           | Onions                    | 15                                                          |
| 63              | Estonia | 2007           | Oranges, Mandarines       | 52                                                          |
| 63              | Estonia | 2007           | Peas                      | 4                                                           |
| 63              | Estonia | 2007           | Pelagic Fish              | 6                                                           |
| 63              | Estonia | 2007           | Pepper                    | 1                                                           |
| 63              | Estonia | 2007           | Pigmeat                   | 78                                                          |
| 63              | Estonia | 2007           | Pineapples                | 7                                                           |
| 63              | Estonia | 2007           | Plantains                 | 2                                                           |
| 63              | Estonia | 2007           | Potatoes                  | 318                                                         |
| 63              | Estonia | 2007           | Poultry Meat              | 48                                                          |
| 63              | Estonia | 2007           | Pulses, Other             | 16                                                          |
| 63              | Estonia | 2007           | Rice (Milled Equivalent)  | 6                                                           |
| 63              | Estonia | 2007           | Rye                       | 52                                                          |
| 63              | Estonia | 2007           | Soyabean Oil              | 8                                                           |
| 63              | Estonia | 2007           | Spices, Other             | 1                                                           |
| 63              | Estonia | 2007           | Sugar, Refined Equivalent | 110                                                         |
| 63              | Estonia | 2007           | Sweeteners, Other         | 10                                                          |
| 63              | Estonia | 2007           | Tea                       | 1                                                           |
| 63              | Estonia | 2007           | Tomatoes                  | 49                                                          |
| 63              | Estonia | 2007           | Vegetables, Other         | 209                                                         |
| 63              | Estonia | 2007           | Wheat                     | 254                                                         |
| 63              | Estonia | 2007           | Wine                      | 23                                                          |
| 63              | Estonia | 2008           | Apples                    | 51                                                          |
| 63              | Estonia | 2008           | Bananas                   | 28                                                          |
| 63              | Estonia | 2008           | Barley                    | 9                                                           |
| 63              | Estonia | 2008           | Beer                      | 258                                                         |
| 63              | Estonia | 2008           | Beverages, Alcoholic      | 54                                                          |
| 63              | Estonia | 2008           | Beverages, Fermented      | 3                                                           |
| 63              | Estonia | 2008           | Bovine Meat               | 39                                                          |
| 63              | Estonia | 2008           | Butter, Ghee              | 6                                                           |
| 63              | Estonia | 2008           | Cephalopods               | 2                                                           |
| 63              | Estonia | 2008           | Cheese                    | 18                                                          |
| 63              | Estonia | 2008           | Citrus, Other             | 1                                                           |
| 63              | Estonia | 2008           | Cocoa Beans               | 20                                                          |
| 63              | Estonia | 2008           | Coconut Oil               | 1                                                           |
| 63              | Estonia | 2008           | Coconuts - Incl Copra     | 1                                                           |
| 63              | Estonia | 2008           | Coffee                    | 19                                                          |
| 63              | Estonia | 2008           | Cream                     | 10                                                          |
| 63              | Estonia | 2008           | Crustaceans               | 7                                                           |
| 63              | Estonia | 2008           | Demersal Fish             | 18                                                          |
| 63              | Estonia | 2008           | Eggs                      | 29                                                          |
| 63              | Estonia | 2008           | Fats, Animals, Raw        | 4                                                           |
| 63              | Estonia | 2008           | Freshwater Fish           | 8                                                           |
| 63              | Estonia | 2008           | Fruits, Other             | 56                                                          |
| 63              | Estonia | 2008           | Grapefruit                | 6                                                           |
| 63              | Estonia | 2008           | Grapes                    | 23                                                          |
| 63              | Estonia | 2008           | Groundnuts (Shelled Eq)   | 1                                                           |
| 63              | Estonia | 2008           | Honey                     | 1                                                           |
| 63              | Estonia | 2008           | Lemons, Limes             | 4                                                           |
| 63              | Estonia | 2008           | Maize                     | 17                                                          |
| 63              | Estonia | 2008           | Maize Germ Oil            | 2                                                           |
| 63              | Estonia | 2008           | Milk, Whole               | 496                                                         |
| 63              | Estonia | 2008           | Mutton & Goat Meat        | 2                                                           |
| 63              | Estonia | 2008           | Nuts                      | 8                                                           |
| 63              | Estonia | 2008           | Oats                      | 5                                                           |
| 63              | Estonia | 2008           | Offals, Edible            | 14                                                          |
| 63              | Estonia | 2008           | Oilcrops Oil, Other       | 12                                                          |
| 63              | Estonia | 2008           | Onions                    | 16                                                          |
| 63              | Estonia | 2008           | Oranges, Mandarines       | 53                                                          |
| 63              | Estonia | 2008           | Peas                      | 1                                                           |
| 63              | Estonia | 2008           | Pelagic Fish              | 9                                                           |
| 63              | Estonia | 2008           | Pepper                    | 1                                                           |
| 63              | Estonia | 2008           | Pigmeat                   | 75                                                          |
| 63              | Estonia | 2008           | Pimento                   | 1                                                           |
| 63              | Estonia | 2008           | Pineapples                | 6                                                           |
| 63              | Estonia | 2008           | Potatoes                  | 234                                                         |
| 63              | Estonia | 2008           | Poultry Meat              | 50                                                          |
| 63              | Estonia | 2008           | Pulses, Other             | 17                                                          |
| 63              | Estonia | 2008           | Rice (Milled Equivalent)  | 8                                                           |
| 63              | Estonia | 2008           | Rye                       | 52                                                          |
| 63              | Estonia | 2008           | Soyabean Oil              | 7                                                           |
| 63              | Estonia | 2008           | Spices, Other             | 1                                                           |
| 63              | Estonia | 2008           | Sugar, Refined Equivalent | 102                                                         |
| 63              | Estonia | 2008           | Sweeteners, Other         | 9                                                           |
| 63              | Estonia | 2008           | Tea                       | 1                                                           |
| 63              | Estonia | 2008           | Tomatoes                  | 49                                                          |
| 63              | Estonia | 2008           | Vegetables, Other         | 199                                                         |
| 63              | Estonia | 2008           | Wheat                     | 259                                                         |
| 63              | Estonia | 2008           | Wine                      | 30                                                          |
| 63              | Estonia | 2009           | Apples                    | 58                                                          |
| 63              | Estonia | 2009           | Bananas                   | 23                                                          |
| 63              | Estonia | 2009           | Barley                    | 15                                                          |
| 63              | Estonia | 2009           | Beer                      | 243                                                         |
| 63              | Estonia | 2009           | Beverages, Alcoholic      | 54                                                          |
| 63              | Estonia | 2009           | Beverages, Fermented      | 8                                                           |
| 63              | Estonia | 2009           | Bovine Meat               | 35                                                          |
| 63              | Estonia | 2009           | Butter, Ghee              | 7                                                           |
| 63              | Estonia | 2009           | Cephalopods               | 2                                                           |
| 63              | Estonia | 2009           | Cheese                    | 20                                                          |
| 63              | Estonia | 2009           | Citrus, Other             | 1                                                           |
| 63              | Estonia | 2009           | Cocoa Beans               | 17                                                          |
| 63              | Estonia | 2009           | Coconut Oil               | 1                                                           |
| 63              | Estonia | 2009           | Coffee                    | 18                                                          |
| 63              | Estonia | 2009           | Cream                     | 13                                                          |
| 63              | Estonia | 2009           | Crustaceans               | 5                                                           |
| 63              | Estonia | 2009           | Demersal Fish             | 16                                                          |
| 63              | Estonia | 2009           | Eggs                      | 31                                                          |

Dietary calcium and zinc deficiency risks are decreasing but remain prevalent

| FAO countrycode | Country | Reference year | Food item                 | Gross food supply (g capita <sup>-1</sup> d <sup>-1</sup> ) |
|-----------------|---------|----------------|---------------------------|-------------------------------------------------------------|
| 63              | Estonia | 2009           | Fats, Animals, Raw        | 4                                                           |
| 63              | Estonia | 2009           | Freshwater Fish           | 7                                                           |
| 63              | Estonia | 2009           | Fruits, Other             | 60                                                          |
| 63              | Estonia | 2009           | Grapefruit                | 5                                                           |
| 63              | Estonia | 2009           | Grapes                    | 18                                                          |
| 63              | Estonia | 2009           | Groundnuts (Shelled Eq)   | 1                                                           |
| 63              | Estonia | 2009           | Honey                     | 2                                                           |
| 63              | Estonia | 2009           | Lemons, Limes             | 4                                                           |
| 63              | Estonia | 2009           | Maize                     | 18                                                          |
| 63              | Estonia | 2009           | Maize Germ Oil            | 1                                                           |
| 63              | Estonia | 2009           | Milk, Whole               | 372                                                         |
| 63              | Estonia | 2009           | Mutton & Goat Meat        | 2                                                           |
| 63              | Estonia | 2009           | Nuts                      | 8                                                           |
| 63              | Estonia | 2009           | Oats                      | 7                                                           |
| 63              | Estonia | 2009           | Offals, Edible            | 15                                                          |
| 63              | Estonia | 2009           | Oilcrops Oil, Other       | 13                                                          |
| 63              | Estonia | 2009           | Olive Oil                 | 1                                                           |
| 63              | Estonia | 2009           | Onions                    | 20                                                          |
| 63              | Estonia | 2009           | Oranges, Mandarines       | 52                                                          |
| 63              | Estonia | 2009           | Peas                      | 1                                                           |
| 63              | Estonia | 2009           | Pelagic Fish              | 10                                                          |
| 63              | Estonia | 2009           | Pepper                    | 1                                                           |
| 63              | Estonia | 2009           | Pigmeat                   | 73                                                          |
| 63              | Estonia | 2009           | Pimento                   | 1                                                           |
| 63              | Estonia | 2009           | Pineapples                | 7                                                           |
| 63              | Estonia | 2009           | Potatoes                  | 276                                                         |
| 63              | Estonia | 2009           | Poultry Meat              | 55                                                          |
| 63              | Estonia | 2009           | Rice (Milled Equivalent)  | 5                                                           |
| 63              | Estonia | 2009           | Rye                       | 53                                                          |
| 63              | Estonia | 2009           | Soyabean Oil              | 7                                                           |
| 63              | Estonia | 2009           | Spices, Other             | 1                                                           |
| 63              | Estonia | 2009           | Sugar, Refined Equivalent | 107                                                         |
| 63              | Estonia | 2009           | Sweeteners, Other         | 10                                                          |
| 63              | Estonia | 2009           | Tea                       | 1                                                           |
| 63              | Estonia | 2009           | Tomatoes                  | 48                                                          |
| 63              | Estonia | 2009           | Vegetables, Other         | 227                                                         |
| 63              | Estonia | 2009           | Wheat                     | 263                                                         |
| 63              | Estonia | 2009           | Wine                      | 28                                                          |
| 63              | Estonia | 2010           | Apples                    | 39                                                          |
| 63              | Estonia | 2010           | Bananas                   | 24                                                          |
| 63              | Estonia | 2010           | Barley                    | 35                                                          |
| 63              | Estonia | 2010           | Beer                      | 264                                                         |
| 63              | Estonia | 2010           | Beverages, Alcoholic      | 55                                                          |
| 63              | Estonia | 2010           | Beverages, Fermented      | 11                                                          |
| 63              | Estonia | 2010           | Bovine Meat               | 35                                                          |
| 63              | Estonia | 2010           | Butter, Ghee              | 6                                                           |
| 63              | Estonia | 2010           | Cephalopods               | 1                                                           |
| 63              | Estonia | 2010           | Cheese                    | 22                                                          |
| 63              | Estonia | 2010           | Cocoa Beans               | 15                                                          |
| 63              | Estonia | 2010           | Coconut Oil               | 1                                                           |
| 63              | Estonia | 2010           | Coffee                    | 15                                                          |
| 63              | Estonia | 2010           | Cream                     | 9                                                           |
| 63              | Estonia | 2010           | Crustaceans               | 3                                                           |
| 63              | Estonia | 2010           | Demersal Fish             | 20                                                          |
| 63              | Estonia | 2010           | Eggs                      | 32                                                          |
| 63              | Estonia | 2010           | Fats, Animals, Raw        | 4                                                           |
| 63              | Estonia | 2010           | Freshwater Fish           | 7                                                           |
| 63              | Estonia | 2010           | Fruits, Other             | 57                                                          |
| 63              | Estonia | 2010           | Grapefruit                | 7                                                           |
| 63              | Estonia | 2010           | Grapes                    | 17                                                          |
| 63              | Estonia | 2010           | Honey                     | 2                                                           |
| 63              | Estonia | 2010           | Lemons, Limes             | 4                                                           |
| 63              | Estonia | 2010           | Maize                     | 20                                                          |
| 63              | Estonia | 2010           | Maize Germ Oil            | 1                                                           |
| 63              | Estonia | 2010           | Meat, Other               | 1                                                           |
| 63              | Estonia | 2010           | Milk, Whole               | 343                                                         |
| 63              | Estonia | 2010           | Molluscs, Other           | 1                                                           |
| 63              | Estonia | 2010           | Mutton & Goat Meat        | 2                                                           |
| 63              | Estonia | 2010           | Nuts                      | 10                                                          |
| 63              | Estonia | 2010           | Oats                      | 6                                                           |
| 63              | Estonia | 2010           | Offals, Edible            | 15                                                          |
| 63              | Estonia | 2010           | Oilcrops Oil, Other       | 12                                                          |
| 63              | Estonia | 2010           | Olive Oil                 | 1                                                           |
| 63              | Estonia | 2010           | Olives                    | 1                                                           |
| 63              | Estonia | 2010           | Onions                    | 20                                                          |
| 63              | Estonia | 2010           | Oranges, Mandarines       | 49                                                          |
| 63              | Estonia | 2010           | Peas                      | 14                                                          |
| 63              | Estonia | 2010           | Pelagic Fish              | 8                                                           |
| 63              | Estonia | 2010           | Pigmeat                   | 73                                                          |
| 63              | Estonia | 2010           | Pimento                   | 1                                                           |
| 63              | Estonia | 2010           | Pineapples                | 6                                                           |
| 63              | Estonia | 2010           | Potatoes                  | 305                                                         |
| 63              | Estonia | 2010           | Poultry Meat              | 58                                                          |
| 63              | Estonia | 2010           | Rice (Milled Equivalent)  | 7                                                           |
| 63              | Estonia | 2010           | Rye                       | 42                                                          |
| 63              | Estonia | 2010           | Soyabean Oil              | 4                                                           |
| 63              | Estonia | 2010           | Spices, Other             | 1                                                           |
| 63              | Estonia | 2010           | Sugar, Refined Equivalent | 91                                                          |
| 63              | Estonia | 2010           | Sweeteners, Other         | 12                                                          |
| 63              | Estonia | 2010           | Tea                       | 1                                                           |
| 63              | Estonia | 2010           | Tomatoes                  | 47                                                          |
| 63              | Estonia | 2010           | Vegetables, Other         | 233                                                         |
| 63              | Estonia | 2010           | Wheat                     | 238                                                         |
| 63              | Estonia | 2010           | Wine                      | 32                                                          |
| 63              | Estonia | 2011           | Apples                    | 34                                                          |
| 63              | Estonia | 2011           | Bananas                   | 24                                                          |
| 63              | Estonia | 2011           | Barley                    | 8                                                           |

Dietary calcium and zinc deficiency risks are decreasing but remain prevalent

| FAO countrycode | Country  | Reference year | Food item                 | Gross food supply (g capita <sup>-1</sup> d <sup>-1</sup> ) |
|-----------------|----------|----------------|---------------------------|-------------------------------------------------------------|
| 63              | Estonia  | 2011           | Beer                      | 270                                                         |
| 63              | Estonia  | 2011           | Beverages, Alcoholic      | 55                                                          |
| 63              | Estonia  | 2011           | Beverages, Fermented      | 19                                                          |
| 63              | Estonia  | 2011           | Bovine Meat               | 37                                                          |
| 63              | Estonia  | 2011           | Butter, Ghee              | 6                                                           |
| 63              | Estonia  | 2011           | Cephalopods               | 1                                                           |
| 63              | Estonia  | 2011           | Cheese                    | 26                                                          |
| 63              | Estonia  | 2011           | Citrus, Other             | 1                                                           |
| 63              | Estonia  | 2011           | Cocoa Beans               | 20                                                          |
| 63              | Estonia  | 2011           | Coconut Oil               | 1                                                           |
| 63              | Estonia  | 2011           | Coffee                    | 14                                                          |
| 63              | Estonia  | 2011           | Cream                     | 11                                                          |
| 63              | Estonia  | 2011           | Crustaceans               | 3                                                           |
| 63              | Estonia  | 2011           | Demersal Fish             | 20                                                          |
| 63              | Estonia  | 2011           | Eggs                      | 31                                                          |
| 63              | Estonia  | 2011           | Fats, Animals, Raw        | 4                                                           |
| 63              | Estonia  | 2011           | Freshwater Fish           | 7                                                           |
| 63              | Estonia  | 2011           | Fruits, Other             | 68                                                          |
| 63              | Estonia  | 2011           | Grapefruit                | 5                                                           |
| 63              | Estonia  | 2011           | Grapes                    | 16                                                          |
| 63              | Estonia  | 2011           | Groundnuts (Shelled Eq)   | 1                                                           |
| 63              | Estonia  | 2011           | Honey                     | 2                                                           |
| 63              | Estonia  | 2011           | Lemons, Limes             | 4                                                           |
| 63              | Estonia  | 2011           | Maize                     | 24                                                          |
| 63              | Estonia  | 2011           | Maize Germ Oil            | 1                                                           |
| 63              | Estonia  | 2011           | Milk, Whole               | 317                                                         |
| 63              | Estonia  | 2011           | Molluscs, Other           | 1                                                           |
| 63              | Estonia  | 2011           | Mutton & Goat Meat        | 1                                                           |
| 63              | Estonia  | 2011           | Nuts                      | 7                                                           |
| 63              | Estonia  | 2011           | Oats                      | 8                                                           |
| 63              | Estonia  | 2011           | Offals, Edible            | 14                                                          |
| 63              | Estonia  | 2011           | Oilcrops Oil, Other       | 10                                                          |
| 63              | Estonia  | 2011           | Olive Oil                 | 1                                                           |
| 63              | Estonia  | 2011           | Olives                    | 1                                                           |
| 63              | Estonia  | 2011           | Onions                    | 16                                                          |
| 63              | Estonia  | 2011           | Oranges, Mandarines       | 41                                                          |
| 63              | Estonia  | 2011           | Peas                      | 12                                                          |
| 63              | Estonia  | 2011           | Pelagic Fish              | 8                                                           |
| 63              | Estonia  | 2011           | Pepper                    | 1                                                           |
| 63              | Estonia  | 2011           | Pigmeat                   | 71                                                          |
| 63              | Estonia  | 2011           | Pimento                   | 1                                                           |
| 63              | Estonia  | 2011           | Pineapples                | 5                                                           |
| 63              | Estonia  | 2011           | Potatoes                  | 312                                                         |
| 63              | Estonia  | 2011           | Poultry Meat              | 53                                                          |
| 63              | Estonia  | 2011           | Rice (Milled Equivalent)  | 7                                                           |
| 63              | Estonia  | 2011           | Rye                       | 47                                                          |
| 63              | Estonia  | 2011           | Soyabean Oil              | 4                                                           |
| 63              | Estonia  | 2011           | Spices, Other             | 1                                                           |
| 63              | Estonia  | 2011           | Sugar, Refined Equivalent | 86                                                          |
| 63              | Estonia  | 2011           | Sweeteners, Other         | 12                                                          |
| 63              | Estonia  | 2011           | Tea                       | 1                                                           |
| 63              | Estonia  | 2011           | Tomatoes                  | 51                                                          |
| 63              | Estonia  | 2011           | Vegetables, Other         | 267                                                         |
| 63              | Estonia  | 2011           | Wheat                     | 263                                                         |
| 63              | Estonia  | 2011           | Wine                      | 36                                                          |
| 238             | Ethiopia | 1992           | Bananas                   | 3                                                           |
| 238             | Ethiopia | 1992           | Barley                    | 34                                                          |
| 238             | Ethiopia | 1992           | Beans                     | 4                                                           |
| 238             | Ethiopia | 1992           | Beer                      | 16                                                          |
| 238             | Ethiopia | 1992           | Beverages, Fermented      | 6                                                           |
| 238             | Ethiopia | 1992           | Bovine Meat               | 12                                                          |
| 238             | Ethiopia | 1992           | Butter, Ghee              | 1                                                           |
| 238             | Ethiopia | 1992           | Cereals, Other            | 61                                                          |
| 238             | Ethiopia | 1992           | Coffee                    | 3                                                           |
| 238             | Ethiopia | 1992           | Eggs                      | 3                                                           |
| 238             | Ethiopia | 1992           | Fats, Animals, Raw        | 1                                                           |
| 238             | Ethiopia | 1992           | Fruits, Other             | 5                                                           |
| 238             | Ethiopia | 1992           | Groundnut Oil             | 1                                                           |
| 238             | Ethiopia | 1992           | Honey                     | 1                                                           |
| 238             | Ethiopia | 1992           | Maize                     | 72                                                          |
| 238             | Ethiopia | 1992           | Meat, Other               | 6                                                           |
| 238             | Ethiopia | 1992           | Milk, Whole               | 35                                                          |
| 238             | Ethiopia | 1992           | Millet                    | 7                                                           |
| 238             | Ethiopia | 1992           | Mutton & Goat Meat        | 7                                                           |
| 238             | Ethiopia | 1992           | Nuts                      | 3                                                           |
| 238             | Ethiopia | 1992           | Oats                      | 2                                                           |
| 238             | Ethiopia | 1992           | Offals, Edible            | 5                                                           |
| 238             | Ethiopia | 1992           | Oilcrops Oil, Other       | 1                                                           |
| 238             | Ethiopia | 1992           | Oilcrops, Other           | 5                                                           |
| 238             | Ethiopia | 1992           | Onions                    | 2                                                           |
| 238             | Ethiopia | 1992           | Oranges, Mandarines       | 1                                                           |
| 238             | Ethiopia | 1992           | Peas                      | 7                                                           |
| 238             | Ethiopia | 1992           | Pimento                   | 5                                                           |
| 238             | Ethiopia | 1992           | Potatoes                  | 15                                                          |
| 238             | Ethiopia | 1992           | Poultry Meat              | 4                                                           |
| 238             | Ethiopia | 1992           | Pulses, Other             | 26                                                          |
| 238             | Ethiopia | 1992           | Rape and Mustard Oil      | 3                                                           |
| 238             | Ethiopia | 1992           | Rice (Milled Equivalent)  | 1                                                           |
| 238             | Ethiopia | 1992           | Roots, Other              | 111                                                         |
| 238             | Ethiopia | 1992           | Sesameseed                | 1                                                           |
| 238             | Ethiopia | 1992           | Sorghum                   | 44                                                          |
| 238             | Ethiopia | 1992           | Soyabean Oil              | 1                                                           |
| 238             | Ethiopia | 1992           | Soyabeans                 | 1                                                           |
| 238             | Ethiopia | 1992           | Sugar, Refined Equivalent | 7                                                           |
| 238             | Ethiopia | 1992           | Sweet Potatoes            | 7                                                           |
| 238             | Ethiopia | 1992           | Tomatoes                  | 2                                                           |
| 238             | Ethiopia | 1992           | Vegetables, Other         | 21                                                          |

Dietary calcium and zinc deficiency risks are decreasing but remain prevalent

| FAO countrycode | Country  | Reference year | Food item                 | Gross food supply (g capita <sup>-1</sup> d <sup>-1</sup> ) |
|-----------------|----------|----------------|---------------------------|-------------------------------------------------------------|
| 238             | Ethiopia | 1992           | Wheat                     | 77                                                          |
| 238             | Ethiopia | 1992           | Yams                      | 10                                                          |
| 238             | Ethiopia | 1993           | Bananas                   | 3                                                           |
| 238             | Ethiopia | 1993           | Barley                    | 31                                                          |
| 238             | Ethiopia | 1993           | Beans                     | 1                                                           |
| 238             | Ethiopia | 1993           | Beer                      | 6                                                           |
| 238             | Ethiopia | 1993           | Beverages, Fermented      | 5                                                           |
| 238             | Ethiopia | 1993           | Bovine Meat               | 12                                                          |
| 238             | Ethiopia | 1993           | Butter, Ghee              | 1                                                           |
| 238             | Ethiopia | 1993           | Cereals, Other            | 59                                                          |
| 238             | Ethiopia | 1993           | Coffee                    | 4                                                           |
| 238             | Ethiopia | 1993           | Eggs                      | 1                                                           |
| 238             | Ethiopia | 1993           | Fats, Animals, Raw        | 1                                                           |
| 238             | Ethiopia | 1993           | Fruits, Other             | 5                                                           |
| 238             | Ethiopia | 1993           | Honey                     | 1                                                           |
| 238             | Ethiopia | 1993           | Maize                     | 101                                                         |
| 238             | Ethiopia | 1993           | Meat, Other               | 3                                                           |
| 238             | Ethiopia | 1993           | Milk, Whole               | 29                                                          |
| 238             | Ethiopia | 1993           | Millet                    | 5                                                           |
| 238             | Ethiopia | 1993           | Mutton & Goat Meat        | 3                                                           |
| 238             | Ethiopia | 1993           | Nuts                      | 3                                                           |
| 238             | Ethiopia | 1993           | Oats                      | 2                                                           |
| 238             | Ethiopia | 1993           | Offals, Edible            | 3                                                           |
| 238             | Ethiopia | 1993           | Oilcrops Oil, Other       | 1                                                           |
| 238             | Ethiopia | 1993           | Onions                    | 4                                                           |
| 238             | Ethiopia | 1993           | Oranges, Mandarines       | 1                                                           |
| 238             | Ethiopia | 1993           | Palm Oil                  | 1                                                           |
| 238             | Ethiopia | 1993           | Peas                      | 5                                                           |
| 238             | Ethiopia | 1993           | Pimento                   | 5                                                           |
| 238             | Ethiopia | 1993           | Potatoes                  | 15                                                          |
| 238             | Ethiopia | 1993           | Poultry Meat              | 2                                                           |
| 238             | Ethiopia | 1993           | Pulses, Other             | 19                                                          |
| 238             | Ethiopia | 1993           | Rape and Mustard Oil      | 1                                                           |
| 238             | Ethiopia | 1993           | Rice (Milled Equivalent)  | 1                                                           |
| 238             | Ethiopia | 1993           | Roots, Other              | 129                                                         |
| 238             | Ethiopia | 1993           | Sorghum                   | 45                                                          |
| 238             | Ethiopia | 1993           | Soyabean Oil              | 1                                                           |
| 238             | Ethiopia | 1993           | Sugar, Refined Equivalent | 8                                                           |
| 238             | Ethiopia | 1993           | Sweet Potatoes            | 8                                                           |
| 238             | Ethiopia | 1993           | Tomatoes                  | 2                                                           |
| 238             | Ethiopia | 1993           | Vegetables, Other         | 27                                                          |
| 238             | Ethiopia | 1993           | Wheat                     | 60                                                          |
| 238             | Ethiopia | 1993           | Yams                      | 8                                                           |
| 238             | Ethiopia | 1994           | Bananas                   | 2                                                           |
| 238             | Ethiopia | 1994           | Barley                    | 31                                                          |
| 238             | Ethiopia | 1994           | Beer                      | 4                                                           |
| 238             | Ethiopia | 1994           | Beverages, Fermented      | 6                                                           |
| 238             | Ethiopia | 1994           | Bovine Meat               | 12                                                          |
| 238             | Ethiopia | 1994           | Butter, Ghee              | 1                                                           |
| 238             | Ethiopia | 1994           | Cereals, Other            | 59                                                          |
| 238             | Ethiopia | 1994           | Coffee                    | 4                                                           |
| 238             | Ethiopia | 1994           | Eggs                      | 1                                                           |
| 238             | Ethiopia | 1994           | Fats, Animals, Raw        | 1                                                           |
| 238             | Ethiopia | 1994           | Fruits, Other             | 5                                                           |
| 238             | Ethiopia | 1994           | Honey                     | 1                                                           |
| 238             | Ethiopia | 1994           | Maize                     | 100                                                         |
| 238             | Ethiopia | 1994           | Maize Germ Oil            | 1                                                           |
| 238             | Ethiopia | 1994           | Meat, Other               | 3                                                           |
| 238             | Ethiopia | 1994           | Milk, Whole               | 29                                                          |
| 238             | Ethiopia | 1994           | Millet                    | 7                                                           |
| 238             | Ethiopia | 1994           | Mutton & Goat Meat        | 3                                                           |
| 238             | Ethiopia | 1994           | Nuts                      | 3                                                           |
| 238             | Ethiopia | 1994           | Oats                      | 2                                                           |
| 238             | Ethiopia | 1994           | Offals, Edible            | 3                                                           |
| 238             | Ethiopia | 1994           | Oilcrops Oil, Other       | 1                                                           |
| 238             | Ethiopia | 1994           | Onions                    | 4                                                           |
| 238             | Ethiopia | 1994           | Oranges, Mandarines       | 1                                                           |
| 238             | Ethiopia | 1994           | Palm Oil                  | 1                                                           |
| 238             | Ethiopia | 1994           | Peas                      | 4                                                           |
| 238             | Ethiopia | 1994           | Pimento                   | 6                                                           |
| 238             | Ethiopia | 1994           | Potatoes                  | 14                                                          |
| 238             | Ethiopia | 1994           | Poultry Meat              | 2                                                           |
| 238             | Ethiopia | 1994           | Pulses, Other             | 19                                                          |
| 238             | Ethiopia | 1994           | Rape and Mustard Oil      | 1                                                           |
| 238             | Ethiopia | 1994           | Rice (Milled Equivalent)  | 1                                                           |
| 238             | Ethiopia | 1994           | Roots, Other              | 134                                                         |
| 238             | Ethiopia | 1994           | Sorghum                   | 51                                                          |
| 238             | Ethiopia | 1994           | Soyabean Oil              | 1                                                           |
| 238             | Ethiopia | 1994           | Sugar, Refined Equivalent | 7                                                           |
| 238             | Ethiopia | 1994           | Sweet Potatoes            | 8                                                           |
| 238             | Ethiopia | 1994           | Tomatoes                  | 2                                                           |
| 238             | Ethiopia | 1994           | Vegetables, Other         | 27                                                          |
| 238             | Ethiopia | 1994           | Wheat                     | 67                                                          |
| 238             | Ethiopia | 1994           | Yams                      | 8                                                           |
| 238             | Ethiopia | 1995           | Bananas                   | 2                                                           |
| 238             | Ethiopia | 1995           | Barley                    | 35                                                          |
| 238             | Ethiopia | 1995           | Beans                     | 1                                                           |
| 238             | Ethiopia | 1995           | Beer                      | 5                                                           |
| 238             | Ethiopia | 1995           | Beverages, Fermented      | 5                                                           |
| 238             | Ethiopia | 1995           | Bovine Meat               | 11                                                          |
| 238             | Ethiopia | 1995           | Butter, Ghee              | 1                                                           |
| 238             | Ethiopia | 1995           | Cereals, Other            | 59                                                          |
| 238             | Ethiopia | 1995           | Coffee                    | 4                                                           |
| 238             | Ethiopia | 1995           | Eggs                      | 1                                                           |
| 238             | Ethiopia | 1995           | Fats, Animals, Raw        | 1                                                           |
| 238             | Ethiopia | 1995           | Fruits, Other             | 6                                                           |
| 238             | Ethiopia | 1995           | Honey                     | 1                                                           |

Dietary calcium and zinc deficiency risks are decreasing but remain prevalent

| FAO countrycode | Country  | Reference year | Food item                 | Gross food supply (g capita <sup>-1</sup> d <sup>-1</sup> ) |
|-----------------|----------|----------------|---------------------------|-------------------------------------------------------------|
| 238             | Ethiopia | 1995           | Maize                     | 99                                                          |
| 238             | Ethiopia | 1995           | Meat, Other               | 3                                                           |
| 238             | Ethiopia | 1995           | Milk, Whole               | 31                                                          |
| 238             | Ethiopia | 1995           | Millet                    | 6                                                           |
| 238             | Ethiopia | 1995           | Mutton & Goat Meat        | 3                                                           |
| 238             | Ethiopia | 1995           | Nuts                      | 3                                                           |
| 238             | Ethiopia | 1995           | Oats                      | 2                                                           |
| 238             | Ethiopia | 1995           | Offals, Edible            | 3                                                           |
| 238             | Ethiopia | 1995           | Oilcrops Oil, Other       | 1                                                           |
| 238             | Ethiopia | 1995           | Onions                    | 4                                                           |
| 238             | Ethiopia | 1995           | Oranges, Mandarines       | 1                                                           |
| 238             | Ethiopia | 1995           | Peas                      | 4                                                           |
| 238             | Ethiopia | 1995           | Pimento                   | 5                                                           |
| 238             | Ethiopia | 1995           | Potatoes                  | 14                                                          |
| 238             | Ethiopia | 1995           | Poultry Meat              | 2                                                           |
| 238             | Ethiopia | 1995           | Pulses, Other             | 24                                                          |
| 238             | Ethiopia | 1995           | Roots, Other              | 138                                                         |
| 238             | Ethiopia | 1995           | Sorghum                   | 55                                                          |
| 238             | Ethiopia | 1995           | Sugar, Refined Equivalent | 7                                                           |
| 238             | Ethiopia | 1995           | Sweet Potatoes            | 8                                                           |
| 238             | Ethiopia | 1995           | Tomatoes                  | 2                                                           |
| 238             | Ethiopia | 1995           | Vegetables, Other         | 27                                                          |
| 238             | Ethiopia | 1995           | Wheat                     | 65                                                          |
| 238             | Ethiopia | 1995           | Yams                      | 8                                                           |
| 238             | Ethiopia | 1996           | Bananas                   | 2                                                           |
| 238             | Ethiopia | 1996           | Barley                    | 33                                                          |
| 238             | Ethiopia | 1996           | Beans                     | 3                                                           |
| 238             | Ethiopia | 1996           | Beer                      | 6                                                           |
| 238             | Ethiopia | 1996           | Beverages, Fermented      | 8                                                           |
| 238             | Ethiopia | 1996           | Bovine Meat               | 12                                                          |
| 238             | Ethiopia | 1996           | Butter, Ghee              | 1                                                           |
| 238             | Ethiopia | 1996           | Cereals, Other            | 63                                                          |
| 238             | Ethiopia | 1996           | Coffee                    | 3                                                           |
| 238             | Ethiopia | 1996           | Eggs                      | 1                                                           |
| 238             | Ethiopia | 1996           | Fats, Animals, Raw        | 1                                                           |
| 238             | Ethiopia | 1996           | Fruits, Other             | 6                                                           |
| 238             | Ethiopia | 1996           | Honey                     | 1                                                           |
| 238             | Ethiopia | 1996           | Maize                     | 106                                                         |
| 238             | Ethiopia | 1996           | Meat, Other               | 3                                                           |
| 238             | Ethiopia | 1996           | Milk, Whole               | 35                                                          |
| 238             | Ethiopia | 1996           | Millet                    | 9                                                           |
| 238             | Ethiopia | 1996           | Mutton & Goat Meat        | 3                                                           |
| 238             | Ethiopia | 1996           | Nuts                      | 3                                                           |
| 238             | Ethiopia | 1996           | Oats                      | 4                                                           |
| 238             | Ethiopia | 1996           | Offals, Edible            | 3                                                           |
| 238             | Ethiopia | 1996           | Oilcrops Oil, Other       | 1                                                           |
| 238             | Ethiopia | 1996           | Oilcrops, Other           | 1                                                           |
| 238             | Ethiopia | 1996           | Onions                    | 4                                                           |
| 238             | Ethiopia | 1996           | Oranges, Mandarines       | 1                                                           |
| 238             | Ethiopia | 1996           | Peas                      | 4                                                           |
| 238             | Ethiopia | 1996           | Pimento                   | 5                                                           |
| 238             | Ethiopia | 1996           | Potatoes                  | 14                                                          |
| 238             | Ethiopia | 1996           | Poultry Meat              | 2                                                           |
| 238             | Ethiopia | 1996           | Pulses, Other             | 24                                                          |
| 238             | Ethiopia | 1996           | Rice (Milled Equivalent)  | 1                                                           |
| 238             | Ethiopia | 1996           | Roots, Other              | 138                                                         |
| 238             | Ethiopia | 1996           | Sorghum                   | 58                                                          |
| 238             | Ethiopia | 1996           | Soyabean Oil              | 1                                                           |
| 238             | Ethiopia | 1996           | Sugar, Refined Equivalent | 8                                                           |
| 238             | Ethiopia | 1996           | Sweet Potatoes            | 7                                                           |
| 238             | Ethiopia | 1996           | Tomatoes                  | 2                                                           |
| 238             | Ethiopia | 1996           | Vegetables, Other         | 27                                                          |
| 238             | Ethiopia | 1996           | Wheat                     | 65                                                          |
| 238             | Ethiopia | 1996           | Yams                      | 7                                                           |
| 238             | Ethiopia | 1997           | Bananas                   | 3                                                           |
| 238             | Ethiopia | 1997           | Barley                    | 34                                                          |
| 238             | Ethiopia | 1997           | Beans                     | 3                                                           |
| 238             | Ethiopia | 1997           | Beer                      | 6                                                           |
| 238             | Ethiopia | 1997           | Beverages, Fermented      | 9                                                           |
| 238             | Ethiopia | 1997           | Bovine Meat               | 12                                                          |
| 238             | Ethiopia | 1997           | Butter, Ghee              | 1                                                           |
| 238             | Ethiopia | 1997           | Cereals, Other            | 68                                                          |
| 238             | Ethiopia | 1997           | Coffee                    | 4                                                           |
| 238             | Ethiopia | 1997           | Eggs                      | 1                                                           |
| 238             | Ethiopia | 1997           | Fats, Animals, Raw        | 1                                                           |
| 238             | Ethiopia | 1997           | Fruits, Other             | 6                                                           |
| 238             | Ethiopia | 1997           | Honey                     | 1                                                           |
| 238             | Ethiopia | 1997           | Maize                     | 110                                                         |
| 238             | Ethiopia | 1997           | Meat, Other               | 3                                                           |
| 238             | Ethiopia | 1997           | Milk, Whole               | 35                                                          |
| 238             | Ethiopia | 1997           | Millet                    | 11                                                          |
| 238             | Ethiopia | 1997           | Mutton & Goat Meat        | 3                                                           |
| 238             | Ethiopia | 1997           | Nuts                      | 4                                                           |
| 238             | Ethiopia | 1997           | Oats                      | 3                                                           |
| 238             | Ethiopia | 1997           | Offals, Edible            | 3                                                           |
| 238             | Ethiopia | 1997           | Oilcrops Oil, Other       | 1                                                           |
| 238             | Ethiopia | 1997           | Onions                    | 4                                                           |
| 238             | Ethiopia | 1997           | Oranges, Mandarines       | 1                                                           |
| 238             | Ethiopia | 1997           | Palm Oil                  | 1                                                           |
| 238             | Ethiopia | 1997           | Peas                      | 5                                                           |
| 238             | Ethiopia | 1997           | Pimento                   | 4                                                           |
| 238             | Ethiopia | 1997           | Potatoes                  | 13                                                          |
| 238             | Ethiopia | 1997           | Poultry Meat              | 2                                                           |
| 238             | Ethiopia | 1997           | Pulses, Other             | 24                                                          |
| 238             | Ethiopia | 1997           | Rice (Milled Equivalent)  | 1                                                           |
| 238             | Ethiopia | 1997           | Roots, Other              | 138                                                         |
| 238             | Ethiopia | 1997           | Sorghum                   | 58                                                          |

Dietary calcium and zinc deficiency risks are decreasing but remain prevalent

| FAO countrycode | Country  | Reference year | Food item                 | Gross food supply (g capita <sup>-1</sup> d <sup>-1</sup> ) |
|-----------------|----------|----------------|---------------------------|-------------------------------------------------------------|
| 238             | Ethiopia | 1997           | Sugar, Refined Equivalent | 9                                                           |
| 238             | Ethiopia | 1997           | Sweet Potatoes            | 8                                                           |
| 238             | Ethiopia | 1997           | Tomatoes                  | 2                                                           |
| 238             | Ethiopia | 1997           | Vegetables, Other         | 28                                                          |
| 238             | Ethiopia | 1997           | Wheat                     | 65                                                          |
| 238             | Ethiopia | 1997           | Yams                      | 8                                                           |
| 238             | Ethiopia | 1998           | Bananas                   | 3                                                           |
| 238             | Ethiopia | 1998           | Barley                    | 34                                                          |
| 238             | Ethiopia | 1998           | Beans                     | 2                                                           |
| 238             | Ethiopia | 1998           | Beer                      | 5                                                           |
| 238             | Ethiopia | 1998           | Beverages, Fermented      | 8                                                           |
| 238             | Ethiopia | 1998           | Bovine Meat               | 12                                                          |
| 238             | Ethiopia | 1998           | Butter, Ghee              | 1                                                           |
| 238             | Ethiopia | 1998           | Cereals, Other            | 68                                                          |
| 238             | Ethiopia | 1998           | Coffee                    | 3                                                           |
| 238             | Ethiopia | 1998           | Eggs                      | 1                                                           |
| 238             | Ethiopia | 1998           | Fats, Animals, Raw        | 1                                                           |
| 238             | Ethiopia | 1998           | Freshwater Fish           | 1                                                           |
| 238             | Ethiopia | 1998           | Fruits, Other             | 6                                                           |
| 238             | Ethiopia | 1998           | Honey                     | 1                                                           |
| 238             | Ethiopia | 1998           | Maize                     | 110                                                         |
| 238             | Ethiopia | 1998           | Meat, Other               | 3                                                           |
| 238             | Ethiopia | 1998           | Milk, Whole               | 34                                                          |
| 238             | Ethiopia | 1998           | Millet                    | 9                                                           |
| 238             | Ethiopia | 1998           | Mutton & Goat Meat        | 3                                                           |
| 238             | Ethiopia | 1998           | Nuts                      | 3                                                           |
| 238             | Ethiopia | 1998           | Oats                      | 2                                                           |
| 238             | Ethiopia | 1998           | Offals, Edible            | 3                                                           |
| 238             | Ethiopia | 1998           | Oilcrops Oil, Other       | 1                                                           |
| 238             | Ethiopia | 1998           | Onions                    | 4                                                           |
| 238             | Ethiopia | 1998           | Oranges, Mandarines       | 1                                                           |
| 238             | Ethiopia | 1998           | Palm Oil                  | 1                                                           |
| 238             | Ethiopia | 1998           | Peas                      | 5                                                           |
| 238             | Ethiopia | 1998           | Pimento                   | 5                                                           |
| 238             | Ethiopia | 1998           | Potatoes                  | 13                                                          |
| 238             | Ethiopia | 1998           | Poultry Meat              | 2                                                           |
| 238             | Ethiopia | 1998           | Pulses, Other             | 24                                                          |
| 238             | Ethiopia | 1998           | Rice (Milled Equivalent)  | 1                                                           |
| 238             | Ethiopia | 1998           | Roots, Other              | 140                                                         |
| 238             | Ethiopia | 1998           | Sorghum                   | 61                                                          |
| 238             | Ethiopia | 1998           | Sugar, Refined Equivalent | 9                                                           |
| 238             | Ethiopia | 1998           | Sweet Potatoes            | 9                                                           |
| 238             | Ethiopia | 1998           | Tomatoes                  | 2                                                           |
| 238             | Ethiopia | 1998           | Vegetables, Other         | 26                                                          |
| 238             | Ethiopia | 1998           | Wheat                     | 67                                                          |
| 238             | Ethiopia | 1998           | Yams                      | 6                                                           |
| 238             | Ethiopia | 1999           | Bananas                   | 3                                                           |
| 238             | Ethiopia | 1999           | Barley                    | 34                                                          |
| 238             | Ethiopia | 1999           | Beans                     | 3                                                           |
| 238             | Ethiopia | 1999           | Beer                      | 6                                                           |
| 238             | Ethiopia | 1999           | Beverages, Fermented      | 11                                                          |
| 238             | Ethiopia | 1999           | Bovine Meat               | 12                                                          |
| 238             | Ethiopia | 1999           | Butter, Ghee              | 1                                                           |
| 238             | Ethiopia | 1999           | Cereals, Other            | 67                                                          |
| 238             | Ethiopia | 1999           | Coffee                    | 3                                                           |
| 238             | Ethiopia | 1999           | Eggs                      | 1                                                           |
| 238             | Ethiopia | 1999           | Fats, Animals, Raw        | 1                                                           |
| 238             | Ethiopia | 1999           | Freshwater Fish           | 1                                                           |
| 238             | Ethiopia | 1999           | Fruits, Other             | 6                                                           |
| 238             | Ethiopia | 1999           | Honey                     | 1                                                           |
| 238             | Ethiopia | 1999           | Maize                     | 114                                                         |
| 238             | Ethiopia | 1999           | Meat, Other               | 3                                                           |
| 238             | Ethiopia | 1999           | Milk, Whole               | 34                                                          |
| 238             | Ethiopia | 1999           | Millet                    | 13                                                          |
| 238             | Ethiopia | 1999           | Mutton & Goat Meat        | 3                                                           |
| 238             | Ethiopia | 1999           | Nuts                      | 3                                                           |
| 238             | Ethiopia | 1999           | Oats                      | 2                                                           |
| 238             | Ethiopia | 1999           | Offals, Edible            | 3                                                           |
| 238             | Ethiopia | 1999           | Oilcrops Oil, Other       | 1                                                           |
| 238             | Ethiopia | 1999           | Onions                    | 4                                                           |
| 238             | Ethiopia | 1999           | Oranges, Mandarines       | 1                                                           |
| 238             | Ethiopia | 1999           | Palm Oil                  | 1                                                           |
| 238             | Ethiopia | 1999           | Peas                      | 5                                                           |
| 238             | Ethiopia | 1999           | Pimento                   | 5                                                           |
| 238             | Ethiopia | 1999           | Potatoes                  | 14                                                          |
| 238             | Ethiopia | 1999           | Poultry Meat              | 2                                                           |
| 238             | Ethiopia | 1999           | Pulses, Other             | 23                                                          |
| 238             | Ethiopia | 1999           | Rice (Milled Equivalent)  | 1                                                           |
| 238             | Ethiopia | 1999           | Roots, Other              | 141                                                         |
| 238             | Ethiopia | 1999           | Sorghum                   | 61                                                          |
| 238             | Ethiopia | 1999           | Sugar, Refined Equivalent | 9                                                           |
| 238             | Ethiopia | 1999           | Sweet Potatoes            | 9                                                           |
| 238             | Ethiopia | 1999           | Tomatoes                  | 2                                                           |
| 238             | Ethiopia | 1999           | Vegetables, Other         | 27                                                          |
| 238             | Ethiopia | 1999           | Wheat                     | 68                                                          |
| 238             | Ethiopia | 1999           | Yams                      | 7                                                           |
| 238             | Ethiopia | 2000           | Bananas                   | 4                                                           |
| 238             | Ethiopia | 2000           | Barley                    | 32                                                          |
| 238             | Ethiopia | 2000           | Beans                     | 4                                                           |
| 238             | Ethiopia | 2000           | Beer                      | 5                                                           |
| 238             | Ethiopia | 2000           | Beverages, Fermented      | 9                                                           |
| 238             | Ethiopia | 2000           | Bovine Meat               | 12                                                          |
| 238             | Ethiopia | 2000           | Butter, Ghee              | 1                                                           |
| 238             | Ethiopia | 2000           | Cereals, Other            | 68                                                          |
| 238             | Ethiopia | 2000           | Coffee                    | 3                                                           |
| 238             | Ethiopia | 2000           | Eggs                      | 1                                                           |
| 238             | Ethiopia | 2000           | Fats, Animals, Raw        | 1                                                           |

Dietary calcium and zinc deficiency risks are decreasing but remain prevalent

| FAO countrycode | Country  | Reference year | Food item                 | Gross food supply (g capita <sup>-1</sup> d <sup>-1</sup> ) |
|-----------------|----------|----------------|---------------------------|-------------------------------------------------------------|
| 238             | Ethiopia | 2000           | Freshwater Fish           | 1                                                           |
| 238             | Ethiopia | 2000           | Fruits, Other             | 10                                                          |
| 238             | Ethiopia | 2000           | Honey                     | 1                                                           |
| 238             | Ethiopia | 2000           | Maize                     | 115                                                         |
| 238             | Ethiopia | 2000           | Meat, Other               | 3                                                           |
| 238             | Ethiopia | 2000           | Milk, Whole               | 27                                                          |
| 238             | Ethiopia | 2000           | Millet                    | 10                                                          |
| 238             | Ethiopia | 2000           | Mutton & Goat Meat        | 3                                                           |
| 238             | Ethiopia | 2000           | Nuts                      | 3                                                           |
| 238             | Ethiopia | 2000           | Oats                      | 2                                                           |
| 238             | Ethiopia | 2000           | Offals, Edible            | 3                                                           |
| 238             | Ethiopia | 2000           | Oilcrops Oil, Other       | 1                                                           |
| 238             | Ethiopia | 2000           | Onions                    | 4                                                           |
| 238             | Ethiopia | 2000           | Oranges, Mandarines       | 1                                                           |
| 238             | Ethiopia | 2000           | Peas                      | 6                                                           |
| 238             | Ethiopia | 2000           | Pimento                   | 5                                                           |
| 238             | Ethiopia | 2000           | Potatoes                  | 13                                                          |
| 238             | Ethiopia | 2000           | Poultry Meat              | 2                                                           |
| 238             | Ethiopia | 2000           | Pulses, Other             | 26                                                          |
| 238             | Ethiopia | 2000           | Rice (Milled Equivalent)  | 1                                                           |
| 238             | Ethiopia | 2000           | Roots, Other              | 143                                                         |
| 238             | Ethiopia | 2000           | Sorghum                   | 61                                                          |
| 238             | Ethiopia | 2000           | Soyabean Oil              | 1                                                           |
| 238             | Ethiopia | 2000           | Sugar, Refined Equivalent | 9                                                           |
| 238             | Ethiopia | 2000           | Sweet Potatoes            | 12                                                          |
| 238             | Ethiopia | 2000           | Tomatoes                  | 2                                                           |
| 238             | Ethiopia | 2000           | Vegetables, Other         | 26                                                          |
| 238             | Ethiopia | 2000           | Wheat                     | 83                                                          |
| 238             | Ethiopia | 2000           | Yams                      | 7                                                           |
| 238             | Ethiopia | 2001           | Bananas                   | 4                                                           |
| 238             | Ethiopia | 2001           | Barley                    | 34                                                          |
| 238             | Ethiopia | 2001           | Beans                     | 7                                                           |
| 238             | Ethiopia | 2001           | Beer                      | 6                                                           |
| 238             | Ethiopia | 2001           | Beverages, Fermented      | 9                                                           |
| 238             | Ethiopia | 2001           | Bovine Meat               | 12                                                          |
| 238             | Ethiopia | 2001           | Butter, Ghee              | 1                                                           |
| 238             | Ethiopia | 2001           | Cereals, Other            | 66                                                          |
| 238             | Ethiopia | 2001           | Coffee                    | 4                                                           |
| 238             | Ethiopia | 2001           | Eggs                      | 1                                                           |
| 238             | Ethiopia | 2001           | Fats, Animals, Raw        | 1                                                           |
| 238             | Ethiopia | 2001           | Freshwater Fish           | 1                                                           |
| 238             | Ethiopia | 2001           | Fruits, Other             | 7                                                           |
| 238             | Ethiopia | 2001           | Honey                     | 1                                                           |
| 238             | Ethiopia | 2001           | Maize                     | 111                                                         |
| 238             | Ethiopia | 2001           | Meat, Other               | 3                                                           |
| 238             | Ethiopia | 2001           | Milk, Whole               | 29                                                          |
| 238             | Ethiopia | 2001           | Millet                    | 10                                                          |
| 238             | Ethiopia | 2001           | Mutton & Goat Meat        | 3                                                           |
| 238             | Ethiopia | 2001           | Nuts                      | 3                                                           |
| 238             | Ethiopia | 2001           | Oats                      | 2                                                           |
| 238             | Ethiopia | 2001           | Offals, Edible            | 3                                                           |
| 238             | Ethiopia | 2001           | Oilcrops Oil, Other       | 1                                                           |
| 238             | Ethiopia | 2001           | Onions                    | 5                                                           |
| 238             | Ethiopia | 2001           | Oranges, Mandarines       | 1                                                           |
| 238             | Ethiopia | 2001           | Palm Oil                  | 1                                                           |
| 238             | Ethiopia | 2001           | Peas                      | 6                                                           |
| 238             | Ethiopia | 2001           | Pimento                   | 5                                                           |
| 238             | Ethiopia | 2001           | Potatoes                  | 15                                                          |
| 238             | Ethiopia | 2001           | Poultry Meat              | 2                                                           |
| 238             | Ethiopia | 2001           | Pulses, Other             | 25                                                          |
| 238             | Ethiopia | 2001           | Rice (Milled Equivalent)  | 1                                                           |
| 238             | Ethiopia | 2001           | Roots, Other              | 144                                                         |
| 238             | Ethiopia | 2001           | Sorghum                   | 63                                                          |
| 238             | Ethiopia | 2001           | Soyabean Oil              | 1                                                           |
| 238             | Ethiopia | 2001           | Sugar, Refined Equivalent | 9                                                           |
| 238             | Ethiopia | 2001           | Sweet Potatoes            | 15                                                          |
| 238             | Ethiopia | 2001           | Tomatoes                  | 1                                                           |
| 238             | Ethiopia | 2001           | Vegetables, Other         | 27                                                          |
| 238             | Ethiopia | 2001           | Wheat                     | 92                                                          |
| 238             | Ethiopia | 2001           | Yams                      | 7                                                           |
| 238             | Ethiopia | 2002           | Bananas                   | 6                                                           |
| 238             | Ethiopia | 2002           | Barley                    | 36                                                          |
| 238             | Ethiopia | 2002           | Beans                     | 1                                                           |
| 238             | Ethiopia | 2002           | Beer                      | 6                                                           |
| 238             | Ethiopia | 2002           | Beverages, Fermented      | 8                                                           |
| 238             | Ethiopia | 2002           | Bovine Meat               | 14                                                          |
| 238             | Ethiopia | 2002           | Butter, Ghee              | 1                                                           |
| 238             | Ethiopia | 2002           | Cereals, Other            | 67                                                          |
| 238             | Ethiopia | 2002           | Coffee                    | 1                                                           |
| 238             | Ethiopia | 2002           | Eggs                      | 1                                                           |
| 238             | Ethiopia | 2002           | Fats, Animals, Raw        | 1                                                           |
| 238             | Ethiopia | 2002           | Fruits, Other             | 7                                                           |
| 238             | Ethiopia | 2002           | Honey                     | 2                                                           |
| 238             | Ethiopia | 2002           | Maize                     | 109                                                         |
| 238             | Ethiopia | 2002           | Meat, Other               | 3                                                           |
| 238             | Ethiopia | 2002           | Milk, Whole               | 86                                                          |
| 238             | Ethiopia | 2002           | Millet                    | 9                                                           |
| 238             | Ethiopia | 2002           | Mutton & Goat Meat        | 3                                                           |
| 238             | Ethiopia | 2002           | Nuts                      | 3                                                           |
| 238             | Ethiopia | 2002           | Oats                      | 1                                                           |
| 238             | Ethiopia | 2002           | Offals, Edible            | 4                                                           |
| 238             | Ethiopia | 2002           | Oilcrops Oil, Other       | 1                                                           |
| 238             | Ethiopia | 2002           | Onions                    | 5                                                           |
| 238             | Ethiopia | 2002           | Oranges, Mandarines       | 1                                                           |
| 238             | Ethiopia | 2002           | Palm Oil                  | 1                                                           |
| 238             | Ethiopia | 2002           | Peas                      | 6                                                           |
| 238             | Ethiopia | 2002           | Pimento                   | 4                                                           |



## Dietary calcium and zinc deficiency risks are decreasing but remain prevalent

| FAO countrycode | Country  | Reference year | Food item                 | Gross food supply (g capita <sup>-1</sup> d <sup>-1</sup> ) |
|-----------------|----------|----------------|---------------------------|-------------------------------------------------------------|
| 238             | Ethiopia | 2002           | Potatoes                  | 12                                                          |
| 238             | Ethiopia | 2002           | Poultry Meat              | 2                                                           |
| 238             | Ethiopia | 2002           | Pulses, Other             | 26                                                          |
| 238             | Ethiopia | 2002           | Rice (Milled Equivalent)  | 1                                                           |
| 238             | Ethiopia | 2002           | Roots, Other              | 146                                                         |
| 238             | Ethiopia | 2002           | Sorghum                   | 62                                                          |
| 238             | Ethiopia | 2002           | Sugar, Refined Equivalent | 9                                                           |
| 238             | Ethiopia | 2002           | Sweet Potatoes            | 13                                                          |
| 238             | Ethiopia | 2002           | Tomatoes                  | 1                                                           |
| 238             | Ethiopia | 2002           | Vegetables, Other         | 29                                                          |
| 238             | Ethiopia | 2002           | Wheat                     | 92                                                          |
| 238             | Ethiopia | 2002           | Yams                      | 7                                                           |
| 238             | Ethiopia | 2003           | Bananas                   | 6                                                           |
| 238             | Ethiopia | 2003           | Barley                    | 35                                                          |
| 238             | Ethiopia | 2003           | Beans                     | 2                                                           |
| 238             | Ethiopia | 2003           | Beer                      | 6                                                           |
| 238             | Ethiopia | 2003           | Beverages, Fermented      | 8                                                           |
| 238             | Ethiopia | 2003           | Bovine Meat               | 13                                                          |
| 238             | Ethiopia | 2003           | Butter, Ghee              | 1                                                           |
| 238             | Ethiopia | 2003           | Cereals, Other            | 68                                                          |
| 238             | Ethiopia | 2003           | Coffee                    | 1                                                           |
| 238             | Ethiopia | 2003           | Eggs                      | 1                                                           |
| 238             | Ethiopia | 2003           | Fats, Animals, Raw        | 1                                                           |
| 238             | Ethiopia | 2003           | Fruits, Other             | 8                                                           |
| 238             | Ethiopia | 2003           | Groundnuts (Shelled Eq)   | 1                                                           |
| 238             | Ethiopia | 2003           | Honey                     | 1                                                           |
| 238             | Ethiopia | 2003           | Maize                     | 106                                                         |
| 238             | Ethiopia | 2003           | Meat, Other               | 3                                                           |
| 238             | Ethiopia | 2003           | Milk, Whole               | 86                                                          |
| 238             | Ethiopia | 2003           | Millet                    | 9                                                           |
| 238             | Ethiopia | 2003           | Mutton & Goat Meat        | 3                                                           |
| 238             | Ethiopia | 2003           | Nuts                      | 3                                                           |
| 238             | Ethiopia | 2003           | Oats                      | 1                                                           |
| 238             | Ethiopia | 2003           | Offals, Edible            | 4                                                           |
| 238             | Ethiopia | 2003           | Oilcrops Oil, Other       | 2                                                           |
| 238             | Ethiopia | 2003           | Onions                    | 6                                                           |
| 238             | Ethiopia | 2003           | Oranges, Mandarines       | 1                                                           |
| 238             | Ethiopia | 2003           | Palm Oil                  | 1                                                           |
| 238             | Ethiopia | 2003           | Peas                      | 7                                                           |
| 238             | Ethiopia | 2003           | Pimento                   | 4                                                           |
| 238             | Ethiopia | 2003           | Potatoes                  | 17                                                          |
| 238             | Ethiopia | 2003           | Poultry Meat              | 2                                                           |
| 238             | Ethiopia | 2003           | Pulses, Other             | 25                                                          |
| 238             | Ethiopia | 2003           | Rice (Milled Equivalent)  | 1                                                           |
| 238             | Ethiopia | 2003           | Roots, Other              | 147                                                         |
| 238             | Ethiopia | 2003           | Sorghum                   | 64                                                          |
| 238             | Ethiopia | 2003           | Sugar, Refined Equivalent | 9                                                           |
| 238             | Ethiopia | 2003           | Sweet Potatoes            | 19                                                          |
| 238             | Ethiopia | 2003           | Tomatoes                  | 2                                                           |
| 238             | Ethiopia | 2003           | Vegetables, Other         | 27                                                          |
| 238             | Ethiopia | 2003           | Wheat                     | 97                                                          |
| 238             | Ethiopia | 2003           | Yams                      | 7                                                           |
| 238             | Ethiopia | 2004           | Bananas                   | 6                                                           |
| 238             | Ethiopia | 2004           | Barley                    | 40                                                          |
| 238             | Ethiopia | 2004           | Beans                     | 5                                                           |
| 238             | Ethiopia | 2004           | Beer                      | 6                                                           |
| 238             | Ethiopia | 2004           | Beverages, Fermented      | 9                                                           |
| 238             | Ethiopia | 2004           | Bovine Meat               | 12                                                          |
| 238             | Ethiopia | 2004           | Butter, Ghee              | 1                                                           |
| 238             | Ethiopia | 2004           | Cereals, Other            | 69                                                          |
| 238             | Ethiopia | 2004           | Coffee                    | 1                                                           |
| 238             | Ethiopia | 2004           | Eggs                      | 1                                                           |
| 238             | Ethiopia | 2004           | Fats, Animals, Raw        | 1                                                           |
| 238             | Ethiopia | 2004           | Fruits, Other             | 8                                                           |
| 238             | Ethiopia | 2004           | Honey                     | 2                                                           |
| 238             | Ethiopia | 2004           | Maize                     | 100                                                         |
| 238             | Ethiopia | 2004           | Meat, Other               | 3                                                           |
| 238             | Ethiopia | 2004           | Milk, Whole               | 83                                                          |
| 238             | Ethiopia | 2004           | Millet                    | 10                                                          |
| 238             | Ethiopia | 2004           | Mutton & Goat Meat        | 4                                                           |
| 238             | Ethiopia | 2004           | Nuts                      | 2                                                           |
| 238             | Ethiopia | 2004           | Oats                      | 1                                                           |
| 238             | Ethiopia | 2004           | Offals, Edible            | 4                                                           |
| 238             | Ethiopia | 2004           | Oilcrops Oil, Other       | 2                                                           |
| 238             | Ethiopia | 2004           | Onions                    | 7                                                           |
| 238             | Ethiopia | 2004           | Oranges, Mandarines       | 1                                                           |
| 238             | Ethiopia | 2004           | Palm Oil                  | 1                                                           |
| 238             | Ethiopia | 2004           | Peas                      | 7                                                           |
| 238             | Ethiopia | 2004           | Pimento                   | 4                                                           |
| 238             | Ethiopia | 2004           | Potatoes                  | 16                                                          |
| 238             | Ethiopia | 2004           | Poultry Meat              | 2                                                           |
| 238             | Ethiopia | 2004           | Pulses, Other             | 25                                                          |
| 238             | Ethiopia | 2004           | Rice (Milled Equivalent)  | 1                                                           |
| 238             | Ethiopia | 2004           | Roots, Other              | 150                                                         |
| 238             | Ethiopia | 2004           | Sorghum                   | 62                                                          |
| 238             | Ethiopia | 2004           | Soybean Oil               | 1                                                           |
| 238             | Ethiopia | 2004           | Sugar, Refined Equivalent | 13                                                          |
| 238             | Ethiopia | 2004           | Sweet Potatoes            | 17                                                          |
| 238             | Ethiopia | 2004           | Tomatoes                  | 1                                                           |
| 238             | Ethiopia | 2004           | Vegetables, Other         | 33                                                          |
| 238             | Ethiopia | 2004           | Wheat                     | 91                                                          |
| 238             | Ethiopia | 2004           | Yams                      | 6                                                           |
| 238             | Ethiopia | 2005           | Bananas                   | 7                                                           |
| 238             | Ethiopia | 2005           | Barley                    | 41                                                          |
| 238             | Ethiopia | 2005           | Beans                     | 7                                                           |
| 238             | Ethiopia | 2005           | Beer                      | 7                                                           |
| 238             | Ethiopia | 2005           | Beverages, Fermented      | 10                                                          |

## Dietary calcium and zinc deficiency risks are decreasing but remain prevalent

| FAO countrycode | Country  | Reference year | Food item                 | Gross food supply (g capita <sup>-1</sup> d <sup>-1</sup> ) |
|-----------------|----------|----------------|---------------------------|-------------------------------------------------------------|
| 238             | Ethiopia | 2005           | Bovine Meat               | 13                                                          |
| 238             | Ethiopia | 2005           | Butter, Ghee              | 1                                                           |
| 238             | Ethiopia | 2005           | Cereals, Other            | 74                                                          |
| 238             | Ethiopia | 2005           | Eggs                      | 1                                                           |
| 238             | Ethiopia | 2005           | Fats, Animals, Raw        | 1                                                           |
| 238             | Ethiopia | 2005           | Fruits, Other             | 12                                                          |
| 238             | Ethiopia | 2005           | Honey                     | 1                                                           |
| 238             | Ethiopia | 2005           | Maize                     | 111                                                         |
| 238             | Ethiopia | 2005           | Meat, Other               | 3                                                           |
| 238             | Ethiopia | 2005           | Milk, Whole               | 67                                                          |
| 238             | Ethiopia | 2005           | Millet                    | 11                                                          |
| 238             | Ethiopia | 2005           | Mutton & Goat Meat        | 4                                                           |
| 238             | Ethiopia | 2005           | Nuts                      | 3                                                           |
| 238             | Ethiopia | 2005           | Oats                      | 2                                                           |
| 238             | Ethiopia | 2005           | Offals, Edible            | 4                                                           |
| 238             | Ethiopia | 2005           | Oilcrops Oil, Other       | 3                                                           |
| 238             | Ethiopia | 2005           | Oilcrops, Other           | 1                                                           |
| 238             | Ethiopia | 2005           | Onions                    | 7                                                           |
| 238             | Ethiopia | 2005           | Oranges, Mandarines       | 2                                                           |
| 238             | Ethiopia | 2005           | Palm Oil                  | 1                                                           |
| 238             | Ethiopia | 2005           | Peas                      | 7                                                           |
| 238             | Ethiopia | 2005           | Pimento                   | 4                                                           |
| 238             | Ethiopia | 2005           | Potatoes                  | 13                                                          |
| 238             | Ethiopia | 2005           | Poultry Meat              | 2                                                           |
| 238             | Ethiopia | 2005           | Pulses, Other             | 28                                                          |
| 238             | Ethiopia | 2005           | Rice (Milled Equivalent)  | 1                                                           |
| 238             | Ethiopia | 2005           | Roots, Other              | 152                                                         |
| 238             | Ethiopia | 2005           | Sorghum                   | 57                                                          |
| 238             | Ethiopia | 2005           | Soyabean Oil              | 1                                                           |
| 238             | Ethiopia | 2005           | Sugar, Refined Equivalent | 12                                                          |
| 238             | Ethiopia | 2005           | Sweet Potatoes            | 15                                                          |
| 238             | Ethiopia | 2005           | Tomatoes                  | 1                                                           |
| 238             | Ethiopia | 2005           | Vegetables, Other         | 36                                                          |
| 238             | Ethiopia | 2005           | Wheat                     | 99                                                          |
| 238             | Ethiopia | 2005           | Yams                      | 5                                                           |
| 238             | Ethiopia | 2006           | Bananas                   | 7                                                           |
| 238             | Ethiopia | 2006           | Barley                    | 38                                                          |
| 238             | Ethiopia | 2006           | Beans                     | 4                                                           |
| 238             | Ethiopia | 2006           | Beer                      | 10                                                          |
| 238             | Ethiopia | 2006           | Beverages, Fermented      | 12                                                          |
| 238             | Ethiopia | 2006           | Bovine Meat               | 13                                                          |
| 238             | Ethiopia | 2006           | Butter, Ghee              | 1                                                           |
| 238             | Ethiopia | 2006           | Cereals, Other            | 73                                                          |
| 238             | Ethiopia | 2006           | Eggs                      | 1                                                           |
| 238             | Ethiopia | 2006           | Fats, Animals, Raw        | 1                                                           |
| 238             | Ethiopia | 2006           | Fruits, Other             | 13                                                          |
| 238             | Ethiopia | 2006           | Groundnuts (Shelled Eq)   | 1                                                           |
| 238             | Ethiopia | 2006           | Honey                     | 2                                                           |
| 238             | Ethiopia | 2006           | Maize                     | 113                                                         |
| 238             | Ethiopia | 2006           | Meat, Other               | 3                                                           |
| 238             | Ethiopia | 2006           | Milk, Whole               | 72                                                          |
| 238             | Ethiopia | 2006           | Millet                    | 14                                                          |
| 238             | Ethiopia | 2006           | Mutton & Goat Meat        | 4                                                           |
| 238             | Ethiopia | 2006           | Nuts                      | 2                                                           |
| 238             | Ethiopia | 2006           | Oats                      | 1                                                           |
| 238             | Ethiopia | 2006           | Offals, Edible            | 4                                                           |
| 238             | Ethiopia | 2006           | Oilcrops Oil, Other       | 2                                                           |
| 238             | Ethiopia | 2006           | Oilcrops, Other           | 1                                                           |
| 238             | Ethiopia | 2006           | Onions                    | 5                                                           |
| 238             | Ethiopia | 2006           | Oranges, Mandarines       | 2                                                           |
| 238             | Ethiopia | 2006           | Palm Oil                  | 1                                                           |
| 238             | Ethiopia | 2006           | Peas                      | 6                                                           |
| 238             | Ethiopia | 2006           | Pimento                   | 3                                                           |
| 238             | Ethiopia | 2006           | Potatoes                  | 13                                                          |
| 238             | Ethiopia | 2006           | Poultry Meat              | 2                                                           |
| 238             | Ethiopia | 2006           | Pulses, Other             | 31                                                          |
| 238             | Ethiopia | 2006           | Rice (Milled Equivalent)  | 1                                                           |
| 238             | Ethiopia | 2006           | Roots, Other              | 154                                                         |
| 238             | Ethiopia | 2006           | Sorghum                   | 66                                                          |
| 238             | Ethiopia | 2006           | Soyabean Oil              | 1                                                           |
| 238             | Ethiopia | 2006           | Sugar, Refined Equivalent | 13                                                          |
| 238             | Ethiopia | 2006           | Sweet Potatoes            | 14                                                          |
| 238             | Ethiopia | 2006           | Tomatoes                  | 1                                                           |
| 238             | Ethiopia | 2006           | Vegetables, Other         | 33                                                          |
| 238             | Ethiopia | 2006           | Wheat                     | 88                                                          |
| 238             | Ethiopia | 2006           | Yams                      | 6                                                           |
| 238             | Ethiopia | 2007           | Bananas                   | 8                                                           |
| 238             | Ethiopia | 2007           | Barley                    | 36                                                          |
| 238             | Ethiopia | 2007           | Beans                     | 4                                                           |
| 238             | Ethiopia | 2007           | Beer                      | 11                                                          |
| 238             | Ethiopia | 2007           | Beverages, Fermented      | 9                                                           |
| 238             | Ethiopia | 2007           | Bovine Meat               | 12                                                          |
| 238             | Ethiopia | 2007           | Butter, Ghee              | 1                                                           |
| 238             | Ethiopia | 2007           | Cereals, Other            | 74                                                          |
| 238             | Ethiopia | 2007           | Coffee                    | 1                                                           |
| 238             | Ethiopia | 2007           | Eggs                      | 1                                                           |
| 238             | Ethiopia | 2007           | Fats, Animals, Raw        | 1                                                           |
| 238             | Ethiopia | 2007           | Fruits, Other             | 13                                                          |
| 238             | Ethiopia | 2007           | Groundnuts (Shelled Eq)   | 1                                                           |
| 238             | Ethiopia | 2007           | Honey                     | 1                                                           |
| 238             | Ethiopia | 2007           | Maize                     | 109                                                         |
| 238             | Ethiopia | 2007           | Meat, Other               | 3                                                           |
| 238             | Ethiopia | 2007           | Milk, Whole               | 81                                                          |
| 238             | Ethiopia | 2007           | Millet                    | 11                                                          |
| 238             | Ethiopia | 2007           | Mutton & Goat Meat        | 5                                                           |
| 238             | Ethiopia | 2007           | Nuts                      | 2                                                           |
| 238             | Ethiopia | 2007           | Oats                      | 1                                                           |

## Dietary calcium and zinc deficiency risks are decreasing but remain prevalent

| FAO countrycode | Country  | Reference year | Food item                 | Gross food supply (g capita <sup>-1</sup> d <sup>-1</sup> ) |
|-----------------|----------|----------------|---------------------------|-------------------------------------------------------------|
| 238             | Ethiopia | 2007           | Offals, Edible            | 4                                                           |
| 238             | Ethiopia | 2007           | Oilcrops Oil, Other       | 2                                                           |
| 238             | Ethiopia | 2007           | Onions                    | 6                                                           |
| 238             | Ethiopia | 2007           | Oranges, Mandarines       | 2                                                           |
| 238             | Ethiopia | 2007           | Palm Oil                  | 2                                                           |
| 238             | Ethiopia | 2007           | Peas                      | 7                                                           |
| 238             | Ethiopia | 2007           | Pimento                   | 3                                                           |
| 238             | Ethiopia | 2007           | Potatoes                  | 15                                                          |
| 238             | Ethiopia | 2007           | Poultry Meat              | 2                                                           |
| 238             | Ethiopia | 2007           | Pulses, Other             | 32                                                          |
| 238             | Ethiopia | 2007           | Rice (Milled Equivalent)  | 2                                                           |
| 238             | Ethiopia | 2007           | Roots, Other              | 152                                                         |
| 238             | Ethiopia | 2007           | Sorghum                   | 62                                                          |
| 238             | Ethiopia | 2007           | Soyabean Oil              | 1                                                           |
| 238             | Ethiopia | 2007           | Spices, Other             | 1                                                           |
| 238             | Ethiopia | 2007           | Sugar, Refined Equivalent | 13                                                          |
| 238             | Ethiopia | 2007           | Sweet Potatoes            | 18                                                          |
| 238             | Ethiopia | 2007           | Tomatoes                  | 1                                                           |
| 238             | Ethiopia | 2007           | Vegetables, Other         | 28                                                          |
| 238             | Ethiopia | 2007           | Wheat                     | 87                                                          |
| 238             | Ethiopia | 2007           | Yams                      | 8                                                           |
| 238             | Ethiopia | 2008           | Bananas                   | 6                                                           |
| 238             | Ethiopia | 2008           | Barley                    | 36                                                          |
| 238             | Ethiopia | 2008           | Beans                     | 5                                                           |
| 238             | Ethiopia | 2008           | Beer                      | 10                                                          |
| 238             | Ethiopia | 2008           | Beverages, Fermented      | 11                                                          |
| 238             | Ethiopia | 2008           | Bovine Meat               | 13                                                          |
| 238             | Ethiopia | 2008           | Butter, Ghee              | 1                                                           |
| 238             | Ethiopia | 2008           | Cereals, Other            | 70                                                          |
| 238             | Ethiopia | 2008           | Coffee                    | 2                                                           |
| 238             | Ethiopia | 2008           | Eggs                      | 1                                                           |
| 238             | Ethiopia | 2008           | Fats, Animals, Raw        | 1                                                           |
| 238             | Ethiopia | 2008           | Freshwater Fish           | 1                                                           |
| 238             | Ethiopia | 2008           | Fruits, Other             | 10                                                          |
| 238             | Ethiopia | 2008           | Groundnuts (Shelled Eq)   | 1                                                           |
| 238             | Ethiopia | 2008           | Honey                     | 1                                                           |
| 238             | Ethiopia | 2008           | Maize                     | 115                                                         |
| 238             | Ethiopia | 2008           | Meat, Other               | 4                                                           |
| 238             | Ethiopia | 2008           | Milk, Whole               | 102                                                         |
| 238             | Ethiopia | 2008           | Millet                    | 13                                                          |
| 238             | Ethiopia | 2008           | Mutton & Goat Meat        | 5                                                           |
| 238             | Ethiopia | 2008           | Nuts                      | 2                                                           |
| 238             | Ethiopia | 2008           | Oats                      | 1                                                           |
| 238             | Ethiopia | 2008           | Offals, Edible            | 4                                                           |
| 238             | Ethiopia | 2008           | Oilcrops Oil, Other       | 2                                                           |
| 238             | Ethiopia | 2008           | Oilcrops, Other           | 1                                                           |
| 238             | Ethiopia | 2008           | Onions                    | 5                                                           |
| 238             | Ethiopia | 2008           | Oranges, Mandarines       | 1                                                           |
| 238             | Ethiopia | 2008           | Palm Oil                  | 5                                                           |
| 238             | Ethiopia | 2008           | Peas                      | 8                                                           |
| 238             | Ethiopia | 2008           | Pimento                   | 4                                                           |
| 238             | Ethiopia | 2008           | Potatoes                  | 10                                                          |
| 238             | Ethiopia | 2008           | Poultry Meat              | 2                                                           |
| 238             | Ethiopia | 2008           | Pulses, Other             | 34                                                          |
| 238             | Ethiopia | 2008           | Rice (Milled Equivalent)  | 2                                                           |
| 238             | Ethiopia | 2008           | Roots, Other              | 142                                                         |
| 238             | Ethiopia | 2008           | Sorghum                   | 64                                                          |
| 238             | Ethiopia | 2008           | Spices, Other             | 1                                                           |
| 238             | Ethiopia | 2008           | Sugar, Refined Equivalent | 13                                                          |
| 238             | Ethiopia | 2008           | Sweet Potatoes            | 9                                                           |
| 238             | Ethiopia | 2008           | Sweeteners, Other         | 1                                                           |
| 238             | Ethiopia | 2008           | Tomatoes                  | 1                                                           |
| 238             | Ethiopia | 2008           | Vegetables, Other         | 31                                                          |
| 238             | Ethiopia | 2008           | Wheat                     | 91                                                          |
| 238             | Ethiopia | 2008           | Yams                      | 6                                                           |
| 238             | Ethiopia | 2009           | Bananas                   | 6                                                           |
| 238             | Ethiopia | 2009           | Barley                    | 43                                                          |
| 238             | Ethiopia | 2009           | Beans                     | 6                                                           |
| 238             | Ethiopia | 2009           | Beer                      | 10                                                          |
| 238             | Ethiopia | 2009           | Beverages, Fermented      | 12                                                          |
| 238             | Ethiopia | 2009           | Bovine Meat               | 11                                                          |
| 238             | Ethiopia | 2009           | Butter, Ghee              | 1                                                           |
| 238             | Ethiopia | 2009           | Cereals, Other            | 69                                                          |
| 238             | Ethiopia | 2009           | Coffee                    | 2                                                           |
| 238             | Ethiopia | 2009           | Eggs                      | 1                                                           |
| 238             | Ethiopia | 2009           | Fats, Animals, Raw        | 1                                                           |
| 238             | Ethiopia | 2009           | Freshwater Fish           | 1                                                           |
| 238             | Ethiopia | 2009           | Fruits, Other             | 12                                                          |
| 238             | Ethiopia | 2009           | Groundnuts (Shelled Eq)   | 1                                                           |
| 238             | Ethiopia | 2009           | Honey                     | 1                                                           |
| 238             | Ethiopia | 2009           | Maize                     | 113                                                         |
| 238             | Ethiopia | 2009           | Meat, Other               | 4                                                           |
| 238             | Ethiopia | 2009           | Milk, Whole               | 88                                                          |
| 238             | Ethiopia | 2009           | Millet                    | 13                                                          |
| 238             | Ethiopia | 2009           | Mutton & Goat Meat        | 5                                                           |
| 238             | Ethiopia | 2009           | Nuts                      | 2                                                           |
| 238             | Ethiopia | 2009           | Oats                      | 1                                                           |
| 238             | Ethiopia | 2009           | Offals, Edible            | 4                                                           |
| 238             | Ethiopia | 2009           | Oilcrops Oil, Other       | 1                                                           |
| 238             | Ethiopia | 2009           | Oilcrops, Other           | 1                                                           |
| 238             | Ethiopia | 2009           | Onions                    | 5                                                           |
| 238             | Ethiopia | 2009           | Oranges, Mandarines       | 2                                                           |
| 238             | Ethiopia | 2009           | Palm Oil                  | 5                                                           |
| 238             | Ethiopia | 2009           | Peas                      | 8                                                           |
| 238             | Ethiopia | 2009           | Pimento                   | 3                                                           |
| 238             | Ethiopia | 2009           | Potatoes                  | 16                                                          |
| 238             | Ethiopia | 2009           | Poultry Meat              | 2                                                           |

Dietary calcium and zinc deficiency risks are decreasing but remain prevalent

| FAO countrycode | Country  | Reference year | Food item                 | Gross food supply (g capita <sup>-1</sup> d <sup>-1</sup> ) |
|-----------------|----------|----------------|---------------------------|-------------------------------------------------------------|
| 238             | Ethiopia | 2009           | Pulses, Other             | 34                                                          |
| 238             | Ethiopia | 2009           | Rice (Milled Equivalent)  | 3                                                           |
| 238             | Ethiopia | 2009           | Roots, Other              | 133                                                         |
| 238             | Ethiopia | 2009           | Sorghum                   | 71                                                          |
| 238             | Ethiopia | 2009           | Spices, Other             | 1                                                           |
| 238             | Ethiopia | 2009           | Sugar, Refined Equivalent | 12                                                          |
| 238             | Ethiopia | 2009           | Sweet Potatoes            | 15                                                          |
| 238             | Ethiopia | 2009           | Tomatoes                  | 1                                                           |
| 238             | Ethiopia | 2009           | Vegetables, Other         | 36                                                          |
| 238             | Ethiopia | 2009           | Wheat                     | 99                                                          |
| 238             | Ethiopia | 2009           | Yams                      | 10                                                          |
| 238             | Ethiopia | 2010           | Bananas                   | 8                                                           |
| 238             | Ethiopia | 2010           | Barley                    | 40                                                          |
| 238             | Ethiopia | 2010           | Beans                     | 7                                                           |
| 238             | Ethiopia | 2010           | Beer                      | 11                                                          |
| 238             | Ethiopia | 2010           | Beverages, Fermented      | 14                                                          |
| 238             | Ethiopia | 2010           | Bovine Meat               | 13                                                          |
| 238             | Ethiopia | 2010           | Butter, Ghee              | 1                                                           |
| 238             | Ethiopia | 2010           | Cereals, Other            | 74                                                          |
| 238             | Ethiopia | 2010           | Coffee                    | 3                                                           |
| 238             | Ethiopia | 2010           | Eggs                      | 1                                                           |
| 238             | Ethiopia | 2010           | Fats, Animals, Raw        | 1                                                           |
| 238             | Ethiopia | 2010           | Freshwater Fish           | 1                                                           |
| 238             | Ethiopia | 2010           | Fruits, Other             | 10                                                          |
| 238             | Ethiopia | 2010           | Groundnuts (Shelled Eq)   | 1                                                           |
| 238             | Ethiopia | 2010           | Honey                     | 2                                                           |
| 238             | Ethiopia | 2010           | Maize                     | 116                                                         |
| 238             | Ethiopia | 2010           | Meat, Other               | 4                                                           |
| 238             | Ethiopia | 2010           | Milk, Whole               | 123                                                         |
| 238             | Ethiopia | 2010           | Millet                    | 16                                                          |
| 238             | Ethiopia | 2010           | Mutton & Goat Meat        | 4                                                           |
| 238             | Ethiopia | 2010           | Nuts                      | 2                                                           |
| 238             | Ethiopia | 2010           | Oats                      | 1                                                           |
| 238             | Ethiopia | 2010           | Offals, Edible            | 4                                                           |
| 238             | Ethiopia | 2010           | Oilcrops Oil, Other       | 1                                                           |
| 238             | Ethiopia | 2010           | Onions                    | 7                                                           |
| 238             | Ethiopia | 2010           | Oranges, Mandarines       | 2                                                           |
| 238             | Ethiopia | 2010           | Palm Oil                  | 6                                                           |
| 238             | Ethiopia | 2010           | Peas                      | 8                                                           |
| 238             | Ethiopia | 2010           | Pimento                   | 2                                                           |
| 238             | Ethiopia | 2010           | Potatoes                  | 11                                                          |
| 238             | Ethiopia | 2010           | Poultry Meat              | 2                                                           |
| 238             | Ethiopia | 2010           | Pulses, Other             | 34                                                          |
| 238             | Ethiopia | 2010           | Rice (Milled Equivalent)  | 3                                                           |
| 238             | Ethiopia | 2010           | Roots, Other              | 133                                                         |
| 238             | Ethiopia | 2010           | Sorghum                   | 70                                                          |
| 238             | Ethiopia | 2010           | Spices, Other             | 1                                                           |
| 238             | Ethiopia | 2010           | Sugar, Refined Equivalent | 13                                                          |
| 238             | Ethiopia | 2010           | Sweet Potatoes            | 23                                                          |
| 238             | Ethiopia | 2010           | Tomatoes                  | 1                                                           |
| 238             | Ethiopia | 2010           | Vegetables, Other         | 43                                                          |
| 238             | Ethiopia | 2010           | Wheat                     | 88                                                          |
| 238             | Ethiopia | 2010           | Yams                      | 9                                                           |
| 238             | Ethiopia | 2011           | Bananas                   | 8                                                           |
| 238             | Ethiopia | 2011           | Barley                    | 39                                                          |
| 238             | Ethiopia | 2011           | Beans                     | 6                                                           |
| 238             | Ethiopia | 2011           | Beer                      | 11                                                          |
| 238             | Ethiopia | 2011           | Beverages, Fermented      | 14                                                          |
| 238             | Ethiopia | 2011           | Bovine Meat               | 12                                                          |
| 238             | Ethiopia | 2011           | Butter, Ghee              | 1                                                           |
| 238             | Ethiopia | 2011           | Cereals, Other            | 75                                                          |
| 238             | Ethiopia | 2011           | Coffee                    | 2                                                           |
| 238             | Ethiopia | 2011           | Eggs                      | 1                                                           |
| 238             | Ethiopia | 2011           | Fats, Animals, Raw        | 1                                                           |
| 238             | Ethiopia | 2011           | Freshwater Fish           | 1                                                           |
| 238             | Ethiopia | 2011           | Fruits, Other             | 11                                                          |
| 238             | Ethiopia | 2011           | Groundnuts (Shelled Eq)   | 2                                                           |
| 238             | Ethiopia | 2011           | Honey                     | 1                                                           |
| 238             | Ethiopia | 2011           | Maize                     | 118                                                         |
| 238             | Ethiopia | 2011           | Meat, Other               | 3                                                           |
| 238             | Ethiopia | 2011           | Milk, Whole               | 95                                                          |
| 238             | Ethiopia | 2011           | Millet                    | 16                                                          |
| 238             | Ethiopia | 2011           | Mutton & Goat Meat        | 4                                                           |
| 238             | Ethiopia | 2011           | Nuts                      | 2                                                           |
| 238             | Ethiopia | 2011           | Oats                      | 1                                                           |
| 238             | Ethiopia | 2011           | Offals, Edible            | 4                                                           |
| 238             | Ethiopia | 2011           | Oilcrops Oil, Other       | 2                                                           |
| 238             | Ethiopia | 2011           | Onions                    | 9                                                           |
| 238             | Ethiopia | 2011           | Oranges, Mandarines       | 2                                                           |
| 238             | Ethiopia | 2011           | Palm Oil                  | 5                                                           |
| 238             | Ethiopia | 2011           | Peas                      | 8                                                           |
| 238             | Ethiopia | 2011           | Pimento                   | 3                                                           |
| 238             | Ethiopia | 2011           | Potatoes                  | 10                                                          |
| 238             | Ethiopia | 2011           | Poultry Meat              | 2                                                           |
| 238             | Ethiopia | 2011           | Pulses, Other             | 38                                                          |
| 238             | Ethiopia | 2011           | Rape and Mustard Oil      | 1                                                           |
| 238             | Ethiopia | 2011           | Rice (Milled Equivalent)  | 4                                                           |
| 238             | Ethiopia | 2011           | Roots, Other              | 141                                                         |
| 238             | Ethiopia | 2011           | Sorghum                   | 69                                                          |
| 238             | Ethiopia | 2011           | Soybeans                  | 1                                                           |
| 238             | Ethiopia | 2011           | Spices, Other             | 1                                                           |
| 238             | Ethiopia | 2011           | Sugar, Refined Equivalent | 15                                                          |
| 238             | Ethiopia | 2011           | Sweet Potatoes            | 12                                                          |
| 238             | Ethiopia | 2011           | Tomatoes                  | 2                                                           |
| 238             | Ethiopia | 2011           | Vegetables, Other         | 38                                                          |
| 238             | Ethiopia | 2011           | Wheat                     | 87                                                          |
| 238             | Ethiopia | 2011           | Yams                      | 8                                                           |

Dietary calcium and zinc deficiency risks are decreasing but remain prevalent

| FAO countrycode | Country | Reference year | Food item                 | Gross food supply (g capita <sup>-1</sup> d <sup>-1</sup> ) |
|-----------------|---------|----------------|---------------------------|-------------------------------------------------------------|
| 67              | Finland | 1992           | Apples                    | 40                                                          |
| 67              | Finland | 1992           | Bananas                   | 42                                                          |
| 67              | Finland | 1992           | Barley                    | 7                                                           |
| 67              | Finland | 1992           | Beer                      | 254                                                         |
| 67              | Finland | 1992           | Beverages, Alcoholic      | 20                                                          |
| 67              | Finland | 1992           | Beverages, Fermented      | 1                                                           |
| 67              | Finland | 1992           | Bovine Meat               | 54                                                          |
| 67              | Finland | 1992           | Butter, Ghee              | 22                                                          |
| 67              | Finland | 1992           | Cereals, Other            | 1                                                           |
| 67              | Finland | 1992           | Cheese                    | 36                                                          |
| 67              | Finland | 1992           | Cocoa Beans               | 1                                                           |
| 67              | Finland | 1992           | Coconuts - Incl Copra     | 1                                                           |
| 67              | Finland | 1992           | Coffee                    | 33                                                          |
| 67              | Finland | 1992           | Cream                     | 18                                                          |
| 67              | Finland | 1992           | Crustaceans               | 4                                                           |
| 67              | Finland | 1992           | Demersal Fish             | 9                                                           |
| 67              | Finland | 1992           | Eggs                      | 29                                                          |
| 67              | Finland | 1992           | Fats, Animals, Raw        | 2                                                           |
| 67              | Finland | 1992           | Freshwater Fish           | 22                                                          |
| 67              | Finland | 1992           | Fruits, Other             | 42                                                          |
| 67              | Finland | 1992           | Grapefruit                | 2                                                           |
| 67              | Finland | 1992           | Grapes                    | 15                                                          |
| 67              | Finland | 1992           | Groundnuts (Shelled Eq)   | 1                                                           |
| 67              | Finland | 1992           | Honey                     | 1                                                           |
| 67              | Finland | 1992           | Lemons, Limes             | 2                                                           |
| 67              | Finland | 1992           | Marine Fish, Other        | 5                                                           |
| 67              | Finland | 1992           | Meat, Other               | 2                                                           |
| 67              | Finland | 1992           | Milk, Whole               | 397                                                         |
| 67              | Finland | 1992           | Molluscs, Other           | 1                                                           |
| 67              | Finland | 1992           | Mutton & Goat Meat        | 1                                                           |
| 67              | Finland | 1992           | Nuts                      | 3                                                           |
| 67              | Finland | 1992           | Oats                      | 15                                                          |
| 67              | Finland | 1992           | Offals, Edible            | 8                                                           |
| 67              | Finland | 1992           | Oilcrops Oil, Other       | 2                                                           |
| 67              | Finland | 1992           | Onions                    | 12                                                          |
| 67              | Finland | 1992           | Oranges, Mandarines       | 67                                                          |
| 67              | Finland | 1992           | Peas                      | 4                                                           |
| 67              | Finland | 1992           | Pelagic Fish              | 46                                                          |
| 67              | Finland | 1992           | Pigmeat                   | 88                                                          |
| 67              | Finland | 1992           | Pineapples                | 8                                                           |
| 67              | Finland | 1992           | Potatoes                  | 182                                                         |
| 67              | Finland | 1992           | Poultry Meat              | 21                                                          |
| 67              | Finland | 1992           | Rape and Mustard Oil      | 19                                                          |
| 67              | Finland | 1992           | Rice (Milled Equivalent)  | 13                                                          |
| 67              | Finland | 1992           | Rye                       | 48                                                          |
| 67              | Finland | 1992           | Soyabean Oil              | 3                                                           |
| 67              | Finland | 1992           | Sugar, Refined Equivalent | 101                                                         |
| 67              | Finland | 1992           | Sunflowerseed Oil         | 4                                                           |
| 67              | Finland | 1992           | Sweeteners, Other         | 8                                                           |
| 67              | Finland | 1992           | Tea                       | 1                                                           |
| 67              | Finland | 1992           | Tomatoes                  | 36                                                          |
| 67              | Finland | 1992           | Vegetables, Other         | 114                                                         |
| 67              | Finland | 1992           | Wheat                     | 193                                                         |
| 67              | Finland | 1992           | Wine                      | 15                                                          |
| 67              | Finland | 1993           | Apples                    | 47                                                          |
| 67              | Finland | 1993           | Bananas                   | 36                                                          |
| 67              | Finland | 1993           | Barley                    | 8                                                           |
| 67              | Finland | 1993           | Beer                      | 244                                                         |
| 67              | Finland | 1993           | Beverages, Alcoholic      | 16                                                          |
| 67              | Finland | 1993           | Beverages, Fermented      | 1                                                           |
| 67              | Finland | 1993           | Bovine Meat               | 52                                                          |
| 67              | Finland | 1993           | Butter, Ghee              | 21                                                          |
| 67              | Finland | 1993           | Cereals, Other            | 1                                                           |
| 67              | Finland | 1993           | Cheese                    | 33                                                          |
| 67              | Finland | 1993           | Coconut Oil               | 3                                                           |
| 67              | Finland | 1993           | Coconuts - Incl Copra     | 1                                                           |
| 67              | Finland | 1993           | Coffee                    | 36                                                          |
| 67              | Finland | 1993           | Cream                     | 16                                                          |
| 67              | Finland | 1993           | Crustaceans               | 5                                                           |
| 67              | Finland | 1993           | Demersal Fish             | 9                                                           |
| 67              | Finland | 1993           | Eggs                      | 28                                                          |
| 67              | Finland | 1993           | Fats, Animals, Raw        | 2                                                           |
| 67              | Finland | 1993           | Freshwater Fish           | 25                                                          |
| 67              | Finland | 1993           | Fruits, Other             | 35                                                          |
| 67              | Finland | 1993           | Grapefruit                | 2                                                           |
| 67              | Finland | 1993           | Grapes                    | 16                                                          |
| 67              | Finland | 1993           | Groundnuts (Shelled Eq)   | 1                                                           |
| 67              | Finland | 1993           | Honey                     | 1                                                           |
| 67              | Finland | 1993           | Lemons, Limes             | 2                                                           |
| 67              | Finland | 1993           | Marine Fish, Other        | 5                                                           |
| 67              | Finland | 1993           | Meat, Other               | 2                                                           |
| 67              | Finland | 1993           | Milk, Whole               | 395                                                         |
| 67              | Finland | 1993           | Molluscs, Other           | 1                                                           |
| 67              | Finland | 1993           | Mutton & Goat Meat        | 1                                                           |
| 67              | Finland | 1993           | Nuts                      | 4                                                           |
| 67              | Finland | 1993           | Oats                      | 15                                                          |
| 67              | Finland | 1993           | Offals, Edible            | 8                                                           |
| 67              | Finland | 1993           | Oilcrops Oil, Other       | 3                                                           |
| 67              | Finland | 1993           | Onions                    | 11                                                          |
| 67              | Finland | 1993           | Oranges, Mandarines       | 61                                                          |
| 67              | Finland | 1993           | Peas                      | 4                                                           |
| 67              | Finland | 1993           | Pelagic Fish              | 42                                                          |
| 67              | Finland | 1993           | Pigmeat                   | 81                                                          |
| 67              | Finland | 1993           | Pineapples                | 6                                                           |
| 67              | Finland | 1993           | Potatoes                  | 182                                                         |
| 67              | Finland | 1993           | Poultry Meat              | 20                                                          |
| 67              | Finland | 1993           | Rape and Mustard Oil      | 19                                                          |

Dietary calcium and zinc deficiency risks are decreasing but remain prevalent

| FAO countrycode | Country | Reference year | Food item                 | Gross food supply (g capita <sup>-1</sup> d <sup>-1</sup> ) |
|-----------------|---------|----------------|---------------------------|-------------------------------------------------------------|
| 67              | Finland | 1993           | Rice (Milled Equivalent)  | 13                                                          |
| 67              | Finland | 1993           | Rye                       | 50                                                          |
| 67              | Finland | 1993           | Sugar, Refined Equivalent | 103                                                         |
| 67              | Finland | 1993           | Sunflowerseed Oil         | 3                                                           |
| 67              | Finland | 1993           | Sweeteners, Other         | 7                                                           |
| 67              | Finland | 1993           | Tea                       | 1                                                           |
| 67              | Finland | 1993           | Tomatoes                  | 39                                                          |
| 67              | Finland | 1993           | Vegetables, Other         | 114                                                         |
| 67              | Finland | 1993           | Wheat                     | 161                                                         |
| 67              | Finland | 1993           | Wine                      | 15                                                          |
| 67              | Finland | 1994           | Apples                    | 49                                                          |
| 67              | Finland | 1994           | Bananas                   | 38                                                          |
| 67              | Finland | 1994           | Barley                    | 9                                                           |
| 67              | Finland | 1994           | Beer                      | 237                                                         |
| 67              | Finland | 1994           | Beverages, Alcoholic      | 12                                                          |
| 67              | Finland | 1994           | Bovine Meat               | 54                                                          |
| 67              | Finland | 1994           | Butter, Ghee              | 16                                                          |
| 67              | Finland | 1994           | Cereals, Other            | 1                                                           |
| 67              | Finland | 1994           | Cheese                    | 34                                                          |
| 67              | Finland | 1994           | Coconut Oil               | 2                                                           |
| 67              | Finland | 1994           | Coconuts - Incl Copra     | 1                                                           |
| 67              | Finland | 1994           | Coffee                    | 37                                                          |
| 67              | Finland | 1994           | Cream                     | 19                                                          |
| 67              | Finland | 1994           | Crustaceans               | 5                                                           |
| 67              | Finland | 1994           | Demersal Fish             | 11                                                          |
| 67              | Finland | 1994           | Eggs                      | 27                                                          |
| 67              | Finland | 1994           | Fats, Animals, Raw        | 2                                                           |
| 67              | Finland | 1994           | Freshwater Fish           | 24                                                          |
| 67              | Finland | 1994           | Fruits, Other             | 42                                                          |
| 67              | Finland | 1994           | Grapefruit                | 2                                                           |
| 67              | Finland | 1994           | Grapes                    | 17                                                          |
| 67              | Finland | 1994           | Groundnuts (Shelled Eq)   | 2                                                           |
| 67              | Finland | 1994           | Honey                     | 2                                                           |
| 67              | Finland | 1994           | Lemons, Limes             | 2                                                           |
| 67              | Finland | 1994           | Marine Fish, Other        | 6                                                           |
| 67              | Finland | 1994           | Meat, Other               | 2                                                           |
| 67              | Finland | 1994           | Milk, Whole               | 426                                                         |
| 67              | Finland | 1994           | Molluscs, Other           | 1                                                           |
| 67              | Finland | 1994           | Mutton & Goat Meat        | 1                                                           |
| 67              | Finland | 1994           | Nuts                      | 4                                                           |
| 67              | Finland | 1994           | Oats                      | 13                                                          |
| 67              | Finland | 1994           | Offals, Edible            | 7                                                           |
| 67              | Finland | 1994           | Oilcrops Oil, Other       | 2                                                           |
| 67              | Finland | 1994           | Onions                    | 9                                                           |
| 67              | Finland | 1994           | Oranges, Mandarines       | 53                                                          |
| 67              | Finland | 1994           | Peas                      | 4                                                           |
| 67              | Finland | 1994           | Pelagic Fish              | 42                                                          |
| 67              | Finland | 1994           | Pigmeat                   | 80                                                          |
| 67              | Finland | 1994           | Pineapples                | 9                                                           |
| 67              | Finland | 1994           | Potatoes                  | 184                                                         |
| 67              | Finland | 1994           | Poultry Meat              | 23                                                          |
| 67              | Finland | 1994           | Rape and Mustard Oil      | 19                                                          |
| 67              | Finland | 1994           | Rice (Milled Equivalent)  | 18                                                          |
| 67              | Finland | 1994           | Rye                       | 47                                                          |
| 67              | Finland | 1994           | Sugar, Refined Equivalent | 95                                                          |
| 67              | Finland | 1994           | Sunflowerseed Oil         | 3                                                           |
| 67              | Finland | 1994           | Sweeteners, Other         | 6                                                           |
| 67              | Finland | 1994           | Tea                       | 1                                                           |
| 67              | Finland | 1994           | Tomatoes                  | 46                                                          |
| 67              | Finland | 1994           | Vegetables, Other         | 139                                                         |
| 67              | Finland | 1994           | Wheat                     | 155                                                         |
| 67              | Finland | 1994           | Wine                      | 15                                                          |
| 67              | Finland | 1995           | Apples                    | 33                                                          |
| 67              | Finland | 1995           | Bananas                   | 32                                                          |
| 67              | Finland | 1995           | Barley                    | 22                                                          |
| 67              | Finland | 1995           | Beer                      | 242                                                         |
| 67              | Finland | 1995           | Beverages, Alcoholic      | 11                                                          |
| 67              | Finland | 1995           | Beverages, Fermented      | 1                                                           |
| 67              | Finland | 1995           | Bovine Meat               | 53                                                          |
| 67              | Finland | 1995           | Butter, Ghee              | 18                                                          |
| 67              | Finland | 1995           | Cereals, Other            | 1                                                           |
| 67              | Finland | 1995           | Cheese                    | 36                                                          |
| 67              | Finland | 1995           | Cocoa Beans               | 1                                                           |
| 67              | Finland | 1995           | Coconut Oil               | 2                                                           |
| 67              | Finland | 1995           | Coffee                    | 21                                                          |
| 67              | Finland | 1995           | Cream                     | 17                                                          |
| 67              | Finland | 1995           | Crustaceans               | 3                                                           |
| 67              | Finland | 1995           | Demersal Fish             | 10                                                          |
| 67              | Finland | 1995           | Eggs                      | 31                                                          |
| 67              | Finland | 1995           | Fats, Animals, Raw        | 3                                                           |
| 67              | Finland | 1995           | Freshwater Fish           | 29                                                          |
| 67              | Finland | 1995           | Fruits, Other             | 30                                                          |
| 67              | Finland | 1995           | Grapefruit                | 2                                                           |
| 67              | Finland | 1995           | Grapes                    | 10                                                          |
| 67              | Finland | 1995           | Groundnuts (Shelled Eq)   | 1                                                           |
| 67              | Finland | 1995           | Honey                     | 1                                                           |
| 67              | Finland | 1995           | Lemons, Limes             | 1                                                           |
| 67              | Finland | 1995           | Marine Fish, Other        | 1                                                           |
| 67              | Finland | 1995           | Meat, Other               | 2                                                           |
| 67              | Finland | 1995           | Milk, Whole               | 384                                                         |
| 67              | Finland | 1995           | Molluscs, Other           | 1                                                           |
| 67              | Finland | 1995           | Mutton & Goat Meat        | 1                                                           |
| 67              | Finland | 1995           | Nuts                      | 4                                                           |
| 67              | Finland | 1995           | Oats                      | 16                                                          |
| 67              | Finland | 1995           | Offals, Edible            | 7                                                           |
| 67              | Finland | 1995           | Oilcrops Oil, Other       | 3                                                           |
| 67              | Finland | 1995           | Olives                    | 1                                                           |

Dietary calcium and zinc deficiency risks are decreasing but remain prevalent

| FAO countrycode | Country | Reference year | Food item                 | Gross food supply (g capita <sup>-1</sup> d <sup>-1</sup> ) |
|-----------------|---------|----------------|---------------------------|-------------------------------------------------------------|
| 67              | Finland | 1995           | Onions                    | 11                                                          |
| 67              | Finland | 1995           | Oranges, Mandarines       | 31                                                          |
| 67              | Finland | 1995           | Peas                      | 4                                                           |
| 67              | Finland | 1995           | Pelagic Fish              | 46                                                          |
| 67              | Finland | 1995           | Pigmeat                   | 89                                                          |
| 67              | Finland | 1995           | Pineapples                | 4                                                           |
| 67              | Finland | 1995           | Potatoes                  | 183                                                         |
| 67              | Finland | 1995           | Poultry Meat              | 26                                                          |
| 67              | Finland | 1995           | Rape and Mustard Oil      | 12                                                          |
| 67              | Finland | 1995           | Rice (Milled Equivalent)  | 6                                                           |
| 67              | Finland | 1995           | Rye                       | 43                                                          |
| 67              | Finland | 1995           | Soyabean Oil              | 9                                                           |
| 67              | Finland | 1995           | Sugar, Refined Equivalent | 94                                                          |
| 67              | Finland | 1995           | Sunflowerseed Oil         | 2                                                           |
| 67              | Finland | 1995           | Sweeteners, Other         | 6                                                           |
| 67              | Finland | 1995           | Tomatoes                  | 35                                                          |
| 67              | Finland | 1995           | Vegetables, Other         | 131                                                         |
| 67              | Finland | 1995           | Wheat                     | 170                                                         |
| 67              | Finland | 1995           | Wine                      | 15                                                          |
| 67              | Finland | 1996           | Apples                    | 41                                                          |
| 67              | Finland | 1996           | Bananas                   | 29                                                          |
| 67              | Finland | 1996           | Barley                    | 32                                                          |
| 67              | Finland | 1996           | Beer                      | 225                                                         |
| 67              | Finland | 1996           | Beverages, Alcoholic      | 13                                                          |
| 67              | Finland | 1996           | Beverages, Fermented      | 3                                                           |
| 67              | Finland | 1996           | Bovine Meat               | 52                                                          |
| 67              | Finland | 1996           | Butter, Ghee              | 18                                                          |
| 67              | Finland | 1996           | Cereals, Other            | 1                                                           |
| 67              | Finland | 1996           | Cheese                    | 39                                                          |
| 67              | Finland | 1996           | Coffee                    | 30                                                          |
| 67              | Finland | 1996           | Cream                     | 18                                                          |
| 67              | Finland | 1996           | Crustaceans               | 4                                                           |
| 67              | Finland | 1996           | Demersal Fish             | 12                                                          |
| 67              | Finland | 1996           | Eggs                      | 28                                                          |
| 67              | Finland | 1996           | Fats, Animals, Raw        | 2                                                           |
| 67              | Finland | 1996           | Freshwater Fish           | 27                                                          |
| 67              | Finland | 1996           | Fruits, Other             | 39                                                          |
| 67              | Finland | 1996           | Grapefruit                | 2                                                           |
| 67              | Finland | 1996           | Grapes                    | 13                                                          |
| 67              | Finland | 1996           | Groundnuts (Shelled Eq)   | 2                                                           |
| 67              | Finland | 1996           | Honey                     | 1                                                           |
| 67              | Finland | 1996           | Lemons, Limes             | 2                                                           |
| 67              | Finland | 1996           | Marine Fish, Other        | 3                                                           |
| 67              | Finland | 1996           | Meat, Other               | 2                                                           |
| 67              | Finland | 1996           | Milk, Whole               | 359                                                         |
| 67              | Finland | 1996           | Molluscs, Other           | 1                                                           |
| 67              | Finland | 1996           | Mutton & Goat Meat        | 1                                                           |
| 67              | Finland | 1996           | Nuts                      | 4                                                           |
| 67              | Finland | 1996           | Oats                      | 16                                                          |
| 67              | Finland | 1996           | Offals, Edible            | 7                                                           |
| 67              | Finland | 1996           | Oilcrops Oil, Other       | 3                                                           |
| 67              | Finland | 1996           | Olives                    | 1                                                           |
| 67              | Finland | 1996           | Onions                    | 12                                                          |
| 67              | Finland | 1996           | Oranges, Mandarines       | 56                                                          |
| 67              | Finland | 1996           | Palm Oil                  | 1                                                           |
| 67              | Finland | 1996           | Peas                      | 4                                                           |
| 67              | Finland | 1996           | Pelagic Fish              | 46                                                          |
| 67              | Finland | 1996           | Pigmeat                   | 89                                                          |
| 67              | Finland | 1996           | Pineapples                | 7                                                           |
| 67              | Finland | 1996           | Potatoes                  | 188                                                         |
| 67              | Finland | 1996           | Poultry Meat              | 30                                                          |
| 67              | Finland | 1996           | Rape and Mustard Oil      | 11                                                          |
| 67              | Finland | 1996           | Rice (Milled Equivalent)  | 11                                                          |
| 67              | Finland | 1996           | Rye                       | 43                                                          |
| 67              | Finland | 1996           | Soyabean Oil              | 8                                                           |
| 67              | Finland | 1996           | Sugar, Refined Equivalent | 90                                                          |
| 67              | Finland | 1996           | Sunflowerseed Oil         | 1                                                           |
| 67              | Finland | 1996           | Sweeteners, Other         | 6                                                           |
| 67              | Finland | 1996           | Tea                       | 1                                                           |
| 67              | Finland | 1996           | Tomatoes                  | 42                                                          |
| 67              | Finland | 1996           | Vegetables, Other         | 139                                                         |
| 67              | Finland | 1996           | Wheat                     | 160                                                         |
| 67              | Finland | 1996           | Wine                      | 14                                                          |
| 67              | Finland | 1997           | Apples                    | 40                                                          |
| 67              | Finland | 1997           | Bananas                   | 30                                                          |
| 67              | Finland | 1997           | Barley                    | 25                                                          |
| 67              | Finland | 1997           | Beer                      | 229                                                         |
| 67              | Finland | 1997           | Beverages, Alcoholic      | 9                                                           |
| 67              | Finland | 1997           | Beverages, Fermented      | 7                                                           |
| 67              | Finland | 1997           | Bovine Meat               | 53                                                          |
| 67              | Finland | 1997           | Butter, Ghee              | 15                                                          |
| 67              | Finland | 1997           | Cheese                    | 37                                                          |
| 67              | Finland | 1997           | Cocoa Beans               | 1                                                           |
| 67              | Finland | 1997           | Coconut Oil               | 1                                                           |
| 67              | Finland | 1997           | Coconuts - Incl Copra     | 1                                                           |
| 67              | Finland | 1997           | Coffee                    | 30                                                          |
| 67              | Finland | 1997           | Cream                     | 18                                                          |
| 67              | Finland | 1997           | Crustaceans               | 4                                                           |
| 67              | Finland | 1997           | Demersal Fish             | 12                                                          |
| 67              | Finland | 1997           | Eggs                      | 27                                                          |
| 67              | Finland | 1997           | Fats, Animals, Raw        | 4                                                           |
| 67              | Finland | 1997           | Freshwater Fish           | 30                                                          |
| 67              | Finland | 1997           | Fruits, Other             | 39                                                          |
| 67              | Finland | 1997           | Grapefruit                | 3                                                           |
| 67              | Finland | 1997           | Grapes                    | 12                                                          |
| 67              | Finland | 1997           | Groundnuts (Shelled Eq)   | 1                                                           |
| 67              | Finland | 1997           | Honey                     | 1                                                           |

Dietary calcium and zinc deficiency risks are decreasing but remain prevalent

| FAO countrycode | Country | Reference year | Food item                 | Gross food supply (g capita <sup>-1</sup> d <sup>-1</sup> ) |
|-----------------|---------|----------------|---------------------------|-------------------------------------------------------------|
| 67              | Finland | 1997           | Lemons, Limes             | 2                                                           |
| 67              | Finland | 1997           | Marine Fish, Other        | 2                                                           |
| 67              | Finland | 1997           | Meat, Other               | 1                                                           |
| 67              | Finland | 1997           | Milk, Whole               | 395                                                         |
| 67              | Finland | 1997           | Molluscs, Other           | 1                                                           |
| 67              | Finland | 1997           | Mutton & Goat Meat        | 1                                                           |
| 67              | Finland | 1997           | Nuts                      | 4                                                           |
| 67              | Finland | 1997           | Oats                      | 14                                                          |
| 67              | Finland | 1997           | Offals, Edible            | 5                                                           |
| 67              | Finland | 1997           | Oilcrops Oil, Other       | 4                                                           |
| 67              | Finland | 1997           | Olives                    | 1                                                           |
| 67              | Finland | 1997           | Onions                    | 9                                                           |
| 67              | Finland | 1997           | Oranges, Mandarines       | 59                                                          |
| 67              | Finland | 1997           | Peas                      | 4                                                           |
| 67              | Finland | 1997           | Pelagic Fish              | 41                                                          |
| 67              | Finland | 1997           | Pigmeat                   | 90                                                          |
| 67              | Finland | 1997           | Pineapples                | 6                                                           |
| 67              | Finland | 1997           | Potatoes                  | 189                                                         |
| 67              | Finland | 1997           | Poultry Meat              | 30                                                          |
| 67              | Finland | 1997           | Rape and Mustard Oil      | 22                                                          |
| 67              | Finland | 1997           | Rice (Milled Equivalent)  | 12                                                          |
| 67              | Finland | 1997           | Rye                       | 43                                                          |
| 67              | Finland | 1997           | Sugar, Refined Equivalent | 90                                                          |
| 67              | Finland | 1997           | Sunflowerseed Oil         | 2                                                           |
| 67              | Finland | 1997           | Sweeteners, Other         | 6                                                           |
| 67              | Finland | 1997           | Tea                       | 1                                                           |
| 67              | Finland | 1997           | Tomatoes                  | 38                                                          |
| 67              | Finland | 1997           | Vegetables, Other         | 155                                                         |
| 67              | Finland | 1997           | Wheat                     | 191                                                         |
| 67              | Finland | 1997           | Wine                      | 17                                                          |
| 67              | Finland | 1998           | Apples                    | 43                                                          |
| 67              | Finland | 1998           | Bananas                   | 29                                                          |
| 67              | Finland | 1998           | Barley                    | 38                                                          |
| 67              | Finland | 1998           | Beer                      | 224                                                         |
| 67              | Finland | 1998           | Beverages, Alcoholic      | 13                                                          |
| 67              | Finland | 1998           | Beverages, Fermented      | 7                                                           |
| 67              | Finland | 1998           | Bovine Meat               | 54                                                          |
| 67              | Finland | 1998           | Butter, Ghee              | 16                                                          |
| 67              | Finland | 1998           | Cheese                    | 41                                                          |
| 67              | Finland | 1998           | Cocoa Beans               | 2                                                           |
| 67              | Finland | 1998           | Coffee                    | 31                                                          |
| 67              | Finland | 1998           | Cream                     | 18                                                          |
| 67              | Finland | 1998           | Crustaceans               | 4                                                           |
| 67              | Finland | 1998           | Demersal Fish             | 11                                                          |
| 67              | Finland | 1998           | Eggs                      | 26                                                          |
| 67              | Finland | 1998           | Fats, Animals, Raw        | 4                                                           |
| 67              | Finland | 1998           | Freshwater Fish           | 27                                                          |
| 67              | Finland | 1998           | Fruits, Other             | 36                                                          |
| 67              | Finland | 1998           | Grapefruit                | 3                                                           |
| 67              | Finland | 1998           | Grapes                    | 13                                                          |
| 67              | Finland | 1998           | Groundnuts (Shelled Eq)   | 2                                                           |
| 67              | Finland | 1998           | Honey                     | 1                                                           |
| 67              | Finland | 1998           | Lemons, Limes             | 2                                                           |
| 67              | Finland | 1998           | Marine Fish, Other        | 2                                                           |
| 67              | Finland | 1998           | Meat, Other               | 2                                                           |
| 67              | Finland | 1998           | Milk, Whole               | 395                                                         |
| 67              | Finland | 1998           | Molluscs, Other           | 1                                                           |
| 67              | Finland | 1998           | Mutton & Goat Meat        | 1                                                           |
| 67              | Finland | 1998           | Nuts                      | 3                                                           |
| 67              | Finland | 1998           | Oats                      | 11                                                          |
| 67              | Finland | 1998           | Offals, Edible            | 5                                                           |
| 67              | Finland | 1998           | Oilcrops Oil, Other       | 4                                                           |
| 67              | Finland | 1998           | Olives                    | 1                                                           |
| 67              | Finland | 1998           | Onions                    | 13                                                          |
| 67              | Finland | 1998           | Oranges, Mandarines       | 64                                                          |
| 67              | Finland | 1998           | Peas                      | 3                                                           |
| 67              | Finland | 1998           | Pelagic Fish              | 44                                                          |
| 67              | Finland | 1998           | Pigmeat                   | 94                                                          |
| 67              | Finland | 1998           | Pineapples                | 5                                                           |
| 67              | Finland | 1998           | Potatoes                  | 188                                                         |
| 67              | Finland | 1998           | Poultry Meat              | 33                                                          |
| 67              | Finland | 1998           | Rape and Mustard Oil      | 23                                                          |
| 67              | Finland | 1998           | Rice (Milled Equivalent)  | 11                                                          |
| 67              | Finland | 1998           | Rye                       | 44                                                          |
| 67              | Finland | 1998           | Sugar, Refined Equivalent | 87                                                          |
| 67              | Finland | 1998           | Sunflowerseed Oil         | 1                                                           |
| 67              | Finland | 1998           | Sweeteners, Other         | 5                                                           |
| 67              | Finland | 1998           | Tea                       | 1                                                           |
| 67              | Finland | 1998           | Tomatoes                  | 35                                                          |
| 67              | Finland | 1998           | Vegetables, Other         | 128                                                         |
| 67              | Finland | 1998           | Wheat                     | 180                                                         |
| 67              | Finland | 1998           | Wine                      | 19                                                          |
| 67              | Finland | 1999           | Apples                    | 64                                                          |
| 67              | Finland | 1999           | Bananas                   | 32                                                          |
| 67              | Finland | 1999           | Barley                    | 11                                                          |
| 67              | Finland | 1999           | Beer                      | 239                                                         |
| 67              | Finland | 1999           | Beverages, Alcoholic      | 15                                                          |
| 67              | Finland | 1999           | Beverages, Fermented      | 7                                                           |
| 67              | Finland | 1999           | Bovine Meat               | 52                                                          |
| 67              | Finland | 1999           | Butter, Ghee              | 16                                                          |
| 67              | Finland | 1999           | Cheese                    | 44                                                          |
| 67              | Finland | 1999           | Cocoa Beans               | 2                                                           |
| 67              | Finland | 1999           | Coconut Oil               | 1                                                           |
| 67              | Finland | 1999           | Coffee                    | 33                                                          |
| 67              | Finland | 1999           | Cream                     | 17                                                          |
| 67              | Finland | 1999           | Crustaceans               | 4                                                           |
| 67              | Finland | 1999           | Demersal Fish             | 11                                                          |



Dietary calcium and zinc deficiency risks are decreasing but remain prevalent

| FAO countrycode | Country | Reference year | Food item                 | Gross food supply (g capita <sup>-1</sup> d <sup>-1</sup> ) |
|-----------------|---------|----------------|---------------------------|-------------------------------------------------------------|
| 67              | Finland | 1999           | Eggs                      | 25                                                          |
| 67              | Finland | 1999           | Fats, Animals, Raw        | 2                                                           |
| 67              | Finland | 1999           | Freshwater Fish           | 32                                                          |
| 67              | Finland | 1999           | Fruits, Other             | 42                                                          |
| 67              | Finland | 1999           | Grapefruit                | 4                                                           |
| 67              | Finland | 1999           | Grapes                    | 13                                                          |
| 67              | Finland | 1999           | Groundnuts (Shelled Eq)   | 2                                                           |
| 67              | Finland | 1999           | Honey                     | 2                                                           |
| 67              | Finland | 1999           | Lemons, Limes             | 2                                                           |
| 67              | Finland | 1999           | Marine Fish, Other        | 2                                                           |
| 67              | Finland | 1999           | Meat, Other               | 2                                                           |
| 67              | Finland | 1999           | Milk, Whole               | 348                                                         |
| 67              | Finland | 1999           | Molluscs, Other           | 1                                                           |
| 67              | Finland | 1999           | Mutton & Goat Meat        | 1                                                           |
| 67              | Finland | 1999           | Nuts                      | 3                                                           |
| 67              | Finland | 1999           | Oats                      | 14                                                          |
| 67              | Finland | 1999           | Offals, Edible            | 5                                                           |
| 67              | Finland | 1999           | Oilcrops Oil, Other       | 4                                                           |
| 67              | Finland | 1999           | Olives                    | 1                                                           |
| 67              | Finland | 1999           | Onions                    | 11                                                          |
| 67              | Finland | 1999           | Oranges, Mandarines       | 68                                                          |
| 67              | Finland | 1999           | Peas                      | 3                                                           |
| 67              | Finland | 1999           | Pelagic Fish              | 36                                                          |
| 67              | Finland | 1999           | Pigmeat                   | 93                                                          |
| 67              | Finland | 1999           | Pineapples                | 7                                                           |
| 67              | Finland | 1999           | Potatoes                  | 192                                                         |
| 67              | Finland | 1999           | Poultry Meat              | 35                                                          |
| 67              | Finland | 1999           | Rape and Mustard Oil      | 20                                                          |
| 67              | Finland | 1999           | Rice (Milled Equivalent)  | 11                                                          |
| 67              | Finland | 1999           | Rye                       | 44                                                          |
| 67              | Finland | 1999           | Sugar, Refined Equivalent | 86                                                          |
| 67              | Finland | 1999           | Sunflowerseed Oil         | 3                                                           |
| 67              | Finland | 1999           | Sweeteners, Other         | 5                                                           |
| 67              | Finland | 1999           | Tomatoes                  | 42                                                          |
| 67              | Finland | 1999           | Vegetables, Other         | 148                                                         |
| 67              | Finland | 1999           | Wheat                     | 217                                                         |
| 67              | Finland | 1999           | Wine                      | 19                                                          |
| 67              | Finland | 2000           | Apples                    | 62                                                          |
| 67              | Finland | 2000           | Bananas                   | 30                                                          |
| 67              | Finland | 2000           | Barley                    | 16                                                          |
| 67              | Finland | 2000           | Beer                      | 230                                                         |
| 67              | Finland | 2000           | Beverages, Alcoholic      | 18                                                          |
| 67              | Finland | 2000           | Beverages, Fermented      | 3                                                           |
| 67              | Finland | 2000           | Bovine Meat               | 49                                                          |
| 67              | Finland | 2000           | Butter, Ghee              | 14                                                          |
| 67              | Finland | 2000           | Cheese                    | 39                                                          |
| 67              | Finland | 2000           | Cocoa Beans               | 3                                                           |
| 67              | Finland | 2000           | Coffee                    | 29                                                          |
| 67              | Finland | 2000           | Cream                     | 17                                                          |
| 67              | Finland | 2000           | Crustaceans               | 4                                                           |
| 67              | Finland | 2000           | Demersal Fish             | 11                                                          |
| 67              | Finland | 2000           | Eggs                      | 25                                                          |
| 67              | Finland | 2000           | Fats, Animals, Raw        | 2                                                           |
| 67              | Finland | 2000           | Freshwater Fish           | 20                                                          |
| 67              | Finland | 2000           | Fruits, Other             | 40                                                          |
| 67              | Finland | 2000           | Grapefruit                | 3                                                           |
| 67              | Finland | 2000           | Grapes                    | 11                                                          |
| 67              | Finland | 2000           | Groundnuts (Shelled Eq)   | 2                                                           |
| 67              | Finland | 2000           | Honey                     | 1                                                           |
| 67              | Finland | 2000           | Lemons, Limes             | 2                                                           |
| 67              | Finland | 2000           | Marine Fish, Other        | 2                                                           |
| 67              | Finland | 2000           | Meat, Other               | 2                                                           |
| 67              | Finland | 2000           | Milk, Whole               | 374                                                         |
| 67              | Finland | 2000           | Molluscs, Other           | 1                                                           |
| 67              | Finland | 2000           | Mutton & Goat Meat        | 1                                                           |
| 67              | Finland | 2000           | Nuts                      | 3                                                           |
| 67              | Finland | 2000           | Oats                      | 9                                                           |
| 67              | Finland | 2000           | Offals, Edible            | 4                                                           |
| 67              | Finland | 2000           | Oilcrops Oil, Other       | 2                                                           |
| 67              | Finland | 2000           | Olives                    | 1                                                           |
| 67              | Finland | 2000           | Onions                    | 14                                                          |
| 67              | Finland | 2000           | Oranges, Mandarines       | 70                                                          |
| 67              | Finland | 2000           | Peas                      | 3                                                           |
| 67              | Finland | 2000           | Pelagic Fish              | 47                                                          |
| 67              | Finland | 2000           | Pigmeat                   | 90                                                          |
| 67              | Finland | 2000           | Pineapples                | 6                                                           |
| 67              | Finland | 2000           | Potatoes                  | 190                                                         |
| 67              | Finland | 2000           | Poultry Meat              | 37                                                          |
| 67              | Finland | 2000           | Rape and Mustard Oil      | 16                                                          |
| 67              | Finland | 2000           | Rice (Milled Equivalent)  | 11                                                          |
| 67              | Finland | 2000           | Rye                       | 43                                                          |
| 67              | Finland | 2000           | Soyabean Oil              | 5                                                           |
| 67              | Finland | 2000           | Sugar, Refined Equivalent | 91                                                          |
| 67              | Finland | 2000           | Sunflowerseed Oil         | 3                                                           |
| 67              | Finland | 2000           | Sweeteners, Other         | 5                                                           |
| 67              | Finland | 2000           | Tomatoes                  | 42                                                          |
| 67              | Finland | 2000           | Vegetables, Other         | 139                                                         |
| 67              | Finland | 2000           | Wheat                     | 213                                                         |
| 67              | Finland | 2000           | Wine                      | 21                                                          |
| 67              | Finland | 2001           | Apples                    | 77                                                          |
| 67              | Finland | 2001           | Bananas                   | 30                                                          |
| 67              | Finland | 2001           | Barley                    | 16                                                          |
| 67              | Finland | 2001           | Beer                      | 243                                                         |
| 67              | Finland | 2001           | Beverages, Alcoholic      | 19                                                          |
| 67              | Finland | 2001           | Beverages, Fermented      | 3                                                           |
| 67              | Finland | 2001           | Bovine Meat               | 50                                                          |
| 67              | Finland | 2001           | Butter, Ghee              | 13                                                          |

Dietary calcium and zinc deficiency risks are decreasing but remain prevalent

| FAO countrycode | Country | Reference year | Food item                 | Gross food supply (g capita <sup>-1</sup> d <sup>-1</sup> ) |
|-----------------|---------|----------------|---------------------------|-------------------------------------------------------------|
| 67              | Finland | 2001           | Cereals, Other            | 1                                                           |
| 67              | Finland | 2001           | Cheese                    | 43                                                          |
| 67              | Finland | 2001           | Cocoa Beans               | 3                                                           |
| 67              | Finland | 2001           | Coffee                    | 30                                                          |
| 67              | Finland | 2001           | Cream                     | 18                                                          |
| 67              | Finland | 2001           | Crustaceans               | 5                                                           |
| 67              | Finland | 2001           | Demersal Fish             | 12                                                          |
| 67              | Finland | 2001           | Eggs                      | 24                                                          |
| 67              | Finland | 2001           | Fats, Animals, Raw        | 3                                                           |
| 67              | Finland | 2001           | Freshwater Fish           | 26                                                          |
| 67              | Finland | 2001           | Fruits, Other             | 44                                                          |
| 67              | Finland | 2001           | Grapefruit                | 3                                                           |
| 67              | Finland | 2001           | Grapes                    | 12                                                          |
| 67              | Finland | 2001           | Groundnuts (Shelled Eq)   | 2                                                           |
| 67              | Finland | 2001           | Honey                     | 1                                                           |
| 67              | Finland | 2001           | Lemons, Limes             | 2                                                           |
| 67              | Finland | 2001           | Marine Fish, Other        | 2                                                           |
| 67              | Finland | 2001           | Meat, Other               | 2                                                           |
| 67              | Finland | 2001           | Milk, Whole               | 350                                                         |
| 67              | Finland | 2001           | Molluscs, Other           | 1                                                           |
| 67              | Finland | 2001           | Mutton & Goat Meat        | 1                                                           |
| 67              | Finland | 2001           | Nuts                      | 3                                                           |
| 67              | Finland | 2001           | Oats                      | 8                                                           |
| 67              | Finland | 2001           | Offals, Edible            | 4                                                           |
| 67              | Finland | 2001           | Oilcrops Oil, Other       | 2                                                           |
| 67              | Finland | 2001           | Olives                    | 1                                                           |
| 67              | Finland | 2001           | Onions                    | 11                                                          |
| 67              | Finland | 2001           | Oranges, Mandarines       | 72                                                          |
| 67              | Finland | 2001           | Peas                      | 3                                                           |
| 67              | Finland | 2001           | Pelagic Fish              | 41                                                          |
| 67              | Finland | 2001           | Pigmeat                   | 87                                                          |
| 67              | Finland | 2001           | Pineapples                | 7                                                           |
| 67              | Finland | 2001           | Potatoes                  | 194                                                         |
| 67              | Finland | 2001           | Poultry Meat              | 43                                                          |
| 67              | Finland | 2001           | Rape and Mustard Oil      | 11                                                          |
| 67              | Finland | 2001           | Rice (Milled Equivalent)  | 12                                                          |
| 67              | Finland | 2001           | Rye                       | 42                                                          |
| 67              | Finland | 2001           | Soyabean Oil              | 13                                                          |
| 67              | Finland | 2001           | Sugar, Refined Equivalent | 82                                                          |
| 67              | Finland | 2001           | Sunflowerseed Oil         | 3                                                           |
| 67              | Finland | 2001           | Sweeteners, Other         | 5                                                           |
| 67              | Finland | 2001           | Tea                       | 1                                                           |
| 67              | Finland | 2001           | Tomatoes                  | 44                                                          |
| 67              | Finland | 2001           | Vegetables, Other         | 138                                                         |
| 67              | Finland | 2001           | Wheat                     | 218                                                         |
| 67              | Finland | 2001           | Wine                      | 23                                                          |
| 67              | Finland | 2002           | Apples                    | 61                                                          |
| 67              | Finland | 2002           | Bananas                   | 31                                                          |
| 67              | Finland | 2002           | Barley                    | 12                                                          |
| 67              | Finland | 2002           | Beer                      | 243                                                         |
| 67              | Finland | 2002           | Beverages, Alcoholic      | 19                                                          |
| 67              | Finland | 2002           | Beverages, Fermented      | 3                                                           |
| 67              | Finland | 2002           | Bovine Meat               | 49                                                          |
| 67              | Finland | 2002           | Butter, Ghee              | 13                                                          |
| 67              | Finland | 2002           | Cheese                    | 43                                                          |
| 67              | Finland | 2002           | Cocoa Beans               | 3                                                           |
| 67              | Finland | 2002           | Coconut Oil               | 1                                                           |
| 67              | Finland | 2002           | Coffee                    | 30                                                          |
| 67              | Finland | 2002           | Cream                     | 18                                                          |
| 67              | Finland | 2002           | Crustaceans               | 4                                                           |
| 67              | Finland | 2002           | Demersal Fish             | 10                                                          |
| 67              | Finland | 2002           | Eggs                      | 24                                                          |
| 67              | Finland | 2002           | Fats, Animals, Raw        | 3                                                           |
| 67              | Finland | 2002           | Freshwater Fish           | 27                                                          |
| 67              | Finland | 2002           | Fruits, Other             | 44                                                          |
| 67              | Finland | 2002           | Grapefruit                | 3                                                           |
| 67              | Finland | 2002           | Grapes                    | 12                                                          |
| 67              | Finland | 2002           | Groundnuts (Shelled Eq)   | 2                                                           |
| 67              | Finland | 2002           | Honey                     | 1                                                           |
| 67              | Finland | 2002           | Lemons, Limes             | 2                                                           |
| 67              | Finland | 2002           | Marine Fish, Other        | 3                                                           |
| 67              | Finland | 2002           | Meat, Other               | 2                                                           |
| 67              | Finland | 2002           | Milk, Whole               | 351                                                         |
| 67              | Finland | 2002           | Molluscs, Other           | 1                                                           |
| 67              | Finland | 2002           | Mutton & Goat Meat        | 1                                                           |
| 67              | Finland | 2002           | Nuts                      | 3                                                           |
| 67              | Finland | 2002           | Oats                      | 11                                                          |
| 67              | Finland | 2002           | Offals, Edible            | 5                                                           |
| 67              | Finland | 2002           | Oilcrops Oil, Other       | 2                                                           |
| 67              | Finland | 2002           | Olive Oil                 | 1                                                           |
| 67              | Finland | 2002           | Olives                    | 1                                                           |
| 67              | Finland | 2002           | Onions                    | 13                                                          |
| 67              | Finland | 2002           | Oranges, Mandarines       | 67                                                          |
| 67              | Finland | 2002           | Peas                      | 3                                                           |
| 67              | Finland | 2002           | Pelagic Fish              | 43                                                          |
| 67              | Finland | 2002           | Pigmeat                   | 88                                                          |
| 67              | Finland | 2002           | Pineapples                | 9                                                           |
| 67              | Finland | 2002           | Potatoes                  | 191                                                         |
| 67              | Finland | 2002           | Poultry Meat              | 46                                                          |
| 67              | Finland | 2002           | Rape and Mustard Oil      | 19                                                          |
| 67              | Finland | 2002           | Rice (Milled Equivalent)  | 14                                                          |
| 67              | Finland | 2002           | Rye                       | 41                                                          |
| 67              | Finland | 2002           | Soyabean Oil              | 3                                                           |
| 67              | Finland | 2002           | Sugar, Refined Equivalent | 79                                                          |
| 67              | Finland | 2002           | Sunflowerseed Oil         | 4                                                           |
| 67              | Finland | 2002           | Sweeteners, Other         | 8                                                           |
| 67              | Finland | 2002           | Tomatoes                  | 45                                                          |

Dietary calcium and zinc deficiency risks are decreasing but remain prevalent

| FAO countrycode | Country | Reference year | Food item                 | Gross food supply (g capita <sup>-1</sup> d <sup>-1</sup> ) |
|-----------------|---------|----------------|---------------------------|-------------------------------------------------------------|
| 67              | Finland | 2002           | Vegetables, Other         | 140                                                         |
| 67              | Finland | 2002           | Wheat                     | 213                                                         |
| 67              | Finland | 2002           | Wine                      | 24                                                          |
| 67              | Finland | 2003           | Apples                    | 70                                                          |
| 67              | Finland | 2003           | Bananas                   | 32                                                          |
| 67              | Finland | 2003           | Barley                    | 13                                                          |
| 67              | Finland | 2003           | Beer                      | 241                                                         |
| 67              | Finland | 2003           | Beverages, Alcoholic      | 19                                                          |
| 67              | Finland | 2003           | Beverages, Fermented      | 3                                                           |
| 67              | Finland | 2003           | Bovine Meat               | 50                                                          |
| 67              | Finland | 2003           | Butter, Ghee              | 11                                                          |
| 67              | Finland | 2003           | Cheese                    | 44                                                          |
| 67              | Finland | 2003           | Citrus, Other             | 1                                                           |
| 67              | Finland | 2003           | Cocoa Beans               | 4                                                           |
| 67              | Finland | 2003           | Coconut Oil               | 2                                                           |
| 67              | Finland | 2003           | Coffee                    | 31                                                          |
| 67              | Finland | 2003           | Cream                     | 18                                                          |
| 67              | Finland | 2003           | Crustaceans               | 4                                                           |
| 67              | Finland | 2003           | Demersal Fish             | 10                                                          |
| 67              | Finland | 2003           | Eggs                      | 23                                                          |
| 67              | Finland | 2003           | Fats, Animals, Raw        | 2                                                           |
| 67              | Finland | 2003           | Freshwater Fish           | 32                                                          |
| 67              | Finland | 2003           | Fruits, Other             | 44                                                          |
| 67              | Finland | 2003           | Grapefruit                | 3                                                           |
| 67              | Finland | 2003           | Grapes                    | 12                                                          |
| 67              | Finland | 2003           | Groundnuts (Shelled Eq)   | 2                                                           |
| 67              | Finland | 2003           | Honey                     | 1                                                           |
| 67              | Finland | 2003           | Lemons, Limes             | 2                                                           |
| 67              | Finland | 2003           | Marine Fish, Other        | 4                                                           |
| 67              | Finland | 2003           | Meat, Other               | 3                                                           |
| 67              | Finland | 2003           | Milk, Whole               | 344                                                         |
| 67              | Finland | 2003           | Molluscs, Other           | 1                                                           |
| 67              | Finland | 2003           | Mutton & Goat Meat        | 1                                                           |
| 67              | Finland | 2003           | Nuts                      | 3                                                           |
| 67              | Finland | 2003           | Oats                      | 11                                                          |
| 67              | Finland | 2003           | Offals, Edible            | 4                                                           |
| 67              | Finland | 2003           | Oilcrops Oil, Other       | 3                                                           |
| 67              | Finland | 2003           | Olive Oil                 | 1                                                           |
| 67              | Finland | 2003           | Olives                    | 1                                                           |
| 67              | Finland | 2003           | Onions                    | 11                                                          |
| 67              | Finland | 2003           | Oranges, Mandarines       | 75                                                          |
| 67              | Finland | 2003           | Peas                      | 3                                                           |
| 67              | Finland | 2003           | Pelagic Fish              | 39                                                          |
| 67              | Finland | 2003           | Pigmeat                   | 88                                                          |
| 67              | Finland | 2003           | Pineapples                | 12                                                          |
| 67              | Finland | 2003           | Potatoes                  | 197                                                         |
| 67              | Finland | 2003           | Poultry Meat              | 49                                                          |
| 67              | Finland | 2003           | Rape and Mustard Oil      | 21                                                          |
| 67              | Finland | 2003           | Rice (Milled Equivalent)  | 12                                                          |
| 67              | Finland | 2003           | Rye                       | 40                                                          |
| 67              | Finland | 2003           | Sugar, Refined Equivalent | 79                                                          |
| 67              | Finland | 2003           | Sunflowerseed Oil         | 3                                                           |
| 67              | Finland | 2003           | Sweeteners, Other         | 7                                                           |
| 67              | Finland | 2003           | Tea                       | 1                                                           |
| 67              | Finland | 2003           | Tomatoes                  | 44                                                          |
| 67              | Finland | 2003           | Vegetables, Other         | 144                                                         |
| 67              | Finland | 2003           | Wheat                     | 215                                                         |
| 67              | Finland | 2003           | Wine                      | 27                                                          |
| 67              | Finland | 2004           | Apples                    | 70                                                          |
| 67              | Finland | 2004           | Bananas                   | 34                                                          |
| 67              | Finland | 2004           | Barley                    | 12                                                          |
| 67              | Finland | 2004           | Beer                      | 263                                                         |
| 67              | Finland | 2004           | Beverages, Alcoholic      | 18                                                          |
| 67              | Finland | 2004           | Beverages, Fermented      | 2                                                           |
| 67              | Finland | 2004           | Bovine Meat               | 52                                                          |
| 67              | Finland | 2004           | Butter, Ghee              | 11                                                          |
| 67              | Finland | 2004           | Cereals, Other            | 1                                                           |
| 67              | Finland | 2004           | Cheese                    | 39                                                          |
| 67              | Finland | 2004           | Citrus, Other             | 1                                                           |
| 67              | Finland | 2004           | Cocoa Beans               | 4                                                           |
| 67              | Finland | 2004           | Coffee                    | 32                                                          |
| 67              | Finland | 2004           | Cream                     | 18                                                          |
| 67              | Finland | 2004           | Crustaceans               | 5                                                           |
| 67              | Finland | 2004           | Demersal Fish             | 9                                                           |
| 67              | Finland | 2004           | Eggs                      | 23                                                          |
| 67              | Finland | 2004           | Fats, Animals, Raw        | 1                                                           |
| 67              | Finland | 2004           | Freshwater Fish           | 39                                                          |
| 67              | Finland | 2004           | Fruits, Other             | 45                                                          |
| 67              | Finland | 2004           | Grapefruit                | 3                                                           |
| 67              | Finland | 2004           | Grapes                    | 14                                                          |
| 67              | Finland | 2004           | Groundnuts (Shelled Eq)   | 2                                                           |
| 67              | Finland | 2004           | Honey                     | 1                                                           |
| 67              | Finland | 2004           | Lemons, Limes             | 2                                                           |
| 67              | Finland | 2004           | Marine Fish, Other        | 4                                                           |
| 67              | Finland | 2004           | Meat, Other               | 3                                                           |
| 67              | Finland | 2004           | Milk, Whole               | 353                                                         |
| 67              | Finland | 2004           | Molluscs, Other           | 1                                                           |
| 67              | Finland | 2004           | Mutton & Goat Meat        | 1                                                           |
| 67              | Finland | 2004           | Nuts                      | 2                                                           |
| 67              | Finland | 2004           | Oats                      | 10                                                          |
| 67              | Finland | 2004           | Offals, Edible            | 5                                                           |
| 67              | Finland | 2004           | Oilcrops Oil, Other       | 2                                                           |
| 67              | Finland | 2004           | Olive Oil                 | 1                                                           |
| 67              | Finland | 2004           | Olives                    | 1                                                           |
| 67              | Finland | 2004           | Onions                    | 15                                                          |
| 67              | Finland | 2004           | Oranges, Mandarines       | 82                                                          |
| 67              | Finland | 2004           | Peas                      | 3                                                           |

Dietary calcium and zinc deficiency risks are decreasing but remain prevalent

| FAO countrycode | Country | Reference year | Food item                 | Gross food supply (g capita <sup>-1</sup> d <sup>-1</sup> ) |
|-----------------|---------|----------------|---------------------------|-------------------------------------------------------------|
| 67              | Finland | 2004           | Pelagic Fish              | 37                                                          |
| 67              | Finland | 2004           | Pigmeat                   | 90                                                          |
| 67              | Finland | 2004           | Pineapples                | 12                                                          |
| 67              | Finland | 2004           | Potatoes                  | 200                                                         |
| 67              | Finland | 2004           | Poultry Meat              | 49                                                          |
| 67              | Finland | 2004           | Rape and Mustard Oil      | 21                                                          |
| 67              | Finland | 2004           | Rice (Milled Equivalent)  | 10                                                          |
| 67              | Finland | 2004           | Rye                       | 42                                                          |
| 67              | Finland | 2004           | Soyabean Oil              | 3                                                           |
| 67              | Finland | 2004           | Sugar, Refined Equivalent | 79                                                          |
| 67              | Finland | 2004           | Sunflowerseed Oil         | 2                                                           |
| 67              | Finland | 2004           | Sweeteners, Other         | 9                                                           |
| 67              | Finland | 2004           | Tea                       | 1                                                           |
| 67              | Finland | 2004           | Tomatoes                  | 45                                                          |
| 67              | Finland | 2004           | Vegetables, Other         | 146                                                         |
| 67              | Finland | 2004           | Wheat                     | 220                                                         |
| 67              | Finland | 2004           | Wine                      | 27                                                          |
| 67              | Finland | 2005           | Apples                    | 66                                                          |
| 67              | Finland | 2005           | Bananas                   | 32                                                          |
| 67              | Finland | 2005           | Barley                    | 12                                                          |
| 67              | Finland | 2005           | Beer                      | 244                                                         |
| 67              | Finland | 2005           | Beverages, Alcoholic      | 18                                                          |
| 67              | Finland | 2005           | Beverages, Fermented      | 4                                                           |
| 67              | Finland | 2005           | Bovine Meat               | 52                                                          |
| 67              | Finland | 2005           | Butter, Ghee              | 11                                                          |
| 67              | Finland | 2005           | Cereals, Other            | 1                                                           |
| 67              | Finland | 2005           | Cheese                    | 40                                                          |
| 67              | Finland | 2005           | Cocoa Beans               | 4                                                           |
| 67              | Finland | 2005           | Coconut Oil               | 1                                                           |
| 67              | Finland | 2005           | Coffee                    | 33                                                          |
| 67              | Finland | 2005           | Cream                     | 18                                                          |
| 67              | Finland | 2005           | Crustaceans               | 5                                                           |
| 67              | Finland | 2005           | Demersal Fish             | 7                                                           |
| 67              | Finland | 2005           | Eggs                      | 23                                                          |
| 67              | Finland | 2005           | Fats, Animals, Raw        | 2                                                           |
| 67              | Finland | 2005           | Freshwater Fish           | 32                                                          |
| 67              | Finland | 2005           | Fruits, Other             | 50                                                          |
| 67              | Finland | 2005           | Grapefruit                | 2                                                           |
| 67              | Finland | 2005           | Grapes                    | 13                                                          |
| 67              | Finland | 2005           | Groundnuts (Shelled Eq)   | 2                                                           |
| 67              | Finland | 2005           | Honey                     | 2                                                           |
| 67              | Finland | 2005           | Lemons, Limes             | 2                                                           |
| 67              | Finland | 2005           | Marine Fish, Other        | 3                                                           |
| 67              | Finland | 2005           | Meat, Other               | 3                                                           |
| 67              | Finland | 2005           | Milk, Whole               | 351                                                         |
| 67              | Finland | 2005           | Molluscs, Other           | 1                                                           |
| 67              | Finland | 2005           | Mutton & Goat Meat        | 1                                                           |
| 67              | Finland | 2005           | Nuts                      | 3                                                           |
| 67              | Finland | 2005           | Oats                      | 19                                                          |
| 67              | Finland | 2005           | Offals, Edible            | 5                                                           |
| 67              | Finland | 2005           | Oilcrops Oil, Other       | 2                                                           |
| 67              | Finland | 2005           | Olive Oil                 | 1                                                           |
| 67              | Finland | 2005           | Olives                    | 1                                                           |
| 67              | Finland | 2005           | Onions                    | 13                                                          |
| 67              | Finland | 2005           | Oranges, Mandarines       | 82                                                          |
| 67              | Finland | 2005           | Peas                      | 3                                                           |
| 67              | Finland | 2005           | Pelagic Fish              | 40                                                          |
| 67              | Finland | 2005           | Pigmeat                   | 92                                                          |
| 67              | Finland | 2005           | Pineapples                | 10                                                          |
| 67              | Finland | 2005           | Potatoes                  | 197                                                         |
| 67              | Finland | 2005           | Poultry Meat              | 49                                                          |
| 67              | Finland | 2005           | Rape and Mustard Oil      | 24                                                          |
| 67              | Finland | 2005           | Rice (Milled Equivalent)  | 13                                                          |
| 67              | Finland | 2005           | Rye                       | 42                                                          |
| 67              | Finland | 2005           | Sugar, Refined Equivalent | 75                                                          |
| 67              | Finland | 2005           | Sunflowerseed Oil         | 2                                                           |
| 67              | Finland | 2005           | Sweeteners, Other         | 8                                                           |
| 67              | Finland | 2005           | Tea                       | 1                                                           |
| 67              | Finland | 2005           | Tomatoes                  | 44                                                          |
| 67              | Finland | 2005           | Vegetables, Other         | 159                                                         |
| 67              | Finland | 2005           | Wheat                     | 215                                                         |
| 67              | Finland | 2005           | Wine                      | 29                                                          |
| 67              | Finland | 2006           | Apples                    | 67                                                          |
| 67              | Finland | 2006           | Bananas                   | 31                                                          |
| 67              | Finland | 2006           | Barley                    | 12                                                          |
| 67              | Finland | 2006           | Beer                      | 229                                                         |
| 67              | Finland | 2006           | Beverages, Alcoholic      | 17                                                          |
| 67              | Finland | 2006           | Beverages, Fermented      | 5                                                           |
| 67              | Finland | 2006           | Bovine Meat               | 52                                                          |
| 67              | Finland | 2006           | Butter, Ghee              | 12                                                          |
| 67              | Finland | 2006           | Cereals, Other            | 1                                                           |
| 67              | Finland | 2006           | Cheese                    | 40                                                          |
| 67              | Finland | 2006           | Citrus, Other             | 2                                                           |
| 67              | Finland | 2006           | Cocoa Beans               | 5                                                           |
| 67              | Finland | 2006           | Coffee                    | 32                                                          |
| 67              | Finland | 2006           | Cream                     | 18                                                          |
| 67              | Finland | 2006           | Crustaceans               | 5                                                           |
| 67              | Finland | 2006           | Demersal Fish             | 8                                                           |
| 67              | Finland | 2006           | Eggs                      | 23                                                          |
| 67              | Finland | 2006           | Fats, Animals, Raw        | 2                                                           |
| 67              | Finland | 2006           | Freshwater Fish           | 33                                                          |
| 67              | Finland | 2006           | Fruits, Other             | 47                                                          |
| 67              | Finland | 2006           | Grapefruit                | 2                                                           |
| 67              | Finland | 2006           | Grapes                    | 13                                                          |
| 67              | Finland | 2006           | Groundnuts (Shelled Eq)   | 3                                                           |
| 67              | Finland | 2006           | Honey                     | 2                                                           |
| 67              | Finland | 2006           | Lemons, Limes             | 2                                                           |

Dietary calcium and zinc deficiency risks are decreasing but remain prevalent

| FAO countrycode | Country | Reference year | Food item                 | Gross food supply (g capita <sup>-1</sup> d <sup>-1</sup> ) |
|-----------------|---------|----------------|---------------------------|-------------------------------------------------------------|
| 67              | Finland | 2006           | Marine Fish, Other        | 3                                                           |
| 67              | Finland | 2006           | Meat, Other               | 3                                                           |
| 67              | Finland | 2006           | Milk, Whole               | 357                                                         |
| 67              | Finland | 2006           | Molluscs, Other           | 1                                                           |
| 67              | Finland | 2006           | Mutton & Goat Meat        | 1                                                           |
| 67              | Finland | 2006           | Nuts                      | 3                                                           |
| 67              | Finland | 2006           | Oats                      | 20                                                          |
| 67              | Finland | 2006           | Offals, Edible            | 5                                                           |
| 67              | Finland | 2006           | Oilcrops Oil, Other       | 3                                                           |
| 67              | Finland | 2006           | Olive Oil                 | 1                                                           |
| 67              | Finland | 2006           | Olives                    | 1                                                           |
| 67              | Finland | 2006           | Onions                    | 12                                                          |
| 67              | Finland | 2006           | Oranges, Mandarines       | 69                                                          |
| 67              | Finland | 2006           | Palm Oil                  | 5                                                           |
| 67              | Finland | 2006           | Peas                      | 3                                                           |
| 67              | Finland | 2006           | Pelagic Fish              | 40                                                          |
| 67              | Finland | 2006           | Pigmeat                   | 91                                                          |
| 67              | Finland | 2006           | Pineapples                | 11                                                          |
| 67              | Finland | 2006           | Potatoes                  | 196                                                         |
| 67              | Finland | 2006           | Poultry Meat              | 47                                                          |
| 67              | Finland | 2006           | Rape and Mustard Oil      | 19                                                          |
| 67              | Finland | 2006           | Rice (Milled Equivalent)  | 12                                                          |
| 67              | Finland | 2006           | Rye                       | 45                                                          |
| 67              | Finland | 2006           | Sugar, Refined Equivalent | 73                                                          |
| 67              | Finland | 2006           | Sunflowerseed Oil         | 3                                                           |
| 67              | Finland | 2006           | Sweeteners, Other         | 9                                                           |
| 67              | Finland | 2006           | Tea                       | 1                                                           |
| 67              | Finland | 2006           | Tomatoes                  | 43                                                          |
| 67              | Finland | 2006           | Vegetables, Other         | 150                                                         |
| 67              | Finland | 2006           | Wheat                     | 226                                                         |
| 67              | Finland | 2006           | Wine                      | 29                                                          |
| 67              | Finland | 2007           | Apples                    | 71                                                          |
| 67              | Finland | 2007           | Bananas                   | 35                                                          |
| 67              | Finland | 2007           | Barley                    | 12                                                          |
| 67              | Finland | 2007           | Beer                      | 237                                                         |
| 67              | Finland | 2007           | Beverages, Alcoholic      | 14                                                          |
| 67              | Finland | 2007           | Beverages, Fermented      | 6                                                           |
| 67              | Finland | 2007           | Bovine Meat               | 51                                                          |
| 67              | Finland | 2007           | Butter, Ghee              | 10                                                          |
| 67              | Finland | 2007           | Cereals, Other            | 1                                                           |
| 67              | Finland | 2007           | Cheese                    | 44                                                          |
| 67              | Finland | 2007           | Citrus, Other             | 1                                                           |
| 67              | Finland | 2007           | Cocoa Beans               | 6                                                           |
| 67              | Finland | 2007           | Coconut Oil               | 1                                                           |
| 67              | Finland | 2007           | Coffee                    | 33                                                          |
| 67              | Finland | 2007           | Cream                     | 19                                                          |
| 67              | Finland | 2007           | Crustaceans               | 5                                                           |
| 67              | Finland | 2007           | Demersal Fish             | 8                                                           |
| 67              | Finland | 2007           | Eggs                      | 23                                                          |
| 67              | Finland | 2007           | Fats, Animals, Raw        | 2                                                           |
| 67              | Finland | 2007           | Freshwater Fish           | 41                                                          |
| 67              | Finland | 2007           | Fruits, Other             | 51                                                          |
| 67              | Finland | 2007           | Grapefruit                | 2                                                           |
| 67              | Finland | 2007           | Grapes                    | 15                                                          |
| 67              | Finland | 2007           | Groundnuts (Shelled Eq)   | 2                                                           |
| 67              | Finland | 2007           | Honey                     | 1                                                           |
| 67              | Finland | 2007           | Lemons, Limes             | 2                                                           |
| 67              | Finland | 2007           | Marine Fish, Other        | 4                                                           |
| 67              | Finland | 2007           | Meat, Other               | 5                                                           |
| 67              | Finland | 2007           | Milk, Whole               | 349                                                         |
| 67              | Finland | 2007           | Molluscs, Other           | 1                                                           |
| 67              | Finland | 2007           | Mutton & Goat Meat        | 1                                                           |
| 67              | Finland | 2007           | Nuts                      | 4                                                           |
| 67              | Finland | 2007           | Oats                      | 14                                                          |
| 67              | Finland | 2007           | Offals, Edible            | 4                                                           |
| 67              | Finland | 2007           | Oilcrops Oil, Other       | 3                                                           |
| 67              | Finland | 2007           | Olive Oil                 | 1                                                           |
| 67              | Finland | 2007           | Olives                    | 2                                                           |
| 67              | Finland | 2007           | Onions                    | 14                                                          |
| 67              | Finland | 2007           | Oranges, Mandarines       | 67                                                          |
| 67              | Finland | 2007           | Peas                      | 3                                                           |
| 67              | Finland | 2007           | Pelagic Fish              | 40                                                          |
| 67              | Finland | 2007           | Pigmeat                   | 96                                                          |
| 67              | Finland | 2007           | Pineapples                | 12                                                          |
| 67              | Finland | 2007           | Plantains                 | 1                                                           |
| 67              | Finland | 2007           | Potatoes                  | 188                                                         |
| 67              | Finland | 2007           | Poultry Meat              | 51                                                          |
| 67              | Finland | 2007           | Rape and Mustard Oil      | 21                                                          |
| 67              | Finland | 2007           | Rice (Milled Equivalent)  | 13                                                          |
| 67              | Finland | 2007           | Rye                       | 46                                                          |
| 67              | Finland | 2007           | Soyabean Oil              | 2                                                           |
| 67              | Finland | 2007           | Sugar, Refined Equivalent | 76                                                          |
| 67              | Finland | 2007           | Sunflowerseed Oil         | 2                                                           |
| 67              | Finland | 2007           | Sweeteners, Other         | 9                                                           |
| 67              | Finland | 2007           | Tea                       | 1                                                           |
| 67              | Finland | 2007           | Tomatoes                  | 44                                                          |
| 67              | Finland | 2007           | Vegetables, Other         | 158                                                         |
| 67              | Finland | 2007           | Wheat                     | 221                                                         |
| 67              | Finland | 2007           | Wine                      | 32                                                          |
| 67              | Finland | 2008           | Apples                    | 63                                                          |
| 67              | Finland | 2008           | Bananas                   | 28                                                          |
| 67              | Finland | 2008           | Barley                    | 13                                                          |
| 67              | Finland | 2008           | Beer                      | 233                                                         |
| 67              | Finland | 2008           | Beverages, Alcoholic      | 11                                                          |
| 67              | Finland | 2008           | Beverages, Fermented      | 2                                                           |
| 67              | Finland | 2008           | Bovine Meat               | 50                                                          |
| 67              | Finland | 2008           | Butter, Ghee              | 12                                                          |

## Dietary calcium and zinc deficiency risks are decreasing but remain prevalent

| FAO countrycode | Country | Reference year | Food item                 | Gross food supply (g capita <sup>-1</sup> d <sup>-1</sup> ) |
|-----------------|---------|----------------|---------------------------|-------------------------------------------------------------|
| 67              | Finland | 2008           | Cereals, Other            | 3                                                           |
| 67              | Finland | 2008           | Cheese                    | 49                                                          |
| 67              | Finland | 2008           | Citrus, Other             | 1                                                           |
| 67              | Finland | 2008           | Cocoa Beans               | 6                                                           |
| 67              | Finland | 2008           | Coconut Oil               | 1                                                           |
| 67              | Finland | 2008           | Coffee                    | 35                                                          |
| 67              | Finland | 2008           | Cream                     | 19                                                          |
| 67              | Finland | 2008           | Crustaceans               | 5                                                           |
| 67              | Finland | 2008           | Demersal Fish             | 8                                                           |
| 67              | Finland | 2008           | Eggs                      | 24                                                          |
| 67              | Finland | 2008           | Fats, Animals, Raw        | 2                                                           |
| 67              | Finland | 2008           | Freshwater Fish           | 40                                                          |
| 67              | Finland | 2008           | Fruits, Other             | 51                                                          |
| 67              | Finland | 2008           | Grapefruit                | 2                                                           |
| 67              | Finland | 2008           | Grapes                    | 16                                                          |
| 67              | Finland | 2008           | Groundnuts (Shelled Eq)   | 2                                                           |
| 67              | Finland | 2008           | Honey                     | 1                                                           |
| 67              | Finland | 2008           | Lemons, Limes             | 2                                                           |
| 67              | Finland | 2008           | Marine Fish, Other        | 4                                                           |
| 67              | Finland | 2008           | Meat, Other               | 5                                                           |
| 67              | Finland | 2008           | Milk, Whole               | 353                                                         |
| 67              | Finland | 2008           | Molluscs, Other           | 1                                                           |
| 67              | Finland | 2008           | Mutton & Goat Meat        | 1                                                           |
| 67              | Finland | 2008           | Nuts                      | 4                                                           |
| 67              | Finland | 2008           | Oats                      | 18                                                          |
| 67              | Finland | 2008           | Offals, Edible            | 4                                                           |
| 67              | Finland | 2008           | Oilcrops Oil, Other       | 2                                                           |
| 67              | Finland | 2008           | Olive Oil                 | 1                                                           |
| 67              | Finland | 2008           | Olives                    | 2                                                           |
| 67              | Finland | 2008           | Onions                    | 13                                                          |
| 67              | Finland | 2008           | Oranges, Mandarines       | 63                                                          |
| 67              | Finland | 2008           | Peas                      | 3                                                           |
| 67              | Finland | 2008           | Pelagic Fish              | 37                                                          |
| 67              | Finland | 2008           | Pigmeat                   | 93                                                          |
| 67              | Finland | 2008           | Pineapples                | 13                                                          |
| 67              | Finland | 2008           | Potatoes                  | 188                                                         |
| 67              | Finland | 2008           | Poultry Meat              | 54                                                          |
| 67              | Finland | 2008           | Rape and Mustard Oil      | 19                                                          |
| 67              | Finland | 2008           | Rice (Milled Equivalent)  | 13                                                          |
| 67              | Finland | 2008           | Rye                       | 44                                                          |
| 67              | Finland | 2008           | Soyabean Oil              | 3                                                           |
| 67              | Finland | 2008           | Spices, Other             | 1                                                           |
| 67              | Finland | 2008           | Sugar, Refined Equivalent | 64                                                          |
| 67              | Finland | 2008           | Sunflowerseed Oil         | 2                                                           |
| 67              | Finland | 2008           | Sweet Potatoes            | 1                                                           |
| 67              | Finland | 2008           | Sweeteners, Other         | 9                                                           |
| 67              | Finland | 2008           | Tea                       | 1                                                           |
| 67              | Finland | 2008           | Tomatoes                  | 47                                                          |
| 67              | Finland | 2008           | Vegetables, Other         | 154                                                         |
| 67              | Finland | 2008           | Wheat                     | 225                                                         |
| 67              | Finland | 2008           | Wine                      | 33                                                          |
| 67              | Finland | 2009           | Apples                    | 61                                                          |
| 67              | Finland | 2009           | Bananas                   | 26                                                          |
| 67              | Finland | 2009           | Barley                    | 13                                                          |
| 67              | Finland | 2009           | Beer                      | 229                                                         |
| 67              | Finland | 2009           | Beverages, Alcoholic      | 11                                                          |
| 67              | Finland | 2009           | Beverages, Fermented      | 3                                                           |
| 67              | Finland | 2009           | Bovine Meat               | 50                                                          |
| 67              | Finland | 2009           | Butter, Ghee              | 10                                                          |
| 67              | Finland | 2009           | Cereals, Other            | 5                                                           |
| 67              | Finland | 2009           | Cheese                    | 48                                                          |
| 67              | Finland | 2009           | Citrus, Other             | 1                                                           |
| 67              | Finland | 2009           | Cocoa Beans               | 6                                                           |
| 67              | Finland | 2009           | Coconut Oil               | 1                                                           |
| 67              | Finland | 2009           | Coffee                    | 33                                                          |
| 67              | Finland | 2009           | Cream                     | 19                                                          |
| 67              | Finland | 2009           | Crustaceans               | 5                                                           |
| 67              | Finland | 2009           | Demersal Fish             | 7                                                           |
| 67              | Finland | 2009           | Eggs                      | 23                                                          |
| 67              | Finland | 2009           | Fats, Animals, Raw        | 2                                                           |
| 67              | Finland | 2009           | Freshwater Fish           | 37                                                          |
| 67              | Finland | 2009           | Fruits, Other             | 58                                                          |
| 67              | Finland | 2009           | Grapefruit                | 2                                                           |
| 67              | Finland | 2009           | Grapes                    | 17                                                          |
| 67              | Finland | 2009           | Groundnuts (Shelled Eq)   | 3                                                           |
| 67              | Finland | 2009           | Honey                     | 1                                                           |
| 67              | Finland | 2009           | Lemons, Limes             | 2                                                           |
| 67              | Finland | 2009           | Marine Fish, Other        | 4                                                           |
| 67              | Finland | 2009           | Meat, Other               | 5                                                           |
| 67              | Finland | 2009           | Milk, Whole               | 351                                                         |
| 67              | Finland | 2009           | Molluscs, Other           | 1                                                           |
| 67              | Finland | 2009           | Mutton & Goat Meat        | 1                                                           |
| 67              | Finland | 2009           | Nuts                      | 5                                                           |
| 67              | Finland | 2009           | Oats                      | 16                                                          |
| 67              | Finland | 2009           | Offals, Edible            | 5                                                           |
| 67              | Finland | 2009           | Oilcrops Oil, Other       | 2                                                           |
| 67              | Finland | 2009           | Olive Oil                 | 1                                                           |
| 67              | Finland | 2009           | Olives                    | 2                                                           |
| 67              | Finland | 2009           | Onions                    | 14                                                          |
| 67              | Finland | 2009           | Oranges, Mandarines       | 68                                                          |
| 67              | Finland | 2009           | Peas                      | 3                                                           |
| 67              | Finland | 2009           | Pelagic Fish              | 38                                                          |
| 67              | Finland | 2009           | Pigmeat                   | 93                                                          |
| 67              | Finland | 2009           | Pineapples                | 11                                                          |
| 67              | Finland | 2009           | Potatoes                  | 183                                                         |
| 67              | Finland | 2009           | Poultry Meat              | 50                                                          |
| 67              | Finland | 2009           | Rape and Mustard Oil      | 22                                                          |

## Dietary calcium and zinc deficiency risks are decreasing but remain prevalent

| FAO countrycode | Country | Reference year | Food item                 | Gross food supply (g capita <sup>-1</sup> d <sup>-1</sup> ) |
|-----------------|---------|----------------|---------------------------|-------------------------------------------------------------|
| 67              | Finland | 2009           | Rice (Milled Equivalent)  | 12                                                          |
| 67              | Finland | 2009           | Rye                       | 43                                                          |
| 67              | Finland | 2009           | Spices, Other             | 1                                                           |
| 67              | Finland | 2009           | Sugar, Refined Equivalent | 75                                                          |
| 67              | Finland | 2009           | Sunflowerseed Oil         | 3                                                           |
| 67              | Finland | 2009           | Sweet Potatoes            | 1                                                           |
| 67              | Finland | 2009           | Sweeteners, Other         | 8                                                           |
| 67              | Finland | 2009           | Tea                       | 1                                                           |
| 67              | Finland | 2009           | Tomatoes                  | 48                                                          |
| 67              | Finland | 2009           | Vegetables, Other         | 170                                                         |
| 67              | Finland | 2009           | Wheat                     | 214                                                         |
| 67              | Finland | 2009           | Wine                      | 33                                                          |
| 67              | Finland | 2010           | Apples                    | 63                                                          |
| 67              | Finland | 2010           | Bananas                   | 27                                                          |
| 67              | Finland | 2010           | Barley                    | 13                                                          |
| 67              | Finland | 2010           | Beer                      | 227                                                         |
| 67              | Finland | 2010           | Beverages, Alcoholic      | 11                                                          |
| 67              | Finland | 2010           | Beverages, Fermented      | 2                                                           |
| 67              | Finland | 2010           | Bovine Meat               | 51                                                          |
| 67              | Finland | 2010           | Butter, Ghee              | 13                                                          |
| 67              | Finland | 2010           | Cereals, Other            | 7                                                           |
| 67              | Finland | 2010           | Cheese                    | 48                                                          |
| 67              | Finland | 2010           | Citrus, Other             | 2                                                           |
| 67              | Finland | 2010           | Cocoa Beans               | 8                                                           |
| 67              | Finland | 2010           | Coffee                    | 34                                                          |
| 67              | Finland | 2010           | Cream                     | 17                                                          |
| 67              | Finland | 2010           | Crustaceans               | 6                                                           |
| 67              | Finland | 2010           | Demersal Fish             | 8                                                           |
| 67              | Finland | 2010           | Eggs                      | 24                                                          |
| 67              | Finland | 2010           | Fats, Animals, Raw        | 2                                                           |
| 67              | Finland | 2010           | Freshwater Fish           | 37                                                          |
| 67              | Finland | 2010           | Fruits, Other             | 51                                                          |
| 67              | Finland | 2010           | Grapefruit                | 2                                                           |
| 67              | Finland | 2010           | Grapes                    | 16                                                          |
| 67              | Finland | 2010           | Groundnuts (Shelled Eq)   | 3                                                           |
| 67              | Finland | 2010           | Honey                     | 2                                                           |
| 67              | Finland | 2010           | Lemons, Limes             | 2                                                           |
| 67              | Finland | 2010           | Marine Fish, Other        | 4                                                           |
| 67              | Finland | 2010           | Meat, Other               | 5                                                           |
| 67              | Finland | 2010           | Milk, Whole               | 350                                                         |
| 67              | Finland | 2010           | Molluscs, Other           | 1                                                           |
| 67              | Finland | 2010           | Mutton & Goat Meat        | 1                                                           |
| 67              | Finland | 2010           | Nuts                      | 5                                                           |
| 67              | Finland | 2010           | Oats                      | 17                                                          |
| 67              | Finland | 2010           | Offals, Edible            | 4                                                           |
| 67              | Finland | 2010           | Oilcrops Oil, Other       | 2                                                           |
| 67              | Finland | 2010           | Olive Oil                 | 1                                                           |
| 67              | Finland | 2010           | Olives                    | 2                                                           |
| 67              | Finland | 2010           | Onions                    | 13                                                          |
| 67              | Finland | 2010           | Oranges, Mandarines       | 70                                                          |
| 67              | Finland | 2010           | Palm Oil                  | 3                                                           |
| 67              | Finland | 2010           | Peas                      | 3                                                           |
| 67              | Finland | 2010           | Pelagic Fish              | 41                                                          |
| 67              | Finland | 2010           | Pigmeat                   | 100                                                         |
| 67              | Finland | 2010           | Pineapples                | 12                                                          |
| 67              | Finland | 2010           | Potatoes                  | 184                                                         |
| 67              | Finland | 2010           | Poultry Meat              | 48                                                          |
| 67              | Finland | 2010           | Rape and Mustard Oil      | 20                                                          |
| 67              | Finland | 2010           | Rice (Milled Equivalent)  | 12                                                          |
| 67              | Finland | 2010           | Rye                       | 45                                                          |
| 67              | Finland | 2010           | Sugar, Refined Equivalent | 67                                                          |
| 67              | Finland | 2010           | Sunflowerseed Oil         | 2                                                           |
| 67              | Finland | 2010           | Sweet Potatoes            | 1                                                           |
| 67              | Finland | 2010           | Sweeteners, Other         | 8                                                           |
| 67              | Finland | 2010           | Tea                       | 1                                                           |
| 67              | Finland | 2010           | Tomatoes                  | 42                                                          |
| 67              | Finland | 2010           | Vegetables, Other         | 165                                                         |
| 67              | Finland | 2010           | Wheat                     | 223                                                         |
| 67              | Finland | 2010           | Wine                      | 33                                                          |
| 67              | Finland | 2011           | Apples                    | 63                                                          |
| 67              | Finland | 2011           | Bananas                   | 34                                                          |
| 67              | Finland | 2011           | Barley                    | 13                                                          |
| 67              | Finland | 2011           | Beer                      | 235                                                         |
| 67              | Finland | 2011           | Beverages, Alcoholic      | 11                                                          |
| 67              | Finland | 2011           | Beverages, Fermented      | 2                                                           |
| 67              | Finland | 2011           | Bovine Meat               | 52                                                          |
| 67              | Finland | 2011           | Butter, Ghee              | 15                                                          |
| 67              | Finland | 2011           | Cereals, Other            | 3                                                           |
| 67              | Finland | 2011           | Cheese                    | 53                                                          |
| 67              | Finland | 2011           | Citrus, Other             | 1                                                           |
| 67              | Finland | 2011           | Cocoa Beans               | 5                                                           |
| 67              | Finland | 2011           | Coffee                    | 33                                                          |
| 67              | Finland | 2011           | Cream                     | 18                                                          |
| 67              | Finland | 2011           | Crustaceans               | 6                                                           |
| 67              | Finland | 2011           | Demersal Fish             | 8                                                           |
| 67              | Finland | 2011           | Eggs                      | 24                                                          |
| 67              | Finland | 2011           | Fats, Animals, Raw        | 2                                                           |
| 67              | Finland | 2011           | Freshwater Fish           | 37                                                          |
| 67              | Finland | 2011           | Fruits, Other             | 56                                                          |
| 67              | Finland | 2011           | Grapefruit                | 2                                                           |
| 67              | Finland | 2011           | Grapes                    | 14                                                          |
| 67              | Finland | 2011           | Groundnuts (Shelled Eq)   | 3                                                           |
| 67              | Finland | 2011           | Honey                     | 1                                                           |
| 67              | Finland | 2011           | Lemons, Limes             | 4                                                           |
| 67              | Finland | 2011           | Marine Fish, Other        | 4                                                           |
| 67              | Finland | 2011           | Meat, Other               | 6                                                           |
| 67              | Finland | 2011           | Milk, Whole               | 339                                                         |

Dietary calcium and zinc deficiency risks are decreasing but remain prevalent

| FAO countrycode | Country | Reference year | Food item                 | Gross food supply (g capita <sup>-1</sup> d <sup>-1</sup> ) |
|-----------------|---------|----------------|---------------------------|-------------------------------------------------------------|
| 67              | Finland | 2011           | Molluscs, Other           | 1                                                           |
| 67              | Finland | 2011           | Mutton & Goat Meat        | 2                                                           |
| 67              | Finland | 2011           | Nuts                      | 6                                                           |
| 67              | Finland | 2011           | Oats                      | 18                                                          |
| 67              | Finland | 2011           | Offals, Edible            | 4                                                           |
| 67              | Finland | 2011           | Oilcrops Oil, Other       | 2                                                           |
| 67              | Finland | 2011           | Olive Oil                 | 1                                                           |
| 67              | Finland | 2011           | Olives                    | 2                                                           |
| 67              | Finland | 2011           | Onions                    | 16                                                          |
| 67              | Finland | 2011           | Oranges, Mandarines       | 70                                                          |
| 67              | Finland | 2011           | Palm Oil                  | 3                                                           |
| 67              | Finland | 2011           | Peas                      | 3                                                           |
| 67              | Finland | 2011           | Pelagic Fish              | 41                                                          |
| 67              | Finland | 2011           | Pigmeat                   | 95                                                          |
| 67              | Finland | 2011           | Pineapples                | 13                                                          |
| 67              | Finland | 2011           | Plantains                 | 2                                                           |
| 67              | Finland | 2011           | Potatoes                  | 183                                                         |
| 67              | Finland | 2011           | Poultry Meat              | 50                                                          |
| 67              | Finland | 2011           | Rape and Mustard Oil      | 18                                                          |
| 67              | Finland | 2011           | Rice (Milled Equivalent)  | 12                                                          |
| 67              | Finland | 2011           | Rye                       | 45                                                          |
| 67              | Finland | 2011           | Spices, Other             | 1                                                           |
| 67              | Finland | 2011           | Sugar, Refined Equivalent | 68                                                          |
| 67              | Finland | 2011           | Sunflowerseed Oil         | 3                                                           |
| 67              | Finland | 2011           | Sweet Potatoes            | 1                                                           |
| 67              | Finland | 2011           | Sweeteners, Other         | 9                                                           |
| 67              | Finland | 2011           | Tea                       | 1                                                           |
| 67              | Finland | 2011           | Tomatoes                  | 47                                                          |
| 67              | Finland | 2011           | Vegetables, Other         | 178                                                         |
| 67              | Finland | 2011           | Wheat                     | 214                                                         |
| 67              | Finland | 2011           | Wine                      | 33                                                          |
| 68              | France  | 1992           | Apples                    | 35                                                          |
| 68              | France  | 1992           | Bananas                   | 22                                                          |
| 68              | France  | 1992           | Barley                    | 1                                                           |
| 68              | France  | 1992           | Beans                     | 3                                                           |
| 68              | France  | 1992           | Beer                      | 95                                                          |
| 68              | France  | 1992           | Beverages, Alcoholic      | 7                                                           |
| 68              | France  | 1992           | Beverages, Fermented      | 41                                                          |
| 68              | France  | 1992           | Bovine Meat               | 83                                                          |
| 68              | France  | 1992           | Butter, Ghee              | 23                                                          |
| 68              | France  | 1992           | Cephalopods               | 1                                                           |
| 68              | France  | 1992           | Cheese                    | 59                                                          |
| 68              | France  | 1992           | Cocoa Beans               | 8                                                           |
| 68              | France  | 1992           | Coconut Oil               | 1                                                           |
| 68              | France  | 1992           | Coconuts - Incl Copra     | 2                                                           |
| 68              | France  | 1992           | Coffee                    | 16                                                          |
| 68              | France  | 1992           | Cream                     | 12                                                          |
| 68              | France  | 1992           | Crustaceans               | 10                                                          |
| 68              | France  | 1992           | Demersal Fish             | 28                                                          |
| 68              | France  | 1992           | Eggs                      | 40                                                          |
| 68              | France  | 1992           | Fats, Animals, Raw        | 12                                                          |
| 68              | France  | 1992           | Fish, Body Oil            | 1                                                           |
| 68              | France  | 1992           | Freshwater Fish           | 8                                                           |
| 68              | France  | 1992           | Fruits, Other             | 84                                                          |
| 68              | France  | 1992           | Grapefruit                | 12                                                          |
| 68              | France  | 1992           | Grapes                    | 6                                                           |
| 68              | France  | 1992           | Groundnut Oil             | 4                                                           |
| 68              | France  | 1992           | Groundnuts (Shelled Eq)   | 3                                                           |
| 68              | France  | 1992           | Honey                     | 1                                                           |
| 68              | France  | 1992           | Lemons, Limes             | 7                                                           |
| 68              | France  | 1992           | Maize                     | 35                                                          |
| 68              | France  | 1992           | Maize Germ Oil            | 1                                                           |
| 68              | France  | 1992           | Marine Fish, Other        | 2                                                           |
| 68              | France  | 1992           | Meat, Other               | 18                                                          |
| 68              | France  | 1992           | Milk, Whole               | 271                                                         |
| 68              | France  | 1992           | Molluscs, Other           | 18                                                          |
| 68              | France  | 1992           | Mutton & Goat Meat        | 12                                                          |
| 68              | France  | 1992           | Nuts                      | 10                                                          |
| 68              | France  | 1992           | Offals, Edible            | 27                                                          |
| 68              | France  | 1992           | Oilcrops Oil, Other       | 5                                                           |
| 68              | France  | 1992           | Olive Oil                 | 2                                                           |
| 68              | France  | 1992           | Olives                    | 2                                                           |
| 68              | France  | 1992           | Onions                    | 13                                                          |
| 68              | France  | 1992           | Oranges, Mandarines       | 74                                                          |
| 68              | France  | 1992           | Palm Oil                  | 4                                                           |
| 68              | France  | 1992           | Palmkernel Oil            | 1                                                           |
| 68              | France  | 1992           | Peas                      | 2                                                           |
| 68              | France  | 1992           | Pelagic Fish              | 16                                                          |
| 68              | France  | 1992           | Pigmeat                   | 96                                                          |
| 68              | France  | 1992           | Pineapples                | 6                                                           |
| 68              | France  | 1992           | Potatoes                  | 206                                                         |
| 68              | France  | 1992           | Poultry Meat              | 60                                                          |
| 68              | France  | 1992           | Pulses, Other             | 1                                                           |
| 68              | France  | 1992           | Rape and Mustard Oil      | 8                                                           |
| 68              | France  | 1992           | Rice (Milled Equivalent)  | 10                                                          |
| 68              | France  | 1992           | Rye                       | 2                                                           |
| 68              | France  | 1992           | Soyabean Oil              | 1                                                           |
| 68              | France  | 1992           | Sugar, Refined Equivalent | 93                                                          |
| 68              | France  | 1992           | Sunflowerseed Oil         | 20                                                          |
| 68              | France  | 1992           | Sweeteners, Other         | 2                                                           |
| 68              | France  | 1992           | Tea                       | 1                                                           |
| 68              | France  | 1992           | Tomatoes                  | 63                                                          |
| 68              | France  | 1992           | Vegetables, Other         | 251                                                         |
| 68              | France  | 1992           | Wheat                     | 240                                                         |
| 68              | France  | 1992           | Wine                      | 179                                                         |
| 68              | France  | 1993           | Apples                    | 33                                                          |
| 68              | France  | 1993           | Bananas                   | 22                                                          |



Dietary calcium and zinc deficiency risks are decreasing but remain prevalent

| FAO countrycode | Country | Reference year | Food item                 | Gross food supply (g capita <sup>-1</sup> d <sup>-1</sup> ) |
|-----------------|---------|----------------|---------------------------|-------------------------------------------------------------|
| 68              | France  | 1993           | Barley                    | 1                                                           |
| 68              | France  | 1993           | Beans                     | 3                                                           |
| 68              | France  | 1993           | Beer                      | 94                                                          |
| 68              | France  | 1993           | Beverages, Alcoholic      | 7                                                           |
| 68              | France  | 1993           | Beverages, Fermented      | 41                                                          |
| 68              | France  | 1993           | Bovine Meat               | 72                                                          |
| 68              | France  | 1993           | Butter, Ghee              | 22                                                          |
| 68              | France  | 1993           | Cephalopods               | 1                                                           |
| 68              | France  | 1993           | Cheese                    | 60                                                          |
| 68              | France  | 1993           | Cocoa Beans               | 8                                                           |
| 68              | France  | 1993           | Coconut Oil               | 1                                                           |
| 68              | France  | 1993           | Coconuts - Incl Copra     | 1                                                           |
| 68              | France  | 1993           | Coffee                    | 17                                                          |
| 68              | France  | 1993           | Cream                     | 12                                                          |
| 68              | France  | 1993           | Crustaceans               | 10                                                          |
| 68              | France  | 1993           | Demersal Fish             | 28                                                          |
| 68              | France  | 1993           | Eggs                      | 40                                                          |
| 68              | France  | 1993           | Fats, Animals, Raw        | 12                                                          |
| 68              | France  | 1993           | Freshwater Fish           | 8                                                           |
| 68              | France  | 1993           | Fruits, Other             | 72                                                          |
| 68              | France  | 1993           | Grapefruit                | 11                                                          |
| 68              | France  | 1993           | Grapes                    | 7                                                           |
| 68              | France  | 1993           | Groundnut Oil             | 4                                                           |
| 68              | France  | 1993           | Groundnuts (Shelled Eq)   | 3                                                           |
| 68              | France  | 1993           | Honey                     | 1                                                           |
| 68              | France  | 1993           | Lemons, Limes             | 5                                                           |
| 68              | France  | 1993           | Maize                     | 35                                                          |
| 68              | France  | 1993           | Maize Germ Oil            | 1                                                           |
| 68              | France  | 1993           | Marine Fish, Other        | 2                                                           |
| 68              | France  | 1993           | Meat, Other               | 18                                                          |
| 68              | France  | 1993           | Milk, Whole               | 247                                                         |
| 68              | France  | 1993           | Molluscs, Other           | 18                                                          |
| 68              | France  | 1993           | Mutton & Goat Meat        | 12                                                          |
| 68              | France  | 1993           | Nuts                      | 10                                                          |
| 68              | France  | 1993           | Offals, Edible            | 27                                                          |
| 68              | France  | 1993           | Oilcrops Oil, Other       | 6                                                           |
| 68              | France  | 1993           | Olive Oil                 | 2                                                           |
| 68              | France  | 1993           | Olives                    | 2                                                           |
| 68              | France  | 1993           | Onions                    | 12                                                          |
| 68              | France  | 1993           | Oranges, Mandarines       | 75                                                          |
| 68              | France  | 1993           | Palm Oil                  | 2                                                           |
| 68              | France  | 1993           | Peas                      | 1                                                           |
| 68              | France  | 1993           | Pelagic Fish              | 16                                                          |
| 68              | France  | 1993           | Pigmeat                   | 98                                                          |
| 68              | France  | 1993           | Pineapples                | 5                                                           |
| 68              | France  | 1993           | Potatoes                  | 203                                                         |
| 68              | France  | 1993           | Poultry Meat              | 58                                                          |
| 68              | France  | 1993           | Pulses, Other             | 2                                                           |
| 68              | France  | 1993           | Rape and Mustard Oil      | 7                                                           |
| 68              | France  | 1993           | Rice (Milled Equivalent)  | 9                                                           |
| 68              | France  | 1993           | Rye                       | 1                                                           |
| 68              | France  | 1993           | Soyabean Oil              | 4                                                           |
| 68              | France  | 1993           | Sugar, Refined Equivalent | 90                                                          |
| 68              | France  | 1993           | Sunflowerseed Oil         | 20                                                          |
| 68              | France  | 1993           | Sweeteners, Other         | 2                                                           |
| 68              | France  | 1993           | Tea                       | 1                                                           |
| 68              | France  | 1993           | Tomatoes                  | 58                                                          |
| 68              | France  | 1993           | Vegetables, Other         | 269                                                         |
| 68              | France  | 1993           | Wheat                     | 256                                                         |
| 68              | France  | 1993           | Wine                      | 175                                                         |
| 68              | France  | 1994           | Apples                    | 32                                                          |
| 68              | France  | 1994           | Bananas                   | 18                                                          |
| 68              | France  | 1994           | Barley                    | 1                                                           |
| 68              | France  | 1994           | Beans                     | 3                                                           |
| 68              | France  | 1994           | Beer                      | 93                                                          |
| 68              | France  | 1994           | Beverages, Alcoholic      | 7                                                           |
| 68              | France  | 1994           | Beverages, Fermented      | 38                                                          |
| 68              | France  | 1994           | Bovine Meat               | 71                                                          |
| 68              | France  | 1994           | Butter, Ghee              | 23                                                          |
| 68              | France  | 1994           | Cephalopods               | 1                                                           |
| 68              | France  | 1994           | Cheese                    | 60                                                          |
| 68              | France  | 1994           | Cocoa Beans               | 8                                                           |
| 68              | France  | 1994           | Coconuts - Incl Copra     | 2                                                           |
| 68              | France  | 1994           | Coffee                    | 16                                                          |
| 68              | France  | 1994           | Cream                     | 13                                                          |
| 68              | France  | 1994           | Crustaceans               | 9                                                           |
| 68              | France  | 1994           | Demersal Fish             | 29                                                          |
| 68              | France  | 1994           | Eggs                      | 41                                                          |
| 68              | France  | 1994           | Fats, Animals, Raw        | 12                                                          |
| 68              | France  | 1994           | Fish, Body Oil            | 1                                                           |
| 68              | France  | 1994           | Freshwater Fish           | 8                                                           |
| 68              | France  | 1994           | Fruits, Other             | 81                                                          |
| 68              | France  | 1994           | Grapefruit                | 13                                                          |
| 68              | France  | 1994           | Grapes                    | 10                                                          |
| 68              | France  | 1994           | Groundnut Oil             | 4                                                           |
| 68              | France  | 1994           | Groundnuts (Shelled Eq)   | 2                                                           |
| 68              | France  | 1994           | Honey                     | 1                                                           |
| 68              | France  | 1994           | Lemons, Limes             | 6                                                           |
| 68              | France  | 1994           | Maize                     | 35                                                          |
| 68              | France  | 1994           | Maize Germ Oil            | 1                                                           |
| 68              | France  | 1994           | Marine Fish, Other        | 2                                                           |
| 68              | France  | 1994           | Meat, Other               | 17                                                          |
| 68              | France  | 1994           | Milk, Whole               | 232                                                         |
| 68              | France  | 1994           | Molluscs, Other           | 18                                                          |
| 68              | France  | 1994           | Mutton & Goat Meat        | 12                                                          |
| 68              | France  | 1994           | Nuts                      | 9                                                           |
| 68              | France  | 1994           | Oats                      | 1                                                           |

Dietary calcium and zinc deficiency risks are decreasing but remain prevalent

| FAO countrycode | Country | Reference year | Food item                 | Gross food supply (g capita <sup>-1</sup> d <sup>-1</sup> ) |
|-----------------|---------|----------------|---------------------------|-------------------------------------------------------------|
| 68              | France  | 1994           | Offals, Edible            | 26                                                          |
| 68              | France  | 1994           | Oilcrops Oil, Other       | 7                                                           |
| 68              | France  | 1994           | Olive Oil                 | 2                                                           |
| 68              | France  | 1994           | Olives                    | 2                                                           |
| 68              | France  | 1994           | Onions                    | 13                                                          |
| 68              | France  | 1994           | Oranges, Mandarines       | 84                                                          |
| 68              | France  | 1994           | Palm Oil                  | 1                                                           |
| 68              | France  | 1994           | Palmkernel Oil            | 1                                                           |
| 68              | France  | 1994           | Peas                      | 1                                                           |
| 68              | France  | 1994           | Pelagic Fish              | 16                                                          |
| 68              | France  | 1994           | Pigmeat                   | 98                                                          |
| 68              | France  | 1994           | Pineapples                | 5                                                           |
| 68              | France  | 1994           | Potatoes                  | 187                                                         |
| 68              | France  | 1994           | Poultry Meat              | 63                                                          |
| 68              | France  | 1994           | Pulses, Other             | 2                                                           |
| 68              | France  | 1994           | Rape and Mustard Oil      | 8                                                           |
| 68              | France  | 1994           | Rice (Milled Equivalent)  | 10                                                          |
| 68              | France  | 1994           | Rye                       | 2                                                           |
| 68              | France  | 1994           | Soyabean Oil              | 3                                                           |
| 68              | France  | 1994           | Sugar, Refined Equivalent | 88                                                          |
| 68              | France  | 1994           | Sunflowerseed Oil         | 20                                                          |
| 68              | France  | 1994           | Sweeteners, Other         | 4                                                           |
| 68              | France  | 1994           | Tea                       | 1                                                           |
| 68              | France  | 1994           | Tomatoes                  | 63                                                          |
| 68              | France  | 1994           | Vegetables, Other         | 197                                                         |
| 68              | France  | 1994           | Wheat                     | 256                                                         |
| 68              | France  | 1994           | Wine                      | 171                                                         |
| 68              | France  | 1995           | Apples                    | 28                                                          |
| 68              | France  | 1995           | Bananas                   | 25                                                          |
| 68              | France  | 1995           | Barley                    | 1                                                           |
| 68              | France  | 1995           | Beans                     | 3                                                           |
| 68              | France  | 1995           | Beer                      | 94                                                          |
| 68              | France  | 1995           | Beverages, Alcoholic      | 7                                                           |
| 68              | France  | 1995           | Beverages, Fermented      | 37                                                          |
| 68              | France  | 1995           | Bovine Meat               | 76                                                          |
| 68              | France  | 1995           | Butter, Ghee              | 24                                                          |
| 68              | France  | 1995           | Cephalopods               | 2                                                           |
| 68              | France  | 1995           | Cheese                    | 60                                                          |
| 68              | France  | 1995           | Cocoa Beans               | 8                                                           |
| 68              | France  | 1995           | Coconuts - Incl Copra     | 1                                                           |
| 68              | France  | 1995           | Coffee                    | 14                                                          |
| 68              | France  | 1995           | Cream                     | 11                                                          |
| 68              | France  | 1995           | Crustaceans               | 10                                                          |
| 68              | France  | 1995           | Demersal Fish             | 29                                                          |
| 68              | France  | 1995           | Eggs                      | 43                                                          |
| 68              | France  | 1995           | Fats, Animals, Raw        | 13                                                          |
| 68              | France  | 1995           | Fish, Body Oil            | 1                                                           |
| 68              | France  | 1995           | Freshwater Fish           | 8                                                           |
| 68              | France  | 1995           | Fruits, Other             | 82                                                          |
| 68              | France  | 1995           | Grapefruit                | 14                                                          |
| 68              | France  | 1995           | Grapes                    | 10                                                          |
| 68              | France  | 1995           | Groundnut Oil             | 4                                                           |
| 68              | France  | 1995           | Groundnuts (Shelled Eq)   | 3                                                           |
| 68              | France  | 1995           | Honey                     | 1                                                           |
| 68              | France  | 1995           | Lemons, Limes             | 6                                                           |
| 68              | France  | 1995           | Maize                     | 35                                                          |
| 68              | France  | 1995           | Maize Germ Oil            | 1                                                           |
| 68              | France  | 1995           | Marine Fish, Other        | 2                                                           |
| 68              | France  | 1995           | Meat, Other               | 17                                                          |
| 68              | France  | 1995           | Milk, Whole               | 220                                                         |
| 68              | France  | 1995           | Molluscs, Other           | 18                                                          |
| 68              | France  | 1995           | Mutton & Goat Meat        | 12                                                          |
| 68              | France  | 1995           | Nuts                      | 10                                                          |
| 68              | France  | 1995           | Oats                      | 1                                                           |
| 68              | France  | 1995           | Offals, Edible            | 26                                                          |
| 68              | France  | 1995           | Oilcrops Oil, Other       | 6                                                           |
| 68              | France  | 1995           | Olive Oil                 | 2                                                           |
| 68              | France  | 1995           | Olives                    | 2                                                           |
| 68              | France  | 1995           | Onions                    | 14                                                          |
| 68              | France  | 1995           | Oranges, Mandarines       | 88                                                          |
| 68              | France  | 1995           | Palm Oil                  | 1                                                           |
| 68              | France  | 1995           | Palmkernel Oil            | 1                                                           |
| 68              | France  | 1995           | Peas                      | 1                                                           |
| 68              | France  | 1995           | Pelagic Fish              | 16                                                          |
| 68              | France  | 1995           | Pigmeat                   | 98                                                          |
| 68              | France  | 1995           | Pineapples                | 5                                                           |
| 68              | France  | 1995           | Potatoes                  | 194                                                         |
| 68              | France  | 1995           | Poultry Meat              | 65                                                          |
| 68              | France  | 1995           | Pulses, Other             | 2                                                           |
| 68              | France  | 1995           | Rape and Mustard Oil      | 8                                                           |
| 68              | France  | 1995           | Rice (Milled Equivalent)  | 9                                                           |
| 68              | France  | 1995           | Rye                       | 2                                                           |
| 68              | France  | 1995           | Soyabean Oil              | 4                                                           |
| 68              | France  | 1995           | Sugar, Refined Equivalent | 88                                                          |
| 68              | France  | 1995           | Sunflowerseed Oil         | 20                                                          |
| 68              | France  | 1995           | Sweeteners, Other         | 6                                                           |
| 68              | France  | 1995           | Tea                       | 1                                                           |
| 68              | France  | 1995           | Tomatoes                  | 65                                                          |
| 68              | France  | 1995           | Vegetables, Other         | 214                                                         |
| 68              | France  | 1995           | Wheat                     | 257                                                         |
| 68              | France  | 1995           | Wine                      | 161                                                         |
| 68              | France  | 1996           | Apples                    | 23                                                          |
| 68              | France  | 1996           | Bananas                   | 19                                                          |
| 68              | France  | 1996           | Barley                    | 1                                                           |
| 68              | France  | 1996           | Beans                     | 2                                                           |
| 68              | France  | 1996           | Beer                      | 91                                                          |
| 68              | France  | 1996           | Beverages, Alcoholic      | 7                                                           |

Dietary calcium and zinc deficiency risks are decreasing but remain prevalent

| FAO countrycode | Country | Reference year | Food item                 | Gross food supply (g capita <sup>-1</sup> d <sup>-1</sup> ) |
|-----------------|---------|----------------|---------------------------|-------------------------------------------------------------|
| 68              | France  | 1996           | Beverages, Fermented      | 34                                                          |
| 68              | France  | 1996           | Bovine Meat               | 76                                                          |
| 68              | France  | 1996           | Butter, Ghee              | 24                                                          |
| 68              | France  | 1996           | Cephalopods               | 1                                                           |
| 68              | France  | 1996           | Cheese                    | 60                                                          |
| 68              | France  | 1996           | Cocoa Beans               | 9                                                           |
| 68              | France  | 1996           | Coconuts - Incl Copra     | 1                                                           |
| 68              | France  | 1996           | Coffee                    | 15                                                          |
| 68              | France  | 1996           | Cream                     | 12                                                          |
| 68              | France  | 1996           | Crustaceans               | 9                                                           |
| 68              | France  | 1996           | Demersal Fish             | 30                                                          |
| 68              | France  | 1996           | Eggs                      | 43                                                          |
| 68              | France  | 1996           | Fats, Animals, Raw        | 14                                                          |
| 68              | France  | 1996           | Fish, Body Oil            | 1                                                           |
| 68              | France  | 1996           | Freshwater Fish           | 9                                                           |
| 68              | France  | 1996           | Fruits, Other             | 83                                                          |
| 68              | France  | 1996           | Grapefruit                | 13                                                          |
| 68              | France  | 1996           | Grapes                    | 10                                                          |
| 68              | France  | 1996           | Groundnut Oil             | 3                                                           |
| 68              | France  | 1996           | Groundnuts (Shelled Eq)   | 2                                                           |
| 68              | France  | 1996           | Honey                     | 1                                                           |
| 68              | France  | 1996           | Lemons, Limes             | 6                                                           |
| 68              | France  | 1996           | Maize                     | 35                                                          |
| 68              | France  | 1996           | Maize Germ Oil            | 1                                                           |
| 68              | France  | 1996           | Marine Fish, Other        | 2                                                           |
| 68              | France  | 1996           | Meat, Other               | 17                                                          |
| 68              | France  | 1996           | Milk, Whole               | 178                                                         |
| 68              | France  | 1996           | Molluscs, Other           | 19                                                          |
| 68              | France  | 1996           | Mutton & Goat Meat        | 12                                                          |
| 68              | France  | 1996           | Nuts                      | 10                                                          |
| 68              | France  | 1996           | Oats                      | 1                                                           |
| 68              | France  | 1996           | Offals, Edible            | 25                                                          |
| 68              | France  | 1996           | Oilcrops Oil, Other       | 6                                                           |
| 68              | France  | 1996           | Olive Oil                 | 2                                                           |
| 68              | France  | 1996           | Olives                    | 2                                                           |
| 68              | France  | 1996           | Onions                    | 13                                                          |
| 68              | France  | 1996           | Oranges, Mandarines       | 83                                                          |
| 68              | France  | 1996           | Palm Oil                  | 1                                                           |
| 68              | France  | 1996           | Peas                      | 2                                                           |
| 68              | France  | 1996           | Pelagic Fish              | 16                                                          |
| 68              | France  | 1996           | Pig meat                  | 97                                                          |
| 68              | France  | 1996           | Pineapples                | 4                                                           |
| 68              | France  | 1996           | Potatoes                  | 194                                                         |
| 68              | France  | 1996           | Poultry Meat              | 70                                                          |
| 68              | France  | 1996           | Pulses, Other             | 1                                                           |
| 68              | France  | 1996           | Rape and Mustard Oil      | 7                                                           |
| 68              | France  | 1996           | Rice (Milled Equivalent)  | 9                                                           |
| 68              | France  | 1996           | Rye                       | 2                                                           |
| 68              | France  | 1996           | Soyabean Oil              | 3                                                           |
| 68              | France  | 1996           | Sugar, Refined Equivalent | 90                                                          |
| 68              | France  | 1996           | Sunflowerseed Oil         | 19                                                          |
| 68              | France  | 1996           | Sweeteners, Other         | 7                                                           |
| 68              | France  | 1996           | Tea                       | 1                                                           |
| 68              | France  | 1996           | Tomatoes                  | 64                                                          |
| 68              | France  | 1996           | Vegetables, Other         | 212                                                         |
| 68              | France  | 1996           | Wheat                     | 258                                                         |
| 68              | France  | 1996           | Wine                      | 165                                                         |
| 68              | France  | 1997           | Apples                    | 26                                                          |
| 68              | France  | 1997           | Bananas                   | 3                                                           |
| 68              | France  | 1997           | Barley                    | 1                                                           |
| 68              | France  | 1997           | Beans                     | 3                                                           |
| 68              | France  | 1997           | Beer                      | 82                                                          |
| 68              | France  | 1997           | Beverages, Alcoholic      | 7                                                           |
| 68              | France  | 1997           | Beverages, Fermented      | 31                                                          |
| 68              | France  | 1997           | Bovine Meat               | 76                                                          |
| 68              | France  | 1997           | Butter, Ghee              | 25                                                          |
| 68              | France  | 1997           | Cephalopods               | 1                                                           |
| 68              | France  | 1997           | Cheese                    | 61                                                          |
| 68              | France  | 1997           | Cocoa Beans               | 9                                                           |
| 68              | France  | 1997           | Coconuts - Incl Copra     | 1                                                           |
| 68              | France  | 1997           | Coffee                    | 16                                                          |
| 68              | France  | 1997           | Cream                     | 14                                                          |
| 68              | France  | 1997           | Crustaceans               | 8                                                           |
| 68              | France  | 1997           | Demersal Fish             | 30                                                          |
| 68              | France  | 1997           | Eggs                      | 43                                                          |
| 68              | France  | 1997           | Fats, Animals, Raw        | 14                                                          |
| 68              | France  | 1997           | Fish, Body Oil            | 1                                                           |
| 68              | France  | 1997           | Freshwater Fish           | 9                                                           |
| 68              | France  | 1997           | Fruits, Other             | 75                                                          |
| 68              | France  | 1997           | Grapefruit                | 15                                                          |
| 68              | France  | 1997           | Grapes                    | 8                                                           |
| 68              | France  | 1997           | Groundnut Oil             | 3                                                           |
| 68              | France  | 1997           | Groundnuts (Shelled Eq)   | 3                                                           |
| 68              | France  | 1997           | Honey                     | 1                                                           |
| 68              | France  | 1997           | Lemons, Limes             | 6                                                           |
| 68              | France  | 1997           | Maize                     | 35                                                          |
| 68              | France  | 1997           | Maize Germ Oil            | 1                                                           |
| 68              | France  | 1997           | Marine Fish, Other        | 2                                                           |
| 68              | France  | 1997           | Meat, Other               | 16                                                          |
| 68              | France  | 1997           | Milk, Whole               | 178                                                         |
| 68              | France  | 1997           | Molluscs, Other           | 20                                                          |
| 68              | France  | 1997           | Mutton & Goat Meat        | 12                                                          |
| 68              | France  | 1997           | Nuts                      | 10                                                          |
| 68              | France  | 1997           | Oats                      | 1                                                           |
| 68              | France  | 1997           | Offals, Edible            | 26                                                          |
| 68              | France  | 1997           | Oilcrops Oil, Other       | 7                                                           |
| 68              | France  | 1997           | Olive Oil                 | 3                                                           |

Dietary calcium and zinc deficiency risks are decreasing but remain prevalent

| FAO countrycode | Country | Reference year | Food item                 | Gross food supply (g capita <sup>-1</sup> d <sup>-1</sup> ) |
|-----------------|---------|----------------|---------------------------|-------------------------------------------------------------|
| 68              | France  | 1997           | Olives                    | 3                                                           |
| 68              | France  | 1997           | Onions                    | 14                                                          |
| 68              | France  | 1997           | Oranges, Mandarines       | 91                                                          |
| 68              | France  | 1997           | Palm Oil                  | 1                                                           |
| 68              | France  | 1997           | Peas                      | 2                                                           |
| 68              | France  | 1997           | Pelagic Fish              | 14                                                          |
| 68              | France  | 1997           | Pigmeat                   | 98                                                          |
| 68              | France  | 1997           | Pineapples                | 4                                                           |
| 68              | France  | 1997           | Potatoes                  | 192                                                         |
| 68              | France  | 1997           | Poultry Meat              | 72                                                          |
| 68              | France  | 1997           | Pulses, Other             | 1                                                           |
| 68              | France  | 1997           | Rape and Mustard Oil      | 6                                                           |
| 68              | France  | 1997           | Rice (Milled Equivalent)  | 12                                                          |
| 68              | France  | 1997           | Rye                       | 1                                                           |
| 68              | France  | 1997           | Soyabean Oil              | 4                                                           |
| 68              | France  | 1997           | Sugar, Refined Equivalent | 93                                                          |
| 68              | France  | 1997           | Sunflowerseed Oil         | 20                                                          |
| 68              | France  | 1997           | Sweeteners, Other         | 5                                                           |
| 68              | France  | 1997           | Tea                       | 1                                                           |
| 68              | France  | 1997           | Tomatoes                  | 65                                                          |
| 68              | France  | 1997           | Vegetables, Other         | 204                                                         |
| 68              | France  | 1997           | Wheat                     | 258                                                         |
| 68              | France  | 1997           | Wine                      | 158                                                         |
| 68              | France  | 1998           | Apples                    | 27                                                          |
| 68              | France  | 1998           | Bananas                   | 2                                                           |
| 68              | France  | 1998           | Barley                    | 1                                                           |
| 68              | France  | 1998           | Beans                     | 3                                                           |
| 68              | France  | 1998           | Beer                      | 89                                                          |
| 68              | France  | 1998           | Beverages, Alcoholic      | 7                                                           |
| 68              | France  | 1998           | Beverages, Fermented      | 28                                                          |
| 68              | France  | 1998           | Bovine Meat               | 76                                                          |
| 68              | France  | 1998           | Butter, Ghee              | 25                                                          |
| 68              | France  | 1998           | Cephalopods               | 1                                                           |
| 68              | France  | 1998           | Cheese                    | 63                                                          |
| 68              | France  | 1998           | Cocoa Beans               | 9                                                           |
| 68              | France  | 1998           | Coconuts - Incl Copra     | 2                                                           |
| 68              | France  | 1998           | Coffee                    | 15                                                          |
| 68              | France  | 1998           | Cream                     | 14                                                          |
| 68              | France  | 1998           | Crustaceans               | 9                                                           |
| 68              | France  | 1998           | Dates                     | 1                                                           |
| 68              | France  | 1998           | Demersal Fish             | 30                                                          |
| 68              | France  | 1998           | Eggs                      | 43                                                          |
| 68              | France  | 1998           | Fats, Animals, Raw        | 13                                                          |
| 68              | France  | 1998           | Fish, Body Oil            | 1                                                           |
| 68              | France  | 1998           | Freshwater Fish           | 9                                                           |
| 68              | France  | 1998           | Fruits, Other             | 73                                                          |
| 68              | France  | 1998           | Grapefruit                | 15                                                          |
| 68              | France  | 1998           | Grapes                    | 5                                                           |
| 68              | France  | 1998           | Groundnut Oil             | 2                                                           |
| 68              | France  | 1998           | Groundnuts (Shelled Eq)   | 2                                                           |
| 68              | France  | 1998           | Honey                     | 1                                                           |
| 68              | France  | 1998           | Lemons, Limes             | 6                                                           |
| 68              | France  | 1998           | Maize                     | 35                                                          |
| 68              | France  | 1998           | Maize Germ Oil            | 1                                                           |
| 68              | France  | 1998           | Marine Fish, Other        | 1                                                           |
| 68              | France  | 1998           | Meat, Other               | 16                                                          |
| 68              | France  | 1998           | Milk, Whole               | 171                                                         |
| 68              | France  | 1998           | Molluscs, Other           | 19                                                          |
| 68              | France  | 1998           | Mutton & Goat Meat        | 12                                                          |
| 68              | France  | 1998           | Nuts                      | 11                                                          |
| 68              | France  | 1998           | Oats                      | 1                                                           |
| 68              | France  | 1998           | Offals, Edible            | 27                                                          |
| 68              | France  | 1998           | Oilcrops Oil, Other       | 6                                                           |
| 68              | France  | 1998           | Olive Oil                 | 4                                                           |
| 68              | France  | 1998           | Olives                    | 3                                                           |
| 68              | France  | 1998           | Onions                    | 14                                                          |
| 68              | France  | 1998           | Oranges, Mandarines       | 100                                                         |
| 68              | France  | 1998           | Palm Oil                  | 1                                                           |
| 68              | France  | 1998           | Peas                      | 2                                                           |
| 68              | France  | 1998           | Pelagic Fish              | 18                                                          |
| 68              | France  | 1998           | Pigmeat                   | 102                                                         |
| 68              | France  | 1998           | Pineapples                | 4                                                           |
| 68              | France  | 1998           | Potatoes                  | 186                                                         |
| 68              | France  | 1998           | Poultry Meat              | 73                                                          |
| 68              | France  | 1998           | Pulses, Other             | 1                                                           |
| 68              | France  | 1998           | Rape and Mustard Oil      | 8                                                           |
| 68              | France  | 1998           | Rice (Milled Equivalent)  | 13                                                          |
| 68              | France  | 1998           | Rye                       | 1                                                           |
| 68              | France  | 1998           | Soyabean Oil              | 3                                                           |
| 68              | France  | 1998           | Sugar, Refined Equivalent | 92                                                          |
| 68              | France  | 1998           | Sunflowerseed Oil         | 20                                                          |
| 68              | France  | 1998           | Sweeteners, Other         | 10                                                          |
| 68              | France  | 1998           | Tea                       | 1                                                           |
| 68              | France  | 1998           | Tomatoes                  | 68                                                          |
| 68              | France  | 1998           | Vegetables, Other         | 215                                                         |
| 68              | France  | 1998           | Wheat                     | 262                                                         |
| 68              | France  | 1998           | Wine                      | 160                                                         |
| 68              | France  | 1999           | Apples                    | 26                                                          |
| 68              | France  | 1999           | Bananas                   | 3                                                           |
| 68              | France  | 1999           | Barley                    | 1                                                           |
| 68              | France  | 1999           | Beans                     | 3                                                           |
| 68              | France  | 1999           | Beer                      | 89                                                          |
| 68              | France  | 1999           | Beverages, Alcoholic      | 7                                                           |
| 68              | France  | 1999           | Beverages, Fermented      | 28                                                          |
| 68              | France  | 1999           | Bovine Meat               | 72                                                          |
| 68              | France  | 1999           | Butter, Ghee              | 24                                                          |
| 68              | France  | 1999           | Cephalopods               | 1                                                           |

Dietary calcium and zinc deficiency risks are decreasing but remain prevalent

| FAO countrycode | Country | Reference year | Food item                 | Gross food supply (g capita <sup>-1</sup> d <sup>-1</sup> ) |
|-----------------|---------|----------------|---------------------------|-------------------------------------------------------------|
| 68              | France  | 1999           | Cheese                    | 64                                                          |
| 68              | France  | 1999           | Cocoa Beans               | 10                                                          |
| 68              | France  | 1999           | Coconuts - Incl Copra     | 2                                                           |
| 68              | France  | 1999           | Coffee                    | 15                                                          |
| 68              | France  | 1999           | Cream                     | 15                                                          |
| 68              | France  | 1999           | Crustaceans               | 9                                                           |
| 68              | France  | 1999           | Demersal Fish             | 30                                                          |
| 68              | France  | 1999           | Eggs                      | 44                                                          |
| 68              | France  | 1999           | Fats, Animals, Raw        | 12                                                          |
| 68              | France  | 1999           | Fish, Body Oil            | 1                                                           |
| 68              | France  | 1999           | Freshwater Fish           | 10                                                          |
| 68              | France  | 1999           | Fruits, Other             | 81                                                          |
| 68              | France  | 1999           | Grapefruit                | 17                                                          |
| 68              | France  | 1999           | Grapes                    | 6                                                           |
| 68              | France  | 1999           | Groundnut Oil             | 3                                                           |
| 68              | France  | 1999           | Groundnuts (Shelled Eq)   | 3                                                           |
| 68              | France  | 1999           | Honey                     | 1                                                           |
| 68              | France  | 1999           | Lemons, Limes             | 6                                                           |
| 68              | France  | 1999           | Maize                     | 35                                                          |
| 68              | France  | 1999           | Maize Germ Oil            | 1                                                           |
| 68              | France  | 1999           | Marine Fish, Other        | 1                                                           |
| 68              | France  | 1999           | Meat, Other               | 16                                                          |
| 68              | France  | 1999           | Milk, Whole               | 170                                                         |
| 68              | France  | 1999           | Molluscs, Other           | 20                                                          |
| 68              | France  | 1999           | Mutton & Goat Meat        | 12                                                          |
| 68              | France  | 1999           | Nuts                      | 11                                                          |
| 68              | France  | 1999           | Oats                      | 1                                                           |
| 68              | France  | 1999           | Offals, Edible            | 27                                                          |
| 68              | France  | 1999           | Oilcrops Oil, Other       | 5                                                           |
| 68              | France  | 1999           | Olive Oil                 | 4                                                           |
| 68              | France  | 1999           | Olives                    | 3                                                           |
| 68              | France  | 1999           | Onions                    | 14                                                          |
| 68              | France  | 1999           | Oranges, Mandarines       | 103                                                         |
| 68              | France  | 1999           | Palm Oil                  | 2                                                           |
| 68              | France  | 1999           | Palmkernel Oil            | 1                                                           |
| 68              | France  | 1999           | Peas                      | 2                                                           |
| 68              | France  | 1999           | Pelagic Fish              | 16                                                          |
| 68              | France  | 1999           | Pigmeat                   | 102                                                         |
| 68              | France  | 1999           | Pineapples                | 4                                                           |
| 68              | France  | 1999           | Potatoes                  | 187                                                         |
| 68              | France  | 1999           | Poultry Meat              | 69                                                          |
| 68              | France  | 1999           | Pulses, Other             | 1                                                           |
| 68              | France  | 1999           | Rape and Mustard Oil      | 8                                                           |
| 68              | France  | 1999           | Rice (Milled Equivalent)  | 13                                                          |
| 68              | France  | 1999           | Rye                       | 1                                                           |
| 68              | France  | 1999           | Soyabean Oil              | 3                                                           |
| 68              | France  | 1999           | Sugar, Refined Equivalent | 92                                                          |
| 68              | France  | 1999           | Sunflowerseed Oil         | 20                                                          |
| 68              | France  | 1999           | Sweeteners, Other         | 11                                                          |
| 68              | France  | 1999           | Tea                       | 1                                                           |
| 68              | France  | 1999           | Tomatoes                  | 72                                                          |
| 68              | France  | 1999           | Vegetables, Other         | 213                                                         |
| 68              | France  | 1999           | Wheat                     | 263                                                         |
| 68              | France  | 1999           | Wine                      | 153                                                         |
| 68              | France  | 2000           | Apples                    | 23                                                          |
| 68              | France  | 2000           | Bananas                   | 4                                                           |
| 68              | France  | 2000           | Barley                    | 1                                                           |
| 68              | France  | 2000           | Beans                     | 3                                                           |
| 68              | France  | 2000           | Beer                      | 79                                                          |
| 68              | France  | 2000           | Beverages, Alcoholic      | 7                                                           |
| 68              | France  | 2000           | Beverages, Fermented      | 25                                                          |
| 68              | France  | 2000           | Bovine Meat               | 71                                                          |
| 68              | France  | 2000           | Butter, Ghee              | 24                                                          |
| 68              | France  | 2000           | Cephalopods               | 2                                                           |
| 68              | France  | 2000           | Cheese                    | 65                                                          |
| 68              | France  | 2000           | Cocoa Beans               | 11                                                          |
| 68              | France  | 2000           | Coconuts - Incl Copra     | 2                                                           |
| 68              | France  | 2000           | Coffee                    | 15                                                          |
| 68              | France  | 2000           | Cream                     | 14                                                          |
| 68              | France  | 2000           | Crustaceans               | 8                                                           |
| 68              | France  | 2000           | Demersal Fish             | 30                                                          |
| 68              | France  | 2000           | Eggs                      | 44                                                          |
| 68              | France  | 2000           | Fats, Animals, Raw        | 12                                                          |
| 68              | France  | 2000           | Fish, Body Oil            | 1                                                           |
| 68              | France  | 2000           | Freshwater Fish           | 9                                                           |
| 68              | France  | 2000           | Fruits, Other             | 85                                                          |
| 68              | France  | 2000           | Grapefruit                | 16                                                          |
| 68              | France  | 2000           | Grapes                    | 17                                                          |
| 68              | France  | 2000           | Groundnut Oil             | 3                                                           |
| 68              | France  | 2000           | Groundnuts (Shelled Eq)   | 3                                                           |
| 68              | France  | 2000           | Honey                     | 1                                                           |
| 68              | France  | 2000           | Lemons, Limes             | 6                                                           |
| 68              | France  | 2000           | Maize                     | 37                                                          |
| 68              | France  | 2000           | Maize Germ Oil            | 1                                                           |
| 68              | France  | 2000           | Marine Fish, Other        | 1                                                           |
| 68              | France  | 2000           | Meat, Other               | 16                                                          |
| 68              | France  | 2000           | Milk, Whole               | 168                                                         |
| 68              | France  | 2000           | Molluscs, Other           | 19                                                          |
| 68              | France  | 2000           | Mutton & Goat Meat        | 12                                                          |
| 68              | France  | 2000           | Nuts                      | 11                                                          |
| 68              | France  | 2000           | Oats                      | 1                                                           |
| 68              | France  | 2000           | Offals, Edible            | 25                                                          |
| 68              | France  | 2000           | Oilcrops Oil, Other       | 6                                                           |
| 68              | France  | 2000           | Olive Oil                 | 4                                                           |
| 68              | France  | 2000           | Olives                    | 3                                                           |
| 68              | France  | 2000           | Onions                    | 19                                                          |
| 68              | France  | 2000           | Oranges, Mandarines       | 112                                                         |

Dietary calcium and zinc deficiency risks are decreasing but remain prevalent

| FAO countrycode | Country | Reference year | Food item                 | Gross food supply (g capita <sup>-1</sup> d <sup>-1</sup> ) |
|-----------------|---------|----------------|---------------------------|-------------------------------------------------------------|
| 68              | France  | 2000           | Palm Oil                  | 1                                                           |
| 68              | France  | 2000           | Palmkernel Oil            | 1                                                           |
| 68              | France  | 2000           | Peas                      | 2                                                           |
| 68              | France  | 2000           | Pelagic Fish              | 16                                                          |
| 68              | France  | 2000           | Pigmeat                   | 103                                                         |
| 68              | France  | 2000           | Pineapples                | 4                                                           |
| 68              | France  | 2000           | Potatoes                  | 185                                                         |
| 68              | France  | 2000           | Poultry Meat              | 73                                                          |
| 68              | France  | 2000           | Pulses, Other             | 2                                                           |
| 68              | France  | 2000           | Rape and Mustard Oil      | 9                                                           |
| 68              | France  | 2000           | Rice (Milled Equivalent)  | 13                                                          |
| 68              | France  | 2000           | Rye                       | 1                                                           |
| 68              | France  | 2000           | Soyabean Oil              | 3                                                           |
| 68              | France  | 2000           | Sugar, Refined Equivalent | 90                                                          |
| 68              | France  | 2000           | Sunflowerseed Oil         | 20                                                          |
| 68              | France  | 2000           | Sweeteners, Other         | 9                                                           |
| 68              | France  | 2000           | Tea                       | 1                                                           |
| 68              | France  | 2000           | Tomatoes                  | 70                                                          |
| 68              | France  | 2000           | Vegetables, Other         | 210                                                         |
| 68              | France  | 2000           | Wheat                     | 263                                                         |
| 68              | France  | 2000           | Wine                      | 140                                                         |
| 68              | France  | 2001           | Apples                    | 39                                                          |
| 68              | France  | 2001           | Bananas                   | 7                                                           |
| 68              | France  | 2001           | Barley                    | 1                                                           |
| 68              | France  | 2001           | Beans                     | 3                                                           |
| 68              | France  | 2001           | Beer                      | 82                                                          |
| 68              | France  | 2001           | Beverages, Alcoholic      | 7                                                           |
| 68              | France  | 2001           | Beverages, Fermented      | 25                                                          |
| 68              | France  | 2001           | Bovine Meat               | 75                                                          |
| 68              | France  | 2001           | Butter, Ghee              | 23                                                          |
| 68              | France  | 2001           | Cephalopods               | 1                                                           |
| 68              | France  | 2001           | Cheese                    | 67                                                          |
| 68              | France  | 2001           | Cocoa Beans               | 10                                                          |
| 68              | France  | 2001           | Coconuts - Incl Copra     | 2                                                           |
| 68              | France  | 2001           | Coffee                    | 15                                                          |
| 68              | France  | 2001           | Cream                     | 15                                                          |
| 68              | France  | 2001           | Crustaceans               | 9                                                           |
| 68              | France  | 2001           | Demersal Fish             | 32                                                          |
| 68              | France  | 2001           | Eggs                      | 43                                                          |
| 68              | France  | 2001           | Fats, Animals, Raw        | 11                                                          |
| 68              | France  | 2001           | Fish, Body Oil            | 1                                                           |
| 68              | France  | 2001           | Freshwater Fish           | 10                                                          |
| 68              | France  | 2001           | Fruits, Other             | 86                                                          |
| 68              | France  | 2001           | Grapefruit                | 13                                                          |
| 68              | France  | 2001           | Grapes                    | 10                                                          |
| 68              | France  | 2001           | Groundnut Oil             | 2                                                           |
| 68              | France  | 2001           | Groundnuts (Shelled Eq)   | 2                                                           |
| 68              | France  | 2001           | Honey                     | 1                                                           |
| 68              | France  | 2001           | Lemons, Limes             | 5                                                           |
| 68              | France  | 2001           | Maize                     | 35                                                          |
| 68              | France  | 2001           | Maize Germ Oil            | 1                                                           |
| 68              | France  | 2001           | Marine Fish, Other        | 1                                                           |
| 68              | France  | 2001           | Meat, Other               | 16                                                          |
| 68              | France  | 2001           | Milk, Whole               | 177                                                         |
| 68              | France  | 2001           | Molluscs, Other           | 20                                                          |
| 68              | France  | 2001           | Mutton & Goat Meat        | 9                                                           |
| 68              | France  | 2001           | Nuts                      | 11                                                          |
| 68              | France  | 2001           | Oats                      | 1                                                           |
| 68              | France  | 2001           | Offals, Edible            | 25                                                          |
| 68              | France  | 2001           | Oilcrops Oil, Other       | 7                                                           |
| 68              | France  | 2001           | Olive Oil                 | 4                                                           |
| 68              | France  | 2001           | Olives                    | 3                                                           |
| 68              | France  | 2001           | Onions                    | 18                                                          |
| 68              | France  | 2001           | Oranges, Mandarines       | 98                                                          |
| 68              | France  | 2001           | Palm Oil                  | 1                                                           |
| 68              | France  | 2001           | Peas                      | 1                                                           |
| 68              | France  | 2001           | Pelagic Fish              | 19                                                          |
| 68              | France  | 2001           | Pigmeat                   | 102                                                         |
| 68              | France  | 2001           | Pineapples                | 5                                                           |
| 68              | France  | 2001           | Potatoes                  | 183                                                         |
| 68              | France  | 2001           | Poultry Meat              | 76                                                          |
| 68              | France  | 2001           | Pulses, Other             | 1                                                           |
| 68              | France  | 2001           | Rape and Mustard Oil      | 8                                                           |
| 68              | France  | 2001           | Rice (Milled Equivalent)  | 14                                                          |
| 68              | France  | 2001           | Rye                       | 1                                                           |
| 68              | France  | 2001           | Soyabean Oil              | 5                                                           |
| 68              | France  | 2001           | Sugar, Refined Equivalent | 91                                                          |
| 68              | France  | 2001           | Sunflowerseed Oil         | 20                                                          |
| 68              | France  | 2001           | Sweeteners, Other         | 11                                                          |
| 68              | France  | 2001           | Tea                       | 1                                                           |
| 68              | France  | 2001           | Tomatoes                  | 70                                                          |
| 68              | France  | 2001           | Vegetables, Other         | 207                                                         |
| 68              | France  | 2001           | Wheat                     | 269                                                         |
| 68              | France  | 2001           | Wine                      | 139                                                         |
| 68              | France  | 2002           | Apples                    | 37                                                          |
| 68              | France  | 2002           | Bananas                   | 6                                                           |
| 68              | France  | 2002           | Barley                    | 1                                                           |
| 68              | France  | 2002           | Beans                     | 3                                                           |
| 68              | France  | 2002           | Beer                      | 80                                                          |
| 68              | France  | 2002           | Beverages, Alcoholic      | 7                                                           |
| 68              | France  | 2002           | Beverages, Fermented      | 25                                                          |
| 68              | France  | 2002           | Bovine Meat               | 77                                                          |
| 68              | France  | 2002           | Butter, Ghee              | 23                                                          |
| 68              | France  | 2002           | Cephalopods               | 1                                                           |
| 68              | France  | 2002           | Cereals, Other            | 1                                                           |
| 68              | France  | 2002           | Cheese                    | 67                                                          |
| 68              | France  | 2002           | Cocoa Beans               | 10                                                          |

Dietary calcium and zinc deficiency risks are decreasing but remain prevalent

| FAO countrycode | Country | Reference year | Food item                 | Gross food supply (g capita <sup>-1</sup> d <sup>-1</sup> ) |
|-----------------|---------|----------------|---------------------------|-------------------------------------------------------------|
| 68              | France  | 2002           | Coconuts - Incl Copra     | 2                                                           |
| 68              | France  | 2002           | Coffee                    | 15                                                          |
| 68              | France  | 2002           | Cream                     | 15                                                          |
| 68              | France  | 2002           | Crustaceans               | 10                                                          |
| 68              | France  | 2002           | Dates                     | 1                                                           |
| 68              | France  | 2002           | Demersal Fish             | 29                                                          |
| 68              | France  | 2002           | Eggs                      | 42                                                          |
| 68              | France  | 2002           | Fats, Animals, Raw        | 12                                                          |
| 68              | France  | 2002           | Fish, Body Oil            | 1                                                           |
| 68              | France  | 2002           | Freshwater Fish           | 9                                                           |
| 68              | France  | 2002           | Fruits, Other             | 86                                                          |
| 68              | France  | 2002           | Grapefruit                | 11                                                          |
| 68              | France  | 2002           | Grapes                    | 14                                                          |
| 68              | France  | 2002           | Groundnut Oil             | 2                                                           |
| 68              | France  | 2002           | Groundnuts (Shelled Eq)   | 3                                                           |
| 68              | France  | 2002           | Honey                     | 1                                                           |
| 68              | France  | 2002           | Lemons, Limes             | 7                                                           |
| 68              | France  | 2002           | Maize                     | 35                                                          |
| 68              | France  | 2002           | Maize Germ Oil            | 2                                                           |
| 68              | France  | 2002           | Marine Fish, Other        | 1                                                           |
| 68              | France  | 2002           | Meat, Other               | 14                                                          |
| 68              | France  | 2002           | Milk, Whole               | 183                                                         |
| 68              | France  | 2002           | Molluscs, Other           | 19                                                          |
| 68              | France  | 2002           | Mutton & Goat Meat        | 9                                                           |
| 68              | France  | 2002           | Nuts                      | 11                                                          |
| 68              | France  | 2002           | Oats                      | 1                                                           |
| 68              | France  | 2002           | Offals, Edible            | 25                                                          |
| 68              | France  | 2002           | Oilcrops Oil, Other       | 8                                                           |
| 68              | France  | 2002           | Olive Oil                 | 4                                                           |
| 68              | France  | 2002           | Olives                    | 3                                                           |
| 68              | France  | 2002           | Onions                    | 20                                                          |
| 68              | France  | 2002           | Oranges, Mandarines       | 110                                                         |
| 68              | France  | 2002           | Palm Oil                  | 1                                                           |
| 68              | France  | 2002           | Peas                      | 1                                                           |
| 68              | France  | 2002           | Pelagic Fish              | 24                                                          |
| 68              | France  | 2002           | Pigmeat                   | 98                                                          |
| 68              | France  | 2002           | Pineapples                | 5                                                           |
| 68              | France  | 2002           | Potatoes                  | 181                                                         |
| 68              | France  | 2002           | Poultry Meat              | 70                                                          |
| 68              | France  | 2002           | Pulses, Other             | 1                                                           |
| 68              | France  | 2002           | Rape and Mustard Oil      | 9                                                           |
| 68              | France  | 2002           | Rice (Milled Equivalent)  | 14                                                          |
| 68              | France  | 2002           | Rye                       | 1                                                           |
| 68              | France  | 2002           | Soyabean Oil              | 4                                                           |
| 68              | France  | 2002           | Sugar, Refined Equivalent | 93                                                          |
| 68              | France  | 2002           | Sunflowerseed Oil         | 20                                                          |
| 68              | France  | 2002           | Sweeteners, Other         | 11                                                          |
| 68              | France  | 2002           | Tea                       | 1                                                           |
| 68              | France  | 2002           | Tomatoes                  | 65                                                          |
| 68              | France  | 2002           | Vegetables, Other         | 214                                                         |
| 68              | France  | 2002           | Wheat                     | 270                                                         |
| 68              | France  | 2002           | Wine                      | 138                                                         |
| 68              | France  | 2003           | Apples                    | 30                                                          |
| 68              | France  | 2003           | Bananas                   | 7                                                           |
| 68              | France  | 2003           | Barley                    | 1                                                           |
| 68              | France  | 2003           | Beans                     | 3                                                           |
| 68              | France  | 2003           | Beer                      | 82                                                          |
| 68              | France  | 2003           | Beverages, Alcoholic      | 7                                                           |
| 68              | France  | 2003           | Beverages, Fermented      | 22                                                          |
| 68              | France  | 2003           | Bovine Meat               | 72                                                          |
| 68              | France  | 2003           | Butter, Ghee              | 22                                                          |
| 68              | France  | 2003           | Cephalopods               | 1                                                           |
| 68              | France  | 2003           | Cereals, Other            | 1                                                           |
| 68              | France  | 2003           | Cheese                    | 66                                                          |
| 68              | France  | 2003           | Cocoa Beans               | 11                                                          |
| 68              | France  | 2003           | Coconuts - Incl Copra     | 2                                                           |
| 68              | France  | 2003           | Coffee                    | 14                                                          |
| 68              | France  | 2003           | Cream                     | 12                                                          |
| 68              | France  | 2003           | Crustaceans               | 10                                                          |
| 68              | France  | 2003           | Dates                     | 1                                                           |
| 68              | France  | 2003           | Demersal Fish             | 30                                                          |
| 68              | France  | 2003           | Eggs                      | 42                                                          |
| 68              | France  | 2003           | Fats, Animals, Raw        | 12                                                          |
| 68              | France  | 2003           | Fish, Body Oil            | 1                                                           |
| 68              | France  | 2003           | Freshwater Fish           | 10                                                          |
| 68              | France  | 2003           | Fruits, Other             | 80                                                          |
| 68              | France  | 2003           | Grapefruit                | 15                                                          |
| 68              | France  | 2003           | Grapes                    | 7                                                           |
| 68              | France  | 2003           | Groundnut Oil             | 3                                                           |
| 68              | France  | 2003           | Groundnuts (Shelled Eq)   | 2                                                           |
| 68              | France  | 2003           | Honey                     | 1                                                           |
| 68              | France  | 2003           | Lemons, Limes             | 5                                                           |
| 68              | France  | 2003           | Maize                     | 35                                                          |
| 68              | France  | 2003           | Maize Germ Oil            | 1                                                           |
| 68              | France  | 2003           | Marine Fish, Other        | 1                                                           |
| 68              | France  | 2003           | Meat, Other               | 12                                                          |
| 68              | France  | 2003           | Milk, Whole               | 181                                                         |
| 68              | France  | 2003           | Molluscs, Other           | 20                                                          |
| 68              | France  | 2003           | Mutton & Goat Meat        | 9                                                           |
| 68              | France  | 2003           | Nuts                      | 10                                                          |
| 68              | France  | 2003           | Oats                      | 1                                                           |
| 68              | France  | 2003           | Offals, Edible            | 24                                                          |
| 68              | France  | 2003           | Oilcrops Oil, Other       | 7                                                           |
| 68              | France  | 2003           | Olive Oil                 | 4                                                           |
| 68              | France  | 2003           | Olives                    | 3                                                           |
| 68              | France  | 2003           | Onions                    | 16                                                          |
| 68              | France  | 2003           | Oranges, Mandarines       | 112                                                         |

Dietary calcium and zinc deficiency risks are decreasing but remain prevalent

| FAO countrycode | Country | Reference year | Food item                 | Gross food supply (g capita <sup>-1</sup> d <sup>-1</sup> ) |
|-----------------|---------|----------------|---------------------------|-------------------------------------------------------------|
| 68              | France  | 2003           | Palm Oil                  | 1                                                           |
| 68              | France  | 2003           | Peas                      | 1                                                           |
| 68              | France  | 2003           | Pelagic Fish              | 20                                                          |
| 68              | France  | 2003           | Pigmeat                   | 103                                                         |
| 68              | France  | 2003           | Pineapples                | 5                                                           |
| 68              | France  | 2003           | Potatoes                  | 176                                                         |
| 68              | France  | 2003           | Poultry Meat              | 67                                                          |
| 68              | France  | 2003           | Pulses, Other             | 2                                                           |
| 68              | France  | 2003           | Rape and Mustard Oil      | 9                                                           |
| 68              | France  | 2003           | Rice (Milled Equivalent)  | 14                                                          |
| 68              | France  | 2003           | Rye                       | 1                                                           |
| 68              | France  | 2003           | Soyabean Oil              | 5                                                           |
| 68              | France  | 2003           | Sugar, Refined Equivalent | 92                                                          |
| 68              | France  | 2003           | Sunflowerseed Oil         | 18                                                          |
| 68              | France  | 2003           | Sweeteners, Other         | 10                                                          |
| 68              | France  | 2003           | Tea                       | 1                                                           |
| 68              | France  | 2003           | Tomatoes                  | 70                                                          |
| 68              | France  | 2003           | Vegetables, Other         | 206                                                         |
| 68              | France  | 2003           | Wheat                     | 266                                                         |
| 68              | France  | 2003           | Wine                      | 138                                                         |
| 68              | France  | 2004           | Apples                    | 38                                                          |
| 68              | France  | 2004           | Bananas                   | 8                                                           |
| 68              | France  | 2004           | Barley                    | 1                                                           |
| 68              | France  | 2004           | Beans                     | 2                                                           |
| 68              | France  | 2004           | Beer                      | 76                                                          |
| 68              | France  | 2004           | Beverages, Alcoholic      | 7                                                           |
| 68              | France  | 2004           | Beverages, Fermented      | 24                                                          |
| 68              | France  | 2004           | Bovine Meat               | 72                                                          |
| 68              | France  | 2004           | Butter, Ghee              | 22                                                          |
| 68              | France  | 2004           | Cephalopods               | 1                                                           |
| 68              | France  | 2004           | Cheese                    | 65                                                          |
| 68              | France  | 2004           | Cocoa Beans               | 11                                                          |
| 68              | France  | 2004           | Coconuts - Incl Copra     | 2                                                           |
| 68              | France  | 2004           | Coffee                    | 13                                                          |
| 68              | France  | 2004           | Cream                     | 12                                                          |
| 68              | France  | 2004           | Crustaceans               | 10                                                          |
| 68              | France  | 2004           | Dates                     | 1                                                           |
| 68              | France  | 2004           | Demersal Fish             | 31                                                          |
| 68              | France  | 2004           | Eggs                      | 43                                                          |
| 68              | France  | 2004           | Fats, Animals, Raw        | 11                                                          |
| 68              | France  | 2004           | Fish, Body Oil            | 1                                                           |
| 68              | France  | 2004           | Freshwater Fish           | 10                                                          |
| 68              | France  | 2004           | Fruits, Other             | 90                                                          |
| 68              | France  | 2004           | Grapefruit                | 16                                                          |
| 68              | France  | 2004           | Grapes                    | 6                                                           |
| 68              | France  | 2004           | Groundnut Oil             | 1                                                           |
| 68              | France  | 2004           | Groundnuts (Shelled Eq)   | 2                                                           |
| 68              | France  | 2004           | Honey                     | 1                                                           |
| 68              | France  | 2004           | Lemons, Limes             | 5                                                           |
| 68              | France  | 2004           | Maize                     | 36                                                          |
| 68              | France  | 2004           | Maize Germ Oil            | 1                                                           |
| 68              | France  | 2004           | Meat, Other               | 10                                                          |
| 68              | France  | 2004           | Milk, Whole               | 165                                                         |
| 68              | France  | 2004           | Molluscs, Other           | 21                                                          |
| 68              | France  | 2004           | Mutton & Goat Meat        | 9                                                           |
| 68              | France  | 2004           | Nuts                      | 10                                                          |
| 68              | France  | 2004           | Oats                      | 1                                                           |
| 68              | France  | 2004           | Offals, Edible            | 22                                                          |
| 68              | France  | 2004           | Oilcrops Oil, Other       | 7                                                           |
| 68              | France  | 2004           | Olive Oil                 | 4                                                           |
| 68              | France  | 2004           | Olives                    | 3                                                           |
| 68              | France  | 2004           | Onions                    | 19                                                          |
| 68              | France  | 2004           | Oranges, Mandarines       | 122                                                         |
| 68              | France  | 2004           | Palm Oil                  | 1                                                           |
| 68              | France  | 2004           | Palmkernel Oil            | 1                                                           |
| 68              | France  | 2004           | Peas                      | 1                                                           |
| 68              | France  | 2004           | Pelagic Fish              | 16                                                          |
| 68              | France  | 2004           | Pigmeat                   | 92                                                          |
| 68              | France  | 2004           | Pineapples                | 7                                                           |
| 68              | France  | 2004           | Plantains                 | 1                                                           |
| 68              | France  | 2004           | Potatoes                  | 182                                                         |
| 68              | France  | 2004           | Poultry Meat              | 66                                                          |
| 68              | France  | 2004           | Pulses, Other             | 1                                                           |
| 68              | France  | 2004           | Rape and Mustard Oil      | 8                                                           |
| 68              | France  | 2004           | Rice (Milled Equivalent)  | 13                                                          |
| 68              | France  | 2004           | Rye                       | 1                                                           |
| 68              | France  | 2004           | Soyabean Oil              | 4                                                           |
| 68              | France  | 2004           | Sugar, Refined Equivalent | 96                                                          |
| 68              | France  | 2004           | Sunflowerseed Oil         | 19                                                          |
| 68              | France  | 2004           | Sweeteners, Other         | 7                                                           |
| 68              | France  | 2004           | Tea                       | 1                                                           |
| 68              | France  | 2004           | Tomatoes                  | 73                                                          |
| 68              | France  | 2004           | Vegetables, Other         | 214                                                         |
| 68              | France  | 2004           | Wheat                     | 272                                                         |
| 68              | France  | 2004           | Wine                      | 146                                                         |
| 68              | France  | 2005           | Apples                    | 44                                                          |
| 68              | France  | 2005           | Bananas                   | 9                                                           |
| 68              | France  | 2005           | Beans                     | 2                                                           |
| 68              | France  | 2005           | Beer                      | 74                                                          |
| 68              | France  | 2005           | Beverages, Alcoholic      | 6                                                           |
| 68              | France  | 2005           | Beverages, Fermented      | 24                                                          |
| 68              | France  | 2005           | Bovine Meat               | 73                                                          |
| 68              | France  | 2005           | Butter, Ghee              | 22                                                          |
| 68              | France  | 2005           | Cephalopods               | 1                                                           |
| 68              | France  | 2005           | Cheese                    | 65                                                          |
| 68              | France  | 2005           | Cocoa Beans               | 11                                                          |
| 68              | France  | 2005           | Coconuts - Incl Copra     | 2                                                           |



Dietary calcium and zinc deficiency risks are decreasing but remain prevalent

| FAO countrycode | Country | Reference year | Food item                 | Gross food supply (g capita <sup>-1</sup> d <sup>-1</sup> ) |
|-----------------|---------|----------------|---------------------------|-------------------------------------------------------------|
| 68              | France  | 2005           | Coffee                    | 13                                                          |
| 68              | France  | 2005           | Cream                     | 13                                                          |
| 68              | France  | 2005           | Crustaceans               | 10                                                          |
| 68              | France  | 2005           | Dates                     | 1                                                           |
| 68              | France  | 2005           | Demersal Fish             | 28                                                          |
| 68              | France  | 2005           | Eggs                      | 39                                                          |
| 68              | France  | 2005           | Fats, Animals, Raw        | 9                                                           |
| 68              | France  | 2005           | Fish, Body Oil            | 1                                                           |
| 68              | France  | 2005           | Freshwater Fish           | 10                                                          |
| 68              | France  | 2005           | Fruits, Other             | 95                                                          |
| 68              | France  | 2005           | Grapefruit                | 16                                                          |
| 68              | France  | 2005           | Grapes                    | 7                                                           |
| 68              | France  | 2005           | Groundnut Oil             | 2                                                           |
| 68              | France  | 2005           | Groundnuts (Shelled Eq)   | 2                                                           |
| 68              | France  | 2005           | Honey                     | 1                                                           |
| 68              | France  | 2005           | Lemons, Limes             | 5                                                           |
| 68              | France  | 2005           | Maize                     | 36                                                          |
| 68              | France  | 2005           | Maize Germ Oil            | 1                                                           |
| 68              | France  | 2005           | Meat, Other               | 9                                                           |
| 68              | France  | 2005           | Milk, Whole               | 144                                                         |
| 68              | France  | 2005           | Molluscs, Other           | 22                                                          |
| 68              | France  | 2005           | Mutton & Goat Meat        | 9                                                           |
| 68              | France  | 2005           | Nuts                      | 9                                                           |
| 68              | France  | 2005           | Oats                      | 1                                                           |
| 68              | France  | 2005           | Offals, Edible            | 21                                                          |
| 68              | France  | 2005           | Oilcrops Oil, Other       | 7                                                           |
| 68              | France  | 2005           | Olive Oil                 | 4                                                           |
| 68              | France  | 2005           | Olives                    | 3                                                           |
| 68              | France  | 2005           | Onions                    | 15                                                          |
| 68              | France  | 2005           | Oranges, Mandarines       | 124                                                         |
| 68              | France  | 2005           | Palm Oil                  | 1                                                           |
| 68              | France  | 2005           | Palmkernel Oil            | 3                                                           |
| 68              | France  | 2005           | Peas                      | 1                                                           |
| 68              | France  | 2005           | Pelagic Fish              | 21                                                          |
| 68              | France  | 2005           | Pigmeat                   | 94                                                          |
| 68              | France  | 2005           | Pineapples                | 6                                                           |
| 68              | France  | 2005           | Potatoes                  | 144                                                         |
| 68              | France  | 2005           | Poultry Meat              | 57                                                          |
| 68              | France  | 2005           | Pulses, Other             | 2                                                           |
| 68              | France  | 2005           | Rape and Mustard Oil      | 8                                                           |
| 68              | France  | 2005           | Rice (Milled Equivalent)  | 14                                                          |
| 68              | France  | 2005           | Rye                       | 1                                                           |
| 68              | France  | 2005           | Soyabean Oil              | 6                                                           |
| 68              | France  | 2005           | Sugar, Refined Equivalent | 97                                                          |
| 68              | France  | 2005           | Sunflowerseed Oil         | 20                                                          |
| 68              | France  | 2005           | Sweeteners, Other         | 7                                                           |
| 68              | France  | 2005           | Tea                       | 1                                                           |
| 68              | France  | 2005           | Tomatoes                  | 68                                                          |
| 68              | France  | 2005           | Vegetables, Other         | 202                                                         |
| 68              | France  | 2005           | Wheat                     | 274                                                         |
| 68              | France  | 2005           | Wine                      | 147                                                         |
| 68              | France  | 2006           | Apples                    | 34                                                          |
| 68              | France  | 2006           | Bananas                   | 10                                                          |
| 68              | France  | 2006           | Beans                     | 2                                                           |
| 68              | France  | 2006           | Beer                      | 77                                                          |
| 68              | France  | 2006           | Beverages, Alcoholic      | 6                                                           |
| 68              | France  | 2006           | Beverages, Fermented      | 24                                                          |
| 68              | France  | 2006           | Bovine Meat               | 71                                                          |
| 68              | France  | 2006           | Butter, Ghee              | 22                                                          |
| 68              | France  | 2006           | Cephalopods               | 1                                                           |
| 68              | France  | 2006           | Cheese                    | 66                                                          |
| 68              | France  | 2006           | Cocoa Beans               | 11                                                          |
| 68              | France  | 2006           | Coconuts - Incl Copra     | 1                                                           |
| 68              | France  | 2006           | Coffee                    | 15                                                          |
| 68              | France  | 2006           | Cream                     | 16                                                          |
| 68              | France  | 2006           | Crustaceans               | 10                                                          |
| 68              | France  | 2006           | Dates                     | 1                                                           |
| 68              | France  | 2006           | Demersal Fish             | 30                                                          |
| 68              | France  | 2006           | Eggs                      | 38                                                          |
| 68              | France  | 2006           | Fats, Animals, Raw        | 10                                                          |
| 68              | France  | 2006           | Fish, Body Oil            | 1                                                           |
| 68              | France  | 2006           | Freshwater Fish           | 11                                                          |
| 68              | France  | 2006           | Fruits, Other             | 103                                                         |
| 68              | France  | 2006           | Grapefruit                | 14                                                          |
| 68              | France  | 2006           | Grapes                    | 5                                                           |
| 68              | France  | 2006           | Groundnut Oil             | 1                                                           |
| 68              | France  | 2006           | Groundnuts (Shelled Eq)   | 3                                                           |
| 68              | France  | 2006           | Honey                     | 1                                                           |
| 68              | France  | 2006           | Lemons, Limes             | 5                                                           |
| 68              | France  | 2006           | Maize                     | 34                                                          |
| 68              | France  | 2006           | Maize Germ Oil            | 1                                                           |
| 68              | France  | 2006           | Meat, Other               | 9                                                           |
| 68              | France  | 2006           | Milk, Whole               | 141                                                         |
| 68              | France  | 2006           | Molluscs, Other           | 22                                                          |
| 68              | France  | 2006           | Mutton & Goat Meat        | 9                                                           |
| 68              | France  | 2006           | Nuts                      | 10                                                          |
| 68              | France  | 2006           | Offals, Edible            | 20                                                          |
| 68              | France  | 2006           | Oilcrops Oil, Other       | 7                                                           |
| 68              | France  | 2006           | Olive Oil                 | 4                                                           |
| 68              | France  | 2006           | Olives                    | 2                                                           |
| 68              | France  | 2006           | Onions                    | 9                                                           |
| 68              | France  | 2006           | Oranges, Mandarines       | 123                                                         |
| 68              | France  | 2006           | Palm Oil                  | 1                                                           |
| 68              | France  | 2006           | Palmkernel Oil            | 1                                                           |
| 68              | France  | 2006           | Peas                      | 1                                                           |
| 68              | France  | 2006           | Pelagic Fish              | 21                                                          |
| 68              | France  | 2006           | Pigmeat                   | 85                                                          |

Dietary calcium and zinc deficiency risks are decreasing but remain prevalent

| FAO countrycode | Country | Reference year | Food item                 | Gross food supply (g capita <sup>-1</sup> d <sup>-1</sup> ) |
|-----------------|---------|----------------|---------------------------|-------------------------------------------------------------|
| 68              | France  | 2006           | Pineapples                | 8                                                           |
| 68              | France  | 2006           | Plantains                 | 1                                                           |
| 68              | France  | 2006           | Potatoes                  | 153                                                         |
| 68              | France  | 2006           | Poultry Meat              | 55                                                          |
| 68              | France  | 2006           | Pulses, Other             | 2                                                           |
| 68              | France  | 2006           | Rape and Mustard Oil      | 9                                                           |
| 68              | France  | 2006           | Rice (Milled Equivalent)  | 14                                                          |
| 68              | France  | 2006           | Rye                       | 1                                                           |
| 68              | France  | 2006           | Soyabean Oil              | 8                                                           |
| 68              | France  | 2006           | Sugar, Refined Equivalent | 87                                                          |
| 68              | France  | 2006           | Sunflowerseed Oil         | 22                                                          |
| 68              | France  | 2006           | Sweeteners, Other         | 8                                                           |
| 68              | France  | 2006           | Tea                       | 1                                                           |
| 68              | France  | 2006           | Tomatoes                  | 64                                                          |
| 68              | France  | 2006           | Vegetables, Other         | 193                                                         |
| 68              | France  | 2006           | Wheat                     | 284                                                         |
| 68              | France  | 2006           | Wine                      | 143                                                         |
| 68              | France  | 2007           | Apples                    | 40                                                          |
| 68              | France  | 2007           | Bananas                   | 13                                                          |
| 68              | France  | 2007           | Barley                    | 1                                                           |
| 68              | France  | 2007           | Beans                     | 2                                                           |
| 68              | France  | 2007           | Beer                      | 74                                                          |
| 68              | France  | 2007           | Beverages, Alcoholic      | 6                                                           |
| 68              | France  | 2007           | Beverages, Fermented      | 24                                                          |
| 68              | France  | 2007           | Bovine Meat               | 73                                                          |
| 68              | France  | 2007           | Butter, Ghee              | 22                                                          |
| 68              | France  | 2007           | Cephalopods               | 1                                                           |
| 68              | France  | 2007           | Cereals, Other            | 2                                                           |
| 68              | France  | 2007           | Cheese                    | 67                                                          |
| 68              | France  | 2007           | Cocoa Beans               | 11                                                          |
| 68              | France  | 2007           | Coconuts - Incl Copra     | 2                                                           |
| 68              | France  | 2007           | Coffee                    | 15                                                          |
| 68              | France  | 2007           | Cream                     | 16                                                          |
| 68              | France  | 2007           | Crustaceans               | 10                                                          |
| 68              | France  | 2007           | Dates                     | 1                                                           |
| 68              | France  | 2007           | Demersal Fish             | 28                                                          |
| 68              | France  | 2007           | Eggs                      | 40                                                          |
| 68              | France  | 2007           | Fats, Animals, Raw        | 8                                                           |
| 68              | France  | 2007           | Fish, Body Oil            | 1                                                           |
| 68              | France  | 2007           | Freshwater Fish           | 11                                                          |
| 68              | France  | 2007           | Fruits, Other             | 107                                                         |
| 68              | France  | 2007           | Grapefruit                | 14                                                          |
| 68              | France  | 2007           | Grapes                    | 11                                                          |
| 68              | France  | 2007           | Groundnut Oil             | 1                                                           |
| 68              | France  | 2007           | Groundnuts (Shelled Eq)   | 3                                                           |
| 68              | France  | 2007           | Honey                     | 2                                                           |
| 68              | France  | 2007           | Lemons, Limes             | 5                                                           |
| 68              | France  | 2007           | Maize                     | 33                                                          |
| 68              | France  | 2007           | Maize Germ Oil            | 1                                                           |
| 68              | France  | 2007           | Meat, Other               | 10                                                          |
| 68              | France  | 2007           | Milk, Whole               | 146                                                         |
| 68              | France  | 2007           | Molluscs, Other           | 21                                                          |
| 68              | France  | 2007           | Mutton & Goat Meat        | 9                                                           |
| 68              | France  | 2007           | Nuts                      | 9                                                           |
| 68              | France  | 2007           | Oats                      | 1                                                           |
| 68              | France  | 2007           | Offals, Edible            | 19                                                          |
| 68              | France  | 2007           | Oilcrops Oil, Other       | 8                                                           |
| 68              | France  | 2007           | Olive Oil                 | 5                                                           |
| 68              | France  | 2007           | Olives                    | 3                                                           |
| 68              | France  | 2007           | Onions                    | 10                                                          |
| 68              | France  | 2007           | Oranges, Mandarines       | 120                                                         |
| 68              | France  | 2007           | Palm Oil                  | 1                                                           |
| 68              | France  | 2007           | Palmkernel Oil            | 3                                                           |
| 68              | France  | 2007           | Peas                      | 1                                                           |
| 68              | France  | 2007           | Pelagic Fish              | 20                                                          |
| 68              | France  | 2007           | Pigmeat                   | 80                                                          |
| 68              | France  | 2007           | Pineapples                | 7                                                           |
| 68              | France  | 2007           | Plantains                 | 1                                                           |
| 68              | France  | 2007           | Potatoes                  | 152                                                         |
| 68              | France  | 2007           | Poultry Meat              | 57                                                          |
| 68              | France  | 2007           | Pulses, Other             | 1                                                           |
| 68              | France  | 2007           | Rape and Mustard Oil      | 9                                                           |
| 68              | France  | 2007           | Rice (Milled Equivalent)  | 16                                                          |
| 68              | France  | 2007           | Rye                       | 1                                                           |
| 68              | France  | 2007           | Soyabean Oil              | 10                                                          |
| 68              | France  | 2007           | Sugar, Refined Equivalent | 84                                                          |
| 68              | France  | 2007           | Sunflowerseed Oil         | 18                                                          |
| 68              | France  | 2007           | Sweeteners, Other         | 9                                                           |
| 68              | France  | 2007           | Tea                       | 1                                                           |
| 68              | France  | 2007           | Tomatoes                  | 63                                                          |
| 68              | France  | 2007           | Vegetables, Other         | 195                                                         |
| 68              | France  | 2007           | Wheat                     | 269                                                         |
| 68              | France  | 2007           | Wine                      | 144                                                         |
| 68              | France  | 2008           | Apples                    | 16                                                          |
| 68              | France  | 2008           | Aquatic Animals, Others   | 1                                                           |
| 68              | France  | 2008           | Bananas                   | 14                                                          |
| 68              | France  | 2008           | Barley                    | 1                                                           |
| 68              | France  | 2008           | Beans                     | 2                                                           |
| 68              | France  | 2008           | Beer                      | 76                                                          |
| 68              | France  | 2008           | Beverages, Alcoholic      | 6                                                           |
| 68              | France  | 2008           | Beverages, Fermented      | 24                                                          |
| 68              | France  | 2008           | Bovine Meat               | 71                                                          |
| 68              | France  | 2008           | Butter, Ghee              | 22                                                          |
| 68              | France  | 2008           | Cephalopods               | 1                                                           |
| 68              | France  | 2008           | Cereals, Other            | 2                                                           |
| 68              | France  | 2008           | Cheese                    | 67                                                          |
| 68              | France  | 2008           | Cocoa Beans               | 11                                                          |

Dietary calcium and zinc deficiency risks are decreasing but remain prevalent

| FAO countrycode | Country | Reference year | Food item                 | Gross food supply (g capita <sup>-1</sup> d <sup>-1</sup> ) |
|-----------------|---------|----------------|---------------------------|-------------------------------------------------------------|
| 68              | France  | 2008           | Coconuts - Incl Copra     | 1                                                           |
| 68              | France  | 2008           | Coffee                    | 15                                                          |
| 68              | France  | 2008           | Cream                     | 18                                                          |
| 68              | France  | 2008           | Crustaceans               | 10                                                          |
| 68              | France  | 2008           | Dates                     | 1                                                           |
| 68              | France  | 2008           | Demersal Fish             | 28                                                          |
| 68              | France  | 2008           | Eggs                      | 37                                                          |
| 68              | France  | 2008           | Fats, Animals, Raw        | 8                                                           |
| 68              | France  | 2008           | Fish, Body Oil            | 1                                                           |
| 68              | France  | 2008           | Freshwater Fish           | 11                                                          |
| 68              | France  | 2008           | Fruits, Other             | 87                                                          |
| 68              | France  | 2008           | Grapefruit                | 17                                                          |
| 68              | France  | 2008           | Grapes                    | 40                                                          |
| 68              | France  | 2008           | Groundnut Oil             | 1                                                           |
| 68              | France  | 2008           | Groundnuts (Shelled Eq)   | 3                                                           |
| 68              | France  | 2008           | Honey                     | 2                                                           |
| 68              | France  | 2008           | Lemons, Limes             | 5                                                           |
| 68              | France  | 2008           | Maize                     | 33                                                          |
| 68              | France  | 2008           | Maize Germ Oil            | 1                                                           |
| 68              | France  | 2008           | Marine Fish, Other        | 1                                                           |
| 68              | France  | 2008           | Meat, Other               | 8                                                           |
| 68              | France  | 2008           | Milk, Whole               | 96                                                          |
| 68              | France  | 2008           | Molluscs, Other           | 21                                                          |
| 68              | France  | 2008           | Mutton & Goat Meat        | 9                                                           |
| 68              | France  | 2008           | Nuts                      | 10                                                          |
| 68              | France  | 2008           | Oats                      | 1                                                           |
| 68              | France  | 2008           | Offals, Edible            | 19                                                          |
| 68              | France  | 2008           | Oilcrops Oil, Other       | 8                                                           |
| 68              | France  | 2008           | Olive Oil                 | 5                                                           |
| 68              | France  | 2008           | Olives                    | 4                                                           |
| 68              | France  | 2008           | Onions                    | 9                                                           |
| 68              | France  | 2008           | Oranges, Mandarines       | 127                                                         |
| 68              | France  | 2008           | Palm Oil                  | 1                                                           |
| 68              | France  | 2008           | Palmkernel Oil            | 3                                                           |
| 68              | France  | 2008           | Peas                      | 1                                                           |
| 68              | France  | 2008           | Pelagic Fish              | 21                                                          |
| 68              | France  | 2008           | Pig meat                  | 95                                                          |
| 68              | France  | 2008           | Pineapples                | 7                                                           |
| 68              | France  | 2008           | Plantains                 | 1                                                           |
| 68              | France  | 2008           | Potatoes                  | 158                                                         |
| 68              | France  | 2008           | Poultry Meat              | 66                                                          |
| 68              | France  | 2008           | Pulses, Other             | 1                                                           |
| 68              | France  | 2008           | Rape and Mustard Oil      | 9                                                           |
| 68              | France  | 2008           | Rice (Milled Equivalent)  | 15                                                          |
| 68              | France  | 2008           | Rye                       | 1                                                           |
| 68              | France  | 2008           | Soyabean Oil              | 11                                                          |
| 68              | France  | 2008           | Spices, Other             | 1                                                           |
| 68              | France  | 2008           | Sugar, Refined Equivalent | 83                                                          |
| 68              | France  | 2008           | Sunflowerseed Oil         | 18                                                          |
| 68              | France  | 2008           | Sweeteners, Other         | 7                                                           |
| 68              | France  | 2008           | Tea                       | 1                                                           |
| 68              | France  | 2008           | Tomatoes                  | 64                                                          |
| 68              | France  | 2008           | Vegetables, Other         | 202                                                         |
| 68              | France  | 2008           | Wheat                     | 292                                                         |
| 68              | France  | 2008           | Wine                      | 105                                                         |
| 68              | France  | 2009           | Apples                    | 26                                                          |
| 68              | France  | 2009           | Aquatic Animals, Others   | 1                                                           |
| 68              | France  | 2009           | Bananas                   | 12                                                          |
| 68              | France  | 2009           | Beans                     | 2                                                           |
| 68              | France  | 2009           | Beer                      | 82                                                          |
| 68              | France  | 2009           | Beverages, Alcoholic      | 6                                                           |
| 68              | France  | 2009           | Beverages, Fermented      | 24                                                          |
| 68              | France  | 2009           | Bovine Meat               | 72                                                          |
| 68              | France  | 2009           | Butter, Ghee              | 21                                                          |
| 68              | France  | 2009           | Cephalopods               | 1                                                           |
| 68              | France  | 2009           | Cereals, Other            | 2                                                           |
| 68              | France  | 2009           | Cheese                    | 67                                                          |
| 68              | France  | 2009           | Cocoa Beans               | 9                                                           |
| 68              | France  | 2009           | Coconut Oil               | 4                                                           |
| 68              | France  | 2009           | Coconuts - Incl Copra     | 2                                                           |
| 68              | France  | 2009           | Coffee                    | 15                                                          |
| 68              | France  | 2009           | Cream                     | 16                                                          |
| 68              | France  | 2009           | Crustaceans               | 11                                                          |
| 68              | France  | 2009           | Demersal Fish             | 28                                                          |
| 68              | France  | 2009           | Eggs                      | 39                                                          |
| 68              | France  | 2009           | Fats, Animals, Raw        | 7                                                           |
| 68              | France  | 2009           | Fish, Body Oil            | 1                                                           |
| 68              | France  | 2009           | Freshwater Fish           | 12                                                          |
| 68              | France  | 2009           | Fruits, Other             | 96                                                          |
| 68              | France  | 2009           | Grapefruit                | 18                                                          |
| 68              | France  | 2009           | Grapes                    | 21                                                          |
| 68              | France  | 2009           | Groundnut Oil             | 1                                                           |
| 68              | France  | 2009           | Groundnuts (Shelled Eq)   | 2                                                           |
| 68              | France  | 2009           | Honey                     | 2                                                           |
| 68              | France  | 2009           | Lemons, Limes             | 5                                                           |
| 68              | France  | 2009           | Maize                     | 32                                                          |
| 68              | France  | 2009           | Maize Germ Oil            | 2                                                           |
| 68              | France  | 2009           | Marine Fish, Other        | 1                                                           |
| 68              | France  | 2009           | Meat, Other               | 7                                                           |
| 68              | France  | 2009           | Milk, Whole               | 103                                                         |
| 68              | France  | 2009           | Molluscs, Other           | 21                                                          |
| 68              | France  | 2009           | Mutton & Goat Meat        | 9                                                           |
| 68              | France  | 2009           | Nuts                      | 11                                                          |
| 68              | France  | 2009           | Oats                      | 1                                                           |
| 68              | France  | 2009           | Offals, Edible            | 19                                                          |
| 68              | France  | 2009           | Oilcrops Oil, Other       | 7                                                           |
| 68              | France  | 2009           | Olive Oil                 | 5                                                           |

Dietary calcium and zinc deficiency risks are decreasing but remain prevalent

| FAO countrycode | Country | Reference year | Food item                 | Gross food supply (g capita <sup>-1</sup> d <sup>-1</sup> ) |
|-----------------|---------|----------------|---------------------------|-------------------------------------------------------------|
| 68              | France  | 2009           | Olives                    | 2                                                           |
| 68              | France  | 2009           | Onions                    | 7                                                           |
| 68              | France  | 2009           | Oranges, Mandarines       | 132                                                         |
| 68              | France  | 2009           | Palm Oil                  | 1                                                           |
| 68              | France  | 2009           | Palmkernel Oil            | 1                                                           |
| 68              | France  | 2009           | Peas                      | 1                                                           |
| 68              | France  | 2009           | Pelagic Fish              | 20                                                          |
| 68              | France  | 2009           | Pigmeat                   | 96                                                          |
| 68              | France  | 2009           | Pineapples                | 7                                                           |
| 68              | France  | 2009           | Plantains                 | 1                                                           |
| 68              | France  | 2009           | Potatoes                  | 145                                                         |
| 68              | France  | 2009           | Poultry Meat              | 65                                                          |
| 68              | France  | 2009           | Pulses, Other             | 1                                                           |
| 68              | France  | 2009           | Rape and Mustard Oil      | 9                                                           |
| 68              | France  | 2009           | Rice (Milled Equivalent)  | 15                                                          |
| 68              | France  | 2009           | Rye                       | 1                                                           |
| 68              | France  | 2009           | Soyabean Oil              | 10                                                          |
| 68              | France  | 2009           | Spices, Other             | 1                                                           |
| 68              | France  | 2009           | Sugar, Refined Equivalent | 93                                                          |
| 68              | France  | 2009           | Sunflowerseed Oil         | 19                                                          |
| 68              | France  | 2009           | Sweeteners, Other         | 8                                                           |
| 68              | France  | 2009           | Tea                       | 1                                                           |
| 68              | France  | 2009           | Tomatoes                  | 64                                                          |
| 68              | France  | 2009           | Vegetables, Other         | 217                                                         |
| 68              | France  | 2009           | Wheat                     | 276                                                         |
| 68              | France  | 2009           | Wine                      | 128                                                         |
| 68              | France  | 2010           | Apples                    | 27                                                          |
| 68              | France  | 2010           | Aquatic Animals, Others   | 1                                                           |
| 68              | France  | 2010           | Bananas                   | 9                                                           |
| 68              | France  | 2010           | Beans                     | 2                                                           |
| 68              | France  | 2010           | Beer                      | 76                                                          |
| 68              | France  | 2010           | Beverages, Alcoholic      | 6                                                           |
| 68              | France  | 2010           | Beverages, Fermented      | 22                                                          |
| 68              | France  | 2010           | Bovine Meat               | 71                                                          |
| 68              | France  | 2010           | Butter, Ghee              | 22                                                          |
| 68              | France  | 2010           | Cephalopods               | 1                                                           |
| 68              | France  | 2010           | Cheese                    | 67                                                          |
| 68              | France  | 2010           | Cocoa Beans               | 10                                                          |
| 68              | France  | 2010           | Coconut Oil               | 5                                                           |
| 68              | France  | 2010           | Coconuts - Incl Copra     | 1                                                           |
| 68              | France  | 2010           | Coffee                    | 16                                                          |
| 68              | France  | 2010           | Cream                     | 14                                                          |
| 68              | France  | 2010           | Crustaceans               | 11                                                          |
| 68              | France  | 2010           | Dates                     | 1                                                           |
| 68              | France  | 2010           | Demersal Fish             | 29                                                          |
| 68              | France  | 2010           | Eggs                      | 37                                                          |
| 68              | France  | 2010           | Fats, Animals, Raw        | 7                                                           |
| 68              | France  | 2010           | Fish, Body Oil            | 1                                                           |
| 68              | France  | 2010           | Freshwater Fish           | 12                                                          |
| 68              | France  | 2010           | Fruits, Other             | 97                                                          |
| 68              | France  | 2010           | Grapefruit                | 15                                                          |
| 68              | France  | 2010           | Grapes                    | 13                                                          |
| 68              | France  | 2010           | Groundnut Oil             | 1                                                           |
| 68              | France  | 2010           | Groundnuts (Shelled Eq)   | 3                                                           |
| 68              | France  | 2010           | Honey                     | 2                                                           |
| 68              | France  | 2010           | Lemons, Limes             | 6                                                           |
| 68              | France  | 2010           | Maize                     | 31                                                          |
| 68              | France  | 2010           | Maize Germ Oil            | 2                                                           |
| 68              | France  | 2010           | Marine Fish, Other        | 1                                                           |
| 68              | France  | 2010           | Meat, Other               | 10                                                          |
| 68              | France  | 2010           | Milk, Whole               | 111                                                         |
| 68              | France  | 2010           | Molluscs, Other           | 22                                                          |
| 68              | France  | 2010           | Mutton & Goat Meat        | 9                                                           |
| 68              | France  | 2010           | Nuts                      | 11                                                          |
| 68              | France  | 2010           | Oats                      | 2                                                           |
| 68              | France  | 2010           | Offals, Edible            | 18                                                          |
| 68              | France  | 2010           | Oilcrops Oil, Other       | 4                                                           |
| 68              | France  | 2010           | Olive Oil                 | 5                                                           |
| 68              | France  | 2010           | Olives                    | 3                                                           |
| 68              | France  | 2010           | Onions                    | 12                                                          |
| 68              | France  | 2010           | Oranges, Mandarines       | 131                                                         |
| 68              | France  | 2010           | Palm Oil                  | 1                                                           |
| 68              | France  | 2010           | Palmkernel Oil            | 3                                                           |
| 68              | France  | 2010           | Peas                      | 1                                                           |
| 68              | France  | 2010           | Pelagic Fish              | 20                                                          |
| 68              | France  | 2010           | Pigmeat                   | 94                                                          |
| 68              | France  | 2010           | Pineapples                | 7                                                           |
| 68              | France  | 2010           | Plantains                 | 1                                                           |
| 68              | France  | 2010           | Potatoes                  | 154                                                         |
| 68              | France  | 2010           | Poultry Meat              | 63                                                          |
| 68              | France  | 2010           | Pulses, Other             | 2                                                           |
| 68              | France  | 2010           | Rape and Mustard Oil      | 8                                                           |
| 68              | France  | 2010           | Rice (Milled Equivalent)  | 15                                                          |
| 68              | France  | 2010           | Rye                       | 1                                                           |
| 68              | France  | 2010           | Soyabean Oil              | 11                                                          |
| 68              | France  | 2010           | Spices, Other             | 1                                                           |
| 68              | France  | 2010           | Sugar, Refined Equivalent | 87                                                          |
| 68              | France  | 2010           | Sunflowerseed Oil         | 16                                                          |
| 68              | France  | 2010           | Sweeteners, Other         | 8                                                           |
| 68              | France  | 2010           | Tea                       | 1                                                           |
| 68              | France  | 2010           | Tomatoes                  | 60                                                          |
| 68              | France  | 2010           | Vegetables, Other         | 209                                                         |
| 68              | France  | 2010           | Wheat                     | 303                                                         |
| 68              | France  | 2010           | Wine                      | 108                                                         |
| 68              | France  | 2011           | Apples                    | 23                                                          |
| 68              | France  | 2011           | Aquatic Animals, Others   | 1                                                           |
| 68              | France  | 2011           | Bananas                   | 12                                                          |

Dietary calcium and zinc deficiency risks are decreasing but remain prevalent

| FAO countrycode | Country | Reference year | Food item                 | Gross food supply (g capita <sup>-1</sup> d <sup>-1</sup> ) |
|-----------------|---------|----------------|---------------------------|-------------------------------------------------------------|
| 68              | France  | 2011           | Beans                     | 2                                                           |
| 68              | France  | 2011           | Beer                      | 78                                                          |
| 68              | France  | 2011           | Beverages, Alcoholic      | 6                                                           |
| 68              | France  | 2011           | Beverages, Fermented      | 24                                                          |
| 68              | France  | 2011           | Bovine Meat               | 69                                                          |
| 68              | France  | 2011           | Butter, Ghee              | 22                                                          |
| 68              | France  | 2011           | Cephalopods               | 1                                                           |
| 68              | France  | 2011           | Cereals, Other            | 2                                                           |
| 68              | France  | 2011           | Cheese                    | 66                                                          |
| 68              | France  | 2011           | Cocoa Beans               | 12                                                          |
| 68              | France  | 2011           | Coconut Oil               | 7                                                           |
| 68              | France  | 2011           | Coconuts - Incl Copra     | 2                                                           |
| 68              | France  | 2011           | Coffee                    | 16                                                          |
| 68              | France  | 2011           | Cream                     | 9                                                           |
| 68              | France  | 2011           | Crustaceans               | 11                                                          |
| 68              | France  | 2011           | Demersal Fish             | 29                                                          |
| 68              | France  | 2011           | Eggs                      | 34                                                          |
| 68              | France  | 2011           | Fats, Animals, Raw        | 6                                                           |
| 68              | France  | 2011           | Fish, Body Oil            | 1                                                           |
| 68              | France  | 2011           | Freshwater Fish           | 12                                                          |
| 68              | France  | 2011           | Fruits, Other             | 92                                                          |
| 68              | France  | 2011           | Grapefruit                | 14                                                          |
| 68              | France  | 2011           | Grapes                    | 16                                                          |
| 68              | France  | 2011           | Groundnut Oil             | 1                                                           |
| 68              | France  | 2011           | Groundnuts (Shelled Eq)   | 3                                                           |
| 68              | France  | 2011           | Honey                     | 2                                                           |
| 68              | France  | 2011           | Lemons, Limes             | 6                                                           |
| 68              | France  | 2011           | Maize                     | 31                                                          |
| 68              | France  | 2011           | Maize Germ Oil            | 2                                                           |
| 68              | France  | 2011           | Marine Fish, Other        | 1                                                           |
| 68              | France  | 2011           | Meat, Other               | 9                                                           |
| 68              | France  | 2011           | Milk, Whole               | 118                                                         |
| 68              | France  | 2011           | Molluscs, Other           | 21                                                          |
| 68              | France  | 2011           | Mutton & Goat Meat        | 9                                                           |
| 68              | France  | 2011           | Nuts                      | 11                                                          |
| 68              | France  | 2011           | Oats                      | 1                                                           |
| 68              | France  | 2011           | Offals, Edible            | 17                                                          |
| 68              | France  | 2011           | Oilcrops Oil, Other       | 5                                                           |
| 68              | France  | 2011           | Olive Oil                 | 5                                                           |
| 68              | France  | 2011           | Olives                    | 4                                                           |
| 68              | France  | 2011           | Onions                    | 15                                                          |
| 68              | France  | 2011           | Oranges, Mandarines       | 130                                                         |
| 68              | France  | 2011           | Palm Oil                  | 1                                                           |
| 68              | France  | 2011           | Palmkernel Oil            | 1                                                           |
| 68              | France  | 2011           | Peas                      | 1                                                           |
| 68              | France  | 2011           | Pelagic Fish              | 20                                                          |
| 68              | France  | 2011           | Pigmeat                   | 92                                                          |
| 68              | France  | 2011           | Pineapples                | 7                                                           |
| 68              | France  | 2011           | Plantains                 | 1                                                           |
| 68              | France  | 2011           | Potatoes                  | 149                                                         |
| 68              | France  | 2011           | Poultry Meat              | 63                                                          |
| 68              | France  | 2011           | Pulses, Other             | 2                                                           |
| 68              | France  | 2011           | Rape and Mustard Oil      | 8                                                           |
| 68              | France  | 2011           | Rice (Milled Equivalent)  | 16                                                          |
| 68              | France  | 2011           | Rye                       | 1                                                           |
| 68              | France  | 2011           | Soyabean Oil              | 11                                                          |
| 68              | France  | 2011           | Sugar, Refined Equivalent | 87                                                          |
| 68              | France  | 2011           | Sunflowerseed Oil         | 17                                                          |
| 68              | France  | 2011           | Sweeteners, Other         | 7                                                           |
| 68              | France  | 2011           | Tea                       | 1                                                           |
| 68              | France  | 2011           | Tomatoes                  | 56                                                          |
| 68              | France  | 2011           | Vegetables, Other         | 212                                                         |
| 68              | France  | 2011           | Wheat                     | 291                                                         |
| 68              | France  | 2011           | Wine                      | 131                                                         |
| 74              | Gabon   | 1993           | Apples                    | 2                                                           |
| 74              | Gabon   | 1993           | Bananas                   | 23                                                          |
| 74              | Gabon   | 1993           | Beer                      | 186                                                         |
| 74              | Gabon   | 1993           | Beverages, Alcoholic      | 2                                                           |
| 74              | Gabon   | 1993           | Bovine Meat               | 61                                                          |
| 74              | Gabon   | 1993           | Butter, Ghee              | 2                                                           |
| 74              | Gabon   | 1993           | Cassava                   | 262                                                         |
| 74              | Gabon   | 1993           | Cheese                    | 1                                                           |
| 74              | Gabon   | 1993           | Citrus, Other             | 3                                                           |
| 74              | Gabon   | 1993           | Coffee                    | 1                                                           |
| 74              | Gabon   | 1993           | Cream                     | 1                                                           |
| 74              | Gabon   | 1993           | Demersal Fish             | 24                                                          |
| 74              | Gabon   | 1993           | Eggs                      | 4                                                           |
| 74              | Gabon   | 1993           | Fats, Animals, Raw        | 1                                                           |
| 74              | Gabon   | 1993           | Freshwater Fish           | 9                                                           |
| 74              | Gabon   | 1993           | Fruits, Other             | 26                                                          |
| 74              | Gabon   | 1993           | Grapes                    | 1                                                           |
| 74              | Gabon   | 1993           | Groundnuts (Shelled Eq)   | 25                                                          |
| 74              | Gabon   | 1993           | Maize                     | 21                                                          |
| 74              | Gabon   | 1993           | Marine Fish, Other        | 33                                                          |
| 74              | Gabon   | 1993           | Meat, Other               | 57                                                          |
| 74              | Gabon   | 1993           | Milk, Whole               | 73                                                          |
| 74              | Gabon   | 1993           | Mutton & Goat Meat        | 4                                                           |
| 74              | Gabon   | 1993           | Offals, Edible            | 15                                                          |
| 74              | Gabon   | 1993           | Oilcrops Oil, Other       | 3                                                           |
| 74              | Gabon   | 1993           | Onions                    | 7                                                           |
| 74              | Gabon   | 1993           | Oranges, Mandarines       | 4                                                           |
| 74              | Gabon   | 1993           | Palm Oil                  | 10                                                          |
| 74              | Gabon   | 1993           | Pelagic Fish              | 61                                                          |
| 74              | Gabon   | 1993           | Pigmeat                   | 21                                                          |
| 74              | Gabon   | 1993           | Pineapples                | 2                                                           |
| 74              | Gabon   | 1993           | Plantains                 | 412                                                         |
| 74              | Gabon   | 1993           | Potatoes                  | 7                                                           |

## Dietary calcium and zinc deficiency risks are decreasing but remain prevalent

| FAO countrycode | Country | Reference year | Food item                 | Gross food supply (g capita <sup>-1</sup> d <sup>-1</sup> ) |
|-----------------|---------|----------------|---------------------------|-------------------------------------------------------------|
| 74              | Gabon   | 1993           | Poultry Meat              | 19                                                          |
| 74              | Gabon   | 1993           | Pulses, Other             | 1                                                           |
| 74              | Gabon   | 1993           | Rice (Milled Equivalent)  | 78                                                          |
| 74              | Gabon   | 1993           | Roots, Other              | 97                                                          |
| 74              | Gabon   | 1993           | Soyabean Oil              | 1                                                           |
| 74              | Gabon   | 1993           | Sugar Cane                | 11                                                          |
| 74              | Gabon   | 1993           | Sugar, Refined Equivalent | 42                                                          |
| 74              | Gabon   | 1993           | Sweet Potatoes            | 6                                                           |
| 74              | Gabon   | 1993           | Sweeteners, Other         | 1                                                           |
| 74              | Gabon   | 1993           | Tomatoes                  | 27                                                          |
| 74              | Gabon   | 1993           | Vegetables, Other         | 85                                                          |
| 74              | Gabon   | 1993           | Wheat                     | 123                                                         |
| 74              | Gabon   | 1993           | Wine                      | 27                                                          |
| 74              | Gabon   | 1993           | Yams                      | 103                                                         |
| 74              | Gabon   | 1994           | Apples                    | 2                                                           |
| 74              | Gabon   | 1994           | Bananas                   | 23                                                          |
| 74              | Gabon   | 1994           | Beer                      | 164                                                         |
| 74              | Gabon   | 1994           | Beverages, Alcoholic      | 2                                                           |
| 74              | Gabon   | 1994           | Bovine Meat               | 54                                                          |
| 74              | Gabon   | 1994           | Butter, Ghee              | 2                                                           |
| 74              | Gabon   | 1994           | Cassava                   | 242                                                         |
| 74              | Gabon   | 1994           | Cheese                    | 1                                                           |
| 74              | Gabon   | 1994           | Citrus, Other             | 2                                                           |
| 74              | Gabon   | 1994           | Coffee                    | 1                                                           |
| 74              | Gabon   | 1994           | Demersal Fish             | 15                                                          |
| 74              | Gabon   | 1994           | Eggs                      | 4                                                           |
| 74              | Gabon   | 1994           | Fats, Animals, Raw        | 1                                                           |
| 74              | Gabon   | 1994           | Freshwater Fish           | 12                                                          |
| 74              | Gabon   | 1994           | Fruits, Other             | 26                                                          |
| 74              | Gabon   | 1994           | Groundnuts (Shelled Eq)   | 25                                                          |
| 74              | Gabon   | 1994           | Maize                     | 22                                                          |
| 74              | Gabon   | 1994           | Marine Fish, Other        | 37                                                          |
| 74              | Gabon   | 1994           | Meat, Other               | 56                                                          |
| 74              | Gabon   | 1994           | Milk, Whole               | 45                                                          |
| 74              | Gabon   | 1994           | Mutton & Goat Meat        | 4                                                           |
| 74              | Gabon   | 1994           | Offals, Edible            | 9                                                           |
| 74              | Gabon   | 1994           | Oilcrops Oil, Other       | 3                                                           |
| 74              | Gabon   | 1994           | Onions                    | 5                                                           |
| 74              | Gabon   | 1994           | Oranges, Mandarines       | 3                                                           |
| 74              | Gabon   | 1994           | Palm Oil                  | 10                                                          |
| 74              | Gabon   | 1994           | Pelagic Fish              | 44                                                          |
| 74              | Gabon   | 1994           | Pigmeat                   | 22                                                          |
| 74              | Gabon   | 1994           | Pineapples                | 2                                                           |
| 74              | Gabon   | 1994           | Plantains                 | 415                                                         |
| 74              | Gabon   | 1994           | Potatoes                  | 3                                                           |
| 74              | Gabon   | 1994           | Poultry Meat              | 28                                                          |
| 74              | Gabon   | 1994           | Pulses, Other             | 1                                                           |
| 74              | Gabon   | 1994           | Rice (Milled Equivalent)  | 87                                                          |
| 74              | Gabon   | 1994           | Roots, Other              | 91                                                          |
| 74              | Gabon   | 1994           | Soyabean Oil              | 1                                                           |
| 74              | Gabon   | 1994           | Sugar Cane                | 10                                                          |
| 74              | Gabon   | 1994           | Sugar, Refined Equivalent | 39                                                          |
| 74              | Gabon   | 1994           | Sweet Potatoes            | 6                                                           |
| 74              | Gabon   | 1994           | Sweeteners, Other         | 1                                                           |
| 74              | Gabon   | 1994           | Tomatoes                  | 23                                                          |
| 74              | Gabon   | 1994           | Vegetables, Other         | 82                                                          |
| 74              | Gabon   | 1994           | Wheat                     | 116                                                         |
| 74              | Gabon   | 1994           | Wine                      | 21                                                          |
| 74              | Gabon   | 1994           | Yams                      | 131                                                         |
| 74              | Gabon   | 1995           | Apples                    | 2                                                           |
| 74              | Gabon   | 1995           | Bananas                   | 23                                                          |
| 74              | Gabon   | 1995           | Barley                    | 3                                                           |
| 74              | Gabon   | 1995           | Beer                      | 211                                                         |
| 74              | Gabon   | 1995           | Beverages, Alcoholic      | 3                                                           |
| 74              | Gabon   | 1995           | Bovine Meat               | 45                                                          |
| 74              | Gabon   | 1995           | Butter, Ghee              | 1                                                           |
| 74              | Gabon   | 1995           | Cassava                   | 226                                                         |
| 74              | Gabon   | 1995           | Cheese                    | 1                                                           |
| 74              | Gabon   | 1995           | Citrus, Other             | 3                                                           |
| 74              | Gabon   | 1995           | Coffee                    | 1                                                           |
| 74              | Gabon   | 1995           | Crustaceans               | 1                                                           |
| 74              | Gabon   | 1995           | Demersal Fish             | 24                                                          |
| 74              | Gabon   | 1995           | Eggs                      | 5                                                           |
| 74              | Gabon   | 1995           | Freshwater Fish           | 19                                                          |
| 74              | Gabon   | 1995           | Fruits, Other             | 25                                                          |
| 74              | Gabon   | 1995           | Groundnuts (Shelled Eq)   | 25                                                          |
| 74              | Gabon   | 1995           | Maize                     | 32                                                          |
| 74              | Gabon   | 1995           | Marine Fish, Other        | 22                                                          |
| 74              | Gabon   | 1995           | Meat, Other               | 53                                                          |
| 74              | Gabon   | 1995           | Milk, Whole               | 56                                                          |
| 74              | Gabon   | 1995           | Mutton & Goat Meat        | 3                                                           |
| 74              | Gabon   | 1995           | Offals, Edible            | 9                                                           |
| 74              | Gabon   | 1995           | Oilcrops Oil, Other       | 3                                                           |
| 74              | Gabon   | 1995           | Onions                    | 4                                                           |
| 74              | Gabon   | 1995           | Oranges, Mandarines       | 3                                                           |
| 74              | Gabon   | 1995           | Palm Oil                  | 10                                                          |
| 74              | Gabon   | 1995           | Pelagic Fish              | 48                                                          |
| 74              | Gabon   | 1995           | Pigmeat                   | 22                                                          |
| 74              | Gabon   | 1995           | Pineapples                | 2                                                           |
| 74              | Gabon   | 1995           | Plantains                 | 376                                                         |
| 74              | Gabon   | 1995           | Potatoes                  | 3                                                           |
| 74              | Gabon   | 1995           | Poultry Meat              | 40                                                          |
| 74              | Gabon   | 1995           | Pulses, Other             | 1                                                           |
| 74              | Gabon   | 1995           | Rice (Milled Equivalent)  | 102                                                         |
| 74              | Gabon   | 1995           | Roots, Other              | 89                                                          |
| 74              | Gabon   | 1995           | Soyabean Oil              | 1                                                           |
| 74              | Gabon   | 1995           | Sugar Cane                | 13                                                          |

Dietary calcium and zinc deficiency risks are decreasing but remain prevalent

| FAO countrycode | Country | Reference year | Food item                 | Gross food supply (g capita <sup>-1</sup> d <sup>-1</sup> ) |
|-----------------|---------|----------------|---------------------------|-------------------------------------------------------------|
| 74              | Gabon   | 1995           | Sugar, Refined Equivalent | 40                                                          |
| 74              | Gabon   | 1995           | Sweet Potatoes            | 6                                                           |
| 74              | Gabon   | 1995           | Tomatoes                  | 24                                                          |
| 74              | Gabon   | 1995           | Vegetables, Other         | 83                                                          |
| 74              | Gabon   | 1995           | Wheat                     | 119                                                         |
| 74              | Gabon   | 1995           | Wine                      | 27                                                          |
| 74              | Gabon   | 1995           | Yams                      | 127                                                         |
| 74              | Gabon   | 1996           | Apples                    | 2                                                           |
| 74              | Gabon   | 1996           | Bananas                   | 24                                                          |
| 74              | Gabon   | 1996           | Barley                    | 11                                                          |
| 74              | Gabon   | 1996           | Beer                      | 183                                                         |
| 74              | Gabon   | 1996           | Beverages, Alcoholic      | 4                                                           |
| 74              | Gabon   | 1996           | Bovine Meat               | 33                                                          |
| 74              | Gabon   | 1996           | Butter, Ghee              | 1                                                           |
| 74              | Gabon   | 1996           | Cassava                   | 246                                                         |
| 74              | Gabon   | 1996           | Cereals, Other            | 1                                                           |
| 74              | Gabon   | 1996           | Cheese                    | 1                                                           |
| 74              | Gabon   | 1996           | Citrus, Other             | 3                                                           |
| 74              | Gabon   | 1996           | Coffee                    | 1                                                           |
| 74              | Gabon   | 1996           | Crustaceans               | 2                                                           |
| 74              | Gabon   | 1996           | Demersal Fish             | 32                                                          |
| 74              | Gabon   | 1996           | Eggs                      | 5                                                           |
| 74              | Gabon   | 1996           | Fats, Animals, Raw        | 1                                                           |
| 74              | Gabon   | 1996           | Freshwater Fish           | 25                                                          |
| 74              | Gabon   | 1996           | Fruits, Other             | 25                                                          |
| 74              | Gabon   | 1996           | Groundnut Oil             | 1                                                           |
| 74              | Gabon   | 1996           | Groundnuts (Shelled Eq)   | 25                                                          |
| 74              | Gabon   | 1996           | Maize                     | 33                                                          |
| 74              | Gabon   | 1996           | Marine Fish, Other        | 20                                                          |
| 74              | Gabon   | 1996           | Meat, Other               | 53                                                          |
| 74              | Gabon   | 1996           | Milk, Whole               | 57                                                          |
| 74              | Gabon   | 1996           | Mutton & Goat Meat        | 3                                                           |
| 74              | Gabon   | 1996           | Offals, Edible            | 7                                                           |
| 74              | Gabon   | 1996           | Oilcrops Oil, Other       | 3                                                           |
| 74              | Gabon   | 1996           | Onions                    | 6                                                           |
| 74              | Gabon   | 1996           | Oranges, Mandarines       | 4                                                           |
| 74              | Gabon   | 1996           | Palm Oil                  | 10                                                          |
| 74              | Gabon   | 1996           | Pelagic Fish              | 59                                                          |
| 74              | Gabon   | 1996           | Pigmeat                   | 21                                                          |
| 74              | Gabon   | 1996           | Pineapples                | 2                                                           |
| 74              | Gabon   | 1996           | Plantains                 | 401                                                         |
| 74              | Gabon   | 1996           | Potatoes                  | 3                                                           |
| 74              | Gabon   | 1996           | Poultry Meat              | 33                                                          |
| 74              | Gabon   | 1996           | Pulses, Other             | 1                                                           |
| 74              | Gabon   | 1996           | Rice (Milled Equivalent)  | 105                                                         |
| 74              | Gabon   | 1996           | Roots, Other              | 86                                                          |
| 74              | Gabon   | 1996           | Soyabean Oil              | 1                                                           |
| 74              | Gabon   | 1996           | Sugar Cane                | 12                                                          |
| 74              | Gabon   | 1996           | Sugar, Refined Equivalent | 42                                                          |
| 74              | Gabon   | 1996           | Sunflowerseed Oil         | 1                                                           |
| 74              | Gabon   | 1996           | Sweet Potatoes            | 6                                                           |
| 74              | Gabon   | 1996           | Sweeteners, Other         | 1                                                           |
| 74              | Gabon   | 1996           | Tomatoes                  | 32                                                          |
| 74              | Gabon   | 1996           | Vegetables, Other         | 82                                                          |
| 74              | Gabon   | 1996           | Wheat                     | 120                                                         |
| 74              | Gabon   | 1996           | Wine                      | 26                                                          |
| 74              | Gabon   | 1996           | Yams                      | 135                                                         |
| 74              | Gabon   | 1997           | Apples                    | 2                                                           |
| 74              | Gabon   | 1997           | Bananas                   | 23                                                          |
| 74              | Gabon   | 1997           | Barley                    | 5                                                           |
| 74              | Gabon   | 1997           | Beer                      | 183                                                         |
| 74              | Gabon   | 1997           | Beverages, Alcoholic      | 4                                                           |
| 74              | Gabon   | 1997           | Bovine Meat               | 24                                                          |
| 74              | Gabon   | 1997           | Butter, Ghee              | 2                                                           |
| 74              | Gabon   | 1997           | Cassava                   | 244                                                         |
| 74              | Gabon   | 1997           | Cheese                    | 2                                                           |
| 74              | Gabon   | 1997           | Citrus, Other             | 2                                                           |
| 74              | Gabon   | 1997           | Coffee                    | 1                                                           |
| 74              | Gabon   | 1997           | Crustaceans               | 3                                                           |
| 74              | Gabon   | 1997           | Demersal Fish             | 32                                                          |
| 74              | Gabon   | 1997           | Eggs                      | 5                                                           |
| 74              | Gabon   | 1997           | Fats, Animals, Raw        | 1                                                           |
| 74              | Gabon   | 1997           | Freshwater Fish           | 24                                                          |
| 74              | Gabon   | 1997           | Fruits, Other             | 25                                                          |
| 74              | Gabon   | 1997           | Grapefruit                | 1                                                           |
| 74              | Gabon   | 1997           | Grapes                    | 1                                                           |
| 74              | Gabon   | 1997           | Groundnuts (Shelled Eq)   | 25                                                          |
| 74              | Gabon   | 1997           | Lemons, Limes             | 2                                                           |
| 74              | Gabon   | 1997           | Maize                     | 29                                                          |
| 74              | Gabon   | 1997           | Marine Fish, Other        | 21                                                          |
| 74              | Gabon   | 1997           | Meat, Other               | 53                                                          |
| 74              | Gabon   | 1997           | Milk, Whole               | 79                                                          |
| 74              | Gabon   | 1997           | Mutton & Goat Meat        | 3                                                           |
| 74              | Gabon   | 1997           | Nuts                      | 1                                                           |
| 74              | Gabon   | 1997           | Offals, Edible            | 9                                                           |
| 74              | Gabon   | 1997           | Oilcrops Oil, Other       | 3                                                           |
| 74              | Gabon   | 1997           | Onions                    | 7                                                           |
| 74              | Gabon   | 1997           | Oranges, Mandarines       | 5                                                           |
| 74              | Gabon   | 1997           | Palm Oil                  | 7                                                           |
| 74              | Gabon   | 1997           | Pelagic Fish              | 57                                                          |
| 74              | Gabon   | 1997           | Pigmeat                   | 17                                                          |
| 74              | Gabon   | 1997           | Pineapples                | 2                                                           |
| 74              | Gabon   | 1997           | Plantains                 | 402                                                         |
| 74              | Gabon   | 1997           | Potatoes                  | 4                                                           |
| 74              | Gabon   | 1997           | Poultry Meat              | 35                                                          |
| 74              | Gabon   | 1997           | Pulses, Other             | 1                                                           |
| 74              | Gabon   | 1997           | Rape and Mustard Oil      | 1                                                           |

Dietary calcium and zinc deficiency risks are decreasing but remain prevalent

| FAO countrycode | Country | Reference year | Food item                 | Gross food supply (g capita <sup>-1</sup> d <sup>-1</sup> ) |
|-----------------|---------|----------------|---------------------------|-------------------------------------------------------------|
| 74              | Gabon   | 1997           | Rice (Milled Equivalent)  | 107                                                         |
| 74              | Gabon   | 1997           | Roots, Other              | 82                                                          |
| 74              | Gabon   | 1997           | Soyabean Oil              | 1                                                           |
| 74              | Gabon   | 1997           | Sugar Cane                | 12                                                          |
| 74              | Gabon   | 1997           | Sugar, Refined Equivalent | 42                                                          |
| 74              | Gabon   | 1997           | Sunflowerseed Oil         | 2                                                           |
| 74              | Gabon   | 1997           | Sweet Potatoes            | 6                                                           |
| 74              | Gabon   | 1997           | Sweeteners, Other         | 1                                                           |
| 74              | Gabon   | 1997           | Tomatoes                  | 24                                                          |
| 74              | Gabon   | 1997           | Vegetables, Other         | 83                                                          |
| 74              | Gabon   | 1997           | Wheat                     | 123                                                         |
| 74              | Gabon   | 1997           | Wine                      | 25                                                          |
| 74              | Gabon   | 1997           | Yams                      | 130                                                         |
| 74              | Gabon   | 1998           | Apples                    | 3                                                           |
| 74              | Gabon   | 1998           | Bananas                   | 23                                                          |
| 74              | Gabon   | 1998           | Barley                    | 4                                                           |
| 74              | Gabon   | 1998           | Beer                      | 178                                                         |
| 74              | Gabon   | 1998           | Beverages, Alcoholic      | 4                                                           |
| 74              | Gabon   | 1998           | Bovine Meat               | 30                                                          |
| 74              | Gabon   | 1998           | Butter, Ghee              | 2                                                           |
| 74              | Gabon   | 1998           | Cassava                   | 245                                                         |
| 74              | Gabon   | 1998           | Cheese                    | 1                                                           |
| 74              | Gabon   | 1998           | Citrus, Other             | 2                                                           |
| 74              | Gabon   | 1998           | Coffee                    | 1                                                           |
| 74              | Gabon   | 1998           | Crustaceans               | 2                                                           |
| 74              | Gabon   | 1998           | Demersal Fish             | 36                                                          |
| 74              | Gabon   | 1998           | Eggs                      | 5                                                           |
| 74              | Gabon   | 1998           | Fats, Animals, Raw        | 1                                                           |
| 74              | Gabon   | 1998           | Freshwater Fish           | 22                                                          |
| 74              | Gabon   | 1998           | Fruits, Other             | 27                                                          |
| 74              | Gabon   | 1998           | Grapes                    | 1                                                           |
| 74              | Gabon   | 1998           | Groundnuts (Shelled Eq)   | 28                                                          |
| 74              | Gabon   | 1998           | Lemons, Limes             | 3                                                           |
| 74              | Gabon   | 1998           | Maize                     | 25                                                          |
| 74              | Gabon   | 1998           | Marine Fish, Other        | 16                                                          |
| 74              | Gabon   | 1998           | Meat, Other               | 53                                                          |
| 74              | Gabon   | 1998           | Milk, Whole               | 68                                                          |
| 74              | Gabon   | 1998           | Mutton & Goat Meat        | 3                                                           |
| 74              | Gabon   | 1998           | Nuts                      | 1                                                           |
| 74              | Gabon   | 1998           | Offals, Edible            | 12                                                          |
| 74              | Gabon   | 1998           | Oilcrops Oil, Other       | 4                                                           |
| 74              | Gabon   | 1998           | Onions                    | 6                                                           |
| 74              | Gabon   | 1998           | Oranges, Mandarines       | 7                                                           |
| 74              | Gabon   | 1998           | Palm Oil                  | 8                                                           |
| 74              | Gabon   | 1998           | Pelagic Fish              | 61                                                          |
| 74              | Gabon   | 1998           | Pigmeat                   | 20                                                          |
| 74              | Gabon   | 1998           | Pineapples                | 2                                                           |
| 74              | Gabon   | 1998           | Plantains                 | 401                                                         |
| 74              | Gabon   | 1998           | Potatoes                  | 4                                                           |
| 74              | Gabon   | 1998           | Poultry Meat              | 34                                                          |
| 74              | Gabon   | 1998           | Pulses, Other             | 1                                                           |
| 74              | Gabon   | 1998           | Rice (Milled Equivalent)  | 105                                                         |
| 74              | Gabon   | 1998           | Roots, Other              | 87                                                          |
| 74              | Gabon   | 1998           | Soyabean Oil              | 1                                                           |
| 74              | Gabon   | 1998           | Sugar Cane                | 12                                                          |
| 74              | Gabon   | 1998           | Sugar, Refined Equivalent | 45                                                          |
| 74              | Gabon   | 1998           | Sunflowerseed Oil         | 2                                                           |
| 74              | Gabon   | 1998           | Sweet Potatoes            | 6                                                           |
| 74              | Gabon   | 1998           | Sweeteners, Other         | 1                                                           |
| 74              | Gabon   | 1998           | Tomatoes                  | 30                                                          |
| 74              | Gabon   | 1998           | Vegetables, Other         | 84                                                          |
| 74              | Gabon   | 1998           | Wheat                     | 126                                                         |
| 74              | Gabon   | 1998           | Wine                      | 26                                                          |
| 74              | Gabon   | 1998           | Yams                      | 133                                                         |
| 74              | Gabon   | 1999           | Apples                    | 3                                                           |
| 74              | Gabon   | 1999           | Aquatic Animals, Others   | 1                                                           |
| 74              | Gabon   | 1999           | Bananas                   | 24                                                          |
| 74              | Gabon   | 1999           | Barley                    | 5                                                           |
| 74              | Gabon   | 1999           | Beans                     | 1                                                           |
| 74              | Gabon   | 1999           | Beer                      | 190                                                         |
| 74              | Gabon   | 1999           | Beverages, Alcoholic      | 4                                                           |
| 74              | Gabon   | 1999           | Bovine Meat               | 31                                                          |
| 74              | Gabon   | 1999           | Butter, Ghee              | 2                                                           |
| 74              | Gabon   | 1999           | Cassava                   | 239                                                         |
| 74              | Gabon   | 1999           | Cheese                    | 1                                                           |
| 74              | Gabon   | 1999           | Citrus, Other             | 2                                                           |
| 74              | Gabon   | 1999           | Coffee                    | 1                                                           |
| 74              | Gabon   | 1999           | Demersal Fish             | 33                                                          |
| 74              | Gabon   | 1999           | Eggs                      | 5                                                           |
| 74              | Gabon   | 1999           | Fats, Animals, Raw        | 1                                                           |
| 74              | Gabon   | 1999           | Freshwater Fish           | 25                                                          |
| 74              | Gabon   | 1999           | Fruits, Other             | 26                                                          |
| 74              | Gabon   | 1999           | Groundnuts (Shelled Eq)   | 27                                                          |
| 74              | Gabon   | 1999           | Lemons, Limes             | 1                                                           |
| 74              | Gabon   | 1999           | Maize                     | 28                                                          |
| 74              | Gabon   | 1999           | Marine Fish, Other        | 19                                                          |
| 74              | Gabon   | 1999           | Meat, Other               | 53                                                          |
| 74              | Gabon   | 1999           | Milk, Whole               | 66                                                          |
| 74              | Gabon   | 1999           | Mutton & Goat Meat        | 3                                                           |
| 74              | Gabon   | 1999           | Nuts                      | 1                                                           |
| 74              | Gabon   | 1999           | Offals, Edible            | 14                                                          |
| 74              | Gabon   | 1999           | Oilcrops Oil, Other       | 4                                                           |
| 74              | Gabon   | 1999           | Onions                    | 7                                                           |
| 74              | Gabon   | 1999           | Oranges, Mandarines       | 5                                                           |
| 74              | Gabon   | 1999           | Palm Oil                  | 9                                                           |
| 74              | Gabon   | 1999           | Pelagic Fish              | 53                                                          |
| 74              | Gabon   | 1999           | Pigmeat                   | 20                                                          |



Dietary calcium and zinc deficiency risks are decreasing but remain prevalent

| FAO countrycode | Country | Reference year | Food item                 | Gross food supply (g capita <sup>-1</sup> d <sup>-1</sup> ) |
|-----------------|---------|----------------|---------------------------|-------------------------------------------------------------|
| 74              | Gabon   | 1999           | Pineapples                | 2                                                           |
| 74              | Gabon   | 1999           | Plantains                 | 375                                                         |
| 74              | Gabon   | 1999           | Potatoes                  | 5                                                           |
| 74              | Gabon   | 1999           | Poultry Meat              | 30                                                          |
| 74              | Gabon   | 1999           | Pulses, Other             | 1                                                           |
| 74              | Gabon   | 1999           | Rape and Mustard Oil      | 4                                                           |
| 74              | Gabon   | 1999           | Rice (Milled Equivalent)  | 105                                                         |
| 74              | Gabon   | 1999           | Roots, Other              | 83                                                          |
| 74              | Gabon   | 1999           | Soyabean Oil              | 1                                                           |
| 74              | Gabon   | 1999           | Sugar Cane                | 11                                                          |
| 74              | Gabon   | 1999           | Sugar, Refined Equivalent | 45                                                          |
| 74              | Gabon   | 1999           | Sunflowerseed Oil         | 2                                                           |
| 74              | Gabon   | 1999           | Sweet Potatoes            | 6                                                           |
| 74              | Gabon   | 1999           | Sweeteners, Other         | 1                                                           |
| 74              | Gabon   | 1999           | Tomatoes                  | 30                                                          |
| 74              | Gabon   | 1999           | Vegetables, Other         | 86                                                          |
| 74              | Gabon   | 1999           | Wheat                     | 139                                                         |
| 74              | Gabon   | 1999           | Wine                      | 25                                                          |
| 74              | Gabon   | 1999           | Yams                      | 134                                                         |
| 74              | Gabon   | 2000           | Apples                    | 3                                                           |
| 74              | Gabon   | 2000           | Bananas                   | 24                                                          |
| 74              | Gabon   | 2000           | Barley                    | 5                                                           |
| 74              | Gabon   | 2000           | Beans                     | 1                                                           |
| 74              | Gabon   | 2000           | Beer                      | 185                                                         |
| 74              | Gabon   | 2000           | Beverages, Alcoholic      | 6                                                           |
| 74              | Gabon   | 2000           | Bovine Meat               | 31                                                          |
| 74              | Gabon   | 2000           | Butter, Ghee              | 2                                                           |
| 74              | Gabon   | 2000           | Cassava                   | 236                                                         |
| 74              | Gabon   | 2000           | Cephalopods               | 1                                                           |
| 74              | Gabon   | 2000           | Cheese                    | 1                                                           |
| 74              | Gabon   | 2000           | Citrus, Other             | 2                                                           |
| 74              | Gabon   | 2000           | Coffee                    | 2                                                           |
| 74              | Gabon   | 2000           | Crustaceans               | 1                                                           |
| 74              | Gabon   | 2000           | Demersal Fish             | 28                                                          |
| 74              | Gabon   | 2000           | Eggs                      | 5                                                           |
| 74              | Gabon   | 2000           | Fats, Animals, Raw        | 1                                                           |
| 74              | Gabon   | 2000           | Freshwater Fish           | 26                                                          |
| 74              | Gabon   | 2000           | Fruits, Other             | 26                                                          |
| 74              | Gabon   | 2000           | Groundnut Oil             | 1                                                           |
| 74              | Gabon   | 2000           | Groundnuts (Shelled Eq)   | 28                                                          |
| 74              | Gabon   | 2000           | Lemons, Limes             | 1                                                           |
| 74              | Gabon   | 2000           | Maize                     | 28                                                          |
| 74              | Gabon   | 2000           | Marine Fish, Other        | 16                                                          |
| 74              | Gabon   | 2000           | Meat, Other               | 52                                                          |
| 74              | Gabon   | 2000           | Milk, Whole               | 71                                                          |
| 74              | Gabon   | 2000           | Mutton & Goat Meat        | 3                                                           |
| 74              | Gabon   | 2000           | Offals, Edible            | 10                                                          |
| 74              | Gabon   | 2000           | Oilcrops Oil, Other       | 4                                                           |
| 74              | Gabon   | 2000           | Onions                    | 7                                                           |
| 74              | Gabon   | 2000           | Oranges, Mandarines       | 5                                                           |
| 74              | Gabon   | 2000           | Palm Oil                  | 9                                                           |
| 74              | Gabon   | 2000           | Pelagic Fish              | 55                                                          |
| 74              | Gabon   | 2000           | Pigmeat                   | 21                                                          |
| 74              | Gabon   | 2000           | Pineapples                | 2                                                           |
| 74              | Gabon   | 2000           | Plantains                 | 373                                                         |
| 74              | Gabon   | 2000           | Potatoes                  | 9                                                           |
| 74              | Gabon   | 2000           | Poultry Meat              | 33                                                          |
| 74              | Gabon   | 2000           | Pulses, Other             | 1                                                           |
| 74              | Gabon   | 2000           | Rape and Mustard Oil      | 3                                                           |
| 74              | Gabon   | 2000           | Rice (Milled Equivalent)  | 104                                                         |
| 74              | Gabon   | 2000           | Roots, Other              | 88                                                          |
| 74              | Gabon   | 2000           | Soyabean Oil              | 2                                                           |
| 74              | Gabon   | 2000           | Sugar Cane                | 11                                                          |
| 74              | Gabon   | 2000           | Sugar, Refined Equivalent | 39                                                          |
| 74              | Gabon   | 2000           | Sunflowerseed Oil         | 1                                                           |
| 74              | Gabon   | 2000           | Sweet Potatoes            | 6                                                           |
| 74              | Gabon   | 2000           | Sweeteners, Other         | 1                                                           |
| 74              | Gabon   | 2000           | Tomatoes                  | 29                                                          |
| 74              | Gabon   | 2000           | Vegetables, Other         | 88                                                          |
| 74              | Gabon   | 2000           | Wheat                     | 145                                                         |
| 74              | Gabon   | 2000           | Wine                      | 22                                                          |
| 74              | Gabon   | 2000           | Yams                      | 158                                                         |
| 74              | Gabon   | 2001           | Apples                    | 3                                                           |
| 74              | Gabon   | 2001           | Aquatic Animals, Others   | 1                                                           |
| 74              | Gabon   | 2001           | Bananas                   | 23                                                          |
| 74              | Gabon   | 2001           | Barley                    | 5                                                           |
| 74              | Gabon   | 2001           | Beans                     | 1                                                           |
| 74              | Gabon   | 2001           | Beer                      | 178                                                         |
| 74              | Gabon   | 2001           | Beverages, Alcoholic      | 7                                                           |
| 74              | Gabon   | 2001           | Bovine Meat               | 30                                                          |
| 74              | Gabon   | 2001           | Butter, Ghee              | 2                                                           |
| 74              | Gabon   | 2001           | Cassava                   | 230                                                         |
| 74              | Gabon   | 2001           | Cheese                    | 1                                                           |
| 74              | Gabon   | 2001           | Citrus, Other             | 2                                                           |
| 74              | Gabon   | 2001           | Cocoa Beans               | 1                                                           |
| 74              | Gabon   | 2001           | Coffee                    | 1                                                           |
| 74              | Gabon   | 2001           | Demersal Fish             | 30                                                          |
| 74              | Gabon   | 2001           | Eggs                      | 5                                                           |
| 74              | Gabon   | 2001           | Fats, Animals, Raw        | 1                                                           |
| 74              | Gabon   | 2001           | Freshwater Fish           | 23                                                          |
| 74              | Gabon   | 2001           | Fruits, Other             | 28                                                          |
| 74              | Gabon   | 2001           | Groundnuts (Shelled Eq)   | 23                                                          |
| 74              | Gabon   | 2001           | Lemons, Limes             | 1                                                           |
| 74              | Gabon   | 2001           | Maize                     | 32                                                          |
| 74              | Gabon   | 2001           | Marine Fish, Other        | 9                                                           |
| 74              | Gabon   | 2001           | Meat, Other               | 50                                                          |
| 74              | Gabon   | 2001           | Milk, Whole               | 77                                                          |

Dietary calcium and zinc deficiency risks are decreasing but remain prevalent

| FAO countrycode | Country | Reference year | Food item                 | Gross food supply (g capita <sup>-1</sup> d <sup>-1</sup> ) |
|-----------------|---------|----------------|---------------------------|-------------------------------------------------------------|
| 74              | Gabon   | 2001           | Mutton & Goat Meat        | 3                                                           |
| 74              | Gabon   | 2001           | Offals, Edible            | 14                                                          |
| 74              | Gabon   | 2001           | Oilcrops Oil, Other       | 5                                                           |
| 74              | Gabon   | 2001           | Onions                    | 5                                                           |
| 74              | Gabon   | 2001           | Oranges, Mandarines       | 6                                                           |
| 74              | Gabon   | 2001           | Palm Oil                  | 9                                                           |
| 74              | Gabon   | 2001           | Pelagic Fish              | 56                                                          |
| 74              | Gabon   | 2001           | Pigmeat                   | 21                                                          |
| 74              | Gabon   | 2001           | Pineapples                | 2                                                           |
| 74              | Gabon   | 2001           | Plantains                 | 363                                                         |
| 74              | Gabon   | 2001           | Potatoes                  | 9                                                           |
| 74              | Gabon   | 2001           | Poultry Meat              | 36                                                          |
| 74              | Gabon   | 2001           | Pulses, Other             | 1                                                           |
| 74              | Gabon   | 2001           | Rape and Mustard Oil      | 3                                                           |
| 74              | Gabon   | 2001           | Rice (Milled Equivalent)  | 102                                                         |
| 74              | Gabon   | 2001           | Roots, Other              | 65                                                          |
| 74              | Gabon   | 2001           | Soyabean Oil              | 2                                                           |
| 74              | Gabon   | 2001           | Sugar Cane                | 11                                                          |
| 74              | Gabon   | 2001           | Sugar, Refined Equivalent | 38                                                          |
| 74              | Gabon   | 2001           | Sunflowerseed Oil         | 1                                                           |
| 74              | Gabon   | 2001           | Sweet Potatoes            | 6                                                           |
| 74              | Gabon   | 2001           | Sweeteners, Other         | 1                                                           |
| 74              | Gabon   | 2001           | Tomatoes                  | 31                                                          |
| 74              | Gabon   | 2001           | Vegetables, Other         | 88                                                          |
| 74              | Gabon   | 2001           | Wheat                     | 147                                                         |
| 74              | Gabon   | 2001           | Wine                      | 24                                                          |
| 74              | Gabon   | 2001           | Yams                      | 168                                                         |
| 74              | Gabon   | 2002           | Apples                    | 1                                                           |
| 74              | Gabon   | 2002           | Aquatic Animals, Others   | 2                                                           |
| 74              | Gabon   | 2002           | Bananas                   | 23                                                          |
| 74              | Gabon   | 2002           | Barley                    | 5                                                           |
| 74              | Gabon   | 2002           | Beer                      | 178                                                         |
| 74              | Gabon   | 2002           | Beverages, Alcoholic      | 7                                                           |
| 74              | Gabon   | 2002           | Bovine Meat               | 23                                                          |
| 74              | Gabon   | 2002           | Butter, Ghee              | 2                                                           |
| 74              | Gabon   | 2002           | Cassava                   | 227                                                         |
| 74              | Gabon   | 2002           | Cephalopods               | 1                                                           |
| 74              | Gabon   | 2002           | Cheese                    | 1                                                           |
| 74              | Gabon   | 2002           | Citrus, Other             | 2                                                           |
| 74              | Gabon   | 2002           | Coffee                    | 1                                                           |
| 74              | Gabon   | 2002           | Demersal Fish             | 28                                                          |
| 74              | Gabon   | 2002           | Eggs                      | 4                                                           |
| 74              | Gabon   | 2002           | Fats, Animals, Raw        | 1                                                           |
| 74              | Gabon   | 2002           | Freshwater Fish           | 21                                                          |
| 74              | Gabon   | 2002           | Fruits, Other             | 22                                                          |
| 74              | Gabon   | 2002           | Grapefruit                | 1                                                           |
| 74              | Gabon   | 2002           | Groundnuts (Shelled Eq)   | 28                                                          |
| 74              | Gabon   | 2002           | Maize                     | 35                                                          |
| 74              | Gabon   | 2002           | Marine Fish, Other        | 3                                                           |
| 74              | Gabon   | 2002           | Meat, Other               | 48                                                          |
| 74              | Gabon   | 2002           | Milk, Whole               | 66                                                          |
| 74              | Gabon   | 2002           | Mutton & Goat Meat        | 2                                                           |
| 74              | Gabon   | 2002           | Offals, Edible            | 5                                                           |
| 74              | Gabon   | 2002           | Oilcrops Oil, Other       | 4                                                           |
| 74              | Gabon   | 2002           | Onions                    | 6                                                           |
| 74              | Gabon   | 2002           | Oranges, Mandarines       | 4                                                           |
| 74              | Gabon   | 2002           | Palm Oil                  | 10                                                          |
| 74              | Gabon   | 2002           | Pelagic Fish              | 40                                                          |
| 74              | Gabon   | 2002           | Pigmeat                   | 20                                                          |
| 74              | Gabon   | 2002           | Pineapples                | 2                                                           |
| 74              | Gabon   | 2002           | Plantains                 | 357                                                         |
| 74              | Gabon   | 2002           | Potatoes                  | 4                                                           |
| 74              | Gabon   | 2002           | Poultry Meat              | 40                                                          |
| 74              | Gabon   | 2002           | Pulses, Other             | 1                                                           |
| 74              | Gabon   | 2002           | Rape and Mustard Oil      | 1                                                           |
| 74              | Gabon   | 2002           | Rice (Milled Equivalent)  | 102                                                         |
| 74              | Gabon   | 2002           | Roots, Other              | 71                                                          |
| 74              | Gabon   | 2002           | Soyabean Oil              | 3                                                           |
| 74              | Gabon   | 2002           | Sugar Cane                | 11                                                          |
| 74              | Gabon   | 2002           | Sugar, Refined Equivalent | 40                                                          |
| 74              | Gabon   | 2002           | Sweet Potatoes            | 6                                                           |
| 74              | Gabon   | 2002           | Sweeteners, Other         | 1                                                           |
| 74              | Gabon   | 2002           | Tomatoes                  | 25                                                          |
| 74              | Gabon   | 2002           | Vegetables, Other         | 78                                                          |
| 74              | Gabon   | 2002           | Wheat                     | 145                                                         |
| 74              | Gabon   | 2002           | Wine                      | 18                                                          |
| 74              | Gabon   | 2002           | Yams                      | 174                                                         |
| 74              | Gabon   | 2003           | Apples                    | 1                                                           |
| 74              | Gabon   | 2003           | Aquatic Animals, Others   | 2                                                           |
| 74              | Gabon   | 2003           | Bananas                   | 22                                                          |
| 74              | Gabon   | 2003           | Barley                    | 4                                                           |
| 74              | Gabon   | 2003           | Beans                     | 2                                                           |
| 74              | Gabon   | 2003           | Beer                      | 187                                                         |
| 74              | Gabon   | 2003           | Beverages, Alcoholic      | 5                                                           |
| 74              | Gabon   | 2003           | Bovine Meat               | 21                                                          |
| 74              | Gabon   | 2003           | Butter, Ghee              | 2                                                           |
| 74              | Gabon   | 2003           | Cassava                   | 232                                                         |
| 74              | Gabon   | 2003           | Cephalopods               | 1                                                           |
| 74              | Gabon   | 2003           | Cheese                    | 1                                                           |
| 74              | Gabon   | 2003           | Citrus, Other             | 2                                                           |
| 74              | Gabon   | 2003           | Coffee                    | 2                                                           |
| 74              | Gabon   | 2003           | Crustaceans               | 5                                                           |
| 74              | Gabon   | 2003           | Demersal Fish             | 30                                                          |
| 74              | Gabon   | 2003           | Eggs                      | 4                                                           |
| 74              | Gabon   | 2003           | Fats, Animals, Raw        | 1                                                           |
| 74              | Gabon   | 2003           | Freshwater Fish           | 21                                                          |
| 74              | Gabon   | 2003           | Fruits, Other             | 25                                                          |

Dietary calcium and zinc deficiency risks are decreasing but remain prevalent

| FAO countrycode | Country | Reference year | Food item                 | Gross food supply (g capita <sup>-1</sup> d <sup>-1</sup> ) |
|-----------------|---------|----------------|---------------------------|-------------------------------------------------------------|
| 74              | Gabon   | 2003           | Groundnuts (Shelled Eq)   | 24                                                          |
| 74              | Gabon   | 2003           | Maize                     | 37                                                          |
| 74              | Gabon   | 2003           | Marine Fish, Other        | 2                                                           |
| 74              | Gabon   | 2003           | Meat, Other               | 47                                                          |
| 74              | Gabon   | 2003           | Milk, Whole               | 59                                                          |
| 74              | Gabon   | 2003           | Mutton & Goat Meat        | 3                                                           |
| 74              | Gabon   | 2003           | Offals, Edible            | 13                                                          |
| 74              | Gabon   | 2003           | Oilcrops Oil, Other       | 6                                                           |
| 74              | Gabon   | 2003           | Onions                    | 2                                                           |
| 74              | Gabon   | 2003           | Oranges, Mandarines       | 3                                                           |
| 74              | Gabon   | 2003           | Palm Oil                  | 9                                                           |
| 74              | Gabon   | 2003           | Pelagic Fish              | 43                                                          |
| 74              | Gabon   | 2003           | Pigmeat                   | 16                                                          |
| 74              | Gabon   | 2003           | Pineapples                | 1                                                           |
| 74              | Gabon   | 2003           | Plantains                 | 350                                                         |
| 74              | Gabon   | 2003           | Potatoes                  | 12                                                          |
| 74              | Gabon   | 2003           | Poultry Meat              | 44                                                          |
| 74              | Gabon   | 2003           | Pulses, Other             | 1                                                           |
| 74              | Gabon   | 2003           | Rape and Mustard Oil      | 2                                                           |
| 74              | Gabon   | 2003           | Rice (Milled Equivalent)  | 103                                                         |
| 74              | Gabon   | 2003           | Roots, Other              | 73                                                          |
| 74              | Gabon   | 2003           | Soyabean Oil              | 3                                                           |
| 74              | Gabon   | 2003           | Sugar Cane                | 10                                                          |
| 74              | Gabon   | 2003           | Sugar, Refined Equivalent | 41                                                          |
| 74              | Gabon   | 2003           | Sunflowerseed Oil         | 1                                                           |
| 74              | Gabon   | 2003           | Sweet Potatoes            | 6                                                           |
| 74              | Gabon   | 2003           | Tomatoes                  | 17                                                          |
| 74              | Gabon   | 2003           | Vegetables, Other         | 82                                                          |
| 74              | Gabon   | 2003           | Wheat                     | 146                                                         |
| 74              | Gabon   | 2003           | Wine                      | 13                                                          |
| 74              | Gabon   | 2003           | Yams                      | 173                                                         |
| 74              | Gabon   | 2004           | Apples                    | 3                                                           |
| 74              | Gabon   | 2004           | Bananas                   | 23                                                          |
| 74              | Gabon   | 2004           | Barley                    | 4                                                           |
| 74              | Gabon   | 2004           | Beans                     | 1                                                           |
| 74              | Gabon   | 2004           | Beer                      | 181                                                         |
| 74              | Gabon   | 2004           | Beverages, Alcoholic      | 7                                                           |
| 74              | Gabon   | 2004           | Bovine Meat               | 25                                                          |
| 74              | Gabon   | 2004           | Butter, Ghee              | 1                                                           |
| 74              | Gabon   | 2004           | Cassava                   | 221                                                         |
| 74              | Gabon   | 2004           | Cephalopods               | 2                                                           |
| 74              | Gabon   | 2004           | Cheese                    | 1                                                           |
| 74              | Gabon   | 2004           | Citrus, Other             | 2                                                           |
| 74              | Gabon   | 2004           | Coffee                    | 1                                                           |
| 74              | Gabon   | 2004           | Crustaceans               | 2                                                           |
| 74              | Gabon   | 2004           | Demersal Fish             | 37                                                          |
| 74              | Gabon   | 2004           | Eggs                      | 4                                                           |
| 74              | Gabon   | 2004           | Fats, Animals, Raw        | 1                                                           |
| 74              | Gabon   | 2004           | Freshwater Fish           | 18                                                          |
| 74              | Gabon   | 2004           | Fruits, Other             | 22                                                          |
| 74              | Gabon   | 2004           | Groundnuts (Shelled Eq)   | 23                                                          |
| 74              | Gabon   | 2004           | Maize                     | 42                                                          |
| 74              | Gabon   | 2004           | Marine Fish, Other        | 4                                                           |
| 74              | Gabon   | 2004           | Meat, Other               | 49                                                          |
| 74              | Gabon   | 2004           | Milk, Whole               | 81                                                          |
| 74              | Gabon   | 2004           | Mutton & Goat Meat        | 3                                                           |
| 74              | Gabon   | 2004           | Nuts                      | 1                                                           |
| 74              | Gabon   | 2004           | Offals, Edible            | 16                                                          |
| 74              | Gabon   | 2004           | Oilcrops Oil, Other       | 5                                                           |
| 74              | Gabon   | 2004           | Onions                    | 5                                                           |
| 74              | Gabon   | 2004           | Oranges, Mandarines       | 5                                                           |
| 74              | Gabon   | 2004           | Palm Oil                  | 9                                                           |
| 74              | Gabon   | 2004           | Pelagic Fish              | 44                                                          |
| 74              | Gabon   | 2004           | Pigmeat                   | 18                                                          |
| 74              | Gabon   | 2004           | Pineapples                | 2                                                           |
| 74              | Gabon   | 2004           | Plantains                 | 342                                                         |
| 74              | Gabon   | 2004           | Potatoes                  | 6                                                           |
| 74              | Gabon   | 2004           | Poultry Meat              | 58                                                          |
| 74              | Gabon   | 2004           | Pulses, Other             | 1                                                           |
| 74              | Gabon   | 2004           | Rape and Mustard Oil      | 1                                                           |
| 74              | Gabon   | 2004           | Rice (Milled Equivalent)  | 103                                                         |
| 74              | Gabon   | 2004           | Roots, Other              | 75                                                          |
| 74              | Gabon   | 2004           | Soyabean Oil              | 3                                                           |
| 74              | Gabon   | 2004           | Sugar Cane                | 10                                                          |
| 74              | Gabon   | 2004           | Sugar, Refined Equivalent | 40                                                          |
| 74              | Gabon   | 2004           | Sweet Potatoes            | 6                                                           |
| 74              | Gabon   | 2004           | Sweeteners, Other         | 1                                                           |
| 74              | Gabon   | 2004           | Tomatoes                  | 25                                                          |
| 74              | Gabon   | 2004           | Vegetables, Other         | 88                                                          |
| 74              | Gabon   | 2004           | Wheat                     | 142                                                         |
| 74              | Gabon   | 2004           | Wine                      | 14                                                          |
| 74              | Gabon   | 2004           | Yams                      | 166                                                         |
| 74              | Gabon   | 2005           | Apples                    | 4                                                           |
| 74              | Gabon   | 2005           | Bananas                   | 23                                                          |
| 74              | Gabon   | 2005           | Barley                    | 5                                                           |
| 74              | Gabon   | 2005           | Beans                     | 1                                                           |
| 74              | Gabon   | 2005           | Beer                      | 175                                                         |
| 74              | Gabon   | 2005           | Beverages, Alcoholic      | 7                                                           |
| 74              | Gabon   | 2005           | Bovine Meat               | 35                                                          |
| 74              | Gabon   | 2005           | Butter, Ghee              | 2                                                           |
| 74              | Gabon   | 2005           | Cassava                   | 217                                                         |
| 74              | Gabon   | 2005           | Cephalopods               | 2                                                           |
| 74              | Gabon   | 2005           | Cheese                    | 1                                                           |
| 74              | Gabon   | 2005           | Citrus, Other             | 2                                                           |
| 74              | Gabon   | 2005           | Cocoa Beans               | 1                                                           |
| 74              | Gabon   | 2005           | Coffee                    | 1                                                           |
| 74              | Gabon   | 2005           | Demersal Fish             | 30                                                          |

Dietary calcium and zinc deficiency risks are decreasing but remain prevalent

| FAO countrycode | Country | Reference year | Food item                 | Gross food supply (g capita <sup>-1</sup> d <sup>-1</sup> ) |
|-----------------|---------|----------------|---------------------------|-------------------------------------------------------------|
| 74              | Gabon   | 2005           | Eggs                      | 4                                                           |
| 74              | Gabon   | 2005           | Fats, Animals, Raw        | 1                                                           |
| 74              | Gabon   | 2005           | Freshwater Fish           | 20                                                          |
| 74              | Gabon   | 2005           | Fruits, Other             | 22                                                          |
| 74              | Gabon   | 2005           | Groundnuts (Shelled Eq)   | 23                                                          |
| 74              | Gabon   | 2005           | Maize                     | 50                                                          |
| 74              | Gabon   | 2005           | Marine Fish, Other        | 9                                                           |
| 74              | Gabon   | 2005           | Meat, Other               | 48                                                          |
| 74              | Gabon   | 2005           | Milk, Whole               | 78                                                          |
| 74              | Gabon   | 2005           | Mutton & Goat Meat        | 4                                                           |
| 74              | Gabon   | 2005           | Offals, Edible            | 17                                                          |
| 74              | Gabon   | 2005           | Oilcrops Oil, Other       | 4                                                           |
| 74              | Gabon   | 2005           | Onions                    | 6                                                           |
| 74              | Gabon   | 2005           | Oranges, Mandarines       | 7                                                           |
| 74              | Gabon   | 2005           | Palm Oil                  | 9                                                           |
| 74              | Gabon   | 2005           | Pelagic Fish              | 41                                                          |
| 74              | Gabon   | 2005           | Pigmeat                   | 18                                                          |
| 74              | Gabon   | 2005           | Pineapples                | 2                                                           |
| 74              | Gabon   | 2005           | Plantains                 | 333                                                         |
| 74              | Gabon   | 2005           | Potatoes                  | 6                                                           |
| 74              | Gabon   | 2005           | Poultry Meat              | 67                                                          |
| 74              | Gabon   | 2005           | Pulses, Other             | 1                                                           |
| 74              | Gabon   | 2005           | Rice (Milled Equivalent)  | 102                                                         |
| 74              | Gabon   | 2005           | Roots, Other              | 69                                                          |
| 74              | Gabon   | 2005           | Soyabean Oil              | 4                                                           |
| 74              | Gabon   | 2005           | Sugar Cane                | 10                                                          |
| 74              | Gabon   | 2005           | Sugar, Refined Equivalent | 39                                                          |
| 74              | Gabon   | 2005           | Sweet Potatoes            | 8                                                           |
| 74              | Gabon   | 2005           | Sweeteners, Other         | 1                                                           |
| 74              | Gabon   | 2005           | Tomatoes                  | 26                                                          |
| 74              | Gabon   | 2005           | Vegetables, Other         | 95                                                          |
| 74              | Gabon   | 2005           | Wheat                     | 150                                                         |
| 74              | Gabon   | 2005           | Wine                      | 13                                                          |
| 74              | Gabon   | 2005           | Yams                      | 160                                                         |
| 74              | Gabon   | 2006           | Apples                    | 5                                                           |
| 74              | Gabon   | 2006           | Bananas                   | 25                                                          |
| 74              | Gabon   | 2006           | Barley                    | 5                                                           |
| 74              | Gabon   | 2006           | Beans                     | 2                                                           |
| 74              | Gabon   | 2006           | Beer                      | 185                                                         |
| 74              | Gabon   | 2006           | Beverages, Alcoholic      | 7                                                           |
| 74              | Gabon   | 2006           | Bovine Meat               | 37                                                          |
| 74              | Gabon   | 2006           | Butter, Ghee              | 1                                                           |
| 74              | Gabon   | 2006           | Cassava                   | 222                                                         |
| 74              | Gabon   | 2006           | Cephalopods               | 1                                                           |
| 74              | Gabon   | 2006           | Cheese                    | 1                                                           |
| 74              | Gabon   | 2006           | Citrus, Other             | 2                                                           |
| 74              | Gabon   | 2006           | Cocoa Beans               | 1                                                           |
| 74              | Gabon   | 2006           | Coffee                    | 1                                                           |
| 74              | Gabon   | 2006           | Cream                     | 1                                                           |
| 74              | Gabon   | 2006           | Crustaceans               | 1                                                           |
| 74              | Gabon   | 2006           | Demersal Fish             | 25                                                          |
| 74              | Gabon   | 2006           | Eggs                      | 4                                                           |
| 74              | Gabon   | 2006           | Fats, Animals, Raw        | 1                                                           |
| 74              | Gabon   | 2006           | Freshwater Fish           | 19                                                          |
| 74              | Gabon   | 2006           | Fruits, Other             | 23                                                          |
| 74              | Gabon   | 2006           | Grapes                    | 1                                                           |
| 74              | Gabon   | 2006           | Groundnuts (Shelled Eq)   | 22                                                          |
| 74              | Gabon   | 2006           | Maize                     | 44                                                          |
| 74              | Gabon   | 2006           | Marine Fish, Other        | 9                                                           |
| 74              | Gabon   | 2006           | Meat, Other               | 47                                                          |
| 74              | Gabon   | 2006           | Milk, Whole               | 83                                                          |
| 74              | Gabon   | 2006           | Mutton & Goat Meat        | 4                                                           |
| 74              | Gabon   | 2006           | Nuts                      | 1                                                           |
| 74              | Gabon   | 2006           | Offals, Edible            | 18                                                          |
| 74              | Gabon   | 2006           | Oilcrops Oil, Other       | 5                                                           |
| 74              | Gabon   | 2006           | Onions                    | 5                                                           |
| 74              | Gabon   | 2006           | Oranges, Mandarines       | 11                                                          |
| 74              | Gabon   | 2006           | Palm Oil                  | 9                                                           |
| 74              | Gabon   | 2006           | Pelagic Fish              | 46                                                          |
| 74              | Gabon   | 2006           | Pigmeat                   | 19                                                          |
| 74              | Gabon   | 2006           | Pineapples                | 2                                                           |
| 74              | Gabon   | 2006           | Plantains                 | 331                                                         |
| 74              | Gabon   | 2006           | Potatoes                  | 8                                                           |
| 74              | Gabon   | 2006           | Poultry Meat              | 71                                                          |
| 74              | Gabon   | 2006           | Pulses, Other             | 1                                                           |
| 74              | Gabon   | 2006           | Rape and Mustard Oil      | 1                                                           |
| 74              | Gabon   | 2006           | Rice (Milled Equivalent)  | 97                                                          |
| 74              | Gabon   | 2006           | Roots, Other              | 68                                                          |
| 74              | Gabon   | 2006           | Soyabean Oil              | 4                                                           |
| 74              | Gabon   | 2006           | Sugar Cane                | 11                                                          |
| 74              | Gabon   | 2006           | Sugar, Refined Equivalent | 38                                                          |
| 74              | Gabon   | 2006           | Sweet Potatoes            | 7                                                           |
| 74              | Gabon   | 2006           | Sweeteners, Other         | 1                                                           |
| 74              | Gabon   | 2006           | Tea                       | 1                                                           |
| 74              | Gabon   | 2006           | Tomatoes                  | 22                                                          |
| 74              | Gabon   | 2006           | Vegetables, Other         | 87                                                          |
| 74              | Gabon   | 2006           | Wheat                     | 151                                                         |
| 74              | Gabon   | 2006           | Wine                      | 14                                                          |
| 74              | Gabon   | 2006           | Yams                      | 158                                                         |
| 74              | Gabon   | 2007           | Apples                    | 5                                                           |
| 74              | Gabon   | 2007           | Bananas                   | 22                                                          |
| 74              | Gabon   | 2007           | Barley                    | 5                                                           |
| 74              | Gabon   | 2007           | Beans                     | 1                                                           |
| 74              | Gabon   | 2007           | Beer                      | 196                                                         |
| 74              | Gabon   | 2007           | Beverages, Alcoholic      | 9                                                           |
| 74              | Gabon   | 2007           | Bovine Meat               | 26                                                          |
| 74              | Gabon   | 2007           | Butter, Ghee              | 1                                                           |

Dietary calcium and zinc deficiency risks are decreasing but remain prevalent

| FAO countrycode | Country | Reference year | Food item                 | Gross food supply (g capita <sup>-1</sup> d <sup>-1</sup> ) |
|-----------------|---------|----------------|---------------------------|-------------------------------------------------------------|
| 74              | Gabon   | 2007           | Cassava                   | 222                                                         |
| 74              | Gabon   | 2007           | Cephalopods               | 1                                                           |
| 74              | Gabon   | 2007           | Cheese                    | 1                                                           |
| 74              | Gabon   | 2007           | Citrus, Other             | 2                                                           |
| 74              | Gabon   | 2007           | Cocoa Beans               | 1                                                           |
| 74              | Gabon   | 2007           | Coffee                    | 1                                                           |
| 74              | Gabon   | 2007           | Demersal Fish             | 22                                                          |
| 74              | Gabon   | 2007           | Eggs                      | 4                                                           |
| 74              | Gabon   | 2007           | Fats, Animals, Raw        | 1                                                           |
| 74              | Gabon   | 2007           | Freshwater Fish           | 20                                                          |
| 74              | Gabon   | 2007           | Fruits, Other             | 24                                                          |
| 74              | Gabon   | 2007           | Groundnuts (Shelled Eq)   | 23                                                          |
| 74              | Gabon   | 2007           | Maize                     | 43                                                          |
| 74              | Gabon   | 2007           | Marine Fish, Other        | 9                                                           |
| 74              | Gabon   | 2007           | Meat, Other               | 47                                                          |
| 74              | Gabon   | 2007           | Milk, Whole               | 87                                                          |
| 74              | Gabon   | 2007           | Mutton & Goat Meat        | 4                                                           |
| 74              | Gabon   | 2007           | Offals, Edible            | 21                                                          |
| 74              | Gabon   | 2007           | Oilcrops Oil, Other       | 4                                                           |
| 74              | Gabon   | 2007           | Onions                    | 4                                                           |
| 74              | Gabon   | 2007           | Oranges, Mandarines       | 6                                                           |
| 74              | Gabon   | 2007           | Palm Oil                  | 9                                                           |
| 74              | Gabon   | 2007           | Pelagic Fish              | 46                                                          |
| 74              | Gabon   | 2007           | Pigmeat                   | 20                                                          |
| 74              | Gabon   | 2007           | Pineapples                | 2                                                           |
| 74              | Gabon   | 2007           | Plantains                 | 327                                                         |
| 74              | Gabon   | 2007           | Potatoes                  | 8                                                           |
| 74              | Gabon   | 2007           | Poultry Meat              | 76                                                          |
| 74              | Gabon   | 2007           | Pulses, Other             | 1                                                           |
| 74              | Gabon   | 2007           | Rape and Mustard Oil      | 1                                                           |
| 74              | Gabon   | 2007           | Rice (Milled Equivalent)  | 94                                                          |
| 74              | Gabon   | 2007           | Roots, Other              | 65                                                          |
| 74              | Gabon   | 2007           | Soyabean Oil              | 4                                                           |
| 74              | Gabon   | 2007           | Sugar Cane                | 11                                                          |
| 74              | Gabon   | 2007           | Sugar, Refined Equivalent | 39                                                          |
| 74              | Gabon   | 2007           | Sunflowerseed Oil         | 1                                                           |
| 74              | Gabon   | 2007           | Sweet Potatoes            | 6                                                           |
| 74              | Gabon   | 2007           | Sweeteners, Other         | 1                                                           |
| 74              | Gabon   | 2007           | Tomatoes                  | 26                                                          |
| 74              | Gabon   | 2007           | Vegetables, Other         | 88                                                          |
| 74              | Gabon   | 2007           | Wheat                     | 152                                                         |
| 74              | Gabon   | 2007           | Wine                      | 17                                                          |
| 74              | Gabon   | 2007           | Yams                      | 172                                                         |
| 74              | Gabon   | 2008           | Apples                    | 6                                                           |
| 74              | Gabon   | 2008           | Bananas                   | 23                                                          |
| 74              | Gabon   | 2008           | Barley                    | 6                                                           |
| 74              | Gabon   | 2008           | Beer                      | 212                                                         |
| 74              | Gabon   | 2008           | Beverages, Alcoholic      | 7                                                           |
| 74              | Gabon   | 2008           | Bovine Meat               | 17                                                          |
| 74              | Gabon   | 2008           | Butter, Ghee              | 1                                                           |
| 74              | Gabon   | 2008           | Cassava                   | 223                                                         |
| 74              | Gabon   | 2008           | Cephalopods               | 1                                                           |
| 74              | Gabon   | 2008           | Cheese                    | 1                                                           |
| 74              | Gabon   | 2008           | Citrus, Other             | 2                                                           |
| 74              | Gabon   | 2008           | Coffee                    | 1                                                           |
| 74              | Gabon   | 2008           | Demersal Fish             | 14                                                          |
| 74              | Gabon   | 2008           | Eggs                      | 4                                                           |
| 74              | Gabon   | 2008           | Fats, Animals, Raw        | 1                                                           |
| 74              | Gabon   | 2008           | Freshwater Fish           | 20                                                          |
| 74              | Gabon   | 2008           | Fruits, Other             | 24                                                          |
| 74              | Gabon   | 2008           | Grapefruit                | 1                                                           |
| 74              | Gabon   | 2008           | Groundnuts (Shelled Eq)   | 23                                                          |
| 74              | Gabon   | 2008           | Maize                     | 43                                                          |
| 74              | Gabon   | 2008           | Marine Fish, Other        | 30                                                          |
| 74              | Gabon   | 2008           | Meat, Other               | 45                                                          |
| 74              | Gabon   | 2008           | Milk, Whole               | 64                                                          |
| 74              | Gabon   | 2008           | Mutton & Goat Meat        | 4                                                           |
| 74              | Gabon   | 2008           | Oats                      | 1                                                           |
| 74              | Gabon   | 2008           | Offals, Edible            | 21                                                          |
| 74              | Gabon   | 2008           | Oilcrops Oil, Other       | 2                                                           |
| 74              | Gabon   | 2008           | Onions                    | 5                                                           |
| 74              | Gabon   | 2008           | Oranges, Mandarines       | 9                                                           |
| 74              | Gabon   | 2008           | Palm Oil                  | 9                                                           |
| 74              | Gabon   | 2008           | Palmkernel Oil            | 1                                                           |
| 74              | Gabon   | 2008           | Pelagic Fish              | 36                                                          |
| 74              | Gabon   | 2008           | Pigmeat                   | 16                                                          |
| 74              | Gabon   | 2008           | Pineapples                | 2                                                           |
| 74              | Gabon   | 2008           | Plantains                 | 319                                                         |
| 74              | Gabon   | 2008           | Potatoes                  | 6                                                           |
| 74              | Gabon   | 2008           | Poultry Meat              | 83                                                          |
| 74              | Gabon   | 2008           | Rice (Milled Equivalent)  | 103                                                         |
| 74              | Gabon   | 2008           | Roots, Other              | 62                                                          |
| 74              | Gabon   | 2008           | Soyabean Oil              | 3                                                           |
| 74              | Gabon   | 2008           | Sugar Cane                | 11                                                          |
| 74              | Gabon   | 2008           | Sugar, Refined Equivalent | 35                                                          |
| 74              | Gabon   | 2008           | Sweet Potatoes            | 6                                                           |
| 74              | Gabon   | 2008           | Sweeteners, Other         | 1                                                           |
| 74              | Gabon   | 2008           | Tomatoes                  | 25                                                          |
| 74              | Gabon   | 2008           | Vegetables, Other         | 87                                                          |
| 74              | Gabon   | 2008           | Wheat                     | 156                                                         |
| 74              | Gabon   | 2008           | Wine                      | 13                                                          |
| 74              | Gabon   | 2008           | Yams                      | 174                                                         |
| 74              | Gabon   | 2009           | Apples                    | 7                                                           |
| 74              | Gabon   | 2009           | Bananas                   | 24                                                          |
| 74              | Gabon   | 2009           | Barley                    | 2                                                           |
| 74              | Gabon   | 2009           | Beer                      | 206                                                         |
| 74              | Gabon   | 2009           | Beverages, Alcoholic      | 7                                                           |

Dietary calcium and zinc deficiency risks are decreasing but remain prevalent

| FAO countrycode | Country | Reference year | Food item                 | Gross food supply (g capita <sup>-1</sup> d <sup>-1</sup> ) |
|-----------------|---------|----------------|---------------------------|-------------------------------------------------------------|
| 74              | Gabon   | 2009           | Bovine Meat               | 18                                                          |
| 74              | Gabon   | 2009           | Butter, Ghee              | 1                                                           |
| 74              | Gabon   | 2009           | Cassava                   | 209                                                         |
| 74              | Gabon   | 2009           | Cheese                    | 1                                                           |
| 74              | Gabon   | 2009           | Citrus, Other             | 2                                                           |
| 74              | Gabon   | 2009           | Cocoa Beans               | 1                                                           |
| 74              | Gabon   | 2009           | Coffee                    | 1                                                           |
| 74              | Gabon   | 2009           | Demersal Fish             | 10                                                          |
| 74              | Gabon   | 2009           | Eggs                      | 3                                                           |
| 74              | Gabon   | 2009           | Fats, Animals, Raw        | 1                                                           |
| 74              | Gabon   | 2009           | Freshwater Fish           | 19                                                          |
| 74              | Gabon   | 2009           | Fruits, Other             | 28                                                          |
| 74              | Gabon   | 2009           | Groundnuts (Shelled Eq)   | 20                                                          |
| 74              | Gabon   | 2009           | Maize                     | 45                                                          |
| 74              | Gabon   | 2009           | Marine Fish, Other        | 24                                                          |
| 74              | Gabon   | 2009           | Meat, Other               | 47                                                          |
| 74              | Gabon   | 2009           | Milk, Whole               | 76                                                          |
| 74              | Gabon   | 2009           | Mutton & Goat Meat        | 4                                                           |
| 74              | Gabon   | 2009           | Oats                      | 1                                                           |
| 74              | Gabon   | 2009           | Offals, Edible            | 20                                                          |
| 74              | Gabon   | 2009           | Oilcrops Oil, Other       | 3                                                           |
| 74              | Gabon   | 2009           | Onions                    | 7                                                           |
| 74              | Gabon   | 2009           | Oranges, Mandarines       | 10                                                          |
| 74              | Gabon   | 2009           | Palm Oil                  | 8                                                           |
| 74              | Gabon   | 2009           | Palmkernel Oil            | 1                                                           |
| 74              | Gabon   | 2009           | Pelagic Fish              | 34                                                          |
| 74              | Gabon   | 2009           | Pigmeat                   | 15                                                          |
| 74              | Gabon   | 2009           | Pineapples                | 2                                                           |
| 74              | Gabon   | 2009           | Plantains                 | 379                                                         |
| 74              | Gabon   | 2009           | Potatoes                  | 7                                                           |
| 74              | Gabon   | 2009           | Poultry Meat              | 88                                                          |
| 74              | Gabon   | 2009           | Pulses, Other             | 1                                                           |
| 74              | Gabon   | 2009           | Rice (Milled Equivalent)  | 93                                                          |
| 74              | Gabon   | 2009           | Roots, Other              | 64                                                          |
| 74              | Gabon   | 2009           | Soyabean Oil              | 3                                                           |
| 74              | Gabon   | 2009           | Sugar Cane                | 11                                                          |
| 74              | Gabon   | 2009           | Sugar, Refined Equivalent | 39                                                          |
| 74              | Gabon   | 2009           | Sweet Potatoes            | 7                                                           |
| 74              | Gabon   | 2009           | Sweeteners, Other         | 1                                                           |
| 74              | Gabon   | 2009           | Tomatoes                  | 23                                                          |
| 74              | Gabon   | 2009           | Vegetables, Other         | 82                                                          |
| 74              | Gabon   | 2009           | Wheat                     | 168                                                         |
| 74              | Gabon   | 2009           | Wine                      | 13                                                          |
| 74              | Gabon   | 2009           | Yams                      | 177                                                         |
| 74              | Gabon   | 2010           | Apples                    | 9                                                           |
| 74              | Gabon   | 2010           | Bananas                   | 26                                                          |
| 74              | Gabon   | 2010           | Barley                    | 2                                                           |
| 74              | Gabon   | 2010           | Beer                      | 204                                                         |
| 74              | Gabon   | 2010           | Beverages, Alcoholic      | 9                                                           |
| 74              | Gabon   | 2010           | Bovine Meat               | 20                                                          |
| 74              | Gabon   | 2010           | Butter, Ghee              | 1                                                           |
| 74              | Gabon   | 2010           | Cassava                   | 206                                                         |
| 74              | Gabon   | 2010           | Cheese                    | 1                                                           |
| 74              | Gabon   | 2010           | Citrus, Other             | 2                                                           |
| 74              | Gabon   | 2010           | Cocoa Beans               | 1                                                           |
| 74              | Gabon   | 2010           | Coffee                    | 1                                                           |
| 74              | Gabon   | 2010           | Demersal Fish             | 11                                                          |
| 74              | Gabon   | 2010           | Eggs                      | 3                                                           |
| 74              | Gabon   | 2010           | Fats, Animals, Raw        | 1                                                           |
| 74              | Gabon   | 2010           | Freshwater Fish           | 19                                                          |
| 74              | Gabon   | 2010           | Fruits, Other             | 30                                                          |
| 74              | Gabon   | 2010           | Groundnuts (Shelled Eq)   | 19                                                          |
| 74              | Gabon   | 2010           | Maize                     | 44                                                          |
| 74              | Gabon   | 2010           | Marine Fish, Other        | 24                                                          |
| 74              | Gabon   | 2010           | Meat, Other               | 51                                                          |
| 74              | Gabon   | 2010           | Milk, Whole               | 78                                                          |
| 74              | Gabon   | 2010           | Mutton & Goat Meat        | 3                                                           |
| 74              | Gabon   | 2010           | Oats                      | 1                                                           |
| 74              | Gabon   | 2010           | Offals, Edible            | 18                                                          |
| 74              | Gabon   | 2010           | Oilcrops Oil, Other       | 5                                                           |
| 74              | Gabon   | 2010           | Onions                    | 8                                                           |
| 74              | Gabon   | 2010           | Oranges, Mandarines       | 11                                                          |
| 74              | Gabon   | 2010           | Palm Oil                  | 7                                                           |
| 74              | Gabon   | 2010           | Palmkernel Oil            | 1                                                           |
| 74              | Gabon   | 2010           | Pelagic Fish              | 29                                                          |
| 74              | Gabon   | 2010           | Pigmeat                   | 17                                                          |
| 74              | Gabon   | 2010           | Pineapples                | 3                                                           |
| 74              | Gabon   | 2010           | Plantains                 | 383                                                         |
| 74              | Gabon   | 2010           | Potatoes                  | 8                                                           |
| 74              | Gabon   | 2010           | Poultry Meat              | 84                                                          |
| 74              | Gabon   | 2010           | Pulses, Other             | 1                                                           |
| 74              | Gabon   | 2010           | Rice (Milled Equivalent)  | 92                                                          |
| 74              | Gabon   | 2010           | Roots, Other              | 64                                                          |
| 74              | Gabon   | 2010           | Soyabean Oil              | 3                                                           |
| 74              | Gabon   | 2010           | Sugar Cane                | 11                                                          |
| 74              | Gabon   | 2010           | Sugar, Refined Equivalent | 39                                                          |
| 74              | Gabon   | 2010           | Sunflowerseed Oil         | 1                                                           |
| 74              | Gabon   | 2010           | Sweet Potatoes            | 6                                                           |
| 74              | Gabon   | 2010           | Sweeteners, Other         | 1                                                           |
| 74              | Gabon   | 2010           | Tomatoes                  | 28                                                          |
| 74              | Gabon   | 2010           | Vegetables, Other         | 92                                                          |
| 74              | Gabon   | 2010           | Wheat                     | 167                                                         |
| 74              | Gabon   | 2010           | Wine                      | 18                                                          |
| 74              | Gabon   | 2010           | Yams                      | 176                                                         |
| 74              | Gabon   | 2011           | Apples                    | 7                                                           |
| 74              | Gabon   | 2011           | Bananas                   | 26                                                          |
| 74              | Gabon   | 2011           | Barley                    | 2                                                           |

Dietary calcium and zinc deficiency risks are decreasing but remain prevalent

| FAO countrycode | Country | Reference year | Food item                 | Gross food supply (g capita <sup>-1</sup> d <sup>-1</sup> ) |
|-----------------|---------|----------------|---------------------------|-------------------------------------------------------------|
| 74              | Gabon   | 2011           | Beer                      | 203                                                         |
| 74              | Gabon   | 2011           | Beverages, Alcoholic      | 9                                                           |
| 74              | Gabon   | 2011           | Bovine Meat               | 18                                                          |
| 74              | Gabon   | 2011           | Butter, Ghee              | 1                                                           |
| 74              | Gabon   | 2011           | Cassava                   | 204                                                         |
| 74              | Gabon   | 2011           | Cheese                    | 1                                                           |
| 74              | Gabon   | 2011           | Citrus, Other             | 2                                                           |
| 74              | Gabon   | 2011           | Cocoa Beans               | 1                                                           |
| 74              | Gabon   | 2011           | Coffee                    | 1                                                           |
| 74              | Gabon   | 2011           | Demersal Fish             | 12                                                          |
| 74              | Gabon   | 2011           | Eggs                      | 3                                                           |
| 74              | Gabon   | 2011           | Fats, Animals, Raw        | 1                                                           |
| 74              | Gabon   | 2011           | Freshwater Fish           | 19                                                          |
| 74              | Gabon   | 2011           | Fruits, Other             | 36                                                          |
| 74              | Gabon   | 2011           | Grapes                    | 1                                                           |
| 74              | Gabon   | 2011           | Groundnuts (Shelled Eq)   | 24                                                          |
| 74              | Gabon   | 2011           | Maize                     | 45                                                          |
| 74              | Gabon   | 2011           | Marine Fish, Other        | 30                                                          |
| 74              | Gabon   | 2011           | Meat, Other               | 51                                                          |
| 74              | Gabon   | 2011           | Milk, Whole               | 74                                                          |
| 74              | Gabon   | 2011           | Mutton & Goat Meat        | 3                                                           |
| 74              | Gabon   | 2011           | Oats                      | 1                                                           |
| 74              | Gabon   | 2011           | Offals, Edible            | 20                                                          |
| 74              | Gabon   | 2011           | Oilcrops Oil, Other       | 6                                                           |
| 74              | Gabon   | 2011           | Onions                    | 8                                                           |
| 74              | Gabon   | 2011           | Oranges, Mandarines       | 13                                                          |
| 74              | Gabon   | 2011           | Palm Oil                  | 7                                                           |
| 74              | Gabon   | 2011           | Palmkernel Oil            | 1                                                           |
| 74              | Gabon   | 2011           | Pelagic Fish              | 32                                                          |
| 74              | Gabon   | 2011           | Pigmeat                   | 19                                                          |
| 74              | Gabon   | 2011           | Pineapples                | 3                                                           |
| 74              | Gabon   | 2011           | Plantains                 | 327                                                         |
| 74              | Gabon   | 2011           | Potatoes                  | 7                                                           |
| 74              | Gabon   | 2011           | Poultry Meat              | 91                                                          |
| 74              | Gabon   | 2011           | Pulses, Other             | 1                                                           |
| 74              | Gabon   | 2011           | Rice (Milled Equivalent)  | 94                                                          |
| 74              | Gabon   | 2011           | Roots, Other              | 65                                                          |
| 74              | Gabon   | 2011           | Soyabean Oil              | 3                                                           |
| 74              | Gabon   | 2011           | Sugar Cane                | 10                                                          |
| 74              | Gabon   | 2011           | Sugar, Refined Equivalent | 40                                                          |
| 74              | Gabon   | 2011           | Sunflowerseed Oil         | 1                                                           |
| 74              | Gabon   | 2011           | Sweet Potatoes            | 6                                                           |
| 74              | Gabon   | 2011           | Sweeteners, Other         | 1                                                           |
| 74              | Gabon   | 2011           | Tomatoes                  | 23                                                          |
| 74              | Gabon   | 2011           | Vegetables, Other         | 90                                                          |
| 74              | Gabon   | 2011           | Wheat                     | 171                                                         |
| 74              | Gabon   | 2011           | Wine                      | 16                                                          |
| 74              | Gabon   | 2011           | Yams                      | 179                                                         |
| 75              | Gambia  | 1993           | Beer                      | 2                                                           |
| 75              | Gambia  | 1993           | Beverages, Fermented      | 52                                                          |
| 75              | Gambia  | 1993           | Bovine Meat               | 10                                                          |
| 75              | Gambia  | 1993           | Cassava                   | 26                                                          |
| 75              | Gambia  | 1993           | Cephalopods               | 2                                                           |
| 75              | Gambia  | 1993           | Cereals, Other            | 1                                                           |
| 75              | Gambia  | 1993           | Demersal Fish             | 9                                                           |
| 75              | Gambia  | 1993           | Eggs                      | 3                                                           |
| 75              | Gambia  | 1993           | Freshwater Fish           | 6                                                           |
| 75              | Gambia  | 1993           | Fruits, Other             | 11                                                          |
| 75              | Gambia  | 1993           | Groundnut Oil             | 7                                                           |
| 75              | Gambia  | 1993           | Groundnuts (Shelled Eq)   | 19                                                          |
| 75              | Gambia  | 1993           | Maize                     | 29                                                          |
| 75              | Gambia  | 1993           | Marine Fish, Other        | 1                                                           |
| 75              | Gambia  | 1993           | Meat, Other               | 3                                                           |
| 75              | Gambia  | 1993           | Milk, Whole               | 41                                                          |
| 75              | Gambia  | 1993           | Millet                    | 92                                                          |
| 75              | Gambia  | 1993           | Mutton & Goat Meat        | 2                                                           |
| 75              | Gambia  | 1993           | Offals, Edible            | 2                                                           |
| 75              | Gambia  | 1993           | Oilcrops Oil, Other       | 3                                                           |
| 75              | Gambia  | 1993           | Palm Oil                  | 8                                                           |
| 75              | Gambia  | 1993           | Pelagic Fish              | 35                                                          |
| 75              | Gambia  | 1993           | Pigmeat                   | 1                                                           |
| 75              | Gambia  | 1993           | Potatoes                  | 8                                                           |
| 75              | Gambia  | 1993           | Poultry Meat              | 3                                                           |
| 75              | Gambia  | 1993           | Pulses, Other             | 7                                                           |
| 75              | Gambia  | 1993           | Rape and Mustard Oil      | 18                                                          |
| 75              | Gambia  | 1993           | Rice (Milled Equivalent)  | 197                                                         |
| 75              | Gambia  | 1993           | Sesameseed                | 1                                                           |
| 75              | Gambia  | 1993           | Sorghum                   | 27                                                          |
| 75              | Gambia  | 1993           | Soyabean Oil              | 12                                                          |
| 75              | Gambia  | 1993           | Sugar, Refined Equivalent | 93                                                          |
| 75              | Gambia  | 1993           | Sweeteners, Other         | 1                                                           |
| 75              | Gambia  | 1993           | Tea                       | 6                                                           |
| 75              | Gambia  | 1993           | Tomatoes                  | 85                                                          |
| 75              | Gambia  | 1993           | Vegetables, Other         | 31                                                          |
| 75              | Gambia  | 1993           | Wheat                     | 78                                                          |
| 75              | Gambia  | 1993           | Wine                      | 1                                                           |
| 75              | Gambia  | 1994           | Beer                      | 2                                                           |
| 75              | Gambia  | 1994           | Beverages, Fermented      | 57                                                          |
| 75              | Gambia  | 1994           | Bovine Meat               | 12                                                          |
| 75              | Gambia  | 1994           | Cassava                   | 26                                                          |
| 75              | Gambia  | 1994           | Cephalopods               | 1                                                           |
| 75              | Gambia  | 1994           | Cereals, Other            | 1                                                           |
| 75              | Gambia  | 1994           | Demersal Fish             | 4                                                           |
| 75              | Gambia  | 1994           | Eggs                      | 3                                                           |
| 75              | Gambia  | 1994           | Freshwater Fish           | 6                                                           |
| 75              | Gambia  | 1994           | Fruits, Other             | 11                                                          |
| 75              | Gambia  | 1994           | Groundnut Oil             | 6                                                           |

Dietary calcium and zinc deficiency risks are decreasing but remain prevalent

| FAO countrycode | Country | Reference year | Food item                 | Gross food supply (g capita <sup>-1</sup> d <sup>-1</sup> ) |
|-----------------|---------|----------------|---------------------------|-------------------------------------------------------------|
| 75              | Gambia  | 1994           | Groundnuts (Shelled Eq)   | 19                                                          |
| 75              | Gambia  | 1994           | Maize                     | 34                                                          |
| 75              | Gambia  | 1994           | Meat, Other               | 3                                                           |
| 75              | Gambia  | 1994           | Milk, Whole               | 33                                                          |
| 75              | Gambia  | 1994           | Millet                    | 101                                                         |
| 75              | Gambia  | 1994           | Mutton & Goat Meat        | 2                                                           |
| 75              | Gambia  | 1994           | Offals, Edible            | 2                                                           |
| 75              | Gambia  | 1994           | Oilcrops Oil, Other       | 2                                                           |
| 75              | Gambia  | 1994           | Palm Oil                  | 8                                                           |
| 75              | Gambia  | 1994           | Pelagic Fish              | 40                                                          |
| 75              | Gambia  | 1994           | Pepper                    | 1                                                           |
| 75              | Gambia  | 1994           | Pigmeat                   | 1                                                           |
| 75              | Gambia  | 1994           | Potatoes                  | 8                                                           |
| 75              | Gambia  | 1994           | Poultry Meat              | 3                                                           |
| 75              | Gambia  | 1994           | Pulses, Other             | 8                                                           |
| 75              | Gambia  | 1994           | Rape and Mustard Oil      | 16                                                          |
| 75              | Gambia  | 1994           | Rice (Milled Equivalent)  | 198                                                         |
| 75              | Gambia  | 1994           | Sesameseed                | 1                                                           |
| 75              | Gambia  | 1994           | Sorghum                   | 19                                                          |
| 75              | Gambia  | 1994           | Soyabean Oil              | 7                                                           |
| 75              | Gambia  | 1994           | Sugar, Refined Equivalent | 93                                                          |
| 75              | Gambia  | 1994           | Sweeteners, Other         | 1                                                           |
| 75              | Gambia  | 1994           | Tea                       | 3                                                           |
| 75              | Gambia  | 1994           | Tomatoes                  | 33                                                          |
| 75              | Gambia  | 1994           | Vegetables, Other         | 28                                                          |
| 75              | Gambia  | 1994           | Wheat                     | 72                                                          |
| 75              | Gambia  | 1994           | Wine                      | 1                                                           |
| 75              | Gambia  | 1995           | Beverages, Fermented      | 57                                                          |
| 75              | Gambia  | 1995           | Bovine Meat               | 9                                                           |
| 75              | Gambia  | 1995           | Cassava                   | 26                                                          |
| 75              | Gambia  | 1995           | Cereals, Other            | 10                                                          |
| 75              | Gambia  | 1995           | Demersal Fish             | 13                                                          |
| 75              | Gambia  | 1995           | Eggs                      | 3                                                           |
| 75              | Gambia  | 1995           | Freshwater Fish           | 6                                                           |
| 75              | Gambia  | 1995           | Fruits, Other             | 14                                                          |
| 75              | Gambia  | 1995           | Groundnut Oil             | 7                                                           |
| 75              | Gambia  | 1995           | Groundnuts (Shelled Eq)   | 19                                                          |
| 75              | Gambia  | 1995           | Maize                     | 21                                                          |
| 75              | Gambia  | 1995           | Meat, Other               | 3                                                           |
| 75              | Gambia  | 1995           | Milk, Whole               | 37                                                          |
| 75              | Gambia  | 1995           | Millet                    | 100                                                         |
| 75              | Gambia  | 1995           | Molluscs, Other           | 1                                                           |
| 75              | Gambia  | 1995           | Mutton & Goat Meat        | 2                                                           |
| 75              | Gambia  | 1995           | Nuts                      | 4                                                           |
| 75              | Gambia  | 1995           | Offals, Edible            | 2                                                           |
| 75              | Gambia  | 1995           | Oilcrops Oil, Other       | 11                                                          |
| 75              | Gambia  | 1995           | Palm Oil                  | 9                                                           |
| 75              | Gambia  | 1995           | Pelagic Fish              | 35                                                          |
| 75              | Gambia  | 1995           | Pigmeat                   | 1                                                           |
| 75              | Gambia  | 1995           | Potatoes                  | 1                                                           |
| 75              | Gambia  | 1995           | Poultry Meat              | 3                                                           |
| 75              | Gambia  | 1995           | Pulses, Other             | 3                                                           |
| 75              | Gambia  | 1995           | Rape and Mustard Oil      | 10                                                          |
| 75              | Gambia  | 1995           | Rice (Milled Equivalent)  | 207                                                         |
| 75              | Gambia  | 1995           | Sesameseed                | 1                                                           |
| 75              | Gambia  | 1995           | Sorghum                   | 19                                                          |
| 75              | Gambia  | 1995           | Soyabean Oil              | 2                                                           |
| 75              | Gambia  | 1995           | Sugar, Refined Equivalent | 95                                                          |
| 75              | Gambia  | 1995           | Sweeteners, Other         | 1                                                           |
| 75              | Gambia  | 1995           | Tea                       | 1                                                           |
| 75              | Gambia  | 1995           | Tomatoes                  | 56                                                          |
| 75              | Gambia  | 1995           | Vegetables, Other         | 37                                                          |
| 75              | Gambia  | 1995           | Wheat                     | 51                                                          |
| 75              | Gambia  | 1996           | Beer                      | 2                                                           |
| 75              | Gambia  | 1996           | Beverages, Fermented      | 60                                                          |
| 75              | Gambia  | 1996           | Bovine Meat               | 9                                                           |
| 75              | Gambia  | 1996           | Cassava                   | 26                                                          |
| 75              | Gambia  | 1996           | Cereals, Other            | 1                                                           |
| 75              | Gambia  | 1996           | Demersal Fish             | 11                                                          |
| 75              | Gambia  | 1996           | Eggs                      | 2                                                           |
| 75              | Gambia  | 1996           | Freshwater Fish           | 6                                                           |
| 75              | Gambia  | 1996           | Fruits, Other             | 14                                                          |
| 75              | Gambia  | 1996           | Groundnut Oil             | 8                                                           |
| 75              | Gambia  | 1996           | Groundnuts (Shelled Eq)   | 19                                                          |
| 75              | Gambia  | 1996           | Maize                     | 19                                                          |
| 75              | Gambia  | 1996           | Meat, Other               | 3                                                           |
| 75              | Gambia  | 1996           | Milk, Whole               | 44                                                          |
| 75              | Gambia  | 1996           | Millet                    | 105                                                         |
| 75              | Gambia  | 1996           | Molluscs, Other           | 1                                                           |
| 75              | Gambia  | 1996           | Mutton & Goat Meat        | 2                                                           |
| 75              | Gambia  | 1996           | Offals, Edible            | 2                                                           |
| 75              | Gambia  | 1996           | Oilcrops Oil, Other       | 11                                                          |
| 75              | Gambia  | 1996           | Palm Oil                  | 7                                                           |
| 75              | Gambia  | 1996           | Pelagic Fish              | 54                                                          |
| 75              | Gambia  | 1996           | Pepper                    | 1                                                           |
| 75              | Gambia  | 1996           | Pigmeat                   | 1                                                           |
| 75              | Gambia  | 1996           | Potatoes                  | 4                                                           |
| 75              | Gambia  | 1996           | Poultry Meat              | 2                                                           |
| 75              | Gambia  | 1996           | Pulses, Other             | 4                                                           |
| 75              | Gambia  | 1996           | Rape and Mustard Oil      | 11                                                          |
| 75              | Gambia  | 1996           | Rice (Milled Equivalent)  | 209                                                         |
| 75              | Gambia  | 1996           | Sesameseed                | 1                                                           |
| 75              | Gambia  | 1996           | Sorghum                   | 24                                                          |
| 75              | Gambia  | 1996           | Soyabean Oil              | 1                                                           |
| 75              | Gambia  | 1996           | Sugar, Refined Equivalent | 90                                                          |
| 75              | Gambia  | 1996           | Sweeteners, Other         | 1                                                           |
| 75              | Gambia  | 1996           | Tea                       | 1                                                           |



## Dietary calcium and zinc deficiency risks are decreasing but remain prevalent

| FAO countrycode | Country | Reference year | Food item                 | Gross food supply (g capita <sup>-1</sup> d <sup>-1</sup> ) |
|-----------------|---------|----------------|---------------------------|-------------------------------------------------------------|
| 75              | Gambia  | 1996           | Tomatoes                  | 50                                                          |
| 75              | Gambia  | 1996           | Vegetables, Other         | 29                                                          |
| 75              | Gambia  | 1996           | Wheat                     | 77                                                          |
| 75              | Gambia  | 1997           | Beer                      | 2                                                           |
| 75              | Gambia  | 1997           | Beverages, Fermented      | 62                                                          |
| 75              | Gambia  | 1997           | Bovine Meat               | 9                                                           |
| 75              | Gambia  | 1997           | Cassava                   | 26                                                          |
| 75              | Gambia  | 1997           | Cereals, Other            | 4                                                           |
| 75              | Gambia  | 1997           | Demersal Fish             | 17                                                          |
| 75              | Gambia  | 1997           | Eggs                      | 2                                                           |
| 75              | Gambia  | 1997           | Freshwater Fish           | 4                                                           |
| 75              | Gambia  | 1997           | Fruits, Other             | 14                                                          |
| 75              | Gambia  | 1997           | Groundnut Oil             | 10                                                          |
| 75              | Gambia  | 1997           | Groundnuts (Shelled Eq)   | 19                                                          |
| 75              | Gambia  | 1997           | Maize                     | 14                                                          |
| 75              | Gambia  | 1997           | Meat, Other               | 3                                                           |
| 75              | Gambia  | 1997           | Milk, Whole               | 43                                                          |
| 75              | Gambia  | 1997           | Millet                    | 109                                                         |
| 75              | Gambia  | 1997           | Mutton & Goat Meat        | 2                                                           |
| 75              | Gambia  | 1997           | Offals, Edible            | 2                                                           |
| 75              | Gambia  | 1997           | Oilcrops Oil, Other       | 11                                                          |
| 75              | Gambia  | 1997           | Palm Oil                  | 11                                                          |
| 75              | Gambia  | 1997           | Pelagic Fish              | 53                                                          |
| 75              | Gambia  | 1997           | Pigmeat                   | 1                                                           |
| 75              | Gambia  | 1997           | Potatoes                  | 5                                                           |
| 75              | Gambia  | 1997           | Poultry Meat              | 2                                                           |
| 75              | Gambia  | 1997           | Pulses, Other             | 4                                                           |
| 75              | Gambia  | 1997           | Rape and Mustard Oil      | 11                                                          |
| 75              | Gambia  | 1997           | Rice (Milled Equivalent)  | 206                                                         |
| 75              | Gambia  | 1997           | Sesameseed                | 3                                                           |
| 75              | Gambia  | 1997           | Sorghum                   | 27                                                          |
| 75              | Gambia  | 1997           | Soyabean Oil              | 3                                                           |
| 75              | Gambia  | 1997           | Sugar, Refined Equivalent | 90                                                          |
| 75              | Gambia  | 1997           | Sweeteners, Other         | 1                                                           |
| 75              | Gambia  | 1997           | Tea                       | 8                                                           |
| 75              | Gambia  | 1997           | Tomatoes                  | 37                                                          |
| 75              | Gambia  | 1997           | Vegetables, Other         | 35                                                          |
| 75              | Gambia  | 1997           | Wheat                     | 82                                                          |
| 75              | Gambia  | 1998           | Beer                      | 1                                                           |
| 75              | Gambia  | 1998           | Beverages, Fermented      | 78                                                          |
| 75              | Gambia  | 1998           | Bovine Meat               | 9                                                           |
| 75              | Gambia  | 1998           | Cassava                   | 26                                                          |
| 75              | Gambia  | 1998           | Cereals, Other            | 4                                                           |
| 75              | Gambia  | 1998           | Demersal Fish             | 6                                                           |
| 75              | Gambia  | 1998           | Eggs                      | 2                                                           |
| 75              | Gambia  | 1998           | Freshwater Fish           | 6                                                           |
| 75              | Gambia  | 1998           | Fruits, Other             | 14                                                          |
| 75              | Gambia  | 1998           | Groundnut Oil             | 9                                                           |
| 75              | Gambia  | 1998           | Groundnuts (Shelled Eq)   | 20                                                          |
| 75              | Gambia  | 1998           | Maize                     | 17                                                          |
| 75              | Gambia  | 1998           | Meat, Other               | 3                                                           |
| 75              | Gambia  | 1998           | Milk, Whole               | 44                                                          |
| 75              | Gambia  | 1998           | Millet                    | 137                                                         |
| 75              | Gambia  | 1998           | Molluscs, Other           | 1                                                           |
| 75              | Gambia  | 1998           | Mutton & Goat Meat        | 2                                                           |
| 75              | Gambia  | 1998           | Offals, Edible            | 2                                                           |
| 75              | Gambia  | 1998           | Oilcrops Oil, Other       | 10                                                          |
| 75              | Gambia  | 1998           | Palm Oil                  | 11                                                          |
| 75              | Gambia  | 1998           | Pelagic Fish              | 54                                                          |
| 75              | Gambia  | 1998           | Pepper                    | 1                                                           |
| 75              | Gambia  | 1998           | Pigmeat                   | 1                                                           |
| 75              | Gambia  | 1998           | Potatoes                  | 5                                                           |
| 75              | Gambia  | 1998           | Poultry Meat              | 2                                                           |
| 75              | Gambia  | 1998           | Pulses, Other             | 6                                                           |
| 75              | Gambia  | 1998           | Rape and Mustard Oil      | 14                                                          |
| 75              | Gambia  | 1998           | Rice (Milled Equivalent)  | 117                                                         |
| 75              | Gambia  | 1998           | Sesameseed                | 3                                                           |
| 75              | Gambia  | 1998           | Sorghum                   | 29                                                          |
| 75              | Gambia  | 1998           | Soyabean Oil              | 11                                                          |
| 75              | Gambia  | 1998           | Sugar, Refined Equivalent | 87                                                          |
| 75              | Gambia  | 1998           | Sweeteners, Other         | 1                                                           |
| 75              | Gambia  | 1998           | Tea                       | 10                                                          |
| 75              | Gambia  | 1998           | Tomatoes                  | 41                                                          |
| 75              | Gambia  | 1998           | Vegetables, Other         | 32                                                          |
| 75              | Gambia  | 1998           | Wheat                     | 80                                                          |
| 75              | Gambia  | 1999           | Beer                      | 6                                                           |
| 75              | Gambia  | 1999           | Beverages, Fermented      | 87                                                          |
| 75              | Gambia  | 1999           | Bovine Meat               | 8                                                           |
| 75              | Gambia  | 1999           | Cassava                   | 26                                                          |
| 75              | Gambia  | 1999           | Cereals, Other            | 6                                                           |
| 75              | Gambia  | 1999           | Cocoa Beans               | 1                                                           |
| 75              | Gambia  | 1999           | Demersal Fish             | 6                                                           |
| 75              | Gambia  | 1999           | Eggs                      | 6                                                           |
| 75              | Gambia  | 1999           | Freshwater Fish           | 5                                                           |
| 75              | Gambia  | 1999           | Fruits, Other             | 18                                                          |
| 75              | Gambia  | 1999           | Groundnut Oil             | 8                                                           |
| 75              | Gambia  | 1999           | Groundnuts (Shelled Eq)   | 19                                                          |
| 75              | Gambia  | 1999           | Maize                     | 22                                                          |
| 75              | Gambia  | 1999           | Meat, Other               | 3                                                           |
| 75              | Gambia  | 1999           | Milk, Whole               | 77                                                          |
| 75              | Gambia  | 1999           | Millet                    | 154                                                         |
| 75              | Gambia  | 1999           | Molluscs, Other           | 1                                                           |
| 75              | Gambia  | 1999           | Mutton & Goat Meat        | 2                                                           |
| 75              | Gambia  | 1999           | Nuts                      | 2                                                           |
| 75              | Gambia  | 1999           | Offals, Edible            | 2                                                           |
| 75              | Gambia  | 1999           | Oilcrops Oil, Other       | 2                                                           |
| 75              | Gambia  | 1999           | Oranges, Mandarines       | 2                                                           |

Dietary calcium and zinc deficiency risks are decreasing but remain prevalent

| FAO countrycode | Country | Reference year | Food item                 | Gross food supply (g capita <sup>-1</sup> d <sup>-1</sup> ) |
|-----------------|---------|----------------|---------------------------|-------------------------------------------------------------|
| 75              | Gambia  | 1999           | Palm Oil                  | 10                                                          |
| 75              | Gambia  | 1999           | Pelagic Fish              | 55                                                          |
| 75              | Gambia  | 1999           | Pigmeat                   | 1                                                           |
| 75              | Gambia  | 1999           | Potatoes                  | 9                                                           |
| 75              | Gambia  | 1999           | Poultry Meat              | 5                                                           |
| 75              | Gambia  | 1999           | Pulses, Other             | 7                                                           |
| 75              | Gambia  | 1999           | Rape and Mustard Oil      | 15                                                          |
| 75              | Gambia  | 1999           | Rice (Milled Equivalent)  | 138                                                         |
| 75              | Gambia  | 1999           | Sesameseed                | 4                                                           |
| 75              | Gambia  | 1999           | Sorghum                   | 34                                                          |
| 75              | Gambia  | 1999           | Soyabean Oil              | 13                                                          |
| 75              | Gambia  | 1999           | Sugar, Refined Equivalent | 81                                                          |
| 75              | Gambia  | 1999           | Sweeteners, Other         | 1                                                           |
| 75              | Gambia  | 1999           | Tea                       | 2                                                           |
| 75              | Gambia  | 1999           | Tomatoes                  | 30                                                          |
| 75              | Gambia  | 1999           | Vegetables, Other         | 85                                                          |
| 75              | Gambia  | 1999           | Wheat                     | 77                                                          |
| 75              | Gambia  | 2000           | Beer                      | 5                                                           |
| 75              | Gambia  | 2000           | Beverages, Fermented      | 88                                                          |
| 75              | Gambia  | 2000           | Bovine Meat               | 8                                                           |
| 75              | Gambia  | 2000           | Cassava                   | 16                                                          |
| 75              | Gambia  | 2000           | Cephalopods               | 1                                                           |
| 75              | Gambia  | 2000           | Cereals, Other            | 17                                                          |
| 75              | Gambia  | 2000           | Cottonseed Oil            | 1                                                           |
| 75              | Gambia  | 2000           | Demersal Fish             | 9                                                           |
| 75              | Gambia  | 2000           | Eggs                      | 3                                                           |
| 75              | Gambia  | 2000           | Freshwater Fish           | 5                                                           |
| 75              | Gambia  | 2000           | Fruits, Other             | 15                                                          |
| 75              | Gambia  | 2000           | Groundnut Oil             | 13                                                          |
| 75              | Gambia  | 2000           | Groundnuts (Shelled Eq)   | 14                                                          |
| 75              | Gambia  | 2000           | Maize                     | 21                                                          |
| 75              | Gambia  | 2000           | Meat, Other               | 3                                                           |
| 75              | Gambia  | 2000           | Milk, Whole               | 65                                                          |
| 75              | Gambia  | 2000           | Millet                    | 155                                                         |
| 75              | Gambia  | 2000           | Mutton & Goat Meat        | 2                                                           |
| 75              | Gambia  | 2000           | Nuts                      | 1                                                           |
| 75              | Gambia  | 2000           | Offals, Edible            | 2                                                           |
| 75              | Gambia  | 2000           | Oilcrops Oil, Other       | 2                                                           |
| 75              | Gambia  | 2000           | Oranges, Mandarines       | 2                                                           |
| 75              | Gambia  | 2000           | Palm Oil                  | 10                                                          |
| 75              | Gambia  | 2000           | Pelagic Fish              | 49                                                          |
| 75              | Gambia  | 2000           | Pepper                    | 1                                                           |
| 75              | Gambia  | 2000           | Pigmeat                   | 1                                                           |
| 75              | Gambia  | 2000           | Potatoes                  | 16                                                          |
| 75              | Gambia  | 2000           | Poultry Meat              | 6                                                           |
| 75              | Gambia  | 2000           | Pulses, Other             | 11                                                          |
| 75              | Gambia  | 2000           | Rape and Mustard Oil      | 8                                                           |
| 75              | Gambia  | 2000           | Rice (Milled Equivalent)  | 148                                                         |
| 75              | Gambia  | 2000           | Sesameseed                | 6                                                           |
| 75              | Gambia  | 2000           | Sorghum                   | 46                                                          |
| 75              | Gambia  | 2000           | Soyabean Oil              | 14                                                          |
| 75              | Gambia  | 2000           | Sugar, Refined Equivalent | 86                                                          |
| 75              | Gambia  | 2000           | Sweeteners, Other         | 1                                                           |
| 75              | Gambia  | 2000           | Tea                       | 4                                                           |
| 75              | Gambia  | 2000           | Tomatoes                  | 35                                                          |
| 75              | Gambia  | 2000           | Vegetables, Other         | 59                                                          |
| 75              | Gambia  | 2000           | Wheat                     | 74                                                          |
| 75              | Gambia  | 2001           | Beer                      | 2                                                           |
| 75              | Gambia  | 2001           | Beverages, Fermented      | 92                                                          |
| 75              | Gambia  | 2001           | Bovine Meat               | 7                                                           |
| 75              | Gambia  | 2001           | Cassava                   | 16                                                          |
| 75              | Gambia  | 2001           | Cephalopods               | 3                                                           |
| 75              | Gambia  | 2001           | Cereals, Other            | 4                                                           |
| 75              | Gambia  | 2001           | Cocoa Beans               | 1                                                           |
| 75              | Gambia  | 2001           | Cream                     | 1                                                           |
| 75              | Gambia  | 2001           | Demersal Fish             | 22                                                          |
| 75              | Gambia  | 2001           | Eggs                      | 5                                                           |
| 75              | Gambia  | 2001           | Freshwater Fish           | 5                                                           |
| 75              | Gambia  | 2001           | Fruits, Other             | 13                                                          |
| 75              | Gambia  | 2001           | Groundnut Oil             | 14                                                          |
| 75              | Gambia  | 2001           | Groundnuts (Shelled Eq)   | 16                                                          |
| 75              | Gambia  | 2001           | Maize                     | 21                                                          |
| 75              | Gambia  | 2001           | Meat, Other               | 3                                                           |
| 75              | Gambia  | 2001           | Milk, Whole               | 62                                                          |
| 75              | Gambia  | 2001           | Millet                    | 162                                                         |
| 75              | Gambia  | 2001           | Mutton & Goat Meat        | 2                                                           |
| 75              | Gambia  | 2001           | Offals, Edible            | 2                                                           |
| 75              | Gambia  | 2001           | Oilcrops Oil, Other       | 3                                                           |
| 75              | Gambia  | 2001           | Oranges, Mandarines       | 1                                                           |
| 75              | Gambia  | 2001           | Palm Oil                  | 11                                                          |
| 75              | Gambia  | 2001           | Pelagic Fish              | 44                                                          |
| 75              | Gambia  | 2001           | Pigmeat                   | 1                                                           |
| 75              | Gambia  | 2001           | Potatoes                  | 12                                                          |
| 75              | Gambia  | 2001           | Poultry Meat              | 4                                                           |
| 75              | Gambia  | 2001           | Pulses, Other             | 12                                                          |
| 75              | Gambia  | 2001           | Rape and Mustard Oil      | 6                                                           |
| 75              | Gambia  | 2001           | Rice (Milled Equivalent)  | 138                                                         |
| 75              | Gambia  | 2001           | Roots, Other              | 1                                                           |
| 75              | Gambia  | 2001           | Sesameseed                | 4                                                           |
| 75              | Gambia  | 2001           | Sorghum                   | 49                                                          |
| 75              | Gambia  | 2001           | Soyabean Oil              | 22                                                          |
| 75              | Gambia  | 2001           | Sugar, Refined Equivalent | 66                                                          |
| 75              | Gambia  | 2001           | Sweeteners, Other         | 1                                                           |
| 75              | Gambia  | 2001           | Tea                       | 2                                                           |
| 75              | Gambia  | 2001           | Tomatoes                  | 33                                                          |
| 75              | Gambia  | 2001           | Vegetables, Other         | 45                                                          |
| 75              | Gambia  | 2001           | Wheat                     | 57                                                          |

Dietary calcium and zinc deficiency risks are decreasing but remain prevalent

| FAO countrycode | Country | Reference year | Food item                 | Gross food supply (g capita <sup>-1</sup> d <sup>-1</sup> ) |
|-----------------|---------|----------------|---------------------------|-------------------------------------------------------------|
| 75              | Gambia  | 2002           | Beer                      | 4                                                           |
| 75              | Gambia  | 2002           | Beverages, Fermented      | 91                                                          |
| 75              | Gambia  | 2002           | Bovine Meat               | 7                                                           |
| 75              | Gambia  | 2002           | Cassava                   | 15                                                          |
| 75              | Gambia  | 2002           | Cephalopods               | 1                                                           |
| 75              | Gambia  | 2002           | Cereals, Other            | 1                                                           |
| 75              | Gambia  | 2002           | Coconuts - Incl Copra     | 1                                                           |
| 75              | Gambia  | 2002           | Cream                     | 1                                                           |
| 75              | Gambia  | 2002           | Crustaceans               | 1                                                           |
| 75              | Gambia  | 2002           | Demersal Fish             | 27                                                          |
| 75              | Gambia  | 2002           | Eggs                      | 3                                                           |
| 75              | Gambia  | 2002           | Freshwater Fish           | 5                                                           |
| 75              | Gambia  | 2002           | Fruits, Other             | 16                                                          |
| 75              | Gambia  | 2002           | Groundnut Oil             | 11                                                          |
| 75              | Gambia  | 2002           | Groundnuts (Shelled Eq)   | 15                                                          |
| 75              | Gambia  | 2002           | Maize                     | 23                                                          |
| 75              | Gambia  | 2002           | Meat, Other               | 3                                                           |
| 75              | Gambia  | 2002           | Milk, Whole               | 56                                                          |
| 75              | Gambia  | 2002           | Millet                    | 161                                                         |
| 75              | Gambia  | 2002           | Mutton & Goat Meat        | 2                                                           |
| 75              | Gambia  | 2002           | Offals, Edible            | 2                                                           |
| 75              | Gambia  | 2002           | Oilcrops Oil, Other       | 3                                                           |
| 75              | Gambia  | 2002           | Oranges, Mandarines       | 3                                                           |
| 75              | Gambia  | 2002           | Palm Oil                  | 13                                                          |
| 75              | Gambia  | 2002           | Pelagic Fish              | 65                                                          |
| 75              | Gambia  | 2002           | Pigmeat                   | 1                                                           |
| 75              | Gambia  | 2002           | Potatoes                  | 17                                                          |
| 75              | Gambia  | 2002           | Poultry Meat              | 3                                                           |
| 75              | Gambia  | 2002           | Pulses, Other             | 14                                                          |
| 75              | Gambia  | 2002           | Rape and Mustard Oil      | 1                                                           |
| 75              | Gambia  | 2002           | Rice (Milled Equivalent)  | 120                                                         |
| 75              | Gambia  | 2002           | Sesameseed                | 5                                                           |
| 75              | Gambia  | 2002           | Sorghum                   | 43                                                          |
| 75              | Gambia  | 2002           | Soyabean Oil              | 21                                                          |
| 75              | Gambia  | 2002           | Sugar, Refined Equivalent | 69                                                          |
| 75              | Gambia  | 2002           | Sweeteners, Other         | 3                                                           |
| 75              | Gambia  | 2002           | Tea                       | 4                                                           |
| 75              | Gambia  | 2002           | Tomatoes                  | 38                                                          |
| 75              | Gambia  | 2002           | Vegetables, Other         | 60                                                          |
| 75              | Gambia  | 2002           | Wheat                     | 90                                                          |
| 75              | Gambia  | 2003           | Beer                      | 5                                                           |
| 75              | Gambia  | 2003           | Beverages, Fermented      | 99                                                          |
| 75              | Gambia  | 2003           | Bovine Meat               | 8                                                           |
| 75              | Gambia  | 2003           | Cassava                   | 18                                                          |
| 75              | Gambia  | 2003           | Cephalopods               | 2                                                           |
| 75              | Gambia  | 2003           | Cereals, Other            | 2                                                           |
| 75              | Gambia  | 2003           | Cream                     | 1                                                           |
| 75              | Gambia  | 2003           | Demersal Fish             | 15                                                          |
| 75              | Gambia  | 2003           | Eggs                      | 2                                                           |
| 75              | Gambia  | 2003           | Freshwater Fish           | 6                                                           |
| 75              | Gambia  | 2003           | Fruits, Other             | 13                                                          |
| 75              | Gambia  | 2003           | Groundnut Oil             | 13                                                          |
| 75              | Gambia  | 2003           | Groundnuts (Shelled Eq)   | 15                                                          |
| 75              | Gambia  | 2003           | Maize                     | 25                                                          |
| 75              | Gambia  | 2003           | Meat, Other               | 3                                                           |
| 75              | Gambia  | 2003           | Milk, Whole               | 70                                                          |
| 75              | Gambia  | 2003           | Millet                    | 175                                                         |
| 75              | Gambia  | 2003           | Mutton & Goat Meat        | 3                                                           |
| 75              | Gambia  | 2003           | Offals, Edible            | 2                                                           |
| 75              | Gambia  | 2003           | Oilcrops Oil, Other       | 5                                                           |
| 75              | Gambia  | 2003           | Oranges, Mandarines       | 1                                                           |
| 75              | Gambia  | 2003           | Palm Oil                  | 16                                                          |
| 75              | Gambia  | 2003           | Pelagic Fish              | 59                                                          |
| 75              | Gambia  | 2003           | Pigmeat                   | 1                                                           |
| 75              | Gambia  | 2003           | Potatoes                  | 13                                                          |
| 75              | Gambia  | 2003           | Poultry Meat              | 3                                                           |
| 75              | Gambia  | 2003           | Pulses, Other             | 16                                                          |
| 75              | Gambia  | 2003           | Rice (Milled Equivalent)  | 90                                                          |
| 75              | Gambia  | 2003           | Sesameseed                | 4                                                           |
| 75              | Gambia  | 2003           | Sorghum                   | 50                                                          |
| 75              | Gambia  | 2003           | Soyabean Oil              | 18                                                          |
| 75              | Gambia  | 2003           | Sugar, Refined Equivalent | 67                                                          |
| 75              | Gambia  | 2003           | Sweeteners, Other         | 3                                                           |
| 75              | Gambia  | 2003           | Tea                       | 4                                                           |
| 75              | Gambia  | 2003           | Tomatoes                  | 32                                                          |
| 75              | Gambia  | 2003           | Vegetables, Other         | 30                                                          |
| 75              | Gambia  | 2003           | Wheat                     | 71                                                          |
| 75              | Gambia  | 2004           | Beer                      | 5                                                           |
| 75              | Gambia  | 2004           | Beverages, Fermented      | 97                                                          |
| 75              | Gambia  | 2004           | Bovine Meat               | 9                                                           |
| 75              | Gambia  | 2004           | Cassava                   | 18                                                          |
| 75              | Gambia  | 2004           | Cephalopods               | 1                                                           |
| 75              | Gambia  | 2004           | Cereals, Other            | 1                                                           |
| 75              | Gambia  | 2004           | Cheese                    | 1                                                           |
| 75              | Gambia  | 2004           | Coffee                    | 1                                                           |
| 75              | Gambia  | 2004           | Demersal Fish             | 19                                                          |
| 75              | Gambia  | 2004           | Eggs                      | 4                                                           |
| 75              | Gambia  | 2004           | Freshwater Fish           | 7                                                           |
| 75              | Gambia  | 2004           | Fruits, Other             | 12                                                          |
| 75              | Gambia  | 2004           | Groundnut Oil             | 13                                                          |
| 75              | Gambia  | 2004           | Groundnuts (Shelled Eq)   | 14                                                          |
| 75              | Gambia  | 2004           | Maize                     | 24                                                          |
| 75              | Gambia  | 2004           | Meat, Other               | 3                                                           |
| 75              | Gambia  | 2004           | Milk, Whole               | 62                                                          |
| 75              | Gambia  | 2004           | Millet                    | 171                                                         |
| 75              | Gambia  | 2004           | Mutton & Goat Meat        | 3                                                           |
| 75              | Gambia  | 2004           | Offals, Edible            | 2                                                           |

## Dietary calcium and zinc deficiency risks are decreasing but remain prevalent

| FAO countrycode | Country | Reference year | Food item                 | Gross food supply (g capita <sup>-1</sup> d <sup>-1</sup> ) |
|-----------------|---------|----------------|---------------------------|-------------------------------------------------------------|
| 75              | Gambia  | 2004           | Oilcrops Oil, Other       | 12                                                          |
| 75              | Gambia  | 2004           | Oranges, Mandarines       | 3                                                           |
| 75              | Gambia  | 2004           | Palm Oil                  | 17                                                          |
| 75              | Gambia  | 2004           | Peas                      | 1                                                           |
| 75              | Gambia  | 2004           | Pelagic Fish              | 43                                                          |
| 75              | Gambia  | 2004           | Pepper                    | 1                                                           |
| 75              | Gambia  | 2004           | Pigmeat                   | 1                                                           |
| 75              | Gambia  | 2004           | Potatoes                  | 15                                                          |
| 75              | Gambia  | 2004           | Poultry Meat              | 12                                                          |
| 75              | Gambia  | 2004           | Pulses, Other             | 7                                                           |
| 75              | Gambia  | 2004           | Rice (Milled Equivalent)  | 95                                                          |
| 75              | Gambia  | 2004           | Sesameseed                | 2                                                           |
| 75              | Gambia  | 2004           | Sorghum                   | 38                                                          |
| 75              | Gambia  | 2004           | Soyabean Oil              | 14                                                          |
| 75              | Gambia  | 2004           | Sugar, Refined Equivalent | 71                                                          |
| 75              | Gambia  | 2004           | Sweeteners, Other         | 3                                                           |
| 75              | Gambia  | 2004           | Tea                       | 8                                                           |
| 75              | Gambia  | 2004           | Tomatoes                  | 84                                                          |
| 75              | Gambia  | 2004           | Vegetables, Other         | 24                                                          |
| 75              | Gambia  | 2004           | Wheat                     | 68                                                          |
| 75              | Gambia  | 2005           | Beer                      | 6                                                           |
| 75              | Gambia  | 2005           | Beverages, Fermented      | 90                                                          |
| 75              | Gambia  | 2005           | Bovine Meat               | 9                                                           |
| 75              | Gambia  | 2005           | Cassava                   | 18                                                          |
| 75              | Gambia  | 2005           | Cephalopods               | 4                                                           |
| 75              | Gambia  | 2005           | Cereals, Other            | 1                                                           |
| 75              | Gambia  | 2005           | Coffee                    | 2                                                           |
| 75              | Gambia  | 2005           | Demersal Fish             | 20                                                          |
| 75              | Gambia  | 2005           | Eggs                      | 5                                                           |
| 75              | Gambia  | 2005           | Freshwater Fish           | 7                                                           |
| 75              | Gambia  | 2005           | Fruits, Other             | 12                                                          |
| 75              | Gambia  | 2005           | Groundnut Oil             | 14                                                          |
| 75              | Gambia  | 2005           | Groundnuts (Shelled Eq)   | 14                                                          |
| 75              | Gambia  | 2005           | Maize                     | 22                                                          |
| 75              | Gambia  | 2005           | Meat, Other               | 3                                                           |
| 75              | Gambia  | 2005           | Milk, Whole               | 59                                                          |
| 75              | Gambia  | 2005           | Millet                    | 159                                                         |
| 75              | Gambia  | 2005           | Mutton & Goat Meat        | 3                                                           |
| 75              | Gambia  | 2005           | Offals, Edible            | 2                                                           |
| 75              | Gambia  | 2005           | Oilcrops Oil, Other       | 7                                                           |
| 75              | Gambia  | 2005           | Oranges, Mandarines       | 1                                                           |
| 75              | Gambia  | 2005           | Palm Oil                  | 21                                                          |
| 75              | Gambia  | 2005           | Peas                      | 3                                                           |
| 75              | Gambia  | 2005           | Pelagic Fish              | 37                                                          |
| 75              | Gambia  | 2005           | Pepper                    | 1                                                           |
| 75              | Gambia  | 2005           | Pigmeat                   | 1                                                           |
| 75              | Gambia  | 2005           | Potatoes                  | 17                                                          |
| 75              | Gambia  | 2005           | Poultry Meat              | 14                                                          |
| 75              | Gambia  | 2005           | Pulses, Other             | 5                                                           |
| 75              | Gambia  | 2005           | Rape and Mustard Oil      | 1                                                           |
| 75              | Gambia  | 2005           | Rice (Milled Equivalent)  | 108                                                         |
| 75              | Gambia  | 2005           | Roots, Other              | 2                                                           |
| 75              | Gambia  | 2005           | Sesameseed                | 4                                                           |
| 75              | Gambia  | 2005           | Sorghum                   | 49                                                          |
| 75              | Gambia  | 2005           | Soyabean Oil              | 11                                                          |
| 75              | Gambia  | 2005           | Sugar, Refined Equivalent | 72                                                          |
| 75              | Gambia  | 2005           | Sweeteners, Other         | 3                                                           |
| 75              | Gambia  | 2005           | Tea                       | 6                                                           |
| 75              | Gambia  | 2005           | Tomatoes                  | 83                                                          |
| 75              | Gambia  | 2005           | Vegetables, Other         | 23                                                          |
| 75              | Gambia  | 2005           | Wheat                     | 69                                                          |
| 75              | Gambia  | 2005           | Wine                      | 1                                                           |
| 75              | Gambia  | 2006           | Beer                      | 6                                                           |
| 75              | Gambia  | 2006           | Beverages, Fermented      | 88                                                          |
| 75              | Gambia  | 2006           | Bovine Meat               | 8                                                           |
| 75              | Gambia  | 2006           | Cassava                   | 19                                                          |
| 75              | Gambia  | 2006           | Cephalopods               | 2                                                           |
| 75              | Gambia  | 2006           | Cereals, Other            | 1                                                           |
| 75              | Gambia  | 2006           | Cocoa Beans               | 1                                                           |
| 75              | Gambia  | 2006           | Coffee                    | 3                                                           |
| 75              | Gambia  | 2006           | Crustaceans               | 1                                                           |
| 75              | Gambia  | 2006           | Demersal Fish             | 20                                                          |
| 75              | Gambia  | 2006           | Eggs                      | 6                                                           |
| 75              | Gambia  | 2006           | Freshwater Fish           | 8                                                           |
| 75              | Gambia  | 2006           | Fruits, Other             | 12                                                          |
| 75              | Gambia  | 2006           | Groundnut Oil             | 13                                                          |
| 75              | Gambia  | 2006           | Groundnuts (Shelled Eq)   | 13                                                          |
| 75              | Gambia  | 2006           | Maize                     | 25                                                          |
| 75              | Gambia  | 2006           | Marine Fish, Other        | 1                                                           |
| 75              | Gambia  | 2006           | Meat, Other               | 2                                                           |
| 75              | Gambia  | 2006           | Milk, Whole               | 66                                                          |
| 75              | Gambia  | 2006           | Millet                    | 155                                                         |
| 75              | Gambia  | 2006           | Mutton & Goat Meat        | 4                                                           |
| 75              | Gambia  | 2006           | Offals, Edible            | 2                                                           |
| 75              | Gambia  | 2006           | Oilcrops Oil, Other       | 8                                                           |
| 75              | Gambia  | 2006           | Oranges, Mandarines       | 2                                                           |
| 75              | Gambia  | 2006           | Palm Oil                  | 19                                                          |
| 75              | Gambia  | 2006           | Pelagic Fish              | 43                                                          |
| 75              | Gambia  | 2006           | Pepper                    | 1                                                           |
| 75              | Gambia  | 2006           | Pigmeat                   | 1                                                           |
| 75              | Gambia  | 2006           | Potatoes                  | 12                                                          |
| 75              | Gambia  | 2006           | Poultry Meat              | 12                                                          |
| 75              | Gambia  | 2006           | Pulses, Other             | 5                                                           |
| 75              | Gambia  | 2006           | Rape and Mustard Oil      | 1                                                           |
| 75              | Gambia  | 2006           | Rice (Milled Equivalent)  | 122                                                         |
| 75              | Gambia  | 2006           | Roots, Other              | 2                                                           |
| 75              | Gambia  | 2006           | Sesameseed                | 3                                                           |

Dietary calcium and zinc deficiency risks are decreasing but remain prevalent

| FAO countrycode | Country | Reference year | Food item                 | Gross food supply (g capita <sup>-1</sup> d <sup>-1</sup> ) |
|-----------------|---------|----------------|---------------------------|-------------------------------------------------------------|
| 75              | Gambia  | 2006           | Sorghum                   | 43                                                          |
| 75              | Gambia  | 2006           | Soyabean Oil              | 5                                                           |
| 75              | Gambia  | 2006           | Sugar, Refined Equivalent | 65                                                          |
| 75              | Gambia  | 2006           | Sweeteners, Other         | 2                                                           |
| 75              | Gambia  | 2006           | Tea                       | 7                                                           |
| 75              | Gambia  | 2006           | Tomatoes                  | 74                                                          |
| 75              | Gambia  | 2006           | Vegetables, Other         | 19                                                          |
| 75              | Gambia  | 2006           | Wheat                     | 64                                                          |
| 75              | Gambia  | 2006           | Wine                      | 1                                                           |
| 75              | Gambia  | 2007           | Beer                      | 8                                                           |
| 75              | Gambia  | 2007           | Beverages, Fermented      | 85                                                          |
| 75              | Gambia  | 2007           | Bovine Meat               | 7                                                           |
| 75              | Gambia  | 2007           | Cassava                   | 15                                                          |
| 75              | Gambia  | 2007           | Cephalopods               | 1                                                           |
| 75              | Gambia  | 2007           | Cereals, Other            | 1                                                           |
| 75              | Gambia  | 2007           | Cocoa Beans               | 1                                                           |
| 75              | Gambia  | 2007           | Coffee                    | 1                                                           |
| 75              | Gambia  | 2007           | Crustaceans               | 3                                                           |
| 75              | Gambia  | 2007           | Demersal Fish             | 24                                                          |
| 75              | Gambia  | 2007           | Eggs                      | 9                                                           |
| 75              | Gambia  | 2007           | Freshwater Fish           | 9                                                           |
| 75              | Gambia  | 2007           | Fruits, Other             | 15                                                          |
| 75              | Gambia  | 2007           | Groundnut Oil             | 15                                                          |
| 75              | Gambia  | 2007           | Groundnuts (Shelled Eq)   | 13                                                          |
| 75              | Gambia  | 2007           | Maize                     | 31                                                          |
| 75              | Gambia  | 2007           | Meat, Other               | 3                                                           |
| 75              | Gambia  | 2007           | Milk, Whole               | 65                                                          |
| 75              | Gambia  | 2007           | Millet                    | 150                                                         |
| 75              | Gambia  | 2007           | Molluscs, Other           | 1                                                           |
| 75              | Gambia  | 2007           | Mutton & Goat Meat        | 3                                                           |
| 75              | Gambia  | 2007           | Nuts                      | 1                                                           |
| 75              | Gambia  | 2007           | Offals, Edible            | 2                                                           |
| 75              | Gambia  | 2007           | Oilcrops Oil, Other       | 6                                                           |
| 75              | Gambia  | 2007           | Oranges, Mandarines       | 2                                                           |
| 75              | Gambia  | 2007           | Palm Oil                  | 21                                                          |
| 75              | Gambia  | 2007           | Peas                      | 1                                                           |
| 75              | Gambia  | 2007           | Pelagic Fish              | 43                                                          |
| 75              | Gambia  | 2007           | Pepper                    | 1                                                           |
| 75              | Gambia  | 2007           | Pigmeat                   | 2                                                           |
| 75              | Gambia  | 2007           | Potatoes                  | 12                                                          |
| 75              | Gambia  | 2007           | Poultry Meat              | 13                                                          |
| 75              | Gambia  | 2007           | Pulses, Other             | 5                                                           |
| 75              | Gambia  | 2007           | Rice (Milled Equivalent)  | 160                                                         |
| 75              | Gambia  | 2007           | Roots, Other              | 2                                                           |
| 75              | Gambia  | 2007           | Rye                       | 1                                                           |
| 75              | Gambia  | 2007           | Sesameseed                | 3                                                           |
| 75              | Gambia  | 2007           | Sorghum                   | 40                                                          |
| 75              | Gambia  | 2007           | Soyabean Oil              | 4                                                           |
| 75              | Gambia  | 2007           | Sugar, Refined Equivalent | 69                                                          |
| 75              | Gambia  | 2007           | Sweeteners, Other         | 3                                                           |
| 75              | Gambia  | 2007           | Tea                       | 6                                                           |
| 75              | Gambia  | 2007           | Tomatoes                  | 55                                                          |
| 75              | Gambia  | 2007           | Vegetables, Other         | 37                                                          |
| 75              | Gambia  | 2007           | Wheat                     | 87                                                          |
| 75              | Gambia  | 2007           | Whey                      | 8                                                           |
| 75              | Gambia  | 2007           | Wine                      | 1                                                           |
| 75              | Gambia  | 2008           | Beer                      | 5                                                           |
| 75              | Gambia  | 2008           | Beverages, Fermented      | 82                                                          |
| 75              | Gambia  | 2008           | Bovine Meat               | 7                                                           |
| 75              | Gambia  | 2008           | Butter, Ghee              | 1                                                           |
| 75              | Gambia  | 2008           | Cassava                   | 14                                                          |
| 75              | Gambia  | 2008           | Cephalopods               | 1                                                           |
| 75              | Gambia  | 2008           | Cereals, Other            | 1                                                           |
| 75              | Gambia  | 2008           | Coffee                    | 1                                                           |
| 75              | Gambia  | 2008           | Cream                     | 1                                                           |
| 75              | Gambia  | 2008           | Crustaceans               | 3                                                           |
| 75              | Gambia  | 2008           | Demersal Fish             | 24                                                          |
| 75              | Gambia  | 2008           | Eggs                      | 11                                                          |
| 75              | Gambia  | 2008           | Freshwater Fish           | 6                                                           |
| 75              | Gambia  | 2008           | Fruits, Other             | 17                                                          |
| 75              | Gambia  | 2008           | Groundnut Oil             | 14                                                          |
| 75              | Gambia  | 2008           | Groundnuts (Shelled Eq)   | 13                                                          |
| 75              | Gambia  | 2008           | Maize                     | 40                                                          |
| 75              | Gambia  | 2008           | Marine Fish, Other        | 1                                                           |
| 75              | Gambia  | 2008           | Meat, Other               | 4                                                           |
| 75              | Gambia  | 2008           | Milk, Whole               | 74                                                          |
| 75              | Gambia  | 2008           | Millet                    | 144                                                         |
| 75              | Gambia  | 2008           | Molluscs, Other           | 1                                                           |
| 75              | Gambia  | 2008           | Mutton & Goat Meat        | 3                                                           |
| 75              | Gambia  | 2008           | Nuts                      | 1                                                           |
| 75              | Gambia  | 2008           | Offals, Edible            | 2                                                           |
| 75              | Gambia  | 2008           | Oilcrops Oil, Other       | 2                                                           |
| 75              | Gambia  | 2008           | Oranges, Mandarines       | 1                                                           |
| 75              | Gambia  | 2008           | Palm Oil                  | 19                                                          |
| 75              | Gambia  | 2008           | Peas                      | 2                                                           |
| 75              | Gambia  | 2008           | Pelagic Fish              | 43                                                          |
| 75              | Gambia  | 2008           | Pigmeat                   | 1                                                           |
| 75              | Gambia  | 2008           | Potatoes                  | 12                                                          |
| 75              | Gambia  | 2008           | Poultry Meat              | 6                                                           |
| 75              | Gambia  | 2008           | Pulses, Other             | 5                                                           |
| 75              | Gambia  | 2008           | Rice (Milled Equivalent)  | 179                                                         |
| 75              | Gambia  | 2008           | Roots, Other              | 1                                                           |
| 75              | Gambia  | 2008           | Sesameseed                | 4                                                           |
| 75              | Gambia  | 2008           | Sorghum                   | 39                                                          |
| 75              | Gambia  | 2008           | Soyabean Oil              | 3                                                           |
| 75              | Gambia  | 2008           | Sugar, Refined Equivalent | 64                                                          |
| 75              | Gambia  | 2008           | Sweeteners, Other         | 3                                                           |

## Dietary calcium and zinc deficiency risks are decreasing but remain prevalent

| FAO countrycode | Country | Reference year | Food item                 | Gross food supply (g capita <sup>-1</sup> d <sup>-1</sup> ) |
|-----------------|---------|----------------|---------------------------|-------------------------------------------------------------|
| 75              | Gambia  | 2008           | Tea                       | 6                                                           |
| 75              | Gambia  | 2008           | Tomatoes                  | 55                                                          |
| 75              | Gambia  | 2008           | Vegetables, Other         | 41                                                          |
| 75              | Gambia  | 2008           | Wheat                     | 89                                                          |
| 75              | Gambia  | 2009           | Beer                      | 6                                                           |
| 75              | Gambia  | 2009           | Beverages, Fermented      | 87                                                          |
| 75              | Gambia  | 2009           | Bovine Meat               | 7                                                           |
| 75              | Gambia  | 2009           | Butter, Ghee              | 1                                                           |
| 75              | Gambia  | 2009           | Cassava                   | 12                                                          |
| 75              | Gambia  | 2009           | Cephalopods               | 1                                                           |
| 75              | Gambia  | 2009           | Cereals, Other            | 1                                                           |
| 75              | Gambia  | 2009           | Crustaceans               | 3                                                           |
| 75              | Gambia  | 2009           | Demersal Fish             | 19                                                          |
| 75              | Gambia  | 2009           | Eggs                      | 3                                                           |
| 75              | Gambia  | 2009           | Freshwater Fish           | 7                                                           |
| 75              | Gambia  | 2009           | Fruits, Other             | 18                                                          |
| 75              | Gambia  | 2009           | Grapefruit                | 1                                                           |
| 75              | Gambia  | 2009           | Groundnut Oil             | 15                                                          |
| 75              | Gambia  | 2009           | Groundnuts (Shelled Eq)   | 12                                                          |
| 75              | Gambia  | 2009           | Maize                     | 44                                                          |
| 75              | Gambia  | 2009           | Marine Fish, Other        | 2                                                           |
| 75              | Gambia  | 2009           | Meat, Other               | 2                                                           |
| 75              | Gambia  | 2009           | Milk, Whole               | 94                                                          |
| 75              | Gambia  | 2009           | Millet                    | 153                                                         |
| 75              | Gambia  | 2009           | Molluscs, Other           | 1                                                           |
| 75              | Gambia  | 2009           | Mutton & Goat Meat        | 3                                                           |
| 75              | Gambia  | 2009           | Nuts                      | 1                                                           |
| 75              | Gambia  | 2009           | Offals, Edible            | 2                                                           |
| 75              | Gambia  | 2009           | Oilcrops Oil, Other       | 7                                                           |
| 75              | Gambia  | 2009           | Palm Oil                  | 22                                                          |
| 75              | Gambia  | 2009           | Pelagic Fish              | 46                                                          |
| 75              | Gambia  | 2009           | Pigmeat                   | 1                                                           |
| 75              | Gambia  | 2009           | Potatoes                  | 8                                                           |
| 75              | Gambia  | 2009           | Poultry Meat              | 10                                                          |
| 75              | Gambia  | 2009           | Pulses, Other             | 3                                                           |
| 75              | Gambia  | 2009           | Rape and Mustard Oil      | 1                                                           |
| 75              | Gambia  | 2009           | Rice (Milled Equivalent)  | 193                                                         |
| 75              | Gambia  | 2009           | Roots, Other              | 2                                                           |
| 75              | Gambia  | 2009           | Sesameseed                | 5                                                           |
| 75              | Gambia  | 2009           | Sorghum                   | 38                                                          |
| 75              | Gambia  | 2009           | Sugar, Refined Equivalent | 61                                                          |
| 75              | Gambia  | 2009           | Sweeteners, Other         | 3                                                           |
| 75              | Gambia  | 2009           | Tea                       | 3                                                           |
| 75              | Gambia  | 2009           | Tomatoes                  | 54                                                          |
| 75              | Gambia  | 2009           | Vegetables, Other         | 33                                                          |
| 75              | Gambia  | 2009           | Wheat                     | 107                                                         |
| 75              | Gambia  | 2010           | Beer                      | 6                                                           |
| 75              | Gambia  | 2010           | Beverages, Fermented      | 92                                                          |
| 75              | Gambia  | 2010           | Bovine Meat               | 7                                                           |
| 75              | Gambia  | 2010           | Butter, Ghee              | 2                                                           |
| 75              | Gambia  | 2010           | Cassava                   | 13                                                          |
| 75              | Gambia  | 2010           | Cephalopods               | 1                                                           |
| 75              | Gambia  | 2010           | Cereals, Other            | 1                                                           |
| 75              | Gambia  | 2010           | Cream                     | 1                                                           |
| 75              | Gambia  | 2010           | Crustaceans               | 3                                                           |
| 75              | Gambia  | 2010           | Demersal Fish             | 14                                                          |
| 75              | Gambia  | 2010           | Eggs                      | 3                                                           |
| 75              | Gambia  | 2010           | Freshwater Fish           | 7                                                           |
| 75              | Gambia  | 2010           | Fruits, Other             | 26                                                          |
| 75              | Gambia  | 2010           | Groundnut Oil             | 14                                                          |
| 75              | Gambia  | 2010           | Groundnuts (Shelled Eq)   | 12                                                          |
| 75              | Gambia  | 2010           | Maize                     | 46                                                          |
| 75              | Gambia  | 2010           | Marine Fish, Other        | 5                                                           |
| 75              | Gambia  | 2010           | Meat, Other               | 2                                                           |
| 75              | Gambia  | 2010           | Milk, Whole               | 128                                                         |
| 75              | Gambia  | 2010           | Millet                    | 163                                                         |
| 75              | Gambia  | 2010           | Mutton & Goat Meat        | 3                                                           |
| 75              | Gambia  | 2010           | Nuts                      | 1                                                           |
| 75              | Gambia  | 2010           | Offals, Edible            | 6                                                           |
| 75              | Gambia  | 2010           | Oilcrops Oil, Other       | 10                                                          |
| 75              | Gambia  | 2010           | Oranges, Mandarines       | 2                                                           |
| 75              | Gambia  | 2010           | Palm Oil                  | 20                                                          |
| 75              | Gambia  | 2010           | Pelagic Fish              | 49                                                          |
| 75              | Gambia  | 2010           | Pigmeat                   | 2                                                           |
| 75              | Gambia  | 2010           | Potatoes                  | 12                                                          |
| 75              | Gambia  | 2010           | Poultry Meat              | 9                                                           |
| 75              | Gambia  | 2010           | Pulses, Other             | 3                                                           |
| 75              | Gambia  | 2010           | Rice (Milled Equivalent)  | 187                                                         |
| 75              | Gambia  | 2010           | Roots, Other              | 3                                                           |
| 75              | Gambia  | 2010           | Sesameseed                | 5                                                           |
| 75              | Gambia  | 2010           | Sorghum                   | 40                                                          |
| 75              | Gambia  | 2010           | Soyabean Oil              | 1                                                           |
| 75              | Gambia  | 2010           | Sugar, Refined Equivalent | 62                                                          |
| 75              | Gambia  | 2010           | Sunflowerseed Oil         | 1                                                           |
| 75              | Gambia  | 2010           | Sweeteners, Other         | 2                                                           |
| 75              | Gambia  | 2010           | Tea                       | 9                                                           |
| 75              | Gambia  | 2010           | Tomatoes                  | 48                                                          |
| 75              | Gambia  | 2010           | Vegetables, Other         | 53                                                          |
| 75              | Gambia  | 2010           | Wheat                     | 91                                                          |
| 75              | Gambia  | 2011           | Apples                    | 1                                                           |
| 75              | Gambia  | 2011           | Beer                      | 5                                                           |
| 75              | Gambia  | 2011           | Beverages, Fermented      | 91                                                          |
| 75              | Gambia  | 2011           | Bovine Meat               | 6                                                           |
| 75              | Gambia  | 2011           | Butter, Ghee              | 1                                                           |
| 75              | Gambia  | 2011           | Cassava                   | 15                                                          |
| 75              | Gambia  | 2011           | Cephalopods               | 1                                                           |
| 75              | Gambia  | 2011           | Cereals, Other            | 1                                                           |

Dietary calcium and zinc deficiency risks are decreasing but remain prevalent

| FAO countrycode | Country | Reference year | Food item                 | Gross food supply (g capita <sup>-1</sup> d <sup>-1</sup> ) |
|-----------------|---------|----------------|---------------------------|-------------------------------------------------------------|
| 75              | Gambia  | 2011           | Crustaceans               | 3                                                           |
| 75              | Gambia  | 2011           | Demersal Fish             | 16                                                          |
| 75              | Gambia  | 2011           | Eggs                      | 2                                                           |
| 75              | Gambia  | 2011           | Freshwater Fish           | 7                                                           |
| 75              | Gambia  | 2011           | Fruits, Other             | 23                                                          |
| 75              | Gambia  | 2011           | Groundnut Oil             | 13                                                          |
| 75              | Gambia  | 2011           | Groundnuts (Shelled Eq)   | 12                                                          |
| 75              | Gambia  | 2011           | Maize                     | 48                                                          |
| 75              | Gambia  | 2011           | Marine Fish, Other        | 5                                                           |
| 75              | Gambia  | 2011           | Meat, Other               | 2                                                           |
| 75              | Gambia  | 2011           | Milk, Whole               | 163                                                         |
| 75              | Gambia  | 2011           | Millet                    | 160                                                         |
| 75              | Gambia  | 2011           | Mutton & Goat Meat        | 2                                                           |
| 75              | Gambia  | 2011           | Nuts                      | 1                                                           |
| 75              | Gambia  | 2011           | Offals, Edible            | 2                                                           |
| 75              | Gambia  | 2011           | Oilcrops Oil, Other       | 9                                                           |
| 75              | Gambia  | 2011           | Oranges, Mandarines       | 4                                                           |
| 75              | Gambia  | 2011           | Palm Oil                  | 24                                                          |
| 75              | Gambia  | 2011           | Pelagic Fish              | 41                                                          |
| 75              | Gambia  | 2011           | Pigmeat                   | 1                                                           |
| 75              | Gambia  | 2011           | Potatoes                  | 4                                                           |
| 75              | Gambia  | 2011           | Poultry Meat              | 12                                                          |
| 75              | Gambia  | 2011           | Pulses, Other             | 3                                                           |
| 75              | Gambia  | 2011           | Rice (Milled Equivalent)  | 186                                                         |
| 75              | Gambia  | 2011           | Sesameseed                | 4                                                           |
| 75              | Gambia  | 2011           | Sorghum                   | 42                                                          |
| 75              | Gambia  | 2011           | Sugar, Refined Equivalent | 65                                                          |
| 75              | Gambia  | 2011           | Sunflowerseed Oil         | 1                                                           |
| 75              | Gambia  | 2011           | Sweeteners, Other         | 2                                                           |
| 75              | Gambia  | 2011           | Tea                       | 9                                                           |
| 75              | Gambia  | 2011           | Tomatoes                  | 44                                                          |
| 75              | Gambia  | 2011           | Vegetables, Other         | 39                                                          |
| 75              | Gambia  | 2011           | Wheat                     | 100                                                         |
| 73              | Georgia | 1992           | Apples                    | 49                                                          |
| 73              | Georgia | 1992           | Barley                    | 10                                                          |
| 73              | Georgia | 1992           | Beer                      | 2                                                           |
| 73              | Georgia | 1992           | Beverages, Alcoholic      | 8                                                           |
| 73              | Georgia | 1992           | Bovine Meat               | 25                                                          |
| 73              | Georgia | 1992           | Eggs                      | 8                                                           |
| 73              | Georgia | 1992           | Fats, Animals, Raw        | 4                                                           |
| 73              | Georgia | 1992           | Freshwater Fish           | 1                                                           |
| 73              | Georgia | 1992           | Fruits, Other             | 52                                                          |
| 73              | Georgia | 1992           | Grapes                    | 3                                                           |
| 73              | Georgia | 1992           | Lemons, Limes             | 5                                                           |
| 73              | Georgia | 1992           | Maize                     | 81                                                          |
| 73              | Georgia | 1992           | Marine Fish, Other        | 1                                                           |
| 73              | Georgia | 1992           | Milk, Whole               | 184                                                         |
| 73              | Georgia | 1992           | Mutton & Goat Meat        | 3                                                           |
| 73              | Georgia | 1992           | Nuts                      | 11                                                          |
| 73              | Georgia | 1992           | Offals, Edible            | 4                                                           |
| 73              | Georgia | 1992           | Oilcrops Oil, Other       | 3                                                           |
| 73              | Georgia | 1992           | Onions                    | 12                                                          |
| 73              | Georgia | 1992           | Oranges, Mandarines       | 133                                                         |
| 73              | Georgia | 1992           | Pelagic Fish              | 19                                                          |
| 73              | Georgia | 1992           | Pigmeat                   | 28                                                          |
| 73              | Georgia | 1992           | Potatoes                  | 137                                                         |
| 73              | Georgia | 1992           | Poultry Meat              | 6                                                           |
| 73              | Georgia | 1992           | Rice (Milled Equivalent)  | 1                                                           |
| 73              | Georgia | 1992           | Sugar, Refined Equivalent | 29                                                          |
| 73              | Georgia | 1992           | Sweeteners, Other         | 1                                                           |
| 73              | Georgia | 1992           | Tea                       | 26                                                          |
| 73              | Georgia | 1992           | Tomatoes                  | 83                                                          |
| 73              | Georgia | 1992           | Vegetables, Other         | 54                                                          |
| 73              | Georgia | 1992           | Wheat                     | 322                                                         |
| 73              | Georgia | 1992           | Wine                      | 91                                                          |
| 73              | Georgia | 1993           | Apples                    | 51                                                          |
| 73              | Georgia | 1993           | Barley                    | 6                                                           |
| 73              | Georgia | 1993           | Beer                      | 3                                                           |
| 73              | Georgia | 1993           | Beverages, Alcoholic      | 8                                                           |
| 73              | Georgia | 1993           | Bovine Meat               | 20                                                          |
| 73              | Georgia | 1993           | Eggs                      | 7                                                           |
| 73              | Georgia | 1993           | Fats, Animals, Raw        | 3                                                           |
| 73              | Georgia | 1993           | Freshwater Fish           | 1                                                           |
| 73              | Georgia | 1993           | Fruits, Other             | 43                                                          |
| 73              | Georgia | 1993           | Grapes                    | 13                                                          |
| 73              | Georgia | 1993           | Lemons, Limes             | 2                                                           |
| 73              | Georgia | 1993           | Maize                     | 87                                                          |
| 73              | Georgia | 1993           | Marine Fish, Other        | 1                                                           |
| 73              | Georgia | 1993           | Milk, Whole               | 181                                                         |
| 73              | Georgia | 1993           | Mutton & Goat Meat        | 3                                                           |
| 73              | Georgia | 1993           | Nuts                      | 12                                                          |
| 73              | Georgia | 1993           | Offals, Edible            | 4                                                           |
| 73              | Georgia | 1993           | Oilcrops Oil, Other       | 2                                                           |
| 73              | Georgia | 1993           | Onions                    | 19                                                          |
| 73              | Georgia | 1993           | Oranges, Mandarines       | 42                                                          |
| 73              | Georgia | 1993           | Pelagic Fish              | 9                                                           |
| 73              | Georgia | 1993           | Pigmeat                   | 27                                                          |
| 73              | Georgia | 1993           | Potatoes                  | 132                                                         |
| 73              | Georgia | 1993           | Poultry Meat              | 5                                                           |
| 73              | Georgia | 1993           | Rice (Milled Equivalent)  | 1                                                           |
| 73              | Georgia | 1993           | Sugar, Refined Equivalent | 30                                                          |
| 73              | Georgia | 1993           | Sweeteners, Other         | 1                                                           |
| 73              | Georgia | 1993           | Tea                       | 25                                                          |
| 73              | Georgia | 1993           | Tomatoes                  | 88                                                          |
| 73              | Georgia | 1993           | Vegetables, Other         | 105                                                         |
| 73              | Georgia | 1993           | Wheat                     | 234                                                         |
| 73              | Georgia | 1993           | Wine                      | 84                                                          |

Dietary calcium and zinc deficiency risks are decreasing but remain prevalent

| FAO countrycode | Country | Reference year | Food item                 | Gross food supply (g capita <sup>-1</sup> d <sup>-1</sup> ) |
|-----------------|---------|----------------|---------------------------|-------------------------------------------------------------|
| 73              | Georgia | 1994           | Apples                    | 51                                                          |
| 73              | Georgia | 1994           | Barley                    | 5                                                           |
| 73              | Georgia | 1994           | Beer                      | 5                                                           |
| 73              | Georgia | 1994           | Beverages, Alcoholic      | 2                                                           |
| 73              | Georgia | 1994           | Bovine Meat               | 18                                                          |
| 73              | Georgia | 1994           | Eggs                      | 8                                                           |
| 73              | Georgia | 1994           | Fats, Animals, Raw        | 3                                                           |
| 73              | Georgia | 1994           | Fruits, Other             | 46                                                          |
| 73              | Georgia | 1994           | Grapes                    | 5                                                           |
| 73              | Georgia | 1994           | Lemons, Limes             | 2                                                           |
| 73              | Georgia | 1994           | Maize                     | 118                                                         |
| 73              | Georgia | 1994           | Milk, Whole               | 214                                                         |
| 73              | Georgia | 1994           | Mutton & Goat Meat        | 4                                                           |
| 73              | Georgia | 1994           | Nuts                      | 11                                                          |
| 73              | Georgia | 1994           | Offals, Edible            | 1                                                           |
| 73              | Georgia | 1994           | Oilcrops Oil, Other       | 2                                                           |
| 73              | Georgia | 1994           | Onions                    | 18                                                          |
| 73              | Georgia | 1994           | Oranges, Mandarines       | 50                                                          |
| 73              | Georgia | 1994           | Pelagic Fish              | 4                                                           |
| 73              | Georgia | 1994           | Pigmeat                   | 25                                                          |
| 73              | Georgia | 1994           | Potatoes                  | 134                                                         |
| 73              | Georgia | 1994           | Poultry Meat              | 6                                                           |
| 73              | Georgia | 1994           | Pulses, Other             | 2                                                           |
| 73              | Georgia | 1994           | Rice (Milled Equivalent)  | 2                                                           |
| 73              | Georgia | 1994           | Soyabean Oil              | 2                                                           |
| 73              | Georgia | 1994           | Spices, Other             | 2                                                           |
| 73              | Georgia | 1994           | Sugar, Refined Equivalent | 26                                                          |
| 73              | Georgia | 1994           | Sunflowerseed Oil         | 1                                                           |
| 73              | Georgia | 1994           | Sweeteners, Other         | 1                                                           |
| 73              | Georgia | 1994           | Tea                       | 30                                                          |
| 73              | Georgia | 1994           | Tomatoes                  | 115                                                         |
| 73              | Georgia | 1994           | Vegetables, Other         | 89                                                          |
| 73              | Georgia | 1994           | Wheat                     | 303                                                         |
| 73              | Georgia | 1994           | Wine                      | 84                                                          |
| 73              | Georgia | 1995           | Apples                    | 37                                                          |
| 73              | Georgia | 1995           | Barley                    | 5                                                           |
| 73              | Georgia | 1995           | Beer                      | 12                                                          |
| 73              | Georgia | 1995           | Beverages, Alcoholic      | 3                                                           |
| 73              | Georgia | 1995           | Bovine Meat               | 37                                                          |
| 73              | Georgia | 1995           | Cocoa Beans               | 1                                                           |
| 73              | Georgia | 1995           | Eggs                      | 16                                                          |
| 73              | Georgia | 1995           | Fats, Animals, Raw        | 3                                                           |
| 73              | Georgia | 1995           | Fruits, Other             | 52                                                          |
| 73              | Georgia | 1995           | Grapes                    | 17                                                          |
| 73              | Georgia | 1995           | Lemons, Limes             | 2                                                           |
| 73              | Georgia | 1995           | Maize                     | 103                                                         |
| 73              | Georgia | 1995           | Marine Fish, Other        | 1                                                           |
| 73              | Georgia | 1995           | Milk, Whole               | 241                                                         |
| 73              | Georgia | 1995           | Mutton & Goat Meat        | 5                                                           |
| 73              | Georgia | 1995           | Nuts                      | 10                                                          |
| 73              | Georgia | 1995           | Offals, Edible            | 9                                                           |
| 73              | Georgia | 1995           | Oilcrops Oil, Other       | 2                                                           |
| 73              | Georgia | 1995           | Olive Oil                 | 1                                                           |
| 73              | Georgia | 1995           | Onions                    | 23                                                          |
| 73              | Georgia | 1995           | Oranges, Mandarines       | 63                                                          |
| 73              | Georgia | 1995           | Pelagic Fish              | 1                                                           |
| 73              | Georgia | 1995           | Pigmeat                   | 26                                                          |
| 73              | Georgia | 1995           | Potatoes                  | 115                                                         |
| 73              | Georgia | 1995           | Poultry Meat              | 7                                                           |
| 73              | Georgia | 1995           | Rice (Milled Equivalent)  | 3                                                           |
| 73              | Georgia | 1995           | Spices, Other             | 2                                                           |
| 73              | Georgia | 1995           | Sugar, Refined Equivalent | 35                                                          |
| 73              | Georgia | 1995           | Sunflowerseed Oil         | 4                                                           |
| 73              | Georgia | 1995           | Sweeteners, Other         | 2                                                           |
| 73              | Georgia | 1995           | Tea                       | 18                                                          |
| 73              | Georgia | 1995           | Tomatoes                  | 122                                                         |
| 73              | Georgia | 1995           | Vegetables, Other         | 96                                                          |
| 73              | Georgia | 1995           | Wheat                     | 436                                                         |
| 73              | Georgia | 1995           | Wine                      | 42                                                          |
| 73              | Georgia | 1996           | Apples                    | 83                                                          |
| 73              | Georgia | 1996           | Bananas                   | 1                                                           |
| 73              | Georgia | 1996           | Barley                    | 6                                                           |
| 73              | Georgia | 1996           | Beer                      | 8                                                           |
| 73              | Georgia | 1996           | Beverages, Alcoholic      | 5                                                           |
| 73              | Georgia | 1996           | Bovine Meat               | 31                                                          |
| 73              | Georgia | 1996           | Butter, Ghee              | 1                                                           |
| 73              | Georgia | 1996           | Cereals, Other            | 2                                                           |
| 73              | Georgia | 1996           | Coffee                    | 2                                                           |
| 73              | Georgia | 1996           | Demersal Fish             | 1                                                           |
| 73              | Georgia | 1996           | Eggs                      | 16                                                          |
| 73              | Georgia | 1996           | Fats, Animals, Raw        | 4                                                           |
| 73              | Georgia | 1996           | Fruits, Other             | 60                                                          |
| 73              | Georgia | 1996           | Grapes                    | 16                                                          |
| 73              | Georgia | 1996           | Lemons, Limes             | 2                                                           |
| 73              | Georgia | 1996           | Maize                     | 112                                                         |
| 73              | Georgia | 1996           | Marine Fish, Other        | 1                                                           |
| 73              | Georgia | 1996           | Milk, Whole               | 284                                                         |
| 73              | Georgia | 1996           | Mutton & Goat Meat        | 5                                                           |
| 73              | Georgia | 1996           | Nuts                      | 13                                                          |
| 73              | Georgia | 1996           | Offals, Edible            | 7                                                           |
| 73              | Georgia | 1996           | Oilcrops Oil, Other       | 1                                                           |
| 73              | Georgia | 1996           | Onions                    | 26                                                          |
| 73              | Georgia | 1996           | Oranges, Mandarines       | 23                                                          |
| 73              | Georgia | 1996           | Pelagic Fish              | 2                                                           |
| 73              | Georgia | 1996           | Pigmeat                   | 25                                                          |
| 73              | Georgia | 1996           | Potatoes                  | 126                                                         |
| 73              | Georgia | 1996           | Poultry Meat              | 15                                                          |



Dietary calcium and zinc deficiency risks are decreasing but remain prevalent

| FAO countrycode | Country | Reference year | Food item                 | Gross food supply (g capita <sup>-1</sup> d <sup>-1</sup> ) |
|-----------------|---------|----------------|---------------------------|-------------------------------------------------------------|
| 73              | Georgia | 1996           | Rice (Milled Equivalent)  | 1                                                           |
| 73              | Georgia | 1996           | Rye                       | 4                                                           |
| 73              | Georgia | 1996           | Soyabean Oil              | 1                                                           |
| 73              | Georgia | 1996           | Spices, Other             | 3                                                           |
| 73              | Georgia | 1996           | Sugar, Refined Equivalent | 64                                                          |
| 73              | Georgia | 1996           | Sunflowerseed Oil         | 2                                                           |
| 73              | Georgia | 1996           | Sweeteners, Other         | 1                                                           |
| 73              | Georgia | 1996           | Tea                       | 10                                                          |
| 73              | Georgia | 1996           | Tomatoes                  | 115                                                         |
| 73              | Georgia | 1996           | Vegetables, Other         | 111                                                         |
| 73              | Georgia | 1996           | Wheat                     | 430                                                         |
| 73              | Georgia | 1996           | Wine                      | 41                                                          |
| 73              | Georgia | 1997           | Apples                    | 75                                                          |
| 73              | Georgia | 1997           | Bananas                   | 4                                                           |
| 73              | Georgia | 1997           | Barley                    | 9                                                           |
| 73              | Georgia | 1997           | Beer                      | 6                                                           |
| 73              | Georgia | 1997           | Beverages, Alcoholic      | 2                                                           |
| 73              | Georgia | 1997           | Bovine Meat               | 32                                                          |
| 73              | Georgia | 1997           | Butter, Ghee              | 1                                                           |
| 73              | Georgia | 1997           | Coffee                    | 2                                                           |
| 73              | Georgia | 1997           | Eggs                      | 16                                                          |
| 73              | Georgia | 1997           | Fats, Animals, Raw        | 4                                                           |
| 73              | Georgia | 1997           | Fruits, Other             | 54                                                          |
| 73              | Georgia | 1997           | Grapes                    | 17                                                          |
| 73              | Georgia | 1997           | Honey                     | 1                                                           |
| 73              | Georgia | 1997           | Lemons, Limes             | 1                                                           |
| 73              | Georgia | 1997           | Maize                     | 131                                                         |
| 73              | Georgia | 1997           | Marine Fish, Other        | 1                                                           |
| 73              | Georgia | 1997           | Milk, Whole               | 319                                                         |
| 73              | Georgia | 1997           | Mutton & Goat Meat        | 4                                                           |
| 73              | Georgia | 1997           | Nuts                      | 13                                                          |
| 73              | Georgia | 1997           | Offals, Edible            | 7                                                           |
| 73              | Georgia | 1997           | Oilcrops Oil, Other       | 1                                                           |
| 73              | Georgia | 1997           | Onions                    | 20                                                          |
| 73              | Georgia | 1997           | Oranges, Mandarines       | 16                                                          |
| 73              | Georgia | 1997           | Pelagic Fish              | 3                                                           |
| 73              | Georgia | 1997           | Pigmeat                   | 26                                                          |
| 73              | Georgia | 1997           | Potatoes                  | 134                                                         |
| 73              | Georgia | 1997           | Poultry Meat              | 17                                                          |
| 73              | Georgia | 1997           | Rice (Milled Equivalent)  | 2                                                           |
| 73              | Georgia | 1997           | Spices, Other             | 3                                                           |
| 73              | Georgia | 1997           | Sugar, Refined Equivalent | 73                                                          |
| 73              | Georgia | 1997           | Sunflowerseed Oil         | 1                                                           |
| 73              | Georgia | 1997           | Sweeteners, Other         | 1                                                           |
| 73              | Georgia | 1997           | Tea                       | 10                                                          |
| 73              | Georgia | 1997           | Tomatoes                  | 122                                                         |
| 73              | Georgia | 1997           | Vegetables, Other         | 147                                                         |
| 73              | Georgia | 1997           | Wheat                     | 430                                                         |
| 73              | Georgia | 1997           | Wine                      | 37                                                          |
| 73              | Georgia | 1998           | Apples                    | 51                                                          |
| 73              | Georgia | 1998           | Bananas                   | 4                                                           |
| 73              | Georgia | 1998           | Barley                    | 15                                                          |
| 73              | Georgia | 1998           | Beer                      | 6                                                           |
| 73              | Georgia | 1998           | Bovine Meat               | 27                                                          |
| 73              | Georgia | 1998           | Coffee                    | 2                                                           |
| 73              | Georgia | 1998           | Eggs                      | 19                                                          |
| 73              | Georgia | 1998           | Fats, Animals, Raw        | 3                                                           |
| 73              | Georgia | 1998           | Fruits, Other             | 61                                                          |
| 73              | Georgia | 1998           | Grapes                    | 13                                                          |
| 73              | Georgia | 1998           | Honey                     | 1                                                           |
| 73              | Georgia | 1998           | Lemons, Limes             | 2                                                           |
| 73              | Georgia | 1998           | Maize                     | 108                                                         |
| 73              | Georgia | 1998           | Marine Fish, Other        | 1                                                           |
| 73              | Georgia | 1998           | Milk, Whole               | 351                                                         |
| 73              | Georgia | 1998           | Mutton & Goat Meat        | 5                                                           |
| 73              | Georgia | 1998           | Nuts                      | 15                                                          |
| 73              | Georgia | 1998           | Offals, Edible            | 7                                                           |
| 73              | Georgia | 1998           | Oilcrops Oil, Other       | 1                                                           |
| 73              | Georgia | 1998           | Onions                    | 23                                                          |
| 73              | Georgia | 1998           | Oranges, Mandarines       | 29                                                          |
| 73              | Georgia | 1998           | Pelagic Fish              | 4                                                           |
| 73              | Georgia | 1998           | Pigmeat                   | 23                                                          |
| 73              | Georgia | 1998           | Potatoes                  | 132                                                         |
| 73              | Georgia | 1998           | Poultry Meat              | 17                                                          |
| 73              | Georgia | 1998           | Rice (Milled Equivalent)  | 2                                                           |
| 73              | Georgia | 1998           | Soyabean Oil              | 5                                                           |
| 73              | Georgia | 1998           | Spices, Other             | 3                                                           |
| 73              | Georgia | 1998           | Sugar, Refined Equivalent | 68                                                          |
| 73              | Georgia | 1998           | Sunflowerseed Oil         | 3                                                           |
| 73              | Georgia | 1998           | Sweeteners, Other         | 1                                                           |
| 73              | Georgia | 1998           | Tea                       | 21                                                          |
| 73              | Georgia | 1998           | Tomatoes                  | 115                                                         |
| 73              | Georgia | 1998           | Vegetables, Other         | 119                                                         |
| 73              | Georgia | 1998           | Wheat                     | 426                                                         |
| 73              | Georgia | 1998           | Wine                      | 33                                                          |
| 73              | Georgia | 1999           | Apples                    | 9                                                           |
| 73              | Georgia | 1999           | Bananas                   | 3                                                           |
| 73              | Georgia | 1999           | Barley                    | 21                                                          |
| 73              | Georgia | 1999           | Beer                      | 7                                                           |
| 73              | Georgia | 1999           | Bovine Meat               | 29                                                          |
| 73              | Georgia | 1999           | Coffee                    | 2                                                           |
| 73              | Georgia | 1999           | Eggs                      | 19                                                          |
| 73              | Georgia | 1999           | Fats, Animals, Raw        | 3                                                           |
| 73              | Georgia | 1999           | Fruits, Other             | 69                                                          |
| 73              | Georgia | 1999           | Grapes                    | 14                                                          |
| 73              | Georgia | 1999           | Honey                     | 1                                                           |
| 73              | Georgia | 1999           | Lemons, Limes             | 1                                                           |

Dietary calcium and zinc deficiency risks are decreasing but remain prevalent

| FAO countrycode | Country | Reference year | Food item                 | Gross food supply (g capita <sup>-1</sup> d <sup>-1</sup> ) |
|-----------------|---------|----------------|---------------------------|-------------------------------------------------------------|
| 73              | Georgia | 1999           | Maize                     | 124                                                         |
| 73              | Georgia | 1999           | Milk, Whole               | 354                                                         |
| 73              | Georgia | 1999           | Mutton & Goat Meat        | 4                                                           |
| 73              | Georgia | 1999           | Nuts                      | 12                                                          |
| 73              | Georgia | 1999           | Offals, Edible            | 7                                                           |
| 73              | Georgia | 1999           | Oilcrops Oil, Other       | 2                                                           |
| 73              | Georgia | 1999           | Onions                    | 20                                                          |
| 73              | Georgia | 1999           | Oranges, Mandarines       | 25                                                          |
| 73              | Georgia | 1999           | Pelagic Fish              | 3                                                           |
| 73              | Georgia | 1999           | Pigmeat                   | 23                                                          |
| 73              | Georgia | 1999           | Potatoes                  | 143                                                         |
| 73              | Georgia | 1999           | Poultry Meat              | 17                                                          |
| 73              | Georgia | 1999           | Rice (Milled Equivalent)  | 1                                                           |
| 73              | Georgia | 1999           | Soyabean Oil              | 1                                                           |
| 73              | Georgia | 1999           | Spices, Other             | 3                                                           |
| 73              | Georgia | 1999           | Sugar, Refined Equivalent | 68                                                          |
| 73              | Georgia | 1999           | Sunflowerseed Oil         | 3                                                           |
| 73              | Georgia | 1999           | Sweeteners, Other         | 1                                                           |
| 73              | Georgia | 1999           | Tea                       | 27                                                          |
| 73              | Georgia | 1999           | Tomatoes                  | 107                                                         |
| 73              | Georgia | 1999           | Vegetables, Other         | 94                                                          |
| 73              | Georgia | 1999           | Wheat                     | 424                                                         |
| 73              | Georgia | 1999           | Wine                      | 33                                                          |
| 73              | Georgia | 2000           | Apples                    | 39                                                          |
| 73              | Georgia | 2000           | Bananas                   | 2                                                           |
| 73              | Georgia | 2000           | Barley                    | 13                                                          |
| 73              | Georgia | 2000           | Beer                      | 13                                                          |
| 73              | Georgia | 2000           | Beverages, Alcoholic      | 1                                                           |
| 73              | Georgia | 2000           | Bovine Meat               | 28                                                          |
| 73              | Georgia | 2000           | Butter, Ghee              | 1                                                           |
| 73              | Georgia | 2000           | Coffee                    | 1                                                           |
| 73              | Georgia | 2000           | Eggs                      | 15                                                          |
| 73              | Georgia | 2000           | Fats, Animals, Raw        | 4                                                           |
| 73              | Georgia | 2000           | Fruits, Other             | 63                                                          |
| 73              | Georgia | 2000           | Grapes                    | 14                                                          |
| 73              | Georgia | 2000           | Honey                     | 1                                                           |
| 73              | Georgia | 2000           | Lemons, Limes             | 1                                                           |
| 73              | Georgia | 2000           | Maize                     | 89                                                          |
| 73              | Georgia | 2000           | Milk, Whole               | 347                                                         |
| 73              | Georgia | 2000           | Mutton & Goat Meat        | 5                                                           |
| 73              | Georgia | 2000           | Nuts                      | 10                                                          |
| 73              | Georgia | 2000           | Offals, Edible            | 6                                                           |
| 73              | Georgia | 2000           | Oilcrops Oil, Other       | 2                                                           |
| 73              | Georgia | 2000           | Onions                    | 17                                                          |
| 73              | Georgia | 2000           | Oranges, Mandarines       | 16                                                          |
| 73              | Georgia | 2000           | Pelagic Fish              | 2                                                           |
| 73              | Georgia | 2000           | Pigmeat                   | 22                                                          |
| 73              | Georgia | 2000           | Potatoes                  | 135                                                         |
| 73              | Georgia | 2000           | Poultry Meat              | 17                                                          |
| 73              | Georgia | 2000           | Spices, Other             | 2                                                           |
| 73              | Georgia | 2000           | Sugar, Refined Equivalent | 76                                                          |
| 73              | Georgia | 2000           | Sunflowerseed Oil         | 4                                                           |
| 73              | Georgia | 2000           | Tea                       | 9                                                           |
| 73              | Georgia | 2000           | Tomatoes                  | 63                                                          |
| 73              | Georgia | 2000           | Vegetables, Other         | 128                                                         |
| 73              | Georgia | 2000           | Wheat                     | 413                                                         |
| 73              | Georgia | 2000           | Wine                      | 31                                                          |
| 73              | Georgia | 2001           | Apples                    | 29                                                          |
| 73              | Georgia | 2001           | Bananas                   | 2                                                           |
| 73              | Georgia | 2001           | Barley                    | 20                                                          |
| 73              | Georgia | 2001           | Beer                      | 15                                                          |
| 73              | Georgia | 2001           | Beverages, Alcoholic      | 1                                                           |
| 73              | Georgia | 2001           | Bovine Meat               | 28                                                          |
| 73              | Georgia | 2001           | Butter, Ghee              | 1                                                           |
| 73              | Georgia | 2001           | Cereals, Other            | 1                                                           |
| 73              | Georgia | 2001           | Cocoa Beans               | 1                                                           |
| 73              | Georgia | 2001           | Coffee                    | 1                                                           |
| 73              | Georgia | 2001           | Eggs                      | 17                                                          |
| 73              | Georgia | 2001           | Fats, Animals, Raw        | 4                                                           |
| 73              | Georgia | 2001           | Fruits, Other             | 51                                                          |
| 73              | Georgia | 2001           | Grapes                    | 10                                                          |
| 73              | Georgia | 2001           | Honey                     | 1                                                           |
| 73              | Georgia | 2001           | Lemons, Limes             | 2                                                           |
| 73              | Georgia | 2001           | Maize                     | 85                                                          |
| 73              | Georgia | 2001           | Milk, Whole               | 408                                                         |
| 73              | Georgia | 2001           | Mutton & Goat Meat        | 4                                                           |
| 73              | Georgia | 2001           | Nuts                      | 9                                                           |
| 73              | Georgia | 2001           | Offals, Edible            | 8                                                           |
| 73              | Georgia | 2001           | Oilcrops Oil, Other       | 6                                                           |
| 73              | Georgia | 2001           | Onions                    | 18                                                          |
| 73              | Georgia | 2001           | Oranges, Mandarines       | 30                                                          |
| 73              | Georgia | 2001           | Pelagic Fish              | 2                                                           |
| 73              | Georgia | 2001           | Pigmeat                   | 22                                                          |
| 73              | Georgia | 2001           | Potatoes                  | 140                                                         |
| 73              | Georgia | 2001           | Poultry Meat              | 16                                                          |
| 73              | Georgia | 2001           | Soyabean Oil              | 9                                                           |
| 73              | Georgia | 2001           | Spices, Other             | 3                                                           |
| 73              | Georgia | 2001           | Sugar, Refined Equivalent | 73                                                          |
| 73              | Georgia | 2001           | Sunflowerseed Oil         | 6                                                           |
| 73              | Georgia | 2001           | Tea                       | 8                                                           |
| 73              | Georgia | 2001           | Tomatoes                  | 79                                                          |
| 73              | Georgia | 2001           | Vegetables, Other         | 125                                                         |
| 73              | Georgia | 2001           | Wheat                     | 420                                                         |
| 73              | Georgia | 2001           | Wine                      | 22                                                          |
| 73              | Georgia | 2002           | Apples                    | 30                                                          |
| 73              | Georgia | 2002           | Bananas                   | 3                                                           |
| 73              | Georgia | 2002           | Barley                    | 23                                                          |

Dietary calcium and zinc deficiency risks are decreasing but remain prevalent

| FAO countrycode | Country | Reference year | Food item                 | Gross food supply (g capita <sup>-1</sup> d <sup>-1</sup> ) |
|-----------------|---------|----------------|---------------------------|-------------------------------------------------------------|
| 73              | Georgia | 2002           | Beer                      | 16                                                          |
| 73              | Georgia | 2002           | Bovine Meat               | 31                                                          |
| 73              | Georgia | 2002           | Cereals, Other            | 2                                                           |
| 73              | Georgia | 2002           | Cocoa Beans               | 1                                                           |
| 73              | Georgia | 2002           | Coffee                    | 1                                                           |
| 73              | Georgia | 2002           | Eggs                      | 16                                                          |
| 73              | Georgia | 2002           | Fats, Animals, Raw        | 5                                                           |
| 73              | Georgia | 2002           | Fruits, Other             | 39                                                          |
| 73              | Georgia | 2002           | Grapes                    | 8                                                           |
| 73              | Georgia | 2002           | Honey                     | 1                                                           |
| 73              | Georgia | 2002           | Lemons, Limes             | 1                                                           |
| 73              | Georgia | 2002           | Maize                     | 119                                                         |
| 73              | Georgia | 2002           | Milk, Whole               | 435                                                         |
| 73              | Georgia | 2002           | Mutton & Goat Meat        | 5                                                           |
| 73              | Georgia | 2002           | Nuts                      | 9                                                           |
| 73              | Georgia | 2002           | Offals, Edible            | 9                                                           |
| 73              | Georgia | 2002           | Oilcrops Oil, Other       | 7                                                           |
| 73              | Georgia | 2002           | Onions                    | 20                                                          |
| 73              | Georgia | 2002           | Oranges, Mandarines       | 21                                                          |
| 73              | Georgia | 2002           | Pelagic Fish              | 2                                                           |
| 73              | Georgia | 2002           | Pig meat                  | 23                                                          |
| 73              | Georgia | 2002           | Potatoes                  | 141                                                         |
| 73              | Georgia | 2002           | Poultry Meat              | 19                                                          |
| 73              | Georgia | 2002           | Rice (Milled Equivalent)  | 1                                                           |
| 73              | Georgia | 2002           | Spices, Other             | 4                                                           |
| 73              | Georgia | 2002           | Sugar, Refined Equivalent | 81                                                          |
| 73              | Georgia | 2002           | Sunflowerseed Oil         | 14                                                          |
| 73              | Georgia | 2002           | Tea                       | 9                                                           |
| 73              | Georgia | 2002           | Tomatoes                  | 72                                                          |
| 73              | Georgia | 2002           | Vegetables, Other         | 137                                                         |
| 73              | Georgia | 2002           | Wheat                     | 424                                                         |
| 73              | Georgia | 2002           | Wine                      | 20                                                          |
| 73              | Georgia | 2003           | Apples                    | 22                                                          |
| 73              | Georgia | 2003           | Bananas                   | 3                                                           |
| 73              | Georgia | 2003           | Barley                    | 32                                                          |
| 73              | Georgia | 2003           | Beer                      | 17                                                          |
| 73              | Georgia | 2003           | Bovine Meat               | 33                                                          |
| 73              | Georgia | 2003           | Butter, Ghee              | 2                                                           |
| 73              | Georgia | 2003           | Cereals, Other            | 2                                                           |
| 73              | Georgia | 2003           | Cocoa Beans               | 2                                                           |
| 73              | Georgia | 2003           | Coffee                    | 2                                                           |
| 73              | Georgia | 2003           | Demersal Fish             | 1                                                           |
| 73              | Georgia | 2003           | Eggs                      | 18                                                          |
| 73              | Georgia | 2003           | Fats, Animals, Raw        | 5                                                           |
| 73              | Georgia | 2003           | Fruits, Other             | 73                                                          |
| 73              | Georgia | 2003           | Grapes                    | 17                                                          |
| 73              | Georgia | 2003           | Honey                     | 1                                                           |
| 73              | Georgia | 2003           | Lemons, Limes             | 2                                                           |
| 73              | Georgia | 2003           | Maize                     | 123                                                         |
| 73              | Georgia | 2003           | Milk, Whole               | 455                                                         |
| 73              | Georgia | 2003           | Mutton & Goat Meat        | 5                                                           |
| 73              | Georgia | 2003           | Nuts                      | 11                                                          |
| 73              | Georgia | 2003           | Offals, Edible            | 9                                                           |
| 73              | Georgia | 2003           | Oilcrops Oil, Other       | 6                                                           |
| 73              | Georgia | 2003           | Onions                    | 20                                                          |
| 73              | Georgia | 2003           | Oranges, Mandarines       | 28                                                          |
| 73              | Georgia | 2003           | Pelagic Fish              | 4                                                           |
| 73              | Georgia | 2003           | Pig meat                  | 24                                                          |
| 73              | Georgia | 2003           | Potatoes                  | 163                                                         |
| 73              | Georgia | 2003           | Poultry Meat              | 19                                                          |
| 73              | Georgia | 2003           | Spices, Other             | 3                                                           |
| 73              | Georgia | 2003           | Sugar, Refined Equivalent | 83                                                          |
| 73              | Georgia | 2003           | Sunflowerseed Oil         | 11                                                          |
| 73              | Georgia | 2003           | Sweeteners, Other         | 1                                                           |
| 73              | Georgia | 2003           | Tea                       | 10                                                          |
| 73              | Georgia | 2003           | Tomatoes                  | 84                                                          |
| 73              | Georgia | 2003           | Vegetables, Other         | 127                                                         |
| 73              | Georgia | 2003           | Wheat                     | 426                                                         |
| 73              | Georgia | 2003           | Wine                      | 19                                                          |
| 73              | Georgia | 2004           | Apples                    | 34                                                          |
| 73              | Georgia | 2004           | Bananas                   | 3                                                           |
| 73              | Georgia | 2004           | Barley                    | 15                                                          |
| 73              | Georgia | 2004           | Beer                      | 32                                                          |
| 73              | Georgia | 2004           | Bovine Meat               | 33                                                          |
| 73              | Georgia | 2004           | Butter, Ghee              | 3                                                           |
| 73              | Georgia | 2004           | Cereals, Other            | 1                                                           |
| 73              | Georgia | 2004           | Citrus, Other             | 2                                                           |
| 73              | Georgia | 2004           | Cocoa Beans               | 3                                                           |
| 73              | Georgia | 2004           | Coffee                    | 3                                                           |
| 73              | Georgia | 2004           | Eggs                      | 21                                                          |
| 73              | Georgia | 2004           | Fats, Animals, Raw        | 6                                                           |
| 73              | Georgia | 2004           | Freshwater Fish           | 1                                                           |
| 73              | Georgia | 2004           | Fruits, Other             | 42                                                          |
| 73              | Georgia | 2004           | Grapes                    | 12                                                          |
| 73              | Georgia | 2004           | Honey                     | 1                                                           |
| 73              | Georgia | 2004           | Lemons, Limes             | 2                                                           |
| 73              | Georgia | 2004           | Maize                     | 121                                                         |
| 73              | Georgia | 2004           | Marine Fish, Other        | 1                                                           |
| 73              | Georgia | 2004           | Milk, Whole               | 474                                                         |
| 73              | Georgia | 2004           | Mutton & Goat Meat        | 6                                                           |
| 73              | Georgia | 2004           | Nuts                      | 4                                                           |
| 73              | Georgia | 2004           | Oats                      | 1                                                           |
| 73              | Georgia | 2004           | Offals, Edible            | 9                                                           |
| 73              | Georgia | 2004           | Oilcrops Oil, Other       | 6                                                           |
| 73              | Georgia | 2004           | Onions                    | 18                                                          |
| 73              | Georgia | 2004           | Oranges, Mandarines       | 15                                                          |
| 73              | Georgia | 2004           | Pelagic Fish              | 12                                                          |

Dietary calcium and zinc deficiency risks are decreasing but remain prevalent

| FAO countrycode | Country | Reference year | Food item                 | Gross food supply (g capita <sup>-1</sup> d <sup>-1</sup> ) |
|-----------------|---------|----------------|---------------------------|-------------------------------------------------------------|
| 73              | Georgia | 2004           | Pigmeat                   | 24                                                          |
| 73              | Georgia | 2004           | Potatoes                  | 149                                                         |
| 73              | Georgia | 2004           | Poultry Meat              | 18                                                          |
| 73              | Georgia | 2004           | Rice (Milled Equivalent)  | 6                                                           |
| 73              | Georgia | 2004           | Soyabean Oil              | 1                                                           |
| 73              | Georgia | 2004           | Sugar, Refined Equivalent | 93                                                          |
| 73              | Georgia | 2004           | Sunflowerseed Oil         | 18                                                          |
| 73              | Georgia | 2004           | Sweeteners, Other         | 1                                                           |
| 73              | Georgia | 2004           | Tea                       | 8                                                           |
| 73              | Georgia | 2004           | Tomatoes                  | 69                                                          |
| 73              | Georgia | 2004           | Vegetables, Other         | 149                                                         |
| 73              | Georgia | 2004           | Wheat                     | 426                                                         |
| 73              | Georgia | 2004           | Wine                      | 8                                                           |
| 73              | Georgia | 2005           | Apples                    | 11                                                          |
| 73              | Georgia | 2005           | Bananas                   | 4                                                           |
| 73              | Georgia | 2005           | Barley                    | 20                                                          |
| 73              | Georgia | 2005           | Beer                      | 37                                                          |
| 73              | Georgia | 2005           | Bovine Meat               | 33                                                          |
| 73              | Georgia | 2005           | Butter, Ghee              | 4                                                           |
| 73              | Georgia | 2005           | Cereals, Other            | 2                                                           |
| 73              | Georgia | 2005           | Citrus, Other             | 2                                                           |
| 73              | Georgia | 2005           | Cocoa Beans               | 4                                                           |
| 73              | Georgia | 2005           | Coffee                    | 4                                                           |
| 73              | Georgia | 2005           | Demersal Fish             | 1                                                           |
| 73              | Georgia | 2005           | Eggs                      | 20                                                          |
| 73              | Georgia | 2005           | Fats, Animals, Raw        | 6                                                           |
| 73              | Georgia | 2005           | Freshwater Fish           | 1                                                           |
| 73              | Georgia | 2005           | Fruits, Other             | 74                                                          |
| 73              | Georgia | 2005           | Grapes                    | 14                                                          |
| 73              | Georgia | 2005           | Honey                     | 1                                                           |
| 73              | Georgia | 2005           | Lemons, Limes             | 3                                                           |
| 73              | Georgia | 2005           | Maize                     | 116                                                         |
| 73              | Georgia | 2005           | Milk, Whole               | 482                                                         |
| 73              | Georgia | 2005           | Mutton & Goat Meat        | 6                                                           |
| 73              | Georgia | 2005           | Nuts                      | 9                                                           |
| 73              | Georgia | 2005           | Oats                      | 1                                                           |
| 73              | Georgia | 2005           | Offals, Edible            | 11                                                          |
| 73              | Georgia | 2005           | Oilcrops Oil, Other       | 6                                                           |
| 73              | Georgia | 2005           | Onions                    | 24                                                          |
| 73              | Georgia | 2005           | Oranges, Mandarines       | 54                                                          |
| 73              | Georgia | 2005           | Pelagic Fish              | 14                                                          |
| 73              | Georgia | 2005           | Pigmeat                   | 25                                                          |
| 73              | Georgia | 2005           | Potatoes                  | 147                                                         |
| 73              | Georgia | 2005           | Poultry Meat              | 20                                                          |
| 73              | Georgia | 2005           | Rice (Milled Equivalent)  | 2                                                           |
| 73              | Georgia | 2005           | Rye                       | 1                                                           |
| 73              | Georgia | 2005           | Soyabean Oil              | 1                                                           |
| 73              | Georgia | 2005           | Sugar, Refined Equivalent | 95                                                          |
| 73              | Georgia | 2005           | Sunflowerseed Oil         | 14                                                          |
| 73              | Georgia | 2005           | Sweeteners, Other         | 1                                                           |
| 73              | Georgia | 2005           | Tea                       | 11                                                          |
| 73              | Georgia | 2005           | Tomatoes                  | 104                                                         |
| 73              | Georgia | 2005           | Vegetables, Other         | 126                                                         |
| 73              | Georgia | 2005           | Wheat                     | 420                                                         |
| 73              | Georgia | 2005           | Wine                      | 14                                                          |
| 73              | Georgia | 2006           | Apples                    | 20                                                          |
| 73              | Georgia | 2006           | Bananas                   | 6                                                           |
| 73              | Georgia | 2006           | Barley                    | 22                                                          |
| 73              | Georgia | 2006           | Beer                      | 37                                                          |
| 73              | Georgia | 2006           | Bovine Meat               | 24                                                          |
| 73              | Georgia | 2006           | Butter, Ghee              | 4                                                           |
| 73              | Georgia | 2006           | Cereals, Other            | 7                                                           |
| 73              | Georgia | 2006           | Cocoa Beans               | 4                                                           |
| 73              | Georgia | 2006           | Coffee                    | 4                                                           |
| 73              | Georgia | 2006           | Demersal Fish             | 1                                                           |
| 73              | Georgia | 2006           | Eggs                      | 9                                                           |
| 73              | Georgia | 2006           | Fats, Animals, Raw        | 5                                                           |
| 73              | Georgia | 2006           | Freshwater Fish           | 1                                                           |
| 73              | Georgia | 2006           | Fruits, Other             | 50                                                          |
| 73              | Georgia | 2006           | Grapes                    | 12                                                          |
| 73              | Georgia | 2006           | Groundnuts (Shelled Eq)   | 1                                                           |
| 73              | Georgia | 2006           | Honey                     | 1                                                           |
| 73              | Georgia | 2006           | Lemons, Limes             | 2                                                           |
| 73              | Georgia | 2006           | Maize                     | 86                                                          |
| 73              | Georgia | 2006           | Marine Fish, Other        | 6                                                           |
| 73              | Georgia | 2006           | Meat, Other               | 1                                                           |
| 73              | Georgia | 2006           | Milk, Whole               | 392                                                         |
| 73              | Georgia | 2006           | Mutton & Goat Meat        | 5                                                           |
| 73              | Georgia | 2006           | Nuts                      | 3                                                           |
| 73              | Georgia | 2006           | Oats                      | 1                                                           |
| 73              | Georgia | 2006           | Offals, Edible            | 7                                                           |
| 73              | Georgia | 2006           | Oilcrops Oil, Other       | 6                                                           |
| 73              | Georgia | 2006           | Olives                    | 1                                                           |
| 73              | Georgia | 2006           | Onions                    | 25                                                          |
| 73              | Georgia | 2006           | Oranges, Mandarines       | 25                                                          |
| 73              | Georgia | 2006           | Pelagic Fish              | 10                                                          |
| 73              | Georgia | 2006           | Pigmeat                   | 28                                                          |
| 73              | Georgia | 2006           | Pineapples                | 1                                                           |
| 73              | Georgia | 2006           | Potatoes                  | 123                                                         |
| 73              | Georgia | 2006           | Poultry Meat              | 16                                                          |
| 73              | Georgia | 2006           | Rice (Milled Equivalent)  | 5                                                           |
| 73              | Georgia | 2006           | Soyabean Oil              | 1                                                           |
| 73              | Georgia | 2006           | Spices, Other             | 2                                                           |
| 73              | Georgia | 2006           | Sugar, Refined Equivalent | 98                                                          |
| 73              | Georgia | 2006           | Sunflowerseed Oil         | 13                                                          |
| 73              | Georgia | 2006           | Sweeteners, Other         | 1                                                           |
| 73              | Georgia | 2006           | Tea                       | 2                                                           |

Dietary calcium and zinc deficiency risks are decreasing but remain prevalent

| FAO countrycode | Country | Reference year | Food item                 | Gross food supply (g capita <sup>-1</sup> d <sup>-1</sup> ) |
|-----------------|---------|----------------|---------------------------|-------------------------------------------------------------|
| 73              | Georgia | 2006           | Tomatoes                  | 49                                                          |
| 73              | Georgia | 2006           | Vegetables, Other         | 89                                                          |
| 73              | Georgia | 2006           | Wheat                     | 432                                                         |
| 73              | Georgia | 2006           | Wine                      | 40                                                          |
| 73              | Georgia | 2007           | Apples                    | 15                                                          |
| 73              | Georgia | 2007           | Bananas                   | 6                                                           |
| 73              | Georgia | 2007           | Barley                    | 23                                                          |
| 73              | Georgia | 2007           | Beer                      | 39                                                          |
| 73              | Georgia | 2007           | Beverages, Alcoholic      | 1                                                           |
| 73              | Georgia | 2007           | Bovine Meat               | 25                                                          |
| 73              | Georgia | 2007           | Butter, Ghee              | 2                                                           |
| 73              | Georgia | 2007           | Cereals, Other            | 4                                                           |
| 73              | Georgia | 2007           | Cocoa Beans               | 5                                                           |
| 73              | Georgia | 2007           | Coffee                    | 6                                                           |
| 73              | Georgia | 2007           | Demersal Fish             | 1                                                           |
| 73              | Georgia | 2007           | Eggs                      | 13                                                          |
| 73              | Georgia | 2007           | Fats, Animals, Raw        | 5                                                           |
| 73              | Georgia | 2007           | Freshwater Fish           | 1                                                           |
| 73              | Georgia | 2007           | Fruits, Other             | 40                                                          |
| 73              | Georgia | 2007           | Grapes                    | 12                                                          |
| 73              | Georgia | 2007           | Groundnuts (Shelled Eq)   | 1                                                           |
| 73              | Georgia | 2007           | Honey                     | 1                                                           |
| 73              | Georgia | 2007           | Lemons, Limes             | 2                                                           |
| 73              | Georgia | 2007           | Maize                     | 77                                                          |
| 73              | Georgia | 2007           | Marine Fish, Other        | 6                                                           |
| 73              | Georgia | 2007           | Meat, Other               | 1                                                           |
| 73              | Georgia | 2007           | Milk, Whole               | 404                                                         |
| 73              | Georgia | 2007           | Mutton & Goat Meat        | 5                                                           |
| 73              | Georgia | 2007           | Nuts                      | 8                                                           |
| 73              | Georgia | 2007           | Oats                      | 1                                                           |
| 73              | Georgia | 2007           | Offals, Edible            | 7                                                           |
| 73              | Georgia | 2007           | Oilcrops Oil, Other       | 6                                                           |
| 73              | Georgia | 2007           | Olives                    | 1                                                           |
| 73              | Georgia | 2007           | Onions                    | 24                                                          |
| 73              | Georgia | 2007           | Oranges, Mandarines       | 40                                                          |
| 73              | Georgia | 2007           | Pelagic Fish              | 15                                                          |
| 73              | Georgia | 2007           | Pig meat                  | 22                                                          |
| 73              | Georgia | 2007           | Pineapples                | 1                                                           |
| 73              | Georgia | 2007           | Potatoes                  | 129                                                         |
| 73              | Georgia | 2007           | Poultry Meat              | 24                                                          |
| 73              | Georgia | 2007           | Rice (Milled Equivalent)  | 5                                                           |
| 73              | Georgia | 2007           | Spices, Other             | 2                                                           |
| 73              | Georgia | 2007           | Sugar, Refined Equivalent | 106                                                         |
| 73              | Georgia | 2007           | Sunflowerseed Oil         | 14                                                          |
| 73              | Georgia | 2007           | Sweeteners, Other         | 1                                                           |
| 73              | Georgia | 2007           | Tea                       | 4                                                           |
| 73              | Georgia | 2007           | Tomatoes                  | 57                                                          |
| 73              | Georgia | 2007           | Vegetables, Other         | 93                                                          |
| 73              | Georgia | 2007           | Wheat                     | 426                                                         |
| 73              | Georgia | 2007           | Wine                      | 57                                                          |
| 73              | Georgia | 2008           | Apples                    | 13                                                          |
| 73              | Georgia | 2008           | Bananas                   | 6                                                           |
| 73              | Georgia | 2008           | Barley                    | 22                                                          |
| 73              | Georgia | 2008           | Beer                      | 46                                                          |
| 73              | Georgia | 2008           | Beverages, Alcoholic      | 1                                                           |
| 73              | Georgia | 2008           | Bovine Meat               | 20                                                          |
| 73              | Georgia | 2008           | Butter, Ghee              | 1                                                           |
| 73              | Georgia | 2008           | Cereals, Other            | 9                                                           |
| 73              | Georgia | 2008           | Cocoa Beans               | 5                                                           |
| 73              | Georgia | 2008           | Coffee                    | 7                                                           |
| 73              | Georgia | 2008           | Demersal Fish             | 1                                                           |
| 73              | Georgia | 2008           | Eggs                      | 14                                                          |
| 73              | Georgia | 2008           | Fats, Animals, Raw        | 5                                                           |
| 73              | Georgia | 2008           | Freshwater Fish           | 2                                                           |
| 73              | Georgia | 2008           | Fruits, Other             | 53                                                          |
| 73              | Georgia | 2008           | Grapes                    | 11                                                          |
| 73              | Georgia | 2008           | Groundnuts (Shelled Eq)   | 1                                                           |
| 73              | Georgia | 2008           | Honey                     | 1                                                           |
| 73              | Georgia | 2008           | Lemons, Limes             | 2                                                           |
| 73              | Georgia | 2008           | Maize                     | 93                                                          |
| 73              | Georgia | 2008           | Marine Fish, Other        | 8                                                           |
| 73              | Georgia | 2008           | Milk, Whole               | 399                                                         |
| 73              | Georgia | 2008           | Mutton & Goat Meat        | 5                                                           |
| 73              | Georgia | 2008           | Nuts                      | 5                                                           |
| 73              | Georgia | 2008           | Oats                      | 2                                                           |
| 73              | Georgia | 2008           | Offals, Edible            | 6                                                           |
| 73              | Georgia | 2008           | Oilcrops Oil, Other       | 6                                                           |
| 73              | Georgia | 2008           | Olives                    | 1                                                           |
| 73              | Georgia | 2008           | Onions                    | 22                                                          |
| 73              | Georgia | 2008           | Oranges, Mandarines       | 25                                                          |
| 73              | Georgia | 2008           | Pelagic Fish              | 18                                                          |
| 73              | Georgia | 2008           | Pig meat                  | 18                                                          |
| 73              | Georgia | 2008           | Pineapples                | 1                                                           |
| 73              | Georgia | 2008           | Potatoes                  | 133                                                         |
| 73              | Georgia | 2008           | Poultry Meat              | 31                                                          |
| 73              | Georgia | 2008           | Rice (Milled Equivalent)  | 5                                                           |
| 73              | Georgia | 2008           | Rye                       | 1                                                           |
| 73              | Georgia | 2008           | Soyabean Oil              | 1                                                           |
| 73              | Georgia | 2008           | Spices, Other             | 4                                                           |
| 73              | Georgia | 2008           | Sugar, Refined Equivalent | 112                                                         |
| 73              | Georgia | 2008           | Sunflowerseed Oil         | 11                                                          |
| 73              | Georgia | 2008           | Tea                       | 4                                                           |
| 73              | Georgia | 2008           | Tomatoes                  | 50                                                          |
| 73              | Georgia | 2008           | Vegetables, Other         | 104                                                         |
| 73              | Georgia | 2008           | Wheat                     | 435                                                         |
| 73              | Georgia | 2008           | Wine                      | 56                                                          |
| 73              | Georgia | 2009           | Apples                    | 22                                                          |

Dietary calcium and zinc deficiency risks are decreasing but remain prevalent

| FAO countrycode | Country | Reference year | Food item                 | Gross food supply (g capita <sup>-1</sup> d <sup>-1</sup> ) |
|-----------------|---------|----------------|---------------------------|-------------------------------------------------------------|
| 73              | Georgia | 2009           | Bananas                   | 6                                                           |
| 73              | Georgia | 2009           | Barley                    | 17                                                          |
| 73              | Georgia | 2009           | Beer                      | 40                                                          |
| 73              | Georgia | 2009           | Beverages, Alcoholic      | 2                                                           |
| 73              | Georgia | 2009           | Bovine Meat               | 18                                                          |
| 73              | Georgia | 2009           | Butter, Ghee              | 1                                                           |
| 73              | Georgia | 2009           | Cassava                   | 1                                                           |
| 73              | Georgia | 2009           | Cereals, Other            | 6                                                           |
| 73              | Georgia | 2009           | Cocoa Beans               | 5                                                           |
| 73              | Georgia | 2009           | Coffee                    | 7                                                           |
| 73              | Georgia | 2009           | Eggs                      | 14                                                          |
| 73              | Georgia | 2009           | Fats, Animals, Raw        | 5                                                           |
| 73              | Georgia | 2009           | Freshwater Fish           | 1                                                           |
| 73              | Georgia | 2009           | Fruits, Other             | 37                                                          |
| 73              | Georgia | 2009           | Grapes                    | 7                                                           |
| 73              | Georgia | 2009           | Groundnuts (Shelled Eq)   | 1                                                           |
| 73              | Georgia | 2009           | Honey                     | 2                                                           |
| 73              | Georgia | 2009           | Lemons, Limes             | 2                                                           |
| 73              | Georgia | 2009           | Maize                     | 100                                                         |
| 73              | Georgia | 2009           | Marine Fish, Other        | 6                                                           |
| 73              | Georgia | 2009           | Milk, Whole               | 345                                                         |
| 73              | Georgia | 2009           | Mutton & Goat Meat        | 3                                                           |
| 73              | Georgia | 2009           | Nuts                      | 7                                                           |
| 73              | Georgia | 2009           | Oats                      | 2                                                           |
| 73              | Georgia | 2009           | Offals, Edible            | 7                                                           |
| 73              | Georgia | 2009           | Oilcrops Oil, Other       | 6                                                           |
| 73              | Georgia | 2009           | Olives                    | 1                                                           |
| 73              | Georgia | 2009           | Onions                    | 21                                                          |
| 73              | Georgia | 2009           | Oranges, Mandarines       | 29                                                          |
| 73              | Georgia | 2009           | Pelagic Fish              | 10                                                          |
| 73              | Georgia | 2009           | Pigmeat                   | 15                                                          |
| 73              | Georgia | 2009           | Potatoes                  | 121                                                         |
| 73              | Georgia | 2009           | Poultry Meat              | 32                                                          |
| 73              | Georgia | 2009           | Rice (Milled Equivalent)  | 5                                                           |
| 73              | Georgia | 2009           | Spices, Other             | 1                                                           |
| 73              | Georgia | 2009           | Sugar, Refined Equivalent | 71                                                          |
| 73              | Georgia | 2009           | Sunflowerseed Oil         | 22                                                          |
| 73              | Georgia | 2009           | Tea                       | 3                                                           |
| 73              | Georgia | 2009           | Tomatoes                  | 42                                                          |
| 73              | Georgia | 2009           | Vegetables, Other         | 98                                                          |
| 73              | Georgia | 2009           | Wheat                     | 425                                                         |
| 73              | Georgia | 2009           | Wine                      | 55                                                          |
| 73              | Georgia | 2010           | Apples                    | 30                                                          |
| 73              | Georgia | 2010           | Bananas                   | 9                                                           |
| 73              | Georgia | 2010           | Barley                    | 13                                                          |
| 73              | Georgia | 2010           | Beer                      | 40                                                          |
| 73              | Georgia | 2010           | Beverages, Alcoholic      | 4                                                           |
| 73              | Georgia | 2010           | Bovine Meat               | 20                                                          |
| 73              | Georgia | 2010           | Butter, Ghee              | 1                                                           |
| 73              | Georgia | 2010           | Cereals, Other            | 8                                                           |
| 73              | Georgia | 2010           | Cocoa Beans               | 5                                                           |
| 73              | Georgia | 2010           | Coffee                    | 7                                                           |
| 73              | Georgia | 2010           | Demersal Fish             | 1                                                           |
| 73              | Georgia | 2010           | Eggs                      | 15                                                          |
| 73              | Georgia | 2010           | Fats, Animals, Raw        | 7                                                           |
| 73              | Georgia | 2010           | Freshwater Fish           | 1                                                           |
| 73              | Georgia | 2010           | Fruits, Other             | 33                                                          |
| 73              | Georgia | 2010           | Grapefruit                | 1                                                           |
| 73              | Georgia | 2010           | Grapes                    | 9                                                           |
| 73              | Georgia | 2010           | Groundnuts (Shelled Eq)   | 1                                                           |
| 73              | Georgia | 2010           | Honey                     | 3                                                           |
| 73              | Georgia | 2010           | Lemons, Limes             | 2                                                           |
| 73              | Georgia | 2010           | Maize                     | 55                                                          |
| 73              | Georgia | 2010           | Marine Fish, Other        | 7                                                           |
| 73              | Georgia | 2010           | Milk, Whole               | 366                                                         |
| 73              | Georgia | 2010           | Mutton & Goat Meat        | 3                                                           |
| 73              | Georgia | 2010           | Nuts                      | 5                                                           |
| 73              | Georgia | 2010           | Oats                      | 2                                                           |
| 73              | Georgia | 2010           | Offals, Edible            | 7                                                           |
| 73              | Georgia | 2010           | Oilcrops Oil, Other       | 6                                                           |
| 73              | Georgia | 2010           | Olives                    | 1                                                           |
| 73              | Georgia | 2010           | Onions                    | 29                                                          |
| 73              | Georgia | 2010           | Oranges, Mandarines       | 14                                                          |
| 73              | Georgia | 2010           | Pelagic Fish              | 12                                                          |
| 73              | Georgia | 2010           | Pigmeat                   | 17                                                          |
| 73              | Georgia | 2010           | Potatoes                  | 123                                                         |
| 73              | Georgia | 2010           | Poultry Meat              | 32                                                          |
| 73              | Georgia | 2010           | Rice (Milled Equivalent)  | 6                                                           |
| 73              | Georgia | 2010           | Spices, Other             | 1                                                           |
| 73              | Georgia | 2010           | Sugar, Refined Equivalent | 63                                                          |
| 73              | Georgia | 2010           | Sunflowerseed Oil         | 15                                                          |
| 73              | Georgia | 2010           | Sweeteners, Other         | 1                                                           |
| 73              | Georgia | 2010           | Tea                       | 2                                                           |
| 73              | Georgia | 2010           | Tomatoes                  | 46                                                          |
| 73              | Georgia | 2010           | Vegetables, Other         | 80                                                          |
| 73              | Georgia | 2010           | Wheat                     | 434                                                         |
| 73              | Georgia | 2010           | Wine                      | 52                                                          |
| 73              | Georgia | 2011           | Apples                    | 8                                                           |
| 73              | Georgia | 2011           | Bananas                   | 8                                                           |
| 73              | Georgia | 2011           | Barley                    | 13                                                          |
| 73              | Georgia | 2011           | Beer                      | 35                                                          |
| 73              | Georgia | 2011           | Beverages, Alcoholic      | 4                                                           |
| 73              | Georgia | 2011           | Bovine Meat               | 18                                                          |
| 73              | Georgia | 2011           | Butter, Ghee              | 1                                                           |
| 73              | Georgia | 2011           | Cereals, Other            | 28                                                          |
| 73              | Georgia | 2011           | Cheese                    | 1                                                           |
| 73              | Georgia | 2011           | Cocoa Beans               | 5                                                           |

Dietary calcium and zinc deficiency risks are decreasing but remain prevalent

| FAO countrycode | Country | Reference year | Food item                 | Gross food supply (g capita <sup>-1</sup> d <sup>-1</sup> ) |
|-----------------|---------|----------------|---------------------------|-------------------------------------------------------------|
| 73              | Georgia | 2011           | Coffee                    | 7                                                           |
| 73              | Georgia | 2011           | Demersal Fish             | 1                                                           |
| 73              | Georgia | 2011           | Eggs                      | 15                                                          |
| 73              | Georgia | 2011           | Fats, Animals, Raw        | 8                                                           |
| 73              | Georgia | 2011           | Freshwater Fish           | 1                                                           |
| 73              | Georgia | 2011           | Fruits, Other             | 42                                                          |
| 73              | Georgia | 2011           | Grapefruit                | 1                                                           |
| 73              | Georgia | 2011           | Grapes                    | 8                                                           |
| 73              | Georgia | 2011           | Groundnuts (Shelled Eq)   | 1                                                           |
| 73              | Georgia | 2011           | Honey                     | 2                                                           |
| 73              | Georgia | 2011           | Lemons, Limes             | 2                                                           |
| 73              | Georgia | 2011           | Maize                     | 78                                                          |
| 73              | Georgia | 2011           | Maize Germ Oil            | 1                                                           |
| 73              | Georgia | 2011           | Marine Fish, Other        | 7                                                           |
| 73              | Georgia | 2011           | Milk, Whole               | 365                                                         |
| 73              | Georgia | 2011           | Mutton & Goat Meat        | 2                                                           |
| 73              | Georgia | 2011           | Nuts                      | 5                                                           |
| 73              | Georgia | 2011           | Oats                      | 2                                                           |
| 73              | Georgia | 2011           | Offals, Edible            | 6                                                           |
| 73              | Georgia | 2011           | Oilcrops Oil, Other       | 5                                                           |
| 73              | Georgia | 2011           | Olives                    | 1                                                           |
| 73              | Georgia | 2011           | Onions                    | 22                                                          |
| 73              | Georgia | 2011           | Oranges, Mandarines       | 24                                                          |
| 73              | Georgia | 2011           | Pelagic Fish              | 12                                                          |
| 73              | Georgia | 2011           | Pigmeat                   | 18                                                          |
| 73              | Georgia | 2011           | Pineapples                | 1                                                           |
| 73              | Georgia | 2011           | Potatoes                  | 133                                                         |
| 73              | Georgia | 2011           | Poultry Meat              | 35                                                          |
| 73              | Georgia | 2011           | Rice (Milled Equivalent)  | 7                                                           |
| 73              | Georgia | 2011           | Spices, Other             | 1                                                           |
| 73              | Georgia | 2011           | Sugar, Refined Equivalent | 74                                                          |
| 73              | Georgia | 2011           | Sunflowerseed Oil         | 7                                                           |
| 73              | Georgia | 2011           | Sweeteners, Other         | 1                                                           |
| 73              | Georgia | 2011           | Tea                       | 1                                                           |
| 73              | Georgia | 2011           | Tomatoes                  | 48                                                          |
| 73              | Georgia | 2011           | Vegetables, Other         | 91                                                          |
| 73              | Georgia | 2011           | Wheat                     | 435                                                         |
| 73              | Georgia | 2011           | Wine                      | 54                                                          |
| 79              | Germany | 1992           | Apples                    | 106                                                         |
| 79              | Germany | 1992           | Bananas                   | 41                                                          |
| 79              | Germany | 1992           | Barley                    | 1                                                           |
| 79              | Germany | 1992           | Beer                      | 390                                                         |
| 79              | Germany | 1992           | Beverages, Alcoholic      | 17                                                          |
| 79              | Germany | 1992           | Bovine Meat               | 55                                                          |
| 79              | Germany | 1992           | Butter, Ghee              | 21                                                          |
| 79              | Germany | 1992           | Cereals, Other            | 2                                                           |
| 79              | Germany | 1992           | Cheese                    | 47                                                          |
| 79              | Germany | 1992           | Cocoa Beans               | 8                                                           |
| 79              | Germany | 1992           | Coconut Oil               | 3                                                           |
| 79              | Germany | 1992           | Coconuts - Incl Copra     | 2                                                           |
| 79              | Germany | 1992           | Coffee                    | 21                                                          |
| 79              | Germany | 1992           | Cream                     | 15                                                          |
| 79              | Germany | 1992           | Crustaceans               | 2                                                           |
| 79              | Germany | 1992           | Demersal Fish             | 13                                                          |
| 79              | Germany | 1992           | Eggs                      | 37                                                          |
| 79              | Germany | 1992           | Fats, Animals, Raw        | 21                                                          |
| 79              | Germany | 1992           | Freshwater Fish           | 4                                                           |
| 79              | Germany | 1992           | Fruits, Other             | 91                                                          |
| 79              | Germany | 1992           | Grapefruit                | 4                                                           |
| 79              | Germany | 1992           | Grapes                    | 23                                                          |
| 79              | Germany | 1992           | Groundnut Oil             | 1                                                           |
| 79              | Germany | 1992           | Groundnuts (Shelled Eq)   | 2                                                           |
| 79              | Germany | 1992           | Honey                     | 3                                                           |
| 79              | Germany | 1992           | Lemons, Limes             | 7                                                           |
| 79              | Germany | 1992           | Maize                     | 20                                                          |
| 79              | Germany | 1992           | Maize Germ Oil            | 1                                                           |
| 79              | Germany | 1992           | Marine Fish, Other        | 2                                                           |
| 79              | Germany | 1992           | Meat, Other               | 3                                                           |
| 79              | Germany | 1992           | Milk, Whole               | 217                                                         |
| 79              | Germany | 1992           | Molluscs, Other           | 3                                                           |
| 79              | Germany | 1992           | Mutton & Goat Meat        | 3                                                           |
| 79              | Germany | 1992           | Nuts                      | 13                                                          |
| 79              | Germany | 1992           | Oats                      | 6                                                           |
| 79              | Germany | 1992           | Offals, Edible            | 14                                                          |
| 79              | Germany | 1992           | Oilcrops Oil, Other       | 1                                                           |
| 79              | Germany | 1992           | Olives                    | 1                                                           |
| 79              | Germany | 1992           | Onions                    | 15                                                          |
| 79              | Germany | 1992           | Oranges, Mandarines       | 42                                                          |
| 79              | Germany | 1992           | Palm Oil                  | 5                                                           |
| 79              | Germany | 1992           | Peas                      | 2                                                           |
| 79              | Germany | 1992           | Pelagic Fish              | 14                                                          |
| 79              | Germany | 1992           | Pepper                    | 1                                                           |
| 79              | Germany | 1992           | Pigmeat                   | 145                                                         |
| 79              | Germany | 1992           | Pineapples                | 5                                                           |
| 79              | Germany | 1992           | Potatoes                  | 217                                                         |
| 79              | Germany | 1992           | Poultry Meat              | 33                                                          |
| 79              | Germany | 1992           | Rape and Mustard Oil      | 7                                                           |
| 79              | Germany | 1992           | Rice (Milled Equivalent)  | 6                                                           |
| 79              | Germany | 1992           | Rye                       | 35                                                          |
| 79              | Germany | 1992           | Soyabean Oil              | 17                                                          |
| 79              | Germany | 1992           | Soybeans                  | 1                                                           |
| 79              | Germany | 1992           | Spices, Other             | 1                                                           |
| 79              | Germany | 1992           | Sugar, Refined Equivalent | 100                                                         |
| 79              | Germany | 1992           | Sunflowerseed Oil         | 8                                                           |
| 79              | Germany | 1992           | Sweeteners, Other         | 14                                                          |
| 79              | Germany | 1992           | Tea                       | 1                                                           |
| 79              | Germany | 1992           | Tomatoes                  | 36                                                          |

Dietary calcium and zinc deficiency risks are decreasing but remain prevalent

| FAO countrycode | Country | Reference year | Food item                 | Gross food supply (g capita <sup>-1</sup> d <sup>-1</sup> ) |
|-----------------|---------|----------------|---------------------------|-------------------------------------------------------------|
| 79              | Germany | 1992           | Vegetables, Other         | 167                                                         |
| 79              | Germany | 1992           | Wheat                     | 181                                                         |
| 79              | Germany | 1992           | Wine                      | 71                                                          |
| 79              | Germany | 1993           | Apples                    | 68                                                          |
| 79              | Germany | 1993           | Bananas                   | 34                                                          |
| 79              | Germany | 1993           | Barley                    | 2                                                           |
| 79              | Germany | 1993           | Beer                      | 353                                                         |
| 79              | Germany | 1993           | Beverages, Alcoholic      | 15                                                          |
| 79              | Germany | 1993           | Bovine Meat               | 48                                                          |
| 79              | Germany | 1993           | Butter, Ghee              | 17                                                          |
| 79              | Germany | 1993           | Cereals, Other            | 2                                                           |
| 79              | Germany | 1993           | Cheese                    | 45                                                          |
| 79              | Germany | 1993           | Citrus, Other             | 1                                                           |
| 79              | Germany | 1993           | Cocoa Beans               | 9                                                           |
| 79              | Germany | 1993           | Coconuts - Incl Copra     | 2                                                           |
| 79              | Germany | 1993           | Coffee                    | 22                                                          |
| 79              | Germany | 1993           | Cream                     | 16                                                          |
| 79              | Germany | 1993           | Crustaceans               | 1                                                           |
| 79              | Germany | 1993           | Demersal Fish             | 14                                                          |
| 79              | Germany | 1993           | Eggs                      | 32                                                          |
| 79              | Germany | 1993           | Fats, Animals, Raw        | 22                                                          |
| 79              | Germany | 1993           | Freshwater Fish           | 5                                                           |
| 79              | Germany | 1993           | Fruits, Other             | 78                                                          |
| 79              | Germany | 1993           | Grapefruit                | 4                                                           |
| 79              | Germany | 1993           | Grapes                    | 21                                                          |
| 79              | Germany | 1993           | Groundnut Oil             | 1                                                           |
| 79              | Germany | 1993           | Groundnuts (Shelled Eq)   | 2                                                           |
| 79              | Germany | 1993           | Honey                     | 3                                                           |
| 79              | Germany | 1993           | Lemons, Limes             | 4                                                           |
| 79              | Germany | 1993           | Maize                     | 16                                                          |
| 79              | Germany | 1993           | Marine Fish, Other        | 1                                                           |
| 79              | Germany | 1993           | Meat, Other               | 3                                                           |
| 79              | Germany | 1993           | Milk, Whole               | 184                                                         |
| 79              | Germany | 1993           | Molluscs, Other           | 3                                                           |
| 79              | Germany | 1993           | Mutton & Goat Meat        | 3                                                           |
| 79              | Germany | 1993           | Nuts                      | 12                                                          |
| 79              | Germany | 1993           | Oats                      | 6                                                           |
| 79              | Germany | 1993           | Offals, Edible            | 12                                                          |
| 79              | Germany | 1993           | Oilcrops Oil, Other       | 1                                                           |
| 79              | Germany | 1993           | Olives                    | 1                                                           |
| 79              | Germany | 1993           | Onions                    | 15                                                          |
| 79              | Germany | 1993           | Oranges, Mandarines       | 27                                                          |
| 79              | Germany | 1993           | Palm Oil                  | 4                                                           |
| 79              | Germany | 1993           | Palmkernel Oil            | 3                                                           |
| 79              | Germany | 1993           | Peas                      | 2                                                           |
| 79              | Germany | 1993           | Pelagic Fish              | 12                                                          |
| 79              | Germany | 1993           | Pepper                    | 1                                                           |
| 79              | Germany | 1993           | Pigmeat                   | 147                                                         |
| 79              | Germany | 1993           | Pineapples                | 5                                                           |
| 79              | Germany | 1993           | Potatoes                  | 218                                                         |
| 79              | Germany | 1993           | Poultry Meat              | 30                                                          |
| 79              | Germany | 1993           | Rape and Mustard Oil      | 7                                                           |
| 79              | Germany | 1993           | Rice (Milled Equivalent)  | 6                                                           |
| 79              | Germany | 1993           | Rye                       | 34                                                          |
| 79              | Germany | 1993           | Soyabean Oil              | 18                                                          |
| 79              | Germany | 1993           | Soyabeans                 | 1                                                           |
| 79              | Germany | 1993           | Sugar, Refined Equivalent | 92                                                          |
| 79              | Germany | 1993           | Sunflowerseed Oil         | 8                                                           |
| 79              | Germany | 1993           | Sweeteners, Other         | 13                                                          |
| 79              | Germany | 1993           | Tea                       | 1                                                           |
| 79              | Germany | 1993           | Tomatoes                  | 33                                                          |
| 79              | Germany | 1993           | Vegetables, Other         | 147                                                         |
| 79              | Germany | 1993           | Wheat                     | 185                                                         |
| 79              | Germany | 1993           | Wine                      | 56                                                          |
| 79              | Germany | 1994           | Apples                    | 71                                                          |
| 79              | Germany | 1994           | Bananas                   | 37                                                          |
| 79              | Germany | 1994           | Barley                    | 3                                                           |
| 79              | Germany | 1994           | Beer                      | 356                                                         |
| 79              | Germany | 1994           | Beverages, Alcoholic      | 12                                                          |
| 79              | Germany | 1994           | Bovine Meat               | 45                                                          |
| 79              | Germany | 1994           | Butter, Ghee              | 17                                                          |
| 79              | Germany | 1994           | Cereals, Other            | 2                                                           |
| 79              | Germany | 1994           | Cheese                    | 47                                                          |
| 79              | Germany | 1994           | Citrus, Other             | 1                                                           |
| 79              | Germany | 1994           | Cocoa Beans               | 8                                                           |
| 79              | Germany | 1994           | Coconuts - Incl Copra     | 2                                                           |
| 79              | Germany | 1994           | Coffee                    | 20                                                          |
| 79              | Germany | 1994           | Cream                     | 16                                                          |
| 79              | Germany | 1994           | Crustaceans               | 2                                                           |
| 79              | Germany | 1994           | Demersal Fish             | 14                                                          |
| 79              | Germany | 1994           | Eggs                      | 34                                                          |
| 79              | Germany | 1994           | Fats, Animals, Raw        | 21                                                          |
| 79              | Germany | 1994           | Freshwater Fish           | 6                                                           |
| 79              | Germany | 1994           | Fruits, Other             | 78                                                          |
| 79              | Germany | 1994           | Grapefruit                | 4                                                           |
| 79              | Germany | 1994           | Grapes                    | 23                                                          |
| 79              | Germany | 1994           | Groundnut Oil             | 1                                                           |
| 79              | Germany | 1994           | Groundnuts (Shelled Eq)   | 2                                                           |
| 79              | Germany | 1994           | Honey                     | 3                                                           |
| 79              | Germany | 1994           | Lemons, Limes             | 4                                                           |
| 79              | Germany | 1994           | Maize                     | 17                                                          |
| 79              | Germany | 1994           | Maize Germ Oil            | 1                                                           |
| 79              | Germany | 1994           | Marine Fish, Other        | 2                                                           |
| 79              | Germany | 1994           | Meat, Other               | 3                                                           |
| 79              | Germany | 1994           | Milk, Whole               | 188                                                         |
| 79              | Germany | 1994           | Molluscs, Other           | 3                                                           |
| 79              | Germany | 1994           | Mutton & Goat Meat        | 3                                                           |



Dietary calcium and zinc deficiency risks are decreasing but remain prevalent

| FAO countrycode | Country | Reference year | Food item                 | Gross food supply (g capita <sup>-1</sup> d <sup>-1</sup> ) |
|-----------------|---------|----------------|---------------------------|-------------------------------------------------------------|
| 79              | Germany | 1994           | Nuts                      | 13                                                          |
| 79              | Germany | 1994           | Oats                      | 6                                                           |
| 79              | Germany | 1994           | Offals, Edible            | 12                                                          |
| 79              | Germany | 1994           | Oilcrops Oil, Other       | 2                                                           |
| 79              | Germany | 1994           | Olives                    | 1                                                           |
| 79              | Germany | 1994           | Onions                    | 15                                                          |
| 79              | Germany | 1994           | Oranges, Mandarines       | 21                                                          |
| 79              | Germany | 1994           | Palmkernel Oil            | 3                                                           |
| 79              | Germany | 1994           | Peas                      | 2                                                           |
| 79              | Germany | 1994           | Pelagic Fish              | 12                                                          |
| 79              | Germany | 1994           | Pepper                    | 1                                                           |
| 79              | Germany | 1994           | Pigmeat                   | 146                                                         |
| 79              | Germany | 1994           | Pineapples                | 5                                                           |
| 79              | Germany | 1994           | Potatoes                  | 212                                                         |
| 79              | Germany | 1994           | Poultry Meat              | 33                                                          |
| 79              | Germany | 1994           | Rape and Mustard Oil      | 10                                                          |
| 79              | Germany | 1994           | Rice (Milled Equivalent)  | 6                                                           |
| 79              | Germany | 1994           | Rye                       | 36                                                          |
| 79              | Germany | 1994           | Soyabean Oil              | 18                                                          |
| 79              | Germany | 1994           | Soyabeans                 | 1                                                           |
| 79              | Germany | 1994           | Sugar, Refined Equivalent | 87                                                          |
| 79              | Germany | 1994           | Sunflowerseed Oil         | 8                                                           |
| 79              | Germany | 1994           | Sweeteners, Other         | 13                                                          |
| 79              | Germany | 1994           | Tea                       | 1                                                           |
| 79              | Germany | 1994           | Tomatoes                  | 32                                                          |
| 79              | Germany | 1994           | Vegetables, Other         | 163                                                         |
| 79              | Germany | 1994           | Wheat                     | 189                                                         |
| 79              | Germany | 1994           | Wine                      | 60                                                          |
| 79              | Germany | 1995           | Apples                    | 54                                                          |
| 79              | Germany | 1995           | Bananas                   | 39                                                          |
| 79              | Germany | 1995           | Barley                    | 1                                                           |
| 79              | Germany | 1995           | Beer                      | 350                                                         |
| 79              | Germany | 1995           | Beverages, Alcoholic      | 15                                                          |
| 79              | Germany | 1995           | Bovine Meat               | 43                                                          |
| 79              | Germany | 1995           | Butter, Ghee              | 18                                                          |
| 79              | Germany | 1995           | Cereals, Other            | 2                                                           |
| 79              | Germany | 1995           | Cheese                    | 47                                                          |
| 79              | Germany | 1995           | Citrus, Other             | 1                                                           |
| 79              | Germany | 1995           | Cocoa Beans               | 6                                                           |
| 79              | Germany | 1995           | Coconut Oil               | 3                                                           |
| 79              | Germany | 1995           | Coconuts - Incl Copra     | 2                                                           |
| 79              | Germany | 1995           | Coffee                    | 19                                                          |
| 79              | Germany | 1995           | Cream                     | 18                                                          |
| 79              | Germany | 1995           | Crustaceans               | 2                                                           |
| 79              | Germany | 1995           | Demersal Fish             | 16                                                          |
| 79              | Germany | 1995           | Eggs                      | 33                                                          |
| 79              | Germany | 1995           | Fats, Animals, Raw        | 21                                                          |
| 79              | Germany | 1995           | Freshwater Fish           | 6                                                           |
| 79              | Germany | 1995           | Fruits, Other             | 74                                                          |
| 79              | Germany | 1995           | Grapefruit                | 3                                                           |
| 79              | Germany | 1995           | Grapes                    | 21                                                          |
| 79              | Germany | 1995           | Groundnut Oil             | 1                                                           |
| 79              | Germany | 1995           | Groundnuts (Shelled Eq)   | 2                                                           |
| 79              | Germany | 1995           | Honey                     | 4                                                           |
| 79              | Germany | 1995           | Lemons, Limes             | 4                                                           |
| 79              | Germany | 1995           | Maize                     | 20                                                          |
| 79              | Germany | 1995           | Maize Germ Oil            | 1                                                           |
| 79              | Germany | 1995           | Marine Fish, Other        | 1                                                           |
| 79              | Germany | 1995           | Meat, Other               | 5                                                           |
| 79              | Germany | 1995           | Milk, Whole               | 182                                                         |
| 79              | Germany | 1995           | Molluscs, Other           | 3                                                           |
| 79              | Germany | 1995           | Mutton & Goat Meat        | 3                                                           |
| 79              | Germany | 1995           | Nuts                      | 13                                                          |
| 79              | Germany | 1995           | Oats                      | 6                                                           |
| 79              | Germany | 1995           | Offals, Edible            | 11                                                          |
| 79              | Germany | 1995           | Oilcrops Oil, Other       | 2                                                           |
| 79              | Germany | 1995           | Olive Oil                 | 1                                                           |
| 79              | Germany | 1995           | Olives                    | 1                                                           |
| 79              | Germany | 1995           | Onions                    | 16                                                          |
| 79              | Germany | 1995           | Oranges, Mandarines       | 20                                                          |
| 79              | Germany | 1995           | Palm Oil                  | 4                                                           |
| 79              | Germany | 1995           | Peas                      | 2                                                           |
| 79              | Germany | 1995           | Pelagic Fish              | 11                                                          |
| 79              | Germany | 1995           | Pepper                    | 1                                                           |
| 79              | Germany | 1995           | Pigmeat                   | 141                                                         |
| 79              | Germany | 1995           | Pineapples                | 4                                                           |
| 79              | Germany | 1995           | Potatoes                  | 213                                                         |
| 79              | Germany | 1995           | Poultry Meat              | 32                                                          |
| 79              | Germany | 1995           | Rape and Mustard Oil      | 6                                                           |
| 79              | Germany | 1995           | Rice (Milled Equivalent)  | 6                                                           |
| 79              | Germany | 1995           | Rye                       | 33                                                          |
| 79              | Germany | 1995           | Soyabean Oil              | 20                                                          |
| 79              | Germany | 1995           | Soyabeans                 | 2                                                           |
| 79              | Germany | 1995           | Sugar, Refined Equivalent | 94                                                          |
| 79              | Germany | 1995           | Sunflowerseed Oil         | 8                                                           |
| 79              | Germany | 1995           | Sweeteners, Other         | 15                                                          |
| 79              | Germany | 1995           | Tea                       | 1                                                           |
| 79              | Germany | 1995           | Tomatoes                  | 32                                                          |
| 79              | Germany | 1995           | Vegetables, Other         | 165                                                         |
| 79              | Germany | 1995           | Wheat                     | 191                                                         |
| 79              | Germany | 1995           | Wine                      | 50                                                          |
| 79              | Germany | 1996           | Apples                    | 82                                                          |
| 79              | Germany | 1996           | Bananas                   | 37                                                          |
| 79              | Germany | 1996           | Barley                    | 1                                                           |
| 79              | Germany | 1996           | Beer                      | 337                                                         |
| 79              | Germany | 1996           | Beverages, Alcoholic      | 16                                                          |
| 79              | Germany | 1996           | Bovine Meat               | 44                                                          |

Dietary calcium and zinc deficiency risks are decreasing but remain prevalent

| FAO countrycode | Country | Reference year | Food item                 | Gross food supply (g capita <sup>-1</sup> d <sup>-1</sup> ) |
|-----------------|---------|----------------|---------------------------|-------------------------------------------------------------|
| 79              | Germany | 1996           | Butter, Ghee              | 18                                                          |
| 79              | Germany | 1996           | Cereals, Other            | 2                                                           |
| 79              | Germany | 1996           | Cheese                    | 49                                                          |
| 79              | Germany | 1996           | Citrus, Other             | 1                                                           |
| 79              | Germany | 1996           | Cocoa Beans               | 6                                                           |
| 79              | Germany | 1996           | Coconuts - Incl Copra     | 2                                                           |
| 79              | Germany | 1996           | Coffee                    | 19                                                          |
| 79              | Germany | 1996           | Cream                     | 18                                                          |
| 79              | Germany | 1996           | Crustaceans               | 2                                                           |
| 79              | Germany | 1996           | Demersal Fish             | 15                                                          |
| 79              | Germany | 1996           | Eggs                      | 34                                                          |
| 79              | Germany | 1996           | Fats, Animals, Raw        | 20                                                          |
| 79              | Germany | 1996           | Freshwater Fish           | 6                                                           |
| 79              | Germany | 1996           | Fruits, Other             | 82                                                          |
| 79              | Germany | 1996           | Grapefruit                | 4                                                           |
| 79              | Germany | 1996           | Grapes                    | 23                                                          |
| 79              | Germany | 1996           | Groundnut Oil             | 1                                                           |
| 79              | Germany | 1996           | Groundnuts (Shelled Eq)   | 2                                                           |
| 79              | Germany | 1996           | Honey                     | 3                                                           |
| 79              | Germany | 1996           | Lemons, Limes             | 4                                                           |
| 79              | Germany | 1996           | Maize                     | 19                                                          |
| 79              | Germany | 1996           | Maize Germ Oil            | 1                                                           |
| 79              | Germany | 1996           | Marine Fish, Other        | 1                                                           |
| 79              | Germany | 1996           | Meat, Other               | 5                                                           |
| 79              | Germany | 1996           | Milk, Whole               | 180                                                         |
| 79              | Germany | 1996           | Molluscs, Other           | 2                                                           |
| 79              | Germany | 1996           | Mutton & Goat Meat        | 3                                                           |
| 79              | Germany | 1996           | Nuts                      | 13                                                          |
| 79              | Germany | 1996           | Oats                      | 6                                                           |
| 79              | Germany | 1996           | Offals, Edible            | 11                                                          |
| 79              | Germany | 1996           | Oilcrops Oil, Other       | 2                                                           |
| 79              | Germany | 1996           | Olive Oil                 | 1                                                           |
| 79              | Germany | 1996           | Olives                    | 1                                                           |
| 79              | Germany | 1996           | Onions                    | 17                                                          |
| 79              | Germany | 1996           | Oranges, Mandarines       | 28                                                          |
| 79              | Germany | 1996           | Palm Oil                  | 4                                                           |
| 79              | Germany | 1996           | Palmkernel Oil            | 2                                                           |
| 79              | Germany | 1996           | Peas                      | 2                                                           |
| 79              | Germany | 1996           | Pelagic Fish              | 10                                                          |
| 79              | Germany | 1996           | Pigmeat                   | 144                                                         |
| 79              | Germany | 1996           | Pineapples                | 5                                                           |
| 79              | Germany | 1996           | Potatoes                  | 218                                                         |
| 79              | Germany | 1996           | Poultry Meat              | 36                                                          |
| 79              | Germany | 1996           | Rape and Mustard Oil      | 11                                                          |
| 79              | Germany | 1996           | Rice (Milled Equivalent)  | 6                                                           |
| 79              | Germany | 1996           | Rye                       | 31                                                          |
| 79              | Germany | 1996           | Soyabean Oil              | 21                                                          |
| 79              | Germany | 1996           | Soyabeans                 | 2                                                           |
| 79              | Germany | 1996           | Spices, Other             | 1                                                           |
| 79              | Germany | 1996           | Sugar, Refined Equivalent | 85                                                          |
| 79              | Germany | 1996           | Sunflowerseed Oil         | 7                                                           |
| 79              | Germany | 1996           | Sweeteners, Other         | 14                                                          |
| 79              | Germany | 1996           | Tea                       | 1                                                           |
| 79              | Germany | 1996           | Tomatoes                  | 35                                                          |
| 79              | Germany | 1996           | Vegetables, Other         | 181                                                         |
| 79              | Germany | 1996           | Wheat                     | 195                                                         |
| 79              | Germany | 1996           | Wine                      | 57                                                          |
| 79              | Germany | 1997           | Apples                    | 83                                                          |
| 79              | Germany | 1997           | Bananas                   | 30                                                          |
| 79              | Germany | 1997           | Barley                    | 1                                                           |
| 79              | Germany | 1997           | Beans                     | 1                                                           |
| 79              | Germany | 1997           | Beer                      | 334                                                         |
| 79              | Germany | 1997           | Beverages, Alcoholic      | 17                                                          |
| 79              | Germany | 1997           | Bovine Meat               | 40                                                          |
| 79              | Germany | 1997           | Butter, Ghee              | 18                                                          |
| 79              | Germany | 1997           | Cereals, Other            | 2                                                           |
| 79              | Germany | 1997           | Cheese                    | 50                                                          |
| 79              | Germany | 1997           | Citrus, Other             | 1                                                           |
| 79              | Germany | 1997           | Cocoa Beans               | 7                                                           |
| 79              | Germany | 1997           | Coconut Oil               | 4                                                           |
| 79              | Germany | 1997           | Coconuts - Incl Copra     | 2                                                           |
| 79              | Germany | 1997           | Coffee                    | 19                                                          |
| 79              | Germany | 1997           | Cream                     | 19                                                          |
| 79              | Germany | 1997           | Crustaceans               | 2                                                           |
| 79              | Germany | 1997           | Demersal Fish             | 15                                                          |
| 79              | Germany | 1997           | Eggs                      | 35                                                          |
| 79              | Germany | 1997           | Fats, Animals, Raw        | 20                                                          |
| 79              | Germany | 1997           | Freshwater Fish           | 7                                                           |
| 79              | Germany | 1997           | Fruits, Other             | 61                                                          |
| 79              | Germany | 1997           | Grapefruit                | 4                                                           |
| 79              | Germany | 1997           | Grapes                    | 23                                                          |
| 79              | Germany | 1997           | Groundnut Oil             | 1                                                           |
| 79              | Germany | 1997           | Groundnuts (Shelled Eq)   | 3                                                           |
| 79              | Germany | 1997           | Honey                     | 3                                                           |
| 79              | Germany | 1997           | Lemons, Limes             | 4                                                           |
| 79              | Germany | 1997           | Maize                     | 19                                                          |
| 79              | Germany | 1997           | Maize Germ Oil            | 1                                                           |
| 79              | Germany | 1997           | Marine Fish, Other        | 1                                                           |
| 79              | Germany | 1997           | Meat, Other               | 5                                                           |
| 79              | Germany | 1997           | Milk, Whole               | 178                                                         |
| 79              | Germany | 1997           | Molluscs, Other           | 2                                                           |
| 79              | Germany | 1997           | Mutton & Goat Meat        | 3                                                           |
| 79              | Germany | 1997           | Nuts                      | 13                                                          |
| 79              | Germany | 1997           | Oats                      | 6                                                           |
| 79              | Germany | 1997           | Offals, Edible            | 10                                                          |
| 79              | Germany | 1997           | Oilcrops Oil, Other       | 1                                                           |
| 79              | Germany | 1997           | Olive Oil                 | 1                                                           |

Dietary calcium and zinc deficiency risks are decreasing but remain prevalent

| FAO countrycode | Country | Reference year | Food item                 | Gross food supply (g capita <sup>-1</sup> d <sup>-1</sup> ) |
|-----------------|---------|----------------|---------------------------|-------------------------------------------------------------|
| 79              | Germany | 1997           | Olives                    | 1                                                           |
| 79              | Germany | 1997           | Onions                    | 13                                                          |
| 79              | Germany | 1997           | Oranges, Mandarines       | 25                                                          |
| 79              | Germany | 1997           | Palm Oil                  | 4                                                           |
| 79              | Germany | 1997           | Peas                      | 3                                                           |
| 79              | Germany | 1997           | Pelagic Fish              | 10                                                          |
| 79              | Germany | 1997           | Pepper                    | 1                                                           |
| 79              | Germany | 1997           | Pigmeat                   | 140                                                         |
| 79              | Germany | 1997           | Pineapples                | 4                                                           |
| 79              | Germany | 1997           | Potatoes                  | 213                                                         |
| 79              | Germany | 1997           | Poultry Meat              | 35                                                          |
| 79              | Germany | 1997           | Rape and Mustard Oil      | 18                                                          |
| 79              | Germany | 1997           | Rice (Milled Equivalent)  | 6                                                           |
| 79              | Germany | 1997           | Rye                       | 31                                                          |
| 79              | Germany | 1997           | Soyabean Oil              | 11                                                          |
| 79              | Germany | 1997           | Soyabeans                 | 2                                                           |
| 79              | Germany | 1997           | Spices, Other             | 1                                                           |
| 79              | Germany | 1997           | Sugar, Refined Equivalent | 91                                                          |
| 79              | Germany | 1997           | Sunflowerseed Oil         | 10                                                          |
| 79              | Germany | 1997           | Sweeteners, Other         | 14                                                          |
| 79              | Germany | 1997           | Tea                       | 1                                                           |
| 79              | Germany | 1997           | Tomatoes                  | 36                                                          |
| 79              | Germany | 1997           | Vegetables, Other         | 179                                                         |
| 79              | Germany | 1997           | Wheat                     | 156                                                         |
| 79              | Germany | 1997           | Wine                      | 54                                                          |
| 79              | Germany | 1998           | Apples                    | 83                                                          |
| 79              | Germany | 1998           | Bananas                   | 28                                                          |
| 79              | Germany | 1998           | Barley                    | 1                                                           |
| 79              | Germany | 1998           | Beer                      | 325                                                         |
| 79              | Germany | 1998           | Beverages, Alcoholic      | 16                                                          |
| 79              | Germany | 1998           | Bovine Meat               | 39                                                          |
| 79              | Germany | 1998           | Butter, Ghee              | 17                                                          |
| 79              | Germany | 1998           | Cereals, Other            | 1                                                           |
| 79              | Germany | 1998           | Cheese                    | 50                                                          |
| 79              | Germany | 1998           | Citrus, Other             | 2                                                           |
| 79              | Germany | 1998           | Cocoa Beans               | 8                                                           |
| 79              | Germany | 1998           | Coconut Oil               | 4                                                           |
| 79              | Germany | 1998           | Coconuts - Incl Copra     | 2                                                           |
| 79              | Germany | 1998           | Coffee                    | 18                                                          |
| 79              | Germany | 1998           | Cream                     | 19                                                          |
| 79              | Germany | 1998           | Crustaceans               | 2                                                           |
| 79              | Germany | 1998           | Demersal Fish             | 17                                                          |
| 79              | Germany | 1998           | Eggs                      | 35                                                          |
| 79              | Germany | 1998           | Fats, Animals, Raw        | 21                                                          |
| 79              | Germany | 1998           | Freshwater Fish           | 7                                                           |
| 79              | Germany | 1998           | Fruits, Other             | 64                                                          |
| 79              | Germany | 1998           | Grapefruit                | 4                                                           |
| 79              | Germany | 1998           | Grapes                    | 21                                                          |
| 79              | Germany | 1998           | Groundnut Oil             | 1                                                           |
| 79              | Germany | 1998           | Groundnuts (Shelled Eq)   | 3                                                           |
| 79              | Germany | 1998           | Honey                     | 3                                                           |
| 79              | Germany | 1998           | Lemons, Limes             | 4                                                           |
| 79              | Germany | 1998           | Maize                     | 20                                                          |
| 79              | Germany | 1998           | Maize Germ Oil            | 1                                                           |
| 79              | Germany | 1998           | Marine Fish, Other        | 1                                                           |
| 79              | Germany | 1998           | Meat, Other               | 6                                                           |
| 79              | Germany | 1998           | Milk, Whole               | 169                                                         |
| 79              | Germany | 1998           | Molluscs, Other           | 2                                                           |
| 79              | Germany | 1998           | Mutton & Goat Meat        | 3                                                           |
| 79              | Germany | 1998           | Nuts                      | 12                                                          |
| 79              | Germany | 1998           | Oats                      | 6                                                           |
| 79              | Germany | 1998           | Offals, Edible            | 10                                                          |
| 79              | Germany | 1998           | Oilcrops Oil, Other       | 2                                                           |
| 79              | Germany | 1998           | Olive Oil                 | 1                                                           |
| 79              | Germany | 1998           | Olives                    | 1                                                           |
| 79              | Germany | 1998           | Onions                    | 15                                                          |
| 79              | Germany | 1998           | Oranges, Mandarines       | 24                                                          |
| 79              | Germany | 1998           | Palm Oil                  | 3                                                           |
| 79              | Germany | 1998           | Palmkernel Oil            | 1                                                           |
| 79              | Germany | 1998           | Peas                      | 4                                                           |
| 79              | Germany | 1998           | Pelagic Fish              | 12                                                          |
| 79              | Germany | 1998           | Pigmeat                   | 149                                                         |
| 79              | Germany | 1998           | Pineapples                | 4                                                           |
| 79              | Germany | 1998           | Potatoes                  | 203                                                         |
| 79              | Germany | 1998           | Poultry Meat              | 37                                                          |
| 79              | Germany | 1998           | Rape and Mustard Oil      | 17                                                          |
| 79              | Germany | 1998           | Rice (Milled Equivalent)  | 7                                                           |
| 79              | Germany | 1998           | Rye                       | 31                                                          |
| 79              | Germany | 1998           | Soyabean Oil              | 12                                                          |
| 79              | Germany | 1998           | Soyabeans                 | 1                                                           |
| 79              | Germany | 1998           | Spices, Other             | 1                                                           |
| 79              | Germany | 1998           | Sugar, Refined Equivalent | 86                                                          |
| 79              | Germany | 1998           | Sunflowerseed Oil         | 5                                                           |
| 79              | Germany | 1998           | Sweeteners, Other         | 15                                                          |
| 79              | Germany | 1998           | Tea                       | 1                                                           |
| 79              | Germany | 1998           | Tomatoes                  | 35                                                          |
| 79              | Germany | 1998           | Vegetables, Other         | 181                                                         |
| 79              | Germany | 1998           | Wheat                     | 199                                                         |
| 79              | Germany | 1998           | Wine                      | 67                                                          |
| 79              | Germany | 1999           | Apples                    | 81                                                          |
| 79              | Germany | 1999           | Bananas                   | 28                                                          |
| 79              | Germany | 1999           | Barley                    | 1                                                           |
| 79              | Germany | 1999           | Beer                      | 328                                                         |
| 79              | Germany | 1999           | Beverages, Alcoholic      | 17                                                          |
| 79              | Germany | 1999           | Bovine Meat               | 34                                                          |
| 79              | Germany | 1999           | Butter, Ghee              | 17                                                          |
| 79              | Germany | 1999           | Cereals, Other            | 2                                                           |

Dietary calcium and zinc deficiency risks are decreasing but remain prevalent

| FAO countrycode | Country | Reference year | Food item                 | Gross food supply (g capita <sup>-1</sup> d <sup>-1</sup> ) |
|-----------------|---------|----------------|---------------------------|-------------------------------------------------------------|
| 79              | Germany | 1999           | Cheese                    | 50                                                          |
| 79              | Germany | 1999           | Citrus, Other             | 1                                                           |
| 79              | Germany | 1999           | Cocoa Beans               | 7                                                           |
| 79              | Germany | 1999           | Coconut Oil               | 6                                                           |
| 79              | Germany | 1999           | Coconuts - Incl Copra     | 2                                                           |
| 79              | Germany | 1999           | Coffee                    | 20                                                          |
| 79              | Germany | 1999           | Cream                     | 20                                                          |
| 79              | Germany | 1999           | Crustaceans               | 2                                                           |
| 79              | Germany | 1999           | Demersal Fish             | 13                                                          |
| 79              | Germany | 1999           | Eggs                      | 34                                                          |
| 79              | Germany | 1999           | Fats, Animals, Raw        | 22                                                          |
| 79              | Germany | 1999           | Freshwater Fish           | 7                                                           |
| 79              | Germany | 1999           | Fruits, Other             | 70                                                          |
| 79              | Germany | 1999           | Grapefruit                | 4                                                           |
| 79              | Germany | 1999           | Grapes                    | 22                                                          |
| 79              | Germany | 1999           | Groundnut Oil             | 1                                                           |
| 79              | Germany | 1999           | Groundnuts (Shelled Eq)   | 3                                                           |
| 79              | Germany | 1999           | Honey                     | 3                                                           |
| 79              | Germany | 1999           | Lemons, Limes             | 4                                                           |
| 79              | Germany | 1999           | Maize                     | 19                                                          |
| 79              | Germany | 1999           | Marine Fish, Other        | 1                                                           |
| 79              | Germany | 1999           | Meat, Other               | 7                                                           |
| 79              | Germany | 1999           | Milk, Whole               | 168                                                         |
| 79              | Germany | 1999           | Molluscs, Other           | 2                                                           |
| 79              | Germany | 1999           | Mutton & Goat Meat        | 3                                                           |
| 79              | Germany | 1999           | Nuts                      | 12                                                          |
| 79              | Germany | 1999           | Oats                      | 7                                                           |
| 79              | Germany | 1999           | Offals, Edible            | 11                                                          |
| 79              | Germany | 1999           | Oilcrops Oil, Other       | 2                                                           |
| 79              | Germany | 1999           | Olive Oil                 | 1                                                           |
| 79              | Germany | 1999           | Olives                    | 1                                                           |
| 79              | Germany | 1999           | Onions                    | 15                                                          |
| 79              | Germany | 1999           | Oranges, Mandarines       | 14                                                          |
| 79              | Germany | 1999           | Palm Oil                  | 5                                                           |
| 79              | Germany | 1999           | Peas                      | 3                                                           |
| 79              | Germany | 1999           | Pelagic Fish              | 8                                                           |
| 79              | Germany | 1999           | Pig meat                  | 149                                                         |
| 79              | Germany | 1999           | Pineapples                | 6                                                           |
| 79              | Germany | 1999           | Potatoes                  | 208                                                         |
| 79              | Germany | 1999           | Poultry Meat              | 34                                                          |
| 79              | Germany | 1999           | Rape and Mustard Oil      | 13                                                          |
| 79              | Germany | 1999           | Rice (Milled Equivalent)  | 7                                                           |
| 79              | Germany | 1999           | Rye                       | 30                                                          |
| 79              | Germany | 1999           | Soyabean Oil              | 10                                                          |
| 79              | Germany | 1999           | Soyabbeans                | 1                                                           |
| 79              | Germany | 1999           | Spices, Other             | 1                                                           |
| 79              | Germany | 1999           | Sugar, Refined Equivalent | 88                                                          |
| 79              | Germany | 1999           | Sunflowerseed Oil         | 7                                                           |
| 79              | Germany | 1999           | Sweeteners, Other         | 15                                                          |
| 79              | Germany | 1999           | Tea                       | 1                                                           |
| 79              | Germany | 1999           | Tomatoes                  | 35                                                          |
| 79              | Germany | 1999           | Vegetables, Other         | 193                                                         |
| 79              | Germany | 1999           | Wheat                     | 201                                                         |
| 79              | Germany | 1999           | Wine                      | 70                                                          |
| 79              | Germany | 2000           | Apples                    | 166                                                         |
| 79              | Germany | 2000           | Bananas                   | 33                                                          |
| 79              | Germany | 2000           | Barley                    | 1                                                           |
| 79              | Germany | 2000           | Beer                      | 335                                                         |
| 79              | Germany | 2000           | Beverages, Alcoholic      | 17                                                          |
| 79              | Germany | 2000           | Bovine Meat               | 36                                                          |
| 79              | Germany | 2000           | Butter, Ghee              | 17                                                          |
| 79              | Germany | 2000           | Cereals, Other            | 2                                                           |
| 79              | Germany | 2000           | Cheese                    | 51                                                          |
| 79              | Germany | 2000           | Citrus, Other             | 1                                                           |
| 79              | Germany | 2000           | Cocoa Beans               | 7                                                           |
| 79              | Germany | 2000           | Coconut Oil               | 1                                                           |
| 79              | Germany | 2000           | Coconuts - Incl Copra     | 2                                                           |
| 79              | Germany | 2000           | Coffee                    | 17                                                          |
| 79              | Germany | 2000           | Cream                     | 20                                                          |
| 79              | Germany | 2000           | Crustaceans               | 2                                                           |
| 79              | Germany | 2000           | Demersal Fish             | 16                                                          |
| 79              | Germany | 2000           | Eggs                      | 34                                                          |
| 79              | Germany | 2000           | Fats, Animals, Raw        | 20                                                          |
| 79              | Germany | 2000           | Freshwater Fish           | 6                                                           |
| 79              | Germany | 2000           | Fruits, Other             | 57                                                          |
| 79              | Germany | 2000           | Grapefruit                | 4                                                           |
| 79              | Germany | 2000           | Grapes                    | 22                                                          |
| 79              | Germany | 2000           | Groundnut Oil             | 1                                                           |
| 79              | Germany | 2000           | Groundnuts (Shelled Eq)   | 3                                                           |
| 79              | Germany | 2000           | Honey                     | 3                                                           |
| 79              | Germany | 2000           | Lemons, Limes             | 4                                                           |
| 79              | Germany | 2000           | Maize                     | 22                                                          |
| 79              | Germany | 2000           | Maize Germ Oil            | 1                                                           |
| 79              | Germany | 2000           | Marine Fish, Other        | 1                                                           |
| 79              | Germany | 2000           | Meat, Other               | 9                                                           |
| 79              | Germany | 2000           | Milk, Whole               | 159                                                         |
| 79              | Germany | 2000           | Molluscs, Other           | 2                                                           |
| 79              | Germany | 2000           | Mutton & Goat Meat        | 3                                                           |
| 79              | Germany | 2000           | Nuts                      | 13                                                          |
| 79              | Germany | 2000           | Oats                      | 7                                                           |
| 79              | Germany | 2000           | Offals, Edible            | 10                                                          |
| 79              | Germany | 2000           | Oilcrops Oil, Other       | 1                                                           |
| 79              | Germany | 2000           | Olive Oil                 | 1                                                           |
| 79              | Germany | 2000           | Olives                    | 1                                                           |
| 79              | Germany | 2000           | Onions                    | 15                                                          |
| 79              | Germany | 2000           | Oranges, Mandarines       | 16                                                          |
| 79              | Germany | 2000           | Palm Oil                  | 6                                                           |

Dietary calcium and zinc deficiency risks are decreasing but remain prevalent

| FAO countrycode | Country | Reference year | Food item                 | Gross food supply (g capita <sup>-1</sup> d <sup>-1</sup> ) |
|-----------------|---------|----------------|---------------------------|-------------------------------------------------------------|
| 79              | Germany | 2000           | Peas                      | 3                                                           |
| 79              | Germany | 2000           | Pelagic Fish              | 10                                                          |
| 79              | Germany | 2000           | Pigmeat                   | 145                                                         |
| 79              | Germany | 2000           | Pineapples                | 7                                                           |
| 79              | Germany | 2000           | Potatoes                  | 206                                                         |
| 79              | Germany | 2000           | Poultry Meat              | 35                                                          |
| 79              | Germany | 2000           | Pulses, Other             | 1                                                           |
| 79              | Germany | 2000           | Rape and Mustard Oil      | 23                                                          |
| 79              | Germany | 2000           | Rice (Milled Equivalent)  | 7                                                           |
| 79              | Germany | 2000           | Rye                       | 29                                                          |
| 79              | Germany | 2000           | Soyabean Oil              | 10                                                          |
| 79              | Germany | 2000           | Soyabeans                 | 1                                                           |
| 79              | Germany | 2000           | Spices, Other             | 1                                                           |
| 79              | Germany | 2000           | Sugar, Refined Equivalent | 88                                                          |
| 79              | Germany | 2000           | Sunflowerseed Oil         | 7                                                           |
| 79              | Germany | 2000           | Sweeteners, Other         | 16                                                          |
| 79              | Germany | 2000           | Tea                       | 1                                                           |
| 79              | Germany | 2000           | Tomatoes                  | 37                                                          |
| 79              | Germany | 2000           | Vegetables, Other         | 193                                                         |
| 79              | Germany | 2000           | Wheat                     | 199                                                         |
| 79              | Germany | 2000           | Wine                      | 57                                                          |
| 79              | Germany | 2001           | Apples                    | 101                                                         |
| 79              | Germany | 2001           | Bananas                   | 30                                                          |
| 79              | Germany | 2001           | Barley                    | 6                                                           |
| 79              | Germany | 2001           | Beer                      | 328                                                         |
| 79              | Germany | 2001           | Beverages, Alcoholic      | 17                                                          |
| 79              | Germany | 2001           | Bovine Meat               | 28                                                          |
| 79              | Germany | 2001           | Butter, Ghee              | 16                                                          |
| 79              | Germany | 2001           | Cereals, Other            | 2                                                           |
| 79              | Germany | 2001           | Cheese                    | 53                                                          |
| 79              | Germany | 2001           | Citrus, Other             | 1                                                           |
| 79              | Germany | 2001           | Cocoa Beans               | 6                                                           |
| 79              | Germany | 2001           | Coconut Oil               | 3                                                           |
| 79              | Germany | 2001           | Coconuts - Incl Copra     | 2                                                           |
| 79              | Germany | 2001           | Coffee                    | 19                                                          |
| 79              | Germany | 2001           | Cream                     | 20                                                          |
| 79              | Germany | 2001           | Crustaceans               | 2                                                           |
| 79              | Germany | 2001           | Demersal Fish             | 19                                                          |
| 79              | Germany | 2001           | Eggs                      | 34                                                          |
| 79              | Germany | 2001           | Fats, Animals, Raw        | 21                                                          |
| 79              | Germany | 2001           | Freshwater Fish           | 7                                                           |
| 79              | Germany | 2001           | Fruits, Other             | 56                                                          |
| 79              | Germany | 2001           | Grapefruit                | 4                                                           |
| 79              | Germany | 2001           | Grapes                    | 22                                                          |
| 79              | Germany | 2001           | Groundnut Oil             | 1                                                           |
| 79              | Germany | 2001           | Groundnuts (Shelled Eq)   | 2                                                           |
| 79              | Germany | 2001           | Honey                     | 3                                                           |
| 79              | Germany | 2001           | Lemons, Limes             | 4                                                           |
| 79              | Germany | 2001           | Maize                     | 24                                                          |
| 79              | Germany | 2001           | Maize Germ Oil            | 1                                                           |
| 79              | Germany | 2001           | Marine Fish, Other        | 1                                                           |
| 79              | Germany | 2001           | Meat, Other               | 13                                                          |
| 79              | Germany | 2001           | Milk, Whole               | 166                                                         |
| 79              | Germany | 2001           | Molluscs, Other           | 2                                                           |
| 79              | Germany | 2001           | Mutton & Goat Meat        | 3                                                           |
| 79              | Germany | 2001           | Nuts                      | 13                                                          |
| 79              | Germany | 2001           | Oats                      | 7                                                           |
| 79              | Germany | 2001           | Offals, Edible            | 8                                                           |
| 79              | Germany | 2001           | Oilcrops Oil, Other       | 1                                                           |
| 79              | Germany | 2001           | Olive Oil                 | 1                                                           |
| 79              | Germany | 2001           | Olives                    | 1                                                           |
| 79              | Germany | 2001           | Onions                    | 15                                                          |
| 79              | Germany | 2001           | Oranges, Mandarines       | 18                                                          |
| 79              | Germany | 2001           | Palm Oil                  | 6                                                           |
| 79              | Germany | 2001           | Peas                      | 2                                                           |
| 79              | Germany | 2001           | Pelagic Fish              | 10                                                          |
| 79              | Germany | 2001           | Pepper                    | 1                                                           |
| 79              | Germany | 2001           | Pigmeat                   | 140                                                         |
| 79              | Germany | 2001           | Pineapples                | 7                                                           |
| 79              | Germany | 2001           | Potatoes                  | 202                                                         |
| 79              | Germany | 2001           | Poultry Meat              | 39                                                          |
| 79              | Germany | 2001           | Rape and Mustard Oil      | 12                                                          |
| 79              | Germany | 2001           | Rice (Milled Equivalent)  | 7                                                           |
| 79              | Germany | 2001           | Rye                       | 30                                                          |
| 79              | Germany | 2001           | Soyabean Oil              | 11                                                          |
| 79              | Germany | 2001           | Soyabeans                 | 2                                                           |
| 79              | Germany | 2001           | Spices, Other             | 1                                                           |
| 79              | Germany | 2001           | Sugar, Refined Equivalent | 95                                                          |
| 79              | Germany | 2001           | Sunflowerseed Oil         | 8                                                           |
| 79              | Germany | 2001           | Sweeteners, Other         | 19                                                          |
| 79              | Germany | 2001           | Tea                       | 1                                                           |
| 79              | Germany | 2001           | Tomatoes                  | 39                                                          |
| 79              | Germany | 2001           | Vegetables, Other         | 196                                                         |
| 79              | Germany | 2001           | Wheat                     | 218                                                         |
| 79              | Germany | 2001           | Wine                      | 58                                                          |
| 79              | Germany | 2002           | Apples                    | 100                                                         |
| 79              | Germany | 2002           | Bananas                   | 30                                                          |
| 79              | Germany | 2002           | Barley                    | 6                                                           |
| 79              | Germany | 2002           | Beer                      | 312                                                         |
| 79              | Germany | 2002           | Beverages, Alcoholic      | 18                                                          |
| 79              | Germany | 2002           | Bovine Meat               | 32                                                          |
| 79              | Germany | 2002           | Butter, Ghee              | 17                                                          |
| 79              | Germany | 2002           | Cereals, Other            | 2                                                           |
| 79              | Germany | 2002           | Cheese                    | 55                                                          |
| 79              | Germany | 2002           | Citrus, Other             | 5                                                           |
| 79              | Germany | 2002           | Cocoa Beans               | 7                                                           |
| 79              | Germany | 2002           | Coconut Oil               | 3                                                           |

Dietary calcium and zinc deficiency risks are decreasing but remain prevalent

| FAO countrycode | Country | Reference year | Food item                 | Gross food supply (g capita <sup>-1</sup> d <sup>-1</sup> ) |
|-----------------|---------|----------------|---------------------------|-------------------------------------------------------------|
| 79              | Germany | 2002           | Coconuts - Incl Copra     | 2                                                           |
| 79              | Germany | 2002           | Coffee                    | 18                                                          |
| 79              | Germany | 2002           | Cream                     | 20                                                          |
| 79              | Germany | 2002           | Crustaceans               | 2                                                           |
| 79              | Germany | 2002           | Demersal Fish             | 18                                                          |
| 79              | Germany | 2002           | Eggs                      | 34                                                          |
| 79              | Germany | 2002           | Fats, Animals, Raw        | 21                                                          |
| 79              | Germany | 2002           | Freshwater Fish           | 7                                                           |
| 79              | Germany | 2002           | Fruits, Other             | 64                                                          |
| 79              | Germany | 2002           | Grapefruit                | 3                                                           |
| 79              | Germany | 2002           | Grapes                    | 21                                                          |
| 79              | Germany | 2002           | Groundnut Oil             | 1                                                           |
| 79              | Germany | 2002           | Groundnuts (Shelled Eq)   | 2                                                           |
| 79              | Germany | 2002           | Honey                     | 3                                                           |
| 79              | Germany | 2002           | Lemons, Limes             | 5                                                           |
| 79              | Germany | 2002           | Maize                     | 29                                                          |
| 79              | Germany | 2002           | Maize Germ Oil            | 1                                                           |
| 79              | Germany | 2002           | Marine Fish, Other        | 1                                                           |
| 79              | Germany | 2002           | Meat, Other               | 9                                                           |
| 79              | Germany | 2002           | Milk, Whole               | 181                                                         |
| 79              | Germany | 2002           | Molluscs, Other           | 2                                                           |
| 79              | Germany | 2002           | Mutton & Goat Meat        | 2                                                           |
| 79              | Germany | 2002           | Nuts                      | 13                                                          |
| 79              | Germany | 2002           | Oats                      | 7                                                           |
| 79              | Germany | 2002           | Offals, Edible            | 8                                                           |
| 79              | Germany | 2002           | Oilcrops Oil, Other       | 1                                                           |
| 79              | Germany | 2002           | Olive Oil                 | 1                                                           |
| 79              | Germany | 2002           | Olives                    | 1                                                           |
| 79              | Germany | 2002           | Onions                    | 15                                                          |
| 79              | Germany | 2002           | Oranges, Mandarines       | 28                                                          |
| 79              | Germany | 2002           | Palm Oil                  | 6                                                           |
| 79              | Germany | 2002           | Peas                      | 1                                                           |
| 79              | Germany | 2002           | Pelagic Fish              | 9                                                           |
| 79              | Germany | 2002           | Pepper                    | 1                                                           |
| 79              | Germany | 2002           | Pigmeat                   | 143                                                         |
| 79              | Germany | 2002           | Pineapples                | 7                                                           |
| 79              | Germany | 2002           | Potatoes                  | 196                                                         |
| 79              | Germany | 2002           | Poultry Meat              | 36                                                          |
| 79              | Germany | 2002           | Rape and Mustard Oil      | 12                                                          |
| 79              | Germany | 2002           | Rice (Milled Equivalent)  | 7                                                           |
| 79              | Germany | 2002           | Rye                       | 29                                                          |
| 79              | Germany | 2002           | Soybean Oil               | 12                                                          |
| 79              | Germany | 2002           | Soybeans                  | 2                                                           |
| 79              | Germany | 2002           | Spices, Other             | 1                                                           |
| 79              | Germany | 2002           | Sugar, Refined Equivalent | 92                                                          |
| 79              | Germany | 2002           | Sunflowerseed Oil         | 8                                                           |
| 79              | Germany | 2002           | Sweeteners, Other         | 20                                                          |
| 79              | Germany | 2002           | Tea                       | 1                                                           |
| 79              | Germany | 2002           | Tomatoes                  | 41                                                          |
| 79              | Germany | 2002           | Vegetables, Other         | 192                                                         |
| 79              | Germany | 2002           | Wheat                     | 234                                                         |
| 79              | Germany | 2002           | Wine                      | 63                                                          |
| 79              | Germany | 2003           | Apples                    | 70                                                          |
| 79              | Germany | 2003           | Bananas                   | 30                                                          |
| 79              | Germany | 2003           | Barley                    | 5                                                           |
| 79              | Germany | 2003           | Beer                      | 296                                                         |
| 79              | Germany | 2003           | Beverages, Alcoholic      | 15                                                          |
| 79              | Germany | 2003           | Beverages, Fermented      | 2                                                           |
| 79              | Germany | 2003           | Bovine Meat               | 31                                                          |
| 79              | Germany | 2003           | Butter, Ghee              | 17                                                          |
| 79              | Germany | 2003           | Cereals, Other            | 1                                                           |
| 79              | Germany | 2003           | Cheese                    | 53                                                          |
| 79              | Germany | 2003           | Citrus, Other             | 7                                                           |
| 79              | Germany | 2003           | Cocoa Beans               | 6                                                           |
| 79              | Germany | 2003           | Coconut Oil               | 2                                                           |
| 79              | Germany | 2003           | Coconuts - Incl Copra     | 2                                                           |
| 79              | Germany | 2003           | Coffee                    | 17                                                          |
| 79              | Germany | 2003           | Cream                     | 20                                                          |
| 79              | Germany | 2003           | Crustaceans               | 2                                                           |
| 79              | Germany | 2003           | Demersal Fish             | 16                                                          |
| 79              | Germany | 2003           | Eggs                      | 33                                                          |
| 79              | Germany | 2003           | Fats, Animals, Raw        | 21                                                          |
| 79              | Germany | 2003           | Freshwater Fish           | 7                                                           |
| 79              | Germany | 2003           | Fruits, Other             | 68                                                          |
| 79              | Germany | 2003           | Grapefruit                | 3                                                           |
| 79              | Germany | 2003           | Grapes                    | 31                                                          |
| 79              | Germany | 2003           | Groundnuts (Shelled Eq)   | 2                                                           |
| 79              | Germany | 2003           | Honey                     | 3                                                           |
| 79              | Germany | 2003           | Lemons, Limes             | 4                                                           |
| 79              | Germany | 2003           | Maize                     | 24                                                          |
| 79              | Germany | 2003           | Maize Germ Oil            | 1                                                           |
| 79              | Germany | 2003           | Marine Fish, Other        | 1                                                           |
| 79              | Germany | 2003           | Meat, Other               | 11                                                          |
| 79              | Germany | 2003           | Milk, Whole               | 206                                                         |
| 79              | Germany | 2003           | Molluscs, Other           | 2                                                           |
| 79              | Germany | 2003           | Mutton & Goat Meat        | 2                                                           |
| 79              | Germany | 2003           | Nuts                      | 13                                                          |
| 79              | Germany | 2003           | Oats                      | 8                                                           |
| 79              | Germany | 2003           | Offals, Edible            | 7                                                           |
| 79              | Germany | 2003           | Oilcrops Oil, Other       | 1                                                           |
| 79              | Germany | 2003           | Olive Oil                 | 1                                                           |
| 79              | Germany | 2003           | Olives                    | 1                                                           |
| 79              | Germany | 2003           | Onions                    | 14                                                          |
| 79              | Germany | 2003           | Oranges, Mandarines       | 28                                                          |
| 79              | Germany | 2003           | Palm Oil                  | 6                                                           |
| 79              | Germany | 2003           | Peas                      | 2                                                           |
| 79              | Germany | 2003           | Pelagic Fish              | 10                                                          |

Dietary calcium and zinc deficiency risks are decreasing but remain prevalent

| FAO countrycode | Country | Reference year | Food item                 | Gross food supply (g capita <sup>-1</sup> d <sup>-1</sup> ) |
|-----------------|---------|----------------|---------------------------|-------------------------------------------------------------|
| 79              | Germany | 2003           | Pepper                    | 1                                                           |
| 79              | Germany | 2003           | Pigmeat                   | 146                                                         |
| 79              | Germany | 2003           | Pineapples                | 5                                                           |
| 79              | Germany | 2003           | Potatoes                  | 191                                                         |
| 79              | Germany | 2003           | Poultry Meat              | 37                                                          |
| 79              | Germany | 2003           | Rape and Mustard Oil      | 13                                                          |
| 79              | Germany | 2003           | Rice (Milled Equivalent)  | 7                                                           |
| 79              | Germany | 2003           | Rye                       | 29                                                          |
| 79              | Germany | 2003           | Soyabean Oil              | 13                                                          |
| 79              | Germany | 2003           | Spices, Other             | 1                                                           |
| 79              | Germany | 2003           | Sugar, Refined Equivalent | 99                                                          |
| 79              | Germany | 2003           | Sunflowerseed Oil         | 7                                                           |
| 79              | Germany | 2003           | Sweeteners, Other         | 22                                                          |
| 79              | Germany | 2003           | Tea                       | 2                                                           |
| 79              | Germany | 2003           | Tomatoes                  | 40                                                          |
| 79              | Germany | 2003           | Vegetables, Other         | 189                                                         |
| 79              | Germany | 2003           | Wheat                     | 214                                                         |
| 79              | Germany | 2003           | Wine                      | 57                                                          |
| 79              | Germany | 2004           | Apples                    | 66                                                          |
| 79              | Germany | 2004           | Bananas                   | 28                                                          |
| 79              | Germany | 2004           | Barley                    | 1                                                           |
| 79              | Germany | 2004           | Beer                      | 285                                                         |
| 79              | Germany | 2004           | Beverages, Alcoholic      | 18                                                          |
| 79              | Germany | 2004           | Beverages, Fermented      | 2                                                           |
| 79              | Germany | 2004           | Bovine Meat               | 34                                                          |
| 79              | Germany | 2004           | Butter, Ghee              | 16                                                          |
| 79              | Germany | 2004           | Cereals, Other            | 1                                                           |
| 79              | Germany | 2004           | Cheese                    | 54                                                          |
| 79              | Germany | 2004           | Citrus, Other             | 1                                                           |
| 79              | Germany | 2004           | Cocoa Beans               | 4                                                           |
| 79              | Germany | 2004           | Coconut Oil               | 4                                                           |
| 79              | Germany | 2004           | Coconuts - Incl Copra     | 2                                                           |
| 79              | Germany | 2004           | Coffee                    | 19                                                          |
| 79              | Germany | 2004           | Cream                     | 16                                                          |
| 79              | Germany | 2004           | Crustaceans               | 2                                                           |
| 79              | Germany | 2004           | Demersal Fish             | 16                                                          |
| 79              | Germany | 2004           | Eggs                      | 33                                                          |
| 79              | Germany | 2004           | Fats, Animals, Raw        | 20                                                          |
| 79              | Germany | 2004           | Freshwater Fish           | 8                                                           |
| 79              | Germany | 2004           | Fruits, Other             | 49                                                          |
| 79              | Germany | 2004           | Grapefruit                | 3                                                           |
| 79              | Germany | 2004           | Grapes                    | 25                                                          |
| 79              | Germany | 2004           | Groundnuts (Shelled Eq)   | 2                                                           |
| 79              | Germany | 2004           | Honey                     | 3                                                           |
| 79              | Germany | 2004           | Lemons, Limes             | 4                                                           |
| 79              | Germany | 2004           | Maize                     | 34                                                          |
| 79              | Germany | 2004           | Maize Germ Oil            | 1                                                           |
| 79              | Germany | 2004           | Marine Fish, Other        | 1                                                           |
| 79              | Germany | 2004           | Meat, Other               | 4                                                           |
| 79              | Germany | 2004           | Milk, Whole               | 203                                                         |
| 79              | Germany | 2004           | Molluscs, Other           | 1                                                           |
| 79              | Germany | 2004           | Mutton & Goat Meat        | 2                                                           |
| 79              | Germany | 2004           | Nuts                      | 15                                                          |
| 79              | Germany | 2004           | Oats                      | 9                                                           |
| 79              | Germany | 2004           | Offals, Edible            | 6                                                           |
| 79              | Germany | 2004           | Oilcrops Oil, Other       | 1                                                           |
| 79              | Germany | 2004           | Olive Oil                 | 1                                                           |
| 79              | Germany | 2004           | Olives                    | 1                                                           |
| 79              | Germany | 2004           | Onions                    | 19                                                          |
| 79              | Germany | 2004           | Oranges, Mandarines       | 48                                                          |
| 79              | Germany | 2004           | Palm Oil                  | 7                                                           |
| 79              | Germany | 2004           | Peas                      | 1                                                           |
| 79              | Germany | 2004           | Pelagic Fish              | 9                                                           |
| 79              | Germany | 2004           | Pepper                    | 1                                                           |
| 79              | Germany | 2004           | Pigmeat                   | 147                                                         |
| 79              | Germany | 2004           | Pineapples                | 7                                                           |
| 79              | Germany | 2004           | Potatoes                  | 204                                                         |
| 79              | Germany | 2004           | Poultry Meat              | 40                                                          |
| 79              | Germany | 2004           | Rape and Mustard Oil      | 14                                                          |
| 79              | Germany | 2004           | Rice (Milled Equivalent)  | 7                                                           |
| 79              | Germany | 2004           | Rye                       | 28                                                          |
| 79              | Germany | 2004           | Soyabean Oil              | 12                                                          |
| 79              | Germany | 2004           | Spices, Other             | 1                                                           |
| 79              | Germany | 2004           | Sugar, Refined Equivalent | 99                                                          |
| 79              | Germany | 2004           | Sunflowerseed Oil         | 8                                                           |
| 79              | Germany | 2004           | Sweeteners, Other         | 24                                                          |
| 79              | Germany | 2004           | Tea                       | 2                                                           |
| 79              | Germany | 2004           | Tomatoes                  | 41                                                          |
| 79              | Germany | 2004           | Vegetables, Other         | 190                                                         |
| 79              | Germany | 2004           | Wheat                     | 213                                                         |
| 79              | Germany | 2004           | Wine                      | 66                                                          |
| 79              | Germany | 2005           | Apples                    | 63                                                          |
| 79              | Germany | 2005           | Bananas                   | 29                                                          |
| 79              | Germany | 2005           | Barley                    | 1                                                           |
| 79              | Germany | 2005           | Beer                      | 276                                                         |
| 79              | Germany | 2005           | Beverages, Alcoholic      | 23                                                          |
| 79              | Germany | 2005           | Beverages, Fermented      | 2                                                           |
| 79              | Germany | 2005           | Bovine Meat               | 33                                                          |
| 79              | Germany | 2005           | Butter, Ghee              | 16                                                          |
| 79              | Germany | 2005           | Cereals, Other            | 2                                                           |
| 79              | Germany | 2005           | Cheese                    | 54                                                          |
| 79              | Germany | 2005           | Cocoa Beans               | 5                                                           |
| 79              | Germany | 2005           | Coconut Oil               | 3                                                           |
| 79              | Germany | 2005           | Coconuts - Incl Copra     | 2                                                           |
| 79              | Germany | 2005           | Coffee                    | 14                                                          |
| 79              | Germany | 2005           | Cream                     | 17                                                          |
| 79              | Germany | 2005           | Crustaceans               | 2                                                           |

Dietary calcium and zinc deficiency risks are decreasing but remain prevalent

| FAO countrycode | Country | Reference year | Food item                 | Gross food supply (g capita <sup>-1</sup> d <sup>-1</sup> ) |
|-----------------|---------|----------------|---------------------------|-------------------------------------------------------------|
| 79              | Germany | 2005           | Demersal Fish             | 16                                                          |
| 79              | Germany | 2005           | Eggs                      | 32                                                          |
| 79              | Germany | 2005           | Fats, Animals, Raw        | 20                                                          |
| 79              | Germany | 2005           | Freshwater Fish           | 9                                                           |
| 79              | Germany | 2005           | Fruits, Other             | 61                                                          |
| 79              | Germany | 2005           | Grapefruit                | 4                                                           |
| 79              | Germany | 2005           | Grapes                    | 28                                                          |
| 79              | Germany | 2005           | Groundnuts (Shelled Eq)   | 2                                                           |
| 79              | Germany | 2005           | Honey                     | 3                                                           |
| 79              | Germany | 2005           | Lemons, Limes             | 4                                                           |
| 79              | Germany | 2005           | Maize                     | 33                                                          |
| 79              | Germany | 2005           | Marine Fish, Other        | 1                                                           |
| 79              | Germany | 2005           | Meat, Other               | 4                                                           |
| 79              | Germany | 2005           | Milk, Whole               | 188                                                         |
| 79              | Germany | 2005           | Molluscs, Other           | 1                                                           |
| 79              | Germany | 2005           | Mutton & Goat Meat        | 3                                                           |
| 79              | Germany | 2005           | Nuts                      | 14                                                          |
| 79              | Germany | 2005           | Oats                      | 8                                                           |
| 79              | Germany | 2005           | Offals, Edible            | 5                                                           |
| 79              | Germany | 2005           | Oilcrops Oil, Other       | 2                                                           |
| 79              | Germany | 2005           | Olive Oil                 | 1                                                           |
| 79              | Germany | 2005           | Olives                    | 1                                                           |
| 79              | Germany | 2005           | Onions                    | 16                                                          |
| 79              | Germany | 2005           | Oranges, Mandarines       | 33                                                          |
| 79              | Germany | 2005           | Palm Oil                  | 7                                                           |
| 79              | Germany | 2005           | Peas                      | 1                                                           |
| 79              | Germany | 2005           | Pelagic Fish              | 9                                                           |
| 79              | Germany | 2005           | Pigmeat                   | 146                                                         |
| 79              | Germany | 2005           | Pineapples                | 8                                                           |
| 79              | Germany | 2005           | Potatoes                  | 181                                                         |
| 79              | Germany | 2005           | Poultry Meat              | 39                                                          |
| 79              | Germany | 2005           | Rape and Mustard Oil      | 13                                                          |
| 79              | Germany | 2005           | Rice (Milled Equivalent)  | 7                                                           |
| 79              | Germany | 2005           | Rye                       | 27                                                          |
| 79              | Germany | 2005           | Soyabean Oil              | 12                                                          |
| 79              | Germany | 2005           | Spices, Other             | 1                                                           |
| 79              | Germany | 2005           | Sugar, Refined Equivalent | 103                                                         |
| 79              | Germany | 2005           | Sunflowerseed Oil         | 8                                                           |
| 79              | Germany | 2005           | Sweeteners, Other         | 25                                                          |
| 79              | Germany | 2005           | Tea                       | 2                                                           |
| 79              | Germany | 2005           | Tomatoes                  | 43                                                          |
| 79              | Germany | 2005           | Vegetables, Other         | 177                                                         |
| 79              | Germany | 2005           | Wheat                     | 226                                                         |
| 79              | Germany | 2005           | Wine                      | 62                                                          |
| 79              | Germany | 2006           | Apples                    | 58                                                          |
| 79              | Germany | 2006           | Bananas                   | 28                                                          |
| 79              | Germany | 2006           | Barley                    | 1                                                           |
| 79              | Germany | 2006           | Beer                      | 296                                                         |
| 79              | Germany | 2006           | Beverages, Alcoholic      | 26                                                          |
| 79              | Germany | 2006           | Beverages, Fermented      | 1                                                           |
| 79              | Germany | 2006           | Bovine Meat               | 33                                                          |
| 79              | Germany | 2006           | Butter, Ghee              | 17                                                          |
| 79              | Germany | 2006           | Cereals, Other            | 2                                                           |
| 79              | Germany | 2006           | Cheese                    | 55                                                          |
| 79              | Germany | 2006           | Cocoa Beans               | 5                                                           |
| 79              | Germany | 2006           | Coconut Oil               | 2                                                           |
| 79              | Germany | 2006           | Coconuts - Incl Copra     | 2                                                           |
| 79              | Germany | 2006           | Coffee                    | 15                                                          |
| 79              | Germany | 2006           | Cream                     | 18                                                          |
| 79              | Germany | 2006           | Crustaceans               | 2                                                           |
| 79              | Germany | 2006           | Demersal Fish             | 17                                                          |
| 79              | Germany | 2006           | Eggs                      | 33                                                          |
| 79              | Germany | 2006           | Fats, Animals, Raw        | 17                                                          |
| 79              | Germany | 2006           | Freshwater Fish           | 9                                                           |
| 79              | Germany | 2006           | Fruits, Other             | 53                                                          |
| 79              | Germany | 2006           | Grapefruit                | 3                                                           |
| 79              | Germany | 2006           | Grapes                    | 30                                                          |
| 79              | Germany | 2006           | Groundnut Oil             | 1                                                           |
| 79              | Germany | 2006           | Groundnuts (Shelled Eq)   | 2                                                           |
| 79              | Germany | 2006           | Honey                     | 3                                                           |
| 79              | Germany | 2006           | Lemons, Limes             | 4                                                           |
| 79              | Germany | 2006           | Maize                     | 34                                                          |
| 79              | Germany | 2006           | Maize Germ Oil            | 1                                                           |
| 79              | Germany | 2006           | Marine Fish, Other        | 1                                                           |
| 79              | Germany | 2006           | Meat, Other               | 5                                                           |
| 79              | Germany | 2006           | Milk, Whole               | 181                                                         |
| 79              | Germany | 2006           | Molluscs, Other           | 1                                                           |
| 79              | Germany | 2006           | Mutton & Goat Meat        | 2                                                           |
| 79              | Germany | 2006           | Nuts                      | 15                                                          |
| 79              | Germany | 2006           | Oats                      | 8                                                           |
| 79              | Germany | 2006           | Offals, Edible            | 6                                                           |
| 79              | Germany | 2006           | Oilcrops Oil, Other       | 1                                                           |
| 79              | Germany | 2006           | Olive Oil                 | 2                                                           |
| 79              | Germany | 2006           | Olives                    | 1                                                           |
| 79              | Germany | 2006           | Onions                    | 15                                                          |
| 79              | Germany | 2006           | Oranges, Mandarines       | 40                                                          |
| 79              | Germany | 2006           | Palm Oil                  | 7                                                           |
| 79              | Germany | 2006           | Peas                      | 1                                                           |
| 79              | Germany | 2006           | Pelagic Fish              | 10                                                          |
| 79              | Germany | 2006           | Pepper                    | 1                                                           |
| 79              | Germany | 2006           | Pigmeat                   | 146                                                         |
| 79              | Germany | 2006           | Pineapples                | 8                                                           |
| 79              | Germany | 2006           | Potatoes                  | 174                                                         |
| 79              | Germany | 2006           | Poultry Meat              | 38                                                          |
| 79              | Germany | 2006           | Pulses, Other             | 1                                                           |
| 79              | Germany | 2006           | Rape and Mustard Oil      | 14                                                          |
| 79              | Germany | 2006           | Rice (Milled Equivalent)  | 7                                                           |



## Dietary calcium and zinc deficiency risks are decreasing but remain prevalent

| FAO countrycode | Country | Reference year | Food item                 | Gross food supply (g capita <sup>-1</sup> d <sup>-1</sup> ) |
|-----------------|---------|----------------|---------------------------|-------------------------------------------------------------|
| 79              | Germany | 2006           | Rye                       | 28                                                          |
| 79              | Germany | 2006           | Soyabean Oil              | 13                                                          |
| 79              | Germany | 2006           | Soyabeans                 | 2                                                           |
| 79              | Germany | 2006           | Spices, Other             | 1                                                           |
| 79              | Germany | 2006           | Sugar, Refined Equivalent | 98                                                          |
| 79              | Germany | 2006           | Sunflowerseed Oil         | 8                                                           |
| 79              | Germany | 2006           | Sweeteners, Other         | 22                                                          |
| 79              | Germany | 2006           | Tea                       | 3                                                           |
| 79              | Germany | 2006           | Tomatoes                  | 41                                                          |
| 79              | Germany | 2006           | Vegetables, Other         | 185                                                         |
| 79              | Germany | 2006           | Wheat                     | 222                                                         |
| 79              | Germany | 2006           | Wine                      | 61                                                          |
| 79              | Germany | 2007           | Apples                    | 57                                                          |
| 79              | Germany | 2007           | Bananas                   | 28                                                          |
| 79              | Germany | 2007           | Barley                    | 1                                                           |
| 79              | Germany | 2007           | Beer                      | 286                                                         |
| 79              | Germany | 2007           | Beverages, Alcoholic      | 24                                                          |
| 79              | Germany | 2007           | Beverages, Fermented      | 1                                                           |
| 79              | Germany | 2007           | Bovine Meat               | 35                                                          |
| 79              | Germany | 2007           | Butter, Ghee              | 17                                                          |
| 79              | Germany | 2007           | Cereals, Other            | 3                                                           |
| 79              | Germany | 2007           | Cheese                    | 56                                                          |
| 79              | Germany | 2007           | Cocoa Beans               | 7                                                           |
| 79              | Germany | 2007           | Coconut Oil               | 9                                                           |
| 79              | Germany | 2007           | Coconuts - Incl Copra     | 2                                                           |
| 79              | Germany | 2007           | Coffee                    | 16                                                          |
| 79              | Germany | 2007           | Cream                     | 17                                                          |
| 79              | Germany | 2007           | Crustaceans               | 3                                                           |
| 79              | Germany | 2007           | Demersal Fish             | 18                                                          |
| 79              | Germany | 2007           | Eggs                      | 33                                                          |
| 79              | Germany | 2007           | Fats, Animals, Raw        | 19                                                          |
| 79              | Germany | 2007           | Freshwater Fish           | 10                                                          |
| 79              | Germany | 2007           | Fruits, Other             | 63                                                          |
| 79              | Germany | 2007           | Grapefruit                | 4                                                           |
| 79              | Germany | 2007           | Grapes                    | 24                                                          |
| 79              | Germany | 2007           | Groundnuts (Shelled Eq)   | 3                                                           |
| 79              | Germany | 2007           | Honey                     | 3                                                           |
| 79              | Germany | 2007           | Lemons, Limes             | 5                                                           |
| 79              | Germany | 2007           | Maize                     | 30                                                          |
| 79              | Germany | 2007           | Marine Fish, Other        | 1                                                           |
| 79              | Germany | 2007           | Meat, Other               | 7                                                           |
| 79              | Germany | 2007           | Milk, Whole               | 191                                                         |
| 79              | Germany | 2007           | Molluscs, Other           | 2                                                           |
| 79              | Germany | 2007           | Mutton & Goat Meat        | 2                                                           |
| 79              | Germany | 2007           | Nuts                      | 15                                                          |
| 79              | Germany | 2007           | Oats                      | 7                                                           |
| 79              | Germany | 2007           | Offals, Edible            | 6                                                           |
| 79              | Germany | 2007           | Oilcrops Oil, Other       | 2                                                           |
| 79              | Germany | 2007           | Olive Oil                 | 2                                                           |
| 79              | Germany | 2007           | Olives                    | 2                                                           |
| 79              | Germany | 2007           | Onions                    | 16                                                          |
| 79              | Germany | 2007           | Oranges, Mandarines       | 31                                                          |
| 79              | Germany | 2007           | Palm Oil                  | 2                                                           |
| 79              | Germany | 2007           | Peas                      | 1                                                           |
| 79              | Germany | 2007           | Pelagic Fish              | 8                                                           |
| 79              | Germany | 2007           | Pepper                    | 1                                                           |
| 79              | Germany | 2007           | Pigmeat                   | 149                                                         |
| 79              | Germany | 2007           | Pineapples                | 9                                                           |
| 79              | Germany | 2007           | Potatoes                  | 194                                                         |
| 79              | Germany | 2007           | Poultry Meat              | 41                                                          |
| 79              | Germany | 2007           | Pulses, Other             | 1                                                           |
| 79              | Germany | 2007           | Rape and Mustard Oil      | 12                                                          |
| 79              | Germany | 2007           | Rice (Milled Equivalent)  | 8                                                           |
| 79              | Germany | 2007           | Rye                       | 29                                                          |
| 79              | Germany | 2007           | Soyabean Oil              | 15                                                          |
| 79              | Germany | 2007           | Soyabeans                 | 2                                                           |
| 79              | Germany | 2007           | Spices, Other             | 1                                                           |
| 79              | Germany | 2007           | Sugar, Refined Equivalent | 88                                                          |
| 79              | Germany | 2007           | Sunflowerseed Oil         | 8                                                           |
| 79              | Germany | 2007           | Sweeteners, Other         | 27                                                          |
| 79              | Germany | 2007           | Tea                       | 3                                                           |
| 79              | Germany | 2007           | Tomatoes                  | 47                                                          |
| 79              | Germany | 2007           | Vegetables, Other         | 175                                                         |
| 79              | Germany | 2007           | Wheat                     | 226                                                         |
| 79              | Germany | 2007           | Wine                      | 67                                                          |
| 79              | Germany | 2008           | Apples                    | 55                                                          |
| 79              | Germany | 2008           | Bananas                   | 29                                                          |
| 79              | Germany | 2008           | Barley                    | 1                                                           |
| 79              | Germany | 2008           | Beer                      | 277                                                         |
| 79              | Germany | 2008           | Beverages, Alcoholic      | 23                                                          |
| 79              | Germany | 2008           | Beverages, Fermented      | 1                                                           |
| 79              | Germany | 2008           | Bovine Meat               | 34                                                          |
| 79              | Germany | 2008           | Butter, Ghee              | 16                                                          |
| 79              | Germany | 2008           | Cereals, Other            | 2                                                           |
| 79              | Germany | 2008           | Cheese                    | 56                                                          |
| 79              | Germany | 2008           | Cocoa Beans               | 5                                                           |
| 79              | Germany | 2008           | Coconut Oil               | 7                                                           |
| 79              | Germany | 2008           | Coconuts - Incl Copra     | 2                                                           |
| 79              | Germany | 2008           | Coffee                    | 17                                                          |
| 79              | Germany | 2008           | Cream                     | 17                                                          |
| 79              | Germany | 2008           | Crustaceans               | 3                                                           |
| 79              | Germany | 2008           | Demersal Fish             | 17                                                          |
| 79              | Germany | 2008           | Eggs                      | 33                                                          |
| 79              | Germany | 2008           | Fats, Animals, Raw        | 19                                                          |
| 79              | Germany | 2008           | Freshwater Fish           | 10                                                          |
| 79              | Germany | 2008           | Fruits, Other             | 60                                                          |
| 79              | Germany | 2008           | Grapefruit                | 5                                                           |

Dietary calcium and zinc deficiency risks are decreasing but remain prevalent

| FAO countrycode | Country | Reference year | Food item                 | Gross food supply (g capita <sup>-1</sup> d <sup>-1</sup> ) |
|-----------------|---------|----------------|---------------------------|-------------------------------------------------------------|
| 79              | Germany | 2008           | Grapes                    | 24                                                          |
| 79              | Germany | 2008           | Groundnuts (Shelled Eq)   | 3                                                           |
| 79              | Germany | 2008           | Honey                     | 3                                                           |
| 79              | Germany | 2008           | Lemons, Limes             | 4                                                           |
| 79              | Germany | 2008           | Maize                     | 29                                                          |
| 79              | Germany | 2008           | Maize Germ Oil            | 1                                                           |
| 79              | Germany | 2008           | Meat, Other               | 7                                                           |
| 79              | Germany | 2008           | Milk, Whole               | 179                                                         |
| 79              | Germany | 2008           | Molluscs, Other           | 1                                                           |
| 79              | Germany | 2008           | Mutton & Goat Meat        | 2                                                           |
| 79              | Germany | 2008           | Nuts                      | 16                                                          |
| 79              | Germany | 2008           | Oats                      | 7                                                           |
| 79              | Germany | 2008           | Offals, Edible            | 5                                                           |
| 79              | Germany | 2008           | Oilcrops Oil, Other       | 2                                                           |
| 79              | Germany | 2008           | Olive Oil                 | 2                                                           |
| 79              | Germany | 2008           | Olives                    | 2                                                           |
| 79              | Germany | 2008           | Onions                    | 17                                                          |
| 79              | Germany | 2008           | Oranges, Mandarines       | 27                                                          |
| 79              | Germany | 2008           | Peas                      | 1                                                           |
| 79              | Germany | 2008           | Pelagic Fish              | 8                                                           |
| 79              | Germany | 2008           | Pigmeat                   | 145                                                         |
| 79              | Germany | 2008           | Pineapples                | 10                                                          |
| 79              | Germany | 2008           | Potatoes                  | 191                                                         |
| 79              | Germany | 2008           | Poultry Meat              | 46                                                          |
| 79              | Germany | 2008           | Pulses, Other             | 1                                                           |
| 79              | Germany | 2008           | Rape and Mustard Oil      | 16                                                          |
| 79              | Germany | 2008           | Rice (Milled Equivalent)  | 8                                                           |
| 79              | Germany | 2008           | Rye                       | 29                                                          |
| 79              | Germany | 2008           | Soyabean Oil              | 15                                                          |
| 79              | Germany | 2008           | Soyabeans                 | 2                                                           |
| 79              | Germany | 2008           | Spices, Other             | 1                                                           |
| 79              | Germany | 2008           | Sugar, Refined Equivalent | 97                                                          |
| 79              | Germany | 2008           | Sunflowerseed Oil         | 8                                                           |
| 79              | Germany | 2008           | Sweeteners, Other         | 27                                                          |
| 79              | Germany | 2008           | Tea                       | 3                                                           |
| 79              | Germany | 2008           | Tomatoes                  | 48                                                          |
| 79              | Germany | 2008           | Vegetables, Other         | 177                                                         |
| 79              | Germany | 2008           | Wheat                     | 226                                                         |
| 79              | Germany | 2008           | Wine                      | 65                                                          |
| 79              | Germany | 2009           | Apples                    | 56                                                          |
| 79              | Germany | 2009           | Bananas                   | 29                                                          |
| 79              | Germany | 2009           | Barley                    | 1                                                           |
| 79              | Germany | 2009           | Beer                      | 271                                                         |
| 79              | Germany | 2009           | Beverages, Alcoholic      | 26                                                          |
| 79              | Germany | 2009           | Beverages, Fermented      | 1                                                           |
| 79              | Germany | 2009           | Bovine Meat               | 34                                                          |
| 79              | Germany | 2009           | Butter, Ghee              | 14                                                          |
| 79              | Germany | 2009           | Cereals, Other            | 2                                                           |
| 79              | Germany | 2009           | Cheese                    | 56                                                          |
| 79              | Germany | 2009           | Citrus, Other             | 1                                                           |
| 79              | Germany | 2009           | Cocoa Beans               | 5                                                           |
| 79              | Germany | 2009           | Coconuts - Incl Copra     | 2                                                           |
| 79              | Germany | 2009           | Coffee                    | 16                                                          |
| 79              | Germany | 2009           | Cream                     | 17                                                          |
| 79              | Germany | 2009           | Crustaceans               | 4                                                           |
| 79              | Germany | 2009           | Demersal Fish             | 15                                                          |
| 79              | Germany | 2009           | Eggs                      | 33                                                          |
| 79              | Germany | 2009           | Fats, Animals, Raw        | 19                                                          |
| 79              | Germany | 2009           | Freshwater Fish           | 12                                                          |
| 79              | Germany | 2009           | Fruits, Other             | 62                                                          |
| 79              | Germany | 2009           | Grapefruit                | 5                                                           |
| 79              | Germany | 2009           | Grapes                    | 22                                                          |
| 79              | Germany | 2009           | Groundnuts (Shelled Eq)   | 3                                                           |
| 79              | Germany | 2009           | Honey                     | 3                                                           |
| 79              | Germany | 2009           | Lemons, Limes             | 4                                                           |
| 79              | Germany | 2009           | Maize                     | 24                                                          |
| 79              | Germany | 2009           | Maize Germ Oil            | 1                                                           |
| 79              | Germany | 2009           | Marine Fish, Other        | 1                                                           |
| 79              | Germany | 2009           | Meat, Other               | 7                                                           |
| 79              | Germany | 2009           | Milk, Whole               | 210                                                         |
| 79              | Germany | 2009           | Molluscs, Other           | 1                                                           |
| 79              | Germany | 2009           | Mutton & Goat Meat        | 2                                                           |
| 79              | Germany | 2009           | Nuts                      | 17                                                          |
| 79              | Germany | 2009           | Oats                      | 7                                                           |
| 79              | Germany | 2009           | Offals, Edible            | 4                                                           |
| 79              | Germany | 2009           | Oilcrops Oil, Other       | 1                                                           |
| 79              | Germany | 2009           | Olive Oil                 | 2                                                           |
| 79              | Germany | 2009           | Olives                    | 2                                                           |
| 79              | Germany | 2009           | Onions                    | 17                                                          |
| 79              | Germany | 2009           | Oranges, Mandarines       | 27                                                          |
| 79              | Germany | 2009           | Palm Oil                  | 11                                                          |
| 79              | Germany | 2009           | Peas                      | 1                                                           |
| 79              | Germany | 2009           | Pelagic Fish              | 7                                                           |
| 79              | Germany | 2009           | Pepper                    | 1                                                           |
| 79              | Germany | 2009           | Pigmeat                   | 146                                                         |
| 79              | Germany | 2009           | Pimento                   | 1                                                           |
| 79              | Germany | 2009           | Pineapples                | 10                                                          |
| 79              | Germany | 2009           | Potatoes                  | 193                                                         |
| 79              | Germany | 2009           | Poultry Meat              | 46                                                          |
| 79              | Germany | 2009           | Rape and Mustard Oil      | 13                                                          |
| 79              | Germany | 2009           | Rice (Milled Equivalent)  | 8                                                           |
| 79              | Germany | 2009           | Rye                       | 28                                                          |
| 79              | Germany | 2009           | Soyabean Oil              | 14                                                          |
| 79              | Germany | 2009           | Soyabeans                 | 2                                                           |
| 79              | Germany | 2009           | Spices, Other             | 1                                                           |
| 79              | Germany | 2009           | Sugar, Refined Equivalent | 93                                                          |
| 79              | Germany | 2009           | Sunflowerseed Oil         | 8                                                           |

Dietary calcium and zinc deficiency risks are decreasing but remain prevalent

| FAO countrycode | Country | Reference year | Food item                 | Gross food supply (g capita <sup>-1</sup> d <sup>-1</sup> ) |
|-----------------|---------|----------------|---------------------------|-------------------------------------------------------------|
| 79              | Germany | 2009           | Sweeteners, Other         | 28                                                          |
| 79              | Germany | 2009           | Tea                       | 2                                                           |
| 79              | Germany | 2009           | Tomatoes                  | 50                                                          |
| 79              | Germany | 2009           | Vegetables, Other         | 184                                                         |
| 79              | Germany | 2009           | Wheat                     | 235                                                         |
| 79              | Germany | 2009           | Wine                      | 64                                                          |
| 79              | Germany | 2010           | Apples                    | 51                                                          |
| 79              | Germany | 2010           | Bananas                   | 28                                                          |
| 79              | Germany | 2010           | Barley                    | 1                                                           |
| 79              | Germany | 2010           | Beer                      | 267                                                         |
| 79              | Germany | 2010           | Beverages, Alcoholic      | 21                                                          |
| 79              | Germany | 2010           | Beverages, Fermented      | 1                                                           |
| 79              | Germany | 2010           | Bovine Meat               | 34                                                          |
| 79              | Germany | 2010           | Butter, Ghee              | 14                                                          |
| 79              | Germany | 2010           | Cereals, Other            | 2                                                           |
| 79              | Germany | 2010           | Cheese                    | 58                                                          |
| 79              | Germany | 2010           | Citrus, Other             | 1                                                           |
| 79              | Germany | 2010           | Cocoa Beans               | 3                                                           |
| 79              | Germany | 2010           | Coconut Oil               | 7                                                           |
| 79              | Germany | 2010           | Coconuts - Incl Copra     | 2                                                           |
| 79              | Germany | 2010           | Coffee                    | 17                                                          |
| 79              | Germany | 2010           | Cream                     | 17                                                          |
| 79              | Germany | 2010           | Crustaceans               | 4                                                           |
| 79              | Germany | 2010           | Demersal Fish             | 15                                                          |
| 79              | Germany | 2010           | Eggs                      | 34                                                          |
| 79              | Germany | 2010           | Fats, Animals, Raw        | 22                                                          |
| 79              | Germany | 2010           | Freshwater Fish           | 12                                                          |
| 79              | Germany | 2010           | Fruits, Other             | 60                                                          |
| 79              | Germany | 2010           | Grapefruit                | 5                                                           |
| 79              | Germany | 2010           | Grapes                    | 24                                                          |
| 79              | Germany | 2010           | Groundnuts (Shelled Eq)   | 3                                                           |
| 79              | Germany | 2010           | Honey                     | 3                                                           |
| 79              | Germany | 2010           | Lemons, Limes             | 4                                                           |
| 79              | Germany | 2010           | Maize                     | 24                                                          |
| 79              | Germany | 2010           | Maize Germ Oil            | 1                                                           |
| 79              | Germany | 2010           | Marine Fish, Other        | 1                                                           |
| 79              | Germany | 2010           | Meat, Other               | 6                                                           |
| 79              | Germany | 2010           | Milk, Whole               | 206                                                         |
| 79              | Germany | 2010           | Molluscs, Other           | 1                                                           |
| 79              | Germany | 2010           | Mutton & Goat Meat        | 2                                                           |
| 79              | Germany | 2010           | Nuts                      | 17                                                          |
| 79              | Germany | 2010           | Oats                      | 7                                                           |
| 79              | Germany | 2010           | Offals, Edible            | 4                                                           |
| 79              | Germany | 2010           | Oilcrops Oil, Other       | 2                                                           |
| 79              | Germany | 2010           | Olive Oil                 | 2                                                           |
| 79              | Germany | 2010           | Olives                    | 2                                                           |
| 79              | Germany | 2010           | Onions                    | 16                                                          |
| 79              | Germany | 2010           | Oranges, Mandarines       | 27                                                          |
| 79              | Germany | 2010           | Peas                      | 1                                                           |
| 79              | Germany | 2010           | Pelagic Fish              | 6                                                           |
| 79              | Germany | 2010           | Pepper                    | 1                                                           |
| 79              | Germany | 2010           | Pigmeat                   | 149                                                         |
| 79              | Germany | 2010           | Pineapples                | 9                                                           |
| 79              | Germany | 2010           | Potatoes                  | 170                                                         |
| 79              | Germany | 2010           | Poultry Meat              | 49                                                          |
| 79              | Germany | 2010           | Pulses, Other             | 1                                                           |
| 79              | Germany | 2010           | Rape and Mustard Oil      | 14                                                          |
| 79              | Germany | 2010           | Rice (Milled Equivalent)  | 8                                                           |
| 79              | Germany | 2010           | Rye                       | 28                                                          |
| 79              | Germany | 2010           | Soyabean Oil              | 14                                                          |
| 79              | Germany | 2010           | Soyabeans                 | 2                                                           |
| 79              | Germany | 2010           | Spices, Other             | 1                                                           |
| 79              | Germany | 2010           | Sugar, Refined Equivalent | 97                                                          |
| 79              | Germany | 2010           | Sunflowerseed Oil         | 8                                                           |
| 79              | Germany | 2010           | Sweeteners, Other         | 28                                                          |
| 79              | Germany | 2010           | Tea                       | 1                                                           |
| 79              | Germany | 2010           | Tomatoes                  | 51                                                          |
| 79              | Germany | 2010           | Vegetables, Other         | 180                                                         |
| 79              | Germany | 2010           | Wheat                     | 239                                                         |
| 79              | Germany | 2010           | Wine                      | 55                                                          |
| 79              | Germany | 2011           | Apples                    | 53                                                          |
| 79              | Germany | 2011           | Bananas                   | 28                                                          |
| 79              | Germany | 2011           | Barley                    | 1                                                           |
| 79              | Germany | 2011           | Beer                      | 268                                                         |
| 79              | Germany | 2011           | Beverages, Alcoholic      | 25                                                          |
| 79              | Germany | 2011           | Beverages, Fermented      | 1                                                           |
| 79              | Germany | 2011           | Bovine Meat               | 37                                                          |
| 79              | Germany | 2011           | Butter, Ghee              | 15                                                          |
| 79              | Germany | 2011           | Cereals, Other            | 2                                                           |
| 79              | Germany | 2011           | Cheese                    | 59                                                          |
| 79              | Germany | 2011           | Citrus, Other             | 1                                                           |
| 79              | Germany | 2011           | Cocoa Beans               | 6                                                           |
| 79              | Germany | 2011           | Coconuts - Incl Copra     | 2                                                           |
| 79              | Germany | 2011           | Coffee                    | 18                                                          |
| 79              | Germany | 2011           | Cream                     | 18                                                          |
| 79              | Germany | 2011           | Crustaceans               | 4                                                           |
| 79              | Germany | 2011           | Demersal Fish             | 15                                                          |
| 79              | Germany | 2011           | Eggs                      | 35                                                          |
| 79              | Germany | 2011           | Fats, Animals, Raw        | 22                                                          |
| 79              | Germany | 2011           | Freshwater Fish           | 12                                                          |
| 79              | Germany | 2011           | Fruits, Other             | 43                                                          |
| 79              | Germany | 2011           | Grapefruit                | 4                                                           |
| 79              | Germany | 2011           | Grapes                    | 25                                                          |
| 79              | Germany | 2011           | Groundnuts (Shelled Eq)   | 3                                                           |
| 79              | Germany | 2011           | Honey                     | 3                                                           |
| 79              | Germany | 2011           | Lemons, Limes             | 4                                                           |
| 79              | Germany | 2011           | Maize                     | 27                                                          |

Dietary calcium and zinc deficiency risks are decreasing but remain prevalent

| FAO countrycode | Country | Reference year | Food item                 | Gross food supply (g capita <sup>-1</sup> d <sup>-1</sup> ) |
|-----------------|---------|----------------|---------------------------|-------------------------------------------------------------|
| 79              | Germany | 2011           | Marine Fish, Other        | 1                                                           |
| 79              | Germany | 2011           | Meat, Other               | 6                                                           |
| 79              | Germany | 2011           | Milk, Whole               | 218                                                         |
| 79              | Germany | 2011           | Molluscs, Other           | 1                                                           |
| 79              | Germany | 2011           | Mutton & Goat Meat        | 2                                                           |
| 79              | Germany | 2011           | Nuts                      | 18                                                          |
| 79              | Germany | 2011           | Oats                      | 6                                                           |
| 79              | Germany | 2011           | Offals, Edible            | 3                                                           |
| 79              | Germany | 2011           | Oilcrops Oil, Other       | 2                                                           |
| 79              | Germany | 2011           | Olive Oil                 | 2                                                           |
| 79              | Germany | 2011           | Olives                    | 2                                                           |
| 79              | Germany | 2011           | Onions                    | 21                                                          |
| 79              | Germany | 2011           | Oranges, Mandarines       | 52                                                          |
| 79              | Germany | 2011           | Palm Oil                  | 7                                                           |
| 79              | Germany | 2011           | Peas                      | 2                                                           |
| 79              | Germany | 2011           | Pelagic Fish              | 6                                                           |
| 79              | Germany | 2011           | Pigmeat                   | 147                                                         |
| 79              | Germany | 2011           | Pineapples                | 9                                                           |
| 79              | Germany | 2011           | Potatoes                  | 194                                                         |
| 79              | Germany | 2011           | Poultry Meat              | 49                                                          |
| 79              | Germany | 2011           | Pulses, Other             | 1                                                           |
| 79              | Germany | 2011           | Rape and Mustard Oil      | 14                                                          |
| 79              | Germany | 2011           | Rice (Milled Equivalent)  | 8                                                           |
| 79              | Germany | 2011           | Rye                       | 28                                                          |
| 79              | Germany | 2011           | Soyabean Oil              | 14                                                          |
| 79              | Germany | 2011           | Soyabeans                 | 2                                                           |
| 79              | Germany | 2011           | Spices, Other             | 1                                                           |
| 79              | Germany | 2011           | Sugar, Refined Equivalent | 93                                                          |
| 79              | Germany | 2011           | Sunflowerseed Oil         | 8                                                           |
| 79              | Germany | 2011           | Sweeteners, Other         | 27                                                          |
| 79              | Germany | 2011           | Tea                       | 1                                                           |
| 79              | Germany | 2011           | Tomatoes                  | 52                                                          |
| 79              | Germany | 2011           | Vegetables, Other         | 186                                                         |
| 79              | Germany | 2011           | Wheat                     | 234                                                         |
| 79              | Germany | 2011           | Wine                      | 68                                                          |
| 81              | Ghana   | 1992           | Bananas                   | 1                                                           |
| 81              | Ghana   | 1992           | Beer                      | 12                                                          |
| 81              | Ghana   | 1992           | Beverages, Fermented      | 49                                                          |
| 81              | Ghana   | 1992           | Bovine Meat               | 9                                                           |
| 81              | Ghana   | 1992           | Cassava                   | 529                                                         |
| 81              | Ghana   | 1992           | Cocoa Beans               | 1                                                           |
| 81              | Ghana   | 1992           | Coconut Oil               | 1                                                           |
| 81              | Ghana   | 1992           | Coconuts - Incl Copra     | 21                                                          |
| 81              | Ghana   | 1992           | Demersal Fish             | 6                                                           |
| 81              | Ghana   | 1992           | Eggs                      | 2                                                           |
| 81              | Ghana   | 1992           | Freshwater Fish           | 11                                                          |
| 81              | Ghana   | 1992           | Fruits, Other             | 8                                                           |
| 81              | Ghana   | 1992           | Groundnut Oil             | 2                                                           |
| 81              | Ghana   | 1992           | Groundnuts (Shelled Eq)   | 5                                                           |
| 81              | Ghana   | 1992           | Lemons, Limes             | 4                                                           |
| 81              | Ghana   | 1992           | Maize                     | 57                                                          |
| 81              | Ghana   | 1992           | Marine Fish, Other        | 4                                                           |
| 81              | Ghana   | 1992           | Meat, Other               | 17                                                          |
| 81              | Ghana   | 1992           | Milk, Whole               | 4                                                           |
| 81              | Ghana   | 1992           | Millet                    | 17                                                          |
| 81              | Ghana   | 1992           | Mutton & Goat Meat        | 2                                                           |
| 81              | Ghana   | 1992           | Nuts                      | 1                                                           |
| 81              | Ghana   | 1992           | Offals, Edible            | 1                                                           |
| 81              | Ghana   | 1992           | Oilcrops Oil, Other       | 2                                                           |
| 81              | Ghana   | 1992           | Oilcrops, Other           | 1                                                           |
| 81              | Ghana   | 1992           | Onions                    | 3                                                           |
| 81              | Ghana   | 1992           | Oranges, Mandarines       | 15                                                          |
| 81              | Ghana   | 1992           | Palm Oil                  | 13                                                          |
| 81              | Ghana   | 1992           | Palmkernel Oil            | 1                                                           |
| 81              | Ghana   | 1992           | Pelagic Fish              | 57                                                          |
| 81              | Ghana   | 1992           | Pigmeat                   | 2                                                           |
| 81              | Ghana   | 1992           | Pimento                   | 5                                                           |
| 81              | Ghana   | 1992           | Plantains                 | 172                                                         |
| 81              | Ghana   | 1992           | Poultry Meat              | 3                                                           |
| 81              | Ghana   | 1992           | Pulses, Other             | 2                                                           |
| 81              | Ghana   | 1992           | Rice (Milled Equivalent)  | 44                                                          |
| 81              | Ghana   | 1992           | Roots, Other              | 170                                                         |
| 81              | Ghana   | 1992           | Sorghum                   | 30                                                          |
| 81              | Ghana   | 1992           | Sugar Cane                | 18                                                          |
| 81              | Ghana   | 1992           | Sugar, Refined Equivalent | 21                                                          |
| 81              | Ghana   | 1992           | Tomatoes                  | 19                                                          |
| 81              | Ghana   | 1992           | Vegetables, Other         | 45                                                          |
| 81              | Ghana   | 1992           | Wheat                     | 29                                                          |
| 81              | Ghana   | 1992           | Yams                      | 191                                                         |
| 81              | Ghana   | 1993           | Bananas                   | 1                                                           |
| 81              | Ghana   | 1993           | Beer                      | 11                                                          |
| 81              | Ghana   | 1993           | Beverages, Fermented      | 60                                                          |
| 81              | Ghana   | 1993           | Bovine Meat               | 7                                                           |
| 81              | Ghana   | 1993           | Cassava                   | 574                                                         |
| 81              | Ghana   | 1993           | Cocoa Beans               | 1                                                           |
| 81              | Ghana   | 1993           | Coconut Oil               | 1                                                           |
| 81              | Ghana   | 1993           | Coconuts - Incl Copra     | 22                                                          |
| 81              | Ghana   | 1993           | Demersal Fish             | 6                                                           |
| 81              | Ghana   | 1993           | Eggs                      | 2                                                           |
| 81              | Ghana   | 1993           | Freshwater Fish           | 10                                                          |
| 81              | Ghana   | 1993           | Fruits, Other             | 8                                                           |
| 81              | Ghana   | 1993           | Groundnut Oil             | 3                                                           |
| 81              | Ghana   | 1993           | Groundnuts (Shelled Eq)   | 7                                                           |
| 81              | Ghana   | 1993           | Lemons, Limes             | 5                                                           |
| 81              | Ghana   | 1993           | Maize                     | 63                                                          |
| 81              | Ghana   | 1993           | Marine Fish, Other        | 5                                                           |
| 81              | Ghana   | 1993           | Meat, Other               | 18                                                          |

Dietary calcium and zinc deficiency risks are decreasing but remain prevalent

| FAO countrycode | Country | Reference year | Food item                 | Gross food supply (g capita <sup>-1</sup> d <sup>-1</sup> ) |
|-----------------|---------|----------------|---------------------------|-------------------------------------------------------------|
| 81              | Ghana   | 1993           | Milk, Whole               | 5                                                           |
| 81              | Ghana   | 1993           | Millet                    | 21                                                          |
| 81              | Ghana   | 1993           | Mutton & Goat Meat        | 2                                                           |
| 81              | Ghana   | 1993           | Nuts                      | 1                                                           |
| 81              | Ghana   | 1993           | Offals, Edible            | 1                                                           |
| 81              | Ghana   | 1993           | Oilcrops Oil, Other       | 2                                                           |
| 81              | Ghana   | 1993           | Oilcrops, Other           | 1                                                           |
| 81              | Ghana   | 1993           | Onions                    | 3                                                           |
| 81              | Ghana   | 1993           | Oranges, Mandarines       | 18                                                          |
| 81              | Ghana   | 1993           | Palm Oil                  | 11                                                          |
| 81              | Ghana   | 1993           | Palmkernel Oil            | 1                                                           |
| 81              | Ghana   | 1993           | Pelagic Fish              | 47                                                          |
| 81              | Ghana   | 1993           | Pigmeat                   | 2                                                           |
| 81              | Ghana   | 1993           | Pimento                   | 6                                                           |
| 81              | Ghana   | 1993           | Plantains                 | 205                                                         |
| 81              | Ghana   | 1993           | Poultry Meat              | 3                                                           |
| 81              | Ghana   | 1993           | Pulses, Other             | 2                                                           |
| 81              | Ghana   | 1993           | Rice (Milled Equivalent)  | 47                                                          |
| 81              | Ghana   | 1993           | Roots, Other              | 170                                                         |
| 81              | Ghana   | 1993           | Sorghum                   | 37                                                          |
| 81              | Ghana   | 1993           | Sugar Cane                | 17                                                          |
| 81              | Ghana   | 1993           | Sugar, Refined Equivalent | 21                                                          |
| 81              | Ghana   | 1993           | Tomatoes                  | 19                                                          |
| 81              | Ghana   | 1993           | Vegetables, Other         | 42                                                          |
| 81              | Ghana   | 1993           | Wheat                     | 40                                                          |
| 81              | Ghana   | 1993           | Yams                      | 191                                                         |
| 81              | Ghana   | 1994           | Bananas                   | 1                                                           |
| 81              | Ghana   | 1994           | Beans                     | 1                                                           |
| 81              | Ghana   | 1994           | Beer                      | 11                                                          |
| 81              | Ghana   | 1994           | Beverages, Fermented      | 60                                                          |
| 81              | Ghana   | 1994           | Bovine Meat               | 7                                                           |
| 81              | Ghana   | 1994           | Cassava                   | 568                                                         |
| 81              | Ghana   | 1994           | Cocoa Beans               | 1                                                           |
| 81              | Ghana   | 1994           | Coconut Oil               | 1                                                           |
| 81              | Ghana   | 1994           | Coconuts - Incl Copra     | 25                                                          |
| 81              | Ghana   | 1994           | Demersal Fish             | 6                                                           |
| 81              | Ghana   | 1994           | Eggs                      | 2                                                           |
| 81              | Ghana   | 1994           | Freshwater Fish           | 10                                                          |
| 81              | Ghana   | 1994           | Fruits, Other             | 8                                                           |
| 81              | Ghana   | 1994           | Groundnut Oil             | 4                                                           |
| 81              | Ghana   | 1994           | Groundnuts (Shelled Eq)   | 8                                                           |
| 81              | Ghana   | 1994           | Lemons, Limes             | 4                                                           |
| 81              | Ghana   | 1994           | Maize                     | 59                                                          |
| 81              | Ghana   | 1994           | Marine Fish, Other        | 4                                                           |
| 81              | Ghana   | 1994           | Meat, Other               | 17                                                          |
| 81              | Ghana   | 1994           | Milk, Whole               | 4                                                           |
| 81              | Ghana   | 1994           | Millet                    | 25                                                          |
| 81              | Ghana   | 1994           | Mutton & Goat Meat        | 2                                                           |
| 81              | Ghana   | 1994           | Nuts                      | 1                                                           |
| 81              | Ghana   | 1994           | Offals, Edible            | 1                                                           |
| 81              | Ghana   | 1994           | Oilcrops Oil, Other       | 1                                                           |
| 81              | Ghana   | 1994           | Oilcrops, Other           | 1                                                           |
| 81              | Ghana   | 1994           | Onions                    | 4                                                           |
| 81              | Ghana   | 1994           | Oranges, Mandarines       | 22                                                          |
| 81              | Ghana   | 1994           | Palm Oil                  | 11                                                          |
| 81              | Ghana   | 1994           | Palmkernel Oil            | 1                                                           |
| 81              | Ghana   | 1994           | Pelagic Fish              | 37                                                          |
| 81              | Ghana   | 1994           | Pigmeat                   | 2                                                           |
| 81              | Ghana   | 1994           | Pimento                   | 6                                                           |
| 81              | Ghana   | 1994           | Plantains                 | 223                                                         |
| 81              | Ghana   | 1994           | Poultry Meat              | 3                                                           |
| 81              | Ghana   | 1994           | Pulses, Other             | 2                                                           |
| 81              | Ghana   | 1994           | Rice (Milled Equivalent)  | 53                                                          |
| 81              | Ghana   | 1994           | Roots, Other              | 154                                                         |
| 81              | Ghana   | 1994           | Sorghum                   | 36                                                          |
| 81              | Ghana   | 1994           | Sugar Cane                | 17                                                          |
| 81              | Ghana   | 1994           | Sugar, Refined Equivalent | 15                                                          |
| 81              | Ghana   | 1994           | Tomatoes                  | 29                                                          |
| 81              | Ghana   | 1994           | Vegetables, Other         | 39                                                          |
| 81              | Ghana   | 1994           | Wheat                     | 33                                                          |
| 81              | Ghana   | 1994           | Whey                      | 1                                                           |
| 81              | Ghana   | 1994           | Wine                      | 1                                                           |
| 81              | Ghana   | 1994           | Yams                      | 241                                                         |
| 81              | Ghana   | 1995           | Bananas                   | 1                                                           |
| 81              | Ghana   | 1995           | Beer                      | 11                                                          |
| 81              | Ghana   | 1995           | Beverages, Fermented      | 63                                                          |
| 81              | Ghana   | 1995           | Bovine Meat               | 6                                                           |
| 81              | Ghana   | 1995           | Cassava                   | 614                                                         |
| 81              | Ghana   | 1995           | Cocoa Beans               | 1                                                           |
| 81              | Ghana   | 1995           | Coconut Oil               | 1                                                           |
| 81              | Ghana   | 1995           | Coconuts - Incl Copra     | 22                                                          |
| 81              | Ghana   | 1995           | Demersal Fish             | 5                                                           |
| 81              | Ghana   | 1995           | Eggs                      | 2                                                           |
| 81              | Ghana   | 1995           | Freshwater Fish           | 10                                                          |
| 81              | Ghana   | 1995           | Fruits, Other             | 8                                                           |
| 81              | Ghana   | 1995           | Groundnut Oil             | 4                                                           |
| 81              | Ghana   | 1995           | Groundnuts (Shelled Eq)   | 8                                                           |
| 81              | Ghana   | 1995           | Lemons, Limes             | 4                                                           |
| 81              | Ghana   | 1995           | Maize                     | 61                                                          |
| 81              | Ghana   | 1995           | Marine Fish, Other        | 4                                                           |
| 81              | Ghana   | 1995           | Meat, Other               | 17                                                          |
| 81              | Ghana   | 1995           | Milk, Whole               | 5                                                           |
| 81              | Ghana   | 1995           | Millet                    | 24                                                          |
| 81              | Ghana   | 1995           | Mutton & Goat Meat        | 2                                                           |
| 81              | Ghana   | 1995           | Nuts                      | 1                                                           |
| 81              | Ghana   | 1995           | Offals, Edible            | 1                                                           |
| 81              | Ghana   | 1995           | Oilcrops Oil, Other       | 1                                                           |

Dietary calcium and zinc deficiency risks are decreasing but remain prevalent

| FAO countrycode | Country | Reference year | Food item                 | Gross food supply (g capita <sup>-1</sup> d <sup>-1</sup> ) |
|-----------------|---------|----------------|---------------------------|-------------------------------------------------------------|
| 81              | Ghana   | 1995           | Oilcrops, Other           | 1                                                           |
| 81              | Ghana   | 1995           | Onions                    | 4                                                           |
| 81              | Ghana   | 1995           | Oranges, Mandarines       | 29                                                          |
| 81              | Ghana   | 1995           | Palm Oil                  | 10                                                          |
| 81              | Ghana   | 1995           | Palmkernel Oil            | 1                                                           |
| 81              | Ghana   | 1995           | Pelagic Fish              | 39                                                          |
| 81              | Ghana   | 1995           | Pigmeat                   | 2                                                           |
| 81              | Ghana   | 1995           | Pimento                   | 7                                                           |
| 81              | Ghana   | 1995           | Plantains                 | 241                                                         |
| 81              | Ghana   | 1995           | Poultry Meat              | 3                                                           |
| 81              | Ghana   | 1995           | Pulses, Other             | 2                                                           |
| 81              | Ghana   | 1995           | Rice (Milled Equivalent)  | 43                                                          |
| 81              | Ghana   | 1995           | Roots, Other              | 179                                                         |
| 81              | Ghana   | 1995           | Sorghum                   | 39                                                          |
| 81              | Ghana   | 1995           | Soyabean Oil              | 1                                                           |
| 81              | Ghana   | 1995           | Sugar Cane                | 17                                                          |
| 81              | Ghana   | 1995           | Sugar, Refined Equivalent | 21                                                          |
| 81              | Ghana   | 1995           | Tomatoes                  | 34                                                          |
| 81              | Ghana   | 1995           | Vegetables, Other         | 38                                                          |
| 81              | Ghana   | 1995           | Wheat                     | 21                                                          |
| 81              | Ghana   | 1995           | Whey                      | 2                                                           |
| 81              | Ghana   | 1995           | Wine                      | 1                                                           |
| 81              | Ghana   | 1995           | Yams                      | 229                                                         |
| 81              | Ghana   | 1996           | Bananas                   | 1                                                           |
| 81              | Ghana   | 1996           | Beer                      | 11                                                          |
| 81              | Ghana   | 1996           | Beverages, Fermented      | 61                                                          |
| 81              | Ghana   | 1996           | Bovine Meat               | 4                                                           |
| 81              | Ghana   | 1996           | Cassava                   | 670                                                         |
| 81              | Ghana   | 1996           | Coconut Oil               | 1                                                           |
| 81              | Ghana   | 1996           | Coconuts - Incl Copra     | 26                                                          |
| 81              | Ghana   | 1996           | Demersal Fish             | 6                                                           |
| 81              | Ghana   | 1996           | Eggs                      | 2                                                           |
| 81              | Ghana   | 1996           | Freshwater Fish           | 13                                                          |
| 81              | Ghana   | 1996           | Fruits, Other             | 8                                                           |
| 81              | Ghana   | 1996           | Groundnut Oil             | 3                                                           |
| 81              | Ghana   | 1996           | Groundnuts (Shelled Eq)   | 7                                                           |
| 81              | Ghana   | 1996           | Lemons, Limes             | 5                                                           |
| 81              | Ghana   | 1996           | Maize                     | 58                                                          |
| 81              | Ghana   | 1996           | Marine Fish, Other        | 5                                                           |
| 81              | Ghana   | 1996           | Meat, Other               | 16                                                          |
| 81              | Ghana   | 1996           | Milk, Whole               | 6                                                           |
| 81              | Ghana   | 1996           | Millet                    | 23                                                          |
| 81              | Ghana   | 1996           | Mutton & Goat Meat        | 2                                                           |
| 81              | Ghana   | 1996           | Nuts                      | 1                                                           |
| 81              | Ghana   | 1996           | Offals, Edible            | 1                                                           |
| 81              | Ghana   | 1996           | Oilcrops Oil, Other       | 1                                                           |
| 81              | Ghana   | 1996           | Oilcrops, Other           | 1                                                           |
| 81              | Ghana   | 1996           | Onions                    | 4                                                           |
| 81              | Ghana   | 1996           | Oranges, Mandarines       | 37                                                          |
| 81              | Ghana   | 1996           | Palm Oil                  | 7                                                           |
| 81              | Ghana   | 1996           | Palmkernel Oil            | 1                                                           |
| 81              | Ghana   | 1996           | Pelagic Fish              | 60                                                          |
| 81              | Ghana   | 1996           | Pigmeat                   | 2                                                           |
| 81              | Ghana   | 1996           | Pimento                   | 7                                                           |
| 81              | Ghana   | 1996           | Pineapples                | 1                                                           |
| 81              | Ghana   | 1996           | Plantains                 | 262                                                         |
| 81              | Ghana   | 1996           | Poultry Meat              | 3                                                           |
| 81              | Ghana   | 1996           | Pulses, Other             | 2                                                           |
| 81              | Ghana   | 1996           | Rice (Milled Equivalent)  | 28                                                          |
| 81              | Ghana   | 1996           | Roots, Other              | 198                                                         |
| 81              | Ghana   | 1996           | Sorghum                   | 37                                                          |
| 81              | Ghana   | 1996           | Soyabean Oil              | 1                                                           |
| 81              | Ghana   | 1996           | Sugar Cane                | 21                                                          |
| 81              | Ghana   | 1996           | Sugar, Refined Equivalent | 12                                                          |
| 81              | Ghana   | 1996           | Sweet Potatoes            | 14                                                          |
| 81              | Ghana   | 1996           | Tomatoes                  | 26                                                          |
| 81              | Ghana   | 1996           | Vegetables, Other         | 70                                                          |
| 81              | Ghana   | 1996           | Wheat                     | 16                                                          |
| 81              | Ghana   | 1996           | Wine                      | 1                                                           |
| 81              | Ghana   | 1996           | Yams                      | 259                                                         |
| 81              | Ghana   | 1997           | Bananas                   | 2                                                           |
| 81              | Ghana   | 1997           | Beer                      | 12                                                          |
| 81              | Ghana   | 1997           | Beverages, Fermented      | 53                                                          |
| 81              | Ghana   | 1997           | Bovine Meat               | 4                                                           |
| 81              | Ghana   | 1997           | Cassava                   | 671                                                         |
| 81              | Ghana   | 1997           | Cocoa Beans               | 1                                                           |
| 81              | Ghana   | 1997           | Coconut Oil               | 1                                                           |
| 81              | Ghana   | 1997           | Coconuts - Incl Copra     | 25                                                          |
| 81              | Ghana   | 1997           | Demersal Fish             | 6                                                           |
| 81              | Ghana   | 1997           | Eggs                      | 2                                                           |
| 81              | Ghana   | 1997           | Freshwater Fish           | 12                                                          |
| 81              | Ghana   | 1997           | Fruits, Other             | 9                                                           |
| 81              | Ghana   | 1997           | Groundnut Oil             | 3                                                           |
| 81              | Ghana   | 1997           | Groundnuts (Shelled Eq)   | 7                                                           |
| 81              | Ghana   | 1997           | Lemons, Limes             | 5                                                           |
| 81              | Ghana   | 1997           | Maize                     | 57                                                          |
| 81              | Ghana   | 1997           | Marine Fish, Other        | 6                                                           |
| 81              | Ghana   | 1997           | Meat, Other               | 16                                                          |
| 81              | Ghana   | 1997           | Milk, Whole               | 6                                                           |
| 81              | Ghana   | 1997           | Millet                    | 17                                                          |
| 81              | Ghana   | 1997           | Mutton & Goat Meat        | 2                                                           |
| 81              | Ghana   | 1997           | Nuts                      | 3                                                           |
| 81              | Ghana   | 1997           | Offals, Edible            | 1                                                           |
| 81              | Ghana   | 1997           | Oilcrops Oil, Other       | 1                                                           |
| 81              | Ghana   | 1997           | Oilcrops, Other           | 1                                                           |
| 81              | Ghana   | 1997           | Onions                    | 5                                                           |
| 81              | Ghana   | 1997           | Oranges, Mandarines       | 36                                                          |

Dietary calcium and zinc deficiency risks are decreasing but remain prevalent

| FAO countrycode | Country | Reference year | Food item                 | Gross food supply (g capita <sup>-1</sup> d <sup>-1</sup> ) |
|-----------------|---------|----------------|---------------------------|-------------------------------------------------------------|
| 81              | Ghana   | 1997           | Palm Oil                  | 9                                                           |
| 81              | Ghana   | 1997           | Palmkernel Oil            | 1                                                           |
| 81              | Ghana   | 1997           | Pelagic Fish              | 69                                                          |
| 81              | Ghana   | 1997           | Pigmeat                   | 3                                                           |
| 81              | Ghana   | 1997           | Pimento                   | 7                                                           |
| 81              | Ghana   | 1997           | Pineapples                | 1                                                           |
| 81              | Ghana   | 1997           | Plantains                 | 255                                                         |
| 81              | Ghana   | 1997           | Poultry Meat              | 4                                                           |
| 81              | Ghana   | 1997           | Pulses, Other             | 2                                                           |
| 81              | Ghana   | 1997           | Rice (Milled Equivalent)  | 22                                                          |
| 81              | Ghana   | 1997           | Roots, Other              | 192                                                         |
| 81              | Ghana   | 1997           | Sorghum                   | 34                                                          |
| 81              | Ghana   | 1997           | Sugar Cane                | 20                                                          |
| 81              | Ghana   | 1997           | Sugar, Refined Equivalent | 6                                                           |
| 81              | Ghana   | 1997           | Sweet Potatoes            | 10                                                          |
| 81              | Ghana   | 1997           | Tomatoes                  | 32                                                          |
| 81              | Ghana   | 1997           | Vegetables, Other         | 66                                                          |
| 81              | Ghana   | 1997           | Wheat                     | 31                                                          |
| 81              | Ghana   | 1997           | Yams                      | 317                                                         |
| 81              | Ghana   | 1998           | Bananas                   | 2                                                           |
| 81              | Ghana   | 1998           | Beer                      | 13                                                          |
| 81              | Ghana   | 1998           | Beverages, Fermented      | 55                                                          |
| 81              | Ghana   | 1998           | Bovine Meat               | 3                                                           |
| 81              | Ghana   | 1998           | Cassava                   | 648                                                         |
| 81              | Ghana   | 1998           | Cocoa Beans               | 1                                                           |
| 81              | Ghana   | 1998           | Coconut Oil               | 1                                                           |
| 81              | Ghana   | 1998           | Coconuts - Incl Copra     | 26                                                          |
| 81              | Ghana   | 1998           | Demersal Fish             | 6                                                           |
| 81              | Ghana   | 1998           | Eggs                      | 2                                                           |
| 81              | Ghana   | 1998           | Freshwater Fish           | 12                                                          |
| 81              | Ghana   | 1998           | Fruits, Other             | 9                                                           |
| 81              | Ghana   | 1998           | Groundnut Oil             | 4                                                           |
| 81              | Ghana   | 1998           | Groundnuts (Shelled Eq)   | 9                                                           |
| 81              | Ghana   | 1998           | Lemons, Limes             | 5                                                           |
| 81              | Ghana   | 1998           | Maize                     | 54                                                          |
| 81              | Ghana   | 1998           | Marine Fish, Other        | 9                                                           |
| 81              | Ghana   | 1998           | Meat, Other               | 15                                                          |
| 81              | Ghana   | 1998           | Milk, Whole               | 8                                                           |
| 81              | Ghana   | 1998           | Millet                    | 19                                                          |
| 81              | Ghana   | 1998           | Mutton & Goat Meat        | 2                                                           |
| 81              | Ghana   | 1998           | Nuts                      | 2                                                           |
| 81              | Ghana   | 1998           | Offals, Edible            | 1                                                           |
| 81              | Ghana   | 1998           | Oilcrops, Other           | 1                                                           |
| 81              | Ghana   | 1998           | Onions                    | 5                                                           |
| 81              | Ghana   | 1998           | Oranges, Mandarines       | 37                                                          |
| 81              | Ghana   | 1998           | Palm Oil                  | 11                                                          |
| 81              | Ghana   | 1998           | Palmkernel Oil            | 1                                                           |
| 81              | Ghana   | 1998           | Pelagic Fish              | 60                                                          |
| 81              | Ghana   | 1998           | Pigmeat                   | 2                                                           |
| 81              | Ghana   | 1998           | Pimento                   | 7                                                           |
| 81              | Ghana   | 1998           | Pineapples                | 2                                                           |
| 81              | Ghana   | 1998           | Plantains                 | 262                                                         |
| 81              | Ghana   | 1998           | Poultry Meat              | 4                                                           |
| 81              | Ghana   | 1998           | Pulses, Other             | 1                                                           |
| 81              | Ghana   | 1998           | Rice (Milled Equivalent)  | 24                                                          |
| 81              | Ghana   | 1998           | Roots, Other              | 192                                                         |
| 81              | Ghana   | 1998           | Sorghum                   | 35                                                          |
| 81              | Ghana   | 1998           | Sugar Cane                | 21                                                          |
| 81              | Ghana   | 1998           | Sugar, Refined Equivalent | 11                                                          |
| 81              | Ghana   | 1998           | Sweet Potatoes            | 14                                                          |
| 81              | Ghana   | 1998           | Tomatoes                  | 31                                                          |
| 81              | Ghana   | 1998           | Vegetables, Other         | 79                                                          |
| 81              | Ghana   | 1998           | Wheat                     | 32                                                          |
| 81              | Ghana   | 1998           | Whey                      | 2                                                           |
| 81              | Ghana   | 1998           | Wine                      | 1                                                           |
| 81              | Ghana   | 1998           | Yams                      | 290                                                         |
| 81              | Ghana   | 1999           | Bananas                   | 2                                                           |
| 81              | Ghana   | 1999           | Barley                    | 1                                                           |
| 81              | Ghana   | 1999           | Beer                      | 13                                                          |
| 81              | Ghana   | 1999           | Beverages, Fermented      | 52                                                          |
| 81              | Ghana   | 1999           | Bovine Meat               | 4                                                           |
| 81              | Ghana   | 1999           | Cassava                   | 603                                                         |
| 81              | Ghana   | 1999           | Cephalopods               | 1                                                           |
| 81              | Ghana   | 1999           | Coconut Oil               | 1                                                           |
| 81              | Ghana   | 1999           | Coconuts - Incl Copra     | 26                                                          |
| 81              | Ghana   | 1999           | Demersal Fish             | 7                                                           |
| 81              | Ghana   | 1999           | Eggs                      | 2                                                           |
| 81              | Ghana   | 1999           | Freshwater Fish           | 12                                                          |
| 81              | Ghana   | 1999           | Fruits, Other             | 9                                                           |
| 81              | Ghana   | 1999           | Groundnut Oil             | 4                                                           |
| 81              | Ghana   | 1999           | Groundnuts (Shelled Eq)   | 8                                                           |
| 81              | Ghana   | 1999           | Lemons, Limes             | 5                                                           |
| 81              | Ghana   | 1999           | Maize                     | 55                                                          |
| 81              | Ghana   | 1999           | Marine Fish, Other        | 18                                                          |
| 81              | Ghana   | 1999           | Meat, Other               | 15                                                          |
| 81              | Ghana   | 1999           | Milk, Whole               | 9                                                           |
| 81              | Ghana   | 1999           | Millet                    | 18                                                          |
| 81              | Ghana   | 1999           | Mutton & Goat Meat        | 2                                                           |
| 81              | Ghana   | 1999           | Nuts                      | 1                                                           |
| 81              | Ghana   | 1999           | Offals, Edible            | 1                                                           |
| 81              | Ghana   | 1999           | Oilcrops, Other           | 1                                                           |
| 81              | Ghana   | 1999           | Onions                    | 5                                                           |
| 81              | Ghana   | 1999           | Oranges, Mandarines       | 36                                                          |
| 81              | Ghana   | 1999           | Palm Oil                  | 11                                                          |
| 81              | Ghana   | 1999           | Palmkernel Oil            | 1                                                           |
| 81              | Ghana   | 1999           | Pelagic Fish              | 52                                                          |
| 81              | Ghana   | 1999           | Pigmeat                   | 2                                                           |

## Dietary calcium and zinc deficiency risks are decreasing but remain prevalent

| FAO countrycode | Country | Reference year | Food item                 | Gross food supply (g capita <sup>-1</sup> d <sup>-1</sup> ) |
|-----------------|---------|----------------|---------------------------|-------------------------------------------------------------|
| 81              | Ghana   | 1999           | Pimento                   | 5                                                           |
| 81              | Ghana   | 1999           | Pineapples                | 2                                                           |
| 81              | Ghana   | 1999           | Plantains                 | 274                                                         |
| 81              | Ghana   | 1999           | Poultry Meat              | 5                                                           |
| 81              | Ghana   | 1999           | Pulses, Other             | 2                                                           |
| 81              | Ghana   | 1999           | Rice (Milled Equivalent)  | 31                                                          |
| 81              | Ghana   | 1999           | Roots, Other              | 203                                                         |
| 81              | Ghana   | 1999           | Sorghum                   | 33                                                          |
| 81              | Ghana   | 1999           | Sugar Cane                | 19                                                          |
| 81              | Ghana   | 1999           | Sugar, Refined Equivalent | 15                                                          |
| 81              | Ghana   | 1999           | Sweet Potatoes            | 13                                                          |
| 81              | Ghana   | 1999           | Tomatoes                  | 34                                                          |
| 81              | Ghana   | 1999           | Vegetables, Other         | 77                                                          |
| 81              | Ghana   | 1999           | Wheat                     | 37                                                          |
| 81              | Ghana   | 1999           | Whey                      | 3                                                           |
| 81              | Ghana   | 1999           | Yams                      | 320                                                         |
| 81              | Ghana   | 2000           | Bananas                   | 1                                                           |
| 81              | Ghana   | 2000           | Barley                    | 1                                                           |
| 81              | Ghana   | 2000           | Beer                      | 12                                                          |
| 81              | Ghana   | 2000           | Beverages, Alcoholic      | 1                                                           |
| 81              | Ghana   | 2000           | Beverages, Fermented      | 45                                                          |
| 81              | Ghana   | 2000           | Bovine Meat               | 4                                                           |
| 81              | Ghana   | 2000           | Cassava                   | 612                                                         |
| 81              | Ghana   | 2000           | Cocoa Beans               | 2                                                           |
| 81              | Ghana   | 2000           | Coconut Oil               | 1                                                           |
| 81              | Ghana   | 2000           | Coconuts - Incl Copra     | 26                                                          |
| 81              | Ghana   | 2000           | Demersal Fish             | 3                                                           |
| 81              | Ghana   | 2000           | Eggs                      | 2                                                           |
| 81              | Ghana   | 2000           | Freshwater Fish           | 12                                                          |
| 81              | Ghana   | 2000           | Fruits, Other             | 8                                                           |
| 81              | Ghana   | 2000           | Groundnut Oil             | 4                                                           |
| 81              | Ghana   | 2000           | Groundnuts (Shelled Eq)   | 9                                                           |
| 81              | Ghana   | 2000           | Lemons, Limes             | 5                                                           |
| 81              | Ghana   | 2000           | Maize                     | 55                                                          |
| 81              | Ghana   | 2000           | Marine Fish, Other        | 5                                                           |
| 81              | Ghana   | 2000           | Meat, Other               | 15                                                          |
| 81              | Ghana   | 2000           | Milk, Whole               | 9                                                           |
| 81              | Ghana   | 2000           | Millet                    | 18                                                          |
| 81              | Ghana   | 2000           | Mutton & Goat Meat        | 3                                                           |
| 81              | Ghana   | 2000           | Nuts                      | 2                                                           |
| 81              | Ghana   | 2000           | Offals, Edible            | 1                                                           |
| 81              | Ghana   | 2000           | Oilcrops Oil, Other       | 1                                                           |
| 81              | Ghana   | 2000           | Oilcrops, Other           | 1                                                           |
| 81              | Ghana   | 2000           | Onions                    | 7                                                           |
| 81              | Ghana   | 2000           | Oranges, Mandarines       | 39                                                          |
| 81              | Ghana   | 2000           | Palm Oil                  | 11                                                          |
| 81              | Ghana   | 2000           | Palmkernel Oil            | 1                                                           |
| 81              | Ghana   | 2000           | Pelagic Fish              | 64                                                          |
| 81              | Ghana   | 2000           | Pigmeat                   | 2                                                           |
| 81              | Ghana   | 2000           | Pimento                   | 6                                                           |
| 81              | Ghana   | 2000           | Pineapples                | 4                                                           |
| 81              | Ghana   | 2000           | Plantains                 | 253                                                         |
| 81              | Ghana   | 2000           | Potatoes                  | 1                                                           |
| 81              | Ghana   | 2000           | Poultry Meat              | 5                                                           |
| 81              | Ghana   | 2000           | Pulses, Other             | 2                                                           |
| 81              | Ghana   | 2000           | Rice (Milled Equivalent)  | 44                                                          |
| 81              | Ghana   | 2000           | Roots, Other              | 190                                                         |
| 81              | Ghana   | 2000           | Rye                       | 1                                                           |
| 81              | Ghana   | 2000           | Sorghum                   | 27                                                          |
| 81              | Ghana   | 2000           | Sugar Cane                | 19                                                          |
| 81              | Ghana   | 2000           | Sugar, Refined Equivalent | 18                                                          |
| 81              | Ghana   | 2000           | Sweet Potatoes            | 13                                                          |
| 81              | Ghana   | 2000           | Tomatoes                  | 32                                                          |
| 81              | Ghana   | 2000           | Vegetables, Other         | 46                                                          |
| 81              | Ghana   | 2000           | Wheat                     | 40                                                          |
| 81              | Ghana   | 2000           | Whey                      | 2                                                           |
| 81              | Ghana   | 2000           | Wine                      | 1                                                           |
| 81              | Ghana   | 2000           | Yams                      | 328                                                         |
| 81              | Ghana   | 2001           | Bananas                   | 1                                                           |
| 81              | Ghana   | 2001           | Barley                    | 1                                                           |
| 81              | Ghana   | 2001           | Beer                      | 11                                                          |
| 81              | Ghana   | 2001           | Beverages, Alcoholic      | 1                                                           |
| 81              | Ghana   | 2001           | Beverages, Fermented      | 42                                                          |
| 81              | Ghana   | 2001           | Bovine Meat               | 4                                                           |
| 81              | Ghana   | 2001           | Cassava                   | 608                                                         |
| 81              | Ghana   | 2001           | Cocoa Beans               | 2                                                           |
| 81              | Ghana   | 2001           | Coconut Oil               | 1                                                           |
| 81              | Ghana   | 2001           | Coconuts - Incl Copra     | 26                                                          |
| 81              | Ghana   | 2001           | Demersal Fish             | 6                                                           |
| 81              | Ghana   | 2001           | Eggs                      | 2                                                           |
| 81              | Ghana   | 2001           | Freshwater Fish           | 12                                                          |
| 81              | Ghana   | 2001           | Fruits, Other             | 8                                                           |
| 81              | Ghana   | 2001           | Groundnut Oil             | 5                                                           |
| 81              | Ghana   | 2001           | Groundnuts (Shelled Eq)   | 10                                                          |
| 81              | Ghana   | 2001           | Lemons, Limes             | 5                                                           |
| 81              | Ghana   | 2001           | Maize                     | 49                                                          |
| 81              | Ghana   | 2001           | Marine Fish, Other        | 8                                                           |
| 81              | Ghana   | 2001           | Meat, Other               | 15                                                          |
| 81              | Ghana   | 2001           | Milk, Whole               | 9                                                           |
| 81              | Ghana   | 2001           | Millet                    | 14                                                          |
| 81              | Ghana   | 2001           | Mutton & Goat Meat        | 3                                                           |
| 81              | Ghana   | 2001           | Nuts                      | 3                                                           |
| 81              | Ghana   | 2001           | Offals, Edible            | 1                                                           |
| 81              | Ghana   | 2001           | Oilcrops, Other           | 1                                                           |
| 81              | Ghana   | 2001           | Onions                    | 6                                                           |
| 81              | Ghana   | 2001           | Oranges, Mandarines       | 38                                                          |
| 81              | Ghana   | 2001           | Palm Oil                  | 9                                                           |



Dietary calcium and zinc deficiency risks are decreasing but remain prevalent

| FAO countrycode | Country | Reference year | Food item                 | Gross food supply (g capita <sup>-1</sup> d <sup>-1</sup> ) |
|-----------------|---------|----------------|---------------------------|-------------------------------------------------------------|
| 81              | Ghana   | 2001           | Palmkernel Oil            | 1                                                           |
| 81              | Ghana   | 2001           | Pelagic Fish              | 51                                                          |
| 81              | Ghana   | 2001           | Pigmeat                   | 2                                                           |
| 81              | Ghana   | 2001           | Pimento                   | 6                                                           |
| 81              | Ghana   | 2001           | Pineapples                | 5                                                           |
| 81              | Ghana   | 2001           | Plantains                 | 265                                                         |
| 81              | Ghana   | 2001           | Potatoes                  | 1                                                           |
| 81              | Ghana   | 2001           | Poultry Meat              | 5                                                           |
| 81              | Ghana   | 2001           | Pulses, Other             | 1                                                           |
| 81              | Ghana   | 2001           | Rice (Milled Equivalent)  | 64                                                          |
| 81              | Ghana   | 2001           | Roots, Other              | 191                                                         |
| 81              | Ghana   | 2001           | Rye                       | 1                                                           |
| 81              | Ghana   | 2001           | Sorghum                   | 26                                                          |
| 81              | Ghana   | 2001           | Soyabean Oil              | 1                                                           |
| 81              | Ghana   | 2001           | Sugar Cane                | 18                                                          |
| 81              | Ghana   | 2001           | Sugar, Refined Equivalent | 18                                                          |
| 81              | Ghana   | 2001           | Sweet Potatoes            | 14                                                          |
| 81              | Ghana   | 2001           | Tea                       | 1                                                           |
| 81              | Ghana   | 2001           | Tomatoes                  | 30                                                          |
| 81              | Ghana   | 2001           | Vegetables, Other         | 46                                                          |
| 81              | Ghana   | 2001           | Wheat                     | 35                                                          |
| 81              | Ghana   | 2001           | Whey                      | 4                                                           |
| 81              | Ghana   | 2001           | Wine                      | 1                                                           |
| 81              | Ghana   | 2001           | Yams                      | 339                                                         |
| 81              | Ghana   | 2002           | Apples                    | 1                                                           |
| 81              | Ghana   | 2002           | Bananas                   | 1                                                           |
| 81              | Ghana   | 2002           | Barley                    | 1                                                           |
| 81              | Ghana   | 2002           | Beer                      | 15                                                          |
| 81              | Ghana   | 2002           | Beverages, Alcoholic      | 1                                                           |
| 81              | Ghana   | 2002           | Beverages, Fermented      | 42                                                          |
| 81              | Ghana   | 2002           | Bovine Meat               | 4                                                           |
| 81              | Ghana   | 2002           | Cassava                   | 604                                                         |
| 81              | Ghana   | 2002           | Cephalopods               | 1                                                           |
| 81              | Ghana   | 2002           | Coconut Oil               | 1                                                           |
| 81              | Ghana   | 2002           | Coconuts - Incl Copra     | 26                                                          |
| 81              | Ghana   | 2002           | Demersal Fish             | 6                                                           |
| 81              | Ghana   | 2002           | Eggs                      | 2                                                           |
| 81              | Ghana   | 2002           | Freshwater Fish           | 12                                                          |
| 81              | Ghana   | 2002           | Fruits, Other             | 9                                                           |
| 81              | Ghana   | 2002           | Groundnut Oil             | 14                                                          |
| 81              | Ghana   | 2002           | Groundnuts (Shelled Eq)   | 10                                                          |
| 81              | Ghana   | 2002           | Lemons, Limes             | 5                                                           |
| 81              | Ghana   | 2002           | Maize                     | 38                                                          |
| 81              | Ghana   | 2002           | Marine Fish, Other        | 5                                                           |
| 81              | Ghana   | 2002           | Meat, Other               | 14                                                          |
| 81              | Ghana   | 2002           | Milk, Whole               | 9                                                           |
| 81              | Ghana   | 2002           | Millet                    | 16                                                          |
| 81              | Ghana   | 2002           | Mutton & Goat Meat        | 3                                                           |
| 81              | Ghana   | 2002           | Nuts                      | 2                                                           |
| 81              | Ghana   | 2002           | Offals, Edible            | 2                                                           |
| 81              | Ghana   | 2002           | Oilcrops, Other           | 1                                                           |
| 81              | Ghana   | 2002           | Onions                    | 6                                                           |
| 81              | Ghana   | 2002           | Oranges, Mandarines       | 39                                                          |
| 81              | Ghana   | 2002           | Palm Oil                  | 7                                                           |
| 81              | Ghana   | 2002           | Palmkernel Oil            | 1                                                           |
| 81              | Ghana   | 2002           | Pelagic Fish              | 50                                                          |
| 81              | Ghana   | 2002           | Pigmeat                   | 2                                                           |
| 81              | Ghana   | 2002           | Pimento                   | 7                                                           |
| 81              | Ghana   | 2002           | Pineapples                | 2                                                           |
| 81              | Ghana   | 2002           | Plantains                 | 284                                                         |
| 81              | Ghana   | 2002           | Potatoes                  | 2                                                           |
| 81              | Ghana   | 2002           | Poultry Meat              | 7                                                           |
| 81              | Ghana   | 2002           | Pulses, Other             | 2                                                           |
| 81              | Ghana   | 2002           | Rice (Milled Equivalent)  | 67                                                          |
| 81              | Ghana   | 2002           | Roots, Other              | 196                                                         |
| 81              | Ghana   | 2002           | Rye                       | 3                                                           |
| 81              | Ghana   | 2002           | Sorghum                   | 25                                                          |
| 81              | Ghana   | 2002           | Soyabean Oil              | 1                                                           |
| 81              | Ghana   | 2002           | Sugar Cane                | 18                                                          |
| 81              | Ghana   | 2002           | Sugar, Refined Equivalent | 18                                                          |
| 81              | Ghana   | 2002           | Sweet Potatoes            | 15                                                          |
| 81              | Ghana   | 2002           | Tea                       | 1                                                           |
| 81              | Ghana   | 2002           | Tomatoes                  | 36                                                          |
| 81              | Ghana   | 2002           | Vegetables, Other         | 48                                                          |
| 81              | Ghana   | 2002           | Wheat                     | 31                                                          |
| 81              | Ghana   | 2002           | Whey                      | 4                                                           |
| 81              | Ghana   | 2002           | Wine                      | 1                                                           |
| 81              | Ghana   | 2002           | Yams                      | 331                                                         |
| 81              | Ghana   | 2003           | Apples                    | 1                                                           |
| 81              | Ghana   | 2003           | Bananas                   | 2                                                           |
| 81              | Ghana   | 2003           | Beer                      | 15                                                          |
| 81              | Ghana   | 2003           | Beverages, Fermented      | 45                                                          |
| 81              | Ghana   | 2003           | Bovine Meat               | 4                                                           |
| 81              | Ghana   | 2003           | Cassava                   | 620                                                         |
| 81              | Ghana   | 2003           | Cephalopods               | 1                                                           |
| 81              | Ghana   | 2003           | Coconut Oil               | 1                                                           |
| 81              | Ghana   | 2003           | Coconuts - Incl Copra     | 24                                                          |
| 81              | Ghana   | 2003           | Demersal Fish             | 3                                                           |
| 81              | Ghana   | 2003           | Eggs                      | 2                                                           |
| 81              | Ghana   | 2003           | Freshwater Fish           | 11                                                          |
| 81              | Ghana   | 2003           | Fruits, Other             | 10                                                          |
| 81              | Ghana   | 2003           | Groundnut Oil             | 10                                                          |
| 81              | Ghana   | 2003           | Groundnuts (Shelled Eq)   | 9                                                           |
| 81              | Ghana   | 2003           | Lemons, Limes             | 5                                                           |
| 81              | Ghana   | 2003           | Maize                     | 59                                                          |
| 81              | Ghana   | 2003           | Marine Fish, Other        | 1                                                           |
| 81              | Ghana   | 2003           | Meat, Other               | 14                                                          |

Dietary calcium and zinc deficiency risks are decreasing but remain prevalent

| FAO countrycode | Country | Reference year | Food item                 | Gross food supply (g capita <sup>-1</sup> d <sup>-1</sup> ) |
|-----------------|---------|----------------|---------------------------|-------------------------------------------------------------|
| 81              | Ghana   | 2003           | Milk, Whole               | 6                                                           |
| 81              | Ghana   | 2003           | Millet                    | 18                                                          |
| 81              | Ghana   | 2003           | Mutton & Goat Meat        | 3                                                           |
| 81              | Ghana   | 2003           | Nuts                      | 2                                                           |
| 81              | Ghana   | 2003           | Offals, Edible            | 3                                                           |
| 81              | Ghana   | 2003           | Oilcrops Oil, Other       | 1                                                           |
| 81              | Ghana   | 2003           | Oilcrops, Other           | 1                                                           |
| 81              | Ghana   | 2003           | Onions                    | 4                                                           |
| 81              | Ghana   | 2003           | Oranges, Mandarines       | 41                                                          |
| 81              | Ghana   | 2003           | Palm Oil                  | 6                                                           |
| 81              | Ghana   | 2003           | Palmkernel Oil            | 1                                                           |
| 81              | Ghana   | 2003           | Pelagic Fish              | 45                                                          |
| 81              | Ghana   | 2003           | Pigmeat                   | 2                                                           |
| 81              | Ghana   | 2003           | Pimento                   | 7                                                           |
| 81              | Ghana   | 2003           | Pineapples                | 2                                                           |
| 81              | Ghana   | 2003           | Plantains                 | 283                                                         |
| 81              | Ghana   | 2003           | Potatoes                  | 1                                                           |
| 81              | Ghana   | 2003           | Poultry Meat              | 11                                                          |
| 81              | Ghana   | 2003           | Pulses, Other             | 1                                                           |
| 81              | Ghana   | 2003           | Rice (Milled Equivalent)  | 62                                                          |
| 81              | Ghana   | 2003           | Roots, Other              | 183                                                         |
| 81              | Ghana   | 2003           | Sorghum                   | 27                                                          |
| 81              | Ghana   | 2003           | Soyabean Oil              | 1                                                           |
| 81              | Ghana   | 2003           | Sugar Cane                | 17                                                          |
| 81              | Ghana   | 2003           | Sugar, Refined Equivalent | 17                                                          |
| 81              | Ghana   | 2003           | Sweet Potatoes            | 15                                                          |
| 81              | Ghana   | 2003           | Tea                       | 1                                                           |
| 81              | Ghana   | 2003           | Tomatoes                  | 35                                                          |
| 81              | Ghana   | 2003           | Vegetables, Other         | 41                                                          |
| 81              | Ghana   | 2003           | Wheat                     | 33                                                          |
| 81              | Ghana   | 2003           | Whey                      | 5                                                           |
| 81              | Ghana   | 2003           | Wine                      | 1                                                           |
| 81              | Ghana   | 2003           | Yams                      | 324                                                         |
| 81              | Ghana   | 2004           | Apples                    | 1                                                           |
| 81              | Ghana   | 2004           | Bananas                   | 2                                                           |
| 81              | Ghana   | 2004           | Beer                      | 16                                                          |
| 81              | Ghana   | 2004           | Beverages, Fermented      | 40                                                          |
| 81              | Ghana   | 2004           | Bovine Meat               | 4                                                           |
| 81              | Ghana   | 2004           | Cassava                   | 601                                                         |
| 81              | Ghana   | 2004           | Cocoa Beans               | 1                                                           |
| 81              | Ghana   | 2004           | Coconut Oil               | 1                                                           |
| 81              | Ghana   | 2004           | Coconuts - Incl Copra     | 24                                                          |
| 81              | Ghana   | 2004           | Demersal Fish             | 6                                                           |
| 81              | Ghana   | 2004           | Eggs                      | 3                                                           |
| 81              | Ghana   | 2004           | Freshwater Fish           | 11                                                          |
| 81              | Ghana   | 2004           | Fruits, Other             | 11                                                          |
| 81              | Ghana   | 2004           | Groundnut Oil             | 8                                                           |
| 81              | Ghana   | 2004           | Groundnuts (Shelled Eq)   | 9                                                           |
| 81              | Ghana   | 2004           | Lemons, Limes             | 5                                                           |
| 81              | Ghana   | 2004           | Maize                     | 64                                                          |
| 81              | Ghana   | 2004           | Marine Fish, Other        | 2                                                           |
| 81              | Ghana   | 2004           | Meat, Other               | 14                                                          |
| 81              | Ghana   | 2004           | Milk, Whole               | 9                                                           |
| 81              | Ghana   | 2004           | Millet                    | 14                                                          |
| 81              | Ghana   | 2004           | Mutton & Goat Meat        | 3                                                           |
| 81              | Ghana   | 2004           | Nuts                      | 3                                                           |
| 81              | Ghana   | 2004           | Oats                      | 1                                                           |
| 81              | Ghana   | 2004           | Offals, Edible            | 2                                                           |
| 81              | Ghana   | 2004           | Oilcrops Oil, Other       | 1                                                           |
| 81              | Ghana   | 2004           | Oilcrops, Other           | 1                                                           |
| 81              | Ghana   | 2004           | Onions                    | 5                                                           |
| 81              | Ghana   | 2004           | Oranges, Mandarines       | 52                                                          |
| 81              | Ghana   | 2004           | Palm Oil                  | 9                                                           |
| 81              | Ghana   | 2004           | Palmkernel Oil            | 1                                                           |
| 81              | Ghana   | 2004           | Pelagic Fish              | 63                                                          |
| 81              | Ghana   | 2004           | Pigmeat                   | 2                                                           |
| 81              | Ghana   | 2004           | Pimento                   | 8                                                           |
| 81              | Ghana   | 2004           | Plantains                 | 282                                                         |
| 81              | Ghana   | 2004           | Poultry Meat              | 10                                                          |
| 81              | Ghana   | 2004           | Pulses, Other             | 2                                                           |
| 81              | Ghana   | 2004           | Rice (Milled Equivalent)  | 63                                                          |
| 81              | Ghana   | 2004           | Roots, Other              | 166                                                         |
| 81              | Ghana   | 2004           | Sorghum                   | 25                                                          |
| 81              | Ghana   | 2004           | Sugar Cane                | 17                                                          |
| 81              | Ghana   | 2004           | Sugar, Refined Equivalent | 20                                                          |
| 81              | Ghana   | 2004           | Sweet Potatoes            | 14                                                          |
| 81              | Ghana   | 2004           | Sweeteners, Other         | 1                                                           |
| 81              | Ghana   | 2004           | Tea                       | 1                                                           |
| 81              | Ghana   | 2004           | Tomatoes                  | 54                                                          |
| 81              | Ghana   | 2004           | Vegetables, Other         | 46                                                          |
| 81              | Ghana   | 2004           | Wheat                     | 37                                                          |
| 81              | Ghana   | 2004           | Whey                      | 4                                                           |
| 81              | Ghana   | 2004           | Wine                      | 1                                                           |
| 81              | Ghana   | 2004           | Yams                      | 322                                                         |
| 81              | Ghana   | 2005           | Apples                    | 1                                                           |
| 81              | Ghana   | 2005           | Bananas                   | 3                                                           |
| 81              | Ghana   | 2005           | Beer                      | 18                                                          |
| 81              | Ghana   | 2005           | Beverages, Fermented      | 42                                                          |
| 81              | Ghana   | 2005           | Bovine Meat               | 4                                                           |
| 81              | Ghana   | 2005           | Cassava                   | 576                                                         |
| 81              | Ghana   | 2005           | Cocoa Beans               | 1                                                           |
| 81              | Ghana   | 2005           | Coconut Oil               | 1                                                           |
| 81              | Ghana   | 2005           | Coconuts - Incl Copra     | 23                                                          |
| 81              | Ghana   | 2005           | Crustaceans               | 1                                                           |
| 81              | Ghana   | 2005           | Demersal Fish             | 5                                                           |
| 81              | Ghana   | 2005           | Eggs                      | 2                                                           |
| 81              | Ghana   | 2005           | Freshwater Fish           | 10                                                          |

Dietary calcium and zinc deficiency risks are decreasing but remain prevalent

| FAO countrycode | Country | Reference year | Food item                 | Gross food supply (g capita <sup>-1</sup> d <sup>-1</sup> ) |
|-----------------|---------|----------------|---------------------------|-------------------------------------------------------------|
| 81              | Ghana   | 2005           | Fruits, Other             | 12                                                          |
| 81              | Ghana   | 2005           | Groundnut Oil             | 8                                                           |
| 81              | Ghana   | 2005           | Groundnuts (Shelled Eq)   | 12                                                          |
| 81              | Ghana   | 2005           | Lemons, Limes             | 5                                                           |
| 81              | Ghana   | 2005           | Maize                     | 61                                                          |
| 81              | Ghana   | 2005           | Marine Fish, Other        | 3                                                           |
| 81              | Ghana   | 2005           | Meat, Other               | 13                                                          |
| 81              | Ghana   | 2005           | Milk, Whole               | 8                                                           |
| 81              | Ghana   | 2005           | Millet                    | 16                                                          |
| 81              | Ghana   | 2005           | Mutton & Goat Meat        | 3                                                           |
| 81              | Ghana   | 2005           | Nuts                      | 3                                                           |
| 81              | Ghana   | 2005           | Oats                      | 1                                                           |
| 81              | Ghana   | 2005           | Offals, Edible            | 4                                                           |
| 81              | Ghana   | 2005           | Oilcrops Oil, Other       | 2                                                           |
| 81              | Ghana   | 2005           | Oilcrops, Other           | 1                                                           |
| 81              | Ghana   | 2005           | Onions                    | 5                                                           |
| 81              | Ghana   | 2005           | Oranges, Mandarines       | 58                                                          |
| 81              | Ghana   | 2005           | Palm Oil                  | 9                                                           |
| 81              | Ghana   | 2005           | Palmkernel Oil            | 1                                                           |
| 81              | Ghana   | 2005           | Pelagic Fish              | 59                                                          |
| 81              | Ghana   | 2005           | Pigmeat                   | 2                                                           |
| 81              | Ghana   | 2005           | Pimento                   | 9                                                           |
| 81              | Ghana   | 2005           | Pineapples                | 1                                                           |
| 81              | Ghana   | 2005           | Plantains                 | 322                                                         |
| 81              | Ghana   | 2005           | Potatoes                  | 1                                                           |
| 81              | Ghana   | 2005           | Poultry Meat              | 10                                                          |
| 81              | Ghana   | 2005           | Pulses, Other             | 2                                                           |
| 81              | Ghana   | 2005           | Rice (Milled Equivalent)  | 63                                                          |
| 81              | Ghana   | 2005           | Roots, Other              | 160                                                         |
| 81              | Ghana   | 2005           | Sorghum                   | 26                                                          |
| 81              | Ghana   | 2005           | Sugar Cane                | 17                                                          |
| 81              | Ghana   | 2005           | Sugar, Refined Equivalent | 24                                                          |
| 81              | Ghana   | 2005           | Sweet Potatoes            | 12                                                          |
| 81              | Ghana   | 2005           | Tea                       | 1                                                           |
| 81              | Ghana   | 2005           | Tomatoes                  | 36                                                          |
| 81              | Ghana   | 2005           | Vegetables, Other         | 40                                                          |
| 81              | Ghana   | 2005           | Wheat                     | 53                                                          |
| 81              | Ghana   | 2005           | Whey                      | 11                                                          |
| 81              | Ghana   | 2005           | Wine                      | 1                                                           |
| 81              | Ghana   | 2005           | Yams                      | 318                                                         |
| 81              | Ghana   | 2006           | Apples                    | 1                                                           |
| 81              | Ghana   | 2006           | Bananas                   | 3                                                           |
| 81              | Ghana   | 2006           | Beer                      | 17                                                          |
| 81              | Ghana   | 2006           | Beverages, Fermented      | 42                                                          |
| 81              | Ghana   | 2006           | Bovine Meat               | 4                                                           |
| 81              | Ghana   | 2006           | Cassava                   | 563                                                         |
| 81              | Ghana   | 2006           | Cocoa Beans               | 1                                                           |
| 81              | Ghana   | 2006           | Coconut Oil               | 1                                                           |
| 81              | Ghana   | 2006           | Coconuts - Incl Copra     | 22                                                          |
| 81              | Ghana   | 2006           | Demersal Fish             | 5                                                           |
| 81              | Ghana   | 2006           | Eggs                      | 3                                                           |
| 81              | Ghana   | 2006           | Freshwater Fish           | 11                                                          |
| 81              | Ghana   | 2006           | Fruits, Other             | 10                                                          |
| 81              | Ghana   | 2006           | Groundnut Oil             | 11                                                          |
| 81              | Ghana   | 2006           | Groundnuts (Shelled Eq)   | 13                                                          |
| 81              | Ghana   | 2006           | Lemons, Limes             | 4                                                           |
| 81              | Ghana   | 2006           | Maize                     | 61                                                          |
| 81              | Ghana   | 2006           | Marine Fish, Other        | 2                                                           |
| 81              | Ghana   | 2006           | Meat, Other               | 12                                                          |
| 81              | Ghana   | 2006           | Milk, Whole               | 10                                                          |
| 81              | Ghana   | 2006           | Millet                    | 15                                                          |
| 81              | Ghana   | 2006           | Mutton & Goat Meat        | 3                                                           |
| 81              | Ghana   | 2006           | Nuts                      | 3                                                           |
| 81              | Ghana   | 2006           | Oats                      | 1                                                           |
| 81              | Ghana   | 2006           | Offals, Edible            | 3                                                           |
| 81              | Ghana   | 2006           | Oilcrops Oil, Other       | 1                                                           |
| 81              | Ghana   | 2006           | Oilcrops, Other           | 1                                                           |
| 81              | Ghana   | 2006           | Onions                    | 5                                                           |
| 81              | Ghana   | 2006           | Oranges, Mandarines       | 52                                                          |
| 81              | Ghana   | 2006           | Palm Oil                  | 8                                                           |
| 81              | Ghana   | 2006           | Palmkernel Oil            | 1                                                           |
| 81              | Ghana   | 2006           | Pelagic Fish              | 62                                                          |
| 81              | Ghana   | 2006           | Pigmeat                   | 3                                                           |
| 81              | Ghana   | 2006           | Pimento                   | 9                                                           |
| 81              | Ghana   | 2006           | Pineapples                | 2                                                           |
| 81              | Ghana   | 2006           | Plantains                 | 326                                                         |
| 81              | Ghana   | 2006           | Poultry Meat              | 11                                                          |
| 81              | Ghana   | 2006           | Pulses, Other             | 2                                                           |
| 81              | Ghana   | 2006           | Rice (Milled Equivalent)  | 69                                                          |
| 81              | Ghana   | 2006           | Roots, Other              | 152                                                         |
| 81              | Ghana   | 2006           | Sorghum                   | 26                                                          |
| 81              | Ghana   | 2006           | Soybean Oil               | 1                                                           |
| 81              | Ghana   | 2006           | Sugar Cane                | 16                                                          |
| 81              | Ghana   | 2006           | Sugar, Refined Equivalent | 24                                                          |
| 81              | Ghana   | 2006           | Sweet Potatoes            | 12                                                          |
| 81              | Ghana   | 2006           | Sweeteners, Other         | 1                                                           |
| 81              | Ghana   | 2006           | Tea                       | 1                                                           |
| 81              | Ghana   | 2006           | Tomatoes                  | 47                                                          |
| 81              | Ghana   | 2006           | Vegetables, Other         | 33                                                          |
| 81              | Ghana   | 2006           | Wheat                     | 48                                                          |
| 81              | Ghana   | 2006           | Whey                      | 6                                                           |
| 81              | Ghana   | 2006           | Wine                      | 1                                                           |
| 81              | Ghana   | 2006           | Yams                      | 338                                                         |
| 81              | Ghana   | 2007           | Apples                    | 2                                                           |
| 81              | Ghana   | 2007           | Bananas                   | 5                                                           |
| 81              | Ghana   | 2007           | Beer                      | 16                                                          |
| 81              | Ghana   | 2007           | Beverages, Fermented      | 23                                                          |

Dietary calcium and zinc deficiency risks are decreasing but remain prevalent

| FAO countrycode | Country | Reference year | Food item                 | Gross food supply (g capita <sup>-1</sup> d <sup>-1</sup> ) |
|-----------------|---------|----------------|---------------------------|-------------------------------------------------------------|
| 81              | Ghana   | 2007           | Bovine Meat               | 5                                                           |
| 81              | Ghana   | 2007           | Cassava                   | 579                                                         |
| 81              | Ghana   | 2007           | Cocoa Beans               | 1                                                           |
| 81              | Ghana   | 2007           | Coconut Oil               | 1                                                           |
| 81              | Ghana   | 2007           | Coconuts - Incl Copra     | 22                                                          |
| 81              | Ghana   | 2007           | Demersal Fish             | 8                                                           |
| 81              | Ghana   | 2007           | Eggs                      | 3                                                           |
| 81              | Ghana   | 2007           | Freshwater Fish           | 12                                                          |
| 81              | Ghana   | 2007           | Fruits, Other             | 19                                                          |
| 81              | Ghana   | 2007           | Groundnut Oil             | 4                                                           |
| 81              | Ghana   | 2007           | Groundnuts (Shelled Eq)   | 12                                                          |
| 81              | Ghana   | 2007           | Lemons, Limes             | 5                                                           |
| 81              | Ghana   | 2007           | Maize                     | 66                                                          |
| 81              | Ghana   | 2007           | Marine Fish, Other        | 2                                                           |
| 81              | Ghana   | 2007           | Meat, Other               | 11                                                          |
| 81              | Ghana   | 2007           | Milk, Whole               | 9                                                           |
| 81              | Ghana   | 2007           | Millet                    | 11                                                          |
| 81              | Ghana   | 2007           | Mutton & Goat Meat        | 4                                                           |
| 81              | Ghana   | 2007           | Nuts                      | 2                                                           |
| 81              | Ghana   | 2007           | Offals, Edible            | 3                                                           |
| 81              | Ghana   | 2007           | Oilcrops Oil, Other       | 6                                                           |
| 81              | Ghana   | 2007           | Oilcrops, Other           | 1                                                           |
| 81              | Ghana   | 2007           | Onions                    | 5                                                           |
| 81              | Ghana   | 2007           | Oranges, Mandarines       | 57                                                          |
| 81              | Ghana   | 2007           | Palm Oil                  | 9                                                           |
| 81              | Ghana   | 2007           | Palmkernel Oil            | 1                                                           |
| 81              | Ghana   | 2007           | Pelagic Fish              | 62                                                          |
| 81              | Ghana   | 2007           | Pigmeat                   | 3                                                           |
| 81              | Ghana   | 2007           | Pimento                   | 10                                                          |
| 81              | Ghana   | 2007           | Pineapples                | 4                                                           |
| 81              | Ghana   | 2007           | Plantains                 | 354                                                         |
| 81              | Ghana   | 2007           | Poultry Meat              | 15                                                          |
| 81              | Ghana   | 2007           | Pulses, Other             | 2                                                           |
| 81              | Ghana   | 2007           | Rice (Milled Equivalent)  | 70                                                          |
| 81              | Ghana   | 2007           | Roots, Other              | 152                                                         |
| 81              | Ghana   | 2007           | Sorghum                   | 13                                                          |
| 81              | Ghana   | 2007           | Soyabean Oil              | 1                                                           |
| 81              | Ghana   | 2007           | Sugar Cane                | 16                                                          |
| 81              | Ghana   | 2007           | Sugar, Refined Equivalent | 25                                                          |
| 81              | Ghana   | 2007           | Sweet Potatoes            | 12                                                          |
| 81              | Ghana   | 2007           | Sweeteners, Other         | 1                                                           |
| 81              | Ghana   | 2007           | Tea                       | 1                                                           |
| 81              | Ghana   | 2007           | Tomatoes                  | 48                                                          |
| 81              | Ghana   | 2007           | Vegetables, Other         | 28                                                          |
| 81              | Ghana   | 2007           | Wheat                     | 52                                                          |
| 81              | Ghana   | 2007           | Whey                      | 5                                                           |
| 81              | Ghana   | 2007           | Wine                      | 2                                                           |
| 81              | Ghana   | 2007           | Yams                      | 367                                                         |
| 81              | Ghana   | 2008           | Apples                    | 2                                                           |
| 81              | Ghana   | 2008           | Bananas                   | 6                                                           |
| 81              | Ghana   | 2008           | Beer                      | 17                                                          |
| 81              | Ghana   | 2008           | Beverages, Fermented      | 43                                                          |
| 81              | Ghana   | 2008           | Bovine Meat               | 5                                                           |
| 81              | Ghana   | 2008           | Cassava                   | 583                                                         |
| 81              | Ghana   | 2008           | Cocoa Beans               | 7                                                           |
| 81              | Ghana   | 2008           | Coconut Oil               | 1                                                           |
| 81              | Ghana   | 2008           | Coconuts - Incl Copra     | 21                                                          |
| 81              | Ghana   | 2008           | Demersal Fish             | 9                                                           |
| 81              | Ghana   | 2008           | Eggs                      | 3                                                           |
| 81              | Ghana   | 2008           | Freshwater Fish           | 11                                                          |
| 81              | Ghana   | 2008           | Fruits, Other             | 20                                                          |
| 81              | Ghana   | 2008           | Groundnut Oil             | 8                                                           |
| 81              | Ghana   | 2008           | Groundnuts (Shelled Eq)   | 16                                                          |
| 81              | Ghana   | 2008           | Lemons, Limes             | 5                                                           |
| 81              | Ghana   | 2008           | Maize                     | 63                                                          |
| 81              | Ghana   | 2008           | Marine Fish, Other        | 2                                                           |
| 81              | Ghana   | 2008           | Meat, Other               | 12                                                          |
| 81              | Ghana   | 2008           | Milk, Whole               | 10                                                          |
| 81              | Ghana   | 2008           | Millet                    | 17                                                          |
| 81              | Ghana   | 2008           | Mutton & Goat Meat        | 4                                                           |
| 81              | Ghana   | 2008           | Nuts                      | 3                                                           |
| 81              | Ghana   | 2008           | Offals, Edible            | 3                                                           |
| 81              | Ghana   | 2008           | Oilcrops Oil, Other       | 5                                                           |
| 81              | Ghana   | 2008           | Oilcrops, Other           | 1                                                           |
| 81              | Ghana   | 2008           | Onions                    | 5                                                           |
| 81              | Ghana   | 2008           | Oranges, Mandarines       | 58                                                          |
| 81              | Ghana   | 2008           | Palm Oil                  | 8                                                           |
| 81              | Ghana   | 2008           | Palmkernel Oil            | 1                                                           |
| 81              | Ghana   | 2008           | Pelagic Fish              | 53                                                          |
| 81              | Ghana   | 2008           | Pigmeat                   | 3                                                           |
| 81              | Ghana   | 2008           | Pimento                   | 11                                                          |
| 81              | Ghana   | 2008           | Pineapples                | 6                                                           |
| 81              | Ghana   | 2008           | Plantains                 | 356                                                         |
| 81              | Ghana   | 2008           | Poultry Meat              | 14                                                          |
| 81              | Ghana   | 2008           | Pulses, Other             | 2                                                           |
| 81              | Ghana   | 2008           | Rice (Milled Equivalent)  | 72                                                          |
| 81              | Ghana   | 2008           | Roots, Other              | 148                                                         |
| 81              | Ghana   | 2008           | Sorghum                   | 26                                                          |
| 81              | Ghana   | 2008           | Soyabeans                 | 1                                                           |
| 81              | Ghana   | 2008           | Sugar Cane                | 16                                                          |
| 81              | Ghana   | 2008           | Sugar, Refined Equivalent | 23                                                          |
| 81              | Ghana   | 2008           | Sweet Potatoes            | 13                                                          |
| 81              | Ghana   | 2008           | Sweeteners, Other         | 1                                                           |
| 81              | Ghana   | 2008           | Tomatoes                  | 48                                                          |
| 81              | Ghana   | 2008           | Vegetables, Other         | 24                                                          |
| 81              | Ghana   | 2008           | Wheat                     | 49                                                          |
| 81              | Ghana   | 2008           | Whey                      | 8                                                           |

Dietary calcium and zinc deficiency risks are decreasing but remain prevalent

| FAO countrycode | Country | Reference year | Food item                 | Gross food supply (g capita <sup>-1</sup> d <sup>-1</sup> ) |
|-----------------|---------|----------------|---------------------------|-------------------------------------------------------------|
| 81              | Ghana   | 2008           | Wine                      | 2                                                           |
| 81              | Ghana   | 2008           | Yams                      | 367                                                         |
| 81              | Ghana   | 2009           | Apples                    | 2                                                           |
| 81              | Ghana   | 2009           | Bananas                   | 5                                                           |
| 81              | Ghana   | 2009           | Beer                      | 17                                                          |
| 81              | Ghana   | 2009           | Beverages, Fermented      | 46                                                          |
| 81              | Ghana   | 2009           | Bovine Meat               | 3                                                           |
| 81              | Ghana   | 2009           | Cassava                   | 592                                                         |
| 81              | Ghana   | 2009           | Cocoa Beans               | 6                                                           |
| 81              | Ghana   | 2009           | Coconut Oil               | 1                                                           |
| 81              | Ghana   | 2009           | Coconuts - Incl Copra     | 17                                                          |
| 81              | Ghana   | 2009           | Demersal Fish             | 6                                                           |
| 81              | Ghana   | 2009           | Eggs                      | 3                                                           |
| 81              | Ghana   | 2009           | Freshwater Fish           | 12                                                          |
| 81              | Ghana   | 2009           | Fruits, Other             | 28                                                          |
| 81              | Ghana   | 2009           | Groundnut Oil             | 8                                                           |
| 81              | Ghana   | 2009           | Groundnuts (Shelled Eq)   | 18                                                          |
| 81              | Ghana   | 2009           | Lemons, Limes             | 5                                                           |
| 81              | Ghana   | 2009           | Maize                     | 72                                                          |
| 81              | Ghana   | 2009           | Marine Fish, Other        | 1                                                           |
| 81              | Ghana   | 2009           | Meat, Other               | 13                                                          |
| 81              | Ghana   | 2009           | Milk, Whole               | 7                                                           |
| 81              | Ghana   | 2009           | Millet                    | 21                                                          |
| 81              | Ghana   | 2009           | Mutton & Goat Meat        | 5                                                           |
| 81              | Ghana   | 2009           | Nuts                      | 2                                                           |
| 81              | Ghana   | 2009           | Offals, Edible            | 2                                                           |
| 81              | Ghana   | 2009           | Oilcrops Oil, Other       | 4                                                           |
| 81              | Ghana   | 2009           | Oilcrops, Other           | 1                                                           |
| 81              | Ghana   | 2009           | Onions                    | 13                                                          |
| 81              | Ghana   | 2009           | Oranges, Mandarines       | 57                                                          |
| 81              | Ghana   | 2009           | Palm Oil                  | 7                                                           |
| 81              | Ghana   | 2009           | Palmkernel Oil            | 1                                                           |
| 81              | Ghana   | 2009           | Pelagic Fish              | 46                                                          |
| 81              | Ghana   | 2009           | Pigmeat                   | 3                                                           |
| 81              | Ghana   | 2009           | Pimento                   | 11                                                          |
| 81              | Ghana   | 2009           | Pineapples                | 3                                                           |
| 81              | Ghana   | 2009           | Plantains                 | 371                                                         |
| 81              | Ghana   | 2009           | Poultry Meat              | 13                                                          |
| 81              | Ghana   | 2009           | Pulses, Other             | 2                                                           |
| 81              | Ghana   | 2009           | Rice (Milled Equivalent)  | 74                                                          |
| 81              | Ghana   | 2009           | Roots, Other              | 123                                                         |
| 81              | Ghana   | 2009           | Sorghum                   | 27                                                          |
| 81              | Ghana   | 2009           | Sugar Cane                | 15                                                          |
| 81              | Ghana   | 2009           | Sugar, Refined Equivalent | 28                                                          |
| 81              | Ghana   | 2009           | Sweet Potatoes            | 14                                                          |
| 81              | Ghana   | 2009           | Sweeteners, Other         | 1                                                           |
| 81              | Ghana   | 2009           | Tomatoes                  | 53                                                          |
| 81              | Ghana   | 2009           | Vegetables, Other         | 22                                                          |
| 81              | Ghana   | 2009           | Wheat                     | 48                                                          |
| 81              | Ghana   | 2009           | Whey                      | 4                                                           |
| 81              | Ghana   | 2009           | Wine                      | 1                                                           |
| 81              | Ghana   | 2009           | Yams                      | 402                                                         |
| 81              | Ghana   | 2010           | Apples                    | 2                                                           |
| 81              | Ghana   | 2010           | Bananas                   | 6                                                           |
| 81              | Ghana   | 2010           | Beans                     | 1                                                           |
| 81              | Ghana   | 2010           | Beer                      | 10                                                          |
| 81              | Ghana   | 2010           | Beverages, Fermented      | 41                                                          |
| 81              | Ghana   | 2010           | Bovine Meat               | 4                                                           |
| 81              | Ghana   | 2010           | Cassava                   | 589                                                         |
| 81              | Ghana   | 2010           | Cocoa Beans               | 6                                                           |
| 81              | Ghana   | 2010           | Coconut Oil               | 1                                                           |
| 81              | Ghana   | 2010           | Coconuts - Incl Copra     | 16                                                          |
| 81              | Ghana   | 2010           | Demersal Fish             | 5                                                           |
| 81              | Ghana   | 2010           | Eggs                      | 3                                                           |
| 81              | Ghana   | 2010           | Fats, Animals, Raw        | 1                                                           |
| 81              | Ghana   | 2010           | Freshwater Fish           | 12                                                          |
| 81              | Ghana   | 2010           | Fruits, Other             | 32                                                          |
| 81              | Ghana   | 2010           | Groundnut Oil             | 8                                                           |
| 81              | Ghana   | 2010           | Groundnuts (Shelled Eq)   | 18                                                          |
| 81              | Ghana   | 2010           | Lemons, Limes             | 5                                                           |
| 81              | Ghana   | 2010           | Maize                     | 79                                                          |
| 81              | Ghana   | 2010           | Marine Fish, Other        | 1                                                           |
| 81              | Ghana   | 2010           | Meat, Other               | 13                                                          |
| 81              | Ghana   | 2010           | Milk, Whole               | 9                                                           |
| 81              | Ghana   | 2010           | Millet                    | 18                                                          |
| 81              | Ghana   | 2010           | Mutton & Goat Meat        | 5                                                           |
| 81              | Ghana   | 2010           | Nuts                      | 2                                                           |
| 81              | Ghana   | 2010           | Offals, Edible            | 3                                                           |
| 81              | Ghana   | 2010           | Oilcrops Oil, Other       | 3                                                           |
| 81              | Ghana   | 2010           | Oilcrops, Other           | 1                                                           |
| 81              | Ghana   | 2010           | Onions                    | 15                                                          |
| 81              | Ghana   | 2010           | Oranges, Mandarines       | 59                                                          |
| 81              | Ghana   | 2010           | Palm Oil                  | 9                                                           |
| 81              | Ghana   | 2010           | Palmkernel Oil            | 1                                                           |
| 81              | Ghana   | 2010           | Pelagic Fish              | 46                                                          |
| 81              | Ghana   | 2010           | Pigmeat                   | 3                                                           |
| 81              | Ghana   | 2010           | Pimento                   | 10                                                          |
| 81              | Ghana   | 2010           | Pineapples                | 4                                                           |
| 81              | Ghana   | 2010           | Plantains                 | 360                                                         |
| 81              | Ghana   | 2010           | Poultry Meat              | 17                                                          |
| 81              | Ghana   | 2010           | Pulses, Other             | 2                                                           |
| 81              | Ghana   | 2010           | Rice (Milled Equivalent)  | 84                                                          |
| 81              | Ghana   | 2010           | Roots, Other              | 106                                                         |
| 81              | Ghana   | 2010           | Sorghum                   | 24                                                          |
| 81              | Ghana   | 2010           | Sugar Cane                | 15                                                          |
| 81              | Ghana   | 2010           | Sugar, Refined Equivalent | 32                                                          |
| 81              | Ghana   | 2010           | Sweet Potatoes            | 14                                                          |

Dietary calcium and zinc deficiency risks are decreasing but remain prevalent

| FAO countrycode | Country | Reference year | Food item                 | Gross food supply (g capita <sup>-1</sup> d <sup>-1</sup> ) |
|-----------------|---------|----------------|---------------------------|-------------------------------------------------------------|
| 81              | Ghana   | 2010           | Sweeteners, Other         | 1                                                           |
| 81              | Ghana   | 2010           | Tomatoes                  | 58                                                          |
| 81              | Ghana   | 2010           | Vegetables, Other         | 23                                                          |
| 81              | Ghana   | 2010           | Wheat                     | 46                                                          |
| 81              | Ghana   | 2010           | Whey                      | 5                                                           |
| 81              | Ghana   | 2010           | Wine                      | 1                                                           |
| 81              | Ghana   | 2010           | Yams                      | 401                                                         |
| 81              | Ghana   | 2011           | Apples                    | 3                                                           |
| 81              | Ghana   | 2011           | Bananas                   | 5                                                           |
| 81              | Ghana   | 2011           | Beans                     | 3                                                           |
| 81              | Ghana   | 2011           | Beer                      | 14                                                          |
| 81              | Ghana   | 2011           | Beverages, Fermented      | 36                                                          |
| 81              | Ghana   | 2011           | Bovine Meat               | 3                                                           |
| 81              | Ghana   | 2011           | Cassava                   | 673                                                         |
| 81              | Ghana   | 2011           | Cocoa Beans               | 14                                                          |
| 81              | Ghana   | 2011           | Coconut Oil               | 1                                                           |
| 81              | Ghana   | 2011           | Coconuts - Incl Copra     | 16                                                          |
| 81              | Ghana   | 2011           | Demersal Fish             | 4                                                           |
| 81              | Ghana   | 2011           | Eggs                      | 3                                                           |
| 81              | Ghana   | 2011           | Freshwater Fish           | 13                                                          |
| 81              | Ghana   | 2011           | Fruits, Other             | 39                                                          |
| 81              | Ghana   | 2011           | Groundnut Oil             | 7                                                           |
| 81              | Ghana   | 2011           | Groundnuts (Shelled Eq)   | 15                                                          |
| 81              | Ghana   | 2011           | Lemons, Limes             | 4                                                           |
| 81              | Ghana   | 2011           | Maize                     | 70                                                          |
| 81              | Ghana   | 2011           | Marine Fish, Other        | 1                                                           |
| 81              | Ghana   | 2011           | Meat, Other               | 13                                                          |
| 81              | Ghana   | 2011           | Milk, Whole               | 10                                                          |
| 81              | Ghana   | 2011           | Millet                    | 15                                                          |
| 81              | Ghana   | 2011           | Mutton & Goat Meat        | 5                                                           |
| 81              | Ghana   | 2011           | Nuts                      | 3                                                           |
| 81              | Ghana   | 2011           | Offals, Edible            | 4                                                           |
| 81              | Ghana   | 2011           | Oilcrops Oil, Other       | 1                                                           |
| 81              | Ghana   | 2011           | Oilcrops, Other           | 1                                                           |
| 81              | Ghana   | 2011           | Onions                    | 19                                                          |
| 81              | Ghana   | 2011           | Oranges, Mandarines       | 59                                                          |
| 81              | Ghana   | 2011           | Palm Oil                  | 8                                                           |
| 81              | Ghana   | 2011           | Palmkernel Oil            | 1                                                           |
| 81              | Ghana   | 2011           | Pelagic Fish              | 56                                                          |
| 81              | Ghana   | 2011           | Pigmeat                   | 3                                                           |
| 81              | Ghana   | 2011           | Pimento                   | 9                                                           |
| 81              | Ghana   | 2011           | Pineapples                | 1                                                           |
| 81              | Ghana   | 2011           | Plantains                 | 360                                                         |
| 81              | Ghana   | 2011           | Potatoes                  | 1                                                           |
| 81              | Ghana   | 2011           | Poultry Meat              | 22                                                          |
| 81              | Ghana   | 2011           | Pulses, Other             | 2                                                           |
| 81              | Ghana   | 2011           | Rice (Milled Equivalent)  | 94                                                          |
| 81              | Ghana   | 2011           | Roots, Other              | 97                                                          |
| 81              | Ghana   | 2011           | Sorghum                   | 21                                                          |
| 81              | Ghana   | 2011           | Sugar Cane                | 15                                                          |
| 81              | Ghana   | 2011           | Sugar, Refined Equivalent | 26                                                          |
| 81              | Ghana   | 2011           | Sweet Potatoes            | 14                                                          |
| 81              | Ghana   | 2011           | Sweeteners, Other         | 2                                                           |
| 81              | Ghana   | 2011           | Tomatoes                  | 66                                                          |
| 81              | Ghana   | 2011           | Vegetables, Other         | 24                                                          |
| 81              | Ghana   | 2011           | Wheat                     | 51                                                          |
| 81              | Ghana   | 2011           | Whey                      | 6                                                           |
| 81              | Ghana   | 2011           | Wine                      | 1                                                           |
| 81              | Ghana   | 2011           | Yams                      | 407                                                         |
| 84              | Greece  | 1992           | Apples                    | 76                                                          |
| 84              | Greece  | 1992           | Bananas                   | 12                                                          |
| 84              | Greece  | 1992           | Beans                     | 9                                                           |
| 84              | Greece  | 1992           | Beer                      | 106                                                         |
| 84              | Greece  | 1992           | Beverages, Alcoholic      | 16                                                          |
| 84              | Greece  | 1992           | Bovine Meat               | 59                                                          |
| 84              | Greece  | 1992           | Butter, Ghee              | 3                                                           |
| 84              | Greece  | 1992           | Cephalopods               | 6                                                           |
| 84              | Greece  | 1992           | Cheese                    | 65                                                          |
| 84              | Greece  | 1992           | Citrus, Other             | 1                                                           |
| 84              | Greece  | 1992           | Cocoa Beans               | 3                                                           |
| 84              | Greece  | 1992           | Coconuts - Incl Copra     | 1                                                           |
| 84              | Greece  | 1992           | Coffee                    | 5                                                           |
| 84              | Greece  | 1992           | Cottonseed Oil            | 4                                                           |
| 84              | Greece  | 1992           | Cream                     | 2                                                           |
| 84              | Greece  | 1992           | Crustaceans               | 2                                                           |
| 84              | Greece  | 1992           | Demersal Fish             | 22                                                          |
| 84              | Greece  | 1992           | Eggs                      | 28                                                          |
| 84              | Greece  | 1992           | Fats, Animals, Raw        | 2                                                           |
| 84              | Greece  | 1992           | Freshwater Fish           | 2                                                           |
| 84              | Greece  | 1992           | Fruits, Other             | 193                                                         |
| 84              | Greece  | 1992           | Grapefruit                | 2                                                           |
| 84              | Greece  | 1992           | Grapes                    | 45                                                          |
| 84              | Greece  | 1992           | Groundnut Oil             | 1                                                           |
| 84              | Greece  | 1992           | Groundnuts (Shelled Eq)   | 1                                                           |
| 84              | Greece  | 1992           | Honey                     | 4                                                           |
| 84              | Greece  | 1992           | Lemons, Limes             | 26                                                          |
| 84              | Greece  | 1992           | Maize                     | 5                                                           |
| 84              | Greece  | 1992           | Maize Germ Oil            | 7                                                           |
| 84              | Greece  | 1992           | Marine Fish, Other        | 6                                                           |
| 84              | Greece  | 1992           | Meat, Other               | 3                                                           |
| 84              | Greece  | 1992           | Milk, Whole               | 210                                                         |
| 84              | Greece  | 1992           | Molluscs, Other           | 4                                                           |
| 84              | Greece  | 1992           | Mutton & Goat Meat        | 41                                                          |
| 84              | Greece  | 1992           | Nuts                      | 29                                                          |
| 84              | Greece  | 1992           | Offals, Edible            | 11                                                          |
| 84              | Greece  | 1992           | Olive Oil                 | 49                                                          |
| 84              | Greece  | 1992           | Olives                    | 35                                                          |

## Dietary calcium and zinc deficiency risks are decreasing but remain prevalent

| FAO countrycode | Country | Reference year | Food item                 | Gross food supply (g capita <sup>-1</sup> d <sup>-1</sup> ) |
|-----------------|---------|----------------|---------------------------|-------------------------------------------------------------|
| 84              | Greece  | 1992           | Onions                    | 40                                                          |
| 84              | Greece  | 1992           | Oranges, Mandarines       | 110                                                         |
| 84              | Greece  | 1992           | Pelagic Fish              | 16                                                          |
| 84              | Greece  | 1992           | Pigmeat                   | 58                                                          |
| 84              | Greece  | 1992           | Pineapples                | 1                                                           |
| 84              | Greece  | 1992           | Potatoes                  | 213                                                         |
| 84              | Greece  | 1992           | Poultry Meat              | 40                                                          |
| 84              | Greece  | 1992           | Pulses, Other             | 7                                                           |
| 84              | Greece  | 1992           | Rice (Milled Equivalent)  | 16                                                          |
| 84              | Greece  | 1992           | Rye                       | 1                                                           |
| 84              | Greece  | 1992           | Sesameseed                | 1                                                           |
| 84              | Greece  | 1992           | Sesameseed Oil            | 1                                                           |
| 84              | Greece  | 1992           | Soyabean Oil              | 2                                                           |
| 84              | Greece  | 1992           | Spices, Other             | 1                                                           |
| 84              | Greece  | 1992           | Sugar, Refined Equivalent | 77                                                          |
| 84              | Greece  | 1992           | Sunflowerseed Oil         | 12                                                          |
| 84              | Greece  | 1992           | Sweet Potatoes            | 1                                                           |
| 84              | Greece  | 1992           | Sweeteners, Other         | 1                                                           |
| 84              | Greece  | 1992           | Tomatoes                  | 310                                                         |
| 84              | Greece  | 1992           | Vegetables, Other         | 349                                                         |
| 84              | Greece  | 1992           | Wheat                     | 386                                                         |
| 84              | Greece  | 1992           | Wine                      | 45                                                          |
| 84              | Greece  | 1993           | Apples                    | 58                                                          |
| 84              | Greece  | 1993           | Bananas                   | 12                                                          |
| 84              | Greece  | 1993           | Barley                    | 1                                                           |
| 84              | Greece  | 1993           | Beans                     | 8                                                           |
| 84              | Greece  | 1993           | Beer                      | 101                                                         |
| 84              | Greece  | 1993           | Beverages, Alcoholic      | 13                                                          |
| 84              | Greece  | 1993           | Bovine Meat               | 55                                                          |
| 84              | Greece  | 1993           | Butter, Ghee              | 3                                                           |
| 84              | Greece  | 1993           | Cephalopods               | 6                                                           |
| 84              | Greece  | 1993           | Cheese                    | 66                                                          |
| 84              | Greece  | 1993           | Cocoa Beans               | 4                                                           |
| 84              | Greece  | 1993           | Coconuts - Incl Copra     | 1                                                           |
| 84              | Greece  | 1993           | Coffee                    | 3                                                           |
| 84              | Greece  | 1993           | Cottonseed Oil            | 4                                                           |
| 84              | Greece  | 1993           | Cream                     | 4                                                           |
| 84              | Greece  | 1993           | Crustaceans               | 2                                                           |
| 84              | Greece  | 1993           | Demersal Fish             | 24                                                          |
| 84              | Greece  | 1993           | Eggs                      | 28                                                          |
| 84              | Greece  | 1993           | Fats, Animals, Raw        | 2                                                           |
| 84              | Greece  | 1993           | Freshwater Fish           | 2                                                           |
| 84              | Greece  | 1993           | Fruits, Other             | 196                                                         |
| 84              | Greece  | 1993           | Grapefruit                | 2                                                           |
| 84              | Greece  | 1993           | Grapes                    | 82                                                          |
| 84              | Greece  | 1993           | Groundnut Oil             | 1                                                           |
| 84              | Greece  | 1993           | Groundnuts (Shelled Eq)   | 1                                                           |
| 84              | Greece  | 1993           | Honey                     | 4                                                           |
| 84              | Greece  | 1993           | Lemons, Limes             | 16                                                          |
| 84              | Greece  | 1993           | Maize                     | 5                                                           |
| 84              | Greece  | 1993           | Maize Germ Oil            | 5                                                           |
| 84              | Greece  | 1993           | Marine Fish, Other        | 5                                                           |
| 84              | Greece  | 1993           | Meat, Other               | 4                                                           |
| 84              | Greece  | 1993           | Milk, Whole               | 208                                                         |
| 84              | Greece  | 1993           | Molluscs, Other           | 4                                                           |
| 84              | Greece  | 1993           | Mutton & Goat Meat        | 39                                                          |
| 84              | Greece  | 1993           | Nuts                      | 26                                                          |
| 84              | Greece  | 1993           | Offals, Edible            | 11                                                          |
| 84              | Greece  | 1993           | Olive Oil                 | 49                                                          |
| 84              | Greece  | 1993           | Olives                    | 35                                                          |
| 84              | Greece  | 1993           | Onions                    | 37                                                          |
| 84              | Greece  | 1993           | Oranges, Mandarines       | 102                                                         |
| 84              | Greece  | 1993           | Pelagic Fish              | 18                                                          |
| 84              | Greece  | 1993           | Pigmeat                   | 58                                                          |
| 84              | Greece  | 1993           | Pineapples                | 1                                                           |
| 84              | Greece  | 1993           | Potatoes                  | 210                                                         |
| 84              | Greece  | 1993           | Poultry Meat              | 40                                                          |
| 84              | Greece  | 1993           | Pulses, Other             | 6                                                           |
| 84              | Greece  | 1993           | Rice (Milled Equivalent)  | 16                                                          |
| 84              | Greece  | 1993           | Rye                       | 1                                                           |
| 84              | Greece  | 1993           | Sesameseed                | 1                                                           |
| 84              | Greece  | 1993           | Soyabean Oil              | 2                                                           |
| 84              | Greece  | 1993           | Spices, Other             | 1                                                           |
| 84              | Greece  | 1993           | Sugar, Refined Equivalent | 73                                                          |
| 84              | Greece  | 1993           | Sunflowerseed Oil         | 11                                                          |
| 84              | Greece  | 1993           | Sweet Potatoes            | 1                                                           |
| 84              | Greece  | 1993           | Sweeteners, Other         | 1                                                           |
| 84              | Greece  | 1993           | Tomatoes                  | 306                                                         |
| 84              | Greece  | 1993           | Vegetables, Other         | 375                                                         |
| 84              | Greece  | 1993           | Wheat                     | 391                                                         |
| 84              | Greece  | 1993           | Wine                      | 50                                                          |
| 84              | Greece  | 1994           | Apples                    | 64                                                          |
| 84              | Greece  | 1994           | Bananas                   | 5                                                           |
| 84              | Greece  | 1994           | Barley                    | 1                                                           |
| 84              | Greece  | 1994           | Beans                     | 7                                                           |
| 84              | Greece  | 1994           | Beer                      | 97                                                          |
| 84              | Greece  | 1994           | Beverages, Alcoholic      | 12                                                          |
| 84              | Greece  | 1994           | Bovine Meat               | 54                                                          |
| 84              | Greece  | 1994           | Butter, Ghee              | 3                                                           |
| 84              | Greece  | 1994           | Cephalopods               | 7                                                           |
| 84              | Greece  | 1994           | Cheese                    | 67                                                          |
| 84              | Greece  | 1994           | Citrus, Other             | 1                                                           |
| 84              | Greece  | 1994           | Cocoa Beans               | 4                                                           |
| 84              | Greece  | 1994           | Coconuts - Incl Copra     | 1                                                           |
| 84              | Greece  | 1994           | Coffee                    | 6                                                           |
| 84              | Greece  | 1994           | Cottonseed Oil            | 4                                                           |
| 84              | Greece  | 1994           | Cream                     | 4                                                           |

Dietary calcium and zinc deficiency risks are decreasing but remain prevalent

| FAO countrycode | Country | Reference year | Food item                 | Gross food supply (g capita <sup>-1</sup> d <sup>-1</sup> ) |
|-----------------|---------|----------------|---------------------------|-------------------------------------------------------------|
| 84              | Greece  | 1994           | Crustaceans               | 2                                                           |
| 84              | Greece  | 1994           | Demersal Fish             | 27                                                          |
| 84              | Greece  | 1994           | Eggs                      | 28                                                          |
| 84              | Greece  | 1994           | Fats, Animals, Raw        | 2                                                           |
| 84              | Greece  | 1994           | Freshwater Fish           | 3                                                           |
| 84              | Greece  | 1994           | Fruits, Other             | 203                                                         |
| 84              | Greece  | 1994           | Grapefruit                | 2                                                           |
| 84              | Greece  | 1994           | Grapes                    | 87                                                          |
| 84              | Greece  | 1994           | Groundnut Oil             | 1                                                           |
| 84              | Greece  | 1994           | Groundnuts (Shelled Eq)   | 1                                                           |
| 84              | Greece  | 1994           | Honey                     | 4                                                           |
| 84              | Greece  | 1994           | Lemons, Limes             | 25                                                          |
| 84              | Greece  | 1994           | Maize                     | 5                                                           |
| 84              | Greece  | 1994           | Maize Germ Oil            | 7                                                           |
| 84              | Greece  | 1994           | Marine Fish, Other        | 5                                                           |
| 84              | Greece  | 1994           | Meat, Other               | 4                                                           |
| 84              | Greece  | 1994           | Milk, Whole               | 217                                                         |
| 84              | Greece  | 1994           | Molluscs, Other           | 5                                                           |
| 84              | Greece  | 1994           | Mutton & Goat Meat        | 39                                                          |
| 84              | Greece  | 1994           | Nuts                      | 28                                                          |
| 84              | Greece  | 1994           | Oats                      | 1                                                           |
| 84              | Greece  | 1994           | Offals, Edible            | 11                                                          |
| 84              | Greece  | 1994           | Olive Oil                 | 48                                                          |
| 84              | Greece  | 1994           | Olives                    | 35                                                          |
| 84              | Greece  | 1994           | Onions                    | 37                                                          |
| 84              | Greece  | 1994           | Oranges, Mandarines       | 103                                                         |
| 84              | Greece  | 1994           | Pelagic Fish              | 20                                                          |
| 84              | Greece  | 1994           | Pigmeat                   | 61                                                          |
| 84              | Greece  | 1994           | Pineapples                | 2                                                           |
| 84              | Greece  | 1994           | Plantains                 | 1                                                           |
| 84              | Greece  | 1994           | Potatoes                  | 229                                                         |
| 84              | Greece  | 1994           | Poultry Meat              | 42                                                          |
| 84              | Greece  | 1994           | Pulses, Other             | 5                                                           |
| 84              | Greece  | 1994           | Rice (Milled Equivalent)  | 10                                                          |
| 84              | Greece  | 1994           | Rye                       | 1                                                           |
| 84              | Greece  | 1994           | Sesameseed                | 1                                                           |
| 84              | Greece  | 1994           | Soyabean Oil              | 2                                                           |
| 84              | Greece  | 1994           | Sugar, Refined Equivalent | 74                                                          |
| 84              | Greece  | 1994           | Sunflowerseed Oil         | 12                                                          |
| 84              | Greece  | 1994           | Sweeteners, Other         | 2                                                           |
| 84              | Greece  | 1994           | Tomatoes                  | 338                                                         |
| 84              | Greece  | 1994           | Vegetables, Other         | 367                                                         |
| 84              | Greece  | 1994           | Wheat                     | 381                                                         |
| 84              | Greece  | 1994           | Wine                      | 47                                                          |
| 84              | Greece  | 1995           | Apples                    | 50                                                          |
| 84              | Greece  | 1995           | Bananas                   | 5                                                           |
| 84              | Greece  | 1995           | Beans                     | 8                                                           |
| 84              | Greece  | 1995           | Beer                      | 96                                                          |
| 84              | Greece  | 1995           | Beverages, Alcoholic      | 5                                                           |
| 84              | Greece  | 1995           | Bovine Meat               | 55                                                          |
| 84              | Greece  | 1995           | Butter, Ghee              | 3                                                           |
| 84              | Greece  | 1995           | Cephalopods               | 6                                                           |
| 84              | Greece  | 1995           | Cereals, Other            | 5                                                           |
| 84              | Greece  | 1995           | Cheese                    | 67                                                          |
| 84              | Greece  | 1995           | Citrus, Other             | 1                                                           |
| 84              | Greece  | 1995           | Cocoa Beans               | 3                                                           |
| 84              | Greece  | 1995           | Coconuts - Incl Copra     | 1                                                           |
| 84              | Greece  | 1995           | Coffee                    | 6                                                           |
| 84              | Greece  | 1995           | Cottonseed Oil            | 3                                                           |
| 84              | Greece  | 1995           | Cream                     | 4                                                           |
| 84              | Greece  | 1995           | Crustaceans               | 2                                                           |
| 84              | Greece  | 1995           | Demersal Fish             | 23                                                          |
| 84              | Greece  | 1995           | Eggs                      | 27                                                          |
| 84              | Greece  | 1995           | Fats, Animals, Raw        | 1                                                           |
| 84              | Greece  | 1995           | Freshwater Fish           | 3                                                           |
| 84              | Greece  | 1995           | Fruits, Other             | 150                                                         |
| 84              | Greece  | 1995           | Grapefruit                | 2                                                           |
| 84              | Greece  | 1995           | Grapes                    | 43                                                          |
| 84              | Greece  | 1995           | Groundnut Oil             | 1                                                           |
| 84              | Greece  | 1995           | Honey                     | 4                                                           |
| 84              | Greece  | 1995           | Lemons, Limes             | 31                                                          |
| 84              | Greece  | 1995           | Maize                     | 5                                                           |
| 84              | Greece  | 1995           | Maize Germ Oil            | 8                                                           |
| 84              | Greece  | 1995           | Marine Fish, Other        | 5                                                           |
| 84              | Greece  | 1995           | Meat, Other               | 4                                                           |
| 84              | Greece  | 1995           | Milk, Whole               | 216                                                         |
| 84              | Greece  | 1995           | Molluscs, Other           | 4                                                           |
| 84              | Greece  | 1995           | Mutton & Goat Meat        | 38                                                          |
| 84              | Greece  | 1995           | Nuts                      | 28                                                          |
| 84              | Greece  | 1995           | Offals, Edible            | 11                                                          |
| 84              | Greece  | 1995           | Olive Oil                 | 47                                                          |
| 84              | Greece  | 1995           | Olives                    | 34                                                          |
| 84              | Greece  | 1995           | Onions                    | 40                                                          |
| 84              | Greece  | 1995           | Oranges, Mandarines       | 110                                                         |
| 84              | Greece  | 1995           | Pelagic Fish              | 17                                                          |
| 84              | Greece  | 1995           | Pigmeat                   | 76                                                          |
| 84              | Greece  | 1995           | Pineapples                | 2                                                           |
| 84              | Greece  | 1995           | Potatoes                  | 183                                                         |
| 84              | Greece  | 1995           | Poultry Meat              | 46                                                          |
| 84              | Greece  | 1995           | Pulses, Other             | 5                                                           |
| 84              | Greece  | 1995           | Rice (Milled Equivalent)  | 21                                                          |
| 84              | Greece  | 1995           | Rye                       | 1                                                           |
| 84              | Greece  | 1995           | Sesameseed                | 2                                                           |
| 84              | Greece  | 1995           | Sesameseed Oil            | 1                                                           |
| 84              | Greece  | 1995           | Soyabean Oil              | 1                                                           |
| 84              | Greece  | 1995           | Sugar, Refined Equivalent | 74                                                          |
| 84              | Greece  | 1995           | Sunflowerseed Oil         | 12                                                          |



## Dietary calcium and zinc deficiency risks are decreasing but remain prevalent

| FAO countrycode | Country | Reference year | Food item                 | Gross food supply (g capita <sup>-1</sup> d <sup>-1</sup> ) |
|-----------------|---------|----------------|---------------------------|-------------------------------------------------------------|
| 84              | Greece  | 1995           | Sweeteners, Other         | 1                                                           |
| 84              | Greece  | 1995           | Tomatoes                  | 372                                                         |
| 84              | Greece  | 1995           | Vegetables, Other         | 339                                                         |
| 84              | Greece  | 1995           | Wheat                     | 372                                                         |
| 84              | Greece  | 1995           | Wine                      | 51                                                          |
| 84              | Greece  | 1996           | Apples                    | 49                                                          |
| 84              | Greece  | 1996           | Bananas                   | 13                                                          |
| 84              | Greece  | 1996           | Beans                     | 9                                                           |
| 84              | Greece  | 1996           | Beer                      | 91                                                          |
| 84              | Greece  | 1996           | Beverages, Alcoholic      | 4                                                           |
| 84              | Greece  | 1996           | Bovine Meat               | 55                                                          |
| 84              | Greece  | 1996           | Butter, Ghee              | 2                                                           |
| 84              | Greece  | 1996           | Cephalopods               | 7                                                           |
| 84              | Greece  | 1996           | Cereals, Other            | 14                                                          |
| 84              | Greece  | 1996           | Cheese                    | 67                                                          |
| 84              | Greece  | 1996           | Cocoa Beans               | 4                                                           |
| 84              | Greece  | 1996           | Coconuts - Incl Copra     | 1                                                           |
| 84              | Greece  | 1996           | Coffee                    | 11                                                          |
| 84              | Greece  | 1996           | Cottonseed Oil            | 3                                                           |
| 84              | Greece  | 1996           | Cream                     | 4                                                           |
| 84              | Greece  | 1996           | Crustaceans               | 2                                                           |
| 84              | Greece  | 1996           | Demersal Fish             | 26                                                          |
| 84              | Greece  | 1996           | Eggs                      | 28                                                          |
| 84              | Greece  | 1996           | Fats, Animals, Raw        | 1                                                           |
| 84              | Greece  | 1996           | Freshwater Fish           | 4                                                           |
| 84              | Greece  | 1996           | Fruits, Other             | 127                                                         |
| 84              | Greece  | 1996           | Grapefruit                | 2                                                           |
| 84              | Greece  | 1996           | Grapes                    | 57                                                          |
| 84              | Greece  | 1996           | Groundnut Oil             | 1                                                           |
| 84              | Greece  | 1996           | Honey                     | 4                                                           |
| 84              | Greece  | 1996           | Lemons, Limes             | 27                                                          |
| 84              | Greece  | 1996           | Maize                     | 4                                                           |
| 84              | Greece  | 1996           | Maize Germ Oil            | 9                                                           |
| 84              | Greece  | 1996           | Marine Fish, Other        | 6                                                           |
| 84              | Greece  | 1996           | Meat, Other               | 4                                                           |
| 84              | Greece  | 1996           | Milk, Whole               | 211                                                         |
| 84              | Greece  | 1996           | Molluscs, Other           | 4                                                           |
| 84              | Greece  | 1996           | Mutton & Goat Meat        | 39                                                          |
| 84              | Greece  | 1996           | Nuts                      | 29                                                          |
| 84              | Greece  | 1996           | Offals, Edible            | 11                                                          |
| 84              | Greece  | 1996           | Olive Oil                 | 48                                                          |
| 84              | Greece  | 1996           | Olives                    | 34                                                          |
| 84              | Greece  | 1996           | Onions                    | 41                                                          |
| 84              | Greece  | 1996           | Oranges, Mandarines       | 112                                                         |
| 84              | Greece  | 1996           | Pelagic Fish              | 15                                                          |
| 84              | Greece  | 1996           | Pigmeat                   | 65                                                          |
| 84              | Greece  | 1996           | Pineapples                | 2                                                           |
| 84              | Greece  | 1996           | Potatoes                  | 187                                                         |
| 84              | Greece  | 1996           | Poultry Meat              | 42                                                          |
| 84              | Greece  | 1996           | Pulses, Other             | 6                                                           |
| 84              | Greece  | 1996           | Rice (Milled Equivalent)  | 21                                                          |
| 84              | Greece  | 1996           | Rye                       | 1                                                           |
| 84              | Greece  | 1996           | Sesameseed                | 2                                                           |
| 84              | Greece  | 1996           | Sesameseed Oil            | 1                                                           |
| 84              | Greece  | 1996           | Soybean Oil               | 2                                                           |
| 84              | Greece  | 1996           | Spices, Other             | 1                                                           |
| 84              | Greece  | 1996           | Sugar, Refined Equivalent | 72                                                          |
| 84              | Greece  | 1996           | Sunflowerseed Oil         | 13                                                          |
| 84              | Greece  | 1996           | Sweeteners, Other         | 1                                                           |
| 84              | Greece  | 1996           | Tomatoes                  | 357                                                         |
| 84              | Greece  | 1996           | Vegetables, Other         | 365                                                         |
| 84              | Greece  | 1996           | Wheat                     | 364                                                         |
| 84              | Greece  | 1996           | Wine                      | 55                                                          |
| 84              | Greece  | 1997           | Apples                    | 56                                                          |
| 84              | Greece  | 1997           | Bananas                   | 14                                                          |
| 84              | Greece  | 1997           | Beans                     | 8                                                           |
| 84              | Greece  | 1997           | Beer                      | 100                                                         |
| 84              | Greece  | 1997           | Beverages, Alcoholic      | 15                                                          |
| 84              | Greece  | 1997           | Bovine Meat               | 53                                                          |
| 84              | Greece  | 1997           | Butter, Ghee              | 3                                                           |
| 84              | Greece  | 1997           | Cephalopods               | 8                                                           |
| 84              | Greece  | 1997           | Cereals, Other            | 3                                                           |
| 84              | Greece  | 1997           | Cheese                    | 71                                                          |
| 84              | Greece  | 1997           | Cocoa Beans               | 5                                                           |
| 84              | Greece  | 1997           | Coconuts - Incl Copra     | 1                                                           |
| 84              | Greece  | 1997           | Coffee                    | 10                                                          |
| 84              | Greece  | 1997           | Cottonseed Oil            | 1                                                           |
| 84              | Greece  | 1997           | Cream                     | 5                                                           |
| 84              | Greece  | 1997           | Crustaceans               | 2                                                           |
| 84              | Greece  | 1997           | Demersal Fish             | 26                                                          |
| 84              | Greece  | 1997           | Eggs                      | 27                                                          |
| 84              | Greece  | 1997           | Fats, Animals, Raw        | 1                                                           |
| 84              | Greece  | 1997           | Freshwater Fish           | 4                                                           |
| 84              | Greece  | 1997           | Fruits, Other             | 106                                                         |
| 84              | Greece  | 1997           | Grapefruit                | 2                                                           |
| 84              | Greece  | 1997           | Grapes                    | 60                                                          |
| 84              | Greece  | 1997           | Groundnut Oil             | 1                                                           |
| 84              | Greece  | 1997           | Honey                     | 4                                                           |
| 84              | Greece  | 1997           | Lemons, Limes             | 25                                                          |
| 84              | Greece  | 1997           | Maize                     | 4                                                           |
| 84              | Greece  | 1997           | Maize Germ Oil            | 8                                                           |
| 84              | Greece  | 1997           | Marine Fish, Other        | 5                                                           |
| 84              | Greece  | 1997           | Meat, Other               | 4                                                           |
| 84              | Greece  | 1997           | Milk, Whole               | 210                                                         |
| 84              | Greece  | 1997           | Molluscs, Other           | 6                                                           |
| 84              | Greece  | 1997           | Mutton & Goat Meat        | 39                                                          |
| 84              | Greece  | 1997           | Nuts                      | 31                                                          |

## Dietary calcium and zinc deficiency risks are decreasing but remain prevalent

| FAO countrycode | Country | Reference year | Food item                 | Gross food supply (g capita <sup>-1</sup> d <sup>-1</sup> ) |
|-----------------|---------|----------------|---------------------------|-------------------------------------------------------------|
| 84              | Greece  | 1997           | Offals, Edible            | 10                                                          |
| 84              | Greece  | 1997           | Olive Oil                 | 47                                                          |
| 84              | Greece  | 1997           | Olives                    | 35                                                          |
| 84              | Greece  | 1997           | Onions                    | 45                                                          |
| 84              | Greece  | 1997           | Oranges, Mandarines       | 124                                                         |
| 84              | Greece  | 1997           | Pelagic Fish              | 17                                                          |
| 84              | Greece  | 1997           | Pigmeat                   | 79                                                          |
| 84              | Greece  | 1997           | Pineapples                | 1                                                           |
| 84              | Greece  | 1997           | Potatoes                  | 199                                                         |
| 84              | Greece  | 1997           | Poultry Meat              | 33                                                          |
| 84              | Greece  | 1997           | Pulses, Other             | 5                                                           |
| 84              | Greece  | 1997           | Rice (Milled Equivalent)  | 20                                                          |
| 84              | Greece  | 1997           | Rye                       | 1                                                           |
| 84              | Greece  | 1997           | Sesameseed                | 2                                                           |
| 84              | Greece  | 1997           | Sesameseed Oil            | 1                                                           |
| 84              | Greece  | 1997           | Soyabean Oil              | 1                                                           |
| 84              | Greece  | 1997           | Spices, Other             | 1                                                           |
| 84              | Greece  | 1997           | Sugar, Refined Equivalent | 63                                                          |
| 84              | Greece  | 1997           | Sunflowerseed Oil         | 14                                                          |
| 84              | Greece  | 1997           | Sweet Potatoes            | 1                                                           |
| 84              | Greece  | 1997           | Sweeteners, Other         | 2                                                           |
| 84              | Greece  | 1997           | Tomatoes                  | 330                                                         |
| 84              | Greece  | 1997           | Vegetables, Other         | 345                                                         |
| 84              | Greece  | 1997           | Wheat                     | 369                                                         |
| 84              | Greece  | 1997           | Wine                      | 50                                                          |
| 84              | Greece  | 1998           | Apples                    | 55                                                          |
| 84              | Greece  | 1998           | Bananas                   | 13                                                          |
| 84              | Greece  | 1998           | Beans                     | 7                                                           |
| 84              | Greece  | 1998           | Beer                      | 97                                                          |
| 84              | Greece  | 1998           | Beverages, Alcoholic      | 15                                                          |
| 84              | Greece  | 1998           | Bovine Meat               | 56                                                          |
| 84              | Greece  | 1998           | Butter, Ghee              | 3                                                           |
| 84              | Greece  | 1998           | Cephalopods               | 7                                                           |
| 84              | Greece  | 1998           | Cereals, Other            | 3                                                           |
| 84              | Greece  | 1998           | Cheese                    | 72                                                          |
| 84              | Greece  | 1998           | Cocoa Beans               | 5                                                           |
| 84              | Greece  | 1998           | Coconuts - Incl Copra     | 1                                                           |
| 84              | Greece  | 1998           | Coffee                    | 9                                                           |
| 84              | Greece  | 1998           | Cottonseed Oil            | 1                                                           |
| 84              | Greece  | 1998           | Cream                     | 7                                                           |
| 84              | Greece  | 1998           | Crustaceans               | 2                                                           |
| 84              | Greece  | 1998           | Demersal Fish             | 22                                                          |
| 84              | Greece  | 1998           | Eggs                      | 27                                                          |
| 84              | Greece  | 1998           | Fats, Animals, Raw        | 1                                                           |
| 84              | Greece  | 1998           | Freshwater Fish           | 8                                                           |
| 84              | Greece  | 1998           | Fruits, Other             | 88                                                          |
| 84              | Greece  | 1998           | Grapefruit                | 2                                                           |
| 84              | Greece  | 1998           | Grapes                    | 70                                                          |
| 84              | Greece  | 1998           | Groundnut Oil             | 1                                                           |
| 84              | Greece  | 1998           | Honey                     | 4                                                           |
| 84              | Greece  | 1998           | Lemons, Limes             | 33                                                          |
| 84              | Greece  | 1998           | Maize                     | 4                                                           |
| 84              | Greece  | 1998           | Maize Germ Oil            | 9                                                           |
| 84              | Greece  | 1998           | Marine Fish, Other        | 7                                                           |
| 84              | Greece  | 1998           | Meat, Other               | 5                                                           |
| 84              | Greece  | 1998           | Milk, Whole               | 213                                                         |
| 84              | Greece  | 1998           | Molluscs, Other           | 2                                                           |
| 84              | Greece  | 1998           | Mutton & Goat Meat        | 39                                                          |
| 84              | Greece  | 1998           | Nuts                      | 25                                                          |
| 84              | Greece  | 1998           | Offals, Edible            | 10                                                          |
| 84              | Greece  | 1998           | Olive Oil                 | 48                                                          |
| 84              | Greece  | 1998           | Olives                    | 35                                                          |
| 84              | Greece  | 1998           | Onions                    | 44                                                          |
| 84              | Greece  | 1998           | Oranges, Mandarines       | 118                                                         |
| 84              | Greece  | 1998           | Pelagic Fish              | 13                                                          |
| 84              | Greece  | 1998           | Pigmeat                   | 72                                                          |
| 84              | Greece  | 1998           | Pineapples                | 1                                                           |
| 84              | Greece  | 1998           | Potatoes                  | 214                                                         |
| 84              | Greece  | 1998           | Poultry Meat              | 36                                                          |
| 84              | Greece  | 1998           | Pulses, Other             | 5                                                           |
| 84              | Greece  | 1998           | Rice (Milled Equivalent)  | 17                                                          |
| 84              | Greece  | 1998           | Rye                       | 1                                                           |
| 84              | Greece  | 1998           | Sesameseed                | 2                                                           |
| 84              | Greece  | 1998           | Sesameseed Oil            | 1                                                           |
| 84              | Greece  | 1998           | Soyabean Oil              | 1                                                           |
| 84              | Greece  | 1998           | Spices, Other             | 1                                                           |
| 84              | Greece  | 1998           | Sugar, Refined Equivalent | 74                                                          |
| 84              | Greece  | 1998           | Sunflowerseed Oil         | 13                                                          |
| 84              | Greece  | 1998           | Sweet Potatoes            | 1                                                           |
| 84              | Greece  | 1998           | Sweeteners, Other         | 2                                                           |
| 84              | Greece  | 1998           | Tomatoes                  | 346                                                         |
| 84              | Greece  | 1998           | Vegetables, Other         | 345                                                         |
| 84              | Greece  | 1998           | Wheat                     | 356                                                         |
| 84              | Greece  | 1998           | Wine                      | 58                                                          |
| 84              | Greece  | 1999           | Apples                    | 56                                                          |
| 84              | Greece  | 1999           | Bananas                   | 17                                                          |
| 84              | Greece  | 1999           | Barley                    | 1                                                           |
| 84              | Greece  | 1999           | Beans                     | 8                                                           |
| 84              | Greece  | 1999           | Beer                      | 112                                                         |
| 84              | Greece  | 1999           | Beverages, Alcoholic      | 12                                                          |
| 84              | Greece  | 1999           | Bovine Meat               | 63                                                          |
| 84              | Greece  | 1999           | Butter, Ghee              | 3                                                           |
| 84              | Greece  | 1999           | Cephalopods               | 9                                                           |
| 84              | Greece  | 1999           | Cereals, Other            | 4                                                           |
| 84              | Greece  | 1999           | Cheese                    | 73                                                          |
| 84              | Greece  | 1999           | Cocoa Beans               | 5                                                           |
| 84              | Greece  | 1999           | Coconuts - Incl Copra     | 1                                                           |

Dietary calcium and zinc deficiency risks are decreasing but remain prevalent

| FAO countrycode | Country | Reference year | Food item                 | Gross food supply (g capita <sup>-1</sup> d <sup>-1</sup> ) |
|-----------------|---------|----------------|---------------------------|-------------------------------------------------------------|
| 84              | Greece  | 1999           | Coffee                    | 10                                                          |
| 84              | Greece  | 1999           | Cottonseed Oil            | 3                                                           |
| 84              | Greece  | 1999           | Cream                     | 5                                                           |
| 84              | Greece  | 1999           | Crustaceans               | 2                                                           |
| 84              | Greece  | 1999           | Demersal Fish             | 27                                                          |
| 84              | Greece  | 1999           | Eggs                      | 29                                                          |
| 84              | Greece  | 1999           | Fats, Animals, Raw        | 1                                                           |
| 84              | Greece  | 1999           | Freshwater Fish           | 3                                                           |
| 84              | Greece  | 1999           | Fruits, Other             | 174                                                         |
| 84              | Greece  | 1999           | Grapefruit                | 2                                                           |
| 84              | Greece  | 1999           | Grapes                    | 50                                                          |
| 84              | Greece  | 1999           | Groundnut Oil             | 1                                                           |
| 84              | Greece  | 1999           | Honey                     | 4                                                           |
| 84              | Greece  | 1999           | Lemons, Limes             | 33                                                          |
| 84              | Greece  | 1999           | Maize                     | 4                                                           |
| 84              | Greece  | 1999           | Maize Germ Oil            | 7                                                           |
| 84              | Greece  | 1999           | Marine Fish, Other        | 5                                                           |
| 84              | Greece  | 1999           | Meat, Other               | 4                                                           |
| 84              | Greece  | 1999           | Milk, Whole               | 205                                                         |
| 84              | Greece  | 1999           | Molluscs, Other           | 5                                                           |
| 84              | Greece  | 1999           | Mutton & Goat Meat        | 39                                                          |
| 84              | Greece  | 1999           | Nuts                      | 32                                                          |
| 84              | Greece  | 1999           | Offals, Edible            | 11                                                          |
| 84              | Greece  | 1999           | Olive Oil                 | 47                                                          |
| 84              | Greece  | 1999           | Olives                    | 38                                                          |
| 84              | Greece  | 1999           | Onions                    | 48                                                          |
| 84              | Greece  | 1999           | Oranges, Mandarines       | 157                                                         |
| 84              | Greece  | 1999           | Pelagic Fish              | 11                                                          |
| 84              | Greece  | 1999           | Pig meat                  | 87                                                          |
| 84              | Greece  | 1999           | Pineapples                | 2                                                           |
| 84              | Greece  | 1999           | Potatoes                  | 216                                                         |
| 84              | Greece  | 1999           | Poultry Meat              | 34                                                          |
| 84              | Greece  | 1999           | Pulses, Other             | 5                                                           |
| 84              | Greece  | 1999           | Rice (Milled Equivalent)  | 21                                                          |
| 84              | Greece  | 1999           | Rye                       | 1                                                           |
| 84              | Greece  | 1999           | Sesameseed                | 1                                                           |
| 84              | Greece  | 1999           | Sesameseed Oil            | 1                                                           |
| 84              | Greece  | 1999           | Soyabean Oil              | 1                                                           |
| 84              | Greece  | 1999           | Spices, Other             | 1                                                           |
| 84              | Greece  | 1999           | Sugar, Refined Equivalent | 76                                                          |
| 84              | Greece  | 1999           | Sunflowerseed Oil         | 13                                                          |
| 84              | Greece  | 1999           | Sweet Potatoes            | 1                                                           |
| 84              | Greece  | 1999           | Sweeteners, Other         | 2                                                           |
| 84              | Greece  | 1999           | Tomatoes                  | 377                                                         |
| 84              | Greece  | 1999           | Vegetables, Other         | 335                                                         |
| 84              | Greece  | 1999           | Wheat                     | 358                                                         |
| 84              | Greece  | 1999           | Wine                      | 66                                                          |
| 84              | Greece  | 2000           | Apples                    | 50                                                          |
| 84              | Greece  | 2000           | Bananas                   | 13                                                          |
| 84              | Greece  | 2000           | Barley                    | 1                                                           |
| 84              | Greece  | 2000           | Beans                     | 8                                                           |
| 84              | Greece  | 2000           | Beer                      | 102                                                         |
| 84              | Greece  | 2000           | Beverages, Alcoholic      | 14                                                          |
| 84              | Greece  | 2000           | Bovine Meat               | 94                                                          |
| 84              | Greece  | 2000           | Butter, Ghee              | 2                                                           |
| 84              | Greece  | 2000           | Cephalopods               | 8                                                           |
| 84              | Greece  | 2000           | Cereals, Other            | 6                                                           |
| 84              | Greece  | 2000           | Cheese                    | 67                                                          |
| 84              | Greece  | 2000           | Cocoa Beans               | 4                                                           |
| 84              | Greece  | 2000           | Coconuts - Incl Copra     | 1                                                           |
| 84              | Greece  | 2000           | Coffee                    | 11                                                          |
| 84              | Greece  | 2000           | Cottonseed Oil            | 3                                                           |
| 84              | Greece  | 2000           | Cream                     | 6                                                           |
| 84              | Greece  | 2000           | Crustaceans               | 2                                                           |
| 84              | Greece  | 2000           | Demersal Fish             | 24                                                          |
| 84              | Greece  | 2000           | Eggs                      | 27                                                          |
| 84              | Greece  | 2000           | Fats, Animals, Raw        | 1                                                           |
| 84              | Greece  | 2000           | Freshwater Fish           | 4                                                           |
| 84              | Greece  | 2000           | Fruits, Other             | 134                                                         |
| 84              | Greece  | 2000           | Grapefruit                | 2                                                           |
| 84              | Greece  | 2000           | Grapes                    | 100                                                         |
| 84              | Greece  | 2000           | Groundnut Oil             | 1                                                           |
| 84              | Greece  | 2000           | Groundnuts (Shelled Eq)   | 1                                                           |
| 84              | Greece  | 2000           | Honey                     | 4                                                           |
| 84              | Greece  | 2000           | Lemons, Limes             | 18                                                          |
| 84              | Greece  | 2000           | Maize                     | 4                                                           |
| 84              | Greece  | 2000           | Maize Germ Oil            | 6                                                           |
| 84              | Greece  | 2000           | Marine Fish, Other        | 8                                                           |
| 84              | Greece  | 2000           | Meat, Other               | 5                                                           |
| 84              | Greece  | 2000           | Milk, Whole               | 227                                                         |
| 84              | Greece  | 2000           | Molluscs, Other           | 2                                                           |
| 84              | Greece  | 2000           | Mutton & Goat Meat        | 35                                                          |
| 84              | Greece  | 2000           | Nuts                      | 29                                                          |
| 84              | Greece  | 2000           | Offals, Edible            | 13                                                          |
| 84              | Greece  | 2000           | Olive Oil                 | 43                                                          |
| 84              | Greece  | 2000           | Olives                    | 40                                                          |
| 84              | Greece  | 2000           | Onions                    | 52                                                          |
| 84              | Greece  | 2000           | Oranges, Mandarines       | 132                                                         |
| 84              | Greece  | 2000           | Pelagic Fish              | 11                                                          |
| 84              | Greece  | 2000           | Pig meat                  | 98                                                          |
| 84              | Greece  | 2000           | Pineapples                | 2                                                           |
| 84              | Greece  | 2000           | Potatoes                  | 216                                                         |
| 84              | Greece  | 2000           | Poultry Meat              | 36                                                          |
| 84              | Greece  | 2000           | Pulses, Other             | 5                                                           |
| 84              | Greece  | 2000           | Rice (Milled Equivalent)  | 18                                                          |
| 84              | Greece  | 2000           | Rye                       | 1                                                           |
| 84              | Greece  | 2000           | Sesameseed                | 2                                                           |

Dietary calcium and zinc deficiency risks are decreasing but remain prevalent

| FAO countrycode | Country | Reference year | Food item                 | Gross food supply (g capita <sup>-1</sup> d <sup>-1</sup> ) |
|-----------------|---------|----------------|---------------------------|-------------------------------------------------------------|
| 84              | Greece  | 2000           | Sesameseed Oil            | 1                                                           |
| 84              | Greece  | 2000           | Soyabean Oil              | 1                                                           |
| 84              | Greece  | 2000           | Spices, Other             | 1                                                           |
| 84              | Greece  | 2000           | Sugar, Refined Equivalent | 78                                                          |
| 84              | Greece  | 2000           | Sunflowerseed Oil         | 9                                                           |
| 84              | Greece  | 2000           | Sweet Potatoes            | 1                                                           |
| 84              | Greece  | 2000           | Sweeteners, Other         | 2                                                           |
| 84              | Greece  | 2000           | Tomatoes                  | 380                                                         |
| 84              | Greece  | 2000           | Vegetables, Other         | 357                                                         |
| 84              | Greece  | 2000           | Wheat                     | 358                                                         |
| 84              | Greece  | 2000           | Wine                      | 61                                                          |
| 84              | Greece  | 2001           | Apples                    | 45                                                          |
| 84              | Greece  | 2001           | Bananas                   | 16                                                          |
| 84              | Greece  | 2001           | Barley                    | 1                                                           |
| 84              | Greece  | 2001           | Beans                     | 7                                                           |
| 84              | Greece  | 2001           | Beer                      | 107                                                         |
| 84              | Greece  | 2001           | Beverages, Alcoholic      | 15                                                          |
| 84              | Greece  | 2001           | Bovine Meat               | 62                                                          |
| 84              | Greece  | 2001           | Butter, Ghee              | 2                                                           |
| 84              | Greece  | 2001           | Cephalopods               | 9                                                           |
| 84              | Greece  | 2001           | Cereals, Other            | 14                                                          |
| 84              | Greece  | 2001           | Cheese                    | 62                                                          |
| 84              | Greece  | 2001           | Cocoa Beans               | 6                                                           |
| 84              | Greece  | 2001           | Coconuts - Incl Copra     | 1                                                           |
| 84              | Greece  | 2001           | Coffee                    | 8                                                           |
| 84              | Greece  | 2001           | Cottonseed Oil            | 3                                                           |
| 84              | Greece  | 2001           | Cream                     | 5                                                           |
| 84              | Greece  | 2001           | Crustaceans               | 3                                                           |
| 84              | Greece  | 2001           | Demersal Fish             | 22                                                          |
| 84              | Greece  | 2001           | Eggs                      | 26                                                          |
| 84              | Greece  | 2001           | Fats, Animals, Raw        | 1                                                           |
| 84              | Greece  | 2001           | Freshwater Fish           | 6                                                           |
| 84              | Greece  | 2001           | Fruits, Other             | 103                                                         |
| 84              | Greece  | 2001           | Grapefruit                | 2                                                           |
| 84              | Greece  | 2001           | Grapes                    | 116                                                         |
| 84              | Greece  | 2001           | Groundnut Oil             | 1                                                           |
| 84              | Greece  | 2001           | Groundnuts (Shelled Eq)   | 1                                                           |
| 84              | Greece  | 2001           | Honey                     | 5                                                           |
| 84              | Greece  | 2001           | Lemons, Limes             | 32                                                          |
| 84              | Greece  | 2001           | Maize                     | 4                                                           |
| 84              | Greece  | 2001           | Maize Germ Oil            | 6                                                           |
| 84              | Greece  | 2001           | Marine Fish, Other        | 6                                                           |
| 84              | Greece  | 2001           | Meat, Other               | 5                                                           |
| 84              | Greece  | 2001           | Milk, Whole               | 220                                                         |
| 84              | Greece  | 2001           | Molluscs, Other           | 4                                                           |
| 84              | Greece  | 2001           | Mutton & Goat Meat        | 34                                                          |
| 84              | Greece  | 2001           | Nuts                      | 33                                                          |
| 84              | Greece  | 2001           | Offals, Edible            | 8                                                           |
| 84              | Greece  | 2001           | Olive Oil                 | 42                                                          |
| 84              | Greece  | 2001           | Olives                    | 38                                                          |
| 84              | Greece  | 2001           | Onions                    | 50                                                          |
| 84              | Greece  | 2001           | Oranges, Mandarines       | 152                                                         |
| 84              | Greece  | 2001           | Pelagic Fish              | 10                                                          |
| 84              | Greece  | 2001           | Pigmeat                   | 97                                                          |
| 84              | Greece  | 2001           | Pineapples                | 2                                                           |
| 84              | Greece  | 2001           | Potatoes                  | 201                                                         |
| 84              | Greece  | 2001           | Poultry Meat              | 44                                                          |
| 84              | Greece  | 2001           | Pulses, Other             | 5                                                           |
| 84              | Greece  | 2001           | Rice (Milled Equivalent)  | 20                                                          |
| 84              | Greece  | 2001           | Rye                       | 1                                                           |
| 84              | Greece  | 2001           | Sesameseed                | 2                                                           |
| 84              | Greece  | 2001           | Sesameseed Oil            | 1                                                           |
| 84              | Greece  | 2001           | Soyabean Oil              | 1                                                           |
| 84              | Greece  | 2001           | Spices, Other             | 1                                                           |
| 84              | Greece  | 2001           | Sugar, Refined Equivalent | 78                                                          |
| 84              | Greece  | 2001           | Sunflowerseed Oil         | 12                                                          |
| 84              | Greece  | 2001           | Sweet Potatoes            | 1                                                           |
| 84              | Greece  | 2001           | Sweeteners, Other         | 5                                                           |
| 84              | Greece  | 2001           | Tomatoes                  | 363                                                         |
| 84              | Greece  | 2001           | Vegetables, Other         | 359                                                         |
| 84              | Greece  | 2001           | Wheat                     | 353                                                         |
| 84              | Greece  | 2001           | Wine                      | 69                                                          |
| 84              | Greece  | 2002           | Apples                    | 42                                                          |
| 84              | Greece  | 2002           | Bananas                   | 16                                                          |
| 84              | Greece  | 2002           | Barley                    | 1                                                           |
| 84              | Greece  | 2002           | Beans                     | 9                                                           |
| 84              | Greece  | 2002           | Beer                      | 110                                                         |
| 84              | Greece  | 2002           | Beverages, Alcoholic      | 16                                                          |
| 84              | Greece  | 2002           | Bovine Meat               | 54                                                          |
| 84              | Greece  | 2002           | Butter, Ghee              | 3                                                           |
| 84              | Greece  | 2002           | Cephalopods               | 10                                                          |
| 84              | Greece  | 2002           | Cereals, Other            | 17                                                          |
| 84              | Greece  | 2002           | Cheese                    | 70                                                          |
| 84              | Greece  | 2002           | Citrus, Other             | 1                                                           |
| 84              | Greece  | 2002           | Cocoa Beans               | 5                                                           |
| 84              | Greece  | 2002           | Coconuts - Incl Copra     | 1                                                           |
| 84              | Greece  | 2002           | Coffee                    | 13                                                          |
| 84              | Greece  | 2002           | Cottonseed Oil            | 2                                                           |
| 84              | Greece  | 2002           | Cream                     | 4                                                           |
| 84              | Greece  | 2002           | Crustaceans               | 3                                                           |
| 84              | Greece  | 2002           | Demersal Fish             | 22                                                          |
| 84              | Greece  | 2002           | Eggs                      | 25                                                          |
| 84              | Greece  | 2002           | Fats, Animals, Raw        | 1                                                           |
| 84              | Greece  | 2002           | Freshwater Fish           | 4                                                           |
| 84              | Greece  | 2002           | Fruits, Other             | 102                                                         |
| 84              | Greece  | 2002           | Grapefruit                | 4                                                           |
| 84              | Greece  | 2002           | Grapes                    | 96                                                          |

Dietary calcium and zinc deficiency risks are decreasing but remain prevalent

| FAO countrycode | Country | Reference year | Food item                 | Gross food supply (g capita <sup>-1</sup> d <sup>-1</sup> ) |
|-----------------|---------|----------------|---------------------------|-------------------------------------------------------------|
| 84              | Greece  | 2002           | Groundnut Oil             | 1                                                           |
| 84              | Greece  | 2002           | Groundnuts (Shelled Eq)   | 1                                                           |
| 84              | Greece  | 2002           | Honey                     | 4                                                           |
| 84              | Greece  | 2002           | Lemons, Limes             | 38                                                          |
| 84              | Greece  | 2002           | Maize                     | 4                                                           |
| 84              | Greece  | 2002           | Maize Germ Oil            | 9                                                           |
| 84              | Greece  | 2002           | Marine Fish, Other        | 4                                                           |
| 84              | Greece  | 2002           | Meat, Other               | 4                                                           |
| 84              | Greece  | 2002           | Milk, Whole               | 212                                                         |
| 84              | Greece  | 2002           | Molluscs, Other           | 3                                                           |
| 84              | Greece  | 2002           | Mutton & Goat Meat        | 34                                                          |
| 84              | Greece  | 2002           | Nuts                      | 32                                                          |
| 84              | Greece  | 2002           | Offals, Edible            | 9                                                           |
| 84              | Greece  | 2002           | Olive Oil                 | 44                                                          |
| 84              | Greece  | 2002           | Olives                    | 39                                                          |
| 84              | Greece  | 2002           | Onions                    | 54                                                          |
| 84              | Greece  | 2002           | Oranges, Mandarines       | 153                                                         |
| 84              | Greece  | 2002           | Pelagic Fish              | 11                                                          |
| 84              | Greece  | 2002           | Pigmeat                   | 85                                                          |
| 84              | Greece  | 2002           | Pineapples                | 3                                                           |
| 84              | Greece  | 2002           | Potatoes                  | 190                                                         |
| 84              | Greece  | 2002           | Poultry Meat              | 42                                                          |
| 84              | Greece  | 2002           | Pulses, Other             | 5                                                           |
| 84              | Greece  | 2002           | Rice (Milled Equivalent)  | 20                                                          |
| 84              | Greece  | 2002           | Rye                       | 1                                                           |
| 84              | Greece  | 2002           | Sesameseed                | 2                                                           |
| 84              | Greece  | 2002           | Sesameseed Oil            | 1                                                           |
| 84              | Greece  | 2002           | Soyabean Oil              | 2                                                           |
| 84              | Greece  | 2002           | Spices, Other             | 1                                                           |
| 84              | Greece  | 2002           | Sugar, Refined Equivalent | 79                                                          |
| 84              | Greece  | 2002           | Sunflowerseed Oil         | 13                                                          |
| 84              | Greece  | 2002           | Sweet Potatoes            | 1                                                           |
| 84              | Greece  | 2002           | Sweeteners, Other         | 4                                                           |
| 84              | Greece  | 2002           | Tomatoes                  | 309                                                         |
| 84              | Greece  | 2002           | Vegetables, Other         | 358                                                         |
| 84              | Greece  | 2002           | Wheat                     | 355                                                         |
| 84              | Greece  | 2002           | Wine                      | 73                                                          |
| 84              | Greece  | 2003           | Apples                    | 41                                                          |
| 84              | Greece  | 2003           | Bananas                   | 17                                                          |
| 84              | Greece  | 2003           | Barley                    | 1                                                           |
| 84              | Greece  | 2003           | Beans                     | 9                                                           |
| 84              | Greece  | 2003           | Beer                      | 69                                                          |
| 84              | Greece  | 2003           | Beverages, Alcoholic      | 14                                                          |
| 84              | Greece  | 2003           | Bovine Meat               | 54                                                          |
| 84              | Greece  | 2003           | Butter, Ghee              | 3                                                           |
| 84              | Greece  | 2003           | Cephalopods               | 10                                                          |
| 84              | Greece  | 2003           | Cereals, Other            | 8                                                           |
| 84              | Greece  | 2003           | Cheese                    | 73                                                          |
| 84              | Greece  | 2003           | Citrus, Other             | 1                                                           |
| 84              | Greece  | 2003           | Cocoa Beans               | 6                                                           |
| 84              | Greece  | 2003           | Coconuts - Incl Copra     | 1                                                           |
| 84              | Greece  | 2003           | Coffee                    | 15                                                          |
| 84              | Greece  | 2003           | Cottonseed Oil            | 1                                                           |
| 84              | Greece  | 2003           | Cream                     | 6                                                           |
| 84              | Greece  | 2003           | Crustaceans               | 3                                                           |
| 84              | Greece  | 2003           | Demersal Fish             | 24                                                          |
| 84              | Greece  | 2003           | Eggs                      | 24                                                          |
| 84              | Greece  | 2003           | Fats, Animals, Raw        | 1                                                           |
| 84              | Greece  | 2003           | Freshwater Fish           | 3                                                           |
| 84              | Greece  | 2003           | Fruits, Other             | 59                                                          |
| 84              | Greece  | 2003           | Grapefruit                | 3                                                           |
| 84              | Greece  | 2003           | Grapes                    | 113                                                         |
| 84              | Greece  | 2003           | Groundnut Oil             | 1                                                           |
| 84              | Greece  | 2003           | Groundnuts (Shelled Eq)   | 1                                                           |
| 84              | Greece  | 2003           | Honey                     | 4                                                           |
| 84              | Greece  | 2003           | Lemons, Limes             | 31                                                          |
| 84              | Greece  | 2003           | Maize                     | 4                                                           |
| 84              | Greece  | 2003           | Maize Germ Oil            | 7                                                           |
| 84              | Greece  | 2003           | Marine Fish, Other        | 5                                                           |
| 84              | Greece  | 2003           | Meat, Other               | 5                                                           |
| 84              | Greece  | 2003           | Milk, Whole               | 242                                                         |
| 84              | Greece  | 2003           | Molluscs, Other           | 4                                                           |
| 84              | Greece  | 2003           | Mutton & Goat Meat        | 35                                                          |
| 84              | Greece  | 2003           | Nuts                      | 32                                                          |
| 84              | Greece  | 2003           | Offals, Edible            | 11                                                          |
| 84              | Greece  | 2003           | Olive Oil                 | 44                                                          |
| 84              | Greece  | 2003           | Olives                    | 28                                                          |
| 84              | Greece  | 2003           | Onions                    | 54                                                          |
| 84              | Greece  | 2003           | Oranges, Mandarines       | 144                                                         |
| 84              | Greece  | 2003           | Pelagic Fish              | 10                                                          |
| 84              | Greece  | 2003           | Pigmeat                   | 76                                                          |
| 84              | Greece  | 2003           | Pimento                   | 1                                                           |
| 84              | Greece  | 2003           | Pineapples                | 4                                                           |
| 84              | Greece  | 2003           | Potatoes                  | 217                                                         |
| 84              | Greece  | 2003           | Poultry Meat              | 57                                                          |
| 84              | Greece  | 2003           | Pulses, Other             | 4                                                           |
| 84              | Greece  | 2003           | Rice (Milled Equivalent)  | 21                                                          |
| 84              | Greece  | 2003           | Rye                       | 1                                                           |
| 84              | Greece  | 2003           | Sesameseed                | 2                                                           |
| 84              | Greece  | 2003           | Sesameseed Oil            | 1                                                           |
| 84              | Greece  | 2003           | Soyabean Oil              | 2                                                           |
| 84              | Greece  | 2003           | Spices, Other             | 1                                                           |
| 84              | Greece  | 2003           | Sugar, Refined Equivalent | 80                                                          |
| 84              | Greece  | 2003           | Sunflowerseed Oil         | 15                                                          |
| 84              | Greece  | 2003           | Sweet Potatoes            | 1                                                           |
| 84              | Greece  | 2003           | Sweeteners, Other         | 5                                                           |
| 84              | Greece  | 2003           | Tomatoes                  | 343                                                         |

Dietary calcium and zinc deficiency risks are decreasing but remain prevalent

| FAO countrycode | Country | Reference year | Food item                 | Gross food supply (g capita <sup>-1</sup> d <sup>-1</sup> ) |
|-----------------|---------|----------------|---------------------------|-------------------------------------------------------------|
| 84              | Greece  | 2003           | Vegetables, Other         | 393                                                         |
| 84              | Greece  | 2003           | Wheat                     | 360                                                         |
| 84              | Greece  | 2003           | Wine                      | 68                                                          |
| 84              | Greece  | 2004           | Apples                    | 63                                                          |
| 84              | Greece  | 2004           | Bananas                   | 17                                                          |
| 84              | Greece  | 2004           | Barley                    | 3                                                           |
| 84              | Greece  | 2004           | Beans                     | 8                                                           |
| 84              | Greece  | 2004           | Beer                      | 100                                                         |
| 84              | Greece  | 2004           | Beverages, Alcoholic      | 11                                                          |
| 84              | Greece  | 2004           | Bovine Meat               | 49                                                          |
| 84              | Greece  | 2004           | Butter, Ghee              | 3                                                           |
| 84              | Greece  | 2004           | Cephalopods               | 9                                                           |
| 84              | Greece  | 2004           | Cereals, Other            | 3                                                           |
| 84              | Greece  | 2004           | Cheese                    | 76                                                          |
| 84              | Greece  | 2004           | Citrus, Other             | 1                                                           |
| 84              | Greece  | 2004           | Cocoa Beans               | 6                                                           |
| 84              | Greece  | 2004           | Coconuts - Incl Copra     | 1                                                           |
| 84              | Greece  | 2004           | Coffee                    | 13                                                          |
| 84              | Greece  | 2004           | Cottonseed Oil            | 3                                                           |
| 84              | Greece  | 2004           | Cream                     | 6                                                           |
| 84              | Greece  | 2004           | Crustaceans               | 3                                                           |
| 84              | Greece  | 2004           | Demersal Fish             | 24                                                          |
| 84              | Greece  | 2004           | Eggs                      | 25                                                          |
| 84              | Greece  | 2004           | Fats, Animals, Raw        | 1                                                           |
| 84              | Greece  | 2004           | Freshwater Fish           | 4                                                           |
| 84              | Greece  | 2004           | Fruits, Other             | 181                                                         |
| 84              | Greece  | 2004           | Grapefruit                | 4                                                           |
| 84              | Greece  | 2004           | Grapes                    | 102                                                         |
| 84              | Greece  | 2004           | Groundnut Oil             | 1                                                           |
| 84              | Greece  | 2004           | Groundnuts (Shelled Eq)   | 1                                                           |
| 84              | Greece  | 2004           | Honey                     | 4                                                           |
| 84              | Greece  | 2004           | Lemons, Limes             | 26                                                          |
| 84              | Greece  | 2004           | Maize                     | 4                                                           |
| 84              | Greece  | 2004           | Maize Germ Oil            | 8                                                           |
| 84              | Greece  | 2004           | Marine Fish, Other        | 5                                                           |
| 84              | Greece  | 2004           | Meat, Other               | 4                                                           |
| 84              | Greece  | 2004           | Milk, Whole               | 213                                                         |
| 84              | Greece  | 2004           | Molluscs, Other           | 2                                                           |
| 84              | Greece  | 2004           | Mutton & Goat Meat        | 39                                                          |
| 84              | Greece  | 2004           | Nuts                      | 33                                                          |
| 84              | Greece  | 2004           | Offals, Edible            | 9                                                           |
| 84              | Greece  | 2004           | Olive Oil                 | 44                                                          |
| 84              | Greece  | 2004           | Olives                    | 28                                                          |
| 84              | Greece  | 2004           | Onions                    | 51                                                          |
| 84              | Greece  | 2004           | Oranges, Mandarines       | 117                                                         |
| 84              | Greece  | 2004           | Pelagic Fish              | 9                                                           |
| 84              | Greece  | 2004           | Pigmeat                   | 74                                                          |
| 84              | Greece  | 2004           | Pineapples                | 5                                                           |
| 84              | Greece  | 2004           | Potatoes                  | 205                                                         |
| 84              | Greece  | 2004           | Poultry Meat              | 47                                                          |
| 84              | Greece  | 2004           | Pulses, Other             | 5                                                           |
| 84              | Greece  | 2004           | Rice (Milled Equivalent)  | 20                                                          |
| 84              | Greece  | 2004           | Rye                       | 1                                                           |
| 84              | Greece  | 2004           | Sesameseed                | 2                                                           |
| 84              | Greece  | 2004           | Sesameseed Oil            | 1                                                           |
| 84              | Greece  | 2004           | Soyabean Oil              | 2                                                           |
| 84              | Greece  | 2004           | Spices, Other             | 1                                                           |
| 84              | Greece  | 2004           | Sugar, Refined Equivalent | 81                                                          |
| 84              | Greece  | 2004           | Sunflowerseed Oil         | 13                                                          |
| 84              | Greece  | 2004           | Sweet Potatoes            | 2                                                           |
| 84              | Greece  | 2004           | Sweeteners, Other         | 7                                                           |
| 84              | Greece  | 2004           | Tomatoes                  | 386                                                         |
| 84              | Greece  | 2004           | Vegetables, Other         | 391                                                         |
| 84              | Greece  | 2004           | Wheat                     | 370                                                         |
| 84              | Greece  | 2004           | Wine                      | 69                                                          |
| 84              | Greece  | 2005           | Apples                    | 52                                                          |
| 84              | Greece  | 2005           | Bananas                   | 18                                                          |
| 84              | Greece  | 2005           | Barley                    | 1                                                           |
| 84              | Greece  | 2005           | Beans                     | 7                                                           |
| 84              | Greece  | 2005           | Beer                      | 99                                                          |
| 84              | Greece  | 2005           | Beverages, Alcoholic      | 12                                                          |
| 84              | Greece  | 2005           | Bovine Meat               | 49                                                          |
| 84              | Greece  | 2005           | Butter, Ghee              | 3                                                           |
| 84              | Greece  | 2005           | Cephalopods               | 10                                                          |
| 84              | Greece  | 2005           | Cereals, Other            | 7                                                           |
| 84              | Greece  | 2005           | Cheese                    | 75                                                          |
| 84              | Greece  | 2005           | Cocoa Beans               | 7                                                           |
| 84              | Greece  | 2005           | Coconuts - Incl Copra     | 1                                                           |
| 84              | Greece  | 2005           | Coffee                    | 13                                                          |
| 84              | Greece  | 2005           | Cottonseed Oil            | 2                                                           |
| 84              | Greece  | 2005           | Cream                     | 7                                                           |
| 84              | Greece  | 2005           | Crustaceans               | 3                                                           |
| 84              | Greece  | 2005           | Demersal Fish             | 25                                                          |
| 84              | Greece  | 2005           | Eggs                      | 25                                                          |
| 84              | Greece  | 2005           | Fats, Animals, Raw        | 1                                                           |
| 84              | Greece  | 2005           | Freshwater Fish           | 5                                                           |
| 84              | Greece  | 2005           | Fruits, Other             | 138                                                         |
| 84              | Greece  | 2005           | Grapefruit                | 4                                                           |
| 84              | Greece  | 2005           | Grapes                    | 78                                                          |
| 84              | Greece  | 2005           | Groundnut Oil             | 1                                                           |
| 84              | Greece  | 2005           | Groundnuts (Shelled Eq)   | 1                                                           |
| 84              | Greece  | 2005           | Honey                     | 5                                                           |
| 84              | Greece  | 2005           | Lemons, Limes             | 31                                                          |
| 84              | Greece  | 2005           | Maize                     | 4                                                           |
| 84              | Greece  | 2005           | Maize Germ Oil            | 7                                                           |
| 84              | Greece  | 2005           | Marine Fish, Other        | 4                                                           |
| 84              | Greece  | 2005           | Meat, Other               | 4                                                           |

Dietary calcium and zinc deficiency risks are decreasing but remain prevalent

| FAO countrycode | Country | Reference year | Food item                 | Gross food supply (g capita <sup>-1</sup> d <sup>-1</sup> ) |
|-----------------|---------|----------------|---------------------------|-------------------------------------------------------------|
| 84              | Greece  | 2005           | Milk, Whole               | 213                                                         |
| 84              | Greece  | 2005           | Molluscs, Other           | 2                                                           |
| 84              | Greece  | 2005           | Mutton & Goat Meat        | 40                                                          |
| 84              | Greece  | 2005           | Nuts                      | 33                                                          |
| 84              | Greece  | 2005           | Offals, Edible            | 8                                                           |
| 84              | Greece  | 2005           | Olive Oil                 | 44                                                          |
| 84              | Greece  | 2005           | Olives                    | 33                                                          |
| 84              | Greece  | 2005           | Onions                    | 45                                                          |
| 84              | Greece  | 2005           | Oranges, Mandarines       | 143                                                         |
| 84              | Greece  | 2005           | Pelagic Fish              | 8                                                           |
| 84              | Greece  | 2005           | Pigmeat                   | 80                                                          |
| 84              | Greece  | 2005           | Pineapples                | 4                                                           |
| 84              | Greece  | 2005           | Potatoes                  | 193                                                         |
| 84              | Greece  | 2005           | Poultry Meat              | 50                                                          |
| 84              | Greece  | 2005           | Pulses, Other             | 5                                                           |
| 84              | Greece  | 2005           | Rice (Milled Equivalent)  | 20                                                          |
| 84              | Greece  | 2005           | Rye                       | 1                                                           |
| 84              | Greece  | 2005           | Sesameseed                | 2                                                           |
| 84              | Greece  | 2005           | Sesameseed Oil            | 1                                                           |
| 84              | Greece  | 2005           | Soyabean Oil              | 2                                                           |
| 84              | Greece  | 2005           | Sugar, Refined Equivalent | 74                                                          |
| 84              | Greece  | 2005           | Sunflowerseed Oil         | 15                                                          |
| 84              | Greece  | 2005           | Sweet Potatoes            | 1                                                           |
| 84              | Greece  | 2005           | Sweeteners, Other         | 8                                                           |
| 84              | Greece  | 2005           | Tomatoes                  | 297                                                         |
| 84              | Greece  | 2005           | Vegetables, Other         | 377                                                         |
| 84              | Greece  | 2005           | Wheat                     | 349                                                         |
| 84              | Greece  | 2005           | Wine                      | 68                                                          |
| 84              | Greece  | 2006           | Apples                    | 49                                                          |
| 84              | Greece  | 2006           | Bananas                   | 22                                                          |
| 84              | Greece  | 2006           | Barley                    | 1                                                           |
| 84              | Greece  | 2006           | Beans                     | 7                                                           |
| 84              | Greece  | 2006           | Beer                      | 99                                                          |
| 84              | Greece  | 2006           | Beverages, Alcoholic      | 12                                                          |
| 84              | Greece  | 2006           | Bovine Meat               | 53                                                          |
| 84              | Greece  | 2006           | Butter, Ghee              | 3                                                           |
| 84              | Greece  | 2006           | Cephalopods               | 8                                                           |
| 84              | Greece  | 2006           | Cereals, Other            | 7                                                           |
| 84              | Greece  | 2006           | Cheese                    | 74                                                          |
| 84              | Greece  | 2006           | Cocoa Beans               | 7                                                           |
| 84              | Greece  | 2006           | Coconuts - Incl Copra     | 1                                                           |
| 84              | Greece  | 2006           | Coffee                    | 13                                                          |
| 84              | Greece  | 2006           | Cottonseed Oil            | 1                                                           |
| 84              | Greece  | 2006           | Cream                     | 7                                                           |
| 84              | Greece  | 2006           | Crustaceans               | 3                                                           |
| 84              | Greece  | 2006           | Demersal Fish             | 24                                                          |
| 84              | Greece  | 2006           | Eggs                      | 24                                                          |
| 84              | Greece  | 2006           | Fats, Animals, Raw        | 1                                                           |
| 84              | Greece  | 2006           | Freshwater Fish           | 6                                                           |
| 84              | Greece  | 2006           | Fruits, Other             | 127                                                         |
| 84              | Greece  | 2006           | Grapefruit                | 3                                                           |
| 84              | Greece  | 2006           | Grapes                    | 57                                                          |
| 84              | Greece  | 2006           | Groundnut Oil             | 1                                                           |
| 84              | Greece  | 2006           | Groundnuts (Shelled Eq)   | 1                                                           |
| 84              | Greece  | 2006           | Honey                     | 4                                                           |
| 84              | Greece  | 2006           | Lemons, Limes             | 29                                                          |
| 84              | Greece  | 2006           | Maize                     | 12                                                          |
| 84              | Greece  | 2006           | Maize Germ Oil            | 9                                                           |
| 84              | Greece  | 2006           | Marine Fish, Other        | 4                                                           |
| 84              | Greece  | 2006           | Meat, Other               | 5                                                           |
| 84              | Greece  | 2006           | Milk, Whole               | 240                                                         |
| 84              | Greece  | 2006           | Molluscs, Other           | 2                                                           |
| 84              | Greece  | 2006           | Mutton & Goat Meat        | 40                                                          |
| 84              | Greece  | 2006           | Nuts                      | 34                                                          |
| 84              | Greece  | 2006           | Offals, Edible            | 9                                                           |
| 84              | Greece  | 2006           | Olive Oil                 | 41                                                          |
| 84              | Greece  | 2006           | Olives                    | 20                                                          |
| 84              | Greece  | 2006           | Onions                    | 44                                                          |
| 84              | Greece  | 2006           | Oranges, Mandarines       | 131                                                         |
| 84              | Greece  | 2006           | Peas                      | 1                                                           |
| 84              | Greece  | 2006           | Pelagic Fish              | 12                                                          |
| 84              | Greece  | 2006           | Pigmeat                   | 88                                                          |
| 84              | Greece  | 2006           | Pineapples                | 5                                                           |
| 84              | Greece  | 2006           | Potatoes                  | 201                                                         |
| 84              | Greece  | 2006           | Poultry Meat              | 39                                                          |
| 84              | Greece  | 2006           | Pulses, Other             | 5                                                           |
| 84              | Greece  | 2006           | Rice (Milled Equivalent)  | 11                                                          |
| 84              | Greece  | 2006           | Rye                       | 1                                                           |
| 84              | Greece  | 2006           | Sesameseed                | 2                                                           |
| 84              | Greece  | 2006           | Sesameseed Oil            | 1                                                           |
| 84              | Greece  | 2006           | Soyabean Oil              | 2                                                           |
| 84              | Greece  | 2006           | Spices, Other             | 1                                                           |
| 84              | Greece  | 2006           | Sugar, Refined Equivalent | 62                                                          |
| 84              | Greece  | 2006           | Sunflowerseed Oil         | 15                                                          |
| 84              | Greece  | 2006           | Sweeteners, Other         | 7                                                           |
| 84              | Greece  | 2006           | Tomatoes                  | 243                                                         |
| 84              | Greece  | 2006           | Vegetables, Other         | 365                                                         |
| 84              | Greece  | 2006           | Wheat                     | 332                                                         |
| 84              | Greece  | 2006           | Wine                      | 94                                                          |
| 84              | Greece  | 2007           | Apples                    | 41                                                          |
| 84              | Greece  | 2007           | Bananas                   | 21                                                          |
| 84              | Greece  | 2007           | Barley                    | 1                                                           |
| 84              | Greece  | 2007           | Beans                     | 8                                                           |
| 84              | Greece  | 2007           | Beer                      | 103                                                         |
| 84              | Greece  | 2007           | Beverages, Alcoholic      | 11                                                          |
| 84              | Greece  | 2007           | Bovine Meat               | 51                                                          |
| 84              | Greece  | 2007           | Butter, Ghee              | 3                                                           |

Dietary calcium and zinc deficiency risks are decreasing but remain prevalent

| FAO countrycode | Country | Reference year | Food item                 | Gross food supply (g capita <sup>-1</sup> d <sup>-1</sup> ) |
|-----------------|---------|----------------|---------------------------|-------------------------------------------------------------|
| 84              | Greece  | 2007           | Cephalopods               | 10                                                          |
| 84              | Greece  | 2007           | Cereals, Other            | 6                                                           |
| 84              | Greece  | 2007           | Cheese                    | 84                                                          |
| 84              | Greece  | 2007           | Cocoa Beans               | 8                                                           |
| 84              | Greece  | 2007           | Coconuts - Incl Copra     | 1                                                           |
| 84              | Greece  | 2007           | Coffee                    | 15                                                          |
| 84              | Greece  | 2007           | Cottonseed Oil            | 1                                                           |
| 84              | Greece  | 2007           | Cream                     | 5                                                           |
| 84              | Greece  | 2007           | Crustaceans               | 4                                                           |
| 84              | Greece  | 2007           | Demersal Fish             | 17                                                          |
| 84              | Greece  | 2007           | Eggs                      | 24                                                          |
| 84              | Greece  | 2007           | Fats, Animals, Raw        | 1                                                           |
| 84              | Greece  | 2007           | Freshwater Fish           | 6                                                           |
| 84              | Greece  | 2007           | Fruits, Other             | 127                                                         |
| 84              | Greece  | 2007           | Grapefruit                | 3                                                           |
| 84              | Greece  | 2007           | Grapes                    | 63                                                          |
| 84              | Greece  | 2007           | Groundnut Oil             | 1                                                           |
| 84              | Greece  | 2007           | Groundnuts (Shelled Eq)   | 1                                                           |
| 84              | Greece  | 2007           | Honey                     | 4                                                           |
| 84              | Greece  | 2007           | Lemons, Limes             | 29                                                          |
| 84              | Greece  | 2007           | Maize                     | 4                                                           |
| 84              | Greece  | 2007           | Maize Germ Oil            | 9                                                           |
| 84              | Greece  | 2007           | Marine Fish, Other        | 5                                                           |
| 84              | Greece  | 2007           | Meat, Other               | 6                                                           |
| 84              | Greece  | 2007           | Milk, Whole               | 237                                                         |
| 84              | Greece  | 2007           | Molluscs, Other           | 2                                                           |
| 84              | Greece  | 2007           | Mutton & Goat Meat        | 38                                                          |
| 84              | Greece  | 2007           | Nuts                      | 32                                                          |
| 84              | Greece  | 2007           | Offals, Edible            | 10                                                          |
| 84              | Greece  | 2007           | Olive Oil                 | 41                                                          |
| 84              | Greece  | 2007           | Olives                    | 33                                                          |
| 84              | Greece  | 2007           | Onions                    | 41                                                          |
| 84              | Greece  | 2007           | Oranges, Mandarines       | 142                                                         |
| 84              | Greece  | 2007           | Peas                      | 2                                                           |
| 84              | Greece  | 2007           | Pelagic Fish              | 13                                                          |
| 84              | Greece  | 2007           | Pigmeat                   | 79                                                          |
| 84              | Greece  | 2007           | Pineapples                | 6                                                           |
| 84              | Greece  | 2007           | Potatoes                  | 218                                                         |
| 84              | Greece  | 2007           | Poultry Meat              | 38                                                          |
| 84              | Greece  | 2007           | Pulses, Other             | 6                                                           |
| 84              | Greece  | 2007           | Rice (Milled Equivalent)  | 13                                                          |
| 84              | Greece  | 2007           | Rye                       | 1                                                           |
| 84              | Greece  | 2007           | Sesameseed                | 3                                                           |
| 84              | Greece  | 2007           | Sesameseed Oil            | 1                                                           |
| 84              | Greece  | 2007           | Soyabean Oil              | 2                                                           |
| 84              | Greece  | 2007           | Spices, Other             | 1                                                           |
| 84              | Greece  | 2007           | Sugar, Refined Equivalent | 70                                                          |
| 84              | Greece  | 2007           | Sunflowerseed Oil         | 15                                                          |
| 84              | Greece  | 2007           | Sweet Potatoes            | 1                                                           |
| 84              | Greece  | 2007           | Sweeteners, Other         | 6                                                           |
| 84              | Greece  | 2007           | Tomatoes                  | 259                                                         |
| 84              | Greece  | 2007           | Vegetables, Other         | 362                                                         |
| 84              | Greece  | 2007           | Wheat                     | 325                                                         |
| 84              | Greece  | 2007           | Wine                      | 65                                                          |
| 84              | Greece  | 2008           | Apples                    | 26                                                          |
| 84              | Greece  | 2008           | Bananas                   | 16                                                          |
| 84              | Greece  | 2008           | Barley                    | 1                                                           |
| 84              | Greece  | 2008           | Beans                     | 6                                                           |
| 84              | Greece  | 2008           | Beer                      | 114                                                         |
| 84              | Greece  | 2008           | Beverages, Alcoholic      | 11                                                          |
| 84              | Greece  | 2008           | Bovine Meat               | 50                                                          |
| 84              | Greece  | 2008           | Butter, Ghee              | 3                                                           |
| 84              | Greece  | 2008           | Cephalopods               | 10                                                          |
| 84              | Greece  | 2008           | Cereals, Other            | 6                                                           |
| 84              | Greece  | 2008           | Cheese                    | 72                                                          |
| 84              | Greece  | 2008           | Cocoa Beans               | 8                                                           |
| 84              | Greece  | 2008           | Coconuts - Incl Copra     | 1                                                           |
| 84              | Greece  | 2008           | Coffee                    | 15                                                          |
| 84              | Greece  | 2008           | Cottonseed Oil            | 1                                                           |
| 84              | Greece  | 2008           | Cream                     | 6                                                           |
| 84              | Greece  | 2008           | Crustaceans               | 4                                                           |
| 84              | Greece  | 2008           | Demersal Fish             | 20                                                          |
| 84              | Greece  | 2008           | Eggs                      | 25                                                          |
| 84              | Greece  | 2008           | Fats, Animals, Raw        | 1                                                           |
| 84              | Greece  | 2008           | Freshwater Fish           | 7                                                           |
| 84              | Greece  | 2008           | Fruits, Other             | 133                                                         |
| 84              | Greece  | 2008           | Grapefruit                | 2                                                           |
| 84              | Greece  | 2008           | Grapes                    | 44                                                          |
| 84              | Greece  | 2008           | Groundnut Oil             | 1                                                           |
| 84              | Greece  | 2008           | Groundnuts (Shelled Eq)   | 1                                                           |
| 84              | Greece  | 2008           | Honey                     | 4                                                           |
| 84              | Greece  | 2008           | Lemons, Limes             | 26                                                          |
| 84              | Greece  | 2008           | Maize                     | 4                                                           |
| 84              | Greece  | 2008           | Maize Germ Oil            | 13                                                          |
| 84              | Greece  | 2008           | Marine Fish, Other        | 6                                                           |
| 84              | Greece  | 2008           | Meat, Other               | 4                                                           |
| 84              | Greece  | 2008           | Milk, Whole               | 250                                                         |
| 84              | Greece  | 2008           | Molluscs, Other           | 3                                                           |
| 84              | Greece  | 2008           | Mutton & Goat Meat        | 37                                                          |
| 84              | Greece  | 2008           | Nuts                      | 27                                                          |
| 84              | Greece  | 2008           | Offals, Edible            | 8                                                           |
| 84              | Greece  | 2008           | Olive Oil                 | 41                                                          |
| 84              | Greece  | 2008           | Olives                    | 64                                                          |
| 84              | Greece  | 2008           | Onions                    | 50                                                          |
| 84              | Greece  | 2008           | Oranges, Mandarines       | 137                                                         |
| 84              | Greece  | 2008           | Pelagic Fish              | 11                                                          |
| 84              | Greece  | 2008           | Pigmeat                   | 81                                                          |



## Dietary calcium and zinc deficiency risks are decreasing but remain prevalent

| FAO countrycode | Country | Reference year | Food item                 | Gross food supply (g capita <sup>-1</sup> d <sup>-1</sup> ) |
|-----------------|---------|----------------|---------------------------|-------------------------------------------------------------|
| 84              | Greece  | 2008           | Pineapples                | 5                                                           |
| 84              | Greece  | 2008           | Potatoes                  | 192                                                         |
| 84              | Greece  | 2008           | Poultry Meat              | 40                                                          |
| 84              | Greece  | 2008           | Pulses, Other             | 5                                                           |
| 84              | Greece  | 2008           | Rice (Milled Equivalent)  | 22                                                          |
| 84              | Greece  | 2008           | Rye                       | 1                                                           |
| 84              | Greece  | 2008           | Sesameseed                | 3                                                           |
| 84              | Greece  | 2008           | Sesameseed Oil            | 1                                                           |
| 84              | Greece  | 2008           | Soyabean Oil              | 2                                                           |
| 84              | Greece  | 2008           | Spices, Other             | 1                                                           |
| 84              | Greece  | 2008           | Sugar, Refined Equivalent | 70                                                          |
| 84              | Greece  | 2008           | Sunflowerseed Oil         | 15                                                          |
| 84              | Greece  | 2008           | Sweet Potatoes            | 1                                                           |
| 84              | Greece  | 2008           | Sweeteners, Other         | 5                                                           |
| 84              | Greece  | 2008           | Tomatoes                  | 246                                                         |
| 84              | Greece  | 2008           | Vegetables, Other         | 336                                                         |
| 84              | Greece  | 2008           | Wheat                     | 348                                                         |
| 84              | Greece  | 2008           | Wine                      | 64                                                          |
| 84              | Greece  | 2009           | Apples                    | 32                                                          |
| 84              | Greece  | 2009           | Bananas                   | 15                                                          |
| 84              | Greece  | 2009           | Barley                    | 1                                                           |
| 84              | Greece  | 2009           | Beans                     | 8                                                           |
| 84              | Greece  | 2009           | Beer                      | 109                                                         |
| 84              | Greece  | 2009           | Beverages, Alcoholic      | 11                                                          |
| 84              | Greece  | 2009           | Bovine Meat               | 48                                                          |
| 84              | Greece  | 2009           | Butter, Ghee              | 3                                                           |
| 84              | Greece  | 2009           | Cephalopods               | 10                                                          |
| 84              | Greece  | 2009           | Cereals, Other            | 6                                                           |
| 84              | Greece  | 2009           | Cheese                    | 72                                                          |
| 84              | Greece  | 2009           | Cocoa Beans               | 8                                                           |
| 84              | Greece  | 2009           | Coconuts - Incl Copra     | 1                                                           |
| 84              | Greece  | 2009           | Coffee                    | 15                                                          |
| 84              | Greece  | 2009           | Cottonseed Oil            | 1                                                           |
| 84              | Greece  | 2009           | Cream                     | 8                                                           |
| 84              | Greece  | 2009           | Crustaceans               | 4                                                           |
| 84              | Greece  | 2009           | Demersal Fish             | 20                                                          |
| 84              | Greece  | 2009           | Eggs                      | 27                                                          |
| 84              | Greece  | 2009           | Fats, Animals, Raw        | 4                                                           |
| 84              | Greece  | 2009           | Freshwater Fish           | 6                                                           |
| 84              | Greece  | 2009           | Fruits, Other             | 152                                                         |
| 84              | Greece  | 2009           | Grapefruit                | 3                                                           |
| 84              | Greece  | 2009           | Grapes                    | 51                                                          |
| 84              | Greece  | 2009           | Groundnut Oil             | 1                                                           |
| 84              | Greece  | 2009           | Groundnuts (Shelled Eq)   | 1                                                           |
| 84              | Greece  | 2009           | Honey                     | 4                                                           |
| 84              | Greece  | 2009           | Lemons, Limes             | 26                                                          |
| 84              | Greece  | 2009           | Maize                     | 4                                                           |
| 84              | Greece  | 2009           | Maize Germ Oil            | 10                                                          |
| 84              | Greece  | 2009           | Marine Fish, Other        | 3                                                           |
| 84              | Greece  | 2009           | Meat, Other               | 6                                                           |
| 84              | Greece  | 2009           | Milk, Whole               | 250                                                         |
| 84              | Greece  | 2009           | Molluscs, Other           | 2                                                           |
| 84              | Greece  | 2009           | Mutton & Goat Meat        | 37                                                          |
| 84              | Greece  | 2009           | Nuts                      | 32                                                          |
| 84              | Greece  | 2009           | Offals, Edible            | 8                                                           |
| 84              | Greece  | 2009           | Olive Oil                 | 41                                                          |
| 84              | Greece  | 2009           | Olives                    | 58                                                          |
| 84              | Greece  | 2009           | Onions                    | 47                                                          |
| 84              | Greece  | 2009           | Oranges, Mandarines       | 120                                                         |
| 84              | Greece  | 2009           | Pelagic Fish              | 13                                                          |
| 84              | Greece  | 2009           | Pigmeat                   | 82                                                          |
| 84              | Greece  | 2009           | Pineapples                | 5                                                           |
| 84              | Greece  | 2009           | Potatoes                  | 199                                                         |
| 84              | Greece  | 2009           | Poultry Meat              | 41                                                          |
| 84              | Greece  | 2009           | Pulses, Other             | 5                                                           |
| 84              | Greece  | 2009           | Rice (Milled Equivalent)  | 19                                                          |
| 84              | Greece  | 2009           | Rye                       | 1                                                           |
| 84              | Greece  | 2009           | Sesameseed                | 3                                                           |
| 84              | Greece  | 2009           | Sesameseed Oil            | 1                                                           |
| 84              | Greece  | 2009           | Soyabean Oil              | 2                                                           |
| 84              | Greece  | 2009           | Spices, Other             | 1                                                           |
| 84              | Greece  | 2009           | Sugar, Refined Equivalent | 62                                                          |
| 84              | Greece  | 2009           | Sunflowerseed Oil         | 16                                                          |
| 84              | Greece  | 2009           | Sweet Potatoes            | 1                                                           |
| 84              | Greece  | 2009           | Sweeteners, Other         | 4                                                           |
| 84              | Greece  | 2009           | Tomatoes                  | 294                                                         |
| 84              | Greece  | 2009           | Vegetables, Other         | 334                                                         |
| 84              | Greece  | 2009           | Wheat                     | 333                                                         |
| 84              | Greece  | 2009           | Wine                      | 64                                                          |
| 84              | Greece  | 2010           | Apples                    | 20                                                          |
| 84              | Greece  | 2010           | Bananas                   | 23                                                          |
| 84              | Greece  | 2010           | Barley                    | 1                                                           |
| 84              | Greece  | 2010           | Beans                     | 8                                                           |
| 84              | Greece  | 2010           | Beer                      | 102                                                         |
| 84              | Greece  | 2010           | Beverages, Alcoholic      | 10                                                          |
| 84              | Greece  | 2010           | Bovine Meat               | 56                                                          |
| 84              | Greece  | 2010           | Butter, Ghee              | 3                                                           |
| 84              | Greece  | 2010           | Cephalopods               | 7                                                           |
| 84              | Greece  | 2010           | Cereals, Other            | 6                                                           |
| 84              | Greece  | 2010           | Cheese                    | 71                                                          |
| 84              | Greece  | 2010           | Cocoa Beans               | 8                                                           |
| 84              | Greece  | 2010           | Coconuts - Incl Copra     | 1                                                           |
| 84              | Greece  | 2010           | Coffee                    | 15                                                          |
| 84              | Greece  | 2010           | Cottonseed Oil            | 1                                                           |
| 84              | Greece  | 2010           | Cream                     | 9                                                           |
| 84              | Greece  | 2010           | Crustaceans               | 4                                                           |
| 84              | Greece  | 2010           | Demersal Fish             | 15                                                          |

## Dietary calcium and zinc deficiency risks are decreasing but remain prevalent

| FAO countrycode | Country | Reference year | Food item                 | Gross food supply (g capita <sup>-1</sup> d <sup>-1</sup> ) |
|-----------------|---------|----------------|---------------------------|-------------------------------------------------------------|
| 84              | Greece  | 2010           | Eggs                      | 25                                                          |
| 84              | Greece  | 2010           | Fats, Animals, Raw        | 4                                                           |
| 84              | Greece  | 2010           | Freshwater Fish           | 7                                                           |
| 84              | Greece  | 2010           | Fruits, Other             | 104                                                         |
| 84              | Greece  | 2010           | Grapefruit                | 2                                                           |
| 84              | Greece  | 2010           | Grapes                    | 63                                                          |
| 84              | Greece  | 2010           | Groundnut Oil             | 1                                                           |
| 84              | Greece  | 2010           | Groundnuts (Shelled Eq)   | 1                                                           |
| 84              | Greece  | 2010           | Honey                     | 4                                                           |
| 84              | Greece  | 2010           | Lemons, Limes             | 18                                                          |
| 84              | Greece  | 2010           | Maize                     | 4                                                           |
| 84              | Greece  | 2010           | Maize Germ Oil            | 10                                                          |
| 84              | Greece  | 2010           | Marine Fish, Other        | 3                                                           |
| 84              | Greece  | 2010           | Meat, Other               | 8                                                           |
| 84              | Greece  | 2010           | Milk, Whole               | 287                                                         |
| 84              | Greece  | 2010           | Molluscs, Other           | 4                                                           |
| 84              | Greece  | 2010           | Mutton & Goat Meat        | 36                                                          |
| 84              | Greece  | 2010           | Nuts                      | 30                                                          |
| 84              | Greece  | 2010           | Offals, Edible            | 8                                                           |
| 84              | Greece  | 2010           | Olive Oil                 | 41                                                          |
| 84              | Greece  | 2010           | Olives                    | 49                                                          |
| 84              | Greece  | 2010           | Onions                    | 46                                                          |
| 84              | Greece  | 2010           | Oranges, Mandarines       | 105                                                         |
| 84              | Greece  | 2010           | Pelagic Fish              | 13                                                          |
| 84              | Greece  | 2010           | Pigmeat                   | 80                                                          |
| 84              | Greece  | 2010           | Pineapples                | 4                                                           |
| 84              | Greece  | 2010           | Potatoes                  | 178                                                         |
| 84              | Greece  | 2010           | Poultry Meat              | 41                                                          |
| 84              | Greece  | 2010           | Pulses, Other             | 6                                                           |
| 84              | Greece  | 2010           | Rice (Milled Equivalent)  | 15                                                          |
| 84              | Greece  | 2010           | Rye                       | 1                                                           |
| 84              | Greece  | 2010           | Sesameseed                | 3                                                           |
| 84              | Greece  | 2010           | Sesameseed Oil            | 1                                                           |
| 84              | Greece  | 2010           | Soyabean Oil              | 2                                                           |
| 84              | Greece  | 2010           | Spices, Other             | 1                                                           |
| 84              | Greece  | 2010           | Sugar, Refined Equivalent | 62                                                          |
| 84              | Greece  | 2010           | Sunflowerseed Oil         | 17                                                          |
| 84              | Greece  | 2010           | Sweet Potatoes            | 1                                                           |
| 84              | Greece  | 2010           | Sweeteners, Other         | 6                                                           |
| 84              | Greece  | 2010           | Tea                       | 1                                                           |
| 84              | Greece  | 2010           | Tomatoes                  | 257                                                         |
| 84              | Greece  | 2010           | Vegetables, Other         | 299                                                         |
| 84              | Greece  | 2010           | Wheat                     | 332                                                         |
| 84              | Greece  | 2010           | Wine                      | 50                                                          |
| 84              | Greece  | 2011           | Apples                    | 19                                                          |
| 84              | Greece  | 2011           | Bananas                   | 21                                                          |
| 84              | Greece  | 2011           | Barley                    | 1                                                           |
| 84              | Greece  | 2011           | Beans                     | 8                                                           |
| 84              | Greece  | 2011           | Beer                      | 95                                                          |
| 84              | Greece  | 2011           | Beverages, Alcoholic      | 9                                                           |
| 84              | Greece  | 2011           | Bovine Meat               | 51                                                          |
| 84              | Greece  | 2011           | Butter, Ghee              | 3                                                           |
| 84              | Greece  | 2011           | Cephalopods               | 7                                                           |
| 84              | Greece  | 2011           | Cereals, Other            | 6                                                           |
| 84              | Greece  | 2011           | Cheese                    | 72                                                          |
| 84              | Greece  | 2011           | Cocoa Beans               | 8                                                           |
| 84              | Greece  | 2011           | Coconuts - Incl Copra     | 1                                                           |
| 84              | Greece  | 2011           | Coffee                    | 15                                                          |
| 84              | Greece  | 2011           | Cottonseed Oil            | 1                                                           |
| 84              | Greece  | 2011           | Cream                     | 10                                                          |
| 84              | Greece  | 2011           | Crustaceans               | 4                                                           |
| 84              | Greece  | 2011           | Demersal Fish             | 15                                                          |
| 84              | Greece  | 2011           | Eggs                      | 24                                                          |
| 84              | Greece  | 2011           | Fats, Animals, Raw        | 2                                                           |
| 84              | Greece  | 2011           | Freshwater Fish           | 7                                                           |
| 84              | Greece  | 2011           | Fruits, Other             | 98                                                          |
| 84              | Greece  | 2011           | Grapefruit                | 4                                                           |
| 84              | Greece  | 2011           | Grapes                    | 56                                                          |
| 84              | Greece  | 2011           | Groundnut Oil             | 1                                                           |
| 84              | Greece  | 2011           | Groundnuts (Shelled Eq)   | 1                                                           |
| 84              | Greece  | 2011           | Honey                     | 4                                                           |
| 84              | Greece  | 2011           | Lemons, Limes             | 18                                                          |
| 84              | Greece  | 2011           | Maize                     | 4                                                           |
| 84              | Greece  | 2011           | Maize Germ Oil            | 8                                                           |
| 84              | Greece  | 2011           | Marine Fish, Other        | 3                                                           |
| 84              | Greece  | 2011           | Meat, Other               | 7                                                           |
| 84              | Greece  | 2011           | Milk, Whole               | 248                                                         |
| 84              | Greece  | 2011           | Molluscs, Other           | 4                                                           |
| 84              | Greece  | 2011           | Mutton & Goat Meat        | 35                                                          |
| 84              | Greece  | 2011           | Nuts                      | 30                                                          |
| 84              | Greece  | 2011           | Oats                      | 1                                                           |
| 84              | Greece  | 2011           | Offals, Edible            | 7                                                           |
| 84              | Greece  | 2011           | Olive Oil                 | 40                                                          |
| 84              | Greece  | 2011           | Olives                    | 26                                                          |
| 84              | Greece  | 2011           | Onions                    | 59                                                          |
| 84              | Greece  | 2011           | Oranges, Mandarines       | 111                                                         |
| 84              | Greece  | 2011           | Pelagic Fish              | 13                                                          |
| 84              | Greece  | 2011           | Pigmeat                   | 87                                                          |
| 84              | Greece  | 2011           | Pineapples                | 4                                                           |
| 84              | Greece  | 2011           | Potatoes                  | 179                                                         |
| 84              | Greece  | 2011           | Poultry Meat              | 40                                                          |
| 84              | Greece  | 2011           | Pulses, Other             | 5                                                           |
| 84              | Greece  | 2011           | Rice (Milled Equivalent)  | 20                                                          |
| 84              | Greece  | 2011           | Rye                       | 1                                                           |
| 84              | Greece  | 2011           | Sesameseed                | 2                                                           |
| 84              | Greece  | 2011           | Sesameseed Oil            | 1                                                           |
| 84              | Greece  | 2011           | Soyabean Oil              | 2                                                           |

Dietary calcium and zinc deficiency risks are decreasing but remain prevalent

| FAO countrycode | Country   | Reference year | Food item                 | Gross food supply (g capita <sup>-1</sup> d <sup>-1</sup> ) |
|-----------------|-----------|----------------|---------------------------|-------------------------------------------------------------|
| 84              | Greece    | 2011           | Spices, Other             | 1                                                           |
| 84              | Greece    | 2011           | Sugar, Refined Equivalent | 62                                                          |
| 84              | Greece    | 2011           | Sunflowerseed Oil         | 20                                                          |
| 84              | Greece    | 2011           | Sweet Potatoes            | 1                                                           |
| 84              | Greece    | 2011           | Sweeteners, Other         | 4                                                           |
| 84              | Greece    | 2011           | Tea                       | 1                                                           |
| 84              | Greece    | 2011           | Tomatoes                  | 211                                                         |
| 84              | Greece    | 2011           | Vegetables, Other         | 366                                                         |
| 84              | Greece    | 2011           | Wheat                     | 342                                                         |
| 84              | Greece    | 2011           | Wine                      | 42                                                          |
| 89              | Guatemala | 1992           | Apples                    | 6                                                           |
| 89              | Guatemala | 1992           | Bananas                   | 9                                                           |
| 89              | Guatemala | 1992           | Beans                     | 32                                                          |
| 89              | Guatemala | 1992           | Beer                      | 21                                                          |
| 89              | Guatemala | 1992           | Beverages, Alcoholic      | 6                                                           |
| 89              | Guatemala | 1992           | Bovine Meat               | 7                                                           |
| 89              | Guatemala | 1992           | Cassava                   | 4                                                           |
| 89              | Guatemala | 1992           | Cheese                    | 3                                                           |
| 89              | Guatemala | 1992           | Citrus, Other             | 1                                                           |
| 89              | Guatemala | 1992           | Cocoa Beans               | 1                                                           |
| 89              | Guatemala | 1992           | Coconuts - Incl Copra     | 2                                                           |
| 89              | Guatemala | 1992           | Coffee                    | 5                                                           |
| 89              | Guatemala | 1992           | Cottonseed Oil            | 4                                                           |
| 89              | Guatemala | 1992           | Eggs                      | 19                                                          |
| 89              | Guatemala | 1992           | Fats, Animals, Raw        | 2                                                           |
| 89              | Guatemala | 1992           | Freshwater Fish           | 1                                                           |
| 89              | Guatemala | 1992           | Fruits, Other             | 11                                                          |
| 89              | Guatemala | 1992           | Grapes                    | 3                                                           |
| 89              | Guatemala | 1992           | Lemons, Limes             | 36                                                          |
| 89              | Guatemala | 1992           | Maize                     | 295                                                         |
| 89              | Guatemala | 1992           | Meat, Other               | 1                                                           |
| 89              | Guatemala | 1992           | Milk, Whole               | 74                                                          |
| 89              | Guatemala | 1992           | Mutton & Goat Meat        | 1                                                           |
| 89              | Guatemala | 1992           | Nuts                      | 6                                                           |
| 89              | Guatemala | 1992           | Offals, Edible            | 2                                                           |
| 89              | Guatemala | 1992           | Onions                    | 14                                                          |
| 89              | Guatemala | 1992           | Oranges, Mandarines       | 24                                                          |
| 89              | Guatemala | 1992           | Palm Oil                  | 1                                                           |
| 89              | Guatemala | 1992           | Pelagic Fish              | 1                                                           |
| 89              | Guatemala | 1992           | Pigmeat                   | 7                                                           |
| 89              | Guatemala | 1992           | Pineapples                | 18                                                          |
| 89              | Guatemala | 1992           | Plantains                 | 9                                                           |
| 89              | Guatemala | 1992           | Potatoes                  | 9                                                           |
| 89              | Guatemala | 1992           | Poultry Meat              | 26                                                          |
| 89              | Guatemala | 1992           | Pulses, Other             | 8                                                           |
| 89              | Guatemala | 1992           | Rice (Milled Equivalent)  | 20                                                          |
| 89              | Guatemala | 1992           | Sorghum                   | 4                                                           |
| 89              | Guatemala | 1992           | Soyabean Oil              | 5                                                           |
| 89              | Guatemala | 1992           | Soyabeans                 | 1                                                           |
| 89              | Guatemala | 1992           | Sugar, Non-Centrifugal    | 9                                                           |
| 89              | Guatemala | 1992           | Sugar, Refined Equivalent | 98                                                          |
| 89              | Guatemala | 1992           | Sunflowerseed Oil         | 3                                                           |
| 89              | Guatemala | 1992           | Sweeteners, Other         | 1                                                           |
| 89              | Guatemala | 1992           | Tomatoes                  | 31                                                          |
| 89              | Guatemala | 1992           | Vegetables, Other         | 103                                                         |
| 89              | Guatemala | 1992           | Wheat                     | 82                                                          |
| 89              | Guatemala | 1993           | Apples                    | 6                                                           |
| 89              | Guatemala | 1993           | Bananas                   | 9                                                           |
| 89              | Guatemala | 1993           | Beans                     | 26                                                          |
| 89              | Guatemala | 1993           | Beer                      | 20                                                          |
| 89              | Guatemala | 1993           | Beverages, Alcoholic      | 5                                                           |
| 89              | Guatemala | 1993           | Bovine Meat               | 9                                                           |
| 89              | Guatemala | 1993           | Cassava                   | 4                                                           |
| 89              | Guatemala | 1993           | Cereals, Other            | 1                                                           |
| 89              | Guatemala | 1993           | Cheese                    | 3                                                           |
| 89              | Guatemala | 1993           | Citrus, Other             | 1                                                           |
| 89              | Guatemala | 1993           | Cocoa Beans               | 1                                                           |
| 89              | Guatemala | 1993           | Coconuts - Incl Copra     | 2                                                           |
| 89              | Guatemala | 1993           | Coffee                    | 4                                                           |
| 89              | Guatemala | 1993           | Cottonseed Oil            | 1                                                           |
| 89              | Guatemala | 1993           | Eggs                      | 22                                                          |
| 89              | Guatemala | 1993           | Fats, Animals, Raw        | 2                                                           |
| 89              | Guatemala | 1993           | Freshwater Fish           | 1                                                           |
| 89              | Guatemala | 1993           | Fruits, Other             | 63                                                          |
| 89              | Guatemala | 1993           | Grapes                    | 4                                                           |
| 89              | Guatemala | 1993           | Honey                     | 1                                                           |
| 89              | Guatemala | 1993           | Lemons, Limes             | 35                                                          |
| 89              | Guatemala | 1993           | Maize                     | 331                                                         |
| 89              | Guatemala | 1993           | Meat, Other               | 1                                                           |
| 89              | Guatemala | 1993           | Milk, Whole               | 72                                                          |
| 89              | Guatemala | 1993           | Mutton & Goat Meat        | 1                                                           |
| 89              | Guatemala | 1993           | Nuts                      | 6                                                           |
| 89              | Guatemala | 1993           | Offals, Edible            | 2                                                           |
| 89              | Guatemala | 1993           | Onions                    | 11                                                          |
| 89              | Guatemala | 1993           | Oranges, Mandarines       | 22                                                          |
| 89              | Guatemala | 1993           | Palm Oil                  | 1                                                           |
| 89              | Guatemala | 1993           | Pelagic Fish              | 1                                                           |
| 89              | Guatemala | 1993           | Pigmeat                   | 7                                                           |
| 89              | Guatemala | 1993           | Pineapples                | 18                                                          |
| 89              | Guatemala | 1993           | Plantains                 | 7                                                           |
| 89              | Guatemala | 1993           | Potatoes                  | 9                                                           |
| 89              | Guatemala | 1993           | Poultry Meat              | 25                                                          |
| 89              | Guatemala | 1993           | Pulses, Other             | 9                                                           |
| 89              | Guatemala | 1993           | Rice (Milled Equivalent)  | 13                                                          |
| 89              | Guatemala | 1993           | Sorghum                   | 3                                                           |
| 89              | Guatemala | 1993           | Soyabean Oil              | 6                                                           |
| 89              | Guatemala | 1993           | Soyabeans                 | 1                                                           |

Dietary calcium and zinc deficiency risks are decreasing but remain prevalent

| FAO countrycode | Country   | Reference year | Food item                 | Gross food supply (g capita <sup>-1</sup> d <sup>-1</sup> ) |
|-----------------|-----------|----------------|---------------------------|-------------------------------------------------------------|
| 89              | Guatemala | 1993           | Sugar, Non-Centrifugal    | 9                                                           |
| 89              | Guatemala | 1993           | Sugar, Refined Equivalent | 100                                                         |
| 89              | Guatemala | 1993           | Sunflowerseed Oil         | 3                                                           |
| 89              | Guatemala | 1993           | Sweeteners, Other         | 1                                                           |
| 89              | Guatemala | 1993           | Tomatoes                  | 32                                                          |
| 89              | Guatemala | 1993           | Vegetables, Other         | 66                                                          |
| 89              | Guatemala | 1993           | Wheat                     | 76                                                          |
| 89              | Guatemala | 1994           | Apples                    | 6                                                           |
| 89              | Guatemala | 1994           | Bananas                   | 8                                                           |
| 89              | Guatemala | 1994           | Beans                     | 23                                                          |
| 89              | Guatemala | 1994           | Beer                      | 20                                                          |
| 89              | Guatemala | 1994           | Beverages, Alcoholic      | 4                                                           |
| 89              | Guatemala | 1994           | Bovine Meat               | 13                                                          |
| 89              | Guatemala | 1994           | Cassava                   | 4                                                           |
| 89              | Guatemala | 1994           | Cereals, Other            | 1                                                           |
| 89              | Guatemala | 1994           | Cheese                    | 3                                                           |
| 89              | Guatemala | 1994           | Citrus, Other             | 1                                                           |
| 89              | Guatemala | 1994           | Cocoa Beans               | 1                                                           |
| 89              | Guatemala | 1994           | Coconuts - Incl Copra     | 1                                                           |
| 89              | Guatemala | 1994           | Coffee                    | 1                                                           |
| 89              | Guatemala | 1994           | Cottonseed Oil            | 2                                                           |
| 89              | Guatemala | 1994           | Eggs                      | 22                                                          |
| 89              | Guatemala | 1994           | Fats, Animals, Raw        | 2                                                           |
| 89              | Guatemala | 1994           | Freshwater Fish           | 1                                                           |
| 89              | Guatemala | 1994           | Fruits, Other             | 71                                                          |
| 89              | Guatemala | 1994           | Grapefruit                | 1                                                           |
| 89              | Guatemala | 1994           | Grapes                    | 4                                                           |
| 89              | Guatemala | 1994           | Lemons, Limes             | 34                                                          |
| 89              | Guatemala | 1994           | Maize                     | 325                                                         |
| 89              | Guatemala | 1994           | Meat, Other               | 1                                                           |
| 89              | Guatemala | 1994           | Milk, Whole               | 85                                                          |
| 89              | Guatemala | 1994           | Mutton & Goat Meat        | 1                                                           |
| 89              | Guatemala | 1994           | Nuts                      | 6                                                           |
| 89              | Guatemala | 1994           | Offals, Edible            | 2                                                           |
| 89              | Guatemala | 1994           | Onions                    | 13                                                          |
| 89              | Guatemala | 1994           | Oranges, Mandarines       | 22                                                          |
| 89              | Guatemala | 1994           | Palm Oil                  | 1                                                           |
| 89              | Guatemala | 1994           | Pelagic Fish              | 1                                                           |
| 89              | Guatemala | 1994           | Pigmeat                   | 7                                                           |
| 89              | Guatemala | 1994           | Pineapples                | 19                                                          |
| 89              | Guatemala | 1994           | Plantains                 | 7                                                           |
| 89              | Guatemala | 1994           | Potatoes                  | 9                                                           |
| 89              | Guatemala | 1994           | Poultry Meat              | 27                                                          |
| 89              | Guatemala | 1994           | Pulses, Other             | 9                                                           |
| 89              | Guatemala | 1994           | Rice (Milled Equivalent)  | 10                                                          |
| 89              | Guatemala | 1994           | Sorghum                   | 3                                                           |
| 89              | Guatemala | 1994           | Soyabean Oil              | 5                                                           |
| 89              | Guatemala | 1994           | Soybeans                  | 1                                                           |
| 89              | Guatemala | 1994           | Spices, Other             | 1                                                           |
| 89              | Guatemala | 1994           | Sugar, Non-Centrifugal    | 9                                                           |
| 89              | Guatemala | 1994           | Sugar, Refined Equivalent | 105                                                         |
| 89              | Guatemala | 1994           | Sunflowerseed Oil         | 2                                                           |
| 89              | Guatemala | 1994           | Sweeteners, Other         | 1                                                           |
| 89              | Guatemala | 1994           | Tomatoes                  | 33                                                          |
| 89              | Guatemala | 1994           | Vegetables, Other         | 66                                                          |
| 89              | Guatemala | 1994           | Wheat                     | 83                                                          |
| 89              | Guatemala | 1995           | Apples                    | 6                                                           |
| 89              | Guatemala | 1995           | Bananas                   | 9                                                           |
| 89              | Guatemala | 1995           | Beans                     | 22                                                          |
| 89              | Guatemala | 1995           | Beer                      | 25                                                          |
| 89              | Guatemala | 1995           | Beverages, Alcoholic      | 5                                                           |
| 89              | Guatemala | 1995           | Bovine Meat               | 14                                                          |
| 89              | Guatemala | 1995           | Cassava                   | 4                                                           |
| 89              | Guatemala | 1995           | Cereals, Other            | 2                                                           |
| 89              | Guatemala | 1995           | Cheese                    | 3                                                           |
| 89              | Guatemala | 1995           | Citrus, Other             | 1                                                           |
| 89              | Guatemala | 1995           | Cocoa Beans               | 1                                                           |
| 89              | Guatemala | 1995           | Coconuts - Incl Copra     | 2                                                           |
| 89              | Guatemala | 1995           | Coffee                    | 1                                                           |
| 89              | Guatemala | 1995           | Cottonseed Oil            | 1                                                           |
| 89              | Guatemala | 1995           | Eggs                      | 24                                                          |
| 89              | Guatemala | 1995           | Fats, Animals, Raw        | 2                                                           |
| 89              | Guatemala | 1995           | Freshwater Fish           | 1                                                           |
| 89              | Guatemala | 1995           | Fruits, Other             | 82                                                          |
| 89              | Guatemala | 1995           | Grapes                    | 5                                                           |
| 89              | Guatemala | 1995           | Lemons, Limes             | 34                                                          |
| 89              | Guatemala | 1995           | Maize                     | 305                                                         |
| 89              | Guatemala | 1995           | Meat, Other               | 1                                                           |
| 89              | Guatemala | 1995           | Milk, Whole               | 82                                                          |
| 89              | Guatemala | 1995           | Mutton & Goat Meat        | 1                                                           |
| 89              | Guatemala | 1995           | Nuts                      | 6                                                           |
| 89              | Guatemala | 1995           | Offals, Edible            | 2                                                           |
| 89              | Guatemala | 1995           | Onions                    | 16                                                          |
| 89              | Guatemala | 1995           | Oranges, Mandarines       | 25                                                          |
| 89              | Guatemala | 1995           | Palm Oil                  | 1                                                           |
| 89              | Guatemala | 1995           | Pelagic Fish              | 1                                                           |
| 89              | Guatemala | 1995           | Pigmeat                   | 8                                                           |
| 89              | Guatemala | 1995           | Pineapples                | 19                                                          |
| 89              | Guatemala | 1995           | Plantains                 | 6                                                           |
| 89              | Guatemala | 1995           | Potatoes                  | 9                                                           |
| 89              | Guatemala | 1995           | Poultry Meat              | 28                                                          |
| 89              | Guatemala | 1995           | Pulses, Other             | 9                                                           |
| 89              | Guatemala | 1995           | Rice (Milled Equivalent)  | 12                                                          |
| 89              | Guatemala | 1995           | Sesameseed                | 1                                                           |
| 89              | Guatemala | 1995           | Sorghum                   | 3                                                           |
| 89              | Guatemala | 1995           | Soyabean Oil              | 4                                                           |
| 89              | Guatemala | 1995           | Soybeans                  | 1                                                           |

Dietary calcium and zinc deficiency risks are decreasing but remain prevalent

| FAO countrycode | Country   | Reference year | Food item                 | Gross food supply (g capita <sup>-1</sup> d <sup>-1</sup> ) |
|-----------------|-----------|----------------|---------------------------|-------------------------------------------------------------|
| 89              | Guatemala | 1995           | Spices, Other             | 1                                                           |
| 89              | Guatemala | 1995           | Sugar, Non-Centrifugal    | 9                                                           |
| 89              | Guatemala | 1995           | Sugar, Refined Equivalent | 104                                                         |
| 89              | Guatemala | 1995           | Sunflowerseed Oil         | 3                                                           |
| 89              | Guatemala | 1995           | Sweeteners, Other         | 1                                                           |
| 89              | Guatemala | 1995           | Tomatoes                  | 39                                                          |
| 89              | Guatemala | 1995           | Vegetables, Other         | 66                                                          |
| 89              | Guatemala | 1995           | Wheat                     | 75                                                          |
| 89              | Guatemala | 1995           | Wine                      | 1                                                           |
| 89              | Guatemala | 1996           | Apples                    | 7                                                           |
| 89              | Guatemala | 1996           | Bananas                   | 9                                                           |
| 89              | Guatemala | 1996           | Beans                     | 19                                                          |
| 89              | Guatemala | 1996           | Beer                      | 24                                                          |
| 89              | Guatemala | 1996           | Beverages, Alcoholic      | 5                                                           |
| 89              | Guatemala | 1996           | Bovine Meat               | 14                                                          |
| 89              | Guatemala | 1996           | Cassava                   | 4                                                           |
| 89              | Guatemala | 1996           | Cereals, Other            | 3                                                           |
| 89              | Guatemala | 1996           | Cheese                    | 3                                                           |
| 89              | Guatemala | 1996           | Citrus, Other             | 2                                                           |
| 89              | Guatemala | 1996           | Cocoa Beans               | 1                                                           |
| 89              | Guatemala | 1996           | Coconuts - Incl Copra     | 2                                                           |
| 89              | Guatemala | 1996           | Coffee                    | 8                                                           |
| 89              | Guatemala | 1996           | Cottonseed Oil            | 1                                                           |
| 89              | Guatemala | 1996           | Eggs                      | 24                                                          |
| 89              | Guatemala | 1996           | Fats, Animals, Raw        | 2                                                           |
| 89              | Guatemala | 1996           | Freshwater Fish           | 2                                                           |
| 89              | Guatemala | 1996           | Fruits, Other             | 82                                                          |
| 89              | Guatemala | 1996           | Grapes                    | 5                                                           |
| 89              | Guatemala | 1996           | Lemons, Limes             | 33                                                          |
| 89              | Guatemala | 1996           | Maize                     | 306                                                         |
| 89              | Guatemala | 1996           | Meat, Other               | 1                                                           |
| 89              | Guatemala | 1996           | Milk, Whole               | 88                                                          |
| 89              | Guatemala | 1996           | Mutton & Goat Meat        | 1                                                           |
| 89              | Guatemala | 1996           | Nuts                      | 6                                                           |
| 89              | Guatemala | 1996           | Offals, Edible            | 2                                                           |
| 89              | Guatemala | 1996           | Onions                    | 13                                                          |
| 89              | Guatemala | 1996           | Oranges, Mandarines       | 24                                                          |
| 89              | Guatemala | 1996           | Palm Oil                  | 2                                                           |
| 89              | Guatemala | 1996           | Pigmeat                   | 8                                                           |
| 89              | Guatemala | 1996           | Pineapples                | 21                                                          |
| 89              | Guatemala | 1996           | Plantains                 | 7                                                           |
| 89              | Guatemala | 1996           | Potatoes                  | 10                                                          |
| 89              | Guatemala | 1996           | Poultry Meat              | 29                                                          |
| 89              | Guatemala | 1996           | Pulses, Other             | 9                                                           |
| 89              | Guatemala | 1996           | Rice (Milled Equivalent)  | 7                                                           |
| 89              | Guatemala | 1996           | Sesameseed                | 1                                                           |
| 89              | Guatemala | 1996           | Sorghum                   | 3                                                           |
| 89              | Guatemala | 1996           | Soyabean Oil              | 3                                                           |
| 89              | Guatemala | 1996           | Soyabeans                 | 1                                                           |
| 89              | Guatemala | 1996           | Sugar, Non-Centrifugal    | 8                                                           |
| 89              | Guatemala | 1996           | Sugar, Refined Equivalent | 96                                                          |
| 89              | Guatemala | 1996           | Sunflowerseed Oil         | 3                                                           |
| 89              | Guatemala | 1996           | Sweeteners, Other         | 1                                                           |
| 89              | Guatemala | 1996           | Tomatoes                  | 37                                                          |
| 89              | Guatemala | 1996           | Vegetables, Other         | 60                                                          |
| 89              | Guatemala | 1996           | Wheat                     | 79                                                          |
| 89              | Guatemala | 1997           | Apples                    | 6                                                           |
| 89              | Guatemala | 1997           | Bananas                   | 9                                                           |
| 89              | Guatemala | 1997           | Beans                     | 17                                                          |
| 89              | Guatemala | 1997           | Beer                      | 25                                                          |
| 89              | Guatemala | 1997           | Beverages, Alcoholic      | 4                                                           |
| 89              | Guatemala | 1997           | Bovine Meat               | 15                                                          |
| 89              | Guatemala | 1997           | Cassava                   | 3                                                           |
| 89              | Guatemala | 1997           | Cereals, Other            | 2                                                           |
| 89              | Guatemala | 1997           | Cheese                    | 3                                                           |
| 89              | Guatemala | 1997           | Citrus, Other             | 3                                                           |
| 89              | Guatemala | 1997           | Cocoa Beans               | 1                                                           |
| 89              | Guatemala | 1997           | Coconuts - Incl Copra     | 3                                                           |
| 89              | Guatemala | 1997           | Coffee                    | 7                                                           |
| 89              | Guatemala | 1997           | Eggs                      | 22                                                          |
| 89              | Guatemala | 1997           | Fats, Animals, Raw        | 2                                                           |
| 89              | Guatemala | 1997           | Freshwater Fish           | 2                                                           |
| 89              | Guatemala | 1997           | Fruits, Other             | 83                                                          |
| 89              | Guatemala | 1997           | Grapes                    | 5                                                           |
| 89              | Guatemala | 1997           | Lemons, Limes             | 34                                                          |
| 89              | Guatemala | 1997           | Maize                     | 264                                                         |
| 89              | Guatemala | 1997           | Meat, Other               | 1                                                           |
| 89              | Guatemala | 1997           | Milk, Whole               | 96                                                          |
| 89              | Guatemala | 1997           | Mutton & Goat Meat        | 1                                                           |
| 89              | Guatemala | 1997           | Nuts                      | 6                                                           |
| 89              | Guatemala | 1997           | Offals, Edible            | 2                                                           |
| 89              | Guatemala | 1997           | Onions                    | 18                                                          |
| 89              | Guatemala | 1997           | Oranges, Mandarines       | 24                                                          |
| 89              | Guatemala | 1997           | Palm Oil                  | 2                                                           |
| 89              | Guatemala | 1997           | Pelagic Fish              | 1                                                           |
| 89              | Guatemala | 1997           | Pigmeat                   | 8                                                           |
| 89              | Guatemala | 1997           | Pineapples                | 21                                                          |
| 89              | Guatemala | 1997           | Plantains                 | 7                                                           |
| 89              | Guatemala | 1997           | Potatoes                  | 11                                                          |
| 89              | Guatemala | 1997           | Poultry Meat              | 34                                                          |
| 89              | Guatemala | 1997           | Pulses, Other             | 9                                                           |
| 89              | Guatemala | 1997           | Rice (Milled Equivalent)  | 8                                                           |
| 89              | Guatemala | 1997           | Sorghum                   | 3                                                           |
| 89              | Guatemala | 1997           | Soyabean Oil              | 4                                                           |
| 89              | Guatemala | 1997           | Soyabeans                 | 1                                                           |
| 89              | Guatemala | 1997           | Sugar, Non-Centrifugal    | 8                                                           |
| 89              | Guatemala | 1997           | Sugar, Refined Equivalent | 95                                                          |

Dietary calcium and zinc deficiency risks are decreasing but remain prevalent

| FAO countrycode | Country   | Reference year | Food item                 | Gross food supply (g capita <sup>-1</sup> d <sup>-1</sup> ) |
|-----------------|-----------|----------------|---------------------------|-------------------------------------------------------------|
| 89              | Guatemala | 1997           | Sunflowerseed Oil         | 3                                                           |
| 89              | Guatemala | 1997           | Sweeteners, Other         | 1                                                           |
| 89              | Guatemala | 1997           | Tomatoes                  | 36                                                          |
| 89              | Guatemala | 1997           | Vegetables, Other         | 65                                                          |
| 89              | Guatemala | 1997           | Wheat                     | 92                                                          |
| 89              | Guatemala | 1998           | Apples                    | 8                                                           |
| 89              | Guatemala | 1998           | Bananas                   | 8                                                           |
| 89              | Guatemala | 1998           | Beans                     | 19                                                          |
| 89              | Guatemala | 1998           | Beer                      | 26                                                          |
| 89              | Guatemala | 1998           | Beverages, Alcoholic      | 3                                                           |
| 89              | Guatemala | 1998           | Bovine Meat               | 15                                                          |
| 89              | Guatemala | 1998           | Cassava                   | 3                                                           |
| 89              | Guatemala | 1998           | Cereals, Other            | 1                                                           |
| 89              | Guatemala | 1998           | Cheese                    | 3                                                           |
| 89              | Guatemala | 1998           | Citrus, Other             | 5                                                           |
| 89              | Guatemala | 1998           | Cocoa Beans               | 1                                                           |
| 89              | Guatemala | 1998           | Coconuts - Incl Copra     | 3                                                           |
| 89              | Guatemala | 1998           | Coffee                    | 10                                                          |
| 89              | Guatemala | 1998           | Eggs                      | 20                                                          |
| 89              | Guatemala | 1998           | Fats, Animals, Raw        | 2                                                           |
| 89              | Guatemala | 1998           | Freshwater Fish           | 2                                                           |
| 89              | Guatemala | 1998           | Fruits, Other             | 84                                                          |
| 89              | Guatemala | 1998           | Grapefruit                | 1                                                           |
| 89              | Guatemala | 1998           | Grapes                    | 5                                                           |
| 89              | Guatemala | 1998           | Groundnuts (Shelled Eq)   | 1                                                           |
| 89              | Guatemala | 1998           | Lemons, Limes             | 33                                                          |
| 89              | Guatemala | 1998           | Maize                     | 261                                                         |
| 89              | Guatemala | 1998           | Meat, Other               | 1                                                           |
| 89              | Guatemala | 1998           | Milk, Whole               | 87                                                          |
| 89              | Guatemala | 1998           | Mutton & Goat Meat        | 1                                                           |
| 89              | Guatemala | 1998           | Nuts                      | 6                                                           |
| 89              | Guatemala | 1998           | Offals, Edible            | 2                                                           |
| 89              | Guatemala | 1998           | Onions                    | 22                                                          |
| 89              | Guatemala | 1998           | Oranges, Mandarines       | 27                                                          |
| 89              | Guatemala | 1998           | Palm Oil                  | 3                                                           |
| 89              | Guatemala | 1998           | Pelagic Fish              | 1                                                           |
| 89              | Guatemala | 1998           | Pigmeat                   | 9                                                           |
| 89              | Guatemala | 1998           | Pineapples                | 21                                                          |
| 89              | Guatemala | 1998           | Plantains                 | 7                                                           |
| 89              | Guatemala | 1998           | Potatoes                  | 10                                                          |
| 89              | Guatemala | 1998           | Poultry Meat              | 37                                                          |
| 89              | Guatemala | 1998           | Pulses, Other             | 9                                                           |
| 89              | Guatemala | 1998           | Rice (Milled Equivalent)  | 5                                                           |
| 89              | Guatemala | 1998           | Sesameseed                | 1                                                           |
| 89              | Guatemala | 1998           | Sorghum                   | 2                                                           |
| 89              | Guatemala | 1998           | Soyabean Oil              | 4                                                           |
| 89              | Guatemala | 1998           | Soyabeans                 | 1                                                           |
| 89              | Guatemala | 1998           | Spices, Other             | 1                                                           |
| 89              | Guatemala | 1998           | Sugar, Non-Centrifugal    | 5                                                           |
| 89              | Guatemala | 1998           | Sugar, Refined Equivalent | 99                                                          |
| 89              | Guatemala | 1998           | Sunflowerseed Oil         | 3                                                           |
| 89              | Guatemala | 1998           | Sweeteners, Other         | 1                                                           |
| 89              | Guatemala | 1998           | Tomatoes                  | 32                                                          |
| 89              | Guatemala | 1998           | Vegetables, Other         | 71                                                          |
| 89              | Guatemala | 1998           | Wheat                     | 98                                                          |
| 89              | Guatemala | 1999           | Apples                    | 9                                                           |
| 89              | Guatemala | 1999           | Bananas                   | 8                                                           |
| 89              | Guatemala | 1999           | Beans                     | 19                                                          |
| 89              | Guatemala | 1999           | Beer                      | 21                                                          |
| 89              | Guatemala | 1999           | Beverages, Alcoholic      | 2                                                           |
| 89              | Guatemala | 1999           | Bovine Meat               | 16                                                          |
| 89              | Guatemala | 1999           | Cassava                   | 4                                                           |
| 89              | Guatemala | 1999           | Cereals, Other            | 3                                                           |
| 89              | Guatemala | 1999           | Cheese                    | 3                                                           |
| 89              | Guatemala | 1999           | Citrus, Other             | 5                                                           |
| 89              | Guatemala | 1999           | Cocoa Beans               | 1                                                           |
| 89              | Guatemala | 1999           | Coconuts - Incl Copra     | 3                                                           |
| 89              | Guatemala | 1999           | Coffee                    | 6                                                           |
| 89              | Guatemala | 1999           | Eggs                      | 18                                                          |
| 89              | Guatemala | 1999           | Fats, Animals, Raw        | 2                                                           |
| 89              | Guatemala | 1999           | Freshwater Fish           | 3                                                           |
| 89              | Guatemala | 1999           | Fruits, Other             | 81                                                          |
| 89              | Guatemala | 1999           | Grapefruit                | 1                                                           |
| 89              | Guatemala | 1999           | Grapes                    | 5                                                           |
| 89              | Guatemala | 1999           | Lemons, Limes             | 32                                                          |
| 89              | Guatemala | 1999           | Maize                     | 251                                                         |
| 89              | Guatemala | 1999           | Meat, Other               | 1                                                           |
| 89              | Guatemala | 1999           | Milk, Whole               | 82                                                          |
| 89              | Guatemala | 1999           | Mutton & Goat Meat        | 1                                                           |
| 89              | Guatemala | 1999           | Nuts                      | 6                                                           |
| 89              | Guatemala | 1999           | Offals, Edible            | 3                                                           |
| 89              | Guatemala | 1999           | Onions                    | 17                                                          |
| 89              | Guatemala | 1999           | Oranges, Mandarines       | 26                                                          |
| 89              | Guatemala | 1999           | Palm Oil                  | 3                                                           |
| 89              | Guatemala | 1999           | Palmkernel Oil            | 1                                                           |
| 89              | Guatemala | 1999           | Pelagic Fish              | 1                                                           |
| 89              | Guatemala | 1999           | Pigmeat                   | 9                                                           |
| 89              | Guatemala | 1999           | Pineapples                | 21                                                          |
| 89              | Guatemala | 1999           | Plantains                 | 5                                                           |
| 89              | Guatemala | 1999           | Potatoes                  | 13                                                          |
| 89              | Guatemala | 1999           | Poultry Meat              | 36                                                          |
| 89              | Guatemala | 1999           | Pulses, Other             | 8                                                           |
| 89              | Guatemala | 1999           | Rice (Milled Equivalent)  | 11                                                          |
| 89              | Guatemala | 1999           | Sesameseed                | 2                                                           |
| 89              | Guatemala | 1999           | Sorghum                   | 2                                                           |
| 89              | Guatemala | 1999           | Soyabean Oil              | 6                                                           |
| 89              | Guatemala | 1999           | Soyabeans                 | 1                                                           |

Dietary calcium and zinc deficiency risks are decreasing but remain prevalent

| FAO countrycode | Country   | Reference year | Food item                 | Gross food supply (g capita <sup>-1</sup> d <sup>-1</sup> ) |
|-----------------|-----------|----------------|---------------------------|-------------------------------------------------------------|
| 89              | Guatemala | 1999           | Spices, Other             | 1                                                           |
| 89              | Guatemala | 1999           | Sugar, Non-Centrifugal    | 5                                                           |
| 89              | Guatemala | 1999           | Sugar, Refined Equivalent | 103                                                         |
| 89              | Guatemala | 1999           | Sunflowerseed Oil         | 2                                                           |
| 89              | Guatemala | 1999           | Sweeteners, Other         | 1                                                           |
| 89              | Guatemala | 1999           | Tomatoes                  | 31                                                          |
| 89              | Guatemala | 1999           | Vegetables, Other         | 72                                                          |
| 89              | Guatemala | 1999           | Wheat                     | 88                                                          |
| 89              | Guatemala | 2000           | Apples                    | 8                                                           |
| 89              | Guatemala | 2000           | Bananas                   | 6                                                           |
| 89              | Guatemala | 2000           | Beans                     | 20                                                          |
| 89              | Guatemala | 2000           | Beer                      | 22                                                          |
| 89              | Guatemala | 2000           | Beverages, Alcoholic      | 3                                                           |
| 89              | Guatemala | 2000           | Bovine Meat               | 16                                                          |
| 89              | Guatemala | 2000           | Cassava                   | 4                                                           |
| 89              | Guatemala | 2000           | Cereals, Other            | 3                                                           |
| 89              | Guatemala | 2000           | Cheese                    | 3                                                           |
| 89              | Guatemala | 2000           | Citrus, Other             | 5                                                           |
| 89              | Guatemala | 2000           | Cocoa Beans               | 1                                                           |
| 89              | Guatemala | 2000           | Coconuts - Incl Copra     | 3                                                           |
| 89              | Guatemala | 2000           | Coffee                    | 5                                                           |
| 89              | Guatemala | 2000           | Eggs                      | 18                                                          |
| 89              | Guatemala | 2000           | Fats, Animals, Raw        | 2                                                           |
| 89              | Guatemala | 2000           | Freshwater Fish           | 2                                                           |
| 89              | Guatemala | 2000           | Fruits, Other             | 80                                                          |
| 89              | Guatemala | 2000           | Grapes                    | 5                                                           |
| 89              | Guatemala | 2000           | Groundnuts (Shelled Eq)   | 1                                                           |
| 89              | Guatemala | 2000           | Lemons, Limes             | 31                                                          |
| 89              | Guatemala | 2000           | Maize                     | 247                                                         |
| 89              | Guatemala | 2000           | Meat, Other               | 1                                                           |
| 89              | Guatemala | 2000           | Milk, Whole               | 88                                                          |
| 89              | Guatemala | 2000           | Nuts                      | 6                                                           |
| 89              | Guatemala | 2000           | Offals, Edible            | 2                                                           |
| 89              | Guatemala | 2000           | Onions                    | 18                                                          |
| 89              | Guatemala | 2000           | Oranges, Mandarines       | 25                                                          |
| 89              | Guatemala | 2000           | Palm Oil                  | 4                                                           |
| 89              | Guatemala | 2000           | Pelagic Fish              | 1                                                           |
| 89              | Guatemala | 2000           | Pigmeat                   | 10                                                          |
| 89              | Guatemala | 2000           | Pineapples                | 20                                                          |
| 89              | Guatemala | 2000           | Plantains                 | 4                                                           |
| 89              | Guatemala | 2000           | Potatoes                  | 18                                                          |
| 89              | Guatemala | 2000           | Poultry Meat              | 34                                                          |
| 89              | Guatemala | 2000           | Pulses, Other             | 8                                                           |
| 89              | Guatemala | 2000           | Rice (Milled Equivalent)  | 13                                                          |
| 89              | Guatemala | 2000           | Sesameseed                | 3                                                           |
| 89              | Guatemala | 2000           | Sorghum                   | 1                                                           |
| 89              | Guatemala | 2000           | Soyabean Oil              | 8                                                           |
| 89              | Guatemala | 2000           | Soybeans                  | 1                                                           |
| 89              | Guatemala | 2000           | Spices, Other             | 1                                                           |
| 89              | Guatemala | 2000           | Sugar, Non-Centrifugal    | 5                                                           |
| 89              | Guatemala | 2000           | Sugar, Refined Equivalent | 106                                                         |
| 89              | Guatemala | 2000           | Sunflowerseed Oil         | 3                                                           |
| 89              | Guatemala | 2000           | Sweeteners, Other         | 1                                                           |
| 89              | Guatemala | 2000           | Tomatoes                  | 30                                                          |
| 89              | Guatemala | 2000           | Vegetables, Other         | 74                                                          |
| 89              | Guatemala | 2000           | Wheat                     | 85                                                          |
| 89              | Guatemala | 2001           | Apples                    | 7                                                           |
| 89              | Guatemala | 2001           | Bananas                   | 6                                                           |
| 89              | Guatemala | 2001           | Beans                     | 20                                                          |
| 89              | Guatemala | 2001           | Beer                      | 22                                                          |
| 89              | Guatemala | 2001           | Beverages, Alcoholic      | 4                                                           |
| 89              | Guatemala | 2001           | Bovine Meat               | 17                                                          |
| 89              | Guatemala | 2001           | Cassava                   | 3                                                           |
| 89              | Guatemala | 2001           | Cereals, Other            | 5                                                           |
| 89              | Guatemala | 2001           | Cheese                    | 3                                                           |
| 89              | Guatemala | 2001           | Citrus, Other             | 5                                                           |
| 89              | Guatemala | 2001           | Cocoa Beans               | 1                                                           |
| 89              | Guatemala | 2001           | Coconuts - Incl Copra     | 3                                                           |
| 89              | Guatemala | 2001           | Coffee                    | 4                                                           |
| 89              | Guatemala | 2001           | Eggs                      | 29                                                          |
| 89              | Guatemala | 2001           | Fats, Animals, Raw        | 2                                                           |
| 89              | Guatemala | 2001           | Freshwater Fish           | 2                                                           |
| 89              | Guatemala | 2001           | Fruits, Other             | 58                                                          |
| 89              | Guatemala | 2001           | Grapefruit                | 1                                                           |
| 89              | Guatemala | 2001           | Grapes                    | 5                                                           |
| 89              | Guatemala | 2001           | Groundnuts (Shelled Eq)   | 1                                                           |
| 89              | Guatemala | 2001           | Lemons, Limes             | 31                                                          |
| 89              | Guatemala | 2001           | Maize                     | 249                                                         |
| 89              | Guatemala | 2001           | Maize Germ Oil            | 1                                                           |
| 89              | Guatemala | 2001           | Meat, Other               | 1                                                           |
| 89              | Guatemala | 2001           | Milk, Whole               | 100                                                         |
| 89              | Guatemala | 2001           | Nuts                      | 6                                                           |
| 89              | Guatemala | 2001           | Offals, Edible            | 3                                                           |
| 89              | Guatemala | 2001           | Onions                    | 20                                                          |
| 89              | Guatemala | 2001           | Oranges, Mandarines       | 28                                                          |
| 89              | Guatemala | 2001           | Palm Oil                  | 4                                                           |
| 89              | Guatemala | 2001           | Pelagic Fish              | 2                                                           |
| 89              | Guatemala | 2001           | Pigmeat                   | 11                                                          |
| 89              | Guatemala | 2001           | Pineapples                | 19                                                          |
| 89              | Guatemala | 2001           | Plantains                 | 4                                                           |
| 89              | Guatemala | 2001           | Potatoes                  | 20                                                          |
| 89              | Guatemala | 2001           | Poultry Meat              | 35                                                          |
| 89              | Guatemala | 2001           | Pulses, Other             | 8                                                           |
| 89              | Guatemala | 2001           | Rice (Milled Equivalent)  | 13                                                          |
| 89              | Guatemala | 2001           | Sesameseed                | 3                                                           |
| 89              | Guatemala | 2001           | Sorghum                   | 1                                                           |
| 89              | Guatemala | 2001           | Soyabean Oil              | 8                                                           |

Dietary calcium and zinc deficiency risks are decreasing but remain prevalent

| FAO countrycode | Country   | Reference year | Food item                 | Gross food supply (g capita <sup>-1</sup> d <sup>-1</sup> ) |
|-----------------|-----------|----------------|---------------------------|-------------------------------------------------------------|
| 89              | Guatemala | 2001           | Soybeans                  | 1                                                           |
| 89              | Guatemala | 2001           | Spices, Other             | 1                                                           |
| 89              | Guatemala | 2001           | Sugar, Non-Centrifugal    | 5                                                           |
| 89              | Guatemala | 2001           | Sugar, Refined Equivalent | 102                                                         |
| 89              | Guatemala | 2001           | Sunflowerseed Oil         | 3                                                           |
| 89              | Guatemala | 2001           | Sweeteners, Other         | 1                                                           |
| 89              | Guatemala | 2001           | Tomatoes                  | 28                                                          |
| 89              | Guatemala | 2001           | Vegetables, Other         | 79                                                          |
| 89              | Guatemala | 2001           | Wheat                     | 94                                                          |
| 89              | Guatemala | 2002           | Apples                    | 5                                                           |
| 89              | Guatemala | 2002           | Bananas                   | 6                                                           |
| 89              | Guatemala | 2002           | Beans                     | 21                                                          |
| 89              | Guatemala | 2002           | Beer                      | 22                                                          |
| 89              | Guatemala | 2002           | Beverages, Alcoholic      | 5                                                           |
| 89              | Guatemala | 2002           | Bovine Meat               | 16                                                          |
| 89              | Guatemala | 2002           | Cassava                   | 4                                                           |
| 89              | Guatemala | 2002           | Cereals, Other            | 6                                                           |
| 89              | Guatemala | 2002           | Cheese                    | 3                                                           |
| 89              | Guatemala | 2002           | Citrus, Other             | 5                                                           |
| 89              | Guatemala | 2002           | Cocoa Beans               | 1                                                           |
| 89              | Guatemala | 2002           | Coconuts - Incl Copra     | 3                                                           |
| 89              | Guatemala | 2002           | Coffee                    | 4                                                           |
| 89              | Guatemala | 2002           | Eggs                      | 40                                                          |
| 89              | Guatemala | 2002           | Fats, Animals, Raw        | 2                                                           |
| 89              | Guatemala | 2002           | Freshwater Fish           | 2                                                           |
| 89              | Guatemala | 2002           | Fruits, Other             | 68                                                          |
| 89              | Guatemala | 2002           | Grapes                    | 6                                                           |
| 89              | Guatemala | 2002           | Groundnuts (Shelled Eq)   | 1                                                           |
| 89              | Guatemala | 2002           | Lemons, Limes             | 33                                                          |
| 89              | Guatemala | 2002           | Maize                     | 255                                                         |
| 89              | Guatemala | 2002           | Maize Germ Oil            | 1                                                           |
| 89              | Guatemala | 2002           | Meat, Other               | 1                                                           |
| 89              | Guatemala | 2002           | Milk, Whole               | 108                                                         |
| 89              | Guatemala | 2002           | Nuts                      | 6                                                           |
| 89              | Guatemala | 2002           | Offals, Edible            | 3                                                           |
| 89              | Guatemala | 2002           | Onions                    | 18                                                          |
| 89              | Guatemala | 2002           | Oranges, Mandarines       | 41                                                          |
| 89              | Guatemala | 2002           | Palm Oil                  | 4                                                           |
| 89              | Guatemala | 2002           | Pelagic Fish              | 5                                                           |
| 89              | Guatemala | 2002           | Pigmeat                   | 13                                                          |
| 89              | Guatemala | 2002           | Pineapples                | 19                                                          |
| 89              | Guatemala | 2002           | Plantains                 | 4                                                           |
| 89              | Guatemala | 2002           | Potatoes                  | 12                                                          |
| 89              | Guatemala | 2002           | Poultry Meat              | 41                                                          |
| 89              | Guatemala | 2002           | Pulses, Other             | 8                                                           |
| 89              | Guatemala | 2002           | Rice (Milled Equivalent)  | 19                                                          |
| 89              | Guatemala | 2002           | Sesameseed                | 2                                                           |
| 89              | Guatemala | 2002           | Sorghum                   | 1                                                           |
| 89              | Guatemala | 2002           | Soyabean Oil              | 11                                                          |
| 89              | Guatemala | 2002           | Soybeans                  | 1                                                           |
| 89              | Guatemala | 2002           | Sugar, Non-Centrifugal    | 4                                                           |
| 89              | Guatemala | 2002           | Sugar, Refined Equivalent | 116                                                         |
| 89              | Guatemala | 2002           | Sunflowerseed Oil         | 3                                                           |
| 89              | Guatemala | 2002           | Sweeteners, Other         | 1                                                           |
| 89              | Guatemala | 2002           | Tomatoes                  | 34                                                          |
| 89              | Guatemala | 2002           | Vegetables, Other         | 88                                                          |
| 89              | Guatemala | 2002           | Wheat                     | 90                                                          |
| 89              | Guatemala | 2003           | Apples                    | 3                                                           |
| 89              | Guatemala | 2003           | Bananas                   | 5                                                           |
| 89              | Guatemala | 2003           | Beans                     | 21                                                          |
| 89              | Guatemala | 2003           | Beer                      | 18                                                          |
| 89              | Guatemala | 2003           | Beverages, Alcoholic      | 3                                                           |
| 89              | Guatemala | 2003           | Bovine Meat               | 16                                                          |
| 89              | Guatemala | 2003           | Cassava                   | 3                                                           |
| 89              | Guatemala | 2003           | Cereals, Other            | 5                                                           |
| 89              | Guatemala | 2003           | Cheese                    | 3                                                           |
| 89              | Guatemala | 2003           | Citrus, Other             | 5                                                           |
| 89              | Guatemala | 2003           | Cocoa Beans               | 1                                                           |
| 89              | Guatemala | 2003           | Coconuts - Incl Copra     | 4                                                           |
| 89              | Guatemala | 2003           | Coffee                    | 3                                                           |
| 89              | Guatemala | 2003           | Eggs                      | 40                                                          |
| 89              | Guatemala | 2003           | Fats, Animals, Raw        | 2                                                           |
| 89              | Guatemala | 2003           | Freshwater Fish           | 2                                                           |
| 89              | Guatemala | 2003           | Fruits, Other             | 61                                                          |
| 89              | Guatemala | 2003           | Grapes                    | 4                                                           |
| 89              | Guatemala | 2003           | Groundnuts (Shelled Eq)   | 1                                                           |
| 89              | Guatemala | 2003           | Lemons, Limes             | 22                                                          |
| 89              | Guatemala | 2003           | Maize                     | 235                                                         |
| 89              | Guatemala | 2003           | Meat, Other               | 1                                                           |
| 89              | Guatemala | 2003           | Milk, Whole               | 114                                                         |
| 89              | Guatemala | 2003           | Nuts                      | 5                                                           |
| 89              | Guatemala | 2003           | Offals, Edible            | 3                                                           |
| 89              | Guatemala | 2003           | Onions                    | 21                                                          |
| 89              | Guatemala | 2003           | Oranges, Mandarines       | 40                                                          |
| 89              | Guatemala | 2003           | Palm Oil                  | 3                                                           |
| 89              | Guatemala | 2003           | Palmkernel Oil            | 1                                                           |
| 89              | Guatemala | 2003           | Pelagic Fish              | 5                                                           |
| 89              | Guatemala | 2003           | Pigmeat                   | 15                                                          |
| 89              | Guatemala | 2003           | Pineapples                | 9                                                           |
| 89              | Guatemala | 2003           | Plantains                 | 4                                                           |
| 89              | Guatemala | 2003           | Potatoes                  | 29                                                          |
| 89              | Guatemala | 2003           | Poultry Meat              | 38                                                          |
| 89              | Guatemala | 2003           | Pulses, Other             | 8                                                           |
| 89              | Guatemala | 2003           | Rice (Milled Equivalent)  | 14                                                          |
| 89              | Guatemala | 2003           | Sesameseed                | 4                                                           |
| 89              | Guatemala | 2003           | Sorghum                   | 1                                                           |
| 89              | Guatemala | 2003           | Soyabean Oil              | 13                                                          |



Dietary calcium and zinc deficiency risks are decreasing but remain prevalent

| FAO countrycode | Country   | Reference year | Food item                 | Gross food supply (g capita <sup>-1</sup> d <sup>-1</sup> ) |
|-----------------|-----------|----------------|---------------------------|-------------------------------------------------------------|
| 89              | Guatemala | 2003           | Soybeans                  | 1                                                           |
| 89              | Guatemala | 2003           | Sugar, Non-Centrifugal    | 4                                                           |
| 89              | Guatemala | 2003           | Sugar, Refined Equivalent | 124                                                         |
| 89              | Guatemala | 2003           | Sunflowerseed Oil         | 3                                                           |
| 89              | Guatemala | 2003           | Sweeteners, Other         | 1                                                           |
| 89              | Guatemala | 2003           | Tomatoes                  | 38                                                          |
| 89              | Guatemala | 2003           | Vegetables, Other         | 123                                                         |
| 89              | Guatemala | 2003           | Wheat                     | 97                                                          |
| 89              | Guatemala | 2004           | Apples                    | 5                                                           |
| 89              | Guatemala | 2004           | Bananas                   | 5                                                           |
| 89              | Guatemala | 2004           | Beans                     | 20                                                          |
| 89              | Guatemala | 2004           | Beer                      | 15                                                          |
| 89              | Guatemala | 2004           | Beverages, Alcoholic      | 3                                                           |
| 89              | Guatemala | 2004           | Bovine Meat               | 15                                                          |
| 89              | Guatemala | 2004           | Cassava                   | 3                                                           |
| 89              | Guatemala | 2004           | Cereals, Other            | 7                                                           |
| 89              | Guatemala | 2004           | Cheese                    | 3                                                           |
| 89              | Guatemala | 2004           | Citrus, Other             | 5                                                           |
| 89              | Guatemala | 2004           | Cocoa Beans               | 2                                                           |
| 89              | Guatemala | 2004           | Coconuts - Incl Copra     | 4                                                           |
| 89              | Guatemala | 2004           | Coffee                    | 11                                                          |
| 89              | Guatemala | 2004           | Eggs                      | 40                                                          |
| 89              | Guatemala | 2004           | Fats, Animals, Raw        | 2                                                           |
| 89              | Guatemala | 2004           | Freshwater Fish           | 1                                                           |
| 89              | Guatemala | 2004           | Fruits, Other             | 61                                                          |
| 89              | Guatemala | 2004           | Grapes                    | 5                                                           |
| 89              | Guatemala | 2004           | Groundnuts (Shelled Eq)   | 1                                                           |
| 89              | Guatemala | 2004           | Lemons, Limes             | 22                                                          |
| 89              | Guatemala | 2004           | Maize                     | 229                                                         |
| 89              | Guatemala | 2004           | Meat, Other               | 1                                                           |
| 89              | Guatemala | 2004           | Milk, Whole               | 105                                                         |
| 89              | Guatemala | 2004           | Mutton & Goat Meat        | 1                                                           |
| 89              | Guatemala | 2004           | Nuts                      | 5                                                           |
| 89              | Guatemala | 2004           | Offals, Edible            | 3                                                           |
| 89              | Guatemala | 2004           | Onions                    | 8                                                           |
| 89              | Guatemala | 2004           | Oranges, Mandarines       | 41                                                          |
| 89              | Guatemala | 2004           | Palm Oil                  | 3                                                           |
| 89              | Guatemala | 2004           | Palmkernel Oil            | 1                                                           |
| 89              | Guatemala | 2004           | Pelagic Fish              | 2                                                           |
| 89              | Guatemala | 2004           | Pigmeat                   | 15                                                          |
| 89              | Guatemala | 2004           | Pineapples                | 10                                                          |
| 89              | Guatemala | 2004           | Plantains                 | 4                                                           |
| 89              | Guatemala | 2004           | Potatoes                  | 31                                                          |
| 89              | Guatemala | 2004           | Poultry Meat              | 42                                                          |
| 89              | Guatemala | 2004           | Pulses, Other             | 7                                                           |
| 89              | Guatemala | 2004           | Rice (Milled Equivalent)  | 18                                                          |
| 89              | Guatemala | 2004           | Sesameseed                | 6                                                           |
| 89              | Guatemala | 2004           | Sorghum                   | 2                                                           |
| 89              | Guatemala | 2004           | Soyabean Oil              | 13                                                          |
| 89              | Guatemala | 2004           | Soybeans                  | 1                                                           |
| 89              | Guatemala | 2004           | Sugar, Non-Centrifugal    | 4                                                           |
| 89              | Guatemala | 2004           | Sugar, Refined Equivalent | 120                                                         |
| 89              | Guatemala | 2004           | Sunflowerseed Oil         | 3                                                           |
| 89              | Guatemala | 2004           | Sweeteners, Other         | 1                                                           |
| 89              | Guatemala | 2004           | Tomatoes                  | 37                                                          |
| 89              | Guatemala | 2004           | Vegetables, Other         | 106                                                         |
| 89              | Guatemala | 2004           | Wheat                     | 96                                                          |
| 89              | Guatemala | 2005           | Apples                    | 5                                                           |
| 89              | Guatemala | 2005           | Bananas                   | 7                                                           |
| 89              | Guatemala | 2005           | Beans                     | 17                                                          |
| 89              | Guatemala | 2005           | Beer                      | 14                                                          |
| 89              | Guatemala | 2005           | Beverages, Alcoholic      | 6                                                           |
| 89              | Guatemala | 2005           | Bovine Meat               | 14                                                          |
| 89              | Guatemala | 2005           | Cassava                   | 3                                                           |
| 89              | Guatemala | 2005           | Cereals, Other            | 7                                                           |
| 89              | Guatemala | 2005           | Cheese                    | 4                                                           |
| 89              | Guatemala | 2005           | Citrus, Other             | 3                                                           |
| 89              | Guatemala | 2005           | Cocoa Beans               | 3                                                           |
| 89              | Guatemala | 2005           | Coconuts - Incl Copra     | 4                                                           |
| 89              | Guatemala | 2005           | Coffee                    | 7                                                           |
| 89              | Guatemala | 2005           | Cream                     | 1                                                           |
| 89              | Guatemala | 2005           | Crustaceans               | 1                                                           |
| 89              | Guatemala | 2005           | Eggs                      | 40                                                          |
| 89              | Guatemala | 2005           | Fats, Animals, Raw        | 2                                                           |
| 89              | Guatemala | 2005           | Freshwater Fish           | 1                                                           |
| 89              | Guatemala | 2005           | Fruits, Other             | 57                                                          |
| 89              | Guatemala | 2005           | Grapes                    | 4                                                           |
| 89              | Guatemala | 2005           | Groundnuts (Shelled Eq)   | 1                                                           |
| 89              | Guatemala | 2005           | Lemons, Limes             | 26                                                          |
| 89              | Guatemala | 2005           | Maize                     | 230                                                         |
| 89              | Guatemala | 2005           | Meat, Other               | 1                                                           |
| 89              | Guatemala | 2005           | Milk, Whole               | 98                                                          |
| 89              | Guatemala | 2005           | Mutton & Goat Meat        | 1                                                           |
| 89              | Guatemala | 2005           | Nuts                      | 5                                                           |
| 89              | Guatemala | 2005           | Offals, Edible            | 3                                                           |
| 89              | Guatemala | 2005           | Onions                    | 16                                                          |
| 89              | Guatemala | 2005           | Oranges, Mandarines       | 52                                                          |
| 89              | Guatemala | 2005           | Palm Oil                  | 3                                                           |
| 89              | Guatemala | 2005           | Palmkernel Oil            | 1                                                           |
| 89              | Guatemala | 2005           | Pelagic Fish              | 6                                                           |
| 89              | Guatemala | 2005           | Pigmeat                   | 16                                                          |
| 89              | Guatemala | 2005           | Pineapples                | 23                                                          |
| 89              | Guatemala | 2005           | Plantains                 | 4                                                           |
| 89              | Guatemala | 2005           | Potatoes                  | 33                                                          |
| 89              | Guatemala | 2005           | Poultry Meat              | 42                                                          |
| 89              | Guatemala | 2005           | Pulses, Other             | 7                                                           |
| 89              | Guatemala | 2005           | Rice (Milled Equivalent)  | 18                                                          |

Dietary calcium and zinc deficiency risks are decreasing but remain prevalent

| FAO countrycode | Country   | Reference year | Food item                 | Gross food supply (g capita <sup>-1</sup> d <sup>-1</sup> ) |
|-----------------|-----------|----------------|---------------------------|-------------------------------------------------------------|
| 89              | Guatemala | 2005           | Sesameseed                | 6                                                           |
| 89              | Guatemala | 2005           | Sorghum                   | 1                                                           |
| 89              | Guatemala | 2005           | Soyabean Oil              | 16                                                          |
| 89              | Guatemala | 2005           | Soyabeans                 | 1                                                           |
| 89              | Guatemala | 2005           | Spices, Other             | 1                                                           |
| 89              | Guatemala | 2005           | Sugar, Refined Equivalent | 131                                                         |
| 89              | Guatemala | 2005           | Sunflowerseed Oil         | 3                                                           |
| 89              | Guatemala | 2005           | Sweeteners, Other         | 1                                                           |
| 89              | Guatemala | 2005           | Tomatoes                  | 43                                                          |
| 89              | Guatemala | 2005           | Vegetables, Other         | 94                                                          |
| 89              | Guatemala | 2005           | Wheat                     | 92                                                          |
| 89              | Guatemala | 2006           | Apples                    | 5                                                           |
| 89              | Guatemala | 2006           | Bananas                   | 9                                                           |
| 89              | Guatemala | 2006           | Beans                     | 26                                                          |
| 89              | Guatemala | 2006           | Beer                      | 30                                                          |
| 89              | Guatemala | 2006           | Beverages, Alcoholic      | 3                                                           |
| 89              | Guatemala | 2006           | Bovine Meat               | 15                                                          |
| 89              | Guatemala | 2006           | Cassava                   | 3                                                           |
| 89              | Guatemala | 2006           | Cereals, Other            | 8                                                           |
| 89              | Guatemala | 2006           | Cheese                    | 4                                                           |
| 89              | Guatemala | 2006           | Citrus, Other             | 3                                                           |
| 89              | Guatemala | 2006           | Cocoa Beans               | 3                                                           |
| 89              | Guatemala | 2006           | Coconuts - Incl Copra     | 4                                                           |
| 89              | Guatemala | 2006           | Coffee                    | 7                                                           |
| 89              | Guatemala | 2006           | Cream                     | 1                                                           |
| 89              | Guatemala | 2006           | Crustaceans               | 1                                                           |
| 89              | Guatemala | 2006           | Eggs                      | 40                                                          |
| 89              | Guatemala | 2006           | Fats, Animals, Raw        | 2                                                           |
| 89              | Guatemala | 2006           | Freshwater Fish           | 1                                                           |
| 89              | Guatemala | 2006           | Fruits, Other             | 70                                                          |
| 89              | Guatemala | 2006           | Grapes                    | 5                                                           |
| 89              | Guatemala | 2006           | Groundnuts (Shelled Eq)   | 1                                                           |
| 89              | Guatemala | 2006           | Lemons, Limes             | 20                                                          |
| 89              | Guatemala | 2006           | Maize                     | 229                                                         |
| 89              | Guatemala | 2006           | Meat, Other               | 1                                                           |
| 89              | Guatemala | 2006           | Milk, Whole               | 91                                                          |
| 89              | Guatemala | 2006           | Mutton & Goat Meat        | 1                                                           |
| 89              | Guatemala | 2006           | Nuts                      | 5                                                           |
| 89              | Guatemala | 2006           | Offals, Edible            | 3                                                           |
| 89              | Guatemala | 2006           | Onions                    | 24                                                          |
| 89              | Guatemala | 2006           | Oranges, Mandarines       | 56                                                          |
| 89              | Guatemala | 2006           | Palm Oil                  | 4                                                           |
| 89              | Guatemala | 2006           | Palmkernel Oil            | 1                                                           |
| 89              | Guatemala | 2006           | Pelagic Fish              | 5                                                           |
| 89              | Guatemala | 2006           | Pigmeat                   | 13                                                          |
| 89              | Guatemala | 2006           | Pineapples                | 25                                                          |
| 89              | Guatemala | 2006           | Plantains                 | 4                                                           |
| 89              | Guatemala | 2006           | Potatoes                  | 32                                                          |
| 89              | Guatemala | 2006           | Poultry Meat              | 39                                                          |
| 89              | Guatemala | 2006           | Pulses, Other             | 7                                                           |
| 89              | Guatemala | 2006           | Rice (Milled Equivalent)  | 19                                                          |
| 89              | Guatemala | 2006           | Sesameseed                | 5                                                           |
| 89              | Guatemala | 2006           | Sorghum                   | 2                                                           |
| 89              | Guatemala | 2006           | Soyabean Oil              | 16                                                          |
| 89              | Guatemala | 2006           | Soyabeans                 | 1                                                           |
| 89              | Guatemala | 2006           | Spices, Other             | 1                                                           |
| 89              | Guatemala | 2006           | Sugar, Refined Equivalent | 125                                                         |
| 89              | Guatemala | 2006           | Sunflowerseed Oil         | 3                                                           |
| 89              | Guatemala | 2006           | Sweeteners, Other         | 1                                                           |
| 89              | Guatemala | 2006           | Tomatoes                  | 51                                                          |
| 89              | Guatemala | 2006           | Vegetables, Other         | 108                                                         |
| 89              | Guatemala | 2006           | Wheat                     | 94                                                          |
| 89              | Guatemala | 2006           | Wine                      | 1                                                           |
| 89              | Guatemala | 2007           | Apples                    | 5                                                           |
| 89              | Guatemala | 2007           | Bananas                   | 11                                                          |
| 89              | Guatemala | 2007           | Beans                     | 27                                                          |
| 89              | Guatemala | 2007           | Beer                      | 30                                                          |
| 89              | Guatemala | 2007           | Beverages, Alcoholic      | 1                                                           |
| 89              | Guatemala | 2007           | Bovine Meat               | 15                                                          |
| 89              | Guatemala | 2007           | Cassava                   | 3                                                           |
| 89              | Guatemala | 2007           | Cereals, Other            | 9                                                           |
| 89              | Guatemala | 2007           | Cheese                    | 4                                                           |
| 89              | Guatemala | 2007           | Citrus, Other             | 4                                                           |
| 89              | Guatemala | 2007           | Cocoa Beans               | 3                                                           |
| 89              | Guatemala | 2007           | Coconuts - Incl Copra     | 3                                                           |
| 89              | Guatemala | 2007           | Coffee                    | 8                                                           |
| 89              | Guatemala | 2007           | Cream                     | 1                                                           |
| 89              | Guatemala | 2007           | Eggs                      | 40                                                          |
| 89              | Guatemala | 2007           | Fats, Animals, Raw        | 2                                                           |
| 89              | Guatemala | 2007           | Freshwater Fish           | 1                                                           |
| 89              | Guatemala | 2007           | Fruits, Other             | 65                                                          |
| 89              | Guatemala | 2007           | Grapes                    | 5                                                           |
| 89              | Guatemala | 2007           | Groundnuts (Shelled Eq)   | 1                                                           |
| 89              | Guatemala | 2007           | Lemons, Limes             | 21                                                          |
| 89              | Guatemala | 2007           | Maize                     | 231                                                         |
| 89              | Guatemala | 2007           | Meat, Other               | 1                                                           |
| 89              | Guatemala | 2007           | Milk, Whole               | 83                                                          |
| 89              | Guatemala | 2007           | Mutton & Goat Meat        | 1                                                           |
| 89              | Guatemala | 2007           | Nuts                      | 5                                                           |
| 89              | Guatemala | 2007           | Offals, Edible            | 3                                                           |
| 89              | Guatemala | 2007           | Onions                    | 19                                                          |
| 89              | Guatemala | 2007           | Oranges, Mandarines       | 46                                                          |
| 89              | Guatemala | 2007           | Palm Oil                  | 5                                                           |
| 89              | Guatemala | 2007           | Palmkernel Oil            | 1                                                           |
| 89              | Guatemala | 2007           | Pelagic Fish              | 4                                                           |
| 89              | Guatemala | 2007           | Pigmeat                   | 13                                                          |
| 89              | Guatemala | 2007           | Pineapples                | 22                                                          |

Dietary calcium and zinc deficiency risks are decreasing but remain prevalent

| FAO countrycode | Country   | Reference year | Food item                 | Gross food supply (g capita <sup>-1</sup> d <sup>-1</sup> ) |
|-----------------|-----------|----------------|---------------------------|-------------------------------------------------------------|
| 89              | Guatemala | 2007           | Plantains                 | 4                                                           |
| 89              | Guatemala | 2007           | Potatoes                  | 32                                                          |
| 89              | Guatemala | 2007           | Poultry Meat              | 46                                                          |
| 89              | Guatemala | 2007           | Pulses, Other             | 8                                                           |
| 89              | Guatemala | 2007           | Rice (Milled Equivalent)  | 16                                                          |
| 89              | Guatemala | 2007           | Sesameseed                | 3                                                           |
| 89              | Guatemala | 2007           | Sorghum                   | 2                                                           |
| 89              | Guatemala | 2007           | Soyabean Oil              | 16                                                          |
| 89              | Guatemala | 2007           | Soyabeans                 | 1                                                           |
| 89              | Guatemala | 2007           | Spices, Other             | 1                                                           |
| 89              | Guatemala | 2007           | Sugar, Refined Equivalent | 138                                                         |
| 89              | Guatemala | 2007           | Sunflowerseed Oil         | 3                                                           |
| 89              | Guatemala | 2007           | Sweeteners, Other         | 2                                                           |
| 89              | Guatemala | 2007           | Tomatoes                  | 72                                                          |
| 89              | Guatemala | 2007           | Vegetables, Other         | 98                                                          |
| 89              | Guatemala | 2007           | Wheat                     | 88                                                          |
| 89              | Guatemala | 2007           | Wine                      | 1                                                           |
| 89              | Guatemala | 2008           | Apples                    | 4                                                           |
| 89              | Guatemala | 2008           | Bananas                   | 12                                                          |
| 89              | Guatemala | 2008           | Beans                     | 18                                                          |
| 89              | Guatemala | 2008           | Beer                      | 29                                                          |
| 89              | Guatemala | 2008           | Beverages, Alcoholic      | 1                                                           |
| 89              | Guatemala | 2008           | Bovine Meat               | 16                                                          |
| 89              | Guatemala | 2008           | Cassava                   | 3                                                           |
| 89              | Guatemala | 2008           | Cereals, Other            | 7                                                           |
| 89              | Guatemala | 2008           | Cheese                    | 4                                                           |
| 89              | Guatemala | 2008           | Citrus, Other             | 2                                                           |
| 89              | Guatemala | 2008           | Cocoa Beans               | 3                                                           |
| 89              | Guatemala | 2008           | Coconuts - Incl Copra     | 4                                                           |
| 89              | Guatemala | 2008           | Coffee                    | 5                                                           |
| 89              | Guatemala | 2008           | Cream                     | 1                                                           |
| 89              | Guatemala | 2008           | Crustaceans               | 1                                                           |
| 89              | Guatemala | 2008           | Eggs                      | 40                                                          |
| 89              | Guatemala | 2008           | Fats, Animals, Raw        | 2                                                           |
| 89              | Guatemala | 2008           | Freshwater Fish           | 1                                                           |
| 89              | Guatemala | 2008           | Fruits, Other             | 62                                                          |
| 89              | Guatemala | 2008           | Grapes                    | 5                                                           |
| 89              | Guatemala | 2008           | Groundnuts (Shelled Eq)   | 1                                                           |
| 89              | Guatemala | 2008           | Lemons, Limes             | 21                                                          |
| 89              | Guatemala | 2008           | Maize                     | 234                                                         |
| 89              | Guatemala | 2008           | Meat, Other               | 1                                                           |
| 89              | Guatemala | 2008           | Milk, Whole               | 77                                                          |
| 89              | Guatemala | 2008           | Mutton & Goat Meat        | 1                                                           |
| 89              | Guatemala | 2008           | Nuts                      | 6                                                           |
| 89              | Guatemala | 2008           | Offals, Edible            | 3                                                           |
| 89              | Guatemala | 2008           | Onions                    | 18                                                          |
| 89              | Guatemala | 2008           | Oranges, Mandarines       | 44                                                          |
| 89              | Guatemala | 2008           | Palm Oil                  | 5                                                           |
| 89              | Guatemala | 2008           | Palmkernel Oil            | 2                                                           |
| 89              | Guatemala | 2008           | Pelagic Fish              | 3                                                           |
| 89              | Guatemala | 2008           | Pigmeat                   | 13                                                          |
| 89              | Guatemala | 2008           | Pineapples                | 23                                                          |
| 89              | Guatemala | 2008           | Plantains                 | 9                                                           |
| 89              | Guatemala | 2008           | Potatoes                  | 30                                                          |
| 89              | Guatemala | 2008           | Poultry Meat              | 45                                                          |
| 89              | Guatemala | 2008           | Pulses, Other             | 8                                                           |
| 89              | Guatemala | 2008           | Rice (Milled Equivalent)  | 15                                                          |
| 89              | Guatemala | 2008           | Sesameseed                | 4                                                           |
| 89              | Guatemala | 2008           | Sorghum                   | 2                                                           |
| 89              | Guatemala | 2008           | Soyabean Oil              | 15                                                          |
| 89              | Guatemala | 2008           | Soyabeans                 | 1                                                           |
| 89              | Guatemala | 2008           | Spices, Other             | 1                                                           |
| 89              | Guatemala | 2008           | Sugar, Refined Equivalent | 122                                                         |
| 89              | Guatemala | 2008           | Sunflowerseed Oil         | 2                                                           |
| 89              | Guatemala | 2008           | Sweeteners, Other         | 2                                                           |
| 89              | Guatemala | 2008           | Tomatoes                  | 70                                                          |
| 89              | Guatemala | 2008           | Vegetables, Other         | 116                                                         |
| 89              | Guatemala | 2008           | Wheat                     | 93                                                          |
| 89              | Guatemala | 2008           | Wine                      | 1                                                           |
| 89              | Guatemala | 2009           | Apples                    | 5                                                           |
| 89              | Guatemala | 2009           | Bananas                   | 12                                                          |
| 89              | Guatemala | 2009           | Beans                     | 32                                                          |
| 89              | Guatemala | 2009           | Beer                      | 30                                                          |
| 89              | Guatemala | 2009           | Beverages, Alcoholic      | 5                                                           |
| 89              | Guatemala | 2009           | Bovine Meat               | 16                                                          |
| 89              | Guatemala | 2009           | Butter, Ghee              | 1                                                           |
| 89              | Guatemala | 2009           | Cassava                   | 3                                                           |
| 89              | Guatemala | 2009           | Cereals, Other            | 7                                                           |
| 89              | Guatemala | 2009           | Cheese                    | 4                                                           |
| 89              | Guatemala | 2009           | Citrus, Other             | 2                                                           |
| 89              | Guatemala | 2009           | Cocoa Beans               | 3                                                           |
| 89              | Guatemala | 2009           | Coconuts - Incl Copra     | 4                                                           |
| 89              | Guatemala | 2009           | Coffee                    | 4                                                           |
| 89              | Guatemala | 2009           | Cream                     | 1                                                           |
| 89              | Guatemala | 2009           | Crustaceans               | 1                                                           |
| 89              | Guatemala | 2009           | Eggs                      | 40                                                          |
| 89              | Guatemala | 2009           | Fats, Animals, Raw        | 2                                                           |
| 89              | Guatemala | 2009           | Freshwater Fish           | 1                                                           |
| 89              | Guatemala | 2009           | Fruits, Other             | 63                                                          |
| 89              | Guatemala | 2009           | Grapes                    | 6                                                           |
| 89              | Guatemala | 2009           | Groundnuts (Shelled Eq)   | 1                                                           |
| 89              | Guatemala | 2009           | Lemons, Limes             | 22                                                          |
| 89              | Guatemala | 2009           | Maize                     | 237                                                         |
| 89              | Guatemala | 2009           | Meat, Other               | 1                                                           |
| 89              | Guatemala | 2009           | Milk, Whole               | 80                                                          |
| 89              | Guatemala | 2009           | Mutton & Goat Meat        | 1                                                           |
| 89              | Guatemala | 2009           | Nuts                      | 6                                                           |

Dietary calcium and zinc deficiency risks are decreasing but remain prevalent

| FAO countrycode | Country   | Reference year | Food item                 | Gross food supply (g capita <sup>-1</sup> d <sup>-1</sup> ) |
|-----------------|-----------|----------------|---------------------------|-------------------------------------------------------------|
| 89              | Guatemala | 2009           | Offals, Edible            | 3                                                           |
| 89              | Guatemala | 2009           | Onions                    | 20                                                          |
| 89              | Guatemala | 2009           | Oranges, Mandarines       | 34                                                          |
| 89              | Guatemala | 2009           | Palm Oil                  | 5                                                           |
| 89              | Guatemala | 2009           | Palmkernel Oil            | 2                                                           |
| 89              | Guatemala | 2009           | Pelagic Fish              | 3                                                           |
| 89              | Guatemala | 2009           | Pigmeat                   | 14                                                          |
| 89              | Guatemala | 2009           | Pineapples                | 29                                                          |
| 89              | Guatemala | 2009           | Plantains                 | 16                                                          |
| 89              | Guatemala | 2009           | Potatoes                  | 31                                                          |
| 89              | Guatemala | 2009           | Poultry Meat              | 45                                                          |
| 89              | Guatemala | 2009           | Pulses, Other             | 8                                                           |
| 89              | Guatemala | 2009           | Rice (Milled Equivalent)  | 13                                                          |
| 89              | Guatemala | 2009           | Sesameseed                | 4                                                           |
| 89              | Guatemala | 2009           | Sorghum                   | 2                                                           |
| 89              | Guatemala | 2009           | Soyabean Oil              | 12                                                          |
| 89              | Guatemala | 2009           | Soyabeans                 | 1                                                           |
| 89              | Guatemala | 2009           | Spices, Other             | 1                                                           |
| 89              | Guatemala | 2009           | Sugar, Refined Equivalent | 134                                                         |
| 89              | Guatemala | 2009           | Sunflowerseed Oil         | 2                                                           |
| 89              | Guatemala | 2009           | Sweeteners, Other         | 2                                                           |
| 89              | Guatemala | 2009           | Tomatoes                  | 65                                                          |
| 89              | Guatemala | 2009           | Vegetables, Other         | 86                                                          |
| 89              | Guatemala | 2009           | Wheat                     | 93                                                          |
| 89              | Guatemala | 2009           | Wine                      | 1                                                           |
| 89              | Guatemala | 2010           | Apples                    | 6                                                           |
| 89              | Guatemala | 2010           | Bananas                   | 12                                                          |
| 89              | Guatemala | 2010           | Beans                     | 33                                                          |
| 89              | Guatemala | 2010           | Beer                      | 29                                                          |
| 89              | Guatemala | 2010           | Beverages, Alcoholic      | 5                                                           |
| 89              | Guatemala | 2010           | Bovine Meat               | 15                                                          |
| 89              | Guatemala | 2010           | Butter, Ghee              | 1                                                           |
| 89              | Guatemala | 2010           | Cassava                   | 3                                                           |
| 89              | Guatemala | 2010           | Cereals, Other            | 5                                                           |
| 89              | Guatemala | 2010           | Cheese                    | 4                                                           |
| 89              | Guatemala | 2010           | Citrus, Other             | 2                                                           |
| 89              | Guatemala | 2010           | Cocoa Beans               | 3                                                           |
| 89              | Guatemala | 2010           | Coconuts - Incl Copra     | 4                                                           |
| 89              | Guatemala | 2010           | Coffee                    | 4                                                           |
| 89              | Guatemala | 2010           | Cream                     | 1                                                           |
| 89              | Guatemala | 2010           | Eggs                      | 40                                                          |
| 89              | Guatemala | 2010           | Fats, Animals, Raw        | 2                                                           |
| 89              | Guatemala | 2010           | Freshwater Fish           | 1                                                           |
| 89              | Guatemala | 2010           | Fruits, Other             | 57                                                          |
| 89              | Guatemala | 2010           | Grapes                    | 6                                                           |
| 89              | Guatemala | 2010           | Groundnuts (Shelled Eq)   | 1                                                           |
| 89              | Guatemala | 2010           | Lemons, Limes             | 19                                                          |
| 89              | Guatemala | 2010           | Maize                     | 231                                                         |
| 89              | Guatemala | 2010           | Meat, Other               | 1                                                           |
| 89              | Guatemala | 2010           | Milk, Whole               | 83                                                          |
| 89              | Guatemala | 2010           | Mutton & Goat Meat        | 1                                                           |
| 89              | Guatemala | 2010           | Nuts                      | 3                                                           |
| 89              | Guatemala | 2010           | Offals, Edible            | 3                                                           |
| 89              | Guatemala | 2010           | Oilcrops Oil, Other       | 1                                                           |
| 89              | Guatemala | 2010           | Onions                    | 22                                                          |
| 89              | Guatemala | 2010           | Oranges, Mandarines       | 38                                                          |
| 89              | Guatemala | 2010           | Palm Oil                  | 5                                                           |
| 89              | Guatemala | 2010           | Palmkernel Oil            | 2                                                           |
| 89              | Guatemala | 2010           | Pelagic Fish              | 2                                                           |
| 89              | Guatemala | 2010           | Pigmeat                   | 14                                                          |
| 89              | Guatemala | 2010           | Pineapples                | 32                                                          |
| 89              | Guatemala | 2010           | Plantains                 | 11                                                          |
| 89              | Guatemala | 2010           | Potatoes                  | 32                                                          |
| 89              | Guatemala | 2010           | Poultry Meat              | 45                                                          |
| 89              | Guatemala | 2010           | Pulses, Other             | 8                                                           |
| 89              | Guatemala | 2010           | Rice (Milled Equivalent)  | 15                                                          |
| 89              | Guatemala | 2010           | Sesameseed                | 4                                                           |
| 89              | Guatemala | 2010           | Sorghum                   | 2                                                           |
| 89              | Guatemala | 2010           | Soyabean Oil              | 12                                                          |
| 89              | Guatemala | 2010           | Soyabeans                 | 1                                                           |
| 89              | Guatemala | 2010           | Spices, Other             | 1                                                           |
| 89              | Guatemala | 2010           | Sugar, Refined Equivalent | 122                                                         |
| 89              | Guatemala | 2010           | Sunflowerseed Oil         | 2                                                           |
| 89              | Guatemala | 2010           | Sweeteners, Other         | 3                                                           |
| 89              | Guatemala | 2010           | Tomatoes                  | 50                                                          |
| 89              | Guatemala | 2010           | Vegetables, Other         | 103                                                         |
| 89              | Guatemala | 2010           | Wheat                     | 97                                                          |
| 89              | Guatemala | 2010           | Wine                      | 1                                                           |
| 89              | Guatemala | 2011           | Apples                    | 5                                                           |
| 89              | Guatemala | 2011           | Bananas                   | 12                                                          |
| 89              | Guatemala | 2011           | Beans                     | 34                                                          |
| 89              | Guatemala | 2011           | Beer                      | 30                                                          |
| 89              | Guatemala | 2011           | Beverages, Alcoholic      | 5                                                           |
| 89              | Guatemala | 2011           | Bovine Meat               | 15                                                          |
| 89              | Guatemala | 2011           | Butter, Ghee              | 1                                                           |
| 89              | Guatemala | 2011           | Cassava                   | 3                                                           |
| 89              | Guatemala | 2011           | Cereals, Other            | 5                                                           |
| 89              | Guatemala | 2011           | Cheese                    | 5                                                           |
| 89              | Guatemala | 2011           | Citrus, Other             | 2                                                           |
| 89              | Guatemala | 2011           | Cocoa Beans               | 3                                                           |
| 89              | Guatemala | 2011           | Coconuts - Incl Copra     | 4                                                           |
| 89              | Guatemala | 2011           | Coffee                    | 4                                                           |
| 89              | Guatemala | 2011           | Cream                     | 1                                                           |
| 89              | Guatemala | 2011           | Eggs                      | 40                                                          |
| 89              | Guatemala | 2011           | Fats, Animals, Raw        | 2                                                           |
| 89              | Guatemala | 2011           | Freshwater Fish           | 1                                                           |
| 89              | Guatemala | 2011           | Fruits, Other             | 57                                                          |

## Dietary calcium and zinc deficiency risks are decreasing but remain prevalent

| FAO countrycode | Country   | Reference year | Food item                 | Gross food supply (g capita <sup>-1</sup> d <sup>-1</sup> ) |
|-----------------|-----------|----------------|---------------------------|-------------------------------------------------------------|
| 89              | Guatemala | 2011           | Grapes                    | 6                                                           |
| 89              | Guatemala | 2011           | Groundnuts (Shelled Eq)   | 1                                                           |
| 89              | Guatemala | 2011           | Lemons, Limes             | 18                                                          |
| 89              | Guatemala | 2011           | Maize                     | 233                                                         |
| 89              | Guatemala | 2011           | Meat, Other               | 1                                                           |
| 89              | Guatemala | 2011           | Milk, Whole               | 76                                                          |
| 89              | Guatemala | 2011           | Mutton & Goat Meat        | 1                                                           |
| 89              | Guatemala | 2011           | Nuts                      | 3                                                           |
| 89              | Guatemala | 2011           | Offals, Edible            | 3                                                           |
| 89              | Guatemala | 2011           | Oilcrops Oil, Other       | 1                                                           |
| 89              | Guatemala | 2011           | Onions                    | 21                                                          |
| 89              | Guatemala | 2011           | Oranges, Mandarines       | 36                                                          |
| 89              | Guatemala | 2011           | Palm Oil                  | 5                                                           |
| 89              | Guatemala | 2011           | Palmkernel Oil            | 3                                                           |
| 89              | Guatemala | 2011           | Pelagic Fish              | 2                                                           |
| 89              | Guatemala | 2011           | Pigmeat                   | 14                                                          |
| 89              | Guatemala | 2011           | Pineapples                | 32                                                          |
| 89              | Guatemala | 2011           | Plantains                 | 11                                                          |
| 89              | Guatemala | 2011           | Potatoes                  | 33                                                          |
| 89              | Guatemala | 2011           | Poultry Meat              | 45                                                          |
| 89              | Guatemala | 2011           | Pulses, Other             | 7                                                           |
| 89              | Guatemala | 2011           | Rice (Milled Equivalent)  | 15                                                          |
| 89              | Guatemala | 2011           | Sesameseed                | 7                                                           |
| 89              | Guatemala | 2011           | Sorghum                   | 2                                                           |
| 89              | Guatemala | 2011           | Soyabean Oil              | 12                                                          |
| 89              | Guatemala | 2011           | Soyabeans                 | 1                                                           |
| 89              | Guatemala | 2011           | Spices, Other             | 1                                                           |
| 89              | Guatemala | 2011           | Sugar, Refined Equivalent | 131                                                         |
| 89              | Guatemala | 2011           | Sunflowerseed Oil         | 2                                                           |
| 89              | Guatemala | 2011           | Sweeteners, Other         | 3                                                           |
| 89              | Guatemala | 2011           | Tomatoes                  | 46                                                          |
| 89              | Guatemala | 2011           | Vegetables, Other         | 111                                                         |
| 89              | Guatemala | 2011           | Wheat                     | 97                                                          |
| 89              | Guatemala | 2011           | Wine                      | 1                                                           |
| 90              | Guinea    | 1992           | Bananas                   | 41                                                          |
| 90              | Guinea    | 1992           | Beer                      | 5                                                           |
| 90              | Guinea    | 1992           | Beverages, Alcoholic      | 1                                                           |
| 90              | Guinea    | 1992           | Bovine Meat               | 8                                                           |
| 90              | Guinea    | 1992           | Cassava                   | 224                                                         |
| 90              | Guinea    | 1992           | Cereals, Other            | 20                                                          |
| 90              | Guinea    | 1992           | Citrus, Other             | 84                                                          |
| 90              | Guinea    | 1992           | Coconut Oil               | 1                                                           |
| 90              | Guinea    | 1992           | Coconuts - Incl Copra     | 7                                                           |
| 90              | Guinea    | 1992           | Coffee                    | 10                                                          |
| 90              | Guinea    | 1992           | Demersal Fish             | 5                                                           |
| 90              | Guinea    | 1992           | Eggs                      | 3                                                           |
| 90              | Guinea    | 1992           | Freshwater Fish           | 2                                                           |
| 90              | Guinea    | 1992           | Fruits, Other             | 45                                                          |
| 90              | Guinea    | 1992           | Groundnut Oil             | 13                                                          |
| 90              | Guinea    | 1992           | Groundnuts (Shelled Eq)   | 7                                                           |
| 90              | Guinea    | 1992           | Maize                     | 27                                                          |
| 90              | Guinea    | 1992           | Marine Fish, Other        | 12                                                          |
| 90              | Guinea    | 1992           | Meat, Other               | 2                                                           |
| 90              | Guinea    | 1992           | Milk, Whole               | 32                                                          |
| 90              | Guinea    | 1992           | Millet                    | 1                                                           |
| 90              | Guinea    | 1992           | Mutton & Goat Meat        | 2                                                           |
| 90              | Guinea    | 1992           | Offals, Edible            | 2                                                           |
| 90              | Guinea    | 1992           | Onions                    | 4                                                           |
| 90              | Guinea    | 1992           | Palm Oil                  | 13                                                          |
| 90              | Guinea    | 1992           | Palmkernel Oil            | 2                                                           |
| 90              | Guinea    | 1992           | Pelagic Fish              | 12                                                          |
| 90              | Guinea    | 1992           | Pigmeat                   | 1                                                           |
| 90              | Guinea    | 1992           | Pineapples                | 21                                                          |
| 90              | Guinea    | 1992           | Plantains                 | 140                                                         |
| 90              | Guinea    | 1992           | Poultry Meat              | 1                                                           |
| 90              | Guinea    | 1992           | Pulses, Other             | 19                                                          |
| 90              | Guinea    | 1992           | Rape and Mustard Oil      | 4                                                           |
| 90              | Guinea    | 1992           | Rice (Milled Equivalent)  | 255                                                         |
| 90              | Guinea    | 1992           | Roots, Other              | 12                                                          |
| 90              | Guinea    | 1992           | Sorghum                   | 4                                                           |
| 90              | Guinea    | 1992           | Soyabean Oil              | 1                                                           |
| 90              | Guinea    | 1992           | Sugar, Refined Equivalent | 25                                                          |
| 90              | Guinea    | 1992           | Sweet Potatoes            | 44                                                          |
| 90              | Guinea    | 1992           | Tomatoes                  | 7                                                           |
| 90              | Guinea    | 1992           | Vegetables, Other         | 192                                                         |
| 90              | Guinea    | 1992           | Wheat                     | 37                                                          |
| 90              | Guinea    | 1992           | Yams                      | 25                                                          |
| 90              | Guinea    | 1993           | Bananas                   | 42                                                          |
| 90              | Guinea    | 1993           | Beer                      | 4                                                           |
| 90              | Guinea    | 1993           | Beverages, Alcoholic      | 1                                                           |
| 90              | Guinea    | 1993           | Bovine Meat               | 9                                                           |
| 90              | Guinea    | 1993           | Cassava                   | 220                                                         |
| 90              | Guinea    | 1993           | Cereals, Other            | 25                                                          |
| 90              | Guinea    | 1993           | Citrus, Other             | 73                                                          |
| 90              | Guinea    | 1993           | Coconut Oil               | 1                                                           |
| 90              | Guinea    | 1993           | Coconuts - Incl Copra     | 6                                                           |
| 90              | Guinea    | 1993           | Coffee                    | 9                                                           |
| 90              | Guinea    | 1993           | Demersal Fish             | 6                                                           |
| 90              | Guinea    | 1993           | Eggs                      | 3                                                           |
| 90              | Guinea    | 1993           | Freshwater Fish           | 2                                                           |
| 90              | Guinea    | 1993           | Fruits, Other             | 37                                                          |
| 90              | Guinea    | 1993           | Groundnut Oil             | 11                                                          |
| 90              | Guinea    | 1993           | Groundnuts (Shelled Eq)   | 6                                                           |
| 90              | Guinea    | 1993           | Maize                     | 25                                                          |
| 90              | Guinea    | 1993           | Marine Fish, Other        | 11                                                          |
| 90              | Guinea    | 1993           | Meat, Other               | 2                                                           |
| 90              | Guinea    | 1993           | Milk, Whole               | 30                                                          |

Dietary calcium and zinc deficiency risks are decreasing but remain prevalent

| FAO countrycode | Country | Reference year | Food item                 | Gross food supply (g capita <sup>-1</sup> d <sup>-1</sup> ) |
|-----------------|---------|----------------|---------------------------|-------------------------------------------------------------|
| 90              | Guinea  | 1993           | Millet                    | 1                                                           |
| 90              | Guinea  | 1993           | Mutton & Goat Meat        | 2                                                           |
| 90              | Guinea  | 1993           | Offals, Edible            | 2                                                           |
| 90              | Guinea  | 1993           | Onions                    | 2                                                           |
| 90              | Guinea  | 1993           | Palm Oil                  | 15                                                          |
| 90              | Guinea  | 1993           | Palmkernel Oil            | 2                                                           |
| 90              | Guinea  | 1993           | Pelagic Fish              | 12                                                          |
| 90              | Guinea  | 1993           | Pigmeat                   | 1                                                           |
| 90              | Guinea  | 1993           | Pineapples                | 20                                                          |
| 90              | Guinea  | 1993           | Plantains                 | 134                                                         |
| 90              | Guinea  | 1993           | Poultry Meat              | 2                                                           |
| 90              | Guinea  | 1993           | Pulses, Other             | 17                                                          |
| 90              | Guinea  | 1993           | Rape and Mustard Oil      | 4                                                           |
| 90              | Guinea  | 1993           | Rice (Milled Equivalent)  | 251                                                         |
| 90              | Guinea  | 1993           | Roots, Other              | 12                                                          |
| 90              | Guinea  | 1993           | Sorghum                   | 1                                                           |
| 90              | Guinea  | 1993           | Soyabean Oil              | 5                                                           |
| 90              | Guinea  | 1993           | Sugar, Refined Equivalent | 25                                                          |
| 90              | Guinea  | 1993           | Sweet Potatoes            | 43                                                          |
| 90              | Guinea  | 1993           | Tomatoes                  | 10                                                          |
| 90              | Guinea  | 1993           | Vegetables, Other         | 192                                                         |
| 90              | Guinea  | 1993           | Wheat                     | 39                                                          |
| 90              | Guinea  | 1993           | Yams                      | 24                                                          |
| 90              | Guinea  | 1994           | Bananas                   | 44                                                          |
| 90              | Guinea  | 1994           | Beer                      | 4                                                           |
| 90              | Guinea  | 1994           | Beverages, Alcoholic      | 1                                                           |
| 90              | Guinea  | 1994           | Bovine Meat               | 9                                                           |
| 90              | Guinea  | 1994           | Cassava                   | 217                                                         |
| 90              | Guinea  | 1994           | Cereals, Other            | 23                                                          |
| 90              | Guinea  | 1994           | Citrus, Other             | 74                                                          |
| 90              | Guinea  | 1994           | Coconut Oil               | 1                                                           |
| 90              | Guinea  | 1994           | Coconuts - Incl Copra     | 6                                                           |
| 90              | Guinea  | 1994           | Coffee                    | 7                                                           |
| 90              | Guinea  | 1994           | Demersal Fish             | 5                                                           |
| 90              | Guinea  | 1994           | Eggs                      | 3                                                           |
| 90              | Guinea  | 1994           | Freshwater Fish           | 1                                                           |
| 90              | Guinea  | 1994           | Fruits, Other             | 45                                                          |
| 90              | Guinea  | 1994           | Groundnut Oil             | 10                                                          |
| 90              | Guinea  | 1994           | Groundnuts (Shelled Eq)   | 6                                                           |
| 90              | Guinea  | 1994           | Maize                     | 23                                                          |
| 90              | Guinea  | 1994           | Marine Fish, Other        | 10                                                          |
| 90              | Guinea  | 1994           | Meat, Other               | 2                                                           |
| 90              | Guinea  | 1994           | Milk, Whole               | 26                                                          |
| 90              | Guinea  | 1994           | Millet                    | 1                                                           |
| 90              | Guinea  | 1994           | Mutton & Goat Meat        | 2                                                           |
| 90              | Guinea  | 1994           | Offals, Edible            | 2                                                           |
| 90              | Guinea  | 1994           | Oilcrops Oil, Other       | 1                                                           |
| 90              | Guinea  | 1994           | Onions                    | 2                                                           |
| 90              | Guinea  | 1994           | Palm Oil                  | 14                                                          |
| 90              | Guinea  | 1994           | Palmkernel Oil            | 2                                                           |
| 90              | Guinea  | 1994           | Pelagic Fish              | 12                                                          |
| 90              | Guinea  | 1994           | Pigmeat                   | 1                                                           |
| 90              | Guinea  | 1994           | Pineapples                | 22                                                          |
| 90              | Guinea  | 1994           | Plantains                 | 130                                                         |
| 90              | Guinea  | 1994           | Poultry Meat              | 1                                                           |
| 90              | Guinea  | 1994           | Pulses, Other             | 17                                                          |
| 90              | Guinea  | 1994           | Rape and Mustard Oil      | 2                                                           |
| 90              | Guinea  | 1994           | Rice (Milled Equivalent)  | 261                                                         |
| 90              | Guinea  | 1994           | Roots, Other              | 12                                                          |
| 90              | Guinea  | 1994           | Sorghum                   | 1                                                           |
| 90              | Guinea  | 1994           | Soyabean Oil              | 1                                                           |
| 90              | Guinea  | 1994           | Sugar, Refined Equivalent | 24                                                          |
| 90              | Guinea  | 1994           | Sweet Potatoes            | 42                                                          |
| 90              | Guinea  | 1994           | Sweeteners, Other         | 1                                                           |
| 90              | Guinea  | 1994           | Tomatoes                  | 7                                                           |
| 90              | Guinea  | 1994           | Vegetables, Other         | 198                                                         |
| 90              | Guinea  | 1994           | Wheat                     | 40                                                          |
| 90              | Guinea  | 1994           | Yams                      | 35                                                          |
| 90              | Guinea  | 1995           | Bananas                   | 42                                                          |
| 90              | Guinea  | 1995           | Beer                      | 2                                                           |
| 90              | Guinea  | 1995           | Beverages, Alcoholic      | 2                                                           |
| 90              | Guinea  | 1995           | Bovine Meat               | 10                                                          |
| 90              | Guinea  | 1995           | Cassava                   | 217                                                         |
| 90              | Guinea  | 1995           | Cereals, Other            | 29                                                          |
| 90              | Guinea  | 1995           | Citrus, Other             | 66                                                          |
| 90              | Guinea  | 1995           | Coconuts - Incl Copra     | 4                                                           |
| 90              | Guinea  | 1995           | Coffee                    | 3                                                           |
| 90              | Guinea  | 1995           | Demersal Fish             | 8                                                           |
| 90              | Guinea  | 1995           | Eggs                      | 3                                                           |
| 90              | Guinea  | 1995           | Freshwater Fish           | 1                                                           |
| 90              | Guinea  | 1995           | Fruits, Other             | 40                                                          |
| 90              | Guinea  | 1995           | Groundnut Oil             | 11                                                          |
| 90              | Guinea  | 1995           | Groundnuts (Shelled Eq)   | 6                                                           |
| 90              | Guinea  | 1995           | Maize                     | 26                                                          |
| 90              | Guinea  | 1995           | Marine Fish, Other        | 9                                                           |
| 90              | Guinea  | 1995           | Meat, Other               | 2                                                           |
| 90              | Guinea  | 1995           | Milk, Whole               | 33                                                          |
| 90              | Guinea  | 1995           | Millet                    | 2                                                           |
| 90              | Guinea  | 1995           | Mutton & Goat Meat        | 2                                                           |
| 90              | Guinea  | 1995           | Offals, Edible            | 2                                                           |
| 90              | Guinea  | 1995           | Oilcrops Oil, Other       | 4                                                           |
| 90              | Guinea  | 1995           | Onions                    | 2                                                           |
| 90              | Guinea  | 1995           | Palm Oil                  | 15                                                          |
| 90              | Guinea  | 1995           | Palmkernel Oil            | 2                                                           |
| 90              | Guinea  | 1995           | Pelagic Fish              | 13                                                          |
| 90              | Guinea  | 1995           | Pineapples                | 21                                                          |
| 90              | Guinea  | 1995           | Plantains                 | 126                                                         |

Dietary calcium and zinc deficiency risks are decreasing but remain prevalent

| FAO countrycode | Country | Reference year | Food item                 | Gross food supply (g capita <sup>-1</sup> d <sup>-1</sup> ) |
|-----------------|---------|----------------|---------------------------|-------------------------------------------------------------|
| 90              | Guinea  | 1995           | Poultry Meat              | 1                                                           |
| 90              | Guinea  | 1995           | Pulses, Other             | 10                                                          |
| 90              | Guinea  | 1995           | Rape and Mustard Oil      | 3                                                           |
| 90              | Guinea  | 1995           | Rice (Milled Equivalent)  | 259                                                         |
| 90              | Guinea  | 1995           | Roots, Other              | 8                                                           |
| 90              | Guinea  | 1995           | Sorghum                   | 1                                                           |
| 90              | Guinea  | 1995           | Soyabean Oil              | 1                                                           |
| 90              | Guinea  | 1995           | Sugar, Refined Equivalent | 26                                                          |
| 90              | Guinea  | 1995           | Sweet Potatoes            | 40                                                          |
| 90              | Guinea  | 1995           | Sweeteners, Other         | 1                                                           |
| 90              | Guinea  | 1995           | Tomatoes                  | 6                                                           |
| 90              | Guinea  | 1995           | Vegetables, Other         | 194                                                         |
| 90              | Guinea  | 1995           | Wheat                     | 26                                                          |
| 90              | Guinea  | 1995           | Yams                      | 28                                                          |
| 90              | Guinea  | 1996           | Bananas                   | 44                                                          |
| 90              | Guinea  | 1996           | Beer                      | 2                                                           |
| 90              | Guinea  | 1996           | Beverages, Alcoholic      | 1                                                           |
| 90              | Guinea  | 1996           | Bovine Meat               | 10                                                          |
| 90              | Guinea  | 1996           | Cassava                   | 218                                                         |
| 90              | Guinea  | 1996           | Cereals, Other            | 28                                                          |
| 90              | Guinea  | 1996           | Citrus, Other             | 63                                                          |
| 90              | Guinea  | 1996           | Coconuts - Incl Copra     | 4                                                           |
| 90              | Guinea  | 1996           | Coffee                    | 3                                                           |
| 90              | Guinea  | 1996           | Demersal Fish             | 6                                                           |
| 90              | Guinea  | 1996           | Eggs                      | 3                                                           |
| 90              | Guinea  | 1996           | Fats, Animals, Raw        | 1                                                           |
| 90              | Guinea  | 1996           | Freshwater Fish           | 1                                                           |
| 90              | Guinea  | 1996           | Fruits, Other             | 34                                                          |
| 90              | Guinea  | 1996           | Groundnut Oil             | 11                                                          |
| 90              | Guinea  | 1996           | Groundnuts (Shelled Eq)   | 6                                                           |
| 90              | Guinea  | 1996           | Maize                     | 24                                                          |
| 90              | Guinea  | 1996           | Marine Fish, Other        | 8                                                           |
| 90              | Guinea  | 1996           | Meat, Other               | 2                                                           |
| 90              | Guinea  | 1996           | Milk, Whole               | 26                                                          |
| 90              | Guinea  | 1996           | Millet                    | 2                                                           |
| 90              | Guinea  | 1996           | Mutton & Goat Meat        | 2                                                           |
| 90              | Guinea  | 1996           | Offals, Edible            | 2                                                           |
| 90              | Guinea  | 1996           | Oilcrops Oil, Other       | 4                                                           |
| 90              | Guinea  | 1996           | Onions                    | 2                                                           |
| 90              | Guinea  | 1996           | Oranges, Mandarines       | 1                                                           |
| 90              | Guinea  | 1996           | Palm Oil                  | 16                                                          |
| 90              | Guinea  | 1996           | Palmkernel Oil            | 2                                                           |
| 90              | Guinea  | 1996           | Pelagic Fish              | 13                                                          |
| 90              | Guinea  | 1996           | Pigmeat                   | 1                                                           |
| 90              | Guinea  | 1996           | Pineapples                | 20                                                          |
| 90              | Guinea  | 1996           | Plantains                 | 125                                                         |
| 90              | Guinea  | 1996           | Poultry Meat              | 1                                                           |
| 90              | Guinea  | 1996           | Pulses, Other             | 11                                                          |
| 90              | Guinea  | 1996           | Rape and Mustard Oil      | 3                                                           |
| 90              | Guinea  | 1996           | Rice (Milled Equivalent)  | 241                                                         |
| 90              | Guinea  | 1996           | Roots, Other              | 6                                                           |
| 90              | Guinea  | 1996           | Sorghum                   | 1                                                           |
| 90              | Guinea  | 1996           | Sugar, Refined Equivalent | 27                                                          |
| 90              | Guinea  | 1996           | Sweet Potatoes            | 42                                                          |
| 90              | Guinea  | 1996           | Tomatoes                  | 4                                                           |
| 90              | Guinea  | 1996           | Vegetables, Other         | 217                                                         |
| 90              | Guinea  | 1996           | Wheat                     | 33                                                          |
| 90              | Guinea  | 1996           | Yams                      | 26                                                          |
| 90              | Guinea  | 1997           | Bananas                   | 39                                                          |
| 90              | Guinea  | 1997           | Beer                      | 3                                                           |
| 90              | Guinea  | 1997           | Bovine Meat               | 10                                                          |
| 90              | Guinea  | 1997           | Cassava                   | 222                                                         |
| 90              | Guinea  | 1997           | Cereals, Other            | 29                                                          |
| 90              | Guinea  | 1997           | Citrus, Other             | 64                                                          |
| 90              | Guinea  | 1997           | Coconuts - Incl Copra     | 4                                                           |
| 90              | Guinea  | 1997           | Coffee                    | 1                                                           |
| 90              | Guinea  | 1997           | Demersal Fish             | 5                                                           |
| 90              | Guinea  | 1997           | Eggs                      | 3                                                           |
| 90              | Guinea  | 1997           | Freshwater Fish           | 1                                                           |
| 90              | Guinea  | 1997           | Fruits, Other             | 33                                                          |
| 90              | Guinea  | 1997           | Groundnut Oil             | 12                                                          |
| 90              | Guinea  | 1997           | Groundnuts (Shelled Eq)   | 7                                                           |
| 90              | Guinea  | 1997           | Maize                     | 30                                                          |
| 90              | Guinea  | 1997           | Marine Fish, Other        | 9                                                           |
| 90              | Guinea  | 1997           | Meat, Other               | 2                                                           |
| 90              | Guinea  | 1997           | Milk, Whole               | 27                                                          |
| 90              | Guinea  | 1997           | Millet                    | 2                                                           |
| 90              | Guinea  | 1997           | Mutton & Goat Meat        | 2                                                           |
| 90              | Guinea  | 1997           | Offals, Edible            | 2                                                           |
| 90              | Guinea  | 1997           | Oilcrops Oil, Other       | 1                                                           |
| 90              | Guinea  | 1997           | Onions                    | 3                                                           |
| 90              | Guinea  | 1997           | Palm Oil                  | 14                                                          |
| 90              | Guinea  | 1997           | Palmkernel Oil            | 2                                                           |
| 90              | Guinea  | 1997           | Pelagic Fish              | 13                                                          |
| 90              | Guinea  | 1997           | Pigmeat                   | 1                                                           |
| 90              | Guinea  | 1997           | Pineapples                | 20                                                          |
| 90              | Guinea  | 1997           | Plantains                 | 121                                                         |
| 90              | Guinea  | 1997           | Poultry Meat              | 1                                                           |
| 90              | Guinea  | 1997           | Pulses, Other             | 11                                                          |
| 90              | Guinea  | 1997           | Rape and Mustard Oil      | 1                                                           |
| 90              | Guinea  | 1997           | Rice (Milled Equivalent)  | 228                                                         |
| 90              | Guinea  | 1997           | Roots, Other              | 7                                                           |
| 90              | Guinea  | 1997           | Sorghum                   | 1                                                           |
| 90              | Guinea  | 1997           | Soyabean Oil              | 2                                                           |
| 90              | Guinea  | 1997           | Sugar, Refined Equivalent | 28                                                          |
| 90              | Guinea  | 1997           | Sweet Potatoes            | 43                                                          |
| 90              | Guinea  | 1997           | Tomatoes                  | 4                                                           |

Dietary calcium and zinc deficiency risks are decreasing but remain prevalent

| FAO countrycode | Country | Reference year | Food item                 | Gross food supply (g capita <sup>-1</sup> d <sup>-1</sup> ) |
|-----------------|---------|----------------|---------------------------|-------------------------------------------------------------|
| 90              | Guinea  | 1997           | Vegetables, Other         | 222                                                         |
| 90              | Guinea  | 1997           | Wheat                     | 34                                                          |
| 90              | Guinea  | 1997           | Yams                      | 27                                                          |
| 90              | Guinea  | 1998           | Bananas                   | 39                                                          |
| 90              | Guinea  | 1998           | Beer                      | 4                                                           |
| 90              | Guinea  | 1998           | Beverages, Alcoholic      | 1                                                           |
| 90              | Guinea  | 1998           | Bovine Meat               | 9                                                           |
| 90              | Guinea  | 1998           | Cassava                   | 227                                                         |
| 90              | Guinea  | 1998           | Cereals, Other            | 29                                                          |
| 90              | Guinea  | 1998           | Citrus, Other             | 66                                                          |
| 90              | Guinea  | 1998           | Coconuts - Incl Copra     | 4                                                           |
| 90              | Guinea  | 1998           | Coffee                    | 2                                                           |
| 90              | Guinea  | 1998           | Demersal Fish             | 5                                                           |
| 90              | Guinea  | 1998           | Eggs                      | 3                                                           |
| 90              | Guinea  | 1998           | Freshwater Fish           | 1                                                           |
| 90              | Guinea  | 1998           | Fruits, Other             | 36                                                          |
| 90              | Guinea  | 1998           | Groundnut Oil             | 13                                                          |
| 90              | Guinea  | 1998           | Groundnuts (Shelled Eq)   | 7                                                           |
| 90              | Guinea  | 1998           | Maize                     | 24                                                          |
| 90              | Guinea  | 1998           | Marine Fish, Other        | 9                                                           |
| 90              | Guinea  | 1998           | Meat, Other               | 2                                                           |
| 90              | Guinea  | 1998           | Milk, Whole               | 27                                                          |
| 90              | Guinea  | 1998           | Millet                    | 2                                                           |
| 90              | Guinea  | 1998           | Mutton & Goat Meat        | 2                                                           |
| 90              | Guinea  | 1998           | Offals, Edible            | 2                                                           |
| 90              | Guinea  | 1998           | Oilcrops Oil, Other       | 1                                                           |
| 90              | Guinea  | 1998           | Onions                    | 2                                                           |
| 90              | Guinea  | 1998           | Palm Oil                  | 13                                                          |
| 90              | Guinea  | 1998           | Palmkernel Oil            | 2                                                           |
| 90              | Guinea  | 1998           | Pelagic Fish              | 14                                                          |
| 90              | Guinea  | 1998           | Pigmeat                   | 1                                                           |
| 90              | Guinea  | 1998           | Pineapples                | 21                                                          |
| 90              | Guinea  | 1998           | Plantains                 | 118                                                         |
| 90              | Guinea  | 1998           | Poultry Meat              | 1                                                           |
| 90              | Guinea  | 1998           | Pulses, Other             | 15                                                          |
| 90              | Guinea  | 1998           | Rice (Milled Equivalent)  | 224                                                         |
| 90              | Guinea  | 1998           | Roots, Other              | 8                                                           |
| 90              | Guinea  | 1998           | Sorghum                   | 1                                                           |
| 90              | Guinea  | 1998           | Soyabean Oil              | 2                                                           |
| 90              | Guinea  | 1998           | Sugar, Refined Equivalent | 28                                                          |
| 90              | Guinea  | 1998           | Sweet Potatoes            | 43                                                          |
| 90              | Guinea  | 1998           | Tomatoes                  | 5                                                           |
| 90              | Guinea  | 1998           | Vegetables, Other         | 149                                                         |
| 90              | Guinea  | 1998           | Wheat                     | 41                                                          |
| 90              | Guinea  | 1998           | Yams                      | 24                                                          |
| 90              | Guinea  | 1999           | Bananas                   | 43                                                          |
| 90              | Guinea  | 1999           | Beer                      | 4                                                           |
| 90              | Guinea  | 1999           | Beverages, Alcoholic      | 1                                                           |
| 90              | Guinea  | 1999           | Bovine Meat               | 10                                                          |
| 90              | Guinea  | 1999           | Cassava                   | 232                                                         |
| 90              | Guinea  | 1999           | Cereals, Other            | 29                                                          |
| 90              | Guinea  | 1999           | Citrus, Other             | 68                                                          |
| 90              | Guinea  | 1999           | Coconut Oil               | 1                                                           |
| 90              | Guinea  | 1999           | Coconuts - Incl Copra     | 4                                                           |
| 90              | Guinea  | 1999           | Coffee                    | 3                                                           |
| 90              | Guinea  | 1999           | Demersal Fish             | 4                                                           |
| 90              | Guinea  | 1999           | Eggs                      | 3                                                           |
| 90              | Guinea  | 1999           | Freshwater Fish           | 1                                                           |
| 90              | Guinea  | 1999           | Fruits, Other             | 40                                                          |
| 90              | Guinea  | 1999           | Groundnut Oil             | 14                                                          |
| 90              | Guinea  | 1999           | Groundnuts (Shelled Eq)   | 8                                                           |
| 90              | Guinea  | 1999           | Maize                     | 24                                                          |
| 90              | Guinea  | 1999           | Marine Fish, Other        | 14                                                          |
| 90              | Guinea  | 1999           | Meat, Other               | 2                                                           |
| 90              | Guinea  | 1999           | Milk, Whole               | 29                                                          |
| 90              | Guinea  | 1999           | Millet                    | 2                                                           |
| 90              | Guinea  | 1999           | Mutton & Goat Meat        | 2                                                           |
| 90              | Guinea  | 1999           | Offals, Edible            | 2                                                           |
| 90              | Guinea  | 1999           | Oilcrops Oil, Other       | 1                                                           |
| 90              | Guinea  | 1999           | Onions                    | 3                                                           |
| 90              | Guinea  | 1999           | Palm Oil                  | 13                                                          |
| 90              | Guinea  | 1999           | Palmkernel Oil            | 2                                                           |
| 90              | Guinea  | 1999           | Peas                      | 1                                                           |
| 90              | Guinea  | 1999           | Pelagic Fish              | 14                                                          |
| 90              | Guinea  | 1999           | Pigmeat                   | 1                                                           |
| 90              | Guinea  | 1999           | Pineapples                | 23                                                          |
| 90              | Guinea  | 1999           | Plantains                 | 120                                                         |
| 90              | Guinea  | 1999           | Poultry Meat              | 1                                                           |
| 90              | Guinea  | 1999           | Pulses, Other             | 14                                                          |
| 90              | Guinea  | 1999           | Rice (Milled Equivalent)  | 231                                                         |
| 90              | Guinea  | 1999           | Roots, Other              | 7                                                           |
| 90              | Guinea  | 1999           | Sorghum                   | 1                                                           |
| 90              | Guinea  | 1999           | Soyabean Oil              | 3                                                           |
| 90              | Guinea  | 1999           | Sugar, Refined Equivalent | 28                                                          |
| 90              | Guinea  | 1999           | Sweet Potatoes            | 44                                                          |
| 90              | Guinea  | 1999           | Tomatoes                  | 6                                                           |
| 90              | Guinea  | 1999           | Vegetables, Other         | 149                                                         |
| 90              | Guinea  | 1999           | Wheat                     | 38                                                          |
| 90              | Guinea  | 1999           | Yams                      | 24                                                          |
| 90              | Guinea  | 2000           | Bananas                   | 40                                                          |
| 90              | Guinea  | 2000           | Beer                      | 4                                                           |
| 90              | Guinea  | 2000           | Bovine Meat               | 10                                                          |
| 90              | Guinea  | 2000           | Cassava                   | 238                                                         |
| 90              | Guinea  | 2000           | Cereals, Other            | 31                                                          |
| 90              | Guinea  | 2000           | Citrus, Other             | 59                                                          |
| 90              | Guinea  | 2000           | Coconuts - Incl Copra     | 4                                                           |
| 90              | Guinea  | 2000           | Coffee                    | 2                                                           |



Dietary calcium and zinc deficiency risks are decreasing but remain prevalent

| FAO countrycode | Country | Reference year | Food item                 | Gross food supply (g capita <sup>-1</sup> d <sup>-1</sup> ) |
|-----------------|---------|----------------|---------------------------|-------------------------------------------------------------|
| 90              | Guinea  | 2000           | Demersal Fish             | 6                                                           |
| 90              | Guinea  | 2000           | Eggs                      | 3                                                           |
| 90              | Guinea  | 2000           | Freshwater Fish           | 1                                                           |
| 90              | Guinea  | 2000           | Fruits, Other             | 32                                                          |
| 90              | Guinea  | 2000           | Groundnut Oil             | 15                                                          |
| 90              | Guinea  | 2000           | Groundnuts (Shelled Eq)   | 8                                                           |
| 90              | Guinea  | 2000           | Maize                     | 28                                                          |
| 90              | Guinea  | 2000           | Marine Fish, Other        | 6                                                           |
| 90              | Guinea  | 2000           | Meat, Other               | 2                                                           |
| 90              | Guinea  | 2000           | Milk, Whole               | 35                                                          |
| 90              | Guinea  | 2000           | Millet                    | 2                                                           |
| 90              | Guinea  | 2000           | Mutton & Goat Meat        | 2                                                           |
| 90              | Guinea  | 2000           | Offals, Edible            | 2                                                           |
| 90              | Guinea  | 2000           | Oilcrops Oil, Other       | 1                                                           |
| 90              | Guinea  | 2000           | Onions                    | 3                                                           |
| 90              | Guinea  | 2000           | Palm Oil                  | 13                                                          |
| 90              | Guinea  | 2000           | Palmkernel Oil            | 2                                                           |
| 90              | Guinea  | 2000           | Peas                      | 1                                                           |
| 90              | Guinea  | 2000           | Pelagic Fish              | 16                                                          |
| 90              | Guinea  | 2000           | Pigmeat                   | 1                                                           |
| 90              | Guinea  | 2000           | Pineapples                | 21                                                          |
| 90              | Guinea  | 2000           | Plantains                 | 114                                                         |
| 90              | Guinea  | 2000           | Poultry Meat              | 2                                                           |
| 90              | Guinea  | 2000           | Pulses, Other             | 15                                                          |
| 90              | Guinea  | 2000           | Rice (Milled Equivalent)  | 238                                                         |
| 90              | Guinea  | 2000           | Roots, Other              | 7                                                           |
| 90              | Guinea  | 2000           | Sorghum                   | 1                                                           |
| 90              | Guinea  | 2000           | Soyabean Oil              | 5                                                           |
| 90              | Guinea  | 2000           | Sugar, Refined Equivalent | 28                                                          |
| 90              | Guinea  | 2000           | Sweet Potatoes            | 45                                                          |
| 90              | Guinea  | 2000           | Tomatoes                  | 6                                                           |
| 90              | Guinea  | 2000           | Vegetables, Other         | 152                                                         |
| 90              | Guinea  | 2000           | Wheat                     | 36                                                          |
| 90              | Guinea  | 2000           | Yams                      | 23                                                          |
| 90              | Guinea  | 2001           | Bananas                   | 41                                                          |
| 90              | Guinea  | 2001           | Beer                      | 3                                                           |
| 90              | Guinea  | 2001           | Bovine Meat               | 10                                                          |
| 90              | Guinea  | 2001           | Cassava                   | 231                                                         |
| 90              | Guinea  | 2001           | Cereals, Other            | 30                                                          |
| 90              | Guinea  | 2001           | Citrus, Other             | 60                                                          |
| 90              | Guinea  | 2001           | Coconuts - Incl Copra     | 3                                                           |
| 90              | Guinea  | 2001           | Coffee                    | 2                                                           |
| 90              | Guinea  | 2001           | Demersal Fish             | 6                                                           |
| 90              | Guinea  | 2001           | Eggs                      | 3                                                           |
| 90              | Guinea  | 2001           | Freshwater Fish           | 1                                                           |
| 90              | Guinea  | 2001           | Fruits, Other             | 41                                                          |
| 90              | Guinea  | 2001           | Groundnut Oil             | 15                                                          |
| 90              | Guinea  | 2001           | Groundnuts (Shelled Eq)   | 8                                                           |
| 90              | Guinea  | 2001           | Maize                     | 26                                                          |
| 90              | Guinea  | 2001           | Marine Fish, Other        | 6                                                           |
| 90              | Guinea  | 2001           | Meat, Other               | 2                                                           |
| 90              | Guinea  | 2001           | Milk, Whole               | 28                                                          |
| 90              | Guinea  | 2001           | Millet                    | 2                                                           |
| 90              | Guinea  | 2001           | Mutton & Goat Meat        | 3                                                           |
| 90              | Guinea  | 2001           | Offals, Edible            | 2                                                           |
| 90              | Guinea  | 2001           | Oilcrops Oil, Other       | 1                                                           |
| 90              | Guinea  | 2001           | Onions                    | 3                                                           |
| 90              | Guinea  | 2001           | Palm Oil                  | 13                                                          |
| 90              | Guinea  | 2001           | Palmkernel Oil            | 2                                                           |
| 90              | Guinea  | 2001           | Pelagic Fish              | 18                                                          |
| 90              | Guinea  | 2001           | Pigmeat                   | 1                                                           |
| 90              | Guinea  | 2001           | Pineapples                | 24                                                          |
| 90              | Guinea  | 2001           | Plantains                 | 115                                                         |
| 90              | Guinea  | 2001           | Poultry Meat              | 2                                                           |
| 90              | Guinea  | 2001           | Pulses, Other             | 17                                                          |
| 90              | Guinea  | 2001           | Rice (Milled Equivalent)  | 246                                                         |
| 90              | Guinea  | 2001           | Roots, Other              | 7                                                           |
| 90              | Guinea  | 2001           | Sorghum                   | 1                                                           |
| 90              | Guinea  | 2001           | Soyabean Oil              | 2                                                           |
| 90              | Guinea  | 2001           | Sugar, Refined Equivalent | 26                                                          |
| 90              | Guinea  | 2001           | Sweet Potatoes            | 45                                                          |
| 90              | Guinea  | 2001           | Sweeteners, Other         | 1                                                           |
| 90              | Guinea  | 2001           | Tomatoes                  | 5                                                           |
| 90              | Guinea  | 2001           | Vegetables, Other         | 151                                                         |
| 90              | Guinea  | 2001           | Wheat                     | 29                                                          |
| 90              | Guinea  | 2001           | Yams                      | 24                                                          |
| 90              | Guinea  | 2002           | Bananas                   | 41                                                          |
| 90              | Guinea  | 2002           | Beer                      | 3                                                           |
| 90              | Guinea  | 2002           | Bovine Meat               | 11                                                          |
| 90              | Guinea  | 2002           | Cassava                   | 239                                                         |
| 90              | Guinea  | 2002           | Cereals, Other            | 31                                                          |
| 90              | Guinea  | 2002           | Citrus, Other             | 60                                                          |
| 90              | Guinea  | 2002           | Coconuts - Incl Copra     | 3                                                           |
| 90              | Guinea  | 2002           | Coffee                    | 2                                                           |
| 90              | Guinea  | 2002           | Demersal Fish             | 7                                                           |
| 90              | Guinea  | 2002           | Eggs                      | 4                                                           |
| 90              | Guinea  | 2002           | Freshwater Fish           | 1                                                           |
| 90              | Guinea  | 2002           | Fruits, Other             | 50                                                          |
| 90              | Guinea  | 2002           | Groundnut Oil             | 16                                                          |
| 90              | Guinea  | 2002           | Groundnuts (Shelled Eq)   | 9                                                           |
| 90              | Guinea  | 2002           | Maize                     | 24                                                          |
| 90              | Guinea  | 2002           | Marine Fish, Other        | 4                                                           |
| 90              | Guinea  | 2002           | Meat, Other               | 2                                                           |
| 90              | Guinea  | 2002           | Milk, Whole               | 28                                                          |
| 90              | Guinea  | 2002           | Millet                    | 2                                                           |
| 90              | Guinea  | 2002           | Mutton & Goat Meat        | 3                                                           |
| 90              | Guinea  | 2002           | Offals, Edible            | 2                                                           |

Dietary calcium and zinc deficiency risks are decreasing but remain prevalent

| FAO countrycode | Country | Reference year | Food item                 | Gross food supply (g capita <sup>-1</sup> d <sup>-1</sup> ) |
|-----------------|---------|----------------|---------------------------|-------------------------------------------------------------|
| 90              | Guinea  | 2002           | Oilcrops Oil, Other       | 1                                                           |
| 90              | Guinea  | 2002           | Onions                    | 4                                                           |
| 90              | Guinea  | 2002           | Palm Oil                  | 13                                                          |
| 90              | Guinea  | 2002           | Palmkernel Oil            | 1                                                           |
| 90              | Guinea  | 2002           | Peas                      | 1                                                           |
| 90              | Guinea  | 2002           | Pelagic Fish              | 15                                                          |
| 90              | Guinea  | 2002           | Pigmeat                   | 1                                                           |
| 90              | Guinea  | 2002           | Pineapples                | 28                                                          |
| 90              | Guinea  | 2002           | Plantains                 | 119                                                         |
| 90              | Guinea  | 2002           | Poultry Meat              | 2                                                           |
| 90              | Guinea  | 2002           | Pulses, Other             | 20                                                          |
| 90              | Guinea  | 2002           | Rice (Milled Equivalent)  | 245                                                         |
| 90              | Guinea  | 2002           | Roots, Other              | 8                                                           |
| 90              | Guinea  | 2002           | Sorghum                   | 1                                                           |
| 90              | Guinea  | 2002           | Soyabean Oil              | 2                                                           |
| 90              | Guinea  | 2002           | Sugar, Refined Equivalent | 25                                                          |
| 90              | Guinea  | 2002           | Sweet Potatoes            | 46                                                          |
| 90              | Guinea  | 2002           | Sweeteners, Other         | 1                                                           |
| 90              | Guinea  | 2002           | Tomatoes                  | 7                                                           |
| 90              | Guinea  | 2002           | Vegetables, Other         | 148                                                         |
| 90              | Guinea  | 2002           | Wheat                     | 28                                                          |
| 90              | Guinea  | 2002           | Yams                      | 11                                                          |
| 90              | Guinea  | 2003           | Bananas                   | 41                                                          |
| 90              | Guinea  | 2003           | Beer                      | 5                                                           |
| 90              | Guinea  | 2003           | Bovine Meat               | 11                                                          |
| 90              | Guinea  | 2003           | Cassava                   | 246                                                         |
| 90              | Guinea  | 2003           | Cereals, Other            | 35                                                          |
| 90              | Guinea  | 2003           | Citrus, Other             | 61                                                          |
| 90              | Guinea  | 2003           | Coconuts - Incl Copra     | 4                                                           |
| 90              | Guinea  | 2003           | Coffee                    | 3                                                           |
| 90              | Guinea  | 2003           | Demersal Fish             | 9                                                           |
| 90              | Guinea  | 2003           | Eggs                      | 4                                                           |
| 90              | Guinea  | 2003           | Freshwater Fish           | 2                                                           |
| 90              | Guinea  | 2003           | Fruits, Other             | 50                                                          |
| 90              | Guinea  | 2003           | Groundnut Oil             | 16                                                          |
| 90              | Guinea  | 2003           | Groundnuts (Shelled Eq)   | 9                                                           |
| 90              | Guinea  | 2003           | Maize                     | 26                                                          |
| 90              | Guinea  | 2003           | Marine Fish, Other        | 7                                                           |
| 90              | Guinea  | 2003           | Meat, Other               | 2                                                           |
| 90              | Guinea  | 2003           | Milk, Whole               | 30                                                          |
| 90              | Guinea  | 2003           | Millet                    | 2                                                           |
| 90              | Guinea  | 2003           | Mutton & Goat Meat        | 3                                                           |
| 90              | Guinea  | 2003           | Offals, Edible            | 3                                                           |
| 90              | Guinea  | 2003           | Oilcrops Oil, Other       | 1                                                           |
| 90              | Guinea  | 2003           | Onions                    | 2                                                           |
| 90              | Guinea  | 2003           | Palm Oil                  | 15                                                          |
| 90              | Guinea  | 2003           | Palmkernel Oil            | 1                                                           |
| 90              | Guinea  | 2003           | Pelagic Fish              | 17                                                          |
| 90              | Guinea  | 2003           | Pigmeat                   | 1                                                           |
| 90              | Guinea  | 2003           | Pineapples                | 29                                                          |
| 90              | Guinea  | 2003           | Plantains                 | 120                                                         |
| 90              | Guinea  | 2003           | Potatoes                  | 3                                                           |
| 90              | Guinea  | 2003           | Poultry Meat              | 2                                                           |
| 90              | Guinea  | 2003           | Pulses, Other             | 17                                                          |
| 90              | Guinea  | 2003           | Rice (Milled Equivalent)  | 232                                                         |
| 90              | Guinea  | 2003           | Roots, Other              | 8                                                           |
| 90              | Guinea  | 2003           | Sorghum                   | 1                                                           |
| 90              | Guinea  | 2003           | Soyabean Oil              | 3                                                           |
| 90              | Guinea  | 2003           | Sugar, Refined Equivalent | 28                                                          |
| 90              | Guinea  | 2003           | Sweet Potatoes            | 46                                                          |
| 90              | Guinea  | 2003           | Sweeteners, Other         | 1                                                           |
| 90              | Guinea  | 2003           | Tomatoes                  | 7                                                           |
| 90              | Guinea  | 2003           | Vegetables, Other         | 155                                                         |
| 90              | Guinea  | 2003           | Wheat                     | 34                                                          |
| 90              | Guinea  | 2003           | Yams                      | 6                                                           |
| 90              | Guinea  | 2004           | Bananas                   | 40                                                          |
| 90              | Guinea  | 2004           | Beer                      | 3                                                           |
| 90              | Guinea  | 2004           | Beverages, Alcoholic      | 1                                                           |
| 90              | Guinea  | 2004           | Bovine Meat               | 12                                                          |
| 90              | Guinea  | 2004           | Cassava                   | 254                                                         |
| 90              | Guinea  | 2004           | Cereals, Other            | 31                                                          |
| 90              | Guinea  | 2004           | Citrus, Other             | 61                                                          |
| 90              | Guinea  | 2004           | Coconuts - Incl Copra     | 4                                                           |
| 90              | Guinea  | 2004           | Coffee                    | 3                                                           |
| 90              | Guinea  | 2004           | Demersal Fish             | 6                                                           |
| 90              | Guinea  | 2004           | Eggs                      | 4                                                           |
| 90              | Guinea  | 2004           | Freshwater Fish           | 2                                                           |
| 90              | Guinea  | 2004           | Fruits, Other             | 50                                                          |
| 90              | Guinea  | 2004           | Groundnut Oil             | 17                                                          |
| 90              | Guinea  | 2004           | Groundnuts (Shelled Eq)   | 10                                                          |
| 90              | Guinea  | 2004           | Maize                     | 25                                                          |
| 90              | Guinea  | 2004           | Marine Fish, Other        | 8                                                           |
| 90              | Guinea  | 2004           | Meat, Other               | 2                                                           |
| 90              | Guinea  | 2004           | Milk, Whole               | 30                                                          |
| 90              | Guinea  | 2004           | Millet                    | 2                                                           |
| 90              | Guinea  | 2004           | Mutton & Goat Meat        | 3                                                           |
| 90              | Guinea  | 2004           | Offals, Edible            | 3                                                           |
| 90              | Guinea  | 2004           | Oilcrops Oil, Other       | 2                                                           |
| 90              | Guinea  | 2004           | Onions                    | 4                                                           |
| 90              | Guinea  | 2004           | Palm Oil                  | 17                                                          |
| 90              | Guinea  | 2004           | Palmkernel Oil            | 1                                                           |
| 90              | Guinea  | 2004           | Pelagic Fish              | 11                                                          |
| 90              | Guinea  | 2004           | Pigmeat                   | 1                                                           |
| 90              | Guinea  | 2004           | Pineapples                | 29                                                          |
| 90              | Guinea  | 2004           | Plantains                 | 122                                                         |
| 90              | Guinea  | 2004           | Potatoes                  | 3                                                           |
| 90              | Guinea  | 2004           | Poultry Meat              | 2                                                           |

Dietary calcium and zinc deficiency risks are decreasing but remain prevalent

| FAO countrycode | Country | Reference year | Food item                 | Gross food supply (g capita <sup>-1</sup> d <sup>-1</sup> ) |
|-----------------|---------|----------------|---------------------------|-------------------------------------------------------------|
| 90              | Guinea  | 2004           | Pulses, Other             | 21                                                          |
| 90              | Guinea  | 2004           | Rice (Milled Equivalent)  | 227                                                         |
| 90              | Guinea  | 2004           | Roots, Other              | 8                                                           |
| 90              | Guinea  | 2004           | Sorghum                   | 1                                                           |
| 90              | Guinea  | 2004           | Soyabean Oil              | 2                                                           |
| 90              | Guinea  | 2004           | Sugar, Refined Equivalent | 29                                                          |
| 90              | Guinea  | 2004           | Sweet Potatoes            | 46                                                          |
| 90              | Guinea  | 2004           | Tomatoes                  | 8                                                           |
| 90              | Guinea  | 2004           | Vegetables, Other         | 159                                                         |
| 90              | Guinea  | 2004           | Wheat                     | 34                                                          |
| 90              | Guinea  | 2004           | Yams                      | 6                                                           |
| 90              | Guinea  | 2005           | Bananas                   | 35                                                          |
| 90              | Guinea  | 2005           | Beer                      | 4                                                           |
| 90              | Guinea  | 2005           | Bovine Meat               | 12                                                          |
| 90              | Guinea  | 2005           | Cassava                   | 261                                                         |
| 90              | Guinea  | 2005           | Cereals, Other            | 31                                                          |
| 90              | Guinea  | 2005           | Citrus, Other             | 55                                                          |
| 90              | Guinea  | 2005           | Coconuts - Incl Copra     | 4                                                           |
| 90              | Guinea  | 2005           | Coffee                    | 2                                                           |
| 90              | Guinea  | 2005           | Demersal Fish             | 10                                                          |
| 90              | Guinea  | 2005           | Eggs                      | 5                                                           |
| 90              | Guinea  | 2005           | Freshwater Fish           | 1                                                           |
| 90              | Guinea  | 2005           | Fruits, Other             | 50                                                          |
| 90              | Guinea  | 2005           | Groundnut Oil             | 18                                                          |
| 90              | Guinea  | 2005           | Groundnuts (Shelled Eq)   | 10                                                          |
| 90              | Guinea  | 2005           | Maize                     | 27                                                          |
| 90              | Guinea  | 2005           | Marine Fish, Other        | 11                                                          |
| 90              | Guinea  | 2005           | Meat, Other               | 2                                                           |
| 90              | Guinea  | 2005           | Milk, Whole               | 32                                                          |
| 90              | Guinea  | 2005           | Millet                    | 3                                                           |
| 90              | Guinea  | 2005           | Mutton & Goat Meat        | 3                                                           |
| 90              | Guinea  | 2005           | Offals, Edible            | 3                                                           |
| 90              | Guinea  | 2005           | Oilcrops Oil, Other       | 2                                                           |
| 90              | Guinea  | 2005           | Onions                    | 7                                                           |
| 90              | Guinea  | 2005           | Palm Oil                  | 16                                                          |
| 90              | Guinea  | 2005           | Palmkernel Oil            | 1                                                           |
| 90              | Guinea  | 2005           | Peas                      | 1                                                           |
| 90              | Guinea  | 2005           | Pelagic Fish              | 5                                                           |
| 90              | Guinea  | 2005           | Pigmeat                   | 1                                                           |
| 90              | Guinea  | 2005           | Pineapples                | 28                                                          |
| 90              | Guinea  | 2005           | Plantains                 | 132                                                         |
| 90              | Guinea  | 2005           | Potatoes                  | 3                                                           |
| 90              | Guinea  | 2005           | Poultry Meat              | 2                                                           |
| 90              | Guinea  | 2005           | Pulses, Other             | 16                                                          |
| 90              | Guinea  | 2005           | Rice (Milled Equivalent)  | 232                                                         |
| 90              | Guinea  | 2005           | Roots, Other              | 6                                                           |
| 90              | Guinea  | 2005           | Sorghum                   | 1                                                           |
| 90              | Guinea  | 2005           | Soyabean Oil              | 1                                                           |
| 90              | Guinea  | 2005           | Sugar, Refined Equivalent | 32                                                          |
| 90              | Guinea  | 2005           | Sweet Potatoes            | 46                                                          |
| 90              | Guinea  | 2005           | Sweeteners, Other         | 1                                                           |
| 90              | Guinea  | 2005           | Tomatoes                  | 11                                                          |
| 90              | Guinea  | 2005           | Vegetables, Other         | 153                                                         |
| 90              | Guinea  | 2005           | Wheat                     | 35                                                          |
| 90              | Guinea  | 2005           | Yams                      | 6                                                           |
| 90              | Guinea  | 2006           | Bananas                   | 35                                                          |
| 90              | Guinea  | 2006           | Beer                      | 5                                                           |
| 90              | Guinea  | 2006           | Bovine Meat               | 13                                                          |
| 90              | Guinea  | 2006           | Cassava                   | 268                                                         |
| 90              | Guinea  | 2006           | Cereals, Other            | 31                                                          |
| 90              | Guinea  | 2006           | Citrus, Other             | 56                                                          |
| 90              | Guinea  | 2006           | Coconuts - Incl Copra     | 6                                                           |
| 90              | Guinea  | 2006           | Coffee                    | 2                                                           |
| 90              | Guinea  | 2006           | Demersal Fish             | 8                                                           |
| 90              | Guinea  | 2006           | Eggs                      | 5                                                           |
| 90              | Guinea  | 2006           | Fats, Animals, Raw        | 1                                                           |
| 90              | Guinea  | 2006           | Freshwater Fish           | 1                                                           |
| 90              | Guinea  | 2006           | Fruits, Other             | 48                                                          |
| 90              | Guinea  | 2006           | Groundnut Oil             | 19                                                          |
| 90              | Guinea  | 2006           | Groundnuts (Shelled Eq)   | 11                                                          |
| 90              | Guinea  | 2006           | Maize                     | 27                                                          |
| 90              | Guinea  | 2006           | Marine Fish, Other        | 9                                                           |
| 90              | Guinea  | 2006           | Meat, Other               | 1                                                           |
| 90              | Guinea  | 2006           | Milk, Whole               | 37                                                          |
| 90              | Guinea  | 2006           | Millet                    | 3                                                           |
| 90              | Guinea  | 2006           | Mutton & Goat Meat        | 4                                                           |
| 90              | Guinea  | 2006           | Offals, Edible            | 3                                                           |
| 90              | Guinea  | 2006           | Oilcrops Oil, Other       | 2                                                           |
| 90              | Guinea  | 2006           | Onions                    | 7                                                           |
| 90              | Guinea  | 2006           | Palm Oil                  | 14                                                          |
| 90              | Guinea  | 2006           | Palmkernel Oil            | 1                                                           |
| 90              | Guinea  | 2006           | Pelagic Fish              | 7                                                           |
| 90              | Guinea  | 2006           | Pigmeat                   | 1                                                           |
| 90              | Guinea  | 2006           | Pineapples                | 27                                                          |
| 90              | Guinea  | 2006           | Plantains                 | 103                                                         |
| 90              | Guinea  | 2006           | Potatoes                  | 3                                                           |
| 90              | Guinea  | 2006           | Poultry Meat              | 3                                                           |
| 90              | Guinea  | 2006           | Pulses, Other             | 15                                                          |
| 90              | Guinea  | 2006           | Rice (Milled Equivalent)  | 254                                                         |
| 90              | Guinea  | 2006           | Roots, Other              | 7                                                           |
| 90              | Guinea  | 2006           | Sorghum                   | 1                                                           |
| 90              | Guinea  | 2006           | Soyabean Oil              | 2                                                           |
| 90              | Guinea  | 2006           | Sugar, Refined Equivalent | 32                                                          |
| 90              | Guinea  | 2006           | Sweet Potatoes            | 46                                                          |
| 90              | Guinea  | 2006           | Sweeteners, Other         | 1                                                           |
| 90              | Guinea  | 2006           | Tomatoes                  | 7                                                           |
| 90              | Guinea  | 2006           | Vegetables, Other         | 128                                                         |

Dietary calcium and zinc deficiency risks are decreasing but remain prevalent

| FAO countrycode | Country | Reference year | Food item                 | Gross food supply (g capita <sup>-1</sup> d <sup>-1</sup> ) |
|-----------------|---------|----------------|---------------------------|-------------------------------------------------------------|
| 90              | Guinea  | 2006           | Wheat                     | 33                                                          |
| 90              | Guinea  | 2006           | Yams                      | 6                                                           |
| 90              | Guinea  | 2007           | Bananas                   | 35                                                          |
| 90              | Guinea  | 2007           | Beer                      | 5                                                           |
| 90              | Guinea  | 2007           | Bovine Meat               | 13                                                          |
| 90              | Guinea  | 2007           | Cassava                   | 275                                                         |
| 90              | Guinea  | 2007           | Cereals, Other            | 31                                                          |
| 90              | Guinea  | 2007           | Citrus, Other             | 54                                                          |
| 90              | Guinea  | 2007           | Coconuts - Incl Copra     | 6                                                           |
| 90              | Guinea  | 2007           | Coffee                    | 2                                                           |
| 90              | Guinea  | 2007           | Demersal Fish             | 5                                                           |
| 90              | Guinea  | 2007           | Eggs                      | 5                                                           |
| 90              | Guinea  | 2007           | Fats, Animals, Raw        | 1                                                           |
| 90              | Guinea  | 2007           | Freshwater Fish           | 2                                                           |
| 90              | Guinea  | 2007           | Fruits, Other             | 48                                                          |
| 90              | Guinea  | 2007           | Groundnut Oil             | 19                                                          |
| 90              | Guinea  | 2007           | Groundnuts (Shelled Eq)   | 10                                                          |
| 90              | Guinea  | 2007           | Maize                     | 27                                                          |
| 90              | Guinea  | 2007           | Marine Fish, Other        | 4                                                           |
| 90              | Guinea  | 2007           | Meat, Other               | 1                                                           |
| 90              | Guinea  | 2007           | Milk, Whole               | 36                                                          |
| 90              | Guinea  | 2007           | Millet                    | 3                                                           |
| 90              | Guinea  | 2007           | Mutton & Goat Meat        | 4                                                           |
| 90              | Guinea  | 2007           | Offals, Edible            | 3                                                           |
| 90              | Guinea  | 2007           | Oilcrops Oil, Other       | 1                                                           |
| 90              | Guinea  | 2007           | Onions                    | 4                                                           |
| 90              | Guinea  | 2007           | Palm Oil                  | 15                                                          |
| 90              | Guinea  | 2007           | Palmkernel Oil            | 1                                                           |
| 90              | Guinea  | 2007           | Pelagic Fish              | 9                                                           |
| 90              | Guinea  | 2007           | Pigmeat                   | 1                                                           |
| 90              | Guinea  | 2007           | Pineapples                | 27                                                          |
| 90              | Guinea  | 2007           | Plantains                 | 101                                                         |
| 90              | Guinea  | 2007           | Potatoes                  | 3                                                           |
| 90              | Guinea  | 2007           | Poultry Meat              | 3                                                           |
| 90              | Guinea  | 2007           | Pulses, Other             | 15                                                          |
| 90              | Guinea  | 2007           | Rice (Milled Eq uivalent) | 255                                                         |
| 90              | Guinea  | 2007           | Roots, Other              | 7                                                           |
| 90              | Guinea  | 2007           | Sorghum                   | 1                                                           |
| 90              | Guinea  | 2007           | Soyabean Oil              | 1                                                           |
| 90              | Guinea  | 2007           | Sugar, Refined Equivalent | 32                                                          |
| 90              | Guinea  | 2007           | Sweet Potatoes            | 46                                                          |
| 90              | Guinea  | 2007           | Sweeteners, Other         | 1                                                           |
| 90              | Guinea  | 2007           | Tomatoes                  | 9                                                           |
| 90              | Guinea  | 2007           | Vegetables, Other         | 129                                                         |
| 90              | Guinea  | 2007           | Wheat                     | 33                                                          |
| 90              | Guinea  | 2007           | Yams                      | 6                                                           |
| 90              | Guinea  | 2008           | Bananas                   | 34                                                          |
| 90              | Guinea  | 2008           | Beer                      | 5                                                           |
| 90              | Guinea  | 2008           | Bovine Meat               | 13                                                          |
| 90              | Guinea  | 2008           | Cassava                   | 251                                                         |
| 90              | Guinea  | 2008           | Cereals, Other            | 30                                                          |
| 90              | Guinea  | 2008           | Citrus, Other             | 53                                                          |
| 90              | Guinea  | 2008           | Cocoa Beans               | 1                                                           |
| 90              | Guinea  | 2008           | Coconuts - Incl Copra     | 6                                                           |
| 90              | Guinea  | 2008           | Coffee                    | 5                                                           |
| 90              | Guinea  | 2008           | Demersal Fish             | 6                                                           |
| 90              | Guinea  | 2008           | Eggs                      | 5                                                           |
| 90              | Guinea  | 2008           | Fats, Animals, Raw        | 1                                                           |
| 90              | Guinea  | 2008           | Freshwater Fish           | 3                                                           |
| 90              | Guinea  | 2008           | Fruits, Other             | 47                                                          |
| 90              | Guinea  | 2008           | Groundnut Oil             | 19                                                          |
| 90              | Guinea  | 2008           | Groundnuts (Shelled Eq)   | 10                                                          |
| 90              | Guinea  | 2008           | Maize                     | 26                                                          |
| 90              | Guinea  | 2008           | Marine Fish, Other        | 4                                                           |
| 90              | Guinea  | 2008           | Meat, Other               | 1                                                           |
| 90              | Guinea  | 2008           | Milk, Whole               | 31                                                          |
| 90              | Guinea  | 2008           | Millet                    | 3                                                           |
| 90              | Guinea  | 2008           | Mutton & Goat Meat        | 4                                                           |
| 90              | Guinea  | 2008           | Offals, Edible            | 3                                                           |
| 90              | Guinea  | 2008           | Oilcrops Oil, Other       | 1                                                           |
| 90              | Guinea  | 2008           | Onions                    | 6                                                           |
| 90              | Guinea  | 2008           | Palm Oil                  | 15                                                          |
| 90              | Guinea  | 2008           | Palmkernel Oil            | 1                                                           |
| 90              | Guinea  | 2008           | Pelagic Fish              | 10                                                          |
| 90              | Guinea  | 2008           | Pineapples                | 27                                                          |
| 90              | Guinea  | 2008           | Plantains                 | 102                                                         |
| 90              | Guinea  | 2008           | Potatoes                  | 3                                                           |
| 90              | Guinea  | 2008           | Poultry Meat              | 3                                                           |
| 90              | Guinea  | 2008           | Pulses, Other             | 14                                                          |
| 90              | Guinea  | 2008           | Rice (Milled Equivalent)  | 274                                                         |
| 90              | Guinea  | 2008           | Roots, Other              | 7                                                           |
| 90              | Guinea  | 2008           | Sorghum                   | 1                                                           |
| 90              | Guinea  | 2008           | Soyabean Oil              | 1                                                           |
| 90              | Guinea  | 2008           | Sugar, Refined Equivalent | 33                                                          |
| 90              | Guinea  | 2008           | Sweet Potatoes            | 46                                                          |
| 90              | Guinea  | 2008           | Sweeteners, Other         | 1                                                           |
| 90              | Guinea  | 2008           | Tea                       | 1                                                           |
| 90              | Guinea  | 2008           | Tomatoes                  | 5                                                           |
| 90              | Guinea  | 2008           | Vegetables, Other         | 127                                                         |
| 90              | Guinea  | 2008           | Wheat                     | 34                                                          |
| 90              | Guinea  | 2008           | Yams                      | 6                                                           |
| 90              | Guinea  | 2009           | Bananas                   | 37                                                          |
| 90              | Guinea  | 2009           | Beer                      | 4                                                           |
| 90              | Guinea  | 2009           | Bovine Meat               | 14                                                          |
| 90              | Guinea  | 2009           | Cassava                   | 244                                                         |
| 90              | Guinea  | 2009           | Cereals, Other            | 30                                                          |
| 90              | Guinea  | 2009           | Citrus, Other             | 57                                                          |

## Dietary calcium and zinc deficiency risks are decreasing but remain prevalent

| FAO countrycode | Country | Reference year | Food item                 | Gross food supply (g capita <sup>-1</sup> d <sup>-1</sup> ) |
|-----------------|---------|----------------|---------------------------|-------------------------------------------------------------|
| 90              | Guinea  | 2009           | Cocoa Beans               | 1                                                           |
| 90              | Guinea  | 2009           | Coconuts - Incl Copra     | 5                                                           |
| 90              | Guinea  | 2009           | Coffee                    | 5                                                           |
| 90              | Guinea  | 2009           | Demersal Fish             | 9                                                           |
| 90              | Guinea  | 2009           | Eggs                      | 5                                                           |
| 90              | Guinea  | 2009           | Fats, Animals, Raw        | 1                                                           |
| 90              | Guinea  | 2009           | Freshwater Fish           | 4                                                           |
| 90              | Guinea  | 2009           | Fruits, Other             | 46                                                          |
| 90              | Guinea  | 2009           | Groundnut Oil             | 18                                                          |
| 90              | Guinea  | 2009           | Groundnuts (Shelled Eq)   | 10                                                          |
| 90              | Guinea  | 2009           | Maize                     | 26                                                          |
| 90              | Guinea  | 2009           | Marine Fish, Other        | 4                                                           |
| 90              | Guinea  | 2009           | Meat, Other               | 1                                                           |
| 90              | Guinea  | 2009           | Milk, Whole               | 35                                                          |
| 90              | Guinea  | 2009           | Millet                    | 2                                                           |
| 90              | Guinea  | 2009           | Mutton & Goat Meat        | 4                                                           |
| 90              | Guinea  | 2009           | Offals, Edible            | 3                                                           |
| 90              | Guinea  | 2009           | Oilcrops Oil, Other       | 1                                                           |
| 90              | Guinea  | 2009           | Onions                    | 6                                                           |
| 90              | Guinea  | 2009           | Palm Oil                  | 16                                                          |
| 90              | Guinea  | 2009           | Palmkernel Oil            | 1                                                           |
| 90              | Guinea  | 2009           | Pelagic Fish              | 15                                                          |
| 90              | Guinea  | 2009           | Pigmeat                   | 1                                                           |
| 90              | Guinea  | 2009           | Pineapples                | 26                                                          |
| 90              | Guinea  | 2009           | Plantains                 | 106                                                         |
| 90              | Guinea  | 2009           | Potatoes                  | 3                                                           |
| 90              | Guinea  | 2009           | Poultry Meat              | 3                                                           |
| 90              | Guinea  | 2009           | Pulses, Other             | 14                                                          |
| 90              | Guinea  | 2009           | Rice (Milled Equivalent)  | 272                                                         |
| 90              | Guinea  | 2009           | Roots, Other              | 6                                                           |
| 90              | Guinea  | 2009           | Sorghum                   | 1                                                           |
| 90              | Guinea  | 2009           | Soyabean Oil              | 1                                                           |
| 90              | Guinea  | 2009           | Sugar, Refined Equivalent | 33                                                          |
| 90              | Guinea  | 2009           | Sweet Potatoes            | 45                                                          |
| 90              | Guinea  | 2009           | Sweeteners, Other         | 1                                                           |
| 90              | Guinea  | 2009           | Tea                       | 1                                                           |
| 90              | Guinea  | 2009           | Tomatoes                  | 5                                                           |
| 90              | Guinea  | 2009           | Vegetables, Other         | 126                                                         |
| 90              | Guinea  | 2009           | Wheat                     | 37                                                          |
| 90              | Guinea  | 2009           | Yams                      | 5                                                           |
| 90              | Guinea  | 2010           | Bananas                   | 41                                                          |
| 90              | Guinea  | 2010           | Beer                      | 3                                                           |
| 90              | Guinea  | 2010           | Bovine Meat               | 14                                                          |
| 90              | Guinea  | 2010           | Cassava                   | 249                                                         |
| 90              | Guinea  | 2010           | Cereals, Other            | 30                                                          |
| 90              | Guinea  | 2010           | Citrus, Other             | 54                                                          |
| 90              | Guinea  | 2010           | Cocoa Beans               | 1                                                           |
| 90              | Guinea  | 2010           | Coconuts - Incl Copra     | 4                                                           |
| 90              | Guinea  | 2010           | Coffee                    | 3                                                           |
| 90              | Guinea  | 2010           | Demersal Fish             | 7                                                           |
| 90              | Guinea  | 2010           | Eggs                      | 5                                                           |
| 90              | Guinea  | 2010           | Fats, Animals, Raw        | 1                                                           |
| 90              | Guinea  | 2010           | Freshwater Fish           | 4                                                           |
| 90              | Guinea  | 2010           | Fruits, Other             | 44                                                          |
| 90              | Guinea  | 2010           | Groundnut Oil             | 18                                                          |
| 90              | Guinea  | 2010           | Groundnuts (Shelled Eq)   | 10                                                          |
| 90              | Guinea  | 2010           | Maize                     | 26                                                          |
| 90              | Guinea  | 2010           | Marine Fish, Other        | 4                                                           |
| 90              | Guinea  | 2010           | Meat, Other               | 1                                                           |
| 90              | Guinea  | 2010           | Milk, Whole               | 43                                                          |
| 90              | Guinea  | 2010           | Millet                    | 2                                                           |
| 90              | Guinea  | 2010           | Mutton & Goat Meat        | 4                                                           |
| 90              | Guinea  | 2010           | Offals, Edible            | 3                                                           |
| 90              | Guinea  | 2010           | Oilcrops Oil, Other       | 1                                                           |
| 90              | Guinea  | 2010           | Onions                    | 9                                                           |
| 90              | Guinea  | 2010           | Palm Oil                  | 18                                                          |
| 90              | Guinea  | 2010           | Palmkernel Oil            | 1                                                           |
| 90              | Guinea  | 2010           | Pelagic Fish              | 12                                                          |
| 90              | Guinea  | 2010           | Pigmeat                   | 1                                                           |
| 90              | Guinea  | 2010           | Pineapples                | 25                                                          |
| 90              | Guinea  | 2010           | Plantains                 | 99                                                          |
| 90              | Guinea  | 2010           | Potatoes                  | 3                                                           |
| 90              | Guinea  | 2010           | Poultry Meat              | 4                                                           |
| 90              | Guinea  | 2010           | Pulses, Other             | 12                                                          |
| 90              | Guinea  | 2010           | Rice (Milled Equivalent)  | 265                                                         |
| 90              | Guinea  | 2010           | Roots, Other              | 6                                                           |
| 90              | Guinea  | 2010           | Sorghum                   | 1                                                           |
| 90              | Guinea  | 2010           | Soyabean Oil              | 1                                                           |
| 90              | Guinea  | 2010           | Sugar, Refined Equivalent | 34                                                          |
| 90              | Guinea  | 2010           | Sweet Potatoes            | 50                                                          |
| 90              | Guinea  | 2010           | Sweeteners, Other         | 1                                                           |
| 90              | Guinea  | 2010           | Tea                       | 1                                                           |
| 90              | Guinea  | 2010           | Tomatoes                  | 6                                                           |
| 90              | Guinea  | 2010           | Vegetables, Other         | 132                                                         |
| 90              | Guinea  | 2010           | Wheat                     | 42                                                          |
| 90              | Guinea  | 2010           | Yams                      | 5                                                           |
| 90              | Guinea  | 2011           | Bananas                   | 41                                                          |
| 90              | Guinea  | 2011           | Beer                      | 6                                                           |
| 90              | Guinea  | 2011           | Bovine Meat               | 13                                                          |
| 90              | Guinea  | 2011           | Cassava                   | 245                                                         |
| 90              | Guinea  | 2011           | Cereals, Other            | 30                                                          |
| 90              | Guinea  | 2011           | Citrus, Other             | 53                                                          |
| 90              | Guinea  | 2011           | Cocoa Beans               | 1                                                           |
| 90              | Guinea  | 2011           | Coconuts - Incl Copra     | 5                                                           |
| 90              | Guinea  | 2011           | Coffee                    | 4                                                           |
| 90              | Guinea  | 2011           | Demersal Fish             | 7                                                           |
| 90              | Guinea  | 2011           | Eggs                      | 5                                                           |

Dietary calcium and zinc deficiency risks are decreasing but remain prevalent

| FAO countrycode | Country       | Reference year | Food item                 | Gross food supply (g capita <sup>-1</sup> d <sup>-1</sup> ) |
|-----------------|---------------|----------------|---------------------------|-------------------------------------------------------------|
| 90              | Guinea        | 2011           | Fats, Animals, Raw        | 1                                                           |
| 90              | Guinea        | 2011           | Freshwater Fish           | 4                                                           |
| 90              | Guinea        | 2011           | Fruits, Other             | 43                                                          |
| 90              | Guinea        | 2011           | Groundnut Oil             | 17                                                          |
| 90              | Guinea        | 2011           | Groundnuts (Shelled Eq)   | 10                                                          |
| 90              | Guinea        | 2011           | Maize                     | 26                                                          |
| 90              | Guinea        | 2011           | Marine Fish, Other        | 4                                                           |
| 90              | Guinea        | 2011           | Meat, Other               | 1                                                           |
| 90              | Guinea        | 2011           | Milk, Whole               | 41                                                          |
| 90              | Guinea        | 2011           | Millet                    | 2                                                           |
| 90              | Guinea        | 2011           | Mutton & Goat Meat        | 4                                                           |
| 90              | Guinea        | 2011           | Offals, Edible            | 3                                                           |
| 90              | Guinea        | 2011           | Oilcrops Oil, Other       | 1                                                           |
| 90              | Guinea        | 2011           | Onions                    | 9                                                           |
| 90              | Guinea        | 2011           | Palm Oil                  | 20                                                          |
| 90              | Guinea        | 2011           | Palmkernel Oil            | 1                                                           |
| 90              | Guinea        | 2011           | Pelagic Fish              | 12                                                          |
| 90              | Guinea        | 2011           | Pigmeat                   | 1                                                           |
| 90              | Guinea        | 2011           | Pineapples                | 27                                                          |
| 90              | Guinea        | 2011           | Plantains                 | 97                                                          |
| 90              | Guinea        | 2011           | Potatoes                  | 3                                                           |
| 90              | Guinea        | 2011           | Poultry Meat              | 4                                                           |
| 90              | Guinea        | 2011           | Pulses, Other             | 12                                                          |
| 90              | Guinea        | 2011           | Rice (Milled Equivalent)  | 264                                                         |
| 90              | Guinea        | 2011           | Roots, Other              | 6                                                           |
| 90              | Guinea        | 2011           | Sorghum                   | 1                                                           |
| 90              | Guinea        | 2011           | Soyabean Oil              | 1                                                           |
| 90              | Guinea        | 2011           | Sugar, Refined Equivalent | 34                                                          |
| 90              | Guinea        | 2011           | Sweet Potatoes            | 47                                                          |
| 90              | Guinea        | 2011           | Sweeteners, Other         | 2                                                           |
| 90              | Guinea        | 2011           | Tea                       | 2                                                           |
| 90              | Guinea        | 2011           | Tomatoes                  | 6                                                           |
| 90              | Guinea        | 2011           | Vegetables, Other         | 128                                                         |
| 90              | Guinea        | 2011           | Wheat                     | 44                                                          |
| 90              | Guinea        | 2011           | Yams                      | 5                                                           |
| 175             | Guinea-Bissau | 1992           | Bananas                   | 12                                                          |
| 175             | Guinea-Bissau | 1992           | Beer                      | 10                                                          |
| 175             | Guinea-Bissau | 1992           | Beverages, Alcoholic      | 3                                                           |
| 175             | Guinea-Bissau | 1992           | Beverages, Fermented      | 44                                                          |
| 175             | Guinea-Bissau | 1992           | Bovine Meat               | 11                                                          |
| 175             | Guinea-Bissau | 1992           | Cassava                   | 38                                                          |
| 175             | Guinea-Bissau | 1992           | Cereals, Other            | 3                                                           |
| 175             | Guinea-Bissau | 1992           | Coconut Oil               | 1                                                           |
| 175             | Guinea-Bissau | 1992           | Coconuts - Incl Copra     | 7                                                           |
| 175             | Guinea-Bissau | 1992           | Crustaceans               | 2                                                           |
| 175             | Guinea-Bissau | 1992           | Demersal Fish             | 5                                                           |
| 175             | Guinea-Bissau | 1992           | Eggs                      | 1                                                           |
| 175             | Guinea-Bissau | 1992           | Fats, Animals, Raw        | 2                                                           |
| 175             | Guinea-Bissau | 1992           | Freshwater Fish           | 1                                                           |
| 175             | Guinea-Bissau | 1992           | Fruits, Other             | 46                                                          |
| 175             | Guinea-Bissau | 1992           | Groundnut Oil             | 8                                                           |
| 175             | Guinea-Bissau | 1992           | Groundnuts (Shelled Eq)   | 3                                                           |
| 175             | Guinea-Bissau | 1992           | Lemons, Limes             | 8                                                           |
| 175             | Guinea-Bissau | 1992           | Maize                     | 23                                                          |
| 175             | Guinea-Bissau | 1992           | Marine Fish, Other        | 4                                                           |
| 175             | Guinea-Bissau | 1992           | Milk, Whole               | 44                                                          |
| 175             | Guinea-Bissau | 1992           | Millet                    | 39                                                          |
| 175             | Guinea-Bissau | 1992           | Mutton & Goat Meat        | 3                                                           |
| 175             | Guinea-Bissau | 1992           | Nuts                      | 9                                                           |
| 175             | Guinea-Bissau | 1992           | Offals, Edible            | 4                                                           |
| 175             | Guinea-Bissau | 1992           | Oilcrops Oil, Other       | 12                                                          |
| 175             | Guinea-Bissau | 1992           | Onions                    | 1                                                           |
| 175             | Guinea-Bissau | 1992           | Oranges, Mandarines       | 13                                                          |
| 175             | Guinea-Bissau | 1992           | Palm Oil                  | 8                                                           |
| 175             | Guinea-Bissau | 1992           | Palmkernel Oil            | 5                                                           |
| 175             | Guinea-Bissau | 1992           | Pelagic Fish              | 2                                                           |
| 175             | Guinea-Bissau | 1992           | Pigmeat                   | 24                                                          |
| 175             | Guinea-Bissau | 1992           | Plantains                 | 66                                                          |
| 175             | Guinea-Bissau | 1992           | Potatoes                  | 1                                                           |
| 175             | Guinea-Bissau | 1992           | Poultry Meat              | 2                                                           |
| 175             | Guinea-Bissau | 1992           | Pulses, Other             | 5                                                           |
| 175             | Guinea-Bissau | 1992           | Rape and Mustard Oil      | 2                                                           |
| 175             | Guinea-Bissau | 1992           | Rice (Milled Equivalent)  | 311                                                         |
| 175             | Guinea-Bissau | 1992           | Roots, Other              | 127                                                         |
| 175             | Guinea-Bissau | 1992           | Sorghum                   | 22                                                          |
| 175             | Guinea-Bissau | 1992           | Soyabean Oil              | 4                                                           |
| 175             | Guinea-Bissau | 1992           | Sugar, Refined Equivalent | 4                                                           |
| 175             | Guinea-Bissau | 1992           | Tomatoes                  | 2                                                           |
| 175             | Guinea-Bissau | 1992           | Vegetables, Other         | 46                                                          |
| 175             | Guinea-Bissau | 1992           | Wheat                     | 12                                                          |
| 175             | Guinea-Bissau | 1992           | Wine                      | 7                                                           |
| 175             | Guinea-Bissau | 1993           | Bananas                   | 11                                                          |
| 175             | Guinea-Bissau | 1993           | Beer                      | 11                                                          |
| 175             | Guinea-Bissau | 1993           | Beverages, Alcoholic      | 3                                                           |
| 175             | Guinea-Bissau | 1993           | Beverages, Fermented      | 50                                                          |
| 175             | Guinea-Bissau | 1993           | Bovine Meat               | 11                                                          |
| 175             | Guinea-Bissau | 1993           | Cassava                   | 37                                                          |
| 175             | Guinea-Bissau | 1993           | Cereals, Other            | 5                                                           |
| 175             | Guinea-Bissau | 1993           | Coconut Oil               | 1                                                           |
| 175             | Guinea-Bissau | 1993           | Coconuts - Incl Copra     | 7                                                           |
| 175             | Guinea-Bissau | 1993           | Crustaceans               | 3                                                           |
| 175             | Guinea-Bissau | 1993           | Demersal Fish             | 3                                                           |
| 175             | Guinea-Bissau | 1993           | Eggs                      | 1                                                           |
| 175             | Guinea-Bissau | 1993           | Fats, Animals, Raw        | 2                                                           |
| 175             | Guinea-Bissau | 1993           | Freshwater Fish           | 1                                                           |
| 175             | Guinea-Bissau | 1993           | Fruits, Other             | 47                                                          |
| 175             | Guinea-Bissau | 1993           | Groundnut Oil             | 10                                                          |

## Dietary calcium and zinc deficiency risks are decreasing but remain prevalent

| FAO countrycode | Country       | Reference year | Food item                 | Gross food supply (g capita <sup>-1</sup> d <sup>-1</sup> ) |
|-----------------|---------------|----------------|---------------------------|-------------------------------------------------------------|
| 175             | Guinea-Bissau | 1993           | Groundnuts (Shelled Eq)   | 4                                                           |
| 175             | Guinea-Bissau | 1993           | Lemons, Limes             | 8                                                           |
| 175             | Guinea-Bissau | 1993           | Maize                     | 26                                                          |
| 175             | Guinea-Bissau | 1993           | Marine Fish, Other        | 4                                                           |
| 175             | Guinea-Bissau | 1993           | Milk, Whole               | 43                                                          |
| 175             | Guinea-Bissau | 1993           | Millet                    | 43                                                          |
| 175             | Guinea-Bissau | 1993           | Mutton & Goat Meat        | 3                                                           |
| 175             | Guinea-Bissau | 1993           | Nuts                      | 11                                                          |
| 175             | Guinea-Bissau | 1993           | Offals, Edible            | 4                                                           |
| 175             | Guinea-Bissau | 1993           | Oilcrops Oil, Other       | 3                                                           |
| 175             | Guinea-Bissau | 1993           | Oranges, Mandarines       | 13                                                          |
| 175             | Guinea-Bissau | 1993           | Palm Oil                  | 7                                                           |
| 175             | Guinea-Bissau | 1993           | Palmkernel Oil            | 6                                                           |
| 175             | Guinea-Bissau | 1993           | Pelagic Fish              | 2                                                           |
| 175             | Guinea-Bissau | 1993           | Pigmeat                   | 24                                                          |
| 175             | Guinea-Bissau | 1993           | Plantains                 | 66                                                          |
| 175             | Guinea-Bissau | 1993           | Potatoes                  | 1                                                           |
| 175             | Guinea-Bissau | 1993           | Poultry Meat              | 2                                                           |
| 175             | Guinea-Bissau | 1993           | Pulses, Other             | 5                                                           |
| 175             | Guinea-Bissau | 1993           | Rape and Mustard Oil      | 2                                                           |
| 175             | Guinea-Bissau | 1993           | Rice (Milled Equivalent)  | 296                                                         |
| 175             | Guinea-Bissau | 1993           | Roots, Other              | 127                                                         |
| 175             | Guinea-Bissau | 1993           | Sorghum                   | 27                                                          |
| 175             | Guinea-Bissau | 1993           | Soyabean Oil              | 4                                                           |
| 175             | Guinea-Bissau | 1993           | Sugar, Refined Equivalent | 4                                                           |
| 175             | Guinea-Bissau | 1993           | Tomatoes                  | 2                                                           |
| 175             | Guinea-Bissau | 1993           | Vegetables, Other         | 46                                                          |
| 175             | Guinea-Bissau | 1993           | Wheat                     | 9                                                           |
| 175             | Guinea-Bissau | 1993           | Wine                      | 9                                                           |
| 175             | Guinea-Bissau | 1994           | Bananas                   | 10                                                          |
| 175             | Guinea-Bissau | 1994           | Beer                      | 14                                                          |
| 175             | Guinea-Bissau | 1994           | Beverages, Alcoholic      | 3                                                           |
| 175             | Guinea-Bissau | 1994           | Beverages, Fermented      | 51                                                          |
| 175             | Guinea-Bissau | 1994           | Bovine Meat               | 11                                                          |
| 175             | Guinea-Bissau | 1994           | Cassava                   | 36                                                          |
| 175             | Guinea-Bissau | 1994           | Cereals, Other            | 5                                                           |
| 175             | Guinea-Bissau | 1994           | Coconut Oil               | 1                                                           |
| 175             | Guinea-Bissau | 1994           | Coconuts - Incl Copra     | 7                                                           |
| 175             | Guinea-Bissau | 1994           | Crustaceans               | 3                                                           |
| 175             | Guinea-Bissau | 1994           | Demersal Fish             | 3                                                           |
| 175             | Guinea-Bissau | 1994           | Eggs                      | 1                                                           |
| 175             | Guinea-Bissau | 1994           | Fats, Animals, Raw        | 2                                                           |
| 175             | Guinea-Bissau | 1994           | Freshwater Fish           | 1                                                           |
| 175             | Guinea-Bissau | 1994           | Fruits, Other             | 47                                                          |
| 175             | Guinea-Bissau | 1994           | Groundnut Oil             | 9                                                           |
| 175             | Guinea-Bissau | 1994           | Groundnuts (Shelled Eq)   | 4                                                           |
| 175             | Guinea-Bissau | 1994           | Lemons, Limes             | 8                                                           |
| 175             | Guinea-Bissau | 1994           | Maize                     | 27                                                          |
| 175             | Guinea-Bissau | 1994           | Marine Fish, Other        | 4                                                           |
| 175             | Guinea-Bissau | 1994           | Milk, Whole               | 41                                                          |
| 175             | Guinea-Bissau | 1994           | Millet                    | 44                                                          |
| 175             | Guinea-Bissau | 1994           | Mutton & Goat Meat        | 3                                                           |
| 175             | Guinea-Bissau | 1994           | Nuts                      | 9                                                           |
| 175             | Guinea-Bissau | 1994           | Offals, Edible            | 4                                                           |
| 175             | Guinea-Bissau | 1994           | Oilcrops Oil, Other       | 3                                                           |
| 175             | Guinea-Bissau | 1994           | Oranges, Mandarines       | 13                                                          |
| 175             | Guinea-Bissau | 1994           | Palm Oil                  | 8                                                           |
| 175             | Guinea-Bissau | 1994           | Palmkernel Oil            | 5                                                           |
| 175             | Guinea-Bissau | 1994           | Pelagic Fish              | 2                                                           |
| 175             | Guinea-Bissau | 1994           | Pigmeat                   | 24                                                          |
| 175             | Guinea-Bissau | 1994           | Plantains                 | 66                                                          |
| 175             | Guinea-Bissau | 1994           | Poultry Meat              | 2                                                           |
| 175             | Guinea-Bissau | 1994           | Pulses, Other             | 5                                                           |
| 175             | Guinea-Bissau | 1994           | Rape and Mustard Oil      | 3                                                           |
| 175             | Guinea-Bissau | 1994           | Rice (Milled Equivalent)  | 294                                                         |
| 175             | Guinea-Bissau | 1994           | Roots, Other              | 126                                                         |
| 175             | Guinea-Bissau | 1994           | Sorghum                   | 27                                                          |
| 175             | Guinea-Bissau | 1994           | Soyabean Oil              | 4                                                           |
| 175             | Guinea-Bissau | 1994           | Sugar, Refined Equivalent | 9                                                           |
| 175             | Guinea-Bissau | 1994           | Tomatoes                  | 2                                                           |
| 175             | Guinea-Bissau | 1994           | Vegetables, Other         | 46                                                          |
| 175             | Guinea-Bissau | 1994           | Wheat                     | 19                                                          |
| 175             | Guinea-Bissau | 1994           | Wine                      | 6                                                           |
| 175             | Guinea-Bissau | 1995           | Bananas                   | 10                                                          |
| 175             | Guinea-Bissau | 1995           | Beer                      | 12                                                          |
| 175             | Guinea-Bissau | 1995           | Beverages, Alcoholic      | 3                                                           |
| 175             | Guinea-Bissau | 1995           | Beverages, Fermented      | 60                                                          |
| 175             | Guinea-Bissau | 1995           | Bovine Meat               | 10                                                          |
| 175             | Guinea-Bissau | 1995           | Cassava                   | 35                                                          |
| 175             | Guinea-Bissau | 1995           | Cereals, Other            | 4                                                           |
| 175             | Guinea-Bissau | 1995           | Coconut Oil               | 1                                                           |
| 175             | Guinea-Bissau | 1995           | Coconuts - Incl Copra     | 7                                                           |
| 175             | Guinea-Bissau | 1995           | Crustaceans               | 2                                                           |
| 175             | Guinea-Bissau | 1995           | Demersal Fish             | 4                                                           |
| 175             | Guinea-Bissau | 1995           | Eggs                      | 1                                                           |
| 175             | Guinea-Bissau | 1995           | Fats, Animals, Raw        | 2                                                           |
| 175             | Guinea-Bissau | 1995           | Freshwater Fish           | 1                                                           |
| 175             | Guinea-Bissau | 1995           | Fruits, Other             | 47                                                          |
| 175             | Guinea-Bissau | 1995           | Groundnut Oil             | 9                                                           |
| 175             | Guinea-Bissau | 1995           | Groundnuts (Shelled Eq)   | 4                                                           |
| 175             | Guinea-Bissau | 1995           | Lemons, Limes             | 8                                                           |
| 175             | Guinea-Bissau | 1995           | Maize                     | 30                                                          |
| 175             | Guinea-Bissau | 1995           | Marine Fish, Other        | 4                                                           |
| 175             | Guinea-Bissau | 1995           | Milk, Whole               | 40                                                          |
| 175             | Guinea-Bissau | 1995           | Millet                    | 53                                                          |
| 175             | Guinea-Bissau | 1995           | Mutton & Goat Meat        | 3                                                           |
| 175             | Guinea-Bissau | 1995           | Nuts                      | 10                                                          |

## Dietary calcium and zinc deficiency risks are decreasing but remain prevalent

| FAO countrycode | Country       | Reference year | Food item                 | Gross food supply (g capita <sup>-1</sup> d <sup>-1</sup> ) |
|-----------------|---------------|----------------|---------------------------|-------------------------------------------------------------|
| 175             | Guinea-Bissau | 1995           | Offals, Edible            | 4                                                           |
| 175             | Guinea-Bissau | 1995           | Oilcrops Oil, Other       | 3                                                           |
| 175             | Guinea-Bissau | 1995           | Oranges, Mandarines       | 13                                                          |
| 175             | Guinea-Bissau | 1995           | Palm Oil                  | 8                                                           |
| 175             | Guinea-Bissau | 1995           | Palmkernel Oil            | 7                                                           |
| 175             | Guinea-Bissau | 1995           | Pelagic Fish              | 2                                                           |
| 175             | Guinea-Bissau | 1995           | Pigmeat                   | 24                                                          |
| 175             | Guinea-Bissau | 1995           | Plantains                 | 66                                                          |
| 175             | Guinea-Bissau | 1995           | Potatoes                  | 1                                                           |
| 175             | Guinea-Bissau | 1995           | Poultry Meat              | 2                                                           |
| 175             | Guinea-Bissau | 1995           | Pulses, Other             | 6                                                           |
| 175             | Guinea-Bissau | 1995           | Rape and Mustard Oil      | 1                                                           |
| 175             | Guinea-Bissau | 1995           | Rice (Milled Equivalent)  | 294                                                         |
| 175             | Guinea-Bissau | 1995           | Roots, Other              | 125                                                         |
| 175             | Guinea-Bissau | 1995           | Sorghum                   | 30                                                          |
| 175             | Guinea-Bissau | 1995           | Soyabean Oil              | 7                                                           |
| 175             | Guinea-Bissau | 1995           | Sugar, Refined Equivalent | 6                                                           |
| 175             | Guinea-Bissau | 1995           | Tomatoes                  | 2                                                           |
| 175             | Guinea-Bissau | 1995           | Vegetables, Other         | 45                                                          |
| 175             | Guinea-Bissau | 1995           | Wheat                     | 8                                                           |
| 175             | Guinea-Bissau | 1995           | Wine                      | 5                                                           |
| 175             | Guinea-Bissau | 1996           | Bananas                   | 10                                                          |
| 175             | Guinea-Bissau | 1996           | Beer                      | 7                                                           |
| 175             | Guinea-Bissau | 1996           | Beverages, Alcoholic      | 3                                                           |
| 175             | Guinea-Bissau | 1996           | Beverages, Fermented      | 54                                                          |
| 175             | Guinea-Bissau | 1996           | Bovine Meat               | 11                                                          |
| 175             | Guinea-Bissau | 1996           | Cassava                   | 50                                                          |
| 175             | Guinea-Bissau | 1996           | Cereals, Other            | 4                                                           |
| 175             | Guinea-Bissau | 1996           | Coconut Oil               | 1                                                           |
| 175             | Guinea-Bissau | 1996           | Coconuts - Incl Copra     | 7                                                           |
| 175             | Guinea-Bissau | 1996           | Crustaceans               | 2                                                           |
| 175             | Guinea-Bissau | 1996           | Demersal Fish             | 5                                                           |
| 175             | Guinea-Bissau | 1996           | Eggs                      | 1                                                           |
| 175             | Guinea-Bissau | 1996           | Fats, Animals, Raw        | 2                                                           |
| 175             | Guinea-Bissau | 1996           | Freshwater Fish           | 1                                                           |
| 175             | Guinea-Bissau | 1996           | Fruits, Other             | 48                                                          |
| 175             | Guinea-Bissau | 1996           | Groundnut Oil             | 8                                                           |
| 175             | Guinea-Bissau | 1996           | Groundnuts (Shelled Eq)   | 4                                                           |
| 175             | Guinea-Bissau | 1996           | Lemons, Limes             | 8                                                           |
| 175             | Guinea-Bissau | 1996           | Maize                     | 16                                                          |
| 175             | Guinea-Bissau | 1996           | Marine Fish, Other        | 4                                                           |
| 175             | Guinea-Bissau | 1996           | Milk, Whole               | 41                                                          |
| 175             | Guinea-Bissau | 1996           | Millet                    | 34                                                          |
| 175             | Guinea-Bissau | 1996           | Mutton & Goat Meat        | 3                                                           |
| 175             | Guinea-Bissau | 1996           | Nuts                      | 9                                                           |
| 175             | Guinea-Bissau | 1996           | Offals, Edible            | 4                                                           |
| 175             | Guinea-Bissau | 1996           | Oilcrops Oil, Other       | 3                                                           |
| 175             | Guinea-Bissau | 1996           | Oranges, Mandarines       | 13                                                          |
| 175             | Guinea-Bissau | 1996           | Palm Oil                  | 7                                                           |
| 175             | Guinea-Bissau | 1996           | Palmkernel Oil            | 5                                                           |
| 175             | Guinea-Bissau | 1996           | Pelagic Fish              | 2                                                           |
| 175             | Guinea-Bissau | 1996           | Pigmeat                   | 24                                                          |
| 175             | Guinea-Bissau | 1996           | Plantains                 | 67                                                          |
| 175             | Guinea-Bissau | 1996           | Poultry Meat              | 2                                                           |
| 175             | Guinea-Bissau | 1996           | Pulses, Other             | 5                                                           |
| 175             | Guinea-Bissau | 1996           | Rape and Mustard Oil      | 3                                                           |
| 175             | Guinea-Bissau | 1996           | Rice (Milled Equivalent)  | 276                                                         |
| 175             | Guinea-Bissau | 1996           | Roots, Other              | 127                                                         |
| 175             | Guinea-Bissau | 1996           | Sorghum                   | 41                                                          |
| 175             | Guinea-Bissau | 1996           | Soyabean Oil              | 5                                                           |
| 175             | Guinea-Bissau | 1996           | Sugar, Refined Equivalent | 13                                                          |
| 175             | Guinea-Bissau | 1996           | Tomatoes                  | 4                                                           |
| 175             | Guinea-Bissau | 1996           | Vegetables, Other         | 45                                                          |
| 175             | Guinea-Bissau | 1996           | Wheat                     | 20                                                          |
| 175             | Guinea-Bissau | 1996           | Wine                      | 6                                                           |
| 175             | Guinea-Bissau | 1997           | Bananas                   | 9                                                           |
| 175             | Guinea-Bissau | 1997           | Beer                      | 9                                                           |
| 175             | Guinea-Bissau | 1997           | Beverages, Alcoholic      | 3                                                           |
| 175             | Guinea-Bissau | 1997           | Beverages, Fermented      | 25                                                          |
| 175             | Guinea-Bissau | 1997           | Bovine Meat               | 11                                                          |
| 175             | Guinea-Bissau | 1997           | Cassava                   | 73                                                          |
| 175             | Guinea-Bissau | 1997           | Cereals, Other            | 5                                                           |
| 175             | Guinea-Bissau | 1997           | Coconut Oil               | 1                                                           |
| 175             | Guinea-Bissau | 1997           | Coconuts - Incl Copra     | 7                                                           |
| 175             | Guinea-Bissau | 1997           | Crustaceans               | 2                                                           |
| 175             | Guinea-Bissau | 1997           | Demersal Fish             | 6                                                           |
| 175             | Guinea-Bissau | 1997           | Eggs                      | 2                                                           |
| 175             | Guinea-Bissau | 1997           | Fats, Animals, Raw        | 2                                                           |
| 175             | Guinea-Bissau | 1997           | Fruits, Other             | 49                                                          |
| 175             | Guinea-Bissau | 1997           | Groundnut Oil             | 9                                                           |
| 175             | Guinea-Bissau | 1997           | Groundnuts (Shelled Eq)   | 3                                                           |
| 175             | Guinea-Bissau | 1997           | Lemons, Limes             | 8                                                           |
| 175             | Guinea-Bissau | 1997           | Maize                     | 29                                                          |
| 175             | Guinea-Bissau | 1997           | Marine Fish, Other        | 5                                                           |
| 175             | Guinea-Bissau | 1997           | Milk, Whole               | 40                                                          |
| 175             | Guinea-Bissau | 1997           | Millet                    | 13                                                          |
| 175             | Guinea-Bissau | 1997           | Mutton & Goat Meat        | 3                                                           |
| 175             | Guinea-Bissau | 1997           | Nuts                      | 9                                                           |
| 175             | Guinea-Bissau | 1997           | Offals, Edible            | 4                                                           |
| 175             | Guinea-Bissau | 1997           | Oilcrops Oil, Other       | 3                                                           |
| 175             | Guinea-Bissau | 1997           | Oranges, Mandarines       | 13                                                          |
| 175             | Guinea-Bissau | 1997           | Palm Oil                  | 7                                                           |
| 175             | Guinea-Bissau | 1997           | Palmkernel Oil            | 6                                                           |
| 175             | Guinea-Bissau | 1997           | Pelagic Fish              | 2                                                           |
| 175             | Guinea-Bissau | 1997           | Pigmeat                   | 24                                                          |
| 175             | Guinea-Bissau | 1997           | Plantains                 | 66                                                          |
| 175             | Guinea-Bissau | 1997           | Potatoes                  | 1                                                           |



## Dietary calcium and zinc deficiency risks are decreasing but remain prevalent

| FAO countrycode | Country       | Reference year | Food item                 | Gross food supply (g capita <sup>-1</sup> d <sup>-1</sup> ) |
|-----------------|---------------|----------------|---------------------------|-------------------------------------------------------------|
| 175             | Guinea-Bissau | 1997           | Poultry Meat              | 3                                                           |
| 175             | Guinea-Bissau | 1997           | Pulses, Other             | 5                                                           |
| 175             | Guinea-Bissau | 1997           | Rape and Mustard Oil      | 1                                                           |
| 175             | Guinea-Bissau | 1997           | Rice (Milled Equivalent)  | 274                                                         |
| 175             | Guinea-Bissau | 1997           | Roots, Other              | 126                                                         |
| 175             | Guinea-Bissau | 1997           | Sorghum                   | 22                                                          |
| 175             | Guinea-Bissau | 1997           | Soyabean Oil              | 3                                                           |
| 175             | Guinea-Bissau | 1997           | Sugar, Refined Equivalent | 15                                                          |
| 175             | Guinea-Bissau | 1997           | Tomatoes                  | 4                                                           |
| 175             | Guinea-Bissau | 1997           | Vegetables, Other         | 45                                                          |
| 175             | Guinea-Bissau | 1997           | Wheat                     | 23                                                          |
| 175             | Guinea-Bissau | 1997           | Wine                      | 8                                                           |
| 175             | Guinea-Bissau | 1998           | Bananas                   | 11                                                          |
| 175             | Guinea-Bissau | 1998           | Beer                      | 9                                                           |
| 175             | Guinea-Bissau | 1998           | Beverages, Alcoholic      | 3                                                           |
| 175             | Guinea-Bissau | 1998           | Beverages, Fermented      | 35                                                          |
| 175             | Guinea-Bissau | 1998           | Bovine Meat               | 11                                                          |
| 175             | Guinea-Bissau | 1998           | Cassava                   | 72                                                          |
| 175             | Guinea-Bissau | 1998           | Cereals, Other            | 8                                                           |
| 175             | Guinea-Bissau | 1998           | Coconut Oil               | 1                                                           |
| 175             | Guinea-Bissau | 1998           | Coconuts - Incl Copra     | 7                                                           |
| 175             | Guinea-Bissau | 1998           | Crustaceans               | 2                                                           |
| 175             | Guinea-Bissau | 1998           | Demersal Fish             | 4                                                           |
| 175             | Guinea-Bissau | 1998           | Eggs                      | 2                                                           |
| 175             | Guinea-Bissau | 1998           | Fats, Animals, Raw        | 2                                                           |
| 175             | Guinea-Bissau | 1998           | Fruits, Other             | 50                                                          |
| 175             | Guinea-Bissau | 1998           | Groundnut Oil             | 9                                                           |
| 175             | Guinea-Bissau | 1998           | Groundnuts (Shelled Eq)   | 3                                                           |
| 175             | Guinea-Bissau | 1998           | Lemons, Limes             | 9                                                           |
| 175             | Guinea-Bissau | 1998           | Maize                     | 28                                                          |
| 175             | Guinea-Bissau | 1998           | Marine Fish, Other        | 5                                                           |
| 175             | Guinea-Bissau | 1998           | Milk, Whole               | 38                                                          |
| 175             | Guinea-Bissau | 1998           | Millet                    | 30                                                          |
| 175             | Guinea-Bissau | 1998           | Mutton & Goat Meat        | 4                                                           |
| 175             | Guinea-Bissau | 1998           | Nuts                      | 6                                                           |
| 175             | Guinea-Bissau | 1998           | Offals, Edible            | 4                                                           |
| 175             | Guinea-Bissau | 1998           | Oilcrops Oil, Other       | 2                                                           |
| 175             | Guinea-Bissau | 1998           | Oranges, Mandarines       | 14                                                          |
| 175             | Guinea-Bissau | 1998           | Palm Oil                  | 7                                                           |
| 175             | Guinea-Bissau | 1998           | Palmkernel Oil            | 8                                                           |
| 175             | Guinea-Bissau | 1998           | Pelagic Fish              | 2                                                           |
| 175             | Guinea-Bissau | 1998           | Pigmeat                   | 24                                                          |
| 175             | Guinea-Bissau | 1998           | Plantains                 | 67                                                          |
| 175             | Guinea-Bissau | 1998           | Potatoes                  | 1                                                           |
| 175             | Guinea-Bissau | 1998           | Poultry Meat              | 3                                                           |
| 175             | Guinea-Bissau | 1998           | Pulses, Other             | 4                                                           |
| 175             | Guinea-Bissau | 1998           | Rape and Mustard Oil      | 1                                                           |
| 175             | Guinea-Bissau | 1998           | Rice (Milled Equivalent)  | 271                                                         |
| 175             | Guinea-Bissau | 1998           | Roots, Other              | 127                                                         |
| 175             | Guinea-Bissau | 1998           | Sorghum                   | 20                                                          |
| 175             | Guinea-Bissau | 1998           | Soyabean Oil              | 3                                                           |
| 175             | Guinea-Bissau | 1998           | Sugar, Refined Equivalent | 9                                                           |
| 175             | Guinea-Bissau | 1998           | Tomatoes                  | 4                                                           |
| 175             | Guinea-Bissau | 1998           | Vegetables, Other         | 46                                                          |
| 175             | Guinea-Bissau | 1998           | Wheat                     | 10                                                          |
| 175             | Guinea-Bissau | 1998           | Wine                      | 3                                                           |
| 175             | Guinea-Bissau | 1999           | Bananas                   | 12                                                          |
| 175             | Guinea-Bissau | 1999           | Beer                      | 7                                                           |
| 175             | Guinea-Bissau | 1999           | Beverages, Alcoholic      | 2                                                           |
| 175             | Guinea-Bissau | 1999           | Beverages, Fermented      | 37                                                          |
| 175             | Guinea-Bissau | 1999           | Bovine Meat               | 11                                                          |
| 175             | Guinea-Bissau | 1999           | Cassava                   | 72                                                          |
| 175             | Guinea-Bissau | 1999           | Cereals, Other            | 9                                                           |
| 175             | Guinea-Bissau | 1999           | Coconut Oil               | 1                                                           |
| 175             | Guinea-Bissau | 1999           | Coconuts - Incl Copra     | 7                                                           |
| 175             | Guinea-Bissau | 1999           | Crustaceans               | 1                                                           |
| 175             | Guinea-Bissau | 1999           | Demersal Fish             | 4                                                           |
| 175             | Guinea-Bissau | 1999           | Eggs                      | 2                                                           |
| 175             | Guinea-Bissau | 1999           | Fats, Animals, Raw        | 2                                                           |
| 175             | Guinea-Bissau | 1999           | Fruits, Other             | 51                                                          |
| 175             | Guinea-Bissau | 1999           | Groundnut Oil             | 9                                                           |
| 175             | Guinea-Bissau | 1999           | Groundnuts (Shelled Eq)   | 3                                                           |
| 175             | Guinea-Bissau | 1999           | Lemons, Limes             | 9                                                           |
| 175             | Guinea-Bissau | 1999           | Maize                     | 38                                                          |
| 175             | Guinea-Bissau | 1999           | Marine Fish, Other        | 5                                                           |
| 175             | Guinea-Bissau | 1999           | Milk, Whole               | 41                                                          |
| 175             | Guinea-Bissau | 1999           | Millet                    | 27                                                          |
| 175             | Guinea-Bissau | 1999           | Mutton & Goat Meat        | 4                                                           |
| 175             | Guinea-Bissau | 1999           | Nuts                      | 6                                                           |
| 175             | Guinea-Bissau | 1999           | Offals, Edible            | 4                                                           |
| 175             | Guinea-Bissau | 1999           | Oilcrops Oil, Other       | 3                                                           |
| 175             | Guinea-Bissau | 1999           | Onions                    | 1                                                           |
| 175             | Guinea-Bissau | 1999           | Oranges, Mandarines       | 14                                                          |
| 175             | Guinea-Bissau | 1999           | Palm Oil                  | 9                                                           |
| 175             | Guinea-Bissau | 1999           | Palmkernel Oil            | 4                                                           |
| 175             | Guinea-Bissau | 1999           | Pelagic Fish              | 1                                                           |
| 175             | Guinea-Bissau | 1999           | Pigmeat                   | 23                                                          |
| 175             | Guinea-Bissau | 1999           | Plantains                 | 67                                                          |
| 175             | Guinea-Bissau | 1999           | Poultry Meat              | 3                                                           |
| 175             | Guinea-Bissau | 1999           | Pulses, Other             | 6                                                           |
| 175             | Guinea-Bissau | 1999           | Rape and Mustard Oil      | 1                                                           |
| 175             | Guinea-Bissau | 1999           | Rice (Milled Equivalent)  | 262                                                         |
| 175             | Guinea-Bissau | 1999           | Roots, Other              | 129                                                         |
| 175             | Guinea-Bissau | 1999           | Sorghum                   | 25                                                          |
| 175             | Guinea-Bissau | 1999           | Soyabean Oil              | 2                                                           |
| 175             | Guinea-Bissau | 1999           | Sugar, Refined Equivalent | 10                                                          |
| 175             | Guinea-Bissau | 1999           | Sweeteners, Other         | 1                                                           |

## Dietary calcium and zinc deficiency risks are decreasing but remain prevalent

| FAO countrycode | Country       | Reference year | Food item                 | Gross food supply (g capita <sup>-1</sup> d <sup>-1</sup> ) |
|-----------------|---------------|----------------|---------------------------|-------------------------------------------------------------|
| 175             | Guinea-Bissau | 1999           | Tomatoes                  | 1                                                           |
| 175             | Guinea-Bissau | 1999           | Vegetables, Other         | 44                                                          |
| 175             | Guinea-Bissau | 1999           | Wheat                     | 12                                                          |
| 175             | Guinea-Bissau | 1999           | Wine                      | 5                                                           |
| 175             | Guinea-Bissau | 2000           | Bananas                   | 11                                                          |
| 175             | Guinea-Bissau | 2000           | Beer                      | 17                                                          |
| 175             | Guinea-Bissau | 2000           | Beverages, Alcoholic      | 2                                                           |
| 175             | Guinea-Bissau | 2000           | Beverages, Fermented      | 44                                                          |
| 175             | Guinea-Bissau | 2000           | Bovine Meat               | 11                                                          |
| 175             | Guinea-Bissau | 2000           | Cassava                   | 70                                                          |
| 175             | Guinea-Bissau | 2000           | Cereals, Other            | 8                                                           |
| 175             | Guinea-Bissau | 2000           | Coconut Oil               | 1                                                           |
| 175             | Guinea-Bissau | 2000           | Coconuts - Incl Copra     | 7                                                           |
| 175             | Guinea-Bissau | 2000           | Crustaceans               | 2                                                           |
| 175             | Guinea-Bissau | 2000           | Demersal Fish             | 2                                                           |
| 175             | Guinea-Bissau | 2000           | Eggs                      | 2                                                           |
| 175             | Guinea-Bissau | 2000           | Fats, Animals, Raw        | 2                                                           |
| 175             | Guinea-Bissau | 2000           | Fruits, Other             | 48                                                          |
| 175             | Guinea-Bissau | 2000           | Groundnut Oil             | 9                                                           |
| 175             | Guinea-Bissau | 2000           | Groundnuts (Shelled Eq)   | 3                                                           |
| 175             | Guinea-Bissau | 2000           | Lemons, Limes             | 8                                                           |
| 175             | Guinea-Bissau | 2000           | Maize                     | 41                                                          |
| 175             | Guinea-Bissau | 2000           | Marine Fish, Other        | 4                                                           |
| 175             | Guinea-Bissau | 2000           | Milk, Whole               | 42                                                          |
| 175             | Guinea-Bissau | 2000           | Millet                    | 26                                                          |
| 175             | Guinea-Bissau | 2000           | Mutton & Goat Meat        | 3                                                           |
| 175             | Guinea-Bissau | 2000           | Nuts                      | 7                                                           |
| 175             | Guinea-Bissau | 2000           | Offals, Edible            | 4                                                           |
| 175             | Guinea-Bissau | 2000           | Oilcrops Oil, Other       | 2                                                           |
| 175             | Guinea-Bissau | 2000           | Onions                    | 1                                                           |
| 175             | Guinea-Bissau | 2000           | Oranges, Mandarines       | 13                                                          |
| 175             | Guinea-Bissau | 2000           | Palm Oil                  | 7                                                           |
| 175             | Guinea-Bissau | 2000           | Palmkernel Oil            | 6                                                           |
| 175             | Guinea-Bissau | 2000           | Pelagic Fish              | 1                                                           |
| 175             | Guinea-Bissau | 2000           | Pigmeat                   | 23                                                          |
| 175             | Guinea-Bissau | 2000           | Plantains                 | 64                                                          |
| 175             | Guinea-Bissau | 2000           | Poultry Meat              | 3                                                           |
| 175             | Guinea-Bissau | 2000           | Pulses, Other             | 4                                                           |
| 175             | Guinea-Bissau | 2000           | Rice (Milled Equivalent)  | 265                                                         |
| 175             | Guinea-Bissau | 2000           | Roots, Other              | 127                                                         |
| 175             | Guinea-Bissau | 2000           | Sorghum                   | 35                                                          |
| 175             | Guinea-Bissau | 2000           | Soyabean Oil              | 5                                                           |
| 175             | Guinea-Bissau | 2000           | Sugar, Refined Equivalent | 11                                                          |
| 175             | Guinea-Bissau | 2000           | Sweeteners, Other         | 2                                                           |
| 175             | Guinea-Bissau | 2000           | Tomatoes                  | 5                                                           |
| 175             | Guinea-Bissau | 2000           | Vegetables, Other         | 44                                                          |
| 175             | Guinea-Bissau | 2000           | Wheat                     | 18                                                          |
| 175             | Guinea-Bissau | 2000           | Wine                      | 8                                                           |
| 175             | Guinea-Bissau | 2001           | Bananas                   | 11                                                          |
| 175             | Guinea-Bissau | 2001           | Beer                      | 12                                                          |
| 175             | Guinea-Bissau | 2001           | Beverages, Alcoholic      | 2                                                           |
| 175             | Guinea-Bissau | 2001           | Beverages, Fermented      | 45                                                          |
| 175             | Guinea-Bissau | 2001           | Bovine Meat               | 11                                                          |
| 175             | Guinea-Bissau | 2001           | Cassava                   | 72                                                          |
| 175             | Guinea-Bissau | 2001           | Cereals, Other            | 9                                                           |
| 175             | Guinea-Bissau | 2001           | Coconut Oil               | 1                                                           |
| 175             | Guinea-Bissau | 2001           | Coconuts - Incl Copra     | 7                                                           |
| 175             | Guinea-Bissau | 2001           | Crustaceans               | 2                                                           |
| 175             | Guinea-Bissau | 2001           | Demersal Fish             | 1                                                           |
| 175             | Guinea-Bissau | 2001           | Eggs                      | 2                                                           |
| 175             | Guinea-Bissau | 2001           | Fats, Animals, Raw        | 2                                                           |
| 175             | Guinea-Bissau | 2001           | Fruits, Other             | 46                                                          |
| 175             | Guinea-Bissau | 2001           | Groundnut Oil             | 9                                                           |
| 175             | Guinea-Bissau | 2001           | Groundnuts (Shelled Eq)   | 3                                                           |
| 175             | Guinea-Bissau | 2001           | Lemons, Limes             | 8                                                           |
| 175             | Guinea-Bissau | 2001           | Maize                     | 45                                                          |
| 175             | Guinea-Bissau | 2001           | Marine Fish, Other        | 4                                                           |
| 175             | Guinea-Bissau | 2001           | Milk, Whole               | 41                                                          |
| 175             | Guinea-Bissau | 2001           | Millet                    | 38                                                          |
| 175             | Guinea-Bissau | 2001           | Mutton & Goat Meat        | 3                                                           |
| 175             | Guinea-Bissau | 2001           | Nuts                      | 1                                                           |
| 175             | Guinea-Bissau | 2001           | Offals, Edible            | 4                                                           |
| 175             | Guinea-Bissau | 2001           | Oilcrops Oil, Other       | 1                                                           |
| 175             | Guinea-Bissau | 2001           | Onions                    | 1                                                           |
| 175             | Guinea-Bissau | 2001           | Oranges, Mandarines       | 13                                                          |
| 175             | Guinea-Bissau | 2001           | Palm Oil                  | 7                                                           |
| 175             | Guinea-Bissau | 2001           | Palmkernel Oil            | 7                                                           |
| 175             | Guinea-Bissau | 2001           | Pelagic Fish              | 1                                                           |
| 175             | Guinea-Bissau | 2001           | Pigmeat                   | 23                                                          |
| 175             | Guinea-Bissau | 2001           | Plantains                 | 64                                                          |
| 175             | Guinea-Bissau | 2001           | Potatoes                  | 1                                                           |
| 175             | Guinea-Bissau | 2001           | Poultry Meat              | 4                                                           |
| 175             | Guinea-Bissau | 2001           | Pulses, Other             | 4                                                           |
| 175             | Guinea-Bissau | 2001           | Rice (Milled Equivalent)  | 265                                                         |
| 175             | Guinea-Bissau | 2001           | Roots, Other              | 126                                                         |
| 175             | Guinea-Bissau | 2001           | Sorghum                   | 25                                                          |
| 175             | Guinea-Bissau | 2001           | Soyabean Oil              | 5                                                           |
| 175             | Guinea-Bissau | 2001           | Sugar, Refined Equivalent | 15                                                          |
| 175             | Guinea-Bissau | 2001           | Sweeteners, Other         | 1                                                           |
| 175             | Guinea-Bissau | 2001           | Tomatoes                  | 2                                                           |
| 175             | Guinea-Bissau | 2001           | Vegetables, Other         | 44                                                          |
| 175             | Guinea-Bissau | 2001           | Wheat                     | 25                                                          |
| 175             | Guinea-Bissau | 2001           | Wine                      | 6                                                           |
| 175             | Guinea-Bissau | 2002           | Bananas                   | 11                                                          |
| 175             | Guinea-Bissau | 2002           | Beer                      | 10                                                          |
| 175             | Guinea-Bissau | 2002           | Beverages, Alcoholic      | 2                                                           |
| 175             | Guinea-Bissau | 2002           | Beverages, Fermented      | 38                                                          |

Dietary calcium and zinc deficiency risks are decreasing but remain prevalent

| FAO countrycode | Country       | Reference year | Food item                 | Gross food supply (g capita <sup>-1</sup> d <sup>-1</sup> ) |
|-----------------|---------------|----------------|---------------------------|-------------------------------------------------------------|
| 175             | Guinea-Bissau | 2002           | Bovine Meat               | 9                                                           |
| 175             | Guinea-Bissau | 2002           | Cassava                   | 74                                                          |
| 175             | Guinea-Bissau | 2002           | Cereals, Other            | 5                                                           |
| 175             | Guinea-Bissau | 2002           | Coconut Oil               | 1                                                           |
| 175             | Guinea-Bissau | 2002           | Coconuts - Incl Copra     | 6                                                           |
| 175             | Guinea-Bissau | 2002           | Demersal Fish             | 4                                                           |
| 175             | Guinea-Bissau | 2002           | Eggs                      | 2                                                           |
| 175             | Guinea-Bissau | 2002           | Fats, Animals, Raw        | 1                                                           |
| 175             | Guinea-Bissau | 2002           | Fruits, Other             | 44                                                          |
| 175             | Guinea-Bissau | 2002           | Groundnut Oil             | 8                                                           |
| 175             | Guinea-Bissau | 2002           | Groundnuts (Shelled Eq)   | 3                                                           |
| 175             | Guinea-Bissau | 2002           | Lemons, Limes             | 9                                                           |
| 175             | Guinea-Bissau | 2002           | Maize                     | 45                                                          |
| 175             | Guinea-Bissau | 2002           | Marine Fish, Other        | 4                                                           |
| 175             | Guinea-Bissau | 2002           | Milk, Whole               | 43                                                          |
| 175             | Guinea-Bissau | 2002           | Millet                    | 30                                                          |
| 175             | Guinea-Bissau | 2002           | Mutton & Goat Meat        | 3                                                           |
| 175             | Guinea-Bissau | 2002           | Nuts                      | 3                                                           |
| 175             | Guinea-Bissau | 2002           | Offals, Edible            | 4                                                           |
| 175             | Guinea-Bissau | 2002           | Oilcrops Oil, Other       | 3                                                           |
| 175             | Guinea-Bissau | 2002           | Onions                    | 2                                                           |
| 175             | Guinea-Bissau | 2002           | Oranges, Mandarines       | 14                                                          |
| 175             | Guinea-Bissau | 2002           | Palm Oil                  | 7                                                           |
| 175             | Guinea-Bissau | 2002           | Palmkernel Oil            | 8                                                           |
| 175             | Guinea-Bissau | 2002           | Pigmeat                   | 22                                                          |
| 175             | Guinea-Bissau | 2002           | Plantains                 | 66                                                          |
| 175             | Guinea-Bissau | 2002           | Potatoes                  | 1                                                           |
| 175             | Guinea-Bissau | 2002           | Poultry Meat              | 4                                                           |
| 175             | Guinea-Bissau | 2002           | Pulses, Other             | 4                                                           |
| 175             | Guinea-Bissau | 2002           | Rice (Milled Equivalent)  | 268                                                         |
| 175             | Guinea-Bissau | 2002           | Roots, Other              | 131                                                         |
| 175             | Guinea-Bissau | 2002           | Sorghum                   | 23                                                          |
| 175             | Guinea-Bissau | 2002           | Soyabean Oil              | 5                                                           |
| 175             | Guinea-Bissau | 2002           | Sugar, Refined Equivalent | 12                                                          |
| 175             | Guinea-Bissau | 2002           | Sweeteners, Other         | 1                                                           |
| 175             | Guinea-Bissau | 2002           | Tomatoes                  | 2                                                           |
| 175             | Guinea-Bissau | 2002           | Vegetables, Other         | 45                                                          |
| 175             | Guinea-Bissau | 2002           | Wheat                     | 28                                                          |
| 175             | Guinea-Bissau | 2002           | Wine                      | 9                                                           |
| 175             | Guinea-Bissau | 2003           | Bananas                   | 9                                                           |
| 175             | Guinea-Bissau | 2003           | Beer                      | 10                                                          |
| 175             | Guinea-Bissau | 2003           | Beverages, Alcoholic      | 2                                                           |
| 175             | Guinea-Bissau | 2003           | Beverages, Fermented      | 30                                                          |
| 175             | Guinea-Bissau | 2003           | Bovine Meat               | 10                                                          |
| 175             | Guinea-Bissau | 2003           | Cassava                   | 76                                                          |
| 175             | Guinea-Bissau | 2003           | Cereals, Other            | 3                                                           |
| 175             | Guinea-Bissau | 2003           | Coconut Oil               | 1                                                           |
| 175             | Guinea-Bissau | 2003           | Coconuts - Incl Copra     | 6                                                           |
| 175             | Guinea-Bissau | 2003           | Demersal Fish             | 2                                                           |
| 175             | Guinea-Bissau | 2003           | Eggs                      | 2                                                           |
| 175             | Guinea-Bissau | 2003           | Fats, Animals, Raw        | 2                                                           |
| 175             | Guinea-Bissau | 2003           | Fruits, Other             | 41                                                          |
| 175             | Guinea-Bissau | 2003           | Groundnut Oil             | 9                                                           |
| 175             | Guinea-Bissau | 2003           | Groundnuts (Shelled Eq)   | 3                                                           |
| 175             | Guinea-Bissau | 2003           | Lemons, Limes             | 9                                                           |
| 175             | Guinea-Bissau | 2003           | Maize                     | 44                                                          |
| 175             | Guinea-Bissau | 2003           | Marine Fish, Other        | 3                                                           |
| 175             | Guinea-Bissau | 2003           | Milk, Whole               | 40                                                          |
| 175             | Guinea-Bissau | 2003           | Millet                    | 27                                                          |
| 175             | Guinea-Bissau | 2003           | Mutton & Goat Meat        | 3                                                           |
| 175             | Guinea-Bissau | 2003           | Nuts                      | 1                                                           |
| 175             | Guinea-Bissau | 2003           | Offals, Edible            | 4                                                           |
| 175             | Guinea-Bissau | 2003           | Oilcrops Oil, Other       | 5                                                           |
| 175             | Guinea-Bissau | 2003           | Onions                    | 2                                                           |
| 175             | Guinea-Bissau | 2003           | Oranges, Mandarines       | 14                                                          |
| 175             | Guinea-Bissau | 2003           | Palm Oil                  | 7                                                           |
| 175             | Guinea-Bissau | 2003           | Palmkernel Oil            | 8                                                           |
| 175             | Guinea-Bissau | 2003           | Pigmeat                   | 23                                                          |
| 175             | Guinea-Bissau | 2003           | Plantains                 | 63                                                          |
| 175             | Guinea-Bissau | 2003           | Potatoes                  | 1                                                           |
| 175             | Guinea-Bissau | 2003           | Poultry Meat              | 4                                                           |
| 175             | Guinea-Bissau | 2003           | Pulses, Other             | 4                                                           |
| 175             | Guinea-Bissau | 2003           | Rice (Milled Equivalent)  | 272                                                         |
| 175             | Guinea-Bissau | 2003           | Roots, Other              | 123                                                         |
| 175             | Guinea-Bissau | 2003           | Sorghum                   | 15                                                          |
| 175             | Guinea-Bissau | 2003           | Soyabean Oil              | 5                                                           |
| 175             | Guinea-Bissau | 2003           | Sugar, Refined Equivalent | 16                                                          |
| 175             | Guinea-Bissau | 2003           | Sweeteners, Other         | 1                                                           |
| 175             | Guinea-Bissau | 2003           | Tomatoes                  | 1                                                           |
| 175             | Guinea-Bissau | 2003           | Vegetables, Other         | 41                                                          |
| 175             | Guinea-Bissau | 2003           | Wheat                     | 30                                                          |
| 175             | Guinea-Bissau | 2003           | Wine                      | 7                                                           |
| 175             | Guinea-Bissau | 2004           | Bananas                   | 8                                                           |
| 175             | Guinea-Bissau | 2004           | Beer                      | 13                                                          |
| 175             | Guinea-Bissau | 2004           | Beverages, Alcoholic      | 2                                                           |
| 175             | Guinea-Bissau | 2004           | Beverages, Fermented      | 46                                                          |
| 175             | Guinea-Bissau | 2004           | Bovine Meat               | 10                                                          |
| 175             | Guinea-Bissau | 2004           | Cassava                   | 78                                                          |
| 175             | Guinea-Bissau | 2004           | Cereals, Other            | 6                                                           |
| 175             | Guinea-Bissau | 2004           | Coconut Oil               | 1                                                           |
| 175             | Guinea-Bissau | 2004           | Coconuts - Incl Copra     | 6                                                           |
| 175             | Guinea-Bissau | 2004           | Demersal Fish             | 2                                                           |
| 175             | Guinea-Bissau | 2004           | Eggs                      | 2                                                           |
| 175             | Guinea-Bissau | 2004           | Fats, Animals, Raw        | 2                                                           |
| 175             | Guinea-Bissau | 2004           | Fruits, Other             | 42                                                          |
| 175             | Guinea-Bissau | 2004           | Groundnut Oil             | 8                                                           |
| 175             | Guinea-Bissau | 2004           | Groundnuts (Shelled Eq)   | 3                                                           |

Dietary calcium and zinc deficiency risks are decreasing but remain prevalent

| FAO countrycode | Country       | Reference year | Food item                 | Gross food supply (g capita <sup>-1</sup> d <sup>-1</sup> ) |
|-----------------|---------------|----------------|---------------------------|-------------------------------------------------------------|
| 175             | Guinea-Bissau | 2004           | Lemons, Limes             | 9                                                           |
| 175             | Guinea-Bissau | 2004           | Maize                     | 44                                                          |
| 175             | Guinea-Bissau | 2004           | Milk, Whole               | 39                                                          |
| 175             | Guinea-Bissau | 2004           | Millet                    | 40                                                          |
| 175             | Guinea-Bissau | 2004           | Mutton & Goat Meat        | 3                                                           |
| 175             | Guinea-Bissau | 2004           | Nuts                      | 2                                                           |
| 175             | Guinea-Bissau | 2004           | Offals, Edible            | 4                                                           |
| 175             | Guinea-Bissau | 2004           | Oilcrops Oil, Other       | 5                                                           |
| 175             | Guinea-Bissau | 2004           | Oilcrops, Other           | 2                                                           |
| 175             | Guinea-Bissau | 2004           | Onions                    | 3                                                           |
| 175             | Guinea-Bissau | 2004           | Oranges, Mandarines       | 16                                                          |
| 175             | Guinea-Bissau | 2004           | Palm Oil                  | 8                                                           |
| 175             | Guinea-Bissau | 2004           | Palmkernel Oil            | 8                                                           |
| 175             | Guinea-Bissau | 2004           | Pelagic Fish              | 1                                                           |
| 175             | Guinea-Bissau | 2004           | Pigmeat                   | 22                                                          |
| 175             | Guinea-Bissau | 2004           | Plantains                 | 64                                                          |
| 175             | Guinea-Bissau | 2004           | Potatoes                  | 1                                                           |
| 175             | Guinea-Bissau | 2004           | Poultry Meat              | 4                                                           |
| 175             | Guinea-Bissau | 2004           | Pulses, Other             | 5                                                           |
| 175             | Guinea-Bissau | 2004           | Rice (Milled Equivalent)  | 237                                                         |
| 175             | Guinea-Bissau | 2004           | Roots, Other              | 126                                                         |
| 175             | Guinea-Bissau | 2004           | Sorghum                   | 23                                                          |
| 175             | Guinea-Bissau | 2004           | Soyabean Oil              | 5                                                           |
| 175             | Guinea-Bissau | 2004           | Sugar, Refined Equivalent | 26                                                          |
| 175             | Guinea-Bissau | 2004           | Sweeteners, Other         | 1                                                           |
| 175             | Guinea-Bissau | 2004           | Tomatoes                  | 2                                                           |
| 175             | Guinea-Bissau | 2004           | Vegetables, Other         | 43                                                          |
| 175             | Guinea-Bissau | 2004           | Wheat                     | 29                                                          |
| 175             | Guinea-Bissau | 2004           | Wine                      | 7                                                           |
| 175             | Guinea-Bissau | 2005           | Bananas                   | 7                                                           |
| 175             | Guinea-Bissau | 2005           | Beans                     | 1                                                           |
| 175             | Guinea-Bissau | 2005           | Beer                      | 14                                                          |
| 175             | Guinea-Bissau | 2005           | Beverages, Alcoholic      | 2                                                           |
| 175             | Guinea-Bissau | 2005           | Beverages, Fermented      | 60                                                          |
| 175             | Guinea-Bissau | 2005           | Bovine Meat               | 10                                                          |
| 175             | Guinea-Bissau | 2005           | Cassava                   | 80                                                          |
| 175             | Guinea-Bissau | 2005           | Cereals, Other            | 7                                                           |
| 175             | Guinea-Bissau | 2005           | Coconut Oil               | 1                                                           |
| 175             | Guinea-Bissau | 2005           | Coconuts - Incl Copra     | 6                                                           |
| 175             | Guinea-Bissau | 2005           | Demersal Fish             | 2                                                           |
| 175             | Guinea-Bissau | 2005           | Eggs                      | 2                                                           |
| 175             | Guinea-Bissau | 2005           | Fats, Animals, Raw        | 2                                                           |
| 175             | Guinea-Bissau | 2005           | Fruits, Other             | 43                                                          |
| 175             | Guinea-Bissau | 2005           | Groundnut Oil             | 9                                                           |
| 175             | Guinea-Bissau | 2005           | Groundnuts (Shelled Eq)   | 3                                                           |
| 175             | Guinea-Bissau | 2005           | Lemons, Limes             | 9                                                           |
| 175             | Guinea-Bissau | 2005           | Maize                     | 45                                                          |
| 175             | Guinea-Bissau | 2005           | Marine Fish, Other        | 2                                                           |
| 175             | Guinea-Bissau | 2005           | Milk, Whole               | 40                                                          |
| 175             | Guinea-Bissau | 2005           | Millet                    | 49                                                          |
| 175             | Guinea-Bissau | 2005           | Mutton & Goat Meat        | 3                                                           |
| 175             | Guinea-Bissau | 2005           | Nuts                      | 2                                                           |
| 175             | Guinea-Bissau | 2005           | Offals, Edible            | 4                                                           |
| 175             | Guinea-Bissau | 2005           | Oilcrops Oil, Other       | 6                                                           |
| 175             | Guinea-Bissau | 2005           | Oilcrops, Other           | 2                                                           |
| 175             | Guinea-Bissau | 2005           | Onions                    | 5                                                           |
| 175             | Guinea-Bissau | 2005           | Oranges, Mandarines       | 17                                                          |
| 175             | Guinea-Bissau | 2005           | Palm Oil                  | 8                                                           |
| 175             | Guinea-Bissau | 2005           | Palmkernel Oil            | 7                                                           |
| 175             | Guinea-Bissau | 2005           | Pelagic Fish              | 1                                                           |
| 175             | Guinea-Bissau | 2005           | Pigmeat                   | 22                                                          |
| 175             | Guinea-Bissau | 2005           | Plantains                 | 69                                                          |
| 175             | Guinea-Bissau | 2005           | Potatoes                  | 1                                                           |
| 175             | Guinea-Bissau | 2005           | Poultry Meat              | 4                                                           |
| 175             | Guinea-Bissau | 2005           | Pulses, Other             | 3                                                           |
| 175             | Guinea-Bissau | 2005           | Rice (Milled Equivalent)  | 218                                                         |
| 175             | Guinea-Bissau | 2005           | Roots, Other              | 125                                                         |
| 175             | Guinea-Bissau | 2005           | Sorghum                   | 35                                                          |
| 175             | Guinea-Bissau | 2005           | Soyabean Oil              | 5                                                           |
| 175             | Guinea-Bissau | 2005           | Sugar, Refined Equivalent | 28                                                          |
| 175             | Guinea-Bissau | 2005           | Sweeteners, Other         | 1                                                           |
| 175             | Guinea-Bissau | 2005           | Tomatoes                  | 2                                                           |
| 175             | Guinea-Bissau | 2005           | Vegetables, Other         | 45                                                          |
| 175             | Guinea-Bissau | 2005           | Wheat                     | 30                                                          |
| 175             | Guinea-Bissau | 2005           | Wine                      | 8                                                           |
| 175             | Guinea-Bissau | 2006           | Bananas                   | 9                                                           |
| 175             | Guinea-Bissau | 2006           | Beans                     | 1                                                           |
| 175             | Guinea-Bissau | 2006           | Beer                      | 12                                                          |
| 175             | Guinea-Bissau | 2006           | Beverages, Alcoholic      | 2                                                           |
| 175             | Guinea-Bissau | 2006           | Beverages, Fermented      | 64                                                          |
| 175             | Guinea-Bissau | 2006           | Bovine Meat               | 10                                                          |
| 175             | Guinea-Bissau | 2006           | Cassava                   | 75                                                          |
| 175             | Guinea-Bissau | 2006           | Cereals, Other            | 6                                                           |
| 175             | Guinea-Bissau | 2006           | Coconut Oil               | 1                                                           |
| 175             | Guinea-Bissau | 2006           | Coconuts - Incl Copra     | 6                                                           |
| 175             | Guinea-Bissau | 2006           | Crustaceans               | 1                                                           |
| 175             | Guinea-Bissau | 2006           | Demersal Fish             | 1                                                           |
| 175             | Guinea-Bissau | 2006           | Eggs                      | 2                                                           |
| 175             | Guinea-Bissau | 2006           | Fats, Animals, Raw        | 2                                                           |
| 175             | Guinea-Bissau | 2006           | Fruits, Other             | 44                                                          |
| 175             | Guinea-Bissau | 2006           | Groundnut Oil             | 9                                                           |
| 175             | Guinea-Bissau | 2006           | Groundnuts (Shelled Eq)   | 3                                                           |
| 175             | Guinea-Bissau | 2006           | Lemons, Limes             | 7                                                           |
| 175             | Guinea-Bissau | 2006           | Maize                     | 47                                                          |
| 175             | Guinea-Bissau | 2006           | Milk, Whole               | 44                                                          |
| 175             | Guinea-Bissau | 2006           | Millet                    | 53                                                          |
| 175             | Guinea-Bissau | 2006           | Mutton & Goat Meat        | 3                                                           |

Dietary calcium and zinc deficiency risks are decreasing but remain prevalent

| FAO countrycode | Country       | Reference year | Food item                 | Gross food supply (g capita <sup>-1</sup> d <sup>-1</sup> ) |
|-----------------|---------------|----------------|---------------------------|-------------------------------------------------------------|
| 175             | Guinea-Bissau | 2006           | Nuts                      | 2                                                           |
| 175             | Guinea-Bissau | 2006           | Offals, Edible            | 4                                                           |
| 175             | Guinea-Bissau | 2006           | Oilcrops Oil, Other       | 3                                                           |
| 175             | Guinea-Bissau | 2006           | Oilcrops, Other           | 2                                                           |
| 175             | Guinea-Bissau | 2006           | Onions                    | 4                                                           |
| 175             | Guinea-Bissau | 2006           | Oranges, Mandarines       | 15                                                          |
| 175             | Guinea-Bissau | 2006           | Palm Oil                  | 9                                                           |
| 175             | Guinea-Bissau | 2006           | Palmkernel Oil            | 7                                                           |
| 175             | Guinea-Bissau | 2006           | Pelagic Fish              | 1                                                           |
| 175             | Guinea-Bissau | 2006           | Pigmeat                   | 22                                                          |
| 175             | Guinea-Bissau | 2006           | Plantains                 | 70                                                          |
| 175             | Guinea-Bissau | 2006           | Poultry Meat              | 4                                                           |
| 175             | Guinea-Bissau | 2006           | Pulses, Other             | 3                                                           |
| 175             | Guinea-Bissau | 2006           | Rice (Milled Equivalent)  | 201                                                         |
| 175             | Guinea-Bissau | 2006           | Roots, Other              | 120                                                         |
| 175             | Guinea-Bissau | 2006           | Sorghum                   | 36                                                          |
| 175             | Guinea-Bissau | 2006           | Soyabean Oil              | 5                                                           |
| 175             | Guinea-Bissau | 2006           | Sugar, Refined Equivalent | 28                                                          |
| 175             | Guinea-Bissau | 2006           | Sweeteners, Other         | 1                                                           |
| 175             | Guinea-Bissau | 2006           | Tomatoes                  | 2                                                           |
| 175             | Guinea-Bissau | 2006           | Vegetables, Other         | 41                                                          |
| 175             | Guinea-Bissau | 2006           | Wheat                     | 31                                                          |
| 175             | Guinea-Bissau | 2006           | Wine                      | 6                                                           |
| 175             | Guinea-Bissau | 2007           | Bananas                   | 10                                                          |
| 175             | Guinea-Bissau | 2007           | Beans                     | 4                                                           |
| 175             | Guinea-Bissau | 2007           | Beer                      | 12                                                          |
| 175             | Guinea-Bissau | 2007           | Beverages, Alcoholic      | 2                                                           |
| 175             | Guinea-Bissau | 2007           | Beverages, Fermented      | 51                                                          |
| 175             | Guinea-Bissau | 2007           | Bovine Meat               | 10                                                          |
| 175             | Guinea-Bissau | 2007           | Cassava                   | 80                                                          |
| 175             | Guinea-Bissau | 2007           | Cereals, Other            | 3                                                           |
| 175             | Guinea-Bissau | 2007           | Coconut Oil               | 1                                                           |
| 175             | Guinea-Bissau | 2007           | Coconuts - Incl Copra     | 6                                                           |
| 175             | Guinea-Bissau | 2007           | Crustaceans               | 1                                                           |
| 175             | Guinea-Bissau | 2007           | Demersal Fish             | 1                                                           |
| 175             | Guinea-Bissau | 2007           | Eggs                      | 2                                                           |
| 175             | Guinea-Bissau | 2007           | Fats, Animals, Raw        | 2                                                           |
| 175             | Guinea-Bissau | 2007           | Fruits, Other             | 40                                                          |
| 175             | Guinea-Bissau | 2007           | Groundnut Oil             | 10                                                          |
| 175             | Guinea-Bissau | 2007           | Groundnuts (Shelled Eq)   | 3                                                           |
| 175             | Guinea-Bissau | 2007           | Lemons, Limes             | 7                                                           |
| 175             | Guinea-Bissau | 2007           | Maize                     | 42                                                          |
| 175             | Guinea-Bissau | 2007           | Milk, Whole               | 43                                                          |
| 175             | Guinea-Bissau | 2007           | Millet                    | 50                                                          |
| 175             | Guinea-Bissau | 2007           | Mutton & Goat Meat        | 4                                                           |
| 175             | Guinea-Bissau | 2007           | Nuts                      | 3                                                           |
| 175             | Guinea-Bissau | 2007           | Offals, Edible            | 4                                                           |
| 175             | Guinea-Bissau | 2007           | Oilcrops Oil, Other       | 2                                                           |
| 175             | Guinea-Bissau | 2007           | Oilcrops, Other           | 2                                                           |
| 175             | Guinea-Bissau | 2007           | Onions                    | 3                                                           |
| 175             | Guinea-Bissau | 2007           | Oranges, Mandarines       | 11                                                          |
| 175             | Guinea-Bissau | 2007           | Palm Oil                  | 12                                                          |
| 175             | Guinea-Bissau | 2007           | Palmkernel Oil            | 7                                                           |
| 175             | Guinea-Bissau | 2007           | Pelagic Fish              | 2                                                           |
| 175             | Guinea-Bissau | 2007           | Pigmeat                   | 23                                                          |
| 175             | Guinea-Bissau | 2007           | Pineapples                | 1                                                           |
| 175             | Guinea-Bissau | 2007           | Plantains                 | 66                                                          |
| 175             | Guinea-Bissau | 2007           | Potatoes                  | 1                                                           |
| 175             | Guinea-Bissau | 2007           | Poultry Meat              | 4                                                           |
| 175             | Guinea-Bissau | 2007           | Pulses, Other             | 5                                                           |
| 175             | Guinea-Bissau | 2007           | Rice (Milled Equivalent)  | 214                                                         |
| 175             | Guinea-Bissau | 2007           | Roots, Other              | 118                                                         |
| 175             | Guinea-Bissau | 2007           | Sorghum                   | 21                                                          |
| 175             | Guinea-Bissau | 2007           | Soyabean Oil              | 4                                                           |
| 175             | Guinea-Bissau | 2007           | Sugar, Refined Equivalent | 28                                                          |
| 175             | Guinea-Bissau | 2007           | Sweeteners, Other         | 1                                                           |
| 175             | Guinea-Bissau | 2007           | Tomatoes                  | 1                                                           |
| 175             | Guinea-Bissau | 2007           | Vegetables, Other         | 41                                                          |
| 175             | Guinea-Bissau | 2007           | Wheat                     | 32                                                          |
| 175             | Guinea-Bissau | 2007           | Wine                      | 8                                                           |
| 175             | Guinea-Bissau | 2008           | Bananas                   | 10                                                          |
| 175             | Guinea-Bissau | 2008           | Beans                     | 1                                                           |
| 175             | Guinea-Bissau | 2008           | Beer                      | 10                                                          |
| 175             | Guinea-Bissau | 2008           | Beverages, Alcoholic      | 2                                                           |
| 175             | Guinea-Bissau | 2008           | Beverages, Fermented      | 49                                                          |
| 175             | Guinea-Bissau | 2008           | Bovine Meat               | 12                                                          |
| 175             | Guinea-Bissau | 2008           | Cassava                   | 86                                                          |
| 175             | Guinea-Bissau | 2008           | Cereals, Other            | 3                                                           |
| 175             | Guinea-Bissau | 2008           | Coconut Oil               | 1                                                           |
| 175             | Guinea-Bissau | 2008           | Coconuts - Incl Copra     | 6                                                           |
| 175             | Guinea-Bissau | 2008           | Demersal Fish             | 4                                                           |
| 175             | Guinea-Bissau | 2008           | Eggs                      | 2                                                           |
| 175             | Guinea-Bissau | 2008           | Fats, Animals, Raw        | 2                                                           |
| 175             | Guinea-Bissau | 2008           | Fruits, Other             | 37                                                          |
| 175             | Guinea-Bissau | 2008           | Groundnut Oil             | 12                                                          |
| 175             | Guinea-Bissau | 2008           | Groundnuts (Shelled Eq)   | 3                                                           |
| 175             | Guinea-Bissau | 2008           | Lemons, Limes             | 7                                                           |
| 175             | Guinea-Bissau | 2008           | Maize                     | 41                                                          |
| 175             | Guinea-Bissau | 2008           | Marine Fish, Other        | 5                                                           |
| 175             | Guinea-Bissau | 2008           | Milk, Whole               | 44                                                          |
| 175             | Guinea-Bissau | 2008           | Millet                    | 43                                                          |
| 175             | Guinea-Bissau | 2008           | Mutton & Goat Meat        | 4                                                           |
| 175             | Guinea-Bissau | 2008           | Nuts                      | 4                                                           |
| 175             | Guinea-Bissau | 2008           | Offals, Edible            | 4                                                           |
| 175             | Guinea-Bissau | 2008           | Oilcrops Oil, Other       | 2                                                           |
| 175             | Guinea-Bissau | 2008           | Oilcrops, Other           | 2                                                           |
| 175             | Guinea-Bissau | 2008           | Onions                    | 4                                                           |

Dietary calcium and zinc deficiency risks are decreasing but remain prevalent

| FAO countrycode | Country       | Reference year | Food item                 | Gross food supply (g capita <sup>-1</sup> d <sup>-1</sup> ) |
|-----------------|---------------|----------------|---------------------------|-------------------------------------------------------------|
| 175             | Guinea-Bissau | 2008           | Oranges, Mandarines       | 11                                                          |
| 175             | Guinea-Bissau | 2008           | Palm Oil                  | 10                                                          |
| 175             | Guinea-Bissau | 2008           | Palmkernel Oil            | 7                                                           |
| 175             | Guinea-Bissau | 2008           | Pelagic Fish              | 1                                                           |
| 175             | Guinea-Bissau | 2008           | Pigmeat                   | 23                                                          |
| 175             | Guinea-Bissau | 2008           | Pineapples                | 1                                                           |
| 175             | Guinea-Bissau | 2008           | Plantains                 | 69                                                          |
| 175             | Guinea-Bissau | 2008           | Potatoes                  | 1                                                           |
| 175             | Guinea-Bissau | 2008           | Poultry Meat              | 5                                                           |
| 175             | Guinea-Bissau | 2008           | Pulses, Other             | 5                                                           |
| 175             | Guinea-Bissau | 2008           | Rice (Milled Equivalent)  | 237                                                         |
| 175             | Guinea-Bissau | 2008           | Roots, Other              | 115                                                         |
| 175             | Guinea-Bissau | 2008           | Sorghum                   | 26                                                          |
| 175             | Guinea-Bissau | 2008           | Soyabean Oil              | 5                                                           |
| 175             | Guinea-Bissau | 2008           | Sugar, Refined Equivalent | 29                                                          |
| 175             | Guinea-Bissau | 2008           | Sweeteners, Other         | 1                                                           |
| 175             | Guinea-Bissau | 2008           | Tomatoes                  | 1                                                           |
| 175             | Guinea-Bissau | 2008           | Vegetables, Other         | 47                                                          |
| 175             | Guinea-Bissau | 2008           | Wheat                     | 32                                                          |
| 175             | Guinea-Bissau | 2008           | Wine                      | 8                                                           |
| 175             | Guinea-Bissau | 2009           | Bananas                   | 11                                                          |
| 175             | Guinea-Bissau | 2009           | Beans                     | 1                                                           |
| 175             | Guinea-Bissau | 2009           | Beer                      | 15                                                          |
| 175             | Guinea-Bissau | 2009           | Beverages, Alcoholic      | 2                                                           |
| 175             | Guinea-Bissau | 2009           | Beverages, Fermented      | 40                                                          |
| 175             | Guinea-Bissau | 2009           | Bovine Meat               | 11                                                          |
| 175             | Guinea-Bissau | 2009           | Cassava                   | 49                                                          |
| 175             | Guinea-Bissau | 2009           | Cereals, Other            | 4                                                           |
| 175             | Guinea-Bissau | 2009           | Coconut Oil               | 1                                                           |
| 175             | Guinea-Bissau | 2009           | Coconuts - Incl Copra     | 5                                                           |
| 175             | Guinea-Bissau | 2009           | Demersal Fish             | 2                                                           |
| 175             | Guinea-Bissau | 2009           | Eggs                      | 2                                                           |
| 175             | Guinea-Bissau | 2009           | Fats, Animals, Raw        | 2                                                           |
| 175             | Guinea-Bissau | 2009           | Fruits, Other             | 44                                                          |
| 175             | Guinea-Bissau | 2009           | Groundnut Oil             | 12                                                          |
| 175             | Guinea-Bissau | 2009           | Groundnuts (Shelled Eq)   | 4                                                           |
| 175             | Guinea-Bissau | 2009           | Lemons, Limes             | 7                                                           |
| 175             | Guinea-Bissau | 2009           | Maize                     | 39                                                          |
| 175             | Guinea-Bissau | 2009           | Milk, Whole               | 44                                                          |
| 175             | Guinea-Bissau | 2009           | Millet                    | 36                                                          |
| 175             | Guinea-Bissau | 2009           | Mutton & Goat Meat        | 4                                                           |
| 175             | Guinea-Bissau | 2009           | Nuts                      | 4                                                           |
| 175             | Guinea-Bissau | 2009           | Offals, Edible            | 4                                                           |
| 175             | Guinea-Bissau | 2009           | Oilcrops Oil, Other       | 2                                                           |
| 175             | Guinea-Bissau | 2009           | Oilcrops, Other           | 2                                                           |
| 175             | Guinea-Bissau | 2009           | Onions                    | 5                                                           |
| 175             | Guinea-Bissau | 2009           | Oranges, Mandarines       | 11                                                          |
| 175             | Guinea-Bissau | 2009           | Palm Oil                  | 11                                                          |
| 175             | Guinea-Bissau | 2009           | Palmkernel Oil            | 7                                                           |
| 175             | Guinea-Bissau | 2009           | Pelagic Fish              | 1                                                           |
| 175             | Guinea-Bissau | 2009           | Pigmeat                   | 23                                                          |
| 175             | Guinea-Bissau | 2009           | Pineapples                | 1                                                           |
| 175             | Guinea-Bissau | 2009           | Plantains                 | 68                                                          |
| 175             | Guinea-Bissau | 2009           | Potatoes                  | 1                                                           |
| 175             | Guinea-Bissau | 2009           | Poultry Meat              | 5                                                           |
| 175             | Guinea-Bissau | 2009           | Pulses, Other             | 5                                                           |
| 175             | Guinea-Bissau | 2009           | Rice (Milled Equivalent)  | 250                                                         |
| 175             | Guinea-Bissau | 2009           | Roots, Other              | 114                                                         |
| 175             | Guinea-Bissau | 2009           | Sorghum                   | 20                                                          |
| 175             | Guinea-Bissau | 2009           | Soyabean Oil              | 5                                                           |
| 175             | Guinea-Bissau | 2009           | Sugar, Refined Equivalent | 30                                                          |
| 175             | Guinea-Bissau | 2009           | Sweeteners, Other         | 2                                                           |
| 175             | Guinea-Bissau | 2009           | Tomatoes                  | 3                                                           |
| 175             | Guinea-Bissau | 2009           | Vegetables, Other         | 41                                                          |
| 175             | Guinea-Bissau | 2009           | Wheat                     | 29                                                          |
| 175             | Guinea-Bissau | 2009           | Wine                      | 7                                                           |
| 175             | Guinea-Bissau | 2010           | Bananas                   | 13                                                          |
| 175             | Guinea-Bissau | 2010           | Beans                     | 2                                                           |
| 175             | Guinea-Bissau | 2010           | Beer                      | 14                                                          |
| 175             | Guinea-Bissau | 2010           | Beverages, Alcoholic      | 2                                                           |
| 175             | Guinea-Bissau | 2010           | Beverages, Fermented      | 39                                                          |
| 175             | Guinea-Bissau | 2010           | Bovine Meat               | 11                                                          |
| 175             | Guinea-Bissau | 2010           | Cassava                   | 118                                                         |
| 175             | Guinea-Bissau | 2010           | Cereals, Other            | 4                                                           |
| 175             | Guinea-Bissau | 2010           | Coconut Oil               | 1                                                           |
| 175             | Guinea-Bissau | 2010           | Coconuts - Incl Copra     | 5                                                           |
| 175             | Guinea-Bissau | 2010           | Demersal Fish             | 2                                                           |
| 175             | Guinea-Bissau | 2010           | Eggs                      | 2                                                           |
| 175             | Guinea-Bissau | 2010           | Fats, Animals, Raw        | 2                                                           |
| 175             | Guinea-Bissau | 2010           | Fruits, Other             | 43                                                          |
| 175             | Guinea-Bissau | 2010           | Groundnut Oil             | 12                                                          |
| 175             | Guinea-Bissau | 2010           | Groundnuts (Shelled Eq)   | 4                                                           |
| 175             | Guinea-Bissau | 2010           | Lemons, Limes             | 7                                                           |
| 175             | Guinea-Bissau | 2010           | Maize                     | 37                                                          |
| 175             | Guinea-Bissau | 2010           | Milk, Whole               | 48                                                          |
| 175             | Guinea-Bissau | 2010           | Millet                    | 31                                                          |
| 175             | Guinea-Bissau | 2010           | Mutton & Goat Meat        | 4                                                           |
| 175             | Guinea-Bissau | 2010           | Nuts                      | 4                                                           |
| 175             | Guinea-Bissau | 2010           | Offals, Edible            | 4                                                           |
| 175             | Guinea-Bissau | 2010           | Oilcrops Oil, Other       | 1                                                           |
| 175             | Guinea-Bissau | 2010           | Oilcrops, Other           | 1                                                           |
| 175             | Guinea-Bissau | 2010           | Onions                    | 5                                                           |
| 175             | Guinea-Bissau | 2010           | Oranges, Mandarines       | 11                                                          |
| 175             | Guinea-Bissau | 2010           | Palm Oil                  | 11                                                          |
| 175             | Guinea-Bissau | 2010           | Palmkernel Oil            | 7                                                           |
| 175             | Guinea-Bissau | 2010           | Pelagic Fish              | 1                                                           |
| 175             | Guinea-Bissau | 2010           | Pigmeat                   | 24                                                          |

Dietary calcium and zinc deficiency risks are decreasing but remain prevalent

| FAO countrycode | Country       | Reference year | Food item                 | Gross food supply (g capita <sup>-1</sup> d <sup>-1</sup> ) |
|-----------------|---------------|----------------|---------------------------|-------------------------------------------------------------|
| 175             | Guinea-Bissau | 2010           | Pineapples                | 1                                                           |
| 175             | Guinea-Bissau | 2010           | Plantains                 | 67                                                          |
| 175             | Guinea-Bissau | 2010           | Potatoes                  | 6                                                           |
| 175             | Guinea-Bissau | 2010           | Poultry Meat              | 5                                                           |
| 175             | Guinea-Bissau | 2010           | Pulses, Other             | 5                                                           |
| 175             | Guinea-Bissau | 2010           | Rice (Milled Equivalent)  | 251                                                         |
| 175             | Guinea-Bissau | 2010           | Roots, Other              | 90                                                          |
| 175             | Guinea-Bissau | 2010           | Sorghum                   | 23                                                          |
| 175             | Guinea-Bissau | 2010           | Soyabean Oil              | 5                                                           |
| 175             | Guinea-Bissau | 2010           | Sugar, Refined Equivalent | 31                                                          |
| 175             | Guinea-Bissau | 2010           | Sweeteners, Other         | 2                                                           |
| 175             | Guinea-Bissau | 2010           | Tomatoes                  | 2                                                           |
| 175             | Guinea-Bissau | 2010           | Vegetables, Other         | 51                                                          |
| 175             | Guinea-Bissau | 2010           | Wheat                     | 30                                                          |
| 175             | Guinea-Bissau | 2010           | Wine                      | 9                                                           |
| 175             | Guinea-Bissau | 2011           | Bananas                   | 12                                                          |
| 175             | Guinea-Bissau | 2011           | Beans                     | 2                                                           |
| 175             | Guinea-Bissau | 2011           | Beer                      | 16                                                          |
| 175             | Guinea-Bissau | 2011           | Beverages, Alcoholic      | 2                                                           |
| 175             | Guinea-Bissau | 2011           | Beverages, Fermented      | 36                                                          |
| 175             | Guinea-Bissau | 2011           | Bovine Meat               | 11                                                          |
| 175             | Guinea-Bissau | 2011           | Cassava                   | 102                                                         |
| 175             | Guinea-Bissau | 2011           | Cereals, Other            | 3                                                           |
| 175             | Guinea-Bissau | 2011           | Coconuts - Incl Copra     | 5                                                           |
| 175             | Guinea-Bissau | 2011           | Demersal Fish             | 2                                                           |
| 175             | Guinea-Bissau | 2011           | Eggs                      | 2                                                           |
| 175             | Guinea-Bissau | 2011           | Fats, Animals, Raw        | 2                                                           |
| 175             | Guinea-Bissau | 2011           | Fruits, Other             | 46                                                          |
| 175             | Guinea-Bissau | 2011           | Groundnut Oil             | 13                                                          |
| 175             | Guinea-Bissau | 2011           | Groundnuts (Shelled Eq)   | 4                                                           |
| 175             | Guinea-Bissau | 2011           | Lemons, Limes             | 7                                                           |
| 175             | Guinea-Bissau | 2011           | Maize                     | 28                                                          |
| 175             | Guinea-Bissau | 2011           | Milk, Whole               | 46                                                          |
| 175             | Guinea-Bissau | 2011           | Millet                    | 25                                                          |
| 175             | Guinea-Bissau | 2011           | Mutton & Goat Meat        | 4                                                           |
| 175             | Guinea-Bissau | 2011           | Nuts                      | 4                                                           |
| 175             | Guinea-Bissau | 2011           | Offals, Edible            | 4                                                           |
| 175             | Guinea-Bissau | 2011           | Oilcrops Oil, Other       | 3                                                           |
| 175             | Guinea-Bissau | 2011           | Oilcrops, Other           | 1                                                           |
| 175             | Guinea-Bissau | 2011           | Onions                    | 5                                                           |
| 175             | Guinea-Bissau | 2011           | Oranges, Mandarines       | 11                                                          |
| 175             | Guinea-Bissau | 2011           | Palm Oil                  | 11                                                          |
| 175             | Guinea-Bissau | 2011           | Palmkernel Oil            | 7                                                           |
| 175             | Guinea-Bissau | 2011           | Pelagic Fish              | 1                                                           |
| 175             | Guinea-Bissau | 2011           | Pigmeat                   | 25                                                          |
| 175             | Guinea-Bissau | 2011           | Pineapples                | 1                                                           |
| 175             | Guinea-Bissau | 2011           | Plantains                 | 67                                                          |
| 175             | Guinea-Bissau | 2011           | Potatoes                  | 5                                                           |
| 175             | Guinea-Bissau | 2011           | Poultry Meat              | 6                                                           |
| 175             | Guinea-Bissau | 2011           | Pulses, Other             | 5                                                           |
| 175             | Guinea-Bissau | 2011           | Rice (Milled Equivalent)  | 251                                                         |
| 175             | Guinea-Bissau | 2011           | Roots, Other              | 88                                                          |
| 175             | Guinea-Bissau | 2011           | Sorghum                   | 25                                                          |
| 175             | Guinea-Bissau | 2011           | Soyabean Oil              | 4                                                           |
| 175             | Guinea-Bissau | 2011           | Sugar, Refined Equivalent | 29                                                          |
| 175             | Guinea-Bissau | 2011           | Sweeteners, Other         | 2                                                           |
| 175             | Guinea-Bissau | 2011           | Tomatoes                  | 3                                                           |
| 175             | Guinea-Bissau | 2011           | Vegetables, Other         | 47                                                          |
| 175             | Guinea-Bissau | 2011           | Wheat                     | 32                                                          |
| 175             | Guinea-Bissau | 2011           | Wine                      | 12                                                          |
| 93              | Haiti         | 1992           | Bananas                   | 64                                                          |
| 93              | Haiti         | 1992           | Beans                     | 29                                                          |
| 93              | Haiti         | 1992           | Beverages, Alcoholic      | 19                                                          |
| 93              | Haiti         | 1992           | Bovine Meat               | 10                                                          |
| 93              | Haiti         | 1992           | Cassava                   | 89                                                          |
| 93              | Haiti         | 1992           | Cereals, Other            | 2                                                           |
| 93              | Haiti         | 1992           | Cocoa Beans               | 1                                                           |
| 93              | Haiti         | 1992           | Coconuts - Incl Copra     | 9                                                           |
| 93              | Haiti         | 1992           | Coffee                    | 7                                                           |
| 93              | Haiti         | 1992           | Demersal Fish             | 3                                                           |
| 93              | Haiti         | 1992           | Eggs                      | 1                                                           |
| 93              | Haiti         | 1992           | Fats, Animals, Raw        | 1                                                           |
| 93              | Haiti         | 1992           | Fruits, Other             | 91                                                          |
| 93              | Haiti         | 1992           | Grapefruit                | 3                                                           |
| 93              | Haiti         | 1992           | Groundnuts (Shelled Eq)   | 5                                                           |
| 93              | Haiti         | 1992           | Lemons, Limes             | 4                                                           |
| 93              | Haiti         | 1992           | Maize                     | 69                                                          |
| 93              | Haiti         | 1992           | Marine Fish, Other        | 1                                                           |
| 93              | Haiti         | 1992           | Meat, Other               | 3                                                           |
| 93              | Haiti         | 1992           | Milk, Whole               | 28                                                          |
| 93              | Haiti         | 1992           | Mutton & Goat Meat        | 2                                                           |
| 93              | Haiti         | 1992           | Offals, Edible            | 2                                                           |
| 93              | Haiti         | 1992           | Onions                    | 1                                                           |
| 93              | Haiti         | 1992           | Oranges, Mandarines       | 12                                                          |
| 93              | Haiti         | 1992           | Palm Oil                  | 7                                                           |
| 93              | Haiti         | 1992           | Pelagic Fish              | 2                                                           |
| 93              | Haiti         | 1992           | Pigmeat                   | 7                                                           |
| 93              | Haiti         | 1992           | Pineapples                | 1                                                           |
| 93              | Haiti         | 1992           | Plantains                 | 56                                                          |
| 93              | Haiti         | 1992           | Potatoes                  | 2                                                           |
| 93              | Haiti         | 1992           | Poultry Meat              | 2                                                           |
| 93              | Haiti         | 1992           | Pulses, Other             | 13                                                          |
| 93              | Haiti         | 1992           | Rice (Milled Equivalent)  | 60                                                          |
| 93              | Haiti         | 1992           | Roots, Other              | 10                                                          |
| 93              | Haiti         | 1992           | Sesameseed                | 1                                                           |
| 93              | Haiti         | 1992           | Sorghum                   | 30                                                          |
| 93              | Haiti         | 1992           | Soyabean Oil              | 3                                                           |

Dietary calcium and zinc deficiency risks are decreasing but remain prevalent

| FAO countrycode | Country | Reference year | Food item                 | Gross food supply (g capita <sup>-1</sup> d <sup>-1</sup> ) |
|-----------------|---------|----------------|---------------------------|-------------------------------------------------------------|
| 93              | Haiti   | 1992           | Sugar, Non-Centrifugal    | 15                                                          |
| 93              | Haiti   | 1992           | Sugar, Refined Equivalent | 32                                                          |
| 93              | Haiti   | 1992           | Sweet Potatoes            | 58                                                          |
| 93              | Haiti   | 1992           | Tomatoes                  | 1                                                           |
| 93              | Haiti   | 1992           | Vegetables, Other         | 78                                                          |
| 93              | Haiti   | 1992           | Wheat                     | 75                                                          |
| 93              | Haiti   | 1992           | Yams                      | 63                                                          |
| 93              | Haiti   | 1993           | Bananas                   | 56                                                          |
| 93              | Haiti   | 1993           | Beans                     | 21                                                          |
| 93              | Haiti   | 1993           | Beverages, Alcoholic      | 18                                                          |
| 93              | Haiti   | 1993           | Bovine Meat               | 10                                                          |
| 93              | Haiti   | 1993           | Cassava                   | 91                                                          |
| 93              | Haiti   | 1993           | Cereals, Other            | 4                                                           |
| 93              | Haiti   | 1993           | Cocoa Beans               | 1                                                           |
| 93              | Haiti   | 1993           | Coconuts - Incl Copra     | 10                                                          |
| 93              | Haiti   | 1993           | Coffee                    | 9                                                           |
| 93              | Haiti   | 1993           | Demersal Fish             | 3                                                           |
| 93              | Haiti   | 1993           | Eggs                      | 1                                                           |
| 93              | Haiti   | 1993           | Fats, Animals, Raw        | 1                                                           |
| 93              | Haiti   | 1993           | Fruits, Other             | 68                                                          |
| 93              | Haiti   | 1993           | Grapefruit                | 2                                                           |
| 93              | Haiti   | 1993           | Groundnuts (Shelled Eq)   | 5                                                           |
| 93              | Haiti   | 1993           | Lemons, Limes             | 3                                                           |
| 93              | Haiti   | 1993           | Maize                     | 64                                                          |
| 93              | Haiti   | 1993           | Marine Fish, Other        | 2                                                           |
| 93              | Haiti   | 1993           | Meat, Other               | 3                                                           |
| 93              | Haiti   | 1993           | Milk, Whole               | 26                                                          |
| 93              | Haiti   | 1993           | Mutton & Goat Meat        | 2                                                           |
| 93              | Haiti   | 1993           | Offals, Edible            | 2                                                           |
| 93              | Haiti   | 1993           | Onions                    | 1                                                           |
| 93              | Haiti   | 1993           | Oranges, Mandarines       | 10                                                          |
| 93              | Haiti   | 1993           | Palm Oil                  | 7                                                           |
| 93              | Haiti   | 1993           | Pelagic Fish              | 1                                                           |
| 93              | Haiti   | 1993           | Pigmeat                   | 7                                                           |
| 93              | Haiti   | 1993           | Pineapples                | 1                                                           |
| 93              | Haiti   | 1993           | Plantains                 | 54                                                          |
| 93              | Haiti   | 1993           | Potatoes                  | 2                                                           |
| 93              | Haiti   | 1993           | Poultry Meat              | 2                                                           |
| 93              | Haiti   | 1993           | Pulses, Other             | 12                                                          |
| 93              | Haiti   | 1993           | Rice (Milled Equivalent)  | 84                                                          |
| 93              | Haiti   | 1993           | Roots, Other              | 12                                                          |
| 93              | Haiti   | 1993           | Sesameseed                | 1                                                           |
| 93              | Haiti   | 1993           | Sorghum                   | 29                                                          |
| 93              | Haiti   | 1993           | Soyabean Oil              | 2                                                           |
| 93              | Haiti   | 1993           | Sugar, Non-Centrifugal    | 14                                                          |
| 93              | Haiti   | 1993           | Sugar, Refined Equivalent | 28                                                          |
| 93              | Haiti   | 1993           | Sweet Potatoes            | 55                                                          |
| 93              | Haiti   | 1993           | Tomatoes                  | 1                                                           |
| 93              | Haiti   | 1993           | Vegetables, Other         | 70                                                          |
| 93              | Haiti   | 1993           | Wheat                     | 76                                                          |
| 93              | Haiti   | 1993           | Yams                      | 58                                                          |
| 93              | Haiti   | 1994           | Bananas                   | 62                                                          |
| 93              | Haiti   | 1994           | Beans                     | 24                                                          |
| 93              | Haiti   | 1994           | Beverages, Alcoholic      | 18                                                          |
| 93              | Haiti   | 1994           | Bovine Meat               | 10                                                          |
| 93              | Haiti   | 1994           | Cassava                   | 80                                                          |
| 93              | Haiti   | 1994           | Cereals, Other            | 4                                                           |
| 93              | Haiti   | 1994           | Cocoa Beans               | 1                                                           |
| 93              | Haiti   | 1994           | Coconuts - Incl Copra     | 10                                                          |
| 93              | Haiti   | 1994           | Coffee                    | 9                                                           |
| 93              | Haiti   | 1994           | Demersal Fish             | 2                                                           |
| 93              | Haiti   | 1994           | Eggs                      | 1                                                           |
| 93              | Haiti   | 1994           | Fats, Animals, Raw        | 1                                                           |
| 93              | Haiti   | 1994           | Fruits, Other             | 88                                                          |
| 93              | Haiti   | 1994           | Grapefruit                | 3                                                           |
| 93              | Haiti   | 1994           | Groundnuts (Shelled Eq)   | 6                                                           |
| 93              | Haiti   | 1994           | Lemons, Limes             | 3                                                           |
| 93              | Haiti   | 1994           | Maize                     | 66                                                          |
| 93              | Haiti   | 1994           | Marine Fish, Other        | 2                                                           |
| 93              | Haiti   | 1994           | Meat, Other               | 3                                                           |
| 93              | Haiti   | 1994           | Milk, Whole               | 26                                                          |
| 93              | Haiti   | 1994           | Mutton & Goat Meat        | 1                                                           |
| 93              | Haiti   | 1994           | Offals, Edible            | 2                                                           |
| 93              | Haiti   | 1994           | Oilcrops Oil, Other       | 1                                                           |
| 93              | Haiti   | 1994           | Onions                    | 1                                                           |
| 93              | Haiti   | 1994           | Oranges, Mandarines       | 11                                                          |
| 93              | Haiti   | 1994           | Palm Oil                  | 7                                                           |
| 93              | Haiti   | 1994           | Pelagic Fish              | 1                                                           |
| 93              | Haiti   | 1994           | Pigmeat                   | 8                                                           |
| 93              | Haiti   | 1994           | Pineapples                | 1                                                           |
| 93              | Haiti   | 1994           | Plantains                 | 53                                                          |
| 93              | Haiti   | 1994           | Potatoes                  | 2                                                           |
| 93              | Haiti   | 1994           | Poultry Meat              | 3                                                           |
| 93              | Haiti   | 1994           | Pulses, Other             | 13                                                          |
| 93              | Haiti   | 1994           | Rice (Milled Equivalent)  | 86                                                          |
| 93              | Haiti   | 1994           | Roots, Other              | 12                                                          |
| 93              | Haiti   | 1994           | Sesameseed                | 1                                                           |
| 93              | Haiti   | 1994           | Sorghum                   | 21                                                          |
| 93              | Haiti   | 1994           | Soyabean Oil              | 4                                                           |
| 93              | Haiti   | 1994           | Sugar, Non-Centrifugal    | 13                                                          |
| 93              | Haiti   | 1994           | Sugar, Refined Equivalent | 28                                                          |
| 93              | Haiti   | 1994           | Sweet Potatoes            | 53                                                          |
| 93              | Haiti   | 1994           | Tomatoes                  | 1                                                           |
| 93              | Haiti   | 1994           | Vegetables, Other         | 73                                                          |
| 93              | Haiti   | 1994           | Wheat                     | 67                                                          |
| 93              | Haiti   | 1994           | Yams                      | 60                                                          |
| 93              | Haiti   | 1995           | Bananas                   | 62                                                          |



## Dietary calcium and zinc deficiency risks are decreasing but remain prevalent

| FAO countrycode | Country | Reference year | Food item                 | Gross food supply (g capita <sup>-1</sup> d <sup>-1</sup> ) |
|-----------------|---------|----------------|---------------------------|-------------------------------------------------------------|
| 93              | Haiti   | 1995           | Beans                     | 25                                                          |
| 93              | Haiti   | 1995           | Beer                      | 1                                                           |
| 93              | Haiti   | 1995           | Beverages, Alcoholic      | 21                                                          |
| 93              | Haiti   | 1995           | Bovine Meat               | 9                                                           |
| 93              | Haiti   | 1995           | Cassava                   | 103                                                         |
| 93              | Haiti   | 1995           | Cereals, Other            | 4                                                           |
| 93              | Haiti   | 1995           | Cocoa Beans               | 1                                                           |
| 93              | Haiti   | 1995           | Coconuts - Incl Copra     | 10                                                          |
| 93              | Haiti   | 1995           | Coffee                    | 7                                                           |
| 93              | Haiti   | 1995           | Eggs                      | 1                                                           |
| 93              | Haiti   | 1995           | Fats, Animals, Raw        | 2                                                           |
| 93              | Haiti   | 1995           | Freshwater Fish           | 3                                                           |
| 93              | Haiti   | 1995           | Fruits, Other             | 80                                                          |
| 93              | Haiti   | 1995           | Grapefruit                | 3                                                           |
| 93              | Haiti   | 1995           | Groundnuts (Shelled Eq)   | 6                                                           |
| 93              | Haiti   | 1995           | Lemons, Limes             | 3                                                           |
| 93              | Haiti   | 1995           | Maize                     | 64                                                          |
| 93              | Haiti   | 1995           | Marine Fish, Other        | 1                                                           |
| 93              | Haiti   | 1995           | Meat, Other               | 2                                                           |
| 93              | Haiti   | 1995           | Milk, Whole               | 31                                                          |
| 93              | Haiti   | 1995           | Mutton & Goat Meat        | 1                                                           |
| 93              | Haiti   | 1995           | Offals, Edible            | 2                                                           |
| 93              | Haiti   | 1995           | Onions                    | 1                                                           |
| 93              | Haiti   | 1995           | Oranges, Mandarines       | 10                                                          |
| 93              | Haiti   | 1995           | Palm Oil                  | 2                                                           |
| 93              | Haiti   | 1995           | Pelagic Fish              | 2                                                           |
| 93              | Haiti   | 1995           | Pigmeat                   | 8                                                           |
| 93              | Haiti   | 1995           | Pineapples                | 1                                                           |
| 93              | Haiti   | 1995           | Plantains                 | 52                                                          |
| 93              | Haiti   | 1995           | Potatoes                  | 2                                                           |
| 93              | Haiti   | 1995           | Poultry Meat              | 4                                                           |
| 93              | Haiti   | 1995           | Pulses, Other             | 10                                                          |
| 93              | Haiti   | 1995           | Rice (Milled Equivalent)  | 86                                                          |
| 93              | Haiti   | 1995           | Roots, Other              | 12                                                          |
| 93              | Haiti   | 1995           | Sesameseed                | 1                                                           |
| 93              | Haiti   | 1995           | Sorghum                   | 14                                                          |
| 93              | Haiti   | 1995           | Soyabean Oil              | 9                                                           |
| 93              | Haiti   | 1995           | Sugar, Non-Centrifugal    | 13                                                          |
| 93              | Haiti   | 1995           | Sugar, Refined Equivalent | 39                                                          |
| 93              | Haiti   | 1995           | Sweet Potatoes            | 56                                                          |
| 93              | Haiti   | 1995           | Sweeteners, Other         | 1                                                           |
| 93              | Haiti   | 1995           | Tomatoes                  | 1                                                           |
| 93              | Haiti   | 1995           | Vegetables, Other         | 67                                                          |
| 93              | Haiti   | 1995           | Wheat                     | 70                                                          |
| 93              | Haiti   | 1995           | Yams                      | 62                                                          |
| 93              | Haiti   | 1996           | Bananas                   | 62                                                          |
| 93              | Haiti   | 1996           | Beans                     | 19                                                          |
| 93              | Haiti   | 1996           | Beverages, Alcoholic      | 24                                                          |
| 93              | Haiti   | 1996           | Bovine Meat               | 10                                                          |
| 93              | Haiti   | 1996           | Cassava                   | 71                                                          |
| 93              | Haiti   | 1996           | Cereals, Other            | 1                                                           |
| 93              | Haiti   | 1996           | Cocoa Beans               | 1                                                           |
| 93              | Haiti   | 1996           | Coconuts - Incl Copra     | 11                                                          |
| 93              | Haiti   | 1996           | Coffee                    | 6                                                           |
| 93              | Haiti   | 1996           | Eggs                      | 1                                                           |
| 93              | Haiti   | 1996           | Fats, Animals, Raw        | 2                                                           |
| 93              | Haiti   | 1996           | Freshwater Fish           | 2                                                           |
| 93              | Haiti   | 1996           | Fruits, Other             | 79                                                          |
| 93              | Haiti   | 1996           | Grapefruit                | 3                                                           |
| 93              | Haiti   | 1996           | Groundnuts (Shelled Eq)   | 5                                                           |
| 93              | Haiti   | 1996           | Lemons, Limes             | 3                                                           |
| 93              | Haiti   | 1996           | Maize                     | 65                                                          |
| 93              | Haiti   | 1996           | Marine Fish, Other        | 1                                                           |
| 93              | Haiti   | 1996           | Meat, Other               | 3                                                           |
| 93              | Haiti   | 1996           | Milk, Whole               | 30                                                          |
| 93              | Haiti   | 1996           | Mutton & Goat Meat        | 2                                                           |
| 93              | Haiti   | 1996           | Offals, Edible            | 4                                                           |
| 93              | Haiti   | 1996           | Oilcrops Oil, Other       | 1                                                           |
| 93              | Haiti   | 1996           | Onions                    | 1                                                           |
| 93              | Haiti   | 1996           | Oranges, Mandarines       | 11                                                          |
| 93              | Haiti   | 1996           | Palm Oil                  | 2                                                           |
| 93              | Haiti   | 1996           | Peas                      | 1                                                           |
| 93              | Haiti   | 1996           | Pelagic Fish              | 3                                                           |
| 93              | Haiti   | 1996           | Pigmeat                   | 9                                                           |
| 93              | Haiti   | 1996           | Pineapples                | 1                                                           |
| 93              | Haiti   | 1996           | Plantains                 | 51                                                          |
| 93              | Haiti   | 1996           | Potatoes                  | 2                                                           |
| 93              | Haiti   | 1996           | Poultry Meat              | 5                                                           |
| 93              | Haiti   | 1996           | Pulses, Other             | 11                                                          |
| 93              | Haiti   | 1996           | Rice (Milled Equivalent)  | 95                                                          |
| 93              | Haiti   | 1996           | Roots, Other              | 12                                                          |
| 93              | Haiti   | 1996           | Sesameseed                | 1                                                           |
| 93              | Haiti   | 1996           | Sorghum                   | 14                                                          |
| 93              | Haiti   | 1996           | Soyabean Oil              | 8                                                           |
| 93              | Haiti   | 1996           | Sugar, Non-Centrifugal    | 11                                                          |
| 93              | Haiti   | 1996           | Sugar, Refined Equivalent | 37                                                          |
| 93              | Haiti   | 1996           | Sweet Potatoes            | 50                                                          |
| 93              | Haiti   | 1996           | Tomatoes                  | 7                                                           |
| 93              | Haiti   | 1996           | Vegetables, Other         | 80                                                          |
| 93              | Haiti   | 1996           | Wheat                     | 83                                                          |
| 93              | Haiti   | 1996           | Yams                      | 63                                                          |
| 93              | Haiti   | 1997           | Bananas                   | 63                                                          |
| 93              | Haiti   | 1997           | Beans                     | 21                                                          |
| 93              | Haiti   | 1997           | Beer                      | 1                                                           |
| 93              | Haiti   | 1997           | Beverages, Alcoholic      | 24                                                          |
| 93              | Haiti   | 1997           | Bovine Meat               | 10                                                          |
| 93              | Haiti   | 1997           | Cassava                   | 56                                                          |

Dietary calcium and zinc deficiency risks are decreasing but remain prevalent

| FAO countrycode | Country | Reference year | Food item                 | Gross food supply (g capita <sup>-1</sup> d <sup>-1</sup> ) |
|-----------------|---------|----------------|---------------------------|-------------------------------------------------------------|
| 93              | Haiti   | 1997           | Cereals, Other            | 2                                                           |
| 93              | Haiti   | 1997           | Cocoa Beans               | 1                                                           |
| 93              | Haiti   | 1997           | Coconuts - Incl Copra     | 10                                                          |
| 93              | Haiti   | 1997           | Coffee                    | 8                                                           |
| 93              | Haiti   | 1997           | Eggs                      | 1                                                           |
| 93              | Haiti   | 1997           | Fats, Animals, Raw        | 2                                                           |
| 93              | Haiti   | 1997           | Freshwater Fish           | 1                                                           |
| 93              | Haiti   | 1997           | Fruits, Other             | 76                                                          |
| 93              | Haiti   | 1997           | Grapefruit                | 2                                                           |
| 93              | Haiti   | 1997           | Groundnuts (Shelled Eq)   | 5                                                           |
| 93              | Haiti   | 1997           | Lemons, Limes             | 4                                                           |
| 93              | Haiti   | 1997           | Maize                     | 65                                                          |
| 93              | Haiti   | 1997           | Marine Fish, Other        | 1                                                           |
| 93              | Haiti   | 1997           | Meat, Other               | 3                                                           |
| 93              | Haiti   | 1997           | Milk, Whole               | 35                                                          |
| 93              | Haiti   | 1997           | Mutton & Goat Meat        | 2                                                           |
| 93              | Haiti   | 1997           | Offals, Edible            | 3                                                           |
| 93              | Haiti   | 1997           | Oilcrops Oil, Other       | 2                                                           |
| 93              | Haiti   | 1997           | Onions                    | 1                                                           |
| 93              | Haiti   | 1997           | Oranges, Mandarines       | 10                                                          |
| 93              | Haiti   | 1997           | Palm Oil                  | 2                                                           |
| 93              | Haiti   | 1997           | Pelagic Fish              | 4                                                           |
| 93              | Haiti   | 1997           | Pigmeat                   | 9                                                           |
| 93              | Haiti   | 1997           | Pineapples                | 1                                                           |
| 93              | Haiti   | 1997           | Plantains                 | 51                                                          |
| 93              | Haiti   | 1997           | Potatoes                  | 2                                                           |
| 93              | Haiti   | 1997           | Poultry Meat              | 7                                                           |
| 93              | Haiti   | 1997           | Pulses, Other             | 11                                                          |
| 93              | Haiti   | 1997           | Rice (Milled Equivalent)  | 99                                                          |
| 93              | Haiti   | 1997           | Roots, Other              | 10                                                          |
| 93              | Haiti   | 1997           | Sesameseed                | 1                                                           |
| 93              | Haiti   | 1997           | Sorghum                   | 15                                                          |
| 93              | Haiti   | 1997           | Soyabean Oil              | 14                                                          |
| 93              | Haiti   | 1997           | Sugar, Non-Centrifugal    | 9                                                           |
| 93              | Haiti   | 1997           | Sugar, Refined Equivalent | 38                                                          |
| 93              | Haiti   | 1997           | Sweet Potatoes            | 43                                                          |
| 93              | Haiti   | 1997           | Tomatoes                  | 6                                                           |
| 93              | Haiti   | 1997           | Vegetables, Other         | 78                                                          |
| 93              | Haiti   | 1997           | Wheat                     | 67                                                          |
| 93              | Haiti   | 1997           | Yams                      | 65                                                          |
| 93              | Haiti   | 1998           | Bananas                   | 71                                                          |
| 93              | Haiti   | 1998           | Beans                     | 18                                                          |
| 93              | Haiti   | 1998           | Beer                      | 1                                                           |
| 93              | Haiti   | 1998           | Beverages, Alcoholic      | 23                                                          |
| 93              | Haiti   | 1998           | Bovine Meat               | 11                                                          |
| 93              | Haiti   | 1998           | Cassava                   | 80                                                          |
| 93              | Haiti   | 1998           | Cereals, Other            | 2                                                           |
| 93              | Haiti   | 1998           | Citrus, Other             | 1                                                           |
| 93              | Haiti   | 1998           | Cocoa Beans               | 1                                                           |
| 93              | Haiti   | 1998           | Coconuts - Incl Copra     | 10                                                          |
| 93              | Haiti   | 1998           | Coffee                    | 6                                                           |
| 93              | Haiti   | 1998           | Eggs                      | 1                                                           |
| 93              | Haiti   | 1998           | Fats, Animals, Raw        | 2                                                           |
| 93              | Haiti   | 1998           | Freshwater Fish           | 2                                                           |
| 93              | Haiti   | 1998           | Fruits, Other             | 81                                                          |
| 93              | Haiti   | 1998           | Grapefruit                | 3                                                           |
| 93              | Haiti   | 1998           | Groundnuts (Shelled Eq)   | 4                                                           |
| 93              | Haiti   | 1998           | Lemons, Limes             | 3                                                           |
| 93              | Haiti   | 1998           | Maize                     | 65                                                          |
| 93              | Haiti   | 1998           | Marine Fish, Other        | 1                                                           |
| 93              | Haiti   | 1998           | Meat, Other               | 3                                                           |
| 93              | Haiti   | 1998           | Milk, Whole               | 36                                                          |
| 93              | Haiti   | 1998           | Mutton & Goat Meat        | 2                                                           |
| 93              | Haiti   | 1998           | Offals, Edible            | 5                                                           |
| 93              | Haiti   | 1998           | Oilcrops Oil, Other       | 2                                                           |
| 93              | Haiti   | 1998           | Onions                    | 1                                                           |
| 93              | Haiti   | 1998           | Oranges, Mandarines       | 10                                                          |
| 93              | Haiti   | 1998           | Palm Oil                  | 4                                                           |
| 93              | Haiti   | 1998           | Peas                      | 2                                                           |
| 93              | Haiti   | 1998           | Pelagic Fish              | 5                                                           |
| 93              | Haiti   | 1998           | Pigmeat                   | 10                                                          |
| 93              | Haiti   | 1998           | Pineapples                | 1                                                           |
| 93              | Haiti   | 1998           | Plantains                 | 50                                                          |
| 93              | Haiti   | 1998           | Potatoes                  | 3                                                           |
| 93              | Haiti   | 1998           | Poultry Meat              | 9                                                           |
| 93              | Haiti   | 1998           | Pulses, Other             | 12                                                          |
| 93              | Haiti   | 1998           | Rice (Milled Equivalent)  | 89                                                          |
| 93              | Haiti   | 1998           | Roots, Other              | 9                                                           |
| 93              | Haiti   | 1998           | Sesameseed                | 1                                                           |
| 93              | Haiti   | 1998           | Sorghum                   | 15                                                          |
| 93              | Haiti   | 1998           | Soyabean Oil              | 14                                                          |
| 93              | Haiti   | 1998           | Sugar, Non-Centrifugal    | 8                                                           |
| 93              | Haiti   | 1998           | Sugar, Refined Equivalent | 41                                                          |
| 93              | Haiti   | 1998           | Sweet Potatoes            | 45                                                          |
| 93              | Haiti   | 1998           | Sweeteners, Other         | 1                                                           |
| 93              | Haiti   | 1998           | Tomatoes                  | 4                                                           |
| 93              | Haiti   | 1998           | Vegetables, Other         | 94                                                          |
| 93              | Haiti   | 1998           | Wheat                     | 102                                                         |
| 93              | Haiti   | 1998           | Yams                      | 51                                                          |
| 93              | Haiti   | 1999           | Bananas                   | 71                                                          |
| 93              | Haiti   | 1999           | Beans                     | 18                                                          |
| 93              | Haiti   | 1999           | Beer                      | 1                                                           |
| 93              | Haiti   | 1999           | Beverages, Alcoholic      | 23                                                          |
| 93              | Haiti   | 1999           | Bovine Meat               | 10                                                          |
| 93              | Haiti   | 1999           | Cassava                   | 80                                                          |
| 93              | Haiti   | 1999           | Citrus, Other             | 4                                                           |
| 93              | Haiti   | 1999           | Cocoa Beans               | 1                                                           |

Dietary calcium and zinc deficiency risks are decreasing but remain prevalent

| FAO countrycode | Country | Reference year | Food item                 | Gross food supply (g capita <sup>-1</sup> d <sup>-1</sup> ) |
|-----------------|---------|----------------|---------------------------|-------------------------------------------------------------|
| 93              | Haiti   | 1999           | Coconuts - Incl Copra     | 12                                                          |
| 93              | Haiti   | 1999           | Coffee                    | 7                                                           |
| 93              | Haiti   | 1999           | Eggs                      | 1                                                           |
| 93              | Haiti   | 1999           | Fats, Animals, Raw        | 2                                                           |
| 93              | Haiti   | 1999           | Freshwater Fish           | 3                                                           |
| 93              | Haiti   | 1999           | Fruits, Other             | 80                                                          |
| 93              | Haiti   | 1999           | Grapefruit                | 2                                                           |
| 93              | Haiti   | 1999           | Groundnuts (Shelled Eq)   | 4                                                           |
| 93              | Haiti   | 1999           | Lemons, Limes             | 3                                                           |
| 93              | Haiti   | 1999           | Maize                     | 63                                                          |
| 93              | Haiti   | 1999           | Marine Fish, Other        | 1                                                           |
| 93              | Haiti   | 1999           | Meat, Other               | 3                                                           |
| 93              | Haiti   | 1999           | Milk, Whole               | 42                                                          |
| 93              | Haiti   | 1999           | Mutton & Goat Meat        | 2                                                           |
| 93              | Haiti   | 1999           | Offals, Edible            | 4                                                           |
| 93              | Haiti   | 1999           | Oilcrops Oil, Other       | 1                                                           |
| 93              | Haiti   | 1999           | Onions                    | 1                                                           |
| 93              | Haiti   | 1999           | Oranges, Mandarines       | 10                                                          |
| 93              | Haiti   | 1999           | Palm Oil                  | 6                                                           |
| 93              | Haiti   | 1999           | Peas                      | 1                                                           |
| 93              | Haiti   | 1999           | Pelagic Fish              | 4                                                           |
| 93              | Haiti   | 1999           | Pigmeat                   | 10                                                          |
| 93              | Haiti   | 1999           | Pineapples                | 1                                                           |
| 93              | Haiti   | 1999           | Plantains                 | 49                                                          |
| 93              | Haiti   | 1999           | Potatoes                  | 3                                                           |
| 93              | Haiti   | 1999           | Poultry Meat              | 13                                                          |
| 93              | Haiti   | 1999           | Pulses, Other             | 13                                                          |
| 93              | Haiti   | 1999           | Rice (Milled Equivalent)  | 96                                                          |
| 93              | Haiti   | 1999           | Roots, Other              | 11                                                          |
| 93              | Haiti   | 1999           | Sesameseed                | 2                                                           |
| 93              | Haiti   | 1999           | Sorghum                   | 15                                                          |
| 93              | Haiti   | 1999           | Soyabean Oil              | 14                                                          |
| 93              | Haiti   | 1999           | Sugar, Non-Centrifugal    | 8                                                           |
| 93              | Haiti   | 1999           | Sugar, Refined Equivalent | 52                                                          |
| 93              | Haiti   | 1999           | Sweet Potatoes            | 45                                                          |
| 93              | Haiti   | 1999           | Sweeteners, Other         | 1                                                           |
| 93              | Haiti   | 1999           | Tomatoes                  | 4                                                           |
| 93              | Haiti   | 1999           | Vegetables, Other         | 102                                                         |
| 93              | Haiti   | 1999           | Wheat                     | 83                                                          |
| 93              | Haiti   | 1999           | Yams                      | 51                                                          |
| 93              | Haiti   | 2000           | Bananas                   | 77                                                          |
| 93              | Haiti   | 2000           | Beans                     | 15                                                          |
| 93              | Haiti   | 2000           | Beer                      | 1                                                           |
| 93              | Haiti   | 2000           | Beverages, Alcoholic      | 19                                                          |
| 93              | Haiti   | 2000           | Bovine Meat               | 13                                                          |
| 93              | Haiti   | 2000           | Cassava                   | 81                                                          |
| 93              | Haiti   | 2000           | Citrus, Other             | 3                                                           |
| 93              | Haiti   | 2000           | Cocoa Beans               | 1                                                           |
| 93              | Haiti   | 2000           | Coconuts - Incl Copra     | 7                                                           |
| 93              | Haiti   | 2000           | Coffee                    | 8                                                           |
| 93              | Haiti   | 2000           | Eggs                      | 1                                                           |
| 93              | Haiti   | 2000           | Fats, Animals, Raw        | 2                                                           |
| 93              | Haiti   | 2000           | Freshwater Fish           | 1                                                           |
| 93              | Haiti   | 2000           | Fruits, Other             | 91                                                          |
| 93              | Haiti   | 2000           | Grapefruit                | 4                                                           |
| 93              | Haiti   | 2000           | Groundnuts (Shelled Eq)   | 4                                                           |
| 93              | Haiti   | 2000           | Lemons, Limes             | 4                                                           |
| 93              | Haiti   | 2000           | Maize                     | 65                                                          |
| 93              | Haiti   | 2000           | Marine Fish, Other        | 2                                                           |
| 93              | Haiti   | 2000           | Meat, Other               | 3                                                           |
| 93              | Haiti   | 2000           | Milk, Whole               | 36                                                          |
| 93              | Haiti   | 2000           | Mutton & Goat Meat        | 2                                                           |
| 93              | Haiti   | 2000           | Offals, Edible            | 5                                                           |
| 93              | Haiti   | 2000           | Oilcrops Oil, Other       | 3                                                           |
| 93              | Haiti   | 2000           | Onions                    | 2                                                           |
| 93              | Haiti   | 2000           | Oranges, Mandarines       | 10                                                          |
| 93              | Haiti   | 2000           | Palm Oil                  | 4                                                           |
| 93              | Haiti   | 2000           | Peas                      | 1                                                           |
| 93              | Haiti   | 2000           | Pelagic Fish              | 4                                                           |
| 93              | Haiti   | 2000           | Pigmeat                   | 10                                                          |
| 93              | Haiti   | 2000           | Pineapples                | 1                                                           |
| 93              | Haiti   | 2000           | Plantains                 | 48                                                          |
| 93              | Haiti   | 2000           | Potatoes                  | 3                                                           |
| 93              | Haiti   | 2000           | Poultry Meat              | 8                                                           |
| 93              | Haiti   | 2000           | Pulses, Other             | 11                                                          |
| 93              | Haiti   | 2000           | Rice (Milled Equivalent)  | 101                                                         |
| 93              | Haiti   | 2000           | Roots, Other              | 8                                                           |
| 93              | Haiti   | 2000           | Sesameseed                | 1                                                           |
| 93              | Haiti   | 2000           | Sorghum                   | 13                                                          |
| 93              | Haiti   | 2000           | Soyabean Oil              | 16                                                          |
| 93              | Haiti   | 2000           | Sugar, Non-Centrifugal    | 4                                                           |
| 93              | Haiti   | 2000           | Sugar, Refined Equivalent | 51                                                          |
| 93              | Haiti   | 2000           | Sweet Potatoes            | 46                                                          |
| 93              | Haiti   | 2000           | Sweeteners, Other         | 1                                                           |
| 93              | Haiti   | 2000           | Tomatoes                  | 4                                                           |
| 93              | Haiti   | 2000           | Vegetables, Other         | 102                                                         |
| 93              | Haiti   | 2000           | Wheat                     | 90                                                          |
| 93              | Haiti   | 2000           | Yams                      | 51                                                          |
| 93              | Haiti   | 2001           | Bananas                   | 68                                                          |
| 93              | Haiti   | 2001           | Beans                     | 15                                                          |
| 93              | Haiti   | 2001           | Beer                      | 1                                                           |
| 93              | Haiti   | 2001           | Beverages, Alcoholic      | 19                                                          |
| 93              | Haiti   | 2001           | Bovine Meat               | 13                                                          |
| 93              | Haiti   | 2001           | Cassava                   | 79                                                          |
| 93              | Haiti   | 2001           | Citrus, Other             | 4                                                           |
| 93              | Haiti   | 2001           | Cocoa Beans               | 1                                                           |
| 93              | Haiti   | 2001           | Coconuts - Incl Copra     | 6                                                           |

Dietary calcium and zinc deficiency risks are decreasing but remain prevalent

| FAO countrycode | Country | Reference year | Food item                 | Gross food supply (g capita <sup>-1</sup> d <sup>-1</sup> ) |
|-----------------|---------|----------------|---------------------------|-------------------------------------------------------------|
| 93              | Haiti   | 2001           | Coffee                    | 7                                                           |
| 93              | Haiti   | 2001           | Eggs                      | 1                                                           |
| 93              | Haiti   | 2001           | Fats, Animals, Raw        | 2                                                           |
| 93              | Haiti   | 2001           | Freshwater Fish           | 1                                                           |
| 93              | Haiti   | 2001           | Fruits, Other             | 87                                                          |
| 93              | Haiti   | 2001           | Grapefruit                | 2                                                           |
| 93              | Haiti   | 2001           | Groundnuts (Shelled Eq)   | 4                                                           |
| 93              | Haiti   | 2001           | Lemons, Limes             | 3                                                           |
| 93              | Haiti   | 2001           | Maize                     | 63                                                          |
| 93              | Haiti   | 2001           | Marine Fish, Other        | 2                                                           |
| 93              | Haiti   | 2001           | Meat, Other               | 3                                                           |
| 93              | Haiti   | 2001           | Milk, Whole               | 39                                                          |
| 93              | Haiti   | 2001           | Mutton & Goat Meat        | 2                                                           |
| 93              | Haiti   | 2001           | Offals, Edible            | 5                                                           |
| 93              | Haiti   | 2001           | Oilcrops Oil, Other       | 2                                                           |
| 93              | Haiti   | 2001           | Onions                    | 1                                                           |
| 93              | Haiti   | 2001           | Oranges, Mandarines       | 8                                                           |
| 93              | Haiti   | 2001           | Palm Oil                  | 6                                                           |
| 93              | Haiti   | 2001           | Pelagic Fish              | 4                                                           |
| 93              | Haiti   | 2001           | Pigmeat                   | 12                                                          |
| 93              | Haiti   | 2001           | Pineapples                | 1                                                           |
| 93              | Haiti   | 2001           | Plantains                 | 47                                                          |
| 93              | Haiti   | 2001           | Potatoes                  | 3                                                           |
| 93              | Haiti   | 2001           | Poultry Meat              | 8                                                           |
| 93              | Haiti   | 2001           | Pulses, Other             | 11                                                          |
| 93              | Haiti   | 2001           | Rice (Milled Equivalent)  | 96                                                          |
| 93              | Haiti   | 2001           | Roots, Other              | 10                                                          |
| 93              | Haiti   | 2001           | Sesameseed                | 1                                                           |
| 93              | Haiti   | 2001           | Sorghum                   | 8                                                           |
| 93              | Haiti   | 2001           | Soyabean Oil              | 14                                                          |
| 93              | Haiti   | 2001           | Sugar, Non-Centrifugal    | 6                                                           |
| 93              | Haiti   | 2001           | Sugar, Refined Equivalent | 50                                                          |
| 93              | Haiti   | 2001           | Sweet Potatoes            | 44                                                          |
| 93              | Haiti   | 2001           | Sweeteners, Other         | 1                                                           |
| 93              | Haiti   | 2001           | Tomatoes                  | 4                                                           |
| 93              | Haiti   | 2001           | Vegetables, Other         | 56                                                          |
| 93              | Haiti   | 2001           | Wheat                     | 97                                                          |
| 93              | Haiti   | 2001           | Yams                      | 50                                                          |
| 93              | Haiti   | 2002           | Bananas                   | 71                                                          |
| 93              | Haiti   | 2002           | Beans                     | 13                                                          |
| 93              | Haiti   | 2002           | Beer                      | 1                                                           |
| 93              | Haiti   | 2002           | Beverages, Alcoholic      | 19                                                          |
| 93              | Haiti   | 2002           | Bovine Meat               | 13                                                          |
| 93              | Haiti   | 2002           | Cassava                   | 77                                                          |
| 93              | Haiti   | 2002           | Cocoa Beans               | 1                                                           |
| 93              | Haiti   | 2002           | Coconuts - Incl Copra     | 6                                                           |
| 93              | Haiti   | 2002           | Coffee                    | 7                                                           |
| 93              | Haiti   | 2002           | Crustaceans               | 1                                                           |
| 93              | Haiti   | 2002           | Eggs                      | 1                                                           |
| 93              | Haiti   | 2002           | Fats, Animals, Raw        | 2                                                           |
| 93              | Haiti   | 2002           | Freshwater Fish           | 2                                                           |
| 93              | Haiti   | 2002           | Fruits, Other             | 87                                                          |
| 93              | Haiti   | 2002           | Grapefruit                | 1                                                           |
| 93              | Haiti   | 2002           | Groundnuts (Shelled Eq)   | 4                                                           |
| 93              | Haiti   | 2002           | Lemons, Limes             | 3                                                           |
| 93              | Haiti   | 2002           | Maize                     | 56                                                          |
| 93              | Haiti   | 2002           | Marine Fish, Other        | 2                                                           |
| 93              | Haiti   | 2002           | Meat, Other               | 2                                                           |
| 93              | Haiti   | 2002           | Milk, Whole               | 38                                                          |
| 93              | Haiti   | 2002           | Mutton & Goat Meat        | 2                                                           |
| 93              | Haiti   | 2002           | Offals, Edible            | 5                                                           |
| 93              | Haiti   | 2002           | Oilcrops Oil, Other       | 2                                                           |
| 93              | Haiti   | 2002           | Olive Oil                 | 1                                                           |
| 93              | Haiti   | 2002           | Onions                    | 1                                                           |
| 93              | Haiti   | 2002           | Oranges, Mandarines       | 9                                                           |
| 93              | Haiti   | 2002           | Palm Oil                  | 7                                                           |
| 93              | Haiti   | 2002           | Peas                      | 1                                                           |
| 93              | Haiti   | 2002           | Pelagic Fish              | 2                                                           |
| 93              | Haiti   | 2002           | Pigmeat                   | 13                                                          |
| 93              | Haiti   | 2002           | Pineapples                | 1                                                           |
| 93              | Haiti   | 2002           | Plantains                 | 47                                                          |
| 93              | Haiti   | 2002           | Potatoes                  | 3                                                           |
| 93              | Haiti   | 2002           | Poultry Meat              | 10                                                          |
| 93              | Haiti   | 2002           | Pulses, Other             | 11                                                          |
| 93              | Haiti   | 2002           | Rice (Milled Equivalent)  | 107                                                         |
| 93              | Haiti   | 2002           | Roots, Other              | 10                                                          |
| 93              | Haiti   | 2002           | Sesameseed                | 1                                                           |
| 93              | Haiti   | 2002           | Sorghum                   | 8                                                           |
| 93              | Haiti   | 2002           | Soyabean Oil              | 12                                                          |
| 93              | Haiti   | 2002           | Sugar, Non-Centrifugal    | 3                                                           |
| 93              | Haiti   | 2002           | Sugar, Refined Equivalent | 56                                                          |
| 93              | Haiti   | 2002           | Sweet Potatoes            | 43                                                          |
| 93              | Haiti   | 2002           | Tomatoes                  | 5                                                           |
| 93              | Haiti   | 2002           | Vegetables, Other         | 51                                                          |
| 93              | Haiti   | 2002           | Wheat                     | 91                                                          |
| 93              | Haiti   | 2002           | Yams                      | 47                                                          |
| 93              | Haiti   | 2003           | Bananas                   | 71                                                          |
| 93              | Haiti   | 2003           | Beans                     | 16                                                          |
| 93              | Haiti   | 2003           | Beverages, Alcoholic      | 13                                                          |
| 93              | Haiti   | 2003           | Bovine Meat               | 13                                                          |
| 93              | Haiti   | 2003           | Cassava                   | 75                                                          |
| 93              | Haiti   | 2003           | Cocoa Beans               | 1                                                           |
| 93              | Haiti   | 2003           | Coconuts - Incl Copra     | 6                                                           |
| 93              | Haiti   | 2003           | Coffee                    | 8                                                           |
| 93              | Haiti   | 2003           | Crustaceans               | 1                                                           |
| 93              | Haiti   | 2003           | Eggs                      | 1                                                           |
| 93              | Haiti   | 2003           | Fats, Animals, Raw        | 4                                                           |

Dietary calcium and zinc deficiency risks are decreasing but remain prevalent

| FAO countrycode | Country | Reference year | Food item                 | Gross food supply (g capita <sup>-1</sup> d <sup>-1</sup> ) |
|-----------------|---------|----------------|---------------------------|-------------------------------------------------------------|
| 93              | Haiti   | 2003           | Freshwater Fish           | 2                                                           |
| 93              | Haiti   | 2003           | Fruits, Other             | 87                                                          |
| 93              | Haiti   | 2003           | Grapefruit                | 1                                                           |
| 93              | Haiti   | 2003           | Groundnuts (Shelled Eq)   | 4                                                           |
| 93              | Haiti   | 2003           | Lemons, Limes             | 3                                                           |
| 93              | Haiti   | 2003           | Maize                     | 56                                                          |
| 93              | Haiti   | 2003           | Marine Fish, Other        | 2                                                           |
| 93              | Haiti   | 2003           | Meat, Other               | 2                                                           |
| 93              | Haiti   | 2003           | Milk, Whole               | 37                                                          |
| 93              | Haiti   | 2003           | Mutton & Goat Meat        | 2                                                           |
| 93              | Haiti   | 2003           | Offals, Edible            | 5                                                           |
| 93              | Haiti   | 2003           | Oilcrops Oil, Other       | 3                                                           |
| 93              | Haiti   | 2003           | Onions                    | 1                                                           |
| 93              | Haiti   | 2003           | Oranges, Mandarines       | 9                                                           |
| 93              | Haiti   | 2003           | Palm Oil                  | 4                                                           |
| 93              | Haiti   | 2003           | Pelagic Fish              | 3                                                           |
| 93              | Haiti   | 2003           | Pigmeat                   | 13                                                          |
| 93              | Haiti   | 2003           | Pineapples                | 1                                                           |
| 93              | Haiti   | 2003           | Plantains                 | 46                                                          |
| 93              | Haiti   | 2003           | Potatoes                  | 3                                                           |
| 93              | Haiti   | 2003           | Poultry Meat              | 11                                                          |
| 93              | Haiti   | 2003           | Pulses, Other             | 11                                                          |
| 93              | Haiti   | 2003           | Rice (Milled Equivalent)  | 124                                                         |
| 93              | Haiti   | 2003           | Roots, Other              | 10                                                          |
| 93              | Haiti   | 2003           | Sesameseed                | 1                                                           |
| 93              | Haiti   | 2003           | Sorghum                   | 8                                                           |
| 93              | Haiti   | 2003           | Soyabean Oil              | 9                                                           |
| 93              | Haiti   | 2003           | Sugar, Non-Centrifugal    | 3                                                           |
| 93              | Haiti   | 2003           | Sugar, Refined Equivalent | 51                                                          |
| 93              | Haiti   | 2003           | Sweet Potatoes            | 44                                                          |
| 93              | Haiti   | 2003           | Tomatoes                  | 3                                                           |
| 93              | Haiti   | 2003           | Vegetables, Other         | 56                                                          |
| 93              | Haiti   | 2003           | Wheat                     | 81                                                          |
| 93              | Haiti   | 2003           | Yams                      | 47                                                          |
| 93              | Haiti   | 2004           | Bananas                   | 68                                                          |
| 93              | Haiti   | 2004           | Beans                     | 15                                                          |
| 93              | Haiti   | 2004           | Beverages, Alcoholic      | 24                                                          |
| 93              | Haiti   | 2004           | Bovine Meat               | 13                                                          |
| 93              | Haiti   | 2004           | Cassava                   | 77                                                          |
| 93              | Haiti   | 2004           | Cocoa Beans               | 1                                                           |
| 93              | Haiti   | 2004           | Coconuts - Incl Copra     | 6                                                           |
| 93              | Haiti   | 2004           | Coffee                    | 8                                                           |
| 93              | Haiti   | 2004           | Crustaceans               | 1                                                           |
| 93              | Haiti   | 2004           | Eggs                      | 1                                                           |
| 93              | Haiti   | 2004           | Fats, Animals, Raw        | 2                                                           |
| 93              | Haiti   | 2004           | Freshwater Fish           | 2                                                           |
| 93              | Haiti   | 2004           | Fruits, Other             | 88                                                          |
| 93              | Haiti   | 2004           | Grapefruit                | 2                                                           |
| 93              | Haiti   | 2004           | Groundnuts (Shelled Eq)   | 4                                                           |
| 93              | Haiti   | 2004           | Lemons, Limes             | 3                                                           |
| 93              | Haiti   | 2004           | Maize                     | 60                                                          |
| 93              | Haiti   | 2004           | Marine Fish, Other        | 2                                                           |
| 93              | Haiti   | 2004           | Meat, Other               | 2                                                           |
| 93              | Haiti   | 2004           | Milk, Whole               | 37                                                          |
| 93              | Haiti   | 2004           | Mutton & Goat Meat        | 2                                                           |
| 93              | Haiti   | 2004           | Offals, Edible            | 5                                                           |
| 93              | Haiti   | 2004           | Oilcrops Oil, Other       | 4                                                           |
| 93              | Haiti   | 2004           | Onions                    | 1                                                           |
| 93              | Haiti   | 2004           | Oranges, Mandarines       | 10                                                          |
| 93              | Haiti   | 2004           | Palm Oil                  | 6                                                           |
| 93              | Haiti   | 2004           | Peas                      | 1                                                           |
| 93              | Haiti   | 2004           | Pelagic Fish              | 4                                                           |
| 93              | Haiti   | 2004           | Pigmeat                   | 12                                                          |
| 93              | Haiti   | 2004           | Pineapples                | 1                                                           |
| 93              | Haiti   | 2004           | Plantains                 | 46                                                          |
| 93              | Haiti   | 2004           | Potatoes                  | 3                                                           |
| 93              | Haiti   | 2004           | Poultry Meat              | 8                                                           |
| 93              | Haiti   | 2004           | Pulses, Other             | 10                                                          |
| 93              | Haiti   | 2004           | Rice (Milled Equivalent)  | 100                                                         |
| 93              | Haiti   | 2004           | Roots, Other              | 10                                                          |
| 93              | Haiti   | 2004           | Sesameseed                | 1                                                           |
| 93              | Haiti   | 2004           | Sorghum                   | 9                                                           |
| 93              | Haiti   | 2004           | Soyabean Oil              | 9                                                           |
| 93              | Haiti   | 2004           | Sugar, Non-Centrifugal    | 4                                                           |
| 93              | Haiti   | 2004           | Sugar, Refined Equivalent | 52                                                          |
| 93              | Haiti   | 2004           | Sunflowerseed Oil         | 1                                                           |
| 93              | Haiti   | 2004           | Sweet Potatoes            | 42                                                          |
| 93              | Haiti   | 2004           | Tomatoes                  | 7                                                           |
| 93              | Haiti   | 2004           | Vegetables, Other         | 54                                                          |
| 93              | Haiti   | 2004           | Wheat                     | 89                                                          |
| 93              | Haiti   | 2004           | Yams                      | 48                                                          |
| 93              | Haiti   | 2005           | Bananas                   | 67                                                          |
| 93              | Haiti   | 2005           | Beans                     | 16                                                          |
| 93              | Haiti   | 2005           | Beverages, Alcoholic      | 24                                                          |
| 93              | Haiti   | 2005           | Bovine Meat               | 13                                                          |
| 93              | Haiti   | 2005           | Cassava                   | 91                                                          |
| 93              | Haiti   | 2005           | Cocoa Beans               | 1                                                           |
| 93              | Haiti   | 2005           | Coconuts - Incl Copra     | 6                                                           |
| 93              | Haiti   | 2005           | Coffee                    | 10                                                          |
| 93              | Haiti   | 2005           | Eggs                      | 1                                                           |
| 93              | Haiti   | 2005           | Fats, Animals, Raw        | 2                                                           |
| 93              | Haiti   | 2005           | Freshwater Fish           | 2                                                           |
| 93              | Haiti   | 2005           | Fruits, Other             | 87                                                          |
| 93              | Haiti   | 2005           | Grapefruit                | 3                                                           |
| 93              | Haiti   | 2005           | Groundnuts (Shelled Eq)   | 5                                                           |
| 93              | Haiti   | 2005           | Lemons, Limes             | 3                                                           |
| 93              | Haiti   | 2005           | Maize                     | 54                                                          |

Dietary calcium and zinc deficiency risks are decreasing but remain prevalent

| FAO countrycode | Country | Reference year | Food item                 | Gross food supply (g capita <sup>-1</sup> d <sup>-1</sup> ) |
|-----------------|---------|----------------|---------------------------|-------------------------------------------------------------|
| 93              | Haiti   | 2005           | Marine Fish, Other        | 3                                                           |
| 93              | Haiti   | 2005           | Meat, Other               | 3                                                           |
| 93              | Haiti   | 2005           | Milk, Whole               | 35                                                          |
| 93              | Haiti   | 2005           | Mutton & Goat Meat        | 2                                                           |
| 93              | Haiti   | 2005           | Offals, Edible            | 5                                                           |
| 93              | Haiti   | 2005           | Oilcrops Oil, Other       | 1                                                           |
| 93              | Haiti   | 2005           | Onions                    | 2                                                           |
| 93              | Haiti   | 2005           | Oranges, Mandarines       | 12                                                          |
| 93              | Haiti   | 2005           | Palm Oil                  | 4                                                           |
| 93              | Haiti   | 2005           | Pelagic Fish              | 4                                                           |
| 93              | Haiti   | 2005           | Pigmeat                   | 12                                                          |
| 93              | Haiti   | 2005           | Pineapples                | 1                                                           |
| 93              | Haiti   | 2005           | Plantains                 | 45                                                          |
| 93              | Haiti   | 2005           | Potatoes                  | 3                                                           |
| 93              | Haiti   | 2005           | Poultry Meat              | 9                                                           |
| 93              | Haiti   | 2005           | Pulses, Other             | 9                                                           |
| 93              | Haiti   | 2005           | Rice (Milled Equivalent)  | 118                                                         |
| 93              | Haiti   | 2005           | Roots, Other              | 11                                                          |
| 93              | Haiti   | 2005           | Sesameseed                | 1                                                           |
| 93              | Haiti   | 2005           | Sorghum                   | 12                                                          |
| 93              | Haiti   | 2005           | Soyabean Oil              | 10                                                          |
| 93              | Haiti   | 2005           | Sugar, Non-Centrifugal    | 4                                                           |
| 93              | Haiti   | 2005           | Sugar, Refined Equivalent | 52                                                          |
| 93              | Haiti   | 2005           | Sweet Potatoes            | 47                                                          |
| 93              | Haiti   | 2005           | Tomatoes                  | 5                                                           |
| 93              | Haiti   | 2005           | Vegetables, Other         | 55                                                          |
| 93              | Haiti   | 2005           | Wheat                     | 81                                                          |
| 93              | Haiti   | 2005           | Yams                      | 52                                                          |
| 93              | Haiti   | 2006           | Bananas                   | 61                                                          |
| 93              | Haiti   | 2006           | Beans                     | 15                                                          |
| 93              | Haiti   | 2006           | Beer                      | 1                                                           |
| 93              | Haiti   | 2006           | Beverages, Alcoholic      | 26                                                          |
| 93              | Haiti   | 2006           | Bovine Meat               | 13                                                          |
| 93              | Haiti   | 2006           | Cassava                   | 90                                                          |
| 93              | Haiti   | 2006           | Cocoa Beans               | 1                                                           |
| 93              | Haiti   | 2006           | Coconuts - Incl Copra     | 6                                                           |
| 93              | Haiti   | 2006           | Coffee                    | 9                                                           |
| 93              | Haiti   | 2006           | Eggs                      | 1                                                           |
| 93              | Haiti   | 2006           | Fats, Animals, Raw        | 3                                                           |
| 93              | Haiti   | 2006           | Freshwater Fish           | 2                                                           |
| 93              | Haiti   | 2006           | Fruits, Other             | 85                                                          |
| 93              | Haiti   | 2006           | Grapefruit                | 3                                                           |
| 93              | Haiti   | 2006           | Groundnuts (Shelled Eq)   | 4                                                           |
| 93              | Haiti   | 2006           | Lemons, Limes             | 3                                                           |
| 93              | Haiti   | 2006           | Maize                     | 49                                                          |
| 93              | Haiti   | 2006           | Marine Fish, Other        | 3                                                           |
| 93              | Haiti   | 2006           | Meat, Other               | 3                                                           |
| 93              | Haiti   | 2006           | Milk, Whole               | 45                                                          |
| 93              | Haiti   | 2006           | Mutton & Goat Meat        | 2                                                           |
| 93              | Haiti   | 2006           | Offals, Edible            | 4                                                           |
| 93              | Haiti   | 2006           | Oilcrops Oil, Other       | 2                                                           |
| 93              | Haiti   | 2006           | Onions                    | 2                                                           |
| 93              | Haiti   | 2006           | Oranges, Mandarines       | 12                                                          |
| 93              | Haiti   | 2006           | Palm Oil                  | 12                                                          |
| 93              | Haiti   | 2006           | Pelagic Fish              | 6                                                           |
| 93              | Haiti   | 2006           | Pigmeat                   | 11                                                          |
| 93              | Haiti   | 2006           | Pineapples                | 1                                                           |
| 93              | Haiti   | 2006           | Plantains                 | 44                                                          |
| 93              | Haiti   | 2006           | Potatoes                  | 3                                                           |
| 93              | Haiti   | 2006           | Poultry Meat              | 9                                                           |
| 93              | Haiti   | 2006           | Pulses, Other             | 9                                                           |
| 93              | Haiti   | 2006           | Rice (Milled Equivalent)  | 124                                                         |
| 93              | Haiti   | 2006           | Roots, Other              | 12                                                          |
| 93              | Haiti   | 2006           | Sesameseed                | 1                                                           |
| 93              | Haiti   | 2006           | Sorghum                   | 12                                                          |
| 93              | Haiti   | 2006           | Soyabean Oil              | 6                                                           |
| 93              | Haiti   | 2006           | Sugar, Non-Centrifugal    | 4                                                           |
| 93              | Haiti   | 2006           | Sugar, Refined Equivalent | 52                                                          |
| 93              | Haiti   | 2006           | Sweet Potatoes            | 47                                                          |
| 93              | Haiti   | 2006           | Tomatoes                  | 7                                                           |
| 93              | Haiti   | 2006           | Vegetables, Other         | 46                                                          |
| 93              | Haiti   | 2006           | Wheat                     | 79                                                          |
| 93              | Haiti   | 2006           | Yams                      | 51                                                          |
| 93              | Haiti   | 2007           | Bananas                   | 64                                                          |
| 93              | Haiti   | 2007           | Beans                     | 22                                                          |
| 93              | Haiti   | 2007           | Beverages, Alcoholic      | 26                                                          |
| 93              | Haiti   | 2007           | Bovine Meat               | 13                                                          |
| 93              | Haiti   | 2007           | Cassava                   | 97                                                          |
| 93              | Haiti   | 2007           | Citrus, Other             | 1                                                           |
| 93              | Haiti   | 2007           | Cocoa Beans               | 1                                                           |
| 93              | Haiti   | 2007           | Coconuts - Incl Copra     | 9                                                           |
| 93              | Haiti   | 2007           | Coffee                    | 13                                                          |
| 93              | Haiti   | 2007           | Eggs                      | 1                                                           |
| 93              | Haiti   | 2007           | Fats, Animals, Raw        | 1                                                           |
| 93              | Haiti   | 2007           | Freshwater Fish           | 3                                                           |
| 93              | Haiti   | 2007           | Fruits, Other             | 94                                                          |
| 93              | Haiti   | 2007           | Grapefruit                | 3                                                           |
| 93              | Haiti   | 2007           | Groundnuts (Shelled Eq)   | 5                                                           |
| 93              | Haiti   | 2007           | Lemons, Limes             | 4                                                           |
| 93              | Haiti   | 2007           | Maize                     | 60                                                          |
| 93              | Haiti   | 2007           | Marine Fish, Other        | 4                                                           |
| 93              | Haiti   | 2007           | Meat, Other               | 3                                                           |
| 93              | Haiti   | 2007           | Milk, Whole               | 39                                                          |
| 93              | Haiti   | 2007           | Mutton & Goat Meat        | 2                                                           |
| 93              | Haiti   | 2007           | Offals, Edible            | 4                                                           |
| 93              | Haiti   | 2007           | Oilcrops Oil, Other       | 1                                                           |
| 93              | Haiti   | 2007           | Onions                    | 3                                                           |

Dietary calcium and zinc deficiency risks are decreasing but remain prevalent

| FAO countrycode | Country | Reference year | Food item                 | Gross food supply (g capita <sup>-1</sup> d <sup>-1</sup> ) |
|-----------------|---------|----------------|---------------------------|-------------------------------------------------------------|
| 93              | Haiti   | 2007           | Oranges, Mandarines       | 14                                                          |
| 93              | Haiti   | 2007           | Palm Oil                  | 7                                                           |
| 93              | Haiti   | 2007           | Pelagic Fish              | 6                                                           |
| 93              | Haiti   | 2007           | Pigmeat                   | 12                                                          |
| 93              | Haiti   | 2007           | Pineapples                | 1                                                           |
| 93              | Haiti   | 2007           | Plantains                 | 43                                                          |
| 93              | Haiti   | 2007           | Potatoes                  | 4                                                           |
| 93              | Haiti   | 2007           | Poultry Meat              | 9                                                           |
| 93              | Haiti   | 2007           | Pulses, Other             | 9                                                           |
| 93              | Haiti   | 2007           | Rice (Milled Equivalent)  | 115                                                         |
| 93              | Haiti   | 2007           | Roots, Other              | 11                                                          |
| 93              | Haiti   | 2007           | Sesameseed                | 1                                                           |
| 93              | Haiti   | 2007           | Sorghum                   | 12                                                          |
| 93              | Haiti   | 2007           | Soyabean Oil              | 13                                                          |
| 93              | Haiti   | 2007           | Sugar, Non-Centrifugal    | 3                                                           |
| 93              | Haiti   | 2007           | Sugar, Refined Equivalent | 51                                                          |
| 93              | Haiti   | 2007           | Sweet Potatoes            | 51                                                          |
| 93              | Haiti   | 2007           | Tomatoes                  | 12                                                          |
| 93              | Haiti   | 2007           | Vegetables, Other         | 45                                                          |
| 93              | Haiti   | 2007           | Wheat                     | 77                                                          |
| 93              | Haiti   | 2007           | Yams                      | 53                                                          |
| 93              | Haiti   | 2008           | Bananas                   | 52                                                          |
| 93              | Haiti   | 2008           | Beans                     | 21                                                          |
| 93              | Haiti   | 2008           | Beer                      | 1                                                           |
| 93              | Haiti   | 2008           | Beverages, Alcoholic      | 26                                                          |
| 93              | Haiti   | 2008           | Bovine Meat               | 13                                                          |
| 93              | Haiti   | 2008           | Cassava                   | 95                                                          |
| 93              | Haiti   | 2008           | Cereals, Other            | 1                                                           |
| 93              | Haiti   | 2008           | Citrus, Other             | 1                                                           |
| 93              | Haiti   | 2008           | Cocoa Beans               | 1                                                           |
| 93              | Haiti   | 2008           | Coconuts - Incl Copra     | 9                                                           |
| 93              | Haiti   | 2008           | Coffee                    | 9                                                           |
| 93              | Haiti   | 2008           | Eggs                      | 1                                                           |
| 93              | Haiti   | 2008           | Fats, Animals, Raw        | 1                                                           |
| 93              | Haiti   | 2008           | Freshwater Fish           | 2                                                           |
| 93              | Haiti   | 2008           | Fruits, Other             | 75                                                          |
| 93              | Haiti   | 2008           | Grapefruit                | 3                                                           |
| 93              | Haiti   | 2008           | Groundnuts (Shelled Eq)   | 5                                                           |
| 93              | Haiti   | 2008           | Lemons, Limes             | 3                                                           |
| 93              | Haiti   | 2008           | Maize                     | 64                                                          |
| 93              | Haiti   | 2008           | Marine Fish, Other        | 4                                                           |
| 93              | Haiti   | 2008           | Meat, Other               | 3                                                           |
| 93              | Haiti   | 2008           | Milk, Whole               | 41                                                          |
| 93              | Haiti   | 2008           | Mutton & Goat Meat        | 2                                                           |
| 93              | Haiti   | 2008           | Offals, Edible            | 4                                                           |
| 93              | Haiti   | 2008           | Oilcrops Oil, Other       | 3                                                           |
| 93              | Haiti   | 2008           | Onions                    | 3                                                           |
| 93              | Haiti   | 2008           | Oranges, Mandarines       | 11                                                          |
| 93              | Haiti   | 2008           | Palm Oil                  | 10                                                          |
| 93              | Haiti   | 2008           | Peas                      | 1                                                           |
| 93              | Haiti   | 2008           | Pelagic Fish              | 6                                                           |
| 93              | Haiti   | 2008           | Pigmeat                   | 12                                                          |
| 93              | Haiti   | 2008           | Pineapples                | 1                                                           |
| 93              | Haiti   | 2008           | Plantains                 | 43                                                          |
| 93              | Haiti   | 2008           | Potatoes                  | 4                                                           |
| 93              | Haiti   | 2008           | Poultry Meat              | 9                                                           |
| 93              | Haiti   | 2008           | Pulses, Other             | 8                                                           |
| 93              | Haiti   | 2008           | Rice (Milled Equivalent)  | 113                                                         |
| 93              | Haiti   | 2008           | Roots, Other              | 11                                                          |
| 93              | Haiti   | 2008           | Sesameseed                | 1                                                           |
| 93              | Haiti   | 2008           | Sorghum                   | 11                                                          |
| 93              | Haiti   | 2008           | Soyabean Oil              | 10                                                          |
| 93              | Haiti   | 2008           | Sugar, Non-Centrifugal    | 4                                                           |
| 93              | Haiti   | 2008           | Sugar, Refined Equivalent | 50                                                          |
| 93              | Haiti   | 2008           | Sweet Potatoes            | 59                                                          |
| 93              | Haiti   | 2008           | Tomatoes                  | 6                                                           |
| 93              | Haiti   | 2008           | Vegetables, Other         | 44                                                          |
| 93              | Haiti   | 2008           | Wheat                     | 79                                                          |
| 93              | Haiti   | 2008           | Yams                      | 53                                                          |
| 93              | Haiti   | 2009           | Bananas                   | 60                                                          |
| 93              | Haiti   | 2009           | Beans                     | 25                                                          |
| 93              | Haiti   | 2009           | Beverages, Alcoholic      | 25                                                          |
| 93              | Haiti   | 2009           | Bovine Meat               | 12                                                          |
| 93              | Haiti   | 2009           | Cassava                   | 96                                                          |
| 93              | Haiti   | 2009           | Cereals, Other            | 3                                                           |
| 93              | Haiti   | 2009           | Cocoa Beans               | 1                                                           |
| 93              | Haiti   | 2009           | Coconuts - Incl Copra     | 7                                                           |
| 93              | Haiti   | 2009           | Coffee                    | 9                                                           |
| 93              | Haiti   | 2009           | Eggs                      | 1                                                           |
| 93              | Haiti   | 2009           | Fats, Animals, Raw        | 1                                                           |
| 93              | Haiti   | 2009           | Freshwater Fish           | 2                                                           |
| 93              | Haiti   | 2009           | Fruits, Other             | 83                                                          |
| 93              | Haiti   | 2009           | Grapefruit                | 2                                                           |
| 93              | Haiti   | 2009           | Groundnuts (Shelled Eq)   | 4                                                           |
| 93              | Haiti   | 2009           | Lemons, Limes             | 4                                                           |
| 93              | Haiti   | 2009           | Maize                     | 65                                                          |
| 93              | Haiti   | 2009           | Marine Fish, Other        | 4                                                           |
| 93              | Haiti   | 2009           | Meat, Other               | 3                                                           |
| 93              | Haiti   | 2009           | Milk, Whole               | 42                                                          |
| 93              | Haiti   | 2009           | Mutton & Goat Meat        | 2                                                           |
| 93              | Haiti   | 2009           | Offals, Edible            | 4                                                           |
| 93              | Haiti   | 2009           | Oilcrops Oil, Other       | 3                                                           |
| 93              | Haiti   | 2009           | Onions                    | 3                                                           |
| 93              | Haiti   | 2009           | Oranges, Mandarines       | 14                                                          |
| 93              | Haiti   | 2009           | Palm Oil                  | 10                                                          |
| 93              | Haiti   | 2009           | Peas                      | 1                                                           |
| 93              | Haiti   | 2009           | Pelagic Fish              | 7                                                           |

Dietary calcium and zinc deficiency risks are decreasing but remain prevalent

| FAO countrycode | Country | Reference year | Food item                 | Gross food supply (g capita <sup>-1</sup> d <sup>-1</sup> ) |
|-----------------|---------|----------------|---------------------------|-------------------------------------------------------------|
| 93              | Haiti   | 2009           | Pigmeat                   | 12                                                          |
| 93              | Haiti   | 2009           | Pineapples                | 1                                                           |
| 93              | Haiti   | 2009           | Plantains                 | 42                                                          |
| 93              | Haiti   | 2009           | Potatoes                  | 2                                                           |
| 93              | Haiti   | 2009           | Poultry Meat              | 11                                                          |
| 93              | Haiti   | 2009           | Pulses, Other             | 8                                                           |
| 93              | Haiti   | 2009           | Rice (Milled Equivalent)  | 112                                                         |
| 93              | Haiti   | 2009           | Roots, Other              | 9                                                           |
| 93              | Haiti   | 2009           | Sesameseed                | 1                                                           |
| 93              | Haiti   | 2009           | Sorghum                   | 11                                                          |
| 93              | Haiti   | 2009           | Soyabean Oil              | 12                                                          |
| 93              | Haiti   | 2009           | Sugar, Non-Centrifugal    | 3                                                           |
| 93              | Haiti   | 2009           | Sugar, Refined Equivalent | 49                                                          |
| 93              | Haiti   | 2009           | Sweet Potatoes            | 62                                                          |
| 93              | Haiti   | 2009           | Tomatoes                  | 8                                                           |
| 93              | Haiti   | 2009           | Vegetables, Other         | 44                                                          |
| 93              | Haiti   | 2009           | Wheat                     | 80                                                          |
| 93              | Haiti   | 2009           | Yams                      | 69                                                          |
| 93              | Haiti   | 2010           | Bananas                   | 53                                                          |
| 93              | Haiti   | 2010           | Beans                     | 28                                                          |
| 93              | Haiti   | 2010           | Beverages, Alcoholic      | 25                                                          |
| 93              | Haiti   | 2010           | Bovine Meat               | 13                                                          |
| 93              | Haiti   | 2010           | Cassava                   | 115                                                         |
| 93              | Haiti   | 2010           | Cereals, Other            | 2                                                           |
| 93              | Haiti   | 2010           | Citrus, Other             | 4                                                           |
| 93              | Haiti   | 2010           | Cocoa Beans               | 1                                                           |
| 93              | Haiti   | 2010           | Coconuts - Incl Copra     | 8                                                           |
| 93              | Haiti   | 2010           | Coffee                    | 5                                                           |
| 93              | Haiti   | 2010           | Eggs                      | 1                                                           |
| 93              | Haiti   | 2010           | Fats, Animals, Raw        | 1                                                           |
| 93              | Haiti   | 2010           | Freshwater Fish           | 2                                                           |
| 93              | Haiti   | 2010           | Fruits, Other             | 70                                                          |
| 93              | Haiti   | 2010           | Grapefruit                | 2                                                           |
| 93              | Haiti   | 2010           | Groundnuts (Shelled Eq)   | 3                                                           |
| 93              | Haiti   | 2010           | Lemons, Limes             | 4                                                           |
| 93              | Haiti   | 2010           | Maize                     | 83                                                          |
| 93              | Haiti   | 2010           | Marine Fish, Other        | 3                                                           |
| 93              | Haiti   | 2010           | Meat, Other               | 3                                                           |
| 93              | Haiti   | 2010           | Milk, Whole               | 45                                                          |
| 93              | Haiti   | 2010           | Mutton & Goat Meat        | 2                                                           |
| 93              | Haiti   | 2010           | Offals, Edible            | 4                                                           |
| 93              | Haiti   | 2010           | Oilcrops Oil, Other       | 4                                                           |
| 93              | Haiti   | 2010           | Onions                    | 3                                                           |
| 93              | Haiti   | 2010           | Oranges, Mandarines       | 11                                                          |
| 93              | Haiti   | 2010           | Palm Oil                  | 8                                                           |
| 93              | Haiti   | 2010           | Peas                      | 6                                                           |
| 93              | Haiti   | 2010           | Pelagic Fish              | 5                                                           |
| 93              | Haiti   | 2010           | Pigmeat                   | 12                                                          |
| 93              | Haiti   | 2010           | Pineapples                | 1                                                           |
| 93              | Haiti   | 2010           | Plantains                 | 42                                                          |
| 93              | Haiti   | 2010           | Potatoes                  | 6                                                           |
| 93              | Haiti   | 2010           | Poultry Meat              | 16                                                          |
| 93              | Haiti   | 2010           | Pulses, Other             | 10                                                          |
| 93              | Haiti   | 2010           | Rice (Milled Equivalent)  | 124                                                         |
| 93              | Haiti   | 2010           | Roots, Other              | 11                                                          |
| 93              | Haiti   | 2010           | Sesameseed                | 1                                                           |
| 93              | Haiti   | 2010           | Sorghum                   | 14                                                          |
| 93              | Haiti   | 2010           | Soyabean Oil              | 12                                                          |
| 93              | Haiti   | 2010           | Sugar, Non-Centrifugal    | 3                                                           |
| 93              | Haiti   | 2010           | Sugar, Refined Equivalent | 41                                                          |
| 93              | Haiti   | 2010           | Sunflowerseed Oil         | 1                                                           |
| 93              | Haiti   | 2010           | Sweet Potatoes            | 92                                                          |
| 93              | Haiti   | 2010           | Tomatoes                  | 9                                                           |
| 93              | Haiti   | 2010           | Vegetables, Other         | 41                                                          |
| 93              | Haiti   | 2010           | Wheat                     | 57                                                          |
| 93              | Haiti   | 2010           | Yams                      | 75                                                          |
| 93              | Haiti   | 2011           | Bananas                   | 54                                                          |
| 93              | Haiti   | 2011           | Beans                     | 20                                                          |
| 93              | Haiti   | 2011           | Beverages, Alcoholic      | 25                                                          |
| 93              | Haiti   | 2011           | Bovine Meat               | 13                                                          |
| 93              | Haiti   | 2011           | Cassava                   | 94                                                          |
| 93              | Haiti   | 2011           | Cheese                    | 1                                                           |
| 93              | Haiti   | 2011           | Citrus, Other             | 1                                                           |
| 93              | Haiti   | 2011           | Cocoa Beans               | 1                                                           |
| 93              | Haiti   | 2011           | Coconuts - Incl Copra     | 9                                                           |
| 93              | Haiti   | 2011           | Coffee                    | 6                                                           |
| 93              | Haiti   | 2011           | Demersal Fish             | 1                                                           |
| 93              | Haiti   | 2011           | Eggs                      | 1                                                           |
| 93              | Haiti   | 2011           | Fats, Animals, Raw        | 1                                                           |
| 93              | Haiti   | 2011           | Freshwater Fish           | 1                                                           |
| 93              | Haiti   | 2011           | Fruits, Other             | 68                                                          |
| 93              | Haiti   | 2011           | Grapefruit                | 2                                                           |
| 93              | Haiti   | 2011           | Groundnuts (Shelled Eq)   | 4                                                           |
| 93              | Haiti   | 2011           | Lemons, Limes             | 4                                                           |
| 93              | Haiti   | 2011           | Maize                     | 88                                                          |
| 93              | Haiti   | 2011           | Marine Fish, Other        | 4                                                           |
| 93              | Haiti   | 2011           | Meat, Other               | 3                                                           |
| 93              | Haiti   | 2011           | Milk, Whole               | 46                                                          |
| 93              | Haiti   | 2011           | Mutton & Goat Meat        | 2                                                           |
| 93              | Haiti   | 2011           | Offals, Edible            | 4                                                           |
| 93              | Haiti   | 2011           | Oilcrops Oil, Other       | 7                                                           |
| 93              | Haiti   | 2011           | Onions                    | 4                                                           |
| 93              | Haiti   | 2011           | Oranges, Mandarines       | 10                                                          |
| 93              | Haiti   | 2011           | Palm Oil                  | 11                                                          |
| 93              | Haiti   | 2011           | Peas                      | 1                                                           |
| 93              | Haiti   | 2011           | Pelagic Fish              | 7                                                           |
| 93              | Haiti   | 2011           | Pigmeat                   | 13                                                          |



Dietary calcium and zinc deficiency risks are decreasing but remain prevalent

| FAO countrycode | Country  | Reference year | Food item                 | Gross food supply (g capita <sup>-1</sup> d <sup>-1</sup> ) |
|-----------------|----------|----------------|---------------------------|-------------------------------------------------------------|
| 93              | Haiti    | 2011           | Pineapples                | 2                                                           |
| 93              | Haiti    | 2011           | Plantains                 | 41                                                          |
| 93              | Haiti    | 2011           | Potatoes                  | 3                                                           |
| 93              | Haiti    | 2011           | Poultry Meat              | 21                                                          |
| 93              | Haiti    | 2011           | Pulses, Other             | 9                                                           |
| 93              | Haiti    | 2011           | Rice (Milled Equivalent)  | 132                                                         |
| 93              | Haiti    | 2011           | Roots, Other              | 13                                                          |
| 93              | Haiti    | 2011           | Sesameseed                | 1                                                           |
| 93              | Haiti    | 2011           | Sorghum                   | 11                                                          |
| 93              | Haiti    | 2011           | Soyabean Oil              | 14                                                          |
| 93              | Haiti    | 2011           | Sugar Cane                | 10                                                          |
| 93              | Haiti    | 2011           | Sugar, Non-Centrifugal    | 3                                                           |
| 93              | Haiti    | 2011           | Sugar, Refined Equivalent | 40                                                          |
| 93              | Haiti    | 2011           | Sunflowerseed Oil         | 1                                                           |
| 93              | Haiti    | 2011           | Sweet Potatoes            | 53                                                          |
| 93              | Haiti    | 2011           | Tomatoes                  | 10                                                          |
| 93              | Haiti    | 2011           | Vegetables, Other         | 38                                                          |
| 93              | Haiti    | 2011           | Wheat                     | 44                                                          |
| 93              | Haiti    | 2011           | Yams                      | 71                                                          |
| 95              | Honduras | 1992           | Apples                    | 1                                                           |
| 95              | Honduras | 1992           | Bananas                   | 90                                                          |
| 95              | Honduras | 1992           | Beans                     | 25                                                          |
| 95              | Honduras | 1992           | Beer                      | 38                                                          |
| 95              | Honduras | 1992           | Beverages, Alcoholic      | 4                                                           |
| 95              | Honduras | 1992           | Bovine Meat               | 18                                                          |
| 95              | Honduras | 1992           | Butter, Ghee              | 2                                                           |
| 95              | Honduras | 1992           | Cassava                   | 4                                                           |
| 95              | Honduras | 1992           | Cheese                    | 4                                                           |
| 95              | Honduras | 1992           | Cocoa Beans               | 1                                                           |
| 95              | Honduras | 1992           | Coconuts - Incl Copra     | 9                                                           |
| 95              | Honduras | 1992           | Coffee                    | 7                                                           |
| 95              | Honduras | 1992           | Crustaceans               | 5                                                           |
| 95              | Honduras | 1992           | Demersal Fish             | 1                                                           |
| 95              | Honduras | 1992           | Eggs                      | 14                                                          |
| 95              | Honduras | 1992           | Fats, Animals, Raw        | 4                                                           |
| 95              | Honduras | 1992           | Fruits, Other             | 17                                                          |
| 95              | Honduras | 1992           | Grapefruit                | 1                                                           |
| 95              | Honduras | 1992           | Lemons, Limes             | 1                                                           |
| 95              | Honduras | 1992           | Maize                     | 256                                                         |
| 95              | Honduras | 1992           | Maize Germ Oil            | 1                                                           |
| 95              | Honduras | 1992           | Milk, Whole               | 187                                                         |
| 95              | Honduras | 1992           | Molluscs, Other           | 3                                                           |
| 95              | Honduras | 1992           | Nuts                      | 1                                                           |
| 95              | Honduras | 1992           | Offals, Edible            | 4                                                           |
| 95              | Honduras | 1992           | Onions                    | 4                                                           |
| 95              | Honduras | 1992           | Oranges, Mandarines       | 34                                                          |
| 95              | Honduras | 1992           | Palm Oil                  | 23                                                          |
| 95              | Honduras | 1992           | Pelagic Fish              | 1                                                           |
| 95              | Honduras | 1992           | Pigmeat                   | 7                                                           |
| 95              | Honduras | 1992           | Pineapples                | 11                                                          |
| 95              | Honduras | 1992           | Plantains                 | 61                                                          |
| 95              | Honduras | 1992           | Potatoes                  | 3                                                           |
| 95              | Honduras | 1992           | Poultry Meat              | 19                                                          |
| 95              | Honduras | 1992           | Rice (Milled Equivalent)  | 19                                                          |
| 95              | Honduras | 1992           | Sorghum                   | 4                                                           |
| 95              | Honduras | 1992           | Soyabean Oil              | 2                                                           |
| 95              | Honduras | 1992           | Sugar, Non-Centrifugal    | 9                                                           |
| 95              | Honduras | 1992           | Sugar, Refined Equivalent | 83                                                          |
| 95              | Honduras | 1992           | Sweeteners, Other         | 1                                                           |
| 95              | Honduras | 1992           | Tomatoes                  | 24                                                          |
| 95              | Honduras | 1992           | Vegetables, Other         | 64                                                          |
| 95              | Honduras | 1992           | Wheat                     | 75                                                          |
| 95              | Honduras | 1993           | Apples                    | 1                                                           |
| 95              | Honduras | 1993           | Bananas                   | 108                                                         |
| 95              | Honduras | 1993           | Beans                     | 26                                                          |
| 95              | Honduras | 1993           | Beer                      | 42                                                          |
| 95              | Honduras | 1993           | Beverages, Alcoholic      | 5                                                           |
| 95              | Honduras | 1993           | Bovine Meat               | 13                                                          |
| 95              | Honduras | 1993           | Butter, Ghee              | 2                                                           |
| 95              | Honduras | 1993           | Cassava                   | 1                                                           |
| 95              | Honduras | 1993           | Cereals, Other            | 1                                                           |
| 95              | Honduras | 1993           | Cheese                    | 4                                                           |
| 95              | Honduras | 1993           | Cocoa Beans               | 1                                                           |
| 95              | Honduras | 1993           | Coconuts - Incl Copra     | 6                                                           |
| 95              | Honduras | 1993           | Coffee                    | 8                                                           |
| 95              | Honduras | 1993           | Crustaceans               | 5                                                           |
| 95              | Honduras | 1993           | Demersal Fish             | 1                                                           |
| 95              | Honduras | 1993           | Eggs                      | 14                                                          |
| 95              | Honduras | 1993           | Fats, Animals, Raw        | 5                                                           |
| 95              | Honduras | 1993           | Fruits, Other             | 21                                                          |
| 95              | Honduras | 1993           | Grapefruit                | 2                                                           |
| 95              | Honduras | 1993           | Grapes                    | 1                                                           |
| 95              | Honduras | 1993           | Lemons, Limes             | 2                                                           |
| 95              | Honduras | 1993           | Maize                     | 249                                                         |
| 95              | Honduras | 1993           | Maize Germ Oil            | 1                                                           |
| 95              | Honduras | 1993           | Milk, Whole               | 184                                                         |
| 95              | Honduras | 1993           | Molluscs, Other           | 2                                                           |
| 95              | Honduras | 1993           | Offals, Edible            | 3                                                           |
| 95              | Honduras | 1993           | Onions                    | 3                                                           |
| 95              | Honduras | 1993           | Oranges, Mandarines       | 14                                                          |
| 95              | Honduras | 1993           | Palm Oil                  | 23                                                          |
| 95              | Honduras | 1993           | Pelagic Fish              | 1                                                           |
| 95              | Honduras | 1993           | Pigmeat                   | 7                                                           |
| 95              | Honduras | 1993           | Pineapples                | 19                                                          |
| 95              | Honduras | 1993           | Plantains                 | 62                                                          |
| 95              | Honduras | 1993           | Potatoes                  | 7                                                           |
| 95              | Honduras | 1993           | Poultry Meat              | 21                                                          |

Dietary calcium and zinc deficiency risks are decreasing but remain prevalent

| FAO countrycode | Country  | Reference year | Food item                 | Gross food supply (g capita <sup>-1</sup> d <sup>-1</sup> ) |
|-----------------|----------|----------------|---------------------------|-------------------------------------------------------------|
| 95              | Honduras | 1993           | Pulses, Other             | 2                                                           |
| 95              | Honduras | 1993           | Rice (Milled Equivalent)  | 16                                                          |
| 95              | Honduras | 1993           | Roots, Other              | 1                                                           |
| 95              | Honduras | 1993           | Sorghum                   | 5                                                           |
| 95              | Honduras | 1993           | Soyabean Oil              | 1                                                           |
| 95              | Honduras | 1993           | Sugar, Non-Centrifugal    | 11                                                          |
| 95              | Honduras | 1993           | Sugar, Refined Equivalent | 86                                                          |
| 95              | Honduras | 1993           | Sweeteners, Other         | 1                                                           |
| 95              | Honduras | 1993           | Tomatoes                  | 29                                                          |
| 95              | Honduras | 1993           | Vegetables, Other         | 62                                                          |
| 95              | Honduras | 1993           | Wheat                     | 75                                                          |
| 95              | Honduras | 1994           | Apples                    | 1                                                           |
| 95              | Honduras | 1994           | Bananas                   | 110                                                         |
| 95              | Honduras | 1994           | Beans                     | 25                                                          |
| 95              | Honduras | 1994           | Beer                      | 37                                                          |
| 95              | Honduras | 1994           | Beverages, Alcoholic      | 4                                                           |
| 95              | Honduras | 1994           | Bovine Meat               | 27                                                          |
| 95              | Honduras | 1994           | Butter, Ghee              | 2                                                           |
| 95              | Honduras | 1994           | Cassava                   | 1                                                           |
| 95              | Honduras | 1994           | Cereals, Other            | 2                                                           |
| 95              | Honduras | 1994           | Cheese                    | 3                                                           |
| 95              | Honduras | 1994           | Coconuts - Incl Copra     | 7                                                           |
| 95              | Honduras | 1994           | Coffee                    | 9                                                           |
| 95              | Honduras | 1994           | Crustaceans               | 3                                                           |
| 95              | Honduras | 1994           | Demersal Fish             | 1                                                           |
| 95              | Honduras | 1994           | Eggs                      | 16                                                          |
| 95              | Honduras | 1994           | Fats, Animals, Raw        | 5                                                           |
| 95              | Honduras | 1994           | Fruits, Other             | 18                                                          |
| 95              | Honduras | 1994           | Grapefruit                | 8                                                           |
| 95              | Honduras | 1994           | Lemons, Limes             | 2                                                           |
| 95              | Honduras | 1994           | Maize                     | 247                                                         |
| 95              | Honduras | 1994           | Maize Germ Oil            | 1                                                           |
| 95              | Honduras | 1994           | Milk, Whole               | 192                                                         |
| 95              | Honduras | 1994           | Molluscs, Other           | 1                                                           |
| 95              | Honduras | 1994           | Nuts                      | 1                                                           |
| 95              | Honduras | 1994           | Offals, Edible            | 4                                                           |
| 95              | Honduras | 1994           | Onions                    | 3                                                           |
| 95              | Honduras | 1994           | Oranges, Mandarines       | 21                                                          |
| 95              | Honduras | 1994           | Palm Oil                  | 22                                                          |
| 95              | Honduras | 1994           | Pelagic Fish              | 1                                                           |
| 95              | Honduras | 1994           | Pigmeat                   | 4                                                           |
| 95              | Honduras | 1994           | Pineapples                | 18                                                          |
| 95              | Honduras | 1994           | Plantains                 | 65                                                          |
| 95              | Honduras | 1994           | Potatoes                  | 6                                                           |
| 95              | Honduras | 1994           | Poultry Meat              | 24                                                          |
| 95              | Honduras | 1994           | Pulses, Other             | 1                                                           |
| 95              | Honduras | 1994           | Rice (Milled Equivalent)  | 26                                                          |
| 95              | Honduras | 1994           | Roots, Other              | 1                                                           |
| 95              | Honduras | 1994           | Sorghum                   | 4                                                           |
| 95              | Honduras | 1994           | Sugar, Non-Centrifugal    | 11                                                          |
| 95              | Honduras | 1994           | Sugar, Refined Equivalent | 86                                                          |
| 95              | Honduras | 1994           | Sweeteners, Other         | 2                                                           |
| 95              | Honduras | 1994           | Tomatoes                  | 19                                                          |
| 95              | Honduras | 1994           | Vegetables, Other         | 65                                                          |
| 95              | Honduras | 1994           | Wheat                     | 73                                                          |
| 95              | Honduras | 1995           | Apples                    | 1                                                           |
| 95              | Honduras | 1995           | Bananas                   | 98                                                          |
| 95              | Honduras | 1995           | Beans                     | 25                                                          |
| 95              | Honduras | 1995           | Beer                      | 40                                                          |
| 95              | Honduras | 1995           | Beverages, Alcoholic      | 5                                                           |
| 95              | Honduras | 1995           | Bovine Meat               | 28                                                          |
| 95              | Honduras | 1995           | Butter, Ghee              | 2                                                           |
| 95              | Honduras | 1995           | Cassava                   | 1                                                           |
| 95              | Honduras | 1995           | Cephalopods               | 1                                                           |
| 95              | Honduras | 1995           | Cereals, Other            | 4                                                           |
| 95              | Honduras | 1995           | Cheese                    | 4                                                           |
| 95              | Honduras | 1995           | Cocoa Beans               | 1                                                           |
| 95              | Honduras | 1995           | Coconuts - Incl Copra     | 7                                                           |
| 95              | Honduras | 1995           | Coffee                    | 14                                                          |
| 95              | Honduras | 1995           | Crustaceans               | 3                                                           |
| 95              | Honduras | 1995           | Demersal Fish             | 1                                                           |
| 95              | Honduras | 1995           | Eggs                      | 17                                                          |
| 95              | Honduras | 1995           | Fats, Animals, Raw        | 5                                                           |
| 95              | Honduras | 1995           | Fruits, Other             | 20                                                          |
| 95              | Honduras | 1995           | Grapefruit                | 8                                                           |
| 95              | Honduras | 1995           | Lemons, Limes             | 2                                                           |
| 95              | Honduras | 1995           | Maize                     | 255                                                         |
| 95              | Honduras | 1995           | Maize Germ Oil            | 1                                                           |
| 95              | Honduras | 1995           | Milk, Whole               | 201                                                         |
| 95              | Honduras | 1995           | Molluscs, Other           | 3                                                           |
| 95              | Honduras | 1995           | Nuts                      | 1                                                           |
| 95              | Honduras | 1995           | Offals, Edible            | 4                                                           |
| 95              | Honduras | 1995           | Onions                    | 4                                                           |
| 95              | Honduras | 1995           | Oranges, Mandarines       | 18                                                          |
| 95              | Honduras | 1995           | Palm Oil                  | 23                                                          |
| 95              | Honduras | 1995           | Pelagic Fish              | 2                                                           |
| 95              | Honduras | 1995           | Pigmeat                   | 5                                                           |
| 95              | Honduras | 1995           | Pineapples                | 18                                                          |
| 95              | Honduras | 1995           | Plantains                 | 71                                                          |
| 95              | Honduras | 1995           | Potatoes                  | 5                                                           |
| 95              | Honduras | 1995           | Poultry Meat              | 25                                                          |
| 95              | Honduras | 1995           | Rice (Milled Equivalent)  | 16                                                          |
| 95              | Honduras | 1995           | Sorghum                   | 4                                                           |
| 95              | Honduras | 1995           | Soyabean Oil              | 1                                                           |
| 95              | Honduras | 1995           | Sugar, Non-Centrifugal    | 9                                                           |
| 95              | Honduras | 1995           | Sugar, Refined Equivalent | 86                                                          |
| 95              | Honduras | 1995           | Sweeteners, Other         | 5                                                           |

Dietary calcium and zinc deficiency risks are decreasing but remain prevalent

| FAO countrycode | Country  | Reference year | Food item                 | Gross food supply (g capita <sup>-1</sup> d <sup>-1</sup> ) |
|-----------------|----------|----------------|---------------------------|-------------------------------------------------------------|
| 95              | Honduras | 1995           | Tomatoes                  | 19                                                          |
| 95              | Honduras | 1995           | Vegetables, Other         | 76                                                          |
| 95              | Honduras | 1995           | Wheat                     | 73                                                          |
| 95              | Honduras | 1996           | Apples                    | 1                                                           |
| 95              | Honduras | 1996           | Bananas                   | 120                                                         |
| 95              | Honduras | 1996           | Beans                     | 25                                                          |
| 95              | Honduras | 1996           | Beer                      | 39                                                          |
| 95              | Honduras | 1996           | Beverages, Alcoholic      | 4                                                           |
| 95              | Honduras | 1996           | Bovine Meat               | 29                                                          |
| 95              | Honduras | 1996           | Butter, Ghee              | 2                                                           |
| 95              | Honduras | 1996           | Cassava                   | 2                                                           |
| 95              | Honduras | 1996           | Cephalopods               | 2                                                           |
| 95              | Honduras | 1996           | Cereals, Other            | 3                                                           |
| 95              | Honduras | 1996           | Cheese                    | 4                                                           |
| 95              | Honduras | 1996           | Cocoa Beans               | 1                                                           |
| 95              | Honduras | 1996           | Coconuts - Incl Copra     | 2                                                           |
| 95              | Honduras | 1996           | Coffee                    | 15                                                          |
| 95              | Honduras | 1996           | Crustaceans               | 4                                                           |
| 95              | Honduras | 1996           | Demersal Fish             | 1                                                           |
| 95              | Honduras | 1996           | Eggs                      | 20                                                          |
| 95              | Honduras | 1996           | Fats, Animals, Raw        | 5                                                           |
| 95              | Honduras | 1996           | Fruits, Other             | 16                                                          |
| 95              | Honduras | 1996           | Grapefruit                | 7                                                           |
| 95              | Honduras | 1996           | Lemons, Limes             | 2                                                           |
| 95              | Honduras | 1996           | Maize                     | 229                                                         |
| 95              | Honduras | 1996           | Maize Germ Oil            | 1                                                           |
| 95              | Honduras | 1996           | Marine Fish, Other        | 1                                                           |
| 95              | Honduras | 1996           | Milk, Whole               | 233                                                         |
| 95              | Honduras | 1996           | Molluscs, Other           | 2                                                           |
| 95              | Honduras | 1996           | Nuts                      | 1                                                           |
| 95              | Honduras | 1996           | Offals, Edible            | 4                                                           |
| 95              | Honduras | 1996           | Onions                    | 4                                                           |
| 95              | Honduras | 1996           | Oranges, Mandarines       | 12                                                          |
| 95              | Honduras | 1996           | Palm Oil                  | 23                                                          |
| 95              | Honduras | 1996           | Pelagic Fish              | 3                                                           |
| 95              | Honduras | 1996           | Pigmeat                   | 5                                                           |
| 95              | Honduras | 1996           | Pineapples                | 17                                                          |
| 95              | Honduras | 1996           | Plantains                 | 77                                                          |
| 95              | Honduras | 1996           | Potatoes                  | 8                                                           |
| 95              | Honduras | 1996           | Poultry Meat              | 27                                                          |
| 95              | Honduras | 1996           | Rice (Milled Equivalent)  | 28                                                          |
| 95              | Honduras | 1996           | Roots, Other              | 1                                                           |
| 95              | Honduras | 1996           | Sorghum                   | 10                                                          |
| 95              | Honduras | 1996           | Soyabean Oil              | 1                                                           |
| 95              | Honduras | 1996           | Sugar, Non-Centrifugal    | 8                                                           |
| 95              | Honduras | 1996           | Sugar, Refined Equivalent | 88                                                          |
| 95              | Honduras | 1996           | Sweeteners, Other         | 5                                                           |
| 95              | Honduras | 1996           | Tomatoes                  | 19                                                          |
| 95              | Honduras | 1996           | Vegetables, Other         | 70                                                          |
| 95              | Honduras | 1996           | Wheat                     | 75                                                          |
| 95              | Honduras | 1997           | Apples                    | 2                                                           |
| 95              | Honduras | 1997           | Bananas                   | 117                                                         |
| 95              | Honduras | 1997           | Beans                     | 24                                                          |
| 95              | Honduras | 1997           | Beer                      | 47                                                          |
| 95              | Honduras | 1997           | Beverages, Alcoholic      | 4                                                           |
| 95              | Honduras | 1997           | Bovine Meat               | 29                                                          |
| 95              | Honduras | 1997           | Butter, Ghee              | 2                                                           |
| 95              | Honduras | 1997           | Cassava                   | 4                                                           |
| 95              | Honduras | 1997           | Cephalopods               | 1                                                           |
| 95              | Honduras | 1997           | Cereals, Other            | 3                                                           |
| 95              | Honduras | 1997           | Cheese                    | 4                                                           |
| 95              | Honduras | 1997           | Cocoa Beans               | 2                                                           |
| 95              | Honduras | 1997           | Coconuts - Incl Copra     | 7                                                           |
| 95              | Honduras | 1997           | Coffee                    | 22                                                          |
| 95              | Honduras | 1997           | Crustaceans               | 2                                                           |
| 95              | Honduras | 1997           | Eggs                      | 20                                                          |
| 95              | Honduras | 1997           | Fats, Animals, Raw        | 5                                                           |
| 95              | Honduras | 1997           | Fruits, Other             | 25                                                          |
| 95              | Honduras | 1997           | Grapefruit                | 12                                                          |
| 95              | Honduras | 1997           | Grapes                    | 1                                                           |
| 95              | Honduras | 1997           | Lemons, Limes             | 2                                                           |
| 95              | Honduras | 1997           | Maize                     | 202                                                         |
| 95              | Honduras | 1997           | Maize Germ Oil            | 1                                                           |
| 95              | Honduras | 1997           | Marine Fish, Other        | 1                                                           |
| 95              | Honduras | 1997           | Milk, Whole               | 225                                                         |
| 95              | Honduras | 1997           | Molluscs, Other           | 3                                                           |
| 95              | Honduras | 1997           | Nuts                      | 1                                                           |
| 95              | Honduras | 1997           | Offals, Edible            | 4                                                           |
| 95              | Honduras | 1997           | Onions                    | 4                                                           |
| 95              | Honduras | 1997           | Oranges, Mandarines       | 32                                                          |
| 95              | Honduras | 1997           | Palm Oil                  | 27                                                          |
| 95              | Honduras | 1997           | Pelagic Fish              | 5                                                           |
| 95              | Honduras | 1997           | Pigmeat                   | 5                                                           |
| 95              | Honduras | 1997           | Pineapples                | 18                                                          |
| 95              | Honduras | 1997           | Plantains                 | 77                                                          |
| 95              | Honduras | 1997           | Potatoes                  | 8                                                           |
| 95              | Honduras | 1997           | Poultry Meat              | 29                                                          |
| 95              | Honduras | 1997           | Rice (Milled Equivalent)  | 26                                                          |
| 95              | Honduras | 1997           | Roots, Other              | 1                                                           |
| 95              | Honduras | 1997           | Sorghum                   | 13                                                          |
| 95              | Honduras | 1997           | Soyabean Oil              | 1                                                           |
| 95              | Honduras | 1997           | Sugar, Non-Centrifugal    | 8                                                           |
| 95              | Honduras | 1997           | Sugar, Refined Equivalent | 90                                                          |
| 95              | Honduras | 1997           | Sweeteners, Other         | 4                                                           |
| 95              | Honduras | 1997           | Tomatoes                  | 20                                                          |
| 95              | Honduras | 1997           | Vegetables, Other         | 96                                                          |
| 95              | Honduras | 1997           | Wheat                     | 79                                                          |

Dietary calcium and zinc deficiency risks are decreasing but remain prevalent

| FAO countrycode | Country  | Reference year | Food item                 | Gross food supply (g capita <sup>-1</sup> d <sup>-1</sup> ) |
|-----------------|----------|----------------|---------------------------|-------------------------------------------------------------|
| 95              | Honduras | 1998           | Apples                    | 1                                                           |
| 95              | Honduras | 1998           | Bananas                   | 92                                                          |
| 95              | Honduras | 1998           | Beans                     | 25                                                          |
| 95              | Honduras | 1998           | Beer                      | 44                                                          |
| 95              | Honduras | 1998           | Beverages, Alcoholic      | 4                                                           |
| 95              | Honduras | 1998           | Bovine Meat               | 25                                                          |
| 95              | Honduras | 1998           | Butter, Ghee              | 3                                                           |
| 95              | Honduras | 1998           | Cassava                   | 4                                                           |
| 95              | Honduras | 1998           | Cheese                    | 4                                                           |
| 95              | Honduras | 1998           | Cocoa Beans               | 1                                                           |
| 95              | Honduras | 1998           | Coconuts - Incl Copra     | 9                                                           |
| 95              | Honduras | 1998           | Coffee                    | 20                                                          |
| 95              | Honduras | 1998           | Crustaceans               | 1                                                           |
| 95              | Honduras | 1998           | Eggs                      | 19                                                          |
| 95              | Honduras | 1998           | Fats, Animals, Raw        | 5                                                           |
| 95              | Honduras | 1998           | Fruits, Other             | 14                                                          |
| 95              | Honduras | 1998           | Grapefruit                | 3                                                           |
| 95              | Honduras | 1998           | Lemons, Limes             | 2                                                           |
| 95              | Honduras | 1998           | Maize                     | 225                                                         |
| 95              | Honduras | 1998           | Maize Germ Oil            | 1                                                           |
| 95              | Honduras | 1998           | Marine Fish, Other        | 1                                                           |
| 95              | Honduras | 1998           | Milk, Whole               | 255                                                         |
| 95              | Honduras | 1998           | Molluscs, Other           | 2                                                           |
| 95              | Honduras | 1998           | Nuts                      | 1                                                           |
| 95              | Honduras | 1998           | Oats                      | 1                                                           |
| 95              | Honduras | 1998           | Offals, Edible            | 3                                                           |
| 95              | Honduras | 1998           | Onions                    | 4                                                           |
| 95              | Honduras | 1998           | Oranges, Mandarines       | 25                                                          |
| 95              | Honduras | 1998           | Palm Oil                  | 27                                                          |
| 95              | Honduras | 1998           | Pelagic Fish              | 4                                                           |
| 95              | Honduras | 1998           | Pigmeat                   | 5                                                           |
| 95              | Honduras | 1998           | Pineapples                | 9                                                           |
| 95              | Honduras | 1998           | Plantains                 | 59                                                          |
| 95              | Honduras | 1998           | Potatoes                  | 2                                                           |
| 95              | Honduras | 1998           | Poultry Meat              | 29                                                          |
| 95              | Honduras | 1998           | Rice (Milled Equivalent)  | 20                                                          |
| 95              | Honduras | 1998           | Roots, Other              | 1                                                           |
| 95              | Honduras | 1998           | Sorghum                   | 13                                                          |
| 95              | Honduras | 1998           | Sugar, Non-Centrifugal    | 5                                                           |
| 95              | Honduras | 1998           | Sugar, Refined Equivalent | 95                                                          |
| 95              | Honduras | 1998           | Sweeteners, Other         | 4                                                           |
| 95              | Honduras | 1998           | Tomatoes                  | 15                                                          |
| 95              | Honduras | 1998           | Vegetables, Other         | 76                                                          |
| 95              | Honduras | 1998           | Wheat                     | 76                                                          |
| 95              | Honduras | 1999           | Apples                    | 2                                                           |
| 95              | Honduras | 1999           | Bananas                   | 67                                                          |
| 95              | Honduras | 1999           | Beans                     | 24                                                          |
| 95              | Honduras | 1999           | Beer                      | 43                                                          |
| 95              | Honduras | 1999           | Beverages, Alcoholic      | 5                                                           |
| 95              | Honduras | 1999           | Bovine Meat               | 24                                                          |
| 95              | Honduras | 1999           | Butter, Ghee              | 2                                                           |
| 95              | Honduras | 1999           | Cassava                   | 4                                                           |
| 95              | Honduras | 1999           | Cephalopods               | 1                                                           |
| 95              | Honduras | 1999           | Cereals, Other            | 2                                                           |
| 95              | Honduras | 1999           | Cheese                    | 4                                                           |
| 95              | Honduras | 1999           | Cocoa Beans               | 1                                                           |
| 95              | Honduras | 1999           | Coconuts - Incl Copra     | 8                                                           |
| 95              | Honduras | 1999           | Coffee                    | 16                                                          |
| 95              | Honduras | 1999           | Crustaceans               | 1                                                           |
| 95              | Honduras | 1999           | Eggs                      | 19                                                          |
| 95              | Honduras | 1999           | Fats, Animals, Raw        | 5                                                           |
| 95              | Honduras | 1999           | Freshwater Fish           | 1                                                           |
| 95              | Honduras | 1999           | Fruits, Other             | 18                                                          |
| 95              | Honduras | 1999           | Grapefruit                | 5                                                           |
| 95              | Honduras | 1999           | Grapes                    | 1                                                           |
| 95              | Honduras | 1999           | Lemons, Limes             | 2                                                           |
| 95              | Honduras | 1999           | Maize                     | 218                                                         |
| 95              | Honduras | 1999           | Maize Germ Oil            | 1                                                           |
| 95              | Honduras | 1999           | Milk, Whole               | 243                                                         |
| 95              | Honduras | 1999           | Molluscs, Other           | 3                                                           |
| 95              | Honduras | 1999           | Nuts                      | 1                                                           |
| 95              | Honduras | 1999           | Offals, Edible            | 3                                                           |
| 95              | Honduras | 1999           | Onions                    | 5                                                           |
| 95              | Honduras | 1999           | Oranges, Mandarines       | 42                                                          |
| 95              | Honduras | 1999           | Palm Oil                  | 27                                                          |
| 95              | Honduras | 1999           | Pelagic Fish              | 6                                                           |
| 95              | Honduras | 1999           | Pigmeat                   | 8                                                           |
| 95              | Honduras | 1999           | Pineapples                | 7                                                           |
| 95              | Honduras | 1999           | Plantains                 | 29                                                          |
| 95              | Honduras | 1999           | Potatoes                  | 9                                                           |
| 95              | Honduras | 1999           | Poultry Meat              | 33                                                          |
| 95              | Honduras | 1999           | Rice (Milled Equivalent)  | 29                                                          |
| 95              | Honduras | 1999           | Roots, Other              | 1                                                           |
| 95              | Honduras | 1999           | Sorghum                   | 10                                                          |
| 95              | Honduras | 1999           | Soyabean Oil              | 1                                                           |
| 95              | Honduras | 1999           | Sugar, Non-Centrifugal    | 1                                                           |
| 95              | Honduras | 1999           | Sugar, Refined Equivalent | 98                                                          |
| 95              | Honduras | 1999           | Sweeteners, Other         | 4                                                           |
| 95              | Honduras | 1999           | Tomatoes                  | 20                                                          |
| 95              | Honduras | 1999           | Vegetables, Other         | 69                                                          |
| 95              | Honduras | 1999           | Wheat                     | 82                                                          |
| 95              | Honduras | 2000           | Apples                    | 1                                                           |
| 95              | Honduras | 2000           | Bananas                   | 42                                                          |
| 95              | Honduras | 2000           | Beans                     | 25                                                          |
| 95              | Honduras | 2000           | Beer                      | 42                                                          |
| 95              | Honduras | 2000           | Beverages, Alcoholic      | 5                                                           |
| 95              | Honduras | 2000           | Bovine Meat               | 24                                                          |

Dietary calcium and zinc deficiency risks are decreasing but remain prevalent

| FAO countrycode | Country  | Reference year | Food item                 | Gross food supply (g capita <sup>-1</sup> d <sup>-1</sup> ) |
|-----------------|----------|----------------|---------------------------|-------------------------------------------------------------|
| 95              | Honduras | 2000           | Butter, Ghee              | 2                                                           |
| 95              | Honduras | 2000           | Cassava                   | 4                                                           |
| 95              | Honduras | 2000           | Cereals, Other            | 1                                                           |
| 95              | Honduras | 2000           | Cheese                    | 6                                                           |
| 95              | Honduras | 2000           | Cocoa Beans               | 2                                                           |
| 95              | Honduras | 2000           | Coconuts - Incl Copra     | 7                                                           |
| 95              | Honduras | 2000           | Coffee                    | 10                                                          |
| 95              | Honduras | 2000           | Crustaceans               | 1                                                           |
| 95              | Honduras | 2000           | Eggs                      | 19                                                          |
| 95              | Honduras | 2000           | Fats, Animals, Raw        | 5                                                           |
| 95              | Honduras | 2000           | Freshwater Fish           | 1                                                           |
| 95              | Honduras | 2000           | Fruits, Other             | 23                                                          |
| 95              | Honduras | 2000           | Grapefruit                | 4                                                           |
| 95              | Honduras | 2000           | Grapes                    | 1                                                           |
| 95              | Honduras | 2000           | Lemons, Limes             | 2                                                           |
| 95              | Honduras | 2000           | Maize                     | 218                                                         |
| 95              | Honduras | 2000           | Maize Germ Oil            | 1                                                           |
| 95              | Honduras | 2000           | Milk, Whole               | 210                                                         |
| 95              | Honduras | 2000           | Molluscs, Other           | 3                                                           |
| 95              | Honduras | 2000           | Nuts                      | 1                                                           |
| 95              | Honduras | 2000           | Oats                      | 2                                                           |
| 95              | Honduras | 2000           | Offals, Edible            | 3                                                           |
| 95              | Honduras | 2000           | Onions                    | 7                                                           |
| 95              | Honduras | 2000           | Oranges, Mandarines       | 25                                                          |
| 95              | Honduras | 2000           | Palm Oil                  | 26                                                          |
| 95              | Honduras | 2000           | Pelagic Fish              | 3                                                           |
| 95              | Honduras | 2000           | Pigmeat                   | 7                                                           |
| 95              | Honduras | 2000           | Pineapples                | 8                                                           |
| 95              | Honduras | 2000           | Plantains                 | 19                                                          |
| 95              | Honduras | 2000           | Potatoes                  | 7                                                           |
| 95              | Honduras | 2000           | Poultry Meat              | 38                                                          |
| 95              | Honduras | 2000           | Rice (Milled Equivalent)  | 31                                                          |
| 95              | Honduras | 2000           | Sorghum                   | 9                                                           |
| 95              | Honduras | 2000           | Soybean Oil               | 1                                                           |
| 95              | Honduras | 2000           | Sugar, Non-Centrifugal    | 1                                                           |
| 95              | Honduras | 2000           | Sugar, Refined Equivalent | 96                                                          |
| 95              | Honduras | 2000           | Sunflowerseed Oil         | 1                                                           |
| 95              | Honduras | 2000           | Sweeteners, Other         | 4                                                           |
| 95              | Honduras | 2000           | Tomatoes                  | 17                                                          |
| 95              | Honduras | 2000           | Vegetables, Other         | 81                                                          |
| 95              | Honduras | 2000           | Wheat                     | 81                                                          |
| 95              | Honduras | 2000           | Whey                      | 1                                                           |
| 95              | Honduras | 2001           | Apples                    | 2                                                           |
| 95              | Honduras | 2001           | Bananas                   | 39                                                          |
| 95              | Honduras | 2001           | Beans                     | 24                                                          |
| 95              | Honduras | 2001           | Beer                      | 41                                                          |
| 95              | Honduras | 2001           | Beverages, Alcoholic      | 6                                                           |
| 95              | Honduras | 2001           | Bovine Meat               | 24                                                          |
| 95              | Honduras | 2001           | Butter, Ghee              | 2                                                           |
| 95              | Honduras | 2001           | Cassava                   | 4                                                           |
| 95              | Honduras | 2001           | Cheese                    | 5                                                           |
| 95              | Honduras | 2001           | Cocoa Beans               | 2                                                           |
| 95              | Honduras | 2001           | Coconuts - Incl Copra     | 8                                                           |
| 95              | Honduras | 2001           | Coffee                    | 14                                                          |
| 95              | Honduras | 2001           | Crustaceans               | 1                                                           |
| 95              | Honduras | 2001           | Eggs                      | 19                                                          |
| 95              | Honduras | 2001           | Fats, Animals, Raw        | 5                                                           |
| 95              | Honduras | 2001           | Freshwater Fish           | 1                                                           |
| 95              | Honduras | 2001           | Fruits, Other             | 24                                                          |
| 95              | Honduras | 2001           | Grapefruit                | 4                                                           |
| 95              | Honduras | 2001           | Grapes                    | 1                                                           |
| 95              | Honduras | 2001           | Lemons, Limes             | 2                                                           |
| 95              | Honduras | 2001           | Maize                     | 221                                                         |
| 95              | Honduras | 2001           | Maize Germ Oil            | 1                                                           |
| 95              | Honduras | 2001           | Milk, Whole               | 247                                                         |
| 95              | Honduras | 2001           | Molluscs, Other           | 2                                                           |
| 95              | Honduras | 2001           | Nuts                      | 1                                                           |
| 95              | Honduras | 2001           | Oats                      | 1                                                           |
| 95              | Honduras | 2001           | Offals, Edible            | 3                                                           |
| 95              | Honduras | 2001           | Onions                    | 7                                                           |
| 95              | Honduras | 2001           | Oranges, Mandarines       | 32                                                          |
| 95              | Honduras | 2001           | Palm Oil                  | 29                                                          |
| 95              | Honduras | 2001           | Pelagic Fish              | 5                                                           |
| 95              | Honduras | 2001           | Pigmeat                   | 9                                                           |
| 95              | Honduras | 2001           | Pineapples                | 8                                                           |
| 95              | Honduras | 2001           | Plantains                 | 21                                                          |
| 95              | Honduras | 2001           | Potatoes                  | 13                                                          |
| 95              | Honduras | 2001           | Poultry Meat              | 32                                                          |
| 95              | Honduras | 2001           | Rice (Milled Equivalent)  | 40                                                          |
| 95              | Honduras | 2001           | Sorghum                   | 9                                                           |
| 95              | Honduras | 2001           | Soybean Oil               | 1                                                           |
| 95              | Honduras | 2001           | Sugar, Refined Equivalent | 95                                                          |
| 95              | Honduras | 2001           | Sweeteners, Other         | 5                                                           |
| 95              | Honduras | 2001           | Tomatoes                  | 19                                                          |
| 95              | Honduras | 2001           | Vegetables, Other         | 63                                                          |
| 95              | Honduras | 2001           | Wheat                     | 84                                                          |
| 95              | Honduras | 2001           | Whey                      | 1                                                           |
| 95              | Honduras | 2002           | Apples                    | 2                                                           |
| 95              | Honduras | 2002           | Bananas                   | 63                                                          |
| 95              | Honduras | 2002           | Beans                     | 29                                                          |
| 95              | Honduras | 2002           | Beer                      | 42                                                          |
| 95              | Honduras | 2002           | Beverages, Alcoholic      | 7                                                           |
| 95              | Honduras | 2002           | Bovine Meat               | 24                                                          |
| 95              | Honduras | 2002           | Butter, Ghee              | 2                                                           |
| 95              | Honduras | 2002           | Cassava                   | 4                                                           |
| 95              | Honduras | 2002           | Cereals, Other            | 2                                                           |
| 95              | Honduras | 2002           | Cheese                    | 5                                                           |

Dietary calcium and zinc deficiency risks are decreasing but remain prevalent

| FAO countrycode | Country  | Reference year | Food item                 | Gross food supply (g capita <sup>-1</sup> d <sup>-1</sup> ) |
|-----------------|----------|----------------|---------------------------|-------------------------------------------------------------|
| 95              | Honduras | 2002           | Cocoa Beans               | 2                                                           |
| 95              | Honduras | 2002           | Coconuts - Incl Copra     | 5                                                           |
| 95              | Honduras | 2002           | Coffee                    | 13                                                          |
| 95              | Honduras | 2002           | Crustaceans               | 1                                                           |
| 95              | Honduras | 2002           | Eggs                      | 14                                                          |
| 95              | Honduras | 2002           | Fats, Animals, Raw        | 5                                                           |
| 95              | Honduras | 2002           | Fruits, Other             | 29                                                          |
| 95              | Honduras | 2002           | Grapefruit                | 2                                                           |
| 95              | Honduras | 2002           | Grapes                    | 1                                                           |
| 95              | Honduras | 2002           | Lemons, Limes             | 2                                                           |
| 95              | Honduras | 2002           | Maize                     | 228                                                         |
| 95              | Honduras | 2002           | Maize Germ Oil            | 1                                                           |
| 95              | Honduras | 2002           | Milk, Whole               | 194                                                         |
| 95              | Honduras | 2002           | Molluscs, Other           | 2                                                           |
| 95              | Honduras | 2002           | Nuts                      | 1                                                           |
| 95              | Honduras | 2002           | Offals, Edible            | 3                                                           |
| 95              | Honduras | 2002           | Onions                    | 8                                                           |
| 95              | Honduras | 2002           | Oranges, Mandarines       | 67                                                          |
| 95              | Honduras | 2002           | Palm Oil                  | 29                                                          |
| 95              | Honduras | 2002           | Pelagic Fish              | 2                                                           |
| 95              | Honduras | 2002           | Pigmeat                   | 7                                                           |
| 95              | Honduras | 2002           | Pineapples                | 7                                                           |
| 95              | Honduras | 2002           | Plantains                 | 21                                                          |
| 95              | Honduras | 2002           | Potatoes                  | 10                                                          |
| 95              | Honduras | 2002           | Poultry Meat              | 47                                                          |
| 95              | Honduras | 2002           | Rice (Milled Equivalent)  | 27                                                          |
| 95              | Honduras | 2002           | Sorghum                   | 9                                                           |
| 95              | Honduras | 2002           | Soyabean Oil              | 1                                                           |
| 95              | Honduras | 2002           | Sugar, Refined Equivalent | 94                                                          |
| 95              | Honduras | 2002           | Sunflowerseed Oil         | 1                                                           |
| 95              | Honduras | 2002           | Sweeteners, Other         | 5                                                           |
| 95              | Honduras | 2002           | Tomatoes                  | 6                                                           |
| 95              | Honduras | 2002           | Vegetables, Other         | 72                                                          |
| 95              | Honduras | 2002           | Wheat                     | 87                                                          |
| 95              | Honduras | 2002           | Whey                      | 1                                                           |
| 95              | Honduras | 2002           | Wine                      | 1                                                           |
| 95              | Honduras | 2003           | Apples                    | 3                                                           |
| 95              | Honduras | 2003           | Bananas                   | 62                                                          |
| 95              | Honduras | 2003           | Barley                    | 1                                                           |
| 95              | Honduras | 2003           | Beans                     | 29                                                          |
| 95              | Honduras | 2003           | Beer                      | 41                                                          |
| 95              | Honduras | 2003           | Beverages, Alcoholic      | 7                                                           |
| 95              | Honduras | 2003           | Bovine Meat               | 26                                                          |
| 95              | Honduras | 2003           | Butter, Ghee              | 2                                                           |
| 95              | Honduras | 2003           | Cassava                   | 5                                                           |
| 95              | Honduras | 2003           | Cereals, Other            | 2                                                           |
| 95              | Honduras | 2003           | Cheese                    | 5                                                           |
| 95              | Honduras | 2003           | Cocoa Beans               | 1                                                           |
| 95              | Honduras | 2003           | Coconuts - Incl Copra     | 6                                                           |
| 95              | Honduras | 2003           | Coffee                    | 6                                                           |
| 95              | Honduras | 2003           | Crustaceans               | 1                                                           |
| 95              | Honduras | 2003           | Eggs                      | 14                                                          |
| 95              | Honduras | 2003           | Fats, Animals, Raw        | 5                                                           |
| 95              | Honduras | 2003           | Fruits, Other             | 31                                                          |
| 95              | Honduras | 2003           | Grapefruit                | 1                                                           |
| 95              | Honduras | 2003           | Grapes                    | 2                                                           |
| 95              | Honduras | 2003           | Lemons, Limes             | 2                                                           |
| 95              | Honduras | 2003           | Maize                     | 221                                                         |
| 95              | Honduras | 2003           | Maize Germ Oil            | 2                                                           |
| 95              | Honduras | 2003           | Marine Fish, Other        | 2                                                           |
| 95              | Honduras | 2003           | Milk, Whole               | 208                                                         |
| 95              | Honduras | 2003           | Molluscs, Other           | 3                                                           |
| 95              | Honduras | 2003           | Nuts                      | 1                                                           |
| 95              | Honduras | 2003           | Oats                      | 2                                                           |
| 95              | Honduras | 2003           | Offals, Edible            | 4                                                           |
| 95              | Honduras | 2003           | Onions                    | 9                                                           |
| 95              | Honduras | 2003           | Oranges, Mandarines       | 74                                                          |
| 95              | Honduras | 2003           | Palm Oil                  | 24                                                          |
| 95              | Honduras | 2003           | Pelagic Fish              | 2                                                           |
| 95              | Honduras | 2003           | Pigmeat                   | 8                                                           |
| 95              | Honduras | 2003           | Pineapples                | 7                                                           |
| 95              | Honduras | 2003           | Plantains                 | 19                                                          |
| 95              | Honduras | 2003           | Potatoes                  | 11                                                          |
| 95              | Honduras | 2003           | Poultry Meat              | 51                                                          |
| 95              | Honduras | 2003           | Rice (Milled Equivalent)  | 39                                                          |
| 95              | Honduras | 2003           | Sorghum                   | 9                                                           |
| 95              | Honduras | 2003           | Soyabean Oil              | 1                                                           |
| 95              | Honduras | 2003           | Sugar, Refined Equivalent | 96                                                          |
| 95              | Honduras | 2003           | Sweeteners, Other         | 11                                                          |
| 95              | Honduras | 2003           | Tomatoes                  | 21                                                          |
| 95              | Honduras | 2003           | Vegetables, Other         | 89                                                          |
| 95              | Honduras | 2003           | Wheat                     | 85                                                          |
| 95              | Honduras | 2003           | Whey                      | 1                                                           |
| 95              | Honduras | 2004           | Apples                    | 3                                                           |
| 95              | Honduras | 2004           | Bananas                   | 61                                                          |
| 95              | Honduras | 2004           | Beans                     | 30                                                          |
| 95              | Honduras | 2004           | Beer                      | 39                                                          |
| 95              | Honduras | 2004           | Beverages, Alcoholic      | 7                                                           |
| 95              | Honduras | 2004           | Bovine Meat               | 26                                                          |
| 95              | Honduras | 2004           | Butter, Ghee              | 2                                                           |
| 95              | Honduras | 2004           | Cassava                   | 8                                                           |
| 95              | Honduras | 2004           | Cereals, Other            | 2                                                           |
| 95              | Honduras | 2004           | Cheese                    | 6                                                           |
| 95              | Honduras | 2004           | Cocoa Beans               | 1                                                           |
| 95              | Honduras | 2004           | Coconuts - Incl Copra     | 6                                                           |
| 95              | Honduras | 2004           | Coffee                    | 6                                                           |
| 95              | Honduras | 2004           | Eggs                      | 13                                                          |

Dietary calcium and zinc deficiency risks are decreasing but remain prevalent

| FAO countrycode | Country  | Reference year | Food item                 | Gross food supply (g capita <sup>-1</sup> d <sup>-1</sup> ) |
|-----------------|----------|----------------|---------------------------|-------------------------------------------------------------|
| 95              | Honduras | 2004           | Fats, Animals, Raw        | 5                                                           |
| 95              | Honduras | 2004           | Fruits, Other             | 40                                                          |
| 95              | Honduras | 2004           | Grapefruit                | 1                                                           |
| 95              | Honduras | 2004           | Grapes                    | 2                                                           |
| 95              | Honduras | 2004           | Lemons, Limes             | 3                                                           |
| 95              | Honduras | 2004           | Maize                     | 215                                                         |
| 95              | Honduras | 2004           | Maize Germ Oil            | 1                                                           |
| 95              | Honduras | 2004           | Marine Fish, Other        | 1                                                           |
| 95              | Honduras | 2004           | Milk, Whole               | 206                                                         |
| 95              | Honduras | 2004           | Nuts                      | 1                                                           |
| 95              | Honduras | 2004           | Oats                      | 2                                                           |
| 95              | Honduras | 2004           | Offals, Edible            | 4                                                           |
| 95              | Honduras | 2004           | Onions                    | 8                                                           |
| 95              | Honduras | 2004           | Oranges, Mandarines       | 63                                                          |
| 95              | Honduras | 2004           | Palm Oil                  | 25                                                          |
| 95              | Honduras | 2004           | Pelagic Fish              | 4                                                           |
| 95              | Honduras | 2004           | Pigmeat                   | 7                                                           |
| 95              | Honduras | 2004           | Pineapples                | 7                                                           |
| 95              | Honduras | 2004           | Plantains                 | 18                                                          |
| 95              | Honduras | 2004           | Potatoes                  | 12                                                          |
| 95              | Honduras | 2004           | Poultry Meat              | 55                                                          |
| 95              | Honduras | 2004           | Rice (Milled Equivalent)  | 41                                                          |
| 95              | Honduras | 2004           | Sorghum                   | 9                                                           |
| 95              | Honduras | 2004           | Sugar, Refined Equivalent | 94                                                          |
| 95              | Honduras | 2004           | Sweeteners, Other         | 11                                                          |
| 95              | Honduras | 2004           | Tomatoes                  | 31                                                          |
| 95              | Honduras | 2004           | Vegetables, Other         | 78                                                          |
| 95              | Honduras | 2004           | Wheat                     | 88                                                          |
| 95              | Honduras | 2004           | Whey                      | 1                                                           |
| 95              | Honduras | 2004           | Wine                      | 1                                                           |
| 95              | Honduras | 2005           | Apples                    | 6                                                           |
| 95              | Honduras | 2005           | Bananas                   | 60                                                          |
| 95              | Honduras | 2005           | Beans                     | 32                                                          |
| 95              | Honduras | 2005           | Beer                      | 44                                                          |
| 95              | Honduras | 2005           | Beverages, Alcoholic      | 6                                                           |
| 95              | Honduras | 2005           | Bovine Meat               | 27                                                          |
| 95              | Honduras | 2005           | Butter, Ghee              | 3                                                           |
| 95              | Honduras | 2005           | Cassava                   | 11                                                          |
| 95              | Honduras | 2005           | Cereals, Other            | 3                                                           |
| 95              | Honduras | 2005           | Cheese                    | 5                                                           |
| 95              | Honduras | 2005           | Cocoa Beans               | 1                                                           |
| 95              | Honduras | 2005           | Coconuts - Incl Copra     | 6                                                           |
| 95              | Honduras | 2005           | Coffee                    | 17                                                          |
| 95              | Honduras | 2005           | Crustaceans               | 1                                                           |
| 95              | Honduras | 2005           | Eggs                      | 13                                                          |
| 95              | Honduras | 2005           | Fats, Animals, Raw        | 4                                                           |
| 95              | Honduras | 2005           | Freshwater Fish           | 4                                                           |
| 95              | Honduras | 2005           | Fruits, Other             | 47                                                          |
| 95              | Honduras | 2005           | Grapefruit                | 1                                                           |
| 95              | Honduras | 2005           | Grapes                    | 2                                                           |
| 95              | Honduras | 2005           | Lemons, Limes             | 4                                                           |
| 95              | Honduras | 2005           | Maize                     | 205                                                         |
| 95              | Honduras | 2005           | Maize Germ Oil            | 1                                                           |
| 95              | Honduras | 2005           | Marine Fish, Other        | 1                                                           |
| 95              | Honduras | 2005           | Milk, Whole               | 217                                                         |
| 95              | Honduras | 2005           | Nuts                      | 1                                                           |
| 95              | Honduras | 2005           | Offals, Edible            | 4                                                           |
| 95              | Honduras | 2005           | Onions                    | 10                                                          |
| 95              | Honduras | 2005           | Oranges, Mandarines       | 35                                                          |
| 95              | Honduras | 2005           | Palm Oil                  | 25                                                          |
| 95              | Honduras | 2005           | Pelagic Fish              | 7                                                           |
| 95              | Honduras | 2005           | Pigmeat                   | 10                                                          |
| 95              | Honduras | 2005           | Pineapples                | 7                                                           |
| 95              | Honduras | 2005           | Plantains                 | 18                                                          |
| 95              | Honduras | 2005           | Potatoes                  | 13                                                          |
| 95              | Honduras | 2005           | Poultry Meat              | 59                                                          |
| 95              | Honduras | 2005           | Rice (Milled Equivalent)  | 39                                                          |
| 95              | Honduras | 2005           | Roots, Other              | 1                                                           |
| 95              | Honduras | 2005           | Sorghum                   | 9                                                           |
| 95              | Honduras | 2005           | Soyabean Oil              | 1                                                           |
| 95              | Honduras | 2005           | Spices, Other             | 1                                                           |
| 95              | Honduras | 2005           | Sugar, Refined Equivalent | 92                                                          |
| 95              | Honduras | 2005           | Sweeteners, Other         | 16                                                          |
| 95              | Honduras | 2005           | Tomatoes                  | 38                                                          |
| 95              | Honduras | 2005           | Vegetables, Other         | 72                                                          |
| 95              | Honduras | 2005           | Wheat                     | 93                                                          |
| 95              | Honduras | 2005           | Whey                      | 1                                                           |
| 95              | Honduras | 2005           | Wine                      | 1                                                           |
| 95              | Honduras | 2006           | Apples                    | 8                                                           |
| 95              | Honduras | 2006           | Bananas                   | 40                                                          |
| 95              | Honduras | 2006           | Beans                     | 22                                                          |
| 95              | Honduras | 2006           | Beer                      | 45                                                          |
| 95              | Honduras | 2006           | Beverages, Alcoholic      | 7                                                           |
| 95              | Honduras | 2006           | Bovine Meat               | 28                                                          |
| 95              | Honduras | 2006           | Butter, Ghee              | 3                                                           |
| 95              | Honduras | 2006           | Cassava                   | 11                                                          |
| 95              | Honduras | 2006           | Cereals, Other            | 3                                                           |
| 95              | Honduras | 2006           | Cheese                    | 5                                                           |
| 95              | Honduras | 2006           | Cocoa Beans               | 1                                                           |
| 95              | Honduras | 2006           | Coconuts - Incl Copra     | 4                                                           |
| 95              | Honduras | 2006           | Coffee                    | 15                                                          |
| 95              | Honduras | 2006           | Crustaceans               | 1                                                           |
| 95              | Honduras | 2006           | Eggs                      | 16                                                          |
| 95              | Honduras | 2006           | Fats, Animals, Raw        | 4                                                           |
| 95              | Honduras | 2006           | Freshwater Fish           | 3                                                           |
| 95              | Honduras | 2006           | Fruits, Other             | 61                                                          |
| 95              | Honduras | 2006           | Grapefruit                | 2                                                           |

Dietary calcium and zinc deficiency risks are decreasing but remain prevalent

| FAO countrycode | Country  | Reference year | Food item                 | Gross food supply (g capita <sup>-1</sup> d <sup>-1</sup> ) |
|-----------------|----------|----------------|---------------------------|-------------------------------------------------------------|
| 95              | Honduras | 2006           | Grapes                    | 2                                                           |
| 95              | Honduras | 2006           | Lemons, Limes             | 4                                                           |
| 95              | Honduras | 2006           | Maize                     | 200                                                         |
| 95              | Honduras | 2006           | Maize Germ Oil            | 1                                                           |
| 95              | Honduras | 2006           | Marine Fish, Other        | 1                                                           |
| 95              | Honduras | 2006           | Milk, Whole               | 251                                                         |
| 95              | Honduras | 2006           | Molluscs, Other           | 1                                                           |
| 95              | Honduras | 2006           | Nuts                      | 1                                                           |
| 95              | Honduras | 2006           | Oats                      | 2                                                           |
| 95              | Honduras | 2006           | Offals, Edible            | 4                                                           |
| 95              | Honduras | 2006           | Onions                    | 9                                                           |
| 95              | Honduras | 2006           | Oranges, Mandarines       | 45                                                          |
| 95              | Honduras | 2006           | Palm Oil                  | 25                                                          |
| 95              | Honduras | 2006           | Pelagic Fish              | 7                                                           |
| 95              | Honduras | 2006           | Pigmeat                   | 13                                                          |
| 95              | Honduras | 2006           | Pineapples                | 7                                                           |
| 95              | Honduras | 2006           | Plantains                 | 24                                                          |
| 95              | Honduras | 2006           | Potatoes                  | 13                                                          |
| 95              | Honduras | 2006           | Poultry Meat              | 53                                                          |
| 95              | Honduras | 2006           | Rice (Milled Equivalent)  | 41                                                          |
| 95              | Honduras | 2006           | Sorghum                   | 11                                                          |
| 95              | Honduras | 2006           | Soyabean Oil              | 1                                                           |
| 95              | Honduras | 2006           | Sugar, Refined Equivalent | 92                                                          |
| 95              | Honduras | 2006           | Sweeteners, Other         | 23                                                          |
| 95              | Honduras | 2006           | Tomatoes                  | 35                                                          |
| 95              | Honduras | 2006           | Vegetables, Other         | 75                                                          |
| 95              | Honduras | 2006           | Wheat                     | 102                                                         |
| 95              | Honduras | 2006           | Whey                      | 1                                                           |
| 95              | Honduras | 2006           | Wine                      | 1                                                           |
| 95              | Honduras | 2007           | Apples                    | 9                                                           |
| 95              | Honduras | 2007           | Bananas                   | 44                                                          |
| 95              | Honduras | 2007           | Beans                     | 22                                                          |
| 95              | Honduras | 2007           | Beer                      | 44                                                          |
| 95              | Honduras | 2007           | Beverages, Alcoholic      | 6                                                           |
| 95              | Honduras | 2007           | Bovine Meat               | 29                                                          |
| 95              | Honduras | 2007           | Butter, Ghee              | 3                                                           |
| 95              | Honduras | 2007           | Cassava                   | 9                                                           |
| 95              | Honduras | 2007           | Cereals, Other            | 4                                                           |
| 95              | Honduras | 2007           | Cheese                    | 9                                                           |
| 95              | Honduras | 2007           | Cocoa Beans               | 1                                                           |
| 95              | Honduras | 2007           | Coconuts - Incl Copra     | 5                                                           |
| 95              | Honduras | 2007           | Coffee                    | 10                                                          |
| 95              | Honduras | 2007           | Crustaceans               | 3                                                           |
| 95              | Honduras | 2007           | Eggs                      | 16                                                          |
| 95              | Honduras | 2007           | Fats, Animals, Raw        | 4                                                           |
| 95              | Honduras | 2007           | Freshwater Fish           | 3                                                           |
| 95              | Honduras | 2007           | Fruits, Other             | 58                                                          |
| 95              | Honduras | 2007           | Grapefruit                | 2                                                           |
| 95              | Honduras | 2007           | Grapes                    | 2                                                           |
| 95              | Honduras | 2007           | Lemons, Limes             | 3                                                           |
| 95              | Honduras | 2007           | Maize                     | 210                                                         |
| 95              | Honduras | 2007           | Maize Germ Oil            | 2                                                           |
| 95              | Honduras | 2007           | Marine Fish, Other        | 1                                                           |
| 95              | Honduras | 2007           | Milk, Whole               | 235                                                         |
| 95              | Honduras | 2007           | Nuts                      | 1                                                           |
| 95              | Honduras | 2007           | Oats                      | 2                                                           |
| 95              | Honduras | 2007           | Offals, Edible            | 4                                                           |
| 95              | Honduras | 2007           | Onions                    | 10                                                          |
| 95              | Honduras | 2007           | Oranges, Mandarines       | 40                                                          |
| 95              | Honduras | 2007           | Palm Oil                  | 25                                                          |
| 95              | Honduras | 2007           | Pelagic Fish              | 5                                                           |
| 95              | Honduras | 2007           | Pigmeat                   | 14                                                          |
| 95              | Honduras | 2007           | Pineapples                | 7                                                           |
| 95              | Honduras | 2007           | Plantains                 | 24                                                          |
| 95              | Honduras | 2007           | Potatoes                  | 12                                                          |
| 95              | Honduras | 2007           | Poultry Meat              | 55                                                          |
| 95              | Honduras | 2007           | Rice (Milled Equivalent)  | 40                                                          |
| 95              | Honduras | 2007           | Sorghum                   | 4                                                           |
| 95              | Honduras | 2007           | Soyabean Oil              | 2                                                           |
| 95              | Honduras | 2007           | Sugar, Refined Equivalent | 94                                                          |
| 95              | Honduras | 2007           | Sunflowerseed Oil         | 1                                                           |
| 95              | Honduras | 2007           | Sweeteners, Other         | 24                                                          |
| 95              | Honduras | 2007           | Tomatoes                  | 42                                                          |
| 95              | Honduras | 2007           | Vegetables, Other         | 91                                                          |
| 95              | Honduras | 2007           | Wheat                     | 97                                                          |
| 95              | Honduras | 2007           | Whey                      | 1                                                           |
| 95              | Honduras | 2007           | Wine                      | 1                                                           |
| 95              | Honduras | 2008           | Apples                    | 12                                                          |
| 95              | Honduras | 2008           | Bananas                   | 34                                                          |
| 95              | Honduras | 2008           | Beans                     | 29                                                          |
| 95              | Honduras | 2008           | Beer                      | 47                                                          |
| 95              | Honduras | 2008           | Beverages, Alcoholic      | 8                                                           |
| 95              | Honduras | 2008           | Bovine Meat               | 28                                                          |
| 95              | Honduras | 2008           | Butter, Ghee              | 3                                                           |
| 95              | Honduras | 2008           | Cassava                   | 9                                                           |
| 95              | Honduras | 2008           | Cereals, Other            | 4                                                           |
| 95              | Honduras | 2008           | Cheese                    | 9                                                           |
| 95              | Honduras | 2008           | Cocoa Beans               | 1                                                           |
| 95              | Honduras | 2008           | Coconuts - Incl Copra     | 4                                                           |
| 95              | Honduras | 2008           | Coffee                    | 14                                                          |
| 95              | Honduras | 2008           | Crustaceans               | 3                                                           |
| 95              | Honduras | 2008           | Eggs                      | 16                                                          |
| 95              | Honduras | 2008           | Fats, Animals, Raw        | 4                                                           |
| 95              | Honduras | 2008           | Fruits, Other             | 56                                                          |
| 95              | Honduras | 2008           | Grapefruit                | 2                                                           |
| 95              | Honduras | 2008           | Grapes                    | 2                                                           |
| 95              | Honduras | 2008           | Lemons, Limes             | 4                                                           |



Dietary calcium and zinc deficiency risks are decreasing but remain prevalent

| FAO countrycode | Country  | Reference year | Food item                 | Gross food supply (g capita <sup>-1</sup> d <sup>-1</sup> ) |
|-----------------|----------|----------------|---------------------------|-------------------------------------------------------------|
| 95              | Honduras | 2008           | Maize                     | 207                                                         |
| 95              | Honduras | 2008           | Maize Germ Oil            | 1                                                           |
| 95              | Honduras | 2008           | Marine Fish, Other        | 1                                                           |
| 95              | Honduras | 2008           | Milk, Whole               | 237                                                         |
| 95              | Honduras | 2008           | Nuts                      | 1                                                           |
| 95              | Honduras | 2008           | Oats                      | 1                                                           |
| 95              | Honduras | 2008           | Offals, Edible            | 4                                                           |
| 95              | Honduras | 2008           | Onions                    | 11                                                          |
| 95              | Honduras | 2008           | Oranges, Mandarines       | 47                                                          |
| 95              | Honduras | 2008           | Palm Oil                  | 26                                                          |
| 95              | Honduras | 2008           | Pelagic Fish              | 5                                                           |
| 95              | Honduras | 2008           | Pigmeat                   | 15                                                          |
| 95              | Honduras | 2008           | Pineapples                | 6                                                           |
| 95              | Honduras | 2008           | Plantains                 | 25                                                          |
| 95              | Honduras | 2008           | Potatoes                  | 16                                                          |
| 95              | Honduras | 2008           | Poultry Meat              | 57                                                          |
| 95              | Honduras | 2008           | Rice (Milled Equivalent)  | 41                                                          |
| 95              | Honduras | 2008           | Sorghum                   | 12                                                          |
| 95              | Honduras | 2008           | Soyabean Oil              | 2                                                           |
| 95              | Honduras | 2008           | Sugar, Refined Equivalent | 98                                                          |
| 95              | Honduras | 2008           | Sweeteners, Other         | 20                                                          |
| 95              | Honduras | 2008           | Tomatoes                  | 45                                                          |
| 95              | Honduras | 2008           | Vegetables, Other         | 100                                                         |
| 95              | Honduras | 2008           | Wheat                     | 95                                                          |
| 95              | Honduras | 2008           | Whey                      | 1                                                           |
| 95              | Honduras | 2008           | Wine                      | 1                                                           |
| 95              | Honduras | 2009           | Apples                    | 10                                                          |
| 95              | Honduras | 2009           | Bananas                   | 60                                                          |
| 95              | Honduras | 2009           | Barley                    | 1                                                           |
| 95              | Honduras | 2009           | Beans                     | 24                                                          |
| 95              | Honduras | 2009           | Beer                      | 43                                                          |
| 95              | Honduras | 2009           | Beverages, Alcoholic      | 8                                                           |
| 95              | Honduras | 2009           | Bovine Meat               | 21                                                          |
| 95              | Honduras | 2009           | Butter, Ghee              | 3                                                           |
| 95              | Honduras | 2009           | Cassava                   | 7                                                           |
| 95              | Honduras | 2009           | Cereals, Other            | 3                                                           |
| 95              | Honduras | 2009           | Cheese                    | 8                                                           |
| 95              | Honduras | 2009           | Cocoa Beans               | 1                                                           |
| 95              | Honduras | 2009           | Coconuts - Incl Copra     | 4                                                           |
| 95              | Honduras | 2009           | Coffee                    | 11                                                          |
| 95              | Honduras | 2009           | Eggs                      | 14                                                          |
| 95              | Honduras | 2009           | Fats, Animals, Raw        | 4                                                           |
| 95              | Honduras | 2009           | Fruits, Other             | 56                                                          |
| 95              | Honduras | 2009           | Grapefruit                | 2                                                           |
| 95              | Honduras | 2009           | Grapes                    | 2                                                           |
| 95              | Honduras | 2009           | Lemons, Limes             | 3                                                           |
| 95              | Honduras | 2009           | Maize                     | 215                                                         |
| 95              | Honduras | 2009           | Maize Germ Oil            | 2                                                           |
| 95              | Honduras | 2009           | Marine Fish, Other        | 1                                                           |
| 95              | Honduras | 2009           | Milk, Whole               | 194                                                         |
| 95              | Honduras | 2009           | Molluscs, Other           | 1                                                           |
| 95              | Honduras | 2009           | Nuts                      | 1                                                           |
| 95              | Honduras | 2009           | Offals, Edible            | 5                                                           |
| 95              | Honduras | 2009           | Onions                    | 8                                                           |
| 95              | Honduras | 2009           | Oranges, Mandarines       | 44                                                          |
| 95              | Honduras | 2009           | Palm Oil                  | 26                                                          |
| 95              | Honduras | 2009           | Pelagic Fish              | 4                                                           |
| 95              | Honduras | 2009           | Pigmeat                   | 15                                                          |
| 95              | Honduras | 2009           | Pineapples                | 6                                                           |
| 95              | Honduras | 2009           | Plantains                 | 28                                                          |
| 95              | Honduras | 2009           | Potatoes                  | 13                                                          |
| 95              | Honduras | 2009           | Poultry Meat              | 57                                                          |
| 95              | Honduras | 2009           | Rice (Milled Equivalent)  | 41                                                          |
| 95              | Honduras | 2009           | Sorghum                   | 10                                                          |
| 95              | Honduras | 2009           | Soyabean Oil              | 2                                                           |
| 95              | Honduras | 2009           | Sugar, Refined Equivalent | 103                                                         |
| 95              | Honduras | 2009           | Sweeteners, Other         | 16                                                          |
| 95              | Honduras | 2009           | Tomatoes                  | 42                                                          |
| 95              | Honduras | 2009           | Vegetables, Other         | 84                                                          |
| 95              | Honduras | 2009           | Wheat                     | 99                                                          |
| 95              | Honduras | 2009           | Whey                      | 2                                                           |
| 95              | Honduras | 2009           | Wine                      | 1                                                           |
| 95              | Honduras | 2010           | Apples                    | 8                                                           |
| 95              | Honduras | 2010           | Bananas                   | 61                                                          |
| 95              | Honduras | 2010           | Beans                     | 25                                                          |
| 95              | Honduras | 2010           | Beer                      | 39                                                          |
| 95              | Honduras | 2010           | Beverages, Alcoholic      | 8                                                           |
| 95              | Honduras | 2010           | Bovine Meat               | 21                                                          |
| 95              | Honduras | 2010           | Butter, Ghee              | 3                                                           |
| 95              | Honduras | 2010           | Cassava                   | 7                                                           |
| 95              | Honduras | 2010           | Cereals, Other            | 3                                                           |
| 95              | Honduras | 2010           | Cheese                    | 7                                                           |
| 95              | Honduras | 2010           | Cocoa Beans               | 1                                                           |
| 95              | Honduras | 2010           | Coconuts - Incl Copra     | 4                                                           |
| 95              | Honduras | 2010           | Coffee                    | 4                                                           |
| 95              | Honduras | 2010           | Eggs                      | 12                                                          |
| 95              | Honduras | 2010           | Fats, Animals, Raw        | 5                                                           |
| 95              | Honduras | 2010           | Freshwater Fish           | 4                                                           |
| 95              | Honduras | 2010           | Fruits, Other             | 51                                                          |
| 95              | Honduras | 2010           | Grapefruit                | 3                                                           |
| 95              | Honduras | 2010           | Grapes                    | 2                                                           |
| 95              | Honduras | 2010           | Lemons, Limes             | 3                                                           |
| 95              | Honduras | 2010           | Maize                     | 210                                                         |
| 95              | Honduras | 2010           | Maize Germ Oil            | 2                                                           |
| 95              | Honduras | 2010           | Marine Fish, Other        | 1                                                           |
| 95              | Honduras | 2010           | Milk, Whole               | 197                                                         |
| 95              | Honduras | 2010           | Molluscs, Other           | 1                                                           |

Dietary calcium and zinc deficiency risks are decreasing but remain prevalent

| FAO countrycode | Country  | Reference year | Food item                 | Gross food supply (g capita <sup>-1</sup> d <sup>-1</sup> ) |
|-----------------|----------|----------------|---------------------------|-------------------------------------------------------------|
| 95              | Honduras | 2010           | Nuts                      | 1                                                           |
| 95              | Honduras | 2010           | Oats                      | 2                                                           |
| 95              | Honduras | 2010           | Offals, Edible            | 3                                                           |
| 95              | Honduras | 2010           | Onions                    | 9                                                           |
| 95              | Honduras | 2010           | Oranges, Mandarines       | 40                                                          |
| 95              | Honduras | 2010           | Palm Oil                  | 26                                                          |
| 95              | Honduras | 2010           | Pelagic Fish              | 2                                                           |
| 95              | Honduras | 2010           | Pigmeat                   | 16                                                          |
| 95              | Honduras | 2010           | Pineapples                | 6                                                           |
| 95              | Honduras | 2010           | Plantains                 | 27                                                          |
| 95              | Honduras | 2010           | Potatoes                  | 13                                                          |
| 95              | Honduras | 2010           | Poultry Meat              | 60                                                          |
| 95              | Honduras | 2010           | Rice (Milled Equivalent)  | 41                                                          |
| 95              | Honduras | 2010           | Roots, Other              | 2                                                           |
| 95              | Honduras | 2010           | Sorghum                   | 6                                                           |
| 95              | Honduras | 2010           | Soyabean Oil              | 1                                                           |
| 95              | Honduras | 2010           | Sugar, Refined Equivalent | 107                                                         |
| 95              | Honduras | 2010           | Sweeteners, Other         | 11                                                          |
| 95              | Honduras | 2010           | Tomatoes                  | 44                                                          |
| 95              | Honduras | 2010           | Vegetables, Other         | 98                                                          |
| 95              | Honduras | 2010           | Wheat                     | 99                                                          |
| 95              | Honduras | 2010           | Whey                      | 2                                                           |
| 95              | Honduras | 2011           | Apples                    | 5                                                           |
| 95              | Honduras | 2011           | Bananas                   | 58                                                          |
| 95              | Honduras | 2011           | Beans                     | 28                                                          |
| 95              | Honduras | 2011           | Beer                      | 48                                                          |
| 95              | Honduras | 2011           | Beverages, Alcoholic      | 9                                                           |
| 95              | Honduras | 2011           | Bovine Meat               | 19                                                          |
| 95              | Honduras | 2011           | Butter, Ghee              | 3                                                           |
| 95              | Honduras | 2011           | Cassava                   | 7                                                           |
| 95              | Honduras | 2011           | Cereals, Other            | 3                                                           |
| 95              | Honduras | 2011           | Cheese                    | 8                                                           |
| 95              | Honduras | 2011           | Cocoa Beans               | 2                                                           |
| 95              | Honduras | 2011           | Coconuts - Incl Copra     | 4                                                           |
| 95              | Honduras | 2011           | Coffee                    | 8                                                           |
| 95              | Honduras | 2011           | Eggs                      | 12                                                          |
| 95              | Honduras | 2011           | Fats, Animals, Raw        | 4                                                           |
| 95              | Honduras | 2011           | Freshwater Fish           | 4                                                           |
| 95              | Honduras | 2011           | Fruits, Other             | 44                                                          |
| 95              | Honduras | 2011           | Grapefruit                | 3                                                           |
| 95              | Honduras | 2011           | Grapes                    | 2                                                           |
| 95              | Honduras | 2011           | Lemons, Limes             | 4                                                           |
| 95              | Honduras | 2011           | Maize                     | 216                                                         |
| 95              | Honduras | 2011           | Maize Germ Oil            | 3                                                           |
| 95              | Honduras | 2011           | Marine Fish, Other        | 1                                                           |
| 95              | Honduras | 2011           | Milk, Whole               | 223                                                         |
| 95              | Honduras | 2011           | Molluscs, Other           | 1                                                           |
| 95              | Honduras | 2011           | Nuts                      | 1                                                           |
| 95              | Honduras | 2011           | Oats                      | 3                                                           |
| 95              | Honduras | 2011           | Offals, Edible            | 3                                                           |
| 95              | Honduras | 2011           | Onions                    | 8                                                           |
| 95              | Honduras | 2011           | Oranges, Mandarines       | 59                                                          |
| 95              | Honduras | 2011           | Palm Oil                  | 26                                                          |
| 95              | Honduras | 2011           | Pelagic Fish              | 2                                                           |
| 95              | Honduras | 2011           | Pigmeat                   | 16                                                          |
| 95              | Honduras | 2011           | Pineapples                | 6                                                           |
| 95              | Honduras | 2011           | Plantains                 | 27                                                          |
| 95              | Honduras | 2011           | Potatoes                  | 13                                                          |
| 95              | Honduras | 2011           | Poultry Meat              | 62                                                          |
| 95              | Honduras | 2011           | Rice (Milled Equivalent)  | 44                                                          |
| 95              | Honduras | 2011           | Roots, Other              | 2                                                           |
| 95              | Honduras | 2011           | Sorghum                   | 3                                                           |
| 95              | Honduras | 2011           | Soyabean Oil              | 2                                                           |
| 95              | Honduras | 2011           | Sugar, Refined Equivalent | 102                                                         |
| 95              | Honduras | 2011           | Sweeteners, Other         | 13                                                          |
| 95              | Honduras | 2011           | Tomatoes                  | 47                                                          |
| 95              | Honduras | 2011           | Vegetables, Other         | 97                                                          |
| 95              | Honduras | 2011           | Wheat                     | 101                                                         |
| 95              | Honduras | 2011           | Whey                      | 2                                                           |
| 97              | Hungary  | 1992           | Apples                    | 58                                                          |
| 97              | Hungary  | 1992           | Bananas                   | 20                                                          |
| 97              | Hungary  | 1992           | Beans                     | 1                                                           |
| 97              | Hungary  | 1992           | Beer                      | 256                                                         |
| 97              | Hungary  | 1992           | Beverages, Alcoholic      | 19                                                          |
| 97              | Hungary  | 1992           | Beverages, Fermented      | 1                                                           |
| 97              | Hungary  | 1992           | Bovine Meat               | 48                                                          |
| 97              | Hungary  | 1992           | Butter, Ghee              | 5                                                           |
| 97              | Hungary  | 1992           | Cheese                    | 19                                                          |
| 97              | Hungary  | 1992           | Cocoa Beans               | 4                                                           |
| 97              | Hungary  | 1992           | Coffee                    | 9                                                           |
| 97              | Hungary  | 1992           | Cream                     | 15                                                          |
| 97              | Hungary  | 1992           | Eggs                      | 56                                                          |
| 97              | Hungary  | 1992           | Fats, Animals, Raw        | 53                                                          |
| 97              | Hungary  | 1992           | Freshwater Fish           | 6                                                           |
| 97              | Hungary  | 1992           | Fruits, Other             | 80                                                          |
| 97              | Hungary  | 1992           | Grapes                    | 14                                                          |
| 97              | Hungary  | 1992           | Groundnuts (Shelled Eq)   | 1                                                           |
| 97              | Hungary  | 1992           | Honey                     | 1                                                           |
| 97              | Hungary  | 1992           | Lemons, Limes             | 3                                                           |
| 97              | Hungary  | 1992           | Maize                     | 3                                                           |
| 97              | Hungary  | 1992           | Maize Germ Oil            | 1                                                           |
| 97              | Hungary  | 1992           | Marine Fish, Other        | 2                                                           |
| 97              | Hungary  | 1992           | Meat, Other               | 2                                                           |
| 97              | Hungary  | 1992           | Milk, Whole               | 256                                                         |
| 97              | Hungary  | 1992           | Mutton & Goat Meat        | 1                                                           |
| 97              | Hungary  | 1992           | Nuts                      | 2                                                           |
| 97              | Hungary  | 1992           | Offals, Edible            | 9                                                           |

Dietary calcium and zinc deficiency risks are decreasing but remain prevalent

| FAO countrycode | Country | Reference year | Food item                 | Gross food supply (g capita <sup>-1</sup> d <sup>-1</sup> ) |
|-----------------|---------|----------------|---------------------------|-------------------------------------------------------------|
| 97              | Hungary | 1992           | Oilcrops Oil, Other       | 1                                                           |
| 97              | Hungary | 1992           | Onions                    | 39                                                          |
| 97              | Hungary | 1992           | Oranges, Mandarines       | 14                                                          |
| 97              | Hungary | 1992           | Palm Oil                  | 1                                                           |
| 97              | Hungary | 1992           | Peas                      | 2                                                           |
| 97              | Hungary | 1992           | Pelagic Fish              | 1                                                           |
| 97              | Hungary | 1992           | Pigmeat                   | 178                                                         |
| 97              | Hungary | 1992           | Pimento                   | 11                                                          |
| 97              | Hungary | 1992           | Potatoes                  | 203                                                         |
| 97              | Hungary | 1992           | Poultry Meat              | 63                                                          |
| 97              | Hungary | 1992           | Pulses, Other             | 1                                                           |
| 97              | Hungary | 1992           | Rape and Mustard Oil      | 2                                                           |
| 97              | Hungary | 1992           | Rice (Milled Equivalent)  | 10                                                          |
| 97              | Hungary | 1992           | Rye                       | 7                                                           |
| 97              | Hungary | 1992           | Spices, Other             | 1                                                           |
| 97              | Hungary | 1992           | Sugar, Refined Equivalent | 108                                                         |
| 97              | Hungary | 1992           | Sunflowerseed Oil         | 27                                                          |
| 97              | Hungary | 1992           | Sweeteners, Other         | 5                                                           |
| 97              | Hungary | 1992           | Tomatoes                  | 51                                                          |
| 97              | Hungary | 1992           | Vegetables, Other         | 157                                                         |
| 97              | Hungary | 1992           | Wheat                     | 284                                                         |
| 97              | Hungary | 1992           | Wine                      | 81                                                          |
| 97              | Hungary | 1993           | Apples                    | 71                                                          |
| 97              | Hungary | 1993           | Bananas                   | 18                                                          |
| 97              | Hungary | 1993           | Beans                     | 1                                                           |
| 97              | Hungary | 1993           | Beer                      | 226                                                         |
| 97              | Hungary | 1993           | Beverages, Alcoholic      | 19                                                          |
| 97              | Hungary | 1993           | Beverages, Fermented      | 1                                                           |
| 97              | Hungary | 1993           | Bovine Meat               | 49                                                          |
| 97              | Hungary | 1993           | Butter, Ghee              | 4                                                           |
| 97              | Hungary | 1993           | Cheese                    | 20                                                          |
| 97              | Hungary | 1993           | Cocoa Beans               | 4                                                           |
| 97              | Hungary | 1993           | Coffee                    | 10                                                          |
| 97              | Hungary | 1993           | Cream                     | 30                                                          |
| 97              | Hungary | 1993           | Eggs                      | 56                                                          |
| 97              | Hungary | 1993           | Fats, Animals, Raw        | 50                                                          |
| 97              | Hungary | 1993           | Freshwater Fish           | 5                                                           |
| 97              | Hungary | 1993           | Fruits, Other             | 75                                                          |
| 97              | Hungary | 1993           | Grapes                    | 12                                                          |
| 97              | Hungary | 1993           | Groundnuts (Shelled Eq)   | 1                                                           |
| 97              | Hungary | 1993           | Honey                     | 1                                                           |
| 97              | Hungary | 1993           | Lemons, Limes             | 1                                                           |
| 97              | Hungary | 1993           | Maize                     | 2                                                           |
| 97              | Hungary | 1993           | Maize Germ Oil            | 1                                                           |
| 97              | Hungary | 1993           | Marine Fish, Other        | 3                                                           |
| 97              | Hungary | 1993           | Meat, Other               | 3                                                           |
| 97              | Hungary | 1993           | Milk, Whole               | 203                                                         |
| 97              | Hungary | 1993           | Nuts                      | 3                                                           |
| 97              | Hungary | 1993           | Offals, Edible            | 9                                                           |
| 97              | Hungary | 1993           | Oilcrops Oil, Other       | 1                                                           |
| 97              | Hungary | 1993           | Onions                    | 26                                                          |
| 97              | Hungary | 1993           | Oranges, Mandarines       | 18                                                          |
| 97              | Hungary | 1993           | Palm Oil                  | 3                                                           |
| 97              | Hungary | 1993           | Peas                      | 3                                                           |
| 97              | Hungary | 1993           | Pelagic Fish              | 1                                                           |
| 97              | Hungary | 1993           | Pigmeat                   | 156                                                         |
| 97              | Hungary | 1993           | Pimento                   | 7                                                           |
| 97              | Hungary | 1993           | Pineapples                | 1                                                           |
| 97              | Hungary | 1993           | Potatoes                  | 178                                                         |
| 97              | Hungary | 1993           | Poultry Meat              | 60                                                          |
| 97              | Hungary | 1993           | Rape and Mustard Oil      | 4                                                           |
| 97              | Hungary | 1993           | Rice (Milled Equivalent)  | 10                                                          |
| 97              | Hungary | 1993           | Rye                       | 4                                                           |
| 97              | Hungary | 1993           | Soyabean Oil              | 1                                                           |
| 97              | Hungary | 1993           | Spices, Other             | 1                                                           |
| 97              | Hungary | 1993           | Sugar, Refined Equivalent | 72                                                          |
| 97              | Hungary | 1993           | Sunflowerseed Oil         | 25                                                          |
| 97              | Hungary | 1993           | Sweeteners, Other         | 31                                                          |
| 97              | Hungary | 1993           | Tomatoes                  | 52                                                          |
| 97              | Hungary | 1993           | Vegetables, Other         | 164                                                         |
| 97              | Hungary | 1993           | Wheat                     | 264                                                         |
| 97              | Hungary | 1993           | Wine                      | 86                                                          |
| 97              | Hungary | 1994           | Apples                    | 75                                                          |
| 97              | Hungary | 1994           | Bananas                   | 19                                                          |
| 97              | Hungary | 1994           | Barley                    | 1                                                           |
| 97              | Hungary | 1994           | Beans                     | 2                                                           |
| 97              | Hungary | 1994           | Beer                      | 230                                                         |
| 97              | Hungary | 1994           | Beverages, Alcoholic      | 18                                                          |
| 97              | Hungary | 1994           | Bovine Meat               | 42                                                          |
| 97              | Hungary | 1994           | Butter, Ghee              | 4                                                           |
| 97              | Hungary | 1994           | Cheese                    | 20                                                          |
| 97              | Hungary | 1994           | Cocoa Beans               | 5                                                           |
| 97              | Hungary | 1994           | Coffee                    | 10                                                          |
| 97              | Hungary | 1994           | Cream                     | 26                                                          |
| 97              | Hungary | 1994           | Eggs                      | 52                                                          |
| 97              | Hungary | 1994           | Fats, Animals, Raw        | 44                                                          |
| 97              | Hungary | 1994           | Freshwater Fish           | 4                                                           |
| 97              | Hungary | 1994           | Fruits, Other             | 63                                                          |
| 97              | Hungary | 1994           | Grapes                    | 13                                                          |
| 97              | Hungary | 1994           | Groundnuts (Shelled Eq)   | 1                                                           |
| 97              | Hungary | 1994           | Honey                     | 1                                                           |
| 97              | Hungary | 1994           | Maize                     | 2                                                           |
| 97              | Hungary | 1994           | Maize Germ Oil            | 1                                                           |
| 97              | Hungary | 1994           | Marine Fish, Other        | 3                                                           |
| 97              | Hungary | 1994           | Meat, Other               | 4                                                           |
| 97              | Hungary | 1994           | Milk, Whole               | 205                                                         |
| 97              | Hungary | 1994           | Nuts                      | 3                                                           |

## Dietary calcium and zinc deficiency risks are decreasing but remain prevalent

| FAO countrycode | Country | Reference year | Food item                 | Gross food supply (g capita <sup>-1</sup> d <sup>-1</sup> ) |
|-----------------|---------|----------------|---------------------------|-------------------------------------------------------------|
| 97              | Hungary | 1994           | Offals, Edible            | 9                                                           |
| 97              | Hungary | 1994           | Oilcrops Oil, Other       | 1                                                           |
| 97              | Hungary | 1994           | Onions                    | 24                                                          |
| 97              | Hungary | 1994           | Oranges, Mandarines       | 13                                                          |
| 97              | Hungary | 1994           | Palm Oil                  | 4                                                           |
| 97              | Hungary | 1994           | Palmkernel Oil            | 1                                                           |
| 97              | Hungary | 1994           | Peas                      | 4                                                           |
| 97              | Hungary | 1994           | Pelagic Fish              | 1                                                           |
| 97              | Hungary | 1994           | Pigmeat                   | 144                                                         |
| 97              | Hungary | 1994           | Pimento                   | 9                                                           |
| 97              | Hungary | 1994           | Pineapples                | 1                                                           |
| 97              | Hungary | 1994           | Potatoes                  | 183                                                         |
| 97              | Hungary | 1994           | Poultry Meat              | 62                                                          |
| 97              | Hungary | 1994           | Pulses, Other             | 1                                                           |
| 97              | Hungary | 1994           | Rape and Mustard Oil      | 4                                                           |
| 97              | Hungary | 1994           | Rice (Milled Equivalent)  | 9                                                           |
| 97              | Hungary | 1994           | Rye                       | 4                                                           |
| 97              | Hungary | 1994           | Soyabean Oil              | 1                                                           |
| 97              | Hungary | 1994           | Spices, Other             | 1                                                           |
| 97              | Hungary | 1994           | Sugar, Refined Equivalent | 94                                                          |
| 97              | Hungary | 1994           | Sunflowerseed Oil         | 27                                                          |
| 97              | Hungary | 1994           | Sweeteners, Other         | 5                                                           |
| 97              | Hungary | 1994           | Tomatoes                  | 46                                                          |
| 97              | Hungary | 1994           | Vegetables, Other         | 169                                                         |
| 97              | Hungary | 1994           | Wheat                     | 255                                                         |
| 97              | Hungary | 1994           | Wine                      | 79                                                          |
| 97              | Hungary | 1995           | Apples                    | 57                                                          |
| 97              | Hungary | 1995           | Bananas                   | 17                                                          |
| 97              | Hungary | 1995           | Beans                     | 2                                                           |
| 97              | Hungary | 1995           | Beer                      | 204                                                         |
| 97              | Hungary | 1995           | Beverages, Alcoholic      | 17                                                          |
| 97              | Hungary | 1995           | Beverages, Fermented      | 1                                                           |
| 97              | Hungary | 1995           | Bovine Meat               | 30                                                          |
| 97              | Hungary | 1995           | Butter, Ghee              | 4                                                           |
| 97              | Hungary | 1995           | Cheese                    | 20                                                          |
| 97              | Hungary | 1995           | Cocoa Beans               | 4                                                           |
| 97              | Hungary | 1995           | Coffee                    | 9                                                           |
| 97              | Hungary | 1995           | Cream                     | 25                                                          |
| 97              | Hungary | 1995           | Eggs                      | 46                                                          |
| 97              | Hungary | 1995           | Fats, Animals, Raw        | 44                                                          |
| 97              | Hungary | 1995           | Freshwater Fish           | 4                                                           |
| 97              | Hungary | 1995           | Fruits, Other             | 56                                                          |
| 97              | Hungary | 1995           | Grapes                    | 11                                                          |
| 97              | Hungary | 1995           | Groundnuts (Shelled Eq)   | 2                                                           |
| 97              | Hungary | 1995           | Honey                     | 1                                                           |
| 97              | Hungary | 1995           | Maize                     | 2                                                           |
| 97              | Hungary | 1995           | Maize Germ Oil            | 1                                                           |
| 97              | Hungary | 1995           | Marine Fish, Other        | 3                                                           |
| 97              | Hungary | 1995           | Meat, Other               | 3                                                           |
| 97              | Hungary | 1995           | Milk, Whole               | 182                                                         |
| 97              | Hungary | 1995           | Nuts                      | 1                                                           |
| 97              | Hungary | 1995           | Offals, Edible            | 7                                                           |
| 97              | Hungary | 1995           | Onions                    | 24                                                          |
| 97              | Hungary | 1995           | Oranges, Mandarines       | 5                                                           |
| 97              | Hungary | 1995           | Palm Oil                  | 2                                                           |
| 97              | Hungary | 1995           | Palmkernel Oil            | 2                                                           |
| 97              | Hungary | 1995           | Peas                      | 7                                                           |
| 97              | Hungary | 1995           | Pelagic Fish              | 2                                                           |
| 97              | Hungary | 1995           | Pigmeat                   | 134                                                         |
| 97              | Hungary | 1995           | Pimento                   | 8                                                           |
| 97              | Hungary | 1995           | Pineapples                | 1                                                           |
| 97              | Hungary | 1995           | Potatoes                  | 209                                                         |
| 97              | Hungary | 1995           | Poultry Meat              | 65                                                          |
| 97              | Hungary | 1995           | Pulses, Other             | 1                                                           |
| 97              | Hungary | 1995           | Rape and Mustard Oil      | 2                                                           |
| 97              | Hungary | 1995           | Rice (Milled Equivalent)  | 9                                                           |
| 97              | Hungary | 1995           | Rye                       | 4                                                           |
| 97              | Hungary | 1995           | Soyabean Oil              | 1                                                           |
| 97              | Hungary | 1995           | Spices, Other             | 1                                                           |
| 97              | Hungary | 1995           | Sugar, Refined Equivalent | 102                                                         |
| 97              | Hungary | 1995           | Sunflowerseed Oil         | 30                                                          |
| 97              | Hungary | 1995           | Sweeteners, Other         | 5                                                           |
| 97              | Hungary | 1995           | Tomatoes                  | 49                                                          |
| 97              | Hungary | 1995           | Vegetables, Other         | 197                                                         |
| 97              | Hungary | 1995           | Wheat                     | 232                                                         |
| 97              | Hungary | 1995           | Wine                      | 72                                                          |
| 97              | Hungary | 1996           | Apples                    | 70                                                          |
| 97              | Hungary | 1996           | Bananas                   | 14                                                          |
| 97              | Hungary | 1996           | Beans                     | 2                                                           |
| 97              | Hungary | 1996           | Beer                      | 193                                                         |
| 97              | Hungary | 1996           | Beverages, Alcoholic      | 17                                                          |
| 97              | Hungary | 1996           | Bovine Meat               | 23                                                          |
| 97              | Hungary | 1996           | Butter, Ghee              | 4                                                           |
| 97              | Hungary | 1996           | Cheese                    | 19                                                          |
| 97              | Hungary | 1996           | Cocoa Beans               | 5                                                           |
| 97              | Hungary | 1996           | Coffee                    | 9                                                           |
| 97              | Hungary | 1996           | Cream                     | 25                                                          |
| 97              | Hungary | 1996           | Eggs                      | 43                                                          |
| 97              | Hungary | 1996           | Fats, Animals, Raw        | 46                                                          |
| 97              | Hungary | 1996           | Freshwater Fish           | 3                                                           |
| 97              | Hungary | 1996           | Fruits, Other             | 66                                                          |
| 97              | Hungary | 1996           | Grapes                    | 13                                                          |
| 97              | Hungary | 1996           | Groundnuts (Shelled Eq)   | 1                                                           |
| 97              | Hungary | 1996           | Honey                     | 1                                                           |
| 97              | Hungary | 1996           | Lemons, Limes             | 2                                                           |
| 97              | Hungary | 1996           | Maize                     | 2                                                           |
| 97              | Hungary | 1996           | Maize Germ Oil            | 2                                                           |

## Dietary calcium and zinc deficiency risks are decreasing but remain prevalent

| FAO countrycode | Country | Reference year | Food item                 | Gross food supply (g capita <sup>-1</sup> d <sup>-1</sup> ) |
|-----------------|---------|----------------|---------------------------|-------------------------------------------------------------|
| 97              | Hungary | 1996           | Marine Fish, Other        | 2                                                           |
| 97              | Hungary | 1996           | Meat, Other               | 3                                                           |
| 97              | Hungary | 1996           | Milk, Whole               | 188                                                         |
| 97              | Hungary | 1996           | Nuts                      | 1                                                           |
| 97              | Hungary | 1996           | Offals, Edible            | 7                                                           |
| 97              | Hungary | 1996           | Oilcrops Oil, Other       | 1                                                           |
| 97              | Hungary | 1996           | Onions                    | 21                                                          |
| 97              | Hungary | 1996           | Oranges, Mandarines       | 8                                                           |
| 97              | Hungary | 1996           | Palm Oil                  | 3                                                           |
| 97              | Hungary | 1996           | Palmkernel Oil            | 1                                                           |
| 97              | Hungary | 1996           | Peas                      | 7                                                           |
| 97              | Hungary | 1996           | Pelagic Fish              | 2                                                           |
| 97              | Hungary | 1996           | Pigmeat                   | 134                                                         |
| 97              | Hungary | 1996           | Pimento                   | 11                                                          |
| 97              | Hungary | 1996           | Pineapples                | 1                                                           |
| 97              | Hungary | 1996           | Potatoes                  | 243                                                         |
| 97              | Hungary | 1996           | Poultry Meat              | 64                                                          |
| 97              | Hungary | 1996           | Pulses, Other             | 1                                                           |
| 97              | Hungary | 1996           | Rape and Mustard Oil      | 2                                                           |
| 97              | Hungary | 1996           | Rice (Milled Equivalent)  | 9                                                           |
| 97              | Hungary | 1996           | Rye                       | 7                                                           |
| 97              | Hungary | 1996           | Soyabean Oil              | 1                                                           |
| 97              | Hungary | 1996           | Spices, Other             | 1                                                           |
| 97              | Hungary | 1996           | Sugar, Refined Equivalent | 109                                                         |
| 97              | Hungary | 1996           | Sunflowerseed Oil         | 28                                                          |
| 97              | Hungary | 1996           | Sweeteners, Other         | 6                                                           |
| 97              | Hungary | 1996           | Tomatoes                  | 54                                                          |
| 97              | Hungary | 1996           | Vegetables, Other         | 182                                                         |
| 97              | Hungary | 1996           | Wheat                     | 204                                                         |
| 97              | Hungary | 1996           | Wine                      | 82                                                          |
| 97              | Hungary | 1997           | Apples                    | 58                                                          |
| 97              | Hungary | 1997           | Bananas                   | 14                                                          |
| 97              | Hungary | 1997           | Beans                     | 1                                                           |
| 97              | Hungary | 1997           | Beer                      | 188                                                         |
| 97              | Hungary | 1997           | Beverages, Alcoholic      | 16                                                          |
| 97              | Hungary | 1997           | Bovine Meat               | 27                                                          |
| 97              | Hungary | 1997           | Butter, Ghee              | 3                                                           |
| 97              | Hungary | 1997           | Cheese                    | 24                                                          |
| 97              | Hungary | 1997           | Citrus, Other             | 1                                                           |
| 97              | Hungary | 1997           | Cocoa Beans               | 4                                                           |
| 97              | Hungary | 1997           | Coffee                    | 10                                                          |
| 97              | Hungary | 1997           | Cream                     | 26                                                          |
| 97              | Hungary | 1997           | Eggs                      | 41                                                          |
| 97              | Hungary | 1997           | Fats, Animals, Raw        | 41                                                          |
| 97              | Hungary | 1997           | Freshwater Fish           | 4                                                           |
| 97              | Hungary | 1997           | Fruits, Other             | 58                                                          |
| 97              | Hungary | 1997           | Grapes                    | 13                                                          |
| 97              | Hungary | 1997           | Groundnuts (Shelled Eq)   | 2                                                           |
| 97              | Hungary | 1997           | Honey                     | 2                                                           |
| 97              | Hungary | 1997           | Lemons, Limes             | 2                                                           |
| 97              | Hungary | 1997           | Maize                     | 2                                                           |
| 97              | Hungary | 1997           | Maize Germ Oil            | 4                                                           |
| 97              | Hungary | 1997           | Marine Fish, Other        | 3                                                           |
| 97              | Hungary | 1997           | Meat, Other               | 2                                                           |
| 97              | Hungary | 1997           | Milk, Whole               | 215                                                         |
| 97              | Hungary | 1997           | Nuts                      | 1                                                           |
| 97              | Hungary | 1997           | Offals, Edible            | 7                                                           |
| 97              | Hungary | 1997           | Onions                    | 27                                                          |
| 97              | Hungary | 1997           | Oranges, Mandarines       | 14                                                          |
| 97              | Hungary | 1997           | Palm Oil                  | 3                                                           |
| 97              | Hungary | 1997           | Palmkernel Oil            | 2                                                           |
| 97              | Hungary | 1997           | Peas                      | 10                                                          |
| 97              | Hungary | 1997           | Pelagic Fish              | 2                                                           |
| 97              | Hungary | 1997           | Pigmeat                   | 127                                                         |
| 97              | Hungary | 1997           | Pimento                   | 10                                                          |
| 97              | Hungary | 1997           | Pineapples                | 1                                                           |
| 97              | Hungary | 1997           | Potatoes                  | 203                                                         |
| 97              | Hungary | 1997           | Poultry Meat              | 68                                                          |
| 97              | Hungary | 1997           | Rape and Mustard Oil      | 2                                                           |
| 97              | Hungary | 1997           | Rice (Milled Equivalent)  | 10                                                          |
| 97              | Hungary | 1997           | Rye                       | 3                                                           |
| 97              | Hungary | 1997           | Soyabean Oil              | 1                                                           |
| 97              | Hungary | 1997           | Spices, Other             | 1                                                           |
| 97              | Hungary | 1997           | Sugar, Refined Equivalent | 108                                                         |
| 97              | Hungary | 1997           | Sunflowerseed Oil         | 26                                                          |
| 97              | Hungary | 1997           | Sweeteners, Other         | 6                                                           |
| 97              | Hungary | 1997           | Tomatoes                  | 61                                                          |
| 97              | Hungary | 1997           | Vegetables, Other         | 199                                                         |
| 97              | Hungary | 1997           | Wheat                     | 244                                                         |
| 97              | Hungary | 1997           | Wine                      | 86                                                          |
| 97              | Hungary | 1998           | Apples                    | 62                                                          |
| 97              | Hungary | 1998           | Bananas                   | 17                                                          |
| 97              | Hungary | 1998           | Beans                     | 1                                                           |
| 97              | Hungary | 1998           | Beer                      | 187                                                         |
| 97              | Hungary | 1998           | Beverages, Alcoholic      | 16                                                          |
| 97              | Hungary | 1998           | Bovine Meat               | 20                                                          |
| 97              | Hungary | 1998           | Butter, Ghee              | 3                                                           |
| 97              | Hungary | 1998           | Cheese                    | 22                                                          |
| 97              | Hungary | 1998           | Cocoa Beans               | 5                                                           |
| 97              | Hungary | 1998           | Coffee                    | 9                                                           |
| 97              | Hungary | 1998           | Cream                     | 26                                                          |
| 97              | Hungary | 1998           | Demersal Fish             | 1                                                           |
| 97              | Hungary | 1998           | Eggs                      | 43                                                          |
| 97              | Hungary | 1998           | Fats, Animals, Raw        | 42                                                          |
| 97              | Hungary | 1998           | Freshwater Fish           | 4                                                           |
| 97              | Hungary | 1998           | Fruits, Other             | 58                                                          |
| 97              | Hungary | 1998           | Grapefruit                | 1                                                           |

Dietary calcium and zinc deficiency risks are decreasing but remain prevalent

| FAO countrycode | Country | Reference year | Food item                 | Gross food supply (g capita <sup>-1</sup> d <sup>-1</sup> ) |
|-----------------|---------|----------------|---------------------------|-------------------------------------------------------------|
| 97              | Hungary | 1998           | Grapes                    | 21                                                          |
| 97              | Hungary | 1998           | Groundnuts (Shelled Eq)   | 2                                                           |
| 97              | Hungary | 1998           | Honey                     | 2                                                           |
| 97              | Hungary | 1998           | Lemons, Limes             | 2                                                           |
| 97              | Hungary | 1998           | Maize                     | 2                                                           |
| 97              | Hungary | 1998           | Maize Germ Oil            | 2                                                           |
| 97              | Hungary | 1998           | Marine Fish, Other        | 3                                                           |
| 97              | Hungary | 1998           | Meat, Other               | 2                                                           |
| 97              | Hungary | 1998           | Milk, Whole               | 202                                                         |
| 97              | Hungary | 1998           | Mutton & Goat Meat        | 1                                                           |
| 97              | Hungary | 1998           | Nuts                      | 1                                                           |
| 97              | Hungary | 1998           | Offals, Edible            | 8                                                           |
| 97              | Hungary | 1998           | Onions                    | 29                                                          |
| 97              | Hungary | 1998           | Oranges, Mandarines       | 14                                                          |
| 97              | Hungary | 1998           | Palm Oil                  | 2                                                           |
| 97              | Hungary | 1998           | Peas                      | 11                                                          |
| 97              | Hungary | 1998           | Pelagic Fish              | 3                                                           |
| 97              | Hungary | 1998           | Pigmeat                   | 125                                                         |
| 97              | Hungary | 1998           | Pimento                   | 14                                                          |
| 97              | Hungary | 1998           | Pineapples                | 1                                                           |
| 97              | Hungary | 1998           | Potatoes                  | 213                                                         |
| 97              | Hungary | 1998           | Poultry Meat              | 74                                                          |
| 97              | Hungary | 1998           | Pulses, Other             | 1                                                           |
| 97              | Hungary | 1998           | Rape and Mustard Oil      | 4                                                           |
| 97              | Hungary | 1998           | Rice (Milled Equivalent)  | 9                                                           |
| 97              | Hungary | 1998           | Rye                       | 2                                                           |
| 97              | Hungary | 1998           | Soyabean Oil              | 1                                                           |
| 97              | Hungary | 1998           | Spices, Other             | 1                                                           |
| 97              | Hungary | 1998           | Sugar, Refined Equivalent | 111                                                         |
| 97              | Hungary | 1998           | Sunflowerseed Oil         | 33                                                          |
| 97              | Hungary | 1998           | Sweeteners, Other         | 8                                                           |
| 97              | Hungary | 1998           | Tea                       | 1                                                           |
| 97              | Hungary | 1998           | Tomatoes                  | 63                                                          |
| 97              | Hungary | 1998           | Vegetables, Other         | 192                                                         |
| 97              | Hungary | 1998           | Wheat                     | 216                                                         |
| 97              | Hungary | 1998           | Wine                      | 89                                                          |
| 97              | Hungary | 1999           | Apples                    | 59                                                          |
| 97              | Hungary | 1999           | Bananas                   | 21                                                          |
| 97              | Hungary | 1999           | Barley                    | 1                                                           |
| 97              | Hungary | 1999           | Beans                     | 2                                                           |
| 97              | Hungary | 1999           | Beer                      | 186                                                         |
| 97              | Hungary | 1999           | Beverages, Alcoholic      | 16                                                          |
| 97              | Hungary | 1999           | Beverages, Fermented      | 1                                                           |
| 97              | Hungary | 1999           | Bovine Meat               | 21                                                          |
| 97              | Hungary | 1999           | Butter, Ghee              | 2                                                           |
| 97              | Hungary | 1999           | Cheese                    | 22                                                          |
| 97              | Hungary | 1999           | Cocoa Beans               | 5                                                           |
| 97              | Hungary | 1999           | Coffee                    | 10                                                          |
| 97              | Hungary | 1999           | Cream                     | 26                                                          |
| 97              | Hungary | 1999           | Demersal Fish             | 1                                                           |
| 97              | Hungary | 1999           | Eggs                      | 42                                                          |
| 97              | Hungary | 1999           | Fats, Animals, Raw        | 46                                                          |
| 97              | Hungary | 1999           | Freshwater Fish           | 5                                                           |
| 97              | Hungary | 1999           | Fruits, Other             | 64                                                          |
| 97              | Hungary | 1999           | Grapefruit                | 1                                                           |
| 97              | Hungary | 1999           | Grapes                    | 23                                                          |
| 97              | Hungary | 1999           | Groundnuts (Shelled Eq)   | 2                                                           |
| 97              | Hungary | 1999           | Honey                     | 1                                                           |
| 97              | Hungary | 1999           | Lemons, Limes             | 3                                                           |
| 97              | Hungary | 1999           | Maize                     | 2                                                           |
| 97              | Hungary | 1999           | Maize Germ Oil            | 2                                                           |
| 97              | Hungary | 1999           | Marine Fish, Other        | 2                                                           |
| 97              | Hungary | 1999           | Meat, Other               | 3                                                           |
| 97              | Hungary | 1999           | Milk, Whole               | 216                                                         |
| 97              | Hungary | 1999           | Mutton & Goat Meat        | 1                                                           |
| 97              | Hungary | 1999           | Nuts                      | 1                                                           |
| 97              | Hungary | 1999           | Offals, Edible            | 7                                                           |
| 97              | Hungary | 1999           | Onions                    | 29                                                          |
| 97              | Hungary | 1999           | Oranges, Mandarines       | 17                                                          |
| 97              | Hungary | 1999           | Palm Oil                  | 1                                                           |
| 97              | Hungary | 1999           | Peas                      | 10                                                          |
| 97              | Hungary | 1999           | Pelagic Fish              | 3                                                           |
| 97              | Hungary | 1999           | Pigmeat                   | 128                                                         |
| 97              | Hungary | 1999           | Pimento                   | 6                                                           |
| 97              | Hungary | 1999           | Pineapples                | 1                                                           |
| 97              | Hungary | 1999           | Potatoes                  | 237                                                         |
| 97              | Hungary | 1999           | Poultry Meat              | 76                                                          |
| 97              | Hungary | 1999           | Pulses, Other             | 1                                                           |
| 97              | Hungary | 1999           | Rape and Mustard Oil      | 9                                                           |
| 97              | Hungary | 1999           | Rice (Milled Equivalent)  | 11                                                          |
| 97              | Hungary | 1999           | Rye                       | 2                                                           |
| 97              | Hungary | 1999           | Soyabean Oil              | 3                                                           |
| 97              | Hungary | 1999           | Spices, Other             | 1                                                           |
| 97              | Hungary | 1999           | Sugar, Refined Equivalent | 101                                                         |
| 97              | Hungary | 1999           | Sunflowerseed Oil         | 20                                                          |
| 97              | Hungary | 1999           | Sweeteners, Other         | 7                                                           |
| 97              | Hungary | 1999           | Tomatoes                  | 62                                                          |
| 97              | Hungary | 1999           | Vegetables, Other         | 174                                                         |
| 97              | Hungary | 1999           | Wheat                     | 228                                                         |
| 97              | Hungary | 1999           | Wine                      | 81                                                          |
| 97              | Hungary | 2000           | Apples                    | 54                                                          |
| 97              | Hungary | 2000           | Bananas                   | 21                                                          |
| 97              | Hungary | 2000           | Beans                     | 2                                                           |
| 97              | Hungary | 2000           | Beer                      | 196                                                         |
| 97              | Hungary | 2000           | Beverages, Alcoholic      | 17                                                          |
| 97              | Hungary | 2000           | Bovine Meat               | 34                                                          |
| 97              | Hungary | 2000           | Butter, Ghee              | 2                                                           |

Dietary calcium and zinc deficiency risks are decreasing but remain prevalent

| FAO countrycode | Country | Reference year | Food item                 | Gross food supply (g capita <sup>-1</sup> d <sup>-1</sup> ) |
|-----------------|---------|----------------|---------------------------|-------------------------------------------------------------|
| 97              | Hungary | 2000           | Cheese                    | 23                                                          |
| 97              | Hungary | 2000           | Cocoa Beans               | 5                                                           |
| 97              | Hungary | 2000           | Coffee                    | 9                                                           |
| 97              | Hungary | 2000           | Cream                     | 23                                                          |
| 97              | Hungary | 2000           | Eggs                      | 43                                                          |
| 97              | Hungary | 2000           | Fats, Animals, Raw        | 43                                                          |
| 97              | Hungary | 2000           | Freshwater Fish           | 5                                                           |
| 97              | Hungary | 2000           | Fruits, Other             | 63                                                          |
| 97              | Hungary | 2000           | Grapefruit                | 1                                                           |
| 97              | Hungary | 2000           | Grapes                    | 23                                                          |
| 97              | Hungary | 2000           | Groundnuts (Shelled Eq)   | 2                                                           |
| 97              | Hungary | 2000           | Honey                     | 1                                                           |
| 97              | Hungary | 2000           | Lemons, Limes             | 3                                                           |
| 97              | Hungary | 2000           | Maize                     | 2                                                           |
| 97              | Hungary | 2000           | Maize Germ Oil            | 3                                                           |
| 97              | Hungary | 2000           | Marine Fish, Other        | 2                                                           |
| 97              | Hungary | 2000           | Meat, Other               | 4                                                           |
| 97              | Hungary | 2000           | Milk, Whole               | 197                                                         |
| 97              | Hungary | 2000           | Mutton & Goat Meat        | 1                                                           |
| 97              | Hungary | 2000           | Nuts                      | 1                                                           |
| 97              | Hungary | 2000           | Offals, Edible            | 7                                                           |
| 97              | Hungary | 2000           | Oilcrops Oil, Other       | 1                                                           |
| 97              | Hungary | 2000           | Onions                    | 34                                                          |
| 97              | Hungary | 2000           | Oranges, Mandarines       | 20                                                          |
| 97              | Hungary | 2000           | Peas                      | 5                                                           |
| 97              | Hungary | 2000           | Pelagic Fish              | 4                                                           |
| 97              | Hungary | 2000           | Pigmeat                   | 126                                                         |
| 97              | Hungary | 2000           | Pimento                   | 9                                                           |
| 97              | Hungary | 2000           | Pineapples                | 1                                                           |
| 97              | Hungary | 2000           | Potatoes                  | 176                                                         |
| 97              | Hungary | 2000           | Poultry Meat              | 93                                                          |
| 97              | Hungary | 2000           | Pulses, Other             | 1                                                           |
| 97              | Hungary | 2000           | Rape and Mustard Oil      | 7                                                           |
| 97              | Hungary | 2000           | Rice (Milled Equivalent)  | 8                                                           |
| 97              | Hungary | 2000           | Rye                       | 4                                                           |
| 97              | Hungary | 2000           | Soyabean Oil              | 3                                                           |
| 97              | Hungary | 2000           | Spices, Other             | 1                                                           |
| 97              | Hungary | 2000           | Sugar, Refined Equivalent | 90                                                          |
| 97              | Hungary | 2000           | Sunflowerseed Oil         | 30                                                          |
| 97              | Hungary | 2000           | Sweeteners, Other         | 6                                                           |
| 97              | Hungary | 2000           | Tea                       | 1                                                           |
| 97              | Hungary | 2000           | Tomatoes                  | 59                                                          |
| 97              | Hungary | 2000           | Vegetables, Other         | 217                                                         |
| 97              | Hungary | 2000           | Wheat                     | 292                                                         |
| 97              | Hungary | 2000           | Wine                      | 77                                                          |
| 97              | Hungary | 2001           | Apples                    | 54                                                          |
| 97              | Hungary | 2001           | Bananas                   | 19                                                          |
| 97              | Hungary | 2001           | Beans                     | 2                                                           |
| 97              | Hungary | 2001           | Beer                      | 195                                                         |
| 97              | Hungary | 2001           | Beverages, Alcoholic      | 18                                                          |
| 97              | Hungary | 2001           | Beverages, Fermented      | 1                                                           |
| 97              | Hungary | 2001           | Bovine Meat               | 27                                                          |
| 97              | Hungary | 2001           | Butter, Ghee              | 3                                                           |
| 97              | Hungary | 2001           | Cheese                    | 26                                                          |
| 97              | Hungary | 2001           | Cocoa Beans               | 5                                                           |
| 97              | Hungary | 2001           | Coffee                    | 8                                                           |
| 97              | Hungary | 2001           | Cream                     | 18                                                          |
| 97              | Hungary | 2001           | Eggs                      | 45                                                          |
| 97              | Hungary | 2001           | Fats, Animals, Raw        | 42                                                          |
| 97              | Hungary | 2001           | Freshwater Fish           | 5                                                           |
| 97              | Hungary | 2001           | Fruits, Other             | 52                                                          |
| 97              | Hungary | 2001           | Grapefruit                | 1                                                           |
| 97              | Hungary | 2001           | Grapes                    | 12                                                          |
| 97              | Hungary | 2001           | Groundnuts (Shelled Eq)   | 2                                                           |
| 97              | Hungary | 2001           | Lemons, Limes             | 3                                                           |
| 97              | Hungary | 2001           | Maize                     | 2                                                           |
| 97              | Hungary | 2001           | Maize Germ Oil            | 3                                                           |
| 97              | Hungary | 2001           | Marine Fish, Other        | 3                                                           |
| 97              | Hungary | 2001           | Meat, Other               | 3                                                           |
| 97              | Hungary | 2001           | Milk, Whole               | 185                                                         |
| 97              | Hungary | 2001           | Nuts                      | 1                                                           |
| 97              | Hungary | 2001           | Offals, Edible            | 8                                                           |
| 97              | Hungary | 2001           | Onions                    | 36                                                          |
| 97              | Hungary | 2001           | Oranges, Mandarines       | 19                                                          |
| 97              | Hungary | 2001           | Palm Oil                  | 1                                                           |
| 97              | Hungary | 2001           | Peas                      | 6                                                           |
| 97              | Hungary | 2001           | Pelagic Fish              | 3                                                           |
| 97              | Hungary | 2001           | Pigmeat                   | 119                                                         |
| 97              | Hungary | 2001           | Pimento                   | 13                                                          |
| 97              | Hungary | 2001           | Pineapples                | 1                                                           |
| 97              | Hungary | 2001           | Potatoes                  | 207                                                         |
| 97              | Hungary | 2001           | Poultry Meat              | 93                                                          |
| 97              | Hungary | 2001           | Pulses, Other             | 1                                                           |
| 97              | Hungary | 2001           | Rape and Mustard Oil      | 5                                                           |
| 97              | Hungary | 2001           | Rice (Milled Equivalent)  | 9                                                           |
| 97              | Hungary | 2001           | Rye                       | 4                                                           |
| 97              | Hungary | 2001           | Soyabean Oil              | 4                                                           |
| 97              | Hungary | 2001           | Spices, Other             | 1                                                           |
| 97              | Hungary | 2001           | Sugar, Refined Equivalent | 89                                                          |
| 97              | Hungary | 2001           | Sunflowerseed Oil         | 30                                                          |
| 97              | Hungary | 2001           | Sweeteners, Other         | 6                                                           |
| 97              | Hungary | 2001           | Tea                       | 1                                                           |
| 97              | Hungary | 2001           | Tomatoes                  | 57                                                          |
| 97              | Hungary | 2001           | Vegetables, Other         | 200                                                         |
| 97              | Hungary | 2001           | Wheat                     | 272                                                         |
| 97              | Hungary | 2001           | Wine                      | 93                                                          |
| 97              | Hungary | 2002           | Apples                    | 56                                                          |

Dietary calcium and zinc deficiency risks are decreasing but remain prevalent

| FAO countrycode | Country | Reference year | Food item                 | Gross food supply (g capita <sup>-1</sup> d <sup>-1</sup> ) |
|-----------------|---------|----------------|---------------------------|-------------------------------------------------------------|
| 97              | Hungary | 2002           | Bananas                   | 26                                                          |
| 97              | Hungary | 2002           | Beans                     | 3                                                           |
| 97              | Hungary | 2002           | Beer                      | 199                                                         |
| 97              | Hungary | 2002           | Beverages, Alcoholic      | 19                                                          |
| 97              | Hungary | 2002           | Beverages, Fermented      | 1                                                           |
| 97              | Hungary | 2002           | Bovine Meat               | 29                                                          |
| 97              | Hungary | 2002           | Butter, Ghee              | 3                                                           |
| 97              | Hungary | 2002           | Cheese                    | 26                                                          |
| 97              | Hungary | 2002           | Citrus, Other             | 2                                                           |
| 97              | Hungary | 2002           | Cocoa Beans               | 6                                                           |
| 97              | Hungary | 2002           | Coffee                    | 7                                                           |
| 97              | Hungary | 2002           | Cream                     | 19                                                          |
| 97              | Hungary | 2002           | Demersal Fish             | 1                                                           |
| 97              | Hungary | 2002           | Eggs                      | 47                                                          |
| 97              | Hungary | 2002           | Fats, Animals, Raw        | 47                                                          |
| 97              | Hungary | 2002           | Freshwater Fish           | 5                                                           |
| 97              | Hungary | 2002           | Fruits, Other             | 28                                                          |
| 97              | Hungary | 2002           | Grapefruit                | 1                                                           |
| 97              | Hungary | 2002           | Grapes                    | 11                                                          |
| 97              | Hungary | 2002           | Groundnuts (Shelled Eq)   | 2                                                           |
| 97              | Hungary | 2002           | Honey                     | 1                                                           |
| 97              | Hungary | 2002           | Lemons, Limes             | 3                                                           |
| 97              | Hungary | 2002           | Maize                     | 2                                                           |
| 97              | Hungary | 2002           | Maize Germ Oil            | 3                                                           |
| 97              | Hungary | 2002           | Marine Fish, Other        | 3                                                           |
| 97              | Hungary | 2002           | Meat, Other               | 3                                                           |
| 97              | Hungary | 2002           | Milk, Whole               | 197                                                         |
| 97              | Hungary | 2002           | Mutton & Goat Meat        | 1                                                           |
| 97              | Hungary | 2002           | Nuts                      | 1                                                           |
| 97              | Hungary | 2002           | Offals, Edible            | 8                                                           |
| 97              | Hungary | 2002           | Oilcrops Oil, Other       | 1                                                           |
| 97              | Hungary | 2002           | Onions                    | 28                                                          |
| 97              | Hungary | 2002           | Oranges, Mandarines       | 44                                                          |
| 97              | Hungary | 2002           | Palm Oil                  | 5                                                           |
| 97              | Hungary | 2002           | Peas                      | 9                                                           |
| 97              | Hungary | 2002           | Pelagic Fish              | 4                                                           |
| 97              | Hungary | 2002           | Pig meat                  | 133                                                         |
| 97              | Hungary | 2002           | Pimento                   | 13                                                          |
| 97              | Hungary | 2002           | Pineapples                | 2                                                           |
| 97              | Hungary | 2002           | Potatoes                  | 159                                                         |
| 97              | Hungary | 2002           | Poultry Meat              | 102                                                         |
| 97              | Hungary | 2002           | Pulses, Other             | 1                                                           |
| 97              | Hungary | 2002           | Rape and Mustard Oil      | 4                                                           |
| 97              | Hungary | 2002           | Rice (Milled Equivalent)  | 11                                                          |
| 97              | Hungary | 2002           | Rye                       | 4                                                           |
| 97              | Hungary | 2002           | Soyabean Oil              | 3                                                           |
| 97              | Hungary | 2002           | Spices, Other             | 2                                                           |
| 97              | Hungary | 2002           | Sugar, Refined Equivalent | 87                                                          |
| 97              | Hungary | 2002           | Sunflowerseed Oil         | 25                                                          |
| 97              | Hungary | 2002           | Sweeteners, Other         | 6                                                           |
| 97              | Hungary | 2002           | Tea                       | 1                                                           |
| 97              | Hungary | 2002           | Tomatoes                  | 66                                                          |
| 97              | Hungary | 2002           | Vegetables, Other         | 198                                                         |
| 97              | Hungary | 2002           | Wheat                     | 244                                                         |
| 97              | Hungary | 2002           | Wine                      | 93                                                          |
| 97              | Hungary | 2003           | Apples                    | 64                                                          |
| 97              | Hungary | 2003           | Bananas                   | 27                                                          |
| 97              | Hungary | 2003           | Beans                     | 2                                                           |
| 97              | Hungary | 2003           | Beer                      | 206                                                         |
| 97              | Hungary | 2003           | Beverages, Alcoholic      | 19                                                          |
| 97              | Hungary | 2003           | Beverages, Fermented      | 1                                                           |
| 97              | Hungary | 2003           | Bovine Meat               | 33                                                          |
| 97              | Hungary | 2003           | Butter, Ghee              | 3                                                           |
| 97              | Hungary | 2003           | Cheese                    | 26                                                          |
| 97              | Hungary | 2003           | Citrus, Other             | 4                                                           |
| 97              | Hungary | 2003           | Cocoa Beans               | 6                                                           |
| 97              | Hungary | 2003           | Coffee                    | 7                                                           |
| 97              | Hungary | 2003           | Cream                     | 19                                                          |
| 97              | Hungary | 2003           | Demersal Fish             | 1                                                           |
| 97              | Hungary | 2003           | Eggs                      | 45                                                          |
| 97              | Hungary | 2003           | Fats, Animals, Raw        | 38                                                          |
| 97              | Hungary | 2003           | Freshwater Fish           | 5                                                           |
| 97              | Hungary | 2003           | Fruits, Other             | 35                                                          |
| 97              | Hungary | 2003           | Grapefruit                | 2                                                           |
| 97              | Hungary | 2003           | Grapes                    | 14                                                          |
| 97              | Hungary | 2003           | Groundnuts (Shelled Eq)   | 2                                                           |
| 97              | Hungary | 2003           | Honey                     | 1                                                           |
| 97              | Hungary | 2003           | Lemons, Limes             | 4                                                           |
| 97              | Hungary | 2003           | Maize                     | 1                                                           |
| 97              | Hungary | 2003           | Maize Germ Oil            | 4                                                           |
| 97              | Hungary | 2003           | Marine Fish, Other        | 3                                                           |
| 97              | Hungary | 2003           | Meat, Other               | 2                                                           |
| 97              | Hungary | 2003           | Milk, Whole               | 188                                                         |
| 97              | Hungary | 2003           | Nuts                      | 1                                                           |
| 97              | Hungary | 2003           | Offals, Edible            | 5                                                           |
| 97              | Hungary | 2003           | Oilcrops Oil, Other       | 1                                                           |
| 97              | Hungary | 2003           | Onions                    | 28                                                          |
| 97              | Hungary | 2003           | Oranges, Mandarines       | 52                                                          |
| 97              | Hungary | 2003           | Palm Oil                  | 6                                                           |
| 97              | Hungary | 2003           | Palmkernel Oil            | 1                                                           |
| 97              | Hungary | 2003           | Peas                      | 4                                                           |
| 97              | Hungary | 2003           | Pelagic Fish              | 4                                                           |
| 97              | Hungary | 2003           | Pig meat                  | 114                                                         |
| 97              | Hungary | 2003           | Pimento                   | 8                                                           |
| 97              | Hungary | 2003           | Pineapples                | 3                                                           |
| 97              | Hungary | 2003           | Potatoes                  | 125                                                         |
| 97              | Hungary | 2003           | Poultry Meat              | 93                                                          |



Dietary calcium and zinc deficiency risks are decreasing but remain prevalent

| FAO countrycode | Country | Reference year | Food item                 | Gross food supply (g capita <sup>-1</sup> d <sup>-1</sup> ) |
|-----------------|---------|----------------|---------------------------|-------------------------------------------------------------|
| 97              | Hungary | 2003           | Pulses, Other             | 1                                                           |
| 97              | Hungary | 2003           | Rape and Mustard Oil      | 5                                                           |
| 97              | Hungary | 2003           | Rice (Milled Equivalent)  | 11                                                          |
| 97              | Hungary | 2003           | Rye                       | 3                                                           |
| 97              | Hungary | 2003           | Soybean Oil               | 4                                                           |
| 97              | Hungary | 2003           | Spices, Other             | 2                                                           |
| 97              | Hungary | 2003           | Sugar, Refined Equivalent | 88                                                          |
| 97              | Hungary | 2003           | Sunflowerseed Oil         | 23                                                          |
| 97              | Hungary | 2003           | Sweeteners, Other         | 7                                                           |
| 97              | Hungary | 2003           | Tea                       | 1                                                           |
| 97              | Hungary | 2003           | Tomatoes                  | 70                                                          |
| 97              | Hungary | 2003           | Vegetables, Other         | 201                                                         |
| 97              | Hungary | 2003           | Wheat                     | 279                                                         |
| 97              | Hungary | 2003           | Wine                      | 88                                                          |
| 97              | Hungary | 2004           | Apples                    | 62                                                          |
| 97              | Hungary | 2004           | Bananas                   | 27                                                          |
| 97              | Hungary | 2004           | Beans                     | 3                                                           |
| 97              | Hungary | 2004           | Beer                      | 201                                                         |
| 97              | Hungary | 2004           | Beverages, Alcoholic      | 19                                                          |
| 97              | Hungary | 2004           | Beverages, Fermented      | 1                                                           |
| 97              | Hungary | 2004           | Bovine Meat               | 25                                                          |
| 97              | Hungary | 2004           | Butter, Ghee              | 3                                                           |
| 97              | Hungary | 2004           | Cheese                    | 27                                                          |
| 97              | Hungary | 2004           | Citrus, Other             | 3                                                           |
| 97              | Hungary | 2004           | Cocoa Beans               | 7                                                           |
| 97              | Hungary | 2004           | Coffee                    | 6                                                           |
| 97              | Hungary | 2004           | Cream                     | 18                                                          |
| 97              | Hungary | 2004           | Demersal Fish             | 4                                                           |
| 97              | Hungary | 2004           | Eggs                      | 45                                                          |
| 97              | Hungary | 2004           | Fats, Animals, Raw        | 39                                                          |
| 97              | Hungary | 2004           | Freshwater Fish           | 6                                                           |
| 97              | Hungary | 2004           | Fruits, Other             | 67                                                          |
| 97              | Hungary | 2004           | Grapefruit                | 1                                                           |
| 97              | Hungary | 2004           | Grapes                    | 22                                                          |
| 97              | Hungary | 2004           | Groundnuts (Shelled Eq)   | 1                                                           |
| 97              | Hungary | 2004           | Honey                     | 1                                                           |
| 97              | Hungary | 2004           | Lemons, Limes             | 4                                                           |
| 97              | Hungary | 2004           | Maize                     | 1                                                           |
| 97              | Hungary | 2004           | Maize Germ Oil            | 4                                                           |
| 97              | Hungary | 2004           | Marine Fish, Other        | 1                                                           |
| 97              | Hungary | 2004           | Meat, Other               | 3                                                           |
| 97              | Hungary | 2004           | Milk, Whole               | 193                                                         |
| 97              | Hungary | 2004           | Mutton & Goat Meat        | 1                                                           |
| 97              | Hungary | 2004           | Nuts                      | 1                                                           |
| 97              | Hungary | 2004           | Offals, Edible            | 5                                                           |
| 97              | Hungary | 2004           | Oilcrops Oil, Other       | 1                                                           |
| 97              | Hungary | 2004           | Onions                    | 29                                                          |
| 97              | Hungary | 2004           | Oranges, Mandarines       | 43                                                          |
| 97              | Hungary | 2004           | Palm Oil                  | 3                                                           |
| 97              | Hungary | 2004           | Peas                      | 10                                                          |
| 97              | Hungary | 2004           | Pelagic Fish              | 3                                                           |
| 97              | Hungary | 2004           | Pigmeat                   | 127                                                         |
| 97              | Hungary | 2004           | Pimento                   | 12                                                          |
| 97              | Hungary | 2004           | Pineapples                | 3                                                           |
| 97              | Hungary | 2004           | Potatoes                  | 183                                                         |
| 97              | Hungary | 2004           | Poultry Meat              | 93                                                          |
| 97              | Hungary | 2004           | Pulses, Other             | 1                                                           |
| 97              | Hungary | 2004           | Rape and Mustard Oil      | 3                                                           |
| 97              | Hungary | 2004           | Rice (Milled Equivalent)  | 11                                                          |
| 97              | Hungary | 2004           | Rye                       | 3                                                           |
| 97              | Hungary | 2004           | Soybean Oil               | 4                                                           |
| 97              | Hungary | 2004           | Spices, Other             | 1                                                           |
| 97              | Hungary | 2004           | Sugar, Refined Equivalent | 81                                                          |
| 97              | Hungary | 2004           | Sunflowerseed Oil         | 32                                                          |
| 97              | Hungary | 2004           | Sweeteners, Other         | 14                                                          |
| 97              | Hungary | 2004           | Tea                       | 1                                                           |
| 97              | Hungary | 2004           | Tomatoes                  | 70                                                          |
| 97              | Hungary | 2004           | Vegetables, Other         | 233                                                         |
| 97              | Hungary | 2004           | Wheat                     | 281                                                         |
| 97              | Hungary | 2004           | Wine                      | 90                                                          |
| 97              | Hungary | 2005           | Apples                    | 71                                                          |
| 97              | Hungary | 2005           | Bananas                   | 15                                                          |
| 97              | Hungary | 2005           | Beans                     | 3                                                           |
| 97              | Hungary | 2005           | Beer                      | 199                                                         |
| 97              | Hungary | 2005           | Beverages, Alcoholic      | 19                                                          |
| 97              | Hungary | 2005           | Beverages, Fermented      | 1                                                           |
| 97              | Hungary | 2005           | Bovine Meat               | 17                                                          |
| 97              | Hungary | 2005           | Butter, Ghee              | 3                                                           |
| 97              | Hungary | 2005           | Cheese                    | 27                                                          |
| 97              | Hungary | 2005           | Citrus, Other             | 3                                                           |
| 97              | Hungary | 2005           | Cocoa Beans               | 6                                                           |
| 97              | Hungary | 2005           | Coffee                    | 4                                                           |
| 97              | Hungary | 2005           | Cream                     | 20                                                          |
| 97              | Hungary | 2005           | Demersal Fish             | 4                                                           |
| 97              | Hungary | 2005           | Eggs                      | 44                                                          |
| 97              | Hungary | 2005           | Fats, Animals, Raw        | 41                                                          |
| 97              | Hungary | 2005           | Freshwater Fish           | 6                                                           |
| 97              | Hungary | 2005           | Fruits, Other             | 50                                                          |
| 97              | Hungary | 2005           | Grapefruit                | 2                                                           |
| 97              | Hungary | 2005           | Grapes                    | 20                                                          |
| 97              | Hungary | 2005           | Groundnuts (Shelled Eq)   | 2                                                           |
| 97              | Hungary | 2005           | Lemons, Limes             | 4                                                           |
| 97              | Hungary | 2005           | Maize                     | 1                                                           |
| 97              | Hungary | 2005           | Maize Germ Oil            | 3                                                           |
| 97              | Hungary | 2005           | Marine Fish, Other        | 1                                                           |
| 97              | Hungary | 2005           | Meat, Other               | 2                                                           |
| 97              | Hungary | 2005           | Milk, Whole               | 193                                                         |

Dietary calcium and zinc deficiency risks are decreasing but remain prevalent

| FAO countrycode | Country | Reference year | Food item                 | Gross food supply (g capita <sup>-1</sup> d <sup>-1</sup> ) |
|-----------------|---------|----------------|---------------------------|-------------------------------------------------------------|
| 97              | Hungary | 2005           | Nuts                      | 1                                                           |
| 97              | Hungary | 2005           | Offals, Edible            | 6                                                           |
| 97              | Hungary | 2005           | Onions                    | 25                                                          |
| 97              | Hungary | 2005           | Oranges, Mandarines       | 53                                                          |
| 97              | Hungary | 2005           | Palm Oil                  | 5                                                           |
| 97              | Hungary | 2005           | Peas                      | 7                                                           |
| 97              | Hungary | 2005           | Pelagic Fish              | 3                                                           |
| 97              | Hungary | 2005           | Pigmeat                   | 119                                                         |
| 97              | Hungary | 2005           | Pimento                   | 12                                                          |
| 97              | Hungary | 2005           | Pineapples                | 4                                                           |
| 97              | Hungary | 2005           | Potatoes                  | 150                                                         |
| 97              | Hungary | 2005           | Poultry Meat              | 91                                                          |
| 97              | Hungary | 2005           | Pulses, Other             | 1                                                           |
| 97              | Hungary | 2005           | Rape and Mustard Oil      | 3                                                           |
| 97              | Hungary | 2005           | Rice (Milled Equivalent)  | 11                                                          |
| 97              | Hungary | 2005           | Rye                       | 3                                                           |
| 97              | Hungary | 2005           | Soyabean Oil              | 5                                                           |
| 97              | Hungary | 2005           | Spices, Other             | 1                                                           |
| 97              | Hungary | 2005           | Sugar, Refined Equivalent | 68                                                          |
| 97              | Hungary | 2005           | Sunflowerseed Oil         | 34                                                          |
| 97              | Hungary | 2005           | Sweeteners, Other         | 25                                                          |
| 97              | Hungary | 2005           | Tea                       | 1                                                           |
| 97              | Hungary | 2005           | Tomatoes                  | 47                                                          |
| 97              | Hungary | 2005           | Vegetables, Other         | 224                                                         |
| 97              | Hungary | 2005           | Wheat                     | 327                                                         |
| 97              | Hungary | 2005           | Wine                      | 91                                                          |
| 97              | Hungary | 2006           | Apples                    | 68                                                          |
| 97              | Hungary | 2006           | Bananas                   | 16                                                          |
| 97              | Hungary | 2006           | Beans                     | 2                                                           |
| 97              | Hungary | 2006           | Beer                      | 203                                                         |
| 97              | Hungary | 2006           | Beverages, Alcoholic      | 18                                                          |
| 97              | Hungary | 2006           | Beverages, Fermented      | 1                                                           |
| 97              | Hungary | 2006           | Bovine Meat               | 21                                                          |
| 97              | Hungary | 2006           | Butter, Ghee              | 3                                                           |
| 97              | Hungary | 2006           | Cheese                    | 29                                                          |
| 97              | Hungary | 2006           | Citrus, Other             | 3                                                           |
| 97              | Hungary | 2006           | Cocoa Beans               | 9                                                           |
| 97              | Hungary | 2006           | Coffee                    | 4                                                           |
| 97              | Hungary | 2006           | Cream                     | 20                                                          |
| 97              | Hungary | 2006           | Demersal Fish             | 3                                                           |
| 97              | Hungary | 2006           | Eggs                      | 44                                                          |
| 97              | Hungary | 2006           | Fats, Animals, Raw        | 38                                                          |
| 97              | Hungary | 2006           | Freshwater Fish           | 7                                                           |
| 97              | Hungary | 2006           | Fruits, Other             | 73                                                          |
| 97              | Hungary | 2006           | Grapefruit                | 1                                                           |
| 97              | Hungary | 2006           | Grapes                    | 30                                                          |
| 97              | Hungary | 2006           | Groundnuts (Shelled Eq)   | 2                                                           |
| 97              | Hungary | 2006           | Lemons, Limes             | 4                                                           |
| 97              | Hungary | 2006           | Maize                     | 1                                                           |
| 97              | Hungary | 2006           | Maize Germ Oil            | 3                                                           |
| 97              | Hungary | 2006           | Marine Fish, Other        | 1                                                           |
| 97              | Hungary | 2006           | Meat, Other               | 3                                                           |
| 97              | Hungary | 2006           | Milk, Whole               | 198                                                         |
| 97              | Hungary | 2006           | Nuts                      | 1                                                           |
| 97              | Hungary | 2006           | Offals, Edible            | 5                                                           |
| 97              | Hungary | 2006           | Onions                    | 26                                                          |
| 97              | Hungary | 2006           | Oranges, Mandarines       | 56                                                          |
| 97              | Hungary | 2006           | Palm Oil                  | 6                                                           |
| 97              | Hungary | 2006           | Peas                      | 7                                                           |
| 97              | Hungary | 2006           | Pelagic Fish              | 3                                                           |
| 97              | Hungary | 2006           | Pigmeat                   | 127                                                         |
| 97              | Hungary | 2006           | Pimento                   | 8                                                           |
| 97              | Hungary | 2006           | Pineapples                | 5                                                           |
| 97              | Hungary | 2006           | Potatoes                  | 131                                                         |
| 97              | Hungary | 2006           | Poultry Meat              | 80                                                          |
| 97              | Hungary | 2006           | Pulses, Other             | 1                                                           |
| 97              | Hungary | 2006           | Rape and Mustard Oil      | 2                                                           |
| 97              | Hungary | 2006           | Rice (Milled Equivalent)  | 12                                                          |
| 97              | Hungary | 2006           | Rye                       | 3                                                           |
| 97              | Hungary | 2006           | Soyabean Oil              | 4                                                           |
| 97              | Hungary | 2006           | Spices, Other             | 1                                                           |
| 97              | Hungary | 2006           | Sugar, Refined Equivalent | 54                                                          |
| 97              | Hungary | 2006           | Sunflowerseed Oil         | 34                                                          |
| 97              | Hungary | 2006           | Sweeteners, Other         | 42                                                          |
| 97              | Hungary | 2006           | Tea                       | 1                                                           |
| 97              | Hungary | 2006           | Tomatoes                  | 56                                                          |
| 97              | Hungary | 2006           | Vegetables, Other         | 271                                                         |
| 97              | Hungary | 2006           | Wheat                     | 313                                                         |
| 97              | Hungary | 2006           | Wine                      | 92                                                          |
| 97              | Hungary | 2007           | Apples                    | 72                                                          |
| 97              | Hungary | 2007           | Bananas                   | 19                                                          |
| 97              | Hungary | 2007           | Beans                     | 2                                                           |
| 97              | Hungary | 2007           | Beer                      | 213                                                         |
| 97              | Hungary | 2007           | Beverages, Alcoholic      | 20                                                          |
| 97              | Hungary | 2007           | Beverages, Fermented      | 1                                                           |
| 97              | Hungary | 2007           | Bovine Meat               | 18                                                          |
| 97              | Hungary | 2007           | Butter, Ghee              | 3                                                           |
| 97              | Hungary | 2007           | Cheese                    | 31                                                          |
| 97              | Hungary | 2007           | Citrus, Other             | 3                                                           |
| 97              | Hungary | 2007           | Cocoa Beans               | 8                                                           |
| 97              | Hungary | 2007           | Coffee                    | 3                                                           |
| 97              | Hungary | 2007           | Cream                     | 19                                                          |
| 97              | Hungary | 2007           | Demersal Fish             | 3                                                           |
| 97              | Hungary | 2007           | Eggs                      | 44                                                          |
| 97              | Hungary | 2007           | Fats, Animals, Raw        | 38                                                          |
| 97              | Hungary | 2007           | Freshwater Fish           | 7                                                           |
| 97              | Hungary | 2007           | Fruits, Other             | 45                                                          |

Dietary calcium and zinc deficiency risks are decreasing but remain prevalent

| FAO countrycode | Country | Reference year | Food item                 | Gross food supply (g capita <sup>-1</sup> d <sup>-1</sup> ) |
|-----------------|---------|----------------|---------------------------|-------------------------------------------------------------|
| 97              | Hungary | 2007           | Grapefruit                | 1                                                           |
| 97              | Hungary | 2007           | Grapes                    | 32                                                          |
| 97              | Hungary | 2007           | Groundnuts (Shelled Eq)   | 2                                                           |
| 97              | Hungary | 2007           | Honey                     | 1                                                           |
| 97              | Hungary | 2007           | Lemons, Limes             | 3                                                           |
| 97              | Hungary | 2007           | Maize                     | 3                                                           |
| 97              | Hungary | 2007           | Maize Germ Oil            | 3                                                           |
| 97              | Hungary | 2007           | Marine Fish, Other        | 1                                                           |
| 97              | Hungary | 2007           | Meat, Other               | 3                                                           |
| 97              | Hungary | 2007           | Milk, Whole               | 204                                                         |
| 97              | Hungary | 2007           | Nuts                      | 1                                                           |
| 97              | Hungary | 2007           | Offals, Edible            | 7                                                           |
| 97              | Hungary | 2007           | Onions                    | 20                                                          |
| 97              | Hungary | 2007           | Oranges, Mandarines       | 22                                                          |
| 97              | Hungary | 2007           | Palm Oil                  | 7                                                           |
| 97              | Hungary | 2007           | Peas                      | 7                                                           |
| 97              | Hungary | 2007           | Pelagic Fish              | 2                                                           |
| 97              | Hungary | 2007           | Pigmeat                   | 131                                                         |
| 97              | Hungary | 2007           | Pimento                   | 3                                                           |
| 97              | Hungary | 2007           | Pineapples                | 4                                                           |
| 97              | Hungary | 2007           | Potatoes                  | 140                                                         |
| 97              | Hungary | 2007           | Poultry Meat              | 76                                                          |
| 97              | Hungary | 2007           | Pulses, Other             | 1                                                           |
| 97              | Hungary | 2007           | Rape and Mustard Oil      | 3                                                           |
| 97              | Hungary | 2007           | Rice (Milled Equivalent)  | 11                                                          |
| 97              | Hungary | 2007           | Rye                       | 3                                                           |
| 97              | Hungary | 2007           | Soyabean Oil              | 5                                                           |
| 97              | Hungary | 2007           | Spices, Other             | 1                                                           |
| 97              | Hungary | 2007           | Sugar, Refined Equivalent | 41                                                          |
| 97              | Hungary | 2007           | Sunflowerseed Oil         | 36                                                          |
| 97              | Hungary | 2007           | Sweeteners, Other         | 51                                                          |
| 97              | Hungary | 2007           | Tea                       | 1                                                           |
| 97              | Hungary | 2007           | Tomatoes                  | 59                                                          |
| 97              | Hungary | 2007           | Vegetables, Other         | 234                                                         |
| 97              | Hungary | 2007           | Wheat                     | 280                                                         |
| 97              | Hungary | 2007           | Wine                      | 78                                                          |
| 97              | Hungary | 2008           | Apples                    | 71                                                          |
| 97              | Hungary | 2008           | Bananas                   | 19                                                          |
| 97              | Hungary | 2008           | Beans                     | 2                                                           |
| 97              | Hungary | 2008           | Beer                      | 200                                                         |
| 97              | Hungary | 2008           | Beverages, Alcoholic      | 20                                                          |
| 97              | Hungary | 2008           | Beverages, Fermented      | 1                                                           |
| 97              | Hungary | 2008           | Bovine Meat               | 16                                                          |
| 97              | Hungary | 2008           | Butter, Ghee              | 2                                                           |
| 97              | Hungary | 2008           | Cheese                    | 31                                                          |
| 97              | Hungary | 2008           | Citrus, Other             | 2                                                           |
| 97              | Hungary | 2008           | Cocoa Beans               | 8                                                           |
| 97              | Hungary | 2008           | Coffee                    | 2                                                           |
| 97              | Hungary | 2008           | Cream                     | 17                                                          |
| 97              | Hungary | 2008           | Demersal Fish             | 3                                                           |
| 97              | Hungary | 2008           | Eggs                      | 43                                                          |
| 97              | Hungary | 2008           | Fats, Animals, Raw        | 40                                                          |
| 97              | Hungary | 2008           | Freshwater Fish           | 8                                                           |
| 97              | Hungary | 2008           | Fruits, Other             | 49                                                          |
| 97              | Hungary | 2008           | Grapefruit                | 1                                                           |
| 97              | Hungary | 2008           | Grapes                    | 32                                                          |
| 97              | Hungary | 2008           | Groundnuts (Shelled Eq)   | 2                                                           |
| 97              | Hungary | 2008           | Honey                     | 1                                                           |
| 97              | Hungary | 2008           | Lemons, Limes             | 3                                                           |
| 97              | Hungary | 2008           | Maize                     | 1                                                           |
| 97              | Hungary | 2008           | Maize Germ Oil            | 3                                                           |
| 97              | Hungary | 2008           | Marine Fish, Other        | 1                                                           |
| 97              | Hungary | 2008           | Meat, Other               | 3                                                           |
| 97              | Hungary | 2008           | Milk, Whole               | 176                                                         |
| 97              | Hungary | 2008           | Nuts                      | 1                                                           |
| 97              | Hungary | 2008           | Offals, Edible            | 5                                                           |
| 97              | Hungary | 2008           | Olive Oil                 | 1                                                           |
| 97              | Hungary | 2008           | Onions                    | 17                                                          |
| 97              | Hungary | 2008           | Oranges, Mandarines       | 33                                                          |
| 97              | Hungary | 2008           | Palm Oil                  | 8                                                           |
| 97              | Hungary | 2008           | Peas                      | 7                                                           |
| 97              | Hungary | 2008           | Pelagic Fish              | 3                                                           |
| 97              | Hungary | 2008           | Pigmeat                   | 125                                                         |
| 97              | Hungary | 2008           | Pimento                   | 3                                                           |
| 97              | Hungary | 2008           | Pineapples                | 5                                                           |
| 97              | Hungary | 2008           | Potatoes                  | 175                                                         |
| 97              | Hungary | 2008           | Poultry Meat              | 78                                                          |
| 97              | Hungary | 2008           | Pulses, Other             | 1                                                           |
| 97              | Hungary | 2008           | Rape and Mustard Oil      | 3                                                           |
| 97              | Hungary | 2008           | Rice (Milled Equivalent)  | 12                                                          |
| 97              | Hungary | 2008           | Rye                       | 3                                                           |
| 97              | Hungary | 2008           | Soyabean Oil              | 5                                                           |
| 97              | Hungary | 2008           | Spices, Other             | 1                                                           |
| 97              | Hungary | 2008           | Sugar, Refined Equivalent | 36                                                          |
| 97              | Hungary | 2008           | Sunflowerseed Oil         | 35                                                          |
| 97              | Hungary | 2008           | Sweeteners, Other         | 59                                                          |
| 97              | Hungary | 2008           | Tea                       | 1                                                           |
| 97              | Hungary | 2008           | Tomatoes                  | 52                                                          |
| 97              | Hungary | 2008           | Vegetables, Other         | 246                                                         |
| 97              | Hungary | 2008           | Wheat                     | 280                                                         |
| 97              | Hungary | 2008           | Wine                      | 66                                                          |
| 97              | Hungary | 2009           | Apples                    | 72                                                          |
| 97              | Hungary | 2009           | Bananas                   | 13                                                          |
| 97              | Hungary | 2009           | Beans                     | 2                                                           |
| 97              | Hungary | 2009           | Beer                      | 199                                                         |
| 97              | Hungary | 2009           | Beverages, Alcoholic      | 20                                                          |
| 97              | Hungary | 2009           | Bovine Meat               | 16                                                          |

## Dietary calcium and zinc deficiency risks are decreasing but remain prevalent

| FAO countrycode | Country | Reference year | Food item                 | Gross food supply (g capita <sup>-1</sup> d <sup>-1</sup> ) |
|-----------------|---------|----------------|---------------------------|-------------------------------------------------------------|
| 97              | Hungary | 2009           | Butter, Ghee              | 2                                                           |
| 97              | Hungary | 2009           | Cheese                    | 31                                                          |
| 97              | Hungary | 2009           | Citrus, Other             | 2                                                           |
| 97              | Hungary | 2009           | Cocoa Beans               | 7                                                           |
| 97              | Hungary | 2009           | Coffee                    | 2                                                           |
| 97              | Hungary | 2009           | Cream                     | 18                                                          |
| 97              | Hungary | 2009           | Demersal Fish             | 2                                                           |
| 97              | Hungary | 2009           | Eggs                      | 41                                                          |
| 97              | Hungary | 2009           | Fats, Animals, Raw        | 40                                                          |
| 97              | Hungary | 2009           | Freshwater Fish           | 8                                                           |
| 97              | Hungary | 2009           | Fruits, Other             | 59                                                          |
| 97              | Hungary | 2009           | Grapefruit                | 1                                                           |
| 97              | Hungary | 2009           | Grapes                    | 29                                                          |
| 97              | Hungary | 2009           | Groundnuts (Shelled Eq)   | 1                                                           |
| 97              | Hungary | 2009           | Lemons, Limes             | 3                                                           |
| 97              | Hungary | 2009           | Maize                     | 1                                                           |
| 97              | Hungary | 2009           | Maize Germ Oil            | 2                                                           |
| 97              | Hungary | 2009           | Marine Fish, Other        | 1                                                           |
| 97              | Hungary | 2009           | Meat, Other               | 2                                                           |
| 97              | Hungary | 2009           | Milk, Whole               | 190                                                         |
| 97              | Hungary | 2009           | Nuts                      | 1                                                           |
| 97              | Hungary | 2009           | Offals, Edible            | 5                                                           |
| 97              | Hungary | 2009           | Olive Oil                 | 1                                                           |
| 97              | Hungary | 2009           | Onions                    | 20                                                          |
| 97              | Hungary | 2009           | Oranges, Mandarines       | 25                                                          |
| 97              | Hungary | 2009           | Palm Oil                  | 8                                                           |
| 97              | Hungary | 2009           | Peas                      | 4                                                           |
| 97              | Hungary | 2009           | Pelagic Fish              | 2                                                           |
| 97              | Hungary | 2009           | Pig meat                  | 122                                                         |
| 97              | Hungary | 2009           | Pimento                   | 5                                                           |
| 97              | Hungary | 2009           | Pineapples                | 2                                                           |
| 97              | Hungary | 2009           | Potatoes                  | 140                                                         |
| 97              | Hungary | 2009           | Poultry Meat              | 75                                                          |
| 97              | Hungary | 2009           | Pulses, Other             | 1                                                           |
| 97              | Hungary | 2009           | Rape and Mustard Oil      | 3                                                           |
| 97              | Hungary | 2009           | Rice (Milled Equivalent)  | 9                                                           |
| 97              | Hungary | 2009           | Rye                       | 3                                                           |
| 97              | Hungary | 2009           | Soyabean Oil              | 3                                                           |
| 97              | Hungary | 2009           | Spices, Other             | 1                                                           |
| 97              | Hungary | 2009           | Sugar, Refined Equivalent | 36                                                          |
| 97              | Hungary | 2009           | Sunflowerseed Oil         | 34                                                          |
| 97              | Hungary | 2009           | Sweeteners, Other         | 54                                                          |
| 97              | Hungary | 2009           | Tomatoes                  | 51                                                          |
| 97              | Hungary | 2009           | Vegetables, Other         | 217                                                         |
| 97              | Hungary | 2009           | Wheat                     | 311                                                         |
| 97              | Hungary | 2009           | Wine                      | 65                                                          |
| 97              | Hungary | 2010           | Apples                    | 78                                                          |
| 97              | Hungary | 2010           | Bananas                   | 9                                                           |
| 97              | Hungary | 2010           | Barley                    | 2                                                           |
| 97              | Hungary | 2010           | Beans                     | 2                                                           |
| 97              | Hungary | 2010           | Beer                      | 182                                                         |
| 97              | Hungary | 2010           | Beverages, Alcoholic      | 18                                                          |
| 97              | Hungary | 2010           | Beverages, Fermented      | 1                                                           |
| 97              | Hungary | 2010           | Bovine Meat               | 15                                                          |
| 97              | Hungary | 2010           | Butter, Ghee              | 2                                                           |
| 97              | Hungary | 2010           | Cheese                    | 31                                                          |
| 97              | Hungary | 2010           | Citrus, Other             | 3                                                           |
| 97              | Hungary | 2010           | Cocoa Beans               | 7                                                           |
| 97              | Hungary | 2010           | Coffee                    | 2                                                           |
| 97              | Hungary | 2010           | Cream                     | 18                                                          |
| 97              | Hungary | 2010           | Demersal Fish             | 2                                                           |
| 97              | Hungary | 2010           | Eggs                      | 38                                                          |
| 97              | Hungary | 2010           | Fats, Animals, Raw        | 40                                                          |
| 97              | Hungary | 2010           | Freshwater Fish           | 8                                                           |
| 97              | Hungary | 2010           | Fruits, Other             | 48                                                          |
| 97              | Hungary | 2010           | Grapes                    | 16                                                          |
| 97              | Hungary | 2010           | Groundnuts (Shelled Eq)   | 1                                                           |
| 97              | Hungary | 2010           | Lemons, Limes             | 2                                                           |
| 97              | Hungary | 2010           | Maize                     | 1                                                           |
| 97              | Hungary | 2010           | Maize Germ Oil            | 2                                                           |
| 97              | Hungary | 2010           | Marine Fish, Other        | 1                                                           |
| 97              | Hungary | 2010           | Meat, Other               | 3                                                           |
| 97              | Hungary | 2010           | Milk, Whole               | 191                                                         |
| 97              | Hungary | 2010           | Nuts                      | 1                                                           |
| 97              | Hungary | 2010           | Oats                      | 1                                                           |
| 97              | Hungary | 2010           | Offals, Edible            | 5                                                           |
| 97              | Hungary | 2010           | Olive Oil                 | 1                                                           |
| 97              | Hungary | 2010           | Onions                    | 15                                                          |
| 97              | Hungary | 2010           | Oranges, Mandarines       | 13                                                          |
| 97              | Hungary | 2010           | Palm Oil                  | 8                                                           |
| 97              | Hungary | 2010           | Peas                      | 6                                                           |
| 97              | Hungary | 2010           | Pelagic Fish              | 3                                                           |
| 97              | Hungary | 2010           | Pigmeat                   | 110                                                         |
| 97              | Hungary | 2010           | Pimento                   | 4                                                           |
| 97              | Hungary | 2010           | Pineapples                | 2                                                           |
| 97              | Hungary | 2010           | Potatoes                  | 115                                                         |
| 97              | Hungary | 2010           | Poultry Meat              | 65                                                          |
| 97              | Hungary | 2010           | Pulses, Other             | 1                                                           |
| 97              | Hungary | 2010           | Rape and Mustard Oil      | 3                                                           |
| 97              | Hungary | 2010           | Rice (Milled Equivalent)  | 7                                                           |
| 97              | Hungary | 2010           | Rye                       | 3                                                           |
| 97              | Hungary | 2010           | Soyabean Oil              | 6                                                           |
| 97              | Hungary | 2010           | Spices, Other             | 2                                                           |
| 97              | Hungary | 2010           | Sugar, Refined Equivalent | 36                                                          |
| 97              | Hungary | 2010           | Sunflowerseed Oil         | 34                                                          |
| 97              | Hungary | 2010           | Sweeteners, Other         | 50                                                          |
| 97              | Hungary | 2010           | Tomatoes                  | 34                                                          |

Dietary calcium and zinc deficiency risks are decreasing but remain prevalent

| FAO countrycode | Country | Reference year | Food item                 | Gross food supply (g capita <sup>-1</sup> d <sup>-1</sup> ) |
|-----------------|---------|----------------|---------------------------|-------------------------------------------------------------|
| 97              | Hungary | 2010           | Vegetables, Other         | 145                                                         |
| 97              | Hungary | 2010           | Wheat                     | 307                                                         |
| 97              | Hungary | 2010           | Wine                      | 64                                                          |
| 97              | Hungary | 2011           | Apples                    | 85                                                          |
| 97              | Hungary | 2011           | Bananas                   | 9                                                           |
| 97              | Hungary | 2011           | Beans                     | 2                                                           |
| 97              | Hungary | 2011           | Beer                      | 189                                                         |
| 97              | Hungary | 2011           | Beverages, Alcoholic      | 18                                                          |
| 97              | Hungary | 2011           | Beverages, Fermented      | 1                                                           |
| 97              | Hungary | 2011           | Bovine Meat               | 16                                                          |
| 97              | Hungary | 2011           | Butter, Ghee              | 2                                                           |
| 97              | Hungary | 2011           | Cheese                    | 29                                                          |
| 97              | Hungary | 2011           | Citrus, Other             | 4                                                           |
| 97              | Hungary | 2011           | Cocoa Beans               | 8                                                           |
| 97              | Hungary | 2011           | Coffee                    | 1                                                           |
| 97              | Hungary | 2011           | Cream                     | 20                                                          |
| 97              | Hungary | 2011           | Demersal Fish             | 2                                                           |
| 97              | Hungary | 2011           | Eggs                      | 36                                                          |
| 97              | Hungary | 2011           | Fats, Animals, Raw        | 39                                                          |
| 97              | Hungary | 2011           | Freshwater Fish           | 8                                                           |
| 97              | Hungary | 2011           | Fruits, Other             | 42                                                          |
| 97              | Hungary | 2011           | Grapefruit                | 1                                                           |
| 97              | Hungary | 2011           | Grapes                    | 21                                                          |
| 97              | Hungary | 2011           | Groundnuts (Shelled Eq)   | 1                                                           |
| 97              | Hungary | 2011           | Lemons, Limes             | 3                                                           |
| 97              | Hungary | 2011           | Maize                     | 1                                                           |
| 97              | Hungary | 2011           | Maize Germ Oil            | 1                                                           |
| 97              | Hungary | 2011           | Marine Fish, Other        | 1                                                           |
| 97              | Hungary | 2011           | Meat, Other               | 3                                                           |
| 97              | Hungary | 2011           | Milk, Whole               | 159                                                         |
| 97              | Hungary | 2011           | Nuts                      | 1                                                           |
| 97              | Hungary | 2011           | Oats                      | 1                                                           |
| 97              | Hungary | 2011           | Offals, Edible            | 3                                                           |
| 97              | Hungary | 2011           | Olive Oil                 | 1                                                           |
| 97              | Hungary | 2011           | Onions                    | 18                                                          |
| 97              | Hungary | 2011           | Oranges, Mandarines       | 14                                                          |
| 97              | Hungary | 2011           | Palm Oil                  | 8                                                           |
| 97              | Hungary | 2011           | Peas                      | 7                                                           |
| 97              | Hungary | 2011           | Pelagic Fish              | 3                                                           |
| 97              | Hungary | 2011           | Pigmeat                   | 113                                                         |
| 97              | Hungary | 2011           | Pimento                   | 5                                                           |
| 97              | Hungary | 2011           | Pineapples                | 3                                                           |
| 97              | Hungary | 2011           | Potatoes                  | 162                                                         |
| 97              | Hungary | 2011           | Poultry Meat              | 69                                                          |
| 97              | Hungary | 2011           | Pulses, Other             | 1                                                           |
| 97              | Hungary | 2011           | Rape and Mustard Oil      | 3                                                           |
| 97              | Hungary | 2011           | Rice (Milled Equivalent)  | 8                                                           |
| 97              | Hungary | 2011           | Rye                       | 3                                                           |
| 97              | Hungary | 2011           | Soyabean Oil              | 4                                                           |
| 97              | Hungary | 2011           | Spices, Other             | 2                                                           |
| 97              | Hungary | 2011           | Sugar, Refined Equivalent | 36                                                          |
| 97              | Hungary | 2011           | Sunflowerseed Oil         | 34                                                          |
| 97              | Hungary | 2011           | Sweeteners, Other         | 48                                                          |
| 97              | Hungary | 2011           | Tomatoes                  | 46                                                          |
| 97              | Hungary | 2011           | Vegetables, Other         | 194                                                         |
| 97              | Hungary | 2011           | Wheat                     | 264                                                         |
| 97              | Hungary | 2011           | Wine                      | 72                                                          |
| 100             | India   | 1992           | Apples                    | 3                                                           |
| 100             | India   | 1992           | Bananas                   | 21                                                          |
| 100             | India   | 1992           | Barley                    | 4                                                           |
| 100             | India   | 1992           | Beans                     | 10                                                          |
| 100             | India   | 1992           | Beer                      | 1                                                           |
| 100             | India   | 1992           | Beverages, Alcoholic      | 2                                                           |
| 100             | India   | 1992           | Bovine Meat               | 6                                                           |
| 100             | India   | 1992           | Butter, Ghee              | 3                                                           |
| 100             | India   | 1992           | Cassava                   | 17                                                          |
| 100             | India   | 1992           | Coconut Oil               | 1                                                           |
| 100             | India   | 1992           | Coconuts - Incl Copra     | 18                                                          |
| 100             | India   | 1992           | Cottonseed Oil            | 1                                                           |
| 100             | India   | 1992           | Crustaceans               | 1                                                           |
| 100             | India   | 1992           | Demersal Fish             | 3                                                           |
| 100             | India   | 1992           | Eggs                      | 3                                                           |
| 100             | India   | 1992           | Freshwater Fish           | 5                                                           |
| 100             | India   | 1992           | Fruits, Other             | 47                                                          |
| 100             | India   | 1992           | Grapes                    | 2                                                           |
| 100             | India   | 1992           | Groundnut Oil             | 5                                                           |
| 100             | India   | 1992           | Groundnuts (Shelled Eq)   | 1                                                           |
| 100             | India   | 1992           | Lemons, Limes             | 2                                                           |
| 100             | India   | 1992           | Maize                     | 19                                                          |
| 100             | India   | 1992           | Marine Fish, Other        | 1                                                           |
| 100             | India   | 1992           | Milk, Whole               | 109                                                         |
| 100             | India   | 1992           | Millet                    | 33                                                          |
| 100             | India   | 1992           | Mutton & Goat Meat        | 2                                                           |
| 100             | India   | 1992           | Nuts                      | 2                                                           |
| 100             | India   | 1992           | Offals, Edible            | 1                                                           |
| 100             | India   | 1992           | Onions                    | 9                                                           |
| 100             | India   | 1992           | Oranges, Mandarines       | 4                                                           |
| 100             | India   | 1992           | Peas                      | 2                                                           |
| 100             | India   | 1992           | Pelagic Fish              | 1                                                           |
| 100             | India   | 1992           | Pigmeat                   | 1                                                           |
| 100             | India   | 1992           | Pimento                   | 2                                                           |
| 100             | India   | 1992           | Pineapples                | 3                                                           |
| 100             | India   | 1992           | Potatoes                  | 40                                                          |
| 100             | India   | 1992           | Poultry Meat              | 2                                                           |
| 100             | India   | 1992           | Pulses, Other             | 19                                                          |
| 100             | India   | 1992           | Rape and Mustard Oil      | 5                                                           |
| 100             | India   | 1992           | Rice (Milled Equivalent)  | 201                                                         |

Dietary calcium and zinc deficiency risks are decreasing but remain prevalent

| FAO countrycode | Country | Reference year | Food item                 | Gross food supply (g capita <sup>-1</sup> d <sup>-1</sup> ) |
|-----------------|---------|----------------|---------------------------|-------------------------------------------------------------|
| 100             | India   | 1992           | Ricebran Oil              | 1                                                           |
| 100             | India   | 1992           | Sesameseed Oil            | 1                                                           |
| 100             | India   | 1992           | Sorghum                   | 34                                                          |
| 100             | India   | 1992           | Soyabean Oil              | 1                                                           |
| 100             | India   | 1992           | Spices, Other             | 3                                                           |
| 100             | India   | 1992           | Sugar Cane                | 31                                                          |
| 100             | India   | 1992           | Sugar, Non-Centrifugal    | 17                                                          |
| 100             | India   | 1992           | Sugar, Refined Equivalent | 37                                                          |
| 100             | India   | 1992           | Sunflowerseed Oil         | 1                                                           |
| 100             | India   | 1992           | Sweet Potatoes            | 3                                                           |
| 100             | India   | 1992           | Sweeteners, Other         | 1                                                           |
| 100             | India   | 1992           | Tea                       | 2                                                           |
| 100             | India   | 1992           | Tomatoes                  | 13                                                          |
| 100             | India   | 1992           | Vegetables, Other         | 119                                                         |
| 100             | India   | 1992           | Wheat                     | 164                                                         |
| 100             | India   | 1993           | Apples                    | 3                                                           |
| 100             | India   | 1993           | Bananas                   | 24                                                          |
| 100             | India   | 1993           | Barley                    | 4                                                           |
| 100             | India   | 1993           | Beans                     | 8                                                           |
| 100             | India   | 1993           | Beer                      | 1                                                           |
| 100             | India   | 1993           | Beverages, Alcoholic      | 3                                                           |
| 100             | India   | 1993           | Bovine Meat               | 6                                                           |
| 100             | India   | 1993           | Butter, Ghee              | 3                                                           |
| 100             | India   | 1993           | Cassava                   | 15                                                          |
| 100             | India   | 1993           | Coconuts - Incl Copra     | 17                                                          |
| 100             | India   | 1993           | Cottonseed Oil            | 1                                                           |
| 100             | India   | 1993           | Crustaceans               | 1                                                           |
| 100             | India   | 1993           | Demersal Fish             | 2                                                           |
| 100             | India   | 1993           | Eggs                      | 3                                                           |
| 100             | India   | 1993           | Freshwater Fish           | 6                                                           |
| 100             | India   | 1993           | Fruits, Other             | 49                                                          |
| 100             | India   | 1993           | Grapes                    | 2                                                           |
| 100             | India   | 1993           | Groundnut Oil             | 4                                                           |
| 100             | India   | 1993           | Groundnuts (Shelled Eq)   | 1                                                           |
| 100             | India   | 1993           | Lemons, Limes             | 2                                                           |
| 100             | India   | 1993           | Maize                     | 15                                                          |
| 100             | India   | 1993           | Marine Fish, Other        | 1                                                           |
| 100             | India   | 1993           | Milk, Whole               | 111                                                         |
| 100             | India   | 1993           | Millet                    | 22                                                          |
| 100             | India   | 1993           | Mutton & Goat Meat        | 2                                                           |
| 100             | India   | 1993           | Nuts                      | 2                                                           |
| 100             | India   | 1993           | Offals, Edible            | 1                                                           |
| 100             | India   | 1993           | Oilcrops Oil, Other       | 1                                                           |
| 100             | India   | 1993           | Onions                    | 10                                                          |
| 100             | India   | 1993           | Oranges, Mandarines       | 5                                                           |
| 100             | India   | 1993           | Palm Oil                  | 1                                                           |
| 100             | India   | 1993           | Peas                      | 2                                                           |
| 100             | India   | 1993           | Pelagic Fish              | 1                                                           |
| 100             | India   | 1993           | Pigmeat                   | 1                                                           |
| 100             | India   | 1993           | Pimento                   | 2                                                           |
| 100             | India   | 1993           | Pineapples                | 3                                                           |
| 100             | India   | 1993           | Potatoes                  | 41                                                          |
| 100             | India   | 1993           | Poultry Meat              | 2                                                           |
| 100             | India   | 1993           | Pulses, Other             | 22                                                          |
| 100             | India   | 1993           | Rape and Mustard Oil      | 4                                                           |
| 100             | India   | 1993           | Rice (Milled Equivalent)  | 209                                                         |
| 100             | India   | 1993           | Ricebran Oil              | 1                                                           |
| 100             | India   | 1993           | Sesameseed Oil            | 1                                                           |
| 100             | India   | 1993           | Sorghum                   | 30                                                          |
| 100             | India   | 1993           | Soyabean Oil              | 2                                                           |
| 100             | India   | 1993           | Spices, Other             | 4                                                           |
| 100             | India   | 1993           | Sugar Cane                | 27                                                          |
| 100             | India   | 1993           | Sugar, Non-Centrifugal    | 9                                                           |
| 100             | India   | 1993           | Sugar, Refined Equivalent | 38                                                          |
| 100             | India   | 1993           | Sunflowerseed Oil         | 1                                                           |
| 100             | India   | 1993           | Sweet Potatoes            | 3                                                           |
| 100             | India   | 1993           | Sweeteners, Other         | 1                                                           |
| 100             | India   | 1993           | Tea                       | 2                                                           |
| 100             | India   | 1993           | Tomatoes                  | 13                                                          |
| 100             | India   | 1993           | Vegetables, Other         | 122                                                         |
| 100             | India   | 1993           | Wheat                     | 159                                                         |
| 100             | India   | 1994           | Apples                    | 3                                                           |
| 100             | India   | 1994           | Bananas                   | 25                                                          |
| 100             | India   | 1994           | Barley                    | 3                                                           |
| 100             | India   | 1994           | Beans                     | 8                                                           |
| 100             | India   | 1994           | Beer                      | 1                                                           |
| 100             | India   | 1994           | Beverages, Alcoholic      | 3                                                           |
| 100             | India   | 1994           | Bovine Meat               | 6                                                           |
| 100             | India   | 1994           | Butter, Ghee              | 4                                                           |
| 100             | India   | 1994           | Cassava                   | 16                                                          |
| 100             | India   | 1994           | Coconuts - Incl Copra     | 18                                                          |
| 100             | India   | 1994           | Cottonseed Oil            | 1                                                           |
| 100             | India   | 1994           | Crustaceans               | 1                                                           |
| 100             | India   | 1994           | Demersal Fish             | 2                                                           |
| 100             | India   | 1994           | Eggs                      | 4                                                           |
| 100             | India   | 1994           | Freshwater Fish           | 6                                                           |
| 100             | India   | 1994           | Fruits, Other             | 52                                                          |
| 100             | India   | 1994           | Grapes                    | 2                                                           |
| 100             | India   | 1994           | Groundnut Oil             | 6                                                           |
| 100             | India   | 1994           | Groundnuts (Shelled Eq)   | 1                                                           |
| 100             | India   | 1994           | Lemons, Limes             | 2                                                           |
| 100             | India   | 1994           | Maize                     | 13                                                          |
| 100             | India   | 1994           | Marine Fish, Other        | 1                                                           |
| 100             | India   | 1994           | Milk, Whole               | 111                                                         |
| 100             | India   | 1994           | Millet                    | 27                                                          |
| 100             | India   | 1994           | Mutton & Goat Meat        | 2                                                           |
| 100             | India   | 1994           | Nuts                      | 2                                                           |

Dietary calcium and zinc deficiency risks are decreasing but remain prevalent

| FAO countrycode | Country | Reference year | Food item                 | Gross food supply (g capita <sup>-1</sup> d <sup>-1</sup> ) |
|-----------------|---------|----------------|---------------------------|-------------------------------------------------------------|
| 100             | India   | 1994           | Offals, Edible            | 1                                                           |
| 100             | India   | 1994           | Oilcrops Oil, Other       | 1                                                           |
| 100             | India   | 1994           | Onions                    | 10                                                          |
| 100             | India   | 1994           | Oranges, Mandarines       | 5                                                           |
| 100             | India   | 1994           | Palm Oil                  | 1                                                           |
| 100             | India   | 1994           | Peas                      | 2                                                           |
| 100             | India   | 1994           | Pelagic Fish              | 2                                                           |
| 100             | India   | 1994           | Pigmeat                   | 1                                                           |
| 100             | India   | 1994           | Pimento                   | 2                                                           |
| 100             | India   | 1994           | Pineapples                | 3                                                           |
| 100             | India   | 1994           | Potatoes                  | 37                                                          |
| 100             | India   | 1994           | Poultry Meat              | 2                                                           |
| 100             | India   | 1994           | Pulses, Other             | 24                                                          |
| 100             | India   | 1994           | Rape and Mustard Oil      | 5                                                           |
| 100             | India   | 1994           | Rice (Milled Equivalent)  | 209                                                         |
| 100             | India   | 1994           | Ricebran Oil              | 1                                                           |
| 100             | India   | 1994           | Sesameseed Oil            | 1                                                           |
| 100             | India   | 1994           | Sorghum                   | 22                                                          |
| 100             | India   | 1994           | Soyabean Oil              | 2                                                           |
| 100             | India   | 1994           | Spices, Other             | 3                                                           |
| 100             | India   | 1994           | Sugar Cane                | 27                                                          |
| 100             | India   | 1994           | Sugar, Non-Centrifugal    | 18                                                          |
| 100             | India   | 1994           | Sugar, Refined Equivalent | 35                                                          |
| 100             | India   | 1994           | Sunflowerseed Oil         | 1                                                           |
| 100             | India   | 1994           | Sweet Potatoes            | 3                                                           |
| 100             | India   | 1994           | Sweeteners, Other         | 1                                                           |
| 100             | India   | 1994           | Tea                       | 2                                                           |
| 100             | India   | 1994           | Tomatoes                  | 13                                                          |
| 100             | India   | 1994           | Vegetables, Other         | 123                                                         |
| 100             | India   | 1994           | Wheat                     | 160                                                         |
| 100             | India   | 1995           | Apples                    | 3                                                           |
| 100             | India   | 1995           | Bananas                   | 23                                                          |
| 100             | India   | 1995           | Barley                    | 3                                                           |
| 100             | India   | 1995           | Beans                     | 8                                                           |
| 100             | India   | 1995           | Beer                      | 1                                                           |
| 100             | India   | 1995           | Beverages, Alcoholic      | 3                                                           |
| 100             | India   | 1995           | Bovine Meat               | 6                                                           |
| 100             | India   | 1995           | Butter, Ghee              | 4                                                           |
| 100             | India   | 1995           | Cassava                   | 16                                                          |
| 100             | India   | 1995           | Coconut Oil               | 1                                                           |
| 100             | India   | 1995           | Coconuts - Incl Copra     | 17                                                          |
| 100             | India   | 1995           | Cottonseed Oil            | 1                                                           |
| 100             | India   | 1995           | Crustaceans               | 1                                                           |
| 100             | India   | 1995           | Demersal Fish             | 2                                                           |
| 100             | India   | 1995           | Eggs                      | 4                                                           |
| 100             | India   | 1995           | Freshwater Fish           | 6                                                           |
| 100             | India   | 1995           | Fruits, Other             | 51                                                          |
| 100             | India   | 1995           | Grapes                    | 2                                                           |
| 100             | India   | 1995           | Groundnut Oil             | 5                                                           |
| 100             | India   | 1995           | Groundnuts (Shelled Eq)   | 1                                                           |
| 100             | India   | 1995           | Lemons, Limes             | 2                                                           |
| 100             | India   | 1995           | Maize                     | 13                                                          |
| 100             | India   | 1995           | Marine Fish, Other        | 1                                                           |
| 100             | India   | 1995           | Milk, Whole               | 115                                                         |
| 100             | India   | 1995           | Millet                    | 22                                                          |
| 100             | India   | 1995           | Mutton & Goat Meat        | 2                                                           |
| 100             | India   | 1995           | Nuts                      | 2                                                           |
| 100             | India   | 1995           | Offals, Edible            | 1                                                           |
| 100             | India   | 1995           | Oilcrops Oil, Other       | 1                                                           |
| 100             | India   | 1995           | Onions                    | 10                                                          |
| 100             | India   | 1995           | Oranges, Mandarines       | 4                                                           |
| 100             | India   | 1995           | Palm Oil                  | 2                                                           |
| 100             | India   | 1995           | Peas                      | 2                                                           |
| 100             | India   | 1995           | Pelagic Fish              | 2                                                           |
| 100             | India   | 1995           | Pigmeat                   | 1                                                           |
| 100             | India   | 1995           | Pimento                   | 2                                                           |
| 100             | India   | 1995           | Pineapples                | 3                                                           |
| 100             | India   | 1995           | Potatoes                  | 36                                                          |
| 100             | India   | 1995           | Poultry Meat              | 2                                                           |
| 100             | India   | 1995           | Pulses, Other             | 26                                                          |
| 100             | India   | 1995           | Rape and Mustard Oil      | 5                                                           |
| 100             | India   | 1995           | Rice (Milled Equivalent)  | 206                                                         |
| 100             | India   | 1995           | Ricebran Oil              | 1                                                           |
| 100             | India   | 1995           | Sorghum                   | 24                                                          |
| 100             | India   | 1995           | Soyabean Oil              | 2                                                           |
| 100             | India   | 1995           | Spices, Other             | 2                                                           |
| 100             | India   | 1995           | Sugar Cane                | 32                                                          |
| 100             | India   | 1995           | Sugar, Non-Centrifugal    | 16                                                          |
| 100             | India   | 1995           | Sugar, Refined Equivalent | 37                                                          |
| 100             | India   | 1995           | Sunflowerseed Oil         | 1                                                           |
| 100             | India   | 1995           | Sweet Potatoes            | 3                                                           |
| 100             | India   | 1995           | Sweeteners, Other         | 1                                                           |
| 100             | India   | 1995           | Tea                       | 2                                                           |
| 100             | India   | 1995           | Tomatoes                  | 14                                                          |
| 100             | India   | 1995           | Vegetables, Other         | 127                                                         |
| 100             | India   | 1995           | Wheat                     | 167                                                         |
| 100             | India   | 1996           | Apples                    | 3                                                           |
| 100             | India   | 1996           | Bananas                   | 23                                                          |
| 100             | India   | 1996           | Barley                    | 3                                                           |
| 100             | India   | 1996           | Beans                     | 8                                                           |
| 100             | India   | 1996           | Beer                      | 1                                                           |
| 100             | India   | 1996           | Beverages, Alcoholic      | 4                                                           |
| 100             | India   | 1996           | Bovine Meat               | 6                                                           |
| 100             | India   | 1996           | Butter, Ghee              | 4                                                           |
| 100             | India   | 1996           | Cassava                   | 14                                                          |
| 100             | India   | 1996           | Coconuts - Incl Copra     | 17                                                          |
| 100             | India   | 1996           | Cottonseed Oil            | 1                                                           |

Dietary calcium and zinc deficiency risks are decreasing but remain prevalent

| FAO countrycode | Country | Reference year | Food item                 | Gross food supply (g capita <sup>-1</sup> d <sup>-1</sup> ) |
|-----------------|---------|----------------|---------------------------|-------------------------------------------------------------|
| 100             | India   | 1996           | Crustaceans               | 1                                                           |
| 100             | India   | 1996           | Dates                     | 1                                                           |
| 100             | India   | 1996           | Demersal Fish             | 3                                                           |
| 100             | India   | 1996           | Eggs                      | 4                                                           |
| 100             | India   | 1996           | Freshwater Fish           | 7                                                           |
| 100             | India   | 1996           | Fruits, Other             | 55                                                          |
| 100             | India   | 1996           | Grapes                    | 2                                                           |
| 100             | India   | 1996           | Groundnut Oil             | 5                                                           |
| 100             | India   | 1996           | Groundnuts (Shelled Eq)   | 1                                                           |
| 100             | India   | 1996           | Lemons, Limes             | 2                                                           |
| 100             | India   | 1996           | Maize                     | 16                                                          |
| 100             | India   | 1996           | Milk, Whole               | 115                                                         |
| 100             | India   | 1996           | Millet                    | 28                                                          |
| 100             | India   | 1996           | Mutton & Goat Meat        | 2                                                           |
| 100             | India   | 1996           | Nuts                      | 3                                                           |
| 100             | India   | 1996           | Offals, Edible            | 1                                                           |
| 100             | India   | 1996           | Oilcrops Oil, Other       | 1                                                           |
| 100             | India   | 1996           | Onions                    | 10                                                          |
| 100             | India   | 1996           | Oranges, Mandarines       | 5                                                           |
| 100             | India   | 1996           | Palm Oil                  | 3                                                           |
| 100             | India   | 1996           | Peas                      | 2                                                           |
| 100             | India   | 1996           | Pelagic Fish              | 2                                                           |
| 100             | India   | 1996           | Pigmeat                   | 1                                                           |
| 100             | India   | 1996           | Pimento                   | 3                                                           |
| 100             | India   | 1996           | Pineapples                | 3                                                           |
| 100             | India   | 1996           | Potatoes                  | 38                                                          |
| 100             | India   | 1996           | Poultry Meat              | 2                                                           |
| 100             | India   | 1996           | Pulses, Other             | 22                                                          |
| 100             | India   | 1996           | Rape and Mustard Oil      | 5                                                           |
| 100             | India   | 1996           | Rice (Milled Equivalent)  | 205                                                         |
| 100             | India   | 1996           | Ricebran Oil              | 1                                                           |
| 100             | India   | 1996           | Sesameseed Oil            | 1                                                           |
| 100             | India   | 1996           | Sorghum                   | 27                                                          |
| 100             | India   | 1996           | Soyabean Oil              | 2                                                           |
| 100             | India   | 1996           | Spices, Other             | 3                                                           |
| 100             | India   | 1996           | Sugar Cane                | 19                                                          |
| 100             | India   | 1996           | Sugar, Non-Centrifugal    | 13                                                          |
| 100             | India   | 1996           | Sugar, Refined Equivalent | 39                                                          |
| 100             | India   | 1996           | Sunflowerseed Oil         | 2                                                           |
| 100             | India   | 1996           | Sweet Potatoes            | 3                                                           |
| 100             | India   | 1996           | Sweeteners, Other         | 2                                                           |
| 100             | India   | 1996           | Tea                       | 2                                                           |
| 100             | India   | 1996           | Tomatoes                  | 15                                                          |
| 100             | India   | 1996           | Vegetables, Other         | 125                                                         |
| 100             | India   | 1996           | Wheat                     | 159                                                         |
| 100             | India   | 1997           | Apples                    | 3                                                           |
| 100             | India   | 1997           | Bananas                   | 30                                                          |
| 100             | India   | 1997           | Barley                    | 3                                                           |
| 100             | India   | 1997           | Beans                     | 7                                                           |
| 100             | India   | 1997           | Beer                      | 1                                                           |
| 100             | India   | 1997           | Beverages, Alcoholic      | 3                                                           |
| 100             | India   | 1997           | Bovine Meat               | 6                                                           |
| 100             | India   | 1997           | Butter, Ghee              | 4                                                           |
| 100             | India   | 1997           | Cassava                   | 15                                                          |
| 100             | India   | 1997           | Coconut Oil               | 1                                                           |
| 100             | India   | 1997           | Coconuts - Incl Copra     | 14                                                          |
| 100             | India   | 1997           | Cottonseed Oil            | 1                                                           |
| 100             | India   | 1997           | Crustaceans               | 1                                                           |
| 100             | India   | 1997           | Dates                     | 1                                                           |
| 100             | India   | 1997           | Demersal Fish             | 3                                                           |
| 100             | India   | 1997           | Eggs                      | 4                                                           |
| 100             | India   | 1997           | Freshwater Fish           | 7                                                           |
| 100             | India   | 1997           | Fruits, Other             | 51                                                          |
| 100             | India   | 1997           | Grapes                    | 2                                                           |
| 100             | India   | 1997           | Groundnut Oil             | 6                                                           |
| 100             | India   | 1997           | Groundnuts (Shelled Eq)   | 1                                                           |
| 100             | India   | 1997           | Lemons, Limes             | 2                                                           |
| 100             | India   | 1997           | Maize                     | 15                                                          |
| 100             | India   | 1997           | Marine Fish, Other        | 1                                                           |
| 100             | India   | 1997           | Milk, Whole               | 117                                                         |
| 100             | India   | 1997           | Millet                    | 26                                                          |
| 100             | India   | 1997           | Mutton & Goat Meat        | 2                                                           |
| 100             | India   | 1997           | Nuts                      | 4                                                           |
| 100             | India   | 1997           | Offals, Edible            | 1                                                           |
| 100             | India   | 1997           | Oilcrops Oil, Other       | 1                                                           |
| 100             | India   | 1997           | Onions                    | 7                                                           |
| 100             | India   | 1997           | Oranges, Mandarines       | 6                                                           |
| 100             | India   | 1997           | Palm Oil                  | 3                                                           |
| 100             | India   | 1997           | Peas                      | 2                                                           |
| 100             | India   | 1997           | Pelagic Fish              | 1                                                           |
| 100             | India   | 1997           | Pigmeat                   | 1                                                           |
| 100             | India   | 1997           | Pimento                   | 2                                                           |
| 100             | India   | 1997           | Pineapples                | 3                                                           |
| 100             | India   | 1997           | Potatoes                  | 50                                                          |
| 100             | India   | 1997           | Poultry Meat              | 2                                                           |
| 100             | India   | 1997           | Pulses, Other             | 25                                                          |
| 100             | India   | 1997           | Rape and Mustard Oil      | 6                                                           |
| 100             | India   | 1997           | Rice (Milled Equivalent)  | 203                                                         |
| 100             | India   | 1997           | Ricebran Oil              | 1                                                           |
| 100             | India   | 1997           | Sorghum                   | 18                                                          |
| 100             | India   | 1997           | Soyabean Oil              | 3                                                           |
| 100             | India   | 1997           | Spices, Other             | 3                                                           |
| 100             | India   | 1997           | Sugar Cane                | 35                                                          |
| 100             | India   | 1997           | Sugar, Non-Centrifugal    | 17                                                          |
| 100             | India   | 1997           | Sugar, Refined Equivalent | 41                                                          |
| 100             | India   | 1997           | Sunflowerseed Oil         | 1                                                           |
| 100             | India   | 1997           | Sweet Potatoes            | 3                                                           |



Dietary calcium and zinc deficiency risks are decreasing but remain prevalent

| FAO countrycode | Country | Reference year | Food item                 | Gross food supply (g capita <sup>-1</sup> d <sup>-1</sup> ) |
|-----------------|---------|----------------|---------------------------|-------------------------------------------------------------|
| 100             | India   | 1997           | Sweeteners, Other         | 1                                                           |
| 100             | India   | 1997           | Tea                       | 2                                                           |
| 100             | India   | 1997           | Tomatoes                  | 17                                                          |
| 100             | India   | 1997           | Vegetables, Other         | 114                                                         |
| 100             | India   | 1997           | Wheat                     | 167                                                         |
| 100             | India   | 1998           | Apples                    | 3                                                           |
| 100             | India   | 1998           | Bananas                   | 33                                                          |
| 100             | India   | 1998           | Barley                    | 4                                                           |
| 100             | India   | 1998           | Beans                     | 6                                                           |
| 100             | India   | 1998           | Beer                      | 1                                                           |
| 100             | India   | 1998           | Beverages, Alcoholic      | 3                                                           |
| 100             | India   | 1998           | Bovine Meat               | 6                                                           |
| 100             | India   | 1998           | Butter, Ghee              | 5                                                           |
| 100             | India   | 1998           | Cassava                   | 17                                                          |
| 100             | India   | 1998           | Coconut Oil               | 1                                                           |
| 100             | India   | 1998           | Coconuts - Incl Copra     | 13                                                          |
| 100             | India   | 1998           | Cottonseed Oil            | 2                                                           |
| 100             | India   | 1998           | Crustaceans               | 1                                                           |
| 100             | India   | 1998           | Dates                     | 1                                                           |
| 100             | India   | 1998           | Demersal Fish             | 2                                                           |
| 100             | India   | 1998           | Eggs                      | 4                                                           |
| 100             | India   | 1998           | Freshwater Fish           | 7                                                           |
| 100             | India   | 1998           | Fruits, Other             | 54                                                          |
| 100             | India   | 1998           | Grapes                    | 2                                                           |
| 100             | India   | 1998           | Groundnut Oil             | 4                                                           |
| 100             | India   | 1998           | Groundnuts (Shelled Eq)   | 1                                                           |
| 100             | India   | 1998           | Lemons, Limes             | 3                                                           |
| 100             | India   | 1998           | Maize                     | 16                                                          |
| 100             | India   | 1998           | Marine Fish, Other        | 1                                                           |
| 100             | India   | 1998           | Milk, Whole               | 116                                                         |
| 100             | India   | 1998           | Millet                    | 25                                                          |
| 100             | India   | 1998           | Mutton & Goat Meat        | 2                                                           |
| 100             | India   | 1998           | Nuts                      | 3                                                           |
| 100             | India   | 1998           | Offals, Edible            | 1                                                           |
| 100             | India   | 1998           | Oilcrops Oil, Other       | 1                                                           |
| 100             | India   | 1998           | Onions                    | 13                                                          |
| 100             | India   | 1998           | Oranges, Mandarines       | 6                                                           |
| 100             | India   | 1998           | Palm Oil                  | 3                                                           |
| 100             | India   | 1998           | Peas                      | 2                                                           |
| 100             | India   | 1998           | Pelagic Fish              | 1                                                           |
| 100             | India   | 1998           | Pigmeat                   | 1                                                           |
| 100             | India   | 1998           | Pimento                   | 3                                                           |
| 100             | India   | 1998           | Pineapples                | 3                                                           |
| 100             | India   | 1998           | Potatoes                  | 34                                                          |
| 100             | India   | 1998           | Poultry Meat              | 2                                                           |
| 100             | India   | 1998           | Pulses, Other             | 22                                                          |
| 100             | India   | 1998           | Rape and Mustard Oil      | 4                                                           |
| 100             | India   | 1998           | Rice (Milled Equivalent)  | 202                                                         |
| 100             | India   | 1998           | Ricebran Oil              | 1                                                           |
| 100             | India   | 1998           | Sorghum                   | 20                                                          |
| 100             | India   | 1998           | Soyabean Oil              | 3                                                           |
| 100             | India   | 1998           | Spices, Other             | 3                                                           |
| 100             | India   | 1998           | Sugar Cane                | 66                                                          |
| 100             | India   | 1998           | Sugar, Non-Centrifugal    | 17                                                          |
| 100             | India   | 1998           | Sugar, Refined Equivalent | 41                                                          |
| 100             | India   | 1998           | Sunflowerseed Oil         | 2                                                           |
| 100             | India   | 1998           | Sweet Potatoes            | 3                                                           |
| 100             | India   | 1998           | Sweeteners, Other         | 1                                                           |
| 100             | India   | 1998           | Tea                       | 2                                                           |
| 100             | India   | 1998           | Tomatoes                  | 15                                                          |
| 100             | India   | 1998           | Vegetables, Other         | 134                                                         |
| 100             | India   | 1998           | Wheat                     | 170                                                         |
| 100             | India   | 1999           | Apples                    | 3                                                           |
| 100             | India   | 1999           | Bananas                   | 36                                                          |
| 100             | India   | 1999           | Barley                    | 3                                                           |
| 100             | India   | 1999           | Beans                     | 7                                                           |
| 100             | India   | 1999           | Beer                      | 1                                                           |
| 100             | India   | 1999           | Beverages, Alcoholic      | 3                                                           |
| 100             | India   | 1999           | Bovine Meat               | 6                                                           |
| 100             | India   | 1999           | Butter, Ghee              | 5                                                           |
| 100             | India   | 1999           | Cassava                   | 15                                                          |
| 100             | India   | 1999           | Coconut Oil               | 1                                                           |
| 100             | India   | 1999           | Coconuts - Incl Copra     | 13                                                          |
| 100             | India   | 1999           | Cottonseed Oil            | 1                                                           |
| 100             | India   | 1999           | Crustaceans               | 1                                                           |
| 100             | India   | 1999           | Dates                     | 1                                                           |
| 100             | India   | 1999           | Demersal Fish             | 3                                                           |
| 100             | India   | 1999           | Eggs                      | 4                                                           |
| 100             | India   | 1999           | Freshwater Fish           | 7                                                           |
| 100             | India   | 1999           | Fruits, Other             | 50                                                          |
| 100             | India   | 1999           | Grapes                    | 3                                                           |
| 100             | India   | 1999           | Groundnut Oil             | 4                                                           |
| 100             | India   | 1999           | Groundnuts (Shelled Eq)   | 1                                                           |
| 100             | India   | 1999           | Lemons, Limes             | 3                                                           |
| 100             | India   | 1999           | Maize                     | 17                                                          |
| 100             | India   | 1999           | Marine Fish, Other        | 1                                                           |
| 100             | India   | 1999           | Milk, Whole               | 116                                                         |
| 100             | India   | 1999           | Millet                    | 21                                                          |
| 100             | India   | 1999           | Mutton & Goat Meat        | 2                                                           |
| 100             | India   | 1999           | Nuts                      | 2                                                           |
| 100             | India   | 1999           | Offals, Edible            | 1                                                           |
| 100             | India   | 1999           | Onions                    | 12                                                          |
| 100             | India   | 1999           | Oranges, Mandarines       | 6                                                           |
| 100             | India   | 1999           | Palm Oil                  | 5                                                           |
| 100             | India   | 1999           | Peas                      | 2                                                           |
| 100             | India   | 1999           | Pelagic Fish              | 1                                                           |
| 100             | India   | 1999           | Pigmeat                   | 1                                                           |

Dietary calcium and zinc deficiency risks are decreasing but remain prevalent

| FAO countrycode | Country | Reference year | Food item                 | Gross food supply (g capita <sup>-1</sup> d <sup>-1</sup> ) |
|-----------------|---------|----------------|---------------------------|-------------------------------------------------------------|
| 100             | India   | 1999           | Pimento                   | 3                                                           |
| 100             | India   | 1999           | Pineapples                | 3                                                           |
| 100             | India   | 1999           | Potatoes                  | 44                                                          |
| 100             | India   | 1999           | Poultry Meat              | 2                                                           |
| 100             | India   | 1999           | Pulses, Other             | 25                                                          |
| 100             | India   | 1999           | Rape and Mustard Oil      | 5                                                           |
| 100             | India   | 1999           | Rice (Milled Equivalent)  | 203                                                         |
| 100             | India   | 1999           | Ricebran Oil              | 1                                                           |
| 100             | India   | 1999           | Sorghum                   | 21                                                          |
| 100             | India   | 1999           | Soyabean Oil              | 3                                                           |
| 100             | India   | 1999           | Spices, Other             | 3                                                           |
| 100             | India   | 1999           | Sugar Cane                | 68                                                          |
| 100             | India   | 1999           | Sugar, Non-Centrifugal    | 16                                                          |
| 100             | India   | 1999           | Sugar, Refined Equivalent | 41                                                          |
| 100             | India   | 1999           | Sunflowerseed Oil         | 2                                                           |
| 100             | India   | 1999           | Sweet Potatoes            | 3                                                           |
| 100             | India   | 1999           | Sweeteners, Other         | 1                                                           |
| 100             | India   | 1999           | Tea                       | 2                                                           |
| 100             | India   | 1999           | Tomatoes                  | 20                                                          |
| 100             | India   | 1999           | Vegetables, Other         | 145                                                         |
| 100             | India   | 1999           | Wheat                     | 171                                                         |
| 100             | India   | 2000           | Apples                    | 2                                                           |
| 100             | India   | 2000           | Bananas                   | 30                                                          |
| 100             | India   | 2000           | Barley                    | 3                                                           |
| 100             | India   | 2000           | Beans                     | 6                                                           |
| 100             | India   | 2000           | Beer                      | 1                                                           |
| 100             | India   | 2000           | Beverages, Alcoholic      | 3                                                           |
| 100             | India   | 2000           | Bovine Meat               | 5                                                           |
| 100             | India   | 2000           | Butter, Ghee              | 5                                                           |
| 100             | India   | 2000           | Cassava                   | 15                                                          |
| 100             | India   | 2000           | Coconut Oil               | 1                                                           |
| 100             | India   | 2000           | Coconuts - Incl Copra     | 12                                                          |
| 100             | India   | 2000           | Cottonseed Oil            | 1                                                           |
| 100             | India   | 2000           | Crustaceans               | 1                                                           |
| 100             | India   | 2000           | Dates                     | 1                                                           |
| 100             | India   | 2000           | Demersal Fish             | 2                                                           |
| 100             | India   | 2000           | Eggs                      | 5                                                           |
| 100             | India   | 2000           | Freshwater Fish           | 7                                                           |
| 100             | India   | 2000           | Fruits, Other             | 49                                                          |
| 100             | India   | 2000           | Grapes                    | 3                                                           |
| 100             | India   | 2000           | Groundnut Oil             | 4                                                           |
| 100             | India   | 2000           | Groundnuts (Shelled Eq)   | 1                                                           |
| 100             | India   | 2000           | Lemons, Limes             | 3                                                           |
| 100             | India   | 2000           | Maize                     | 16                                                          |
| 100             | India   | 2000           | Marine Fish, Other        | 1                                                           |
| 100             | India   | 2000           | Milk, Whole               | 109                                                         |
| 100             | India   | 2000           | Millet                    | 24                                                          |
| 100             | India   | 2000           | Mutton & Goat Meat        | 2                                                           |
| 100             | India   | 2000           | Nuts                      | 2                                                           |
| 100             | India   | 2000           | Offals, Edible            | 1                                                           |
| 100             | India   | 2000           | Onions                    | 11                                                          |
| 100             | India   | 2000           | Oranges, Mandarines       | 6                                                           |
| 100             | India   | 2000           | Palm Oil                  | 4                                                           |
| 100             | India   | 2000           | Peas                      | 2                                                           |
| 100             | India   | 2000           | Pelagic Fish              | 1                                                           |
| 100             | India   | 2000           | Pigmeat                   | 1                                                           |
| 100             | India   | 2000           | Pimento                   | 2                                                           |
| 100             | India   | 2000           | Pineapples                | 3                                                           |
| 100             | India   | 2000           | Potatoes                  | 49                                                          |
| 100             | India   | 2000           | Poultry Meat              | 2                                                           |
| 100             | India   | 2000           | Pulses, Other             | 22                                                          |
| 100             | India   | 2000           | Rape and Mustard Oil      | 5                                                           |
| 100             | India   | 2000           | Rice (Milled Equivalent)  | 199                                                         |
| 100             | India   | 2000           | Ricebran Oil              | 1                                                           |
| 100             | India   | 2000           | Sorghum                   | 17                                                          |
| 100             | India   | 2000           | Soyabean Oil              | 2                                                           |
| 100             | India   | 2000           | Spices, Other             | 3                                                           |
| 100             | India   | 2000           | Sugar Cane                | 28                                                          |
| 100             | India   | 2000           | Sugar, Non-Centrifugal    | 14                                                          |
| 100             | India   | 2000           | Sugar, Refined Equivalent | 44                                                          |
| 100             | India   | 2000           | Sunflowerseed Oil         | 2                                                           |
| 100             | India   | 2000           | Sweet Potatoes            | 3                                                           |
| 100             | India   | 2000           | Sweeteners, Other         | 1                                                           |
| 100             | India   | 2000           | Tea                       | 2                                                           |
| 100             | India   | 2000           | Tomatoes                  | 18                                                          |
| 100             | India   | 2000           | Vegetables, Other         | 148                                                         |
| 100             | India   | 2000           | Wheat                     | 180                                                         |
| 100             | India   | 2001           | Apples                    | 3                                                           |
| 100             | India   | 2001           | Bananas                   | 29                                                          |
| 100             | India   | 2001           | Barley                    | 3                                                           |
| 100             | India   | 2001           | Beans                     | 8                                                           |
| 100             | India   | 2001           | Beer                      | 1                                                           |
| 100             | India   | 2001           | Beverages, Alcoholic      | 3                                                           |
| 100             | India   | 2001           | Bovine Meat               | 5                                                           |
| 100             | India   | 2001           | Butter, Ghee              | 6                                                           |
| 100             | India   | 2001           | Cassava                   | 17                                                          |
| 100             | India   | 2001           | Coconut Oil               | 1                                                           |
| 100             | India   | 2001           | Coconuts - Incl Copra     | 12                                                          |
| 100             | India   | 2001           | Cottonseed Oil            | 1                                                           |
| 100             | India   | 2001           | Crustaceans               | 1                                                           |
| 100             | India   | 2001           | Dates                     | 1                                                           |
| 100             | India   | 2001           | Demersal Fish             | 2                                                           |
| 100             | India   | 2001           | Eggs                      | 5                                                           |
| 100             | India   | 2001           | Freshwater Fish           | 8                                                           |
| 100             | India   | 2001           | Fruits, Other             | 51                                                          |
| 100             | India   | 2001           | Grapes                    | 3                                                           |
| 100             | India   | 2001           | Groundnut Oil             | 4                                                           |

Dietary calcium and zinc deficiency risks are decreasing but remain prevalent

| FAO countrycode | Country | Reference year | Food item                 | Gross food supply (g capita <sup>-1</sup> d <sup>-1</sup> ) |
|-----------------|---------|----------------|---------------------------|-------------------------------------------------------------|
| 100             | India   | 2001           | Groundnuts (Shelled Eq)   | 1                                                           |
| 100             | India   | 2001           | Lemons, Limes             | 3                                                           |
| 100             | India   | 2001           | Maize                     | 17                                                          |
| 100             | India   | 2001           | Marine Fish, Other        | 1                                                           |
| 100             | India   | 2001           | Milk, Whole               | 106                                                         |
| 100             | India   | 2001           | Millet                    | 26                                                          |
| 100             | India   | 2001           | Mutton & Goat Meat        | 2                                                           |
| 100             | India   | 2001           | Nuts                      | 2                                                           |
| 100             | India   | 2001           | Offals, Edible            | 1                                                           |
| 100             | India   | 2001           | Onions                    | 12                                                          |
| 100             | India   | 2001           | Oranges, Mandarines       | 6                                                           |
| 100             | India   | 2001           | Palm Oil                  | 5                                                           |
| 100             | India   | 2001           | Peas                      | 3                                                           |
| 100             | India   | 2001           | Pelagic Fish              | 1                                                           |
| 100             | India   | 2001           | Pigmeat                   | 1                                                           |
| 100             | India   | 2001           | Pimento                   | 2                                                           |
| 100             | India   | 2001           | Pineapples                | 3                                                           |
| 100             | India   | 2001           | Potatoes                  | 42                                                          |
| 100             | India   | 2001           | Poultry Meat              | 2                                                           |
| 100             | India   | 2001           | Pulses, Other             | 20                                                          |
| 100             | India   | 2001           | Rape and Mustard Oil      | 3                                                           |
| 100             | India   | 2001           | Rice (Milled Equivalent)  | 193                                                         |
| 100             | India   | 2001           | Ricebran Oil              | 1                                                           |
| 100             | India   | 2001           | Sorghum                   | 17                                                          |
| 100             | India   | 2001           | Soyabean Oil              | 3                                                           |
| 100             | India   | 2001           | Spices, Other             | 3                                                           |
| 100             | India   | 2001           | Sugar Cane                | 28                                                          |
| 100             | India   | 2001           | Sugar, Non-Centrifugal    | 14                                                          |
| 100             | India   | 2001           | Sugar, Refined Equivalent | 45                                                          |
| 100             | India   | 2001           | Sunflowerseed Oil         | 1                                                           |
| 100             | India   | 2001           | Sweet Potatoes            | 2                                                           |
| 100             | India   | 2001           | Sweeteners, Other         | 1                                                           |
| 100             | India   | 2001           | Tea                       | 2                                                           |
| 100             | India   | 2001           | Tomatoes                  | 17                                                          |
| 100             | India   | 2001           | Vegetables, Other         | 160                                                         |
| 100             | India   | 2001           | Wheat                     | 170                                                         |
| 100             | India   | 2002           | Apples                    | 3                                                           |
| 100             | India   | 2002           | Bananas                   | 27                                                          |
| 100             | India   | 2002           | Barley                    | 3                                                           |
| 100             | India   | 2002           | Beans                     | 6                                                           |
| 100             | India   | 2002           | Beer                      | 1                                                           |
| 100             | India   | 2002           | Beverages, Alcoholic      | 4                                                           |
| 100             | India   | 2002           | Bovine Meat               | 5                                                           |
| 100             | India   | 2002           | Butter, Ghee              | 6                                                           |
| 100             | India   | 2002           | Cassava                   | 16                                                          |
| 100             | India   | 2002           | Coconut Oil               | 1                                                           |
| 100             | India   | 2002           | Coconuts - Incl Copra     | 13                                                          |
| 100             | India   | 2002           | Cottonseed Oil            | 1                                                           |
| 100             | India   | 2002           | Crustaceans               | 1                                                           |
| 100             | India   | 2002           | Demersal Fish             | 2                                                           |
| 100             | India   | 2002           | Eggs                      | 5                                                           |
| 100             | India   | 2002           | Freshwater Fish           | 7                                                           |
| 100             | India   | 2002           | Fruits, Other             | 49                                                          |
| 100             | India   | 2002           | Grapes                    | 3                                                           |
| 100             | India   | 2002           | Groundnut Oil             | 4                                                           |
| 100             | India   | 2002           | Groundnuts (Shelled Eq)   | 1                                                           |
| 100             | India   | 2002           | Lemons, Limes             | 3                                                           |
| 100             | India   | 2002           | Maize                     | 14                                                          |
| 100             | India   | 2002           | Marine Fish, Other        | 2                                                           |
| 100             | India   | 2002           | Milk, Whole               | 100                                                         |
| 100             | India   | 2002           | Millet                    | 22                                                          |
| 100             | India   | 2002           | Mutton & Goat Meat        | 2                                                           |
| 100             | India   | 2002           | Nuts                      | 2                                                           |
| 100             | India   | 2002           | Offals, Edible            | 1                                                           |
| 100             | India   | 2002           | Onions                    | 9                                                           |
| 100             | India   | 2002           | Oranges, Mandarines       | 7                                                           |
| 100             | India   | 2002           | Palm Oil                  | 5                                                           |
| 100             | India   | 2002           | Peas                      | 3                                                           |
| 100             | India   | 2002           | Pelagic Fish              | 1                                                           |
| 100             | India   | 2002           | Pigmeat                   | 1                                                           |
| 100             | India   | 2002           | Pimento                   | 2                                                           |
| 100             | India   | 2002           | Pineapples                | 3                                                           |
| 100             | India   | 2002           | Potatoes                  | 46                                                          |
| 100             | India   | 2002           | Poultry Meat              | 3                                                           |
| 100             | India   | 2002           | Pulses, Other             | 23                                                          |
| 100             | India   | 2002           | Rape and Mustard Oil      | 4                                                           |
| 100             | India   | 2002           | Rice (Milled Equivalent)  | 189                                                         |
| 100             | India   | 2002           | Ricebran Oil              | 1                                                           |
| 100             | India   | 2002           | Sorghum                   | 16                                                          |
| 100             | India   | 2002           | Soyabean Oil              | 4                                                           |
| 100             | India   | 2002           | Spices, Other             | 3                                                           |
| 100             | India   | 2002           | Sugar Cane                | 26                                                          |
| 100             | India   | 2002           | Sugar, Non-Centrifugal    | 12                                                          |
| 100             | India   | 2002           | Sugar, Refined Equivalent | 46                                                          |
| 100             | India   | 2002           | Sunflowerseed Oil         | 1                                                           |
| 100             | India   | 2002           | Sweet Potatoes            | 3                                                           |
| 100             | India   | 2002           | Sweeteners, Other         | 1                                                           |
| 100             | India   | 2002           | Tea                       | 2                                                           |
| 100             | India   | 2002           | Tomatoes                  | 17                                                          |
| 100             | India   | 2002           | Vegetables, Other         | 137                                                         |
| 100             | India   | 2002           | Wheat                     | 170                                                         |
| 100             | India   | 2003           | Apples                    | 3                                                           |
| 100             | India   | 2003           | Bananas                   | 28                                                          |
| 100             | India   | 2003           | Barley                    | 3                                                           |
| 100             | India   | 2003           | Beans                     | 10                                                          |
| 100             | India   | 2003           | Beer                      | 1                                                           |
| 100             | India   | 2003           | Beverages, Alcoholic      | 4                                                           |

Dietary calcium and zinc deficiency risks are decreasing but remain prevalent

| FAO countrycode | Country | Reference year | Food item                 | Gross food supply (g capita <sup>-1</sup> d <sup>-1</sup> ) |
|-----------------|---------|----------------|---------------------------|-------------------------------------------------------------|
| 100             | India   | 2003           | Bovine Meat               | 5                                                           |
| 100             | India   | 2003           | Butter, Ghee              | 6                                                           |
| 100             | India   | 2003           | Cassava                   | 13                                                          |
| 100             | India   | 2003           | Coconut Oil               | 1                                                           |
| 100             | India   | 2003           | Coconuts - Incl Copra     | 12                                                          |
| 100             | India   | 2003           | Cottonseed Oil            | 1                                                           |
| 100             | India   | 2003           | Crustaceans               | 1                                                           |
| 100             | India   | 2003           | Demersal Fish             | 2                                                           |
| 100             | India   | 2003           | Eggs                      | 5                                                           |
| 100             | India   | 2003           | Freshwater Fish           | 7                                                           |
| 100             | India   | 2003           | Fruits, Other             | 54                                                          |
| 100             | India   | 2003           | Grapes                    | 3                                                           |
| 100             | India   | 2003           | Groundnut Oil             | 4                                                           |
| 100             | India   | 2003           | Groundnuts (Shelled Eq)   | 1                                                           |
| 100             | India   | 2003           | Lemons, Limes             | 3                                                           |
| 100             | India   | 2003           | Maize                     | 17                                                          |
| 100             | India   | 2003           | Marine Fish, Other        | 2                                                           |
| 100             | India   | 2003           | Milk, Whole               | 100                                                         |
| 100             | India   | 2003           | Millet                    | 26                                                          |
| 100             | India   | 2003           | Mutton & Goat Meat        | 2                                                           |
| 100             | India   | 2003           | Nuts                      | 3                                                           |
| 100             | India   | 2003           | Offals, Edible            | 1                                                           |
| 100             | India   | 2003           | Onions                    | 13                                                          |
| 100             | India   | 2003           | Oranges, Mandarines       | 4                                                           |
| 100             | India   | 2003           | Palm Oil                  | 4                                                           |
| 100             | India   | 2003           | Peas                      | 3                                                           |
| 100             | India   | 2003           | Pelagic Fish              | 1                                                           |
| 100             | India   | 2003           | Pigmeat                   | 1                                                           |
| 100             | India   | 2003           | Pimento                   | 3                                                           |
| 100             | India   | 2003           | Pineapples                | 3                                                           |
| 100             | India   | 2003           | Potatoes                  | 42                                                          |
| 100             | India   | 2003           | Poultry Meat              | 3                                                           |
| 100             | India   | 2003           | Pulses, Other             | 17                                                          |
| 100             | India   | 2003           | Rape and Mustard Oil      | 3                                                           |
| 100             | India   | 2003           | Rice (Milled Equivalent)  | 186                                                         |
| 100             | India   | 2003           | Ricebran Oil              | 1                                                           |
| 100             | India   | 2003           | Sesameseed                | 1                                                           |
| 100             | India   | 2003           | Sorghum                   | 15                                                          |
| 100             | India   | 2003           | Soyabean Oil              | 4                                                           |
| 100             | India   | 2003           | Spices, Other             | 4                                                           |
| 100             | India   | 2003           | Sugar Cane                | 25                                                          |
| 100             | India   | 2003           | Sugar, Non-Centrifugal    | 11                                                          |
| 100             | India   | 2003           | Sugar, Refined Equivalent | 50                                                          |
| 100             | India   | 2003           | Sunflowerseed Oil         | 1                                                           |
| 100             | India   | 2003           | Sweet Potatoes            | 3                                                           |
| 100             | India   | 2003           | Sweeteners, Other         | 1                                                           |
| 100             | India   | 2003           | Tea                       | 2                                                           |
| 100             | India   | 2003           | Tomatoes                  | 17                                                          |
| 100             | India   | 2003           | Vegetables, Other         | 152                                                         |
| 100             | India   | 2003           | Wheat                     | 160                                                         |
| 100             | India   | 2004           | Apples                    | 3                                                           |
| 100             | India   | 2004           | Bananas                   | 33                                                          |
| 100             | India   | 2004           | Barley                    | 2                                                           |
| 100             | India   | 2004           | Beans                     | 7                                                           |
| 100             | India   | 2004           | Beer                      | 1                                                           |
| 100             | India   | 2004           | Beverages, Alcoholic      | 3                                                           |
| 100             | India   | 2004           | Bovine Meat               | 5                                                           |
| 100             | India   | 2004           | Butter, Ghee              | 7                                                           |
| 100             | India   | 2004           | Cassava                   | 14                                                          |
| 100             | India   | 2004           | Coconut Oil               | 1                                                           |
| 100             | India   | 2004           | Coconuts - Incl Copra     | 11                                                          |
| 100             | India   | 2004           | Cottonseed Oil            | 1                                                           |
| 100             | India   | 2004           | Crustaceans               | 1                                                           |
| 100             | India   | 2004           | Dates                     | 1                                                           |
| 100             | India   | 2004           | Demersal Fish             | 2                                                           |
| 100             | India   | 2004           | Eggs                      | 5                                                           |
| 100             | India   | 2004           | Freshwater Fish           | 8                                                           |
| 100             | India   | 2004           | Fruits, Other             | 48                                                          |
| 100             | India   | 2004           | Grapes                    | 3                                                           |
| 100             | India   | 2004           | Groundnut Oil             | 4                                                           |
| 100             | India   | 2004           | Groundnuts (Shelled Eq)   | 1                                                           |
| 100             | India   | 2004           | Lemons, Limes             | 3                                                           |
| 100             | India   | 2004           | Maize                     | 17                                                          |
| 100             | India   | 2004           | Marine Fish, Other        | 2                                                           |
| 100             | India   | 2004           | Milk, Whole               | 103                                                         |
| 100             | India   | 2004           | Millet                    | 24                                                          |
| 100             | India   | 2004           | Mutton & Goat Meat        | 2                                                           |
| 100             | India   | 2004           | Nuts                      | 3                                                           |
| 100             | India   | 2004           | Offals, Edible            | 1                                                           |
| 100             | India   | 2004           | Onions                    | 16                                                          |
| 100             | India   | 2004           | Oranges, Mandarines       | 7                                                           |
| 100             | India   | 2004           | Palm Oil                  | 4                                                           |
| 100             | India   | 2004           | Peas                      | 3                                                           |
| 100             | India   | 2004           | Pelagic Fish              | 1                                                           |
| 100             | India   | 2004           | Pigmeat                   | 1                                                           |
| 100             | India   | 2004           | Pimento                   | 2                                                           |
| 100             | India   | 2004           | Pineapples                | 3                                                           |
| 100             | India   | 2004           | Potatoes                  | 51                                                          |
| 100             | India   | 2004           | Poultry Meat              | 3                                                           |
| 100             | India   | 2004           | Pulses, Other             | 21                                                          |
| 100             | India   | 2004           | Rape and Mustard Oil      | 5                                                           |
| 100             | India   | 2004           | Rice (Milled Equivalent)  | 192                                                         |
| 100             | India   | 2004           | Ricebran Oil              | 1                                                           |
| 100             | India   | 2004           | Sorghum                   | 14                                                          |
| 100             | India   | 2004           | Soyabean Oil              | 4                                                           |
| 100             | India   | 2004           | Spices, Other             | 3                                                           |
| 100             | India   | 2004           | Sugar Cane                | 25                                                          |

Dietary calcium and zinc deficiency risks are decreasing but remain prevalent

| FAO countrycode | Country | Reference year | Food item                 | Gross food supply (g capita <sup>-1</sup> d <sup>-1</sup> ) |
|-----------------|---------|----------------|---------------------------|-------------------------------------------------------------|
| 100             | India   | 2004           | Sugar, Non-Centrifugal    | 7                                                           |
| 100             | India   | 2004           | Sugar, Refined Equivalent | 43                                                          |
| 100             | India   | 2004           | Sunflowerseed Oil         | 1                                                           |
| 100             | India   | 2004           | Sweet Potatoes            | 3                                                           |
| 100             | India   | 2004           | Sweeteners, Other         | 1                                                           |
| 100             | India   | 2004           | Tea                       | 2                                                           |
| 100             | India   | 2004           | Tomatoes                  | 18                                                          |
| 100             | India   | 2004           | Vegetables, Other         | 115                                                         |
| 100             | India   | 2004           | Wheat                     | 159                                                         |
| 100             | India   | 2005           | Apples                    | 4                                                           |
| 100             | India   | 2005           | Bananas                   | 37                                                          |
| 100             | India   | 2005           | Barley                    | 2                                                           |
| 100             | India   | 2005           | Beans                     | 6                                                           |
| 100             | India   | 2005           | Beer                      | 1                                                           |
| 100             | India   | 2005           | Beverages, Alcoholic      | 2                                                           |
| 100             | India   | 2005           | Bovine Meat               | 5                                                           |
| 100             | India   | 2005           | Butter, Ghee              | 7                                                           |
| 100             | India   | 2005           | Cassava                   | 17                                                          |
| 100             | India   | 2005           | Coconut Oil               | 1                                                           |
| 100             | India   | 2005           | Coconuts - Incl Copra     | 13                                                          |
| 100             | India   | 2005           | Cottonseed Oil            | 1                                                           |
| 100             | India   | 2005           | Crustaceans               | 1                                                           |
| 100             | India   | 2005           | Dates                     | 1                                                           |
| 100             | India   | 2005           | Demersal Fish             | 2                                                           |
| 100             | India   | 2005           | Eggs                      | 5                                                           |
| 100             | India   | 2005           | Freshwater Fish           | 9                                                           |
| 100             | India   | 2005           | Fruits, Other             | 49                                                          |
| 100             | India   | 2005           | Grapes                    | 3                                                           |
| 100             | India   | 2005           | Groundnut Oil             | 4                                                           |
| 100             | India   | 2005           | Groundnuts (Shelled Eq)   | 1                                                           |
| 100             | India   | 2005           | Lemons, Limes             | 2                                                           |
| 100             | India   | 2005           | Maize                     | 19                                                          |
| 100             | India   | 2005           | Marine Fish, Other        | 2                                                           |
| 100             | India   | 2005           | Milk, Whole               | 105                                                         |
| 100             | India   | 2005           | Millet                    | 23                                                          |
| 100             | India   | 2005           | Mutton & Goat Meat        | 2                                                           |
| 100             | India   | 2005           | Nuts                      | 3                                                           |
| 100             | India   | 2005           | Offals, Edible            | 1                                                           |
| 100             | India   | 2005           | Onions                    | 19                                                          |
| 100             | India   | 2005           | Oranges, Mandarines       | 7                                                           |
| 100             | India   | 2005           | Palm Oil                  | 4                                                           |
| 100             | India   | 2005           | Peas                      | 3                                                           |
| 100             | India   | 2005           | Pelagic Fish              | 1                                                           |
| 100             | India   | 2005           | Pigmeat                   | 1                                                           |
| 100             | India   | 2005           | Pimento                   | 2                                                           |
| 100             | India   | 2005           | Pineapples                | 3                                                           |
| 100             | India   | 2005           | Potatoes                  | 52                                                          |
| 100             | India   | 2005           | Poultry Meat              | 4                                                           |
| 100             | India   | 2005           | Pulses, Other             | 20                                                          |
| 100             | India   | 2005           | Rape and Mustard Oil      | 6                                                           |
| 100             | India   | 2005           | Rice (Milled Equivalent)  | 196                                                         |
| 100             | India   | 2005           | Ricebran Oil              | 1                                                           |
| 100             | India   | 2005           | Sorghum                   | 15                                                          |
| 100             | India   | 2005           | Soyabean Oil              | 5                                                           |
| 100             | India   | 2005           | Spices, Other             | 4                                                           |
| 100             | India   | 2005           | Sugar Cane                | 23                                                          |
| 100             | India   | 2005           | Sugar, Non-Centrifugal    | 8                                                           |
| 100             | India   | 2005           | Sugar, Refined Equivalent | 42                                                          |
| 100             | India   | 2005           | Sunflowerseed Oil         | 1                                                           |
| 100             | India   | 2005           | Sweet Potatoes            | 3                                                           |
| 100             | India   | 2005           | Sweeteners, Other         | 1                                                           |
| 100             | India   | 2005           | Tea                       | 2                                                           |
| 100             | India   | 2005           | Tomatoes                  | 19                                                          |
| 100             | India   | 2005           | Vegetables, Other         | 121                                                         |
| 100             | India   | 2005           | Wheat                     | 151                                                         |
| 100             | India   | 2006           | Apples                    | 4                                                           |
| 100             | India   | 2006           | Bananas                   | 40                                                          |
| 100             | India   | 2006           | Barley                    | 2                                                           |
| 100             | India   | 2006           | Beans                     | 8                                                           |
| 100             | India   | 2006           | Beer                      | 1                                                           |
| 100             | India   | 2006           | Beverages, Alcoholic      | 3                                                           |
| 100             | India   | 2006           | Bovine Meat               | 5                                                           |
| 100             | India   | 2006           | Butter, Ghee              | 7                                                           |
| 100             | India   | 2006           | Cassava                   | 18                                                          |
| 100             | India   | 2006           | Citrus, Other             | 1                                                           |
| 100             | India   | 2006           | Coconut Oil               | 1                                                           |
| 100             | India   | 2006           | Coconuts - Incl Copra     | 16                                                          |
| 100             | India   | 2006           | Cottonseed Oil            | 2                                                           |
| 100             | India   | 2006           | Crustaceans               | 1                                                           |
| 100             | India   | 2006           | Dates                     | 1                                                           |
| 100             | India   | 2006           | Demersal Fish             | 2                                                           |
| 100             | India   | 2006           | Eggs                      | 6                                                           |
| 100             | India   | 2006           | Freshwater Fish           | 9                                                           |
| 100             | India   | 2006           | Fruits, Other             | 54                                                          |
| 100             | India   | 2006           | Grapes                    | 3                                                           |
| 100             | India   | 2006           | Groundnut Oil             | 4                                                           |
| 100             | India   | 2006           | Groundnuts (Shelled Eq)   | 1                                                           |
| 100             | India   | 2006           | Lemons, Limes             | 4                                                           |
| 100             | India   | 2006           | Maize                     | 18                                                          |
| 100             | India   | 2006           | Marine Fish, Other        | 2                                                           |
| 100             | India   | 2006           | Milk, Whole               | 112                                                         |
| 100             | India   | 2006           | Millet                    | 22                                                          |
| 100             | India   | 2006           | Mutton & Goat Meat        | 2                                                           |
| 100             | India   | 2006           | Nuts                      | 3                                                           |
| 100             | India   | 2006           | Offals, Edible            | 1                                                           |
| 100             | India   | 2006           | Onions                    | 21                                                          |
| 100             | India   | 2006           | Oranges, Mandarines       | 7                                                           |

## Dietary calcium and zinc deficiency risks are decreasing but remain prevalent

| FAO countrycode | Country | Reference year | Food item                 | Gross food supply (g capita <sup>-1</sup> d <sup>-1</sup> ) |
|-----------------|---------|----------------|---------------------------|-------------------------------------------------------------|
| 100             | India   | 2006           | Palm Oil                  | 4                                                           |
| 100             | India   | 2006           | Peas                      | 4                                                           |
| 100             | India   | 2006           | Pelagic Fish              | 1                                                           |
| 100             | India   | 2006           | Pigmeat                   | 1                                                           |
| 100             | India   | 2006           | Pimento                   | 2                                                           |
| 100             | India   | 2006           | Pineapples                | 3                                                           |
| 100             | India   | 2006           | Potatoes                  | 51                                                          |
| 100             | India   | 2006           | Poultry Meat              | 4                                                           |
| 100             | India   | 2006           | Pulses, Other             | 20                                                          |
| 100             | India   | 2006           | Rape and Mustard Oil      | 6                                                           |
| 100             | India   | 2006           | Rice (Milled Equivalent)  | 194                                                         |
| 100             | India   | 2006           | Ricebran Oil              | 2                                                           |
| 100             | India   | 2006           | Sorghum                   | 16                                                          |
| 100             | India   | 2006           | Soyabean Oil              | 4                                                           |
| 100             | India   | 2006           | Spices, Other             | 4                                                           |
| 100             | India   | 2006           | Sugar Cane                | 27                                                          |
| 100             | India   | 2006           | Sugar, Non-Centrifugal    | 7                                                           |
| 100             | India   | 2006           | Sugar, Refined Equivalent | 44                                                          |
| 100             | India   | 2006           | Sunflowerseed Oil         | 1                                                           |
| 100             | India   | 2006           | Sweet Potatoes            | 2                                                           |
| 100             | India   | 2006           | Sweeteners, Other         | 1                                                           |
| 100             | India   | 2006           | Tea                       | 2                                                           |
| 100             | India   | 2006           | Tomatoes                  | 21                                                          |
| 100             | India   | 2006           | Vegetables, Other         | 137                                                         |
| 100             | India   | 2006           | Wheat                     | 159                                                         |
| 100             | India   | 2007           | Apples                    | 4                                                           |
| 100             | India   | 2007           | Bananas                   | 45                                                          |
| 100             | India   | 2007           | Barley                    | 2                                                           |
| 100             | India   | 2007           | Beans                     | 9                                                           |
| 100             | India   | 2007           | Beer                      | 1                                                           |
| 100             | India   | 2007           | Beverages, Alcoholic      | 5                                                           |
| 100             | India   | 2007           | Bovine Meat               | 5                                                           |
| 100             | India   | 2007           | Butter, Ghee              | 7                                                           |
| 100             | India   | 2007           | Cassava                   | 18                                                          |
| 100             | India   | 2007           | Citrus, Other             | 1                                                           |
| 100             | India   | 2007           | Coconut Oil               | 1                                                           |
| 100             | India   | 2007           | Coconuts - Incl Copra     | 17                                                          |
| 100             | India   | 2007           | Cottonseed Oil            | 2                                                           |
| 100             | India   | 2007           | Crustaceans               | 1                                                           |
| 100             | India   | 2007           | Dates                     | 1                                                           |
| 100             | India   | 2007           | Demersal Fish             | 2                                                           |
| 100             | India   | 2007           | Eggs                      | 6                                                           |
| 100             | India   | 2007           | Freshwater Fish           | 9                                                           |
| 100             | India   | 2007           | Fruits, Other             | 55                                                          |
| 100             | India   | 2007           | Grapes                    | 3                                                           |
| 100             | India   | 2007           | Groundnut Oil             | 4                                                           |
| 100             | India   | 2007           | Groundnuts (Shelled Eq)   | 1                                                           |
| 100             | India   | 2007           | Lemons, Limes             | 5                                                           |
| 100             | India   | 2007           | Maize                     | 18                                                          |
| 100             | India   | 2007           | Marine Fish, Other        | 1                                                           |
| 100             | India   | 2007           | Milk, Whole               | 124                                                         |
| 100             | India   | 2007           | Millet                    | 24                                                          |
| 100             | India   | 2007           | Mutton & Goat Meat        | 2                                                           |
| 100             | India   | 2007           | Nuts                      | 3                                                           |
| 100             | India   | 2007           | Offals, Edible            | 1                                                           |
| 100             | India   | 2007           | Onions                    | 29                                                          |
| 100             | India   | 2007           | Oranges, Mandarines       | 9                                                           |
| 100             | India   | 2007           | Palm Oil                  | 4                                                           |
| 100             | India   | 2007           | Peas                      | 5                                                           |
| 100             | India   | 2007           | Pelagic Fish              | 1                                                           |
| 100             | India   | 2007           | Pigmeat                   | 1                                                           |
| 100             | India   | 2007           | Pimento                   | 2                                                           |
| 100             | India   | 2007           | Pineapples                | 3                                                           |
| 100             | India   | 2007           | Potatoes                  | 49                                                          |
| 100             | India   | 2007           | Poultry Meat              | 4                                                           |
| 100             | India   | 2007           | Pulses, Other             | 21                                                          |
| 100             | India   | 2007           | Rape and Mustard Oil      | 5                                                           |
| 100             | India   | 2007           | Rice (Milled Equivalent)  | 195                                                         |
| 100             | India   | 2007           | Ricebran Oil              | 1                                                           |
| 100             | India   | 2007           | Sorghum                   | 15                                                          |
| 100             | India   | 2007           | Soyabean Oil              | 5                                                           |
| 100             | India   | 2007           | Spices, Other             | 4                                                           |
| 100             | India   | 2007           | Sugar Cane                | 34                                                          |
| 100             | India   | 2007           | Sugar, Non-Centrifugal    | 6                                                           |
| 100             | India   | 2007           | Sugar, Refined Equivalent | 45                                                          |
| 100             | India   | 2007           | Sunflowerseed Oil         | 1                                                           |
| 100             | India   | 2007           | Sweet Potatoes            | 2                                                           |
| 100             | India   | 2007           | Sweeteners, Other         | 1                                                           |
| 100             | India   | 2007           | Tea                       | 2                                                           |
| 100             | India   | 2007           | Tomatoes                  | 21                                                          |
| 100             | India   | 2007           | Vegetables, Other         | 141                                                         |
| 100             | India   | 2007           | Wheat                     | 164                                                         |
| 100             | India   | 2008           | Apples                    | 4                                                           |
| 100             | India   | 2008           | Bananas                   | 49                                                          |
| 100             | India   | 2008           | Barley                    | 2                                                           |
| 100             | India   | 2008           | Beans                     | 7                                                           |
| 100             | India   | 2008           | Beer                      | 1                                                           |
| 100             | India   | 2008           | Beverages, Alcoholic      | 5                                                           |
| 100             | India   | 2008           | Bovine Meat               | 5                                                           |
| 100             | India   | 2008           | Butter, Ghee              | 7                                                           |
| 100             | India   | 2008           | Cassava                   | 20                                                          |
| 100             | India   | 2008           | Citrus, Other             | 1                                                           |
| 100             | India   | 2008           | Coconut Oil               | 1                                                           |
| 100             | India   | 2008           | Coconuts - Incl Copra     | 14                                                          |
| 100             | India   | 2008           | Cottonseed Oil            | 2                                                           |
| 100             | India   | 2008           | Crustaceans               | 1                                                           |
| 100             | India   | 2008           | Dates                     | 1                                                           |

## Dietary calcium and zinc deficiency risks are decreasing but remain prevalent

| FAO countrycode | Country | Reference year | Food item                 | Gross food supply (g capita <sup>-1</sup> d <sup>-1</sup> ) |
|-----------------|---------|----------------|---------------------------|-------------------------------------------------------------|
| 100             | India   | 2008           | Demersal Fish             | 2                                                           |
| 100             | India   | 2008           | Eggs                      | 6                                                           |
| 100             | India   | 2008           | Freshwater Fish           | 10                                                          |
| 100             | India   | 2008           | Fruits, Other             | 59                                                          |
| 100             | India   | 2008           | Grapes                    | 3                                                           |
| 100             | India   | 2008           | Groundnut Oil             | 4                                                           |
| 100             | India   | 2008           | Groundnuts (Shelled Eq)   | 1                                                           |
| 100             | India   | 2008           | Lemons, Limes             | 5                                                           |
| 100             | India   | 2008           | Maize                     | 17                                                          |
| 100             | India   | 2008           | Marine Fish, Other        | 2                                                           |
| 100             | India   | 2008           | Milk, Whole               | 127                                                         |
| 100             | India   | 2008           | Millet                    | 23                                                          |
| 100             | India   | 2008           | Mutton & Goat Meat        | 2                                                           |
| 100             | India   | 2008           | Nuts                      | 3                                                           |
| 100             | India   | 2008           | Offals, Edible            | 1                                                           |
| 100             | India   | 2008           | Onions                    | 26                                                          |
| 100             | India   | 2008           | Oranges, Mandarines       | 10                                                          |
| 100             | India   | 2008           | Palm Oil                  | 5                                                           |
| 100             | India   | 2008           | Peas                      | 4                                                           |
| 100             | India   | 2008           | Pelagic Fish              | 1                                                           |
| 100             | India   | 2008           | Pigmeat                   | 1                                                           |
| 100             | India   | 2008           | Pimento                   | 2                                                           |
| 100             | India   | 2008           | Pineapples                | 3                                                           |
| 100             | India   | 2008           | Potatoes                  | 60                                                          |
| 100             | India   | 2008           | Poultry Meat              | 4                                                           |
| 100             | India   | 2008           | Pulses, Other             | 21                                                          |
| 100             | India   | 2008           | Rape and Mustard Oil      | 4                                                           |
| 100             | India   | 2008           | Rice (Milled Equivalent)  | 198                                                         |
| 100             | India   | 2008           | Ricebran Oil              | 1                                                           |
| 100             | India   | 2008           | Sorghum                   | 16                                                          |
| 100             | India   | 2008           | Soyabean Oil              | 4                                                           |
| 100             | India   | 2008           | Spices, Other             | 4                                                           |
| 100             | India   | 2008           | Sugar Cane                | 28                                                          |
| 100             | India   | 2008           | Sugar, Non-Centrifugal    | 7                                                           |
| 100             | India   | 2008           | Sugar, Refined Equivalent | 50                                                          |
| 100             | India   | 2008           | Sunflowerseed Oil         | 2                                                           |
| 100             | India   | 2008           | Sweet Potatoes            | 2                                                           |
| 100             | India   | 2008           | Sweeteners, Other         | 1                                                           |
| 100             | India   | 2008           | Tea                       | 2                                                           |
| 100             | India   | 2008           | Tomatoes                  | 21                                                          |
| 100             | India   | 2008           | Vegetables, Other         | 147                                                         |
| 100             | India   | 2008           | Wheat                     | 166                                                         |
| 100             | India   | 2009           | Apples                    | 4                                                           |
| 100             | India   | 2009           | Bananas                   | 49                                                          |
| 100             | India   | 2009           | Barley                    | 3                                                           |
| 100             | India   | 2009           | Beans                     | 6                                                           |
| 100             | India   | 2009           | Beer                      | 1                                                           |
| 100             | India   | 2009           | Beverages, Alcoholic      | 3                                                           |
| 100             | India   | 2009           | Bovine Meat               | 5                                                           |
| 100             | India   | 2009           | Butter, Ghee              | 7                                                           |
| 100             | India   | 2009           | Cassava                   | 21                                                          |
| 100             | India   | 2009           | Citrus, Other             | 1                                                           |
| 100             | India   | 2009           | Coconut Oil               | 1                                                           |
| 100             | India   | 2009           | Coconuts - Incl Copra     | 16                                                          |
| 100             | India   | 2009           | Cottonseed Oil            | 2                                                           |
| 100             | India   | 2009           | Crustaceans               | 1                                                           |
| 100             | India   | 2009           | Dates                     | 1                                                           |
| 100             | India   | 2009           | Demersal Fish             | 2                                                           |
| 100             | India   | 2009           | Eggs                      | 6                                                           |
| 100             | India   | 2009           | Freshwater Fish           | 10                                                          |
| 100             | India   | 2009           | Fruits, Other             | 57                                                          |
| 100             | India   | 2009           | Grapes                    | 4                                                           |
| 100             | India   | 2009           | Groundnut Oil             | 4                                                           |
| 100             | India   | 2009           | Groundnuts (Shelled Eq)   | 1                                                           |
| 100             | India   | 2009           | Lemons, Limes             | 5                                                           |
| 100             | India   | 2009           | Maize                     | 16                                                          |
| 100             | India   | 2009           | Marine Fish, Other        | 1                                                           |
| 100             | India   | 2009           | Milk, Whole               | 133                                                         |
| 100             | India   | 2009           | Millet                    | 21                                                          |
| 100             | India   | 2009           | Mutton & Goat Meat        | 2                                                           |
| 100             | India   | 2009           | Nuts                      | 4                                                           |
| 100             | India   | 2009           | Offals, Edible            | 1                                                           |
| 100             | India   | 2009           | Onions                    | 23                                                          |
| 100             | India   | 2009           | Oranges, Mandarines       | 11                                                          |
| 100             | India   | 2009           | Palm Oil                  | 5                                                           |
| 100             | India   | 2009           | Peas                      | 5                                                           |
| 100             | India   | 2009           | Pelagic Fish              | 1                                                           |
| 100             | India   | 2009           | Pigmeat                   | 1                                                           |
| 100             | India   | 2009           | Pimento                   | 2                                                           |
| 100             | India   | 2009           | Pineapples                | 3                                                           |
| 100             | India   | 2009           | Potatoes                  | 59                                                          |
| 100             | India   | 2009           | Poultry Meat              | 5                                                           |
| 100             | India   | 2009           | Pulses, Other             | 23                                                          |
| 100             | India   | 2009           | Rape and Mustard Oil      | 5                                                           |
| 100             | India   | 2009           | Rice (Milled Equivalent)  | 196                                                         |
| 100             | India   | 2009           | Ricebran Oil              | 1                                                           |
| 100             | India   | 2009           | Sorghum                   | 15                                                          |
| 100             | India   | 2009           | Soyabean Oil              | 4                                                           |
| 100             | India   | 2009           | Spices, Other             | 4                                                           |
| 100             | India   | 2009           | Sugar Cane                | 23                                                          |
| 100             | India   | 2009           | Sugar, Non-Centrifugal    | 9                                                           |
| 100             | India   | 2009           | Sugar, Refined Equivalent | 49                                                          |
| 100             | India   | 2009           | Sunflowerseed Oil         | 2                                                           |
| 100             | India   | 2009           | Sweet Potatoes            | 2                                                           |
| 100             | India   | 2009           | Sweeteners, Other         | 1                                                           |
| 100             | India   | 2009           | Tea                       | 2                                                           |
| 100             | India   | 2009           | Tomatoes                  | 23                                                          |

Dietary calcium and zinc deficiency risks are decreasing but remain prevalent

| FAO countrycode | Country | Reference year | Food item                 | Gross food supply (g capita <sup>-1</sup> d <sup>-1</sup> ) |
|-----------------|---------|----------------|---------------------------|-------------------------------------------------------------|
| 100             | India   | 2009           | Vegetables, Other         | 144                                                         |
| 100             | India   | 2009           | Wheat                     | 161                                                         |
| 100             | India   | 2010           | Apples                    | 4                                                           |
| 100             | India   | 2010           | Bananas                   | 54                                                          |
| 100             | India   | 2010           | Barley                    | 2                                                           |
| 100             | India   | 2010           | Beans                     | 10                                                          |
| 100             | India   | 2010           | Beer                      | 1                                                           |
| 100             | India   | 2010           | Beverages, Alcoholic      | 3                                                           |
| 100             | India   | 2010           | Bovine Meat               | 4                                                           |
| 100             | India   | 2010           | Butter, Ghee              | 8                                                           |
| 100             | India   | 2010           | Cassava                   | 17                                                          |
| 100             | India   | 2010           | Citrus, Other             | 2                                                           |
| 100             | India   | 2010           | Coconut Oil               | 1                                                           |
| 100             | India   | 2010           | Coconuts - Incl Copra     | 17                                                          |
| 100             | India   | 2010           | Cottonseed Oil            | 2                                                           |
| 100             | India   | 2010           | Crustaceans               | 1                                                           |
| 100             | India   | 2010           | Demersal Fish             | 1                                                           |
| 100             | India   | 2010           | Eggs                      | 6                                                           |
| 100             | India   | 2010           | Freshwater Fish           | 12                                                          |
| 100             | India   | 2010           | Fruits, Other             | 62                                                          |
| 100             | India   | 2010           | Grapefruit                | 1                                                           |
| 100             | India   | 2010           | Grapes                    | 2                                                           |
| 100             | India   | 2010           | Groundnut Oil             | 4                                                           |
| 100             | India   | 2010           | Groundnuts (Shelled Eq)   | 1                                                           |
| 100             | India   | 2010           | Lemons, Limes             | 5                                                           |
| 100             | India   | 2010           | Maize                     | 18                                                          |
| 100             | India   | 2010           | Marine Fish, Other        | 1                                                           |
| 100             | India   | 2010           | Milk, Whole               | 137                                                         |
| 100             | India   | 2010           | Millet                    | 24                                                          |
| 100             | India   | 2010           | Mutton & Goat Meat        | 2                                                           |
| 100             | India   | 2010           | Nuts                      | 3                                                           |
| 100             | India   | 2010           | Offals, Edible            | 1                                                           |
| 100             | India   | 2010           | Onions                    | 30                                                          |
| 100             | India   | 2010           | Oranges, Mandarines       | 12                                                          |
| 100             | India   | 2010           | Palm Oil                  | 4                                                           |
| 100             | India   | 2010           | Peas                      | 4                                                           |
| 100             | India   | 2010           | Pelagic Fish              | 1                                                           |
| 100             | India   | 2010           | Pigmeat                   | 1                                                           |
| 100             | India   | 2010           | Pimento                   | 2                                                           |
| 100             | India   | 2010           | Pineapples                | 3                                                           |
| 100             | India   | 2010           | Potatoes                  | 59                                                          |
| 100             | India   | 2010           | Poultry Meat              | 5                                                           |
| 100             | India   | 2010           | Pulses, Other             | 22                                                          |
| 100             | India   | 2010           | Rape and Mustard Oil      | 5                                                           |
| 100             | India   | 2010           | Rice (Milled Equivalent)  | 198                                                         |
| 100             | India   | 2010           | Ricebran Oil              | 1                                                           |
| 100             | India   | 2010           | Sesameseed                | 1                                                           |
| 100             | India   | 2010           | Sorghum                   | 13                                                          |
| 100             | India   | 2010           | Soyabean Oil              | 4                                                           |
| 100             | India   | 2010           | Spices, Other             | 5                                                           |
| 100             | India   | 2010           | Sugar Cane                | 52                                                          |
| 100             | India   | 2010           | Sugar, Non-Centrifugal    | 8                                                           |
| 100             | India   | 2010           | Sugar, Refined Equivalent | 47                                                          |
| 100             | India   | 2010           | Sunflowerseed Oil         | 1                                                           |
| 100             | India   | 2010           | Sweet Potatoes            | 2                                                           |
| 100             | India   | 2010           | Tea                       | 2                                                           |
| 100             | India   | 2010           | Tomatoes                  | 25                                                          |
| 100             | India   | 2010           | Vegetables, Other         | 154                                                         |
| 100             | India   | 2010           | Wheat                     | 165                                                         |
| 100             | India   | 2011           | Apples                    | 6                                                           |
| 100             | India   | 2011           | Bananas                   | 51                                                          |
| 100             | India   | 2011           | Barley                    | 3                                                           |
| 100             | India   | 2011           | Beans                     | 9                                                           |
| 100             | India   | 2011           | Beer                      | 1                                                           |
| 100             | India   | 2011           | Beverages, Alcoholic      | 4                                                           |
| 100             | India   | 2011           | Bovine Meat               | 3                                                           |
| 100             | India   | 2011           | Butter, Ghee              | 8                                                           |
| 100             | India   | 2011           | Cassava                   | 17                                                          |
| 100             | India   | 2011           | Citrus, Other             | 1                                                           |
| 100             | India   | 2011           | Coconut Oil               | 1                                                           |
| 100             | India   | 2011           | Coconuts - Incl Copra     | 15                                                          |
| 100             | India   | 2011           | Cottonseed Oil            | 3                                                           |
| 100             | India   | 2011           | Crustaceans               | 1                                                           |
| 100             | India   | 2011           | Dates                     | 1                                                           |
| 100             | India   | 2011           | Demersal Fish             | 1                                                           |
| 100             | India   | 2011           | Eggs                      | 7                                                           |
| 100             | India   | 2011           | Freshwater Fish           | 12                                                          |
| 100             | India   | 2011           | Fruits, Other             | 63                                                          |
| 100             | India   | 2011           | Grapes                    | 2                                                           |
| 100             | India   | 2011           | Groundnut Oil             | 4                                                           |
| 100             | India   | 2011           | Groundnuts (Shelled Eq)   | 1                                                           |
| 100             | India   | 2011           | Lemons, Limes             | 4                                                           |
| 100             | India   | 2011           | Maize                     | 18                                                          |
| 100             | India   | 2011           | Marine Fish, Other        | 1                                                           |
| 100             | India   | 2011           | Milk, Whole               | 136                                                         |
| 100             | India   | 2011           | Millet                    | 24                                                          |
| 100             | India   | 2011           | Mutton & Goat Meat        | 2                                                           |
| 100             | India   | 2011           | Nuts                      | 4                                                           |
| 100             | India   | 2011           | Offals, Edible            | 1                                                           |
| 100             | India   | 2011           | Onions                    | 35                                                          |
| 100             | India   | 2011           | Oranges, Mandarines       | 9                                                           |
| 100             | India   | 2011           | Palm Oil                  | 4                                                           |
| 100             | India   | 2011           | Peas                      | 5                                                           |
| 100             | India   | 2011           | Pelagic Fish              | 2                                                           |
| 100             | India   | 2011           | Pigmeat                   | 1                                                           |
| 100             | India   | 2011           | Pimento                   | 2                                                           |
| 100             | India   | 2011           | Pineapples                | 3                                                           |



Dietary calcium and zinc deficiency risks are decreasing but remain prevalent

| FAO countrycode | Country   | Reference year | Food item                 | Gross food supply (g capita <sup>-1</sup> d <sup>-1</sup> ) |
|-----------------|-----------|----------------|---------------------------|-------------------------------------------------------------|
| 100             | India     | 2011           | Potatoes                  | 69                                                          |
| 100             | India     | 2011           | Poultry Meat              | 5                                                           |
| 100             | India     | 2011           | Pulses, Other             | 25                                                          |
| 100             | India     | 2011           | Rape and Mustard Oil      | 6                                                           |
| 100             | India     | 2011           | Rice (Milled Equivalent)  | 196                                                         |
| 100             | India     | 2011           | Ricebran Oil              | 1                                                           |
| 100             | India     | 2011           | Sorghum                   | 14                                                          |
| 100             | India     | 2011           | Soyabean Oil              | 4                                                           |
| 100             | India     | 2011           | Spices, Other             | 6                                                           |
| 100             | India     | 2011           | Sugar Cane                | 27                                                          |
| 100             | India     | 2011           | Sugar, Non-Centrifugal    | 5                                                           |
| 100             | India     | 2011           | Sugar, Refined Equivalent | 50                                                          |
| 100             | India     | 2011           | Sunflowerseed Oil         | 2                                                           |
| 100             | India     | 2011           | Sweet Potatoes            | 2                                                           |
| 100             | India     | 2011           | Sweeteners, Other         | 1                                                           |
| 100             | India     | 2011           | Tea                       | 1                                                           |
| 100             | India     | 2011           | Tomatoes                  | 34                                                          |
| 100             | India     | 2011           | Vegetables, Other         | 153                                                         |
| 100             | India     | 2011           | Wheat                     | 161                                                         |
| 101             | Indonesia | 1992           | Bananas                   | 34                                                          |
| 101             | Indonesia | 1992           | Beans                     | 11                                                          |
| 101             | Indonesia | 1992           | Beer                      | 1                                                           |
| 101             | Indonesia | 1992           | Bovine Meat               | 5                                                           |
| 101             | Indonesia | 1992           | Cassava                   | 121                                                         |
| 101             | Indonesia | 1992           | Cocoa Beans               | 1                                                           |
| 101             | Indonesia | 1992           | Coconut Oil               | 4                                                           |
| 101             | Indonesia | 1992           | Coconuts - Incl Copra     | 52                                                          |
| 101             | Indonesia | 1992           | Coffee                    | 1                                                           |
| 101             | Indonesia | 1992           | Crustaceans               | 3                                                           |
| 101             | Indonesia | 1992           | Demersal Fish             | 7                                                           |
| 101             | Indonesia | 1992           | Eggs                      | 7                                                           |
| 101             | Indonesia | 1992           | Fats, Animals, Raw        | 1                                                           |
| 101             | Indonesia | 1992           | Freshwater Fish           | 10                                                          |
| 101             | Indonesia | 1992           | Fruits, Other             | 33                                                          |
| 101             | Indonesia | 1992           | Groundnuts (Shelled Eq)   | 12                                                          |
| 101             | Indonesia | 1992           | Maize                     | 81                                                          |
| 101             | Indonesia | 1992           | Marine Fish, Other        | 2                                                           |
| 101             | Indonesia | 1992           | Milk, Whole               | 8                                                           |
| 101             | Indonesia | 1992           | Molluscs, Other           | 1                                                           |
| 101             | Indonesia | 1992           | Mutton & Goat Meat        | 1                                                           |
| 101             | Indonesia | 1992           | Nuts                      | 2                                                           |
| 101             | Indonesia | 1992           | Offals, Edible            | 3                                                           |
| 101             | Indonesia | 1992           | Onions                    | 7                                                           |
| 101             | Indonesia | 1992           | Oranges, Mandarines       | 6                                                           |
| 101             | Indonesia | 1992           | Palm Oil                  | 8                                                           |
| 101             | Indonesia | 1992           | Palmkernel Oil            | 1                                                           |
| 101             | Indonesia | 1992           | Pelagic Fish              | 21                                                          |
| 101             | Indonesia | 1992           | Pigmeat                   | 9                                                           |
| 101             | Indonesia | 1992           | Pineapples                | 4                                                           |
| 101             | Indonesia | 1992           | Potatoes                  | 8                                                           |
| 101             | Indonesia | 1992           | Poultry Meat              | 10                                                          |
| 101             | Indonesia | 1992           | Rice (Milled Equivalent)  | 361                                                         |
| 101             | Indonesia | 1992           | Roots, Other              | 4                                                           |
| 101             | Indonesia | 1992           | Soyabean Oil              | 5                                                           |
| 101             | Indonesia | 1992           | Soyabeans                 | 4                                                           |
| 101             | Indonesia | 1992           | Spices, Other             | 1                                                           |
| 101             | Indonesia | 1992           | Sugar, Refined Equivalent | 31                                                          |
| 101             | Indonesia | 1992           | Sweet Potatoes            | 25                                                          |
| 101             | Indonesia | 1992           | Sweeteners, Other         | 4                                                           |
| 101             | Indonesia | 1992           | Tea                       | 1                                                           |
| 101             | Indonesia | 1992           | Tomatoes                  | 3                                                           |
| 101             | Indonesia | 1992           | Vegetables, Other         | 58                                                          |
| 101             | Indonesia | 1992           | Wheat                     | 35                                                          |
| 101             | Indonesia | 1993           | Bananas                   | 34                                                          |
| 101             | Indonesia | 1993           | Beans                     | 11                                                          |
| 101             | Indonesia | 1993           | Beer                      | 1                                                           |
| 101             | Indonesia | 1993           | Bovine Meat               | 6                                                           |
| 101             | Indonesia | 1993           | Cassava                   | 119                                                         |
| 101             | Indonesia | 1993           | Coconut Oil               | 4                                                           |
| 101             | Indonesia | 1993           | Coconuts - Incl Copra     | 58                                                          |
| 101             | Indonesia | 1993           | Coffee                    | 1                                                           |
| 101             | Indonesia | 1993           | Crustaceans               | 3                                                           |
| 101             | Indonesia | 1993           | Demersal Fish             | 7                                                           |
| 101             | Indonesia | 1993           | Eggs                      | 7                                                           |
| 101             | Indonesia | 1993           | Fats, Animals, Raw        | 1                                                           |
| 101             | Indonesia | 1993           | Freshwater Fish           | 11                                                          |
| 101             | Indonesia | 1993           | Fruits, Other             | 34                                                          |
| 101             | Indonesia | 1993           | Groundnuts (Shelled Eq)   | 11                                                          |
| 101             | Indonesia | 1993           | Maize                     | 87                                                          |
| 101             | Indonesia | 1993           | Marine Fish, Other        | 3                                                           |
| 101             | Indonesia | 1993           | Milk, Whole               | 8                                                           |
| 101             | Indonesia | 1993           | Molluscs, Other           | 1                                                           |
| 101             | Indonesia | 1993           | Mutton & Goat Meat        | 2                                                           |
| 101             | Indonesia | 1993           | Nuts                      | 2                                                           |
| 101             | Indonesia | 1993           | Offals, Edible            | 4                                                           |
| 101             | Indonesia | 1993           | Onions                    | 7                                                           |
| 101             | Indonesia | 1993           | Oranges, Mandarines       | 4                                                           |
| 101             | Indonesia | 1993           | Palm Oil                  | 7                                                           |
| 101             | Indonesia | 1993           | Palmkernel Oil            | 1                                                           |
| 101             | Indonesia | 1993           | Pelagic Fish              | 21                                                          |
| 101             | Indonesia | 1993           | Pigmeat                   | 9                                                           |
| 101             | Indonesia | 1993           | Pineapples                | 4                                                           |
| 101             | Indonesia | 1993           | Potatoes                  | 9                                                           |
| 101             | Indonesia | 1993           | Poultry Meat              | 10                                                          |
| 101             | Indonesia | 1993           | Rice (Milled Equivalent)  | 362                                                         |
| 101             | Indonesia | 1993           | Roots, Other              | 4                                                           |
| 101             | Indonesia | 1993           | Soyabean Oil              | 5                                                           |

Dietary calcium and zinc deficiency risks are decreasing but remain prevalent

| FAO countrycode | Country   | Reference year | Food item                 | Gross food supply (g capita <sup>-1</sup> d <sup>-1</sup> ) |
|-----------------|-----------|----------------|---------------------------|-------------------------------------------------------------|
| 101             | Indonesia | 1993           | Soyabeans                 | 4                                                           |
| 101             | Indonesia | 1993           | Spices, Other             | 1                                                           |
| 101             | Indonesia | 1993           | Sugar, Refined Equivalent | 32                                                          |
| 101             | Indonesia | 1993           | Sweet Potatoes            | 24                                                          |
| 101             | Indonesia | 1993           | Sweeteners, Other         | 4                                                           |
| 101             | Indonesia | 1993           | Tea                       | 1                                                           |
| 101             | Indonesia | 1993           | Tomatoes                  | 3                                                           |
| 101             | Indonesia | 1993           | Vegetables, Other         | 60                                                          |
| 101             | Indonesia | 1993           | Wheat                     | 35                                                          |
| 101             | Indonesia | 1994           | Bananas                   | 39                                                          |
| 101             | Indonesia | 1994           | Beans                     | 12                                                          |
| 101             | Indonesia | 1994           | Beer                      | 1                                                           |
| 101             | Indonesia | 1994           | Bovine Meat               | 6                                                           |
| 101             | Indonesia | 1994           | Cassava                   | 121                                                         |
| 101             | Indonesia | 1994           | Coconut Oil               | 4                                                           |
| 101             | Indonesia | 1994           | Coconuts - Incl Copra     | 56                                                          |
| 101             | Indonesia | 1994           | Coffee                    | 2                                                           |
| 101             | Indonesia | 1994           | Crustaceans               | 3                                                           |
| 101             | Indonesia | 1994           | Demersal Fish             | 8                                                           |
| 101             | Indonesia | 1994           | Eggs                      | 8                                                           |
| 101             | Indonesia | 1994           | Fats, Animals, Raw        | 1                                                           |
| 101             | Indonesia | 1994           | Freshwater Fish           | 11                                                          |
| 101             | Indonesia | 1994           | Fruits, Other             | 39                                                          |
| 101             | Indonesia | 1994           | Groundnuts (Shelled Eq)   | 11                                                          |
| 101             | Indonesia | 1994           | Maize                     | 90                                                          |
| 101             | Indonesia | 1994           | Marine Fish, Other        | 3                                                           |
| 101             | Indonesia | 1994           | Milk, Whole               | 9                                                           |
| 101             | Indonesia | 1994           | Molluscs, Other           | 1                                                           |
| 101             | Indonesia | 1994           | Mutton & Goat Meat        | 1                                                           |
| 101             | Indonesia | 1994           | Nuts                      | 2                                                           |
| 101             | Indonesia | 1994           | Offals, Edible            | 4                                                           |
| 101             | Indonesia | 1994           | Onions                    | 8                                                           |
| 101             | Indonesia | 1994           | Oranges, Mandarines       | 6                                                           |
| 101             | Indonesia | 1994           | Palm Oil                  | 8                                                           |
| 101             | Indonesia | 1994           | Palmkernel Oil            | 1                                                           |
| 101             | Indonesia | 1994           | Pelagic Fish              | 23                                                          |
| 101             | Indonesia | 1994           | Pig meat                  | 9                                                           |
| 101             | Indonesia | 1994           | Pineapples                | 3                                                           |
| 101             | Indonesia | 1994           | Potatoes                  | 10                                                          |
| 101             | Indonesia | 1994           | Poultry Meat              | 12                                                          |
| 101             | Indonesia | 1994           | Rice (Milled Equivalent)  | 354                                                         |
| 101             | Indonesia | 1994           | Roots, Other              | 4                                                           |
| 101             | Indonesia | 1994           | Soyabean Oil              | 5                                                           |
| 101             | Indonesia | 1994           | Soyabeans                 | 4                                                           |
| 101             | Indonesia | 1994           | Spices, Other             | 1                                                           |
| 101             | Indonesia | 1994           | Sugar, Refined Equivalent | 35                                                          |
| 101             | Indonesia | 1994           | Sweet Potatoes            | 21                                                          |
| 101             | Indonesia | 1994           | Sweeteners, Other         | 4                                                           |
| 101             | Indonesia | 1994           | Tea                       | 1                                                           |
| 101             | Indonesia | 1994           | Tomatoes                  | 4                                                           |
| 101             | Indonesia | 1994           | Vegetables, Other         | 63                                                          |
| 101             | Indonesia | 1994           | Wheat                     | 45                                                          |
| 101             | Indonesia | 1995           | Apples                    | 1                                                           |
| 101             | Indonesia | 1995           | Aquatic Animals, Others   | 1                                                           |
| 101             | Indonesia | 1995           | Bananas                   | 47                                                          |
| 101             | Indonesia | 1995           | Beans                     | 8                                                           |
| 101             | Indonesia | 1995           | Beer                      | 2                                                           |
| 101             | Indonesia | 1995           | Bovine Meat               | 5                                                           |
| 101             | Indonesia | 1995           | Cassava                   | 119                                                         |
| 101             | Indonesia | 1995           | Cocoa Beans               | 1                                                           |
| 101             | Indonesia | 1995           | Coconut Oil               | 4                                                           |
| 101             | Indonesia | 1995           | Coconuts - Incl Copra     | 59                                                          |
| 101             | Indonesia | 1995           | Coffee                    | 3                                                           |
| 101             | Indonesia | 1995           | Crustaceans               | 3                                                           |
| 101             | Indonesia | 1995           | Demersal Fish             | 8                                                           |
| 101             | Indonesia | 1995           | Eggs                      | 8                                                           |
| 101             | Indonesia | 1995           | Fats, Animals, Raw        | 1                                                           |
| 101             | Indonesia | 1995           | Freshwater Fish           | 11                                                          |
| 101             | Indonesia | 1995           | Fruits, Other             | 51                                                          |
| 101             | Indonesia | 1995           | Groundnuts (Shelled Eq)   | 10                                                          |
| 101             | Indonesia | 1995           | Maize                     | 93                                                          |
| 101             | Indonesia | 1995           | Marine Fish, Other        | 2                                                           |
| 101             | Indonesia | 1995           | Milk, Whole               | 9                                                           |
| 101             | Indonesia | 1995           | Molluscs, Other           | 1                                                           |
| 101             | Indonesia | 1995           | Mutton & Goat Meat        | 1                                                           |
| 101             | Indonesia | 1995           | Nuts                      | 3                                                           |
| 101             | Indonesia | 1995           | Offals, Edible            | 4                                                           |
| 101             | Indonesia | 1995           | Onions                    | 8                                                           |
| 101             | Indonesia | 1995           | Oranges, Mandarines       | 13                                                          |
| 101             | Indonesia | 1995           | Palm Oil                  | 8                                                           |
| 101             | Indonesia | 1995           | Palmkernel Oil            | 2                                                           |
| 101             | Indonesia | 1995           | Pelagic Fish              | 23                                                          |
| 101             | Indonesia | 1995           | Pig meat                  | 8                                                           |
| 101             | Indonesia | 1995           | Pineapples                | 5                                                           |
| 101             | Indonesia | 1995           | Potatoes                  | 12                                                          |
| 101             | Indonesia | 1995           | Poultry Meat              | 12                                                          |
| 101             | Indonesia | 1995           | Rice (Milled Equivalent)  | 359                                                         |
| 101             | Indonesia | 1995           | Roots, Other              | 4                                                           |
| 101             | Indonesia | 1995           | Soyabean Oil              | 5                                                           |
| 101             | Indonesia | 1995           | Soyabeans                 | 3                                                           |
| 101             | Indonesia | 1995           | Spices, Other             | 1                                                           |
| 101             | Indonesia | 1995           | Sugar, Refined Equivalent | 36                                                          |
| 101             | Indonesia | 1995           | Sweet Potatoes            | 24                                                          |
| 101             | Indonesia | 1995           | Sweeteners, Other         | 4                                                           |
| 101             | Indonesia | 1995           | Tea                       | 1                                                           |
| 101             | Indonesia | 1995           | Tomatoes                  | 8                                                           |
| 101             | Indonesia | 1995           | Vegetables, Other         | 102                                                         |

Dietary calcium and zinc deficiency risks are decreasing but remain prevalent

| FAO countrycode | Country   | Reference year | Food item                 | Gross food supply (g capita <sup>-1</sup> d <sup>-1</sup> ) |
|-----------------|-----------|----------------|---------------------------|-------------------------------------------------------------|
| 101             | Indonesia | 1995           | Wheat                     | 56                                                          |
| 101             | Indonesia | 1996           | Apples                    | 1                                                           |
| 101             | Indonesia | 1996           | Bananas                   | 36                                                          |
| 101             | Indonesia | 1996           | Beans                     | 4                                                           |
| 101             | Indonesia | 1996           | Beer                      | 2                                                           |
| 101             | Indonesia | 1996           | Bovine Meat               | 6                                                           |
| 101             | Indonesia | 1996           | Cassava                   | 117                                                         |
| 101             | Indonesia | 1996           | Cephalopods               | 1                                                           |
| 101             | Indonesia | 1996           | Coconut Oil               | 3                                                           |
| 101             | Indonesia | 1996           | Coconuts - Incl Copra     | 57                                                          |
| 101             | Indonesia | 1996           | Crustaceans               | 3                                                           |
| 101             | Indonesia | 1996           | Demersal Fish             | 9                                                           |
| 101             | Indonesia | 1996           | Eggs                      | 9                                                           |
| 101             | Indonesia | 1996           | Fats, Animals, Raw        | 1                                                           |
| 101             | Indonesia | 1996           | Freshwater Fish           | 12                                                          |
| 101             | Indonesia | 1996           | Fruits, Other             | 44                                                          |
| 101             | Indonesia | 1996           | Groundnuts (Shelled Eq)   | 13                                                          |
| 101             | Indonesia | 1996           | Maize                     | 94                                                          |
| 101             | Indonesia | 1996           | Marine Fish, Other        | 2                                                           |
| 101             | Indonesia | 1996           | Milk, Whole               | 9                                                           |
| 101             | Indonesia | 1996           | Molluscs, Other           | 1                                                           |
| 101             | Indonesia | 1996           | Mutton & Goat Meat        | 1                                                           |
| 101             | Indonesia | 1996           | Nuts                      | 3                                                           |
| 101             | Indonesia | 1996           | Offals, Edible            | 4                                                           |
| 101             | Indonesia | 1996           | Onions                    | 10                                                          |
| 101             | Indonesia | 1996           | Oranges, Mandarines       | 10                                                          |
| 101             | Indonesia | 1996           | Palm Oil                  | 8                                                           |
| 101             | Indonesia | 1996           | Palmkernel Oil            | 2                                                           |
| 101             | Indonesia | 1996           | Pelagic Fish              | 24                                                          |
| 101             | Indonesia | 1996           | Pigmeat                   | 8                                                           |
| 101             | Indonesia | 1996           | Pineapples                | 3                                                           |
| 101             | Indonesia | 1996           | Potatoes                  | 13                                                          |
| 101             | Indonesia | 1996           | Poultry Meat              | 13                                                          |
| 101             | Indonesia | 1996           | Rice (Milled Equivalent)  | 368                                                         |
| 101             | Indonesia | 1996           | Roots, Other              | 4                                                           |
| 101             | Indonesia | 1996           | Soyabean Oil              | 5                                                           |
| 101             | Indonesia | 1996           | Soyabeans                 | 3                                                           |
| 101             | Indonesia | 1996           | Spices, Other             | 1                                                           |
| 101             | Indonesia | 1996           | Sugar, Refined Equivalent | 37                                                          |
| 101             | Indonesia | 1996           | Sweet Potatoes            | 22                                                          |
| 101             | Indonesia | 1996           | Sweeteners, Other         | 3                                                           |
| 101             | Indonesia | 1996           | Tea                       | 1                                                           |
| 101             | Indonesia | 1996           | Tomatoes                  | 8                                                           |
| 101             | Indonesia | 1996           | Vegetables, Other         | 90                                                          |
| 101             | Indonesia | 1996           | Wheat                     | 53                                                          |
| 101             | Indonesia | 1997           | Apples                    | 1                                                           |
| 101             | Indonesia | 1997           | Bananas                   | 36                                                          |
| 101             | Indonesia | 1997           | Beans                     | 4                                                           |
| 101             | Indonesia | 1997           | Beer                      | 2                                                           |
| 101             | Indonesia | 1997           | Bovine Meat               | 6                                                           |
| 101             | Indonesia | 1997           | Cassava                   | 118                                                         |
| 101             | Indonesia | 1997           | Cephalopods               | 1                                                           |
| 101             | Indonesia | 1997           | Cocoa Beans               | 1                                                           |
| 101             | Indonesia | 1997           | Coconut Oil               | 3                                                           |
| 101             | Indonesia | 1997           | Coconuts - Incl Copra     | 55                                                          |
| 101             | Indonesia | 1997           | Coffee                    | 1                                                           |
| 101             | Indonesia | 1997           | Crustaceans               | 4                                                           |
| 101             | Indonesia | 1997           | Demersal Fish             | 10                                                          |
| 101             | Indonesia | 1997           | Eggs                      | 8                                                           |
| 101             | Indonesia | 1997           | Fats, Animals, Raw        | 1                                                           |
| 101             | Indonesia | 1997           | Freshwater Fish           | 11                                                          |
| 101             | Indonesia | 1997           | Fruits, Other             | 47                                                          |
| 101             | Indonesia | 1997           | Groundnuts (Shelled Eq)   | 12                                                          |
| 101             | Indonesia | 1997           | Maize                     | 97                                                          |
| 101             | Indonesia | 1997           | Marine Fish, Other        | 1                                                           |
| 101             | Indonesia | 1997           | Milk, Whole               | 9                                                           |
| 101             | Indonesia | 1997           | Molluscs, Other           | 1                                                           |
| 101             | Indonesia | 1997           | Mutton & Goat Meat        | 1                                                           |
| 101             | Indonesia | 1997           | Nuts                      | 2                                                           |
| 101             | Indonesia | 1997           | Offals, Edible            | 4                                                           |
| 101             | Indonesia | 1997           | Onions                    | 8                                                           |
| 101             | Indonesia | 1997           | Oranges, Mandarines       | 10                                                          |
| 101             | Indonesia | 1997           | Palm Oil                  | 7                                                           |
| 101             | Indonesia | 1997           | Palmkernel Oil            | 1                                                           |
| 101             | Indonesia | 1997           | Pelagic Fish              | 25                                                          |
| 101             | Indonesia | 1997           | Pigmeat                   | 9                                                           |
| 101             | Indonesia | 1997           | Pineapples                | 3                                                           |
| 101             | Indonesia | 1997           | Potatoes                  | 10                                                          |
| 101             | Indonesia | 1997           | Poultry Meat              | 12                                                          |
| 101             | Indonesia | 1997           | Rice (Milled Equivalent)  | 365                                                         |
| 101             | Indonesia | 1997           | Roots, Other              | 4                                                           |
| 101             | Indonesia | 1997           | Soyabean Oil              | 4                                                           |
| 101             | Indonesia | 1997           | Soyabeans                 | 3                                                           |
| 101             | Indonesia | 1997           | Spices, Other             | 1                                                           |
| 101             | Indonesia | 1997           | Sugar, Refined Equivalent | 39                                                          |
| 101             | Indonesia | 1997           | Sweet Potatoes            | 20                                                          |
| 101             | Indonesia | 1997           | Sweeteners, Other         | 3                                                           |
| 101             | Indonesia | 1997           | Tea                       | 1                                                           |
| 101             | Indonesia | 1997           | Tomatoes                  | 6                                                           |
| 101             | Indonesia | 1997           | Vegetables, Other         | 73                                                          |
| 101             | Indonesia | 1997           | Wheat                     | 46                                                          |
| 101             | Indonesia | 1998           | Bananas                   | 37                                                          |
| 101             | Indonesia | 1998           | Beans                     | 4                                                           |
| 101             | Indonesia | 1998           | Beer                      | 2                                                           |
| 101             | Indonesia | 1998           | Bovine Meat               | 5                                                           |
| 101             | Indonesia | 1998           | Cassava                   | 116                                                         |
| 101             | Indonesia | 1998           | Cephalopods               | 1                                                           |

Dietary calcium and zinc deficiency risks are decreasing but remain prevalent

| FAO countrycode | Country   | Reference year | Food item                 | Gross food supply (g capita <sup>-1</sup> d <sup>-1</sup> ) |
|-----------------|-----------|----------------|---------------------------|-------------------------------------------------------------|
| 101             | Indonesia | 1998           | Cocoa Beans               | 1                                                           |
| 101             | Indonesia | 1998           | Coconut Oil               | 3                                                           |
| 101             | Indonesia | 1998           | Coconuts - Incl Copra     | 61                                                          |
| 101             | Indonesia | 1998           | Coffee                    | 2                                                           |
| 101             | Indonesia | 1998           | Crustaceans               | 3                                                           |
| 101             | Indonesia | 1998           | Demersal Fish             | 9                                                           |
| 101             | Indonesia | 1998           | Eggs                      | 6                                                           |
| 101             | Indonesia | 1998           | Fats, Animals, Raw        | 1                                                           |
| 101             | Indonesia | 1998           | Freshwater Fish           | 11                                                          |
| 101             | Indonesia | 1998           | Fruits, Other             | 39                                                          |
| 101             | Indonesia | 1998           | Groundnuts (Shelled Eq)   | 10                                                          |
| 101             | Indonesia | 1998           | Maize                     | 96                                                          |
| 101             | Indonesia | 1998           | Marine Fish, Other        | 3                                                           |
| 101             | Indonesia | 1998           | Milk, Whole               | 8                                                           |
| 101             | Indonesia | 1998           | Molluscs, Other           | 1                                                           |
| 101             | Indonesia | 1998           | Mutton & Goat Meat        | 1                                                           |
| 101             | Indonesia | 1998           | Nuts                      | 2                                                           |
| 101             | Indonesia | 1998           | Offals, Edible            | 3                                                           |
| 101             | Indonesia | 1998           | Onions                    | 7                                                           |
| 101             | Indonesia | 1998           | Oranges, Mandarines       | 6                                                           |
| 101             | Indonesia | 1998           | Palm Oil                  | 8                                                           |
| 101             | Indonesia | 1998           | Palmkernel Oil            | 2                                                           |
| 101             | Indonesia | 1998           | Pelagic Fish              | 25                                                          |
| 101             | Indonesia | 1998           | Pigmeat                   | 8                                                           |
| 101             | Indonesia | 1998           | Pineapples                | 2                                                           |
| 101             | Indonesia | 1998           | Potatoes                  | 12                                                          |
| 101             | Indonesia | 1998           | Poultry Meat              | 8                                                           |
| 101             | Indonesia | 1998           | Rice (Milled Equivalent)  | 369                                                         |
| 101             | Indonesia | 1998           | Roots, Other              | 4                                                           |
| 101             | Indonesia | 1998           | Soyabean Oil              | 4                                                           |
| 101             | Indonesia | 1998           | Soyabeans                 | 2                                                           |
| 101             | Indonesia | 1998           | Spices, Other             | 1                                                           |
| 101             | Indonesia | 1998           | Sugar, Refined Equivalent | 39                                                          |
| 101             | Indonesia | 1998           | Sweet Potatoes            | 21                                                          |
| 101             | Indonesia | 1998           | Sweeteners, Other         | 3                                                           |
| 101             | Indonesia | 1998           | Tea                       | 1                                                           |
| 101             | Indonesia | 1998           | Tomatoes                  | 7                                                           |
| 101             | Indonesia | 1998           | Vegetables, Other         | 81                                                          |
| 101             | Indonesia | 1998           | Wheat                     | 44                                                          |
| 101             | Indonesia | 1999           | Apples                    | 1                                                           |
| 101             | Indonesia | 1999           | Bananas                   | 39                                                          |
| 101             | Indonesia | 1999           | Beans                     | 3                                                           |
| 101             | Indonesia | 1999           | Beer                      | 2                                                           |
| 101             | Indonesia | 1999           | Bovine Meat               | 5                                                           |
| 101             | Indonesia | 1999           | Cassava                   | 116                                                         |
| 101             | Indonesia | 1999           | Cephalopods               | 1                                                           |
| 101             | Indonesia | 1999           | Cocoa Beans               | 1                                                           |
| 101             | Indonesia | 1999           | Coconut Oil               | 3                                                           |
| 101             | Indonesia | 1999           | Coconuts - Incl Copra     | 65                                                          |
| 101             | Indonesia | 1999           | Coffee                    | 2                                                           |
| 101             | Indonesia | 1999           | Crustaceans               | 4                                                           |
| 101             | Indonesia | 1999           | Demersal Fish             | 10                                                          |
| 101             | Indonesia | 1999           | Eggs                      | 7                                                           |
| 101             | Indonesia | 1999           | Fats, Animals, Raw        | 1                                                           |
| 101             | Indonesia | 1999           | Freshwater Fish           | 12                                                          |
| 101             | Indonesia | 1999           | Fruits, Other             | 39                                                          |
| 101             | Indonesia | 1999           | Groundnuts (Shelled Eq)   | 10                                                          |
| 101             | Indonesia | 1999           | Maize                     | 81                                                          |
| 101             | Indonesia | 1999           | Marine Fish, Other        | 2                                                           |
| 101             | Indonesia | 1999           | Milk, Whole               | 9                                                           |
| 101             | Indonesia | 1999           | Molluscs, Other           | 1                                                           |
| 101             | Indonesia | 1999           | Mutton & Goat Meat        | 1                                                           |
| 101             | Indonesia | 1999           | Nuts                      | 2                                                           |
| 101             | Indonesia | 1999           | Offals, Edible            | 3                                                           |
| 101             | Indonesia | 1999           | Onions                    | 12                                                          |
| 101             | Indonesia | 1999           | Oranges, Mandarines       | 7                                                           |
| 101             | Indonesia | 1999           | Palm Oil                  | 7                                                           |
| 101             | Indonesia | 1999           | Palmkernel Oil            | 1                                                           |
| 101             | Indonesia | 1999           | Pelagic Fish              | 25                                                          |
| 101             | Indonesia | 1999           | Pigmeat                   | 7                                                           |
| 101             | Indonesia | 1999           | Pineapples                | 2                                                           |
| 101             | Indonesia | 1999           | Potatoes                  | 11                                                          |
| 101             | Indonesia | 1999           | Poultry Meat              | 8                                                           |
| 101             | Indonesia | 1999           | Rice (Milled Equivalent)  | 374                                                         |
| 101             | Indonesia | 1999           | Roots, Other              | 4                                                           |
| 101             | Indonesia | 1999           | Soyabean Oil              | 5                                                           |
| 101             | Indonesia | 1999           | Soyabeans                 | 4                                                           |
| 101             | Indonesia | 1999           | Spices, Other             | 1                                                           |
| 101             | Indonesia | 1999           | Sugar, Refined Equivalent | 36                                                          |
| 101             | Indonesia | 1999           | Sweet Potatoes            | 17                                                          |
| 101             | Indonesia | 1999           | Sweeteners, Other         | 3                                                           |
| 101             | Indonesia | 1999           | Tea                       | 1                                                           |
| 101             | Indonesia | 1999           | Tomatoes                  | 7                                                           |
| 101             | Indonesia | 1999           | Vegetables, Other         | 81                                                          |
| 101             | Indonesia | 1999           | Wheat                     | 39                                                          |
| 101             | Indonesia | 2000           | Apples                    | 1                                                           |
| 101             | Indonesia | 2000           | Bananas                   | 44                                                          |
| 101             | Indonesia | 2000           | Beans                     | 4                                                           |
| 101             | Indonesia | 2000           | Beer                      | 2                                                           |
| 101             | Indonesia | 2000           | Bovine Meat               | 6                                                           |
| 101             | Indonesia | 2000           | Cassava                   | 117                                                         |
| 101             | Indonesia | 2000           | Cephalopods               | 1                                                           |
| 101             | Indonesia | 2000           | Cocoa Beans               | 1                                                           |
| 101             | Indonesia | 2000           | Coconut Oil               | 3                                                           |
| 101             | Indonesia | 2000           | Coconuts - Incl Copra     | 66                                                          |
| 101             | Indonesia | 2000           | Coffee                    | 2                                                           |
| 101             | Indonesia | 2000           | Crustaceans               | 4                                                           |

## Dietary calcium and zinc deficiency risks are decreasing but remain prevalent

| FAO countrycode | Country   | Reference year | Food item                 | Gross food supply (g capita <sup>-1</sup> d <sup>-1</sup> ) |
|-----------------|-----------|----------------|---------------------------|-------------------------------------------------------------|
| 101             | Indonesia | 2000           | Demersal Fish             | 9                                                           |
| 101             | Indonesia | 2000           | Eggs                      | 8                                                           |
| 101             | Indonesia | 2000           | Fats, Animals, Raw        | 1                                                           |
| 101             | Indonesia | 2000           | Freshwater Fish           | 12                                                          |
| 101             | Indonesia | 2000           | Fruits, Other             | 42                                                          |
| 101             | Indonesia | 2000           | Groundnuts (Shelled Eq)   | 11                                                          |
| 101             | Indonesia | 2000           | Maize                     | 83                                                          |
| 101             | Indonesia | 2000           | Marine Fish, Other        | 5                                                           |
| 101             | Indonesia | 2000           | Milk, Whole               | 11                                                          |
| 101             | Indonesia | 2000           | Molluscs, Other           | 1                                                           |
| 101             | Indonesia | 2000           | Mutton & Goat Meat        | 1                                                           |
| 101             | Indonesia | 2000           | Nuts                      | 2                                                           |
| 101             | Indonesia | 2000           | Offals, Edible            | 3                                                           |
| 101             | Indonesia | 2000           | Onions                    | 9                                                           |
| 101             | Indonesia | 2000           | Oranges, Mandarines       | 9                                                           |
| 101             | Indonesia | 2000           | Palm Oil                  | 8                                                           |
| 101             | Indonesia | 2000           | Palmkernel Oil            | 2                                                           |
| 101             | Indonesia | 2000           | Pelagic Fish              | 25                                                          |
| 101             | Indonesia | 2000           | Pigmeat                   | 5                                                           |
| 101             | Indonesia | 2000           | Pineapples                | 3                                                           |
| 101             | Indonesia | 2000           | Potatoes                  | 11                                                          |
| 101             | Indonesia | 2000           | Poultry Meat              | 11                                                          |
| 101             | Indonesia | 2000           | Rice (Milled Equivalent)  | 355                                                         |
| 101             | Indonesia | 2000           | Roots, Other              | 4                                                           |
| 101             | Indonesia | 2000           | Soyabean Oil              | 5                                                           |
| 101             | Indonesia | 2000           | Soyabeans                 | 3                                                           |
| 101             | Indonesia | 2000           | Spices, Other             | 2                                                           |
| 101             | Indonesia | 2000           | Sugar, Refined Equivalent | 38                                                          |
| 101             | Indonesia | 2000           | Sweet Potatoes            | 19                                                          |
| 101             | Indonesia | 2000           | Sweeteners, Other         | 3                                                           |
| 101             | Indonesia | 2000           | Tea                       | 1                                                           |
| 101             | Indonesia | 2000           | Tomatoes                  | 7                                                           |
| 101             | Indonesia | 2000           | Vegetables, Other         | 70                                                          |
| 101             | Indonesia | 2000           | Wheat                     | 44                                                          |
| 101             | Indonesia | 2001           | Apples                    | 1                                                           |
| 101             | Indonesia | 2001           | Bananas                   | 50                                                          |
| 101             | Indonesia | 2001           | Beans                     | 3                                                           |
| 101             | Indonesia | 2001           | Beer                      | 2                                                           |
| 101             | Indonesia | 2001           | Bovine Meat               | 5                                                           |
| 101             | Indonesia | 2001           | Cassava                   | 117                                                         |
| 101             | Indonesia | 2001           | Cephalopods               | 1                                                           |
| 101             | Indonesia | 2001           | Cocoa Beans               | 2                                                           |
| 101             | Indonesia | 2001           | Coconut Oil               | 3                                                           |
| 101             | Indonesia | 2001           | Coconuts - Incl Copra     | 72                                                          |
| 101             | Indonesia | 2001           | Coffee                    | 4                                                           |
| 101             | Indonesia | 2001           | Crustaceans               | 4                                                           |
| 101             | Indonesia | 2001           | Demersal Fish             | 10                                                          |
| 101             | Indonesia | 2001           | Eggs                      | 9                                                           |
| 101             | Indonesia | 2001           | Fats, Animals, Raw        | 1                                                           |
| 101             | Indonesia | 2001           | Freshwater Fish           | 13                                                          |
| 101             | Indonesia | 2001           | Fruits, Other             | 48                                                          |
| 101             | Indonesia | 2001           | Groundnuts (Shelled Eq)   | 11                                                          |
| 101             | Indonesia | 2001           | Maize                     | 82                                                          |
| 101             | Indonesia | 2001           | Marine Fish, Other        | 6                                                           |
| 101             | Indonesia | 2001           | Milk, Whole               | 10                                                          |
| 101             | Indonesia | 2001           | Molluscs, Other           | 1                                                           |
| 101             | Indonesia | 2001           | Mutton & Goat Meat        | 1                                                           |
| 101             | Indonesia | 2001           | Nuts                      | 2                                                           |
| 101             | Indonesia | 2001           | Offals, Edible            | 4                                                           |
| 101             | Indonesia | 2001           | Onions                    | 10                                                          |
| 101             | Indonesia | 2001           | Oranges, Mandarines       | 9                                                           |
| 101             | Indonesia | 2001           | Palm Oil                  | 8                                                           |
| 101             | Indonesia | 2001           | Palmkernel Oil            | 3                                                           |
| 101             | Indonesia | 2001           | Pelagic Fish              | 25                                                          |
| 101             | Indonesia | 2001           | Pigmeat                   | 5                                                           |
| 101             | Indonesia | 2001           | Pineapples                | 3                                                           |
| 101             | Indonesia | 2001           | Potatoes                  | 10                                                          |
| 101             | Indonesia | 2001           | Poultry Meat              | 12                                                          |
| 101             | Indonesia | 2001           | Rice (Milled Equivalent)  | 350                                                         |
| 101             | Indonesia | 2001           | Roots, Other              | 4                                                           |
| 101             | Indonesia | 2001           | Soyabean Oil              | 4                                                           |
| 101             | Indonesia | 2001           | Soyabeans                 | 3                                                           |
| 101             | Indonesia | 2001           | Spices, Other             | 2                                                           |
| 101             | Indonesia | 2001           | Sugar, Refined Equivalent | 39                                                          |
| 101             | Indonesia | 2001           | Sweet Potatoes            | 18                                                          |
| 101             | Indonesia | 2001           | Sweeteners, Other         | 3                                                           |
| 101             | Indonesia | 2001           | Tea                       | 1                                                           |
| 101             | Indonesia | 2001           | Tomatoes                  | 6                                                           |
| 101             | Indonesia | 2001           | Vegetables, Other         | 64                                                          |
| 101             | Indonesia | 2001           | Wheat                     | 43                                                          |
| 101             | Indonesia | 2002           | Apples                    | 1                                                           |
| 101             | Indonesia | 2002           | Bananas                   | 50                                                          |
| 101             | Indonesia | 2002           | Beans                     | 3                                                           |
| 101             | Indonesia | 2002           | Beer                      | 2                                                           |
| 101             | Indonesia | 2002           | Bovine Meat               | 5                                                           |
| 101             | Indonesia | 2002           | Cassava                   | 115                                                         |
| 101             | Indonesia | 2002           | Cephalopods               | 1                                                           |
| 101             | Indonesia | 2002           | Cocoa Beans               | 3                                                           |
| 101             | Indonesia | 2002           | Coconut Oil               | 3                                                           |
| 101             | Indonesia | 2002           | Coconuts - Incl Copra     | 67                                                          |
| 101             | Indonesia | 2002           | Coffee                    | 4                                                           |
| 101             | Indonesia | 2002           | Crustaceans               | 4                                                           |
| 101             | Indonesia | 2002           | Demersal Fish             | 10                                                          |
| 101             | Indonesia | 2002           | Eggs                      | 10                                                          |
| 101             | Indonesia | 2002           | Fats, Animals, Raw        | 1                                                           |
| 101             | Indonesia | 2002           | Freshwater Fish           | 13                                                          |
| 101             | Indonesia | 2002           | Fruits, Other             | 63                                                          |

Dietary calcium and zinc deficiency risks are decreasing but remain prevalent

| FAO countrycode | Country   | Reference year | Food item                 | Gross food supply (g capita <sup>-1</sup> d <sup>-1</sup> ) |
|-----------------|-----------|----------------|---------------------------|-------------------------------------------------------------|
| 101             | Indonesia | 2002           | Groundnuts (Shelled Eq)   | 11                                                          |
| 101             | Indonesia | 2002           | Maize                     | 77                                                          |
| 101             | Indonesia | 2002           | Marine Fish, Other        | 4                                                           |
| 101             | Indonesia | 2002           | Milk, Whole               | 9                                                           |
| 101             | Indonesia | 2002           | Molluscs, Other           | 1                                                           |
| 101             | Indonesia | 2002           | Mutton & Goat Meat        | 2                                                           |
| 101             | Indonesia | 2002           | Nuts                      | 3                                                           |
| 101             | Indonesia | 2002           | Offals, Edible            | 4                                                           |
| 101             | Indonesia | 2002           | Onions                    | 9                                                           |
| 101             | Indonesia | 2002           | Oranges, Mandarines       | 12                                                          |
| 101             | Indonesia | 2002           | Palm Oil                  | 8                                                           |
| 101             | Indonesia | 2002           | Palmkernel Oil            | 3                                                           |
| 101             | Indonesia | 2002           | Pelagic Fish              | 25                                                          |
| 101             | Indonesia | 2002           | Pigmeat                   | 6                                                           |
| 101             | Indonesia | 2002           | Pineapples                | 3                                                           |
| 101             | Indonesia | 2002           | Potatoes                  | 10                                                          |
| 101             | Indonesia | 2002           | Poultry Meat              | 14                                                          |
| 101             | Indonesia | 2002           | Rice (Milled Equivalent)  | 349                                                         |
| 101             | Indonesia | 2002           | Roots, Other              | 4                                                           |
| 101             | Indonesia | 2002           | Soyabean Oil              | 4                                                           |
| 101             | Indonesia | 2002           | Soyabbeans                | 3                                                           |
| 101             | Indonesia | 2002           | Spices, Other             | 2                                                           |
| 101             | Indonesia | 2002           | Sugar, Refined Equivalent | 39                                                          |
| 101             | Indonesia | 2002           | Sweet Potatoes            | 18                                                          |
| 101             | Indonesia | 2002           | Sweeteners, Other         | 3                                                           |
| 101             | Indonesia | 2002           | Tea                       | 1                                                           |
| 101             | Indonesia | 2002           | Tomatoes                  | 7                                                           |
| 101             | Indonesia | 2002           | Vegetables, Other         | 64                                                          |
| 101             | Indonesia | 2002           | Wheat                     | 52                                                          |
| 101             | Indonesia | 2003           | Apples                    | 1                                                           |
| 101             | Indonesia | 2003           | Bananas                   | 47                                                          |
| 101             | Indonesia | 2003           | Beans                     | 4                                                           |
| 101             | Indonesia | 2003           | Beer                      | 2                                                           |
| 101             | Indonesia | 2003           | Bovine Meat               | 5                                                           |
| 101             | Indonesia | 2003           | Cassava                   | 115                                                         |
| 101             | Indonesia | 2003           | Cephalopods               | 1                                                           |
| 101             | Indonesia | 2003           | Cocoa Beans               | 4                                                           |
| 101             | Indonesia | 2003           | Coconut Oil               | 3                                                           |
| 101             | Indonesia | 2003           | Coconuts - Incl Copra     | 66                                                          |
| 101             | Indonesia | 2003           | Coffee                    | 4                                                           |
| 101             | Indonesia | 2003           | Crustaceans               | 4                                                           |
| 101             | Indonesia | 2003           | Demersal Fish             | 10                                                          |
| 101             | Indonesia | 2003           | Eggs                      | 10                                                          |
| 101             | Indonesia | 2003           | Fats, Animals, Raw        | 1                                                           |
| 101             | Indonesia | 2003           | Freshwater Fish           | 13                                                          |
| 101             | Indonesia | 2003           | Fruits, Other             | 73                                                          |
| 101             | Indonesia | 2003           | Groundnuts (Shelled Eq)   | 11                                                          |
| 101             | Indonesia | 2003           | Maize                     | 76                                                          |
| 101             | Indonesia | 2003           | Marine Fish, Other        | 4                                                           |
| 101             | Indonesia | 2003           | Milk, Whole               | 11                                                          |
| 101             | Indonesia | 2003           | Molluscs, Other           | 1                                                           |
| 101             | Indonesia | 2003           | Mutton & Goat Meat        | 2                                                           |
| 101             | Indonesia | 2003           | Nuts                      | 2                                                           |
| 101             | Indonesia | 2003           | Offals, Edible            | 4                                                           |
| 101             | Indonesia | 2003           | Onions                    | 9                                                           |
| 101             | Indonesia | 2003           | Oranges, Mandarines       | 17                                                          |
| 101             | Indonesia | 2003           | Palm Oil                  | 8                                                           |
| 101             | Indonesia | 2003           | Palmkernel Oil            | 5                                                           |
| 101             | Indonesia | 2003           | Pelagic Fish              | 24                                                          |
| 101             | Indonesia | 2003           | Pigmeat                   | 6                                                           |
| 101             | Indonesia | 2003           | Pineapples                | 4                                                           |
| 101             | Indonesia | 2003           | Potatoes                  | 12                                                          |
| 101             | Indonesia | 2003           | Poultry Meat              | 14                                                          |
| 101             | Indonesia | 2003           | Rice (Milled Equivalent)  | 347                                                         |
| 101             | Indonesia | 2003           | Roots, Other              | 4                                                           |
| 101             | Indonesia | 2003           | Soyabean Oil              | 4                                                           |
| 101             | Indonesia | 2003           | Soyabbeans                | 3                                                           |
| 101             | Indonesia | 2003           | Spices, Other             | 2                                                           |
| 101             | Indonesia | 2003           | Sugar, Refined Equivalent | 39                                                          |
| 101             | Indonesia | 2003           | Sweet Potatoes            | 20                                                          |
| 101             | Indonesia | 2003           | Sweeteners, Other         | 3                                                           |
| 101             | Indonesia | 2003           | Tea                       | 1                                                           |
| 101             | Indonesia | 2003           | Tomatoes                  | 8                                                           |
| 101             | Indonesia | 2003           | Vegetables, Other         | 77                                                          |
| 101             | Indonesia | 2003           | Wheat                     | 49                                                          |
| 101             | Indonesia | 2004           | Apples                    | 1                                                           |
| 101             | Indonesia | 2004           | Bananas                   | 54                                                          |
| 101             | Indonesia | 2004           | Beans                     | 3                                                           |
| 101             | Indonesia | 2004           | Beer                      | 2                                                           |
| 101             | Indonesia | 2004           | Bovine Meat               | 6                                                           |
| 101             | Indonesia | 2004           | Cassava                   | 112                                                         |
| 101             | Indonesia | 2004           | Cephalopods               | 1                                                           |
| 101             | Indonesia | 2004           | Cocoa Beans               | 4                                                           |
| 101             | Indonesia | 2004           | Coconut Oil               | 3                                                           |
| 101             | Indonesia | 2004           | Coconuts - Incl Copra     | 64                                                          |
| 101             | Indonesia | 2004           | Coffee                    | 4                                                           |
| 101             | Indonesia | 2004           | Crustaceans               | 4                                                           |
| 101             | Indonesia | 2004           | Demersal Fish             | 10                                                          |
| 101             | Indonesia | 2004           | Eggs                      | 11                                                          |
| 101             | Indonesia | 2004           | Fats, Animals, Raw        | 1                                                           |
| 101             | Indonesia | 2004           | Freshwater Fish           | 13                                                          |
| 101             | Indonesia | 2004           | Fruits, Other             | 74                                                          |
| 101             | Indonesia | 2004           | Groundnuts (Shelled Eq)   | 11                                                          |
| 101             | Indonesia | 2004           | Maize                     | 74                                                          |
| 101             | Indonesia | 2004           | Marine Fish, Other        | 4                                                           |
| 101             | Indonesia | 2004           | Milk, Whole               | 13                                                          |
| 101             | Indonesia | 2004           | Molluscs, Other           | 1                                                           |

Dietary calcium and zinc deficiency risks are decreasing but remain prevalent

| FAO countrycode | Country   | Reference year | Food item                 | Gross food supply (g capita <sup>-1</sup> d <sup>-1</sup> ) |
|-----------------|-----------|----------------|---------------------------|-------------------------------------------------------------|
| 101             | Indonesia | 2004           | Mutton & Goat Meat        | 2                                                           |
| 101             | Indonesia | 2004           | Nuts                      | 2                                                           |
| 101             | Indonesia | 2004           | Offals, Edible            | 4                                                           |
| 101             | Indonesia | 2004           | Onions                    | 9                                                           |
| 101             | Indonesia | 2004           | Oranges, Mandarines       | 25                                                          |
| 101             | Indonesia | 2004           | Palm Oil                  | 9                                                           |
| 101             | Indonesia | 2004           | Palmkernel Oil            | 5                                                           |
| 101             | Indonesia | 2004           | Pelagic Fish              | 25                                                          |
| 101             | Indonesia | 2004           | Pepper                    | 1                                                           |
| 101             | Indonesia | 2004           | Pigmeat                   | 6                                                           |
| 101             | Indonesia | 2004           | Pineapples                | 5                                                           |
| 101             | Indonesia | 2004           | Potatoes                  | 12                                                          |
| 101             | Indonesia | 2004           | Poultry Meat              | 15                                                          |
| 101             | Indonesia | 2004           | Rice (Milled Equivalent)  | 345                                                         |
| 101             | Indonesia | 2004           | Roots, Other              | 4                                                           |
| 101             | Indonesia | 2004           | Soyabean Oil              | 4                                                           |
| 101             | Indonesia | 2004           | Soyabeans                 | 2                                                           |
| 101             | Indonesia | 2004           | Spices, Other             | 2                                                           |
| 101             | Indonesia | 2004           | Sugar, Refined Equivalent | 39                                                          |
| 101             | Indonesia | 2004           | Sweet Potatoes            | 18                                                          |
| 101             | Indonesia | 2004           | Sweeteners, Other         | 3                                                           |
| 101             | Indonesia | 2004           | Tea                       | 1                                                           |
| 101             | Indonesia | 2004           | Tomatoes                  | 7                                                           |
| 101             | Indonesia | 2004           | Vegetables, Other         | 81                                                          |
| 101             | Indonesia | 2004           | Wheat                     | 56                                                          |
| 101             | Indonesia | 2005           | Apples                    | 2                                                           |
| 101             | Indonesia | 2005           | Bananas                   | 56                                                          |
| 101             | Indonesia | 2005           | Beans                     | 3                                                           |
| 101             | Indonesia | 2005           | Beer                      | 2                                                           |
| 101             | Indonesia | 2005           | Bovine Meat               | 5                                                           |
| 101             | Indonesia | 2005           | Cassava                   | 110                                                         |
| 101             | Indonesia | 2005           | Cephalopods               | 1                                                           |
| 101             | Indonesia | 2005           | Cocoa Beans               | 4                                                           |
| 101             | Indonesia | 2005           | Coconut Oil               | 3                                                           |
| 101             | Indonesia | 2005           | Coconuts - Incl Copra     | 65                                                          |
| 101             | Indonesia | 2005           | Coffee                    | 2                                                           |
| 101             | Indonesia | 2005           | Crustaceans               | 4                                                           |
| 101             | Indonesia | 2005           | Demersal Fish             | 10                                                          |
| 101             | Indonesia | 2005           | Eggs                      | 11                                                          |
| 101             | Indonesia | 2005           | Fats, Animals, Raw        | 1                                                           |
| 101             | Indonesia | 2005           | Freshwater Fish           | 14                                                          |
| 101             | Indonesia | 2005           | Fruits, Other             | 69                                                          |
| 101             | Indonesia | 2005           | Groundnuts (Shelled Eq)   | 12                                                          |
| 101             | Indonesia | 2005           | Maize                     | 70                                                          |
| 101             | Indonesia | 2005           | Marine Fish, Other        | 6                                                           |
| 101             | Indonesia | 2005           | Milk, Whole               | 12                                                          |
| 101             | Indonesia | 2005           | Molluscs, Other           | 1                                                           |
| 101             | Indonesia | 2005           | Mutton & Goat Meat        | 1                                                           |
| 101             | Indonesia | 2005           | Nuts                      | 2                                                           |
| 101             | Indonesia | 2005           | Offals, Edible            | 4                                                           |
| 101             | Indonesia | 2005           | Onions                    | 8                                                           |
| 101             | Indonesia | 2005           | Oranges, Mandarines       | 26                                                          |
| 101             | Indonesia | 2005           | Palm Oil                  | 9                                                           |
| 101             | Indonesia | 2005           | Palmkernel Oil            | 5                                                           |
| 101             | Indonesia | 2005           | Pelagic Fish              | 25                                                          |
| 101             | Indonesia | 2005           | Pepper                    | 1                                                           |
| 101             | Indonesia | 2005           | Pigmeat                   | 7                                                           |
| 101             | Indonesia | 2005           | Pineapples                | 6                                                           |
| 101             | Indonesia | 2005           | Potatoes                  | 12                                                          |
| 101             | Indonesia | 2005           | Poultry Meat              | 14                                                          |
| 101             | Indonesia | 2005           | Rice (Milled Equivalent)  | 343                                                         |
| 101             | Indonesia | 2005           | Roots, Other              | 4                                                           |
| 101             | Indonesia | 2005           | Soyabean Oil              | 4                                                           |
| 101             | Indonesia | 2005           | Soyabeans                 | 2                                                           |
| 101             | Indonesia | 2005           | Spices, Other             | 2                                                           |
| 101             | Indonesia | 2005           | Sugar, Refined Equivalent | 40                                                          |
| 101             | Indonesia | 2005           | Sweet Potatoes            | 18                                                          |
| 101             | Indonesia | 2005           | Sweeteners, Other         | 3                                                           |
| 101             | Indonesia | 2005           | Tea                       | 1                                                           |
| 101             | Indonesia | 2005           | Tomatoes                  | 7                                                           |
| 101             | Indonesia | 2005           | Vegetables, Other         | 82                                                          |
| 101             | Indonesia | 2005           | Wheat                     | 55                                                          |
| 101             | Indonesia | 2006           | Apples                    | 2                                                           |
| 101             | Indonesia | 2006           | Bananas                   | 54                                                          |
| 101             | Indonesia | 2006           | Beans                     | 3                                                           |
| 101             | Indonesia | 2006           | Beer                      | 2                                                           |
| 101             | Indonesia | 2006           | Bovine Meat               | 6                                                           |
| 101             | Indonesia | 2006           | Cassava                   | 112                                                         |
| 101             | Indonesia | 2006           | Cephalopods               | 1                                                           |
| 101             | Indonesia | 2006           | Cocoa Beans               | 2                                                           |
| 101             | Indonesia | 2006           | Coconut Oil               | 3                                                           |
| 101             | Indonesia | 2006           | Coconuts - Incl Copra     | 63                                                          |
| 101             | Indonesia | 2006           | Coffee                    | 3                                                           |
| 101             | Indonesia | 2006           | Crustaceans               | 5                                                           |
| 101             | Indonesia | 2006           | Demersal Fish             | 11                                                          |
| 101             | Indonesia | 2006           | Eggs                      | 12                                                          |
| 101             | Indonesia | 2006           | Fats, Animals, Raw        | 1                                                           |
| 101             | Indonesia | 2006           | Freshwater Fish           | 15                                                          |
| 101             | Indonesia | 2006           | Fruits, Other             | 74                                                          |
| 101             | Indonesia | 2006           | Groundnuts (Shelled Eq)   | 12                                                          |
| 101             | Indonesia | 2006           | Maize                     | 78                                                          |
| 101             | Indonesia | 2006           | Marine Fish, Other        | 3                                                           |
| 101             | Indonesia | 2006           | Milk, Whole               | 15                                                          |
| 101             | Indonesia | 2006           | Molluscs, Other           | 1                                                           |
| 101             | Indonesia | 2006           | Mutton & Goat Meat        | 2                                                           |
| 101             | Indonesia | 2006           | Nuts                      | 2                                                           |
| 101             | Indonesia | 2006           | Offals, Edible            | 4                                                           |

Dietary calcium and zinc deficiency risks are decreasing but remain prevalent

| FAO countrycode | Country   | Reference year | Food item                 | Gross food supply (g capita <sup>-1</sup> d <sup>-1</sup> ) |
|-----------------|-----------|----------------|---------------------------|-------------------------------------------------------------|
| 101             | Indonesia | 2006           | Onions                    | 9                                                           |
| 101             | Indonesia | 2006           | Oranges, Mandarines       | 29                                                          |
| 101             | Indonesia | 2006           | Palm Oil                  | 10                                                          |
| 101             | Indonesia | 2006           | Palmkernel Oil            | 5                                                           |
| 101             | Indonesia | 2006           | Pelagic Fish              | 28                                                          |
| 101             | Indonesia | 2006           | Pigmeat                   | 7                                                           |
| 101             | Indonesia | 2006           | Pineapples                | 12                                                          |
| 101             | Indonesia | 2006           | Potatoes                  | 11                                                          |
| 101             | Indonesia | 2006           | Poultry Meat              | 16                                                          |
| 101             | Indonesia | 2006           | Rice (Milled Equivalent)  | 343                                                         |
| 101             | Indonesia | 2006           | Roots, Other              | 4                                                           |
| 101             | Indonesia | 2006           | Soyabean Oil              | 4                                                           |
| 101             | Indonesia | 2006           | Soyabeans                 | 2                                                           |
| 101             | Indonesia | 2006           | Spices, Other             | 3                                                           |
| 101             | Indonesia | 2006           | Sugar, Refined Equivalent | 34                                                          |
| 101             | Indonesia | 2006           | Sweet Potatoes            | 18                                                          |
| 101             | Indonesia | 2006           | Sweeteners, Other         | 3                                                           |
| 101             | Indonesia | 2006           | Tea                       | 1                                                           |
| 101             | Indonesia | 2006           | Tomatoes                  | 7                                                           |
| 101             | Indonesia | 2006           | Vegetables, Other         | 84                                                          |
| 101             | Indonesia | 2006           | Wheat                     | 58                                                          |
| 101             | Indonesia | 2007           | Apples                    | 2                                                           |
| 101             | Indonesia | 2007           | Bananas                   | 57                                                          |
| 101             | Indonesia | 2007           | Beans                     | 3                                                           |
| 101             | Indonesia | 2007           | Beer                      | 2                                                           |
| 101             | Indonesia | 2007           | Bovine Meat               | 5                                                           |
| 101             | Indonesia | 2007           | Cassava                   | 110                                                         |
| 101             | Indonesia | 2007           | Cephalopods               | 1                                                           |
| 101             | Indonesia | 2007           | Cocoa Beans               | 3                                                           |
| 101             | Indonesia | 2007           | Coconut Oil               | 3                                                           |
| 101             | Indonesia | 2007           | Coconuts - Incl Copra     | 63                                                          |
| 101             | Indonesia | 2007           | Coffee                    | 3                                                           |
| 101             | Indonesia | 2007           | Crustaceans               | 5                                                           |
| 101             | Indonesia | 2007           | Demersal Fish             | 12                                                          |
| 101             | Indonesia | 2007           | Eggs                      | 14                                                          |
| 101             | Indonesia | 2007           | Fats, Animals, Raw        | 1                                                           |
| 101             | Indonesia | 2007           | Freshwater Fish           | 16                                                          |
| 101             | Indonesia | 2007           | Fruits, Other             | 69                                                          |
| 101             | Indonesia | 2007           | Groundnuts (Shelled Eq)   | 12                                                          |
| 101             | Indonesia | 2007           | Maize                     | 76                                                          |
| 101             | Indonesia | 2007           | Marine Fish, Other        | 4                                                           |
| 101             | Indonesia | 2007           | Milk, Whole               | 15                                                          |
| 101             | Indonesia | 2007           | Molluscs, Other           | 1                                                           |
| 101             | Indonesia | 2007           | Mutton & Goat Meat        | 1                                                           |
| 101             | Indonesia | 2007           | Nuts                      | 2                                                           |
| 101             | Indonesia | 2007           | Offals, Edible            | 4                                                           |
| 101             | Indonesia | 2007           | Onions                    | 9                                                           |
| 101             | Indonesia | 2007           | Oranges, Mandarines       | 30                                                          |
| 101             | Indonesia | 2007           | Palm Oil                  | 10                                                          |
| 101             | Indonesia | 2007           | Palmkernel Oil            | 6                                                           |
| 101             | Indonesia | 2007           | Pelagic Fish              | 28                                                          |
| 101             | Indonesia | 2007           | Pigmeat                   | 7                                                           |
| 101             | Indonesia | 2007           | Pineapples                | 13                                                          |
| 101             | Indonesia | 2007           | Potatoes                  | 11                                                          |
| 101             | Indonesia | 2007           | Poultry Meat              | 16                                                          |
| 101             | Indonesia | 2007           | Rice (Milled Equivalent)  | 347                                                         |
| 101             | Indonesia | 2007           | Roots, Other              | 4                                                           |
| 101             | Indonesia | 2007           | Soyabean Oil              | 5                                                           |
| 101             | Indonesia | 2007           | Soyabeans                 | 4                                                           |
| 101             | Indonesia | 2007           | Spices, Other             | 3                                                           |
| 101             | Indonesia | 2007           | Sugar, Refined Equivalent | 33                                                          |
| 101             | Indonesia | 2007           | Sweet Potatoes            | 18                                                          |
| 101             | Indonesia | 2007           | Sweeteners, Other         | 3                                                           |
| 101             | Indonesia | 2007           | Tea                       | 1                                                           |
| 101             | Indonesia | 2007           | Tomatoes                  | 7                                                           |
| 101             | Indonesia | 2007           | Vegetables, Other         | 83                                                          |
| 101             | Indonesia | 2007           | Wheat                     | 59                                                          |
| 101             | Indonesia | 2008           | Apples                    | 2                                                           |
| 101             | Indonesia | 2008           | Bananas                   | 63                                                          |
| 101             | Indonesia | 2008           | Beans                     | 3                                                           |
| 101             | Indonesia | 2008           | Beer                      | 2                                                           |
| 101             | Indonesia | 2008           | Bovine Meat               | 6                                                           |
| 101             | Indonesia | 2008           | Cassava                   | 119                                                         |
| 101             | Indonesia | 2008           | Cephalopods               | 1                                                           |
| 101             | Indonesia | 2008           | Cocoa Beans               | 4                                                           |
| 101             | Indonesia | 2008           | Coconut Oil               | 3                                                           |
| 101             | Indonesia | 2008           | Coconuts - Incl Copra     | 48                                                          |
| 101             | Indonesia | 2008           | Coffee                    | 1                                                           |
| 101             | Indonesia | 2008           | Crustaceans               | 5                                                           |
| 101             | Indonesia | 2008           | Demersal Fish             | 11                                                          |
| 101             | Indonesia | 2008           | Eggs                      | 13                                                          |
| 101             | Indonesia | 2008           | Fats, Animals, Raw        | 1                                                           |
| 101             | Indonesia | 2008           | Freshwater Fish           | 18                                                          |
| 101             | Indonesia | 2008           | Fruits, Other             | 75                                                          |
| 101             | Indonesia | 2008           | Groundnuts (Shelled Eq)   | 12                                                          |
| 101             | Indonesia | 2008           | Maize                     | 86                                                          |
| 101             | Indonesia | 2008           | Marine Fish, Other        | 3                                                           |
| 101             | Indonesia | 2008           | Milk, Whole               | 14                                                          |
| 101             | Indonesia | 2008           | Molluscs, Other           | 1                                                           |
| 101             | Indonesia | 2008           | Mutton & Goat Meat        | 1                                                           |
| 101             | Indonesia | 2008           | Nuts                      | 2                                                           |
| 101             | Indonesia | 2008           | Offals, Edible            | 5                                                           |
| 101             | Indonesia | 2008           | Onions                    | 9                                                           |
| 101             | Indonesia | 2008           | Oranges, Mandarines       | 28                                                          |
| 101             | Indonesia | 2008           | Palm Oil                  | 11                                                          |
| 101             | Indonesia | 2008           | Palmkernel Oil            | 7                                                           |
| 101             | Indonesia | 2008           | Pelagic Fish              | 30                                                          |



Dietary calcium and zinc deficiency risks are decreasing but remain prevalent

| FAO countrycode | Country   | Reference year | Food item                 | Gross food supply (g capita <sup>-1</sup> d <sup>-1</sup> ) |
|-----------------|-----------|----------------|---------------------------|-------------------------------------------------------------|
| 101             | Indonesia | 2008           | Pigmeat                   | 7                                                           |
| 101             | Indonesia | 2008           | Pineapples                | 11                                                          |
| 101             | Indonesia | 2008           | Potatoes                  | 11                                                          |
| 101             | Indonesia | 2008           | Poultry Meat              | 16                                                          |
| 101             | Indonesia | 2008           | Rice (Milled Equivalent)  | 351                                                         |
| 101             | Indonesia | 2008           | Roots, Other              | 4                                                           |
| 101             | Indonesia | 2008           | Soyabean Oil              | 4                                                           |
| 101             | Indonesia | 2008           | Soyabeans                 | 2                                                           |
| 101             | Indonesia | 2008           | Spices, Other             | 3                                                           |
| 101             | Indonesia | 2008           | Sugar, Refined Equivalent | 32                                                          |
| 101             | Indonesia | 2008           | Sweet Potatoes            | 17                                                          |
| 101             | Indonesia | 2008           | Sweeteners, Other         | 3                                                           |
| 101             | Indonesia | 2008           | Tea                       | 1                                                           |
| 101             | Indonesia | 2008           | Tomatoes                  | 8                                                           |
| 101             | Indonesia | 2008           | Vegetables, Other         | 86                                                          |
| 101             | Indonesia | 2008           | Wheat                     | 56                                                          |
| 101             | Indonesia | 2009           | Apples                    | 2                                                           |
| 101             | Indonesia | 2009           | Bananas                   | 65                                                          |
| 101             | Indonesia | 2009           | Beans                     | 3                                                           |
| 101             | Indonesia | 2009           | Beer                      | 2                                                           |
| 101             | Indonesia | 2009           | Bovine Meat               | 6                                                           |
| 101             | Indonesia | 2009           | Cassava                   | 122                                                         |
| 101             | Indonesia | 2009           | Cephalopods               | 1                                                           |
| 101             | Indonesia | 2009           | Cocoa Beans               | 4                                                           |
| 101             | Indonesia | 2009           | Coconut Oil               | 2                                                           |
| 101             | Indonesia | 2009           | Coconuts - Incl Copra     | 51                                                          |
| 101             | Indonesia | 2009           | Coffee                    | 1                                                           |
| 101             | Indonesia | 2009           | Crustaceans               | 5                                                           |
| 101             | Indonesia | 2009           | Demersal Fish             | 12                                                          |
| 101             | Indonesia | 2009           | Eggs                      | 12                                                          |
| 101             | Indonesia | 2009           | Fats, Animals, Raw        | 1                                                           |
| 101             | Indonesia | 2009           | Freshwater Fish           | 19                                                          |
| 101             | Indonesia | 2009           | Fruits, Other             | 80                                                          |
| 101             | Indonesia | 2009           | Grapes                    | 1                                                           |
| 101             | Indonesia | 2009           | Groundnuts (Shelled Eq)   | 12                                                          |
| 101             | Indonesia | 2009           | Maize                     | 89                                                          |
| 101             | Indonesia | 2009           | Marine Fish, Other        | 3                                                           |
| 101             | Indonesia | 2009           | Milk, Whole               | 14                                                          |
| 101             | Indonesia | 2009           | Mutton & Goat Meat        | 1                                                           |
| 101             | Indonesia | 2009           | Nuts                      | 2                                                           |
| 101             | Indonesia | 2009           | Offals, Edible            | 5                                                           |
| 101             | Indonesia | 2009           | Onions                    | 10                                                          |
| 101             | Indonesia | 2009           | Oranges, Mandarines       | 25                                                          |
| 101             | Indonesia | 2009           | Palm Oil                  | 11                                                          |
| 101             | Indonesia | 2009           | Palmkernel Oil            | 7                                                           |
| 101             | Indonesia | 2009           | Pelagic Fish              | 30                                                          |
| 101             | Indonesia | 2009           | Pigmeat                   | 7                                                           |
| 101             | Indonesia | 2009           | Pineapples                | 14                                                          |
| 101             | Indonesia | 2009           | Potatoes                  | 13                                                          |
| 101             | Indonesia | 2009           | Poultry Meat              | 17                                                          |
| 101             | Indonesia | 2009           | Rice (Milled Equivalent)  | 356                                                         |
| 101             | Indonesia | 2009           | Roots, Other              | 4                                                           |
| 101             | Indonesia | 2009           | Soyabean Oil              | 4                                                           |
| 101             | Indonesia | 2009           | Soyabeans                 | 3                                                           |
| 101             | Indonesia | 2009           | Spices, Other             | 2                                                           |
| 101             | Indonesia | 2009           | Sugar, Refined Equivalent | 32                                                          |
| 101             | Indonesia | 2009           | Sweet Potatoes            | 19                                                          |
| 101             | Indonesia | 2009           | Sweeteners, Other         | 4                                                           |
| 101             | Indonesia | 2009           | Tea                       | 1                                                           |
| 101             | Indonesia | 2009           | Tomatoes                  | 9                                                           |
| 101             | Indonesia | 2009           | Vegetables, Other         | 89                                                          |
| 101             | Indonesia | 2009           | Wheat                     | 59                                                          |
| 101             | Indonesia | 2010           | Apples                    | 2                                                           |
| 101             | Indonesia | 2010           | Bananas                   | 59                                                          |
| 101             | Indonesia | 2010           | Beans                     | 3                                                           |
| 101             | Indonesia | 2010           | Beer                      | 2                                                           |
| 101             | Indonesia | 2010           | Bovine Meat               | 7                                                           |
| 101             | Indonesia | 2010           | Cassava                   | 131                                                         |
| 101             | Indonesia | 2010           | Cephalopods               | 1                                                           |
| 101             | Indonesia | 2010           | Cocoa Beans               | 4                                                           |
| 101             | Indonesia | 2010           | Coconut Oil               | 3                                                           |
| 101             | Indonesia | 2010           | Coconuts - Incl Copra     | 50                                                          |
| 101             | Indonesia | 2010           | Coffee                    | 1                                                           |
| 101             | Indonesia | 2010           | Crustaceans               | 5                                                           |
| 101             | Indonesia | 2010           | Demersal Fish             | 12                                                          |
| 101             | Indonesia | 2010           | Eggs                      | 13                                                          |
| 101             | Indonesia | 2010           | Fats, Animals, Raw        | 1                                                           |
| 101             | Indonesia | 2010           | Freshwater Fish           | 23                                                          |
| 101             | Indonesia | 2010           | Fruits, Other             | 59                                                          |
| 101             | Indonesia | 2010           | Grapes                    | 1                                                           |
| 101             | Indonesia | 2010           | Groundnuts (Shelled Eq)   | 12                                                          |
| 101             | Indonesia | 2010           | Maize                     | 92                                                          |
| 101             | Indonesia | 2010           | Marine Fish, Other        | 2                                                           |
| 101             | Indonesia | 2010           | Milk, Whole               | 14                                                          |
| 101             | Indonesia | 2010           | Mutton & Goat Meat        | 1                                                           |
| 101             | Indonesia | 2010           | Nuts                      | 2                                                           |
| 101             | Indonesia | 2010           | Offals, Edible            | 5                                                           |
| 101             | Indonesia | 2010           | Onions                    | 11                                                          |
| 101             | Indonesia | 2010           | Oranges, Mandarines       | 23                                                          |
| 101             | Indonesia | 2010           | Palm Oil                  | 11                                                          |
| 101             | Indonesia | 2010           | Palmkernel Oil            | 7                                                           |
| 101             | Indonesia | 2010           | Pelagic Fish              | 31                                                          |
| 101             | Indonesia | 2010           | Pigmeat                   | 8                                                           |
| 101             | Indonesia | 2010           | Pineapples                | 12                                                          |
| 101             | Indonesia | 2010           | Potatoes                  | 11                                                          |
| 101             | Indonesia | 2010           | Poultry Meat              | 18                                                          |
| 101             | Indonesia | 2010           | Rice (Milled Equivalent)  | 361                                                         |

Dietary calcium and zinc deficiency risks are decreasing but remain prevalent

| FAO countrycode | Country   | Reference year | Food item                 | Gross food supply (g capita <sup>-1</sup> d <sup>-1</sup> ) |
|-----------------|-----------|----------------|---------------------------|-------------------------------------------------------------|
| 101             | Indonesia | 2010           | Roots, Other              | 4                                                           |
| 101             | Indonesia | 2010           | Soyabean Oil              | 5                                                           |
| 101             | Indonesia | 2010           | Soyabeans                 | 3                                                           |
| 101             | Indonesia | 2010           | Spices, Other             | 2                                                           |
| 101             | Indonesia | 2010           | Sugar, Refined Equivalent | 33                                                          |
| 101             | Indonesia | 2010           | Sweet Potatoes            | 18                                                          |
| 101             | Indonesia | 2010           | Sweeteners, Other         | 3                                                           |
| 101             | Indonesia | 2010           | Tea                       | 1                                                           |
| 101             | Indonesia | 2010           | Tomatoes                  | 10                                                          |
| 101             | Indonesia | 2010           | Vegetables, Other         | 88                                                          |
| 101             | Indonesia | 2010           | Wheat                     | 61                                                          |
| 101             | Indonesia | 2011           | Apples                    | 2                                                           |
| 101             | Indonesia | 2011           | Bananas                   | 61                                                          |
| 101             | Indonesia | 2011           | Beans                     | 4                                                           |
| 101             | Indonesia | 2011           | Beer                      | 2                                                           |
| 101             | Indonesia | 2011           | Bovine Meat               | 7                                                           |
| 101             | Indonesia | 2011           | Cassava                   | 130                                                         |
| 101             | Indonesia | 2011           | Cephalopods               | 1                                                           |
| 101             | Indonesia | 2011           | Cocoa Beans               | 4                                                           |
| 101             | Indonesia | 2011           | Coconut Oil               | 3                                                           |
| 101             | Indonesia | 2011           | Coconuts - Incl Copra     | 49                                                          |
| 101             | Indonesia | 2011           | Coffee                    | 2                                                           |
| 101             | Indonesia | 2011           | Crustaceans               | 6                                                           |
| 101             | Indonesia | 2011           | Demersal Fish             | 13                                                          |
| 101             | Indonesia | 2011           | Eggs                      | 12                                                          |
| 101             | Indonesia | 2011           | Fats, Animals, Raw        | 1                                                           |
| 101             | Indonesia | 2011           | Freshwater Fish           | 24                                                          |
| 101             | Indonesia | 2011           | Fruits, Other             | 84                                                          |
| 101             | Indonesia | 2011           | Grapes                    | 1                                                           |
| 101             | Indonesia | 2011           | Groundnuts (Shelled Eq)   | 11                                                          |
| 101             | Indonesia | 2011           | Maize                     | 93                                                          |
| 101             | Indonesia | 2011           | Marine Fish, Other        | 2                                                           |
| 101             | Indonesia | 2011           | Milk, Whole               | 18                                                          |
| 101             | Indonesia | 2011           | Mutton & Goat Meat        | 1                                                           |
| 101             | Indonesia | 2011           | Nuts                      | 2                                                           |
| 101             | Indonesia | 2011           | Offals, Edible            | 5                                                           |
| 101             | Indonesia | 2011           | Onions                    | 10                                                          |
| 101             | Indonesia | 2011           | Oranges, Mandarines       | 21                                                          |
| 101             | Indonesia | 2011           | Palm Oil                  | 12                                                          |
| 101             | Indonesia | 2011           | Palmkernel Oil            | 7                                                           |
| 101             | Indonesia | 2011           | Pelagic Fish              | 32                                                          |
| 101             | Indonesia | 2011           | Pepper                    | 1                                                           |
| 101             | Indonesia | 2011           | Pigmeat                   | 8                                                           |
| 101             | Indonesia | 2011           | Pineapples                | 12                                                          |
| 101             | Indonesia | 2011           | Potatoes                  | 11                                                          |
| 101             | Indonesia | 2011           | Poultry Meat              | 19                                                          |
| 101             | Indonesia | 2011           | Rice (Milled Equivalent)  | 364                                                         |
| 101             | Indonesia | 2011           | Roots, Other              | 4                                                           |
| 101             | Indonesia | 2011           | Soyabean Oil              | 5                                                           |
| 101             | Indonesia | 2011           | Soyabeans                 | 4                                                           |
| 101             | Indonesia | 2011           | Spices, Other             | 2                                                           |
| 101             | Indonesia | 2011           | Sugar, Refined Equivalent | 34                                                          |
| 101             | Indonesia | 2011           | Sweet Potatoes            | 19                                                          |
| 101             | Indonesia | 2011           | Sweeteners, Other         | 3                                                           |
| 101             | Indonesia | 2011           | Tea                       | 1                                                           |
| 101             | Indonesia | 2011           | Tomatoes                  | 10                                                          |
| 101             | Indonesia | 2011           | Vegetables, Other         | 98                                                          |
| 101             | Indonesia | 2011           | Wheat                     | 64                                                          |
| 102             | Iran      | 1992           | Apples                    | 56                                                          |
| 102             | Iran      | 1992           | Bananas                   | 6                                                           |
| 102             | Iran      | 1992           | Barley                    | 1                                                           |
| 102             | Iran      | 1992           | Beans                     | 5                                                           |
| 102             | Iran      | 1992           | Bovine Meat               | 13                                                          |
| 102             | Iran      | 1992           | Butter, Ghee              | 5                                                           |
| 102             | Iran      | 1992           | Cheese                    | 12                                                          |
| 102             | Iran      | 1992           | Citrus, Other             | 2                                                           |
| 102             | Iran      | 1992           | Dates                     | 20                                                          |
| 102             | Iran      | 1992           | Eggs                      | 16                                                          |
| 102             | Iran      | 1992           | Freshwater Fish           | 4                                                           |
| 102             | Iran      | 1992           | Fruits, Other             | 70                                                          |
| 102             | Iran      | 1992           | Grapefruit                | 2                                                           |
| 102             | Iran      | 1992           | Grapes                    | 54                                                          |
| 102             | Iran      | 1992           | Honey                     | 1                                                           |
| 102             | Iran      | 1992           | Lemons, Limes             | 22                                                          |
| 102             | Iran      | 1992           | Maize                     | 2                                                           |
| 102             | Iran      | 1992           | Marine Fish, Other        | 7                                                           |
| 102             | Iran      | 1992           | Meat, Other               | 2                                                           |
| 102             | Iran      | 1992           | Milk, Whole               | 59                                                          |
| 102             | Iran      | 1992           | Mutton & Goat Meat        | 19                                                          |
| 102             | Iran      | 1992           | Nuts                      | 11                                                          |
| 102             | Iran      | 1992           | Offals, Edible            | 6                                                           |
| 102             | Iran      | 1992           | Onions                    | 52                                                          |
| 102             | Iran      | 1992           | Oranges, Mandarines       | 101                                                         |
| 102             | Iran      | 1992           | Pelagic Fish              | 3                                                           |
| 102             | Iran      | 1992           | Potatoes                  | 107                                                         |
| 102             | Iran      | 1992           | Poultry Meat              | 26                                                          |
| 102             | Iran      | 1992           | Pulses, Other             | 14                                                          |
| 102             | Iran      | 1992           | Rice (Milled Equivalent)  | 103                                                         |
| 102             | Iran      | 1992           | Soyabean Oil              | 25                                                          |
| 102             | Iran      | 1992           | Spices, Other             | 1                                                           |
| 102             | Iran      | 1992           | Sugar, Refined Equivalent | 69                                                          |
| 102             | Iran      | 1992           | Sunflowerseed Oil         | 3                                                           |
| 102             | Iran      | 1992           | Tea                       | 7                                                           |
| 102             | Iran      | 1992           | Tomatoes                  | 100                                                         |
| 102             | Iran      | 1992           | Vegetables, Other         | 255                                                         |
| 102             | Iran      | 1992           | Wheat                     | 457                                                         |
| 102             | Iran      | 1993           | Apples                    | 58                                                          |

## Dietary calcium and zinc deficiency risks are decreasing but remain prevalent

| FAO countrycode | Country | Reference year | Food item                 | Gross food supply (g capita <sup>-1</sup> d <sup>-1</sup> ) |
|-----------------|---------|----------------|---------------------------|-------------------------------------------------------------|
| 102             | Iran    | 1993           | Bananas                   | 8                                                           |
| 102             | Iran    | 1993           | Barley                    | 2                                                           |
| 102             | Iran    | 1993           | Beans                     | 4                                                           |
| 102             | Iran    | 1993           | Bovine Meat               | 15                                                          |
| 102             | Iran    | 1993           | Butter, Ghee              | 6                                                           |
| 102             | Iran    | 1993           | Cheese                    | 12                                                          |
| 102             | Iran    | 1993           | Citrus, Other             | 4                                                           |
| 102             | Iran    | 1993           | Dates                     | 25                                                          |
| 102             | Iran    | 1993           | Eggs                      | 18                                                          |
| 102             | Iran    | 1993           | Freshwater Fish           | 4                                                           |
| 102             | Iran    | 1993           | Fruits, Other             | 89                                                          |
| 102             | Iran    | 1993           | Grapefruit                | 3                                                           |
| 102             | Iran    | 1993           | Grapes                    | 65                                                          |
| 102             | Iran    | 1993           | Honey                     | 1                                                           |
| 102             | Iran    | 1993           | Lemons, Limes             | 26                                                          |
| 102             | Iran    | 1993           | Maize                     | 1                                                           |
| 102             | Iran    | 1993           | Marine Fish, Other        | 7                                                           |
| 102             | Iran    | 1993           | Meat, Other               | 2                                                           |
| 102             | Iran    | 1993           | Milk, Whole               | 60                                                          |
| 102             | Iran    | 1993           | Mutton & Goat Meat        | 18                                                          |
| 102             | Iran    | 1993           | Nuts                      | 14                                                          |
| 102             | Iran    | 1993           | Offals, Edible            | 6                                                           |
| 102             | Iran    | 1993           | Onions                    | 39                                                          |
| 102             | Iran    | 1993           | Oranges, Mandarines       | 80                                                          |
| 102             | Iran    | 1993           | Pelagic Fish              | 3                                                           |
| 102             | Iran    | 1993           | Potatoes                  | 128                                                         |
| 102             | Iran    | 1993           | Poultry Meat              | 29                                                          |
| 102             | Iran    | 1993           | Pulses, Other             | 14                                                          |
| 102             | Iran    | 1993           | Rice (Milled Equivalent)  | 107                                                         |
| 102             | Iran    | 1993           | Soyabean Oil              | 22                                                          |
| 102             | Iran    | 1993           | Spices, Other             | 1                                                           |
| 102             | Iran    | 1993           | Sugar, Refined Equivalent | 70                                                          |
| 102             | Iran    | 1993           | Sunflowerseed Oil         | 2                                                           |
| 102             | Iran    | 1993           | Tea                       | 5                                                           |
| 102             | Iran    | 1993           | Tomatoes                  | 100                                                         |
| 102             | Iran    | 1993           | Vegetables, Other         | 225                                                         |
| 102             | Iran    | 1993           | Wheat                     | 472                                                         |
| 102             | Iran    | 1994           | Apples                    | 74                                                          |
| 102             | Iran    | 1994           | Bananas                   | 3                                                           |
| 102             | Iran    | 1994           | Barley                    | 2                                                           |
| 102             | Iran    | 1994           | Beans                     | 5                                                           |
| 102             | Iran    | 1994           | Bovine Meat               | 15                                                          |
| 102             | Iran    | 1994           | Butter, Ghee              | 5                                                           |
| 102             | Iran    | 1994           | Cheese                    | 10                                                          |
| 102             | Iran    | 1994           | Citrus, Other             | 4                                                           |
| 102             | Iran    | 1994           | Dates                     | 26                                                          |
| 102             | Iran    | 1994           | Eggs                      | 20                                                          |
| 102             | Iran    | 1994           | Freshwater Fish           | 5                                                           |
| 102             | Iran    | 1994           | Fruits, Other             | 95                                                          |
| 102             | Iran    | 1994           | Grapefruit                | 2                                                           |
| 102             | Iran    | 1994           | Grapes                    | 64                                                          |
| 102             | Iran    | 1994           | Honey                     | 1                                                           |
| 102             | Iran    | 1994           | Lemons, Limes             | 27                                                          |
| 102             | Iran    | 1994           | Maize                     | 2                                                           |
| 102             | Iran    | 1994           | Marine Fish, Other        | 4                                                           |
| 102             | Iran    | 1994           | Meat, Other               | 2                                                           |
| 102             | Iran    | 1994           | Milk, Whole               | 61                                                          |
| 102             | Iran    | 1994           | Mutton & Goat Meat        | 18                                                          |
| 102             | Iran    | 1994           | Nuts                      | 14                                                          |
| 102             | Iran    | 1994           | Offals, Edible            | 6                                                           |
| 102             | Iran    | 1994           | Olives                    | 1                                                           |
| 102             | Iran    | 1994           | Onions                    | 42                                                          |
| 102             | Iran    | 1994           | Oranges, Mandarines       | 89                                                          |
| 102             | Iran    | 1994           | Pelagic Fish              | 3                                                           |
| 102             | Iran    | 1994           | Potatoes                  | 120                                                         |
| 102             | Iran    | 1994           | Poultry Meat              | 29                                                          |
| 102             | Iran    | 1994           | Pulses, Other             | 14                                                          |
| 102             | Iran    | 1994           | Rice (Milled Equivalent)  | 79                                                          |
| 102             | Iran    | 1994           | Soyabean Oil              | 22                                                          |
| 102             | Iran    | 1994           | Spices, Other             | 1                                                           |
| 102             | Iran    | 1994           | Sugar, Refined Equivalent | 71                                                          |
| 102             | Iran    | 1994           | Sunflowerseed Oil         | 6                                                           |
| 102             | Iran    | 1994           | Tea                       | 3                                                           |
| 102             | Iran    | 1994           | Tomatoes                  | 86                                                          |
| 102             | Iran    | 1994           | Vegetables, Other         | 185                                                         |
| 102             | Iran    | 1994           | Wheat                     | 492                                                         |
| 102             | Iran    | 1995           | Apples                    | 72                                                          |
| 102             | Iran    | 1995           | Bananas                   | 6                                                           |
| 102             | Iran    | 1995           | Barley                    | 2                                                           |
| 102             | Iran    | 1995           | Beans                     | 5                                                           |
| 102             | Iran    | 1995           | Bovine Meat               | 14                                                          |
| 102             | Iran    | 1995           | Butter, Ghee              | 6                                                           |
| 102             | Iran    | 1995           | Cheese                    | 10                                                          |
| 102             | Iran    | 1995           | Citrus, Other             | 4                                                           |
| 102             | Iran    | 1995           | Dates                     | 27                                                          |
| 102             | Iran    | 1995           | Eggs                      | 18                                                          |
| 102             | Iran    | 1995           | Freshwater Fish           | 5                                                           |
| 102             | Iran    | 1995           | Fruits, Other             | 98                                                          |
| 102             | Iran    | 1995           | Grapefruit                | 3                                                           |
| 102             | Iran    | 1995           | Grapes                    | 65                                                          |
| 102             | Iran    | 1995           | Honey                     | 1                                                           |
| 102             | Iran    | 1995           | Lemons, Limes             | 29                                                          |
| 102             | Iran    | 1995           | Maize                     | 2                                                           |
| 102             | Iran    | 1995           | Marine Fish, Other        | 5                                                           |
| 102             | Iran    | 1995           | Meat, Other               | 1                                                           |
| 102             | Iran    | 1995           | Milk, Whole               | 63                                                          |
| 102             | Iran    | 1995           | Mutton & Goat Meat        | 18                                                          |

Dietary calcium and zinc deficiency risks are decreasing but remain prevalent

| FAO countrycode | Country | Reference year | Food item                 | Gross food supply (g capita <sup>-1</sup> d <sup>-1</sup> ) |
|-----------------|---------|----------------|---------------------------|-------------------------------------------------------------|
| 102             | Iran    | 1995           | Nuts                      | 14                                                          |
| 102             | Iran    | 1995           | Offals, Edible            | 7                                                           |
| 102             | Iran    | 1995           | Olives                    | 1                                                           |
| 102             | Iran    | 1995           | Onions                    | 42                                                          |
| 102             | Iran    | 1995           | Oranges, Mandarines       | 87                                                          |
| 102             | Iran    | 1995           | Pelagic Fish              | 4                                                           |
| 102             | Iran    | 1995           | Potatoes                  | 114                                                         |
| 102             | Iran    | 1995           | Poultry Meat              | 29                                                          |
| 102             | Iran    | 1995           | Pulses, Other             | 14                                                          |
| 102             | Iran    | 1995           | Rice (Milled Equivalent)  | 121                                                         |
| 102             | Iran    | 1995           | Soyabean Oil              | 20                                                          |
| 102             | Iran    | 1995           | Spices, Other             | 1                                                           |
| 102             | Iran    | 1995           | Sugar, Refined Equivalent | 67                                                          |
| 102             | Iran    | 1995           | Sunflowerseed Oil         | 11                                                          |
| 102             | Iran    | 1995           | Tea                       | 4                                                           |
| 102             | Iran    | 1995           | Tomatoes                  | 98                                                          |
| 102             | Iran    | 1995           | Vegetables, Other         | 187                                                         |
| 102             | Iran    | 1995           | Wheat                     | 411                                                         |
| 102             | Iran    | 1996           | Apples                    | 69                                                          |
| 102             | Iran    | 1996           | Bananas                   | 7                                                           |
| 102             | Iran    | 1996           | Barley                    | 2                                                           |
| 102             | Iran    | 1996           | Beans                     | 5                                                           |
| 102             | Iran    | 1996           | Bovine Meat               | 17                                                          |
| 102             | Iran    | 1996           | Butter, Ghee              | 6                                                           |
| 102             | Iran    | 1996           | Cheese                    | 9                                                           |
| 102             | Iran    | 1996           | Citrus, Other             | 3                                                           |
| 102             | Iran    | 1996           | Dates                     | 25                                                          |
| 102             | Iran    | 1996           | Eggs                      | 20                                                          |
| 102             | Iran    | 1996           | Freshwater Fish           | 6                                                           |
| 102             | Iran    | 1996           | Fruits, Other             | 101                                                         |
| 102             | Iran    | 1996           | Grapefruit                | 2                                                           |
| 102             | Iran    | 1996           | Grapes                    | 70                                                          |
| 102             | Iran    | 1996           | Honey                     | 1                                                           |
| 102             | Iran    | 1996           | Lemons, Limes             | 30                                                          |
| 102             | Iran    | 1996           | Maize                     | 2                                                           |
| 102             | Iran    | 1996           | Marine Fish, Other        | 4                                                           |
| 102             | Iran    | 1996           | Meat, Other               | 1                                                           |
| 102             | Iran    | 1996           | Milk, Whole               | 67                                                          |
| 102             | Iran    | 1996           | Mutton & Goat Meat        | 18                                                          |
| 102             | Iran    | 1996           | Nuts                      | 15                                                          |
| 102             | Iran    | 1996           | Offals, Edible            | 7                                                           |
| 102             | Iran    | 1996           | Olives                    | 1                                                           |
| 102             | Iran    | 1996           | Onions                    | 44                                                          |
| 102             | Iran    | 1996           | Oranges, Mandarines       | 91                                                          |
| 102             | Iran    | 1996           | Pelagic Fish              | 3                                                           |
| 102             | Iran    | 1996           | Potatoes                  | 116                                                         |
| 102             | Iran    | 1996           | Poultry Meat              | 30                                                          |
| 102             | Iran    | 1996           | Pulses, Other             | 14                                                          |
| 102             | Iran    | 1996           | Rice (Milled Equivalent)  | 100                                                         |
| 102             | Iran    | 1996           | Soyabean Oil              | 21                                                          |
| 102             | Iran    | 1996           | Spices, Other             | 1                                                           |
| 102             | Iran    | 1996           | Sugar, Refined Equivalent | 66                                                          |
| 102             | Iran    | 1996           | Sunflowerseed Oil         | 6                                                           |
| 102             | Iran    | 1996           | Tea                       | 4                                                           |
| 102             | Iran    | 1996           | Tomatoes                  | 119                                                         |
| 102             | Iran    | 1996           | Vegetables, Other         | 258                                                         |
| 102             | Iran    | 1996           | Wheat                     | 449                                                         |
| 102             | Iran    | 1997           | Apples                    | 72                                                          |
| 102             | Iran    | 1997           | Bananas                   | 8                                                           |
| 102             | Iran    | 1997           | Barley                    | 1                                                           |
| 102             | Iran    | 1997           | Beans                     | 6                                                           |
| 102             | Iran    | 1997           | Bovine Meat               | 17                                                          |
| 102             | Iran    | 1997           | Butter, Ghee              | 6                                                           |
| 102             | Iran    | 1997           | Cheese                    | 8                                                           |
| 102             | Iran    | 1997           | Citrus, Other             | 4                                                           |
| 102             | Iran    | 1997           | Coconuts - Incl Copra     | 1                                                           |
| 102             | Iran    | 1997           | Cottonseed Oil            | 2                                                           |
| 102             | Iran    | 1997           | Dates                     | 32                                                          |
| 102             | Iran    | 1997           | Demersal Fish             | 3                                                           |
| 102             | Iran    | 1997           | Eggs                      | 18                                                          |
| 102             | Iran    | 1997           | Freshwater Fish           | 6                                                           |
| 102             | Iran    | 1997           | Fruits, Other             | 105                                                         |
| 102             | Iran    | 1997           | Grapefruit                | 2                                                           |
| 102             | Iran    | 1997           | Grapes                    | 73                                                          |
| 102             | Iran    | 1997           | Honey                     | 1                                                           |
| 102             | Iran    | 1997           | Lemons, Limes             | 37                                                          |
| 102             | Iran    | 1997           | Maize                     | 3                                                           |
| 102             | Iran    | 1997           | Marine Fish, Other        | 2                                                           |
| 102             | Iran    | 1997           | Meat, Other               | 1                                                           |
| 102             | Iran    | 1997           | Milk, Whole               | 68                                                          |
| 102             | Iran    | 1997           | Mutton & Goat Meat        | 18                                                          |
| 102             | Iran    | 1997           | Nuts                      | 16                                                          |
| 102             | Iran    | 1997           | Offals, Edible            | 7                                                           |
| 102             | Iran    | 1997           | Olives                    | 1                                                           |
| 102             | Iran    | 1997           | Onions                    | 42                                                          |
| 102             | Iran    | 1997           | Oranges, Mandarines       | 91                                                          |
| 102             | Iran    | 1997           | Pelagic Fish              | 2                                                           |
| 102             | Iran    | 1997           | Potatoes                  | 119                                                         |
| 102             | Iran    | 1997           | Poultry Meat              | 31                                                          |
| 102             | Iran    | 1997           | Pulses, Other             | 13                                                          |
| 102             | Iran    | 1997           | Rice (Milled Equivalent)  | 82                                                          |
| 102             | Iran    | 1997           | Soyabean Oil              | 17                                                          |
| 102             | Iran    | 1997           | Spices, Other             | 1                                                           |
| 102             | Iran    | 1997           | Sugar, Refined Equivalent | 66                                                          |
| 102             | Iran    | 1997           | Sunflowerseed Oil         | 9                                                           |
| 102             | Iran    | 1997           | Tea                       | 3                                                           |
| 102             | Iran    | 1997           | Tomatoes                  | 91                                                          |

Dietary calcium and zinc deficiency risks are decreasing but remain prevalent

| FAO countrycode | Country | Reference year | Food item                 | Gross food supply (g capita <sup>-1</sup> d <sup>-1</sup> ) |
|-----------------|---------|----------------|---------------------------|-------------------------------------------------------------|
| 102             | Iran    | 1997           | Vegetables, Other         | 251                                                         |
| 102             | Iran    | 1997           | Wheat                     | 485                                                         |
| 102             | Iran    | 1998           | Apples                    | 65                                                          |
| 102             | Iran    | 1998           | Bananas                   | 9                                                           |
| 102             | Iran    | 1998           | Barley                    | 2                                                           |
| 102             | Iran    | 1998           | Beans                     | 6                                                           |
| 102             | Iran    | 1998           | Bovine Meat               | 17                                                          |
| 102             | Iran    | 1998           | Butter, Ghee              | 7                                                           |
| 102             | Iran    | 1998           | Cheese                    | 9                                                           |
| 102             | Iran    | 1998           | Citrus, Other             | 2                                                           |
| 102             | Iran    | 1998           | Dates                     | 32                                                          |
| 102             | Iran    | 1998           | Demersal Fish             | 2                                                           |
| 102             | Iran    | 1998           | Eggs                      | 18                                                          |
| 102             | Iran    | 1998           | Freshwater Fish           | 7                                                           |
| 102             | Iran    | 1998           | Fruits, Other             | 112                                                         |
| 102             | Iran    | 1998           | Grapefruit                | 2                                                           |
| 102             | Iran    | 1998           | Grapes                    | 74                                                          |
| 102             | Iran    | 1998           | Honey                     | 1                                                           |
| 102             | Iran    | 1998           | Lemons, Limes             | 34                                                          |
| 102             | Iran    | 1998           | Maize                     | 2                                                           |
| 102             | Iran    | 1998           | Meat, Other               | 1                                                           |
| 102             | Iran    | 1998           | Milk, Whole               | 69                                                          |
| 102             | Iran    | 1998           | Mutton & Goat Meat        | 19                                                          |
| 102             | Iran    | 1998           | Nuts                      | 15                                                          |
| 102             | Iran    | 1998           | Offals, Edible            | 7                                                           |
| 102             | Iran    | 1998           | Olives                    | 1                                                           |
| 102             | Iran    | 1998           | Onions                    | 42                                                          |
| 102             | Iran    | 1998           | Oranges, Mandarines       | 93                                                          |
| 102             | Iran    | 1998           | Pelagic Fish              | 3                                                           |
| 102             | Iran    | 1998           | Potatoes                  | 123                                                         |
| 102             | Iran    | 1998           | Poultry Meat              | 32                                                          |
| 102             | Iran    | 1998           | Pulses, Other             | 13                                                          |
| 102             | Iran    | 1998           | Rice (Milled Equivalent)  | 87                                                          |
| 102             | Iran    | 1998           | Soyabean Oil              | 13                                                          |
| 102             | Iran    | 1998           | Spices, Other             | 1                                                           |
| 102             | Iran    | 1998           | Sugar, Refined Equivalent | 66                                                          |
| 102             | Iran    | 1998           | Sunflowerseed Oil         | 14                                                          |
| 102             | Iran    | 1998           | Tea                       | 3                                                           |
| 102             | Iran    | 1998           | Tomatoes                  | 119                                                         |
| 102             | Iran    | 1998           | Vegetables, Other         | 283                                                         |
| 102             | Iran    | 1998           | Wheat                     | 462                                                         |
| 102             | Iran    | 1999           | Apples                    | 72                                                          |
| 102             | Iran    | 1999           | Bananas                   | 9                                                           |
| 102             | Iran    | 1999           | Barley                    | 1                                                           |
| 102             | Iran    | 1999           | Beans                     | 6                                                           |
| 102             | Iran    | 1999           | Bovine Meat               | 14                                                          |
| 102             | Iran    | 1999           | Butter, Ghee              | 6                                                           |
| 102             | Iran    | 1999           | Cheese                    | 9                                                           |
| 102             | Iran    | 1999           | Citrus, Other             | 2                                                           |
| 102             | Iran    | 1999           | Cottonseed Oil            | 2                                                           |
| 102             | Iran    | 1999           | Dates                     | 30                                                          |
| 102             | Iran    | 1999           | Demersal Fish             | 1                                                           |
| 102             | Iran    | 1999           | Eggs                      | 20                                                          |
| 102             | Iran    | 1999           | Freshwater Fish           | 8                                                           |
| 102             | Iran    | 1999           | Fruits, Other             | 106                                                         |
| 102             | Iran    | 1999           | Grapefruit                | 2                                                           |
| 102             | Iran    | 1999           | Grapes                    | 73                                                          |
| 102             | Iran    | 1999           | Honey                     | 1                                                           |
| 102             | Iran    | 1999           | Lemons, Limes             | 37                                                          |
| 102             | Iran    | 1999           | Maize                     | 3                                                           |
| 102             | Iran    | 1999           | Meat, Other               | 1                                                           |
| 102             | Iran    | 1999           | Milk, Whole               | 74                                                          |
| 102             | Iran    | 1999           | Mutton & Goat Meat        | 17                                                          |
| 102             | Iran    | 1999           | Nuts                      | 15                                                          |
| 102             | Iran    | 1999           | Offals, Edible            | 7                                                           |
| 102             | Iran    | 1999           | Olives                    | 1                                                           |
| 102             | Iran    | 1999           | Onions                    | 60                                                          |
| 102             | Iran    | 1999           | Oranges, Mandarines       | 97                                                          |
| 102             | Iran    | 1999           | Pelagic Fish              | 3                                                           |
| 102             | Iran    | 1999           | Potatoes                  | 122                                                         |
| 102             | Iran    | 1999           | Poultry Meat              | 32                                                          |
| 102             | Iran    | 1999           | Pulses, Other             | 13                                                          |
| 102             | Iran    | 1999           | Rice (Milled Equivalent)  | 84                                                          |
| 102             | Iran    | 1999           | Soyabean Oil              | 17                                                          |
| 102             | Iran    | 1999           | Spices, Other             | 1                                                           |
| 102             | Iran    | 1999           | Sugar, Refined Equivalent | 66                                                          |
| 102             | Iran    | 1999           | Sunflowerseed Oil         | 7                                                           |
| 102             | Iran    | 1999           | Tea                       | 3                                                           |
| 102             | Iran    | 1999           | Tomatoes                  | 121                                                         |
| 102             | Iran    | 1999           | Vegetables, Other         | 275                                                         |
| 102             | Iran    | 1999           | Wheat                     | 473                                                         |
| 102             | Iran    | 2000           | Apples                    | 73                                                          |
| 102             | Iran    | 2000           | Bananas                   | 10                                                          |
| 102             | Iran    | 2000           | Barley                    | 1                                                           |
| 102             | Iran    | 2000           | Beans                     | 7                                                           |
| 102             | Iran    | 2000           | Bovine Meat               | 12                                                          |
| 102             | Iran    | 2000           | Butter, Ghee              | 7                                                           |
| 102             | Iran    | 2000           | Cheese                    | 9                                                           |
| 102             | Iran    | 2000           | Citrus, Other             | 2                                                           |
| 102             | Iran    | 2000           | Crustaceans               | 1                                                           |
| 102             | Iran    | 2000           | Dates                     | 28                                                          |
| 102             | Iran    | 2000           | Demersal Fish             | 2                                                           |
| 102             | Iran    | 2000           | Eggs                      | 18                                                          |
| 102             | Iran    | 2000           | Freshwater Fish           | 7                                                           |
| 102             | Iran    | 2000           | Fruits, Other             | 111                                                         |
| 102             | Iran    | 2000           | Grapefruit                | 2                                                           |
| 102             | Iran    | 2000           | Grapes                    | 76                                                          |

Dietary calcium and zinc deficiency risks are decreasing but remain prevalent

| FAO countrycode | Country | Reference year | Food item                 | Gross food supply (g capita <sup>-1</sup> d <sup>-1</sup> ) |
|-----------------|---------|----------------|---------------------------|-------------------------------------------------------------|
| 102             | Iran    | 2000           | Honey                     | 1                                                           |
| 102             | Iran    | 2000           | Lemons, Limes             | 37                                                          |
| 102             | Iran    | 2000           | Maize                     | 3                                                           |
| 102             | Iran    | 2000           | Meat, Other               | 1                                                           |
| 102             | Iran    | 2000           | Milk, Whole               | 78                                                          |
| 102             | Iran    | 2000           | Mutton & Goat Meat        | 18                                                          |
| 102             | Iran    | 2000           | Nuts                      | 13                                                          |
| 102             | Iran    | 2000           | Offals, Edible            | 6                                                           |
| 102             | Iran    | 2000           | Olives                    | 1                                                           |
| 102             | Iran    | 2000           | Onions                    | 48                                                          |
| 102             | Iran    | 2000           | Oranges, Mandarines       | 91                                                          |
| 102             | Iran    | 2000           | Pelagic Fish              | 4                                                           |
| 102             | Iran    | 2000           | Potatoes                  | 129                                                         |
| 102             | Iran    | 2000           | Poultry Meat              | 35                                                          |
| 102             | Iran    | 2000           | Pulses, Other             | 13                                                          |
| 102             | Iran    | 2000           | Rice (Milled Equivalent)  | 82                                                          |
| 102             | Iran    | 2000           | Soyabean Oil              | 18                                                          |
| 102             | Iran    | 2000           | Spices, Other             | 1                                                           |
| 102             | Iran    | 2000           | Sugar, Refined Equivalent | 66                                                          |
| 102             | Iran    | 2000           | Sunflowerseed Oil         | 6                                                           |
| 102             | Iran    | 2000           | Tea                       | 2                                                           |
| 102             | Iran    | 2000           | Tomatoes                  | 107                                                         |
| 102             | Iran    | 2000           | Vegetables, Other         | 256                                                         |
| 102             | Iran    | 2000           | Wheat                     | 474                                                         |
| 102             | Iran    | 2001           | Apples                    | 81                                                          |
| 102             | Iran    | 2001           | Bananas                   | 5                                                           |
| 102             | Iran    | 2001           | Barley                    | 1                                                           |
| 102             | Iran    | 2001           | Beans                     | 7                                                           |
| 102             | Iran    | 2001           | Bovine Meat               | 13                                                          |
| 102             | Iran    | 2001           | Butter, Ghee              | 7                                                           |
| 102             | Iran    | 2001           | Cheese                    | 9                                                           |
| 102             | Iran    | 2001           | Citrus, Other             | 2                                                           |
| 102             | Iran    | 2001           | Coconuts - Incl Copra     | 1                                                           |
| 102             | Iran    | 2001           | Crustaceans               | 1                                                           |
| 102             | Iran    | 2001           | Dates                     | 27                                                          |
| 102             | Iran    | 2001           | Demersal Fish             | 2                                                           |
| 102             | Iran    | 2001           | Eggs                      | 18                                                          |
| 102             | Iran    | 2001           | Freshwater Fish           | 6                                                           |
| 102             | Iran    | 2001           | Fruits, Other             | 113                                                         |
| 102             | Iran    | 2001           | Grapefruit                | 1                                                           |
| 102             | Iran    | 2001           | Grapes                    | 73                                                          |
| 102             | Iran    | 2001           | Honey                     | 1                                                           |
| 102             | Iran    | 2001           | Lemons, Limes             | 35                                                          |
| 102             | Iran    | 2001           | Maize                     | 3                                                           |
| 102             | Iran    | 2001           | Marine Fish, Other        | 1                                                           |
| 102             | Iran    | 2001           | Meat, Other               | 1                                                           |
| 102             | Iran    | 2001           | Milk, Whole               | 78                                                          |
| 102             | Iran    | 2001           | Mutton & Goat Meat        | 18                                                          |
| 102             | Iran    | 2001           | Nuts                      | 15                                                          |
| 102             | Iran    | 2001           | Offals, Edible            | 6                                                           |
| 102             | Iran    | 2001           | Olives                    | 1                                                           |
| 102             | Iran    | 2001           | Onions                    | 50                                                          |
| 102             | Iran    | 2001           | Oranges, Mandarines       | 93                                                          |
| 102             | Iran    | 2001           | Pelagic Fish              | 4                                                           |
| 102             | Iran    | 2001           | Potatoes                  | 118                                                         |
| 102             | Iran    | 2001           | Poultry Meat              | 36                                                          |
| 102             | Iran    | 2001           | Pulses, Other             | 11                                                          |
| 102             | Iran    | 2001           | Rice (Milled Equivalent)  | 69                                                          |
| 102             | Iran    | 2001           | Soyabean Oil              | 22                                                          |
| 102             | Iran    | 2001           | Spices, Other             | 1                                                           |
| 102             | Iran    | 2001           | Sugar, Refined Equivalent | 66                                                          |
| 102             | Iran    | 2001           | Sunflowerseed Oil         | 3                                                           |
| 102             | Iran    | 2001           | Tea                       | 2                                                           |
| 102             | Iran    | 2001           | Tomatoes                  | 103                                                         |
| 102             | Iran    | 2001           | Vegetables, Other         | 259                                                         |
| 102             | Iran    | 2001           | Wheat                     | 490                                                         |
| 102             | Iran    | 2002           | Apples                    | 80                                                          |
| 102             | Iran    | 2002           | Bananas                   | 8                                                           |
| 102             | Iran    | 2002           | Barley                    | 1                                                           |
| 102             | Iran    | 2002           | Beans                     | 8                                                           |
| 102             | Iran    | 2002           | Bovine Meat               | 12                                                          |
| 102             | Iran    | 2002           | Butter, Ghee              | 7                                                           |
| 102             | Iran    | 2002           | Cheese                    | 9                                                           |
| 102             | Iran    | 2002           | Citrus, Other             | 2                                                           |
| 102             | Iran    | 2002           | Coconuts - Incl Copra     | 1                                                           |
| 102             | Iran    | 2002           | Dates                     | 27                                                          |
| 102             | Iran    | 2002           | Demersal Fish             | 2                                                           |
| 102             | Iran    | 2002           | Eggs                      | 17                                                          |
| 102             | Iran    | 2002           | Freshwater Fish           | 5                                                           |
| 102             | Iran    | 2002           | Fruits, Other             | 114                                                         |
| 102             | Iran    | 2002           | Grapefruit                | 1                                                           |
| 102             | Iran    | 2002           | Grapes                    | 78                                                          |
| 102             | Iran    | 2002           | Honey                     | 1                                                           |
| 102             | Iran    | 2002           | Lemons, Limes             | 31                                                          |
| 102             | Iran    | 2002           | Maize                     | 3                                                           |
| 102             | Iran    | 2002           | Marine Fish, Other        | 1                                                           |
| 102             | Iran    | 2002           | Meat, Other               | 1                                                           |
| 102             | Iran    | 2002           | Milk, Whole               | 78                                                          |
| 102             | Iran    | 2002           | Mutton & Goat Meat        | 18                                                          |
| 102             | Iran    | 2002           | Nuts                      | 15                                                          |
| 102             | Iran    | 2002           | Offals, Edible            | 6                                                           |
| 102             | Iran    | 2002           | Olives                    | 1                                                           |
| 102             | Iran    | 2002           | Onions                    | 53                                                          |
| 102             | Iran    | 2002           | Oranges, Mandarines       | 93                                                          |
| 102             | Iran    | 2002           | Pelagic Fish              | 5                                                           |
| 102             | Iran    | 2002           | Potatoes                  | 126                                                         |
| 102             | Iran    | 2002           | Poultry Meat              | 38                                                          |

## Dietary calcium and zinc deficiency risks are decreasing but remain prevalent

| FAO countrycode | Country | Reference year | Food item                 | Gross food supply (g capita <sup>-1</sup> d <sup>-1</sup> ) |
|-----------------|---------|----------------|---------------------------|-------------------------------------------------------------|
| 102             | Iran    | 2002           | Pulses, Other             | 10                                                          |
| 102             | Iran    | 2002           | Rape and Mustard Oil      | 1                                                           |
| 102             | Iran    | 2002           | Rice (Milled Equivalent)  | 97                                                          |
| 102             | Iran    | 2002           | Sesameseed Oil            | 1                                                           |
| 102             | Iran    | 2002           | Soyabean Oil              | 19                                                          |
| 102             | Iran    | 2002           | Spices, Other             | 1                                                           |
| 102             | Iran    | 2002           | Sugar, Refined Equivalent | 66                                                          |
| 102             | Iran    | 2002           | Sunflowerseed Oil         | 2                                                           |
| 102             | Iran    | 2002           | Tea                       | 2                                                           |
| 102             | Iran    | 2002           | Tomatoes                  | 146                                                         |
| 102             | Iran    | 2002           | Vegetables, Other         | 290                                                         |
| 102             | Iran    | 2002           | Wheat                     | 453                                                         |
| 102             | Iran    | 2003           | Apples                    | 80                                                          |
| 102             | Iran    | 2003           | Bananas                   | 12                                                          |
| 102             | Iran    | 2003           | Barley                    | 1                                                           |
| 102             | Iran    | 2003           | Beans                     | 8                                                           |
| 102             | Iran    | 2003           | Bovine Meat               | 14                                                          |
| 102             | Iran    | 2003           | Butter, Ghee              | 7                                                           |
| 102             | Iran    | 2003           | Cheese                    | 9                                                           |
| 102             | Iran    | 2003           | Citrus, Other             | 2                                                           |
| 102             | Iran    | 2003           | Cocoa Beans               | 1                                                           |
| 102             | Iran    | 2003           | Coconuts - Incl Copra     | 1                                                           |
| 102             | Iran    | 2003           | Cottonseed Oil            | 1                                                           |
| 102             | Iran    | 2003           | Dates                     | 27                                                          |
| 102             | Iran    | 2003           | Demersal Fish             | 2                                                           |
| 102             | Iran    | 2003           | Eggs                      | 19                                                          |
| 102             | Iran    | 2003           | Freshwater Fish           | 6                                                           |
| 102             | Iran    | 2003           | Fruits, Other             | 118                                                         |
| 102             | Iran    | 2003           | Grapefruit                | 1                                                           |
| 102             | Iran    | 2003           | Grapes                    | 77                                                          |
| 102             | Iran    | 2003           | Groundnuts (Shelled Eq)   | 1                                                           |
| 102             | Iran    | 2003           | Honey                     | 1                                                           |
| 102             | Iran    | 2003           | Lemons, Limes             | 25                                                          |
| 102             | Iran    | 2003           | Maize                     | 6                                                           |
| 102             | Iran    | 2003           | Marine Fish, Other        | 1                                                           |
| 102             | Iran    | 2003           | Meat, Other               | 1                                                           |
| 102             | Iran    | 2003           | Milk, Whole               | 76                                                          |
| 102             | Iran    | 2003           | Mutton & Goat Meat        | 17                                                          |
| 102             | Iran    | 2003           | Nuts                      | 12                                                          |
| 102             | Iran    | 2003           | Offals, Edible            | 6                                                           |
| 102             | Iran    | 2003           | Olives                    | 2                                                           |
| 102             | Iran    | 2003           | Onions                    | 54                                                          |
| 102             | Iran    | 2003           | Oranges, Mandarines       | 92                                                          |
| 102             | Iran    | 2003           | Pelagic Fish              | 7                                                           |
| 102             | Iran    | 2003           | Pineapples                | 1                                                           |
| 102             | Iran    | 2003           | Potatoes                  | 144                                                         |
| 102             | Iran    | 2003           | Poultry Meat              | 44                                                          |
| 102             | Iran    | 2003           | Pulses, Other             | 11                                                          |
| 102             | Iran    | 2003           | Rape and Mustard Oil      | 2                                                           |
| 102             | Iran    | 2003           | Rice (Milled Equivalent)  | 98                                                          |
| 102             | Iran    | 2003           | Sesameseed Oil            | 1                                                           |
| 102             | Iran    | 2003           | Soyabean Oil              | 16                                                          |
| 102             | Iran    | 2003           | Spices, Other             | 1                                                           |
| 102             | Iran    | 2003           | Sugar, Refined Equivalent | 67                                                          |
| 102             | Iran    | 2003           | Sunflowerseed Oil         | 4                                                           |
| 102             | Iran    | 2003           | Tea                       | 2                                                           |
| 102             | Iran    | 2003           | Tomatoes                  | 144                                                         |
| 102             | Iran    | 2003           | Vegetables, Other         | 273                                                         |
| 102             | Iran    | 2003           | Wheat                     | 437                                                         |
| 102             | Iran    | 2004           | Apples                    | 70                                                          |
| 102             | Iran    | 2004           | Bananas                   | 13                                                          |
| 102             | Iran    | 2004           | Barley                    | 2                                                           |
| 102             | Iran    | 2004           | Beans                     | 8                                                           |
| 102             | Iran    | 2004           | Bovine Meat               | 16                                                          |
| 102             | Iran    | 2004           | Butter, Ghee              | 9                                                           |
| 102             | Iran    | 2004           | Cheese                    | 11                                                          |
| 102             | Iran    | 2004           | Citrus, Other             | 2                                                           |
| 102             | Iran    | 2004           | Cocoa Beans               | 1                                                           |
| 102             | Iran    | 2004           | Coconuts - Incl Copra     | 2                                                           |
| 102             | Iran    | 2004           | Dates                     | 31                                                          |
| 102             | Iran    | 2004           | Demersal Fish             | 2                                                           |
| 102             | Iran    | 2004           | Eggs                      | 20                                                          |
| 102             | Iran    | 2004           | Freshwater Fish           | 6                                                           |
| 102             | Iran    | 2004           | Fruits, Other             | 112                                                         |
| 102             | Iran    | 2004           | Grapefruit                | 2                                                           |
| 102             | Iran    | 2004           | Grapes                    | 77                                                          |
| 102             | Iran    | 2004           | Groundnuts (Shelled Eq)   | 1                                                           |
| 102             | Iran    | 2004           | Honey                     | 1                                                           |
| 102             | Iran    | 2004           | Lemons, Limes             | 18                                                          |
| 102             | Iran    | 2004           | Maize                     | 4                                                           |
| 102             | Iran    | 2004           | Marine Fish, Other        | 1                                                           |
| 102             | Iran    | 2004           | Meat, Other               | 1                                                           |
| 102             | Iran    | 2004           | Milk, Whole               | 66                                                          |
| 102             | Iran    | 2004           | Mutton & Goat Meat        | 17                                                          |
| 102             | Iran    | 2004           | Nuts                      | 12                                                          |
| 102             | Iran    | 2004           | Offals, Edible            | 7                                                           |
| 102             | Iran    | 2004           | Olives                    | 1                                                           |
| 102             | Iran    | 2004           | Onions                    | 56                                                          |
| 102             | Iran    | 2004           | Oranges, Mandarines       | 101                                                         |
| 102             | Iran    | 2004           | Pelagic Fish              | 8                                                           |
| 102             | Iran    | 2004           | Pineapples                | 1                                                           |
| 102             | Iran    | 2004           | Potatoes                  | 151                                                         |
| 102             | Iran    | 2004           | Poultry Meat              | 46                                                          |
| 102             | Iran    | 2004           | Pulses, Other             | 10                                                          |
| 102             | Iran    | 2004           | Rape and Mustard Oil      | 3                                                           |
| 102             | Iran    | 2004           | Rice (Milled Equivalent)  | 83                                                          |
| 102             | Iran    | 2004           | Sesameseed Oil            | 1                                                           |

Dietary calcium and zinc deficiency risks are decreasing but remain prevalent

| FAO countrycode | Country | Reference year | Food item                 | Gross food supply (g capita <sup>-1</sup> d <sup>-1</sup> ) |
|-----------------|---------|----------------|---------------------------|-------------------------------------------------------------|
| 102             | Iran    | 2004           | Soyabean Oil              | 18                                                          |
| 102             | Iran    | 2004           | Spices, Other             | 1                                                           |
| 102             | Iran    | 2004           | Sugar, Refined Equivalent | 67                                                          |
| 102             | Iran    | 2004           | Sunflowerseed Oil         | 7                                                           |
| 102             | Iran    | 2004           | Tea                       | 2                                                           |
| 102             | Iran    | 2004           | Tomatoes                  | 136                                                         |
| 102             | Iran    | 2004           | Vegetables, Other         | 317                                                         |
| 102             | Iran    | 2004           | Wheat                     | 453                                                         |
| 102             | Iran    | 2005           | Apples                    | 86                                                          |
| 102             | Iran    | 2005           | Bananas                   | 20                                                          |
| 102             | Iran    | 2005           | Barley                    | 2                                                           |
| 102             | Iran    | 2005           | Beans                     | 8                                                           |
| 102             | Iran    | 2005           | Bovine Meat               | 15                                                          |
| 102             | Iran    | 2005           | Butter, Ghee              | 9                                                           |
| 102             | Iran    | 2005           | Cheese                    | 11                                                          |
| 102             | Iran    | 2005           | Citrus, Other             | 2                                                           |
| 102             | Iran    | 2005           | Cocoa Beans               | 1                                                           |
| 102             | Iran    | 2005           | Coconuts - Incl Copra     | 1                                                           |
| 102             | Iran    | 2005           | Dates                     | 30                                                          |
| 102             | Iran    | 2005           | Demersal Fish             | 2                                                           |
| 102             | Iran    | 2005           | Eggs                      | 24                                                          |
| 102             | Iran    | 2005           | Freshwater Fish           | 7                                                           |
| 102             | Iran    | 2005           | Fruits, Other             | 126                                                         |
| 102             | Iran    | 2005           | Grapefruit                | 2                                                           |
| 102             | Iran    | 2005           | Grapes                    | 82                                                          |
| 102             | Iran    | 2005           | Groundnuts (Shelled Eq)   | 1                                                           |
| 102             | Iran    | 2005           | Honey                     | 1                                                           |
| 102             | Iran    | 2005           | Lemons, Limes             | 19                                                          |
| 102             | Iran    | 2005           | Maize                     | 5                                                           |
| 102             | Iran    | 2005           | Marine Fish, Other        | 1                                                           |
| 102             | Iran    | 2005           | Meat, Other               | 1                                                           |
| 102             | Iran    | 2005           | Milk, Whole               | 66                                                          |
| 102             | Iran    | 2005           | Mutton & Goat Meat        | 17                                                          |
| 102             | Iran    | 2005           | Nuts                      | 17                                                          |
| 102             | Iran    | 2005           | Offals, Edible            | 7                                                           |
| 102             | Iran    | 2005           | Olives                    | 2                                                           |
| 102             | Iran    | 2005           | Onions                    | 58                                                          |
| 102             | Iran    | 2005           | Oranges, Mandarines       | 104                                                         |
| 102             | Iran    | 2005           | Pelagic Fish              | 8                                                           |
| 102             | Iran    | 2005           | Potatoes                  | 156                                                         |
| 102             | Iran    | 2005           | Poultry Meat              | 48                                                          |
| 102             | Iran    | 2005           | Pulses, Other             | 12                                                          |
| 102             | Iran    | 2005           | Rape and Mustard Oil      | 3                                                           |
| 102             | Iran    | 2005           | Rice (Milled Equivalent)  | 84                                                          |
| 102             | Iran    | 2005           | Sesameseed Oil            | 1                                                           |
| 102             | Iran    | 2005           | Soyabean Oil              | 18                                                          |
| 102             | Iran    | 2005           | Spices, Other             | 1                                                           |
| 102             | Iran    | 2005           | Sugar, Refined Equivalent | 68                                                          |
| 102             | Iran    | 2005           | Sunflowerseed Oil         | 1                                                           |
| 102             | Iran    | 2005           | Tea                       | 3                                                           |
| 102             | Iran    | 2005           | Tomatoes                  | 163                                                         |
| 102             | Iran    | 2005           | Vegetables, Other         | 382                                                         |
| 102             | Iran    | 2005           | Wheat                     | 435                                                         |
| 102             | Iran    | 2006           | Apples                    | 82                                                          |
| 102             | Iran    | 2006           | Bananas                   | 23                                                          |
| 102             | Iran    | 2006           | Barley                    | 1                                                           |
| 102             | Iran    | 2006           | Beans                     | 7                                                           |
| 102             | Iran    | 2006           | Bovine Meat               | 16                                                          |
| 102             | Iran    | 2006           | Butter, Ghee              | 9                                                           |
| 102             | Iran    | 2006           | Cheese                    | 11                                                          |
| 102             | Iran    | 2006           | Citrus, Other             | 1                                                           |
| 102             | Iran    | 2006           | Cocoa Beans               | 1                                                           |
| 102             | Iran    | 2006           | Coconuts - Incl Copra     | 2                                                           |
| 102             | Iran    | 2006           | Dates                     | 29                                                          |
| 102             | Iran    | 2006           | Demersal Fish             | 2                                                           |
| 102             | Iran    | 2006           | Eggs                      | 19                                                          |
| 102             | Iran    | 2006           | Freshwater Fish           | 7                                                           |
| 102             | Iran    | 2006           | Fruits, Other             | 110                                                         |
| 102             | Iran    | 2006           | Grapefruit                | 2                                                           |
| 102             | Iran    | 2006           | Grapes                    | 63                                                          |
| 102             | Iran    | 2006           | Groundnuts (Shelled Eq)   | 1                                                           |
| 102             | Iran    | 2006           | Honey                     | 1                                                           |
| 102             | Iran    | 2006           | Lemons, Limes             | 19                                                          |
| 102             | Iran    | 2006           | Maize                     | 6                                                           |
| 102             | Iran    | 2006           | Marine Fish, Other        | 1                                                           |
| 102             | Iran    | 2006           | Meat, Other               | 1                                                           |
| 102             | Iran    | 2006           | Milk, Whole               | 67                                                          |
| 102             | Iran    | 2006           | Mutton & Goat Meat        | 15                                                          |
| 102             | Iran    | 2006           | Nuts                      | 18                                                          |
| 102             | Iran    | 2006           | Offals, Edible            | 6                                                           |
| 102             | Iran    | 2006           | Olives                    | 1                                                           |
| 102             | Iran    | 2006           | Onions                    | 65                                                          |
| 102             | Iran    | 2006           | Oranges, Mandarines       | 107                                                         |
| 102             | Iran    | 2006           | Pelagic Fish              | 10                                                          |
| 102             | Iran    | 2006           | Potatoes                  | 131                                                         |
| 102             | Iran    | 2006           | Poultry Meat              | 52                                                          |
| 102             | Iran    | 2006           | Pulses, Other             | 15                                                          |
| 102             | Iran    | 2006           | Rape and Mustard Oil      | 4                                                           |
| 102             | Iran    | 2006           | Rice (Milled Equivalent)  | 88                                                          |
| 102             | Iran    | 2006           | Sesameseed Oil            | 1                                                           |
| 102             | Iran    | 2006           | Soyabean Oil              | 20                                                          |
| 102             | Iran    | 2006           | Spices, Other             | 1                                                           |
| 102             | Iran    | 2006           | Sugar, Refined Equivalent | 70                                                          |
| 102             | Iran    | 2006           | Sunflowerseed Oil         | 2                                                           |
| 102             | Iran    | 2006           | Tea                       | 2                                                           |
| 102             | Iran    | 2006           | Tomatoes                  | 161                                                         |
| 102             | Iran    | 2006           | Vegetables, Other         | 346                                                         |



Dietary calcium and zinc deficiency risks are decreasing but remain prevalent

| FAO countrycode | Country | Reference year | Food item                 | Gross food supply (g capita <sup>-1</sup> d <sup>-1</sup> ) |
|-----------------|---------|----------------|---------------------------|-------------------------------------------------------------|
| 102             | Iran    | 2006           | Wheat                     | 419                                                         |
| 102             | Iran    | 2007           | Apples                    | 79                                                          |
| 102             | Iran    | 2007           | Bananas                   | 27                                                          |
| 102             | Iran    | 2007           | Barley                    | 2                                                           |
| 102             | Iran    | 2007           | Beans                     | 9                                                           |
| 102             | Iran    | 2007           | Bovine Meat               | 18                                                          |
| 102             | Iran    | 2007           | Butter, Ghee              | 10                                                          |
| 102             | Iran    | 2007           | Cheese                    | 11                                                          |
| 102             | Iran    | 2007           | Citrus, Other             | 1                                                           |
| 102             | Iran    | 2007           | Cocoa Beans               | 1                                                           |
| 102             | Iran    | 2007           | Coconuts - Incl Copra     | 2                                                           |
| 102             | Iran    | 2007           | Cottonseed Oil            | 1                                                           |
| 102             | Iran    | 2007           | Dates                     | 40                                                          |
| 102             | Iran    | 2007           | Demersal Fish             | 2                                                           |
| 102             | Iran    | 2007           | Eggs                      | 21                                                          |
| 102             | Iran    | 2007           | Freshwater Fish           | 9                                                           |
| 102             | Iran    | 2007           | Fruits, Other             | 112                                                         |
| 102             | Iran    | 2007           | Grapefruit                | 2                                                           |
| 102             | Iran    | 2007           | Grapes                    | 44                                                          |
| 102             | Iran    | 2007           | Groundnuts (Shelled Eq)   | 1                                                           |
| 102             | Iran    | 2007           | Honey                     | 2                                                           |
| 102             | Iran    | 2007           | Lemons, Limes             | 20                                                          |
| 102             | Iran    | 2007           | Maize                     | 6                                                           |
| 102             | Iran    | 2007           | Marine Fish, Other        | 1                                                           |
| 102             | Iran    | 2007           | Meat, Other               | 1                                                           |
| 102             | Iran    | 2007           | Milk, Whole               | 66                                                          |
| 102             | Iran    | 2007           | Mutton & Goat Meat        | 13                                                          |
| 102             | Iran    | 2007           | Nuts                      | 23                                                          |
| 102             | Iran    | 2007           | Offals, Edible            | 6                                                           |
| 102             | Iran    | 2007           | Olives                    | 1                                                           |
| 102             | Iran    | 2007           | Onions                    | 62                                                          |
| 102             | Iran    | 2007           | Oranges, Mandarines       | 109                                                         |
| 102             | Iran    | 2007           | Pelagic Fish              | 7                                                           |
| 102             | Iran    | 2007           | Potatoes                  | 135                                                         |
| 102             | Iran    | 2007           | Poultry Meat              | 57                                                          |
| 102             | Iran    | 2007           | Pulses, Other             | 17                                                          |
| 102             | Iran    | 2007           | Rape and Mustard Oil      | 4                                                           |
| 102             | Iran    | 2007           | Rice (Milled Equivalent)  | 79                                                          |
| 102             | Iran    | 2007           | Sesameseed Oil            | 1                                                           |
| 102             | Iran    | 2007           | Soyabean Oil              | 20                                                          |
| 102             | Iran    | 2007           | Spices, Other             | 1                                                           |
| 102             | Iran    | 2007           | Sugar, Refined Equivalent | 69                                                          |
| 102             | Iran    | 2007           | Sunflowerseed Oil         | 4                                                           |
| 102             | Iran    | 2007           | Tea                       | 1                                                           |
| 102             | Iran    | 2007           | Tomatoes                  | 172                                                         |
| 102             | Iran    | 2007           | Vegetables, Other         | 364                                                         |
| 102             | Iran    | 2007           | Wheat                     | 412                                                         |
| 102             | Iran    | 2008           | Apples                    | 79                                                          |
| 102             | Iran    | 2008           | Bananas                   | 27                                                          |
| 102             | Iran    | 2008           | Barley                    | 1                                                           |
| 102             | Iran    | 2008           | Beans                     | 7                                                           |
| 102             | Iran    | 2008           | Bovine Meat               | 13                                                          |
| 102             | Iran    | 2008           | Butter, Ghee              | 9                                                           |
| 102             | Iran    | 2008           | Cheese                    | 9                                                           |
| 102             | Iran    | 2008           | Citrus, Other             | 1                                                           |
| 102             | Iran    | 2008           | Cocoa Beans               | 1                                                           |
| 102             | Iran    | 2008           | Coconuts - Incl Copra     | 2                                                           |
| 102             | Iran    | 2008           | Dates                     | 30                                                          |
| 102             | Iran    | 2008           | Demersal Fish             | 2                                                           |
| 102             | Iran    | 2008           | Eggs                      | 21                                                          |
| 102             | Iran    | 2008           | Freshwater Fish           | 8                                                           |
| 102             | Iran    | 2008           | Fruits, Other             | 132                                                         |
| 102             | Iran    | 2008           | Grapefruit                | 2                                                           |
| 102             | Iran    | 2008           | Grapes                    | 61                                                          |
| 102             | Iran    | 2008           | Groundnuts (Shelled Eq)   | 1                                                           |
| 102             | Iran    | 2008           | Honey                     | 1                                                           |
| 102             | Iran    | 2008           | Lemons, Limes             | 21                                                          |
| 102             | Iran    | 2008           | Maize                     | 5                                                           |
| 102             | Iran    | 2008           | Marine Fish, Other        | 1                                                           |
| 102             | Iran    | 2008           | Meat, Other               | 1                                                           |
| 102             | Iran    | 2008           | Milk, Whole               | 59                                                          |
| 102             | Iran    | 2008           | Mutton & Goat Meat        | 11                                                          |
| 102             | Iran    | 2008           | Nuts                      | 34                                                          |
| 102             | Iran    | 2008           | Offals, Edible            | 5                                                           |
| 102             | Iran    | 2008           | Olives                    | 1                                                           |
| 102             | Iran    | 2008           | Onions                    | 58                                                          |
| 102             | Iran    | 2008           | Oranges, Mandarines       | 118                                                         |
| 102             | Iran    | 2008           | Pelagic Fish              | 7                                                           |
| 102             | Iran    | 2008           | Pineapples                | 1                                                           |
| 102             | Iran    | 2008           | Potatoes                  | 144                                                         |
| 102             | Iran    | 2008           | Poultry Meat              | 60                                                          |
| 102             | Iran    | 2008           | Pulses, Other             | 9                                                           |
| 102             | Iran    | 2008           | Rape and Mustard Oil      | 4                                                           |
| 102             | Iran    | 2008           | Rice (Milled Equivalent)  | 79                                                          |
| 102             | Iran    | 2008           | Sesameseed Oil            | 1                                                           |
| 102             | Iran    | 2008           | Soyabean Oil              | 18                                                          |
| 102             | Iran    | 2008           | Spices, Other             | 2                                                           |
| 102             | Iran    | 2008           | Sugar, Refined Equivalent | 68                                                          |
| 102             | Iran    | 2008           | Sunflowerseed Oil         | 5                                                           |
| 102             | Iran    | 2008           | Tea                       | 7                                                           |
| 102             | Iran    | 2008           | Tomatoes                  | 149                                                         |
| 102             | Iran    | 2008           | Vegetables, Other         | 286                                                         |
| 102             | Iran    | 2008           | Wheat                     | 425                                                         |
| 102             | Iran    | 2009           | Apples                    | 66                                                          |
| 102             | Iran    | 2009           | Bananas                   | 27                                                          |
| 102             | Iran    | 2009           | Barley                    | 2                                                           |
| 102             | Iran    | 2009           | Beans                     | 6                                                           |

Dietary calcium and zinc deficiency risks are decreasing but remain prevalent

| FAO countrycode | Country | Reference year | Food item                 | Gross food supply (g capita <sup>-1</sup> d <sup>-1</sup> ) |
|-----------------|---------|----------------|---------------------------|-------------------------------------------------------------|
| 102             | Iran    | 2009           | Bovine Meat               | 14                                                          |
| 102             | Iran    | 2009           | Butter, Ghee              | 10                                                          |
| 102             | Iran    | 2009           | Cheese                    | 11                                                          |
| 102             | Iran    | 2009           | Citrus, Other             | 2                                                           |
| 102             | Iran    | 2009           | Cocoa Beans               | 1                                                           |
| 102             | Iran    | 2009           | Coconuts - Incl Copra     | 2                                                           |
| 102             | Iran    | 2009           | Coffee                    | 1                                                           |
| 102             | Iran    | 2009           | Crustaceans               | 1                                                           |
| 102             | Iran    | 2009           | Dates                     | 32                                                          |
| 102             | Iran    | 2009           | Demersal Fish             | 2                                                           |
| 102             | Iran    | 2009           | Eggs                      | 20                                                          |
| 102             | Iran    | 2009           | Fats, Animals, Raw        | 1                                                           |
| 102             | Iran    | 2009           | Freshwater Fish           | 9                                                           |
| 102             | Iran    | 2009           | Fruits, Other             | 129                                                         |
| 102             | Iran    | 2009           | Grapefruit                | 2                                                           |
| 102             | Iran    | 2009           | Grapes                    | 70                                                          |
| 102             | Iran    | 2009           | Honey                     | 2                                                           |
| 102             | Iran    | 2009           | Lemons, Limes             | 21                                                          |
| 102             | Iran    | 2009           | Maize                     | 6                                                           |
| 102             | Iran    | 2009           | Marine Fish, Other        | 1                                                           |
| 102             | Iran    | 2009           | Meat, Other               | 1                                                           |
| 102             | Iran    | 2009           | Milk, Whole               | 63                                                          |
| 102             | Iran    | 2009           | Mutton & Goat Meat        | 9                                                           |
| 102             | Iran    | 2009           | Nuts                      | 38                                                          |
| 102             | Iran    | 2009           | Offals, Edible            | 4                                                           |
| 102             | Iran    | 2009           | Olives                    | 1                                                           |
| 102             | Iran    | 2009           | Onions                    | 51                                                          |
| 102             | Iran    | 2009           | Oranges, Mandarines       | 97                                                          |
| 102             | Iran    | 2009           | Pelagic Fish              | 7                                                           |
| 102             | Iran    | 2009           | Pineapples                | 1                                                           |
| 102             | Iran    | 2009           | Potatoes                  | 131                                                         |
| 102             | Iran    | 2009           | Poultry Meat              | 75                                                          |
| 102             | Iran    | 2009           | Pulses, Other             | 10                                                          |
| 102             | Iran    | 2009           | Rape and Mustard Oil      | 5                                                           |
| 102             | Iran    | 2009           | Rice (Milled Equivalent)  | 64                                                          |
| 102             | Iran    | 2009           | Sesameseed Oil            | 1                                                           |
| 102             | Iran    | 2009           | Soyabean Oil              | 14                                                          |
| 102             | Iran    | 2009           | Spices, Other             | 2                                                           |
| 102             | Iran    | 2009           | Sugar, Refined Equivalent | 69                                                          |
| 102             | Iran    | 2009           | Sunflowerseed Oil         | 9                                                           |
| 102             | Iran    | 2009           | Tea                       | 8                                                           |
| 102             | Iran    | 2009           | Tomatoes                  | 195                                                         |
| 102             | Iran    | 2009           | Vegetables, Other         | 355                                                         |
| 102             | Iran    | 2009           | Wheat                     | 438                                                         |
| 102             | Iran    | 2010           | Apples                    | 38                                                          |
| 102             | Iran    | 2010           | Bananas                   | 28                                                          |
| 102             | Iran    | 2010           | Barley                    | 2                                                           |
| 102             | Iran    | 2010           | Beans                     | 11                                                          |
| 102             | Iran    | 2010           | Bovine Meat               | 17                                                          |
| 102             | Iran    | 2010           | Butter, Ghee              | 9                                                           |
| 102             | Iran    | 2010           | Cheese                    | 10                                                          |
| 102             | Iran    | 2010           | Citrus, Other             | 2                                                           |
| 102             | Iran    | 2010           | Cocoa Beans               | 1                                                           |
| 102             | Iran    | 2010           | Coconuts - Incl Copra     | 2                                                           |
| 102             | Iran    | 2010           | Coffee                    | 1                                                           |
| 102             | Iran    | 2010           | Dates                     | 30                                                          |
| 102             | Iran    | 2010           | Demersal Fish             | 2                                                           |
| 102             | Iran    | 2010           | Eggs                      | 18                                                          |
| 102             | Iran    | 2010           | Freshwater Fish           | 11                                                          |
| 102             | Iran    | 2010           | Fruits, Other             | 126                                                         |
| 102             | Iran    | 2010           | Grapefruit                | 2                                                           |
| 102             | Iran    | 2010           | Grapes                    | 54                                                          |
| 102             | Iran    | 2010           | Groundnuts (Shelled Eq)   | 1                                                           |
| 102             | Iran    | 2010           | Honey                     | 2                                                           |
| 102             | Iran    | 2010           | Lemons, Limes             | 20                                                          |
| 102             | Iran    | 2010           | Maize                     | 9                                                           |
| 102             | Iran    | 2010           | Meat, Other               | 1                                                           |
| 102             | Iran    | 2010           | Milk, Whole               | 63                                                          |
| 102             | Iran    | 2010           | Mutton & Goat Meat        | 9                                                           |
| 102             | Iran    | 2010           | Nuts                      | 33                                                          |
| 102             | Iran    | 2010           | Offals, Edible            | 4                                                           |
| 102             | Iran    | 2010           | Olives                    | 1                                                           |
| 102             | Iran    | 2010           | Onions                    | 59                                                          |
| 102             | Iran    | 2010           | Oranges, Mandarines       | 80                                                          |
| 102             | Iran    | 2010           | Pelagic Fish              | 9                                                           |
| 102             | Iran    | 2010           | Pineapples                | 2                                                           |
| 102             | Iran    | 2010           | Potatoes                  | 125                                                         |
| 102             | Iran    | 2010           | Poultry Meat              | 69                                                          |
| 102             | Iran    | 2010           | Pulses, Other             | 16                                                          |
| 102             | Iran    | 2010           | Rape and Mustard Oil      | 4                                                           |
| 102             | Iran    | 2010           | Rice (Milled Equivalent)  | 85                                                          |
| 102             | Iran    | 2010           | Sesameseed Oil            | 1                                                           |
| 102             | Iran    | 2010           | Soyabean Oil              | 17                                                          |
| 102             | Iran    | 2010           | Spices, Other             | 2                                                           |
| 102             | Iran    | 2010           | Sugar, Refined Equivalent | 73                                                          |
| 102             | Iran    | 2010           | Sunflowerseed Oil         | 8                                                           |
| 102             | Iran    | 2010           | Tea                       | 7                                                           |
| 102             | Iran    | 2010           | Tomatoes                  | 153                                                         |
| 102             | Iran    | 2010           | Vegetables, Other         | 392                                                         |
| 102             | Iran    | 2010           | Wheat                     | 420                                                         |
| 102             | Iran    | 2011           | Apples                    | 55                                                          |
| 102             | Iran    | 2011           | Bananas                   | 26                                                          |
| 102             | Iran    | 2011           | Barley                    | 2                                                           |
| 102             | Iran    | 2011           | Beans                     | 11                                                          |
| 102             | Iran    | 2011           | Bovine Meat               | 16                                                          |
| 102             | Iran    | 2011           | Butter, Ghee              | 9                                                           |
| 102             | Iran    | 2011           | Cheese                    | 9                                                           |

Dietary calcium and zinc deficiency risks are decreasing but remain prevalent

| FAO countrycode | Country | Reference year | Food item                 | Gross food supply (g capita <sup>-1</sup> d <sup>-1</sup> ) |
|-----------------|---------|----------------|---------------------------|-------------------------------------------------------------|
| 102             | Iran    | 2011           | Citrus, Other             | 1                                                           |
| 102             | Iran    | 2011           | Cocoa Beans               | 1                                                           |
| 102             | Iran    | 2011           | Coconuts - Incl Copra     | 2                                                           |
| 102             | Iran    | 2011           | Coffee                    | 1                                                           |
| 102             | Iran    | 2011           | Dates                     | 30                                                          |
| 102             | Iran    | 2011           | Demersal Fish             | 2                                                           |
| 102             | Iran    | 2011           | Eggs                      | 15                                                          |
| 102             | Iran    | 2011           | Freshwater Fish           | 11                                                          |
| 102             | Iran    | 2011           | Fruits, Other             | 115                                                         |
| 102             | Iran    | 2011           | Grapefruit                | 1                                                           |
| 102             | Iran    | 2011           | Grapes                    | 52                                                          |
| 102             | Iran    | 2011           | Groundnuts (Shelled Eq)   | 1                                                           |
| 102             | Iran    | 2011           | Honey                     | 2                                                           |
| 102             | Iran    | 2011           | Lemons, Limes             | 15                                                          |
| 102             | Iran    | 2011           | Maize                     | 7                                                           |
| 102             | Iran    | 2011           | Meat, Other               | 1                                                           |
| 102             | Iran    | 2011           | Milk, Whole               | 63                                                          |
| 102             | Iran    | 2011           | Mutton & Goat Meat        | 9                                                           |
| 102             | Iran    | 2011           | Nuts                      | 31                                                          |
| 102             | Iran    | 2011           | Offals, Edible            | 4                                                           |
| 102             | Iran    | 2011           | Olives                    | 1                                                           |
| 102             | Iran    | 2011           | Onions                    | 68                                                          |
| 102             | Iran    | 2011           | Oranges, Mandarines       | 81                                                          |
| 102             | Iran    | 2011           | Pelagic Fish              | 9                                                           |
| 102             | Iran    | 2011           | Pineapples                | 3                                                           |
| 102             | Iran    | 2011           | Potatoes                  | 167                                                         |
| 102             | Iran    | 2011           | Poultry Meat              | 71                                                          |
| 102             | Iran    | 2011           | Pulses, Other             | 17                                                          |
| 102             | Iran    | 2011           | Rape and Mustard Oil      | 5                                                           |
| 102             | Iran    | 2011           | Rice (Milled Equivalent)  | 80                                                          |
| 102             | Iran    | 2011           | Sesameseed Oil            | 1                                                           |
| 102             | Iran    | 2011           | Soyabean Oil              | 19                                                          |
| 102             | Iran    | 2011           | Spices, Other             | 2                                                           |
| 102             | Iran    | 2011           | Sugar, Refined Equivalent | 71                                                          |
| 102             | Iran    | 2011           | Sunflowerseed Oil         | 4                                                           |
| 102             | Iran    | 2011           | Tea                       | 5                                                           |
| 102             | Iran    | 2011           | Tomatoes                  | 165                                                         |
| 102             | Iran    | 2011           | Vegetables, Other         | 452                                                         |
| 102             | Iran    | 2011           | Wheat                     | 417                                                         |
| 103             | Iraq    | 1992           | Apples                    | 9                                                           |
| 103             | Iraq    | 1992           | Barley                    | 74                                                          |
| 103             | Iraq    | 1992           | Beans                     | 1                                                           |
| 103             | Iraq    | 1992           | Beer                      | 7                                                           |
| 103             | Iraq    | 1992           | Bovine Meat               | 12                                                          |
| 103             | Iraq    | 1992           | Butter, Ghee              | 2                                                           |
| 103             | Iraq    | 1992           | Cheese                    | 2                                                           |
| 103             | Iraq    | 1992           | Dates                     | 41                                                          |
| 103             | Iraq    | 1992           | Eggs                      | 4                                                           |
| 103             | Iraq    | 1992           | Fats, Animals, Raw        | 1                                                           |
| 103             | Iraq    | 1992           | Freshwater Fish           | 3                                                           |
| 103             | Iraq    | 1992           | Fruits, Other             | 21                                                          |
| 103             | Iraq    | 1992           | Grapes                    | 54                                                          |
| 103             | Iraq    | 1992           | Lemons, Limes             | 2                                                           |
| 103             | Iraq    | 1992           | Maize                     | 15                                                          |
| 103             | Iraq    | 1992           | Maize Germ Oil            | 2                                                           |
| 103             | Iraq    | 1992           | Milk, Whole               | 16                                                          |
| 103             | Iraq    | 1992           | Mutton & Goat Meat        | 4                                                           |
| 103             | Iraq    | 1992           | Nuts                      | 1                                                           |
| 103             | Iraq    | 1992           | Offals, Edible            | 2                                                           |
| 103             | Iraq    | 1992           | Olives                    | 2                                                           |
| 103             | Iraq    | 1992           | Onions                    | 17                                                          |
| 103             | Iraq    | 1992           | Oranges, Mandarines       | 46                                                          |
| 103             | Iraq    | 1992           | Palm Oil                  | 16                                                          |
| 103             | Iraq    | 1992           | Potatoes                  | 47                                                          |
| 103             | Iraq    | 1992           | Poultry Meat              | 5                                                           |
| 103             | Iraq    | 1992           | Pulses, Other             | 8                                                           |
| 103             | Iraq    | 1992           | Rice (Milled Equivalent)  | 79                                                          |
| 103             | Iraq    | 1992           | Sesameseed                | 1                                                           |
| 103             | Iraq    | 1992           | Sesameseed Oil            | 1                                                           |
| 103             | Iraq    | 1992           | Sugar Cane                | 10                                                          |
| 103             | Iraq    | 1992           | Sugar, Refined Equivalent | 44                                                          |
| 103             | Iraq    | 1992           | Sunflowerseed             | 2                                                           |
| 103             | Iraq    | 1992           | Sunflowerseed Oil         | 6                                                           |
| 103             | Iraq    | 1992           | Tea                       | 3                                                           |
| 103             | Iraq    | 1992           | Tomatoes                  | 62                                                          |
| 103             | Iraq    | 1992           | Vegetables, Other         | 281                                                         |
| 103             | Iraq    | 1992           | Wheat                     | 292                                                         |
| 103             | Iraq    | 1993           | Apples                    | 9                                                           |
| 103             | Iraq    | 1993           | Barley                    | 64                                                          |
| 103             | Iraq    | 1993           | Beans                     | 1                                                           |
| 103             | Iraq    | 1993           | Beer                      | 9                                                           |
| 103             | Iraq    | 1993           | Bovine Meat               | 11                                                          |
| 103             | Iraq    | 1993           | Butter, Ghee              | 2                                                           |
| 103             | Iraq    | 1993           | Cheese                    | 2                                                           |
| 103             | Iraq    | 1993           | Cottonseed Oil            | 1                                                           |
| 103             | Iraq    | 1993           | Dates                     | 44                                                          |
| 103             | Iraq    | 1993           | Eggs                      | 4                                                           |
| 103             | Iraq    | 1993           | Fats, Animals, Raw        | 1                                                           |
| 103             | Iraq    | 1993           | Freshwater Fish           | 3                                                           |
| 103             | Iraq    | 1993           | Fruits, Other             | 22                                                          |
| 103             | Iraq    | 1993           | Grapes                    | 53                                                          |
| 103             | Iraq    | 1993           | Lemons, Limes             | 2                                                           |
| 103             | Iraq    | 1993           | Maize                     | 13                                                          |
| 103             | Iraq    | 1993           | Maize Germ Oil            | 2                                                           |
| 103             | Iraq    | 1993           | Milk, Whole               | 17                                                          |
| 103             | Iraq    | 1993           | Mutton & Goat Meat        | 5                                                           |
| 103             | Iraq    | 1993           | Nuts                      | 1                                                           |

Dietary calcium and zinc deficiency risks are decreasing but remain prevalent

| FAO countrycode | Country | Reference year | Food item                 | Gross food supply (g capita <sup>-1</sup> d <sup>-1</sup> ) |
|-----------------|---------|----------------|---------------------------|-------------------------------------------------------------|
| 103             | Iraq    | 1993           | Offals, Edible            | 2                                                           |
| 103             | Iraq    | 1993           | Olives                    | 2                                                           |
| 103             | Iraq    | 1993           | Onions                    | 12                                                          |
| 103             | Iraq    | 1993           | Oranges, Mandarines       | 47                                                          |
| 103             | Iraq    | 1993           | Palm Oil                  | 27                                                          |
| 103             | Iraq    | 1993           | Potatoes                  | 57                                                          |
| 103             | Iraq    | 1993           | Poultry Meat              | 5                                                           |
| 103             | Iraq    | 1993           | Pulses, Other             | 7                                                           |
| 103             | Iraq    | 1993           | Rice (Milled Equivalent)  | 79                                                          |
| 103             | Iraq    | 1993           | Sesameseed                | 1                                                           |
| 103             | Iraq    | 1993           | Sesameseed Oil            | 1                                                           |
| 103             | Iraq    | 1993           | Soyabean Oil              | 1                                                           |
| 103             | Iraq    | 1993           | Sugar Cane                | 8                                                           |
| 103             | Iraq    | 1993           | Sugar, Refined Equivalent | 43                                                          |
| 103             | Iraq    | 1993           | Sunflowerseed             | 3                                                           |
| 103             | Iraq    | 1993           | Sunflowerseed Oil         | 5                                                           |
| 103             | Iraq    | 1993           | Tea                       | 3                                                           |
| 103             | Iraq    | 1993           | Tomatoes                  | 113                                                         |
| 103             | Iraq    | 1993           | Vegetables, Other         | 278                                                         |
| 103             | Iraq    | 1993           | Wheat                     | 270                                                         |
| 103             | Iraq    | 1994           | Apples                    | 11                                                          |
| 103             | Iraq    | 1994           | Barley                    | 62                                                          |
| 103             | Iraq    | 1994           | Beans                     | 1                                                           |
| 103             | Iraq    | 1994           | Beer                      | 9                                                           |
| 103             | Iraq    | 1994           | Bovine Meat               | 8                                                           |
| 103             | Iraq    | 1994           | Butter, Ghee              | 2                                                           |
| 103             | Iraq    | 1994           | Cheese                    | 3                                                           |
| 103             | Iraq    | 1994           | Dates                     | 44                                                          |
| 103             | Iraq    | 1994           | Eggs                      | 4                                                           |
| 103             | Iraq    | 1994           | Fats, Animals, Raw        | 1                                                           |
| 103             | Iraq    | 1994           | Freshwater Fish           | 3                                                           |
| 103             | Iraq    | 1994           | Fruits, Other             | 20                                                          |
| 103             | Iraq    | 1994           | Grapes                    | 35                                                          |
| 103             | Iraq    | 1994           | Lemons, Limes             | 2                                                           |
| 103             | Iraq    | 1994           | Maize                     | 13                                                          |
| 103             | Iraq    | 1994           | Maize Germ Oil            | 3                                                           |
| 103             | Iraq    | 1994           | Marine Fish, Other        | 1                                                           |
| 103             | Iraq    | 1994           | Milk, Whole               | 21                                                          |
| 103             | Iraq    | 1994           | Mutton & Goat Meat        | 5                                                           |
| 103             | Iraq    | 1994           | Nuts                      | 1                                                           |
| 103             | Iraq    | 1994           | Offals, Edible            | 2                                                           |
| 103             | Iraq    | 1994           | Olives                    | 2                                                           |
| 103             | Iraq    | 1994           | Onions                    | 9                                                           |
| 103             | Iraq    | 1994           | Oranges, Mandarines       | 45                                                          |
| 103             | Iraq    | 1994           | Palm Oil                  | 37                                                          |
| 103             | Iraq    | 1994           | Potatoes                  | 45                                                          |
| 103             | Iraq    | 1994           | Poultry Meat              | 6                                                           |
| 103             | Iraq    | 1994           | Pulses, Other             | 7                                                           |
| 103             | Iraq    | 1994           | Rice (Milled Equivalent)  | 67                                                          |
| 103             | Iraq    | 1994           | Sesameseed Oil            | 1                                                           |
| 103             | Iraq    | 1994           | Soyabean Oil              | 2                                                           |
| 103             | Iraq    | 1994           | Sugar Cane                | 8                                                           |
| 103             | Iraq    | 1994           | Sugar, Refined Equivalent | 44                                                          |
| 103             | Iraq    | 1994           | Sunflowerseed             | 2                                                           |
| 103             | Iraq    | 1994           | Sunflowerseed Oil         | 6                                                           |
| 103             | Iraq    | 1994           | Tea                       | 2                                                           |
| 103             | Iraq    | 1994           | Tomatoes                  | 115                                                         |
| 103             | Iraq    | 1994           | Vegetables, Other         | 258                                                         |
| 103             | Iraq    | 1994           | Wheat                     | 254                                                         |
| 103             | Iraq    | 1995           | Apples                    | 11                                                          |
| 103             | Iraq    | 1995           | Barley                    | 54                                                          |
| 103             | Iraq    | 1995           | Beans                     | 1                                                           |
| 103             | Iraq    | 1995           | Beer                      | 9                                                           |
| 103             | Iraq    | 1995           | Bovine Meat               | 6                                                           |
| 103             | Iraq    | 1995           | Butter, Ghee              | 2                                                           |
| 103             | Iraq    | 1995           | Cheese                    | 3                                                           |
| 103             | Iraq    | 1995           | Coconut Oil               | 1                                                           |
| 103             | Iraq    | 1995           | Dates                     | 44                                                          |
| 103             | Iraq    | 1995           | Eggs                      | 3                                                           |
| 103             | Iraq    | 1995           | Fats, Animals, Raw        | 1                                                           |
| 103             | Iraq    | 1995           | Freshwater Fish           | 3                                                           |
| 103             | Iraq    | 1995           | Fruits, Other             | 20                                                          |
| 103             | Iraq    | 1995           | Grapes                    | 36                                                          |
| 103             | Iraq    | 1995           | Lemons, Limes             | 2                                                           |
| 103             | Iraq    | 1995           | Maize                     | 12                                                          |
| 103             | Iraq    | 1995           | Maize Germ Oil            | 2                                                           |
| 103             | Iraq    | 1995           | Marine Fish, Other        | 1                                                           |
| 103             | Iraq    | 1995           | Milk, Whole               | 19                                                          |
| 103             | Iraq    | 1995           | Mutton & Goat Meat        | 4                                                           |
| 103             | Iraq    | 1995           | Nuts                      | 1                                                           |
| 103             | Iraq    | 1995           | Offals, Edible            | 2                                                           |
| 103             | Iraq    | 1995           | Olives                    | 2                                                           |
| 103             | Iraq    | 1995           | Onions                    | 9                                                           |
| 103             | Iraq    | 1995           | Oranges, Mandarines       | 44                                                          |
| 103             | Iraq    | 1995           | Palm Oil                  | 44                                                          |
| 103             | Iraq    | 1995           | Potatoes                  | 40                                                          |
| 103             | Iraq    | 1995           | Poultry Meat              | 5                                                           |
| 103             | Iraq    | 1995           | Pulses, Other             | 7                                                           |
| 103             | Iraq    | 1995           | Rice (Milled Equivalent)  | 67                                                          |
| 103             | Iraq    | 1995           | Sesameseed Oil            | 1                                                           |
| 103             | Iraq    | 1995           | Soyabean Oil              | 4                                                           |
| 103             | Iraq    | 1995           | Sugar Cane                | 8                                                           |
| 103             | Iraq    | 1995           | Sugar, Refined Equivalent | 36                                                          |
| 103             | Iraq    | 1995           | Sunflowerseed             | 2                                                           |
| 103             | Iraq    | 1995           | Sunflowerseed Oil         | 6                                                           |
| 103             | Iraq    | 1995           | Tea                       | 2                                                           |
| 103             | Iraq    | 1995           | Tomatoes                  | 111                                                         |

Dietary calcium and zinc deficiency risks are decreasing but remain prevalent

| FAO countrycode | Country | Reference year | Food item                 | Gross food supply (g capita <sup>-1</sup> d <sup>-1</sup> ) |
|-----------------|---------|----------------|---------------------------|-------------------------------------------------------------|
| 103             | Iraq    | 1995           | Vegetables, Other         | 249                                                         |
| 103             | Iraq    | 1995           | Wheat                     | 244                                                         |
| 103             | Iraq    | 1996           | Apples                    | 10                                                          |
| 103             | Iraq    | 1996           | Barley                    | 52                                                          |
| 103             | Iraq    | 1996           | Beans                     | 1                                                           |
| 103             | Iraq    | 1996           | Beer                      | 7                                                           |
| 103             | Iraq    | 1996           | Bovine Meat               | 5                                                           |
| 103             | Iraq    | 1996           | Butter, Ghee              | 1                                                           |
| 103             | Iraq    | 1996           | Cheese                    | 4                                                           |
| 103             | Iraq    | 1996           | Dates                     | 46                                                          |
| 103             | Iraq    | 1996           | Eggs                      | 3                                                           |
| 103             | Iraq    | 1996           | Freshwater Fish           | 3                                                           |
| 103             | Iraq    | 1996           | Fruits, Other             | 19                                                          |
| 103             | Iraq    | 1996           | Grapes                    | 36                                                          |
| 103             | Iraq    | 1996           | Lemons, Limes             | 2                                                           |
| 103             | Iraq    | 1996           | Maize                     | 12                                                          |
| 103             | Iraq    | 1996           | Maize Germ Oil            | 2                                                           |
| 103             | Iraq    | 1996           | Marine Fish, Other        | 2                                                           |
| 103             | Iraq    | 1996           | Milk, Whole               | 27                                                          |
| 103             | Iraq    | 1996           | Mutton & Goat Meat        | 3                                                           |
| 103             | Iraq    | 1996           | Nuts                      | 1                                                           |
| 103             | Iraq    | 1996           | Offals, Edible            | 1                                                           |
| 103             | Iraq    | 1996           | Olives                    | 1                                                           |
| 103             | Iraq    | 1996           | Onions                    | 10                                                          |
| 103             | Iraq    | 1996           | Oranges, Mandarines       | 42                                                          |
| 103             | Iraq    | 1996           | Palm Oil                  | 44                                                          |
| 103             | Iraq    | 1996           | Potatoes                  | 62                                                          |
| 103             | Iraq    | 1996           | Poultry Meat              | 5                                                           |
| 103             | Iraq    | 1996           | Pulses, Other             | 9                                                           |
| 103             | Iraq    | 1996           | Rice (Milled Equivalent)  | 64                                                          |
| 103             | Iraq    | 1996           | Sesameed Oil              | 1                                                           |
| 103             | Iraq    | 1996           | Soyabean Oil              | 6                                                           |
| 103             | Iraq    | 1996           | Sugar Cane                | 7                                                           |
| 103             | Iraq    | 1996           | Sugar, Refined Equivalent | 31                                                          |
| 103             | Iraq    | 1996           | Sunflowerseed             | 2                                                           |
| 103             | Iraq    | 1996           | Sunflowerseed Oil         | 6                                                           |
| 103             | Iraq    | 1996           | Tea                       | 1                                                           |
| 103             | Iraq    | 1996           | Tomatoes                  | 108                                                         |
| 103             | Iraq    | 1996           | Vegetables, Other         | 243                                                         |
| 103             | Iraq    | 1996           | Wheat                     | 239                                                         |
| 103             | Iraq    | 1997           | Apples                    | 9                                                           |
| 103             | Iraq    | 1997           | Barley                    | 15                                                          |
| 103             | Iraq    | 1997           | Beans                     | 1                                                           |
| 103             | Iraq    | 1997           | Beer                      | 6                                                           |
| 103             | Iraq    | 1997           | Bovine Meat               | 6                                                           |
| 103             | Iraq    | 1997           | Butter, Ghee              | 1                                                           |
| 103             | Iraq    | 1997           | Cheese                    | 4                                                           |
| 103             | Iraq    | 1997           | Cottonseed Oil            | 1                                                           |
| 103             | Iraq    | 1997           | Dates                     | 40                                                          |
| 103             | Iraq    | 1997           | Eggs                      | 1                                                           |
| 103             | Iraq    | 1997           | Freshwater Fish           | 3                                                           |
| 103             | Iraq    | 1997           | Fruits, Other             | 18                                                          |
| 103             | Iraq    | 1997           | Grapes                    | 34                                                          |
| 103             | Iraq    | 1997           | Lemons, Limes             | 2                                                           |
| 103             | Iraq    | 1997           | Maize                     | 3                                                           |
| 103             | Iraq    | 1997           | Maize Germ Oil            | 3                                                           |
| 103             | Iraq    | 1997           | Marine Fish, Other        | 1                                                           |
| 103             | Iraq    | 1997           | Milk, Whole               | 29                                                          |
| 103             | Iraq    | 1997           | Mutton & Goat Meat        | 3                                                           |
| 103             | Iraq    | 1997           | Nuts                      | 1                                                           |
| 103             | Iraq    | 1997           | Offals, Edible            | 2                                                           |
| 103             | Iraq    | 1997           | Olives                    | 1                                                           |
| 103             | Iraq    | 1997           | Onions                    | 11                                                          |
| 103             | Iraq    | 1997           | Oranges, Mandarines       | 40                                                          |
| 103             | Iraq    | 1997           | Palm Oil                  | 35                                                          |
| 103             | Iraq    | 1997           | Potatoes                  | 51                                                          |
| 103             | Iraq    | 1997           | Poultry Meat              | 4                                                           |
| 103             | Iraq    | 1997           | Pulses, Other             | 12                                                          |
| 103             | Iraq    | 1997           | Rice (Milled Equivalent)  | 81                                                          |
| 103             | Iraq    | 1997           | Sesameed Oil              | 1                                                           |
| 103             | Iraq    | 1997           | Soyabean Oil              | 6                                                           |
| 103             | Iraq    | 1997           | Sugar Cane                | 7                                                           |
| 103             | Iraq    | 1997           | Sugar, Refined Equivalent | 38                                                          |
| 103             | Iraq    | 1997           | Sunflowerseed             | 2                                                           |
| 103             | Iraq    | 1997           | Sunflowerseed Oil         | 6                                                           |
| 103             | Iraq    | 1997           | Tea                       | 2                                                           |
| 103             | Iraq    | 1997           | Tomatoes                  | 103                                                         |
| 103             | Iraq    | 1997           | Vegetables, Other         | 237                                                         |
| 103             | Iraq    | 1997           | Wheat                     | 266                                                         |
| 103             | Iraq    | 1998           | Apples                    | 9                                                           |
| 103             | Iraq    | 1998           | Barley                    | 12                                                          |
| 103             | Iraq    | 1998           | Beans                     | 1                                                           |
| 103             | Iraq    | 1998           | Beer                      | 6                                                           |
| 103             | Iraq    | 1998           | Bovine Meat               | 6                                                           |
| 103             | Iraq    | 1998           | Butter, Ghee              | 1                                                           |
| 103             | Iraq    | 1998           | Cheese                    | 4                                                           |
| 103             | Iraq    | 1998           | Cottonseed Oil            | 1                                                           |
| 103             | Iraq    | 1998           | Dates                     | 45                                                          |
| 103             | Iraq    | 1998           | Freshwater Fish           | 2                                                           |
| 103             | Iraq    | 1998           | Fruits, Other             | 18                                                          |
| 103             | Iraq    | 1998           | Grapes                    | 34                                                          |
| 103             | Iraq    | 1998           | Lemons, Limes             | 2                                                           |
| 103             | Iraq    | 1998           | Maize                     | 2                                                           |
| 103             | Iraq    | 1998           | Maize Germ Oil            | 3                                                           |
| 103             | Iraq    | 1998           | Marine Fish, Other        | 2                                                           |
| 103             | Iraq    | 1998           | Milk, Whole               | 37                                                          |
| 103             | Iraq    | 1998           | Mutton & Goat Meat        | 3                                                           |

Dietary calcium and zinc deficiency risks are decreasing but remain prevalent

| FAO countrycode | Country | Reference year | Food item                 | Gross food supply (g capita <sup>-1</sup> d <sup>-1</sup> ) |
|-----------------|---------|----------------|---------------------------|-------------------------------------------------------------|
| 103             | Iraq    | 1998           | Nuts                      | 1                                                           |
| 103             | Iraq    | 1998           | Offals, Edible            | 2                                                           |
| 103             | Iraq    | 1998           | Olives                    | 1                                                           |
| 103             | Iraq    | 1998           | Onions                    | 13                                                          |
| 103             | Iraq    | 1998           | Oranges, Mandarines       | 40                                                          |
| 103             | Iraq    | 1998           | Palm Oil                  | 31                                                          |
| 103             | Iraq    | 1998           | Potatoes                  | 48                                                          |
| 103             | Iraq    | 1998           | Poultry Meat              | 3                                                           |
| 103             | Iraq    | 1998           | Pulses, Other             | 7                                                           |
| 103             | Iraq    | 1998           | Rice (Milled Equivalent)  | 81                                                          |
| 103             | Iraq    | 1998           | Sesameseed Oil            | 1                                                           |
| 103             | Iraq    | 1998           | Soyabean Oil              | 6                                                           |
| 103             | Iraq    | 1998           | Sugar Cane                | 7                                                           |
| 103             | Iraq    | 1998           | Sugar, Refined Equivalent | 39                                                          |
| 103             | Iraq    | 1998           | Sunflowerseed             | 1                                                           |
| 103             | Iraq    | 1998           | Sunflowerseed Oil         | 4                                                           |
| 103             | Iraq    | 1998           | Tea                       | 3                                                           |
| 103             | Iraq    | 1998           | Tomatoes                  | 112                                                         |
| 103             | Iraq    | 1998           | Vegetables, Other         | 244                                                         |
| 103             | Iraq    | 1998           | Wheat                     | 290                                                         |
| 103             | Iraq    | 1999           | Apples                    | 10                                                          |
| 103             | Iraq    | 1999           | Barley                    | 12                                                          |
| 103             | Iraq    | 1999           | Beans                     | 2                                                           |
| 103             | Iraq    | 1999           | Beer                      | 6                                                           |
| 103             | Iraq    | 1999           | Bovine Meat               | 6                                                           |
| 103             | Iraq    | 1999           | Butter, Ghee              | 1                                                           |
| 103             | Iraq    | 1999           | Cheese                    | 3                                                           |
| 103             | Iraq    | 1999           | Cottonseed Oil            | 1                                                           |
| 103             | Iraq    | 1999           | Dates                     | 39                                                          |
| 103             | Iraq    | 1999           | Eggs                      | 4                                                           |
| 103             | Iraq    | 1999           | Freshwater Fish           | 1                                                           |
| 103             | Iraq    | 1999           | Fruits, Other             | 16                                                          |
| 103             | Iraq    | 1999           | Grapes                    | 29                                                          |
| 103             | Iraq    | 1999           | Lemons, Limes             | 2                                                           |
| 103             | Iraq    | 1999           | Maize                     | 2                                                           |
| 103             | Iraq    | 1999           | Maize Germ Oil            | 3                                                           |
| 103             | Iraq    | 1999           | Marine Fish, Other        | 2                                                           |
| 103             | Iraq    | 1999           | Milk, Whole               | 62                                                          |
| 103             | Iraq    | 1999           | Mutton & Goat Meat        | 3                                                           |
| 103             | Iraq    | 1999           | Offals, Edible            | 2                                                           |
| 103             | Iraq    | 1999           | Olives                    | 1                                                           |
| 103             | Iraq    | 1999           | Onions                    | 16                                                          |
| 103             | Iraq    | 1999           | Oranges, Mandarines       | 36                                                          |
| 103             | Iraq    | 1999           | Palm Oil                  | 21                                                          |
| 103             | Iraq    | 1999           | Potatoes                  | 62                                                          |
| 103             | Iraq    | 1999           | Poultry Meat              | 6                                                           |
| 103             | Iraq    | 1999           | Pulses, Other             | 4                                                           |
| 103             | Iraq    | 1999           | Rice (Milled Equivalent)  | 87                                                          |
| 103             | Iraq    | 1999           | Sesameseed Oil            | 1                                                           |
| 103             | Iraq    | 1999           | Soyabean Oil              | 9                                                           |
| 103             | Iraq    | 1999           | Sugar Cane                | 7                                                           |
| 103             | Iraq    | 1999           | Sugar, Refined Equivalent | 43                                                          |
| 103             | Iraq    | 1999           | Sunflowerseed             | 1                                                           |
| 103             | Iraq    | 1999           | Sunflowerseed Oil         | 4                                                           |
| 103             | Iraq    | 1999           | Tea                       | 3                                                           |
| 103             | Iraq    | 1999           | Tomatoes                  | 123                                                         |
| 103             | Iraq    | 1999           | Vegetables, Other         | 251                                                         |
| 103             | Iraq    | 1999           | Wheat                     | 302                                                         |
| 103             | Iraq    | 2000           | Apples                    | 7                                                           |
| 103             | Iraq    | 2000           | Barley                    | 12                                                          |
| 103             | Iraq    | 2000           | Beans                     | 4                                                           |
| 103             | Iraq    | 2000           | Beer                      | 6                                                           |
| 103             | Iraq    | 2000           | Bovine Meat               | 6                                                           |
| 103             | Iraq    | 2000           | Butter, Ghee              | 2                                                           |
| 103             | Iraq    | 2000           | Cheese                    | 4                                                           |
| 103             | Iraq    | 2000           | Dates                     | 35                                                          |
| 103             | Iraq    | 2000           | Eggs                      | 4                                                           |
| 103             | Iraq    | 2000           | Fats, Animals, Raw        | 1                                                           |
| 103             | Iraq    | 2000           | Freshwater Fish           | 1                                                           |
| 103             | Iraq    | 2000           | Fruits, Other             | 15                                                          |
| 103             | Iraq    | 2000           | Grapes                    | 29                                                          |
| 103             | Iraq    | 2000           | Lemons, Limes             | 1                                                           |
| 103             | Iraq    | 2000           | Maize                     | 1                                                           |
| 103             | Iraq    | 2000           | Maize Germ Oil            | 3                                                           |
| 103             | Iraq    | 2000           | Marine Fish, Other        | 1                                                           |
| 103             | Iraq    | 2000           | Milk, Whole               | 63                                                          |
| 103             | Iraq    | 2000           | Mutton & Goat Meat        | 4                                                           |
| 103             | Iraq    | 2000           | Offals, Edible            | 2                                                           |
| 103             | Iraq    | 2000           | Olives                    | 1                                                           |
| 103             | Iraq    | 2000           | Onions                    | 15                                                          |
| 103             | Iraq    | 2000           | Oranges, Mandarines       | 32                                                          |
| 103             | Iraq    | 2000           | Palm Oil                  | 21                                                          |
| 103             | Iraq    | 2000           | Potatoes                  | 43                                                          |
| 103             | Iraq    | 2000           | Poultry Meat              | 9                                                           |
| 103             | Iraq    | 2000           | Pulses, Other             | 7                                                           |
| 103             | Iraq    | 2000           | Rice (Milled Equivalent)  | 106                                                         |
| 103             | Iraq    | 2000           | Sesameseed Oil            | 1                                                           |
| 103             | Iraq    | 2000           | Soyabean Oil              | 8                                                           |
| 103             | Iraq    | 2000           | Sugar Cane                | 6                                                           |
| 103             | Iraq    | 2000           | Sugar, Refined Equivalent | 43                                                          |
| 103             | Iraq    | 2000           | Sunflowerseed             | 1                                                           |
| 103             | Iraq    | 2000           | Sunflowerseed Oil         | 3                                                           |
| 103             | Iraq    | 2000           | Tea                       | 2                                                           |
| 103             | Iraq    | 2000           | Tomatoes                  | 108                                                         |
| 103             | Iraq    | 2000           | Vegetables, Other         | 242                                                         |
| 103             | Iraq    | 2000           | Wheat                     | 293                                                         |
| 103             | Iraq    | 2001           | Apples                    | 7                                                           |

Dietary calcium and zinc deficiency risks are decreasing but remain prevalent

| FAO countrycode | Country | Reference year | Food item                 | Gross food supply (g capita <sup>-1</sup> d <sup>-1</sup> ) |
|-----------------|---------|----------------|---------------------------|-------------------------------------------------------------|
| 103             | Iraq    | 2001           | Barley                    | 8                                                           |
| 103             | Iraq    | 2001           | Beans                     | 3                                                           |
| 103             | Iraq    | 2001           | Beer                      | 5                                                           |
| 103             | Iraq    | 2001           | Bovine Meat               | 6                                                           |
| 103             | Iraq    | 2001           | Butter, Ghee              | 2                                                           |
| 103             | Iraq    | 2001           | Cheese                    | 4                                                           |
| 103             | Iraq    | 2001           | Cottonseed Oil            | 1                                                           |
| 103             | Iraq    | 2001           | Dates                     | 34                                                          |
| 103             | Iraq    | 2001           | Eggs                      | 5                                                           |
| 103             | Iraq    | 2001           | Freshwater Fish           | 2                                                           |
| 103             | Iraq    | 2001           | Fruits, Other             | 14                                                          |
| 103             | Iraq    | 2001           | Grapes                    | 30                                                          |
| 103             | Iraq    | 2001           | Lemons, Limes             | 3                                                           |
| 103             | Iraq    | 2001           | Maize                     | 1                                                           |
| 103             | Iraq    | 2001           | Maize Germ Oil            | 2                                                           |
| 103             | Iraq    | 2001           | Marine Fish, Other        | 2                                                           |
| 103             | Iraq    | 2001           | Milk, Whole               | 54                                                          |
| 103             | Iraq    | 2001           | Mutton & Goat Meat        | 3                                                           |
| 103             | Iraq    | 2001           | Offals, Edible            | 2                                                           |
| 103             | Iraq    | 2001           | Olives                    | 1                                                           |
| 103             | Iraq    | 2001           | Onions                    | 39                                                          |
| 103             | Iraq    | 2001           | Oranges, Mandarines       | 37                                                          |
| 103             | Iraq    | 2001           | Palm Oil                  | 25                                                          |
| 103             | Iraq    | 2001           | Potatoes                  | 46                                                          |
| 103             | Iraq    | 2001           | Poultry Meat              | 9                                                           |
| 103             | Iraq    | 2001           | Pulses, Other             | 9                                                           |
| 103             | Iraq    | 2001           | Rice (Milled Equivalent)  | 104                                                         |
| 103             | Iraq    | 2001           | Sesameseed Oil            | 1                                                           |
| 103             | Iraq    | 2001           | Soyabean Oil              | 8                                                           |
| 103             | Iraq    | 2001           | Sugar Cane                | 6                                                           |
| 103             | Iraq    | 2001           | Sugar, Refined Equivalent | 45                                                          |
| 103             | Iraq    | 2001           | Sunflowerseed             | 1                                                           |
| 103             | Iraq    | 2001           | Sunflowerseed Oil         | 3                                                           |
| 103             | Iraq    | 2001           | Tea                       | 4                                                           |
| 103             | Iraq    | 2001           | Tomatoes                  | 139                                                         |
| 103             | Iraq    | 2001           | Vegetables, Other         | 234                                                         |
| 103             | Iraq    | 2001           | Wheat                     | 308                                                         |
| 103             | Iraq    | 2002           | Apples                    | 9                                                           |
| 103             | Iraq    | 2002           | Barley                    | 8                                                           |
| 103             | Iraq    | 2002           | Beans                     | 3                                                           |
| 103             | Iraq    | 2002           | Beer                      | 4                                                           |
| 103             | Iraq    | 2002           | Bovine Meat               | 6                                                           |
| 103             | Iraq    | 2002           | Butter, Ghee              | 1                                                           |
| 103             | Iraq    | 2002           | Cheese                    | 3                                                           |
| 103             | Iraq    | 2002           | Cottonseed Oil            | 1                                                           |
| 103             | Iraq    | 2002           | Dates                     | 29                                                          |
| 103             | Iraq    | 2002           | Eggs                      | 5                                                           |
| 103             | Iraq    | 2002           | Freshwater Fish           | 2                                                           |
| 103             | Iraq    | 2002           | Fruits, Other             | 12                                                          |
| 103             | Iraq    | 2002           | Grapes                    | 34                                                          |
| 103             | Iraq    | 2002           | Lemons, Limes             | 3                                                           |
| 103             | Iraq    | 2002           | Maize                     | 1                                                           |
| 103             | Iraq    | 2002           | Maize Germ Oil            | 2                                                           |
| 103             | Iraq    | 2002           | Marine Fish, Other        | 2                                                           |
| 103             | Iraq    | 2002           | Milk, Whole               | 69                                                          |
| 103             | Iraq    | 2002           | Mutton & Goat Meat        | 3                                                           |
| 103             | Iraq    | 2002           | Offals, Edible            | 1                                                           |
| 103             | Iraq    | 2002           | Olives                    | 1                                                           |
| 103             | Iraq    | 2002           | Onions                    | 15                                                          |
| 103             | Iraq    | 2002           | Oranges, Mandarines       | 36                                                          |
| 103             | Iraq    | 2002           | Palm Oil                  | 18                                                          |
| 103             | Iraq    | 2002           | Potatoes                  | 69                                                          |
| 103             | Iraq    | 2002           | Poultry Meat              | 10                                                          |
| 103             | Iraq    | 2002           | Pulses, Other             | 10                                                          |
| 103             | Iraq    | 2002           | Rice (Milled Equivalent)  | 101                                                         |
| 103             | Iraq    | 2002           | Sesameseed Oil            | 1                                                           |
| 103             | Iraq    | 2002           | Soyabean Oil              | 8                                                           |
| 103             | Iraq    | 2002           | Sugar Cane                | 8                                                           |
| 103             | Iraq    | 2002           | Sugar, Refined Equivalent | 47                                                          |
| 103             | Iraq    | 2002           | Sunflowerseed             | 1                                                           |
| 103             | Iraq    | 2002           | Sunflowerseed Oil         | 3                                                           |
| 103             | Iraq    | 2002           | Tea                       | 6                                                           |
| 103             | Iraq    | 2002           | Tomatoes                  | 131                                                         |
| 103             | Iraq    | 2002           | Vegetables, Other         | 214                                                         |
| 103             | Iraq    | 2002           | Wheat                     | 326                                                         |
| 103             | Iraq    | 2003           | Apples                    | 10                                                          |
| 103             | Iraq    | 2003           | Barley                    | 11                                                          |
| 103             | Iraq    | 2003           | Beans                     | 7                                                           |
| 103             | Iraq    | 2003           | Beer                      | 2                                                           |
| 103             | Iraq    | 2003           | Beverages, Alcoholic      | 1                                                           |
| 103             | Iraq    | 2003           | Bovine Meat               | 4                                                           |
| 103             | Iraq    | 2003           | Butter, Ghee              | 1                                                           |
| 103             | Iraq    | 2003           | Cheese                    | 2                                                           |
| 103             | Iraq    | 2003           | Dates                     | 27                                                          |
| 103             | Iraq    | 2003           | Eggs                      | 5                                                           |
| 103             | Iraq    | 2003           | Freshwater Fish           | 2                                                           |
| 103             | Iraq    | 2003           | Fruits, Other             | 13                                                          |
| 103             | Iraq    | 2003           | Grapes                    | 34                                                          |
| 103             | Iraq    | 2003           | Lemons, Limes             | 1                                                           |
| 103             | Iraq    | 2003           | Maize                     | 1                                                           |
| 103             | Iraq    | 2003           | Maize Germ Oil            | 2                                                           |
| 103             | Iraq    | 2003           | Milk, Whole               | 28                                                          |
| 103             | Iraq    | 2003           | Mutton & Goat Meat        | 3                                                           |
| 103             | Iraq    | 2003           | Offals, Edible            | 1                                                           |
| 103             | Iraq    | 2003           | Onions                    | 13                                                          |
| 103             | Iraq    | 2003           | Oranges, Mandarines       | 20                                                          |
| 103             | Iraq    | 2003           | Palm Oil                  | 17                                                          |

Dietary calcium and zinc deficiency risks are decreasing but remain prevalent

| FAO countrycode | Country | Reference year | Food item                 | Gross food supply (g capita <sup>-1</sup> d <sup>-1</sup> ) |
|-----------------|---------|----------------|---------------------------|-------------------------------------------------------------|
| 103             | Iraq    | 2003           | Peas                      | 2                                                           |
| 103             | Iraq    | 2003           | Potatoes                  | 73                                                          |
| 103             | Iraq    | 2003           | Poultry Meat              | 3                                                           |
| 103             | Iraq    | 2003           | Pulses, Other             | 17                                                          |
| 103             | Iraq    | 2003           | Rice (Milled Equivalent)  | 93                                                          |
| 103             | Iraq    | 2003           | Sesameseed Oil            | 1                                                           |
| 103             | Iraq    | 2003           | Soyabean Oil              | 8                                                           |
| 103             | Iraq    | 2003           | Sugar, Refined Equivalent | 45                                                          |
| 103             | Iraq    | 2003           | Sunflowerseed             | 1                                                           |
| 103             | Iraq    | 2003           | Sunflowerseed Oil         | 3                                                           |
| 103             | Iraq    | 2003           | Sweeteners, Other         | 2                                                           |
| 103             | Iraq    | 2003           | Tea                       | 1                                                           |
| 103             | Iraq    | 2003           | Tomatoes                  | 45                                                          |
| 103             | Iraq    | 2003           | Vegetables, Other         | 203                                                         |
| 103             | Iraq    | 2003           | Wheat                     | 342                                                         |
| 103             | Iraq    | 2004           | Apples                    | 10                                                          |
| 103             | Iraq    | 2004           | Barley                    | 10                                                          |
| 103             | Iraq    | 2004           | Beans                     | 7                                                           |
| 103             | Iraq    | 2004           | Beer                      | 10                                                          |
| 103             | Iraq    | 2004           | Bovine Meat               | 5                                                           |
| 103             | Iraq    | 2004           | Butter, Ghee              | 1                                                           |
| 103             | Iraq    | 2004           | Cheese                    | 2                                                           |
| 103             | Iraq    | 2004           | Cocoa Beans               | 1                                                           |
| 103             | Iraq    | 2004           | Dates                     | 24                                                          |
| 103             | Iraq    | 2004           | Demersal Fish             | 1                                                           |
| 103             | Iraq    | 2004           | Eggs                      | 5                                                           |
| 103             | Iraq    | 2004           | Freshwater Fish           | 3                                                           |
| 103             | Iraq    | 2004           | Fruits, Other             | 13                                                          |
| 103             | Iraq    | 2004           | Grapes                    | 3                                                           |
| 103             | Iraq    | 2004           | Lemons, Limes             | 1                                                           |
| 103             | Iraq    | 2004           | Maize                     | 1                                                           |
| 103             | Iraq    | 2004           | Maize Germ Oil            | 2                                                           |
| 103             | Iraq    | 2004           | Milk, Whole               | 59                                                          |
| 103             | Iraq    | 2004           | Mutton & Goat Meat        | 2                                                           |
| 103             | Iraq    | 2004           | Nuts                      | 1                                                           |
| 103             | Iraq    | 2004           | Offals, Edible            | 1                                                           |
| 103             | Iraq    | 2004           | Onions                    | 11                                                          |
| 103             | Iraq    | 2004           | Oranges, Mandarines       | 11                                                          |
| 103             | Iraq    | 2004           | Palm Oil                  | 29                                                          |
| 103             | Iraq    | 2004           | Peas                      | 1                                                           |
| 103             | Iraq    | 2004           | Potatoes                  | 52                                                          |
| 103             | Iraq    | 2004           | Poultry Meat              | 8                                                           |
| 103             | Iraq    | 2004           | Pulses, Other             | 14                                                          |
| 103             | Iraq    | 2004           | Rice (Milled Equivalent)  | 92                                                          |
| 103             | Iraq    | 2004           | Sesameseed Oil            | 1                                                           |
| 103             | Iraq    | 2004           | Soyabean Oil              | 6                                                           |
| 103             | Iraq    | 2004           | Sugar, Refined Equivalent | 60                                                          |
| 103             | Iraq    | 2004           | Sunflowerseed             | 1                                                           |
| 103             | Iraq    | 2004           | Sunflowerseed Oil         | 3                                                           |
| 103             | Iraq    | 2004           | Sweeteners, Other         | 9                                                           |
| 103             | Iraq    | 2004           | Tea                       | 3                                                           |
| 103             | Iraq    | 2004           | Tomatoes                  | 108                                                         |
| 103             | Iraq    | 2004           | Vegetables, Other         | 245                                                         |
| 103             | Iraq    | 2004           | Wheat                     | 337                                                         |
| 103             | Iraq    | 2005           | Apples                    | 11                                                          |
| 103             | Iraq    | 2005           | Bananas                   | 1                                                           |
| 103             | Iraq    | 2005           | Barley                    | 10                                                          |
| 103             | Iraq    | 2005           | Beans                     | 3                                                           |
| 103             | Iraq    | 2005           | Beer                      | 5                                                           |
| 103             | Iraq    | 2005           | Bovine Meat               | 5                                                           |
| 103             | Iraq    | 2005           | Butter, Ghee              | 1                                                           |
| 103             | Iraq    | 2005           | Cheese                    | 2                                                           |
| 103             | Iraq    | 2005           | Cocoa Beans               | 1                                                           |
| 103             | Iraq    | 2005           | Dates                     | 17                                                          |
| 103             | Iraq    | 2005           | Demersal Fish             | 1                                                           |
| 103             | Iraq    | 2005           | Eggs                      | 5                                                           |
| 103             | Iraq    | 2005           | Freshwater Fish           | 4                                                           |
| 103             | Iraq    | 2005           | Fruits, Other             | 15                                                          |
| 103             | Iraq    | 2005           | Grapes                    | 18                                                          |
| 103             | Iraq    | 2005           | Lemons, Limes             | 1                                                           |
| 103             | Iraq    | 2005           | Maize                     | 1                                                           |
| 103             | Iraq    | 2005           | Maize Germ Oil            | 2                                                           |
| 103             | Iraq    | 2005           | Milk, Whole               | 43                                                          |
| 103             | Iraq    | 2005           | Mutton & Goat Meat        | 3                                                           |
| 103             | Iraq    | 2005           | Offals, Edible            | 1                                                           |
| 103             | Iraq    | 2005           | Onions                    | 16                                                          |
| 103             | Iraq    | 2005           | Oranges, Mandarines       | 11                                                          |
| 103             | Iraq    | 2005           | Palm Oil                  | 29                                                          |
| 103             | Iraq    | 2005           | Peas                      | 1                                                           |
| 103             | Iraq    | 2005           | Potatoes                  | 70                                                          |
| 103             | Iraq    | 2005           | Poultry Meat              | 12                                                          |
| 103             | Iraq    | 2005           | Pulses, Other             | 8                                                           |
| 103             | Iraq    | 2005           | Rice (Milled Equivalent)  | 87                                                          |
| 103             | Iraq    | 2005           | Sesameseed Oil            | 1                                                           |
| 103             | Iraq    | 2005           | Soyabean Oil              | 8                                                           |
| 103             | Iraq    | 2005           | Sugar, Refined Equivalent | 51                                                          |
| 103             | Iraq    | 2005           | Sunflowerseed             | 1                                                           |
| 103             | Iraq    | 2005           | Sunflowerseed Oil         | 4                                                           |
| 103             | Iraq    | 2005           | Sweeteners, Other         | 9                                                           |
| 103             | Iraq    | 2005           | Tea                       | 3                                                           |
| 103             | Iraq    | 2005           | Tomatoes                  | 108                                                         |
| 103             | Iraq    | 2005           | Vegetables, Other         | 276                                                         |
| 103             | Iraq    | 2005           | Wheat                     | 340                                                         |
| 103             | Iraq    | 2006           | Apples                    | 17                                                          |
| 103             | Iraq    | 2006           | Barley                    | 10                                                          |
| 103             | Iraq    | 2006           | Beans                     | 1                                                           |
| 103             | Iraq    | 2006           | Bovine Meat               | 5                                                           |



Dietary calcium and zinc deficiency risks are decreasing but remain prevalent

| FAO countrycode | Country | Reference year | Food item                 | Gross food supply (g capita <sup>-1</sup> d <sup>-1</sup> ) |
|-----------------|---------|----------------|---------------------------|-------------------------------------------------------------|
| 103             | Iraq    | 2006           | Butter, Ghee              | 1                                                           |
| 103             | Iraq    | 2006           | Cheese                    | 3                                                           |
| 103             | Iraq    | 2006           | Dates                     | 20                                                          |
| 103             | Iraq    | 2006           | Demersal Fish             | 2                                                           |
| 103             | Iraq    | 2006           | Eggs                      | 6                                                           |
| 103             | Iraq    | 2006           | Freshwater Fish           | 6                                                           |
| 103             | Iraq    | 2006           | Fruits, Other             | 17                                                          |
| 103             | Iraq    | 2006           | Grapes                    | 20                                                          |
| 103             | Iraq    | 2006           | Lemons, Limes             | 1                                                           |
| 103             | Iraq    | 2006           | Maize                     | 1                                                           |
| 103             | Iraq    | 2006           | Maize Germ Oil            | 2                                                           |
| 103             | Iraq    | 2006           | Marine Fish, Other        | 1                                                           |
| 103             | Iraq    | 2006           | Milk, Whole               | 44                                                          |
| 103             | Iraq    | 2006           | Mutton & Goat Meat        | 4                                                           |
| 103             | Iraq    | 2006           | Offals, Edible            | 1                                                           |
| 103             | Iraq    | 2006           | Onions                    | 18                                                          |
| 103             | Iraq    | 2006           | Oranges, Mandarines       | 12                                                          |
| 103             | Iraq    | 2006           | Palm Oil                  | 20                                                          |
| 103             | Iraq    | 2006           | Potatoes                  | 65                                                          |
| 103             | Iraq    | 2006           | Poultry Meat              | 12                                                          |
| 103             | Iraq    | 2006           | Pulses, Other             | 5                                                           |
| 103             | Iraq    | 2006           | Rice (Milled Equivalent)  | 97                                                          |
| 103             | Iraq    | 2006           | Sesameseed Oil            | 1                                                           |
| 103             | Iraq    | 2006           | Soyabean Oil              | 7                                                           |
| 103             | Iraq    | 2006           | Sugar, Refined Equivalent | 52                                                          |
| 103             | Iraq    | 2006           | Sunflowerseed             | 1                                                           |
| 103             | Iraq    | 2006           | Sunflowerseed Oil         | 10                                                          |
| 103             | Iraq    | 2006           | Sweeteners, Other         | 13                                                          |
| 103             | Iraq    | 2006           | Tea                       | 1                                                           |
| 103             | Iraq    | 2006           | Tomatoes                  | 125                                                         |
| 103             | Iraq    | 2006           | Vegetables, Other         | 270                                                         |
| 103             | Iraq    | 2006           | Wheat                     | 357                                                         |
| 103             | Iraq    | 2007           | Apples                    | 3                                                           |
| 103             | Iraq    | 2007           | Barley                    | 12                                                          |
| 103             | Iraq    | 2007           | Beans                     | 1                                                           |
| 103             | Iraq    | 2007           | Beer                      | 4                                                           |
| 103             | Iraq    | 2007           | Bovine Meat               | 4                                                           |
| 103             | Iraq    | 2007           | Butter, Ghee              | 1                                                           |
| 103             | Iraq    | 2007           | Cheese                    | 2                                                           |
| 103             | Iraq    | 2007           | Cocoa Beans               | 2                                                           |
| 103             | Iraq    | 2007           | Dates                     | 15                                                          |
| 103             | Iraq    | 2007           | Demersal Fish             | 2                                                           |
| 103             | Iraq    | 2007           | Eggs                      | 9                                                           |
| 103             | Iraq    | 2007           | Freshwater Fish           | 6                                                           |
| 103             | Iraq    | 2007           | Fruits, Other             | 24                                                          |
| 103             | Iraq    | 2007           | Grapes                    | 16                                                          |
| 103             | Iraq    | 2007           | Lemons, Limes             | 1                                                           |
| 103             | Iraq    | 2007           | Maize                     | 1                                                           |
| 103             | Iraq    | 2007           | Maize Germ Oil            | 2                                                           |
| 103             | Iraq    | 2007           | Marine Fish, Other        | 1                                                           |
| 103             | Iraq    | 2007           | Milk, Whole               | 24                                                          |
| 103             | Iraq    | 2007           | Mutton & Goat Meat        | 4                                                           |
| 103             | Iraq    | 2007           | Offals, Edible            | 1                                                           |
| 103             | Iraq    | 2007           | Olives                    | 1                                                           |
| 103             | Iraq    | 2007           | Onions                    | 15                                                          |
| 103             | Iraq    | 2007           | Oranges, Mandarines       | 11                                                          |
| 103             | Iraq    | 2007           | Palm Oil                  | 18                                                          |
| 103             | Iraq    | 2007           | Potatoes                  | 53                                                          |
| 103             | Iraq    | 2007           | Poultry Meat              | 20                                                          |
| 103             | Iraq    | 2007           | Pulses, Other             | 5                                                           |
| 103             | Iraq    | 2007           | Rice (Milled Equivalent)  | 100                                                         |
| 103             | Iraq    | 2007           | Sesameseed Oil            | 1                                                           |
| 103             | Iraq    | 2007           | Soyabean Oil              | 6                                                           |
| 103             | Iraq    | 2007           | Sugar, Refined Equivalent | 49                                                          |
| 103             | Iraq    | 2007           | Sunflowerseed             | 1                                                           |
| 103             | Iraq    | 2007           | Sunflowerseed Oil         | 11                                                          |
| 103             | Iraq    | 2007           | Sweeteners, Other         | 8                                                           |
| 103             | Iraq    | 2007           | Tea                       | 2                                                           |
| 103             | Iraq    | 2007           | Tomatoes                  | 146                                                         |
| 103             | Iraq    | 2007           | Vegetables, Other         | 252                                                         |
| 103             | Iraq    | 2007           | Wheat                     | 369                                                         |
| 103             | Iraq    | 2008           | Apples                    | 4                                                           |
| 103             | Iraq    | 2008           | Barley                    | 12                                                          |
| 103             | Iraq    | 2008           | Beans                     | 2                                                           |
| 103             | Iraq    | 2008           | Beer                      | 4                                                           |
| 103             | Iraq    | 2008           | Bovine Meat               | 5                                                           |
| 103             | Iraq    | 2008           | Butter, Ghee              | 1                                                           |
| 103             | Iraq    | 2008           | Cheese                    | 2                                                           |
| 103             | Iraq    | 2008           | Cocoa Beans               | 2                                                           |
| 103             | Iraq    | 2008           | Dates                     | 13                                                          |
| 103             | Iraq    | 2008           | Demersal Fish             | 2                                                           |
| 103             | Iraq    | 2008           | Eggs                      | 15                                                          |
| 103             | Iraq    | 2008           | Freshwater Fish           | 4                                                           |
| 103             | Iraq    | 2008           | Fruits, Other             | 20                                                          |
| 103             | Iraq    | 2008           | Grapes                    | 17                                                          |
| 103             | Iraq    | 2008           | Lemons, Limes             | 1                                                           |
| 103             | Iraq    | 2008           | Maize                     | 1                                                           |
| 103             | Iraq    | 2008           | Maize Germ Oil            | 2                                                           |
| 103             | Iraq    | 2008           | Marine Fish, Other        | 1                                                           |
| 103             | Iraq    | 2008           | Milk, Whole               | 70                                                          |
| 103             | Iraq    | 2008           | Mutton & Goat Meat        | 5                                                           |
| 103             | Iraq    | 2008           | Nuts                      | 1                                                           |
| 103             | Iraq    | 2008           | Offals, Edible            | 1                                                           |
| 103             | Iraq    | 2008           | Olives                    | 1                                                           |
| 103             | Iraq    | 2008           | Onions                    | 17                                                          |
| 103             | Iraq    | 2008           | Oranges, Mandarines       | 13                                                          |
| 103             | Iraq    | 2008           | Palm Oil                  | 19                                                          |

Dietary calcium and zinc deficiency risks are decreasing but remain prevalent

| FAO countrycode | Country | Reference year | Food item                 | Gross food supply (g capita <sup>-1</sup> d <sup>-1</sup> ) |
|-----------------|---------|----------------|---------------------------|-------------------------------------------------------------|
| 103             | Iraq    | 2008           | Potatoes                  | 30                                                          |
| 103             | Iraq    | 2008           | Poultry Meat              | 21                                                          |
| 103             | Iraq    | 2008           | Pulses, Other             | 4                                                           |
| 103             | Iraq    | 2008           | Rice (Milled Equivalent)  | 103                                                         |
| 103             | Iraq    | 2008           | Sesameseed Oil            | 1                                                           |
| 103             | Iraq    | 2008           | Soyabean Oil              | 9                                                           |
| 103             | Iraq    | 2008           | Sugar, Refined Equivalent | 44                                                          |
| 103             | Iraq    | 2008           | Sunflowerseed             | 1                                                           |
| 103             | Iraq    | 2008           | Sunflowerseed Oil         | 15                                                          |
| 103             | Iraq    | 2008           | Sweeteners, Other         | 3                                                           |
| 103             | Iraq    | 2008           | Tea                       | 3                                                           |
| 103             | Iraq    | 2008           | Tomatoes                  | 96                                                          |
| 103             | Iraq    | 2008           | Vegetables, Other         | 237                                                         |
| 103             | Iraq    | 2008           | Wheat                     | 350                                                         |
| 103             | Iraq    | 2009           | Apples                    | 11                                                          |
| 103             | Iraq    | 2009           | Barley                    | 12                                                          |
| 103             | Iraq    | 2009           | Beans                     | 3                                                           |
| 103             | Iraq    | 2009           | Beer                      | 5                                                           |
| 103             | Iraq    | 2009           | Bovine Meat               | 6                                                           |
| 103             | Iraq    | 2009           | Butter, Ghee              | 1                                                           |
| 103             | Iraq    | 2009           | Cheese                    | 4                                                           |
| 103             | Iraq    | 2009           | Cocoa Beans               | 1                                                           |
| 103             | Iraq    | 2009           | Dates                     | 16                                                          |
| 103             | Iraq    | 2009           | Demersal Fish             | 3                                                           |
| 103             | Iraq    | 2009           | Eggs                      | 19                                                          |
| 103             | Iraq    | 2009           | Freshwater Fish           | 4                                                           |
| 103             | Iraq    | 2009           | Fruits, Other             | 18                                                          |
| 103             | Iraq    | 2009           | Grapes                    | 16                                                          |
| 103             | Iraq    | 2009           | Lemons, Limes             | 3                                                           |
| 103             | Iraq    | 2009           | Maize                     | 1                                                           |
| 103             | Iraq    | 2009           | Maize Germ Oil            | 1                                                           |
| 103             | Iraq    | 2009           | Marine Fish, Other        | 1                                                           |
| 103             | Iraq    | 2009           | Milk, Whole               | 52                                                          |
| 103             | Iraq    | 2009           | Mutton & Goat Meat        | 5                                                           |
| 103             | Iraq    | 2009           | Nuts                      | 1                                                           |
| 103             | Iraq    | 2009           | Offals, Edible            | 1                                                           |
| 103             | Iraq    | 2009           | Olives                    | 1                                                           |
| 103             | Iraq    | 2009           | Onions                    | 10                                                          |
| 103             | Iraq    | 2009           | Oranges, Mandarines       | 15                                                          |
| 103             | Iraq    | 2009           | Palm Oil                  | 20                                                          |
| 103             | Iraq    | 2009           | Peas                      | 1                                                           |
| 103             | Iraq    | 2009           | Pelagic Fish              | 1                                                           |
| 103             | Iraq    | 2009           | Potatoes                  | 19                                                          |
| 103             | Iraq    | 2009           | Poultry Meat              | 32                                                          |
| 103             | Iraq    | 2009           | Pulses, Other             | 6                                                           |
| 103             | Iraq    | 2009           | Rice (Milled Equivalent)  | 100                                                         |
| 103             | Iraq    | 2009           | Soyabean Oil              | 8                                                           |
| 103             | Iraq    | 2009           | Sugar, Refined Equivalent | 38                                                          |
| 103             | Iraq    | 2009           | Sunflowerseed             | 1                                                           |
| 103             | Iraq    | 2009           | Sunflowerseed Oil         | 14                                                          |
| 103             | Iraq    | 2009           | Sweeteners, Other         | 2                                                           |
| 103             | Iraq    | 2009           | Tea                       | 2                                                           |
| 103             | Iraq    | 2009           | Tomatoes                  | 122                                                         |
| 103             | Iraq    | 2009           | Vegetables, Other         | 220                                                         |
| 103             | Iraq    | 2009           | Wheat                     | 369                                                         |
| 103             | Iraq    | 2010           | Apples                    | 39                                                          |
| 103             | Iraq    | 2010           | Barley                    | 12                                                          |
| 103             | Iraq    | 2010           | Beans                     | 1                                                           |
| 103             | Iraq    | 2010           | Beer                      | 5                                                           |
| 103             | Iraq    | 2010           | Beverages, Alcoholic      | 1                                                           |
| 103             | Iraq    | 2010           | Bovine Meat               | 7                                                           |
| 103             | Iraq    | 2010           | Butter, Ghee              | 1                                                           |
| 103             | Iraq    | 2010           | Cheese                    | 4                                                           |
| 103             | Iraq    | 2010           | Cocoa Beans               | 2                                                           |
| 103             | Iraq    | 2010           | Dates                     | 19                                                          |
| 103             | Iraq    | 2010           | Demersal Fish             | 3                                                           |
| 103             | Iraq    | 2010           | Eggs                      | 21                                                          |
| 103             | Iraq    | 2010           | Freshwater Fish           | 3                                                           |
| 103             | Iraq    | 2010           | Fruits, Other             | 19                                                          |
| 103             | Iraq    | 2010           | Grapes                    | 22                                                          |
| 103             | Iraq    | 2010           | Lemons, Limes             | 4                                                           |
| 103             | Iraq    | 2010           | Maize                     | 1                                                           |
| 103             | Iraq    | 2010           | Maize Germ Oil            | 1                                                           |
| 103             | Iraq    | 2010           | Marine Fish, Other        | 1                                                           |
| 103             | Iraq    | 2010           | Milk, Whole               | 38                                                          |
| 103             | Iraq    | 2010           | Mutton & Goat Meat        | 5                                                           |
| 103             | Iraq    | 2010           | Offals, Edible            | 1                                                           |
| 103             | Iraq    | 2010           | Olives                    | 1                                                           |
| 103             | Iraq    | 2010           | Onions                    | 10                                                          |
| 103             | Iraq    | 2010           | Oranges, Mandarines       | 13                                                          |
| 103             | Iraq    | 2010           | Palm Oil                  | 20                                                          |
| 103             | Iraq    | 2010           | Pelagic Fish              | 1                                                           |
| 103             | Iraq    | 2010           | Potatoes                  | 21                                                          |
| 103             | Iraq    | 2010           | Poultry Meat              | 28                                                          |
| 103             | Iraq    | 2010           | Pulses, Other             | 8                                                           |
| 103             | Iraq    | 2010           | Rape and Mustard Oil      | 1                                                           |
| 103             | Iraq    | 2010           | Rice (Milled Equivalent)  | 92                                                          |
| 103             | Iraq    | 2010           | Sesameseed Oil            | 1                                                           |
| 103             | Iraq    | 2010           | Soyabean Oil              | 7                                                           |
| 103             | Iraq    | 2010           | Sugar, Refined Equivalent | 46                                                          |
| 103             | Iraq    | 2010           | Sunflowerseed Oil         | 14                                                          |
| 103             | Iraq    | 2010           | Sweeteners, Other         | 2                                                           |
| 103             | Iraq    | 2010           | Tea                       | 1                                                           |
| 103             | Iraq    | 2010           | Tomatoes                  | 154                                                         |
| 103             | Iraq    | 2010           | Vegetables, Other         | 227                                                         |
| 103             | Iraq    | 2010           | Wheat                     | 380                                                         |
| 103             | Iraq    | 2011           | Apples                    | 10                                                          |

Dietary calcium and zinc deficiency risks are decreasing but remain prevalent

| FAO countrycode | Country | Reference year | Food item                 | Gross food supply (g capita <sup>-1</sup> d <sup>-1</sup> ) |
|-----------------|---------|----------------|---------------------------|-------------------------------------------------------------|
| 103             | Iraq    | 2011           | Barley                    | 12                                                          |
| 103             | Iraq    | 2011           | Beans                     | 1                                                           |
| 103             | Iraq    | 2011           | Beer                      | 4                                                           |
| 103             | Iraq    | 2011           | Beverages, Alcoholic      | 1                                                           |
| 103             | Iraq    | 2011           | Bovine Meat               | 7                                                           |
| 103             | Iraq    | 2011           | Cheese                    | 4                                                           |
| 103             | Iraq    | 2011           | Cocoa Beans               | 2                                                           |
| 103             | Iraq    | 2011           | Dates                     | 19                                                          |
| 103             | Iraq    | 2011           | Demersal Fish             | 3                                                           |
| 103             | Iraq    | 2011           | Eggs                      | 19                                                          |
| 103             | Iraq    | 2011           | Freshwater Fish           | 4                                                           |
| 103             | Iraq    | 2011           | Fruits, Other             | 21                                                          |
| 103             | Iraq    | 2011           | Grapes                    | 18                                                          |
| 103             | Iraq    | 2011           | Lemons, Limes             | 5                                                           |
| 103             | Iraq    | 2011           | Maize                     | 1                                                           |
| 103             | Iraq    | 2011           | Maize Germ Oil            | 1                                                           |
| 103             | Iraq    | 2011           | Marine Fish, Other        | 1                                                           |
| 103             | Iraq    | 2011           | Milk, Whole               | 30                                                          |
| 103             | Iraq    | 2011           | Mutton & Goat Meat        | 5                                                           |
| 103             | Iraq    | 2011           | Nuts                      | 1                                                           |
| 103             | Iraq    | 2011           | Offals, Edible            | 1                                                           |
| 103             | Iraq    | 2011           | Olives                    | 1                                                           |
| 103             | Iraq    | 2011           | Onions                    | 11                                                          |
| 103             | Iraq    | 2011           | Oranges, Mandarines       | 19                                                          |
| 103             | Iraq    | 2011           | Palm Oil                  | 21                                                          |
| 103             | Iraq    | 2011           | Peas                      | 1                                                           |
| 103             | Iraq    | 2011           | Pelagic Fish              | 1                                                           |
| 103             | Iraq    | 2011           | Potatoes                  | 36                                                          |
| 103             | Iraq    | 2011           | Poultry Meat              | 40                                                          |
| 103             | Iraq    | 2011           | Pulses, Other             | 6                                                           |
| 103             | Iraq    | 2011           | Rice (Milled Equivalent)  | 83                                                          |
| 103             | Iraq    | 2011           | Sesameseed                | 1                                                           |
| 103             | Iraq    | 2011           | Sesameseed Oil            | 1                                                           |
| 103             | Iraq    | 2011           | Soyabean Oil              | 7                                                           |
| 103             | Iraq    | 2011           | Sugar, Refined Equivalent | 46                                                          |
| 103             | Iraq    | 2011           | Sunflowerseed             | 1                                                           |
| 103             | Iraq    | 2011           | Sunflowerseed Oil         | 17                                                          |
| 103             | Iraq    | 2011           | Sweeteners, Other         | 2                                                           |
| 103             | Iraq    | 2011           | Tea                       | 2                                                           |
| 103             | Iraq    | 2011           | Tomatoes                  | 102                                                         |
| 103             | Iraq    | 2011           | Vegetables, Other         | 218                                                         |
| 103             | Iraq    | 2011           | Wheat                     | 383                                                         |
| 104             | Ireland | 1992           | Apples                    | 46                                                          |
| 104             | Ireland | 1992           | Bananas                   | 29                                                          |
| 104             | Ireland | 1992           | Barley                    | 6                                                           |
| 104             | Ireland | 1992           | Beans                     | 3                                                           |
| 104             | Ireland | 1992           | Beer                      | 354                                                         |
| 104             | Ireland | 1992           | Beverages, Alcoholic      | 22                                                          |
| 104             | Ireland | 1992           | Beverages, Fermented      | 2                                                           |
| 104             | Ireland | 1992           | Bovine Meat               | 58                                                          |
| 104             | Ireland | 1992           | Butter, Ghee              | 11                                                          |
| 104             | Ireland | 1992           | Cereals, Other            | 1                                                           |
| 104             | Ireland | 1992           | Cheese                    | 15                                                          |
| 104             | Ireland | 1992           | Citrus, Other             | 1                                                           |
| 104             | Ireland | 1992           | Cocoa Beans               | 6                                                           |
| 104             | Ireland | 1992           | Coconut Oil               | 7                                                           |
| 104             | Ireland | 1992           | Coconuts - Incl Copra     | 3                                                           |
| 104             | Ireland | 1992           | Coffee                    | 6                                                           |
| 104             | Ireland | 1992           | Cream                     | 18                                                          |
| 104             | Ireland | 1992           | Crustaceans               | 2                                                           |
| 104             | Ireland | 1992           | Demersal Fish             | 13                                                          |
| 104             | Ireland | 1992           | Eggs                      | 24                                                          |
| 104             | Ireland | 1992           | Fats, Animals, Raw        | 11                                                          |
| 104             | Ireland | 1992           | Freshwater Fish           | 7                                                           |
| 104             | Ireland | 1992           | Fruits, Other             | 43                                                          |
| 104             | Ireland | 1992           | Grapefruit                | 3                                                           |
| 104             | Ireland | 1992           | Grapes                    | 21                                                          |
| 104             | Ireland | 1992           | Groundnuts (Shelled Eq)   | 1                                                           |
| 104             | Ireland | 1992           | Honey                     | 1                                                           |
| 104             | Ireland | 1992           | Lemons, Limes             | 5                                                           |
| 104             | Ireland | 1992           | Maize                     | 32                                                          |
| 104             | Ireland | 1992           | Maize Germ Oil            | 1                                                           |
| 104             | Ireland | 1992           | Milk, Whole               | 534                                                         |
| 104             | Ireland | 1992           | Molluscs, Other           | 5                                                           |
| 104             | Ireland | 1992           | Mutton & Goat Meat        | 25                                                          |
| 104             | Ireland | 1992           | Nuts                      | 1                                                           |
| 104             | Ireland | 1992           | Oats                      | 10                                                          |
| 104             | Ireland | 1992           | Offals, Edible            | 39                                                          |
| 104             | Ireland | 1992           | Olive Oil                 | 1                                                           |
| 104             | Ireland | 1992           | Onions                    | 15                                                          |
| 104             | Ireland | 1992           | Oranges, Mandarines       | 28                                                          |
| 104             | Ireland | 1992           | Palm Oil                  | 2                                                           |
| 104             | Ireland | 1992           | Palmkernel Oil            | 2                                                           |
| 104             | Ireland | 1992           | Peas                      | 5                                                           |
| 104             | Ireland | 1992           | Pelagic Fish              | 12                                                          |
| 104             | Ireland | 1992           | Pigmeat                   | 100                                                         |
| 104             | Ireland | 1992           | Pineapples                | 2                                                           |
| 104             | Ireland | 1992           | Potatoes                  | 339                                                         |
| 104             | Ireland | 1992           | Poultry Meat              | 65                                                          |
| 104             | Ireland | 1992           | Pulses, Other             | 1                                                           |
| 104             | Ireland | 1992           | Rape and Mustard Oil      | 15                                                          |
| 104             | Ireland | 1992           | Rice (Milled Equivalent)  | 6                                                           |
| 104             | Ireland | 1992           | Soyabean Oil              | 7                                                           |
| 104             | Ireland | 1992           | Sugar, Refined Equivalent | 105                                                         |
| 104             | Ireland | 1992           | Sunflowerseed Oil         | 5                                                           |
| 104             | Ireland | 1992           | Sweeteners, Other         | 15                                                          |
| 104             | Ireland | 1992           | Tea                       | 9                                                           |

Dietary calcium and zinc deficiency risks are decreasing but remain prevalent

| FAO countrycode | Country | Reference year | Food item                 | Gross food supply (g capita <sup>-1</sup> d <sup>-1</sup> ) |
|-----------------|---------|----------------|---------------------------|-------------------------------------------------------------|
| 104             | Ireland | 1992           | Tomatoes                  | 25                                                          |
| 104             | Ireland | 1992           | Vegetables, Other         | 179                                                         |
| 104             | Ireland | 1992           | Wheat                     | 311                                                         |
| 104             | Ireland | 1992           | Wine                      | 10                                                          |
| 104             | Ireland | 1993           | Apples                    | 35                                                          |
| 104             | Ireland | 1993           | Bananas                   | 29                                                          |
| 104             | Ireland | 1993           | Barley                    | 9                                                           |
| 104             | Ireland | 1993           | Beans                     | 1                                                           |
| 104             | Ireland | 1993           | Beer                      | 382                                                         |
| 104             | Ireland | 1993           | Beverages, Alcoholic      | 23                                                          |
| 104             | Ireland | 1993           | Beverages, Fermented      | 5                                                           |
| 104             | Ireland | 1993           | Bovine Meat               | 54                                                          |
| 104             | Ireland | 1993           | Butter, Ghee              | 10                                                          |
| 104             | Ireland | 1993           | Cereals, Other            | 5                                                           |
| 104             | Ireland | 1993           | Cheese                    | 18                                                          |
| 104             | Ireland | 1993           | Citrus, Other             | 1                                                           |
| 104             | Ireland | 1993           | Cocoa Beans               | 3                                                           |
| 104             | Ireland | 1993           | Coconut Oil               | 2                                                           |
| 104             | Ireland | 1993           | Coconuts - Incl Copra     | 4                                                           |
| 104             | Ireland | 1993           | Coffee                    | 6                                                           |
| 104             | Ireland | 1993           | Cream                     | 16                                                          |
| 104             | Ireland | 1993           | Crustaceans               | 4                                                           |
| 104             | Ireland | 1993           | Demersal Fish             | 18                                                          |
| 104             | Ireland | 1993           | Eggs                      | 22                                                          |
| 104             | Ireland | 1993           | Fats, Animals, Raw        | 11                                                          |
| 104             | Ireland | 1993           | Freshwater Fish           | 6                                                           |
| 104             | Ireland | 1993           | Fruits, Other             | 43                                                          |
| 104             | Ireland | 1993           | Grapefruit                | 6                                                           |
| 104             | Ireland | 1993           | Grapes                    | 25                                                          |
| 104             | Ireland | 1993           | Groundnuts (Shelled Eq)   | 2                                                           |
| 104             | Ireland | 1993           | Honey                     | 2                                                           |
| 104             | Ireland | 1993           | Lemons, Limes             | 3                                                           |
| 104             | Ireland | 1993           | Maize                     | 33                                                          |
| 104             | Ireland | 1993           | Maize Germ Oil            | 1                                                           |
| 104             | Ireland | 1993           | Meat, Other               | 1                                                           |
| 104             | Ireland | 1993           | Milk, Whole               | 544                                                         |
| 104             | Ireland | 1993           | Molluscs, Other           | 9                                                           |
| 104             | Ireland | 1993           | Mutton & Goat Meat        | 27                                                          |
| 104             | Ireland | 1993           | Nuts                      | 3                                                           |
| 104             | Ireland | 1993           | Oats                      | 7                                                           |
| 104             | Ireland | 1993           | Offals, Edible            | 34                                                          |
| 104             | Ireland | 1993           | Olive Oil                 | 1                                                           |
| 104             | Ireland | 1993           | Onions                    | 17                                                          |
| 104             | Ireland | 1993           | Oranges, Mandarines       | 45                                                          |
| 104             | Ireland | 1993           | Palm Oil                  | 2                                                           |
| 104             | Ireland | 1993           | Peas                      | 5                                                           |
| 104             | Ireland | 1993           | Pelagic Fish              | 12                                                          |
| 104             | Ireland | 1993           | Pigmeat                   | 89                                                          |
| 104             | Ireland | 1993           | Pineapples                | 1                                                           |
| 104             | Ireland | 1993           | Potatoes                  | 337                                                         |
| 104             | Ireland | 1993           | Poultry Meat              | 66                                                          |
| 104             | Ireland | 1993           | Pulses, Other             | 1                                                           |
| 104             | Ireland | 1993           | Rape and Mustard Oil      | 14                                                          |
| 104             | Ireland | 1993           | Rice (Milled Equivalent)  | 6                                                           |
| 104             | Ireland | 1993           | Soyabean Oil              | 6                                                           |
| 104             | Ireland | 1993           | Sugar, Refined Equivalent | 106                                                         |
| 104             | Ireland | 1993           | Sunflowerseed Oil         | 7                                                           |
| 104             | Ireland | 1993           | Sweeteners, Other         | 18                                                          |
| 104             | Ireland | 1993           | Tea                       | 9                                                           |
| 104             | Ireland | 1993           | Tomatoes                  | 24                                                          |
| 104             | Ireland | 1993           | Vegetables, Other         | 173                                                         |
| 104             | Ireland | 1993           | Wheat                     | 304                                                         |
| 104             | Ireland | 1993           | Wine                      | 11                                                          |
| 104             | Ireland | 1994           | Apples                    | 37                                                          |
| 104             | Ireland | 1994           | Bananas                   | 16                                                          |
| 104             | Ireland | 1994           | Barley                    | 9                                                           |
| 104             | Ireland | 1994           | Beans                     | 3                                                           |
| 104             | Ireland | 1994           | Beer                      | 407                                                         |
| 104             | Ireland | 1994           | Beverages, Alcoholic      | 23                                                          |
| 104             | Ireland | 1994           | Beverages, Fermented      | 1                                                           |
| 104             | Ireland | 1994           | Bovine Meat               | 49                                                          |
| 104             | Ireland | 1994           | Butter, Ghee              | 11                                                          |
| 104             | Ireland | 1994           | Cereals, Other            | 4                                                           |
| 104             | Ireland | 1994           | Cheese                    | 16                                                          |
| 104             | Ireland | 1994           | Citrus, Other             | 1                                                           |
| 104             | Ireland | 1994           | Cocoa Beans               | 1                                                           |
| 104             | Ireland | 1994           | Coconut Oil               | 12                                                          |
| 104             | Ireland | 1994           | Coconuts - Incl Copra     | 5                                                           |
| 104             | Ireland | 1994           | Coffee                    | 6                                                           |
| 104             | Ireland | 1994           | Cream                     | 21                                                          |
| 104             | Ireland | 1994           | Crustaceans               | 7                                                           |
| 104             | Ireland | 1994           | Demersal Fish             | 18                                                          |
| 104             | Ireland | 1994           | Eggs                      | 21                                                          |
| 104             | Ireland | 1994           | Fats, Animals, Raw        | 10                                                          |
| 104             | Ireland | 1994           | Freshwater Fish           | 7                                                           |
| 104             | Ireland | 1994           | Fruits, Other             | 51                                                          |
| 104             | Ireland | 1994           | Grapefruit                | 4                                                           |
| 104             | Ireland | 1994           | Grapes                    | 22                                                          |
| 104             | Ireland | 1994           | Groundnuts (Shelled Eq)   | 2                                                           |
| 104             | Ireland | 1994           | Honey                     | 1                                                           |
| 104             | Ireland | 1994           | Lemons, Limes             | 3                                                           |
| 104             | Ireland | 1994           | Maize                     | 42                                                          |
| 104             | Ireland | 1994           | Maize Germ Oil            | 2                                                           |
| 104             | Ireland | 1994           | Milk, Whole               | 446                                                         |
| 104             | Ireland | 1994           | Molluscs, Other           | 8                                                           |
| 104             | Ireland | 1994           | Mutton & Goat Meat        | 21                                                          |
| 104             | Ireland | 1994           | Nuts                      | 3                                                           |

Dietary calcium and zinc deficiency risks are decreasing but remain prevalent

| FAO countrycode | Country | Reference year | Food item                 | Gross food supply (g capita <sup>-1</sup> d <sup>-1</sup> ) |
|-----------------|---------|----------------|---------------------------|-------------------------------------------------------------|
| 104             | Ireland | 1994           | Oats                      | 9                                                           |
| 104             | Ireland | 1994           | Offals, Edible            | 38                                                          |
| 104             | Ireland | 1994           | Olive Oil                 | 1                                                           |
| 104             | Ireland | 1994           | Onions                    | 18                                                          |
| 104             | Ireland | 1994           | Oranges, Mandarines       | 53                                                          |
| 104             | Ireland | 1994           | Palm Oil                  | 1                                                           |
| 104             | Ireland | 1994           | Peas                      | 4                                                           |
| 104             | Ireland | 1994           | Pelagic Fish              | 9                                                           |
| 104             | Ireland | 1994           | Pigmeat                   | 85                                                          |
| 104             | Ireland | 1994           | Pineapples                | 1                                                           |
| 104             | Ireland | 1994           | Potatoes                  | 353                                                         |
| 104             | Ireland | 1994           | Poultry Meat              | 74                                                          |
| 104             | Ireland | 1994           | Rape and Mustard Oil      | 15                                                          |
| 104             | Ireland | 1994           | Rice (Milled Equivalent)  | 6                                                           |
| 104             | Ireland | 1994           | Soyabean Oil              | 6                                                           |
| 104             | Ireland | 1994           | Spices, Other             | 1                                                           |
| 104             | Ireland | 1994           | Sugar, Refined Equivalent | 109                                                         |
| 104             | Ireland | 1994           | Sunflowerseed Oil         | 8                                                           |
| 104             | Ireland | 1994           | Sweeteners, Other         | 15                                                          |
| 104             | Ireland | 1994           | Tea                       | 9                                                           |
| 104             | Ireland | 1994           | Tomatoes                  | 24                                                          |
| 104             | Ireland | 1994           | Vegetables, Other         | 175                                                         |
| 104             | Ireland | 1994           | Wheat                     | 289                                                         |
| 104             | Ireland | 1994           | Wine                      | 14                                                          |
| 104             | Ireland | 1995           | Apples                    | 33                                                          |
| 104             | Ireland | 1995           | Bananas                   | 25                                                          |
| 104             | Ireland | 1995           | Barley                    | 8                                                           |
| 104             | Ireland | 1995           | Beans                     | 2                                                           |
| 104             | Ireland | 1995           | Beer                      | 412                                                         |
| 104             | Ireland | 1995           | Beverages, Alcoholic      | 25                                                          |
| 104             | Ireland | 1995           | Beverages, Fermented      | 4                                                           |
| 104             | Ireland | 1995           | Bovine Meat               | 42                                                          |
| 104             | Ireland | 1995           | Butter, Ghee              | 10                                                          |
| 104             | Ireland | 1995           | Cephalopods               | 1                                                           |
| 104             | Ireland | 1995           | Cereals, Other            | 6                                                           |
| 104             | Ireland | 1995           | Cheese                    | 17                                                          |
| 104             | Ireland | 1995           | Citrus, Other             | 1                                                           |
| 104             | Ireland | 1995           | Cocoa Beans               | 2                                                           |
| 104             | Ireland | 1995           | Coconut Oil               | 12                                                          |
| 104             | Ireland | 1995           | Coconuts - Incl Copra     | 3                                                           |
| 104             | Ireland | 1995           | Coffee                    | 5                                                           |
| 104             | Ireland | 1995           | Cream                     | 23                                                          |
| 104             | Ireland | 1995           | Crustaceans               | 5                                                           |
| 104             | Ireland | 1995           | Demersal Fish             | 22                                                          |
| 104             | Ireland | 1995           | Eggs                      | 21                                                          |
| 104             | Ireland | 1995           | Fats, Animals, Raw        | 10                                                          |
| 104             | Ireland | 1995           | Freshwater Fish           | 9                                                           |
| 104             | Ireland | 1995           | Fruits, Other             | 45                                                          |
| 104             | Ireland | 1995           | Grapefruit                | 4                                                           |
| 104             | Ireland | 1995           | Grapes                    | 21                                                          |
| 104             | Ireland | 1995           | Groundnuts (Shelled Eq)   | 1                                                           |
| 104             | Ireland | 1995           | Honey                     | 1                                                           |
| 104             | Ireland | 1995           | Lemons, Limes             | 2                                                           |
| 104             | Ireland | 1995           | Maize                     | 48                                                          |
| 104             | Ireland | 1995           | Maize Germ Oil            | 1                                                           |
| 104             | Ireland | 1995           | Milk, Whole               | 477                                                         |
| 104             | Ireland | 1995           | Molluscs, Other           | 7                                                           |
| 104             | Ireland | 1995           | Mutton & Goat Meat        | 31                                                          |
| 104             | Ireland | 1995           | Nuts                      | 2                                                           |
| 104             | Ireland | 1995           | Oats                      | 9                                                           |
| 104             | Ireland | 1995           | Offals, Edible            | 38                                                          |
| 104             | Ireland | 1995           | Olive Oil                 | 1                                                           |
| 104             | Ireland | 1995           | Onions                    | 18                                                          |
| 104             | Ireland | 1995           | Oranges, Mandarines       | 24                                                          |
| 104             | Ireland | 1995           | Palm Oil                  | 1                                                           |
| 104             | Ireland | 1995           | Peas                      | 4                                                           |
| 104             | Ireland | 1995           | Pelagic Fish              | 13                                                          |
| 104             | Ireland | 1995           | Pigmeat                   | 87                                                          |
| 104             | Ireland | 1995           | Pineapples                | 1                                                           |
| 104             | Ireland | 1995           | Potatoes                  | 349                                                         |
| 104             | Ireland | 1995           | Poultry Meat              | 71                                                          |
| 104             | Ireland | 1995           | Rape and Mustard Oil      | 13                                                          |
| 104             | Ireland | 1995           | Rice (Milled Equivalent)  | 7                                                           |
| 104             | Ireland | 1995           | Soyabean Oil              | 4                                                           |
| 104             | Ireland | 1995           | Spices, Other             | 1                                                           |
| 104             | Ireland | 1995           | Sugar, Refined Equivalent | 102                                                         |
| 104             | Ireland | 1995           | Sunflowerseed Oil         | 9                                                           |
| 104             | Ireland | 1995           | Sweeteners, Other         | 13                                                          |
| 104             | Ireland | 1995           | Tea                       | 8                                                           |
| 104             | Ireland | 1995           | Tomatoes                  | 24                                                          |
| 104             | Ireland | 1995           | Vegetables, Other         | 150                                                         |
| 104             | Ireland | 1995           | Wheat                     | 272                                                         |
| 104             | Ireland | 1995           | Wine                      | 12                                                          |
| 104             | Ireland | 1996           | Apples                    | 36                                                          |
| 104             | Ireland | 1996           | Bananas                   | 25                                                          |
| 104             | Ireland | 1996           | Barley                    | 16                                                          |
| 104             | Ireland | 1996           | Beans                     | 3                                                           |
| 104             | Ireland | 1996           | Beer                      | 514                                                         |
| 104             | Ireland | 1996           | Beverages, Alcoholic      | 24                                                          |
| 104             | Ireland | 1996           | Beverages, Fermented      | 5                                                           |
| 104             | Ireland | 1996           | Bovine Meat               | 47                                                          |
| 104             | Ireland | 1996           | Butter, Ghee              | 10                                                          |
| 104             | Ireland | 1996           | Cereals, Other            | 6                                                           |
| 104             | Ireland | 1996           | Cheese                    | 19                                                          |
| 104             | Ireland | 1996           | Citrus, Other             | 3                                                           |
| 104             | Ireland | 1996           | Cocoa Beans               | 3                                                           |
| 104             | Ireland | 1996           | Coconut Oil               | 11                                                          |

Dietary calcium and zinc deficiency risks are decreasing but remain prevalent

| FAO countrycode | Country | Reference year | Food item                 | Gross food supply (g capita <sup>-1</sup> d <sup>-1</sup> ) |
|-----------------|---------|----------------|---------------------------|-------------------------------------------------------------|
| 104             | Ireland | 1996           | Coconuts - Incl Copra     | 2                                                           |
| 104             | Ireland | 1996           | Coffee                    | 4                                                           |
| 104             | Ireland | 1996           | Cream                     | 25                                                          |
| 104             | Ireland | 1996           | Crustaceans               | 4                                                           |
| 104             | Ireland | 1996           | Demersal Fish             | 20                                                          |
| 104             | Ireland | 1996           | Eggs                      | 24                                                          |
| 104             | Ireland | 1996           | Fats, Animals, Raw        | 12                                                          |
| 104             | Ireland | 1996           | Freshwater Fish           | 8                                                           |
| 104             | Ireland | 1996           | Fruits, Other             | 55                                                          |
| 104             | Ireland | 1996           | Grapefruit                | 4                                                           |
| 104             | Ireland | 1996           | Grapes                    | 22                                                          |
| 104             | Ireland | 1996           | Groundnuts (Shelled Eq)   | 1                                                           |
| 104             | Ireland | 1996           | Honey                     | 1                                                           |
| 104             | Ireland | 1996           | Lemons, Limes             | 2                                                           |
| 104             | Ireland | 1996           | Maize                     | 48                                                          |
| 104             | Ireland | 1996           | Maize Germ Oil            | 1                                                           |
| 104             | Ireland | 1996           | Meat, Other               | 1                                                           |
| 104             | Ireland | 1996           | Milk, Whole               | 476                                                         |
| 104             | Ireland | 1996           | Molluscs, Other           | 5                                                           |
| 104             | Ireland | 1996           | Mutton & Goat Meat        | 24                                                          |
| 104             | Ireland | 1996           | Nuts                      | 2                                                           |
| 104             | Ireland | 1996           | Oats                      | 9                                                           |
| 104             | Ireland | 1996           | Offals, Edible            | 38                                                          |
| 104             | Ireland | 1996           | Olive Oil                 | 1                                                           |
| 104             | Ireland | 1996           | Onions                    | 19                                                          |
| 104             | Ireland | 1996           | Oranges, Mandarines       | 81                                                          |
| 104             | Ireland | 1996           | Peas                      | 4                                                           |
| 104             | Ireland | 1996           | Pelagic Fish              | 9                                                           |
| 104             | Ireland | 1996           | Pig meat                  | 89                                                          |
| 104             | Ireland | 1996           | Pineapples                | 2                                                           |
| 104             | Ireland | 1996           | Potatoes                  | 357                                                         |
| 104             | Ireland | 1996           | Poultry Meat              | 71                                                          |
| 104             | Ireland | 1996           | Pulses, Other             | 1                                                           |
| 104             | Ireland | 1996           | Rape and Mustard Oil      | 16                                                          |
| 104             | Ireland | 1996           | Rice (Milled Equivalent)  | 8                                                           |
| 104             | Ireland | 1996           | Rye                       | 2                                                           |
| 104             | Ireland | 1996           | Soyabean Oil              | 4                                                           |
| 104             | Ireland | 1996           | Spices, Other             | 1                                                           |
| 104             | Ireland | 1996           | Sugar, Refined Equivalent | 93                                                          |
| 104             | Ireland | 1996           | Sunflowerseed Oil         | 10                                                          |
| 104             | Ireland | 1996           | Sweeteners, Other         | 7                                                           |
| 104             | Ireland | 1996           | Tea                       | 9                                                           |
| 104             | Ireland | 1996           | Tomatoes                  | 24                                                          |
| 104             | Ireland | 1996           | Vegetables, Other         | 162                                                         |
| 104             | Ireland | 1996           | Wheat                     | 271                                                         |
| 104             | Ireland | 1996           | Wine                      | 20                                                          |
| 104             | Ireland | 1997           | Apples                    | 32                                                          |
| 104             | Ireland | 1997           | Bananas                   | 26                                                          |
| 104             | Ireland | 1997           | Barley                    | 9                                                           |
| 104             | Ireland | 1997           | Beans                     | 1                                                           |
| 104             | Ireland | 1997           | Beer                      | 537                                                         |
| 104             | Ireland | 1997           | Beverages, Alcoholic      | 24                                                          |
| 104             | Ireland | 1997           | Beverages, Fermented      | 6                                                           |
| 104             | Ireland | 1997           | Bovine Meat               | 52                                                          |
| 104             | Ireland | 1997           | Butter, Ghee              | 10                                                          |
| 104             | Ireland | 1997           | Cereals, Other            | 5                                                           |
| 104             | Ireland | 1997           | Cheese                    | 23                                                          |
| 104             | Ireland | 1997           | Citrus, Other             | 2                                                           |
| 104             | Ireland | 1997           | Cocoa Beans               | 7                                                           |
| 104             | Ireland | 1997           | Coconut Oil               | 11                                                          |
| 104             | Ireland | 1997           | Coconuts - Incl Copra     | 3                                                           |
| 104             | Ireland | 1997           | Coffee                    | 6                                                           |
| 104             | Ireland | 1997           | Cream                     | 22                                                          |
| 104             | Ireland | 1997           | Crustaceans               | 8                                                           |
| 104             | Ireland | 1997           | Demersal Fish             | 21                                                          |
| 104             | Ireland | 1997           | Eggs                      | 22                                                          |
| 104             | Ireland | 1997           | Fats, Animals, Raw        | 13                                                          |
| 104             | Ireland | 1997           | Freshwater Fish           | 5                                                           |
| 104             | Ireland | 1997           | Fruits, Other             | 46                                                          |
| 104             | Ireland | 1997           | Grapefruit                | 3                                                           |
| 104             | Ireland | 1997           | Grapes                    | 21                                                          |
| 104             | Ireland | 1997           | Groundnuts (Shelled Eq)   | 1                                                           |
| 104             | Ireland | 1997           | Honey                     | 1                                                           |
| 104             | Ireland | 1997           | Lemons, Limes             | 3                                                           |
| 104             | Ireland | 1997           | Maize                     | 48                                                          |
| 104             | Ireland | 1997           | Maize Germ Oil            | 1                                                           |
| 104             | Ireland | 1997           | Meat, Other               | 1                                                           |
| 104             | Ireland | 1997           | Milk, Whole               | 478                                                         |
| 104             | Ireland | 1997           | Molluscs, Other           | 2                                                           |
| 104             | Ireland | 1997           | Mutton & Goat Meat        | 26                                                          |
| 104             | Ireland | 1997           | Nuts                      | 2                                                           |
| 104             | Ireland | 1997           | Oats                      | 8                                                           |
| 104             | Ireland | 1997           | Offals, Edible            | 37                                                          |
| 104             | Ireland | 1997           | Olive Oil                 | 1                                                           |
| 104             | Ireland | 1997           | Onions                    | 18                                                          |
| 104             | Ireland | 1997           | Oranges, Mandarines       | 44                                                          |
| 104             | Ireland | 1997           | Peas                      | 4                                                           |
| 104             | Ireland | 1997           | Pelagic Fish              | 12                                                          |
| 104             | Ireland | 1997           | Pig meat                  | 96                                                          |
| 104             | Ireland | 1997           | Pineapples                | 2                                                           |
| 104             | Ireland | 1997           | Potatoes                  | 346                                                         |
| 104             | Ireland | 1997           | Poultry Meat              | 68                                                          |
| 104             | Ireland | 1997           | Rape and Mustard Oil      | 20                                                          |
| 104             | Ireland | 1997           | Rice (Milled Equivalent)  | 9                                                           |
| 104             | Ireland | 1997           | Rye                       | 2                                                           |
| 104             | Ireland | 1997           | Soyabean Oil              | 4                                                           |
| 104             | Ireland | 1997           | Spices, Other             | 1                                                           |

Dietary calcium and zinc deficiency risks are decreasing but remain prevalent

| FAO countrycode | Country | Reference year | Food item                 | Gross food supply (g capita <sup>-1</sup> d <sup>-1</sup> ) |
|-----------------|---------|----------------|---------------------------|-------------------------------------------------------------|
| 104             | Ireland | 1997           | Sugar, Refined Equivalent | 93                                                          |
| 104             | Ireland | 1997           | Sunflowerseed Oil         | 9                                                           |
| 104             | Ireland | 1997           | Sweeteners, Other         | 8                                                           |
| 104             | Ireland | 1997           | Tea                       | 9                                                           |
| 104             | Ireland | 1997           | Tomatoes                  | 25                                                          |
| 104             | Ireland | 1997           | Vegetables, Other         | 153                                                         |
| 104             | Ireland | 1997           | Wheat                     | 272                                                         |
| 104             | Ireland | 1997           | Wine                      | 22                                                          |
| 104             | Ireland | 1998           | Apples                    | 35                                                          |
| 104             | Ireland | 1998           | Bananas                   | 25                                                          |
| 104             | Ireland | 1998           | Barley                    | 7                                                           |
| 104             | Ireland | 1998           | Beans                     | 2                                                           |
| 104             | Ireland | 1998           | Beer                      | 553                                                         |
| 104             | Ireland | 1998           | Beverages, Alcoholic      | 24                                                          |
| 104             | Ireland | 1998           | Bovine Meat               | 55                                                          |
| 104             | Ireland | 1998           | Butter, Ghee              | 10                                                          |
| 104             | Ireland | 1998           | Cereals, Other            | 8                                                           |
| 104             | Ireland | 1998           | Cheese                    | 24                                                          |
| 104             | Ireland | 1998           | Citrus, Other             | 4                                                           |
| 104             | Ireland | 1998           | Cocoa Beans               | 7                                                           |
| 104             | Ireland | 1998           | Coconut Oil               | 14                                                          |
| 104             | Ireland | 1998           | Coconuts - Incl Copra     | 3                                                           |
| 104             | Ireland | 1998           | Coffee                    | 6                                                           |
| 104             | Ireland | 1998           | Cream                     | 27                                                          |
| 104             | Ireland | 1998           | Crustaceans               | 7                                                           |
| 104             | Ireland | 1998           | Demersal Fish             | 37                                                          |
| 104             | Ireland | 1998           | Eggs                      | 20                                                          |
| 104             | Ireland | 1998           | Fats, Animals, Raw        | 11                                                          |
| 104             | Ireland | 1998           | Freshwater Fish           | 7                                                           |
| 104             | Ireland | 1998           | Fruits, Other             | 39                                                          |
| 104             | Ireland | 1998           | Grapefruit                | 3                                                           |
| 104             | Ireland | 1998           | Grapes                    | 22                                                          |
| 104             | Ireland | 1998           | Groundnuts (Shelled Eq)   | 2                                                           |
| 104             | Ireland | 1998           | Honey                     | 1                                                           |
| 104             | Ireland | 1998           | Lemons, Limes             | 3                                                           |
| 104             | Ireland | 1998           | Maize                     | 47                                                          |
| 104             | Ireland | 1998           | Maize Germ Oil            | 1                                                           |
| 104             | Ireland | 1998           | Meat, Other               | 4                                                           |
| 104             | Ireland | 1998           | Milk, Whole               | 475                                                         |
| 104             | Ireland | 1998           | Molluscs, Other           | 1                                                           |
| 104             | Ireland | 1998           | Mutton & Goat Meat        | 29                                                          |
| 104             | Ireland | 1998           | Nuts                      | 2                                                           |
| 104             | Ireland | 1998           | Oats                      | 9                                                           |
| 104             | Ireland | 1998           | Offals, Edible            | 40                                                          |
| 104             | Ireland | 1998           | Olive Oil                 | 1                                                           |
| 104             | Ireland | 1998           | Onions                    | 21                                                          |
| 104             | Ireland | 1998           | Oranges, Mandarines       | 38                                                          |
| 104             | Ireland | 1998           | Peas                      | 3                                                           |
| 104             | Ireland | 1998           | Pelagic Fish              | 12                                                          |
| 104             | Ireland | 1998           | Pigmeat                   | 103                                                         |
| 104             | Ireland | 1998           | Pineapples                | 2                                                           |
| 104             | Ireland | 1998           | Potatoes                  | 353                                                         |
| 104             | Ireland | 1998           | Poultry Meat              | 71                                                          |
| 104             | Ireland | 1998           | Rape and Mustard Oil      | 17                                                          |
| 104             | Ireland | 1998           | Rice (Milled Equivalent)  | 11                                                          |
| 104             | Ireland | 1998           | Rye                       | 2                                                           |
| 104             | Ireland | 1998           | Soyabean Oil              | 4                                                           |
| 104             | Ireland | 1998           | Spices, Other             | 1                                                           |
| 104             | Ireland | 1998           | Sugar, Refined Equivalent | 82                                                          |
| 104             | Ireland | 1998           | Sunflowerseed Oil         | 7                                                           |
| 104             | Ireland | 1998           | Sweeteners, Other         | 16                                                          |
| 104             | Ireland | 1998           | Tea                       | 7                                                           |
| 104             | Ireland | 1998           | Tomatoes                  | 27                                                          |
| 104             | Ireland | 1998           | Vegetables, Other         | 160                                                         |
| 104             | Ireland | 1998           | Wheat                     | 274                                                         |
| 104             | Ireland | 1998           | Wine                      | 21                                                          |
| 104             | Ireland | 1999           | Apples                    | 32                                                          |
| 104             | Ireland | 1999           | Bananas                   | 24                                                          |
| 104             | Ireland | 1999           | Barley                    | 6                                                           |
| 104             | Ireland | 1999           | Beans                     | 2                                                           |
| 104             | Ireland | 1999           | Beer                      | 558                                                         |
| 104             | Ireland | 1999           | Beverages, Alcoholic      | 23                                                          |
| 104             | Ireland | 1999           | Beverages, Fermented      | 1                                                           |
| 104             | Ireland | 1999           | Bovine Meat               | 53                                                          |
| 104             | Ireland | 1999           | Butter, Ghee              | 9                                                           |
| 104             | Ireland | 1999           | Cereals, Other            | 10                                                          |
| 104             | Ireland | 1999           | Cheese                    | 25                                                          |
| 104             | Ireland | 1999           | Citrus, Other             | 6                                                           |
| 104             | Ireland | 1999           | Cocoa Beans               | 4                                                           |
| 104             | Ireland | 1999           | Coconut Oil               | 4                                                           |
| 104             | Ireland | 1999           | Coconuts - Incl Copra     | 6                                                           |
| 104             | Ireland | 1999           | Coffee                    | 6                                                           |
| 104             | Ireland | 1999           | Cream                     | 22                                                          |
| 104             | Ireland | 1999           | Crustaceans               | 6                                                           |
| 104             | Ireland | 1999           | Demersal Fish             | 33                                                          |
| 104             | Ireland | 1999           | Eggs                      | 19                                                          |
| 104             | Ireland | 1999           | Fats, Animals, Raw        | 14                                                          |
| 104             | Ireland | 1999           | Fish, Liver Oil           | 1                                                           |
| 104             | Ireland | 1999           | Freshwater Fish           | 4                                                           |
| 104             | Ireland | 1999           | Fruits, Other             | 44                                                          |
| 104             | Ireland | 1999           | Grapefruit                | 3                                                           |
| 104             | Ireland | 1999           | Grapes                    | 18                                                          |
| 104             | Ireland | 1999           | Groundnuts (Shelled Eq)   | 2                                                           |
| 104             | Ireland | 1999           | Honey                     | 1                                                           |
| 104             | Ireland | 1999           | Lemons, Limes             | 3                                                           |
| 104             | Ireland | 1999           | Maize                     | 46                                                          |
| 104             | Ireland | 1999           | Maize Germ Oil            | 1                                                           |

Dietary calcium and zinc deficiency risks are decreasing but remain prevalent

| FAO countrycode | Country | Reference year | Food item                 | Gross food supply (g capita <sup>-1</sup> d <sup>-1</sup> ) |
|-----------------|---------|----------------|---------------------------|-------------------------------------------------------------|
| 104             | Ireland | 1999           | Meat, Other               | 1                                                           |
| 104             | Ireland | 1999           | Milk, Whole               | 494                                                         |
| 104             | Ireland | 1999           | Molluscs, Other           | 4                                                           |
| 104             | Ireland | 1999           | Mutton & Goat Meat        | 27                                                          |
| 104             | Ireland | 1999           | Nuts                      | 2                                                           |
| 104             | Ireland | 1999           | Oats                      | 9                                                           |
| 104             | Ireland | 1999           | Offals, Edible            | 35                                                          |
| 104             | Ireland | 1999           | Olive Oil                 | 1                                                           |
| 104             | Ireland | 1999           | Onions                    | 23                                                          |
| 104             | Ireland | 1999           | Oranges, Mandarines       | 17                                                          |
| 104             | Ireland | 1999           | Peas                      | 4                                                           |
| 104             | Ireland | 1999           | Pelagic Fish              | 11                                                          |
| 104             | Ireland | 1999           | Pigmeat                   | 116                                                         |
| 104             | Ireland | 1999           | Pineapples                | 2                                                           |
| 104             | Ireland | 1999           | Potatoes                  | 358                                                         |
| 104             | Ireland | 1999           | Poultry Meat              | 90                                                          |
| 104             | Ireland | 1999           | Rape and Mustard Oil      | 22                                                          |
| 104             | Ireland | 1999           | Rice (Milled Equivalent)  | 9                                                           |
| 104             | Ireland | 1999           | Rye                       | 1                                                           |
| 104             | Ireland | 1999           | Soyabean Oil              | 4                                                           |
| 104             | Ireland | 1999           | Spices, Other             | 1                                                           |
| 104             | Ireland | 1999           | Sugar, Refined Equivalent | 86                                                          |
| 104             | Ireland | 1999           | Sunflowerseed Oil         | 8                                                           |
| 104             | Ireland | 1999           | Sweeteners, Other         | 16                                                          |
| 104             | Ireland | 1999           | Tea                       | 8                                                           |
| 104             | Ireland | 1999           | Tomatoes                  | 27                                                          |
| 104             | Ireland | 1999           | Vegetables, Other         | 147                                                         |
| 104             | Ireland | 1999           | Wheat                     | 274                                                         |
| 104             | Ireland | 1999           | Wine                      | 30                                                          |
| 104             | Ireland | 2000           | Apples                    | 42                                                          |
| 104             | Ireland | 2000           | Bananas                   | 26                                                          |
| 104             | Ireland | 2000           | Barley                    | 6                                                           |
| 104             | Ireland | 2000           | Beans                     | 3                                                           |
| 104             | Ireland | 2000           | Beer                      | 536                                                         |
| 104             | Ireland | 2000           | Beverages, Alcoholic      | 23                                                          |
| 104             | Ireland | 2000           | Beverages, Fermented      | 1                                                           |
| 104             | Ireland | 2000           | Bovine Meat               | 49                                                          |
| 104             | Ireland | 2000           | Butter, Ghee              | 9                                                           |
| 104             | Ireland | 2000           | Cereals, Other            | 7                                                           |
| 104             | Ireland | 2000           | Cheese                    | 30                                                          |
| 104             | Ireland | 2000           | Citrus, Other             | 6                                                           |
| 104             | Ireland | 2000           | Cocoa Beans               | 5                                                           |
| 104             | Ireland | 2000           | Coconut Oil               | 9                                                           |
| 104             | Ireland | 2000           | Coconuts - Incl Copra     | 6                                                           |
| 104             | Ireland | 2000           | Coffee                    | 3                                                           |
| 104             | Ireland | 2000           | Cream                     | 22                                                          |
| 104             | Ireland | 2000           | Crustaceans               | 8                                                           |
| 104             | Ireland | 2000           | Demersal Fish             | 35                                                          |
| 104             | Ireland | 2000           | Eggs                      | 20                                                          |
| 104             | Ireland | 2000           | Fats, Animals, Raw        | 11                                                          |
| 104             | Ireland | 2000           | Fish, Liver Oil           | 1                                                           |
| 104             | Ireland | 2000           | Freshwater Fish           | 4                                                           |
| 104             | Ireland | 2000           | Fruits, Other             | 46                                                          |
| 104             | Ireland | 2000           | Grapefruit                | 2                                                           |
| 104             | Ireland | 2000           | Grapes                    | 21                                                          |
| 104             | Ireland | 2000           | Groundnuts (Shelled Eq)   | 2                                                           |
| 104             | Ireland | 2000           | Honey                     | 1                                                           |
| 104             | Ireland | 2000           | Lemons, Limes             | 4                                                           |
| 104             | Ireland | 2000           | Maize                     | 46                                                          |
| 104             | Ireland | 2000           | Meat, Other               | 2                                                           |
| 104             | Ireland | 2000           | Milk, Whole               | 524                                                         |
| 104             | Ireland | 2000           | Molluscs, Other           | 4                                                           |
| 104             | Ireland | 2000           | Mutton & Goat Meat        | 23                                                          |
| 104             | Ireland | 2000           | Nuts                      | 3                                                           |
| 104             | Ireland | 2000           | Oats                      | 8                                                           |
| 104             | Ireland | 2000           | Offals, Edible            | 32                                                          |
| 104             | Ireland | 2000           | Olive Oil                 | 1                                                           |
| 104             | Ireland | 2000           | Onions                    | 20                                                          |
| 104             | Ireland | 2000           | Oranges, Mandarines       | 33                                                          |
| 104             | Ireland | 2000           | Peas                      | 4                                                           |
| 104             | Ireland | 2000           | Pelagic Fish              | 15                                                          |
| 104             | Ireland | 2000           | Pigmeat                   | 102                                                         |
| 104             | Ireland | 2000           | Pineapples                | 2                                                           |
| 104             | Ireland | 2000           | Potatoes                  | 343                                                         |
| 104             | Ireland | 2000           | Poultry Meat              | 85                                                          |
| 104             | Ireland | 2000           | Rape and Mustard Oil      | 21                                                          |
| 104             | Ireland | 2000           | Rice (Milled Equivalent)  | 8                                                           |
| 104             | Ireland | 2000           | Rye                       | 1                                                           |
| 104             | Ireland | 2000           | Soyabean Oil              | 4                                                           |
| 104             | Ireland | 2000           | Spices, Other             | 1                                                           |
| 104             | Ireland | 2000           | Sugar, Refined Equivalent | 92                                                          |
| 104             | Ireland | 2000           | Sunflowerseed Oil         | 7                                                           |
| 104             | Ireland | 2000           | Sweeteners, Other         | 19                                                          |
| 104             | Ireland | 2000           | Tea                       | 8                                                           |
| 104             | Ireland | 2000           | Tomatoes                  | 29                                                          |
| 104             | Ireland | 2000           | Vegetables, Other         | 146                                                         |
| 104             | Ireland | 2000           | Wheat                     | 275                                                         |
| 104             | Ireland | 2000           | Wine                      | 31                                                          |
| 104             | Ireland | 2001           | Apples                    | 41                                                          |
| 104             | Ireland | 2001           | Bananas                   | 21                                                          |
| 104             | Ireland | 2001           | Barley                    | 6                                                           |
| 104             | Ireland | 2001           | Beans                     | 3                                                           |
| 104             | Ireland | 2001           | Beer                      | 542                                                         |
| 104             | Ireland | 2001           | Beverages, Alcoholic      | 23                                                          |
| 104             | Ireland | 2001           | Bovine Meat               | 69                                                          |
| 104             | Ireland | 2001           | Butter, Ghee              | 8                                                           |
| 104             | Ireland | 2001           | Cereals, Other            | 6                                                           |



Dietary calcium and zinc deficiency risks are decreasing but remain prevalent

| FAO countrycode | Country | Reference year | Food item                 | Gross food supply (g capita <sup>-1</sup> d <sup>-1</sup> ) |
|-----------------|---------|----------------|---------------------------|-------------------------------------------------------------|
| 104             | Ireland | 2001           | Cheese                    | 28                                                          |
| 104             | Ireland | 2001           | Citrus, Other             | 4                                                           |
| 104             | Ireland | 2001           | Cocoa Beans               | 5                                                           |
| 104             | Ireland | 2001           | Coconut Oil               | 9                                                           |
| 104             | Ireland | 2001           | Coconuts - Incl Copra     | 5                                                           |
| 104             | Ireland | 2001           | Coffee                    | 4                                                           |
| 104             | Ireland | 2001           | Cream                     | 18                                                          |
| 104             | Ireland | 2001           | Crustaceans               | 8                                                           |
| 104             | Ireland | 2001           | Demersal Fish             | 32                                                          |
| 104             | Ireland | 2001           | Eggs                      | 22                                                          |
| 104             | Ireland | 2001           | Fats, Animals, Raw        | 13                                                          |
| 104             | Ireland | 2001           | Fish, Liver Oil           | 1                                                           |
| 104             | Ireland | 2001           | Freshwater Fish           | 5                                                           |
| 104             | Ireland | 2001           | Fruits, Other             | 51                                                          |
| 104             | Ireland | 2001           | Grapefruit                | 2                                                           |
| 104             | Ireland | 2001           | Grapes                    | 15                                                          |
| 104             | Ireland | 2001           | Groundnuts (Shelled Eq)   | 2                                                           |
| 104             | Ireland | 2001           | Honey                     | 1                                                           |
| 104             | Ireland | 2001           | Lemons, Limes             | 4                                                           |
| 104             | Ireland | 2001           | Maize                     | 43                                                          |
| 104             | Ireland | 2001           | Marine Fish, Other        | 1                                                           |
| 104             | Ireland | 2001           | Meat, Other               | 9                                                           |
| 104             | Ireland | 2001           | Milk, Whole               | 578                                                         |
| 104             | Ireland | 2001           | Molluscs, Other           | 3                                                           |
| 104             | Ireland | 2001           | Mutton & Goat Meat        | 9                                                           |
| 104             | Ireland | 2001           | Nuts                      | 2                                                           |
| 104             | Ireland | 2001           | Oats                      | 8                                                           |
| 104             | Ireland | 2001           | Offals, Edible            | 38                                                          |
| 104             | Ireland | 2001           | Olive Oil                 | 1                                                           |
| 104             | Ireland | 2001           | Onions                    | 22                                                          |
| 104             | Ireland | 2001           | Oranges, Mandarines       | 76                                                          |
| 104             | Ireland | 2001           | Palmkernel Oil            | 1                                                           |
| 104             | Ireland | 2001           | Peas                      | 4                                                           |
| 104             | Ireland | 2001           | Pelagic Fish              | 19                                                          |
| 104             | Ireland | 2001           | Pigmeat                   | 106                                                         |
| 104             | Ireland | 2001           | Pineapples                | 2                                                           |
| 104             | Ireland | 2001           | Plantains                 | 2                                                           |
| 104             | Ireland | 2001           | Potatoes                  | 326                                                         |
| 104             | Ireland | 2001           | Poultry Meat              | 77                                                          |
| 104             | Ireland | 2001           | Rape and Mustard Oil      | 17                                                          |
| 104             | Ireland | 2001           | Rice (Milled Equivalent)  | 9                                                           |
| 104             | Ireland | 2001           | Rye                       | 2                                                           |
| 104             | Ireland | 2001           | Soyabean Oil              | 4                                                           |
| 104             | Ireland | 2001           | Spices, Other             | 1                                                           |
| 104             | Ireland | 2001           | Sugar, Refined Equivalent | 90                                                          |
| 104             | Ireland | 2001           | Sunflowerseed             | 1                                                           |
| 104             | Ireland | 2001           | Sunflowerseed Oil         | 7                                                           |
| 104             | Ireland | 2001           | Sweeteners, Other         | 19                                                          |
| 104             | Ireland | 2001           | Tea                       | 7                                                           |
| 104             | Ireland | 2001           | Tomatoes                  | 34                                                          |
| 104             | Ireland | 2001           | Vegetables, Other         | 165                                                         |
| 104             | Ireland | 2001           | Wheat                     | 278                                                         |
| 104             | Ireland | 2001           | Wine                      | 34                                                          |
| 104             | Ireland | 2002           | Apples                    | 39                                                          |
| 104             | Ireland | 2002           | Bananas                   | 28                                                          |
| 104             | Ireland | 2002           | Barley                    | 5                                                           |
| 104             | Ireland | 2002           | Beans                     | 3                                                           |
| 104             | Ireland | 2002           | Beer                      | 562                                                         |
| 104             | Ireland | 2002           | Beverages, Alcoholic      | 22                                                          |
| 104             | Ireland | 2002           | Bovine Meat               | 73                                                          |
| 104             | Ireland | 2002           | Butter, Ghee              | 8                                                           |
| 104             | Ireland | 2002           | Cereals, Other            | 7                                                           |
| 104             | Ireland | 2002           | Cheese                    | 25                                                          |
| 104             | Ireland | 2002           | Cocoa Beans               | 5                                                           |
| 104             | Ireland | 2002           | Coconut Oil               | 12                                                          |
| 104             | Ireland | 2002           | Coconuts - Incl Copra     | 3                                                           |
| 104             | Ireland | 2002           | Coffee                    | 5                                                           |
| 104             | Ireland | 2002           | Cream                     | 14                                                          |
| 104             | Ireland | 2002           | Crustaceans               | 6                                                           |
| 104             | Ireland | 2002           | Demersal Fish             | 20                                                          |
| 104             | Ireland | 2002           | Eggs                      | 20                                                          |
| 104             | Ireland | 2002           | Fats, Animals, Raw        | 11                                                          |
| 104             | Ireland | 2002           | Freshwater Fish           | 5                                                           |
| 104             | Ireland | 2002           | Fruits, Other             | 52                                                          |
| 104             | Ireland | 2002           | Grapefruit                | 9                                                           |
| 104             | Ireland | 2002           | Grapes                    | 21                                                          |
| 104             | Ireland | 2002           | Groundnuts (Shelled Eq)   | 2                                                           |
| 104             | Ireland | 2002           | Honey                     | 1                                                           |
| 104             | Ireland | 2002           | Lemons, Limes             | 3                                                           |
| 104             | Ireland | 2002           | Maize                     | 44                                                          |
| 104             | Ireland | 2002           | Marine Fish, Other        | 1                                                           |
| 104             | Ireland | 2002           | Meat, Other               | 3                                                           |
| 104             | Ireland | 2002           | Milk, Whole               | 544                                                         |
| 104             | Ireland | 2002           | Molluscs, Other           | 4                                                           |
| 104             | Ireland | 2002           | Mutton & Goat Meat        | 15                                                          |
| 104             | Ireland | 2002           | Nuts                      | 3                                                           |
| 104             | Ireland | 2002           | Oats                      | 8                                                           |
| 104             | Ireland | 2002           | Offals, Edible            | 29                                                          |
| 104             | Ireland | 2002           | Olive Oil                 | 2                                                           |
| 104             | Ireland | 2002           | Onions                    | 24                                                          |
| 104             | Ireland | 2002           | Oranges, Mandarines       | 147                                                         |
| 104             | Ireland | 2002           | Peas                      | 4                                                           |
| 104             | Ireland | 2002           | Pelagic Fish              | 20                                                          |
| 104             | Ireland | 2002           | Pigmeat                   | 110                                                         |
| 104             | Ireland | 2002           | Pineapples                | 3                                                           |
| 104             | Ireland | 2002           | Plantains                 | 3                                                           |
| 104             | Ireland | 2002           | Potatoes                  | 323                                                         |

Dietary calcium and zinc deficiency risks are decreasing but remain prevalent

| FAO countrycode | Country | Reference year | Food item                 | Gross food supply (g capita <sup>-1</sup> d <sup>-1</sup> ) |
|-----------------|---------|----------------|---------------------------|-------------------------------------------------------------|
| 104             | Ireland | 2002           | Poultry Meat              | 75                                                          |
| 104             | Ireland | 2002           | Rape and Mustard Oil      | 17                                                          |
| 104             | Ireland | 2002           | Rice (Milled Equivalent)  | 9                                                           |
| 104             | Ireland | 2002           | Rye                       | 2                                                           |
| 104             | Ireland | 2002           | Soyabean Oil              | 3                                                           |
| 104             | Ireland | 2002           | Spices, Other             | 1                                                           |
| 104             | Ireland | 2002           | Sugar, Refined Equivalent | 72                                                          |
| 104             | Ireland | 2002           | Sunflowerseed             | 1                                                           |
| 104             | Ireland | 2002           | Sunflowerseed Oil         | 7                                                           |
| 104             | Ireland | 2002           | Sweeteners, Other         | 12                                                          |
| 104             | Ireland | 2002           | Tea                       | 8                                                           |
| 104             | Ireland | 2002           | Tomatoes                  | 36                                                          |
| 104             | Ireland | 2002           | Vegetables, Other         | 160                                                         |
| 104             | Ireland | 2002           | Wheat                     | 265                                                         |
| 104             | Ireland | 2002           | Wine                      | 35                                                          |
| 104             | Ireland | 2003           | Apples                    | 41                                                          |
| 104             | Ireland | 2003           | Bananas                   | 26                                                          |
| 104             | Ireland | 2003           | Barley                    | 5                                                           |
| 104             | Ireland | 2003           | Beans                     | 4                                                           |
| 104             | Ireland | 2003           | Beer                      | 429                                                         |
| 104             | Ireland | 2003           | Beverages, Alcoholic      | 22                                                          |
| 104             | Ireland | 2003           | Beverages, Fermented      | 1                                                           |
| 104             | Ireland | 2003           | Bovine Meat               | 64                                                          |
| 104             | Ireland | 2003           | Butter, Ghee              | 8                                                           |
| 104             | Ireland | 2003           | Cereals, Other            | 9                                                           |
| 104             | Ireland | 2003           | Cheese                    | 34                                                          |
| 104             | Ireland | 2003           | Cocoa Beans               | 5                                                           |
| 104             | Ireland | 2003           | Coconut Oil               | 9                                                           |
| 104             | Ireland | 2003           | Coconuts - Incl Copra     | 2                                                           |
| 104             | Ireland | 2003           | Coffee                    | 7                                                           |
| 104             | Ireland | 2003           | Cream                     | 13                                                          |
| 104             | Ireland | 2003           | Crustaceans               | 7                                                           |
| 104             | Ireland | 2003           | Demersal Fish             | 15                                                          |
| 104             | Ireland | 2003           | Eggs                      | 18                                                          |
| 104             | Ireland | 2003           | Fats, Animals, Raw        | 10                                                          |
| 104             | Ireland | 2003           | Freshwater Fish           | 4                                                           |
| 104             | Ireland | 2003           | Fruits, Other             | 57                                                          |
| 104             | Ireland | 2003           | Grapefruit                | 6                                                           |
| 104             | Ireland | 2003           | Grapes                    | 18                                                          |
| 104             | Ireland | 2003           | Groundnuts (Shelled Eq)   | 2                                                           |
| 104             | Ireland | 2003           | Honey                     | 1                                                           |
| 104             | Ireland | 2003           | Lemons, Limes             | 3                                                           |
| 104             | Ireland | 2003           | Maize                     | 43                                                          |
| 104             | Ireland | 2003           | Meat, Other               | 2                                                           |
| 104             | Ireland | 2003           | Milk, Whole               | 555                                                         |
| 104             | Ireland | 2003           | Molluscs, Other           | 8                                                           |
| 104             | Ireland | 2003           | Mutton & Goat Meat        | 14                                                          |
| 104             | Ireland | 2003           | Nuts                      | 2                                                           |
| 104             | Ireland | 2003           | Oats                      | 8                                                           |
| 104             | Ireland | 2003           | Offals, Edible            | 22                                                          |
| 104             | Ireland | 2003           | Olive Oil                 | 2                                                           |
| 104             | Ireland | 2003           | Onions                    | 25                                                          |
| 104             | Ireland | 2003           | Oranges, Mandarines       | 214                                                         |
| 104             | Ireland | 2003           | Peas                      | 3                                                           |
| 104             | Ireland | 2003           | Pelagic Fish              | 25                                                          |
| 104             | Ireland | 2003           | Pigmeat                   | 115                                                         |
| 104             | Ireland | 2003           | Pineapples                | 2                                                           |
| 104             | Ireland | 2003           | Plantains                 | 3                                                           |
| 104             | Ireland | 2003           | Potatoes                  | 330                                                         |
| 104             | Ireland | 2003           | Poultry Meat              | 75                                                          |
| 104             | Ireland | 2003           | Rape and Mustard Oil      | 16                                                          |
| 104             | Ireland | 2003           | Rice (Milled Equivalent)  | 8                                                           |
| 104             | Ireland | 2003           | Rye                       | 1                                                           |
| 104             | Ireland | 2003           | Soyabean Oil              | 4                                                           |
| 104             | Ireland | 2003           | Spices, Other             | 1                                                           |
| 104             | Ireland | 2003           | Sugar, Refined Equivalent | 85                                                          |
| 104             | Ireland | 2003           | Sunflowerseed Oil         | 8                                                           |
| 104             | Ireland | 2003           | Sweeteners, Other         | 11                                                          |
| 104             | Ireland | 2003           | Tea                       | 10                                                          |
| 104             | Ireland | 2003           | Tomatoes                  | 34                                                          |
| 104             | Ireland | 2003           | Vegetables, Other         | 157                                                         |
| 104             | Ireland | 2003           | Wheat                     | 271                                                         |
| 104             | Ireland | 2003           | Wine                      | 38                                                          |
| 104             | Ireland | 2004           | Apples                    | 39                                                          |
| 104             | Ireland | 2004           | Bananas                   | 20                                                          |
| 104             | Ireland | 2004           | Barley                    | 2                                                           |
| 104             | Ireland | 2004           | Beans                     | 3                                                           |
| 104             | Ireland | 2004           | Beer                      | 415                                                         |
| 104             | Ireland | 2004           | Beverages, Alcoholic      | 21                                                          |
| 104             | Ireland | 2004           | Beverages, Fermented      | 1                                                           |
| 104             | Ireland | 2004           | Bovine Meat               | 76                                                          |
| 104             | Ireland | 2004           | Butter, Ghee              | 9                                                           |
| 104             | Ireland | 2004           | Cereals, Other            | 11                                                          |
| 104             | Ireland | 2004           | Cheese                    | 30                                                          |
| 104             | Ireland | 2004           | Citrus, Other             | 1                                                           |
| 104             | Ireland | 2004           | Cocoa Beans               | 5                                                           |
| 104             | Ireland | 2004           | Coconut Oil               | 5                                                           |
| 104             | Ireland | 2004           | Coffee                    | 8                                                           |
| 104             | Ireland | 2004           | Cream                     | 16                                                          |
| 104             | Ireland | 2004           | Crustaceans               | 8                                                           |
| 104             | Ireland | 2004           | Demersal Fish             | 21                                                          |
| 104             | Ireland | 2004           | Eggs                      | 18                                                          |
| 104             | Ireland | 2004           | Fats, Animals, Raw        | 10                                                          |
| 104             | Ireland | 2004           | Freshwater Fish           | 6                                                           |
| 104             | Ireland | 2004           | Fruits, Other             | 41                                                          |
| 104             | Ireland | 2004           | Grapefruit                | 7                                                           |
| 104             | Ireland | 2004           | Grapes                    | 15                                                          |

Dietary calcium and zinc deficiency risks are decreasing but remain prevalent

| FAO countrycode | Country | Reference year | Food item                 | Gross food supply (g capita <sup>-1</sup> d <sup>-1</sup> ) |
|-----------------|---------|----------------|---------------------------|-------------------------------------------------------------|
| 104             | Ireland | 2004           | Groundnuts (Shelled Eq)   | 2                                                           |
| 104             | Ireland | 2004           | Honey                     | 1                                                           |
| 104             | Ireland | 2004           | Lemons, Limes             | 2                                                           |
| 104             | Ireland | 2004           | Maize                     | 42                                                          |
| 104             | Ireland | 2004           | Marine Fish, Other        | 1                                                           |
| 104             | Ireland | 2004           | Meat, Other               | 4                                                           |
| 104             | Ireland | 2004           | Milk, Whole               | 538                                                         |
| 104             | Ireland | 2004           | Molluscs, Other           | 10                                                          |
| 104             | Ireland | 2004           | Mutton & Goat Meat        | 16                                                          |
| 104             | Ireland | 2004           | Nuts                      | 3                                                           |
| 104             | Ireland | 2004           | Oats                      | 8                                                           |
| 104             | Ireland | 2004           | Offals, Edible            | 25                                                          |
| 104             | Ireland | 2004           | Olive Oil                 | 2                                                           |
| 104             | Ireland | 2004           | Onions                    | 24                                                          |
| 104             | Ireland | 2004           | Oranges, Mandarines       | 196                                                         |
| 104             | Ireland | 2004           | Peas                      | 3                                                           |
| 104             | Ireland | 2004           | Pelagic Fish              | 18                                                          |
| 104             | Ireland | 2004           | Pigmeat                   | 107                                                         |
| 104             | Ireland | 2004           | Pineapples                | 8                                                           |
| 104             | Ireland | 2004           | Plantains                 | 3                                                           |
| 104             | Ireland | 2004           | Potatoes                  | 328                                                         |
| 104             | Ireland | 2004           | Poultry Meat              | 76                                                          |
| 104             | Ireland | 2004           | Rape and Mustard Oil      | 22                                                          |
| 104             | Ireland | 2004           | Rice (Milled Equivalent)  | 9                                                           |
| 104             | Ireland | 2004           | Rye                       | 6                                                           |
| 104             | Ireland | 2004           | Soyabean Oil              | 7                                                           |
| 104             | Ireland | 2004           | Spices, Other             | 1                                                           |
| 104             | Ireland | 2004           | Sugar, Refined Equivalent | 83                                                          |
| 104             | Ireland | 2004           | Sunflowerseed Oil         | 6                                                           |
| 104             | Ireland | 2004           | Sweeteners, Other         | 12                                                          |
| 104             | Ireland | 2004           | Tea                       | 7                                                           |
| 104             | Ireland | 2004           | Tomatoes                  | 31                                                          |
| 104             | Ireland | 2004           | Vegetables, Other         | 151                                                         |
| 104             | Ireland | 2004           | Wheat                     | 265                                                         |
| 104             | Ireland | 2004           | Wine                      | 43                                                          |
| 104             | Ireland | 2005           | Apples                    | 9                                                           |
| 104             | Ireland | 2005           | Bananas                   | 24                                                          |
| 104             | Ireland | 2005           | Barley                    | 2                                                           |
| 104             | Ireland | 2005           | Beans                     | 4                                                           |
| 104             | Ireland | 2005           | Beer                      | 446                                                         |
| 104             | Ireland | 2005           | Beverages, Alcoholic      | 20                                                          |
| 104             | Ireland | 2005           | Beverages, Fermented      | 1                                                           |
| 104             | Ireland | 2005           | Bovine Meat               | 71                                                          |
| 104             | Ireland | 2005           | Butter, Ghee              | 8                                                           |
| 104             | Ireland | 2005           | Cereals, Other            | 8                                                           |
| 104             | Ireland | 2005           | Cheese                    | 27                                                          |
| 104             | Ireland | 2005           | Citrus, Other             | 7                                                           |
| 104             | Ireland | 2005           | Cocoa Beans               | 5                                                           |
| 104             | Ireland | 2005           | Coconut Oil               | 12                                                          |
| 104             | Ireland | 2005           | Coconuts - Incl Copra     | 3                                                           |
| 104             | Ireland | 2005           | Coffee                    | 8                                                           |
| 104             | Ireland | 2005           | Cream                     | 12                                                          |
| 104             | Ireland | 2005           | Crustaceans               | 4                                                           |
| 104             | Ireland | 2005           | Demersal Fish             | 25                                                          |
| 104             | Ireland | 2005           | Eggs                      | 19                                                          |
| 104             | Ireland | 2005           | Fats, Animals, Raw        | 11                                                          |
| 104             | Ireland | 2005           | Freshwater Fish           | 8                                                           |
| 104             | Ireland | 2005           | Fruits, Other             | 48                                                          |
| 104             | Ireland | 2005           | Grapefruit                | 3                                                           |
| 104             | Ireland | 2005           | Grapes                    | 17                                                          |
| 104             | Ireland | 2005           | Groundnuts (Shelled Eq)   | 2                                                           |
| 104             | Ireland | 2005           | Honey                     | 1                                                           |
| 104             | Ireland | 2005           | Lemons, Limes             | 3                                                           |
| 104             | Ireland | 2005           | Maize                     | 23                                                          |
| 104             | Ireland | 2005           | Meat, Other               | 5                                                           |
| 104             | Ireland | 2005           | Milk, Whole               | 479                                                         |
| 104             | Ireland | 2005           | Molluscs, Other           | 10                                                          |
| 104             | Ireland | 2005           | Mutton & Goat Meat        | 14                                                          |
| 104             | Ireland | 2005           | Nuts                      | 3                                                           |
| 104             | Ireland | 2005           | Oats                      | 7                                                           |
| 104             | Ireland | 2005           | Offals, Edible            | 24                                                          |
| 104             | Ireland | 2005           | Olive Oil                 | 5                                                           |
| 104             | Ireland | 2005           | Onions                    | 23                                                          |
| 104             | Ireland | 2005           | Oranges, Mandarines       | 189                                                         |
| 104             | Ireland | 2005           | Palmkernel Oil            | 1                                                           |
| 104             | Ireland | 2005           | Peas                      | 4                                                           |
| 104             | Ireland | 2005           | Pelagic Fish              | 15                                                          |
| 104             | Ireland | 2005           | Pigmeat                   | 98                                                          |
| 104             | Ireland | 2005           | Pineapples                | 4                                                           |
| 104             | Ireland | 2005           | Plantains                 | 3                                                           |
| 104             | Ireland | 2005           | Potatoes                  | 273                                                         |
| 104             | Ireland | 2005           | Poultry Meat              | 88                                                          |
| 104             | Ireland | 2005           | Rape and Mustard Oil      | 17                                                          |
| 104             | Ireland | 2005           | Rice (Milled Equivalent)  | 6                                                           |
| 104             | Ireland | 2005           | Rye                       | 2                                                           |
| 104             | Ireland | 2005           | Soyabean Oil              | 6                                                           |
| 104             | Ireland | 2005           | Spices, Other             | 1                                                           |
| 104             | Ireland | 2005           | Sugar, Refined Equivalent | 70                                                          |
| 104             | Ireland | 2005           | Sunflowerseed Oil         | 5                                                           |
| 104             | Ireland | 2005           | Sweeteners, Other         | 10                                                          |
| 104             | Ireland | 2005           | Tea                       | 7                                                           |
| 104             | Ireland | 2005           | Tomatoes                  | 28                                                          |
| 104             | Ireland | 2005           | Vegetables, Other         | 145                                                         |
| 104             | Ireland | 2005           | Wheat                     | 279                                                         |
| 104             | Ireland | 2005           | Wine                      | 35                                                          |
| 104             | Ireland | 2006           | Apples                    | 13                                                          |
| 104             | Ireland | 2006           | Bananas                   | 26                                                          |

Dietary calcium and zinc deficiency risks are decreasing but remain prevalent

| FAO countrycode | Country | Reference year | Food item                 | Gross food supply (g capita <sup>-1</sup> d <sup>-1</sup> ) |
|-----------------|---------|----------------|---------------------------|-------------------------------------------------------------|
| 104             | Ireland | 2006           | Barley                    | 2                                                           |
| 104             | Ireland | 2006           | Beans                     | 7                                                           |
| 104             | Ireland | 2006           | Beer                      | 424                                                         |
| 104             | Ireland | 2006           | Beverages, Alcoholic      | 19                                                          |
| 104             | Ireland | 2006           | Beverages, Fermented      | 1                                                           |
| 104             | Ireland | 2006           | Bovine Meat               | 76                                                          |
| 104             | Ireland | 2006           | Butter, Ghee              | 7                                                           |
| 104             | Ireland | 2006           | Cereals, Other            | 9                                                           |
| 104             | Ireland | 2006           | Cheese                    | 23                                                          |
| 104             | Ireland | 2006           | Citrus, Other             | 9                                                           |
| 104             | Ireland | 2006           | Cocoa Beans               | 5                                                           |
| 104             | Ireland | 2006           | Coconut Oil               | 9                                                           |
| 104             | Ireland | 2006           | Coconuts - Incl Copra     | 3                                                           |
| 104             | Ireland | 2006           | Coffee                    | 8                                                           |
| 104             | Ireland | 2006           | Cream                     | 20                                                          |
| 104             | Ireland | 2006           | Crustaceans               | 7                                                           |
| 104             | Ireland | 2006           | Demersal Fish             | 23                                                          |
| 104             | Ireland | 2006           | Eggs                      | 21                                                          |
| 104             | Ireland | 2006           | Fats, Animals, Raw        | 10                                                          |
| 104             | Ireland | 2006           | Freshwater Fish           | 5                                                           |
| 104             | Ireland | 2006           | Fruits, Other             | 55                                                          |
| 104             | Ireland | 2006           | Grapefruit                | 5                                                           |
| 104             | Ireland | 2006           | Grapes                    | 18                                                          |
| 104             | Ireland | 2006           | Groundnuts (Shelled Eq)   | 3                                                           |
| 104             | Ireland | 2006           | Honey                     | 1                                                           |
| 104             | Ireland | 2006           | Lemons, Limes             | 3                                                           |
| 104             | Ireland | 2006           | Maize                     | 23                                                          |
| 104             | Ireland | 2006           | Meat, Other               | 11                                                          |
| 104             | Ireland | 2006           | Milk, Whole               | 403                                                         |
| 104             | Ireland | 2006           | Molluscs, Other           | 4                                                           |
| 104             | Ireland | 2006           | Mutton & Goat Meat        | 13                                                          |
| 104             | Ireland | 2006           | Nuts                      | 4                                                           |
| 104             | Ireland | 2006           | Oats                      | 7                                                           |
| 104             | Ireland | 2006           | Offals, Edible            | 18                                                          |
| 104             | Ireland | 2006           | Olive Oil                 | 2                                                           |
| 104             | Ireland | 2006           | Onions                    | 23                                                          |
| 104             | Ireland | 2006           | Oranges, Mandarines       | 169                                                         |
| 104             | Ireland | 2006           | Peas                      | 4                                                           |
| 104             | Ireland | 2006           | Pelagic Fish              | 17                                                          |
| 104             | Ireland | 2006           | Pigmeat                   | 100                                                         |
| 104             | Ireland | 2006           | Pineapples                | 3                                                           |
| 104             | Ireland | 2006           | Plantains                 | 3                                                           |
| 104             | Ireland | 2006           | Potatoes                  | 275                                                         |
| 104             | Ireland | 2006           | Poultry Meat              | 77                                                          |
| 104             | Ireland | 2006           | Rape and Mustard Oil      | 17                                                          |
| 104             | Ireland | 2006           | Rice (Milled Equivalent)  | 6                                                           |
| 104             | Ireland | 2006           | Rye                       | 2                                                           |
| 104             | Ireland | 2006           | Soyabean Oil              | 4                                                           |
| 104             | Ireland | 2006           | Spices, Other             | 2                                                           |
| 104             | Ireland | 2006           | Sugar, Refined Equivalent | 89                                                          |
| 104             | Ireland | 2006           | Sunflowerseed Oil         | 7                                                           |
| 104             | Ireland | 2006           | Sweeteners, Other         | 19                                                          |
| 104             | Ireland | 2006           | Tea                       | 6                                                           |
| 104             | Ireland | 2006           | Tomatoes                  | 30                                                          |
| 104             | Ireland | 2006           | Vegetables, Other         | 167                                                         |
| 104             | Ireland | 2006           | Wheat                     | 325                                                         |
| 104             | Ireland | 2006           | Wine                      | 37                                                          |
| 104             | Ireland | 2007           | Apples                    | 16                                                          |
| 104             | Ireland | 2007           | Bananas                   | 30                                                          |
| 104             | Ireland | 2007           | Barley                    | 4                                                           |
| 104             | Ireland | 2007           | Beans                     | 3                                                           |
| 104             | Ireland | 2007           | Beer                      | 437                                                         |
| 104             | Ireland | 2007           | Beverages, Alcoholic      | 26                                                          |
| 104             | Ireland | 2007           | Beverages, Fermented      | 2                                                           |
| 104             | Ireland | 2007           | Bovine Meat               | 66                                                          |
| 104             | Ireland | 2007           | Butter, Ghee              | 7                                                           |
| 104             | Ireland | 2007           | Cereals, Other            | 5                                                           |
| 104             | Ireland | 2007           | Cheese                    | 34                                                          |
| 104             | Ireland | 2007           | Citrus, Other             | 14                                                          |
| 104             | Ireland | 2007           | Cocoa Beans               | 5                                                           |
| 104             | Ireland | 2007           | Coconut Oil               | 8                                                           |
| 104             | Ireland | 2007           | Coconuts - Incl Copra     | 3                                                           |
| 104             | Ireland | 2007           | Coffee                    | 11                                                          |
| 104             | Ireland | 2007           | Cream                     | 17                                                          |
| 104             | Ireland | 2007           | Crustaceans               | 8                                                           |
| 104             | Ireland | 2007           | Demersal Fish             | 24                                                          |
| 104             | Ireland | 2007           | Eggs                      | 20                                                          |
| 104             | Ireland | 2007           | Fats, Animals, Raw        | 10                                                          |
| 104             | Ireland | 2007           | Freshwater Fish           | 4                                                           |
| 104             | Ireland | 2007           | Fruits, Other             | 58                                                          |
| 104             | Ireland | 2007           | Grapefruit                | 3                                                           |
| 104             | Ireland | 2007           | Grapes                    | 19                                                          |
| 104             | Ireland | 2007           | Groundnuts (Shelled Eq)   | 3                                                           |
| 104             | Ireland | 2007           | Honey                     | 1                                                           |
| 104             | Ireland | 2007           | Lemons, Limes             | 3                                                           |
| 104             | Ireland | 2007           | Maize                     | 30                                                          |
| 104             | Ireland | 2007           | Meat, Other               | 7                                                           |
| 104             | Ireland | 2007           | Milk, Whole               | 384                                                         |
| 104             | Ireland | 2007           | Molluscs, Other           | 8                                                           |
| 104             | Ireland | 2007           | Mutton & Goat Meat        | 13                                                          |
| 104             | Ireland | 2007           | Nuts                      | 5                                                           |
| 104             | Ireland | 2007           | Oats                      | 10                                                          |
| 104             | Ireland | 2007           | Offals, Edible            | 19                                                          |
| 104             | Ireland | 2007           | Olive Oil                 | 3                                                           |
| 104             | Ireland | 2007           | Olives                    | 1                                                           |
| 104             | Ireland | 2007           | Onions                    | 24                                                          |
| 104             | Ireland | 2007           | Oranges, Mandarines       | 229                                                         |

Dietary calcium and zinc deficiency risks are decreasing but remain prevalent

| FAO countrycode | Country | Reference year | Food item                 | Gross food supply (g capita <sup>-1</sup> d <sup>-1</sup> ) |
|-----------------|---------|----------------|---------------------------|-------------------------------------------------------------|
| 104             | Ireland | 2007           | Peas                      | 4                                                           |
| 104             | Ireland | 2007           | Pelagic Fish              | 17                                                          |
| 104             | Ireland | 2007           | Pigmeat                   | 95                                                          |
| 104             | Ireland | 2007           | Pineapples                | 5                                                           |
| 104             | Ireland | 2007           | Plantains                 | 4                                                           |
| 104             | Ireland | 2007           | Potatoes                  | 264                                                         |
| 104             | Ireland | 2007           | Poultry Meat              | 72                                                          |
| 104             | Ireland | 2007           | Rape and Mustard Oil      | 17                                                          |
| 104             | Ireland | 2007           | Rice (Milled Equivalent)  | 8                                                           |
| 104             | Ireland | 2007           | Rye                       | 2                                                           |
| 104             | Ireland | 2007           | Soyabean Oil              | 6                                                           |
| 104             | Ireland | 2007           | Spices, Other             | 1                                                           |
| 104             | Ireland | 2007           | Sugar, Refined Equivalent | 71                                                          |
| 104             | Ireland | 2007           | Sunflowerseed Oil         | 9                                                           |
| 104             | Ireland | 2007           | Sweeteners, Other         | 38                                                          |
| 104             | Ireland | 2007           | Tea                       | 6                                                           |
| 104             | Ireland | 2007           | Tomatoes                  | 38                                                          |
| 104             | Ireland | 2007           | Vegetables, Other         | 163                                                         |
| 104             | Ireland | 2007           | Wheat                     | 287                                                         |
| 104             | Ireland | 2007           | Wine                      | 46                                                          |
| 104             | Ireland | 2008           | Apples                    | 10                                                          |
| 104             | Ireland | 2008           | Bananas                   | 30                                                          |
| 104             | Ireland | 2008           | Barley                    | 7                                                           |
| 104             | Ireland | 2008           | Beans                     | 2                                                           |
| 104             | Ireland | 2008           | Beer                      | 417                                                         |
| 104             | Ireland | 2008           | Beverages, Alcoholic      | 25                                                          |
| 104             | Ireland | 2008           | Beverages, Fermented      | 4                                                           |
| 104             | Ireland | 2008           | Bovine Meat               | 61                                                          |
| 104             | Ireland | 2008           | Butter, Ghee              | 9                                                           |
| 104             | Ireland | 2008           | Cereals, Other            | 1                                                           |
| 104             | Ireland | 2008           | Cheese                    | 38                                                          |
| 104             | Ireland | 2008           | Citrus, Other             | 13                                                          |
| 104             | Ireland | 2008           | Cocoa Beans               | 5                                                           |
| 104             | Ireland | 2008           | Coconut Oil               | 10                                                          |
| 104             | Ireland | 2008           | Coconuts - Incl Copra     | 3                                                           |
| 104             | Ireland | 2008           | Coffee                    | 8                                                           |
| 104             | Ireland | 2008           | Cream                     | 17                                                          |
| 104             | Ireland | 2008           | Crustaceans               | 7                                                           |
| 104             | Ireland | 2008           | Demersal Fish             | 25                                                          |
| 104             | Ireland | 2008           | Eggs                      | 24                                                          |
| 104             | Ireland | 2008           | Fats, Animals, Raw        | 9                                                           |
| 104             | Ireland | 2008           | Freshwater Fish           | 6                                                           |
| 104             | Ireland | 2008           | Fruits, Other             | 72                                                          |
| 104             | Ireland | 2008           | Grapefruit                | 1                                                           |
| 104             | Ireland | 2008           | Grapes                    | 21                                                          |
| 104             | Ireland | 2008           | Groundnuts (Shelled Eq)   | 3                                                           |
| 104             | Ireland | 2008           | Honey                     | 1                                                           |
| 104             | Ireland | 2008           | Lemons, Limes             | 4                                                           |
| 104             | Ireland | 2008           | Maize                     | 30                                                          |
| 104             | Ireland | 2008           | Meat, Other               | 5                                                           |
| 104             | Ireland | 2008           | Milk, Whole               | 342                                                         |
| 104             | Ireland | 2008           | Molluscs, Other           | 5                                                           |
| 104             | Ireland | 2008           | Mutton & Goat Meat        | 12                                                          |
| 104             | Ireland | 2008           | Nuts                      | 5                                                           |
| 104             | Ireland | 2008           | Oats                      | 10                                                          |
| 104             | Ireland | 2008           | Offals, Edible            | 22                                                          |
| 104             | Ireland | 2008           | Olive Oil                 | 3                                                           |
| 104             | Ireland | 2008           | Olives                    | 2                                                           |
| 104             | Ireland | 2008           | Onions                    | 32                                                          |
| 104             | Ireland | 2008           | Oranges, Mandarines       | 254                                                         |
| 104             | Ireland | 2008           | Palmkernel Oil            | 1                                                           |
| 104             | Ireland | 2008           | Peas                      | 2                                                           |
| 104             | Ireland | 2008           | Pelagic Fish              | 15                                                          |
| 104             | Ireland | 2008           | Pigmeat                   | 93                                                          |
| 104             | Ireland | 2008           | Pineapples                | 4                                                           |
| 104             | Ireland | 2008           | Plantains                 | 1                                                           |
| 104             | Ireland | 2008           | Potatoes                  | 265                                                         |
| 104             | Ireland | 2008           | Poultry Meat              | 76                                                          |
| 104             | Ireland | 2008           | Pulses, Other             | 1                                                           |
| 104             | Ireland | 2008           | Rape and Mustard Oil      | 16                                                          |
| 104             | Ireland | 2008           | Rice (Milled Equivalent)  | 12                                                          |
| 104             | Ireland | 2008           | Rye                       | 1                                                           |
| 104             | Ireland | 2008           | Soyabean Oil              | 7                                                           |
| 104             | Ireland | 2008           | Spices, Other             | 1                                                           |
| 104             | Ireland | 2008           | Sugar, Refined Equivalent | 73                                                          |
| 104             | Ireland | 2008           | Sunflowerseed Oil         | 8                                                           |
| 104             | Ireland | 2008           | Sweeteners, Other         | 40                                                          |
| 104             | Ireland | 2008           | Tea                       | 6                                                           |
| 104             | Ireland | 2008           | Tomatoes                  | 43                                                          |
| 104             | Ireland | 2008           | Vegetables, Other         | 168                                                         |
| 104             | Ireland | 2008           | Wheat                     | 296                                                         |
| 104             | Ireland | 2008           | Wine                      | 31                                                          |
| 104             | Ireland | 2009           | Apples                    | 10                                                          |
| 104             | Ireland | 2009           | Bananas                   | 26                                                          |
| 104             | Ireland | 2009           | Barley                    | 2                                                           |
| 104             | Ireland | 2009           | Beans                     | 7                                                           |
| 104             | Ireland | 2009           | Beer                      | 368                                                         |
| 104             | Ireland | 2009           | Beverages, Alcoholic      | 25                                                          |
| 104             | Ireland | 2009           | Beverages, Fermented      | 3                                                           |
| 104             | Ireland | 2009           | Bovine Meat               | 62                                                          |
| 104             | Ireland | 2009           | Butter, Ghee              | 9                                                           |
| 104             | Ireland | 2009           | Cheese                    | 29                                                          |
| 104             | Ireland | 2009           | Citrus, Other             | 6                                                           |
| 104             | Ireland | 2009           | Cocoa Beans               | 5                                                           |
| 104             | Ireland | 2009           | Coconut Oil               | 5                                                           |
| 104             | Ireland | 2009           | Coconuts - Incl Copra     | 2                                                           |
| 104             | Ireland | 2009           | Coffee                    | 6                                                           |

Dietary calcium and zinc deficiency risks are decreasing but remain prevalent

| FAO countrycode | Country | Reference year | Food item                 | Gross food supply (g capita <sup>-1</sup> d <sup>-1</sup> ) |
|-----------------|---------|----------------|---------------------------|-------------------------------------------------------------|
| 104             | Ireland | 2009           | Cream                     | 16                                                          |
| 104             | Ireland | 2009           | Crustaceans               | 7                                                           |
| 104             | Ireland | 2009           | Demersal Fish             | 30                                                          |
| 104             | Ireland | 2009           | Eggs                      | 23                                                          |
| 104             | Ireland | 2009           | Fats, Animals, Raw        | 10                                                          |
| 104             | Ireland | 2009           | Freshwater Fish           | 5                                                           |
| 104             | Ireland | 2009           | Fruits, Other             | 62                                                          |
| 104             | Ireland | 2009           | Grapefruit                | 1                                                           |
| 104             | Ireland | 2009           | Grapes                    | 21                                                          |
| 104             | Ireland | 2009           | Groundnuts (Shelled Eq)   | 3                                                           |
| 104             | Ireland | 2009           | Honey                     | 1                                                           |
| 104             | Ireland | 2009           | Lemons, Limes             | 4                                                           |
| 104             | Ireland | 2009           | Maize                     | 29                                                          |
| 104             | Ireland | 2009           | Meat, Other               | 6                                                           |
| 104             | Ireland | 2009           | Milk, Whole               | 348                                                         |
| 104             | Ireland | 2009           | Molluscs, Other           | 7                                                           |
| 104             | Ireland | 2009           | Mutton & Goat Meat        | 11                                                          |
| 104             | Ireland | 2009           | Nuts                      | 6                                                           |
| 104             | Ireland | 2009           | Oats                      | 10                                                          |
| 104             | Ireland | 2009           | Offals, Edible            | 17                                                          |
| 104             | Ireland | 2009           | Olive Oil                 | 3                                                           |
| 104             | Ireland | 2009           | Olives                    | 1                                                           |
| 104             | Ireland | 2009           | Onions                    | 26                                                          |
| 104             | Ireland | 2009           | Oranges, Mandarines       | 249                                                         |
| 104             | Ireland | 2009           | Peas                      | 6                                                           |
| 104             | Ireland | 2009           | Pelagic Fish              | 13                                                          |
| 104             | Ireland | 2009           | Pigmeat                   | 89                                                          |
| 104             | Ireland | 2009           | Pineapples                | 7                                                           |
| 104             | Ireland | 2009           | Plantains                 | 5                                                           |
| 104             | Ireland | 2009           | Potatoes                  | 254                                                         |
| 104             | Ireland | 2009           | Poultry Meat              | 71                                                          |
| 104             | Ireland | 2009           | Rape and Mustard Oil      | 15                                                          |
| 104             | Ireland | 2009           | Rice (Milled Equivalent)  | 12                                                          |
| 104             | Ireland | 2009           | Rye                       | 2                                                           |
| 104             | Ireland | 2009           | Soyabean Oil              | 10                                                          |
| 104             | Ireland | 2009           | Spices, Other             | 1                                                           |
| 104             | Ireland | 2009           | Sugar, Refined Equivalent | 78                                                          |
| 104             | Ireland | 2009           | Sunflowerseed Oil         | 9                                                           |
| 104             | Ireland | 2009           | Sweeteners, Other         | 22                                                          |
| 104             | Ireland | 2009           | Tea                       | 9                                                           |
| 104             | Ireland | 2009           | Tomatoes                  | 42                                                          |
| 104             | Ireland | 2009           | Vegetables, Other         | 175                                                         |
| 104             | Ireland | 2009           | Wheat                     | 307                                                         |
| 104             | Ireland | 2009           | Wine                      | 39                                                          |
| 104             | Ireland | 2010           | Apples                    | 27                                                          |
| 104             | Ireland | 2010           | Bananas                   | 28                                                          |
| 104             | Ireland | 2010           | Beans                     | 9                                                           |
| 104             | Ireland | 2010           | Beer                      | 376                                                         |
| 104             | Ireland | 2010           | Beverages, Alcoholic      | 25                                                          |
| 104             | Ireland | 2010           | Beverages, Fermented      | 2                                                           |
| 104             | Ireland | 2010           | Bovine Meat               | 68                                                          |
| 104             | Ireland | 2010           | Butter, Ghee              | 9                                                           |
| 104             | Ireland | 2010           | Cereals, Other            | 4                                                           |
| 104             | Ireland | 2010           | Cheese                    | 35                                                          |
| 104             | Ireland | 2010           | Citrus, Other             | 10                                                          |
| 104             | Ireland | 2010           | Cocoa Beans               | 3                                                           |
| 104             | Ireland | 2010           | Coconut Oil               | 10                                                          |
| 104             | Ireland | 2010           | Coconuts - Incl Copra     | 2                                                           |
| 104             | Ireland | 2010           | Coffee                    | 7                                                           |
| 104             | Ireland | 2010           | Cream                     | 15                                                          |
| 104             | Ireland | 2010           | Crustaceans               | 8                                                           |
| 104             | Ireland | 2010           | Demersal Fish             | 29                                                          |
| 104             | Ireland | 2010           | Eggs                      | 25                                                          |
| 104             | Ireland | 2010           | Fats, Animals, Raw        | 9                                                           |
| 104             | Ireland | 2010           | Freshwater Fish           | 3                                                           |
| 104             | Ireland | 2010           | Fruits, Other             | 45                                                          |
| 104             | Ireland | 2010           | Grapefruit                | 3                                                           |
| 104             | Ireland | 2010           | Grapes                    | 23                                                          |
| 104             | Ireland | 2010           | Groundnuts (Shelled Eq)   | 3                                                           |
| 104             | Ireland | 2010           | Honey                     | 1                                                           |
| 104             | Ireland | 2010           | Lemons, Limes             | 5                                                           |
| 104             | Ireland | 2010           | Maize                     | 25                                                          |
| 104             | Ireland | 2010           | Meat, Other               | 4                                                           |
| 104             | Ireland | 2010           | Milk, Whole               | 275                                                         |
| 104             | Ireland | 2010           | Molluscs, Other           | 4                                                           |
| 104             | Ireland | 2010           | Mutton & Goat Meat        | 10                                                          |
| 104             | Ireland | 2010           | Nuts                      | 6                                                           |
| 104             | Ireland | 2010           | Oats                      | 12                                                          |
| 104             | Ireland | 2010           | Offals, Edible            | 25                                                          |
| 104             | Ireland | 2010           | Olive Oil                 | 4                                                           |
| 104             | Ireland | 2010           | Olives                    | 1                                                           |
| 104             | Ireland | 2010           | Onions                    | 27                                                          |
| 104             | Ireland | 2010           | Oranges, Mandarines       | 211                                                         |
| 104             | Ireland | 2010           | Peas                      | 5                                                           |
| 104             | Ireland | 2010           | Pelagic Fish              | 17                                                          |
| 104             | Ireland | 2010           | Pigmeat                   | 85                                                          |
| 104             | Ireland | 2010           | Pineapples                | 6                                                           |
| 104             | Ireland | 2010           | Plantains                 | 6                                                           |
| 104             | Ireland | 2010           | Potatoes                  | 253                                                         |
| 104             | Ireland | 2010           | Poultry Meat              | 63                                                          |
| 104             | Ireland | 2010           | Rape and Mustard Oil      | 18                                                          |
| 104             | Ireland | 2010           | Rice (Milled Equivalent)  | 12                                                          |
| 104             | Ireland | 2010           | Rye                       | 5                                                           |
| 104             | Ireland | 2010           | Soyabean Oil              | 6                                                           |
| 104             | Ireland | 2010           | Soybeans                  | 1                                                           |
| 104             | Ireland | 2010           | Spices, Other             | 1                                                           |
| 104             | Ireland | 2010           | Sugar, Refined Equivalent | 71                                                          |

Dietary calcium and zinc deficiency risks are decreasing but remain prevalent

| FAO countrycode | Country | Reference year | Food item                 | Gross food supply (g capita <sup>-1</sup> d <sup>-1</sup> ) |
|-----------------|---------|----------------|---------------------------|-------------------------------------------------------------|
| 104             | Ireland | 2010           | Sunflowerseed Oil         | 9                                                           |
| 104             | Ireland | 2010           | Sweeteners, Other         | 27                                                          |
| 104             | Ireland | 2010           | Tea                       | 6                                                           |
| 104             | Ireland | 2010           | Tomatoes                  | 41                                                          |
| 104             | Ireland | 2010           | Vegetables, Other         | 186                                                         |
| 104             | Ireland | 2010           | Wheat                     | 314                                                         |
| 104             | Ireland | 2010           | Wine                      | 41                                                          |
| 104             | Ireland | 2011           | Apples                    | 17                                                          |
| 104             | Ireland | 2011           | Bananas                   | 43                                                          |
| 104             | Ireland | 2011           | Barley                    | 1                                                           |
| 104             | Ireland | 2011           | Beans                     | 4                                                           |
| 104             | Ireland | 2011           | Beer                      | 391                                                         |
| 104             | Ireland | 2011           | Beverages, Alcoholic      | 24                                                          |
| 104             | Ireland | 2011           | Beverages, Fermented      | 1                                                           |
| 104             | Ireland | 2011           | Bovine Meat               | 63                                                          |
| 104             | Ireland | 2011           | Butter, Ghee              | 8                                                           |
| 104             | Ireland | 2011           | Cereals, Other            | 1                                                           |
| 104             | Ireland | 2011           | Cheese                    | 44                                                          |
| 104             | Ireland | 2011           | Citrus, Other             | 29                                                          |
| 104             | Ireland | 2011           | Cocoa Beans               | 3                                                           |
| 104             | Ireland | 2011           | Coconut Oil               | 10                                                          |
| 104             | Ireland | 2011           | Coconuts - Incl Copra     | 1                                                           |
| 104             | Ireland | 2011           | Coffee                    | 8                                                           |
| 104             | Ireland | 2011           | Cream                     | 16                                                          |
| 104             | Ireland | 2011           | Crustaceans               | 8                                                           |
| 104             | Ireland | 2011           | Demersal Fish             | 29                                                          |
| 104             | Ireland | 2011           | Eggs                      | 25                                                          |
| 104             | Ireland | 2011           | Fats, Animals, Raw        | 9                                                           |
| 104             | Ireland | 2011           | Freshwater Fish           | 3                                                           |
| 104             | Ireland | 2011           | Fruits, Other             | 48                                                          |
| 104             | Ireland | 2011           | Grapefruit                | 1                                                           |
| 104             | Ireland | 2011           | Grapes                    | 21                                                          |
| 104             | Ireland | 2011           | Groundnuts (Shelled Eq)   | 4                                                           |
| 104             | Ireland | 2011           | Honey                     | 1                                                           |
| 104             | Ireland | 2011           | Lemons, Limes             | 6                                                           |
| 104             | Ireland | 2011           | Maize                     | 26                                                          |
| 104             | Ireland | 2011           | Meat, Other               | 2                                                           |
| 104             | Ireland | 2011           | Milk, Whole               | 227                                                         |
| 104             | Ireland | 2011           | Molluscs, Other           | 4                                                           |
| 104             | Ireland | 2011           | Mutton & Goat Meat        | 8                                                           |
| 104             | Ireland | 2011           | Nuts                      | 6                                                           |
| 104             | Ireland | 2011           | Oats                      | 12                                                          |
| 104             | Ireland | 2011           | Offals, Edible            | 16                                                          |
| 104             | Ireland | 2011           | Olive Oil                 | 3                                                           |
| 104             | Ireland | 2011           | Olives                    | 3                                                           |
| 104             | Ireland | 2011           | Onions                    | 26                                                          |
| 104             | Ireland | 2011           | Oranges, Mandarines       | 186                                                         |
| 104             | Ireland | 2011           | Peas                      | 3                                                           |
| 104             | Ireland | 2011           | Pelagic Fish              | 16                                                          |
| 104             | Ireland | 2011           | Pigmeat                   | 89                                                          |
| 104             | Ireland | 2011           | Pineapples                | 5                                                           |
| 104             | Ireland | 2011           | Plantains                 | 5                                                           |
| 104             | Ireland | 2011           | Potatoes                  | 247                                                         |
| 104             | Ireland | 2011           | Poultry Meat              | 59                                                          |
| 104             | Ireland | 2011           | Rape and Mustard Oil      | 14                                                          |
| 104             | Ireland | 2011           | Rice (Milled Equivalent)  | 11                                                          |
| 104             | Ireland | 2011           | Rye                       | 2                                                           |
| 104             | Ireland | 2011           | Soyabean Oil              | 8                                                           |
| 104             | Ireland | 2011           | Soyabbeans                | 1                                                           |
| 104             | Ireland | 2011           | Spices, Other             | 1                                                           |
| 104             | Ireland | 2011           | Sugar, Refined Equivalent | 72                                                          |
| 104             | Ireland | 2011           | Sunflowerseed Oil         | 9                                                           |
| 104             | Ireland | 2011           | Sweeteners, Other         | 55                                                          |
| 104             | Ireland | 2011           | Tea                       | 5                                                           |
| 104             | Ireland | 2011           | Tomatoes                  | 39                                                          |
| 104             | Ireland | 2011           | Vegetables, Other         | 196                                                         |
| 104             | Ireland | 2011           | Wheat                     | 304                                                         |
| 104             | Ireland | 2011           | Wine                      | 42                                                          |
| 105             | Israel  | 1992           | Apples                    | 27                                                          |
| 105             | Israel  | 1992           | Bananas                   | 36                                                          |
| 105             | Israel  | 1992           | Barley                    | 1                                                           |
| 105             | Israel  | 1992           | Beans                     | 3                                                           |
| 105             | Israel  | 1992           | Beer                      | 32                                                          |
| 105             | Israel  | 1992           | Beverages, Alcoholic      | 2                                                           |
| 105             | Israel  | 1992           | Beverages, Fermented      | 1                                                           |
| 105             | Israel  | 1992           | Bovine Meat               | 40                                                          |
| 105             | Israel  | 1992           | Butter, Ghee              | 2                                                           |
| 105             | Israel  | 1992           | Cheese                    | 46                                                          |
| 105             | Israel  | 1992           | Cocoa Beans               | 6                                                           |
| 105             | Israel  | 1992           | Coconut Oil               | 1                                                           |
| 105             | Israel  | 1992           | Coconuts - Incl Copra     | 6                                                           |
| 105             | Israel  | 1992           | Coffee                    | 12                                                          |
| 105             | Israel  | 1992           | Cottonseed Oil            | 4                                                           |
| 105             | Israel  | 1992           | Dates                     | 4                                                           |
| 105             | Israel  | 1992           | Demersal Fish             | 41                                                          |
| 105             | Israel  | 1992           | Eggs                      | 50                                                          |
| 105             | Israel  | 1992           | Fats, Animals, Raw        | 1                                                           |
| 105             | Israel  | 1992           | Freshwater Fish           | 8                                                           |
| 105             | Israel  | 1992           | Fruits, Other             | 105                                                         |
| 105             | Israel  | 1992           | Grapefruit                | 85                                                          |
| 105             | Israel  | 1992           | Grapes                    | 36                                                          |
| 105             | Israel  | 1992           | Groundnuts (Shelled Eq)   | 6                                                           |
| 105             | Israel  | 1992           | Honey                     | 1                                                           |
| 105             | Israel  | 1992           | Lemons, Limes             | 17                                                          |
| 105             | Israel  | 1992           | Maize                     | 76                                                          |
| 105             | Israel  | 1992           | Maize Germ Oil            | 4                                                           |
| 105             | Israel  | 1992           | Milk, Whole               | 225                                                         |

Dietary calcium and zinc deficiency risks are decreasing but remain prevalent

| FAO countrycode | Country | Reference year | Food item                 | Gross food supply (g capita <sup>-1</sup> d <sup>-1</sup> ) |
|-----------------|---------|----------------|---------------------------|-------------------------------------------------------------|
| 105             | Israel  | 1992           | Mutton & Goat Meat        | 3                                                           |
| 105             | Israel  | 1992           | Nuts                      | 10                                                          |
| 105             | Israel  | 1992           | Oats                      | 2                                                           |
| 105             | Israel  | 1992           | Offals, Edible            | 13                                                          |
| 105             | Israel  | 1992           | Oilcrops Oil, Other       | 3                                                           |
| 105             | Israel  | 1992           | Oilcrops, Other           | 2                                                           |
| 105             | Israel  | 1992           | Olive Oil                 | 1                                                           |
| 105             | Israel  | 1992           | Olives                    | 23                                                          |
| 105             | Israel  | 1992           | Onions                    | 38                                                          |
| 105             | Israel  | 1992           | Oranges, Mandarines       | 133                                                         |
| 105             | Israel  | 1992           | Palm Oil                  | 3                                                           |
| 105             | Israel  | 1992           | Palmkernel Oil            | 1                                                           |
| 105             | Israel  | 1992           | Peas                      | 1                                                           |
| 105             | Israel  | 1992           | Pelagic Fish              | 15                                                          |
| 105             | Israel  | 1992           | Pepper                    | 1                                                           |
| 105             | Israel  | 1992           | Pigmeat                   | 5                                                           |
| 105             | Israel  | 1992           | Pineapples                | 5                                                           |
| 105             | Israel  | 1992           | Potatoes                  | 93                                                          |
| 105             | Israel  | 1992           | Poultry Meat              | 119                                                         |
| 105             | Israel  | 1992           | Pulses, Other             | 11                                                          |
| 105             | Israel  | 1992           | Rape and Mustard Oil      | 5                                                           |
| 105             | Israel  | 1992           | Rice (Milled Equivalent)  | 20                                                          |
| 105             | Israel  | 1992           | Sesameseed                | 7                                                           |
| 105             | Israel  | 1992           | Soyabean Oil              | 32                                                          |
| 105             | Israel  | 1992           | Spices, Other             | 1                                                           |
| 105             | Israel  | 1992           | Sugar, Refined Equivalent | 106                                                         |
| 105             | Israel  | 1992           | Sunflowerseed             | 8                                                           |
| 105             | Israel  | 1992           | Sunflowerseed Oil         | 5                                                           |
| 105             | Israel  | 1992           | Sweet Potatoes            | 1                                                           |
| 105             | Israel  | 1992           | Sweeteners, Other         | 2                                                           |
| 105             | Israel  | 1992           | Tea                       | 2                                                           |
| 105             | Israel  | 1992           | Tomatoes                  | 142                                                         |
| 105             | Israel  | 1992           | Vegetables, Other         | 327                                                         |
| 105             | Israel  | 1992           | Wheat                     | 332                                                         |
| 105             | Israel  | 1992           | Wine                      | 6                                                           |
| 105             | Israel  | 1993           | Apples                    | 23                                                          |
| 105             | Israel  | 1993           | Bananas                   | 21                                                          |
| 105             | Israel  | 1993           | Barley                    | 1                                                           |
| 105             | Israel  | 1993           | Beans                     | 3                                                           |
| 105             | Israel  | 1993           | Beer                      | 38                                                          |
| 105             | Israel  | 1993           | Beverages, Alcoholic      | 3                                                           |
| 105             | Israel  | 1993           | Beverages, Fermented      | 1                                                           |
| 105             | Israel  | 1993           | Bovine Meat               | 42                                                          |
| 105             | Israel  | 1993           | Butter, Ghee              | 2                                                           |
| 105             | Israel  | 1993           | Cheese                    | 46                                                          |
| 105             | Israel  | 1993           | Citrus, Other             | 8                                                           |
| 105             | Israel  | 1993           | Cocoa Beans               | 7                                                           |
| 105             | Israel  | 1993           | Coconut Oil               | 1                                                           |
| 105             | Israel  | 1993           | Coconuts - Incl Copra     | 5                                                           |
| 105             | Israel  | 1993           | Coffee                    | 12                                                          |
| 105             | Israel  | 1993           | Cottonseed Oil            | 4                                                           |
| 105             | Israel  | 1993           | Dates                     | 4                                                           |
| 105             | Israel  | 1993           | Demersal Fish             | 42                                                          |
| 105             | Israel  | 1993           | Eggs                      | 42                                                          |
| 105             | Israel  | 1993           | Fats, Animals, Raw        | 1                                                           |
| 105             | Israel  | 1993           | Freshwater Fish           | 8                                                           |
| 105             | Israel  | 1993           | Fruits, Other             | 118                                                         |
| 105             | Israel  | 1993           | Grapefruit                | 114                                                         |
| 105             | Israel  | 1993           | Grapes                    | 30                                                          |
| 105             | Israel  | 1993           | Groundnuts (Shelled Eq)   | 6                                                           |
| 105             | Israel  | 1993           | Honey                     | 1                                                           |
| 105             | Israel  | 1993           | Lemons, Limes             | 12                                                          |
| 105             | Israel  | 1993           | Maize                     | 81                                                          |
| 105             | Israel  | 1993           | Maize Germ Oil            | 3                                                           |
| 105             | Israel  | 1993           | Milk, Whole               | 175                                                         |
| 105             | Israel  | 1993           | Mutton & Goat Meat        | 4                                                           |
| 105             | Israel  | 1993           | Nuts                      | 10                                                          |
| 105             | Israel  | 1993           | Oats                      | 2                                                           |
| 105             | Israel  | 1993           | Offals, Edible            | 12                                                          |
| 105             | Israel  | 1993           | Oilcrops Oil, Other       | 5                                                           |
| 105             | Israel  | 1993           | Oilcrops, Other           | 1                                                           |
| 105             | Israel  | 1993           | Olives                    | 14                                                          |
| 105             | Israel  | 1993           | Onions                    | 40                                                          |
| 105             | Israel  | 1993           | Oranges, Mandarines       | 97                                                          |
| 105             | Israel  | 1993           | Palm Oil                  | 4                                                           |
| 105             | Israel  | 1993           | Peas                      | 1                                                           |
| 105             | Israel  | 1993           | Pelagic Fish              | 14                                                          |
| 105             | Israel  | 1993           | Pigmeat                   | 5                                                           |
| 105             | Israel  | 1993           | Pineapples                | 5                                                           |
| 105             | Israel  | 1993           | Potatoes                  | 92                                                          |
| 105             | Israel  | 1993           | Poultry Meat              | 124                                                         |
| 105             | Israel  | 1993           | Pulses, Other             | 13                                                          |
| 105             | Israel  | 1993           | Rape and Mustard Oil      | 5                                                           |
| 105             | Israel  | 1993           | Rice (Milled Equivalent)  | 22                                                          |
| 105             | Israel  | 1993           | Sesameseed                | 7                                                           |
| 105             | Israel  | 1993           | Soyabean Oil              | 31                                                          |
| 105             | Israel  | 1993           | Spices, Other             | 1                                                           |
| 105             | Israel  | 1993           | Sugar, Refined Equivalent | 105                                                         |
| 105             | Israel  | 1993           | Sunflowerseed             | 3                                                           |
| 105             | Israel  | 1993           | Sunflowerseed Oil         | 2                                                           |
| 105             | Israel  | 1993           | Sweet Potatoes            | 1                                                           |
| 105             | Israel  | 1993           | Sweeteners, Other         | 2                                                           |
| 105             | Israel  | 1993           | Tea                       | 1                                                           |
| 105             | Israel  | 1993           | Tomatoes                  | 158                                                         |
| 105             | Israel  | 1993           | Vegetables, Other         | 345                                                         |
| 105             | Israel  | 1993           | Wheat                     | 323                                                         |
| 105             | Israel  | 1993           | Wine                      | 6                                                           |



Dietary calcium and zinc deficiency risks are decreasing but remain prevalent

| FAO countrycode | Country | Reference year | Food item                 | Gross food supply (g capita <sup>-1</sup> d <sup>-1</sup> ) |
|-----------------|---------|----------------|---------------------------|-------------------------------------------------------------|
| 105             | Israel  | 1994           | Apples                    | 19                                                          |
| 105             | Israel  | 1994           | Bananas                   | 43                                                          |
| 105             | Israel  | 1994           | Barley                    | 2                                                           |
| 105             | Israel  | 1994           | Beans                     | 4                                                           |
| 105             | Israel  | 1994           | Beer                      | 33                                                          |
| 105             | Israel  | 1994           | Beverages, Alcoholic      | 2                                                           |
| 105             | Israel  | 1994           | Beverages, Fermented      | 1                                                           |
| 105             | Israel  | 1994           | Bovine Meat               | 54                                                          |
| 105             | Israel  | 1994           | Butter, Ghee              | 2                                                           |
| 105             | Israel  | 1994           | Cheese                    | 47                                                          |
| 105             | Israel  | 1994           | Citrus, Other             | 7                                                           |
| 105             | Israel  | 1994           | Cocoa Beans               | 6                                                           |
| 105             | Israel  | 1994           | Coconut Oil               | 1                                                           |
| 105             | Israel  | 1994           | Coconuts - Incl Copra     | 4                                                           |
| 105             | Israel  | 1994           | Coffee                    | 13                                                          |
| 105             | Israel  | 1994           | Cottonseed Oil            | 3                                                           |
| 105             | Israel  | 1994           | Dates                     | 4                                                           |
| 105             | Israel  | 1994           | Demersal Fish             | 39                                                          |
| 105             | Israel  | 1994           | Eggs                      | 42                                                          |
| 105             | Israel  | 1994           | Fats, Animals, Raw        | 1                                                           |
| 105             | Israel  | 1994           | Freshwater Fish           | 8                                                           |
| 105             | Israel  | 1994           | Fruits, Other             | 81                                                          |
| 105             | Israel  | 1994           | Grapefruit                | 72                                                          |
| 105             | Israel  | 1994           | Grapes                    | 32                                                          |
| 105             | Israel  | 1994           | Groundnuts (Shelled Eq)   | 5                                                           |
| 105             | Israel  | 1994           | Honey                     | 1                                                           |
| 105             | Israel  | 1994           | Lemons, Limes             | 12                                                          |
| 105             | Israel  | 1994           | Maize                     | 65                                                          |
| 105             | Israel  | 1994           | Maize Germ Oil            | 5                                                           |
| 105             | Israel  | 1994           | Milk, Whole               | 257                                                         |
| 105             | Israel  | 1994           | Mutton & Goat Meat        | 4                                                           |
| 105             | Israel  | 1994           | Nuts                      | 10                                                          |
| 105             | Israel  | 1994           | Oats                      | 2                                                           |
| 105             | Israel  | 1994           | Offals, Edible            | 14                                                          |
| 105             | Israel  | 1994           | Oilcrops Oil, Other       | 5                                                           |
| 105             | Israel  | 1994           | Oilcrops, Other           | 1                                                           |
| 105             | Israel  | 1994           | Olive Oil                 | 1                                                           |
| 105             | Israel  | 1994           | Olives                    | 13                                                          |
| 105             | Israel  | 1994           | Onions                    | 35                                                          |
| 105             | Israel  | 1994           | Oranges, Mandarines       | 75                                                          |
| 105             | Israel  | 1994           | Palm Oil                  | 3                                                           |
| 105             | Israel  | 1994           | Peas                      | 1                                                           |
| 105             | Israel  | 1994           | Pelagic Fish              | 12                                                          |
| 105             | Israel  | 1994           | Pigmeat                   | 5                                                           |
| 105             | Israel  | 1994           | Pineapples                | 3                                                           |
| 105             | Israel  | 1994           | Potatoes                  | 112                                                         |
| 105             | Israel  | 1994           | Poultry Meat              | 132                                                         |
| 105             | Israel  | 1994           | Pulses, Other             | 11                                                          |
| 105             | Israel  | 1994           | Rape and Mustard Oil      | 5                                                           |
| 105             | Israel  | 1994           | Rice (Milled Equivalent)  | 28                                                          |
| 105             | Israel  | 1994           | Sesameseed                | 7                                                           |
| 105             | Israel  | 1994           | Soyabean Oil              | 25                                                          |
| 105             | Israel  | 1994           | Spices, Other             | 1                                                           |
| 105             | Israel  | 1994           | Sugar, Refined Equivalent | 109                                                         |
| 105             | Israel  | 1994           | Sunflowerseed             | 1                                                           |
| 105             | Israel  | 1994           | Sunflowerseed Oil         | 3                                                           |
| 105             | Israel  | 1994           | Sweet Potatoes            | 1                                                           |
| 105             | Israel  | 1994           | Sweeteners, Other         | 1                                                           |
| 105             | Israel  | 1994           | Tea                       | 2                                                           |
| 105             | Israel  | 1994           | Tomatoes                  | 166                                                         |
| 105             | Israel  | 1994           | Vegetables, Other         | 418                                                         |
| 105             | Israel  | 1994           | Wheat                     | 327                                                         |
| 105             | Israel  | 1994           | Wine                      | 5                                                           |
| 105             | Israel  | 1995           | Apples                    | 24                                                          |
| 105             | Israel  | 1995           | Bananas                   | 47                                                          |
| 105             | Israel  | 1995           | Barley                    | 3                                                           |
| 105             | Israel  | 1995           | Beans                     | 7                                                           |
| 105             | Israel  | 1995           | Beer                      | 35                                                          |
| 105             | Israel  | 1995           | Beverages, Alcoholic      | 1                                                           |
| 105             | Israel  | 1995           | Beverages, Fermented      | 1                                                           |
| 105             | Israel  | 1995           | Bovine Meat               | 47                                                          |
| 105             | Israel  | 1995           | Butter, Ghee              | 3                                                           |
| 105             | Israel  | 1995           | Cheese                    | 47                                                          |
| 105             | Israel  | 1995           | Citrus, Other             | 1                                                           |
| 105             | Israel  | 1995           | Cocoa Beans               | 6                                                           |
| 105             | Israel  | 1995           | Coconuts - Incl Copra     | 4                                                           |
| 105             | Israel  | 1995           | Coffee                    | 18                                                          |
| 105             | Israel  | 1995           | Cottonseed Oil            | 4                                                           |
| 105             | Israel  | 1995           | Dates                     | 4                                                           |
| 105             | Israel  | 1995           | Demersal Fish             | 44                                                          |
| 105             | Israel  | 1995           | Eggs                      | 36                                                          |
| 105             | Israel  | 1995           | Fats, Animals, Raw        | 4                                                           |
| 105             | Israel  | 1995           | Freshwater Fish           | 8                                                           |
| 105             | Israel  | 1995           | Fruits, Other             | 106                                                         |
| 105             | Israel  | 1995           | Grapefruit                | 74                                                          |
| 105             | Israel  | 1995           | Grapes                    | 34                                                          |
| 105             | Israel  | 1995           | Groundnuts (Shelled Eq)   | 6                                                           |
| 105             | Israel  | 1995           | Honey                     | 1                                                           |
| 105             | Israel  | 1995           | Lemons, Limes             | 12                                                          |
| 105             | Israel  | 1995           | Maize                     | 56                                                          |
| 105             | Israel  | 1995           | Maize Germ Oil            | 5                                                           |
| 105             | Israel  | 1995           | Marine Fish, Other        | 1                                                           |
| 105             | Israel  | 1995           | Milk, Whole               | 201                                                         |
| 105             | Israel  | 1995           | Mutton & Goat Meat        | 4                                                           |
| 105             | Israel  | 1995           | Nuts                      | 12                                                          |
| 105             | Israel  | 1995           | Oats                      | 3                                                           |
| 105             | Israel  | 1995           | Offals, Edible            | 14                                                          |

Dietary calcium and zinc deficiency risks are decreasing but remain prevalent

| FAO countrycode | Country | Reference year | Food item                 | Gross food supply (g capita <sup>-1</sup> d <sup>-1</sup> ) |
|-----------------|---------|----------------|---------------------------|-------------------------------------------------------------|
| 105             | Israel  | 1995           | Oilcrops Oil, Other       | 6                                                           |
| 105             | Israel  | 1995           | Oilcrops, Other           | 1                                                           |
| 105             | Israel  | 1995           | Olive Oil                 | 1                                                           |
| 105             | Israel  | 1995           | Olives                    | 12                                                          |
| 105             | Israel  | 1995           | Onions                    | 49                                                          |
| 105             | Israel  | 1995           | Oranges, Mandarines       | 46                                                          |
| 105             | Israel  | 1995           | Palm Oil                  | 3                                                           |
| 105             | Israel  | 1995           | Peas                      | 1                                                           |
| 105             | Israel  | 1995           | Pelagic Fish              | 13                                                          |
| 105             | Israel  | 1995           | Pigmeat                   | 5                                                           |
| 105             | Israel  | 1995           | Pineapples                | 4                                                           |
| 105             | Israel  | 1995           | Potatoes                  | 115                                                         |
| 105             | Israel  | 1995           | Poultry Meat              | 127                                                         |
| 105             | Israel  | 1995           | Pulses, Other             | 11                                                          |
| 105             | Israel  | 1995           | Rape and Mustard Oil      | 5                                                           |
| 105             | Israel  | 1995           | Rice (Milled Equivalent)  | 30                                                          |
| 105             | Israel  | 1995           | Sesameseed                | 7                                                           |
| 105             | Israel  | 1995           | Soyabean Oil              | 29                                                          |
| 105             | Israel  | 1995           | Sugar, Refined Equivalent | 112                                                         |
| 105             | Israel  | 1995           | Sunflowerseed Oil         | 9                                                           |
| 105             | Israel  | 1995           | Sweet Potatoes            | 1                                                           |
| 105             | Israel  | 1995           | Sweeteners, Other         | 1                                                           |
| 105             | Israel  | 1995           | Tea                       | 1                                                           |
| 105             | Israel  | 1995           | Tomatoes                  | 173                                                         |
| 105             | Israel  | 1995           | Vegetables, Other         | 467                                                         |
| 105             | Israel  | 1995           | Wheat                     | 321                                                         |
| 105             | Israel  | 1995           | Wine                      | 5                                                           |
| 105             | Israel  | 1996           | Apples                    | 24                                                          |
| 105             | Israel  | 1996           | Bananas                   | 44                                                          |
| 105             | Israel  | 1996           | Barley                    | 1                                                           |
| 105             | Israel  | 1996           | Beans                     | 5                                                           |
| 105             | Israel  | 1996           | Beer                      | 35                                                          |
| 105             | Israel  | 1996           | Beverages, Alcoholic      | 2                                                           |
| 105             | Israel  | 1996           | Beverages, Fermented      | 1                                                           |
| 105             | Israel  | 1996           | Bovine Meat               | 52                                                          |
| 105             | Israel  | 1996           | Butter, Ghee              | 2                                                           |
| 105             | Israel  | 1996           | Cheese                    | 46                                                          |
| 105             | Israel  | 1996           | Citrus, Other             | 10                                                          |
| 105             | Israel  | 1996           | Cocoa Beans               | 8                                                           |
| 105             | Israel  | 1996           | Coconuts - Incl Copra     | 4                                                           |
| 105             | Israel  | 1996           | Coffee                    | 13                                                          |
| 105             | Israel  | 1996           | Cottonseed Oil            | 3                                                           |
| 105             | Israel  | 1996           | Dates                     | 5                                                           |
| 105             | Israel  | 1996           | Demersal Fish             | 41                                                          |
| 105             | Israel  | 1996           | Eggs                      | 35                                                          |
| 105             | Israel  | 1996           | Fats, Animals, Raw        | 2                                                           |
| 105             | Israel  | 1996           | Freshwater Fish           | 9                                                           |
| 105             | Israel  | 1996           | Fruits, Other             | 108                                                         |
| 105             | Israel  | 1996           | Grapefruit                | 84                                                          |
| 105             | Israel  | 1996           | Grapes                    | 36                                                          |
| 105             | Israel  | 1996           | Groundnuts (Shelled Eq)   | 5                                                           |
| 105             | Israel  | 1996           | Honey                     | 1                                                           |
| 105             | Israel  | 1996           | Lemons, Limes             | 10                                                          |
| 105             | Israel  | 1996           | Maize                     | 53                                                          |
| 105             | Israel  | 1996           | Maize Germ Oil            | 5                                                           |
| 105             | Israel  | 1996           | Marine Fish, Other        | 1                                                           |
| 105             | Israel  | 1996           | Milk, Whole               | 211                                                         |
| 105             | Israel  | 1996           | Molluscs, Other           | 1                                                           |
| 105             | Israel  | 1996           | Mutton & Goat Meat        | 4                                                           |
| 105             | Israel  | 1996           | Nuts                      | 15                                                          |
| 105             | Israel  | 1996           | Oats                      | 4                                                           |
| 105             | Israel  | 1996           | Offals, Edible            | 14                                                          |
| 105             | Israel  | 1996           | Oilcrops Oil, Other       | 7                                                           |
| 105             | Israel  | 1996           | Oilcrops, Other           | 1                                                           |
| 105             | Israel  | 1996           | Olives                    | 14                                                          |
| 105             | Israel  | 1996           | Onions                    | 45                                                          |
| 105             | Israel  | 1996           | Oranges, Mandarines       | 62                                                          |
| 105             | Israel  | 1996           | Palm Oil                  | 3                                                           |
| 105             | Israel  | 1996           | Peas                      | 1                                                           |
| 105             | Israel  | 1996           | Pelagic Fish              | 10                                                          |
| 105             | Israel  | 1996           | Pigmeat                   | 5                                                           |
| 105             | Israel  | 1996           | Pineapples                | 14                                                          |
| 105             | Israel  | 1996           | Potatoes                  | 109                                                         |
| 105             | Israel  | 1996           | Poultry Meat              | 127                                                         |
| 105             | Israel  | 1996           | Pulses, Other             | 17                                                          |
| 105             | Israel  | 1996           | Rape and Mustard Oil      | 5                                                           |
| 105             | Israel  | 1996           | Rice (Milled Equivalent)  | 32                                                          |
| 105             | Israel  | 1996           | Sesameseed                | 7                                                           |
| 105             | Israel  | 1996           | Soyabean Oil              | 34                                                          |
| 105             | Israel  | 1996           | Spices, Other             | 1                                                           |
| 105             | Israel  | 1996           | Sugar, Refined Equivalent | 124                                                         |
| 105             | Israel  | 1996           | Sunflowerseed Oil         | 6                                                           |
| 105             | Israel  | 1996           | Sweet Potatoes            | 1                                                           |
| 105             | Israel  | 1996           | Sweeteners, Other         | 1                                                           |
| 105             | Israel  | 1996           | Tea                       | 1                                                           |
| 105             | Israel  | 1996           | Tomatoes                  | 175                                                         |
| 105             | Israel  | 1996           | Vegetables, Other         | 407                                                         |
| 105             | Israel  | 1996           | Wheat                     | 304                                                         |
| 105             | Israel  | 1996           | Wine                      | 3                                                           |
| 105             | Israel  | 1997           | Apples                    | 50                                                          |
| 105             | Israel  | 1997           | Bananas                   | 50                                                          |
| 105             | Israel  | 1997           | Barley                    | 1                                                           |
| 105             | Israel  | 1997           | Beans                     | 5                                                           |
| 105             | Israel  | 1997           | Beer                      | 37                                                          |
| 105             | Israel  | 1997           | Beverages, Alcoholic      | 4                                                           |
| 105             | Israel  | 1997           | Beverages, Fermented      | 1                                                           |
| 105             | Israel  | 1997           | Bovine Meat               | 55                                                          |

Dietary calcium and zinc deficiency risks are decreasing but remain prevalent

| FAO countrycode | Country | Reference year | Food item                 | Gross food supply (g capita <sup>-1</sup> d <sup>-1</sup> ) |
|-----------------|---------|----------------|---------------------------|-------------------------------------------------------------|
| 105             | Israel  | 1997           | Butter, Ghee              | 2                                                           |
| 105             | Israel  | 1997           | Cheese                    | 46                                                          |
| 105             | Israel  | 1997           | Citrus, Other             | 4                                                           |
| 105             | Israel  | 1997           | Cocoa Beans               | 7                                                           |
| 105             | Israel  | 1997           | Coconuts - Incl Copra     | 4                                                           |
| 105             | Israel  | 1997           | Coffee                    | 11                                                          |
| 105             | Israel  | 1997           | Cottonseed Oil            | 3                                                           |
| 105             | Israel  | 1997           | Dates                     | 4                                                           |
| 105             | Israel  | 1997           | Demersal Fish             | 45                                                          |
| 105             | Israel  | 1997           | Eggs                      | 32                                                          |
| 105             | Israel  | 1997           | Fats, Animals, Raw        | 1                                                           |
| 105             | Israel  | 1997           | Freshwater Fish           | 9                                                           |
| 105             | Israel  | 1997           | Fruits, Other             | 104                                                         |
| 105             | Israel  | 1997           | Grapefruit                | 75                                                          |
| 105             | Israel  | 1997           | Grapes                    | 39                                                          |
| 105             | Israel  | 1997           | Groundnuts (Shelled Eq)   | 6                                                           |
| 105             | Israel  | 1997           | Honey                     | 1                                                           |
| 105             | Israel  | 1997           | Lemons, Limes             | 8                                                           |
| 105             | Israel  | 1997           | Maize                     | 49                                                          |
| 105             | Israel  | 1997           | Maize Germ Oil            | 5                                                           |
| 105             | Israel  | 1997           | Marine Fish, Other        | 1                                                           |
| 105             | Israel  | 1997           | Milk, Whole               | 202                                                         |
| 105             | Israel  | 1997           | Mutton & Goat Meat        | 3                                                           |
| 105             | Israel  | 1997           | Nuts                      | 13                                                          |
| 105             | Israel  | 1997           | Oats                      | 4                                                           |
| 105             | Israel  | 1997           | Offals, Edible            | 14                                                          |
| 105             | Israel  | 1997           | Oilcrops Oil, Other       | 7                                                           |
| 105             | Israel  | 1997           | Oilcrops, Other           | 1                                                           |
| 105             | Israel  | 1997           | Olives                    | 6                                                           |
| 105             | Israel  | 1997           | Onions                    | 35                                                          |
| 105             | Israel  | 1997           | Oranges, Mandarines       | 85                                                          |
| 105             | Israel  | 1997           | Palm Oil                  | 3                                                           |
| 105             | Israel  | 1997           | Peas                      | 2                                                           |
| 105             | Israel  | 1997           | Pelagic Fish              | 11                                                          |
| 105             | Israel  | 1997           | Pigmeat                   | 6                                                           |
| 105             | Israel  | 1997           | Pineapples                | 10                                                          |
| 105             | Israel  | 1997           | Potatoes                  | 113                                                         |
| 105             | Israel  | 1997           | Poultry Meat              | 126                                                         |
| 105             | Israel  | 1997           | Pulses, Other             | 14                                                          |
| 105             | Israel  | 1997           | Rape and Mustard Oil      | 5                                                           |
| 105             | Israel  | 1997           | Rice (Milled Equivalent)  | 30                                                          |
| 105             | Israel  | 1997           | Sesameseed                | 6                                                           |
| 105             | Israel  | 1997           | Soyabean Oil              | 33                                                          |
| 105             | Israel  | 1997           | Sugar, Refined Equivalent | 127                                                         |
| 105             | Israel  | 1997           | Sunflowerseed Oil         | 7                                                           |
| 105             | Israel  | 1997           | Sweet Potatoes            | 1                                                           |
| 105             | Israel  | 1997           | Sweeteners, Other         | 1                                                           |
| 105             | Israel  | 1997           | Tea                       | 1                                                           |
| 105             | Israel  | 1997           | Tomatoes                  | 137                                                         |
| 105             | Israel  | 1997           | Vegetables, Other         | 432                                                         |
| 105             | Israel  | 1997           | Wheat                     | 308                                                         |
| 105             | Israel  | 1997           | Wine                      | 4                                                           |
| 105             | Israel  | 1998           | Apples                    | 43                                                          |
| 105             | Israel  | 1998           | Bananas                   | 47                                                          |
| 105             | Israel  | 1998           | Barley                    | 1                                                           |
| 105             | Israel  | 1998           | Beans                     | 4                                                           |
| 105             | Israel  | 1998           | Beer                      | 36                                                          |
| 105             | Israel  | 1998           | Beverages, Alcoholic      | 4                                                           |
| 105             | Israel  | 1998           | Beverages, Fermented      | 1                                                           |
| 105             | Israel  | 1998           | Bovine Meat               | 52                                                          |
| 105             | Israel  | 1998           | Butter, Ghee              | 2                                                           |
| 105             | Israel  | 1998           | Cheese                    | 45                                                          |
| 105             | Israel  | 1998           | Citrus, Other             | 10                                                          |
| 105             | Israel  | 1998           | Cocoa Beans               | 10                                                          |
| 105             | Israel  | 1998           | Coconuts - Incl Copra     | 2                                                           |
| 105             | Israel  | 1998           | Coffee                    | 14                                                          |
| 105             | Israel  | 1998           | Cottonseed Oil            | 3                                                           |
| 105             | Israel  | 1998           | Dates                     | 3                                                           |
| 105             | Israel  | 1998           | Demersal Fish             | 44                                                          |
| 105             | Israel  | 1998           | Eggs                      | 31                                                          |
| 105             | Israel  | 1998           | Fats, Animals, Raw        | 4                                                           |
| 105             | Israel  | 1998           | Freshwater Fish           | 10                                                          |
| 105             | Israel  | 1998           | Fruits, Other             | 102                                                         |
| 105             | Israel  | 1998           | Grapefruit                | 32                                                          |
| 105             | Israel  | 1998           | Grapes                    | 34                                                          |
| 105             | Israel  | 1998           | Groundnuts (Shelled Eq)   | 7                                                           |
| 105             | Israel  | 1998           | Honey                     | 1                                                           |
| 105             | Israel  | 1998           | Lemons, Limes             | 9                                                           |
| 105             | Israel  | 1998           | Maize                     | 51                                                          |
| 105             | Israel  | 1998           | Maize Germ Oil            | 6                                                           |
| 105             | Israel  | 1998           | Marine Fish, Other        | 1                                                           |
| 105             | Israel  | 1998           | Milk, Whole               | 206                                                         |
| 105             | Israel  | 1998           | Mutton & Goat Meat        | 4                                                           |
| 105             | Israel  | 1998           | Nuts                      | 12                                                          |
| 105             | Israel  | 1998           | Oats                      | 4                                                           |
| 105             | Israel  | 1998           | Offals, Edible            | 13                                                          |
| 105             | Israel  | 1998           | Oilcrops Oil, Other       | 4                                                           |
| 105             | Israel  | 1998           | Oilcrops, Other           | 1                                                           |
| 105             | Israel  | 1998           | Olive Oil                 | 3                                                           |
| 105             | Israel  | 1998           | Olives                    | 7                                                           |
| 105             | Israel  | 1998           | Onions                    | 38                                                          |
| 105             | Israel  | 1998           | Oranges, Mandarines       | 71                                                          |
| 105             | Israel  | 1998           | Palm Oil                  | 6                                                           |
| 105             | Israel  | 1998           | Peas                      | 1                                                           |
| 105             | Israel  | 1998           | Pelagic Fish              | 11                                                          |
| 105             | Israel  | 1998           | Pigmeat                   | 6                                                           |
| 105             | Israel  | 1998           | Pineapples                | 13                                                          |

Dietary calcium and zinc deficiency risks are decreasing but remain prevalent

| FAO countrycode | Country | Reference year | Food item                 | Gross food supply (g capita <sup>-1</sup> d <sup>-1</sup> ) |
|-----------------|---------|----------------|---------------------------|-------------------------------------------------------------|
| 105             | Israel  | 1998           | Potatoes                  | 119                                                         |
| 105             | Israel  | 1998           | Poultry Meat              | 125                                                         |
| 105             | Israel  | 1998           | Pulses, Other             | 15                                                          |
| 105             | Israel  | 1998           | Rape and Mustard Oil      | 6                                                           |
| 105             | Israel  | 1998           | Rice (Milled Equivalent)  | 29                                                          |
| 105             | Israel  | 1998           | Sesameseed                | 8                                                           |
| 105             | Israel  | 1998           | Soyabean Oil              | 25                                                          |
| 105             | Israel  | 1998           | Sugar, Refined Equivalent | 128                                                         |
| 105             | Israel  | 1998           | Sunflowerseed Oil         | 8                                                           |
| 105             | Israel  | 1998           | Sweet Potatoes            | 1                                                           |
| 105             | Israel  | 1998           | Sweeteners, Other         | 1                                                           |
| 105             | Israel  | 1998           | Tea                       | 1                                                           |
| 105             | Israel  | 1998           | Tomatoes                  | 165                                                         |
| 105             | Israel  | 1998           | Vegetables, Other         | 469                                                         |
| 105             | Israel  | 1998           | Wheat                     | 305                                                         |
| 105             | Israel  | 1998           | Wine                      | 4                                                           |
| 105             | Israel  | 1999           | Apples                    | 57                                                          |
| 105             | Israel  | 1999           | Bananas                   | 49                                                          |
| 105             | Israel  | 1999           | Barley                    | 1                                                           |
| 105             | Israel  | 1999           | Beans                     | 5                                                           |
| 105             | Israel  | 1999           | Beer                      | 35                                                          |
| 105             | Israel  | 1999           | Beverages, Alcoholic      | 4                                                           |
| 105             | Israel  | 1999           | Beverages, Fermented      | 1                                                           |
| 105             | Israel  | 1999           | Bovine Meat               | 52                                                          |
| 105             | Israel  | 1999           | Butter, Ghee              | 2                                                           |
| 105             | Israel  | 1999           | Cheese                    | 45                                                          |
| 105             | Israel  | 1999           | Citrus, Other             | 19                                                          |
| 105             | Israel  | 1999           | Cocoa Beans               | 10                                                          |
| 105             | Israel  | 1999           | Coconuts - Incl Copra     | 2                                                           |
| 105             | Israel  | 1999           | Coffee                    | 13                                                          |
| 105             | Israel  | 1999           | Cottonseed Oil            | 2                                                           |
| 105             | Israel  | 1999           | Dates                     | 4                                                           |
| 105             | Israel  | 1999           | Demersal Fish             | 32                                                          |
| 105             | Israel  | 1999           | Eggs                      | 33                                                          |
| 105             | Israel  | 1999           | Fats, Animals, Raw        | 1                                                           |
| 105             | Israel  | 1999           | Freshwater Fish           | 10                                                          |
| 105             | Israel  | 1999           | Fruits, Other             | 92                                                          |
| 105             | Israel  | 1999           | Grapefruit                | 43                                                          |
| 105             | Israel  | 1999           | Grapes                    | 34                                                          |
| 105             | Israel  | 1999           | Groundnuts (Shelled Eq)   | 5                                                           |
| 105             | Israel  | 1999           | Honey                     | 2                                                           |
| 105             | Israel  | 1999           | Lemons, Limes             | 9                                                           |
| 105             | Israel  | 1999           | Maize                     | 43                                                          |
| 105             | Israel  | 1999           | Maize Germ Oil            | 6                                                           |
| 105             | Israel  | 1999           | Marine Fish, Other        | 1                                                           |
| 105             | Israel  | 1999           | Milk, Whole               | 218                                                         |
| 105             | Israel  | 1999           | Mutton & Goat Meat        | 4                                                           |
| 105             | Israel  | 1999           | Nuts                      | 13                                                          |
| 105             | Israel  | 1999           | Oats                      | 4                                                           |
| 105             | Israel  | 1999           | Offals, Edible            | 14                                                          |
| 105             | Israel  | 1999           | Oilcrops Oil, Other       | 4                                                           |
| 105             | Israel  | 1999           | Oilcrops, Other           | 1                                                           |
| 105             | Israel  | 1999           | Olive Oil                 | 2                                                           |
| 105             | Israel  | 1999           | Olives                    | 6                                                           |
| 105             | Israel  | 1999           | Onions                    | 41                                                          |
| 105             | Israel  | 1999           | Oranges, Mandarines       | 61                                                          |
| 105             | Israel  | 1999           | Palm Oil                  | 8                                                           |
| 105             | Israel  | 1999           | Peas                      | 1                                                           |
| 105             | Israel  | 1999           | Pelagic Fish              | 14                                                          |
| 105             | Israel  | 1999           | Pepper                    | 1                                                           |
| 105             | Israel  | 1999           | Pig meat                  | 4                                                           |
| 105             | Israel  | 1999           | Pineapples                | 5                                                           |
| 105             | Israel  | 1999           | Potatoes                  | 126                                                         |
| 105             | Israel  | 1999           | Poultry Meat              | 128                                                         |
| 105             | Israel  | 1999           | Pulses, Other             | 15                                                          |
| 105             | Israel  | 1999           | Rape and Mustard Oil      | 7                                                           |
| 105             | Israel  | 1999           | Rice (Milled Equivalent)  | 29                                                          |
| 105             | Israel  | 1999           | Rye                       | 1                                                           |
| 105             | Israel  | 1999           | Sesameseed                | 8                                                           |
| 105             | Israel  | 1999           | Soyabean Oil              | 26                                                          |
| 105             | Israel  | 1999           | Sugar, Refined Equivalent | 129                                                         |
| 105             | Israel  | 1999           | Sunflowerseed Oil         | 9                                                           |
| 105             | Israel  | 1999           | Sweet Potatoes            | 1                                                           |
| 105             | Israel  | 1999           | Sweeteners, Other         | 2                                                           |
| 105             | Israel  | 1999           | Tea                       | 1                                                           |
| 105             | Israel  | 1999           | Tomatoes                  | 224                                                         |
| 105             | Israel  | 1999           | Vegetables, Other         | 453                                                         |
| 105             | Israel  | 1999           | Wheat                     | 308                                                         |
| 105             | Israel  | 1999           | Wine                      | 4                                                           |
| 105             | Israel  | 2000           | Apples                    | 46                                                          |
| 105             | Israel  | 2000           | Bananas                   | 36                                                          |
| 105             | Israel  | 2000           | Barley                    | 1                                                           |
| 105             | Israel  | 2000           | Beans                     | 4                                                           |
| 105             | Israel  | 2000           | Beer                      | 37                                                          |
| 105             | Israel  | 2000           | Beverages, Alcoholic      | 4                                                           |
| 105             | Israel  | 2000           | Beverages, Fermented      | 1                                                           |
| 105             | Israel  | 2000           | Bovine Meat               | 64                                                          |
| 105             | Israel  | 2000           | Butter, Ghee              | 2                                                           |
| 105             | Israel  | 2000           | Cheese                    | 46                                                          |
| 105             | Israel  | 2000           | Citrus, Other             | 21                                                          |
| 105             | Israel  | 2000           | Cocoa Beans               | 9                                                           |
| 105             | Israel  | 2000           | Coconuts - Incl Copra     | 3                                                           |
| 105             | Israel  | 2000           | Coffee                    | 10                                                          |
| 105             | Israel  | 2000           | Cottonseed Oil            | 2                                                           |
| 105             | Israel  | 2000           | Dates                     | 5                                                           |
| 105             | Israel  | 2000           | Demersal Fish             | 32                                                          |
| 105             | Israel  | 2000           | Eggs                      | 27                                                          |

Dietary calcium and zinc deficiency risks are decreasing but remain prevalent

| FAO countrycode | Country | Reference year | Food item                 | Gross food supply (g capita <sup>-1</sup> d <sup>-1</sup> ) |
|-----------------|---------|----------------|---------------------------|-------------------------------------------------------------|
| 105             | Israel  | 2000           | Fats, Animals, Raw        | 4                                                           |
| 105             | Israel  | 2000           | Freshwater Fish           | 10                                                          |
| 105             | Israel  | 2000           | Fruits, Other             | 115                                                         |
| 105             | Israel  | 2000           | Grapefruit                | 15                                                          |
| 105             | Israel  | 2000           | Grapes                    | 41                                                          |
| 105             | Israel  | 2000           | Groundnuts (Shelled Eq)   | 6                                                           |
| 105             | Israel  | 2000           | Honey                     | 2                                                           |
| 105             | Israel  | 2000           | Lemons, Limes             | 6                                                           |
| 105             | Israel  | 2000           | Maize                     | 41                                                          |
| 105             | Israel  | 2000           | Maize Germ Oil            | 8                                                           |
| 105             | Israel  | 2000           | Marine Fish, Other        | 1                                                           |
| 105             | Israel  | 2000           | Milk, Whole               | 188                                                         |
| 105             | Israel  | 2000           | Mutton & Goat Meat        | 4                                                           |
| 105             | Israel  | 2000           | Nuts                      | 14                                                          |
| 105             | Israel  | 2000           | Oats                      | 6                                                           |
| 105             | Israel  | 2000           | Offals, Edible            | 17                                                          |
| 105             | Israel  | 2000           | Oilcrops Oil, Other       | 4                                                           |
| 105             | Israel  | 2000           | Olive Oil                 | 2                                                           |
| 105             | Israel  | 2000           | Olives                    | 6                                                           |
| 105             | Israel  | 2000           | Onions                    | 48                                                          |
| 105             | Israel  | 2000           | Oranges, Mandarines       | 94                                                          |
| 105             | Israel  | 2000           | Palm Oil                  | 7                                                           |
| 105             | Israel  | 2000           | Peas                      | 1                                                           |
| 105             | Israel  | 2000           | Pelagic Fish              | 12                                                          |
| 105             | Israel  | 2000           | Pepper                    | 1                                                           |
| 105             | Israel  | 2000           | Pigmeat                   | 7                                                           |
| 105             | Israel  | 2000           | Pineapples                | 6                                                           |
| 105             | Israel  | 2000           | Potatoes                  | 108                                                         |
| 105             | Israel  | 2000           | Poultry Meat              | 159                                                         |
| 105             | Israel  | 2000           | Pulses, Other             | 17                                                          |
| 105             | Israel  | 2000           | Rape and Mustard Oil      | 6                                                           |
| 105             | Israel  | 2000           | Rice (Milled Equivalent)  | 30                                                          |
| 105             | Israel  | 2000           | Rye                       | 1                                                           |
| 105             | Israel  | 2000           | Sesameseed                | 5                                                           |
| 105             | Israel  | 2000           | Soyabean Oil              | 29                                                          |
| 105             | Israel  | 2000           | Sugar, Refined Equivalent | 129                                                         |
| 105             | Israel  | 2000           | Sunflowerseed Oil         | 7                                                           |
| 105             | Israel  | 2000           | Sweet Potatoes            | 1                                                           |
| 105             | Israel  | 2000           | Sweeteners, Other         | 2                                                           |
| 105             | Israel  | 2000           | Tea                       | 1                                                           |
| 105             | Israel  | 2000           | Tomatoes                  | 163                                                         |
| 105             | Israel  | 2000           | Vegetables, Other         | 447                                                         |
| 105             | Israel  | 2000           | Wheat                     | 303                                                         |
| 105             | Israel  | 2000           | Wine                      | 4                                                           |
| 105             | Israel  | 2001           | Apples                    | 57                                                          |
| 105             | Israel  | 2001           | Bananas                   | 41                                                          |
| 105             | Israel  | 2001           | Barley                    | 2                                                           |
| 105             | Israel  | 2001           | Beans                     | 5                                                           |
| 105             | Israel  | 2001           | Beer                      | 37                                                          |
| 105             | Israel  | 2001           | Beverages, Alcoholic      | 5                                                           |
| 105             | Israel  | 2001           | Beverages, Fermented      | 1                                                           |
| 105             | Israel  | 2001           | Bovine Meat               | 58                                                          |
| 105             | Israel  | 2001           | Butter, Ghee              | 2                                                           |
| 105             | Israel  | 2001           | Cheese                    | 45                                                          |
| 105             | Israel  | 2001           | Citrus, Other             | 7                                                           |
| 105             | Israel  | 2001           | Cocoa Beans               | 8                                                           |
| 105             | Israel  | 2001           | Coconuts - Incl Copra     | 1                                                           |
| 105             | Israel  | 2001           | Coffee                    | 12                                                          |
| 105             | Israel  | 2001           | Cottonseed Oil            | 2                                                           |
| 105             | Israel  | 2001           | Crustaceans               | 1                                                           |
| 105             | Israel  | 2001           | Dates                     | 5                                                           |
| 105             | Israel  | 2001           | Demersal Fish             | 36                                                          |
| 105             | Israel  | 2001           | Eggs                      | 26                                                          |
| 105             | Israel  | 2001           | Fats, Animals, Raw        | 3                                                           |
| 105             | Israel  | 2001           | Freshwater Fish           | 10                                                          |
| 105             | Israel  | 2001           | Fruits, Other             | 107                                                         |
| 105             | Israel  | 2001           | Grapefruit                | 68                                                          |
| 105             | Israel  | 2001           | Grapes                    | 51                                                          |
| 105             | Israel  | 2001           | Groundnuts (Shelled Eq)   | 6                                                           |
| 105             | Israel  | 2001           | Honey                     | 2                                                           |
| 105             | Israel  | 2001           | Lemons, Limes             | 10                                                          |
| 105             | Israel  | 2001           | Maize                     | 54                                                          |
| 105             | Israel  | 2001           | Maize Germ Oil            | 8                                                           |
| 105             | Israel  | 2001           | Marine Fish, Other        | 1                                                           |
| 105             | Israel  | 2001           | Milk, Whole               | 215                                                         |
| 105             | Israel  | 2001           | Mutton & Goat Meat        | 4                                                           |
| 105             | Israel  | 2001           | Nuts                      | 16                                                          |
| 105             | Israel  | 2001           | Oats                      | 6                                                           |
| 105             | Israel  | 2001           | Offals, Edible            | 16                                                          |
| 105             | Israel  | 2001           | Oilcrops Oil, Other       | 5                                                           |
| 105             | Israel  | 2001           | Oilcrops, Other           | 1                                                           |
| 105             | Israel  | 2001           | Olive Oil                 | 2                                                           |
| 105             | Israel  | 2001           | Olives                    | 7                                                           |
| 105             | Israel  | 2001           | Onions                    | 40                                                          |
| 105             | Israel  | 2001           | Oranges, Mandarines       | 80                                                          |
| 105             | Israel  | 2001           | Palm Oil                  | 6                                                           |
| 105             | Israel  | 2001           | Peas                      | 2                                                           |
| 105             | Israel  | 2001           | Pelagic Fish              | 14                                                          |
| 105             | Israel  | 2001           | Pigmeat                   | 7                                                           |
| 105             | Israel  | 2001           | Pineapples                | 4                                                           |
| 105             | Israel  | 2001           | Potatoes                  | 134                                                         |
| 105             | Israel  | 2001           | Poultry Meat              | 182                                                         |
| 105             | Israel  | 2001           | Pulses, Other             | 15                                                          |
| 105             | Israel  | 2001           | Rape and Mustard Oil      | 5                                                           |
| 105             | Israel  | 2001           | Rice (Milled Equivalent)  | 30                                                          |
| 105             | Israel  | 2001           | Sesameseed                | 8                                                           |
| 105             | Israel  | 2001           | Soyabean Oil              | 37                                                          |

Dietary calcium and zinc deficiency risks are decreasing but remain prevalent

| FAO countrycode | Country | Reference year | Food item                 | Gross food supply (g capita <sup>-1</sup> d <sup>-1</sup> ) |
|-----------------|---------|----------------|---------------------------|-------------------------------------------------------------|
| 105             | Israel  | 2001           | Spices, Other             | 1                                                           |
| 105             | Israel  | 2001           | Sugar, Refined Equivalent | 105                                                         |
| 105             | Israel  | 2001           | Sunflowerseed Oil         | 5                                                           |
| 105             | Israel  | 2001           | Sweet Potatoes            | 1                                                           |
| 105             | Israel  | 2001           | Sweeteners, Other         | 4                                                           |
| 105             | Israel  | 2001           | Tea                       | 1                                                           |
| 105             | Israel  | 2001           | Tomatoes                  | 129                                                         |
| 105             | Israel  | 2001           | Vegetables, Other         | 456                                                         |
| 105             | Israel  | 2001           | Wheat                     | 301                                                         |
| 105             | Israel  | 2001           | Wine                      | 3                                                           |
| 105             | Israel  | 2002           | Apples                    | 70                                                          |
| 105             | Israel  | 2002           | Bananas                   | 39                                                          |
| 105             | Israel  | 2002           | Barley                    | 1                                                           |
| 105             | Israel  | 2002           | Beans                     | 5                                                           |
| 105             | Israel  | 2002           | Beer                      | 38                                                          |
| 105             | Israel  | 2002           | Beverages, Alcoholic      | 5                                                           |
| 105             | Israel  | 2002           | Beverages, Fermented      | 1                                                           |
| 105             | Israel  | 2002           | Bovine Meat               | 68                                                          |
| 105             | Israel  | 2002           | Butter, Ghee              | 2                                                           |
| 105             | Israel  | 2002           | Cheese                    | 45                                                          |
| 105             | Israel  | 2002           | Citrus, Other             | 4                                                           |
| 105             | Israel  | 2002           | Cocoa Beans               | 7                                                           |
| 105             | Israel  | 2002           | Coconuts - Incl Copra     | 1                                                           |
| 105             | Israel  | 2002           | Coffee                    | 11                                                          |
| 105             | Israel  | 2002           | Cottonseed Oil            | 2                                                           |
| 105             | Israel  | 2002           | Crustaceans               | 1                                                           |
| 105             | Israel  | 2002           | Dates                     | 6                                                           |
| 105             | Israel  | 2002           | Demersal Fish             | 34                                                          |
| 105             | Israel  | 2002           | Eggs                      | 26                                                          |
| 105             | Israel  | 2002           | Fats, Animals, Raw        | 2                                                           |
| 105             | Israel  | 2002           | Freshwater Fish           | 10                                                          |
| 105             | Israel  | 2002           | Fruits, Other             | 113                                                         |
| 105             | Israel  | 2002           | Grapefruit                | 43                                                          |
| 105             | Israel  | 2002           | Grapes                    | 52                                                          |
| 105             | Israel  | 2002           | Groundnuts (Shelled Eq)   | 5                                                           |
| 105             | Israel  | 2002           | Honey                     | 2                                                           |
| 105             | Israel  | 2002           | Lemons, Limes             | 19                                                          |
| 105             | Israel  | 2002           | Maize                     | 56                                                          |
| 105             | Israel  | 2002           | Maize Germ Oil            | 5                                                           |
| 105             | Israel  | 2002           | Marine Fish, Other        | 1                                                           |
| 105             | Israel  | 2002           | Milk, Whole               | 213                                                         |
| 105             | Israel  | 2002           | Mutton & Goat Meat        | 4                                                           |
| 105             | Israel  | 2002           | Nuts                      | 17                                                          |
| 105             | Israel  | 2002           | Oats                      | 4                                                           |
| 105             | Israel  | 2002           | Offals, Edible            | 17                                                          |
| 105             | Israel  | 2002           | Oilcrops Oil, Other       | 4                                                           |
| 105             | Israel  | 2002           | Oilcrops, Other           | 1                                                           |
| 105             | Israel  | 2002           | Olive Oil                 | 1                                                           |
| 105             | Israel  | 2002           | Olives                    | 16                                                          |
| 105             | Israel  | 2002           | Onions                    | 38                                                          |
| 105             | Israel  | 2002           | Oranges, Mandarines       | 84                                                          |
| 105             | Israel  | 2002           | Palm Oil                  | 6                                                           |
| 105             | Israel  | 2002           | Peas                      | 2                                                           |
| 105             | Israel  | 2002           | Pelagic Fish              | 12                                                          |
| 105             | Israel  | 2002           | Pigmeat                   | 7                                                           |
| 105             | Israel  | 2002           | Pineapples                | 8                                                           |
| 105             | Israel  | 2002           | Potatoes                  | 133                                                         |
| 105             | Israel  | 2002           | Poultry Meat              | 193                                                         |
| 105             | Israel  | 2002           | Pulses, Other             | 15                                                          |
| 105             | Israel  | 2002           | Rape and Mustard Oil      | 5                                                           |
| 105             | Israel  | 2002           | Rice (Milled Equivalent)  | 29                                                          |
| 105             | Israel  | 2002           | Sesameseed                | 8                                                           |
| 105             | Israel  | 2002           | Soyabean Oil              | 43                                                          |
| 105             | Israel  | 2002           | Sugar, Refined Equivalent | 108                                                         |
| 105             | Israel  | 2002           | Sunflowerseed Oil         | 4                                                           |
| 105             | Israel  | 2002           | Sweet Potatoes            | 2                                                           |
| 105             | Israel  | 2002           | Sweeteners, Other         | 3                                                           |
| 105             | Israel  | 2002           | Tea                       | 1                                                           |
| 105             | Israel  | 2002           | Tomatoes                  | 142                                                         |
| 105             | Israel  | 2002           | Vegetables, Other         | 464                                                         |
| 105             | Israel  | 2002           | Wheat                     | 314                                                         |
| 105             | Israel  | 2002           | Wine                      | 4                                                           |
| 105             | Israel  | 2003           | Apples                    | 68                                                          |
| 105             | Israel  | 2003           | Bananas                   | 37                                                          |
| 105             | Israel  | 2003           | Barley                    | 1                                                           |
| 105             | Israel  | 2003           | Beans                     | 4                                                           |
| 105             | Israel  | 2003           | Beer                      | 43                                                          |
| 105             | Israel  | 2003           | Beverages, Alcoholic      | 6                                                           |
| 105             | Israel  | 2003           | Beverages, Fermented      | 1                                                           |
| 105             | Israel  | 2003           | Bovine Meat               | 71                                                          |
| 105             | Israel  | 2003           | Butter, Ghee              | 2                                                           |
| 105             | Israel  | 2003           | Cheese                    | 46                                                          |
| 105             | Israel  | 2003           | Cocoa Beans               | 8                                                           |
| 105             | Israel  | 2003           | Coconuts - Incl Copra     | 2                                                           |
| 105             | Israel  | 2003           | Coffee                    | 12                                                          |
| 105             | Israel  | 2003           | Cottonseed Oil            | 3                                                           |
| 105             | Israel  | 2003           | Crustaceans               | 1                                                           |
| 105             | Israel  | 2003           | Dates                     | 2                                                           |
| 105             | Israel  | 2003           | Demersal Fish             | 39                                                          |
| 105             | Israel  | 2003           | Eggs                      | 24                                                          |
| 105             | Israel  | 2003           | Fats, Animals, Raw        | 2                                                           |
| 105             | Israel  | 2003           | Freshwater Fish           | 10                                                          |
| 105             | Israel  | 2003           | Fruits, Other             | 119                                                         |
| 105             | Israel  | 2003           | Grapefruit                | 17                                                          |
| 105             | Israel  | 2003           | Grapes                    | 53                                                          |
| 105             | Israel  | 2003           | Groundnuts (Shelled Eq)   | 6                                                           |
| 105             | Israel  | 2003           | Honey                     | 1                                                           |

Dietary calcium and zinc deficiency risks are decreasing but remain prevalent

| FAO countrycode | Country | Reference year | Food item                 | Gross food supply (g capita <sup>-1</sup> d <sup>-1</sup> ) |
|-----------------|---------|----------------|---------------------------|-------------------------------------------------------------|
| 105             | Israel  | 2003           | Lemons, Limes             | 19                                                          |
| 105             | Israel  | 2003           | Maize                     | 53                                                          |
| 105             | Israel  | 2003           | Maize Germ Oil            | 4                                                           |
| 105             | Israel  | 2003           | Marine Fish, Other        | 1                                                           |
| 105             | Israel  | 2003           | Milk, Whole               | 177                                                         |
| 105             | Israel  | 2003           | Mutton & Goat Meat        | 4                                                           |
| 105             | Israel  | 2003           | Nuts                      | 16                                                          |
| 105             | Israel  | 2003           | Oats                      | 4                                                           |
| 105             | Israel  | 2003           | Offals, Edible            | 18                                                          |
| 105             | Israel  | 2003           | Oilcrops Oil, Other       | 5                                                           |
| 105             | Israel  | 2003           | Oilcrops, Other           | 1                                                           |
| 105             | Israel  | 2003           | Olive Oil                 | 3                                                           |
| 105             | Israel  | 2003           | Olives                    | 6                                                           |
| 105             | Israel  | 2003           | Onions                    | 37                                                          |
| 105             | Israel  | 2003           | Oranges, Mandarines       | 60                                                          |
| 105             | Israel  | 2003           | Palm Oil                  | 8                                                           |
| 105             | Israel  | 2003           | Peas                      | 1                                                           |
| 105             | Israel  | 2003           | Pelagic Fish              | 11                                                          |
| 105             | Israel  | 2003           | Pigmeat                   | 8                                                           |
| 105             | Israel  | 2003           | Pineapples                | 9                                                           |
| 105             | Israel  | 2003           | Potatoes                  | 128                                                         |
| 105             | Israel  | 2003           | Poultry Meat              | 192                                                         |
| 105             | Israel  | 2003           | Pulses, Other             | 14                                                          |
| 105             | Israel  | 2003           | Rape and Mustard Oil      | 5                                                           |
| 105             | Israel  | 2003           | Rice (Milled Equivalent)  | 25                                                          |
| 105             | Israel  | 2003           | Rye                       | 1                                                           |
| 105             | Israel  | 2003           | Sesameseed                | 6                                                           |
| 105             | Israel  | 2003           | Soyabean Oil              | 39                                                          |
| 105             | Israel  | 2003           | Sugar, Refined Equivalent | 94                                                          |
| 105             | Israel  | 2003           | Sunflowerseed Oil         | 6                                                           |
| 105             | Israel  | 2003           | Sweet Potatoes            | 3                                                           |
| 105             | Israel  | 2003           | Sweeteners, Other         | 4                                                           |
| 105             | Israel  | 2003           | Tea                       | 1                                                           |
| 105             | Israel  | 2003           | Tomatoes                  | 144                                                         |
| 105             | Israel  | 2003           | Vegetables, Other         | 435                                                         |
| 105             | Israel  | 2003           | Wheat                     | 319                                                         |
| 105             | Israel  | 2003           | Wine                      | 3                                                           |
| 105             | Israel  | 2004           | Apples                    | 83                                                          |
| 105             | Israel  | 2004           | Bananas                   | 50                                                          |
| 105             | Israel  | 2004           | Beans                     | 2                                                           |
| 105             | Israel  | 2004           | Beer                      | 44                                                          |
| 105             | Israel  | 2004           | Beverages, Alcoholic      | 6                                                           |
| 105             | Israel  | 2004           | Beverages, Fermented      | 1                                                           |
| 105             | Israel  | 2004           | Bovine Meat               | 71                                                          |
| 105             | Israel  | 2004           | Butter, Ghee              | 2                                                           |
| 105             | Israel  | 2004           | Cheese                    | 54                                                          |
| 105             | Israel  | 2004           | Citrus, Other             | 19                                                          |
| 105             | Israel  | 2004           | Cocoa Beans               | 9                                                           |
| 105             | Israel  | 2004           | Coconut Oil               | 1                                                           |
| 105             | Israel  | 2004           | Coconuts - Incl Copra     | 1                                                           |
| 105             | Israel  | 2004           | Coffee                    | 11                                                          |
| 105             | Israel  | 2004           | Cottonseed Oil            | 2                                                           |
| 105             | Israel  | 2004           | Crustaceans               | 1                                                           |
| 105             | Israel  | 2004           | Dates                     | 3                                                           |
| 105             | Israel  | 2004           | Demersal Fish             | 36                                                          |
| 105             | Israel  | 2004           | Eggs                      | 26                                                          |
| 105             | Israel  | 2004           | Fats, Animals, Raw        | 3                                                           |
| 105             | Israel  | 2004           | Freshwater Fish           | 13                                                          |
| 105             | Israel  | 2004           | Fruits, Other             | 119                                                         |
| 105             | Israel  | 2004           | Grapefruit                | 28                                                          |
| 105             | Israel  | 2004           | Grapes                    | 56                                                          |
| 105             | Israel  | 2004           | Groundnuts (Shelled Eq)   | 6                                                           |
| 105             | Israel  | 2004           | Honey                     | 2                                                           |
| 105             | Israel  | 2004           | Lemons, Limes             | 20                                                          |
| 105             | Israel  | 2004           | Maize                     | 58                                                          |
| 105             | Israel  | 2004           | Maize Germ Oil            | 5                                                           |
| 105             | Israel  | 2004           | Marine Fish, Other        | 1                                                           |
| 105             | Israel  | 2004           | Milk, Whole               | 179                                                         |
| 105             | Israel  | 2004           | Mutton & Goat Meat        | 4                                                           |
| 105             | Israel  | 2004           | Nuts                      | 15                                                          |
| 105             | Israel  | 2004           | Oats                      | 4                                                           |
| 105             | Israel  | 2004           | Offals, Edible            | 17                                                          |
| 105             | Israel  | 2004           | Oilcrops Oil, Other       | 5                                                           |
| 105             | Israel  | 2004           | Olive Oil                 | 4                                                           |
| 105             | Israel  | 2004           | Olives                    | 6                                                           |
| 105             | Israel  | 2004           | Onions                    | 40                                                          |
| 105             | Israel  | 2004           | Oranges, Mandarines       | 74                                                          |
| 105             | Israel  | 2004           | Palm Oil                  | 8                                                           |
| 105             | Israel  | 2004           | Peas                      | 1                                                           |
| 105             | Israel  | 2004           | Pelagic Fish              | 14                                                          |
| 105             | Israel  | 2004           | Pigmeat                   | 8                                                           |
| 105             | Israel  | 2004           | Pineapples                | 13                                                          |
| 105             | Israel  | 2004           | Potatoes                  | 132                                                         |
| 105             | Israel  | 2004           | Poultry Meat              | 195                                                         |
| 105             | Israel  | 2004           | Pulses, Other             | 14                                                          |
| 105             | Israel  | 2004           | Rape and Mustard Oil      | 5                                                           |
| 105             | Israel  | 2004           | Rice (Milled Equivalent)  | 27                                                          |
| 105             | Israel  | 2004           | Sesameseed                | 11                                                          |
| 105             | Israel  | 2004           | Soyabean Oil              | 45                                                          |
| 105             | Israel  | 2004           | Spices, Other             | 1                                                           |
| 105             | Israel  | 2004           | Sugar, Refined Equivalent | 62                                                          |
| 105             | Israel  | 2004           | Sunflowerseed Oil         | 4                                                           |
| 105             | Israel  | 2004           | Sweet Potatoes            | 2                                                           |
| 105             | Israel  | 2004           | Sweeteners, Other         | 6                                                           |
| 105             | Israel  | 2004           | Tea                       | 1                                                           |
| 105             | Israel  | 2004           | Tomatoes                  | 186                                                         |
| 105             | Israel  | 2004           | Vegetables, Other         | 419                                                         |

Dietary calcium and zinc deficiency risks are decreasing but remain prevalent

| FAO countrycode | Country | Reference year | Food item                 | Gross food supply (g capita <sup>-1</sup> d <sup>-1</sup> ) |
|-----------------|---------|----------------|---------------------------|-------------------------------------------------------------|
| 105             | Israel  | 2004           | Wheat                     | 329                                                         |
| 105             | Israel  | 2004           | Wine                      | 3                                                           |
| 105             | Israel  | 2005           | Apples                    | 84                                                          |
| 105             | Israel  | 2005           | Bananas                   | 44                                                          |
| 105             | Israel  | 2005           | Beans                     | 2                                                           |
| 105             | Israel  | 2005           | Beer                      | 44                                                          |
| 105             | Israel  | 2005           | Beverages, Alcoholic      | 7                                                           |
| 105             | Israel  | 2005           | Beverages, Fermented      | 1                                                           |
| 105             | Israel  | 2005           | Bovine Meat               | 66                                                          |
| 105             | Israel  | 2005           | Butter, Ghee              | 2                                                           |
| 105             | Israel  | 2005           | Cheese                    | 53                                                          |
| 105             | Israel  | 2005           | Citrus, Other             | 2                                                           |
| 105             | Israel  | 2005           | Cocoa Beans               | 8                                                           |
| 105             | Israel  | 2005           | Coconut Oil               | 1                                                           |
| 105             | Israel  | 2005           | Coconuts - Incl Copra     | 1                                                           |
| 105             | Israel  | 2005           | Coffee                    | 12                                                          |
| 105             | Israel  | 2005           | Cottonseed Oil            | 3                                                           |
| 105             | Israel  | 2005           | Crustaceans               | 1                                                           |
| 105             | Israel  | 2005           | Dates                     | 3                                                           |
| 105             | Israel  | 2005           | Demersal Fish             | 33                                                          |
| 105             | Israel  | 2005           | Eggs                      | 25                                                          |
| 105             | Israel  | 2005           | Fats, Animals, Raw        | 3                                                           |
| 105             | Israel  | 2005           | Freshwater Fish           | 11                                                          |
| 105             | Israel  | 2005           | Fruits, Other             | 138                                                         |
| 105             | Israel  | 2005           | Grapefruit                | 73                                                          |
| 105             | Israel  | 2005           | Grapes                    | 49                                                          |
| 105             | Israel  | 2005           | Groundnuts (Shelled Eq)   | 6                                                           |
| 105             | Israel  | 2005           | Honey                     | 2                                                           |
| 105             | Israel  | 2005           | Lemons, Limes             | 28                                                          |
| 105             | Israel  | 2005           | Maize                     | 61                                                          |
| 105             | Israel  | 2005           | Maize Germ Oil            | 3                                                           |
| 105             | Israel  | 2005           | Marine Fish, Other        | 1                                                           |
| 105             | Israel  | 2005           | Milk, Whole               | 176                                                         |
| 105             | Israel  | 2005           | Molluscs, Other           | 1                                                           |
| 105             | Israel  | 2005           | Mutton & Goat Meat        | 4                                                           |
| 105             | Israel  | 2005           | Nuts                      | 18                                                          |
| 105             | Israel  | 2005           | Oats                      | 4                                                           |
| 105             | Israel  | 2005           | Offals, Edible            | 18                                                          |
| 105             | Israel  | 2005           | Oilcrops Oil, Other       | 4                                                           |
| 105             | Israel  | 2005           | Olive Oil                 | 4                                                           |
| 105             | Israel  | 2005           | Olives                    | 5                                                           |
| 105             | Israel  | 2005           | Onions                    | 40                                                          |
| 105             | Israel  | 2005           | Oranges, Mandarines       | 85                                                          |
| 105             | Israel  | 2005           | Palm Oil                  | 8                                                           |
| 105             | Israel  | 2005           | Peas                      | 2                                                           |
| 105             | Israel  | 2005           | Pelagic Fish              | 12                                                          |
| 105             | Israel  | 2005           | Pigmeat                   | 8                                                           |
| 105             | Israel  | 2005           | Pineapples                | 11                                                          |
| 105             | Israel  | 2005           | Potatoes                  | 129                                                         |
| 105             | Israel  | 2005           | Poultry Meat              | 199                                                         |
| 105             | Israel  | 2005           | Pulses, Other             | 15                                                          |
| 105             | Israel  | 2005           | Rape and Mustard Oil      | 6                                                           |
| 105             | Israel  | 2005           | Rice (Milled Equivalent)  | 27                                                          |
| 105             | Israel  | 2005           | Rye                       | 1                                                           |
| 105             | Israel  | 2005           | Sesameseed                | 11                                                          |
| 105             | Israel  | 2005           | Soyabean Oil              | 43                                                          |
| 105             | Israel  | 2005           | Spices, Other             | 1                                                           |
| 105             | Israel  | 2005           | Sugar, Refined Equivalent | 62                                                          |
| 105             | Israel  | 2005           | Sunflowerseed Oil         | 4                                                           |
| 105             | Israel  | 2005           | Sweet Potatoes            | 2                                                           |
| 105             | Israel  | 2005           | Sweeteners, Other         | 5                                                           |
| 105             | Israel  | 2005           | Tomatoes                  | 146                                                         |
| 105             | Israel  | 2005           | Vegetables, Other         | 359                                                         |
| 105             | Israel  | 2005           | Wheat                     | 325                                                         |
| 105             | Israel  | 2005           | Wine                      | 3                                                           |
| 105             | Israel  | 2006           | Apples                    | 58                                                          |
| 105             | Israel  | 2006           | Bananas                   | 45                                                          |
| 105             | Israel  | 2006           | Barley                    | 2                                                           |
| 105             | Israel  | 2006           | Beans                     | 3                                                           |
| 105             | Israel  | 2006           | Beer                      | 41                                                          |
| 105             | Israel  | 2006           | Beverages, Alcoholic      | 7                                                           |
| 105             | Israel  | 2006           | Beverages, Fermented      | 1                                                           |
| 105             | Israel  | 2006           | Bovine Meat               | 78                                                          |
| 105             | Israel  | 2006           | Butter, Ghee              | 3                                                           |
| 105             | Israel  | 2006           | Cheese                    | 52                                                          |
| 105             | Israel  | 2006           | Citrus, Other             | 17                                                          |
| 105             | Israel  | 2006           | Cocoa Beans               | 7                                                           |
| 105             | Israel  | 2006           | Coconut Oil               | 1                                                           |
| 105             | Israel  | 2006           | Coconuts - Incl Copra     | 1                                                           |
| 105             | Israel  | 2006           | Coffee                    | 11                                                          |
| 105             | Israel  | 2006           | Cottonseed Oil            | 2                                                           |
| 105             | Israel  | 2006           | Crustaceans               | 1                                                           |
| 105             | Israel  | 2006           | Dates                     | 3                                                           |
| 105             | Israel  | 2006           | Demersal Fish             | 33                                                          |
| 105             | Israel  | 2006           | Eggs                      | 25                                                          |
| 105             | Israel  | 2006           | Fats, Animals, Raw        | 2                                                           |
| 105             | Israel  | 2006           | Freshwater Fish           | 8                                                           |
| 105             | Israel  | 2006           | Fruits, Other             | 117                                                         |
| 105             | Israel  | 2006           | Grapefruit                | 38                                                          |
| 105             | Israel  | 2006           | Grapes                    | 47                                                          |
| 105             | Israel  | 2006           | Groundnuts (Shelled Eq)   | 6                                                           |
| 105             | Israel  | 2006           | Honey                     | 1                                                           |
| 105             | Israel  | 2006           | Lemons, Limes             | 8                                                           |
| 105             | Israel  | 2006           | Maize                     | 62                                                          |
| 105             | Israel  | 2006           | Maize Germ Oil            | 3                                                           |
| 105             | Israel  | 2006           | Milk, Whole               | 159                                                         |
| 105             | Israel  | 2006           | Molluscs, Other           | 1                                                           |



Dietary calcium and zinc deficiency risks are decreasing but remain prevalent

| FAO countrycode | Country | Reference year | Food item                 | Gross food supply (g capita <sup>-1</sup> d <sup>-1</sup> ) |
|-----------------|---------|----------------|---------------------------|-------------------------------------------------------------|
| 105             | Israel  | 2006           | Mutton & Goat Meat        | 4                                                           |
| 105             | Israel  | 2006           | Nuts                      | 18                                                          |
| 105             | Israel  | 2006           | Oats                      | 4                                                           |
| 105             | Israel  | 2006           | Offals, Edible            | 18                                                          |
| 105             | Israel  | 2006           | Oilcrops Oil, Other       | 4                                                           |
| 105             | Israel  | 2006           | Olive Oil                 | 4                                                           |
| 105             | Israel  | 2006           | Olives                    | 6                                                           |
| 105             | Israel  | 2006           | Onions                    | 35                                                          |
| 105             | Israel  | 2006           | Oranges, Mandarines       | 59                                                          |
| 105             | Israel  | 2006           | Palm Oil                  | 12                                                          |
| 105             | Israel  | 2006           | Peas                      | 2                                                           |
| 105             | Israel  | 2006           | Pelagic Fish              | 10                                                          |
| 105             | Israel  | 2006           | Pigmeat                   | 7                                                           |
| 105             | Israel  | 2006           | Pineapples                | 12                                                          |
| 105             | Israel  | 2006           | Potatoes                  | 124                                                         |
| 105             | Israel  | 2006           | Poultry Meat              | 192                                                         |
| 105             | Israel  | 2006           | Pulses, Other             | 19                                                          |
| 105             | Israel  | 2006           | Rape and Mustard Oil      | 7                                                           |
| 105             | Israel  | 2006           | Rice (Milled Equivalent)  | 27                                                          |
| 105             | Israel  | 2006           | Rye                       | 1                                                           |
| 105             | Israel  | 2006           | Sesameseed                | 12                                                          |
| 105             | Israel  | 2006           | Soyabean Oil              | 39                                                          |
| 105             | Israel  | 2006           | Spices, Other             | 1                                                           |
| 105             | Israel  | 2006           | Sugar, Refined Equivalent | 59                                                          |
| 105             | Israel  | 2006           | Sunflowerseed Oil         | 5                                                           |
| 105             | Israel  | 2006           | Sweet Potatoes            | 3                                                           |
| 105             | Israel  | 2006           | Sweeteners, Other         | 5                                                           |
| 105             | Israel  | 2006           | Tea                       | 1                                                           |
| 105             | Israel  | 2006           | Tomatoes                  | 145                                                         |
| 105             | Israel  | 2006           | Vegetables, Other         | 318                                                         |
| 105             | Israel  | 2006           | Wheat                     | 332                                                         |
| 105             | Israel  | 2006           | Wine                      | 2                                                           |
| 105             | Israel  | 2007           | Apples                    | 54                                                          |
| 105             | Israel  | 2007           | Bananas                   | 47                                                          |
| 105             | Israel  | 2007           | Barley                    | 1                                                           |
| 105             | Israel  | 2007           | Beans                     | 3                                                           |
| 105             | Israel  | 2007           | Beer                      | 43                                                          |
| 105             | Israel  | 2007           | Beverages, Alcoholic      | 8                                                           |
| 105             | Israel  | 2007           | Beverages, Fermented      | 1                                                           |
| 105             | Israel  | 2007           | Bovine Meat               | 74                                                          |
| 105             | Israel  | 2007           | Butter, Ghee              | 2                                                           |
| 105             | Israel  | 2007           | Cheese                    | 52                                                          |
| 105             | Israel  | 2007           | Citrus, Other             | 34                                                          |
| 105             | Israel  | 2007           | Cocoa Beans               | 9                                                           |
| 105             | Israel  | 2007           | Coconuts - Incl Copra     | 1                                                           |
| 105             | Israel  | 2007           | Coffee                    | 12                                                          |
| 105             | Israel  | 2007           | Cottonseed Oil            | 2                                                           |
| 105             | Israel  | 2007           | Crustaceans               | 1                                                           |
| 105             | Israel  | 2007           | Dates                     | 3                                                           |
| 105             | Israel  | 2007           | Demersal Fish             | 41                                                          |
| 105             | Israel  | 2007           | Eggs                      | 25                                                          |
| 105             | Israel  | 2007           | Fats, Animals, Raw        | 2                                                           |
| 105             | Israel  | 2007           | Freshwater Fish           | 11                                                          |
| 105             | Israel  | 2007           | Fruits, Other             | 119                                                         |
| 105             | Israel  | 2007           | Grapefruit                | 11                                                          |
| 105             | Israel  | 2007           | Grapes                    | 43                                                          |
| 105             | Israel  | 2007           | Groundnuts (Shelled Eq)   | 6                                                           |
| 105             | Israel  | 2007           | Honey                     | 2                                                           |
| 105             | Israel  | 2007           | Lemons, Limes             | 9                                                           |
| 105             | Israel  | 2007           | Maize                     | 43                                                          |
| 105             | Israel  | 2007           | Maize Germ Oil            | 4                                                           |
| 105             | Israel  | 2007           | Marine Fish, Other        | 1                                                           |
| 105             | Israel  | 2007           | Milk, Whole               | 188                                                         |
| 105             | Israel  | 2007           | Molluscs, Other           | 1                                                           |
| 105             | Israel  | 2007           | Mutton & Goat Meat        | 4                                                           |
| 105             | Israel  | 2007           | Nuts                      | 15                                                          |
| 105             | Israel  | 2007           | Oats                      | 3                                                           |
| 105             | Israel  | 2007           | Offals, Edible            | 18                                                          |
| 105             | Israel  | 2007           | Oilcrops Oil, Other       | 4                                                           |
| 105             | Israel  | 2007           | Oilcrops, Other           | 1                                                           |
| 105             | Israel  | 2007           | Olive Oil                 | 3                                                           |
| 105             | Israel  | 2007           | Olives                    | 4                                                           |
| 105             | Israel  | 2007           | Onions                    | 34                                                          |
| 105             | Israel  | 2007           | Oranges, Mandarines       | 57                                                          |
| 105             | Israel  | 2007           | Palm Oil                  | 9                                                           |
| 105             | Israel  | 2007           | Peas                      | 3                                                           |
| 105             | Israel  | 2007           | Pelagic Fish              | 12                                                          |
| 105             | Israel  | 2007           | Pigmeat                   | 7                                                           |
| 105             | Israel  | 2007           | Pineapples                | 11                                                          |
| 105             | Israel  | 2007           | Potatoes                  | 96                                                          |
| 105             | Israel  | 2007           | Poultry Meat              | 186                                                         |
| 105             | Israel  | 2007           | Pulses, Other             | 19                                                          |
| 105             | Israel  | 2007           | Rape and Mustard Oil      | 8                                                           |
| 105             | Israel  | 2007           | Rice (Milled Equivalent)  | 27                                                          |
| 105             | Israel  | 2007           | Rye                       | 1                                                           |
| 105             | Israel  | 2007           | Sesameseed                | 13                                                          |
| 105             | Israel  | 2007           | Soyabean Oil              | 37                                                          |
| 105             | Israel  | 2007           | Spices, Other             | 1                                                           |
| 105             | Israel  | 2007           | Sugar, Refined Equivalent | 59                                                          |
| 105             | Israel  | 2007           | Sunflowerseed Oil         | 6                                                           |
| 105             | Israel  | 2007           | Sweet Potatoes            | 4                                                           |
| 105             | Israel  | 2007           | Sweeteners, Other         | 6                                                           |
| 105             | Israel  | 2007           | Tomatoes                  | 140                                                         |
| 105             | Israel  | 2007           | Vegetables, Other         | 313                                                         |
| 105             | Israel  | 2007           | Wheat                     | 330                                                         |
| 105             | Israel  | 2007           | Wine                      | 2                                                           |
| 105             | Israel  | 2008           | Apples                    | 40                                                          |

Dietary calcium and zinc deficiency risks are decreasing but remain prevalent

| FAO countrycode | Country | Reference year | Food item                 | Gross food supply (g capita <sup>-1</sup> d <sup>-1</sup> ) |
|-----------------|---------|----------------|---------------------------|-------------------------------------------------------------|
| 105             | Israel  | 2008           | Bananas                   | 30                                                          |
| 105             | Israel  | 2008           | Barley                    | 2                                                           |
| 105             | Israel  | 2008           | Beans                     | 3                                                           |
| 105             | Israel  | 2008           | Beer                      | 46                                                          |
| 105             | Israel  | 2008           | Beverages, Alcoholic      | 8                                                           |
| 105             | Israel  | 2008           | Beverages, Fermented      | 1                                                           |
| 105             | Israel  | 2008           | Bovine Meat               | 80                                                          |
| 105             | Israel  | 2008           | Butter, Ghee              | 3                                                           |
| 105             | Israel  | 2008           | Cheese                    | 51                                                          |
| 105             | Israel  | 2008           | Citrus, Other             | 20                                                          |
| 105             | Israel  | 2008           | Cocoa Beans               | 7                                                           |
| 105             | Israel  | 2008           | Coconut Oil               | 1                                                           |
| 105             | Israel  | 2008           | Coconuts - Incl Copra     | 1                                                           |
| 105             | Israel  | 2008           | Coffee                    | 12                                                          |
| 105             | Israel  | 2008           | Cottonseed Oil            | 1                                                           |
| 105             | Israel  | 2008           | Crustaceans               | 1                                                           |
| 105             | Israel  | 2008           | Dates                     | 3                                                           |
| 105             | Israel  | 2008           | Demersal Fish             | 34                                                          |
| 105             | Israel  | 2008           | Eggs                      | 24                                                          |
| 105             | Israel  | 2008           | Fats, Animals, Raw        | 2                                                           |
| 105             | Israel  | 2008           | Freshwater Fish           | 11                                                          |
| 105             | Israel  | 2008           | Fruits, Other             | 128                                                         |
| 105             | Israel  | 2008           | Grapefruit                | 2                                                           |
| 105             | Israel  | 2008           | Grapes                    | 38                                                          |
| 105             | Israel  | 2008           | Groundnuts (Shelled Eq)   | 6                                                           |
| 105             | Israel  | 2008           | Honey                     | 2                                                           |
| 105             | Israel  | 2008           | Lemons, Limes             | 12                                                          |
| 105             | Israel  | 2008           | Maize                     | 45                                                          |
| 105             | Israel  | 2008           | Maize Germ Oil            | 4                                                           |
| 105             | Israel  | 2008           | Marine Fish, Other        | 1                                                           |
| 105             | Israel  | 2008           | Milk, Whole               | 219                                                         |
| 105             | Israel  | 2008           | Molluscs, Other           | 1                                                           |
| 105             | Israel  | 2008           | Mutton & Goat Meat        | 5                                                           |
| 105             | Israel  | 2008           | Nuts                      | 18                                                          |
| 105             | Israel  | 2008           | Oats                      | 3                                                           |
| 105             | Israel  | 2008           | Offals, Edible            | 18                                                          |
| 105             | Israel  | 2008           | Oilcrops Oil, Other       | 4                                                           |
| 105             | Israel  | 2008           | Olive Oil                 | 3                                                           |
| 105             | Israel  | 2008           | Olives                    | 5                                                           |
| 105             | Israel  | 2008           | Onions                    | 32                                                          |
| 105             | Israel  | 2008           | Oranges, Mandarines       | 66                                                          |
| 105             | Israel  | 2008           | Palm Oil                  | 13                                                          |
| 105             | Israel  | 2008           | Palmkernel Oil            | 1                                                           |
| 105             | Israel  | 2008           | Peas                      | 1                                                           |
| 105             | Israel  | 2008           | Pelagic Fish              | 13                                                          |
| 105             | Israel  | 2008           | Pigmeat                   | 7                                                           |
| 105             | Israel  | 2008           | Pineapples                | 8                                                           |
| 105             | Israel  | 2008           | Potatoes                  | 115                                                         |
| 105             | Israel  | 2008           | Poultry Meat              | 188                                                         |
| 105             | Israel  | 2008           | Pulses, Other             | 16                                                          |
| 105             | Israel  | 2008           | Rape and Mustard Oil      | 10                                                          |
| 105             | Israel  | 2008           | Rice (Milled Eqivalent)   | 26                                                          |
| 105             | Israel  | 2008           | Sesameseed                | 12                                                          |
| 105             | Israel  | 2008           | Soyabean Oil              | 35                                                          |
| 105             | Israel  | 2008           | Spices, Other             | 1                                                           |
| 105             | Israel  | 2008           | Sugar, Refined Equivalent | 56                                                          |
| 105             | Israel  | 2008           | Sunflowerseed             | 1                                                           |
| 105             | Israel  | 2008           | Sunflowerseed Oil         | 2                                                           |
| 105             | Israel  | 2008           | Sweet Potatoes            | 7                                                           |
| 105             | Israel  | 2008           | Sweeteners, Other         | 7                                                           |
| 105             | Israel  | 2008           | Tea                       | 1                                                           |
| 105             | Israel  | 2008           | Tomatoes                  | 128                                                         |
| 105             | Israel  | 2008           | Vegetables, Other         | 300                                                         |
| 105             | Israel  | 2008           | Wheat                     | 328                                                         |
| 105             | Israel  | 2008           | Wine                      | 3                                                           |
| 105             | Israel  | 2009           | Apples                    | 52                                                          |
| 105             | Israel  | 2009           | Bananas                   | 32                                                          |
| 105             | Israel  | 2009           | Barley                    | 1                                                           |
| 105             | Israel  | 2009           | Beans                     | 3                                                           |
| 105             | Israel  | 2009           | Beer                      | 44                                                          |
| 105             | Israel  | 2009           | Beverages, Alcoholic      | 9                                                           |
| 105             | Israel  | 2009           | Beverages, Fermented      | 1                                                           |
| 105             | Israel  | 2009           | Bovine Meat               | 69                                                          |
| 105             | Israel  | 2009           | Butter, Ghee              | 3                                                           |
| 105             | Israel  | 2009           | Cheese                    | 48                                                          |
| 105             | Israel  | 2009           | Cocoa Beans               | 7                                                           |
| 105             | Israel  | 2009           | Coconuts - Incl Copra     | 1                                                           |
| 105             | Israel  | 2009           | Coffee                    | 10                                                          |
| 105             | Israel  | 2009           | Cottonseed Oil            | 1                                                           |
| 105             | Israel  | 2009           | Crustaceans               | 2                                                           |
| 105             | Israel  | 2009           | Dates                     | 4                                                           |
| 105             | Israel  | 2009           | Demersal Fish             | 31                                                          |
| 105             | Israel  | 2009           | Eggs                      | 26                                                          |
| 105             | Israel  | 2009           | Fats, Animals, Raw        | 2                                                           |
| 105             | Israel  | 2009           | Freshwater Fish           | 12                                                          |
| 105             | Israel  | 2009           | Fruits, Other             | 139                                                         |
| 105             | Israel  | 2009           | Grapefruit                | 33                                                          |
| 105             | Israel  | 2009           | Grapes                    | 37                                                          |
| 105             | Israel  | 2009           | Groundnuts (Shelled Eq)   | 6                                                           |
| 105             | Israel  | 2009           | Honey                     | 1                                                           |
| 105             | Israel  | 2009           | Lemons, Limes             | 20                                                          |
| 105             | Israel  | 2009           | Maize                     | 50                                                          |
| 105             | Israel  | 2009           | Maize Germ Oil            | 4                                                           |
| 105             | Israel  | 2009           | Milk, Whole               | 190                                                         |
| 105             | Israel  | 2009           | Molluscs, Other           | 1                                                           |
| 105             | Israel  | 2009           | Mutton & Goat Meat        | 5                                                           |
| 105             | Israel  | 2009           | Nuts                      | 18                                                          |

Dietary calcium and zinc deficiency risks are decreasing but remain prevalent

| FAO countrycode | Country | Reference year | Food item                 | Gross food supply (g capita <sup>-1</sup> d <sup>-1</sup> ) |
|-----------------|---------|----------------|---------------------------|-------------------------------------------------------------|
| 105             | Israel  | 2009           | Oats                      | 3                                                           |
| 105             | Israel  | 2009           | Offals, Edible            | 18                                                          |
| 105             | Israel  | 2009           | Oilcrops Oil, Other       | 2                                                           |
| 105             | Israel  | 2009           | Oilcrops, Other           | 1                                                           |
| 105             | Israel  | 2009           | Olive Oil                 | 4                                                           |
| 105             | Israel  | 2009           | Olives                    | 4                                                           |
| 105             | Israel  | 2009           | Onions                    | 30                                                          |
| 105             | Israel  | 2009           | Oranges, Mandarines       | 60                                                          |
| 105             | Israel  | 2009           | Palm Oil                  | 10                                                          |
| 105             | Israel  | 2009           | Palmkernel Oil            | 2                                                           |
| 105             | Israel  | 2009           | Peas                      | 1                                                           |
| 105             | Israel  | 2009           | Pelagic Fish              | 13                                                          |
| 105             | Israel  | 2009           | Pigmeat                   | 7                                                           |
| 105             | Israel  | 2009           | Pineapples                | 5                                                           |
| 105             | Israel  | 2009           | Potatoes                  | 110                                                         |
| 105             | Israel  | 2009           | Poultry Meat              | 182                                                         |
| 105             | Israel  | 2009           | Pulses, Other             | 19                                                          |
| 105             | Israel  | 2009           | Rape and Mustard Oil      | 14                                                          |
| 105             | Israel  | 2009           | Rice (Milled Equivalent)  | 26                                                          |
| 105             | Israel  | 2009           | Sesameseed                | 14                                                          |
| 105             | Israel  | 2009           | Soyabean Oil              | 31                                                          |
| 105             | Israel  | 2009           | Spices, Other             | 1                                                           |
| 105             | Israel  | 2009           | Sugar, Refined Equivalent | 61                                                          |
| 105             | Israel  | 2009           | Sunflowerseed             | 2                                                           |
| 105             | Israel  | 2009           | Sunflowerseed Oil         | 5                                                           |
| 105             | Israel  | 2009           | Sweet Potatoes            | 5                                                           |
| 105             | Israel  | 2009           | Sweeteners, Other         | 4                                                           |
| 105             | Israel  | 2009           | Tea                       | 1                                                           |
| 105             | Israel  | 2009           | Tomatoes                  | 136                                                         |
| 105             | Israel  | 2009           | Vegetables, Other         | 315                                                         |
| 105             | Israel  | 2009           | Wheat                     | 320                                                         |
| 105             | Israel  | 2009           | Wine                      | 2                                                           |
| 105             | Israel  | 2010           | Apples                    | 58                                                          |
| 105             | Israel  | 2010           | Bananas                   | 34                                                          |
| 105             | Israel  | 2010           | Barley                    | 3                                                           |
| 105             | Israel  | 2010           | Beans                     | 2                                                           |
| 105             | Israel  | 2010           | Beer                      | 47                                                          |
| 105             | Israel  | 2010           | Beverages, Alcoholic      | 5                                                           |
| 105             | Israel  | 2010           | Beverages, Fermented      | 1                                                           |
| 105             | Israel  | 2010           | Bovine Meat               | 73                                                          |
| 105             | Israel  | 2010           | Butter, Ghee              | 3                                                           |
| 105             | Israel  | 2010           | Cheese                    | 47                                                          |
| 105             | Israel  | 2010           | Cocoa Beans               | 8                                                           |
| 105             | Israel  | 2010           | Coconuts - Incl Copra     | 2                                                           |
| 105             | Israel  | 2010           | Coffee                    | 14                                                          |
| 105             | Israel  | 2010           | Cottonseed Oil            | 1                                                           |
| 105             | Israel  | 2010           | Crustaceans               | 2                                                           |
| 105             | Israel  | 2010           | Dates                     | 6                                                           |
| 105             | Israel  | 2010           | Demersal Fish             | 30                                                          |
| 105             | Israel  | 2010           | Eggs                      | 27                                                          |
| 105             | Israel  | 2010           | Fats, Animals, Raw        | 2                                                           |
| 105             | Israel  | 2010           | Freshwater Fish           | 12                                                          |
| 105             | Israel  | 2010           | Fruits, Other             | 114                                                         |
| 105             | Israel  | 2010           | Grapefruit                | 21                                                          |
| 105             | Israel  | 2010           | Grapes                    | 36                                                          |
| 105             | Israel  | 2010           | Groundnuts (Shelled Eq)   | 6                                                           |
| 105             | Israel  | 2010           | Honey                     | 1                                                           |
| 105             | Israel  | 2010           | Lemons, Limes             | 23                                                          |
| 105             | Israel  | 2010           | Maize                     | 54                                                          |
| 105             | Israel  | 2010           | Maize Germ Oil            | 5                                                           |
| 105             | Israel  | 2010           | Milk, Whole               | 199                                                         |
| 105             | Israel  | 2010           | Molluscs, Other           | 1                                                           |
| 105             | Israel  | 2010           | Mutton & Goat Meat        | 5                                                           |
| 105             | Israel  | 2010           | Nuts                      | 15                                                          |
| 105             | Israel  | 2010           | Oats                      | 4                                                           |
| 105             | Israel  | 2010           | Offals, Edible            | 18                                                          |
| 105             | Israel  | 2010           | Oilcrops Oil, Other       | 4                                                           |
| 105             | Israel  | 2010           | Olive Oil                 | 5                                                           |
| 105             | Israel  | 2010           | Olives                    | 3                                                           |
| 105             | Israel  | 2010           | Onions                    | 30                                                          |
| 105             | Israel  | 2010           | Oranges, Mandarines       | 38                                                          |
| 105             | Israel  | 2010           | Palm Oil                  | 8                                                           |
| 105             | Israel  | 2010           | Palmkernel Oil            | 1                                                           |
| 105             | Israel  | 2010           | Peas                      | 1                                                           |
| 105             | Israel  | 2010           | Pelagic Fish              | 12                                                          |
| 105             | Israel  | 2010           | Pigmeat                   | 7                                                           |
| 105             | Israel  | 2010           | Pineapples                | 2                                                           |
| 105             | Israel  | 2010           | Potatoes                  | 102                                                         |
| 105             | Israel  | 2010           | Poultry Meat              | 183                                                         |
| 105             | Israel  | 2010           | Pulses, Other             | 17                                                          |
| 105             | Israel  | 2010           | Rape and Mustard Oil      | 16                                                          |
| 105             | Israel  | 2010           | Rice (Milled Equivalent)  | 26                                                          |
| 105             | Israel  | 2010           | Sesameseed                | 13                                                          |
| 105             | Israel  | 2010           | Soyabean Oil              | 29                                                          |
| 105             | Israel  | 2010           | Spices, Other             | 1                                                           |
| 105             | Israel  | 2010           | Sugar, Refined Equivalent | 62                                                          |
| 105             | Israel  | 2010           | Sunflowerseed             | 1                                                           |
| 105             | Israel  | 2010           | Sunflowerseed Oil         | 4                                                           |
| 105             | Israel  | 2010           | Sweet Potatoes            | 3                                                           |
| 105             | Israel  | 2010           | Sweeteners, Other         | 7                                                           |
| 105             | Israel  | 2010           | Tea                       | 1                                                           |
| 105             | Israel  | 2010           | Tomatoes                  | 135                                                         |
| 105             | Israel  | 2010           | Vegetables, Other         | 281                                                         |
| 105             | Israel  | 2010           | Wheat                     | 342                                                         |
| 105             | Israel  | 2010           | Wine                      | 2                                                           |
| 105             | Israel  | 2011           | Apples                    | 50                                                          |
| 105             | Israel  | 2011           | Bananas                   | 37                                                          |

Dietary calcium and zinc deficiency risks are decreasing but remain prevalent

| FAO countrycode | Country | Reference year | Food item                 | Gross food supply (g capita <sup>-1</sup> d <sup>-1</sup> ) |
|-----------------|---------|----------------|---------------------------|-------------------------------------------------------------|
| 105             | Israel  | 2011           | Barley                    | 1                                                           |
| 105             | Israel  | 2011           | Beans                     | 2                                                           |
| 105             | Israel  | 2011           | Beer                      | 48                                                          |
| 105             | Israel  | 2011           | Beverages, Alcoholic      | 5                                                           |
| 105             | Israel  | 2011           | Beverages, Fermented      | 1                                                           |
| 105             | Israel  | 2011           | Bovine Meat               | 76                                                          |
| 105             | Israel  | 2011           | Butter, Ghee              | 3                                                           |
| 105             | Israel  | 2011           | Cheese                    | 46                                                          |
| 105             | Israel  | 2011           | Cocoa Beans               | 8                                                           |
| 105             | Israel  | 2011           | Coconut Oil               | 1                                                           |
| 105             | Israel  | 2011           | Coconuts - Incl Copra     | 1                                                           |
| 105             | Israel  | 2011           | Coffee                    | 11                                                          |
| 105             | Israel  | 2011           | Cottonseed Oil            | 1                                                           |
| 105             | Israel  | 2011           | Crustaceans               | 1                                                           |
| 105             | Israel  | 2011           | Dates                     | 8                                                           |
| 105             | Israel  | 2011           | Demersal Fish             | 30                                                          |
| 105             | Israel  | 2011           | Eggs                      | 29                                                          |
| 105             | Israel  | 2011           | Fats, Animals, Raw        | 2                                                           |
| 105             | Israel  | 2011           | Freshwater Fish           | 11                                                          |
| 105             | Israel  | 2011           | Fruits, Other             | 110                                                         |
| 105             | Israel  | 2011           | Grapefruit                | 7                                                           |
| 105             | Israel  | 2011           | Grapes                    | 33                                                          |
| 105             | Israel  | 2011           | Groundnuts (Shelled Eq)   | 5                                                           |
| 105             | Israel  | 2011           | Honey                     | 1                                                           |
| 105             | Israel  | 2011           | Lemons, Limes             | 22                                                          |
| 105             | Israel  | 2011           | Maize                     | 46                                                          |
| 105             | Israel  | 2011           | Maize Germ Oil            | 4                                                           |
| 105             | Israel  | 2011           | Milk, Whole               | 218                                                         |
| 105             | Israel  | 2011           | Molluscs, Other           | 1                                                           |
| 105             | Israel  | 2011           | Mutton & Goat Meat        | 6                                                           |
| 105             | Israel  | 2011           | Nuts                      | 14                                                          |
| 105             | Israel  | 2011           | Oats                      | 3                                                           |
| 105             | Israel  | 2011           | Offals, Edible            | 19                                                          |
| 105             | Israel  | 2011           | Oilcrops Oil, Other       | 4                                                           |
| 105             | Israel  | 2011           | Olive Oil                 | 6                                                           |
| 105             | Israel  | 2011           | Olives                    | 4                                                           |
| 105             | Israel  | 2011           | Onions                    | 33                                                          |
| 105             | Israel  | 2011           | Oranges, Mandarines       | 25                                                          |
| 105             | Israel  | 2011           | Palm Oil                  | 7                                                           |
| 105             | Israel  | 2011           | Palmkernel Oil            | 1                                                           |
| 105             | Israel  | 2011           | Peas                      | 1                                                           |
| 105             | Israel  | 2011           | Pelagic Fish              | 12                                                          |
| 105             | Israel  | 2011           | Pigmeat                   | 7                                                           |
| 105             | Israel  | 2011           | Pineapples                | 3                                                           |
| 105             | Israel  | 2011           | Potatoes                  | 99                                                          |
| 105             | Israel  | 2011           | Poultry Meat              | 191                                                         |
| 105             | Israel  | 2011           | Pulses, Other             | 17                                                          |
| 105             | Israel  | 2011           | Rape and Mustard Oil      | 17                                                          |
| 105             | Israel  | 2011           | Rice (Milled Equivalent)  | 25                                                          |
| 105             | Israel  | 2011           | Sesameseed                | 13                                                          |
| 105             | Israel  | 2011           | Soyabean Oil              | 30                                                          |
| 105             | Israel  | 2011           | Spices, Other             | 1                                                           |
| 105             | Israel  | 2011           | Sugar, Refined Equivalent | 80                                                          |
| 105             | Israel  | 2011           | Sunflowerseed Oil         | 4                                                           |
| 105             | Israel  | 2011           | Sweet Potatoes            | 4                                                           |
| 105             | Israel  | 2011           | Sweeteners, Other         | 6                                                           |
| 105             | Israel  | 2011           | Tea                       | 1                                                           |
| 105             | Israel  | 2011           | Tomatoes                  | 129                                                         |
| 105             | Israel  | 2011           | Vegetables, Other         | 298                                                         |
| 105             | Israel  | 2011           | Wheat                     | 333                                                         |
| 105             | Israel  | 2011           | Wine                      | 3                                                           |
| 106             | Italy   | 1992           | Apples                    | 63                                                          |
| 106             | Italy   | 1992           | Bananas                   | 24                                                          |
| 106             | Italy   | 1992           | Barley                    | 1                                                           |
| 106             | Italy   | 1992           | Beans                     | 4                                                           |
| 106             | Italy   | 1992           | Beer                      | 64                                                          |
| 106             | Italy   | 1992           | Beverages, Alcoholic      | 3                                                           |
| 106             | Italy   | 1992           | Bovine Meat               | 71                                                          |
| 106             | Italy   | 1992           | Butter, Ghee              | 5                                                           |
| 106             | Italy   | 1992           | Cephalopods               | 8                                                           |
| 106             | Italy   | 1992           | Cheese                    | 54                                                          |
| 106             | Italy   | 1992           | Citrus, Other             | 1                                                           |
| 106             | Italy   | 1992           | Cocoa Beans               | 3                                                           |
| 106             | Italy   | 1992           | Coconut Oil               | 2                                                           |
| 106             | Italy   | 1992           | Coconuts - Incl Copra     | 1                                                           |
| 106             | Italy   | 1992           | Coffee                    | 12                                                          |
| 106             | Italy   | 1992           | Cream                     | 8                                                           |
| 106             | Italy   | 1992           | Crustaceans               | 5                                                           |
| 106             | Italy   | 1992           | Demersal Fish             | 19                                                          |
| 106             | Italy   | 1992           | Eggs                      | 34                                                          |
| 106             | Italy   | 1992           | Fats, Animals, Raw        | 15                                                          |
| 106             | Italy   | 1992           | Freshwater Fish           | 4                                                           |
| 106             | Italy   | 1992           | Fruits, Other             | 135                                                         |
| 106             | Italy   | 1992           | Grapefruit                | 4                                                           |
| 106             | Italy   | 1992           | Grapes                    | 36                                                          |
| 106             | Italy   | 1992           | Groundnut Oil             | 3                                                           |
| 106             | Italy   | 1992           | Groundnuts (Shelled Eq)   | 1                                                           |
| 106             | Italy   | 1992           | Honey                     | 1                                                           |
| 106             | Italy   | 1992           | Lemons, Limes             | 30                                                          |
| 106             | Italy   | 1992           | Maize                     | 9                                                           |
| 106             | Italy   | 1992           | Maize Germ Oil            | 3                                                           |
| 106             | Italy   | 1992           | Marine Fish, Other        | 6                                                           |
| 106             | Italy   | 1992           | Meat, Other               | 16                                                          |
| 106             | Italy   | 1992           | Milk, Whole               | 110                                                         |
| 106             | Italy   | 1992           | Molluscs, Other           | 8                                                           |
| 106             | Italy   | 1992           | Mutton & Goat Meat        | 5                                                           |
| 106             | Italy   | 1992           | Nuts                      | 16                                                          |

Dietary calcium and zinc deficiency risks are decreasing but remain prevalent

| FAO countrycode | Country | Reference year | Food item                 | Gross food supply (g capita <sup>-1</sup> d <sup>-1</sup> ) |
|-----------------|---------|----------------|---------------------------|-------------------------------------------------------------|
| 106             | Italy   | 1992           | Offals, Edible            | 11                                                          |
| 106             | Italy   | 1992           | Olive Oil                 | 31                                                          |
| 106             | Italy   | 1992           | Olives                    | 5                                                           |
| 106             | Italy   | 1992           | Onions                    | 20                                                          |
| 106             | Italy   | 1992           | Oranges, Mandarines       | 105                                                         |
| 106             | Italy   | 1992           | Palm Oil                  | 4                                                           |
| 106             | Italy   | 1992           | Peas                      | 3                                                           |
| 106             | Italy   | 1992           | Pelagic Fish              | 10                                                          |
| 106             | Italy   | 1992           | Pigmeat                   | 91                                                          |
| 106             | Italy   | 1992           | Pineapples                | 4                                                           |
| 106             | Italy   | 1992           | Potatoes                  | 123                                                         |
| 106             | Italy   | 1992           | Poultry Meat              | 54                                                          |
| 106             | Italy   | 1992           | Pulses, Other             | 8                                                           |
| 106             | Italy   | 1992           | Rape and Mustard Oil      | 6                                                           |
| 106             | Italy   | 1992           | Rice (Milled Equivalent)  | 13                                                          |
| 106             | Italy   | 1992           | Soyabean Oil              | 7                                                           |
| 106             | Italy   | 1992           | Sugar, Refined Equivalent | 74                                                          |
| 106             | Italy   | 1992           | Sunflowerseed Oil         | 8                                                           |
| 106             | Italy   | 1992           | Sweet Potatoes            | 1                                                           |
| 106             | Italy   | 1992           | Sweeteners, Other         | 3                                                           |
| 106             | Italy   | 1992           | Tomatoes                  | 168                                                         |
| 106             | Italy   | 1992           | Vegetables, Other         | 328                                                         |
| 106             | Italy   | 1992           | Wheat                     | 402                                                         |
| 106             | Italy   | 1992           | Wine                      | 158                                                         |
| 106             | Italy   | 1993           | Apples                    | 71                                                          |
| 106             | Italy   | 1993           | Bananas                   | 22                                                          |
| 106             | Italy   | 1993           | Barley                    | 1                                                           |
| 106             | Italy   | 1993           | Beans                     | 4                                                           |
| 106             | Italy   | 1993           | Beer                      | 61                                                          |
| 106             | Italy   | 1993           | Beverages, Alcoholic      | 2                                                           |
| 106             | Italy   | 1993           | Bovine Meat               | 73                                                          |
| 106             | Italy   | 1993           | Butter, Ghee              | 6                                                           |
| 106             | Italy   | 1993           | Cephalopods               | 7                                                           |
| 106             | Italy   | 1993           | Cheese                    | 52                                                          |
| 106             | Italy   | 1993           | Cocoa Beans               | 3                                                           |
| 106             | Italy   | 1993           | Coconut Oil               | 2                                                           |
| 106             | Italy   | 1993           | Coconuts - Incl Copra     | 1                                                           |
| 106             | Italy   | 1993           | Coffee                    | 14                                                          |
| 106             | Italy   | 1993           | Cream                     | 8                                                           |
| 106             | Italy   | 1993           | Crustaceans               | 4                                                           |
| 106             | Italy   | 1993           | Demersal Fish             | 20                                                          |
| 106             | Italy   | 1993           | Eggs                      | 33                                                          |
| 106             | Italy   | 1993           | Fats, Animals, Raw        | 15                                                          |
| 106             | Italy   | 1993           | Freshwater Fish           | 4                                                           |
| 106             | Italy   | 1993           | Fruits, Other             | 105                                                         |
| 106             | Italy   | 1993           | Grapefruit                | 4                                                           |
| 106             | Italy   | 1993           | Grapes                    | 24                                                          |
| 106             | Italy   | 1993           | Groundnut Oil             | 2                                                           |
| 106             | Italy   | 1993           | Groundnuts (Shelled Eq)   | 1                                                           |
| 106             | Italy   | 1993           | Honey                     | 1                                                           |
| 106             | Italy   | 1993           | Lemons, Limes             | 28                                                          |
| 106             | Italy   | 1993           | Maize                     | 9                                                           |
| 106             | Italy   | 1993           | Maize Germ Oil            | 4                                                           |
| 106             | Italy   | 1993           | Marine Fish, Other        | 5                                                           |
| 106             | Italy   | 1993           | Meat, Other               | 15                                                          |
| 106             | Italy   | 1993           | Milk, Whole               | 99                                                          |
| 106             | Italy   | 1993           | Molluscs, Other           | 8                                                           |
| 106             | Italy   | 1993           | Mutton & Goat Meat        | 5                                                           |
| 106             | Italy   | 1993           | Nuts                      | 13                                                          |
| 106             | Italy   | 1993           | Offals, Edible            | 10                                                          |
| 106             | Italy   | 1993           | Olive Oil                 | 32                                                          |
| 106             | Italy   | 1993           | Olives                    | 6                                                           |
| 106             | Italy   | 1993           | Onions                    | 18                                                          |
| 106             | Italy   | 1993           | Oranges, Mandarines       | 119                                                         |
| 106             | Italy   | 1993           | Palm Oil                  | 2                                                           |
| 106             | Italy   | 1993           | Peas                      | 2                                                           |
| 106             | Italy   | 1993           | Pelagic Fish              | 10                                                          |
| 106             | Italy   | 1993           | Pigmeat                   | 94                                                          |
| 106             | Italy   | 1993           | Pineapples                | 4                                                           |
| 106             | Italy   | 1993           | Potatoes                  | 116                                                         |
| 106             | Italy   | 1993           | Poultry Meat              | 53                                                          |
| 106             | Italy   | 1993           | Pulses, Other             | 8                                                           |
| 106             | Italy   | 1993           | Rape and Mustard Oil      | 5                                                           |
| 106             | Italy   | 1993           | Rice (Milled Equivalent)  | 15                                                          |
| 106             | Italy   | 1993           | Soyabean Oil              | 9                                                           |
| 106             | Italy   | 1993           | Sugar, Refined Equivalent | 74                                                          |
| 106             | Italy   | 1993           | Sunflowerseed Oil         | 9                                                           |
| 106             | Italy   | 1993           | Sweet Potatoes            | 1                                                           |
| 106             | Italy   | 1993           | Sweeteners, Other         | 3                                                           |
| 106             | Italy   | 1993           | Tomatoes                  | 137                                                         |
| 106             | Italy   | 1993           | Vegetables, Other         | 287                                                         |
| 106             | Italy   | 1993           | Wheat                     | 392                                                         |
| 106             | Italy   | 1993           | Wine                      | 159                                                         |
| 106             | Italy   | 1994           | Apples                    | 64                                                          |
| 106             | Italy   | 1994           | Bananas                   | 20                                                          |
| 106             | Italy   | 1994           | Barley                    | 1                                                           |
| 106             | Italy   | 1994           | Beans                     | 4                                                           |
| 106             | Italy   | 1994           | Beer                      | 61                                                          |
| 106             | Italy   | 1994           | Beverages, Alcoholic      | 2                                                           |
| 106             | Italy   | 1994           | Bovine Meat               | 74                                                          |
| 106             | Italy   | 1994           | Butter, Ghee              | 6                                                           |
| 106             | Italy   | 1994           | Cephalopods               | 8                                                           |
| 106             | Italy   | 1994           | Cheese                    | 51                                                          |
| 106             | Italy   | 1994           | Cocoa Beans               | 4                                                           |
| 106             | Italy   | 1994           | Coconut Oil               | 2                                                           |
| 106             | Italy   | 1994           | Coffee                    | 14                                                          |
| 106             | Italy   | 1994           | Cream                     | 9                                                           |

Dietary calcium and zinc deficiency risks are decreasing but remain prevalent

| FAO countrycode | Country | Reference year | Food item                 | Gross food supply (g capita <sup>-1</sup> d <sup>-1</sup> ) |
|-----------------|---------|----------------|---------------------------|-------------------------------------------------------------|
| 106             | Italy   | 1994           | Crustaceans               | 4                                                           |
| 106             | Italy   | 1994           | Demersal Fish             | 21                                                          |
| 106             | Italy   | 1994           | Eggs                      | 33                                                          |
| 106             | Italy   | 1994           | Fats, Animals, Raw        | 15                                                          |
| 106             | Italy   | 1994           | Freshwater Fish           | 4                                                           |
| 106             | Italy   | 1994           | Fruits, Other             | 110                                                         |
| 106             | Italy   | 1994           | Grapefruit                | 4                                                           |
| 106             | Italy   | 1994           | Grapes                    | 22                                                          |
| 106             | Italy   | 1994           | Groundnut Oil             | 2                                                           |
| 106             | Italy   | 1994           | Groundnuts (Shelled Eq)   | 1                                                           |
| 106             | Italy   | 1994           | Honey                     | 1                                                           |
| 106             | Italy   | 1994           | Lemons, Limes             | 27                                                          |
| 106             | Italy   | 1994           | Maize                     | 10                                                          |
| 106             | Italy   | 1994           | Maize Germ Oil            | 4                                                           |
| 106             | Italy   | 1994           | Marine Fish, Other        | 4                                                           |
| 106             | Italy   | 1994           | Meat, Other               | 16                                                          |
| 106             | Italy   | 1994           | Milk, Whole               | 100                                                         |
| 106             | Italy   | 1994           | Molluscs, Other           | 7                                                           |
| 106             | Italy   | 1994           | Mutton & Goat Meat        | 5                                                           |
| 106             | Italy   | 1994           | Nuts                      | 16                                                          |
| 106             | Italy   | 1994           | Offals, Edible            | 10                                                          |
| 106             | Italy   | 1994           | Oilcrops Oil, Other       | 1                                                           |
| 106             | Italy   | 1994           | Olive Oil                 | 34                                                          |
| 106             | Italy   | 1994           | Olives                    | 4                                                           |
| 106             | Italy   | 1994           | Onions                    | 18                                                          |
| 106             | Italy   | 1994           | Oranges, Mandarines       | 102                                                         |
| 106             | Italy   | 1994           | Palm Oil                  | 2                                                           |
| 106             | Italy   | 1994           | Peas                      | 2                                                           |
| 106             | Italy   | 1994           | Pelagic Fish              | 10                                                          |
| 106             | Italy   | 1994           | Pigmeat                   | 93                                                          |
| 106             | Italy   | 1994           | Pineapples                | 4                                                           |
| 106             | Italy   | 1994           | Potatoes                  | 120                                                         |
| 106             | Italy   | 1994           | Poultry Meat              | 52                                                          |
| 106             | Italy   | 1994           | Pulses, Other             | 9                                                           |
| 106             | Italy   | 1994           | Rape and Mustard Oil      | 4                                                           |
| 106             | Italy   | 1994           | Rice (Milled Equivalent)  | 16                                                          |
| 106             | Italy   | 1994           | Soyabean Oil              | 11                                                          |
| 106             | Italy   | 1994           | Sugar, Refined Equivalent | 72                                                          |
| 106             | Italy   | 1994           | Sunflowerseed Oil         | 9                                                           |
| 106             | Italy   | 1994           | Sweet Potatoes            | 1                                                           |
| 106             | Italy   | 1994           | Sweeteners, Other         | 3                                                           |
| 106             | Italy   | 1994           | Tomatoes                  | 159                                                         |
| 106             | Italy   | 1994           | Vegetables, Other         | 300                                                         |
| 106             | Italy   | 1994           | Wheat                     | 386                                                         |
| 106             | Italy   | 1994           | Wine                      | 159                                                         |
| 106             | Italy   | 1995           | Apples                    | 57                                                          |
| 106             | Italy   | 1995           | Bananas                   | 23                                                          |
| 106             | Italy   | 1995           | Barley                    | 2                                                           |
| 106             | Italy   | 1995           | Beans                     | 4                                                           |
| 106             | Italy   | 1995           | Beer                      | 64                                                          |
| 106             | Italy   | 1995           | Beverages, Alcoholic      | 2                                                           |
| 106             | Italy   | 1995           | Bovine Meat               | 70                                                          |
| 106             | Italy   | 1995           | Butter, Ghee              | 7                                                           |
| 106             | Italy   | 1995           | Cephalopods               | 8                                                           |
| 106             | Italy   | 1995           | Cheese                    | 50                                                          |
| 106             | Italy   | 1995           | Cocoa Beans               | 4                                                           |
| 106             | Italy   | 1995           | Coconuts - Incl Copra     | 1                                                           |
| 106             | Italy   | 1995           | Coffee                    | 13                                                          |
| 106             | Italy   | 1995           | Cream                     | 8                                                           |
| 106             | Italy   | 1995           | Crustaceans               | 4                                                           |
| 106             | Italy   | 1995           | Demersal Fish             | 18                                                          |
| 106             | Italy   | 1995           | Eggs                      | 33                                                          |
| 106             | Italy   | 1995           | Fats, Animals, Raw        | 15                                                          |
| 106             | Italy   | 1995           | Freshwater Fish           | 4                                                           |
| 106             | Italy   | 1995           | Fruits, Other             | 106                                                         |
| 106             | Italy   | 1995           | Grapefruit                | 3                                                           |
| 106             | Italy   | 1995           | Grapes                    | 11                                                          |
| 106             | Italy   | 1995           | Groundnut Oil             | 2                                                           |
| 106             | Italy   | 1995           | Groundnuts (Shelled Eq)   | 1                                                           |
| 106             | Italy   | 1995           | Honey                     | 1                                                           |
| 106             | Italy   | 1995           | Lemons, Limes             | 22                                                          |
| 106             | Italy   | 1995           | Maize                     | 10                                                          |
| 106             | Italy   | 1995           | Maize Germ Oil            | 4                                                           |
| 106             | Italy   | 1995           | Marine Fish, Other        | 4                                                           |
| 106             | Italy   | 1995           | Meat, Other               | 16                                                          |
| 106             | Italy   | 1995           | Milk, Whole               | 92                                                          |
| 106             | Italy   | 1995           | Molluscs, Other           | 10                                                          |
| 106             | Italy   | 1995           | Mutton & Goat Meat        | 4                                                           |
| 106             | Italy   | 1995           | Nuts                      | 15                                                          |
| 106             | Italy   | 1995           | Offals, Edible            | 10                                                          |
| 106             | Italy   | 1995           | Olive Oil                 | 33                                                          |
| 106             | Italy   | 1995           | Olives                    | 6                                                           |
| 106             | Italy   | 1995           | Onions                    | 17                                                          |
| 106             | Italy   | 1995           | Oranges, Mandarines       | 101                                                         |
| 106             | Italy   | 1995           | Palm Oil                  | 4                                                           |
| 106             | Italy   | 1995           | Peas                      | 3                                                           |
| 106             | Italy   | 1995           | Pelagic Fish              | 11                                                          |
| 106             | Italy   | 1995           | Pigmeat                   | 90                                                          |
| 106             | Italy   | 1995           | Pineapples                | 3                                                           |
| 106             | Italy   | 1995           | Potatoes                  | 101                                                         |
| 106             | Italy   | 1995           | Poultry Meat              | 50                                                          |
| 106             | Italy   | 1995           | Pulses, Other             | 7                                                           |
| 106             | Italy   | 1995           | Rape and Mustard Oil      | 4                                                           |
| 106             | Italy   | 1995           | Rice (Milled Equivalent)  | 16                                                          |
| 106             | Italy   | 1995           | Soyabean Oil              | 12                                                          |
| 106             | Italy   | 1995           | Sugar, Refined Equivalent | 72                                                          |
| 106             | Italy   | 1995           | Sunflowerseed Oil         | 10                                                          |

Dietary calcium and zinc deficiency risks are decreasing but remain prevalent

| FAO countrycode | Country | Reference year | Food item                 | Gross food supply (g capita <sup>-1</sup> d <sup>-1</sup> ) |
|-----------------|---------|----------------|---------------------------|-------------------------------------------------------------|
| 106             | Italy   | 1995           | Sweet Potatoes            | 1                                                           |
| 106             | Italy   | 1995           | Sweeteners, Other         | 4                                                           |
| 106             | Italy   | 1995           | Tomatoes                  | 152                                                         |
| 106             | Italy   | 1995           | Vegetables, Other         | 318                                                         |
| 106             | Italy   | 1995           | Wheat                     | 406                                                         |
| 106             | Italy   | 1995           | Wine                      | 159                                                         |
| 106             | Italy   | 1996           | Apples                    | 53                                                          |
| 106             | Italy   | 1996           | Bananas                   | 22                                                          |
| 106             | Italy   | 1996           | Barley                    | 1                                                           |
| 106             | Italy   | 1996           | Beans                     | 4                                                           |
| 106             | Italy   | 1996           | Beer                      | 63                                                          |
| 106             | Italy   | 1996           | Beverages, Alcoholic      | 2                                                           |
| 106             | Italy   | 1996           | Bovine Meat               | 70                                                          |
| 106             | Italy   | 1996           | Butter, Ghee              | 7                                                           |
| 106             | Italy   | 1996           | Cephalopods               | 8                                                           |
| 106             | Italy   | 1996           | Cheese                    | 54                                                          |
| 106             | Italy   | 1996           | Cocoa Beans               | 4                                                           |
| 106             | Italy   | 1996           | Coconut Oil               | 2                                                           |
| 106             | Italy   | 1996           | Coconuts - Incl Copra     | 1                                                           |
| 106             | Italy   | 1996           | Coffee                    | 13                                                          |
| 106             | Italy   | 1996           | Cream                     | 9                                                           |
| 106             | Italy   | 1996           | Crustaceans               | 4                                                           |
| 106             | Italy   | 1996           | Demersal Fish             | 19                                                          |
| 106             | Italy   | 1996           | Eggs                      | 35                                                          |
| 106             | Italy   | 1996           | Fats, Animals, Raw        | 14                                                          |
| 106             | Italy   | 1996           | Freshwater Fish           | 5                                                           |
| 106             | Italy   | 1996           | Fruits, Other             | 106                                                         |
| 106             | Italy   | 1996           | Grapefruit                | 3                                                           |
| 106             | Italy   | 1996           | Grapes                    | 48                                                          |
| 106             | Italy   | 1996           | Groundnut Oil             | 2                                                           |
| 106             | Italy   | 1996           | Groundnuts (Shelled Eq)   | 1                                                           |
| 106             | Italy   | 1996           | Honey                     | 1                                                           |
| 106             | Italy   | 1996           | Lemons, Limes             | 25                                                          |
| 106             | Italy   | 1996           | Maize                     | 10                                                          |
| 106             | Italy   | 1996           | Maize Germ Oil            | 5                                                           |
| 106             | Italy   | 1996           | Marine Fish, Other        | 5                                                           |
| 106             | Italy   | 1996           | Meat, Other               | 16                                                          |
| 106             | Italy   | 1996           | Milk, Whole               | 102                                                         |
| 106             | Italy   | 1996           | Molluscs, Other           | 8                                                           |
| 106             | Italy   | 1996           | Mutton & Goat Meat        | 5                                                           |
| 106             | Italy   | 1996           | Nuts                      | 16                                                          |
| 106             | Italy   | 1996           | Oats                      | 1                                                           |
| 106             | Italy   | 1996           | Offals, Edible            | 10                                                          |
| 106             | Italy   | 1996           | Olive Oil                 | 33                                                          |
| 106             | Italy   | 1996           | Olives                    | 5                                                           |
| 106             | Italy   | 1996           | Onions                    | 17                                                          |
| 106             | Italy   | 1996           | Oranges, Mandarines       | 92                                                          |
| 106             | Italy   | 1996           | Palm Oil                  | 2                                                           |
| 106             | Italy   | 1996           | Peas                      | 3                                                           |
| 106             | Italy   | 1996           | Pelagic Fish              | 11                                                          |
| 106             | Italy   | 1996           | Pigmeat                   | 98                                                          |
| 106             | Italy   | 1996           | Pineapples                | 4                                                           |
| 106             | Italy   | 1996           | Potatoes                  | 104                                                         |
| 106             | Italy   | 1996           | Poultry Meat              | 51                                                          |
| 106             | Italy   | 1996           | Pulses, Other             | 7                                                           |
| 106             | Italy   | 1996           | Rape and Mustard Oil      | 4                                                           |
| 106             | Italy   | 1996           | Rice (Milled Equivalent)  | 16                                                          |
| 106             | Italy   | 1996           | Soyabean Oil              | 11                                                          |
| 106             | Italy   | 1996           | Sugar, Refined Equivalent | 73                                                          |
| 106             | Italy   | 1996           | Sunflowerseed Oil         | 10                                                          |
| 106             | Italy   | 1996           | Sweeteners, Other         | 4                                                           |
| 106             | Italy   | 1996           | Tomatoes                  | 182                                                         |
| 106             | Italy   | 1996           | Vegetables, Other         | 290                                                         |
| 106             | Italy   | 1996           | Wheat                     | 408                                                         |
| 106             | Italy   | 1996           | Wine                      | 158                                                         |
| 106             | Italy   | 1997           | Apples                    | 55                                                          |
| 106             | Italy   | 1997           | Bananas                   | 20                                                          |
| 106             | Italy   | 1997           | Barley                    | 2                                                           |
| 106             | Italy   | 1997           | Beans                     | 5                                                           |
| 106             | Italy   | 1997           | Beer                      | 64                                                          |
| 106             | Italy   | 1997           | Beverages, Alcoholic      | 2                                                           |
| 106             | Italy   | 1997           | Bovine Meat               | 66                                                          |
| 106             | Italy   | 1997           | Butter, Ghee              | 7                                                           |
| 106             | Italy   | 1997           | Cephalopods               | 8                                                           |
| 106             | Italy   | 1997           | Cheese                    | 51                                                          |
| 106             | Italy   | 1997           | Cocoa Beans               | 4                                                           |
| 106             | Italy   | 1997           | Coconut Oil               | 2                                                           |
| 106             | Italy   | 1997           | Coconuts - Incl Copra     | 1                                                           |
| 106             | Italy   | 1997           | Coffee                    | 14                                                          |
| 106             | Italy   | 1997           | Cream                     | 9                                                           |
| 106             | Italy   | 1997           | Crustaceans               | 4                                                           |
| 106             | Italy   | 1997           | Demersal Fish             | 18                                                          |
| 106             | Italy   | 1997           | Eggs                      | 35                                                          |
| 106             | Italy   | 1997           | Fats, Animals, Raw        | 16                                                          |
| 106             | Italy   | 1997           | Freshwater Fish           | 5                                                           |
| 106             | Italy   | 1997           | Fruits, Other             | 85                                                          |
| 106             | Italy   | 1997           | Grapefruit                | 4                                                           |
| 106             | Italy   | 1997           | Grapes                    | 33                                                          |
| 106             | Italy   | 1997           | Groundnut Oil             | 2                                                           |
| 106             | Italy   | 1997           | Groundnuts (Shelled Eq)   | 1                                                           |
| 106             | Italy   | 1997           | Honey                     | 1                                                           |
| 106             | Italy   | 1997           | Lemons, Limes             | 25                                                          |
| 106             | Italy   | 1997           | Maize                     | 10                                                          |
| 106             | Italy   | 1997           | Maize Germ Oil            | 5                                                           |
| 106             | Italy   | 1997           | Marine Fish, Other        | 4                                                           |
| 106             | Italy   | 1997           | Meat, Other               | 16                                                          |
| 106             | Italy   | 1997           | Milk, Whole               | 99                                                          |

Dietary calcium and zinc deficiency risks are decreasing but remain prevalent

| FAO countrycode | Country | Reference year | Food item                 | Gross food supply (g capita <sup>-1</sup> d <sup>-1</sup> ) |
|-----------------|---------|----------------|---------------------------|-------------------------------------------------------------|
| 106             | Italy   | 1997           | Molluscs, Other           | 9                                                           |
| 106             | Italy   | 1997           | Mutton & Goat Meat        | 4                                                           |
| 106             | Italy   | 1997           | Nuts                      | 16                                                          |
| 106             | Italy   | 1997           | Offals, Edible            | 10                                                          |
| 106             | Italy   | 1997           | Olive Oil                 | 34                                                          |
| 106             | Italy   | 1997           | Olives                    | 8                                                           |
| 106             | Italy   | 1997           | Onions                    | 17                                                          |
| 106             | Italy   | 1997           | Oranges, Mandarines       | 99                                                          |
| 106             | Italy   | 1997           | Palm Oil                  | 2                                                           |
| 106             | Italy   | 1997           | Peas                      | 3                                                           |
| 106             | Italy   | 1997           | Pelagic Fish              | 11                                                          |
| 106             | Italy   | 1997           | Pigmeat                   | 97                                                          |
| 106             | Italy   | 1997           | Pineapples                | 4                                                           |
| 106             | Italy   | 1997           | Potatoes                  | 106                                                         |
| 106             | Italy   | 1997           | Poultry Meat              | 51                                                          |
| 106             | Italy   | 1997           | Pulses, Other             | 8                                                           |
| 106             | Italy   | 1997           | Rape and Mustard Oil      | 4                                                           |
| 106             | Italy   | 1997           | Rice (Milled Equivalent)  | 17                                                          |
| 106             | Italy   | 1997           | Soyabean Oil              | 10                                                          |
| 106             | Italy   | 1997           | Sugar, Refined Equivalent | 76                                                          |
| 106             | Italy   | 1997           | Sunflowerseed Oil         | 11                                                          |
| 106             | Italy   | 1997           | Sweet Potatoes            | 1                                                           |
| 106             | Italy   | 1997           | Sweeteners, Other         | 4                                                           |
| 106             | Italy   | 1997           | Tomatoes                  | 176                                                         |
| 106             | Italy   | 1997           | Vegetables, Other         | 295                                                         |
| 106             | Italy   | 1997           | Wheat                     | 411                                                         |
| 106             | Italy   | 1997           | Wine                      | 155                                                         |
| 106             | Italy   | 1998           | Apples                    | 55                                                          |
| 106             | Italy   | 1998           | Bananas                   | 18                                                          |
| 106             | Italy   | 1998           | Barley                    | 3                                                           |
| 106             | Italy   | 1998           | Beans                     | 4                                                           |
| 106             | Italy   | 1998           | Beer                      | 70                                                          |
| 106             | Italy   | 1998           | Beverages, Alcoholic      | 2                                                           |
| 106             | Italy   | 1998           | Bovine Meat               | 67                                                          |
| 106             | Italy   | 1998           | Butter, Ghee              | 9                                                           |
| 106             | Italy   | 1998           | Cephalopods               | 8                                                           |
| 106             | Italy   | 1998           | Cheese                    | 60                                                          |
| 106             | Italy   | 1998           | Cocoa Beans               | 4                                                           |
| 106             | Italy   | 1998           | Coconut Oil               | 1                                                           |
| 106             | Italy   | 1998           | Coconuts - Incl Copra     | 1                                                           |
| 106             | Italy   | 1998           | Coffee                    | 14                                                          |
| 106             | Italy   | 1998           | Cream                     | 10                                                          |
| 106             | Italy   | 1998           | Crustaceans               | 4                                                           |
| 106             | Italy   | 1998           | Demersal Fish             | 17                                                          |
| 106             | Italy   | 1998           | Eggs                      | 34                                                          |
| 106             | Italy   | 1998           | Fats, Animals, Raw        | 15                                                          |
| 106             | Italy   | 1998           | Freshwater Fish           | 5                                                           |
| 106             | Italy   | 1998           | Fruits, Other             | 105                                                         |
| 106             | Italy   | 1998           | Grapefruit                | 4                                                           |
| 106             | Italy   | 1998           | Grapes                    | 44                                                          |
| 106             | Italy   | 1998           | Groundnut Oil             | 2                                                           |
| 106             | Italy   | 1998           | Groundnuts (Shelled Eq)   | 1                                                           |
| 106             | Italy   | 1998           | Honey                     | 1                                                           |
| 106             | Italy   | 1998           | Lemons, Limes             | 22                                                          |
| 106             | Italy   | 1998           | Maize                     | 10                                                          |
| 106             | Italy   | 1998           | Maize Germ Oil            | 5                                                           |
| 106             | Italy   | 1998           | Marine Fish, Other        | 4                                                           |
| 106             | Italy   | 1998           | Meat, Other               | 15                                                          |
| 106             | Italy   | 1998           | Milk, Whole               | 99                                                          |
| 106             | Italy   | 1998           | Molluscs, Other           | 10                                                          |
| 106             | Italy   | 1998           | Mutton & Goat Meat        | 4                                                           |
| 106             | Italy   | 1998           | Nuts                      | 18                                                          |
| 106             | Italy   | 1998           | Offals, Edible            | 10                                                          |
| 106             | Italy   | 1998           | Oilcrops Oil, Other       | 1                                                           |
| 106             | Italy   | 1998           | Olive Oil                 | 35                                                          |
| 106             | Italy   | 1998           | Olives                    | 7                                                           |
| 106             | Italy   | 1998           | Onions                    | 16                                                          |
| 106             | Italy   | 1998           | Oranges, Mandarines       | 79                                                          |
| 106             | Italy   | 1998           | Palm Oil                  | 4                                                           |
| 106             | Italy   | 1998           | Peas                      | 4                                                           |
| 106             | Italy   | 1998           | Pelagic Fish              | 11                                                          |
| 106             | Italy   | 1998           | Pigmeat                   | 104                                                         |
| 106             | Italy   | 1998           | Pineapples                | 4                                                           |
| 106             | Italy   | 1998           | Potatoes                  | 112                                                         |
| 106             | Italy   | 1998           | Poultry Meat              | 51                                                          |
| 106             | Italy   | 1998           | Pulses, Other             | 8                                                           |
| 106             | Italy   | 1998           | Rape and Mustard Oil      | 3                                                           |
| 106             | Italy   | 1998           | Rice (Milled Equivalent)  | 17                                                          |
| 106             | Italy   | 1998           | Soyabean Oil              | 10                                                          |
| 106             | Italy   | 1998           | Sugar, Refined Equivalent | 78                                                          |
| 106             | Italy   | 1998           | Sunflowerseed Oil         | 12                                                          |
| 106             | Italy   | 1998           | Sweet Potatoes            | 1                                                           |
| 106             | Italy   | 1998           | Sweeteners, Other         | 4                                                           |
| 106             | Italy   | 1998           | Tomatoes                  | 163                                                         |
| 106             | Italy   | 1998           | Vegetables, Other         | 298                                                         |
| 106             | Italy   | 1998           | Wheat                     | 411                                                         |
| 106             | Italy   | 1998           | Wine                      | 155                                                         |
| 106             | Italy   | 1999           | Apples                    | 60                                                          |
| 106             | Italy   | 1999           | Bananas                   | 18                                                          |
| 106             | Italy   | 1999           | Barley                    | 2                                                           |
| 106             | Italy   | 1999           | Beans                     | 4                                                           |
| 106             | Italy   | 1999           | Beer                      | 71                                                          |
| 106             | Italy   | 1999           | Beverages, Alcoholic      | 2                                                           |
| 106             | Italy   | 1999           | Bovine Meat               | 70                                                          |
| 106             | Italy   | 1999           | Butter, Ghee              | 9                                                           |
| 106             | Italy   | 1999           | Cephalopods               | 9                                                           |
| 106             | Italy   | 1999           | Cereals, Other            | 1                                                           |



Dietary calcium and zinc deficiency risks are decreasing but remain prevalent

| FAO countrycode | Country | Reference year | Food item                 | Gross food supply (g capita <sup>-1</sup> d <sup>-1</sup> ) |
|-----------------|---------|----------------|---------------------------|-------------------------------------------------------------|
| 106             | Italy   | 1999           | Cheese                    | 61                                                          |
| 106             | Italy   | 1999           | Cocoa Beans               | 5                                                           |
| 106             | Italy   | 1999           | Coconut Oil               | 2                                                           |
| 106             | Italy   | 1999           | Coconuts - Incl Copra     | 1                                                           |
| 106             | Italy   | 1999           | Coffee                    | 14                                                          |
| 106             | Italy   | 1999           | Cream                     | 10                                                          |
| 106             | Italy   | 1999           | Crustaceans               | 4                                                           |
| 106             | Italy   | 1999           | Demersal Fish             | 17                                                          |
| 106             | Italy   | 1999           | Eggs                      | 34                                                          |
| 106             | Italy   | 1999           | Fats, Animals, Raw        | 16                                                          |
| 106             | Italy   | 1999           | Freshwater Fish           | 5                                                           |
| 106             | Italy   | 1999           | Fruits, Other             | 119                                                         |
| 106             | Italy   | 1999           | Grapefruit                | 4                                                           |
| 106             | Italy   | 1999           | Grapes                    | 44                                                          |
| 106             | Italy   | 1999           | Groundnut Oil             | 2                                                           |
| 106             | Italy   | 1999           | Groundnuts (Shelled Eq)   | 1                                                           |
| 106             | Italy   | 1999           | Honey                     | 1                                                           |
| 106             | Italy   | 1999           | Lemons, Limes             | 25                                                          |
| 106             | Italy   | 1999           | Maize                     | 11                                                          |
| 106             | Italy   | 1999           | Maize Germ Oil            | 4                                                           |
| 106             | Italy   | 1999           | Marine Fish, Other        | 4                                                           |
| 106             | Italy   | 1999           | Meat, Other               | 16                                                          |
| 106             | Italy   | 1999           | Milk, Whole               | 122                                                         |
| 106             | Italy   | 1999           | Molluscs, Other           | 10                                                          |
| 106             | Italy   | 1999           | Mutton & Goat Meat        | 4                                                           |
| 106             | Italy   | 1999           | Nuts                      | 17                                                          |
| 106             | Italy   | 1999           | Offals, Edible            | 10                                                          |
| 106             | Italy   | 1999           | Olive Oil                 | 35                                                          |
| 106             | Italy   | 1999           | Olives                    | 7                                                           |
| 106             | Italy   | 1999           | Onions                    | 18                                                          |
| 106             | Italy   | 1999           | Oranges, Mandarines       | 102                                                         |
| 106             | Italy   | 1999           | Palm Oil                  | 2                                                           |
| 106             | Italy   | 1999           | Peas                      | 4                                                           |
| 106             | Italy   | 1999           | Pelagic Fish              | 11                                                          |
| 106             | Italy   | 1999           | Pigmeat                   | 102                                                         |
| 106             | Italy   | 1999           | Pineapples                | 5                                                           |
| 106             | Italy   | 1999           | Potatoes                  | 106                                                         |
| 106             | Italy   | 1999           | Poultry Meat              | 50                                                          |
| 106             | Italy   | 1999           | Pulses, Other             | 7                                                           |
| 106             | Italy   | 1999           | Rape and Mustard Oil      | 4                                                           |
| 106             | Italy   | 1999           | Rice (Milled Equivalent)  | 16                                                          |
| 106             | Italy   | 1999           | Soyabean Oil              | 11                                                          |
| 106             | Italy   | 1999           | Sugar, Refined Equivalent | 70                                                          |
| 106             | Italy   | 1999           | Sunflowerseed Oil         | 13                                                          |
| 106             | Italy   | 1999           | Sweet Potatoes            | 1                                                           |
| 106             | Italy   | 1999           | Sweeteners, Other         | 4                                                           |
| 106             | Italy   | 1999           | Tomatoes                  | 211                                                         |
| 106             | Italy   | 1999           | Vegetables, Other         | 278                                                         |
| 106             | Italy   | 1999           | Wheat                     | 414                                                         |
| 106             | Italy   | 1999           | Wine                      | 153                                                         |
| 106             | Italy   | 2000           | Apples                    | 61                                                          |
| 106             | Italy   | 2000           | Bananas                   | 20                                                          |
| 106             | Italy   | 2000           | Barley                    | 1                                                           |
| 106             | Italy   | 2000           | Beans                     | 4                                                           |
| 106             | Italy   | 2000           | Beer                      | 73                                                          |
| 106             | Italy   | 2000           | Beverages, Alcoholic      | 3                                                           |
| 106             | Italy   | 2000           | Bovine Meat               | 68                                                          |
| 106             | Italy   | 2000           | Butter, Ghee              | 8                                                           |
| 106             | Italy   | 2000           | Cephalopods               | 9                                                           |
| 106             | Italy   | 2000           | Cheese                    | 61                                                          |
| 106             | Italy   | 2000           | Cocoa Beans               | 5                                                           |
| 106             | Italy   | 2000           | Coconut Oil               | 2                                                           |
| 106             | Italy   | 2000           | Coconuts - Incl Copra     | 1                                                           |
| 106             | Italy   | 2000           | Coffee                    | 15                                                          |
| 106             | Italy   | 2000           | Cream                     | 10                                                          |
| 106             | Italy   | 2000           | Crustaceans               | 5                                                           |
| 106             | Italy   | 2000           | Demersal Fish             | 16                                                          |
| 106             | Italy   | 2000           | Eggs                      | 34                                                          |
| 106             | Italy   | 2000           | Fats, Animals, Raw        | 16                                                          |
| 106             | Italy   | 2000           | Freshwater Fish           | 5                                                           |
| 106             | Italy   | 2000           | Fruits, Other             | 118                                                         |
| 106             | Italy   | 2000           | Grapefruit                | 4                                                           |
| 106             | Italy   | 2000           | Grapes                    | 56                                                          |
| 106             | Italy   | 2000           | Groundnut Oil             | 2                                                           |
| 106             | Italy   | 2000           | Groundnuts (Shelled Eq)   | 1                                                           |
| 106             | Italy   | 2000           | Honey                     | 1                                                           |
| 106             | Italy   | 2000           | Lemons, Limes             | 27                                                          |
| 106             | Italy   | 2000           | Maize                     | 11                                                          |
| 106             | Italy   | 2000           | Maize Germ Oil            | 4                                                           |
| 106             | Italy   | 2000           | Marine Fish, Other        | 4                                                           |
| 106             | Italy   | 2000           | Meat, Other               | 16                                                          |
| 106             | Italy   | 2000           | Milk, Whole               | 83                                                          |
| 106             | Italy   | 2000           | Molluscs, Other           | 11                                                          |
| 106             | Italy   | 2000           | Mutton & Goat Meat        | 4                                                           |
| 106             | Italy   | 2000           | Nuts                      | 17                                                          |
| 106             | Italy   | 2000           | Offals, Edible            | 10                                                          |
| 106             | Italy   | 2000           | Olive Oil                 | 35                                                          |
| 106             | Italy   | 2000           | Olives                    | 7                                                           |
| 106             | Italy   | 2000           | Onions                    | 18                                                          |
| 106             | Italy   | 2000           | Oranges, Mandarines       | 111                                                         |
| 106             | Italy   | 2000           | Palm Oil                  | 2                                                           |
| 106             | Italy   | 2000           | Peas                      | 4                                                           |
| 106             | Italy   | 2000           | Pelagic Fish              | 11                                                          |
| 106             | Italy   | 2000           | Pigmeat                   | 103                                                         |
| 106             | Italy   | 2000           | Pineapples                | 6                                                           |
| 106             | Italy   | 2000           | Potatoes                  | 117                                                         |
| 106             | Italy   | 2000           | Poultry Meat              | 52                                                          |

Dietary calcium and zinc deficiency risks are decreasing but remain prevalent

| FAO countrycode | Country | Reference year | Food item                 | Gross food supply (g capita <sup>-1</sup> d <sup>-1</sup> ) |
|-----------------|---------|----------------|---------------------------|-------------------------------------------------------------|
| 106             | Italy   | 2000           | Pulses, Other             | 7                                                           |
| 106             | Italy   | 2000           | Rape and Mustard Oil      | 4                                                           |
| 106             | Italy   | 2000           | Rice (Milled Equivalent)  | 16                                                          |
| 106             | Italy   | 2000           | Soyabean Oil              | 11                                                          |
| 106             | Italy   | 2000           | Sugar, Refined Equivalent | 74                                                          |
| 106             | Italy   | 2000           | Sunflowerseed Oil         | 12                                                          |
| 106             | Italy   | 2000           | Sweet Potatoes            | 1                                                           |
| 106             | Italy   | 2000           | Sweeteners, Other         | 4                                                           |
| 106             | Italy   | 2000           | Tomatoes                  | 216                                                         |
| 106             | Italy   | 2000           | Vegetables, Other         | 305                                                         |
| 106             | Italy   | 2000           | Wheat                     | 414                                                         |
| 106             | Italy   | 2000           | Wine                      | 147                                                         |
| 106             | Italy   | 2001           | Apples                    | 51                                                          |
| 106             | Italy   | 2001           | Bananas                   | 20                                                          |
| 106             | Italy   | 2001           | Barley                    | 1                                                           |
| 106             | Italy   | 2001           | Beans                     | 5                                                           |
| 106             | Italy   | 2001           | Beer                      | 73                                                          |
| 106             | Italy   | 2001           | Beverages, Alcoholic      | 3                                                           |
| 106             | Italy   | 2001           | Bovine Meat               | 66                                                          |
| 106             | Italy   | 2001           | Butter, Ghee              | 8                                                           |
| 106             | Italy   | 2001           | Cephalopods               | 10                                                          |
| 106             | Italy   | 2001           | Cheese                    | 61                                                          |
| 106             | Italy   | 2001           | Citrus, Other             | 1                                                           |
| 106             | Italy   | 2001           | Cocoa Beans               | 5                                                           |
| 106             | Italy   | 2001           | Coconut Oil               | 2                                                           |
| 106             | Italy   | 2001           | Coconuts - Incl Copra     | 1                                                           |
| 106             | Italy   | 2001           | Coffee                    | 15                                                          |
| 106             | Italy   | 2001           | Cream                     | 9                                                           |
| 106             | Italy   | 2001           | Crustaceans               | 5                                                           |
| 106             | Italy   | 2001           | Demersal Fish             | 17                                                          |
| 106             | Italy   | 2001           | Eggs                      | 33                                                          |
| 106             | Italy   | 2001           | Fats, Animals, Raw        | 16                                                          |
| 106             | Italy   | 2001           | Freshwater Fish           | 5                                                           |
| 106             | Italy   | 2001           | Fruits, Other             | 121                                                         |
| 106             | Italy   | 2001           | Grapefruit                | 3                                                           |
| 106             | Italy   | 2001           | Grapes                    | 41                                                          |
| 106             | Italy   | 2001           | Groundnut Oil             | 2                                                           |
| 106             | Italy   | 2001           | Groundnuts (Shelled Eq)   | 1                                                           |
| 106             | Italy   | 2001           | Honey                     | 1                                                           |
| 106             | Italy   | 2001           | Lemons, Limes             | 24                                                          |
| 106             | Italy   | 2001           | Maize                     | 12                                                          |
| 106             | Italy   | 2001           | Maize Germ Oil            | 4                                                           |
| 106             | Italy   | 2001           | Marine Fish, Other        | 5                                                           |
| 106             | Italy   | 2001           | Meat, Other               | 18                                                          |
| 106             | Italy   | 2001           | Milk, Whole               | 96                                                          |
| 106             | Italy   | 2001           | Molluscs, Other           | 12                                                          |
| 106             | Italy   | 2001           | Mutton & Goat Meat        | 4                                                           |
| 106             | Italy   | 2001           | Nuts                      | 17                                                          |
| 106             | Italy   | 2001           | Offals, Edible            | 10                                                          |
| 106             | Italy   | 2001           | Oilcrops Oil, Other       | 1                                                           |
| 106             | Italy   | 2001           | Olive Oil                 | 36                                                          |
| 106             | Italy   | 2001           | Olives                    | 7                                                           |
| 106             | Italy   | 2001           | Onions                    | 17                                                          |
| 106             | Italy   | 2001           | Oranges, Mandarines       | 102                                                         |
| 106             | Italy   | 2001           | Palm Oil                  | 2                                                           |
| 106             | Italy   | 2001           | Peas                      | 3                                                           |
| 106             | Italy   | 2001           | Pelagic Fish              | 12                                                          |
| 106             | Italy   | 2001           | Pigmeat                   | 109                                                         |
| 106             | Italy   | 2001           | Pineapples                | 4                                                           |
| 106             | Italy   | 2001           | Potatoes                  | 112                                                         |
| 106             | Italy   | 2001           | Poultry Meat              | 50                                                          |
| 106             | Italy   | 2001           | Pulses, Other             | 7                                                           |
| 106             | Italy   | 2001           | Rape and Mustard Oil      | 4                                                           |
| 106             | Italy   | 2001           | Rice (Milled Equivalent)  | 16                                                          |
| 106             | Italy   | 2001           | Soyabean Oil              | 11                                                          |
| 106             | Italy   | 2001           | Sugar, Refined Equivalent | 76                                                          |
| 106             | Italy   | 2001           | Sunflowerseed Oil         | 12                                                          |
| 106             | Italy   | 2001           | Sweet Potatoes            | 1                                                           |
| 106             | Italy   | 2001           | Sweeteners, Other         | 4                                                           |
| 106             | Italy   | 2001           | Tomatoes                  | 144                                                         |
| 106             | Italy   | 2001           | Vegetables, Other         | 278                                                         |
| 106             | Italy   | 2001           | Wheat                     | 416                                                         |
| 106             | Italy   | 2001           | Wine                      | 151                                                         |
| 106             | Italy   | 2002           | Apples                    | 61                                                          |
| 106             | Italy   | 2002           | Bananas                   | 22                                                          |
| 106             | Italy   | 2002           | Barley                    | 2                                                           |
| 106             | Italy   | 2002           | Beans                     | 5                                                           |
| 106             | Italy   | 2002           | Beer                      | 73                                                          |
| 106             | Italy   | 2002           | Beverages, Alcoholic      | 3                                                           |
| 106             | Italy   | 2002           | Bovine Meat               | 66                                                          |
| 106             | Italy   | 2002           | Butter, Ghee              | 8                                                           |
| 106             | Italy   | 2002           | Cephalopods               | 10                                                          |
| 106             | Italy   | 2002           | Cheese                    | 59                                                          |
| 106             | Italy   | 2002           | Citrus, Other             | 1                                                           |
| 106             | Italy   | 2002           | Cocoa Beans               | 4                                                           |
| 106             | Italy   | 2002           | Coconut Oil               | 2                                                           |
| 106             | Italy   | 2002           | Coconuts - Incl Copra     | 1                                                           |
| 106             | Italy   | 2002           | Coffee                    | 15                                                          |
| 106             | Italy   | 2002           | Cream                     | 9                                                           |
| 106             | Italy   | 2002           | Crustaceans               | 5                                                           |
| 106             | Italy   | 2002           | Demersal Fish             | 17                                                          |
| 106             | Italy   | 2002           | Eggs                      | 32                                                          |
| 106             | Italy   | 2002           | Fats, Animals, Raw        | 16                                                          |
| 106             | Italy   | 2002           | Freshwater Fish           | 5                                                           |
| 106             | Italy   | 2002           | Fruits, Other             | 126                                                         |
| 106             | Italy   | 2002           | Grapefruit                | 3                                                           |
| 106             | Italy   | 2002           | Grapes                    | 49                                                          |

Dietary calcium and zinc deficiency risks are decreasing but remain prevalent

| FAO countrycode | Country | Reference year | Food item                 | Gross food supply (g capita <sup>-1</sup> d <sup>-1</sup> ) |
|-----------------|---------|----------------|---------------------------|-------------------------------------------------------------|
| 106             | Italy   | 2002           | Groundnut Oil             | 2                                                           |
| 106             | Italy   | 2002           | Groundnuts (Shelled Eq)   | 1                                                           |
| 106             | Italy   | 2002           | Honey                     | 1                                                           |
| 106             | Italy   | 2002           | Lemons, Limes             | 23                                                          |
| 106             | Italy   | 2002           | Maize                     | 12                                                          |
| 106             | Italy   | 2002           | Maize Germ Oil            | 4                                                           |
| 106             | Italy   | 2002           | Marine Fish, Other        | 4                                                           |
| 106             | Italy   | 2002           | Meat, Other               | 17                                                          |
| 106             | Italy   | 2002           | Milk, Whole               | 122                                                         |
| 106             | Italy   | 2002           | Molluscs, Other           | 12                                                          |
| 106             | Italy   | 2002           | Mutton & Goat Meat        | 4                                                           |
| 106             | Italy   | 2002           | Nuts                      | 18                                                          |
| 106             | Italy   | 2002           | Oats                      | 1                                                           |
| 106             | Italy   | 2002           | Offals, Edible            | 10                                                          |
| 106             | Italy   | 2002           | Olive Oil                 | 37                                                          |
| 106             | Italy   | 2002           | Olives                    | 7                                                           |
| 106             | Italy   | 2002           | Onions                    | 17                                                          |
| 106             | Italy   | 2002           | Oranges, Mandarines       | 103                                                         |
| 106             | Italy   | 2002           | Palm Oil                  | 2                                                           |
| 106             | Italy   | 2002           | Peas                      | 4                                                           |
| 106             | Italy   | 2002           | Pelagic Fish              | 12                                                          |
| 106             | Italy   | 2002           | Pigmeat                   | 109                                                         |
| 106             | Italy   | 2002           | Pineapples                | 8                                                           |
| 106             | Italy   | 2002           | Potatoes                  | 109                                                         |
| 106             | Italy   | 2002           | Poultry Meat              | 49                                                          |
| 106             | Italy   | 2002           | Pulses, Other             | 7                                                           |
| 106             | Italy   | 2002           | Rape and Mustard Oil      | 4                                                           |
| 106             | Italy   | 2002           | Rice (Milled Equivalent)  | 17                                                          |
| 106             | Italy   | 2002           | Soyabean Oil              | 11                                                          |
| 106             | Italy   | 2002           | Sugar, Refined Equivalent | 75                                                          |
| 106             | Italy   | 2002           | Sunflowerseed Oil         | 11                                                          |
| 106             | Italy   | 2002           | Sweet Potatoes            | 1                                                           |
| 106             | Italy   | 2002           | Sweeteners, Other         | 3                                                           |
| 106             | Italy   | 2002           | Tomatoes                  | 116                                                         |
| 106             | Italy   | 2002           | Vegetables, Other         | 264                                                         |
| 106             | Italy   | 2002           | Wheat                     | 413                                                         |
| 106             | Italy   | 2002           | Wine                      | 132                                                         |
| 106             | Italy   | 2003           | Apples                    | 43                                                          |
| 106             | Italy   | 2003           | Bananas                   | 22                                                          |
| 106             | Italy   | 2003           | Barley                    | 1                                                           |
| 106             | Italy   | 2003           | Beans                     | 5                                                           |
| 106             | Italy   | 2003           | Beer                      | 83                                                          |
| 106             | Italy   | 2003           | Beverages, Alcoholic      | 3                                                           |
| 106             | Italy   | 2003           | Bovine Meat               | 68                                                          |
| 106             | Italy   | 2003           | Butter, Ghee              | 8                                                           |
| 106             | Italy   | 2003           | Cephalopods               | 10                                                          |
| 106             | Italy   | 2003           | Cheese                    | 59                                                          |
| 106             | Italy   | 2003           | Cocoa Beans               | 5                                                           |
| 106             | Italy   | 2003           | Coconut Oil               | 2                                                           |
| 106             | Italy   | 2003           | Coconuts - Incl Copra     | 1                                                           |
| 106             | Italy   | 2003           | Coffee                    | 15                                                          |
| 106             | Italy   | 2003           | Cream                     | 9                                                           |
| 106             | Italy   | 2003           | Crustaceans               | 5                                                           |
| 106             | Italy   | 2003           | Demersal Fish             | 17                                                          |
| 106             | Italy   | 2003           | Eggs                      | 32                                                          |
| 106             | Italy   | 2003           | Fats, Animals, Raw        | 17                                                          |
| 106             | Italy   | 2003           | Freshwater Fish           | 5                                                           |
| 106             | Italy   | 2003           | Fruits, Other             | 105                                                         |
| 106             | Italy   | 2003           | Grapefruit                | 4                                                           |
| 106             | Italy   | 2003           | Grapes                    | 52                                                          |
| 106             | Italy   | 2003           | Groundnut Oil             | 2                                                           |
| 106             | Italy   | 2003           | Groundnuts (Shelled Eq)   | 1                                                           |
| 106             | Italy   | 2003           | Honey                     | 1                                                           |
| 106             | Italy   | 2003           | Lemons, Limes             | 25                                                          |
| 106             | Italy   | 2003           | Maize                     | 12                                                          |
| 106             | Italy   | 2003           | Maize Germ Oil            | 4                                                           |
| 106             | Italy   | 2003           | Marine Fish, Other        | 4                                                           |
| 106             | Italy   | 2003           | Meat, Other               | 14                                                          |
| 106             | Italy   | 2003           | Milk, Whole               | 104                                                         |
| 106             | Italy   | 2003           | Molluscs, Other           | 12                                                          |
| 106             | Italy   | 2003           | Mutton & Goat Meat        | 4                                                           |
| 106             | Italy   | 2003           | Nuts                      | 16                                                          |
| 106             | Italy   | 2003           | Oats                      | 1                                                           |
| 106             | Italy   | 2003           | Offals, Edible            | 10                                                          |
| 106             | Italy   | 2003           | Olive Oil                 | 43                                                          |
| 106             | Italy   | 2003           | Olives                    | 7                                                           |
| 106             | Italy   | 2003           | Onions                    | 16                                                          |
| 106             | Italy   | 2003           | Oranges, Mandarines       | 107                                                         |
| 106             | Italy   | 2003           | Palm Oil                  | 2                                                           |
| 106             | Italy   | 2003           | Peas                      | 3                                                           |
| 106             | Italy   | 2003           | Pelagic Fish              | 14                                                          |
| 106             | Italy   | 2003           | Pigmeat                   | 110                                                         |
| 106             | Italy   | 2003           | Pineapples                | 9                                                           |
| 106             | Italy   | 2003           | Potatoes                  | 101                                                         |
| 106             | Italy   | 2003           | Poultry Meat              | 41                                                          |
| 106             | Italy   | 2003           | Pulses, Other             | 7                                                           |
| 106             | Italy   | 2003           | Rape and Mustard Oil      | 1                                                           |
| 106             | Italy   | 2003           | Rice (Milled Equivalent)  | 16                                                          |
| 106             | Italy   | 2003           | Soyabean Oil              | 5                                                           |
| 106             | Italy   | 2003           | Sugar, Refined Equivalent | 75                                                          |
| 106             | Italy   | 2003           | Sunflowerseed Oil         | 12                                                          |
| 106             | Italy   | 2003           | Sweet Potatoes            | 1                                                           |
| 106             | Italy   | 2003           | Sweeteners, Other         | 4                                                           |
| 106             | Italy   | 2003           | Tomatoes                  | 180                                                         |
| 106             | Italy   | 2003           | Vegetables, Other         | 282                                                         |
| 106             | Italy   | 2003           | Wheat                     | 411                                                         |
| 106             | Italy   | 2003           | Wine                      | 139                                                         |

Dietary calcium and zinc deficiency risks are decreasing but remain prevalent

| FAO countrycode | Country | Reference year | Food item                 | Gross food supply (g capita <sup>-1</sup> d <sup>-1</sup> ) |
|-----------------|---------|----------------|---------------------------|-------------------------------------------------------------|
| 106             | Italy   | 2004           | Apples                    | 59                                                          |
| 106             | Italy   | 2004           | Bananas                   | 22                                                          |
| 106             | Italy   | 2004           | Barley                    | 3                                                           |
| 106             | Italy   | 2004           | Beans                     | 5                                                           |
| 106             | Italy   | 2004           | Beer                      | 81                                                          |
| 106             | Italy   | 2004           | Beverages, Alcoholic      | 3                                                           |
| 106             | Italy   | 2004           | Bovine Meat               | 64                                                          |
| 106             | Italy   | 2004           | Butter, Ghee              | 8                                                           |
| 106             | Italy   | 2004           | Cephalopods               | 10                                                          |
| 106             | Italy   | 2004           | Cheese                    | 58                                                          |
| 106             | Italy   | 2004           | Citrus, Other             | 1                                                           |
| 106             | Italy   | 2004           | Cocoa Beans               | 4                                                           |
| 106             | Italy   | 2004           | Coconuts - Incl Copra     | 1                                                           |
| 106             | Italy   | 2004           | Coffee                    | 15                                                          |
| 106             | Italy   | 2004           | Cream                     | 9                                                           |
| 106             | Italy   | 2004           | Crustaceans               | 5                                                           |
| 106             | Italy   | 2004           | Demersal Fish             | 17                                                          |
| 106             | Italy   | 2004           | Eggs                      | 32                                                          |
| 106             | Italy   | 2004           | Fats, Animals, Raw        | 16                                                          |
| 106             | Italy   | 2004           | Freshwater Fish           | 5                                                           |
| 106             | Italy   | 2004           | Fruits, Other             | 137                                                         |
| 106             | Italy   | 2004           | Grapefruit                | 3                                                           |
| 106             | Italy   | 2004           | Grapes                    | 38                                                          |
| 106             | Italy   | 2004           | Groundnut Oil             | 2                                                           |
| 106             | Italy   | 2004           | Groundnuts (Shelled Eq)   | 1                                                           |
| 106             | Italy   | 2004           | Honey                     | 1                                                           |
| 106             | Italy   | 2004           | Lemons, Limes             | 27                                                          |
| 106             | Italy   | 2004           | Maize                     | 11                                                          |
| 106             | Italy   | 2004           | Maize Germ Oil            | 3                                                           |
| 106             | Italy   | 2004           | Marine Fish, Other        | 4                                                           |
| 106             | Italy   | 2004           | Meat, Other               | 15                                                          |
| 106             | Italy   | 2004           | Milk, Whole               | 107                                                         |
| 106             | Italy   | 2004           | Molluscs, Other           | 11                                                          |
| 106             | Italy   | 2004           | Mutton & Goat Meat        | 4                                                           |
| 106             | Italy   | 2004           | Nuts                      | 19                                                          |
| 106             | Italy   | 2004           | Oats                      | 1                                                           |
| 106             | Italy   | 2004           | Offals, Edible            | 10                                                          |
| 106             | Italy   | 2004           | Oilcrops Oil, Other       | 1                                                           |
| 106             | Italy   | 2004           | Olive Oil                 | 45                                                          |
| 106             | Italy   | 2004           | Olives                    | 6                                                           |
| 106             | Italy   | 2004           | Onions                    | 18                                                          |
| 106             | Italy   | 2004           | Oranges, Mandarines       | 128                                                         |
| 106             | Italy   | 2004           | Palm Oil                  | 4                                                           |
| 106             | Italy   | 2004           | Peas                      | 4                                                           |
| 106             | Italy   | 2004           | Pelagic Fish              | 13                                                          |
| 106             | Italy   | 2004           | Pigmeat                   | 109                                                         |
| 106             | Italy   | 2004           | Pineapples                | 8                                                           |
| 106             | Italy   | 2004           | Potatoes                  | 112                                                         |
| 106             | Italy   | 2004           | Poultry Meat              | 43                                                          |
| 106             | Italy   | 2004           | Pulses, Other             | 7                                                           |
| 106             | Italy   | 2004           | Rape and Mustard Oil      | 2                                                           |
| 106             | Italy   | 2004           | Rice (Milled Equivalent)  | 15                                                          |
| 106             | Italy   | 2004           | Soyabean Oil              | 6                                                           |
| 106             | Italy   | 2004           | Sugar, Refined Equivalent | 76                                                          |
| 106             | Italy   | 2004           | Sunflowerseed Oil         | 7                                                           |
| 106             | Italy   | 2004           | Sweet Potatoes            | 1                                                           |
| 106             | Italy   | 2004           | Sweeteners, Other         | 4                                                           |
| 106             | Italy   | 2004           | Tomatoes                  | 224                                                         |
| 106             | Italy   | 2004           | Vegetables, Other         | 299                                                         |
| 106             | Italy   | 2004           | Wheat                     | 408                                                         |
| 106             | Italy   | 2004           | Wine                      | 133                                                         |
| 106             | Italy   | 2005           | Apples                    | 51                                                          |
| 106             | Italy   | 2005           | Bananas                   | 22                                                          |
| 106             | Italy   | 2005           | Barley                    | 1                                                           |
| 106             | Italy   | 2005           | Beans                     | 4                                                           |
| 106             | Italy   | 2005           | Beer                      | 79                                                          |
| 106             | Italy   | 2005           | Beverages, Alcoholic      | 3                                                           |
| 106             | Italy   | 2005           | Bovine Meat               | 65                                                          |
| 106             | Italy   | 2005           | Butter, Ghee              | 8                                                           |
| 106             | Italy   | 2005           | Cephalopods               | 11                                                          |
| 106             | Italy   | 2005           | Cheese                    | 61                                                          |
| 106             | Italy   | 2005           | Citrus, Other             | 1                                                           |
| 106             | Italy   | 2005           | Cocoa Beans               | 5                                                           |
| 106             | Italy   | 2005           | Coconut Oil               | 2                                                           |
| 106             | Italy   | 2005           | Coconuts - Incl Copra     | 1                                                           |
| 106             | Italy   | 2005           | Coffee                    | 16                                                          |
| 106             | Italy   | 2005           | Cream                     | 9                                                           |
| 106             | Italy   | 2005           | Crustaceans               | 6                                                           |
| 106             | Italy   | 2005           | Demersal Fish             | 18                                                          |
| 106             | Italy   | 2005           | Eggs                      | 32                                                          |
| 106             | Italy   | 2005           | Fats, Animals, Raw        | 16                                                          |
| 106             | Italy   | 2005           | Freshwater Fish           | 6                                                           |
| 106             | Italy   | 2005           | Fruits, Other             | 134                                                         |
| 106             | Italy   | 2005           | Grapefruit                | 3                                                           |
| 106             | Italy   | 2005           | Grapes                    | 43                                                          |
| 106             | Italy   | 2005           | Groundnut Oil             | 2                                                           |
| 106             | Italy   | 2005           | Groundnuts (Shelled Eq)   | 1                                                           |
| 106             | Italy   | 2005           | Honey                     | 1                                                           |
| 106             | Italy   | 2005           | Lemons, Limes             | 27                                                          |
| 106             | Italy   | 2005           | Maize                     | 12                                                          |
| 106             | Italy   | 2005           | Maize Germ Oil            | 4                                                           |
| 106             | Italy   | 2005           | Marine Fish, Other        | 4                                                           |
| 106             | Italy   | 2005           | Meat, Other               | 15                                                          |
| 106             | Italy   | 2005           | Milk, Whole               | 108                                                         |
| 106             | Italy   | 2005           | Molluscs, Other           | 11                                                          |
| 106             | Italy   | 2005           | Mutton & Goat Meat        | 4                                                           |
| 106             | Italy   | 2005           | Nuts                      | 19                                                          |

## Dietary calcium and zinc deficiency risks are decreasing but remain prevalent

| FAO countrycode | Country | Reference year | Food item                 | Gross food supply (g capita <sup>-1</sup> d <sup>-1</sup> ) |
|-----------------|---------|----------------|---------------------------|-------------------------------------------------------------|
| 106             | Italy   | 2005           | Oats                      | 1                                                           |
| 106             | Italy   | 2005           | Offals, Edible            | 9                                                           |
| 106             | Italy   | 2005           | Olive Oil                 | 31                                                          |
| 106             | Italy   | 2005           | Olives                    | 6                                                           |
| 106             | Italy   | 2005           | Onions                    | 15                                                          |
| 106             | Italy   | 2005           | Oranges, Mandarines       | 130                                                         |
| 106             | Italy   | 2005           | Palm Oil                  | 2                                                           |
| 106             | Italy   | 2005           | Peas                      | 4                                                           |
| 106             | Italy   | 2005           | Pelagic Fish              | 13                                                          |
| 106             | Italy   | 2005           | Pigmeat                   | 106                                                         |
| 106             | Italy   | 2005           | Pineapples                | 8                                                           |
| 106             | Italy   | 2005           | Potatoes                  | 107                                                         |
| 106             | Italy   | 2005           | Poultry Meat              | 42                                                          |
| 106             | Italy   | 2005           | Pulses, Other             | 7                                                           |
| 106             | Italy   | 2005           | Rape and Mustard Oil      | 4                                                           |
| 106             | Italy   | 2005           | Rice (Milled Equivalent)  | 14                                                          |
| 106             | Italy   | 2005           | Soyabean Oil              | 10                                                          |
| 106             | Italy   | 2005           | Sugar, Refined Equivalent | 76                                                          |
| 106             | Italy   | 2005           | Sunflowerseed Oil         | 12                                                          |
| 106             | Italy   | 2005           | Sweet Potatoes            | 1                                                           |
| 106             | Italy   | 2005           | Sweeteners, Other         | 4                                                           |
| 106             | Italy   | 2005           | Tomatoes                  | 189                                                         |
| 106             | Italy   | 2005           | Vegetables, Other         | 298                                                         |
| 106             | Italy   | 2005           | Wheat                     | 405                                                         |
| 106             | Italy   | 2005           | Wine                      | 126                                                         |
| 106             | Italy   | 2006           | Apples                    | 48                                                          |
| 106             | Italy   | 2006           | Aquatic Animals, Others   | 1                                                           |
| 106             | Italy   | 2006           | Bananas                   | 24                                                          |
| 106             | Italy   | 2006           | Barley                    | 1                                                           |
| 106             | Italy   | 2006           | Beans                     | 5                                                           |
| 106             | Italy   | 2006           | Beer                      | 79                                                          |
| 106             | Italy   | 2006           | Beverages, Alcoholic      | 3                                                           |
| 106             | Italy   | 2006           | Bovine Meat               | 67                                                          |
| 106             | Italy   | 2006           | Butter, Ghee              | 8                                                           |
| 106             | Italy   | 2006           | Cephalopods               | 10                                                          |
| 106             | Italy   | 2006           | Cheese                    | 61                                                          |
| 106             | Italy   | 2006           | Citrus, Other             | 1                                                           |
| 106             | Italy   | 2006           | Cocoa Beans               | 5                                                           |
| 106             | Italy   | 2006           | Coconut Oil               | 2                                                           |
| 106             | Italy   | 2006           | Coconuts - Incl Copra     | 1                                                           |
| 106             | Italy   | 2006           | Coffee                    | 16                                                          |
| 106             | Italy   | 2006           | Cream                     | 10                                                          |
| 106             | Italy   | 2006           | Crustaceans               | 7                                                           |
| 106             | Italy   | 2006           | Demersal Fish             | 19                                                          |
| 106             | Italy   | 2006           | Eggs                      | 30                                                          |
| 106             | Italy   | 2006           | Fats, Animals, Raw        | 16                                                          |
| 106             | Italy   | 2006           | Freshwater Fish           | 7                                                           |
| 106             | Italy   | 2006           | Fruits, Other             | 131                                                         |
| 106             | Italy   | 2006           | Grapefruit                | 2                                                           |
| 106             | Italy   | 2006           | Grapes                    | 43                                                          |
| 106             | Italy   | 2006           | Groundnut Oil             | 2                                                           |
| 106             | Italy   | 2006           | Groundnuts (Shelled Eq)   | 1                                                           |
| 106             | Italy   | 2006           | Honey                     | 1                                                           |
| 106             | Italy   | 2006           | Lemons, Limes             | 27                                                          |
| 106             | Italy   | 2006           | Maize                     | 12                                                          |
| 106             | Italy   | 2006           | Maize Germ Oil            | 3                                                           |
| 106             | Italy   | 2006           | Marine Fish, Other        | 4                                                           |
| 106             | Italy   | 2006           | Meat, Other               | 15                                                          |
| 106             | Italy   | 2006           | Milk, Whole               | 109                                                         |
| 106             | Italy   | 2006           | Molluscs, Other           | 11                                                          |
| 106             | Italy   | 2006           | Mutton & Goat Meat        | 4                                                           |
| 106             | Italy   | 2006           | Nuts                      | 23                                                          |
| 106             | Italy   | 2006           | Oats                      | 1                                                           |
| 106             | Italy   | 2006           | Offals, Edible            | 9                                                           |
| 106             | Italy   | 2006           | Olive Oil                 | 35                                                          |
| 106             | Italy   | 2006           | Olives                    | 7                                                           |
| 106             | Italy   | 2006           | Onions                    | 16                                                          |
| 106             | Italy   | 2006           | Oranges, Mandarines       | 134                                                         |
| 106             | Italy   | 2006           | Palm Oil                  | 2                                                           |
| 106             | Italy   | 2006           | Peas                      | 4                                                           |
| 106             | Italy   | 2006           | Pelagic Fish              | 13                                                          |
| 106             | Italy   | 2006           | Pigmeat                   | 110                                                         |
| 106             | Italy   | 2006           | Pineapples                | 9                                                           |
| 106             | Italy   | 2006           | Potatoes                  | 107                                                         |
| 106             | Italy   | 2006           | Poultry Meat              | 37                                                          |
| 106             | Italy   | 2006           | Pulses, Other             | 7                                                           |
| 106             | Italy   | 2006           | Rape and Mustard Oil      | 4                                                           |
| 106             | Italy   | 2006           | Rice (Milled Equivalent)  | 14                                                          |
| 106             | Italy   | 2006           | Soyabean Oil              | 14                                                          |
| 106             | Italy   | 2006           | Sugar, Refined Equivalent | 71                                                          |
| 106             | Italy   | 2006           | Sunflowerseed Oil         | 12                                                          |
| 106             | Italy   | 2006           | Sweet Potatoes            | 1                                                           |
| 106             | Italy   | 2006           | Sweeteners, Other         | 4                                                           |
| 106             | Italy   | 2006           | Tomatoes                  | 140                                                         |
| 106             | Italy   | 2006           | Vegetables, Other         | 282                                                         |
| 106             | Italy   | 2006           | Wheat                     | 400                                                         |
| 106             | Italy   | 2006           | Wine                      | 127                                                         |
| 106             | Italy   | 2007           | Apples                    | 47                                                          |
| 106             | Italy   | 2007           | Aquatic Animals, Others   | 1                                                           |
| 106             | Italy   | 2007           | Bananas                   | 26                                                          |
| 106             | Italy   | 2007           | Barley                    | 1                                                           |
| 106             | Italy   | 2007           | Beans                     | 5                                                           |
| 106             | Italy   | 2007           | Beer                      | 86                                                          |
| 106             | Italy   | 2007           | Beverages, Alcoholic      | 3                                                           |
| 106             | Italy   | 2007           | Bovine Meat               | 66                                                          |
| 106             | Italy   | 2007           | Butter, Ghee              | 7                                                           |
| 106             | Italy   | 2007           | Cephalopods               | 10                                                          |

Dietary calcium and zinc deficiency risks are decreasing but remain prevalent

| FAO countrycode | Country | Reference year | Food item                 | Gross food supply (g capita <sup>-1</sup> d <sup>-1</sup> ) |
|-----------------|---------|----------------|---------------------------|-------------------------------------------------------------|
| 106             | Italy   | 2007           | Cheese                    | 60                                                          |
| 106             | Italy   | 2007           | Cocoa Beans               | 4                                                           |
| 106             | Italy   | 2007           | Coconut Oil               | 2                                                           |
| 106             | Italy   | 2007           | Coconuts - Incl Copra     | 1                                                           |
| 106             | Italy   | 2007           | Coffee                    | 16                                                          |
| 106             | Italy   | 2007           | Cream                     | 10                                                          |
| 106             | Italy   | 2007           | Crustaceans               | 7                                                           |
| 106             | Italy   | 2007           | Demersal Fish             | 18                                                          |
| 106             | Italy   | 2007           | Eggs                      | 32                                                          |
| 106             | Italy   | 2007           | Fats, Animals, Raw        | 16                                                          |
| 106             | Italy   | 2007           | Freshwater Fish           | 8                                                           |
| 106             | Italy   | 2007           | Fruits, Other             | 125                                                         |
| 106             | Italy   | 2007           | Grapefruit                | 2                                                           |
| 106             | Italy   | 2007           | Grapes                    | 39                                                          |
| 106             | Italy   | 2007           | Groundnut Oil             | 2                                                           |
| 106             | Italy   | 2007           | Groundnuts (Shelled Eq)   | 1                                                           |
| 106             | Italy   | 2007           | Honey                     | 1                                                           |
| 106             | Italy   | 2007           | Lemons, Limes             | 25                                                          |
| 106             | Italy   | 2007           | Maize                     | 12                                                          |
| 106             | Italy   | 2007           | Maize Germ Oil            | 3                                                           |
| 106             | Italy   | 2007           | Marine Fish, Other        | 4                                                           |
| 106             | Italy   | 2007           | Meat, Other               | 15                                                          |
| 106             | Italy   | 2007           | Milk, Whole               | 97                                                          |
| 106             | Italy   | 2007           | Molluscs, Other           | 11                                                          |
| 106             | Italy   | 2007           | Mutton & Goat Meat        | 4                                                           |
| 106             | Italy   | 2007           | Nuts                      | 20                                                          |
| 106             | Italy   | 2007           | Oats                      | 1                                                           |
| 106             | Italy   | 2007           | Offals, Edible            | 9                                                           |
| 106             | Italy   | 2007           | Olive Oil                 | 32                                                          |
| 106             | Italy   | 2007           | Olives                    | 5                                                           |
| 106             | Italy   | 2007           | Onions                    | 16                                                          |
| 106             | Italy   | 2007           | Oranges, Mandarines       | 140                                                         |
| 106             | Italy   | 2007           | Palm Oil                  | 2                                                           |
| 106             | Italy   | 2007           | Peas                      | 3                                                           |
| 106             | Italy   | 2007           | Pelagic Fish              | 12                                                          |
| 106             | Italy   | 2007           | Pigmeat                   | 112                                                         |
| 106             | Italy   | 2007           | Pineapples                | 10                                                          |
| 106             | Italy   | 2007           | Potatoes                  | 108                                                         |
| 106             | Italy   | 2007           | Poultry Meat              | 43                                                          |
| 106             | Italy   | 2007           | Pulses, Other             | 7                                                           |
| 106             | Italy   | 2007           | Rape and Mustard Oil      | 4                                                           |
| 106             | Italy   | 2007           | Rice (Milled Equivalent)  | 14                                                          |
| 106             | Italy   | 2007           | Soyabean Oil              | 18                                                          |
| 106             | Italy   | 2007           | Sugar, Refined Equivalent | 70                                                          |
| 106             | Italy   | 2007           | Sunflowerseed Oil         | 12                                                          |
| 106             | Italy   | 2007           | Sweeteners, Other         | 4                                                           |
| 106             | Italy   | 2007           | Tomatoes                  | 147                                                         |
| 106             | Italy   | 2007           | Vegetables, Other         | 269                                                         |
| 106             | Italy   | 2007           | Wheat                     | 398                                                         |
| 106             | Italy   | 2007           | Wine                      | 109                                                         |
| 106             | Italy   | 2008           | Apples                    | 52                                                          |
| 106             | Italy   | 2008           | Aquatic Animals, Others   | 1                                                           |
| 106             | Italy   | 2008           | Bananas                   | 27                                                          |
| 106             | Italy   | 2008           | Barley                    | 1                                                           |
| 106             | Italy   | 2008           | Beans                     | 5                                                           |
| 106             | Italy   | 2008           | Beer                      | 83                                                          |
| 106             | Italy   | 2008           | Beverages, Alcoholic      | 3                                                           |
| 106             | Italy   | 2008           | Bovine Meat               | 63                                                          |
| 106             | Italy   | 2008           | Butter, Ghee              | 7                                                           |
| 106             | Italy   | 2008           | Cephalopods               | 9                                                           |
| 106             | Italy   | 2008           | Cheese                    | 60                                                          |
| 106             | Italy   | 2008           | Citrus, Other             | 1                                                           |
| 106             | Italy   | 2008           | Cocoa Beans               | 4                                                           |
| 106             | Italy   | 2008           | Coconut Oil               | 2                                                           |
| 106             | Italy   | 2008           | Coconuts - Incl Copra     | 1                                                           |
| 106             | Italy   | 2008           | Coffee                    | 16                                                          |
| 106             | Italy   | 2008           | Cream                     | 11                                                          |
| 106             | Italy   | 2008           | Crustaceans               | 6                                                           |
| 106             | Italy   | 2008           | Demersal Fish             | 16                                                          |
| 106             | Italy   | 2008           | Eggs                      | 32                                                          |
| 106             | Italy   | 2008           | Fats, Animals, Raw        | 16                                                          |
| 106             | Italy   | 2008           | Freshwater Fish           | 8                                                           |
| 106             | Italy   | 2008           | Fruits, Other             | 130                                                         |
| 106             | Italy   | 2008           | Grapefruit                | 2                                                           |
| 106             | Italy   | 2008           | Grapes                    | 30                                                          |
| 106             | Italy   | 2008           | Groundnut Oil             | 2                                                           |
| 106             | Italy   | 2008           | Groundnuts (Shelled Eq)   | 1                                                           |
| 106             | Italy   | 2008           | Honey                     | 1                                                           |
| 106             | Italy   | 2008           | Lemons, Limes             | 23                                                          |
| 106             | Italy   | 2008           | Maize                     | 12                                                          |
| 106             | Italy   | 2008           | Maize Germ Oil            | 3                                                           |
| 106             | Italy   | 2008           | Marine Fish, Other        | 5                                                           |
| 106             | Italy   | 2008           | Meat, Other               | 16                                                          |
| 106             | Italy   | 2008           | Milk, Whole               | 114                                                         |
| 106             | Italy   | 2008           | Molluscs, Other           | 11                                                          |
| 106             | Italy   | 2008           | Mutton & Goat Meat        | 4                                                           |
| 106             | Italy   | 2008           | Nuts                      | 20                                                          |
| 106             | Italy   | 2008           | Oats                      | 1                                                           |
| 106             | Italy   | 2008           | Offals, Edible            | 8                                                           |
| 106             | Italy   | 2008           | Olive Oil                 | 33                                                          |
| 106             | Italy   | 2008           | Olives                    | 5                                                           |
| 106             | Italy   | 2008           | Onions                    | 18                                                          |
| 106             | Italy   | 2008           | Oranges, Mandarines       | 121                                                         |
| 106             | Italy   | 2008           | Palm Oil                  | 2                                                           |
| 106             | Italy   | 2008           | Peas                      | 3                                                           |
| 106             | Italy   | 2008           | Pelagic Fish              | 13                                                          |
| 106             | Italy   | 2008           | Pigmeat                   | 107                                                         |

## Dietary calcium and zinc deficiency risks are decreasing but remain prevalent

| FAO countrycode | Country | Reference year | Food item                 | Gross food supply (g capita <sup>-1</sup> d <sup>-1</sup> ) |
|-----------------|---------|----------------|---------------------------|-------------------------------------------------------------|
| 106             | Italy   | 2008           | Pineapples                | 9                                                           |
| 106             | Italy   | 2008           | Potatoes                  | 102                                                         |
| 106             | Italy   | 2008           | Poultry Meat              | 47                                                          |
| 106             | Italy   | 2008           | Pulses, Other             | 6                                                           |
| 106             | Italy   | 2008           | Rape and Mustard Oil      | 4                                                           |
| 106             | Italy   | 2008           | Rice (Milled Equivalent)  | 14                                                          |
| 106             | Italy   | 2008           | Soyabean Oil              | 19                                                          |
| 106             | Italy   | 2008           | Sugar, Refined Equivalent | 70                                                          |
| 106             | Italy   | 2008           | Sunflowerseed Oil         | 10                                                          |
| 106             | Italy   | 2008           | Sweeteners, Other         | 5                                                           |
| 106             | Italy   | 2008           | Tomatoes                  | 120                                                         |
| 106             | Italy   | 2008           | Vegetables, Other         | 283                                                         |
| 106             | Italy   | 2008           | Wheat                     | 401                                                         |
| 106             | Italy   | 2008           | Wine                      | 95                                                          |
| 106             | Italy   | 2009           | Apples                    | 54                                                          |
| 106             | Italy   | 2009           | Aquatic Animals, Others   | 1                                                           |
| 106             | Italy   | 2009           | Bananas                   | 26                                                          |
| 106             | Italy   | 2009           | Barley                    | 1                                                           |
| 106             | Italy   | 2009           | Beans                     | 4                                                           |
| 106             | Italy   | 2009           | Beer                      | 80                                                          |
| 106             | Italy   | 2009           | Beverages, Alcoholic      | 3                                                           |
| 106             | Italy   | 2009           | Bovine Meat               | 65                                                          |
| 106             | Italy   | 2009           | Butter, Ghee              | 7                                                           |
| 106             | Italy   | 2009           | Cephalopods               | 9                                                           |
| 106             | Italy   | 2009           | Cheese                    | 61                                                          |
| 106             | Italy   | 2009           | Citrus, Other             | 1                                                           |
| 106             | Italy   | 2009           | Cocoa Beans               | 4                                                           |
| 106             | Italy   | 2009           | Coconut Oil               | 2                                                           |
| 106             | Italy   | 2009           | Coconuts - Incl Copra     | 1                                                           |
| 106             | Italy   | 2009           | Coffee                    | 16                                                          |
| 106             | Italy   | 2009           | Cream                     | 10                                                          |
| 106             | Italy   | 2009           | Crustaceans               | 6                                                           |
| 106             | Italy   | 2009           | Demersal Fish             | 17                                                          |
| 106             | Italy   | 2009           | Eggs                      | 35                                                          |
| 106             | Italy   | 2009           | Fats, Animals, Raw        | 16                                                          |
| 106             | Italy   | 2009           | Freshwater Fish           | 7                                                           |
| 106             | Italy   | 2009           | Fruits, Other             | 134                                                         |
| 106             | Italy   | 2009           | Grapefruit                | 2                                                           |
| 106             | Italy   | 2009           | Grapes                    | 52                                                          |
| 106             | Italy   | 2009           | Groundnut Oil             | 2                                                           |
| 106             | Italy   | 2009           | Groundnuts (Shelled Eq)   | 1                                                           |
| 106             | Italy   | 2009           | Honey                     | 1                                                           |
| 106             | Italy   | 2009           | Lemons, Limes             | 25                                                          |
| 106             | Italy   | 2009           | Maize                     | 12                                                          |
| 106             | Italy   | 2009           | Maize Germ Oil            | 4                                                           |
| 106             | Italy   | 2009           | Marine Fish, Other        | 5                                                           |
| 106             | Italy   | 2009           | Meat, Other               | 16                                                          |
| 106             | Italy   | 2009           | Milk, Whole               | 84                                                          |
| 106             | Italy   | 2009           | Molluscs, Other           | 11                                                          |
| 106             | Italy   | 2009           | Mutton & Goat Meat        | 4                                                           |
| 106             | Italy   | 2009           | Nuts                      | 20                                                          |
| 106             | Italy   | 2009           | Oats                      | 1                                                           |
| 106             | Italy   | 2009           | Offals, Edible            | 8                                                           |
| 106             | Italy   | 2009           | Olive Oil                 | 30                                                          |
| 106             | Italy   | 2009           | Olives                    | 5                                                           |
| 106             | Italy   | 2009           | Onions                    | 17                                                          |
| 106             | Italy   | 2009           | Oranges, Mandarines       | 146                                                         |
| 106             | Italy   | 2009           | Palm Oil                  | 3                                                           |
| 106             | Italy   | 2009           | Peas                      | 4                                                           |
| 106             | Italy   | 2009           | Pelagic Fish              | 13                                                          |
| 106             | Italy   | 2009           | Pigmeat                   | 109                                                         |
| 106             | Italy   | 2009           | Pineapples                | 8                                                           |
| 106             | Italy   | 2009           | Potatoes                  | 109                                                         |
| 106             | Italy   | 2009           | Poultry Meat              | 48                                                          |
| 106             | Italy   | 2009           | Pulses, Other             | 7                                                           |
| 106             | Italy   | 2009           | Rape and Mustard Oil      | 2                                                           |
| 106             | Italy   | 2009           | Rice (Milled Equivalent)  | 12                                                          |
| 106             | Italy   | 2009           | Soyabean Oil              | 16                                                          |
| 106             | Italy   | 2009           | Sugar, Refined Equivalent | 70                                                          |
| 106             | Italy   | 2009           | Sunflowerseed Oil         | 14                                                          |
| 106             | Italy   | 2009           | Sweet Potatoes            | 1                                                           |
| 106             | Italy   | 2009           | Sweeteners, Other         | 5                                                           |
| 106             | Italy   | 2009           | Tomatoes                  | 170                                                         |
| 106             | Italy   | 2009           | Vegetables, Other         | 292                                                         |
| 106             | Italy   | 2009           | Wheat                     | 406                                                         |
| 106             | Italy   | 2009           | Wine                      | 87                                                          |
| 106             | Italy   | 2010           | Apples                    | 41                                                          |
| 106             | Italy   | 2010           | Aquatic Animals, Others   | 1                                                           |
| 106             | Italy   | 2010           | Bananas                   | 26                                                          |
| 106             | Italy   | 2010           | Barley                    | 1                                                           |
| 106             | Italy   | 2010           | Beans                     | 5                                                           |
| 106             | Italy   | 2010           | Beer                      | 76                                                          |
| 106             | Italy   | 2010           | Beverages, Alcoholic      | 2                                                           |
| 106             | Italy   | 2010           | Bovine Meat               | 63                                                          |
| 106             | Italy   | 2010           | Butter, Ghee              | 6                                                           |
| 106             | Italy   | 2010           | Cephalopods               | 9                                                           |
| 106             | Italy   | 2010           | Cereals, Other            | 1                                                           |
| 106             | Italy   | 2010           | Cheese                    | 65                                                          |
| 106             | Italy   | 2010           | Cocoa Beans               | 4                                                           |
| 106             | Italy   | 2010           | Coconut Oil               | 2                                                           |
| 106             | Italy   | 2010           | Coconuts - Incl Copra     | 1                                                           |
| 106             | Italy   | 2010           | Coffee                    | 16                                                          |
| 106             | Italy   | 2010           | Cream                     | 11                                                          |
| 106             | Italy   | 2010           | Crustaceans               | 7                                                           |
| 106             | Italy   | 2010           | Demersal Fish             | 18                                                          |
| 106             | Italy   | 2010           | Eggs                      | 32                                                          |
| 106             | Italy   | 2010           | Fats, Animals, Raw        | 16                                                          |

## Dietary calcium and zinc deficiency risks are decreasing but remain prevalent

| FAO countrycode | Country | Reference year | Food item                 | Gross food supply (g capita <sup>-1</sup> d <sup>-1</sup> ) |
|-----------------|---------|----------------|---------------------------|-------------------------------------------------------------|
| 106             | Italy   | 2010           | Freshwater Fish           | 8                                                           |
| 106             | Italy   | 2010           | Fruits, Other             | 125                                                         |
| 106             | Italy   | 2010           | Grapefruit                | 2                                                           |
| 106             | Italy   | 2010           | Grapes                    | 29                                                          |
| 106             | Italy   | 2010           | Groundnut Oil             | 2                                                           |
| 106             | Italy   | 2010           | Groundnuts (Shelled Eq)   | 1                                                           |
| 106             | Italy   | 2010           | Honey                     | 1                                                           |
| 106             | Italy   | 2010           | Lemons, Limes             | 23                                                          |
| 106             | Italy   | 2010           | Maize                     | 11                                                          |
| 106             | Italy   | 2010           | Maize Germ Oil            | 3                                                           |
| 106             | Italy   | 2010           | Marine Fish, Other        | 5                                                           |
| 106             | Italy   | 2010           | Meat, Other               | 16                                                          |
| 106             | Italy   | 2010           | Milk, Whole               | 99                                                          |
| 106             | Italy   | 2010           | Molluscs, Other           | 11                                                          |
| 106             | Italy   | 2010           | Mutton & Goat Meat        | 3                                                           |
| 106             | Italy   | 2010           | Nuts                      | 21                                                          |
| 106             | Italy   | 2010           | Oats                      | 1                                                           |
| 106             | Italy   | 2010           | Offals, Edible            | 8                                                           |
| 106             | Italy   | 2010           | Olive Oil                 | 30                                                          |
| 106             | Italy   | 2010           | Olives                    | 6                                                           |
| 106             | Italy   | 2010           | Onions                    | 16                                                          |
| 106             | Italy   | 2010           | Oranges, Mandarines       | 131                                                         |
| 106             | Italy   | 2010           | Palm Oil                  | 3                                                           |
| 106             | Italy   | 2010           | Peas                      | 4                                                           |
| 106             | Italy   | 2010           | Pelagic Fish              | 12                                                          |
| 106             | Italy   | 2010           | Pigmeat                   | 115                                                         |
| 106             | Italy   | 2010           | Pineapples                | 8                                                           |
| 106             | Italy   | 2010           | Potatoes                  | 109                                                         |
| 106             | Italy   | 2010           | Poultry Meat              | 48                                                          |
| 106             | Italy   | 2010           | Pulses, Other             | 7                                                           |
| 106             | Italy   | 2010           | Rape and Mustard Oil      | 2                                                           |
| 106             | Italy   | 2010           | Rice (Milled Equivalent)  | 15                                                          |
| 106             | Italy   | 2010           | Soyabean Oil              | 21                                                          |
| 106             | Italy   | 2010           | Sugar, Refined Equivalent | 69                                                          |
| 106             | Italy   | 2010           | Sunflowerseed Oil         | 12                                                          |
| 106             | Italy   | 2010           | Sweet Potatoes            | 1                                                           |
| 106             | Italy   | 2010           | Sweeteners, Other         | 4                                                           |
| 106             | Italy   | 2010           | Tomatoes                  | 111                                                         |
| 106             | Italy   | 2010           | Vegetables, Other         | 269                                                         |
| 106             | Italy   | 2010           | Wheat                     | 396                                                         |
| 106             | Italy   | 2010           | Wine                      | 86                                                          |
| 106             | Italy   | 2011           | Apples                    | 44                                                          |
| 106             | Italy   | 2011           | Aquatic Animals, Others   | 1                                                           |
| 106             | Italy   | 2011           | Bananas                   | 27                                                          |
| 106             | Italy   | 2011           | Barley                    | 1                                                           |
| 106             | Italy   | 2011           | Beans                     | 5                                                           |
| 106             | Italy   | 2011           | Beer                      | 77                                                          |
| 106             | Italy   | 2011           | Beverages, Alcoholic      | 2                                                           |
| 106             | Italy   | 2011           | Bovine Meat               | 59                                                          |
| 106             | Italy   | 2011           | Butter, Ghee              | 6                                                           |
| 106             | Italy   | 2011           | Cephalopods               | 9                                                           |
| 106             | Italy   | 2011           | Cheese                    | 65                                                          |
| 106             | Italy   | 2011           | Citrus, Other             | 1                                                           |
| 106             | Italy   | 2011           | Cocoa Beans               | 4                                                           |
| 106             | Italy   | 2011           | Coconut Oil               | 2                                                           |
| 106             | Italy   | 2011           | Coconuts - Incl Copra     | 1                                                           |
| 106             | Italy   | 2011           | Coffee                    | 16                                                          |
| 106             | Italy   | 2011           | Cream                     | 10                                                          |
| 106             | Italy   | 2011           | Crustaceans               | 7                                                           |
| 106             | Italy   | 2011           | Demersal Fish             | 18                                                          |
| 106             | Italy   | 2011           | Eggs                      | 32                                                          |
| 106             | Italy   | 2011           | Fats, Animals, Raw        | 16                                                          |
| 106             | Italy   | 2011           | Freshwater Fish           | 8                                                           |
| 106             | Italy   | 2011           | Fruits, Other             | 130                                                         |
| 106             | Italy   | 2011           | Grapefruit                | 2                                                           |
| 106             | Italy   | 2011           | Grapes                    | 12                                                          |
| 106             | Italy   | 2011           | Groundnut Oil             | 2                                                           |
| 106             | Italy   | 2011           | Groundnuts (Shelled Eq)   | 1                                                           |
| 106             | Italy   | 2011           | Honey                     | 1                                                           |
| 106             | Italy   | 2011           | Lemons, Limes             | 22                                                          |
| 106             | Italy   | 2011           | Maize                     | 11                                                          |
| 106             | Italy   | 2011           | Maize Germ Oil            | 3                                                           |
| 106             | Italy   | 2011           | Marine Fish, Other        | 5                                                           |
| 106             | Italy   | 2011           | Meat, Other               | 16                                                          |
| 106             | Italy   | 2011           | Milk, Whole               | 91                                                          |
| 106             | Italy   | 2011           | Molluscs, Other           | 11                                                          |
| 106             | Italy   | 2011           | Mutton & Goat Meat        | 3                                                           |
| 106             | Italy   | 2011           | Nuts                      | 23                                                          |
| 106             | Italy   | 2011           | Oats                      | 1                                                           |
| 106             | Italy   | 2011           | Offals, Edible            | 7                                                           |
| 106             | Italy   | 2011           | Olive Oil                 | 32                                                          |
| 106             | Italy   | 2011           | Olives                    | 6                                                           |
| 106             | Italy   | 2011           | Onions                    | 17                                                          |
| 106             | Italy   | 2011           | Oranges, Mandarines       | 140                                                         |
| 106             | Italy   | 2011           | Palm Oil                  | 3                                                           |
| 106             | Italy   | 2011           | Peas                      | 2                                                           |
| 106             | Italy   | 2011           | Pelagic Fish              | 12                                                          |
| 106             | Italy   | 2011           | Pigmeat                   | 110                                                         |
| 106             | Italy   | 2011           | Pineapples                | 9                                                           |
| 106             | Italy   | 2011           | Potatoes                  | 105                                                         |
| 106             | Italy   | 2011           | Poultry Meat              | 50                                                          |
| 106             | Italy   | 2011           | Pulses, Other             | 6                                                           |
| 106             | Italy   | 2011           | Rape and Mustard Oil      | 2                                                           |
| 106             | Italy   | 2011           | Rice (Milled Equivalent)  | 14                                                          |
| 106             | Italy   | 2011           | Soyabean Oil              | 22                                                          |
| 106             | Italy   | 2011           | Sugar, Refined Equivalent | 69                                                          |
| 106             | Italy   | 2011           | Sunflowerseed Oil         | 11                                                          |



Dietary calcium and zinc deficiency risks are decreasing but remain prevalent

| FAO countrycode | Country | Reference year | Food item                 | Gross food supply (g capita <sup>-1</sup> d <sup>-1</sup> ) |
|-----------------|---------|----------------|---------------------------|-------------------------------------------------------------|
| 106             | Italy   | 2011           | Sweet Potatoes            | 1                                                           |
| 106             | Italy   | 2011           | Sweeteners, Other         | 4                                                           |
| 106             | Italy   | 2011           | Tomatoes                  | 108                                                         |
| 106             | Italy   | 2011           | Vegetables, Other         | 270                                                         |
| 106             | Italy   | 2011           | Wheat                     | 399                                                         |
| 106             | Italy   | 2011           | Wine                      | 85                                                          |
| 109             | Jamaica | 1992           | Bananas                   | 60                                                          |
| 109             | Jamaica | 1992           | Barley                    | 2                                                           |
| 109             | Jamaica | 1992           | Beans                     | 1                                                           |
| 109             | Jamaica | 1992           | Beer                      | 85                                                          |
| 109             | Jamaica | 1992           | Beverages, Alcoholic      | 9                                                           |
| 109             | Jamaica | 1992           | Bovine Meat               | 24                                                          |
| 109             | Jamaica | 1992           | Butter, Ghee              | 2                                                           |
| 109             | Jamaica | 1992           | Cassava                   | 6                                                           |
| 109             | Jamaica | 1992           | Cheese                    | 3                                                           |
| 109             | Jamaica | 1992           | Cocoa Beans               | 1                                                           |
| 109             | Jamaica | 1992           | Coconut Oil               | 7                                                           |
| 109             | Jamaica | 1992           | Coconuts - Incl Copra     | 40                                                          |
| 109             | Jamaica | 1992           | Coffee                    | 1                                                           |
| 109             | Jamaica | 1992           | Demersal Fish             | 4                                                           |
| 109             | Jamaica | 1992           | Eggs                      | 5                                                           |
| 109             | Jamaica | 1992           | Fats, Animals, Raw        | 5                                                           |
| 109             | Jamaica | 1992           | Freshwater Fish           | 4                                                           |
| 109             | Jamaica | 1992           | Fruits, Other             | 67                                                          |
| 109             | Jamaica | 1992           | Grapefruit                | 34                                                          |
| 109             | Jamaica | 1992           | Grapes                    | 2                                                           |
| 109             | Jamaica | 1992           | Groundnuts (Shelled Eq)   | 4                                                           |
| 109             | Jamaica | 1992           | Honey                     | 1                                                           |
| 109             | Jamaica | 1992           | Lemons, Limes             | 32                                                          |
| 109             | Jamaica | 1992           | Maize                     | 25                                                          |
| 109             | Jamaica | 1992           | Maize Germ Oil            | 1                                                           |
| 109             | Jamaica | 1992           | Marine Fish, Other        | 11                                                          |
| 109             | Jamaica | 1992           | Milk, Whole               | 247                                                         |
| 109             | Jamaica | 1992           | Molluscs, Other           | 8                                                           |
| 109             | Jamaica | 1992           | Mutton & Goat Meat        | 2                                                           |
| 109             | Jamaica | 1992           | Oats                      | 1                                                           |
| 109             | Jamaica | 1992           | Offals, Edible            | 13                                                          |
| 109             | Jamaica | 1992           | Onions                    | 5                                                           |
| 109             | Jamaica | 1992           | Oranges, Mandarines       | 28                                                          |
| 109             | Jamaica | 1992           | Peas                      | 4                                                           |
| 109             | Jamaica | 1992           | Pelagic Fish              | 20                                                          |
| 109             | Jamaica | 1992           | Pigmeat                   | 7                                                           |
| 109             | Jamaica | 1992           | Pimento                   | 3                                                           |
| 109             | Jamaica | 1992           | Pineapples                | 12                                                          |
| 109             | Jamaica | 1992           | Plantains                 | 29                                                          |
| 109             | Jamaica | 1992           | Potatoes                  | 7                                                           |
| 109             | Jamaica | 1992           | Poultry Meat              | 91                                                          |
| 109             | Jamaica | 1992           | Pulses, Other             | 3                                                           |
| 109             | Jamaica | 1992           | Rice (Milled Equivalent)  | 70                                                          |
| 109             | Jamaica | 1992           | Roots, Other              | 27                                                          |
| 109             | Jamaica | 1992           | Soyabean Oil              | 16                                                          |
| 109             | Jamaica | 1992           | Spices, Other             | 2                                                           |
| 109             | Jamaica | 1992           | Sugar, Refined Equivalent | 123                                                         |
| 109             | Jamaica | 1992           | Sweet Potatoes            | 22                                                          |
| 109             | Jamaica | 1992           | Sweeteners, Other         | 4                                                           |
| 109             | Jamaica | 1992           | Tomatoes                  | 18                                                          |
| 109             | Jamaica | 1992           | Vegetables, Other         | 134                                                         |
| 109             | Jamaica | 1992           | Wheat                     | 168                                                         |
| 109             | Jamaica | 1992           | Yams                      | 213                                                         |
| 109             | Jamaica | 1993           | Apples                    | 1                                                           |
| 109             | Jamaica | 1993           | Bananas                   | 50                                                          |
| 109             | Jamaica | 1993           | Barley                    | 3                                                           |
| 109             | Jamaica | 1993           | Beans                     | 2                                                           |
| 109             | Jamaica | 1993           | Beer                      | 82                                                          |
| 109             | Jamaica | 1993           | Beverages, Alcoholic      | 5                                                           |
| 109             | Jamaica | 1993           | Bovine Meat               | 23                                                          |
| 109             | Jamaica | 1993           | Butter, Ghee              | 2                                                           |
| 109             | Jamaica | 1993           | Cassava                   | 8                                                           |
| 109             | Jamaica | 1993           | Cereals, Other            | 2                                                           |
| 109             | Jamaica | 1993           | Cheese                    | 5                                                           |
| 109             | Jamaica | 1993           | Cocoa Beans               | 1                                                           |
| 109             | Jamaica | 1993           | Coconut Oil               | 9                                                           |
| 109             | Jamaica | 1993           | Coconuts - Incl Copra     | 40                                                          |
| 109             | Jamaica | 1993           | Demersal Fish             | 3                                                           |
| 109             | Jamaica | 1993           | Eggs                      | 6                                                           |
| 109             | Jamaica | 1993           | Fats, Animals, Raw        | 5                                                           |
| 109             | Jamaica | 1993           | Freshwater Fish           | 4                                                           |
| 109             | Jamaica | 1993           | Fruits, Other             | 74                                                          |
| 109             | Jamaica | 1993           | Grapefruit                | 26                                                          |
| 109             | Jamaica | 1993           | Grapes                    | 3                                                           |
| 109             | Jamaica | 1993           | Groundnuts (Shelled Eq)   | 4                                                           |
| 109             | Jamaica | 1993           | Honey                     | 1                                                           |
| 109             | Jamaica | 1993           | Lemons, Limes             | 23                                                          |
| 109             | Jamaica | 1993           | Maize                     | 22                                                          |
| 109             | Jamaica | 1993           | Marine Fish, Other        | 16                                                          |
| 109             | Jamaica | 1993           | Meat, Other               | 1                                                           |
| 109             | Jamaica | 1993           | Milk, Whole               | 260                                                         |
| 109             | Jamaica | 1993           | Molluscs, Other           | 9                                                           |
| 109             | Jamaica | 1993           | Mutton & Goat Meat        | 3                                                           |
| 109             | Jamaica | 1993           | Oats                      | 1                                                           |
| 109             | Jamaica | 1993           | Offals, Edible            | 13                                                          |
| 109             | Jamaica | 1993           | Onions                    | 6                                                           |
| 109             | Jamaica | 1993           | Oranges, Mandarines       | 50                                                          |
| 109             | Jamaica | 1993           | Peas                      | 4                                                           |
| 109             | Jamaica | 1993           | Pelagic Fish              | 21                                                          |
| 109             | Jamaica | 1993           | Pigmeat                   | 9                                                           |
| 109             | Jamaica | 1993           | Pimento                   | 5                                                           |

Dietary calcium and zinc deficiency risks are decreasing but remain prevalent

| FAO countrycode | Country | Reference year | Food item                 | Gross food supply (g capita <sup>-1</sup> d <sup>-1</sup> ) |
|-----------------|---------|----------------|---------------------------|-------------------------------------------------------------|
| 109             | Jamaica | 1993           | Pineapples                | 23                                                          |
| 109             | Jamaica | 1993           | Plantains                 | 36                                                          |
| 109             | Jamaica | 1993           | Potatoes                  | 9                                                           |
| 109             | Jamaica | 1993           | Poultry Meat              | 93                                                          |
| 109             | Jamaica | 1993           | Pulses, Other             | 2                                                           |
| 109             | Jamaica | 1993           | Rice (Milled Equivalent)  | 56                                                          |
| 109             | Jamaica | 1993           | Roots, Other              | 34                                                          |
| 109             | Jamaica | 1993           | Soyabean Oil              | 17                                                          |
| 109             | Jamaica | 1993           | Spices, Other             | 2                                                           |
| 109             | Jamaica | 1993           | Sugar, Refined Equivalent | 128                                                         |
| 109             | Jamaica | 1993           | Sweet Potatoes            | 24                                                          |
| 109             | Jamaica | 1993           | Sweeteners, Other         | 5                                                           |
| 109             | Jamaica | 1993           | Tomatoes                  | 22                                                          |
| 109             | Jamaica | 1993           | Vegetables, Other         | 161                                                         |
| 109             | Jamaica | 1993           | Wheat                     | 180                                                         |
| 109             | Jamaica | 1993           | Yams                      | 218                                                         |
| 109             | Jamaica | 1994           | Apples                    | 1                                                           |
| 109             | Jamaica | 1994           | Bananas                   | 43                                                          |
| 109             | Jamaica | 1994           | Barley                    | 2                                                           |
| 109             | Jamaica | 1994           | Beans                     | 2                                                           |
| 109             | Jamaica | 1994           | Beer                      | 71                                                          |
| 109             | Jamaica | 1994           | Beverages, Alcoholic      | 4                                                           |
| 109             | Jamaica | 1994           | Bovine Meat               | 22                                                          |
| 109             | Jamaica | 1994           | Butter, Ghee              | 2                                                           |
| 109             | Jamaica | 1994           | Cassava                   | 7                                                           |
| 109             | Jamaica | 1994           | Cheese                    | 2                                                           |
| 109             | Jamaica | 1994           | Cocoa Beans               | 1                                                           |
| 109             | Jamaica | 1994           | Coconut Oil               | 8                                                           |
| 109             | Jamaica | 1994           | Coconuts - Incl Copra     | 39                                                          |
| 109             | Jamaica | 1994           | Coffee                    | 2                                                           |
| 109             | Jamaica | 1994           | Crustaceans               | 1                                                           |
| 109             | Jamaica | 1994           | Demersal Fish             | 2                                                           |
| 109             | Jamaica | 1994           | Eggs                      | 6                                                           |
| 109             | Jamaica | 1994           | Fats, Animals, Raw        | 5                                                           |
| 109             | Jamaica | 1994           | Freshwater Fish           | 4                                                           |
| 109             | Jamaica | 1994           | Fruits, Other             | 82                                                          |
| 109             | Jamaica | 1994           | Grapefruit                | 28                                                          |
| 109             | Jamaica | 1994           | Grapes                    | 3                                                           |
| 109             | Jamaica | 1994           | Groundnuts (Shelled Eq)   | 4                                                           |
| 109             | Jamaica | 1994           | Honey                     | 1                                                           |
| 109             | Jamaica | 1994           | Lemons, Limes             | 23                                                          |
| 109             | Jamaica | 1994           | Maize                     | 21                                                          |
| 109             | Jamaica | 1994           | Marine Fish, Other        | 23                                                          |
| 109             | Jamaica | 1994           | Milk, Whole               | 241                                                         |
| 109             | Jamaica | 1994           | Molluscs, Other           | 19                                                          |
| 109             | Jamaica | 1994           | Mutton & Goat Meat        | 3                                                           |
| 109             | Jamaica | 1994           | Oats                      | 2                                                           |
| 109             | Jamaica | 1994           | Offals, Edible            | 11                                                          |
| 109             | Jamaica | 1994           | Onions                    | 10                                                          |
| 109             | Jamaica | 1994           | Oranges, Mandarines       | 139                                                         |
| 109             | Jamaica | 1994           | Peas                      | 5                                                           |
| 109             | Jamaica | 1994           | Pelagic Fish              | 14                                                          |
| 109             | Jamaica | 1994           | Pigmeat                   | 10                                                          |
| 109             | Jamaica | 1994           | Pimento                   | 7                                                           |
| 109             | Jamaica | 1994           | Pineapples                | 17                                                          |
| 109             | Jamaica | 1994           | Plantains                 | 36                                                          |
| 109             | Jamaica | 1994           | Potatoes                  | 14                                                          |
| 109             | Jamaica | 1994           | Poultry Meat              | 78                                                          |
| 109             | Jamaica | 1994           | Pulses, Other             | 3                                                           |
| 109             | Jamaica | 1994           | Rice (Milled Equivalent)  | 65                                                          |
| 109             | Jamaica | 1994           | Roots, Other              | 36                                                          |
| 109             | Jamaica | 1994           | Soyabean Oil              | 17                                                          |
| 109             | Jamaica | 1994           | Spices, Other             | 2                                                           |
| 109             | Jamaica | 1994           | Sugar, Refined Equivalent | 124                                                         |
| 109             | Jamaica | 1994           | Sweet Potatoes            | 26                                                          |
| 109             | Jamaica | 1994           | Sweeteners, Other         | 8                                                           |
| 109             | Jamaica | 1994           | Tomatoes                  | 20                                                          |
| 109             | Jamaica | 1994           | Vegetables, Other         | 190                                                         |
| 109             | Jamaica | 1994           | Wheat                     | 179                                                         |
| 109             | Jamaica | 1994           | Wine                      | 1                                                           |
| 109             | Jamaica | 1994           | Yams                      | 227                                                         |
| 109             | Jamaica | 1995           | Apples                    | 2                                                           |
| 109             | Jamaica | 1995           | Bananas                   | 45                                                          |
| 109             | Jamaica | 1995           | Barley                    | 5                                                           |
| 109             | Jamaica | 1995           | Beans                     | 2                                                           |
| 109             | Jamaica | 1995           | Beer                      | 66                                                          |
| 109             | Jamaica | 1995           | Beverages, Alcoholic      | 5                                                           |
| 109             | Jamaica | 1995           | Bovine Meat               | 25                                                          |
| 109             | Jamaica | 1995           | Butter, Ghee              | 2                                                           |
| 109             | Jamaica | 1995           | Cassava                   | 7                                                           |
| 109             | Jamaica | 1995           | Cheese                    | 4                                                           |
| 109             | Jamaica | 1995           | Coconut Oil               | 7                                                           |
| 109             | Jamaica | 1995           | Coconuts - Incl Copra     | 39                                                          |
| 109             | Jamaica | 1995           | Coffee                    | 1                                                           |
| 109             | Jamaica | 1995           | Crustaceans               | 1                                                           |
| 109             | Jamaica | 1995           | Demersal Fish             | 3                                                           |
| 109             | Jamaica | 1995           | Eggs                      | 6                                                           |
| 109             | Jamaica | 1995           | Fats, Animals, Raw        | 6                                                           |
| 109             | Jamaica | 1995           | Freshwater Fish           | 4                                                           |
| 109             | Jamaica | 1995           | Fruits, Other             | 76                                                          |
| 109             | Jamaica | 1995           | Grapefruit                | 32                                                          |
| 109             | Jamaica | 1995           | Grapes                    | 4                                                           |
| 109             | Jamaica | 1995           | Groundnuts (Shelled Eq)   | 4                                                           |
| 109             | Jamaica | 1995           | Honey                     | 1                                                           |
| 109             | Jamaica | 1995           | Lemons, Limes             | 25                                                          |
| 109             | Jamaica | 1995           | Maize                     | 18                                                          |
| 109             | Jamaica | 1995           | Marine Fish, Other        | 23                                                          |

## Dietary calcium and zinc deficiency risks are decreasing but remain prevalent

| FAO countrycode | Country | Reference year | Food item                 | Gross food supply (g capita <sup>-1</sup> d <sup>-1</sup> ) |
|-----------------|---------|----------------|---------------------------|-------------------------------------------------------------|
| 109             | Jamaica | 1995           | Milk, Whole               | 253                                                         |
| 109             | Jamaica | 1995           | Molluscs, Other           | 10                                                          |
| 109             | Jamaica | 1995           | Mutton & Goat Meat        | 4                                                           |
| 109             | Jamaica | 1995           | Oats                      | 2                                                           |
| 109             | Jamaica | 1995           | Offals, Edible            | 12                                                          |
| 109             | Jamaica | 1995           | Onions                    | 7                                                           |
| 109             | Jamaica | 1995           | Oranges, Mandarines       | 128                                                         |
| 109             | Jamaica | 1995           | Peas                      | 4                                                           |
| 109             | Jamaica | 1995           | Pelagic Fish              | 17                                                          |
| 109             | Jamaica | 1995           | Pepper                    | 1                                                           |
| 109             | Jamaica | 1995           | Pigmeat                   | 9                                                           |
| 109             | Jamaica | 1995           | Pimento                   | 7                                                           |
| 109             | Jamaica | 1995           | Pineapples                | 18                                                          |
| 109             | Jamaica | 1995           | Plantains                 | 35                                                          |
| 109             | Jamaica | 1995           | Potatoes                  | 21                                                          |
| 109             | Jamaica | 1995           | Poultry Meat              | 69                                                          |
| 109             | Jamaica | 1995           | Pulses, Other             | 2                                                           |
| 109             | Jamaica | 1995           | Rice (Milled Equivalent)  | 76                                                          |
| 109             | Jamaica | 1995           | Roots, Other              | 41                                                          |
| 109             | Jamaica | 1995           | Soyabean Oil              | 16                                                          |
| 109             | Jamaica | 1995           | Spices, Other             | 2                                                           |
| 109             | Jamaica | 1995           | Sugar, Refined Equivalent | 95                                                          |
| 109             | Jamaica | 1995           | Sweet Potatoes            | 29                                                          |
| 109             | Jamaica | 1995           | Sweeteners, Other         | 4                                                           |
| 109             | Jamaica | 1995           | Tomatoes                  | 25                                                          |
| 109             | Jamaica | 1995           | Vegetables, Other         | 203                                                         |
| 109             | Jamaica | 1995           | Wheat                     | 186                                                         |
| 109             | Jamaica | 1995           | Wine                      | 1                                                           |
| 109             | Jamaica | 1995           | Yams                      | 234                                                         |
| 109             | Jamaica | 1996           | Apples                    | 3                                                           |
| 109             | Jamaica | 1996           | Bananas                   | 47                                                          |
| 109             | Jamaica | 1996           | Barley                    | 1                                                           |
| 109             | Jamaica | 1996           | Beans                     | 1                                                           |
| 109             | Jamaica | 1996           | Beer                      | 67                                                          |
| 109             | Jamaica | 1996           | Beverages, Alcoholic      | 5                                                           |
| 109             | Jamaica | 1996           | Bovine Meat               | 22                                                          |
| 109             | Jamaica | 1996           | Butter, Ghee              | 2                                                           |
| 109             | Jamaica | 1996           | Cassava                   | 8                                                           |
| 109             | Jamaica | 1996           | Cheese                    | 3                                                           |
| 109             | Jamaica | 1996           | Cocoa Beans               | 1                                                           |
| 109             | Jamaica | 1996           | Coconut Oil               | 7                                                           |
| 109             | Jamaica | 1996           | Coconuts - Incl Copra     | 39                                                          |
| 109             | Jamaica | 1996           | Coffee                    | 1                                                           |
| 109             | Jamaica | 1996           | Crustaceans               | 1                                                           |
| 109             | Jamaica | 1996           | Demersal Fish             | 3                                                           |
| 109             | Jamaica | 1996           | Eggs                      | 6                                                           |
| 109             | Jamaica | 1996           | Fats, Animals, Raw        | 7                                                           |
| 109             | Jamaica | 1996           | Freshwater Fish           | 4                                                           |
| 109             | Jamaica | 1996           | Fruits, Other             | 75                                                          |
| 109             | Jamaica | 1996           | Grapefruit                | 46                                                          |
| 109             | Jamaica | 1996           | Grapes                    | 3                                                           |
| 109             | Jamaica | 1996           | Groundnuts (Shelled Eq)   | 4                                                           |
| 109             | Jamaica | 1996           | Honey                     | 1                                                           |
| 109             | Jamaica | 1996           | Lemons, Limes             | 28                                                          |
| 109             | Jamaica | 1996           | Maize                     | 18                                                          |
| 109             | Jamaica | 1996           | Maize Germ Oil            | 1                                                           |
| 109             | Jamaica | 1996           | Marine Fish, Other        | 24                                                          |
| 109             | Jamaica | 1996           | Milk, Whole               | 247                                                         |
| 109             | Jamaica | 1996           | Molluscs, Other           | 1                                                           |
| 109             | Jamaica | 1996           | Mutton & Goat Meat        | 4                                                           |
| 109             | Jamaica | 1996           | Oats                      | 3                                                           |
| 109             | Jamaica | 1996           | Offals, Edible            | 12                                                          |
| 109             | Jamaica | 1996           | Onions                    | 10                                                          |
| 109             | Jamaica | 1996           | Oranges, Mandarines       | 147                                                         |
| 109             | Jamaica | 1996           | Peas                      | 3                                                           |
| 109             | Jamaica | 1996           | Pelagic Fish              | 20                                                          |
| 109             | Jamaica | 1996           | Pigmeat                   | 9                                                           |
| 109             | Jamaica | 1996           | Pimento                   | 8                                                           |
| 109             | Jamaica | 1996           | Pineapples                | 22                                                          |
| 109             | Jamaica | 1996           | Plantains                 | 34                                                          |
| 109             | Jamaica | 1996           | Potatoes                  | 22                                                          |
| 109             | Jamaica | 1996           | Poultry Meat              | 108                                                         |
| 109             | Jamaica | 1996           | Pulses, Other             | 3                                                           |
| 109             | Jamaica | 1996           | Rice (Milled Equivalent)  | 77                                                          |
| 109             | Jamaica | 1996           | Roots, Other              | 44                                                          |
| 109             | Jamaica | 1996           | Soyabean Oil              | 20                                                          |
| 109             | Jamaica | 1996           | Spices, Other             | 2                                                           |
| 109             | Jamaica | 1996           | Sugar, Refined Equivalent | 118                                                         |
| 109             | Jamaica | 1996           | Sweet Potatoes            | 29                                                          |
| 109             | Jamaica | 1996           | Sweeteners, Other         | 10                                                          |
| 109             | Jamaica | 1996           | Tomatoes                  | 27                                                          |
| 109             | Jamaica | 1996           | Vegetables, Other         | 211                                                         |
| 109             | Jamaica | 1996           | Wheat                     | 128                                                         |
| 109             | Jamaica | 1996           | Wine                      | 1                                                           |
| 109             | Jamaica | 1996           | Yams                      | 245                                                         |
| 109             | Jamaica | 1997           | Apples                    | 4                                                           |
| 109             | Jamaica | 1997           | Bananas                   | 52                                                          |
| 109             | Jamaica | 1997           | Barley                    | 1                                                           |
| 109             | Jamaica | 1997           | Beans                     | 2                                                           |
| 109             | Jamaica | 1997           | Beer                      | 63                                                          |
| 109             | Jamaica | 1997           | Beverages, Alcoholic      | 5                                                           |
| 109             | Jamaica | 1997           | Bovine Meat               | 23                                                          |
| 109             | Jamaica | 1997           | Butter, Ghee              | 2                                                           |
| 109             | Jamaica | 1997           | Cassava                   | 5                                                           |
| 109             | Jamaica | 1997           | Cereals, Other            | 1                                                           |
| 109             | Jamaica | 1997           | Cheese                    | 4                                                           |
| 109             | Jamaica | 1997           | Cocoa Beans               | 2                                                           |

## Dietary calcium and zinc deficiency risks are decreasing but remain prevalent

| FAO countrycode | Country | Reference year | Food item                 | Gross food supply (g capita <sup>-1</sup> d <sup>-1</sup> ) |
|-----------------|---------|----------------|---------------------------|-------------------------------------------------------------|
| 109             | Jamaica | 1997           | Coconut Oil               | 7                                                           |
| 109             | Jamaica | 1997           | Coconuts - Incl Copra     | 38                                                          |
| 109             | Jamaica | 1997           | Coffee                    | 1                                                           |
| 109             | Jamaica | 1997           | Crustaceans               | 1                                                           |
| 109             | Jamaica | 1997           | Demersal Fish             | 4                                                           |
| 109             | Jamaica | 1997           | Eggs                      | 6                                                           |
| 109             | Jamaica | 1997           | Fats, Animals, Raw        | 7                                                           |
| 109             | Jamaica | 1997           | Freshwater Fish           | 4                                                           |
| 109             | Jamaica | 1997           | Fruits, Other             | 68                                                          |
| 109             | Jamaica | 1997           | Grapefruit                | 38                                                          |
| 109             | Jamaica | 1997           | Grapes                    | 4                                                           |
| 109             | Jamaica | 1997           | Groundnuts (Shelled Eq)   | 4                                                           |
| 109             | Jamaica | 1997           | Honey                     | 1                                                           |
| 109             | Jamaica | 1997           | Lemons, Limes             | 35                                                          |
| 109             | Jamaica | 1997           | Maize                     | 16                                                          |
| 109             | Jamaica | 1997           | Maize Germ Oil            | 1                                                           |
| 109             | Jamaica | 1997           | Marine Fish, Other        | 19                                                          |
| 109             | Jamaica | 1997           | Milk, Whole               | 252                                                         |
| 109             | Jamaica | 1997           | Molluscs, Other           | 9                                                           |
| 109             | Jamaica | 1997           | Mutton & Goat Meat        | 5                                                           |
| 109             | Jamaica | 1997           | Oats                      | 2                                                           |
| 109             | Jamaica | 1997           | Offals, Edible            | 12                                                          |
| 109             | Jamaica | 1997           | Onions                    | 8                                                           |
| 109             | Jamaica | 1997           | Oranges, Mandarines       | 146                                                         |
| 109             | Jamaica | 1997           | Peas                      | 2                                                           |
| 109             | Jamaica | 1997           | Pelagic Fish              | 22                                                          |
| 109             | Jamaica | 1997           | Pigmeat                   | 9                                                           |
| 109             | Jamaica | 1997           | Pimento                   | 6                                                           |
| 109             | Jamaica | 1997           | Pineapples                | 20                                                          |
| 109             | Jamaica | 1997           | Plantains                 | 26                                                          |
| 109             | Jamaica | 1997           | Potatoes                  | 21                                                          |
| 109             | Jamaica | 1997           | Poultry Meat              | 113                                                         |
| 109             | Jamaica | 1997           | Pulses, Other             | 2                                                           |
| 109             | Jamaica | 1997           | Rice (Milled Equivalent)  | 60                                                          |
| 109             | Jamaica | 1997           | Roots, Other              | 31                                                          |
| 109             | Jamaica | 1997           | Soyabean Oil              | 21                                                          |
| 109             | Jamaica | 1997           | Spices, Other             | 1                                                           |
| 109             | Jamaica | 1997           | Sugar, Refined Equivalent | 114                                                         |
| 109             | Jamaica | 1997           | Sweet Potatoes            | 20                                                          |
| 109             | Jamaica | 1997           | Sweeteners, Other         | 5                                                           |
| 109             | Jamaica | 1997           | Tomatoes                  | 22                                                          |
| 109             | Jamaica | 1997           | Vegetables, Other         | 172                                                         |
| 109             | Jamaica | 1997           | Wheat                     | 174                                                         |
| 109             | Jamaica | 1997           | Wine                      | 1                                                           |
| 109             | Jamaica | 1997           | Yams                      | 203                                                         |
| 109             | Jamaica | 1998           | Apples                    | 2                                                           |
| 109             | Jamaica | 1998           | Bananas                   | 56                                                          |
| 109             | Jamaica | 1998           | Barley                    | 2                                                           |
| 109             | Jamaica | 1998           | Beans                     | 1                                                           |
| 109             | Jamaica | 1998           | Beer                      | 62                                                          |
| 109             | Jamaica | 1998           | Beverages, Alcoholic      | 5                                                           |
| 109             | Jamaica | 1998           | Bovine Meat               | 21                                                          |
| 109             | Jamaica | 1998           | Butter, Ghee              | 2                                                           |
| 109             | Jamaica | 1998           | Cassava                   | 6                                                           |
| 109             | Jamaica | 1998           | Cereals, Other            | 1                                                           |
| 109             | Jamaica | 1998           | Cheese                    | 4                                                           |
| 109             | Jamaica | 1998           | Cocoa Beans               | 2                                                           |
| 109             | Jamaica | 1998           | Coconut Oil               | 7                                                           |
| 109             | Jamaica | 1998           | Coconuts - Incl Copra     | 38                                                          |
| 109             | Jamaica | 1998           | Coffee                    | 1                                                           |
| 109             | Jamaica | 1998           | Crustaceans               | 1                                                           |
| 109             | Jamaica | 1998           | Demersal Fish             | 9                                                           |
| 109             | Jamaica | 1998           | Eggs                      | 7                                                           |
| 109             | Jamaica | 1998           | Fats, Animals, Raw        | 7                                                           |
| 109             | Jamaica | 1998           | Freshwater Fish           | 4                                                           |
| 109             | Jamaica | 1998           | Fruits, Other             | 65                                                          |
| 109             | Jamaica | 1998           | Grapefruit                | 42                                                          |
| 109             | Jamaica | 1998           | Grapes                    | 3                                                           |
| 109             | Jamaica | 1998           | Groundnuts (Shelled Eq)   | 4                                                           |
| 109             | Jamaica | 1998           | Honey                     | 1                                                           |
| 109             | Jamaica | 1998           | Lemons, Limes             | 30                                                          |
| 109             | Jamaica | 1998           | Maize                     | 18                                                          |
| 109             | Jamaica | 1998           | Maize Germ Oil            | 1                                                           |
| 109             | Jamaica | 1998           | Marine Fish, Other        | 18                                                          |
| 109             | Jamaica | 1998           | Milk, Whole               | 218                                                         |
| 109             | Jamaica | 1998           | Molluscs, Other           | 9                                                           |
| 109             | Jamaica | 1998           | Mutton & Goat Meat        | 7                                                           |
| 109             | Jamaica | 1998           | Oats                      | 4                                                           |
| 109             | Jamaica | 1998           | Offals, Edible            | 11                                                          |
| 109             | Jamaica | 1998           | Onions                    | 6                                                           |
| 109             | Jamaica | 1998           | Oranges, Mandarines       | 137                                                         |
| 109             | Jamaica | 1998           | Peas                      | 2                                                           |
| 109             | Jamaica | 1998           | Pelagic Fish              | 20                                                          |
| 109             | Jamaica | 1998           | Pigmeat                   | 9                                                           |
| 109             | Jamaica | 1998           | Pimento                   | 6                                                           |
| 109             | Jamaica | 1998           | Pineapples                | 20                                                          |
| 109             | Jamaica | 1998           | Plantains                 | 22                                                          |
| 109             | Jamaica | 1998           | Potatoes                  | 22                                                          |
| 109             | Jamaica | 1998           | Poultry Meat              | 112                                                         |
| 109             | Jamaica | 1998           | Pulses, Other             | 2                                                           |
| 109             | Jamaica | 1998           | Rice (Milled Equivalent)  | 62                                                          |
| 109             | Jamaica | 1998           | Roots, Other              | 26                                                          |
| 109             | Jamaica | 1998           | Soyabean Oil              | 22                                                          |
| 109             | Jamaica | 1998           | Spices, Other             | 1                                                           |
| 109             | Jamaica | 1998           | Sugar, Refined Equivalent | 120                                                         |
| 109             | Jamaica | 1998           | Sweet Potatoes            | 23                                                          |
| 109             | Jamaica | 1998           | Sweeteners, Other         | 5                                                           |

Dietary calcium and zinc deficiency risks are decreasing but remain prevalent

| FAO countrycode | Country | Reference year | Food item                 | Gross food supply (g capita <sup>-1</sup> d <sup>-1</sup> ) |
|-----------------|---------|----------------|---------------------------|-------------------------------------------------------------|
| 109             | Jamaica | 1998           | Tomatoes                  | 21                                                          |
| 109             | Jamaica | 1998           | Vegetables, Other         | 174                                                         |
| 109             | Jamaica | 1998           | Wheat                     | 178                                                         |
| 109             | Jamaica | 1998           | Wine                      | 1                                                           |
| 109             | Jamaica | 1998           | Yams                      | 191                                                         |
| 109             | Jamaica | 1999           | Apples                    | 12                                                          |
| 109             | Jamaica | 1999           | Bananas                   | 59                                                          |
| 109             | Jamaica | 1999           | Barley                    | 3                                                           |
| 109             | Jamaica | 1999           | Beans                     | 3                                                           |
| 109             | Jamaica | 1999           | Beer                      | 58                                                          |
| 109             | Jamaica | 1999           | Beverages, Alcoholic      | 5                                                           |
| 109             | Jamaica | 1999           | Bovine Meat               | 24                                                          |
| 109             | Jamaica | 1999           | Butter, Ghee              | 2                                                           |
| 109             | Jamaica | 1999           | Cassava                   | 7                                                           |
| 109             | Jamaica | 1999           | Cereals, Other            | 2                                                           |
| 109             | Jamaica | 1999           | Cheese                    | 4                                                           |
| 109             | Jamaica | 1999           | Cocoa Beans               | 2                                                           |
| 109             | Jamaica | 1999           | Coconut Oil               | 5                                                           |
| 109             | Jamaica | 1999           | Coconuts - Incl Copra     | 38                                                          |
| 109             | Jamaica | 1999           | Coffee                    | 1                                                           |
| 109             | Jamaica | 1999           | Crustaceans               | 1                                                           |
| 109             | Jamaica | 1999           | Demersal Fish             | 5                                                           |
| 109             | Jamaica | 1999           | Eggs                      | 6                                                           |
| 109             | Jamaica | 1999           | Fats, Animals, Raw        | 7                                                           |
| 109             | Jamaica | 1999           | Freshwater Fish           | 5                                                           |
| 109             | Jamaica | 1999           | Fruits, Other             | 73                                                          |
| 109             | Jamaica | 1999           | Grapefruit                | 33                                                          |
| 109             | Jamaica | 1999           | Grapes                    | 4                                                           |
| 109             | Jamaica | 1999           | Groundnuts (Shelled Eq)   | 4                                                           |
| 109             | Jamaica | 1999           | Honey                     | 1                                                           |
| 109             | Jamaica | 1999           | Lemons, Limes             | 37                                                          |
| 109             | Jamaica | 1999           | Maize                     | 21                                                          |
| 109             | Jamaica | 1999           | Maize Germ Oil            | 1                                                           |
| 109             | Jamaica | 1999           | Marine Fish, Other        | 25                                                          |
| 109             | Jamaica | 1999           | Milk, Whole               | 204                                                         |
| 109             | Jamaica | 1999           | Molluscs, Other           | 7                                                           |
| 109             | Jamaica | 1999           | Mutton & Goat Meat        | 5                                                           |
| 109             | Jamaica | 1999           | Nuts                      | 1                                                           |
| 109             | Jamaica | 1999           | Oats                      | 3                                                           |
| 109             | Jamaica | 1999           | Offals, Edible            | 13                                                          |
| 109             | Jamaica | 1999           | Onions                    | 5                                                           |
| 109             | Jamaica | 1999           | Oranges, Mandarines       | 143                                                         |
| 109             | Jamaica | 1999           | Peas                      | 2                                                           |
| 109             | Jamaica | 1999           | Pelagic Fish              | 22                                                          |
| 109             | Jamaica | 1999           | Pepper                    | 1                                                           |
| 109             | Jamaica | 1999           | Pig meat                  | 9                                                           |
| 109             | Jamaica | 1999           | Pimento                   | 5                                                           |
| 109             | Jamaica | 1999           | Pineapples                | 21                                                          |
| 109             | Jamaica | 1999           | Plantains                 | 27                                                          |
| 109             | Jamaica | 1999           | Potatoes                  | 17                                                          |
| 109             | Jamaica | 1999           | Poultry Meat              | 113                                                         |
| 109             | Jamaica | 1999           | Pulses, Other             | 2                                                           |
| 109             | Jamaica | 1999           | Rice (Milled Equivalent)  | 63                                                          |
| 109             | Jamaica | 1999           | Roots, Other              | 28                                                          |
| 109             | Jamaica | 1999           | Soyabean Oil              | 25                                                          |
| 109             | Jamaica | 1999           | Spices, Other             | 2                                                           |
| 109             | Jamaica | 1999           | Sugar, Refined Equivalent | 111                                                         |
| 109             | Jamaica | 1999           | Sweet Potatoes            | 21                                                          |
| 109             | Jamaica | 1999           | Sweeteners, Other         | 17                                                          |
| 109             | Jamaica | 1999           | Tomatoes                  | 26                                                          |
| 109             | Jamaica | 1999           | Vegetables, Other         | 185                                                         |
| 109             | Jamaica | 1999           | Wheat                     | 176                                                         |
| 109             | Jamaica | 1999           | Wine                      | 1                                                           |
| 109             | Jamaica | 1999           | Yams                      | 181                                                         |
| 109             | Jamaica | 2000           | Apples                    | 2                                                           |
| 109             | Jamaica | 2000           | Bananas                   | 59                                                          |
| 109             | Jamaica | 2000           | Barley                    | 3                                                           |
| 109             | Jamaica | 2000           | Beans                     | 3                                                           |
| 109             | Jamaica | 2000           | Beer                      | 60                                                          |
| 109             | Jamaica | 2000           | Beverages, Alcoholic      | 4                                                           |
| 109             | Jamaica | 2000           | Bovine Meat               | 22                                                          |
| 109             | Jamaica | 2000           | Butter, Ghee              | 2                                                           |
| 109             | Jamaica | 2000           | Cassava                   | 6                                                           |
| 109             | Jamaica | 2000           | Cereals, Other            | 1                                                           |
| 109             | Jamaica | 2000           | Cheese                    | 4                                                           |
| 109             | Jamaica | 2000           | Cocoa Beans               | 2                                                           |
| 109             | Jamaica | 2000           | Coconut Oil               | 7                                                           |
| 109             | Jamaica | 2000           | Coconuts - Incl Copra     | 37                                                          |
| 109             | Jamaica | 2000           | Coffee                    | 1                                                           |
| 109             | Jamaica | 2000           | Demersal Fish             | 2                                                           |
| 109             | Jamaica | 2000           | Eggs                      | 5                                                           |
| 109             | Jamaica | 2000           | Fats, Animals, Raw        | 7                                                           |
| 109             | Jamaica | 2000           | Freshwater Fish           | 5                                                           |
| 109             | Jamaica | 2000           | Fruits, Other             | 75                                                          |
| 109             | Jamaica | 2000           | Grapefruit                | 39                                                          |
| 109             | Jamaica | 2000           | Grapes                    | 3                                                           |
| 109             | Jamaica | 2000           | Groundnuts (Shelled Eq)   | 3                                                           |
| 109             | Jamaica | 2000           | Honey                     | 1                                                           |
| 109             | Jamaica | 2000           | Lemons, Limes             | 30                                                          |
| 109             | Jamaica | 2000           | Maize                     | 21                                                          |
| 109             | Jamaica | 2000           | Maize Germ Oil            | 1                                                           |
| 109             | Jamaica | 2000           | Marine Fish, Other        | 27                                                          |
| 109             | Jamaica | 2000           | Milk, Whole               | 214                                                         |
| 109             | Jamaica | 2000           | Mutton & Goat Meat        | 6                                                           |
| 109             | Jamaica | 2000           | Oats                      | 3                                                           |
| 109             | Jamaica | 2000           | Offals, Edible            | 10                                                          |
| 109             | Jamaica | 2000           | Onions                    | 9                                                           |

Dietary calcium and zinc deficiency risks are decreasing but remain prevalent

| FAO countrycode | Country | Reference year | Food item                 | Gross food supply (g capita <sup>-1</sup> d <sup>-1</sup> ) |
|-----------------|---------|----------------|---------------------------|-------------------------------------------------------------|
| 109             | Jamaica | 2000           | Oranges, Mandarines       | 133                                                         |
| 109             | Jamaica | 2000           | Peas                      | 1                                                           |
| 109             | Jamaica | 2000           | Pelagic Fish              | 19                                                          |
| 109             | Jamaica | 2000           | Pepper                    | 1                                                           |
| 109             | Jamaica | 2000           | Pigmeat                   | 8                                                           |
| 109             | Jamaica | 2000           | Pimento                   | 4                                                           |
| 109             | Jamaica | 2000           | Pineapples                | 22                                                          |
| 109             | Jamaica | 2000           | Plantains                 | 22                                                          |
| 109             | Jamaica | 2000           | Potatoes                  | 21                                                          |
| 109             | Jamaica | 2000           | Poultry Meat              | 113                                                         |
| 109             | Jamaica | 2000           | Pulses, Other             | 2                                                           |
| 109             | Jamaica | 2000           | Rice (Milled Equivalent)  | 66                                                          |
| 109             | Jamaica | 2000           | Roots, Other              | 19                                                          |
| 109             | Jamaica | 2000           | Soyabean Oil              | 25                                                          |
| 109             | Jamaica | 2000           | Spices, Other             | 1                                                           |
| 109             | Jamaica | 2000           | Sugar, Refined Equivalent | 127                                                         |
| 109             | Jamaica | 2000           | Sweet Potatoes            | 17                                                          |
| 109             | Jamaica | 2000           | Sweeteners, Other         | 21                                                          |
| 109             | Jamaica | 2000           | Tomatoes                  | 26                                                          |
| 109             | Jamaica | 2000           | Vegetables, Other         | 157                                                         |
| 109             | Jamaica | 2000           | Wheat                     | 171                                                         |
| 109             | Jamaica | 2000           | Wine                      | 2                                                           |
| 109             | Jamaica | 2000           | Yams                      | 139                                                         |
| 109             | Jamaica | 2001           | Apples                    | 8                                                           |
| 109             | Jamaica | 2001           | Bananas                   | 62                                                          |
| 109             | Jamaica | 2001           | Barley                    | 2                                                           |
| 109             | Jamaica | 2001           | Beans                     | 3                                                           |
| 109             | Jamaica | 2001           | Beer                      | 68                                                          |
| 109             | Jamaica | 2001           | Beverages, Alcoholic      | 6                                                           |
| 109             | Jamaica | 2001           | Bovine Meat               | 17                                                          |
| 109             | Jamaica | 2001           | Butter, Ghee              | 2                                                           |
| 109             | Jamaica | 2001           | Cassava                   | 5                                                           |
| 109             | Jamaica | 2001           | Cereals, Other            | 3                                                           |
| 109             | Jamaica | 2001           | Cheese                    | 4                                                           |
| 109             | Jamaica | 2001           | Cocoa Beans               | 2                                                           |
| 109             | Jamaica | 2001           | Coconut Oil               | 7                                                           |
| 109             | Jamaica | 2001           | Coconuts - Incl Copra     | 37                                                          |
| 109             | Jamaica | 2001           | Coffee                    | 1                                                           |
| 109             | Jamaica | 2001           | Demersal Fish             | 3                                                           |
| 109             | Jamaica | 2001           | Eggs                      | 7                                                           |
| 109             | Jamaica | 2001           | Fats, Animals, Raw        | 7                                                           |
| 109             | Jamaica | 2001           | Freshwater Fish           | 6                                                           |
| 109             | Jamaica | 2001           | Fruits, Other             | 80                                                          |
| 109             | Jamaica | 2001           | Grapefruit                | 40                                                          |
| 109             | Jamaica | 2001           | Grapes                    | 5                                                           |
| 109             | Jamaica | 2001           | Groundnuts (Shelled Eq)   | 5                                                           |
| 109             | Jamaica | 2001           | Honey                     | 1                                                           |
| 109             | Jamaica | 2001           | Lemons, Limes             | 26                                                          |
| 109             | Jamaica | 2001           | Maize                     | 17                                                          |
| 109             | Jamaica | 2001           | Maize Germ Oil            | 1                                                           |
| 109             | Jamaica | 2001           | Marine Fish, Other        | 29                                                          |
| 109             | Jamaica | 2001           | Milk, Whole               | 210                                                         |
| 109             | Jamaica | 2001           | Molluscs, Other           | 8                                                           |
| 109             | Jamaica | 2001           | Mutton & Goat Meat        | 5                                                           |
| 109             | Jamaica | 2001           | Nuts                      | 1                                                           |
| 109             | Jamaica | 2001           | Oats                      | 2                                                           |
| 109             | Jamaica | 2001           | Offals, Edible            | 11                                                          |
| 109             | Jamaica | 2001           | Onions                    | 11                                                          |
| 109             | Jamaica | 2001           | Oranges, Mandarines       | 140                                                         |
| 109             | Jamaica | 2001           | Peas                      | 2                                                           |
| 109             | Jamaica | 2001           | Pelagic Fish              | 23                                                          |
| 109             | Jamaica | 2001           | Pigmeat                   | 9                                                           |
| 109             | Jamaica | 2001           | Pimento                   | 5                                                           |
| 109             | Jamaica | 2001           | Pineapples                | 23                                                          |
| 109             | Jamaica | 2001           | Plantains                 | 21                                                          |
| 109             | Jamaica | 2001           | Potatoes                  | 29                                                          |
| 109             | Jamaica | 2001           | Poultry Meat              | 120                                                         |
| 109             | Jamaica | 2001           | Pulses, Other             | 4                                                           |
| 109             | Jamaica | 2001           | Rice (Milled Equivalent)  | 60                                                          |
| 109             | Jamaica | 2001           | Roots, Other              | 19                                                          |
| 109             | Jamaica | 2001           | Soyabean Oil              | 26                                                          |
| 109             | Jamaica | 2001           | Spices, Other             | 2                                                           |
| 109             | Jamaica | 2001           | Sugar, Refined Equivalent | 127                                                         |
| 109             | Jamaica | 2001           | Sweet Potatoes            | 21                                                          |
| 109             | Jamaica | 2001           | Sweeteners, Other         | 18                                                          |
| 109             | Jamaica | 2001           | Tomatoes                  | 28                                                          |
| 109             | Jamaica | 2001           | Vegetables, Other         | 182                                                         |
| 109             | Jamaica | 2001           | Wheat                     | 178                                                         |
| 109             | Jamaica | 2001           | Wine                      | 1                                                           |
| 109             | Jamaica | 2001           | Yams                      | 141                                                         |
| 109             | Jamaica | 2002           | Apples                    | 6                                                           |
| 109             | Jamaica | 2002           | Bananas                   | 66                                                          |
| 109             | Jamaica | 2002           | Barley                    | 1                                                           |
| 109             | Jamaica | 2002           | Beans                     | 3                                                           |
| 109             | Jamaica | 2002           | Beer                      | 66                                                          |
| 109             | Jamaica | 2002           | Beverages, Alcoholic      | 6                                                           |
| 109             | Jamaica | 2002           | Bovine Meat               | 23                                                          |
| 109             | Jamaica | 2002           | Butter, Ghee              | 2                                                           |
| 109             | Jamaica | 2002           | Cassava                   | 5                                                           |
| 109             | Jamaica | 2002           | Cereals, Other            | 2                                                           |
| 109             | Jamaica | 2002           | Cheese                    | 5                                                           |
| 109             | Jamaica | 2002           | Cocoa Beans               | 2                                                           |
| 109             | Jamaica | 2002           | Coconut Oil               | 8                                                           |
| 109             | Jamaica | 2002           | Coconuts - Incl Copra     | 37                                                          |
| 109             | Jamaica | 2002           | Coffee                    | 1                                                           |
| 109             | Jamaica | 2002           | Crustaceans               | 1                                                           |
| 109             | Jamaica | 2002           | Demersal Fish             | 1                                                           |

Dietary calcium and zinc deficiency risks are decreasing but remain prevalent

| FAO countrycode | Country | Reference year | Food item                 | Gross food supply (g capita <sup>-1</sup> d <sup>-1</sup> ) |
|-----------------|---------|----------------|---------------------------|-------------------------------------------------------------|
| 109             | Jamaica | 2002           | Eggs                      | 6                                                           |
| 109             | Jamaica | 2002           | Fats, Animals, Raw        | 7                                                           |
| 109             | Jamaica | 2002           | Freshwater Fish           | 7                                                           |
| 109             | Jamaica | 2002           | Fruits, Other             | 79                                                          |
| 109             | Jamaica | 2002           | Grapefruit                | 35                                                          |
| 109             | Jamaica | 2002           | Grapes                    | 4                                                           |
| 109             | Jamaica | 2002           | Groundnuts (Shelled Eq)   | 4                                                           |
| 109             | Jamaica | 2002           | Honey                     | 1                                                           |
| 109             | Jamaica | 2002           | Lemons, Limes             | 28                                                          |
| 109             | Jamaica | 2002           | Maize                     | 22                                                          |
| 109             | Jamaica | 2002           | Marine Fish, Other        | 34                                                          |
| 109             | Jamaica | 2002           | Milk, Whole               | 212                                                         |
| 109             | Jamaica | 2002           | Mutton & Goat Meat        | 6                                                           |
| 109             | Jamaica | 2002           | Oats                      | 3                                                           |
| 109             | Jamaica | 2002           | Offals, Edible            | 10                                                          |
| 109             | Jamaica | 2002           | Onions                    | 9                                                           |
| 109             | Jamaica | 2002           | Oranges, Mandarines       | 139                                                         |
| 109             | Jamaica | 2002           | Peas                      | 1                                                           |
| 109             | Jamaica | 2002           | Pelagic Fish              | 22                                                          |
| 109             | Jamaica | 2002           | Pigmeat                   | 8                                                           |
| 109             | Jamaica | 2002           | Pimento                   | 4                                                           |
| 109             | Jamaica | 2002           | Pineapples                | 22                                                          |
| 109             | Jamaica | 2002           | Plantains                 | 20                                                          |
| 109             | Jamaica | 2002           | Potatoes                  | 25                                                          |
| 109             | Jamaica | 2002           | Poultry Meat              | 120                                                         |
| 109             | Jamaica | 2002           | Pulses, Other             | 2                                                           |
| 109             | Jamaica | 2002           | Rice (Milled Equivalent)  | 75                                                          |
| 109             | Jamaica | 2002           | Roots, Other              | 16                                                          |
| 109             | Jamaica | 2002           | Soyabean Oil              | 27                                                          |
| 109             | Jamaica | 2002           | Spices, Other             | 1                                                           |
| 109             | Jamaica | 2002           | Sugar, Refined Equivalent | 123                                                         |
| 109             | Jamaica | 2002           | Sweet Potatoes            | 15                                                          |
| 109             | Jamaica | 2002           | Sweeteners, Other         | 23                                                          |
| 109             | Jamaica | 2002           | Tomatoes                  | 24                                                          |
| 109             | Jamaica | 2002           | Vegetables, Other         | 137                                                         |
| 109             | Jamaica | 2002           | Wheat                     | 165                                                         |
| 109             | Jamaica | 2002           | Wine                      | 1                                                           |
| 109             | Jamaica | 2002           | Yams                      | 134                                                         |
| 109             | Jamaica | 2003           | Apples                    | 7                                                           |
| 109             | Jamaica | 2003           | Bananas                   | 70                                                          |
| 109             | Jamaica | 2003           | Barley                    | 2                                                           |
| 109             | Jamaica | 2003           | Beans                     | 3                                                           |
| 109             | Jamaica | 2003           | Beer                      | 60                                                          |
| 109             | Jamaica | 2003           | Beverages, Alcoholic      | 7                                                           |
| 109             | Jamaica | 2003           | Bovine Meat               | 21                                                          |
| 109             | Jamaica | 2003           | Butter, Ghee              | 2                                                           |
| 109             | Jamaica | 2003           | Cassava                   | 6                                                           |
| 109             | Jamaica | 2003           | Cereals, Other            | 2                                                           |
| 109             | Jamaica | 2003           | Cheese                    | 5                                                           |
| 109             | Jamaica | 2003           | Cocoa Beans               | 2                                                           |
| 109             | Jamaica | 2003           | Coconut Oil               | 9                                                           |
| 109             | Jamaica | 2003           | Coconuts - Incl Copra     | 36                                                          |
| 109             | Jamaica | 2003           | Demersal Fish             | 1                                                           |
| 109             | Jamaica | 2003           | Eggs                      | 6                                                           |
| 109             | Jamaica | 2003           | Fats, Animals, Raw        | 7                                                           |
| 109             | Jamaica | 2003           | Freshwater Fish           | 3                                                           |
| 109             | Jamaica | 2003           | Fruits, Other             | 81                                                          |
| 109             | Jamaica | 2003           | Grapefruit                | 43                                                          |
| 109             | Jamaica | 2003           | Grapes                    | 6                                                           |
| 109             | Jamaica | 2003           | Groundnuts (Shelled Eq)   | 4                                                           |
| 109             | Jamaica | 2003           | Honey                     | 1                                                           |
| 109             | Jamaica | 2003           | Lemons, Limes             | 33                                                          |
| 109             | Jamaica | 2003           | Maize                     | 19                                                          |
| 109             | Jamaica | 2003           | Marine Fish, Other        | 36                                                          |
| 109             | Jamaica | 2003           | Milk, Whole               | 199                                                         |
| 109             | Jamaica | 2003           | Molluscs, Other           | 4                                                           |
| 109             | Jamaica | 2003           | Mutton & Goat Meat        | 6                                                           |
| 109             | Jamaica | 2003           | Oats                      | 3                                                           |
| 109             | Jamaica | 2003           | Offals, Edible            | 8                                                           |
| 109             | Jamaica | 2003           | Onions                    | 9                                                           |
| 109             | Jamaica | 2003           | Oranges, Mandarines       | 141                                                         |
| 109             | Jamaica | 2003           | Peas                      | 1                                                           |
| 109             | Jamaica | 2003           | Pelagic Fish              | 24                                                          |
| 109             | Jamaica | 2003           | Pigmeat                   | 9                                                           |
| 109             | Jamaica | 2003           | Pimento                   | 5                                                           |
| 109             | Jamaica | 2003           | Pineapples                | 23                                                          |
| 109             | Jamaica | 2003           | Plantains                 | 19                                                          |
| 109             | Jamaica | 2003           | Potatoes                  | 25                                                          |
| 109             | Jamaica | 2003           | Poultry Meat              | 135                                                         |
| 109             | Jamaica | 2003           | Pulses, Other             | 2                                                           |
| 109             | Jamaica | 2003           | Rice (Milled Equivalent)  | 72                                                          |
| 109             | Jamaica | 2003           | Roots, Other              | 16                                                          |
| 109             | Jamaica | 2003           | Soyabean Oil              | 27                                                          |
| 109             | Jamaica | 2003           | Spices, Other             | 2                                                           |
| 109             | Jamaica | 2003           | Sugar, Refined Equivalent | 124                                                         |
| 109             | Jamaica | 2003           | Sweet Potatoes            | 18                                                          |
| 109             | Jamaica | 2003           | Sweeteners, Other         | 18                                                          |
| 109             | Jamaica | 2003           | Tomatoes                  | 28                                                          |
| 109             | Jamaica | 2003           | Vegetables, Other         | 176                                                         |
| 109             | Jamaica | 2003           | Wheat                     | 167                                                         |
| 109             | Jamaica | 2003           | Wine                      | 1                                                           |
| 109             | Jamaica | 2003           | Yams                      | 137                                                         |
| 109             | Jamaica | 2004           | Apples                    | 11                                                          |
| 109             | Jamaica | 2004           | Bananas                   | 94                                                          |
| 109             | Jamaica | 2004           | Beans                     | 5                                                           |
| 109             | Jamaica | 2004           | Beer                      | 57                                                          |
| 109             | Jamaica | 2004           | Beverages, Alcoholic      | 10                                                          |

Dietary calcium and zinc deficiency risks are decreasing but remain prevalent

| FAO countrycode | Country | Reference year | Food item                 | Gross food supply (g capita <sup>-1</sup> d <sup>-1</sup> ) |
|-----------------|---------|----------------|---------------------------|-------------------------------------------------------------|
| 109             | Jamaica | 2004           | Bovine Meat               | 19                                                          |
| 109             | Jamaica | 2004           | Butter, Ghee              | 2                                                           |
| 109             | Jamaica | 2004           | Cassava                   | 6                                                           |
| 109             | Jamaica | 2004           | Cheese                    | 5                                                           |
| 109             | Jamaica | 2004           | Cocoa Beans               | 3                                                           |
| 109             | Jamaica | 2004           | Coconut Oil               | 11                                                          |
| 109             | Jamaica | 2004           | Coconuts - Incl Copra     | 36                                                          |
| 109             | Jamaica | 2004           | Coffee                    | 1                                                           |
| 109             | Jamaica | 2004           | Demersal Fish             | 1                                                           |
| 109             | Jamaica | 2004           | Eggs                      | 7                                                           |
| 109             | Jamaica | 2004           | Fats, Animals, Raw        | 7                                                           |
| 109             | Jamaica | 2004           | Freshwater Fish           | 5                                                           |
| 109             | Jamaica | 2004           | Fruits, Other             | 58                                                          |
| 109             | Jamaica | 2004           | Grapefruit                | 40                                                          |
| 109             | Jamaica | 2004           | Grapes                    | 7                                                           |
| 109             | Jamaica | 2004           | Groundnuts (Shelled Eq)   | 3                                                           |
| 109             | Jamaica | 2004           | Honey                     | 1                                                           |
| 109             | Jamaica | 2004           | Lemons, Limes             | 30                                                          |
| 109             | Jamaica | 2004           | Maize                     | 18                                                          |
| 109             | Jamaica | 2004           | Marine Fish, Other        | 37                                                          |
| 109             | Jamaica | 2004           | Milk, Whole               | 221                                                         |
| 109             | Jamaica | 2004           | Molluscs, Other           | 5                                                           |
| 109             | Jamaica | 2004           | Mutton & Goat Meat        | 5                                                           |
| 109             | Jamaica | 2004           | Nuts                      | 1                                                           |
| 109             | Jamaica | 2004           | Oats                      | 3                                                           |
| 109             | Jamaica | 2004           | Offals, Edible            | 7                                                           |
| 109             | Jamaica | 2004           | Onions                    | 9                                                           |
| 109             | Jamaica | 2004           | Oranges, Mandarines       | 130                                                         |
| 109             | Jamaica | 2004           | Peas                      | 3                                                           |
| 109             | Jamaica | 2004           | Pelagic Fish              | 21                                                          |
| 109             | Jamaica | 2004           | Pepper                    | 1                                                           |
| 109             | Jamaica | 2004           | Pigmeat                   | 10                                                          |
| 109             | Jamaica | 2004           | Pimento                   | 4                                                           |
| 109             | Jamaica | 2004           | Pineapples                | 21                                                          |
| 109             | Jamaica | 2004           | Plantains                 | 17                                                          |
| 109             | Jamaica | 2004           | Potatoes                  | 29                                                          |
| 109             | Jamaica | 2004           | Poultry Meat              | 138                                                         |
| 109             | Jamaica | 2004           | Pulses, Other             | 2                                                           |
| 109             | Jamaica | 2004           | Rice (Milled Equivalent)  | 68                                                          |
| 109             | Jamaica | 2004           | Roots, Other              | 14                                                          |
| 109             | Jamaica | 2004           | Rye                       | 1                                                           |
| 109             | Jamaica | 2004           | Soybean Oil               | 25                                                          |
| 109             | Jamaica | 2004           | Spices, Other             | 2                                                           |
| 109             | Jamaica | 2004           | Sugar, Refined Equivalent | 107                                                         |
| 109             | Jamaica | 2004           | Sweet Potatoes            | 15                                                          |
| 109             | Jamaica | 2004           | Sweeteners, Other         | 19                                                          |
| 109             | Jamaica | 2004           | Tomatoes                  | 22                                                          |
| 109             | Jamaica | 2004           | Vegetables, Other         | 148                                                         |
| 109             | Jamaica | 2004           | Wheat                     | 180                                                         |
| 109             | Jamaica | 2004           | Wine                      | 1                                                           |
| 109             | Jamaica | 2004           | Yams                      | 118                                                         |
| 109             | Jamaica | 2005           | Apples                    | 8                                                           |
| 109             | Jamaica | 2005           | Bananas                   | 76                                                          |
| 109             | Jamaica | 2005           | Beans                     | 5                                                           |
| 109             | Jamaica | 2005           | Beer                      | 58                                                          |
| 109             | Jamaica | 2005           | Beverages, Alcoholic      | 10                                                          |
| 109             | Jamaica | 2005           | Bovine Meat               | 20                                                          |
| 109             | Jamaica | 2005           | Butter, Ghee              | 2                                                           |
| 109             | Jamaica | 2005           | Cassava                   | 5                                                           |
| 109             | Jamaica | 2005           | Cheese                    | 4                                                           |
| 109             | Jamaica | 2005           | Cocoa Beans               | 2                                                           |
| 109             | Jamaica | 2005           | Coconut Oil               | 11                                                          |
| 109             | Jamaica | 2005           | Coconuts - Incl Copra     | 36                                                          |
| 109             | Jamaica | 2005           | Coffee                    | 9                                                           |
| 109             | Jamaica | 2005           | Crustaceans               | 2                                                           |
| 109             | Jamaica | 2005           | Eggs                      | 6                                                           |
| 109             | Jamaica | 2005           | Fats, Animals, Raw        | 8                                                           |
| 109             | Jamaica | 2005           | Freshwater Fish           | 6                                                           |
| 109             | Jamaica | 2005           | Fruits, Other             | 54                                                          |
| 109             | Jamaica | 2005           | Grapefruit                | 29                                                          |
| 109             | Jamaica | 2005           | Grapes                    | 6                                                           |
| 109             | Jamaica | 2005           | Groundnuts (Shelled Eq)   | 3                                                           |
| 109             | Jamaica | 2005           | Honey                     | 1                                                           |
| 109             | Jamaica | 2005           | Lemons, Limes             | 23                                                          |
| 109             | Jamaica | 2005           | Maize                     | 20                                                          |
| 109             | Jamaica | 2005           | Marine Fish, Other        | 36                                                          |
| 109             | Jamaica | 2005           | Milk, Whole               | 196                                                         |
| 109             | Jamaica | 2005           | Molluscs, Other           | 5                                                           |
| 109             | Jamaica | 2005           | Mutton & Goat Meat        | 6                                                           |
| 109             | Jamaica | 2005           | Nuts                      | 1                                                           |
| 109             | Jamaica | 2005           | Oats                      | 3                                                           |
| 109             | Jamaica | 2005           | Offals, Edible            | 9                                                           |
| 109             | Jamaica | 2005           | Onions                    | 9                                                           |
| 109             | Jamaica | 2005           | Oranges, Mandarines       | 124                                                         |
| 109             | Jamaica | 2005           | Peas                      | 2                                                           |
| 109             | Jamaica | 2005           | Pelagic Fish              | 25                                                          |
| 109             | Jamaica | 2005           | Pepper                    | 1                                                           |
| 109             | Jamaica | 2005           | Pigmeat                   | 12                                                          |
| 109             | Jamaica | 2005           | Pimento                   | 6                                                           |
| 109             | Jamaica | 2005           | Pineapples                | 17                                                          |
| 109             | Jamaica | 2005           | Plantains                 | 8                                                           |
| 109             | Jamaica | 2005           | Potatoes                  | 30                                                          |
| 109             | Jamaica | 2005           | Poultry Meat              | 133                                                         |
| 109             | Jamaica | 2005           | Pulses, Other             | 1                                                           |
| 109             | Jamaica | 2005           | Rice (Milled Equivalent)  | 71                                                          |
| 109             | Jamaica | 2005           | Roots, Other              | 14                                                          |
| 109             | Jamaica | 2005           | Rye                       | 1                                                           |



Dietary calcium and zinc deficiency risks are decreasing but remain prevalent

| FAO countrycode | Country | Reference year | Food item                 | Gross food supply (g capita <sup>-1</sup> d <sup>-1</sup> ) |
|-----------------|---------|----------------|---------------------------|-------------------------------------------------------------|
| 109             | Jamaica | 2005           | Soyabean Oil              | 24                                                          |
| 109             | Jamaica | 2005           | Spices, Other             | 3                                                           |
| 109             | Jamaica | 2005           | Sugar, Refined Equivalent | 117                                                         |
| 109             | Jamaica | 2005           | Sweet Potatoes            | 21                                                          |
| 109             | Jamaica | 2005           | Sweeteners, Other         | 15                                                          |
| 109             | Jamaica | 2005           | Tomatoes                  | 24                                                          |
| 109             | Jamaica | 2005           | Vegetables, Other         | 157                                                         |
| 109             | Jamaica | 2005           | Wheat                     | 181                                                         |
| 109             | Jamaica | 2005           | Wine                      | 3                                                           |
| 109             | Jamaica | 2005           | Yams                      | 94                                                          |
| 109             | Jamaica | 2006           | Apples                    | 14                                                          |
| 109             | Jamaica | 2006           | Bananas                   | 53                                                          |
| 109             | Jamaica | 2006           | Barley                    | 1                                                           |
| 109             | Jamaica | 2006           | Beans                     | 8                                                           |
| 109             | Jamaica | 2006           | Beer                      | 59                                                          |
| 109             | Jamaica | 2006           | Beverages, Alcoholic      | 11                                                          |
| 109             | Jamaica | 2006           | Bovine Meat               | 14                                                          |
| 109             | Jamaica | 2006           | Butter, Ghee              | 2                                                           |
| 109             | Jamaica | 2006           | Cassava                   | 6                                                           |
| 109             | Jamaica | 2006           | Cereals, Other            | 1                                                           |
| 109             | Jamaica | 2006           | Cheese                    | 4                                                           |
| 109             | Jamaica | 2006           | Citrus, Other             | 4                                                           |
| 109             | Jamaica | 2006           | Cocoa Beans               | 2                                                           |
| 109             | Jamaica | 2006           | Coconut Oil               | 11                                                          |
| 109             | Jamaica | 2006           | Coconuts - Incl Copra     | 42                                                          |
| 109             | Jamaica | 2006           | Coffee                    | 12                                                          |
| 109             | Jamaica | 2006           | Crustaceans               | 1                                                           |
| 109             | Jamaica | 2006           | Eggs                      | 8                                                           |
| 109             | Jamaica | 2006           | Fats, Animals, Raw        | 7                                                           |
| 109             | Jamaica | 2006           | Freshwater Fish           | 8                                                           |
| 109             | Jamaica | 2006           | Fruits, Other             | 79                                                          |
| 109             | Jamaica | 2006           | Grapefruit                | 33                                                          |
| 109             | Jamaica | 2006           | Grapes                    | 2                                                           |
| 109             | Jamaica | 2006           | Groundnuts (Shelled Eq)   | 4                                                           |
| 109             | Jamaica | 2006           | Honey                     | 1                                                           |
| 109             | Jamaica | 2006           | Lemons, Limes             | 22                                                          |
| 109             | Jamaica | 2006           | Maize                     | 26                                                          |
| 109             | Jamaica | 2006           | Marine Fish, Other        | 44                                                          |
| 109             | Jamaica | 2006           | Meat, Other               | 1                                                           |
| 109             | Jamaica | 2006           | Milk, Whole               | 186                                                         |
| 109             | Jamaica | 2006           | Molluscs, Other           | 5                                                           |
| 109             | Jamaica | 2006           | Mutton & Goat Meat        | 7                                                           |
| 109             | Jamaica | 2006           | Nuts                      | 1                                                           |
| 109             | Jamaica | 2006           | Oats                      | 5                                                           |
| 109             | Jamaica | 2006           | Offals, Edible            | 7                                                           |
| 109             | Jamaica | 2006           | Onions                    | 10                                                          |
| 109             | Jamaica | 2006           | Oranges, Mandarines       | 114                                                         |
| 109             | Jamaica | 2006           | Peas                      | 1                                                           |
| 109             | Jamaica | 2006           | Pelagic Fish              | 21                                                          |
| 109             | Jamaica | 2006           | Pigmeat                   | 14                                                          |
| 109             | Jamaica | 2006           | Pimento                   | 7                                                           |
| 109             | Jamaica | 2006           | Pineapples                | 22                                                          |
| 109             | Jamaica | 2006           | Plantains                 | 20                                                          |
| 109             | Jamaica | 2006           | Potatoes                  | 31                                                          |
| 109             | Jamaica | 2006           | Poultry Meat              | 129                                                         |
| 109             | Jamaica | 2006           | Pulses, Other             | 2                                                           |
| 109             | Jamaica | 2006           | Rice (Milled Equivalent)  | 72                                                          |
| 109             | Jamaica | 2006           | Roots, Other              | 16                                                          |
| 109             | Jamaica | 2006           | Soyabean Oil              | 24                                                          |
| 109             | Jamaica | 2006           | Spices, Other             | 3                                                           |
| 109             | Jamaica | 2006           | Sugar, Refined Equivalent | 102                                                         |
| 109             | Jamaica | 2006           | Sweet Potatoes            | 22                                                          |
| 109             | Jamaica | 2006           | Sweeteners, Other         | 20                                                          |
| 109             | Jamaica | 2006           | Tomatoes                  | 26                                                          |
| 109             | Jamaica | 2006           | Vegetables, Other         | 170                                                         |
| 109             | Jamaica | 2006           | Wheat                     | 180                                                         |
| 109             | Jamaica | 2006           | Wine                      | 2                                                           |
| 109             | Jamaica | 2006           | Yams                      | 107                                                         |
| 109             | Jamaica | 2007           | Apples                    | 12                                                          |
| 109             | Jamaica | 2007           | Bananas                   | 64                                                          |
| 109             | Jamaica | 2007           | Barley                    | 2                                                           |
| 109             | Jamaica | 2007           | Beans                     | 7                                                           |
| 109             | Jamaica | 2007           | Beer                      | 54                                                          |
| 109             | Jamaica | 2007           | Beverages, Alcoholic      | 11                                                          |
| 109             | Jamaica | 2007           | Bovine Meat               | 14                                                          |
| 109             | Jamaica | 2007           | Cassava                   | 7                                                           |
| 109             | Jamaica | 2007           | Cheese                    | 4                                                           |
| 109             | Jamaica | 2007           | Cocoa Beans               | 3                                                           |
| 109             | Jamaica | 2007           | Coconut Oil               | 11                                                          |
| 109             | Jamaica | 2007           | Coconuts - Incl Copra     | 42                                                          |
| 109             | Jamaica | 2007           | Coffee                    | 15                                                          |
| 109             | Jamaica | 2007           | Crustaceans               | 2                                                           |
| 109             | Jamaica | 2007           | Eggs                      | 5                                                           |
| 109             | Jamaica | 2007           | Fats, Animals, Raw        | 6                                                           |
| 109             | Jamaica | 2007           | Freshwater Fish           | 7                                                           |
| 109             | Jamaica | 2007           | Fruits, Other             | 51                                                          |
| 109             | Jamaica | 2007           | Grapefruit                | 30                                                          |
| 109             | Jamaica | 2007           | Grapes                    | 6                                                           |
| 109             | Jamaica | 2007           | Groundnuts (Shelled Eq)   | 4                                                           |
| 109             | Jamaica | 2007           | Honey                     | 1                                                           |
| 109             | Jamaica | 2007           | Lemons, Limes             | 24                                                          |
| 109             | Jamaica | 2007           | Maize                     | 20                                                          |
| 109             | Jamaica | 2007           | Marine Fish, Other        | 42                                                          |
| 109             | Jamaica | 2007           | Milk, Whole               | 193                                                         |
| 109             | Jamaica | 2007           | Molluscs, Other           | 6                                                           |
| 109             | Jamaica | 2007           | Mutton & Goat Meat        | 8                                                           |
| 109             | Jamaica | 2007           | Nuts                      | 1                                                           |

## Dietary calcium and zinc deficiency risks are decreasing but remain prevalent

| FAO countrycode | Country | Reference year | Food item                 | Gross food supply (g capita <sup>-1</sup> d <sup>-1</sup> ) |
|-----------------|---------|----------------|---------------------------|-------------------------------------------------------------|
| 109             | Jamaica | 2007           | Oats                      | 4                                                           |
| 109             | Jamaica | 2007           | Offals, Edible            | 10                                                          |
| 109             | Jamaica | 2007           | Onions                    | 8                                                           |
| 109             | Jamaica | 2007           | Oranges, Mandarines       | 117                                                         |
| 109             | Jamaica | 2007           | Peas                      | 1                                                           |
| 109             | Jamaica | 2007           | Pelagic Fish              | 27                                                          |
| 109             | Jamaica | 2007           | Pigmeat                   | 10                                                          |
| 109             | Jamaica | 2007           | Pimento                   | 6                                                           |
| 109             | Jamaica | 2007           | Pineapples                | 20                                                          |
| 109             | Jamaica | 2007           | Plantains                 | 18                                                          |
| 109             | Jamaica | 2007           | Potatoes                  | 29                                                          |
| 109             | Jamaica | 2007           | Poultry Meat              | 144                                                         |
| 109             | Jamaica | 2007           | Pulses, Other             | 2                                                           |
| 109             | Jamaica | 2007           | Rice (Milled Equivalent)  | 71                                                          |
| 109             | Jamaica | 2007           | Roots, Other              | 15                                                          |
| 109             | Jamaica | 2007           | Soyabean Oil              | 26                                                          |
| 109             | Jamaica | 2007           | Spices, Other             | 3                                                           |
| 109             | Jamaica | 2007           | Sugar, Refined Equivalent | 103                                                         |
| 109             | Jamaica | 2007           | Sweet Potatoes            | 21                                                          |
| 109             | Jamaica | 2007           | Sweeteners, Other         | 19                                                          |
| 109             | Jamaica | 2007           | Tomatoes                  | 23                                                          |
| 109             | Jamaica | 2007           | Vegetables, Other         | 160                                                         |
| 109             | Jamaica | 2007           | Wheat                     | 182                                                         |
| 109             | Jamaica | 2007           | Wine                      | 2                                                           |
| 109             | Jamaica | 2007           | Yams                      | 96                                                          |
| 109             | Jamaica | 2008           | Apples                    | 6                                                           |
| 109             | Jamaica | 2008           | Bananas                   | 35                                                          |
| 109             | Jamaica | 2008           | Barley                    | 2                                                           |
| 109             | Jamaica | 2008           | Beans                     | 6                                                           |
| 109             | Jamaica | 2008           | Beer                      | 53                                                          |
| 109             | Jamaica | 2008           | Beverages, Alcoholic      | 17                                                          |
| 109             | Jamaica | 2008           | Bovine Meat               | 16                                                          |
| 109             | Jamaica | 2008           | Butter, Ghee              | 1                                                           |
| 109             | Jamaica | 2008           | Cassava                   | 5                                                           |
| 109             | Jamaica | 2008           | Cheese                    | 4                                                           |
| 109             | Jamaica | 2008           | Cocoa Beans               | 3                                                           |
| 109             | Jamaica | 2008           | Coconut Oil               | 11                                                          |
| 109             | Jamaica | 2008           | Coconuts - Incl Copra     | 43                                                          |
| 109             | Jamaica | 2008           | Coffee                    | 9                                                           |
| 109             | Jamaica | 2008           | Crustaceans               | 1                                                           |
| 109             | Jamaica | 2008           | Eggs                      | 5                                                           |
| 109             | Jamaica | 2008           | Fats, Animals, Raw        | 5                                                           |
| 109             | Jamaica | 2008           | Freshwater Fish           | 6                                                           |
| 109             | Jamaica | 2008           | Fruits, Other             | 44                                                          |
| 109             | Jamaica | 2008           | Grapefruit                | 35                                                          |
| 109             | Jamaica | 2008           | Grapes                    | 6                                                           |
| 109             | Jamaica | 2008           | Groundnuts (Shelled Eq)   | 3                                                           |
| 109             | Jamaica | 2008           | Honey                     | 1                                                           |
| 109             | Jamaica | 2008           | Lemons, Limes             | 22                                                          |
| 109             | Jamaica | 2008           | Maize                     | 21                                                          |
| 109             | Jamaica | 2008           | Marine Fish, Other        | 38                                                          |
| 109             | Jamaica | 2008           | Milk, Whole               | 204                                                         |
| 109             | Jamaica | 2008           | Molluscs, Other           | 4                                                           |
| 109             | Jamaica | 2008           | Mutton & Goat Meat        | 7                                                           |
| 109             | Jamaica | 2008           | Nuts                      | 2                                                           |
| 109             | Jamaica | 2008           | Oats                      | 4                                                           |
| 109             | Jamaica | 2008           | Offals, Edible            | 10                                                          |
| 109             | Jamaica | 2008           | Oilcrops Oil, Other       | 4                                                           |
| 109             | Jamaica | 2008           | Onions                    | 9                                                           |
| 109             | Jamaica | 2008           | Oranges, Mandarines       | 111                                                         |
| 109             | Jamaica | 2008           | Peas                      | 1                                                           |
| 109             | Jamaica | 2008           | Pelagic Fish              | 24                                                          |
| 109             | Jamaica | 2008           | Pepper                    | 1                                                           |
| 109             | Jamaica | 2008           | Pigmeat                   | 12                                                          |
| 109             | Jamaica | 2008           | Pimento                   | 5                                                           |
| 109             | Jamaica | 2008           | Pineapples                | 22                                                          |
| 109             | Jamaica | 2008           | Plantains                 | 14                                                          |
| 109             | Jamaica | 2008           | Potatoes                  | 23                                                          |
| 109             | Jamaica | 2008           | Poultry Meat              | 141                                                         |
| 109             | Jamaica | 2008           | Pulses, Other             | 2                                                           |
| 109             | Jamaica | 2008           | Rice (Milled Equivalent)  | 72                                                          |
| 109             | Jamaica | 2008           | Roots, Other              | 15                                                          |
| 109             | Jamaica | 2008           | Soyabean Oil              | 7                                                           |
| 109             | Jamaica | 2008           | Spices, Other             | 3                                                           |
| 109             | Jamaica | 2008           | Sugar, Refined Equivalent | 121                                                         |
| 109             | Jamaica | 2008           | Sweet Potatoes            | 21                                                          |
| 109             | Jamaica | 2008           | Sweeteners, Other         | 19                                                          |
| 109             | Jamaica | 2008           | Tomatoes                  | 22                                                          |
| 109             | Jamaica | 2008           | Vegetables, Other         | 157                                                         |
| 109             | Jamaica | 2008           | Wheat                     | 189                                                         |
| 109             | Jamaica | 2008           | Wine                      | 2                                                           |
| 109             | Jamaica | 2008           | Yams                      | 87                                                          |
| 109             | Jamaica | 2009           | Apples                    | 5                                                           |
| 109             | Jamaica | 2009           | Bananas                   | 50                                                          |
| 109             | Jamaica | 2009           | Barley                    | 2                                                           |
| 109             | Jamaica | 2009           | Beans                     | 7                                                           |
| 109             | Jamaica | 2009           | Beer                      | 45                                                          |
| 109             | Jamaica | 2009           | Beverages, Alcoholic      | 20                                                          |
| 109             | Jamaica | 2009           | Bovine Meat               | 12                                                          |
| 109             | Jamaica | 2009           | Butter, Ghee              | 1                                                           |
| 109             | Jamaica | 2009           | Cassava                   | 5                                                           |
| 109             | Jamaica | 2009           | Cheese                    | 3                                                           |
| 109             | Jamaica | 2009           | Cocoa Beans               | 2                                                           |
| 109             | Jamaica | 2009           | Coconut Oil               | 11                                                          |
| 109             | Jamaica | 2009           | Coconuts - Incl Copra     | 35                                                          |
| 109             | Jamaica | 2009           | Coffee                    | 12                                                          |
| 109             | Jamaica | 2009           | Crustaceans               | 1                                                           |

Dietary calcium and zinc deficiency risks are decreasing but remain prevalent

| FAO countrycode | Country | Reference year | Food item                 | Gross food supply (g capita <sup>-1</sup> d <sup>-1</sup> ) |
|-----------------|---------|----------------|---------------------------|-------------------------------------------------------------|
| 109             | Jamaica | 2009           | Eggs                      | 6                                                           |
| 109             | Jamaica | 2009           | Fats, Animals, Raw        | 5                                                           |
| 109             | Jamaica | 2009           | Freshwater Fish           | 6                                                           |
| 109             | Jamaica | 2009           | Fruits, Other             | 47                                                          |
| 109             | Jamaica | 2009           | Grapefruit                | 40                                                          |
| 109             | Jamaica | 2009           | Grapes                    | 5                                                           |
| 109             | Jamaica | 2009           | Groundnuts (Shelled Eq)   | 3                                                           |
| 109             | Jamaica | 2009           | Honey                     | 1                                                           |
| 109             | Jamaica | 2009           | Lemons, Limes             | 25                                                          |
| 109             | Jamaica | 2009           | Maize                     | 22                                                          |
| 109             | Jamaica | 2009           | Marine Fish, Other        | 39                                                          |
| 109             | Jamaica | 2009           | Milk, Whole               | 199                                                         |
| 109             | Jamaica | 2009           | Molluscs, Other           | 4                                                           |
| 109             | Jamaica | 2009           | Mutton & Goat Meat        | 5                                                           |
| 109             | Jamaica | 2009           | Nuts                      | 2                                                           |
| 109             | Jamaica | 2009           | Oats                      | 3                                                           |
| 109             | Jamaica | 2009           | Offals, Edible            | 11                                                          |
| 109             | Jamaica | 2009           | Oilcrops Oil, Other       | 1                                                           |
| 109             | Jamaica | 2009           | Onions                    | 9                                                           |
| 109             | Jamaica | 2009           | Oranges, Mandarines       | 112                                                         |
| 109             | Jamaica | 2009           | Peas                      | 1                                                           |
| 109             | Jamaica | 2009           | Pelagic Fish              | 21                                                          |
| 109             | Jamaica | 2009           | Pigmeat                   | 11                                                          |
| 109             | Jamaica | 2009           | Pimento                   | 10                                                          |
| 109             | Jamaica | 2009           | Pineapples                | 22                                                          |
| 109             | Jamaica | 2009           | Plantains                 | 22                                                          |
| 109             | Jamaica | 2009           | Potatoes                  | 26                                                          |
| 109             | Jamaica | 2009           | Poultry Meat              | 134                                                         |
| 109             | Jamaica | 2009           | Pulses, Other             | 2                                                           |
| 109             | Jamaica | 2009           | Rice (Milled Equivalent)  | 77                                                          |
| 109             | Jamaica | 2009           | Roots, Other              | 19                                                          |
| 109             | Jamaica | 2009           | Soyabean Oil              | 6                                                           |
| 109             | Jamaica | 2009           | Spices, Other             | 2                                                           |
| 109             | Jamaica | 2009           | Sugar, Refined Equivalent | 112                                                         |
| 109             | Jamaica | 2009           | Sweet Potatoes            | 28                                                          |
| 109             | Jamaica | 2009           | Sweeteners, Other         | 15                                                          |
| 109             | Jamaica | 2009           | Tea                       | 1                                                           |
| 109             | Jamaica | 2009           | Tomatoes                  | 23                                                          |
| 109             | Jamaica | 2009           | Vegetables, Other         | 181                                                         |
| 109             | Jamaica | 2009           | Wheat                     | 188                                                         |
| 109             | Jamaica | 2009           | Wine                      | 2                                                           |
| 109             | Jamaica | 2009           | Yams                      | 107                                                         |
| 109             | Jamaica | 2010           | Apples                    | 5                                                           |
| 109             | Jamaica | 2010           | Bananas                   | 51                                                          |
| 109             | Jamaica | 2010           | Barley                    | 2                                                           |
| 109             | Jamaica | 2010           | Beans                     | 6                                                           |
| 109             | Jamaica | 2010           | Beer                      | 47                                                          |
| 109             | Jamaica | 2010           | Beverages, Alcoholic      | 19                                                          |
| 109             | Jamaica | 2010           | Bovine Meat               | 12                                                          |
| 109             | Jamaica | 2010           | Butter, Ghee              | 1                                                           |
| 109             | Jamaica | 2010           | Cassava                   | 6                                                           |
| 109             | Jamaica | 2010           | Cheese                    | 3                                                           |
| 109             | Jamaica | 2010           | Cocoa Beans               | 3                                                           |
| 109             | Jamaica | 2010           | Coconut Oil               | 11                                                          |
| 109             | Jamaica | 2010           | Coconuts - Incl Copra     | 35                                                          |
| 109             | Jamaica | 2010           | Coffee                    | 9                                                           |
| 109             | Jamaica | 2010           | Crustaceans               | 1                                                           |
| 109             | Jamaica | 2010           | Eggs                      | 4                                                           |
| 109             | Jamaica | 2010           | Fats, Animals, Raw        | 5                                                           |
| 109             | Jamaica | 2010           | Freshwater Fish           | 6                                                           |
| 109             | Jamaica | 2010           | Fruits, Other             | 37                                                          |
| 109             | Jamaica | 2010           | Grapefruit                | 2                                                           |
| 109             | Jamaica | 2010           | Grapes                    | 5                                                           |
| 109             | Jamaica | 2010           | Groundnuts (Shelled Eq)   | 3                                                           |
| 109             | Jamaica | 2010           | Honey                     | 1                                                           |
| 109             | Jamaica | 2010           | Lemons, Limes             | 24                                                          |
| 109             | Jamaica | 2010           | Maize                     | 19                                                          |
| 109             | Jamaica | 2010           | Marine Fish, Other        | 39                                                          |
| 109             | Jamaica | 2010           | Milk, Whole               | 199                                                         |
| 109             | Jamaica | 2010           | Molluscs, Other           | 4                                                           |
| 109             | Jamaica | 2010           | Mutton & Goat Meat        | 5                                                           |
| 109             | Jamaica | 2010           | Nuts                      | 2                                                           |
| 109             | Jamaica | 2010           | Oats                      | 3                                                           |
| 109             | Jamaica | 2010           | Offals, Edible            | 10                                                          |
| 109             | Jamaica | 2010           | Onions                    | 8                                                           |
| 109             | Jamaica | 2010           | Oranges, Mandarines       | 97                                                          |
| 109             | Jamaica | 2010           | Peas                      | 1                                                           |
| 109             | Jamaica | 2010           | Pelagic Fish              | 20                                                          |
| 109             | Jamaica | 2010           | Pigmeat                   | 10                                                          |
| 109             | Jamaica | 2010           | Pimento                   | 10                                                          |
| 109             | Jamaica | 2010           | Pineapples                | 21                                                          |
| 109             | Jamaica | 2010           | Plantains                 | 27                                                          |
| 109             | Jamaica | 2010           | Potatoes                  | 26                                                          |
| 109             | Jamaica | 2010           | Poultry Meat              | 162                                                         |
| 109             | Jamaica | 2010           | Pulses, Other             | 2                                                           |
| 109             | Jamaica | 2010           | Rice (Milled Equivalent)  | 70                                                          |
| 109             | Jamaica | 2010           | Roots, Other              | 22                                                          |
| 109             | Jamaica | 2010           | Soyabean Oil              | 18                                                          |
| 109             | Jamaica | 2010           | Spices, Other             | 2                                                           |
| 109             | Jamaica | 2010           | Sugar, Refined Equivalent | 112                                                         |
| 109             | Jamaica | 2010           | Sweet Potatoes            | 28                                                          |
| 109             | Jamaica | 2010           | Sweeteners, Other         | 15                                                          |
| 109             | Jamaica | 2010           | Tomatoes                  | 23                                                          |
| 109             | Jamaica | 2010           | Vegetables, Other         | 174                                                         |
| 109             | Jamaica | 2010           | Wheat                     | 192                                                         |
| 109             | Jamaica | 2010           | Wine                      | 2                                                           |
| 109             | Jamaica | 2010           | Yams                      | 116                                                         |

## Dietary calcium and zinc deficiency risks are decreasing but remain prevalent

| FAO countrycode | Country | Reference year | Food item                 | Gross food supply (g capita <sup>-1</sup> d <sup>-1</sup> ) |
|-----------------|---------|----------------|---------------------------|-------------------------------------------------------------|
| 109             | Jamaica | 2011           | Apples                    | 6                                                           |
| 109             | Jamaica | 2011           | Bananas                   | 44                                                          |
| 109             | Jamaica | 2011           | Beans                     | 9                                                           |
| 109             | Jamaica | 2011           | Beer                      | 68                                                          |
| 109             | Jamaica | 2011           | Beverages, Alcoholic      | 20                                                          |
| 109             | Jamaica | 2011           | Bovine Meat               | 15                                                          |
| 109             | Jamaica | 2011           | Butter, Ghee              | 1                                                           |
| 109             | Jamaica | 2011           | Cassava                   | 7                                                           |
| 109             | Jamaica | 2011           | Cheese                    | 3                                                           |
| 109             | Jamaica | 2011           | Citrus, Other             | 1                                                           |
| 109             | Jamaica | 2011           | Cocoa Beans               | 1                                                           |
| 109             | Jamaica | 2011           | Coconut Oil               | 12                                                          |
| 109             | Jamaica | 2011           | Coconuts - Incl Copra     | 35                                                          |
| 109             | Jamaica | 2011           | Coffee                    | 8                                                           |
| 109             | Jamaica | 2011           | Crustaceans               | 1                                                           |
| 109             | Jamaica | 2011           | Eggs                      | 5                                                           |
| 109             | Jamaica | 2011           | Fats, Animals, Raw        | 5                                                           |
| 109             | Jamaica | 2011           | Freshwater Fish           | 6                                                           |
| 109             | Jamaica | 2011           | Fruits, Other             | 44                                                          |
| 109             | Jamaica | 2011           | Grapefruit                | 1                                                           |
| 109             | Jamaica | 2011           | Grapes                    | 3                                                           |
| 109             | Jamaica | 2011           | Groundnuts (Shelled Eq)   | 4                                                           |
| 109             | Jamaica | 2011           | Honey                     | 1                                                           |
| 109             | Jamaica | 2011           | Lemons, Limes             | 26                                                          |
| 109             | Jamaica | 2011           | Maize                     | 18                                                          |
| 109             | Jamaica | 2011           | Maize Germ Oil            | 1                                                           |
| 109             | Jamaica | 2011           | Marine Fish, Other        | 38                                                          |
| 109             | Jamaica | 2011           | Milk, Whole               | 197                                                         |
| 109             | Jamaica | 2011           | Molluscs, Other           | 4                                                           |
| 109             | Jamaica | 2011           | Mutton & Goat Meat        | 4                                                           |
| 109             | Jamaica | 2011           | Nuts                      | 1                                                           |
| 109             | Jamaica | 2011           | Oats                      | 8                                                           |
| 109             | Jamaica | 2011           | Offals, Edible            | 9                                                           |
| 109             | Jamaica | 2011           | Onions                    | 11                                                          |
| 109             | Jamaica | 2011           | Oranges, Mandarines       | 90                                                          |
| 109             | Jamaica | 2011           | Peas                      | 1                                                           |
| 109             | Jamaica | 2011           | Pelagic Fish              | 20                                                          |
| 109             | Jamaica | 2011           | Pigmeat                   | 11                                                          |
| 109             | Jamaica | 2011           | Pimento                   | 13                                                          |
| 109             | Jamaica | 2011           | Pineapples                | 21                                                          |
| 109             | Jamaica | 2011           | Plantains                 | 32                                                          |
| 109             | Jamaica | 2011           | Potatoes                  | 32                                                          |
| 109             | Jamaica | 2011           | Poultry Meat              | 140                                                         |
| 109             | Jamaica | 2011           | Pulses, Other             | 2                                                           |
| 109             | Jamaica | 2011           | Rice (Milled Equivalent)  | 71                                                          |
| 109             | Jamaica | 2011           | Roots, Other              | 24                                                          |
| 109             | Jamaica | 2011           | Soyabean Oil              | 15                                                          |
| 109             | Jamaica | 2011           | Spices, Other             | 2                                                           |
| 109             | Jamaica | 2011           | Sugar, Refined Equivalent | 116                                                         |
| 109             | Jamaica | 2011           | Sweet Potatoes            | 34                                                          |
| 109             | Jamaica | 2011           | Sweeteners, Other         | 10                                                          |
| 109             | Jamaica | 2011           | Tomatoes                  | 28                                                          |
| 109             | Jamaica | 2011           | Vegetables, Other         | 225                                                         |
| 109             | Jamaica | 2011           | Wheat                     | 190                                                         |
| 109             | Jamaica | 2011           | Wine                      | 2                                                           |
| 109             | Jamaica | 2011           | Yams                      | 115                                                         |
| 110             | Japan   | 1992           | Apples                    | 23                                                          |
| 110             | Japan   | 1992           | Aquatic Animals, Others   | 2                                                           |
| 110             | Japan   | 1992           | Aquatic Plants            | 4                                                           |
| 110             | Japan   | 1992           | Bananas                   | 14                                                          |
| 110             | Japan   | 1992           | Barley                    | 2                                                           |
| 110             | Japan   | 1992           | Beans                     | 6                                                           |
| 110             | Japan   | 1992           | Beer                      | 158                                                         |
| 110             | Japan   | 1992           | Beverages, Alcoholic      | 20                                                          |
| 110             | Japan   | 1992           | Beverages, Fermented      | 23                                                          |
| 110             | Japan   | 1992           | Bovine Meat               | 25                                                          |
| 110             | Japan   | 1992           | Butter, Ghee              | 2                                                           |
| 110             | Japan   | 1992           | Cephalopods               | 13                                                          |
| 110             | Japan   | 1992           | Cereals, Other            | 2                                                           |
| 110             | Japan   | 1992           | Cheese                    | 5                                                           |
| 110             | Japan   | 1992           | Citrus, Other             | 6                                                           |
| 110             | Japan   | 1992           | Cocoa Beans               | 3                                                           |
| 110             | Japan   | 1992           | Coconut Oil               | 1                                                           |
| 110             | Japan   | 1992           | Coffee                    | 8                                                           |
| 110             | Japan   | 1992           | Crustaceans               | 22                                                          |
| 110             | Japan   | 1992           | Demersal Fish             | 36                                                          |
| 110             | Japan   | 1992           | Eggs                      | 55                                                          |
| 110             | Japan   | 1992           | Fats, Animals, Raw        | 3                                                           |
| 110             | Japan   | 1992           | Fish, Body Oil            | 1                                                           |
| 110             | Japan   | 1992           | Freshwater Fish           | 15                                                          |
| 110             | Japan   | 1992           | Fruits, Other             | 35                                                          |
| 110             | Japan   | 1992           | Grapefruit                | 6                                                           |
| 110             | Japan   | 1992           | Grapes                    | 6                                                           |
| 110             | Japan   | 1992           | Groundnuts (Shelled Eq)   | 3                                                           |
| 110             | Japan   | 1992           | Honey                     | 1                                                           |
| 110             | Japan   | 1992           | Lemons, Limes             | 2                                                           |
| 110             | Japan   | 1992           | Maize                     | 53                                                          |
| 110             | Japan   | 1992           | Maize Germ Oil            | 2                                                           |
| 110             | Japan   | 1992           | Marine Fish, Other        | 21                                                          |
| 110             | Japan   | 1992           | Meat, Other               | 1                                                           |
| 110             | Japan   | 1992           | Milk, Whole               | 137                                                         |
| 110             | Japan   | 1992           | Molluscs, Other           | 26                                                          |
| 110             | Japan   | 1992           | Mutton & Goat Meat        | 1                                                           |
| 110             | Japan   | 1992           | Nuts                      | 4                                                           |
| 110             | Japan   | 1992           | Offals, Edible            | 9                                                           |
| 110             | Japan   | 1992           | Oilcrops Oil, Other       | 1                                                           |
| 110             | Japan   | 1992           | Onions                    | 30                                                          |

## Dietary calcium and zinc deficiency risks are decreasing but remain prevalent

| FAO countrycode | Country | Reference year | Food item                 | Gross food supply (g capita <sup>-1</sup> d <sup>-1</sup> ) |
|-----------------|---------|----------------|---------------------------|-------------------------------------------------------------|
| 110             | Japan   | 1992           | Oranges, Mandarines       | 44                                                          |
| 110             | Japan   | 1992           | Peas                      | 1                                                           |
| 110             | Japan   | 1992           | Pelagic Fish              | 49                                                          |
| 110             | Japan   | 1992           | Pigmeat                   | 43                                                          |
| 110             | Japan   | 1992           | Pineapples                | 4                                                           |
| 110             | Japan   | 1992           | Potatoes                  | 70                                                          |
| 110             | Japan   | 1992           | Poultry Meat              | 39                                                          |
| 110             | Japan   | 1992           | Rape and Mustard Oil      | 17                                                          |
| 110             | Japan   | 1992           | Rice (Milled Equivalent)  | 143                                                         |
| 110             | Japan   | 1992           | Ricebran Oil              | 1                                                           |
| 110             | Japan   | 1992           | Roots, Other              | 7                                                           |
| 110             | Japan   | 1992           | Sesameseed                | 1                                                           |
| 110             | Japan   | 1992           | Soyabean Oil              | 13                                                          |
| 110             | Japan   | 1992           | Soyabeans                 | 23                                                          |
| 110             | Japan   | 1992           | Spices, Other             | 2                                                           |
| 110             | Japan   | 1992           | Sugar, Refined Equivalent | 54                                                          |
| 110             | Japan   | 1992           | Sweet Potatoes            | 21                                                          |
| 110             | Japan   | 1992           | Sweeteners, Other         | 29                                                          |
| 110             | Japan   | 1992           | Tea                       | 3                                                           |
| 110             | Japan   | 1992           | Tomatoes                  | 21                                                          |
| 110             | Japan   | 1992           | Vegetables, Other         | 269                                                         |
| 110             | Japan   | 1992           | Wheat                     | 118                                                         |
| 110             | Japan   | 1992           | Wine                      | 3                                                           |
| 110             | Japan   | 1992           | Yams                      | 3                                                           |
| 110             | Japan   | 1993           | Apples                    | 23                                                          |
| 110             | Japan   | 1993           | Aquatic Animals, Others   | 2                                                           |
| 110             | Japan   | 1993           | Aquatic Plants            | 4                                                           |
| 110             | Japan   | 1993           | Bananas                   | 17                                                          |
| 110             | Japan   | 1993           | Barley                    | 2                                                           |
| 110             | Japan   | 1993           | Beans                     | 6                                                           |
| 110             | Japan   | 1993           | Beer                      | 156                                                         |
| 110             | Japan   | 1993           | Beverages, Alcoholic      | 21                                                          |
| 110             | Japan   | 1993           | Beverages, Fermented      | 23                                                          |
| 110             | Japan   | 1993           | Bovine Meat               | 28                                                          |
| 110             | Japan   | 1993           | Butter, Ghee              | 2                                                           |
| 110             | Japan   | 1993           | Cephalopods               | 15                                                          |
| 110             | Japan   | 1993           | Cereals, Other            | 3                                                           |
| 110             | Japan   | 1993           | Cheese                    | 5                                                           |
| 110             | Japan   | 1993           | Citrus, Other             | 5                                                           |
| 110             | Japan   | 1993           | Cocoa Beans               | 2                                                           |
| 110             | Japan   | 1993           | Coconut Oil               | 1                                                           |
| 110             | Japan   | 1993           | Coffee                    | 8                                                           |
| 110             | Japan   | 1993           | Crustaceans               | 22                                                          |
| 110             | Japan   | 1993           | Demersal Fish             | 32                                                          |
| 110             | Japan   | 1993           | Eggs                      | 55                                                          |
| 110             | Japan   | 1993           | Fats, Animals, Raw        | 3                                                           |
| 110             | Japan   | 1993           | Fish, Body Oil            | 1                                                           |
| 110             | Japan   | 1993           | Freshwater Fish           | 17                                                          |
| 110             | Japan   | 1993           | Fruits, Other             | 34                                                          |
| 110             | Japan   | 1993           | Grapefruit                | 6                                                           |
| 110             | Japan   | 1993           | Grapes                    | 6                                                           |
| 110             | Japan   | 1993           | Groundnuts (Shelled Eq)   | 3                                                           |
| 110             | Japan   | 1993           | Honey                     | 1                                                           |
| 110             | Japan   | 1993           | Lemons, Limes             | 2                                                           |
| 110             | Japan   | 1993           | Maize                     | 50                                                          |
| 110             | Japan   | 1993           | Maize Germ Oil            | 2                                                           |
| 110             | Japan   | 1993           | Marine Fish, Other        | 20                                                          |
| 110             | Japan   | 1993           | Meat, Other               | 1                                                           |
| 110             | Japan   | 1993           | Milk, Whole               | 129                                                         |
| 110             | Japan   | 1993           | Molluscs, Other           | 28                                                          |
| 110             | Japan   | 1993           | Mutton & Goat Meat        | 1                                                           |
| 110             | Japan   | 1993           | Nuts                      | 4                                                           |
| 110             | Japan   | 1993           | Offals, Edible            | 9                                                           |
| 110             | Japan   | 1993           | Oilcrops Oil, Other       | 1                                                           |
| 110             | Japan   | 1993           | Onions                    | 30                                                          |
| 110             | Japan   | 1993           | Oranges, Mandarines       | 39                                                          |
| 110             | Japan   | 1993           | Pelagic Fish              | 52                                                          |
| 110             | Japan   | 1993           | Pigmeat                   | 42                                                          |
| 110             | Japan   | 1993           | Pineapples                | 4                                                           |
| 110             | Japan   | 1993           | Potatoes                  | 69                                                          |
| 110             | Japan   | 1993           | Poultry Meat              | 38                                                          |
| 110             | Japan   | 1993           | Rape and Mustard Oil      | 17                                                          |
| 110             | Japan   | 1993           | Rice (Milled Equivalent)  | 142                                                         |
| 110             | Japan   | 1993           | Ricebran Oil              | 1                                                           |
| 110             | Japan   | 1993           | Roots, Other              | 7                                                           |
| 110             | Japan   | 1993           | Sesameseed                | 1                                                           |
| 110             | Japan   | 1993           | Soyabean Oil              | 14                                                          |
| 110             | Japan   | 1993           | Soyabeans                 | 21                                                          |
| 110             | Japan   | 1993           | Spices, Other             | 2                                                           |
| 110             | Japan   | 1993           | Sugar, Refined Equivalent | 53                                                          |
| 110             | Japan   | 1993           | Sweet Potatoes            | 18                                                          |
| 110             | Japan   | 1993           | Sweeteners, Other         | 29                                                          |
| 110             | Japan   | 1993           | Tea                       | 3                                                           |
| 110             | Japan   | 1993           | Tomatoes                  | 21                                                          |
| 110             | Japan   | 1993           | Vegetables, Other         | 260                                                         |
| 110             | Japan   | 1993           | Wheat                     | 120                                                         |
| 110             | Japan   | 1993           | Wine                      | 3                                                           |
| 110             | Japan   | 1993           | Yams                      | 3                                                           |
| 110             | Japan   | 1994           | Apples                    | 23                                                          |
| 110             | Japan   | 1994           | Aquatic Animals, Others   | 2                                                           |
| 110             | Japan   | 1994           | Aquatic Plants            | 4                                                           |
| 110             | Japan   | 1994           | Bananas                   | 17                                                          |
| 110             | Japan   | 1994           | Barley                    | 2                                                           |
| 110             | Japan   | 1994           | Beans                     | 5                                                           |
| 110             | Japan   | 1994           | Beer                      | 163                                                         |
| 110             | Japan   | 1994           | Beverages, Alcoholic      | 21                                                          |
| 110             | Japan   | 1994           | Beverages, Fermented      | 21                                                          |

Dietary calcium and zinc deficiency risks are decreasing but remain prevalent

| FAO countrycode | Country | Reference year | Food item                 | Gross food supply (g capita <sup>-1</sup> d <sup>-1</sup> ) |
|-----------------|---------|----------------|---------------------------|-------------------------------------------------------------|
| 110             | Japan   | 1994           | Bovine Meat               | 30                                                          |
| 110             | Japan   | 1994           | Butter, Ghee              | 2                                                           |
| 110             | Japan   | 1994           | Cephalopods               | 15                                                          |
| 110             | Japan   | 1994           | Cereals, Other            | 2                                                           |
| 110             | Japan   | 1994           | Cheese                    | 5                                                           |
| 110             | Japan   | 1994           | Citrus, Other             | 6                                                           |
| 110             | Japan   | 1994           | Cocoa Beans               | 2                                                           |
| 110             | Japan   | 1994           | Coconut Oil               | 1                                                           |
| 110             | Japan   | 1994           | Coffee                    | 9                                                           |
| 110             | Japan   | 1994           | Crustaceans               | 23                                                          |
| 110             | Japan   | 1994           | Demersal Fish             | 33                                                          |
| 110             | Japan   | 1994           | Eggs                      | 55                                                          |
| 110             | Japan   | 1994           | Fats, Animals, Raw        | 3                                                           |
| 110             | Japan   | 1994           | Fish, Body Oil            | 1                                                           |
| 110             | Japan   | 1994           | Freshwater Fish           | 17                                                          |
| 110             | Japan   | 1994           | Fruits, Other             | 38                                                          |
| 110             | Japan   | 1994           | Grapefruit                | 7                                                           |
| 110             | Japan   | 1994           | Grapes                    | 6                                                           |
| 110             | Japan   | 1994           | Groundnuts (Shelled Eq)   | 3                                                           |
| 110             | Japan   | 1994           | Honey                     | 1                                                           |
| 110             | Japan   | 1994           | Lemons, Limes             | 2                                                           |
| 110             | Japan   | 1994           | Maize                     | 46                                                          |
| 110             | Japan   | 1994           | Maize Germ Oil            | 3                                                           |
| 110             | Japan   | 1994           | Marine Fish, Other        | 20                                                          |
| 110             | Japan   | 1994           | Meat, Other               | 1                                                           |
| 110             | Japan   | 1994           | Milk, Whole               | 142                                                         |
| 110             | Japan   | 1994           | Molluscs, Other           | 29                                                          |
| 110             | Japan   | 1994           | Mutton & Goat Meat        | 1                                                           |
| 110             | Japan   | 1994           | Nuts                      | 4                                                           |
| 110             | Japan   | 1994           | Offals, Edible            | 9                                                           |
| 110             | Japan   | 1994           | Oilcrops Oil, Other       | 1                                                           |
| 110             | Japan   | 1994           | Onions                    | 28                                                          |
| 110             | Japan   | 1994           | Oranges, Mandarines       | 39                                                          |
| 110             | Japan   | 1994           | Pelagic Fish              | 58                                                          |
| 110             | Japan   | 1994           | Pigmeat                   | 42                                                          |
| 110             | Japan   | 1994           | Pineapples                | 5                                                           |
| 110             | Japan   | 1994           | Potatoes                  | 70                                                          |
| 110             | Japan   | 1994           | Poultry Meat              | 38                                                          |
| 110             | Japan   | 1994           | Rape and Mustard Oil      | 18                                                          |
| 110             | Japan   | 1994           | Rice (Milled Equivalent)  | 136                                                         |
| 110             | Japan   | 1994           | Ricebran Oil              | 1                                                           |
| 110             | Japan   | 1994           | Roots, Other              | 7                                                           |
| 110             | Japan   | 1994           | Sesameseed                | 1                                                           |
| 110             | Japan   | 1994           | Soyabean Oil              | 13                                                          |
| 110             | Japan   | 1994           | Soyabbeans                | 22                                                          |
| 110             | Japan   | 1994           | Spices, Other             | 2                                                           |
| 110             | Japan   | 1994           | Sugar, Refined Equivalent | 51                                                          |
| 110             | Japan   | 1994           | Sweet Potatoes            | 21                                                          |
| 110             | Japan   | 1994           | Sweeteners, Other         | 30                                                          |
| 110             | Japan   | 1994           | Tea                       | 3                                                           |
| 110             | Japan   | 1994           | Tomatoes                  | 22                                                          |
| 110             | Japan   | 1994           | Vegetables, Other         | 263                                                         |
| 110             | Japan   | 1994           | Wheat                     | 123                                                         |
| 110             | Japan   | 1994           | Wine                      | 3                                                           |
| 110             | Japan   | 1994           | Yams                      | 3                                                           |
| 110             | Japan   | 1995           | Apples                    | 39                                                          |
| 110             | Japan   | 1995           | Aquatic Animals, Others   | 1                                                           |
| 110             | Japan   | 1995           | Aquatic Plants            | 4                                                           |
| 110             | Japan   | 1995           | Bananas                   | 16                                                          |
| 110             | Japan   | 1995           | Barley                    | 2                                                           |
| 110             | Japan   | 1995           | Beans                     | 5                                                           |
| 110             | Japan   | 1995           | Beer                      | 155                                                         |
| 110             | Japan   | 1995           | Beverages, Alcoholic      | 21                                                          |
| 110             | Japan   | 1995           | Beverages, Fermented      | 22                                                          |
| 110             | Japan   | 1995           | Bovine Meat               | 31                                                          |
| 110             | Japan   | 1995           | Butter, Ghee              | 2                                                           |
| 110             | Japan   | 1995           | Cephalopods               | 17                                                          |
| 110             | Japan   | 1995           | Cereals, Other            | 2                                                           |
| 110             | Japan   | 1995           | Cheese                    | 6                                                           |
| 110             | Japan   | 1995           | Citrus, Other             | 5                                                           |
| 110             | Japan   | 1995           | Cocoa Beans               | 3                                                           |
| 110             | Japan   | 1995           | Coconut Oil               | 1                                                           |
| 110             | Japan   | 1995           | Coffee                    | 8                                                           |
| 110             | Japan   | 1995           | Crustaceans               | 25                                                          |
| 110             | Japan   | 1995           | Demersal Fish             | 36                                                          |
| 110             | Japan   | 1995           | Eggs                      | 54                                                          |
| 110             | Japan   | 1995           | Fats, Animals, Raw        | 3                                                           |
| 110             | Japan   | 1995           | Fish, Body Oil            | 1                                                           |
| 110             | Japan   | 1995           | Freshwater Fish           | 17                                                          |
| 110             | Japan   | 1995           | Fruits, Other             | 28                                                          |
| 110             | Japan   | 1995           | Grapefruit                | 6                                                           |
| 110             | Japan   | 1995           | Grapes                    | 6                                                           |
| 110             | Japan   | 1995           | Groundnuts (Shelled Eq)   | 3                                                           |
| 110             | Japan   | 1995           | Honey                     | 1                                                           |
| 110             | Japan   | 1995           | Lemons, Limes             | 3                                                           |
| 110             | Japan   | 1995           | Maize                     | 42                                                          |
| 110             | Japan   | 1995           | Maize Germ Oil            | 2                                                           |
| 110             | Japan   | 1995           | Marine Fish, Other        | 19                                                          |
| 110             | Japan   | 1995           | Meat, Other               | 1                                                           |
| 110             | Japan   | 1995           | Milk, Whole               | 142                                                         |
| 110             | Japan   | 1995           | Molluscs, Other           | 31                                                          |
| 110             | Japan   | 1995           | Mutton & Goat Meat        | 1                                                           |
| 110             | Japan   | 1995           | Nuts                      | 4                                                           |
| 110             | Japan   | 1995           | Offals, Edible            | 9                                                           |
| 110             | Japan   | 1995           | Oilcrops Oil, Other       | 1                                                           |
| 110             | Japan   | 1995           | Onions                    | 32                                                          |
| 110             | Japan   | 1995           | Oranges, Mandarines       | 39                                                          |

Dietary calcium and zinc deficiency risks are decreasing but remain prevalent

| FAO countrycode | Country | Reference year | Food item                 | Gross food supply (g capita <sup>-1</sup> d <sup>-1</sup> ) |
|-----------------|---------|----------------|---------------------------|-------------------------------------------------------------|
| 110             | Japan   | 1995           | Peas                      | 1                                                           |
| 110             | Japan   | 1995           | Pelagic Fish              | 50                                                          |
| 110             | Japan   | 1995           | Pigmeat                   | 47                                                          |
| 110             | Japan   | 1995           | Pineapples                | 4                                                           |
| 110             | Japan   | 1995           | Potatoes                  | 68                                                          |
| 110             | Japan   | 1995           | Poultry Meat              | 41                                                          |
| 110             | Japan   | 1995           | Rape and Mustard Oil      | 18                                                          |
| 110             | Japan   | 1995           | Rice (Milled Equivalent)  | 139                                                         |
| 110             | Japan   | 1995           | Ricebran Oil              | 1                                                           |
| 110             | Japan   | 1995           | Roots, Other              | 7                                                           |
| 110             | Japan   | 1995           | Sesameseed                | 1                                                           |
| 110             | Japan   | 1995           | Soyabean Oil              | 13                                                          |
| 110             | Japan   | 1995           | Soyabeans                 | 21                                                          |
| 110             | Japan   | 1995           | Spices, Other             | 3                                                           |
| 110             | Japan   | 1995           | Sugar, Refined Equivalent | 50                                                          |
| 110             | Japan   | 1995           | Sweet Potatoes            | 19                                                          |
| 110             | Japan   | 1995           | Sweeteners, Other         | 29                                                          |
| 110             | Japan   | 1995           | Tea                       | 3                                                           |
| 110             | Japan   | 1995           | Tomatoes                  | 23                                                          |
| 110             | Japan   | 1995           | Vegetables, Other         | 265                                                         |
| 110             | Japan   | 1995           | Wheat                     | 121                                                         |
| 110             | Japan   | 1995           | Wine                      | 4                                                           |
| 110             | Japan   | 1995           | Yams                      | 3                                                           |
| 110             | Japan   | 1996           | Apples                    | 35                                                          |
| 110             | Japan   | 1996           | Aquatic Animals, Others   | 2                                                           |
| 110             | Japan   | 1996           | Aquatic Plants            | 4                                                           |
| 110             | Japan   | 1996           | Bananas                   | 15                                                          |
| 110             | Japan   | 1996           | Barley                    | 2                                                           |
| 110             | Japan   | 1996           | Beans                     | 5                                                           |
| 110             | Japan   | 1996           | Beer                      | 155                                                         |
| 110             | Japan   | 1996           | Beverages, Alcoholic      | 22                                                          |
| 110             | Japan   | 1996           | Beverages, Fermented      | 21                                                          |
| 110             | Japan   | 1996           | Bovine Meat               | 29                                                          |
| 110             | Japan   | 1996           | Butter, Ghee              | 2                                                           |
| 110             | Japan   | 1996           | Cephalopods               | 18                                                          |
| 110             | Japan   | 1996           | Cereals, Other            | 2                                                           |
| 110             | Japan   | 1996           | Cheese                    | 6                                                           |
| 110             | Japan   | 1996           | Citrus, Other             | 5                                                           |
| 110             | Japan   | 1996           | Cocoa Beans               | 3                                                           |
| 110             | Japan   | 1996           | Coconut Oil               | 1                                                           |
| 110             | Japan   | 1996           | Coffee                    | 9                                                           |
| 110             | Japan   | 1996           | Crustaceans               | 25                                                          |
| 110             | Japan   | 1996           | Demersal Fish             | 37                                                          |
| 110             | Japan   | 1996           | Eggs                      | 54                                                          |
| 110             | Japan   | 1996           | Fats, Animals, Raw        | 3                                                           |
| 110             | Japan   | 1996           | Fish, Body Oil            | 1                                                           |
| 110             | Japan   | 1996           | Freshwater Fish           | 18                                                          |
| 110             | Japan   | 1996           | Fruits, Other             | 27                                                          |
| 110             | Japan   | 1996           | Grapefruit                | 7                                                           |
| 110             | Japan   | 1996           | Grapes                    | 6                                                           |
| 110             | Japan   | 1996           | Groundnuts (Shelled Eq)   | 3                                                           |
| 110             | Japan   | 1996           | Honey                     | 1                                                           |
| 110             | Japan   | 1996           | Lemons, Limes             | 2                                                           |
| 110             | Japan   | 1996           | Maize                     | 45                                                          |
| 110             | Japan   | 1996           | Maize Germ Oil            | 2                                                           |
| 110             | Japan   | 1996           | Marine Fish, Other        | 18                                                          |
| 110             | Japan   | 1996           | Meat, Other               | 1                                                           |
| 110             | Japan   | 1996           | Milk, Whole               | 144                                                         |
| 110             | Japan   | 1996           | Molluscs, Other           | 31                                                          |
| 110             | Japan   | 1996           | Mutton & Goat Meat        | 1                                                           |
| 110             | Japan   | 1996           | Nuts                      | 4                                                           |
| 110             | Japan   | 1996           | Oats                      | 1                                                           |
| 110             | Japan   | 1996           | Offals, Edible            | 9                                                           |
| 110             | Japan   | 1996           | Oilcrops Oil, Other       | 1                                                           |
| 110             | Japan   | 1996           | Onions                    | 30                                                          |
| 110             | Japan   | 1996           | Oranges, Mandarines       | 36                                                          |
| 110             | Japan   | 1996           | Palm Oil                  | 3                                                           |
| 110             | Japan   | 1996           | Peas                      | 1                                                           |
| 110             | Japan   | 1996           | Pelagic Fish              | 43                                                          |
| 110             | Japan   | 1996           | Pigmeat                   | 50                                                          |
| 110             | Japan   | 1996           | Pineapples                | 4                                                           |
| 110             | Japan   | 1996           | Potatoes                  | 65                                                          |
| 110             | Japan   | 1996           | Poultry Meat              | 41                                                          |
| 110             | Japan   | 1996           | Rape and Mustard Oil      | 18                                                          |
| 110             | Japan   | 1996           | Rice (Milled Equivalent)  | 138                                                         |
| 110             | Japan   | 1996           | Ricebran Oil              | 1                                                           |
| 110             | Japan   | 1996           | Roots, Other              | 7                                                           |
| 110             | Japan   | 1996           | Sesameseed                | 1                                                           |
| 110             | Japan   | 1996           | Soyabean Oil              | 13                                                          |
| 110             | Japan   | 1996           | Soyabeans                 | 23                                                          |
| 110             | Japan   | 1996           | Spices, Other             | 3                                                           |
| 110             | Japan   | 1996           | Sugar, Refined Equivalent | 50                                                          |
| 110             | Japan   | 1996           | Sweet Potatoes            | 19                                                          |
| 110             | Japan   | 1996           | Sweeteners, Other         | 29                                                          |
| 110             | Japan   | 1996           | Tea                       | 3                                                           |
| 110             | Japan   | 1996           | Tomatoes                  | 22                                                          |
| 110             | Japan   | 1996           | Vegetables, Other         | 265                                                         |
| 110             | Japan   | 1996           | Wheat                     | 123                                                         |
| 110             | Japan   | 1996           | Wine                      | 4                                                           |
| 110             | Japan   | 1996           | Yams                      | 3                                                           |
| 110             | Japan   | 1997           | Apples                    | 34                                                          |
| 110             | Japan   | 1997           | Aquatic Animals, Others   | 1                                                           |
| 110             | Japan   | 1997           | Aquatic Plants            | 4                                                           |
| 110             | Japan   | 1997           | Bananas                   | 16                                                          |
| 110             | Japan   | 1997           | Barley                    | 2                                                           |
| 110             | Japan   | 1997           | Beans                     | 5                                                           |
| 110             | Japan   | 1997           | Beer                      | 147                                                         |

Dietary calcium and zinc deficiency risks are decreasing but remain prevalent

| FAO countrycode | Country | Reference year | Food item                 | Gross food supply (g capita <sup>-1</sup> d <sup>-1</sup> ) |
|-----------------|---------|----------------|---------------------------|-------------------------------------------------------------|
| 110             | Japan   | 1997           | Beverages, Alcoholic      | 22                                                          |
| 110             | Japan   | 1997           | Beverages, Fermented      | 20                                                          |
| 110             | Japan   | 1997           | Bovine Meat               | 29                                                          |
| 110             | Japan   | 1997           | Butter, Ghee              | 2                                                           |
| 110             | Japan   | 1997           | Cephalopods               | 15                                                          |
| 110             | Japan   | 1997           | Cereals, Other            | 2                                                           |
| 110             | Japan   | 1997           | Cheese                    | 6                                                           |
| 110             | Japan   | 1997           | Citrus, Other             | 5                                                           |
| 110             | Japan   | 1997           | Cocoa Beans               | 3                                                           |
| 110             | Japan   | 1997           | Coconut Oil               | 1                                                           |
| 110             | Japan   | 1997           | Coffee                    | 9                                                           |
| 110             | Japan   | 1997           | Crustaceans               | 24                                                          |
| 110             | Japan   | 1997           | Demersal Fish             | 37                                                          |
| 110             | Japan   | 1997           | Eggs                      | 55                                                          |
| 110             | Japan   | 1997           | Fats, Animals, Raw        | 3                                                           |
| 110             | Japan   | 1997           | Fish, Body Oil            | 1                                                           |
| 110             | Japan   | 1997           | Freshwater Fish           | 17                                                          |
| 110             | Japan   | 1997           | Fruits, Other             | 29                                                          |
| 110             | Japan   | 1997           | Grapefruit                | 7                                                           |
| 110             | Japan   | 1997           | Grapes                    | 5                                                           |
| 110             | Japan   | 1997           | Groundnuts (Shelled Eq)   | 3                                                           |
| 110             | Japan   | 1997           | Honey                     | 1                                                           |
| 110             | Japan   | 1997           | Lemons, Limes             | 2                                                           |
| 110             | Japan   | 1997           | Maize                     | 46                                                          |
| 110             | Japan   | 1997           | Maize Germ Oil            | 2                                                           |
| 110             | Japan   | 1997           | Marine Fish, Other        | 19                                                          |
| 110             | Japan   | 1997           | Meat, Other               | 1                                                           |
| 110             | Japan   | 1997           | Milk, Whole               | 142                                                         |
| 110             | Japan   | 1997           | Molluscs, Other           | 30                                                          |
| 110             | Japan   | 1997           | Mutton & Goat Meat        | 1                                                           |
| 110             | Japan   | 1997           | Nuts                      | 4                                                           |
| 110             | Japan   | 1997           | Offals, Edible            | 8                                                           |
| 110             | Japan   | 1997           | Oilcrops Oil, Other       | 1                                                           |
| 110             | Japan   | 1997           | Olive Oil                 | 1                                                           |
| 110             | Japan   | 1997           | Onions                    | 30                                                          |
| 110             | Japan   | 1997           | Oranges, Mandarines       | 44                                                          |
| 110             | Japan   | 1997           | Palm Oil                  | 3                                                           |
| 110             | Japan   | 1997           | Peas                      | 1                                                           |
| 110             | Japan   | 1997           | Pelagic Fish              | 40                                                          |
| 110             | Japan   | 1997           | Pigmeat                   | 45                                                          |
| 110             | Japan   | 1997           | Pineapples                | 3                                                           |
| 110             | Japan   | 1997           | Potatoes                  | 71                                                          |
| 110             | Japan   | 1997           | Poultry Meat              | 40                                                          |
| 110             | Japan   | 1997           | Rape and Mustard Oil      | 19                                                          |
| 110             | Japan   | 1997           | Rice (Milled Equivalent)  | 137                                                         |
| 110             | Japan   | 1997           | Ricebran Oil              | 1                                                           |
| 110             | Japan   | 1997           | Roots, Other              | 7                                                           |
| 110             | Japan   | 1997           | Sesameseed                | 2                                                           |
| 110             | Japan   | 1997           | Soyabean Oil              | 13                                                          |
| 110             | Japan   | 1997           | Soyabean                  | 22                                                          |
| 110             | Japan   | 1997           | Spices, Other             | 3                                                           |
| 110             | Japan   | 1997           | Sugar, Refined Equivalent | 49                                                          |
| 110             | Japan   | 1997           | Sweet Potatoes            | 20                                                          |
| 110             | Japan   | 1997           | Sweeteners, Other         | 29                                                          |
| 110             | Japan   | 1997           | Tea                       | 3                                                           |
| 110             | Japan   | 1997           | Tomatoes                  | 22                                                          |
| 110             | Japan   | 1997           | Vegetables, Other         | 257                                                         |
| 110             | Japan   | 1997           | Wheat                     | 120                                                         |
| 110             | Japan   | 1997           | Wine                      | 5                                                           |
| 110             | Japan   | 1997           | Yams                      | 3                                                           |
| 110             | Japan   | 1998           | Apples                    | 31                                                          |
| 110             | Japan   | 1998           | Aquatic Animals, Others   | 1                                                           |
| 110             | Japan   | 1998           | Aquatic Plants            | 4                                                           |
| 110             | Japan   | 1998           | Bananas                   | 16                                                          |
| 110             | Japan   | 1998           | Barley                    | 2                                                           |
| 110             | Japan   | 1998           | Beans                     | 5                                                           |
| 110             | Japan   | 1998           | Beer                      | 135                                                         |
| 110             | Japan   | 1998           | Beverages, Alcoholic      | 21                                                          |
| 110             | Japan   | 1998           | Beverages, Fermented      | 18                                                          |
| 110             | Japan   | 1998           | Bovine Meat               | 30                                                          |
| 110             | Japan   | 1998           | Butter, Ghee              | 2                                                           |
| 110             | Japan   | 1998           | Cephalopods               | 14                                                          |
| 110             | Japan   | 1998           | Cereals, Other            | 2                                                           |
| 110             | Japan   | 1998           | Cheese                    | 7                                                           |
| 110             | Japan   | 1998           | Citrus, Other             | 5                                                           |
| 110             | Japan   | 1998           | Cocoa Beans               | 3                                                           |
| 110             | Japan   | 1998           | Coconut Oil               | 1                                                           |
| 110             | Japan   | 1998           | Coffee                    | 8                                                           |
| 110             | Japan   | 1998           | Crustaceans               | 24                                                          |
| 110             | Japan   | 1998           | Demersal Fish             | 35                                                          |
| 110             | Japan   | 1998           | Eggs                      | 54                                                          |
| 110             | Japan   | 1998           | Fats, Animals, Raw        | 2                                                           |
| 110             | Japan   | 1998           | Fish, Body Oil            | 1                                                           |
| 110             | Japan   | 1998           | Freshwater Fish           | 16                                                          |
| 110             | Japan   | 1998           | Fruits, Other             | 27                                                          |
| 110             | Japan   | 1998           | Grapefruit                | 6                                                           |
| 110             | Japan   | 1998           | Grapes                    | 5                                                           |
| 110             | Japan   | 1998           | Groundnuts (Shelled Eq)   | 2                                                           |
| 110             | Japan   | 1998           | Honey                     | 1                                                           |
| 110             | Japan   | 1998           | Lemons, Limes             | 2                                                           |
| 110             | Japan   | 1998           | Maize                     | 48                                                          |
| 110             | Japan   | 1998           | Maize Germ Oil            | 2                                                           |
| 110             | Japan   | 1998           | Marine Fish, Other        | 17                                                          |
| 110             | Japan   | 1998           | Meat, Other               | 1                                                           |
| 110             | Japan   | 1998           | Milk, Whole               | 139                                                         |
| 110             | Japan   | 1998           | Molluscs, Other           | 29                                                          |
| 110             | Japan   | 1998           | Mutton & Goat Meat        | 1                                                           |



Dietary calcium and zinc deficiency risks are decreasing but remain prevalent

| FAO countrycode | Country | Reference year | Food item                 | Gross food supply (g capita <sup>-1</sup> d <sup>-1</sup> ) |
|-----------------|---------|----------------|---------------------------|-------------------------------------------------------------|
| 110             | Japan   | 1998           | Nuts                      | 3                                                           |
| 110             | Japan   | 1998           | Offals, Edible            | 8                                                           |
| 110             | Japan   | 1998           | Oilcrops Oil, Other       | 1                                                           |
| 110             | Japan   | 1998           | Olive Oil                 | 1                                                           |
| 110             | Japan   | 1998           | Onions                    | 32                                                          |
| 110             | Japan   | 1998           | Oranges, Mandarines       | 36                                                          |
| 110             | Japan   | 1998           | Palm Oil                  | 3                                                           |
| 110             | Japan   | 1998           | Pelagic Fish              | 43                                                          |
| 110             | Japan   | 1998           | Pigmeat                   | 45                                                          |
| 110             | Japan   | 1998           | Pineapples                | 3                                                           |
| 110             | Japan   | 1998           | Potatoes                  | 66                                                          |
| 110             | Japan   | 1998           | Poultry Meat              | 40                                                          |
| 110             | Japan   | 1998           | Rape and Mustard Oil      | 19                                                          |
| 110             | Japan   | 1998           | Rice (Milled Equivalent)  | 134                                                         |
| 110             | Japan   | 1998           | Ricebran Oil              | 1                                                           |
| 110             | Japan   | 1998           | Roots, Other              | 7                                                           |
| 110             | Japan   | 1998           | Sesameseed                | 1                                                           |
| 110             | Japan   | 1998           | Soyabean Oil              | 13                                                          |
| 110             | Japan   | 1998           | Soyabeans                 | 23                                                          |
| 110             | Japan   | 1998           | Spices, Other             | 3                                                           |
| 110             | Japan   | 1998           | Sugar, Refined Equivalent | 49                                                          |
| 110             | Japan   | 1998           | Sweet Potatoes            | 20                                                          |
| 110             | Japan   | 1998           | Sweeteners, Other         | 29                                                          |
| 110             | Japan   | 1998           | Tea                       | 3                                                           |
| 110             | Japan   | 1998           | Tomatoes                  | 23                                                          |
| 110             | Japan   | 1998           | Vegetables, Other         | 247                                                         |
| 110             | Japan   | 1998           | Wheat                     | 120                                                         |
| 110             | Japan   | 1998           | Wine                      | 10                                                          |
| 110             | Japan   | 1998           | Yams                      | 3                                                           |
| 110             | Japan   | 1999           | Apples                    | 36                                                          |
| 110             | Japan   | 1999           | Aquatic Animals, Others   | 1                                                           |
| 110             | Japan   | 1999           | Aquatic Plants            | 4                                                           |
| 110             | Japan   | 1999           | Bananas                   | 18                                                          |
| 110             | Japan   | 1999           | Barley                    | 2                                                           |
| 110             | Japan   | 1999           | Beans                     | 5                                                           |
| 110             | Japan   | 1999           | Beer                      | 129                                                         |
| 110             | Japan   | 1999           | Beverages, Alcoholic      | 23                                                          |
| 110             | Japan   | 1999           | Beverages, Fermented      | 17                                                          |
| 110             | Japan   | 1999           | Bovine Meat               | 30                                                          |
| 110             | Japan   | 1999           | Butter, Ghee              | 2                                                           |
| 110             | Japan   | 1999           | Cephalopods               | 14                                                          |
| 110             | Japan   | 1999           | Cereals, Other            | 2                                                           |
| 110             | Japan   | 1999           | Cheese                    | 7                                                           |
| 110             | Japan   | 1999           | Citrus, Other             | 5                                                           |
| 110             | Japan   | 1999           | Cocoa Beans               | 3                                                           |
| 110             | Japan   | 1999           | Coconut Oil               | 1                                                           |
| 110             | Japan   | 1999           | Coffee                    | 9                                                           |
| 110             | Japan   | 1999           | Crustaceans               | 24                                                          |
| 110             | Japan   | 1999           | Demersal Fish             | 34                                                          |
| 110             | Japan   | 1999           | Eggs                      | 54                                                          |
| 110             | Japan   | 1999           | Fats, Animals, Raw        | 2                                                           |
| 110             | Japan   | 1999           | Fish, Body Oil            | 1                                                           |
| 110             | Japan   | 1999           | Freshwater Fish           | 16                                                          |
| 110             | Japan   | 1999           | Fruits, Other             | 30                                                          |
| 110             | Japan   | 1999           | Grapefruit                | 7                                                           |
| 110             | Japan   | 1999           | Grapes                    | 6                                                           |
| 110             | Japan   | 1999           | Groundnuts (Shelled Eq)   | 3                                                           |
| 110             | Japan   | 1999           | Honey                     | 1                                                           |
| 110             | Japan   | 1999           | Lemons, Limes             | 3                                                           |
| 110             | Japan   | 1999           | Maize                     | 47                                                          |
| 110             | Japan   | 1999           | Maize Germ Oil            | 2                                                           |
| 110             | Japan   | 1999           | Marine Fish, Other        | 20                                                          |
| 110             | Japan   | 1999           | Meat, Other               | 1                                                           |
| 110             | Japan   | 1999           | Milk, Whole               | 138                                                         |
| 110             | Japan   | 1999           | Molluscs, Other           | 30                                                          |
| 110             | Japan   | 1999           | Mutton & Goat Meat        | 1                                                           |
| 110             | Japan   | 1999           | Nuts                      | 4                                                           |
| 110             | Japan   | 1999           | Oats                      | 1                                                           |
| 110             | Japan   | 1999           | Offals, Edible            | 8                                                           |
| 110             | Japan   | 1999           | Oilcrops Oil, Other       | 1                                                           |
| 110             | Japan   | 1999           | Olive Oil                 | 1                                                           |
| 110             | Japan   | 1999           | Onions                    | 30                                                          |
| 110             | Japan   | 1999           | Oranges, Mandarines       | 39                                                          |
| 110             | Japan   | 1999           | Palm Oil                  | 3                                                           |
| 110             | Japan   | 1999           | Pelagic Fish              | 42                                                          |
| 110             | Japan   | 1999           | Pigmeat                   | 48                                                          |
| 110             | Japan   | 1999           | Pineapples                | 3                                                           |
| 110             | Japan   | 1999           | Potatoes                  | 66                                                          |
| 110             | Japan   | 1999           | Poultry Meat              | 42                                                          |
| 110             | Japan   | 1999           | Rape and Mustard Oil      | 20                                                          |
| 110             | Japan   | 1999           | Rice (Milled Equivalent)  | 134                                                         |
| 110             | Japan   | 1999           | Ricebran Oil              | 1                                                           |
| 110             | Japan   | 1999           | Roots, Other              | 7                                                           |
| 110             | Japan   | 1999           | Sesameseed                | 1                                                           |
| 110             | Japan   | 1999           | Soyabean Oil              | 13                                                          |
| 110             | Japan   | 1999           | Soyabeans                 | 22                                                          |
| 110             | Japan   | 1999           | Spices, Other             | 3                                                           |
| 110             | Japan   | 1999           | Sugar, Refined Equivalent | 48                                                          |
| 110             | Japan   | 1999           | Sweet Potatoes            | 18                                                          |
| 110             | Japan   | 1999           | Sweeteners, Other         | 29                                                          |
| 110             | Japan   | 1999           | Tea                       | 3                                                           |
| 110             | Japan   | 1999           | Tomatoes                  | 24                                                          |
| 110             | Japan   | 1999           | Vegetables, Other         | 258                                                         |
| 110             | Japan   | 1999           | Wheat                     | 120                                                         |
| 110             | Japan   | 1999           | Wine                      | 6                                                           |
| 110             | Japan   | 1999           | Yams                      | 4                                                           |
| 110             | Japan   | 2000           | Apples                    | 34                                                          |

Dietary calcium and zinc deficiency risks are decreasing but remain prevalent

| FAO countrycode | Country | Reference year | Food item                 | Gross food supply (g capita <sup>-1</sup> d <sup>-1</sup> ) |
|-----------------|---------|----------------|---------------------------|-------------------------------------------------------------|
| 110             | Japan   | 2000           | Aquatic Animals, Others   | 1                                                           |
| 110             | Japan   | 2000           | Aquatic Plants            | 4                                                           |
| 110             | Japan   | 2000           | Bananas                   | 20                                                          |
| 110             | Japan   | 2000           | Barley                    | 2                                                           |
| 110             | Japan   | 2000           | Beans                     | 5                                                           |
| 110             | Japan   | 2000           | Beer                      | 119                                                         |
| 110             | Japan   | 2000           | Beverages, Alcoholic      | 24                                                          |
| 110             | Japan   | 2000           | Beverages, Fermented      | 17                                                          |
| 110             | Japan   | 2000           | Bovine Meat               | 31                                                          |
| 110             | Japan   | 2000           | Butter, Ghee              | 2                                                           |
| 110             | Japan   | 2000           | Cephalopods               | 19                                                          |
| 110             | Japan   | 2000           | Cereals, Other            | 2                                                           |
| 110             | Japan   | 2000           | Cheese                    | 7                                                           |
| 110             | Japan   | 2000           | Citrus, Other             | 5                                                           |
| 110             | Japan   | 2000           | Cocoa Beans               | 3                                                           |
| 110             | Japan   | 2000           | Coconut Oil               | 1                                                           |
| 110             | Japan   | 2000           | Coffee                    | 10                                                          |
| 110             | Japan   | 2000           | Crustaceans               | 24                                                          |
| 110             | Japan   | 2000           | Demersal Fish             | 30                                                          |
| 110             | Japan   | 2000           | Eggs                      | 54                                                          |
| 110             | Japan   | 2000           | Fats, Animals, Raw        | 2                                                           |
| 110             | Japan   | 2000           | Fish, Body Oil            | 1                                                           |
| 110             | Japan   | 2000           | Freshwater Fish           | 16                                                          |
| 110             | Japan   | 2000           | Fruits, Other             | 30                                                          |
| 110             | Japan   | 2000           | Grapefruit                | 8                                                           |
| 110             | Japan   | 2000           | Grapes                    | 5                                                           |
| 110             | Japan   | 2000           | Groundnuts (Shelled Eq)   | 3                                                           |
| 110             | Japan   | 2000           | Honey                     | 1                                                           |
| 110             | Japan   | 2000           | Lemons, Limes             | 3                                                           |
| 110             | Japan   | 2000           | Maize                     | 46                                                          |
| 110             | Japan   | 2000           | Maize Germ Oil            | 2                                                           |
| 110             | Japan   | 2000           | Marine Fish, Other        | 21                                                          |
| 110             | Japan   | 2000           | Meat, Other               | 1                                                           |
| 110             | Japan   | 2000           | Milk, Whole               | 137                                                         |
| 110             | Japan   | 2000           | Molluscs, Other           | 30                                                          |
| 110             | Japan   | 2000           | Mutton & Goat Meat        | 1                                                           |
| 110             | Japan   | 2000           | Nuts                      | 4                                                           |
| 110             | Japan   | 2000           | Offals, Edible            | 9                                                           |
| 110             | Japan   | 2000           | Oilcrops Oil, Other       | 1                                                           |
| 110             | Japan   | 2000           | Olive Oil                 | 1                                                           |
| 110             | Japan   | 2000           | Onions                    | 31                                                          |
| 110             | Japan   | 2000           | Oranges, Mandarines       | 34                                                          |
| 110             | Japan   | 2000           | Palm Oil                  | 3                                                           |
| 110             | Japan   | 2000           | Pelagic Fish              | 44                                                          |
| 110             | Japan   | 2000           | Pigmeat                   | 49                                                          |
| 110             | Japan   | 2000           | Pineapples                | 3                                                           |
| 110             | Japan   | 2000           | Potatoes                  | 65                                                          |
| 110             | Japan   | 2000           | Poultry Meat              | 43                                                          |
| 110             | Japan   | 2000           | Rape and Mustard Oil      | 20                                                          |
| 110             | Japan   | 2000           | Rice (Milled Equivalent)  | 133                                                         |
| 110             | Japan   | 2000           | Ricebran Oil              | 1                                                           |
| 110             | Japan   | 2000           | Roots, Other              | 7                                                           |
| 110             | Japan   | 2000           | Sesameseed                | 2                                                           |
| 110             | Japan   | 2000           | Soyabean Oil              | 14                                                          |
| 110             | Japan   | 2000           | Soybeans                  | 22                                                          |
| 110             | Japan   | 2000           | Spices, Other             | 3                                                           |
| 110             | Japan   | 2000           | Sugar, Refined Equivalent | 45                                                          |
| 110             | Japan   | 2000           | Sunflowerseed Oil         | 1                                                           |
| 110             | Japan   | 2000           | Sweet Potatoes            | 19                                                          |
| 110             | Japan   | 2000           | Sweeteners, Other         | 28                                                          |
| 110             | Japan   | 2000           | Tea                       | 3                                                           |
| 110             | Japan   | 2000           | Tomatoes                  | 25                                                          |
| 110             | Japan   | 2000           | Vegetables, Other         | 253                                                         |
| 110             | Japan   | 2000           | Wheat                     | 120                                                         |
| 110             | Japan   | 2000           | Wine                      | 6                                                           |
| 110             | Japan   | 2000           | Yams                      | 4                                                           |
| 110             | Japan   | 2001           | Apples                    | 37                                                          |
| 110             | Japan   | 2001           | Aquatic Animals, Others   | 1                                                           |
| 110             | Japan   | 2001           | Aquatic Plants            | 4                                                           |
| 110             | Japan   | 2001           | Bananas                   | 18                                                          |
| 110             | Japan   | 2001           | Barley                    | 2                                                           |
| 110             | Japan   | 2001           | Beans                     | 5                                                           |
| 110             | Japan   | 2001           | Beer                      | 104                                                         |
| 110             | Japan   | 2001           | Beverages, Alcoholic      | 25                                                          |
| 110             | Japan   | 2001           | Beverages, Fermented      | 16                                                          |
| 110             | Japan   | 2001           | Bovine Meat               | 28                                                          |
| 110             | Japan   | 2001           | Butter, Ghee              | 2                                                           |
| 110             | Japan   | 2001           | Cephalopods               | 18                                                          |
| 110             | Japan   | 2001           | Cereals, Other            | 3                                                           |
| 110             | Japan   | 2001           | Cheese                    | 7                                                           |
| 110             | Japan   | 2001           | Citrus, Other             | 5                                                           |
| 110             | Japan   | 2001           | Cocoa Beans               | 3                                                           |
| 110             | Japan   | 2001           | Coconut Oil               | 1                                                           |
| 110             | Japan   | 2001           | Coffee                    | 10                                                          |
| 110             | Japan   | 2001           | Crustaceans               | 27                                                          |
| 110             | Japan   | 2001           | Demersal Fish             | 30                                                          |
| 110             | Japan   | 2001           | Eggs                      | 53                                                          |
| 110             | Japan   | 2001           | Fats, Animals, Raw        | 2                                                           |
| 110             | Japan   | 2001           | Fish, Body Oil            | 1                                                           |
| 110             | Japan   | 2001           | Freshwater Fish           | 17                                                          |
| 110             | Japan   | 2001           | Fruits, Other             | 31                                                          |
| 110             | Japan   | 2001           | Grapefruit                | 8                                                           |
| 110             | Japan   | 2001           | Grapes                    | 4                                                           |
| 110             | Japan   | 2001           | Groundnuts (Shelled Eq)   | 3                                                           |
| 110             | Japan   | 2001           | Honey                     | 1                                                           |
| 110             | Japan   | 2001           | Lemons, Limes             | 3                                                           |
| 110             | Japan   | 2001           | Maize                     | 44                                                          |

Dietary calcium and zinc deficiency risks are decreasing but remain prevalent

| FAO countrycode | Country | Reference year | Food item                 | Gross food supply (g capita <sup>-1</sup> d <sup>-1</sup> ) |
|-----------------|---------|----------------|---------------------------|-------------------------------------------------------------|
| 110             | Japan   | 2001           | Maize Germ Oil            | 2                                                           |
| 110             | Japan   | 2001           | Marine Fish, Other        | 24                                                          |
| 110             | Japan   | 2001           | Meat, Other               | 1                                                           |
| 110             | Japan   | 2001           | Milk, Whole               | 138                                                         |
| 110             | Japan   | 2001           | Molluscs, Other           | 23                                                          |
| 110             | Japan   | 2001           | Mutton & Goat Meat        | 1                                                           |
| 110             | Japan   | 2001           | Nuts                      | 5                                                           |
| 110             | Japan   | 2001           | Offals, Edible            | 8                                                           |
| 110             | Japan   | 2001           | Oilcrops Oil, Other       | 1                                                           |
| 110             | Japan   | 2001           | Olive Oil                 | 1                                                           |
| 110             | Japan   | 2001           | Onions                    | 31                                                          |
| 110             | Japan   | 2001           | Oranges, Mandarines       | 38                                                          |
| 110             | Japan   | 2001           | Palm Oil                  | 3                                                           |
| 110             | Japan   | 2001           | Pelagic Fish              | 52                                                          |
| 110             | Japan   | 2001           | Pigmeat                   | 50                                                          |
| 110             | Japan   | 2001           | Pineapples                | 4                                                           |
| 110             | Japan   | 2001           | Potatoes                  | 65                                                          |
| 110             | Japan   | 2001           | Poultry Meat              | 43                                                          |
| 110             | Japan   | 2001           | Rape and Mustard Oil      | 20                                                          |
| 110             | Japan   | 2001           | Rice (Milled Equivalent)  | 131                                                         |
| 110             | Japan   | 2001           | Ricebran Oil              | 1                                                           |
| 110             | Japan   | 2001           | Roots, Other              | 7                                                           |
| 110             | Japan   | 2001           | Sesameseed                | 1                                                           |
| 110             | Japan   | 2001           | Soyabean Oil              | 14                                                          |
| 110             | Japan   | 2001           | Soyabeans                 | 22                                                          |
| 110             | Japan   | 2001           | Spices, Other             | 3                                                           |
| 110             | Japan   | 2001           | Sugar, Refined Equivalent | 48                                                          |
| 110             | Japan   | 2001           | Sunflowerseed Oil         | 1                                                           |
| 110             | Japan   | 2001           | Sweet Potatoes            | 19                                                          |
| 110             | Japan   | 2001           | Sweeteners, Other         | 27                                                          |
| 110             | Japan   | 2001           | Tea                       | 3                                                           |
| 110             | Japan   | 2001           | Tomatoes                  | 25                                                          |
| 110             | Japan   | 2001           | Vegetables, Other         | 250                                                         |
| 110             | Japan   | 2001           | Wheat                     | 120                                                         |
| 110             | Japan   | 2001           | Wine                      | 6                                                           |
| 110             | Japan   | 2001           | Yams                      | 3                                                           |
| 110             | Japan   | 2002           | Apples                    | 47                                                          |
| 110             | Japan   | 2002           | Aquatic Animals, Others   | 1                                                           |
| 110             | Japan   | 2002           | Aquatic Plants            | 4                                                           |
| 110             | Japan   | 2002           | Bananas                   | 17                                                          |
| 110             | Japan   | 2002           | Barley                    | 2                                                           |
| 110             | Japan   | 2002           | Beans                     | 5                                                           |
| 110             | Japan   | 2002           | Beer                      | 93                                                          |
| 110             | Japan   | 2002           | Beverages, Alcoholic      | 24                                                          |
| 110             | Japan   | 2002           | Beverages, Fermented      | 15                                                          |
| 110             | Japan   | 2002           | Bovine Meat               | 25                                                          |
| 110             | Japan   | 2002           | Butter, Ghee              | 2                                                           |
| 110             | Japan   | 2002           | Cephalopods               | 15                                                          |
| 110             | Japan   | 2002           | Cereals, Other            | 3                                                           |
| 110             | Japan   | 2002           | Cheese                    | 7                                                           |
| 110             | Japan   | 2002           | Citrus, Other             | 6                                                           |
| 110             | Japan   | 2002           | Cocoa Beans               | 3                                                           |
| 110             | Japan   | 2002           | Coconut Oil               | 1                                                           |
| 110             | Japan   | 2002           | Coffee                    | 10                                                          |
| 110             | Japan   | 2002           | Crustaceans               | 26                                                          |
| 110             | Japan   | 2002           | Demersal Fish             | 27                                                          |
| 110             | Japan   | 2002           | Eggs                      | 53                                                          |
| 110             | Japan   | 2002           | Fats, Animals, Raw        | 2                                                           |
| 110             | Japan   | 2002           | Fish, Body Oil            | 1                                                           |
| 110             | Japan   | 2002           | Freshwater Fish           | 17                                                          |
| 110             | Japan   | 2002           | Fruits, Other             | 30                                                          |
| 110             | Japan   | 2002           | Grapefruit                | 10                                                          |
| 110             | Japan   | 2002           | Grapes                    | 5                                                           |
| 110             | Japan   | 2002           | Groundnuts (Shelled Eq)   | 3                                                           |
| 110             | Japan   | 2002           | Honey                     | 1                                                           |
| 110             | Japan   | 2002           | Lemons, Limes             | 2                                                           |
| 110             | Japan   | 2002           | Maize                     | 45                                                          |
| 110             | Japan   | 2002           | Maize Germ Oil            | 2                                                           |
| 110             | Japan   | 2002           | Marine Fish, Other        | 24                                                          |
| 110             | Japan   | 2002           | Milk, Whole               | 137                                                         |
| 110             | Japan   | 2002           | Molluscs, Other           | 30                                                          |
| 110             | Japan   | 2002           | Mutton & Goat Meat        | 1                                                           |
| 110             | Japan   | 2002           | Nuts                      | 5                                                           |
| 110             | Japan   | 2002           | Offals, Edible            | 8                                                           |
| 110             | Japan   | 2002           | Oilcrops Oil, Other       | 1                                                           |
| 110             | Japan   | 2002           | Olive Oil                 | 1                                                           |
| 110             | Japan   | 2002           | Onions                    | 29                                                          |
| 110             | Japan   | 2002           | Oranges, Mandarines       | 34                                                          |
| 110             | Japan   | 2002           | Palm Oil                  | 2                                                           |
| 110             | Japan   | 2002           | Pelagic Fish              | 46                                                          |
| 110             | Japan   | 2002           | Pigmeat                   | 52                                                          |
| 110             | Japan   | 2002           | Pineapples                | 4                                                           |
| 110             | Japan   | 2002           | Potatoes                  | 64                                                          |
| 110             | Japan   | 2002           | Poultry Meat              | 44                                                          |
| 110             | Japan   | 2002           | Rape and Mustard Oil      | 19                                                          |
| 110             | Japan   | 2002           | Rice (Milled Equivalent)  | 129                                                         |
| 110             | Japan   | 2002           | Ricebran Oil              | 1                                                           |
| 110             | Japan   | 2002           | Roots, Other              | 6                                                           |
| 110             | Japan   | 2002           | Sesameseed                | 1                                                           |
| 110             | Japan   | 2002           | Soyabean Oil              | 14                                                          |
| 110             | Japan   | 2002           | Soyabeans                 | 22                                                          |
| 110             | Japan   | 2002           | Spices, Other             | 3                                                           |
| 110             | Japan   | 2002           | Sugar, Refined Equivalent | 48                                                          |
| 110             | Japan   | 2002           | Sunflowerseed Oil         | 1                                                           |
| 110             | Japan   | 2002           | Sweet Potatoes            | 18                                                          |
| 110             | Japan   | 2002           | Sweeteners, Other         | 28                                                          |
| 110             | Japan   | 2002           | Tea                       | 3                                                           |

## Dietary calcium and zinc deficiency risks are decreasing but remain prevalent

| FAO countrycode | Country | Reference year | Food item                 | Gross food supply (g capita <sup>-1</sup> d <sup>-1</sup> ) |
|-----------------|---------|----------------|---------------------------|-------------------------------------------------------------|
| 110             | Japan   | 2002           | Tomatoes                  | 23                                                          |
| 110             | Japan   | 2002           | Vegetables, Other         | 242                                                         |
| 110             | Japan   | 2002           | Wheat                     | 120                                                         |
| 110             | Japan   | 2002           | Wine                      | 6                                                           |
| 110             | Japan   | 2002           | Yams                      | 3                                                           |
| 110             | Japan   | 2003           | Apples                    | 46                                                          |
| 110             | Japan   | 2003           | Aquatic Animals, Others   | 2                                                           |
| 110             | Japan   | 2003           | Aquatic Plants            | 3                                                           |
| 110             | Japan   | 2003           | Bananas                   | 18                                                          |
| 110             | Japan   | 2003           | Barley                    | 2                                                           |
| 110             | Japan   | 2003           | Beans                     | 5                                                           |
| 110             | Japan   | 2003           | Beer                      | 85                                                          |
| 110             | Japan   | 2003           | Beverages, Alcoholic      | 26                                                          |
| 110             | Japan   | 2003           | Beverages, Fermented      | 14                                                          |
| 110             | Japan   | 2003           | Bovine Meat               | 26                                                          |
| 110             | Japan   | 2003           | Butter, Ghee              | 2                                                           |
| 110             | Japan   | 2003           | Cephalopods               | 18                                                          |
| 110             | Japan   | 2003           | Cereals, Other            | 3                                                           |
| 110             | Japan   | 2003           | Cheese                    | 7                                                           |
| 110             | Japan   | 2003           | Citrus, Other             | 6                                                           |
| 110             | Japan   | 2003           | Cocoa Beans               | 4                                                           |
| 110             | Japan   | 2003           | Coconut Oil               | 1                                                           |
| 110             | Japan   | 2003           | Coffee                    | 9                                                           |
| 110             | Japan   | 2003           | Crustaceans               | 23                                                          |
| 110             | Japan   | 2003           | Demersal Fish             | 25                                                          |
| 110             | Japan   | 2003           | Eggs                      | 53                                                          |
| 110             | Japan   | 2003           | Fats, Animals, Raw        | 2                                                           |
| 110             | Japan   | 2003           | Fish, Body Oil            | 1                                                           |
| 110             | Japan   | 2003           | Freshwater Fish           | 15                                                          |
| 110             | Japan   | 2003           | Fruits, Other             | 28                                                          |
| 110             | Japan   | 2003           | Grapefruit                | 10                                                          |
| 110             | Japan   | 2003           | Grapes                    | 5                                                           |
| 110             | Japan   | 2003           | Groundnuts (Shelled Eq)   | 3                                                           |
| 110             | Japan   | 2003           | Honey                     | 1                                                           |
| 110             | Japan   | 2003           | Lemons, Limes             | 2                                                           |
| 110             | Japan   | 2003           | Maize                     | 40                                                          |
| 110             | Japan   | 2003           | Maize Germ Oil            | 2                                                           |
| 110             | Japan   | 2003           | Marine Fish, Other        | 22                                                          |
| 110             | Japan   | 2003           | Milk, Whole               | 139                                                         |
| 110             | Japan   | 2003           | Molluscs, Other           | 28                                                          |
| 110             | Japan   | 2003           | Nuts                      | 4                                                           |
| 110             | Japan   | 2003           | Offals, Edible            | 8                                                           |
| 110             | Japan   | 2003           | Olive Oil                 | 1                                                           |
| 110             | Japan   | 2003           | Onions                    | 29                                                          |
| 110             | Japan   | 2003           | Oranges, Mandarines       | 33                                                          |
| 110             | Japan   | 2003           | Palm Oil                  | 2                                                           |
| 110             | Japan   | 2003           | Pelagic Fish              | 49                                                          |
| 110             | Japan   | 2003           | Pigmeat                   | 52                                                          |
| 110             | Japan   | 2003           | Pineapples                | 4                                                           |
| 110             | Japan   | 2003           | Potatoes                  | 61                                                          |
| 110             | Japan   | 2003           | Poultry Meat              | 44                                                          |
| 110             | Japan   | 2003           | Rape and Mustard Oil      | 19                                                          |
| 110             | Japan   | 2003           | Rice (Milled Equivalent)  | 127                                                         |
| 110             | Japan   | 2003           | Ricebran Oil              | 1                                                           |
| 110             | Japan   | 2003           | Roots, Other              | 6                                                           |
| 110             | Japan   | 2003           | Sesameseed                | 1                                                           |
| 110             | Japan   | 2003           | Soyabean Oil              | 14                                                          |
| 110             | Japan   | 2003           | Soybeans                  | 22                                                          |
| 110             | Japan   | 2003           | Spices, Other             | 3                                                           |
| 110             | Japan   | 2003           | Sugar, Non-Centrifugal    | 1                                                           |
| 110             | Japan   | 2003           | Sugar, Refined Equivalent | 48                                                          |
| 110             | Japan   | 2003           | Sunflowerseed Oil         | 1                                                           |
| 110             | Japan   | 2003           | Sweet Potatoes            | 18                                                          |
| 110             | Japan   | 2003           | Sweeteners, Other         | 28                                                          |
| 110             | Japan   | 2003           | Tea                       | 3                                                           |
| 110             | Japan   | 2003           | Tomatoes                  | 23                                                          |
| 110             | Japan   | 2003           | Vegetables, Other         | 243                                                         |
| 110             | Japan   | 2003           | Wheat                     | 122                                                         |
| 110             | Japan   | 2003           | Wine                      | 6                                                           |
| 110             | Japan   | 2003           | Yams                      | 3                                                           |
| 110             | Japan   | 2004           | Apples                    | 50                                                          |
| 110             | Japan   | 2004           | Aquatic Animals, Others   | 2                                                           |
| 110             | Japan   | 2004           | Aquatic Plants            | 4                                                           |
| 110             | Japan   | 2004           | Bananas                   | 18                                                          |
| 110             | Japan   | 2004           | Barley                    | 2                                                           |
| 110             | Japan   | 2004           | Beans                     | 5                                                           |
| 110             | Japan   | 2004           | Beer                      | 83                                                          |
| 110             | Japan   | 2004           | Beverages, Alcoholic      | 26                                                          |
| 110             | Japan   | 2004           | Beverages, Fermented      | 13                                                          |
| 110             | Japan   | 2004           | Bovine Meat               | 23                                                          |
| 110             | Japan   | 2004           | Butter, Ghee              | 2                                                           |
| 110             | Japan   | 2004           | Cephalopods               | 11                                                          |
| 110             | Japan   | 2004           | Cereals, Other            | 2                                                           |
| 110             | Japan   | 2004           | Cheese                    | 7                                                           |
| 110             | Japan   | 2004           | Citrus, Other             | 6                                                           |
| 110             | Japan   | 2004           | Cocoa Beans               | 4                                                           |
| 110             | Japan   | 2004           | Coconut Oil               | 1                                                           |
| 110             | Japan   | 2004           | Coffee                    | 10                                                          |
| 110             | Japan   | 2004           | Crustaceans               | 23                                                          |
| 110             | Japan   | 2004           | Demersal Fish             | 24                                                          |
| 110             | Japan   | 2004           | Eggs                      | 52                                                          |
| 110             | Japan   | 2004           | Fats, Animals, Raw        | 2                                                           |
| 110             | Japan   | 2004           | Fish, Body Oil            | 1                                                           |
| 110             | Japan   | 2004           | Freshwater Fish           | 15                                                          |
| 110             | Japan   | 2004           | Fruits, Other             | 29                                                          |
| 110             | Japan   | 2004           | Grapefruit                | 11                                                          |
| 110             | Japan   | 2004           | Grapes                    | 5                                                           |

Dietary calcium and zinc deficiency risks are decreasing but remain prevalent

| FAO countrycode | Country | Reference year | Food item                 | Gross food supply (g capita <sup>-1</sup> d <sup>-1</sup> ) |
|-----------------|---------|----------------|---------------------------|-------------------------------------------------------------|
| 110             | Japan   | 2004           | Groundnuts (Shelled Eq)   | 2                                                           |
| 110             | Japan   | 2004           | Honey                     | 1                                                           |
| 110             | Japan   | 2004           | Lemons, Limes             | 2                                                           |
| 110             | Japan   | 2004           | Maize                     | 38                                                          |
| 110             | Japan   | 2004           | Maize Germ Oil            | 2                                                           |
| 110             | Japan   | 2004           | Marine Fish, Other        | 24                                                          |
| 110             | Japan   | 2004           | Milk, Whole               | 137                                                         |
| 110             | Japan   | 2004           | Molluscs, Other           | 29                                                          |
| 110             | Japan   | 2004           | Mutton & Goat Meat        | 1                                                           |
| 110             | Japan   | 2004           | Nuts                      | 5                                                           |
| 110             | Japan   | 2004           | Offals, Edible            | 6                                                           |
| 110             | Japan   | 2004           | Olive Oil                 | 1                                                           |
| 110             | Japan   | 2004           | Onions                    | 29                                                          |
| 110             | Japan   | 2004           | Oranges, Mandarines       | 33                                                          |
| 110             | Japan   | 2004           | Palm Oil                  | 2                                                           |
| 110             | Japan   | 2004           | Pelagic Fish              | 43                                                          |
| 110             | Japan   | 2004           | Pigmeat                   | 56                                                          |
| 110             | Japan   | 2004           | Pineapples                | 5                                                           |
| 110             | Japan   | 2004           | Potatoes                  | 62                                                          |
| 110             | Japan   | 2004           | Poultry Meat              | 41                                                          |
| 110             | Japan   | 2004           | Rape and Mustard Oil      | 22                                                          |
| 110             | Japan   | 2004           | Rice (Milled Equivalent)  | 127                                                         |
| 110             | Japan   | 2004           | Ricebran Oil              | 1                                                           |
| 110             | Japan   | 2004           | Roots, Other              | 6                                                           |
| 110             | Japan   | 2004           | Sesameseed                | 1                                                           |
| 110             | Japan   | 2004           | Soyabean Oil              | 14                                                          |
| 110             | Japan   | 2004           | Soyabeans                 | 23                                                          |
| 110             | Japan   | 2004           | Spices, Other             | 3                                                           |
| 110             | Japan   | 2004           | Sugar, Refined Equivalent | 48                                                          |
| 110             | Japan   | 2004           | Sweet Potatoes            | 19                                                          |
| 110             | Japan   | 2004           | Sweeteners, Other         | 29                                                          |
| 110             | Japan   | 2004           | Tea                       | 3                                                           |
| 110             | Japan   | 2004           | Tomatoes                  | 24                                                          |
| 110             | Japan   | 2004           | Vegetables, Other         | 236                                                         |
| 110             | Japan   | 2004           | Wheat                     | 123                                                         |
| 110             | Japan   | 2004           | Wine                      | 6                                                           |
| 110             | Japan   | 2004           | Yams                      | 4                                                           |
| 110             | Japan   | 2005           | Apples                    | 54                                                          |
| 110             | Japan   | 2005           | Aquatic Animals, Others   | 2                                                           |
| 110             | Japan   | 2005           | Aquatic Plants            | 3                                                           |
| 110             | Japan   | 2005           | Bananas                   | 19                                                          |
| 110             | Japan   | 2005           | Barley                    | 2                                                           |
| 110             | Japan   | 2005           | Beans                     | 5                                                           |
| 110             | Japan   | 2005           | Beer                      | 79                                                          |
| 110             | Japan   | 2005           | Beverages, Alcoholic      | 24                                                          |
| 110             | Japan   | 2005           | Beverages, Fermented      | 12                                                          |
| 110             | Japan   | 2005           | Bovine Meat               | 24                                                          |
| 110             | Japan   | 2005           | Butter, Ghee              | 2                                                           |
| 110             | Japan   | 2005           | Cephalopods               | 10                                                          |
| 110             | Japan   | 2005           | Cereals, Other            | 3                                                           |
| 110             | Japan   | 2005           | Cheese                    | 7                                                           |
| 110             | Japan   | 2005           | Citrus, Other             | 6                                                           |
| 110             | Japan   | 2005           | Cocoa Beans               | 4                                                           |
| 110             | Japan   | 2005           | Coconut Oil               | 1                                                           |
| 110             | Japan   | 2005           | Coffee                    | 10                                                          |
| 110             | Japan   | 2005           | Crustaceans               | 24                                                          |
| 110             | Japan   | 2005           | Demersal Fish             | 23                                                          |
| 110             | Japan   | 2005           | Eggs                      | 52                                                          |
| 110             | Japan   | 2005           | Fats, Animals, Raw        | 2                                                           |
| 110             | Japan   | 2005           | Fish, Body Oil            | 1                                                           |
| 110             | Japan   | 2005           | Freshwater Fish           | 14                                                          |
| 110             | Japan   | 2005           | Fruits, Other             | 32                                                          |
| 110             | Japan   | 2005           | Grapefruit                | 9                                                           |
| 110             | Japan   | 2005           | Grapes                    | 5                                                           |
| 110             | Japan   | 2005           | Groundnuts (Shelled Eq)   | 2                                                           |
| 110             | Japan   | 2005           | Honey                     | 1                                                           |
| 110             | Japan   | 2005           | Lemons, Limes             | 2                                                           |
| 110             | Japan   | 2005           | Maize                     | 40                                                          |
| 110             | Japan   | 2005           | Maize Germ Oil            | 2                                                           |
| 110             | Japan   | 2005           | Marine Fish, Other        | 23                                                          |
| 110             | Japan   | 2005           | Meat, Other               | 1                                                           |
| 110             | Japan   | 2005           | Milk, Whole               | 134                                                         |
| 110             | Japan   | 2005           | Molluscs, Other           | 27                                                          |
| 110             | Japan   | 2005           | Mutton & Goat Meat        | 1                                                           |
| 110             | Japan   | 2005           | Nuts                      | 5                                                           |
| 110             | Japan   | 2005           | Offals, Edible            | 6                                                           |
| 110             | Japan   | 2005           | Olive Oil                 | 1                                                           |
| 110             | Japan   | 2005           | Onions                    | 30                                                          |
| 110             | Japan   | 2005           | Oranges, Mandarines       | 34                                                          |
| 110             | Japan   | 2005           | Palm Oil                  | 2                                                           |
| 110             | Japan   | 2005           | Palmkernel Oil            | 1                                                           |
| 110             | Japan   | 2005           | Pelagic Fish              | 44                                                          |
| 110             | Japan   | 2005           | Pigmeat                   | 57                                                          |
| 110             | Japan   | 2005           | Pineapples                | 5                                                           |
| 110             | Japan   | 2005           | Potatoes                  | 61                                                          |
| 110             | Japan   | 2005           | Poultry Meat              | 46                                                          |
| 110             | Japan   | 2005           | Rape and Mustard Oil      | 22                                                          |
| 110             | Japan   | 2005           | Rice (Milled Equivalent)  | 126                                                         |
| 110             | Japan   | 2005           | Ricebran Oil              | 1                                                           |
| 110             | Japan   | 2005           | Roots, Other              | 6                                                           |
| 110             | Japan   | 2005           | Sesameseed                | 2                                                           |
| 110             | Japan   | 2005           | Soyabean Oil              | 13                                                          |
| 110             | Japan   | 2005           | Soyabeans                 | 23                                                          |
| 110             | Japan   | 2005           | Spices, Other             | 3                                                           |
| 110             | Japan   | 2005           | Sugar, Refined Equivalent | 44                                                          |
| 110             | Japan   | 2005           | Sunflowerseed Oil         | 1                                                           |
| 110             | Japan   | 2005           | Sweet Potatoes            | 21                                                          |

Dietary calcium and zinc deficiency risks are decreasing but remain prevalent

| FAO countrycode | Country | Reference year | Food item                 | Gross food supply (g capita <sup>-1</sup> d <sup>-1</sup> ) |
|-----------------|---------|----------------|---------------------------|-------------------------------------------------------------|
| 110             | Japan   | 2005           | Sweeteners, Other         | 29                                                          |
| 110             | Japan   | 2005           | Tea                       | 3                                                           |
| 110             | Japan   | 2005           | Tomatoes                  | 25                                                          |
| 110             | Japan   | 2005           | Vegetables, Other         | 241                                                         |
| 110             | Japan   | 2005           | Wheat                     | 122                                                         |
| 110             | Japan   | 2005           | Wine                      | 6                                                           |
| 110             | Japan   | 2005           | Yams                      | 4                                                           |
| 110             | Japan   | 2006           | Apples                    | 52                                                          |
| 110             | Japan   | 2006           | Aquatic Animals, Others   | 2                                                           |
| 110             | Japan   | 2006           | Aquatic Plants            | 3                                                           |
| 110             | Japan   | 2006           | Bananas                   | 19                                                          |
| 110             | Japan   | 2006           | Barley                    | 1                                                           |
| 110             | Japan   | 2006           | Beans                     | 5                                                           |
| 110             | Japan   | 2006           | Beer                      | 76                                                          |
| 110             | Japan   | 2006           | Beverages, Alcoholic      | 27                                                          |
| 110             | Japan   | 2006           | Beverages, Fermented      | 13                                                          |
| 110             | Japan   | 2006           | Bovine Meat               | 23                                                          |
| 110             | Japan   | 2006           | Butter, Ghee              | 2                                                           |
| 110             | Japan   | 2006           | Cephalopods               | 9                                                           |
| 110             | Japan   | 2006           | Cereals, Other            | 2                                                           |
| 110             | Japan   | 2006           | Cheese                    | 7                                                           |
| 110             | Japan   | 2006           | Citrus, Other             | 6                                                           |
| 110             | Japan   | 2006           | Cocoa Beans               | 4                                                           |
| 110             | Japan   | 2006           | Coconut Oil               | 1                                                           |
| 110             | Japan   | 2006           | Coffee                    | 11                                                          |
| 110             | Japan   | 2006           | Crustaceans               | 23                                                          |
| 110             | Japan   | 2006           | Demersal Fish             | 22                                                          |
| 110             | Japan   | 2006           | Eggs                      | 52                                                          |
| 110             | Japan   | 2006           | Fats, Animals, Raw        | 2                                                           |
| 110             | Japan   | 2006           | Fish, Body Oil            | 1                                                           |
| 110             | Japan   | 2006           | Freshwater Fish           | 13                                                          |
| 110             | Japan   | 2006           | Fruits, Other             | 28                                                          |
| 110             | Japan   | 2006           | Grapefruit                | 7                                                           |
| 110             | Japan   | 2006           | Grapes                    | 5                                                           |
| 110             | Japan   | 2006           | Groundnuts (Shelled Eq)   | 2                                                           |
| 110             | Japan   | 2006           | Honey                     | 1                                                           |
| 110             | Japan   | 2006           | Lemons, Limes             | 2                                                           |
| 110             | Japan   | 2006           | Maize                     | 36                                                          |
| 110             | Japan   | 2006           | Maize Germ Oil            | 2                                                           |
| 110             | Japan   | 2006           | Marine Fish, Other        | 23                                                          |
| 110             | Japan   | 2006           | Milk, Whole               | 131                                                         |
| 110             | Japan   | 2006           | Molluscs, Other           | 27                                                          |
| 110             | Japan   | 2006           | Mutton & Goat Meat        | 1                                                           |
| 110             | Japan   | 2006           | Nuts                      | 5                                                           |
| 110             | Japan   | 2006           | Offals, Edible            | 7                                                           |
| 110             | Japan   | 2006           | Olive Oil                 | 1                                                           |
| 110             | Japan   | 2006           | Onions                    | 30                                                          |
| 110             | Japan   | 2006           | Oranges, Mandarines       | 28                                                          |
| 110             | Japan   | 2006           | Palm Oil                  | 2                                                           |
| 110             | Japan   | 2006           | Palmkernel Oil            | 1                                                           |
| 110             | Japan   | 2006           | Pelagic Fish              | 41                                                          |
| 110             | Japan   | 2006           | Pigmeat                   | 53                                                          |
| 110             | Japan   | 2006           | Pineapples                | 5                                                           |
| 110             | Japan   | 2006           | Potatoes                  | 58                                                          |
| 110             | Japan   | 2006           | Poultry Meat              | 48                                                          |
| 110             | Japan   | 2006           | Rape and Mustard Oil      | 21                                                          |
| 110             | Japan   | 2006           | Rice (Milled Equivalent)  | 125                                                         |
| 110             | Japan   | 2006           | Ricebran Oil              | 1                                                           |
| 110             | Japan   | 2006           | Roots, Other              | 5                                                           |
| 110             | Japan   | 2006           | Sesameseed                | 1                                                           |
| 110             | Japan   | 2006           | Soyabean Oil              | 13                                                          |
| 110             | Japan   | 2006           | Soyabeans                 | 22                                                          |
| 110             | Japan   | 2006           | Spices, Other             | 3                                                           |
| 110             | Japan   | 2006           | Sugar, Refined Equivalent | 42                                                          |
| 110             | Japan   | 2006           | Sweet Potatoes            | 19                                                          |
| 110             | Japan   | 2006           | Sweeteners, Other         | 29                                                          |
| 110             | Japan   | 2006           | Tea                       | 3                                                           |
| 110             | Japan   | 2006           | Tomatoes                  | 24                                                          |
| 110             | Japan   | 2006           | Vegetables, Other         | 237                                                         |
| 110             | Japan   | 2006           | Wheat                     | 122                                                         |
| 110             | Japan   | 2006           | Wine                      | 6                                                           |
| 110             | Japan   | 2006           | Yams                      | 4                                                           |
| 110             | Japan   | 2007           | Apples                    | 41                                                          |
| 110             | Japan   | 2007           | Aquatic Animals, Others   | 1                                                           |
| 110             | Japan   | 2007           | Aquatic Plants            | 3                                                           |
| 110             | Japan   | 2007           | Bananas                   | 17                                                          |
| 110             | Japan   | 2007           | Barley                    | 2                                                           |
| 110             | Japan   | 2007           | Beans                     | 5                                                           |
| 110             | Japan   | 2007           | Beer                      | 75                                                          |
| 110             | Japan   | 2007           | Beverages, Alcoholic      | 26                                                          |
| 110             | Japan   | 2007           | Beverages, Fermented      | 13                                                          |
| 110             | Japan   | 2007           | Bovine Meat               | 24                                                          |
| 110             | Japan   | 2007           | Butter, Ghee              | 2                                                           |
| 110             | Japan   | 2007           | Cephalopods               | 10                                                          |
| 110             | Japan   | 2007           | Cereals, Other            | 2                                                           |
| 110             | Japan   | 2007           | Cheese                    | 8                                                           |
| 110             | Japan   | 2007           | Citrus, Other             | 6                                                           |
| 110             | Japan   | 2007           | Cocoa Beans               | 4                                                           |
| 110             | Japan   | 2007           | Coconut Oil               | 1                                                           |
| 110             | Japan   | 2007           | Coffee                    | 10                                                          |
| 110             | Japan   | 2007           | Crustaceans               | 22                                                          |
| 110             | Japan   | 2007           | Demersal Fish             | 20                                                          |
| 110             | Japan   | 2007           | Eggs                      | 54                                                          |
| 110             | Japan   | 2007           | Fats, Animals, Raw        | 2                                                           |
| 110             | Japan   | 2007           | Fish, Body Oil            | 1                                                           |
| 110             | Japan   | 2007           | Freshwater Fish           | 15                                                          |
| 110             | Japan   | 2007           | Fruits, Other             | 29                                                          |

Dietary calcium and zinc deficiency risks are decreasing but remain prevalent

| FAO countrycode | Country | Reference year | Food item                 | Gross food supply (g capita <sup>-1</sup> d <sup>-1</sup> ) |
|-----------------|---------|----------------|---------------------------|-------------------------------------------------------------|
| 110             | Japan   | 2007           | Grapefruit                | 8                                                           |
| 110             | Japan   | 2007           | Grapes                    | 20                                                          |
| 110             | Japan   | 2007           | Groundnuts (Shelled Eq)   | 2                                                           |
| 110             | Japan   | 2007           | Honey                     | 1                                                           |
| 110             | Japan   | 2007           | Lemons, Limes             | 2                                                           |
| 110             | Japan   | 2007           | Maize                     | 33                                                          |
| 110             | Japan   | 2007           | Maize Germ Oil            | 2                                                           |
| 110             | Japan   | 2007           | Marine Fish, Other        | 21                                                          |
| 110             | Japan   | 2007           | Milk, Whole               | 133                                                         |
| 110             | Japan   | 2007           | Molluscs, Other           | 25                                                          |
| 110             | Japan   | 2007           | Nuts                      | 4                                                           |
| 110             | Japan   | 2007           | Offals, Edible            | 7                                                           |
| 110             | Japan   | 2007           | Olive Oil                 | 1                                                           |
| 110             | Japan   | 2007           | Onions                    | 30                                                          |
| 110             | Japan   | 2007           | Oranges, Mandarines       | 30                                                          |
| 110             | Japan   | 2007           | Palm Oil                  | 2                                                           |
| 110             | Japan   | 2007           | Palmkernel Oil            | 1                                                           |
| 110             | Japan   | 2007           | Pelagic Fish              | 40                                                          |
| 110             | Japan   | 2007           | Pigmeat                   | 55                                                          |
| 110             | Japan   | 2007           | Pineapples                | 5                                                           |
| 110             | Japan   | 2007           | Potatoes                  | 62                                                          |
| 110             | Japan   | 2007           | Poultry Meat              | 47                                                          |
| 110             | Japan   | 2007           | Rape and Mustard Oil      | 21                                                          |
| 110             | Japan   | 2007           | Rice (Milled Equivalent)  | 126                                                         |
| 110             | Japan   | 2007           | Ricebran Oil              | 1                                                           |
| 110             | Japan   | 2007           | Roots, Other              | 5                                                           |
| 110             | Japan   | 2007           | Sesameseed                | 2                                                           |
| 110             | Japan   | 2007           | Soyabean Oil              | 13                                                          |
| 110             | Japan   | 2007           | Soyabeans                 | 22                                                          |
| 110             | Japan   | 2007           | Spices, Other             | 3                                                           |
| 110             | Japan   | 2007           | Sugar, Refined Equivalent | 48                                                          |
| 110             | Japan   | 2007           | Sweet Potatoes            | 18                                                          |
| 110             | Japan   | 2007           | Sweeteners, Other         | 29                                                          |
| 110             | Japan   | 2007           | Tea                       | 3                                                           |
| 110             | Japan   | 2007           | Tomatoes                  | 25                                                          |
| 110             | Japan   | 2007           | Vegetables, Other         | 232                                                         |
| 110             | Japan   | 2007           | Wheat                     | 131                                                         |
| 110             | Japan   | 2007           | Wine                      | 5                                                           |
| 110             | Japan   | 2007           | Yams                      | 4                                                           |
| 110             | Japan   | 2008           | Apples                    | 51                                                          |
| 110             | Japan   | 2008           | Aquatic Animals, Others   | 2                                                           |
| 110             | Japan   | 2008           | Aquatic Plants            | 3                                                           |
| 110             | Japan   | 2008           | Bananas                   | 20                                                          |
| 110             | Japan   | 2008           | Barley                    | 1                                                           |
| 110             | Japan   | 2008           | Beans                     | 5                                                           |
| 110             | Japan   | 2008           | Beer                      | 69                                                          |
| 110             | Japan   | 2008           | Beverages, Alcoholic      | 25                                                          |
| 110             | Japan   | 2008           | Beverages, Fermented      | 14                                                          |
| 110             | Japan   | 2008           | Bovine Meat               | 23                                                          |
| 110             | Japan   | 2008           | Butter, Ghee              | 2                                                           |
| 110             | Japan   | 2008           | Cephalopods               | 11                                                          |
| 110             | Japan   | 2008           | Cereals, Other            | 2                                                           |
| 110             | Japan   | 2008           | Cheese                    | 7                                                           |
| 110             | Japan   | 2008           | Citrus, Other             | 5                                                           |
| 110             | Japan   | 2008           | Cocoa Beans               | 3                                                           |
| 110             | Japan   | 2008           | Coconut Oil               | 1                                                           |
| 110             | Japan   | 2008           | Coffee                    | 9                                                           |
| 110             | Japan   | 2008           | Crustaceans               | 22                                                          |
| 110             | Japan   | 2008           | Demersal Fish             | 21                                                          |
| 110             | Japan   | 2008           | Eggs                      | 53                                                          |
| 110             | Japan   | 2008           | Fats, Animals, Raw        | 2                                                           |
| 110             | Japan   | 2008           | Fish, Body Oil            | 1                                                           |
| 110             | Japan   | 2008           | Freshwater Fish           | 14                                                          |
| 110             | Japan   | 2008           | Fruits, Other             | 29                                                          |
| 110             | Japan   | 2008           | Grapefruit                | 7                                                           |
| 110             | Japan   | 2008           | Grapes                    | 5                                                           |
| 110             | Japan   | 2008           | Groundnuts (Shelled Eq)   | 2                                                           |
| 110             | Japan   | 2008           | Honey                     | 1                                                           |
| 110             | Japan   | 2008           | Lemons, Limes             | 1                                                           |
| 110             | Japan   | 2008           | Maize                     | 26                                                          |
| 110             | Japan   | 2008           | Maize Germ Oil            | 2                                                           |
| 110             | Japan   | 2008           | Marine Fish, Other        | 21                                                          |
| 110             | Japan   | 2008           | Milk, Whole               | 134                                                         |
| 110             | Japan   | 2008           | Molluscs, Other           | 23                                                          |
| 110             | Japan   | 2008           | Mutton & Goat Meat        | 1                                                           |
| 110             | Japan   | 2008           | Nuts                      | 4                                                           |
| 110             | Japan   | 2008           | Offals, Edible            | 7                                                           |
| 110             | Japan   | 2008           | Olive Oil                 | 1                                                           |
| 110             | Japan   | 2008           | Onions                    | 30                                                          |
| 110             | Japan   | 2008           | Oranges, Mandarines       | 27                                                          |
| 110             | Japan   | 2008           | Palm Oil                  | 2                                                           |
| 110             | Japan   | 2008           | Palmkernel Oil            | 1                                                           |
| 110             | Japan   | 2008           | Pelagic Fish              | 39                                                          |
| 110             | Japan   | 2008           | Pigmeat                   | 56                                                          |
| 110             | Japan   | 2008           | Pineapples                | 5                                                           |
| 110             | Japan   | 2008           | Potatoes                  | 61                                                          |
| 110             | Japan   | 2008           | Poultry Meat              | 48                                                          |
| 110             | Japan   | 2008           | Rape and Mustard Oil      | 21                                                          |
| 110             | Japan   | 2008           | Rice (Milled Equivalent)  | 121                                                         |
| 110             | Japan   | 2008           | Ricebran Oil              | 1                                                           |
| 110             | Japan   | 2008           | Roots, Other              | 5                                                           |
| 110             | Japan   | 2008           | Sesameseed                | 2                                                           |
| 110             | Japan   | 2008           | Soyabean Oil              | 12                                                          |
| 110             | Japan   | 2008           | Soyabeans                 | 22                                                          |
| 110             | Japan   | 2008           | Spices, Other             | 3                                                           |
| 110             | Japan   | 2008           | Sugar, Refined Equivalent | 45                                                          |
| 110             | Japan   | 2008           | Sweet Potatoes            | 20                                                          |

Dietary calcium and zinc deficiency risks are decreasing but remain prevalent

| FAO countrycode | Country | Reference year | Food item                 | Gross food supply (g capita <sup>-1</sup> d <sup>-1</sup> ) |
|-----------------|---------|----------------|---------------------------|-------------------------------------------------------------|
| 110             | Japan   | 2008           | Sweeteners, Other         | 27                                                          |
| 110             | Japan   | 2008           | Tea                       | 3                                                           |
| 110             | Japan   | 2008           | Tomatoes                  | 24                                                          |
| 110             | Japan   | 2008           | Vegetables, Other         | 228                                                         |
| 110             | Japan   | 2008           | Wheat                     | 128                                                         |
| 110             | Japan   | 2008           | Wine                      | 5                                                           |
| 110             | Japan   | 2008           | Yams                      | 3                                                           |
| 110             | Japan   | 2009           | Apples                    | 41                                                          |
| 110             | Japan   | 2009           | Aquatic Animals, Others   | 1                                                           |
| 110             | Japan   | 2009           | Aquatic Plants            | 3                                                           |
| 110             | Japan   | 2009           | Bananas                   | 22                                                          |
| 110             | Japan   | 2009           | Barley                    | 1                                                           |
| 110             | Japan   | 2009           | Beans                     | 5                                                           |
| 110             | Japan   | 2009           | Beer                      | 66                                                          |
| 110             | Japan   | 2009           | Beverages, Alcoholic      | 25                                                          |
| 110             | Japan   | 2009           | Beverages, Fermented      | 15                                                          |
| 110             | Japan   | 2009           | Bovine Meat               | 24                                                          |
| 110             | Japan   | 2009           | Butter, Ghee              | 2                                                           |
| 110             | Japan   | 2009           | Cephalopods               | 12                                                          |
| 110             | Japan   | 2009           | Cereals, Other            | 2                                                           |
| 110             | Japan   | 2009           | Cheese                    | 7                                                           |
| 110             | Japan   | 2009           | Citrus, Other             | 5                                                           |
| 110             | Japan   | 2009           | Cocoa Beans               | 4                                                           |
| 110             | Japan   | 2009           | Coconut Oil               | 1                                                           |
| 110             | Japan   | 2009           | Coffee                    | 9                                                           |
| 110             | Japan   | 2009           | Crustaceans               | 21                                                          |
| 110             | Japan   | 2009           | Demersal Fish             | 18                                                          |
| 110             | Japan   | 2009           | Eggs                      | 52                                                          |
| 110             | Japan   | 2009           | Fats, Animals, Raw        | 2                                                           |
| 110             | Japan   | 2009           | Fish, Body Oil            | 1                                                           |
| 110             | Japan   | 2009           | Freshwater Fish           | 14                                                          |
| 110             | Japan   | 2009           | Fruits, Other             | 28                                                          |
| 110             | Japan   | 2009           | Grapefruit                | 7                                                           |
| 110             | Japan   | 2009           | Grapes                    | 7                                                           |
| 110             | Japan   | 2009           | Groundnuts (Shelled Eq)   | 2                                                           |
| 110             | Japan   | 2009           | Honey                     | 1                                                           |
| 110             | Japan   | 2009           | Lemons, Limes             | 1                                                           |
| 110             | Japan   | 2009           | Maize                     | 24                                                          |
| 110             | Japan   | 2009           | Maize Germ Oil            | 2                                                           |
| 110             | Japan   | 2009           | Marine Fish, Other        | 19                                                          |
| 110             | Japan   | 2009           | Milk, Whole               | 126                                                         |
| 110             | Japan   | 2009           | Molluscs, Other           | 25                                                          |
| 110             | Japan   | 2009           | Mutton & Goat Meat        | 1                                                           |
| 110             | Japan   | 2009           | Nuts                      | 4                                                           |
| 110             | Japan   | 2009           | Offals, Edible            | 7                                                           |
| 110             | Japan   | 2009           | Olive Oil                 | 1                                                           |
| 110             | Japan   | 2009           | Onions                    | 28                                                          |
| 110             | Japan   | 2009           | Oranges, Mandarines       | 28                                                          |
| 110             | Japan   | 2009           | Palm Oil                  | 2                                                           |
| 110             | Japan   | 2009           | Palmkernel Oil            | 1                                                           |
| 110             | Japan   | 2009           | Pelagic Fish              | 38                                                          |
| 110             | Japan   | 2009           | Pigmeat                   | 54                                                          |
| 110             | Japan   | 2009           | Pineapples                | 5                                                           |
| 110             | Japan   | 2009           | Potatoes                  | 58                                                          |
| 110             | Japan   | 2009           | Poultry Meat              | 46                                                          |
| 110             | Japan   | 2009           | Rape and Mustard Oil      | 20                                                          |
| 110             | Japan   | 2009           | Rice (Milled Equivalent)  | 120                                                         |
| 110             | Japan   | 2009           | Ricebran Oil              | 2                                                           |
| 110             | Japan   | 2009           | Roots, Other              | 5                                                           |
| 110             | Japan   | 2009           | Sesameseed                | 1                                                           |
| 110             | Japan   | 2009           | Soyabean Oil              | 12                                                          |
| 110             | Japan   | 2009           | Soyabeans                 | 21                                                          |
| 110             | Japan   | 2009           | Spices, Other             | 3                                                           |
| 110             | Japan   | 2009           | Sugar, Refined Equivalent | 43                                                          |
| 110             | Japan   | 2009           | Sweet Potatoes            | 21                                                          |
| 110             | Japan   | 2009           | Sweeteners, Other         | 28                                                          |
| 110             | Japan   | 2009           | Tea                       | 3                                                           |
| 110             | Japan   | 2009           | Tomatoes                  | 23                                                          |
| 110             | Japan   | 2009           | Vegetables, Other         | 225                                                         |
| 110             | Japan   | 2009           | Wheat                     | 130                                                         |
| 110             | Japan   | 2009           | Wine                      | 6                                                           |
| 110             | Japan   | 2009           | Yams                      | 3                                                           |
| 110             | Japan   | 2010           | Apples                    | 42                                                          |
| 110             | Japan   | 2010           | Aquatic Animals, Others   | 1                                                           |
| 110             | Japan   | 2010           | Aquatic Plants            | 3                                                           |
| 110             | Japan   | 2010           | Bananas                   | 20                                                          |
| 110             | Japan   | 2010           | Barley                    | 1                                                           |
| 110             | Japan   | 2010           | Beans                     | 4                                                           |
| 110             | Japan   | 2010           | Beer                      | 64                                                          |
| 110             | Japan   | 2010           | Beverages, Alcoholic      | 25                                                          |
| 110             | Japan   | 2010           | Beverages, Fermented      | 15                                                          |
| 110             | Japan   | 2010           | Bovine Meat               | 24                                                          |
| 110             | Japan   | 2010           | Butter, Ghee              | 2                                                           |
| 110             | Japan   | 2010           | Cephalopods               | 12                                                          |
| 110             | Japan   | 2010           | Cereals, Other            | 2                                                           |
| 110             | Japan   | 2010           | Cheese                    | 7                                                           |
| 110             | Japan   | 2010           | Citrus, Other             | 5                                                           |
| 110             | Japan   | 2010           | Cocoa Beans               | 4                                                           |
| 110             | Japan   | 2010           | Coconut Oil               | 1                                                           |
| 110             | Japan   | 2010           | Coffee                    | 10                                                          |
| 110             | Japan   | 2010           | Crustaceans               | 21                                                          |
| 110             | Japan   | 2010           | Demersal Fish             | 18                                                          |
| 110             | Japan   | 2010           | Eggs                      | 52                                                          |
| 110             | Japan   | 2010           | Fats, Animals, Raw        | 1                                                           |
| 110             | Japan   | 2010           | Fish, Body Oil            | 1                                                           |
| 110             | Japan   | 2010           | Freshwater Fish           | 14                                                          |
| 110             | Japan   | 2010           | Fruits, Other             | 25                                                          |



## Dietary calcium and zinc deficiency risks are decreasing but remain prevalent

| FAO countrycode | Country | Reference year | Food item                 | Gross food supply (g capita <sup>-1</sup> d <sup>-1</sup> ) |
|-----------------|---------|----------------|---------------------------|-------------------------------------------------------------|
| 110             | Japan   | 2010           | Grapefruit                | 6                                                           |
| 110             | Japan   | 2010           | Grapes                    | 5                                                           |
| 110             | Japan   | 2010           | Groundnuts (Shelled Eq)   | 2                                                           |
| 110             | Japan   | 2010           | Honey                     | 1                                                           |
| 110             | Japan   | 2010           | Lemons, Limes             | 1                                                           |
| 110             | Japan   | 2010           | Maize                     | 27                                                          |
| 110             | Japan   | 2010           | Maize Germ Oil            | 2                                                           |
| 110             | Japan   | 2010           | Marine Fish, Other        | 19                                                          |
| 110             | Japan   | 2010           | Milk, Whole               | 127                                                         |
| 110             | Japan   | 2010           | Molluscs, Other           | 25                                                          |
| 110             | Japan   | 2010           | Nuts                      | 5                                                           |
| 110             | Japan   | 2010           | Offals, Edible            | 7                                                           |
| 110             | Japan   | 2010           | Olive Oil                 | 1                                                           |
| 110             | Japan   | 2010           | Onions                    | 28                                                          |
| 110             | Japan   | 2010           | Oranges, Mandarines       | 25                                                          |
| 110             | Japan   | 2010           | Palm Oil                  | 2                                                           |
| 110             | Japan   | 2010           | Palmkernel Oil            | 2                                                           |
| 110             | Japan   | 2010           | Pelagic Fish              | 38                                                          |
| 110             | Japan   | 2010           | Pigmeat                   | 55                                                          |
| 110             | Japan   | 2010           | Pineapples                | 5                                                           |
| 110             | Japan   | 2010           | Potatoes                  | 56                                                          |
| 110             | Japan   | 2010           | Poultry Meat              | 50                                                          |
| 110             | Japan   | 2010           | Rape and Mustard Oil      | 22                                                          |
| 110             | Japan   | 2010           | Rice (Milled Equivalent)  | 122                                                         |
| 110             | Japan   | 2010           | Ricebran Oil              | 2                                                           |
| 110             | Japan   | 2010           | Roots, Other              | 5                                                           |
| 110             | Japan   | 2010           | Sesameseed                | 1                                                           |
| 110             | Japan   | 2010           | Soyabean Oil              | 11                                                          |
| 110             | Japan   | 2010           | Soyabeans                 | 21                                                          |
| 110             | Japan   | 2010           | Spices, Other             | 3                                                           |
| 110             | Japan   | 2010           | Sugar, Refined Equivalent | 38                                                          |
| 110             | Japan   | 2010           | Sweet Potatoes            | 18                                                          |
| 110             | Japan   | 2010           | Sweeteners, Other         | 28                                                          |
| 110             | Japan   | 2010           | Tea                       | 3                                                           |
| 110             | Japan   | 2010           | Tomatoes                  | 23                                                          |
| 110             | Japan   | 2010           | Vegetables, Other         | 220                                                         |
| 110             | Japan   | 2010           | Wheat                     | 132                                                         |
| 110             | Japan   | 2010           | Wine                      | 6                                                           |
| 110             | Japan   | 2010           | Yams                      | 3                                                           |
| 110             | Japan   | 2011           | Apples                    | 42                                                          |
| 110             | Japan   | 2011           | Aquatic Animals, Others   | 1                                                           |
| 110             | Japan   | 2011           | Aquatic Plants            | 3                                                           |
| 110             | Japan   | 2011           | Bananas                   | 19                                                          |
| 110             | Japan   | 2011           | Barley                    | 2                                                           |
| 110             | Japan   | 2011           | Beans                     | 5                                                           |
| 110             | Japan   | 2011           | Beer                      | 67                                                          |
| 110             | Japan   | 2011           | Beverages, Alcoholic      | 25                                                          |
| 110             | Japan   | 2011           | Beverages, Fermented      | 19                                                          |
| 110             | Japan   | 2011           | Bovine Meat               | 25                                                          |
| 110             | Japan   | 2011           | Butter, Ghee              | 2                                                           |
| 110             | Japan   | 2011           | Cephalopods               | 12                                                          |
| 110             | Japan   | 2011           | Cereals, Other            | 2                                                           |
| 110             | Japan   | 2011           | Cheese                    | 7                                                           |
| 110             | Japan   | 2011           | Citrus, Other             | 5                                                           |
| 110             | Japan   | 2011           | Cocoa Beans               | 4                                                           |
| 110             | Japan   | 2011           | Coconut Oil               | 1                                                           |
| 110             | Japan   | 2011           | Coffee                    | 10                                                          |
| 110             | Japan   | 2011           | Crustaceans               | 21                                                          |
| 110             | Japan   | 2011           | Demersal Fish             | 18                                                          |
| 110             | Japan   | 2011           | Eggs                      | 52                                                          |
| 110             | Japan   | 2011           | Fats, Animals, Raw        | 1                                                           |
| 110             | Japan   | 2011           | Fish, Body Oil            | 1                                                           |
| 110             | Japan   | 2011           | Freshwater Fish           | 14                                                          |
| 110             | Japan   | 2011           | Fruits, Other             | 27                                                          |
| 110             | Japan   | 2011           | Grapefruit                | 7                                                           |
| 110             | Japan   | 2011           | Grapes                    | 5                                                           |
| 110             | Japan   | 2011           | Groundnuts (Shelled Eq)   | 2                                                           |
| 110             | Japan   | 2011           | Honey                     | 1                                                           |
| 110             | Japan   | 2011           | Lemons, Limes             | 1                                                           |
| 110             | Japan   | 2011           | Maize                     | 30                                                          |
| 110             | Japan   | 2011           | Maize Germ Oil            | 2                                                           |
| 110             | Japan   | 2011           | Marine Fish, Other        | 19                                                          |
| 110             | Japan   | 2011           | Milk, Whole               | 128                                                         |
| 110             | Japan   | 2011           | Molluscs, Other           | 25                                                          |
| 110             | Japan   | 2011           | Nuts                      | 5                                                           |
| 110             | Japan   | 2011           | Offals, Edible            | 7                                                           |
| 110             | Japan   | 2011           | Olive Oil                 | 1                                                           |
| 110             | Japan   | 2011           | Onions                    | 30                                                          |
| 110             | Japan   | 2011           | Oranges, Mandarines       | 29                                                          |
| 110             | Japan   | 2011           | Palm Oil                  | 2                                                           |
| 110             | Japan   | 2011           | Palmkernel Oil            | 2                                                           |
| 110             | Japan   | 2011           | Pelagic Fish              | 38                                                          |
| 110             | Japan   | 2011           | Pigmeat                   | 56                                                          |
| 110             | Japan   | 2011           | Pineapples                | 5                                                           |
| 110             | Japan   | 2011           | Potatoes                  | 57                                                          |
| 110             | Japan   | 2011           | Poultry Meat              | 52                                                          |
| 110             | Japan   | 2011           | Rape and Mustard Oil      | 23                                                          |
| 110             | Japan   | 2011           | Rice (Milled Equivalent)  | 119                                                         |
| 110             | Japan   | 2011           | Ricebran Oil              | 2                                                           |
| 110             | Japan   | 2011           | Roots, Other              | 5                                                           |
| 110             | Japan   | 2011           | Sesameseed                | 1                                                           |
| 110             | Japan   | 2011           | Soyabean Oil              | 10                                                          |
| 110             | Japan   | 2011           | Soyabeans                 | 20                                                          |
| 110             | Japan   | 2011           | Spices, Other             | 3                                                           |
| 110             | Japan   | 2011           | Sugar, Refined Equivalent | 44                                                          |
| 110             | Japan   | 2011           | Sweet Potatoes            | 18                                                          |
| 110             | Japan   | 2011           | Sweeteners, Other         | 29                                                          |

Dietary calcium and zinc deficiency risks are decreasing but remain prevalent

| FAO countrycode | Country | Reference year | Food item                 | Gross food supply (g capita <sup>-1</sup> d <sup>-1</sup> ) |
|-----------------|---------|----------------|---------------------------|-------------------------------------------------------------|
| 110             | Japan   | 2011           | Tea                       | 3                                                           |
| 110             | Japan   | 2011           | Tomatoes                  | 24                                                          |
| 110             | Japan   | 2011           | Vegetables, Other         | 224                                                         |
| 110             | Japan   | 2011           | Wheat                     | 133                                                         |
| 110             | Japan   | 2011           | Wine                      | 6                                                           |
| 110             | Japan   | 2011           | Yams                      | 3                                                           |
| 112             | Jordan  | 1992           | Apples                    | 16                                                          |
| 112             | Jordan  | 1992           | Bananas                   | 11                                                          |
| 112             | Jordan  | 1992           | Beans                     | 1                                                           |
| 112             | Jordan  | 1992           | Beer                      | 3                                                           |
| 112             | Jordan  | 1992           | Bovine Meat               | 3                                                           |
| 112             | Jordan  | 1992           | Butter, Ghee              | 1                                                           |
| 112             | Jordan  | 1992           | Cereals, Other            | 4                                                           |
| 112             | Jordan  | 1992           | Cheese                    | 6                                                           |
| 112             | Jordan  | 1992           | Citrus, Other             | 1                                                           |
| 112             | Jordan  | 1992           | Cocoa Beans               | 1                                                           |
| 112             | Jordan  | 1992           | Coconut Oil               | 1                                                           |
| 112             | Jordan  | 1992           | Coconuts - Incl Copra     | 5                                                           |
| 112             | Jordan  | 1992           | Coffee                    | 4                                                           |
| 112             | Jordan  | 1992           | Dates                     | 10                                                          |
| 112             | Jordan  | 1992           | Eggs                      | 25                                                          |
| 112             | Jordan  | 1992           | Fruits, Other             | 23                                                          |
| 112             | Jordan  | 1992           | Grapefruit                | 3                                                           |
| 112             | Jordan  | 1992           | Grapes                    | 36                                                          |
| 112             | Jordan  | 1992           | Groundnuts (Shelled Eq)   | 2                                                           |
| 112             | Jordan  | 1992           | Lemons, Limes             | 23                                                          |
| 112             | Jordan  | 1992           | Maize                     | 1                                                           |
| 112             | Jordan  | 1992           | Maize Germ Oil            | 3                                                           |
| 112             | Jordan  | 1992           | Marine Fish, Other        | 4                                                           |
| 112             | Jordan  | 1992           | Milk, Whole               | 176                                                         |
| 112             | Jordan  | 1992           | Mutton & Goat Meat        | 22                                                          |
| 112             | Jordan  | 1992           | Nuts                      | 3                                                           |
| 112             | Jordan  | 1992           | Offals, Edible            | 3                                                           |
| 112             | Jordan  | 1992           | Oilcrops, Other           | 4                                                           |
| 112             | Jordan  | 1992           | Olive Oil                 | 12                                                          |
| 112             | Jordan  | 1992           | Olives                    | 5                                                           |
| 112             | Jordan  | 1992           | Onions                    | 26                                                          |
| 112             | Jordan  | 1992           | Oranges, Mandarines       | 61                                                          |
| 112             | Jordan  | 1992           | Palm Oil                  | 13                                                          |
| 112             | Jordan  | 1992           | Palmkernel Oil            | 1                                                           |
| 112             | Jordan  | 1992           | Pelagic Fish              | 4                                                           |
| 112             | Jordan  | 1992           | Potatoes                  | 24                                                          |
| 112             | Jordan  | 1992           | Poultry Meat              | 57                                                          |
| 112             | Jordan  | 1992           | Pulses, Other             | 22                                                          |
| 112             | Jordan  | 1992           | Rice (Milled Equivalent)  | 57                                                          |
| 112             | Jordan  | 1992           | Sesameseed                | 2                                                           |
| 112             | Jordan  | 1992           | Sesameseed Oil            | 1                                                           |
| 112             | Jordan  | 1992           | Soyabean Oil              | 6                                                           |
| 112             | Jordan  | 1992           | Spices, Other             | 1                                                           |
| 112             | Jordan  | 1992           | Sugar, Refined Equivalent | 101                                                         |
| 112             | Jordan  | 1992           | Sweeteners, Other         | 2                                                           |
| 112             | Jordan  | 1992           | Tea                       | 3                                                           |
| 112             | Jordan  | 1992           | Tomatoes                  | 114                                                         |
| 112             | Jordan  | 1992           | Vegetables, Other         | 164                                                         |
| 112             | Jordan  | 1992           | Wheat                     | 370                                                         |
| 112             | Jordan  | 1993           | Apples                    | 18                                                          |
| 112             | Jordan  | 1993           | Bananas                   | 22                                                          |
| 112             | Jordan  | 1993           | Beans                     | 1                                                           |
| 112             | Jordan  | 1993           | Beer                      | 5                                                           |
| 112             | Jordan  | 1993           | Bovine Meat               | 16                                                          |
| 112             | Jordan  | 1993           | Butter, Ghee              | 2                                                           |
| 112             | Jordan  | 1993           | Cereals, Other            | 3                                                           |
| 112             | Jordan  | 1993           | Cheese                    | 6                                                           |
| 112             | Jordan  | 1993           | Citrus, Other             | 2                                                           |
| 112             | Jordan  | 1993           | Cocoa Beans               | 1                                                           |
| 112             | Jordan  | 1993           | Coconuts - Incl Copra     | 6                                                           |
| 112             | Jordan  | 1993           | Coffee                    | 2                                                           |
| 112             | Jordan  | 1993           | Dates                     | 2                                                           |
| 112             | Jordan  | 1993           | Eggs                      | 28                                                          |
| 112             | Jordan  | 1993           | Fats, Animals, Raw        | 1                                                           |
| 112             | Jordan  | 1993           | Fruits, Other             | 24                                                          |
| 112             | Jordan  | 1993           | Grapefruit                | 3                                                           |
| 112             | Jordan  | 1993           | Grapes                    | 23                                                          |
| 112             | Jordan  | 1993           | Groundnuts (Shelled Eq)   | 2                                                           |
| 112             | Jordan  | 1993           | Lemons, Limes             | 32                                                          |
| 112             | Jordan  | 1993           | Maize Germ Oil            | 2                                                           |
| 112             | Jordan  | 1993           | Marine Fish, Other        | 7                                                           |
| 112             | Jordan  | 1993           | Milk, Whole               | 188                                                         |
| 112             | Jordan  | 1993           | Mutton & Goat Meat        | 24                                                          |
| 112             | Jordan  | 1993           | Nuts                      | 3                                                           |
| 112             | Jordan  | 1993           | Offals, Edible            | 3                                                           |
| 112             | Jordan  | 1993           | Oilcrops, Other           | 3                                                           |
| 112             | Jordan  | 1993           | Olive Oil                 | 10                                                          |
| 112             | Jordan  | 1993           | Olives                    | 2                                                           |
| 112             | Jordan  | 1993           | Onions                    | 27                                                          |
| 112             | Jordan  | 1993           | Oranges, Mandarines       | 63                                                          |
| 112             | Jordan  | 1993           | Palm Oil                  | 14                                                          |
| 112             | Jordan  | 1993           | Palmkernel Oil            | 3                                                           |
| 112             | Jordan  | 1993           | Pelagic Fish              | 4                                                           |
| 112             | Jordan  | 1993           | Potatoes                  | 41                                                          |
| 112             | Jordan  | 1993           | Poultry Meat              | 60                                                          |
| 112             | Jordan  | 1993           | Pulses, Other             | 16                                                          |
| 112             | Jordan  | 1993           | Rice (Milled Equivalent)  | 56                                                          |
| 112             | Jordan  | 1993           | Sesameseed                | 2                                                           |
| 112             | Jordan  | 1993           | Sesameseed Oil            | 2                                                           |
| 112             | Jordan  | 1993           | Soyabean Oil              | 10                                                          |
| 112             | Jordan  | 1993           | Spices, Other             | 1                                                           |

Dietary calcium and zinc deficiency risks are decreasing but remain prevalent

| FAO countrycode | Country | Reference year | Food item                 | Gross food supply (g capita <sup>-1</sup> d <sup>-1</sup> ) |
|-----------------|---------|----------------|---------------------------|-------------------------------------------------------------|
| 112             | Jordan  | 1993           | Sugar, Refined Equivalent | 99                                                          |
| 112             | Jordan  | 1993           | Sunflowerseed             | 1                                                           |
| 112             | Jordan  | 1993           | Sweeteners, Other         | 3                                                           |
| 112             | Jordan  | 1993           | Tea                       | 3                                                           |
| 112             | Jordan  | 1993           | Tomatoes                  | 67                                                          |
| 112             | Jordan  | 1993           | Vegetables, Other         | 129                                                         |
| 112             | Jordan  | 1993           | Wheat                     | 345                                                         |
| 112             | Jordan  | 1994           | Apples                    | 31                                                          |
| 112             | Jordan  | 1994           | Bananas                   | 18                                                          |
| 112             | Jordan  | 1994           | Beans                     | 1                                                           |
| 112             | Jordan  | 1994           | Beer                      | 4                                                           |
| 112             | Jordan  | 1994           | Bovine Meat               | 15                                                          |
| 112             | Jordan  | 1994           | Butter, Ghee              | 1                                                           |
| 112             | Jordan  | 1994           | Cheese                    | 6                                                           |
| 112             | Jordan  | 1994           | Citrus, Other             | 1                                                           |
| 112             | Jordan  | 1994           | Cocoa Beans               | 1                                                           |
| 112             | Jordan  | 1994           | Coconut Oil               | 1                                                           |
| 112             | Jordan  | 1994           | Coconuts - Incl Copra     | 3                                                           |
| 112             | Jordan  | 1994           | Coffee                    | 2                                                           |
| 112             | Jordan  | 1994           | Cream                     | 1                                                           |
| 112             | Jordan  | 1994           | Dates                     | 2                                                           |
| 112             | Jordan  | 1994           | Demersal Fish             | 2                                                           |
| 112             | Jordan  | 1994           | Eggs                      | 27                                                          |
| 112             | Jordan  | 1994           | Freshwater Fish           | 2                                                           |
| 112             | Jordan  | 1994           | Fruits, Other             | 28                                                          |
| 112             | Jordan  | 1994           | Grapefruit                | 7                                                           |
| 112             | Jordan  | 1994           | Grapes                    | 16                                                          |
| 112             | Jordan  | 1994           | Groundnuts (Shelled Eq)   | 1                                                           |
| 112             | Jordan  | 1994           | Lemons, Limes             | 30                                                          |
| 112             | Jordan  | 1994           | Maize                     | 2                                                           |
| 112             | Jordan  | 1994           | Maize Germ Oil            | 6                                                           |
| 112             | Jordan  | 1994           | Marine Fish, Other        | 2                                                           |
| 112             | Jordan  | 1994           | Milk, Whole               | 93                                                          |
| 112             | Jordan  | 1994           | Mutton & Goat Meat        | 16                                                          |
| 112             | Jordan  | 1994           | Nuts                      | 2                                                           |
| 112             | Jordan  | 1994           | Offals, Edible            | 2                                                           |
| 112             | Jordan  | 1994           | Oilcrops, Other           | 2                                                           |
| 112             | Jordan  | 1994           | Olive Oil                 | 11                                                          |
| 112             | Jordan  | 1994           | Olives                    | 5                                                           |
| 112             | Jordan  | 1994           | Onions                    | 40                                                          |
| 112             | Jordan  | 1994           | Oranges, Mandarines       | 65                                                          |
| 112             | Jordan  | 1994           | Palm Oil                  | 13                                                          |
| 112             | Jordan  | 1994           | Palmkernel Oil            | 1                                                           |
| 112             | Jordan  | 1994           | Pelagic Fish              | 5                                                           |
| 112             | Jordan  | 1994           | Potatoes                  | 52                                                          |
| 112             | Jordan  | 1994           | Poultry Meat              | 65                                                          |
| 112             | Jordan  | 1994           | Pulses, Other             | 17                                                          |
| 112             | Jordan  | 1994           | Rice (Milled Equivalent)  | 46                                                          |
| 112             | Jordan  | 1994           | Rye                       | 1                                                           |
| 112             | Jordan  | 1994           | Sesameseed                | 2                                                           |
| 112             | Jordan  | 1994           | Sesameseed Oil            | 2                                                           |
| 112             | Jordan  | 1994           | Soyabean Oil              | 6                                                           |
| 112             | Jordan  | 1994           | Spices, Other             | 1                                                           |
| 112             | Jordan  | 1994           | Sugar, Refined Equivalent | 98                                                          |
| 112             | Jordan  | 1994           | Sweeteners, Other         | 1                                                           |
| 112             | Jordan  | 1994           | Tea                       | 3                                                           |
| 112             | Jordan  | 1994           | Tomatoes                  | 157                                                         |
| 112             | Jordan  | 1994           | Vegetables, Other         | 180                                                         |
| 112             | Jordan  | 1994           | Wheat                     | 349                                                         |
| 112             | Jordan  | 1995           | Apples                    | 31                                                          |
| 112             | Jordan  | 1995           | Bananas                   | 18                                                          |
| 112             | Jordan  | 1995           | Beans                     | 1                                                           |
| 112             | Jordan  | 1995           | Beer                      | 4                                                           |
| 112             | Jordan  | 1995           | Bovine Meat               | 12                                                          |
| 112             | Jordan  | 1995           | Butter, Ghee              | 2                                                           |
| 112             | Jordan  | 1995           | Cheese                    | 6                                                           |
| 112             | Jordan  | 1995           | Citrus, Other             | 1                                                           |
| 112             | Jordan  | 1995           | Cocoa Beans               | 1                                                           |
| 112             | Jordan  | 1995           | Coconut Oil               | 1                                                           |
| 112             | Jordan  | 1995           | Coconuts - Incl Copra     | 3                                                           |
| 112             | Jordan  | 1995           | Coffee                    | 1                                                           |
| 112             | Jordan  | 1995           | Cream                     | 1                                                           |
| 112             | Jordan  | 1995           | Dates                     | 2                                                           |
| 112             | Jordan  | 1995           | Demersal Fish             | 5                                                           |
| 112             | Jordan  | 1995           | Eggs                      | 20                                                          |
| 112             | Jordan  | 1995           | Freshwater Fish           | 1                                                           |
| 112             | Jordan  | 1995           | Fruits, Other             | 22                                                          |
| 112             | Jordan  | 1995           | Grapefruit                | 6                                                           |
| 112             | Jordan  | 1995           | Grapes                    | 16                                                          |
| 112             | Jordan  | 1995           | Groundnuts (Shelled Eq)   | 3                                                           |
| 112             | Jordan  | 1995           | Lemons, Limes             | 35                                                          |
| 112             | Jordan  | 1995           | Maize                     | 2                                                           |
| 112             | Jordan  | 1995           | Maize Germ Oil            | 3                                                           |
| 112             | Jordan  | 1995           | Marine Fish, Other        | 1                                                           |
| 112             | Jordan  | 1995           | Milk, Whole               | 84                                                          |
| 112             | Jordan  | 1995           | Mutton & Goat Meat        | 13                                                          |
| 112             | Jordan  | 1995           | Nuts                      | 2                                                           |
| 112             | Jordan  | 1995           | Offals, Edible            | 2                                                           |
| 112             | Jordan  | 1995           | Oilcrops Oil, Other       | 2                                                           |
| 112             | Jordan  | 1995           | Oilcrops, Other           | 2                                                           |
| 112             | Jordan  | 1995           | Olive Oil                 | 10                                                          |
| 112             | Jordan  | 1995           | Olives                    | 4                                                           |
| 112             | Jordan  | 1995           | Onions                    | 43                                                          |
| 112             | Jordan  | 1995           | Oranges, Mandarines       | 69                                                          |
| 112             | Jordan  | 1995           | Palm Oil                  | 13                                                          |
| 112             | Jordan  | 1995           | Palmkernel Oil            | 2                                                           |
| 112             | Jordan  | 1995           | Pelagic Fish              | 5                                                           |

Dietary calcium and zinc deficiency risks are decreasing but remain prevalent

| FAO countrycode | Country | Reference year | Food item                 | Gross food supply (g capita <sup>-1</sup> d <sup>-1</sup> ) |
|-----------------|---------|----------------|---------------------------|-------------------------------------------------------------|
| 112             | Jordan  | 1995           | Potatoes                  | 51                                                          |
| 112             | Jordan  | 1995           | Poultry Meat              | 68                                                          |
| 112             | Jordan  | 1995           | Pulses, Other             | 16                                                          |
| 112             | Jordan  | 1995           | Rice (Milled Equivalent)  | 64                                                          |
| 112             | Jordan  | 1995           | Sesameseed                | 2                                                           |
| 112             | Jordan  | 1995           | Sesameseed Oil            | 2                                                           |
| 112             | Jordan  | 1995           | Soyabean Oil              | 9                                                           |
| 112             | Jordan  | 1995           | Spices, Other             | 1                                                           |
| 112             | Jordan  | 1995           | Sugar, Refined Equivalent | 83                                                          |
| 112             | Jordan  | 1995           | Sweeteners, Other         | 3                                                           |
| 112             | Jordan  | 1995           | Tea                       | 3                                                           |
| 112             | Jordan  | 1995           | Tomatoes                  | 119                                                         |
| 112             | Jordan  | 1995           | Vegetables, Other         | 218                                                         |
| 112             | Jordan  | 1995           | Wheat                     | 362                                                         |
| 112             | Jordan  | 1996           | Apples                    | 21                                                          |
| 112             | Jordan  | 1996           | Bananas                   | 19                                                          |
| 112             | Jordan  | 1996           | Beer                      | 5                                                           |
| 112             | Jordan  | 1996           | Bovine Meat               | 7                                                           |
| 112             | Jordan  | 1996           | Butter, Ghee              | 1                                                           |
| 112             | Jordan  | 1996           | Cheese                    | 5                                                           |
| 112             | Jordan  | 1996           | Coconuts - Incl Copra     | 2                                                           |
| 112             | Jordan  | 1996           | Coffee                    | 1                                                           |
| 112             | Jordan  | 1996           | Dates                     | 3                                                           |
| 112             | Jordan  | 1996           | Demersal Fish             | 2                                                           |
| 112             | Jordan  | 1996           | Eggs                      | 21                                                          |
| 112             | Jordan  | 1996           | Freshwater Fish           | 3                                                           |
| 112             | Jordan  | 1996           | Fruits, Other             | 19                                                          |
| 112             | Jordan  | 1996           | Grapefruit                | 7                                                           |
| 112             | Jordan  | 1996           | Grapes                    | 17                                                          |
| 112             | Jordan  | 1996           | Groundnuts (Shelled Eq)   | 2                                                           |
| 112             | Jordan  | 1996           | Lemons, Limes             | 16                                                          |
| 112             | Jordan  | 1996           | Maize                     | 2                                                           |
| 112             | Jordan  | 1996           | Maize Germ Oil            | 5                                                           |
| 112             | Jordan  | 1996           | Marine Fish, Other        | 2                                                           |
| 112             | Jordan  | 1996           | Milk, Whole               | 86                                                          |
| 112             | Jordan  | 1996           | Mutton & Goat Meat        | 13                                                          |
| 112             | Jordan  | 1996           | Nuts                      | 2                                                           |
| 112             | Jordan  | 1996           | Offals, Edible            | 2                                                           |
| 112             | Jordan  | 1996           | Oilcrops Oil, Other       | 1                                                           |
| 112             | Jordan  | 1996           | Oilcrops, Other           | 2                                                           |
| 112             | Jordan  | 1996           | Olive Oil                 | 10                                                          |
| 112             | Jordan  | 1996           | Olives                    | 4                                                           |
| 112             | Jordan  | 1996           | Onions                    | 14                                                          |
| 112             | Jordan  | 1996           | Oranges, Mandarines       | 38                                                          |
| 112             | Jordan  | 1996           | Palm Oil                  | 13                                                          |
| 112             | Jordan  | 1996           | Palmkernel Oil            | 5                                                           |
| 112             | Jordan  | 1996           | Pelagic Fish              | 8                                                           |
| 112             | Jordan  | 1996           | Potatoes                  | 40                                                          |
| 112             | Jordan  | 1996           | Poultry Meat              | 63                                                          |
| 112             | Jordan  | 1996           | Pulses, Other             | 10                                                          |
| 112             | Jordan  | 1996           | Rice (Milled Equivalent)  | 64                                                          |
| 112             | Jordan  | 1996           | Sesameseed                | 2                                                           |
| 112             | Jordan  | 1996           | Sesameseed Oil            | 2                                                           |
| 112             | Jordan  | 1996           | Soyabean Oil              | 4                                                           |
| 112             | Jordan  | 1996           | Sugar, Refined Equivalent | 87                                                          |
| 112             | Jordan  | 1996           | Sweeteners, Other         | 1                                                           |
| 112             | Jordan  | 1996           | Tea                       | 3                                                           |
| 112             | Jordan  | 1996           | Tomatoes                  | 92                                                          |
| 112             | Jordan  | 1996           | Vegetables, Other         | 187                                                         |
| 112             | Jordan  | 1996           | Wheat                     | 397                                                         |
| 112             | Jordan  | 1997           | Apples                    | 24                                                          |
| 112             | Jordan  | 1997           | Bananas                   | 13                                                          |
| 112             | Jordan  | 1997           | Beer                      | 5                                                           |
| 112             | Jordan  | 1997           | Bovine Meat               | 14                                                          |
| 112             | Jordan  | 1997           | Butter, Ghee              | 1                                                           |
| 112             | Jordan  | 1997           | Cereals, Other            | 1                                                           |
| 112             | Jordan  | 1997           | Cheese                    | 6                                                           |
| 112             | Jordan  | 1997           | Cocoa Beans               | 1                                                           |
| 112             | Jordan  | 1997           | Coconut Oil               | 1                                                           |
| 112             | Jordan  | 1997           | Coconuts - Incl Copra     | 4                                                           |
| 112             | Jordan  | 1997           | Coffee                    | 2                                                           |
| 112             | Jordan  | 1997           | Cream                     | 1                                                           |
| 112             | Jordan  | 1997           | Dates                     | 3                                                           |
| 112             | Jordan  | 1997           | Demersal Fish             | 3                                                           |
| 112             | Jordan  | 1997           | Eggs                      | 23                                                          |
| 112             | Jordan  | 1997           | Fats, Animals, Raw        | 1                                                           |
| 112             | Jordan  | 1997           | Freshwater Fish           | 1                                                           |
| 112             | Jordan  | 1997           | Fruits, Other             | 22                                                          |
| 112             | Jordan  | 1997           | Grapefruit                | 6                                                           |
| 112             | Jordan  | 1997           | Grapes                    | 14                                                          |
| 112             | Jordan  | 1997           | Groundnuts (Shelled Eq)   | 2                                                           |
| 112             | Jordan  | 1997           | Lemons, Limes             | 18                                                          |
| 112             | Jordan  | 1997           | Maize                     | 3                                                           |
| 112             | Jordan  | 1997           | Maize Germ Oil            | 7                                                           |
| 112             | Jordan  | 1997           | Milk, Whole               | 90                                                          |
| 112             | Jordan  | 1997           | Mutton & Goat Meat        | 12                                                          |
| 112             | Jordan  | 1997           | Nuts                      | 4                                                           |
| 112             | Jordan  | 1997           | Offals, Edible            | 2                                                           |
| 112             | Jordan  | 1997           | Oilcrops, Other           | 3                                                           |
| 112             | Jordan  | 1997           | Olive Oil                 | 11                                                          |
| 112             | Jordan  | 1997           | Olives                    | 3                                                           |
| 112             | Jordan  | 1997           | Onions                    | 9                                                           |
| 112             | Jordan  | 1997           | Oranges, Mandarines       | 61                                                          |
| 112             | Jordan  | 1997           | Palm Oil                  | 15                                                          |
| 112             | Jordan  | 1997           | Palmkernel Oil            | 1                                                           |
| 112             | Jordan  | 1997           | Pelagic Fish              | 6                                                           |
| 112             | Jordan  | 1997           | Potatoes                  | 50                                                          |

Dietary calcium and zinc deficiency risks are decreasing but remain prevalent

| FAO countrycode | Country | Reference year | Food item                 | Gross food supply (g capita <sup>-1</sup> d <sup>-1</sup> ) |
|-----------------|---------|----------------|---------------------------|-------------------------------------------------------------|
| 112             | Jordan  | 1997           | Poultry Meat              | 61                                                          |
| 112             | Jordan  | 1997           | Pulses, Other             | 17                                                          |
| 112             | Jordan  | 1997           | Rice (Milled Equivalent)  | 60                                                          |
| 112             | Jordan  | 1997           | Sesameseed                | 2                                                           |
| 112             | Jordan  | 1997           | Sesameseed Oil            | 2                                                           |
| 112             | Jordan  | 1997           | Soyabean Oil              | 9                                                           |
| 112             | Jordan  | 1997           | Spices, Other             | 1                                                           |
| 112             | Jordan  | 1997           | Sugar, Refined Equivalent | 97                                                          |
| 112             | Jordan  | 1997           | Sunflowerseed             | 3                                                           |
| 112             | Jordan  | 1997           | Sweeteners, Other         | 1                                                           |
| 112             | Jordan  | 1997           | Tea                       | 3                                                           |
| 112             | Jordan  | 1997           | Tomatoes                  | 29                                                          |
| 112             | Jordan  | 1997           | Vegetables, Other         | 152                                                         |
| 112             | Jordan  | 1997           | Wheat                     | 373                                                         |
| 112             | Jordan  | 1998           | Apples                    | 28                                                          |
| 112             | Jordan  | 1998           | Bananas                   | 15                                                          |
| 112             | Jordan  | 1998           | Beer                      | 5                                                           |
| 112             | Jordan  | 1998           | Bovine Meat               | 11                                                          |
| 112             | Jordan  | 1998           | Butter, Ghee              | 1                                                           |
| 112             | Jordan  | 1998           | Cereals, Other            | 1                                                           |
| 112             | Jordan  | 1998           | Cheese                    | 6                                                           |
| 112             | Jordan  | 1998           | Cocoa Beans               | 1                                                           |
| 112             | Jordan  | 1998           | Coconuts - Incl Copra     | 2                                                           |
| 112             | Jordan  | 1998           | Coffee                    | 4                                                           |
| 112             | Jordan  | 1998           | Cream                     | 1                                                           |
| 112             | Jordan  | 1998           | Dates                     | 3                                                           |
| 112             | Jordan  | 1998           | Demersal Fish             | 4                                                           |
| 112             | Jordan  | 1998           | Eggs                      | 23                                                          |
| 112             | Jordan  | 1998           | Fats, Animals, Raw        | 2                                                           |
| 112             | Jordan  | 1998           | Freshwater Fish           | 2                                                           |
| 112             | Jordan  | 1998           | Fruits, Other             | 21                                                          |
| 112             | Jordan  | 1998           | Grapefruit                | 4                                                           |
| 112             | Jordan  | 1998           | Grapes                    | 11                                                          |
| 112             | Jordan  | 1998           | Groundnuts (Shelled Eq)   | 2                                                           |
| 112             | Jordan  | 1998           | Lemons, Limes             | 18                                                          |
| 112             | Jordan  | 1998           | Maize                     | 3                                                           |
| 112             | Jordan  | 1998           | Maize Germ Oil            | 8                                                           |
| 112             | Jordan  | 1998           | Milk, Whole               | 107                                                         |
| 112             | Jordan  | 1998           | Mutton & Goat Meat        | 15                                                          |
| 112             | Jordan  | 1998           | Nuts                      | 4                                                           |
| 112             | Jordan  | 1998           | Offals, Edible            | 2                                                           |
| 112             | Jordan  | 1998           | Oilcrops, Other           | 2                                                           |
| 112             | Jordan  | 1998           | Olive Oil                 | 11                                                          |
| 112             | Jordan  | 1998           | Olives                    | 5                                                           |
| 112             | Jordan  | 1998           | Onions                    | 7                                                           |
| 112             | Jordan  | 1998           | Oranges, Mandarines       | 68                                                          |
| 112             | Jordan  | 1998           | Palm Oil                  | 14                                                          |
| 112             | Jordan  | 1998           | Palmkernel Oil            | 1                                                           |
| 112             | Jordan  | 1998           | Pelagic Fish              | 7                                                           |
| 112             | Jordan  | 1998           | Pineapples                | 1                                                           |
| 112             | Jordan  | 1998           | Potatoes                  | 36                                                          |
| 112             | Jordan  | 1998           | Poultry Meat              | 59                                                          |
| 112             | Jordan  | 1998           | Pulses, Other             | 5                                                           |
| 112             | Jordan  | 1998           | Rice (Milled Equivalent)  | 59                                                          |
| 112             | Jordan  | 1998           | Sesameseed                | 2                                                           |
| 112             | Jordan  | 1998           | Sesameseed Oil            | 2                                                           |
| 112             | Jordan  | 1998           | Soyabean Oil              | 8                                                           |
| 112             | Jordan  | 1998           | Spices, Other             | 2                                                           |
| 112             | Jordan  | 1998           | Sugar, Refined Equivalent | 96                                                          |
| 112             | Jordan  | 1998           | Sunflowerseed             | 11                                                          |
| 112             | Jordan  | 1998           | Tea                       | 3                                                           |
| 112             | Jordan  | 1998           | Tomatoes                  | 9                                                           |
| 112             | Jordan  | 1998           | Vegetables, Other         | 160                                                         |
| 112             | Jordan  | 1998           | Wheat                     | 382                                                         |
| 112             | Jordan  | 1999           | Apples                    | 22                                                          |
| 112             | Jordan  | 1999           | Bananas                   | 21                                                          |
| 112             | Jordan  | 1999           | Beans                     | 1                                                           |
| 112             | Jordan  | 1999           | Beer                      | 5                                                           |
| 112             | Jordan  | 1999           | Beverages, Alcoholic      | 1                                                           |
| 112             | Jordan  | 1999           | Bovine Meat               | 13                                                          |
| 112             | Jordan  | 1999           | Butter, Ghee              | 1                                                           |
| 112             | Jordan  | 1999           | Cereals, Other            | 1                                                           |
| 112             | Jordan  | 1999           | Cheese                    | 5                                                           |
| 112             | Jordan  | 1999           | Cocoa Beans               | 1                                                           |
| 112             | Jordan  | 1999           | Coconuts - Incl Copra     | 3                                                           |
| 112             | Jordan  | 1999           | Coffee                    | 4                                                           |
| 112             | Jordan  | 1999           | Cottonseed Oil            | 1                                                           |
| 112             | Jordan  | 1999           | Dates                     | 1                                                           |
| 112             | Jordan  | 1999           | Demersal Fish             | 3                                                           |
| 112             | Jordan  | 1999           | Eggs                      | 20                                                          |
| 112             | Jordan  | 1999           | Fats, Animals, Raw        | 3                                                           |
| 112             | Jordan  | 1999           | Freshwater Fish           | 2                                                           |
| 112             | Jordan  | 1999           | Fruits, Other             | 26                                                          |
| 112             | Jordan  | 1999           | Grapefruit                | 5                                                           |
| 112             | Jordan  | 1999           | Grapes                    | 12                                                          |
| 112             | Jordan  | 1999           | Groundnuts (Shelled Eq)   | 2                                                           |
| 112             | Jordan  | 1999           | Lemons, Limes             | 10                                                          |
| 112             | Jordan  | 1999           | Maize                     | 3                                                           |
| 112             | Jordan  | 1999           | Maize Germ Oil            | 2                                                           |
| 112             | Jordan  | 1999           | Marine Fish, Other        | 1                                                           |
| 112             | Jordan  | 1999           | Milk, Whole               | 111                                                         |
| 112             | Jordan  | 1999           | Mutton & Goat Meat        | 13                                                          |
| 112             | Jordan  | 1999           | Nuts                      | 4                                                           |
| 112             | Jordan  | 1999           | Offals, Edible            | 2                                                           |
| 112             | Jordan  | 1999           | Oilcrops, Other           | 2                                                           |
| 112             | Jordan  | 1999           | Olive Oil                 | 11                                                          |
| 112             | Jordan  | 1999           | Olives                    | 3                                                           |

Dietary calcium and zinc deficiency risks are decreasing but remain prevalent

| FAO countrycode | Country | Reference year | Food item                 | Gross food supply (g capita <sup>-1</sup> d <sup>-1</sup> ) |
|-----------------|---------|----------------|---------------------------|-------------------------------------------------------------|
| 112             | Jordan  | 1999           | Onions                    | 14                                                          |
| 112             | Jordan  | 1999           | Oranges, Mandarines       | 34                                                          |
| 112             | Jordan  | 1999           | Palm Oil                  | 12                                                          |
| 112             | Jordan  | 1999           | Pelagic Fish              | 5                                                           |
| 112             | Jordan  | 1999           | Pineapples                | 1                                                           |
| 112             | Jordan  | 1999           | Potatoes                  | 56                                                          |
| 112             | Jordan  | 1999           | Poultry Meat              | 66                                                          |
| 112             | Jordan  | 1999           | Pulses, Other             | 15                                                          |
| 112             | Jordan  | 1999           | Rice (Milled Equivalent)  | 63                                                          |
| 112             | Jordan  | 1999           | Sesameseed                | 2                                                           |
| 112             | Jordan  | 1999           | Sesameseed Oil            | 2                                                           |
| 112             | Jordan  | 1999           | Soyabean Oil              | 8                                                           |
| 112             | Jordan  | 1999           | Spices, Other             | 1                                                           |
| 112             | Jordan  | 1999           | Sugar, Refined Equivalent | 94                                                          |
| 112             | Jordan  | 1999           | Sunflowerseed             | 1                                                           |
| 112             | Jordan  | 1999           | Sunflowerseed Oil         | 1                                                           |
| 112             | Jordan  | 1999           | Sweeteners, Other         | 1                                                           |
| 112             | Jordan  | 1999           | Tea                       | 3                                                           |
| 112             | Jordan  | 1999           | Tomatoes                  | 26                                                          |
| 112             | Jordan  | 1999           | Vegetables, Other         | 190                                                         |
| 112             | Jordan  | 1999           | Wheat                     | 368                                                         |
| 112             | Jordan  | 2000           | Apples                    | 24                                                          |
| 112             | Jordan  | 2000           | Bananas                   | 14                                                          |
| 112             | Jordan  | 2000           | Beans                     | 1                                                           |
| 112             | Jordan  | 2000           | Beer                      | 5                                                           |
| 112             | Jordan  | 2000           | Beverages, Alcoholic      | 1                                                           |
| 112             | Jordan  | 2000           | Bovine Meat               | 17                                                          |
| 112             | Jordan  | 2000           | Butter, Ghee              | 1                                                           |
| 112             | Jordan  | 2000           | Cereals, Other            | 1                                                           |
| 112             | Jordan  | 2000           | Cheese                    | 6                                                           |
| 112             | Jordan  | 2000           | Citrus, Other             | 1                                                           |
| 112             | Jordan  | 2000           | Cocoa Beans               | 2                                                           |
| 112             | Jordan  | 2000           | Coconuts - Incl Copra     | 5                                                           |
| 112             | Jordan  | 2000           | Coffee                    | 5                                                           |
| 112             | Jordan  | 2000           | Dates                     | 3                                                           |
| 112             | Jordan  | 2000           | Demersal Fish             | 2                                                           |
| 112             | Jordan  | 2000           | Eggs                      | 19                                                          |
| 112             | Jordan  | 2000           | Fats, Animals, Raw        | 2                                                           |
| 112             | Jordan  | 2000           | Freshwater Fish           | 2                                                           |
| 112             | Jordan  | 2000           | Fruits, Other             | 23                                                          |
| 112             | Jordan  | 2000           | Grapefruit                | 3                                                           |
| 112             | Jordan  | 2000           | Grapes                    | 16                                                          |
| 112             | Jordan  | 2000           | Groundnuts (Shelled Eq)   | 3                                                           |
| 112             | Jordan  | 2000           | Lemons, Limes             | 12                                                          |
| 112             | Jordan  | 2000           | Maize                     | 3                                                           |
| 112             | Jordan  | 2000           | Maize Germ Oil            | 6                                                           |
| 112             | Jordan  | 2000           | Marine Fish, Other        | 1                                                           |
| 112             | Jordan  | 2000           | Milk, Whole               | 123                                                         |
| 112             | Jordan  | 2000           | Mutton & Goat Meat        | 13                                                          |
| 112             | Jordan  | 2000           | Nuts                      | 5                                                           |
| 112             | Jordan  | 2000           | Offals, Edible            | 2                                                           |
| 112             | Jordan  | 2000           | Oilcrops, Other           | 2                                                           |
| 112             | Jordan  | 2000           | Olive Oil                 | 11                                                          |
| 112             | Jordan  | 2000           | Olives                    | 11                                                          |
| 112             | Jordan  | 2000           | Onions                    | 24                                                          |
| 112             | Jordan  | 2000           | Oranges, Mandarines       | 53                                                          |
| 112             | Jordan  | 2000           | Palm Oil                  | 10                                                          |
| 112             | Jordan  | 2000           | Peas                      | 1                                                           |
| 112             | Jordan  | 2000           | Pelagic Fish              | 6                                                           |
| 112             | Jordan  | 2000           | Pineapples                | 1                                                           |
| 112             | Jordan  | 2000           | Potatoes                  | 54                                                          |
| 112             | Jordan  | 2000           | Poultry Meat              | 69                                                          |
| 112             | Jordan  | 2000           | Pulses, Other             | 18                                                          |
| 112             | Jordan  | 2000           | Rice (Milled Equivalent)  | 58                                                          |
| 112             | Jordan  | 2000           | Sesameseed                | 2                                                           |
| 112             | Jordan  | 2000           | Sesameseed Oil            | 2                                                           |
| 112             | Jordan  | 2000           | Soyabean Oil              | 8                                                           |
| 112             | Jordan  | 2000           | Spices, Other             | 1                                                           |
| 112             | Jordan  | 2000           | Sugar, Refined Equivalent | 104                                                         |
| 112             | Jordan  | 2000           | Sunflowerseed             | 5                                                           |
| 112             | Jordan  | 2000           | Sunflowerseed Oil         | 3                                                           |
| 112             | Jordan  | 2000           | Sweeteners, Other         | 1                                                           |
| 112             | Jordan  | 2000           | Tea                       | 3                                                           |
| 112             | Jordan  | 2000           | Tomatoes                  | 70                                                          |
| 112             | Jordan  | 2000           | Vegetables, Other         | 173                                                         |
| 112             | Jordan  | 2000           | Wheat                     | 344                                                         |
| 112             | Jordan  | 2001           | Apples                    | 25                                                          |
| 112             | Jordan  | 2001           | Bananas                   | 14                                                          |
| 112             | Jordan  | 2001           | Beans                     | 1                                                           |
| 112             | Jordan  | 2001           | Beer                      | 5                                                           |
| 112             | Jordan  | 2001           | Beverages, Alcoholic      | 1                                                           |
| 112             | Jordan  | 2001           | Bovine Meat               | 20                                                          |
| 112             | Jordan  | 2001           | Butter, Ghee              | 1                                                           |
| 112             | Jordan  | 2001           | Cheese                    | 6                                                           |
| 112             | Jordan  | 2001           | Citrus, Other             | 2                                                           |
| 112             | Jordan  | 2001           | Cocoa Beans               | 2                                                           |
| 112             | Jordan  | 2001           | Coconuts - Incl Copra     | 3                                                           |
| 112             | Jordan  | 2001           | Coffee                    | 4                                                           |
| 112             | Jordan  | 2001           | Cottonseed Oil            | 1                                                           |
| 112             | Jordan  | 2001           | Dates                     | 2                                                           |
| 112             | Jordan  | 2001           | Demersal Fish             | 2                                                           |
| 112             | Jordan  | 2001           | Eggs                      | 17                                                          |
| 112             | Jordan  | 2001           | Fats, Animals, Raw        | 1                                                           |
| 112             | Jordan  | 2001           | Freshwater Fish           | 1                                                           |
| 112             | Jordan  | 2001           | Fruits, Other             | 20                                                          |
| 112             | Jordan  | 2001           | Grapefruit                | 4                                                           |
| 112             | Jordan  | 2001           | Grapes                    | 16                                                          |

Dietary calcium and zinc deficiency risks are decreasing but remain prevalent

| FAO countrycode | Country | Reference year | Food item                 | Gross food supply (g capita <sup>-1</sup> d <sup>-1</sup> ) |
|-----------------|---------|----------------|---------------------------|-------------------------------------------------------------|
| 112             | Jordan  | 2001           | Groundnuts (Shelled Eq)   | 2                                                           |
| 112             | Jordan  | 2001           | Lemons, Limes             | 16                                                          |
| 112             | Jordan  | 2001           | Maize                     | 3                                                           |
| 112             | Jordan  | 2001           | Maize Germ Oil            | 8                                                           |
| 112             | Jordan  | 2001           | Marine Fish, Other        | 1                                                           |
| 112             | Jordan  | 2001           | Milk, Whole               | 110                                                         |
| 112             | Jordan  | 2001           | Mutton & Goat Meat        | 14                                                          |
| 112             | Jordan  | 2001           | Nuts                      | 4                                                           |
| 112             | Jordan  | 2001           | Offals, Edible            | 2                                                           |
| 112             | Jordan  | 2001           | Olive Oil                 | 11                                                          |
| 112             | Jordan  | 2001           | Olives                    | 7                                                           |
| 112             | Jordan  | 2001           | Onions                    | 11                                                          |
| 112             | Jordan  | 2001           | Oranges, Mandarines       | 57                                                          |
| 112             | Jordan  | 2001           | Palm Oil                  | 9                                                           |
| 112             | Jordan  | 2001           | Palmkernel Oil            | 2                                                           |
| 112             | Jordan  | 2001           | Pelagic Fish              | 7                                                           |
| 112             | Jordan  | 2001           | Potatoes                  | 51                                                          |
| 112             | Jordan  | 2001           | Poultry Meat              | 68                                                          |
| 112             | Jordan  | 2001           | Pulses, Other             | 20                                                          |
| 112             | Jordan  | 2001           | Rice (Milled Equivalent)  | 57                                                          |
| 112             | Jordan  | 2001           | Sesameseed                | 2                                                           |
| 112             | Jordan  | 2001           | Sesameseed Oil            | 2                                                           |
| 112             | Jordan  | 2001           | Soyabean Oil              | 12                                                          |
| 112             | Jordan  | 2001           | Spices, Other             | 1                                                           |
| 112             | Jordan  | 2001           | Sugar, Refined Equivalent | 102                                                         |
| 112             | Jordan  | 2001           | Sunflowerseed             | 4                                                           |
| 112             | Jordan  | 2001           | Sunflowerseed Oil         | 5                                                           |
| 112             | Jordan  | 2001           | Sweeteners, Other         | 1                                                           |
| 112             | Jordan  | 2001           | Tea                       | 3                                                           |
| 112             | Jordan  | 2001           | Tomatoes                  | 37                                                          |
| 112             | Jordan  | 2001           | Vegetables, Other         | 146                                                         |
| 112             | Jordan  | 2001           | Wheat                     | 369                                                         |
| 112             | Jordan  | 2002           | Apples                    | 25                                                          |
| 112             | Jordan  | 2002           | Bananas                   | 25                                                          |
| 112             | Jordan  | 2002           | Barley                    | 1                                                           |
| 112             | Jordan  | 2002           | Beans                     | 2                                                           |
| 112             | Jordan  | 2002           | Beer                      | 3                                                           |
| 112             | Jordan  | 2002           | Beverages, Alcoholic      | 1                                                           |
| 112             | Jordan  | 2002           | Bovine Meat               | 22                                                          |
| 112             | Jordan  | 2002           | Butter, Ghee              | 1                                                           |
| 112             | Jordan  | 2002           | Cereals, Other            | 1                                                           |
| 112             | Jordan  | 2002           | Cheese                    | 6                                                           |
| 112             | Jordan  | 2002           | Citrus, Other             | 3                                                           |
| 112             | Jordan  | 2002           | Cocoa Beans               | 2                                                           |
| 112             | Jordan  | 2002           | Coconuts - Incl Copra     | 3                                                           |
| 112             | Jordan  | 2002           | Coffee                    | 6                                                           |
| 112             | Jordan  | 2002           | Cottonseed Oil            | 1                                                           |
| 112             | Jordan  | 2002           | Dates                     | 4                                                           |
| 112             | Jordan  | 2002           | Demersal Fish             | 3                                                           |
| 112             | Jordan  | 2002           | Eggs                      | 17                                                          |
| 112             | Jordan  | 2002           | Fats, Animals, Raw        | 1                                                           |
| 112             | Jordan  | 2002           | Freshwater Fish           | 2                                                           |
| 112             | Jordan  | 2002           | Fruits, Other             | 34                                                          |
| 112             | Jordan  | 2002           | Grapefruit                | 3                                                           |
| 112             | Jordan  | 2002           | Grapes                    | 20                                                          |
| 112             | Jordan  | 2002           | Groundnuts (Shelled Eq)   | 3                                                           |
| 112             | Jordan  | 2002           | Lemons, Limes             | 14                                                          |
| 112             | Jordan  | 2002           | Maize                     | 3                                                           |
| 112             | Jordan  | 2002           | Maize Germ Oil            | 10                                                          |
| 112             | Jordan  | 2002           | Marine Fish, Other        | 2                                                           |
| 112             | Jordan  | 2002           | Milk, Whole               | 110                                                         |
| 112             | Jordan  | 2002           | Mutton & Goat Meat        | 14                                                          |
| 112             | Jordan  | 2002           | Nuts                      | 5                                                           |
| 112             | Jordan  | 2002           | Offals, Edible            | 3                                                           |
| 112             | Jordan  | 2002           | Olive Oil                 | 15                                                          |
| 112             | Jordan  | 2002           | Olives                    | 22                                                          |
| 112             | Jordan  | 2002           | Onions                    | 24                                                          |
| 112             | Jordan  | 2002           | Oranges, Mandarines       | 57                                                          |
| 112             | Jordan  | 2002           | Palm Oil                  | 10                                                          |
| 112             | Jordan  | 2002           | Palmkernel Oil            | 1                                                           |
| 112             | Jordan  | 2002           | Pelagic Fish              | 7                                                           |
| 112             | Jordan  | 2002           | Pineapples                | 1                                                           |
| 112             | Jordan  | 2002           | Potatoes                  | 58                                                          |
| 112             | Jordan  | 2002           | Poultry Meat              | 63                                                          |
| 112             | Jordan  | 2002           | Pulses, Other             | 21                                                          |
| 112             | Jordan  | 2002           | Rice (Milled Equivalent)  | 56                                                          |
| 112             | Jordan  | 2002           | Sesameseed                | 2                                                           |
| 112             | Jordan  | 2002           | Sesameseed Oil            | 2                                                           |
| 112             | Jordan  | 2002           | Soyabean Oil              | 11                                                          |
| 112             | Jordan  | 2002           | Spices, Other             | 1                                                           |
| 112             | Jordan  | 2002           | Sugar, Refined Equivalent | 102                                                         |
| 112             | Jordan  | 2002           | Sunflowerseed             | 2                                                           |
| 112             | Jordan  | 2002           | Sunflowerseed Oil         | 5                                                           |
| 112             | Jordan  | 2002           | Sweet Potatoes            | 1                                                           |
| 112             | Jordan  | 2002           | Sweeteners, Other         | 6                                                           |
| 112             | Jordan  | 2002           | Tea                       | 3                                                           |
| 112             | Jordan  | 2002           | Tomatoes                  | 58                                                          |
| 112             | Jordan  | 2002           | Vegetables, Other         | 255                                                         |
| 112             | Jordan  | 2002           | Wheat                     | 363                                                         |
| 112             | Jordan  | 2003           | Apples                    | 25                                                          |
| 112             | Jordan  | 2003           | Bananas                   | 8                                                           |
| 112             | Jordan  | 2003           | Barley                    | 1                                                           |
| 112             | Jordan  | 2003           | Beans                     | 2                                                           |
| 112             | Jordan  | 2003           | Beer                      | 3                                                           |
| 112             | Jordan  | 2003           | Bovine Meat               | 17                                                          |
| 112             | Jordan  | 2003           | Butter, Ghee              | 1                                                           |
| 112             | Jordan  | 2003           | Cereals, Other            | 1                                                           |

Dietary calcium and zinc deficiency risks are decreasing but remain prevalent

| FAO countrycode | Country | Reference year | Food item                 | Gross food supply (g capita <sup>-1</sup> d <sup>-1</sup> ) |
|-----------------|---------|----------------|---------------------------|-------------------------------------------------------------|
| 112             | Jordan  | 2003           | Cheese                    | 7                                                           |
| 112             | Jordan  | 2003           | Citrus, Other             | 2                                                           |
| 112             | Jordan  | 2003           | Cocoa Beans               | 2                                                           |
| 112             | Jordan  | 2003           | Coconuts - Incl Copra     | 4                                                           |
| 112             | Jordan  | 2003           | Coffee                    | 5                                                           |
| 112             | Jordan  | 2003           | Dates                     | 4                                                           |
| 112             | Jordan  | 2003           | Demersal Fish             | 3                                                           |
| 112             | Jordan  | 2003           | Eggs                      | 15                                                          |
| 112             | Jordan  | 2003           | Fats, Animals, Raw        | 1                                                           |
| 112             | Jordan  | 2003           | Freshwater Fish           | 1                                                           |
| 112             | Jordan  | 2003           | Fruits, Other             | 22                                                          |
| 112             | Jordan  | 2003           | Grapefruit                | 5                                                           |
| 112             | Jordan  | 2003           | Grapes                    | 17                                                          |
| 112             | Jordan  | 2003           | Groundnuts (Shelled Eq)   | 3                                                           |
| 112             | Jordan  | 2003           | Lemons, Limes             | 21                                                          |
| 112             | Jordan  | 2003           | Maize                     | 3                                                           |
| 112             | Jordan  | 2003           | Maize Germ Oil            | 4                                                           |
| 112             | Jordan  | 2003           | Marine Fish, Other        | 2                                                           |
| 112             | Jordan  | 2003           | Milk, Whole               | 120                                                         |
| 112             | Jordan  | 2003           | Mutton & Goat Meat        | 13                                                          |
| 112             | Jordan  | 2003           | Nuts                      | 6                                                           |
| 112             | Jordan  | 2003           | Offals, Edible            | 2                                                           |
| 112             | Jordan  | 2003           | Olive Oil                 | 10                                                          |
| 112             | Jordan  | 2003           | Olives                    | 12                                                          |
| 112             | Jordan  | 2003           | Onions                    | 23                                                          |
| 112             | Jordan  | 2003           | Oranges, Mandarines       | 55                                                          |
| 112             | Jordan  | 2003           | Palm Oil                  | 10                                                          |
| 112             | Jordan  | 2003           | Palmkernel Oil            | 1                                                           |
| 112             | Jordan  | 2003           | Pelagic Fish              | 8                                                           |
| 112             | Jordan  | 2003           | Pineapples                | 1                                                           |
| 112             | Jordan  | 2003           | Potatoes                  | 71                                                          |
| 112             | Jordan  | 2003           | Poultry Meat              | 70                                                          |
| 112             | Jordan  | 2003           | Pulses, Other             | 20                                                          |
| 112             | Jordan  | 2003           | Rice (Milled Equivalent)  | 72                                                          |
| 112             | Jordan  | 2003           | Sesameseed                | 2                                                           |
| 112             | Jordan  | 2003           | Sesameseed Oil            | 2                                                           |
| 112             | Jordan  | 2003           | Soyabean Oil              | 11                                                          |
| 112             | Jordan  | 2003           | Spices, Other             | 1                                                           |
| 112             | Jordan  | 2003           | Sugar, Refined Equivalent | 106                                                         |
| 112             | Jordan  | 2003           | Sunflowerseed             | 1                                                           |
| 112             | Jordan  | 2003           | Sunflowerseed Oil         | 7                                                           |
| 112             | Jordan  | 2003           | Sweet Potatoes            | 1                                                           |
| 112             | Jordan  | 2003           | Sweeteners, Other         | 7                                                           |
| 112             | Jordan  | 2003           | Tea                       | 2                                                           |
| 112             | Jordan  | 2003           | Tomatoes                  | 94                                                          |
| 112             | Jordan  | 2003           | Vegetables, Other         | 195                                                         |
| 112             | Jordan  | 2003           | Wheat                     | 406                                                         |
| 112             | Jordan  | 2004           | Apples                    | 31                                                          |
| 112             | Jordan  | 2004           | Bananas                   | 18                                                          |
| 112             | Jordan  | 2004           | Barley                    | 2                                                           |
| 112             | Jordan  | 2004           | Beans                     | 1                                                           |
| 112             | Jordan  | 2004           | Beer                      | 3                                                           |
| 112             | Jordan  | 2004           | Beverages, Alcoholic      | 1                                                           |
| 112             | Jordan  | 2004           | Bovine Meat               | 22                                                          |
| 112             | Jordan  | 2004           | Butter, Ghee              | 1                                                           |
| 112             | Jordan  | 2004           | Cereals, Other            | 2                                                           |
| 112             | Jordan  | 2004           | Cheese                    | 8                                                           |
| 112             | Jordan  | 2004           | Citrus, Other             | 1                                                           |
| 112             | Jordan  | 2004           | Cocoa Beans               | 2                                                           |
| 112             | Jordan  | 2004           | Coconuts - Incl Copra     | 3                                                           |
| 112             | Jordan  | 2004           | Coffee                    | 6                                                           |
| 112             | Jordan  | 2004           | Cream                     | 1                                                           |
| 112             | Jordan  | 2004           | Dates                     | 6                                                           |
| 112             | Jordan  | 2004           | Demersal Fish             | 3                                                           |
| 112             | Jordan  | 2004           | Eggs                      | 17                                                          |
| 112             | Jordan  | 2004           | Fats, Animals, Raw        | 1                                                           |
| 112             | Jordan  | 2004           | Fruits, Other             | 24                                                          |
| 112             | Jordan  | 2004           | Grapefruit                | 5                                                           |



**Dietary calcium and zinc deficiency risks are decreasing but remain prevalent**

Diriba B. Kumssa<sup>1,2,3</sup>, Edward J. M. Joy<sup>1,2</sup>, E. Louise Ander<sup>2</sup>, Michael J. Watts<sup>2</sup>, Scott D. Young<sup>1</sup>, Sue Walker<sup>3</sup> & Martin R. Broadley<sup>1</sup>

<sup>1</sup>School of Biosciences, University of Nottingham, Sutton Bonington Campus, Loughborough, LE12 5RD, UK, <sup>2</sup>Centre for Environmental Geochemistry, British Geological Survey, Keyworth, Nottingham, NG12 5GG, UK, <sup>3</sup>Crops For the Future, The University of Nottingham Malaysia Campus, Jalan Broga, 43500 Semenyih, Selangor Darul Ehsan, Malaysia.

Correspondence and requests for materials should be addressed to M.R.B. (martin.broadley@nottingham.ac.uk)

Supplementary Table S2 : Food Balance Sheet (FBS) food items obtained from FAOSTAT.

Abbreviations: AP, animal products; CE, cereals; FV, fruits and vegetables; OT, others; PB, pulses and beans; RT, roots and tubers

| No. | Food item                 | Food item code | Source | Food group |
|-----|---------------------------|----------------|--------|------------|
| 52  | Apples                    | 2617           | Crop   | FV         |
| 89  | Aquatic Animals, Others   | 2769           | Animal | AP         |
| 90  | Aquatic Plants            | 2775           | Crop   | FV         |
| 50  | Bananas                   | 2615           | Crop   | FV         |
| 2   | Barley                    | 2513           | Crop   | CE         |
| 19  | Beans                     | 2546           | Crop   | PB         |
| 65  | Beer                      | 2656           | Crop   | OT         |
| 67  | Beverages, Alcoholic      | 2658           | Crop   | OT         |
| 66  | Beverages, Fermented      | 2657           | Crop   | CE         |
| 68  | Bovine Meat               | 2731           | Animal | AP         |
| 76  | Butter, Ghee              | 2740           | Animal | AP         |
| 10  | Cassava                   | 2532           | Crop   | RT         |
| 87  | Cephalopods               | 2766           | Animal | AP         |
| 8   | Cereals, Other            | 2520           | Crop   | CE         |
| 77  | Cheese                    | 2741           | Animal | AP         |
| 49  | Citrus, Other             | 2614           | Crop   | FV         |
| 62  | Cloves                    | 2642           | Crop   | OT         |
| 58  | Cocoa Beans               | 2633           | Crop   | OT         |
| 37  | Coconut Oil               | 2578           | Crop   | OT         |
| 26  | Coconuts - Incl Copra     | 2560           | Crop   | OT         |
| 57  | Coffee                    | 2630           | Crop   | OT         |
| 34  | Cottonseed Oil            | 2575           | Crop   | OT         |
| 79  | Cream                     | 2743           | Animal | AP         |
| 86  | Crustaceans               | 2765           | Animal | AP         |
| 54  | Dates                     | 2619           | Crop   | FV         |
| 83  | Demersal Fish             | 2762           | Animal | AP         |
| 80  | Eggs                      | 2744           | Animal | AP         |
| 74  | Fats, Animals, Raw        | 2737           | Animal | AP         |
| 91  | Fish, Body Oil            | 2781           | Animal | AP         |
| 92  | Fish, Liver Oil           | 2782           | Animal | AP         |
| 82  | Freshwater Fish           | 2761           | Animal | AP         |
| 56  | Fruits, Other             | 2625           | Crop   | FV         |
| 48  | Grapefruit                | 2613           | Crop   | FV         |
| 55  | Grapes                    | 2620           | Crop   | FV         |
| 31  | Groundnut Oil             | 2572           | Crop   | PB         |
| 24  | Groundnuts (Shelled Eq)   | 2556           | Crop   | PB         |
| 81  | Honey                     | 2745           | Animal | OT         |
| 47  | Lemons, Limes             | 2612           | Crop   | FV         |
| 3   | Maize                     | 2514           | Crop   | CE         |
| 41  | Maize Germ Oil            | 2582           | Crop   | OT         |
| 85  | Marine Fish, Other        | 2764           | Animal | AP         |
| 72  | Meat, Other               | 2735           | Animal | AP         |
| 75  | Milk, Whole               | 2738           | Animal | AP         |
| 6   | Millet                    | 2517           | Crop   | CE         |
| 18  | Molasses                  | 2544           | Crop   | OT         |
| 88  | Molluscs, Other           | 2767           | Animal | AP         |
| 69  | Mutton & Goat Meat        | 2732           | Animal | AP         |
| 22  | Nuts                      | 2551           | Crop   | OT         |
| 5   | Oats                      | 2516           | Crop   | CE         |
| 73  | Offal, Edible             | 2736           | Animal | AP         |
| 42  | Oil crops Oil, Other      | 2586           | Crop   | OT         |
| 29  | Oilcrops, Other           | 2570           | Crop   | OT         |
| 39  | Olive Oil                 | 2580           | Crop   | OT         |
| 28  | Olives                    | 2563           | Crop   | FV         |
| 44  | Onions                    | 2602           | Crop   | FV         |
| 46  | Oranges, Mandarins        | 2611           | Crop   | FV         |
| 35  | Palm kernel Oil           | 2576           | Crop   | OT         |
| 36  | Palm Oil                  | 2577           | Crop   | OT         |
| 20  | Peas                      | 2547           | Crop   | PB         |
| 84  | Pelagic Fish              | 2763           | Animal | AP         |
| 60  | Pepper                    | 2640           | Crop   | FV         |
| 70  | Pig meat                  | 2733           | Animal | AP         |
| 61  | Pimento                   | 2641           | Crop   | FV         |
| 53  | Pineapples                | 2618           | Crop   | FV         |
| 51  | Plantains                 | 2616           | Crop   | FV         |
| 9   | Potatoes                  | 2531           | Crop   | RT         |
| 71  | Poultry Meat              | 2734           | Animal | AP         |
| 21  | Pulses, Other             | 2549           | Crop   | PB         |
| 33  | Rape and Mustard Oil      | 2574           | Crop   | OT         |
| 93  | Rice (Milled Equivalent)  | 2805           | Crop   | CE         |
| 40  | Rice bran Oil             | 2581           | Crop   | OT         |
| 12  | Roots, Other              | 2534           | Crop   | RT         |
| 4   | Rye                       | 2515           | Crop   | CE         |
| 27  | Sesame seed               | 2561           | Crop   | PB         |
| 38  | Sesame seed Oil           | 2579           | Crop   | PB         |
| 7   | Sorghum                   | 2518           | Crop   | CE         |
| 30  | Soybean Oil               | 2571           | Crop   | PB         |
| 23  | Soybeans                  | 2555           | Crop   | PB         |
| 63  | Spices, Other             | 2645           | Crop   | OT         |
| 15  | Sugar Beet                | 2537           | Crop   | OT         |
| 14  | Sugar Cane                | 2536           | Crop   | OT         |
| 16  | Sugar, Non-Centrifugal    | 2541           | Crop   | OT         |
| 94  | Sugar, Refined Equivalent | 2818           | Crop   | OT         |
| 25  | Sunflower seed            | 2557           | Crop   | OT         |
| 32  | Sunflower seed Oil        | 2573           | Crop   | OT         |
| 11  | Sweet Potatoes            | 2533           | Crop   | RT         |
| 17  | Sweeteners, Other         | 2543           | Crop   | OT         |
| 59  | Tea                       | 2635           | Crop   | OT         |
| 43  | Tomatoes                  | 2601           | Crop   | FV         |
| 45  | Vegetables, Other         | 2605           | Crop   | FV         |
| 1   | Wheat                     | 2511           | Crop   | CE         |
| 78  | Whey                      | 2742           | Animal | AP         |
| 64  | Wine                      | 2655           | Crop   | OT         |
| 13  | Yams                      | 2535           | Crop   | RT         |

## Dietary calcium and zinc deficiency risks are decreasing but remain prevalent

Diriba B. Kumssa<sup>1,2,3</sup>, Edward J. M. Joy<sup>1,2</sup>, E. Louise Ander<sup>2</sup>, Michael J. Watts<sup>2</sup>, Scott D. Young<sup>1</sup>, Sue Walker<sup>3</sup> & Martin R. Broadley<sup>1</sup>

<sup>1</sup>School of Biosciences, University of Nottingham, Sutton Bonington Campus, Loughborough, LE12 5RD, UK, <sup>2</sup>Centre for Environmental Geochemistry, British Geological Survey, Keyworth, Nottingham, NG12 5GG, UK, <sup>3</sup>Crops For the Future, The University of Nottingham Malaysia Campus, Jalan Broga, 43500 Semenyih, Selangor Darul Ehsan, Malaysia.

Correspondence and requests for materials should be addressed to M.R.B. (martin.broadley@nottingham.ac.uk)

**Supplementary Table S3 : Nutrient and phytate composition of food commodities (Ca and Zn composition data from USDA nutrient database SR 26 [USDA SR 26]; phytate composition from the Tanzanian food composition table [Tanzanian FCT]).**

| Food item                 | Nutrient | Nutrient composition (100 g <sup>-1</sup> edible portion) | Source     |
|---------------------------|----------|-----------------------------------------------------------|------------|
| Apples                    | Calcium  | 6.17                                                      | USDA SR 26 |
| Aquatic Plants            | Calcium  | 87.67                                                     | USDA SR 26 |
| Aquatic Animals, Others   | Calcium  | 20.91                                                     | USDA SR 26 |
| Bananas                   | Calcium  | 5.00                                                      | USDA SR 26 |
| Barley                    | Calcium  | 29.00                                                     | USDA SR 26 |
| Beans                     | Calcium  | 143.00                                                    | USDA SR 26 |
| Beer                      | Calcium  | 3.83                                                      | USDA SR 26 |
| Beverages, Alcoholic      | Calcium  | 0.00                                                      | USDA SR 26 |
| Beverages, Fermented      | Calcium  | 0.00                                                      | USDA SR 26 |
| Bovine Meat               | Calcium  | 14.46                                                     | USDA SR 26 |
| Butter, Ghee              | Calcium  | 24.00                                                     | USDA SR 26 |
| Cassava                   | Calcium  | 16.00                                                     | USDA SR 26 |
| Cephalopods               | Calcium  | 32.00                                                     | USDA SR 26 |
| Cereals, Other            | Calcium  | 34.00                                                     | USDA SR 26 |
| Citrus, Other             | Calcium  | 40.00                                                     | USDA SR 26 |
| Cheese                    | Calcium  | 691.42                                                    | USDA SR 26 |
| Cloves                    | Calcium  | 632.00                                                    | USDA SR 26 |
| Cocoa Beans               | Calcium  | 133.00                                                    | USDA SR 26 |
| Coconut Oil               | Calcium  | 0.00                                                      | USDA SR 26 |
| Coconuts - Incl Copra     | Calcium  | 14.00                                                     | USDA SR 26 |
| Coffee                    | Calcium  | 45.60                                                     | USDA SR 26 |
| Cottonseed Oil            | Calcium  | 0.00                                                      | USDA SR 26 |
| Cream                     | Calcium  | 52.00                                                     | USDA SR 26 |
| Crustaceans               | Calcium  | 44.71                                                     | USDA SR 26 |
| Dates                     | Calcium  | 51.50                                                     | USDA SR 26 |
| Demersal Fish             | Calcium  | 20.91                                                     | USDA SR 26 |
| Eggs                      | Calcium  | 68.60                                                     | USDA SR 26 |
| Fats, Animals, Raw        | Calcium  | 0.00                                                      | USDA SR 26 |
| Fish, Body Oil            | Calcium  | 0.00                                                      | USDA SR 26 |
| Fish, Liver Oil           | Calcium  | 0.00                                                      | USDA SR 26 |
| Freshwater Fish           | Calcium  | 20.91                                                     | USDA SR 26 |
| Fruits, Other             | Calcium  | 10.50                                                     | USDA SR 26 |
| Grapefruit                | Calcium  | 14.14                                                     | USDA SR 26 |
| Grapes                    | Calcium  | 20.33                                                     | USDA SR 26 |
| Groundnut Oil             | Calcium  | 0.00                                                      | USDA SR 26 |
| Groundnuts (Shelled Eq)   | Calcium  | 87.25                                                     | USDA SR 26 |
| Honey                     | Calcium  | 6.00                                                      | USDA SR 26 |
| Lemons, Limes             | Calcium  | 29.50                                                     | USDA SR 26 |
| Maize                     | Calcium  | 12.00                                                     | USDA SR 26 |
| Maize Germ Oil            | Calcium  | 0.00                                                      | USDA SR 26 |
| Marine Fish, Other        | Calcium  | 20.91                                                     | USDA SR 26 |
| Meat, Other               | Calcium  | 7.00                                                      | USDA SR 26 |
| Milk, Whole               | Calcium  | 119.00                                                    | USDA SR 26 |
| Millet                    | Calcium  | 14.00                                                     | USDA SR 26 |
| Molluscs, Other           | Calcium  | 37.50                                                     | USDA SR 26 |
| Molasses                  | Calcium  | 205.00                                                    | USDA SR 26 |
| Mutton & Goat Meat        | Calcium  | 11.50                                                     | USDA SR 26 |
| Nuts                      | Calcium  | 37.00                                                     | USDA SR 26 |
| Oats                      | Calcium  | 54.00                                                     | USDA SR 26 |
| Offals, Edible            | Calcium  | 17.50                                                     | USDA SR 26 |
| Oilcrops Oil, Other       | Calcium  | 0.00                                                      | USDA SR 26 |
| Oilcrops, Other           | Calcium  | 1.00                                                      | USDA SR 26 |
| Olive Oil                 | Calcium  | 1.00                                                      | USDA SR 26 |
| Olives                    | Calcium  | 78.00                                                     | USDA SR 26 |
| Onions                    | Calcium  | 28.25                                                     | USDA SR 26 |
| Oranges, Mandarines       | Calcium  | 47.20                                                     | USDA SR 26 |
| Palm Oil                  | Calcium  | 0.00                                                      | USDA SR 26 |
| Palmkernel Oil            | Calcium  | 1.20                                                      | USDA SR 26 |
| Peas                      | Calcium  | 36.25                                                     | USDA SR 26 |
| Pelagic Fish              | Calcium  | 20.91                                                     | USDA SR 26 |
| Pepper                    | Calcium  | 354.00                                                    | USDA SR 26 |
| Pigmeat                   | Calcium  | 15.94                                                     | USDA SR 26 |
| Pimento                   | Calcium  | 12.11                                                     | USDA SR 26 |
| Pineapples                | Calcium  | 13.00                                                     | USDA SR 26 |
| Plantains                 | Calcium  | 3.00                                                      | USDA SR 26 |
| Potatoes                  | Calcium  | 14.80                                                     | USDA SR 26 |
| Poultry Meat              | Calcium  | 21.62                                                     | USDA SR 26 |
| Pulses, Other             | Calcium  | 130.00                                                    | USDA SR 26 |
| Rape and Mustard Oil      | Calcium  | 0.00                                                      | USDA SR 26 |
| Rice (Milled Equivalent)  | Calcium  | 16.83                                                     | USDA SR 26 |
| Ricebran Oil              | Calcium  | 0.00                                                      | USDA SR 26 |
| Roots, Other              | Calcium  | 43.00                                                     | USDA SR 26 |
| Rye                       | Calcium  | 24.50                                                     | USDA SR 26 |
| Sesameseed                | Calcium  | 975.00                                                    | USDA SR 26 |
| Sesameseed Oil            | Calcium  | 0.00                                                      | USDA SR 26 |
| Sorghum                   | Calcium  | 20.00                                                     | USDA SR 26 |
| Soyabean Oil              | Calcium  | 0.00                                                      | USDA SR 26 |
| Soyabeans                 | Calcium  | 277.00                                                    | USDA SR 26 |
| Spices, Other             | Calcium  | 1064.63                                                   | USDA SR 26 |
| Sugar, Refined Equivalent | Calcium  | 28.33                                                     | USDA SR 26 |
| Sunflowerseed             | Calcium  | 78.00                                                     | USDA SR 26 |
| Sugar Cane                | Calcium  | 13.00                                                     | USDA SR 26 |
| Sugar, Non-Centrifugal    | Calcium  | 70.00                                                     | USDA SR 26 |

The unit of measurement is mg for Ca, Zn, and phytate; and kcal for energy.

| Food item                 | Nutrient | Nutrient composition (100 g <sup>-1</sup> edible portion) | Source     |
|---------------------------|----------|-----------------------------------------------------------|------------|
| Sunflowerseed Oil         | Calcium  | 0.00                                                      | USDA SR 26 |
| Sweet Potatoes            | Calcium  | 30.00                                                     | USDA SR 26 |
| Sweeteners, Other         | Calcium  | 94.50                                                     | USDA SR 26 |
| Tea                       | Calcium  | 118.00                                                    | USDA SR 26 |
| Tomatoes                  | Calcium  | 9.75                                                      | USDA SR 26 |
| Vegetables, Other         | Calcium  | 58.17                                                     | USDA SR 26 |
| Wheat                     | Calcium  | 30.38                                                     | USDA SR 26 |
| Whey                      | Calcium  | 750.00                                                    | USDA SR 26 |
| Wine                      | Calcium  | 8.44                                                      | USDA SR 26 |
| Yams                      | Calcium  | 17.00                                                     | USDA SR 26 |
| Sugar Beet                | Calcium  | 16.00                                                     | USDA SR 26 |
| Apples                    | Energy   | 57.67                                                     | USDA SR 26 |
| Aquatic Plants            | Energy   | 37.33                                                     | USDA SR 26 |
| Aquatic Animals, Others   | Energy   | 105.73                                                    | USDA SR 26 |
| Bananas                   | Energy   | 89.00                                                     | USDA SR 26 |
| Barley                    | Energy   | 352.00                                                    | USDA SR 26 |
| Beans                     | Energy   | 333.00                                                    | USDA SR 26 |
| Beer                      | Energy   | 32.83                                                     | USDA SR 26 |
| Beverages, Alcoholic      | Energy   | 254.33                                                    | USDA SR 26 |
| Beverages, Fermented      | Energy   | 254.33                                                    | USDA SR 26 |
| Bovine Meat               | Energy   | 233.66                                                    | USDA SR 26 |
| Butter, Ghee              | Energy   | 717.00                                                    | USDA SR 26 |
| Cassava                   | Energy   | 160.00                                                    | USDA SR 26 |
| Cephalopods               | Energy   | 92.00                                                     | USDA SR 26 |
| Cereals, Other            | Energy   | 340.00                                                    | USDA SR 26 |
| Citrus, Other             | Energy   | 47.00                                                     | USDA SR 26 |
| Cheese                    | Energy   | 331.58                                                    | USDA SR 26 |
| Cloves                    | Energy   | 274.00                                                    | USDA SR 26 |
| Cocoa Beans               | Energy   | 398.00                                                    | USDA SR 26 |
| Coconut Oil               | Energy   | 862.00                                                    | USDA SR 26 |
| Coconuts - Incl Copra     | Energy   | 354.00                                                    | USDA SR 26 |
| Coffee                    | Energy   | 158.80                                                    | USDA SR 26 |
| Cottonseed Oil            | Energy   | 884.00                                                    | USDA SR 26 |
| Cream                     | Energy   | 256.22                                                    | USDA SR 26 |
| Crustaceans               | Energy   | 81.00                                                     | USDA SR 26 |
| Dates                     | Energy   | 279.50                                                    | USDA SR 26 |
| Demersal Fish             | Energy   | 105.73                                                    | USDA SR 26 |
| Eggs                      | Energy   | 168.40                                                    | USDA SR 26 |
| Fats, Animals, Raw        | Energy   | 902.00                                                    | USDA SR 26 |
| Fish, Body Oil            | Energy   | 902.00                                                    | USDA SR 26 |
| Fish, Liver Oil           | Energy   | 902.00                                                    | USDA SR 26 |
| Freshwater Fish           | Energy   | 105.73                                                    | USDA SR 26 |
| Fruits, Other             | Energy   | 58.00                                                     | USDA SR 26 |
| Grapefruit                | Energy   | 34.71                                                     | USDA SR 26 |
| Grapes                    | Energy   | 64.33                                                     | USDA SR 26 |
| Groundnut Oil             | Energy   | 884.00                                                    | USDA SR 26 |
| Groundnuts (Shelled Eq)   | Energy   | 567.50                                                    | USDA SR 26 |
| Honey                     | Energy   | 304.00                                                    | USDA SR 26 |
| Lemons, Limes             | Energy   | 29.50                                                     | USDA SR 26 |
| Maize                     | Energy   | 379.00                                                    | USDA SR 26 |
| Maize Germ Oil            | Energy   | 900.00                                                    | USDA SR 26 |
| Marine Fish, Other        | Energy   | 105.73                                                    | USDA SR 26 |
| Meat, Other               | Energy   | 116.00                                                    | USDA SR 26 |
| Milk, Whole               | Energy   | 64.00                                                     | USDA SR 26 |
| Millet                    | Energy   | 373.00                                                    | USDA SR 26 |
| Molluscs, Other           | Energy   | 69.17                                                     | USDA SR 26 |
| Molasses                  | Energy   | 290.00                                                    | USDA SR 26 |
| Mutton & Goat Meat        | Energy   | 171.50                                                    | USDA SR 26 |
| Nuts                      | Energy   | 553.00                                                    | USDA SR 26 |
| Oats                      | Energy   | 389.00                                                    | USDA SR 26 |
| Offals, Edible            | Energy   | 218.50                                                    | USDA SR 26 |
| Oilcrops Oil, Other       | Energy   | 884.00                                                    | USDA SR 26 |
| Oilcrops, Other           | Energy   | 884.00                                                    | USDA SR 26 |
| Olive Oil                 | Energy   | 884.00                                                    | USDA SR 26 |
| Olives                    | Energy   | 113.67                                                    | USDA SR 26 |
| Onions                    | Energy   | 33.25                                                     | USDA SR 26 |
| Oranges, Mandarines       | Energy   | 50.80                                                     | USDA SR 26 |
| Palm Oil                  | Energy   | 884.00                                                    | USDA SR 26 |
| Palmkernel Oil            | Energy   | 884.00                                                    | USDA SR 26 |
| Peas                      | Energy   | 135.25                                                    | USDA SR 26 |
| Pelagic Fish              | Energy   | 105.73                                                    | USDA SR 26 |
| Pepper                    | Energy   | 273.50                                                    | USDA SR 26 |
| Pigmeat                   | Energy   | 275.61                                                    | USDA SR 26 |
| Pimento                   | Energy   | 30.56                                                     | USDA SR 26 |
| Pineapples                | Energy   | 48.67                                                     | USDA SR 26 |
| Plantains                 | Energy   | 122.00                                                    | USDA SR 26 |
| Potatoes                  | Energy   | 70.60                                                     | USDA SR 26 |
| Poultry Meat              | Energy   | 207.74                                                    | USDA SR 26 |
| Pulses, Other             | Energy   | 343.00                                                    | USDA SR 26 |
| Rape and Mustard Oil      | Energy   | 884.00                                                    | USDA SR 26 |
| Rice (Milled Equivalent)  | Energy   | 363.83                                                    | USDA SR 26 |
| Ricebran Oil              | Energy   | 884.00                                                    | USDA SR 26 |
| Roots, Other              | Energy   | 112.00                                                    | USDA SR 26 |
| Rye                       | Energy   | 342.25                                                    | USDA SR 26 |
| Sesameseed                | Energy   | 573.00                                                    | USDA SR 26 |
| Sesameseed Oil            | Energy   | 884.00                                                    | USDA SR 26 |
| Sorghum                   | Energy   | 350.00                                                    | USDA SR 26 |
| Soyabean Oil              | Energy   | 884.00                                                    | USDA SR 26 |
| Soyabeans                 | Energy   | 446.00                                                    | USDA SR 26 |
| Spices, Other             | Energy   | 314.13                                                    | USDA SR 26 |
| Sugar, Refined Equivalent | Energy   | 385.33                                                    | USDA SR 26 |
| Sunflowerseed             | Energy   | 584.00                                                    | USDA SR 26 |
| Sugar Cane                | Energy   | 269.00                                                    | USDA SR 26 |
| Sugar, Non-Centrifugal    | Energy   | 92.00                                                     | USDA SR 26 |
| Sunflowerseed Oil         | Energy   | 884.00                                                    | USDA SR 26 |
| Sweet Potatoes            | Energy   | 86.00                                                     | USDA SR 26 |
| Sweeteners, Other         | Energy   | 315.10                                                    | USDA SR 26 |

| Food item                 | Nutrient | Nutrient composition (100 g <sup>-1</sup> edible portion) | Source     |
|---------------------------|----------|-----------------------------------------------------------|------------|
| Tea                       | Energy   | 315.00                                                    | USDA SR 26 |
| Tomatoes                  | Energy   | 18.00                                                     | USDA SR 26 |
| Vegetables, Other         | Energy   | 22.67                                                     | USDA SR 26 |
| Wheat                     | Energy   | 318.25                                                    | USDA SR 26 |
| Whey                      | Energy   | 185.75                                                    | USDA SR 26 |
| Wine                      | Energy   | 86.29                                                     | USDA SR 26 |
| Yams                      | Energy   | 118.00                                                    | USDA SR 26 |
| Sugar Beet                | Energy   | 43.00                                                     | USDA SR 26 |
| Apples                    | Zinc     | 0.04                                                      | USDA SR 26 |
| Aquatic Plants            | Zinc     | 0.90                                                      | USDA SR 26 |
| Aquatic Animals, Others   | Zinc     | 0.64                                                      | USDA SR 26 |
| Bananas                   | Zinc     | 0.15                                                      | USDA SR 26 |
| Barley                    | Zinc     | 2.13                                                      | USDA SR 26 |
| Beans                     | Zinc     | 2.79                                                      | USDA SR 26 |
| Beer                      | Zinc     | 0.01                                                      | USDA SR 26 |
| Beverages, Alcoholic      | Zinc     | 0.03                                                      | USDA SR 26 |
| Beverages, Fermented      | Zinc     | 0.03                                                      | USDA SR 26 |
| Bovine Meat               | Zinc     | 8.07                                                      | USDA SR 26 |
| Butter, Ghee              | Zinc     | 0.09                                                      | USDA SR 26 |
| Cassava                   | Zinc     | 0.34                                                      | USDA SR 26 |
| Cephalopods               | Zinc     | 1.53                                                      | USDA SR 26 |
| Cereals, Other            | Zinc     | 2.60                                                      | USDA SR 26 |
| Citrus, Other             | Zinc     | 0.07                                                      | USDA SR 26 |
| Cheese                    | Zinc     | 2.87                                                      | USDA SR 26 |
| Cloves                    | Zinc     | 2.32                                                      | USDA SR 26 |
| Cocoa Beans               | Zinc     | 1.46                                                      | USDA SR 26 |
| Coconut Oil               | Zinc     | 0.00                                                      | USDA SR 26 |
| Coconuts - Incl Copra     | Zinc     | 1.10                                                      | USDA SR 26 |
| Coffee                    | Zinc     | 0.10                                                      | USDA SR 26 |
| Cottonseed Oil            | Zinc     | 0.00                                                      | USDA SR 26 |
| Cream                     | Zinc     | 0.34                                                      | USDA SR 26 |
| Crustaceans               | Zinc     | 2.83                                                      | USDA SR 26 |
| Dates                     | Zinc     | 0.37                                                      | USDA SR 26 |
| Demersal Fish             | Zinc     | 0.64                                                      | USDA SR 26 |
| Eggs                      | Zinc     | 1.42                                                      | USDA SR 26 |
| Fats, Animals, Raw        | Zinc     | 0.11                                                      | USDA SR 26 |
| Fish, Body Oil            | Zinc     | 0.00                                                      | USDA SR 26 |
| Fish, Liver Oil           | Zinc     | 0.00                                                      | USDA SR 26 |
| Freshwater Fish           | Zinc     | 0.64                                                      | USDA SR 26 |
| Fruits, Other             | Zinc     | 0.13                                                      | USDA SR 26 |
| Grapefruit                | Zinc     | 0.07                                                      | USDA SR 26 |
| Grapes                    | Zinc     | 0.07                                                      | USDA SR 26 |
| Groundnut Oil             | Zinc     | 0.01                                                      | USDA SR 26 |
| Groundnuts (Shelled Eq)   | Zinc     | 3.29                                                      | USDA SR 26 |
| Honey                     | Zinc     | 0.22                                                      | USDA SR 26 |
| Lemons, Limes             | Zinc     | 0.09                                                      | USDA SR 26 |
| Maize                     | Zinc     | 2.80                                                      | USDA SR 26 |
| Maize Germ Oil            | Zinc     | 0.00                                                      | USDA SR 26 |
| Marine Fish, Other        | Zinc     | 0.64                                                      | USDA SR 26 |
| Meat, Other               | Zinc     | 0.00                                                      | USDA SR 26 |
| Milk, Whole               | Zinc     | 0.38                                                      | USDA SR 26 |
| Millet                    | Zinc     | 2.63                                                      | USDA SR 26 |
| Molluscs, Other           | Zinc     | 16.43                                                     | USDA SR 26 |
| Molasses                  | Zinc     | 0.29                                                      | USDA SR 26 |
| Mutton & Goat Meat        | Zinc     | 4.97                                                      | USDA SR 26 |
| Nuts                      | Zinc     | 5.78                                                      | USDA SR 26 |
| Oats                      | Zinc     | 3.97                                                      | USDA SR 26 |
| Offals, Edible            | Zinc     | 1.75                                                      | USDA SR 26 |
| Oilcrops Oil, Other       | Zinc     | 0.00                                                      | USDA SR 26 |
| Oilcrops, Other           | Zinc     | 0.07                                                      | USDA SR 26 |
| Olive Oil                 | Zinc     | 0.00                                                      | USDA SR 26 |
| Olives                    | Zinc     | 0.16                                                      | USDA SR 26 |
| Onions                    | Zinc     | 0.26                                                      | USDA SR 26 |
| Oranges, Mandarines       | Zinc     | 0.08                                                      | USDA SR 26 |
| Palm Oil                  | Zinc     | 0.00                                                      | USDA SR 26 |
| Palmkernel Oil            | Zinc     | 0.05                                                      | USDA SR 26 |
| Peas                      | Zinc     | 1.34                                                      | USDA SR 26 |
| Pelagic Fish              | Zinc     | 0.64                                                      | USDA SR 26 |
| Pepper                    | Zinc     | 1.16                                                      | USDA SR 26 |
| Pigmeat                   | Zinc     | 2.28                                                      | USDA SR 26 |
| Pimento                   | Zinc     | 0.23                                                      | USDA SR 26 |
| Pineapples                | Zinc     | 0.11                                                      | USDA SR 26 |
| Plantains                 | Zinc     | 0.14                                                      | USDA SR 26 |
| Potatoes                  | Zinc     | 0.31                                                      | USDA SR 26 |
| Poultry Meat              | Zinc     | 1.57                                                      | USDA SR 26 |
| Pulses, Other             | Zinc     | 2.76                                                      | USDA SR 26 |
| Rape and Mustard Oil      | Zinc     | 0.00                                                      | USDA SR 26 |
| Rice (Milled Equivalent)  | Zinc     | 1.42                                                      | USDA SR 26 |
| Ricebran Oil              | Zinc     | 0.00                                                      | USDA SR 26 |
| Roots, Other              | Zinc     | 0.23                                                      | USDA SR 26 |
| Rye                       | Zinc     | 2.80                                                      | USDA SR 26 |
| Sesameseed                | Zinc     | 7.75                                                      | USDA SR 26 |
| Sesameseed Oil            | Zinc     | 0.00                                                      | USDA SR 26 |
| Sorghum                   | Zinc     | 1.49                                                      | USDA SR 26 |
| Soyabean Oil              | Zinc     | 0.01                                                      | USDA SR 26 |
| Soyabeans                 | Zinc     | 4.89                                                      | USDA SR 26 |
| Spices, Other             | Zinc     | 5.20                                                      | USDA SR 26 |
| Sugar, Refined Equivalent | Zinc     | 0.02                                                      | USDA SR 26 |
| Sunflowerseed             | Zinc     | 5.00                                                      | USDA SR 26 |
| Sugar Cane                | Zinc     | 0.19                                                      | USDA SR 26 |
| Sugar, Non-Centrifugal    | Zinc     | 0.75                                                      | USDA SR 26 |
| Sunflowerseed Oil         | Zinc     | 0.00                                                      | USDA SR 26 |
| Sweet Potatoes            | Zinc     | 0.30                                                      | USDA SR 26 |
| Sweeteners, Other         | Zinc     | 0.03                                                      | USDA SR 26 |
| Tea                       | Zinc     | 1.69                                                      | USDA SR 26 |
| Tomatoes                  | Zinc     | 0.17                                                      | USDA SR 26 |
| Vegetables, Other         | Zinc     | 0.21                                                      | USDA SR 26 |

| Food item                 | Nutrient | Nutrient composition (100 g <sup>-1</sup> edible portion) | Source        |
|---------------------------|----------|-----------------------------------------------------------|---------------|
| Wheat                     | Zinc     | 2.91                                                      | USDA SR 26    |
| Whey                      | Zinc     | 2.21                                                      | USDA SR 26    |
| Wine                      | Zinc     | 0.11                                                      | USDA SR 26    |
| Yams                      | Zinc     | 0.24                                                      | USDA SR 26    |
| Sugar Beet                | Zinc     | 0.35                                                      | USDA SR 26    |
| Apples                    | Phytate  | 55.00                                                     | Tanzanian FCT |
| Aquatic Animals, Others   | Phytate  | 0.00                                                      | Tanzanian FCT |
| Aquatic Plants            | Phytate  | 0.00                                                      | Tanzanian FCT |
| Bananas                   | Phytate  | 0.00                                                      | Tanzanian FCT |
| Barley                    | Phytate  | 452.00                                                    | Tanzanian FCT |
| Beans                     | Phytate  | 1586.00                                                   | Tanzanian FCT |
| Beer                      | Phytate  | 0.00                                                      | Tanzanian FCT |
| Beverages, Alcoholic      | Phytate  | 0.00                                                      | Tanzanian FCT |
| Beverages, Fermented      | Phytate  | 0.00                                                      | Tanzanian FCT |
| Bovine Meat               | Phytate  | 0.00                                                      | Tanzanian FCT |
| Butter, Ghee              | Phytate  | 0.00                                                      | Tanzanian FCT |
| Cassava                   | Phytate  | 54.00                                                     | Tanzanian FCT |
| Cephalopods               | Phytate  | 0.00                                                      | Tanzanian FCT |
| Cereals, Other            | Phytate  | 282.00                                                    | Tanzanian FCT |
| Cheese                    | Phytate  | 0.00                                                      | Tanzanian FCT |
| Citrus, Other             | Phytate  | 0.00                                                      | Tanzanian FCT |
| Cloves                    | Phytate  | 0.00                                                      | Tanzanian FCT |
| Cocoa Beans               | Phytate  | 0.00                                                      | Tanzanian FCT |
| Coconut Oil               | Phytate  | 0.00                                                      | Tanzanian FCT |
| Coconuts - Incl Copra     | Phytate  | 324.00                                                    | Tanzanian FCT |
| Coffee                    | Phytate  | 0.00                                                      | Tanzanian FCT |
| Cottonseed Oil            | Phytate  | 0.00                                                      | Tanzanian FCT |
| Cream                     | Phytate  | 0.00                                                      | Tanzanian FCT |
| Crustaceans               | Phytate  | 0.00                                                      | Tanzanian FCT |
| Dates                     | Phytate  | 0.00                                                      | Tanzanian FCT |
| Demersal Fish             | Phytate  | 0.00                                                      | Tanzanian FCT |
| Eggs                      | Phytate  | 0.00                                                      | Tanzanian FCT |
| Fats, Animals, Raw        | Phytate  | 0.00                                                      | Tanzanian FCT |
| Fish, Body Oil            | Phytate  | 0.00                                                      | Tanzanian FCT |
| Fish, Liver Oil           | Phytate  | 0.00                                                      | Tanzanian FCT |
| Freshwater Fish           | Phytate  | 0.00                                                      | Tanzanian FCT |
| Fruits, Other             | Phytate  | 20.00                                                     | Tanzanian FCT |
| Grapefruit                | Phytate  | 0.00                                                      | Tanzanian FCT |
| Grapes                    | Phytate  | 59.00                                                     | Tanzanian FCT |
| Groundnut Oil             | Phytate  | 0.00                                                      | Tanzanian FCT |
| Groundnuts (Shelled Eq)   | Phytate  | 1760.00                                                   | Tanzanian FCT |
| Honey                     | Phytate  | 0.00                                                      | Tanzanian FCT |
| Lemons, Limes             | Phytate  | 0.00                                                      | Tanzanian FCT |
| Maize                     | Phytate  | 800.00                                                    | Tanzanian FCT |
| Maize Germ Oil            | Phytate  | 0.00                                                      | Tanzanian FCT |
| Marine Fish, Other        | Phytate  | 0.00                                                      | Tanzanian FCT |
| Meat, Other               | Phytate  | 0.00                                                      | Tanzanian FCT |
| Milk, Whole               | Phytate  | 0.00                                                      | Tanzanian FCT |
| Millet                    | Phytate  | 520.00                                                    | Tanzanian FCT |
| Molasses                  | Phytate  | 0.00                                                      | Tanzanian FCT |
| Molluscs, Other           | Phytate  | 0.00                                                      | Tanzanian FCT |
| Mutton & Goat Meat        | Phytate  | 0.00                                                      | Tanzanian FCT |
| Nuts                      | Phytate  | 2580.00                                                   | Tanzanian FCT |
| Oats                      | Phytate  | 282.00                                                    | Tanzanian FCT |
| Offals, Edible            | Phytate  | 0.00                                                      | Tanzanian FCT |
| Oilcrops Oil, Other       | Phytate  | 0.00                                                      | Tanzanian FCT |
| Oilcrops, Other           | Phytate  | 4710.00                                                   | Tanzanian FCT |
| Olive Oil                 | Phytate  | 0.00                                                      | Tanzanian FCT |
| Olives                    | Phytate  | 0.00                                                      | Tanzanian FCT |
| Onions                    | Phytate  | 0.00                                                      | Tanzanian FCT |
| Oranges, Mandarines       | Phytate  | 0.00                                                      | Tanzanian FCT |
| Palm Oil                  | Phytate  | 0.00                                                      | Tanzanian FCT |
| Palmkernel Oil            | Phytate  | 0.00                                                      | Tanzanian FCT |
| Peas                      | Phytate  | 28.00                                                     | Tanzanian FCT |
| Pelagic Fish              | Phytate  | 0.00                                                      | Tanzanian FCT |
| Pepper                    | Phytate  | 0.00                                                      | Tanzanian FCT |
| Pigmeat                   | Phytate  | 0.00                                                      | Tanzanian FCT |
| Pimento                   | Phytate  | 35.00                                                     | Tanzanian FCT |
| Pineapples                | Phytate  | 0.00                                                      | Tanzanian FCT |
| Plantains                 | Phytate  | 0.00                                                      | Tanzanian FCT |
| Potatoes                  | Phytate  | 147.00                                                    | Tanzanian FCT |
| Poultry Meat              | Phytate  | 0.00                                                      | Tanzanian FCT |
| Pulses, Other             | Phytate  | 1154.00                                                   | Tanzanian FCT |
| Rape and Mustard Oil      | Phytate  | 0.00                                                      | Tanzanian FCT |
| Rice (Milled Equivalent)  | Phytate  | 352.00                                                    | Tanzanian FCT |
| Ricebran Oil              | Phytate  | 0.00                                                      | Tanzanian FCT |
| Roots, Other              | Phytate  | 78.00                                                     | Tanzanian FCT |
| Rye                       | Phytate  | 282.00                                                    | Tanzanian FCT |
| Sesameseed                | Phytate  | 4710.00                                                   | Tanzanian FCT |
| Sesameseed Oil            | Phytate  | 0.00                                                      | Tanzanian FCT |
| Sorghum                   | Phytate  | 439.00                                                    | Tanzanian FCT |
| Soyabean Oil              | Phytate  | 0.00                                                      | Tanzanian FCT |
| Soyabeans                 | Phytate  | 1473.00                                                   | Tanzanian FCT |
| Spices, Other             | Phytate  | 0.00                                                      | Tanzanian FCT |
| Sugar, Refined Equivalent | Phytate  | 0.00                                                      | Tanzanian FCT |
| Sugar Cane                | Phytate  | 0.00                                                      | Tanzanian FCT |
| Sugar, Non-Centrifugal    | Phytate  | 0.00                                                      | Tanzanian FCT |
| Sunflowerseed             | Phytate  | 5160.00                                                   | Tanzanian FCT |
| Sunflowerseed Oil         | Phytate  | 0.00                                                      | Tanzanian FCT |
| Sweet Potatoes            | Phytate  | 10.00                                                     | Tanzanian FCT |
| Sweeteners, Other         | Phytate  | 0.00                                                      | Tanzanian FCT |
| Tea                       | Phytate  | 0.00                                                      | Tanzanian FCT |
| Tomatoes                  | Phytate  | 6.00                                                      | Tanzanian FCT |
| Vegetables, Other         | Phytate  | 0.00                                                      | Tanzanian FCT |
| Wheat                     | Phytate  | 282.00                                                    | Tanzanian FCT |
| Whey                      | Phytate  | 0.00                                                      | Tanzanian FCT |
| Wine                      | Phytate  | 282.00                                                    | Tanzanian FCT |

Dietary calcium and zinc deficiency risks are decreasing but remain prevalent

| Food item | Nutrient | Nutrient composition (100 g <sup>-1</sup> edible portion) | Source        |
|-----------|----------|-----------------------------------------------------------|---------------|
| Yams      | Phytate  | 19.70                                                     | Tanzanian FCT |

## Dietary calcium and zinc deficiency risks are decreasing but remain prevalent

Diriba B. Kumssa<sup>1,2,3</sup>, Edward J. M. Joy<sup>1,2</sup>, E. Louise Ander<sup>2</sup>, Michael J. Watts<sup>2</sup>, Scott D. Young<sup>1</sup>, Sue Walker<sup>3</sup> & Martin R. Broadley<sup>1</sup><sup>1</sup>School of Biosciences, University of Nottingham, Sutton Bonington Campus, Loughborough, LE12 5RD, UK, <sup>2</sup>Centre for Environmental Geochemistry, British Geological Survey, Keyworth, Nottingham, NG12 5GG, UK, <sup>3</sup>Crops For the Future, The University of Nottingham Malaysia Campus, Jalan Broga, 43500 Semenyih, Selangor Darul Ehsan, Malaysia.

Correspondence and requests for materials should be addressed to M.R.B. (martin.broadley@nottingham.ac.uk)

Supplementary Table S4 : Dietary energy supply (kcal *capita*<sup>-1</sup> d<sup>-1</sup>) by Food Balance Sheet (FBS) food item, reference year, and country.

| FAO Country code | Country     | Food item                       | Reference year | Net energy supply (kcal <i>capita</i> <sup>-1</sup> d <sup>-1</sup> ) |
|------------------|-------------|---------------------------------|----------------|-----------------------------------------------------------------------|
| 2                | Afghanistan | Animal fats                     | 1992           | 48                                                                    |
| 2                | Afghanistan | Animal Products                 | 1992           | 269                                                                   |
| 2                | Afghanistan | Apples and products             | 1992           | 1                                                                     |
| 2                | Afghanistan | Barley and products             | 1992           | 78                                                                    |
| 2                | Afghanistan | Bovine Meat                     | 1992           | 37                                                                    |
| 2                | Afghanistan | Butter, Ghee                    | 1992           | 25                                                                    |
| 2                | Afghanistan | Cereals - Excluding Beer        | 1992           | 1,356                                                                 |
| 2                | Afghanistan | Cottonseed Oil                  | 1992           | 11                                                                    |
| 2                | Afghanistan | Eggs                            | 1992           | 3                                                                     |
| 2                | Afghanistan | Fats, Animals, Raw              | 1992           | 23                                                                    |
| 2                | Afghanistan | Fruits - Excluding Wine         | 1992           | 49                                                                    |
| 2                | Afghanistan | Fruits, Other                   | 1992           | 21                                                                    |
| 2                | Afghanistan | Grand Total                     | 1992           | 1,891                                                                 |
| 2                | Afghanistan | Grapes and products (excl wine) | 1992           | 26                                                                    |
| 2                | Afghanistan | Honey                           | 1992           | 2                                                                     |
| 2                | Afghanistan | Maize and products              | 1992           | 104                                                                   |
| 2                | Afghanistan | Meat                            | 1992           | 108                                                                   |
| 2                | Afghanistan | Meat, Other                     | 1992           | 3                                                                     |
| 2                | Afghanistan | Milk - Excluding Butter         | 1992           | 101                                                                   |
| 2                | Afghanistan | Millet and products             | 1992           | 11                                                                    |
| 2                | Afghanistan | Mutton & Goat Meat              | 1992           | 64                                                                    |
| 2                | Afghanistan | Offals                          | 1992           | 9                                                                     |
| 2                | Afghanistan | Oilcrops                        | 1992           | 17                                                                    |
| 2                | Afghanistan | Oilcrops Oil, Other             | 1992           | 50                                                                    |
| 2                | Afghanistan | Oranges, Mandarines             | 1992           | 1                                                                     |
| 2                | Afghanistan | Palm Oil                        | 1992           | 5                                                                     |
| 2                | Afghanistan | Potatoes and products           | 1992           | 31                                                                    |
| 2                | Afghanistan | Poultry Meat                    | 1992           | 3                                                                     |
| 2                | Afghanistan | Pulses                          | 1992           | 20                                                                    |
| 2                | Afghanistan | Pulses, Other and products      | 1992           | 20                                                                    |
| 2                | Afghanistan | Rice (Milled Equivalent)        | 1992           | 184                                                                   |
| 2                | Afghanistan | Sesame seed                     | 1992           | 17                                                                    |
| 2                | Afghanistan | Sesameseed Oil                  | 1992           | 9                                                                     |
| 2                | Afghanistan | Starchy Roots                   | 1992           | 31                                                                    |
| 2                | Afghanistan | Stimulants                      | 1992           | 1                                                                     |
| 2                | Afghanistan | Sugar & Sweeteners              | 1992           | 38                                                                    |
| 2                | Afghanistan | Sugar (Raw Equivalent)          | 1992           | 36                                                                    |
| 2                | Afghanistan | Sunflowerseed Oil               | 1992           | 7                                                                     |
| 2                | Afghanistan | Tea (including mate)            | 1992           | 1                                                                     |
| 2                | Afghanistan | Treenuts                        | 1992           | 10                                                                    |
| 2                | Afghanistan | Vegetable Oils                  | 1992           | 81                                                                    |
| 2                | Afghanistan | Vegetables                      | 1992           | 18                                                                    |
| 2                | Afghanistan | Vegetables, Other               | 1992           | 18                                                                    |
| 2                | Afghanistan | Vegetal Products                | 1992           | 1,622                                                                 |
| 2                | Afghanistan | Wheat and products              | 1992           | 979                                                                   |
| 2                | Afghanistan | Animal fats                     | 1993           | 46                                                                    |
| 2                | Afghanistan | Animal Products                 | 1993           | 264                                                                   |
| 2                | Afghanistan | Apples and products             | 1993           | 1                                                                     |
| 2                | Afghanistan | Barley and products             | 1993           | 92                                                                    |
| 2                | Afghanistan | Bovine Meat                     | 1993           | 38                                                                    |
| 2                | Afghanistan | Butter, Ghee                    | 1993           | 25                                                                    |
| 2                | Afghanistan | Cereals - Excluding Beer        | 1993           | 1,438                                                                 |
| 2                | Afghanistan | Cottonseed Oil                  | 1993           | 10                                                                    |
| 2                | Afghanistan | Eggs                            | 1993           | 3                                                                     |
| 2                | Afghanistan | Fats, Animals, Raw              | 1993           | 21                                                                    |
| 2                | Afghanistan | Fruits - Excluding Wine         | 1993           | 47                                                                    |
| 2                | Afghanistan | Fruits, Other                   | 1993           | 20                                                                    |
| 2                | Afghanistan | Grand Total                     | 1993           | 1,910                                                                 |
| 2                | Afghanistan | Grapes and products (excl wine) | 1993           | 24                                                                    |
| 2                | Afghanistan | Honey                           | 1993           | 2                                                                     |
| 2                | Afghanistan | Maize and products              | 1993           | 151                                                                   |
| 2                | Afghanistan | Meat                            | 1993           | 101                                                                   |
| 2                | Afghanistan | Meat, Other                     | 1993           | 3                                                                     |
| 2                | Afghanistan | Milk - Excluding Butter         | 1993           | 104                                                                   |
| 2                | Afghanistan | Millet and products             | 1993           | 12                                                                    |
| 2                | Afghanistan | Mutton & Goat Meat              | 1993           | 58                                                                    |
| 2                | Afghanistan | Offals                          | 1993           | 9                                                                     |
| 2                | Afghanistan | Oilcrops                        | 1993           | 13                                                                    |
| 2                | Afghanistan | Oilcrops Oil, Other             | 1993           | 16                                                                    |
| 2                | Afghanistan | Oranges, Mandarines             | 1993           | 1                                                                     |
| 2                | Afghanistan | Potatoes and products           | 1993           | 28                                                                    |
| 2                | Afghanistan | Poultry Meat                    | 1993           | 3                                                                     |
| 2                | Afghanistan | Pulses                          | 1993           | 22                                                                    |
| 2                | Afghanistan | Pulses, Other and products      | 1993           | 22                                                                    |
| 2                | Afghanistan | Rice (Milled Equivalent)        | 1993           | 147                                                                   |
| 2                | Afghanistan | Sesame seed                     | 1993           | 13                                                                    |
| 2                | Afghanistan | Sesameseed Oil                  | 1993           | 6                                                                     |
| 2                | Afghanistan | Starchy Roots                   | 1993           | 28                                                                    |
| 2                | Afghanistan | Stimulants                      | 1993           | 1                                                                     |
| 2                | Afghanistan | Sugar & Sweeteners              | 1993           | 32                                                                    |
| 2                | Afghanistan | Sugar (Raw Equivalent)          | 1993           | 30                                                                    |
| 2                | Afghanistan | Sunflowerseed Oil               | 1993           | 6                                                                     |
| 2                | Afghanistan | Tea (including mate)            | 1993           | 1                                                                     |
| 2                | Afghanistan | Treenuts                        | 1993           | 9                                                                     |
| 2                | Afghanistan | Vegetable Oils                  | 1993           | 38                                                                    |

Dietary calcium and zinc deficiency risks are decreasing but remain prevalent

| FAO Country code | Country     | Food item                       | Reference year | Net energy supply (kcal capita <sup>-1</sup> d <sup>-1</sup> ) |
|------------------|-------------|---------------------------------|----------------|----------------------------------------------------------------|
| 2                | Afghanistan | Vegetables                      | 1993           | 17                                                             |
| 2                | Afghanistan | Vegetables, Other               | 1993           | 17                                                             |
| 2                | Afghanistan | Vegetal Products                | 1993           | 1,646                                                          |
| 2                | Afghanistan | Wheat and products              | 1993           | 1,036                                                          |
| 2                | Afghanistan | Animal fats                     | 1994           | 48                                                             |
| 2                | Afghanistan | Animal Products                 | 1994           | 272                                                            |
| 2                | Afghanistan | Apples and products             | 1994           | 1                                                              |
| 2                | Afghanistan | Barley and products             | 1994           | 78                                                             |
| 2                | Afghanistan | Bovine Meat                     | 1994           | 41                                                             |
| 2                | Afghanistan | Butter, Ghee                    | 1994           | 28                                                             |
| 2                | Afghanistan | Cereals - Excluding Beer        | 1994           | 1,358                                                          |
| 2                | Afghanistan | Cottonseed Oil                  | 1994           | 9                                                              |
| 2                | Afghanistan | Eggs                            | 1994           | 3                                                              |
| 2                | Afghanistan | Fats, Animals, Raw              | 1994           | 20                                                             |
| 2                | Afghanistan | Fruits - Excluding Wine         | 1994           | 45                                                             |
| 2                | Afghanistan | Fruits, Other                   | 1994           | 20                                                             |
| 2                | Afghanistan | Grand Total                     | 1994           | 1,820                                                          |
| 2                | Afghanistan | Grapes and products (excl wine) | 1994           | 23                                                             |
| 2                | Afghanistan | Honey                           | 1994           | 2                                                              |
| 2                | Afghanistan | Maize and products              | 1994           | 148                                                            |
| 2                | Afghanistan | Meat                            | 1994           | 100                                                            |
| 2                | Afghanistan | Meat, Other                     | 1994           | 3                                                              |
| 2                | Afghanistan | Milk - Excluding Butter         | 1994           | 114                                                            |
| 2                | Afghanistan | Millet and products             | 1994           | 10                                                             |
| 2                | Afghanistan | Mutton & Goat Meat              | 1994           | 54                                                             |
| 2                | Afghanistan | Offals                          | 1994           | 9                                                              |
| 2                | Afghanistan | Oilcrops                        | 1994           | 13                                                             |
| 2                | Afghanistan | Oilcrops Oil, Other             | 1994           | 6                                                              |
| 2                | Afghanistan | Oranges, Mandarines             | 1994           | 1                                                              |
| 2                | Afghanistan | Potatoes and products           | 1994           | 26                                                             |
| 2                | Afghanistan | Poultry Meat                    | 1994           | 2                                                              |
| 2                | Afghanistan | Pulses                          | 1994           | 24                                                             |
| 2                | Afghanistan | Pulses, Other and products      | 1994           | 24                                                             |
| 2                | Afghanistan | Rice (Milled Equivalent)        | 1994           | 161                                                            |
| 2                | Afghanistan | Sesame seed                     | 1994           | 13                                                             |
| 2                | Afghanistan | Sesameseed Oil                  | 1994           | 6                                                              |
| 2                | Afghanistan | Starchy Roots                   | 1994           | 26                                                             |
| 2                | Afghanistan | Stimulants                      | 1994           | 1                                                              |
| 2                | Afghanistan | Sugar & Sweeteners              | 1994           | 29                                                             |
| 2                | Afghanistan | Sugar (Raw Equivalent)          | 1994           | 27                                                             |
| 2                | Afghanistan | Sunflowerseed Oil               | 1994           | 5                                                              |
| 2                | Afghanistan | Tea (including mate)            | 1994           | 1                                                              |
| 2                | Afghanistan | Treenuts                        | 1994           | 8                                                              |
| 2                | Afghanistan | Vegetable Oils                  | 1994           | 27                                                             |
| 2                | Afghanistan | Vegetables                      | 1994           | 16                                                             |
| 2                | Afghanistan | Vegetables, Other               | 1994           | 16                                                             |
| 2                | Afghanistan | Vegetal Products                | 1994           | 1,548                                                          |
| 2                | Afghanistan | Wheat and products              | 1994           | 962                                                            |
| 2                | Afghanistan | Animal fats                     | 1995           | 59                                                             |
| 2                | Afghanistan | Animal Products                 | 1995           | 287                                                            |
| 2                | Afghanistan | Apples and products             | 1995           | 1                                                              |
| 2                | Afghanistan | Barley and products             | 1995           | 64                                                             |
| 2                | Afghanistan | Bovine Meat                     | 1995           | 44                                                             |
| 2                | Afghanistan | Butter, Ghee                    | 1995           | 29                                                             |
| 2                | Afghanistan | Cereals - Excluding Beer        | 1995           | 1,309                                                          |
| 2                | Afghanistan | Cottonseed Oil                  | 1995           | 8                                                              |
| 2                | Afghanistan | Eggs                            | 1995           | 3                                                              |
| 2                | Afghanistan | Fats, Animals, Raw              | 1995           | 30                                                             |
| 2                | Afghanistan | Fruits - Excluding Wine         | 1995           | 44                                                             |
| 2                | Afghanistan | Fruits, Other                   | 1995           | 19                                                             |
| 2                | Afghanistan | Grand Total                     | 1995           | 1,844                                                          |
| 2                | Afghanistan | Grapes and products (excl wine) | 1995           | 23                                                             |
| 2                | Afghanistan | Honey                           | 1995           | 2                                                              |
| 2                | Afghanistan | Maize and products              | 1995           | 149                                                            |
| 2                | Afghanistan | Meat                            | 1995           | 98                                                             |
| 2                | Afghanistan | Meat, Other                     | 1995           | 2                                                              |
| 2                | Afghanistan | Milk - Excluding Butter         | 1995           | 118                                                            |
| 2                | Afghanistan | Millet and products             | 1995           | 10                                                             |
| 2                | Afghanistan | Mutton & Goat Meat              | 1995           | 50                                                             |
| 2                | Afghanistan | Offals                          | 1995           | 9                                                              |
| 2                | Afghanistan | Oilcrops                        | 1995           | 11                                                             |
| 2                | Afghanistan | Oilcrops Oil, Other             | 1995           | 17                                                             |
| 2                | Afghanistan | Oranges, Mandarines             | 1995           | 1                                                              |
| 2                | Afghanistan | Palm Oil                        | 1995           | 2                                                              |
| 2                | Afghanistan | Potatoes and products           | 1995           | 25                                                             |
| 2                | Afghanistan | Poultry Meat                    | 1995           | 2                                                              |
| 2                | Afghanistan | Pulses                          | 1995           | 17                                                             |
| 2                | Afghanistan | Pulses, Other and products      | 1995           | 17                                                             |
| 2                | Afghanistan | Rice (Milled Equivalent)        | 1995           | 185                                                            |
| 2                | Afghanistan | Sesame seed                     | 1995           | 11                                                             |
| 2                | Afghanistan | Sesameseed Oil                  | 1995           | 6                                                              |
| 2                | Afghanistan | Soyabean Oil                    | 1995           | 40                                                             |
| 2                | Afghanistan | Starchy Roots                   | 1995           | 25                                                             |
| 2                | Afghanistan | Stimulants                      | 1995           | 1                                                              |
| 2                | Afghanistan | Sugar & Sweeteners              | 1995           | 30                                                             |
| 2                | Afghanistan | Sugar (Raw Equivalent)          | 1995           | 28                                                             |
| 2                | Afghanistan | Sunflowerseed Oil               | 1995           | 23                                                             |
| 2                | Afghanistan | Tea (including mate)            | 1995           | 1                                                              |
| 2                | Afghanistan | Treenuts                        | 1995           | 8                                                              |
| 2                | Afghanistan | Vegetable Oils                  | 1995           | 97                                                             |
| 2                | Afghanistan | Vegetables                      | 1995           | 16                                                             |
| 2                | Afghanistan | Vegetables, Other               | 1995           | 16                                                             |
| 2                | Afghanistan | Vegetal Products                | 1995           | 1,557                                                          |
| 2                | Afghanistan | Wheat and products              | 1995           | 901                                                            |
| 2                | Afghanistan | Animal fats                     | 1996           | 57                                                             |
| 2                | Afghanistan | Animal Products                 | 1996           | 300                                                            |
| 2                | Afghanistan | Apples and products             | 1996           | 1                                                              |



Dietary calcium and zinc deficiency risks are decreasing but remain prevalent

| FAO Country code | Country     | Food item                       | Reference year | Net energy supply (kcal capita <sup>-1</sup> d <sup>-1</sup> ) |
|------------------|-------------|---------------------------------|----------------|----------------------------------------------------------------|
| 2                | Afghanistan | Barley and products             | 1996           | 67                                                             |
| 2                | Afghanistan | Bovine Meat                     | 1996           | 46                                                             |
| 2                | Afghanistan | Butter, Ghee                    | 1996           | 32                                                             |
| 2                | Afghanistan | Cereals - Excluding Beer        | 1996           | 1,322                                                          |
| 2                | Afghanistan | Cottonseed Oil                  | 1996           | 8                                                              |
| 2                | Afghanistan | Eggs                            | 1996           | 3                                                              |
| 2                | Afghanistan | Fats, Animals, Raw              | 1996           | 25                                                             |
| 2                | Afghanistan | Fruits - Excluding Wine         | 1996           | 42                                                             |
| 2                | Afghanistan | Fruits, Other                   | 1996           | 18                                                             |
| 2                | Afghanistan | Grand Total                     | 1996           | 1,843                                                          |
| 2                | Afghanistan | Grapes and products (excl wine) | 1996           | 21                                                             |
| 2                | Afghanistan | Honey                           | 1996           | 2                                                              |
| 2                | Afghanistan | Maize and products              | 1996           | 96                                                             |
| 2                | Afghanistan | Meat                            | 1996           | 102                                                            |
| 2                | Afghanistan | Meat, Other                     | 1996           | 2                                                              |
| 2                | Afghanistan | Milk - Excluding Butter         | 1996           | 129                                                            |
| 2                | Afghanistan | Millet and products             | 1996           | 7                                                              |
| 2                | Afghanistan | Mutton & Goat Meat              | 1996           | 52                                                             |
| 2                | Afghanistan | Offals                          | 1996           | 9                                                              |
| 2                | Afghanistan | Oilcrops                        | 1996           | 10                                                             |
| 2                | Afghanistan | Oilcrops Oil, Other             | 1996           | 5                                                              |
| 2                | Afghanistan | Oranges, Mandarines             | 1996           | 1                                                              |
| 2                | Afghanistan | Palm Oil                        | 1996           | 1                                                              |
| 2                | Afghanistan | Potatoes and products           | 1996           | 24                                                             |
| 2                | Afghanistan | Poultry Meat                    | 1996           | 2                                                              |
| 2                | Afghanistan | Pulses                          | 1996           | 16                                                             |
| 2                | Afghanistan | Pulses, Other and products      | 1996           | 16                                                             |
| 2                | Afghanistan | Rice (Milled Equivalent)        | 1996           | 141                                                            |
| 2                | Afghanistan | Sesame seed                     | 1996           | 10                                                             |
| 2                | Afghanistan | Sesameseed Oil                  | 1996           | 5                                                              |
| 2                | Afghanistan | Soyabean Oil                    | 1996           | 43                                                             |
| 2                | Afghanistan | Starchy Roots                   | 1996           | 24                                                             |
| 2                | Afghanistan | Stimulants                      | 1996           | 1                                                              |
| 2                | Afghanistan | Sugar & Sweeteners              | 1996           | 25                                                             |
| 2                | Afghanistan | Sugar (Raw Equivalent)          | 1996           | 24                                                             |
| 2                | Afghanistan | Sunflowerseed Oil               | 1996           | 17                                                             |
| 2                | Afghanistan | Tea (including mate)            | 1996           | 1                                                              |
| 2                | Afghanistan | Treenuts                        | 1996           | 7                                                              |
| 2                | Afghanistan | Vegetable Oils                  | 1996           | 80                                                             |
| 2                | Afghanistan | Vegetables                      | 1996           | 16                                                             |
| 2                | Afghanistan | Vegetables, Other               | 1996           | 16                                                             |
| 2                | Afghanistan | Vegetal Products                | 1996           | 1,543                                                          |
| 2                | Afghanistan | Wheat and products              | 1996           | 1,010                                                          |
| 2                | Afghanistan | Animal fats                     | 1997           | 57                                                             |
| 2                | Afghanistan | Animal Products                 | 1997           | 315                                                            |
| 2                | Afghanistan | Apples and products             | 1997           | 1                                                              |
| 2                | Afghanistan | Barley and products             | 1997           | 75                                                             |
| 2                | Afghanistan | Bovine Meat                     | 1997           | 49                                                             |
| 2                | Afghanistan | Butter, Ghee                    | 1997           | 34                                                             |
| 2                | Afghanistan | Cereals - Excluding Beer        | 1997           | 1,388                                                          |
| 2                | Afghanistan | Cottonseed Oil                  | 1997           | 8                                                              |
| 2                | Afghanistan | Eggs                            | 1997           | 3                                                              |
| 2                | Afghanistan | Fats, Animals, Raw              | 1997           | 24                                                             |
| 2                | Afghanistan | Fruits - Excluding Wine         | 1997           | 41                                                             |
| 2                | Afghanistan | Fruits, Other                   | 1997           | 18                                                             |
| 2                | Afghanistan | Grand Total                     | 1997           | 1,874                                                          |
| 2                | Afghanistan | Grapes and products (excl wine) | 1997           | 21                                                             |
| 2                | Afghanistan | Honey                           | 1997           | 2                                                              |
| 2                | Afghanistan | Maize and products              | 1997           | 77                                                             |
| 2                | Afghanistan | Meat                            | 1997           | 108                                                            |
| 2                | Afghanistan | Meat, Other                     | 1997           | 2                                                              |
| 2                | Afghanistan | Milk - Excluding Butter         | 1997           | 137                                                            |
| 2                | Afghanistan | Millet and products             | 1997           | 8                                                              |
| 2                | Afghanistan | Mutton & Goat Meat              | 1997           | 55                                                             |
| 2                | Afghanistan | Offals                          | 1997           | 9                                                              |
| 2                | Afghanistan | Oilcrops                        | 1997           | 10                                                             |
| 2                | Afghanistan | Oilcrops Oil, Other             | 1997           | 4                                                              |
| 2                | Afghanistan | Oranges, Mandarines             | 1997           | 1                                                              |
| 2                | Afghanistan | Palm Oil                        | 1997           | 1                                                              |
| 2                | Afghanistan | Potatoes and products           | 1997           | 23                                                             |
| 2                | Afghanistan | Poultry Meat                    | 1997           | 3                                                              |
| 2                | Afghanistan | Pulses                          | 1997           | 14                                                             |
| 2                | Afghanistan | Pulses, Other and products      | 1997           | 14                                                             |
| 2                | Afghanistan | Rice (Milled Equivalent)        | 1997           | 175                                                            |
| 2                | Afghanistan | Sesame seed                     | 1997           | 9                                                              |
| 2                | Afghanistan | Sesameseed Oil                  | 1997           | 5                                                              |
| 2                | Afghanistan | Soyabean Oil                    | 1997           | 6                                                              |
| 2                | Afghanistan | Starchy Roots                   | 1997           | 23                                                             |
| 2                | Afghanistan | Stimulants                      | 1997           | 2                                                              |
| 2                | Afghanistan | Sugar & Sweeteners              | 1997           | 28                                                             |
| 2                | Afghanistan | Sugar (Raw Equivalent)          | 1997           | 26                                                             |
| 2                | Afghanistan | Sunflowerseed Oil               | 1997           | 7                                                              |
| 2                | Afghanistan | Tea (including mate)            | 1997           | 1                                                              |
| 2                | Afghanistan | Treenuts                        | 1997           | 7                                                              |
| 2                | Afghanistan | Vegetable Oils                  | 1997           | 30                                                             |
| 2                | Afghanistan | Vegetables                      | 1997           | 16                                                             |
| 2                | Afghanistan | Vegetables, Other               | 1997           | 16                                                             |
| 2                | Afghanistan | Vegetal Products                | 1997           | 1,559                                                          |
| 2                | Afghanistan | Wheat and products              | 1997           | 1,053                                                          |
| 2                | Afghanistan | Animal fats                     | 1998           | 56                                                             |
| 2                | Afghanistan | Animal Products                 | 1998           | 324                                                            |
| 2                | Afghanistan | Apples and products             | 1998           | 1                                                              |
| 2                | Afghanistan | Barley and products             | 1998           | 71                                                             |
| 2                | Afghanistan | Bovine Meat                     | 1998           | 52                                                             |
| 2                | Afghanistan | Butter, Ghee                    | 1998           | 34                                                             |
| 2                | Afghanistan | Cereals - Excluding Beer        | 1998           | 1,400                                                          |
| 2                | Afghanistan | Cottonseed Oil                  | 1998           | 7                                                              |

Dietary calcium and zinc deficiency risks are decreasing but remain prevalent

| FAO Country code | Country     | Food item                       | Reference year | Net energy supply (kcal capita <sup>-1</sup> d <sup>-1</sup> ) |
|------------------|-------------|---------------------------------|----------------|----------------------------------------------------------------|
| 2                | Afghanistan | Eggs                            | 1998           | 3                                                              |
| 2                | Afghanistan | Fats, Animals, Raw              | 1998           | 22                                                             |
| 2                | Afghanistan | Fruits - Excluding Wine         | 1998           | 41                                                             |
| 2                | Afghanistan | Fruits, Other                   | 1998           | 19                                                             |
| 2                | Afghanistan | Grand Total                     | 1998           | 1,903                                                          |
| 2                | Afghanistan | Grapes and products (excl wine) | 1998           | 20                                                             |
| 2                | Afghanistan | Honey                           | 1998           | 2                                                              |
| 2                | Afghanistan | Maize and products              | 1998           | 83                                                             |
| 2                | Afghanistan | Meat                            | 1998           | 114                                                            |
| 2                | Afghanistan | Meat, Other                     | 1998           | 2                                                              |
| 2                | Afghanistan | Milk - Excluding Butter         | 1998           | 141                                                            |
| 2                | Afghanistan | Millet and products             | 1998           | 9                                                              |
| 2                | Afghanistan | Mutton & Goat Meat              | 1998           | 58                                                             |
| 2                | Afghanistan | Offals                          | 1998           | 10                                                             |
| 2                | Afghanistan | Oilcrops                        | 1998           | 9                                                              |
| 2                | Afghanistan | Oilcrops Oil, Other             | 1998           | 3                                                              |
| 2                | Afghanistan | Palm Oil                        | 1998           | 2                                                              |
| 2                | Afghanistan | Potatoes and products           | 1998           | 23                                                             |
| 2                | Afghanistan | Poultry Meat                    | 1998           | 3                                                              |
| 2                | Afghanistan | Pulses                          | 1998           | 16                                                             |
| 2                | Afghanistan | Pulses, Other and products      | 1998           | 16                                                             |
| 2                | Afghanistan | Rice (Milled Equivalent)        | 1998           | 182                                                            |
| 2                | Afghanistan | Sesame seed                     | 1998           | 9                                                              |
| 2                | Afghanistan | Sesameseed Oil                  | 1998           | 5                                                              |
| 2                | Afghanistan | Soyabean Oil                    | 1998           | 13                                                             |
| 2                | Afghanistan | Starchy Roots                   | 1998           | 23                                                             |
| 2                | Afghanistan | Stimulants                      | 1998           | 1                                                              |
| 2                | Afghanistan | Sugar & Sweeteners              | 1998           | 29                                                             |
| 2                | Afghanistan | Sugar (Raw Equivalent)          | 1998           | 28                                                             |
| 2                | Afghanistan | Sunflowerseed Oil               | 1998           | 6                                                              |
| 2                | Afghanistan | Tea (including mate)            | 1998           | 1                                                              |
| 2                | Afghanistan | Treenuts                        | 1998           | 5                                                              |
| 2                | Afghanistan | Vegetable Oils                  | 1998           | 38                                                             |
| 2                | Afghanistan | Vegetables                      | 1998           | 16                                                             |
| 2                | Afghanistan | Vegetables, Other               | 1998           | 16                                                             |
| 2                | Afghanistan | Vegetal Products                | 1998           | 1,578                                                          |
| 2                | Afghanistan | Wheat and products              | 1998           | 1,055                                                          |
| 2                | Afghanistan | Animal fats                     | 1999           | 62                                                             |
| 2                | Afghanistan | Animal Products                 | 1999           | 341                                                            |
| 2                | Afghanistan | Apples and products             | 1999           | 1                                                              |
| 2                | Afghanistan | Barley and products             | 1999           | 63                                                             |
| 2                | Afghanistan | Bovine Meat                     | 1999           | 44                                                             |
| 2                | Afghanistan | Butter, Ghee                    | 1999           | 38                                                             |
| 2                | Afghanistan | Cereals - Excluding Beer        | 1999           | 1,321                                                          |
| 2                | Afghanistan | Cottonseed Oil                  | 1999           | 7                                                              |
| 2                | Afghanistan | Eggs                            | 1999           | 3                                                              |
| 2                | Afghanistan | Fats, Animals, Raw              | 1999           | 24                                                             |
| 2                | Afghanistan | Fruits - Excluding Wine         | 1999           | 38                                                             |
| 2                | Afghanistan | Fruits, Other                   | 1999           | 17                                                             |
| 2                | Afghanistan | Grand Total                     | 1999           | 1,852                                                          |
| 2                | Afghanistan | Grapes and products (excl wine) | 1999           | 19                                                             |
| 2                | Afghanistan | Honey                           | 1999           | 2                                                              |
| 2                | Afghanistan | Maize and products              | 1999           | 59                                                             |
| 2                | Afghanistan | Meat                            | 1999           | 111                                                            |
| 2                | Afghanistan | Meat, Other                     | 1999           | 2                                                              |
| 2                | Afghanistan | Milk - Excluding Butter         | 1999           | 156                                                            |
| 2                | Afghanistan | Millet and products             | 1999           | 7                                                              |
| 2                | Afghanistan | Mutton & Goat Meat              | 1999           | 62                                                             |
| 2                | Afghanistan | Offals                          | 1999           | 9                                                              |
| 2                | Afghanistan | Oilcrops                        | 1999           | 9                                                              |
| 2                | Afghanistan | Oilcrops Oil, Other             | 1999           | 2                                                              |
| 2                | Afghanistan | Oranges, Mandarines             | 1999           | 1                                                              |
| 2                | Afghanistan | Palm Oil                        | 1999           | 1                                                              |
| 2                | Afghanistan | Potatoes and products           | 1999           | 22                                                             |
| 2                | Afghanistan | Poultry Meat                    | 1999           | 2                                                              |
| 2                | Afghanistan | Pulses                          | 1999           | 12                                                             |
| 2                | Afghanistan | Pulses, Other and products      | 1999           | 12                                                             |
| 2                | Afghanistan | Rice (Milled Equivalent)        | 1999           | 138                                                            |
| 2                | Afghanistan | Sesame seed                     | 1999           | 9                                                              |
| 2                | Afghanistan | Sesameseed Oil                  | 1999           | 5                                                              |
| 2                | Afghanistan | Soyabean Oil                    | 1999           | 31                                                             |
| 2                | Afghanistan | Starchy Roots                   | 1999           | 22                                                             |
| 2                | Afghanistan | Stimulants                      | 1999           | 1                                                              |
| 2                | Afghanistan | Sugar & Sweeteners              | 1999           | 31                                                             |
| 2                | Afghanistan | Sugar (Raw Equivalent)          | 1999           | 30                                                             |
| 2                | Afghanistan | Sunflowerseed Oil               | 1999           | 6                                                              |
| 2                | Afghanistan | Tea (including mate)            | 1999           | 1                                                              |
| 2                | Afghanistan | Treenuts                        | 1999           | 7                                                              |
| 2                | Afghanistan | Vegetable Oils                  | 1999           | 52                                                             |
| 2                | Afghanistan | Vegetables                      | 1999           | 17                                                             |
| 2                | Afghanistan | Vegetables, Other               | 1999           | 17                                                             |
| 2                | Afghanistan | Vegetal Products                | 1999           | 1,511                                                          |
| 2                | Afghanistan | Wheat and products              | 1999           | 1,053                                                          |
| 2                | Afghanistan | Animal fats                     | 2000           | 50                                                             |
| 2                | Afghanistan | Animal Products                 | 2000           | 275                                                            |
| 2                | Afghanistan | Apples and products             | 2000           | 1                                                              |
| 2                | Afghanistan | Barley and products             | 2000           | 36                                                             |
| 2                | Afghanistan | Bovine Meat                     | 2000           | 36                                                             |
| 2                | Afghanistan | Butter, Ghee                    | 2000           | 30                                                             |
| 2                | Afghanistan | Cereals - Excluding Beer        | 2000           | 1,335                                                          |
| 2                | Afghanistan | Cottonseed Oil                  | 2000           | 6                                                              |
| 2                | Afghanistan | Eggs                            | 2000           | 2                                                              |
| 2                | Afghanistan | Fats, Animals, Raw              | 2000           | 20                                                             |
| 2                | Afghanistan | Fruits - Excluding Wine         | 2000           | 37                                                             |
| 2                | Afghanistan | Fruits, Other                   | 2000           | 18                                                             |
| 2                | Afghanistan | Grand Total                     | 2000           | 1,791                                                          |
| 2                | Afghanistan | Grapes and products (excl wine) | 2000           | 17                                                             |

## Dietary calcium and zinc deficiency risks are decreasing but remain prevalent

| FAO Country code | Country     | Food item                       | Reference year | Net energy supply (kcal capita <sup>-1</sup> d <sup>-1</sup> ) |
|------------------|-------------|---------------------------------|----------------|----------------------------------------------------------------|
| 2                | Afghanistan | Honey                           | 2000           | 2                                                              |
| 2                | Afghanistan | Maize and products              | 2000           | 27                                                             |
| 2                | Afghanistan | Meat                            | 2000           | 93                                                             |
| 2                | Afghanistan | Meat, Other                     | 2000           | 2                                                              |
| 2                | Afghanistan | Milk - Excluding Butter         | 2000           | 123                                                            |
| 2                | Afghanistan | Millet and products             | 2000           | 8                                                              |
| 2                | Afghanistan | Mutton & Goat Meat              | 2000           | 53                                                             |
| 2                | Afghanistan | Offals                          | 2000           | 7                                                              |
| 2                | Afghanistan | Oilcrops                        | 2000           | 9                                                              |
| 2                | Afghanistan | Oilcrops Oil, Other             | 2000           | 2                                                              |
| 2                | Afghanistan | Oranges, Mandarines             | 2000           | 1                                                              |
| 2                | Afghanistan | Palm Oil                        | 2000           | 2                                                              |
| 2                | Afghanistan | Potatoes and products           | 2000           | 22                                                             |
| 2                | Afghanistan | Poultry Meat                    | 2000           | 2                                                              |
| 2                | Afghanistan | Pulses                          | 2000           | 10                                                             |
| 2                | Afghanistan | Pulses, Other and products      | 2000           | 10                                                             |
| 2                | Afghanistan | Rice (Milled Equivalent)        | 2000           | 184                                                            |
| 2                | Afghanistan | Sesame seed                     | 2000           | 9                                                              |
| 2                | Afghanistan | Sesameseed Oil                  | 2000           | 5                                                              |
| 2                | Afghanistan | Soyabean Oil                    | 2000           | 27                                                             |
| 2                | Afghanistan | Starchy Roots                   | 2000           | 22                                                             |
| 2                | Afghanistan | Stimulants                      | 2000           | 1                                                              |
| 2                | Afghanistan | Sugar & Sweeteners              | 2000           | 31                                                             |
| 2                | Afghanistan | Sugar (Raw Equivalent)          | 2000           | 29                                                             |
| 2                | Afghanistan | Sunflowerseed Oil               | 2000           | 6                                                              |
| 2                | Afghanistan | Tea (including mate)            | 2000           | 1                                                              |
| 2                | Afghanistan | Treenuts                        | 2000           | 5                                                              |
| 2                | Afghanistan | Vegetable Oils                  | 2000           | 48                                                             |
| 2                | Afghanistan | Vegetables                      | 2000           | 17                                                             |
| 2                | Afghanistan | Vegetables, Other               | 2000           | 17                                                             |
| 2                | Afghanistan | Vegetal Products                | 2000           | 1,515                                                          |
| 2                | Afghanistan | Wheat and products              | 2000           | 1,079                                                          |
| 2                | Afghanistan | Animal fats                     | 2001           | 36                                                             |
| 2                | Afghanistan | Animal Products                 | 2001           | 202                                                            |
| 2                | Afghanistan | Apples and products             | 2001           | 1                                                              |
| 2                | Afghanistan | Barley and products             | 2001           | 35                                                             |
| 2                | Afghanistan | Bovine Meat                     | 2001           | 30                                                             |
| 2                | Afghanistan | Butter, Ghee                    | 2001           | 19                                                             |
| 2                | Afghanistan | Cereals - Excluding Beer        | 2001           | 1,344                                                          |
| 2                | Afghanistan | Cottonseed Oil                  | 2001           | 6                                                              |
| 2                | Afghanistan | Eggs                            | 2001           | 2                                                              |
| 2                | Afghanistan | Fats, Animals, Raw              | 2001           | 17                                                             |
| 2                | Afghanistan | Fruits - Excluding Wine         | 2001           | 42                                                             |
| 2                | Afghanistan | Fruits, Other                   | 2001           | 18                                                             |
| 2                | Afghanistan | Grand Total                     | 2001           | 1,737                                                          |
| 2                | Afghanistan | Grapes and products (excl wine) | 2001           | 22                                                             |
| 2                | Afghanistan | Honey                           | 2001           | 2                                                              |
| 2                | Afghanistan | Maize and products              | 2001           | 37                                                             |
| 2                | Afghanistan | Meat                            | 2001           | 79                                                             |
| 2                | Afghanistan | Meat, Other                     | 2001           | 2                                                              |
| 2                | Afghanistan | Milk - Excluding Butter         | 2001           | 80                                                             |
| 2                | Afghanistan | Millet and products             | 2001           | 8                                                              |
| 2                | Afghanistan | Mutton & Goat Meat              | 2001           | 45                                                             |
| 2                | Afghanistan | Offals                          | 2001           | 6                                                              |
| 2                | Afghanistan | Oilcrops                        | 2001           | 9                                                              |
| 2                | Afghanistan | Oilcrops Oil, Other             | 2001           | 2                                                              |
| 2                | Afghanistan | Oranges, Mandarines             | 2001           | 1                                                              |
| 2                | Afghanistan | Potatoes and products           | 2001           | 21                                                             |
| 2                | Afghanistan | Poultry Meat                    | 2001           | 2                                                              |
| 2                | Afghanistan | Pulses                          | 2001           | 17                                                             |
| 2                | Afghanistan | Pulses, Other and products      | 2001           | 17                                                             |
| 2                | Afghanistan | Rice (Milled Equivalent)        | 2001           | 197                                                            |
| 2                | Afghanistan | Sesame seed                     | 2001           | 9                                                              |
| 2                | Afghanistan | Sesameseed Oil                  | 2001           | 5                                                              |
| 2                | Afghanistan | Soyabean Oil                    | 2001           | 27                                                             |
| 2                | Afghanistan | Starchy Roots                   | 2001           | 21                                                             |
| 2                | Afghanistan | Stimulants                      | 2001           | 1                                                              |
| 2                | Afghanistan | Sugar & Sweeteners              | 2001           | 30                                                             |
| 2                | Afghanistan | Sugar (Raw Equivalent)          | 2001           | 28                                                             |
| 2                | Afghanistan | Sunflowerseed Oil               | 2001           | 6                                                              |
| 2                | Afghanistan | Tea (including mate)            | 2001           | 1                                                              |
| 2                | Afghanistan | Treenuts                        | 2001           | 5                                                              |
| 2                | Afghanistan | Vegetable Oils                  | 2001           | 46                                                             |
| 2                | Afghanistan | Vegetables                      | 2001           | 20                                                             |
| 2                | Afghanistan | Vegetables, Other               | 2001           | 20                                                             |
| 2                | Afghanistan | Vegetal Products                | 2001           | 1,535                                                          |
| 2                | Afghanistan | Wheat and products              | 2001           | 1,068                                                          |
| 2                | Afghanistan | Animal fats                     | 2002           | 44                                                             |
| 2                | Afghanistan | Animal Products                 | 2002           | 259                                                            |
| 2                | Afghanistan | Apples and products             | 2002           | 1                                                              |
| 2                | Afghanistan | Barley and products             | 2002           | 49                                                             |
| 2                | Afghanistan | Bovine Meat                     | 2002           | 40                                                             |
| 2                | Afghanistan | Butter, Ghee                    | 2002           | 31                                                             |
| 2                | Afghanistan | Cereals - Excluding Beer        | 2002           | 1,395                                                          |
| 2                | Afghanistan | Cottonseed Oil                  | 2002           | 6                                                              |
| 2                | Afghanistan | Eggs                            | 2002           | 3                                                              |
| 2                | Afghanistan | Fats, Animals, Raw              | 2002           | 13                                                             |
| 2                | Afghanistan | Fruits - Excluding Wine         | 2002           | 38                                                             |
| 2                | Afghanistan | Fruits, Other                   | 2002           | 17                                                             |
| 2                | Afghanistan | Grand Total                     | 2002           | 1,826                                                          |
| 2                | Afghanistan | Grapes and products (excl wine) | 2002           | 18                                                             |
| 2                | Afghanistan | Honey                           | 2002           | 2                                                              |
| 2                | Afghanistan | Maize and products              | 2002           | 65                                                             |
| 2                | Afghanistan | Meat                            | 2002           | 78                                                             |
| 2                | Afghanistan | Meat, Other                     | 2002           | 2                                                              |
| 2                | Afghanistan | Milk - Excluding Butter         | 2002           | 128                                                            |
| 2                | Afghanistan | Millet and products             | 2002           | 7                                                              |

Dietary calcium and zinc deficiency risks are decreasing but remain prevalent

| FAO Country code | Country     | Food item                       | Reference year | Net energy supply (kcal capita <sup>-1</sup> d <sup>-1</sup> ) |
|------------------|-------------|---------------------------------|----------------|----------------------------------------------------------------|
| 2                | Afghanistan | Mutton & Goat Meat              | 2002           | 32                                                             |
| 2                | Afghanistan | Offals                          | 2002           | 7                                                              |
| 2                | Afghanistan | Oilcrops                        | 2002           | 8                                                              |
| 2                | Afghanistan | Oranges, Mandarines             | 2002           | 1                                                              |
| 2                | Afghanistan | Palm Oil                        | 2002           | 15                                                             |
| 2                | Afghanistan | Potatoes and products           | 2002           | 20                                                             |
| 2                | Afghanistan | Poultry Meat                    | 2002           | 4                                                              |
| 2                | Afghanistan | Pulses                          | 2002           | 10                                                             |
| 2                | Afghanistan | Pulses, Other and products      | 2002           | 10                                                             |
| 2                | Afghanistan | Rice (Milled Equivalent)        | 2002           | 206                                                            |
| 2                | Afghanistan | Sesame seed                     | 2002           | 8                                                              |
| 2                | Afghanistan | Sesameseed Oil                  | 2002           | 4                                                              |
| 2                | Afghanistan | Soyabean Oil                    | 2002           | 8                                                              |
| 2                | Afghanistan | Starchy Roots                   | 2002           | 20                                                             |
| 2                | Afghanistan | Stimulants                      | 2002           | 1                                                              |
| 2                | Afghanistan | Sugar & Sweeteners              | 2002           | 34                                                             |
| 2                | Afghanistan | Sugar (Raw Equivalent)          | 2002           | 32                                                             |
| 2                | Afghanistan | Sunflowerseed Oil               | 2002           | 5                                                              |
| 2                | Afghanistan | Tea (including mate)            | 2002           | 1                                                              |
| 2                | Afghanistan | Treenuts                        | 2002           | 5                                                              |
| 2                | Afghanistan | Vegetable Oils                  | 2002           | 38                                                             |
| 2                | Afghanistan | Vegetables                      | 2002           | 16                                                             |
| 2                | Afghanistan | Vegetables, Other               | 2002           | 16                                                             |
| 2                | Afghanistan | Vegetal Products                | 2002           | 1,566                                                          |
| 2                | Afghanistan | Wheat and products              | 2002           | 1,069                                                          |
| 2                | Afghanistan | Animal fats                     | 2003           | 40                                                             |
| 2                | Afghanistan | Animal Products                 | 2003           | 238                                                            |
| 2                | Afghanistan | Apples and products             | 2003           | 1                                                              |
| 2                | Afghanistan | Bananas                         | 2003           | 1                                                              |
| 2                | Afghanistan | Barley and products             | 2003           | 56                                                             |
| 2                | Afghanistan | Bovine Meat                     | 2003           | 35                                                             |
| 2                | Afghanistan | Butter, Ghee                    | 2003           | 28                                                             |
| 2                | Afghanistan | Cereals - Excluding Beer        | 2003           | 1,452                                                          |
| 2                | Afghanistan | Cocoa Beans and products        | 2003           | 1                                                              |
| 2                | Afghanistan | Cottonseed Oil                  | 2003           | 3                                                              |
| 2                | Afghanistan | Eggs                            | 2003           | 3                                                              |
| 2                | Afghanistan | Fats, Animals, Raw              | 2003           | 12                                                             |
| 2                | Afghanistan | Fruits - Excluding Wine         | 2003           | 31                                                             |
| 2                | Afghanistan | Fruits, Other                   | 2003           | 14                                                             |
| 2                | Afghanistan | Grand Total                     | 2003           | 1,892                                                          |
| 2                | Afghanistan | Grapes and products (excl wine) | 2003           | 14                                                             |
| 2                | Afghanistan | Honey                           | 2003           | 2                                                              |
| 2                | Afghanistan | Maize and products              | 2003           | 43                                                             |
| 2                | Afghanistan | Meat                            | 2003           | 73                                                             |
| 2                | Afghanistan | Meat, Other                     | 2003           | 2                                                              |
| 2                | Afghanistan | Milk - Excluding Butter         | 2003           | 116                                                            |
| 2                | Afghanistan | Millet and products             | 2003           | 5                                                              |
| 2                | Afghanistan | Miscellaneous                   | 2003           | 1                                                              |
| 2                | Afghanistan | Mutton & Goat Meat              | 2003           | 32                                                             |
| 2                | Afghanistan | Offals                          | 2003           | 6                                                              |
| 2                | Afghanistan | Oilcrops                        | 2003           | 11                                                             |
| 2                | Afghanistan | Oranges, Mandarines             | 2003           | 1                                                              |
| 2                | Afghanistan | Palm Oil                        | 2003           | 32                                                             |
| 2                | Afghanistan | Potatoes and products           | 2003           | 31                                                             |
| 2                | Afghanistan | Poultry Meat                    | 2003           | 4                                                              |
| 2                | Afghanistan | Pulses                          | 2003           | 9                                                              |
| 2                | Afghanistan | Pulses, Other and products      | 2003           | 9                                                              |
| 2                | Afghanistan | Rice (Milled Equivalent)        | 2003           | 203                                                            |
| 2                | Afghanistan | Sesame seed                     | 2003           | 11                                                             |
| 2                | Afghanistan | Sesameseed Oil                  | 2003           | 4                                                              |
| 2                | Afghanistan | Soyabean Oil                    | 2003           | 7                                                              |
| 2                | Afghanistan | Starchy Roots                   | 2003           | 31                                                             |
| 2                | Afghanistan | Stimulants                      | 2003           | 3                                                              |
| 2                | Afghanistan | Sugar & Sweeteners              | 2003           | 42                                                             |
| 2                | Afghanistan | Sugar (Raw Equivalent)          | 2003           | 40                                                             |
| 2                | Afghanistan | Sunflowerseed Oil               | 2003           | 5                                                              |
| 2                | Afghanistan | Sweeteners, Other               | 2003           | 1                                                              |
| 2                | Afghanistan | Tea (including mate)            | 2003           | 2                                                              |
| 2                | Afghanistan | Treenuts                        | 2003           | 3                                                              |
| 2                | Afghanistan | Vegetable Oils                  | 2003           | 51                                                             |
| 2                | Afghanistan | Vegetables                      | 2003           | 21                                                             |
| 2                | Afghanistan | Vegetables, Other               | 2003           | 21                                                             |
| 2                | Afghanistan | Vegetal Products                | 2003           | 1,654                                                          |
| 2                | Afghanistan | Wheat and products              | 2003           | 1,144                                                          |
| 2                | Afghanistan | Animal fats                     | 2004           | 40                                                             |
| 2                | Afghanistan | Animal Products                 | 2004           | 240                                                            |
| 2                | Afghanistan | Apples and products             | 2004           | 1                                                              |
| 2                | Afghanistan | Barley and products             | 2004           | 69                                                             |
| 2                | Afghanistan | Bovine Meat                     | 2004           | 37                                                             |
| 2                | Afghanistan | Butter, Ghee                    | 2004           | 28                                                             |
| 2                | Afghanistan | Cereals - Excluding Beer        | 2004           | 1,490                                                          |
| 2                | Afghanistan | Cereals, Other                  | 2004           | 1                                                              |
| 2                | Afghanistan | Cocoa Beans and products        | 2004           | 1                                                              |
| 2                | Afghanistan | Cottonseed Oil                  | 2004           | 2                                                              |
| 2                | Afghanistan | Eggs                            | 2004           | 2                                                              |
| 2                | Afghanistan | Fats, Animals, Raw              | 2004           | 13                                                             |
| 2                | Afghanistan | Fruits - Excluding Wine         | 2004           | 32                                                             |
| 2                | Afghanistan | Fruits, Other                   | 2004           | 13                                                             |
| 2                | Afghanistan | Grand Total                     | 2004           | 1,967                                                          |
| 2                | Afghanistan | Grapes and products (excl wine) | 2004           | 16                                                             |
| 2                | Afghanistan | Honey                           | 2004           | 1                                                              |
| 2                | Afghanistan | Maize and products              | 2004           | 81                                                             |
| 2                | Afghanistan | Meat                            | 2004           | 77                                                             |
| 2                | Afghanistan | Meat, Other                     | 2004           | 2                                                              |
| 2                | Afghanistan | Milk - Excluding Butter         | 2004           | 114                                                            |
| 2                | Afghanistan | Millet and products             | 2004           | 5                                                              |
| 2                | Afghanistan | Mutton & Goat Meat              | 2004           | 33                                                             |

Dietary calcium and zinc deficiency risks are decreasing but remain prevalent

| FAO Country code | Country     | Food item                       | Reference year | Net energy supply (kcal capita <sup>-1</sup> d <sup>-1</sup> ) |
|------------------|-------------|---------------------------------|----------------|----------------------------------------------------------------|
| 2                | Afghanistan | Offals                          | 2004           | 6                                                              |
| 2                | Afghanistan | Oilcrops                        | 2004           | 11                                                             |
| 2                | Afghanistan | Oranges, Mandarines             | 2004           | 1                                                              |
| 2                | Afghanistan | Palm Oil                        | 2004           | 71                                                             |
| 2                | Afghanistan | Potatoes and products           | 2004           | 24                                                             |
| 2                | Afghanistan | Poultry Meat                    | 2004           | 5                                                              |
| 2                | Afghanistan | Pulses                          | 2004           | 7                                                              |
| 2                | Afghanistan | Pulses, Other and products      | 2004           | 7                                                              |
| 2                | Afghanistan | Rice (Milled Equivalent)        | 2004           | 178                                                            |
| 2                | Afghanistan | Sesame seed                     | 2004           | 11                                                             |
| 2                | Afghanistan | Sesameseed Oil                  | 2004           | 1                                                              |
| 2                | Afghanistan | Soyabean Oil                    | 2004           | 6                                                              |
| 2                | Afghanistan | Starchy Roots                   | 2004           | 24                                                             |
| 2                | Afghanistan | Stimulants                      | 2004           | 2                                                              |
| 2                | Afghanistan | Sugar & Sweeteners              | 2004           | 54                                                             |
| 2                | Afghanistan | Sugar (Raw Equivalent)          | 2004           | 52                                                             |
| 2                | Afghanistan | Sunflowerseed Oil               | 2004           | 4                                                              |
| 2                | Afghanistan | Sweeteners, Other               | 2004           | 2                                                              |
| 2                | Afghanistan | Tea (including mate)            | 2004           | 1                                                              |
| 2                | Afghanistan | Treenuts                        | 2004           | 4                                                              |
| 2                | Afghanistan | Vegetable Oils                  | 2004           | 85                                                             |
| 2                | Afghanistan | Vegetables                      | 2004           | 16                                                             |
| 2                | Afghanistan | Vegetables, Other               | 2004           | 16                                                             |
| 2                | Afghanistan | Vegetal Products                | 2004           | 1,726                                                          |
| 2                | Afghanistan | Wheat and products              | 2004           | 1,156                                                          |
| 2                | Afghanistan | Animal fats                     | 2005           | 39                                                             |
| 2                | Afghanistan | Animal Products                 | 2005           | 232                                                            |
| 2                | Afghanistan | Apples and products             | 2005           | 1                                                              |
| 2                | Afghanistan | Barley and products             | 2005           | 15                                                             |
| 2                | Afghanistan | Bovine Meat                     | 2005           | 34                                                             |
| 2                | Afghanistan | Butter, Chee                    | 2005           | 26                                                             |
| 2                | Afghanistan | Cereals - Excluding Beer        | 2005           | 1,426                                                          |
| 2                | Afghanistan | Cocoa Beans and products        | 2005           | 1                                                              |
| 2                | Afghanistan | Cottonseed Oil                  | 2005           | 3                                                              |
| 2                | Afghanistan | Dates                           | 2005           | 1                                                              |
| 2                | Afghanistan | Eggs                            | 2005           | 3                                                              |
| 2                | Afghanistan | Fats, Animals, Raw              | 2005           | 13                                                             |
| 2                | Afghanistan | Fruits - Excluding Wine         | 2005           | 34                                                             |
| 2                | Afghanistan | Fruits, Other                   | 2005           | 14                                                             |
| 2                | Afghanistan | Grand Total                     | 2005           | 1,948                                                          |
| 2                | Afghanistan | Grapes and products (excl wine) | 2005           | 17                                                             |
| 2                | Afghanistan | Honey                           | 2005           | 1                                                              |
| 2                | Afghanistan | Maize and products              | 2005           | 23                                                             |
| 2                | Afghanistan | Meat                            | 2005           | 77                                                             |
| 2                | Afghanistan | Meat, Other                     | 2005           | 2                                                              |
| 2                | Afghanistan | Milk - Excluding Butter         | 2005           | 107                                                            |
| 2                | Afghanistan | Millet and products             | 2005           | 7                                                              |
| 2                | Afghanistan | Miscellaneous                   | 2005           | 1                                                              |
| 2                | Afghanistan | Mutton & Goat Meat              | 2005           | 33                                                             |
| 2                | Afghanistan | Offals                          | 2005           | 6                                                              |
| 2                | Afghanistan | Oilcrops                        | 2005           | 11                                                             |
| 2                | Afghanistan | Oilcrops Oil, Other             | 2005           | 1                                                              |
| 2                | Afghanistan | Palm Oil                        | 2005           | 67                                                             |
| 2                | Afghanistan | Potatoes and products           | 2005           | 24                                                             |
| 2                | Afghanistan | Poultry Meat                    | 2005           | 8                                                              |
| 2                | Afghanistan | Pulses                          | 2005           | 14                                                             |
| 2                | Afghanistan | Pulses, Other and products      | 2005           | 14                                                             |
| 2                | Afghanistan | Rape and Mustard Oil            | 2005           | 1                                                              |
| 2                | Afghanistan | Rice (Milled Equivalent)        | 2005           | 183                                                            |
| 2                | Afghanistan | Sesame seed                     | 2005           | 10                                                             |
| 2                | Afghanistan | Sesameseed Oil                  | 2005           | 1                                                              |
| 2                | Afghanistan | Soyabean Oil                    | 2005           | 34                                                             |
| 2                | Afghanistan | Starchy Roots                   | 2005           | 24                                                             |
| 2                | Afghanistan | Stimulants                      | 2005           | 1                                                              |
| 2                | Afghanistan | Sugar & Sweeteners              | 2005           | 65                                                             |
| 2                | Afghanistan | Sugar (Raw Equivalent)          | 2005           | 61                                                             |
| 2                | Afghanistan | Sunflowerseed Oil               | 2005           | 6                                                              |
| 2                | Afghanistan | Sweeteners, Other               | 2005           | 3                                                              |
| 2                | Afghanistan | Treenuts                        | 2005           | 4                                                              |
| 2                | Afghanistan | Vegetable Oils                  | 2005           | 112                                                            |
| 2                | Afghanistan | Vegetables                      | 2005           | 22                                                             |
| 2                | Afghanistan | Vegetables, Other               | 2005           | 22                                                             |
| 2                | Afghanistan | Vegetal Products                | 2005           | 1,715                                                          |
| 2                | Afghanistan | Wheat and products              | 2005           | 1,198                                                          |
| 2                | Afghanistan | Animal fats                     | 2006           | 35                                                             |
| 2                | Afghanistan | Animal Products                 | 2006           | 204                                                            |
| 2                | Afghanistan | Apples and products             | 2006           | 2                                                              |
| 2                | Afghanistan | Bananas                         | 2006           | 1                                                              |
| 2                | Afghanistan | Barley and products             | 2006           | 15                                                             |
| 2                | Afghanistan | Bovine Meat                     | 2006           | 27                                                             |
| 2                | Afghanistan | Butter, Chee                    | 2006           | 24                                                             |
| 2                | Afghanistan | Cereals - Excluding Beer        | 2006           | 1,499                                                          |
| 2                | Afghanistan | Cocoa Beans and products        | 2006           | 1                                                              |
| 2                | Afghanistan | Cottonseed Oil                  | 2006           | 3                                                              |
| 2                | Afghanistan | Dates                           | 2006           | 1                                                              |
| 2                | Afghanistan | Eggs                            | 2006           | 3                                                              |
| 2                | Afghanistan | Fats, Animals, Raw              | 2006           | 11                                                             |
| 2                | Afghanistan | Fruits - Excluding Wine         | 2006           | 33                                                             |
| 2                | Afghanistan | Fruits, Other                   | 2006           | 13                                                             |
| 2                | Afghanistan | Grand Total                     | 2006           | 1,965                                                          |
| 2                | Afghanistan | Grapes and products (excl wine) | 2006           | 14                                                             |
| 2                | Afghanistan | Honey                           | 2006           | 1                                                              |
| 2                | Afghanistan | Maize and products              | 2006           | 27                                                             |
| 2                | Afghanistan | Meat                            | 2006           | 62                                                             |
| 2                | Afghanistan | Meat, Other                     | 2006           | 2                                                              |
| 2                | Afghanistan | Milk - Excluding Butter         | 2006           | 99                                                             |
| 2                | Afghanistan | Millet and products             | 2006           | 3                                                              |

Dietary calcium and zinc deficiency risks are decreasing but remain prevalent

| FAO Country code | Country     | Food item                       | Reference year | Net energy supply (kcal capita <sup>-1</sup> d <sup>-1</sup> ) |
|------------------|-------------|---------------------------------|----------------|----------------------------------------------------------------|
| 2                | Afghanistan | Miscellaneous                   | 2006           | 1                                                              |
| 2                | Afghanistan | Mutton & Goat Meat              | 2006           | 29                                                             |
| 2                | Afghanistan | Offals                          | 2006           | 5                                                              |
| 2                | Afghanistan | Oilcrops                        | 2006           | 9                                                              |
| 2                | Afghanistan | Oranges, Mandarines             | 2006           | 1                                                              |
| 2                | Afghanistan | Palm Oil                        | 2006           | 53                                                             |
| 2                | Afghanistan | Potatoes and products           | 2006           | 24                                                             |
| 2                | Afghanistan | Poultry Meat                    | 2006           | 5                                                              |
| 2                | Afghanistan | Pulses                          | 2006           | 14                                                             |
| 2                | Afghanistan | Pulses, Other and products      | 2006           | 14                                                             |
| 2                | Afghanistan | Rape and Mustard Oil            | 2006           | 3                                                              |
| 2                | Afghanistan | Rice (Milled Equivalent)        | 2006           | 217                                                            |
| 2                | Afghanistan | Sesame seed                     | 2006           | 9                                                              |
| 2                | Afghanistan | Sesameseed Oil                  | 2006           | 1                                                              |
| 2                | Afghanistan | Soyabean Oil                    | 2006           | 17                                                             |
| 2                | Afghanistan | Starchy Roots                   | 2006           | 24                                                             |
| 2                | Afghanistan | Stimulants                      | 2006           | 2                                                              |
| 2                | Afghanistan | Sugar & Sweeteners              | 2006           | 70                                                             |
| 2                | Afghanistan | Sugar (Raw Equivalent)          | 2006           | 67                                                             |
| 2                | Afghanistan | Sunflowerseed Oil               | 2006           | 5                                                              |
| 2                | Afghanistan | Sweeteners, Other               | 2006           | 2                                                              |
| 2                | Afghanistan | Tea (including mate)            | 2006           | 1                                                              |
| 2                | Afghanistan | Treenuts                        | 2006           | 8                                                              |
| 2                | Afghanistan | Vegetable Oils                  | 2006           | 82                                                             |
| 2                | Afghanistan | Vegetables                      | 2006           | 21                                                             |
| 2                | Afghanistan | Vegetables, Other               | 2006           | 21                                                             |
| 2                | Afghanistan | Vegetal Products                | 2006           | 1,762                                                          |
| 2                | Afghanistan | Wheat and products              | 2006           | 1,235                                                          |
| 2                | Afghanistan | Animal fats                     | 2007           | 34                                                             |
| 2                | Afghanistan | Animal Products                 | 2007           | 200                                                            |
| 2                | Afghanistan | Apples and products             | 2007           | 2                                                              |
| 2                | Afghanistan | Barley and products             | 2007           | 16                                                             |
| 2                | Afghanistan | Bovine Meat                     | 2007           | 31                                                             |
| 2                | Afghanistan | Butter, Ghee                    | 2007           | 24                                                             |
| 2                | Afghanistan | Cereals - Excluding Beer        | 2007           | 1,570                                                          |
| 2                | Afghanistan | Cottonseed Oil                  | 2007           | 3                                                              |
| 2                | Afghanistan | Dates                           | 2007           | 1                                                              |
| 2                | Afghanistan | Eggs                            | 2007           | 4                                                              |
| 2                | Afghanistan | Fats, Animals, Raw              | 2007           | 10                                                             |
| 2                | Afghanistan | Fruits - Excluding Wine         | 2007           | 31                                                             |
| 2                | Afghanistan | Fruits, Other                   | 2007           | 11                                                             |
| 2                | Afghanistan | Grand Total                     | 2007           | 2,040                                                          |
| 2                | Afghanistan | Grapes and products (excl wine) | 2007           | 17                                                             |
| 2                | Afghanistan | Honey                           | 2007           | 1                                                              |
| 2                | Afghanistan | Maize and products              | 2007           | 21                                                             |
| 2                | Afghanistan | Meat                            | 2007           | 60                                                             |
| 2                | Afghanistan | Meat, Other                     | 2007           | 2                                                              |
| 2                | Afghanistan | Milk - Excluding Butter         | 2007           | 98                                                             |
| 2                | Afghanistan | Millet and products             | 2007           | 6                                                              |
| 2                | Afghanistan | Miscellaneous                   | 2007           | 1                                                              |
| 2                | Afghanistan | Mutton & Goat Meat              | 2007           | 24                                                             |
| 2                | Afghanistan | Offals                          | 2007           | 5                                                              |
| 2                | Afghanistan | Oilcrops                        | 2007           | 10                                                             |
| 2                | Afghanistan | Palm Oil                        | 2007           | 47                                                             |
| 2                | Afghanistan | Potatoes and products           | 2007           | 20                                                             |
| 2                | Afghanistan | Poultry Meat                    | 2007           | 4                                                              |
| 2                | Afghanistan | Pulses                          | 2007           | 15                                                             |
| 2                | Afghanistan | Pulses, Other and products      | 2007           | 15                                                             |
| 2                | Afghanistan | Rape and Mustard Oil            | 2007           | 5                                                              |
| 2                | Afghanistan | Rice (Milled Equivalent)        | 2007           | 176                                                            |
| 2                | Afghanistan | Sesame seed                     | 2007           | 10                                                             |
| 2                | Afghanistan | Sesameseed Oil                  | 2007           | 2                                                              |
| 2                | Afghanistan | Soyabean Oil                    | 2007           | 19                                                             |
| 2                | Afghanistan | Starchy Roots                   | 2007           | 20                                                             |
| 2                | Afghanistan | Stimulants                      | 2007           | 2                                                              |
| 2                | Afghanistan | Sugar & Sweeteners              | 2007           | 75                                                             |
| 2                | Afghanistan | Sugar (Raw Equivalent)          | 2007           | 73                                                             |
| 2                | Afghanistan | Sunflowerseed Oil               | 2007           | 9                                                              |
| 2                | Afghanistan | Sweeteners, Other               | 2007           | 1                                                              |
| 2                | Afghanistan | Tea (including mate)            | 2007           | 1                                                              |
| 2                | Afghanistan | Treenuts                        | 2007           | 11                                                             |
| 2                | Afghanistan | Vegetable Oils                  | 2007           | 84                                                             |
| 2                | Afghanistan | Vegetables                      | 2007           | 21                                                             |
| 2                | Afghanistan | Vegetables, Other               | 2007           | 21                                                             |
| 2                | Afghanistan | Vegetal Products                | 2007           | 1,839                                                          |
| 2                | Afghanistan | Wheat and products              | 2007           | 1,351                                                          |
| 2                | Afghanistan | Animal fats                     | 2008           | 35                                                             |
| 2                | Afghanistan | Animal Products                 | 2008           | 208                                                            |
| 2                | Afghanistan | Apples and products             | 2008           | 2                                                              |
| 2                | Afghanistan | Bananas                         | 2008           | 1                                                              |
| 2                | Afghanistan | Barley and products             | 2008           | 20                                                             |
| 2                | Afghanistan | Bovine Meat                     | 2008           | 29                                                             |
| 2                | Afghanistan | Butter, Ghee                    | 2008           | 23                                                             |
| 2                | Afghanistan | Cereals - Excluding Beer        | 2008           | 1,577                                                          |
| 2                | Afghanistan | Cottonseed Oil                  | 2008           | 3                                                              |
| 2                | Afghanistan | Eggs                            | 2008           | 4                                                              |
| 2                | Afghanistan | Fats, Animals, Raw              | 2008           | 11                                                             |
| 2                | Afghanistan | Fruits - Excluding Wine         | 2008           | 28                                                             |
| 2                | Afghanistan | Fruits, Other                   | 2008           | 11                                                             |
| 2                | Afghanistan | Grand Total                     | 2008           | 2,038                                                          |
| 2                | Afghanistan | Grapes and products (excl wine) | 2008           | 14                                                             |
| 2                | Afghanistan | Honey                           | 2008           | 1                                                              |
| 2                | Afghanistan | Maize and products              | 2008           | 21                                                             |
| 2                | Afghanistan | Meat                            | 2008           | 68                                                             |
| 2                | Afghanistan | Meat, Other                     | 2008           | 2                                                              |
| 2                | Afghanistan | Milk - Excluding Butter         | 2008           | 96                                                             |
| 2                | Afghanistan | Millet and products             | 2008           | 6                                                              |

Dietary calcium and zinc deficiency risks are decreasing but remain prevalent

| FAO Country code | Country     | Food item                       | Reference year | Net energy supply (kcal capita <sup>-1</sup> d <sup>-1</sup> ) |
|------------------|-------------|---------------------------------|----------------|----------------------------------------------------------------|
| 2                | Afghanistan | Miscellaneous                   | 2008           | 1                                                              |
| 2                | Afghanistan | Mutton & Goat Meat              | 2008           | 30                                                             |
| 2                | Afghanistan | Offals                          | 2008           | 5                                                              |
| 2                | Afghanistan | Oilcrops                        | 2008           | 10                                                             |
| 2                | Afghanistan | Oilcrops Oil, Other             | 2008           | 3                                                              |
| 2                | Afghanistan | Palm Oil                        | 2008           | 32                                                             |
| 2                | Afghanistan | Potatoes and products           | 2008           | 18                                                             |
| 2                | Afghanistan | Poultry Meat                    | 2008           | 7                                                              |
| 2                | Afghanistan | Pulses                          | 2008           | 19                                                             |
| 2                | Afghanistan | Pulses, Other and products      | 2008           | 19                                                             |
| 2                | Afghanistan | Rape and Mustard Oil            | 2008           | 5                                                              |
| 2                | Afghanistan | Rice (Milled Equivalent)        | 2008           | 185                                                            |
| 2                | Afghanistan | Sesame seed                     | 2008           | 10                                                             |
| 2                | Afghanistan | Sesameseed Oil                  | 2008           | 2                                                              |
| 2                | Afghanistan | Soyabean Oil                    | 2008           | 10                                                             |
| 2                | Afghanistan | Spices                          | 2008           | 2                                                              |
| 2                | Afghanistan | Spices, Other                   | 2008           | 2                                                              |
| 2                | Afghanistan | Starchy Roots                   | 2008           | 18                                                             |
| 2                | Afghanistan | Stimulants                      | 2008           | 2                                                              |
| 2                | Afghanistan | Sugar & Sweeteners              | 2008           | 83                                                             |
| 2                | Afghanistan | Sugar (Raw Equivalent)          | 2008           | 80                                                             |
| 2                | Afghanistan | Sunflowerseed Oil               | 2008           | 3                                                              |
| 2                | Afghanistan | Sweeteners, Other               | 2008           | 2                                                              |
| 2                | Afghanistan | Tea (including mate)            | 2008           | 2                                                              |
| 2                | Afghanistan | Treenuts                        | 2008           | 13                                                             |
| 2                | Afghanistan | Vegetable Oils                  | 2008           | 58                                                             |
| 2                | Afghanistan | Vegetables                      | 2008           | 19                                                             |
| 2                | Afghanistan | Vegetables, Other               | 2008           | 19                                                             |
| 2                | Afghanistan | Vegetal Products                | 2008           | 1,831                                                          |
| 2                | Afghanistan | Wheat and products              | 2008           | 1,344                                                          |
| 2                | Afghanistan | Animal fats                     | 2009           | 36                                                             |
| 2                | Afghanistan | Animal Products                 | 2009           | 210                                                            |
| 2                | Afghanistan | Apples and products             | 2009           | 3                                                              |
| 2                | Afghanistan | Bananas                         | 2009           | 2                                                              |
| 2                | Afghanistan | Barley and products             | 2009           | 18                                                             |
| 2                | Afghanistan | Bovine Meat                     | 2009           | 29                                                             |
| 2                | Afghanistan | Butter, Ghee                    | 2009           | 23                                                             |
| 2                | Afghanistan | Cereals - Excluding Beer        | 2009           | 1,597                                                          |
| 2                | Afghanistan | Cottonseed Oil                  | 2009           | 3                                                              |
| 2                | Afghanistan | Eggs                            | 2009           | 4                                                              |
| 2                | Afghanistan | Fats, Animals, Raw              | 2009           | 12                                                             |
| 2                | Afghanistan | Fruits - Excluding Wine         | 2009           | 31                                                             |
| 2                | Afghanistan | Fruits, Other                   | 2009           | 10                                                             |
| 2                | Afghanistan | Grand Total                     | 2009           | 2,080                                                          |
| 2                | Afghanistan | Grapes and products (excl wine) | 2009           | 14                                                             |
| 2                | Afghanistan | Honey                           | 2009           | 1                                                              |
| 2                | Afghanistan | Maize and products              | 2009           | 22                                                             |
| 2                | Afghanistan | Meat                            | 2009           | 68                                                             |
| 2                | Afghanistan | Meat, Other                     | 2009           | 2                                                              |
| 2                | Afghanistan | Milk - Excluding Butter         | 2009           | 97                                                             |
| 2                | Afghanistan | Millet and products             | 2009           | 5                                                              |
| 2                | Afghanistan | Miscellaneous                   | 2009           | 1                                                              |
| 2                | Afghanistan | Mutton & Goat Meat              | 2009           | 32                                                             |
| 2                | Afghanistan | Offals                          | 2009           | 6                                                              |
| 2                | Afghanistan | Oilcrops                        | 2009           | 10                                                             |
| 2                | Afghanistan | Oilcrops Oil, Other             | 2009           | 1                                                              |
| 2                | Afghanistan | Olive Oil                       | 2009           | 1                                                              |
| 2                | Afghanistan | Oranges, Mandarines             | 2009           | 1                                                              |
| 2                | Afghanistan | Palm Oil                        | 2009           | 46                                                             |
| 2                | Afghanistan | Potatoes and products           | 2009           | 19                                                             |
| 2                | Afghanistan | Poultry Meat                    | 2009           | 5                                                              |
| 2                | Afghanistan | Pulses                          | 2009           | 28                                                             |
| 2                | Afghanistan | Pulses, Other and products      | 2009           | 28                                                             |
| 2                | Afghanistan | Rape and Mustard Oil            | 2009           | 5                                                              |
| 2                | Afghanistan | Rice (Milled Equivalent)        | 2009           | 153                                                            |
| 2                | Afghanistan | Sesame seed                     | 2009           | 9                                                              |
| 2                | Afghanistan | Sesameseed Oil                  | 2009           | 1                                                              |
| 2                | Afghanistan | Soyabean Oil                    | 2009           | 5                                                              |
| 2                | Afghanistan | Spices                          | 2009           | 2                                                              |
| 2                | Afghanistan | Spices, Other                   | 2009           | 2                                                              |
| 2                | Afghanistan | Starchy Roots                   | 2009           | 19                                                             |
| 2                | Afghanistan | Sugar & Sweeteners              | 2009           | 84                                                             |
| 2                | Afghanistan | Sugar (Raw Equivalent)          | 2009           | 83                                                             |
| 2                | Afghanistan | Sunflowerseed Oil               | 2009           | 7                                                              |
| 2                | Afghanistan | Treenuts                        | 2009           | 8                                                              |
| 2                | Afghanistan | Vegetable Oils                  | 2009           | 70                                                             |
| 2                | Afghanistan | Vegetables                      | 2009           | 22                                                             |
| 2                | Afghanistan | Vegetables, Other               | 2009           | 22                                                             |
| 2                | Afghanistan | Vegetal Products                | 2009           | 1,871                                                          |
| 2                | Afghanistan | Wheat and products              | 2009           | 1,400                                                          |
| 2                | Afghanistan | Animal fats                     | 2010           | 37                                                             |
| 2                | Afghanistan | Animal Products                 | 2010           | 216                                                            |
| 2                | Afghanistan | Apples and products             | 2010           | 3                                                              |
| 2                | Afghanistan | Bananas                         | 2010           | 1                                                              |
| 2                | Afghanistan | Barley and products             | 2010           | 19                                                             |
| 2                | Afghanistan | Bovine Meat                     | 2010           | 28                                                             |
| 2                | Afghanistan | Butter, Ghee                    | 2010           | 23                                                             |
| 2                | Afghanistan | Cereals - Excluding Beer        | 2010           | 1,592                                                          |
| 2                | Afghanistan | Cottonseed Oil                  | 2010           | 2                                                              |
| 2                | Afghanistan | Dates                           | 2010           | 1                                                              |
| 2                | Afghanistan | Eggs                            | 2010           | 3                                                              |
| 2                | Afghanistan | Fats, Animals, Raw              | 2010           | 13                                                             |
| 2                | Afghanistan | Fruits - Excluding Wine         | 2010           | 36                                                             |
| 2                | Afghanistan | Fruits, Other                   | 2010           | 10                                                             |
| 2                | Afghanistan | Grand Total                     | 2010           | 2,104                                                          |
| 2                | Afghanistan | Grapes and products (excl wine) | 2010           | 17                                                             |
| 2                | Afghanistan | Honey                           | 2010           | 1                                                              |

Dietary calcium and zinc deficiency risks are decreasing but remain prevalent

| FAO Country code | Country     | Food item                       | Reference year | Net energy supply (kcal capita <sup>-1</sup> d <sup>-1</sup> ) |
|------------------|-------------|---------------------------------|----------------|----------------------------------------------------------------|
| 2                | Afghanistan | Maize and products              | 2010           | 24                                                             |
| 2                | Afghanistan | Meat                            | 2010           | 73                                                             |
| 2                | Afghanistan | Meat, Other                     | 2010           | 1                                                              |
| 2                | Afghanistan | Milk - Excluding Butter         | 2010           | 97                                                             |
| 2                | Afghanistan | Millet and products             | 2010           | 4                                                              |
| 2                | Afghanistan | Miscellaneous                   | 2010           | 1                                                              |
| 2                | Afghanistan | Mutton & Goat Meat              | 2010           | 35                                                             |
| 2                | Afghanistan | Offals                          | 2010           | 6                                                              |
| 2                | Afghanistan | Oilcrops                        | 2010           | 11                                                             |
| 2                | Afghanistan | Oilcrops Oil, Other             | 2010           | 2                                                              |
| 2                | Afghanistan | Olive Oil                       | 2010           | 1                                                              |
| 2                | Afghanistan | Oranges, Mandarines             | 2010           | 4                                                              |
| 2                | Afghanistan | Palm Oil                        | 2010           | 50                                                             |
| 2                | Afghanistan | Potatoes and products           | 2010           | 14                                                             |
| 2                | Afghanistan | Poultry Meat                    | 2010           | 8                                                              |
| 2                | Afghanistan | Pulses                          | 2010           | 22                                                             |
| 2                | Afghanistan | Pulses, Other and products      | 2010           | 22                                                             |
| 2                | Afghanistan | Rape and Mustard Oil            | 2010           | 1                                                              |
| 2                | Afghanistan | Rice (Milled Equivalent)        | 2010           | 159                                                            |
| 2                | Afghanistan | Sesame seed                     | 2010           | 11                                                             |
| 2                | Afghanistan | Sesameseed Oil                  | 2010           | 1                                                              |
| 2                | Afghanistan | Soyabean Oil                    | 2010           | 13                                                             |
| 2                | Afghanistan | Spices                          | 2010           | 2                                                              |
| 2                | Afghanistan | Spices, Other                   | 2010           | 2                                                              |
| 2                | Afghanistan | Starchy Roots                   | 2010           | 14                                                             |
| 2                | Afghanistan | Stimulants                      | 2010           | 1                                                              |
| 2                | Afghanistan | Sugar & Sweeteners              | 2010           | 87                                                             |
| 2                | Afghanistan | Sugar (Raw Equivalent)          | 2010           | 85                                                             |
| 2                | Afghanistan | Sunflowerseed Oil               | 2010           | 13                                                             |
| 2                | Afghanistan | Sweeteners, Other               | 2010           | 1                                                              |
| 2                | Afghanistan | Tea (including mate)            | 2010           | 1                                                              |
| 2                | Afghanistan | Treenuts                        | 2010           | 19                                                             |
| 2                | Afghanistan | Vegetable Oils                  | 2010           | 82                                                             |
| 2                | Afghanistan | Vegetables                      | 2010           | 20                                                             |
| 2                | Afghanistan | Vegetables, Other               | 2010           | 20                                                             |
| 2                | Afghanistan | Vegetal Products                | 2010           | 1,888                                                          |
| 2                | Afghanistan | Wheat and products              | 2010           | 1,386                                                          |
| 2                | Afghanistan | Animal fats                     | 2011           | 36                                                             |
| 2                | Afghanistan | Animal Products                 | 2011           | 215                                                            |
| 2                | Afghanistan | Apples and products             | 2011           | 3                                                              |
| 2                | Afghanistan | Bananas                         | 2011           | 2                                                              |
| 2                | Afghanistan | Barley and products             | 2011           | 22                                                             |
| 2                | Afghanistan | Bovine Meat                     | 2011           | 28                                                             |
| 2                | Afghanistan | Butter, Ghee                    | 2011           | 23                                                             |
| 2                | Afghanistan | Cereals - Excluding Beer        | 2011           | 1,597                                                          |
| 2                | Afghanistan | Citrus, Other                   | 2011           | 1                                                              |
| 2                | Afghanistan | Cocoa Beans and products        | 2011           | 1                                                              |
| 2                | Afghanistan | Cottonseed Oil                  | 2011           | 2                                                              |
| 2                | Afghanistan | Cream                           | 2011           | 1                                                              |
| 2                | Afghanistan | Dates                           | 2011           | 1                                                              |
| 2                | Afghanistan | Eggs                            | 2011           | 4                                                              |
| 2                | Afghanistan | Fats, Animals, Raw              | 2011           | 13                                                             |
| 2                | Afghanistan | Fruits - Excluding Wine         | 2011           | 39                                                             |
| 2                | Afghanistan | Fruits, Other                   | 2011           | 8                                                              |
| 2                | Afghanistan | Grand Total                     | 2011           | 2,107                                                          |
| 2                | Afghanistan | Grapes and products (excl wine) | 2011           | 21                                                             |
| 2                | Afghanistan | Honey                           | 2011           | 1                                                              |
| 2                | Afghanistan | Maize and products              | 2011           | 21                                                             |
| 2                | Afghanistan | Meat                            | 2011           | 74                                                             |
| 2                | Afghanistan | Meat, Other                     | 2011           | 1                                                              |
| 2                | Afghanistan | Milk - Excluding Butter         | 2011           | 94                                                             |
| 2                | Afghanistan | Millet and products             | 2011           | 4                                                              |
| 2                | Afghanistan | Miscellaneous                   | 2011           | 2                                                              |
| 2                | Afghanistan | Mutton & Goat Meat              | 2011           | 35                                                             |
| 2                | Afghanistan | Offals                          | 2011           | 6                                                              |
| 2                | Afghanistan | Oilcrops                        | 2011           | 10                                                             |
| 2                | Afghanistan | Oilcrops Oil, Other             | 2011           | 2                                                              |
| 2                | Afghanistan | Oranges, Mandarines             | 2011           | 3                                                              |
| 2                | Afghanistan | Palm Oil                        | 2011           | 43                                                             |
| 2                | Afghanistan | Potatoes and products           | 2011           | 12                                                             |
| 2                | Afghanistan | Poultry Meat                    | 2011           | 9                                                              |
| 2                | Afghanistan | Pulses                          | 2011           | 27                                                             |
| 2                | Afghanistan | Pulses, Other and products      | 2011           | 27                                                             |
| 2                | Afghanistan | Rape and Mustard Oil            | 2011           | 2                                                              |
| 2                | Afghanistan | Rice (Milled Equivalent)        | 2011           | 167                                                            |
| 2                | Afghanistan | Sesame seed                     | 2011           | 10                                                             |
| 2                | Afghanistan | Sesameseed Oil                  | 2011           | 2                                                              |
| 2                | Afghanistan | Soyabean Oil                    | 2011           | 13                                                             |
| 2                | Afghanistan | Spices                          | 2011           | 3                                                              |
| 2                | Afghanistan | Spices, Other                   | 2011           | 3                                                              |
| 2                | Afghanistan | Starchy Roots                   | 2011           | 12                                                             |
| 2                | Afghanistan | Stimulants                      | 2011           | 3                                                              |
| 2                | Afghanistan | Sugar & Sweeteners              | 2011           | 86                                                             |
| 2                | Afghanistan | Sugar (Raw Equivalent)          | 2011           | 82                                                             |
| 2                | Afghanistan | Sunflowerseed Oil               | 2011           | 13                                                             |
| 2                | Afghanistan | Sweeteners, Other               | 2011           | 3                                                              |
| 2                | Afghanistan | Tea (including mate)            | 2011           | 2                                                              |
| 2                | Afghanistan | Treenuts                        | 2011           | 20                                                             |
| 2                | Afghanistan | Vegetable Oils                  | 2011           | 77                                                             |
| 2                | Afghanistan | Vegetables                      | 2011           | 17                                                             |
| 2                | Afghanistan | Vegetables, Other               | 2011           | 17                                                             |
| 2                | Afghanistan | Vegetal Products                | 2011           | 1,892                                                          |
| 2                | Afghanistan | Wheat and products              | 2011           | 1,383                                                          |
| 3                | Albania     | Alcoholic Beverages             | 1992           | 16                                                             |
| 3                | Albania     | Animal fats                     | 1992           | 77                                                             |
| 3                | Albania     | Animal Products                 | 1992           | 530                                                            |
| 3                | Albania     | Apples and products             | 1992           | 4                                                              |



Dietary calcium and zinc deficiency risks are decreasing but remain prevalent

| FAO Country code | Country | Food item                       | Reference year | Net energy supply (kcal capita <sup>-1</sup> d <sup>-1</sup> ) |
|------------------|---------|---------------------------------|----------------|----------------------------------------------------------------|
| 3                | Albania | Barley and products             | 1992           | 2                                                              |
| 3                | Albania | Beans                           | 1992           | 37                                                             |
| 3                | Albania | Beer                            | 1992           | 1                                                              |
| 3                | Albania | Beverages, Alcoholic            | 1992           | 8                                                              |
| 3                | Albania | Bovine Meat                     | 1992           | 52                                                             |
| 3                | Albania | Butter, Ghee                    | 1992           | 55                                                             |
| 3                | Albania | Cereals - Excluding Beer        | 1992           | 1,564                                                          |
| 3                | Albania | Cocoa Beans and products        | 1992           | 4                                                              |
| 3                | Albania | Coffee and products             | 1992           | 1                                                              |
| 3                | Albania | Eggs                            | 1992           | 14                                                             |
| 3                | Albania | Fats, Animals, Raw              | 1992           | 22                                                             |
| 3                | Albania | Fish, Seafood                   | 1992           | 1                                                              |
| 3                | Albania | Freshwater Fish                 | 1992           | 1                                                              |
| 3                | Albania | Fruits - Excluding Wine         | 1992           | 29                                                             |
| 3                | Albania | Fruits, Other                   | 1992           | 10                                                             |
| 3                | Albania | Grand Total                     | 1992           | 2,657                                                          |
| 3                | Albania | Grapes and products (excl wine) | 1992           | 12                                                             |
| 3                | Albania | Honey                           | 1992           | 1                                                              |
| 3                | Albania | Maize and products              | 1992           | 43                                                             |
| 3                | Albania | Meat                            | 1992           | 113                                                            |
| 3                | Albania | Milk - Excluding Butter         | 1992           | 319                                                            |
| 3                | Albania | Mutton & Goat Meat              | 1992           | 23                                                             |
| 3                | Albania | Offals                          | 1992           | 7                                                              |
| 3                | Albania | Oilcrops                        | 1992           | 6                                                              |
| 3                | Albania | Oilcrops Oil, Other             | 1992           | 3                                                              |
| 3                | Albania | Olive Oil                       | 1992           | 18                                                             |
| 3                | Albania | Olives (including preserved)    | 1992           | 6                                                              |
| 3                | Albania | Onions                          | 1992           | 12                                                             |
| 3                | Albania | Oranges, Mandarines             | 1992           | 4                                                              |
| 3                | Albania | Pigmeat                         | 1992           | 34                                                             |
| 3                | Albania | Potatoes and products           | 1992           | 27                                                             |
| 3                | Albania | Poultry Meat                    | 1992           | 4                                                              |
| 3                | Albania | Pulses                          | 1992           | 38                                                             |
| 3                | Albania | Pulses, Other and products      | 1992           | 1                                                              |
| 3                | Albania | Rape and Mustard Oil            | 1992           | 2                                                              |
| 3                | Albania | Rice (Milled Equivalent)        | 1992           | 39                                                             |
| 3                | Albania | Rye and products                | 1992           | 1                                                              |
| 3                | Albania | Soyabean Oil                    | 1992           | 32                                                             |
| 3                | Albania | Starchy Roots                   | 1992           | 27                                                             |
| 3                | Albania | Stimulants                      | 1992           | 5                                                              |
| 3                | Albania | Sugar & Sweeteners              | 1992           | 145                                                            |
| 3                | Albania | Sugar (Raw Equivalent)          | 1992           | 142                                                            |
| 3                | Albania | Sunflowerseed Oil               | 1992           | 153                                                            |
| 3                | Albania | Sweeteners, Other               | 1992           | 2                                                              |
| 3                | Albania | Tomatoes and products           | 1992           | 14                                                             |
| 3                | Albania | Treenuts                        | 1992           | 8                                                              |
| 3                | Albania | Vegetable Oils                  | 1992           | 208                                                            |
| 3                | Albania | Vegetables                      | 1992           | 80                                                             |
| 3                | Albania | Vegetables, Other               | 1992           | 55                                                             |
| 3                | Albania | Vegetal Products                | 1992           | 2,127                                                          |
| 3                | Albania | Wheat and products              | 1992           | 1,480                                                          |
| 3                | Albania | Wine                            | 1992           | 7                                                              |
| 3                | Albania | Alcoholic Beverages             | 1993           | 19                                                             |
| 3                | Albania | Animal fats                     | 1993           | 84                                                             |
| 3                | Albania | Animal Products                 | 1993           | 583                                                            |
| 3                | Albania | Apples and products             | 1993           | 10                                                             |
| 3                | Albania | Bananas                         | 1993           | 1                                                              |
| 3                | Albania | Barley and products             | 1993           | 1                                                              |
| 3                | Albania | Beans                           | 1993           | 38                                                             |
| 3                | Albania | Beer                            | 1993           | 9                                                              |
| 3                | Albania | Beverages, Alcoholic            | 1993           | 4                                                              |
| 3                | Albania | Bovine Meat                     | 1993           | 40                                                             |
| 3                | Albania | Butter, Ghee                    | 1993           | 67                                                             |
| 3                | Albania | Cereals - Excluding Beer        | 1993           | 1,604                                                          |
| 3                | Albania | Cocoa Beans and products        | 1993           | 8                                                              |
| 3                | Albania | Coffee and products             | 1993           | 1                                                              |
| 3                | Albania | Eggs                            | 1993           | 19                                                             |
| 3                | Albania | Fats, Animals, Raw              | 1993           | 17                                                             |
| 3                | Albania | Fish, Seafood                   | 1993           | 1                                                              |
| 3                | Albania | Freshwater Fish                 | 1993           | 1                                                              |
| 3                | Albania | Fruits - Excluding Wine         | 1993           | 50                                                             |
| 3                | Albania | Fruits, Other                   | 1993           | 13                                                             |
| 3                | Albania | Grand Total                     | 1993           | 2,797                                                          |
| 3                | Albania | Grapes and products (excl wine) | 1993           | 18                                                             |
| 3                | Albania | Maize and products              | 1993           | 43                                                             |
| 3                | Albania | Meat                            | 1993           | 130                                                            |
| 3                | Albania | Milk - Excluding Butter         | 1993           | 341                                                            |
| 3                | Albania | Mutton & Goat Meat              | 1993           | 24                                                             |
| 3                | Albania | Offals                          | 1993           | 8                                                              |
| 3                | Albania | Oilcrops                        | 1993           | 3                                                              |
| 3                | Albania | Oilcrops Oil, Other             | 1993           | 2                                                              |
| 3                | Albania | Olive Oil                       | 1993           | 21                                                             |
| 3                | Albania | Olives (including preserved)    | 1993           | 3                                                              |
| 3                | Albania | Onions                          | 1993           | 13                                                             |
| 3                | Albania | Oranges, Mandarines             | 1993           | 7                                                              |
| 3                | Albania | Pigmeat                         | 1993           | 46                                                             |
| 3                | Albania | Potatoes and products           | 1993           | 28                                                             |
| 3                | Albania | Poultry Meat                    | 1993           | 20                                                             |
| 3                | Albania | Pulses                          | 1993           | 39                                                             |
| 3                | Albania | Pulses, Other and products      | 1993           | 1                                                              |
| 3                | Albania | Rape and Mustard Oil            | 1993           | 1                                                              |
| 3                | Albania | Rice (Milled Equivalent)        | 1993           | 54                                                             |
| 3                | Albania | Rye and products                | 1993           | 4                                                              |
| 3                | Albania | Soyabean Oil                    | 1993           | 19                                                             |
| 3                | Albania | Starchy Roots                   | 1993           | 28                                                             |
| 3                | Albania | Stimulants                      | 1993           | 9                                                              |
| 3                | Albania | Sugar & Sweeteners              | 1993           | 164                                                            |

Dietary calcium and zinc deficiency risks are decreasing but remain prevalent

| FAO Country code | Country | Food item                       | Reference year | Net energy supply (kcal <i>capita</i> <sup>-1</sup> d <sup>-1</sup> ) |
|------------------|---------|---------------------------------|----------------|-----------------------------------------------------------------------|
| 3                | Albania | Sugar (Raw Equivalent)          | 1993           | 157                                                                   |
| 3                | Albania | Sunflowerseed Oil               | 1993           | 155                                                                   |
| 3                | Albania | Sweeteners, Other               | 1993           | 6                                                                     |
| 3                | Albania | Tomatoes and products           | 1993           | 15                                                                    |
| 3                | Albania | Treenuts                        | 1993           | 8                                                                     |
| 3                | Albania | Vegetable Oils                  | 1993           | 199                                                                   |
| 3                | Albania | Vegetables                      | 1993           | 90                                                                    |
| 3                | Albania | Vegetables, Other               | 1993           | 62                                                                    |
| 3                | Albania | Vegetal Products                | 1993           | 2,214                                                                 |
| 3                | Albania | Wheat and products              | 1993           | 1,502                                                                 |
| 3                | Albania | Wine                            | 1993           | 6                                                                     |
| 3                | Albania | Alcoholic Beverages             | 1994           | 39                                                                    |
| 3                | Albania | Animal fats                     | 1994           | 54                                                                    |
| 3                | Albania | Animal Products                 | 1994           | 651                                                                   |
| 3                | Albania | Apples and products             | 1994           | 8                                                                     |
| 3                | Albania | Bananas                         | 1994           | 2                                                                     |
| 3                | Albania | Barley and products             | 1994           | 1                                                                     |
| 3                | Albania | Beans                           | 1994           | 33                                                                    |
| 3                | Albania | Beer                            | 1994           | 22                                                                    |
| 3                | Albania | Beverages, Alcoholic            | 1994           | 10                                                                    |
| 3                | Albania | Bovine Meat                     | 1994           | 44                                                                    |
| 3                | Albania | Butter, Ghee                    | 1994           | 35                                                                    |
| 3                | Albania | Cereals - Excluding Beer        | 1994           | 1,595                                                                 |
| 3                | Albania | Cocoa Beans and products        | 1994           | 8                                                                     |
| 3                | Albania | Coffee and products             | 1994           | 1                                                                     |
| 3                | Albania | Eggs                            | 1994           | 19                                                                    |
| 3                | Albania | Fats, Animals, Raw              | 1994           | 20                                                                    |
| 3                | Albania | Fish, Seafood                   | 1994           | 1                                                                     |
| 3                | Albania | Fruits - Excluding Wine         | 1994           | 54                                                                    |
| 3                | Albania | Fruits, Other                   | 1994           | 15                                                                    |
| 3                | Albania | Grand Total                     | 1994           | 2,880                                                                 |
| 3                | Albania | Grapes and products (excl wine) | 1994           | 19                                                                    |
| 3                | Albania | Maize and products              | 1994           | 44                                                                    |
| 3                | Albania | Meat                            | 1994           | 146                                                                   |
| 3                | Albania | Milk - Excluding Butter         | 1994           | 420                                                                   |
| 3                | Albania | Mutton & Goat Meat              | 1994           | 29                                                                    |
| 3                | Albania | Offals                          | 1994           | 10                                                                    |
| 3                | Albania | Oilcrops                        | 1994           | 7                                                                     |
| 3                | Albania | Oilcrops Oil, Other             | 1994           | 1                                                                     |
| 3                | Albania | Olive Oil                       | 1994           | 21                                                                    |
| 3                | Albania | Olives (including preserved)    | 1994           | 7                                                                     |
| 3                | Albania | Onions                          | 1994           | 14                                                                    |
| 3                | Albania | Oranges, Mandarines             | 1994           | 9                                                                     |
| 3                | Albania | Pigmeat                         | 1994           | 50                                                                    |
| 3                | Albania | Potatoes and products           | 1994           | 28                                                                    |
| 3                | Albania | Poultry Meat                    | 1994           | 23                                                                    |
| 3                | Albania | Pulses                          | 1994           | 34                                                                    |
| 3                | Albania | Pulses, Other and products      | 1994           | 1                                                                     |
| 3                | Albania | Rape and Mustard Oil            | 1994           | 1                                                                     |
| 3                | Albania | Rice (Milled Equivalent)        | 1994           | 29                                                                    |
| 3                | Albania | Rye and products                | 1994           | 6                                                                     |
| 3                | Albania | Soyabean Oil                    | 1994           | 2                                                                     |
| 3                | Albania | Starchy Roots                   | 1994           | 28                                                                    |
| 3                | Albania | Stimulants                      | 1994           | 9                                                                     |
| 3                | Albania | Sugar & Sweeteners              | 1994           | 187                                                                   |
| 3                | Albania | Sugar (Raw Equivalent)          | 1994           | 177                                                                   |
| 3                | Albania | Sunflowerseed Oil               | 1994           | 146                                                                   |
| 3                | Albania | Sweeteners, Other               | 1994           | 9                                                                     |
| 3                | Albania | Tomatoes and products           | 1994           | 16                                                                    |
| 3                | Albania | Treenuts                        | 1994           | 10                                                                    |
| 3                | Albania | Vegetable Oils                  | 1994           | 171                                                                   |
| 3                | Albania | Vegetables                      | 1994           | 95                                                                    |
| 3                | Albania | Vegetables, Other               | 1994           | 64                                                                    |
| 3                | Albania | Vegetal Products                | 1994           | 2,229                                                                 |
| 3                | Albania | Wheat and products              | 1994           | 1,515                                                                 |
| 3                | Albania | Wine                            | 1994           | 7                                                                     |
| 3                | Albania | Alcoholic Beverages             | 1995           | 38                                                                    |
| 3                | Albania | Animal fats                     | 1995           | 62                                                                    |
| 3                | Albania | Animal Products                 | 1995           | 736                                                                   |
| 3                | Albania | Apples and products             | 1995           | 7                                                                     |
| 3                | Albania | Bananas                         | 1995           | 11                                                                    |
| 3                | Albania | Barley and products             | 1995           | 1                                                                     |
| 3                | Albania | Beans                           | 1995           | 38                                                                    |
| 3                | Albania | Beer                            | 1995           | 17                                                                    |
| 3                | Albania | Beverages, Alcoholic            | 1995           | 10                                                                    |
| 3                | Albania | Bovine Meat                     | 1995           | 46                                                                    |
| 3                | Albania | Butter, Ghee                    | 1995           | 29                                                                    |
| 3                | Albania | Cereals - Excluding Beer        | 1995           | 1,338                                                                 |
| 3                | Albania | Cocoa Beans and products        | 1995           | 6                                                                     |
| 3                | Albania | Coffee and products             | 1995           | 1                                                                     |
| 3                | Albania | Eggs                            | 1995           | 20                                                                    |
| 3                | Albania | Fats, Animals, Raw              | 1995           | 33                                                                    |
| 3                | Albania | Fish, Seafood                   | 1995           | 1                                                                     |
| 3                | Albania | Fruits - Excluding Wine         | 1995           | 60                                                                    |
| 3                | Albania | Fruits, Other                   | 1995           | 16                                                                    |
| 3                | Albania | Grand Total                     | 1995           | 2,717                                                                 |
| 3                | Albania | Grapes and products (excl wine) | 1995           | 20                                                                    |
| 3                | Albania | Honey                           | 1995           | 1                                                                     |
| 3                | Albania | Maize and products              | 1995           | 53                                                                    |
| 3                | Albania | Meat                            | 1995           | 153                                                                   |
| 3                | Albania | Milk - Excluding Butter         | 1995           | 490                                                                   |
| 3                | Albania | Mutton & Goat Meat              | 1995           | 32                                                                    |
| 3                | Albania | Offals                          | 1995           | 11                                                                    |
| 3                | Albania | Oilcrops                        | 1995           | 7                                                                     |
| 3                | Albania | Oilcrops Oil, Other             | 1995           | 5                                                                     |
| 3                | Albania | Olive Oil                       | 1995           | 20                                                                    |
| 3                | Albania | Olives (including preserved)    | 1995           | 7                                                                     |

Dietary calcium and zinc deficiency risks are decreasing but remain prevalent

| FAO Country code | Country | Food item                       | Reference year | Net energy supply (kcal <i>capita</i> <sup>-1</sup> d <sup>-1</sup> ) |
|------------------|---------|---------------------------------|----------------|-----------------------------------------------------------------------|
| 3                | Albania | Onions                          | 1995           | 10                                                                    |
| 3                | Albania | Oranges, Mandarines             | 1995           | 6                                                                     |
| 3                | Albania | Pelagic Fish                    | 1995           | 1                                                                     |
| 3                | Albania | Pigmeat                         | 1995           | 49                                                                    |
| 3                | Albania | Potatoes and products           | 1995           | 42                                                                    |
| 3                | Albania | Poultry Meat                    | 1995           | 26                                                                    |
| 3                | Albania | Pulses                          | 1995           | 39                                                                    |
| 3                | Albania | Pulses, Other and products      | 1995           | 1                                                                     |
| 3                | Albania | Rape and Mustard Oil            | 1995           | 1                                                                     |
| 3                | Albania | Rice (Milled Equivalent)        | 1995           | 53                                                                    |
| 3                | Albania | Rye and products                | 1995           | 7                                                                     |
| 3                | Albania | Soyabean Oil                    | 1995           | 2                                                                     |
| 3                | Albania | Starchy Roots                   | 1995           | 42                                                                    |
| 3                | Albania | Stimulants                      | 1995           | 7                                                                     |
| 3                | Albania | Sugar & Sweeteners              | 1995           | 196                                                                   |
| 3                | Albania | Sugar (Raw Equivalent)          | 1995           | 195                                                                   |
| 3                | Albania | Sunflowerseed Oil               | 1995           | 134                                                                   |
| 3                | Albania | Tomatoes and products           | 1995           | 20                                                                    |
| 3                | Albania | Treenuts                        | 1995           | 7                                                                     |
| 3                | Albania | Vegetable Oils                  | 1995           | 161                                                                   |
| 3                | Albania | Vegetables                      | 1995           | 85                                                                    |
| 3                | Albania | Vegetables, Other               | 1995           | 55                                                                    |
| 3                | Albania | Vegetal Products                | 1995           | 1,981                                                                 |
| 3                | Albania | Wheat and products              | 1995           | 1,225                                                                 |
| 3                | Albania | Wine                            | 1995           | 10                                                                    |
| 3                | Albania | Alcoholic Beverages             | 1996           | 38                                                                    |
| 3                | Albania | Animal fats                     | 1996           | 50                                                                    |
| 3                | Albania | Animal Products                 | 1996           | 768                                                                   |
| 3                | Albania | Apples and products             | 1996           | 12                                                                    |
| 3                | Albania | Bananas                         | 1996           | 6                                                                     |
| 3                | Albania | Barley and products             | 1996           | 1                                                                     |
| 3                | Albania | Beans                           | 1996           | 41                                                                    |
| 3                | Albania | Beer                            | 1996           | 10                                                                    |
| 3                | Albania | Beverages, Alcoholic            | 1996           | 15                                                                    |
| 3                | Albania | Bovine Meat                     | 1996           | 52                                                                    |
| 3                | Albania | Butter, Chee                    | 1996           | 18                                                                    |
| 3                | Albania | Cereals - Excluding Beer        | 1996           | 1,381                                                                 |
| 3                | Albania | Cereals, Other                  | 1996           | 4                                                                     |
| 3                | Albania | Cocoa Beans and products        | 1996           | 6                                                                     |
| 3                | Albania | Eggs                            | 1996           | 22                                                                    |
| 3                | Albania | Fats, Animals, Raw              | 1996           | 33                                                                    |
| 3                | Albania | Fish, Seafood                   | 1996           | 2                                                                     |
| 3                | Albania | Fruits - Excluding Wine         | 1996           | 64                                                                    |
| 3                | Albania | Fruits, Other                   | 1996           | 23                                                                    |
| 3                | Albania | Grand Total                     | 1996           | 2,837                                                                 |
| 3                | Albania | Grapes and products (excl wine) | 1996           | 17                                                                    |
| 3                | Albania | Groundnut Oil                   | 1996           | 3                                                                     |
| 3                | Albania | Groundnuts (Shelled Eq)         | 1996           | 1                                                                     |
| 3                | Albania | Honey                           | 1996           | 3                                                                     |
| 3                | Albania | Maize and products              | 1996           | 22                                                                    |
| 3                | Albania | Maize Germ Oil                  | 1996           | 1                                                                     |
| 3                | Albania | Marine Fish, Other              | 1996           | 1                                                                     |
| 3                | Albania | Meat                            | 1996           | 155                                                                   |
| 3                | Albania | Milk - Excluding Butter         | 1996           | 529                                                                   |
| 3                | Albania | Miscellaneous                   | 1996           | 2                                                                     |
| 3                | Albania | Mutton & Goat Meat              | 1996           | 28                                                                    |
| 3                | Albania | Offals                          | 1996           | 10                                                                    |
| 3                | Albania | Oilcrops                        | 1996           | 11                                                                    |
| 3                | Albania | Oilcrops Oil, Other             | 1996           | 7                                                                     |
| 3                | Albania | Olive Oil                       | 1996           | 20                                                                    |
| 3                | Albania | Olives (including preserved)    | 1996           | 9                                                                     |
| 3                | Albania | Onions                          | 1996           | 10                                                                    |
| 3                | Albania | Oranges, Mandarines             | 1996           | 5                                                                     |
| 3                | Albania | Pelagic Fish                    | 1996           | 1                                                                     |
| 3                | Albania | Pigmeat                         | 1996           | 29                                                                    |
| 3                | Albania | Potatoes and products           | 1996           | 47                                                                    |
| 3                | Albania | Poultry Meat                    | 1996           | 46                                                                    |
| 3                | Albania | Pulses                          | 1996           | 42                                                                    |
| 3                | Albania | Pulses, Other and products      | 1996           | 1                                                                     |
| 3                | Albania | Rice (Milled Equivalent)        | 1996           | 71                                                                    |
| 3                | Albania | Rye and products                | 1996           | 11                                                                    |
| 3                | Albania | Soyabean Oil                    | 1996           | 1                                                                     |
| 3                | Albania | Starchy Roots                   | 1996           | 47                                                                    |
| 3                | Albania | Stimulants                      | 1996           | 6                                                                     |
| 3                | Albania | Sugar & Sweeteners              | 1996           | 185                                                                   |
| 3                | Albania | Sugar (Raw Equivalent)          | 1996           | 180                                                                   |
| 3                | Albania | Sunflowerseed Oil               | 1996           | 151                                                                   |
| 3                | Albania | Sweeteners, Other               | 1996           | 2                                                                     |
| 3                | Albania | Tomatoes and products           | 1996           | 24                                                                    |
| 3                | Albania | Treenuts                        | 1996           | 16                                                                    |
| 3                | Albania | Vegetable Oils                  | 1996           | 185                                                                   |
| 3                | Albania | Vegetables                      | 1996           | 92                                                                    |
| 3                | Albania | Vegetables, Other               | 1996           | 58                                                                    |
| 3                | Albania | Vegetal Products                | 1996           | 2,069                                                                 |
| 3                | Albania | Wheat and products              | 1996           | 1,272                                                                 |
| 3                | Albania | Wine                            | 1996           | 13                                                                    |
| 3                | Albania | Alcoholic Beverages             | 1997           | 27                                                                    |
| 3                | Albania | Animal fats                     | 1997           | 41                                                                    |
| 3                | Albania | Animal Products                 | 1997           | 637                                                                   |
| 3                | Albania | Apples and products             | 1997           | 9                                                                     |
| 3                | Albania | Bananas                         | 1997           | 2                                                                     |
| 3                | Albania | Barley and products             | 1997           | 1                                                                     |
| 3                | Albania | Beans                           | 1997           | 39                                                                    |
| 3                | Albania | Beer                            | 1997           | 8                                                                     |
| 3                | Albania | Beverages, Alcoholic            | 1997           | 10                                                                    |
| 3                | Albania | Bovine Meat                     | 1997           | 48                                                                    |
| 3                | Albania | Butter, Chee                    | 1997           | 9                                                                     |

Dietary calcium and zinc deficiency risks are decreasing but remain prevalent

| FAO Country code | Country | Food item                       | Reference year | Net energy supply (kcal capita <sup>-1</sup> d <sup>-1</sup> ) |
|------------------|---------|---------------------------------|----------------|----------------------------------------------------------------|
| 3                | Albania | Cereals - Excluding Beer        | 1997           | 1,399                                                          |
| 3                | Albania | Cocoa Beans and products        | 1997           | 2                                                              |
| 3                | Albania | Eggs                            | 1997           | 19                                                             |
| 3                | Albania | Fats, Animals, Raw              | 1997           | 31                                                             |
| 3                | Albania | Fish, Seafood                   | 1997           | 2                                                              |
| 3                | Albania | Fruits - Excluding Wine         | 1997           | 62                                                             |
| 3                | Albania | Fruits, Other                   | 1997           | 20                                                             |
| 3                | Albania | Grand Total                     | 1997           | 2,725                                                          |
| 3                | Albania | Grapes and products (excl wine) | 1997           | 26                                                             |
| 3                | Albania | Groundnut Oil                   | 1997           | 7                                                              |
| 3                | Albania | Groundnuts (Shelled Eq)         | 1997           | 1                                                              |
| 3                | Albania | Honey                           | 1997           | 2                                                              |
| 3                | Albania | Maize and products              | 1997           | 18                                                             |
| 3                | Albania | Meat                            | 1997           | 116                                                            |
| 3                | Albania | Meat, Other                     | 1997           | 1                                                              |
| 3                | Albania | Milk - Excluding Butter         | 1997           | 447                                                            |
| 3                | Albania | Miscellaneous                   | 1997           | 1                                                              |
| 3                | Albania | Mutton & Goat Meat              | 1997           | 26                                                             |
| 3                | Albania | Offals                          | 1997           | 13                                                             |
| 3                | Albania | Oilcrops                        | 1997           | 13                                                             |
| 3                | Albania | Oilcrops Oil, Other             | 1997           | 7                                                              |
| 3                | Albania | Olive Oil                       | 1997           | 20                                                             |
| 3                | Albania | Olives (including preserved)    | 1997           | 12                                                             |
| 3                | Albania | Onions                          | 1997           | 11                                                             |
| 3                | Albania | Oranges, Mandarines             | 1997           | 4                                                              |
| 3                | Albania | Pelagic Fish                    | 1997           | 1                                                              |
| 3                | Albania | Pigmeat                         | 1997           | 27                                                             |
| 3                | Albania | Potatoes and products           | 1997           | 45                                                             |
| 3                | Albania | Poultry Meat                    | 1997           | 15                                                             |
| 3                | Albania | Pulses                          | 1997           | 40                                                             |
| 3                | Albania | Pulses, Other and products      | 1997           | 1                                                              |
| 3                | Albania | Rape and Mustard Oil            | 1997           | 2                                                              |
| 3                | Albania | Rice (Milled Equivalent)        | 1997           | 40                                                             |
| 3                | Albania | Rye and products                | 1997           | 5                                                              |
| 3                | Albania | Soyabean Oil                    | 1997           | 9                                                              |
| 3                | Albania | Starchy Roots                   | 1997           | 45                                                             |
| 3                | Albania | Stimulants                      | 1997           | 2                                                              |
| 3                | Albania | Sugar & Sweeteners              | 1997           | 210                                                            |
| 3                | Albania | Sugar (Raw Equivalent)          | 1997           | 208                                                            |
| 3                | Albania | Sunflowerseed Oil               | 1997           | 142                                                            |
| 3                | Albania | Sweeteners, Other               | 1997           | 1                                                              |
| 3                | Albania | Tomatoes and products           | 1997           | 19                                                             |
| 3                | Albania | Treenuts                        | 1997           | 12                                                             |
| 3                | Albania | Vegetable Oils                  | 1997           | 188                                                            |
| 3                | Albania | Vegetables                      | 1997           | 88                                                             |
| 3                | Albania | Vegetables, Other               | 1997           | 58                                                             |
| 3                | Albania | Vegetal Products                | 1997           | 2,088                                                          |
| 3                | Albania | Wheat and products              | 1997           | 1,334                                                          |
| 3                | Albania | Wine                            | 1997           | 10                                                             |
| 3                | Albania | Alcoholic Beverages             | 1998           | 19                                                             |
| 3                | Albania | Animal fats                     | 1998           | 34                                                             |
| 3                | Albania | Animal Products                 | 1998           | 624                                                            |
| 3                | Albania | Apples and products             | 1998           | 10                                                             |
| 3                | Albania | Bananas                         | 1998           | 2                                                              |
| 3                | Albania | Barley and products             | 1998           | 2                                                              |
| 3                | Albania | Beans                           | 1998           | 41                                                             |
| 3                | Albania | Beer                            | 1998           | 8                                                              |
| 3                | Albania | Beverages, Alcoholic            | 1998           | 5                                                              |
| 3                | Albania | Bovine Meat                     | 1998           | 48                                                             |
| 3                | Albania | Butter, Ghee                    | 1998           | 6                                                              |
| 3                | Albania | Cereals - Excluding Beer        | 1998           | 1,389                                                          |
| 3                | Albania | Cocoa Beans and products        | 1998           | 3                                                              |
| 3                | Albania | Eggs                            | 1998           | 20                                                             |
| 3                | Albania | Fats, Animals, Raw              | 1998           | 28                                                             |
| 3                | Albania | Fish, Seafood                   | 1998           | 3                                                              |
| 3                | Albania | Fruits - Excluding Wine         | 1998           | 70                                                             |
| 3                | Albania | Fruits, Other                   | 1998           | 24                                                             |
| 3                | Albania | Grand Total                     | 1998           | 2,725                                                          |
| 3                | Albania | Grapes and products (excl wine) | 1998           | 31                                                             |
| 3                | Albania | Groundnut Oil                   | 1998           | 11                                                             |
| 3                | Albania | Groundnuts (Shelled Eq)         | 1998           | 2                                                              |
| 3                | Albania | Honey                           | 1998           | 2                                                              |
| 3                | Albania | Maize and products              | 1998           | 18                                                             |
| 3                | Albania | Meat                            | 1998           | 129                                                            |
| 3                | Albania | Milk - Excluding Butter         | 1998           | 425                                                            |
| 3                | Albania | Mutton & Goat Meat              | 1998           | 27                                                             |
| 3                | Albania | Offals                          | 1998           | 13                                                             |
| 3                | Albania | Oilcrops                        | 1998           | 34                                                             |
| 3                | Albania | Oilcrops Oil, Other             | 1998           | 9                                                              |
| 3                | Albania | Olive Oil                       | 1998           | 9                                                              |
| 3                | Albania | Olives (including preserved)    | 1998           | 32                                                             |
| 3                | Albania | Onions                          | 1998           | 13                                                             |
| 3                | Albania | Oranges, Mandarines             | 1998           | 4                                                              |
| 3                | Albania | Pelagic Fish                    | 1998           | 2                                                              |
| 3                | Albania | Pigmeat                         | 1998           | 41                                                             |
| 3                | Albania | Potatoes and products           | 1998           | 53                                                             |
| 3                | Albania | Poultry Meat                    | 1998           | 12                                                             |
| 3                | Albania | Pulses                          | 1998           | 43                                                             |
| 3                | Albania | Pulses, Other and products      | 1998           | 2                                                              |
| 3                | Albania | Rape and Mustard Oil            | 1998           | 10                                                             |
| 3                | Albania | Rice (Milled Equivalent)        | 1998           | 58                                                             |
| 3                | Albania | Rye and products                | 1998           | 5                                                              |
| 3                | Albania | Soyabean Oil                    | 1998           | 6                                                              |
| 3                | Albania | Starchy Roots                   | 1998           | 53                                                             |
| 3                | Albania | Stimulants                      | 1998           | 3                                                              |
| 3                | Albania | Sugar & Sweeteners              | 1998           | 192                                                            |
| 3                | Albania | Sugar (Raw Equivalent)          | 1998           | 185                                                            |

Dietary calcium and zinc deficiency risks are decreasing but remain prevalent

| FAO Country code | Country | Food item                       | Reference year | Net energy supply (kcal capita <sup>-1</sup> d <sup>-1</sup> ) |
|------------------|---------|---------------------------------|----------------|----------------------------------------------------------------|
| 3                | Albania | Sunflowerseed Oil               | 1998           | 139                                                            |
| 3                | Albania | Sweeteners, Other               | 1998           | 5                                                              |
| 3                | Albania | Tomatoes and products           | 1998           | 20                                                             |
| 3                | Albania | Treenuts                        | 1998           | 14                                                             |
| 3                | Albania | Vegetable Oils                  | 1998           | 185                                                            |
| 3                | Albania | Vegetables                      | 1998           | 99                                                             |
| 3                | Albania | Vegetables, Other               | 1998           | 66                                                             |
| 3                | Albania | Vegetal Products                | 1998           | 2,101                                                          |
| 3                | Albania | Wheat and products              | 1998           | 1,306                                                          |
| 3                | Albania | Wine                            | 1998           | 6                                                              |
| 3                | Albania | Alcoholic Beverages             | 1999           | 29                                                             |
| 3                | Albania | Animal fats                     | 1999           | 35                                                             |
| 3                | Albania | Animal Products                 | 1999           | 660                                                            |
| 3                | Albania | Apples and products             | 1999           | 11                                                             |
| 3                | Albania | Bananas                         | 1999           | 4                                                              |
| 3                | Albania | Barley and products             | 1999           | 1                                                              |
| 3                | Albania | Beans                           | 1999           | 44                                                             |
| 3                | Albania | Beer                            | 1999           | 14                                                             |
| 3                | Albania | Beverages, Alcoholic            | 1999           | 8                                                              |
| 3                | Albania | Bovine Meat                     | 1999           | 50                                                             |
| 3                | Albania | Butter, Ghee                    | 1999           | 8                                                              |
| 3                | Albania | Cereals - Excluding Beer        | 1999           | 1,416                                                          |
| 3                | Albania | Cereals, Other                  | 1999           | 1                                                              |
| 3                | Albania | Cocoa Beans and products        | 1999           | 4                                                              |
| 3                | Albania | Coffee and products             | 1999           | 1                                                              |
| 3                | Albania | Dates                           | 1999           | 1                                                              |
| 3                | Albania | Eggs                            | 1999           | 21                                                             |
| 3                | Albania | Fats, Animals, Raw              | 1999           | 27                                                             |
| 3                | Albania | Fish, Seafood                   | 1999           | 5                                                              |
| 3                | Albania | Fruits - Excluding Wine         | 1999           | 82                                                             |
| 3                | Albania | Fruits, Other                   | 1999           | 28                                                             |
| 3                | Albania | Grand Total                     | 1999           | 2,797                                                          |
| 3                | Albania | Grapes and products (excl wine) | 1999           | 31                                                             |
| 3                | Albania | Groundnut Oil                   | 1999           | 1                                                              |
| 3                | Albania | Groundnuts (Shelled Eq)         | 1999           | 2                                                              |
| 3                | Albania | Honey                           | 1999           | 2                                                              |
| 3                | Albania | Maize and products              | 1999           | 23                                                             |
| 3                | Albania | Maize Germ Oil                  | 1999           | 1                                                              |
| 3                | Albania | Marine Fish, Other              | 1999           | 2                                                              |
| 3                | Albania | Meat                            | 1999           | 161                                                            |
| 3                | Albania | Milk - Excluding Butter         | 1999           | 428                                                            |
| 3                | Albania | Miscellaneous                   | 1999           | 6                                                              |
| 3                | Albania | Mutton & Goat Meat              | 1999           | 30                                                             |
| 3                | Albania | Offals                          | 1999           | 10                                                             |
| 3                | Albania | Oilcrops                        | 1999           | 33                                                             |
| 3                | Albania | Oilcrops Oil, Other             | 1999           | 8                                                              |
| 3                | Albania | Olive Oil                       | 1999           | 7                                                              |
| 3                | Albania | Olives (including preserved)    | 1999           | 31                                                             |
| 3                | Albania | Onions                          | 1999           | 10                                                             |
| 3                | Albania | Oranges, Mandarines             | 1999           | 5                                                              |
| 3                | Albania | Pelagic Fish                    | 1999           | 2                                                              |
| 3                | Albania | Pigmeat                         | 1999           | 38                                                             |
| 3                | Albania | Potatoes and products           | 1999           | 57                                                             |
| 3                | Albania | Poultry Meat                    | 1999           | 43                                                             |
| 3                | Albania | Pulses                          | 1999           | 46                                                             |
| 3                | Albania | Pulses, Other and products      | 1999           | 2                                                              |
| 3                | Albania | Rape and Mustard Oil            | 1999           | 3                                                              |
| 3                | Albania | Rice (Milled Equivalent)        | 1999           | 48                                                             |
| 3                | Albania | Rye and products                | 1999           | 6                                                              |
| 3                | Albania | Soyabean Oil                    | 1999           | 2                                                              |
| 3                | Albania | Starchy Roots                   | 1999           | 57                                                             |
| 3                | Albania | Stimulants                      | 1999           | 5                                                              |
| 3                | Albania | Sugar & Sweeteners              | 1999           | 186                                                            |
| 3                | Albania | Sugar (Raw Equivalent)          | 1999           | 182                                                            |
| 3                | Albania | Sunflowerseed Oil               | 1999           | 147                                                            |
| 3                | Albania | Sweeteners, Other               | 1999           | 1                                                              |
| 3                | Albania | Tomatoes and products           | 1999           | 21                                                             |
| 3                | Albania | Treenuts                        | 1999           | 16                                                             |
| 3                | Albania | Vegetable Oils                  | 1999           | 170                                                            |
| 3                | Albania | Vegetables                      | 1999           | 90                                                             |
| 3                | Albania | Vegetables, Other               | 1999           | 60                                                             |
| 3                | Albania | Vegetal Products                | 1999           | 2,137                                                          |
| 3                | Albania | Wheat and products              | 1999           | 1,337                                                          |
| 3                | Albania | Wine                            | 1999           | 7                                                              |
| 3                | Albania | Alcoholic Beverages             | 2000           | 29                                                             |
| 3                | Albania | Animal fats                     | 2000           | 39                                                             |
| 3                | Albania | Animal Products                 | 2000           | 674                                                            |
| 3                | Albania | Apples and products             | 2000           | 15                                                             |
| 3                | Albania | Bananas                         | 2000           | 9                                                              |
| 3                | Albania | Barley and products             | 2000           | 1                                                              |
| 3                | Albania | Beans                           | 2000           | 44                                                             |
| 3                | Albania | Beer                            | 2000           | 17                                                             |
| 3                | Albania | Beverages, Alcoholic            | 2000           | 8                                                              |
| 3                | Albania | Bovine Meat                     | 2000           | 50                                                             |
| 3                | Albania | Butter, Ghee                    | 2000           | 9                                                              |
| 3                | Albania | Cereals - Excluding Beer        | 2000           | 1,331                                                          |
| 3                | Albania | Cocoa Beans and products        | 2000           | 8                                                              |
| 3                | Albania | Coffee and products             | 2000           | 2                                                              |
| 3                | Albania | Demersal Fish                   | 2000           | 1                                                              |
| 3                | Albania | Eggs                            | 2000           | 25                                                             |
| 3                | Albania | Fats, Animals, Raw              | 2000           | 30                                                             |
| 3                | Albania | Fish, Seafood                   | 2000           | 6                                                              |
| 3                | Albania | Freshwater Fish                 | 2000           | 1                                                              |
| 3                | Albania | Fruits - Excluding Wine         | 2000           | 100                                                            |
| 3                | Albania | Fruits, Other                   | 2000           | 29                                                             |
| 3                | Albania | Grand Total                     | 2000           | 2,734                                                          |
| 3                | Albania | Grapes and products (excl wine) | 2000           | 39                                                             |

Dietary calcium and zinc deficiency risks are decreasing but remain prevalent

| FAO Country code | Country | Food item                       | Reference year | Net energy supply (kcal capita <sup>-1</sup> d <sup>-1</sup> ) |
|------------------|---------|---------------------------------|----------------|----------------------------------------------------------------|
| 3                | Albania | Groundnut Oil                   | 2000           | 4                                                              |
| 3                | Albania | Groundnuts (Shelled Eq)         | 2000           | 3                                                              |
| 3                | Albania | Honey                           | 2000           | 3                                                              |
| 3                | Albania | Maize and products              | 2000           | 37                                                             |
| 3                | Albania | Maize Germ Oil                  | 2000           | 2                                                              |
| 3                | Albania | Marine Fish, Other              | 2000           | 1                                                              |
| 3                | Albania | Meat                            | 2000           | 149                                                            |
| 3                | Albania | Milk - Excluding Butter         | 2000           | 445                                                            |
| 3                | Albania | Miscellaneous                   | 2000           | 2                                                              |
| 3                | Albania | Mutton & Goat Meat              | 2000           | 32                                                             |
| 3                | Albania | Offals                          | 2000           | 12                                                             |
| 3                | Albania | Oilcrops                        | 2000           | 26                                                             |
| 3                | Albania | Oilcrops Oil, Other             | 2000           | 9                                                              |
| 3                | Albania | Olive Oil                       | 2000           | 13                                                             |
| 3                | Albania | Olives (including preserved)    | 2000           | 22                                                             |
| 3                | Albania | Onions                          | 2000           | 9                                                              |
| 3                | Albania | Oranges, Mandarines             | 2000           | 8                                                              |
| 3                | Albania | Pelagic Fish                    | 2000           | 3                                                              |
| 3                | Albania | Pigmeat                         | 2000           | 40                                                             |
| 3                | Albania | Pimento                         | 2000           | 2                                                              |
| 3                | Albania | Potatoes and products           | 2000           | 55                                                             |
| 3                | Albania | Poultry Meat                    | 2000           | 26                                                             |
| 3                | Albania | Pulses                          | 2000           | 46                                                             |
| 3                | Albania | Pulses, Other and products      | 2000           | 2                                                              |
| 3                | Albania | Rape and Mustard Oil            | 2000           | 4                                                              |
| 3                | Albania | Rice (Milled Equivalent)        | 2000           | 53                                                             |
| 3                | Albania | Rye and products                | 2000           | 4                                                              |
| 3                | Albania | Soyabean Oil                    | 2000           | 30                                                             |
| 3                | Albania | Spices                          | 2000           | 2                                                              |
| 3                | Albania | Starchy Roots                   | 2000           | 55                                                             |
| 3                | Albania | Stimulants                      | 2000           | 9                                                              |
| 3                | Albania | Sugar & Sweeteners              | 2000           | 188                                                            |
| 3                | Albania | Sugar (Raw Equivalent)          | 2000           | 183                                                            |
| 3                | Albania | Sunflowerseed Oil               | 2000           | 103                                                            |
| 3                | Albania | Sweeteners, Other               | 2000           | 3                                                              |
| 3                | Albania | Tomatoes and products           | 2000           | 21                                                             |
| 3                | Albania | Treenuts                        | 2000           | 12                                                             |
| 3                | Albania | Vegetable Oils                  | 2000           | 165                                                            |
| 3                | Albania | Vegetables                      | 2000           | 93                                                             |
| 3                | Albania | Vegetables, Other               | 2000           | 64                                                             |
| 3                | Albania | Vegetal Products                | 2000           | 2,060                                                          |
| 3                | Albania | Wheat and products              | 2000           | 1,236                                                          |
| 3                | Albania | Wine                            | 2000           | 4                                                              |
| 3                | Albania | Alcoholic Beverages             | 2001           | 33                                                             |
| 3                | Albania | Animal fats                     | 2001           | 52                                                             |
| 3                | Albania | Animal Products                 | 2001           | 721                                                            |
| 3                | Albania | Apples and products             | 2001           | 18                                                             |
| 3                | Albania | Bananas                         | 2001           | 4                                                              |
| 3                | Albania | Barley and products             | 2001           | 1                                                              |
| 3                | Albania | Beans                           | 2001           | 42                                                             |
| 3                | Albania | Beer                            | 2001           | 20                                                             |
| 3                | Albania | Beverages, Alcoholic            | 2001           | 8                                                              |
| 3                | Albania | Bovine Meat                     | 2001           | 51                                                             |
| 3                | Albania | Butter, Ghee                    | 2001           | 10                                                             |
| 3                | Albania | Cereals - Excluding Beer        | 2001           | 1,323                                                          |
| 3                | Albania | Cocoa Beans and products        | 2001           | 11                                                             |
| 3                | Albania | Coffee and products             | 2001           | 2                                                              |
| 3                | Albania | Eggs                            | 2001           | 23                                                             |
| 3                | Albania | Fats, Animals, Raw              | 2001           | 42                                                             |
| 3                | Albania | Fish, Seafood                   | 2001           | 6                                                              |
| 3                | Albania | Freshwater Fish                 | 2001           | 1                                                              |
| 3                | Albania | Fruits - Excluding Wine         | 2001           | 114                                                            |
| 3                | Albania | Fruits, Other                   | 2001           | 44                                                             |
| 3                | Albania | Grand Total                     | 2001           | 2,800                                                          |
| 3                | Albania | Grapes and products (excl wine) | 2001           | 38                                                             |
| 3                | Albania | Groundnut Oil                   | 2001           | 3                                                              |
| 3                | Albania | Groundnuts (Shelled Eq)         | 2001           | 3                                                              |
| 3                | Albania | Honey                           | 2001           | 3                                                              |
| 3                | Albania | Maize and products              | 2001           | 23                                                             |
| 3                | Albania | Maize Germ Oil                  | 2001           | 6                                                              |
| 3                | Albania | Marine Fish, Other              | 2001           | 1                                                              |
| 3                | Albania | Meat                            | 2001           | 168                                                            |
| 3                | Albania | Milk - Excluding Butter         | 2001           | 461                                                            |
| 3                | Albania | Miscellaneous                   | 2001           | 5                                                              |
| 3                | Albania | Mutton & Goat Meat              | 2001           | 31                                                             |
| 3                | Albania | Offals                          | 2001           | 12                                                             |
| 3                | Albania | Oilcrops                        | 2001           | 28                                                             |
| 3                | Albania | Oilcrops Oil, Other             | 2001           | 13                                                             |
| 3                | Albania | Olive Oil                       | 2001           | 15                                                             |
| 3                | Albania | Olives (including preserved)    | 2001           | 24                                                             |
| 3                | Albania | Onions                          | 2001           | 9                                                              |
| 3                | Albania | Oranges, Mandarines             | 2001           | 9                                                              |
| 3                | Albania | Pelagic Fish                    | 2001           | 3                                                              |
| 3                | Albania | Pigmeat                         | 2001           | 48                                                             |
| 3                | Albania | Potatoes and products           | 2001           | 56                                                             |
| 3                | Albania | Poultry Meat                    | 2001           | 37                                                             |
| 3                | Albania | Pulses                          | 2001           | 43                                                             |
| 3                | Albania | Pulses, Other and products      | 2001           | 2                                                              |
| 3                | Albania | Rape and Mustard Oil            | 2001           | 5                                                              |
| 3                | Albania | Rice (Milled Equivalent)        | 2001           | 53                                                             |
| 3                | Albania | Rye and products                | 2001           | 5                                                              |
| 3                | Albania | Soyabean Oil                    | 2001           | 9                                                              |
| 3                | Albania | Starchy Roots                   | 2001           | 57                                                             |
| 3                | Albania | Stimulants                      | 2001           | 12                                                             |
| 3                | Albania | Sugar & Sweeteners              | 2001           | 187                                                            |
| 3                | Albania | Sugar (Raw Equivalent)          | 2001           | 181                                                            |
| 3                | Albania | Sunflowerseed Oil               | 2001           | 114                                                            |

Dietary calcium and zinc deficiency risks are decreasing but remain prevalent

| FAO Country code | Country | Food item                       | Reference year | Net energy supply (kcal capita <sup>-1</sup> d <sup>-1</sup> ) |
|------------------|---------|---------------------------------|----------------|----------------------------------------------------------------|
| 3                | Albania | Sweet potatoes                  | 2001           | 1                                                              |
| 3                | Albania | Sweeteners, Other               | 2001           | 3                                                              |
| 3                | Albania | Tomatoes and products           | 2001           | 22                                                             |
| 3                | Albania | Treenuts                        | 2001           | 14                                                             |
| 3                | Albania | Vegetable Oils                  | 2001           | 166                                                            |
| 3                | Albania | Vegetables                      | 2001           | 95                                                             |
| 3                | Albania | Vegetables, Other               | 2001           | 64                                                             |
| 3                | Albania | Vegetal Products                | 2001           | 2,079                                                          |
| 3                | Albania | Wheat and products              | 2001           | 1,241                                                          |
| 3                | Albania | Wine                            | 2001           | 6                                                              |
| 3                | Albania | Alcoholic Beverages             | 2002           | 31                                                             |
| 3                | Albania | Animal fats                     | 2002           | 50                                                             |
| 3                | Albania | Animal Products                 | 2002           | 759                                                            |
| 3                | Albania | Apples and products             | 2002           | 16                                                             |
| 3                | Albania | Bananas                         | 2002           | 9                                                              |
| 3                | Albania | Barley and products             | 2002           | 1                                                              |
| 3                | Albania | Beans                           | 2002           | 45                                                             |
| 3                | Albania | Beer                            | 2002           | 18                                                             |
| 3                | Albania | Beverages, Alcoholic            | 2002           | 7                                                              |
| 3                | Albania | Bovine Meat                     | 2002           | 57                                                             |
| 3                | Albania | Butter, Ghee                    | 2002           | 11                                                             |
| 3                | Albania | Cereals - Excluding Beer        | 2002           | 1,354                                                          |
| 3                | Albania | Cereals, Other                  | 2002           | 1                                                              |
| 3                | Albania | Cocoa Beans and products        | 2002           | 9                                                              |
| 3                | Albania | Coffee and products             | 2002           | 2                                                              |
| 3                | Albania | Cream                           | 2002           | 1                                                              |
| 3                | Albania | Demersal Fish                   | 2002           | 1                                                              |
| 3                | Albania | Eggs                            | 2002           | 20                                                             |
| 3                | Albania | Fats, Animals, Raw              | 2002           | 39                                                             |
| 3                | Albania | Fish, Seafood                   | 2002           | 8                                                              |
| 3                | Albania | Freshwater Fish                 | 2002           | 1                                                              |
| 3                | Albania | Fruits - Excluding Wine         | 2002           | 119                                                            |
| 3                | Albania | Fruits, Other                   | 2002           | 42                                                             |
| 3                | Albania | Grand Total                     | 2002           | 2,861                                                          |
| 3                | Albania | Grapes and products (excl wine) | 2002           | 44                                                             |
| 3                | Albania | Groundnut Oil                   | 2002           | 1                                                              |
| 3                | Albania | Groundnuts (Shelled Eq)         | 2002           | 4                                                              |
| 3                | Albania | Honey                           | 2002           | 3                                                              |
| 3                | Albania | Maize and products              | 2002           | 24                                                             |
| 3                | Albania | Maize Germ Oil                  | 2002           | 3                                                              |
| 3                | Albania | Marine Fish, Other              | 2002           | 1                                                              |
| 3                | Albania | Meat                            | 2002           | 194                                                            |
| 3                | Albania | Milk - Excluding Butter         | 2002           | 474                                                            |
| 3                | Albania | Miscellaneous                   | 2002           | 2                                                              |
| 3                | Albania | Mutton & Goat Meat              | 2002           | 32                                                             |
| 3                | Albania | Offals                          | 2002           | 12                                                             |
| 3                | Albania | Oilcrops                        | 2002           | 19                                                             |
| 3                | Albania | Oilcrops Oil, Other             | 2002           | 12                                                             |
| 3                | Albania | Olive Oil                       | 2002           | 16                                                             |
| 3                | Albania | Olives (including preserved)    | 2002           | 15                                                             |
| 3                | Albania | Onions                          | 2002           | 10                                                             |
| 3                | Albania | Oranges, Mandarines             | 2002           | 7                                                              |
| 3                | Albania | Pelagic Fish                    | 2002           | 6                                                              |
| 3                | Albania | Pigmeat                         | 2002           | 47                                                             |
| 3                | Albania | Potatoes and products           | 2002           | 56                                                             |
| 3                | Albania | Poultry Meat                    | 2002           | 58                                                             |
| 3                | Albania | Pulses                          | 2002           | 47                                                             |
| 3                | Albania | Pulses, Other and products      | 2002           | 2                                                              |
| 3                | Albania | Rape and Mustard Oil            | 2002           | 1                                                              |
| 3                | Albania | Rice (Milled Equivalent)        | 2002           | 68                                                             |
| 3                | Albania | Rye and products                | 2002           | 3                                                              |
| 3                | Albania | Soyabean Oil                    | 2002           | 13                                                             |
| 3                | Albania | Spices                          | 2002           | 1                                                              |
| 3                | Albania | Starchy Roots                   | 2002           | 59                                                             |
| 3                | Albania | Stimulants                      | 2002           | 11                                                             |
| 3                | Albania | Sugar & Sweeteners              | 2002           | 190                                                            |
| 3                | Albania | Sugar (Raw Equivalent)          | 2002           | 183                                                            |
| 3                | Albania | Sunflowerseed Oil               | 2002           | 109                                                            |
| 3                | Albania | Sweet potatoes                  | 2002           | 3                                                              |
| 3                | Albania | Sweeteners, Other               | 2002           | 4                                                              |
| 3                | Albania | Tomatoes and products           | 2002           | 22                                                             |
| 3                | Albania | Treenuts                        | 2002           | 14                                                             |
| 3                | Albania | Vegetable Oils                  | 2002           | 155                                                            |
| 3                | Albania | Vegetables                      | 2002           | 102                                                            |
| 3                | Albania | Vegetables, Other               | 2002           | 69                                                             |
| 3                | Albania | Vegetal Products                | 2002           | 2,102                                                          |
| 3                | Albania | Wheat and products              | 2002           | 1,257                                                          |
| 3                | Albania | Wine                            | 2002           | 6                                                              |
| 3                | Albania | Alcoholic Beverages             | 2003           | 31                                                             |
| 3                | Albania | Animal fats                     | 2003           | 48                                                             |
| 3                | Albania | Animal Products                 | 2003           | 798                                                            |
| 3                | Albania | Apples and products             | 2003           | 17                                                             |
| 3                | Albania | Bananas                         | 2003           | 12                                                             |
| 3                | Albania | Barley and products             | 2003           | 1                                                              |
| 3                | Albania | Beans                           | 2003           | 37                                                             |
| 3                | Albania | Beer                            | 2003           | 17                                                             |
| 3                | Albania | Beverages, Alcoholic            | 2003           | 7                                                              |
| 3                | Albania | Bovine Meat                     | 2003           | 61                                                             |
| 3                | Albania | Butter, Ghee                    | 2003           | 11                                                             |
| 3                | Albania | Cereals - Excluding Beer        | 2003           | 1,214                                                          |
| 3                | Albania | Cocoa Beans and products        | 2003           | 7                                                              |
| 3                | Albania | Coffee and products             | 2003           | 2                                                              |
| 3                | Albania | Eggs                            | 2003           | 22                                                             |
| 3                | Albania | Fats, Animals, Raw              | 2003           | 37                                                             |
| 3                | Albania | Fish, Seafood                   | 2003           | 7                                                              |
| 3                | Albania | Freshwater Fish                 | 2003           | 1                                                              |
| 3                | Albania | Fruits - Excluding Wine         | 2003           | 130                                                            |

Dietary calcium and zinc deficiency risks are decreasing but remain prevalent

| FAO Country code | Country | Food item                       | Reference year | Net energy supply (kcal capita <sup>-1</sup> d <sup>-1</sup> ) |
|------------------|---------|---------------------------------|----------------|----------------------------------------------------------------|
| 3                | Albania | Fruits, Other                   | 2003           | 41                                                             |
| 3                | Albania | Grand Total                     | 2003           | 2,769                                                          |
| 3                | Albania | Grapes and products (excl wine) | 2003           | 54                                                             |
| 3                | Albania | Groundnut Oil                   | 2003           | 1                                                              |
| 3                | Albania | Groundnuts (Shelled Eq)         | 2003           | 4                                                              |
| 3                | Albania | Honey                           | 2003           | 3                                                              |
| 3                | Albania | Maize and products              | 2003           | 24                                                             |
| 3                | Albania | Maize Germ Oil                  | 2003           | 2                                                              |
| 3                | Albania | Meat                            | 2003           | 193                                                            |
| 3                | Albania | Milk - Excluding Butter         | 2003           | 514                                                            |
| 3                | Albania | Miscellaneous                   | 2003           | 2                                                              |
| 3                | Albania | Mutton & Goat Meat              | 2003           | 33                                                             |
| 3                | Albania | Offals                          | 2003           | 13                                                             |
| 3                | Albania | Oilcrops                        | 2003           | 21                                                             |
| 3                | Albania | Oilcrops Oil, Other             | 2003           | 13                                                             |
| 3                | Albania | Olive Oil                       | 2003           | 18                                                             |
| 3                | Albania | Olives (including preserved)    | 2003           | 17                                                             |
| 3                | Albania | Onions                          | 2003           | 15                                                             |
| 3                | Albania | Oranges, Mandarines             | 2003           | 7                                                              |
| 3                | Albania | Pelagic Fish                    | 2003           | 5                                                              |
| 3                | Albania | Pigmeat                         | 2003           | 51                                                             |
| 3                | Albania | Potatoes and products           | 2003           | 56                                                             |
| 3                | Albania | Poultry Meat                    | 2003           | 49                                                             |
| 3                | Albania | Pulses                          | 2003           | 38                                                             |
| 3                | Albania | Pulses, Other and products      | 2003           | 1                                                              |
| 3                | Albania | Rape and Mustard Oil            | 2003           | 1                                                              |
| 3                | Albania | Rice (Milled Equivalent)        | 2003           | 67                                                             |
| 3                | Albania | Rye and products                | 2003           | 4                                                              |
| 3                | Albania | Soyabean Oil                    | 2003           | 3                                                              |
| 3                | Albania | Starchy Roots                   | 2003           | 56                                                             |
| 3                | Albania | Stimulants                      | 2003           | 9                                                              |
| 3                | Albania | Sugar & Sweeteners              | 2003           | 190                                                            |
| 3                | Albania | Sugar (Raw Equivalent)          | 2003           | 183                                                            |
| 3                | Albania | Sunflowerseed Oil               | 2003           | 112                                                            |
| 3                | Albania | Sweeteners, Other               | 2003           | 3                                                              |
| 3                | Albania | Tomatoes and products           | 2003           | 21                                                             |
| 3                | Albania | Treenuts                        | 2003           | 14                                                             |
| 3                | Albania | Vegetable Oils                  | 2003           | 151                                                            |
| 3                | Albania | Vegetables                      | 2003           | 115                                                            |
| 3                | Albania | Vegetables, Other               | 2003           | 79                                                             |
| 3                | Albania | Vegetal Products                | 2003           | 1,970                                                          |
| 3                | Albania | Wheat and products              | 2003           | 1,119                                                          |
| 3                | Albania | Wine                            | 2003           | 7                                                              |
| 3                | Albania | Alcoholic Beverages             | 2004           | 38                                                             |
| 3                | Albania | Animal fats                     | 2004           | 57                                                             |
| 3                | Albania | Animal Products                 | 2004           | 818                                                            |
| 3                | Albania | Apples and products             | 2004           | 19                                                             |
| 3                | Albania | Bananas                         | 2004           | 8                                                              |
| 3                | Albania | Barley and products             | 2004           | 1                                                              |
| 3                | Albania | Beans                           | 2004           | 43                                                             |
| 3                | Albania | Beer                            | 2004           | 22                                                             |
| 3                | Albania | Beverages, Alcoholic            | 2004           | 8                                                              |
| 3                | Albania | Bovine Meat                     | 2004           | 64                                                             |
| 3                | Albania | Butter, Ghee                    | 2004           | 14                                                             |
| 3                | Albania | Cereals - Excluding Beer        | 2004           | 1,147                                                          |
| 3                | Albania | Cocoa Beans and products        | 2004           | 7                                                              |
| 3                | Albania | Coffee and products             | 2004           | 1                                                              |
| 3                | Albania | Cream                           | 2004           | 1                                                              |
| 3                | Albania | Dates                           | 2004           | 8                                                              |
| 3                | Albania | Demersal Fish                   | 2004           | 1                                                              |
| 3                | Albania | Eggs                            | 2004           | 22                                                             |
| 3                | Albania | Fats, Animals, Raw              | 2004           | 42                                                             |
| 3                | Albania | Fish, Seafood                   | 2004           | 9                                                              |
| 3                | Albania | Freshwater Fish                 | 2004           | 1                                                              |
| 3                | Albania | Fruits - Excluding Wine         | 2004           | 136                                                            |
| 3                | Albania | Fruits, Other                   | 2004           | 43                                                             |
| 3                | Albania | Grand Total                     | 2004           | 2,787                                                          |
| 3                | Albania | Grapes and products (excl wine) | 2004           | 50                                                             |
| 3                | Albania | Groundnuts (Shelled Eq)         | 2004           | 3                                                              |
| 3                | Albania | Honey                           | 2004           | 5                                                              |
| 3                | Albania | Maize and products              | 2004           | 19                                                             |
| 3                | Albania | Maize Germ Oil                  | 2004           | 3                                                              |
| 3                | Albania | Marine Fish, Other              | 2004           | 1                                                              |
| 3                | Albania | Meat                            | 2004           | 202                                                            |
| 3                | Albania | Milk - Excluding Butter         | 2004           | 513                                                            |
| 3                | Albania | Miscellaneous                   | 2004           | 2                                                              |
| 3                | Albania | Mutton & Goat Meat              | 2004           | 36                                                             |
| 3                | Albania | Offals                          | 2004           | 13                                                             |
| 3                | Albania | Oilcrops                        | 2004           | 51                                                             |
| 3                | Albania | Oilcrops Oil, Other             | 2004           | 17                                                             |
| 3                | Albania | Olive Oil                       | 2004           | 14                                                             |
| 3                | Albania | Olives (including preserved)    | 2004           | 47                                                             |
| 3                | Albania | Onions                          | 2004           | 15                                                             |
| 3                | Albania | Oranges, Mandarines             | 2004           | 8                                                              |
| 3                | Albania | Pelagic Fish                    | 2004           | 6                                                              |
| 3                | Albania | Pigmeat                         | 2004           | 56                                                             |
| 3                | Albania | Potatoes and products           | 2004           | 57                                                             |
| 3                | Albania | Poultry Meat                    | 2004           | 46                                                             |
| 3                | Albania | Pulses                          | 2004           | 44                                                             |
| 3                | Albania | Pulses, Other and products      | 2004           | 2                                                              |
| 3                | Albania | Rape and Mustard Oil            | 2004           | 1                                                              |
| 3                | Albania | Rape and Mustardseed            | 2004           | 1                                                              |
| 3                | Albania | Rice (Milled Equivalent)        | 2004           | 63                                                             |
| 3                | Albania | Rye and products                | 2004           | 4                                                              |
| 3                | Albania | Soyabean Oil                    | 2004           | 4                                                              |
| 3                | Albania | Starchy Roots                   | 2004           | 59                                                             |
| 3                | Albania | Stimulants                      | 2004           | 9                                                              |



## Dietary calcium and zinc deficiency risks are decreasing but remain prevalent

| FAO Country code | Country | Food item                       | Reference year | Net energy supply (kcal <i>capita</i> <sup>-1</sup> d <sup>-1</sup> ) |
|------------------|---------|---------------------------------|----------------|-----------------------------------------------------------------------|
| 3                | Albania | Sugar & Sweeteners              | 2004           | 191                                                                   |
| 3                | Albania | Sugar (Raw Equivalent)          | 2004           | 185                                                                   |
| 3                | Albania | Sunflowerseed Oil               | 2004           | 124                                                                   |
| 3                | Albania | Sweet potatoes                  | 2004           | 2                                                                     |
| 3                | Albania | Sweeteners, Other               | 2004           | 1                                                                     |
| 3                | Albania | Tomatoes and products           | 2004           | 22                                                                    |
| 3                | Albania | Treenuts                        | 2004           | 16                                                                    |
| 3                | Albania | Vegetable Oils                  | 2004           | 163                                                                   |
| 3                | Albania | Vegetables                      | 2004           | 112                                                                   |
| 3                | Albania | Vegetables, Other               | 2004           | 76                                                                    |
| 3                | Albania | Vegetal Products                | 2004           | 1,970                                                                 |
| 3                | Albania | Wheat and products              | 2004           | 1,060                                                                 |
| 3                | Albania | Wine                            | 2004           | 9                                                                     |
| 3                | Albania | Alcoholic Beverages             | 2005           | 40                                                                    |
| 3                | Albania | Animal fats                     | 2005           | 65                                                                    |
| 3                | Albania | Animal Products                 | 2005           | 841                                                                   |
| 3                | Albania | Apples and products             | 2005           | 20                                                                    |
| 3                | Albania | Bananas                         | 2005           | 8                                                                     |
| 3                | Albania | Barley and products             | 2005           | 1                                                                     |
| 3                | Albania | Beans                           | 2005           | 43                                                                    |
| 3                | Albania | Beer                            | 2005           | 20                                                                    |
| 3                | Albania | Beverages, Alcoholic            | 2005           | 9                                                                     |
| 3                | Albania | Bovine Meat                     | 2005           | 65                                                                    |
| 3                | Albania | Butter, Ghee                    | 2005           | 15                                                                    |
| 3                | Albania | Cereals - Excluding Beer        | 2005           | 1,207                                                                 |
| 3                | Albania | Cocoa Beans and products        | 2005           | 8                                                                     |
| 3                | Albania | Coffee and products             | 2005           | 1                                                                     |
| 3                | Albania | Cream                           | 2005           | 1                                                                     |
| 3                | Albania | Dates                           | 2005           | 11                                                                    |
| 3                | Albania | Demersal Fish                   | 2005           | 1                                                                     |
| 3                | Albania | Eggs                            | 2005           | 23                                                                    |
| 3                | Albania | Fats, Animals, Raw              | 2005           | 49                                                                    |
| 3                | Albania | Fish, Seafood                   | 2005           | 10                                                                    |
| 3                | Albania | Freshwater Fish                 | 2005           | 1                                                                     |
| 3                | Albania | Fruits - Excluding Wine         | 2005           | 151                                                                   |
| 3                | Albania | Fruits, Other                   | 2005           | 44                                                                    |
| 3                | Albania | Grand Total                     | 2005           | 2,870                                                                 |
| 3                | Albania | Grapes and products (excl wine) | 2005           | 58                                                                    |
| 3                | Albania | Groundnuts (Shelled Eq)         | 2005           | 3                                                                     |
| 3                | Albania | Honey                           | 2005           | 5                                                                     |
| 3                | Albania | Maize and products              | 2005           | 20                                                                    |
| 3                | Albania | Maize Germ Oil                  | 2005           | 5                                                                     |
| 3                | Albania | Marine Fish, Other              | 2005           | 1                                                                     |
| 3                | Albania | Meat                            | 2005           | 209                                                                   |
| 3                | Albania | Milk - Excluding Butter         | 2005           | 521                                                                   |
| 3                | Albania | Miscellaneous                   | 2005           | 3                                                                     |
| 3                | Albania | Mutton & Goat Meat              | 2005           | 36                                                                    |
| 3                | Albania | Offals                          | 2005           | 13                                                                    |
| 3                | Albania | Oilcrops                        | 2005           | 26                                                                    |
| 3                | Albania | Oilcrops Oil, Other             | 2005           | 17                                                                    |
| 3                | Albania | Olive Oil                       | 2005           | 13                                                                    |
| 3                | Albania | Olives (including preserved)    | 2005           | 21                                                                    |
| 3                | Albania | Onions                          | 2005           | 15                                                                    |
| 3                | Albania | Oranges, Mandarines             | 2005           | 10                                                                    |
| 3                | Albania | Pelagic Fish                    | 2005           | 7                                                                     |
| 3                | Albania | Pigmeat                         | 2005           | 61                                                                    |
| 3                | Albania | Potatoes and products           | 2005           | 58                                                                    |
| 3                | Albania | Poultry Meat                    | 2005           | 47                                                                    |
| 3                | Albania | Pulses                          | 2005           | 45                                                                    |
| 3                | Albania | Pulses, Other and products      | 2005           | 2                                                                     |
| 3                | Albania | Rape and Mustard Oil            | 2005           | 1                                                                     |
| 3                | Albania | Rape and Mustardseed            | 2005           | 1                                                                     |
| 3                | Albania | Rice (Milled Equivalent)        | 2005           | 71                                                                    |
| 3                | Albania | Rye and products                | 2005           | 5                                                                     |
| 3                | Albania | Soyabean Oil                    | 2005           | 3                                                                     |
| 3                | Albania | Spices                          | 2005           | 1                                                                     |
| 3                | Albania | Spices, Other                   | 2005           | 1                                                                     |
| 3                | Albania | Starchy Roots                   | 2005           | 60                                                                    |
| 3                | Albania | Stimulants                      | 2005           | 9                                                                     |
| 3                | Albania | Sugar & Sweeteners              | 2005           | 192                                                                   |
| 3                | Albania | Sugar (Raw Equivalent)          | 2005           | 186                                                                   |
| 3                | Albania | Sunflowerseed Oil               | 2005           | 124                                                                   |
| 3                | Albania | Sweet potatoes                  | 2005           | 2                                                                     |
| 3                | Albania | Sweeteners, Other               | 2005           | 1                                                                     |
| 3                | Albania | Tomatoes and products           | 2005           | 22                                                                    |
| 3                | Albania | Treenuts                        | 2005           | 20                                                                    |
| 3                | Albania | Vegetable Oils                  | 2005           | 162                                                                   |
| 3                | Albania | Vegetables                      | 2005           | 114                                                                   |
| 3                | Albania | Vegetables, Other               | 2005           | 77                                                                    |
| 3                | Albania | Vegetal Products                | 2005           | 2,029                                                                 |
| 3                | Albania | Wheat and products              | 2005           | 1,110                                                                 |
| 3                | Albania | Wine                            | 2005           | 11                                                                    |
| 3                | Albania | Alcoholic Beverages             | 2006           | 45                                                                    |
| 3                | Albania | Animal fats                     | 2006           | 68                                                                    |
| 3                | Albania | Animal Products                 | 2006           | 865                                                                   |
| 3                | Albania | Apples and products             | 2006           | 25                                                                    |
| 3                | Albania | Bananas                         | 2006           | 8                                                                     |
| 3                | Albania | Barley and products             | 2006           | 1                                                                     |
| 3                | Albania | Beans                           | 2006           | 43                                                                    |
| 3                | Albania | Beer                            | 2006           | 24                                                                    |
| 3                | Albania | Beverages, Alcoholic            | 2006           | 9                                                                     |
| 3                | Albania | Bovine Meat                     | 2006           | 78                                                                    |
| 3                | Albania | Butter, Ghee                    | 2006           | 18                                                                    |
| 3                | Albania | Cereals - Excluding Beer        | 2006           | 1,118                                                                 |
| 3                | Albania | Cocoa Beans and products        | 2006           | 9                                                                     |
| 3                | Albania | Coconuts - Incl Copra           | 2006           | 2                                                                     |
| 3                | Albania | Coffee and products             | 2006           | 2                                                                     |

## Dietary calcium and zinc deficiency risks are decreasing but remain prevalent

| FAO Country code | Country | Food item                       | Reference year | Net energy supply (kcal capita <sup>-1</sup> d <sup>-1</sup> ) |
|------------------|---------|---------------------------------|----------------|----------------------------------------------------------------|
| 3                | Albania | Cream                           | 2006           | 1                                                              |
| 3                | Albania | Dates                           | 2006           | 11                                                             |
| 3                | Albania | Demersal Fish                   | 2006           | 1                                                              |
| 3                | Albania | Eggs                            | 2006           | 22                                                             |
| 3                | Albania | Fats, Animals, Raw              | 2006           | 49                                                             |
| 3                | Albania | Fish, Seafood                   | 2006           | 8                                                              |
| 3                | Albania | Freshwater Fish                 | 2006           | 1                                                              |
| 3                | Albania | Fruits - Excluding Wine         | 2006           | 164                                                            |
| 3                | Albania | Fruits, Other                   | 2006           | 46                                                             |
| 3                | Albania | Grand Total                     | 2006           | 2,855                                                          |
| 3                | Albania | Grapes and products (excl wine) | 2006           | 63                                                             |
| 3                | Albania | Groundnuts (Shelled Eq)         | 2006           | 4                                                              |
| 3                | Albania | Honey                           | 2006           | 5                                                              |
| 3                | Albania | Lemons, Limes and products      | 2006           | 1                                                              |
| 3                | Albania | Maize and products              | 2006           | 21                                                             |
| 3                | Albania | Maize Germ Oil                  | 2006           | 4                                                              |
| 3                | Albania | Marine Fish, Other              | 2006           | 1                                                              |
| 3                | Albania | Meat                            | 2006           | 225                                                            |
| 3                | Albania | Milk - Excluding Butter         | 2006           | 529                                                            |
| 3                | Albania | Miscellaneous                   | 2006           | 3                                                              |
| 3                | Albania | Mutton & Goat Meat              | 2006           | 37                                                             |
| 3                | Albania | Offals                          | 2006           | 14                                                             |
| 3                | Albania | Oilcrops                        | 2006           | 38                                                             |
| 3                | Albania | Oilcrops Oil, Other             | 2006           | 20                                                             |
| 3                | Albania | Olive Oil                       | 2006           | 12                                                             |
| 3                | Albania | Olives (including preserved)    | 2006           | 31                                                             |
| 3                | Albania | Onions                          | 2006           | 18                                                             |
| 3                | Albania | Oranges, Mandarines             | 2006           | 10                                                             |
| 3                | Albania | Pelagic Fish                    | 2006           | 4                                                              |
| 3                | Albania | Pigmeat                         | 2006           | 73                                                             |
| 3                | Albania | Potatoes and products           | 2006           | 58                                                             |
| 3                | Albania | Poultry Meat                    | 2006           | 36                                                             |
| 3                | Albania | Pulses                          | 2006           | 45                                                             |
| 3                | Albania | Pulses, Other and products      | 2006           | 2                                                              |
| 3                | Albania | Rape and Mustard Oil            | 2006           | 1                                                              |
| 3                | Albania | Rape and Mustardseed            | 2006           | 1                                                              |
| 3                | Albania | Rice (Milled Equivalent)        | 2006           | 82                                                             |
| 3                | Albania | Rye and products                | 2006           | 5                                                              |
| 3                | Albania | Soyabean Oil                    | 2006           | 1                                                              |
| 3                | Albania | Starchy Roots                   | 2006           | 65                                                             |
| 3                | Albania | Stimulants                      | 2006           | 11                                                             |
| 3                | Albania | Sugar & Sweeteners              | 2006           | 196                                                            |
| 3                | Albania | Sugar (Raw Equivalent)          | 2006           | 188                                                            |
| 3                | Albania | Sunflowerseed Oil               | 2006           | 123                                                            |
| 3                | Albania | Sweet potatoes                  | 2006           | 7                                                              |
| 3                | Albania | Sweeteners, Other               | 2006           | 3                                                              |
| 3                | Albania | Tomatoes and products           | 2006           | 24                                                             |
| 3                | Albania | Treenuts                        | 2006           | 26                                                             |
| 3                | Albania | Vegetable Oils                  | 2006           | 162                                                            |
| 3                | Albania | Vegetables                      | 2006           | 117                                                            |
| 3                | Albania | Vegetables, Other               | 2006           | 75                                                             |
| 3                | Albania | Vegetal Products                | 2006           | 1,990                                                          |
| 3                | Albania | Wheat and products              | 2006           | 1,008                                                          |
| 3                | Albania | Wine                            | 2006           | 11                                                             |
| 3                | Albania | Alcoholic Beverages             | 2007           | 50                                                             |
| 3                | Albania | Animal fats                     | 2007           | 85                                                             |
| 3                | Albania | Animal Products                 | 2007           | 868                                                            |
| 3                | Albania | Apples and products             | 2007           | 24                                                             |
| 3                | Albania | Bananas                         | 2007           | 11                                                             |
| 3                | Albania | Barley and products             | 2007           | 1                                                              |
| 3                | Albania | Beans                           | 2007           | 43                                                             |
| 3                | Albania | Beer                            | 2007           | 28                                                             |
| 3                | Albania | Beverages, Alcoholic            | 2007           | 10                                                             |
| 3                | Albania | Bovine Meat                     | 2007           | 79                                                             |
| 3                | Albania | Butter, Chee                    | 2007           | 30                                                             |
| 3                | Albania | Cereals - Excluding Beer        | 2007           | 1,121                                                          |
| 3                | Albania | Cereals, Other                  | 2007           | 1                                                              |
| 3                | Albania | Cocoa Beans and products        | 2007           | 9                                                              |
| 3                | Albania | Coffee and products             | 2007           | 2                                                              |
| 3                | Albania | Cream                           | 2007           | 1                                                              |
| 3                | Albania | Dates                           | 2007           | 11                                                             |
| 3                | Albania | Demersal Fish                   | 2007           | 1                                                              |
| 3                | Albania | Eggs                            | 2007           | 23                                                             |
| 3                | Albania | Fats, Animals, Raw              | 2007           | 54                                                             |
| 3                | Albania | Fish, Seafood                   | 2007           | 10                                                             |
| 3                | Albania | Freshwater Fish                 | 2007           | 2                                                              |
| 3                | Albania | Fruits - Excluding Wine         | 2007           | 176                                                            |
| 3                | Albania | Fruits, Other                   | 2007           | 48                                                             |
| 3                | Albania | Grand Total                     | 2007           | 2,866                                                          |
| 3                | Albania | Grapes and products (excl wine) | 2007           | 71                                                             |
| 3                | Albania | Groundnuts (Shelled Eq)         | 2007           | 3                                                              |
| 3                | Albania | Honey                           | 2007           | 5                                                              |
| 3                | Albania | Lemons, Limes and products      | 2007           | 1                                                              |
| 3                | Albania | Maize and products              | 2007           | 21                                                             |
| 3                | Albania | Maize Germ Oil                  | 2007           | 5                                                              |
| 3                | Albania | Marine Fish, Other              | 2007           | 1                                                              |
| 3                | Albania | Meat                            | 2007           | 252                                                            |
| 3                | Albania | Milk - Excluding Butter         | 2007           | 482                                                            |
| 3                | Albania | Miscellaneous                   | 2007           | 4                                                              |
| 3                | Albania | Mutton & Goat Meat              | 2007           | 48                                                             |
| 3                | Albania | Offals                          | 2007           | 16                                                             |
| 3                | Albania | Oilcrops                        | 2007           | 25                                                             |
| 3                | Albania | Oilcrops Oil, Other             | 2007           | 19                                                             |
| 3                | Albania | Olive Oil                       | 2007           | 13                                                             |
| 3                | Albania | Olives (including preserved)    | 2007           | 20                                                             |
| 3                | Albania | Onions                          | 2007           | 17                                                             |
| 3                | Albania | Oranges, Mandarines             | 2007           | 11                                                             |

Dietary calcium and zinc deficiency risks are decreasing but remain prevalent

| FAO Country code | Country | Food item                       | Reference year | Net energy supply (kcal <i>capita</i> <sup>-1</sup> d <sup>-1</sup> ) |
|------------------|---------|---------------------------------|----------------|-----------------------------------------------------------------------|
| 3                | Albania | Pelagic Fish                    | 2007           | 6                                                                     |
| 3                | Albania | Pigmeat                         | 2007           | 76                                                                    |
| 3                | Albania | Potatoes and products           | 2007           | 59                                                                    |
| 3                | Albania | Poultry Meat                    | 2007           | 49                                                                    |
| 3                | Albania | Pulses                          | 2007           | 45                                                                    |
| 3                | Albania | Pulses, Other and products      | 2007           | 2                                                                     |
| 3                | Albania | Rape and Mustard Oil            | 2007           | 2                                                                     |
| 3                | Albania | Rape and Mustardseed            | 2007           | 1                                                                     |
| 3                | Albania | Rice (Milled Equivalent)        | 2007           | 74                                                                    |
| 3                | Albania | Rye and products                | 2007           | 5                                                                     |
| 3                | Albania | Soyabean Oil                    | 2007           | 2                                                                     |
| 3                | Albania | Starchy Roots                   | 2007           | 69                                                                    |
| 3                | Albania | Stimulants                      | 2007           | 11                                                                    |
| 3                | Albania | Sugar & Sweeteners              | 2007           | 199                                                                   |
| 3                | Albania | Sugar (Raw Equivalent)          | 2007           | 189                                                                   |
| 3                | Albania | Sunflowerseed Oil               | 2007           | 120                                                                   |
| 3                | Albania | Sweet potatoes                  | 2007           | 10                                                                    |
| 3                | Albania | Sweeteners, Other               | 2007           | 4                                                                     |
| 3                | Albania | Tomatoes and products           | 2007           | 24                                                                    |
| 3                | Albania | Treenuts                        | 2007           | 23                                                                    |
| 3                | Albania | Vegetable Oils                  | 2007           | 162                                                                   |
| 3                | Albania | Vegetables                      | 2007           | 113                                                                   |
| 3                | Albania | Vegetables, Other               | 2007           | 72                                                                    |
| 3                | Albania | Vegetal Products                | 2007           | 1,998                                                                 |
| 3                | Albania | Wheat and products              | 2007           | 1,020                                                                 |
| 3                | Albania | Wine                            | 2007           | 12                                                                    |
| 3                | Albania | Alcoholic Beverages             | 2008           | 49                                                                    |
| 3                | Albania | Animal fats                     | 2008           | 73                                                                    |
| 3                | Albania | Animal Products                 | 2008           | 855                                                                   |
| 3                | Albania | Apples and products             | 2008           | 25                                                                    |
| 3                | Albania | Bananas                         | 2008           | 9                                                                     |
| 3                | Albania | Barley and products             | 2008           | 1                                                                     |
| 3                | Albania | Beans                           | 2008           | 44                                                                    |
| 3                | Albania | Beer                            | 2008           | 28                                                                    |
| 3                | Albania | Beverages, Alcoholic            | 2008           | 10                                                                    |
| 3                | Albania | Bovine Meat                     | 2008           | 64                                                                    |
| 3                | Albania | Butter, Ghee                    | 2008           | 19                                                                    |
| 3                | Albania | Cereals - Excluding Beer        | 2008           | 1,127                                                                 |
| 3                | Albania | Cocoa Beans and products        | 2008           | 8                                                                     |
| 3                | Albania | Coffee and products             | 2008           | 3                                                                     |
| 3                | Albania | Cream                           | 2008           | 1                                                                     |
| 3                | Albania | Dates                           | 2008           | 12                                                                    |
| 3                | Albania | Demersal Fish                   | 2008           | 1                                                                     |
| 3                | Albania | Eggs                            | 2008           | 22                                                                    |
| 3                | Albania | Fats, Animals, Raw              | 2008           | 53                                                                    |
| 3                | Albania | Fish, Seafood                   | 2008           | 11                                                                    |
| 3                | Albania | Freshwater Fish                 | 2008           | 2                                                                     |
| 3                | Albania | Fruits - Excluding Wine         | 2008           | 180                                                                   |
| 3                | Albania | Fruits, Other                   | 2008           | 48                                                                    |
| 3                | Albania | Grand Total                     | 2008           | 2,896                                                                 |
| 3                | Albania | Grapes and products (excl wine) | 2008           | 75                                                                    |
| 3                | Albania | Groundnuts (Shelled Eq)         | 2008           | 3                                                                     |
| 3                | Albania | Honey                           | 2008           | 7                                                                     |
| 3                | Albania | Lemons, Limes and products      | 2008           | 1                                                                     |
| 3                | Albania | Maize and products              | 2008           | 20                                                                    |
| 3                | Albania | Maize Germ Oil                  | 2008           | 5                                                                     |
| 3                | Albania | Marine Fish, Other              | 2008           | 1                                                                     |
| 3                | Albania | Meat                            | 2008           | 231                                                                   |
| 3                | Albania | Milk - Excluding Butter         | 2008           | 504                                                                   |
| 3                | Albania | Miscellaneous                   | 2008           | 4                                                                     |
| 3                | Albania | Mutton & Goat Meat              | 2008           | 38                                                                    |
| 3                | Albania | Offals                          | 2008           | 14                                                                    |
| 3                | Albania | Oilcrops                        | 2008           | 49                                                                    |
| 3                | Albania | Oilcrops Oil, Other             | 2008           | 19                                                                    |
| 3                | Albania | Olive Oil                       | 2008           | 13                                                                    |
| 3                | Albania | Olives (including preserved)    | 2008           | 46                                                                    |
| 3                | Albania | Onions                          | 2008           | 18                                                                    |
| 3                | Albania | Oranges, Mandarines             | 2008           | 11                                                                    |
| 3                | Albania | Pelagic Fish                    | 2008           | 7                                                                     |
| 3                | Albania | Pigmeat                         | 2008           | 67                                                                    |
| 3                | Albania | Potatoes and products           | 2008           | 58                                                                    |
| 3                | Albania | Poultry Meat                    | 2008           | 63                                                                    |
| 3                | Albania | Pulses                          | 2008           | 46                                                                    |
| 3                | Albania | Pulses, Other and products      | 2008           | 2                                                                     |
| 3                | Albania | Rape and Mustard Oil            | 2008           | 3                                                                     |
| 3                | Albania | Rape and Mustardseed            | 2008           | 1                                                                     |
| 3                | Albania | Rice (Milled Equivalent)        | 2008           | 56                                                                    |
| 3                | Albania | Rye and products                | 2008           | 5                                                                     |
| 3                | Albania | Soyabean Oil                    | 2008           | 4                                                                     |
| 3                | Albania | Starchy Roots                   | 2008           | 68                                                                    |
| 3                | Albania | Stimulants                      | 2008           | 11                                                                    |
| 3                | Albania | Sugar & Sweeteners              | 2008           | 206                                                                   |
| 3                | Albania | Sugar (Raw Equivalent)          | 2008           | 190                                                                   |
| 3                | Albania | Sunflowerseed Oil               | 2008           | 109                                                                   |
| 3                | Albania | Sweet potatoes                  | 2008           | 9                                                                     |
| 3                | Albania | Sweeteners, Other               | 2008           | 9                                                                     |
| 3                | Albania | Tomatoes and products           | 2008           | 24                                                                    |
| 3                | Albania | Treenuts                        | 2008           | 21                                                                    |
| 3                | Albania | Vegetable Oils                  | 2008           | 154                                                                   |
| 3                | Albania | Vegetables                      | 2008           | 126                                                                   |
| 3                | Albania | Vegetables, Other               | 2008           | 84                                                                    |
| 3                | Albania | Vegetal Products                | 2008           | 2,041                                                                 |
| 3                | Albania | Wheat and products              | 2008           | 1,045                                                                 |
| 3                | Albania | Wine                            | 2008           | 11                                                                    |
| 3                | Albania | Alcoholic Beverages             | 2009           | 47                                                                    |
| 3                | Albania | Animal fats                     | 2009           | 88                                                                    |
| 3                | Albania | Animal Products                 | 2009           | 874                                                                   |

## Dietary calcium and zinc deficiency risks are decreasing but remain prevalent

| FAO Country code | Country | Food item                       | Reference year | Net energy supply (kcal capita <sup>-1</sup> d <sup>-1</sup> ) |
|------------------|---------|---------------------------------|----------------|----------------------------------------------------------------|
| 3                | Albania | Apples and products             | 2009           | 24                                                             |
| 3                | Albania | Bananas                         | 2009           | 9                                                              |
| 3                | Albania | Barley and products             | 2009           | 1                                                              |
| 3                | Albania | Beans                           | 2009           | 44                                                             |
| 3                | Albania | Beer                            | 2009           | 26                                                             |
| 3                | Albania | Beverages, Alcoholic            | 2009           | 9                                                              |
| 3                | Albania | Bovine Meat                     | 2009           | 60                                                             |
| 3                | Albania | Butter, Ghee                    | 2009           | 19                                                             |
| 3                | Albania | Cereals - Excluding Beer        | 2009           | 1,094                                                          |
| 3                | Albania | Cereals, Other                  | 2009           | 1                                                              |
| 3                | Albania | Cocoa Beans and products        | 2009           | 7                                                              |
| 3                | Albania | Coffee and products             | 2009           | 3                                                              |
| 3                | Albania | Cream                           | 2009           | 1                                                              |
| 3                | Albania | Dates                           | 2009           | 13                                                             |
| 3                | Albania | Demersal Fish                   | 2009           | 1                                                              |
| 3                | Albania | Eggs                            | 2009           | 23                                                             |
| 3                | Albania | Fats, Animals, Raw              | 2009           | 68                                                             |
| 3                | Albania | Fish, Seafood                   | 2009           | 11                                                             |
| 3                | Albania | Freshwater Fish                 | 2009           | 2                                                              |
| 3                | Albania | Fruits - Excluding Wine         | 2009           | 191                                                            |
| 3                | Albania | Fruits, Other                   | 2009           | 54                                                             |
| 3                | Albania | Grand Total                     | 2009           | 2,935                                                          |
| 3                | Albania | Grapes and products (excl wine) | 2009           | 79                                                             |
| 3                | Albania | Groundnuts (Shelled Eq)         | 2009           | 3                                                              |
| 3                | Albania | Honey                           | 2009           | 7                                                              |
| 3                | Albania | Lemons, Limes and products      | 2009           | 1                                                              |
| 3                | Albania | Maize and products              | 2009           | 21                                                             |
| 3                | Albania | Maize Germ Oil                  | 2009           | 4                                                              |
| 3                | Albania | Marine Fish, Other              | 2009           | 1                                                              |
| 3                | Albania | Meat                            | 2009           | 237                                                            |
| 3                | Albania | Milk - Excluding Butter         | 2009           | 503                                                            |
| 3                | Albania | Miscellaneous                   | 2009           | 5                                                              |
| 3                | Albania | Mutton & Goat Meat              | 2009           | 40                                                             |
| 3                | Albania | Offals                          | 2009           | 13                                                             |
| 3                | Albania | Oilcrops                        | 2009           | 71                                                             |
| 3                | Albania | Oilcrops Oil, Other             | 2009           | 24                                                             |
| 3                | Albania | Olive Oil                       | 2009           | 14                                                             |
| 3                | Albania | Olives (including preserved)    | 2009           | 67                                                             |
| 3                | Albania | Onions                          | 2009           | 18                                                             |
| 3                | Albania | Oranges, Mandarines             | 2009           | 12                                                             |
| 3                | Albania | Pelagic Fish                    | 2009           | 7                                                              |
| 3                | Albania | Pigmeat                         | 2009           | 71                                                             |
| 3                | Albania | Potatoes and products           | 2009           | 59                                                             |
| 3                | Albania | Poultry Meat                    | 2009           | 66                                                             |
| 3                | Albania | Pulses                          | 2009           | 46                                                             |
| 3                | Albania | Pulses, Other and products      | 2009           | 3                                                              |
| 3                | Albania | Rape and Mustard Oil            | 2009           | 1                                                              |
| 3                | Albania | Rape and Mustardseed            | 2009           | 1                                                              |
| 3                | Albania | Rice (Milled Equivalent)        | 2009           | 65                                                             |
| 3                | Albania | Rye and products                | 2009           | 5                                                              |
| 3                | Albania | Soyabean Oil                    | 2009           | 2                                                              |
| 3                | Albania | Starchy Roots                   | 2009           | 72                                                             |
| 3                | Albania | Stimulants                      | 2009           | 10                                                             |
| 3                | Albania | Sugar & Sweeteners              | 2009           | 210                                                            |
| 3                | Albania | Sugar (Raw Equivalent)          | 2009           | 190                                                            |
| 3                | Albania | Sunflowerseed Oil               | 2009           | 123                                                            |
| 3                | Albania | Sweet potatoes                  | 2009           | 12                                                             |
| 3                | Albania | Sweeteners, Other               | 2009           | 13                                                             |
| 3                | Albania | Tomatoes and products           | 2009           | 23                                                             |
| 3                | Albania | Treenuts                        | 2009           | 24                                                             |
| 3                | Albania | Vegetable Oils                  | 2009           | 167                                                            |
| 3                | Albania | Vegetables                      | 2009           | 123                                                            |
| 3                | Albania | Vegetables, Other               | 2009           | 82                                                             |
| 3                | Albania | Vegetal Products                | 2009           | 2,061                                                          |
| 3                | Albania | Wheat and products              | 2009           | 1,001                                                          |
| 3                | Albania | Wine                            | 2009           | 12                                                             |
| 3                | Albania | Alcoholic Beverages             | 2010           | 54                                                             |
| 3                | Albania | Animal fats                     | 2010           | 74                                                             |
| 3                | Albania | Animal Products                 | 2010           | 872                                                            |
| 3                | Albania | Apples and products             | 2010           | 29                                                             |
| 3                | Albania | Bananas                         | 2010           | 9                                                              |
| 3                | Albania | Barley and products             | 2010           | 1                                                              |
| 3                | Albania | Beans                           | 2010           | 44                                                             |
| 3                | Albania | Beer                            | 2010           | 33                                                             |
| 3                | Albania | Beverages, Alcoholic            | 2010           | 9                                                              |
| 3                | Albania | Bovine Meat                     | 2010           | 62                                                             |
| 3                | Albania | Butter, Ghee                    | 2010           | 20                                                             |
| 3                | Albania | Cephalopods                     | 2010           | 1                                                              |
| 3                | Albania | Cereals - Excluding Beer        | 2010           | 1,155                                                          |
| 3                | Albania | Cereals, Other                  | 2010           | 1                                                              |
| 3                | Albania | Cocoa Beans and products        | 2010           | 8                                                              |
| 3                | Albania | Coffee and products             | 2010           | 3                                                              |
| 3                | Albania | Cream                           | 2010           | 1                                                              |
| 3                | Albania | Dates                           | 2010           | 15                                                             |
| 3                | Albania | Demersal Fish                   | 2010           | 1                                                              |
| 3                | Albania | Eggs                            | 2010           | 22                                                             |
| 3                | Albania | Fats, Animals, Raw              | 2010           | 53                                                             |
| 3                | Albania | Fish, Seafood                   | 2010           | 13                                                             |
| 3                | Albania | Freshwater Fish                 | 2010           | 2                                                              |
| 3                | Albania | Fruits - Excluding Wine         | 2010           | 212                                                            |
| 3                | Albania | Fruits, Other                   | 2010           | 53                                                             |
| 3                | Albania | Grand Total                     | 2010           | 2,987                                                          |
| 3                | Albania | Grapefruit and products         | 2010           | 1                                                              |
| 3                | Albania | Grapes and products (excl wine) | 2010           | 91                                                             |
| 3                | Albania | Groundnuts (Shelled Eq)         | 2010           | 3                                                              |
| 3                | Albania | Honey                           | 2010           | 8                                                              |
| 3                | Albania | Lemons, Limes and products      | 2010           | 1                                                              |

## Dietary calcium and zinc deficiency risks are decreasing but remain prevalent

| FAO Country code | Country | Food item                       | Reference year | Net energy supply (kcal capita <sup>-1</sup> d <sup>-1</sup> ) |
|------------------|---------|---------------------------------|----------------|----------------------------------------------------------------|
| 3                | Albania | Maize and products              | 2010           | 26                                                             |
| 3                | Albania | Maize Germ Oil                  | 2010           | 6                                                              |
| 3                | Albania | Marine Fish, Other              | 2010           | 1                                                              |
| 3                | Albania | Meat                            | 2010           | 235                                                            |
| 3                | Albania | Milk - Excluding Butter         | 2010           | 513                                                            |
| 3                | Albania | Miscellaneous                   | 2010           | 5                                                              |
| 3                | Albania | Mutton & Goat Meat              | 2010           | 36                                                             |
| 3                | Albania | Offals                          | 2010           | 16                                                             |
| 3                | Albania | Oilcrops                        | 2010           | 63                                                             |
| 3                | Albania | Oilcrops Oil, Other             | 2010           | 22                                                             |
| 3                | Albania | Olive Oil                       | 2010           | 14                                                             |
| 3                | Albania | Olives (including preserved)    | 2010           | 59                                                             |
| 3                | Albania | Onions                          | 2010           | 21                                                             |
| 3                | Albania | Oranges, Mandarines             | 2010           | 13                                                             |
| 3                | Albania | Pelagic Fish                    | 2010           | 8                                                              |
| 3                | Albania | Pigmeat                         | 2010           | 68                                                             |
| 3                | Albania | Potatoes and products           | 2010           | 62                                                             |
| 3                | Albania | Poultry Meat                    | 2010           | 69                                                             |
| 3                | Albania | Pulses                          | 2010           | 46                                                             |
| 3                | Albania | Pulses, Other and products      | 2010           | 2                                                              |
| 3                | Albania | Rape and Mustard Oil            | 2010           | 1                                                              |
| 3                | Albania | Rape and Mustardseed            | 2010           | 1                                                              |
| 3                | Albania | Rice (Milled Equivalent)        | 2010           | 68                                                             |
| 3                | Albania | Rye and products                | 2010           | 4                                                              |
| 3                | Albania | Soyabean Oil                    | 2010           | 2                                                              |
| 3                | Albania | Spices                          | 2010           | 1                                                              |
| 3                | Albania | Spices, Other                   | 2010           | 1                                                              |
| 3                | Albania | Starchy Roots                   | 2010           | 76                                                             |
| 3                | Albania | Stimulants                      | 2010           | 11                                                             |
| 3                | Albania | Sugar & Sweeteners              | 2010           | 186                                                            |
| 3                | Albania | Sugar (Raw Equivalent)          | 2010           | 164                                                            |
| 3                | Albania | Sunflowerseed Oil               | 2010           | 94                                                             |
| 3                | Albania | Sweet potatoes                  | 2010           | 14                                                             |
| 3                | Albania | Sweeteners, Other               | 2010           | 14                                                             |
| 3                | Albania | Tomatoes and products           | 2010           | 28                                                             |
| 3                | Albania | Treenuts                        | 2010           | 24                                                             |
| 3                | Albania | Vegetable Oils                  | 2010           | 139                                                            |
| 3                | Albania | Vegetables                      | 2010           | 143                                                            |
| 3                | Albania | Vegetables, Other               | 2010           | 95                                                             |
| 3                | Albania | Vegetal Products                | 2010           | 2,115                                                          |
| 3                | Albania | Wheat and products              | 2010           | 1,055                                                          |
| 3                | Albania | Wine                            | 2010           | 12                                                             |
| 3                | Albania | Alcoholic Beverages             | 2011           | 59                                                             |
| 3                | Albania | Animal fats                     | 2011           | 67                                                             |
| 3                | Albania | Animal Products                 | 2011           | 880                                                            |
| 3                | Albania | Apples and products             | 2011           | 30                                                             |
| 3                | Albania | Bananas                         | 2011           | 9                                                              |
| 3                | Albania | Barley and products             | 2011           | 1                                                              |
| 3                | Albania | Beans                           | 2011           | 44                                                             |
| 3                | Albania | Beer                            | 2011           | 38                                                             |
| 3                | Albania | Beverages, Alcoholic            | 2011           | 9                                                              |
| 3                | Albania | Bovine Meat                     | 2011           | 61                                                             |
| 3                | Albania | Butter, Ghee                    | 2011           | 20                                                             |
| 3                | Albania | Cephalopods                     | 2011           | 1                                                              |
| 3                | Albania | Cereals - Excluding Beer        | 2011           | 1,162                                                          |
| 3                | Albania | Cocoa Beans and products        | 2011           | 9                                                              |
| 3                | Albania | Coffee and products             | 2011           | 3                                                              |
| 3                | Albania | Cream                           | 2011           | 1                                                              |
| 3                | Albania | Dates                           | 2011           | 16                                                             |
| 3                | Albania | Demersal Fish                   | 2011           | 1                                                              |
| 3                | Albania | Eggs                            | 2011           | 22                                                             |
| 3                | Albania | Fats, Animals, Raw              | 2011           | 46                                                             |
| 3                | Albania | Fish, Seafood                   | 2011           | 12                                                             |
| 3                | Albania | Freshwater Fish                 | 2011           | 1                                                              |
| 3                | Albania | Fruits - Excluding Wine         | 2011           | 222                                                            |
| 3                | Albania | Fruits, Other                   | 2011           | 54                                                             |
| 3                | Albania | Grand Total                     | 2011           | 3,023                                                          |
| 3                | Albania | Grapefruit and products         | 2011           | 1                                                              |
| 3                | Albania | Grapes and products (excl wine) | 2011           | 99                                                             |
| 3                | Albania | Groundnuts (Shelled Eq)         | 2011           | 2                                                              |
| 3                | Albania | Honey                           | 2011           | 8                                                              |
| 3                | Albania | Lemons, Limes and products      | 2011           | 1                                                              |
| 3                | Albania | Maize and products              | 2011           | 25                                                             |
| 3                | Albania | Maize Germ Oil                  | 2011           | 5                                                              |
| 3                | Albania | Marine Fish, Other              | 2011           | 2                                                              |
| 3                | Albania | Meat                            | 2011           | 236                                                            |
| 3                | Albania | Milk - Excluding Butter         | 2011           | 528                                                            |
| 3                | Albania | Miscellaneous                   | 2011           | 5                                                              |
| 3                | Albania | Mutton & Goat Meat              | 2011           | 37                                                             |
| 3                | Albania | Offals                          | 2011           | 14                                                             |
| 3                | Albania | Oilcrops                        | 2011           | 58                                                             |
| 3                | Albania | Oilcrops Oil, Other             | 2011           | 27                                                             |
| 3                | Albania | Olive Oil                       | 2011           | 15                                                             |
| 3                | Albania | Olives (including preserved)    | 2011           | 55                                                             |
| 3                | Albania | Onions                          | 2011           | 28                                                             |
| 3                | Albania | Oranges, Mandarines             | 2011           | 13                                                             |
| 3                | Albania | Pelagic Fish                    | 2011           | 7                                                              |
| 3                | Albania | Pigmeat                         | 2011           | 70                                                             |
| 3                | Albania | Potatoes and products           | 2011           | 73                                                             |
| 3                | Albania | Poultry Meat                    | 2011           | 68                                                             |
| 3                | Albania | Pulses                          | 2011           | 46                                                             |
| 3                | Albania | Pulses, Other and products      | 2011           | 3                                                              |
| 3                | Albania | Rice (Milled Equivalent)        | 2011           | 58                                                             |
| 3                | Albania | Rye and products                | 2011           | 5                                                              |
| 3                | Albania | Soyabean Oil                    | 2011           | 1                                                              |
| 3                | Albania | Spices                          | 2011           | 1                                                              |
| 3                | Albania | Spices, Other                   | 2011           | 1                                                              |

Dietary calcium and zinc deficiency risks are decreasing but remain prevalent

| FAO Country code | Country | Food item                       | Reference year | Net energy supply (kcal <i>capita</i> <sup>-1</sup> d <sup>-1</sup> ) |
|------------------|---------|---------------------------------|----------------|-----------------------------------------------------------------------|
| 3                | Albania | Starchy Roots                   | 2011           | 79                                                                    |
| 3                | Albania | Stimulants                      | 2011           | 12                                                                    |
| 3                | Albania | Sugar & Sweeteners              | 2011           | 187                                                                   |
| 3                | Albania | Sugar (Raw Equivalent)          | 2011           | 165                                                                   |
| 3                | Albania | Sunflowerseed Oil               | 2011           | 74                                                                    |
| 3                | Albania | Sweet potatoes                  | 2011           | 5                                                                     |
| 3                | Albania | Sweeteners, Other               | 2011           | 14                                                                    |
| 3                | Albania | Tomatoes and products           | 2011           | 27                                                                    |
| 3                | Albania | Treenuts                        | 2011           | 26                                                                    |
| 3                | Albania | Vegetable Oils                  | 2011           | 123                                                                   |
| 3                | Albania | Vegetables                      | 2011           | 163                                                                   |
| 3                | Albania | Vegetables, Other               | 2011           | 108                                                                   |
| 3                | Albania | Vegetal Products                | 2011           | 2,143                                                                 |
| 3                | Albania | Wheat and products              | 2011           | 1,072                                                                 |
| 3                | Albania | Wine                            | 2011           | 12                                                                    |
| 4                | Algeria | Alcoholic Beverages             | 1992           | 3                                                                     |
| 4                | Algeria | Animal fats                     | 1992           | 33                                                                    |
| 4                | Algeria | Animal Products                 | 1992           | 300                                                                   |
| 4                | Algeria | Apples and products             | 1992           | 3                                                                     |
| 4                | Algeria | Bananas                         | 1992           | 1                                                                     |
| 4                | Algeria | Barley and products             | 1992           | 154                                                                   |
| 4                | Algeria | Beans                           | 1992           | 10                                                                    |
| 4                | Algeria | Beer                            | 1992           | 3                                                                     |
| 4                | Algeria | Bovine Meat                     | 1992           | 21                                                                    |
| 4                | Algeria | Butter, Ghee                    | 1992           | 24                                                                    |
| 4                | Algeria | Cereals - Excluding Beer        | 1992           | 1,630                                                                 |
| 4                | Algeria | Cocoa Beans and products        | 1992           | 2                                                                     |
| 4                | Algeria | Coconut Oil                     | 1992           | 2                                                                     |
| 4                | Algeria | Coffee and products             | 1992           | 2                                                                     |
| 4                | Algeria | Dates                           | 1992           | 42                                                                    |
| 4                | Algeria | Eggs                            | 1992           | 11                                                                    |
| 4                | Algeria | Fats, Animals, Raw              | 1992           | 9                                                                     |
| 4                | Algeria | Fish, Seafood                   | 1992           | 8                                                                     |
| 4                | Algeria | Fruits - Excluding Wine         | 1992           | 80                                                                    |
| 4                | Algeria | Fruits, Other                   | 1992           | 13                                                                    |
| 4                | Algeria | Grand Total                     | 1992           | 2,865                                                                 |
| 4                | Algeria | Grapes and products (excl wine) | 1992           | 10                                                                    |
| 4                | Algeria | Groundnut Oil                   | 1992           | 12                                                                    |
| 4                | Algeria | Maize and products              | 1992           | 14                                                                    |
| 4                | Algeria | Maize Germ Oil                  | 1992           | 3                                                                     |
| 4                | Algeria | Meat                            | 1992           | 81                                                                    |
| 4                | Algeria | Meat, Other                     | 1992           | 1                                                                     |
| 4                | Algeria | Milk - Excluding Butter         | 1992           | 163                                                                   |
| 4                | Algeria | Miscellaneous                   | 1992           | 1                                                                     |
| 4                | Algeria | Mutton & Goat Meat              | 1992           | 33                                                                    |
| 4                | Algeria | Offals                          | 1992           | 4                                                                     |
| 4                | Algeria | Oilcrops                        | 1992           | 3                                                                     |
| 4                | Algeria | Oilcrops Oil, Other             | 1992           | 12                                                                    |
| 4                | Algeria | Olive Oil                       | 1992           | 41                                                                    |
| 4                | Algeria | Olives (including preserved)    | 1992           | 2                                                                     |
| 4                | Algeria | Onions                          | 1992           | 9                                                                     |
| 4                | Algeria | Oranges, Mandarines             | 1992           | 10                                                                    |
| 4                | Algeria | Palm Oil                        | 1992           | 45                                                                    |
| 4                | Algeria | Peas                            | 1992           | 6                                                                     |
| 4                | Algeria | Pelagic Fish                    | 1992           | 7                                                                     |
| 4                | Algeria | Pimento                         | 1992           | 2                                                                     |
| 4                | Algeria | Potatoes and products           | 1992           | 71                                                                    |
| 4                | Algeria | Poultry Meat                    | 1992           | 25                                                                    |
| 4                | Algeria | Pulses                          | 1992           | 54                                                                    |
| 4                | Algeria | Pulses, Other and products      | 1992           | 37                                                                    |
| 4                | Algeria | Rape and Mustard Oil            | 1992           | 70                                                                    |
| 4                | Algeria | Rice (Milled Equivalent)        | 1992           | 14                                                                    |
| 4                | Algeria | Sesame seed                     | 1992           | 1                                                                     |
| 4                | Algeria | Sorghum and products            | 1992           | 1                                                                     |
| 4                | Algeria | Soyabean Oil                    | 1992           | 51                                                                    |
| 4                | Algeria | Spices                          | 1992           | 3                                                                     |
| 4                | Algeria | Starchy Roots                   | 1992           | 71                                                                    |
| 4                | Algeria | Stimulants                      | 1992           | 5                                                                     |
| 4                | Algeria | Sugar & Sweeteners              | 1992           | 245                                                                   |
| 4                | Algeria | Sugar (Raw Equivalent)          | 1992           | 245                                                                   |
| 4                | Algeria | Sunflowerseed Oil               | 1992           | 175                                                                   |
| 4                | Algeria | Tea (including mate)            | 1992           | 1                                                                     |
| 4                | Algeria | Tomatoes and products           | 1992           | 14                                                                    |
| 4                | Algeria | Treenuts                        | 1992           | 5                                                                     |
| 4                | Algeria | Vegetable Oils                  | 1992           | 411                                                                   |
| 4                | Algeria | Vegetables                      | 1992           | 54                                                                    |
| 4                | Algeria | Vegetables, Other               | 1992           | 30                                                                    |
| 4                | Algeria | Vegetal Products                | 1992           | 2,565                                                                 |
| 4                | Algeria | Wheat and products              | 1992           | 1,447                                                                 |
| 4                | Algeria | Alcoholic Beverages             | 1993           | 3                                                                     |
| 4                | Algeria | Animal fats                     | 1993           | 37                                                                    |
| 4                | Algeria | Animal Products                 | 1993           | 320                                                                   |
| 4                | Algeria | Apples and products             | 1993           | 3                                                                     |
| 4                | Algeria | Barley and products             | 1993           | 152                                                                   |
| 4                | Algeria | Beans                           | 1993           | 6                                                                     |
| 4                | Algeria | Beer                            | 1993           | 3                                                                     |
| 4                | Algeria | Bovine Meat                     | 1993           | 21                                                                    |
| 4                | Algeria | Butter, Ghee                    | 1993           | 28                                                                    |
| 4                | Algeria | Cereals - Excluding Beer        | 1993           | 1,640                                                                 |
| 4                | Algeria | Coconut Oil                     | 1993           | 3                                                                     |
| 4                | Algeria | Coffee and products             | 1993           | 4                                                                     |
| 4                | Algeria | Dates                           | 1993           | 42                                                                    |
| 4                | Algeria | Eggs                            | 1993           | 11                                                                    |
| 4                | Algeria | Fats, Animals, Raw              | 1993           | 9                                                                     |
| 4                | Algeria | Fish, Seafood                   | 1993           | 8                                                                     |
| 4                | Algeria | Fruits - Excluding Wine         | 1993           | 77                                                                    |
| 4                | Algeria | Fruits, Other                   | 1993           | 15                                                                    |

Dietary calcium and zinc deficiency risks are decreasing but remain prevalent

| FAO Country code | Country | Food item                       | Reference year | Net energy supply (kcal capita <sup>-1</sup> d <sup>-1</sup> ) |
|------------------|---------|---------------------------------|----------------|----------------------------------------------------------------|
| 4                | Algeria | Grand Total                     | 1993           | 2,865                                                          |
| 4                | Algeria | Grapes and products (excl wine) | 1993           | 7                                                              |
| 4                | Algeria | Groundnut Oil                   | 1993           | 9                                                              |
| 4                | Algeria | Honey                           | 1993           | 1                                                              |
| 4                | Algeria | Maize and products              | 1993           | 22                                                             |
| 4                | Algeria | Meat                            | 1993           | 83                                                             |
| 4                | Algeria | Meat, Other                     | 1993           | 1                                                              |
| 4                | Algeria | Milk - Excluding Butter         | 1993           | 178                                                            |
| 4                | Algeria | Miscellaneous                   | 1993           | 2                                                              |
| 4                | Algeria | Mutton & Goat Meat              | 1993           | 35                                                             |
| 4                | Algeria | Offals                          | 1993           | 4                                                              |
| 4                | Algeria | Oilcrops                        | 1993           | 2                                                              |
| 4                | Algeria | Oilcrops Oil, Other             | 1993           | 7                                                              |
| 4                | Algeria | Olive Oil                       | 1993           | 24                                                             |
| 4                | Algeria | Olives (including preserved)    | 1993           | 2                                                              |
| 4                | Algeria | Onions                          | 1993           | 9                                                              |
| 4                | Algeria | Oranges, Mandarines             | 1993           | 10                                                             |
| 4                | Algeria | Palm Oil                        | 1993           | 59                                                             |
| 4                | Algeria | Peas                            | 1993           | 7                                                              |
| 4                | Algeria | Pelagic Fish                    | 1993           | 8                                                              |
| 4                | Algeria | Pimento                         | 1993           | 2                                                              |
| 4                | Algeria | Potatoes and products           | 1993           | 64                                                             |
| 4                | Algeria | Poultry Meat                    | 1993           | 25                                                             |
| 4                | Algeria | Pulses                          | 1993           | 43                                                             |
| 4                | Algeria | Pulses, Other and products      | 1993           | 30                                                             |
| 4                | Algeria | Rape and Mustard Oil            | 1993           | 67                                                             |
| 4                | Algeria | Rice (Milled Equivalent)        | 1993           | 15                                                             |
| 4                | Algeria | Sorghum and products            | 1993           | 1                                                              |
| 4                | Algeria | Soyabean Oil                    | 1993           | 152                                                            |
| 4                | Algeria | Spices                          | 1993           | 3                                                              |
| 4                | Algeria | Spices, Other                   | 1993           | 1                                                              |
| 4                | Algeria | Starchy Roots                   | 1993           | 64                                                             |
| 4                | Algeria | Stimulants                      | 1993           | 4                                                              |
| 4                | Algeria | Sugar & Sweeteners              | 1993           | 254                                                            |
| 4                | Algeria | Sugar (Raw Equivalent)          | 1993           | 254                                                            |
| 4                | Algeria | Sunflowerseed Oil               | 1993           | 68                                                             |
| 4                | Algeria | Tomatoes and products           | 1993           | 16                                                             |
| 4                | Algeria | Treenuts                        | 1993           | 7                                                              |
| 4                | Algeria | Vegetable Oils                  | 1993           | 391                                                            |
| 4                | Algeria | Vegetables                      | 1993           | 54                                                             |
| 4                | Algeria | Vegetables, Other               | 1993           | 29                                                             |
| 4                | Algeria | Vegetal Products                | 1993           | 2,544                                                          |
| 4                | Algeria | Wheat and products              | 1993           | 1,449                                                          |
| 4                | Algeria | Alcoholic Beverages             | 1994           | 3                                                              |
| 4                | Algeria | Animal fats                     | 1994           | 24                                                             |
| 4                | Algeria | Animal Products                 | 1994           | 295                                                            |
| 4                | Algeria | Apples and products             | 1994           | 2                                                              |
| 4                | Algeria | Barley and products             | 1994           | 137                                                            |
| 4                | Algeria | Beans                           | 1994           | 14                                                             |
| 4                | Algeria | Beer                            | 1994           | 3                                                              |
| 4                | Algeria | Bovine Meat                     | 1994           | 21                                                             |
| 4                | Algeria | Butter, Ghee                    | 1994           | 16                                                             |
| 4                | Algeria | Cereals - Excluding Beer        | 1994           | 1,607                                                          |
| 4                | Algeria | Cereals, Other                  | 1994           | 5                                                              |
| 4                | Algeria | Coconut Oil                     | 1994           | 2                                                              |
| 4                | Algeria | Coffee and products             | 1994           | 5                                                              |
| 4                | Algeria | Dates                           | 1994           | 52                                                             |
| 4                | Algeria | Eggs                            | 1994           | 11                                                             |
| 4                | Algeria | Fats, Animals, Raw              | 1994           | 8                                                              |
| 4                | Algeria | Fish, Seafood                   | 1994           | 11                                                             |
| 4                | Algeria | Fruits - Excluding Wine         | 1994           | 80                                                             |
| 4                | Algeria | Fruits, Other                   | 1994           | 11                                                             |
| 4                | Algeria | Grand Total                     | 1994           | 2,763                                                          |
| 4                | Algeria | Grapes and products (excl wine) | 1994           | 4                                                              |
| 4                | Algeria | Groundnut Oil                   | 1994           | 10                                                             |
| 4                | Algeria | Honey                           | 1994           | 1                                                              |
| 4                | Algeria | Maize and products              | 1994           | 24                                                             |
| 4                | Algeria | Meat                            | 1994           | 82                                                             |
| 4                | Algeria | Meat, Other                     | 1994           | 1                                                              |
| 4                | Algeria | Milk - Excluding Butter         | 1994           | 162                                                            |
| 4                | Algeria | Miscellaneous                   | 1994           | 3                                                              |
| 4                | Algeria | Mutton & Goat Meat              | 1994           | 35                                                             |
| 4                | Algeria | Offals                          | 1994           | 4                                                              |
| 4                | Algeria | Oilcrops                        | 1994           | 3                                                              |
| 4                | Algeria | Oilcrops Oil, Other             | 1994           | 8                                                              |
| 4                | Algeria | Olive Oil                       | 1994           | 20                                                             |
| 4                | Algeria | Olives (including preserved)    | 1994           | 2                                                              |
| 4                | Algeria | Onions                          | 1994           | 9                                                              |
| 4                | Algeria | Oranges, Mandarines             | 1994           | 10                                                             |
| 4                | Algeria | Palm Oil                        | 1994           | 14                                                             |
| 4                | Algeria | Peas                            | 1994           | 6                                                              |
| 4                | Algeria | Pelagic Fish                    | 1994           | 10                                                             |
| 4                | Algeria | Pimento                         | 1994           | 2                                                              |
| 4                | Algeria | Potatoes and products           | 1994           | 47                                                             |
| 4                | Algeria | Poultry Meat                    | 1994           | 25                                                             |
| 4                | Algeria | Pulses                          | 1994           | 49                                                             |
| 4                | Algeria | Pulses, Other and products      | 1994           | 30                                                             |
| 4                | Algeria | Rape and Mustard Oil            | 1994           | 74                                                             |
| 4                | Algeria | Rice (Milled Equivalent)        | 1994           | 16                                                             |
| 4                | Algeria | Sesame seed                     | 1994           | 1                                                              |
| 4                | Algeria | Sorghum and products            | 1994           | 1                                                              |
| 4                | Algeria | Soyabean Oil                    | 1994           | 150                                                            |
| 4                | Algeria | Spices                          | 1994           | 3                                                              |
| 4                | Algeria | Spices, Other                   | 1994           | 1                                                              |
| 4                | Algeria | Starchy Roots                   | 1994           | 47                                                             |
| 4                | Algeria | Stimulants                      | 1994           | 5                                                              |
| 4                | Algeria | Sugar & Sweeteners              | 1994           | 243                                                            |

## Dietary calcium and zinc deficiency risks are decreasing but remain prevalent

| FAO Country code | Country | Food item                       | Reference year | Net energy supply (kcal <i>capita</i> <sup>-1</sup> d <sup>-1</sup> ) |
|------------------|---------|---------------------------------|----------------|-----------------------------------------------------------------------|
| 4                | Algeria | Sugar (Raw Equivalent)          | 1994           | 240                                                                   |
| 4                | Algeria | Sunflowerseed Oil               | 1994           | 92                                                                    |
| 4                | Algeria | Sweeteners, Other               | 1994           | 2                                                                     |
| 4                | Algeria | Tomatoes and products           | 1994           | 13                                                                    |
| 4                | Algeria | Treenuts                        | 1994           | 5                                                                     |
| 4                | Algeria | Vegetable Oils                  | 1994           | 369                                                                   |
| 4                | Algeria | Vegetables                      | 1994           | 52                                                                    |
| 4                | Algeria | Vegetables, Other               | 1994           | 30                                                                    |
| 4                | Algeria | Vegetal Products                | 1994           | 2,468                                                                 |
| 4                | Algeria | Wheat and products              | 1994           | 1,423                                                                 |
| 4                | Algeria | Alcoholic Beverages             | 1995           | 4                                                                     |
| 4                | Algeria | Animal fats                     | 1995           | 23                                                                    |
| 4                | Algeria | Animal Products                 | 1995           | 280                                                                   |
| 4                | Algeria | Apples and products             | 1995           | 3                                                                     |
| 4                | Algeria | Bananas                         | 1995           | 2                                                                     |
| 4                | Algeria | Barley and products             | 1995           | 132                                                                   |
| 4                | Algeria | Beans                           | 1995           | 20                                                                    |
| 4                | Algeria | Beer                            | 1995           | 4                                                                     |
| 4                | Algeria | Bovine Meat                     | 1995           | 22                                                                    |
| 4                | Algeria | Butter, Ghee                    | 1995           | 15                                                                    |
| 4                | Algeria | Cereals - Excluding Beer        | 1995           | 1,592                                                                 |
| 4                | Algeria | Cocoa Beans and products        | 1995           | 1                                                                     |
| 4                | Algeria | Coconut Oil                     | 1995           | 13                                                                    |
| 4                | Algeria | Coffee and products             | 1995           | 2                                                                     |
| 4                | Algeria | Dates                           | 1995           | 44                                                                    |
| 4                | Algeria | Eggs                            | 1995           | 13                                                                    |
| 4                | Algeria | Fats, Animals, Raw              | 1995           | 8                                                                     |
| 4                | Algeria | Fish, Seafood                   | 1995           | 9                                                                     |
| 4                | Algeria | Fruits - Excluding Wine         | 1995           | 77                                                                    |
| 4                | Algeria | Fruits, Other                   | 1995           | 13                                                                    |
| 4                | Algeria | Grand Total                     | 1995           | 2,785                                                                 |
| 4                | Algeria | Grapes and products (excl wine) | 1995           | 7                                                                     |
| 4                | Algeria | Groundnut Oil                   | 1995           | 13                                                                    |
| 4                | Algeria | Honey                           | 1995           | 1                                                                     |
| 4                | Algeria | Maize and products              | 1995           | 25                                                                    |
| 4                | Algeria | Meat                            | 1995           | 83                                                                    |
| 4                | Algeria | Meat, Other                     | 1995           | 1                                                                     |
| 4                | Algeria | Milk - Excluding Butter         | 1995           | 148                                                                   |
| 4                | Algeria | Miscellaneous                   | 1995           | 2                                                                     |
| 4                | Algeria | Mutton & Goat Meat              | 1995           | 35                                                                    |
| 4                | Algeria | Offals                          | 1995           | 4                                                                     |
| 4                | Algeria | Oilcrops                        | 1995           | 2                                                                     |
| 4                | Algeria | Oilcrops Oil, Other             | 1995           | 4                                                                     |
| 4                | Algeria | Olive Oil                       | 1995           | 13                                                                    |
| 4                | Algeria | Olives (including preserved)    | 1995           | 1                                                                     |
| 4                | Algeria | Onions                          | 1995           | 11                                                                    |
| 4                | Algeria | Oranges, Mandarines             | 1995           | 9                                                                     |
| 4                | Algeria | Palm Oil                        | 1995           | 8                                                                     |
| 4                | Algeria | Peas                            | 1995           | 5                                                                     |
| 4                | Algeria | Pelagic Fish                    | 1995           | 8                                                                     |
| 4                | Algeria | Pimento                         | 1995           | 3                                                                     |
| 4                | Algeria | Potatoes and products           | 1995           | 71                                                                    |
| 4                | Algeria | Poultry Meat                    | 1995           | 25                                                                    |
| 4                | Algeria | Pulses                          | 1995           | 54                                                                    |
| 4                | Algeria | Pulses, Other and products      | 1995           | 29                                                                    |
| 4                | Algeria | Rape and Mustard Oil            | 1995           | 69                                                                    |
| 4                | Algeria | Rice (Milled Equivalent)        | 1995           | 11                                                                    |
| 4                | Algeria | Sorghum and products            | 1995           | 1                                                                     |
| 4                | Algeria | Soyabean Oil                    | 1995           | 96                                                                    |
| 4                | Algeria | Spices                          | 1995           | 4                                                                     |
| 4                | Algeria | Spices, Other                   | 1995           | 1                                                                     |
| 4                | Algeria | Starchy Roots                   | 1995           | 71                                                                    |
| 4                | Algeria | Stimulants                      | 1995           | 3                                                                     |
| 4                | Algeria | Sugar & Sweeteners              | 1995           | 237                                                                   |
| 4                | Algeria | Sugar (Raw Equivalent)          | 1995           | 236                                                                   |
| 4                | Algeria | Sunflowerseed Oil               | 1995           | 175                                                                   |
| 4                | Algeria | Sweeteners, Other               | 1995           | 1                                                                     |
| 4                | Algeria | Tomatoes and products           | 1995           | 18                                                                    |
| 4                | Algeria | Treenuts                        | 1995           | 5                                                                     |
| 4                | Algeria | Vegetable Oils                  | 1995           | 392                                                                   |
| 4                | Algeria | Vegetables                      | 1995           | 60                                                                    |
| 4                | Algeria | Vegetables, Other               | 1995           | 31                                                                    |
| 4                | Algeria | Vegetal Products                | 1995           | 2,504                                                                 |
| 4                | Algeria | Wheat and products              | 1995           | 1,423                                                                 |
| 4                | Algeria | Alcoholic Beverages             | 1996           | 3                                                                     |
| 4                | Algeria | Animal fats                     | 1996           | 18                                                                    |
| 4                | Algeria | Animal Products                 | 1996           | 247                                                                   |
| 4                | Algeria | Apples and products             | 1996           | 3                                                                     |
| 4                | Algeria | Barley and products             | 1996           | 154                                                                   |
| 4                | Algeria | Beans                           | 1996           | 13                                                                    |
| 4                | Algeria | Beer                            | 1996           | 3                                                                     |
| 4                | Algeria | Bovine Meat                     | 1996           | 21                                                                    |
| 4                | Algeria | Butter, Ghee                    | 1996           | 10                                                                    |
| 4                | Algeria | Cereals - Excluding Beer        | 1996           | 1,666                                                                 |
| 4                | Algeria | Cereals, Other                  | 1996           | 6                                                                     |
| 4                | Algeria | Cocoa Beans and products        | 1996           | 1                                                                     |
| 4                | Algeria | Coffee and products             | 1996           | 3                                                                     |
| 4                | Algeria | Dates                           | 1996           | 55                                                                    |
| 4                | Algeria | Eggs                            | 1996           | 8                                                                     |
| 4                | Algeria | Fats, Animals, Raw              | 1996           | 8                                                                     |
| 4                | Algeria | Fish, Seafood                   | 1996           | 6                                                                     |
| 4                | Algeria | Fruits - Excluding Wine         | 1996           | 89                                                                    |
| 4                | Algeria | Fruits, Other                   | 1996           | 14                                                                    |
| 4                | Algeria | Grand Total                     | 1996           | 2,784                                                                 |
| 4                | Algeria | Grapes and products (excl wine) | 1996           | 8                                                                     |
| 4                | Algeria | Groundnut Oil                   | 1996           | 8                                                                     |
| 4                | Algeria | Honey                           | 1996           | 1                                                                     |



Dietary calcium and zinc deficiency risks are decreasing but remain prevalent

| FAO Country code | Country | Food item                       | Reference year | Net energy supply (kcal capita <sup>-1</sup> d <sup>-1</sup> ) |
|------------------|---------|---------------------------------|----------------|----------------------------------------------------------------|
| 4                | Algeria | Maize and products              | 1996           | 53                                                             |
| 4                | Algeria | Meat                            | 1996           | 82                                                             |
| 4                | Algeria | Meat, Other                     | 1996           | 1                                                              |
| 4                | Algeria | Milk - Excluding Butter         | 1996           | 129                                                            |
| 4                | Algeria | Miscellaneous                   | 1996           | 1                                                              |
| 4                | Algeria | Mutton & Goat Meat              | 1996           | 36                                                             |
| 4                | Algeria | Offals                          | 1996           | 4                                                              |
| 4                | Algeria | Oilcrops                        | 1996           | 4                                                              |
| 4                | Algeria | Oilcrops Oil, Other             | 1996           | 7                                                              |
| 4                | Algeria | Olive Oil                       | 1996           | 41                                                             |
| 4                | Algeria | Olives (including preserved)    | 1996           | 3                                                              |
| 4                | Algeria | Onions                          | 1996           | 11                                                             |
| 4                | Algeria | Oranges, Mandarines             | 1996           | 9                                                              |
| 4                | Algeria | Palm Oil                        | 1996           | 4                                                              |
| 4                | Algeria | Peas                            | 1996           | 7                                                              |
| 4                | Algeria | Pelagic Fish                    | 1996           | 6                                                              |
| 4                | Algeria | Pimento                         | 1996           | 2                                                              |
| 4                | Algeria | Potatoes and products           | 1996           | 66                                                             |
| 4                | Algeria | Poultry Meat                    | 1996           | 25                                                             |
| 4                | Algeria | Pulses                          | 1996           | 59                                                             |
| 4                | Algeria | Pulses, Other and products      | 1996           | 39                                                             |
| 4                | Algeria | Rape and Mustard Oil            | 1996           | 57                                                             |
| 4                | Algeria | Rice (Milled Equivalent)        | 1996           | 14                                                             |
| 4                | Algeria | Sesame seed                     | 1996           | 1                                                              |
| 4                | Algeria | Sorghum and products            | 1996           | 1                                                              |
| 4                | Algeria | Soyabean Oil                    | 1996           | 1                                                              |
| 4                | Algeria | Spices                          | 1996           | 3                                                              |
| 4                | Algeria | Spices, Other                   | 1996           | 1                                                              |
| 4                | Algeria | Starchy Roots                   | 1996           | 66                                                             |
| 4                | Algeria | Stimulants                      | 1996           | 5                                                              |
| 4                | Algeria | Sugar & Sweeteners              | 1996           | 246                                                            |
| 4                | Algeria | Sugar (Raw Equivalent)          | 1996           | 244                                                            |
| 4                | Algeria | Sunflowerseed Oil               | 1996           | 215                                                            |
| 4                | Algeria | Sweeteners, Other               | 1996           | 1                                                              |
| 4                | Algeria | Tomatoes and products           | 1996           | 13                                                             |
| 4                | Algeria | Treenuts                        | 1996           | 10                                                             |
| 4                | Algeria | Vegetable Oils                  | 1996           | 332                                                            |
| 4                | Algeria | Vegetables                      | 1996           | 53                                                             |
| 4                | Algeria | Vegetables, Other               | 1996           | 29                                                             |
| 4                | Algeria | Vegetal Products                | 1996           | 2,537                                                          |
| 4                | Algeria | Wheat and products              | 1996           | 1,437                                                          |
| 4                | Algeria | Alcoholic Beverages             | 1997           | 3                                                              |
| 4                | Algeria | Animal fats                     | 1997           | 14                                                             |
| 4                | Algeria | Animal Products                 | 1997           | 252                                                            |
| 4                | Algeria | Apples and products             | 1997           | 3                                                              |
| 4                | Algeria | Barley and products             | 1997           | 139                                                            |
| 4                | Algeria | Beans                           | 1997           | 19                                                             |
| 4                | Algeria | Beer                            | 1997           | 3                                                              |
| 4                | Algeria | Bovine Meat                     | 1997           | 19                                                             |
| 4                | Algeria | Butter, Ghee                    | 1997           | 6                                                              |
| 4                | Algeria | Cereals - Excluding Beer        | 1997           | 1,567                                                          |
| 4                | Algeria | Cocoa Beans and products        | 1997           | 3                                                              |
| 4                | Algeria | Coconut Oil                     | 1997           | 2                                                              |
| 4                | Algeria | Coffee and products             | 1997           | 4                                                              |
| 4                | Algeria | Dates                           | 1997           | 46                                                             |
| 4                | Algeria | Eggs                            | 1997           | 9                                                              |
| 4                | Algeria | Fats, Animals, Raw              | 1997           | 7                                                              |
| 4                | Algeria | Fish, Seafood                   | 1997           | 7                                                              |
| 4                | Algeria | Fruits - Excluding Wine         | 1997           | 77                                                             |
| 4                | Algeria | Fruits, Other                   | 1997           | 11                                                             |
| 4                | Algeria | Grand Total                     | 1997           | 2,733                                                          |
| 4                | Algeria | Grapes and products (excl wine) | 1997           | 8                                                              |
| 4                | Algeria | Groundnut Oil                   | 1997           | 5                                                              |
| 4                | Algeria | Maize and products              | 1997           | 35                                                             |
| 4                | Algeria | Meat                            | 1997           | 78                                                             |
| 4                | Algeria | Meat, Other                     | 1997           | 1                                                              |
| 4                | Algeria | Milk - Excluding Butter         | 1997           | 141                                                            |
| 4                | Algeria | Miscellaneous                   | 1997           | 2                                                              |
| 4                | Algeria | Mutton & Goat Meat              | 1997           | 33                                                             |
| 4                | Algeria | Offals                          | 1997           | 4                                                              |
| 4                | Algeria | Oilcrops                        | 1997           | 4                                                              |
| 4                | Algeria | Oilcrops Oil, Other             | 1997           | 11                                                             |
| 4                | Algeria | Olive Oil                       | 1997           | 39                                                             |
| 4                | Algeria | Olives (including preserved)    | 1997           | 4                                                              |
| 4                | Algeria | Onions                          | 1997           | 12                                                             |
| 4                | Algeria | Oranges, Mandarines             | 1997           | 9                                                              |
| 4                | Algeria | Palm Oil                        | 1997           | 12                                                             |
| 4                | Algeria | Peas                            | 1997           | 5                                                              |
| 4                | Algeria | Pelagic Fish                    | 1997           | 6                                                              |
| 4                | Algeria | Pimento                         | 1997           | 2                                                              |
| 4                | Algeria | Potatoes and products           | 1997           | 63                                                             |
| 4                | Algeria | Poultry Meat                    | 1997           | 25                                                             |
| 4                | Algeria | Pulses                          | 1997           | 60                                                             |
| 4                | Algeria | Pulses, Other and products      | 1997           | 36                                                             |
| 4                | Algeria | Rape and Mustard Oil            | 1997           | 75                                                             |
| 4                | Algeria | Rice (Milled Equivalent)        | 1997           | 18                                                             |
| 4                | Algeria | Sesame seed                     | 1997           | 1                                                              |
| 4                | Algeria | Sorghum and products            | 1997           | 3                                                              |
| 4                | Algeria | Soyabean Oil                    | 1997           | 10                                                             |
| 4                | Algeria | Spices                          | 1997           | 4                                                              |
| 4                | Algeria | Spices, Other                   | 1997           | 1                                                              |
| 4                | Algeria | Starchy Roots                   | 1997           | 63                                                             |
| 4                | Algeria | Stimulants                      | 1997           | 7                                                              |
| 4                | Algeria | Sugar & Sweeteners              | 1997           | 262                                                            |
| 4                | Algeria | Sugar (Raw Equivalent)          | 1997           | 261                                                            |
| 4                | Algeria | Sunflowerseed Oil               | 1997           | 220                                                            |
| 4                | Algeria | Sweeteners, Other               | 1997           | 1                                                              |

Dietary calcium and zinc deficiency risks are decreasing but remain prevalent

| FAO Country code | Country | Food item                       | Reference year | Net energy supply (kcal capita <sup>-1</sup> d <sup>-1</sup> ) |
|------------------|---------|---------------------------------|----------------|----------------------------------------------------------------|
| 4                | Algeria | Tomatoes and products           | 1997           | 13                                                             |
| 4                | Algeria | Treenuts                        | 1997           | 5                                                              |
| 4                | Algeria | Vegetable Oils                  | 1997           | 373                                                            |
| 4                | Algeria | Vegetables                      | 1997           | 54                                                             |
| 4                | Algeria | Vegetables, Other               | 1997           | 29                                                             |
| 4                | Algeria | Vegetal Products                | 1997           | 2,481                                                          |
| 4                | Algeria | Wheat and products              | 1997           | 1,372                                                          |
| 4                | Algeria | Alcoholic Beverages             | 1998           | 3                                                              |
| 4                | Algeria | Animal fats                     | 1998           | 12                                                             |
| 4                | Algeria | Animal Products                 | 1998           | 271                                                            |
| 4                | Algeria | Apples and products             | 1998           | 3                                                              |
| 4                | Algeria | Barley and products             | 1998           | 160                                                            |
| 4                | Algeria | Beans                           | 1998           | 18                                                             |
| 4                | Algeria | Beer                            | 1998           | 2                                                              |
| 4                | Algeria | Bovine Meat                     | 1998           | 20                                                             |
| 4                | Algeria | Butter, Ghee                    | 1998           | 6                                                              |
| 4                | Algeria | Cereals - Excluding Beer        | 1998           | 1,694                                                          |
| 4                | Algeria | Cocoa Beans and products        | 1998           | 1                                                              |
| 4                | Algeria | Coconut Oil                     | 1998           | 4                                                              |
| 4                | Algeria | Coffee and products             | 1998           | 4                                                              |
| 4                | Algeria | Dates                           | 1998           | 59                                                             |
| 4                | Algeria | Eggs                            | 1998           | 10                                                             |
| 4                | Algeria | Fats, Animals, Raw              | 1998           | 7                                                              |
| 4                | Algeria | Fish, Seafood                   | 1998           | 7                                                              |
| 4                | Algeria | Fruits - Excluding Wine         | 1998           | 89                                                             |
| 4                | Algeria | Fruits, Other                   | 1998           | 11                                                             |
| 4                | Algeria | Grand Total                     | 1998           | 2,792                                                          |
| 4                | Algeria | Grapes and products (excl wine) | 1998           | 5                                                              |
| 4                | Algeria | Groundnut Oil                   | 1998           | 2                                                              |
| 4                | Algeria | Maize and products              | 1998           | 8                                                              |
| 4                | Algeria | Meat                            | 1998           | 82                                                             |
| 4                | Algeria | Meat, Other                     | 1998           | 1                                                              |
| 4                | Algeria | Milk - Excluding Butter         | 1998           | 156                                                            |
| 4                | Algeria | Miscellaneous                   | 1998           | 1                                                              |
| 4                | Algeria | Mutton & Goat Meat              | 1998           | 33                                                             |
| 4                | Algeria | Offals                          | 1998           | 3                                                              |
| 4                | Algeria | Oilcrops                        | 1998           | 1                                                              |
| 4                | Algeria | Oilcrops Oil, Other             | 1998           | 9                                                              |
| 4                | Algeria | Olive Oil                       | 1998           | 12                                                             |
| 4                | Algeria | Olives (including preserved)    | 1998           | 1                                                              |
| 4                | Algeria | Onions                          | 1998           | 13                                                             |
| 4                | Algeria | Oranges, Mandarines             | 1998           | 10                                                             |
| 4                | Algeria | Palm Oil                        | 1998           | 8                                                              |
| 4                | Algeria | Peas                            | 1998           | 6                                                              |
| 4                | Algeria | Pelagic Fish                    | 1998           | 6                                                              |
| 4                | Algeria | Pimento                         | 1998           | 2                                                              |
| 4                | Algeria | Potatoes and products           | 1998           | 64                                                             |
| 4                | Algeria | Poultry Meat                    | 1998           | 28                                                             |
| 4                | Algeria | Pulses                          | 1998           | 63                                                             |
| 4                | Algeria | Pulses, Other and products      | 1998           | 39                                                             |
| 4                | Algeria | Rape and Mustard Oil            | 1998           | 66                                                             |
| 4                | Algeria | Rice (Milled Equivalent)        | 1998           | 8                                                              |
| 4                | Algeria | Soyabean Oil                    | 1998           | 55                                                             |
| 4                | Algeria | Spices                          | 1998           | 4                                                              |
| 4                | Algeria | Spices, Other                   | 1998           | 1                                                              |
| 4                | Algeria | Starchy Roots                   | 1998           | 64                                                             |
| 4                | Algeria | Stimulants                      | 1998           | 5                                                              |
| 4                | Algeria | Sugar & Sweeteners              | 1998           | 177                                                            |
| 4                | Algeria | Sugar (Raw Equivalent)          | 1998           | 174                                                            |
| 4                | Algeria | Sunflowerseed Oil               | 1998           | 202                                                            |
| 4                | Algeria | Sweeteners, Other               | 1998           | 2                                                              |
| 4                | Algeria | Tomatoes and products           | 1998           | 13                                                             |
| 4                | Algeria | Treenuts                        | 1998           | 6                                                              |
| 4                | Algeria | Vegetable Oils                  | 1998           | 358                                                            |
| 4                | Algeria | Vegetables                      | 1998           | 55                                                             |
| 4                | Algeria | Vegetables, Other               | 1998           | 29                                                             |
| 4                | Algeria | Vegetal Products                | 1998           | 2,521                                                          |
| 4                | Algeria | Wheat and products              | 1998           | 1,517                                                          |
| 4                | Algeria | Alcoholic Beverages             | 1999           | 3                                                              |
| 4                | Algeria | Animal fats                     | 1999           | 15                                                             |
| 4                | Algeria | Animal Products                 | 1999           | 270                                                            |
| 4                | Algeria | Apples and products             | 1999           | 3                                                              |
| 4                | Algeria | Barley and products             | 1999           | 135                                                            |
| 4                | Algeria | Beans                           | 1999           | 28                                                             |
| 4                | Algeria | Beer                            | 1999           | 2                                                              |
| 4                | Algeria | Bovine Meat                     | 1999           | 22                                                             |
| 4                | Algeria | Butter, Ghee                    | 1999           | 7                                                              |
| 4                | Algeria | Cereals - Excluding Beer        | 1999           | 1,687                                                          |
| 4                | Algeria | Cocoa Beans and products        | 1999           | 1                                                              |
| 4                | Algeria | Coconut Oil                     | 1999           | 2                                                              |
| 4                | Algeria | Coffee and products             | 1999           | 4                                                              |
| 4                | Algeria | Dates                           | 1999           | 65                                                             |
| 4                | Algeria | Eggs                            | 1999           | 8                                                              |
| 4                | Algeria | Fats, Animals, Raw              | 1999           | 7                                                              |
| 4                | Algeria | Fish, Seafood                   | 1999           | 8                                                              |
| 4                | Algeria | Fruits - Excluding Wine         | 1999           | 100                                                            |
| 4                | Algeria | Fruits, Other                   | 1999           | 14                                                             |
| 4                | Algeria | Grand Total                     | 1999           | 2,843                                                          |
| 4                | Algeria | Grapes and products (excl wine) | 1999           | 6                                                              |
| 4                | Algeria | Groundnut Oil                   | 1999           | 1                                                              |
| 4                | Algeria | Maize and products              | 1999           | 28                                                             |
| 4                | Algeria | Meat                            | 1999           | 81                                                             |
| 4                | Algeria | Meat, Other                     | 1999           | 1                                                              |
| 4                | Algeria | Milk - Excluding Butter         | 1999           | 154                                                            |
| 4                | Algeria | Miscellaneous                   | 1999           | 1                                                              |
| 4                | Algeria | Mutton & Goat Meat              | 1999           | 32                                                             |
| 4                | Algeria | Offals                          | 1999           | 4                                                              |

Dietary calcium and zinc deficiency risks are decreasing but remain prevalent

| FAO Country code | Country | Food item                       | Reference year | Net energy supply (kcal capita <sup>-1</sup> d <sup>-1</sup> ) |
|------------------|---------|---------------------------------|----------------|----------------------------------------------------------------|
| 4                | Algeria | Oilcrops                        | 1999           | 4                                                              |
| 4                | Algeria | Oilcrops Oil, Other             | 1999           | 18                                                             |
| 4                | Algeria | Olive Oil                       | 1999           | 43                                                             |
| 4                | Algeria | Olives (including preserved)    | 1999           | 3                                                              |
| 4                | Algeria | Onions                          | 1999           | 12                                                             |
| 4                | Algeria | Oranges, Mandarines             | 1999           | 11                                                             |
| 4                | Algeria | Palm Oil                        | 1999           | 7                                                              |
| 4                | Algeria | Peas                            | 1999           | 11                                                             |
| 4                | Algeria | Pelagic Fish                    | 1999           | 7                                                              |
| 4                | Algeria | Pimento                         | 1999           | 2                                                              |
| 4                | Algeria | Potatoes and products           | 1999           | 56                                                             |
| 4                | Algeria | Poultry Meat                    | 1999           | 26                                                             |
| 4                | Algeria | Pulses                          | 1999           | 76                                                             |
| 4                | Algeria | Pulses, Other and products      | 1999           | 37                                                             |
| 4                | Algeria | Rape and Mustard Oil            | 1999           | 57                                                             |
| 4                | Algeria | Rice (Milled Equivalent)        | 1999           | 14                                                             |
| 4                | Algeria | Sesame seed                     | 1999           | 1                                                              |
| 4                | Algeria | Soyabean Oil                    | 1999           | 5                                                              |
| 4                | Algeria | Spices                          | 1999           | 4                                                              |
| 4                | Algeria | Spices, Other                   | 1999           | 1                                                              |
| 4                | Algeria | Starchy Roots                   | 1999           | 56                                                             |
| 4                | Algeria | Stimulants                      | 1999           | 5                                                              |
| 4                | Algeria | Sugar & Sweeteners              | 1999           | 201                                                            |
| 4                | Algeria | Sugar (Raw Equivalent)          | 1999           | 198                                                            |
| 4                | Algeria | Sunflowerseed Oil               | 1999           | 238                                                            |
| 4                | Algeria | Sweeteners, Other               | 1999           | 2                                                              |
| 4                | Algeria | Tomatoes and products           | 1999           | 17                                                             |
| 4                | Algeria | Treenuts                        | 1999           | 7                                                              |
| 4                | Algeria | Vegetable Oils                  | 1999           | 370                                                            |
| 4                | Algeria | Vegetables                      | 1999           | 60                                                             |
| 4                | Algeria | Vegetables, Other               | 1999           | 31                                                             |
| 4                | Algeria | Vegetal Products                | 1999           | 2,573                                                          |
| 4                | Algeria | Wheat and products              | 1999           | 1,511                                                          |
| 4                | Algeria | Alcoholic Beverages             | 2000           | 4                                                              |
| 4                | Algeria | Animal fats                     | 2000           | 12                                                             |
| 4                | Algeria | Animal Products                 | 2000           | 277                                                            |
| 4                | Algeria | Apples and products             | 2000           | 4                                                              |
| 4                | Algeria | Barley and products             | 2000           | 66                                                             |
| 4                | Algeria | Beans                           | 2000           | 10                                                             |
| 4                | Algeria | Beer                            | 2000           | 4                                                              |
| 4                | Algeria | Bovine Meat                     | 2000           | 23                                                             |
| 4                | Algeria | Butter, Ghee                    | 2000           | 5                                                              |
| 4                | Algeria | Cereals - Excluding Beer        | 2000           | 1,613                                                          |
| 4                | Algeria | Cocoa Beans and products        | 2000           | 1                                                              |
| 4                | Algeria | Coconut Oil                     | 2000           | 1                                                              |
| 4                | Algeria | Coffee and products             | 2000           | 4                                                              |
| 4                | Algeria | Dates                           | 2000           | 55                                                             |
| 4                | Algeria | Eggs                            | 2000           | 9                                                              |
| 4                | Algeria | Fats, Animals, Raw              | 2000           | 7                                                              |
| 4                | Algeria | Fish, Seafood                   | 2000           | 8                                                              |
| 4                | Algeria | Fruits - Excluding Wine         | 2000           | 90                                                             |
| 4                | Algeria | Fruits, Other                   | 2000           | 13                                                             |
| 4                | Algeria | Grand Total                     | 2000           | 2,812                                                          |
| 4                | Algeria | Grapes and products (excl wine) | 2000           | 7                                                              |
| 4                | Algeria | Groundnut Oil                   | 2000           | 1                                                              |
| 4                | Algeria | Maize and products              | 2000           | 146                                                            |
| 4                | Algeria | Marine Fish, Other              | 2000           | 1                                                              |
| 4                | Algeria | Meat                            | 2000           | 83                                                             |
| 4                | Algeria | Meat, Other                     | 2000           | 1                                                              |
| 4                | Algeria | Milk - Excluding Butter         | 2000           | 161                                                            |
| 4                | Algeria | Miscellaneous                   | 2000           | 1                                                              |
| 4                | Algeria | Mutton & Goat Meat              | 2000           | 32                                                             |
| 4                | Algeria | Offals                          | 2000           | 4                                                              |
| 4                | Algeria | Oilcrops                        | 2000           | 3                                                              |
| 4                | Algeria | Oilcrops Oil, Other             | 2000           | 18                                                             |
| 4                | Algeria | Olive Oil                       | 2000           | 26                                                             |
| 4                | Algeria | Olives (including preserved)    | 2000           | 2                                                              |
| 4                | Algeria | Onions                          | 2000           | 10                                                             |
| 4                | Algeria | Oranges, Mandarines             | 2000           | 10                                                             |
| 4                | Algeria | Palm Oil                        | 2000           | 21                                                             |
| 4                | Algeria | Peas                            | 2000           | 4                                                              |
| 4                | Algeria | Pelagic Fish                    | 2000           | 7                                                              |
| 4                | Algeria | Pimento                         | 2000           | 2                                                              |
| 4                | Algeria | Potatoes and products           | 2000           | 72                                                             |
| 4                | Algeria | Poultry Meat                    | 2000           | 27                                                             |
| 4                | Algeria | Pulses                          | 2000           | 52                                                             |
| 4                | Algeria | Pulses, Other and products      | 2000           | 37                                                             |
| 4                | Algeria | Rape and Mustard Oil            | 2000           | 54                                                             |
| 4                | Algeria | Rice (Milled Equivalent)        | 2000           | 17                                                             |
| 4                | Algeria | Rye and products                | 2000           | 1                                                              |
| 4                | Algeria | Sesame seed                     | 2000           | 1                                                              |
| 4                | Algeria | Soyabean Oil                    | 2000           | 13                                                             |
| 4                | Algeria | Spices                          | 2000           | 3                                                              |
| 4                | Algeria | Spices, Other                   | 2000           | 1                                                              |
| 4                | Algeria | Starchy Roots                   | 2000           | 72                                                             |
| 4                | Algeria | Stimulants                      | 2000           | 5                                                              |
| 4                | Algeria | Sugar & Sweeteners              | 2000           | 271                                                            |
| 4                | Algeria | Sugar (Raw Equivalent)          | 2000           | 268                                                            |
| 4                | Algeria | Sunflowerseed Oil               | 2000           | 225                                                            |
| 4                | Algeria | Sweeteners, Other               | 2000           | 2                                                              |
| 4                | Algeria | Tomatoes and products           | 2000           | 14                                                             |
| 4                | Algeria | Treenuts                        | 2000           | 7                                                              |
| 4                | Algeria | Vegetable Oils                  | 2000           | 359                                                            |
| 4                | Algeria | Vegetables                      | 2000           | 54                                                             |
| 4                | Algeria | Vegetables, Other               | 2000           | 30                                                             |
| 4                | Algeria | Vegetal Products                | 2000           | 2,535                                                          |
| 4                | Algeria | Wheat and products              | 2000           | 1,384                                                          |

## Dietary calcium and zinc deficiency risks are decreasing but remain prevalent

| FAO Country code | Country | Food item                       | Reference year | Net energy supply (kcal <i>capita</i> <sup>-1</sup> d <sup>-1</sup> ) |
|------------------|---------|---------------------------------|----------------|-----------------------------------------------------------------------|
| 4                | Algeria | Alcoholic Beverages             | 2001           | 4                                                                     |
| 4                | Algeria | Animal fats                     | 2001           | 12                                                                    |
| 4                | Algeria | Animal Products                 | 2001           | 289                                                                   |
| 4                | Algeria | Apples and products             | 2001           | 4                                                                     |
| 4                | Algeria | Bananas                         | 2001           | 4                                                                     |
| 4                | Algeria | Barley and products             | 2001           | 87                                                                    |
| 4                | Algeria | Beans                           | 2001           | 12                                                                    |
| 4                | Algeria | Beer                            | 2001           | 4                                                                     |
| 4                | Algeria | Bovine Meat                     | 2001           | 18                                                                    |
| 4                | Algeria | Butter, Ghee                    | 2001           | 7                                                                     |
| 4                | Algeria | Cereals - Excluding Beer        | 2001           | 1,641                                                                 |
| 4                | Algeria | Cocoa Beans and products        | 2001           | 1                                                                     |
| 4                | Algeria | Coconut Oil                     | 2001           | 2                                                                     |
| 4                | Algeria | Coffee and products             | 2001           | 3                                                                     |
| 4                | Algeria | Dates                           | 2001           | 65                                                                    |
| 4                | Algeria | Eggs                            | 2001           | 10                                                                    |
| 4                | Algeria | Fats, Animals, Raw              | 2001           | 5                                                                     |
| 4                | Algeria | Fish, Seafood                   | 2001           | 10                                                                    |
| 4                | Algeria | Fruits - Excluding Wine         | 2001           | 106                                                                   |
| 4                | Algeria | Fruits, Other                   | 2001           | 13                                                                    |
| 4                | Algeria | Grand Total                     | 2001           | 2,886                                                                 |
| 4                | Algeria | Grapes and products (excl wine) | 2001           | 7                                                                     |
| 4                | Algeria | Groundnut Oil                   | 2001           | 6                                                                     |
| 4                | Algeria | Maize and products              | 2001           | 118                                                                   |
| 4                | Algeria | Meat                            | 2001           | 76                                                                    |
| 4                | Algeria | Meat, Other                     | 2001           | 1                                                                     |
| 4                | Algeria | Milk - Excluding Butter         | 2001           | 178                                                                   |
| 4                | Algeria | Miscellaneous                   | 2001           | 1                                                                     |
| 4                | Algeria | Mutton & Goat Meat              | 2001           | 31                                                                    |
| 4                | Algeria | Offals                          | 2001           | 4                                                                     |
| 4                | Algeria | Oilcrops                        | 2001           | 3                                                                     |
| 4                | Algeria | Oilcrops Oil, Other             | 2001           | 16                                                                    |
| 4                | Algeria | Olive Oil                       | 2001           | 21                                                                    |
| 4                | Algeria | Olives (including preserved)    | 2001           | 2                                                                     |
| 4                | Algeria | Onions                          | 2001           | 14                                                                    |
| 4                | Algeria | Oranges, Mandarines             | 2001           | 11                                                                    |
| 4                | Algeria | Palm Oil                        | 2001           | 46                                                                    |
| 4                | Algeria | Peas                            | 2001           | 4                                                                     |
| 4                | Algeria | Pelagic Fish                    | 2001           | 9                                                                     |
| 4                | Algeria | Pepper                          | 2001           | 1                                                                     |
| 4                | Algeria | Pimento                         | 2001           | 2                                                                     |
| 4                | Algeria | Potatoes and products           | 2001           | 54                                                                    |
| 4                | Algeria | Poultry Meat                    | 2001           | 26                                                                    |
| 4                | Algeria | Pulses                          | 2001           | 53                                                                    |
| 4                | Algeria | Pulses, Other and products      | 2001           | 37                                                                    |
| 4                | Algeria | Rape and Mustard Oil            | 2001           | 49                                                                    |
| 4                | Algeria | Rice (Milled Equivalent)        | 2001           | 8                                                                     |
| 4                | Algeria | Rye and products                | 2001           | 11                                                                    |
| 4                | Algeria | Sesame seed                     | 2001           | 1                                                                     |
| 4                | Algeria | Soyabean Oil                    | 2001           | 13                                                                    |
| 4                | Algeria | Spices                          | 2001           | 4                                                                     |
| 4                | Algeria | Spices, Other                   | 2001           | 1                                                                     |
| 4                | Algeria | Starchy Roots                   | 2001           | 54                                                                    |
| 4                | Algeria | Stimulants                      | 2001           | 5                                                                     |
| 4                | Algeria | Sugar & Sweeteners              | 2001           | 267                                                                   |
| 4                | Algeria | Sugar (Raw Equivalent)          | 2001           | 264                                                                   |
| 4                | Algeria | Sunflowerseed Oil               | 2001           | 241                                                                   |
| 4                | Algeria | Sweeteners, Other               | 2001           | 2                                                                     |
| 4                | Algeria | Tomatoes and products           | 2001           | 14                                                                    |
| 4                | Algeria | Treenuts                        | 2001           | 7                                                                     |
| 4                | Algeria | Vegetable Oils                  | 2001           | 393                                                                   |
| 4                | Algeria | Vegetables                      | 2001           | 59                                                                    |
| 4                | Algeria | Vegetables, Other               | 2001           | 32                                                                    |
| 4                | Algeria | Vegetal Products                | 2001           | 2,598                                                                 |
| 4                | Algeria | Wheat and products              | 2001           | 1,416                                                                 |
| 4                | Algeria | Alcoholic Beverages             | 2002           | 4                                                                     |
| 4                | Algeria | Animal fats                     | 2002           | 15                                                                    |
| 4                | Algeria | Animal Products                 | 2002           | 295                                                                   |
| 4                | Algeria | Apples and products             | 2002           | 6                                                                     |
| 4                | Algeria | Bananas                         | 2002           | 11                                                                    |
| 4                | Algeria | Barley and products             | 2002           | 108                                                                   |
| 4                | Algeria | Beans                           | 2002           | 14                                                                    |
| 4                | Algeria | Beer                            | 2002           | 4                                                                     |
| 4                | Algeria | Bovine Meat                     | 2002           | 20                                                                    |
| 4                | Algeria | Butter, Ghee                    | 2002           | 10                                                                    |
| 4                | Algeria | Cereals - Excluding Beer        | 2002           | 1,667                                                                 |
| 4                | Algeria | Cocoa Beans and products        | 2002           | 2                                                                     |
| 4                | Algeria | Coconut Oil                     | 2002           | 3                                                                     |
| 4                | Algeria | Coffee and products             | 2002           | 4                                                                     |
| 4                | Algeria | Dates                           | 2002           | 61                                                                    |
| 4                | Algeria | Eggs                            | 2002           | 15                                                                    |
| 4                | Algeria | Fats, Animals, Raw              | 2002           | 5                                                                     |
| 4                | Algeria | Fish, Seafood                   | 2002           | 10                                                                    |
| 4                | Algeria | Fruits - Excluding Wine         | 2002           | 116                                                                   |
| 4                | Algeria | Fruits, Other                   | 2002           | 17                                                                    |
| 4                | Algeria | Grand Total                     | 2002           | 2,925                                                                 |
| 4                | Algeria | Grapes and products (excl wine) | 2002           | 9                                                                     |
| 4                | Algeria | Groundnut Oil                   | 2002           | 15                                                                    |
| 4                | Algeria | Honey                           | 2002           | 1                                                                     |
| 4                | Algeria | Lemons, Limes and products      | 2002           | 1                                                                     |
| 4                | Algeria | Maize and products              | 2002           | 108                                                                   |
| 4                | Algeria | Meat                            | 2002           | 79                                                                    |
| 4                | Algeria | Meat, Other                     | 2002           | 1                                                                     |
| 4                | Algeria | Milk - Excluding Butter         | 2002           | 174                                                                   |
| 4                | Algeria | Miscellaneous                   | 2002           | 2                                                                     |
| 4                | Algeria | Mutton & Goat Meat              | 2002           | 31                                                                    |
| 4                | Algeria | Offals                          | 2002           | 4                                                                     |

Dietary calcium and zinc deficiency risks are decreasing but remain prevalent

| FAO Country code | Country | Food item                       | Reference year | Net energy supply (kcal capita <sup>-1</sup> d <sup>-1</sup> ) |
|------------------|---------|---------------------------------|----------------|----------------------------------------------------------------|
| 4                | Algeria | Oilcrops                        | 2002           | 4                                                              |
| 4                | Algeria | Oilcrops Oil, Other             | 2002           | 16                                                             |
| 4                | Algeria | Olive Oil                       | 2002           | 19                                                             |
| 4                | Algeria | Olives (including preserved)    | 2002           | 2                                                              |
| 4                | Algeria | Onions                          | 2002           | 14                                                             |
| 4                | Algeria | Oranges, Mandarines             | 2002           | 12                                                             |
| 4                | Algeria | Palm Oil                        | 2002           | 58                                                             |
| 4                | Algeria | Peas                            | 2002           | 5                                                              |
| 4                | Algeria | Pelagic Fish                    | 2002           | 9                                                              |
| 4                | Algeria | Pimento                         | 2002           | 2                                                              |
| 4                | Algeria | Potatoes and products           | 2002           | 76                                                             |
| 4                | Algeria | Poultry Meat                    | 2002           | 26                                                             |
| 4                | Algeria | Pulses                          | 2002           | 56                                                             |
| 4                | Algeria | Pulses, Other and products      | 2002           | 37                                                             |
| 4                | Algeria | Rape and Mustard Oil            | 2002           | 111                                                            |
| 4                | Algeria | Rice (Milled Equivalent)        | 2002           | 29                                                             |
| 4                | Algeria | Sesame seed                     | 2002           | 1                                                              |
| 4                | Algeria | Sorghum and products            | 2002           | 1                                                              |
| 4                | Algeria | Soyabean Oil                    | 2002           | 19                                                             |
| 4                | Algeria | Spices                          | 2002           | 4                                                              |
| 4                | Algeria | Spices, Other                   | 2002           | 2                                                              |
| 4                | Algeria | Starchy Roots                   | 2002           | 76                                                             |
| 4                | Algeria | Stimulants                      | 2002           | 6                                                              |
| 4                | Algeria | Sugar & Sweeteners              | 2002           | 279                                                            |
| 4                | Algeria | Sugar (Raw Equivalent)          | 2002           | 275                                                            |
| 4                | Algeria | Sunflowerseed Oil               | 2002           | 106                                                            |
| 4                | Algeria | Sweeteners, Other               | 2002           | 3                                                              |
| 4                | Algeria | Tomatoes and products           | 2002           | 14                                                             |
| 4                | Algeria | Treenuts                        | 2002           | 10                                                             |
| 4                | Algeria | Vegetable Oils                  | 2002           | 346                                                            |
| 4                | Algeria | Vegetables                      | 2002           | 61                                                             |
| 4                | Algeria | Vegetables, Other               | 2002           | 33                                                             |
| 4                | Algeria | Vegetal Products                | 2002           | 2,630                                                          |
| 4                | Algeria | Wheat and products              | 2002           | 1,420                                                          |
| 4                | Algeria | Alcoholic Beverages             | 2003           | 5                                                              |
| 4                | Algeria | Animal fats                     | 2003           | 16                                                             |
| 4                | Algeria | Animal Products                 | 2003           | 296                                                            |
| 4                | Algeria | Apples and products             | 2003           | 7                                                              |
| 4                | Algeria | Bananas                         | 2003           | 10                                                             |
| 4                | Algeria | Barley and products             | 2003           | 107                                                            |
| 4                | Algeria | Beans                           | 2003           | 12                                                             |
| 4                | Algeria | Beer                            | 2003           | 4                                                              |
| 4                | Algeria | Bovine Meat                     | 2003           | 24                                                             |
| 4                | Algeria | Butter, Ghee                    | 2003           | 12                                                             |
| 4                | Algeria | Cereals - Excluding Beer        | 2003           | 1,698                                                          |
| 4                | Algeria | Cocoa Beans and products        | 2003           | 3                                                              |
| 4                | Algeria | Coconut Oil                     | 2003           | 2                                                              |
| 4                | Algeria | Coconuts - Incl Copra           | 2003           | 1                                                              |
| 4                | Algeria | Coffee and products             | 2003           | 4                                                              |
| 4                | Algeria | Dates                           | 2003           | 71                                                             |
| 4                | Algeria | Demersal Fish                   | 2003           | 1                                                              |
| 4                | Algeria | Eggs                            | 2003           | 15                                                             |
| 4                | Algeria | Fats, Animals, Raw              | 2003           | 5                                                              |
| 4                | Algeria | Fish, Seafood                   | 2003           | 11                                                             |
| 4                | Algeria | Fruits - Excluding Wine         | 2003           | 130                                                            |
| 4                | Algeria | Fruits, Other                   | 2003           | 18                                                             |
| 4                | Algeria | Grand Total                     | 2003           | 2,970                                                          |
| 4                | Algeria | Grapes and products (excl wine) | 2003           | 10                                                             |
| 4                | Algeria | Groundnut Oil                   | 2003           | 14                                                             |
| 4                | Algeria | Honey                           | 2003           | 1                                                              |
| 4                | Algeria | Lemons, Limes and products      | 2003           | 1                                                              |
| 4                | Algeria | Maize and products              | 2003           | 85                                                             |
| 4                | Algeria | Maize Germ Oil                  | 2003           | 2                                                              |
| 4                | Algeria | Meat                            | 2003           | 83                                                             |
| 4                | Algeria | Meat, Other                     | 2003           | 1                                                              |
| 4                | Algeria | Milk - Excluding Butter         | 2003           | 167                                                            |
| 4                | Algeria | Miscellaneous                   | 2003           | 1                                                              |
| 4                | Algeria | Mutton & Goat Meat              | 2003           | 30                                                             |
| 4                | Algeria | Offals                          | 2003           | 4                                                              |
| 4                | Algeria | Oilcrops                        | 2003           | 3                                                              |
| 4                | Algeria | Oilcrops Oil, Other             | 2003           | 15                                                             |
| 4                | Algeria | Olive Oil                       | 2003           | 19                                                             |
| 4                | Algeria | Olives (including preserved)    | 2003           | 1                                                              |
| 4                | Algeria | Onions                          | 2003           | 17                                                             |
| 4                | Algeria | Oranges, Mandarines             | 2003           | 13                                                             |
| 4                | Algeria | Palm Oil                        | 2003           | 24                                                             |
| 4                | Algeria | Peas                            | 2003           | 4                                                              |
| 4                | Algeria | Pelagic Fish                    | 2003           | 10                                                             |
| 4                | Algeria | Pepper                          | 2003           | 1                                                              |
| 4                | Algeria | Pimento                         | 2003           | 2                                                              |
| 4                | Algeria | Potatoes and products           | 2003           | 99                                                             |
| 4                | Algeria | Poultry Meat                    | 2003           | 27                                                             |
| 4                | Algeria | Pulses                          | 2003           | 59                                                             |
| 4                | Algeria | Pulses, Other and products      | 2003           | 43                                                             |
| 4                | Algeria | Rape and Mustard Oil            | 2003           | 33                                                             |
| 4                | Algeria | Rice (Milled Equivalent)        | 2003           | 18                                                             |
| 4                | Algeria | Rye and products                | 2003           | 1                                                              |
| 4                | Algeria | Sesame seed                     | 2003           | 2                                                              |
| 4                | Algeria | Soyabean Oil                    | 2003           | 13                                                             |
| 4                | Algeria | Spices                          | 2003           | 4                                                              |
| 4                | Algeria | Spices, Other                   | 2003           | 1                                                              |
| 4                | Algeria | Starchy Roots                   | 2003           | 100                                                            |
| 4                | Algeria | Stimulants                      | 2003           | 7                                                              |
| 4                | Algeria | Sugar & Sweeteners              | 2003           | 287                                                            |
| 4                | Algeria | Sugar (Raw Equivalent)          | 2003           | 284                                                            |
| 4                | Algeria | Sunflowerseed Oil               | 2003           | 176                                                            |
| 4                | Algeria | Sweeteners, Other               | 2003           | 3                                                              |

Dietary calcium and zinc deficiency risks are decreasing but remain prevalent

| FAO Country code | Country | Food item                       | Reference year | Net energy supply (kcal capita <sup>-1</sup> d <sup>-1</sup> ) |
|------------------|---------|---------------------------------|----------------|----------------------------------------------------------------|
| 4                | Algeria | Tomatoes and products           | 2003           | 15                                                             |
| 4                | Algeria | Treenuts                        | 2003           | 10                                                             |
| 4                | Algeria | Vegetable Oils                  | 2003           | 299                                                            |
| 4                | Algeria | Vegetables                      | 2003           | 71                                                             |
| 4                | Algeria | Vegetables, Other               | 2003           | 39                                                             |
| 4                | Algeria | Vegetal Products                | 2003           | 2,674                                                          |
| 4                | Algeria | Wheat and products              | 2003           | 1,487                                                          |
| 4                | Algeria | Alcoholic Beverages             | 2004           | 4                                                              |
| 4                | Algeria | Animal fats                     | 2004           | 16                                                             |
| 4                | Algeria | Animal Products                 | 2004           | 325                                                            |
| 4                | Algeria | Apples and products             | 2004           | 8                                                              |
| 4                | Algeria | Bananas                         | 2004           | 9                                                              |
| 4                | Algeria | Barley and products             | 2004           | 106                                                            |
| 4                | Algeria | Beans                           | 2004           | 15                                                             |
| 4                | Algeria | Beer                            | 2004           | 4                                                              |
| 4                | Algeria | Bovine Meat                     | 2004           | 29                                                             |
| 4                | Algeria | Butter, Ghee                    | 2004           | 11                                                             |
| 4                | Algeria | Cereals - Excluding Beer        | 2004           | 1,665                                                          |
| 4                | Algeria | Cocoa Beans and products        | 2004           | 3                                                              |
| 4                | Algeria | Coffee and products             | 2004           | 5                                                              |
| 4                | Algeria | Dates                           | 2004           | 63                                                             |
| 4                | Algeria | Demersal Fish                   | 2004           | 1                                                              |
| 4                | Algeria | Eggs                            | 2004           | 16                                                             |
| 4                | Algeria | Fats, Animals, Raw              | 2004           | 5                                                              |
| 4                | Algeria | Fish, Seafood                   | 2004           | 9                                                              |
| 4                | Algeria | Fruits - Excluding Wine         | 2004           | 124                                                            |
| 4                | Algeria | Fruits, Other                   | 2004           | 19                                                             |
| 4                | Algeria | Grand Total                     | 2004           | 2,987                                                          |
| 4                | Algeria | Grapes and products (excl wine) | 2004           | 9                                                              |
| 4                | Algeria | Groundnut Oil                   | 2004           | 14                                                             |
| 4                | Algeria | Honey                           | 2004           | 1                                                              |
| 4                | Algeria | Lemons, Limes and products      | 2004           | 1                                                              |
| 4                | Algeria | Maize and products              | 2004           | 77                                                             |
| 4                | Algeria | Meat                            | 2004           | 90                                                             |
| 4                | Algeria | Meat, Other                     | 2004           | 1                                                              |
| 4                | Algeria | Milk - Excluding Butter         | 2004           | 190                                                            |
| 4                | Algeria | Miscellaneous                   | 2004           | 2                                                              |
| 4                | Algeria | Mutton & Goat Meat              | 2004           | 33                                                             |
| 4                | Algeria | Offals                          | 2004           | 4                                                              |
| 4                | Algeria | Oilcrops                        | 2004           | 8                                                              |
| 4                | Algeria | Oilcrops Oil, Other             | 2004           | 36                                                             |
| 4                | Algeria | Olive Oil                       | 2004           | 45                                                             |
| 4                | Algeria | Olives (including preserved)    | 2004           | 6                                                              |
| 4                | Algeria | Onions                          | 2004           | 20                                                             |
| 4                | Algeria | Oranges, Mandarines             | 2004           | 14                                                             |
| 4                | Algeria | Palm Oil                        | 2004           | 24                                                             |
| 4                | Algeria | Peas                            | 2004           | 5                                                              |
| 4                | Algeria | Pelagic Fish                    | 2004           | 8                                                              |
| 4                | Algeria | Pepper                          | 2004           | 1                                                              |
| 4                | Algeria | Pimento                         | 2004           | 2                                                              |
| 4                | Algeria | Potatoes and products           | 2004           | 99                                                             |
| 4                | Algeria | Poultry Meat                    | 2004           | 28                                                             |
| 4                | Algeria | Pulses                          | 2004           | 54                                                             |
| 4                | Algeria | Pulses, Other and products      | 2004           | 34                                                             |
| 4                | Algeria | Rape and Mustard Oil            | 2004           | 46                                                             |
| 4                | Algeria | Rice (Milled Equivalent)        | 2004           | 20                                                             |
| 4                | Algeria | Sesame seed                     | 2004           | 1                                                              |
| 4                | Algeria | Soyabean Oil                    | 2004           | 33                                                             |
| 4                | Algeria | Spices                          | 2004           | 4                                                              |
| 4                | Algeria | Spices, Other                   | 2004           | 1                                                              |
| 4                | Algeria | Starchy Roots                   | 2004           | 99                                                             |
| 4                | Algeria | Stimulants                      | 2004           | 9                                                              |
| 4                | Algeria | Sugar & Sweeteners              | 2004           | 292                                                            |
| 4                | Algeria | Sugar (Raw Equivalent)          | 2004           | 288                                                            |
| 4                | Algeria | Sunflowerseed Oil               | 2004           | 104                                                            |
| 4                | Algeria | Sweeteners, Other               | 2004           | 3                                                              |
| 4                | Algeria | Tomatoes and products           | 2004           | 20                                                             |
| 4                | Algeria | Treenuts                        | 2004           | 12                                                             |
| 4                | Algeria | Vegetable Oils                  | 2004           | 304                                                            |
| 4                | Algeria | Vegetables                      | 2004           | 84                                                             |
| 4                | Algeria | Vegetables, Other               | 2004           | 45                                                             |
| 4                | Algeria | Vegetal Products                | 2004           | 2,662                                                          |
| 4                | Algeria | Wheat and products              | 2004           | 1,462                                                          |
| 4                | Algeria | Alcoholic Beverages             | 2005           | 5                                                              |
| 4                | Algeria | Animal fats                     | 2005           | 15                                                             |
| 4                | Algeria | Animal Products                 | 2005           | 326                                                            |
| 4                | Algeria | Apples and products             | 2005           | 10                                                             |
| 4                | Algeria | Bananas                         | 2005           | 7                                                              |
| 4                | Algeria | Barley and products             | 2005           | 104                                                            |
| 4                | Algeria | Beans                           | 2005           | 12                                                             |
| 4                | Algeria | Beer                            | 2005           | 4                                                              |
| 4                | Algeria | Bovine Meat                     | 2005           | 28                                                             |
| 4                | Algeria | Butter, Ghee                    | 2005           | 9                                                              |
| 4                | Algeria | Cereals - Excluding Beer        | 2005           | 1,655                                                          |
| 4                | Algeria | Cocoa Beans and products        | 2005           | 4                                                              |
| 4                | Algeria | Coconuts - Incl Copra           | 2005           | 1                                                              |
| 4                | Algeria | Coffee and products             | 2005           | 4                                                              |
| 4                | Algeria | Dates                           | 2005           | 72                                                             |
| 4                | Algeria | Eggs                            | 2005           | 15                                                             |
| 4                | Algeria | Fats, Animals, Raw              | 2005           | 6                                                              |
| 4                | Algeria | Fish, Seafood                   | 2005           | 10                                                             |
| 4                | Algeria | Fruits - Excluding Wine         | 2005           | 139                                                            |
| 4                | Algeria | Fruits, Other                   | 2005           | 24                                                             |
| 4                | Algeria | Grand Total                     | 2005           | 2,958                                                          |
| 4                | Algeria | Grapes and products (excl wine) | 2005           | 11                                                             |
| 4                | Algeria | Groundnut Oil                   | 2005           | 17                                                             |
| 4                | Algeria | Honey                           | 2005           | 1                                                              |

Dietary calcium and zinc deficiency risks are decreasing but remain prevalent

| FAO Country code | Country | Food item                       | Reference year | Net energy supply (kcal capita <sup>-1</sup> d <sup>-1</sup> ) |
|------------------|---------|---------------------------------|----------------|----------------------------------------------------------------|
| 4                | Algeria | Lemons, Limes and products      | 2005           | 1                                                              |
| 4                | Algeria | Maize and products              | 2005           | 78                                                             |
| 4                | Algeria | Meat                            | 2005           | 91                                                             |
| 4                | Algeria | Meat, Other                     | 2005           | 1                                                              |
| 4                | Algeria | Milk - Excluding Butter         | 2005           | 191                                                            |
| 4                | Algeria | Miscellaneous                   | 2005           | 2                                                              |
| 4                | Algeria | Mutton & Goat Meat              | 2005           | 34                                                             |
| 4                | Algeria | Offals                          | 2005           | 4                                                              |
| 4                | Algeria | Oilcrops                        | 2005           | 7                                                              |
| 4                | Algeria | Oilcrops Oil, Other             | 2005           | 38                                                             |
| 4                | Algeria | Olive Oil                       | 2005           | 27                                                             |
| 4                | Algeria | Olives (including preserved)    | 2005           | 4                                                              |
| 4                | Algeria | Onions                          | 2005           | 20                                                             |
| 4                | Algeria | Oranges, Mandarines             | 2005           | 14                                                             |
| 4                | Algeria | Palm Oil                        | 2005           | 1                                                              |
| 4                | Algeria | Peas                            | 2005           | 5                                                              |
| 4                | Algeria | Pelagic Fish                    | 2005           | 9                                                              |
| 4                | Algeria | Pimento                         | 2005           | 2                                                              |
| 4                | Algeria | Potatoes and products           | 2005           | 109                                                            |
| 4                | Algeria | Poultry Meat                    | 2005           | 28                                                             |
| 4                | Algeria | Pulses                          | 2005           | 61                                                             |
| 4                | Algeria | Pulses, Other and products      | 2005           | 44                                                             |
| 4                | Algeria | Rape and Mustard Oil            | 2005           | 26                                                             |
| 4                | Algeria | Rice (Milled Equivalent)        | 2005           | 15                                                             |
| 4                | Algeria | Sesame seed                     | 2005           | 2                                                              |
| 4                | Algeria | Soyabean Oil                    | 2005           | 123                                                            |
| 4                | Algeria | Spices                          | 2005           | 4                                                              |
| 4                | Algeria | Spices, Other                   | 2005           | 1                                                              |
| 4                | Algeria | Starchy Roots                   | 2005           | 109                                                            |
| 4                | Algeria | Stimulants                      | 2005           | 8                                                              |
| 4                | Algeria | Sugar & Sweeteners              | 2005           | 261                                                            |
| 4                | Algeria | Sugar (Raw Equivalent)          | 2005           | 257                                                            |
| 4                | Algeria | Sunflowerseed Oil               | 2005           | 53                                                             |
| 4                | Algeria | Sweeteners, Other               | 2005           | 4                                                              |
| 4                | Algeria | Tomatoes and products           | 2005           | 17                                                             |
| 4                | Algeria | Treenuts                        | 2005           | 13                                                             |
| 4                | Algeria | Vegetable Oils                  | 2005           | 284                                                            |
| 4                | Algeria | Vegetables                      | 2005           | 84                                                             |
| 4                | Algeria | Vegetables, Other               | 2005           | 46                                                             |
| 4                | Algeria | Vegetal Products                | 2005           | 2,632                                                          |
| 4                | Algeria | Wheat and products              | 2005           | 1,458                                                          |
| 4                | Algeria | Alcoholic Beverages             | 2006           | 5                                                              |
| 4                | Algeria | Animal fats                     | 2006           | 17                                                             |
| 4                | Algeria | Animal Products                 | 2006           | 335                                                            |
| 4                | Algeria | Apples and products             | 2006           | 13                                                             |
| 4                | Algeria | Bananas                         | 2006           | 6                                                              |
| 4                | Algeria | Barley and products             | 2006           | 123                                                            |
| 4                | Algeria | Beans                           | 2006           | 12                                                             |
| 4                | Algeria | Beer                            | 2006           | 5                                                              |
| 4                | Algeria | Bovine Meat                     | 2006           | 25                                                             |
| 4                | Algeria | Butter, Ghee                    | 2006           | 9                                                              |
| 4                | Algeria | Cereals - Excluding Beer        | 2006           | 1,675                                                          |
| 4                | Algeria | Cocoa Beans and products        | 2006           | 4                                                              |
| 4                | Algeria | Coffee and products             | 2006           | 4                                                              |
| 4                | Algeria | Dates                           | 2006           | 67                                                             |
| 4                | Algeria | Eggs                            | 2006           | 15                                                             |
| 4                | Algeria | Fats, Animals, Raw              | 2006           | 7                                                              |
| 4                | Algeria | Fish, Seafood                   | 2006           | 11                                                             |
| 4                | Algeria | Fruits - Excluding Wine         | 2006           | 144                                                            |
| 4                | Algeria | Fruits, Other                   | 2006           | 29                                                             |
| 4                | Algeria | Grand Total                     | 2006           | 3,047                                                          |
| 4                | Algeria | Grapes and products (excl wine) | 2006           | 13                                                             |
| 4                | Algeria | Groundnut Oil                   | 2006           | 13                                                             |
| 4                | Algeria | Groundnuts (Shelled Eq)         | 2006           | 1                                                              |
| 4                | Algeria | Honey                           | 2006           | 1                                                              |
| 4                | Algeria | Lemons, Limes and products      | 2006           | 1                                                              |
| 4                | Algeria | Maize and products              | 2006           | 154                                                            |
| 4                | Algeria | Maize Germ Oil                  | 2006           | 2                                                              |
| 4                | Algeria | Meat                            | 2006           | 86                                                             |
| 4                | Algeria | Meat, Other                     | 2006           | 1                                                              |
| 4                | Algeria | Milk - Excluding Butter         | 2006           | 202                                                            |
| 4                | Algeria | Miscellaneous                   | 2006           | 2                                                              |
| 4                | Algeria | Mutton & Goat Meat              | 2006           | 33                                                             |
| 4                | Algeria | Offals                          | 2006           | 4                                                              |
| 4                | Algeria | Oilcrops                        | 2006           | 6                                                              |
| 4                | Algeria | Oilcrops Oil, Other             | 2006           | 45                                                             |
| 4                | Algeria | Olive Oil                       | 2006           | 24                                                             |
| 4                | Algeria | Olives (including preserved)    | 2006           | 3                                                              |
| 4                | Algeria | Onions                          | 2006           | 21                                                             |
| 4                | Algeria | Oranges, Mandarines             | 2006           | 15                                                             |
| 4                | Algeria | Palm Oil                        | 2006           | 17                                                             |
| 4                | Algeria | Peas                            | 2006           | 3                                                              |
| 4                | Algeria | Pelagic Fish                    | 2006           | 11                                                             |
| 4                | Algeria | Pepper                          | 2006           | 1                                                              |
| 4                | Algeria | Pimento                         | 2006           | 3                                                              |
| 4                | Algeria | Potatoes and products           | 2006           | 112                                                            |
| 4                | Algeria | Poultry Meat                    | 2006           | 26                                                             |
| 4                | Algeria | Pulses                          | 2006           | 52                                                             |
| 4                | Algeria | Pulses, Other and products      | 2006           | 37                                                             |
| 4                | Algeria | Rape and Mustard Oil            | 2006           | 34                                                             |
| 4                | Algeria | Rice (Milled Equivalent)        | 2006           | 19                                                             |
| 4                | Algeria | Sesame seed                     | 2006           | 1                                                              |
| 4                | Algeria | Sorghum and products            | 2006           | 1                                                              |
| 4                | Algeria | Soyabean Oil                    | 2006           | 140                                                            |
| 4                | Algeria | Spices                          | 2006           | 7                                                              |
| 4                | Algeria | Spices, Other                   | 2006           | 3                                                              |
| 4                | Algeria | Starchy Roots                   | 2006           | 112                                                            |

Dietary calcium and zinc deficiency risks are decreasing but remain prevalent

| FAO Country code | Country | Food item                       | Reference year | Net energy supply (kcal capita <sup>-1</sup> d <sup>-1</sup> ) |
|------------------|---------|---------------------------------|----------------|----------------------------------------------------------------|
| 4                | Algeria | Stimulants                      | 2006           | 9                                                              |
| 4                | Algeria | Sugar & Sweeteners              | 2006           | 272                                                            |
| 4                | Algeria | Sugar (Raw Equivalent)          | 2006           | 268                                                            |
| 4                | Algeria | Sunflowerseed Oil               | 2006           | 57                                                             |
| 4                | Algeria | Sweeteners, Other               | 2006           | 3                                                              |
| 4                | Algeria | Tomatoes and products           | 2006           | 15                                                             |
| 4                | Algeria | Treenuts                        | 2006           | 16                                                             |
| 4                | Algeria | Vegetable Oils                  | 2006           | 331                                                            |
| 4                | Algeria | Vegetables                      | 2006           | 81                                                             |
| 4                | Algeria | Vegetables, Other               | 2006           | 45                                                             |
| 4                | Algeria | Vegetal Products                | 2006           | 2,711                                                          |
| 4                | Algeria | Wheat and products              | 2006           | 1,378                                                          |
| 4                | Algeria | Alcoholic Beverages             | 2007           | 5                                                              |
| 4                | Algeria | Animal fats                     | 2007           | 16                                                             |
| 4                | Algeria | Animal Products                 | 2007           | 329                                                            |
| 4                | Algeria | Apples and products             | 2007           | 10                                                             |
| 4                | Algeria | Bananas                         | 2007           | 7                                                              |
| 4                | Algeria | Barley and products             | 2007           | 130                                                            |
| 4                | Algeria | Beans                           | 2007           | 14                                                             |
| 4                | Algeria | Beer                            | 2007           | 5                                                              |
| 4                | Algeria | Bovine Meat                     | 2007           | 25                                                             |
| 4                | Algeria | Butter, Ghee                    | 2007           | 10                                                             |
| 4                | Algeria | Cereals - Excluding Beer        | 2007           | 1,682                                                          |
| 4                | Algeria | Cocoa Beans and products        | 2007           | 7                                                              |
| 4                | Algeria | Coconuts - Incl Copra           | 2007           | 1                                                              |
| 4                | Algeria | Coffee and products             | 2007           | 4                                                              |
| 4                | Algeria | Dates                           | 2007           | 71                                                             |
| 4                | Algeria | Eggs                            | 2007           | 16                                                             |
| 4                | Algeria | Fats, Animals, Raw              | 2007           | 6                                                              |
| 4                | Algeria | Fish, Seafood                   | 2007           | 11                                                             |
| 4                | Algeria | Fruits - Excluding Wine         | 2007           | 134                                                            |
| 4                | Algeria | Fruits, Other                   | 2007           | 21                                                             |
| 4                | Algeria | Grand Total                     | 2007           | 3,041                                                          |
| 4                | Algeria | Grapes and products (excl wine) | 2007           | 10                                                             |
| 4                | Algeria | Groundnut Oil                   | 2007           | 14                                                             |
| 4                | Algeria | Groundnuts (Shelled Eq)         | 2007           | 2                                                              |
| 4                | Algeria | Honey                           | 2007           | 1                                                              |
| 4                | Algeria | Lemons, Limes and products      | 2007           | 1                                                              |
| 4                | Algeria | Maize and products              | 2007           | 172                                                            |
| 4                | Algeria | Maize Germ Oil                  | 2007           | 1                                                              |
| 4                | Algeria | Meat                            | 2007           | 86                                                             |
| 4                | Algeria | Meat, Other                     | 2007           | 1                                                              |
| 4                | Algeria | Milk - Excluding Butter         | 2007           | 196                                                            |
| 4                | Algeria | Miscellaneous                   | 2007           | 3                                                              |
| 4                | Algeria | Mutton & Goat Meat              | 2007           | 33                                                             |
| 4                | Algeria | Offals                          | 2007           | 4                                                              |
| 4                | Algeria | Oilcrops                        | 2007           | 6                                                              |
| 4                | Algeria | Oilcrops Oil, Other             | 2007           | 38                                                             |
| 4                | Algeria | Olive Oil                       | 2007           | 16                                                             |
| 4                | Algeria | Olives (including preserved)    | 2007           | 2                                                              |
| 4                | Algeria | Onions                          | 2007           | 24                                                             |
| 4                | Algeria | Oranges, Mandarines             | 2007           | 15                                                             |
| 4                | Algeria | Palm Oil                        | 2007           | 7                                                              |
| 4                | Algeria | Peas                            | 2007           | 4                                                              |
| 4                | Algeria | Pelagic Fish                    | 2007           | 10                                                             |
| 4                | Algeria | Pimento                         | 2007           | 2                                                              |
| 4                | Algeria | Potatoes and products           | 2007           | 81                                                             |
| 4                | Algeria | Poultry Meat                    | 2007           | 26                                                             |
| 4                | Algeria | Pulses                          | 2007           | 58                                                             |
| 4                | Algeria | Pulses, Other and products      | 2007           | 41                                                             |
| 4                | Algeria | Rape and Mustard Oil            | 2007           | 33                                                             |
| 4                | Algeria | Rice (Milled Equivalent)        | 2007           | 21                                                             |
| 4                | Algeria | Sesame seed                     | 2007           | 1                                                              |
| 4                | Algeria | Sorghum and products            | 2007           | 1                                                              |
| 4                | Algeria | Soyabean Oil                    | 2007           | 189                                                            |
| 4                | Algeria | Spices                          | 2007           | 4                                                              |
| 4                | Algeria | Spices, Other                   | 2007           | 2                                                              |
| 4                | Algeria | Starchy Roots                   | 2007           | 81                                                             |
| 4                | Algeria | Stimulants                      | 2007           | 12                                                             |
| 4                | Algeria | Sugar & Sweeteners              | 2007           | 306                                                            |
| 4                | Algeria | Sugar (Raw Equivalent)          | 2007           | 302                                                            |
| 4                | Algeria | Sunflowerseed Oil               | 2007           | 28                                                             |
| 4                | Algeria | Sweeteners, Other               | 2007           | 4                                                              |
| 4                | Algeria | Tomatoes and products           | 2007           | 12                                                             |
| 4                | Algeria | Treenuts                        | 2007           | 11                                                             |
| 4                | Algeria | Vegetable Oils                  | 2007           | 326                                                            |
| 4                | Algeria | Vegetables                      | 2007           | 82                                                             |
| 4                | Algeria | Vegetables, Other               | 2007           | 46                                                             |
| 4                | Algeria | Vegetal Products                | 2007           | 2,711                                                          |
| 4                | Algeria | Wheat and products              | 2007           | 1,358                                                          |
| 4                | Algeria | Alcoholic Beverages             | 2008           | 6                                                              |
| 4                | Algeria | Animal fats                     | 2008           | 20                                                             |
| 4                | Algeria | Animal Products                 | 2008           | 324                                                            |
| 4                | Algeria | Apples and products             | 2008           | 12                                                             |
| 4                | Algeria | Bananas                         | 2008           | 7                                                              |
| 4                | Algeria | Barley and products             | 2008           | 98                                                             |
| 4                | Algeria | Beans                           | 2008           | 16                                                             |
| 4                | Algeria | Beer                            | 2008           | 5                                                              |
| 4                | Algeria | Bovine Meat                     | 2008           | 24                                                             |
| 4                | Algeria | Butter, Ghee                    | 2008           | 11                                                             |
| 4                | Algeria | Cereals - Excluding Beer        | 2008           | 1,686                                                          |
| 4                | Algeria | Cocoa Beans and products        | 2008           | 8                                                              |
| 4                | Algeria | Coffee and products             | 2008           | 5                                                              |
| 4                | Algeria | Dates                           | 2008           | 73                                                             |
| 4                | Algeria | Demersal Fish                   | 2008           | 1                                                              |
| 4                | Algeria | Eggs                            | 2008           | 15                                                             |
| 4                | Algeria | Fats, Animals, Raw              | 2008           | 9                                                              |



## Dietary calcium and zinc deficiency risks are decreasing but remain prevalent

| FAO Country code | Country | Food item                       | Reference year | Net energy supply (kcal <i>capita</i> <sup>-1</sup> d <sup>-1</sup> ) |
|------------------|---------|---------------------------------|----------------|-----------------------------------------------------------------------|
| 4                | Algeria | Fish, Seafood                   | 2008           | 10                                                                    |
| 4                | Algeria | Fruits - Excluding Wine         | 2008           | 149                                                                   |
| 4                | Algeria | Fruits, Other                   | 2008           | 26                                                                    |
| 4                | Algeria | Grand Total                     | 2008           | 3,048                                                                 |
| 4                | Algeria | Grapes and products (excl wine) | 2008           | 15                                                                    |
| 4                | Algeria | Groundnut Oil                   | 2008           | 15                                                                    |
| 4                | Algeria | Groundnuts (Shelled Eq)         | 2008           | 1                                                                     |
| 4                | Algeria | Honey                           | 2008           | 1                                                                     |
| 4                | Algeria | Lemons, Limes and products      | 2008           | 1                                                                     |
| 4                | Algeria | Maize and products              | 2008           | 152                                                                   |
| 4                | Algeria | Marine Fish, Other              | 2008           | 1                                                                     |
| 4                | Algeria | Meat                            | 2008           | 82                                                                    |
| 4                | Algeria | Meat, Other                     | 2008           | 1                                                                     |
| 4                | Algeria | Milk - Excluding Butter         | 2008           | 193                                                                   |
| 4                | Algeria | Miscellaneous                   | 2008           | 4                                                                     |
| 4                | Algeria | Mutton & Goat Meat              | 2008           | 31                                                                    |
| 4                | Algeria | Offals                          | 2008           | 3                                                                     |
| 4                | Algeria | Oilcrops                        | 2008           | 5                                                                     |
| 4                | Algeria | Oilcrops Oil, Other             | 2008           | 43                                                                    |
| 4                | Algeria | Olive Oil                       | 2008           | 27                                                                    |
| 4                | Algeria | Olives (including preserved)    | 2008           | 1                                                                     |
| 4                | Algeria | Onions                          | 2008           | 22                                                                    |
| 4                | Algeria | Oranges, Mandarines             | 2008           | 15                                                                    |
| 4                | Algeria | Palm Oil                        | 2008           | 19                                                                    |
| 4                | Algeria | Peas                            | 2008           | 4                                                                     |
| 4                | Algeria | Pelagic Fish                    | 2008           | 9                                                                     |
| 4                | Algeria | Pepper                          | 2008           | 1                                                                     |
| 4                | Algeria | Pimento                         | 2008           | 3                                                                     |
| 4                | Algeria | Potatoes and products           | 2008           | 106                                                                   |
| 4                | Algeria | Poultry Meat                    | 2008           | 26                                                                    |
| 4                | Algeria | Pulses                          | 2008           | 54                                                                    |
| 4                | Algeria | Pulses, Other and products      | 2008           | 34                                                                    |
| 4                | Algeria | Rape and Mustard Oil            | 2008           | 16                                                                    |
| 4                | Algeria | Rice (Milled Equivalent)        | 2008           | 27                                                                    |
| 4                | Algeria | Sesame seed                     | 2008           | 2                                                                     |
| 4                | Algeria | Soyabean Oil                    | 2008           | 180                                                                   |
| 4                | Algeria | Spices                          | 2008           | 6                                                                     |
| 4                | Algeria | Spices, Other                   | 2008           | 2                                                                     |
| 4                | Algeria | Starchy Roots                   | 2008           | 106                                                                   |
| 4                | Algeria | Stimulants                      | 2008           | 13                                                                    |
| 4                | Algeria | Sugar & Sweeteners              | 2008           | 275                                                                   |
| 4                | Algeria | Sugar (Raw Equivalent)          | 2008           | 269                                                                   |
| 4                | Algeria | Sunflowerseed Oil               | 2008           | 27                                                                    |
| 4                | Algeria | Sweeteners, Other               | 2008           | 6                                                                     |
| 4                | Algeria | Tomatoes and products           | 2008           | 10                                                                    |
| 4                | Algeria | Treenuts                        | 2008           | 13                                                                    |
| 4                | Algeria | Vegetable Oils                  | 2008           | 329                                                                   |
| 4                | Algeria | Vegetables                      | 2008           | 76                                                                    |
| 4                | Algeria | Vegetables, Other               | 2008           | 44                                                                    |
| 4                | Algeria | Vegetal Products                | 2008           | 2,724                                                                 |
| 4                | Algeria | Wheat and products              | 2008           | 1,409                                                                 |
| 4                | Algeria | Alcoholic Beverages             | 2009           | 5                                                                     |
| 4                | Algeria | Animal fats                     | 2009           | 13                                                                    |
| 4                | Algeria | Animal Products                 | 2009           | 344                                                                   |
| 4                | Algeria | Apples and products             | 2009           | 13                                                                    |
| 4                | Algeria | Bananas                         | 2009           | 7                                                                     |
| 4                | Algeria | Barley and products             | 2009           | 98                                                                    |
| 4                | Algeria | Beans                           | 2009           | 13                                                                    |
| 4                | Algeria | Beer                            | 2009           | 5                                                                     |
| 4                | Algeria | Beverages, Alcoholic            | 2009           | 1                                                                     |
| 4                | Algeria | Bovine Meat                     | 2009           | 26                                                                    |
| 4                | Algeria | Butter, Ghee                    | 2009           | 6                                                                     |
| 4                | Algeria | Cereals - Excluding Beer        | 2009           | 1,678                                                                 |
| 4                | Algeria | Cocoa Beans and products        | 2009           | 8                                                                     |
| 4                | Algeria | Coconut Oil                     | 2009           | 1                                                                     |
| 4                | Algeria | Coconuts - Incl Copra           | 2009           | 1                                                                     |
| 4                | Algeria | Coffee and products             | 2009           | 4                                                                     |
| 4                | Algeria | Dates                           | 2009           | 78                                                                    |
| 4                | Algeria | Eggs                            | 2009           | 16                                                                    |
| 4                | Algeria | Fats, Animals, Raw              | 2009           | 6                                                                     |
| 4                | Algeria | Fish, Seafood                   | 2009           | 10                                                                    |
| 4                | Algeria | Fruits - Excluding Wine         | 2009           | 167                                                                   |
| 4                | Algeria | Fruits, Other                   | 2009           | 29                                                                    |
| 4                | Algeria | Grand Total                     | 2009           | 3,110                                                                 |
| 4                | Algeria | Grapes and products (excl wine) | 2009           | 20                                                                    |
| 4                | Algeria | Groundnut Oil                   | 2009           | 15                                                                    |
| 4                | Algeria | Groundnuts (Shelled Eq)         | 2009           | 4                                                                     |
| 4                | Algeria | Honey                           | 2009           | 1                                                                     |
| 4                | Algeria | Lemons, Limes and products      | 2009           | 1                                                                     |
| 4                | Algeria | Maize and products              | 2009           | 107                                                                   |
| 4                | Algeria | Maize Germ Oil                  | 2009           | 2                                                                     |
| 4                | Algeria | Marine Fish, Other              | 2009           | 1                                                                     |
| 4                | Algeria | Meat                            | 2009           | 85                                                                    |
| 4                | Algeria | Meat, Other                     | 2009           | 1                                                                     |
| 4                | Algeria | Milk - Excluding Butter         | 2009           | 217                                                                   |
| 4                | Algeria | Miscellaneous                   | 2009           | 5                                                                     |
| 4                | Algeria | Mutton & Goat Meat              | 2009           | 32                                                                    |
| 4                | Algeria | Offals                          | 2009           | 4                                                                     |
| 4                | Algeria | Oilcrops                        | 2009           | 13                                                                    |
| 4                | Algeria | Oilcrops Oil, Other             | 2009           | 39                                                                    |
| 4                | Algeria | Olive Oil                       | 2009           | 36                                                                    |
| 4                | Algeria | Olives (including preserved)    | 2009           | 6                                                                     |
| 4                | Algeria | Onions                          | 2009           | 27                                                                    |
| 4                | Algeria | Oranges, Mandarines             | 2009           | 18                                                                    |
| 4                | Algeria | Palm Oil                        | 2009           | 19                                                                    |
| 4                | Algeria | Peas                            | 2009           | 4                                                                     |
| 4                | Algeria | Pelagic Fish                    | 2009           | 9                                                                     |

Dietary calcium and zinc deficiency risks are decreasing but remain prevalent

| FAO Country code | Country | Food item                       | Reference year | Net energy supply (kcal capita <sup>-1</sup> d <sup>-1</sup> ) |
|------------------|---------|---------------------------------|----------------|----------------------------------------------------------------|
| 4                | Algeria | Pimento                         | 2009           | 3                                                              |
| 4                | Algeria | Potatoes and products           | 2009           | 126                                                            |
| 4                | Algeria | Poultry Meat                    | 2009           | 26                                                             |
| 4                | Algeria | Pulses                          | 2009           | 56                                                             |
| 4                | Algeria | Pulses, Other and products      | 2009           | 39                                                             |
| 4                | Algeria | Rape and Mustard Oil            | 2009           | 17                                                             |
| 4                | Algeria | Rice (Milled Equivalent)        | 2009           | 20                                                             |
| 4                | Algeria | Sesame seed                     | 2009           | 1                                                              |
| 4                | Algeria | Soyabean Oil                    | 2009           | 139                                                            |
| 4                | Algeria | Spices                          | 2009           | 6                                                              |
| 4                | Algeria | Spices, Other                   | 2009           | 2                                                              |
| 4                | Algeria | Starchy Roots                   | 2009           | 126                                                            |
| 4                | Algeria | Stimulants                      | 2009           | 13                                                             |
| 4                | Algeria | Sugar & Sweeteners              | 2009           | 294                                                            |
| 4                | Algeria | Sugar (Raw Equivalent)          | 2009           | 289                                                            |
| 4                | Algeria | Sunflowerseed Oil               | 2009           | 28                                                             |
| 4                | Algeria | Sweeteners, Other               | 2009           | 4                                                              |
| 4                | Algeria | Tomatoes and products           | 2009           | 13                                                             |
| 4                | Algeria | Treenuts                        | 2009           | 16                                                             |
| 4                | Algeria | Vegetable Oils                  | 2009           | 296                                                            |
| 4                | Algeria | Vegetables                      | 2009           | 92                                                             |
| 4                | Algeria | Vegetables, Other               | 2009           | 52                                                             |
| 4                | Algeria | Vegetal Products                | 2009           | 2,766                                                          |
| 4                | Algeria | Wheat and products              | 2009           | 1,452                                                          |
| 4                | Algeria | Alcoholic Beverages             | 2010           | 5                                                              |
| 4                | Algeria | Animal fats                     | 2010           | 17                                                             |
| 4                | Algeria | Animal Products                 | 2010           | 348                                                            |
| 4                | Algeria | Apples and products             | 2010           | 16                                                             |
| 4                | Algeria | Bananas                         | 2010           | 2                                                              |
| 4                | Algeria | Barley and products             | 2010           | 97                                                             |
| 4                | Algeria | Beans                           | 2010           | 12                                                             |
| 4                | Algeria | Beer                            | 2010           | 5                                                              |
| 4                | Algeria | Beverages, Alcoholic            | 2010           | 1                                                              |
| 4                | Algeria | Bovine Meat                     | 2010           | 22                                                             |
| 4                | Algeria | Butter, Ghee                    | 2010           | 10                                                             |
| 4                | Algeria | Cereals - Excluding Beer        | 2010           | 1,660                                                          |
| 4                | Algeria | Cocoa Beans and products        | 2010           | 9                                                              |
| 4                | Algeria | Coconut Oil                     | 2010           | 2                                                              |
| 4                | Algeria | Coconuts - Incl Copra           | 2010           | 1                                                              |
| 4                | Algeria | Coffee and products             | 2010           | 2                                                              |
| 4                | Algeria | Dates                           | 2010           | 84                                                             |
| 4                | Algeria | Eggs                            | 2010           | 21                                                             |
| 4                | Algeria | Fats, Animals, Raw              | 2010           | 7                                                              |
| 4                | Algeria | Fish, Seafood                   | 2010           | 8                                                              |
| 4                | Algeria | Fruits - Excluding Wine         | 2010           | 175                                                            |
| 4                | Algeria | Fruits, Other                   | 2010           | 33                                                             |
| 4                | Algeria | Grand Total                     | 2010           | 3,139                                                          |
| 4                | Algeria | Grapes and products (excl wine) | 2010           | 22                                                             |
| 4                | Algeria | Groundnut Oil                   | 2010           | 9                                                              |
| 4                | Algeria | Groundnuts (Shelled Eq)         | 2010           | 5                                                              |
| 4                | Algeria | Honey                           | 2010           | 1                                                              |
| 4                | Algeria | Lemons, Limes and products      | 2010           | 1                                                              |
| 4                | Algeria | Maize and products              | 2010           | 151                                                            |
| 4                | Algeria | Maize Germ Oil                  | 2010           | 1                                                              |
| 4                | Algeria | Marine Fish, Other              | 2010           | 1                                                              |
| 4                | Algeria | Meat                            | 2010           | 82                                                             |
| 4                | Algeria | Meat, Other                     | 2010           | 1                                                              |
| 4                | Algeria | Milk - Excluding Butter         | 2010           | 216                                                            |
| 4                | Algeria | Miscellaneous                   | 2010           | 5                                                              |
| 4                | Algeria | Mutton & Goat Meat              | 2010           | 33                                                             |
| 4                | Algeria | Offals                          | 2010           | 4                                                              |
| 4                | Algeria | Oilcrops                        | 2010           | 11                                                             |
| 4                | Algeria | Oilcrops Oil, Other             | 2010           | 15                                                             |
| 4                | Algeria | Olive Oil                       | 2010           | 24                                                             |
| 4                | Algeria | Olives (including preserved)    | 2010           | 2                                                              |
| 4                | Algeria | Onions                          | 2010           | 27                                                             |
| 4                | Algeria | Oranges, Mandarines             | 2010           | 17                                                             |
| 4                | Algeria | Palm Oil                        | 2010           | 15                                                             |
| 4                | Algeria | Peas                            | 2010           | 5                                                              |
| 4                | Algeria | Pelagic Fish                    | 2010           | 7                                                              |
| 4                | Algeria | Pimento                         | 2010           | 4                                                              |
| 4                | Algeria | Potatoes and products           | 2010           | 128                                                            |
| 4                | Algeria | Poultry Meat                    | 2010           | 26                                                             |
| 4                | Algeria | Pulses                          | 2010           | 64                                                             |
| 4                | Algeria | Pulses, Other and products      | 2010           | 48                                                             |
| 4                | Algeria | Rape and Mustard Oil            | 2010           | 9                                                              |
| 4                | Algeria | Rice (Milled Equivalent)        | 2010           | 28                                                             |
| 4                | Algeria | Sesame seed                     | 2010           | 1                                                              |
| 4                | Algeria | Soyabean Oil                    | 2010           | 195                                                            |
| 4                | Algeria | Spices                          | 2010           | 6                                                              |
| 4                | Algeria | Spices, Other                   | 2010           | 2                                                              |
| 4                | Algeria | Starchy Roots                   | 2010           | 128                                                            |
| 4                | Algeria | Stimulants                      | 2010           | 11                                                             |
| 4                | Algeria | Sugar & Sweeteners              | 2010           | 291                                                            |
| 4                | Algeria | Sugar (Raw Equivalent)          | 2010           | 284                                                            |
| 4                | Algeria | Sunflowerseed Oil               | 2010           | 50                                                             |
| 4                | Algeria | Sweeteners, Other               | 2010           | 6                                                              |
| 4                | Algeria | Tomatoes and products           | 2010           | 13                                                             |
| 4                | Algeria | Treenuts                        | 2010           | 16                                                             |
| 4                | Algeria | Vegetable Oils                  | 2010           | 320                                                            |
| 4                | Algeria | Vegetables                      | 2010           | 99                                                             |
| 4                | Algeria | Vegetables, Other               | 2010           | 58                                                             |
| 4                | Algeria | Vegetal Products                | 2010           | 2,791                                                          |
| 4                | Algeria | Wheat and products              | 2010           | 1,385                                                          |
| 4                | Algeria | Alcoholic Beverages             | 2011           | 6                                                              |
| 4                | Algeria | Animal fats                     | 2011           | 21                                                             |
| 4                | Algeria | Animal Products                 | 2011           | 396                                                            |

Dietary calcium and zinc deficiency risks are decreasing but remain prevalent

| FAO Country code | Country | Food item                       | Reference year | Net energy supply (kcal capita <sup>-1</sup> d <sup>-1</sup> ) |
|------------------|---------|---------------------------------|----------------|----------------------------------------------------------------|
| 4                | Algeria | Apples and products             | 2011           | 18                                                             |
| 4                | Algeria | Bananas                         | 2011           | 10                                                             |
| 4                | Algeria | Barley and products             | 2011           | 96                                                             |
| 4                | Algeria | Beans                           | 2011           | 19                                                             |
| 4                | Algeria | Beer                            | 2011           | 5                                                              |
| 4                | Algeria | Beverages, Alcoholic            | 2011           | 1                                                              |
| 4                | Algeria | Bovine Meat                     | 2011           | 23                                                             |
| 4                | Algeria | Butter, Ghee                    | 2011           | 13                                                             |
| 4                | Algeria | Cereals - Excluding Beer        | 2011           | 1,657                                                          |
| 4                | Algeria | Cocoa Beans and products        | 2011           | 11                                                             |
| 4                | Algeria | Coconut Oil                     | 2011           | 1                                                              |
| 4                | Algeria | Coffee and products             | 2011           | 4                                                              |
| 4                | Algeria | Dates                           | 2011           | 90                                                             |
| 4                | Algeria | Eggs                            | 2011           | 21                                                             |
| 4                | Algeria | Fats, Animals, Raw              | 2011           | 7                                                              |
| 4                | Algeria | Fish, Seafood                   | 2011           | 8                                                              |
| 4                | Algeria | Fruits - Excluding Wine         | 2011           | 193                                                            |
| 4                | Algeria | Fruits, Other                   | 2011           | 37                                                             |
| 4                | Algeria | Grand Total                     | 2011           | 3,220                                                          |
| 4                | Algeria | Grapes and products (excl wine) | 2011           | 15                                                             |
| 4                | Algeria | Groundnut Oil                   | 2011           | 13                                                             |
| 4                | Algeria | Groundnuts (Shelled Eq)         | 2011           | 4                                                              |
| 4                | Algeria | Honey                           | 2011           | 1                                                              |
| 4                | Algeria | Lemons, Limes and products      | 2011           | 1                                                              |
| 4                | Algeria | Maize and products              | 2011           | 119                                                            |
| 4                | Algeria | Marine Fish, Other              | 2011           | 1                                                              |
| 4                | Algeria | Meat                            | 2011           | 89                                                             |
| 4                | Algeria | Meat, Other                     | 2011           | 1                                                              |
| 4                | Algeria | Milk - Excluding Butter         | 2011           | 252                                                            |
| 4                | Algeria | Miscellaneous                   | 2011           | 7                                                              |
| 4                | Algeria | Mutton & Goat Meat              | 2011           | 40                                                             |
| 4                | Algeria | Offals                          | 2011           | 4                                                              |
| 4                | Algeria | Oilcrops                        | 2011           | 12                                                             |
| 4                | Algeria | Oilcrops Oil, Other             | 2011           | 46                                                             |
| 4                | Algeria | Olive Oil                       | 2011           | 35                                                             |
| 4                | Algeria | Olives (including preserved)    | 2011           | 5                                                              |
| 4                | Algeria | Onions                          | 2011           | 31                                                             |
| 4                | Algeria | Oranges, Mandarines             | 2011           | 23                                                             |
| 4                | Algeria | Palm Oil                        | 2011           | 14                                                             |
| 4                | Algeria | Peas                            | 2011           | 3                                                              |
| 4                | Algeria | Pelagic Fish                    | 2011           | 7                                                              |
| 4                | Algeria | Pimento                         | 2011           | 4                                                              |
| 4                | Algeria | Potatoes and products           | 2011           | 125                                                            |
| 4                | Algeria | Poultry Meat                    | 2011           | 25                                                             |
| 4                | Algeria | Pulses                          | 2011           | 74                                                             |
| 4                | Algeria | Pulses, Other and products      | 2011           | 51                                                             |
| 4                | Algeria | Rape and Mustard Oil            | 2011           | 10                                                             |
| 4                | Algeria | Rice (Milled Equivalent)        | 2011           | 21                                                             |
| 4                | Algeria | Sesame seed                     | 2011           | 2                                                              |
| 4                | Algeria | Soyabean Oil                    | 2011           | 190                                                            |
| 4                | Algeria | Spices                          | 2011           | 7                                                              |
| 4                | Algeria | Spices, Other                   | 2011           | 3                                                              |
| 4                | Algeria | Starchy Roots                   | 2011           | 125                                                            |
| 4                | Algeria | Stimulants                      | 2011           | 15                                                             |
| 4                | Algeria | Sugar & Sweeteners              | 2011           | 252                                                            |
| 4                | Algeria | Sugar (Raw Equivalent)          | 2011           | 246                                                            |
| 4                | Algeria | Sunflowerseed Oil               | 2011           | 51                                                             |
| 4                | Algeria | Sweeteners, Other               | 2011           | 5                                                              |
| 4                | Algeria | Tomatoes and products           | 2011           | 14                                                             |
| 4                | Algeria | Treenuts                        | 2011           | 10                                                             |
| 4                | Algeria | Vegetable Oils                  | 2011           | 359                                                            |
| 4                | Algeria | Vegetables                      | 2011           | 106                                                            |
| 4                | Algeria | Vegetables, Other               | 2011           | 61                                                             |
| 4                | Algeria | Vegetal Products                | 2011           | 2,824                                                          |
| 4                | Algeria | Wheat and products              | 2011           | 1,420                                                          |
| 7                | Angola  | Alcoholic Beverages             | 1992           | 28                                                             |
| 7                | Angola  | Animal fats                     | 1992           | 15                                                             |
| 7                | Angola  | Animal Products                 | 1992           | 154                                                            |
| 7                | Angola  | Bananas                         | 1992           | 37                                                             |
| 7                | Angola  | Beans                           | 1992           | 51                                                             |
| 7                | Angola  | Beer                            | 1992           | 7                                                              |
| 7                | Angola  | Beverages, Alcoholic            | 1992           | 6                                                              |
| 7                | Angola  | Beverages, Fermented            | 1992           | 4                                                              |
| 7                | Angola  | Bovine Meat                     | 1992           | 39                                                             |
| 7                | Angola  | Butter, Ghee                    | 1992           | 1                                                              |
| 7                | Angola  | Cassava and products            | 1992           | 477                                                            |
| 7                | Angola  | Cereals - Excluding Beer        | 1992           | 471                                                            |
| 7                | Angola  | Citrus, Other                   | 1992           | 5                                                              |
| 7                | Angola  | Cottonseed Oil                  | 1992           | 3                                                              |
| 7                | Angola  | Demersal Fish                   | 1992           | 1                                                              |
| 7                | Angola  | Eggs                            | 1992           | 1                                                              |
| 7                | Angola  | Fats, Animals, Raw              | 1992           | 14                                                             |
| 7                | Angola  | Fish, Seafood                   | 1992           | 21                                                             |
| 7                | Angola  | Freshwater Fish                 | 1992           | 1                                                              |
| 7                | Angola  | Fruits - Excluding Wine         | 1992           | 49                                                             |
| 7                | Angola  | Fruits, Other                   | 1992           | 3                                                              |
| 7                | Angola  | Grand Total                     | 1992           | 1,628                                                          |
| 7                | Angola  | Groundnut Oil                   | 1992           | 6                                                              |
| 7                | Angola  | Groundnuts (Shelled Eq)         | 1992           | 12                                                             |
| 7                | Angola  | Honey                           | 1992           | 13                                                             |
| 7                | Angola  | Maize and products              | 1992           | 234                                                            |
| 7                | Angola  | Marine Fish, Other              | 1992           | 8                                                              |
| 7                | Angola  | Meat                            | 1992           | 82                                                             |
| 7                | Angola  | Meat, Other                     | 1992           | 2                                                              |
| 7                | Angola  | Milk - Excluding Butter         | 1992           | 31                                                             |
| 7                | Angola  | Millet and products             | 1992           | 46                                                             |
| 7                | Angola  | Miscellaneous                   | 1992           | 2                                                              |

## Dietary calcium and zinc deficiency risks are decreasing but remain prevalent

| FAO Country code | Country | Food item                | Reference year | Net energy supply (kcal capita <sup>-1</sup> d <sup>-1</sup> ) |
|------------------|---------|--------------------------|----------------|----------------------------------------------------------------|
| 7                | Angola  | Mutton & Goat Meat       | 1992           | 2                                                              |
| 7                | Angola  | Offals                   | 1992           | 3                                                              |
| 7                | Angola  | Oilcrops                 | 1992           | 21                                                             |
| 7                | Angola  | Oilcrops Oil, Other      | 1992           | 5                                                              |
| 7                | Angola  | Olive Oil                | 1992           | 6                                                              |
| 7                | Angola  | Palm Oil                 | 1992           | 84                                                             |
| 7                | Angola  | Palmkernel Oil           | 1992           | 13                                                             |
| 7                | Angola  | Pelagic Fish             | 1992           | 11                                                             |
| 7                | Angola  | Pigmeat                  | 1992           | 30                                                             |
| 7                | Angola  | Pineapples and products  | 1992           | 4                                                              |
| 7                | Angola  | Potatoes and products    | 1992           | 7                                                              |
| 7                | Angola  | Poultry Meat             | 1992           | 9                                                              |
| 7                | Angola  | Pulses                   | 1992           | 51                                                             |
| 7                | Angola  | Rape and Mustard Oil     | 1992           | 8                                                              |
| 7                | Angola  | Rice (Milled Equivalent) | 1992           | 84                                                             |
| 7                | Angola  | Sesame seed              | 1992           | 3                                                              |
| 7                | Angola  | Soyabean Oil             | 1992           | 77                                                             |
| 7                | Angola  | Soyabeans                | 1992           | 6                                                              |
| 7                | Angola  | Starchy Roots            | 1992           | 522                                                            |
| 7                | Angola  | Sugar & Sweeteners       | 1992           | 97                                                             |
| 7                | Angola  | Sugar (Raw Equivalent)   | 1992           | 82                                                             |
| 7                | Angola  | Sunflowerseed Oil        | 1992           | 18                                                             |
| 7                | Angola  | Sweet potatoes           | 1992           | 39                                                             |
| 7                | Angola  | Sweeteners, Other        | 1992           | 2                                                              |
| 7                | Angola  | Tomatoes and products    | 1992           | 1                                                              |
| 7                | Angola  | Vegetable Oils           | 1992           | 219                                                            |
| 7                | Angola  | Vegetables               | 1992           | 13                                                             |
| 7                | Angola  | Vegetables, Other        | 1992           | 12                                                             |
| 7                | Angola  | Vegetal Products         | 1992           | 1,474                                                          |
| 7                | Angola  | Wheat and products       | 1992           | 108                                                            |
| 7                | Angola  | Wine                     | 1992           | 10                                                             |
| 7                | Angola  | Alcoholic Beverages      | 1993           | 19                                                             |
| 7                | Angola  | Animal fats              | 1993           | 14                                                             |
| 7                | Angola  | Animal Products          | 1993           | 144                                                            |
| 7                | Angola  | Bananas                  | 1993           | 35                                                             |
| 7                | Angola  | Beans                    | 1993           | 54                                                             |
| 7                | Angola  | Beer                     | 1993           | 7                                                              |
| 7                | Angola  | Beverages, Alcoholic     | 1993           | 3                                                              |
| 7                | Angola  | Beverages, Fermented     | 1993           | 3                                                              |
| 7                | Angola  | Bovine Meat              | 1993           | 37                                                             |
| 7                | Angola  | Butter, Ghee             | 1993           | 1                                                              |
| 7                | Angola  | Cassava and products     | 1993           | 458                                                            |
| 7                | Angola  | Cereals - Excluding Beer | 1993           | 496                                                            |
| 7                | Angola  | Citrus, Other            | 1993           | 5                                                              |
| 7                | Angola  | Cottonseed Oil           | 1993           | 3                                                              |
| 7                | Angola  | Demersal Fish            | 1993           | 1                                                              |
| 7                | Angola  | Eggs                     | 1993           | 1                                                              |
| 7                | Angola  | Fats, Animals, Raw       | 1993           | 13                                                             |
| 7                | Angola  | Fish, Seafood            | 1993           | 22                                                             |
| 7                | Angola  | Freshwater Fish          | 1993           | 1                                                              |
| 7                | Angola  | Fruits - Excluding Wine  | 1993           | 46                                                             |
| 7                | Angola  | Fruits, Other            | 1993           | 3                                                              |
| 7                | Angola  | Grand Total              | 1993           | 1,565                                                          |
| 7                | Angola  | Groundnut Oil            | 1993           | 5                                                              |
| 7                | Angola  | Groundnuts (Shelled Eq)  | 1993           | 11                                                             |
| 7                | Angola  | Honey                    | 1993           | 16                                                             |
| 7                | Angola  | Maize and products       | 1993           | 275                                                            |
| 7                | Angola  | Marine Fish, Other       | 1993           | 8                                                              |
| 7                | Angola  | Meat                     | 1993           | 75                                                             |
| 7                | Angola  | Meat, Other              | 1993           | 2                                                              |
| 7                | Angola  | Milk - Excluding Butter  | 1993           | 29                                                             |
| 7                | Angola  | Millet and products      | 1993           | 24                                                             |
| 7                | Angola  | Miscellaneous            | 1993           | 1                                                              |
| 7                | Angola  | Mutton & Goat Meat       | 1993           | 2                                                              |
| 7                | Angola  | Offals                   | 1993           | 3                                                              |
| 7                | Angola  | Oilcrops                 | 1993           | 14                                                             |
| 7                | Angola  | Oilcrops Oil, Other      | 1993           | 1                                                              |
| 7                | Angola  | Olive Oil                | 1993           | 2                                                              |
| 7                | Angola  | Palm Oil                 | 1993           | 83                                                             |
| 7                | Angola  | Palmkernel Oil           | 1993           | 13                                                             |
| 7                | Angola  | Pelagic Fish             | 1993           | 11                                                             |
| 7                | Angola  | Pigmeat                  | 1993           | 28                                                             |
| 7                | Angola  | Pineapples and products  | 1993           | 3                                                              |
| 7                | Angola  | Potatoes and products    | 1993           | 3                                                              |
| 7                | Angola  | Poultry Meat             | 1993           | 6                                                              |
| 7                | Angola  | Pulses                   | 1993           | 54                                                             |
| 7                | Angola  | Rape and Mustard Oil     | 1993           | 5                                                              |
| 7                | Angola  | Rice (Milled Equivalent) | 1993           | 81                                                             |
| 7                | Angola  | Sesame seed              | 1993           | 3                                                              |
| 7                | Angola  | Soyabean Oil             | 1993           | 61                                                             |
| 7                | Angola  | Starchy Roots            | 1993           | 500                                                            |
| 7                | Angola  | Sugar & Sweeteners       | 1993           | 87                                                             |
| 7                | Angola  | Sugar (Raw Equivalent)   | 1993           | 70                                                             |
| 7                | Angola  | Sunflowerseed Oil        | 1993           | 19                                                             |
| 7                | Angola  | Sweet potatoes           | 1993           | 39                                                             |
| 7                | Angola  | Sweeteners, Other        | 1993           | 1                                                              |
| 7                | Angola  | Tomatoes and products    | 1993           | 1                                                              |
| 7                | Angola  | Vegetable Oils           | 1993           | 192                                                            |
| 7                | Angola  | Vegetables               | 1993           | 13                                                             |
| 7                | Angola  | Vegetables, Other        | 1993           | 12                                                             |
| 7                | Angola  | Vegetal Products         | 1993           | 1,422                                                          |
| 7                | Angola  | Wheat and products       | 1993           | 117                                                            |
| 7                | Angola  | Wine                     | 1993           | 6                                                              |
| 7                | Angola  | Alcoholic Beverages      | 1994           | 22                                                             |
| 7                | Angola  | Animal fats              | 1994           | 13                                                             |
| 7                | Angola  | Animal Products          | 1994           | 134                                                            |
| 7                | Angola  | Bananas                  | 1994           | 34                                                             |

Dietary calcium and zinc deficiency risks are decreasing but remain prevalent

| FAO Country code | Country | Food item                | Reference year | Net energy supply (kcal capita <sup>-1</sup> d <sup>-1</sup> ) |
|------------------|---------|--------------------------|----------------|----------------------------------------------------------------|
| 7                | Angola  | Beans                    | 1994           | 91                                                             |
| 7                | Angola  | Beer                     | 1994           | 8                                                              |
| 7                | Angola  | Beverages, Alcoholic     | 1994           | 4                                                              |
| 7                | Angola  | Beverages, Fermented     | 1994           | 4                                                              |
| 7                | Angola  | Bovine Meat              | 1994           | 32                                                             |
| 7                | Angola  | Butter, Ghee             | 1994           | 1                                                              |
| 7                | Angola  | Cassava and products     | 1994           | 569                                                            |
| 7                | Angola  | Cereals - Excluding Beer | 1994           | 477                                                            |
| 7                | Angola  | Citrus, Other            | 1994           | 5                                                              |
| 7                | Angola  | Cottonseed Oil           | 1994           | 3                                                              |
| 7                | Angola  | Demersal Fish            | 1994           | 1                                                              |
| 7                | Angola  | Eggs                     | 1994           | 1                                                              |
| 7                | Angola  | Fats, Animals, Raw       | 1994           | 12                                                             |
| 7                | Angola  | Fish, Seafood            | 1994           | 21                                                             |
| 7                | Angola  | Freshwater Fish          | 1994           | 1                                                              |
| 7                | Angola  | Fruits - Excluding Wine  | 1994           | 46                                                             |
| 7                | Angola  | Fruits, Other            | 1994           | 3                                                              |
| 7                | Angola  | Grand Total              | 1994           | 1,646                                                          |
| 7                | Angola  | Groundnut Oil            | 1994           | 6                                                              |
| 7                | Angola  | Groundnuts (Shelled Eq)  | 1994           | 12                                                             |
| 7                | Angola  | Honey                    | 1994           | 14                                                             |
| 7                | Angola  | Maize and products       | 1994           | 256                                                            |
| 7                | Angola  | Marine Fish, Other       | 1994           | 9                                                              |
| 7                | Angola  | Meat                     | 1994           | 68                                                             |
| 7                | Angola  | Meat, Other              | 1994           | 2                                                              |
| 7                | Angola  | Milk - Excluding Butter  | 1994           | 27                                                             |
| 7                | Angola  | Millet and products      | 1994           | 35                                                             |
| 7                | Angola  | Miscellaneous            | 1994           | 1                                                              |
| 7                | Angola  | Mutton & Goat Meat       | 1994           | 2                                                              |
| 7                | Angola  | Offals                   | 1994           | 3                                                              |
| 7                | Angola  | Oilcrops                 | 1994           | 14                                                             |
| 7                | Angola  | Oilcrops Oil, Other      | 1994           | 1                                                              |
| 7                | Angola  | Olive Oil                | 1994           | 1                                                              |
| 7                | Angola  | Palm Oil                 | 1994           | 78                                                             |
| 7                | Angola  | Palmkernel Oil           | 1994           | 12                                                             |
| 7                | Angola  | Pelagic Fish             | 1994           | 9                                                              |
| 7                | Angola  | Pigmeat                  | 1994           | 28                                                             |
| 7                | Angola  | Pineapples and products  | 1994           | 4                                                              |
| 7                | Angola  | Potatoes and products    | 1994           | 5                                                              |
| 7                | Angola  | Poultry Meat             | 1994           | 4                                                              |
| 7                | Angola  | Pulses                   | 1994           | 91                                                             |
| 7                | Angola  | Rape and Mustard Oil     | 1994           | 11                                                             |
| 7                | Angola  | Rice (Milled Equivalent) | 1994           | 53                                                             |
| 7                | Angola  | Sesame seed              | 1994           | 2                                                              |
| 7                | Angola  | Soyabean Oil             | 1994           | 42                                                             |
| 7                | Angola  | Starchy Roots            | 1994           | 610                                                            |
| 7                | Angola  | Stimulants               | 1994           | 1                                                              |
| 7                | Angola  | Sugar & Sweeteners       | 1994           | 69                                                             |
| 7                | Angola  | Sugar (Raw Equivalent)   | 1994           | 52                                                             |
| 7                | Angola  | Sunflowerseed Oil        | 1994           | 15                                                             |
| 7                | Angola  | Sweet potatoes           | 1994           | 36                                                             |
| 7                | Angola  | Sweeteners, Other        | 1994           | 2                                                              |
| 7                | Angola  | Tomatoes and products    | 1994           | 1                                                              |
| 7                | Angola  | Vegetable Oils           | 1994           | 169                                                            |
| 7                | Angola  | Vegetables               | 1994           | 12                                                             |
| 7                | Angola  | Vegetables, Other        | 1994           | 11                                                             |
| 7                | Angola  | Vegetal Products         | 1994           | 1,512                                                          |
| 7                | Angola  | Wheat and products       | 1994           | 133                                                            |
| 7                | Angola  | Wine                     | 1994           | 6                                                              |
| 7                | Angola  | Alcoholic Beverages      | 1995           | 21                                                             |
| 7                | Angola  | Animal fats              | 1995           | 15                                                             |
| 7                | Angola  | Animal Products          | 1995           | 134                                                            |
| 7                | Angola  | Bananas                  | 1995           | 35                                                             |
| 7                | Angola  | Beans                    | 1995           | 85                                                             |
| 7                | Angola  | Beer                     | 1995           | 8                                                              |
| 7                | Angola  | Beverages, Alcoholic     | 1995           | 5                                                              |
| 7                | Angola  | Beverages, Fermented     | 1995           | 4                                                              |
| 7                | Angola  | Bovine Meat              | 1995           | 28                                                             |
| 7                | Angola  | Butter, Ghee             | 1995           | 2                                                              |
| 7                | Angola  | Cassava and products     | 1995           | 593                                                            |
| 7                | Angola  | Cereals - Excluding Beer | 1995           | 480                                                            |
| 7                | Angola  | Citrus, Other            | 1995           | 5                                                              |
| 7                | Angola  | Cottonseed Oil           | 1995           | 2                                                              |
| 7                | Angola  | Demersal Fish            | 1995           | 1                                                              |
| 7                | Angola  | Eggs                     | 1995           | 1                                                              |
| 7                | Angola  | Fats, Animals, Raw       | 1995           | 14                                                             |
| 7                | Angola  | Fish, Seafood            | 1995           | 21                                                             |
| 7                | Angola  | Freshwater Fish          | 1995           | 1                                                              |
| 7                | Angola  | Fruits - Excluding Wine  | 1995           | 46                                                             |
| 7                | Angola  | Fruits, Other            | 1995           | 3                                                              |
| 7                | Angola  | Grand Total              | 1995           | 1,688                                                          |
| 7                | Angola  | Groundnut Oil            | 1995           | 4                                                              |
| 7                | Angola  | Groundnuts (Shelled Eq)  | 1995           | 9                                                              |
| 7                | Angola  | Honey                    | 1995           | 15                                                             |
| 7                | Angola  | Maize and products       | 1995           | 250                                                            |
| 7                | Angola  | Marine Fish, Other       | 1995           | 7                                                              |
| 7                | Angola  | Meat                     | 1995           | 66                                                             |
| 7                | Angola  | Meat, Other              | 1995           | 2                                                              |
| 7                | Angola  | Milk - Excluding Butter  | 1995           | 28                                                             |
| 7                | Angola  | Millet and products      | 1995           | 33                                                             |
| 7                | Angola  | Miscellaneous            | 1995           | 1                                                              |
| 7                | Angola  | Mutton & Goat Meat       | 1995           | 2                                                              |
| 7                | Angola  | Offals                   | 1995           | 3                                                              |
| 7                | Angola  | Oilcrops                 | 1995           | 11                                                             |
| 7                | Angola  | Oilcrops Oil, Other      | 1995           | 3                                                              |
| 7                | Angola  | Olive Oil                | 1995           | 1                                                              |
| 7                | Angola  | Palm Oil                 | 1995           | 80                                                             |

Dietary calcium and zinc deficiency risks are decreasing but remain prevalent

| FAO Country code | Country | Food item                | Reference year | Net energy supply (kcal capita <sup>-1</sup> d <sup>-1</sup> ) |
|------------------|---------|--------------------------|----------------|----------------------------------------------------------------|
| 7                | Angola  | Palmkernel Oil           | 1995           | 12                                                             |
| 7                | Angola  | Pelagic Fish             | 1995           | 12                                                             |
| 7                | Angola  | Pigmeat                  | 1995           | 29                                                             |
| 7                | Angola  | Pineapples and products  | 1995           | 3                                                              |
| 7                | Angola  | Potatoes and products    | 1995           | 4                                                              |
| 7                | Angola  | Poultry Meat             | 1995           | 5                                                              |
| 7                | Angola  | Pulses                   | 1995           | 85                                                             |
| 7                | Angola  | Rape and Mustard Oil     | 1995           | 10                                                             |
| 7                | Angola  | Rice (Milled Equivalent) | 1995           | 35                                                             |
| 7                | Angola  | Sesame seed              | 1995           | 2                                                              |
| 7                | Angola  | Soyabean Oil             | 1995           | 50                                                             |
| 7                | Angola  | Starchy Roots            | 1995           | 633                                                            |
| 7                | Angola  | Sugar & Sweeteners       | 1995           | 80                                                             |
| 7                | Angola  | Sugar (Raw Equivalent)   | 1995           | 63                                                             |
| 7                | Angola  | Sunflowerseed Oil        | 1995           | 22                                                             |
| 7                | Angola  | Sweet potatoes           | 1995           | 36                                                             |
| 7                | Angola  | Sweeteners, Other        | 1995           | 1                                                              |
| 7                | Angola  | Tomatoes and products    | 1995           | 1                                                              |
| 7                | Angola  | Vegetable Oils           | 1995           | 186                                                            |
| 7                | Angola  | Vegetables               | 1995           | 12                                                             |
| 7                | Angola  | Vegetables, Other        | 1995           | 11                                                             |
| 7                | Angola  | Vegetal Products         | 1995           | 1,555                                                          |
| 7                | Angola  | Wheat and products       | 1995           | 161                                                            |
| 7                | Angola  | Wine                     | 1995           | 5                                                              |
| 7                | Angola  | Alcoholic Beverages      | 1996           | 23                                                             |
| 7                | Angola  | Animal fats              | 1996           | 7                                                              |
| 7                | Angola  | Animal Products          | 1996           | 135                                                            |
| 7                | Angola  | Bananas                  | 1996           | 34                                                             |
| 7                | Angola  | Beans                    | 1996           | 79                                                             |
| 7                | Angola  | Beer                     | 1996           | 10                                                             |
| 7                | Angola  | Beverages, Alcoholic     | 1996           | 5                                                              |
| 7                | Angola  | Beverages, Fermented     | 1996           | 4                                                              |
| 7                | Angola  | Bovine Meat              | 1996           | 33                                                             |
| 7                | Angola  | Butter, Ghee             | 1996           | 1                                                              |
| 7                | Angola  | Cassava and products     | 1996           | 544                                                            |
| 7                | Angola  | Cereals - Excluding Beer | 1996           | 546                                                            |
| 7                | Angola  | Citrus, Other            | 1996           | 5                                                              |
| 7                | Angola  | Cottonseed Oil           | 1996           | 2                                                              |
| 7                | Angola  | Demersal Fish            | 1996           | 1                                                              |
| 7                | Angola  | Eggs                     | 1996           | 2                                                              |
| 7                | Angola  | Fats, Animals, Raw       | 1996           | 6                                                              |
| 7                | Angola  | Fish, Seafood            | 1996           | 21                                                             |
| 7                | Angola  | Freshwater Fish          | 1996           | 1                                                              |
| 7                | Angola  | Fruits - Excluding Wine  | 1996           | 46                                                             |
| 7                | Angola  | Fruits, Other            | 1996           | 3                                                              |
| 7                | Angola  | Grand Total              | 1996           | 1,733                                                          |
| 7                | Angola  | Groundnut Oil            | 1996           | 5                                                              |
| 7                | Angola  | Groundnuts (Shelled Eq)  | 1996           | 10                                                             |
| 7                | Angola  | Honey                    | 1996           | 16                                                             |
| 7                | Angola  | Maize and products       | 1996           | 303                                                            |
| 7                | Angola  | Marine Fish, Other       | 1996           | 11                                                             |
| 7                | Angola  | Meat                     | 1996           | 74                                                             |
| 7                | Angola  | Meat, Other              | 1996           | 2                                                              |
| 7                | Angola  | Milk - Excluding Butter  | 1996           | 28                                                             |
| 7                | Angola  | Millet and products      | 1996           | 37                                                             |
| 7                | Angola  | Miscellaneous            | 1996           | 1                                                              |
| 7                | Angola  | Mutton & Goat Meat       | 1996           | 3                                                              |
| 7                | Angola  | Offals                   | 1996           | 3                                                              |
| 7                | Angola  | Oilcrops                 | 1996           | 12                                                             |
| 7                | Angola  | Oilcrops Oil, Other      | 1996           | 11                                                             |
| 7                | Angola  | Olive Oil                | 1996           | 1                                                              |
| 7                | Angola  | Palm Oil                 | 1996           | 89                                                             |
| 7                | Angola  | Palmkernel Oil           | 1996           | 13                                                             |
| 7                | Angola  | Pelagic Fish             | 1996           | 7                                                              |
| 7                | Angola  | Pigmeat                  | 1996           | 32                                                             |
| 7                | Angola  | Pineapples and products  | 1996           | 3                                                              |
| 7                | Angola  | Potatoes and products    | 1996           | 4                                                              |
| 7                | Angola  | Poultry Meat             | 1996           | 4                                                              |
| 7                | Angola  | Pulses                   | 1996           | 79                                                             |
| 7                | Angola  | Rape and Mustard Oil     | 1996           | 12                                                             |
| 7                | Angola  | Rice (Milled Equivalent) | 1996           | 33                                                             |
| 7                | Angola  | Sesame seed              | 1996           | 2                                                              |
| 7                | Angola  | Soyabean Oil             | 1996           | 50                                                             |
| 7                | Angola  | Starchy Roots            | 1996           | 584                                                            |
| 7                | Angola  | Sugar & Sweeteners       | 1996           | 89                                                             |
| 7                | Angola  | Sugar (Raw Equivalent)   | 1996           | 72                                                             |
| 7                | Angola  | Sunflowerseed Oil        | 1996           | 22                                                             |
| 7                | Angola  | Sweet potatoes           | 1996           | 36                                                             |
| 7                | Angola  | Sweeteners, Other        | 1996           | 1                                                              |
| 7                | Angola  | Tomatoes and products    | 1996           | 2                                                              |
| 7                | Angola  | Vegetable Oils           | 1996           | 205                                                            |
| 7                | Angola  | Vegetables               | 1996           | 13                                                             |
| 7                | Angola  | Vegetables, Other        | 1996           | 11                                                             |
| 7                | Angola  | Vegetal Products         | 1996           | 1,598                                                          |
| 7                | Angola  | Wheat and products       | 1996           | 173                                                            |
| 7                | Angola  | Wine                     | 1996           | 4                                                              |
| 7                | Angola  | Alcoholic Beverages      | 1997           | 28                                                             |
| 7                | Angola  | Animal fats              | 1997           | 7                                                              |
| 7                | Angola  | Animal Products          | 1997           | 143                                                            |
| 7                | Angola  | Apples and products      | 1997           | 1                                                              |
| 7                | Angola  | Bananas                  | 1997           | 33                                                             |
| 7                | Angola  | Beans                    | 1997           | 91                                                             |
| 7                | Angola  | Beer                     | 1997           | 12                                                             |
| 7                | Angola  | Beverages, Alcoholic     | 1997           | 5                                                              |
| 7                | Angola  | Beverages, Fermented     | 1997           | 5                                                              |
| 7                | Angola  | Bovine Meat              | 1997           | 35                                                             |
| 7                | Angola  | Butter, Ghee             | 1997           | 1                                                              |

Dietary calcium and zinc deficiency risks are decreasing but remain prevalent

| FAO Country code | Country | Food item                | Reference year | Net energy supply (kcal capita <sup>-1</sup> d <sup>-1</sup> ) |
|------------------|---------|--------------------------|----------------|----------------------------------------------------------------|
| 7                | Angola  | Cassava and products     | 1997           | 490                                                            |
| 7                | Angola  | Cereals - Excluding Beer | 1997           | 579                                                            |
| 7                | Angola  | Citrus, Other            | 1997           | 5                                                              |
| 7                | Angola  | Cottonseed Oil           | 1997           | 2                                                              |
| 7                | Angola  | Demersal Fish            | 1997           | 1                                                              |
| 7                | Angola  | Eggs                     | 1997           | 4                                                              |
| 7                | Angola  | Fats, Animals, Raw       | 1997           | 6                                                              |
| 7                | Angola  | Fish, Seafood            | 1997           | 18                                                             |
| 7                | Angola  | Freshwater Fish          | 1997           | 1                                                              |
| 7                | Angola  | Fruits - Excluding Wine  | 1997           | 44                                                             |
| 7                | Angola  | Fruits, Other            | 1997           | 3                                                              |
| 7                | Angola  | Grand Total              | 1997           | 1,734                                                          |
| 7                | Angola  | Groundnut Oil            | 1997           | 4                                                              |
| 7                | Angola  | Groundnuts (Shelled Eq)  | 1997           | 9                                                              |
| 7                | Angola  | Honey                    | 1997           | 17                                                             |
| 7                | Angola  | Maize and products       | 1997           | 323                                                            |
| 7                | Angola  | Marine Fish, Other       | 1997           | 10                                                             |
| 7                | Angola  | Meat                     | 1997           | 80                                                             |
| 7                | Angola  | Meat, Other              | 1997           | 2                                                              |
| 7                | Angola  | Milk - Excluding Butter  | 1997           | 30                                                             |
| 7                | Angola  | Millet and products      | 1997           | 48                                                             |
| 7                | Angola  | Miscellaneous            | 1997           | 1                                                              |
| 7                | Angola  | Mutton & Goat Meat       | 1997           | 3                                                              |
| 7                | Angola  | Offals                   | 1997           | 3                                                              |
| 7                | Angola  | Oilcrops                 | 1997           | 11                                                             |
| 7                | Angola  | Oilcrops Oil, Other      | 1997           | 11                                                             |
| 7                | Angola  | Olive Oil                | 1997           | 1                                                              |
| 7                | Angola  | Palm Oil                 | 1997           | 87                                                             |
| 7                | Angola  | Palmkernel Oil           | 1997           | 13                                                             |
| 7                | Angola  | Pelagic Fish             | 1997           | 6                                                              |
| 7                | Angola  | Pigmeat                  | 1997           | 32                                                             |
| 7                | Angola  | Pineapples and products  | 1997           | 3                                                              |
| 7                | Angola  | Potatoes and products    | 1997           | 4                                                              |
| 7                | Angola  | Poultry Meat             | 1997           | 9                                                              |
| 7                | Angola  | Pulses                   | 1997           | 91                                                             |
| 7                | Angola  | Rape and Mustard Oil     | 1997           | 2                                                              |
| 7                | Angola  | Rice (Milled Equivalent) | 1997           | 32                                                             |
| 7                | Angola  | Sesame seed              | 1997           | 2                                                              |
| 7                | Angola  | Soyabean Oil             | 1997           | 50                                                             |
| 7                | Angola  | Starchy Roots            | 1997           | 530                                                            |
| 7                | Angola  | Stimulants               | 1997           | 1                                                              |
| 7                | Angola  | Sugar & Sweeteners       | 1997           | 106                                                            |
| 7                | Angola  | Sugar (Raw Equivalent)   | 1997           | 86                                                             |
| 7                | Angola  | Sunflowerseed Oil        | 1997           | 17                                                             |
| 7                | Angola  | Sweet potatoes           | 1997           | 35                                                             |
| 7                | Angola  | Sweeteners, Other        | 1997           | 3                                                              |
| 7                | Angola  | Tomatoes and products    | 1997           | 1                                                              |
| 7                | Angola  | Vegetable Oils           | 1997           | 187                                                            |
| 7                | Angola  | Vegetables               | 1997           | 12                                                             |
| 7                | Angola  | Vegetables, Other        | 1997           | 11                                                             |
| 7                | Angola  | Vegetal Products         | 1997           | 1,591                                                          |
| 7                | Angola  | Wheat and products       | 1997           | 176                                                            |
| 7                | Angola  | Wine                     | 1997           | 7                                                              |
| 7                | Angola  | Alcoholic Beverages      | 1998           | 27                                                             |
| 7                | Angola  | Animal fats              | 1998           | 8                                                              |
| 7                | Angola  | Animal Products          | 1998           | 145                                                            |
| 7                | Angola  | Bananas                  | 1998           | 33                                                             |
| 7                | Angola  | Beans                    | 1998           | 65                                                             |
| 7                | Angola  | Beer                     | 1998           | 10                                                             |
| 7                | Angola  | Beverages, Alcoholic     | 1998           | 5                                                              |
| 7                | Angola  | Beverages, Fermented     | 1998           | 5                                                              |
| 7                | Angola  | Bovine Meat              | 1998           | 37                                                             |
| 7                | Angola  | Butter, Ghee             | 1998           | 1                                                              |
| 7                | Angola  | Cassava and products     | 1998           | 547                                                            |
| 7                | Angola  | Cereals - Excluding Beer | 1998           | 573                                                            |
| 7                | Angola  | Citrus, Other            | 1998           | 5                                                              |
| 7                | Angola  | Cottonseed Oil           | 1998           | 2                                                              |
| 7                | Angola  | Demersal Fish            | 1998           | 2                                                              |
| 7                | Angola  | Eggs                     | 1998           | 3                                                              |
| 7                | Angola  | Fats, Animals, Raw       | 1998           | 7                                                              |
| 7                | Angola  | Fish, Seafood            | 1998           | 15                                                             |
| 7                | Angola  | Freshwater Fish          | 1998           | 1                                                              |
| 7                | Angola  | Fruits - Excluding Wine  | 1998           | 44                                                             |
| 7                | Angola  | Fruits, Other            | 1998           | 3                                                              |
| 7                | Angola  | Grand Total              | 1998           | 1,754                                                          |
| 7                | Angola  | Groundnut Oil            | 1998           | 4                                                              |
| 7                | Angola  | Groundnuts (Shelled Eq)  | 1998           | 9                                                              |
| 7                | Angola  | Honey                    | 1998           | 14                                                             |
| 7                | Angola  | Maize and products       | 1998           | 320                                                            |
| 7                | Angola  | Marine Fish, Other       | 1998           | 6                                                              |
| 7                | Angola  | Meat                     | 1998           | 85                                                             |
| 7                | Angola  | Meat, Other              | 1998           | 2                                                              |
| 7                | Angola  | Milk - Excluding Butter  | 1998           | 30                                                             |
| 7                | Angola  | Millet and products      | 1998           | 45                                                             |
| 7                | Angola  | Miscellaneous            | 1998           | 1                                                              |
| 7                | Angola  | Mutton & Goat Meat       | 1998           | 3                                                              |
| 7                | Angola  | Offals                   | 1998           | 4                                                              |
| 7                | Angola  | Oilcrops                 | 1998           | 11                                                             |
| 7                | Angola  | Oilcrops Oil, Other      | 1998           | 9                                                              |
| 7                | Angola  | Olive Oil                | 1998           | 1                                                              |
| 7                | Angola  | Palm Oil                 | 1998           | 85                                                             |
| 7                | Angola  | Palmkernel Oil           | 1998           | 13                                                             |
| 7                | Angola  | Pelagic Fish             | 1998           | 6                                                              |
| 7                | Angola  | Pigmeat                  | 1998           | 33                                                             |
| 7                | Angola  | Pineapples and products  | 1998           | 3                                                              |
| 7                | Angola  | Potatoes and products    | 1998           | 5                                                              |
| 7                | Angola  | Poultry Meat             | 1998           | 11                                                             |

Dietary calcium and zinc deficiency risks are decreasing but remain prevalent

| FAO Country code | Country | Food item                | Reference year | Net energy supply (kcal <i>capita</i> <sup>-1</sup> d <sup>-1</sup> ) |
|------------------|---------|--------------------------|----------------|-----------------------------------------------------------------------|
| 7                | Angola  | Pulses                   | 1998           | 65                                                                    |
| 7                | Angola  | Rape and Mustard Oil     | 1998           | 16                                                                    |
| 7                | Angola  | Rice (Milled Equivalent) | 1998           | 34                                                                    |
| 7                | Angola  | Sesame seed              | 1998           | 2                                                                     |
| 7                | Angola  | Soyabean Oil             | 1998           | 43                                                                    |
| 7                | Angola  | Starchy Roots            | 1998           | 586                                                                   |
| 7                | Angola  | Stimulants               | 1998           | 1                                                                     |
| 7                | Angola  | Sugar & Sweeteners       | 1998           | 97                                                                    |
| 7                | Angola  | Sugar (Raw Equivalent)   | 1998           | 79                                                                    |
| 7                | Angola  | Sunflowerseed Oil        | 1998           | 19                                                                    |
| 7                | Angola  | Sweet potatoes           | 1998           | 34                                                                    |
| 7                | Angola  | Sweeteners, Other        | 1998           | 4                                                                     |
| 7                | Angola  | Tomatoes and products    | 1998           | 1                                                                     |
| 7                | Angola  | Vegetable Oils           | 1998           | 191                                                                   |
| 7                | Angola  | Vegetables               | 1998           | 12                                                                    |
| 7                | Angola  | Vegetables, Other        | 1998           | 11                                                                    |
| 7                | Angola  | Vegetal Products         | 1998           | 1,609                                                                 |
| 7                | Angola  | Wheat and products       | 1998           | 173                                                                   |
| 7                | Angola  | Wine                     | 1998           | 8                                                                     |
| 7                | Angola  | Alcoholic Beverages      | 1999           | 22                                                                    |
| 7                | Angola  | Animal fats              | 1999           | 7                                                                     |
| 7                | Angola  | Animal Products          | 1999           | 141                                                                   |
| 7                | Angola  | Bananas                  | 1999           | 30                                                                    |
| 7                | Angola  | Beans                    | 1999           | 50                                                                    |
| 7                | Angola  | Beer                     | 1999           | 10                                                                    |
| 7                | Angola  | Beverages, Alcoholic     | 1999           | 5                                                                     |
| 7                | Angola  | Beverages, Fermented     | 1999           | 5                                                                     |
| 7                | Angola  | Bovine Meat              | 1999           | 36                                                                    |
| 7                | Angola  | Butter, Ghee             | 1999           | 1                                                                     |
| 7                | Angola  | Cassava and products     | 1999           | 564                                                                   |
| 7                | Angola  | Cereals - Excluding Beer | 1999           | 631                                                                   |
| 7                | Angola  | Citrus, Other            | 1999           | 4                                                                     |
| 7                | Angola  | Cottonseed Oil           | 1999           | 2                                                                     |
| 7                | Angola  | Demersal Fish            | 1999           | 2                                                                     |
| 7                | Angola  | Eggs                     | 1999           | 2                                                                     |
| 7                | Angola  | Fats, Animals, Raw       | 1999           | 6                                                                     |
| 7                | Angola  | Fish, Seafood            | 1999           | 22                                                                    |
| 7                | Angola  | Freshwater Fish          | 1999           | 1                                                                     |
| 7                | Angola  | Fruits - Excluding Wine  | 1999           | 39                                                                    |
| 7                | Angola  | Fruits, Other            | 1999           | 2                                                                     |
| 7                | Angola  | Grand Total              | 1999           | 1,808                                                                 |
| 7                | Angola  | Groundnut Oil            | 1999           | 2                                                                     |
| 7                | Angola  | Groundnuts (Shelled Eq)  | 1999           | 5                                                                     |
| 7                | Angola  | Honey                    | 1999           | 15                                                                    |
| 7                | Angola  | Maize and products       | 1999           | 367                                                                   |
| 7                | Angola  | Marine Fish, Other       | 1999           | 4                                                                     |
| 7                | Angola  | Meat                     | 1999           | 80                                                                    |
| 7                | Angola  | Meat, Other              | 1999           | 2                                                                     |
| 7                | Angola  | Milk - Excluding Butter  | 1999           | 25                                                                    |
| 7                | Angola  | Millet and products      | 1999           | 51                                                                    |
| 7                | Angola  | Miscellaneous            | 1999           | 1                                                                     |
| 7                | Angola  | Mutton & Goat Meat       | 1999           | 3                                                                     |
| 7                | Angola  | Offals                   | 1999           | 4                                                                     |
| 7                | Angola  | Oilcrops                 | 1999           | 7                                                                     |
| 7                | Angola  | Oilcrops Oil, Other      | 1999           | 13                                                                    |
| 7                | Angola  | Olive Oil                | 1999           | 1                                                                     |
| 7                | Angola  | Palm Oil                 | 1999           | 82                                                                    |
| 7                | Angola  | Palmkernel Oil           | 1999           | 12                                                                    |
| 7                | Angola  | Pelagic Fish             | 1999           | 15                                                                    |
| 7                | Angola  | Pigmeat                  | 1999           | 29                                                                    |
| 7                | Angola  | Pineapples and products  | 1999           | 3                                                                     |
| 7                | Angola  | Potatoes and products    | 1999           | 3                                                                     |
| 7                | Angola  | Poultry Meat             | 1999           | 9                                                                     |
| 7                | Angola  | Pulses                   | 1999           | 50                                                                    |
| 7                | Angola  | Rape and Mustard Oil     | 1999           | 9                                                                     |
| 7                | Angola  | Rice (Milled Equivalent) | 1999           | 37                                                                    |
| 7                | Angola  | Sesame seed              | 1999           | 2                                                                     |
| 7                | Angola  | Soyabean Oil             | 1999           | 57                                                                    |
| 7                | Angola  | Starchy Roots            | 1999           | 599                                                                   |
| 7                | Angola  | Sugar & Sweeteners       | 1999           | 117                                                                   |
| 7                | Angola  | Sugar (Raw Equivalent)   | 1999           | 98                                                                    |
| 7                | Angola  | Sunflowerseed Oil        | 1999           | 13                                                                    |
| 7                | Angola  | Sweet potatoes           | 1999           | 32                                                                    |
| 7                | Angola  | Sweeteners, Other        | 1999           | 4                                                                     |
| 7                | Angola  | Tomatoes and products    | 1999           | 1                                                                     |
| 7                | Angola  | Vegetable Oils           | 1999           | 190                                                                   |
| 7                | Angola  | Vegetables               | 1999           | 11                                                                    |
| 7                | Angola  | Vegetables, Other        | 1999           | 9                                                                     |
| 7                | Angola  | Vegetal Products         | 1999           | 1,667                                                                 |
| 7                | Angola  | Wheat and products       | 1999           | 177                                                                   |
| 7                | Angola  | Wine                     | 1999           | 3                                                                     |
| 7                | Angola  | Alcoholic Beverages      | 2000           | 22                                                                    |
| 7                | Angola  | Animal fats              | 2000           | 7                                                                     |
| 7                | Angola  | Animal Products          | 2000           | 153                                                                   |
| 7                | Angola  | Bananas                  | 2000           | 30                                                                    |
| 7                | Angola  | Beans                    | 2000           | 65                                                                    |
| 7                | Angola  | Beer                     | 2000           | 10                                                                    |
| 7                | Angola  | Beverages, Alcoholic     | 2000           | 4                                                                     |
| 7                | Angola  | Beverages, Fermented     | 2000           | 5                                                                     |
| 7                | Angola  | Bovine Meat              | 2000           | 43                                                                    |
| 7                | Angola  | Butter, Ghee             | 2000           | 1                                                                     |
| 7                | Angola  | Cassava and products     | 2000           | 552                                                                   |
| 7                | Angola  | Cereals - Excluding Beer | 2000           | 618                                                                   |
| 7                | Angola  | Citrus, Other            | 2000           | 4                                                                     |
| 7                | Angola  | Cocoa Beans and products | 2000           | 1                                                                     |
| 7                | Angola  | Cottonseed Oil           | 2000           | 2                                                                     |
| 7                | Angola  | Demersal Fish            | 2000           | 3                                                                     |



Dietary calcium and zinc deficiency risks are decreasing but remain prevalent

| FAO Country code | Country | Food item                | Reference year | Net energy supply (kcal capita <sup>-1</sup> d <sup>-1</sup> ) |
|------------------|---------|--------------------------|----------------|----------------------------------------------------------------|
| 7                | Angola  | Eggs                     | 2000           | 2                                                              |
| 7                | Angola  | Fats, Animals, Raw       | 2000           | 6                                                              |
| 7                | Angola  | Fish, Seafood            | 2000           | 23                                                             |
| 7                | Angola  | Freshwater Fish          | 2000           | 1                                                              |
| 7                | Angola  | Fruits - Excluding Wine  | 2000           | 40                                                             |
| 7                | Angola  | Fruits, Other            | 2000           | 3                                                              |
| 7                | Angola  | Grand Total              | 2000           | 1,794                                                          |
| 7                | Angola  | Groundnut Oil            | 2000           | 2                                                              |
| 7                | Angola  | Groundnuts (Shelled Eq)  | 2000           | 4                                                              |
| 7                | Angola  | Honey                    | 2000           | 13                                                             |
| 7                | Angola  | Maize and products       | 2000           | 336                                                            |
| 7                | Angola  | Marine Fish, Other       | 2000           | 4                                                              |
| 7                | Angola  | Meat                     | 2000           | 92                                                             |
| 7                | Angola  | Meat, Other              | 2000           | 2                                                              |
| 7                | Angola  | Milk - Excluding Butter  | 2000           | 25                                                             |
| 7                | Angola  | Millet and products      | 2000           | 51                                                             |
| 7                | Angola  | Miscellaneous            | 2000           | 1                                                              |
| 7                | Angola  | Mutton & Goat Meat       | 2000           | 3                                                              |
| 7                | Angola  | Offals                   | 2000           | 4                                                              |
| 7                | Angola  | Oilcrops                 | 2000           | 6                                                              |
| 7                | Angola  | Oilcrops Oil, Other      | 2000           | 12                                                             |
| 7                | Angola  | Olive Oil                | 2000           | 1                                                              |
| 7                | Angola  | Palm Oil                 | 2000           | 80                                                             |
| 7                | Angola  | Palmkernel Oil           | 2000           | 12                                                             |
| 7                | Angola  | Pelagic Fish             | 2000           | 15                                                             |
| 7                | Angola  | Pigmeat                  | 2000           | 30                                                             |
| 7                | Angola  | Pineapples and products  | 2000           | 3                                                              |
| 7                | Angola  | Potatoes and products    | 2000           | 1                                                              |
| 7                | Angola  | Poultry Meat             | 2000           | 13                                                             |
| 7                | Angola  | Pulses                   | 2000           | 65                                                             |
| 7                | Angola  | Rape and Mustard Oil     | 2000           | 10                                                             |
| 7                | Angola  | Rice (Milled Equivalent) | 2000           | 48                                                             |
| 7                | Angola  | Sesame seed              | 2000           | 2                                                              |
| 7                | Angola  | Soyabean Oil             | 2000           | 67                                                             |
| 7                | Angola  | Starchy Roots            | 2000           | 590                                                            |
| 7                | Angola  | Stimulants               | 2000           | 1                                                              |
| 7                | Angola  | Sugar & Sweeteners       | 2000           | 91                                                             |
| 7                | Angola  | Sugar (Raw Equivalent)   | 2000           | 76                                                             |
| 7                | Angola  | Sunflowerseed Oil        | 2000           | 9                                                              |
| 7                | Angola  | Sweet potatoes           | 2000           | 38                                                             |
| 7                | Angola  | Sweeteners, Other        | 2000           | 1                                                              |
| 7                | Angola  | Tomatoes and products    | 2000           | 2                                                              |
| 7                | Angola  | Vegetable Oils           | 2000           | 195                                                            |
| 7                | Angola  | Vegetables               | 2000           | 13                                                             |
| 7                | Angola  | Vegetables, Other        | 2000           | 10                                                             |
| 7                | Angola  | Vegetal Products         | 2000           | 1,642                                                          |
| 7                | Angola  | Wheat and products       | 2000           | 183                                                            |
| 7                | Angola  | Wine                     | 2000           | 3                                                              |
| 7                | Angola  | Alcoholic Beverages      | 2001           | 32                                                             |
| 7                | Angola  | Animal fats              | 2001           | 8                                                              |
| 7                | Angola  | Animal Products          | 2001           | 157                                                            |
| 7                | Angola  | Bananas                  | 2001           | 34                                                             |
| 7                | Angola  | Beans                    | 2001           | 62                                                             |
| 7                | Angola  | Beer                     | 2001           | 18                                                             |
| 7                | Angola  | Beverages, Alcoholic     | 2001           | 5                                                              |
| 7                | Angola  | Beverages, Fermented     | 2001           | 5                                                              |
| 7                | Angola  | Bovine Meat              | 2001           | 42                                                             |
| 7                | Angola  | Butter, Ghee             | 2001           | 1                                                              |
| 7                | Angola  | Cassava and products     | 2001           | 549                                                            |
| 7                | Angola  | Cereals - Excluding Beer | 2001           | 604                                                            |
| 7                | Angola  | Citrus, Other            | 2001           | 4                                                              |
| 7                | Angola  | Cocoa Beans and products | 2001           | 1                                                              |
| 7                | Angola  | Demersal Fish            | 2001           | 5                                                              |
| 7                | Angola  | Eggs                     | 2001           | 3                                                              |
| 7                | Angola  | Fats, Animals, Raw       | 2001           | 6                                                              |
| 7                | Angola  | Fish, Seafood            | 2001           | 26                                                             |
| 7                | Angola  | Freshwater Fish          | 2001           | 1                                                              |
| 7                | Angola  | Fruits - Excluding Wine  | 2001           | 44                                                             |
| 7                | Angola  | Fruits, Other            | 2001           | 3                                                              |
| 7                | Angola  | Grand Total              | 2001           | 1,835                                                          |
| 7                | Angola  | Groundnut Oil            | 2001           | 5                                                              |
| 7                | Angola  | Groundnuts (Shelled Eq)  | 2001           | 10                                                             |
| 7                | Angola  | Honey                    | 2001           | 14                                                             |
| 7                | Angola  | Maize and products       | 2001           | 331                                                            |
| 7                | Angola  | Marine Fish, Other       | 2001           | 9                                                              |
| 7                | Angola  | Meat                     | 2001           | 91                                                             |
| 7                | Angola  | Meat, Other              | 2001           | 1                                                              |
| 7                | Angola  | Milk - Excluding Butter  | 2001           | 26                                                             |
| 7                | Angola  | Millet and products      | 2001           | 52                                                             |
| 7                | Angola  | Miscellaneous            | 2001           | 1                                                              |
| 7                | Angola  | Mutton & Goat Meat       | 2001           | 4                                                              |
| 7                | Angola  | Offals                   | 2001           | 4                                                              |
| 7                | Angola  | Oilcrops                 | 2001           | 12                                                             |
| 7                | Angola  | Oilcrops Oil, Other      | 2001           | 16                                                             |
| 7                | Angola  | Olive Oil                | 2001           | 1                                                              |
| 7                | Angola  | Onions                   | 2001           | 1                                                              |
| 7                | Angola  | Palm Oil                 | 2001           | 77                                                             |
| 7                | Angola  | Palmkernel Oil           | 2001           | 11                                                             |
| 7                | Angola  | Pelagic Fish             | 2001           | 11                                                             |
| 7                | Angola  | Pigmeat                  | 2001           | 34                                                             |
| 7                | Angola  | Pineapples and products  | 2001           | 3                                                              |
| 7                | Angola  | Potatoes and products    | 2001           | 11                                                             |
| 7                | Angola  | Poultry Meat             | 2001           | 10                                                             |
| 7                | Angola  | Pulses                   | 2001           | 62                                                             |
| 7                | Angola  | Rape and Mustard Oil     | 2001           | 4                                                              |
| 7                | Angola  | Rice (Milled Equivalent) | 2001           | 52                                                             |
| 7                | Angola  | Sesame seed              | 2001           | 2                                                              |

## Dietary calcium and zinc deficiency risks are decreasing but remain prevalent

| FAO Country code | Country | Food item                | Reference year | Net energy supply (kcal capita <sup>-1</sup> d <sup>-1</sup> ) |
|------------------|---------|--------------------------|----------------|----------------------------------------------------------------|
| 7                | Angola  | Soyabean Oil             | 2001           | 69                                                             |
| 7                | Angola  | Starchy Roots            | 2001           | 618                                                            |
| 7                | Angola  | Stimulants               | 2001           | 1                                                              |
| 7                | Angola  | Sugar & Sweeteners       | 2001           | 97                                                             |
| 7                | Angola  | Sugar (Raw Equivalent)   | 2001           | 78                                                             |
| 7                | Angola  | Sunflowerseed Oil        | 2001           | 10                                                             |
| 7                | Angola  | Sweet potatoes           | 2001           | 58                                                             |
| 7                | Angola  | Sweeteners, Other        | 2001           | 5                                                              |
| 7                | Angola  | Tomatoes and products    | 2001           | 2                                                              |
| 7                | Angola  | Vegetable Oils           | 2001           | 194                                                            |
| 7                | Angola  | Vegetables               | 2001           | 13                                                             |
| 7                | Angola  | Vegetables, Other        | 2001           | 10                                                             |
| 7                | Angola  | Vegetal Products         | 2001           | 1,678                                                          |
| 7                | Angola  | Wheat and products       | 2001           | 168                                                            |
| 7                | Angola  | Wine                     | 2001           | 5                                                              |
| 7                | Angola  | Alcoholic Beverages      | 2002           | 37                                                             |
| 7                | Angola  | Animal fats              | 2002           | 8                                                              |
| 7                | Angola  | Animal Products          | 2002           | 171                                                            |
| 7                | Angola  | Apples and products      | 2002           | 1                                                              |
| 7                | Angola  | Bananas                  | 2002           | 44                                                             |
| 7                | Angola  | Beans                    | 2002           | 70                                                             |
| 7                | Angola  | Beer                     | 2002           | 22                                                             |
| 7                | Angola  | Beverages, Alcoholic     | 2002           | 5                                                              |
| 7                | Angola  | Beverages, Fermented     | 2002           | 5                                                              |
| 7                | Angola  | Bovine Meat              | 2002           | 43                                                             |
| 7                | Angola  | Butter, Ghee             | 2002           | 1                                                              |
| 7                | Angola  | Cassava and products     | 2002           | 549                                                            |
| 7                | Angola  | Cereals - Excluding Beer | 2002           | 621                                                            |
| 7                | Angola  | Citrus, Other            | 2002           | 4                                                              |
| 7                | Angola  | Cocoa Beans and products | 2002           | 1                                                              |
| 7                | Angola  | Demersal Fish            | 2002           | 7                                                              |
| 7                | Angola  | Eggs                     | 2002           | 4                                                              |
| 7                | Angola  | Fats, Animals, Raw       | 2002           | 7                                                              |
| 7                | Angola  | Fish, Seafood            | 2002           | 25                                                             |
| 7                | Angola  | Freshwater Fish          | 2002           | 1                                                              |
| 7                | Angola  | Fruits - Excluding Wine  | 2002           | 55                                                             |
| 7                | Angola  | Fruits, Other            | 2002           | 3                                                              |
| 7                | Angola  | Grand Total              | 2002           | 1,917                                                          |
| 7                | Angola  | Groundnut Oil            | 2002           | 6                                                              |
| 7                | Angola  | Groundnuts (Shelled Eq)  | 2002           | 12                                                             |
| 7                | Angola  | Honey                    | 2002           | 14                                                             |
| 7                | Angola  | Maize and products       | 2002           | 343                                                            |
| 7                | Angola  | Maize Germ Oil           | 2002           | 1                                                              |
| 7                | Angola  | Marine Fish, Other       | 2002           | 9                                                              |
| 7                | Angola  | Meat                     | 2002           | 105                                                            |
| 7                | Angola  | Meat, Other              | 2002           | 1                                                              |
| 7                | Angola  | Milk - Excluding Butter  | 2002           | 26                                                             |
| 7                | Angola  | Millet and products      | 2002           | 51                                                             |
| 7                | Angola  | Miscellaneous            | 2002           | 2                                                              |
| 7                | Angola  | Mutton & Goat Meat       | 2002           | 4                                                              |
| 7                | Angola  | Offals                   | 2002           | 3                                                              |
| 7                | Angola  | Oilcrops                 | 2002           | 14                                                             |
| 7                | Angola  | Oilcrops Oil, Other      | 2002           | 17                                                             |
| 7                | Angola  | Olive Oil                | 2002           | 1                                                              |
| 7                | Angola  | Onions                   | 2002           | 1                                                              |
| 7                | Angola  | Palm Oil                 | 2002           | 65                                                             |
| 7                | Angola  | Palmkernel Oil           | 2002           | 11                                                             |
| 7                | Angola  | Pelagic Fish             | 2002           | 8                                                              |
| 7                | Angola  | Pigmeat                  | 2002           | 37                                                             |
| 7                | Angola  | Pineapples and products  | 2002           | 3                                                              |
| 7                | Angola  | Potatoes and products    | 2002           | 12                                                             |
| 7                | Angola  | Poultry Meat             | 2002           | 19                                                             |
| 7                | Angola  | Pulses                   | 2002           | 70                                                             |
| 7                | Angola  | Rape and Mustard Oil     | 2002           | 4                                                              |
| 7                | Angola  | Rice (Milled Equivalent) | 2002           | 56                                                             |
| 7                | Angola  | Sesame seed              | 2002           | 2                                                              |
| 7                | Angola  | Soyabean Oil             | 2002           | 75                                                             |
| 7                | Angola  | Starchy Roots            | 2002           | 628                                                            |
| 7                | Angola  | Stimulants               | 2002           | 1                                                              |
| 7                | Angola  | Sugar & Sweeteners       | 2002           | 118                                                            |
| 7                | Angola  | Sugar (Raw Equivalent)   | 2002           | 96                                                             |
| 7                | Angola  | Sunflowerseed Oil        | 2002           | 8                                                              |
| 7                | Angola  | Sweet potatoes           | 2002           | 67                                                             |
| 7                | Angola  | Sweeteners, Other        | 2002           | 8                                                              |
| 7                | Angola  | Tomatoes and products    | 2002           | 2                                                              |
| 7                | Angola  | Treenuts                 | 2002           | 1                                                              |
| 7                | Angola  | Vegetable Oils           | 2002           | 188                                                            |
| 7                | Angola  | Vegetables               | 2002           | 14                                                             |
| 7                | Angola  | Vegetables, Other        | 2002           | 11                                                             |
| 7                | Angola  | Vegetal Products         | 2002           | 1,747                                                          |
| 7                | Angola  | Wheat and products       | 2002           | 171                                                            |
| 7                | Angola  | Wine                     | 2002           | 5                                                              |
| 7                | Angola  | Alcoholic Beverages      | 2003           | 38                                                             |
| 7                | Angola  | Animal fats              | 2003           | 8                                                              |
| 7                | Angola  | Animal Products          | 2003           | 170                                                            |
| 7                | Angola  | Bananas                  | 2003           | 56                                                             |
| 7                | Angola  | Beans                    | 2003           | 69                                                             |
| 7                | Angola  | Beer                     | 2003           | 22                                                             |
| 7                | Angola  | Beverages, Alcoholic     | 2003           | 5                                                              |
| 7                | Angola  | Beverages, Fermented     | 2003           | 4                                                              |
| 7                | Angola  | Bovine Meat              | 2003           | 43                                                             |
| 7                | Angola  | Butter, Ghee             | 2003           | 2                                                              |
| 7                | Angola  | Cassava and products     | 2003           | 549                                                            |
| 7                | Angola  | Cereals - Excluding Beer | 2003           | 619                                                            |
| 7                | Angola  | Citrus, Other            | 2003           | 4                                                              |
| 7                | Angola  | Cocoa Beans and products | 2003           | 2                                                              |
| 7                | Angola  | Demersal Fish            | 2003           | 7                                                              |

Dietary calcium and zinc deficiency risks are decreasing but remain prevalent

| FAO Country code | Country | Food item                | Reference year | Net energy supply (kcal capita <sup>-1</sup> d <sup>-1</sup> ) |
|------------------|---------|--------------------------|----------------|----------------------------------------------------------------|
| 7                | Angola  | Eggs                     | 2003           | 2                                                              |
| 7                | Angola  | Fats, Animals, Raw       | 2003           | 6                                                              |
| 7                | Angola  | Fish, Seafood            | 2003           | 21                                                             |
| 7                | Angola  | Freshwater Fish          | 2003           | 1                                                              |
| 7                | Angola  | Fruits - Excluding Wine  | 2003           | 66                                                             |
| 7                | Angola  | Fruits, Other            | 2003           | 3                                                              |
| 7                | Angola  | Grand Total              | 2003           | 1,985                                                          |
| 7                | Angola  | Groundnut Oil            | 2003           | 9                                                              |
| 7                | Angola  | Groundnuts (Shelled Eq)  | 2003           | 17                                                             |
| 7                | Angola  | Honey                    | 2003           | 13                                                             |
| 7                | Angola  | Maize and products       | 2003           | 330                                                            |
| 7                | Angola  | Marine Fish, Other       | 2003           | 2                                                              |
| 7                | Angola  | Meat                     | 2003           | 110                                                            |
| 7                | Angola  | Meat, Other              | 2003           | 1                                                              |
| 7                | Angola  | Milk - Excluding Butter  | 2003           | 25                                                             |
| 7                | Angola  | Millet and products      | 2003           | 42                                                             |
| 7                | Angola  | Miscellaneous            | 2003           | 1                                                              |
| 7                | Angola  | Mutton & Goat Meat       | 2003           | 5                                                              |
| 7                | Angola  | Offals                   | 2003           | 3                                                              |
| 7                | Angola  | Oilcrops                 | 2003           | 20                                                             |
| 7                | Angola  | Oilcrops Oil, Other      | 2003           | 28                                                             |
| 7                | Angola  | Olive Oil                | 2003           | 1                                                              |
| 7                | Angola  | Onions                   | 2003           | 1                                                              |
| 7                | Angola  | Palm Oil                 | 2003           | 71                                                             |
| 7                | Angola  | Palmkernel Oil           | 2003           | 11                                                             |
| 7                | Angola  | Pelagic Fish             | 2003           | 10                                                             |
| 7                | Angola  | Pigmeat                  | 2003           | 38                                                             |
| 7                | Angola  | Pineapples and products  | 2003           | 3                                                              |
| 7                | Angola  | Potatoes and products    | 2003           | 11                                                             |
| 7                | Angola  | Poultry Meat             | 2003           | 23                                                             |
| 7                | Angola  | Pulses                   | 2003           | 69                                                             |
| 7                | Angola  | Rape and Mustard Oil     | 2003           | 3                                                              |
| 7                | Angola  | Rice (Milled Equivalent) | 2003           | 58                                                             |
| 7                | Angola  | Sesame seed              | 2003           | 2                                                              |
| 7                | Angola  | Soyabean Oil             | 2003           | 80                                                             |
| 7                | Angola  | Starchy Roots            | 2003           | 643                                                            |
| 7                | Angola  | Stimulants               | 2003           | 2                                                              |
| 7                | Angola  | Sugar & Sweeteners       | 2003           | 132                                                            |
| 7                | Angola  | Sugar (Raw Equivalent)   | 2003           | 119                                                            |
| 7                | Angola  | Sunflowerseed Oil        | 2003           | 8                                                              |
| 7                | Angola  | Sweet potatoes           | 2003           | 82                                                             |
| 7                | Angola  | Tomatoes and products    | 2003           | 3                                                              |
| 7                | Angola  | Vegetable Oils           | 2003           | 212                                                            |
| 7                | Angola  | Vegetables               | 2003           | 14                                                             |
| 7                | Angola  | Vegetables, Other        | 2003           | 10                                                             |
| 7                | Angola  | Vegetal Products         | 2003           | 1,815                                                          |
| 7                | Angola  | Wheat and products       | 2003           | 189                                                            |
| 7                | Angola  | Wine                     | 2003           | 6                                                              |
| 7                | Angola  | Alcoholic Beverages      | 2004           | 45                                                             |
| 7                | Angola  | Animal fats              | 2004           | 9                                                              |
| 7                | Angola  | Animal Products          | 2004           | 162                                                            |
| 7                | Angola  | Bananas                  | 2004           | 64                                                             |
| 7                | Angola  | Beans                    | 2004           | 56                                                             |
| 7                | Angola  | Beer                     | 2004           | 25                                                             |
| 7                | Angola  | Beverages, Alcoholic     | 2004           | 8                                                              |
| 7                | Angola  | Beverages, Fermented     | 2004           | 6                                                              |
| 7                | Angola  | Bovine Meat              | 2004           | 36                                                             |
| 7                | Angola  | Butter, Ghee             | 2004           | 2                                                              |
| 7                | Angola  | Cassava and products     | 2004           | 550                                                            |
| 7                | Angola  | Cereals - Excluding Beer | 2004           | 669                                                            |
| 7                | Angola  | Citrus, Other            | 2004           | 4                                                              |
| 7                | Angola  | Cocoa Beans and products | 2004           | 3                                                              |
| 7                | Angola  | Coconuts - Incl Copra    | 2004           | 1                                                              |
| 7                | Angola  | Demersal Fish            | 2004           | 7                                                              |
| 7                | Angola  | Eggs                     | 2004           | 3                                                              |
| 7                | Angola  | Fats, Animals, Raw       | 2004           | 7                                                              |
| 7                | Angola  | Fish, Seafood            | 2004           | 21                                                             |
| 7                | Angola  | Freshwater Fish          | 2004           | 1                                                              |
| 7                | Angola  | Fruits - Excluding Wine  | 2004           | 74                                                             |
| 7                | Angola  | Fruits, Other            | 2004           | 3                                                              |
| 7                | Angola  | Grand Total              | 2004           | 2,032                                                          |
| 7                | Angola  | Groundnut Oil            | 2004           | 10                                                             |
| 7                | Angola  | Groundnuts (Shelled Eq)  | 2004           | 17                                                             |
| 7                | Angola  | Honey                    | 2004           | 12                                                             |
| 7                | Angola  | Maize and products       | 2004           | 331                                                            |
| 7                | Angola  | Marine Fish, Other       | 2004           | 4                                                              |
| 7                | Angola  | Meat                     | 2004           | 101                                                            |
| 7                | Angola  | Meat, Other              | 2004           | 1                                                              |
| 7                | Angola  | Milk - Excluding Butter  | 2004           | 25                                                             |
| 7                | Angola  | Millet and products      | 2004           | 56                                                             |
| 7                | Angola  | Miscellaneous            | 2004           | 2                                                              |
| 7                | Angola  | Mutton & Goat Meat       | 2004           | 5                                                              |
| 7                | Angola  | Offals                   | 2004           | 3                                                              |
| 7                | Angola  | Oilcrops                 | 2004           | 19                                                             |
| 7                | Angola  | Oilcrops Oil, Other      | 2004           | 30                                                             |
| 7                | Angola  | Olive Oil                | 2004           | 1                                                              |
| 7                | Angola  | Onions                   | 2004           | 1                                                              |
| 7                | Angola  | Palm Oil                 | 2004           | 76                                                             |
| 7                | Angola  | Palmkernel Oil           | 2004           | 11                                                             |
| 7                | Angola  | Pelagic Fish             | 2004           | 8                                                              |
| 7                | Angola  | Pigmeat                  | 2004           | 40                                                             |
| 7                | Angola  | Pineapples and products  | 2004           | 3                                                              |
| 7                | Angola  | Potatoes and products    | 2004           | 5                                                              |
| 7                | Angola  | Poultry Meat             | 2004           | 20                                                             |
| 7                | Angola  | Pulses                   | 2004           | 56                                                             |
| 7                | Angola  | Rice (Milled Equivalent) | 2004           | 73                                                             |
| 7                | Angola  | Sesame seed              | 2004           | 2                                                              |

Dietary calcium and zinc deficiency risks are decreasing but remain prevalent

| FAO Country code | Country | Food item                | Reference year | Net energy supply (kcal <i>capita</i> <sup>-1</sup> d <sup>-1</sup> ) |
|------------------|---------|--------------------------|----------------|-----------------------------------------------------------------------|
| 7                | Angola  | Soyabean Oil             | 2004           | 75                                                                    |
| 7                | Angola  | Starchy Roots            | 2004           | 647                                                                   |
| 7                | Angola  | Stimulants               | 2004           | 3                                                                     |
| 7                | Angola  | Sugar & Sweeteners       | 2004           | 128                                                                   |
| 7                | Angola  | Sugar (Raw Equivalent)   | 2004           | 116                                                                   |
| 7                | Angola  | Sunflowerseed Oil        | 2004           | 10                                                                    |
| 7                | Angola  | Sweet potatoes           | 2004           | 92                                                                    |
| 7                | Angola  | Tomatoes and products    | 2004           | 5                                                                     |
| 7                | Angola  | Vegetable Oils           | 2004           | 212                                                                   |
| 7                | Angola  | Vegetables               | 2004           | 15                                                                    |
| 7                | Angola  | Vegetables, Other        | 2004           | 10                                                                    |
| 7                | Angola  | Vegetal Products         | 2004           | 1,870                                                                 |
| 7                | Angola  | Wheat and products       | 2004           | 209                                                                   |
| 7                | Angola  | Wine                     | 2004           | 7                                                                     |
| 7                | Angola  | Alcoholic Beverages      | 2005           | 51                                                                    |
| 7                | Angola  | Animal fats              | 2005           | 11                                                                    |
| 7                | Angola  | Animal Products          | 2005           | 174                                                                   |
| 7                | Angola  | Bananas                  | 2005           | 74                                                                    |
| 7                | Angola  | Beans                    | 2005           | 65                                                                    |
| 7                | Angola  | Beer                     | 2005           | 27                                                                    |
| 7                | Angola  | Beverages, Alcoholic     | 2005           | 9                                                                     |
| 7                | Angola  | Beverages, Fermented     | 2005           | 6                                                                     |
| 7                | Angola  | Bovine Meat              | 2005           | 40                                                                    |
| 7                | Angola  | Butter, Ghee             | 2005           | 2                                                                     |
| 7                | Angola  | Cassava and products     | 2005           | 551                                                                   |
| 7                | Angola  | Cereals - Excluding Beer | 2005           | 668                                                                   |
| 7                | Angola  | Citrus, Other            | 2005           | 4                                                                     |
| 7                | Angola  | Cocoa Beans and products | 2005           | 2                                                                     |
| 7                | Angola  | Cottonseed Oil           | 2005           | 1                                                                     |
| 7                | Angola  | Demersal Fish            | 2005           | 6                                                                     |
| 7                | Angola  | Eggs                     | 2005           | 4                                                                     |
| 7                | Angola  | Fats, Animals, Raw       | 2005           | 9                                                                     |
| 7                | Angola  | Fish, Seafood            | 2005           | 19                                                                    |
| 7                | Angola  | Freshwater Fish          | 2005           | 1                                                                     |
| 7                | Angola  | Fruits - Excluding Wine  | 2005           | 84                                                                    |
| 7                | Angola  | Fruits, Other            | 2005           | 3                                                                     |
| 7                | Angola  | Grand Total              | 2005           | 2,079                                                                 |
| 7                | Angola  | Groundnut Oil            | 2005           | 11                                                                    |
| 7                | Angola  | Groundnuts (Shelled Eq)  | 2005           | 22                                                                    |
| 7                | Angola  | Honey                    | 2005           | 12                                                                    |
| 7                | Angola  | Maize and products       | 2005           | 322                                                                   |
| 7                | Angola  | Marine Fish, Other       | 2005           | 2                                                                     |
| 7                | Angola  | Meat                     | 2005           | 112                                                                   |
| 7                | Angola  | Meat, Other              | 2005           | 1                                                                     |
| 7                | Angola  | Milk - Excluding Butter  | 2005           | 26                                                                    |
| 7                | Angola  | Millet and products      | 2005           | 57                                                                    |
| 7                | Angola  | Miscellaneous            | 2005           | 2                                                                     |
| 7                | Angola  | Mutton & Goat Meat       | 2005           | 5                                                                     |
| 7                | Angola  | Offals                   | 2005           | 3                                                                     |
| 7                | Angola  | Oilcrops                 | 2005           | 24                                                                    |
| 7                | Angola  | Oilcrops Oil, Other      | 2005           | 29                                                                    |
| 7                | Angola  | Olive Oil                | 2005           | 1                                                                     |
| 7                | Angola  | Onions                   | 2005           | 1                                                                     |
| 7                | Angola  | Palm Oil                 | 2005           | 81                                                                    |
| 7                | Angola  | Palmkernel Oil           | 2005           | 11                                                                    |
| 7                | Angola  | Pelagic Fish             | 2005           | 9                                                                     |
| 7                | Angola  | Pigmeat                  | 2005           | 43                                                                    |
| 7                | Angola  | Pineapples and products  | 2005           | 3                                                                     |
| 7                | Angola  | Potatoes and products    | 2005           | 6                                                                     |
| 7                | Angola  | Poultry Meat             | 2005           | 22                                                                    |
| 7                | Angola  | Pulses                   | 2005           | 65                                                                    |
| 7                | Angola  | Rice (Milled Equivalent) | 2005           | 69                                                                    |
| 7                | Angola  | Sesame seed              | 2005           | 2                                                                     |
| 7                | Angola  | Soyabean Oil             | 2005           | 77                                                                    |
| 7                | Angola  | Starchy Roots            | 2005           | 650                                                                   |
| 7                | Angola  | Stimulants               | 2005           | 3                                                                     |
| 7                | Angola  | Sugar & Sweeteners       | 2005           | 124                                                                   |
| 7                | Angola  | Sugar (Raw Equivalent)   | 2005           | 112                                                                   |
| 7                | Angola  | Sunflowerseed Oil        | 2005           | 8                                                                     |
| 7                | Angola  | Sweet potatoes           | 2005           | 94                                                                    |
| 7                | Angola  | Tomatoes and products    | 2005           | 4                                                                     |
| 7                | Angola  | Vegetable Oils           | 2005           | 218                                                                   |
| 7                | Angola  | Vegetables               | 2005           | 14                                                                    |
| 7                | Angola  | Vegetables, Other        | 2005           | 9                                                                     |
| 7                | Angola  | Vegetal Products         | 2005           | 1,904                                                                 |
| 7                | Angola  | Wheat and products       | 2005           | 220                                                                   |
| 7                | Angola  | Wine                     | 2005           | 8                                                                     |
| 7                | Angola  | Alcoholic Beverages      | 2006           | 63                                                                    |
| 7                | Angola  | Animal fats              | 2006           | 11                                                                    |
| 7                | Angola  | Animal Products          | 2006           | 181                                                                   |
| 7                | Angola  | Apples and products      | 2006           | 1                                                                     |
| 7                | Angola  | Bananas                  | 2006           | 77                                                                    |
| 7                | Angola  | Beans                    | 2006           | 60                                                                    |
| 7                | Angola  | Beer                     | 2006           | 36                                                                    |
| 7                | Angola  | Beverages, Alcoholic     | 2006           | 11                                                                    |
| 7                | Angola  | Beverages, Fermented     | 2006           | 7                                                                     |
| 7                | Angola  | Bovine Meat              | 2006           | 37                                                                    |
| 7                | Angola  | Butter, Ghee             | 2006           | 1                                                                     |
| 7                | Angola  | Cassava and products     | 2006           | 547                                                                   |
| 7                | Angola  | Cereals - Excluding Beer | 2006           | 681                                                                   |
| 7                | Angola  | Citrus, Other            | 2006           | 4                                                                     |
| 7                | Angola  | Cocoa Beans and products | 2006           | 3                                                                     |
| 7                | Angola  | Demersal Fish            | 2006           | 7                                                                     |
| 7                | Angola  | Eggs                     | 2006           | 4                                                                     |
| 7                | Angola  | Fats, Animals, Raw       | 2006           | 9                                                                     |
| 7                | Angola  | Fish, Seafood            | 2006           | 22                                                                    |
| 7                | Angola  | Freshwater Fish          | 2006           | 1                                                                     |

Dietary calcium and zinc deficiency risks are decreasing but remain prevalent

| FAO Country code | Country | Food item                | Reference year | Net energy supply (kcal capita <sup>-1</sup> d <sup>-1</sup> ) |
|------------------|---------|--------------------------|----------------|----------------------------------------------------------------|
| 7                | Angola  | Fruits - Excluding Wine  | 2006           | 89                                                             |
| 7                | Angola  | Fruits, Other            | 2006           | 3                                                              |
| 7                | Angola  | Grand Total              | 2006           | 2,121                                                          |
| 7                | Angola  | Groundnut Oil            | 2006           | 10                                                             |
| 7                | Angola  | Groundnuts (Shelled Eq)  | 2006           | 18                                                             |
| 7                | Angola  | Honey                    | 2006           | 11                                                             |
| 7                | Angola  | Maize and products       | 2006           | 322                                                            |
| 7                | Angola  | Marine Fish, Other       | 2006           | 2                                                              |
| 7                | Angola  | Meat                     | 2006           | 120                                                            |
| 7                | Angola  | Meat, Other              | 2006           | 1                                                              |
| 7                | Angola  | Milk - Excluding Butter  | 2006           | 20                                                             |
| 7                | Angola  | Millet and products      | 2006           | 56                                                             |
| 7                | Angola  | Miscellaneous            | 2006           | 2                                                              |
| 7                | Angola  | Mutton & Goat Meat       | 2006           | 5                                                              |
| 7                | Angola  | Offals                   | 2006           | 3                                                              |
| 7                | Angola  | Oilcrops                 | 2006           | 21                                                             |
| 7                | Angola  | Oilcrops Oil, Other      | 2006           | 29                                                             |
| 7                | Angola  | Olive Oil                | 2006           | 1                                                              |
| 7                | Angola  | Onions                   | 2006           | 1                                                              |
| 7                | Angola  | Palm Oil                 | 2006           | 82                                                             |
| 7                | Angola  | Palmkernel Oil           | 2006           | 11                                                             |
| 7                | Angola  | Pelagic Fish             | 2006           | 11                                                             |
| 7                | Angola  | Pigmeat                  | 2006           | 50                                                             |
| 7                | Angola  | Pineapples and products  | 2006           | 5                                                              |
| 7                | Angola  | Potatoes and products    | 2006           | 20                                                             |
| 7                | Angola  | Poultry Meat             | 2006           | 27                                                             |
| 7                | Angola  | Pulses                   | 2006           | 60                                                             |
| 7                | Angola  | Rice (Milled Equivalent) | 2006           | 68                                                             |
| 7                | Angola  | Sesame seed              | 2006           | 2                                                              |
| 7                | Angola  | Soyabean Oil             | 2006           | 76                                                             |
| 7                | Angola  | Soyabeans                | 2006           | 2                                                              |
| 7                | Angola  | Starchy Roots            | 2006           | 661                                                            |
| 7                | Angola  | Stimulants               | 2006           | 3                                                              |
| 7                | Angola  | Sugar & Sweeteners       | 2006           | 126                                                            |
| 7                | Angola  | Sugar (Raw Equivalent)   | 2006           | 115                                                            |
| 7                | Angola  | Sunflowerseed Oil        | 2006           | 7                                                              |
| 7                | Angola  | Sweet potatoes           | 2006           | 94                                                             |
| 7                | Angola  | Tomatoes and products    | 2006           | 4                                                              |
| 7                | Angola  | Vegetable Oils           | 2006           | 216                                                            |
| 7                | Angola  | Vegetables               | 2006           | 16                                                             |
| 7                | Angola  | Vegetables, Other        | 2006           | 11                                                             |
| 7                | Angola  | Vegetal Products         | 2006           | 1,940                                                          |
| 7                | Angola  | Wheat and products       | 2006           | 234                                                            |
| 7                | Angola  | Wine                     | 2006           | 9                                                              |
| 7                | Angola  | Alcoholic Beverages      | 2007           | 65                                                             |
| 7                | Angola  | Animal fats              | 2007           | 11                                                             |
| 7                | Angola  | Animal Products          | 2007           | 195                                                            |
| 7                | Angola  | Apples and products      | 2007           | 1                                                              |
| 7                | Angola  | Bananas                  | 2007           | 83                                                             |
| 7                | Angola  | Beans                    | 2007           | 63                                                             |
| 7                | Angola  | Beer                     | 2007           | 36                                                             |
| 7                | Angola  | Beverages, Alcoholic     | 2007           | 12                                                             |
| 7                | Angola  | Beverages, Fermented     | 2007           | 8                                                              |
| 7                | Angola  | Bovine Meat              | 2007           | 39                                                             |
| 7                | Angola  | Butter, Ghee             | 2007           | 1                                                              |
| 7                | Angola  | Cassava and products     | 2007           | 551                                                            |
| 7                | Angola  | Cereals - Excluding Beer | 2007           | 653                                                            |
| 7                | Angola  | Citrus, Other            | 2007           | 4                                                              |
| 7                | Angola  | Cocoa Beans and products | 2007           | 3                                                              |
| 7                | Angola  | Coffee and products      | 2007           | 1                                                              |
| 7                | Angola  | Cottonseed Oil           | 2007           | 1                                                              |
| 7                | Angola  | Demersal Fish            | 2007           | 9                                                              |
| 7                | Angola  | Eggs                     | 2007           | 4                                                              |
| 7                | Angola  | Fats, Animals, Raw       | 2007           | 10                                                             |
| 7                | Angola  | Fish, Seafood            | 2007           | 25                                                             |
| 7                | Angola  | Freshwater Fish          | 2007           | 3                                                              |
| 7                | Angola  | Fruits - Excluding Wine  | 2007           | 96                                                             |
| 7                | Angola  | Fruits, Other            | 2007           | 3                                                              |
| 7                | Angola  | Grand Total              | 2007           | 2,171                                                          |
| 7                | Angola  | Groundnut Oil            | 2007           | 11                                                             |
| 7                | Angola  | Groundnuts (Shelled Eq)  | 2007           | 20                                                             |
| 7                | Angola  | Honey                    | 2007           | 12                                                             |
| 7                | Angola  | Maize and products       | 2007           | 319                                                            |
| 7                | Angola  | Marine Fish, Other       | 2007           | 2                                                              |
| 7                | Angola  | Meat                     | 2007           | 131                                                            |
| 7                | Angola  | Meat, Other              | 2007           | 1                                                              |
| 7                | Angola  | Milk - Excluding Butter  | 2007           | 21                                                             |
| 7                | Angola  | Millet and products      | 2007           | 25                                                             |
| 7                | Angola  | Miscellaneous            | 2007           | 2                                                              |
| 7                | Angola  | Mutton & Goat Meat       | 2007           | 5                                                              |
| 7                | Angola  | Offals                   | 2007           | 3                                                              |
| 7                | Angola  | Oilcrops                 | 2007           | 23                                                             |
| 7                | Angola  | Oilcrops Oil, Other      | 2007           | 30                                                             |
| 7                | Angola  | Olive Oil                | 2007           | 2                                                              |
| 7                | Angola  | Onions                   | 2007           | 1                                                              |
| 7                | Angola  | Palm Oil                 | 2007           | 82                                                             |
| 7                | Angola  | Palmkernel Oil           | 2007           | 11                                                             |
| 7                | Angola  | Pelagic Fish             | 2007           | 12                                                             |
| 7                | Angola  | Pigmeat                  | 2007           | 58                                                             |
| 7                | Angola  | Pineapples and products  | 2007           | 5                                                              |
| 7                | Angola  | Potatoes and products    | 2007           | 34                                                             |
| 7                | Angola  | Poultry Meat             | 2007           | 28                                                             |
| 7                | Angola  | Pulses                   | 2007           | 63                                                             |
| 7                | Angola  | Rice (Milled Equivalent) | 2007           | 69                                                             |
| 7                | Angola  | Sesame seed              | 2007           | 2                                                              |
| 7                | Angola  | Soyabean Oil             | 2007           | 77                                                             |
| 7                | Angola  | Soyabeans                | 2007           | 1                                                              |

## Dietary calcium and zinc deficiency risks are decreasing but remain prevalent

| FAO Country code | Country | Food item                | Reference year | Net energy supply (kcal capita <sup>-1</sup> d <sup>-1</sup> ) |
|------------------|---------|--------------------------|----------------|----------------------------------------------------------------|
| 7                | Angola  | Starchy Roots            | 2007           | 710                                                            |
| 7                | Angola  | Stimulants               | 2007           | 4                                                              |
| 7                | Angola  | Sugar & Sweeteners       | 2007           | 129                                                            |
| 7                | Angola  | Sugar (Raw Equivalent)   | 2007           | 116                                                            |
| 7                | Angola  | Sunflowerseed Oil        | 2007           | 6                                                              |
| 7                | Angola  | Sweet potatoes           | 2007           | 125                                                            |
| 7                | Angola  | Tomatoes and products    | 2007           | 3                                                              |
| 7                | Angola  | Treenuts                 | 2007           | 1                                                              |
| 7                | Angola  | Vegetable Oils           | 2007           | 219                                                            |
| 7                | Angola  | Vegetables               | 2007           | 14                                                             |
| 7                | Angola  | Vegetables, Other        | 2007           | 11                                                             |
| 7                | Angola  | Vegetal Products         | 2007           | 1,976                                                          |
| 7                | Angola  | Wheat and products       | 2007           | 240                                                            |
| 7                | Angola  | Wine                     | 2007           | 9                                                              |
| 7                | Angola  | Alcoholic Beverages      | 2008           | 82                                                             |
| 7                | Angola  | Animal fats              | 2008           | 11                                                             |
| 7                | Angola  | Animal Products          | 2008           | 211                                                            |
| 7                | Angola  | Apples and products      | 2008           | 1                                                              |
| 7                | Angola  | Bananas                  | 2008           | 84                                                             |
| 7                | Angola  | Beans                    | 2008           | 74                                                             |
| 7                | Angola  | Beer                     | 2008           | 45                                                             |
| 7                | Angola  | Beverages, Alcoholic     | 2008           | 14                                                             |
| 7                | Angola  | Beverages, Fermented     | 2008           | 12                                                             |
| 7                | Angola  | Bovine Meat              | 2008           | 39                                                             |
| 7                | Angola  | Butter, Ghee             | 2008           | 1                                                              |
| 7                | Angola  | Cassava and products     | 2008           | 546                                                            |
| 7                | Angola  | Cereals - Excluding Beer | 2008           | 677                                                            |
| 7                | Angola  | Citrus, Other            | 2008           | 4                                                              |
| 7                | Angola  | Cocoa Beans and products | 2008           | 4                                                              |
| 7                | Angola  | Coconuts - Incl Copra    | 2008           | 1                                                              |
| 7                | Angola  | Cottonseed Oil           | 2008           | 1                                                              |
| 7                | Angola  | Demersal Fish            | 2008           | 9                                                              |
| 7                | Angola  | Eggs                     | 2008           | 6                                                              |
| 7                | Angola  | Fats, Animals, Raw       | 2008           | 9                                                              |
| 7                | Angola  | Fish, Seafood            | 2008           | 27                                                             |
| 7                | Angola  | Freshwater Fish          | 2008           | 3                                                              |
| 7                | Angola  | Fruits - Excluding Wine  | 2008           | 98                                                             |
| 7                | Angola  | Fruits, Other            | 2008           | 3                                                              |
| 7                | Angola  | Grand Total              | 2008           | 2,238                                                          |
| 7                | Angola  | Groundnut Oil            | 2008           | 13                                                             |
| 7                | Angola  | Groundnuts (Shelled Eq)  | 2008           | 27                                                             |
| 7                | Angola  | Honey                    | 2008           | 12                                                             |
| 7                | Angola  | Maize and products       | 2008           | 337                                                            |
| 7                | Angola  | Marine Fish, Other       | 2008           | 3                                                              |
| 7                | Angola  | Meat                     | 2008           | 145                                                            |
| 7                | Angola  | Meat, Other              | 2008           | 1                                                              |
| 7                | Angola  | Milk - Excluding Butter  | 2008           | 20                                                             |
| 7                | Angola  | Millet and products      | 2008           | 21                                                             |
| 7                | Angola  | Miscellaneous            | 2008           | 4                                                              |
| 7                | Angola  | Mutton & Goat Meat       | 2008           | 7                                                              |
| 7                | Angola  | Offals                   | 2008           | 3                                                              |
| 7                | Angola  | Oilcrops                 | 2008           | 30                                                             |
| 7                | Angola  | Oilcrops Oil, Other      | 2008           | 19                                                             |
| 7                | Angola  | Olive Oil                | 2008           | 2                                                              |
| 7                | Angola  | Palm Oil                 | 2008           | 79                                                             |
| 7                | Angola  | Palmkernel Oil           | 2008           | 8                                                              |
| 7                | Angola  | Pelagic Fish             | 2008           | 13                                                             |
| 7                | Angola  | Pigmeat                  | 2008           | 65                                                             |
| 7                | Angola  | Pineapples and products  | 2008           | 6                                                              |
| 7                | Angola  | Potatoes and products    | 2008           | 29                                                             |
| 7                | Angola  | Poultry Meat             | 2008           | 34                                                             |
| 7                | Angola  | Pulses                   | 2008           | 74                                                             |
| 7                | Angola  | Rice (Milled Equivalent) | 2008           | 71                                                             |
| 7                | Angola  | Sesame seed              | 2008           | 2                                                              |
| 7                | Angola  | Soyabean Oil             | 2008           | 79                                                             |
| 7                | Angola  | Starchy Roots            | 2008           | 680                                                            |
| 7                | Angola  | Stimulants               | 2008           | 4                                                              |
| 7                | Angola  | Sugar & Sweeteners       | 2008           | 142                                                            |
| 7                | Angola  | Sugar (Raw Equivalent)   | 2008           | 130                                                            |
| 7                | Angola  | Sunflowerseed Oil        | 2008           | 7                                                              |
| 7                | Angola  | Sweet potatoes           | 2008           | 105                                                            |
| 7                | Angola  | Tomatoes and products    | 2008           | 3                                                              |
| 7                | Angola  | Treenuts                 | 2008           | 1                                                              |
| 7                | Angola  | Vegetable Oils           | 2008           | 209                                                            |
| 7                | Angola  | Vegetables               | 2008           | 27                                                             |
| 7                | Angola  | Vegetables, Other        | 2008           | 24                                                             |
| 7                | Angola  | Vegetal Products         | 2008           | 2,026                                                          |
| 7                | Angola  | Wheat and products       | 2008           | 247                                                            |
| 7                | Angola  | Wine                     | 2008           | 12                                                             |
| 7                | Angola  | Alcoholic Beverages      | 2009           | 85                                                             |
| 7                | Angola  | Animal fats              | 2009           | 11                                                             |
| 7                | Angola  | Animal Products          | 2009           | 201                                                            |
| 7                | Angola  | Bananas                  | 2009           | 84                                                             |
| 7                | Angola  | Beans                    | 2009           | 79                                                             |
| 7                | Angola  | Beer                     | 2009           | 51                                                             |
| 7                | Angola  | Beverages, Alcoholic     | 2009           | 12                                                             |
| 7                | Angola  | Beverages, Fermented     | 2009           | 14                                                             |
| 7                | Angola  | Bovine Meat              | 2009           | 34                                                             |
| 7                | Angola  | Butter, Ghee             | 2009           | 1                                                              |
| 7                | Angola  | Cassava and products     | 2009           | 546                                                            |
| 7                | Angola  | Cereals - Excluding Beer | 2009           | 669                                                            |
| 7                | Angola  | Citrus, Other            | 2009           | 9                                                              |
| 7                | Angola  | Cocoa Beans and products | 2009           | 4                                                              |
| 7                | Angola  | Coconuts - Incl Copra    | 2009           | 1                                                              |
| 7                | Angola  | Coffee and products      | 2009           | 1                                                              |
| 7                | Angola  | Cottonseed Oil           | 2009           | 1                                                              |
| 7                | Angola  | Demersal Fish            | 2009           | 8                                                              |

Dietary calcium and zinc deficiency risks are decreasing but remain prevalent

| FAO Country code | Country | Food item                | Reference year | Net energy supply (kcal capita <sup>-1</sup> d <sup>-1</sup> ) |
|------------------|---------|--------------------------|----------------|----------------------------------------------------------------|
| 7                | Angola  | Eggs                     | 2009           | 5                                                              |
| 7                | Angola  | Fats, Animals, Raw       | 2009           | 9                                                              |
| 7                | Angola  | Fish, Seafood            | 2009           | 26                                                             |
| 7                | Angola  | Freshwater Fish          | 2009           | 2                                                              |
| 7                | Angola  | Fruits - Excluding Wine  | 2009           | 114                                                            |
| 7                | Angola  | Fruits, Other            | 2009           | 3                                                              |
| 7                | Angola  | Grand Total              | 2009           | 2,299                                                          |
| 7                | Angola  | Groundnut Oil            | 2009           | 16                                                             |
| 7                | Angola  | Groundnuts (Shelled Eq)  | 2009           | 32                                                             |
| 7                | Angola  | Honey                    | 2009           | 12                                                             |
| 7                | Angola  | Maize and products       | 2009           | 335                                                            |
| 7                | Angola  | Marine Fish, Other       | 2009           | 2                                                              |
| 7                | Angola  | Meat                     | 2009           | 141                                                            |
| 7                | Angola  | Meat, Other              | 2009           | 1                                                              |
| 7                | Angola  | Milk - Excluding Butter  | 2009           | 17                                                             |
| 7                | Angola  | Millet and products      | 2009           | 16                                                             |
| 7                | Angola  | Miscellaneous            | 2009           | 4                                                              |
| 7                | Angola  | Mutton & Goat Meat       | 2009           | 6                                                              |
| 7                | Angola  | Offals                   | 2009           | 3                                                              |
| 7                | Angola  | Oilcrops                 | 2009           | 35                                                             |
| 7                | Angola  | Oilcrops Oil, Other      | 2009           | 24                                                             |
| 7                | Angola  | Olive Oil                | 2009           | 3                                                              |
| 7                | Angola  | Palm Oil                 | 2009           | 77                                                             |
| 7                | Angola  | Palmkernel Oil           | 2009           | 10                                                             |
| 7                | Angola  | Pelagic Fish             | 2009           | 13                                                             |
| 7                | Angola  | Pigmeat                  | 2009           | 68                                                             |
| 7                | Angola  | Pineapples and products  | 2009           | 17                                                             |
| 7                | Angola  | Potatoes and products    | 2009           | 56                                                             |
| 7                | Angola  | Poultry Meat             | 2009           | 31                                                             |
| 7                | Angola  | Pulses                   | 2009           | 79                                                             |
| 7                | Angola  | Rice (Milled Equivalent) | 2009           | 73                                                             |
| 7                | Angola  | Sesame seed              | 2009           | 2                                                              |
| 7                | Angola  | Soyabean Oil             | 2009           | 80                                                             |
| 7                | Angola  | Starchy Roots            | 2009           | 723                                                            |
| 7                | Angola  | Stimulants               | 2009           | 5                                                              |
| 7                | Angola  | Sugar & Sweeteners       | 2009           | 133                                                            |
| 7                | Angola  | Sugar (Raw Equivalent)   | 2009           | 121                                                            |
| 7                | Angola  | Sunflowerseed Oil        | 2009           | 5                                                              |
| 7                | Angola  | Sweet potatoes           | 2009           | 122                                                            |
| 7                | Angola  | Tomatoes and products    | 2009           | 3                                                              |
| 7                | Angola  | Treenuts                 | 2009           | 1                                                              |
| 7                | Angola  | Vegetable Oils           | 2009           | 215                                                            |
| 7                | Angola  | Vegetables               | 2009           | 36                                                             |
| 7                | Angola  | Vegetables, Other        | 2009           | 33                                                             |
| 7                | Angola  | Vegetal Products         | 2009           | 2,098                                                          |
| 7                | Angola  | Wheat and products       | 2009           | 244                                                            |
| 7                | Angola  | Wine                     | 2009           | 8                                                              |
| 7                | Angola  | Alcoholic Beverages      | 2010           | 102                                                            |
| 7                | Angola  | Animal fats              | 2010           | 10                                                             |
| 7                | Angola  | Animal Products          | 2010           | 211                                                            |
| 7                | Angola  | Apples and products      | 2010           | 1                                                              |
| 7                | Angola  | Bananas                  | 2010           | 86                                                             |
| 7                | Angola  | Beans                    | 2010           | 79                                                             |
| 7                | Angola  | Beer                     | 2010           | 54                                                             |
| 7                | Angola  | Beverages, Alcoholic     | 2010           | 20                                                             |
| 7                | Angola  | Beverages, Fermented     | 2010           | 19                                                             |
| 7                | Angola  | Bovine Meat              | 2010           | 31                                                             |
| 7                | Angola  | Butter, Ghee             | 2010           | 1                                                              |
| 7                | Angola  | Cassava and products     | 2010           | 549                                                            |
| 7                | Angola  | Cereals - Excluding Beer | 2010           | 684                                                            |
| 7                | Angola  | Citrus, Other            | 2010           | 9                                                              |
| 7                | Angola  | Cocoa Beans and products | 2010           | 4                                                              |
| 7                | Angola  | Coffee and products      | 2010           | 3                                                              |
| 7                | Angola  | Cottonseed Oil           | 2010           | 1                                                              |
| 7                | Angola  | Demersal Fish            | 2010           | 8                                                              |
| 7                | Angola  | Eggs                     | 2010           | 6                                                              |
| 7                | Angola  | Fats, Animals, Raw       | 2010           | 9                                                              |
| 7                | Angola  | Fish, Seafood            | 2010           | 23                                                             |
| 7                | Angola  | Freshwater Fish          | 2010           | 2                                                              |
| 7                | Angola  | Fruits - Excluding Wine  | 2010           | 117                                                            |
| 7                | Angola  | Fruits, Other            | 2010           | 2                                                              |
| 7                | Angola  | Grand Total              | 2010           | 2,339                                                          |
| 7                | Angola  | Groundnut Oil            | 2010           | 16                                                             |
| 7                | Angola  | Groundnuts (Shelled Eq)  | 2010           | 32                                                             |
| 7                | Angola  | Honey                    | 2010           | 10                                                             |
| 7                | Angola  | Maize and products       | 2010           | 348                                                            |
| 7                | Angola  | Marine Fish, Other       | 2010           | 2                                                              |
| 7                | Angola  | Meat                     | 2010           | 150                                                            |
| 7                | Angola  | Meat, Other              | 2010           | 1                                                              |
| 7                | Angola  | Milk - Excluding Butter  | 2010           | 18                                                             |
| 7                | Angola  | Millet and products      | 2010           | 17                                                             |
| 7                | Angola  | Miscellaneous            | 2010           | 3                                                              |
| 7                | Angola  | Mutton & Goat Meat       | 2010           | 5                                                              |
| 7                | Angola  | Offals                   | 2010           | 3                                                              |
| 7                | Angola  | Oilcrops                 | 2010           | 35                                                             |
| 7                | Angola  | Oilcrops Oil, Other      | 2010           | 23                                                             |
| 7                | Angola  | Olive Oil                | 2010           | 2                                                              |
| 7                | Angola  | Palm Oil                 | 2010           | 74                                                             |
| 7                | Angola  | Palmkernel Oil           | 2010           | 10                                                             |
| 7                | Angola  | Pelagic Fish             | 2010           | 11                                                             |
| 7                | Angola  | Pigmeat                  | 2010           | 68                                                             |
| 7                | Angola  | Pineapples and products  | 2010           | 18                                                             |
| 7                | Angola  | Potatoes and products    | 2010           | 55                                                             |
| 7                | Angola  | Poultry Meat             | 2010           | 44                                                             |
| 7                | Angola  | Pulses                   | 2010           | 79                                                             |
| 7                | Angola  | Rice (Milled Equivalent) | 2010           | 71                                                             |
| 7                | Angola  | Sesame seed              | 2010           | 2                                                              |

Dietary calcium and zinc deficiency risks are decreasing but remain prevalent

| FAO Country code | Country             | Food item                | Reference year | Net energy supply (kcal capita <sup>-1</sup> d <sup>-1</sup> ) |
|------------------|---------------------|--------------------------|----------------|----------------------------------------------------------------|
| 7                | Angola              | Soyabean Oil             | 2010           | 82                                                             |
| 7                | Angola              | Starchy Roots            | 2010           | 723                                                            |
| 7                | Angola              | Stimulants               | 2010           | 7                                                              |
| 7                | Angola              | Sugar & Sweeteners       | 2010           | 130                                                            |
| 7                | Angola              | Sugar (Raw Equivalent)   | 2010           | 120                                                            |
| 7                | Angola              | Sunflowerseed Oil        | 2010           | 5                                                              |
| 7                | Angola              | Sweet potatoes           | 2010           | 118                                                            |
| 7                | Angola              | Tomatoes and products    | 2010           | 2                                                              |
| 7                | Angola              | Vegetable Oils           | 2010           | 213                                                            |
| 7                | Angola              | Vegetables               | 2010           | 36                                                             |
| 7                | Angola              | Vegetables, Other        | 2010           | 34                                                             |
| 7                | Angola              | Vegetal Products         | 2010           | 2,128                                                          |
| 7                | Angola              | Wheat and products       | 2010           | 248                                                            |
| 7                | Angola              | Wine                     | 2010           | 9                                                              |
| 7                | Angola              | Alcoholic Beverages      | 2011           | 105                                                            |
| 7                | Angola              | Animal fats              | 2011           | 17                                                             |
| 7                | Angola              | Animal Products          | 2011           | 238                                                            |
| 7                | Angola              | Apples and products      | 2011           | 1                                                              |
| 7                | Angola              | Bananas                  | 2011           | 80                                                             |
| 7                | Angola              | Beans                    | 2011           | 81                                                             |
| 7                | Angola              | Beer                     | 2011           | 59                                                             |
| 7                | Angola              | Beverages, Alcoholic     | 2011           | 17                                                             |
| 7                | Angola              | Beverages, Fermented     | 2011           | 20                                                             |
| 7                | Angola              | Bovine Meat              | 2011           | 33                                                             |
| 7                | Angola              | Butter, Ghee             | 2011           | 1                                                              |
| 7                | Angola              | Cassava and products     | 2011           | 550                                                            |
| 7                | Angola              | Cereals - Excluding Beer | 2011           | 706                                                            |
| 7                | Angola              | Citrus, Other            | 2011           | 10                                                             |
| 7                | Angola              | Cocoa Beans and products | 2011           | 3                                                              |
| 7                | Angola              | Coffee and products      | 2011           | 3                                                              |
| 7                | Angola              | Cottonseed Oil           | 2011           | 1                                                              |
| 7                | Angola              | Demersal Fish            | 2011           | 7                                                              |
| 7                | Angola              | Eggs                     | 2011           | 7                                                              |
| 7                | Angola              | Fats, Animals, Raw       | 2011           | 16                                                             |
| 7                | Angola              | Fish, Seafood            | 2011           | 22                                                             |
| 7                | Angola              | Freshwater Fish          | 2011           | 2                                                              |
| 7                | Angola              | Fruits - Excluding Wine  | 2011           | 112                                                            |
| 7                | Angola              | Fruits, Other            | 2011           | 3                                                              |
| 7                | Angola              | Grand Total              | 2011           | 2,400                                                          |
| 7                | Angola              | Groundnut Oil            | 2011           | 19                                                             |
| 7                | Angola              | Groundnuts (Shelled Eq)  | 2011           | 34                                                             |
| 7                | Angola              | Honey                    | 2011           | 10                                                             |
| 7                | Angola              | Maize and products       | 2011           | 344                                                            |
| 7                | Angola              | Marine Fish, Other       | 2011           | 2                                                              |
| 7                | Angola              | Meat                     | 2011           | 171                                                            |
| 7                | Angola              | Meat, Other              | 2011           | 1                                                              |
| 7                | Angola              | Milk - Excluding Butter  | 2011           | 18                                                             |
| 7                | Angola              | Millet and products      | 2011           | 20                                                             |
| 7                | Angola              | Miscellaneous            | 2011           | 4                                                              |
| 7                | Angola              | Mutton & Goat Meat       | 2011           | 5                                                              |
| 7                | Angola              | Offals                   | 2011           | 3                                                              |
| 7                | Angola              | Oilcrops                 | 2011           | 37                                                             |
| 7                | Angola              | Oilcrops Oil, Other      | 2011           | 18                                                             |
| 7                | Angola              | Olive Oil                | 2011           | 4                                                              |
| 7                | Angola              | Palm Oil                 | 2011           | 72                                                             |
| 7                | Angola              | Palmkernel Oil           | 2011           | 8                                                              |
| 7                | Angola              | Pelagic Fish             | 2011           | 11                                                             |
| 7                | Angola              | Pigmeat                  | 2011           | 80                                                             |
| 7                | Angola              | Pineapples and products  | 2011           | 18                                                             |
| 7                | Angola              | Potatoes and products    | 2011           | 54                                                             |
| 7                | Angola              | Poultry Meat             | 2011           | 51                                                             |
| 7                | Angola              | Pulses                   | 2011           | 81                                                             |
| 7                | Angola              | Rice (Milled Equivalent) | 2011           | 73                                                             |
| 7                | Angola              | Sesame seed              | 2011           | 2                                                              |
| 7                | Angola              | Soyabean Oil             | 2011           | 87                                                             |
| 7                | Angola              | Starchy Roots            | 2011           | 725                                                            |
| 7                | Angola              | Stimulants               | 2011           | 7                                                              |
| 7                | Angola              | Sugar & Sweeteners       | 2011           | 131                                                            |
| 7                | Angola              | Sugar (Raw Equivalent)   | 2011           | 121                                                            |
| 7                | Angola              | Sunflowerseed Oil        | 2011           | 5                                                              |
| 7                | Angola              | Sweet potatoes           | 2011           | 121                                                            |
| 7                | Angola              | Tomatoes and products    | 2011           | 3                                                              |
| 7                | Angola              | Vegetable Oils           | 2011           | 214                                                            |
| 7                | Angola              | Vegetables               | 2011           | 39                                                             |
| 7                | Angola              | Vegetables, Other        | 2011           | 36                                                             |
| 7                | Angola              | Vegetal Products         | 2011           | 2,162                                                          |
| 7                | Angola              | Wheat and products       | 2011           | 270                                                            |
| 7                | Angola              | Wine                     | 2011           | 9                                                              |
| 8                | Antigua and Barbuda | Alcoholic Beverages      | 1992           | 58                                                             |
| 8                | Antigua and Barbuda | Animal fats              | 1992           | 133                                                            |
| 8                | Antigua and Barbuda | Animal Products          | 1992           | 869                                                            |
| 8                | Antigua and Barbuda | Bananas                  | 1992           | 3                                                              |
| 8                | Antigua and Barbuda | Beer                     | 1992           | 27                                                             |
| 8                | Antigua and Barbuda | Beverages, Alcoholic     | 1992           | 19                                                             |
| 8                | Antigua and Barbuda | Bovine Meat              | 1992           | 73                                                             |
| 8                | Antigua and Barbuda | Butter, Ghee             | 1992           | 31                                                             |
| 8                | Antigua and Barbuda | Cassava and products     | 1992           | 3                                                              |
| 8                | Antigua and Barbuda | Cereals - Excluding Beer | 1992           | 664                                                            |
| 8                | Antigua and Barbuda | Cereals, Other           | 1992           | 32                                                             |
| 8                | Antigua and Barbuda | Cocoa Beans and products | 1992           | 8                                                              |
| 8                | Antigua and Barbuda | Cottonseed Oil           | 1992           | 3                                                              |
| 8                | Antigua and Barbuda | Crustaceans              | 1992           | 6                                                              |
| 8                | Antigua and Barbuda | Demersal Fish            | 1992           | 17                                                             |
| 8                | Antigua and Barbuda | Eggs                     | 1992           | 12                                                             |
| 8                | Antigua and Barbuda | Fats, Animals, Raw       | 1992           | 102                                                            |
| 8                | Antigua and Barbuda | Fish, Seafood            | 1992           | 88                                                             |
| 8                | Antigua and Barbuda | Fruits - Excluding Wine  | 1992           | 184                                                            |



Dietary calcium and zinc deficiency risks are decreasing but remain prevalent

| FAO Country code | Country             | Food item                  | Reference year | Net energy supply (kcal <i>capita</i> <sup>-1</sup> d <sup>-1</sup> ) |
|------------------|---------------------|----------------------------|----------------|-----------------------------------------------------------------------|
| 8                | Antigua and Barbuda | Fruits, Other              | 1992           | 169                                                                   |
| 8                | Antigua and Barbuda | Grand Total                | 1992           | 2,545                                                                 |
| 8                | Antigua and Barbuda | Lemons, Limes and products | 1992           | 2                                                                     |
| 8                | Antigua and Barbuda | Maize and products         | 1992           | 24                                                                    |
| 8                | Antigua and Barbuda | Maize Germ Oil             | 1992           | 4                                                                     |
| 8                | Antigua and Barbuda | Marine Fish, Other         | 1992           | 63                                                                    |
| 8                | Antigua and Barbuda | Meat                       | 1992           | 345                                                                   |
| 8                | Antigua and Barbuda | Milk - Excluding Butter    | 1992           | 279                                                                   |
| 8                | Antigua and Barbuda | Miscellaneous              | 1992           | 43                                                                    |
| 8                | Antigua and Barbuda | Molluscs, Other            | 1992           | 1                                                                     |
| 8                | Antigua and Barbuda | Mutton & Goat Meat         | 1992           | 9                                                                     |
| 8                | Antigua and Barbuda | Oats                       | 1992           | 25                                                                    |
| 8                | Antigua and Barbuda | Offals                     | 1992           | 12                                                                    |
| 8                | Antigua and Barbuda | Oilcrops Oil, Other        | 1992           | 183                                                                   |
| 8                | Antigua and Barbuda | Onions                     | 1992           | 5                                                                     |
| 8                | Antigua and Barbuda | Oranges, Mandarines        | 1992           | 8                                                                     |
| 8                | Antigua and Barbuda | Pelagic Fish               | 1992           | 1                                                                     |
| 8                | Antigua and Barbuda | Pigmeat                    | 1992           | 34                                                                    |
| 8                | Antigua and Barbuda | Pineapples and products    | 1992           | 2                                                                     |
| 8                | Antigua and Barbuda | Potatoes and products      | 1992           | 9                                                                     |
| 8                | Antigua and Barbuda | Poultry Meat               | 1992           | 229                                                                   |
| 8                | Antigua and Barbuda | Pulses                     | 1992           | 39                                                                    |
| 8                | Antigua and Barbuda | Pulses, Other and products | 1992           | 39                                                                    |
| 8                | Antigua and Barbuda | Rice (Milled Equivalent)   | 1992           | 93                                                                    |
| 8                | Antigua and Barbuda | Roots, Other               | 1992           | 1                                                                     |
| 8                | Antigua and Barbuda | Soyabean Oil               | 1992           | 85                                                                    |
| 8                | Antigua and Barbuda | Spices                     | 1992           | 11                                                                    |
| 8                | Antigua and Barbuda | Spices, Other              | 1992           | 11                                                                    |
| 8                | Antigua and Barbuda | Starchy Roots              | 1992           | 23                                                                    |
| 8                | Antigua and Barbuda | Stimulants                 | 1992           | 8                                                                     |
| 8                | Antigua and Barbuda | Sugar & Sweeteners         | 1992           | 314                                                                   |
| 8                | Antigua and Barbuda | Sugar (Raw Equivalent)     | 1992           | 300                                                                   |
| 8                | Antigua and Barbuda | Sweet potatoes             | 1992           | 8                                                                     |
| 8                | Antigua and Barbuda | Sweeteners, Other          | 1992           | 14                                                                    |
| 8                | Antigua and Barbuda | Tomatoes and products      | 1992           | 3                                                                     |
| 8                | Antigua and Barbuda | Treenuts                   | 1992           | 1                                                                     |
| 8                | Antigua and Barbuda | Vegetable Oils             | 1992           | 274                                                                   |
| 8                | Antigua and Barbuda | Vegetables                 | 1992           | 56                                                                    |
| 8                | Antigua and Barbuda | Vegetables, Other          | 1992           | 48                                                                    |
| 8                | Antigua and Barbuda | Vegetal Products           | 1992           | 1,676                                                                 |
| 8                | Antigua and Barbuda | Wheat and products         | 1992           | 491                                                                   |
| 8                | Antigua and Barbuda | Wine                       | 1992           | 12                                                                    |
| 8                | Antigua and Barbuda | Yams                       | 1992           | 2                                                                     |
| 8                | Antigua and Barbuda | Alcoholic Beverages        | 1993           | 56                                                                    |
| 8                | Antigua and Barbuda | Animal fats                | 1993           | 137                                                                   |
| 8                | Antigua and Barbuda | Animal Products            | 1993           | 800                                                                   |
| 8                | Antigua and Barbuda | Bananas                    | 1993           | 3                                                                     |
| 8                | Antigua and Barbuda | Beer                       | 1993           | 26                                                                    |
| 8                | Antigua and Barbuda | Beverages, Alcoholic       | 1993           | 17                                                                    |
| 8                | Antigua and Barbuda | Bovine Meat                | 1993           | 76                                                                    |
| 8                | Antigua and Barbuda | Butter, Ghee               | 1993           | 38                                                                    |
| 8                | Antigua and Barbuda | Cassava and products       | 1993           | 2                                                                     |
| 8                | Antigua and Barbuda | Cereals - Excluding Beer   | 1993           | 609                                                                   |
| 8                | Antigua and Barbuda | Cereals, Other             | 1993           | 20                                                                    |
| 8                | Antigua and Barbuda | Cocoa Beans and products   | 1993           | 10                                                                    |
| 8                | Antigua and Barbuda | Cottonseed Oil             | 1993           | 3                                                                     |
| 8                | Antigua and Barbuda | Crustaceans                | 1993           | 7                                                                     |
| 8                | Antigua and Barbuda | Demersal Fish              | 1993           | 17                                                                    |
| 8                | Antigua and Barbuda | Eggs                       | 1993           | 12                                                                    |
| 8                | Antigua and Barbuda | Fats, Animals, Raw         | 1993           | 99                                                                    |
| 8                | Antigua and Barbuda | Fish, Seafood              | 1993           | 67                                                                    |
| 8                | Antigua and Barbuda | Fruits - Excluding Wine    | 1993           | 218                                                                   |
| 8                | Antigua and Barbuda | Fruits, Other              | 1993           | 197                                                                   |
| 8                | Antigua and Barbuda | Grand Total                | 1993           | 2,376                                                                 |
| 8                | Antigua and Barbuda | Lemons, Limes and products | 1993           | 1                                                                     |
| 8                | Antigua and Barbuda | Maize and products         | 1993           | 24                                                                    |
| 8                | Antigua and Barbuda | Maize Germ Oil             | 1993           | 2                                                                     |
| 8                | Antigua and Barbuda | Marine Fish, Other         | 1993           | 40                                                                    |
| 8                | Antigua and Barbuda | Meat                       | 1993           | 328                                                                   |
| 8                | Antigua and Barbuda | Milk - Excluding Butter    | 1993           | 247                                                                   |
| 8                | Antigua and Barbuda | Miscellaneous              | 1993           | 42                                                                    |
| 8                | Antigua and Barbuda | Molluscs, Other            | 1993           | 3                                                                     |
| 8                | Antigua and Barbuda | Mutton & Goat Meat         | 1993           | 11                                                                    |
| 8                | Antigua and Barbuda | Oats                       | 1993           | 24                                                                    |
| 8                | Antigua and Barbuda | Offals                     | 1993           | 9                                                                     |
| 8                | Antigua and Barbuda | Oilcrops Oil, Other        | 1993           | 147                                                                   |
| 8                | Antigua and Barbuda | Olive Oil                  | 1993           | 1                                                                     |
| 8                | Antigua and Barbuda | Onions                     | 1993           | 4                                                                     |
| 8                | Antigua and Barbuda | Oranges, Mandarines        | 1993           | 7                                                                     |
| 8                | Antigua and Barbuda | Pigmeat                    | 1993           | 36                                                                    |
| 8                | Antigua and Barbuda | Pineapples and products    | 1993           | 9                                                                     |
| 8                | Antigua and Barbuda | Potatoes and products      | 1993           | 21                                                                    |
| 8                | Antigua and Barbuda | Poultry Meat               | 1993           | 204                                                                   |
| 8                | Antigua and Barbuda | Pulses                     | 1993           | 38                                                                    |
| 8                | Antigua and Barbuda | Pulses, Other and products | 1993           | 38                                                                    |
| 8                | Antigua and Barbuda | Rice (Milled Equivalent)   | 1993           | 93                                                                    |
| 8                | Antigua and Barbuda | Roots, Other               | 1993           | 1                                                                     |
| 8                | Antigua and Barbuda | Soyabean Oil               | 1993           | 82                                                                    |
| 8                | Antigua and Barbuda | Spices                     | 1993           | 2                                                                     |
| 8                | Antigua and Barbuda | Spices, Other              | 1993           | 2                                                                     |
| 8                | Antigua and Barbuda | Starchy Roots              | 1993           | 32                                                                    |
| 8                | Antigua and Barbuda | Stimulants                 | 1993           | 10                                                                    |
| 8                | Antigua and Barbuda | Sugar & Sweeteners         | 1993           | 283                                                                   |
| 8                | Antigua and Barbuda | Sugar (Raw Equivalent)     | 1993           | 271                                                                   |
| 8                | Antigua and Barbuda | Sweet potatoes             | 1993           | 5                                                                     |
| 8                | Antigua and Barbuda | Sweeteners, Other          | 1993           | 11                                                                    |
| 8                | Antigua and Barbuda | Tomatoes and products      | 1993           | 2                                                                     |

Dietary calcium and zinc deficiency risks are decreasing but remain prevalent

| FAO Country code | Country             | Food item                  | Reference year | Net energy supply (kcal <i>capita</i> <sup>-1</sup> d <sup>-1</sup> ) |
|------------------|---------------------|----------------------------|----------------|-----------------------------------------------------------------------|
| 8                | Antigua and Barbuda | Vegetable Oils             | 1993           | 235                                                                   |
| 8                | Antigua and Barbuda | Vegetables                 | 1993           | 51                                                                    |
| 8                | Antigua and Barbuda | Vegetables, Other          | 1993           | 45                                                                    |
| 8                | Antigua and Barbuda | Vegetal Products           | 1993           | 1,576                                                                 |
| 8                | Antigua and Barbuda | Wheat and products         | 1993           | 448                                                                   |
| 8                | Antigua and Barbuda | Wine                       | 1993           | 12                                                                    |
| 8                | Antigua and Barbuda | Yams                       | 1993           | 2                                                                     |
| 8                | Antigua and Barbuda | Alcoholic Beverages        | 1994           | 62                                                                    |
| 8                | Antigua and Barbuda | Animal fats                | 1994           | 69                                                                    |
| 8                | Antigua and Barbuda | Animal Products            | 1994           | 748                                                                   |
| 8                | Antigua and Barbuda | Bananas                    | 1994           | 3                                                                     |
| 8                | Antigua and Barbuda | Beer                       | 1994           | 13                                                                    |
| 8                | Antigua and Barbuda | Beverages, Alcoholic       | 1994           | 40                                                                    |
| 8                | Antigua and Barbuda | Bovine Meat                | 1994           | 68                                                                    |
| 8                | Antigua and Barbuda | Butter, Ghee               | 1994           | 23                                                                    |
| 8                | Antigua and Barbuda | Cassava and products       | 1994           | 2                                                                     |
| 8                | Antigua and Barbuda | Cereals - Excluding Beer   | 1994           | 616                                                                   |
| 8                | Antigua and Barbuda | Cereals, Other             | 1994           | 7                                                                     |
| 8                | Antigua and Barbuda | Cocoa Beans and products   | 1994           | 5                                                                     |
| 8                | Antigua and Barbuda | Cottonseed Oil             | 1994           | 3                                                                     |
| 8                | Antigua and Barbuda | Crustaceans                | 1994           | 3                                                                     |
| 8                | Antigua and Barbuda | Demersal Fish              | 1994           | 18                                                                    |
| 8                | Antigua and Barbuda | Eggs                       | 1994           | 14                                                                    |
| 8                | Antigua and Barbuda | Fats, Animals, Raw         | 1994           | 46                                                                    |
| 8                | Antigua and Barbuda | Fish, Seafood              | 1994           | 64                                                                    |
| 8                | Antigua and Barbuda | Fruits - Excluding Wine    | 1994           | 194                                                                   |
| 8                | Antigua and Barbuda | Fruits, Other              | 1994           | 182                                                                   |
| 8                | Antigua and Barbuda | Grand Total                | 1994           | 2,255                                                                 |
| 8                | Antigua and Barbuda | Lemons, Limes and products | 1994           | 1                                                                     |
| 8                | Antigua and Barbuda | Maize and products         | 1994           | 24                                                                    |
| 8                | Antigua and Barbuda | Maize Germ Oil             | 1994           | 1                                                                     |
| 8                | Antigua and Barbuda | Marine Fish, Other         | 1994           | 40                                                                    |
| 8                | Antigua and Barbuda | Meat                       | 1994           | 331                                                                   |
| 8                | Antigua and Barbuda | Milk - Excluding Butter    | 1994           | 267                                                                   |
| 8                | Antigua and Barbuda | Miscellaneous              | 1994           | 41                                                                    |
| 8                | Antigua and Barbuda | Molluscs, Other            | 1994           | 3                                                                     |
| 8                | Antigua and Barbuda | Mutton & Goat Meat         | 1994           | 11                                                                    |
| 8                | Antigua and Barbuda | Oats                       | 1994           | 24                                                                    |
| 8                | Antigua and Barbuda | Offals                     | 1994           | 4                                                                     |
| 8                | Antigua and Barbuda | Oilcrops Oil, Other        | 1994           | 88                                                                    |
| 8                | Antigua and Barbuda | Olive Oil                  | 1994           | 1                                                                     |
| 8                | Antigua and Barbuda | Onions                     | 1994           | 3                                                                     |
| 8                | Antigua and Barbuda | Oranges, Mandarines        | 1994           | 5                                                                     |
| 8                | Antigua and Barbuda | Pigmeat                    | 1994           | 26                                                                    |
| 8                | Antigua and Barbuda | Pineapples and products    | 1994           | 2                                                                     |
| 8                | Antigua and Barbuda | Potatoes and products      | 1994           | 22                                                                    |
| 8                | Antigua and Barbuda | Poultry Meat               | 1994           | 226                                                                   |
| 8                | Antigua and Barbuda | Pulses                     | 1994           | 37                                                                    |
| 8                | Antigua and Barbuda | Pulses, Other and products | 1994           | 37                                                                    |
| 8                | Antigua and Barbuda | Rice (Milled Equivalent)   | 1994           | 90                                                                    |
| 8                | Antigua and Barbuda | Roots, Other               | 1994           | 1                                                                     |
| 8                | Antigua and Barbuda | Soyabean Oil               | 1994           | 90                                                                    |
| 8                | Antigua and Barbuda | Spices                     | 1994           | 2                                                                     |
| 8                | Antigua and Barbuda | Spices, Other              | 1994           | 2                                                                     |
| 8                | Antigua and Barbuda | Starchy Roots              | 1994           | 35                                                                    |
| 8                | Antigua and Barbuda | Stimulants                 | 1994           | 6                                                                     |
| 8                | Antigua and Barbuda | Sugar & Sweeteners         | 1994           | 299                                                                   |
| 8                | Antigua and Barbuda | Sugar (Raw Equivalent)     | 1994           | 286                                                                   |
| 8                | Antigua and Barbuda | Sweet potatoes             | 1994           | 8                                                                     |
| 8                | Antigua and Barbuda | Sweeteners, Other          | 1994           | 12                                                                    |
| 8                | Antigua and Barbuda | Tomatoes and products      | 1994           | 2                                                                     |
| 8                | Antigua and Barbuda | Vegetable Oils             | 1994           | 183                                                                   |
| 8                | Antigua and Barbuda | Vegetables                 | 1994           | 31                                                                    |
| 8                | Antigua and Barbuda | Vegetables, Other          | 1994           | 26                                                                    |
| 8                | Antigua and Barbuda | Vegetal Products           | 1994           | 1,507                                                                 |
| 8                | Antigua and Barbuda | Wheat and products         | 1994           | 471                                                                   |
| 8                | Antigua and Barbuda | Wine                       | 1994           | 10                                                                    |
| 8                | Antigua and Barbuda | Yams                       | 1994           | 2                                                                     |
| 8                | Antigua and Barbuda | Alcoholic Beverages        | 1995           | 68                                                                    |
| 8                | Antigua and Barbuda | Animal fats                | 1995           | 68                                                                    |
| 8                | Antigua and Barbuda | Animal Products            | 1995           | 716                                                                   |
| 8                | Antigua and Barbuda | Bananas                    | 1995           | 2                                                                     |
| 8                | Antigua and Barbuda | Beer                       | 1995           | 13                                                                    |
| 8                | Antigua and Barbuda | Beverages, Alcoholic       | 1995           | 50                                                                    |
| 8                | Antigua and Barbuda | Bovine Meat                | 1995           | 65                                                                    |
| 8                | Antigua and Barbuda | Butter, Ghee               | 1995           | 26                                                                    |
| 8                | Antigua and Barbuda | Cassava and products       | 1995           | 2                                                                     |
| 8                | Antigua and Barbuda | Cereals - Excluding Beer   | 1995           | 625                                                                   |
| 8                | Antigua and Barbuda | Cereals, Other             | 1995           | 4                                                                     |
| 8                | Antigua and Barbuda | Cocoa Beans and products   | 1995           | 6                                                                     |
| 8                | Antigua and Barbuda | Cottonseed Oil             | 1995           | 2                                                                     |
| 8                | Antigua and Barbuda | Crustaceans                | 1995           | 3                                                                     |
| 8                | Antigua and Barbuda | Demersal Fish              | 1995           | 21                                                                    |
| 8                | Antigua and Barbuda | Eggs                       | 1995           | 9                                                                     |
| 8                | Antigua and Barbuda | Fats, Animals, Raw         | 1995           | 42                                                                    |
| 8                | Antigua and Barbuda | Fish, Seafood              | 1995           | 60                                                                    |
| 8                | Antigua and Barbuda | Fruits - Excluding Wine    | 1995           | 151                                                                   |
| 8                | Antigua and Barbuda | Fruits, Other              | 1995           | 139                                                                   |
| 8                | Antigua and Barbuda | Grand Total                | 1995           | 2,188                                                                 |
| 8                | Antigua and Barbuda | Lemons, Limes and products | 1995           | 2                                                                     |
| 8                | Antigua and Barbuda | Maize and products         | 1995           | 19                                                                    |
| 8                | Antigua and Barbuda | Marine Fish, Other         | 1995           | 30                                                                    |
| 8                | Antigua and Barbuda | Meat                       | 1995           | 311                                                                   |
| 8                | Antigua and Barbuda | Milk - Excluding Butter    | 1995           | 264                                                                   |
| 8                | Antigua and Barbuda | Miscellaneous              | 1995           | 40                                                                    |
| 8                | Antigua and Barbuda | Molluscs, Other            | 1995           | 2                                                                     |
| 8                | Antigua and Barbuda | Mutton & Goat Meat         | 1995           | 12                                                                    |

Dietary calcium and zinc deficiency risks are decreasing but remain prevalent

| FAO Country code | Country             | Food item                  | Reference year | Net energy supply (kcal capita <sup>-1</sup> d <sup>-1</sup> ) |
|------------------|---------------------|----------------------------|----------------|----------------------------------------------------------------|
| 8                | Antigua and Barbuda | Oats                       | 1995           | 23                                                             |
| 8                | Antigua and Barbuda | Offals                     | 1995           | 4                                                              |
| 8                | Antigua and Barbuda | Oilcrops Oil, Other        | 1995           | 87                                                             |
| 8                | Antigua and Barbuda | Olive Oil                  | 1995           | 3                                                              |
| 8                | Antigua and Barbuda | Onions                     | 1995           | 3                                                              |
| 8                | Antigua and Barbuda | Oranges, Mandarines        | 1995           | 6                                                              |
| 8                | Antigua and Barbuda | Pelagic Fish               | 1995           | 4                                                              |
| 8                | Antigua and Barbuda | Pigmeat                    | 1995           | 24                                                             |
| 8                | Antigua and Barbuda | Pineapples and products    | 1995           | 2                                                              |
| 8                | Antigua and Barbuda | Potatoes and products      | 1995           | 15                                                             |
| 8                | Antigua and Barbuda | Poultry Meat               | 1995           | 210                                                            |
| 8                | Antigua and Barbuda | Pulses                     | 1995           | 36                                                             |
| 8                | Antigua and Barbuda | Pulses, Other and products | 1995           | 36                                                             |
| 8                | Antigua and Barbuda | Rice (Milled Equivalent)   | 1995           | 96                                                             |
| 8                | Antigua and Barbuda | Roots, Other               | 1995           | 1                                                              |
| 8                | Antigua and Barbuda | Soyabean Oil               | 1995           | 89                                                             |
| 8                | Antigua and Barbuda | Spices                     | 1995           | 2                                                              |
| 8                | Antigua and Barbuda | Spices, Other              | 1995           | 2                                                              |
| 8                | Antigua and Barbuda | Starchy Roots              | 1995           | 24                                                             |
| 8                | Antigua and Barbuda | Stimulants                 | 1995           | 7                                                              |
| 8                | Antigua and Barbuda | Sugar & Sweeteners         | 1995           | 304                                                            |
| 8                | Antigua and Barbuda | Sugar (Raw Equivalent)     | 1995           | 290                                                            |
| 8                | Antigua and Barbuda | Sweet potatoes             | 1995           | 6                                                              |
| 8                | Antigua and Barbuda | Sweeteners, Other          | 1995           | 14                                                             |
| 8                | Antigua and Barbuda | Tomatoes and products      | 1995           | 2                                                              |
| 8                | Antigua and Barbuda | Vegetable Oils             | 1995           | 181                                                            |
| 8                | Antigua and Barbuda | Vegetables                 | 1995           | 33                                                             |
| 8                | Antigua and Barbuda | Vegetables, Other          | 1995           | 28                                                             |
| 8                | Antigua and Barbuda | Vegetal Products           | 1995           | 1,472                                                          |
| 8                | Antigua and Barbuda | Wheat and products         | 1995           | 482                                                            |
| 8                | Antigua and Barbuda | Wine                       | 1995           | 5                                                              |
| 8                | Antigua and Barbuda | Yams                       | 1995           | 2                                                              |
| 8                | Antigua and Barbuda | Alcoholic Beverages        | 1996           | 73                                                             |
| 8                | Antigua and Barbuda | Animal fats                | 1996           | 64                                                             |
| 8                | Antigua and Barbuda | Animal Products            | 1996           | 740                                                            |
| 8                | Antigua and Barbuda | Bananas                    | 1996           | 3                                                              |
| 8                | Antigua and Barbuda | Beer                       | 1996           | 13                                                             |
| 8                | Antigua and Barbuda | Beverages, Alcoholic       | 1996           | 55                                                             |
| 8                | Antigua and Barbuda | Bovine Meat                | 1996           | 50                                                             |
| 8                | Antigua and Barbuda | Butter, Ghee               | 1996           | 25                                                             |
| 8                | Antigua and Barbuda | Cassava and products       | 1996           | 2                                                              |
| 8                | Antigua and Barbuda | Cereals - Excluding Beer   | 1996           | 590                                                            |
| 8                | Antigua and Barbuda | Cereals, Other             | 1996           | 4                                                              |
| 8                | Antigua and Barbuda | Cocoa Beans and products   | 1996           | 14                                                             |
| 8                | Antigua and Barbuda | Cottonseed Oil             | 1996           | 2                                                              |
| 8                | Antigua and Barbuda | Demersal Fish              | 1996           | 22                                                             |
| 8                | Antigua and Barbuda | Eggs                       | 1996           | 9                                                              |
| 8                | Antigua and Barbuda | Fats, Animals, Raw         | 1996           | 39                                                             |
| 8                | Antigua and Barbuda | Fish, Seafood              | 1996           | 57                                                             |
| 8                | Antigua and Barbuda | Freshwater Fish            | 1996           | 1                                                              |
| 8                | Antigua and Barbuda | Fruits - Excluding Wine    | 1996           | 166                                                            |
| 8                | Antigua and Barbuda | Fruits, Other              | 1996           | 151                                                            |
| 8                | Antigua and Barbuda | Grand Total                | 1996           | 2,190                                                          |
| 8                | Antigua and Barbuda | Lemons, Limes and products | 1996           | 1                                                              |
| 8                | Antigua and Barbuda | Maize and products         | 1996           | 18                                                             |
| 8                | Antigua and Barbuda | Marine Fish, Other         | 1996           | 28                                                             |
| 8                | Antigua and Barbuda | Meat                       | 1996           | 350                                                            |
| 8                | Antigua and Barbuda | Milk - Excluding Butter    | 1996           | 255                                                            |
| 8                | Antigua and Barbuda | Miscellaneous              | 1996           | 39                                                             |
| 8                | Antigua and Barbuda | Molluscs, Other            | 1996           | 2                                                              |
| 8                | Antigua and Barbuda | Mutton & Goat Meat         | 1996           | 10                                                             |
| 8                | Antigua and Barbuda | Oats                       | 1996           | 23                                                             |
| 8                | Antigua and Barbuda | Offals                     | 1996           | 4                                                              |
| 8                | Antigua and Barbuda | Oilcrops Oil, Other        | 1996           | 87                                                             |
| 8                | Antigua and Barbuda | Olive Oil                  | 1996           | 2                                                              |
| 8                | Antigua and Barbuda | Onions                     | 1996           | 3                                                              |
| 8                | Antigua and Barbuda | Oranges, Mandarines        | 1996           | 7                                                              |
| 8                | Antigua and Barbuda | Pelagic Fish               | 1996           | 4                                                              |
| 8                | Antigua and Barbuda | Pigmeat                    | 1996           | 28                                                             |
| 8                | Antigua and Barbuda | Pineapples and products    | 1996           | 2                                                              |
| 8                | Antigua and Barbuda | Potatoes and products      | 1996           | 14                                                             |
| 8                | Antigua and Barbuda | Poultry Meat               | 1996           | 262                                                            |
| 8                | Antigua and Barbuda | Pulses                     | 1996           | 35                                                             |
| 8                | Antigua and Barbuda | Pulses, Other and products | 1996           | 35                                                             |
| 8                | Antigua and Barbuda | Rice (Milled Equivalent)   | 1996           | 95                                                             |
| 8                | Antigua and Barbuda | Roots, Other               | 1996           | 1                                                              |
| 8                | Antigua and Barbuda | Soyabean Oil               | 1996           | 87                                                             |
| 8                | Antigua and Barbuda | Spices                     | 1996           | 1                                                              |
| 8                | Antigua and Barbuda | Spices, Other              | 1996           | 1                                                              |
| 8                | Antigua and Barbuda | Starchy Roots              | 1996           | 23                                                             |
| 8                | Antigua and Barbuda | Stimulants                 | 1996           | 14                                                             |
| 8                | Antigua and Barbuda | Sugar & Sweeteners         | 1996           | 303                                                            |
| 8                | Antigua and Barbuda | Sugar (Raw Equivalent)     | 1996           | 291                                                            |
| 8                | Antigua and Barbuda | Sweet potatoes             | 1996           | 5                                                              |
| 8                | Antigua and Barbuda | Sweeteners, Other          | 1996           | 12                                                             |
| 8                | Antigua and Barbuda | Tomatoes and products      | 1996           | 2                                                              |
| 8                | Antigua and Barbuda | Vegetable Oils             | 1996           | 178                                                            |
| 8                | Antigua and Barbuda | Vegetables                 | 1996           | 27                                                             |
| 8                | Antigua and Barbuda | Vegetables, Other          | 1996           | 22                                                             |
| 8                | Antigua and Barbuda | Vegetal Products           | 1996           | 1,450                                                          |
| 8                | Antigua and Barbuda | Wheat and products         | 1996           | 450                                                            |
| 8                | Antigua and Barbuda | Wine                       | 1996           | 6                                                              |
| 8                | Antigua and Barbuda | Yams                       | 1996           | 2                                                              |
| 8                | Antigua and Barbuda | Alcoholic Beverages        | 1997           | 73                                                             |
| 8                | Antigua and Barbuda | Animal fats                | 1997           | 65                                                             |
| 8                | Antigua and Barbuda | Animal Products            | 1997           | 756                                                            |
| 8                | Antigua and Barbuda | Bananas                    | 1997           | 3                                                              |

Dietary calcium and zinc deficiency risks are decreasing but remain prevalent

| FAO Country code | Country             | Food item                  | Reference year | Net energy supply (kcal capita <sup>-1</sup> d <sup>-1</sup> ) |
|------------------|---------------------|----------------------------|----------------|----------------------------------------------------------------|
| 8                | Antigua and Barbuda | Beer                       | 1997           | 11                                                             |
| 8                | Antigua and Barbuda | Beverages, Alcoholic       | 1997           | 55                                                             |
| 8                | Antigua and Barbuda | Bovine Meat                | 1997           | 45                                                             |
| 8                | Antigua and Barbuda | Butter, Ghee               | 1997           | 27                                                             |
| 8                | Antigua and Barbuda | Cassava and products       | 1997           | 1                                                              |
| 8                | Antigua and Barbuda | Cephalopods                | 1997           | 1                                                              |
| 8                | Antigua and Barbuda | Cereals - Excluding Beer   | 1997           | 592                                                            |
| 8                | Antigua and Barbuda | Cereals, Other             | 1997           | 11                                                             |
| 8                | Antigua and Barbuda | Cocoa Beans and products   | 1997           | 9                                                              |
| 8                | Antigua and Barbuda | Coffee and products        | 1997           | 1                                                              |
| 8                | Antigua and Barbuda | Cottonseed Oil             | 1997           | 2                                                              |
| 8                | Antigua and Barbuda | Crustaceans                | 1997           | 1                                                              |
| 8                | Antigua and Barbuda | Demersal Fish              | 1997           | 18                                                             |
| 8                | Antigua and Barbuda | Eggs                       | 1997           | 10                                                             |
| 8                | Antigua and Barbuda | Fats, Animals, Raw         | 1997           | 38                                                             |
| 8                | Antigua and Barbuda | Fish, Seafood              | 1997           | 67                                                             |
| 8                | Antigua and Barbuda | Fruits - Excluding Wine    | 1997           | 138                                                            |
| 8                | Antigua and Barbuda | Fruits, Other              | 1997           | 125                                                            |
| 8                | Antigua and Barbuda | Grand Total                | 1997           | 2,163                                                          |
| 8                | Antigua and Barbuda | Lemons, Limes and products | 1997           | 2                                                              |
| 8                | Antigua and Barbuda | Maize and products         | 1997           | 18                                                             |
| 8                | Antigua and Barbuda | Maize Germ Oil             | 1997           | 1                                                              |
| 8                | Antigua and Barbuda | Marine Fish, Other         | 1997           | 34                                                             |
| 8                | Antigua and Barbuda | Meat                       | 1997           | 347                                                            |
| 8                | Antigua and Barbuda | Milk - Excluding Butter    | 1997           | 263                                                            |
| 8                | Antigua and Barbuda | Miscellaneous              | 1997           | 17                                                             |
| 8                | Antigua and Barbuda | Molluscs, Other            | 1997           | 2                                                              |
| 8                | Antigua and Barbuda | Mutton & Goat Meat         | 1997           | 11                                                             |
| 8                | Antigua and Barbuda | Oats                       | 1997           | 22                                                             |
| 8                | Antigua and Barbuda | Offals                     | 1997           | 4                                                              |
| 8                | Antigua and Barbuda | Oilcrops Oil, Other        | 1997           | 95                                                             |
| 8                | Antigua and Barbuda | Olive Oil                  | 1997           | 1                                                              |
| 8                | Antigua and Barbuda | Onions                     | 1997           | 2                                                              |
| 8                | Antigua and Barbuda | Oranges, Mandarines        | 1997           | 6                                                              |
| 8                | Antigua and Barbuda | Pelagic Fish               | 1997           | 11                                                             |
| 8                | Antigua and Barbuda | Pigmeat                    | 1997           | 32                                                             |
| 8                | Antigua and Barbuda | Pineapples and products    | 1997           | 1                                                              |
| 8                | Antigua and Barbuda | Potatoes and products      | 1997           | 15                                                             |
| 8                | Antigua and Barbuda | Poultry Meat               | 1997           | 259                                                            |
| 8                | Antigua and Barbuda | Pulses                     | 1997           | 34                                                             |
| 8                | Antigua and Barbuda | Pulses, Other and products | 1997           | 34                                                             |
| 8                | Antigua and Barbuda | Rice (Milled Equivalent)   | 1997           | 94                                                             |
| 8                | Antigua and Barbuda | Roots, Other               | 1997           | 1                                                              |
| 8                | Antigua and Barbuda | Soyabean Oil               | 1997           | 94                                                             |
| 8                | Antigua and Barbuda | Spices                     | 1997           | 1                                                              |
| 8                | Antigua and Barbuda | Starchy Roots              | 1997           | 23                                                             |
| 8                | Antigua and Barbuda | Stimulants                 | 1997           | 10                                                             |
| 8                | Antigua and Barbuda | Sugar & Sweeteners         | 1997           | 297                                                            |
| 8                | Antigua and Barbuda | Sugar (Raw Equivalent)     | 1997           | 286                                                            |
| 8                | Antigua and Barbuda | Sweet potatoes             | 1997           | 4                                                              |
| 8                | Antigua and Barbuda | Sweeteners, Other          | 1997           | 11                                                             |
| 8                | Antigua and Barbuda | Tomatoes and products      | 1997           | 2                                                              |
| 8                | Antigua and Barbuda | Vegetable Oils             | 1997           | 193                                                            |
| 8                | Antigua and Barbuda | Vegetables                 | 1997           | 30                                                             |
| 8                | Antigua and Barbuda | Vegetables, Other          | 1997           | 26                                                             |
| 8                | Antigua and Barbuda | Vegetal Products           | 1997           | 1,407                                                          |
| 8                | Antigua and Barbuda | Wheat and products         | 1997           | 447                                                            |
| 8                | Antigua and Barbuda | Wine                       | 1997           | 7                                                              |
| 8                | Antigua and Barbuda | Yams                       | 1997           | 1                                                              |
| 8                | Antigua and Barbuda | Alcoholic Beverages        | 1998           | 73                                                             |
| 8                | Antigua and Barbuda | Animal fats                | 1998           | 64                                                             |
| 8                | Antigua and Barbuda | Animal Products            | 1998           | 735                                                            |
| 8                | Antigua and Barbuda | Bananas                    | 1998           | 7                                                              |
| 8                | Antigua and Barbuda | Beans                      | 1998           | 18                                                             |
| 8                | Antigua and Barbuda | Beer                       | 1998           | 9                                                              |
| 8                | Antigua and Barbuda | Beverages, Alcoholic       | 1998           | 57                                                             |
| 8                | Antigua and Barbuda | Bovine Meat                | 1998           | 54                                                             |
| 8                | Antigua and Barbuda | Butter, Ghee               | 1998           | 29                                                             |
| 8                | Antigua and Barbuda | Cassava and products       | 1998           | 2                                                              |
| 8                | Antigua and Barbuda | Cereals - Excluding Beer   | 1998           | 613                                                            |
| 8                | Antigua and Barbuda | Cereals, Other             | 1998           | 9                                                              |
| 8                | Antigua and Barbuda | Cocoa Beans and products   | 1998           | 9                                                              |
| 8                | Antigua and Barbuda | Cottonseed Oil             | 1998           | 2                                                              |
| 8                | Antigua and Barbuda | Crustaceans                | 1998           | 6                                                              |
| 8                | Antigua and Barbuda | Demersal Fish              | 1998           | 17                                                             |
| 8                | Antigua and Barbuda | Eggs                       | 1998           | 10                                                             |
| 8                | Antigua and Barbuda | Fats, Animals, Raw         | 1998           | 35                                                             |
| 8                | Antigua and Barbuda | Fish, Seafood              | 1998           | 55                                                             |
| 8                | Antigua and Barbuda | Fruits - Excluding Wine    | 1998           | 122                                                            |
| 8                | Antigua and Barbuda | Fruits, Other              | 1998           | 106                                                            |
| 8                | Antigua and Barbuda | Grand Total                | 1998           | 2,154                                                          |
| 8                | Antigua and Barbuda | Lemons, Limes and products | 1998           | 1                                                              |
| 8                | Antigua and Barbuda | Maize and products         | 1998           | 23                                                             |
| 8                | Antigua and Barbuda | Marine Fish, Other         | 1998           | 26                                                             |
| 8                | Antigua and Barbuda | Meat                       | 1998           | 348                                                            |
| 8                | Antigua and Barbuda | Milk - Excluding Butter    | 1998           | 253                                                            |
| 8                | Antigua and Barbuda | Miscellaneous              | 1998           | 11                                                             |
| 8                | Antigua and Barbuda | Molluscs, Other            | 1998           | 2                                                              |
| 8                | Antigua and Barbuda | Mutton & Goat Meat         | 1998           | 11                                                             |
| 8                | Antigua and Barbuda | Oats                       | 1998           | 21                                                             |
| 8                | Antigua and Barbuda | Offals                     | 1998           | 4                                                              |
| 8                | Antigua and Barbuda | Oilcrops Oil, Other        | 1998           | 90                                                             |
| 8                | Antigua and Barbuda | Olive Oil                  | 1998           | 3                                                              |
| 8                | Antigua and Barbuda | Onions                     | 1998           | 2                                                              |
| 8                | Antigua and Barbuda | Oranges, Mandarines        | 1998           | 6                                                              |
| 8                | Antigua and Barbuda | Pelagic Fish               | 1998           | 4                                                              |
| 8                | Antigua and Barbuda | Pigmeat                    | 1998           | 39                                                             |

Dietary calcium and zinc deficiency risks are decreasing but remain prevalent

| FAO Country code | Country             | Food item                  | Reference year | Net energy supply (kcal <i>capita</i> <sup>-1</sup> d <sup>-1</sup> ) |
|------------------|---------------------|----------------------------|----------------|-----------------------------------------------------------------------|
| 8                | Antigua and Barbuda | Pineapples and products    | 1998           | 1                                                                     |
| 8                | Antigua and Barbuda | Potatoes and products      | 1998           | 15                                                                    |
| 8                | Antigua and Barbuda | Poultry Meat               | 1998           | 244                                                                   |
| 8                | Antigua and Barbuda | Pulses                     | 1998           | 33                                                                    |
| 8                | Antigua and Barbuda | Pulses, Other and products | 1998           | 14                                                                    |
| 8                | Antigua and Barbuda | Rice (Milled Equivalent)   | 1998           | 92                                                                    |
| 8                | Antigua and Barbuda | Roots, Other               | 1998           | 1                                                                     |
| 8                | Antigua and Barbuda | Soyabean Oil               | 1998           | 98                                                                    |
| 8                | Antigua and Barbuda | Spices                     | 1998           | 1                                                                     |
| 8                | Antigua and Barbuda | Starchy Roots              | 1998           | 24                                                                    |
| 8                | Antigua and Barbuda | Stimulants                 | 1998           | 9                                                                     |
| 8                | Antigua and Barbuda | Sugar & Sweeteners         | 1998           | 308                                                                   |
| 8                | Antigua and Barbuda | Sugar (Raw Equivalent)     | 1998           | 292                                                                   |
| 8                | Antigua and Barbuda | Sweet potatoes             | 1998           | 5                                                                     |
| 8                | Antigua and Barbuda | Sweeteners, Other          | 1998           | 15                                                                    |
| 8                | Antigua and Barbuda | Tomatoes and products      | 1998           | 2                                                                     |
| 8                | Antigua and Barbuda | Vegetable Oils             | 1998           | 194                                                                   |
| 8                | Antigua and Barbuda | Vegetables                 | 1998           | 33                                                                    |
| 8                | Antigua and Barbuda | Vegetables, Other          | 1998           | 29                                                                    |
| 8                | Antigua and Barbuda | Vegetal Products           | 1998           | 1,419                                                                 |
| 8                | Antigua and Barbuda | Wheat and products         | 1998           | 467                                                                   |
| 8                | Antigua and Barbuda | Wine                       | 1998           | 7                                                                     |
| 8                | Antigua and Barbuda | Yams                       | 1998           | 2                                                                     |
| 8                | Antigua and Barbuda | Alcoholic Beverages        | 1999           | 76                                                                    |
| 8                | Antigua and Barbuda | Animal fats                | 1999           | 63                                                                    |
| 8                | Antigua and Barbuda | Animal Products            | 1999           | 722                                                                   |
| 8                | Antigua and Barbuda | Bananas                    | 1999           | 13                                                                    |
| 8                | Antigua and Barbuda | Beans                      | 1999           | 19                                                                    |
| 8                | Antigua and Barbuda | Beer                       | 1999           | 9                                                                     |
| 8                | Antigua and Barbuda | Beverages, Alcoholic       | 1999           | 58                                                                    |
| 8                | Antigua and Barbuda | Bovine Meat                | 1999           | 53                                                                    |
| 8                | Antigua and Barbuda | Butter, Chee               | 1999           | 28                                                                    |
| 8                | Antigua and Barbuda | Cassava and products       | 1999           | 2                                                                     |
| 8                | Antigua and Barbuda | Cereals - Excluding Beer   | 1999           | 595                                                                   |
| 8                | Antigua and Barbuda | Cereals, Other             | 1999           | 9                                                                     |
| 8                | Antigua and Barbuda | Cocoa Beans and products   | 1999           | 11                                                                    |
| 8                | Antigua and Barbuda | Cottonseed Oil             | 1999           | 8                                                                     |
| 8                | Antigua and Barbuda | Crustaceans                | 1999           | 9                                                                     |
| 8                | Antigua and Barbuda | Demersal Fish              | 1999           | 22                                                                    |
| 8                | Antigua and Barbuda | Eggs                       | 1999           | 9                                                                     |
| 8                | Antigua and Barbuda | Fats, Animals, Raw         | 1999           | 34                                                                    |
| 8                | Antigua and Barbuda | Fish, Seafood              | 1999           | 61                                                                    |
| 8                | Antigua and Barbuda | Freshwater Fish            | 1999           | 3                                                                     |
| 8                | Antigua and Barbuda | Fruits - Excluding Wine    | 1999           | 147                                                                   |
| 8                | Antigua and Barbuda | Fruits, Other              | 1999           | 121                                                                   |
| 8                | Antigua and Barbuda | Grand Total                | 1999           | 2,158                                                                 |
| 8                | Antigua and Barbuda | Grapefruit and products    | 1999           | 1                                                                     |
| 8                | Antigua and Barbuda | Lemons, Limes and products | 1999           | 2                                                                     |
| 8                | Antigua and Barbuda | Maize and products         | 1999           | 18                                                                    |
| 8                | Antigua and Barbuda | Marine Fish, Other         | 1999           | 14                                                                    |
| 8                | Antigua and Barbuda | Meat                       | 1999           | 341                                                                   |
| 8                | Antigua and Barbuda | Milk - Excluding Butter    | 1999           | 244                                                                   |
| 8                | Antigua and Barbuda | Miscellaneous              | 1999           | 10                                                                    |
| 8                | Antigua and Barbuda | Molluscs, Other            | 1999           | 3                                                                     |
| 8                | Antigua and Barbuda | Mutton & Goat Meat         | 1999           | 10                                                                    |
| 8                | Antigua and Barbuda | Oats                       | 1999           | 19                                                                    |
| 8                | Antigua and Barbuda | Offals                     | 1999           | 4                                                                     |
| 8                | Antigua and Barbuda | Oilcrops Oil, Other        | 1999           | 91                                                                    |
| 8                | Antigua and Barbuda | Olive Oil                  | 1999           | 7                                                                     |
| 8                | Antigua and Barbuda | Onions                     | 1999           | 3                                                                     |
| 8                | Antigua and Barbuda | Oranges, Mandarines        | 1999           | 10                                                                    |
| 8                | Antigua and Barbuda | Peas                       | 1999           | 3                                                                     |
| 8                | Antigua and Barbuda | Pelagic Fish               | 1999           | 10                                                                    |
| 8                | Antigua and Barbuda | Pigmeat                    | 1999           | 34                                                                    |
| 8                | Antigua and Barbuda | Pineapples and products    | 1999           | 1                                                                     |
| 8                | Antigua and Barbuda | Potatoes and products      | 1999           | 7                                                                     |
| 8                | Antigua and Barbuda | Poultry Meat               | 1999           | 244                                                                   |
| 8                | Antigua and Barbuda | Pulses                     | 1999           | 35                                                                    |
| 8                | Antigua and Barbuda | Pulses, Other and products | 1999           | 13                                                                    |
| 8                | Antigua and Barbuda | Rice (Milled Equivalent)   | 1999           | 92                                                                    |
| 8                | Antigua and Barbuda | Roots, Other               | 1999           | 1                                                                     |
| 8                | Antigua and Barbuda | Soyabean Oil               | 1999           | 99                                                                    |
| 8                | Antigua and Barbuda | Starchy Roots              | 1999           | 17                                                                    |
| 8                | Antigua and Barbuda | Stimulants                 | 1999           | 12                                                                    |
| 8                | Antigua and Barbuda | Sugar & Sweeteners         | 1999           | 302                                                                   |
| 8                | Antigua and Barbuda | Sugar (Raw Equivalent)     | 1999           | 289                                                                   |
| 8                | Antigua and Barbuda | Sweet potatoes             | 1999           | 5                                                                     |
| 8                | Antigua and Barbuda | Sweeteners, Other          | 1999           | 13                                                                    |
| 8                | Antigua and Barbuda | Tomatoes and products      | 1999           | 2                                                                     |
| 8                | Antigua and Barbuda | Treenuts                   | 1999           | 1                                                                     |
| 8                | Antigua and Barbuda | Vegetable Oils             | 1999           | 205                                                                   |
| 8                | Antigua and Barbuda | Vegetables                 | 1999           | 35                                                                    |
| 8                | Antigua and Barbuda | Vegetables, Other          | 1999           | 30                                                                    |
| 8                | Antigua and Barbuda | Vegetal Products           | 1999           | 1,436                                                                 |
| 8                | Antigua and Barbuda | Wheat and products         | 1999           | 456                                                                   |
| 8                | Antigua and Barbuda | Wine                       | 1999           | 9                                                                     |
| 8                | Antigua and Barbuda | Yams                       | 1999           | 2                                                                     |
| 8                | Antigua and Barbuda | Alcoholic Beverages        | 2000           | 69                                                                    |
| 8                | Antigua and Barbuda | Animal fats                | 2000           | 62                                                                    |
| 8                | Antigua and Barbuda | Animal Products            | 2000           | 701                                                                   |
| 8                | Antigua and Barbuda | Bananas                    | 2000           | 32                                                                    |
| 8                | Antigua and Barbuda | Beans                      | 2000           | 17                                                                    |
| 8                | Antigua and Barbuda | Beer                       | 2000           | 10                                                                    |
| 8                | Antigua and Barbuda | Beverages, Alcoholic       | 2000           | 46                                                                    |
| 8                | Antigua and Barbuda | Bovine Meat                | 2000           | 47                                                                    |
| 8                | Antigua and Barbuda | Butter, Chee               | 2000           | 28                                                                    |
| 8                | Antigua and Barbuda | Cassava and products       | 2000           | 2                                                                     |

Dietary calcium and zinc deficiency risks are decreasing but remain prevalent

| FAO Country code | Country             | Food item                  | Reference year | Net energy supply (kcal capita <sup>-1</sup> d <sup>-1</sup> ) |
|------------------|---------------------|----------------------------|----------------|----------------------------------------------------------------|
| 8                | Antigua and Barbuda | Cereals - Excluding Beer   | 2000           | 594                                                            |
| 8                | Antigua and Barbuda | Cereals, Other             | 2000           | 9                                                              |
| 8                | Antigua and Barbuda | Cocoa Beans and products   | 2000           | 21                                                             |
| 8                | Antigua and Barbuda | Cottonseed Oil             | 2000           | 2                                                              |
| 8                | Antigua and Barbuda | Crustaceans                | 2000           | 10                                                             |
| 8                | Antigua and Barbuda | Demersal Fish              | 2000           | 19                                                             |
| 8                | Antigua and Barbuda | Eggs                       | 2000           | 9                                                              |
| 8                | Antigua and Barbuda | Fats, Animals, Raw         | 2000           | 34                                                             |
| 8                | Antigua and Barbuda | Fish, Seafood              | 2000           | 64                                                             |
| 8                | Antigua and Barbuda | Freshwater Fish            | 2000           | 2                                                              |
| 8                | Antigua and Barbuda | Fruits - Excluding Wine    | 2000           | 170                                                            |
| 8                | Antigua and Barbuda | Fruits, Other              | 2000           | 119                                                            |
| 8                | Antigua and Barbuda | Grand Total                | 2000           | 2,150                                                          |
| 8                | Antigua and Barbuda | Grapefruit and products    | 2000           | 1                                                              |
| 8                | Antigua and Barbuda | Lemons, Limes and products | 2000           | 1                                                              |
| 8                | Antigua and Barbuda | Maize and products         | 2000           | 27                                                             |
| 8                | Antigua and Barbuda | Marine Fish, Other         | 2000           | 15                                                             |
| 8                | Antigua and Barbuda | Meat                       | 2000           | 312                                                            |
| 8                | Antigua and Barbuda | Milk - Excluding Butter    | 2000           | 250                                                            |
| 8                | Antigua and Barbuda | Miscellaneous              | 2000           | 9                                                              |
| 8                | Antigua and Barbuda | Molluscs, Other            | 2000           | 4                                                              |
| 8                | Antigua and Barbuda | Mutton & Goat Meat         | 2000           | 11                                                             |
| 8                | Antigua and Barbuda | Oats                       | 2000           | 13                                                             |
| 8                | Antigua and Barbuda | Offals                     | 2000           | 4                                                              |
| 8                | Antigua and Barbuda | Oilcrops Oil, Other        | 2000           | 88                                                             |
| 8                | Antigua and Barbuda | Olive Oil                  | 2000           | 6                                                              |
| 8                | Antigua and Barbuda | Onions                     | 2000           | 2                                                              |
| 8                | Antigua and Barbuda | Oranges, Mandarines        | 2000           | 9                                                              |
| 8                | Antigua and Barbuda | Peas                       | 2000           | 3                                                              |
| 8                | Antigua and Barbuda | Pelagic Fish               | 2000           | 15                                                             |
| 8                | Antigua and Barbuda | Pepper                     | 2000           | 1                                                              |
| 8                | Antigua and Barbuda | Pigmeat                    | 2000           | 39                                                             |
| 8                | Antigua and Barbuda | Pineapples and products    | 2000           | 8                                                              |
| 8                | Antigua and Barbuda | Potatoes and products      | 2000           | 11                                                             |
| 8                | Antigua and Barbuda | Poultry Meat               | 2000           | 215                                                            |
| 8                | Antigua and Barbuda | Pulses                     | 2000           | 36                                                             |
| 8                | Antigua and Barbuda | Pulses, Other and products | 2000           | 16                                                             |
| 8                | Antigua and Barbuda | Rice (Milled Equivalent)   | 2000           | 94                                                             |
| 8                | Antigua and Barbuda | Roots, Other               | 2000           | 1                                                              |
| 8                | Antigua and Barbuda | Soyabean Oil               | 2000           | 99                                                             |
| 8                | Antigua and Barbuda | Spices                     | 2000           | 2                                                              |
| 8                | Antigua and Barbuda | Spices, Other              | 2000           | 1                                                              |
| 8                | Antigua and Barbuda | Starchy Roots              | 2000           | 21                                                             |
| 8                | Antigua and Barbuda | Stimulants                 | 2000           | 21                                                             |
| 8                | Antigua and Barbuda | Sugar & Sweeteners         | 2000           | 298                                                            |
| 8                | Antigua and Barbuda | Sugar (Raw Equivalent)     | 2000           | 287                                                            |
| 8                | Antigua and Barbuda | Sweet potatoes             | 2000           | 6                                                              |
| 8                | Antigua and Barbuda | Sweeteners, Other          | 2000           | 11                                                             |
| 8                | Antigua and Barbuda | Tomatoes and products      | 2000           | 2                                                              |
| 8                | Antigua and Barbuda | Vegetable Oils             | 2000           | 195                                                            |
| 8                | Antigua and Barbuda | Vegetables                 | 2000           | 34                                                             |
| 8                | Antigua and Barbuda | Vegetables, Other          | 2000           | 29                                                             |
| 8                | Antigua and Barbuda | Vegetal Products           | 2000           | 1,450                                                          |
| 8                | Antigua and Barbuda | Wheat and products         | 2000           | 451                                                            |
| 8                | Antigua and Barbuda | Wine                       | 2000           | 12                                                             |
| 8                | Antigua and Barbuda | Yams                       | 2000           | 1                                                              |
| 8                | Antigua and Barbuda | Alcoholic Beverages        | 2001           | 64                                                             |
| 8                | Antigua and Barbuda | Animal fats                | 2001           | 61                                                             |
| 8                | Antigua and Barbuda | Animal Products            | 2001           | 705                                                            |
| 8                | Antigua and Barbuda | Apples and products        | 2001           | 2                                                              |
| 8                | Antigua and Barbuda | Bananas                    | 2001           | 27                                                             |
| 8                | Antigua and Barbuda | Beans                      | 2001           | 24                                                             |
| 8                | Antigua and Barbuda | Beer                       | 2001           | 9                                                              |
| 8                | Antigua and Barbuda | Beverages, Alcoholic       | 2001           | 42                                                             |
| 8                | Antigua and Barbuda | Bovine Meat                | 2001           | 40                                                             |
| 8                | Antigua and Barbuda | Butter, Ghee               | 2001           | 27                                                             |
| 8                | Antigua and Barbuda | Cassava and products       | 2001           | 2                                                              |
| 8                | Antigua and Barbuda | Cereals - Excluding Beer   | 2001           | 554                                                            |
| 8                | Antigua and Barbuda | Cereals, Other             | 2001           | 9                                                              |
| 8                | Antigua and Barbuda | Cocoa Beans and products   | 2001           | 12                                                             |
| 8                | Antigua and Barbuda | Cottonseed Oil             | 2001           | 8                                                              |
| 8                | Antigua and Barbuda | Crustaceans                | 2001           | 4                                                              |
| 8                | Antigua and Barbuda | Demersal Fish              | 2001           | 24                                                             |
| 8                | Antigua and Barbuda | Eggs                       | 2001           | 13                                                             |
| 8                | Antigua and Barbuda | Fats, Animals, Raw         | 2001           | 34                                                             |
| 8                | Antigua and Barbuda | Fish, Seafood              | 2001           | 65                                                             |
| 8                | Antigua and Barbuda | Fruits - Excluding Wine    | 2001           | 166                                                            |
| 8                | Antigua and Barbuda | Fruits, Other              | 2001           | 124                                                            |
| 8                | Antigua and Barbuda | Grand Total                | 2001           | 2,085                                                          |
| 8                | Antigua and Barbuda | Grapefruit and products    | 2001           | 1                                                              |
| 8                | Antigua and Barbuda | Lemons, Limes and products | 2001           | 1                                                              |
| 8                | Antigua and Barbuda | Maize and products         | 2001           | 31                                                             |
| 8                | Antigua and Barbuda | Marine Fish, Other         | 2001           | 13                                                             |
| 8                | Antigua and Barbuda | Meat                       | 2001           | 309                                                            |
| 8                | Antigua and Barbuda | Milk - Excluding Butter    | 2001           | 252                                                            |
| 8                | Antigua and Barbuda | Miscellaneous              | 2001           | 4                                                              |
| 8                | Antigua and Barbuda | Molluscs, Other            | 2001           | 1                                                              |
| 8                | Antigua and Barbuda | Mutton & Goat Meat         | 2001           | 13                                                             |
| 8                | Antigua and Barbuda | Oats                       | 2001           | 14                                                             |
| 8                | Antigua and Barbuda | Offals                     | 2001           | 4                                                              |
| 8                | Antigua and Barbuda | Oilcrops Oil, Other        | 2001           | 76                                                             |
| 8                | Antigua and Barbuda | Olive Oil                  | 2001           | 3                                                              |
| 8                | Antigua and Barbuda | Onions                     | 2001           | 5                                                              |
| 8                | Antigua and Barbuda | Oranges, Mandarines        | 2001           | 8                                                              |
| 8                | Antigua and Barbuda | Peas                       | 2001           | 6                                                              |
| 8                | Antigua and Barbuda | Pelagic Fish               | 2001           | 21                                                             |
| 8                | Antigua and Barbuda | Pepper                     | 2001           | 3                                                              |

Dietary calcium and zinc deficiency risks are decreasing but remain prevalent

| FAO Country code | Country             | Food item                  | Reference year | Net energy supply (kcal <i>capita</i> <sup>-1</sup> d <sup>-1</sup> ) |
|------------------|---------------------|----------------------------|----------------|-----------------------------------------------------------------------|
| 8                | Antigua and Barbuda | Pigmeat                    | 2001           | 38                                                                    |
| 8                | Antigua and Barbuda | Pineapples and products    | 2001           | 4                                                                     |
| 8                | Antigua and Barbuda | Potatoes and products      | 2001           | 18                                                                    |
| 8                | Antigua and Barbuda | Poultry Meat               | 2001           | 218                                                                   |
| 8                | Antigua and Barbuda | Pulses                     | 2001           | 33                                                                    |
| 8                | Antigua and Barbuda | Pulses, Other and products | 2001           | 3                                                                     |
| 8                | Antigua and Barbuda | Rice (Milled Equivalent)   | 2001           | 93                                                                    |
| 8                | Antigua and Barbuda | Roots, Other               | 2001           | 1                                                                     |
| 8                | Antigua and Barbuda | Soyabean Oil               | 2001           | 103                                                                   |
| 8                | Antigua and Barbuda | Spices                     | 2001           | 3                                                                     |
| 8                | Antigua and Barbuda | Starchy Roots              | 2001           | 28                                                                    |
| 8                | Antigua and Barbuda | Stimulants                 | 2001           | 12                                                                    |
| 8                | Antigua and Barbuda | Sugar & Sweeteners         | 2001           | 298                                                                   |
| 8                | Antigua and Barbuda | Sugar (Raw Equivalent)     | 2001           | 287                                                                   |
| 8                | Antigua and Barbuda | Sweet potatoes             | 2001           | 6                                                                     |
| 8                | Antigua and Barbuda | Sweeteners, Other          | 2001           | 11                                                                    |
| 8                | Antigua and Barbuda | Tomatoes and products      | 2001           | 2                                                                     |
| 8                | Antigua and Barbuda | Vegetable Oils             | 2001           | 191                                                                   |
| 8                | Antigua and Barbuda | Vegetables                 | 2001           | 28                                                                    |
| 8                | Antigua and Barbuda | Vegetables, Other          | 2001           | 20                                                                    |
| 8                | Antigua and Barbuda | Vegetal Products           | 2001           | 1,381                                                                 |
| 8                | Antigua and Barbuda | Wheat and products         | 2001           | 406                                                                   |
| 8                | Antigua and Barbuda | Wine                       | 2001           | 13                                                                    |
| 8                | Antigua and Barbuda | Yams                       | 2001           | 2                                                                     |
| 8                | Antigua and Barbuda | Alcoholic Beverages        | 2002           | 61                                                                    |
| 8                | Antigua and Barbuda | Animal fats                | 2002           | 52                                                                    |
| 8                | Antigua and Barbuda | Animal Products            | 2002           | 694                                                                   |
| 8                | Antigua and Barbuda | Bananas                    | 2002           | 27                                                                    |
| 8                | Antigua and Barbuda | Beans                      | 2002           | 24                                                                    |
| 8                | Antigua and Barbuda | Beer                       | 2002           | 8                                                                     |
| 8                | Antigua and Barbuda | Beverages, Alcoholic       | 2002           | 42                                                                    |
| 8                | Antigua and Barbuda | Bovine Meat                | 2002           | 42                                                                    |
| 8                | Antigua and Barbuda | Butter, Ghee               | 2002           | 18                                                                    |
| 8                | Antigua and Barbuda | Cassava and products       | 2002           | 2                                                                     |
| 8                | Antigua and Barbuda | Cereals - Excluding Beer   | 2002           | 549                                                                   |
| 8                | Antigua and Barbuda | Cereals, Other             | 2002           | 9                                                                     |
| 8                | Antigua and Barbuda | Cocoa Beans and products   | 2002           | 13                                                                    |
| 8                | Antigua and Barbuda | Cottonseed Oil             | 2002           | 8                                                                     |
| 8                | Antigua and Barbuda | Crustaceans                | 2002           | 7                                                                     |
| 8                | Antigua and Barbuda | Demersal Fish              | 2002           | 30                                                                    |
| 8                | Antigua and Barbuda | Eggs                       | 2002           | 10                                                                    |
| 8                | Antigua and Barbuda | Fats, Animals, Raw         | 2002           | 33                                                                    |
| 8                | Antigua and Barbuda | Fish, Liver Oil            | 2002           | 1                                                                     |
| 8                | Antigua and Barbuda | Fish, Seafood              | 2002           | 67                                                                    |
| 8                | Antigua and Barbuda | Freshwater Fish            | 2002           | 2                                                                     |
| 8                | Antigua and Barbuda | Fruits - Excluding Wine    | 2002           | 157                                                                   |
| 8                | Antigua and Barbuda | Fruits, Other              | 2002           | 118                                                                   |
| 8                | Antigua and Barbuda | Grand Total                | 2002           | 2,069                                                                 |
| 8                | Antigua and Barbuda | Grapefruit and products    | 2002           | 1                                                                     |
| 8                | Antigua and Barbuda | Lemons, Limes and products | 2002           | 1                                                                     |
| 8                | Antigua and Barbuda | Maize and products         | 2002           | 30                                                                    |
| 8                | Antigua and Barbuda | Maize Germ Oil             | 2002           | 2                                                                     |
| 8                | Antigua and Barbuda | Marine Fish, Other         | 2002           | 7                                                                     |
| 8                | Antigua and Barbuda | Meat                       | 2002           | 308                                                                   |
| 8                | Antigua and Barbuda | Milk - Excluding Butter    | 2002           | 253                                                                   |
| 8                | Antigua and Barbuda | Miscellaneous              | 2002           | 3                                                                     |
| 8                | Antigua and Barbuda | Molluscs, Other            | 2002           | 2                                                                     |
| 8                | Antigua and Barbuda | Mutton & Goat Meat         | 2002           | 16                                                                    |
| 8                | Antigua and Barbuda | Oats                       | 2002           | 8                                                                     |
| 8                | Antigua and Barbuda | Offals                     | 2002           | 4                                                                     |
| 8                | Antigua and Barbuda | Oilcrops Oil, Other        | 2002           | 85                                                                    |
| 8                | Antigua and Barbuda | Olive Oil                  | 2002           | 5                                                                     |
| 8                | Antigua and Barbuda | Onions                     | 2002           | 4                                                                     |
| 8                | Antigua and Barbuda | Oranges, Mandarines        | 2002           | 8                                                                     |
| 8                | Antigua and Barbuda | Peas                       | 2002           | 5                                                                     |
| 8                | Antigua and Barbuda | Pelagic Fish               | 2002           | 19                                                                    |
| 8                | Antigua and Barbuda | Pigmeat                    | 2002           | 45                                                                    |
| 8                | Antigua and Barbuda | Pineapples and products    | 2002           | 2                                                                     |
| 8                | Antigua and Barbuda | Potatoes and products      | 2002           | 19                                                                    |
| 8                | Antigua and Barbuda | Poultry Meat               | 2002           | 204                                                                   |
| 8                | Antigua and Barbuda | Pulses                     | 2002           | 33                                                                    |
| 8                | Antigua and Barbuda | Pulses, Other and products | 2002           | 4                                                                     |
| 8                | Antigua and Barbuda | Rice (Milled Equivalent)   | 2002           | 92                                                                    |
| 8                | Antigua and Barbuda | Roots, Other               | 2002           | 1                                                                     |
| 8                | Antigua and Barbuda | Soyabean Oil               | 2002           | 101                                                                   |
| 8                | Antigua and Barbuda | Spices                     | 2002           | 2                                                                     |
| 8                | Antigua and Barbuda | Spices, Other              | 2002           | 1                                                                     |
| 8                | Antigua and Barbuda | Starchy Roots              | 2002           | 29                                                                    |
| 8                | Antigua and Barbuda | Stimulants                 | 2002           | 14                                                                    |
| 8                | Antigua and Barbuda | Sugar & Sweeteners         | 2002           | 296                                                                   |
| 8                | Antigua and Barbuda | Sugar (Raw Equivalent)     | 2002           | 284                                                                   |
| 8                | Antigua and Barbuda | Sweet potatoes             | 2002           | 5                                                                     |
| 8                | Antigua and Barbuda | Sweeteners, Other          | 2002           | 12                                                                    |
| 8                | Antigua and Barbuda | Tomatoes and products      | 2002           | 2                                                                     |
| 8                | Antigua and Barbuda | Vegetable Oils             | 2002           | 202                                                                   |
| 8                | Antigua and Barbuda | Vegetables                 | 2002           | 30                                                                    |
| 8                | Antigua and Barbuda | Vegetables, Other          | 2002           | 23                                                                    |
| 8                | Antigua and Barbuda | Vegetal Products           | 2002           | 1,375                                                                 |
| 8                | Antigua and Barbuda | Wheat and products         | 2002           | 409                                                                   |
| 8                | Antigua and Barbuda | Wine                       | 2002           | 11                                                                    |
| 8                | Antigua and Barbuda | Yams                       | 2002           | 2                                                                     |
| 8                | Antigua and Barbuda | Alcoholic Beverages        | 2003           | 67                                                                    |
| 8                | Antigua and Barbuda | Animal fats                | 2003           | 64                                                                    |
| 8                | Antigua and Barbuda | Animal Products            | 2003           | 697                                                                   |
| 8                | Antigua and Barbuda | Apples and products        | 2003           | 1                                                                     |
| 8                | Antigua and Barbuda | Bananas                    | 2003           | 21                                                                    |
| 8                | Antigua and Barbuda | Beans                      | 2003           | 26                                                                    |

Dietary calcium and zinc deficiency risks are decreasing but remain prevalent

| FAO Country code | Country             | Food item                  | Reference year | Net energy supply (kcal <i>capita</i> <sup>-1</sup> d <sup>-1</sup> ) |
|------------------|---------------------|----------------------------|----------------|-----------------------------------------------------------------------|
| 8                | Antigua and Barbuda | Beer                       | 2003           | 14                                                                    |
| 8                | Antigua and Barbuda | Beverages, Alcoholic       | 2003           | 44                                                                    |
| 8                | Antigua and Barbuda | Bovine Meat                | 2003           | 39                                                                    |
| 8                | Antigua and Barbuda | Butter, Ghee               | 2003           | 30                                                                    |
| 8                | Antigua and Barbuda | Cassava and products       | 2003           | 2                                                                     |
| 8                | Antigua and Barbuda | Cereals - Excluding Beer   | 2003           | 554                                                                   |
| 8                | Antigua and Barbuda | Cocoa Beans and products   | 2003           | 10                                                                    |
| 8                | Antigua and Barbuda | Coffee and products        | 2003           | 1                                                                     |
| 8                | Antigua and Barbuda | Cottonseed Oil             | 2003           | 2                                                                     |
| 8                | Antigua and Barbuda | Crustaceans                | 2003           | 23                                                                    |
| 8                | Antigua and Barbuda | Demersal Fish              | 2003           | 24                                                                    |
| 8                | Antigua and Barbuda | Eggs                       | 2003           | 10                                                                    |
| 8                | Antigua and Barbuda | Fats, Animals, Raw         | 2003           | 34                                                                    |
| 8                | Antigua and Barbuda | Fish, Seafood              | 2003           | 73                                                                    |
| 8                | Antigua and Barbuda | Freshwater Fish            | 2003           | 3                                                                     |
| 8                | Antigua and Barbuda | Fruits - Excluding Wine    | 2003           | 152                                                                   |
| 8                | Antigua and Barbuda | Fruits, Other              | 2003           | 117                                                                   |
| 8                | Antigua and Barbuda | Grand Total                | 2003           | 2,071                                                                 |
| 8                | Antigua and Barbuda | Grapefruit and products    | 2003           | 1                                                                     |
| 8                | Antigua and Barbuda | Lemons, Limes and products | 2003           | 1                                                                     |
| 8                | Antigua and Barbuda | Maize and products         | 2003           | 32                                                                    |
| 8                | Antigua and Barbuda | Marine Fish, Other         | 2003           | 7                                                                     |
| 8                | Antigua and Barbuda | Meat                       | 2003           | 309                                                                   |
| 8                | Antigua and Barbuda | Milk - Excluding Butter    | 2003           | 236                                                                   |
| 8                | Antigua and Barbuda | Miscellaneous              | 2003           | 5                                                                     |
| 8                | Antigua and Barbuda | Molluscs, Other            | 2003           | 2                                                                     |
| 8                | Antigua and Barbuda | Mutton & Goat Meat         | 2003           | 12                                                                    |
| 8                | Antigua and Barbuda | Oats                       | 2003           | 12                                                                    |
| 8                | Antigua and Barbuda | Offals                     | 2003           | 4                                                                     |
| 8                | Antigua and Barbuda | Oilcrops Oil, Other        | 2003           | 85                                                                    |
| 8                | Antigua and Barbuda | Olive Oil                  | 2003           | 19                                                                    |
| 8                | Antigua and Barbuda | Onions                     | 2003           | 4                                                                     |
| 8                | Antigua and Barbuda | Oranges, Mandarines        | 2003           | 10                                                                    |
| 8                | Antigua and Barbuda | Peas                       | 2003           | 5                                                                     |
| 8                | Antigua and Barbuda | Pelagic Fish               | 2003           | 14                                                                    |
| 8                | Antigua and Barbuda | Pepper                     | 2003           | 1                                                                     |
| 8                | Antigua and Barbuda | Pigmeat                    | 2003           | 46                                                                    |
| 8                | Antigua and Barbuda | Pineapples and products    | 2003           | 2                                                                     |
| 8                | Antigua and Barbuda | Potatoes and products      | 2003           | 17                                                                    |
| 8                | Antigua and Barbuda | Poultry Meat               | 2003           | 211                                                                   |
| 8                | Antigua and Barbuda | Pulses                     | 2003           | 36                                                                    |
| 8                | Antigua and Barbuda | Pulses, Other and products | 2003           | 5                                                                     |
| 8                | Antigua and Barbuda | Rice (Milled Equivalent)   | 2003           | 94                                                                    |
| 8                | Antigua and Barbuda | Roots, Other               | 2003           | 1                                                                     |
| 8                | Antigua and Barbuda | Soyabean Oil               | 2003           | 95                                                                    |
| 8                | Antigua and Barbuda | Spices                     | 2003           | 2                                                                     |
| 8                | Antigua and Barbuda | Spices, Other              | 2003           | 1                                                                     |
| 8                | Antigua and Barbuda | Starchy Roots              | 2003           | 28                                                                    |
| 8                | Antigua and Barbuda | Stimulants                 | 2003           | 11                                                                    |
| 8                | Antigua and Barbuda | Sugar & Sweeteners         | 2003           | 288                                                                   |
| 8                | Antigua and Barbuda | Sugar (Raw Equivalent)     | 2003           | 278                                                                   |
| 8                | Antigua and Barbuda | Sweet potatoes             | 2003           | 6                                                                     |
| 8                | Antigua and Barbuda | Sweeteners, Other          | 2003           | 11                                                                    |
| 8                | Antigua and Barbuda | Tomatoes and products      | 2003           | 2                                                                     |
| 8                | Antigua and Barbuda | Vegetable Oils             | 2003           | 201                                                                   |
| 8                | Antigua and Barbuda | Vegetables                 | 2003           | 29                                                                    |
| 8                | Antigua and Barbuda | Vegetables, Other          | 2003           | 23                                                                    |
| 8                | Antigua and Barbuda | Vegetal Products           | 2003           | 1,374                                                                 |
| 8                | Antigua and Barbuda | Wheat and products         | 2003           | 417                                                                   |
| 8                | Antigua and Barbuda | Wine                       | 2003           | 9                                                                     |
| 8                | Antigua and Barbuda | Yams                       | 2003           | 2                                                                     |
| 8                | Antigua and Barbuda | Alcoholic Beverages        | 2004           | 65                                                                    |
| 8                | Antigua and Barbuda | Animal fats                | 2004           | 60                                                                    |
| 8                | Antigua and Barbuda | Animal Products            | 2004           | 666                                                                   |
| 8                | Antigua and Barbuda | Apples and products        | 2004           | 1                                                                     |
| 8                | Antigua and Barbuda | Bananas                    | 2004           | 20                                                                    |
| 8                | Antigua and Barbuda | Beans                      | 2004           | 14                                                                    |
| 8                | Antigua and Barbuda | Beer                       | 2004           | 16                                                                    |
| 8                | Antigua and Barbuda | Beverages, Alcoholic       | 2004           | 42                                                                    |
| 8                | Antigua and Barbuda | Bovine Meat                | 2004           | 37                                                                    |
| 8                | Antigua and Barbuda | Butter, Ghee               | 2004           | 22                                                                    |
| 8                | Antigua and Barbuda | Cassava and products       | 2004           | 2                                                                     |
| 8                | Antigua and Barbuda | Cephalopods                | 2004           | 1                                                                     |
| 8                | Antigua and Barbuda | Cereals - Excluding Beer   | 2004           | 578                                                                   |
| 8                | Antigua and Barbuda | Cereals, Other             | 2004           | 3                                                                     |
| 8                | Antigua and Barbuda | Cocoa Beans and products   | 2004           | 17                                                                    |
| 8                | Antigua and Barbuda | Coffee and products        | 2004           | 1                                                                     |
| 8                | Antigua and Barbuda | Cottonseed Oil             | 2004           | 2                                                                     |
| 8                | Antigua and Barbuda | Crustaceans                | 2004           | 10                                                                    |
| 8                | Antigua and Barbuda | Demersal Fish              | 2004           | 26                                                                    |
| 8                | Antigua and Barbuda | Eggs                       | 2004           | 12                                                                    |
| 8                | Antigua and Barbuda | Fats, Animals, Raw         | 2004           | 38                                                                    |
| 8                | Antigua and Barbuda | Fish, Seafood              | 2004           | 76                                                                    |
| 8                | Antigua and Barbuda | Freshwater Fish            | 2004           | 2                                                                     |
| 8                | Antigua and Barbuda | Fruits - Excluding Wine    | 2004           | 154                                                                   |
| 8                | Antigua and Barbuda | Fruits, Other              | 2004           | 117                                                                   |
| 8                | Antigua and Barbuda | Grand Total                | 2004           | 2,107                                                                 |
| 8                | Antigua and Barbuda | Grapefruit and products    | 2004           | 1                                                                     |
| 8                | Antigua and Barbuda | Lemons, Limes and products | 2004           | 1                                                                     |
| 8                | Antigua and Barbuda | Maize and products         | 2004           | 32                                                                    |
| 8                | Antigua and Barbuda | Marine Fish, Other         | 2004           | 13                                                                    |
| 8                | Antigua and Barbuda | Meat                       | 2004           | 310                                                                   |
| 8                | Antigua and Barbuda | Milk - Excluding Butter    | 2004           | 204                                                                   |
| 8                | Antigua and Barbuda | Miscellaneous              | 2004           | 5                                                                     |
| 8                | Antigua and Barbuda | Molluscs, Other            | 2004           | 3                                                                     |
| 8                | Antigua and Barbuda | Mutton & Goat Meat         | 2004           | 13                                                                    |
| 8                | Antigua and Barbuda | Oats                       | 2004           | 8                                                                     |



Dietary calcium and zinc deficiency risks are decreasing but remain prevalent

| FAO Country code | Country             | Food item                       | Reference year | Net energy supply (kcal capita <sup>-1</sup> d <sup>-1</sup> ) |
|------------------|---------------------|---------------------------------|----------------|----------------------------------------------------------------|
| 8                | Antigua and Barbuda | Offals                          | 2004           | 4                                                              |
| 8                | Antigua and Barbuda | Oilcrops Oil, Other             | 2004           | 79                                                             |
| 8                | Antigua and Barbuda | Olive Oil                       | 2004           | 28                                                             |
| 8                | Antigua and Barbuda | Onions                          | 2004           | 4                                                              |
| 8                | Antigua and Barbuda | Oranges, Mandarines             | 2004           | 11                                                             |
| 8                | Antigua and Barbuda | Peas                            | 2004           | 2                                                              |
| 8                | Antigua and Barbuda | Pelagic Fish                    | 2004           | 20                                                             |
| 8                | Antigua and Barbuda | Pepper                          | 2004           | 1                                                              |
| 8                | Antigua and Barbuda | Pigmeat                         | 2004           | 43                                                             |
| 8                | Antigua and Barbuda | Pineapples and products         | 2004           | 2                                                              |
| 8                | Antigua and Barbuda | Potatoes and products           | 2004           | 16                                                             |
| 8                | Antigua and Barbuda | Poultry Meat                    | 2004           | 216                                                            |
| 8                | Antigua and Barbuda | Pulses                          | 2004           | 21                                                             |
| 8                | Antigua and Barbuda | Pulses, Other and products      | 2004           | 5                                                              |
| 8                | Antigua and Barbuda | Rice (Milled Equivalent)        | 2004           | 100                                                            |
| 8                | Antigua and Barbuda | Roots, Other                    | 2004           | 1                                                              |
| 8                | Antigua and Barbuda | Soyabean Oil                    | 2004           | 107                                                            |
| 8                | Antigua and Barbuda | Spices                          | 2004           | 3                                                              |
| 8                | Antigua and Barbuda | Spices, Other                   | 2004           | 2                                                              |
| 8                | Antigua and Barbuda | Starchy Roots                   | 2004           | 28                                                             |
| 8                | Antigua and Barbuda | Stimulants                      | 2004           | 21                                                             |
| 8                | Antigua and Barbuda | Sugar & Sweeteners              | 2004           | 320                                                            |
| 8                | Antigua and Barbuda | Sugar (Raw Equivalent)          | 2004           | 306                                                            |
| 8                | Antigua and Barbuda | Sweet potatoes                  | 2004           | 6                                                              |
| 8                | Antigua and Barbuda | Sweeteners, Other               | 2004           | 14                                                             |
| 8                | Antigua and Barbuda | Tea (including mate)            | 2004           | 3                                                              |
| 8                | Antigua and Barbuda | Tomatoes and products           | 2004           | 2                                                              |
| 8                | Antigua and Barbuda | Vegetable Oils                  | 2004           | 216                                                            |
| 8                | Antigua and Barbuda | Vegetables                      | 2004           | 31                                                             |
| 8                | Antigua and Barbuda | Vegetables, Other               | 2004           | 25                                                             |
| 8                | Antigua and Barbuda | Vegetal Products                | 2004           | 1,441                                                          |
| 8                | Antigua and Barbuda | Wheat and products              | 2004           | 435                                                            |
| 8                | Antigua and Barbuda | Wine                            | 2004           | 7                                                              |
| 8                | Antigua and Barbuda | Yams                            | 2004           | 2                                                              |
| 8                | Antigua and Barbuda | Alcoholic Beverages             | 2005           | 73                                                             |
| 8                | Antigua and Barbuda | Animal fats                     | 2005           | 66                                                             |
| 8                | Antigua and Barbuda | Animal Products                 | 2005           | 770                                                            |
| 8                | Antigua and Barbuda | Apples and products             | 2005           | 7                                                              |
| 8                | Antigua and Barbuda | Bananas                         | 2005           | 16                                                             |
| 8                | Antigua and Barbuda | Beans                           | 2005           | 12                                                             |
| 8                | Antigua and Barbuda | Beer                            | 2005           | 18                                                             |
| 8                | Antigua and Barbuda | Beverages, Alcoholic            | 2005           | 41                                                             |
| 8                | Antigua and Barbuda | Beverages, Fermented            | 2005           | 1                                                              |
| 8                | Antigua and Barbuda | Bovine Meat                     | 2005           | 44                                                             |
| 8                | Antigua and Barbuda | Butter, Ghee                    | 2005           | 25                                                             |
| 8                | Antigua and Barbuda | Cassava and products            | 2005           | 3                                                              |
| 8                | Antigua and Barbuda | Cereals - Excluding Beer        | 2005           | 630                                                            |
| 8                | Antigua and Barbuda | Cereals, Other                  | 2005           | 4                                                              |
| 8                | Antigua and Barbuda | Citrus, Other                   | 2005           | 4                                                              |
| 8                | Antigua and Barbuda | Cocoa Beans and products        | 2005           | 10                                                             |
| 8                | Antigua and Barbuda | Coconuts - Incl Copra           | 2005           | 6                                                              |
| 8                | Antigua and Barbuda | Coffee and products             | 2005           | 4                                                              |
| 8                | Antigua and Barbuda | Cottonseed Oil                  | 2005           | 2                                                              |
| 8                | Antigua and Barbuda | Cream                           | 2005           | 3                                                              |
| 8                | Antigua and Barbuda | Crustaceans                     | 2005           | 10                                                             |
| 8                | Antigua and Barbuda | Demersal Fish                   | 2005           | 7                                                              |
| 8                | Antigua and Barbuda | Eggs                            | 2005           | 17                                                             |
| 8                | Antigua and Barbuda | Fats, Animals, Raw              | 2005           | 37                                                             |
| 8                | Antigua and Barbuda | Fish, Seafood                   | 2005           | 86                                                             |
| 8                | Antigua and Barbuda | Freshwater Fish                 | 2005           | 2                                                              |
| 8                | Antigua and Barbuda | Fruits - Excluding Wine         | 2005           | 178                                                            |
| 8                | Antigua and Barbuda | Fruits, Other                   | 2005           | 111                                                            |
| 8                | Antigua and Barbuda | Grand Total                     | 2005           | 2,326                                                          |
| 8                | Antigua and Barbuda | Grapefruit and products         | 2005           | 2                                                              |
| 8                | Antigua and Barbuda | Grapes and products (excl wine) | 2005           | 8                                                              |
| 8                | Antigua and Barbuda | Groundnut Oil                   | 2005           | 4                                                              |
| 8                | Antigua and Barbuda | Groundnuts (Shelled Eq)         | 2005           | 15                                                             |
| 8                | Antigua and Barbuda | Honey                           | 2005           | 2                                                              |
| 8                | Antigua and Barbuda | Lemons, Limes and products      | 2005           | 1                                                              |
| 8                | Antigua and Barbuda | Maize and products              | 2005           | 34                                                             |
| 8                | Antigua and Barbuda | Maize Germ Oil                  | 2005           | 6                                                              |
| 8                | Antigua and Barbuda | Marine Fish, Other              | 2005           | 38                                                             |
| 8                | Antigua and Barbuda | Meat                            | 2005           | 352                                                            |
| 8                | Antigua and Barbuda | Meat, Other                     | 2005           | 11                                                             |
| 8                | Antigua and Barbuda | Milk - Excluding Butter         | 2005           | 238                                                            |
| 8                | Antigua and Barbuda | Miscellaneous                   | 2005           | 6                                                              |
| 8                | Antigua and Barbuda | Molluscs, Other                 | 2005           | 4                                                              |
| 8                | Antigua and Barbuda | Mutton & Goat Meat              | 2005           | 16                                                             |
| 8                | Antigua and Barbuda | Oats                            | 2005           | 9                                                              |
| 8                | Antigua and Barbuda | Offals                          | 2005           | 11                                                             |
| 8                | Antigua and Barbuda | Oilcrops                        | 2005           | 28                                                             |
| 8                | Antigua and Barbuda | Oilcrops Oil, Other             | 2005           | 89                                                             |
| 8                | Antigua and Barbuda | Olive Oil                       | 2005           | 17                                                             |
| 8                | Antigua and Barbuda | Olives (including preserved)    | 2005           | 1                                                              |
| 8                | Antigua and Barbuda | Onions                          | 2005           | 7                                                              |
| 8                | Antigua and Barbuda | Oranges, Mandarines             | 2005           | 16                                                             |
| 8                | Antigua and Barbuda | Peas                            | 2005           | 5                                                              |
| 8                | Antigua and Barbuda | Pelagic Fish                    | 2005           | 25                                                             |
| 8                | Antigua and Barbuda | Pepper                          | 2005           | 2                                                              |
| 8                | Antigua and Barbuda | Pigmeat                         | 2005           | 57                                                             |
| 8                | Antigua and Barbuda | Pimento                         | 2005           | 1                                                              |
| 8                | Antigua and Barbuda | Pineapples and products         | 2005           | 6                                                              |
| 8                | Antigua and Barbuda | Plantains                       | 2005           | 7                                                              |
| 8                | Antigua and Barbuda | Potatoes and products           | 2005           | 22                                                             |
| 8                | Antigua and Barbuda | Poultry Meat                    | 2005           | 224                                                            |
| 8                | Antigua and Barbuda | Pulses                          | 2005           | 26                                                             |
| 8                | Antigua and Barbuda | Pulses, Other and products      | 2005           | 8                                                              |

Dietary calcium and zinc deficiency risks are decreasing but remain prevalent

| FAO Country code | Country             | Food item                       | Reference year | Net energy supply (kcal <i>capita</i> <sup>-1</sup> d <sup>-1</sup> ) |
|------------------|---------------------|---------------------------------|----------------|-----------------------------------------------------------------------|
| 8                | Antigua and Barbuda | Rape and Mustardseed            | 2005           | 5                                                                     |
| 8                | Antigua and Barbuda | Rice (Milled Equivalent)        | 2005           | 125                                                                   |
| 8                | Antigua and Barbuda | Roots, Other                    | 2005           | 4                                                                     |
| 8                | Antigua and Barbuda | Soyabean Oil                    | 2005           | 79                                                                    |
| 8                | Antigua and Barbuda | Spices                          | 2005           | 13                                                                    |
| 8                | Antigua and Barbuda | Spices, Other                   | 2005           | 9                                                                     |
| 8                | Antigua and Barbuda | Starchy Roots                   | 2005           | 39                                                                    |
| 8                | Antigua and Barbuda | Stimulants                      | 2005           | 14                                                                    |
| 8                | Antigua and Barbuda | Sugar & Sweeteners              | 2005           | 272                                                                   |
| 8                | Antigua and Barbuda | Sugar (Raw Equivalent)          | 2005           | 257                                                                   |
| 8                | Antigua and Barbuda | Sunflowerseed Oil               | 2005           | 2                                                                     |
| 8                | Antigua and Barbuda | Sweet potatoes                  | 2005           | 7                                                                     |
| 8                | Antigua and Barbuda | Sweeteners, Other               | 2005           | 14                                                                    |
| 8                | Antigua and Barbuda | Tea (including mate)            | 2005           | 1                                                                     |
| 8                | Antigua and Barbuda | Tomatoes and products           | 2005           | 7                                                                     |
| 8                | Antigua and Barbuda | Treenuts                        | 2005           | 2                                                                     |
| 8                | Antigua and Barbuda | Vegetable Oils                  | 2005           | 199                                                                   |
| 8                | Antigua and Barbuda | Vegetables                      | 2005           | 75                                                                    |
| 8                | Antigua and Barbuda | Vegetables, Other               | 2005           | 61                                                                    |
| 8                | Antigua and Barbuda | Vegetal Products                | 2005           | 1,556                                                                 |
| 8                | Antigua and Barbuda | Wheat and products              | 2005           | 457                                                                   |
| 8                | Antigua and Barbuda | Wine                            | 2005           | 12                                                                    |
| 8                | Antigua and Barbuda | Yams                            | 2005           | 2                                                                     |
| 8                | Antigua and Barbuda | Alcoholic Beverages             | 2006           | 74                                                                    |
| 8                | Antigua and Barbuda | Animal fats                     | 2006           | 68                                                                    |
| 8                | Antigua and Barbuda | Animal Products                 | 2006           | 765                                                                   |
| 8                | Antigua and Barbuda | Apples and products             | 2006           | 16                                                                    |
| 8                | Antigua and Barbuda | Bananas                         | 2006           | 17                                                                    |
| 8                | Antigua and Barbuda | Beans                           | 2006           | 9                                                                     |
| 8                | Antigua and Barbuda | Beer                            | 2006           | 18                                                                    |
| 8                | Antigua and Barbuda | Beverages, Alcoholic            | 2006           | 44                                                                    |
| 8                | Antigua and Barbuda | Beverages, Fermented            | 2006           | 1                                                                     |
| 8                | Antigua and Barbuda | Bovine Meat                     | 2006           | 45                                                                    |
| 8                | Antigua and Barbuda | Butter, Ghee                    | 2006           | 25                                                                    |
| 8                | Antigua and Barbuda | Cassava and products            | 2006           | 3                                                                     |
| 8                | Antigua and Barbuda | Cereals - Excluding Beer        | 2006           | 637                                                                   |
| 8                | Antigua and Barbuda | Cereals, Other                  | 2006           | 1                                                                     |
| 8                | Antigua and Barbuda | Cocoa Beans and products        | 2006           | 17                                                                    |
| 8                | Antigua and Barbuda | Coconuts - Incl Copra           | 2006           | 9                                                                     |
| 8                | Antigua and Barbuda | Coffee and products             | 2006           | 2                                                                     |
| 8                | Antigua and Barbuda | Cottonseed Oil                  | 2006           | 2                                                                     |
| 8                | Antigua and Barbuda | Cream                           | 2006           | 2                                                                     |
| 8                | Antigua and Barbuda | Crustaceans                     | 2006           | 11                                                                    |
| 8                | Antigua and Barbuda | Demersal Fish                   | 2006           | 9                                                                     |
| 8                | Antigua and Barbuda | Eggs                            | 2006           | 18                                                                    |
| 8                | Antigua and Barbuda | Fats, Animals, Raw              | 2006           | 41                                                                    |
| 8                | Antigua and Barbuda | Fish, Seafood                   | 2006           | 90                                                                    |
| 8                | Antigua and Barbuda | Freshwater Fish                 | 2006           | 2                                                                     |
| 8                | Antigua and Barbuda | Fruits - Excluding Wine         | 2006           | 181                                                                   |
| 8                | Antigua and Barbuda | Fruits, Other                   | 2006           | 110                                                                   |
| 8                | Antigua and Barbuda | Grand Total                     | 2006           | 2,329                                                                 |
| 8                | Antigua and Barbuda | Grapefruit and products         | 2006           | 1                                                                     |
| 8                | Antigua and Barbuda | Grapes and products (excl wine) | 2006           | 4                                                                     |
| 8                | Antigua and Barbuda | Groundnut Oil                   | 2006           | 3                                                                     |
| 8                | Antigua and Barbuda | Groundnuts (Shelled Eq)         | 2006           | 10                                                                    |
| 8                | Antigua and Barbuda | Lemons, Limes and products      | 2006           | 2                                                                     |
| 8                | Antigua and Barbuda | Maize and products              | 2006           | 33                                                                    |
| 8                | Antigua and Barbuda | Maize Germ Oil                  | 2006           | 1                                                                     |
| 8                | Antigua and Barbuda | Marine Fish, Other              | 2006           | 36                                                                    |
| 8                | Antigua and Barbuda | Meat                            | 2006           | 345                                                                   |
| 8                | Antigua and Barbuda | Meat, Other                     | 2006           | 10                                                                    |
| 8                | Antigua and Barbuda | Milk - Excluding Butter         | 2006           | 236                                                                   |
| 8                | Antigua and Barbuda | Miscellaneous                   | 2006           | 12                                                                    |
| 8                | Antigua and Barbuda | Molluscs, Other                 | 2006           | 3                                                                     |
| 8                | Antigua and Barbuda | Mutton & Goat Meat              | 2006           | 13                                                                    |
| 8                | Antigua and Barbuda | Oats                            | 2006           | 12                                                                    |
| 8                | Antigua and Barbuda | Offals                          | 2006           | 7                                                                     |
| 8                | Antigua and Barbuda | Oilcrops                        | 2006           | 28                                                                    |
| 8                | Antigua and Barbuda | Oilcrops Oil, Other             | 2006           | 82                                                                    |
| 8                | Antigua and Barbuda | Oilcrops, Other                 | 2006           | 2                                                                     |
| 8                | Antigua and Barbuda | Olive Oil                       | 2006           | 9                                                                     |
| 8                | Antigua and Barbuda | Onions                          | 2006           | 6                                                                     |
| 8                | Antigua and Barbuda | Oranges, Mandarines             | 2006           | 17                                                                    |
| 8                | Antigua and Barbuda | Peas                            | 2006           | 5                                                                     |
| 8                | Antigua and Barbuda | Pelagic Fish                    | 2006           | 28                                                                    |
| 8                | Antigua and Barbuda | Pepper                          | 2006           | 1                                                                     |
| 8                | Antigua and Barbuda | Pigmeat                         | 2006           | 51                                                                    |
| 8                | Antigua and Barbuda | Pineapples and products         | 2006           | 5                                                                     |
| 8                | Antigua and Barbuda | Plantains                       | 2006           | 9                                                                     |
| 8                | Antigua and Barbuda | Potatoes and products           | 2006           | 24                                                                    |
| 8                | Antigua and Barbuda | Poultry Meat                    | 2006           | 226                                                                   |
| 8                | Antigua and Barbuda | Pulses                          | 2006           | 20                                                                    |
| 8                | Antigua and Barbuda | Pulses, Other and products      | 2006           | 5                                                                     |
| 8                | Antigua and Barbuda | Rice (Milled Equivalent)        | 2006           | 120                                                                   |
| 8                | Antigua and Barbuda | Roots, Other                    | 2006           | 5                                                                     |
| 8                | Antigua and Barbuda | Soyabean Oil                    | 2006           | 109                                                                   |
| 8                | Antigua and Barbuda | Soyabeans                       | 2006           | 7                                                                     |
| 8                | Antigua and Barbuda | Spices                          | 2006           | 5                                                                     |
| 8                | Antigua and Barbuda | Spices, Other                   | 2006           | 4                                                                     |
| 8                | Antigua and Barbuda | Starchy Roots                   | 2006           | 42                                                                    |
| 8                | Antigua and Barbuda | Stimulants                      | 2006           | 19                                                                    |
| 8                | Antigua and Barbuda | Sugar & Sweeteners              | 2006           | 291                                                                   |
| 8                | Antigua and Barbuda | Sugar (Raw Equivalent)          | 2006           | 272                                                                   |
| 8                | Antigua and Barbuda | Sunflowerseed Oil               | 2006           | 4                                                                     |
| 8                | Antigua and Barbuda | Sweet potatoes                  | 2006           | 8                                                                     |
| 8                | Antigua and Barbuda | Sweeteners, Other               | 2006           | 18                                                                    |
| 8                | Antigua and Barbuda | Tomatoes and products           | 2006           | 6                                                                     |

Dietary calcium and zinc deficiency risks are decreasing but remain prevalent

| FAO Country code | Country             | Food item                       | Reference year | Net energy supply (kcal <i>capita</i> <sup>-1</sup> d <sup>-1</sup> ) |
|------------------|---------------------|---------------------------------|----------------|-----------------------------------------------------------------------|
| 8                | Antigua and Barbuda | Vegetable Oils                  | 2006           | 210                                                                   |
| 8                | Antigua and Barbuda | Vegetables                      | 2006           | 45                                                                    |
| 8                | Antigua and Barbuda | Vegetables, Other               | 2006           | 33                                                                    |
| 8                | Antigua and Barbuda | Vegetal Products                | 2006           | 1,564                                                                 |
| 8                | Antigua and Barbuda | Wheat and products              | 2006           | 471                                                                   |
| 8                | Antigua and Barbuda | Wine                            | 2006           | 10                                                                    |
| 8                | Antigua and Barbuda | Yams                            | 2006           | 2                                                                     |
| 8                | Antigua and Barbuda | Alcoholic Beverages             | 2007           | 77                                                                    |
| 8                | Antigua and Barbuda | Animal fats                     | 2007           | 65                                                                    |
| 8                | Antigua and Barbuda | Animal Products                 | 2007           | 812                                                                   |
| 8                | Antigua and Barbuda | Apples and products             | 2007           | 18                                                                    |
| 8                | Antigua and Barbuda | Bananas                         | 2007           | 17                                                                    |
| 8                | Antigua and Barbuda | Beans                           | 2007           | 7                                                                     |
| 8                | Antigua and Barbuda | Beer                            | 2007           | 19                                                                    |
| 8                | Antigua and Barbuda | Beverages, Alcoholic            | 2007           | 45                                                                    |
| 8                | Antigua and Barbuda | Beverages, Fermented            | 2007           | 1                                                                     |
| 8                | Antigua and Barbuda | Bovine Meat                     | 2007           | 51                                                                    |
| 8                | Antigua and Barbuda | Butter, Ghee                    | 2007           | 24                                                                    |
| 8                | Antigua and Barbuda | Cassava and products            | 2007           | 3                                                                     |
| 8                | Antigua and Barbuda | Cephalopods                     | 2007           | 1                                                                     |
| 8                | Antigua and Barbuda | Cereals - Excluding Beer        | 2007           | 639                                                                   |
| 8                | Antigua and Barbuda | Cereals, Other                  | 2007           | 2                                                                     |
| 8                | Antigua and Barbuda | Citrus, Other                   | 2007           | 2                                                                     |
| 8                | Antigua and Barbuda | Cocoa Beans and products        | 2007           | 20                                                                    |
| 8                | Antigua and Barbuda | Coconuts - Incl Copra           | 2007           | 9                                                                     |
| 8                | Antigua and Barbuda | Coffee and products             | 2007           | 1                                                                     |
| 8                | Antigua and Barbuda | Cottonseed Oil                  | 2007           | 2                                                                     |
| 8                | Antigua and Barbuda | Cream                           | 2007           | 2                                                                     |
| 8                | Antigua and Barbuda | Crustaceans                     | 2007           | 10                                                                    |
| 8                | Antigua and Barbuda | Demersal Fish                   | 2007           | 11                                                                    |
| 8                | Antigua and Barbuda | Eggs                            | 2007           | 24                                                                    |
| 8                | Antigua and Barbuda | Fats, Animals, Raw              | 2007           | 39                                                                    |
| 8                | Antigua and Barbuda | Fish, Seafood                   | 2007           | 87                                                                    |
| 8                | Antigua and Barbuda | Freshwater Fish                 | 2007           | 3                                                                     |
| 8                | Antigua and Barbuda | Fruits - Excluding Wine         | 2007           | 211                                                                   |
| 8                | Antigua and Barbuda | Fruits, Other                   | 2007           | 135                                                                   |
| 8                | Antigua and Barbuda | Grand Total                     | 2007           | 2,416                                                                 |
| 8                | Antigua and Barbuda | Grapefruit and products         | 2007           | 1                                                                     |
| 8                | Antigua and Barbuda | Grapes and products (excl wine) | 2007           | 4                                                                     |
| 8                | Antigua and Barbuda | Groundnut Oil                   | 2007           | 3                                                                     |
| 8                | Antigua and Barbuda | Groundnuts (Shelled Eq)         | 2007           | 6                                                                     |
| 8                | Antigua and Barbuda | Honey                           | 2007           | 2                                                                     |
| 8                | Antigua and Barbuda | Lemons, Limes and products      | 2007           | 2                                                                     |
| 8                | Antigua and Barbuda | Maize and products              | 2007           | 40                                                                    |
| 8                | Antigua and Barbuda | Marine Fish, Other              | 2007           | 34                                                                    |
| 8                | Antigua and Barbuda | Meat                            | 2007           | 368                                                                   |
| 8                | Antigua and Barbuda | Meat, Other                     | 2007           | 10                                                                    |
| 8                | Antigua and Barbuda | Milk - Excluding Butter         | 2007           | 261                                                                   |
| 8                | Antigua and Barbuda | Miscellaneous                   | 2007           | 21                                                                    |
| 8                | Antigua and Barbuda | Molluscs, Other                 | 2007           | 4                                                                     |
| 8                | Antigua and Barbuda | Mutton & Goat Meat              | 2007           | 16                                                                    |
| 8                | Antigua and Barbuda | Oats                            | 2007           | 14                                                                    |
| 8                | Antigua and Barbuda | Offals                          | 2007           | 7                                                                     |
| 8                | Antigua and Barbuda | Oilcrops                        | 2007           | 16                                                                    |
| 8                | Antigua and Barbuda | Oilcrops Oil, Other             | 2007           | 91                                                                    |
| 8                | Antigua and Barbuda | Oilcrops, Other                 | 2007           | 2                                                                     |
| 8                | Antigua and Barbuda | Olive Oil                       | 2007           | 14                                                                    |
| 8                | Antigua and Barbuda | Onions                          | 2007           | 7                                                                     |
| 8                | Antigua and Barbuda | Oranges, Mandarines             | 2007           | 18                                                                    |
| 8                | Antigua and Barbuda | Peas                            | 2007           | 4                                                                     |
| 8                | Antigua and Barbuda | Pelagic Fish                    | 2007           | 26                                                                    |
| 8                | Antigua and Barbuda | Pigmeat                         | 2007           | 59                                                                    |
| 8                | Antigua and Barbuda | Pineapples and products         | 2007           | 7                                                                     |
| 8                | Antigua and Barbuda | Plantains                       | 2007           | 8                                                                     |
| 8                | Antigua and Barbuda | Potatoes and products           | 2007           | 25                                                                    |
| 8                | Antigua and Barbuda | Poultry Meat                    | 2007           | 232                                                                   |
| 8                | Antigua and Barbuda | Pulses                          | 2007           | 14                                                                    |
| 8                | Antigua and Barbuda | Pulses, Other and products      | 2007           | 3                                                                     |
| 8                | Antigua and Barbuda | Rice (Milled Equivalent)        | 2007           | 118                                                                   |
| 8                | Antigua and Barbuda | Roots, Other                    | 2007           | 5                                                                     |
| 8                | Antigua and Barbuda | Soyabean Oil                    | 2007           | 96                                                                    |
| 8                | Antigua and Barbuda | Spices                          | 2007           | 13                                                                    |
| 8                | Antigua and Barbuda | Spices, Other                   | 2007           | 12                                                                    |
| 8                | Antigua and Barbuda | Starchy Roots                   | 2007           | 45                                                                    |
| 8                | Antigua and Barbuda | Stimulants                      | 2007           | 21                                                                    |
| 8                | Antigua and Barbuda | Sugar & Sweeteners              | 2007           | 297                                                                   |
| 8                | Antigua and Barbuda | Sugar (Raw Equivalent)          | 2007           | 278                                                                   |
| 8                | Antigua and Barbuda | Sunflowerseed Oil               | 2007           | 2                                                                     |
| 8                | Antigua and Barbuda | Sweet potatoes                  | 2007           | 11                                                                    |
| 8                | Antigua and Barbuda | Sweeteners, Other               | 2007           | 18                                                                    |
| 8                | Antigua and Barbuda | Tomatoes and products           | 2007           | 6                                                                     |
| 8                | Antigua and Barbuda | Vegetable Oils                  | 2007           | 209                                                                   |
| 8                | Antigua and Barbuda | Vegetables                      | 2007           | 39                                                                    |
| 8                | Antigua and Barbuda | Vegetables, Other               | 2007           | 26                                                                    |
| 8                | Antigua and Barbuda | Vegetal Products                | 2007           | 1,604                                                                 |
| 8                | Antigua and Barbuda | Wheat and products              | 2007           | 466                                                                   |
| 8                | Antigua and Barbuda | Wine                            | 2007           | 12                                                                    |
| 8                | Antigua and Barbuda | Yams                            | 2007           | 2                                                                     |
| 8                | Antigua and Barbuda | Alcoholic Beverages             | 2008           | 78                                                                    |
| 8                | Antigua and Barbuda | Animal fats                     | 2008           | 53                                                                    |
| 8                | Antigua and Barbuda | Animal Products                 | 2008           | 804                                                                   |
| 8                | Antigua and Barbuda | Apples and products             | 2008           | 8                                                                     |
| 8                | Antigua and Barbuda | Bananas                         | 2008           | 19                                                                    |
| 8                | Antigua and Barbuda | Beans                           | 2008           | 26                                                                    |
| 8                | Antigua and Barbuda | Beer                            | 2008           | 18                                                                    |
| 8                | Antigua and Barbuda | Beverages, Alcoholic            | 2008           | 48                                                                    |
| 8                | Antigua and Barbuda | Bovine Meat                     | 2008           | 50                                                                    |

Dietary calcium and zinc deficiency risks are decreasing but remain prevalent

| FAO Country code | Country             | Food item                       | Reference year | Net energy supply (kcal <i>capita</i> <sup>-1</sup> d <sup>-1</sup> ) |
|------------------|---------------------|---------------------------------|----------------|-----------------------------------------------------------------------|
| 8                | Antigua and Barbuda | Butter, Ghee                    | 2008           | 22                                                                    |
| 8                | Antigua and Barbuda | Cassava and products            | 2008           | 2                                                                     |
| 8                | Antigua and Barbuda | Cereals - Excluding Beer        | 2008           | 637                                                                   |
| 8                | Antigua and Barbuda | Cereals, Other                  | 2008           | 3                                                                     |
| 8                | Antigua and Barbuda | Citrus, Other                   | 2008           | 1                                                                     |
| 8                | Antigua and Barbuda | Cocoa Beans and products        | 2008           | 12                                                                    |
| 8                | Antigua and Barbuda | Coconut Oil                     | 2008           | 1                                                                     |
| 8                | Antigua and Barbuda | Coconuts - Incl Copra           | 2008           | 9                                                                     |
| 8                | Antigua and Barbuda | Coffee and products             | 2008           | 1                                                                     |
| 8                | Antigua and Barbuda | Cottonseed Oil                  | 2008           | 2                                                                     |
| 8                | Antigua and Barbuda | Cream                           | 2008           | 4                                                                     |
| 8                | Antigua and Barbuda | Crustaceans                     | 2008           | 5                                                                     |
| 8                | Antigua and Barbuda | Demersal Fish                   | 2008           | 16                                                                    |
| 8                | Antigua and Barbuda | Eggs                            | 2008           | 26                                                                    |
| 8                | Antigua and Barbuda | Fats, Animals, Raw              | 2008           | 27                                                                    |
| 8                | Antigua and Barbuda | Fish, Seafood                   | 2008           | 89                                                                    |
| 8                | Antigua and Barbuda | Freshwater Fish                 | 2008           | 2                                                                     |
| 8                | Antigua and Barbuda | Fruits - Excluding Wine         | 2008           | 192                                                                   |
| 8                | Antigua and Barbuda | Fruits, Other                   | 2008           | 132                                                                   |
| 8                | Antigua and Barbuda | Grand Total                     | 2008           | 2,382                                                                 |
| 8                | Antigua and Barbuda | Grapes and products (excl wine) | 2008           | 4                                                                     |
| 8                | Antigua and Barbuda | Groundnuts (Shelled Eq)         | 2008           | 5                                                                     |
| 8                | Antigua and Barbuda | Honey                           | 2008           | 3                                                                     |
| 8                | Antigua and Barbuda | Lemons, Limes and products      | 2008           | 1                                                                     |
| 8                | Antigua and Barbuda | Maize and products              | 2008           | 25                                                                    |
| 8                | Antigua and Barbuda | Marine Fish, Other              | 2008           | 29                                                                    |
| 8                | Antigua and Barbuda | Meat                            | 2008           | 384                                                                   |
| 8                | Antigua and Barbuda | Meat, Other                     | 2008           | 10                                                                    |
| 8                | Antigua and Barbuda | Milk - Excluding Butter         | 2008           | 245                                                                   |
| 8                | Antigua and Barbuda | Miscellaneous                   | 2008           | 11                                                                    |
| 8                | Antigua and Barbuda | Molluscs, Other                 | 2008           | 5                                                                     |
| 8                | Antigua and Barbuda | Mutton & Goat Meat              | 2008           | 18                                                                    |
| 8                | Antigua and Barbuda | Oats                            | 2008           | 17                                                                    |
| 8                | Antigua and Barbuda | Offals                          | 2008           | 8                                                                     |
| 8                | Antigua and Barbuda | Oilcrops                        | 2008           | 16                                                                    |
| 8                | Antigua and Barbuda | Oilcrops Oil, Other             | 2008           | 86                                                                    |
| 8                | Antigua and Barbuda | Oilcrops, Other                 | 2008           | 2                                                                     |
| 8                | Antigua and Barbuda | Olive Oil                       | 2008           | 9                                                                     |
| 8                | Antigua and Barbuda | Onions                          | 2008           | 6                                                                     |
| 8                | Antigua and Barbuda | Oranges, Mandarines             | 2008           | 15                                                                    |
| 8                | Antigua and Barbuda | Peas                            | 2008           | 2                                                                     |
| 8                | Antigua and Barbuda | Pelagic Fish                    | 2008           | 32                                                                    |
| 8                | Antigua and Barbuda | Pigmeat                         | 2008           | 70                                                                    |
| 8                | Antigua and Barbuda | Pineapples and products         | 2008           | 3                                                                     |
| 8                | Antigua and Barbuda | Plantains                       | 2008           | 9                                                                     |
| 8                | Antigua and Barbuda | Potatoes and products           | 2008           | 27                                                                    |
| 8                | Antigua and Barbuda | Poultry Meat                    | 2008           | 235                                                                   |
| 8                | Antigua and Barbuda | Pulses                          | 2008           | 36                                                                    |
| 8                | Antigua and Barbuda | Pulses, Other and products      | 2008           | 9                                                                     |
| 8                | Antigua and Barbuda | Rice (Milled Equivalent)        | 2008           | 118                                                                   |
| 8                | Antigua and Barbuda | Roots, Other                    | 2008           | 5                                                                     |
| 8                | Antigua and Barbuda | Soyabean Oil                    | 2008           | 96                                                                    |
| 8                | Antigua and Barbuda | Spices                          | 2008           | 11                                                                    |
| 8                | Antigua and Barbuda | Spices, Other                   | 2008           | 11                                                                    |
| 8                | Antigua and Barbuda | Starchy Roots                   | 2008           | 47                                                                    |
| 8                | Antigua and Barbuda | Stimulants                      | 2008           | 14                                                                    |
| 8                | Antigua and Barbuda | Sugar & Sweeteners              | 2008           | 299                                                                   |
| 8                | Antigua and Barbuda | Sugar (Raw Equivalent)          | 2008           | 274                                                                   |
| 8                | Antigua and Barbuda | Sunflowerseed Oil               | 2008           | 1                                                                     |
| 8                | Antigua and Barbuda | Sweet potatoes                  | 2008           | 10                                                                    |
| 8                | Antigua and Barbuda | Sweeteners, Other               | 2008           | 22                                                                    |
| 8                | Antigua and Barbuda | Tomatoes and products           | 2008           | 10                                                                    |
| 8                | Antigua and Barbuda | Vegetable Oils                  | 2008           | 195                                                                   |
| 8                | Antigua and Barbuda | Vegetables                      | 2008           | 42                                                                    |
| 8                | Antigua and Barbuda | Vegetables, Other               | 2008           | 25                                                                    |
| 8                | Antigua and Barbuda | Vegetal Products                | 2008           | 1,578                                                                 |
| 8                | Antigua and Barbuda | Wheat and products              | 2008           | 474                                                                   |
| 8                | Antigua and Barbuda | Wine                            | 2008           | 10                                                                    |
| 8                | Antigua and Barbuda | Yams                            | 2008           | 2                                                                     |
| 8                | Antigua and Barbuda | Alcoholic Beverages             | 2009           | 59                                                                    |
| 8                | Antigua and Barbuda | Animal fats                     | 2009           | 59                                                                    |
| 8                | Antigua and Barbuda | Animal Products                 | 2009           | 798                                                                   |
| 8                | Antigua and Barbuda | Apples and products             | 2009           | 3                                                                     |
| 8                | Antigua and Barbuda | Bananas                         | 2009           | 14                                                                    |
| 8                | Antigua and Barbuda | Beans                           | 2009           | 13                                                                    |
| 8                | Antigua and Barbuda | Beer                            | 2009           | 17                                                                    |
| 8                | Antigua and Barbuda | Beverages, Alcoholic            | 2009           | 31                                                                    |
| 8                | Antigua and Barbuda | Beverages, Fermented            | 2009           | 1                                                                     |
| 8                | Antigua and Barbuda | Bovine Meat                     | 2009           | 52                                                                    |
| 8                | Antigua and Barbuda | Butter, Ghee                    | 2009           | 24                                                                    |
| 8                | Antigua and Barbuda | Cassava and products            | 2009           | 2                                                                     |
| 8                | Antigua and Barbuda | Cephalopods                     | 2009           | 1                                                                     |
| 8                | Antigua and Barbuda | Cereals - Excluding Beer        | 2009           | 640                                                                   |
| 8                | Antigua and Barbuda | Cereals, Other                  | 2009           | 2                                                                     |
| 8                | Antigua and Barbuda | Cocoa Beans and products        | 2009           | 17                                                                    |
| 8                | Antigua and Barbuda | Coconuts - Incl Copra           | 2009           | 9                                                                     |
| 8                | Antigua and Barbuda | Cottonseed Oil                  | 2009           | 2                                                                     |
| 8                | Antigua and Barbuda | Cream                           | 2009           | 3                                                                     |
| 8                | Antigua and Barbuda | Crustaceans                     | 2009           | 7                                                                     |
| 8                | Antigua and Barbuda | Demersal Fish                   | 2009           | 12                                                                    |
| 8                | Antigua and Barbuda | Eggs                            | 2009           | 26                                                                    |
| 8                | Antigua and Barbuda | Fats, Animals, Raw              | 2009           | 31                                                                    |
| 8                | Antigua and Barbuda | Fish, Seafood                   | 2009           | 86                                                                    |
| 8                | Antigua and Barbuda | Freshwater Fish                 | 2009           | 2                                                                     |
| 8                | Antigua and Barbuda | Fruits - Excluding Wine         | 2009           | 180                                                                   |
| 8                | Antigua and Barbuda | Fruits, Other                   | 2009           | 138                                                                   |
| 8                | Antigua and Barbuda | Grand Total                     | 2009           | 2,310                                                                 |

Dietary calcium and zinc deficiency risks are decreasing but remain prevalent

| FAO Country code | Country             | Food item                       | Reference year | Net energy supply (kcal capita <sup>-1</sup> d <sup>-1</sup> ) |
|------------------|---------------------|---------------------------------|----------------|----------------------------------------------------------------|
| 8                | Antigua and Barbuda | Grapefruit and products         | 2009           | 1                                                              |
| 8                | Antigua and Barbuda | Grapes and products (excl wine) | 2009           | 4                                                              |
| 8                | Antigua and Barbuda | Groundnut Oil                   | 2009           | 1                                                              |
| 8                | Antigua and Barbuda | Groundnuts (Shelled Eq)         | 2009           | 3                                                              |
| 8                | Antigua and Barbuda | Lemons, Limes and products      | 2009           | 2                                                              |
| 8                | Antigua and Barbuda | Maize and products              | 2009           | 24                                                             |
| 8                | Antigua and Barbuda | Marine Fish, Other              | 2009           | 32                                                             |
| 8                | Antigua and Barbuda | Meat                            | 2009           | 375                                                            |
| 8                | Antigua and Barbuda | Meat, Other                     | 2009           | 10                                                             |
| 8                | Antigua and Barbuda | Milk - Excluding Butter         | 2009           | 245                                                            |
| 8                | Antigua and Barbuda | Miscellaneous                   | 2009           | 12                                                             |
| 8                | Antigua and Barbuda | Molluscs, Other                 | 2009           | 5                                                              |
| 8                | Antigua and Barbuda | Mutton & Goat Meat              | 2009           | 17                                                             |
| 8                | Antigua and Barbuda | Oats                            | 2009           | 20                                                             |
| 8                | Antigua and Barbuda | Offals                          | 2009           | 7                                                              |
| 8                | Antigua and Barbuda | Oilcrops                        | 2009           | 13                                                             |
| 8                | Antigua and Barbuda | Oilcrops Oil, Other             | 2009           | 76                                                             |
| 8                | Antigua and Barbuda | Olive Oil                       | 2009           | 6                                                              |
| 8                | Antigua and Barbuda | Onions                          | 2009           | 5                                                              |
| 8                | Antigua and Barbuda | Oranges, Mandarines             | 2009           | 15                                                             |
| 8                | Antigua and Barbuda | Peas                            | 2009           | 2                                                              |
| 8                | Antigua and Barbuda | Pelagic Fish                    | 2009           | 28                                                             |
| 8                | Antigua and Barbuda | Pigmeat                         | 2009           | 58                                                             |
| 8                | Antigua and Barbuda | Pineapples and products         | 2009           | 3                                                              |
| 8                | Antigua and Barbuda | Potatoes and products           | 2009           | 23                                                             |
| 8                | Antigua and Barbuda | Poultry Meat                    | 2009           | 237                                                            |
| 8                | Antigua and Barbuda | Pulses                          | 2009           | 24                                                             |
| 8                | Antigua and Barbuda | Pulses, Other and products      | 2009           | 9                                                              |
| 8                | Antigua and Barbuda | Rice (Milled Equivalent)        | 2009           | 122                                                            |
| 8                | Antigua and Barbuda | Roots, Other                    | 2009           | 5                                                              |
| 8                | Antigua and Barbuda | Soyabean Oil                    | 2009           | 98                                                             |
| 8                | Antigua and Barbuda | Spices                          | 2009           | 6                                                              |
| 8                | Antigua and Barbuda | Spices, Other                   | 2009           | 5                                                              |
| 8                | Antigua and Barbuda | Starchy Roots                   | 2009           | 44                                                             |
| 8                | Antigua and Barbuda | Stimulants                      | 2009           | 17                                                             |
| 8                | Antigua and Barbuda | Sugar & Sweeteners              | 2009           | 293                                                            |
| 8                | Antigua and Barbuda | Sugar (Raw Equivalent)          | 2009           | 277                                                            |
| 8                | Antigua and Barbuda | Sweet potatoes                  | 2009           | 10                                                             |
| 8                | Antigua and Barbuda | Sweeteners, Other               | 2009           | 16                                                             |
| 8                | Antigua and Barbuda | Tomatoes and products           | 2009           | 9                                                              |
| 8                | Antigua and Barbuda | Vegetable Oils                  | 2009           | 184                                                            |
| 8                | Antigua and Barbuda | Vegetables                      | 2009           | 40                                                             |
| 8                | Antigua and Barbuda | Vegetables, Other               | 2009           | 26                                                             |
| 8                | Antigua and Barbuda | Vegetal Products                | 2009           | 1,512                                                          |
| 8                | Antigua and Barbuda | Wheat and products              | 2009           | 472                                                            |
| 8                | Antigua and Barbuda | Wine                            | 2009           | 9                                                              |
| 8                | Antigua and Barbuda | Yams                            | 2009           | 3                                                              |
| 8                | Antigua and Barbuda | Alcoholic Beverages             | 2010           | 63                                                             |
| 8                | Antigua and Barbuda | Animal fats                     | 2010           | 59                                                             |
| 8                | Antigua and Barbuda | Animal Products                 | 2010           | 786                                                            |
| 8                | Antigua and Barbuda | Apples and products             | 2010           | 2                                                              |
| 8                | Antigua and Barbuda | Bananas                         | 2010           | 11                                                             |
| 8                | Antigua and Barbuda | Beans                           | 2010           | 13                                                             |
| 8                | Antigua and Barbuda | Beer                            | 2010           | 17                                                             |
| 8                | Antigua and Barbuda | Beverages, Alcoholic            | 2010           | 35                                                             |
| 8                | Antigua and Barbuda | Beverages, Fermented            | 2010           | 2                                                              |
| 8                | Antigua and Barbuda | Bovine Meat                     | 2010           | 49                                                             |
| 8                | Antigua and Barbuda | Butter, Ghee                    | 2010           | 25                                                             |
| 8                | Antigua and Barbuda | Cassava and products            | 2010           | 3                                                              |
| 8                | Antigua and Barbuda | Cephalopods                     | 2010           | 1                                                              |
| 8                | Antigua and Barbuda | Cereals - Excluding Beer        | 2010           | 671                                                            |
| 8                | Antigua and Barbuda | Cereals, Other                  | 2010           | 3                                                              |
| 8                | Antigua and Barbuda | Cocoa Beans and products        | 2010           | 17                                                             |
| 8                | Antigua and Barbuda | Coconuts - Incl Copra           | 2010           | 9                                                              |
| 8                | Antigua and Barbuda | Coffee and products             | 2010           | 1                                                              |
| 8                | Antigua and Barbuda | Cottonseed Oil                  | 2010           | 2                                                              |
| 8                | Antigua and Barbuda | Cream                           | 2010           | 1                                                              |
| 8                | Antigua and Barbuda | Crustaceans                     | 2010           | 7                                                              |
| 8                | Antigua and Barbuda | Demersal Fish                   | 2010           | 10                                                             |
| 8                | Antigua and Barbuda | Eggs                            | 2010           | 22                                                             |
| 8                | Antigua and Barbuda | Fats, Animals, Raw              | 2010           | 33                                                             |
| 8                | Antigua and Barbuda | Fish, Seafood                   | 2010           | 82                                                             |
| 8                | Antigua and Barbuda | Freshwater Fish                 | 2010           | 2                                                              |
| 8                | Antigua and Barbuda | Fruits - Excluding Wine         | 2010           | 165                                                            |
| 8                | Antigua and Barbuda | Fruits, Other                   | 2010           | 129                                                            |
| 8                | Antigua and Barbuda | Grand Total                     | 2010           | 2,311                                                          |
| 8                | Antigua and Barbuda | Grapefruit and products         | 2010           | 1                                                              |
| 8                | Antigua and Barbuda | Grapes and products (excl wine) | 2010           | 3                                                              |
| 8                | Antigua and Barbuda | Groundnuts (Shelled Eq)         | 2010           | 3                                                              |
| 8                | Antigua and Barbuda | Lemons, Limes and products      | 2010           | 2                                                              |
| 8                | Antigua and Barbuda | Maize and products              | 2010           | 26                                                             |
| 8                | Antigua and Barbuda | Maize Germ Oil                  | 2010           | 2                                                              |
| 8                | Antigua and Barbuda | Marine Fish, Other              | 2010           | 34                                                             |
| 8                | Antigua and Barbuda | Meat                            | 2010           | 378                                                            |
| 8                | Antigua and Barbuda | Meat, Other                     | 2010           | 10                                                             |
| 8                | Antigua and Barbuda | Milk - Excluding Butter         | 2010           | 237                                                            |
| 8                | Antigua and Barbuda | Miscellaneous                   | 2010           | 9                                                              |
| 8                | Antigua and Barbuda | Molluscs, Other                 | 2010           | 5                                                              |
| 8                | Antigua and Barbuda | Mutton & Goat Meat              | 2010           | 16                                                             |
| 8                | Antigua and Barbuda | Oats                            | 2010           | 17                                                             |
| 8                | Antigua and Barbuda | Offals                          | 2010           | 7                                                              |
| 8                | Antigua and Barbuda | Oilcrops                        | 2010           | 12                                                             |
| 8                | Antigua and Barbuda | Oilcrops Oil, Other             | 2010           | 81                                                             |
| 8                | Antigua and Barbuda | Olive Oil                       | 2010           | 8                                                              |
| 8                | Antigua and Barbuda | Onions                          | 2010           | 4                                                              |
| 8                | Antigua and Barbuda | Oranges, Mandarines             | 2010           | 14                                                             |
| 8                | Antigua and Barbuda | Peas                            | 2010           | 4                                                              |

Dietary calcium and zinc deficiency risks are decreasing but remain prevalent

| FAO Country code | Country             | Food item                       | Reference year | Net energy supply (kcal <i>capita</i> <sup>-1</sup> d <sup>-1</sup> ) |
|------------------|---------------------|---------------------------------|----------------|-----------------------------------------------------------------------|
| 8                | Antigua and Barbuda | Pelagic Fish                    | 2010           | 23                                                                    |
| 8                | Antigua and Barbuda | Pigmeat                         | 2010           | 62                                                                    |
| 8                | Antigua and Barbuda | Pineapples and products         | 2010           | 4                                                                     |
| 8                | Antigua and Barbuda | Potatoes and products           | 2010           | 22                                                                    |
| 8                | Antigua and Barbuda | Poultry Meat                    | 2010           | 242                                                                   |
| 8                | Antigua and Barbuda | Pulses                          | 2010           | 22                                                                    |
| 8                | Antigua and Barbuda | Pulses, Other and products      | 2010           | 5                                                                     |
| 8                | Antigua and Barbuda | Rice (Milled Equivalent)        | 2010           | 124                                                                   |
| 8                | Antigua and Barbuda | Roots, Other                    | 2010           | 5                                                                     |
| 8                | Antigua and Barbuda | Soyabean Oil                    | 2010           | 97                                                                    |
| 8                | Antigua and Barbuda | Spices                          | 2010           | 7                                                                     |
| 8                | Antigua and Barbuda | Spices, Other                   | 2010           | 7                                                                     |
| 8                | Antigua and Barbuda | Starchy Roots                   | 2010           | 41                                                                    |
| 8                | Antigua and Barbuda | Stimulants                      | 2010           | 18                                                                    |
| 8                | Antigua and Barbuda | Sugar & Sweeteners              | 2010           | 290                                                                   |
| 8                | Antigua and Barbuda | Sugar (Raw Equivalent)          | 2010           | 271                                                                   |
| 8                | Antigua and Barbuda | Sweet potatoes                  | 2010           | 8                                                                     |
| 8                | Antigua and Barbuda | Sweeteners, Other               | 2010           | 18                                                                    |
| 8                | Antigua and Barbuda | Tomatoes and products           | 2010           | 6                                                                     |
| 8                | Antigua and Barbuda | Vegetable Oils                  | 2010           | 190                                                                   |
| 8                | Antigua and Barbuda | Vegetables                      | 2010           | 35                                                                    |
| 8                | Antigua and Barbuda | Vegetables, Other               | 2010           | 25                                                                    |
| 8                | Antigua and Barbuda | Vegetal Products                | 2010           | 1,525                                                                 |
| 8                | Antigua and Barbuda | Wheat and products              | 2010           | 501                                                                   |
| 8                | Antigua and Barbuda | Wine                            | 2010           | 10                                                                    |
| 8                | Antigua and Barbuda | Yams                            | 2010           | 4                                                                     |
| 8                | Antigua and Barbuda | Alcoholic Beverages             | 2011           | 72                                                                    |
| 8                | Antigua and Barbuda | Animal fats                     | 2011           | 70                                                                    |
| 8                | Antigua and Barbuda | Animal Products                 | 2011           | 820                                                                   |
| 8                | Antigua and Barbuda | Apples and products             | 2011           | 6                                                                     |
| 8                | Antigua and Barbuda | Bananas                         | 2011           | 6                                                                     |
| 8                | Antigua and Barbuda | Beans                           | 2011           | 13                                                                    |
| 8                | Antigua and Barbuda | Beer                            | 2011           | 18                                                                    |
| 8                | Antigua and Barbuda | Beverages, Alcoholic            | 2011           | 37                                                                    |
| 8                | Antigua and Barbuda | Beverages, Fermented            | 2011           | 1                                                                     |
| 8                | Antigua and Barbuda | Bovine Meat                     | 2011           | 58                                                                    |
| 8                | Antigua and Barbuda | Butter, Ghee                    | 2011           | 28                                                                    |
| 8                | Antigua and Barbuda | Cassava and products            | 2011           | 3                                                                     |
| 8                | Antigua and Barbuda | Cephalopods                     | 2011           | 1                                                                     |
| 8                | Antigua and Barbuda | Cereals - Excluding Beer        | 2011           | 657                                                                   |
| 8                | Antigua and Barbuda | Cereals, Other                  | 2011           | 4                                                                     |
| 8                | Antigua and Barbuda | Citrus, Other                   | 2011           | 1                                                                     |
| 8                | Antigua and Barbuda | Cocoa Beans and products        | 2011           | 16                                                                    |
| 8                | Antigua and Barbuda | Coconuts - Incl Copra           | 2011           | 1                                                                     |
| 8                | Antigua and Barbuda | Coffee and products             | 2011           | 4                                                                     |
| 8                | Antigua and Barbuda | Cottonseed Oil                  | 2011           | 2                                                                     |
| 8                | Antigua and Barbuda | Cream                           | 2011           | 6                                                                     |
| 8                | Antigua and Barbuda | Crustaceans                     | 2011           | 7                                                                     |
| 8                | Antigua and Barbuda | Demersal Fish                   | 2011           | 10                                                                    |
| 8                | Antigua and Barbuda | Eggs                            | 2011           | 16                                                                    |
| 8                | Antigua and Barbuda | Fats, Animals, Raw              | 2011           | 36                                                                    |
| 8                | Antigua and Barbuda | Fish, Seafood                   | 2011           | 81                                                                    |
| 8                | Antigua and Barbuda | Freshwater Fish                 | 2011           | 2                                                                     |
| 8                | Antigua and Barbuda | Fruits - Excluding Wine         | 2011           | 164                                                                   |
| 8                | Antigua and Barbuda | Fruits, Other                   | 2011           | 120                                                                   |
| 8                | Antigua and Barbuda | Grand Total                     | 2011           | 2,396                                                                 |
| 8                | Antigua and Barbuda | Grapefruit and products         | 2011           | 1                                                                     |
| 8                | Antigua and Barbuda | Grapes and products (excl wine) | 2011           | 7                                                                     |
| 8                | Antigua and Barbuda | Groundnut Oil                   | 2011           | 5                                                                     |
| 8                | Antigua and Barbuda | Groundnuts (Shelled Eq)         | 2011           | 11                                                                    |
| 8                | Antigua and Barbuda | Honey                           | 2011           | 4                                                                     |
| 8                | Antigua and Barbuda | Lemons, Limes and products      | 2011           | 2                                                                     |
| 8                | Antigua and Barbuda | Maize and products              | 2011           | 25                                                                    |
| 8                | Antigua and Barbuda | Maize Germ Oil                  | 2011           | 4                                                                     |
| 8                | Antigua and Barbuda | Marine Fish, Other              | 2011           | 34                                                                    |
| 8                | Antigua and Barbuda | Meat                            | 2011           | 393                                                                   |
| 8                | Antigua and Barbuda | Meat, Other                     | 2011           | 1                                                                     |
| 8                | Antigua and Barbuda | Milk - Excluding Butter         | 2011           | 249                                                                   |
| 8                | Antigua and Barbuda | Miscellaneous                   | 2011           | 15                                                                    |
| 8                | Antigua and Barbuda | Molluscs, Other                 | 2011           | 5                                                                     |
| 8                | Antigua and Barbuda | Mutton & Goat Meat              | 2011           | 16                                                                    |
| 8                | Antigua and Barbuda | Oats                            | 2011           | 17                                                                    |
| 8                | Antigua and Barbuda | Offals                          | 2011           | 10                                                                    |
| 8                | Antigua and Barbuda | Oilcrops                        | 2011           | 14                                                                    |
| 8                | Antigua and Barbuda | Oilcrops Oil, Other             | 2011           | 82                                                                    |
| 8                | Antigua and Barbuda | Olive Oil                       | 2011           | 11                                                                    |
| 8                | Antigua and Barbuda | Olives (including preserved)    | 2011           | 1                                                                     |
| 8                | Antigua and Barbuda | Onions                          | 2011           | 8                                                                     |
| 8                | Antigua and Barbuda | Oranges, Mandarines             | 2011           | 12                                                                    |
| 8                | Antigua and Barbuda | Peas                            | 2011           | 7                                                                     |
| 8                | Antigua and Barbuda | Pelagic Fish                    | 2011           | 23                                                                    |
| 8                | Antigua and Barbuda | Pepper                          | 2011           | 2                                                                     |
| 8                | Antigua and Barbuda | Pigmeat                         | 2011           | 68                                                                    |
| 8                | Antigua and Barbuda | Pineapples and products         | 2011           | 7                                                                     |
| 8                | Antigua and Barbuda | Plantains                       | 2011           | 1                                                                     |
| 8                | Antigua and Barbuda | Potatoes and products           | 2011           | 24                                                                    |
| 8                | Antigua and Barbuda | Poultry Meat                    | 2011           | 250                                                                   |
| 8                | Antigua and Barbuda | Pulses                          | 2011           | 28                                                                    |
| 8                | Antigua and Barbuda | Pulses, Other and products      | 2011           | 8                                                                     |
| 8                | Antigua and Barbuda | Rice (Milled Equivalent)        | 2011           | 121                                                                   |
| 8                | Antigua and Barbuda | Roots, Other                    | 2011           | 2                                                                     |
| 8                | Antigua and Barbuda | Soyabean Oil                    | 2011           | 97                                                                    |
| 8                | Antigua and Barbuda | Spices                          | 2011           | 8                                                                     |
| 8                | Antigua and Barbuda | Spices, Other                   | 2011           | 6                                                                     |
| 8                | Antigua and Barbuda | Starchy Roots                   | 2011           | 40                                                                    |
| 8                | Antigua and Barbuda | Stimulants                      | 2011           | 22                                                                    |
| 8                | Antigua and Barbuda | Sugar & Sweeteners              | 2011           | 289                                                                   |

Dietary calcium and zinc deficiency risks are decreasing but remain prevalent

| FAO Country code | Country             | Food item                       | Reference year | Net energy supply (kcal capita <sup>-1</sup> d <sup>-1</sup> ) |
|------------------|---------------------|---------------------------------|----------------|----------------------------------------------------------------|
| 8                | Antigua and Barbuda | Sugar (Raw Equivalent)          | 2011           | 268                                                            |
| 8                | Antigua and Barbuda | Sweet potatoes                  | 2011           | 7                                                              |
| 8                | Antigua and Barbuda | Sweeteners, Other               | 2011           | 18                                                             |
| 8                | Antigua and Barbuda | Tea (including mate)            | 2011           | 1                                                              |
| 8                | Antigua and Barbuda | Tomatoes and products           | 2011           | 7                                                              |
| 8                | Antigua and Barbuda | Treenuts                        | 2011           | 1                                                              |
| 8                | Antigua and Barbuda | Vegetable Oils                  | 2011           | 202                                                            |
| 8                | Antigua and Barbuda | Vegetables                      | 2011           | 65                                                             |
| 8                | Antigua and Barbuda | Vegetables, Other               | 2011           | 50                                                             |
| 8                | Antigua and Barbuda | Vegetal Products                | 2011           | 1,577                                                          |
| 8                | Antigua and Barbuda | Wheat and products              | 2011           | 491                                                            |
| 8                | Antigua and Barbuda | Wine                            | 2011           | 16                                                             |
| 8                | Antigua and Barbuda | Yams                            | 2011           | 3                                                              |
| 9                | Argentina           | Alcoholic Beverages             | 1992           | 142                                                            |
| 9                | Argentina           | Animal fats                     | 1992           | 80                                                             |
| 9                | Argentina           | Animal Products                 | 1992           | 944                                                            |
| 9                | Argentina           | Apples and products             | 1992           | 20                                                             |
| 9                | Argentina           | Bananas                         | 1992           | 15                                                             |
| 9                | Argentina           | Beans                           | 1992           | 1                                                              |
| 9                | Argentina           | Beer                            | 1992           | 30                                                             |
| 9                | Argentina           | Beverages, Alcoholic            | 1992           | 18                                                             |
| 9                | Argentina           | Bovine Meat                     | 1992           | 408                                                            |
| 9                | Argentina           | Butter, Ghee                    | 1992           | 28                                                             |
| 9                | Argentina           | Cassava and products            | 1992           | 5                                                              |
| 9                | Argentina           | Cephalopods                     | 1992           | 1                                                              |
| 9                | Argentina           | Cereals - Excluding Beer        | 1992           | 957                                                            |
| 9                | Argentina           | Cereals, Other                  | 1992           | 6                                                              |
| 9                | Argentina           | Cocoa Beans and products        | 1992           | 5                                                              |
| 9                | Argentina           | Coconut Oil                     | 1992           | 3                                                              |
| 9                | Argentina           | Coconuts - Incl Copra           | 1992           | 1                                                              |
| 9                | Argentina           | Coffee and products             | 1992           | 2                                                              |
| 9                | Argentina           | Cottonseed Oil                  | 1992           | 6                                                              |
| 9                | Argentina           | Cream                           | 1992           | 1                                                              |
| 9                | Argentina           | Demersal Fish                   | 1992           | 9                                                              |
| 9                | Argentina           | Eggs                            | 1992           | 24                                                             |
| 9                | Argentina           | Fats, Animals, Raw              | 1992           | 51                                                             |
| 9                | Argentina           | Fish, Seafood                   | 1992           | 14                                                             |
| 9                | Argentina           | Freshwater Fish                 | 1992           | 1                                                              |
| 9                | Argentina           | Fruits - Excluding Wine         | 1992           | 86                                                             |
| 9                | Argentina           | Fruits, Other                   | 1992           | 15                                                             |
| 9                | Argentina           | Grand Total                     | 1992           | 3,077                                                          |
| 9                | Argentina           | Grapefruit and products         | 1992           | 1                                                              |
| 9                | Argentina           | Grapes and products (excl wine) | 1992           | 2                                                              |
| 9                | Argentina           | Groundnut Oil                   | 1992           | 3                                                              |
| 9                | Argentina           | Honey                           | 1992           | 1                                                              |
| 9                | Argentina           | Lemons, Limes and products      | 1992           | 6                                                              |
| 9                | Argentina           | Maize and products              | 1992           | 42                                                             |
| 9                | Argentina           | Maize Germ Oil                  | 1992           | 15                                                             |
| 9                | Argentina           | Meat                            | 1992           | 538                                                            |
| 9                | Argentina           | Meat, Other                     | 1992           | 5                                                              |
| 9                | Argentina           | Milk - Excluding Butter         | 1992           | 269                                                            |
| 9                | Argentina           | Mutton & Goat Meat              | 1992           | 13                                                             |
| 9                | Argentina           | Oats                            | 1992           | 1                                                              |
| 9                | Argentina           | Offals                          | 1992           | 19                                                             |
| 9                | Argentina           | Oilcrops                        | 1992           | 2                                                              |
| 9                | Argentina           | Olive Oil                       | 1992           | 4                                                              |
| 9                | Argentina           | Onions                          | 1992           | 15                                                             |
| 9                | Argentina           | Oranges, Mandarines             | 1992           | 25                                                             |
| 9                | Argentina           | Peas                            | 1992           | 3                                                              |
| 9                | Argentina           | Pelagic Fish                    | 1992           | 3                                                              |
| 9                | Argentina           | Pigmeat                         | 1992           | 43                                                             |
| 9                | Argentina           | Pimento                         | 1992           | 1                                                              |
| 9                | Argentina           | Pineapples and products         | 1992           | 1                                                              |
| 9                | Argentina           | Potatoes and products           | 1992           | 75                                                             |
| 9                | Argentina           | Poultry Meat                    | 1992           | 69                                                             |
| 9                | Argentina           | Pulses                          | 1992           | 10                                                             |
| 9                | Argentina           | Pulses, Other and products      | 1992           | 6                                                              |
| 9                | Argentina           | Rape and Mustard Oil            | 1992           | 2                                                              |
| 9                | Argentina           | Rice (Milled Equivalent)        | 1992           | 72                                                             |
| 9                | Argentina           | Soybean Oil                     | 1992           | 55                                                             |
| 9                | Argentina           | Spices                          | 1992           | 3                                                              |
| 9                | Argentina           | Spices, Other                   | 1992           | 1                                                              |
| 9                | Argentina           | Starchy Roots                   | 1992           | 97                                                             |
| 9                | Argentina           | Stimulants                      | 1992           | 12                                                             |
| 9                | Argentina           | Sugar & Sweeteners              | 1992           | 414                                                            |
| 9                | Argentina           | Sugar (Raw Equivalent)          | 1992           | 342                                                            |
| 9                | Argentina           | Sunflowerseed Oil               | 1992           | 260                                                            |
| 9                | Argentina           | Sweet potatoes                  | 1992           | 17                                                             |
| 9                | Argentina           | Sweeteners, Other               | 1992           | 71                                                             |
| 9                | Argentina           | Tea (including mate)            | 1992           | 5                                                              |
| 9                | Argentina           | Tomatoes and products           | 1992           | 13                                                             |
| 9                | Argentina           | Treenuts                        | 1992           | 4                                                              |
| 9                | Argentina           | Vegetable Oils                  | 1992           | 348                                                            |
| 9                | Argentina           | Vegetables                      | 1992           | 59                                                             |
| 9                | Argentina           | Vegetables, Other               | 1992           | 31                                                             |
| 9                | Argentina           | Vegetal Products                | 1992           | 2,133                                                          |
| 9                | Argentina           | Wheat and products              | 1992           | 836                                                            |
| 9                | Argentina           | Wine                            | 1992           | 93                                                             |
| 9                | Argentina           | Alcoholic Beverages             | 1993           | 137                                                            |
| 9                | Argentina           | Animal fats                     | 1993           | 76                                                             |
| 9                | Argentina           | Animal Products                 | 1993           | 987                                                            |
| 9                | Argentina           | Apples and products             | 1993           | 19                                                             |
| 9                | Argentina           | Bananas                         | 1993           | 18                                                             |
| 9                | Argentina           | Beans                           | 1993           | 1                                                              |
| 9                | Argentina           | Beer                            | 1993           | 31                                                             |
| 9                | Argentina           | Beverages, Alcoholic            | 1993           | 20                                                             |
| 9                | Argentina           | Bovine Meat                     | 1993           | 406                                                            |

Dietary calcium and zinc deficiency risks are decreasing but remain prevalent

| FAO Country code | Country   | Food item                       | Reference year | Net energy supply (kcal capita <sup>-1</sup> d <sup>-1</sup> ) |
|------------------|-----------|---------------------------------|----------------|----------------------------------------------------------------|
| 9                | Argentina | Butter, Ghee                    | 1993           | 21                                                             |
| 9                | Argentina | Cassava and products            | 1993           | 5                                                              |
| 9                | Argentina | Cephalopods                     | 1993           | 1                                                              |
| 9                | Argentina | Cereals - Excluding Beer        | 1993           | 925                                                            |
| 9                | Argentina | Cereals, Other                  | 1993           | 2                                                              |
| 9                | Argentina | Cocoa Beans and products        | 1993           | 5                                                              |
| 9                | Argentina | Coconut Oil                     | 1993           | 3                                                              |
| 9                | Argentina | Coconuts - Incl Copra           | 1993           | 1                                                              |
| 9                | Argentina | Coffee and products             | 1993           | 1                                                              |
| 9                | Argentina | Cottonseed Oil                  | 1993           | 3                                                              |
| 9                | Argentina | Cream                           | 1993           | 1                                                              |
| 9                | Argentina | Demersal Fish                   | 1993           | 12                                                             |
| 9                | Argentina | Eggs                            | 1993           | 24                                                             |
| 9                | Argentina | Fats, Animals, Raw              | 1993           | 53                                                             |
| 9                | Argentina | Fish, Seafood                   | 1993           | 16                                                             |
| 9                | Argentina | Fruits - Excluding Wine         | 1993           | 90                                                             |
| 9                | Argentina | Fruits, Other                   | 1993           | 18                                                             |
| 9                | Argentina | Grand Total                     | 1993           | 3,116                                                          |
| 9                | Argentina | Grapefruit and products         | 1993           | 2                                                              |
| 9                | Argentina | Grapes and products (excl wine) | 1993           | 2                                                              |
| 9                | Argentina | Groundnut Oil                   | 1993           | 2                                                              |
| 9                | Argentina | Honey                           | 1993           | 1                                                              |
| 9                | Argentina | Lemons, Limes and products      | 1993           | 6                                                              |
| 9                | Argentina | Maize and products              | 1993           | 62                                                             |
| 9                | Argentina | Maize Germ Oil                  | 1993           | 15                                                             |
| 9                | Argentina | Meat                            | 1993           | 580                                                            |
| 9                | Argentina | Meat, Other                     | 1993           | 5                                                              |
| 9                | Argentina | Milk - Excluding Butter         | 1993           | 272                                                            |
| 9                | Argentina | Mutton & Goat Meat              | 1993           | 13                                                             |
| 9                | Argentina | Oats                            | 1993           | 3                                                              |
| 9                | Argentina | Offals                          | 1993           | 19                                                             |
| 9                | Argentina | Oilcrops                        | 1993           | 2                                                              |
| 9                | Argentina | Olive Oil                       | 1993           | 4                                                              |
| 9                | Argentina | Olives (including preserved)    | 1993           | 1                                                              |
| 9                | Argentina | Onions                          | 1993           | 11                                                             |
| 9                | Argentina | Oranges, Mandarines             | 1993           | 23                                                             |
| 9                | Argentina | Peas                            | 1993           | 3                                                              |
| 9                | Argentina | Pelagic Fish                    | 1993           | 3                                                              |
| 9                | Argentina | Pigmeat                         | 1993           | 59                                                             |
| 9                | Argentina | Pimento                         | 1993           | 1                                                              |
| 9                | Argentina | Pineapples and products         | 1993           | 1                                                              |
| 9                | Argentina | Potatoes and products           | 1993           | 97                                                             |
| 9                | Argentina | Poultry Meat                    | 1993           | 96                                                             |
| 9                | Argentina | Pulses                          | 1993           | 10                                                             |
| 9                | Argentina | Pulses, Other and products      | 1993           | 6                                                              |
| 9                | Argentina | Rape and Mustard Oil            | 1993           | 4                                                              |
| 9                | Argentina | Rice (Milled Equivalent)        | 1993           | 34                                                             |
| 9                | Argentina | Soyabean Oil                    | 1993           | 52                                                             |
| 9                | Argentina | Spices                          | 1993           | 2                                                              |
| 9                | Argentina | Spices, Other                   | 1993           | 1                                                              |
| 9                | Argentina | Starchy Roots                   | 1993           | 119                                                            |
| 9                | Argentina | Stimulants                      | 1993           | 13                                                             |
| 9                | Argentina | Sugar & Sweeteners              | 1993           | 420                                                            |
| 9                | Argentina | Sugar (Raw Equivalent)          | 1993           | 345                                                            |
| 9                | Argentina | Sunflowerseed Oil               | 1993           | 268                                                            |
| 9                | Argentina | Sweet potatoes                  | 1993           | 17                                                             |
| 9                | Argentina | Sweeteners, Other               | 1993           | 74                                                             |
| 9                | Argentina | Tea (including mate)            | 1993           | 7                                                              |
| 9                | Argentina | Tomatoes and products           | 1993           | 14                                                             |
| 9                | Argentina | Treenuts                        | 1993           | 4                                                              |
| 9                | Argentina | Vegetable Oils                  | 1993           | 352                                                            |
| 9                | Argentina | Vegetables                      | 1993           | 53                                                             |
| 9                | Argentina | Vegetables, Other               | 1993           | 28                                                             |
| 9                | Argentina | Vegetal Products                | 1993           | 2,129                                                          |
| 9                | Argentina | Wheat and products              | 1993           | 824                                                            |
| 9                | Argentina | Wine                            | 1993           | 86                                                             |
| 9                | Argentina | Alcoholic Beverages             | 1994           | 132                                                            |
| 9                | Argentina | Animal fats                     | 1994           | 83                                                             |
| 9                | Argentina | Animal Products                 | 1994           | 994                                                            |
| 9                | Argentina | Apples and products             | 1994           | 20                                                             |
| 9                | Argentina | Bananas                         | 1994           | 18                                                             |
| 9                | Argentina | Beans                           | 1994           | 2                                                              |
| 9                | Argentina | Beer                            | 1994           | 34                                                             |
| 9                | Argentina | Beverages, Alcoholic            | 1994           | 20                                                             |
| 9                | Argentina | Bovine Meat                     | 1994           | 386                                                            |
| 9                | Argentina | Butter, Ghee                    | 1994           | 25                                                             |
| 9                | Argentina | Cassava and products            | 1994           | 5                                                              |
| 9                | Argentina | Cephalopods                     | 1994           | 1                                                              |
| 9                | Argentina | Cereals - Excluding Beer        | 1994           | 912                                                            |
| 9                | Argentina | Cereals, Other                  | 1994           | 2                                                              |
| 9                | Argentina | Cocoa Beans and products        | 1994           | 4                                                              |
| 9                | Argentina | Coconut Oil                     | 1994           | 4                                                              |
| 9                | Argentina | Coconuts - Incl Copra           | 1994           | 1                                                              |
| 9                | Argentina | Coffee and products             | 1994           | 1                                                              |
| 9                | Argentina | Cottonseed Oil                  | 1994           | 3                                                              |
| 9                | Argentina | Cream                           | 1994           | 1                                                              |
| 9                | Argentina | Demersal Fish                   | 1994           | 10                                                             |
| 9                | Argentina | Eggs                            | 1994           | 24                                                             |
| 9                | Argentina | Fats, Animals, Raw              | 1994           | 57                                                             |
| 9                | Argentina | Fish, Seafood                   | 1994           | 15                                                             |
| 9                | Argentina | Freshwater Fish                 | 1994           | 1                                                              |
| 9                | Argentina | Fruits - Excluding Wine         | 1994           | 96                                                             |
| 9                | Argentina | Fruits, Other                   | 1994           | 19                                                             |
| 9                | Argentina | Grand Total                     | 1994           | 3,155                                                          |
| 9                | Argentina | Grapefruit and products         | 1994           | 3                                                              |
| 9                | Argentina | Grapes and products (excl wine) | 1994           | 2                                                              |
| 9                | Argentina | Groundnut Oil                   | 1994           | 1                                                              |



Dietary calcium and zinc deficiency risks are decreasing but remain prevalent

| FAO Country code | Country   | Food item                       | Reference year | Net energy supply (kcal capita <sup>-1</sup> d <sup>-1</sup> ) |
|------------------|-----------|---------------------------------|----------------|----------------------------------------------------------------|
| 9                | Argentina | Lemons, Limes and products      | 1994           | 6                                                              |
| 9                | Argentina | Maize and products              | 1994           | 31                                                             |
| 9                | Argentina | Maize Germ Oil                  | 1994           | 17                                                             |
| 9                | Argentina | Meat                            | 1994           | 565                                                            |
| 9                | Argentina | Meat, Other                     | 1994           | 5                                                              |
| 9                | Argentina | Milk - Excluding Butter         | 1994           | 286                                                            |
| 9                | Argentina | Mutton & Goat Meat              | 1994           | 17                                                             |
| 9                | Argentina | Oats                            | 1994           | 3                                                              |
| 9                | Argentina | Offals                          | 1994           | 19                                                             |
| 9                | Argentina | Oilcrops                        | 1994           | 1                                                              |
| 9                | Argentina | Olive Oil                       | 1994           | 3                                                              |
| 9                | Argentina | Onions                          | 1994           | 10                                                             |
| 9                | Argentina | Oranges, Mandarines             | 1994           | 28                                                             |
| 9                | Argentina | Peas                            | 1994           | 2                                                              |
| 9                | Argentina | Pelagic Fish                    | 1994           | 3                                                              |
| 9                | Argentina | Pigmeat                         | 1994           | 57                                                             |
| 9                | Argentina | Pimento                         | 1994           | 1                                                              |
| 9                | Argentina | Pineapples and products         | 1994           | 1                                                              |
| 9                | Argentina | Potatoes and products           | 1994           | 103                                                            |
| 9                | Argentina | Poultry Meat                    | 1994           | 101                                                            |
| 9                | Argentina | Pulses                          | 1994           | 15                                                             |
| 9                | Argentina | Pulses, Other and products      | 1994           | 11                                                             |
| 9                | Argentina | Rape and Mustard Oil            | 1994           | 6                                                              |
| 9                | Argentina | Rice (Milled Equivalent)        | 1994           | 47                                                             |
| 9                | Argentina | Soyabean Oil                    | 1994           | 45                                                             |
| 9                | Argentina | Spices                          | 1994           | 2                                                              |
| 9                | Argentina | Spices, Other                   | 1994           | 1                                                              |
| 9                | Argentina | Starchy Roots                   | 1994           | 131                                                            |
| 9                | Argentina | Stimulants                      | 1994           | 12                                                             |
| 9                | Argentina | Sugar & Sweeteners              | 1994           | 448                                                            |
| 9                | Argentina | Sugar (Raw Equivalent)          | 1994           | 368                                                            |
| 9                | Argentina | Sunflowerseed Oil               | 1994           | 276                                                            |
| 9                | Argentina | Sweet potatoes                  | 1994           | 23                                                             |
| 9                | Argentina | Sweeteners, Other               | 1994           | 80                                                             |
| 9                | Argentina | Tea (including mate)            | 1994           | 7                                                              |
| 9                | Argentina | Tomatoes and products           | 1994           | 13                                                             |
| 9                | Argentina | Treenuts                        | 1994           | 4                                                              |
| 9                | Argentina | Vegetable Oils                  | 1994           | 356                                                            |
| 9                | Argentina | Vegetables                      | 1994           | 53                                                             |
| 9                | Argentina | Vegetables, Other               | 1994           | 30                                                             |
| 9                | Argentina | Vegetal Products                | 1994           | 2,162                                                          |
| 9                | Argentina | Wheat and products              | 1994           | 829                                                            |
| 9                | Argentina | Wine                            | 1994           | 78                                                             |
| 9                | Argentina | Alcoholic Beverages             | 1995           | 122                                                            |
| 9                | Argentina | Animal fats                     | 1995           | 81                                                             |
| 9                | Argentina | Animal Products                 | 1995           | 967                                                            |
| 9                | Argentina | Apples and products             | 1995           | 20                                                             |
| 9                | Argentina | Bananas                         | 1995           | 17                                                             |
| 9                | Argentina | Beans                           | 1995           | 2                                                              |
| 9                | Argentina | Beer                            | 1995           | 32                                                             |
| 9                | Argentina | Beverages, Alcoholic            | 1995           | 15                                                             |
| 9                | Argentina | Bovine Meat                     | 1995           | 351                                                            |
| 9                | Argentina | Butter, Ghee                    | 1995           | 26                                                             |
| 9                | Argentina | Cassava and products            | 1995           | 5                                                              |
| 9                | Argentina | Cephalopods                     | 1995           | 1                                                              |
| 9                | Argentina | Cereals - Excluding Beer        | 1995           | 949                                                            |
| 9                | Argentina | Cereals, Other                  | 1995           | 2                                                              |
| 9                | Argentina | Cocoa Beans and products        | 1995           | 3                                                              |
| 9                | Argentina | Coconut Oil                     | 1995           | 4                                                              |
| 9                | Argentina | Coconuts - Incl Copra           | 1995           | 1                                                              |
| 9                | Argentina | Coffee and products             | 1995           | 1                                                              |
| 9                | Argentina | Cottonseed Oil                  | 1995           | 4                                                              |
| 9                | Argentina | Cream                           | 1995           | 1                                                              |
| 9                | Argentina | Demersal Fish                   | 1995           | 11                                                             |
| 9                | Argentina | Eggs                            | 1995           | 25                                                             |
| 9                | Argentina | Fats, Animals, Raw              | 1995           | 54                                                             |
| 9                | Argentina | Fish, Seafood                   | 1995           | 19                                                             |
| 9                | Argentina | Freshwater Fish                 | 1995           | 1                                                              |
| 9                | Argentina | Fruits - Excluding Wine         | 1995           | 92                                                             |
| 9                | Argentina | Fruits, Other                   | 1995           | 17                                                             |
| 9                | Argentina | Grand Total                     | 1995           | 3,163                                                          |
| 9                | Argentina | Grapefruit and products         | 1995           | 3                                                              |
| 9                | Argentina | Grapes and products (excl wine) | 1995           | 2                                                              |
| 9                | Argentina | Groundnut Oil                   | 1995           | 1                                                              |
| 9                | Argentina | Honey                           | 1995           | 2                                                              |
| 9                | Argentina | Lemons, Limes and products      | 1995           | 6                                                              |
| 9                | Argentina | Maize and products              | 1995           | 53                                                             |
| 9                | Argentina | Maize Germ Oil                  | 1995           | 18                                                             |
| 9                | Argentina | Marine Fish, Other              | 1995           | 1                                                              |
| 9                | Argentina | Meat                            | 1995           | 525                                                            |
| 9                | Argentina | Meat, Other                     | 1995           | 5                                                              |
| 9                | Argentina | Milk - Excluding Butter         | 1995           | 297                                                            |
| 9                | Argentina | Mutton & Goat Meat              | 1995           | 16                                                             |
| 9                | Argentina | Oats                            | 1995           | 2                                                              |
| 9                | Argentina | Offals                          | 1995           | 19                                                             |
| 9                | Argentina | Oilcrops                        | 1995           | 3                                                              |
| 9                | Argentina | Olive Oil                       | 1995           | 3                                                              |
| 9                | Argentina | Olives (including preserved)    | 1995           | 2                                                              |
| 9                | Argentina | Onions                          | 1995           | 9                                                              |
| 9                | Argentina | Oranges, Mandarines             | 1995           | 26                                                             |
| 9                | Argentina | Peas                            | 1995           | 3                                                              |
| 9                | Argentina | Pelagic Fish                    | 1995           | 5                                                              |
| 9                | Argentina | Pigmeat                         | 1995           | 51                                                             |
| 9                | Argentina | Pimento                         | 1995           | 1                                                              |
| 9                | Argentina | Pineapples and products         | 1995           | 1                                                              |
| 9                | Argentina | Potatoes and products           | 1995           | 108                                                            |
| 9                | Argentina | Poultry Meat                    | 1995           | 103                                                            |

Dietary calcium and zinc deficiency risks are decreasing but remain prevalent

| FAO Country code | Country   | Food item                       | Reference year | Net energy supply (kcal capita <sup>-1</sup> d <sup>-1</sup> ) |
|------------------|-----------|---------------------------------|----------------|----------------------------------------------------------------|
| 9                | Argentina | Pulses                          | 1995           | 12                                                             |
| 9                | Argentina | Pulses, Other and products      | 1995           | 7                                                              |
| 9                | Argentina | Rice (Milled Equivalent)        | 1995           | 54                                                             |
| 9                | Argentina | Soyabean Oil                    | 1995           | 47                                                             |
| 9                | Argentina | Spices                          | 1995           | 2                                                              |
| 9                | Argentina | Spices, Other                   | 1995           | 1                                                              |
| 9                | Argentina | Starchy Roots                   | 1995           | 134                                                            |
| 9                | Argentina | Stimulants                      | 1995           | 11                                                             |
| 9                | Argentina | Sugar & Sweeteners              | 1995           | 461                                                            |
| 9                | Argentina | Sugar (Raw Equivalent)          | 1995           | 378                                                            |
| 9                | Argentina | Sunflowerseed Oil               | 1995           | 276                                                            |
| 9                | Argentina | Sweet potatoes                  | 1995           | 21                                                             |
| 9                | Argentina | Sweeteners, Other               | 1995           | 81                                                             |
| 9                | Argentina | Tea (including mate)            | 1995           | 7                                                              |
| 9                | Argentina | Tomatoes and products           | 1995           | 15                                                             |
| 9                | Argentina | Treenuts                        | 1995           | 3                                                              |
| 9                | Argentina | Vegetable Oils                  | 1995           | 354                                                            |
| 9                | Argentina | Vegetables                      | 1995           | 53                                                             |
| 9                | Argentina | Vegetables, Other               | 1995           | 29                                                             |
| 9                | Argentina | Vegetal Products                | 1995           | 2,197                                                          |
| 9                | Argentina | Wheat and products              | 1995           | 839                                                            |
| 9                | Argentina | Wine                            | 1995           | 74                                                             |
| 9                | Argentina | Alcoholic Beverages             | 1996           | 121                                                            |
| 9                | Argentina | Animal fats                     | 1996           | 85                                                             |
| 9                | Argentina | Animal Products                 | 1996           | 969                                                            |
| 9                | Argentina | Apples and products             | 1996           | 26                                                             |
| 9                | Argentina | Bananas                         | 1996           | 16                                                             |
| 9                | Argentina | Beans                           | 1996           | 2                                                              |
| 9                | Argentina | Beer                            | 1996           | 33                                                             |
| 9                | Argentina | Beverages, Alcoholic            | 1996           | 17                                                             |
| 9                | Argentina | Bovine Meat                     | 1996           | 342                                                            |
| 9                | Argentina | Butter, Chee                    | 1996           | 27                                                             |
| 9                | Argentina | Cassava and products            | 1996           | 5                                                              |
| 9                | Argentina | Cephalopods                     | 1996           | 3                                                              |
| 9                | Argentina | Cereals - Excluding Beer        | 1996           | 979                                                            |
| 9                | Argentina | Cereals, Other                  | 1996           | 1                                                              |
| 9                | Argentina | Cocoa Beans and products        | 1996           | 3                                                              |
| 9                | Argentina | Coconut Oil                     | 1996           | 5                                                              |
| 9                | Argentina | Coconuts - Incl Copra           | 1996           | 1                                                              |
| 9                | Argentina | Coffee and products             | 1996           | 1                                                              |
| 9                | Argentina | Cottonseed Oil                  | 1996           | 5                                                              |
| 9                | Argentina | Demersal Fish                   | 1996           | 11                                                             |
| 9                | Argentina | Eggs                            | 1996           | 25                                                             |
| 9                | Argentina | Fats, Animals, Raw              | 1996           | 58                                                             |
| 9                | Argentina | Fish, Seafood                   | 1996           | 20                                                             |
| 9                | Argentina | Freshwater Fish                 | 1996           | 1                                                              |
| 9                | Argentina | Fruits - Excluding Wine         | 1996           | 91                                                             |
| 9                | Argentina | Fruits, Other                   | 1996           | 20                                                             |
| 9                | Argentina | Grand Total                     | 1996           | 3,155                                                          |
| 9                | Argentina | Grapefruit and products         | 1996           | 2                                                              |
| 9                | Argentina | Grapes and products (excl wine) | 1996           | 1                                                              |
| 9                | Argentina | Groundnut Oil                   | 1996           | 1                                                              |
| 9                | Argentina | Honey                           | 1996           | 1                                                              |
| 9                | Argentina | Lemons, Limes and products      | 1996           | 6                                                              |
| 9                | Argentina | Maize and products              | 1996           | 52                                                             |
| 9                | Argentina | Maize Germ Oil                  | 1996           | 16                                                             |
| 9                | Argentina | Meat                            | 1996           | 504                                                            |
| 9                | Argentina | Meat, Other                     | 1996           | 5                                                              |
| 9                | Argentina | Milk - Excluding Butter         | 1996           | 317                                                            |
| 9                | Argentina | Mutton & Goat Meat              | 1996           | 12                                                             |
| 9                | Argentina | Oats                            | 1996           | 3                                                              |
| 9                | Argentina | Offals                          | 1996           | 18                                                             |
| 9                | Argentina | Oilcrops                        | 1996           | 3                                                              |
| 9                | Argentina | Olive Oil                       | 1996           | 3                                                              |
| 9                | Argentina | Olives (including preserved)    | 1996           | 1                                                              |
| 9                | Argentina | Onions                          | 1996           | 11                                                             |
| 9                | Argentina | Oranges, Mandarines             | 1996           | 17                                                             |
| 9                | Argentina | Peas                            | 1996           | 4                                                              |
| 9                | Argentina | Pelagic Fish                    | 1996           | 5                                                              |
| 9                | Argentina | Pigmeat                         | 1996           | 46                                                             |
| 9                | Argentina | Pimento                         | 1996           | 1                                                              |
| 9                | Argentina | Pineapples and products         | 1996           | 1                                                              |
| 9                | Argentina | Potatoes and products           | 1996           | 99                                                             |
| 9                | Argentina | Poultry Meat                    | 1996           | 99                                                             |
| 9                | Argentina | Pulses                          | 1996           | 13                                                             |
| 9                | Argentina | Pulses, Other and products      | 1996           | 7                                                              |
| 9                | Argentina | Rice (Milled Equivalent)        | 1996           | 70                                                             |
| 9                | Argentina | Soyabean Oil                    | 1996           | 53                                                             |
| 9                | Argentina | Spices                          | 1996           | 2                                                              |
| 9                | Argentina | Spices, Other                   | 1996           | 1                                                              |
| 9                | Argentina | Starchy Roots                   | 1996           | 125                                                            |
| 9                | Argentina | Stimulants                      | 1996           | 12                                                             |
| 9                | Argentina | Sugar & Sweeteners              | 1996           | 443                                                            |
| 9                | Argentina | Sugar (Raw Equivalent)          | 1996           | 373                                                            |
| 9                | Argentina | Sunflowerseed Oil               | 1996           | 258                                                            |
| 9                | Argentina | Sweet potatoes                  | 1996           | 21                                                             |
| 9                | Argentina | Sweeteners, Other               | 1996           | 70                                                             |
| 9                | Argentina | Tea (including mate)            | 1996           | 7                                                              |
| 9                | Argentina | Tomatoes and products           | 1996           | 11                                                             |
| 9                | Argentina | Treenuts                        | 1996           | 4                                                              |
| 9                | Argentina | Vegetable Oils                  | 1996           | 342                                                            |
| 9                | Argentina | Vegetables                      | 1996           | 53                                                             |
| 9                | Argentina | Vegetables, Other               | 1996           | 32                                                             |
| 9                | Argentina | Vegetal Products                | 1996           | 2,186                                                          |
| 9                | Argentina | Wheat and products              | 1996           | 853                                                            |
| 9                | Argentina | Wine                            | 1996           | 71                                                             |
| 9                | Argentina | Alcoholic Beverages             | 1997           | 126                                                            |

Dietary calcium and zinc deficiency risks are decreasing but remain prevalent

| FAO Country code | Country   | Food item                       | Reference year | Net energy supply (kcal capita <sup>-1</sup> d <sup>-1</sup> ) |
|------------------|-----------|---------------------------------|----------------|----------------------------------------------------------------|
| 9                | Argentina | Animal fats                     | 1997           | 86                                                             |
| 9                | Argentina | Animal Products                 | 1997           | 965                                                            |
| 9                | Argentina | Apples and products             | 1997           | 18                                                             |
| 9                | Argentina | Bananas                         | 1997           | 18                                                             |
| 9                | Argentina | Beans                           | 1997           | 2                                                              |
| 9                | Argentina | Beer                            | 1997           | 36                                                             |
| 9                | Argentina | Beverages, Alcoholic            | 1997           | 19                                                             |
| 9                | Argentina | Bovine Meat                     | 1997           | 353                                                            |
| 9                | Argentina | Butter, Ghee                    | 1997           | 25                                                             |
| 9                | Argentina | Cassava and products            | 1997           | 5                                                              |
| 9                | Argentina | Cephalopods                     | 1997           | 6                                                              |
| 9                | Argentina | Cereals - Excluding Beer        | 1997           | 944                                                            |
| 9                | Argentina | Cereals, Other                  | 1997           | 1                                                              |
| 9                | Argentina | Cocoa Beans and products        | 1997           | 2                                                              |
| 9                | Argentina | Coconut Oil                     | 1997           | 2                                                              |
| 9                | Argentina | Coconuts - Incl Copra           | 1997           | 1                                                              |
| 9                | Argentina | Coffee and products             | 1997           | 2                                                              |
| 9                | Argentina | Cottonseed Oil                  | 1997           | 4                                                              |
| 9                | Argentina | Cream                           | 1997           | 1                                                              |
| 9                | Argentina | Demersal Fish                   | 1997           | 8                                                              |
| 9                | Argentina | Eggs                            | 1997           | 25                                                             |
| 9                | Argentina | Fats, Animals, Raw              | 1997           | 60                                                             |
| 9                | Argentina | Fish, Seafood                   | 1997           | 21                                                             |
| 9                | Argentina | Freshwater Fish                 | 1997           | 1                                                              |
| 9                | Argentina | Fruits - Excluding Wine         | 1997           | 98                                                             |
| 9                | Argentina | Fruits, Other                   | 1997           | 18                                                             |
| 9                | Argentina | Grand Total                     | 1997           | 3,134                                                          |
| 9                | Argentina | Grapefruit and products         | 1997           | 3                                                              |
| 9                | Argentina | Grapes and products (excl wine) | 1997           | 2                                                              |
| 9                | Argentina | Groundnut Oil                   | 1997           | 1                                                              |
| 9                | Argentina | Honey                           | 1997           | 1                                                              |
| 9                | Argentina | Lemons, Limes and products      | 1997           | 8                                                              |
| 9                | Argentina | Maize and products              | 1997           | 51                                                             |
| 9                | Argentina | Maize Germ Oil                  | 1997           | 15                                                             |
| 9                | Argentina | Meat                            | 1997           | 514                                                            |
| 9                | Argentina | Meat, Other                     | 1997           | 5                                                              |
| 9                | Argentina | Milk - Excluding Butter         | 1997           | 301                                                            |
| 9                | Argentina | Mutton & Goat Meat              | 1997           | 11                                                             |
| 9                | Argentina | Oats                            | 1997           | 4                                                              |
| 9                | Argentina | Offals                          | 1997           | 18                                                             |
| 9                | Argentina | Oilcrops                        | 1997           | 3                                                              |
| 9                | Argentina | Olive Oil                       | 1997           | 4                                                              |
| 9                | Argentina | Olives (including preserved)    | 1997           | 2                                                              |
| 9                | Argentina | Onions                          | 1997           | 6                                                              |
| 9                | Argentina | Oranges, Mandarines             | 1997           | 29                                                             |
| 9                | Argentina | Peas                            | 1997           | 4                                                              |
| 9                | Argentina | Pelagic Fish                    | 1997           | 6                                                              |
| 9                | Argentina | Pigmeat                         | 1997           | 43                                                             |
| 9                | Argentina | Pimento                         | 1997           | 1                                                              |
| 9                | Argentina | Pineapples and products         | 1997           | 1                                                              |
| 9                | Argentina | Potatoes and products           | 1997           | 130                                                            |
| 9                | Argentina | Poultry Meat                    | 1997           | 103                                                            |
| 9                | Argentina | Pulses                          | 1997           | 13                                                             |
| 9                | Argentina | Pulses, Other and products      | 1997           | 7                                                              |
| 9                | Argentina | Rice (Milled Equivalent)        | 1997           | 66                                                             |
| 9                | Argentina | Soyabean Oil                    | 1997           | 45                                                             |
| 9                | Argentina | Spices                          | 1997           | 3                                                              |
| 9                | Argentina | Spices, Other                   | 1997           | 2                                                              |
| 9                | Argentina | Starchy Roots                   | 1997           | 150                                                            |
| 9                | Argentina | Stimulants                      | 1997           | 11                                                             |
| 9                | Argentina | Sugar & Sweeteners              | 1997           | 438                                                            |
| 9                | Argentina | Sugar (Raw Equivalent)          | 1997           | 369                                                            |
| 9                | Argentina | Sunflowerseed Oil               | 1997           | 259                                                            |
| 9                | Argentina | Sweet potatoes                  | 1997           | 15                                                             |
| 9                | Argentina | Sweeteners, Other               | 1997           | 68                                                             |
| 9                | Argentina | Tea (including mate)            | 1997           | 8                                                              |
| 9                | Argentina | Tomatoes and products           | 1997           | 12                                                             |
| 9                | Argentina | Treenuts                        | 1997           | 3                                                              |
| 9                | Argentina | Vegetable Oils                  | 1997           | 332                                                            |
| 9                | Argentina | Vegetables                      | 1997           | 48                                                             |
| 9                | Argentina | Vegetables, Other               | 1997           | 30                                                             |
| 9                | Argentina | Vegetal Products                | 1997           | 2,170                                                          |
| 9                | Argentina | Wheat and products              | 1997           | 822                                                            |
| 9                | Argentina | Wine                            | 1997           | 71                                                             |
| 9                | Argentina | Alcoholic Beverages             | 1998           | 113                                                            |
| 9                | Argentina | Animal fats                     | 1998           | 89                                                             |
| 9                | Argentina | Animal Products                 | 1998           | 995                                                            |
| 9                | Argentina | Apples and products             | 1998           | 19                                                             |
| 9                | Argentina | Bananas                         | 1998           | 18                                                             |
| 9                | Argentina | Beans                           | 1998           | 2                                                              |
| 9                | Argentina | Beer                            | 1998           | 34                                                             |
| 9                | Argentina | Beverages, Alcoholic            | 1998           | 13                                                             |
| 9                | Argentina | Bovine Meat                     | 1998           | 353                                                            |
| 9                | Argentina | Butter, Ghee                    | 1998           | 25                                                             |
| 9                | Argentina | Cassava and products            | 1998           | 5                                                              |
| 9                | Argentina | Cephalopods                     | 1998           | 3                                                              |
| 9                | Argentina | Cereals - Excluding Beer        | 1998           | 937                                                            |
| 9                | Argentina | Cereals, Other                  | 1998           | 1                                                              |
| 9                | Argentina | Cocoa Beans and products        | 1998           | 2                                                              |
| 9                | Argentina | Coconut Oil                     | 1998           | 3                                                              |
| 9                | Argentina | Coconuts - Incl Copra           | 1998           | 1                                                              |
| 9                | Argentina | Coffee and products             | 1998           | 1                                                              |
| 9                | Argentina | Cottonseed Oil                  | 1998           | 8                                                              |
| 9                | Argentina | Cream                           | 1998           | 1                                                              |
| 9                | Argentina | Demersal Fish                   | 1998           | 9                                                              |
| 9                | Argentina | Eggs                            | 1998           | 26                                                             |
| 9                | Argentina | Fats, Animals, Raw              | 1998           | 63                                                             |

Dietary calcium and zinc deficiency risks are decreasing but remain prevalent

| FAO Country code | Country   | Food item                       | Reference year | Net energy supply (kcal <i>capita</i> <sup>-1</sup> d <sup>-1</sup> ) |
|------------------|-----------|---------------------------------|----------------|-----------------------------------------------------------------------|
| 9                | Argentina | Fish, Seafood                   | 1998           | 18                                                                    |
| 9                | Argentina | Freshwater Fish                 | 1998           | 1                                                                     |
| 9                | Argentina | Fruits - Excluding Wine         | 1998           | 95                                                                    |
| 9                | Argentina | Fruits, Other                   | 1998           | 19                                                                    |
| 9                | Argentina | Grand Total                     | 1998           | 3,167                                                                 |
| 9                | Argentina | Grapefruit and products         | 1998           | 3                                                                     |
| 9                | Argentina | Grapes and products (excl wine) | 1998           | 2                                                                     |
| 9                | Argentina | Groundnut Oil                   | 1998           | 1                                                                     |
| 9                | Argentina | Honey                           | 1998           | 2                                                                     |
| 9                | Argentina | Lemons, Limes and products      | 1998           | 8                                                                     |
| 9                | Argentina | Maize and products              | 1998           | 56                                                                    |
| 9                | Argentina | Maize Germ Oil                  | 1998           | 16                                                                    |
| 9                | Argentina | Meat                            | 1998           | 533                                                                   |
| 9                | Argentina | Meat, Other                     | 1998           | 5                                                                     |
| 9                | Argentina | Milk - Excluding Butter         | 1998           | 311                                                                   |
| 9                | Argentina | Mutton & Goat Meat              | 1998           | 10                                                                    |
| 9                | Argentina | Oats                            | 1998           | 7                                                                     |
| 9                | Argentina | Offals                          | 1998           | 18                                                                    |
| 9                | Argentina | Oilcrops                        | 1998           | 4                                                                     |
| 9                | Argentina | Olive Oil                       | 1998           | 6                                                                     |
| 9                | Argentina | Olives (including preserved)    | 1998           | 2                                                                     |
| 9                | Argentina | Onions                          | 1998           | 12                                                                    |
| 9                | Argentina | Oranges, Mandarines             | 1998           | 25                                                                    |
| 9                | Argentina | Peas                            | 1998           | 3                                                                     |
| 9                | Argentina | Pelagic Fish                    | 1998           | 4                                                                     |
| 9                | Argentina | Pigmeat                         | 1998           | 49                                                                    |
| 9                | Argentina | Pimento                         | 1998           | 1                                                                     |
| 9                | Argentina | Pineapples and products         | 1998           | 1                                                                     |
| 9                | Argentina | Potatoes and products           | 1998           | 140                                                                   |
| 9                | Argentina | Poultry Meat                    | 1998           | 116                                                                   |
| 9                | Argentina | Pulses                          | 1998           | 11                                                                    |
| 9                | Argentina | Pulses, Other and products      | 1998           | 6                                                                     |
| 9                | Argentina | Rice (Milled Equivalent)        | 1998           | 48                                                                    |
| 9                | Argentina | Soyabean Oil                    | 1998           | 51                                                                    |
| 9                | Argentina | Spices                          | 1998           | 3                                                                     |
| 9                | Argentina | Spices, Other                   | 1998           | 2                                                                     |
| 9                | Argentina | Starchy Roots                   | 1998           | 163                                                                   |
| 9                | Argentina | Stimulants                      | 1998           | 11                                                                    |
| 9                | Argentina | Sugar & Sweeteners              | 1998           | 431                                                                   |
| 9                | Argentina | Sugar (Raw Equivalent)          | 1998           | 365                                                                   |
| 9                | Argentina | Sunflowerseed Oil               | 1998           | 262                                                                   |
| 9                | Argentina | Sweet potatoes                  | 1998           | 19                                                                    |
| 9                | Argentina | Sweeteners, Other               | 1998           | 64                                                                    |
| 9                | Argentina | Tea (including mate)            | 1998           | 8                                                                     |
| 9                | Argentina | Tomatoes and products           | 1998           | 11                                                                    |
| 9                | Argentina | Treenuts                        | 1998           | 3                                                                     |
| 9                | Argentina | Vegetable Oils                  | 1998           | 348                                                                   |
| 9                | Argentina | Vegetables                      | 1998           | 54                                                                    |
| 9                | Argentina | Vegetables, Other               | 1998           | 32                                                                    |
| 9                | Argentina | Vegetal Products                | 1998           | 2,172                                                                 |
| 9                | Argentina | Wheat and products              | 1998           | 825                                                                   |
| 9                | Argentina | Wine                            | 1998           | 66                                                                    |
| 9                | Argentina | Alcoholic Beverages             | 1999           | 114                                                                   |
| 9                | Argentina | Animal fats                     | 1999           | 88                                                                    |
| 9                | Argentina | Animal Products                 | 1999           | 1,034                                                                 |
| 9                | Argentina | Apples and products             | 1999           | 18                                                                    |
| 9                | Argentina | Bananas                         | 1999           | 20                                                                    |
| 9                | Argentina | Beans                           | 1999           | 2                                                                     |
| 9                | Argentina | Beer                            | 1999           | 33                                                                    |
| 9                | Argentina | Beverages, Alcoholic            | 1999           | 16                                                                    |
| 9                | Argentina | Bovine Meat                     | 1999           | 378                                                                   |
| 9                | Argentina | Butter, Ghee                    | 1999           | 24                                                                    |
| 9                | Argentina | Cassava and products            | 1999           | 5                                                                     |
| 9                | Argentina | Cephalopods                     | 1999           | 3                                                                     |
| 9                | Argentina | Cereals - Excluding Beer        | 1999           | 975                                                                   |
| 9                | Argentina | Cereals, Other                  | 1999           | 2                                                                     |
| 9                | Argentina | Cocoa Beans and products        | 1999           | 2                                                                     |
| 9                | Argentina | Coconut Oil                     | 1999           | 2                                                                     |
| 9                | Argentina | Coconuts - Incl Copra           | 1999           | 1                                                                     |
| 9                | Argentina | Coffee and products             | 1999           | 1                                                                     |
| 9                | Argentina | Cottonseed Oil                  | 1999           | 17                                                                    |
| 9                | Argentina | Cream                           | 1999           | 1                                                                     |
| 9                | Argentina | Demersal Fish                   | 1999           | 6                                                                     |
| 9                | Argentina | Eggs                            | 1999           | 27                                                                    |
| 9                | Argentina | Fats, Animals, Raw              | 1999           | 63                                                                    |
| 9                | Argentina | Fish, Seafood                   | 1999           | 17                                                                    |
| 9                | Argentina | Freshwater Fish                 | 1999           | 2                                                                     |
| 9                | Argentina | Fruits - Excluding Wine         | 1999           | 93                                                                    |
| 9                | Argentina | Fruits, Other                   | 1999           | 17                                                                    |
| 9                | Argentina | Grand Total                     | 1999           | 3,266                                                                 |
| 9                | Argentina | Grapefruit and products         | 1999           | 3                                                                     |
| 9                | Argentina | Grapes and products (excl wine) | 1999           | 2                                                                     |
| 9                | Argentina | Groundnut Oil                   | 1999           | 1                                                                     |
| 9                | Argentina | Honey                           | 1999           | 2                                                                     |
| 9                | Argentina | Lemons, Limes and products      | 1999           | 8                                                                     |
| 9                | Argentina | Maize and products              | 1999           | 72                                                                    |
| 9                | Argentina | Maize Germ Oil                  | 1999           | 14                                                                    |
| 9                | Argentina | Meat                            | 1999           | 568                                                                   |
| 9                | Argentina | Meat, Other                     | 1999           | 6                                                                     |
| 9                | Argentina | Milk - Excluding Butter         | 1999           | 316                                                                   |
| 9                | Argentina | Molluscs, Other                 | 1999           | 1                                                                     |
| 9                | Argentina | Mutton & Goat Meat              | 1999           | 9                                                                     |
| 9                | Argentina | Oats                            | 1999           | 8                                                                     |
| 9                | Argentina | Offals                          | 1999           | 18                                                                    |
| 9                | Argentina | Oilcrops                        | 1999           | 3                                                                     |
| 9                | Argentina | Olive Oil                       | 1999           | 5                                                                     |
| 9                | Argentina | Olives (including preserved)    | 1999           | 2                                                                     |

Dietary calcium and zinc deficiency risks are decreasing but remain prevalent

| FAO Country code | Country   | Food item                       | Reference year | Net energy supply (kcal capita <sup>-1</sup> d <sup>-1</sup> ) |
|------------------|-----------|---------------------------------|----------------|----------------------------------------------------------------|
| 9                | Argentina | Onions                          | 1999           | 17                                                             |
| 9                | Argentina | Oranges, Mandarines             | 1999           | 23                                                             |
| 9                | Argentina | Peas                            | 1999           | 2                                                              |
| 9                | Argentina | Pelagic Fish                    | 1999           | 5                                                              |
| 9                | Argentina | Pigmeat                         | 1999           | 55                                                             |
| 9                | Argentina | Pimento                         | 1999           | 1                                                              |
| 9                | Argentina | Pineapples and products         | 1999           | 1                                                              |
| 9                | Argentina | Potatoes and products           | 1999           | 112                                                            |
| 9                | Argentina | Poultry Meat                    | 1999           | 120                                                            |
| 9                | Argentina | Pulses                          | 1999           | 12                                                             |
| 9                | Argentina | Pulses, Other and products      | 1999           | 8                                                              |
| 9                | Argentina | Rice (Milled Equivalent)        | 1999           | 65                                                             |
| 9                | Argentina | Soyabean Oil                    | 1999           | 52                                                             |
| 9                | Argentina | Spices                          | 1999           | 2                                                              |
| 9                | Argentina | Spices, Other                   | 1999           | 1                                                              |
| 9                | Argentina | Starchy Roots                   | 1999           | 131                                                            |
| 9                | Argentina | Stimulants                      | 1999           | 12                                                             |
| 9                | Argentina | Sugar & Sweeteners              | 1999           | 468                                                            |
| 9                | Argentina | Sugar (Raw Equivalent)          | 1999           | 387                                                            |
| 9                | Argentina | Sunflowerseed Oil               | 1999           | 266                                                            |
| 9                | Argentina | Sweet potatoes                  | 1999           | 15                                                             |
| 9                | Argentina | Sweeteners, Other               | 1999           | 78                                                             |
| 9                | Argentina | Tea (including mate)            | 1999           | 8                                                              |
| 9                | Argentina | Tomatoes and products           | 1999           | 13                                                             |
| 9                | Argentina | Treenuts                        | 1999           | 4                                                              |
| 9                | Argentina | Vegetable Oils                  | 1999           | 358                                                            |
| 9                | Argentina | Vegetables                      | 1999           | 60                                                             |
| 9                | Argentina | Vegetables, Other               | 1999           | 30                                                             |
| 9                | Argentina | Vegetal Products                | 1999           | 2,233                                                          |
| 9                | Argentina | Wheat and products              | 1999           | 828                                                            |
| 9                | Argentina | Wine                            | 1999           | 65                                                             |
| 9                | Argentina | Alcoholic Beverages             | 2000           | 110                                                            |
| 9                | Argentina | Animal fats                     | 2000           | 75                                                             |
| 9                | Argentina | Animal Products                 | 2000           | 1,014                                                          |
| 9                | Argentina | Apples and products             | 2000           | 20                                                             |
| 9                | Argentina | Bananas                         | 2000           | 22                                                             |
| 9                | Argentina | Barley and products             | 2000           | 1                                                              |
| 9                | Argentina | Beans                           | 2000           | 1                                                              |
| 9                | Argentina | Beer                            | 2000           | 33                                                             |
| 9                | Argentina | Beverages, Alcoholic            | 2000           | 14                                                             |
| 9                | Argentina | Bovine Meat                     | 2000           | 371                                                            |
| 9                | Argentina | Butter, Ghee                    | 2000           | 25                                                             |
| 9                | Argentina | Cassava and products            | 2000           | 5                                                              |
| 9                | Argentina | Cephalopods                     | 2000           | 1                                                              |
| 9                | Argentina | Cereals - Excluding Beer        | 2000           | 1,024                                                          |
| 9                | Argentina | Cereals, Other                  | 2000           | 2                                                              |
| 9                | Argentina | Cocoa Beans and products        | 2000           | 2                                                              |
| 9                | Argentina | Coconut Oil                     | 2000           | 3                                                              |
| 9                | Argentina | Coconuts - Incl Copra           | 2000           | 1                                                              |
| 9                | Argentina | Coffee and products             | 2000           | 1                                                              |
| 9                | Argentina | Cottonseed Oil                  | 2000           | 9                                                              |
| 9                | Argentina | Demersal Fish                   | 2000           | 5                                                              |
| 9                | Argentina | Eggs                            | 2000           | 27                                                             |
| 9                | Argentina | Fats, Animals, Raw              | 2000           | 50                                                             |
| 9                | Argentina | Fish, Seafood                   | 2000           | 14                                                             |
| 9                | Argentina | Freshwater Fish                 | 2000           | 2                                                              |
| 9                | Argentina | Fruits - Excluding Wine         | 2000           | 102                                                            |
| 9                | Argentina | Fruits, Other                   | 2000           | 16                                                             |
| 9                | Argentina | Grand Total                     | 2000           | 3,257                                                          |
| 9                | Argentina | Grapefruit and products         | 2000           | 3                                                              |
| 9                | Argentina | Grapes and products (excl wine) | 2000           | 2                                                              |
| 9                | Argentina | Groundnut Oil                   | 2000           | 1                                                              |
| 9                | Argentina | Honey                           | 2000           | 1                                                              |
| 9                | Argentina | Lemons, Limes and products      | 2000           | 9                                                              |
| 9                | Argentina | Maize and products              | 2000           | 89                                                             |
| 9                | Argentina | Maize Germ Oil                  | 2000           | 12                                                             |
| 9                | Argentina | Meat                            | 2000           | 560                                                            |
| 9                | Argentina | Meat, Other                     | 2000           | 6                                                              |
| 9                | Argentina | Milk - Excluding Butter         | 2000           | 319                                                            |
| 9                | Argentina | Molluscs, Other                 | 2000           | 1                                                              |
| 9                | Argentina | Mutton & Goat Meat              | 2000           | 10                                                             |
| 9                | Argentina | Cats                            | 2000           | 9                                                              |
| 9                | Argentina | Offals                          | 2000           | 18                                                             |
| 9                | Argentina | Oilcrops                        | 2000           | 5                                                              |
| 9                | Argentina | Olive Oil                       | 2000           | 7                                                              |
| 9                | Argentina | Olives (including preserved)    | 2000           | 3                                                              |
| 9                | Argentina | Onions                          | 2000           | 13                                                             |
| 9                | Argentina | Oranges, Mandarines             | 2000           | 29                                                             |
| 9                | Argentina | Peas                            | 2000           | 2                                                              |
| 9                | Argentina | Pelagic Fish                    | 2000           | 5                                                              |
| 9                | Argentina | Pigmeat                         | 2000           | 55                                                             |
| 9                | Argentina | Pimento                         | 2000           | 1                                                              |
| 9                | Argentina | Pineapples and products         | 2000           | 1                                                              |
| 9                | Argentina | Potatoes and products           | 2000           | 88                                                             |
| 9                | Argentina | Poultry Meat                    | 2000           | 120                                                            |
| 9                | Argentina | Pulses                          | 2000           | 9                                                              |
| 9                | Argentina | Pulses, Other and products      | 2000           | 6                                                              |
| 9                | Argentina | Rice (Milled Equivalent)        | 2000           | 56                                                             |
| 9                | Argentina | Soyabean Oil                    | 2000           | 54                                                             |
| 9                | Argentina | Spices                          | 2000           | 2                                                              |
| 9                | Argentina | Spices, Other                   | 2000           | 1                                                              |
| 9                | Argentina | Starchy Roots                   | 2000           | 109                                                            |
| 9                | Argentina | Stimulants                      | 2000           | 12                                                             |
| 9                | Argentina | Sugar & Sweeteners              | 2000           | 465                                                            |
| 9                | Argentina | Sugar (Raw Equivalent)          | 2000           | 393                                                            |
| 9                | Argentina | Sunflowerseed Oil               | 2000           | 258                                                            |
| 9                | Argentina | Sweet potatoes                  | 2000           | 16                                                             |

Dietary calcium and zinc deficiency risks are decreasing but remain prevalent

| FAO Country code | Country   | Food item                       | Reference year | Net energy supply (kcal capita <sup>-1</sup> d <sup>-1</sup> ) |
|------------------|-----------|---------------------------------|----------------|----------------------------------------------------------------|
| 9                | Argentina | Sweeteners, Other               | 2000           | 71                                                             |
| 9                | Argentina | Tea (including mate)            | 2000           | 8                                                              |
| 9                | Argentina | Tomatoes and products           | 2000           | 12                                                             |
| 9                | Argentina | Treenuts                        | 2000           | 4                                                              |
| 9                | Argentina | Vegetable Oils                  | 2000           | 345                                                            |
| 9                | Argentina | Vegetables                      | 2000           | 56                                                             |
| 9                | Argentina | Vegetables, Other               | 2000           | 31                                                             |
| 9                | Argentina | Vegetal Products                | 2000           | 2,242                                                          |
| 9                | Argentina | Wheat and products              | 2000           | 868                                                            |
| 9                | Argentina | Wine                            | 2000           | 63                                                             |
| 9                | Argentina | Alcoholic Beverages             | 2001           | 106                                                            |
| 9                | Argentina | Animal fats                     | 2001           | 77                                                             |
| 9                | Argentina | Animal Products                 | 2001           | 959                                                            |
| 9                | Argentina | Apples and products             | 2001           | 29                                                             |
| 9                | Argentina | Bananas                         | 2001           | 22                                                             |
| 9                | Argentina | Beans                           | 2001           | 1                                                              |
| 9                | Argentina | Beer                            | 2001           | 33                                                             |
| 9                | Argentina | Beverages, Alcoholic            | 2001           | 13                                                             |
| 9                | Argentina | Bovine Meat                     | 2001           | 356                                                            |
| 9                | Argentina | Butter, Chee                    | 2001           | 28                                                             |
| 9                | Argentina | Cassava and products            | 2001           | 5                                                              |
| 9                | Argentina | Cephalopods                     | 2001           | 4                                                              |
| 9                | Argentina | Cereals - Excluding Beer        | 2001           | 1,000                                                          |
| 9                | Argentina | Cereals, Other                  | 2001           | 2                                                              |
| 9                | Argentina | Cocoa Beans and products        | 2001           | 2                                                              |
| 9                | Argentina | Coconut Oil                     | 2001           | 2                                                              |
| 9                | Argentina | Coconuts - Incl Copra           | 2001           | 1                                                              |
| 9                | Argentina | Coffee and products             | 2001           | 1                                                              |
| 9                | Argentina | Cottonseed Oil                  | 2001           | 5                                                              |
| 9                | Argentina | Cream                           | 2001           | 1                                                              |
| 9                | Argentina | Crustaceans                     | 2001           | 1                                                              |
| 9                | Argentina | Demersal Fish                   | 2001           | 5                                                              |
| 9                | Argentina | Eggs                            | 2001           | 25                                                             |
| 9                | Argentina | Fats, Animals, Raw              | 2001           | 49                                                             |
| 9                | Argentina | Fish, Seafood                   | 2001           | 16                                                             |
| 9                | Argentina | Freshwater Fish                 | 2001           | 1                                                              |
| 9                | Argentina | Fruits - Excluding Wine         | 2001           | 113                                                            |
| 9                | Argentina | Fruits, Other                   | 2001           | 18                                                             |
| 9                | Argentina | Grand Total                     | 2001           | 3,216                                                          |
| 9                | Argentina | Grapefruit and products         | 2001           | 3                                                              |
| 9                | Argentina | Grapes and products (excl wine) | 2001           | 2                                                              |
| 9                | Argentina | Groundnut Oil                   | 2001           | 1                                                              |
| 9                | Argentina | Honey                           | 2001           | 2                                                              |
| 9                | Argentina | Lemons, Limes and products      | 2001           | 9                                                              |
| 9                | Argentina | Maize and products              | 2001           | 88                                                             |
| 9                | Argentina | Maize Germ Oil                  | 2001           | 15                                                             |
| 9                | Argentina | Meat                            | 2001           | 535                                                            |
| 9                | Argentina | Meat, Other                     | 2001           | 5                                                              |
| 9                | Argentina | Milk - Excluding Butter         | 2001           | 289                                                            |
| 9                | Argentina | Molluscs, Other                 | 2001           | 1                                                              |
| 9                | Argentina | Mutton & Goat Meat              | 2001           | 9                                                              |
| 9                | Argentina | Oats                            | 2001           | 11                                                             |
| 9                | Argentina | Offals                          | 2001           | 18                                                             |
| 9                | Argentina | Oilcrops                        | 2001           | 5                                                              |
| 9                | Argentina | Olive Oil                       | 2001           | 6                                                              |
| 9                | Argentina | Olives (including preserved)    | 2001           | 4                                                              |
| 9                | Argentina | Onions                          | 2001           | 13                                                             |
| 9                | Argentina | Oranges, Mandarines             | 2001           | 30                                                             |
| 9                | Argentina | Peas                            | 2001           | 2                                                              |
| 9                | Argentina | Pelagic Fish                    | 2001           | 5                                                              |
| 9                | Argentina | Pigmeat                         | 2001           | 50                                                             |
| 9                | Argentina | Pimento                         | 2001           | 1                                                              |
| 9                | Argentina | Pineapples and products         | 2001           | 1                                                              |
| 9                | Argentina | Potatoes and products           | 2001           | 99                                                             |
| 9                | Argentina | Poultry Meat                    | 2001           | 115                                                            |
| 9                | Argentina | Pulses                          | 2001           | 10                                                             |
| 9                | Argentina | Pulses, Other and products      | 2001           | 6                                                              |
| 9                | Argentina | Rice (Milled Equivalent)        | 2001           | 65                                                             |
| 9                | Argentina | Soyabean Oil                    | 2001           | 64                                                             |
| 9                | Argentina | Spices                          | 2001           | 3                                                              |
| 9                | Argentina | Spices, Other                   | 2001           | 1                                                              |
| 9                | Argentina | Starchy Roots                   | 2001           | 119                                                            |
| 9                | Argentina | Stimulants                      | 2001           | 12                                                             |
| 9                | Argentina | Sugar & Sweeteners              | 2001           | 470                                                            |
| 9                | Argentina | Sugar (Raw Equivalent)          | 2001           | 398                                                            |
| 9                | Argentina | Sunflowerseed Oil               | 2001           | 267                                                            |
| 9                | Argentina | Sweet potatoes                  | 2001           | 16                                                             |
| 9                | Argentina | Sweeteners, Other               | 2001           | 71                                                             |
| 9                | Argentina | Tea (including mate)            | 2001           | 8                                                              |
| 9                | Argentina | Tomatoes and products           | 2001           | 12                                                             |
| 9                | Argentina | Treenuts                        | 2001           | 4                                                              |
| 9                | Argentina | Vegetable Oils                  | 2001           | 360                                                            |
| 9                | Argentina | Vegetables                      | 2001           | 55                                                             |
| 9                | Argentina | Vegetables, Other               | 2001           | 30                                                             |
| 9                | Argentina | Vegetal Products                | 2001           | 2,257                                                          |
| 9                | Argentina | Wheat and products              | 2001           | 835                                                            |
| 9                | Argentina | Wine                            | 2001           | 60                                                             |
| 9                | Argentina | Alcoholic Beverages             | 2002           | 100                                                            |
| 9                | Argentina | Animal fats                     | 2002           | 70                                                             |
| 9                | Argentina | Animal Products                 | 2002           | 813                                                            |
| 9                | Argentina | Apples and products             | 2002           | 26                                                             |
| 9                | Argentina | Bananas                         | 2002           | 17                                                             |
| 9                | Argentina | Beans                           | 2002           | 1                                                              |
| 9                | Argentina | Beer                            | 2002           | 31                                                             |
| 9                | Argentina | Beverages, Alcoholic            | 2002           | 10                                                             |
| 9                | Argentina | Bovine Meat                     | 2002           | 332                                                            |
| 9                | Argentina | Butter, Chee                    | 2002           | 27                                                             |

Dietary calcium and zinc deficiency risks are decreasing but remain prevalent

| FAO Country code | Country   | Food item                       | Reference year | Net energy supply (kcal <i>capita</i> <sup>-1</sup> d <sup>-1</sup> ) |
|------------------|-----------|---------------------------------|----------------|-----------------------------------------------------------------------|
| 9                | Argentina | Cassava and products            | 2002           | 4                                                                     |
| 9                | Argentina | Cephalopods                     | 2002           | 4                                                                     |
| 9                | Argentina | Cereals - Excluding Beer        | 2002           | 1,007                                                                 |
| 9                | Argentina | Cereals, Other                  | 2002           | 2                                                                     |
| 9                | Argentina | Cocoa Beans and products        | 2002           | 1                                                                     |
| 9                | Argentina | Coconut Oil                     | 2002           | 1                                                                     |
| 9                | Argentina | Coconuts - Incl Copra           | 2002           | 1                                                                     |
| 9                | Argentina | Coffee and products             | 2002           | 1                                                                     |
| 9                | Argentina | Cottonseed Oil                  | 2002           | 6                                                                     |
| 9                | Argentina | Cream                           | 2002           | 1                                                                     |
| 9                | Argentina | Demersal Fish                   | 2002           | 3                                                                     |
| 9                | Argentina | Eggs                            | 2002           | 21                                                                    |
| 9                | Argentina | Fats, Animals, Raw              | 2002           | 42                                                                    |
| 9                | Argentina | Fish, Seafood                   | 2002           | 11                                                                    |
| 9                | Argentina | Freshwater Fish                 | 2002           | 1                                                                     |
| 9                | Argentina | Fruits - Excluding Wine         | 2002           | 87                                                                    |
| 9                | Argentina | Fruits, Other                   | 2002           | 12                                                                    |
| 9                | Argentina | Grand Total                     | 2002           | 2,985                                                                 |
| 9                | Argentina | Grapefruit and products         | 2002           | 2                                                                     |
| 9                | Argentina | Grapes and products (excl wine) | 2002           | 2                                                                     |
| 9                | Argentina | Groundnut Oil                   | 2002           | 1                                                                     |
| 9                | Argentina | Honey                           | 2002           | 1                                                                     |
| 9                | Argentina | Lemons, Limes and products      | 2002           | 5                                                                     |
| 9                | Argentina | Maize and products              | 2002           | 87                                                                    |
| 9                | Argentina | Maize Germ Oil                  | 2002           | 15                                                                    |
| 9                | Argentina | Meat                            | 2002           | 463                                                                   |
| 9                | Argentina | Meat, Other                     | 2002           | 5                                                                     |
| 9                | Argentina | Milk - Excluding Butter         | 2002           | 232                                                                   |
| 9                | Argentina | Mutton & Goat Meat              | 2002           | 9                                                                     |
| 9                | Argentina | Oats                            | 2002           | 6                                                                     |
| 9                | Argentina | Offals                          | 2002           | 17                                                                    |
| 9                | Argentina | Oilcrops                        | 2002           | 2                                                                     |
| 9                | Argentina | Olive Oil                       | 2002           | 4                                                                     |
| 9                | Argentina | Olives (including preserved)    | 2002           | 1                                                                     |
| 9                | Argentina | Onions                          | 2002           | 14                                                                    |
| 9                | Argentina | Oranges, Mandarines             | 2002           | 23                                                                    |
| 9                | Argentina | Peas                            | 2002           | 3                                                                     |
| 9                | Argentina | Pelagic Fish                    | 2002           | 2                                                                     |
| 9                | Argentina | Pigmeat                         | 2002           | 36                                                                    |
| 9                | Argentina | Pimento                         | 2002           | 1                                                                     |
| 9                | Argentina | Potatoes and products           | 2002           | 87                                                                    |
| 9                | Argentina | Poultry Meat                    | 2002           | 82                                                                    |
| 9                | Argentina | Pulses                          | 2002           | 9                                                                     |
| 9                | Argentina | Pulses, Other and products      | 2002           | 5                                                                     |
| 9                | Argentina | Rice (Milled Equivalent)        | 2002           | 59                                                                    |
| 9                | Argentina | Soyabean Oil                    | 2002           | 47                                                                    |
| 9                | Argentina | Spices                          | 2002           | 2                                                                     |
| 9                | Argentina | Spices, Other                   | 2002           | 1                                                                     |
| 9                | Argentina | Starchy Roots                   | 2002           | 108                                                                   |
| 9                | Argentina | Stimulants                      | 2002           | 10                                                                    |
| 9                | Argentina | Sugar & Sweeteners              | 2002           | 463                                                                   |
| 9                | Argentina | Sugar (Raw Equivalent)          | 2002           | 393                                                                   |
| 9                | Argentina | Sunflowerseed Oil               | 2002           | 251                                                                   |
| 9                | Argentina | Sweet potatoes                  | 2002           | 16                                                                    |
| 9                | Argentina | Sweeteners, Other               | 2002           | 70                                                                    |
| 9                | Argentina | Tea (including mate)            | 2002           | 7                                                                     |
| 9                | Argentina | Tomatoes and products           | 2002           | 11                                                                    |
| 9                | Argentina | Treenuts                        | 2002           | 2                                                                     |
| 9                | Argentina | Vegetable Oils                  | 2002           | 325                                                                   |
| 9                | Argentina | Vegetables                      | 2002           | 55                                                                    |
| 9                | Argentina | Vegetables, Other               | 2002           | 30                                                                    |
| 9                | Argentina | Vegetal Products                | 2002           | 2,171                                                                 |
| 9                | Argentina | Wheat and products              | 2002           | 854                                                                   |
| 9                | Argentina | Wine                            | 2002           | 59                                                                    |
| 9                | Argentina | Alcoholic Beverages             | 2003           | 104                                                                   |
| 9                | Argentina | Animal fats                     | 2003           | 73                                                                    |
| 9                | Argentina | Animal Products                 | 2003           | 831                                                                   |
| 9                | Argentina | Apples and products             | 2003           | 26                                                                    |
| 9                | Argentina | Bananas                         | 2003           | 20                                                                    |
| 9                | Argentina | Beans                           | 2003           | 1                                                                     |
| 9                | Argentina | Beer                            | 2003           | 33                                                                    |
| 9                | Argentina | Beverages, Alcoholic            | 2003           | 10                                                                    |
| 9                | Argentina | Bovine Meat                     | 2003           | 347                                                                   |
| 9                | Argentina | Butter, Ghee                    | 2003           | 29                                                                    |
| 9                | Argentina | Cassava and products            | 2003           | 4                                                                     |
| 9                | Argentina | Cephalopods                     | 2003           | 3                                                                     |
| 9                | Argentina | Cereals - Excluding Beer        | 2003           | 1,042                                                                 |
| 9                | Argentina | Cereals, Other                  | 2003           | 2                                                                     |
| 9                | Argentina | Cocoa Beans and products        | 2003           | 1                                                                     |
| 9                | Argentina | Coconut Oil                     | 2003           | 1                                                                     |
| 9                | Argentina | Coconuts - Incl Copra           | 2003           | 1                                                                     |
| 9                | Argentina | Coffee and products             | 2003           | 1                                                                     |
| 9                | Argentina | Cottonseed Oil                  | 2003           | 3                                                                     |
| 9                | Argentina | Cream                           | 2003           | 1                                                                     |
| 9                | Argentina | Demersal Fish                   | 2003           | 4                                                                     |
| 9                | Argentina | Eggs                            | 2003           | 25                                                                    |
| 9                | Argentina | Fats, Animals, Raw              | 2003           | 44                                                                    |
| 9                | Argentina | Fish, Seafood                   | 2003           | 11                                                                    |
| 9                | Argentina | Freshwater Fish                 | 2003           | 1                                                                     |
| 9                | Argentina | Fruits - Excluding Wine         | 2003           | 88                                                                    |
| 9                | Argentina | Fruits, Other                   | 2003           | 14                                                                    |
| 9                | Argentina | Grand Total                     | 2003           | 3,011                                                                 |
| 9                | Argentina | Grapefruit and products         | 2003           | 1                                                                     |
| 9                | Argentina | Grapes and products (excl wine) | 2003           | 2                                                                     |
| 9                | Argentina | Groundnut Oil                   | 2003           | 1                                                                     |
| 9                | Argentina | Honey                           | 2003           | 1                                                                     |
| 9                | Argentina | Lemons, Limes and products      | 2003           | 4                                                                     |

Dietary calcium and zinc deficiency risks are decreasing but remain prevalent

| FAO Country code | Country   | Food item                       | Reference year | Net energy supply (kcal capita <sup>-1</sup> d <sup>-1</sup> ) |
|------------------|-----------|---------------------------------|----------------|----------------------------------------------------------------|
| 9                | Argentina | Maize and products              | 2003           | 86                                                             |
| 9                | Argentina | Maize Germ Oil                  | 2003           | 9                                                              |
| 9                | Argentina | Meat                            | 2003           | 481                                                            |
| 9                | Argentina | Meat, Other                     | 2003           | 5                                                              |
| 9                | Argentina | Milk - Excluding Butter         | 2003           | 223                                                            |
| 9                | Argentina | Mutton & Goat Meat              | 2003           | 9                                                              |
| 9                | Argentina | Oats                            | 2003           | 5                                                              |
| 9                | Argentina | Offals                          | 2003           | 18                                                             |
| 9                | Argentina | Oilcrops                        | 2003           | 2                                                              |
| 9                | Argentina | Olive Oil                       | 2003           | 2                                                              |
| 9                | Argentina | Olives (including preserved)    | 2003           | 1                                                              |
| 9                | Argentina | Onions                          | 2003           | 13                                                             |
| 9                | Argentina | Oranges, Mandarines             | 2003           | 20                                                             |
| 9                | Argentina | Peas                            | 2003           | 2                                                              |
| 9                | Argentina | Pelagic Fish                    | 2003           | 3                                                              |
| 9                | Argentina | Pigmeat                         | 2003           | 35                                                             |
| 9                | Argentina | Pimento                         | 2003           | 1                                                              |
| 9                | Argentina | Pineapples and products         | 2003           | 1                                                              |
| 9                | Argentina | Potatoes and products           | 2003           | 80                                                             |
| 9                | Argentina | Poultry Meat                    | 2003           | 85                                                             |
| 9                | Argentina | Pulses                          | 2003           | 9                                                              |
| 9                | Argentina | Pulses, Other and products      | 2003           | 6                                                              |
| 9                | Argentina | Rice (Milled Equivalent)        | 2003           | 75                                                             |
| 9                | Argentina | Soyabean Oil                    | 2003           | 44                                                             |
| 9                | Argentina | Spices                          | 2003           | 2                                                              |
| 9                | Argentina | Spices, Other                   | 2003           | 1                                                              |
| 9                | Argentina | Starchy Roots                   | 2003           | 101                                                            |
| 9                | Argentina | Stimulants                      | 2003           | 10                                                             |
| 9                | Argentina | Sugar & Sweeteners              | 2003           | 459                                                            |
| 9                | Argentina | Sugar (Raw Equivalent)          | 2003           | 389                                                            |
| 9                | Argentina | Sunflowerseed Oil               | 2003           | 249                                                            |
| 9                | Argentina | Sweet potatoes                  | 2003           | 16                                                             |
| 9                | Argentina | Sweeteners, Other               | 2003           | 68                                                             |
| 9                | Argentina | Tea (including mate)            | 2003           | 7                                                              |
| 9                | Argentina | Tomatoes and products           | 2003           | 10                                                             |
| 9                | Argentina | Treenuts                        | 2003           | 3                                                              |
| 9                | Argentina | Vegetable Oils                  | 2003           | 309                                                            |
| 9                | Argentina | Vegetables                      | 2003           | 52                                                             |
| 9                | Argentina | Vegetables, Other               | 2003           | 29                                                             |
| 9                | Argentina | Vegetal Products                | 2003           | 2,180                                                          |
| 9                | Argentina | Wheat and products              | 2003           | 873                                                            |
| 9                | Argentina | Wine                            | 2003           | 61                                                             |
| 9                | Argentina | Alcoholic Beverages             | 2004           | 99                                                             |
| 9                | Argentina | Animal fats                     | 2004           | 71                                                             |
| 9                | Argentina | Animal Products                 | 2004           | 808                                                            |
| 9                | Argentina | Apples and products             | 2004           | 28                                                             |
| 9                | Argentina | Bananas                         | 2004           | 20                                                             |
| 9                | Argentina | Beans                           | 2004           | 2                                                              |
| 9                | Argentina | Beer                            | 2004           | 33                                                             |
| 9                | Argentina | Beverages, Alcoholic            | 2004           | 12                                                             |
| 9                | Argentina | Bovine Meat                     | 2004           | 355                                                            |
| 9                | Argentina | Butter, Ghee                    | 2004           | 26                                                             |
| 9                | Argentina | Cassava and products            | 2004           | 5                                                              |
| 9                | Argentina | Cephalopods                     | 2004           | 1                                                              |
| 9                | Argentina | Cereals - Excluding Beer        | 2004           | 1,051                                                          |
| 9                | Argentina | Cereals, Other                  | 2004           | 3                                                              |
| 9                | Argentina | Cocoa Beans and products        | 2004           | 2                                                              |
| 9                | Argentina | Coconut Oil                     | 2004           | 2                                                              |
| 9                | Argentina | Coconuts - Incl Copra           | 2004           | 1                                                              |
| 9                | Argentina | Coffee and products             | 2004           | 1                                                              |
| 9                | Argentina | Cottonseed Oil                  | 2004           | 6                                                              |
| 9                | Argentina | Demersal Fish                   | 2004           | 5                                                              |
| 9                | Argentina | Eggs                            | 2004           | 28                                                             |
| 9                | Argentina | Fats, Animals, Raw              | 2004           | 44                                                             |
| 9                | Argentina | Fish, Seafood                   | 2004           | 11                                                             |
| 9                | Argentina | Fruits - Excluding Wine         | 2004           | 89                                                             |
| 9                | Argentina | Fruits, Other                   | 2004           | 15                                                             |
| 9                | Argentina | Grand Total                     | 2004           | 3,026                                                          |
| 9                | Argentina | Grapefruit and products         | 2004           | 2                                                              |
| 9                | Argentina | Grapes and products (excl wine) | 2004           | 2                                                              |
| 9                | Argentina | Groundnut Oil                   | 2004           | 1                                                              |
| 9                | Argentina | Honey                           | 2004           | 4                                                              |
| 9                | Argentina | Lemons, Limes and products      | 2004           | 5                                                              |
| 9                | Argentina | Maize and products              | 2004           | 86                                                             |
| 9                | Argentina | Maize Germ Oil                  | 2004           | 12                                                             |
| 9                | Argentina | Meat                            | 2004           | 497                                                            |
| 9                | Argentina | Meat, Other                     | 2004           | 5                                                              |
| 9                | Argentina | Milk - Excluding Butter         | 2004           | 184                                                            |
| 9                | Argentina | Mutton & Goat Meat              | 2004           | 7                                                              |
| 9                | Argentina | Oats                            | 2004           | 6                                                              |
| 9                | Argentina | Offals                          | 2004           | 17                                                             |
| 9                | Argentina | Oilcrops                        | 2004           | 2                                                              |
| 9                | Argentina | Olive Oil                       | 2004           | 7                                                              |
| 9                | Argentina | Olives (including preserved)    | 2004           | 1                                                              |
| 9                | Argentina | Onions                          | 2004           | 14                                                             |
| 9                | Argentina | Oranges, Mandarines             | 2004           | 17                                                             |
| 9                | Argentina | Peas                            | 2004           | 1                                                              |
| 9                | Argentina | Pelagic Fish                    | 2004           | 5                                                              |
| 9                | Argentina | Pigmeat                         | 2004           | 36                                                             |
| 9                | Argentina | Pimento                         | 2004           | 1                                                              |
| 9                | Argentina | Pineapples and products         | 2004           | 1                                                              |
| 9                | Argentina | Potatoes and products           | 2004           | 74                                                             |
| 9                | Argentina | Poultry Meat                    | 2004           | 95                                                             |
| 9                | Argentina | Pulses                          | 2004           | 9                                                              |
| 9                | Argentina | Pulses, Other and products      | 2004           | 6                                                              |
| 9                | Argentina | Rice (Milled Equivalent)        | 2004           | 80                                                             |
| 9                | Argentina | Soyabean Oil                    | 2004           | 49                                                             |



Dietary calcium and zinc deficiency risks are decreasing but remain prevalent

| FAO Country code | Country   | Food item                       | Reference year | Net energy supply (kcal capita <sup>-1</sup> d <sup>-1</sup> ) |
|------------------|-----------|---------------------------------|----------------|----------------------------------------------------------------|
| 9                | Argentina | Spices                          | 2004           | 2                                                              |
| 9                | Argentina | Spices, Other                   | 2004           | 1                                                              |
| 9                | Argentina | Starchy Roots                   | 2004           | 98                                                             |
| 9                | Argentina | Stimulants                      | 2004           | 10                                                             |
| 9                | Argentina | Sugar & Sweeteners              | 2004           | 473                                                            |
| 9                | Argentina | Sugar (Raw Equivalent)          | 2004           | 401                                                            |
| 9                | Argentina | Sunflowerseed Oil               | 2004           | 256                                                            |
| 9                | Argentina | Sweet potatoes                  | 2004           | 20                                                             |
| 9                | Argentina | Sweeteners, Other               | 2004           | 68                                                             |
| 9                | Argentina | Tea (including mate)            | 2004           | 7                                                              |
| 9                | Argentina | Tomatoes and products           | 2004           | 9                                                              |
| 9                | Argentina | Treenuts                        | 2004           | 3                                                              |
| 9                | Argentina | Vegetable Oils                  | 2004           | 332                                                            |
| 9                | Argentina | Vegetables                      | 2004           | 50                                                             |
| 9                | Argentina | Vegetables, Other               | 2004           | 28                                                             |
| 9                | Argentina | Vegetal Products                | 2004           | 2,218                                                          |
| 9                | Argentina | Wheat and products              | 2004           | 877                                                            |
| 9                | Argentina | Wine                            | 2004           | 54                                                             |
| 9                | Argentina | Alcoholic Beverages             | 2005           | 100                                                            |
| 9                | Argentina | Animal fats                     | 2005           | 71                                                             |
| 9                | Argentina | Animal Products                 | 2005           | 907                                                            |
| 9                | Argentina | Apples and products             | 2005           | 19                                                             |
| 9                | Argentina | Bananas                         | 2005           | 21                                                             |
| 9                | Argentina | Beer                            | 2005           | 34                                                             |
| 9                | Argentina | Beverages, Alcoholic            | 2005           | 12                                                             |
| 9                | Argentina | Bovine Meat                     | 2005           | 352                                                            |
| 9                | Argentina | Butter, Ghee                    | 2005           | 25                                                             |
| 9                | Argentina | Cassava and products            | 2005           | 5                                                              |
| 9                | Argentina | Cephalopods                     | 2005           | 3                                                              |
| 9                | Argentina | Cereals - Excluding Beer        | 2005           | 1,027                                                          |
| 9                | Argentina | Cereals, Other                  | 2005           | 2                                                              |
| 9                | Argentina | Cocoa Beans and products        | 2005           | 2                                                              |
| 9                | Argentina | Coconut Oil                     | 2005           | 2                                                              |
| 9                | Argentina | Coconuts - Incl Copra           | 2005           | 1                                                              |
| 9                | Argentina | Coffee and products             | 2005           | 1                                                              |
| 9                | Argentina | Cottonseed Oil                  | 2005           | 7                                                              |
| 9                | Argentina | Demersal Fish                   | 2005           | 4                                                              |
| 9                | Argentina | Eggs                            | 2005           | 30                                                             |
| 9                | Argentina | Fats, Animals, Raw              | 2005           | 45                                                             |
| 9                | Argentina | Fish, Seafood                   | 2005           | 12                                                             |
| 9                | Argentina | Fruits - Excluding Wine         | 2005           | 80                                                             |
| 9                | Argentina | Fruits, Other                   | 2005           | 15                                                             |
| 9                | Argentina | Grand Total                     | 2005           | 3,102                                                          |
| 9                | Argentina | Grapefruit and products         | 2005           | 2                                                              |
| 9                | Argentina | Grapes and products (excl wine) | 2005           | 2                                                              |
| 9                | Argentina | Groundnut Oil                   | 2005           | 1                                                              |
| 9                | Argentina | Honey                           | 2005           | 1                                                              |
| 9                | Argentina | Lemons, Limes and products      | 2005           | 4                                                              |
| 9                | Argentina | Maize and products              | 2005           | 84                                                             |
| 9                | Argentina | Maize Germ Oil                  | 2005           | 8                                                              |
| 9                | Argentina | Meat                            | 2005           | 509                                                            |
| 9                | Argentina | Meat, Other                     | 2005           | 5                                                              |
| 9                | Argentina | Milk - Excluding Butter         | 2005           | 267                                                            |
| 9                | Argentina | Mutton & Goat Meat              | 2005           | 8                                                              |
| 9                | Argentina | Oats                            | 2005           | 6                                                              |
| 9                | Argentina | Offals                          | 2005           | 18                                                             |
| 9                | Argentina | Oilcrops                        | 2005           | 2                                                              |
| 9                | Argentina | Olive Oil                       | 2005           | 5                                                              |
| 9                | Argentina | Olives (including preserved)    | 2005           | 1                                                              |
| 9                | Argentina | Onions                          | 2005           | 16                                                             |
| 9                | Argentina | Oranges, Mandarines             | 2005           | 16                                                             |
| 9                | Argentina | Palm Oil                        | 2005           | 1                                                              |
| 9                | Argentina | Peas                            | 2005           | 1                                                              |
| 9                | Argentina | Pelagic Fish                    | 2005           | 5                                                              |
| 9                | Argentina | Pigmeat                         | 2005           | 40                                                             |
| 9                | Argentina | Pimento                         | 2005           | 1                                                              |
| 9                | Argentina | Pineapples and products         | 2005           | 1                                                              |
| 9                | Argentina | Potatoes and products           | 2005           | 62                                                             |
| 9                | Argentina | Poultry Meat                    | 2005           | 105                                                            |
| 9                | Argentina | Pulses                          | 2005           | 7                                                              |
| 9                | Argentina | Pulses, Other and products      | 2005           | 6                                                              |
| 9                | Argentina | Rice (Milled Equivalent)        | 2005           | 62                                                             |
| 9                | Argentina | Soyabean Oil                    | 2005           | 60                                                             |
| 9                | Argentina | Spices                          | 2005           | 2                                                              |
| 9                | Argentina | Spices, Other                   | 2005           | 1                                                              |
| 9                | Argentina | Starchy Roots                   | 2005           | 89                                                             |
| 9                | Argentina | Stimulants                      | 2005           | 10                                                             |
| 9                | Argentina | Sugar & Sweeteners              | 2005           | 485                                                            |
| 9                | Argentina | Sugar (Raw Equivalent)          | 2005           | 417                                                            |
| 9                | Argentina | Sunflowerseed Oil               | 2005           | 254                                                            |
| 9                | Argentina | Sweet potatoes                  | 2005           | 22                                                             |
| 9                | Argentina | Sweeteners, Other               | 2005           | 67                                                             |
| 9                | Argentina | Tea (including mate)            | 2005           | 7                                                              |
| 9                | Argentina | Tomatoes and products           | 2005           | 9                                                              |
| 9                | Argentina | Treenuts                        | 2005           | 3                                                              |
| 9                | Argentina | Vegetable Oils                  | 2005           | 338                                                            |
| 9                | Argentina | Vegetables                      | 2005           | 52                                                             |
| 9                | Argentina | Vegetables, Other               | 2005           | 26                                                             |
| 9                | Argentina | Vegetal Products                | 2005           | 2,195                                                          |
| 9                | Argentina | Wheat and products              | 2005           | 873                                                            |
| 9                | Argentina | Wine                            | 2005           | 53                                                             |
| 9                | Argentina | Alcoholic Beverages             | 2006           | 101                                                            |
| 9                | Argentina | Animal fats                     | 2006           | 61                                                             |
| 9                | Argentina | Animal Products                 | 2006           | 919                                                            |
| 9                | Argentina | Apples and products             | 2006           | 17                                                             |
| 9                | Argentina | Bananas                         | 2006           | 19                                                             |
| 9                | Argentina | Beans                           | 2006           | 18                                                             |

Dietary calcium and zinc deficiency risks are decreasing but remain prevalent

| FAO Country code | Country   | Food item                       | Reference year | Net energy supply (kcal capita <sup>-1</sup> d <sup>-1</sup> ) |
|------------------|-----------|---------------------------------|----------------|----------------------------------------------------------------|
| 9                | Argentina | Beer                            | 2006           | 35                                                             |
| 9                | Argentina | Beverages, Alcoholic            | 2006           | 13                                                             |
| 9                | Argentina | Bovine Meat                     | 2006           | 349                                                            |
| 9                | Argentina | Butter, Ghee                    | 2006           | 20                                                             |
| 9                | Argentina | Cassava and products            | 2006           | 4                                                              |
| 9                | Argentina | Cephalopods                     | 2006           | 6                                                              |
| 9                | Argentina | Cereals - Excluding Beer        | 2006           | 1,032                                                          |
| 9                | Argentina | Cereals, Other                  | 2006           | 2                                                              |
| 9                | Argentina | Cocoa Beans and products        | 2006           | 2                                                              |
| 9                | Argentina | Coconut Oil                     | 2006           | 3                                                              |
| 9                | Argentina | Coconuts - Incl Copra           | 2006           | 1                                                              |
| 9                | Argentina | Coffee and products             | 2006           | 1                                                              |
| 9                | Argentina | Cottonseed Oil                  | 2006           | 4                                                              |
| 9                | Argentina | Demersal Fish                   | 2006           | 4                                                              |
| 9                | Argentina | Eggs                            | 2006           | 32                                                             |
| 9                | Argentina | Fats, Animals, Raw              | 2006           | 40                                                             |
| 9                | Argentina | Fish, Seafood                   | 2006           | 16                                                             |
| 9                | Argentina | Fruits - Excluding Wine         | 2006           | 78                                                             |
| 9                | Argentina | Fruits, Other                   | 2006           | 13                                                             |
| 9                | Argentina | Grand Total                     | 2006           | 3,113                                                          |
| 9                | Argentina | Grapefruit and products         | 2006           | 2                                                              |
| 9                | Argentina | Grapes and products (excl wine) | 2006           | 2                                                              |
| 9                | Argentina | Groundnut Oil                   | 2006           | 1                                                              |
| 9                | Argentina | Lemons, Limes and products      | 2006           | 5                                                              |
| 9                | Argentina | Maize and products              | 2006           | 84                                                             |
| 9                | Argentina | Maize Germ Oil                  | 2006           | 6                                                              |
| 9                | Argentina | Meat                            | 2006           | 529                                                            |
| 9                | Argentina | Meat, Other                     | 2006           | 5                                                              |
| 9                | Argentina | Milk - Excluding Butter         | 2006           | 265                                                            |
| 9                | Argentina | Miscellaneous                   | 2006           | 1                                                              |
| 9                | Argentina | Molluscs, Other                 | 2006           | 1                                                              |
| 9                | Argentina | Mutton & Goat Meat              | 2006           | 8                                                              |
| 9                | Argentina | Oats                            | 2006           | 6                                                              |
| 9                | Argentina | Offals                          | 2006           | 16                                                             |
| 9                | Argentina | Oilcrops                        | 2006           | 2                                                              |
| 9                | Argentina | Olive Oil                       | 2006           | 3                                                              |
| 9                | Argentina | Onions                          | 2006           | 12                                                             |
| 9                | Argentina | Oranges, Mandarines             | 2006           | 18                                                             |
| 9                | Argentina | Palm Oil                        | 2006           | 1                                                              |
| 9                | Argentina | Pelagic Fish                    | 2006           | 5                                                              |
| 9                | Argentina | Pigmeat                         | 2006           | 48                                                             |
| 9                | Argentina | Pimento                         | 2006           | 1                                                              |
| 9                | Argentina | Pineapples and products         | 2006           | 1                                                              |
| 9                | Argentina | Potatoes and products           | 2006           | 65                                                             |
| 9                | Argentina | Poultry Meat                    | 2006           | 119                                                            |
| 9                | Argentina | Pulses                          | 2006           | 23                                                             |
| 9                | Argentina | Pulses, Other and products      | 2006           | 5                                                              |
| 9                | Argentina | Rice (Milled Equivalent)        | 2006           | 64                                                             |
| 9                | Argentina | Soyabean Oil                    | 2006           | 59                                                             |
| 9                | Argentina | Spices                          | 2006           | 2                                                              |
| 9                | Argentina | Spices, Other                   | 2006           | 1                                                              |
| 9                | Argentina | Starchy Roots                   | 2006           | 88                                                             |
| 9                | Argentina | Stimulants                      | 2006           | 11                                                             |
| 9                | Argentina | Sugar & Sweeteners              | 2006           | 474                                                            |
| 9                | Argentina | Sugar (Raw Equivalent)          | 2006           | 408                                                            |
| 9                | Argentina | Sunflowerseed Oil               | 2006           | 256                                                            |
| 9                | Argentina | Sweet potatoes                  | 2006           | 19                                                             |
| 9                | Argentina | Sweeteners, Other               | 2006           | 66                                                             |
| 9                | Argentina | Tea (including mate)            | 2006           | 7                                                              |
| 9                | Argentina | Tomatoes and products           | 2006           | 9                                                              |
| 9                | Argentina | Treenuts                        | 2006           | 3                                                              |
| 9                | Argentina | Vegetable Oils                  | 2006           | 332                                                            |
| 9                | Argentina | Vegetables                      | 2006           | 48                                                             |
| 9                | Argentina | Vegetables, Other               | 2006           | 26                                                             |
| 9                | Argentina | Vegetal Products                | 2006           | 2,194                                                          |
| 9                | Argentina | Wheat and products              | 2006           | 876                                                            |
| 9                | Argentina | Wine                            | 2006           | 53                                                             |
| 9                | Argentina | Alcoholic Beverages             | 2007           | 104                                                            |
| 9                | Argentina | Animal fats                     | 2007           | 63                                                             |
| 9                | Argentina | Animal Products                 | 2007           | 941                                                            |
| 9                | Argentina | Apples and products             | 2007           | 13                                                             |
| 9                | Argentina | Bananas                         | 2007           | 20                                                             |
| 9                | Argentina | Beans                           | 2007           | 6                                                              |
| 9                | Argentina | Beer                            | 2007           | 36                                                             |
| 9                | Argentina | Beverages, Alcoholic            | 2007           | 15                                                             |
| 9                | Argentina | Bovine Meat                     | 2007           | 345                                                            |
| 9                | Argentina | Butter, Ghee                    | 2007           | 20                                                             |
| 9                | Argentina | Cassava and products            | 2007           | 5                                                              |
| 9                | Argentina | Cephalopods                     | 2007           | 4                                                              |
| 9                | Argentina | Cereals - Excluding Beer        | 2007           | 1,032                                                          |
| 9                | Argentina | Cereals, Other                  | 2007           | 3                                                              |
| 9                | Argentina | Cocoa Beans and products        | 2007           | 3                                                              |
| 9                | Argentina | Coconut Oil                     | 2007           | 3                                                              |
| 9                | Argentina | Coconuts - Incl Copra           | 2007           | 2                                                              |
| 9                | Argentina | Coffee and products             | 2007           | 1                                                              |
| 9                | Argentina | Cottonseed Oil                  | 2007           | 7                                                              |
| 9                | Argentina | Demersal Fish                   | 2007           | 3                                                              |
| 9                | Argentina | Eggs                            | 2007           | 34                                                             |
| 9                | Argentina | Fats, Animals, Raw              | 2007           | 43                                                             |
| 9                | Argentina | Fish, Seafood                   | 2007           | 14                                                             |
| 9                | Argentina | Fruits - Excluding Wine         | 2007           | 67                                                             |
| 9                | Argentina | Fruits, Other                   | 2007           | 11                                                             |
| 9                | Argentina | Grand Total                     | 2007           | 3,138                                                          |
| 9                | Argentina | Grapefruit and products         | 2007           | 2                                                              |
| 9                | Argentina | Grapes and products (excl wine) | 2007           | 2                                                              |
| 9                | Argentina | Groundnut Oil                   | 2007           | 2                                                              |
| 9                | Argentina | Lemons, Limes and products      | 2007           | 4                                                              |

Dietary calcium and zinc deficiency risks are decreasing but remain prevalent

| FAO Country code | Country   | Food item                       | Reference year | Net energy supply (kcal <i>capita</i> <sup>-1</sup> d <sup>-1</sup> ) |
|------------------|-----------|---------------------------------|----------------|-----------------------------------------------------------------------|
| 9                | Argentina | Maize and products              | 2007           | 82                                                                    |
| 9                | Argentina | Maize Germ Oil                  | 2007           | 8                                                                     |
| 9                | Argentina | Meat                            | 2007           | 533                                                                   |
| 9                | Argentina | Meat, Other                     | 2007           | 4                                                                     |
| 9                | Argentina | Milk - Excluding Butter         | 2007           | 280                                                                   |
| 9                | Argentina | Miscellaneous                   | 2007           | 2                                                                     |
| 9                | Argentina | Mutton & Goat Meat              | 2007           | 8                                                                     |
| 9                | Argentina | Oats                            | 2007           | 6                                                                     |
| 9                | Argentina | Offals                          | 2007           | 15                                                                    |
| 9                | Argentina | Oilcrops                        | 2007           | 2                                                                     |
| 9                | Argentina | Olive Oil                       | 2007           | 4                                                                     |
| 9                | Argentina | Onions                          | 2007           | 14                                                                    |
| 9                | Argentina | Oranges, Mandarines             | 2007           | 13                                                                    |
| 9                | Argentina | Palm Oil                        | 2007           | 1                                                                     |
| 9                | Argentina | Pelagic Fish                    | 2007           | 7                                                                     |
| 9                | Argentina | Pigmeat                         | 2007           | 51                                                                    |
| 9                | Argentina | Pimento                         | 2007           | 1                                                                     |
| 9                | Argentina | Pineapples and products         | 2007           | 1                                                                     |
| 9                | Argentina | Potatoes and products           | 2007           | 66                                                                    |
| 9                | Argentina | Poultry Meat                    | 2007           | 125                                                                   |
| 9                | Argentina | Pulses                          | 2007           | 10                                                                    |
| 9                | Argentina | Pulses, Other and products      | 2007           | 4                                                                     |
| 9                | Argentina | Rape and Mustard Oil            | 2007           | 5                                                                     |
| 9                | Argentina | Rice (Milled Equivalent)        | 2007           | 69                                                                    |
| 9                | Argentina | Soyabean Oil                    | 2007           | 64                                                                    |
| 9                | Argentina | Spices                          | 2007           | 2                                                                     |
| 9                | Argentina | Spices, Other                   | 2007           | 1                                                                     |
| 9                | Argentina | Starchy Roots                   | 2007           | 90                                                                    |
| 9                | Argentina | Stimulants                      | 2007           | 11                                                                    |
| 9                | Argentina | Sugar & Sweeteners              | 2007           | 471                                                                   |
| 9                | Argentina | Sugar (Raw Equivalent)          | 2007           | 404                                                                   |
| 9                | Argentina | Sunflowerseed Oil               | 2007           | 260                                                                   |
| 9                | Argentina | Sweet potatoes                  | 2007           | 19                                                                    |
| 9                | Argentina | Sweeteners, Other               | 2007           | 66                                                                    |
| 9                | Argentina | Tea (including mate)            | 2007           | 7                                                                     |
| 9                | Argentina | Tomatoes and products           | 2007           | 10                                                                    |
| 9                | Argentina | Treenuts                        | 2007           | 3                                                                     |
| 9                | Argentina | Vegetable Oils                  | 2007           | 354                                                                   |
| 9                | Argentina | Vegetables                      | 2007           | 49                                                                    |
| 9                | Argentina | Vegetables, Other               | 2007           | 26                                                                    |
| 9                | Argentina | Vegetal Products                | 2007           | 2,197                                                                 |
| 9                | Argentina | Wheat and products              | 2007           | 873                                                                   |
| 9                | Argentina | Wine                            | 2007           | 53                                                                    |
| 9                | Argentina | Alcoholic Beverages             | 2008           | 108                                                                   |
| 9                | Argentina | Animal fats                     | 2008           | 57                                                                    |
| 9                | Argentina | Animal Products                 | 2008           | 942                                                                   |
| 9                | Argentina | Apples and products             | 2008           | 14                                                                    |
| 9                | Argentina | Bananas                         | 2008           | 21                                                                    |
| 9                | Argentina | Beans                           | 2008           | 6                                                                     |
| 9                | Argentina | Beer                            | 2008           | 42                                                                    |
| 9                | Argentina | Beverages, Alcoholic            | 2008           | 15                                                                    |
| 9                | Argentina | Bovine Meat                     | 2008           | 343                                                                   |
| 9                | Argentina | Butter, Ghee                    | 2008           | 18                                                                    |
| 9                | Argentina | Cassava and products            | 2008           | 5                                                                     |
| 9                | Argentina | Cephalopods                     | 2008           | 4                                                                     |
| 9                | Argentina | Cereals - Excluding Beer        | 2008           | 1,047                                                                 |
| 9                | Argentina | Cereals, Other                  | 2008           | 3                                                                     |
| 9                | Argentina | Cocoa Beans and products        | 2008           | 4                                                                     |
| 9                | Argentina | Coconut Oil                     | 2008           | 3                                                                     |
| 9                | Argentina | Coconuts - Incl Copra           | 2008           | 1                                                                     |
| 9                | Argentina | Coffee and products             | 2008           | 1                                                                     |
| 9                | Argentina | Cottonseed Oil                  | 2008           | 3                                                                     |
| 9                | Argentina | Demersal Fish                   | 2008           | 4                                                                     |
| 9                | Argentina | Eggs                            | 2008           | 36                                                                    |
| 9                | Argentina | Fats, Animals, Raw              | 2008           | 39                                                                    |
| 9                | Argentina | Fish, Seafood                   | 2008           | 13                                                                    |
| 9                | Argentina | Fruits - Excluding Wine         | 2008           | 76                                                                    |
| 9                | Argentina | Fruits, Other                   | 2008           | 14                                                                    |
| 9                | Argentina | Grand Total                     | 2008           | 3,156                                                                 |
| 9                | Argentina | Grapefruit and products         | 2008           | 2                                                                     |
| 9                | Argentina | Grapes and products (excl wine) | 2008           | 2                                                                     |
| 9                | Argentina | Groundnut Oil                   | 2008           | 2                                                                     |
| 9                | Argentina | Honey                           | 2008           | 1                                                                     |
| 9                | Argentina | Lemons, Limes and products      | 2008           | 3                                                                     |
| 9                | Argentina | Maize and products              | 2008           | 81                                                                    |
| 9                | Argentina | Maize Germ Oil                  | 2008           | 13                                                                    |
| 9                | Argentina | Meat                            | 2008           | 547                                                                   |
| 9                | Argentina | Meat, Other                     | 2008           | 4                                                                     |
| 9                | Argentina | Milk - Excluding Butter         | 2008           | 274                                                                   |
| 9                | Argentina | Miscellaneous                   | 2008           | 1                                                                     |
| 9                | Argentina | Mutton & Goat Meat              | 2008           | 7                                                                     |
| 9                | Argentina | Oats                            | 2008           | 5                                                                     |
| 9                | Argentina | Offals                          | 2008           | 15                                                                    |
| 9                | Argentina | Oilcrops                        | 2008           | 2                                                                     |
| 9                | Argentina | Olive Oil                       | 2008           | 4                                                                     |
| 9                | Argentina | Olives (including preserved)    | 2008           | 1                                                                     |
| 9                | Argentina | Onions                          | 2008           | 13                                                                    |
| 9                | Argentina | Oranges, Mandarines             | 2008           | 18                                                                    |
| 9                | Argentina | Palm Oil                        | 2008           | 1                                                                     |
| 9                | Argentina | Pelagic Fish                    | 2008           | 5                                                                     |
| 9                | Argentina | Pigmeat                         | 2008           | 57                                                                    |
| 9                | Argentina | Pimento                         | 2008           | 1                                                                     |
| 9                | Argentina | Pineapples and products         | 2008           | 1                                                                     |
| 9                | Argentina | Potatoes and products           | 2008           | 62                                                                    |
| 9                | Argentina | Poultry Meat                    | 2008           | 136                                                                   |
| 9                | Argentina | Pulses                          | 2008           | 10                                                                    |
| 9                | Argentina | Pulses, Other and products      | 2008           | 4                                                                     |

Dietary calcium and zinc deficiency risks are decreasing but remain prevalent

| FAO Country code | Country   | Food item                       | Reference year | Net energy supply (kcal capita <sup>-1</sup> d <sup>-1</sup> ) |
|------------------|-----------|---------------------------------|----------------|----------------------------------------------------------------|
| 9                | Argentina | Rape and Mustard Oil            | 2008           | 2                                                              |
| 9                | Argentina | Rice (Milled Equivalent)        | 2008           | 82                                                             |
| 9                | Argentina | Soyabean Oil                    | 2008           | 64                                                             |
| 9                | Argentina | Spices                          | 2008           | 2                                                              |
| 9                | Argentina | Spices, Other                   | 2008           | 1                                                              |
| 9                | Argentina | Starchy Roots                   | 2008           | 86                                                             |
| 9                | Argentina | Stimulants                      | 2008           | 10                                                             |
| 9                | Argentina | Sugar & Sweeteners              | 2008           | 467                                                            |
| 9                | Argentina | Sugar (Raw Equivalent)          | 2008           | 401                                                            |
| 9                | Argentina | Sunflowerseed Oil               | 2008           | 260                                                            |
| 9                | Argentina | Sweet potatoes                  | 2008           | 19                                                             |
| 9                | Argentina | Sweeteners, Other               | 2008           | 66                                                             |
| 9                | Argentina | Tea (including mate)            | 2008           | 6                                                              |
| 9                | Argentina | Tomatoes and products           | 2008           | 10                                                             |
| 9                | Argentina | Treenuts                        | 2008           | 3                                                              |
| 9                | Argentina | Vegetable Oils                  | 2008           | 352                                                            |
| 9                | Argentina | Vegetables                      | 2008           | 50                                                             |
| 9                | Argentina | Vegetables, Other               | 2008           | 26                                                             |
| 9                | Argentina | Vegetal Products                | 2008           | 2,214                                                          |
| 9                | Argentina | Wheat and products              | 2008           | 876                                                            |
| 9                | Argentina | Wine                            | 2008           | 50                                                             |
| 9                | Argentina | Alcoholic Beverages             | 2009           | 106                                                            |
| 9                | Argentina | Animal fats                     | 2009           | 59                                                             |
| 9                | Argentina | Animal Products                 | 2009           | 932                                                            |
| 9                | Argentina | Apples and products             | 2009           | 15                                                             |
| 9                | Argentina | Bananas                         | 2009           | 20                                                             |
| 9                | Argentina | Beans                           | 2009           | 3                                                              |
| 9                | Argentina | Beer                            | 2009           | 42                                                             |
| 9                | Argentina | Beverages, Alcoholic            | 2009           | 15                                                             |
| 9                | Argentina | Bovine Meat                     | 2009           | 342                                                            |
| 9                | Argentina | Butter, Ghee                    | 2009           | 18                                                             |
| 9                | Argentina | Cassava and products            | 2009           | 5                                                              |
| 9                | Argentina | Cephalopods                     | 2009           | 1                                                              |
| 9                | Argentina | Cereals - Excluding Beer        | 2009           | 1,045                                                          |
| 9                | Argentina | Cereals, Other                  | 2009           | 3                                                              |
| 9                | Argentina | Cocoa Beans and products        | 2009           | 3                                                              |
| 9                | Argentina | Coconut Oil                     | 2009           | 2                                                              |
| 9                | Argentina | Coconuts - Incl Copra           | 2009           | 2                                                              |
| 9                | Argentina | Coffee and products             | 2009           | 1                                                              |
| 9                | Argentina | Cottonseed Oil                  | 2009           | 2                                                              |
| 9                | Argentina | Demersal Fish                   | 2009           | 2                                                              |
| 9                | Argentina | Eggs                            | 2009           | 39                                                             |
| 9                | Argentina | Fats, Animals, Raw              | 2009           | 41                                                             |
| 9                | Argentina | Fish, Seafood                   | 2009           | 10                                                             |
| 9                | Argentina | Fruits - Excluding Wine         | 2009           | 75                                                             |
| 9                | Argentina | Fruits, Other                   | 2009           | 13                                                             |
| 9                | Argentina | Grand Total                     | 2009           | 3,130                                                          |
| 9                | Argentina | Grapefruit and products         | 2009           | 2                                                              |
| 9                | Argentina | Grapes and products (excl wine) | 2009           | 1                                                              |
| 9                | Argentina | Groundnut Oil                   | 2009           | 1                                                              |
| 9                | Argentina | Honey                           | 2009           | 1                                                              |
| 9                | Argentina | Lemons, Limes and products      | 2009           | 5                                                              |
| 9                | Argentina | Maize and products              | 2009           | 84                                                             |
| 9                | Argentina | Maize Germ Oil                  | 2009           | 8                                                              |
| 9                | Argentina | Meat                            | 2009           | 557                                                            |
| 9                | Argentina | Meat, Other                     | 2009           | 4                                                              |
| 9                | Argentina | Milk - Excluding Butter         | 2009           | 252                                                            |
| 9                | Argentina | Miscellaneous                   | 2009           | 1                                                              |
| 9                | Argentina | Molluscs, Other                 | 2009           | 1                                                              |
| 9                | Argentina | Mutton & Goat Meat              | 2009           | 7                                                              |
| 9                | Argentina | Oats                            | 2009           | 5                                                              |
| 9                | Argentina | Offals                          | 2009           | 16                                                             |
| 9                | Argentina | Oilcrops                        | 2009           | 2                                                              |
| 9                | Argentina | Olive Oil                       | 2009           | 4                                                              |
| 9                | Argentina | Onions                          | 2009           | 12                                                             |
| 9                | Argentina | Oranges, Mandarines             | 2009           | 16                                                             |
| 9                | Argentina | Palm Oil                        | 2009           | 1                                                              |
| 9                | Argentina | Pelagic Fish                    | 2009           | 5                                                              |
| 9                | Argentina | Pigmeat                         | 2009           | 60                                                             |
| 9                | Argentina | Pimento                         | 2009           | 1                                                              |
| 9                | Argentina | Pineapples and products         | 2009           | 1                                                              |
| 9                | Argentina | Potatoes and products           | 2009           | 64                                                             |
| 9                | Argentina | Poultry Meat                    | 2009           | 144                                                            |
| 9                | Argentina | Pulses                          | 2009           | 7                                                              |
| 9                | Argentina | Pulses, Other and products      | 2009           | 4                                                              |
| 9                | Argentina | Rape and Mustard Oil            | 2009           | 1                                                              |
| 9                | Argentina | Rice (Milled Equivalent)        | 2009           | 80                                                             |
| 9                | Argentina | Soyabean Oil                    | 2009           | 64                                                             |
| 9                | Argentina | Spices                          | 2009           | 2                                                              |
| 9                | Argentina | Spices, Other                   | 2009           | 1                                                              |
| 9                | Argentina | Starchy Roots                   | 2009           | 87                                                             |
| 9                | Argentina | Stimulants                      | 2009           | 10                                                             |
| 9                | Argentina | Sugar & Sweeteners              | 2009           | 462                                                            |
| 9                | Argentina | Sugar (Raw Equivalent)          | 2009           | 398                                                            |
| 9                | Argentina | Sunflowerseed Oil               | 2009           | 266                                                            |
| 9                | Argentina | Sweet potatoes                  | 2009           | 19                                                             |
| 9                | Argentina | Sweeteners, Other               | 2009           | 64                                                             |
| 9                | Argentina | Tea (including mate)            | 2009           | 5                                                              |
| 9                | Argentina | Tomatoes and products           | 2009           | 9                                                              |
| 9                | Argentina | Treenuts                        | 2009           | 3                                                              |
| 9                | Argentina | Vegetable Oils                  | 2009           | 349                                                            |
| 9                | Argentina | Vegetables                      | 2009           | 48                                                             |
| 9                | Argentina | Vegetables, Other               | 2009           | 27                                                             |
| 9                | Argentina | Vegetal Products                | 2009           | 2,198                                                          |
| 9                | Argentina | Wheat and products              | 2009           | 874                                                            |
| 9                | Argentina | Wine                            | 2009           | 48                                                             |
| 9                | Argentina | Alcoholic Beverages             | 2010           | 102                                                            |

Dietary calcium and zinc deficiency risks are decreasing but remain prevalent

| FAO Country code | Country   | Food item                       | Reference year | Net energy supply (kcal capita <sup>-1</sup> d <sup>-1</sup> ) |
|------------------|-----------|---------------------------------|----------------|----------------------------------------------------------------|
| 9                | Argentina | Animal fats                     | 2010           | 54                                                             |
| 9                | Argentina | Animal Products                 | 2010           | 948                                                            |
| 9                | Argentina | Apples and products             | 2010           | 19                                                             |
| 9                | Argentina | Bananas                         | 2010           | 20                                                             |
| 9                | Argentina | Beans                           | 2010           | 1                                                              |
| 9                | Argentina | Beer                            | 2010           | 42                                                             |
| 9                | Argentina | Beverages, Alcoholic            | 2010           | 15                                                             |
| 9                | Argentina | Bovine Meat                     | 2010           | 342                                                            |
| 9                | Argentina | Butter, Ghee                    | 2010           | 19                                                             |
| 9                | Argentina | Cassava and products            | 2010           | 5                                                              |
| 9                | Argentina | Cephalopods                     | 2010           | 2                                                              |
| 9                | Argentina | Cereals - Excluding Beer        | 2010           | 1,054                                                          |
| 9                | Argentina | Cereals, Other                  | 2010           | 3                                                              |
| 9                | Argentina | Cocoa Beans and products        | 2010           | 4                                                              |
| 9                | Argentina | Coconut Oil                     | 2010           | 3                                                              |
| 9                | Argentina | Coconuts - Incl Copra           | 2010           | 2                                                              |
| 9                | Argentina | Coffee and products             | 2010           | 2                                                              |
| 9                | Argentina | Cottonseed Oil                  | 2010           | 4                                                              |
| 9                | Argentina | Demersal Fish                   | 2010           | 2                                                              |
| 9                | Argentina | Eggs                            | 2010           | 42                                                             |
| 9                | Argentina | Fats, Animals, Raw              | 2010           | 34                                                             |
| 9                | Argentina | Fish, Seafood                   | 2010           | 11                                                             |
| 9                | Argentina | Fruits - Excluding Wine         | 2010           | 78                                                             |
| 9                | Argentina | Fruits, Other                   | 2010           | 17                                                             |
| 9                | Argentina | Grand Total                     | 2010           | 3,157                                                          |
| 9                | Argentina | Grapefruit and products         | 2010           | 2                                                              |
| 9                | Argentina | Grapes and products (excl wine) | 2010           | 1                                                              |
| 9                | Argentina | Lemons, Limes and products      | 2010           | 3                                                              |
| 9                | Argentina | Maize and products              | 2010           | 83                                                             |
| 9                | Argentina | Maize Germ Oil                  | 2010           | 9                                                              |
| 9                | Argentina | Meat                            | 2010           | 561                                                            |
| 9                | Argentina | Meat, Other                     | 2010           | 4                                                              |
| 9                | Argentina | Milk - Excluding Butter         | 2010           | 263                                                            |
| 9                | Argentina | Miscellaneous                   | 2010           | 2                                                              |
| 9                | Argentina | Mutton & Goat Meat              | 2010           | 7                                                              |
| 9                | Argentina | Oats                            | 2010           | 6                                                              |
| 9                | Argentina | Offals                          | 2010           | 16                                                             |
| 9                | Argentina | Oilcrops                        | 2010           | 2                                                              |
| 9                | Argentina | Olive Oil                       | 2010           | 2                                                              |
| 9                | Argentina | Onions                          | 2010           | 13                                                             |
| 9                | Argentina | Oranges, Mandarines             | 2010           | 15                                                             |
| 9                | Argentina | Palm Oil                        | 2010           | 3                                                              |
| 9                | Argentina | Pelagic Fish                    | 2010           | 6                                                              |
| 9                | Argentina | Pigmeat                         | 2010           | 60                                                             |
| 9                | Argentina | Pimento                         | 2010           | 1                                                              |
| 9                | Argentina | Pineapples and products         | 2010           | 1                                                              |
| 9                | Argentina | Potatoes and products           | 2010           | 62                                                             |
| 9                | Argentina | Poultry Meat                    | 2010           | 149                                                            |
| 9                | Argentina | Pulses                          | 2010           | 5                                                              |
| 9                | Argentina | Pulses, Other and products      | 2010           | 4                                                              |
| 9                | Argentina | Rape and Mustard Oil            | 2010           | 1                                                              |
| 9                | Argentina | Rice (Milled Equivalent)        | 2010           | 85                                                             |
| 9                | Argentina | Sesame seed                     | 2010           | 1                                                              |
| 9                | Argentina | Soyabean Oil                    | 2010           | 65                                                             |
| 9                | Argentina | Spices                          | 2010           | 2                                                              |
| 9                | Argentina | Spices, Other                   | 2010           | 1                                                              |
| 9                | Argentina | Starchy Roots                   | 2010           | 86                                                             |
| 9                | Argentina | Stimulants                      | 2010           | 11                                                             |
| 9                | Argentina | Sugar & Sweeteners              | 2010           | 462                                                            |
| 9                | Argentina | Sugar (Raw Equivalent)          | 2010           | 400                                                            |
| 9                | Argentina | Sunflowerseed Oil               | 2010           | 264                                                            |
| 9                | Argentina | Sweet potatoes                  | 2010           | 19                                                             |
| 9                | Argentina | Sweeteners, Other               | 2010           | 62                                                             |
| 9                | Argentina | Tea (including mate)            | 2010           | 6                                                              |
| 9                | Argentina | Tomatoes and products           | 2010           | 10                                                             |
| 9                | Argentina | Treenuts                        | 2010           | 3                                                              |
| 9                | Argentina | Vegetable Oils                  | 2010           | 351                                                            |
| 9                | Argentina | Vegetables                      | 2010           | 51                                                             |
| 9                | Argentina | Vegetables, Other               | 2010           | 29                                                             |
| 9                | Argentina | Vegetal Products                | 2010           | 2,209                                                          |
| 9                | Argentina | Wheat and products              | 2010           | 877                                                            |
| 9                | Argentina | Wine                            | 2010           | 45                                                             |
| 9                | Argentina | Alcoholic Beverages             | 2011           | 101                                                            |
| 9                | Argentina | Animal fats                     | 2011           | 49                                                             |
| 9                | Argentina | Animal Products                 | 2011           | 945                                                            |
| 9                | Argentina | Apples and products             | 2011           | 19                                                             |
| 9                | Argentina | Bananas                         | 2011           | 22                                                             |
| 9                | Argentina | Beans                           | 2011           | 1                                                              |
| 9                | Argentina | Beer                            | 2011           | 40                                                             |
| 9                | Argentina | Beverages, Alcoholic            | 2011           | 15                                                             |
| 9                | Argentina | Bovine Meat                     | 2011           | 343                                                            |
| 9                | Argentina | Butter, Ghee                    | 2011           | 15                                                             |
| 9                | Argentina | Cassava and products            | 2011           | 5                                                              |
| 9                | Argentina | Cephalopods                     | 2011           | 2                                                              |
| 9                | Argentina | Cereals - Excluding Beer        | 2011           | 1,043                                                          |
| 9                | Argentina | Cereals, Other                  | 2011           | 3                                                              |
| 9                | Argentina | Cocoa Beans and products        | 2011           | 4                                                              |
| 9                | Argentina | Coconut Oil                     | 2011           | 2                                                              |
| 9                | Argentina | Coconuts - Incl Copra           | 2011           | 1                                                              |
| 9                | Argentina | Coffee and products             | 2011           | 1                                                              |
| 9                | Argentina | Cottonseed Oil                  | 2011           | 4                                                              |
| 9                | Argentina | Demersal Fish                   | 2011           | 2                                                              |
| 9                | Argentina | Eggs                            | 2011           | 44                                                             |
| 9                | Argentina | Fats, Animals, Raw              | 2011           | 33                                                             |
| 9                | Argentina | Fish, Seafood                   | 2011           | 11                                                             |
| 9                | Argentina | Fruits - Excluding Wine         | 2011           | 75                                                             |
| 9                | Argentina | Fruits, Other                   | 2011           | 11                                                             |

Dietary calcium and zinc deficiency risks are decreasing but remain prevalent

| FAO Country code | Country   | Food item                       | Reference year | Net energy supply (kcal <i>capita</i> <sup>-1</sup> d <sup>-1</sup> ) |
|------------------|-----------|---------------------------------|----------------|-----------------------------------------------------------------------|
| 9                | Argentina | Grand Total                     | 2011           | 3,155                                                                 |
| 9                | Argentina | Grapefruit and products         | 2011           | 2                                                                     |
| 9                | Argentina | Grapes and products (excl wine) | 2011           | 1                                                                     |
| 9                | Argentina | Groundnut Oil                   | 2011           | 1                                                                     |
| 9                | Argentina | Lemons, Limes and products      | 2011           | 2                                                                     |
| 9                | Argentina | Maize and products              | 2011           | 82                                                                    |
| 9                | Argentina | Maize Germ Oil                  | 2011           | 6                                                                     |
| 9                | Argentina | Meat                            | 2011           | 570                                                                   |
| 9                | Argentina | Meat, Other                     | 2011           | 4                                                                     |
| 9                | Argentina | Milk - Excluding Butter         | 2011           | 255                                                                   |
| 9                | Argentina | Mutton & Goat Meat              | 2011           | 7                                                                     |
| 9                | Argentina | Oats                            | 2011           | 6                                                                     |
| 9                | Argentina | Offals                          | 2011           | 16                                                                    |
| 9                | Argentina | Oilcrops                        | 2011           | 2                                                                     |
| 9                | Argentina | Olive Oil                       | 2011           | 1                                                                     |
| 9                | Argentina | Onions                          | 2011           | 14                                                                    |
| 9                | Argentina | Oranges, Mandarines             | 2011           | 16                                                                    |
| 9                | Argentina | Palm Oil                        | 2011           | 2                                                                     |
| 9                | Argentina | Pelagic Fish                    | 2011           | 6                                                                     |
| 9                | Argentina | Pigmeat                         | 2011           | 64                                                                    |
| 9                | Argentina | Pimento                         | 2011           | 1                                                                     |
| 9                | Argentina | Pineapples and products         | 2011           | 1                                                                     |
| 9                | Argentina | Potatoes and products           | 2011           | 66                                                                    |
| 9                | Argentina | Poultry Meat                    | 2011           | 152                                                                   |
| 9                | Argentina | Pulses                          | 2011           | 4                                                                     |
| 9                | Argentina | Pulses, Other and products      | 2011           | 4                                                                     |
| 9                | Argentina | Rape and Mustard Oil            | 2011           | 1                                                                     |
| 9                | Argentina | Rice (Milled Equivalent)        | 2011           | 80                                                                    |
| 9                | Argentina | Sesame seed                     | 2011           | 1                                                                     |
| 9                | Argentina | Soyabean Oil                    | 2011           | 66                                                                    |
| 9                | Argentina | Spices                          | 2011           | 2                                                                     |
| 9                | Argentina | Spices, Other                   | 2011           | 1                                                                     |
| 9                | Argentina | Starchy Roots                   | 2011           | 92                                                                    |
| 9                | Argentina | Stimulants                      | 2011           | 12                                                                    |
| 9                | Argentina | Sugar & Sweeteners              | 2011           | 464                                                                   |
| 9                | Argentina | Sugar (Raw Equivalent)          | 2011           | 404                                                                   |
| 9                | Argentina | Sunflowerseed Oil               | 2011           | 277                                                                   |
| 9                | Argentina | Sweet potatoes                  | 2011           | 21                                                                    |
| 9                | Argentina | Sweeteners, Other               | 2011           | 60                                                                    |
| 9                | Argentina | Tea (including mate)            | 2011           | 7                                                                     |
| 9                | Argentina | Tomatoes and products           | 2011           | 10                                                                    |
| 9                | Argentina | Treenuts                        | 2011           | 3                                                                     |
| 9                | Argentina | Vegetable Oils                  | 2011           | 359                                                                   |
| 9                | Argentina | Vegetables                      | 2011           | 53                                                                    |
| 9                | Argentina | Vegetables, Other               | 2011           | 29                                                                    |
| 9                | Argentina | Vegetal Products                | 2011           | 2,210                                                                 |
| 9                | Argentina | Wheat and products              | 2011           | 872                                                                   |
| 9                | Argentina | Wine                            | 2011           | 45                                                                    |
| 1                | Armenia   | Alcoholic Beverages             | 1992           | 32                                                                    |
| 1                | Armenia   | Animal fats                     | 1992           | 29                                                                    |
| 1                | Armenia   | Animal Products                 | 1992           | 355                                                                   |
| 1                | Armenia   | Apples and products             | 1992           | 23                                                                    |
| 1                | Armenia   | Beverages, Alcoholic            | 1992           | 17                                                                    |
| 1                | Armenia   | Bovine Meat                     | 1992           | 49                                                                    |
| 1                | Armenia   | Butter, Ghee                    | 1992           | 13                                                                    |
| 1                | Armenia   | Cereals - Excluding Beer        | 1992           | 1,291                                                                 |
| 1                | Armenia   | Cereals, Other                  | 1992           | 4                                                                     |
| 1                | Armenia   | Cocoa Beans and products        | 1992           | 2                                                                     |
| 1                | Armenia   | Cottonseed Oil                  | 1992           | 4                                                                     |
| 1                | Armenia   | Eggs                            | 1992           | 14                                                                    |
| 1                | Armenia   | Fats, Animals, Raw              | 1992           | 15                                                                    |
| 1                | Armenia   | Fish, Seafood                   | 1992           | 2                                                                     |
| 1                | Armenia   | Freshwater Fish                 | 1992           | 2                                                                     |
| 1                | Armenia   | Fruits - Excluding Wine         | 1992           | 84                                                                    |
| 1                | Armenia   | Fruits, Other                   | 1992           | 22                                                                    |
| 1                | Armenia   | Grand Total                     | 1992           | 2,184                                                                 |
| 1                | Armenia   | Grapes and products (excl wine) | 1992           | 39                                                                    |
| 1                | Armenia   | Honey                           | 1992           | 3                                                                     |
| 1                | Armenia   | Meat                            | 1992           | 121                                                                   |
| 1                | Armenia   | Milk - Excluding Butter         | 1992           | 185                                                                   |
| 1                | Armenia   | Mutton & Goat Meat              | 1992           | 17                                                                    |
| 1                | Armenia   | Offals                          | 1992           | 4                                                                     |
| 1                | Armenia   | Onions                          | 1992           | 12                                                                    |
| 1                | Armenia   | Pigmeat                         | 1992           | 44                                                                    |
| 1                | Armenia   | Potatoes and products           | 1992           | 117                                                                   |
| 1                | Armenia   | Poultry Meat                    | 1992           | 11                                                                    |
| 1                | Armenia   | Rice (Milled Equivalent)        | 1992           | 71                                                                    |
| 1                | Armenia   | Soyabean Oil                    | 1992           | 6                                                                     |
| 1                | Armenia   | Starchy Roots                   | 1992           | 117                                                                   |
| 1                | Armenia   | Stimulants                      | 1992           | 2                                                                     |
| 1                | Armenia   | Sugar & Sweeteners              | 1992           | 218                                                                   |
| 1                | Armenia   | Sugar (Raw Equivalent)          | 1992           | 215                                                                   |
| 1                | Armenia   | Sunflowerseed Oil               | 1992           | 1                                                                     |
| 1                | Armenia   | Tomatoes and products           | 1992           | 25                                                                    |
| 1                | Armenia   | Vegetable Oils                  | 1992           | 11                                                                    |
| 1                | Armenia   | Vegetables                      | 1992           | 75                                                                    |
| 1                | Armenia   | Vegetables, Other               | 1992           | 39                                                                    |
| 1                | Armenia   | Vegetal Products                | 1992           | 1,829                                                                 |
| 1                | Armenia   | Wheat and products              | 1992           | 1,215                                                                 |
| 1                | Armenia   | Wine                            | 1992           | 14                                                                    |
| 1                | Armenia   | Alcoholic Beverages             | 1993           | 34                                                                    |
| 1                | Armenia   | Animal fats                     | 1993           | 56                                                                    |
| 1                | Armenia   | Animal Products                 | 1993           | 267                                                                   |
| 1                | Armenia   | Apples and products             | 1993           | 8                                                                     |
| 1                | Armenia   | Beverages, Alcoholic            | 1993           | 18                                                                    |
| 1                | Armenia   | Bovine Meat                     | 1993           | 76                                                                    |
| 1                | Armenia   | Butter, Ghee                    | 1993           | 46                                                                    |

Dietary calcium and zinc deficiency risks are decreasing but remain prevalent

| FAO Country code | Country | Food item                       | Reference year | Net energy supply (kcal capita <sup>-1</sup> d <sup>-1</sup> ) |
|------------------|---------|---------------------------------|----------------|----------------------------------------------------------------|
| 1                | Armenia | Cereals - Excluding Beer        | 1993           | 1,317                                                          |
| 1                | Armenia | Cereals, Other                  | 1993           | 6                                                              |
| 1                | Armenia | Cocoa Beans and products        | 1993           | 2                                                              |
| 1                | Armenia | Cottonseed Oil                  | 1993           | 7                                                              |
| 1                | Armenia | Eggs                            | 1993           | 10                                                             |
| 1                | Armenia | Fats, Animals, Raw              | 1993           | 10                                                             |
| 1                | Armenia | Fish, Seafood                   | 1993           | 2                                                              |
| 1                | Armenia | Freshwater Fish                 | 1993           | 2                                                              |
| 1                | Armenia | Fruits - Excluding Wine         | 1993           | 52                                                             |
| 1                | Armenia | Fruits, Other                   | 1993           | 8                                                              |
| 1                | Armenia | Grand Total                     | 1993           | 2,103                                                          |
| 1                | Armenia | Grapes and products (excl wine) | 1993           | 36                                                             |
| 1                | Armenia | Honey                           | 1993           | 3                                                              |
| 1                | Armenia | Meat                            | 1993           | 112                                                            |
| 1                | Armenia | Milk - Excluding Butter         | 1993           | 81                                                             |
| 1                | Armenia | Mutton & Goat Meat              | 1993           | 18                                                             |
| 1                | Armenia | Offals                          | 1993           | 6                                                              |
| 1                | Armenia | Onions                          | 1993           | 9                                                              |
| 1                | Armenia | Pigmeat                         | 1993           | 12                                                             |
| 1                | Armenia | Potatoes and products           | 1993           | 134                                                            |
| 1                | Armenia | Poultry Meat                    | 1993           | 6                                                              |
| 1                | Armenia | Rice (Milled Equivalent)        | 1993           | 56                                                             |
| 1                | Armenia | Starchy Roots                   | 1993           | 134                                                            |
| 1                | Armenia | Stimulants                      | 1993           | 2                                                              |
| 1                | Armenia | Sugar & Sweeteners              | 1993           | 223                                                            |
| 1                | Armenia | Sugar (Raw Equivalent)          | 1993           | 220                                                            |
| 1                | Armenia | Sunflowerseed Oil               | 1993           | 3                                                              |
| 1                | Armenia | Tomatoes and products           | 1993           | 19                                                             |
| 1                | Armenia | Vegetable Oils                  | 1993           | 11                                                             |
| 1                | Armenia | Vegetables                      | 1993           | 63                                                             |
| 1                | Armenia | Vegetables, Other               | 1993           | 34                                                             |
| 1                | Armenia | Vegetal Products                | 1993           | 1,835                                                          |
| 1                | Armenia | Wheat and products              | 1993           | 1,256                                                          |
| 1                | Armenia | Wine                            | 1993           | 16                                                             |
| 1                | Armenia | Alcoholic Beverages             | 1994           | 58                                                             |
| 1                | Armenia | Animal fats                     | 1994           | 56                                                             |
| 1                | Armenia | Animal Products                 | 1994           | 372                                                            |
| 1                | Armenia | Apples and products             | 1994           | 12                                                             |
| 1                | Armenia | Beer                            | 1994           | 1                                                              |
| 1                | Armenia | Beverages, Alcoholic            | 1994           | 43                                                             |
| 1                | Armenia | Bovine Meat                     | 1994           | 88                                                             |
| 1                | Armenia | Butter, Ghee                    | 1994           | 45                                                             |
| 1                | Armenia | Cereals - Excluding Beer        | 1994           | 1,248                                                          |
| 1                | Armenia | Cereals, Other                  | 1994           | 2                                                              |
| 1                | Armenia | Cocoa Beans and products        | 1994           | 1                                                              |
| 1                | Armenia | Cottonseed Oil                  | 1994           | 15                                                             |
| 1                | Armenia | Eggs                            | 1994           | 12                                                             |
| 1                | Armenia | Fats, Animals, Raw              | 1994           | 11                                                             |
| 1                | Armenia | Fish, Seafood                   | 1994           | 2                                                              |
| 1                | Armenia | Freshwater Fish                 | 1994           | 1                                                              |
| 1                | Armenia | Fruits - Excluding Wine         | 1994           | 75                                                             |
| 1                | Armenia | Fruits, Other                   | 1994           | 22                                                             |
| 1                | Armenia | Grand Total                     | 1994           | 2,251                                                          |
| 1                | Armenia | Grapes and products (excl wine) | 1994           | 40                                                             |
| 1                | Armenia | Honey                           | 1994           | 3                                                              |
| 1                | Armenia | Meat                            | 1994           | 125                                                            |
| 1                | Armenia | Milk - Excluding Butter         | 1994           | 170                                                            |
| 1                | Armenia | Mutton & Goat Meat              | 1994           | 16                                                             |
| 1                | Armenia | Offals                          | 1994           | 7                                                              |
| 1                | Armenia | Onions                          | 1994           | 9                                                              |
| 1                | Armenia | Pigmeat                         | 1994           | 17                                                             |
| 1                | Armenia | Potatoes and products           | 1994           | 147                                                            |
| 1                | Armenia | Poultry Meat                    | 1994           | 5                                                              |
| 1                | Armenia | Rape and Mustard Oil            | 1994           | 3                                                              |
| 1                | Armenia | Rice (Milled Equivalent)        | 1994           | 51                                                             |
| 1                | Armenia | Soyabean Oil                    | 1994           | 22                                                             |
| 1                | Armenia | Starchy Roots                   | 1994           | 147                                                            |
| 1                | Armenia | Stimulants                      | 1994           | 1                                                              |
| 1                | Armenia | Sugar & Sweeteners              | 1994           | 214                                                            |
| 1                | Armenia | Sugar (Raw Equivalent)          | 1994           | 210                                                            |
| 1                | Armenia | Sunflowerseed Oil               | 1994           | 20                                                             |
| 1                | Armenia | Tomatoes and products           | 1994           | 28                                                             |
| 1                | Armenia | Vegetable Oils                  | 1994           | 60                                                             |
| 1                | Armenia | Vegetables                      | 1994           | 76                                                             |
| 1                | Armenia | Vegetables, Other               | 1994           | 39                                                             |
| 1                | Armenia | Vegetal Products                | 1994           | 1,878                                                          |
| 1                | Armenia | Wheat and products              | 1994           | 1,196                                                          |
| 1                | Armenia | Wine                            | 1994           | 14                                                             |
| 1                | Armenia | Alcoholic Beverages             | 1995           | 41                                                             |
| 1                | Armenia | Animal fats                     | 1995           | 73                                                             |
| 1                | Armenia | Animal Products                 | 1995           | 327                                                            |
| 1                | Armenia | Apples and products             | 1995           | 21                                                             |
| 1                | Armenia | Barley and products             | 1995           | 2                                                              |
| 1                | Armenia | Beverages, Alcoholic            | 1995           | 35                                                             |
| 1                | Armenia | Bovine Meat                     | 1995           | 99                                                             |
| 1                | Armenia | Butter, Ghee                    | 1995           | 56                                                             |
| 1                | Armenia | Cereals - Excluding Beer        | 1995           | 1,235                                                          |
| 1                | Armenia | Cereals, Other                  | 1995           | 2                                                              |
| 1                | Armenia | Cocoa Beans and products        | 1995           | 2                                                              |
| 1                | Armenia | Coffee and products             | 1995           | 1                                                              |
| 1                | Armenia | Cottonseed Oil                  | 1995           | 47                                                             |
| 1                | Armenia | Cream                           | 1995           | 2                                                              |
| 1                | Armenia | Dates                           | 1995           | 1                                                              |
| 1                | Armenia | Eggs                            | 1995           | 14                                                             |
| 1                | Armenia | Fats, Animals, Raw              | 1995           | 15                                                             |
| 1                | Armenia | Fish, Seafood                   | 1995           | 2                                                              |
| 1                | Armenia | Freshwater Fish                 | 1995           | 1                                                              |

Dietary calcium and zinc deficiency risks are decreasing but remain prevalent

| FAO Country code | Country | Food item                       | Reference year | Net energy supply (kcal capita <sup>-1</sup> d <sup>-1</sup> ) |
|------------------|---------|---------------------------------|----------------|----------------------------------------------------------------|
| 1                | Armenia | Fruits - Excluding Wine         | 1995           | 94                                                             |
| 1                | Armenia | Fruits, Other                   | 1995           | 25                                                             |
| 1                | Armenia | Grand Total                     | 1995           | 2,276                                                          |
| 1                | Armenia | Grapes and products (excl wine) | 1995           | 45                                                             |
| 1                | Armenia | Honey                           | 1995           | 3                                                              |
| 1                | Armenia | Meat                            | 1995           | 137                                                            |
| 1                | Armenia | Milk - Excluding Butter         | 1995           | 93                                                             |
| 1                | Armenia | Miscellaneous                   | 1995           | 4                                                              |
| 1                | Armenia | Mutton & Goat Meat              | 1995           | 16                                                             |
| 1                | Armenia | Offals                          | 1995           | 7                                                              |
| 1                | Armenia | Oilcrops                        | 1995           | 1                                                              |
| 1                | Armenia | Oilcrops Oil, Other             | 1995           | 22                                                             |
| 1                | Armenia | Onions                          | 1995           | 12                                                             |
| 1                | Armenia | Oranges, Mandarines             | 1995           | 1                                                              |
| 1                | Armenia | Pigmeat                         | 1995           | 14                                                             |
| 1                | Armenia | Potatoes and products           | 1995           | 167                                                            |
| 1                | Armenia | Poultry Meat                    | 1995           | 9                                                              |
| 1                | Armenia | Rape and Mustard Oil            | 1995           | 2                                                              |
| 1                | Armenia | Rice (Milled Equivalent)        | 1995           | 31                                                             |
| 1                | Armenia | Soyabean Oil                    | 1995           | 7                                                              |
| 1                | Armenia | Starchy Roots                   | 1995           | 167                                                            |
| 1                | Armenia | Stimulants                      | 1995           | 2                                                              |
| 1                | Armenia | Sugar & Sweeteners              | 1995           | 213                                                            |
| 1                | Armenia | Sugar (Raw Equivalent)          | 1995           | 201                                                            |
| 1                | Armenia | Sunflowerseed Oil               | 1995           | 31                                                             |
| 1                | Armenia | Sweeteners, Other               | 1995           | 8                                                              |
| 1                | Armenia | Tomatoes and products           | 1995           | 24                                                             |
| 1                | Armenia | Vegetable Oils                  | 1995           | 109                                                            |
| 1                | Armenia | Vegetables                      | 1995           | 83                                                             |
| 1                | Armenia | Vegetables, Other               | 1995           | 47                                                             |
| 1                | Armenia | Vegetal Products                | 1995           | 1,950                                                          |
| 1                | Armenia | Wheat and products              | 1995           | 1,200                                                          |
| 1                | Armenia | Wine                            | 1995           | 6                                                              |
| 1                | Armenia | Alcoholic Beverages             | 1996           | 41                                                             |
| 1                | Armenia | Animal fats                     | 1996           | 60                                                             |
| 1                | Armenia | Animal Products                 | 1996           | 312                                                            |
| 1                | Armenia | Apples and products             | 1996           | 15                                                             |
| 1                | Armenia | Barley and products             | 1996           | 3                                                              |
| 1                | Armenia | Beer                            | 1996           | 1                                                              |
| 1                | Armenia | Beverages, Alcoholic            | 1996           | 35                                                             |
| 1                | Armenia | Bovine Meat                     | 1996           | 53                                                             |
| 1                | Armenia | Butter, Ghee                    | 1996           | 36                                                             |
| 1                | Armenia | Cereals - Excluding Beer        | 1996           | 1,377                                                          |
| 1                | Armenia | Cereals, Other                  | 1996           | 108                                                            |
| 1                | Armenia | Cocoa Beans and products        | 1996           | 10                                                             |
| 1                | Armenia | Coffee and products             | 1996           | 1                                                              |
| 1                | Armenia | Dates                           | 1996           | 2                                                              |
| 1                | Armenia | Eggs                            | 1996           | 15                                                             |
| 1                | Armenia | Fats, Animals, Raw              | 1996           | 24                                                             |
| 1                | Armenia | Fish, Seafood                   | 1996           | 1                                                              |
| 1                | Armenia | Freshwater Fish                 | 1996           | 1                                                              |
| 1                | Armenia | Fruits - Excluding Wine         | 1996           | 90                                                             |
| 1                | Armenia | Fruits, Other                   | 1996           | 31                                                             |
| 1                | Armenia | Grand Total                     | 1996           | 2,420                                                          |
| 1                | Armenia | Grapes and products (excl wine) | 1996           | 39                                                             |
| 1                | Armenia | Honey                           | 1996           | 4                                                              |
| 1                | Armenia | Meat                            | 1996           | 92                                                             |
| 1                | Armenia | Milk - Excluding Butter         | 1996           | 137                                                            |
| 1                | Armenia | Miscellaneous                   | 1996           | 5                                                              |
| 1                | Armenia | Mutton & Goat Meat              | 1996           | 12                                                             |
| 1                | Armenia | Offals                          | 1996           | 7                                                              |
| 1                | Armenia | Oilcrops                        | 1996           | 1                                                              |
| 1                | Armenia | Oilcrops Oil, Other             | 1996           | 38                                                             |
| 1                | Armenia | Olive Oil                       | 1996           | 22                                                             |
| 1                | Armenia | Onions                          | 1996           | 10                                                             |
| 1                | Armenia | Oranges, Mandarines             | 1996           | 2                                                              |
| 1                | Armenia | Pigmeat                         | 1996           | 7                                                              |
| 1                | Armenia | Potatoes and products           | 1996           | 149                                                            |
| 1                | Armenia | Poultry Meat                    | 1996           | 20                                                             |
| 1                | Armenia | Rice (Milled Equivalent)        | 1996           | 33                                                             |
| 1                | Armenia | Rye and products                | 1996           | 16                                                             |
| 1                | Armenia | Sesameseed Oil                  | 1996           | 6                                                              |
| 1                | Armenia | Starchy Roots                   | 1996           | 149                                                            |
| 1                | Armenia | Stimulants                      | 1996           | 11                                                             |
| 1                | Armenia | Sugar & Sweeteners              | 1996           | 221                                                            |
| 1                | Armenia | Sugar (Raw Equivalent)          | 1996           | 215                                                            |
| 1                | Armenia | Sunflowerseed Oil               | 1996           | 62                                                             |
| 1                | Armenia | Sweeteners, Other               | 1996           | 2                                                              |
| 1                | Armenia | Tomatoes and products           | 1996           | 22                                                             |
| 1                | Armenia | Vegetable Oils                  | 1996           | 129                                                            |
| 1                | Armenia | Vegetables                      | 1996           | 85                                                             |
| 1                | Armenia | Vegetables, Other               | 1996           | 53                                                             |
| 1                | Armenia | Vegetal Products                | 1996           | 2,108                                                          |
| 1                | Armenia | Wheat and products              | 1996           | 1,217                                                          |
| 1                | Armenia | Wine                            | 1996           | 5                                                              |
| 1                | Armenia | Alcoholic Beverages             | 1997           | 41                                                             |
| 1                | Armenia | Animal fats                     | 1997           | 63                                                             |
| 1                | Armenia | Animal Products                 | 1997           | 317                                                            |
| 1                | Armenia | Apples and products             | 1997           | 13                                                             |
| 1                | Armenia | Bananas                         | 1997           | 1                                                              |
| 1                | Armenia | Barley and products             | 1997           | 10                                                             |
| 1                | Armenia | Beer                            | 1997           | 3                                                              |
| 1                | Armenia | Beverages, Alcoholic            | 1997           | 36                                                             |
| 1                | Armenia | Bovine Meat                     | 1997           | 60                                                             |
| 1                | Armenia | Butter, Ghee                    | 1997           | 37                                                             |
| 1                | Armenia | Cereals - Excluding Beer        | 1997           | 1,336                                                          |
| 1                | Armenia | Cereals, Other                  | 1997           | 50                                                             |



Dietary calcium and zinc deficiency risks are decreasing but remain prevalent

| FAO Country code | Country | Food item                       | Reference year | Net energy supply (kcal capita <sup>-1</sup> d <sup>-1</sup> ) |
|------------------|---------|---------------------------------|----------------|----------------------------------------------------------------|
| 1                | Armenia | Cocoa Beans and products        | 1997           | 1                                                              |
| 1                | Armenia | Coffee and products             | 1997           | 2                                                              |
| 1                | Armenia | Cream                           | 1997           | 2                                                              |
| 1                | Armenia | Eggs                            | 1997           | 15                                                             |
| 1                | Armenia | Fats, Animals, Raw              | 1997           | 25                                                             |
| 1                | Armenia | Fish, Seafood                   | 1997           | 1                                                              |
| 1                | Armenia | Freshwater Fish                 | 1997           | 1                                                              |
| 1                | Armenia | Fruits - Excluding Wine         | 1997           | 69                                                             |
| 1                | Armenia | Fruits, Other                   | 1997           | 22                                                             |
| 1                | Armenia | Grand Total                     | 1997           | 2,330                                                          |
| 1                | Armenia | Grapes and products (excl wine) | 1997           | 31                                                             |
| 1                | Armenia | Honey                           | 1997           | 3                                                              |
| 1                | Armenia | Meat                            | 1997           | 98                                                             |
| 1                | Armenia | Milk - Excluding Butter         | 1997           | 133                                                            |
| 1                | Armenia | Mutton & Goat Meat              | 1997           | 11                                                             |
| 1                | Armenia | Offals                          | 1997           | 7                                                              |
| 1                | Armenia | Oilcrops Oil, Other             | 1997           | 44                                                             |
| 1                | Armenia | Onions                          | 1997           | 9                                                              |
| 1                | Armenia | Oranges, Mandarines             | 1997           | 2                                                              |
| 1                | Armenia | Pigmeat                         | 1997           | 6                                                              |
| 1                | Armenia | Potatoes and products           | 1997           | 139                                                            |
| 1                | Armenia | Poultry Meat                    | 1997           | 21                                                             |
| 1                | Armenia | Rice (Milled Equivalent)        | 1997           | 27                                                             |
| 1                | Armenia | Sesameseed Oil                  | 1997           | 12                                                             |
| 1                | Armenia | Soyabean Oil                    | 1997           | 11                                                             |
| 1                | Armenia | Starchy Roots                   | 1997           | 139                                                            |
| 1                | Armenia | Stimulants                      | 1997           | 3                                                              |
| 1                | Armenia | Sugar & Sweeteners              | 1997           | 216                                                            |
| 1                | Armenia | Sugar (Raw Equivalent)          | 1997           | 212                                                            |
| 1                | Armenia | Sunflowerseed Oil               | 1997           | 69                                                             |
| 1                | Armenia | Sweeteners, Other               | 1997           | 1                                                              |
| 1                | Armenia | Tomatoes and products           | 1997           | 18                                                             |
| 1                | Armenia | Vegetable Oils                  | 1997           | 136                                                            |
| 1                | Armenia | Vegetables                      | 1997           | 73                                                             |
| 1                | Armenia | Vegetables, Other               | 1997           | 46                                                             |
| 1                | Armenia | Vegetal Products                | 1997           | 2,013                                                          |
| 1                | Armenia | Wheat and products              | 1997           | 1,249                                                          |
| 1                | Armenia | Wine                            | 1997           | 3                                                              |
| 1                | Armenia | Alcoholic Beverages             | 1998           | 28                                                             |
| 1                | Armenia | Animal fats                     | 1998           | 46                                                             |
| 1                | Armenia | Animal Products                 | 1998           | 318                                                            |
| 1                | Armenia | Apples and products             | 1998           | 6                                                              |
| 1                | Armenia | Bananas                         | 1998           | 1                                                              |
| 1                | Armenia | Barley and products             | 1998           | 8                                                              |
| 1                | Armenia | Beer                            | 1998           | 6                                                              |
| 1                | Armenia | Beverages, Alcoholic            | 1998           | 21                                                             |
| 1                | Armenia | Bovine Meat                     | 1998           | 63                                                             |
| 1                | Armenia | Butter, Ghee                    | 1998           | 28                                                             |
| 1                | Armenia | Cereals - Excluding Beer        | 1998           | 1,334                                                          |
| 1                | Armenia | Cereals, Other                  | 1998           | 49                                                             |
| 1                | Armenia | Cocoa Beans and products        | 1998           | 3                                                              |
| 1                | Armenia | Coffee and products             | 1998           | 2                                                              |
| 1                | Armenia | Dates                           | 1998           | 1                                                              |
| 1                | Armenia | Eggs                            | 1998           | 13                                                             |
| 1                | Armenia | Fats, Animals, Raw              | 1998           | 17                                                             |
| 1                | Armenia | Fish, Seafood                   | 1998           | 1                                                              |
| 1                | Armenia | Freshwater Fish                 | 1998           | 1                                                              |
| 1                | Armenia | Fruits - Excluding Wine         | 1998           | 69                                                             |
| 1                | Armenia | Fruits, Other                   | 1998           | 31                                                             |
| 1                | Armenia | Grand Total                     | 1998           | 2,312                                                          |
| 1                | Armenia | Grapes and products (excl wine) | 1998           | 28                                                             |
| 1                | Armenia | Honey                           | 1998           | 2                                                              |
| 1                | Armenia | Marine Fish, Other              | 1998           | 1                                                              |
| 1                | Armenia | Meat                            | 1998           | 104                                                            |
| 1                | Armenia | Milk - Excluding Butter         | 1998           | 146                                                            |
| 1                | Armenia | Mutton & Goat Meat              | 1998           | 12                                                             |
| 1                | Armenia | Offals                          | 1998           | 8                                                              |
| 1                | Armenia | Oilcrops Oil, Other             | 1998           | 23                                                             |
| 1                | Armenia | Onions                          | 1998           | 10                                                             |
| 1                | Armenia | Oranges, Mandarines             | 1998           | 2                                                              |
| 1                | Armenia | Pigmeat                         | 1998           | 8                                                              |
| 1                | Armenia | Potatoes and products           | 1998           | 153                                                            |
| 1                | Armenia | Poultry Meat                    | 1998           | 21                                                             |
| 1                | Armenia | Rice (Milled Equivalent)        | 1998           | 41                                                             |
| 1                | Armenia | Sesameseed Oil                  | 1998           | 13                                                             |
| 1                | Armenia | Soyabean Oil                    | 1998           | 30                                                             |
| 1                | Armenia | Starchy Roots                   | 1998           | 153                                                            |
| 1                | Armenia | Stimulants                      | 1998           | 5                                                              |
| 1                | Armenia | Sugar & Sweeteners              | 1998           | 242                                                            |
| 1                | Armenia | Sugar (Raw Equivalent)          | 1998           | 240                                                            |
| 1                | Armenia | Sunflowerseed Oil               | 1998           | 16                                                             |
| 1                | Armenia | Tomatoes and products           | 1998           | 17                                                             |
| 1                | Armenia | Vegetable Oils                  | 1998           | 83                                                             |
| 1                | Armenia | Vegetables                      | 1998           | 79                                                             |
| 1                | Armenia | Vegetables, Other               | 1998           | 52                                                             |
| 1                | Armenia | Vegetal Products                | 1998           | 1,994                                                          |
| 1                | Armenia | Wheat and products              | 1998           | 1,236                                                          |
| 1                | Armenia | Wine                            | 1998           | 1                                                              |
| 1                | Armenia | Alcoholic Beverages             | 1999           | 32                                                             |
| 1                | Armenia | Animal fats                     | 1999           | 50                                                             |
| 1                | Armenia | Animal Products                 | 1999           | 331                                                            |
| 1                | Armenia | Apples and products             | 1999           | 3                                                              |
| 1                | Armenia | Bananas                         | 1999           | 1                                                              |
| 1                | Armenia | Barley and products             | 1999           | 8                                                              |
| 1                | Armenia | Beer                            | 1999           | 3                                                              |
| 1                | Armenia | Beverages, Alcoholic            | 1999           | 25                                                             |
| 1                | Armenia | Bovine Meat                     | 1999           | 57                                                             |

Dietary calcium and zinc deficiency risks are decreasing but remain prevalent

| FAO Country code | Country | Food item                       | Reference year | Net energy supply (kcal capita <sup>-1</sup> d <sup>-1</sup> ) |
|------------------|---------|---------------------------------|----------------|----------------------------------------------------------------|
| 1                | Armenia | Butter, Ghee                    | 1999           | 26                                                             |
| 1                | Armenia | Cereals - Excluding Beer        | 1999           | 1,311                                                          |
| 1                | Armenia | Cereals, Other                  | 1999           | 36                                                             |
| 1                | Armenia | Cocoa Beans and products        | 1999           | 6                                                              |
| 1                | Armenia | Coffee and products             | 1999           | 3                                                              |
| 1                | Armenia | Dates                           | 1999           | 1                                                              |
| 1                | Armenia | Eggs                            | 1999           | 17                                                             |
| 1                | Armenia | Fats, Animals, Raw              | 1999           | 24                                                             |
| 1                | Armenia | Fish, Seafood                   | 1999           | 2                                                              |
| 1                | Armenia | Freshwater Fish                 | 1999           | 1                                                              |
| 1                | Armenia | Fruits - Excluding Wine         | 1999           | 54                                                             |
| 1                | Armenia | Fruits, Other                   | 1999           | 24                                                             |
| 1                | Armenia | Grand Total                     | 1999           | 2,281                                                          |
| 1                | Armenia | Grapes and products (excl wine) | 1999           | 22                                                             |
| 1                | Armenia | Groundnuts (Shelled Eq)         | 1999           | 1                                                              |
| 1                | Armenia | Honey                           | 1999           | 2                                                              |
| 1                | Armenia | Maize Germ Oil                  | 1999           | 2                                                              |
| 1                | Armenia | Meat                            | 1999           | 99                                                             |
| 1                | Armenia | Milk - Excluding Butter         | 1999           | 155                                                            |
| 1                | Armenia | Miscellaneous                   | 1999           | 1                                                              |
| 1                | Armenia | Mutton & Goat Meat              | 1999           | 10                                                             |
| 1                | Armenia | Offals                          | 1999           | 8                                                              |
| 1                | Armenia | Oilcrops                        | 1999           | 2                                                              |
| 1                | Armenia | Oilcrops Oil, Other             | 1999           | 22                                                             |
| 1                | Armenia | Olives (including preserved)    | 1999           | 1                                                              |
| 1                | Armenia | Onions                          | 1999           | 11                                                             |
| 1                | Armenia | Oranges, Mandarines             | 1999           | 3                                                              |
| 1                | Armenia | Pigmeat                         | 1999           | 7                                                              |
| 1                | Armenia | Potatoes and products           | 1999           | 155                                                            |
| 1                | Armenia | Poultry Meat                    | 1999           | 23                                                             |
| 1                | Armenia | Rape and Mustard Oil            | 1999           | 1                                                              |
| 1                | Armenia | Rice (Milled Equivalent)        | 1999           | 38                                                             |
| 1                | Armenia | Soyabean Oil                    | 1999           | 34                                                             |
| 1                | Armenia | Starchy Roots                   | 1999           | 155                                                            |
| 1                | Armenia | Stimulants                      | 1999           | 9                                                              |
| 1                | Armenia | Sugar & Sweeteners              | 1999           | 235                                                            |
| 1                | Armenia | Sugar (Raw Equivalent)          | 1999           | 233                                                            |
| 1                | Armenia | Sunflowerseed Oil               | 1999           | 11                                                             |
| 1                | Armenia | Tomatoes and products           | 1999           | 16                                                             |
| 1                | Armenia | Treenuts                        | 1999           | 1                                                              |
| 1                | Armenia | Vegetable Oils                  | 1999           | 69                                                             |
| 1                | Armenia | Vegetables                      | 1999           | 82                                                             |
| 1                | Armenia | Vegetables, Other               | 1999           | 56                                                             |
| 1                | Armenia | Vegetal Products                | 1999           | 1,950                                                          |
| 1                | Armenia | Wheat and products              | 1999           | 1,229                                                          |
| 1                | Armenia | Wine                            | 1999           | 3                                                              |
| 1                | Armenia | Alcoholic Beverages             | 2000           | 27                                                             |
| 1                | Armenia | Animal fats                     | 2000           | 45                                                             |
| 1                | Armenia | Animal Products                 | 2000           | 347                                                            |
| 1                | Armenia | Apples and products             | 2000           | 5                                                              |
| 1                | Armenia | Barley and products             | 2000           | 12                                                             |
| 1                | Armenia | Beer                            | 2000           | 3                                                              |
| 1                | Armenia | Beverages, Alcoholic            | 2000           | 21                                                             |
| 1                | Armenia | Bovine Meat                     | 2000           | 57                                                             |
| 1                | Armenia | Butter, Ghee                    | 2000           | 24                                                             |
| 1                | Armenia | Cereals - Excluding Beer        | 2000           | 1,272                                                          |
| 1                | Armenia | Cereals, Other                  | 2000           | 6                                                              |
| 1                | Armenia | Cocoa Beans and products        | 2000           | 8                                                              |
| 1                | Armenia | Coconut Oil                     | 2000           | 2                                                              |
| 1                | Armenia | Coffee and products             | 2000           | 3                                                              |
| 1                | Armenia | Eggs                            | 2000           | 19                                                             |
| 1                | Armenia | Fats, Animals, Raw              | 2000           | 22                                                             |
| 1                | Armenia | Fish, Seafood                   | 2000           | 2                                                              |
| 1                | Armenia | Freshwater Fish                 | 2000           | 1                                                              |
| 1                | Armenia | Fruits - Excluding Wine         | 2000           | 63                                                             |
| 1                | Armenia | Fruits, Other                   | 2000           | 38                                                             |
| 1                | Armenia | Grand Total                     | 2000           | 2,235                                                          |
| 1                | Armenia | Grapes and products (excl wine) | 2000           | 18                                                             |
| 1                | Armenia | Honey                           | 2000           | 2                                                              |
| 1                | Armenia | Maize Germ Oil                  | 2000           | 2                                                              |
| 1                | Armenia | Meat                            | 2000           | 116                                                            |
| 1                | Armenia | Milk - Excluding Butter         | 2000           | 156                                                            |
| 1                | Armenia | Miscellaneous                   | 2000           | 1                                                              |
| 1                | Armenia | Mutton & Goat Meat              | 2000           | 19                                                             |
| 1                | Armenia | Offals                          | 2000           | 8                                                              |
| 1                | Armenia | Oilcrops                        | 2000           | 1                                                              |
| 1                | Armenia | Oilcrops Oil, Other             | 2000           | 37                                                             |
| 1                | Armenia | Olive Oil                       | 2000           | 1                                                              |
| 1                | Armenia | Olives (including preserved)    | 2000           | 1                                                              |
| 1                | Armenia | Onions                          | 2000           | 8                                                              |
| 1                | Armenia | Pelagic Fish                    | 2000           | 1                                                              |
| 1                | Armenia | Pigmeat                         | 2000           | 23                                                             |
| 1                | Armenia | Potatoes and products           | 2000           | 117                                                            |
| 1                | Armenia | Poultry Meat                    | 2000           | 18                                                             |
| 1                | Armenia | Rice (Milled Equivalent)        | 2000           | 36                                                             |
| 1                | Armenia | Soyabean Oil                    | 2000           | 17                                                             |
| 1                | Armenia | Starchy Roots                   | 2000           | 117                                                            |
| 1                | Armenia | Stimulants                      | 2000           | 11                                                             |
| 1                | Armenia | Sugar & Sweeteners              | 2000           | 235                                                            |
| 1                | Armenia | Sugar (Raw Equivalent)          | 2000           | 233                                                            |
| 1                | Armenia | Sunflowerseed Oil               | 2000           | 30                                                             |
| 1                | Armenia | Tomatoes and products           | 2000           | 18                                                             |
| 1                | Armenia | Treenuts                        | 2000           | 1                                                              |
| 1                | Armenia | Vegetable Oils                  | 2000           | 89                                                             |
| 1                | Armenia | Vegetables                      | 2000           | 71                                                             |
| 1                | Armenia | Vegetables, Other               | 2000           | 45                                                             |
| 1                | Armenia | Vegetal Products                | 2000           | 1,888                                                          |

Dietary calcium and zinc deficiency risks are decreasing but remain prevalent

| FAO Country code | Country | Food item                       | Reference year | Net energy supply (kcal capita <sup>-1</sup> d <sup>-1</sup> ) |
|------------------|---------|---------------------------------|----------------|----------------------------------------------------------------|
| 1                | Armenia | Wheat and products              | 2000           | 1,218                                                          |
| 1                | Armenia | Wine                            | 2000           | 2                                                              |
| 1                | Armenia | Alcoholic Beverages             | 2001           | 24                                                             |
| 1                | Armenia | Animal fats                     | 2001           | 49                                                             |
| 1                | Armenia | Animal Products                 | 2001           | 359                                                            |
| 1                | Armenia | Apples and products             | 2001           | 9                                                              |
| 1                | Armenia | Bananas                         | 2001           | 1                                                              |
| 1                | Armenia | Barley and products             | 2001           | 14                                                             |
| 1                | Armenia | Beer                            | 2001           | 3                                                              |
| 1                | Armenia | Beverages, Alcoholic            | 2001           | 18                                                             |
| 1                | Armenia | Bovine Meat                     | 2001           | 57                                                             |
| 1                | Armenia | Butter, Ghee                    | 2001           | 25                                                             |
| 1                | Armenia | Cereals - Excluding Beer        | 2001           | 1,238                                                          |
| 1                | Armenia | Cereals, Other                  | 2001           | 16                                                             |
| 1                | Armenia | Cocoa Beans and products        | 2001           | 10                                                             |
| 1                | Armenia | Coconut Oil                     | 2001           | 1                                                              |
| 1                | Armenia | Coffee and products             | 2001           | 5                                                              |
| 1                | Armenia | Eggs                            | 2001           | 20                                                             |
| 1                | Armenia | Fats, Animals, Raw              | 2001           | 25                                                             |
| 1                | Armenia | Fish, Seafood                   | 2001           | 3                                                              |
| 1                | Armenia | Freshwater Fish                 | 2001           | 1                                                              |
| 1                | Armenia | Fruits - Excluding Wine         | 2001           | 66                                                             |
| 1                | Armenia | Fruits, Other                   | 2001           | 26                                                             |
| 1                | Armenia | Grand Total                     | 2001           | 2,242                                                          |
| 1                | Armenia | Grapes and products (excl wine) | 2001           | 29                                                             |
| 1                | Armenia | Honey                           | 2001           | 2                                                              |
| 1                | Armenia | Maize Germ Oil                  | 2001           | 2                                                              |
| 1                | Armenia | Meat                            | 2001           | 118                                                            |
| 1                | Armenia | Milk - Excluding Butter         | 2001           | 161                                                            |
| 1                | Armenia | Miscellaneous                   | 2001           | 1                                                              |
| 1                | Armenia | Mutton & Goat Meat              | 2001           | 16                                                             |
| 1                | Armenia | Offals                          | 2001           | 8                                                              |
| 1                | Armenia | Oilcrops                        | 2001           | 1                                                              |
| 1                | Armenia | Oilcrops Oil, Other             | 2001           | 15                                                             |
| 1                | Armenia | Olives (including preserved)    | 2001           | 1                                                              |
| 1                | Armenia | Onions                          | 2001           | 9                                                              |
| 1                | Armenia | Pelagic Fish                    | 2001           | 1                                                              |
| 1                | Armenia | Pigmeat                         | 2001           | 25                                                             |
| 1                | Armenia | Potatoes and products           | 2001           | 119                                                            |
| 1                | Armenia | Poultry Meat                    | 2001           | 20                                                             |
| 1                | Armenia | Rape and Mustard Oil            | 2001           | 1                                                              |
| 1                | Armenia | Rice (Milled Equivalent)        | 2001           | 35                                                             |
| 1                | Armenia | Soyabean Oil                    | 2001           | 14                                                             |
| 1                | Armenia | Starchy Roots                   | 2001           | 119                                                            |
| 1                | Armenia | Stimulants                      | 2001           | 14                                                             |
| 1                | Armenia | Sugar & Sweeteners              | 2001           | 244                                                            |
| 1                | Armenia | Sugar (Raw Equivalent)          | 2001           | 242                                                            |
| 1                | Armenia | Sunflowerseed Oil               | 2001           | 60                                                             |
| 1                | Armenia | Tomatoes and products           | 2001           | 15                                                             |
| 1                | Armenia | Treenuts                        | 2001           | 3                                                              |
| 1                | Armenia | Vegetable Oils                  | 2001           | 93                                                             |
| 1                | Armenia | Vegetables                      | 2001           | 80                                                             |
| 1                | Armenia | Vegetables, Other               | 2001           | 57                                                             |
| 1                | Armenia | Vegetal Products                | 2001           | 1,884                                                          |
| 1                | Armenia | Wheat and products              | 2001           | 1,173                                                          |
| 1                | Armenia | Wine                            | 2001           | 4                                                              |
| 1                | Armenia | Alcoholic Beverages             | 2002           | 21                                                             |
| 1                | Armenia | Animal fats                     | 2002           | 58                                                             |
| 1                | Armenia | Animal Products                 | 2002           | 425                                                            |
| 1                | Armenia | Apples and products             | 2002           | 10                                                             |
| 1                | Armenia | Bananas                         | 2002           | 1                                                              |
| 1                | Armenia | Barley and products             | 2002           | 18                                                             |
| 1                | Armenia | Beer                            | 2002           | 2                                                              |
| 1                | Armenia | Beverages, Alcoholic            | 2002           | 16                                                             |
| 1                | Armenia | Bovine Meat                     | 2002           | 64                                                             |
| 1                | Armenia | Butter, Ghee                    | 2002           | 27                                                             |
| 1                | Armenia | Cereals - Excluding Beer        | 2002           | 1,211                                                          |
| 1                | Armenia | Cereals, Other                  | 2002           | 12                                                             |
| 1                | Armenia | Cocoa Beans and products        | 2002           | 14                                                             |
| 1                | Armenia | Coconut Oil                     | 2002           | 2                                                              |
| 1                | Armenia | Coffee and products             | 2002           | 4                                                              |
| 1                | Armenia | Eggs                            | 2002           | 22                                                             |
| 1                | Armenia | Fats, Animals, Raw              | 2002           | 32                                                             |
| 1                | Armenia | Fish, Seafood                   | 2002           | 2                                                              |
| 1                | Armenia | Freshwater Fish                 | 2002           | 1                                                              |
| 1                | Armenia | Fruits - Excluding Wine         | 2002           | 58                                                             |
| 1                | Armenia | Fruits, Other                   | 2002           | 19                                                             |
| 1                | Armenia | Grand Total                     | 2002           | 2,291                                                          |
| 1                | Armenia | Grapes and products (excl wine) | 2002           | 27                                                             |
| 1                | Armenia | Honey                           | 2002           | 2                                                              |
| 1                | Armenia | Maize Germ Oil                  | 2002           | 2                                                              |
| 1                | Armenia | Meat                            | 2002           | 126                                                            |
| 1                | Armenia | Milk - Excluding Butter         | 2002           | 207                                                            |
| 1                | Armenia | Miscellaneous                   | 2002           | 1                                                              |
| 1                | Armenia | Mutton & Goat Meat              | 2002           | 14                                                             |
| 1                | Armenia | Offals                          | 2002           | 9                                                              |
| 1                | Armenia | Oilcrops                        | 2002           | 2                                                              |
| 1                | Armenia | Oilcrops Oil, Other             | 2002           | 15                                                             |
| 1                | Armenia | Olives (including preserved)    | 2002           | 2                                                              |
| 1                | Armenia | Onions                          | 2002           | 10                                                             |
| 1                | Armenia | Palmkernel Oil                  | 2002           | 3                                                              |
| 1                | Armenia | Pelagic Fish                    | 2002           | 2                                                              |
| 1                | Armenia | Pigmeat                         | 2002           | 27                                                             |
| 1                | Armenia | Potatoes and products           | 2002           | 92                                                             |
| 1                | Armenia | Poultry Meat                    | 2002           | 21                                                             |
| 1                | Armenia | Rice (Milled Equivalent)        | 2002           | 50                                                             |
| 1                | Armenia | Soyabean Oil                    | 2002           | 6                                                              |

Dietary calcium and zinc deficiency risks are decreasing but remain prevalent

| FAO Country code | Country | Food item                       | Reference year | Net energy supply (kcal capita <sup>-1</sup> d <sup>-1</sup> ) |
|------------------|---------|---------------------------------|----------------|----------------------------------------------------------------|
| 1                | Armenia | Starchy Roots                   | 2002           | 92                                                             |
| 1                | Armenia | Stimulants                      | 2002           | 18                                                             |
| 1                | Armenia | Sugar & Sweeteners              | 2002           | 266                                                            |
| 1                | Armenia | Sugar (Raw Equivalent)          | 2002           | 263                                                            |
| 1                | Armenia | Sunflowerseed Oil               | 2002           | 77                                                             |
| 1                | Armenia | Tomatoes and products           | 2002           | 19                                                             |
| 1                | Armenia | Treenuts                        | 2002           | 2                                                              |
| 1                | Armenia | Vegetable Oils                  | 2002           | 105                                                            |
| 1                | Armenia | Vegetables                      | 2002           | 90                                                             |
| 1                | Armenia | Vegetables, Other               | 2002           | 60                                                             |
| 1                | Armenia | Vegetal Products                | 2002           | 1,866                                                          |
| 1                | Armenia | Wheat and products              | 2002           | 1,131                                                          |
| 1                | Armenia | Wine                            | 2002           | 3                                                              |
| 1                | Armenia | Alcoholic Beverages             | 2003           | 19                                                             |
| 1                | Armenia | Animal fats                     | 2003           | 66                                                             |
| 1                | Armenia | Animal Products                 | 2003           | 460                                                            |
| 1                | Armenia | Apples and products             | 2003           | 11                                                             |
| 1                | Armenia | Bananas                         | 2003           | 1                                                              |
| 1                | Armenia | Barley and products             | 2003           | 20                                                             |
| 1                | Armenia | Beer                            | 2003           | 2                                                              |
| 1                | Armenia | Beverages, Alcoholic            | 2003           | 15                                                             |
| 1                | Armenia | Bovine Meat                     | 2003           | 75                                                             |
| 1                | Armenia | Butter, Ghee                    | 2003           | 24                                                             |
| 1                | Armenia | Cereals - Excluding Beer        | 2003           | 1,242                                                          |
| 1                | Armenia | Cereals, Other                  | 2003           | 17                                                             |
| 1                | Armenia | Cocoa Beans and products        | 2003           | 17                                                             |
| 1                | Armenia | Coconut Oil                     | 2003           | 4                                                              |
| 1                | Armenia | Coffee and products             | 2003           | 4                                                              |
| 1                | Armenia | Eggs                            | 2003           | 31                                                             |
| 1                | Armenia | Fats, Animals, Raw              | 2003           | 42                                                             |
| 1                | Armenia | Fish, Seafood                   | 2003           | 2                                                              |
| 1                | Armenia | Freshwater Fish                 | 2003           | 1                                                              |
| 1                | Armenia | Fruits - Excluding Wine         | 2003           | 54                                                             |
| 1                | Armenia | Fruits, Other                   | 2003           | 20                                                             |
| 1                | Armenia | Grand Total                     | 2003           | 2,458                                                          |
| 1                | Armenia | Grapes and products (excl wine) | 2003           | 20                                                             |
| 1                | Armenia | Honey                           | 2003           | 4                                                              |
| 1                | Armenia | Maize Germ Oil                  | 2003           | 2                                                              |
| 1                | Armenia | Meat                            | 2003           | 136                                                            |
| 1                | Armenia | Milk - Excluding Butter         | 2003           | 216                                                            |
| 1                | Armenia | Miscellaneous                   | 2003           | 2                                                              |
| 1                | Armenia | Mutton & Goat Meat              | 2003           | 15                                                             |
| 1                | Armenia | Offals                          | 2003           | 9                                                              |
| 1                | Armenia | Oilcrops                        | 2003           | 2                                                              |
| 1                | Armenia | Oilcrops Oil, Other             | 2003           | 17                                                             |
| 1                | Armenia | Olive Oil                       | 2003           | 1                                                              |
| 1                | Armenia | Olives (including preserved)    | 2003           | 2                                                              |
| 1                | Armenia | Onions                          | 2003           | 9                                                              |
| 1                | Armenia | Palmkernel Oil                  | 2003           | 6                                                              |
| 1                | Armenia | Pelagic Fish                    | 2003           | 1                                                              |
| 1                | Armenia | Pigmeat                         | 2003           | 26                                                             |
| 1                | Armenia | Potatoes and products           | 2003           | 88                                                             |
| 1                | Armenia | Poultry Meat                    | 2003           | 20                                                             |
| 1                | Armenia | Rice (Milled Equivalent)        | 2003           | 45                                                             |
| 1                | Armenia | Rye and products                | 2003           | 1                                                              |
| 1                | Armenia | Soyabean Oil                    | 2003           | 20                                                             |
| 1                | Armenia | Spices                          | 2003           | 1                                                              |
| 1                | Armenia | Starchy Roots                   | 2003           | 88                                                             |
| 1                | Armenia | Stimulants                      | 2003           | 20                                                             |
| 1                | Armenia | Sugar & Sweeteners              | 2003           | 301                                                            |
| 1                | Armenia | Sugar (Raw Equivalent)          | 2003           | 297                                                            |
| 1                | Armenia | Sunflowerseed Oil               | 2003           | 104                                                            |
| 1                | Armenia | Tomatoes and products           | 2003           | 27                                                             |
| 1                | Armenia | Treenuts                        | 2003           | 3                                                              |
| 1                | Armenia | Vegetable Oils                  | 2003           | 154                                                            |
| 1                | Armenia | Vegetables                      | 2003           | 111                                                            |
| 1                | Armenia | Vegetables, Other               | 2003           | 74                                                             |
| 1                | Armenia | Vegetal Products                | 2003           | 1,998                                                          |
| 1                | Armenia | Wheat and products              | 2003           | 1,160                                                          |
| 1                | Armenia | Wine                            | 2003           | 1                                                              |
| 1                | Armenia | Alcoholic Beverages             | 2004           | 34                                                             |
| 1                | Armenia | Animal fats                     | 2004           | 79                                                             |
| 1                | Armenia | Animal Products                 | 2004           | 472                                                            |
| 1                | Armenia | Apples and products             | 2004           | 13                                                             |
| 1                | Armenia | Bananas                         | 2004           | 2                                                              |
| 1                | Armenia | Barley and products             | 2004           | 23                                                             |
| 1                | Armenia | Beer                            | 2004           | 3                                                              |
| 1                | Armenia | Beverages, Alcoholic            | 2004           | 27                                                             |
| 1                | Armenia | Bovine Meat                     | 2004           | 79                                                             |
| 1                | Armenia | Butter, Ghee                    | 2004           | 33                                                             |
| 1                | Armenia | Cereals - Excluding Beer        | 2004           | 1,316                                                          |
| 1                | Armenia | Cereals, Other                  | 2004           | 12                                                             |
| 1                | Armenia | Cocoa Beans and products        | 2004           | 19                                                             |
| 1                | Armenia | Coconut Oil                     | 2004           | 3                                                              |
| 1                | Armenia | Coffee and products             | 2004           | 3                                                              |
| 1                | Armenia | Eggs                            | 2004           | 34                                                             |
| 1                | Armenia | Fats, Animals, Raw              | 2004           | 45                                                             |
| 1                | Armenia | Fish, Seafood                   | 2004           | 1                                                              |
| 1                | Armenia | Fruits - Excluding Wine         | 2004           | 60                                                             |
| 1                | Armenia | Fruits, Other                   | 2004           | 26                                                             |
| 1                | Armenia | Grand Total                     | 2004           | 2,554                                                          |
| 1                | Armenia | Grapes and products (excl wine) | 2004           | 17                                                             |
| 1                | Armenia | Groundnuts (Shelled Eq)         | 2004           | 1                                                              |
| 1                | Armenia | Honey                           | 2004           | 4                                                              |
| 1                | Armenia | Maize Germ Oil                  | 2004           | 3                                                              |
| 1                | Armenia | Meat                            | 2004           | 142                                                            |
| 1                | Armenia | Milk - Excluding Butter         | 2004           | 208                                                            |

Dietary calcium and zinc deficiency risks are decreasing but remain prevalent

| FAO Country code | Country | Food item                       | Reference year | Net energy supply (kcal capita <sup>-1</sup> d <sup>-1</sup> ) |
|------------------|---------|---------------------------------|----------------|----------------------------------------------------------------|
| 1                | Armenia | Miscellaneous                   | 2004           | 4                                                              |
| 1                | Armenia | Mutton & Goat Meat              | 2004           | 17                                                             |
| 1                | Armenia | Offals                          | 2004           | 9                                                              |
| 1                | Armenia | Oilcrops                        | 2004           | 2                                                              |
| 1                | Armenia | Oilcrops Oil, Other             | 2004           | 21                                                             |
| 1                | Armenia | Olive Oil                       | 2004           | 1                                                              |
| 1                | Armenia | Olives (including preserved)    | 2004           | 2                                                              |
| 1                | Armenia | Onions                          | 2004           | 12                                                             |
| 1                | Armenia | Oranges, Mandarines             | 2004           | 1                                                              |
| 1                | Armenia | Palmkernel Oil                  | 2004           | 6                                                              |
| 1                | Armenia | Pelagic Fish                    | 2004           | 1                                                              |
| 1                | Armenia | Pigmeat                         | 2004           | 26                                                             |
| 1                | Armenia | Potatoes and products           | 2004           | 110                                                            |
| 1                | Armenia | Poultry Meat                    | 2004           | 20                                                             |
| 1                | Armenia | Rice (Milled Equivalent)        | 2004           | 43                                                             |
| 1                | Armenia | Soyabean Oil                    | 2004           | 12                                                             |
| 1                | Armenia | Starchy Roots                   | 2004           | 110                                                            |
| 1                | Armenia | Stimulants                      | 2004           | 22                                                             |
| 1                | Armenia | Sugar & Sweeteners              | 2004           | 292                                                            |
| 1                | Armenia | Sugar (Raw Equivalent)          | 2004           | 288                                                            |
| 1                | Armenia | Sunflowerseed Oil               | 2004           | 65                                                             |
| 1                | Armenia | Tomatoes and products           | 2004           | 34                                                             |
| 1                | Armenia | Treenuts                        | 2004           | 4                                                              |
| 1                | Armenia | Vegetable Oils                  | 2004           | 111                                                            |
| 1                | Armenia | Vegetables                      | 2004           | 126                                                            |
| 1                | Armenia | Vegetables, Other               | 2004           | 79                                                             |
| 1                | Armenia | Vegetal Products                | 2004           | 2,082                                                          |
| 1                | Armenia | Wheat and products              | 2004           | 1,237                                                          |
| 1                | Armenia | Wine                            | 2004           | 4                                                              |
| 1                | Armenia | Alcoholic Beverages             | 2005           | 31                                                             |
| 1                | Armenia | Animal fats                     | 2005           | 66                                                             |
| 1                | Armenia | Animal Products                 | 2005           | 523                                                            |
| 1                | Armenia | Apples and products             | 2005           | 31                                                             |
| 1                | Armenia | Bananas                         | 2005           | 4                                                              |
| 1                | Armenia | Barley and products             | 2005           | 20                                                             |
| 1                | Armenia | Beer                            | 2005           | 4                                                              |
| 1                | Armenia | Beverages, Alcoholic            | 2005           | 23                                                             |
| 1                | Armenia | Bovine Meat                     | 2005           | 79                                                             |
| 1                | Armenia | Butter, Ghee                    | 2005           | 26                                                             |
| 1                | Armenia | Cereals - Excluding Beer        | 2005           | 1,206                                                          |
| 1                | Armenia | Cereals, Other                  | 2005           | 13                                                             |
| 1                | Armenia | Cocoa Beans and products        | 2005           | 22                                                             |
| 1                | Armenia | Coconut Oil                     | 2005           | 6                                                              |
| 1                | Armenia | Coffee and products             | 2005           | 3                                                              |
| 1                | Armenia | Dates                           | 2005           | 1                                                              |
| 1                | Armenia | Eggs                            | 2005           | 33                                                             |
| 1                | Armenia | Fats, Animals, Raw              | 2005           | 40                                                             |
| 1                | Armenia | Fish, Seafood                   | 2005           | 5                                                              |
| 1                | Armenia | Fruits - Excluding Wine         | 2005           | 124                                                            |
| 1                | Armenia | Fruits, Other                   | 2005           | 44                                                             |
| 1                | Armenia | Grand Total                     | 2005           | 2,657                                                          |
| 1                | Armenia | Grapes and products (excl wine) | 2005           | 42                                                             |
| 1                | Armenia | Groundnuts (Shelled Eq)         | 2005           | 3                                                              |
| 1                | Armenia | Honey                           | 2005           | 4                                                              |
| 1                | Armenia | Maize Germ Oil                  | 2005           | 3                                                              |
| 1                | Armenia | Marine Fish, Other              | 2005           | 3                                                              |
| 1                | Armenia | Meat                            | 2005           | 158                                                            |
| 1                | Armenia | Milk - Excluding Butter         | 2005           | 250                                                            |
| 1                | Armenia | Miscellaneous                   | 2005           | 3                                                              |
| 1                | Armenia | Mutton & Goat Meat              | 2005           | 18                                                             |
| 1                | Armenia | Offals                          | 2005           | 11                                                             |
| 1                | Armenia | Oilcrops                        | 2005           | 5                                                              |
| 1                | Armenia | Oilcrops Oil, Other             | 2005           | 22                                                             |
| 1                | Armenia | Olives (including preserved)    | 2005           | 2                                                              |
| 1                | Armenia | Onions                          | 2005           | 14                                                             |
| 1                | Armenia | Oranges, Mandarines             | 2005           | 2                                                              |
| 1                | Armenia | Palmkernel Oil                  | 2005           | 5                                                              |
| 1                | Armenia | Pelagic Fish                    | 2005           | 1                                                              |
| 1                | Armenia | Pigmeat                         | 2005           | 37                                                             |
| 1                | Armenia | Potatoes and products           | 2005           | 130                                                            |
| 1                | Armenia | Poultry Meat                    | 2005           | 24                                                             |
| 1                | Armenia | Rice (Milled Equivalent)        | 2005           | 53                                                             |
| 1                | Armenia | Rye and products                | 2005           | 1                                                              |
| 1                | Armenia | Soyabean Oil                    | 2005           | 9                                                              |
| 1                | Armenia | Spices                          | 2005           | 1                                                              |
| 1                | Armenia | Starchy Roots                   | 2005           | 130                                                            |
| 1                | Armenia | Stimulants                      | 2005           | 25                                                             |
| 1                | Armenia | Sugar & Sweeteners              | 2005           | 324                                                            |
| 1                | Armenia | Sugar (Raw Equivalent)          | 2005           | 320                                                            |
| 1                | Armenia | Sunflowerseed Oil               | 2005           | 100                                                            |
| 1                | Armenia | Tomatoes and products           | 2005           | 31                                                             |
| 1                | Armenia | Treenuts                        | 2005           | 2                                                              |
| 1                | Armenia | Vegetable Oils                  | 2005           | 145                                                            |
| 1                | Armenia | Vegetables                      | 2005           | 137                                                            |
| 1                | Armenia | Vegetables, Other               | 2005           | 92                                                             |
| 1                | Armenia | Vegetal Products                | 2005           | 2,134                                                          |
| 1                | Armenia | Wheat and products              | 2005           | 1,119                                                          |
| 1                | Armenia | Wine                            | 2005           | 4                                                              |
| 1                | Armenia | Alcoholic Beverages             | 2006           | 33                                                             |
| 1                | Armenia | Animal fats                     | 2006           | 64                                                             |
| 1                | Armenia | Animal Products                 | 2006           | 559                                                            |
| 1                | Armenia | Apples and products             | 2006           | 30                                                             |
| 1                | Armenia | Bananas                         | 2006           | 3                                                              |
| 1                | Armenia | Barley and products             | 2006           | 21                                                             |
| 1                | Armenia | Beer                            | 2006           | 6                                                              |
| 1                | Armenia | Beverages, Alcoholic            | 2006           | 25                                                             |
| 1                | Armenia | Bovine Meat                     | 2006           | 89                                                             |

Dietary calcium and zinc deficiency risks are decreasing but remain prevalent

| FAO Country code | Country | Food item                       | Reference year | Net energy supply (kcal <i>capita</i> <sup>-1</sup> d <sup>-1</sup> ) |
|------------------|---------|---------------------------------|----------------|-----------------------------------------------------------------------|
| 1                | Armenia | Butter, Ghee                    | 2006           | 21                                                                    |
| 1                | Armenia | Cereals - Excluding Beer        | 2006           | 1,255                                                                 |
| 1                | Armenia | Cereals, Other                  | 2006           | 12                                                                    |
| 1                | Armenia | Cocoa Beans and products        | 2006           | 25                                                                    |
| 1                | Armenia | Coconut Oil                     | 2006           | 7                                                                     |
| 1                | Armenia | Coffee and products             | 2006           | 2                                                                     |
| 1                | Armenia | Dates                           | 2006           | 1                                                                     |
| 1                | Armenia | Eggs                            | 2006           | 31                                                                    |
| 1                | Armenia | Fats, Animals, Raw              | 2006           | 42                                                                    |
| 1                | Armenia | Fish, Seafood                   | 2006           | 3                                                                     |
| 1                | Armenia | Fruits - Excluding Wine         | 2006           | 124                                                                   |
| 1                | Armenia | Fruits, Other                   | 2006           | 50                                                                    |
| 1                | Armenia | Grand Total                     | 2006           | 2,755                                                                 |
| 1                | Armenia | Grapes and products (excl wine) | 2006           | 36                                                                    |
| 1                | Armenia | Groundnuts (Shelled Eq)         | 2006           | 3                                                                     |
| 1                | Armenia | Honey                           | 2006           | 3                                                                     |
| 1                | Armenia | Maize and products              | 2006           | 1                                                                     |
| 1                | Armenia | Maize Germ Oil                  | 2006           | 3                                                                     |
| 1                | Armenia | Marine Fish, Other              | 2006           | 1                                                                     |
| 1                | Armenia | Meat                            | 2006           | 174                                                                   |
| 1                | Armenia | Milk - Excluding Butter         | 2006           | 278                                                                   |
| 1                | Armenia | Miscellaneous                   | 2006           | 3                                                                     |
| 1                | Armenia | Mutton & Goat Meat              | 2006           | 17                                                                    |
| 1                | Armenia | Offals                          | 2006           | 10                                                                    |
| 1                | Armenia | Oilcrops                        | 2006           | 6                                                                     |
| 1                | Armenia | Oilcrops Oil, Other             | 2006           | 30                                                                    |
| 1                | Armenia | Olives (including preserved)    | 2006           | 3                                                                     |
| 1                | Armenia | Onions                          | 2006           | 19                                                                    |
| 1                | Armenia | Oranges, Mandarines             | 2006           | 3                                                                     |
| 1                | Armenia | Palmkernel Oil                  | 2006           | 5                                                                     |
| 1                | Armenia | Pelagic Fish                    | 2006           | 2                                                                     |
| 1                | Armenia | Pigmeat                         | 2006           | 50                                                                    |
| 1                | Armenia | Pineapples and products         | 2006           | 1                                                                     |
| 1                | Armenia | Potatoes and products           | 2006           | 119                                                                   |
| 1                | Armenia | Poultry Meat                    | 2006           | 17                                                                    |
| 1                | Armenia | Rice (Milled Equivalent)        | 2006           | 66                                                                    |
| 1                | Armenia | Rye and products                | 2006           | 1                                                                     |
| 1                | Armenia | Soyabean Oil                    | 2006           | 6                                                                     |
| 1                | Armenia | Starchy Roots                   | 2006           | 119                                                                   |
| 1                | Armenia | Stimulants                      | 2006           | 27                                                                    |
| 1                | Armenia | Sugar & Sweeteners              | 2006           | 316                                                                   |
| 1                | Armenia | Sugar (Raw Equivalent)          | 2006           | 312                                                                   |
| 1                | Armenia | Sunflowerseed Oil               | 2006           | 92                                                                    |
| 1                | Armenia | Tomatoes and products           | 2006           | 48                                                                    |
| 1                | Armenia | Treenuts                        | 2006           | 2                                                                     |
| 1                | Armenia | Vegetable Oils                  | 2006           | 144                                                                   |
| 1                | Armenia | Vegetables                      | 2006           | 166                                                                   |
| 1                | Armenia | Vegetables, Other               | 2006           | 99                                                                    |
| 1                | Armenia | Vegetal Products                | 2006           | 2,196                                                                 |
| 1                | Armenia | Wheat and products              | 2006           | 1,154                                                                 |
| 1                | Armenia | Wine                            | 2006           | 2                                                                     |
| 1                | Armenia | Alcoholic Beverages             | 2007           | 26                                                                    |
| 1                | Armenia | Animal fats                     | 2007           | 74                                                                    |
| 1                | Armenia | Animal Products                 | 2007           | 614                                                                   |
| 1                | Armenia | Apples and products             | 2007           | 31                                                                    |
| 1                | Armenia | Bananas                         | 2007           | 8                                                                     |
| 1                | Armenia | Beer                            | 2007           | 8                                                                     |
| 1                | Armenia | Beverages, Alcoholic            | 2007           | 16                                                                    |
| 1                | Armenia | Bovine Meat                     | 2007           | 96                                                                    |
| 1                | Armenia | Butter, Ghee                    | 2007           | 17                                                                    |
| 1                | Armenia | Cereals - Excluding Beer        | 2007           | 1,226                                                                 |
| 1                | Armenia | Cereals, Other                  | 2007           | 15                                                                    |
| 1                | Armenia | Cocoa Beans and products        | 2007           | 34                                                                    |
| 1                | Armenia | Coconut Oil                     | 2007           | 6                                                                     |
| 1                | Armenia | Coffee and products             | 2007           | 2                                                                     |
| 1                | Armenia | Dates                           | 2007           | 1                                                                     |
| 1                | Armenia | Eggs                            | 2007           | 35                                                                    |
| 1                | Armenia | Fats, Animals, Raw              | 2007           | 57                                                                    |
| 1                | Armenia | Fish, Seafood                   | 2007           | 5                                                                     |
| 1                | Armenia | Freshwater Fish                 | 2007           | 2                                                                     |
| 1                | Armenia | Fruits - Excluding Wine         | 2007           | 113                                                                   |
| 1                | Armenia | Fruits, Other                   | 2007           | 53                                                                    |
| 1                | Armenia | Grand Total                     | 2007           | 2,791                                                                 |
| 1                | Armenia | Grapes and products (excl wine) | 2007           | 17                                                                    |
| 1                | Armenia | Groundnuts (Shelled Eq)         | 2007           | 1                                                                     |
| 1                | Armenia | Honey                           | 2007           | 5                                                                     |
| 1                | Armenia | Maize Germ Oil                  | 2007           | 3                                                                     |
| 1                | Armenia | Meat                            | 2007           | 201                                                                   |
| 1                | Armenia | Milk - Excluding Butter         | 2007           | 288                                                                   |
| 1                | Armenia | Miscellaneous                   | 2007           | 4                                                                     |
| 1                | Armenia | Mutton & Goat Meat              | 2007           | 18                                                                    |
| 1                | Armenia | Offals                          | 2007           | 12                                                                    |
| 1                | Armenia | Oilcrops                        | 2007           | 5                                                                     |
| 1                | Armenia | Oilcrops Oil, Other             | 2007           | 36                                                                    |
| 1                | Armenia | Olive Oil                       | 2007           | 1                                                                     |
| 1                | Armenia | Olives (including preserved)    | 2007           | 4                                                                     |
| 1                | Armenia | Onions                          | 2007           | 18                                                                    |
| 1                | Armenia | Oranges, Mandarines             | 2007           | 2                                                                     |
| 1                | Armenia | Palmkernel Oil                  | 2007           | 6                                                                     |
| 1                | Armenia | Pelagic Fish                    | 2007           | 2                                                                     |
| 1                | Armenia | Pigmeat                         | 2007           | 51                                                                    |
| 1                | Armenia | Pineapples and products         | 2007           | 1                                                                     |
| 1                | Armenia | Potatoes and products           | 2007           | 94                                                                    |
| 1                | Armenia | Poultry Meat                    | 2007           | 36                                                                    |
| 1                | Armenia | Rape and Mustard Oil            | 2007           | 1                                                                     |
| 1                | Armenia | Rice (Milled Equivalent)        | 2007           | 57                                                                    |
| 1                | Armenia | Rye and products                | 2007           | 1                                                                     |

Dietary calcium and zinc deficiency risks are decreasing but remain prevalent

| FAO Country code | Country | Food item                       | Reference year | Net energy supply (kcal capita <sup>-1</sup> d <sup>-1</sup> ) |
|------------------|---------|---------------------------------|----------------|----------------------------------------------------------------|
| 1                | Armenia | Soyabean Oil                    | 2007           | 19                                                             |
| 1                | Armenia | Starchy Roots                   | 2007           | 94                                                             |
| 1                | Armenia | Stimulants                      | 2007           | 37                                                             |
| 1                | Armenia | Sugar & Sweeteners              | 2007           | 294                                                            |
| 1                | Armenia | Sugar (Raw Equivalent)          | 2007           | 289                                                            |
| 1                | Armenia | Sunflowerseed Oil               | 2007           | 108                                                            |
| 1                | Armenia | Tomatoes and products           | 2007           | 46                                                             |
| 1                | Armenia | Treenuts                        | 2007           | 14                                                             |
| 1                | Armenia | Vegetable Oils                  | 2007           | 180                                                            |
| 1                | Armenia | Vegetables                      | 2007           | 184                                                            |
| 1                | Armenia | Vegetables, Other               | 2007           | 120                                                            |
| 1                | Armenia | Vegetal Products                | 2007           | 2,177                                                          |
| 1                | Armenia | Wheat and products              | 2007           | 1,152                                                          |
| 1                | Armenia | Wine                            | 2007           | 2                                                              |
| 1                | Armenia | Alcoholic Beverages             | 2008           | 26                                                             |
| 1                | Armenia | Animal fats                     | 2008           | 89                                                             |
| 1                | Armenia | Animal Products                 | 2008           | 657                                                            |
| 1                | Armenia | Apples and products             | 2008           | 44                                                             |
| 1                | Armenia | Bananas                         | 2008           | 5                                                              |
| 1                | Armenia | Barley and products             | 2008           | 23                                                             |
| 1                | Armenia | Beer                            | 2008           | 8                                                              |
| 1                | Armenia | Beverages, Alcoholic            | 2008           | 16                                                             |
| 1                | Armenia | Bovine Meat                     | 2008           | 122                                                            |
| 1                | Armenia | Butter, Ghee                    | 2008           | 39                                                             |
| 1                | Armenia | Cereals - Excluding Beer        | 2008           | 1,187                                                          |
| 1                | Armenia | Cereals, Other                  | 2008           | 14                                                             |
| 1                | Armenia | Cocoa Beans and products        | 2008           | 42                                                             |
| 1                | Armenia | Coconut Oil                     | 2008           | 6                                                              |
| 1                | Armenia | Coffee and products             | 2008           | 3                                                              |
| 1                | Armenia | Dates                           | 2008           | 1                                                              |
| 1                | Armenia | Eggs                            | 2008           | 38                                                             |
| 1                | Armenia | Fats, Animals, Raw              | 2008           | 51                                                             |
| 1                | Armenia | Fish, Seafood                   | 2008           | 7                                                              |
| 1                | Armenia | Freshwater Fish                 | 2008           | 3                                                              |
| 1                | Armenia | Fruits - Excluding Wine         | 2008           | 142                                                            |
| 1                | Armenia | Fruits, Other                   | 2008           | 49                                                             |
| 1                | Armenia | Grand Total                     | 2008           | 2,833                                                          |
| 1                | Armenia | Grapes and products (excl wine) | 2008           | 39                                                             |
| 1                | Armenia | Groundnuts (Shelled Eq)         | 2008           | 4                                                              |
| 1                | Armenia | Honey                           | 2008           | 4                                                              |
| 1                | Armenia | Maize Germ Oil                  | 2008           | 4                                                              |
| 1                | Armenia | Marine Fish, Other              | 2008           | 1                                                              |
| 1                | Armenia | Meat                            | 2008           | 242                                                            |
| 1                | Armenia | Milk - Excluding Butter         | 2008           | 269                                                            |
| 1                | Armenia | Miscellaneous                   | 2008           | 4                                                              |
| 1                | Armenia | Mutton & Goat Meat              | 2008           | 18                                                             |
| 1                | Armenia | Oats                            | 2008           | 1                                                              |
| 1                | Armenia | Offals                          | 2008           | 13                                                             |
| 1                | Armenia | Oilcrops                        | 2008           | 7                                                              |
| 1                | Armenia | Oilcrops Oil, Other             | 2008           | 40                                                             |
| 1                | Armenia | Olive Oil                       | 2008           | 1                                                              |
| 1                | Armenia | Olives (including preserved)    | 2008           | 3                                                              |
| 1                | Armenia | Onions                          | 2008           | 18                                                             |
| 1                | Armenia | Oranges, Mandarines             | 2008           | 3                                                              |
| 1                | Armenia | Pelagic Fish                    | 2008           | 2                                                              |
| 1                | Armenia | Pigmeat                         | 2008           | 53                                                             |
| 1                | Armenia | Pineapples and products         | 2008           | 1                                                              |
| 1                | Armenia | Potatoes and products           | 2008           | 92                                                             |
| 1                | Armenia | Poultry Meat                    | 2008           | 49                                                             |
| 1                | Armenia | Rape and Mustard Oil            | 2008           | 1                                                              |
| 1                | Armenia | Rice (Milled Equivalent)        | 2008           | 48                                                             |
| 1                | Armenia | Rye and products                | 2008           | 1                                                              |
| 1                | Armenia | Soyabean Oil                    | 2008           | 16                                                             |
| 1                | Armenia | Starchy Roots                   | 2008           | 92                                                             |
| 1                | Armenia | Stimulants                      | 2008           | 46                                                             |
| 1                | Armenia | Sugar & Sweeteners              | 2008           | 307                                                            |
| 1                | Armenia | Sugar (Raw Equivalent)          | 2008           | 303                                                            |
| 1                | Armenia | Sunflowerseed Oil               | 2008           | 100                                                            |
| 1                | Armenia | Tomatoes and products           | 2008           | 45                                                             |
| 1                | Armenia | Treenuts                        | 2008           | 13                                                             |
| 1                | Armenia | Vegetable Oils                  | 2008           | 168                                                            |
| 1                | Armenia | Vegetables                      | 2008           | 184                                                            |
| 1                | Armenia | Vegetables, Other               | 2008           | 121                                                            |
| 1                | Armenia | Vegetal Products                | 2008           | 2,176                                                          |
| 1                | Armenia | Wheat and products              | 2008           | 1,100                                                          |
| 1                | Armenia | Wine                            | 2008           | 2                                                              |
| 1                | Armenia | Alcoholic Beverages             | 2009           | 40                                                             |
| 1                | Armenia | Animal fats                     | 2009           | 78                                                             |
| 1                | Armenia | Animal Products                 | 2009           | 643                                                            |
| 1                | Armenia | Apples and products             | 2009           | 43                                                             |
| 1                | Armenia | Bananas                         | 2009           | 5                                                              |
| 1                | Armenia | Barley and products             | 2009           | 15                                                             |
| 1                | Armenia | Beer                            | 2009           | 7                                                              |
| 1                | Armenia | Beverages, Alcoholic            | 2009           | 30                                                             |
| 1                | Armenia | Bovine Meat                     | 2009           | 117                                                            |
| 1                | Armenia | Butter, Ghee                    | 2009           | 18                                                             |
| 1                | Armenia | Cereals - Excluding Beer        | 2009           | 1,106                                                          |
| 1                | Armenia | Cereals, Other                  | 2009           | 10                                                             |
| 1                | Armenia | Citrus, Other                   | 2009           | 1                                                              |
| 1                | Armenia | Cocoa Beans and products        | 2009           | 36                                                             |
| 1                | Armenia | Coconut Oil                     | 2009           | 7                                                              |
| 1                | Armenia | Coffee and products             | 2009           | 4                                                              |
| 1                | Armenia | Dates                           | 2009           | 1                                                              |
| 1                | Armenia | Eggs                            | 2009           | 42                                                             |
| 1                | Armenia | Fats, Animals, Raw              | 2009           | 60                                                             |
| 1                | Armenia | Fish, Seafood                   | 2009           | 7                                                              |
| 1                | Armenia | Freshwater Fish                 | 2009           | 3                                                              |

Dietary calcium and zinc deficiency risks are decreasing but remain prevalent

| FAO Country code | Country | Food item                       | Reference year | Net energy supply (kcal capita <sup>-1</sup> d <sup>-1</sup> ) |
|------------------|---------|---------------------------------|----------------|----------------------------------------------------------------|
| 1                | Armenia | Fruits - Excluding Wine         | 2009           | 155                                                            |
| 1                | Armenia | Fruits, Other                   | 2009           | 51                                                             |
| 1                | Armenia | Grand Total                     | 2009           | 2,784                                                          |
| 1                | Armenia | Grapes and products (excl wine) | 2009           | 53                                                             |
| 1                | Armenia | Groundnuts (Shelled Eq)         | 2009           | 2                                                              |
| 1                | Armenia | Honey                           | 2009           | 5                                                              |
| 1                | Armenia | Maize Germ Oil                  | 2009           | 4                                                              |
| 1                | Armenia | Marine Fish, Other              | 2009           | 1                                                              |
| 1                | Armenia | Meat                            | 2009           | 208                                                            |
| 1                | Armenia | Milk - Excluding Butter         | 2009           | 296                                                            |
| 1                | Armenia | Miscellaneous                   | 2009           | 4                                                              |
| 1                | Armenia | Mutton & Goat Meat              | 2009           | 22                                                             |
| 1                | Armenia | Oats                            | 2009           | 1                                                              |
| 1                | Armenia | Offals                          | 2009           | 13                                                             |
| 1                | Armenia | Oilcrops                        | 2009           | 6                                                              |
| 1                | Armenia | Oilcrops Oil, Other             | 2009           | 62                                                             |
| 1                | Armenia | Olive Oil                       | 2009           | 1                                                              |
| 1                | Armenia | Olives (including preserved)    | 2009           | 3                                                              |
| 1                | Armenia | Onions                          | 2009           | 17                                                             |
| 1                | Armenia | Oranges, Mandarines             | 2009           | 3                                                              |
| 1                | Armenia | Pelagic Fish                    | 2009           | 3                                                              |
| 1                | Armenia | Pigmeat                         | 2009           | 32                                                             |
| 1                | Armenia | Potatoes and products           | 2009           | 105                                                            |
| 1                | Armenia | Poultry Meat                    | 2009           | 37                                                             |
| 1                | Armenia | Rice (Milled Equivalent)        | 2009           | 48                                                             |
| 1                | Armenia | Rye and products                | 2009           | 1                                                              |
| 1                | Armenia | Starchy Roots                   | 2009           | 105                                                            |
| 1                | Armenia | Stimulants                      | 2009           | 40                                                             |
| 1                | Armenia | Sugar & Sweeteners              | 2009           | 313                                                            |
| 1                | Armenia | Sugar (Raw Equivalent)          | 2009           | 308                                                            |
| 1                | Armenia | Sunflowerseed Oil               | 2009           | 97                                                             |
| 1                | Armenia | Tomatoes and products           | 2009           | 43                                                             |
| 1                | Armenia | Treenuts                        | 2009           | 12                                                             |
| 1                | Armenia | Vegetable Oils                  | 2009           | 171                                                            |
| 1                | Armenia | Vegetables                      | 2009           | 189                                                            |
| 1                | Armenia | Vegetables, Other               | 2009           | 129                                                            |
| 1                | Armenia | Vegetal Products                | 2009           | 2,141                                                          |
| 1                | Armenia | Wheat and products              | 2009           | 1,031                                                          |
| 1                | Armenia | Wine                            | 2009           | 3                                                              |
| 1                | Armenia | Alcoholic Beverages             | 2010           | 37                                                             |
| 1                | Armenia | Animal fats                     | 2010           | 96                                                             |
| 1                | Armenia | Animal Products                 | 2010           | 687                                                            |
| 1                | Armenia | Apples and products             | 2010           | 18                                                             |
| 1                | Armenia | Bananas                         | 2010           | 5                                                              |
| 1                | Armenia | Beer                            | 2010           | 8                                                              |
| 1                | Armenia | Beverages, Alcoholic            | 2010           | 26                                                             |
| 1                | Armenia | Bovine Meat                     | 2010           | 103                                                            |
| 1                | Armenia | Butter, Ghee                    | 2010           | 27                                                             |
| 1                | Armenia | Cereals - Excluding Beer        | 2010           | 1,101                                                          |
| 1                | Armenia | Cereals, Other                  | 2010           | 15                                                             |
| 1                | Armenia | Citrus, Other                   | 2010           | 1                                                              |
| 1                | Armenia | Cocoa Beans and products        | 2010           | 34                                                             |
| 1                | Armenia | Coconut Oil                     | 2010           | 21                                                             |
| 1                | Armenia | Coffee and products             | 2010           | 5                                                              |
| 1                | Armenia | Dates                           | 2010           | 1                                                              |
| 1                | Armenia | Eggs                            | 2010           | 47                                                             |
| 1                | Armenia | Fats, Animals, Raw              | 2010           | 69                                                             |
| 1                | Armenia | Fish, Seafood                   | 2010           | 5                                                              |
| 1                | Armenia | Freshwater Fish                 | 2010           | 3                                                              |
| 1                | Armenia | Fruits - Excluding Wine         | 2010           | 82                                                             |
| 1                | Armenia | Fruits, Other                   | 2010           | 27                                                             |
| 1                | Armenia | Grand Total                     | 2010           | 2,786                                                          |
| 1                | Armenia | Grapes and products (excl wine) | 2010           | 26                                                             |
| 1                | Armenia | Groundnuts (Shelled Eq)         | 2010           | 5                                                              |
| 1                | Armenia | Honey                           | 2010           | 5                                                              |
| 1                | Armenia | Maize Germ Oil                  | 2010           | 3                                                              |
| 1                | Armenia | Meat                            | 2010           | 211                                                            |
| 1                | Armenia | Milk - Excluding Butter         | 2010           | 315                                                            |
| 1                | Armenia | Miscellaneous                   | 2010           | 4                                                              |
| 1                | Armenia | Mutton & Goat Meat              | 2010           | 19                                                             |
| 1                | Armenia | Oats                            | 2010           | 1                                                              |
| 1                | Armenia | Offals                          | 2010           | 13                                                             |
| 1                | Armenia | Oilcrops                        | 2010           | 13                                                             |
| 1                | Armenia | Oilcrops Oil, Other             | 2010           | 58                                                             |
| 1                | Armenia | Olives (including preserved)    | 2010           | 2                                                              |
| 1                | Armenia | Onions                          | 2010           | 13                                                             |
| 1                | Armenia | Oranges, Mandarines             | 2010           | 4                                                              |
| 1                | Armenia | Pelagic Fish                    | 2010           | 2                                                              |
| 1                | Armenia | Pigmeat                         | 2010           | 42                                                             |
| 1                | Armenia | Potatoes and products           | 2010           | 89                                                             |
| 1                | Armenia | Poultry Meat                    | 2010           | 47                                                             |
| 1                | Armenia | Rice (Milled Equivalent)        | 2010           | 41                                                             |
| 1                | Armenia | Rye and products                | 2010           | 1                                                              |
| 1                | Armenia | Sesame seed                     | 2010           | 6                                                              |
| 1                | Armenia | Soyabean Oil                    | 2010           | 9                                                              |
| 1                | Armenia | Starchy Roots                   | 2010           | 89                                                             |
| 1                | Armenia | Stimulants                      | 2010           | 39                                                             |
| 1                | Armenia | Sugar & Sweeteners              | 2010           | 383                                                            |
| 1                | Armenia | Sugar (Raw Equivalent)          | 2010           | 375                                                            |
| 1                | Armenia | Sunflowerseed Oil               | 2010           | 89                                                             |
| 1                | Armenia | Sweeteners, Other               | 2010           | 3                                                              |
| 1                | Armenia | Tomatoes and products           | 2010           | 39                                                             |
| 1                | Armenia | Treenuts                        | 2010           | 12                                                             |
| 1                | Armenia | Vegetable Oils                  | 2010           | 181                                                            |
| 1                | Armenia | Vegetables                      | 2010           | 158                                                            |
| 1                | Armenia | Vegetables, Other               | 2010           | 106                                                            |
| 1                | Armenia | Vegetal Products                | 2010           | 2,099                                                          |



Dietary calcium and zinc deficiency risks are decreasing but remain prevalent

| FAO Country code | Country   | Food item                       | Reference year | Net energy supply (kcal capita <sup>-1</sup> d <sup>-1</sup> ) |
|------------------|-----------|---------------------------------|----------------|----------------------------------------------------------------|
| 1                | Armenia   | Wheat and products              | 2010           | 1,043                                                          |
| 1                | Armenia   | Wine                            | 2010           | 3                                                              |
| 1                | Armenia   | Alcoholic Beverages             | 2011           | 21                                                             |
| 1                | Armenia   | Animal fats                     | 2011           | 98                                                             |
| 1                | Armenia   | Animal Products                 | 2011           | 692                                                            |
| 1                | Armenia   | Apples and products             | 2011           | 26                                                             |
| 1                | Armenia   | Bananas                         | 2011           | 6                                                              |
| 1                | Armenia   | Beer                            | 2011           | 7                                                              |
| 1                | Armenia   | Beverages, Alcoholic            | 2011           | 10                                                             |
| 1                | Armenia   | Bovine Meat                     | 2011           | 102                                                            |
| 1                | Armenia   | Butter, Ghee                    | 2011           | 36                                                             |
| 1                | Armenia   | Cereals - Excluding Beer        | 2011           | 1,129                                                          |
| 1                | Armenia   | Cereals, Other                  | 2011           | 54                                                             |
| 1                | Armenia   | Cocoa Beans and products        | 2011           | 37                                                             |
| 1                | Armenia   | Coconut Oil                     | 2011           | 8                                                              |
| 1                | Armenia   | Coconuts - Incl Copra           | 2011           | 1                                                              |
| 1                | Armenia   | Coffee and products             | 2011           | 5                                                              |
| 1                | Armenia   | Dates                           | 2011           | 1                                                              |
| 1                | Armenia   | Eggs                            | 2011           | 43                                                             |
| 1                | Armenia   | Fats, Animals, Raw              | 2011           | 62                                                             |
| 1                | Armenia   | Fish, Seafood                   | 2011           | 7                                                              |
| 1                | Armenia   | Freshwater Fish                 | 2011           | 3                                                              |
| 1                | Armenia   | Fruits - Excluding Wine         | 2011           | 100                                                            |
| 1                | Armenia   | Fruits, Other                   | 2011           | 42                                                             |
| 1                | Armenia   | Grand Total                     | 2011           | 2,809                                                          |
| 1                | Armenia   | Grapes and products (excl wine) | 2011           | 20                                                             |
| 1                | Armenia   | Groundnuts (Shelled Eq)         | 2011           | 7                                                              |
| 1                | Armenia   | Honey                           | 2011           | 5                                                              |
| 1                | Armenia   | Maize Germ Oil                  | 2011           | 4                                                              |
| 1                | Armenia   | Meat                            | 2011           | 215                                                            |
| 1                | Armenia   | Milk - Excluding Butter         | 2011           | 315                                                            |
| 1                | Armenia   | Miscellaneous                   | 2011           | 4                                                              |
| 1                | Armenia   | Mutton & Goat Meat              | 2011           | 20                                                             |
| 1                | Armenia   | Oats                            | 2011           | 2                                                              |
| 1                | Armenia   | Offals                          | 2011           | 13                                                             |
| 1                | Armenia   | Oilcrops                        | 2011           | 11                                                             |
| 1                | Armenia   | Oilcrops Oil, Other             | 2011           | 46                                                             |
| 1                | Armenia   | Olive Oil                       | 2011           | 1                                                              |
| 1                | Armenia   | Olives (including preserved)    | 2011           | 3                                                              |
| 1                | Armenia   | Onions                          | 2011           | 15                                                             |
| 1                | Armenia   | Oranges, Mandarines             | 2011           | 4                                                              |
| 1                | Armenia   | Pelagic Fish                    | 2011           | 3                                                              |
| 1                | Armenia   | Pigmeat                         | 2011           | 44                                                             |
| 1                | Armenia   | Potatoes and products           | 2011           | 81                                                             |
| 1                | Armenia   | Poultry Meat                    | 2011           | 49                                                             |
| 1                | Armenia   | Rice (Milled Equivalent)        | 2011           | 34                                                             |
| 1                | Armenia   | Rye and products                | 2011           | 1                                                              |
| 1                | Armenia   | Soyabean Oil                    | 2011           | 5                                                              |
| 1                | Armenia   | Spices                          | 2011           | 1                                                              |
| 1                | Armenia   | Starchy Roots                   | 2011           | 81                                                             |
| 1                | Armenia   | Stimulants                      | 2011           | 42                                                             |
| 1                | Armenia   | Sugar & Sweeteners              | 2011           | 352                                                            |
| 1                | Armenia   | Sugar (Raw Equivalent)          | 2011           | 336                                                            |
| 1                | Armenia   | Sunflowerseed Oil               | 2011           | 120                                                            |
| 1                | Armenia   | Sweeteners, Other               | 2011           | 10                                                             |
| 1                | Armenia   | Tomatoes and products           | 2011           | 42                                                             |
| 1                | Armenia   | Treenuts                        | 2011           | 13                                                             |
| 1                | Armenia   | Vegetable Oils                  | 2011           | 184                                                            |
| 1                | Armenia   | Vegetables                      | 2011           | 179                                                            |
| 1                | Armenia   | Vegetables, Other               | 2011           | 122                                                            |
| 1                | Armenia   | Vegetal Products                | 2011           | 2,117                                                          |
| 1                | Armenia   | Wheat and products              | 2011           | 1,039                                                          |
| 1                | Armenia   | Wine                            | 2011           | 4                                                              |
| 10               | Australia | Alcoholic Beverages             | 1992           | 149                                                            |
| 10               | Australia | Animal fats                     | 1992           | 129                                                            |
| 10               | Australia | Animal Products                 | 1992           | 1,044                                                          |
| 10               | Australia | Apples and products             | 1992           | 18                                                             |
| 10               | Australia | Bananas                         | 1992           | 16                                                             |
| 10               | Australia | Beans                           | 1992           | 2                                                              |
| 10               | Australia | Beer                            | 1992           | 102                                                            |
| 10               | Australia | Beverages, Alcoholic            | 1992           | 13                                                             |
| 10               | Australia | Bovine Meat                     | 1992           | 133                                                            |
| 10               | Australia | Butter, Ghee                    | 1992           | 51                                                             |
| 10               | Australia | Cephalopods                     | 1992           | 1                                                              |
| 10               | Australia | Cereals - Excluding Beer        | 1992           | 650                                                            |
| 10               | Australia | Cocoa Beans and products        | 1992           | 7                                                              |
| 10               | Australia | Coconut Oil                     | 1992           | 1                                                              |
| 10               | Australia | Coconuts - Incl Copra           | 1992           | 11                                                             |
| 10               | Australia | Coffee and products             | 1992           | 3                                                              |
| 10               | Australia | Cottonseed Oil                  | 1992           | 73                                                             |
| 10               | Australia | Crustaceans                     | 1992           | 4                                                              |
| 10               | Australia | Dates                           | 1992           | 1                                                              |
| 10               | Australia | Demersal Fish                   | 1992           | 7                                                              |
| 10               | Australia | Eggs                            | 1992           | 25                                                             |
| 10               | Australia | Fats, Animals, Raw              | 1992           | 77                                                             |
| 10               | Australia | Fish, Seafood                   | 1992           | 31                                                             |
| 10               | Australia | Freshwater Fish                 | 1992           | 4                                                              |
| 10               | Australia | Fruits - Excluding Wine         | 1992           | 106                                                            |
| 10               | Australia | Fruits, Other                   | 1992           | 25                                                             |
| 10               | Australia | Grand Total                     | 1992           | 3,106                                                          |
| 10               | Australia | Grapefruit and products         | 1992           | 1                                                              |
| 10               | Australia | Grapes and products (excl wine) | 1992           | 13                                                             |
| 10               | Australia | Groundnut Oil                   | 1992           | 3                                                              |
| 10               | Australia | Groundnuts (Shelled Eq)         | 1992           | 30                                                             |
| 10               | Australia | Honey                           | 1992           | 5                                                              |
| 10               | Australia | Lemons, Limes and products      | 1992           | 1                                                              |
| 10               | Australia | Maize and products              | 1992           | 37                                                             |

Dietary calcium and zinc deficiency risks are decreasing but remain prevalent

| FAO Country code | Country   | Food item                       | Reference year | Net energy supply (kcal <i>capita</i> <sup>-1</sup> d <sup>-1</sup> ) |
|------------------|-----------|---------------------------------|----------------|-----------------------------------------------------------------------|
| 10               | Australia | Maize Germ Oil                  | 1992           | 2                                                                     |
| 10               | Australia | Marine Fish, Other              | 1992           | 6                                                                     |
| 10               | Australia | Meat                            | 1992           | 472                                                                   |
| 10               | Australia | Meat, Other                     | 1992           | 2                                                                     |
| 10               | Australia | Milk - Excluding Butter         | 1992           | 355                                                                   |
| 10               | Australia | Molluscs, Other                 | 1992           | 1                                                                     |
| 10               | Australia | Mutton & Goat Meat              | 1992           | 141                                                                   |
| 10               | Australia | Oats                            | 1992           | 15                                                                    |
| 10               | Australia | Offals                          | 1992           | 31                                                                    |
| 10               | Australia | Oilcrops                        | 1992           | 43                                                                    |
| 10               | Australia | Oilcrops Oil, Other             | 1992           | 2                                                                     |
| 10               | Australia | Olive Oil                       | 1992           | 17                                                                    |
| 10               | Australia | Olives (including preserved)    | 1992           | 1                                                                     |
| 10               | Australia | Onions                          | 1992           | 6                                                                     |
| 10               | Australia | Oranges, Mandarines             | 1992           | 20                                                                    |
| 10               | Australia | Palm Oil                        | 1992           | 112                                                                   |
| 10               | Australia | Peas                            | 1992           | 14                                                                    |
| 10               | Australia | Pelagic Fish                    | 1992           | 9                                                                     |
| 10               | Australia | Pepper                          | 1992           | 1                                                                     |
| 10               | Australia | Pigmeat                         | 1992           | 96                                                                    |
| 10               | Australia | Pineapples and products         | 1992           | 11                                                                    |
| 10               | Australia | Potatoes and products           | 1992           | 92                                                                    |
| 10               | Australia | Poultry Meat                    | 1992           | 100                                                                   |
| 10               | Australia | Pulses                          | 1992           | 23                                                                    |
| 10               | Australia | Pulses, Other and products      | 1992           | 8                                                                     |
| 10               | Australia | Rape and Mustard Oil            | 1992           | 91                                                                    |
| 10               | Australia | Rape and Mustardseed            | 1992           | 1                                                                     |
| 10               | Australia | Rice (Milled Equivalent)        | 1992           | 51                                                                    |
| 10               | Australia | Rye and products                | 1992           | 18                                                                    |
| 10               | Australia | Sesameseed Oil                  | 1992           | 4                                                                     |
| 10               | Australia | Soyabean Oil                    | 1992           | 51                                                                    |
| 10               | Australia | Spices                          | 1992           | 2                                                                     |
| 10               | Australia | Starchy Roots                   | 1992           | 93                                                                    |
| 10               | Australia | Stimulants                      | 1992           | 11                                                                    |
| 10               | Australia | Sugar & Sweeteners              | 1992           | 486                                                                   |
| 10               | Australia | Sugar (Raw Equivalent)          | 1992           | 477                                                                   |
| 10               | Australia | Sunflowerseed Oil               | 1992           | 67                                                                    |
| 10               | Australia | Sweet potatoes                  | 1992           | 1                                                                     |
| 10               | Australia | Sweeteners, Other               | 1992           | 4                                                                     |
| 10               | Australia | Tea (including mate)            | 1992           | 1                                                                     |
| 10               | Australia | Tomatoes and products           | 1992           | 10                                                                    |
| 10               | Australia | Treenuts                        | 1992           | 19                                                                    |
| 10               | Australia | Vegetable Oils                  | 1992           | 423                                                                   |
| 10               | Australia | Vegetables                      | 1992           | 57                                                                    |
| 10               | Australia | Vegetables, Other               | 1992           | 41                                                                    |
| 10               | Australia | Vegetal Products                | 1992           | 2,062                                                                 |
| 10               | Australia | Wheat and products              | 1992           | 529                                                                   |
| 10               | Australia | Wine                            | 1992           | 35                                                                    |
| 10               | Australia | Alcoholic Beverages             | 1993           | 143                                                                   |
| 10               | Australia | Animal fats                     | 1993           | 122                                                                   |
| 10               | Australia | Animal Products                 | 1993           | 1,033                                                                 |
| 10               | Australia | Apples and products             | 1993           | 19                                                                    |
| 10               | Australia | Bananas                         | 1993           | 19                                                                    |
| 10               | Australia | Beans                           | 1993           | 1                                                                     |
| 10               | Australia | Beer                            | 1993           | 98                                                                    |
| 10               | Australia | Beverages, Alcoholic            | 1993           | 11                                                                    |
| 10               | Australia | Beverages, Fermented            | 1993           | 1                                                                     |
| 10               | Australia | Bovine Meat                     | 1993           | 130                                                                   |
| 10               | Australia | Butter, Ghee                    | 1993           | 51                                                                    |
| 10               | Australia | Cephalopods                     | 1993           | 1                                                                     |
| 10               | Australia | Cereals - Excluding Beer        | 1993           | 661                                                                   |
| 10               | Australia | Cocoa Beans and products        | 1993           | 8                                                                     |
| 10               | Australia | Coconut Oil                     | 1993           | 14                                                                    |
| 10               | Australia | Coconuts - Incl Copra           | 1993           | 10                                                                    |
| 10               | Australia | Coffee and products             | 1993           | 3                                                                     |
| 10               | Australia | Cottonseed Oil                  | 1993           | 50                                                                    |
| 10               | Australia | Crustaceans                     | 1993           | 4                                                                     |
| 10               | Australia | Dates                           | 1993           | 1                                                                     |
| 10               | Australia | Demersal Fish                   | 1993           | 7                                                                     |
| 10               | Australia | Eggs                            | 1993           | 25                                                                    |
| 10               | Australia | Fats, Animals, Raw              | 1993           | 71                                                                    |
| 10               | Australia | Fish, Seafood                   | 1993           | 29                                                                    |
| 10               | Australia | Freshwater Fish                 | 1993           | 3                                                                     |
| 10               | Australia | Fruits - Excluding Wine         | 1993           | 110                                                                   |
| 10               | Australia | Fruits, Other                   | 1993           | 25                                                                    |
| 10               | Australia | Grand Total                     | 1993           | 3,033                                                                 |
| 10               | Australia | Grapefruit and products         | 1993           | 1                                                                     |
| 10               | Australia | Grapes and products (excl wine) | 1993           | 9                                                                     |
| 10               | Australia | Groundnut Oil                   | 1993           | 2                                                                     |
| 10               | Australia | Groundnuts (Shelled Eq)         | 1993           | 26                                                                    |
| 10               | Australia | Honey                           | 1993           | 6                                                                     |
| 10               | Australia | Lemons, Limes and products      | 1993           | 1                                                                     |
| 10               | Australia | Maize and products              | 1993           | 36                                                                    |
| 10               | Australia | Maize Germ Oil                  | 1993           | 2                                                                     |
| 10               | Australia | Marine Fish, Other              | 1993           | 6                                                                     |
| 10               | Australia | Meat                            | 1993           | 468                                                                   |
| 10               | Australia | Meat, Other                     | 1993           | 2                                                                     |
| 10               | Australia | Milk - Excluding Butter         | 1993           | 358                                                                   |
| 10               | Australia | Molluscs, Other                 | 1993           | 1                                                                     |
| 10               | Australia | Mutton & Goat Meat              | 1993           | 140                                                                   |
| 10               | Australia | Oats                            | 1993           | 11                                                                    |
| 10               | Australia | Offals                          | 1993           | 31                                                                    |
| 10               | Australia | Oilcrops                        | 1993           | 39                                                                    |
| 10               | Australia | Oilcrops Oil, Other             | 1993           | 2                                                                     |
| 10               | Australia | Olive Oil                       | 1993           | 23                                                                    |
| 10               | Australia | Olives (including preserved)    | 1993           | 1                                                                     |
| 10               | Australia | Onions                          | 1993           | 6                                                                     |

Dietary calcium and zinc deficiency risks are decreasing but remain prevalent

| FAO Country code | Country   | Food item                       | Reference year | Net energy supply (kcal capita <sup>-1</sup> d <sup>-1</sup> ) |
|------------------|-----------|---------------------------------|----------------|----------------------------------------------------------------|
| 10               | Australia | Oranges, Mandarines             | 1993           | 26                                                             |
| 10               | Australia | Palm Oil                        | 1993           | 109                                                            |
| 10               | Australia | Peas                            | 1993           | 4                                                              |
| 10               | Australia | Pelagic Fish                    | 1993           | 8                                                              |
| 10               | Australia | Pepper                          | 1993           | 1                                                              |
| 10               | Australia | Pigmeat                         | 1993           | 94                                                             |
| 10               | Australia | Pimento                         | 1993           | 1                                                              |
| 10               | Australia | Pineapples and products         | 1993           | 10                                                             |
| 10               | Australia | Potatoes and products           | 1993           | 88                                                             |
| 10               | Australia | Poultry Meat                    | 1993           | 104                                                            |
| 10               | Australia | Pulses                          | 1993           | 14                                                             |
| 10               | Australia | Pulses, Other and products      | 1993           | 9                                                              |
| 10               | Australia | Rape and Mustard Oil            | 1993           | 111                                                            |
| 10               | Australia | Rape and Mustardseed            | 1993           | 1                                                              |
| 10               | Australia | Rice (Milled Equivalent)        | 1993           | 57                                                             |
| 10               | Australia | Rye and products                | 1993           | 15                                                             |
| 10               | Australia | Sesameseed Oil                  | 1993           | 3                                                              |
| 10               | Australia | Soyabean Oil                    | 1993           | 54                                                             |
| 10               | Australia | Spices                          | 1993           | 2                                                              |
| 10               | Australia | Spices, Other                   | 1993           | 1                                                              |
| 10               | Australia | Starchy Roots                   | 1993           | 89                                                             |
| 10               | Australia | Stimulants                      | 1993           | 12                                                             |
| 10               | Australia | Sugar & Sweeteners              | 1993           | 427                                                            |
| 10               | Australia | Sugar (Raw Equivalent)          | 1993           | 415                                                            |
| 10               | Australia | Sunflowerseed Oil               | 1993           | 57                                                             |
| 10               | Australia | Sweet potatoes                  | 1993           | 1                                                              |
| 10               | Australia | Sweeteners, Other               | 1993           | 6                                                              |
| 10               | Australia | Tea (including mate)            | 1993           | 1                                                              |
| 10               | Australia | Tomatoes and products           | 1993           | 9                                                              |
| 10               | Australia | Treenuts                        | 1993           | 17                                                             |
| 10               | Australia | Vegetable Oils                  | 1993           | 428                                                            |
| 10               | Australia | Vegetables                      | 1993           | 56                                                             |
| 10               | Australia | Vegetables, Other               | 1993           | 41                                                             |
| 10               | Australia | Vegetal Products                | 1993           | 1,999                                                          |
| 10               | Australia | Wheat and products              | 1993           | 542                                                            |
| 10               | Australia | Wine                            | 1993           | 34                                                             |
| 10               | Australia | Alcoholic Beverages             | 1994           | 142                                                            |
| 10               | Australia | Animal fats                     | 1994           | 131                                                            |
| 10               | Australia | Animal Products                 | 1994           | 1,050                                                          |
| 10               | Australia | Apples and products             | 1994           | 16                                                             |
| 10               | Australia | Bananas                         | 1994           | 18                                                             |
| 10               | Australia | Beans                           | 1994           | 1                                                              |
| 10               | Australia | Beer                            | 1994           | 95                                                             |
| 10               | Australia | Beverages, Alcoholic            | 1994           | 13                                                             |
| 10               | Australia | Beverages, Fermented            | 1994           | 1                                                              |
| 10               | Australia | Bovine Meat                     | 1994           | 129                                                            |
| 10               | Australia | Butter, Ghee                    | 1994           | 61                                                             |
| 10               | Australia | Cephalopods                     | 1994           | 1                                                              |
| 10               | Australia | Cereals - Excluding Beer        | 1994           | 699                                                            |
| 10               | Australia | Cocoa Beans and products        | 1994           | 10                                                             |
| 10               | Australia | Coconut Oil                     | 1994           | 8                                                              |
| 10               | Australia | Coconuts - Incl Copra           | 1994           | 11                                                             |
| 10               | Australia | Coffee and products             | 1994           | 3                                                              |
| 10               | Australia | Cottonseed Oil                  | 1994           | 47                                                             |
| 10               | Australia | Crustaceans                     | 1994           | 3                                                              |
| 10               | Australia | Dates                           | 1994           | 1                                                              |
| 10               | Australia | Demersal Fish                   | 1994           | 8                                                              |
| 10               | Australia | Eggs                            | 1994           | 25                                                             |
| 10               | Australia | Fats, Animals, Raw              | 1994           | 70                                                             |
| 10               | Australia | Fish, Liver Oil                 | 1994           | 1                                                              |
| 10               | Australia | Fish, Seafood                   | 1994           | 28                                                             |
| 10               | Australia | Freshwater Fish                 | 1994           | 2                                                              |
| 10               | Australia | Fruits - Excluding Wine         | 1994           | 105                                                            |
| 10               | Australia | Fruits, Other                   | 1994           | 24                                                             |
| 10               | Australia | Grand Total                     | 1994           | 3,040                                                          |
| 10               | Australia | Grapefruit and products         | 1994           | 1                                                              |
| 10               | Australia | Grapes and products (excl wine) | 1994           | 11                                                             |
| 10               | Australia | Groundnut Oil                   | 1994           | 2                                                              |
| 10               | Australia | Groundnuts (Shelled Eq)         | 1994           | 17                                                             |
| 10               | Australia | Honey                           | 1994           | 6                                                              |
| 10               | Australia | Lemons, Limes and products      | 1994           | 1                                                              |
| 10               | Australia | Maize and products              | 1994           | 35                                                             |
| 10               | Australia | Maize Germ Oil                  | 1994           | 2                                                              |
| 10               | Australia | Marine Fish, Other              | 1994           | 4                                                              |
| 10               | Australia | Meat                            | 1994           | 468                                                            |
| 10               | Australia | Meat, Other                     | 1994           | 2                                                              |
| 10               | Australia | Milk - Excluding Butter         | 1994           | 367                                                            |
| 10               | Australia | Molluscs, Other                 | 1994           | 1                                                              |
| 10               | Australia | Mutton & Goat Meat              | 1994           | 134                                                            |
| 10               | Australia | Oats                            | 1994           | 18                                                             |
| 10               | Australia | Offals                          | 1994           | 31                                                             |
| 10               | Australia | Oilcrops                        | 1994           | 29                                                             |
| 10               | Australia | Oilcrops Oil, Other             | 1994           | 5                                                              |
| 10               | Australia | Olive Oil                       | 1994           | 21                                                             |
| 10               | Australia | Olives (including preserved)    | 1994           | 1                                                              |
| 10               | Australia | Onions                          | 1994           | 6                                                              |
| 10               | Australia | Oranges, Mandarines             | 1994           | 24                                                             |
| 10               | Australia | Palm Oil                        | 1994           | 116                                                            |
| 10               | Australia | Peas                            | 1994           | 5                                                              |
| 10               | Australia | Pelagic Fish                    | 1994           | 9                                                              |
| 10               | Australia | Pepper                          | 1994           | 1                                                              |
| 10               | Australia | Pigmeat                         | 1994           | 96                                                             |
| 10               | Australia | Pimento                         | 1994           | 1                                                              |
| 10               | Australia | Pineapples and products         | 1994           | 9                                                              |
| 10               | Australia | Potatoes and products           | 1994           | 92                                                             |
| 10               | Australia | Poultry Meat                    | 1994           | 107                                                            |
| 10               | Australia | Pulses                          | 1994           | 11                                                             |

Dietary calcium and zinc deficiency risks are decreasing but remain prevalent

| FAO Country code | Country   | Food item                       | Reference year | Net energy supply (kcal capita <sup>-1</sup> d <sup>-1</sup> ) |
|------------------|-----------|---------------------------------|----------------|----------------------------------------------------------------|
| 10               | Australia | Pulses, Other and products      | 1994           | 6                                                              |
| 10               | Australia | Rape and Mustard Oil            | 1994           | 84                                                             |
| 10               | Australia | Rice (Milled Equivalent)        | 1994           | 60                                                             |
| 10               | Australia | Rye and products                | 1994           | 12                                                             |
| 10               | Australia | Sesameseed Oil                  | 1994           | 4                                                              |
| 10               | Australia | Soyabean Oil                    | 1994           | 55                                                             |
| 10               | Australia | Spices                          | 1994           | 2                                                              |
| 10               | Australia | Starchy Roots                   | 1994           | 93                                                             |
| 10               | Australia | Stimulants                      | 1994           | 15                                                             |
| 10               | Australia | Sugar & Sweeteners              | 1994           | 414                                                            |
| 10               | Australia | Sugar (Raw Equivalent)          | 1994           | 403                                                            |
| 10               | Australia | Sunflowerseed Oil               | 1994           | 54                                                             |
| 10               | Australia | Sweet potatoes                  | 1994           | 1                                                              |
| 10               | Australia | Sweeteners, Other               | 1994           | 6                                                              |
| 10               | Australia | Tea (including mate)            | 1994           | 1                                                              |
| 10               | Australia | Tomatoes and products           | 1994           | 12                                                             |
| 10               | Australia | Treenuts                        | 1994           | 18                                                             |
| 10               | Australia | Vegetable Oils                  | 1994           | 399                                                            |
| 10               | Australia | Vegetables                      | 1994           | 62                                                             |
| 10               | Australia | Vegetables, Other               | 1994           | 44                                                             |
| 10               | Australia | Vegetal Products                | 1994           | 1,990                                                          |
| 10               | Australia | Wheat and products              | 1994           | 575                                                            |
| 10               | Australia | Wine                            | 1994           | 34                                                             |
| 10               | Australia | Alcoholic Beverages             | 1995           | 138                                                            |
| 10               | Australia | Animal fats                     | 1995           | 120                                                            |
| 10               | Australia | Animal Products                 | 1995           | 1,018                                                          |
| 10               | Australia | Apples and products             | 1995           | 17                                                             |
| 10               | Australia | Bananas                         | 1995           | 19                                                             |
| 10               | Australia | Beans                           | 1995           | 3                                                              |
| 10               | Australia | Beer                            | 1995           | 93                                                             |
| 10               | Australia | Beverages, Alcoholic            | 1995           | 11                                                             |
| 10               | Australia | Beverages, Fermented            | 1995           | 1                                                              |
| 10               | Australia | Bovine Meat                     | 1995           | 126                                                            |
| 10               | Australia | Butter, Ghee                    | 1995           | 61                                                             |
| 10               | Australia | Cephalopods                     | 1995           | 1                                                              |
| 10               | Australia | Cereals - Excluding Beer        | 1995           | 745                                                            |
| 10               | Australia | Cocoa Beans and products        | 1995           | 10                                                             |
| 10               | Australia | Coconut Oil                     | 1995           | 16                                                             |
| 10               | Australia | Coconuts - Incl Copra           | 1995           | 8                                                              |
| 10               | Australia | Coffee and products             | 1995           | 5                                                              |
| 10               | Australia | Cottonseed Oil                  | 1995           | 58                                                             |
| 10               | Australia | Crustaceans                     | 1995           | 3                                                              |
| 10               | Australia | Dates                           | 1995           | 1                                                              |
| 10               | Australia | Demersal Fish                   | 1995           | 8                                                              |
| 10               | Australia | Eggs                            | 1995           | 24                                                             |
| 10               | Australia | Fats, Animals, Raw              | 1995           | 59                                                             |
| 10               | Australia | Fish, Seafood                   | 1995           | 27                                                             |
| 10               | Australia | Freshwater Fish                 | 1995           | 3                                                              |
| 10               | Australia | Fruits - Excluding Wine         | 1995           | 100                                                            |
| 10               | Australia | Fruits, Other                   | 1995           | 22                                                             |
| 10               | Australia | Grand Total                     | 1995           | 3,091                                                          |
| 10               | Australia | Grapefruit and products         | 1995           | 1                                                              |
| 10               | Australia | Grapes and products (excl wine) | 1995           | 12                                                             |
| 10               | Australia | Groundnut Oil                   | 1995           | 2                                                              |
| 10               | Australia | Groundnuts (Shelled Eq)         | 1995           | 22                                                             |
| 10               | Australia | Honey                           | 1995           | 4                                                              |
| 10               | Australia | Lemons, Limes and products      | 1995           | 1                                                              |
| 10               | Australia | Maize and products              | 1995           | 35                                                             |
| 10               | Australia | Maize Germ Oil                  | 1995           | 3                                                              |
| 10               | Australia | Marine Fish, Other              | 1995           | 4                                                              |
| 10               | Australia | Meat                            | 1995           | 455                                                            |
| 10               | Australia | Meat, Other                     | 1995           | 2                                                              |
| 10               | Australia | Milk - Excluding Butter         | 1995           | 362                                                            |
| 10               | Australia | Molluscs, Other                 | 1995           | 1                                                              |
| 10               | Australia | Mutton & Goat Meat              | 1995           | 123                                                            |
| 10               | Australia | Oats                            | 1995           | 13                                                             |
| 10               | Australia | Offals                          | 1995           | 30                                                             |
| 10               | Australia | Oilcrops                        | 1995           | 33                                                             |
| 10               | Australia | Oilcrops Oil, Other             | 1995           | 5                                                              |
| 10               | Australia | Olive Oil                       | 1995           | 25                                                             |
| 10               | Australia | Olives (including preserved)    | 1995           | 1                                                              |
| 10               | Australia | Onions                          | 1995           | 5                                                              |
| 10               | Australia | Oranges, Mandarines             | 1995           | 21                                                             |
| 10               | Australia | Palm Oil                        | 1995           | 119                                                            |
| 10               | Australia | Peas                            | 1995           | 5                                                              |
| 10               | Australia | Pelagic Fish                    | 1995           | 9                                                              |
| 10               | Australia | Pepper                          | 1995           | 1                                                              |
| 10               | Australia | Pigmeat                         | 1995           | 98                                                             |
| 10               | Australia | Pineapples and products         | 1995           | 8                                                              |
| 10               | Australia | Potatoes and products           | 1995           | 86                                                             |
| 10               | Australia | Poultry Meat                    | 1995           | 105                                                            |
| 10               | Australia | Pulses                          | 1995           | 16                                                             |
| 10               | Australia | Pulses, Other and products      | 1995           | 9                                                              |
| 10               | Australia | Rape and Mustard Oil            | 1995           | 94                                                             |
| 10               | Australia | Rape and Mustardseed            | 1995           | 1                                                              |
| 10               | Australia | Rice (Milled Equivalent)        | 1995           | 64                                                             |
| 10               | Australia | Rye and products                | 1995           | 12                                                             |
| 10               | Australia | Sesameseed Oil                  | 1995           | 4                                                              |
| 10               | Australia | Soyabean Oil                    | 1995           | 43                                                             |
| 10               | Australia | Spices                          | 1995           | 2                                                              |
| 10               | Australia | Starchy Roots                   | 1995           | 87                                                             |
| 10               | Australia | Stimulants                      | 1995           | 16                                                             |
| 10               | Australia | Sugar & Sweeteners              | 1995           | 452                                                            |
| 10               | Australia | Sugar (Raw Equivalent)          | 1995           | 444                                                            |
| 10               | Australia | Sunflowerseed Oil               | 1995           | 33                                                             |
| 10               | Australia | Sweet potatoes                  | 1995           | 1                                                              |
| 10               | Australia | Sweeteners, Other               | 1995           | 5                                                              |

Dietary calcium and zinc deficiency risks are decreasing but remain prevalent

| FAO Country code | Country   | Food item                       | Reference year | Net energy supply (kcal capita <sup>-1</sup> d <sup>-1</sup> ) |
|------------------|-----------|---------------------------------|----------------|----------------------------------------------------------------|
| 10               | Australia | Tea (including mate)            | 1995           | 1                                                              |
| 10               | Australia | Tomatoes and products           | 1995           | 11                                                             |
| 10               | Australia | Treenuts                        | 1995           | 19                                                             |
| 10               | Australia | Vegetable Oils                  | 1995           | 402                                                            |
| 10               | Australia | Vegetables                      | 1995           | 62                                                             |
| 10               | Australia | Vegetables, Other               | 1995           | 46                                                             |
| 10               | Australia | Vegetal Products                | 1995           | 2,073                                                          |
| 10               | Australia | Wheat and products              | 1995           | 620                                                            |
| 10               | Australia | Wine                            | 1995           | 34                                                             |
| 10               | Australia | Alcoholic Beverages             | 1996           | 139                                                            |
| 10               | Australia | Animal fats                     | 1996           | 119                                                            |
| 10               | Australia | Animal Products                 | 1996           | 1,006                                                          |
| 10               | Australia | Apples and products             | 1996           | 15                                                             |
| 10               | Australia | Bananas                         | 1996           | 18                                                             |
| 10               | Australia | Beans                           | 1996           | 15                                                             |
| 10               | Australia | Beer                            | 1996           | 91                                                             |
| 10               | Australia | Beverages, Alcoholic            | 1996           | 14                                                             |
| 10               | Australia | Bovine Meat                     | 1996           | 130                                                            |
| 10               | Australia | Butter, Ghee                    | 1996           | 56                                                             |
| 10               | Australia | Cephalopods                     | 1996           | 1                                                              |
| 10               | Australia | Cereals - Excluding Beer        | 1996           | 719                                                            |
| 10               | Australia | Cocoa Beans and products        | 1996           | 11                                                             |
| 10               | Australia | Coconut Oil                     | 1996           | 15                                                             |
| 10               | Australia | Coconuts - Incl Copra           | 1996           | 9                                                              |
| 10               | Australia | Coffee and products             | 1996           | 4                                                              |
| 10               | Australia | Cottonseed Oil                  | 1996           | 63                                                             |
| 10               | Australia | Crustaceans                     | 1996           | 3                                                              |
| 10               | Australia | Dates                           | 1996           | 1                                                              |
| 10               | Australia | Demersal Fish                   | 1996           | 8                                                              |
| 10               | Australia | Eggs                            | 1996           | 23                                                             |
| 10               | Australia | Fats, Animals, Raw              | 1996           | 63                                                             |
| 10               | Australia | Fish, Seafood                   | 1996           | 29                                                             |
| 10               | Australia | Freshwater Fish                 | 1996           | 3                                                              |
| 10               | Australia | Fruits - Excluding Wine         | 1996           | 99                                                             |
| 10               | Australia | Fruits, Other                   | 1996           | 24                                                             |
| 10               | Australia | Grand Total                     | 1996           | 3,063                                                          |
| 10               | Australia | Grapefruit and products         | 1996           | 1                                                              |
| 10               | Australia | Grapes and products (excl wine) | 1996           | 16                                                             |
| 10               | Australia | Groundnut Oil                   | 1996           | 3                                                              |
| 10               | Australia | Groundnuts (Shelled Eq)         | 1996           | 23                                                             |
| 10               | Australia | Honey                           | 1996           | 6                                                              |
| 10               | Australia | Lemons, Limes and products      | 1996           | 1                                                              |
| 10               | Australia | Maize and products              | 1996           | 35                                                             |
| 10               | Australia | Maize Germ Oil                  | 1996           | 4                                                              |
| 10               | Australia | Marine Fish, Other              | 1996           | 5                                                              |
| 10               | Australia | Meat                            | 1996           | 444                                                            |
| 10               | Australia | Meat, Other                     | 1996           | 2                                                              |
| 10               | Australia | Milk - Excluding Butter         | 1996           | 363                                                            |
| 10               | Australia | Molluscs, Other                 | 1996           | 1                                                              |
| 10               | Australia | Mutton & Goat Meat              | 1996           | 111                                                            |
| 10               | Australia | Oats                            | 1996           | 9                                                              |
| 10               | Australia | Offals                          | 1996           | 28                                                             |
| 10               | Australia | Oilcrops                        | 1996           | 35                                                             |
| 10               | Australia | Oilcrops Oil, Other             | 1996           | 4                                                              |
| 10               | Australia | Olive Oil                       | 1996           | 21                                                             |
| 10               | Australia | Olives (including preserved)    | 1996           | 1                                                              |
| 10               | Australia | Onions                          | 1996           | 8                                                              |
| 10               | Australia | Oranges, Mandarines             | 1996           | 17                                                             |
| 10               | Australia | Palm Oil                        | 1996           | 119                                                            |
| 10               | Australia | Peas                            | 1996           | 5                                                              |
| 10               | Australia | Pelagic Fish                    | 1996           | 7                                                              |
| 10               | Australia | Pepper                          | 1996           | 1                                                              |
| 10               | Australia | Pigmeat                         | 1996           | 94                                                             |
| 10               | Australia | Pimento                         | 1996           | 1                                                              |
| 10               | Australia | Pineapples and products         | 1996           | 7                                                              |
| 10               | Australia | Potatoes and products           | 1996           | 98                                                             |
| 10               | Australia | Poultry Meat                    | 1996           | 108                                                            |
| 10               | Australia | Pulses                          | 1996           | 26                                                             |
| 10               | Australia | Pulses, Other and products      | 1996           | 6                                                              |
| 10               | Australia | Rape and Mustard Oil            | 1996           | 78                                                             |
| 10               | Australia | Rape and Mustardseed            | 1996           | 1                                                              |
| 10               | Australia | Rice (Milled Equivalent)        | 1996           | 72                                                             |
| 10               | Australia | Rye and products                | 1996           | 12                                                             |
| 10               | Australia | Sesameseed Oil                  | 1996           | 4                                                              |
| 10               | Australia | Soyabean Oil                    | 1996           | 41                                                             |
| 10               | Australia | Soyabeans                       | 1996           | 1                                                              |
| 10               | Australia | Spices                          | 1996           | 2                                                              |
| 10               | Australia | Spices, Other                   | 1996           | 1                                                              |
| 10               | Australia | Starchy Roots                   | 1996           | 99                                                             |
| 10               | Australia | Stimulants                      | 1996           | 16                                                             |
| 10               | Australia | Sugar & Sweeteners              | 1996           | 439                                                            |
| 10               | Australia | Sugar (Raw Equivalent)          | 1996           | 429                                                            |
| 10               | Australia | Sunflowerseed Oil               | 1996           | 46                                                             |
| 10               | Australia | Sweet potatoes                  | 1996           | 1                                                              |
| 10               | Australia | Sweeteners, Other               | 1996           | 3                                                              |
| 10               | Australia | Tea (including mate)            | 1996           | 1                                                              |
| 10               | Australia | Tomatoes and products           | 1996           | 10                                                             |
| 10               | Australia | Treenuts                        | 1996           | 18                                                             |
| 10               | Australia | Vegetable Oils                  | 1996           | 399                                                            |
| 10               | Australia | Vegetables                      | 1996           | 66                                                             |
| 10               | Australia | Vegetables, Other               | 1996           | 48                                                             |
| 10               | Australia | Vegetal Products                | 1996           | 2,057                                                          |
| 10               | Australia | Wheat and products              | 1996           | 591                                                            |
| 10               | Australia | Wine                            | 1996           | 34                                                             |
| 10               | Australia | Alcoholic Beverages             | 1997           | 136                                                            |
| 10               | Australia | Animal fats                     | 1997           | 114                                                            |
| 10               | Australia | Animal Products                 | 1997           | 990                                                            |

Dietary calcium and zinc deficiency risks are decreasing but remain prevalent

| FAO Country code | Country   | Food item                       | Reference year | Net energy supply (kcal capita <sup>-1</sup> d <sup>-1</sup> ) |
|------------------|-----------|---------------------------------|----------------|----------------------------------------------------------------|
| 10               | Australia | Apples and products             | 1997           | 18                                                             |
| 10               | Australia | Bananas                         | 1997           | 17                                                             |
| 10               | Australia | Beans                           | 1997           | 6                                                              |
| 10               | Australia | Beer                            | 1997           | 92                                                             |
| 10               | Australia | Beverages, Alcoholic            | 1997           | 9                                                              |
| 10               | Australia | Bovine Meat                     | 1997           | 113                                                            |
| 10               | Australia | Butter, Ghee                    | 1997           | 54                                                             |
| 10               | Australia | Cephalopods                     | 1997           | 1                                                              |
| 10               | Australia | Cereals - Excluding Beer        | 1997           | 718                                                            |
| 10               | Australia | Cocoa Beans and products        | 1997           | 10                                                             |
| 10               | Australia | Coconut Oil                     | 1997           | 9                                                              |
| 10               | Australia | Coconuts - Incl Copra           | 1997           | 10                                                             |
| 10               | Australia | Coffee and products             | 1997           | 3                                                              |
| 10               | Australia | Cottonseed Oil                  | 1997           | 59                                                             |
| 10               | Australia | Crustaceans                     | 1997           | 4                                                              |
| 10               | Australia | Dates                           | 1997           | 1                                                              |
| 10               | Australia | Demersal Fish                   | 1997           | 7                                                              |
| 10               | Australia | Eggs                            | 1997           | 23                                                             |
| 10               | Australia | Fats, Animals, Raw              | 1997           | 60                                                             |
| 10               | Australia | Fish, Seafood                   | 1997           | 28                                                             |
| 10               | Australia | Freshwater Fish                 | 1997           | 3                                                              |
| 10               | Australia | Fruits - Excluding Wine         | 1997           | 108                                                            |
| 10               | Australia | Fruits, Other                   | 1997           | 28                                                             |
| 10               | Australia | Grand Total                     | 1997           | 3,087                                                          |
| 10               | Australia | Grapefruit and products         | 1997           | 1                                                              |
| 10               | Australia | Grapes and products (excl wine) | 1997           | 17                                                             |
| 10               | Australia | Groundnut Oil                   | 1997           | 1                                                              |
| 10               | Australia | Groundnuts (Shelled Eq)         | 1997           | 22                                                             |
| 10               | Australia | Honey                           | 1997           | 6                                                              |
| 10               | Australia | Lemons, Limes and products      | 1997           | 1                                                              |
| 10               | Australia | Maize and products              | 1997           | 37                                                             |
| 10               | Australia | Maize Germ Oil                  | 1997           | 4                                                              |
| 10               | Australia | Marine Fish, Other              | 1997           | 5                                                              |
| 10               | Australia | Meat                            | 1997           | 449                                                            |
| 10               | Australia | Meat, Other                     | 1997           | 2                                                              |
| 10               | Australia | Milk - Excluding Butter         | 1997           | 348                                                            |
| 10               | Australia | Molluscs, Other                 | 1997           | 1                                                              |
| 10               | Australia | Mutton & Goat Meat              | 1997           | 113                                                            |
| 10               | Australia | Oats                            | 1997           | 7                                                              |
| 10               | Australia | Offals                          | 1997           | 28                                                             |
| 10               | Australia | Oilcrops                        | 1997           | 34                                                             |
| 10               | Australia | Oilcrops Oil, Other             | 1997           | 4                                                              |
| 10               | Australia | Olive Oil                       | 1997           | 27                                                             |
| 10               | Australia | Olives (including preserved)    | 1997           | 1                                                              |
| 10               | Australia | Onions                          | 1997           | 7                                                              |
| 10               | Australia | Oranges, Mandarines             | 1997           | 20                                                             |
| 10               | Australia | Palm Oil                        | 1997           | 104                                                            |
| 10               | Australia | Peas                            | 1997           | 4                                                              |
| 10               | Australia | Pelagic Fish                    | 1997           | 7                                                              |
| 10               | Australia | Pepper                          | 1997           | 1                                                              |
| 10               | Australia | Pigmeat                         | 1997           | 96                                                             |
| 10               | Australia | Pineapples and products         | 1997           | 7                                                              |
| 10               | Australia | Potatoes and products           | 1997           | 94                                                             |
| 10               | Australia | Poultry Meat                    | 1997           | 124                                                            |
| 10               | Australia | Pulses                          | 1997           | 16                                                             |
| 10               | Australia | Pulses, Other and products      | 1997           | 6                                                              |
| 10               | Australia | Rape and Mustard Oil            | 1997           | 136                                                            |
| 10               | Australia | Rape and Mustardseed            | 1997           | 1                                                              |
| 10               | Australia | Rice (Milled Equivalent)        | 1997           | 72                                                             |
| 10               | Australia | Rye and products                | 1997           | 14                                                             |
| 10               | Australia | Sesameseed Oil                  | 1997           | 3                                                              |
| 10               | Australia | Soyabean Oil                    | 1997           | 32                                                             |
| 10               | Australia | Soyabeans                       | 1997           | 1                                                              |
| 10               | Australia | Spices                          | 1997           | 2                                                              |
| 10               | Australia | Spices, Other                   | 1997           | 1                                                              |
| 10               | Australia | Starchy Roots                   | 1997           | 96                                                             |
| 10               | Australia | Stimulants                      | 1997           | 15                                                             |
| 10               | Australia | Sugar & Sweeteners              | 1997           | 463                                                            |
| 10               | Australia | Sugar (Raw Equivalent)          | 1997           | 452                                                            |
| 10               | Australia | Sunflowerseed Oil               | 1997           | 47                                                             |
| 10               | Australia | Sweet potatoes                  | 1997           | 1                                                              |
| 10               | Australia | Sweeteners, Other               | 1997           | 5                                                              |
| 10               | Australia | Tea (including mate)            | 1997           | 1                                                              |
| 10               | Australia | Tomatoes and products           | 1997           | 11                                                             |
| 10               | Australia | Treenuts                        | 1997           | 21                                                             |
| 10               | Australia | Vegetable Oils                  | 1997           | 426                                                            |
| 10               | Australia | Vegetables                      | 1997           | 63                                                             |
| 10               | Australia | Vegetables, Other               | 1997           | 46                                                             |
| 10               | Australia | Vegetal Products                | 1997           | 2,098                                                          |
| 10               | Australia | Wheat and products              | 1997           | 588                                                            |
| 10               | Australia | Wine                            | 1997           | 35                                                             |
| 10               | Australia | Alcoholic Beverages             | 1998           | 138                                                            |
| 10               | Australia | Animal fats                     | 1998           | 119                                                            |
| 10               | Australia | Animal Products                 | 1998           | 978                                                            |
| 10               | Australia | Apples and products             | 1998           | 16                                                             |
| 10               | Australia | Bananas                         | 1998           | 20                                                             |
| 10               | Australia | Beans                           | 1998           | 8                                                              |
| 10               | Australia | Beer                            | 1998           | 90                                                             |
| 10               | Australia | Beverages, Alcoholic            | 1998           | 11                                                             |
| 10               | Australia | Bovine Meat                     | 1998           | 121                                                            |
| 10               | Australia | Butter, Ghee                    | 1998           | 57                                                             |
| 10               | Australia | Cephalopods                     | 1998           | 1                                                              |
| 10               | Australia | Cereals - Excluding Beer        | 1998           | 669                                                            |
| 10               | Australia | Cocoa Beans and products        | 1998           | 8                                                              |
| 10               | Australia | Coconut Oil                     | 1998           | 11                                                             |
| 10               | Australia | Coconuts - Incl Copra           | 1998           | 8                                                              |
| 10               | Australia | Coffee and products             | 1998           | 3                                                              |

Dietary calcium and zinc deficiency risks are decreasing but remain prevalent

| FAO Country code | Country   | Food item                       | Reference year | Net energy supply (kcal capita <sup>-1</sup> d <sup>-1</sup> ) |
|------------------|-----------|---------------------------------|----------------|----------------------------------------------------------------|
| 10               | Australia | Cottonseed Oil                  | 1998           | 51                                                             |
| 10               | Australia | Crustaceans                     | 1998           | 4                                                              |
| 10               | Australia | Dates                           | 1998           | 1                                                              |
| 10               | Australia | Demersal Fish                   | 1998           | 7                                                              |
| 10               | Australia | Eggs                            | 1998           | 24                                                             |
| 10               | Australia | Fats, Animals, Raw              | 1998           | 62                                                             |
| 10               | Australia | Fish, Seafood                   | 1998           | 27                                                             |
| 10               | Australia | Freshwater Fish                 | 1998           | 3                                                              |
| 10               | Australia | Fruits - Excluding Wine         | 1998           | 106                                                            |
| 10               | Australia | Fruits, Other                   | 1998           | 25                                                             |
| 10               | Australia | Grand Total                     | 1998           | 3,007                                                          |
| 10               | Australia | Grapefruit and products         | 1998           | 1                                                              |
| 10               | Australia | Grapes and products (excl wine) | 1998           | 18                                                             |
| 10               | Australia | Groundnut Oil                   | 1998           | 1                                                              |
| 10               | Australia | Groundnuts (Shelled Eq)         | 1998           | 16                                                             |
| 10               | Australia | Honey                           | 1998           | 5                                                              |
| 10               | Australia | Lemons, Limes and products      | 1998           | 1                                                              |
| 10               | Australia | Maize and products              | 1998           | 37                                                             |
| 10               | Australia | Maize Germ Oil                  | 1998           | 3                                                              |
| 10               | Australia | Marine Fish, Other              | 1998           | 5                                                              |
| 10               | Australia | Meat                            | 1998           | 466                                                            |
| 10               | Australia | Meat, Other                     | 1998           | 2                                                              |
| 10               | Australia | Milk - Excluding Butter         | 1998           | 312                                                            |
| 10               | Australia | Molluscs, Other                 | 1998           | 1                                                              |
| 10               | Australia | Mutton & Goat Meat              | 1998           | 113                                                            |
| 10               | Australia | Oats                            | 1998           | 9                                                              |
| 10               | Australia | Offals                          | 1998           | 30                                                             |
| 10               | Australia | Oilcrops                        | 1998           | 26                                                             |
| 10               | Australia | Oilcrops Oil, Other             | 1998           | 3                                                              |
| 10               | Australia | Olive Oil                       | 1998           | 19                                                             |
| 10               | Australia | Olives (including preserved)    | 1998           | 1                                                              |
| 10               | Australia | Onions                          | 1998           | 7                                                              |
| 10               | Australia | Oranges, Mandarines             | 1998           | 19                                                             |
| 10               | Australia | Palm Oil                        | 1998           | 120                                                            |
| 10               | Australia | Peas                            | 1998           | 3                                                              |
| 10               | Australia | Pelagic Fish                    | 1998           | 5                                                              |
| 10               | Australia | Pepper                          | 1998           | 1                                                              |
| 10               | Australia | Pigmeat                         | 1998           | 100                                                            |
| 10               | Australia | Pineapples and products         | 1998           | 7                                                              |
| 10               | Australia | Potatoes and products           | 1998           | 100                                                            |
| 10               | Australia | Poultry Meat                    | 1998           | 131                                                            |
| 10               | Australia | Pulses                          | 1998           | 18                                                             |
| 10               | Australia | Pulses, Other and products      | 1998           | 7                                                              |
| 10               | Australia | Rape and Mustard Oil            | 1998           | 136                                                            |
| 10               | Australia | Rice (Milled Equivalent)        | 1998           | 70                                                             |
| 10               | Australia | Rye and products                | 1998           | 11                                                             |
| 10               | Australia | Sesameseed Oil                  | 1998           | 4                                                              |
| 10               | Australia | Soyabean Oil                    | 1998           | 20                                                             |
| 10               | Australia | Spices                          | 1998           | 2                                                              |
| 10               | Australia | Spices, Other                   | 1998           | 1                                                              |
| 10               | Australia | Starchy Roots                   | 1998           | 102                                                            |
| 10               | Australia | Stimulants                      | 1998           | 12                                                             |
| 10               | Australia | Sugar & Sweeteners              | 1998           | 452                                                            |
| 10               | Australia | Sugar (Raw Equivalent)          | 1998           | 442                                                            |
| 10               | Australia | Sunflowerseed Oil               | 1998           | 51                                                             |
| 10               | Australia | Sweet potatoes                  | 1998           | 2                                                              |
| 10               | Australia | Sweeteners, Other               | 1998           | 5                                                              |
| 10               | Australia | Tea (including mate)            | 1998           | 1                                                              |
| 10               | Australia | Tomatoes and products           | 1998           | 10                                                             |
| 10               | Australia | Treenuts                        | 1998           | 21                                                             |
| 10               | Australia | Vegetable Oils                  | 1998           | 418                                                            |
| 10               | Australia | Vegetables                      | 1998           | 64                                                             |
| 10               | Australia | Vegetables, Other               | 1998           | 46                                                             |
| 10               | Australia | Vegetal Products                | 1998           | 2,029                                                          |
| 10               | Australia | Wheat and products              | 1998           | 542                                                            |
| 10               | Australia | Wine                            | 1998           | 36                                                             |
| 10               | Australia | Alcoholic Beverages             | 1999           | 137                                                            |
| 10               | Australia | Animal fats                     | 1999           | 120                                                            |
| 10               | Australia | Animal Products                 | 1999           | 979                                                            |
| 10               | Australia | Apples and products             | 1999           | 17                                                             |
| 10               | Australia | Bananas                         | 1999           | 18                                                             |
| 10               | Australia | Beans                           | 1999           | 2                                                              |
| 10               | Australia | Beer                            | 1999           | 90                                                             |
| 10               | Australia | Beverages, Alcoholic            | 1999           | 10                                                             |
| 10               | Australia | Bovine Meat                     | 1999           | 130                                                            |
| 10               | Australia | Butter, Ghee                    | 1999           | 58                                                             |
| 10               | Australia | Cephalopods                     | 1999           | 2                                                              |
| 10               | Australia | Cereals - Excluding Beer        | 1999           | 671                                                            |
| 10               | Australia | Cocoa Beans and products        | 1999           | 8                                                              |
| 10               | Australia | Coconut Oil                     | 1999           | 11                                                             |
| 10               | Australia | Coconuts - Incl Copra           | 1999           | 9                                                              |
| 10               | Australia | Coffee and products             | 1999           | 4                                                              |
| 10               | Australia | Cottonseed Oil                  | 1999           | 44                                                             |
| 10               | Australia | Crustaceans                     | 1999           | 4                                                              |
| 10               | Australia | Dates                           | 1999           | 1                                                              |
| 10               | Australia | Demersal Fish                   | 1999           | 7                                                              |
| 10               | Australia | Eggs                            | 1999           | 24                                                             |
| 10               | Australia | Fats, Animals, Raw              | 1999           | 62                                                             |
| 10               | Australia | Fish, Seafood                   | 1999           | 28                                                             |
| 10               | Australia | Freshwater Fish                 | 1999           | 3                                                              |
| 10               | Australia | Fruits - Excluding Wine         | 1999           | 108                                                            |
| 10               | Australia | Fruits, Other                   | 1999           | 28                                                             |
| 10               | Australia | Grand Total                     | 1999           | 3,006                                                          |
| 10               | Australia | Grapefruit and products         | 1999           | 1                                                              |
| 10               | Australia | Grapes and products (excl wine) | 1999           | 17                                                             |
| 10               | Australia | Groundnut Oil                   | 1999           | 2                                                              |
| 10               | Australia | Groundnuts (Shelled Eq)         | 1999           | 22                                                             |

Dietary calcium and zinc deficiency risks are decreasing but remain prevalent

| FAO Country code | Country   | Food item                       | Reference year | Net energy supply (kcal capita <sup>-1</sup> d <sup>-1</sup> ) |
|------------------|-----------|---------------------------------|----------------|----------------------------------------------------------------|
| 10               | Australia | Honey                           | 1999           | 4                                                              |
| 10               | Australia | Lemons, Limes and products      | 1999           | 1                                                              |
| 10               | Australia | Maize and products              | 1999           | 36                                                             |
| 10               | Australia | Maize Germ Oil                  | 1999           | 3                                                              |
| 10               | Australia | Marine Fish, Other              | 1999           | 6                                                              |
| 10               | Australia | Meat                            | 1999           | 459                                                            |
| 10               | Australia | Meat, Other                     | 1999           | 2                                                              |
| 10               | Australia | Milk - Excluding Butter         | 1999           | 316                                                            |
| 10               | Australia | Molluscs, Other                 | 1999           | 1                                                              |
| 10               | Australia | Mutton & Goat Meat              | 1999           | 107                                                            |
| 10               | Australia | Oats                            | 1999           | 9                                                              |
| 10               | Australia | Offals                          | 1999           | 31                                                             |
| 10               | Australia | Oilcrops                        | 1999           | 34                                                             |
| 10               | Australia | Oilcrops Oil, Other             | 1999           | 5                                                              |
| 10               | Australia | Olive Oil                       | 1999           | 29                                                             |
| 10               | Australia | Olives (including preserved)    | 1999           | 2                                                              |
| 10               | Australia | Onions                          | 1999           | 7                                                              |
| 10               | Australia | Oranges, Mandarines             | 1999           | 18                                                             |
| 10               | Australia | Palm Oil                        | 1999           | 134                                                            |
| 10               | Australia | Peas                            | 1999           | 3                                                              |
| 10               | Australia | Pelagic Fish                    | 1999           | 6                                                              |
| 10               | Australia | Pepper                          | 1999           | 1                                                              |
| 10               | Australia | Pigmeat                         | 1999           | 96                                                             |
| 10               | Australia | Pimento                         | 1999           | 1                                                              |
| 10               | Australia | Pineapples and products         | 1999           | 8                                                              |
| 10               | Australia | Potatoes and products           | 1999           | 95                                                             |
| 10               | Australia | Poultry Meat                    | 1999           | 124                                                            |
| 10               | Australia | Pulses                          | 1999           | 12                                                             |
| 10               | Australia | Pulses, Other and products      | 1999           | 6                                                              |
| 10               | Australia | Rape and Mustard Oil            | 1999           | 146                                                            |
| 10               | Australia | Rape and Mustardseed            | 1999           | 1                                                              |
| 10               | Australia | Rice (Milled Equivalent)        | 1999           | 74                                                             |
| 10               | Australia | Rye and products                | 1999           | 11                                                             |
| 10               | Australia | Sesameseed Oil                  | 1999           | 5                                                              |
| 10               | Australia | Soyabean Oil                    | 1999           | 24                                                             |
| 10               | Australia | Spices                          | 1999           | 2                                                              |
| 10               | Australia | Spices, Other                   | 1999           | 1                                                              |
| 10               | Australia | Starchy Roots                   | 1999           | 98                                                             |
| 10               | Australia | Stimulants                      | 1999           | 12                                                             |
| 10               | Australia | Sugar & Sweeteners              | 1999           | 406                                                            |
| 10               | Australia | Sugar (Raw Equivalent)          | 1999           | 395                                                            |
| 10               | Australia | Sunflowerseed Oil               | 1999           | 56                                                             |
| 10               | Australia | Sweet potatoes                  | 1999           | 2                                                              |
| 10               | Australia | Sweeteners, Other               | 1999           | 6                                                              |
| 10               | Australia | Tea (including mate)            | 1999           | 1                                                              |
| 10               | Australia | Tomatoes and products           | 1999           | 10                                                             |
| 10               | Australia | Treenuts                        | 1999           | 25                                                             |
| 10               | Australia | Vegetable Oils                  | 1999           | 460                                                            |
| 10               | Australia | Vegetables                      | 1999           | 62                                                             |
| 10               | Australia | Vegetables, Other               | 1999           | 45                                                             |
| 10               | Australia | Vegetal Products                | 1999           | 2,027                                                          |
| 10               | Australia | Wheat and products              | 1999           | 542                                                            |
| 10               | Australia | Wine                            | 1999           | 37                                                             |
| 10               | Australia | Alcoholic Beverages             | 2000           | 143                                                            |
| 10               | Australia | Animal fats                     | 2000           | 125                                                            |
| 10               | Australia | Animal Products                 | 2000           | 977                                                            |
| 10               | Australia | Apples and products             | 2000           | 15                                                             |
| 10               | Australia | Bananas                         | 2000           | 20                                                             |
| 10               | Australia | Beans                           | 2000           | 1                                                              |
| 10               | Australia | Beer                            | 2000           | 89                                                             |
| 10               | Australia | Beverages, Alcoholic            | 2000           | 17                                                             |
| 10               | Australia | Bovine Meat                     | 2000           | 121                                                            |
| 10               | Australia | Butter, Ghee                    | 2000           | 60                                                             |
| 10               | Australia | Cephalopods                     | 2000           | 1                                                              |
| 10               | Australia | Cereals - Excluding Beer        | 2000           | 659                                                            |
| 10               | Australia | Cocoa Beans and products        | 2000           | 8                                                              |
| 10               | Australia | Coconut Oil                     | 2000           | 10                                                             |
| 10               | Australia | Coconuts - Incl Copra           | 2000           | 8                                                              |
| 10               | Australia | Coffee and products             | 2000           | 3                                                              |
| 10               | Australia | Cottonseed Oil                  | 2000           | 37                                                             |
| 10               | Australia | Crustaceans                     | 2000           | 4                                                              |
| 10               | Australia | Dates                           | 2000           | 1                                                              |
| 10               | Australia | Demersal Fish                   | 2000           | 8                                                              |
| 10               | Australia | Eggs                            | 2000           | 22                                                             |
| 10               | Australia | Fats, Animals, Raw              | 2000           | 64                                                             |
| 10               | Australia | Fish, Seafood                   | 2000           | 30                                                             |
| 10               | Australia | Freshwater Fish                 | 2000           | 4                                                              |
| 10               | Australia | Fruits - Excluding Wine         | 2000           | 113                                                            |
| 10               | Australia | Fruits, Other                   | 2000           | 29                                                             |
| 10               | Australia | Grand Total                     | 2000           | 2,999                                                          |
| 10               | Australia | Grapefruit and products         | 2000           | 1                                                              |
| 10               | Australia | Grapes and products (excl wine) | 2000           | 19                                                             |
| 10               | Australia | Groundnut Oil                   | 2000           | 3                                                              |
| 10               | Australia | Groundnuts (Shelled Eq)         | 2000           | 19                                                             |
| 10               | Australia | Honey                           | 2000           | 5                                                              |
| 10               | Australia | Lemons, Limes and products      | 2000           | 1                                                              |
| 10               | Australia | Maize and products              | 2000           | 36                                                             |
| 10               | Australia | Maize Germ Oil                  | 2000           | 3                                                              |
| 10               | Australia | Marine Fish, Other              | 2000           | 4                                                              |
| 10               | Australia | Meat                            | 2000           | 468                                                            |
| 10               | Australia | Meat, Other                     | 2000           | 2                                                              |
| 10               | Australia | Milk - Excluding Butter         | 2000           | 301                                                            |
| 10               | Australia | Miscellaneous                   | 2000           | 2                                                              |
| 10               | Australia | Molluscs, Other                 | 2000           | 1                                                              |
| 10               | Australia | Mutton & Goat Meat              | 2000           | 119                                                            |
| 10               | Australia | Oats                            | 2000           | 8                                                              |
| 10               | Australia | Offals                          | 2000           | 30                                                             |



Dietary calcium and zinc deficiency risks are decreasing but remain prevalent

| FAO Country code | Country   | Food item                       | Reference year | Net energy supply (kcal capita <sup>-1</sup> d <sup>-1</sup> ) |
|------------------|-----------|---------------------------------|----------------|----------------------------------------------------------------|
| 10               | Australia | Oilcrops                        | 2000           | 31                                                             |
| 10               | Australia | Oilcrops Oil, Other             | 2000           | 5                                                              |
| 10               | Australia | Olive Oil                       | 2000           | 34                                                             |
| 10               | Australia | Olives (including preserved)    | 2000           | 2                                                              |
| 10               | Australia | Onions                          | 2000           | 9                                                              |
| 10               | Australia | Oranges, Mandarines             | 2000           | 20                                                             |
| 10               | Australia | Palm Oil                        | 2000           | 145                                                            |
| 10               | Australia | Peas                            | 2000           | 4                                                              |
| 10               | Australia | Pelagic Fish                    | 2000           | 7                                                              |
| 10               | Australia | Pepper                          | 2000           | 1                                                              |
| 10               | Australia | Pigmeat                         | 2000           | 96                                                             |
| 10               | Australia | Pimento                         | 2000           | 1                                                              |
| 10               | Australia | Pineapples and products         | 2000           | 8                                                              |
| 10               | Australia | Potatoes and products           | 2000           | 85                                                             |
| 10               | Australia | Poultry Meat                    | 2000           | 130                                                            |
| 10               | Australia | Pulses                          | 2000           | 10                                                             |
| 10               | Australia | Pulses, Other and products      | 2000           | 5                                                              |
| 10               | Australia | Rape and Mustard Oil            | 2000           | 140                                                            |
| 10               | Australia | Rice (Milled Equivalent)        | 2000           | 80                                                             |
| 10               | Australia | Rye and products                | 2000           | 6                                                              |
| 10               | Australia | Sesameseed Oil                  | 2000           | 5                                                              |
| 10               | Australia | Soyabean Oil                    | 2000           | 15                                                             |
| 10               | Australia | Soyabeans                       | 2000           | 1                                                              |
| 10               | Australia | Spices                          | 2000           | 2                                                              |
| 10               | Australia | Spices, Other                   | 2000           | 1                                                              |
| 10               | Australia | Starchy Roots                   | 2000           | 88                                                             |
| 10               | Australia | Stimulants                      | 2000           | 12                                                             |
| 10               | Australia | Sugar & Sweeteners              | 2000           | 407                                                            |
| 10               | Australia | Sugar (Raw Equivalent)          | 2000           | 394                                                            |
| 10               | Australia | Sunflowerseed Oil               | 2000           | 63                                                             |
| 10               | Australia | Sweet potatoes                  | 2000           | 3                                                              |
| 10               | Australia | Sweeteners, Other               | 2000           | 7                                                              |
| 10               | Australia | Tea (including mate)            | 2000           | 1                                                              |
| 10               | Australia | Tomatoes and products           | 2000           | 11                                                             |
| 10               | Australia | Treenuts                        | 2000           | 25                                                             |
| 10               | Australia | Vegetable Oils                  | 2000           | 461                                                            |
| 10               | Australia | Vegetables                      | 2000           | 69                                                             |
| 10               | Australia | Vegetables, Other               | 2000           | 49                                                             |
| 10               | Australia | Vegetal Products                | 2000           | 2,022                                                          |
| 10               | Australia | Wheat and products              | 2000           | 529                                                            |
| 10               | Australia | Wine                            | 2000           | 38                                                             |
| 10               | Australia | Alcoholic Beverages             | 2001           | 143                                                            |
| 10               | Australia | Animal fats                     | 2001           | 128                                                            |
| 10               | Australia | Animal Products                 | 2001           | 959                                                            |
| 10               | Australia | Apples and products             | 2001           | 16                                                             |
| 10               | Australia | Bananas                         | 2001           | 27                                                             |
| 10               | Australia | Beans                           | 2001           | 2                                                              |
| 10               | Australia | Beer                            | 2001           | 89                                                             |
| 10               | Australia | Beverages, Alcoholic            | 2001           | 14                                                             |
| 10               | Australia | Beverages, Fermented            | 2001           | 1                                                              |
| 10               | Australia | Bovine Meat                     | 2001           | 130                                                            |
| 10               | Australia | Butter, Ghee                    | 2001           | 65                                                             |
| 10               | Australia | Cephalopods                     | 2001           | 2                                                              |
| 10               | Australia | Cereals - Excluding Beer        | 2001           | 669                                                            |
| 10               | Australia | Cocoa Beans and products        | 2001           | 8                                                              |
| 10               | Australia | Coconut Oil                     | 2001           | 13                                                             |
| 10               | Australia | Coconuts - Incl Copra           | 2001           | 9                                                              |
| 10               | Australia | Coffee and products             | 2001           | 2                                                              |
| 10               | Australia | Cottonseed Oil                  | 2001           | 74                                                             |
| 10               | Australia | Crustaceans                     | 2001           | 4                                                              |
| 10               | Australia | Dates                           | 2001           | 1                                                              |
| 10               | Australia | Demersal Fish                   | 2001           | 8                                                              |
| 10               | Australia | Eggs                            | 2001           | 22                                                             |
| 10               | Australia | Fats, Animals, Raw              | 2001           | 62                                                             |
| 10               | Australia | Fish, Liver Oil                 | 2001           | 1                                                              |
| 10               | Australia | Fish, Seafood                   | 2001           | 30                                                             |
| 10               | Australia | Freshwater Fish                 | 2001           | 4                                                              |
| 10               | Australia | Fruits - Excluding Wine         | 2001           | 121                                                            |
| 10               | Australia | Fruits, Other                   | 2001           | 32                                                             |
| 10               | Australia | Grand Total                     | 2001           | 3,078                                                          |
| 10               | Australia | Grapes and products (excl wine) | 2001           | 17                                                             |
| 10               | Australia | Groundnut Oil                   | 2001           | 2                                                              |
| 10               | Australia | Groundnuts (Shelled Eq)         | 2001           | 17                                                             |
| 10               | Australia | Honey                           | 2001           | 5                                                              |
| 10               | Australia | Lemons, Limes and products      | 2001           | 1                                                              |
| 10               | Australia | Maize and products              | 2001           | 31                                                             |
| 10               | Australia | Maize Germ Oil                  | 2001           | 4                                                              |
| 10               | Australia | Marine Fish, Other              | 2001           | 4                                                              |
| 10               | Australia | Meat                            | 2001           | 452                                                            |
| 10               | Australia | Meat, Other                     | 2001           | 2                                                              |
| 10               | Australia | Milk - Excluding Butter         | 2001           | 295                                                            |
| 10               | Australia | Miscellaneous                   | 2001           | 4                                                              |
| 10               | Australia | Molluscs, Other                 | 2001           | 1                                                              |
| 10               | Australia | Mutton & Goat Meat              | 2001           | 101                                                            |
| 10               | Australia | Oats                            | 2001           | 8                                                              |
| 10               | Australia | Offals                          | 2001           | 32                                                             |
| 10               | Australia | Oilcrops                        | 2001           | 28                                                             |
| 10               | Australia | Oilcrops Oil, Other             | 2001           | 5                                                              |
| 10               | Australia | Olive Oil                       | 2001           | 34                                                             |
| 10               | Australia | Olives (including preserved)    | 2001           | 2                                                              |
| 10               | Australia | Onions                          | 2001           | 8                                                              |
| 10               | Australia | Oranges, Mandarines             | 2001           | 20                                                             |
| 10               | Australia | Palm Oil                        | 2001           | 170                                                            |
| 10               | Australia | Peas                            | 2001           | 4                                                              |
| 10               | Australia | Pelagic Fish                    | 2001           | 7                                                              |
| 10               | Australia | Pepper                          | 2001           | 1                                                              |
| 10               | Australia | Pigmeat                         | 2001           | 91                                                             |

Dietary calcium and zinc deficiency risks are decreasing but remain prevalent

| FAO Country code | Country   | Food item                       | Reference year | Net energy supply (kcal capita <sup>-1</sup> d <sup>-1</sup> ) |
|------------------|-----------|---------------------------------|----------------|----------------------------------------------------------------|
| 10               | Australia | Pimento                         | 2001           | 1                                                              |
| 10               | Australia | Pineapples and products         | 2001           | 7                                                              |
| 10               | Australia | Potatoes and products           | 2001           | 92                                                             |
| 10               | Australia | Poultry Meat                    | 2001           | 128                                                            |
| 10               | Australia | Pulses                          | 2001           | 12                                                             |
| 10               | Australia | Pulses, Other and products      | 2001           | 6                                                              |
| 10               | Australia | Rape and Mustard Oil            | 2001           | 154                                                            |
| 10               | Australia | Rice (Milled Equivalent)        | 2001           | 86                                                             |
| 10               | Australia | Rye and products                | 2001           | 12                                                             |
| 10               | Australia | Sesameseed Oil                  | 2001           | 5                                                              |
| 10               | Australia | Soyabean Oil                    | 2001           | 12                                                             |
| 10               | Australia | Soyabeans                       | 2001           | 1                                                              |
| 10               | Australia | Spices                          | 2001           | 2                                                              |
| 10               | Australia | Starchy Roots                   | 2001           | 95                                                             |
| 10               | Australia | Stimulants                      | 2001           | 11                                                             |
| 10               | Australia | Sugar & Sweeteners              | 2001           | 407                                                            |
| 10               | Australia | Sugar (Raw Equivalent)          | 2001           | 394                                                            |
| 10               | Australia | Sunflowerseed Oil               | 2001           | 54                                                             |
| 10               | Australia | Sweet potatoes                  | 2001           | 3                                                              |
| 10               | Australia | Sweeteners, Other               | 2001           | 9                                                              |
| 10               | Australia | Tea (including mate)            | 2001           | 1                                                              |
| 10               | Australia | Tomatoes and products           | 2001           | 15                                                             |
| 10               | Australia | Treenuts                        | 2001           | 28                                                             |
| 10               | Australia | Vegetable Oils                  | 2001           | 527                                                            |
| 10               | Australia | Vegetables                      | 2001           | 72                                                             |
| 10               | Australia | Vegetables, Other               | 2001           | 49                                                             |
| 10               | Australia | Vegetal Products                | 2001           | 2,119                                                          |
| 10               | Australia | Wheat and products              | 2001           | 532                                                            |
| 10               | Australia | Wine                            | 2001           | 38                                                             |
| 10               | Australia | Alcoholic Beverages             | 2002           | 140                                                            |
| 10               | Australia | Animal fats                     | 2002           | 123                                                            |
| 10               | Australia | Animal Products                 | 2002           | 970                                                            |
| 10               | Australia | Apples and products             | 2002           | 17                                                             |
| 10               | Australia | Bananas                         | 2002           | 24                                                             |
| 10               | Australia | Beans                           | 2002           | 1                                                              |
| 10               | Australia | Beer                            | 2002           | 86                                                             |
| 10               | Australia | Beverages, Alcoholic            | 2002           | 15                                                             |
| 10               | Australia | Bovine Meat                     | 2002           | 120                                                            |
| 10               | Australia | Butter, Ghee                    | 2002           | 63                                                             |
| 10               | Australia | Cephalopods                     | 2002           | 1                                                              |
| 10               | Australia | Cereals - Excluding Beer        | 2002           | 730                                                            |
| 10               | Australia | Cocoa Beans and products        | 2002           | 10                                                             |
| 10               | Australia | Coconut Oil                     | 2002           | 13                                                             |
| 10               | Australia | Coconuts - Incl Copra           | 2002           | 8                                                              |
| 10               | Australia | Coffee and products             | 2002           | 3                                                              |
| 10               | Australia | Cottonseed Oil                  | 2002           | 77                                                             |
| 10               | Australia | Crustaceans                     | 2002           | 4                                                              |
| 10               | Australia | Dates                           | 2002           | 1                                                              |
| 10               | Australia | Demersal Fish                   | 2002           | 8                                                              |
| 10               | Australia | Eggs                            | 2002           | 21                                                             |
| 10               | Australia | Fats, Animals, Raw              | 2002           | 59                                                             |
| 10               | Australia | Fish, Seafood                   | 2002           | 32                                                             |
| 10               | Australia | Freshwater Fish                 | 2002           | 4                                                              |
| 10               | Australia | Fruits - Excluding Wine         | 2002           | 116                                                            |
| 10               | Australia | Fruits, Other                   | 2002           | 29                                                             |
| 10               | Australia | Grand Total                     | 2002           | 3,076                                                          |
| 10               | Australia | Grapefruit and products         | 2002           | 1                                                              |
| 10               | Australia | Grapes and products (excl wine) | 2002           | 21                                                             |
| 10               | Australia | Groundnut Oil                   | 2002           | 3                                                              |
| 10               | Australia | Groundnuts (Shelled Eq)         | 2002           | 25                                                             |
| 10               | Australia | Honey                           | 2002           | 6                                                              |
| 10               | Australia | Lemons, Limes and products      | 2002           | 1                                                              |
| 10               | Australia | Maize and products              | 2002           | 40                                                             |
| 10               | Australia | Maize Germ Oil                  | 2002           | 3                                                              |
| 10               | Australia | Marine Fish, Other              | 2002           | 5                                                              |
| 10               | Australia | Meat                            | 2002           | 457                                                            |
| 10               | Australia | Meat, Other                     | 2002           | 2                                                              |
| 10               | Australia | Milk - Excluding Butter         | 2002           | 308                                                            |
| 10               | Australia | Miscellaneous                   | 2002           | 5                                                              |
| 10               | Australia | Molluscs, Other                 | 2002           | 1                                                              |
| 10               | Australia | Mutton & Goat Meat              | 2002           | 98                                                             |
| 10               | Australia | Cats                            | 2002           | 8                                                              |
| 10               | Australia | Offals                          | 2002           | 30                                                             |
| 10               | Australia | Oilcrops                        | 2002           | 37                                                             |
| 10               | Australia | Oilcrops Oil, Other             | 2002           | 7                                                              |
| 10               | Australia | Olive Oil                       | 2002           | 35                                                             |
| 10               | Australia | Olives (including preserved)    | 2002           | 2                                                              |
| 10               | Australia | Onions                          | 2002           | 9                                                              |
| 10               | Australia | Oranges, Mandarines             | 2002           | 15                                                             |
| 10               | Australia | Palm Oil                        | 2002           | 117                                                            |
| 10               | Australia | Peas                            | 2002           | 4                                                              |
| 10               | Australia | Pelagic Fish                    | 2002           | 8                                                              |
| 10               | Australia | Pepper                          | 2002           | 1                                                              |
| 10               | Australia | Pigmeat                         | 2002           | 101                                                            |
| 10               | Australia | Pimento                         | 2002           | 1                                                              |
| 10               | Australia | Pineapples and products         | 2002           | 7                                                              |
| 10               | Australia | Potatoes and products           | 2002           | 93                                                             |
| 10               | Australia | Poultry Meat                    | 2002           | 136                                                            |
| 10               | Australia | Pulses                          | 2002           | 11                                                             |
| 10               | Australia | Pulses, Other and products      | 2002           | 6                                                              |
| 10               | Australia | Rape and Mustard Oil            | 2002           | 129                                                            |
| 10               | Australia | Rape and Mustardseed            | 2002           | 1                                                              |
| 10               | Australia | Rice (Milled Equivalent)        | 2002           | 90                                                             |
| 10               | Australia | Rye and products                | 2002           | 19                                                             |
| 10               | Australia | Sesameseed Oil                  | 2002           | 4                                                              |
| 10               | Australia | Soyabean Oil                    | 2002           | 21                                                             |
| 10               | Australia | Soyabeans                       | 2002           | 1                                                              |

Dietary calcium and zinc deficiency risks are decreasing but remain prevalent

| FAO Country code | Country   | Food item                       | Reference year | Net energy supply (kcal <i>capita</i> <sup>-1</sup> d <sup>-1</sup> ) |
|------------------|-----------|---------------------------------|----------------|-----------------------------------------------------------------------|
| 10               | Australia | Spices                          | 2002           | 3                                                                     |
| 10               | Australia | Spices, Other                   | 2002           | 1                                                                     |
| 10               | Australia | Starchy Roots                   | 2002           | 97                                                                    |
| 10               | Australia | Stimulants                      | 2002           | 14                                                                    |
| 10               | Australia | Sugar & Sweeteners              | 2002           | 407                                                                   |
| 10               | Australia | Sugar (Raw Equivalent)          | 2002           | 392                                                                   |
| 10               | Australia | Sunflowerseed Oil               | 2002           | 40                                                                    |
| 10               | Australia | Sweet potatoes                  | 2002           | 3                                                                     |
| 10               | Australia | Sweeteners, Other               | 2002           | 10                                                                    |
| 10               | Australia | Tea (including mate)            | 2002           | 1                                                                     |
| 10               | Australia | Tomatoes and products           | 2002           | 12                                                                    |
| 10               | Australia | Treenuts                        | 2002           | 30                                                                    |
| 10               | Australia | Vegetable Oils                  | 2002           | 450                                                                   |
| 10               | Australia | Vegetables                      | 2002           | 68                                                                    |
| 10               | Australia | Vegetables, Other               | 2002           | 46                                                                    |
| 10               | Australia | Vegetal Products                | 2002           | 2,106                                                                 |
| 10               | Australia | Wheat and products              | 2002           | 574                                                                   |
| 10               | Australia | Wine                            | 2002           | 38                                                                    |
| 10               | Australia | Alcoholic Beverages             | 2003           | 140                                                                   |
| 10               | Australia | Animal fats                     | 2003           | 131                                                                   |
| 10               | Australia | Animal Products                 | 2003           | 982                                                                   |
| 10               | Australia | Apples and products             | 2003           | 19                                                                    |
| 10               | Australia | Bananas                         | 2003           | 21                                                                    |
| 10               | Australia | Beans                           | 2003           | 1                                                                     |
| 10               | Australia | Beer                            | 2003           | 85                                                                    |
| 10               | Australia | Beverages, Alcoholic            | 2003           | 15                                                                    |
| 10               | Australia | Bovine Meat                     | 2003           | 140                                                                   |
| 10               | Australia | Butter, Chee                    | 2003           | 67                                                                    |
| 10               | Australia | Cephalopods                     | 2003           | 2                                                                     |
| 10               | Australia | Cereals - Excluding Beer        | 2003           | 749                                                                   |
| 10               | Australia | Cocoa Beans and products        | 2003           | 9                                                                     |
| 10               | Australia | Coconut Oil                     | 2003           | 12                                                                    |
| 10               | Australia | Coconuts - Incl Copra           | 2003           | 8                                                                     |
| 10               | Australia | Coffee and products             | 2003           | 3                                                                     |
| 10               | Australia | Cottonseed Oil                  | 2003           | 71                                                                    |
| 10               | Australia | Crustaceans                     | 2003           | 5                                                                     |
| 10               | Australia | Dates                           | 2003           | 1                                                                     |
| 10               | Australia | Demersal Fish                   | 2003           | 9                                                                     |
| 10               | Australia | Eggs                            | 2003           | 19                                                                    |
| 10               | Australia | Fats, Animals, Raw              | 2003           | 63                                                                    |
| 10               | Australia | Fish, Liver Oil                 | 2003           | 1                                                                     |
| 10               | Australia | Fish, Seafood                   | 2003           | 35                                                                    |
| 10               | Australia | Freshwater Fish                 | 2003           | 4                                                                     |
| 10               | Australia | Fruits - Excluding Wine         | 2003           | 121                                                                   |
| 10               | Australia | Fruits, Other                   | 2003           | 32                                                                    |
| 10               | Australia | Grand Total                     | 2003           | 3,116                                                                 |
| 10               | Australia | Grapefruit and products         | 2003           | 1                                                                     |
| 10               | Australia | Grapes and products (excl wine) | 2003           | 15                                                                    |
| 10               | Australia | Groundnut Oil                   | 2003           | 3                                                                     |
| 10               | Australia | Groundnuts (Shelled Eq)         | 2003           | 31                                                                    |
| 10               | Australia | Honey                           | 2003           | 8                                                                     |
| 10               | Australia | Lemons, Limes and products      | 2003           | 1                                                                     |
| 10               | Australia | Maize and products              | 2003           | 42                                                                    |
| 10               | Australia | Maize Germ Oil                  | 2003           | 4                                                                     |
| 10               | Australia | Marine Fish, Other              | 2003           | 5                                                                     |
| 10               | Australia | Meat                            | 2003           | 479                                                                   |
| 10               | Australia | Meat, Other                     | 2003           | 2                                                                     |
| 10               | Australia | Milk - Excluding Butter         | 2003           | 288                                                                   |
| 10               | Australia | Miscellaneous                   | 2003           | 4                                                                     |
| 10               | Australia | Molluscs, Other                 | 2003           | 1                                                                     |
| 10               | Australia | Mutton & Goat Meat              | 2003           | 91                                                                    |
| 10               | Australia | Oats                            | 2003           | 24                                                                    |
| 10               | Australia | Offals                          | 2003           | 30                                                                    |
| 10               | Australia | Oilcrops                        | 2003           | 42                                                                    |
| 10               | Australia | Oilcrops Oil, Other             | 2003           | 7                                                                     |
| 10               | Australia | Olive Oil                       | 2003           | 34                                                                    |
| 10               | Australia | Olives (including preserved)    | 2003           | 2                                                                     |
| 10               | Australia | Onions                          | 2003           | 7                                                                     |
| 10               | Australia | Oranges, Mandarines             | 2003           | 25                                                                    |
| 10               | Australia | Palm Oil                        | 2003           | 105                                                                   |
| 10               | Australia | Peas                            | 2003           | 3                                                                     |
| 10               | Australia | Pelagic Fish                    | 2003           | 10                                                                    |
| 10               | Australia | Pepper                          | 2003           | 1                                                                     |
| 10               | Australia | Pigmeat                         | 2003           | 106                                                                   |
| 10               | Australia | Pimento                         | 2003           | 1                                                                     |
| 10               | Australia | Pineapples and products         | 2003           | 7                                                                     |
| 10               | Australia | Potatoes and products           | 2003           | 85                                                                    |
| 10               | Australia | Poultry Meat                    | 2003           | 140                                                                   |
| 10               | Australia | Pulses                          | 2003           | 10                                                                    |
| 10               | Australia | Pulses, Other and products      | 2003           | 6                                                                     |
| 10               | Australia | Rape and Mustard Oil            | 2003           | 138                                                                   |
| 10               | Australia | Rice (Milled Equivalent)        | 2003           | 90                                                                    |
| 10               | Australia | Rye and products                | 2003           | 11                                                                    |
| 10               | Australia | Sesameseed Oil                  | 2003           | 4                                                                     |
| 10               | Australia | Soyabean Oil                    | 2003           | 20                                                                    |
| 10               | Australia | Soybeans                        | 2003           | 1                                                                     |
| 10               | Australia | Spices                          | 2003           | 2                                                                     |
| 10               | Australia | Spices, Other                   | 2003           | 1                                                                     |
| 10               | Australia | Starchy Roots                   | 2003           | 89                                                                    |
| 10               | Australia | Stimulants                      | 2003           | 13                                                                    |
| 10               | Australia | Sugar & Sweeteners              | 2003           | 418                                                                   |
| 10               | Australia | Sugar (Raw Equivalent)          | 2003           | 403                                                                   |
| 10               | Australia | Sunflowerseed Oil               | 2003           | 48                                                                    |
| 10               | Australia | Sweet potatoes                  | 2003           | 3                                                                     |
| 10               | Australia | Sweeteners, Other               | 2003           | 7                                                                     |
| 10               | Australia | Tea (including mate)            | 2003           | 1                                                                     |
| 10               | Australia | Tomatoes and products           | 2003           | 11                                                                    |

Dietary calcium and zinc deficiency risks are decreasing but remain prevalent

| FAO Country code | Country   | Food item                       | Reference year | Net energy supply (kcal capita <sup>-1</sup> d <sup>-1</sup> ) |
|------------------|-----------|---------------------------------|----------------|----------------------------------------------------------------|
| 10               | Australia | Treenuts                        | 2003           | 32                                                             |
| 10               | Australia | Vegetable Oils                  | 2003           | 447                                                            |
| 10               | Australia | Vegetables                      | 2003           | 65                                                             |
| 10               | Australia | Vegetables, Other               | 2003           | 47                                                             |
| 10               | Australia | Vegetal Products                | 2003           | 2,134                                                          |
| 10               | Australia | Wheat and products              | 2003           | 582                                                            |
| 10               | Australia | Wine                            | 2003           | 39                                                             |
| 10               | Australia | Alcoholic Beverages             | 2004           | 144                                                            |
| 10               | Australia | Animal fats                     | 2004           | 143                                                            |
| 10               | Australia | Animal Products                 | 2004           | 953                                                            |
| 10               | Australia | Apples and products             | 2004           | 18                                                             |
| 10               | Australia | Bananas                         | 2004           | 21                                                             |
| 10               | Australia | Beans                           | 2004           | 1                                                              |
| 10               | Australia | Beer                            | 2004           | 85                                                             |
| 10               | Australia | Beverages, Alcoholic            | 2004           | 18                                                             |
| 10               | Australia | Bovine Meat                     | 2004           | 114                                                            |
| 10               | Australia | Butter, Ghee                    | 2004           | 72                                                             |
| 10               | Australia | Cephalopods                     | 2004           | 2                                                              |
| 10               | Australia | Cereals - Excluding Beer        | 2004           | 688                                                            |
| 10               | Australia | Cocoa Beans and products        | 2004           | 9                                                              |
| 10               | Australia | Coconut Oil                     | 2004           | 12                                                             |
| 10               | Australia | Coconuts - Incl Copra           | 2004           | 8                                                              |
| 10               | Australia | Coffee and products             | 2004           | 3                                                              |
| 10               | Australia | Cottonseed Oil                  | 2004           | 103                                                            |
| 10               | Australia | Crustaceans                     | 2004           | 5                                                              |
| 10               | Australia | Dates                           | 2004           | 1                                                              |
| 10               | Australia | Demersal Fish                   | 2004           | 8                                                              |
| 10               | Australia | Eggs                            | 2004           | 19                                                             |
| 10               | Australia | Fats, Animals, Raw              | 2004           | 71                                                             |
| 10               | Australia | Fish, Seafood                   | 2004           | 42                                                             |
| 10               | Australia | Freshwater Fish                 | 2004           | 4                                                              |
| 10               | Australia | Fruits - Excluding Wine         | 2004           | 116                                                            |
| 10               | Australia | Fruits, Other                   | 2004           | 33                                                             |
| 10               | Australia | Grand Total                     | 2004           | 3,072                                                          |
| 10               | Australia | Grapes and products (excl wine) | 2004           | 18                                                             |
| 10               | Australia | Groundnut Oil                   | 2004           | 3                                                              |
| 10               | Australia | Groundnuts (Shelled Eq)         | 2004           | 9                                                              |
| 10               | Australia | Honey                           | 2004           | 4                                                              |
| 10               | Australia | Lemons, Limes and products      | 2004           | 1                                                              |
| 10               | Australia | Maize and products              | 2004           | 40                                                             |
| 10               | Australia | Maize Germ Oil                  | 2004           | 5                                                              |
| 10               | Australia | Marine Fish, Other              | 2004           | 5                                                              |
| 10               | Australia | Meat                            | 2004           | 445                                                            |
| 10               | Australia | Meat, Other                     | 2004           | 2                                                              |
| 10               | Australia | Milk - Excluding Butter         | 2004           | 275                                                            |
| 10               | Australia | Miscellaneous                   | 2004           | 6                                                              |
| 10               | Australia | Molluscs, Other                 | 2004           | 1                                                              |
| 10               | Australia | Mutton & Goat Meat              | 2004           | 87                                                             |
| 10               | Australia | Oats                            | 2004           | 20                                                             |
| 10               | Australia | Offals                          | 2004           | 28                                                             |
| 10               | Australia | Oilcrops                        | 2004           | 20                                                             |
| 10               | Australia | Oilcrops Oil, Other             | 2004           | 6                                                              |
| 10               | Australia | Olive Oil                       | 2004           | 39                                                             |
| 10               | Australia | Olives (including preserved)    | 2004           | 2                                                              |
| 10               | Australia | Onions                          | 2004           | 7                                                              |
| 10               | Australia | Oranges, Mandarines             | 2004           | 17                                                             |
| 10               | Australia | Palm Oil                        | 2004           | 125                                                            |
| 10               | Australia | Peas                            | 2004           | 2                                                              |
| 10               | Australia | Pelagic Fish                    | 2004           | 15                                                             |
| 10               | Australia | Pepper                          | 2004           | 1                                                              |
| 10               | Australia | Pigmeat                         | 2004           | 103                                                            |
| 10               | Australia | Pimento                         | 2004           | 1                                                              |
| 10               | Australia | Pineapples and products         | 2004           | 7                                                              |
| 10               | Australia | Potatoes and products           | 2004           | 90                                                             |
| 10               | Australia | Poultry Meat                    | 2004           | 139                                                            |
| 10               | Australia | Pulses                          | 2004           | 8                                                              |
| 10               | Australia | Pulses, Other and products      | 2004           | 6                                                              |
| 10               | Australia | Rape and Mustard Oil            | 2004           | 184                                                            |
| 10               | Australia | Rape and Mustardseed            | 2004           | 1                                                              |
| 10               | Australia | Rice (Milled Equivalent)        | 2004           | 91                                                             |
| 10               | Australia | Rye and products                | 2004           | 9                                                              |
| 10               | Australia | Sesameseed Oil                  | 2004           | 4                                                              |
| 10               | Australia | Soyabean Oil                    | 2004           | 17                                                             |
| 10               | Australia | Soyabeans                       | 2004           | 1                                                              |
| 10               | Australia | Spices                          | 2004           | 3                                                              |
| 10               | Australia | Spices, Other                   | 2004           | 1                                                              |
| 10               | Australia | Starchy Roots                   | 2004           | 94                                                             |
| 10               | Australia | Stimulants                      | 2004           | 13                                                             |
| 10               | Australia | Sugar & Sweeteners              | 2004           | 413                                                            |
| 10               | Australia | Sugar (Raw Equivalent)          | 2004           | 401                                                            |
| 10               | Australia | Sunflowerseed Oil               | 2004           | 11                                                             |
| 10               | Australia | Sweet potatoes                  | 2004           | 4                                                              |
| 10               | Australia | Sweeteners, Other               | 2004           | 7                                                              |
| 10               | Australia | Tea (including mate)            | 2004           | 1                                                              |
| 10               | Australia | Tomatoes and products           | 2004           | 13                                                             |
| 10               | Australia | Treenuts                        | 2004           | 32                                                             |
| 10               | Australia | Vegetable Oils                  | 2004           | 511                                                            |
| 10               | Australia | Vegetables                      | 2004           | 70                                                             |
| 10               | Australia | Vegetables, Other               | 2004           | 50                                                             |
| 10               | Australia | Vegetal Products                | 2004           | 2,119                                                          |
| 10               | Australia | Wheat and products              | 2004           | 528                                                            |
| 10               | Australia | Wine                            | 2004           | 40                                                             |
| 10               | Australia | Alcoholic Beverages             | 2005           | 140                                                            |
| 10               | Australia | Animal fats                     | 2005           | 146                                                            |
| 10               | Australia | Animal Products                 | 2005           | 1,005                                                          |
| 10               | Australia | Apples and products             | 2005           | 21                                                             |
| 10               | Australia | Bananas                         | 2005           | 19                                                             |

Dietary calcium and zinc deficiency risks are decreasing but remain prevalent

| FAO Country code | Country   | Food item                       | Reference year | Net energy supply (kcal capita <sup>-1</sup> d <sup>-1</sup> ) |
|------------------|-----------|---------------------------------|----------------|----------------------------------------------------------------|
| 10               | Australia | Beans                           | 2005           | 1                                                              |
| 10               | Australia | Beer                            | 2005           | 87                                                             |
| 10               | Australia | Beverages, Alcoholic            | 2005           | 10                                                             |
| 10               | Australia | Beverages, Fermented            | 2005           | 1                                                              |
| 10               | Australia | Bovine Meat                     | 2005           | 131                                                            |
| 10               | Australia | Butter, Ghee                    | 2005           | 82                                                             |
| 10               | Australia | Cephalopods                     | 2005           | 2                                                              |
| 10               | Australia | Cereals - Excluding Beer        | 2005           | 676                                                            |
| 10               | Australia | Cocoa Beans and products        | 2005           | 6                                                              |
| 10               | Australia | Coconut Oil                     | 2005           | 9                                                              |
| 10               | Australia | Coconuts - Incl Copra           | 2005           | 8                                                              |
| 10               | Australia | Coffee and products             | 2005           | 4                                                              |
| 10               | Australia | Cottonseed Oil                  | 2005           | 49                                                             |
| 10               | Australia | Crustaceans                     | 2005           | 6                                                              |
| 10               | Australia | Dates                           | 2005           | 1                                                              |
| 10               | Australia | Demersal Fish                   | 2005           | 8                                                              |
| 10               | Australia | Eggs                            | 2005           | 20                                                             |
| 10               | Australia | Fats, Animals, Raw              | 2005           | 64                                                             |
| 10               | Australia | Fish, Seafood                   | 2005           | 37                                                             |
| 10               | Australia | Freshwater Fish                 | 2005           | 4                                                              |
| 10               | Australia | Fruits - Excluding Wine         | 2005           | 126                                                            |
| 10               | Australia | Fruits, Other                   | 2005           | 37                                                             |
| 10               | Australia | Grand Total                     | 2005           | 3,122                                                          |
| 10               | Australia | Grapes and products (excl wine) | 2005           | 19                                                             |
| 10               | Australia | Groundnut Oil                   | 2005           | 3                                                              |
| 10               | Australia | Groundnuts (Shelled Eq)         | 2005           | 17                                                             |
| 10               | Australia | Honey                           | 2005           | 4                                                              |
| 10               | Australia | Lemons, Limes and products      | 2005           | 1                                                              |
| 10               | Australia | Maize and products              | 2005           | 40                                                             |
| 10               | Australia | Maize Germ Oil                  | 2005           | 6                                                              |
| 10               | Australia | Marine Fish, Other              | 2005           | 5                                                              |
| 10               | Australia | Meat                            | 2005           | 477                                                            |
| 10               | Australia | Meat, Other                     | 2005           | 2                                                              |
| 10               | Australia | Milk - Excluding Butter         | 2005           | 296                                                            |
| 10               | Australia | Miscellaneous                   | 2005           | 10                                                             |
| 10               | Australia | Molluscs, Other                 | 2005           | 1                                                              |
| 10               | Australia | Mutton & Goat Meat              | 2005           | 87                                                             |
| 10               | Australia | Oats                            | 2005           | 17                                                             |
| 10               | Australia | Offals                          | 2005           | 30                                                             |
| 10               | Australia | Oilcrops                        | 2005           | 29                                                             |
| 10               | Australia | Oilcrops Oil, Other             | 2005           | 2                                                              |
| 10               | Australia | Olive Oil                       | 2005           | 35                                                             |
| 10               | Australia | Olives (including preserved)    | 2005           | 3                                                              |
| 10               | Australia | Onions                          | 2005           | 8                                                              |
| 10               | Australia | Oranges, Mandarines             | 2005           | 19                                                             |
| 10               | Australia | Palm Oil                        | 2005           | 94                                                             |
| 10               | Australia | Peas                            | 2005           | 4                                                              |
| 10               | Australia | Pelagic Fish                    | 2005           | 10                                                             |
| 10               | Australia | Pepper                          | 2005           | 1                                                              |
| 10               | Australia | Pigmeat                         | 2005           | 108                                                            |
| 10               | Australia | Pimento                         | 2005           | 1                                                              |
| 10               | Australia | Pineapples and products         | 2005           | 8                                                              |
| 10               | Australia | Potatoes and products           | 2005           | 87                                                             |
| 10               | Australia | Poultry Meat                    | 2005           | 149                                                            |
| 10               | Australia | Pulses                          | 2005           | 10                                                             |
| 10               | Australia | Pulses, Other and products      | 2005           | 6                                                              |
| 10               | Australia | Rape and Mustard Oil            | 2005           | 233                                                            |
| 10               | Australia | Rape and Mustardseed            | 2005           | 1                                                              |
| 10               | Australia | Rice (Milled Equivalent)        | 2005           | 91                                                             |
| 10               | Australia | Rye and products                | 2005           | 10                                                             |
| 10               | Australia | Sesameseed Oil                  | 2005           | 4                                                              |
| 10               | Australia | Soyabean Oil                    | 2005           | 20                                                             |
| 10               | Australia | Soyabeans                       | 2005           | 1                                                              |
| 10               | Australia | Spices                          | 2005           | 3                                                              |
| 10               | Australia | Spices, Other                   | 2005           | 1                                                              |
| 10               | Australia | Starchy Roots                   | 2005           | 92                                                             |
| 10               | Australia | Stimulants                      | 2005           | 11                                                             |
| 10               | Australia | Sugar & Sweeteners              | 2005           | 415                                                            |
| 10               | Australia | Sugar (Raw Equivalent)          | 2005           | 400                                                            |
| 10               | Australia | Sunflowerseed Oil               | 2005           | 44                                                             |
| 10               | Australia | Sweet potatoes                  | 2005           | 4                                                              |
| 10               | Australia | Sweeteners, Other               | 2005           | 11                                                             |
| 10               | Australia | Tea (including mate)            | 2005           | 1                                                              |
| 10               | Australia | Tomatoes and products           | 2005           | 12                                                             |
| 10               | Australia | Treenuts                        | 2005           | 37                                                             |
| 10               | Australia | Vegetable Oils                  | 2005           | 499                                                            |
| 10               | Australia | Vegetables                      | 2005           | 70                                                             |
| 10               | Australia | Vegetables, Other               | 2005           | 50                                                             |
| 10               | Australia | Vegetal Products                | 2005           | 2,118                                                          |
| 10               | Australia | Wheat and products              | 2005           | 517                                                            |
| 10               | Australia | Wine                            | 2005           | 42                                                             |
| 10               | Australia | Alcoholic Beverages             | 2006           | 139                                                            |
| 10               | Australia | Animal fats                     | 2006           | 137                                                            |
| 10               | Australia | Animal Products                 | 2006           | 1,024                                                          |
| 10               | Australia | Apples and products             | 2006           | 18                                                             |
| 10               | Australia | Aquatic Animals, Others         | 2006           | 1                                                              |
| 10               | Australia | Aquatic Products, Other         | 2006           | 1                                                              |
| 10               | Australia | Bananas                         | 2006           | 16                                                             |
| 10               | Australia | Beans                           | 2006           | 1                                                              |
| 10               | Australia | Beer                            | 2006           | 85                                                             |
| 10               | Australia | Beverages, Alcoholic            | 2006           | 12                                                             |
| 10               | Australia | Beverages, Fermented            | 2006           | 1                                                              |
| 10               | Australia | Bovine Meat                     | 2006           | 109                                                            |
| 10               | Australia | Butter, Ghee                    | 2006           | 78                                                             |
| 10               | Australia | Cephalopods                     | 2006           | 2                                                              |
| 10               | Australia | Cereals - Excluding Beer        | 2006           | 680                                                            |
| 10               | Australia | Cocoa Beans and products        | 2006           | 10                                                             |

Dietary calcium and zinc deficiency risks are decreasing but remain prevalent

| FAO Country code | Country   | Food item                       | Reference year | Net energy supply (kcal <i>capita</i> <sup>-1</sup> d <sup>-1</sup> ) |
|------------------|-----------|---------------------------------|----------------|-----------------------------------------------------------------------|
| 10               | Australia | Coconut Oil                     | 2006           | 1                                                                     |
| 10               | Australia | Coconuts - Incl Copra           | 2006           | 8                                                                     |
| 10               | Australia | Coffee and products             | 2006           | 4                                                                     |
| 10               | Australia | Cottonseed Oil                  | 2006           | 78                                                                    |
| 10               | Australia | Crustaceans                     | 2006           | 6                                                                     |
| 10               | Australia | Dates                           | 2006           | 1                                                                     |
| 10               | Australia | Demersal Fish                   | 2006           | 8                                                                     |
| 10               | Australia | Eggs                            | 2006           | 26                                                                    |
| 10               | Australia | Fats, Animals, Raw              | 2006           | 58                                                                    |
| 10               | Australia | Fish, Seafood                   | 2006           | 37                                                                    |
| 10               | Australia | Freshwater Fish                 | 2006           | 5                                                                     |
| 10               | Australia | Fruits - Excluding Wine         | 2006           | 115                                                                   |
| 10               | Australia | Fruits, Other                   | 2006           | 33                                                                    |
| 10               | Australia | Grand Total                     | 2006           | 3,167                                                                 |
| 10               | Australia | Grapes and products (excl wine) | 2006           | 17                                                                    |
| 10               | Australia | Groundnut Oil                   | 2006           | 1                                                                     |
| 10               | Australia | Groundnuts (Shelled Eq)         | 2006           | 18                                                                    |
| 10               | Australia | Honey                           | 2006           | 4                                                                     |
| 10               | Australia | Lemons, Limes and products      | 2006           | 1                                                                     |
| 10               | Australia | Maize and products              | 2006           | 42                                                                    |
| 10               | Australia | Maize Germ Oil                  | 2006           | 5                                                                     |
| 10               | Australia | Marine Fish, Other              | 2006           | 5                                                                     |
| 10               | Australia | Meat                            | 2006           | 461                                                                   |
| 10               | Australia | Meat, Other                     | 2006           | 3                                                                     |
| 10               | Australia | Milk - Excluding Butter         | 2006           | 334                                                                   |
| 10               | Australia | Miscellaneous                   | 2006           | 10                                                                    |
| 10               | Australia | Molluscs, Other                 | 2006           | 1                                                                     |
| 10               | Australia | Mutton & Goat Meat              | 2006           | 92                                                                    |
| 10               | Australia | Oats                            | 2006           | 14                                                                    |
| 10               | Australia | Offals                          | 2006           | 28                                                                    |
| 10               | Australia | Oilcrops                        | 2006           | 33                                                                    |
| 10               | Australia | Oilcrops Oil, Other             | 2006           | 4                                                                     |
| 10               | Australia | Olive Oil                       | 2006           | 38                                                                    |
| 10               | Australia | Olives (including preserved)    | 2006           | 6                                                                     |
| 10               | Australia | Onions                          | 2006           | 7                                                                     |
| 10               | Australia | Oranges, Mandarines             | 2006           | 19                                                                    |
| 10               | Australia | Palm Oil                        | 2006           | 104                                                                   |
| 10               | Australia | Peas                            | 2006           | 5                                                                     |
| 10               | Australia | Pelagic Fish                    | 2006           | 11                                                                    |
| 10               | Australia | Pepper                          | 2006           | 1                                                                     |
| 10               | Australia | Pigmeat                         | 2006           | 105                                                                   |
| 10               | Australia | Pimento                         | 2006           | 1                                                                     |
| 10               | Australia | Pineapples and products         | 2006           | 9                                                                     |
| 10               | Australia | Potatoes and products           | 2006           | 87                                                                    |
| 10               | Australia | Poultry Meat                    | 2006           | 152                                                                   |
| 10               | Australia | Pulses                          | 2006           | 13                                                                    |
| 10               | Australia | Pulses, Other and products      | 2006           | 7                                                                     |
| 10               | Australia | Rape and Mustard Oil            | 2006           | 208                                                                   |
| 10               | Australia | Rice (Milled Equivalent)        | 2006           | 90                                                                    |
| 10               | Australia | Rye and products                | 2006           | 3                                                                     |
| 10               | Australia | Sesameseed Oil                  | 2006           | 4                                                                     |
| 10               | Australia | Soyabean Oil                    | 2006           | 32                                                                    |
| 10               | Australia | Soyabeans                       | 2006           | 1                                                                     |
| 10               | Australia | Spices                          | 2006           | 3                                                                     |
| 10               | Australia | Spices, Other                   | 2006           | 1                                                                     |
| 10               | Australia | Starchy Roots                   | 2006           | 92                                                                    |
| 10               | Australia | Stimulants                      | 2006           | 15                                                                    |
| 10               | Australia | Sugar & Sweeteners              | 2006           | 412                                                                   |
| 10               | Australia | Sugar (Raw Equivalent)          | 2006           | 398                                                                   |
| 10               | Australia | Sunflowerseed Oil               | 2006           | 49                                                                    |
| 10               | Australia | Sweet potatoes                  | 2006           | 4                                                                     |
| 10               | Australia | Sweeteners, Other               | 2006           | 10                                                                    |
| 10               | Australia | Tea (including mate)            | 2006           | 1                                                                     |
| 10               | Australia | Tomatoes and products           | 2006           | 13                                                                    |
| 10               | Australia | Treenuts                        | 2006           | 40                                                                    |
| 10               | Australia | Vegetable Oils                  | 2006           | 524                                                                   |
| 10               | Australia | Vegetables                      | 2006           | 69                                                                    |
| 10               | Australia | Vegetables, Other               | 2006           | 49                                                                    |
| 10               | Australia | Vegetal Products                | 2006           | 2,143                                                                 |
| 10               | Australia | Wheat and products              | 2006           | 530                                                                   |
| 10               | Australia | Wine                            | 2006           | 42                                                                    |
| 10               | Australia | Alcoholic Beverages             | 2007           | 137                                                                   |
| 10               | Australia | Animal fats                     | 2007           | 142                                                                   |
| 10               | Australia | Animal Products                 | 2007           | 1,051                                                                 |
| 10               | Australia | Apples and products             | 2007           | 19                                                                    |
| 10               | Australia | Aquatic Animals, Others         | 2007           | 1                                                                     |
| 10               | Australia | Aquatic Products, Other         | 2007           | 1                                                                     |
| 10               | Australia | Bananas                         | 2007           | 15                                                                    |
| 10               | Australia | Beans                           | 2007           | 1                                                                     |
| 10               | Australia | Beer                            | 2007           | 83                                                                    |
| 10               | Australia | Beverages, Alcoholic            | 2007           | 11                                                                    |
| 10               | Australia | Beverages, Fermented            | 2007           | 1                                                                     |
| 10               | Australia | Bovine Meat                     | 2007           | 133                                                                   |
| 10               | Australia | Butter, Ghee                    | 2007           | 76                                                                    |
| 10               | Australia | Cephalopods                     | 2007           | 2                                                                     |
| 10               | Australia | Cereals - Excluding Beer        | 2007           | 695                                                                   |
| 10               | Australia | Cocoa Beans and products        | 2007           | 12                                                                    |
| 10               | Australia | Coconut Oil                     | 2007           | 12                                                                    |
| 10               | Australia | Coconuts - Incl Copra           | 2007           | 8                                                                     |
| 10               | Australia | Coffee and products             | 2007           | 4                                                                     |
| 10               | Australia | Cottonseed Oil                  | 2007           | 59                                                                    |
| 10               | Australia | Crustaceans                     | 2007           | 6                                                                     |
| 10               | Australia | Dates                           | 2007           | 1                                                                     |
| 10               | Australia | Demersal Fish                   | 2007           | 8                                                                     |
| 10               | Australia | Eggs                            | 2007           | 24                                                                    |
| 10               | Australia | Fats, Animals, Raw              | 2007           | 65                                                                    |
| 10               | Australia | Fish, Seafood                   | 2007           | 38                                                                    |

Dietary calcium and zinc deficiency risks are decreasing but remain prevalent

| FAO Country code | Country   | Food item                       | Reference year | Net energy supply (kcal <i>capita</i> <sup>-1</sup> d <sup>-1</sup> ) |
|------------------|-----------|---------------------------------|----------------|-----------------------------------------------------------------------|
| 10               | Australia | Freshwater Fish                 | 2007           | 5                                                                     |
| 10               | Australia | Fruits - Excluding Wine         | 2007           | 121                                                                   |
| 10               | Australia | Fruits, Other                   | 2007           | 39                                                                    |
| 10               | Australia | Grand Total                     | 2007           | 3,213                                                                 |
| 10               | Australia | Grapes and products (excl wine) | 2007           | 18                                                                    |
| 10               | Australia | Groundnut Oil                   | 2007           | 2                                                                     |
| 10               | Australia | Groundnuts (Shelled Eq)         | 2007           | 24                                                                    |
| 10               | Australia | Honey                           | 2007           | 5                                                                     |
| 10               | Australia | Lemons, Limes and products      | 2007           | 1                                                                     |
| 10               | Australia | Maize and products              | 2007           | 43                                                                    |
| 10               | Australia | Maize Germ Oil                  | 2007           | 4                                                                     |
| 10               | Australia | Marine Fish, Other              | 2007           | 6                                                                     |
| 10               | Australia | Meat                            | 2007           | 498                                                                   |
| 10               | Australia | Meat, Other                     | 2007           | 3                                                                     |
| 10               | Australia | Milk - Excluding Butter         | 2007           | 318                                                                   |
| 10               | Australia | Miscellaneous                   | 2007           | 9                                                                     |
| 10               | Australia | Molluscs, Other                 | 2007           | 1                                                                     |
| 10               | Australia | Mutton & Goat Meat              | 2007           | 96                                                                    |
| 10               | Australia | Oats                            | 2007           | 15                                                                    |
| 10               | Australia | Offals                          | 2007           | 30                                                                    |
| 10               | Australia | Oilcrops                        | 2007           | 40                                                                    |
| 10               | Australia | Oilcrops Oil, Other             | 2007           | 7                                                                     |
| 10               | Australia | Olive Oil                       | 2007           | 49                                                                    |
| 10               | Australia | Olives (including preserved)    | 2007           | 7                                                                     |
| 10               | Australia | Onions                          | 2007           | 8                                                                     |
| 10               | Australia | Oranges, Mandarines             | 2007           | 18                                                                    |
| 10               | Australia | Palm Oil                        | 2007           | 91                                                                    |
| 10               | Australia | Peas                            | 2007           | 5                                                                     |
| 10               | Australia | Pelagic Fish                    | 2007           | 10                                                                    |
| 10               | Australia | Pepper                          | 2007           | 1                                                                     |
| 10               | Australia | Pigmeat                         | 2007           | 109                                                                   |
| 10               | Australia | Pimento                         | 2007           | 1                                                                     |
| 10               | Australia | Pineapples and products         | 2007           | 10                                                                    |
| 10               | Australia | Potatoes and products           | 2007           | 86                                                                    |
| 10               | Australia | Poultry Meat                    | 2007           | 157                                                                   |
| 10               | Australia | Pulses                          | 2007           | 14                                                                    |
| 10               | Australia | Pulses, Other and products      | 2007           | 9                                                                     |
| 10               | Australia | Rape and Mustard Oil            | 2007           | 208                                                                   |
| 10               | Australia | Rape and Mustardseed            | 2007           | 1                                                                     |
| 10               | Australia | Rice (Milled Equivalent)        | 2007           | 90                                                                    |
| 10               | Australia | Roots, Other                    | 2007           | 1                                                                     |
| 10               | Australia | Rye and products                | 2007           | 3                                                                     |
| 10               | Australia | Sesameseed Oil                  | 2007           | 4                                                                     |
| 10               | Australia | Soyabean Oil                    | 2007           | 26                                                                    |
| 10               | Australia | Soyabeans                       | 2007           | 1                                                                     |
| 10               | Australia | Spices                          | 2007           | 4                                                                     |
| 10               | Australia | Spices, Other                   | 2007           | 2                                                                     |
| 10               | Australia | Starchy Roots                   | 2007           | 91                                                                    |
| 10               | Australia | Stimulants                      | 2007           | 17                                                                    |
| 10               | Australia | Sugar & Sweeteners              | 2007           | 412                                                                   |
| 10               | Australia | Sugar (Raw Equivalent)          | 2007           | 396                                                                   |
| 10               | Australia | Sunflowerseed Oil               | 2007           | 43                                                                    |
| 10               | Australia | Sweet potatoes                  | 2007           | 4                                                                     |
| 10               | Australia | Sweeteners, Other               | 2007           | 10                                                                    |
| 10               | Australia | Tea (including mate)            | 2007           | 1                                                                     |
| 10               | Australia | Tomatoes and products           | 2007           | 11                                                                    |
| 10               | Australia | Treenuts                        | 2007           | 45                                                                    |
| 10               | Australia | Vegetable Oils                  | 2007           | 505                                                                   |
| 10               | Australia | Vegetables                      | 2007           | 72                                                                    |
| 10               | Australia | Vegetables, Other               | 2007           | 54                                                                    |
| 10               | Australia | Vegetal Products                | 2007           | 2,162                                                                 |
| 10               | Australia | Wheat and products              | 2007           | 544                                                                   |
| 10               | Australia | Wine                            | 2007           | 43                                                                    |
| 10               | Australia | Alcoholic Beverages             | 2008           | 131                                                                   |
| 10               | Australia | Animal fats                     | 2008           | 150                                                                   |
| 10               | Australia | Animal Products                 | 2008           | 1,019                                                                 |
| 10               | Australia | Apples and products             | 2008           | 19                                                                    |
| 10               | Australia | Aquatic Animals, Others         | 2008           | 1                                                                     |
| 10               | Australia | Aquatic Products, Other         | 2008           | 1                                                                     |
| 10               | Australia | Bananas                         | 2008           | 14                                                                    |
| 10               | Australia | Beans                           | 2008           | 1                                                                     |
| 10               | Australia | Beer                            | 2008           | 79                                                                    |
| 10               | Australia | Beverages, Alcoholic            | 2008           | 9                                                                     |
| 10               | Australia | Beverages, Fermented            | 2008           | 1                                                                     |
| 10               | Australia | Bovine Meat                     | 2008           | 117                                                                   |
| 10               | Australia | Butter, Ghee                    | 2008           | 82                                                                    |
| 10               | Australia | Cephalopods                     | 2008           | 2                                                                     |
| 10               | Australia | Cereals - Excluding Beer        | 2008           | 744                                                                   |
| 10               | Australia | Cocoa Beans and products        | 2008           | 14                                                                    |
| 10               | Australia | Coconut Oil                     | 2008           | 27                                                                    |
| 10               | Australia | Coconuts - Incl Copra           | 2008           | 8                                                                     |
| 10               | Australia | Coffee and products             | 2008           | 4                                                                     |
| 10               | Australia | Cottonseed Oil                  | 2008           | 43                                                                    |
| 10               | Australia | Crustaceans                     | 2008           | 5                                                                     |
| 10               | Australia | Dates                           | 2008           | 1                                                                     |
| 10               | Australia | Demersal Fish                   | 2008           | 8                                                                     |
| 10               | Australia | Eggs                            | 2008           | 23                                                                    |
| 10               | Australia | Fats, Animals, Raw              | 2008           | 68                                                                    |
| 10               | Australia | Fish, Seafood                   | 2008           | 38                                                                    |
| 10               | Australia | Freshwater Fish                 | 2008           | 5                                                                     |
| 10               | Australia | Fruits - Excluding Wine         | 2008           | 116                                                                   |
| 10               | Australia | Fruits, Other                   | 2008           | 36                                                                    |
| 10               | Australia | Grand Total                     | 2008           | 3,212                                                                 |
| 10               | Australia | Grapes and products (excl wine) | 2008           | 20                                                                    |
| 10               | Australia | Groundnut Oil                   | 2008           | 2                                                                     |
| 10               | Australia | Groundnuts (Shelled Eq)         | 2008           | 16                                                                    |
| 10               | Australia | Honey                           | 2008           | 6                                                                     |

Dietary calcium and zinc deficiency risks are decreasing but remain prevalent

| FAO Country code | Country   | Food item                       | Reference year | Net energy supply (kcal capita <sup>-1</sup> d <sup>-1</sup> ) |
|------------------|-----------|---------------------------------|----------------|----------------------------------------------------------------|
| 10               | Australia | Lemons, Limes and products      | 2008           | 1                                                              |
| 10               | Australia | Maize and products              | 2008           | 42                                                             |
| 10               | Australia | Maize Germ Oil                  | 2008           | 4                                                              |
| 10               | Australia | Marine Fish, Other              | 2008           | 6                                                              |
| 10               | Australia | Meat                            | 2008           | 459                                                            |
| 10               | Australia | Meat, Other                     | 2008           | 3                                                              |
| 10               | Australia | Milk - Excluding Butter         | 2008           | 320                                                            |
| 10               | Australia | Miscellaneous                   | 2008           | 9                                                              |
| 10               | Australia | Molluscs, Other                 | 2008           | 1                                                              |
| 10               | Australia | Mutton & Goat Meat              | 2008           | 84                                                             |
| 10               | Australia | Oats                            | 2008           | 9                                                              |
| 10               | Australia | Offals                          | 2008           | 28                                                             |
| 10               | Australia | Oilcrops                        | 2008           | 31                                                             |
| 10               | Australia | Oilcrops Oil, Other             | 2008           | 15                                                             |
| 10               | Australia | Olive Oil                       | 2008           | 28                                                             |
| 10               | Australia | Olives (including preserved)    | 2008           | 5                                                              |
| 10               | Australia | Onions                          | 2008           | 8                                                              |
| 10               | Australia | Oranges, Mandarines             | 2008           | 16                                                             |
| 10               | Australia | Palm Oil                        | 2008           | 133                                                            |
| 10               | Australia | Peas                            | 2008           | 5                                                              |
| 10               | Australia | Pelagic Fish                    | 2008           | 12                                                             |
| 10               | Australia | Pepper                          | 2008           | 1                                                              |
| 10               | Australia | Pigmeat                         | 2008           | 105                                                            |
| 10               | Australia | Pimento                         | 2008           | 1                                                              |
| 10               | Australia | Pineapples and products         | 2008           | 10                                                             |
| 10               | Australia | Potatoes and products           | 2008           | 101                                                            |
| 10               | Australia | Poultry Meat                    | 2008           | 151                                                            |
| 10               | Australia | Pulses                          | 2008           | 16                                                             |
| 10               | Australia | Pulses, Other and products      | 2008           | 10                                                             |
| 10               | Australia | Rape and Mustard Oil            | 2008           | 183                                                            |
| 10               | Australia | Rape and Mustardseed            | 2008           | 1                                                              |
| 10               | Australia | Rice (Milled Equivalent)        | 2008           | 104                                                            |
| 10               | Australia | Rye and products                | 2008           | 8                                                              |
| 10               | Australia | Sesameseed Oil                  | 2008           | 4                                                              |
| 10               | Australia | Soyabean Oil                    | 2008           | 21                                                             |
| 10               | Australia | Soyabeans                       | 2008           | 1                                                              |
| 10               | Australia | Spices                          | 2008           | 5                                                              |
| 10               | Australia | Spices, Other                   | 2008           | 3                                                              |
| 10               | Australia | Starchy Roots                   | 2008           | 105                                                            |
| 10               | Australia | Stimulants                      | 2008           | 19                                                             |
| 10               | Australia | Sugar & Sweeteners              | 2008           | 408                                                            |
| 10               | Australia | Sugar (Raw Equivalent)          | 2008           | 392                                                            |
| 10               | Australia | Sunflowerseed Oil               | 2008           | 30                                                             |
| 10               | Australia | Sweet potatoes                  | 2008           | 3                                                              |
| 10               | Australia | Sweeteners, Other               | 2008           | 9                                                              |
| 10               | Australia | Tea (including mate)            | 2008           | 1                                                              |
| 10               | Australia | Tomatoes and products           | 2008           | 14                                                             |
| 10               | Australia | Treenuts                        | 2008           | 43                                                             |
| 10               | Australia | Vegetable Oils                  | 2008           | 490                                                            |
| 10               | Australia | Vegetables                      | 2008           | 76                                                             |
| 10               | Australia | Vegetables, Other               | 2008           | 53                                                             |
| 10               | Australia | Vegetal Products                | 2008           | 2,193                                                          |
| 10               | Australia | Wheat and products              | 2008           | 582                                                            |
| 10               | Australia | Wine                            | 2008           | 42                                                             |
| 10               | Australia | Alcoholic Beverages             | 2009           | 136                                                            |
| 10               | Australia | Animal fats                     | 2009           | 152                                                            |
| 10               | Australia | Animal Products                 | 2009           | 984                                                            |
| 10               | Australia | Apples and products             | 2009           | 21                                                             |
| 10               | Australia | Aquatic Animals, Others         | 2009           | 1                                                              |
| 10               | Australia | Aquatic Products, Other         | 2009           | 1                                                              |
| 10               | Australia | Bananas                         | 2009           | 18                                                             |
| 10               | Australia | Beans                           | 2009           | 1                                                              |
| 10               | Australia | Beer                            | 2009           | 83                                                             |
| 10               | Australia | Beverages, Alcoholic            | 2009           | 8                                                              |
| 10               | Australia | Beverages, Fermented            | 2009           | 1                                                              |
| 10               | Australia | Bovine Meat                     | 2009           | 119                                                            |
| 10               | Australia | Butter, Ghee                    | 2009           | 77                                                             |
| 10               | Australia | Cephalopods                     | 2009           | 2                                                              |
| 10               | Australia | Cereals - Excluding Beer        | 2009           | 755                                                            |
| 10               | Australia | Cocoa Beans and products        | 2009           | 15                                                             |
| 10               | Australia | Coconut Oil                     | 2009           | 1                                                              |
| 10               | Australia | Coconuts - Incl Copra           | 2009           | 8                                                              |
| 10               | Australia | Coffee and products             | 2009           | 5                                                              |
| 10               | Australia | Cottonseed Oil                  | 2009           | 55                                                             |
| 10               | Australia | Crustaceans                     | 2009           | 6                                                              |
| 10               | Australia | Dates                           | 2009           | 1                                                              |
| 10               | Australia | Demersal Fish                   | 2009           | 7                                                              |
| 10               | Australia | Eggs                            | 2009           | 22                                                             |
| 10               | Australia | Fats, Animals, Raw              | 2009           | 74                                                             |
| 10               | Australia | Fish, Seafood                   | 2009           | 36                                                             |
| 10               | Australia | Freshwater Fish                 | 2009           | 4                                                              |
| 10               | Australia | Fruits - Excluding Wine         | 2009           | 109                                                            |
| 10               | Australia | Fruits, Other                   | 2009           | 33                                                             |
| 10               | Australia | Grand Total                     | 2009           | 3,205                                                          |
| 10               | Australia | Grapes and products (excl wine) | 2009           | 12                                                             |
| 10               | Australia | Groundnut Oil                   | 2009           | 1                                                              |
| 10               | Australia | Groundnuts (Shelled Eq)         | 2009           | 12                                                             |
| 10               | Australia | Honey                           | 2009           | 5                                                              |
| 10               | Australia | Lemons, Limes and products      | 2009           | 1                                                              |
| 10               | Australia | Maize and products              | 2009           | 41                                                             |
| 10               | Australia | Maize Germ Oil                  | 2009           | 3                                                              |
| 10               | Australia | Marine Fish, Other              | 2009           | 6                                                              |
| 10               | Australia | Meat                            | 2009           | 453                                                            |
| 10               | Australia | Meat, Other                     | 2009           | 2                                                              |
| 10               | Australia | Milk - Excluding Butter         | 2009           | 293                                                            |
| 10               | Australia | Miscellaneous                   | 2009           | 9                                                              |
| 10               | Australia | Molluscs, Other                 | 2009           | 1                                                              |



Dietary calcium and zinc deficiency risks are decreasing but remain prevalent

| FAO Country code | Country   | Food item                       | Reference year | Net energy supply (kcal capita <sup>-1</sup> d <sup>-1</sup> ) |
|------------------|-----------|---------------------------------|----------------|----------------------------------------------------------------|
| 10               | Australia | Mutton & Goat Meat              | 2009           | 77                                                             |
| 10               | Australia | Oats                            | 2009           | 4                                                              |
| 10               | Australia | Offals                          | 2009           | 27                                                             |
| 10               | Australia | Oilcrops                        | 2009           | 27                                                             |
| 10               | Australia | Oilcrops Oil, Other             | 2009           | 18                                                             |
| 10               | Australia | Olive Oil                       | 2009           | 33                                                             |
| 10               | Australia | Olives (including preserved)    | 2009           | 5                                                              |
| 10               | Australia | Onions                          | 2009           | 9                                                              |
| 10               | Australia | Oranges, Mandarines             | 2009           | 13                                                             |
| 10               | Australia | Palm Oil                        | 2009           | 159                                                            |
| 10               | Australia | Peas                            | 2009           | 5                                                              |
| 10               | Australia | Pelagic Fish                    | 2009           | 10                                                             |
| 10               | Australia | Pepper                          | 2009           | 1                                                              |
| 10               | Australia | Pigmeat                         | 2009           | 99                                                             |
| 10               | Australia | Pimento                         | 2009           | 1                                                              |
| 10               | Australia | Pineapples and products         | 2009           | 9                                                              |
| 10               | Australia | Potatoes and products           | 2009           | 84                                                             |
| 10               | Australia | Poultry Meat                    | 2009           | 155                                                            |
| 10               | Australia | Pulses                          | 2009           | 20                                                             |
| 10               | Australia | Pulses, Other and products      | 2009           | 14                                                             |
| 10               | Australia | Rape and Mustard Oil            | 2009           | 193                                                            |
| 10               | Australia | Rape and Mustardseed            | 2009           | 1                                                              |
| 10               | Australia | Rice (Milled Equivalent)        | 2009           | 104                                                            |
| 10               | Australia | Rye and products                | 2009           | 5                                                              |
| 10               | Australia | Sesameseed Oil                  | 2009           | 4                                                              |
| 10               | Australia | Soyabean Oil                    | 2009           | 27                                                             |
| 10               | Australia | Soyabeans                       | 2009           | 1                                                              |
| 10               | Australia | Spices                          | 2009           | 5                                                              |
| 10               | Australia | Spices, Other                   | 2009           | 3                                                              |
| 10               | Australia | Starchy Roots                   | 2009           | 88                                                             |
| 10               | Australia | Stimulants                      | 2009           | 20                                                             |
| 10               | Australia | Sugar & Sweeteners              | 2009           | 398                                                            |
| 10               | Australia | Sugar (Raw Equivalent)          | 2009           | 385                                                            |
| 10               | Australia | Sunflowerseed Oil               | 2009           | 45                                                             |
| 10               | Australia | Sweet potatoes                  | 2009           | 4                                                              |
| 10               | Australia | Sweeteners, Other               | 2009           | 9                                                              |
| 10               | Australia | Tea (including mate)            | 2009           | 1                                                              |
| 10               | Australia | Tomatoes and products           | 2009           | 13                                                             |
| 10               | Australia | Treenuts                        | 2009           | 46                                                             |
| 10               | Australia | Vegetable Oils                  | 2009           | 538                                                            |
| 10               | Australia | Vegetables                      | 2009           | 71                                                             |
| 10               | Australia | Vegetables, Other               | 2009           | 49                                                             |
| 10               | Australia | Vegetal Products                | 2009           | 2,222                                                          |
| 10               | Australia | Wheat and products              | 2009           | 601                                                            |
| 10               | Australia | Wine                            | 2009           | 43                                                             |
| 10               | Australia | Alcoholic Beverages             | 2010           | 130                                                            |
| 10               | Australia | Animal fats                     | 2010           | 152                                                            |
| 10               | Australia | Animal Products                 | 2010           | 1,015                                                          |
| 10               | Australia | Apples and products             | 2010           | 19                                                             |
| 10               | Australia | Aquatic Animals, Others         | 2010           | 1                                                              |
| 10               | Australia | Aquatic Products, Other         | 2010           | 1                                                              |
| 10               | Australia | Bananas                         | 2010           | 20                                                             |
| 10               | Australia | Beans                           | 2010           | 1                                                              |
| 10               | Australia | Beer                            | 2010           | 76                                                             |
| 10               | Australia | Beverages, Alcoholic            | 2010           | 8                                                              |
| 10               | Australia | Beverages, Fermented            | 2010           | 1                                                              |
| 10               | Australia | Bovine Meat                     | 2010           | 115                                                            |
| 10               | Australia | Butter, Ghee                    | 2010           | 77                                                             |
| 10               | Australia | Cephalopods                     | 2010           | 2                                                              |
| 10               | Australia | Cereals - Excluding Beer        | 2010           | 731                                                            |
| 10               | Australia | Cocoa Beans and products        | 2010           | 15                                                             |
| 10               | Australia | Coconut Oil                     | 2010           | 11                                                             |
| 10               | Australia | Coconuts - Incl Copra           | 2010           | 8                                                              |
| 10               | Australia | Coffee and products             | 2010           | 4                                                              |
| 10               | Australia | Cottonseed Oil                  | 2010           | 55                                                             |
| 10               | Australia | Crustaceans                     | 2010           | 6                                                              |
| 10               | Australia | Dates                           | 2010           | 1                                                              |
| 10               | Australia | Demersal Fish                   | 2010           | 7                                                              |
| 10               | Australia | Eggs                            | 2010           | 24                                                             |
| 10               | Australia | Fats, Animals, Raw              | 2010           | 75                                                             |
| 10               | Australia | Fish, Seafood                   | 2010           | 38                                                             |
| 10               | Australia | Freshwater Fish                 | 2010           | 5                                                              |
| 10               | Australia | Fruits - Excluding Wine         | 2010           | 114                                                            |
| 10               | Australia | Fruits, Other                   | 2010           | 32                                                             |
| 10               | Australia | Grand Total                     | 2010           | 3,227                                                          |
| 10               | Australia | Grapes and products (excl wine) | 2010           | 16                                                             |
| 10               | Australia | Groundnut Oil                   | 2010           | 2                                                              |
| 10               | Australia | Groundnuts (Shelled Eq)         | 2010           | 19                                                             |
| 10               | Australia | Honey                           | 2010           | 5                                                              |
| 10               | Australia | Lemons, Limes and products      | 2010           | 1                                                              |
| 10               | Australia | Maize and products              | 2010           | 40                                                             |
| 10               | Australia | Maize Germ Oil                  | 2010           | 5                                                              |
| 10               | Australia | Marine Fish, Other              | 2010           | 6                                                              |
| 10               | Australia | Meat                            | 2010           | 461                                                            |
| 10               | Australia | Meat, Other                     | 2010           | 3                                                              |
| 10               | Australia | Milk - Excluding Butter         | 2010           | 314                                                            |
| 10               | Australia | Miscellaneous                   | 2010           | 13                                                             |
| 10               | Australia | Molluscs, Other                 | 2010           | 1                                                              |
| 10               | Australia | Mutton & Goat Meat              | 2010           | 76                                                             |
| 10               | Australia | Oats                            | 2010           | 1                                                              |
| 10               | Australia | Offals                          | 2010           | 25                                                             |
| 10               | Australia | Oilcrops                        | 2010           | 35                                                             |
| 10               | Australia | Oilcrops Oil, Other             | 2010           | 16                                                             |
| 10               | Australia | Olive Oil                       | 2010           | 41                                                             |
| 10               | Australia | Olives (including preserved)    | 2010           | 6                                                              |
| 10               | Australia | Onions                          | 2010           | 8                                                              |
| 10               | Australia | Oranges, Mandarines             | 2010           | 16                                                             |

Dietary calcium and zinc deficiency risks are decreasing but remain prevalent

| FAO Country code | Country   | Food item                       | Reference year | Net energy supply (kcal capita <sup>-1</sup> d <sup>-1</sup> ) |
|------------------|-----------|---------------------------------|----------------|----------------------------------------------------------------|
| 10               | Australia | Palm Oil                        | 2010           | 127                                                            |
| 10               | Australia | Peas                            | 2010           | 6                                                              |
| 10               | Australia | Pelagic Fish                    | 2010           | 11                                                             |
| 10               | Australia | Pepper                          | 2010           | 1                                                              |
| 10               | Australia | Pigmeat                         | 2010           | 105                                                            |
| 10               | Australia | Pimento                         | 2010           | 1                                                              |
| 10               | Australia | Pineapples and products         | 2010           | 8                                                              |
| 10               | Australia | Potatoes and products           | 2010           | 86                                                             |
| 10               | Australia | Poultry Meat                    | 2010           | 162                                                            |
| 10               | Australia | Pulses                          | 2010           | 24                                                             |
| 10               | Australia | Pulses, Other and products      | 2010           | 17                                                             |
| 10               | Australia | Rape and Mustard Oil            | 2010           | 229                                                            |
| 10               | Australia | Rape and Mustardseed            | 2010           | 1                                                              |
| 10               | Australia | Rice (Milled Equivalent)        | 2010           | 105                                                            |
| 10               | Australia | Rye and products                | 2010           | 7                                                              |
| 10               | Australia | Sesameseed Oil                  | 2010           | 4                                                              |
| 10               | Australia | Soyabean Oil                    | 2010           | 26                                                             |
| 10               | Australia | Soyabeans                       | 2010           | 1                                                              |
| 10               | Australia | Spices                          | 2010           | 5                                                              |
| 10               | Australia | Spices, Other                   | 2010           | 3                                                              |
| 10               | Australia | Starchy Roots                   | 2010           | 91                                                             |
| 10               | Australia | Stimulants                      | 2010           | 20                                                             |
| 10               | Australia | Sugar & Sweeteners              | 2010           | 393                                                            |
| 10               | Australia | Sugar (Raw Equivalent)          | 2010           | 378                                                            |
| 10               | Australia | Sunflowerseed Oil               | 2010           | 24                                                             |
| 10               | Australia | Sweet potatoes                  | 2010           | 4                                                              |
| 10               | Australia | Sweeteners, Other               | 2010           | 9                                                              |
| 10               | Australia | Tea (including mate)            | 2010           | 1                                                              |
| 10               | Australia | Tomatoes and products           | 2010           | 14                                                             |
| 10               | Australia | Treenuts                        | 2010           | 47                                                             |
| 10               | Australia | Vegetable Oils                  | 2010           | 539                                                            |
| 10               | Australia | Vegetables                      | 2010           | 71                                                             |
| 10               | Australia | Vegetables, Other               | 2010           | 49                                                             |
| 10               | Australia | Vegetal Products                | 2010           | 2,212                                                          |
| 10               | Australia | Wheat and products              | 2010           | 579                                                            |
| 10               | Australia | Wine                            | 2010           | 45                                                             |
| 10               | Australia | Alcoholic Beverages             | 2011           | 123                                                            |
| 10               | Australia | Animal fats                     | 2011           | 149                                                            |
| 10               | Australia | Animal Products                 | 2011           | 1,058                                                          |
| 10               | Australia | Apples and products             | 2011           | 21                                                             |
| 10               | Australia | Aquatic Animals, Others         | 2011           | 1                                                              |
| 10               | Australia | Aquatic Products, Other         | 2011           | 1                                                              |
| 10               | Australia | Bananas                         | 2011           | 13                                                             |
| 10               | Australia | Beans                           | 2011           | 1                                                              |
| 10               | Australia | Beer                            | 2011           | 83                                                             |
| 10               | Australia | Beverages, Alcoholic            | 2011           | 1                                                              |
| 10               | Australia | Beverages, Fermented            | 2011           | 2                                                              |
| 10               | Australia | Bovine Meat                     | 2011           | 125                                                            |
| 10               | Australia | Butter, Ghee                    | 2011           | 74                                                             |
| 10               | Australia | Cephalopods                     | 2011           | 2                                                              |
| 10               | Australia | Cereals - Excluding Beer        | 2011           | 708                                                            |
| 10               | Australia | Cocoa Beans and products        | 2011           | 19                                                             |
| 10               | Australia | Coconut Oil                     | 2011           | 15                                                             |
| 10               | Australia | Coconuts - Incl Copra           | 2011           | 8                                                              |
| 10               | Australia | Coffee and products             | 2011           | 5                                                              |
| 10               | Australia | Cottonseed Oil                  | 2011           | 75                                                             |
| 10               | Australia | Crustaceans                     | 2011           | 6                                                              |
| 10               | Australia | Dates                           | 2011           | 1                                                              |
| 10               | Australia | Demersal Fish                   | 2011           | 7                                                              |
| 10               | Australia | Eggs                            | 2011           | 28                                                             |
| 10               | Australia | Fats, Animals, Raw              | 2011           | 74                                                             |
| 10               | Australia | Fish, Seafood                   | 2011           | 38                                                             |
| 10               | Australia | Freshwater Fish                 | 2011           | 5                                                              |
| 10               | Australia | Fruits - Excluding Wine         | 2011           | 109                                                            |
| 10               | Australia | Fruits, Other                   | 2011           | 35                                                             |
| 10               | Australia | Grand Total                     | 2011           | 3,265                                                          |
| 10               | Australia | Grapes and products (excl wine) | 2011           | 17                                                             |
| 10               | Australia | Groundnut Oil                   | 2011           | 2                                                              |
| 10               | Australia | Groundnuts (Shelled Eq)         | 2011           | 17                                                             |
| 10               | Australia | Honey                           | 2011           | 3                                                              |
| 10               | Australia | Lemons, Limes and products      | 2011           | 1                                                              |
| 10               | Australia | Maize and products              | 2011           | 42                                                             |
| 10               | Australia | Maize Germ Oil                  | 2011           | 5                                                              |
| 10               | Australia | Marine Fish, Other              | 2011           | 6                                                              |
| 10               | Australia | Meat                            | 2011           | 492                                                            |
| 10               | Australia | Meat, Other                     | 2011           | 3                                                              |
| 10               | Australia | Milk - Excluding Butter         | 2011           | 328                                                            |
| 10               | Australia | Miscellaneous                   | 2011           | 16                                                             |
| 10               | Australia | Molluscs, Other                 | 2011           | 1                                                              |
| 10               | Australia | Mutton & Goat Meat              | 2011           | 76                                                             |
| 10               | Australia | Oats                            | 2011           | 4                                                              |
| 10               | Australia | Offals                          | 2011           | 23                                                             |
| 10               | Australia | Oilcrops                        | 2011           | 33                                                             |
| 10               | Australia | Oilcrops Oil, Other             | 2011           | 24                                                             |
| 10               | Australia | Olive Oil                       | 2011           | 33                                                             |
| 10               | Australia | Olives (including preserved)    | 2011           | 6                                                              |
| 10               | Australia | Onions                          | 2011           | 10                                                             |
| 10               | Australia | Oranges, Mandarines             | 2011           | 13                                                             |
| 10               | Australia | Palm Oil                        | 2011           | 110                                                            |
| 10               | Australia | Peas                            | 2011           | 22                                                             |
| 10               | Australia | Pelagic Fish                    | 2011           | 11                                                             |
| 10               | Australia | Pepper                          | 2011           | 1                                                              |
| 10               | Australia | Pigmeat                         | 2011           | 106                                                            |
| 10               | Australia | Pimento                         | 2011           | 1                                                              |
| 10               | Australia | Pineapples and products         | 2011           | 8                                                              |
| 10               | Australia | Potatoes and products           | 2011           | 77                                                             |
| 10               | Australia | Poultry Meat                    | 2011           | 182                                                            |

Dietary calcium and zinc deficiency risks are decreasing but remain prevalent

| FAO Country code | Country   | Food item                       | Reference year | Net energy supply (kcal capita <sup>-1</sup> d <sup>-1</sup> ) |
|------------------|-----------|---------------------------------|----------------|----------------------------------------------------------------|
| 10               | Australia | Pulses                          | 2011           | 37                                                             |
| 10               | Australia | Pulses, Other and products      | 2011           | 14                                                             |
| 10               | Australia | Rape and Mustard Oil            | 2011           | 223                                                            |
| 10               | Australia | Rape and Mustardseed            | 2011           | 1                                                              |
| 10               | Australia | Rice (Milled Equivalent)        | 2011           | 99                                                             |
| 10               | Australia | Rye and products                | 2011           | 11                                                             |
| 10               | Australia | Sesameseed Oil                  | 2011           | 4                                                              |
| 10               | Australia | Soyabean Oil                    | 2011           | 37                                                             |
| 10               | Australia | Soyabeans                       | 2011           | 1                                                              |
| 10               | Australia | Spices                          | 2011           | 5                                                              |
| 10               | Australia | Spices, Other                   | 2011           | 3                                                              |
| 10               | Australia | Starchy Roots                   | 2011           | 82                                                             |
| 10               | Australia | Stimulants                      | 2011           | 24                                                             |
| 10               | Australia | Sugar & Sweeteners              | 2011           | 390                                                            |
| 10               | Australia | Sugar (Raw Equivalent)          | 2011           | 375                                                            |
| 10               | Australia | Sunflowerseed Oil               | 2011           | 35                                                             |
| 10               | Australia | Sweet potatoes                  | 2011           | 3                                                              |
| 10               | Australia | Sweeteners, Other               | 2011           | 11                                                             |
| 10               | Australia | Tea (including mate)            | 2011           | 1                                                              |
| 10               | Australia | Tomatoes and products           | 2011           | 13                                                             |
| 10               | Australia | Treenuts                        | 2011           | 46                                                             |
| 10               | Australia | Vegetable Oils                  | 2011           | 562                                                            |
| 10               | Australia | Vegetables                      | 2011           | 73                                                             |
| 10               | Australia | Vegetables, Other               | 2011           | 50                                                             |
| 10               | Australia | Vegetal Products                | 2011           | 2,207                                                          |
| 10               | Australia | Wheat and products              | 2011           | 552                                                            |
| 10               | Australia | Wine                            | 2011           | 37                                                             |
| 11               | Austria   | Alcoholic Beverages             | 1992           | 256                                                            |
| 11               | Austria   | Animal fats                     | 1992           | 355                                                            |
| 11               | Austria   | Animal Products                 | 1992           | 1,242                                                          |
| 11               | Austria   | Apples and products             | 1992           | 58                                                             |
| 11               | Austria   | Bananas                         | 1992           | 24                                                             |
| 11               | Austria   | Barley and products             | 1992           | 2                                                              |
| 11               | Austria   | Beans                           | 1992           | 5                                                              |
| 11               | Austria   | Beer                            | 1992           | 164                                                            |
| 11               | Austria   | Beverages, Alcoholic            | 1992           | 26                                                             |
| 11               | Austria   | Beverages, Fermented            | 1992           | 2                                                              |
| 11               | Austria   | Bovine Meat                     | 1992           | 78                                                             |
| 11               | Austria   | Butter, Ghee                    | 1992           | 107                                                            |
| 11               | Austria   | Cereals - Excluding Beer        | 1992           | 725                                                            |
| 11               | Austria   | Cocoa Beans and products        | 1992           | 13                                                             |
| 11               | Austria   | Coconut Oil                     | 1992           | 23                                                             |
| 11               | Austria   | Coconuts - Incl Copra           | 1992           | 4                                                              |
| 11               | Austria   | Coffee and products             | 1992           | 11                                                             |
| 11               | Austria   | Cream                           | 1992           | 30                                                             |
| 11               | Austria   | Demersal Fish                   | 1992           | 4                                                              |
| 11               | Austria   | Eggs                            | 1992           | 51                                                             |
| 11               | Austria   | Fats, Animals, Raw              | 1992           | 218                                                            |
| 11               | Austria   | Fish, Seafood                   | 1992           | 22                                                             |
| 11               | Austria   | Freshwater Fish                 | 1992           | 2                                                              |
| 11               | Austria   | Fruits - Excluding Wine         | 1992           | 175                                                            |
| 11               | Austria   | Fruits, Other                   | 1992           | 49                                                             |
| 11               | Austria   | Grand Total                     | 1992           | 3,546                                                          |
| 11               | Austria   | Grapefruit and products         | 1992           | 1                                                              |
| 11               | Austria   | Grapes and products (excl wine) | 1992           | 18                                                             |
| 11               | Austria   | Groundnut Oil                   | 1992           | 10                                                             |
| 11               | Austria   | Groundnuts (Shelled Eq)         | 1992           | 10                                                             |
| 11               | Austria   | Honey                           | 1992           | 11                                                             |
| 11               | Austria   | Lemons, Limes and products      | 1992           | 2                                                              |
| 11               | Austria   | Maize and products              | 1992           | 35                                                             |
| 11               | Austria   | Maize Germ Oil                  | 1992           | 18                                                             |
| 11               | Austria   | Marine Fish, Other              | 1992           | 4                                                              |
| 11               | Austria   | Meat                            | 1992           | 461                                                            |
| 11               | Austria   | Meat, Other                     | 1992           | 3                                                              |
| 11               | Austria   | Milk - Excluding Butter         | 1992           | 340                                                            |
| 11               | Austria   | Miscellaneous                   | 1992           | 4                                                              |
| 11               | Austria   | Mutton & Goat Meat              | 1992           | 7                                                              |
| 11               | Austria   | Oats                            | 1992           | 9                                                              |
| 11               | Austria   | Offals                          | 1992           | 12                                                             |
| 11               | Austria   | Oilcrops                        | 1992           | 23                                                             |
| 11               | Austria   | Oilcrops Oil, Other             | 1992           | 83                                                             |
| 11               | Austria   | Oilcrops, Other                 | 1992           | 3                                                              |
| 11               | Austria   | Olive Oil                       | 1992           | 5                                                              |
| 11               | Austria   | Olives (including preserved)    | 1992           | 1                                                              |
| 11               | Austria   | Onions                          | 1992           | 6                                                              |
| 11               | Austria   | Oranges, Mandarines             | 1992           | 19                                                             |
| 11               | Austria   | Palm Oil                        | 1992           | 33                                                             |
| 11               | Austria   | Peas                            | 1992           | 3                                                              |
| 11               | Austria   | Pelagic Fish                    | 1992           | 11                                                             |
| 11               | Austria   | Pepper                          | 1992           | 1                                                              |
| 11               | Austria   | Pigmeat                         | 1992           | 318                                                            |
| 11               | Austria   | Pimento                         | 1992           | 2                                                              |
| 11               | Austria   | Pineapples and products         | 1992           | 3                                                              |
| 11               | Austria   | Potatoes and products           | 1992           | 113                                                            |
| 11               | Austria   | Poultry Meat                    | 1992           | 54                                                             |
| 11               | Austria   | Pulses                          | 1992           | 10                                                             |
| 11               | Austria   | Pulses, Other and products      | 1992           | 2                                                              |
| 11               | Austria   | Rape and Mustard Oil            | 1992           | 185                                                            |
| 11               | Austria   | Rape and Mustardseed            | 1992           | 1                                                              |
| 11               | Austria   | Rice (Milled Equivalent)        | 1992           | 58                                                             |
| 11               | Austria   | Rye and products                | 1992           | 119                                                            |
| 11               | Austria   | Sesame seed                     | 1992           | 2                                                              |
| 11               | Austria   | Soyabean Oil                    | 1992           | 6                                                              |
| 11               | Austria   | Soyabeans                       | 1992           | 3                                                              |
| 11               | Austria   | Spices                          | 1992           | 5                                                              |
| 11               | Austria   | Spices, Other                   | 1992           | 2                                                              |
| 11               | Austria   | Starchy Roots                   | 1992           | 113                                                            |

Dietary calcium and zinc deficiency risks are decreasing but remain prevalent

| FAO Country code | Country | Food item                       | Reference year | Net energy supply (kcal capita <sup>-1</sup> d <sup>-1</sup> ) |
|------------------|---------|---------------------------------|----------------|----------------------------------------------------------------|
| 11               | Austria | Stimulants                      | 1992           | 24                                                             |
| 11               | Austria | Sugar & Sweeteners              | 1992           | 418                                                            |
| 11               | Austria | Sugar (Raw Equivalent)          | 1992           | 390                                                            |
| 11               | Austria | Sunflowerseed Oil               | 1992           | 97                                                             |
| 11               | Austria | Sweeteners, Other               | 1992           | 16                                                             |
| 11               | Austria | Tomatoes and products           | 1992           | 7                                                              |
| 11               | Austria | Treenuts                        | 1992           | 46                                                             |
| 11               | Austria | Vegetable Oils                  | 1992           | 459                                                            |
| 11               | Austria | Vegetables                      | 1992           | 46                                                             |
| 11               | Austria | Vegetables, Other               | 1992           | 32                                                             |
| 11               | Austria | Vegetal Products                | 1992           | 2,304                                                          |
| 11               | Austria | Wheat and products              | 1992           | 502                                                            |
| 11               | Austria | Wine                            | 1992           | 64                                                             |
| 11               | Austria | Alcoholic Beverages             | 1993           | 250                                                            |
| 11               | Austria | Animal fats                     | 1993           | 347                                                            |
| 11               | Austria | Animal Products                 | 1993           | 1,219                                                          |
| 11               | Austria | Apples and products             | 1993           | 75                                                             |
| 11               | Austria | Bananas                         | 1993           | 23                                                             |
| 11               | Austria | Barley and products             | 1993           | 2                                                              |
| 11               | Austria | Beans                           | 1993           | 5                                                              |
| 11               | Austria | Beer                            | 1993           | 156                                                            |
| 11               | Austria | Beverages, Alcoholic            | 1993           | 32                                                             |
| 11               | Austria | Beverages, Fermented            | 1993           | 3                                                              |
| 11               | Austria | Bovine Meat                     | 1993           | 72                                                             |
| 11               | Austria | Butter, Ghee                    | 1993           | 103                                                            |
| 11               | Austria | Cereals - Excluding Beer        | 1993           | 713                                                            |
| 11               | Austria | Cocoa Beans and products        | 1993           | 9                                                              |
| 11               | Austria | Coconut Oil                     | 1993           | 21                                                             |
| 11               | Austria | Coconuts - Incl Copra           | 1993           | 3                                                              |
| 11               | Austria | Coffee and products             | 1993           | 12                                                             |
| 11               | Austria | Cream                           | 1993           | 31                                                             |
| 11               | Austria | Demersal Fish                   | 1993           | 5                                                              |
| 11               | Austria | Eggs                            | 1993           | 52                                                             |
| 11               | Austria | Fats, Animals, Raw              | 1993           | 213                                                            |
| 11               | Austria | Fish, Seafood                   | 1993           | 21                                                             |
| 11               | Austria | Freshwater Fish                 | 1993           | 2                                                              |
| 11               | Austria | Fruits - Excluding Wine         | 1993           | 192                                                            |
| 11               | Austria | Fruits, Other                   | 1993           | 50                                                             |
| 11               | Austria | Grand Total                     | 1993           | 3,508                                                          |
| 11               | Austria | Grapes and products (excl wine) | 1993           | 17                                                             |
| 11               | Austria | Groundnut Oil                   | 1993           | 8                                                              |
| 11               | Austria | Groundnuts (Shelled Eq)         | 1993           | 10                                                             |
| 11               | Austria | Honey                           | 1993           | 14                                                             |
| 11               | Austria | Lemons, Limes and products      | 1993           | 2                                                              |
| 11               | Austria | Maize and products              | 1993           | 33                                                             |
| 11               | Austria | Maize Germ Oil                  | 1993           | 18                                                             |
| 11               | Austria | Marine Fish, Other              | 1993           | 4                                                              |
| 11               | Austria | Meat                            | 1993           | 450                                                            |
| 11               | Austria | Meat, Other                     | 1993           | 3                                                              |
| 11               | Austria | Milk - Excluding Butter         | 1993           | 338                                                            |
| 11               | Austria | Miscellaneous                   | 1993           | 4                                                              |
| 11               | Austria | Mutton & Goat Meat              | 1993           | 7                                                              |
| 11               | Austria | Oats                            | 1993           | 8                                                              |
| 11               | Austria | Offals                          | 1993           | 12                                                             |
| 11               | Austria | Oilcrops                        | 1993           | 26                                                             |
| 11               | Austria | Oilcrops Oil, Other             | 1993           | 88                                                             |
| 11               | Austria | Oilcrops, Other                 | 1993           | 4                                                              |
| 11               | Austria | Olive Oil                       | 1993           | 5                                                              |
| 11               | Austria | Olives (including preserved)    | 1993           | 1                                                              |
| 11               | Austria | Onions                          | 1993           | 7                                                              |
| 11               | Austria | Oranges, Mandarines             | 1993           | 21                                                             |
| 11               | Austria | Palm Oil                        | 1993           | 15                                                             |
| 11               | Austria | Peas                            | 1993           | 3                                                              |
| 11               | Austria | Pelagic Fish                    | 1993           | 10                                                             |
| 11               | Austria | Pepper                          | 1993           | 1                                                              |
| 11               | Austria | Pigmeat                         | 1993           | 313                                                            |
| 11               | Austria | Pimento                         | 1993           | 2                                                              |
| 11               | Austria | Pineapples and products         | 1993           | 3                                                              |
| 11               | Austria | Potatoes and products           | 1993           | 114                                                            |
| 11               | Austria | Poultry Meat                    | 1993           | 55                                                             |
| 11               | Austria | Pulses                          | 1993           | 9                                                              |
| 11               | Austria | Pulses, Other and products      | 1993           | 1                                                              |
| 11               | Austria | Rape and Mustard Oil            | 1993           | 168                                                            |
| 11               | Austria | Rape and Mustardseed            | 1993           | 1                                                              |
| 11               | Austria | Rice (Milled Equivalent)        | 1993           | 66                                                             |
| 11               | Austria | Rye and products                | 1993           | 114                                                            |
| 11               | Austria | Sesame seed                     | 1993           | 2                                                              |
| 11               | Austria | Soyabean Oil                    | 1993           | 34                                                             |
| 11               | Austria | Soyabeans                       | 1993           | 5                                                              |
| 11               | Austria | Spices                          | 1993           | 6                                                              |
| 11               | Austria | Spices, Other                   | 1993           | 3                                                              |
| 11               | Austria | Starchy Roots                   | 1993           | 114                                                            |
| 11               | Austria | Stimulants                      | 1993           | 21                                                             |
| 11               | Austria | Sugar & Sweeteners              | 1993           | 401                                                            |
| 11               | Austria | Sugar (Raw Equivalent)          | 1993           | 370                                                            |
| 11               | Austria | Sunflowerseed Oil               | 1993           | 98                                                             |
| 11               | Austria | Sweeteners, Other               | 1993           | 18                                                             |
| 11               | Austria | Tomatoes and products           | 1993           | 8                                                              |
| 11               | Austria | Treenuts                        | 1993           | 51                                                             |
| 11               | Austria | Vegetable Oils                  | 1993           | 455                                                            |
| 11               | Austria | Vegetables                      | 1993           | 47                                                             |
| 11               | Austria | Vegetables, Other               | 1993           | 33                                                             |
| 11               | Austria | Vegetal Products                | 1993           | 2,289                                                          |
| 11               | Austria | Wheat and products              | 1993           | 489                                                            |
| 11               | Austria | Wine                            | 1993           | 60                                                             |
| 11               | Austria | Alcoholic Beverages             | 1994           | 252                                                            |
| 11               | Austria | Animal fats                     | 1994           | 330                                                            |

Dietary calcium and zinc deficiency risks are decreasing but remain prevalent

| FAO Country code | Country | Food item                       | Reference year | Net energy supply (kcal capita <sup>-1</sup> d <sup>-1</sup> ) |
|------------------|---------|---------------------------------|----------------|----------------------------------------------------------------|
| 11               | Austria | Animal Products                 | 1994           | 1,263                                                          |
| 11               | Austria | Apples and products             | 1994           | 50                                                             |
| 11               | Austria | Bananas                         | 1994           | 23                                                             |
| 11               | Austria | Barley and products             | 1994           | 2                                                              |
| 11               | Austria | Beans                           | 1994           | 5                                                              |
| 11               | Austria | Beer                            | 1994           | 156                                                            |
| 11               | Austria | Beverages, Alcoholic            | 1994           | 33                                                             |
| 11               | Austria | Beverages, Fermented            | 1994           | 3                                                              |
| 11               | Austria | Bovine Meat                     | 1994           | 68                                                             |
| 11               | Austria | Butter, Ghee                    | 1994           | 97                                                             |
| 11               | Austria | Cereals - Excluding Beer        | 1994           | 725                                                            |
| 11               | Austria | Cocoa Beans and products        | 1994           | 10                                                             |
| 11               | Austria | Coconut Oil                     | 1994           | 27                                                             |
| 11               | Austria | Coconuts - Incl Copra           | 1994           | 4                                                              |
| 11               | Austria | Coffee and products             | 1994           | 10                                                             |
| 11               | Austria | Cream                           | 1994           | 31                                                             |
| 11               | Austria | Demersal Fish                   | 1994           | 5                                                              |
| 11               | Austria | Eggs                            | 1994           | 56                                                             |
| 11               | Austria | Fats, Animals, Raw              | 1994           | 203                                                            |
| 11               | Austria | Fish, Seafood                   | 1994           | 26                                                             |
| 11               | Austria | Freshwater Fish                 | 1994           | 3                                                              |
| 11               | Austria | Fruits - Excluding Wine         | 1994           | 166                                                            |
| 11               | Austria | Fruits, Other                   | 1994           | 46                                                             |
| 11               | Austria | Grand Total                     | 1994           | 3,556                                                          |
| 11               | Austria | Grapes and products (excl wine) | 1994           | 17                                                             |
| 11               | Austria | Groundnut Oil                   | 1994           | 8                                                              |
| 11               | Austria | Groundnuts (Shelled Eq)         | 1994           | 10                                                             |
| 11               | Austria | Honey                           | 1994           | 14                                                             |
| 11               | Austria | Lemons, Limes and products      | 1994           | 2                                                              |
| 11               | Austria | Maize and products              | 1994           | 69                                                             |
| 11               | Austria | Maize Germ Oil                  | 1994           | 19                                                             |
| 11               | Austria | Marine Fish, Other              | 1994           | 4                                                              |
| 11               | Austria | Meat                            | 1994           | 483                                                            |
| 11               | Austria | Meat, Other                     | 1994           | 3                                                              |
| 11               | Austria | Milk - Excluding Butter         | 1994           | 357                                                            |
| 11               | Austria | Miscellaneous                   | 1994           | 3                                                              |
| 11               | Austria | Mutton & Goat Meat              | 1994           | 8                                                              |
| 11               | Austria | Oats                            | 1994           | 8                                                              |
| 11               | Austria | Offals                          | 1994           | 11                                                             |
| 11               | Austria | Oilcrops                        | 1994           | 28                                                             |
| 11               | Austria | Oilcrops Oil, Other             | 1994           | 91                                                             |
| 11               | Austria | Oilcrops, Other                 | 1994           | 5                                                              |
| 11               | Austria | Olive Oil                       | 1994           | 11                                                             |
| 11               | Austria | Olives (including preserved)    | 1994           | 1                                                              |
| 11               | Austria | Onions                          | 1994           | 7                                                              |
| 11               | Austria | Oranges, Mandarines             | 1994           | 23                                                             |
| 11               | Austria | Palm Oil                        | 1994           | 7                                                              |
| 11               | Austria | Peas                            | 1994           | 2                                                              |
| 11               | Austria | Pelagic Fish                    | 1994           | 14                                                             |
| 11               | Austria | Pepper                          | 1994           | 1                                                              |
| 11               | Austria | Pigmeat                         | 1994           | 349                                                            |
| 11               | Austria | Pimento                         | 1994           | 2                                                              |
| 11               | Austria | Pineapples and products         | 1994           | 4                                                              |
| 11               | Austria | Potatoes and products           | 1994           | 100                                                            |
| 11               | Austria | Poultry Meat                    | 1994           | 55                                                             |
| 11               | Austria | Pulses                          | 1994           | 8                                                              |
| 11               | Austria | Pulses, Other and products      | 1994           | 1                                                              |
| 11               | Austria | Rape and Mustard Oil            | 1994           | 148                                                            |
| 11               | Austria | Rape and Mustardseed            | 1994           | 1                                                              |
| 11               | Austria | Rice (Milled Equivalent)        | 1994           | 49                                                             |
| 11               | Austria | Rye and products                | 1994           | 102                                                            |
| 11               | Austria | Sesame seed                     | 1994           | 2                                                              |
| 11               | Austria | Soyabean Oil                    | 1994           | 40                                                             |
| 11               | Austria | Soyabeans                       | 1994           | 4                                                              |
| 11               | Austria | Spices                          | 1994           | 6                                                              |
| 11               | Austria | Spices, Other                   | 1994           | 3                                                              |
| 11               | Austria | Starchy Roots                   | 1994           | 100                                                            |
| 11               | Austria | Stimulants                      | 1994           | 20                                                             |
| 11               | Austria | Sugar & Sweeteners              | 1994           | 468                                                            |
| 11               | Austria | Sugar (Raw Equivalent)          | 1994           | 438                                                            |
| 11               | Austria | Sunflower seed                  | 1994           | 1                                                              |
| 11               | Austria | Sunflowerseed Oil               | 1994           | 75                                                             |
| 11               | Austria | Sweeteners, Other               | 1994           | 16                                                             |
| 11               | Austria | Tomatoes and products           | 1994           | 8                                                              |
| 11               | Austria | Treenuts                        | 1994           | 41                                                             |
| 11               | Austria | Vegetable Oils                  | 1994           | 427                                                            |
| 11               | Austria | Vegetables                      | 1994           | 48                                                             |
| 11               | Austria | Vegetables, Other               | 1994           | 33                                                             |
| 11               | Austria | Vegetal Products                | 1994           | 2,293                                                          |
| 11               | Austria | Wheat and products              | 1994           | 495                                                            |
| 11               | Austria | Wine                            | 1994           | 61                                                             |
| 11               | Austria | Alcoholic Beverages             | 1995           | 253                                                            |
| 11               | Austria | Animal fats                     | 1995           | 332                                                            |
| 11               | Austria | Animal Products                 | 1995           | 1,242                                                          |
| 11               | Austria | Apples and products             | 1995           | 49                                                             |
| 11               | Austria | Bananas                         | 1995           | 17                                                             |
| 11               | Austria | Barley and products             | 1995           | 2                                                              |
| 11               | Austria | Beans                           | 1995           | 4                                                              |
| 11               | Austria | Beer                            | 1995           | 152                                                            |
| 11               | Austria | Beverages, Alcoholic            | 1995           | 38                                                             |
| 11               | Austria | Beverages, Fermented            | 1995           | 3                                                              |
| 11               | Austria | Bovine Meat                     | 1995           | 62                                                             |
| 11               | Austria | Butter, Ghee                    | 1995           | 99                                                             |
| 11               | Austria | Cereals - Excluding Beer        | 1995           | 786                                                            |
| 11               | Austria | Cocoa Beans and products        | 1995           | 15                                                             |
| 11               | Austria | Coconut Oil                     | 1995           | 22                                                             |
| 11               | Austria | Coconuts - Incl Copra           | 1995           | 3                                                              |

Dietary calcium and zinc deficiency risks are decreasing but remain prevalent

| FAO Country code | Country | Food item                       | Reference year | Net energy supply (kcal capita <sup>-1</sup> d <sup>-1</sup> ) |
|------------------|---------|---------------------------------|----------------|----------------------------------------------------------------|
| 11               | Austria | Coffee and products             | 1995           | 8                                                              |
| 11               | Austria | Cream                           | 1995           | 25                                                             |
| 11               | Austria | Demersal Fish                   | 1995           | 9                                                              |
| 11               | Austria | Eggs                            | 1995           | 53                                                             |
| 11               | Austria | Fats, Animals, Raw              | 1995           | 207                                                            |
| 11               | Austria | Fish, Seafood                   | 1995           | 20                                                             |
| 11               | Austria | Freshwater Fish                 | 1995           | 3                                                              |
| 11               | Austria | Fruits - Excluding Wine         | 1995           | 135                                                            |
| 11               | Austria | Fruits, Other                   | 1995           | 38                                                             |
| 11               | Austria | Grand Total                     | 1995           | 3,582                                                          |
| 11               | Austria | Grapefruit and products         | 1995           | 1                                                              |
| 11               | Austria | Grapes and products (excl wine) | 1995           | 13                                                             |
| 11               | Austria | Groundnut Oil                   | 1995           | 6                                                              |
| 11               | Austria | Groundnuts (Shelled Eq)         | 1995           | 6                                                              |
| 11               | Austria | Honey                           | 1995           | 12                                                             |
| 11               | Austria | Lemons, Limes and products      | 1995           | 2                                                              |
| 11               | Austria | Maize and products              | 1995           | 85                                                             |
| 11               | Austria | Maize Germ Oil                  | 1995           | 17                                                             |
| 11               | Austria | Marine Fish, Other              | 1995           | 1                                                              |
| 11               | Austria | Meat                            | 1995           | 470                                                            |
| 11               | Austria | Meat, Other                     | 1995           | 3                                                              |
| 11               | Austria | Milk - Excluding Butter         | 1995           | 356                                                            |
| 11               | Austria | Miscellaneous                   | 1995           | 4                                                              |
| 11               | Austria | Mutton & Goat Meat              | 1995           | 7                                                              |
| 11               | Austria | Oats                            | 1995           | 8                                                              |
| 11               | Austria | Offals                          | 1995           | 11                                                             |
| 11               | Austria | Oilcrops                        | 1995           | 26                                                             |
| 11               | Austria | Oilcrops Oil, Other             | 1995           | 78                                                             |
| 11               | Austria | Oilcrops, Other                 | 1995           | 7                                                              |
| 11               | Austria | Olive Oil                       | 1995           | 1                                                              |
| 11               | Austria | Onions                          | 1995           | 6                                                              |
| 11               | Austria | Oranges, Mandarines             | 1995           | 14                                                             |
| 11               | Austria | Palm Oil                        | 1995           | 12                                                             |
| 11               | Austria | Peas                            | 1995           | 2                                                              |
| 11               | Austria | Pelagic Fish                    | 1995           | 7                                                              |
| 11               | Austria | Pepper                          | 1995           | 2                                                              |
| 11               | Austria | Pigmeat                         | 1995           | 343                                                            |
| 11               | Austria | Pimento                         | 1995           | 2                                                              |
| 11               | Austria | Pineapples and products         | 1995           | 1                                                              |
| 11               | Austria | Potatoes and products           | 1995           | 124                                                            |
| 11               | Austria | Poultry Meat                    | 1995           | 55                                                             |
| 11               | Austria | Pulses                          | 1995           | 7                                                              |
| 11               | Austria | Pulses, Other and products      | 1995           | 1                                                              |
| 11               | Austria | Rape and Mustard Oil            | 1995           | 157                                                            |
| 11               | Austria | Rape and Mustardseed            | 1995           | 1                                                              |
| 11               | Austria | Rice (Milled Equivalent)        | 1995           | 46                                                             |
| 11               | Austria | Rye and products                | 1995           | 86                                                             |
| 11               | Austria | Sesame seed                     | 1995           | 1                                                              |
| 11               | Austria | Soyabean Oil                    | 1995           | 53                                                             |
| 11               | Austria | Soyabeans                       | 1995           | 7                                                              |
| 11               | Austria | Spices                          | 1995           | 7                                                              |
| 11               | Austria | Spices, Other                   | 1995           | 4                                                              |
| 11               | Austria | Starchy Roots                   | 1995           | 124                                                            |
| 11               | Austria | Stimulants                      | 1995           | 24                                                             |
| 11               | Austria | Sugar & Sweeteners              | 1995           | 453                                                            |
| 11               | Austria | Sugar (Raw Equivalent)          | 1995           | 424                                                            |
| 11               | Austria | Sunflower seed                  | 1995           | 1                                                              |
| 11               | Austria | Sunflowerseed Oil               | 1995           | 80                                                             |
| 11               | Austria | Sweeteners, Other               | 1995           | 17                                                             |
| 11               | Austria | Tomatoes and products           | 1995           | 7                                                              |
| 11               | Austria | Treenuts                        | 1995           | 38                                                             |
| 11               | Austria | Vegetable Oils                  | 1995           | 428                                                            |
| 11               | Austria | Vegetables                      | 1995           | 55                                                             |
| 11               | Austria | Vegetables, Other               | 1995           | 42                                                             |
| 11               | Austria | Vegetal Products                | 1995           | 2,340                                                          |
| 11               | Austria | Wheat and products              | 1995           | 559                                                            |
| 11               | Austria | Wine                            | 1995           | 60                                                             |
| 11               | Austria | Alcoholic Beverages             | 1996           | 246                                                            |
| 11               | Austria | Animal fats                     | 1996           | 340                                                            |
| 11               | Austria | Animal Products                 | 1996           | 1,265                                                          |
| 11               | Austria | Apples and products             | 1996           | 43                                                             |
| 11               | Austria | Bananas                         | 1996           | 13                                                             |
| 11               | Austria | Barley and products             | 1996           | 2                                                              |
| 11               | Austria | Beans                           | 1996           | 5                                                              |
| 11               | Austria | Beer                            | 1996           | 151                                                            |
| 11               | Austria | Beverages, Alcoholic            | 1996           | 35                                                             |
| 11               | Austria | Beverages, Fermented            | 1996           | 3                                                              |
| 11               | Austria | Bovine Meat                     | 1996           | 68                                                             |
| 11               | Austria | Butter, Ghee                    | 1996           | 98                                                             |
| 11               | Austria | Cereals - Excluding Beer        | 1996           | 830                                                            |
| 11               | Austria | Cocoa Beans and products        | 1996           | 10                                                             |
| 11               | Austria | Coconut Oil                     | 1996           | 26                                                             |
| 11               | Austria | Coconuts - Incl Copra           | 1996           | 3                                                              |
| 11               | Austria | Coffee and products             | 1996           | 9                                                              |
| 11               | Austria | Cream                           | 1996           | 31                                                             |
| 11               | Austria | Dates                           | 1996           | 1                                                              |
| 11               | Austria | Demersal Fish                   | 1996           | 10                                                             |
| 11               | Austria | Eggs                            | 1996           | 53                                                             |
| 11               | Austria | Fats, Animals, Raw              | 1996           | 211                                                            |
| 11               | Austria | Fish, Seafood                   | 1996           | 24                                                             |
| 11               | Austria | Freshwater Fish                 | 1996           | 3                                                              |
| 11               | Austria | Fruits - Excluding Wine         | 1996           | 124                                                            |
| 11               | Austria | Fruits, Other                   | 1996           | 42                                                             |
| 11               | Austria | Grand Total                     | 1996           | 3,630                                                          |
| 11               | Austria | Grapes and products (excl wine) | 1996           | 12                                                             |
| 11               | Austria | Groundnut Oil                   | 1996           | 4                                                              |
| 11               | Austria | Groundnuts (Shelled Eq)         | 1996           | 8                                                              |

Dietary calcium and zinc deficiency risks are decreasing but remain prevalent

| FAO Country code | Country | Food item                       | Reference year | Net energy supply (kcal capita <sup>-1</sup> d <sup>-1</sup> ) |
|------------------|---------|---------------------------------|----------------|----------------------------------------------------------------|
| 11               | Austria | Honey                           | 1996           | 12                                                             |
| 11               | Austria | Lemons, Limes and products      | 1996           | 1                                                              |
| 11               | Austria | Maize and products              | 1996           | 91                                                             |
| 11               | Austria | Maize Germ Oil                  | 1996           | 15                                                             |
| 11               | Austria | Marine Fish, Other              | 1996           | 1                                                              |
| 11               | Austria | Meat                            | 1996           | 497                                                            |
| 11               | Austria | Meat, Other                     | 1996           | 3                                                              |
| 11               | Austria | Milk - Excluding Butter         | 1996           | 342                                                            |
| 11               | Austria | Miscellaneous                   | 1996           | 3                                                              |
| 11               | Austria | Mutton & Goat Meat              | 1996           | 7                                                              |
| 11               | Austria | Oats                            | 1996           | 10                                                             |
| 11               | Austria | Offals                          | 1996           | 9                                                              |
| 11               | Austria | Oilcrops                        | 1996           | 26                                                             |
| 11               | Austria | Oilcrops Oil, Other             | 1996           | 82                                                             |
| 11               | Austria | Oilcrops, Other                 | 1996           | 4                                                              |
| 11               | Austria | Olive Oil                       | 1996           | 3                                                              |
| 11               | Austria | Onions                          | 1996           | 7                                                              |
| 11               | Austria | Oranges, Mandarines             | 1996           | 9                                                              |
| 11               | Austria | Palm Oil                        | 1996           | 16                                                             |
| 11               | Austria | Peas                            | 1996           | 1                                                              |
| 11               | Austria | Pelagic Fish                    | 1996           | 9                                                              |
| 11               | Austria | Pepper                          | 1996           | 1                                                              |
| 11               | Austria | Pigmeat                         | 1996           | 362                                                            |
| 11               | Austria | Pimento                         | 1996           | 2                                                              |
| 11               | Austria | Pineapples and products         | 1996           | 2                                                              |
| 11               | Austria | Potatoes and products           | 1996           | 116                                                            |
| 11               | Austria | Poultry Meat                    | 1996           | 56                                                             |
| 11               | Austria | Pulses                          | 1996           | 7                                                              |
| 11               | Austria | Pulses, Other and products      | 1996           | 2                                                              |
| 11               | Austria | Rape and Mustard Oil            | 1996           | 177                                                            |
| 11               | Austria | Rape and Mustardseed            | 1996           | 2                                                              |
| 11               | Austria | Rice (Milled Equivalent)        | 1996           | 43                                                             |
| 11               | Austria | Rye and products                | 1996           | 91                                                             |
| 11               | Austria | Sesame seed                     | 1996           | 2                                                              |
| 11               | Austria | Sesameseed Oil                  | 1996           | 1                                                              |
| 11               | Austria | Soyabean Oil                    | 1996           | 30                                                             |
| 11               | Austria | Soyabeans                       | 1996           | 6                                                              |
| 11               | Austria | Spices                          | 1996           | 7                                                              |
| 11               | Austria | Spices, Other                   | 1996           | 3                                                              |
| 11               | Austria | Starchy Roots                   | 1996           | 116                                                            |
| 11               | Austria | Stimulants                      | 1996           | 19                                                             |
| 11               | Austria | Sugar & Sweeteners              | 1996           | 455                                                            |
| 11               | Austria | Sugar (Raw Equivalent)          | 1996           | 428                                                            |
| 11               | Austria | Sunflower seed                  | 1996           | 1                                                              |
| 11               | Austria | Sunflowerseed Oil               | 1996           | 89                                                             |
| 11               | Austria | Sweeteners, Other               | 1996           | 14                                                             |
| 11               | Austria | Tomatoes and products           | 1996           | 7                                                              |
| 11               | Austria | Treenuts                        | 1996           | 34                                                             |
| 11               | Austria | Vegetable Oils                  | 1996           | 442                                                            |
| 11               | Austria | Vegetables                      | 1996           | 56                                                             |
| 11               | Austria | Vegetables, Other               | 1996           | 41                                                             |
| 11               | Austria | Vegetal Products                | 1996           | 2,365                                                          |
| 11               | Austria | Wheat and products              | 1996           | 593                                                            |
| 11               | Austria | Wine                            | 1996           | 57                                                             |
| 11               | Austria | Alcoholic Beverages             | 1997           | 256                                                            |
| 11               | Austria | Animal fats                     | 1997           | 341                                                            |
| 11               | Austria | Animal Products                 | 1997           | 1,293                                                          |
| 11               | Austria | Apples and products             | 1997           | 55                                                             |
| 11               | Austria | Bananas                         | 1997           | 17                                                             |
| 11               | Austria | Barley and products             | 1997           | 2                                                              |
| 11               | Austria | Beans                           | 1997           | 2                                                              |
| 11               | Austria | Beer                            | 1997           | 153                                                            |
| 11               | Austria | Beverages, Alcoholic            | 1997           | 41                                                             |
| 11               | Austria | Beverages, Fermented            | 1997           | 3                                                              |
| 11               | Austria | Bovine Meat                     | 1997           | 64                                                             |
| 11               | Austria | Butter, Ghee                    | 1997           | 102                                                            |
| 11               | Austria | Cereals - Excluding Beer        | 1997           | 738                                                            |
| 11               | Austria | Cocoa Beans and products        | 1997           | 10                                                             |
| 11               | Austria | Coconut Oil                     | 1997           | 22                                                             |
| 11               | Austria | Coconuts - Incl Copra           | 1997           | 2                                                              |
| 11               | Austria | Coffee and products             | 1997           | 10                                                             |
| 11               | Austria | Cream                           | 1997           | 25                                                             |
| 11               | Austria | Dates                           | 1997           | 1                                                              |
| 11               | Austria | Demersal Fish                   | 1997           | 9                                                              |
| 11               | Austria | Eggs                            | 1997           | 54                                                             |
| 11               | Austria | Fats, Animals, Raw              | 1997           | 214                                                            |
| 11               | Austria | Fish, Seafood                   | 1997           | 23                                                             |
| 11               | Austria | Freshwater Fish                 | 1997           | 3                                                              |
| 11               | Austria | Fruits - Excluding Wine         | 1997           | 146                                                            |
| 11               | Austria | Fruits, Other                   | 1997           | 44                                                             |
| 11               | Austria | Grand Total                     | 1997           | 3,578                                                          |
| 11               | Austria | Grapes and products (excl wine) | 1997           | 13                                                             |
| 11               | Austria | Groundnut Oil                   | 1997           | 4                                                              |
| 11               | Austria | Groundnuts (Shelled Eq)         | 1997           | 6                                                              |
| 11               | Austria | Honey                           | 1997           | 10                                                             |
| 11               | Austria | Lemons, Limes and products      | 1997           | 1                                                              |
| 11               | Austria | Maize and products              | 1997           | 96                                                             |
| 11               | Austria | Maize Germ Oil                  | 1997           | 16                                                             |
| 11               | Austria | Marine Fish, Other              | 1997           | 1                                                              |
| 11               | Austria | Meat                            | 1997           | 494                                                            |
| 11               | Austria | Meat, Other                     | 1997           | 4                                                              |
| 11               | Austria | Milk - Excluding Butter         | 1997           | 376                                                            |
| 11               | Austria | Miscellaneous                   | 1997           | 3                                                              |
| 11               | Austria | Mutton & Goat Meat              | 1997           | 7                                                              |
| 11               | Austria | Oats                            | 1997           | 10                                                             |
| 11               | Austria | Offals                          | 1997           | 4                                                              |
| 11               | Austria | Oilcrops                        | 1997           | 25                                                             |

Dietary calcium and zinc deficiency risks are decreasing but remain prevalent

| FAO Country code | Country | Food item                       | Reference year | Net energy supply (kcal capita <sup>-1</sup> d <sup>-1</sup> ) |
|------------------|---------|---------------------------------|----------------|----------------------------------------------------------------|
| 11               | Austria | Oilcrops Oil, Other             | 1997           | 91                                                             |
| 11               | Austria | Oilcrops, Other                 | 1997           | 3                                                              |
| 11               | Austria | Olive Oil                       | 1997           | 7                                                              |
| 11               | Austria | Olives (including preserved)    | 1997           | 1                                                              |
| 11               | Austria | Onions                          | 1997           | 6                                                              |
| 11               | Austria | Oranges, Mandarines             | 1997           | 14                                                             |
| 11               | Austria | Palm Oil                        | 1997           | 11                                                             |
| 11               | Austria | Peas                            | 1997           | 2                                                              |
| 11               | Austria | Pelagic Fish                    | 1997           | 10                                                             |
| 11               | Austria | Pepper                          | 1997           | 2                                                              |
| 11               | Austria | Pigmeat                         | 1997           | 360                                                            |
| 11               | Austria | Pimento                         | 1997           | 2                                                              |
| 11               | Austria | Pineapples and products         | 1997           | 2                                                              |
| 11               | Austria | Potatoes and products           | 1997           | 112                                                            |
| 11               | Austria | Poultry Meat                    | 1997           | 58                                                             |
| 11               | Austria | Pulses                          | 1997           | 6                                                              |
| 11               | Austria | Pulses, Other and products      | 1997           | 1                                                              |
| 11               | Austria | Rape and Mustard Oil            | 1997           | 179                                                            |
| 11               | Austria | Rape and Mustardseed            | 1997           | 1                                                              |
| 11               | Austria | Rice (Milled Equivalent)        | 1997           | 41                                                             |
| 11               | Austria | Rye and products                | 1997           | 102                                                            |
| 11               | Austria | Sesame seed                     | 1997           | 2                                                              |
| 11               | Austria | Soyabean Oil                    | 1997           | 21                                                             |
| 11               | Austria | Soyabeans                       | 1997           | 8                                                              |
| 11               | Austria | Spices                          | 1997           | 7                                                              |
| 11               | Austria | Spices, Other                   | 1997           | 3                                                              |
| 11               | Austria | Starchy Roots                   | 1997           | 112                                                            |
| 11               | Austria | Stimulants                      | 1997           | 20                                                             |
| 11               | Austria | Sugar & Sweeteners              | 1997           | 451                                                            |
| 11               | Austria | Sugar (Raw Equivalent)          | 1997           | 431                                                            |
| 11               | Austria | Sunflower seed                  | 1997           | 1                                                              |
| 11               | Austria | Sunflowerseed Oil               | 1997           | 84                                                             |
| 11               | Austria | Sweeteners, Other               | 1997           | 10                                                             |
| 11               | Austria | Tomatoes and products           | 1997           | 7                                                              |
| 11               | Austria | Treenuts                        | 1997           | 33                                                             |
| 11               | Austria | Vegetable Oils                  | 1997           | 437                                                            |
| 11               | Austria | Vegetables                      | 1997           | 53                                                             |
| 11               | Austria | Vegetables, Other               | 1997           | 40                                                             |
| 11               | Austria | Vegetal Products                | 1997           | 2,285                                                          |
| 11               | Austria | Wheat and products              | 1997           | 486                                                            |
| 11               | Austria | Wine                            | 1997           | 59                                                             |
| 11               | Austria | Alcoholic Beverages             | 1998           | 255                                                            |
| 11               | Austria | Animal fats                     | 1998           | 340                                                            |
| 11               | Austria | Animal Products                 | 1998           | 1,291                                                          |
| 11               | Austria | Apples and products             | 1998           | 42                                                             |
| 11               | Austria | Bananas                         | 1998           | 16                                                             |
| 11               | Austria | Barley and products             | 1998           | 2                                                              |
| 11               | Austria | Beans                           | 1998           | 2                                                              |
| 11               | Austria | Beer                            | 1998           | 153                                                            |
| 11               | Austria | Beverages, Alcoholic            | 1998           | 42                                                             |
| 11               | Austria | Beverages, Fermented            | 1998           | 1                                                              |
| 11               | Austria | Bovine Meat                     | 1998           | 63                                                             |
| 11               | Austria | Butter, Ghee                    | 1998           | 102                                                            |
| 11               | Austria | Cereals - Excluding Beer        | 1998           | 910                                                            |
| 11               | Austria | Cocoa Beans and products        | 1998           | 7                                                              |
| 11               | Austria | Coconut Oil                     | 1998           | 11                                                             |
| 11               | Austria | Coconuts - Incl Copra           | 1998           | 3                                                              |
| 11               | Austria | Coffee and products             | 1998           | 10                                                             |
| 11               | Austria | Cream                           | 1998           | 22                                                             |
| 11               | Austria | Demersal Fish                   | 1998           | 8                                                              |
| 11               | Austria | Eggs                            | 1998           | 54                                                             |
| 11               | Austria | Fats, Animals, Raw              | 1998           | 216                                                            |
| 11               | Austria | Fish, Seafood                   | 1998           | 23                                                             |
| 11               | Austria | Freshwater Fish                 | 1998           | 3                                                              |
| 11               | Austria | Fruits - Excluding Wine         | 1998           | 116                                                            |
| 11               | Austria | Fruits, Other                   | 1998           | 39                                                             |
| 11               | Austria | Grand Total                     | 1998           | 3,712                                                          |
| 11               | Austria | Grapes and products (excl wine) | 1998           | 8                                                              |
| 11               | Austria | Groundnut Oil                   | 1998           | 4                                                              |
| 11               | Austria | Groundnuts (Shelled Eq)         | 1998           | 10                                                             |
| 11               | Austria | Honey                           | 1998           | 12                                                             |
| 11               | Austria | Lemons, Limes and products      | 1998           | 1                                                              |
| 11               | Austria | Maize and products              | 1998           | 113                                                            |
| 11               | Austria | Maize Germ Oil                  | 1998           | 20                                                             |
| 11               | Austria | Marine Fish, Other              | 1998           | 1                                                              |
| 11               | Austria | Meat                            | 1998           | 511                                                            |
| 11               | Austria | Meat, Other                     | 1998           | 4                                                              |
| 11               | Austria | Milk - Excluding Butter         | 1998           | 359                                                            |
| 11               | Austria | Miscellaneous                   | 1998           | 4                                                              |
| 11               | Austria | Mutton & Goat Meat              | 1998           | 7                                                              |
| 11               | Austria | Oats                            | 1998           | 9                                                              |
| 11               | Austria | Offals                          | 1998           | 3                                                              |
| 11               | Austria | Oilcrops                        | 1998           | 29                                                             |
| 11               | Austria | Oilcrops Oil, Other             | 1998           | 74                                                             |
| 11               | Austria | Oilcrops, Other                 | 1998           | 6                                                              |
| 11               | Austria | Olive Oil                       | 1998           | 8                                                              |
| 11               | Austria | Olives (including preserved)    | 1998           | 1                                                              |
| 11               | Austria | Onions                          | 1998           | 8                                                              |
| 11               | Austria | Oranges, Mandarines             | 1998           | 8                                                              |
| 11               | Austria | Palm Oil                        | 1998           | 13                                                             |
| 11               | Austria | Peas                            | 1998           | 1                                                              |
| 11               | Austria | Pelagic Fish                    | 1998           | 9                                                              |
| 11               | Austria | Pepper                          | 1998           | 2                                                              |
| 11               | Austria | Pigmeat                         | 1998           | 378                                                            |
| 11               | Austria | Pimento                         | 1998           | 3                                                              |
| 11               | Austria | Pineapples and products         | 1998           | 2                                                              |
| 11               | Austria | Potatoes and products           | 1998           | 103                                                            |



Dietary calcium and zinc deficiency risks are decreasing but remain prevalent

| FAO Country code | Country | Food item                       | Reference year | Net energy supply (kcal capita <sup>-1</sup> d <sup>-1</sup> ) |
|------------------|---------|---------------------------------|----------------|----------------------------------------------------------------|
| 11               | Austria | Poultry Meat                    | 1998           | 60                                                             |
| 11               | Austria | Pulses                          | 1998           | 4                                                              |
| 11               | Austria | Pulses, Other and products      | 1998           | 1                                                              |
| 11               | Austria | Rape and Mustard Oil            | 1998           | 153                                                            |
| 11               | Austria | Rape and Mustardseed            | 1998           | 2                                                              |
| 11               | Austria | Rice (Milled Equivalent)        | 1998           | 38                                                             |
| 11               | Austria | Rye and products                | 1998           | 102                                                            |
| 11               | Austria | Sesame seed                     | 1998           | 3                                                              |
| 11               | Austria | Soyabean Oil                    | 1998           | 38                                                             |
| 11               | Austria | Soyabeans                       | 1998           | 5                                                              |
| 11               | Austria | Spices                          | 1998           | 8                                                              |
| 11               | Austria | Spices, Other                   | 1998           | 3                                                              |
| 11               | Austria | Starchy Roots                   | 1998           | 103                                                            |
| 11               | Austria | Stimulants                      | 1998           | 17                                                             |
| 11               | Austria | Sugar & Sweeteners              | 1998           | 451                                                            |
| 11               | Austria | Sugar (Raw Equivalent)          | 1998           | 422                                                            |
| 11               | Austria | Sunflower seed                  | 1998           | 1                                                              |
| 11               | Austria | Sunflowerseed Oil               | 1998           | 113                                                            |
| 11               | Austria | Sweeteners, Other               | 1998           | 17                                                             |
| 11               | Austria | Tomatoes and products           | 1998           | 4                                                              |
| 11               | Austria | Treenuts                        | 1998           | 37                                                             |
| 11               | Austria | Vegetable Oils                  | 1998           | 436                                                            |
| 11               | Austria | Vegetables                      | 1998           | 49                                                             |
| 11               | Austria | Vegetables, Other               | 1998           | 37                                                             |
| 11               | Austria | Vegetal Products                | 1998           | 2,421                                                          |
| 11               | Austria | Wheat and products              | 1998           | 645                                                            |
| 11               | Austria | Wine                            | 1998           | 59                                                             |
| 11               | Austria | Alcoholic Beverages             | 1999           | 268                                                            |
| 11               | Austria | Animal fats                     | 1999           | 330                                                            |
| 11               | Austria | Animal Products                 | 1999           | 1,279                                                          |
| 11               | Austria | Apples and products             | 1999           | 50                                                             |
| 11               | Austria | Bananas                         | 1999           | 19                                                             |
| 11               | Austria | Barley and products             | 1999           | 3                                                              |
| 11               | Austria | Beans                           | 1999           | 3                                                              |
| 11               | Austria | Beer                            | 1999           | 155                                                            |
| 11               | Austria | Beverages, Alcoholic            | 1999           | 53                                                             |
| 11               | Austria | Bovine Meat                     | 1999           | 58                                                             |
| 11               | Austria | Butter, Ghee                    | 1999           | 96                                                             |
| 11               | Austria | Cereals - Excluding Beer        | 1999           | 902                                                            |
| 11               | Austria | Cocoa Beans and products        | 1999           | 11                                                             |
| 11               | Austria | Coconut Oil                     | 1999           | 11                                                             |
| 11               | Austria | Coconuts - Incl Copra           | 1999           | 2                                                              |
| 11               | Austria | Coffee and products             | 1999           | 10                                                             |
| 11               | Austria | Cream                           | 1999           | 22                                                             |
| 11               | Austria | Crustaceans                     | 1999           | 1                                                              |
| 11               | Austria | Demersal Fish                   | 1999           | 8                                                              |
| 11               | Austria | Eggs                            | 1999           | 51                                                             |
| 11               | Austria | Fats, Animals, Raw              | 1999           | 212                                                            |
| 11               | Austria | Fish, Seafood                   | 1999           | 24                                                             |
| 11               | Austria | Freshwater Fish                 | 1999           | 4                                                              |
| 11               | Austria | Fruits - Excluding Wine         | 1999           | 143                                                            |
| 11               | Austria | Fruits, Other                   | 1999           | 48                                                             |
| 11               | Austria | Grand Total                     | 1999           | 3,776                                                          |
| 11               | Austria | Grapes and products (excl wine) | 1999           | 12                                                             |
| 11               | Austria | Groundnut Oil                   | 1999           | 4                                                              |
| 11               | Austria | Groundnuts (Shelled Eq)         | 1999           | 12                                                             |
| 11               | Austria | Honey                           | 1999           | 15                                                             |
| 11               | Austria | Lemons, Limes and products      | 1999           | 1                                                              |
| 11               | Austria | Maize and products              | 1999           | 120                                                            |
| 11               | Austria | Maize Germ Oil                  | 1999           | 17                                                             |
| 11               | Austria | Marine Fish, Other              | 1999           | 1                                                              |
| 11               | Austria | Meat                            | 1999           | 504                                                            |
| 11               | Austria | Meat, Other                     | 1999           | 3                                                              |
| 11               | Austria | Milk - Excluding Butter         | 1999           | 364                                                            |
| 11               | Austria | Miscellaneous                   | 1999           | 4                                                              |
| 11               | Austria | Mutton & Goat Meat              | 1999           | 7                                                              |
| 11               | Austria | Oats                            | 1999           | 9                                                              |
| 11               | Austria | Offals                          | 1999           | 5                                                              |
| 11               | Austria | Oilcrops                        | 1999           | 35                                                             |
| 11               | Austria | Oilcrops Oil, Other             | 1999           | 84                                                             |
| 11               | Austria | Oilcrops, Other                 | 1999           | 7                                                              |
| 11               | Austria | Olive Oil                       | 1999           | 10                                                             |
| 11               | Austria | Olives (including preserved)    | 1999           | 1                                                              |
| 11               | Austria | Onions                          | 1999           | 12                                                             |
| 11               | Austria | Oranges, Mandarines             | 1999           | 10                                                             |
| 11               | Austria | Palm Oil                        | 1999           | 12                                                             |
| 11               | Austria | Peas                            | 1999           | 4                                                              |
| 11               | Austria | Pelagic Fish                    | 1999           | 10                                                             |
| 11               | Austria | Pepper                          | 1999           | 1                                                              |
| 11               | Austria | Pigmeat                         | 1999           | 375                                                            |
| 11               | Austria | Pimento                         | 1999           | 3                                                              |
| 11               | Austria | Pineapples and products         | 1999           | 2                                                              |
| 11               | Austria | Potatoes and products           | 1999           | 114                                                            |
| 11               | Austria | Poultry Meat                    | 1999           | 61                                                             |
| 11               | Austria | Pulses                          | 1999           | 8                                                              |
| 11               | Austria | Pulses, Other and products      | 1999           | 1                                                              |
| 11               | Austria | Rape and Mustard Oil            | 1999           | 146                                                            |
| 11               | Austria | Rape and Mustardseed            | 1999           | 2                                                              |
| 11               | Austria | Rice (Milled Equivalent)        | 1999           | 38                                                             |
| 11               | Austria | Rye and products                | 1999           | 100                                                            |
| 11               | Austria | Sesame seed                     | 1999           | 3                                                              |
| 11               | Austria | Sesameseed Oil                  | 1999           | 1                                                              |
| 11               | Austria | Soyabean Oil                    | 1999           | 45                                                             |
| 11               | Austria | Soyabeans                       | 1999           | 5                                                              |
| 11               | Austria | Spices                          | 1999           | 6                                                              |
| 11               | Austria | Spices, Other                   | 1999           | 2                                                              |
| 11               | Austria | Starchy Roots                   | 1999           | 114                                                            |

Dietary calcium and zinc deficiency risks are decreasing but remain prevalent

| FAO Country code | Country | Food item                       | Reference year | Net energy supply (kcal capita <sup>-1</sup> d <sup>-1</sup> ) |
|------------------|---------|---------------------------------|----------------|----------------------------------------------------------------|
| 11               | Austria | Stimulants                      | 1999           | 21                                                             |
| 11               | Austria | Sugar & Sweeteners              | 1999           | 446                                                            |
| 11               | Austria | Sugar (Raw Equivalent)          | 1999           | 416                                                            |
| 11               | Austria | Sunflower seed                  | 1999           | 2                                                              |
| 11               | Austria | Sunflowerseed Oil               | 1999           | 120                                                            |
| 11               | Austria | Sweeteners, Other               | 1999           | 15                                                             |
| 11               | Austria | Tomatoes and products           | 1999           | 7                                                              |
| 11               | Austria | Treenuts                        | 1999           | 38                                                             |
| 11               | Austria | Vegetable Oils                  | 1999           | 450                                                            |
| 11               | Austria | Vegetables                      | 1999           | 65                                                             |
| 11               | Austria | Vegetables, Other               | 1999           | 45                                                             |
| 11               | Austria | Vegetal Products                | 1999           | 2,498                                                          |
| 11               | Austria | Wheat and products              | 1999           | 632                                                            |
| 11               | Austria | Wine                            | 1999           | 60                                                             |
| 11               | Austria | Alcoholic Beverages             | 2000           | 265                                                            |
| 11               | Austria | Animal fats                     | 2000           | 321                                                            |
| 11               | Austria | Animal Products                 | 2000           | 1,251                                                          |
| 11               | Austria | Apples and products             | 2000           | 69                                                             |
| 11               | Austria | Bananas                         | 2000           | 15                                                             |
| 11               | Austria | Barley and products             | 2000           | 4                                                              |
| 11               | Austria | Beans                           | 2000           | 4                                                              |
| 11               | Austria | Beer                            | 2000           | 148                                                            |
| 11               | Austria | Beverages, Alcoholic            | 2000           | 59                                                             |
| 11               | Austria | Bovine Meat                     | 2000           | 62                                                             |
| 11               | Austria | Butter, Ghee                    | 2000           | 98                                                             |
| 11               | Austria | Cereals - Excluding Beer        | 2000           | 938                                                            |
| 11               | Austria | Citrus, Other                   | 2000           | 2                                                              |
| 11               | Austria | Cocoa Beans and products        | 2000           | 7                                                              |
| 11               | Austria | Coconut Oil                     | 2000           | 13                                                             |
| 11               | Austria | Coconuts - Incl Copra           | 2000           | 3                                                              |
| 11               | Austria | Coffee and products             | 2000           | 7                                                              |
| 11               | Austria | Cream                           | 2000           | 19                                                             |
| 11               | Austria | Crustaceans                     | 2000           | 1                                                              |
| 11               | Austria | Demersal Fish                   | 2000           | 6                                                              |
| 11               | Austria | Eggs                            | 2000           | 47                                                             |
| 11               | Austria | Fats, Animals, Raw              | 2000           | 204                                                            |
| 11               | Austria | Fish, Seafood                   | 2000           | 21                                                             |
| 11               | Austria | Freshwater Fish                 | 2000           | 4                                                              |
| 11               | Austria | Fruits - Excluding Wine         | 2000           | 158                                                            |
| 11               | Austria | Fruits, Other                   | 2000           | 48                                                             |
| 11               | Austria | Grand Total                     | 2000           | 3,803                                                          |
| 11               | Austria | Grapes and products (excl wine) | 2000           | 12                                                             |
| 11               | Austria | Groundnut Oil                   | 2000           | 4                                                              |
| 11               | Austria | Groundnuts (Shelled Eq)         | 2000           | 11                                                             |
| 11               | Austria | Honey                           | 2000           | 13                                                             |
| 11               | Austria | Lemons, Limes and products      | 2000           | 1                                                              |
| 11               | Austria | Maize and products              | 2000           | 140                                                            |
| 11               | Austria | Maize Germ Oil                  | 2000           | 16                                                             |
| 11               | Austria | Marine Fish, Other              | 2000           | 1                                                              |
| 11               | Austria | Meat                            | 2000           | 499                                                            |
| 11               | Austria | Meat, Other                     | 2000           | 3                                                              |
| 11               | Austria | Milk - Excluding Butter         | 2000           | 360                                                            |
| 11               | Austria | Miscellaneous                   | 2000           | 4                                                              |
| 11               | Austria | Mutton & Goat Meat              | 2000           | 8                                                              |
| 11               | Austria | Oats                            | 2000           | 12                                                             |
| 11               | Austria | Offals                          | 2000           | 1                                                              |
| 11               | Austria | Oilcrops                        | 2000           | 35                                                             |
| 11               | Austria | Oilcrops Oil, Other             | 2000           | 106                                                            |
| 11               | Austria | Oilcrops, Other                 | 2000           | 5                                                              |
| 11               | Austria | Olive Oil                       | 2000           | 13                                                             |
| 11               | Austria | Olives (including preserved)    | 2000           | 1                                                              |
| 11               | Austria | Onions                          | 2000           | 6                                                              |
| 11               | Austria | Oranges, Mandarines             | 2000           | 8                                                              |
| 11               | Austria | Palm Oil                        | 2000           | 11                                                             |
| 11               | Austria | Peas                            | 2000           | 2                                                              |
| 11               | Austria | Pelagic Fish                    | 2000           | 9                                                              |
| 11               | Austria | Pepper                          | 2000           | 1                                                              |
| 11               | Austria | Pigmeat                         | 2000           | 365                                                            |
| 11               | Austria | Pimento                         | 2000           | 3                                                              |
| 11               | Austria | Pineapples and products         | 2000           | 1                                                              |
| 11               | Austria | Potatoes and products           | 2000           | 117                                                            |
| 11               | Austria | Poultry Meat                    | 2000           | 61                                                             |
| 11               | Austria | Pulses                          | 2000           | 7                                                              |
| 11               | Austria | Pulses, Other and products      | 2000           | 1                                                              |
| 11               | Austria | Rape and Mustard Oil            | 2000           | 162                                                            |
| 11               | Austria | Rape and Mustardseed            | 2000           | 2                                                              |
| 11               | Austria | Rice (Milled Equivalent)        | 2000           | 34                                                             |
| 11               | Austria | Rye and products                | 2000           | 103                                                            |
| 11               | Austria | Sesame seed                     | 2000           | 3                                                              |
| 11               | Austria | Soyabean Oil                    | 2000           | 23                                                             |
| 11               | Austria | Soyabeans                       | 2000           | 8                                                              |
| 11               | Austria | Spices                          | 2000           | 8                                                              |
| 11               | Austria | Spices, Other                   | 2000           | 3                                                              |
| 11               | Austria | Starchy Roots                   | 2000           | 117                                                            |
| 11               | Austria | Stimulants                      | 2000           | 14                                                             |
| 11               | Austria | Sugar & Sweeteners              | 2000           | 448                                                            |
| 11               | Austria | Sugar (Raw Equivalent)          | 2000           | 420                                                            |
| 11               | Austria | Sunflower seed                  | 2000           | 2                                                              |
| 11               | Austria | Sunflowerseed Oil               | 2000           | 118                                                            |
| 11               | Austria | Sweeteners, Other               | 2000           | 15                                                             |
| 11               | Austria | Tomatoes and products           | 2000           | 7                                                              |
| 11               | Austria | Treenuts                        | 2000           | 39                                                             |
| 11               | Austria | Vegetable Oils                  | 2000           | 465                                                            |
| 11               | Austria | Vegetables                      | 2000           | 54                                                             |
| 11               | Austria | Vegetables, Other               | 2000           | 41                                                             |
| 11               | Austria | Vegetal Products                | 2000           | 2,552                                                          |
| 11               | Austria | Wheat and products              | 2000           | 646                                                            |

Dietary calcium and zinc deficiency risks are decreasing but remain prevalent

| FAO Country code | Country | Food item                       | Reference year | Net energy supply (kcal capita <sup>-1</sup> d <sup>-1</sup> ) |
|------------------|---------|---------------------------------|----------------|----------------------------------------------------------------|
| 11               | Austria | Wine                            | 2000           | 59                                                             |
| 11               | Austria | Alcoholic Beverages             | 2001           | 259                                                            |
| 11               | Austria | Animal fats                     | 2001           | 328                                                            |
| 11               | Austria | Animal Products                 | 2001           | 1,256                                                          |
| 11               | Austria | Apples and products             | 2001           | 64                                                             |
| 11               | Austria | Bananas                         | 2001           | 15                                                             |
| 11               | Austria | Barley and products             | 2001           | 4                                                              |
| 11               | Austria | Beans                           | 2001           | 3                                                              |
| 11               | Austria | Beer                            | 2001           | 149                                                            |
| 11               | Austria | Beverages, Alcoholic            | 2001           | 55                                                             |
| 11               | Austria | Bovine Meat                     | 2001           | 60                                                             |
| 11               | Austria | Butter, Ghee                    | 2001           | 105                                                            |
| 11               | Austria | Cereals - Excluding Beer        | 2001           | 933                                                            |
| 11               | Austria | Citrus, Other                   | 2001           | 1                                                              |
| 11               | Austria | Cocoa Beans and products        | 2001           | 9                                                              |
| 11               | Austria | Coconut Oil                     | 2001           | 9                                                              |
| 11               | Austria | Coconuts - Incl Copra           | 2001           | 2                                                              |
| 11               | Austria | Coffee and products             | 2001           | 9                                                              |
| 11               | Austria | Cream                           | 2001           | 16                                                             |
| 11               | Austria | Crustaceans                     | 2001           | 1                                                              |
| 11               | Austria | Dates                           | 2001           | 1                                                              |
| 11               | Austria | Demersal Fish                   | 2001           | 7                                                              |
| 11               | Austria | Eggs                            | 2001           | 49                                                             |
| 11               | Austria | Fats, Animals, Raw              | 2001           | 207                                                            |
| 11               | Austria | Fish, Seafood                   | 2001           | 24                                                             |
| 11               | Austria | Freshwater Fish                 | 2001           | 4                                                              |
| 11               | Austria | Fruits - Excluding Wine         | 2001           | 161                                                            |
| 11               | Austria | Fruits, Other                   | 2001           | 54                                                             |
| 11               | Austria | Grand Total                     | 2001           | 3,815                                                          |
| 11               | Austria | Grapes and products (excl wine) | 2001           | 12                                                             |
| 11               | Austria | Groundnut Oil                   | 2001           | 5                                                              |
| 11               | Austria | Groundnuts (Shelled Eq)         | 2001           | 10                                                             |
| 11               | Austria | Honey                           | 2001           | 12                                                             |
| 11               | Austria | Lemons, Limes and products      | 2001           | 1                                                              |
| 11               | Austria | Maize and products              | 2001           | 142                                                            |
| 11               | Austria | Maize Germ Oil                  | 2001           | 15                                                             |
| 11               | Austria | Marine Fish, Other              | 2001           | 2                                                              |
| 11               | Austria | Meat                            | 2001           | 489                                                            |
| 11               | Austria | Meat, Other                     | 2001           | 3                                                              |
| 11               | Austria | Milk - Excluding Butter         | 2001           | 363                                                            |
| 11               | Austria | Miscellaneous                   | 2001           | 5                                                              |
| 11               | Austria | Mutton & Goat Meat              | 2001           | 7                                                              |
| 11               | Austria | Oats                            | 2001           | 14                                                             |
| 11               | Austria | Offals                          | 2001           | 3                                                              |
| 11               | Austria | Oilcrops                        | 2001           | 37                                                             |
| 11               | Austria | Oilcrops Oil, Other             | 2001           | 76                                                             |
| 11               | Austria | Oilcrops, Other                 | 2001           | 5                                                              |
| 11               | Austria | Olive Oil                       | 2001           | 14                                                             |
| 11               | Austria | Olives (including preserved)    | 2001           | 1                                                              |
| 11               | Austria | Onions                          | 2001           | 12                                                             |
| 11               | Austria | Oranges, Mandarines             | 2001           | 11                                                             |
| 11               | Austria | Palm Oil                        | 2001           | 13                                                             |
| 11               | Austria | Peas                            | 2001           | 2                                                              |
| 11               | Austria | Pelagic Fish                    | 2001           | 10                                                             |
| 11               | Austria | Pepper                          | 2001           | 1                                                              |
| 11               | Austria | Pigmeat                         | 2001           | 355                                                            |
| 11               | Austria | Pimento                         | 2001           | 2                                                              |
| 11               | Austria | Pineapples and products         | 2001           | 1                                                              |
| 11               | Austria | Potatoes and products           | 2001           | 113                                                            |
| 11               | Austria | Poultry Meat                    | 2001           | 64                                                             |
| 11               | Austria | Pulses                          | 2001           | 7                                                              |
| 11               | Austria | Pulses, Other and products      | 2001           | 2                                                              |
| 11               | Austria | Rape and Mustard Oil            | 2001           | 178                                                            |
| 11               | Austria | Rape and Mustardseed            | 2001           | 1                                                              |
| 11               | Austria | Rice (Milled Equivalent)        | 2001           | 35                                                             |
| 11               | Austria | Rye and products                | 2001           | 98                                                             |
| 11               | Austria | Sesame seed                     | 2001           | 4                                                              |
| 11               | Austria | Soyabean Oil                    | 2001           | 86                                                             |
| 11               | Austria | Soyabeans                       | 2001           | 11                                                             |
| 11               | Austria | Spices                          | 2001           | 6                                                              |
| 11               | Austria | Spices, Other                   | 2001           | 3                                                              |
| 11               | Austria | Starchy Roots                   | 2001           | 113                                                            |
| 11               | Austria | Stimulants                      | 2001           | 18                                                             |
| 11               | Austria | Sugar & Sweeteners              | 2001           | 439                                                            |
| 11               | Austria | Sugar (Raw Equivalent)          | 2001           | 410                                                            |
| 11               | Austria | Sunflower seed                  | 2001           | 2                                                              |
| 11               | Austria | Sunflowerseed Oil               | 2001           | 83                                                             |
| 11               | Austria | Sweeteners, Other               | 2001           | 17                                                             |
| 11               | Austria | Tomatoes and products           | 2001           | 7                                                              |
| 11               | Austria | Treenuts                        | 2001           | 38                                                             |
| 11               | Austria | Vegetable Oils                  | 2001           | 481                                                            |
| 11               | Austria | Vegetables                      | 2001           | 62                                                             |
| 11               | Austria | Vegetables, Other               | 2001           | 43                                                             |
| 11               | Austria | Vegetal Products                | 2001           | 2,559                                                          |
| 11               | Austria | Wheat and products              | 2001           | 640                                                            |
| 11               | Austria | Wine                            | 2001           | 54                                                             |
| 11               | Austria | Alcoholic Beverages             | 2002           | 259                                                            |
| 11               | Austria | Animal fats                     | 2002           | 318                                                            |
| 11               | Austria | Animal Products                 | 2002           | 1,254                                                          |
| 11               | Austria | Apples and products             | 2002           | 63                                                             |
| 11               | Austria | Bananas                         | 2002           | 15                                                             |
| 11               | Austria | Barley and products             | 2002           | 3                                                              |
| 11               | Austria | Beans                           | 2002           | 3                                                              |
| 11               | Austria | Beer                            | 2002           | 150                                                            |
| 11               | Austria | Beverages, Alcoholic            | 2002           | 53                                                             |
| 11               | Austria | Bovine Meat                     | 2002           | 60                                                             |
| 11               | Austria | Butter, Ghee                    | 2002           | 96                                                             |

Dietary calcium and zinc deficiency risks are decreasing but remain prevalent

| FAO Country code | Country | Food item                       | Reference year | Net energy supply (kcal capita <sup>-1</sup> d <sup>-1</sup> ) |
|------------------|---------|---------------------------------|----------------|----------------------------------------------------------------|
| 11               | Austria | Cereals - Excluding Beer        | 2002           | 922                                                            |
| 11               | Austria | Citrus, Other                   | 2002           | 1                                                              |
| 11               | Austria | Cocoa Beans and products        | 2002           | 8                                                              |
| 11               | Austria | Coconut Oil                     | 2002           | 10                                                             |
| 11               | Austria | Coconuts - Incl Copra           | 2002           | 3                                                              |
| 11               | Austria | Coffee and products             | 2002           | 8                                                              |
| 11               | Austria | Cream                           | 2002           | 14                                                             |
| 11               | Austria | Crustaceans                     | 2002           | 1                                                              |
| 11               | Austria | Dates                           | 2002           | 1                                                              |
| 11               | Austria | Demersal Fish                   | 2002           | 7                                                              |
| 11               | Austria | Eggs                            | 2002           | 50                                                             |
| 11               | Austria | Fats, Animals, Raw              | 2002           | 208                                                            |
| 11               | Austria | Fish, Seafood                   | 2002           | 23                                                             |
| 11               | Austria | Freshwater Fish                 | 2002           | 3                                                              |
| 11               | Austria | Fruits - Excluding Wine         | 2002           | 149                                                            |
| 11               | Austria | Fruits, Other                   | 2002           | 45                                                             |
| 11               | Austria | Grand Total                     | 2002           | 3,753                                                          |
| 11               | Austria | Grapes and products (excl wine) | 2002           | 11                                                             |
| 11               | Austria | Groundnut Oil                   | 2002           | 5                                                              |
| 11               | Austria | Groundnuts (Shelled Eq)         | 2002           | 11                                                             |
| 11               | Austria | Honey                           | 2002           | 12                                                             |
| 11               | Austria | Lemons, Limes and products      | 2002           | 1                                                              |
| 11               | Austria | Maize and products              | 2002           | 123                                                            |
| 11               | Austria | Maize Germ Oil                  | 2002           | 12                                                             |
| 11               | Austria | Marine Fish, Other              | 2002           | 1                                                              |
| 11               | Austria | Meat                            | 2002           | 500                                                            |
| 11               | Austria | Meat, Other                     | 2002           | 3                                                              |
| 11               | Austria | Milk - Excluding Butter         | 2002           | 360                                                            |
| 11               | Austria | Miscellaneous                   | 2002           | 4                                                              |
| 11               | Austria | Mutton & Goat Meat              | 2002           | 7                                                              |
| 11               | Austria | Oats                            | 2002           | 12                                                             |
| 11               | Austria | Offals                          | 2002           | 3                                                              |
| 11               | Austria | Oilcrops                        | 2002           | 40                                                             |
| 11               | Austria | Oilcrops Oil, Other             | 2002           | 68                                                             |
| 11               | Austria | Oilcrops, Other                 | 2002           | 7                                                              |
| 11               | Austria | Olive Oil                       | 2002           | 12                                                             |
| 11               | Austria | Olives (including preserved)    | 2002           | 1                                                              |
| 11               | Austria | Onions                          | 2002           | 9                                                              |
| 11               | Austria | Oranges, Mandarines             | 2002           | 9                                                              |
| 11               | Austria | Palm Oil                        | 2002           | 12                                                             |
| 11               | Austria | Peas                            | 2002           | 2                                                              |
| 11               | Austria | Pelagic Fish                    | 2002           | 10                                                             |
| 11               | Austria | Pepper                          | 2002           | 1                                                              |
| 11               | Austria | Pigmeat                         | 2002           | 367                                                            |
| 11               | Austria | Pimento                         | 2002           | 2                                                              |
| 11               | Austria | Pineapples and products         | 2002           | 3                                                              |
| 11               | Austria | Potatoes and products           | 2002           | 120                                                            |
| 11               | Austria | Poultry Meat                    | 2002           | 62                                                             |
| 11               | Austria | Pulses                          | 2002           | 6                                                              |
| 11               | Austria | Pulses, Other and products      | 2002           | 1                                                              |
| 11               | Austria | Rape and Mustard Oil            | 2002           | 141                                                            |
| 11               | Austria | Rape and Mustardseed            | 2002           | 2                                                              |
| 11               | Austria | Rice (Milled Equivalent)        | 2002           | 38                                                             |
| 11               | Austria | Rye and products                | 2002           | 97                                                             |
| 11               | Austria | Sesame seed                     | 2002           | 4                                                              |
| 11               | Austria | Soyabean Oil                    | 2002           | 90                                                             |
| 11               | Austria | Soyabeans                       | 2002           | 10                                                             |
| 11               | Austria | Spices                          | 2002           | 6                                                              |
| 11               | Austria | Spices, Other                   | 2002           | 2                                                              |
| 11               | Austria | Starchy Roots                   | 2002           | 120                                                            |
| 11               | Austria | Stimulants                      | 2002           | 16                                                             |
| 11               | Austria | Sugar & Sweeteners              | 2002           | 433                                                            |
| 11               | Austria | Sugar (Raw Equivalent)          | 2002           | 404                                                            |
| 11               | Austria | Sunflower seed                  | 2002           | 2                                                              |
| 11               | Austria | Sunflowerseed Oil               | 2002           | 99                                                             |
| 11               | Austria | Sweeteners, Other               | 2002           | 16                                                             |
| 11               | Austria | Tomatoes and products           | 2002           | 7                                                              |
| 11               | Austria | Treenuts                        | 2002           | 34                                                             |
| 11               | Austria | Vegetable Oils                  | 2002           | 449                                                            |
| 11               | Austria | Vegetables                      | 2002           | 61                                                             |
| 11               | Austria | Vegetables, Other               | 2002           | 45                                                             |
| 11               | Austria | Vegetal Products                | 2002           | 2,499                                                          |
| 11               | Austria | Wheat and products              | 2002           | 649                                                            |
| 11               | Austria | Wine                            | 2002           | 56                                                             |
| 11               | Austria | Alcoholic Beverages             | 2003           | 260                                                            |
| 11               | Austria | Animal fats                     | 2003           | 333                                                            |
| 11               | Austria | Animal Products                 | 2003           | 1,168                                                          |
| 11               | Austria | Apples and products             | 2003           | 72                                                             |
| 11               | Austria | Bananas                         | 2003           | 15                                                             |
| 11               | Austria | Barley and products             | 2003           | 2                                                              |
| 11               | Austria | Beans                           | 2003           | 3                                                              |
| 11               | Austria | Beer                            | 2003           | 151                                                            |
| 11               | Austria | Beverages, Alcoholic            | 2003           | 57                                                             |
| 11               | Austria | Bovine Meat                     | 2003           | 59                                                             |
| 11               | Austria | Butter, Ghee                    | 2003           | 102                                                            |
| 11               | Austria | Cereals - Excluding Beer        | 2003           | 936                                                            |
| 11               | Austria | Citrus, Other                   | 2003           | 1                                                              |
| 11               | Austria | Cocoa Beans and products        | 2003           | 11                                                             |
| 11               | Austria | Coconut Oil                     | 2003           | 12                                                             |
| 11               | Austria | Coconuts - Incl Copra           | 2003           | 3                                                              |
| 11               | Austria | Coffee and products             | 2003           | 8                                                              |
| 11               | Austria | Cream                           | 2003           | 18                                                             |
| 11               | Austria | Crustaceans                     | 2003           | 1                                                              |
| 11               | Austria | Dates                           | 2003           | 1                                                              |
| 11               | Austria | Demersal Fish                   | 2003           | 7                                                              |
| 11               | Austria | Eggs                            | 2003           | 49                                                             |
| 11               | Austria | Fats, Animals, Raw              | 2003           | 214                                                            |

Dietary calcium and zinc deficiency risks are decreasing but remain prevalent

| FAO Country code | Country | Food item                       | Reference year | Net energy supply (kcal capita <sup>-1</sup> d <sup>-1</sup> ) |
|------------------|---------|---------------------------------|----------------|----------------------------------------------------------------|
| 11               | Austria | Fish, Seafood                   | 2003           | 25                                                             |
| 11               | Austria | Freshwater Fish                 | 2003           | 4                                                              |
| 11               | Austria | Fruits - Excluding Wine         | 2003           | 173                                                            |
| 11               | Austria | Fruits, Other                   | 2003           | 59                                                             |
| 11               | Austria | Grand Total                     | 2003           | 3,711                                                          |
| 11               | Austria | Grapes and products (excl wine) | 2003           | 10                                                             |
| 11               | Austria | Groundnut Oil                   | 2003           | 4                                                              |
| 11               | Austria | Groundnuts (Shelled Eq)         | 2003           | 11                                                             |
| 11               | Austria | Honey                           | 2003           | 11                                                             |
| 11               | Austria | Lemons, Limes and products      | 2003           | 1                                                              |
| 11               | Austria | Maize and products              | 2003           | 120                                                            |
| 11               | Austria | Maize Germ Oil                  | 2003           | 8                                                              |
| 11               | Austria | Marine Fish, Other              | 2003           | 2                                                              |
| 11               | Austria | Meat                            | 2003           | 493                                                            |
| 11               | Austria | Meat, Other                     | 2003           | 3                                                              |
| 11               | Austria | Milk - Excluding Butter         | 2003           | 265                                                            |
| 11               | Austria | Miscellaneous                   | 2003           | 4                                                              |
| 11               | Austria | Mutton & Goat Meat              | 2003           | 7                                                              |
| 11               | Austria | Oats                            | 2003           | 12                                                             |
| 11               | Austria | Offals                          | 2003           | 3                                                              |
| 11               | Austria | Oilcrops                        | 2003           | 40                                                             |
| 11               | Austria | Oilcrops Oil, Other             | 2003           | 84                                                             |
| 11               | Austria | Oilcrops, Other                 | 2003           | 8                                                              |
| 11               | Austria | Olive Oil                       | 2003           | 13                                                             |
| 11               | Austria | Olives (including preserved)    | 2003           | 1                                                              |
| 11               | Austria | Onions                          | 2003           | 8                                                              |
| 11               | Austria | Oranges, Mandarines             | 2003           | 9                                                              |
| 11               | Austria | Palm Oil                        | 2003           | 16                                                             |
| 11               | Austria | Peas                            | 2003           | 2                                                              |
| 11               | Austria | Pelagic Fish                    | 2003           | 11                                                             |
| 11               | Austria | Pepper                          | 2003           | 1                                                              |
| 11               | Austria | Pigmeat                         | 2003           | 363                                                            |
| 11               | Austria | Pimento                         | 2003           | 2                                                              |
| 11               | Austria | Pineapples and products         | 2003           | 4                                                              |
| 11               | Austria | Potatoes and products           | 2003           | 105                                                            |
| 11               | Austria | Poultry Meat                    | 2003           | 60                                                             |
| 11               | Austria | Pulses                          | 2003           | 6                                                              |
| 11               | Austria | Pulses, Other and products      | 2003           | 1                                                              |
| 11               | Austria | Rape and Mustard Oil            | 2003           | 131                                                            |
| 11               | Austria | Rape and Mustardseed            | 2003           | 1                                                              |
| 11               | Austria | Rice (Milled Equivalent)        | 2003           | 31                                                             |
| 11               | Austria | Rye and products                | 2003           | 95                                                             |
| 11               | Austria | Sesame seed                     | 2003           | 4                                                              |
| 11               | Austria | Soyabean Oil                    | 2003           | 95                                                             |
| 11               | Austria | Soyabeans                       | 2003           | 10                                                             |
| 11               | Austria | Spices                          | 2003           | 6                                                              |
| 11               | Austria | Spices, Other                   | 2003           | 2                                                              |
| 11               | Austria | Starchy Roots                   | 2003           | 105                                                            |
| 11               | Austria | Stimulants                      | 2003           | 19                                                             |
| 11               | Austria | Sugar & Sweeteners              | 2003           | 442                                                            |
| 11               | Austria | Sugar (Raw Equivalent)          | 2003           | 411                                                            |
| 11               | Austria | Sunflower seed                  | 2003           | 2                                                              |
| 11               | Austria | Sunflowerseed Oil               | 2003           | 86                                                             |
| 11               | Austria | Sweeteners, Other               | 2003           | 21                                                             |
| 11               | Austria | Tomatoes and products           | 2003           | 8                                                              |
| 11               | Austria | Treenuts                        | 2003           | 39                                                             |
| 11               | Austria | Vegetable Oils                  | 2003           | 449                                                            |
| 11               | Austria | Vegetables                      | 2003           | 62                                                             |
| 11               | Austria | Vegetables, Other               | 2003           | 46                                                             |
| 11               | Austria | Vegetal Products                | 2003           | 2,544                                                          |
| 11               | Austria | Wheat and products              | 2003           | 675                                                            |
| 11               | Austria | Wine                            | 2003           | 53                                                             |
| 11               | Austria | Alcoholic Beverages             | 2004           | 247                                                            |
| 11               | Austria | Animal fats                     | 2004           | 278                                                            |
| 11               | Austria | Animal Products                 | 2004           | 1,084                                                          |
| 11               | Austria | Apples and products             | 2004           | 60                                                             |
| 11               | Austria | Bananas                         | 2004           | 16                                                             |
| 11               | Austria | Barley and products             | 2004           | 2                                                              |
| 11               | Austria | Beans                           | 2004           | 3                                                              |
| 11               | Austria | Beer                            | 2004           | 146                                                            |
| 11               | Austria | Beverages, Alcoholic            | 2004           | 45                                                             |
| 11               | Austria | Bovine Meat                     | 2004           | 58                                                             |
| 11               | Austria | Butter, Ghee                    | 2004           | 102                                                            |
| 11               | Austria | Cereals - Excluding Beer        | 2004           | 886                                                            |
| 11               | Austria | Citrus, Other                   | 2004           | 1                                                              |
| 11               | Austria | Cocoa Beans and products        | 2004           | 20                                                             |
| 11               | Austria | Coconut Oil                     | 2004           | 16                                                             |
| 11               | Austria | Coconuts - Incl Copra           | 2004           | 3                                                              |
| 11               | Austria | Coffee and products             | 2004           | 9                                                              |
| 11               | Austria | Cottonseed Oil                  | 2004           | 1                                                              |
| 11               | Austria | Cream                           | 2004           | 14                                                             |
| 11               | Austria | Crustaceans                     | 2004           | 1                                                              |
| 11               | Austria | Dates                           | 2004           | 1                                                              |
| 11               | Austria | Demersal Fish                   | 2004           | 7                                                              |
| 11               | Austria | Eggs                            | 2004           | 49                                                             |
| 11               | Austria | Fats, Animals, Raw              | 2004           | 163                                                            |
| 11               | Austria | Fish, Seafood                   | 2004           | 26                                                             |
| 11               | Austria | Freshwater Fish                 | 2004           | 5                                                              |
| 11               | Austria | Fruits - Excluding Wine         | 2004           | 175                                                            |
| 11               | Austria | Fruits, Other                   | 2004           | 59                                                             |
| 11               | Austria | Grand Total                     | 2004           | 3,696                                                          |
| 11               | Austria | Grapefruit and products         | 2004           | 1                                                              |
| 11               | Austria | Grapes and products (excl wine) | 2004           | 22                                                             |
| 11               | Austria | Groundnut Oil                   | 2004           | 3                                                              |
| 11               | Austria | Groundnuts (Shelled Eq)         | 2004           | 13                                                             |
| 11               | Austria | Honey                           | 2004           | 10                                                             |
| 11               | Austria | Lemons, Limes and products      | 2004           | 1                                                              |

Dietary calcium and zinc deficiency risks are decreasing but remain prevalent

| FAO Country code | Country | Food item                       | Reference year | Net energy supply (kcal capita <sup>-1</sup> d <sup>-1</sup> ) |
|------------------|---------|---------------------------------|----------------|----------------------------------------------------------------|
| 11               | Austria | Maize and products              | 2004           | 96                                                             |
| 11               | Austria | Maize Germ Oil                  | 2004           | 14                                                             |
| 11               | Austria | Marine Fish, Other              | 2004           | 2                                                              |
| 11               | Austria | Meat                            | 2004           | 493                                                            |
| 11               | Austria | Meat, Other                     | 2004           | 3                                                              |
| 11               | Austria | Milk - Excluding Butter         | 2004           | 236                                                            |
| 11               | Austria | Miscellaneous                   | 2004           | 4                                                              |
| 11               | Austria | Mutton & Goat Meat              | 2004           | 7                                                              |
| 11               | Austria | Oats                            | 2004           | 12                                                             |
| 11               | Austria | Offals                          | 2004           | 2                                                              |
| 11               | Austria | Oilcrops                        | 2004           | 40                                                             |
| 11               | Austria | Oilcrops Oil, Other             | 2004           | 94                                                             |
| 11               | Austria | Oilcrops, Other                 | 2004           | 7                                                              |
| 11               | Austria | Olive Oil                       | 2004           | 18                                                             |
| 11               | Austria | Olives (including preserved)    | 2004           | 1                                                              |
| 11               | Austria | Onions                          | 2004           | 10                                                             |
| 11               | Austria | Oranges, Mandarines             | 2004           | 11                                                             |
| 11               | Austria | Palm Oil                        | 2004           | 21                                                             |
| 11               | Austria | Peas                            | 2004           | 2                                                              |
| 11               | Austria | Pelagic Fish                    | 2004           | 11                                                             |
| 11               | Austria | Pepper                          | 2004           | 1                                                              |
| 11               | Austria | Pigmeat                         | 2004           | 360                                                            |
| 11               | Austria | Pimento                         | 2004           | 3                                                              |
| 11               | Austria | Pineapples and products         | 2004           | 4                                                              |
| 11               | Austria | Potatoes and products           | 2004           | 113                                                            |
| 11               | Austria | Poultry Meat                    | 2004           | 64                                                             |
| 11               | Austria | Pulses                          | 2004           | 6                                                              |
| 11               | Austria | Pulses, Other and products      | 2004           | 1                                                              |
| 11               | Austria | Rape and Mustard Oil            | 2004           | 235                                                            |
| 11               | Austria | Rape and Mustardseed            | 2004           | 1                                                              |
| 11               | Austria | Rice (Milled Equivalent)        | 2004           | 29                                                             |
| 11               | Austria | Rye and products                | 2004           | 98                                                             |
| 11               | Austria | Sesame seed                     | 2004           | 5                                                              |
| 11               | Austria | Soyabean Oil                    | 2004           | 95                                                             |
| 11               | Austria | Soyabeans                       | 2004           | 6                                                              |
| 11               | Austria | Spices                          | 2004           | 7                                                              |
| 11               | Austria | Spices, Other                   | 2004           | 3                                                              |
| 11               | Austria | Starchy Roots                   | 2004           | 113                                                            |
| 11               | Austria | Stimulants                      | 2004           | 30                                                             |
| 11               | Austria | Sugar & Sweeteners              | 2004           | 452                                                            |
| 11               | Austria | Sugar (Raw Equivalent)          | 2004           | 416                                                            |
| 11               | Austria | Sunflower seed                  | 2004           | 3                                                              |
| 11               | Austria | Sunflowerseed Oil               | 2004           | 43                                                             |
| 11               | Austria | Sweeteners, Other               | 2004           | 27                                                             |
| 11               | Austria | Tomatoes and products           | 2004           | 8                                                              |
| 11               | Austria | Treenuts                        | 2004           | 42                                                             |
| 11               | Austria | Vegetable Oils                  | 2004           | 539                                                            |
| 11               | Austria | Vegetables                      | 2004           | 70                                                             |
| 11               | Austria | Vegetables, Other               | 2004           | 52                                                             |
| 11               | Austria | Vegetal Products                | 2004           | 2,611                                                          |
| 11               | Austria | Wheat and products              | 2004           | 648                                                            |
| 11               | Austria | Wine                            | 2004           | 56                                                             |
| 11               | Austria | Alcoholic Beverages             | 2005           | 246                                                            |
| 11               | Austria | Animal fats                     | 2005           | 327                                                            |
| 11               | Austria | Animal Products                 | 2005           | 1,150                                                          |
| 11               | Austria | Apples and products             | 2005           | 64                                                             |
| 11               | Austria | Bananas                         | 2005           | 16                                                             |
| 11               | Austria | Barley and products             | 2005           | 2                                                              |
| 11               | Austria | Beans                           | 2005           | 2                                                              |
| 11               | Austria | Beer                            | 2005           | 146                                                            |
| 11               | Austria | Beverages, Alcoholic            | 2005           | 39                                                             |
| 11               | Austria | Bovine Meat                     | 2005           | 57                                                             |
| 11               | Austria | Butter, Ghee                    | 2005           | 102                                                            |
| 11               | Austria | Cereals - Excluding Beer        | 2005           | 943                                                            |
| 11               | Austria | Citrus, Other                   | 2005           | 1                                                              |
| 11               | Austria | Cocoa Beans and products        | 2005           | 9                                                              |
| 11               | Austria | Coconut Oil                     | 2005           | 10                                                             |
| 11               | Austria | Coconuts - Incl Copra           | 2005           | 3                                                              |
| 11               | Austria | Coffee and products             | 2005           | 6                                                              |
| 11               | Austria | Cottonseed Oil                  | 2005           | 3                                                              |
| 11               | Austria | Cream                           | 2005           | 15                                                             |
| 11               | Austria | Crustaceans                     | 2005           | 1                                                              |
| 11               | Austria | Dates                           | 2005           | 1                                                              |
| 11               | Austria | Demersal Fish                   | 2005           | 7                                                              |
| 11               | Austria | Eggs                            | 2005           | 51                                                             |
| 11               | Austria | Fats, Animals, Raw              | 2005           | 210                                                            |
| 11               | Austria | Fish, Seafood                   | 2005           | 30                                                             |
| 11               | Austria | Freshwater Fish                 | 2005           | 7                                                              |
| 11               | Austria | Fruits - Excluding Wine         | 2005           | 170                                                            |
| 11               | Austria | Fruits, Other                   | 2005           | 55                                                             |
| 11               | Austria | Grand Total                     | 2005           | 3,734                                                          |
| 11               | Austria | Grapefruit and products         | 2005           | 1                                                              |
| 11               | Austria | Grapes and products (excl wine) | 2005           | 14                                                             |
| 11               | Austria | Groundnut Oil                   | 2005           | 3                                                              |
| 11               | Austria | Groundnuts (Shelled Eq)         | 2005           | 16                                                             |
| 11               | Austria | Honey                           | 2005           | 10                                                             |
| 11               | Austria | Lemons, Limes and products      | 2005           | 1                                                              |
| 11               | Austria | Maize and products              | 2005           | 90                                                             |
| 11               | Austria | Maize Germ Oil                  | 2005           | 13                                                             |
| 11               | Austria | Marine Fish, Other              | 2005           | 2                                                              |
| 11               | Austria | Meat                            | 2005           | 492                                                            |
| 11               | Austria | Meat, Other                     | 2005           | 3                                                              |
| 11               | Austria | Milk - Excluding Butter         | 2005           | 245                                                            |
| 11               | Austria | Miscellaneous                   | 2005           | 9                                                              |
| 11               | Austria | Mutton & Goat Meat              | 2005           | 7                                                              |
| 11               | Austria | Oats                            | 2005           | 12                                                             |
| 11               | Austria | Offals                          | 2005           | 4                                                              |

Dietary calcium and zinc deficiency risks are decreasing but remain prevalent

| FAO Country code | Country | Food item                       | Reference year | Net energy supply (kcal capita <sup>-1</sup> d <sup>-1</sup> ) |
|------------------|---------|---------------------------------|----------------|----------------------------------------------------------------|
| 11               | Austria | Oilcrops                        | 2005           | 43                                                             |
| 11               | Austria | Oilcrops Oil, Other             | 2005           | 60                                                             |
| 11               | Austria | Oilcrops, Other                 | 2005           | 6                                                              |
| 11               | Austria | Olive Oil                       | 2005           | 21                                                             |
| 11               | Austria | Olives (including preserved)    | 2005           | 1                                                              |
| 11               | Austria | Onions                          | 2005           | 8                                                              |
| 11               | Austria | Oranges, Mandarines             | 2005           | 13                                                             |
| 11               | Austria | Palm Oil                        | 2005           | 18                                                             |
| 11               | Austria | Peas                            | 2005           | 2                                                              |
| 11               | Austria | Pelagic Fish                    | 2005           | 12                                                             |
| 11               | Austria | Pepper                          | 2005           | 2                                                              |
| 11               | Austria | Pigmeat                         | 2005           | 359                                                            |
| 11               | Austria | Pimento                         | 2005           | 2                                                              |
| 11               | Austria | Pineapples and products         | 2005           | 4                                                              |
| 11               | Austria | Potatoes and products           | 2005           | 112                                                            |
| 11               | Austria | Poultry Meat                    | 2005           | 66                                                             |
| 11               | Austria | Pulses                          | 2005           | 5                                                              |
| 11               | Austria | Pulses, Other and products      | 2005           | 1                                                              |
| 11               | Austria | Rape and Mustard Oil            | 2005           | 153                                                            |
| 11               | Austria | Rape and Mustardseed            | 2005           | 1                                                              |
| 11               | Austria | Rice (Milled Equivalent)        | 2005           | 30                                                             |
| 11               | Austria | Rye and products                | 2005           | 97                                                             |
| 11               | Austria | Sesame seed                     | 2005           | 5                                                              |
| 11               | Austria | Soyabean Oil                    | 2005           | 88                                                             |
| 11               | Austria | Soyabeans                       | 2005           | 9                                                              |
| 11               | Austria | Spices                          | 2005           | 7                                                              |
| 11               | Austria | Spices, Other                   | 2005           | 3                                                              |
| 11               | Austria | Starchy Roots                   | 2005           | 112                                                            |
| 11               | Austria | Stimulants                      | 2005           | 16                                                             |
| 11               | Austria | Sugar & Sweeteners              | 2005           | 476                                                            |
| 11               | Austria | Sugar (Raw Equivalent)          | 2005           | 432                                                            |
| 11               | Austria | Sunflower seed                  | 2005           | 2                                                              |
| 11               | Austria | Sunflowerseed Oil               | 2005           | 84                                                             |
| 11               | Austria | Sweeteners, Other               | 2005           | 35                                                             |
| 11               | Austria | Tea (including mate)            | 2005           | 1                                                              |
| 11               | Austria | Tomatoes and products           | 2005           | 8                                                              |
| 11               | Austria | Treenuts                        | 2005           | 39                                                             |
| 11               | Austria | Vegetable Oils                  | 2005           | 454                                                            |
| 11               | Austria | Vegetables                      | 2005           | 64                                                             |
| 11               | Austria | Vegetables, Other               | 2005           | 48                                                             |
| 11               | Austria | Vegetal Products                | 2005           | 2,584                                                          |
| 11               | Austria | Wheat and products              | 2005           | 712                                                            |
| 11               | Austria | Wine                            | 2005           | 61                                                             |
| 11               | Austria | Alcoholic Beverages             | 2006           | 247                                                            |
| 11               | Austria | Animal fats                     | 2006           | 317                                                            |
| 11               | Austria | Animal Products                 | 2006           | 1,088                                                          |
| 11               | Austria | Apples and products             | 2006           | 65                                                             |
| 11               | Austria | Bananas                         | 2006           | 22                                                             |
| 11               | Austria | Barley and products             | 2006           | 2                                                              |
| 11               | Austria | Beans                           | 2006           | 2                                                              |
| 11               | Austria | Beer                            | 2006           | 146                                                            |
| 11               | Austria | Beverages, Alcoholic            | 2006           | 40                                                             |
| 11               | Austria | Bovine Meat                     | 2006           | 58                                                             |
| 11               | Austria | Butter, Ghee                    | 2006           | 104                                                            |
| 11               | Austria | Cereals - Excluding Beer        | 2006           | 930                                                            |
| 11               | Austria | Citrus, Other                   | 2006           | 1                                                              |
| 11               | Austria | Cocoa Beans and products        | 2006           | 17                                                             |
| 11               | Austria | Coconut Oil                     | 2006           | 8                                                              |
| 11               | Austria | Coconuts - Incl Copra           | 2006           | 2                                                              |
| 11               | Austria | Coffee and products             | 2006           | 6                                                              |
| 11               | Austria | Cottonseed Oil                  | 2006           | 3                                                              |
| 11               | Austria | Cream                           | 2006           | 22                                                             |
| 11               | Austria | Crustaceans                     | 2006           | 1                                                              |
| 11               | Austria | Dates                           | 2006           | 1                                                              |
| 11               | Austria | Demersal Fish                   | 2006           | 9                                                              |
| 11               | Austria | Eggs                            | 2006           | 52                                                             |
| 11               | Austria | Fats, Animals, Raw              | 2006           | 191                                                            |
| 11               | Austria | Fish, Seafood                   | 2006           | 30                                                             |
| 11               | Austria | Freshwater Fish                 | 2006           | 6                                                              |
| 11               | Austria | Fruits - Excluding Wine         | 2006           | 178                                                            |
| 11               | Austria | Fruits, Other                   | 2006           | 57                                                             |
| 11               | Austria | Grand Total                     | 2006           | 3,784                                                          |
| 11               | Austria | Grapes and products (excl wine) | 2006           | 14                                                             |
| 11               | Austria | Groundnut Oil                   | 2006           | 2                                                              |
| 11               | Austria | Groundnuts (Shelled Eq)         | 2006           | 12                                                             |
| 11               | Austria | Honey                           | 2006           | 9                                                              |
| 11               | Austria | Lemons, Limes and products      | 2006           | 1                                                              |
| 11               | Austria | Maize and products              | 2006           | 100                                                            |
| 11               | Austria | Maize Germ Oil                  | 2006           | 14                                                             |
| 11               | Austria | Marine Fish, Other              | 2006           | 2                                                              |
| 11               | Austria | Meat                            | 2006           | 447                                                            |
| 11               | Austria | Meat, Other                     | 2006           | 3                                                              |
| 11               | Austria | Milk - Excluding Butter         | 2006           | 238                                                            |
| 11               | Austria | Miscellaneous                   | 2006           | 14                                                             |
| 11               | Austria | Mutton & Goat Meat              | 2006           | 7                                                              |
| 11               | Austria | Oats                            | 2006           | 11                                                             |
| 11               | Austria | Offals                          | 2006           | 4                                                              |
| 11               | Austria | Oilcrops                        | 2006           | 45                                                             |
| 11               | Austria | Oilcrops Oil, Other             | 2006           | 55                                                             |
| 11               | Austria | Oilcrops, Other                 | 2006           | 9                                                              |
| 11               | Austria | Olive Oil                       | 2006           | 19                                                             |
| 11               | Austria | Olives (including preserved)    | 2006           | 2                                                              |
| 11               | Austria | Onions                          | 2006           | 8                                                              |
| 11               | Austria | Oranges, Mandarines             | 2006           | 13                                                             |
| 11               | Austria | Palm Oil                        | 2006           | 15                                                             |
| 11               | Austria | Peas                            | 2006           | 3                                                              |
| 11               | Austria | Pelagic Fish                    | 2006           | 11                                                             |

Dietary calcium and zinc deficiency risks are decreasing but remain prevalent

| FAO Country code | Country | Food item                       | Reference year | Net energy supply (kcal capita <sup>-1</sup> d <sup>-1</sup> ) |
|------------------|---------|---------------------------------|----------------|----------------------------------------------------------------|
| 11               | Austria | Pepper                          | 2006           | 2                                                              |
| 11               | Austria | Pigmeat                         | 2006           | 318                                                            |
| 11               | Austria | Pimento                         | 2006           | 3                                                              |
| 11               | Austria | Pineapples and products         | 2006           | 4                                                              |
| 11               | Austria | Potatoes and products           | 2006           | 101                                                            |
| 11               | Austria | Poultry Meat                    | 2006           | 60                                                             |
| 11               | Austria | Pulses                          | 2006           | 5                                                              |
| 11               | Austria | Pulses, Other and products      | 2006           | 1                                                              |
| 11               | Austria | Rape and Mustard Oil            | 2006           | 270                                                            |
| 11               | Austria | Rape and Mustardseed            | 2006           | 1                                                              |
| 11               | Austria | Rice (Milled Equivalent)        | 2006           | 30                                                             |
| 11               | Austria | Rye and products                | 2006           | 92                                                             |
| 11               | Austria | Sesame seed                     | 2006           | 6                                                              |
| 11               | Austria | Sesameseed Oil                  | 2006           | 1                                                              |
| 11               | Austria | Soyabean Oil                    | 2006           | 88                                                             |
| 11               | Austria | Soyabeans                       | 2006           | 11                                                             |
| 11               | Austria | Spices                          | 2006           | 8                                                              |
| 11               | Austria | Spices, Other                   | 2006           | 3                                                              |
| 11               | Austria | Starchy Roots                   | 2006           | 101                                                            |
| 11               | Austria | Stimulants                      | 2006           | 24                                                             |
| 11               | Austria | Sugar & Sweeteners              | 2006           | 470                                                            |
| 11               | Austria | Sugar (Raw Equivalent)          | 2006           | 417                                                            |
| 11               | Austria | Sunflower seed                  | 2006           | 3                                                              |
| 11               | Austria | Sunflowerseed Oil               | 2006           | 98                                                             |
| 11               | Austria | Sweeteners, Other               | 2006           | 45                                                             |
| 11               | Austria | Tea (including mate)            | 2006           | 1                                                              |
| 11               | Austria | Tomatoes and products           | 2006           | 9                                                              |
| 11               | Austria | Treenuts                        | 2006           | 37                                                             |
| 11               | Austria | Vegetable Oils                  | 2006           | 572                                                            |
| 11               | Austria | Vegetables                      | 2006           | 65                                                             |
| 11               | Austria | Vegetables, Other               | 2006           | 47                                                             |
| 11               | Austria | Vegetal Products                | 2006           | 2,695                                                          |
| 11               | Austria | Wheat and products              | 2006           | 694                                                            |
| 11               | Austria | Wine                            | 2006           | 61                                                             |
| 11               | Austria | Alcoholic Beverages             | 2007           | 247                                                            |
| 11               | Austria | Animal fats                     | 2007           | 340                                                            |
| 11               | Austria | Animal Products                 | 2007           | 1,137                                                          |
| 11               | Austria | Apples and products             | 2007           | 81                                                             |
| 11               | Austria | Bananas                         | 2007           | 16                                                             |
| 11               | Austria | Barley and products             | 2007           | 3                                                              |
| 11               | Austria | Beans                           | 2007           | 2                                                              |
| 11               | Austria | Beer                            | 2007           | 145                                                            |
| 11               | Austria | Beverages, Alcoholic            | 2007           | 46                                                             |
| 11               | Austria | Bovine Meat                     | 2007           | 57                                                             |
| 11               | Austria | Butter, Ghee                    | 2007           | 105                                                            |
| 11               | Austria | Cereals - Excluding Beer        | 2007           | 940                                                            |
| 11               | Austria | Cocoa Beans and products        | 2007           | 9                                                              |
| 11               | Austria | Coconut Oil                     | 2007           | 18                                                             |
| 11               | Austria | Coconuts - Incl Copra           | 2007           | 3                                                              |
| 11               | Austria | Coffee and products             | 2007           | 10                                                             |
| 11               | Austria | Cottonseed Oil                  | 2007           | 6                                                              |
| 11               | Austria | Cream                           | 2007           | 34                                                             |
| 11               | Austria | Crustaceans                     | 2007           | 1                                                              |
| 11               | Austria | Dates                           | 2007           | 2                                                              |
| 11               | Austria | Demersal Fish                   | 2007           | 9                                                              |
| 11               | Austria | Eggs                            | 2007           | 53                                                             |
| 11               | Austria | Fats, Animals, Raw              | 2007           | 202                                                            |
| 11               | Austria | Fish, Seafood                   | 2007           | 33                                                             |
| 11               | Austria | Freshwater Fish                 | 2007           | 7                                                              |
| 11               | Austria | Fruits - Excluding Wine         | 2007           | 189                                                            |
| 11               | Austria | Fruits, Other                   | 2007           | 59                                                             |
| 11               | Austria | Grand Total                     | 2007           | 3,798                                                          |
| 11               | Austria | Grapes and products (excl wine) | 2007           | 14                                                             |
| 11               | Austria | Groundnut Oil                   | 2007           | 4                                                              |
| 11               | Austria | Groundnuts (Shelled Eq)         | 2007           | 10                                                             |
| 11               | Austria | Honey                           | 2007           | 10                                                             |
| 11               | Austria | Lemons, Limes and products      | 2007           | 1                                                              |
| 11               | Austria | Maize and products              | 2007           | 90                                                             |
| 11               | Austria | Maize Germ Oil                  | 2007           | 34                                                             |
| 11               | Austria | Marine Fish, Other              | 2007           | 2                                                              |
| 11               | Austria | Meat                            | 2007           | 457                                                            |
| 11               | Austria | Meat, Other                     | 2007           | 3                                                              |
| 11               | Austria | Milk - Excluding Butter         | 2007           | 250                                                            |
| 11               | Austria | Miscellaneous                   | 2007           | 6                                                              |
| 11               | Austria | Mutton & Goat Meat              | 2007           | 6                                                              |
| 11               | Austria | Oats                            | 2007           | 13                                                             |
| 11               | Austria | Offals                          | 2007           | 4                                                              |
| 11               | Austria | Oilcrops                        | 2007           | 48                                                             |
| 11               | Austria | Oilcrops Oil, Other             | 2007           | 32                                                             |
| 11               | Austria | Oilcrops, Other                 | 2007           | 9                                                              |
| 11               | Austria | Olive Oil                       | 2007           | 25                                                             |
| 11               | Austria | Olives (including preserved)    | 2007           | 2                                                              |
| 11               | Austria | Onions                          | 2007           | 9                                                              |
| 11               | Austria | Oranges, Mandarines             | 2007           | 10                                                             |
| 11               | Austria | Palm Oil                        | 2007           | 23                                                             |
| 11               | Austria | Peas                            | 2007           | 3                                                              |
| 11               | Austria | Pelagic Fish                    | 2007           | 12                                                             |
| 11               | Austria | Pepper                          | 2007           | 2                                                              |
| 11               | Austria | Pigmeat                         | 2007           | 327                                                            |
| 11               | Austria | Pimento                         | 2007           | 2                                                              |
| 11               | Austria | Pineapples and products         | 2007           | 5                                                              |
| 11               | Austria | Potatoes and products           | 2007           | 105                                                            |
| 11               | Austria | Poultry Meat                    | 2007           | 63                                                             |
| 11               | Austria | Pulses                          | 2007           | 6                                                              |
| 11               | Austria | Pulses, Other and products      | 2007           | 1                                                              |
| 11               | Austria | Rape and Mustard Oil            | 2007           | 176                                                            |
| 11               | Austria | Rape and Mustardseed            | 2007           | 1                                                              |



Dietary calcium and zinc deficiency risks are decreasing but remain prevalent

| FAO Country code | Country | Food item                       | Reference year | Net energy supply (kcal capita <sup>-1</sup> d <sup>-1</sup> ) |
|------------------|---------|---------------------------------|----------------|----------------------------------------------------------------|
| 11               | Austria | Rice (Milled Equivalent)        | 2007           | 34                                                             |
| 11               | Austria | Rye and products                | 2007           | 98                                                             |
| 11               | Austria | Sesame seed                     | 2007           | 6                                                              |
| 11               | Austria | Soyabean Oil                    | 2007           | 87                                                             |
| 11               | Austria | Soyabeans                       | 2007           | 13                                                             |
| 11               | Austria | Spices                          | 2007           | 7                                                              |
| 11               | Austria | Spices, Other                   | 2007           | 3                                                              |
| 11               | Austria | Starchy Roots                   | 2007           | 105                                                            |
| 11               | Austria | Stimulants                      | 2007           | 20                                                             |
| 11               | Austria | Sugar & Sweeteners              | 2007           | 453                                                            |
| 11               | Austria | Sugar (Raw Equivalent)          | 2007           | 412                                                            |
| 11               | Austria | Sunflower seed                  | 2007           | 4                                                              |
| 11               | Austria | Sunflowerseed Oil               | 2007           | 129                                                            |
| 11               | Austria | Sweeteners, Other               | 2007           | 30                                                             |
| 11               | Austria | Tea (including mate)            | 2007           | 1                                                              |
| 11               | Austria | Tomatoes and products           | 2007           | 10                                                             |
| 11               | Austria | Treenuts                        | 2007           | 39                                                             |
| 11               | Austria | Vegetable Oils                  | 2007           | 536                                                            |
| 11               | Austria | Vegetables                      | 2007           | 66                                                             |
| 11               | Austria | Vegetables, Other               | 2007           | 47                                                             |
| 11               | Austria | Vegetal Products                | 2007           | 2,661                                                          |
| 11               | Austria | Wheat and products              | 2007           | 702                                                            |
| 11               | Austria | Wine                            | 2007           | 55                                                             |
| 11               | Austria | Alcoholic Beverages             | 2008           | 229                                                            |
| 11               | Austria | Animal fats                     | 2008           | 319                                                            |
| 11               | Austria | Animal Products                 | 2008           | 1,109                                                          |
| 11               | Austria | Apples and products             | 2008           | 89                                                             |
| 11               | Austria | Bananas                         | 2008           | 19                                                             |
| 11               | Austria | Barley and products             | 2008           | 2                                                              |
| 11               | Austria | Beans                           | 2008           | 1                                                              |
| 11               | Austria | Beer                            | 2008           | 140                                                            |
| 11               | Austria | Beverages, Alcoholic            | 2008           | 34                                                             |
| 11               | Austria | Bovine Meat                     | 2008           | 58                                                             |
| 11               | Austria | Butter, Ghee                    | 2008           | 103                                                            |
| 11               | Austria | Cereals - Excluding Beer        | 2008           | 910                                                            |
| 11               | Austria | Citrus, Other                   | 2008           | 1                                                              |
| 11               | Austria | Cocoa Beans and products        | 2008           | 6                                                              |
| 11               | Austria | Coconut Oil                     | 2008           | 17                                                             |
| 11               | Austria | Coconuts - Incl Copra           | 2008           | 2                                                              |
| 11               | Austria | Coffee and products             | 2008           | 10                                                             |
| 11               | Austria | Cottonseed Oil                  | 2008           | 2                                                              |
| 11               | Austria | Cream                           | 2008           | 32                                                             |
| 11               | Austria | Crustaceans                     | 2008           | 1                                                              |
| 11               | Austria | Dates                           | 2008           | 1                                                              |
| 11               | Austria | Demersal Fish                   | 2008           | 8                                                              |
| 11               | Austria | Eggs                            | 2008           | 54                                                             |
| 11               | Austria | Fats, Animals, Raw              | 2008           | 184                                                            |
| 11               | Austria | Fish, Seafood                   | 2008           | 31                                                             |
| 11               | Austria | Freshwater Fish                 | 2008           | 7                                                              |
| 11               | Austria | Fruits - Excluding Wine         | 2008           | 200                                                            |
| 11               | Austria | Fruits, Other                   | 2008           | 59                                                             |
| 11               | Austria | Grand Total                     | 2008           | 3,784                                                          |
| 11               | Austria | Grapes and products (excl wine) | 2008           | 14                                                             |
| 11               | Austria | Groundnut Oil                   | 2008           | 2                                                              |
| 11               | Austria | Groundnuts (Shelled Eq)         | 2008           | 11                                                             |
| 11               | Austria | Honey                           | 2008           | 9                                                              |
| 11               | Austria | Lemons, Limes and products      | 2008           | 1                                                              |
| 11               | Austria | Maize and products              | 2008           | 86                                                             |
| 11               | Austria | Maize Germ Oil                  | 2008           | 18                                                             |
| 11               | Austria | Marine Fish, Other              | 2008           | 2                                                              |
| 11               | Austria | Meat                            | 2008           | 444                                                            |
| 11               | Austria | Meat, Other                     | 2008           | 1                                                              |
| 11               | Austria | Milk - Excluding Butter         | 2008           | 258                                                            |
| 11               | Austria | Miscellaneous                   | 2008           | 5                                                              |
| 11               | Austria | Mutton & Goat Meat              | 2008           | 7                                                              |
| 11               | Austria | Oats                            | 2008           | 13                                                             |
| 11               | Austria | Offals                          | 2008           | 3                                                              |
| 11               | Austria | Oilcrops                        | 2008           | 44                                                             |
| 11               | Austria | Oilcrops Oil, Other             | 2008           | 42                                                             |
| 11               | Austria | Oilcrops, Other                 | 2008           | 6                                                              |
| 11               | Austria | Olive Oil                       | 2008           | 30                                                             |
| 11               | Austria | Olives (including preserved)    | 2008           | 2                                                              |
| 11               | Austria | Onions                          | 2008           | 13                                                             |
| 11               | Austria | Oranges, Mandarines             | 2008           | 11                                                             |
| 11               | Austria | Palm Oil                        | 2008           | 26                                                             |
| 11               | Austria | Peas                            | 2008           | 3                                                              |
| 11               | Austria | Pelagic Fish                    | 2008           | 13                                                             |
| 11               | Austria | Pepper                          | 2008           | 1                                                              |
| 11               | Austria | Pigmeat                         | 2008           | 316                                                            |
| 11               | Austria | Pimento                         | 2008           | 2                                                              |
| 11               | Austria | Pineapples and products         | 2008           | 6                                                              |
| 11               | Austria | Potatoes and products           | 2008           | 108                                                            |
| 11               | Austria | Poultry Meat                    | 2008           | 61                                                             |
| 11               | Austria | Pulses                          | 2008           | 6                                                              |
| 11               | Austria | Pulses, Other and products      | 2008           | 2                                                              |
| 11               | Austria | Rape and Mustard Oil            | 2008           | 209                                                            |
| 11               | Austria | Rice (Milled Equivalent)        | 2008           | 38                                                             |
| 11               | Austria | Rye and products                | 2008           | 90                                                             |
| 11               | Austria | Sesame seed                     | 2008           | 4                                                              |
| 11               | Austria | Soyabean Oil                    | 2008           | 78                                                             |
| 11               | Austria | Soyabeans                       | 2008           | 13                                                             |
| 11               | Austria | Spices                          | 2008           | 8                                                              |
| 11               | Austria | Spices, Other                   | 2008           | 4                                                              |
| 11               | Austria | Starchy Roots                   | 2008           | 108                                                            |
| 11               | Austria | Stimulants                      | 2008           | 16                                                             |
| 11               | Austria | Sugar & Sweeteners              | 2008           | 464                                                            |
| 11               | Austria | Sugar (Raw Equivalent)          | 2008           | 415                                                            |

Dietary calcium and zinc deficiency risks are decreasing but remain prevalent

| FAO Country code | Country | Food item                       | Reference year | Net energy supply (kcal capita <sup>-1</sup> d <sup>-1</sup> ) |
|------------------|---------|---------------------------------|----------------|----------------------------------------------------------------|
| 11               | Austria | Sunflower seed                  | 2008           | 4                                                              |
| 11               | Austria | Sunflowerseed Oil               | 2008           | 143                                                            |
| 11               | Austria | Sweeteners, Other               | 2008           | 40                                                             |
| 11               | Austria | Tomatoes and products           | 2008           | 10                                                             |
| 11               | Austria | Treenuts                        | 2008           | 43                                                             |
| 11               | Austria | Vegetable Oils                  | 2008           | 569                                                            |
| 11               | Austria | Vegetables                      | 2008           | 74                                                             |
| 11               | Austria | Vegetables, Other               | 2008           | 51                                                             |
| 11               | Austria | Vegetal Products                | 2008           | 2,675                                                          |
| 11               | Austria | Wheat and products              | 2008           | 681                                                            |
| 11               | Austria | Wine                            | 2008           | 56                                                             |
| 11               | Austria | Alcoholic Beverages             | 2009           | 243                                                            |
| 11               | Austria | Animal fats                     | 2009           | 354                                                            |
| 11               | Austria | Animal Products                 | 2009           | 1,150                                                          |
| 11               | Austria | Apples and products             | 2009           | 58                                                             |
| 11               | Austria | Bananas                         | 2009           | 19                                                             |
| 11               | Austria | Barley and products             | 2009           | 3                                                              |
| 11               | Austria | Beans                           | 2009           | 2                                                              |
| 11               | Austria | Beer                            | 2009           | 141                                                            |
| 11               | Austria | Beverages, Alcoholic            | 2009           | 42                                                             |
| 11               | Austria | Bovine Meat                     | 2009           | 56                                                             |
| 11               | Austria | Butter, Ghee                    | 2009           | 108                                                            |
| 11               | Austria | Cereals - Excluding Beer        | 2009           | 894                                                            |
| 11               | Austria | Cocoa Beans and products        | 2009           | 9                                                              |
| 11               | Austria | Coconut Oil                     | 2009           | 14                                                             |
| 11               | Austria | Coconuts - Incl Copra           | 2009           | 3                                                              |
| 11               | Austria | Coffee and products             | 2009           | 8                                                              |
| 11               | Austria | Cottonseed Oil                  | 2009           | 3                                                              |
| 11               | Austria | Cream                           | 2009           | 34                                                             |
| 11               | Austria | Crustaceans                     | 2009           | 2                                                              |
| 11               | Austria | Dates                           | 2009           | 1                                                              |
| 11               | Austria | Demersal Fish                   | 2009           | 7                                                              |
| 11               | Austria | Eggs                            | 2009           | 52                                                             |
| 11               | Austria | Fats, Animals, Raw              | 2009           | 212                                                            |
| 11               | Austria | Fish, Seafood                   | 2009           | 29                                                             |
| 11               | Austria | Freshwater Fish                 | 2009           | 7                                                              |
| 11               | Austria | Fruits - Excluding Wine         | 2009           | 168                                                            |
| 11               | Austria | Fruits, Other                   | 2009           | 61                                                             |
| 11               | Austria | Grand Total                     | 2009           | 3,793                                                          |
| 11               | Austria | Grapes and products (excl wine) | 2009           | 15                                                             |
| 11               | Austria | Groundnut Oil                   | 2009           | 2                                                              |
| 11               | Austria | Groundnuts (Shelled Eq)         | 2009           | 13                                                             |
| 11               | Austria | Honey                           | 2009           | 10                                                             |
| 11               | Austria | Lemons, Limes and products      | 2009           | 1                                                              |
| 11               | Austria | Maize and products              | 2009           | 110                                                            |
| 11               | Austria | Maize Germ Oil                  | 2009           | 17                                                             |
| 11               | Austria | Marine Fish, Other              | 2009           | 2                                                              |
| 11               | Austria | Meat                            | 2009           | 460                                                            |
| 11               | Austria | Meat, Other                     | 2009           | 2                                                              |
| 11               | Austria | Milk - Excluding Butter         | 2009           | 251                                                            |
| 11               | Austria | Miscellaneous                   | 2009           | 6                                                              |
| 11               | Austria | Mutton & Goat Meat              | 2009           | 7                                                              |
| 11               | Austria | Oats                            | 2009           | 13                                                             |
| 11               | Austria | Offals                          | 2009           | 4                                                              |
| 11               | Austria | Oilcrops                        | 2009           | 51                                                             |
| 11               | Austria | Oilcrops Oil, Other             | 2009           | 95                                                             |
| 11               | Austria | Oilcrops, Other                 | 2009           | 10                                                             |
| 11               | Austria | Olive Oil                       | 2009           | 25                                                             |
| 11               | Austria | Olives (including preserved)    | 2009           | 2                                                              |
| 11               | Austria | Onions                          | 2009           | 13                                                             |
| 11               | Austria | Oranges, Mandarines             | 2009           | 8                                                              |
| 11               | Austria | Palm Oil                        | 2009           | 21                                                             |
| 11               | Austria | Peas                            | 2009           | 3                                                              |
| 11               | Austria | Pelagic Fish                    | 2009           | 11                                                             |
| 11               | Austria | Pepper                          | 2009           | 1                                                              |
| 11               | Austria | Pigmeat                         | 2009           | 331                                                            |
| 11               | Austria | Pimento                         | 2009           | 2                                                              |
| 11               | Austria | Pineapples and products         | 2009           | 4                                                              |
| 11               | Austria | Potatoes and products           | 2009           | 110                                                            |
| 11               | Austria | Poultry Meat                    | 2009           | 63                                                             |
| 11               | Austria | Pulses                          | 2009           | 7                                                              |
| 11               | Austria | Pulses, Other and products      | 2009           | 2                                                              |
| 11               | Austria | Rape and Mustard Oil            | 2009           | 256                                                            |
| 11               | Austria | Rape and Mustardseed            | 2009           | 1                                                              |
| 11               | Austria | Rice (Milled Equivalent)        | 2009           | 35                                                             |
| 11               | Austria | Rye and products                | 2009           | 93                                                             |
| 11               | Austria | Sesame seed                     | 2009           | 3                                                              |
| 11               | Austria | Soyabean Oil                    | 2009           | 32                                                             |
| 11               | Austria | Soyabeans                       | 2009           | 16                                                             |
| 11               | Austria | Spices                          | 2009           | 8                                                              |
| 11               | Austria | Spices, Other                   | 2009           | 4                                                              |
| 11               | Austria | Starchy Roots                   | 2009           | 110                                                            |
| 11               | Austria | Stimulants                      | 2009           | 17                                                             |
| 11               | Austria | Sugar & Sweeteners              | 2009           | 446                                                            |
| 11               | Austria | Sugar (Raw Equivalent)          | 2009           | 400                                                            |
| 11               | Austria | Sunflower seed                  | 2009           | 5                                                              |
| 11               | Austria | Sunflowerseed Oil               | 2009           | 113                                                            |
| 11               | Austria | Sweeteners, Other               | 2009           | 37                                                             |
| 11               | Austria | Tomatoes and products           | 2009           | 9                                                              |
| 11               | Austria | Treenuts                        | 2009           | 42                                                             |
| 11               | Austria | Vegetable Oils                  | 2009           | 578                                                            |
| 11               | Austria | Vegetables                      | 2009           | 72                                                             |
| 11               | Austria | Vegetables, Other               | 2009           | 51                                                             |
| 11               | Austria | Vegetal Products                | 2009           | 2,643                                                          |
| 11               | Austria | Wheat and products              | 2009           | 639                                                            |
| 11               | Austria | Wine                            | 2009           | 61                                                             |
| 11               | Austria | Alcoholic Beverages             | 2010           | 234                                                            |

Dietary calcium and zinc deficiency risks are decreasing but remain prevalent

| FAO Country code | Country | Food item                       | Reference year | Net energy supply (kcal capita <sup>-1</sup> d <sup>-1</sup> ) |
|------------------|---------|---------------------------------|----------------|----------------------------------------------------------------|
| 11               | Austria | Animal fats                     | 2010           | 376                                                            |
| 11               | Austria | Animal Products                 | 2010           | 1,167                                                          |
| 11               | Austria | Apples and products             | 2010           | 63                                                             |
| 11               | Austria | Bananas                         | 2010           | 20                                                             |
| 11               | Austria | Barley and products             | 2010           | 3                                                              |
| 11               | Austria | Beans                           | 2010           | 2                                                              |
| 11               | Austria | Beer                            | 2010           | 140                                                            |
| 11               | Austria | Beverages, Alcoholic            | 2010           | 36                                                             |
| 11               | Austria | Beverages, Fermented            | 2010           | 1                                                              |
| 11               | Austria | Bovine Meat                     | 2010           | 57                                                             |
| 11               | Austria | Butter, Ghee                    | 2010           | 106                                                            |
| 11               | Austria | Cereals - Excluding Beer        | 2010           | 871                                                            |
| 11               | Austria | Cocoa Beans and products        | 2010           | 5                                                              |
| 11               | Austria | Coconut Oil                     | 2010           | 25                                                             |
| 11               | Austria | Coconuts - Incl Copra           | 2010           | 2                                                              |
| 11               | Austria | Coffee and products             | 2010           | 8                                                              |
| 11               | Austria | Cream                           | 2010           | 36                                                             |
| 11               | Austria | Crustaceans                     | 2010           | 1                                                              |
| 11               | Austria | Dates                           | 2010           | 1                                                              |
| 11               | Austria | Demersal Fish                   | 2010           | 8                                                              |
| 11               | Austria | Eggs                            | 2010           | 52                                                             |
| 11               | Austria | Fats, Animals, Raw              | 2010           | 234                                                            |
| 11               | Austria | Fish, Seafood                   | 2010           | 28                                                             |
| 11               | Austria | Freshwater Fish                 | 2010           | 7                                                              |
| 11               | Austria | Fruits - Excluding Wine         | 2010           | 160                                                            |
| 11               | Austria | Fruits, Other                   | 2010           | 48                                                             |
| 11               | Austria | Grand Total                     | 2010           | 3,777                                                          |
| 11               | Austria | Grapes and products (excl wine) | 2010           | 13                                                             |
| 11               | Austria | Groundnut Oil                   | 2010           | 2                                                              |
| 11               | Austria | Groundnuts (Shelled Eq)         | 2010           | 13                                                             |
| 11               | Austria | Honey                           | 2010           | 9                                                              |
| 11               | Austria | Lemons, Limes and products      | 2010           | 1                                                              |
| 11               | Austria | Maize and products              | 2010           | 117                                                            |
| 11               | Austria | Maize Germ Oil                  | 2010           | 20                                                             |
| 11               | Austria | Marine Fish, Other              | 2010           | 2                                                              |
| 11               | Austria | Meat                            | 2010           | 457                                                            |
| 11               | Austria | Meat, Other                     | 2010           | 3                                                              |
| 11               | Austria | Milk - Excluding Butter         | 2010           | 250                                                            |
| 11               | Austria | Miscellaneous                   | 2010           | 1                                                              |
| 11               | Austria | Mutton & Goat Meat              | 2010           | 7                                                              |
| 11               | Austria | Oats                            | 2010           | 13                                                             |
| 11               | Austria | Offals                          | 2010           | 3                                                              |
| 11               | Austria | Oilcrops                        | 2010           | 51                                                             |
| 11               | Austria | Oilcrops Oil, Other             | 2010           | 64                                                             |
| 11               | Austria | Oilcrops, Other                 | 2010           | 8                                                              |
| 11               | Austria | Olive Oil                       | 2010           | 26                                                             |
| 11               | Austria | Olives (including preserved)    | 2010           | 2                                                              |
| 11               | Austria | Onions                          | 2010           | 15                                                             |
| 11               | Austria | Oranges, Mandarines             | 2010           | 8                                                              |
| 11               | Austria | Palm Oil                        | 2010           | 21                                                             |
| 11               | Austria | Peas                            | 2010           | 4                                                              |
| 11               | Austria | Pelagic Fish                    | 2010           | 10                                                             |
| 11               | Austria | Pepper                          | 2010           | 1                                                              |
| 11               | Austria | Pigmeat                         | 2010           | 322                                                            |
| 11               | Austria | Pimento                         | 2010           | 3                                                              |
| 11               | Austria | Pineapples and products         | 2010           | 4                                                              |
| 11               | Austria | Potatoes and products           | 2010           | 107                                                            |
| 11               | Austria | Poultry Meat                    | 2010           | 69                                                             |
| 11               | Austria | Pulses                          | 2010           | 7                                                              |
| 11               | Austria | Pulses, Other and products      | 2010           | 1                                                              |
| 11               | Austria | Rape and Mustard Oil            | 2010           | 288                                                            |
| 11               | Austria | Rice (Milled Equivalent)        | 2010           | 33                                                             |
| 11               | Austria | Rye and products                | 2010           | 91                                                             |
| 11               | Austria | Sesame seed                     | 2010           | 4                                                              |
| 11               | Austria | Sesameseed Oil                  | 2010           | 1                                                              |
| 11               | Austria | Soyabean Oil                    | 2010           | 37                                                             |
| 11               | Austria | Soyabeans                       | 2010           | 16                                                             |
| 11               | Austria | Spices                          | 2010           | 7                                                              |
| 11               | Austria | Spices, Other                   | 2010           | 4                                                              |
| 11               | Austria | Starchy Roots                   | 2010           | 108                                                            |
| 11               | Austria | Stimulants                      | 2010           | 13                                                             |
| 11               | Austria | Sugar & Sweeteners              | 2010           | 457                                                            |
| 11               | Austria | Sugar (Raw Equivalent)          | 2010           | 402                                                            |
| 11               | Austria | Sunflower seed                  | 2010           | 5                                                              |
| 11               | Austria | Sunflowerseed Oil               | 2010           | 107                                                            |
| 11               | Austria | Sweeteners, Other               | 2010           | 45                                                             |
| 11               | Austria | Tomatoes and products           | 2010           | 11                                                             |
| 11               | Austria | Treenuts                        | 2010           | 34                                                             |
| 11               | Austria | Vegetable Oils                  | 2010           | 591                                                            |
| 11               | Austria | Vegetables                      | 2010           | 77                                                             |
| 11               | Austria | Vegetables, Other               | 2010           | 51                                                             |
| 11               | Austria | Vegetal Products                | 2010           | 2,610                                                          |
| 11               | Austria | Wheat and products              | 2010           | 613                                                            |
| 11               | Austria | Wine                            | 2010           | 58                                                             |
| 11               | Austria | Alcoholic Beverages             | 2011           | 237                                                            |
| 11               | Austria | Animal fats                     | 2011           | 385                                                            |
| 11               | Austria | Animal Products                 | 2011           | 1,169                                                          |
| 11               | Austria | Apples and products             | 2011           | 70                                                             |
| 11               | Austria | Bananas                         | 2011           | 20                                                             |
| 11               | Austria | Barley and products             | 2011           | 2                                                              |
| 11               | Austria | Beans                           | 2011           | 2                                                              |
| 11               | Austria | Beer                            | 2011           | 144                                                            |
| 11               | Austria | Beverages, Alcoholic            | 2011           | 35                                                             |
| 11               | Austria | Bovine Meat                     | 2011           | 57                                                             |
| 11               | Austria | Butter, Ghee                    | 2011           | 106                                                            |
| 11               | Austria | Cereals - Excluding Beer        | 2011           | 882                                                            |
| 11               | Austria | Cocoa Beans and products        | 2011           | 8                                                              |

Dietary calcium and zinc deficiency risks are decreasing but remain prevalent

| FAO Country code | Country    | Food item                       | Reference year | Net energy supply (kcal <i>capita</i> <sup>-1</sup> d <sup>-1</sup> ) |
|------------------|------------|---------------------------------|----------------|-----------------------------------------------------------------------|
| 11               | Austria    | Coconut Oil                     | 2011           | 29                                                                    |
| 11               | Austria    | Coconuts - Incl Copra           | 2011           | 3                                                                     |
| 11               | Austria    | Coffee and products             | 2011           | 10                                                                    |
| 11               | Austria    | Cream                           | 2011           | 41                                                                    |
| 11               | Austria    | Crustaceans                     | 2011           | 1                                                                     |
| 11               | Austria    | Dates                           | 2011           | 1                                                                     |
| 11               | Austria    | Demersal Fish                   | 2011           | 8                                                                     |
| 11               | Austria    | Eggs                            | 2011           | 53                                                                    |
| 11               | Austria    | Fats, Animals, Raw              | 2011           | 237                                                                   |
| 11               | Austria    | Fish, Seafood                   | 2011           | 28                                                                    |
| 11               | Austria    | Freshwater Fish                 | 2011           | 7                                                                     |
| 11               | Austria    | Fruits - Excluding Wine         | 2011           | 179                                                                   |
| 11               | Austria    | Fruits, Other                   | 2011           | 57                                                                    |
| 11               | Austria    | Grand Total                     | 2011           | 3,784                                                                 |
| 11               | Austria    | Grapes and products (excl wine) | 2011           | 14                                                                    |
| 11               | Austria    | Groundnut Oil                   | 2011           | 2                                                                     |
| 11               | Austria    | Groundnuts (Shelled Eq)         | 2011           | 13                                                                    |
| 11               | Austria    | Honey                           | 2011           | 9                                                                     |
| 11               | Austria    | Lemons, Limes and products      | 2011           | 1                                                                     |
| 11               | Austria    | Maize and products              | 2011           | 96                                                                    |
| 11               | Austria    | Maize Germ Oil                  | 2011           | 37                                                                    |
| 11               | Austria    | Marine Fish, Other              | 2011           | 2                                                                     |
| 11               | Austria    | Meat                            | 2011           | 448                                                                   |
| 11               | Austria    | Meat, Other                     | 2011           | 3                                                                     |
| 11               | Austria    | Milk - Excluding Butter         | 2011           | 252                                                                   |
| 11               | Austria    | Miscellaneous                   | 2011           | 1                                                                     |
| 11               | Austria    | Mutton & Goat Meat              | 2011           | 7                                                                     |
| 11               | Austria    | Oats                            | 2011           | 14                                                                    |
| 11               | Austria    | Offals                          | 2011           | 3                                                                     |
| 11               | Austria    | Oilcrops                        | 2011           | 51                                                                    |
| 11               | Austria    | Oilcrops Oil, Other             | 2011           | 64                                                                    |
| 11               | Austria    | Oilcrops, Other                 | 2011           | 8                                                                     |
| 11               | Austria    | Olive Oil                       | 2011           | 26                                                                    |
| 11               | Austria    | Olives (including preserved)    | 2011           | 2                                                                     |
| 11               | Austria    | Onions                          | 2011           | 18                                                                    |
| 11               | Austria    | Oranges, Mandarines             | 2011           | 12                                                                    |
| 11               | Austria    | Palm Oil                        | 2011           | 20                                                                    |
| 11               | Austria    | Peas                            | 2011           | 4                                                                     |
| 11               | Austria    | Pelagic Fish                    | 2011           | 10                                                                    |
| 11               | Austria    | Pigmeat                         | 2011           | 312                                                                   |
| 11               | Austria    | Pimento                         | 2011           | 3                                                                     |
| 11               | Austria    | Pineapples and products         | 2011           | 3                                                                     |
| 11               | Austria    | Potatoes and products           | 2011           | 110                                                                   |
| 11               | Austria    | Poultry Meat                    | 2011           | 68                                                                    |
| 11               | Austria    | Pulses                          | 2011           | 7                                                                     |
| 11               | Austria    | Pulses, Other and products      | 2011           | 1                                                                     |
| 11               | Austria    | Rape and Mustard Oil            | 2011           | 222                                                                   |
| 11               | Austria    | Rice (Milled Equivalent)        | 2011           | 36                                                                    |
| 11               | Austria    | Rye and products                | 2011           | 92                                                                    |
| 11               | Austria    | Sesame seed                     | 2011           | 4                                                                     |
| 11               | Austria    | Sesameseed Oil                  | 2011           | 1                                                                     |
| 11               | Austria    | Soyabean Oil                    | 2011           | 37                                                                    |
| 11               | Austria    | Soyabeans                       | 2011           | 15                                                                    |
| 11               | Austria    | Spices                          | 2011           | 8                                                                     |
| 11               | Austria    | Spices, Other                   | 2011           | 5                                                                     |
| 11               | Austria    | Starchy Roots                   | 2011           | 111                                                                   |
| 11               | Austria    | Stimulants                      | 2011           | 18                                                                    |
| 11               | Austria    | Sugar & Sweeteners              | 2011           | 457                                                                   |
| 11               | Austria    | Sugar (Raw Equivalent)          | 2011           | 405                                                                   |
| 11               | Austria    | Sunflower seed                  | 2011           | 5                                                                     |
| 11               | Austria    | Sunflowerseed Oil               | 2011           | 112                                                                   |
| 11               | Austria    | Sweeteners, Other               | 2011           | 43                                                                    |
| 11               | Austria    | Tomatoes and products           | 2011           | 11                                                                    |
| 11               | Austria    | Treenuts                        | 2011           | 36                                                                    |
| 11               | Austria    | Vegetable Oils                  | 2011           | 549                                                                   |
| 11               | Austria    | Vegetables                      | 2011           | 79                                                                    |
| 11               | Austria    | Vegetables, Other               | 2011           | 50                                                                    |
| 11               | Austria    | Vegetal Products                | 2011           | 2,615                                                                 |
| 11               | Austria    | Wheat and products              | 2011           | 642                                                                   |
| 11               | Austria    | Wine                            | 2011           | 58                                                                    |
| 52               | Azerbaijan | Alcoholic Beverages             | 1992           | 65                                                                    |
| 52               | Azerbaijan | Animal fats                     | 1992           | 61                                                                    |
| 52               | Azerbaijan | Animal Products                 | 1992           | 352                                                                   |
| 52               | Azerbaijan | Apples and products             | 1992           | 18                                                                    |
| 52               | Azerbaijan | Barley and products             | 1992           | 113                                                                   |
| 52               | Azerbaijan | Beer                            | 1992           | 4                                                                     |
| 52               | Azerbaijan | Beverages, Alcoholic            | 1992           | 60                                                                    |
| 52               | Azerbaijan | Bovine Meat                     | 1992           | 56                                                                    |
| 52               | Azerbaijan | Butter, Ghee                    | 1992           | 51                                                                    |
| 52               | Azerbaijan | Cereals - Excluding Beer        | 1992           | 1,510                                                                 |
| 52               | Azerbaijan | Cereals, Other                  | 1992           | 3                                                                     |
| 52               | Azerbaijan | Cottonseed Oil                  | 1992           | 35                                                                    |
| 52               | Azerbaijan | Eggs                            | 1992           | 22                                                                    |
| 52               | Azerbaijan | Fats, Animals, Raw              | 1992           | 10                                                                    |
| 52               | Azerbaijan | Fish, Seafood                   | 1992           | 8                                                                     |
| 52               | Azerbaijan | Freshwater Fish                 | 1992           | 8                                                                     |
| 52               | Azerbaijan | Fruits - Excluding Wine         | 1992           | 118                                                                   |
| 52               | Azerbaijan | Fruits, Other                   | 1992           | 35                                                                    |
| 52               | Azerbaijan | Grand Total                     | 1992           | 2,318                                                                 |
| 52               | Azerbaijan | Grapes and products (excl wine) | 1992           | 61                                                                    |
| 52               | Azerbaijan | Honey                           | 1992           | 1                                                                     |
| 52               | Azerbaijan | Meat                            | 1992           | 105                                                                   |
| 52               | Azerbaijan | Milk - Excluding Butter         | 1992           | 151                                                                   |
| 52               | Azerbaijan | Mutton & Goat Meat              | 1992           | 26                                                                    |
| 52               | Azerbaijan | Offals                          | 1992           | 5                                                                     |
| 52               | Azerbaijan | Onions                          | 1992           | 6                                                                     |
| 52               | Azerbaijan | Oranges, Mandarines             | 1992           | 3                                                                     |

Dietary calcium and zinc deficiency risks are decreasing but remain prevalent

| FAO Country code | Country    | Food item                       | Reference year | Net energy supply (kcal capita <sup>-1</sup> d <sup>-1</sup> ) |
|------------------|------------|---------------------------------|----------------|----------------------------------------------------------------|
| 52               | Azerbaijan | Pigmeat                         | 1992           | 6                                                              |
| 52               | Azerbaijan | Potatoes and products           | 1992           | 48                                                             |
| 52               | Azerbaijan | Poultry Meat                    | 1992           | 16                                                             |
| 52               | Azerbaijan | Rice (Milled Equivalent)        | 1992           | 22                                                             |
| 52               | Azerbaijan | Starchy Roots                   | 1992           | 48                                                             |
| 52               | Azerbaijan | Stimulants                      | 1992           | 1                                                              |
| 52               | Azerbaijan | Sugar & Sweeteners              | 1992           | 133                                                            |
| 52               | Azerbaijan | Sugar (Raw Equivalent)          | 1992           | 132                                                            |
| 52               | Azerbaijan | Tea (including mate)            | 1992           | 1                                                              |
| 52               | Azerbaijan | Tomatoes and products           | 1992           | 12                                                             |
| 52               | Azerbaijan | Treenuts                        | 1992           | 24                                                             |
| 52               | Azerbaijan | Vegetable Oils                  | 1992           | 35                                                             |
| 52               | Azerbaijan | Vegetables                      | 1992           | 32                                                             |
| 52               | Azerbaijan | Vegetables, Other               | 1992           | 13                                                             |
| 52               | Azerbaijan | Vegetal Products                | 1992           | 1,966                                                          |
| 52               | Azerbaijan | Wheat and products              | 1992           | 1,372                                                          |
| 52               | Azerbaijan | Wine                            | 1992           | 1                                                              |
| 52               | Azerbaijan | Alcoholic Beverages             | 1993           | 39                                                             |
| 52               | Azerbaijan | Animal fats                     | 1993           | 60                                                             |
| 52               | Azerbaijan | Animal Products                 | 1993           | 320                                                            |
| 52               | Azerbaijan | Apples and products             | 1993           | 15                                                             |
| 52               | Azerbaijan | Barley and products             | 1993           | 78                                                             |
| 52               | Azerbaijan | Beer                            | 1993           | 3                                                              |
| 52               | Azerbaijan | Beverages, Alcoholic            | 1993           | 34                                                             |
| 52               | Azerbaijan | Bovine Meat                     | 1993           | 51                                                             |
| 52               | Azerbaijan | Butter, Ghee                    | 1993           | 51                                                             |
| 52               | Azerbaijan | Cereals - Excluding Beer        | 1993           | 1,532                                                          |
| 52               | Azerbaijan | Cereals, Other                  | 1993           | 2                                                              |
| 52               | Azerbaijan | Cocoa Beans and products        | 1993           | 1                                                              |
| 52               | Azerbaijan | Cottonseed Oil                  | 1993           | 22                                                             |
| 52               | Azerbaijan | Eggs                            | 1993           | 15                                                             |
| 52               | Azerbaijan | Fats, Animals, Raw              | 1993           | 9                                                              |
| 52               | Azerbaijan | Fish, Seafood                   | 1993           | 6                                                              |
| 52               | Azerbaijan | Freshwater Fish                 | 1993           | 6                                                              |
| 52               | Azerbaijan | Fruits - Excluding Wine         | 1993           | 99                                                             |
| 52               | Azerbaijan | Fruits, Other                   | 1993           | 30                                                             |
| 52               | Azerbaijan | Grand Total                     | 1993           | 2,235                                                          |
| 52               | Azerbaijan | Grapes and products (excl wine) | 1993           | 50                                                             |
| 52               | Azerbaijan | Honey                           | 1993           | 1                                                              |
| 52               | Azerbaijan | Meat                            | 1993           | 90                                                             |
| 52               | Azerbaijan | Milk - Excluding Butter         | 1993           | 144                                                            |
| 52               | Azerbaijan | Mutton & Goat Meat              | 1993           | 25                                                             |
| 52               | Azerbaijan | Offals                          | 1993           | 4                                                              |
| 52               | Azerbaijan | Olive Oil                       | 1993           | 1                                                              |
| 52               | Azerbaijan | Onions                          | 1993           | 7                                                              |
| 52               | Azerbaijan | Oranges, Mandarines             | 1993           | 4                                                              |
| 52               | Azerbaijan | Pigmeat                         | 1993           | 3                                                              |
| 52               | Azerbaijan | Potatoes and products           | 1993           | 46                                                             |
| 52               | Azerbaijan | Poultry Meat                    | 1993           | 12                                                             |
| 52               | Azerbaijan | Rape and Mustard Oil            | 1993           | 1                                                              |
| 52               | Azerbaijan | Rice (Milled Equivalent)        | 1993           | 24                                                             |
| 52               | Azerbaijan | Starchy Roots                   | 1993           | 46                                                             |
| 52               | Azerbaijan | Stimulants                      | 1993           | 2                                                              |
| 52               | Azerbaijan | Sugar & Sweeteners              | 1993           | 109                                                            |
| 52               | Azerbaijan | Sugar (Raw Equivalent)          | 1993           | 108                                                            |
| 52               | Azerbaijan | Sunflowerseed Oil               | 1993           | 4                                                              |
| 52               | Azerbaijan | Tea (including mate)            | 1993           | 1                                                              |
| 52               | Azerbaijan | Tomatoes and products           | 1993           | 13                                                             |
| 52               | Azerbaijan | Treenuts                        | 1993           | 26                                                             |
| 52               | Azerbaijan | Vegetable Oils                  | 1993           | 28                                                             |
| 52               | Azerbaijan | Vegetables                      | 1993           | 34                                                             |
| 52               | Azerbaijan | Vegetables, Other               | 1993           | 15                                                             |
| 52               | Azerbaijan | Vegetal Products                | 1993           | 1,915                                                          |
| 52               | Azerbaijan | Wheat and products              | 1993           | 1,428                                                          |
| 52               | Azerbaijan | Wine                            | 1993           | 1                                                              |
| 52               | Azerbaijan | Alcoholic Beverages             | 1994           | 20                                                             |
| 52               | Azerbaijan | Animal fats                     | 1994           | 78                                                             |
| 52               | Azerbaijan | Animal Products                 | 1994           | 319                                                            |
| 52               | Azerbaijan | Apples and products             | 1994           | 22                                                             |
| 52               | Azerbaijan | Barley and products             | 1994           | 62                                                             |
| 52               | Azerbaijan | Beer                            | 1994           | 4                                                              |
| 52               | Azerbaijan | Beverages, Alcoholic            | 1994           | 15                                                             |
| 52               | Azerbaijan | Bovine Meat                     | 1994           | 33                                                             |
| 52               | Azerbaijan | Butter, Ghee                    | 1994           | 47                                                             |
| 52               | Azerbaijan | Cereals - Excluding Beer        | 1994           | 1,403                                                          |
| 52               | Azerbaijan | Cocoa Beans and products        | 1994           | 3                                                              |
| 52               | Azerbaijan | Cottonseed Oil                  | 1994           | 17                                                             |
| 52               | Azerbaijan | Dates                           | 1994           | 1                                                              |
| 52               | Azerbaijan | Eggs                            | 1994           | 16                                                             |
| 52               | Azerbaijan | Fats, Animals, Raw              | 1994           | 31                                                             |
| 52               | Azerbaijan | Fish, Seafood                   | 1994           | 4                                                              |
| 52               | Azerbaijan | Freshwater Fish                 | 1994           | 4                                                              |
| 52               | Azerbaijan | Fruits - Excluding Wine         | 1994           | 99                                                             |
| 52               | Azerbaijan | Fruits, Other                   | 1994           | 27                                                             |
| 52               | Azerbaijan | Grand Total                     | 1994           | 2,112                                                          |
| 52               | Azerbaijan | Grapes and products (excl wine) | 1994           | 44                                                             |
| 52               | Azerbaijan | Honey                           | 1994           | 1                                                              |
| 52               | Azerbaijan | Lemons, Limes and products      | 1994           | 1                                                              |
| 52               | Azerbaijan | Meat                            | 1994           | 67                                                             |
| 52               | Azerbaijan | Milk - Excluding Butter         | 1994           | 152                                                            |
| 52               | Azerbaijan | Mutton & Goat Meat              | 1994           | 21                                                             |
| 52               | Azerbaijan | Offals                          | 1994           | 1                                                              |
| 52               | Azerbaijan | Oilcrops Oil, Other             | 1994           | 1                                                              |
| 52               | Azerbaijan | Olive Oil                       | 1994           | 1                                                              |
| 52               | Azerbaijan | Onions                          | 1994           | 6                                                              |
| 52               | Azerbaijan | Oranges, Mandarines             | 1994           | 5                                                              |
| 52               | Azerbaijan | Pigmeat                         | 1994           | 3                                                              |

Dietary calcium and zinc deficiency risks are decreasing but remain prevalent

| FAO Country code | Country    | Food item                       | Reference year | Net energy supply (kcal capita <sup>-1</sup> d <sup>-1</sup> ) |
|------------------|------------|---------------------------------|----------------|----------------------------------------------------------------|
| 52               | Azerbaijan | Potatoes and products           | 1994           | 43                                                             |
| 52               | Azerbaijan | Poultry Meat                    | 1994           | 9                                                              |
| 52               | Azerbaijan | Rape and Mustard Oil            | 1994           | 3                                                              |
| 52               | Azerbaijan | Rice (Milled Equivalent)        | 1994           | 10                                                             |
| 52               | Azerbaijan | Soyabean Oil                    | 1994           | 6                                                              |
| 52               | Azerbaijan | Starchy Roots                   | 1994           | 43                                                             |
| 52               | Azerbaijan | Stimulants                      | 1994           | 3                                                              |
| 52               | Azerbaijan | Sugar & Sweeteners              | 1994           | 118                                                            |
| 52               | Azerbaijan | Sugar (Raw Equivalent)          | 1994           | 115                                                            |
| 52               | Azerbaijan | Sunflowerseed Oil               | 1994           | 17                                                             |
| 52               | Azerbaijan | Sweeteners, Other               | 1994           | 2                                                              |
| 52               | Azerbaijan | Tea (including mate)            | 1994           | 1                                                              |
| 52               | Azerbaijan | Tomatoes and products           | 1994           | 11                                                             |
| 52               | Azerbaijan | Treenuts                        | 1994           | 27                                                             |
| 52               | Azerbaijan | Vegetable Oils                  | 1994           | 45                                                             |
| 52               | Azerbaijan | Vegetables                      | 1994           | 34                                                             |
| 52               | Azerbaijan | Vegetables, Other               | 1994           | 17                                                             |
| 52               | Azerbaijan | Vegetal Products                | 1994           | 1,793                                                          |
| 52               | Azerbaijan | Wheat and products              | 1994           | 1,331                                                          |
| 52               | Azerbaijan | Wine                            | 1994           | 2                                                              |
| 52               | Azerbaijan | Alcoholic Beverages             | 1995           | 17                                                             |
| 52               | Azerbaijan | Animal fats                     | 1995           | 50                                                             |
| 52               | Azerbaijan | Animal Products                 | 1995           | 297                                                            |
| 52               | Azerbaijan | Apples and products             | 1995           | 22                                                             |
| 52               | Azerbaijan | Barley and products             | 1995           | 124                                                            |
| 52               | Azerbaijan | Beer                            | 1995           | 5                                                              |
| 52               | Azerbaijan | Beverages, Alcoholic            | 1995           | 11                                                             |
| 52               | Azerbaijan | Bovine Meat                     | 1995           | 40                                                             |
| 52               | Azerbaijan | Butter, Ghee                    | 1995           | 39                                                             |
| 52               | Azerbaijan | Cereals - Excluding Beer        | 1995           | 1,400                                                          |
| 52               | Azerbaijan | Cereals, Other                  | 1995           | 3                                                              |
| 52               | Azerbaijan | Cocoa Beans and products        | 1995           | 7                                                              |
| 52               | Azerbaijan | Cottonseed Oil                  | 1995           | 21                                                             |
| 52               | Azerbaijan | Dates                           | 1995           | 1                                                              |
| 52               | Azerbaijan | Eggs                            | 1995           | 16                                                             |
| 52               | Azerbaijan | Fats, Animals, Raw              | 1995           | 11                                                             |
| 52               | Azerbaijan | Fish, Seafood                   | 1995           | 3                                                              |
| 52               | Azerbaijan | Freshwater Fish                 | 1995           | 3                                                              |
| 52               | Azerbaijan | Fruits - Excluding Wine         | 1995           | 105                                                            |
| 52               | Azerbaijan | Fruits, Other                   | 1995           | 37                                                             |
| 52               | Azerbaijan | Grand Total                     | 1995           | 2,115                                                          |
| 52               | Azerbaijan | Grapes and products (excl wine) | 1995           | 42                                                             |
| 52               | Azerbaijan | Honey                           | 1995           | 1                                                              |
| 52               | Azerbaijan | Meat                            | 1995           | 77                                                             |
| 52               | Azerbaijan | Milk - Excluding Butter         | 1995           | 146                                                            |
| 52               | Azerbaijan | Miscellaneous                   | 1995           | 3                                                              |
| 52               | Azerbaijan | Mutton & Goat Meat              | 1995           | 21                                                             |
| 52               | Azerbaijan | Offals                          | 1995           | 5                                                              |
| 52               | Azerbaijan | Onions                          | 1995           | 5                                                              |
| 52               | Azerbaijan | Oranges, Mandarines             | 1995           | 4                                                              |
| 52               | Azerbaijan | Pigmeat                         | 1995           | 3                                                              |
| 52               | Azerbaijan | Potatoes and products           | 1995           | 42                                                             |
| 52               | Azerbaijan | Poultry Meat                    | 1995           | 12                                                             |
| 52               | Azerbaijan | Rape and Mustard Oil            | 1995           | 2                                                              |
| 52               | Azerbaijan | Rice (Milled Equivalent)        | 1995           | 28                                                             |
| 52               | Azerbaijan | Soyabean Oil                    | 1995           | 25                                                             |
| 52               | Azerbaijan | Starchy Roots                   | 1995           | 42                                                             |
| 52               | Azerbaijan | Stimulants                      | 1995           | 8                                                              |
| 52               | Azerbaijan | Sugar & Sweeteners              | 1995           | 128                                                            |
| 52               | Azerbaijan | Sugar (Raw Equivalent)          | 1995           | 127                                                            |
| 52               | Azerbaijan | Sunflowerseed Oil               | 1995           | 10                                                             |
| 52               | Azerbaijan | Tea (including mate)            | 1995           | 1                                                              |
| 52               | Azerbaijan | Tomatoes and products           | 1995           | 10                                                             |
| 52               | Azerbaijan | Treenuts                        | 1995           | 22                                                             |
| 52               | Azerbaijan | Vegetable Oils                  | 1995           | 58                                                             |
| 52               | Azerbaijan | Vegetables                      | 1995           | 35                                                             |
| 52               | Azerbaijan | Vegetables, Other               | 1995           | 19                                                             |
| 52               | Azerbaijan | Vegetal Products                | 1995           | 1,818                                                          |
| 52               | Azerbaijan | Wheat and products              | 1995           | 1,244                                                          |
| 52               | Azerbaijan | Wine                            | 1995           | 1                                                              |
| 52               | Azerbaijan | Alcoholic Beverages             | 1996           | 37                                                             |
| 52               | Azerbaijan | Animal fats                     | 1996           | 92                                                             |
| 52               | Azerbaijan | Animal Products                 | 1996           | 311                                                            |
| 52               | Azerbaijan | Apples and products             | 1996           | 17                                                             |
| 52               | Azerbaijan | Barley and products             | 1996           | 170                                                            |
| 52               | Azerbaijan | Beer                            | 1996           | 3                                                              |
| 52               | Azerbaijan | Beverages, Alcoholic            | 1996           | 32                                                             |
| 52               | Azerbaijan | Bovine Meat                     | 1996           | 38                                                             |
| 52               | Azerbaijan | Butter, Ghee                    | 1996           | 82                                                             |
| 52               | Azerbaijan | Cereals - Excluding Beer        | 1996           | 1,487                                                          |
| 52               | Azerbaijan | Cereals, Other                  | 1996           | 3                                                              |
| 52               | Azerbaijan | Citrus, Other                   | 1996           | 1                                                              |
| 52               | Azerbaijan | Cocoa Beans and products        | 1996           | 9                                                              |
| 52               | Azerbaijan | Cottonseed Oil                  | 1996           | 36                                                             |
| 52               | Azerbaijan | Dates                           | 1996           | 1                                                              |
| 52               | Azerbaijan | Eggs                            | 1996           | 17                                                             |
| 52               | Azerbaijan | Fats, Animals, Raw              | 1996           | 10                                                             |
| 52               | Azerbaijan | Fish, Seafood                   | 1996           | 2                                                              |
| 52               | Azerbaijan | Freshwater Fish                 | 1996           | 2                                                              |
| 52               | Azerbaijan | Fruits - Excluding Wine         | 1996           | 94                                                             |
| 52               | Azerbaijan | Fruits, Other                   | 1996           | 29                                                             |
| 52               | Azerbaijan | Grand Total                     | 1996           | 2,262                                                          |
| 52               | Azerbaijan | Grapes and products (excl wine) | 1996           | 43                                                             |
| 52               | Azerbaijan | Honey                           | 1996           | 1                                                              |
| 52               | Azerbaijan | Meat                            | 1996           | 88                                                             |
| 52               | Azerbaijan | Milk - Excluding Butter         | 1996           | 111                                                            |
| 52               | Azerbaijan | Miscellaneous                   | 1996           | 4                                                              |

Dietary calcium and zinc deficiency risks are decreasing but remain prevalent

| FAO Country code | Country    | Food item                       | Reference year | Net energy supply (kcal capita <sup>-1</sup> d <sup>-1</sup> ) |
|------------------|------------|---------------------------------|----------------|----------------------------------------------------------------|
| 52               | Azerbaijan | Mutton & Goat Meat              | 1996           | 28                                                             |
| 52               | Azerbaijan | Offals                          | 1996           | 1                                                              |
| 52               | Azerbaijan | Onions                          | 1996           | 8                                                              |
| 52               | Azerbaijan | Oranges, Mandarines             | 1996           | 4                                                              |
| 52               | Azerbaijan | Pigmeat                         | 1996           | 4                                                              |
| 52               | Azerbaijan | Potatoes and products           | 1996           | 46                                                             |
| 52               | Azerbaijan | Poultry Meat                    | 1996           | 18                                                             |
| 52               | Azerbaijan | Rape and Mustard Oil            | 1996           | 3                                                              |
| 52               | Azerbaijan | Rice (Milled Equivalent)        | 1996           | 61                                                             |
| 52               | Azerbaijan | Soyabean Oil                    | 1996           | 21                                                             |
| 52               | Azerbaijan | Starchy Roots                   | 1996           | 46                                                             |
| 52               | Azerbaijan | Stimulants                      | 1996           | 10                                                             |
| 52               | Azerbaijan | Sugar & Sweeteners              | 1996           | 139                                                            |
| 52               | Azerbaijan | Sugar (Raw Equivalent)          | 1996           | 138                                                            |
| 52               | Azerbaijan | Sunflowerseed Oil               | 1996           | 10                                                             |
| 52               | Azerbaijan | Tea (including mate)            | 1996           | 1                                                              |
| 52               | Azerbaijan | Tomatoes and products           | 1996           | 14                                                             |
| 52               | Azerbaijan | Treenuts                        | 1996           | 19                                                             |
| 52               | Azerbaijan | Vegetable Oils                  | 1996           | 69                                                             |
| 52               | Azerbaijan | Vegetables                      | 1996           | 46                                                             |
| 52               | Azerbaijan | Vegetables, Other               | 1996           | 24                                                             |
| 52               | Azerbaijan | Vegetal Products                | 1996           | 1,952                                                          |
| 52               | Azerbaijan | Wheat and products              | 1996           | 1,254                                                          |
| 52               | Azerbaijan | Wine                            | 1996           | 1                                                              |
| 52               | Azerbaijan | Alcoholic Beverages             | 1997           | 9                                                              |
| 52               | Azerbaijan | Animal fats                     | 1997           | 57                                                             |
| 52               | Azerbaijan | Animal Products                 | 1997           | 289                                                            |
| 52               | Azerbaijan | Apples and products             | 1997           | 15                                                             |
| 52               | Azerbaijan | Bananas                         | 1997           | 1                                                              |
| 52               | Azerbaijan | Barley and products             | 1997           | 51                                                             |
| 52               | Azerbaijan | Beer                            | 1997           | 3                                                              |
| 52               | Azerbaijan | Beverages, Alcoholic            | 1997           | 4                                                              |
| 52               | Azerbaijan | Bovine Meat                     | 1997           | 36                                                             |
| 52               | Azerbaijan | Butter, Ghee                    | 1997           | 46                                                             |
| 52               | Azerbaijan | Cereals - Excluding Beer        | 1997           | 1,423                                                          |
| 52               | Azerbaijan | Cereals, Other                  | 1997           | 3                                                              |
| 52               | Azerbaijan | Cocoa Beans and products        | 1997           | 2                                                              |
| 52               | Azerbaijan | Cottonseed Oil                  | 1997           | 16                                                             |
| 52               | Azerbaijan | Dates                           | 1997           | 1                                                              |
| 52               | Azerbaijan | Eggs                            | 1997           | 16                                                             |
| 52               | Azerbaijan | Fats, Animals, Raw              | 1997           | 11                                                             |
| 52               | Azerbaijan | Fish, Seafood                   | 1997           | 1                                                              |
| 52               | Azerbaijan | Freshwater Fish                 | 1997           | 1                                                              |
| 52               | Azerbaijan | Fruits - Excluding Wine         | 1997           | 58                                                             |
| 52               | Azerbaijan | Fruits, Other                   | 1997           | 27                                                             |
| 52               | Azerbaijan | Grand Total                     | 1997           | 2,076                                                          |
| 52               | Azerbaijan | Grapes and products (excl wine) | 1997           | 12                                                             |
| 52               | Azerbaijan | Honey                           | 1997           | 1                                                              |
| 52               | Azerbaijan | Meat                            | 1997           | 82                                                             |
| 52               | Azerbaijan | Milk - Excluding Butter         | 1997           | 132                                                            |
| 52               | Azerbaijan | Miscellaneous                   | 1997           | 1                                                              |
| 52               | Azerbaijan | Mutton & Goat Meat              | 1997           | 24                                                             |
| 52               | Azerbaijan | Offals                          | 1997           | 1                                                              |
| 52               | Azerbaijan | Onions                          | 1997           | 6                                                              |
| 52               | Azerbaijan | Oranges, Mandarines             | 1997           | 3                                                              |
| 52               | Azerbaijan | Pigmeat                         | 1997           | 5                                                              |
| 52               | Azerbaijan | Potatoes and products           | 1997           | 50                                                             |
| 52               | Azerbaijan | Poultry Meat                    | 1997           | 17                                                             |
| 52               | Azerbaijan | Rape and Mustard Oil            | 1997           | 4                                                              |
| 52               | Azerbaijan | Rice (Milled Equivalent)        | 1997           | 54                                                             |
| 52               | Azerbaijan | Soyabean Oil                    | 1997           | 10                                                             |
| 52               | Azerbaijan | Starchy Roots                   | 1997           | 50                                                             |
| 52               | Azerbaijan | Stimulants                      | 1997           | 3                                                              |
| 52               | Azerbaijan | Sugar & Sweeteners              | 1997           | 149                                                            |
| 52               | Azerbaijan | Sugar (Raw Equivalent)          | 1997           | 148                                                            |
| 52               | Azerbaijan | Sunflowerseed Oil               | 1997           | 9                                                              |
| 52               | Azerbaijan | Tea (including mate)            | 1997           | 1                                                              |
| 52               | Azerbaijan | Tomatoes and products           | 1997           | 12                                                             |
| 52               | Azerbaijan | Treenuts                        | 1997           | 14                                                             |
| 52               | Azerbaijan | Vegetable Oils                  | 1997           | 39                                                             |
| 52               | Azerbaijan | Vegetables                      | 1997           | 41                                                             |
| 52               | Azerbaijan | Vegetables, Other               | 1997           | 23                                                             |
| 52               | Azerbaijan | Vegetal Products                | 1997           | 1,787                                                          |
| 52               | Azerbaijan | Wheat and products              | 1997           | 1,315                                                          |
| 52               | Azerbaijan | Wine                            | 1997           | 1                                                              |
| 52               | Azerbaijan | Alcoholic Beverages             | 1998           | 13                                                             |
| 52               | Azerbaijan | Animal fats                     | 1998           | 62                                                             |
| 52               | Azerbaijan | Animal Products                 | 1998           | 310                                                            |
| 52               | Azerbaijan | Apples and products             | 1998           | 17                                                             |
| 52               | Azerbaijan | Bananas                         | 1998           | 1                                                              |
| 52               | Azerbaijan | Barley and products             | 1998           | 115                                                            |
| 52               | Azerbaijan | Beer                            | 1998           | 2                                                              |
| 52               | Azerbaijan | Beverages, Alcoholic            | 1998           | 10                                                             |
| 52               | Azerbaijan | Bovine Meat                     | 1998           | 37                                                             |
| 52               | Azerbaijan | Butter, Ghee                    | 1998           | 50                                                             |
| 52               | Azerbaijan | Cereals - Excluding Beer        | 1998           | 1,420                                                          |
| 52               | Azerbaijan | Cereals, Other                  | 1998           | 2                                                              |
| 52               | Azerbaijan | Cocoa Beans and products        | 1998           | 2                                                              |
| 52               | Azerbaijan | Cottonseed Oil                  | 1998           | 6                                                              |
| 52               | Azerbaijan | Dates                           | 1998           | 1                                                              |
| 52               | Azerbaijan | Eggs                            | 1998           | 16                                                             |
| 52               | Azerbaijan | Fats, Animals, Raw              | 1998           | 13                                                             |
| 52               | Azerbaijan | Fish, Seafood                   | 1998           | 2                                                              |
| 52               | Azerbaijan | Freshwater Fish                 | 1998           | 1                                                              |
| 52               | Azerbaijan | Fruits - Excluding Wine         | 1998           | 83                                                             |
| 52               | Azerbaijan | Fruits, Other                   | 1998           | 42                                                             |
| 52               | Azerbaijan | Grand Total                     | 1998           | 2,119                                                          |

Dietary calcium and zinc deficiency risks are decreasing but remain prevalent

| FAO Country code | Country    | Food item                       | Reference year | Net energy supply (kcal capita <sup>-1</sup> d <sup>-1</sup> ) |
|------------------|------------|---------------------------------|----------------|----------------------------------------------------------------|
| 52               | Azerbaijan | Grapes and products (excl wine) | 1998           | 22                                                             |
| 52               | Azerbaijan | Honey                           | 1998           | 1                                                              |
| 52               | Azerbaijan | Maize and products              | 1998           | 3                                                              |
| 52               | Azerbaijan | Meat                            | 1998           | 99                                                             |
| 52               | Azerbaijan | Milk - Excluding Butter         | 1998           | 126                                                            |
| 52               | Azerbaijan | Miscellaneous                   | 1998           | 1                                                              |
| 52               | Azerbaijan | Mutton & Goat Meat              | 1998           | 29                                                             |
| 52               | Azerbaijan | Offals                          | 1998           | 4                                                              |
| 52               | Azerbaijan | Oilcrops Oil, Other             | 1998           | 5                                                              |
| 52               | Azerbaijan | Onions                          | 1998           | 7                                                              |
| 52               | Azerbaijan | Oranges, Mandarines             | 1998           | 1                                                              |
| 52               | Azerbaijan | Pigmeat                         | 1998           | 8                                                              |
| 52               | Azerbaijan | Potatoes and products           | 1998           | 57                                                             |
| 52               | Azerbaijan | Poultry Meat                    | 1998           | 25                                                             |
| 52               | Azerbaijan | Rape and Mustard Oil            | 1998           | 2                                                              |
| 52               | Azerbaijan | Rice (Milled Equivalent)        | 1998           | 66                                                             |
| 52               | Azerbaijan | Soyabean Oil                    | 1998           | 11                                                             |
| 52               | Azerbaijan | Starchy Roots                   | 1998           | 57                                                             |
| 52               | Azerbaijan | Stimulants                      | 1998           | 3                                                              |
| 52               | Azerbaijan | Sugar & Sweeteners              | 1998           | 147                                                            |
| 52               | Azerbaijan | Sugar (Raw Equivalent)          | 1998           | 146                                                            |
| 52               | Azerbaijan | Sunflowerseed Oil               | 1998           | 9                                                              |
| 52               | Azerbaijan | Tea (including mate)            | 1998           | 1                                                              |
| 52               | Azerbaijan | Tomatoes and products           | 1998           | 11                                                             |
| 52               | Azerbaijan | Treenuts                        | 1998           | 11                                                             |
| 52               | Azerbaijan | Vegetable Oils                  | 1998           | 34                                                             |
| 52               | Azerbaijan | Vegetables                      | 1998           | 39                                                             |
| 52               | Azerbaijan | Vegetables, Other               | 1998           | 21                                                             |
| 52               | Azerbaijan | Vegetal Products                | 1998           | 1,809                                                          |
| 52               | Azerbaijan | Wheat and products              | 1998           | 1,233                                                          |
| 52               | Azerbaijan | Wine                            | 1998           | 1                                                              |
| 52               | Azerbaijan | Alcoholic Beverages             | 1999           | 60                                                             |
| 52               | Azerbaijan | Animal fats                     | 1999           | 68                                                             |
| 52               | Azerbaijan | Animal Products                 | 1999           | 321                                                            |
| 52               | Azerbaijan | Apples and products             | 1999           | 18                                                             |
| 52               | Azerbaijan | Bananas                         | 1999           | 1                                                              |
| 52               | Azerbaijan | Barley and products             | 1999           | 69                                                             |
| 52               | Azerbaijan | Beer                            | 1999           | 12                                                             |
| 52               | Azerbaijan | Beverages, Alcoholic            | 1999           | 47                                                             |
| 52               | Azerbaijan | Bovine Meat                     | 1999           | 41                                                             |
| 52               | Azerbaijan | Butter, Ghee                    | 1999           | 50                                                             |
| 52               | Azerbaijan | Cereals - Excluding Beer        | 1999           | 1,492                                                          |
| 52               | Azerbaijan | Cereals, Other                  | 1999           | 5                                                              |
| 52               | Azerbaijan | Cocoa Beans and products        | 1999           | 2                                                              |
| 52               | Azerbaijan | Cottonseed Oil                  | 1999           | 15                                                             |
| 52               | Azerbaijan | Eggs                            | 1999           | 16                                                             |
| 52               | Azerbaijan | Fats, Animals, Raw              | 1999           | 18                                                             |
| 52               | Azerbaijan | Fish, Seafood                   | 1999           | 5                                                              |
| 52               | Azerbaijan | Freshwater Fish                 | 1999           | 4                                                              |
| 52               | Azerbaijan | Fruits - Excluding Wine         | 1999           | 87                                                             |
| 52               | Azerbaijan | Fruits, Other                   | 1999           | 46                                                             |
| 52               | Azerbaijan | Grand Total                     | 1999           | 2,279                                                          |
| 52               | Azerbaijan | Grapes and products (excl wine) | 1999           | 19                                                             |
| 52               | Azerbaijan | Honey                           | 1999           | 1                                                              |
| 52               | Azerbaijan | Maize and products              | 1999           | 12                                                             |
| 52               | Azerbaijan | Maize Germ Oil                  | 1999           | 7                                                              |
| 52               | Azerbaijan | Meat                            | 1999           | 98                                                             |
| 52               | Azerbaijan | Meat, Other                     | 1999           | 1                                                              |
| 52               | Azerbaijan | Milk - Excluding Butter         | 1999           | 128                                                            |
| 52               | Azerbaijan | Miscellaneous                   | 1999           | 3                                                              |
| 52               | Azerbaijan | Mutton & Goat Meat              | 1999           | 31                                                             |
| 52               | Azerbaijan | Offals                          | 1999           | 6                                                              |
| 52               | Azerbaijan | Onions                          | 1999           | 8                                                              |
| 52               | Azerbaijan | Oranges, Mandarines             | 1999           | 3                                                              |
| 52               | Azerbaijan | Pigmeat                         | 1999           | 6                                                              |
| 52               | Azerbaijan | Potatoes and products           | 1999           | 70                                                             |
| 52               | Azerbaijan | Poultry Meat                    | 1999           | 19                                                             |
| 52               | Azerbaijan | Rice (Milled Equivalent)        | 1999           | 32                                                             |
| 52               | Azerbaijan | Sesameseed Oil                  | 1999           | 1                                                              |
| 52               | Azerbaijan | Soyabean Oil                    | 1999           | 15                                                             |
| 52               | Azerbaijan | Starchy Roots                   | 1999           | 70                                                             |
| 52               | Azerbaijan | Stimulants                      | 1999           | 2                                                              |
| 52               | Azerbaijan | Sugar & Sweeteners              | 1999           | 123                                                            |
| 52               | Azerbaijan | Sugar (Raw Equivalent)          | 1999           | 113                                                            |
| 52               | Azerbaijan | Sunflowerseed Oil               | 1999           | 15                                                             |
| 52               | Azerbaijan | Sweeteners, Other               | 1999           | 9                                                              |
| 52               | Azerbaijan | Tomatoes and products           | 1999           | 19                                                             |
| 52               | Azerbaijan | Treenuts                        | 1999           | 14                                                             |
| 52               | Azerbaijan | Vegetable Oils                  | 1999           | 53                                                             |
| 52               | Azerbaijan | Vegetables                      | 1999           | 54                                                             |
| 52               | Azerbaijan | Vegetables, Other               | 1999           | 26                                                             |
| 52               | Azerbaijan | Vegetal Products                | 1999           | 1,958                                                          |
| 52               | Azerbaijan | Wheat and products              | 1999           | 1,373                                                          |
| 52               | Azerbaijan | Wine                            | 1999           | 1                                                              |
| 52               | Azerbaijan | Alcoholic Beverages             | 2000           | 97                                                             |
| 52               | Azerbaijan | Animal fats                     | 2000           | 61                                                             |
| 52               | Azerbaijan | Animal Products                 | 2000           | 314                                                            |
| 52               | Azerbaijan | Apples and products             | 2000           | 20                                                             |
| 52               | Azerbaijan | Bananas                         | 2000           | 1                                                              |
| 52               | Azerbaijan | Barley and products             | 2000           | 7                                                              |
| 52               | Azerbaijan | Beer                            | 2000           | 12                                                             |
| 52               | Azerbaijan | Beverages, Alcoholic            | 2000           | 84                                                             |
| 52               | Azerbaijan | Bovine Meat                     | 2000           | 43                                                             |
| 52               | Azerbaijan | Butter, Ghee                    | 2000           | 45                                                             |
| 52               | Azerbaijan | Cereals - Excluding Beer        | 2000           | 1,574                                                          |
| 52               | Azerbaijan | Cereals, Other                  | 2000           | 2                                                              |
| 52               | Azerbaijan | Cocoa Beans and products        | 2000           | 1                                                              |



Dietary calcium and zinc deficiency risks are decreasing but remain prevalent

| FAO Country code | Country    | Food item                       | Reference year | Net energy supply (kcal capita <sup>-1</sup> d <sup>-1</sup> ) |
|------------------|------------|---------------------------------|----------------|----------------------------------------------------------------|
| 52               | Azerbaijan | Cottonseed Oil                  | 2000           | 22                                                             |
| 52               | Azerbaijan | Eggs                            | 2000           | 16                                                             |
| 52               | Azerbaijan | Fats, Animals, Raw              | 2000           | 16                                                             |
| 52               | Azerbaijan | Fish, Seafood                   | 2000           | 5                                                              |
| 52               | Azerbaijan | Freshwater Fish                 | 2000           | 4                                                              |
| 52               | Azerbaijan | Fruits - Excluding Wine         | 2000           | 83                                                             |
| 52               | Azerbaijan | Fruits, Other                   | 2000           | 49                                                             |
| 52               | Azerbaijan | Grand Total                     | 2000           | 2,395                                                          |
| 52               | Azerbaijan | Grapes and products (excl wine) | 2000           | 11                                                             |
| 52               | Azerbaijan | Honey                           | 2000           | 1                                                              |
| 52               | Azerbaijan | Maize and products              | 2000           | 47                                                             |
| 52               | Azerbaijan | Maize Germ Oil                  | 2000           | 3                                                              |
| 52               | Azerbaijan | Meat                            | 2000           | 93                                                             |
| 52               | Azerbaijan | Milk - Excluding Butter         | 2000           | 132                                                            |
| 52               | Azerbaijan | Miscellaneous                   | 2000           | 1                                                              |
| 52               | Azerbaijan | Mutton & Goat Meat              | 2000           | 31                                                             |
| 52               | Azerbaijan | Offals                          | 2000           | 6                                                              |
| 52               | Azerbaijan | Onions                          | 2000           | 10                                                             |
| 52               | Azerbaijan | Oranges, Mandarines             | 2000           | 2                                                              |
| 52               | Azerbaijan | Pelagic Fish                    | 2000           | 1                                                              |
| 52               | Azerbaijan | Pigmeat                         | 2000           | 5                                                              |
| 52               | Azerbaijan | Potatoes and products           | 2000           | 86                                                             |
| 52               | Azerbaijan | Poultry Meat                    | 2000           | 15                                                             |
| 52               | Azerbaijan | Rape and Mustard Oil            | 2000           | 1                                                              |
| 52               | Azerbaijan | Rice (Milled Equivalent)        | 2000           | 33                                                             |
| 52               | Azerbaijan | Soyabean Oil                    | 2000           | 12                                                             |
| 52               | Azerbaijan | Starchy Roots                   | 2000           | 86                                                             |
| 52               | Azerbaijan | Stimulants                      | 2000           | 1                                                              |
| 52               | Azerbaijan | Sugar & Sweeteners              | 2000           | 108                                                            |
| 52               | Azerbaijan | Sugar (Raw Equivalent)          | 2000           | 107                                                            |
| 52               | Azerbaijan | Sunflowerseed Oil               | 2000           | 17                                                             |
| 52               | Azerbaijan | Tomatoes and products           | 2000           | 19                                                             |
| 52               | Azerbaijan | Treenuts                        | 2000           | 15                                                             |
| 52               | Azerbaijan | Vegetable Oils                  | 2000           | 55                                                             |
| 52               | Azerbaijan | Vegetables                      | 2000           | 60                                                             |
| 52               | Azerbaijan | Vegetables, Other               | 2000           | 31                                                             |
| 52               | Azerbaijan | Vegetal Products                | 2000           | 2,081                                                          |
| 52               | Azerbaijan | Wheat and products              | 2000           | 1,484                                                          |
| 52               | Azerbaijan | Wine                            | 2000           | 1                                                              |
| 52               | Azerbaijan | Alcoholic Beverages             | 2001           | 85                                                             |
| 52               | Azerbaijan | Animal fats                     | 2001           | 63                                                             |
| 52               | Azerbaijan | Animal Products                 | 2001           | 311                                                            |
| 52               | Azerbaijan | Apples and products             | 2001           | 20                                                             |
| 52               | Azerbaijan | Barley and products             | 2001           | 10                                                             |
| 52               | Azerbaijan | Beer                            | 2001           | 19                                                             |
| 52               | Azerbaijan | Beverages, Alcoholic            | 2001           | 65                                                             |
| 52               | Azerbaijan | Bovine Meat                     | 2001           | 43                                                             |
| 52               | Azerbaijan | Butter, Ghee                    | 2001           | 51                                                             |
| 52               | Azerbaijan | Cereals - Excluding Beer        | 2001           | 1,593                                                          |
| 52               | Azerbaijan | Cereals, Other                  | 2001           | 6                                                              |
| 52               | Azerbaijan | Cocoa Beans and products        | 2001           | 3                                                              |
| 52               | Azerbaijan | Cottonseed Oil                  | 2001           | 10                                                             |
| 52               | Azerbaijan | Eggs                            | 2001           | 15                                                             |
| 52               | Azerbaijan | Fats, Animals, Raw              | 2001           | 12                                                             |
| 52               | Azerbaijan | Fish, Seafood                   | 2001           | 3                                                              |
| 52               | Azerbaijan | Freshwater Fish                 | 2001           | 3                                                              |
| 52               | Azerbaijan | Fruits - Excluding Wine         | 2001           | 86                                                             |
| 52               | Azerbaijan | Fruits, Other                   | 2001           | 53                                                             |
| 52               | Azerbaijan | Grand Total                     | 2001           | 2,463                                                          |
| 52               | Azerbaijan | Grapes and products (excl wine) | 2001           | 10                                                             |
| 52               | Azerbaijan | Groundnuts (Shelled Eq)         | 2001           | 1                                                              |
| 52               | Azerbaijan | Honey                           | 2001           | 1                                                              |
| 52               | Azerbaijan | Maize and products              | 2001           | 52                                                             |
| 52               | Azerbaijan | Maize Germ Oil                  | 2001           | 6                                                              |
| 52               | Azerbaijan | Meat                            | 2001           | 92                                                             |
| 52               | Azerbaijan | Milk - Excluding Butter         | 2001           | 132                                                            |
| 52               | Azerbaijan | Miscellaneous                   | 2001           | 2                                                              |
| 52               | Azerbaijan | Mutton & Goat Meat              | 2001           | 32                                                             |
| 52               | Azerbaijan | Offals                          | 2001           | 5                                                              |
| 52               | Azerbaijan | Oilcrops                        | 2001           | 1                                                              |
| 52               | Azerbaijan | Onions                          | 2001           | 12                                                             |
| 52               | Azerbaijan | Oranges, Mandarines             | 2001           | 2                                                              |
| 52               | Azerbaijan | Pigmeat                         | 2001           | 4                                                              |
| 52               | Azerbaijan | Potatoes and products           | 2001           | 105                                                            |
| 52               | Azerbaijan | Poultry Meat                    | 2001           | 12                                                             |
| 52               | Azerbaijan | Rice (Milled Equivalent)        | 2001           | 28                                                             |
| 52               | Azerbaijan | Soyabean Oil                    | 2001           | 28                                                             |
| 52               | Azerbaijan | Starchy Roots                   | 2001           | 105                                                            |
| 52               | Azerbaijan | Stimulants                      | 2001           | 4                                                              |
| 52               | Azerbaijan | Sugar & Sweeteners              | 2001           | 125                                                            |
| 52               | Azerbaijan | Sugar (Raw Equivalent)          | 2001           | 124                                                            |
| 52               | Azerbaijan | Sunflowerseed Oil               | 2001           | 19                                                             |
| 52               | Azerbaijan | Tea (including mate)            | 2001           | 1                                                              |
| 52               | Azerbaijan | Tomatoes and products           | 2001           | 23                                                             |
| 52               | Azerbaijan | Treenuts                        | 2001           | 17                                                             |
| 52               | Azerbaijan | Vegetable Oils                  | 2001           | 63                                                             |
| 52               | Azerbaijan | Vegetables                      | 2001           | 71                                                             |
| 52               | Azerbaijan | Vegetables, Other               | 2001           | 36                                                             |
| 52               | Azerbaijan | Vegetal Products                | 2001           | 2,152                                                          |
| 52               | Azerbaijan | Wheat and products              | 2001           | 1,498                                                          |
| 52               | Azerbaijan | Wine                            | 2001           | 2                                                              |
| 52               | Azerbaijan | Alcoholic Beverages             | 2002           | 72                                                             |
| 52               | Azerbaijan | Animal fats                     | 2002           | 70                                                             |
| 52               | Azerbaijan | Animal Products                 | 2002           | 327                                                            |
| 52               | Azerbaijan | Apples and products             | 2002           | 18                                                             |
| 52               | Azerbaijan | Barley and products             | 2002           | 9                                                              |
| 52               | Azerbaijan | Beer                            | 2002           | 20                                                             |

Dietary calcium and zinc deficiency risks are decreasing but remain prevalent

| FAO Country code | Country    | Food item                       | Reference year | Net energy supply (kcal <i>capita</i> <sup>-1</sup> d <sup>-1</sup> ) |
|------------------|------------|---------------------------------|----------------|-----------------------------------------------------------------------|
| 52               | Azerbaijan | Beverages, Alcoholic            | 2002           | 51                                                                    |
| 52               | Azerbaijan | Bovine Meat                     | 2002           | 47                                                                    |
| 52               | Azerbaijan | Butter, Ghee                    | 2002           | 63                                                                    |
| 52               | Azerbaijan | Cereals - Excluding Beer        | 2002           | 1,653                                                                 |
| 52               | Azerbaijan | Cereals, Other                  | 2002           | 6                                                                     |
| 52               | Azerbaijan | Cocoa Beans and products        | 2002           | 9                                                                     |
| 52               | Azerbaijan | Cottonseed Oil                  | 2002           | 5                                                                     |
| 52               | Azerbaijan | Eggs                            | 2002           | 15                                                                    |
| 52               | Azerbaijan | Fats, Animals, Raw              | 2002           | 6                                                                     |
| 52               | Azerbaijan | Fish, Seafood                   | 2002           | 4                                                                     |
| 52               | Azerbaijan | Freshwater Fish                 | 2002           | 3                                                                     |
| 52               | Azerbaijan | Fruits - Excluding Wine         | 2002           | 83                                                                    |
| 52               | Azerbaijan | Fruits, Other                   | 2002           | 53                                                                    |
| 52               | Azerbaijan | Grand Total                     | 2002           | 2,585                                                                 |
| 52               | Azerbaijan | Grapes and products (excl wine) | 2002           | 9                                                                     |
| 52               | Azerbaijan | Groundnuts (Shelled Eq)         | 2002           | 1                                                                     |
| 52               | Azerbaijan | Honey                           | 2002           | 1                                                                     |
| 52               | Azerbaijan | Maize and products              | 2002           | 58                                                                    |
| 52               | Azerbaijan | Maize Germ Oil                  | 2002           | 3                                                                     |
| 52               | Azerbaijan | Meat                            | 2002           | 95                                                                    |
| 52               | Azerbaijan | Milk - Excluding Butter         | 2002           | 135                                                                   |
| 52               | Azerbaijan | Miscellaneous                   | 2002           | 1                                                                     |
| 52               | Azerbaijan | Mutton & Goat Meat              | 2002           | 33                                                                    |
| 52               | Azerbaijan | Offals                          | 2002           | 8                                                                     |
| 52               | Azerbaijan | Oilcrops                        | 2002           | 1                                                                     |
| 52               | Azerbaijan | Onions                          | 2002           | 13                                                                    |
| 52               | Azerbaijan | Oranges, Mandarines             | 2002           | 2                                                                     |
| 52               | Azerbaijan | Pelagic Fish                    | 2002           | 1                                                                     |
| 52               | Azerbaijan | Pigmeat                         | 2002           | 4                                                                     |
| 52               | Azerbaijan | Potatoes and products           | 2002           | 119                                                                   |
| 52               | Azerbaijan | Poultry Meat                    | 2002           | 11                                                                    |
| 52               | Azerbaijan | Rice (Milled Equivalent)        | 2002           | 35                                                                    |
| 52               | Azerbaijan | Soyabean Oil                    | 2002           | 39                                                                    |
| 52               | Azerbaijan | Starchy Roots                   | 2002           | 119                                                                   |
| 52               | Azerbaijan | Stimulants                      | 2002           | 10                                                                    |
| 52               | Azerbaijan | Sugar & Sweeteners              | 2002           | 156                                                                   |
| 52               | Azerbaijan | Sugar (Raw Equivalent)          | 2002           | 155                                                                   |
| 52               | Azerbaijan | Sunflowerseed Oil               | 2002           | 20                                                                    |
| 52               | Azerbaijan | Sweeteners, Other               | 2002           | 1                                                                     |
| 52               | Azerbaijan | Tea (including mate)            | 2002           | 1                                                                     |
| 52               | Azerbaijan | Tomatoes and products           | 2002           | 23                                                                    |
| 52               | Azerbaijan | Treenuts                        | 2002           | 14                                                                    |
| 52               | Azerbaijan | Vegetable Oils                  | 2002           | 68                                                                    |
| 52               | Azerbaijan | Vegetables                      | 2002           | 79                                                                    |
| 52               | Azerbaijan | Vegetables, Other               | 2002           | 43                                                                    |
| 52               | Azerbaijan | Vegetal Products                | 2002           | 2,258                                                                 |
| 52               | Azerbaijan | Wheat and products              | 2002           | 1,546                                                                 |
| 52               | Azerbaijan | Wine                            | 2002           | 1                                                                     |
| 52               | Azerbaijan | Alcoholic Beverages             | 2003           | 67                                                                    |
| 52               | Azerbaijan | Animal fats                     | 2003           | 67                                                                    |
| 52               | Azerbaijan | Animal Products                 | 2003           | 341                                                                   |
| 52               | Azerbaijan | Apples and products             | 2003           | 16                                                                    |
| 52               | Azerbaijan | Barley and products             | 2003           | 3                                                                     |
| 52               | Azerbaijan | Beer                            | 2003           | 21                                                                    |
| 52               | Azerbaijan | Beverages, Alcoholic            | 2003           | 45                                                                    |
| 52               | Azerbaijan | Bovine Meat                     | 2003           | 51                                                                    |
| 52               | Azerbaijan | Butter, Ghee                    | 2003           | 60                                                                    |
| 52               | Azerbaijan | Cereals - Excluding Beer        | 2003           | 1,703                                                                 |
| 52               | Azerbaijan | Cereals, Other                  | 2003           | 3                                                                     |
| 52               | Azerbaijan | Cocoa Beans and products        | 2003           | 13                                                                    |
| 52               | Azerbaijan | Eggs                            | 2003           | 16                                                                    |
| 52               | Azerbaijan | Fats, Animals, Raw              | 2003           | 7                                                                     |
| 52               | Azerbaijan | Fish, Seafood                   | 2003           | 3                                                                     |
| 52               | Azerbaijan | Freshwater Fish                 | 2003           | 2                                                                     |
| 52               | Azerbaijan | Fruits - Excluding Wine         | 2003           | 80                                                                    |
| 52               | Azerbaijan | Fruits, Other                   | 2003           | 51                                                                    |
| 52               | Azerbaijan | Grand Total                     | 2003           | 2,706                                                                 |
| 52               | Azerbaijan | Grapes and products (excl wine) | 2003           | 10                                                                    |
| 52               | Azerbaijan | Groundnuts (Shelled Eq)         | 2003           | 1                                                                     |
| 52               | Azerbaijan | Honey                           | 2003           | 1                                                                     |
| 52               | Azerbaijan | Maize and products              | 2003           | 68                                                                    |
| 52               | Azerbaijan | Maize Germ Oil                  | 2003           | 16                                                                    |
| 52               | Azerbaijan | Meat                            | 2003           | 102                                                                   |
| 52               | Azerbaijan | Milk - Excluding Butter         | 2003           | 143                                                                   |
| 52               | Azerbaijan | Miscellaneous                   | 2003           | 2                                                                     |
| 52               | Azerbaijan | Mutton & Goat Meat              | 2003           | 34                                                                    |
| 52               | Azerbaijan | Offals                          | 2003           | 10                                                                    |
| 52               | Azerbaijan | Oilcrops                        | 2003           | 1                                                                     |
| 52               | Azerbaijan | Onions                          | 2003           | 16                                                                    |
| 52               | Azerbaijan | Oranges, Mandarines             | 2003           | 2                                                                     |
| 52               | Azerbaijan | Pelagic Fish                    | 2003           | 1                                                                     |
| 52               | Azerbaijan | Pigmeat                         | 2003           | 5                                                                     |
| 52               | Azerbaijan | Potatoes and products           | 2003           | 134                                                                   |
| 52               | Azerbaijan | Poultry Meat                    | 2003           | 12                                                                    |
| 52               | Azerbaijan | Rice (Milled Equivalent)        | 2003           | 32                                                                    |
| 52               | Azerbaijan | Soyabean Oil                    | 2003           | 60                                                                    |
| 52               | Azerbaijan | Starchy Roots                   | 2003           | 134                                                                   |
| 52               | Azerbaijan | Stimulants                      | 2003           | 13                                                                    |
| 52               | Azerbaijan | Sugar & Sweeteners              | 2003           | 164                                                                   |
| 52               | Azerbaijan | Sugar (Raw Equivalent)          | 2003           | 162                                                                   |
| 52               | Azerbaijan | Sunflowerseed Oil               | 2003           | 20                                                                    |
| 52               | Azerbaijan | Sweeteners, Other               | 2003           | 1                                                                     |
| 52               | Azerbaijan | Tomatoes and products           | 2003           | 23                                                                    |
| 52               | Azerbaijan | Treenuts                        | 2003           | 15                                                                    |
| 52               | Azerbaijan | Vegetable Oils                  | 2003           | 96                                                                    |
| 52               | Azerbaijan | Vegetables                      | 2003           | 89                                                                    |
| 52               | Azerbaijan | Vegetables, Other               | 2003           | 49                                                                    |

Dietary calcium and zinc deficiency risks are decreasing but remain prevalent

| FAO Country code | Country    | Food item                       | Reference year | Net energy supply (kcal capita <sup>-1</sup> d <sup>-1</sup> ) |
|------------------|------------|---------------------------------|----------------|----------------------------------------------------------------|
| 52               | Azerbaijan | Vegetal Products                | 2003           | 2,365                                                          |
| 52               | Azerbaijan | Wheat and products              | 2003           | 1,597                                                          |
| 52               | Azerbaijan | Wine                            | 2003           | 1                                                              |
| 52               | Azerbaijan | Alcoholic Beverages             | 2004           | 72                                                             |
| 52               | Azerbaijan | Animal fats                     | 2004           | 68                                                             |
| 52               | Azerbaijan | Animal Products                 | 2004           | 337                                                            |
| 52               | Azerbaijan | Apples and products             | 2004           | 15                                                             |
| 52               | Azerbaijan | Bananas                         | 2004           | 1                                                              |
| 52               | Azerbaijan | Barley and products             | 2004           | 2                                                              |
| 52               | Azerbaijan | Beer                            | 2004           | 29                                                             |
| 52               | Azerbaijan | Beverages, Alcoholic            | 2004           | 42                                                             |
| 52               | Azerbaijan | Bovine Meat                     | 2004           | 51                                                             |
| 52               | Azerbaijan | Butter, Ghee                    | 2004           | 63                                                             |
| 52               | Azerbaijan | Cereals - Excluding Beer        | 2004           | 1,812                                                          |
| 52               | Azerbaijan | Cereals, Other                  | 2004           | 7                                                              |
| 52               | Azerbaijan | Cocoa Beans and products        | 2004           | 17                                                             |
| 52               | Azerbaijan | Eggs                            | 2004           | 20                                                             |
| 52               | Azerbaijan | Fats, Animals, Raw              | 2004           | 4                                                              |
| 52               | Azerbaijan | Fish, Seafood                   | 2004           | 3                                                              |
| 52               | Azerbaijan | Freshwater Fish                 | 2004           | 2                                                              |
| 52               | Azerbaijan | Fruits - Excluding Wine         | 2004           | 58                                                             |
| 52               | Azerbaijan | Fruits, Other                   | 2004           | 31                                                             |
| 52               | Azerbaijan | Grand Total                     | 2004           | 2,842                                                          |
| 52               | Azerbaijan | Grapes and products (excl wine) | 2004           | 9                                                              |
| 52               | Azerbaijan | Groundnuts (Shelled Eq)         | 2004           | 1                                                              |
| 52               | Azerbaijan | Honey                           | 2004           | 1                                                              |
| 52               | Azerbaijan | Maize and products              | 2004           | 76                                                             |
| 52               | Azerbaijan | Maize Germ Oil                  | 2004           | 25                                                             |
| 52               | Azerbaijan | Meat                            | 2004           | 105                                                            |
| 52               | Azerbaijan | Milk - Excluding Butter         | 2004           | 131                                                            |
| 52               | Azerbaijan | Miscellaneous                   | 2004           | 3                                                              |
| 52               | Azerbaijan | Mutton & Goat Meat              | 2004           | 35                                                             |
| 52               | Azerbaijan | Offals                          | 2004           | 11                                                             |
| 52               | Azerbaijan | Oilcrops                        | 2004           | 1                                                              |
| 52               | Azerbaijan | Onions                          | 2004           | 17                                                             |
| 52               | Azerbaijan | Oranges, Mandarines             | 2004           | 2                                                              |
| 52               | Azerbaijan | Pigmeat                         | 2004           | 5                                                              |
| 52               | Azerbaijan | Potatoes and products           | 2004           | 149                                                            |
| 52               | Azerbaijan | Poultry Meat                    | 2004           | 14                                                             |
| 52               | Azerbaijan | Rice (Milled Equivalent)        | 2004           | 26                                                             |
| 52               | Azerbaijan | Soyabean Oil                    | 2004           | 64                                                             |
| 52               | Azerbaijan | Starchy Roots                   | 2004           | 149                                                            |
| 52               | Azerbaijan | Stimulants                      | 2004           | 18                                                             |
| 52               | Azerbaijan | Sugar & Sweeteners              | 2004           | 157                                                            |
| 52               | Azerbaijan | Sugar (Raw Equivalent)          | 2004           | 156                                                            |
| 52               | Azerbaijan | Sunflowerseed Oil               | 2004           | 46                                                             |
| 52               | Azerbaijan | Sweeteners, Other               | 2004           | 1                                                              |
| 52               | Azerbaijan | Tomatoes and products           | 2004           | 22                                                             |
| 52               | Azerbaijan | Treenuts                        | 2004           | 9                                                              |
| 52               | Azerbaijan | Vegetable Oils                  | 2004           | 135                                                            |
| 52               | Azerbaijan | Vegetables                      | 2004           | 90                                                             |
| 52               | Azerbaijan | Vegetables, Other               | 2004           | 52                                                             |
| 52               | Azerbaijan | Vegetal Products                | 2004           | 2,505                                                          |
| 52               | Azerbaijan | Wheat and products              | 2004           | 1,700                                                          |
| 52               | Azerbaijan | Wine                            | 2004           | 1                                                              |
| 52               | Azerbaijan | Alcoholic Beverages             | 2005           | 82                                                             |
| 52               | Azerbaijan | Animal fats                     | 2005           | 51                                                             |
| 52               | Azerbaijan | Animal Products                 | 2005           | 357                                                            |
| 52               | Azerbaijan | Apples and products             | 2005           | 15                                                             |
| 52               | Azerbaijan | Bananas                         | 2005           | 1                                                              |
| 52               | Azerbaijan | Barley and products             | 2005           | 1                                                              |
| 52               | Azerbaijan | Beer                            | 2005           | 39                                                             |
| 52               | Azerbaijan | Beverages, Alcoholic            | 2005           | 42                                                             |
| 52               | Azerbaijan | Bovine Meat                     | 2005           | 53                                                             |
| 52               | Azerbaijan | Butter, Ghee                    | 2005           | 50                                                             |
| 52               | Azerbaijan | Cereals - Excluding Beer        | 2005           | 1,789                                                          |
| 52               | Azerbaijan | Cereals, Other                  | 2005           | 6                                                              |
| 52               | Azerbaijan | Cocoa Beans and products        | 2005           | 20                                                             |
| 52               | Azerbaijan | Eggs                            | 2005           | 21                                                             |
| 52               | Azerbaijan | Fats, Animals, Raw              | 2005           | 1                                                              |
| 52               | Azerbaijan | Fish, Seafood                   | 2005           | 4                                                              |
| 52               | Azerbaijan | Freshwater Fish                 | 2005           | 2                                                              |
| 52               | Azerbaijan | Fruits - Excluding Wine         | 2005           | 85                                                             |
| 52               | Azerbaijan | Fruits, Other                   | 2005           | 54                                                             |
| 52               | Azerbaijan | Grand Total                     | 2005           | 2,918                                                          |
| 52               | Azerbaijan | Grapes and products (excl wine) | 2005           | 13                                                             |
| 52               | Azerbaijan | Groundnuts (Shelled Eq)         | 2005           | 2                                                              |
| 52               | Azerbaijan | Honey                           | 2005           | 1                                                              |
| 52               | Azerbaijan | Maize and products              | 2005           | 83                                                             |
| 52               | Azerbaijan | Maize Germ Oil                  | 2005           | 17                                                             |
| 52               | Azerbaijan | Meat                            | 2005           | 109                                                            |
| 52               | Azerbaijan | Milk - Excluding Butter         | 2005           | 161                                                            |
| 52               | Azerbaijan | Miscellaneous                   | 2005           | 3                                                              |
| 52               | Azerbaijan | Mutton & Goat Meat              | 2005           | 35                                                             |
| 52               | Azerbaijan | Offals                          | 2005           | 11                                                             |
| 52               | Azerbaijan | Oilcrops                        | 2005           | 2                                                              |
| 52               | Azerbaijan | Olive Oil                       | 2005           | 1                                                              |
| 52               | Azerbaijan | Onions                          | 2005           | 17                                                             |
| 52               | Azerbaijan | Oranges, Mandarines             | 2005           | 2                                                              |
| 52               | Azerbaijan | Palm Oil                        | 2005           | 14                                                             |
| 52               | Azerbaijan | Pelagic Fish                    | 2005           | 1                                                              |
| 52               | Azerbaijan | Pigmeat                         | 2005           | 5                                                              |
| 52               | Azerbaijan | Potatoes and products           | 2005           | 167                                                            |
| 52               | Azerbaijan | Poultry Meat                    | 2005           | 16                                                             |
| 52               | Azerbaijan | Rice (Milled Equivalent)        | 2005           | 23                                                             |
| 52               | Azerbaijan | Soyabean Oil                    | 2005           | 38                                                             |
| 52               | Azerbaijan | Starchy Roots                   | 2005           | 167                                                            |

Dietary calcium and zinc deficiency risks are decreasing but remain prevalent

| FAO Country code | Country    | Food item                       | Reference year | Net energy supply (kcal capita <sup>-1</sup> d <sup>-1</sup> ) |
|------------------|------------|---------------------------------|----------------|----------------------------------------------------------------|
| 52               | Azerbaijan | Stimulants                      | 2005           | 20                                                             |
| 52               | Azerbaijan | Sugar & Sweeteners              | 2005           | 179                                                            |
| 52               | Azerbaijan | Sugar (Raw Equivalent)          | 2005           | 177                                                            |
| 52               | Azerbaijan | Sunflowerseed Oil               | 2005           | 47                                                             |
| 52               | Azerbaijan | Sweeteners, Other               | 2005           | 2                                                              |
| 52               | Azerbaijan | Tomatoes and products           | 2005           | 22                                                             |
| 52               | Azerbaijan | Treenuts                        | 2005           | 19                                                             |
| 52               | Azerbaijan | Vegetable Oils                  | 2005           | 117                                                            |
| 52               | Azerbaijan | Vegetables                      | 2005           | 97                                                             |
| 52               | Azerbaijan | Vegetables, Other               | 2005           | 58                                                             |
| 52               | Azerbaijan | Vegetal Products                | 2005           | 2,561                                                          |
| 52               | Azerbaijan | Wheat and products              | 2005           | 1,675                                                          |
| 52               | Azerbaijan | Wine                            | 2005           | 1                                                              |
| 52               | Azerbaijan | Alcoholic Beverages             | 2006           | 98                                                             |
| 52               | Azerbaijan | Animal fats                     | 2006           | 49                                                             |
| 52               | Azerbaijan | Animal Products                 | 2006           | 360                                                            |
| 52               | Azerbaijan | Apples and products             | 2006           | 16                                                             |
| 52               | Azerbaijan | Bananas                         | 2006           | 2                                                              |
| 52               | Azerbaijan | Beer                            | 2006           | 49                                                             |
| 52               | Azerbaijan | Beverages, Alcoholic            | 2006           | 48                                                             |
| 52               | Azerbaijan | Bovine Meat                     | 2006           | 55                                                             |
| 52               | Azerbaijan | Butter, Ghee                    | 2006           | 49                                                             |
| 52               | Azerbaijan | Cereals - Excluding Beer        | 2006           | 1,762                                                          |
| 52               | Azerbaijan | Cereals, Other                  | 2006           | 6                                                              |
| 52               | Azerbaijan | Cocoa Beans and products        | 2006           | 22                                                             |
| 52               | Azerbaijan | Eggs                            | 2006           | 18                                                             |
| 52               | Azerbaijan | Fish, Seafood                   | 2006           | 4                                                              |
| 52               | Azerbaijan | Freshwater Fish                 | 2006           | 1                                                              |
| 52               | Azerbaijan | Fruits - Excluding Wine         | 2006           | 93                                                             |
| 52               | Azerbaijan | Fruits, Other                   | 2006           | 57                                                             |
| 52               | Azerbaijan | Grand Total                     | 2006           | 2,912                                                          |
| 52               | Azerbaijan | Grapes and products (excl wine) | 2006           | 15                                                             |
| 52               | Azerbaijan | Groundnuts (Shelled Eq)         | 2006           | 2                                                              |
| 52               | Azerbaijan | Honey                           | 2006           | 1                                                              |
| 52               | Azerbaijan | Maize and products              | 2006           | 79                                                             |
| 52               | Azerbaijan | Maize Germ Oil                  | 2006           | 8                                                              |
| 52               | Azerbaijan | Meat                            | 2006           | 114                                                            |
| 52               | Azerbaijan | Milk - Excluding Butter         | 2006           | 167                                                            |
| 52               | Azerbaijan | Miscellaneous                   | 2006           | 3                                                              |
| 52               | Azerbaijan | Mutton & Goat Meat              | 2006           | 37                                                             |
| 52               | Azerbaijan | Offals                          | 2006           | 7                                                              |
| 52               | Azerbaijan | Oilcrops                        | 2006           | 2                                                              |
| 52               | Azerbaijan | Oilcrops Oil, Other             | 2006           | 1                                                              |
| 52               | Azerbaijan | Olive Oil                       | 2006           | 1                                                              |
| 52               | Azerbaijan | Onions                          | 2006           | 18                                                             |
| 52               | Azerbaijan | Oranges, Mandarines             | 2006           | 2                                                              |
| 52               | Azerbaijan | Pelagic Fish                    | 2006           | 2                                                              |
| 52               | Azerbaijan | Pigmeat                         | 2006           | 6                                                              |
| 52               | Azerbaijan | Potatoes and products           | 2006           | 164                                                            |
| 52               | Azerbaijan | Poultry Meat                    | 2006           | 16                                                             |
| 52               | Azerbaijan | Rice (Milled Equivalent)        | 2006           | 20                                                             |
| 52               | Azerbaijan | Soyabean Oil                    | 2006           | 71                                                             |
| 52               | Azerbaijan | Spices                          | 2006           | 1                                                              |
| 52               | Azerbaijan | Spices, Other                   | 2006           | 1                                                              |
| 52               | Azerbaijan | Starchy Roots                   | 2006           | 164                                                            |
| 52               | Azerbaijan | Stimulants                      | 2006           | 23                                                             |
| 52               | Azerbaijan | Sugar & Sweeteners              | 2006           | 186                                                            |
| 52               | Azerbaijan | Sugar (Raw Equivalent)          | 2006           | 183                                                            |
| 52               | Azerbaijan | Sunflowerseed Oil               | 2006           | 14                                                             |
| 52               | Azerbaijan | Sweeteners, Other               | 2006           | 2                                                              |
| 52               | Azerbaijan | Tomatoes and products           | 2006           | 22                                                             |
| 52               | Azerbaijan | Treenuts                        | 2006           | 25                                                             |
| 52               | Azerbaijan | Vegetable Oils                  | 2006           | 96                                                             |
| 52               | Azerbaijan | Vegetables                      | 2006           | 99                                                             |
| 52               | Azerbaijan | Vegetables, Other               | 2006           | 59                                                             |
| 52               | Azerbaijan | Vegetal Products                | 2006           | 2,552                                                          |
| 52               | Azerbaijan | Wheat and products              | 2006           | 1,656                                                          |
| 52               | Azerbaijan | Wine                            | 2006           | 1                                                              |
| 52               | Azerbaijan | Alcoholic Beverages             | 2007           | 170                                                            |
| 52               | Azerbaijan | Animal fats                     | 2007           | 53                                                             |
| 52               | Azerbaijan | Animal Products                 | 2007           | 373                                                            |
| 52               | Azerbaijan | Apples and products             | 2007           | 8                                                              |
| 52               | Azerbaijan | Bananas                         | 2007           | 3                                                              |
| 52               | Azerbaijan | Beer                            | 2007           | 50                                                             |
| 52               | Azerbaijan | Beverages, Alcoholic            | 2007           | 120                                                            |
| 52               | Azerbaijan | Bovine Meat                     | 2007           | 51                                                             |
| 52               | Azerbaijan | Butter, Ghee                    | 2007           | 52                                                             |
| 52               | Azerbaijan | Cereals - Excluding Beer        | 2007           | 1,727                                                          |
| 52               | Azerbaijan | Cereals, Other                  | 2007           | 2                                                              |
| 52               | Azerbaijan | Cocoa Beans and products        | 2007           | 22                                                             |
| 52               | Azerbaijan | Coconuts - Incl Copra           | 2007           | 1                                                              |
| 52               | Azerbaijan | Eggs                            | 2007           | 22                                                             |
| 52               | Azerbaijan | Fats, Animals, Raw              | 2007           | 1                                                              |
| 52               | Azerbaijan | Fish, Seafood                   | 2007           | 4                                                              |
| 52               | Azerbaijan | Freshwater Fish                 | 2007           | 1                                                              |
| 52               | Azerbaijan | Fruits - Excluding Wine         | 2007           | 85                                                             |
| 52               | Azerbaijan | Fruits, Other                   | 2007           | 58                                                             |
| 52               | Azerbaijan | Grand Total                     | 2007           | 2,890                                                          |
| 52               | Azerbaijan | Grapes and products (excl wine) | 2007           | 15                                                             |
| 52               | Azerbaijan | Groundnuts (Shelled Eq)         | 2007           | 3                                                              |
| 52               | Azerbaijan | Honey                           | 2007           | 1                                                              |
| 52               | Azerbaijan | Maize and products              | 2007           | 71                                                             |
| 52               | Azerbaijan | Maize Germ Oil                  | 2007           | 4                                                              |
| 52               | Azerbaijan | Meat                            | 2007           | 117                                                            |
| 52               | Azerbaijan | Milk - Excluding Butter         | 2007           | 171                                                            |
| 52               | Azerbaijan | Miscellaneous                   | 2007           | 4                                                              |
| 52               | Azerbaijan | Mutton & Goat Meat              | 2007           | 37                                                             |

Dietary calcium and zinc deficiency risks are decreasing but remain prevalent

| FAO Country code | Country    | Food item                       | Reference year | Net energy supply (kcal capita <sup>-1</sup> d <sup>-1</sup> ) |
|------------------|------------|---------------------------------|----------------|----------------------------------------------------------------|
| 52               | Azerbaijan | Offals                          | 2007           | 7                                                              |
| 52               | Azerbaijan | Oilcrops                        | 2007           | 3                                                              |
| 52               | Azerbaijan | Oilcrops Oil, Other             | 2007           | 2                                                              |
| 52               | Azerbaijan | Olive Oil                       | 2007           | 1                                                              |
| 52               | Azerbaijan | Onions                          | 2007           | 18                                                             |
| 52               | Azerbaijan | Oranges, Mandarines             | 2007           | 1                                                              |
| 52               | Azerbaijan | Pelagic Fish                    | 2007           | 3                                                              |
| 52               | Azerbaijan | Pigmeat                         | 2007           | 6                                                              |
| 52               | Azerbaijan | Potatoes and products           | 2007           | 162                                                            |
| 52               | Azerbaijan | Poultry Meat                    | 2007           | 23                                                             |
| 52               | Azerbaijan | Rice (Milled Equivalent)        | 2007           | 18                                                             |
| 52               | Azerbaijan | Soyabean Oil                    | 2007           | 46                                                             |
| 52               | Azerbaijan | Spices                          | 2007           | 1                                                              |
| 52               | Azerbaijan | Spices, Other                   | 2007           | 1                                                              |
| 52               | Azerbaijan | Starchy Roots                   | 2007           | 162                                                            |
| 52               | Azerbaijan | Stimulants                      | 2007           | 23                                                             |
| 52               | Azerbaijan | Sugar & Sweeteners              | 2007           | 144                                                            |
| 52               | Azerbaijan | Sugar (Raw Equivalent)          | 2007           | 140                                                            |
| 52               | Azerbaijan | Sunflowerseed Oil               | 2007           | 21                                                             |
| 52               | Azerbaijan | Sweeteners, Other               | 2007           | 3                                                              |
| 52               | Azerbaijan | Tea (including mate)            | 2007           | 1                                                              |
| 52               | Azerbaijan | Tomatoes and products           | 2007           | 22                                                             |
| 52               | Azerbaijan | Treenuts                        | 2007           | 23                                                             |
| 52               | Azerbaijan | Vegetable Oils                  | 2007           | 74                                                             |
| 52               | Azerbaijan | Vegetables                      | 2007           | 101                                                            |
| 52               | Azerbaijan | Vegetables, Other               | 2007           | 61                                                             |
| 52               | Azerbaijan | Vegetal Products                | 2007           | 2,517                                                          |
| 52               | Azerbaijan | Wheat and products              | 2007           | 1,635                                                          |
| 52               | Azerbaijan | Wine                            | 2007           | 1                                                              |
| 52               | Azerbaijan | Alcoholic Beverages             | 2008           | 119                                                            |
| 52               | Azerbaijan | Animal fats                     | 2008           | 48                                                             |
| 52               | Azerbaijan | Animal Products                 | 2008           | 380                                                            |
| 52               | Azerbaijan | Apples and products             | 2008           | 12                                                             |
| 52               | Azerbaijan | Bananas                         | 2008           | 3                                                              |
| 52               | Azerbaijan | Beer                            | 2008           | 49                                                             |
| 52               | Azerbaijan | Beverages, Alcoholic            | 2008           | 69                                                             |
| 52               | Azerbaijan | Bovine Meat                     | 2008           | 52                                                             |
| 52               | Azerbaijan | Butter, Ghee                    | 2008           | 47                                                             |
| 52               | Azerbaijan | Cereals - Excluding Beer        | 2008           | 1,756                                                          |
| 52               | Azerbaijan | Cereals, Other                  | 2008           | 7                                                              |
| 52               | Azerbaijan | Cocoa Beans and products        | 2008           | 22                                                             |
| 52               | Azerbaijan | Eggs                            | 2008           | 27                                                             |
| 52               | Azerbaijan | Fish, Seafood                   | 2008           | 5                                                              |
| 52               | Azerbaijan | Freshwater Fish                 | 2008           | 1                                                              |
| 52               | Azerbaijan | Fruits - Excluding Wine         | 2008           | 87                                                             |
| 52               | Azerbaijan | Fruits, Other                   | 2008           | 56                                                             |
| 52               | Azerbaijan | Grand Total                     | 2008           | 2,868                                                          |
| 52               | Azerbaijan | Grapes and products (excl wine) | 2008           | 16                                                             |
| 52               | Azerbaijan | Groundnuts (Shelled Eq)         | 2008           | 3                                                              |
| 52               | Azerbaijan | Honey                           | 2008           | 1                                                              |
| 52               | Azerbaijan | Maize and products              | 2008           | 84                                                             |
| 52               | Azerbaijan | Maize Germ Oil                  | 2008           | 35                                                             |
| 52               | Azerbaijan | Meat                            | 2008           | 120                                                            |
| 52               | Azerbaijan | Milk - Excluding Butter         | 2008           | 177                                                            |
| 52               | Azerbaijan | Miscellaneous                   | 2008           | 4                                                              |
| 52               | Azerbaijan | Mutton & Goat Meat              | 2008           | 38                                                             |
| 52               | Azerbaijan | Oats                            | 2008           | 1                                                              |
| 52               | Azerbaijan | Offals                          | 2008           | 4                                                              |
| 52               | Azerbaijan | Oilcrops                        | 2008           | 3                                                              |
| 52               | Azerbaijan | Oilcrops Oil, Other             | 2008           | 1                                                              |
| 52               | Azerbaijan | Onions                          | 2008           | 15                                                             |
| 52               | Azerbaijan | Oranges, Mandarines             | 2008           | 1                                                              |
| 52               | Azerbaijan | Pelagic Fish                    | 2008           | 3                                                              |
| 52               | Azerbaijan | Pigmeat                         | 2008           | 5                                                              |
| 52               | Azerbaijan | Potatoes and products           | 2008           | 149                                                            |
| 52               | Azerbaijan | Poultry Meat                    | 2008           | 24                                                             |
| 52               | Azerbaijan | Rice (Milled Equivalent)        | 2008           | 31                                                             |
| 52               | Azerbaijan | Rye and products                | 2008           | 1                                                              |
| 52               | Azerbaijan | Soyabean Oil                    | 2008           | 21                                                             |
| 52               | Azerbaijan | Spices                          | 2008           | 1                                                              |
| 52               | Azerbaijan | Spices, Other                   | 2008           | 1                                                              |
| 52               | Azerbaijan | Starchy Roots                   | 2008           | 149                                                            |
| 52               | Azerbaijan | Stimulants                      | 2008           | 24                                                             |
| 52               | Azerbaijan | Sugar & Sweeteners              | 2008           | 159                                                            |
| 52               | Azerbaijan | Sugar (Raw Equivalent)          | 2008           | 155                                                            |
| 52               | Azerbaijan | Sunflowerseed Oil               | 2008           | 4                                                              |
| 52               | Azerbaijan | Sweeteners, Other               | 2008           | 3                                                              |
| 52               | Azerbaijan | Tea (including mate)            | 2008           | 1                                                              |
| 52               | Azerbaijan | Tomatoes and products           | 2008           | 22                                                             |
| 52               | Azerbaijan | Treenuts                        | 2008           | 30                                                             |
| 52               | Azerbaijan | Vegetable Oils                  | 2008           | 62                                                             |
| 52               | Azerbaijan | Vegetables                      | 2008           | 93                                                             |
| 52               | Azerbaijan | Vegetables, Other               | 2008           | 56                                                             |
| 52               | Azerbaijan | Vegetal Products                | 2008           | 2,487                                                          |
| 52               | Azerbaijan | Wheat and products              | 2008           | 1,631                                                          |
| 52               | Azerbaijan | Wine                            | 2008           | 1                                                              |
| 52               | Azerbaijan | Alcoholic Beverages             | 2009           | 131                                                            |
| 52               | Azerbaijan | Animal fats                     | 2009           | 69                                                             |
| 52               | Azerbaijan | Animal Products                 | 2009           | 450                                                            |
| 52               | Azerbaijan | Apples and products             | 2009           | 15                                                             |
| 52               | Azerbaijan | Bananas                         | 2009           | 5                                                              |
| 52               | Azerbaijan | Beer                            | 2009           | 54                                                             |
| 52               | Azerbaijan | Beverages, Alcoholic            | 2009           | 77                                                             |
| 52               | Azerbaijan | Bovine Meat                     | 2009           | 62                                                             |
| 52               | Azerbaijan | Butter, Ghee                    | 2009           | 68                                                             |
| 52               | Azerbaijan | Cereals - Excluding Beer        | 2009           | 1,733                                                          |
| 52               | Azerbaijan | Cereals, Other                  | 2009           | 6                                                              |

Dietary calcium and zinc deficiency risks are decreasing but remain prevalent

| FAO Country code | Country    | Food item                       | Reference year | Net energy supply (kcal capita <sup>-1</sup> d <sup>-1</sup> ) |
|------------------|------------|---------------------------------|----------------|----------------------------------------------------------------|
| 52               | Azerbaijan | Cocoa Beans and products        | 2009           | 21                                                             |
| 52               | Azerbaijan | Eggs                            | 2009           | 29                                                             |
| 52               | Azerbaijan | Fish, Seafood                   | 2009           | 5                                                              |
| 52               | Azerbaijan | Freshwater Fish                 | 2009           | 1                                                              |
| 52               | Azerbaijan | Fruits - Excluding Wine         | 2009           | 98                                                             |
| 52               | Azerbaijan | Fruits, Other                   | 2009           | 58                                                             |
| 52               | Azerbaijan | Grand Total                     | 2009           | 2,909                                                          |
| 52               | Azerbaijan | Grapes and products (excl wine) | 2009           | 18                                                             |
| 52               | Azerbaijan | Groundnuts (Shelled Eq)         | 2009           | 3                                                              |
| 52               | Azerbaijan | Honey                           | 2009           | 1                                                              |
| 52               | Azerbaijan | Maize and products              | 2009           | 85                                                             |
| 52               | Azerbaijan | Maize Germ Oil                  | 2009           | 1                                                              |
| 52               | Azerbaijan | Meat                            | 2009           | 151                                                            |
| 52               | Azerbaijan | Milk - Excluding Butter         | 2009           | 191                                                            |
| 52               | Azerbaijan | Miscellaneous                   | 2009           | 4                                                              |
| 52               | Azerbaijan | Mutton & Goat Meat              | 2009           | 54                                                             |
| 52               | Azerbaijan | Offals                          | 2009           | 6                                                              |
| 52               | Azerbaijan | Oilcrops                        | 2009           | 3                                                              |
| 52               | Azerbaijan | Olive Oil                       | 2009           | 1                                                              |
| 52               | Azerbaijan | Onions                          | 2009           | 15                                                             |
| 52               | Azerbaijan | Oranges, Mandarines             | 2009           | 2                                                              |
| 52               | Azerbaijan | Palm Oil                        | 2009           | 5                                                              |
| 52               | Azerbaijan | Pelagic Fish                    | 2009           | 3                                                              |
| 52               | Azerbaijan | Pigmeat                         | 2009           | 5                                                              |
| 52               | Azerbaijan | Potatoes and products           | 2009           | 149                                                            |
| 52               | Azerbaijan | Poultry Meat                    | 2009           | 30                                                             |
| 52               | Azerbaijan | Rice (Milled Equivalent)        | 2009           | 26                                                             |
| 52               | Azerbaijan | Rye and products                | 2009           | 1                                                              |
| 52               | Azerbaijan | Soyabean Oil                    | 2009           | 12                                                             |
| 52               | Azerbaijan | Spices                          | 2009           | 1                                                              |
| 52               | Azerbaijan | Spices, Other                   | 2009           | 1                                                              |
| 52               | Azerbaijan | Starchy Roots                   | 2009           | 149                                                            |
| 52               | Azerbaijan | Stimulants                      | 2009           | 23                                                             |
| 52               | Azerbaijan | Sugar & Sweeteners              | 2009           | 153                                                            |
| 52               | Azerbaijan | Sugar (Raw Equivalent)          | 2009           | 147                                                            |
| 52               | Azerbaijan | Sunflowerseed Oil               | 2009           | 30                                                             |
| 52               | Azerbaijan | Sweeteners, Other               | 2009           | 5                                                              |
| 52               | Azerbaijan | Tea (including mate)            | 2009           | 1                                                              |
| 52               | Azerbaijan | Tomatoes and products           | 2009           | 20                                                             |
| 52               | Azerbaijan | Treenuts                        | 2009           | 22                                                             |
| 52               | Azerbaijan | Vegetable Oils                  | 2009           | 49                                                             |
| 52               | Azerbaijan | Vegetables                      | 2009           | 93                                                             |
| 52               | Azerbaijan | Vegetables, Other               | 2009           | 57                                                             |
| 52               | Azerbaijan | Vegetal Products                | 2009           | 2,458                                                          |
| 52               | Azerbaijan | Wheat and products              | 2009           | 1,615                                                          |
| 52               | Azerbaijan | Wine                            | 2009           | 1                                                              |
| 52               | Azerbaijan | Alcoholic Beverages             | 2010           | 139                                                            |
| 52               | Azerbaijan | Animal fats                     | 2010           | 70                                                             |
| 52               | Azerbaijan | Animal Products                 | 2010           | 489                                                            |
| 52               | Azerbaijan | Apples and products             | 2010           | 15                                                             |
| 52               | Azerbaijan | Bananas                         | 2010           | 3                                                              |
| 52               | Azerbaijan | Barley and products             | 2010           | 1                                                              |
| 52               | Azerbaijan | Beer                            | 2010           | 56                                                             |
| 52               | Azerbaijan | Beverages, Alcoholic            | 2010           | 83                                                             |
| 52               | Azerbaijan | Bovine Meat                     | 2010           | 75                                                             |
| 52               | Azerbaijan | Butter, Ghee                    | 2010           | 69                                                             |
| 52               | Azerbaijan | Cereals - Excluding Beer        | 2010           | 1,713                                                          |
| 52               | Azerbaijan | Cereals, Other                  | 2010           | 13                                                             |
| 52               | Azerbaijan | Cocoa Beans and products        | 2010           | 19                                                             |
| 52               | Azerbaijan | Eggs                            | 2010           | 27                                                             |
| 52               | Azerbaijan | Fats, Animals, Raw              | 2010           | 1                                                              |
| 52               | Azerbaijan | Fish, Seafood                   | 2010           | 5                                                              |
| 52               | Azerbaijan | Freshwater Fish                 | 2010           | 1                                                              |
| 52               | Azerbaijan | Fruits - Excluding Wine         | 2010           | 99                                                             |
| 52               | Azerbaijan | Fruits, Other                   | 2010           | 59                                                             |
| 52               | Azerbaijan | Grand Total                     | 2010           | 2,948                                                          |
| 52               | Azerbaijan | Grapes and products (excl wine) | 2010           | 17                                                             |
| 52               | Azerbaijan | Groundnuts (Shelled Eq)         | 2010           | 3                                                              |
| 52               | Azerbaijan | Honey                           | 2010           | 2                                                              |
| 52               | Azerbaijan | Lemons, Limes and products      | 2010           | 1                                                              |
| 52               | Azerbaijan | Maize and products              | 2010           | 87                                                             |
| 52               | Azerbaijan | Maize Germ Oil                  | 2010           | 41                                                             |
| 52               | Azerbaijan | Meat                            | 2010           | 166                                                            |
| 52               | Azerbaijan | Milk - Excluding Butter         | 2010           | 213                                                            |
| 52               | Azerbaijan | Miscellaneous                   | 2010           | 4                                                              |
| 52               | Azerbaijan | Mutton & Goat Meat              | 2010           | 59                                                             |
| 52               | Azerbaijan | Offals                          | 2010           | 8                                                              |
| 52               | Azerbaijan | Oilcrops                        | 2010           | 3                                                              |
| 52               | Azerbaijan | Olive Oil                       | 2010           | 2                                                              |
| 52               | Azerbaijan | Onions                          | 2010           | 16                                                             |
| 52               | Azerbaijan | Oranges, Mandarines             | 2010           | 3                                                              |
| 52               | Azerbaijan | Pelagic Fish                    | 2010           | 3                                                              |
| 52               | Azerbaijan | Pigmeat                         | 2010           | 3                                                              |
| 52               | Azerbaijan | Potatoes and products           | 2010           | 134                                                            |
| 52               | Azerbaijan | Poultry Meat                    | 2010           | 29                                                             |
| 52               | Azerbaijan | Rice (Milled Equivalent)        | 2010           | 21                                                             |
| 52               | Azerbaijan | Rye and products                | 2010           | 1                                                              |
| 52               | Azerbaijan | Soyabean Oil                    | 2010           | 7                                                              |
| 52               | Azerbaijan | Spices                          | 2010           | 1                                                              |
| 52               | Azerbaijan | Spices, Other                   | 2010           | 1                                                              |
| 52               | Azerbaijan | Starchy Roots                   | 2010           | 134                                                            |
| 52               | Azerbaijan | Stimulants                      | 2010           | 20                                                             |
| 52               | Azerbaijan | Sugar & Sweeteners              | 2010           | 161                                                            |
| 52               | Azerbaijan | Sugar (Raw Equivalent)          | 2010           | 154                                                            |
| 52               | Azerbaijan | Sunflowerseed Oil               | 2010           | 11                                                             |
| 52               | Azerbaijan | Sweeteners, Other               | 2010           | 5                                                              |
| 52               | Azerbaijan | Tea (including mate)            | 2010           | 1                                                              |

Dietary calcium and zinc deficiency risks are decreasing but remain prevalent

| FAO Country code | Country    | Food item                       | Reference year | Net energy supply (kcal capita <sup>-1</sup> d <sup>-1</sup> ) |
|------------------|------------|---------------------------------|----------------|----------------------------------------------------------------|
| 52               | Azerbaijan | Tomatoes and products           | 2010           | 21                                                             |
| 52               | Azerbaijan | Treenuts                        | 2010           | 27                                                             |
| 52               | Azerbaijan | Vegetable Oils                  | 2010           | 62                                                             |
| 52               | Azerbaijan | Vegetables                      | 2010           | 95                                                             |
| 52               | Azerbaijan | Vegetables, Other               | 2010           | 58                                                             |
| 52               | Azerbaijan | Vegetal Products                | 2010           | 2,459                                                          |
| 52               | Azerbaijan | Wheat and products              | 2010           | 1,591                                                          |
| 52               | Azerbaijan | Wine                            | 2010           | 1                                                              |
| 52               | Azerbaijan | Alcoholic Beverages             | 2011           | 140                                                            |
| 52               | Azerbaijan | Animal fats                     | 2011           | 66                                                             |
| 52               | Azerbaijan | Animal Products                 | 2011           | 505                                                            |
| 52               | Azerbaijan | Apples and products             | 2011           | 15                                                             |
| 52               | Azerbaijan | Bananas                         | 2011           | 4                                                              |
| 52               | Azerbaijan | Beer                            | 2011           | 57                                                             |
| 52               | Azerbaijan | Beverages, Alcoholic            | 2011           | 81                                                             |
| 52               | Azerbaijan | Bovine Meat                     | 2011           | 78                                                             |
| 52               | Azerbaijan | Butter, Ghee                    | 2011           | 64                                                             |
| 52               | Azerbaijan | Cereals - Excluding Beer        | 2011           | 1,696                                                          |
| 52               | Azerbaijan | Cereals, Other                  | 2011           | 19                                                             |
| 52               | Azerbaijan | Cocoa Beans and products        | 2011           | 21                                                             |
| 52               | Azerbaijan | Eggs                            | 2011           | 28                                                             |
| 52               | Azerbaijan | Fats, Animals, Raw              | 2011           | 1                                                              |
| 52               | Azerbaijan | Fish, Seafood                   | 2011           | 5                                                              |
| 52               | Azerbaijan | Fruits - Excluding Wine         | 2011           | 106                                                            |
| 52               | Azerbaijan | Fruits, Other                   | 2011           | 63                                                             |
| 52               | Azerbaijan | Grand Total                     | 2011           | 2,952                                                          |
| 52               | Azerbaijan | Grapes and products (excl wine) | 2011           | 20                                                             |
| 52               | Azerbaijan | Groundnuts (Shelled Eq)         | 2011           | 3                                                              |
| 52               | Azerbaijan | Honey                           | 2011           | 2                                                              |
| 52               | Azerbaijan | Maize and products              | 2011           | 79                                                             |
| 52               | Azerbaijan | Maize Germ Oil                  | 2011           | 37                                                             |
| 52               | Azerbaijan | Meat                            | 2011           | 172                                                            |
| 52               | Azerbaijan | Milk - Excluding Butter         | 2011           | 229                                                            |
| 52               | Azerbaijan | Miscellaneous                   | 2011           | 5                                                              |
| 52               | Azerbaijan | Mutton & Goat Meat              | 2011           | 58                                                             |
| 52               | Azerbaijan | Oats                            | 2011           | 1                                                              |
| 52               | Azerbaijan | Offals                          | 2011           | 6                                                              |
| 52               | Azerbaijan | Oilcrops                        | 2011           | 4                                                              |
| 52               | Azerbaijan | Olive Oil                       | 2011           | 2                                                              |
| 52               | Azerbaijan | Onions                          | 2011           | 16                                                             |
| 52               | Azerbaijan | Oranges, Mandarines             | 2011           | 3                                                              |
| 52               | Azerbaijan | Pelagic Fish                    | 2011           | 4                                                              |
| 52               | Azerbaijan | Pigmeat                         | 2011           | 2                                                              |
| 52               | Azerbaijan | Potatoes and products           | 2011           | 132                                                            |
| 52               | Azerbaijan | Poultry Meat                    | 2011           | 33                                                             |
| 52               | Azerbaijan | Rice (Milled Equivalent)        | 2011           | 22                                                             |
| 52               | Azerbaijan | Rye and products                | 2011           | 1                                                              |
| 52               | Azerbaijan | Soyabean Oil                    | 2011           | 10                                                             |
| 52               | Azerbaijan | Spices                          | 2011           | 1                                                              |
| 52               | Azerbaijan | Spices, Other                   | 2011           | 1                                                              |
| 52               | Azerbaijan | Starchy Roots                   | 2011           | 132                                                            |
| 52               | Azerbaijan | Stimulants                      | 2011           | 23                                                             |
| 52               | Azerbaijan | Sugar & Sweeteners              | 2011           | 164                                                            |
| 52               | Azerbaijan | Sugar (Raw Equivalent)          | 2011           | 158                                                            |
| 52               | Azerbaijan | Sunflowerseed Oil               | 2011           | 6                                                              |
| 52               | Azerbaijan | Sweeteners, Other               | 2011           | 4                                                              |
| 52               | Azerbaijan | Tea (including mate)            | 2011           | 2                                                              |
| 52               | Azerbaijan | Tomatoes and products           | 2011           | 22                                                             |
| 52               | Azerbaijan | Treenuts                        | 2011           | 23                                                             |
| 52               | Azerbaijan | Vegetable Oils                  | 2011           | 56                                                             |
| 52               | Azerbaijan | Vegetables                      | 2011           | 98                                                             |
| 52               | Azerbaijan | Vegetables, Other               | 2011           | 60                                                             |
| 52               | Azerbaijan | Vegetal Products                | 2011           | 2,446                                                          |
| 52               | Azerbaijan | Wheat and products              | 2011           | 1,573                                                          |
| 52               | Azerbaijan | Wine                            | 2011           | 1                                                              |
| 12               | Bahamas    | Alcoholic Beverages             | 1992           | 166                                                            |
| 12               | Bahamas    | Animal fats                     | 1992           | 168                                                            |
| 12               | Bahamas    | Animal Products                 | 1992           | 827                                                            |
| 12               | Bahamas    | Apples and products             | 1992           | 4                                                              |
| 12               | Bahamas    | Bananas                         | 1992           | 26                                                             |
| 12               | Bahamas    | Bailey and products             | 1992           | 16                                                             |
| 12               | Bahamas    | Beans                           | 1992           | 9                                                              |
| 12               | Bahamas    | Beer                            | 1992           | 26                                                             |
| 12               | Bahamas    | Beverages, Alcoholic            | 1992           | 131                                                            |
| 12               | Bahamas    | Bovine Meat                     | 1992           | 128                                                            |
| 12               | Bahamas    | Butter, Ghee                    | 1992           | 36                                                             |
| 12               | Bahamas    | Cassava and products            | 1992           | 8                                                              |
| 12               | Bahamas    | Cereals - Excluding Beer        | 1992           | 672                                                            |
| 12               | Bahamas    | Cereals, Other                  | 1992           | 41                                                             |
| 12               | Bahamas    | Cocoa Beans and products        | 1992           | 16                                                             |
| 12               | Bahamas    | Coffee and products             | 1992           | 2                                                              |
| 12               | Bahamas    | Crustaceans                     | 1992           | 13                                                             |
| 12               | Bahamas    | Demersal Fish                   | 1992           | 3                                                              |
| 12               | Bahamas    | Eggs                            | 1992           | 6                                                              |
| 12               | Bahamas    | Fats, Animals, Raw              | 1992           | 132                                                            |
| 12               | Bahamas    | Fish, Seafood                   | 1992           | 44                                                             |
| 12               | Bahamas    | Fruits - Excluding Wine         | 1992           | 124                                                            |
| 12               | Bahamas    | Fruits, Other                   | 1992           | 60                                                             |
| 12               | Bahamas    | Grand Total                     | 1992           | 2,503                                                          |
| 12               | Bahamas    | Grapefruit and products         | 1992           | 2                                                              |
| 12               | Bahamas    | Grapes and products (excl wine) | 1992           | 9                                                              |
| 12               | Bahamas    | Honey                           | 1992           | 1                                                              |
| 12               | Bahamas    | Lemons, Limes and products      | 1992           | 2                                                              |
| 12               | Bahamas    | Maize and products              | 1992           | 16                                                             |
| 12               | Bahamas    | Marine Fish, Other              | 1992           | 27                                                             |
| 12               | Bahamas    | Meat                            | 1992           | 434                                                            |
| 12               | Bahamas    | Milk - Excluding Butter         | 1992           | 172                                                            |

Dietary calcium and zinc deficiency risks are decreasing but remain prevalent

| FAO Country code | Country | Food item                       | Reference year | Net energy supply (kcal capita <sup>-1</sup> d <sup>-1</sup> ) |
|------------------|---------|---------------------------------|----------------|----------------------------------------------------------------|
| 12               | Bahamas | Molluscs, Other                 | 1992           | 1                                                              |
| 12               | Bahamas | Mutton & Goat Meat              | 1992           | 28                                                             |
| 12               | Bahamas | Offals                          | 1992           | 3                                                              |
| 12               | Bahamas | Oilcrops                        | 1992           | 7                                                              |
| 12               | Bahamas | Oilcrops Oil, Other             | 1992           | 91                                                             |
| 12               | Bahamas | Oilcrops, Other                 | 1992           | 1                                                              |
| 12               | Bahamas | Onions                          | 1992           | 4                                                              |
| 12               | Bahamas | Oranges, Mandarines             | 1992           | 3                                                              |
| 12               | Bahamas | Peas                            | 1992           | 11                                                             |
| 12               | Bahamas | Pelagic Fish                    | 1992           | 1                                                              |
| 12               | Bahamas | Pigmeat                         | 1992           | 161                                                            |
| 12               | Bahamas | Plantains                       | 1992           | 17                                                             |
| 12               | Bahamas | Potatoes and products           | 1992           | 23                                                             |
| 12               | Bahamas | Poultry Meat                    | 1992           | 116                                                            |
| 12               | Bahamas | Pulses                          | 1992           | 33                                                             |
| 12               | Bahamas | Pulses, Other and products      | 1992           | 13                                                             |
| 12               | Bahamas | Rape and Mustardseed            | 1992           | 6                                                              |
| 12               | Bahamas | Rice (Milled Equivalent)        | 1992           | 225                                                            |
| 12               | Bahamas | Spices                          | 1992           | 4                                                              |
| 12               | Bahamas | Spices, Other                   | 1992           | 4                                                              |
| 12               | Bahamas | Starchy Roots                   | 1992           | 40                                                             |
| 12               | Bahamas | Stimulants                      | 1992           | 19                                                             |
| 12               | Bahamas | Sugar & Sweeteners              | 1992           | 409                                                            |
| 12               | Bahamas | Sugar (Raw Equivalent)          | 1992           | 383                                                            |
| 12               | Bahamas | Sweet potatoes                  | 1992           | 10                                                             |
| 12               | Bahamas | Sweeteners, Other               | 1992           | 26                                                             |
| 12               | Bahamas | Tea (including mate)            | 1992           | 1                                                              |
| 12               | Bahamas | Tomatoes and products           | 1992           | 11                                                             |
| 12               | Bahamas | Treenuts                        | 1992           | 8                                                              |
| 12               | Bahamas | Vegetable Oils                  | 1992           | 91                                                             |
| 12               | Bahamas | Vegetables                      | 1992           | 102                                                            |
| 12               | Bahamas | Vegetables, Other               | 1992           | 88                                                             |
| 12               | Bahamas | Vegetal Products                | 1992           | 1,676                                                          |
| 12               | Bahamas | Wheat and products              | 1992           | 374                                                            |
| 12               | Bahamas | Wine                            | 1992           | 9                                                              |
| 12               | Bahamas | Alcoholic Beverages             | 1993           | 178                                                            |
| 12               | Bahamas | Animal fats                     | 1993           | 160                                                            |
| 12               | Bahamas | Animal Products                 | 1993           | 806                                                            |
| 12               | Bahamas | Apples and products             | 1993           | 4                                                              |
| 12               | Bahamas | Bananas                         | 1993           | 22                                                             |
| 12               | Bahamas | Barley and products             | 1993           | 15                                                             |
| 12               | Bahamas | Beans                           | 1993           | 7                                                              |
| 12               | Bahamas | Beer                            | 1993           | 23                                                             |
| 12               | Bahamas | Beverages, Alcoholic            | 1993           | 146                                                            |
| 12               | Bahamas | Bovine Meat                     | 1993           | 128                                                            |
| 12               | Bahamas | Butter, Ghee                    | 1993           | 36                                                             |
| 12               | Bahamas | Cassava and products            | 1993           | 5                                                              |
| 12               | Bahamas | Cereals - Excluding Beer        | 1993           | 627                                                            |
| 12               | Bahamas | Cereals, Other                  | 1993           | 48                                                             |
| 12               | Bahamas | Cocoa Beans and products        | 1993           | 18                                                             |
| 12               | Bahamas | Coffee and products             | 1993           | 3                                                              |
| 12               | Bahamas | Crustaceans                     | 1993           | 9                                                              |
| 12               | Bahamas | Demersal Fish                   | 1993           | 4                                                              |
| 12               | Bahamas | Eggs                            | 1993           | 7                                                              |
| 12               | Bahamas | Fats, Animals, Raw              | 1993           | 124                                                            |
| 12               | Bahamas | Fish, Seafood                   | 1993           | 47                                                             |
| 12               | Bahamas | Fruits - Excluding Wine         | 1993           | 119                                                            |
| 12               | Bahamas | Fruits, Other                   | 1993           | 55                                                             |
| 12               | Bahamas | Grand Total                     | 1993           | 2,420                                                          |
| 12               | Bahamas | Grapefruit and products         | 1993           | 3                                                              |
| 12               | Bahamas | Grapes and products (excl wine) | 1993           | 9                                                              |
| 12               | Bahamas | Honey                           | 1993           | 1                                                              |
| 12               | Bahamas | Lemons, Limes and products      | 1993           | 1                                                              |
| 12               | Bahamas | Maize and products              | 1993           | 19                                                             |
| 12               | Bahamas | Marine Fish, Other              | 1993           | 32                                                             |
| 12               | Bahamas | Meat                            | 1993           | 423                                                            |
| 12               | Bahamas | Milk - Excluding Butter         | 1993           | 166                                                            |
| 12               | Bahamas | Mutton & Goat Meat              | 1993           | 23                                                             |
| 12               | Bahamas | Offals                          | 1993           | 4                                                              |
| 12               | Bahamas | Oilcrops                        | 1993           | 8                                                              |
| 12               | Bahamas | Oilcrops Oil, Other             | 1993           | 89                                                             |
| 12               | Bahamas | Oilcrops, Other                 | 1993           | 2                                                              |
| 12               | Bahamas | Onions                          | 1993           | 3                                                              |
| 12               | Bahamas | Oranges, Mandarines             | 1993           | 2                                                              |
| 12               | Bahamas | Peas                            | 1993           | 10                                                             |
| 12               | Bahamas | Pelagic Fish                    | 1993           | 1                                                              |
| 12               | Bahamas | Pepper                          | 1993           | 1                                                              |
| 12               | Bahamas | Pigmeat                         | 1993           | 160                                                            |
| 12               | Bahamas | Plantains                       | 1993           | 22                                                             |
| 12               | Bahamas | Potatoes and products           | 1993           | 23                                                             |
| 12               | Bahamas | Poultry Meat                    | 1993           | 112                                                            |
| 12               | Bahamas | Pulses                          | 1993           | 29                                                             |
| 12               | Bahamas | Pulses, Other and products      | 1993           | 12                                                             |
| 12               | Bahamas | Rape and Mustardseed            | 1993           | 6                                                              |
| 12               | Bahamas | Rice (Milled Equivalent)        | 1993           | 232                                                            |
| 12               | Bahamas | Spices                          | 1993           | 8                                                              |
| 12               | Bahamas | Spices, Other                   | 1993           | 7                                                              |
| 12               | Bahamas | Starchy Roots                   | 1993           | 37                                                             |
| 12               | Bahamas | Stimulants                      | 1993           | 22                                                             |
| 12               | Bahamas | Sugar & Sweeteners              | 1993           | 386                                                            |
| 12               | Bahamas | Sugar (Raw Equivalent)          | 1993           | 363                                                            |
| 12               | Bahamas | Sweet potatoes                  | 1993           | 8                                                              |
| 12               | Bahamas | Sweeteners, Other               | 1993           | 22                                                             |
| 12               | Bahamas | Tea (including mate)            | 1993           | 1                                                              |
| 12               | Bahamas | Tomatoes and products           | 1993           | 8                                                              |
| 12               | Bahamas | Treenuts                        | 1993           | 9                                                              |
| 12               | Bahamas | Vegetable Oils                  | 1993           | 89                                                             |



Dietary calcium and zinc deficiency risks are decreasing but remain prevalent

| FAO Country code | Country | Food item                       | Reference year | Net energy supply (kcal capita <sup>-1</sup> d <sup>-1</sup> ) |
|------------------|---------|---------------------------------|----------------|----------------------------------------------------------------|
| 12               | Bahamas | Vegetables                      | 1993           | 102                                                            |
| 12               | Bahamas | Vegetables, Other               | 1993           | 91                                                             |
| 12               | Bahamas | Vegetal Products                | 1993           | 1,614                                                          |
| 12               | Bahamas | Wheat and products              | 1993           | 313                                                            |
| 12               | Bahamas | Wine                            | 1993           | 8                                                              |
| 12               | Bahamas | Alcoholic Beverages             | 1994           | 169                                                            |
| 12               | Bahamas | Animal fats                     | 1994           | 145                                                            |
| 12               | Bahamas | Animal Products                 | 1994           | 815                                                            |
| 12               | Bahamas | Apples and products             | 1994           | 5                                                              |
| 12               | Bahamas | Bananas                         | 1994           | 16                                                             |
| 12               | Bahamas | Barley and products             | 1994           | 37                                                             |
| 12               | Bahamas | Beans                           | 1994           | 8                                                              |
| 12               | Bahamas | Beer                            | 1994           | 23                                                             |
| 12               | Bahamas | Beverages, Alcoholic            | 1994           | 140                                                            |
| 12               | Bahamas | Bovine Meat                     | 1994           | 130                                                            |
| 12               | Bahamas | Butter, Ghee                    | 1994           | 30                                                             |
| 12               | Bahamas | Cassava and products            | 1994           | 4                                                              |
| 12               | Bahamas | Cereals - Excluding Beer        | 1994           | 660                                                            |
| 12               | Bahamas | Cereals, Other                  | 1994           | 51                                                             |
| 12               | Bahamas | Cocoa Beans and products        | 1994           | 16                                                             |
| 12               | Bahamas | Coffee and products             | 1994           | 5                                                              |
| 12               | Bahamas | Crustaceans                     | 1994           | 8                                                              |
| 12               | Bahamas | Demersal Fish                   | 1994           | 6                                                              |
| 12               | Bahamas | Eggs                            | 1994           | 8                                                              |
| 12               | Bahamas | Fats, Animals, Raw              | 1994           | 115                                                            |
| 12               | Bahamas | Fish, Seafood                   | 1994           | 44                                                             |
| 12               | Bahamas | Fruits - Excluding Wine         | 1994           | 105                                                            |
| 12               | Bahamas | Fruits, Other                   | 1994           | 52                                                             |
| 12               | Bahamas | Grand Total                     | 1994           | 2,421                                                          |
| 12               | Bahamas | Grapefruit and products         | 1994           | 5                                                              |
| 12               | Bahamas | Grapes and products (excl wine) | 1994           | 9                                                              |
| 12               | Bahamas | Lemons, Limes and products      | 1994           | 2                                                              |
| 12               | Bahamas | Maize and products              | 1994           | 19                                                             |
| 12               | Bahamas | Marine Fish, Other              | 1994           | 29                                                             |
| 12               | Bahamas | Meat                            | 1994           | 441                                                            |
| 12               | Bahamas | Meat, Other                     | 1994           | 1                                                              |
| 12               | Bahamas | Milk - Excluding Butter         | 1994           | 170                                                            |
| 12               | Bahamas | Miscellaneous                   | 1994           | 4                                                              |
| 12               | Bahamas | Mutton & Goat Meat              | 1994           | 31                                                             |
| 12               | Bahamas | Offals                          | 1994           | 7                                                              |
| 12               | Bahamas | Oilcrops                        | 1994           | 8                                                              |
| 12               | Bahamas | Oilcrops Oil, Other             | 1994           | 87                                                             |
| 12               | Bahamas | Oilcrops, Other                 | 1994           | 1                                                              |
| 12               | Bahamas | Onions                          | 1994           | 2                                                              |
| 12               | Bahamas | Oranges, Mandarines             | 1994           | 1                                                              |
| 12               | Bahamas | Peas                            | 1994           | 7                                                              |
| 12               | Bahamas | Pelagic Fish                    | 1994           | 1                                                              |
| 12               | Bahamas | Pepper                          | 1994           | 2                                                              |
| 12               | Bahamas | Pigmeat                         | 1994           | 149                                                            |
| 12               | Bahamas | Pineapples and products         | 1994           | 1                                                              |
| 12               | Bahamas | Plantains                       | 1994           | 14                                                             |
| 12               | Bahamas | Potatoes and products           | 1994           | 26                                                             |
| 12               | Bahamas | Poultry Meat                    | 1994           | 130                                                            |
| 12               | Bahamas | Pulses                          | 1994           | 36                                                             |
| 12               | Bahamas | Pulses, Other and products      | 1994           | 21                                                             |
| 12               | Bahamas | Rape and Mustardseed            | 1994           | 6                                                              |
| 12               | Bahamas | Rice (Milled Equivalent)        | 1994           | 223                                                            |
| 12               | Bahamas | Spices                          | 1994           | 6                                                              |
| 12               | Bahamas | Spices, Other                   | 1994           | 4                                                              |
| 12               | Bahamas | Starchy Roots                   | 1994           | 38                                                             |
| 12               | Bahamas | Stimulants                      | 1994           | 21                                                             |
| 12               | Bahamas | Sugar & Sweeteners              | 1994           | 369                                                            |
| 12               | Bahamas | Sugar (Raw Equivalent)          | 1994           | 341                                                            |
| 12               | Bahamas | Sweet potatoes                  | 1994           | 8                                                              |
| 12               | Bahamas | Sweeteners, Other               | 1994           | 27                                                             |
| 12               | Bahamas | Tea (including mate)            | 1994           | 1                                                              |
| 12               | Bahamas | Tomatoes and products           | 1994           | 6                                                              |
| 12               | Bahamas | Treenuts                        | 1994           | 10                                                             |
| 12               | Bahamas | Vegetable Oils                  | 1994           | 87                                                             |
| 12               | Bahamas | Vegetables                      | 1994           | 94                                                             |
| 12               | Bahamas | Vegetables, Other               | 1994           | 86                                                             |
| 12               | Bahamas | Vegetal Products                | 1994           | 1,607                                                          |
| 12               | Bahamas | Wheat and products              | 1994           | 330                                                            |
| 12               | Bahamas | Wine                            | 1994           | 6                                                              |
| 12               | Bahamas | Alcoholic Beverages             | 1995           | 153                                                            |
| 12               | Bahamas | Animal fats                     | 1995           | 120                                                            |
| 12               | Bahamas | Animal Products                 | 1995           | 743                                                            |
| 12               | Bahamas | Apples and products             | 1995           | 5                                                              |
| 12               | Bahamas | Bananas                         | 1995           | 20                                                             |
| 12               | Bahamas | Barley and products             | 1995           | 62                                                             |
| 12               | Bahamas | Beans                           | 1995           | 5                                                              |
| 12               | Bahamas | Beer                            | 1995           | 19                                                             |
| 12               | Bahamas | Beverages, Alcoholic            | 1995           | 124                                                            |
| 12               | Bahamas | Beverages, Fermented            | 1995           | 1                                                              |
| 12               | Bahamas | Bovine Meat                     | 1995           | 97                                                             |
| 12               | Bahamas | Butter, Ghee                    | 1995           | 30                                                             |
| 12               | Bahamas | Cassava and products            | 1995           | 5                                                              |
| 12               | Bahamas | Cereals - Excluding Beer        | 1995           | 730                                                            |
| 12               | Bahamas | Cereals, Other                  | 1995           | 53                                                             |
| 12               | Bahamas | Cocoa Beans and products        | 1995           | 3                                                              |
| 12               | Bahamas | Coffee and products             | 1995           | 4                                                              |
| 12               | Bahamas | Crustaceans                     | 1995           | 10                                                             |
| 12               | Bahamas | Demersal Fish                   | 1995           | 5                                                              |
| 12               | Bahamas | Eggs                            | 1995           | 11                                                             |
| 12               | Bahamas | Fats, Animals, Raw              | 1995           | 90                                                             |
| 12               | Bahamas | Fish, Seafood                   | 1995           | 45                                                             |
| 12               | Bahamas | Fruits - Excluding Wine         | 1995           | 116                                                            |

Dietary calcium and zinc deficiency risks are decreasing but remain prevalent

| FAO Country code | Country | Food item                       | Reference year | Net energy supply (kcal <i>capita</i> <sup>-1</sup> d <sup>-1</sup> ) |
|------------------|---------|---------------------------------|----------------|-----------------------------------------------------------------------|
| 12               | Bahamas | Fruits, Other                   | 1995           | 52                                                                    |
| 12               | Bahamas | Grand Total                     | 1995           | 2,535                                                                 |
| 12               | Bahamas | Grapefruit and products         | 1995           | 3                                                                     |
| 12               | Bahamas | Grapes and products (excl wine) | 1995           | 9                                                                     |
| 12               | Bahamas | Honey                           | 1995           | 1                                                                     |
| 12               | Bahamas | Lemons, Limes and products      | 1995           | 4                                                                     |
| 12               | Bahamas | Maize and products              | 1995           | 36                                                                    |
| 12               | Bahamas | Marine Fish, Other              | 1995           | 29                                                                    |
| 12               | Bahamas | Meat                            | 1995           | 400                                                                   |
| 12               | Bahamas | Meat, Other                     | 1995           | 1                                                                     |
| 12               | Bahamas | Milk - Excluding Butter         | 1995           | 161                                                                   |
| 12               | Bahamas | Miscellaneous                   | 1995           | 85                                                                    |
| 12               | Bahamas | Mutton & Goat Meat              | 1995           | 23                                                                    |
| 12               | Bahamas | Offals                          | 1995           | 7                                                                     |
| 12               | Bahamas | Oilcrops                        | 1995           | 7                                                                     |
| 12               | Bahamas | Oilcrops Oil, Other             | 1995           | 86                                                                    |
| 12               | Bahamas | Oilcrops, Other                 | 1995           | 1                                                                     |
| 12               | Bahamas | Onions                          | 1995           | 2                                                                     |
| 12               | Bahamas | Oranges, Mandarines             | 1995           | 1                                                                     |
| 12               | Bahamas | Peas                            | 1995           | 5                                                                     |
| 12               | Bahamas | Pelagic Fish                    | 1995           | 1                                                                     |
| 12               | Bahamas | Pepper                          | 1995           | 2                                                                     |
| 12               | Bahamas | Pigmeat                         | 1995           | 140                                                                   |
| 12               | Bahamas | Pineapples and products         | 1995           | 1                                                                     |
| 12               | Bahamas | Plantains                       | 1995           | 21                                                                    |
| 12               | Bahamas | Potatoes and products           | 1995           | 28                                                                    |
| 12               | Bahamas | Poultry Meat                    | 1995           | 139                                                                   |
| 12               | Bahamas | Pulses                          | 1995           | 28                                                                    |
| 12               | Bahamas | Pulses, Other and products      | 1995           | 18                                                                    |
| 12               | Bahamas | Rape and Mustardseed            | 1995           | 6                                                                     |
| 12               | Bahamas | Rice (Milled Equivalent)        | 1995           | 198                                                                   |
| 12               | Bahamas | Spices                          | 1995           | 5                                                                     |
| 12               | Bahamas | Spices, Other                   | 1995           | 4                                                                     |
| 12               | Bahamas | Starchy Roots                   | 1995           | 40                                                                    |
| 12               | Bahamas | Stimulants                      | 1995           | 7                                                                     |
| 12               | Bahamas | Sugar & Sweeteners              | 1995           | 434                                                                   |
| 12               | Bahamas | Sugar (Raw Equivalent)          | 1995           | 405                                                                   |
| 12               | Bahamas | Sweet potatoes                  | 1995           | 7                                                                     |
| 12               | Bahamas | Sweeteners, Other               | 1995           | 28                                                                    |
| 12               | Bahamas | Tomatoes and products           | 1995           | 7                                                                     |
| 12               | Bahamas | Treenuts                        | 1995           | 9                                                                     |
| 12               | Bahamas | Vegetable Oils                  | 1995           | 86                                                                    |
| 12               | Bahamas | Vegetables                      | 1995           | 90                                                                    |
| 12               | Bahamas | Vegetables, Other               | 1995           | 82                                                                    |
| 12               | Bahamas | Vegetal Products                | 1995           | 1,791                                                                 |
| 12               | Bahamas | Wheat and products              | 1995           | 380                                                                   |
| 12               | Bahamas | Wine                            | 1995           | 9                                                                     |
| 12               | Bahamas | Alcoholic Beverages             | 1996           | 142                                                                   |
| 12               | Bahamas | Animal fats                     | 1996           | 126                                                                   |
| 12               | Bahamas | Animal Products                 | 1996           | 744                                                                   |
| 12               | Bahamas | Apples and products             | 1996           | 6                                                                     |
| 12               | Bahamas | Bananas                         | 1996           | 18                                                                    |
| 12               | Bahamas | Barley and products             | 1996           | 69                                                                    |
| 12               | Bahamas | Beans                           | 1996           | 6                                                                     |
| 12               | Bahamas | Beer                            | 1996           | 14                                                                    |
| 12               | Bahamas | Beverages, Alcoholic            | 1996           | 120                                                                   |
| 12               | Bahamas | Beverages, Fermented            | 1996           | 1                                                                     |
| 12               | Bahamas | Bovine Meat                     | 1996           | 67                                                                    |
| 12               | Bahamas | Butter, Ghee                    | 1996           | 33                                                                    |
| 12               | Bahamas | Cassava and products            | 1996           | 6                                                                     |
| 12               | Bahamas | Cereals - Excluding Beer        | 1996           | 699                                                                   |
| 12               | Bahamas | Cereals, Other                  | 1996           | 56                                                                    |
| 12               | Bahamas | Cocoa Beans and products        | 1996           | 14                                                                    |
| 12               | Bahamas | Coffee and products             | 1996           | 3                                                                     |
| 12               | Bahamas | Crustaceans                     | 1996           | 8                                                                     |
| 12               | Bahamas | Demersal Fish                   | 1996           | 5                                                                     |
| 12               | Bahamas | Eggs                            | 1996           | 9                                                                     |
| 12               | Bahamas | Fats, Animals, Raw              | 1996           | 92                                                                    |
| 12               | Bahamas | Fish, Seafood                   | 1996           | 41                                                                    |
| 12               | Bahamas | Fruits - Excluding Wine         | 1996           | 110                                                                   |
| 12               | Bahamas | Fruits, Other                   | 1996           | 53                                                                    |
| 12               | Bahamas | Grand Total                     | 1996           | 2,536                                                                 |
| 12               | Bahamas | Grapefruit and products         | 1996           | 3                                                                     |
| 12               | Bahamas | Grapes and products (excl wine) | 1996           | 8                                                                     |
| 12               | Bahamas | Honey                           | 1996           | 1                                                                     |
| 12               | Bahamas | Lemons, Limes and products      | 1996           | 4                                                                     |
| 12               | Bahamas | Maize and products              | 1996           | 39                                                                    |
| 12               | Bahamas | Marine Fish, Other              | 1996           | 28                                                                    |
| 12               | Bahamas | Meat                            | 1996           | 399                                                                   |
| 12               | Bahamas | Meat, Other                     | 1996           | 1                                                                     |
| 12               | Bahamas | Milk - Excluding Butter         | 1996           | 162                                                                   |
| 12               | Bahamas | Miscellaneous                   | 1996           | 105                                                                   |
| 12               | Bahamas | Mutton & Goat Meat              | 1996           | 22                                                                    |
| 12               | Bahamas | Offals                          | 1996           | 7                                                                     |
| 12               | Bahamas | Oilcrops                        | 1996           | 7                                                                     |
| 12               | Bahamas | Oilcrops Oil, Other             | 1996           | 85                                                                    |
| 12               | Bahamas | Oilcrops, Other                 | 1996           | 1                                                                     |
| 12               | Bahamas | Onions                          | 1996           | 2                                                                     |
| 12               | Bahamas | Oranges, Mandarines             | 1996           | 1                                                                     |
| 12               | Bahamas | Peas                            | 1996           | 3                                                                     |
| 12               | Bahamas | Pelagic Fish                    | 1996           | 1                                                                     |
| 12               | Bahamas | Pepper                          | 1996           | 2                                                                     |
| 12               | Bahamas | Pigmeat                         | 1996           | 131                                                                   |
| 12               | Bahamas | Plantains                       | 1996           | 17                                                                    |
| 12               | Bahamas | Potatoes and products           | 1996           | 30                                                                    |
| 12               | Bahamas | Poultry Meat                    | 1996           | 178                                                                   |
| 12               | Bahamas | Pulses                          | 1996           | 25                                                                    |

Dietary calcium and zinc deficiency risks are decreasing but remain prevalent

| FAO Country code | Country | Food item                       | Reference year | Net energy supply (kcal capita <sup>-1</sup> d <sup>-1</sup> ) |
|------------------|---------|---------------------------------|----------------|----------------------------------------------------------------|
| 12               | Bahamas | Pulses, Other and products      | 1996           | 16                                                             |
| 12               | Bahamas | Rape and Mustardseed            | 1996           | 6                                                              |
| 12               | Bahamas | Rice (Milled Equivalent)        | 1996           | 202                                                            |
| 12               | Bahamas | Spices                          | 1996           | 4                                                              |
| 12               | Bahamas | Spices, Other                   | 1996           | 2                                                              |
| 12               | Bahamas | Starchy Roots                   | 1996           | 41                                                             |
| 12               | Bahamas | Stimulants                      | 1996           | 17                                                             |
| 12               | Bahamas | Sugar & Sweeteners              | 1996           | 458                                                            |
| 12               | Bahamas | Sugar (Raw Equivalent)          | 1996           | 427                                                            |
| 12               | Bahamas | Sweet potatoes                  | 1996           | 6                                                              |
| 12               | Bahamas | Sweeteners, Other               | 1996           | 30                                                             |
| 12               | Bahamas | Tomatoes and products           | 1996           | 6                                                              |
| 12               | Bahamas | Treenuts                        | 1996           | 7                                                              |
| 12               | Bahamas | Vegetable Oils                  | 1996           | 85                                                             |
| 12               | Bahamas | Vegetables                      | 1996           | 91                                                             |
| 12               | Bahamas | Vegetables, Other               | 1996           | 83                                                             |
| 12               | Bahamas | Vegetal Products                | 1996           | 1,791                                                          |
| 12               | Bahamas | Wheat and products              | 1996           | 333                                                            |
| 12               | Bahamas | Wine                            | 1996           | 8                                                              |
| 12               | Bahamas | Alcoholic Beverages             | 1997           | 143                                                            |
| 12               | Bahamas | Animal fats                     | 1997           | 128                                                            |
| 12               | Bahamas | Animal Products                 | 1997           | 811                                                            |
| 12               | Bahamas | Apples and products             | 1997           | 12                                                             |
| 12               | Bahamas | Bananas                         | 1997           | 7                                                              |
| 12               | Bahamas | Barley and products             | 1997           | 64                                                             |
| 12               | Bahamas | Beans                           | 1997           | 3                                                              |
| 12               | Bahamas | Beer                            | 1997           | 14                                                             |
| 12               | Bahamas | Beverages, Alcoholic            | 1997           | 118                                                            |
| 12               | Bahamas | Beverages, Fermented            | 1997           | 1                                                              |
| 12               | Bahamas | Bovine Meat                     | 1997           | 67                                                             |
| 12               | Bahamas | Butter, Ghee                    | 1997           | 35                                                             |
| 12               | Bahamas | Cassava and products            | 1997           | 7                                                              |
| 12               | Bahamas | Cereals - Excluding Beer        | 1997           | 738                                                            |
| 12               | Bahamas | Cereals, Other                  | 1997           | 53                                                             |
| 12               | Bahamas | Cocoa Beans and products        | 1997           | 15                                                             |
| 12               | Bahamas | Coconuts - Incl Copra           | 1997           | 2                                                              |
| 12               | Bahamas | Coffee and products             | 1997           | 2                                                              |
| 12               | Bahamas | Crustaceans                     | 1997           | 11                                                             |
| 12               | Bahamas | Demersal Fish                   | 1997           | 6                                                              |
| 12               | Bahamas | Eggs                            | 1997           | 18                                                             |
| 12               | Bahamas | Fats, Animals, Raw              | 1997           | 92                                                             |
| 12               | Bahamas | Fish, Seafood                   | 1997           | 50                                                             |
| 12               | Bahamas | Freshwater Fish                 | 1997           | 1                                                              |
| 12               | Bahamas | Fruits - Excluding Wine         | 1997           | 133                                                            |
| 12               | Bahamas | Fruits, Other                   | 1997           | 51                                                             |
| 12               | Bahamas | Grand Total                     | 1997           | 2,651                                                          |
| 12               | Bahamas | Grapefruit and products         | 1997           | 5                                                              |
| 12               | Bahamas | Grapes and products (excl wine) | 1997           | 10                                                             |
| 12               | Bahamas | Groundnuts (Shelled Eq)         | 1997           | 23                                                             |
| 12               | Bahamas | Honey                           | 1997           | 2                                                              |
| 12               | Bahamas | Lemons, Limes and products      | 1997           | 7                                                              |
| 12               | Bahamas | Maize and products              | 1997           | 39                                                             |
| 12               | Bahamas | Marine Fish, Other              | 1997           | 6                                                              |
| 12               | Bahamas | Meat                            | 1997           | 440                                                            |
| 12               | Bahamas | Meat, Other                     | 1997           | 3                                                              |
| 12               | Bahamas | Milk - Excluding Butter         | 1997           | 165                                                            |
| 12               | Bahamas | Miscellaneous                   | 1997           | 63                                                             |
| 12               | Bahamas | Molluscs, Other                 | 1997           | 1                                                              |
| 12               | Bahamas | Mutton & Goat Meat              | 1997           | 25                                                             |
| 12               | Bahamas | Offals                          | 1997           | 11                                                             |
| 12               | Bahamas | Oilcrops                        | 1997           | 31                                                             |
| 12               | Bahamas | Oilcrops Oil, Other             | 1997           | 138                                                            |
| 12               | Bahamas | Onions                          | 1997           | 1                                                              |
| 12               | Bahamas | Oranges, Mandarines             | 1997           | 32                                                             |
| 12               | Bahamas | Peas                            | 1997           | 1                                                              |
| 12               | Bahamas | Pelagic Fish                    | 1997           | 24                                                             |
| 12               | Bahamas | Pepper                          | 1997           | 2                                                              |
| 12               | Bahamas | Pigmeat                         | 1997           | 144                                                            |
| 12               | Bahamas | Pineapples and products         | 1997           | 2                                                              |
| 12               | Bahamas | Plantains                       | 1997           | 8                                                              |
| 12               | Bahamas | Potatoes and products           | 1997           | 33                                                             |
| 12               | Bahamas | Poultry Meat                    | 1997           | 201                                                            |
| 12               | Bahamas | Pulses                          | 1997           | 15                                                             |
| 12               | Bahamas | Pulses, Other and products      | 1997           | 11                                                             |
| 12               | Bahamas | Rape and Mustardseed            | 1997           | 6                                                              |
| 12               | Bahamas | Rice (Milled Equivalent)        | 1997           | 231                                                            |
| 12               | Bahamas | Roots, Other                    | 1997           | 2                                                              |
| 12               | Bahamas | Spices                          | 1997           | 4                                                              |
| 12               | Bahamas | Spices, Other                   | 1997           | 2                                                              |
| 12               | Bahamas | Starchy Roots                   | 1997           | 48                                                             |
| 12               | Bahamas | Stimulants                      | 1997           | 18                                                             |
| 12               | Bahamas | Sugar & Sweeteners              | 1997           | 405                                                            |
| 12               | Bahamas | Sugar (Raw Equivalent)          | 1997           | 371                                                            |
| 12               | Bahamas | Sweet potatoes                  | 1997           | 6                                                              |
| 12               | Bahamas | Sweeteners, Other               | 1997           | 33                                                             |
| 12               | Bahamas | Tea (including mate)            | 1997           | 1                                                              |
| 12               | Bahamas | Tomatoes and products           | 1997           | 6                                                              |
| 12               | Bahamas | Treenuts                        | 1997           | 8                                                              |
| 12               | Bahamas | Vegetable Oils                  | 1997           | 138                                                            |
| 12               | Bahamas | Vegetables                      | 1997           | 94                                                             |
| 12               | Bahamas | Vegetables, Other               | 1997           | 87                                                             |
| 12               | Bahamas | Vegetal Products                | 1997           | 1,839                                                          |
| 12               | Bahamas | Wheat and products              | 1997           | 350                                                            |
| 12               | Bahamas | Wine                            | 1997           | 9                                                              |
| 12               | Bahamas | Alcoholic Beverages             | 1998           | 137                                                            |
| 12               | Bahamas | Animal fats                     | 1998           | 130                                                            |
| 12               | Bahamas | Animal Products                 | 1998           | 827                                                            |

Dietary calcium and zinc deficiency risks are decreasing but remain prevalent

| FAO Country code | Country | Food item                       | Reference year | Net energy supply (kcal capita <sup>-1</sup> d <sup>-1</sup> ) |
|------------------|---------|---------------------------------|----------------|----------------------------------------------------------------|
| 12               | Bahamas | Apples and products             | 1998           | 13                                                             |
| 12               | Bahamas | Bananas                         | 1998           | 8                                                              |
| 12               | Bahamas | Barley and products             | 1998           | 65                                                             |
| 12               | Bahamas | Beans                           | 1998           | 4                                                              |
| 12               | Bahamas | Beer                            | 1998           | 12                                                             |
| 12               | Bahamas | Beverages, Alcoholic            | 1998           | 115                                                            |
| 12               | Bahamas | Bovine Meat                     | 1998           | 65                                                             |
| 12               | Bahamas | Butter, Ghee                    | 1998           | 36                                                             |
| 12               | Bahamas | Cassava and products            | 1998           | 5                                                              |
| 12               | Bahamas | Cereals - Excluding Beer        | 1998           | 710                                                            |
| 12               | Bahamas | Cereals, Other                  | 1998           | 30                                                             |
| 12               | Bahamas | Cocoa Beans and products        | 1998           | 7                                                              |
| 12               | Bahamas | Coconuts - Incl Copra           | 1998           | 1                                                              |
| 12               | Bahamas | Coffee and products             | 1998           | 2                                                              |
| 12               | Bahamas | Crustaceans                     | 1998           | 8                                                              |
| 12               | Bahamas | Demersal Fish                   | 1998           | 7                                                              |
| 12               | Bahamas | Eggs                            | 1998           | 16                                                             |
| 12               | Bahamas | Fats, Animals, Raw              | 1998           | 94                                                             |
| 12               | Bahamas | Fish, Seafood                   | 1998           | 53                                                             |
| 12               | Bahamas | Freshwater Fish                 | 1998           | 2                                                              |
| 12               | Bahamas | Fruits - Excluding Wine         | 1998           | 150                                                            |
| 12               | Bahamas | Fruits, Other                   | 1998           | 62                                                             |
| 12               | Bahamas | Grand Total                     | 1998           | 2,601                                                          |
| 12               | Bahamas | Grapefruit and products         | 1998           | 5                                                              |
| 12               | Bahamas | Grapes and products (excl wine) | 1998           | 8                                                              |
| 12               | Bahamas | Groundnuts (Shelled Eq)         | 1998           | 15                                                             |
| 12               | Bahamas | Honey                           | 1998           | 1                                                              |
| 12               | Bahamas | Lemons, Limes and products      | 1998           | 6                                                              |
| 12               | Bahamas | Maize and products              | 1998           | 45                                                             |
| 12               | Bahamas | Marine Fish, Other              | 1998           | 11                                                             |
| 12               | Bahamas | Meat                            | 1998           | 451                                                            |
| 12               | Bahamas | Meat, Other                     | 1998           | 2                                                              |
| 12               | Bahamas | Milk - Excluding Butter         | 1998           | 166                                                            |
| 12               | Bahamas | Miscellaneous                   | 1998           | 40                                                             |
| 12               | Bahamas | Molluscs, Other                 | 1998           | 1                                                              |
| 12               | Bahamas | Mutton & Goat Meat              | 1998           | 20                                                             |
| 12               | Bahamas | Offals                          | 1998           | 11                                                             |
| 12               | Bahamas | Oilcrops                        | 1998           | 23                                                             |
| 12               | Bahamas | Oilcrops Oil, Other             | 1998           | 138                                                            |
| 12               | Bahamas | Onions                          | 1998           | 1                                                              |
| 12               | Bahamas | Oranges, Mandarines             | 1998           | 35                                                             |
| 12               | Bahamas | Pelagic Fish                    | 1998           | 25                                                             |
| 12               | Bahamas | Pigmeat                         | 1998           | 146                                                            |
| 12               | Bahamas | Pineapples and products         | 1998           | 2                                                              |
| 12               | Bahamas | Plantains                       | 1998           | 10                                                             |
| 12               | Bahamas | Potatoes and products           | 1998           | 34                                                             |
| 12               | Bahamas | Poultry Meat                    | 1998           | 218                                                            |
| 12               | Bahamas | Pulses                          | 1998           | 15                                                             |
| 12               | Bahamas | Pulses, Other and products      | 1998           | 10                                                             |
| 12               | Bahamas | Rape and Mustardseed            | 1998           | 7                                                              |
| 12               | Bahamas | Rice (Milled Equivalent)        | 1998           | 223                                                            |
| 12               | Bahamas | Roots, Other                    | 1998           | 2                                                              |
| 12               | Bahamas | Spices                          | 1998           | 6                                                              |
| 12               | Bahamas | Spices, Other                   | 1998           | 6                                                              |
| 12               | Bahamas | Starchy Roots                   | 1998           | 47                                                             |
| 12               | Bahamas | Stimulants                      | 1998           | 9                                                              |
| 12               | Bahamas | Sugar & Sweeteners              | 1998           | 401                                                            |
| 12               | Bahamas | Sugar (Raw Equivalent)          | 1998           | 356                                                            |
| 12               | Bahamas | Sweet potatoes                  | 1998           | 6                                                              |
| 12               | Bahamas | Sweeteners, Other               | 1998           | 44                                                             |
| 12               | Bahamas | Tomatoes and products           | 1998           | 7                                                              |
| 12               | Bahamas | Treenuts                        | 1998           | 7                                                              |
| 12               | Bahamas | Vegetable Oils                  | 1998           | 138                                                            |
| 12               | Bahamas | Vegetables                      | 1998           | 92                                                             |
| 12               | Bahamas | Vegetables, Other               | 1998           | 83                                                             |
| 12               | Bahamas | Vegetal Products                | 1998           | 1,773                                                          |
| 12               | Bahamas | Wheat and products              | 1998           | 346                                                            |
| 12               | Bahamas | Wine                            | 1998           | 10                                                             |
| 12               | Bahamas | Alcoholic Beverages             | 1999           | 135                                                            |
| 12               | Bahamas | Animal fats                     | 1999           | 124                                                            |
| 12               | Bahamas | Animal Products                 | 1999           | 866                                                            |
| 12               | Bahamas | Apples and products             | 1999           | 14                                                             |
| 12               | Bahamas | Bananas                         | 1999           | 23                                                             |
| 12               | Bahamas | Barley and products             | 1999           | 64                                                             |
| 12               | Bahamas | Beans                           | 1999           | 7                                                              |
| 12               | Bahamas | Beer                            | 1999           | 12                                                             |
| 12               | Bahamas | Beverages, Alcoholic            | 1999           | 110                                                            |
| 12               | Bahamas | Beverages, Fermented            | 1999           | 1                                                              |
| 12               | Bahamas | Bovine Meat                     | 1999           | 66                                                             |
| 12               | Bahamas | Butter, Ghee                    | 1999           | 41                                                             |
| 12               | Bahamas | Cassava and products            | 1999           | 6                                                              |
| 12               | Bahamas | Cereals - Excluding Beer        | 1999           | 712                                                            |
| 12               | Bahamas | Cereals, Other                  | 1999           | 26                                                             |
| 12               | Bahamas | Cocoa Beans and products        | 1999           | 8                                                              |
| 12               | Bahamas | Coconuts - Incl Copra           | 1999           | 3                                                              |
| 12               | Bahamas | Coffee and products             | 1999           | 2                                                              |
| 12               | Bahamas | Crustaceans                     | 1999           | 12                                                             |
| 12               | Bahamas | Demersal Fish                   | 1999           | 6                                                              |
| 12               | Bahamas | Eggs                            | 1999           | 12                                                             |
| 12               | Bahamas | Fats, Animals, Raw              | 1999           | 83                                                             |
| 12               | Bahamas | Fish, Seafood                   | 1999           | 56                                                             |
| 12               | Bahamas | Freshwater Fish                 | 1999           | 1                                                              |
| 12               | Bahamas | Fruits - Excluding Wine         | 1999           | 185                                                            |
| 12               | Bahamas | Fruits, Other                   | 1999           | 56                                                             |
| 12               | Bahamas | Grand Total                     | 1999           | 2,704                                                          |
| 12               | Bahamas | Grapefruit and products         | 1999           | 13                                                             |
| 12               | Bahamas | Grapes and products (excl wine) | 1999           | 9                                                              |

Dietary calcium and zinc deficiency risks are decreasing but remain prevalent

| FAO Country code | Country | Food item                       | Reference year | Net energy supply (kcal capita <sup>-1</sup> d <sup>-1</sup> ) |
|------------------|---------|---------------------------------|----------------|----------------------------------------------------------------|
| 12               | Bahamas | Groundnut Oil                   | 1999           | 1                                                              |
| 12               | Bahamas | Groundnuts (Shelled Eq)         | 1999           | 16                                                             |
| 12               | Bahamas | Honey                           | 1999           | 4                                                              |
| 12               | Bahamas | Lemons, Limes and products      | 1999           | 5                                                              |
| 12               | Bahamas | Maize and products              | 1999           | 45                                                             |
| 12               | Bahamas | Maize Germ Oil                  | 1999           | 5                                                              |
| 12               | Bahamas | Marine Fish, Other              | 1999           | 9                                                              |
| 12               | Bahamas | Meat                            | 1999           | 491                                                            |
| 12               | Bahamas | Meat, Other                     | 1999           | 2                                                              |
| 12               | Bahamas | Milk - Excluding Butter         | 1999           | 170                                                            |
| 12               | Bahamas | Miscellaneous                   | 1999           | 43                                                             |
| 12               | Bahamas | Molluscs, Other                 | 1999           | 1                                                              |
| 12               | Bahamas | Mutton & Goat Meat              | 1999           | 32                                                             |
| 12               | Bahamas | Offals                          | 1999           | 14                                                             |
| 12               | Bahamas | Oilcrops                        | 1999           | 27                                                             |
| 12               | Bahamas | Oilcrops Oil, Other             | 1999           | 133                                                            |
| 12               | Bahamas | Onions                          | 1999           | 2                                                              |
| 12               | Bahamas | Oranges, Mandarines             | 1999           | 49                                                             |
| 12               | Bahamas | Pelagic Fish                    | 1999           | 27                                                             |
| 12               | Bahamas | Pigmeat                         | 1999           | 171                                                            |
| 12               | Bahamas | Pineapples and products         | 1999           | 2                                                              |
| 12               | Bahamas | Plantains                       | 1999           | 13                                                             |
| 12               | Bahamas | Potatoes and products           | 1999           | 40                                                             |
| 12               | Bahamas | Poultry Meat                    | 1999           | 219                                                            |
| 12               | Bahamas | Pulses                          | 1999           | 19                                                             |
| 12               | Bahamas | Pulses, Other and products      | 1999           | 11                                                             |
| 12               | Bahamas | Rape and Mustardseed            | 1999           | 7                                                              |
| 12               | Bahamas | Rice (Milled Equivalent)        | 1999           | 223                                                            |
| 12               | Bahamas | Roots, Other                    | 1999           | 2                                                              |
| 12               | Bahamas | Soyabean Oil                    | 1999           | 8                                                              |
| 12               | Bahamas | Spices                          | 1999           | 7                                                              |
| 12               | Bahamas | Spices, Other                   | 1999           | 7                                                              |
| 12               | Bahamas | Starchy Roots                   | 1999           | 53                                                             |
| 12               | Bahamas | Stimulants                      | 1999           | 10                                                             |
| 12               | Bahamas | Sugar & Sweeteners              | 1999           | 403                                                            |
| 12               | Bahamas | Sugar (Raw Equivalent)          | 1999           | 354                                                            |
| 12               | Bahamas | Sunflowerseed Oil               | 1999           | 2                                                              |
| 12               | Bahamas | Sweet potatoes                  | 1999           | 5                                                              |
| 12               | Bahamas | Sweeteners, Other               | 1999           | 45                                                             |
| 12               | Bahamas | Tomatoes and products           | 1999           | 7                                                              |
| 12               | Bahamas | Treenuts                        | 1999           | 16                                                             |
| 12               | Bahamas | Vegetable Oils                  | 1999           | 149                                                            |
| 12               | Bahamas | Vegetables                      | 1999           | 79                                                             |
| 12               | Bahamas | Vegetables, Other               | 1999           | 70                                                             |
| 12               | Bahamas | Vegetal Products                | 1999           | 1,839                                                          |
| 12               | Bahamas | Wheat and products              | 1999           | 354                                                            |
| 12               | Bahamas | Wine                            | 1999           | 11                                                             |
| 12               | Bahamas | Alcoholic Beverages             | 2000           | 124                                                            |
| 12               | Bahamas | Animal fats                     | 2000           | 122                                                            |
| 12               | Bahamas | Animal Products                 | 2000           | 881                                                            |
| 12               | Bahamas | Apples and products             | 2000           | 21                                                             |
| 12               | Bahamas | Bananas                         | 2000           | 26                                                             |
| 12               | Bahamas | Barley and products             | 2000           | 62                                                             |
| 12               | Bahamas | Beans                           | 2000           | 6                                                              |
| 12               | Bahamas | Beer                            | 2000           | 10                                                             |
| 12               | Bahamas | Beverages, Alcoholic            | 2000           | 102                                                            |
| 12               | Bahamas | Beverages, Fermented            | 2000           | 1                                                              |
| 12               | Bahamas | Bovine Meat                     | 2000           | 62                                                             |
| 12               | Bahamas | Butter, Ghee                    | 2000           | 40                                                             |
| 12               | Bahamas | Cassava and products            | 2000           | 6                                                              |
| 12               | Bahamas | Cereals - Excluding Beer        | 2000           | 724                                                            |
| 12               | Bahamas | Cereals, Other                  | 2000           | 27                                                             |
| 12               | Bahamas | Cocoa Beans and products        | 2000           | 13                                                             |
| 12               | Bahamas | Coconut Oil                     | 2000           | 7                                                              |
| 12               | Bahamas | Coconuts - Incl Copra           | 2000           | 5                                                              |
| 12               | Bahamas | Coffee and products             | 2000           | 4                                                              |
| 12               | Bahamas | Cream                           | 2000           | 1                                                              |
| 12               | Bahamas | Crustaceans                     | 2000           | 4                                                              |
| 12               | Bahamas | Demersal Fish                   | 2000           | 7                                                              |
| 12               | Bahamas | Eggs                            | 2000           | 17                                                             |
| 12               | Bahamas | Fats, Animals, Raw              | 2000           | 82                                                             |
| 12               | Bahamas | Fish, Seafood                   | 2000           | 60                                                             |
| 12               | Bahamas | Freshwater Fish                 | 2000           | 2                                                              |
| 12               | Bahamas | Fruits - Excluding Wine         | 2000           | 200                                                            |
| 12               | Bahamas | Fruits, Other                   | 2000           | 40                                                             |
| 12               | Bahamas | Grand Total                     | 2000           | 2,777                                                          |
| 12               | Bahamas | Grapefruit and products         | 2000           | 9                                                              |
| 12               | Bahamas | Grapes and products (excl wine) | 2000           | 14                                                             |
| 12               | Bahamas | Groundnut Oil                   | 2000           | 2                                                              |
| 12               | Bahamas | Groundnuts (Shelled Eq)         | 2000           | 19                                                             |
| 12               | Bahamas | Honey                           | 2000           | 3                                                              |
| 12               | Bahamas | Lemons, Limes and products      | 2000           | 20                                                             |
| 12               | Bahamas | Maize and products              | 2000           | 42                                                             |
| 12               | Bahamas | Maize Germ Oil                  | 2000           | 7                                                              |
| 12               | Bahamas | Marine Fish, Other              | 2000           | 10                                                             |
| 12               | Bahamas | Meat                            | 2000           | 490                                                            |
| 12               | Bahamas | Meat, Other                     | 2000           | 19                                                             |
| 12               | Bahamas | Milk - Excluding Butter         | 2000           | 178                                                            |
| 12               | Bahamas | Miscellaneous                   | 2000           | 61                                                             |
| 12               | Bahamas | Mutton & Goat Meat              | 2000           | 30                                                             |
| 12               | Bahamas | Oats                            | 2000           | 5                                                              |
| 12               | Bahamas | Offals                          | 2000           | 14                                                             |
| 12               | Bahamas | Oilcrops                        | 2000           | 34                                                             |
| 12               | Bahamas | Oilcrops Oil, Other             | 2000           | 114                                                            |
| 12               | Bahamas | Oilcrops, Other                 | 2000           | 1                                                              |
| 12               | Bahamas | Olive Oil                       | 2000           | 8                                                              |
| 12               | Bahamas | Olives (including preserved)    | 2000           | 1                                                              |

Dietary calcium and zinc deficiency risks are decreasing but remain prevalent

| FAO Country code | Country | Food item                       | Reference year | Net energy supply (kcal capita <sup>-1</sup> d <sup>-1</sup> ) |
|------------------|---------|---------------------------------|----------------|----------------------------------------------------------------|
| 12               | Bahamas | Onions                          | 2000           | 2                                                              |
| 12               | Bahamas | Oranges, Mandarines             | 2000           | 50                                                             |
| 12               | Bahamas | Palm Oil                        | 2000           | 2                                                              |
| 12               | Bahamas | Peas                            | 2000           | 1                                                              |
| 12               | Bahamas | Pelagic Fish                    | 2000           | 35                                                             |
| 12               | Bahamas | Pepper                          | 2000           | 2                                                              |
| 12               | Bahamas | Pigmeat                         | 2000           | 158                                                            |
| 12               | Bahamas | Pineapples and products         | 2000           | 5                                                              |
| 12               | Bahamas | Plantains                       | 2000           | 16                                                             |
| 12               | Bahamas | Potatoes and products           | 2000           | 44                                                             |
| 12               | Bahamas | Poultry Meat                    | 2000           | 221                                                            |
| 12               | Bahamas | Pulses                          | 2000           | 17                                                             |
| 12               | Bahamas | Pulses, Other and products      | 2000           | 9                                                              |
| 12               | Bahamas | Rape and Mustardseed            | 2000           | 8                                                              |
| 12               | Bahamas | Rice (Milled Equivalent)        | 2000           | 223                                                            |
| 12               | Bahamas | Roots, Other                    | 2000           | 2                                                              |
| 12               | Bahamas | Rye and products                | 2000           | 6                                                              |
| 12               | Bahamas | Sesame seed                     | 2000           | 1                                                              |
| 12               | Bahamas | Sesameseed Oil                  | 2000           | 1                                                              |
| 12               | Bahamas | Soyabean Oil                    | 2000           | 6                                                              |
| 12               | Bahamas | Spices                          | 2000           | 10                                                             |
| 12               | Bahamas | Spices, Other                   | 2000           | 8                                                              |
| 12               | Bahamas | Starchy Roots                   | 2000           | 61                                                             |
| 12               | Bahamas | Stimulants                      | 2000           | 17                                                             |
| 12               | Bahamas | Sugar & Sweeteners              | 2000           | 385                                                            |
| 12               | Bahamas | Sugar (Raw Equivalent)          | 2000           | 316                                                            |
| 12               | Bahamas | Sunflowerseed Oil               | 2000           | 2                                                              |
| 12               | Bahamas | Sweet potatoes                  | 2000           | 10                                                             |
| 12               | Bahamas | Sweeteners, Other               | 2000           | 66                                                             |
| 12               | Bahamas | Tomatoes and products           | 2000           | 11                                                             |
| 12               | Bahamas | Treenuts                        | 2000           | 15                                                             |
| 12               | Bahamas | Vegetable Oils                  | 2000           | 150                                                            |
| 12               | Bahamas | Vegetables                      | 2000           | 97                                                             |
| 12               | Bahamas | Vegetables, Other               | 2000           | 85                                                             |
| 12               | Bahamas | Vegetal Products                | 2000           | 1,896                                                          |
| 12               | Bahamas | Wheat and products              | 2000           | 360                                                            |
| 12               | Bahamas | Wine                            | 2000           | 11                                                             |
| 12               | Bahamas | Alcoholic Beverages             | 2001           | 125                                                            |
| 12               | Bahamas | Animal fats                     | 2001           | 151                                                            |
| 12               | Bahamas | Animal Products                 | 2001           | 906                                                            |
| 12               | Bahamas | Apples and products             | 2001           | 21                                                             |
| 12               | Bahamas | Bananas                         | 2001           | 25                                                             |
| 12               | Bahamas | Barley and products             | 2001           | 68                                                             |
| 12               | Bahamas | Beans                           | 2001           | 7                                                              |
| 12               | Bahamas | Beer                            | 2001           | 10                                                             |
| 12               | Bahamas | Beverages, Alcoholic            | 2001           | 102                                                            |
| 12               | Bahamas | Beverages, Fermented            | 2001           | 1                                                              |
| 12               | Bahamas | Bovine Meat                     | 2001           | 90                                                             |
| 12               | Bahamas | Butter, Ghee                    | 2001           | 42                                                             |
| 12               | Bahamas | Cassava and products            | 2001           | 6                                                              |
| 12               | Bahamas | Cephalopods                     | 2001           | 2                                                              |
| 12               | Bahamas | Cereals - Excluding Beer        | 2001           | 739                                                            |
| 12               | Bahamas | Cereals, Other                  | 2001           | 24                                                             |
| 12               | Bahamas | Cocoa Beans and products        | 2001           | 13                                                             |
| 12               | Bahamas | Coconut Oil                     | 2001           | 5                                                              |
| 12               | Bahamas | Coconuts - Incl Copra           | 2001           | 3                                                              |
| 12               | Bahamas | Coffee and products             | 2001           | 4                                                              |
| 12               | Bahamas | Cottonseed Oil                  | 2001           | 1                                                              |
| 12               | Bahamas | Crustaceans                     | 2001           | 9                                                              |
| 12               | Bahamas | Demersal Fish                   | 2001           | 6                                                              |
| 12               | Bahamas | Eggs                            | 2001           | 17                                                             |
| 12               | Bahamas | Fats, Animals, Raw              | 2001           | 108                                                            |
| 12               | Bahamas | Fish, Seafood                   | 2001           | 58                                                             |
| 12               | Bahamas | Freshwater Fish                 | 2001           | 3                                                              |
| 12               | Bahamas | Fruits - Excluding Wine         | 2001           | 181                                                            |
| 12               | Bahamas | Fruits, Other                   | 2001           | 39                                                             |
| 12               | Bahamas | Grand Total                     | 2001           | 2,764                                                          |
| 12               | Bahamas | Grapefruit and products         | 2001           | 9                                                              |
| 12               | Bahamas | Grapes and products (excl wine) | 2001           | 10                                                             |
| 12               | Bahamas | Groundnut Oil                   | 2001           | 1                                                              |
| 12               | Bahamas | Groundnuts (Shelled Eq)         | 2001           | 18                                                             |
| 12               | Bahamas | Honey                           | 2001           | 2                                                              |
| 12               | Bahamas | Lemons, Limes and products      | 2001           | 15                                                             |
| 12               | Bahamas | Maize and products              | 2001           | 41                                                             |
| 12               | Bahamas | Maize Germ Oil                  | 2001           | 7                                                              |
| 12               | Bahamas | Marine Fish, Other              | 2001           | 10                                                             |
| 12               | Bahamas | Meat                            | 2001           | 491                                                            |
| 12               | Bahamas | Meat, Other                     | 2001           | 11                                                             |
| 12               | Bahamas | Milk - Excluding Butter         | 2001           | 177                                                            |
| 12               | Bahamas | Miscellaneous                   | 2001           | 52                                                             |
| 12               | Bahamas | Molluscs, Other                 | 2001           | 1                                                              |
| 12               | Bahamas | Mutton & Goat Meat              | 2001           | 27                                                             |
| 12               | Bahamas | Oats                            | 2001           | 6                                                              |
| 12               | Bahamas | Offals                          | 2001           | 13                                                             |
| 12               | Bahamas | Oilcrops                        | 2001           | 31                                                             |
| 12               | Bahamas | Oilcrops Oil, Other             | 2001           | 107                                                            |
| 12               | Bahamas | Oilcrops, Other                 | 2001           | 2                                                              |
| 12               | Bahamas | Olive Oil                       | 2001           | 10                                                             |
| 12               | Bahamas | Olives (including preserved)    | 2001           | 1                                                              |
| 12               | Bahamas | Onions                          | 2001           | 2                                                              |
| 12               | Bahamas | Oranges, Mandarines             | 2001           | 44                                                             |
| 12               | Bahamas | Palm Oil                        | 2001           | 4                                                              |
| 12               | Bahamas | Peas                            | 2001           | 3                                                              |
| 12               | Bahamas | Pelagic Fish                    | 2001           | 27                                                             |
| 12               | Bahamas | Pepper                          | 2001           | 2                                                              |
| 12               | Bahamas | Pigmeat                         | 2001           | 143                                                            |
| 12               | Bahamas | Pineapples and products         | 2001           | 4                                                              |

Dietary calcium and zinc deficiency risks are decreasing but remain prevalent

| FAO Country code | Country | Food item                       | Reference year | Net energy supply (kcal capita <sup>-1</sup> d <sup>-1</sup> ) |
|------------------|---------|---------------------------------|----------------|----------------------------------------------------------------|
| 12               | Bahamas | Plantains                       | 2001           | 13                                                             |
| 12               | Bahamas | Potatoes and products           | 2001           | 43                                                             |
| 12               | Bahamas | Poultry Meat                    | 2001           | 220                                                            |
| 12               | Bahamas | Pulses                          | 2001           | 18                                                             |
| 12               | Bahamas | Pulses, Other and products      | 2001           | 8                                                              |
| 12               | Bahamas | Rape and Mustardseed            | 2001           | 7                                                              |
| 12               | Bahamas | Rice (Milled Equivalent)        | 2001           | 228                                                            |
| 12               | Bahamas | Roots, Other                    | 2001           | 1                                                              |
| 12               | Bahamas | Rye and products                | 2001           | 9                                                              |
| 12               | Bahamas | Sesame seed                     | 2001           | 1                                                              |
| 12               | Bahamas | Soyabean Oil                    | 2001           | 8                                                              |
| 12               | Bahamas | Spices                          | 2001           | 11                                                             |
| 12               | Bahamas | Spices, Other                   | 2001           | 9                                                              |
| 12               | Bahamas | Starchy Roots                   | 2001           | 58                                                             |
| 12               | Bahamas | Stimulants                      | 2001           | 18                                                             |
| 12               | Bahamas | Sugar & Sweeteners              | 2001           | 372                                                            |
| 12               | Bahamas | Sugar (Raw Equivalent)          | 2001           | 293                                                            |
| 12               | Bahamas | Sunflowerseed Oil               | 2001           | 1                                                              |
| 12               | Bahamas | Sweet potatoes                  | 2001           | 8                                                              |
| 12               | Bahamas | Sweeteners, Other               | 2001           | 76                                                             |
| 12               | Bahamas | Tomatoes and products           | 2001           | 11                                                             |
| 12               | Bahamas | Treenuts                        | 2001           | 16                                                             |
| 12               | Bahamas | Vegetable Oils                  | 2001           | 142                                                            |
| 12               | Bahamas | Vegetables                      | 2001           | 95                                                             |
| 12               | Bahamas | Vegetables, Other               | 2001           | 82                                                             |
| 12               | Bahamas | Vegetal Products                | 2001           | 1,858                                                          |
| 12               | Bahamas | Wheat and products              | 2001           | 364                                                            |
| 12               | Bahamas | Wine                            | 2001           | 11                                                             |
| 12               | Bahamas | Alcoholic Beverages             | 2002           | 156                                                            |
| 12               | Bahamas | Animal fats                     | 2002           | 135                                                            |
| 12               | Bahamas | Animal Products                 | 2002           | 906                                                            |
| 12               | Bahamas | Apples and products             | 2002           | 20                                                             |
| 12               | Bahamas | Bananas                         | 2002           | 20                                                             |
| 12               | Bahamas | Barley and products             | 2002           | 71                                                             |
| 12               | Bahamas | Beans                           | 2002           | 9                                                              |
| 12               | Bahamas | Beer                            | 2002           | 12                                                             |
| 12               | Bahamas | Beverages, Alcoholic            | 2002           | 134                                                            |
| 12               | Bahamas | Beverages, Fermented            | 2002           | 1                                                              |
| 12               | Bahamas | Bovine Meat                     | 2002           | 80                                                             |
| 12               | Bahamas | Butter, Ghee                    | 2002           | 44                                                             |
| 12               | Bahamas | Cassava and products            | 2002           | 1                                                              |
| 12               | Bahamas | Cereals - Excluding Beer        | 2002           | 747                                                            |
| 12               | Bahamas | Cereals, Other                  | 2002           | 21                                                             |
| 12               | Bahamas | Cocoa Beans and products        | 2002           | 12                                                             |
| 12               | Bahamas | Coconut Oil                     | 2002           | 5                                                              |
| 12               | Bahamas | Coconuts - Incl Copra           | 2002           | 4                                                              |
| 12               | Bahamas | Coffee and products             | 2002           | 4                                                              |
| 12               | Bahamas | Crustaceans                     | 2002           | 10                                                             |
| 12               | Bahamas | Demersal Fish                   | 2002           | 5                                                              |
| 12               | Bahamas | Eggs                            | 2002           | 11                                                             |
| 12               | Bahamas | Fats, Animals, Raw              | 2002           | 91                                                             |
| 12               | Bahamas | Fish, Seafood                   | 2002           | 57                                                             |
| 12               | Bahamas | Freshwater Fish                 | 2002           | 2                                                              |
| 12               | Bahamas | Fruits - Excluding Wine         | 2002           | 168                                                            |
| 12               | Bahamas | Fruits, Other                   | 2002           | 36                                                             |
| 12               | Bahamas | Grand Total                     | 2002           | 2,725                                                          |
| 12               | Bahamas | Grapefruit and products         | 2002           | 6                                                              |
| 12               | Bahamas | Grapes and products (excl wine) | 2002           | 9                                                              |
| 12               | Bahamas | Groundnut Oil                   | 2002           | 1                                                              |
| 12               | Bahamas | Groundnuts (Shelled Eq)         | 2002           | 21                                                             |
| 12               | Bahamas | Honey                           | 2002           | 2                                                              |
| 12               | Bahamas | Lemons, Limes and products      | 2002           | 12                                                             |
| 12               | Bahamas | Maize and products              | 2002           | 46                                                             |
| 12               | Bahamas | Maize Germ Oil                  | 2002           | 10                                                             |
| 12               | Bahamas | Marine Fish, Other              | 2002           | 7                                                              |
| 12               | Bahamas | Meat                            | 2002           | 520                                                            |
| 12               | Bahamas | Meat, Other                     | 2002           | 11                                                             |
| 12               | Bahamas | Milk - Excluding Butter         | 2002           | 168                                                            |
| 12               | Bahamas | Miscellaneous                   | 2002           | 37                                                             |
| 12               | Bahamas | Molluscs, Other                 | 2002           | 1                                                              |
| 12               | Bahamas | Mutton & Goat Meat              | 2002           | 29                                                             |
| 12               | Bahamas | Oats                            | 2002           | 1                                                              |
| 12               | Bahamas | Offals                          | 2002           | 15                                                             |
| 12               | Bahamas | Oilcrops                        | 2002           | 29                                                             |
| 12               | Bahamas | Oilcrops Oil, Other             | 2002           | 115                                                            |
| 12               | Bahamas | Olive Oil                       | 2002           | 7                                                              |
| 12               | Bahamas | Onions                          | 2002           | 2                                                              |
| 12               | Bahamas | Oranges, Mandarines             | 2002           | 47                                                             |
| 12               | Bahamas | Palm Oil                        | 2002           | 2                                                              |
| 12               | Bahamas | Peas                            | 2002           | 2                                                              |
| 12               | Bahamas | Pelagic Fish                    | 2002           | 31                                                             |
| 12               | Bahamas | Pepper                          | 2002           | 2                                                              |
| 12               | Bahamas | Pigmeat                         | 2002           | 161                                                            |
| 12               | Bahamas | Pineapples and products         | 2002           | 3                                                              |
| 12               | Bahamas | Plantains                       | 2002           | 14                                                             |
| 12               | Bahamas | Potatoes and products           | 2002           | 49                                                             |
| 12               | Bahamas | Poultry Meat                    | 2002           | 240                                                            |
| 12               | Bahamas | Pulses                          | 2002           | 19                                                             |
| 12               | Bahamas | Pulses, Other and products      | 2002           | 8                                                              |
| 12               | Bahamas | Rape and Mustardseed            | 2002           | 2                                                              |
| 12               | Bahamas | Rice (Milled Equivalent)        | 2002           | 233                                                            |
| 12               | Bahamas | Rye and products                | 2002           | 8                                                              |
| 12               | Bahamas | Sesame seed                     | 2002           | 1                                                              |
| 12               | Bahamas | Soyabean Oil                    | 2002           | 16                                                             |
| 12               | Bahamas | Spices                          | 2002           | 8                                                              |
| 12               | Bahamas | Spices, Other                   | 2002           | 6                                                              |
| 12               | Bahamas | Starchy Roots                   | 2002           | 56                                                             |

Dietary calcium and zinc deficiency risks are decreasing but remain prevalent

| FAO Country code | Country | Food item                       | Reference year | Net energy supply (kcal capita <sup>-1</sup> d <sup>-1</sup> ) |
|------------------|---------|---------------------------------|----------------|----------------------------------------------------------------|
| 12               | Bahamas | Stimulants                      | 2002           | 17                                                             |
| 12               | Bahamas | Sugar & Sweeteners              | 2002           | 335                                                            |
| 12               | Bahamas | Sugar (Raw Equivalent)          | 2002           | 288                                                            |
| 12               | Bahamas | Sunflowerseed Oil               | 2002           | 1                                                              |
| 12               | Bahamas | Sweet potatoes                  | 2002           | 6                                                              |
| 12               | Bahamas | Sweeteners, Other               | 2002           | 46                                                             |
| 12               | Bahamas | Tomatoes and products           | 2002           | 8                                                              |
| 12               | Bahamas | Treenuts                        | 2002           | 11                                                             |
| 12               | Bahamas | Vegetable Oils                  | 2002           | 158                                                            |
| 12               | Bahamas | Vegetables                      | 2002           | 78                                                             |
| 12               | Bahamas | Vegetables, Other               | 2002           | 68                                                             |
| 12               | Bahamas | Vegetal Products                | 2002           | 1,818                                                          |
| 12               | Bahamas | Wheat and products              | 2002           | 369                                                            |
| 12               | Bahamas | Wine                            | 2002           | 9                                                              |
| 12               | Bahamas | Alcoholic Beverages             | 2003           | 138                                                            |
| 12               | Bahamas | Animal fats                     | 2003           | 151                                                            |
| 12               | Bahamas | Animal Products                 | 2003           | 874                                                            |
| 12               | Bahamas | Apples and products             | 2003           | 5                                                              |
| 12               | Bahamas | Bananas                         | 2003           | 14                                                             |
| 12               | Bahamas | Barley and products             | 2003           | 83                                                             |
| 12               | Bahamas | Beans                           | 2003           | 10                                                             |
| 12               | Bahamas | Beer                            | 2003           | 12                                                             |
| 12               | Bahamas | Beverages, Alcoholic            | 2003           | 116                                                            |
| 12               | Bahamas | Beverages, Fermented            | 2003           | 1                                                              |
| 12               | Bahamas | Bovine Meat                     | 2003           | 87                                                             |
| 12               | Bahamas | Butter, Ghee                    | 2003           | 48                                                             |
| 12               | Bahamas | Cassava and products            | 2003           | 1                                                              |
| 12               | Bahamas | Cereals - Excluding Beer        | 2003           | 760                                                            |
| 12               | Bahamas | Cereals, Other                  | 2003           | 15                                                             |
| 12               | Bahamas | Cocoa Beans and products        | 2003           | 7                                                              |
| 12               | Bahamas | Coconut Oil                     | 2003           | 4                                                              |
| 12               | Bahamas | Coffee and products             | 2003           | 4                                                              |
| 12               | Bahamas | Cream                           | 2003           | 1                                                              |
| 12               | Bahamas | Crustaceans                     | 2003           | 8                                                              |
| 12               | Bahamas | Demersal Fish                   | 2003           | 5                                                              |
| 12               | Bahamas | Eggs                            | 2003           | 9                                                              |
| 12               | Bahamas | Fats, Animals, Raw              | 2003           | 102                                                            |
| 12               | Bahamas | Fish, Seafood                   | 2003           | 57                                                             |
| 12               | Bahamas | Freshwater Fish                 | 2003           | 9                                                              |
| 12               | Bahamas | Fruits - Excluding Wine         | 2003           | 137                                                            |
| 12               | Bahamas | Fruits, Other                   | 2003           | 55                                                             |
| 12               | Bahamas | Grand Total                     | 2003           | 2,686                                                          |
| 12               | Bahamas | Grapefruit and products         | 2003           | 2                                                              |
| 12               | Bahamas | Grapes and products (excl wine) | 2003           | 6                                                              |
| 12               | Bahamas | Groundnut Oil                   | 2003           | 1                                                              |
| 12               | Bahamas | Groundnuts (Shelled Eq)         | 2003           | 17                                                             |
| 12               | Bahamas | Honey                           | 2003           | 1                                                              |
| 12               | Bahamas | Lemons, Limes and products      | 2003           | 7                                                              |
| 12               | Bahamas | Maize and products              | 2003           | 30                                                             |
| 12               | Bahamas | Maize Germ Oil                  | 2003           | 5                                                              |
| 12               | Bahamas | Marine Fish, Other              | 2003           | 8                                                              |
| 12               | Bahamas | Meat                            | 2003           | 477                                                            |
| 12               | Bahamas | Meat, Other                     | 2003           | 4                                                              |
| 12               | Bahamas | Milk - Excluding Butter         | 2003           | 163                                                            |
| 12               | Bahamas | Miscellaneous                   | 2003           | 28                                                             |
| 12               | Bahamas | Molluscs, Other                 | 2003           | 1                                                              |
| 12               | Bahamas | Mutton & Goat Meat              | 2003           | 23                                                             |
| 12               | Bahamas | Oats                            | 2003           | 4                                                              |
| 12               | Bahamas | Offals                          | 2003           | 17                                                             |
| 12               | Bahamas | Oilcrops                        | 2003           | 21                                                             |
| 12               | Bahamas | Oilcrops Oil, Other             | 2003           | 98                                                             |
| 12               | Bahamas | Oilcrops, Other                 | 2003           | 2                                                              |
| 12               | Bahamas | Olive Oil                       | 2003           | 10                                                             |
| 12               | Bahamas | Onions                          | 2003           | 2                                                              |
| 12               | Bahamas | Oranges, Mandarines             | 2003           | 46                                                             |
| 12               | Bahamas | Palm Oil                        | 2003           | 2                                                              |
| 12               | Bahamas | Pelagic Fish                    | 2003           | 26                                                             |
| 12               | Bahamas | Pepper                          | 2003           | 1                                                              |
| 12               | Bahamas | Pigmeat                         | 2003           | 149                                                            |
| 12               | Bahamas | Pineapples and products         | 2003           | 2                                                              |
| 12               | Bahamas | Potatoes and products           | 2003           | 43                                                             |
| 12               | Bahamas | Poultry Meat                    | 2003           | 214                                                            |
| 12               | Bahamas | Pulses                          | 2003           | 17                                                             |
| 12               | Bahamas | Pulses, Other and products      | 2003           | 6                                                              |
| 12               | Bahamas | Rape and Mustardseed            | 2003           | 1                                                              |
| 12               | Bahamas | Rice (Milled Equivalent)        | 2003           | 276                                                            |
| 12               | Bahamas | Soyabean Oil                    | 2003           | 24                                                             |
| 12               | Bahamas | Soyabeans                       | 2003           | 1                                                              |
| 12               | Bahamas | Spices                          | 2003           | 6                                                              |
| 12               | Bahamas | Spices, Other                   | 2003           | 6                                                              |
| 12               | Bahamas | Starchy Roots                   | 2003           | 50                                                             |
| 12               | Bahamas | Stimulants                      | 2003           | 11                                                             |
| 12               | Bahamas | Sugar & Sweeteners              | 2003           | 410                                                            |
| 12               | Bahamas | Sugar (Raw Equivalent)          | 2003           | 355                                                            |
| 12               | Bahamas | Sunflowerseed Oil               | 2003           | 1                                                              |
| 12               | Bahamas | Sweet potatoes                  | 2003           | 6                                                              |
| 12               | Bahamas | Sweeteners, Other               | 2003           | 53                                                             |
| 12               | Bahamas | Tomatoes and products           | 2003           | 9                                                              |
| 12               | Bahamas | Treenuts                        | 2003           | 10                                                             |
| 12               | Bahamas | Vegetable Oils                  | 2003           | 145                                                            |
| 12               | Bahamas | Vegetables                      | 2003           | 79                                                             |
| 12               | Bahamas | Vegetables, Other               | 2003           | 68                                                             |
| 12               | Bahamas | Vegetal Products                | 2003           | 1,812                                                          |
| 12               | Bahamas | Wheat and products              | 2003           | 352                                                            |
| 12               | Bahamas | Wine                            | 2003           | 8                                                              |
| 12               | Bahamas | Alcoholic Beverages             | 2004           | 134                                                            |
| 12               | Bahamas | Animal fats                     | 2004           | 152                                                            |



Dietary calcium and zinc deficiency risks are decreasing but remain prevalent

| FAO Country code | Country | Food item                       | Reference year | Net energy supply (kcal capita <sup>-1</sup> d <sup>-1</sup> ) |
|------------------|---------|---------------------------------|----------------|----------------------------------------------------------------|
| 12               | Bahamas | Animal Products                 | 2004           | 860                                                            |
| 12               | Bahamas | Apples and products             | 2004           | 5                                                              |
| 12               | Bahamas | Bananas                         | 2004           | 13                                                             |
| 12               | Bahamas | Barley and products             | 2004           | 82                                                             |
| 12               | Bahamas | Beans                           | 2004           | 9                                                              |
| 12               | Bahamas | Beer                            | 2004           | 10                                                             |
| 12               | Bahamas | Beverages, Alcoholic            | 2004           | 115                                                            |
| 12               | Bahamas | Beverages, Fermented            | 2004           | 2                                                              |
| 12               | Bahamas | Bovine Meat                     | 2004           | 75                                                             |
| 12               | Bahamas | Butter, Ghee                    | 2004           | 42                                                             |
| 12               | Bahamas | Cassava and products            | 2004           | 1                                                              |
| 12               | Bahamas | Cereals - Excluding Beer        | 2004           | 710                                                            |
| 12               | Bahamas | Cereals, Other                  | 2004           | 13                                                             |
| 12               | Bahamas | Cocoa Beans and products        | 2004           | 16                                                             |
| 12               | Bahamas | Coconut Oil                     | 2004           | 4                                                              |
| 12               | Bahamas | Coffee and products             | 2004           | 2                                                              |
| 12               | Bahamas | Cream                           | 2004           | 6                                                              |
| 12               | Bahamas | Crustaceans                     | 2004           | 11                                                             |
| 12               | Bahamas | Demersal Fish                   | 2004           | 5                                                              |
| 12               | Bahamas | Eggs                            | 2004           | 11                                                             |
| 12               | Bahamas | Fats, Animals, Raw              | 2004           | 104                                                            |
| 12               | Bahamas | Fish, Seafood                   | 2004           | 55                                                             |
| 12               | Bahamas | Freshwater Fish                 | 2004           | 3                                                              |
| 12               | Bahamas | Fruits - Excluding Wine         | 2004           | 186                                                            |
| 12               | Bahamas | Fruits, Other                   | 2004           | 56                                                             |
| 12               | Bahamas | Grand Total                     | 2004           | 2,661                                                          |
| 12               | Bahamas | Grapefruit and products         | 2004           | 1                                                              |
| 12               | Bahamas | Grapes and products (excl wine) | 2004           | 5                                                              |
| 12               | Bahamas | Groundnuts (Shelled Eq)         | 2004           | 12                                                             |
| 12               | Bahamas | Honey                           | 2004           | 1                                                              |
| 12               | Bahamas | Lemons, Limes and products      | 2004           | 11                                                             |
| 12               | Bahamas | Maize and products              | 2004           | 22                                                             |
| 12               | Bahamas | Maize Germ Oil                  | 2004           | 5                                                              |
| 12               | Bahamas | Marine Fish, Other              | 2004           | 7                                                              |
| 12               | Bahamas | Meat                            | 2004           | 471                                                            |
| 12               | Bahamas | Meat, Other                     | 2004           | 4                                                              |
| 12               | Bahamas | Milk - Excluding Butter         | 2004           | 158                                                            |
| 12               | Bahamas | Miscellaneous                   | 2004           | 29                                                             |
| 12               | Bahamas | Molluscs, Other                 | 2004           | 1                                                              |
| 12               | Bahamas | Mutton & Goat Meat              | 2004           | 24                                                             |
| 12               | Bahamas | Oats                            | 2004           | 3                                                              |
| 12               | Bahamas | Offals                          | 2004           | 12                                                             |
| 12               | Bahamas | Oilcrops                        | 2004           | 16                                                             |
| 12               | Bahamas | Oilcrops Oil, Other             | 2004           | 105                                                            |
| 12               | Bahamas | Oilcrops, Other                 | 2004           | 3                                                              |
| 12               | Bahamas | Olive Oil                       | 2004           | 12                                                             |
| 12               | Bahamas | Onions                          | 2004           | 2                                                              |
| 12               | Bahamas | Oranges, Mandarines             | 2004           | 93                                                             |
| 12               | Bahamas | Palm Oil                        | 2004           | 1                                                              |
| 12               | Bahamas | Pelagic Fish                    | 2004           | 29                                                             |
| 12               | Bahamas | Pigmeat                         | 2004           | 141                                                            |
| 12               | Bahamas | Pimento                         | 2004           | 1                                                              |
| 12               | Bahamas | Pineapples and products         | 2004           | 2                                                              |
| 12               | Bahamas | Potatoes and products           | 2004           | 44                                                             |
| 12               | Bahamas | Poultry Meat                    | 2004           | 227                                                            |
| 12               | Bahamas | Pulses                          | 2004           | 12                                                             |
| 12               | Bahamas | Pulses, Other and products      | 2004           | 4                                                              |
| 12               | Bahamas | Rice (Milled Equivalent)        | 2004           | 259                                                            |
| 12               | Bahamas | Sesame seed                     | 2004           | 1                                                              |
| 12               | Bahamas | Soyabean Oil                    | 2004           | 26                                                             |
| 12               | Bahamas | Spices                          | 2004           | 7                                                              |
| 12               | Bahamas | Spices, Other                   | 2004           | 6                                                              |
| 12               | Bahamas | Starchy Roots                   | 2004           | 52                                                             |
| 12               | Bahamas | Stimulants                      | 2004           | 18                                                             |
| 12               | Bahamas | Sugar & Sweeteners              | 2004           | 410                                                            |
| 12               | Bahamas | Sugar (Raw Equivalent)          | 2004           | 352                                                            |
| 12               | Bahamas | Sweet potatoes                  | 2004           | 6                                                              |
| 12               | Bahamas | Sweeteners, Other               | 2004           | 57                                                             |
| 12               | Bahamas | Tomatoes and products           | 2004           | 10                                                             |
| 12               | Bahamas | Treenuts                        | 2004           | 6                                                              |
| 12               | Bahamas | Vegetable Oils                  | 2004           | 154                                                            |
| 12               | Bahamas | Vegetables                      | 2004           | 67                                                             |
| 12               | Bahamas | Vegetables, Other               | 2004           | 55                                                             |
| 12               | Bahamas | Vegetal Products                | 2004           | 1,802                                                          |
| 12               | Bahamas | Wheat and products              | 2004           | 331                                                            |
| 12               | Bahamas | Wine                            | 2004           | 7                                                              |
| 12               | Bahamas | Alcoholic Beverages             | 2005           | 132                                                            |
| 12               | Bahamas | Animal fats                     | 2005           | 125                                                            |
| 12               | Bahamas | Animal Products                 | 2005           | 836                                                            |
| 12               | Bahamas | Apples and products             | 2005           | 12                                                             |
| 12               | Bahamas | Bananas                         | 2005           | 12                                                             |
| 12               | Bahamas | Barley and products             | 2005           | 18                                                             |
| 12               | Bahamas | Beans                           | 2005           | 9                                                              |
| 12               | Bahamas | Beer                            | 2005           | 8                                                              |
| 12               | Bahamas | Beverages, Alcoholic            | 2005           | 114                                                            |
| 12               | Bahamas | Bovine Meat                     | 2005           | 84                                                             |
| 12               | Bahamas | Butter, Ghee                    | 2005           | 40                                                             |
| 12               | Bahamas | Cassava and products            | 2005           | 7                                                              |
| 12               | Bahamas | Cereals - Excluding Beer        | 2005           | 628                                                            |
| 12               | Bahamas | Cereals, Other                  | 2005           | 15                                                             |
| 12               | Bahamas | Cocoa Beans and products        | 2005           | 15                                                             |
| 12               | Bahamas | Coconut Oil                     | 2005           | 6                                                              |
| 12               | Bahamas | Coconuts - Incl Copra           | 2005           | 3                                                              |
| 12               | Bahamas | Coffee and products             | 2005           | 4                                                              |
| 12               | Bahamas | Crustaceans                     | 2005           | 9                                                              |
| 12               | Bahamas | Demersal Fish                   | 2005           | 4                                                              |
| 12               | Bahamas | Eggs                            | 2005           | 15                                                             |

Dietary calcium and zinc deficiency risks are decreasing but remain prevalent

| FAO Country code | Country | Food item                       | Reference year | Net energy supply (kcal capita <sup>-1</sup> d <sup>-1</sup> ) |
|------------------|---------|---------------------------------|----------------|----------------------------------------------------------------|
| 12               | Bahamas | Fats, Animals, Raw              | 2005           | 85                                                             |
| 12               | Bahamas | Fish, Seafood                   | 2005           | 53                                                             |
| 12               | Bahamas | Freshwater Fish                 | 2005           | 3                                                              |
| 12               | Bahamas | Fruits - Excluding Wine         | 2005           | 178                                                            |
| 12               | Bahamas | Fruits, Other                   | 2005           | 29                                                             |
| 12               | Bahamas | Grand Total                     | 2005           | 2,646                                                          |
| 12               | Bahamas | Grapefruit and products         | 2005           | 6                                                              |
| 12               | Bahamas | Grapes and products (excl wine) | 2005           | 11                                                             |
| 12               | Bahamas | Groundnuts (Shelled Eq)         | 2005           | 14                                                             |
| 12               | Bahamas | Honey                           | 2005           | 2                                                              |
| 12               | Bahamas | Lemons, Limes and products      | 2005           | 17                                                             |
| 12               | Bahamas | Maize and products              | 2005           | 42                                                             |
| 12               | Bahamas | Marine Fish, Other              | 2005           | 6                                                              |
| 12               | Bahamas | Meat                            | 2005           | 482                                                            |
| 12               | Bahamas | Meat, Other                     | 2005           | 2                                                              |
| 12               | Bahamas | Milk - Excluding Butter         | 2005           | 158                                                            |
| 12               | Bahamas | Miscellaneous                   | 2005           | 70                                                             |
| 12               | Bahamas | Molluscs, Other                 | 2005           | 1                                                              |
| 12               | Bahamas | Mutton & Goat Meat              | 2005           | 22                                                             |
| 12               | Bahamas | Oats                            | 2005           | 8                                                              |
| 12               | Bahamas | Offals                          | 2005           | 4                                                              |
| 12               | Bahamas | Oilcrops                        | 2005           | 24                                                             |
| 12               | Bahamas | Oilcrops Oil, Other             | 2005           | 125                                                            |
| 12               | Bahamas | Oilcrops, Other                 | 2005           | 1                                                              |
| 12               | Bahamas | Olive Oil                       | 2005           | 15                                                             |
| 12               | Bahamas | Onions                          | 2005           | 2                                                              |
| 12               | Bahamas | Oranges, Mandarines             | 2005           | 77                                                             |
| 12               | Bahamas | Palm Oil                        | 2005           | 1                                                              |
| 12               | Bahamas | Palmkernel Oil                  | 2005           | 1                                                              |
| 12               | Bahamas | Peas                            | 2005           | 3                                                              |
| 12               | Bahamas | Pelagic Fish                    | 2005           | 28                                                             |
| 12               | Bahamas | Pepper                          | 2005           | 1                                                              |
| 12               | Bahamas | Pigmeat                         | 2005           | 153                                                            |
| 12               | Bahamas | Pineapples and products         | 2005           | 4                                                              |
| 12               | Bahamas | Plantains                       | 2005           | 12                                                             |
| 12               | Bahamas | Potatoes and products           | 2005           | 33                                                             |
| 12               | Bahamas | Poultry Meat                    | 2005           | 221                                                            |
| 12               | Bahamas | Pulses                          | 2005           | 17                                                             |
| 12               | Bahamas | Pulses, Other and products      | 2005           | 5                                                              |
| 12               | Bahamas | Rape and Mustardseed            | 2005           | 6                                                              |
| 12               | Bahamas | Rice (Milled Equivalent)        | 2005           | 247                                                            |
| 12               | Bahamas | Roots, Other                    | 2005           | 2                                                              |
| 12               | Bahamas | Rye and products                | 2005           | 10                                                             |
| 12               | Bahamas | Sesameed Oil                    | 2005           | 1                                                              |
| 12               | Bahamas | Soyabean Oil                    | 2005           | 7                                                              |
| 12               | Bahamas | Spices                          | 2005           | 10                                                             |
| 12               | Bahamas | Spices, Other                   | 2005           | 9                                                              |
| 12               | Bahamas | Starchy Roots                   | 2005           | 51                                                             |
| 12               | Bahamas | Stimulants                      | 2005           | 20                                                             |
| 12               | Bahamas | Sugar & Sweeteners              | 2005           | 421                                                            |
| 12               | Bahamas | Sugar (Raw Equivalent)          | 2005           | 357                                                            |
| 12               | Bahamas | Sunflowerseed Oil               | 2005           | 1                                                              |
| 12               | Bahamas | Sweet potatoes                  | 2005           | 9                                                              |
| 12               | Bahamas | Sweeteners, Other               | 2005           | 63                                                             |
| 12               | Bahamas | Tea (including mate)            | 2005           | 1                                                              |
| 12               | Bahamas | Tomatoes and products           | 2005           | 9                                                              |
| 12               | Bahamas | Treenuts                        | 2005           | 18                                                             |
| 12               | Bahamas | Vegetable Oils                  | 2005           | 157                                                            |
| 12               | Bahamas | Vegetables                      | 2005           | 82                                                             |
| 12               | Bahamas | Vegetables, Other               | 2005           | 70                                                             |
| 12               | Bahamas | Vegetal Products                | 2005           | 1,809                                                          |
| 12               | Bahamas | Wheat and products              | 2005           | 288                                                            |
| 12               | Bahamas | Wine                            | 2005           | 9                                                              |
| 12               | Bahamas | Alcoholic Beverages             | 2006           | 132                                                            |
| 12               | Bahamas | Animal fats                     | 2006           | 124                                                            |
| 12               | Bahamas | Animal Products                 | 2006           | 849                                                            |
| 12               | Bahamas | Apples and products             | 2006           | 13                                                             |
| 12               | Bahamas | Bananas                         | 2006           | 24                                                             |
| 12               | Bahamas | Barley and products             | 2006           | 15                                                             |
| 12               | Bahamas | Beans                           | 2006           | 9                                                              |
| 12               | Bahamas | Beer                            | 2006           | 8                                                              |
| 12               | Bahamas | Beverages, Alcoholic            | 2006           | 113                                                            |
| 12               | Bahamas | Beverages, Fermented            | 2006           | 1                                                              |
| 12               | Bahamas | Bovine Meat                     | 2006           | 81                                                             |
| 12               | Bahamas | Butter, Ghee                    | 2006           | 38                                                             |
| 12               | Bahamas | Cassava and products            | 2006           | 7                                                              |
| 12               | Bahamas | Cereals - Excluding Beer        | 2006           | 642                                                            |
| 12               | Bahamas | Cereals, Other                  | 2006           | 1                                                              |
| 12               | Bahamas | Cocoa Beans and products        | 2006           | 14                                                             |
| 12               | Bahamas | Coconut Oil                     | 2006           | 7                                                              |
| 12               | Bahamas | Coconuts - Incl Copra           | 2006           | 3                                                              |
| 12               | Bahamas | Coffee and products             | 2006           | 4                                                              |
| 12               | Bahamas | Crustaceans                     | 2006           | 8                                                              |
| 12               | Bahamas | Demersal Fish                   | 2006           | 6                                                              |
| 12               | Bahamas | Eggs                            | 2006           | 21                                                             |
| 12               | Bahamas | Fats, Animals, Raw              | 2006           | 86                                                             |
| 12               | Bahamas | Fish, Seafood                   | 2006           | 54                                                             |
| 12               | Bahamas | Freshwater Fish                 | 2006           | 2                                                              |
| 12               | Bahamas | Fruits - Excluding Wine         | 2006           | 159                                                            |
| 12               | Bahamas | Fruits, Other                   | 2006           | 29                                                             |
| 12               | Bahamas | Grand Total                     | 2006           | 2,623                                                          |
| 12               | Bahamas | Grapefruit and products         | 2006           | 4                                                              |
| 12               | Bahamas | Grapes and products (excl wine) | 2006           | 12                                                             |
| 12               | Bahamas | Groundnuts (Shelled Eq)         | 2006           | 14                                                             |
| 12               | Bahamas | Honey                           | 2006           | 2                                                              |
| 12               | Bahamas | Lemons, Limes and products      | 2006           | 14                                                             |
| 12               | Bahamas | Maize and products              | 2006           | 40                                                             |

Dietary calcium and zinc deficiency risks are decreasing but remain prevalent

| FAO Country code | Country | Food item                       | Reference year | Net energy supply (kcal <i>capita</i> <sup>-1</sup> d <sup>-1</sup> ) |
|------------------|---------|---------------------------------|----------------|-----------------------------------------------------------------------|
| 12               | Bahamas | Marine Fish, Other              | 2006           | 7                                                                     |
| 12               | Bahamas | Meat                            | 2006           | 481                                                                   |
| 12               | Bahamas | Meat, Other                     | 2006           | 5                                                                     |
| 12               | Bahamas | Milk - Excluding Butter         | 2006           | 164                                                                   |
| 12               | Bahamas | Miscellaneous                   | 2006           | 71                                                                    |
| 12               | Bahamas | Molluscs, Other                 | 2006           | 1                                                                     |
| 12               | Bahamas | Mutton & Goat Meat              | 2006           | 26                                                                    |
| 12               | Bahamas | Oats                            | 2006           | 8                                                                     |
| 12               | Bahamas | Offals                          | 2006           | 4                                                                     |
| 12               | Bahamas | Oilcrops                        | 2006           | 25                                                                    |
| 12               | Bahamas | Oilcrops Oil, Other             | 2006           | 127                                                                   |
| 12               | Bahamas | Oilcrops, Other                 | 2006           | 1                                                                     |
| 12               | Bahamas | Olive Oil                       | 2006           | 9                                                                     |
| 12               | Bahamas | Onions                          | 2006           | 2                                                                     |
| 12               | Bahamas | Oranges, Mandarines             | 2006           | 48                                                                    |
| 12               | Bahamas | Palm Oil                        | 2006           | 1                                                                     |
| 12               | Bahamas | Peas                            | 2006           | 6                                                                     |
| 12               | Bahamas | Pelagic Fish                    | 2006           | 31                                                                    |
| 12               | Bahamas | Pepper                          | 2006           | 2                                                                     |
| 12               | Bahamas | Pigmeat                         | 2006           | 149                                                                   |
| 12               | Bahamas | Pineapples and products         | 2006           | 4                                                                     |
| 12               | Bahamas | Plantains                       | 2006           | 11                                                                    |
| 12               | Bahamas | Potatoes and products           | 2006           | 40                                                                    |
| 12               | Bahamas | Poultry Meat                    | 2006           | 220                                                                   |
| 12               | Bahamas | Pulses                          | 2006           | 19                                                                    |
| 12               | Bahamas | Pulses, Other and products      | 2006           | 4                                                                     |
| 12               | Bahamas | Rape and Mustardseed            | 2006           | 6                                                                     |
| 12               | Bahamas | Rice (Milled Equivalent)        | 2006           | 243                                                                   |
| 12               | Bahamas | Roots, Other                    | 2006           | 1                                                                     |
| 12               | Bahamas | Rye and products                | 2006           | 9                                                                     |
| 12               | Bahamas | Soyabean Oil                    | 2006           | 6                                                                     |
| 12               | Bahamas | Spices                          | 2006           | 13                                                                    |
| 12               | Bahamas | Spices, Other                   | 2006           | 11                                                                    |
| 12               | Bahamas | Starchy Roots                   | 2006           | 56                                                                    |
| 12               | Bahamas | Stimulants                      | 2006           | 20                                                                    |
| 12               | Bahamas | Sugar & Sweeteners              | 2006           | 388                                                                   |
| 12               | Bahamas | Sugar (Raw Equivalent)          | 2006           | 320                                                                   |
| 12               | Bahamas | Sweet potatoes                  | 2006           | 8                                                                     |
| 12               | Bahamas | Sweeteners, Other               | 2006           | 66                                                                    |
| 12               | Bahamas | Tea (including mate)            | 2006           | 1                                                                     |
| 12               | Bahamas | Tomatoes and products           | 2006           | 11                                                                    |
| 12               | Bahamas | Treenuts                        | 2006           | 15                                                                    |
| 12               | Bahamas | Vegetable Oils                  | 2006           | 150                                                                   |
| 12               | Bahamas | Vegetables                      | 2006           | 84                                                                    |
| 12               | Bahamas | Vegetables, Other               | 2006           | 71                                                                    |
| 12               | Bahamas | Vegetal Products                | 2006           | 1,774                                                                 |
| 12               | Bahamas | Wheat and products              | 2006           | 327                                                                   |
| 12               | Bahamas | Wine                            | 2006           | 11                                                                    |
| 12               | Bahamas | Alcoholic Beverages             | 2007           | 133                                                                   |
| 12               | Bahamas | Animal fats                     | 2007           | 122                                                                   |
| 12               | Bahamas | Animal Products                 | 2007           | 843                                                                   |
| 12               | Bahamas | Apples and products             | 2007           | 14                                                                    |
| 12               | Bahamas | Bananas                         | 2007           | 30                                                                    |
| 12               | Bahamas | Barley and products             | 2007           | 15                                                                    |
| 12               | Bahamas | Beans                           | 2007           | 10                                                                    |
| 12               | Bahamas | Beer                            | 2007           | 7                                                                     |
| 12               | Bahamas | Beverages, Alcoholic            | 2007           | 114                                                                   |
| 12               | Bahamas | Bovine Meat                     | 2007           | 78                                                                    |
| 12               | Bahamas | Butter, Ghee                    | 2007           | 37                                                                    |
| 12               | Bahamas | Cassava and products            | 2007           | 6                                                                     |
| 12               | Bahamas | Cereals - Excluding Beer        | 2007           | 639                                                                   |
| 12               | Bahamas | Cereals, Other                  | 2007           | 1                                                                     |
| 12               | Bahamas | Cocoa Beans and products        | 2007           | 17                                                                    |
| 12               | Bahamas | Coconut Oil                     | 2007           | 7                                                                     |
| 12               | Bahamas | Coconuts - Incl Copra           | 2007           | 2                                                                     |
| 12               | Bahamas | Coffee and products             | 2007           | 4                                                                     |
| 12               | Bahamas | Crustaceans                     | 2007           | 12                                                                    |
| 12               | Bahamas | Demersal Fish                   | 2007           | 4                                                                     |
| 12               | Bahamas | Eggs                            | 2007           | 24                                                                    |
| 12               | Bahamas | Fats, Animals, Raw              | 2007           | 86                                                                    |
| 12               | Bahamas | Fish, Seafood                   | 2007           | 54                                                                    |
| 12               | Bahamas | Freshwater Fish                 | 2007           | 3                                                                     |
| 12               | Bahamas | Fruits - Excluding Wine         | 2007           | 149                                                                   |
| 12               | Bahamas | Fruits, Other                   | 2007           | 30                                                                    |
| 12               | Bahamas | Grand Total                     | 2007           | 2,603                                                                 |
| 12               | Bahamas | Grapefruit and products         | 2007           | 5                                                                     |
| 12               | Bahamas | Grapes and products (excl wine) | 2007           | 13                                                                    |
| 12               | Bahamas | Groundnuts (Shelled Eq)         | 2007           | 12                                                                    |
| 12               | Bahamas | Honey                           | 2007           | 2                                                                     |
| 12               | Bahamas | Lemons, Limes and products      | 2007           | 13                                                                    |
| 12               | Bahamas | Maize and products              | 2007           | 46                                                                    |
| 12               | Bahamas | Maize Germ Oil                  | 2007           | 1                                                                     |
| 12               | Bahamas | Marine Fish, Other              | 2007           | 6                                                                     |
| 12               | Bahamas | Meat                            | 2007           | 474                                                                   |
| 12               | Bahamas | Meat, Other                     | 2007           | 3                                                                     |
| 12               | Bahamas | Milk - Excluding Butter         | 2007           | 163                                                                   |
| 12               | Bahamas | Miscellaneous                   | 2007           | 70                                                                    |
| 12               | Bahamas | Molluscs, Other                 | 2007           | 1                                                                     |
| 12               | Bahamas | Mutton & Goat Meat              | 2007           | 29                                                                    |
| 12               | Bahamas | Oats                            | 2007           | 9                                                                     |
| 12               | Bahamas | Offals                          | 2007           | 5                                                                     |
| 12               | Bahamas | Oilcrops                        | 2007           | 22                                                                    |
| 12               | Bahamas | Oilcrops Oil, Other             | 2007           | 126                                                                   |
| 12               | Bahamas | Oilcrops, Other                 | 2007           | 1                                                                     |
| 12               | Bahamas | Olive Oil                       | 2007           | 10                                                                    |
| 12               | Bahamas | Onions                          | 2007           | 2                                                                     |
| 12               | Bahamas | Oranges, Mandarines             | 2007           | 29                                                                    |

Dietary calcium and zinc deficiency risks are decreasing but remain prevalent

| FAO Country code | Country | Food item                       | Reference year | Net energy supply (kcal capita <sup>-1</sup> d <sup>-1</sup> ) |
|------------------|---------|---------------------------------|----------------|----------------------------------------------------------------|
| 12               | Bahamas | Palm Oil                        | 2007           | 3                                                              |
| 12               | Bahamas | Peas                            | 2007           | 5                                                              |
| 12               | Bahamas | Pelagic Fish                    | 2007           | 29                                                             |
| 12               | Bahamas | Pepper                          | 2007           | 2                                                              |
| 12               | Bahamas | Pigmeat                         | 2007           | 142                                                            |
| 12               | Bahamas | Pineapples and products         | 2007           | 5                                                              |
| 12               | Bahamas | Plantains                       | 2007           | 10                                                             |
| 12               | Bahamas | Potatoes and products           | 2007           | 40                                                             |
| 12               | Bahamas | Poultry Meat                    | 2007           | 222                                                            |
| 12               | Bahamas | Pulses                          | 2007           | 21                                                             |
| 12               | Bahamas | Pulses, Other and products      | 2007           | 5                                                              |
| 12               | Bahamas | Rape and Mustardseed            | 2007           | 6                                                              |
| 12               | Bahamas | Rice (Milled Equivalent)        | 2007           | 241                                                            |
| 12               | Bahamas | Roots, Other                    | 2007           | 1                                                              |
| 12               | Bahamas | Rye and products                | 2007           | 9                                                              |
| 12               | Bahamas | Soyabean Oil                    | 2007           | 9                                                              |
| 12               | Bahamas | Spices                          | 2007           | 12                                                             |
| 12               | Bahamas | Spices, Other                   | 2007           | 10                                                             |
| 12               | Bahamas | Starchy Roots                   | 2007           | 57                                                             |
| 12               | Bahamas | Stimulants                      | 2007           | 22                                                             |
| 12               | Bahamas | Sugar & Sweeteners              | 2007           | 379                                                            |
| 12               | Bahamas | Sugar (Raw Equivalent)          | 2007           | 314                                                            |
| 12               | Bahamas | Sweet potatoes                  | 2007           | 9                                                              |
| 12               | Bahamas | Sweeteners, Other               | 2007           | 64                                                             |
| 12               | Bahamas | Tea (including mate)            | 2007           | 1                                                              |
| 12               | Bahamas | Tomatoes and products           | 2007           | 10                                                             |
| 12               | Bahamas | Treenuts                        | 2007           | 16                                                             |
| 12               | Bahamas | Vegetable Oils                  | 2007           | 157                                                            |
| 12               | Bahamas | Vegetables                      | 2007           | 85                                                             |
| 12               | Bahamas | Vegetables, Other               | 2007           | 73                                                             |
| 12               | Bahamas | Vegetal Products                | 2007           | 1,760                                                          |
| 12               | Bahamas | Wheat and products              | 2007           | 318                                                            |
| 12               | Bahamas | Wine                            | 2007           | 12                                                             |
| 12               | Bahamas | Alcoholic Beverages             | 2008           | 132                                                            |
| 12               | Bahamas | Animal fats                     | 2008           | 122                                                            |
| 12               | Bahamas | Animal Products                 | 2008           | 840                                                            |
| 12               | Bahamas | Apples and products             | 2008           | 18                                                             |
| 12               | Bahamas | Bananas                         | 2008           | 38                                                             |
| 12               | Bahamas | Barley and products             | 2008           | 29                                                             |
| 12               | Bahamas | Beans                           | 2008           | 11                                                             |
| 12               | Bahamas | Beer                            | 2008           | 7                                                              |
| 12               | Bahamas | Beverages, Alcoholic            | 2008           | 114                                                            |
| 12               | Bahamas | Beverages, Fermented            | 2008           | 1                                                              |
| 12               | Bahamas | Bovine Meat                     | 2008           | 77                                                             |
| 12               | Bahamas | Butter, Ghee                    | 2008           | 36                                                             |
| 12               | Bahamas | Cassava and products            | 2008           | 6                                                              |
| 12               | Bahamas | Cereals - Excluding Beer        | 2008           | 605                                                            |
| 12               | Bahamas | Cereals, Other                  | 2008           | 2                                                              |
| 12               | Bahamas | Cocoa Beans and products        | 2008           | 30                                                             |
| 12               | Bahamas | Coconut Oil                     | 2008           | 5                                                              |
| 12               | Bahamas | Coconuts - Incl Copra           | 2008           | 3                                                              |
| 12               | Bahamas | Coffee and products             | 2008           | 5                                                              |
| 12               | Bahamas | Cream                           | 2008           | 1                                                              |
| 12               | Bahamas | Crustaceans                     | 2008           | 11                                                             |
| 12               | Bahamas | Demersal Fish                   | 2008           | 6                                                              |
| 12               | Bahamas | Eggs                            | 2008           | 24                                                             |
| 12               | Bahamas | Fats, Animals, Raw              | 2008           | 85                                                             |
| 12               | Bahamas | Fish, Seafood                   | 2008           | 55                                                             |
| 12               | Bahamas | Freshwater Fish                 | 2008           | 3                                                              |
| 12               | Bahamas | Fruits - Excluding Wine         | 2008           | 171                                                            |
| 12               | Bahamas | Fruits, Other                   | 2008           | 32                                                             |
| 12               | Bahamas | Grand Total                     | 2008           | 2,585                                                          |
| 12               | Bahamas | Grapefruit and products         | 2008           | 18                                                             |
| 12               | Bahamas | Grapes and products (excl wine) | 2008           | 13                                                             |
| 12               | Bahamas | Groundnuts (Shelled Eq)         | 2008           | 13                                                             |
| 12               | Bahamas | Honey                           | 2008           | 2                                                              |
| 12               | Bahamas | Lemons, Limes and products      | 2008           | 10                                                             |
| 12               | Bahamas | Maize and products              | 2008           | 41                                                             |
| 12               | Bahamas | Maize Germ Oil                  | 2008           | 6                                                              |
| 12               | Bahamas | Marine Fish, Other              | 2008           | 6                                                              |
| 12               | Bahamas | Meat                            | 2008           | 480                                                            |
| 12               | Bahamas | Meat, Other                     | 2008           | 4                                                              |
| 12               | Bahamas | Milk - Excluding Butter         | 2008           | 154                                                            |
| 12               | Bahamas | Miscellaneous                   | 2008           | 71                                                             |
| 12               | Bahamas | Molluscs, Other                 | 2008           | 1                                                              |
| 12               | Bahamas | Mutton & Goat Meat              | 2008           | 27                                                             |
| 12               | Bahamas | Oats                            | 2008           | 8                                                              |
| 12               | Bahamas | Offals                          | 2008           | 5                                                              |
| 12               | Bahamas | Oilcrops                        | 2008           | 23                                                             |
| 12               | Bahamas | Oilcrops Oil, Other             | 2008           | 127                                                            |
| 12               | Bahamas | Olive Oil                       | 2008           | 10                                                             |
| 12               | Bahamas | Olives (including preserved)    | 2008           | 1                                                              |
| 12               | Bahamas | Onions                          | 2008           | 2                                                              |
| 12               | Bahamas | Oranges, Mandarines             | 2008           | 28                                                             |
| 12               | Bahamas | Palm Oil                        | 2008           | 2                                                              |
| 12               | Bahamas | Palmkernel Oil                  | 2008           | 1                                                              |
| 12               | Bahamas | Peas                            | 2008           | 1                                                              |
| 12               | Bahamas | Pelagic Fish                    | 2008           | 29                                                             |
| 12               | Bahamas | Pepper                          | 2008           | 2                                                              |
| 12               | Bahamas | Pigmeat                         | 2008           | 148                                                            |
| 12               | Bahamas | Pineapples and products         | 2008           | 4                                                              |
| 12               | Bahamas | Plantains                       | 2008           | 9                                                              |
| 12               | Bahamas | Potatoes and products           | 2008           | 30                                                             |
| 12               | Bahamas | Poultry Meat                    | 2008           | 224                                                            |
| 12               | Bahamas | Pulses                          | 2008           | 18                                                             |
| 12               | Bahamas | Pulses, Other and products      | 2008           | 6                                                              |
| 12               | Bahamas | Rape and Mustardseed            | 2008           | 6                                                              |

Dietary calcium and zinc deficiency risks are decreasing but remain prevalent

| FAO Country code | Country | Food item                       | Reference year | Net energy supply (kcal capita <sup>-1</sup> d <sup>-1</sup> ) |
|------------------|---------|---------------------------------|----------------|----------------------------------------------------------------|
| 12               | Bahamas | Rice (Milled Equivalent)        | 2008           | 206                                                            |
| 12               | Bahamas | Roots, Other                    | 2008           | 2                                                              |
| 12               | Bahamas | Rye and products                | 2008           | 13                                                             |
| 12               | Bahamas | Soyabean Oil                    | 2008           | 8                                                              |
| 12               | Bahamas | Spices                          | 2008           | 13                                                             |
| 12               | Bahamas | Spices, Other                   | 2008           | 11                                                             |
| 12               | Bahamas | Starchy Roots                   | 2008           | 46                                                             |
| 12               | Bahamas | Stimulants                      | 2008           | 36                                                             |
| 12               | Bahamas | Sugar & Sweeteners              | 2008           | 380                                                            |
| 12               | Bahamas | Sugar (Raw Equivalent)          | 2008           | 309                                                            |
| 12               | Bahamas | Sweet potatoes                  | 2008           | 8                                                              |
| 12               | Bahamas | Sweeteners, Other               | 2008           | 68                                                             |
| 12               | Bahamas | Tea (including mate)            | 2008           | 1                                                              |
| 12               | Bahamas | Tomatoes and products           | 2008           | 11                                                             |
| 12               | Bahamas | Treenuts                        | 2008           | 13                                                             |
| 12               | Bahamas | Vegetable Oils                  | 2008           | 158                                                            |
| 12               | Bahamas | Vegetables                      | 2008           | 79                                                             |
| 12               | Bahamas | Vegetables, Other               | 2008           | 66                                                             |
| 12               | Bahamas | Vegetal Products                | 2008           | 1,744                                                          |
| 12               | Bahamas | Wheat and products              | 2008           | 308                                                            |
| 12               | Bahamas | Wine                            | 2008           | 11                                                             |
| 12               | Bahamas | Alcoholic Beverages             | 2009           | 134                                                            |
| 12               | Bahamas | Animal fats                     | 2009           | 125                                                            |
| 12               | Bahamas | Animal Products                 | 2009           | 884                                                            |
| 12               | Bahamas | Apples and products             | 2009           | 21                                                             |
| 12               | Bahamas | Bananas                         | 2009           | 33                                                             |
| 12               | Bahamas | Barley and products             | 2009           | 22                                                             |
| 12               | Bahamas | Beans                           | 2009           | 7                                                              |
| 12               | Bahamas | Beer                            | 2009           | 7                                                              |
| 12               | Bahamas | Beverages, Alcoholic            | 2009           | 113                                                            |
| 12               | Bahamas | Beverages, Fermented            | 2009           | 1                                                              |
| 12               | Bahamas | Bovine Meat                     | 2009           | 90                                                             |
| 12               | Bahamas | Butter, Ghee                    | 2009           | 43                                                             |
| 12               | Bahamas | Cassava and products            | 2009           | 4                                                              |
| 12               | Bahamas | Cereals - Excluding Beer        | 2009           | 596                                                            |
| 12               | Bahamas | Cereals, Other                  | 2009           | 3                                                              |
| 12               | Bahamas | Cocoa Beans and products        | 2009           | 30                                                             |
| 12               | Bahamas | Coconut Oil                     | 2009           | 4                                                              |
| 12               | Bahamas | Coconuts - Incl Copra           | 2009           | 3                                                              |
| 12               | Bahamas | Coffee and products             | 2009           | 9                                                              |
| 12               | Bahamas | Cream                           | 2009           | 3                                                              |
| 12               | Bahamas | Crustaceans                     | 2009           | 11                                                             |
| 12               | Bahamas | Demersal Fish                   | 2009           | 4                                                              |
| 12               | Bahamas | Eggs                            | 2009           | 23                                                             |
| 12               | Bahamas | Fats, Animals, Raw              | 2009           | 79                                                             |
| 12               | Bahamas | Fish, Seafood                   | 2009           | 52                                                             |
| 12               | Bahamas | Freshwater Fish                 | 2009           | 2                                                              |
| 12               | Bahamas | Fruits - Excluding Wine         | 2009           | 166                                                            |
| 12               | Bahamas | Fruits, Other                   | 2009           | 37                                                             |
| 12               | Bahamas | Grand Total                     | 2009           | 2,614                                                          |
| 12               | Bahamas | Grapefruit and products         | 2009           | 21                                                             |
| 12               | Bahamas | Grapes and products (excl wine) | 2009           | 10                                                             |
| 12               | Bahamas | Groundnuts (Shelled Eq)         | 2009           | 17                                                             |
| 12               | Bahamas | Honey                           | 2009           | 4                                                              |
| 12               | Bahamas | Lemons, Limes and products      | 2009           | 7                                                              |
| 12               | Bahamas | Maize and products              | 2009           | 35                                                             |
| 12               | Bahamas | Maize Germ Oil                  | 2009           | 8                                                              |
| 12               | Bahamas | Marine Fish, Other              | 2009           | 4                                                              |
| 12               | Bahamas | Meat                            | 2009           | 499                                                            |
| 12               | Bahamas | Meat, Other                     | 2009           | 2                                                              |
| 12               | Bahamas | Milk - Excluding Butter         | 2009           | 179                                                            |
| 12               | Bahamas | Miscellaneous                   | 2009           | 94                                                             |
| 12               | Bahamas | Molluscs, Other                 | 2009           | 1                                                              |
| 12               | Bahamas | Mutton & Goat Meat              | 2009           | 28                                                             |
| 12               | Bahamas | Oats                            | 2009           | 10                                                             |
| 12               | Bahamas | Offals                          | 2009           | 6                                                              |
| 12               | Bahamas | Oilcrops                        | 2009           | 30                                                             |
| 12               | Bahamas | Oilcrops Oil, Other             | 2009           | 127                                                            |
| 12               | Bahamas | Olive Oil                       | 2009           | 8                                                              |
| 12               | Bahamas | Olives (including preserved)    | 2009           | 1                                                              |
| 12               | Bahamas | Onions                          | 2009           | 2                                                              |
| 12               | Bahamas | Oranges, Mandarines             | 2009           | 26                                                             |
| 12               | Bahamas | Palm Oil                        | 2009           | 1                                                              |
| 12               | Bahamas | Peas                            | 2009           | 1                                                              |
| 12               | Bahamas | Pelagic Fish                    | 2009           | 30                                                             |
| 12               | Bahamas | Pepper                          | 2009           | 3                                                              |
| 12               | Bahamas | Pigmeat                         | 2009           | 154                                                            |
| 12               | Bahamas | Pineapples and products         | 2009           | 5                                                              |
| 12               | Bahamas | Plantains                       | 2009           | 5                                                              |
| 12               | Bahamas | Potatoes and products           | 2009           | 19                                                             |
| 12               | Bahamas | Poultry Meat                    | 2009           | 226                                                            |
| 12               | Bahamas | Pulses                          | 2009           | 13                                                             |
| 12               | Bahamas | Pulses, Other and products      | 2009           | 5                                                              |
| 12               | Bahamas | Rape and Mustardseed            | 2009           | 8                                                              |
| 12               | Bahamas | Rice (Milled Equivalent)        | 2009           | 213                                                            |
| 12               | Bahamas | Roots, Other                    | 2009           | 1                                                              |
| 12               | Bahamas | Rye and products                | 2009           | 6                                                              |
| 12               | Bahamas | Sesame seed                     | 2009           | 1                                                              |
| 12               | Bahamas | Soyabean Oil                    | 2009           | 7                                                              |
| 12               | Bahamas | Spices                          | 2009           | 18                                                             |
| 12               | Bahamas | Spices, Other                   | 2009           | 16                                                             |
| 12               | Bahamas | Starchy Roots                   | 2009           | 32                                                             |
| 12               | Bahamas | Stimulants                      | 2009           | 41                                                             |
| 12               | Bahamas | Sugar & Sweeteners              | 2009           | 364                                                            |
| 12               | Bahamas | Sugar (Raw Equivalent)          | 2009           | 293                                                            |
| 12               | Bahamas | Sweet potatoes                  | 2009           | 8                                                              |
| 12               | Bahamas | Sweeteners, Other               | 2009           | 67                                                             |

Dietary calcium and zinc deficiency risks are decreasing but remain prevalent

| FAO Country code | Country | Food item                       | Reference year | Net energy supply (kcal capita <sup>-1</sup> d <sup>-1</sup> ) |
|------------------|---------|---------------------------------|----------------|----------------------------------------------------------------|
| 12               | Bahamas | Tea (including mate)            | 2009           | 1                                                              |
| 12               | Bahamas | Tomatoes and products           | 2009           | 12                                                             |
| 12               | Bahamas | Treenuts                        | 2009           | 14                                                             |
| 12               | Bahamas | Vegetable Oils                  | 2009           | 155                                                            |
| 12               | Bahamas | Vegetables                      | 2009           | 72                                                             |
| 12               | Bahamas | Vegetables, Other               | 2009           | 58                                                             |
| 12               | Bahamas | Vegetal Products                | 2009           | 1,729                                                          |
| 12               | Bahamas | Wheat and products              | 2009           | 308                                                            |
| 12               | Bahamas | Wine                            | 2009           | 13                                                             |
| 12               | Bahamas | Alcoholic Beverages             | 2010           | 132                                                            |
| 12               | Bahamas | Animal fats                     | 2010           | 120                                                            |
| 12               | Bahamas | Animal Products                 | 2010           | 849                                                            |
| 12               | Bahamas | Apples and products             | 2010           | 10                                                             |
| 12               | Bahamas | Bananas                         | 2010           | 34                                                             |
| 12               | Bahamas | Barley and products             | 2010           | 22                                                             |
| 12               | Bahamas | Beans                           | 2010           | 4                                                              |
| 12               | Bahamas | Beer                            | 2010           | 6                                                              |
| 12               | Bahamas | Beverages, Alcoholic            | 2010           | 116                                                            |
| 12               | Bahamas | Beverages, Fermented            | 2010           | 2                                                              |
| 12               | Bahamas | Bovine Meat                     | 2010           | 88                                                             |
| 12               | Bahamas | Butter, Ghee                    | 2010           | 59                                                             |
| 12               | Bahamas | Cassava and products            | 2010           | 9                                                              |
| 12               | Bahamas | Cereals - Excluding Beer        | 2010           | 598                                                            |
| 12               | Bahamas | Cereals, Other                  | 2010           | 5                                                              |
| 12               | Bahamas | Cocoa Beans and products        | 2010           | 20                                                             |
| 12               | Bahamas | Coconut Oil                     | 2010           | 4                                                              |
| 12               | Bahamas | Coconuts - Incl Copra           | 2010           | 24                                                             |
| 12               | Bahamas | Coffee and products             | 2010           | 2                                                              |
| 12               | Bahamas | Cream                           | 2010           | 3                                                              |
| 12               | Bahamas | Crustaceans                     | 2010           | 12                                                             |
| 12               | Bahamas | Demersal Fish                   | 2010           | 4                                                              |
| 12               | Bahamas | Eggs                            | 2010           | 29                                                             |
| 12               | Bahamas | Fats, Animals, Raw              | 2010           | 58                                                             |
| 12               | Bahamas | Fish, Seafood                   | 2010           | 50                                                             |
| 12               | Bahamas | Freshwater Fish                 | 2010           | 2                                                              |
| 12               | Bahamas | Fruits - Excluding Wine         | 2010           | 189                                                            |
| 12               | Bahamas | Fruits, Other                   | 2010           | 54                                                             |
| 12               | Bahamas | Grand Total                     | 2010           | 2,584                                                          |
| 12               | Bahamas | Grapefruit and products         | 2010           | 27                                                             |
| 12               | Bahamas | Grapes and products (excl wine) | 2010           | 6                                                              |
| 12               | Bahamas | Groundnuts (Shelled Eq)         | 2010           | 7                                                              |
| 12               | Bahamas | Honey                           | 2010           | 2                                                              |
| 12               | Bahamas | Lemons, Limes and products      | 2010           | 8                                                              |
| 12               | Bahamas | Maize and products              | 2010           | 30                                                             |
| 12               | Bahamas | Maize Germ Oil                  | 2010           | 6                                                              |
| 12               | Bahamas | Marine Fish, Other              | 2010           | 4                                                              |
| 12               | Bahamas | Meat                            | 2010           | 489                                                            |
| 12               | Bahamas | Meat, Other                     | 2010           | 1                                                              |
| 12               | Bahamas | Milk - Excluding Butter         | 2010           | 153                                                            |
| 12               | Bahamas | Miscellaneous                   | 2010           | 84                                                             |
| 12               | Bahamas | Molluscs, Other                 | 2010           | 1                                                              |
| 12               | Bahamas | Mutton & Goat Meat              | 2010           | 15                                                             |
| 12               | Bahamas | Oats                            | 2010           | 7                                                              |
| 12               | Bahamas | Offals                          | 2010           | 8                                                              |
| 12               | Bahamas | Oilcrops                        | 2010           | 35                                                             |
| 12               | Bahamas | Oilcrops Oil, Other             | 2010           | 123                                                            |
| 12               | Bahamas | Olive Oil                       | 2010           | 10                                                             |
| 12               | Bahamas | Onions                          | 2010           | 2                                                              |
| 12               | Bahamas | Oranges, Mandarines             | 2010           | 40                                                             |
| 12               | Bahamas | Palm Oil                        | 2010           | 1                                                              |
| 12               | Bahamas | Pelagic Fish                    | 2010           | 28                                                             |
| 12               | Bahamas | Pepper                          | 2010           | 3                                                              |
| 12               | Bahamas | Pigmeat                         | 2010           | 154                                                            |
| 12               | Bahamas | Pineapples and products         | 2010           | 4                                                              |
| 12               | Bahamas | Plantains                       | 2010           | 6                                                              |
| 12               | Bahamas | Potatoes and products           | 2010           | 41                                                             |
| 12               | Bahamas | Poultry Meat                    | 2010           | 229                                                            |
| 12               | Bahamas | Pulses                          | 2010           | 10                                                             |
| 12               | Bahamas | Pulses, Other and products      | 2010           | 6                                                              |
| 12               | Bahamas | Rape and Mustardseed            | 2010           | 2                                                              |
| 12               | Bahamas | Rice (Milled Equivalent)        | 2010           | 213                                                            |
| 12               | Bahamas | Roots, Other                    | 2010           | 1                                                              |
| 12               | Bahamas | Rye and products                | 2010           | 6                                                              |
| 12               | Bahamas | Soyabean Oil                    | 2010           | 7                                                              |
| 12               | Bahamas | Spices                          | 2010           | 21                                                             |
| 12               | Bahamas | Spices, Other                   | 2010           | 19                                                             |
| 12               | Bahamas | Starchy Roots                   | 2010           | 58                                                             |
| 12               | Bahamas | Stimulants                      | 2010           | 23                                                             |
| 12               | Bahamas | Sugar & Sweeteners              | 2010           | 357                                                            |
| 12               | Bahamas | Sugar (Raw Equivalent)          | 2010           | 294                                                            |
| 12               | Bahamas | Sweet potatoes                  | 2010           | 7                                                              |
| 12               | Bahamas | Sweeteners, Other               | 2010           | 62                                                             |
| 12               | Bahamas | Tea (including mate)            | 2010           | 1                                                              |
| 12               | Bahamas | Tomatoes and products           | 2010           | 10                                                             |
| 12               | Bahamas | Treenuts                        | 2010           | 8                                                              |
| 12               | Bahamas | Vegetable Oils                  | 2010           | 150                                                            |
| 12               | Bahamas | Vegetables                      | 2010           | 71                                                             |
| 12               | Bahamas | Vegetables, Other               | 2010           | 59                                                             |
| 12               | Bahamas | Vegetal Products                | 2010           | 1,735                                                          |
| 12               | Bahamas | Wheat and products              | 2010           | 316                                                            |
| 12               | Bahamas | Wine                            | 2010           | 8                                                              |
| 12               | Bahamas | Alcoholic Beverages             | 2011           | 135                                                            |
| 12               | Bahamas | Animal fats                     | 2011           | 104                                                            |
| 12               | Bahamas | Animal Products                 | 2011           | 801                                                            |
| 12               | Bahamas | Apples and products             | 2011           | 8                                                              |
| 12               | Bahamas | Bananas                         | 2011           | 41                                                             |
| 12               | Bahamas | Barley and products             | 2011           | 8                                                              |

Dietary calcium and zinc deficiency risks are decreasing but remain prevalent

| FAO Country code | Country    | Food item                       | Reference year | Net energy supply (kcal capita <sup>-1</sup> d <sup>-1</sup> ) |
|------------------|------------|---------------------------------|----------------|----------------------------------------------------------------|
| 12               | Bahamas    | Beans                           | 2011           | 6                                                              |
| 12               | Bahamas    | Beer                            | 2011           | 6                                                              |
| 12               | Bahamas    | Beverages, Alcoholic            | 2011           | 118                                                            |
| 12               | Bahamas    | Beverages, Fermented            | 2011           | 1                                                              |
| 12               | Bahamas    | Bovine Meat                     | 2011           | 69                                                             |
| 12               | Bahamas    | Butter, Ghee                    | 2011           | 30                                                             |
| 12               | Bahamas    | Cassava and products            | 2011           | 9                                                              |
| 12               | Bahamas    | Cereals - Excluding Beer        | 2011           | 598                                                            |
| 12               | Bahamas    | Cereals, Other                  | 2011           | 2                                                              |
| 12               | Bahamas    | Cocoa Beans and products        | 2011           | 19                                                             |
| 12               | Bahamas    | Coconut Oil                     | 2011           | 1                                                              |
| 12               | Bahamas    | Coconuts - Incl Copra           | 2011           | 25                                                             |
| 12               | Bahamas    | Coffee and products             | 2011           | 1                                                              |
| 12               | Bahamas    | Cream                           | 2011           | 1                                                              |
| 12               | Bahamas    | Crustaceans                     | 2011           | 11                                                             |
| 12               | Bahamas    | Demersal Fish                   | 2011           | 4                                                              |
| 12               | Bahamas    | Eggs                            | 2011           | 27                                                             |
| 12               | Bahamas    | Fats, Animals, Raw              | 2011           | 73                                                             |
| 12               | Bahamas    | Fish, Seafood                   | 2011           | 49                                                             |
| 12               | Bahamas    | Freshwater Fish                 | 2011           | 2                                                              |
| 12               | Bahamas    | Fruits - Excluding Wine         | 2011           | 196                                                            |
| 12               | Bahamas    | Fruits, Other                   | 2011           | 54                                                             |
| 12               | Bahamas    | Grand Total                     | 2011           | 2,575                                                          |
| 12               | Bahamas    | Grapefruit and products         | 2011           | 30                                                             |
| 12               | Bahamas    | Grapes and products (excl wine) | 2011           | 5                                                              |
| 12               | Bahamas    | Groundnuts (Shelled Eq)         | 2011           | 8                                                              |
| 12               | Bahamas    | Honey                           | 2011           | 1                                                              |
| 12               | Bahamas    | Lemons, Limes and products      | 2011           | 8                                                              |
| 12               | Bahamas    | Maize and products              | 2011           | 32                                                             |
| 12               | Bahamas    | Maize Germ Oil                  | 2011           | 3                                                              |
| 12               | Bahamas    | Marine Fish, Other              | 2011           | 4                                                              |
| 12               | Bahamas    | Meat                            | 2011           | 449                                                            |
| 12               | Bahamas    | Meat, Other                     | 2011           | 1                                                              |
| 12               | Bahamas    | Milk - Excluding Butter         | 2011           | 162                                                            |
| 12               | Bahamas    | Miscellaneous                   | 2011           | 100                                                            |
| 12               | Bahamas    | Molluscs, Other                 | 2011           | 1                                                              |
| 12               | Bahamas    | Mutton & Goat Meat              | 2011           | 13                                                             |
| 12               | Bahamas    | Oats                            | 2011           | 5                                                              |
| 12               | Bahamas    | Offals                          | 2011           | 10                                                             |
| 12               | Bahamas    | Oilcrops                        | 2011           | 36                                                             |
| 12               | Bahamas    | Oilcrops Oil, Other             | 2011           | 150                                                            |
| 12               | Bahamas    | Oilcrops, Other                 | 2011           | 1                                                              |
| 12               | Bahamas    | Olive Oil                       | 2011           | 10                                                             |
| 12               | Bahamas    | Onions                          | 2011           | 2                                                              |
| 12               | Bahamas    | Oranges, Mandarines             | 2011           | 40                                                             |
| 12               | Bahamas    | Pelagic Fish                    | 2011           | 27                                                             |
| 12               | Bahamas    | Pepper                          | 2011           | 1                                                              |
| 12               | Bahamas    | Pigmeat                         | 2011           | 139                                                            |
| 12               | Bahamas    | Pineapples and products         | 2011           | 4                                                              |
| 12               | Bahamas    | Plantains                       | 2011           | 6                                                              |
| 12               | Bahamas    | Potatoes and products           | 2011           | 39                                                             |
| 12               | Bahamas    | Poultry Meat                    | 2011           | 225                                                            |
| 12               | Bahamas    | Pulses                          | 2011           | 12                                                             |
| 12               | Bahamas    | Pulses, Other and products      | 2011           | 6                                                              |
| 12               | Bahamas    | Rape and Mustardseed            | 2011           | 2                                                              |
| 12               | Bahamas    | Rice (Milled Equivalent)        | 2011           | 212                                                            |
| 12               | Bahamas    | Roots, Other                    | 2011           | 1                                                              |
| 12               | Bahamas    | Rye and products                | 2011           | 6                                                              |
| 12               | Bahamas    | Soyabean Oil                    | 2011           | 10                                                             |
| 12               | Bahamas    | Spices                          | 2011           | 16                                                             |
| 12               | Bahamas    | Spices, Other                   | 2011           | 15                                                             |
| 12               | Bahamas    | Starchy Roots                   | 2011           | 55                                                             |
| 12               | Bahamas    | Stimulants                      | 2011           | 21                                                             |
| 12               | Bahamas    | Sugar & Sweeteners              | 2011           | 356                                                            |
| 12               | Bahamas    | Sugar (Raw Equivalent)          | 2011           | 286                                                            |
| 12               | Bahamas    | Sweet potatoes                  | 2011           | 6                                                              |
| 12               | Bahamas    | Sweeteners, Other               | 2011           | 69                                                             |
| 12               | Bahamas    | Tomatoes and products           | 2011           | 11                                                             |
| 12               | Bahamas    | Treenuts                        | 2011           | 6                                                              |
| 12               | Bahamas    | Vegetable Oils                  | 2011           | 175                                                            |
| 12               | Bahamas    | Vegetables                      | 2011           | 68                                                             |
| 12               | Bahamas    | Vegetables, Other               | 2011           | 55                                                             |
| 12               | Bahamas    | Vegetal Products                | 2011           | 1,774                                                          |
| 12               | Bahamas    | Wheat and products              | 2011           | 334                                                            |
| 12               | Bahamas    | Wine                            | 2011           | 10                                                             |
| 16               | Bangladesh | Animal fats                     | 1992           | 5                                                              |
| 16               | Bangladesh | Animal Products                 | 1992           | 62                                                             |
| 16               | Bangladesh | Bananas                         | 1992           | 9                                                              |
| 16               | Bangladesh | Barley and products             | 1992           | 1                                                              |
| 16               | Bangladesh | Beans                           | 1992           | 6                                                              |
| 16               | Bangladesh | Bovine Meat                     | 1992           | 6                                                              |
| 16               | Bangladesh | Butter, Ghee                    | 1992           | 3                                                              |
| 16               | Bangladesh | Cereals - Excluding Beer        | 1992           | 1,750                                                          |
| 16               | Bangladesh | Coconut Oil                     | 1992           | 9                                                              |
| 16               | Bangladesh | Cottonseed Oil                  | 1992           | 1                                                              |
| 16               | Bangladesh | Demersal Fish                   | 1992           | 1                                                              |
| 16               | Bangladesh | Eggs                            | 1992           | 3                                                              |
| 16               | Bangladesh | Fats, Animals, Raw              | 1992           | 2                                                              |
| 16               | Bangladesh | Fish, Seafood                   | 1992           | 14                                                             |
| 16               | Bangladesh | Freshwater Fish                 | 1992           | 12                                                             |
| 16               | Bangladesh | Fruits - Excluding Wine         | 1992           | 15                                                             |
| 16               | Bangladesh | Fruits, Other                   | 1992           | 5                                                              |
| 16               | Bangladesh | Grand Total                     | 1992           | 2,111                                                          |
| 16               | Bangladesh | Groundnut Oil                   | 1992           | 2                                                              |
| 16               | Bangladesh | Groundnuts (Shelled Eq)         | 1992           | 1                                                              |
| 16               | Bangladesh | Marine Fish, Other              | 1992           | 1                                                              |
| 16               | Bangladesh | Meat                            | 1992           | 13                                                             |

Dietary calcium and zinc deficiency risks are decreasing but remain prevalent

| FAO Country code | Country    | Food item                  | Reference year | Net energy supply (kcal capita <sup>-1</sup> d <sup>-1</sup> ) |
|------------------|------------|----------------------------|----------------|----------------------------------------------------------------|
| 16               | Bangladesh | Milk - Excluding Butter    | 1992           | 25                                                             |
| 16               | Bangladesh | Millet and products        | 1992           | 5                                                              |
| 16               | Bangladesh | Mutton & Goat Meat         | 1992           | 3                                                              |
| 16               | Bangladesh | Offals                     | 1992           | 1                                                              |
| 16               | Bangladesh | Oilcrops                   | 1992           | 5                                                              |
| 16               | Bangladesh | Oilcrops Oil, Other        | 1992           | 1                                                              |
| 16               | Bangladesh | Onions                     | 1992           | 2                                                              |
| 16               | Bangladesh | Palm Oil                   | 1992           | 15                                                             |
| 16               | Bangladesh | Peas                       | 1992           | 3                                                              |
| 16               | Bangladesh | Pelagic Fish               | 1992           | 1                                                              |
| 16               | Bangladesh | Pimento                    | 1992           | 5                                                              |
| 16               | Bangladesh | Pineapples and products    | 1992           | 1                                                              |
| 16               | Bangladesh | Potatoes and products      | 1992           | 19                                                             |
| 16               | Bangladesh | Poultry Meat               | 1992           | 4                                                              |
| 16               | Bangladesh | Pulses                     | 1992           | 44                                                             |
| 16               | Bangladesh | Pulses, Other and products | 1992           | 36                                                             |
| 16               | Bangladesh | Rape and Mustard Oil       | 1992           | 20                                                             |
| 16               | Bangladesh | Rape and Mustardseed       | 1992           | 4                                                              |
| 16               | Bangladesh | Rice (Milled Equivalent)   | 1992           | 1,555                                                          |
| 16               | Bangladesh | Sesameseed Oil             | 1992           | 4                                                              |
| 16               | Bangladesh | Soyabean Oil               | 1992           | 59                                                             |
| 16               | Bangladesh | Spices                     | 1992           | 13                                                             |
| 16               | Bangladesh | Spices, Other              | 1992           | 8                                                              |
| 16               | Bangladesh | Starchy Roots              | 1992           | 29                                                             |
| 16               | Bangladesh | Sugar & Sweeteners         | 1992           | 67                                                             |
| 16               | Bangladesh | Sugar (Raw Equivalent)     | 1992           | 21                                                             |
| 16               | Bangladesh | Sugar cane                 | 1992           | 3                                                              |
| 16               | Bangladesh | Sugar Crops                | 1992           | 3                                                              |
| 16               | Bangladesh | Sugar non-centrifugal      | 1992           | 40                                                             |
| 16               | Bangladesh | Sweet potatoes             | 1992           | 10                                                             |
| 16               | Bangladesh | Sweeteners, Other          | 1992           | 6                                                              |
| 16               | Bangladesh | Treenuts                   | 1992           | 2                                                              |
| 16               | Bangladesh | Vegetable Oils             | 1992           | 111                                                            |
| 16               | Bangladesh | Vegetables                 | 1992           | 9                                                              |
| 16               | Bangladesh | Vegetables, Other          | 1992           | 6                                                              |
| 16               | Bangladesh | Vegetal Products           | 1992           | 2,049                                                          |
| 16               | Bangladesh | Wheat and products         | 1992           | 189                                                            |
| 16               | Bangladesh | Animal fats                | 1993           | 5                                                              |
| 16               | Bangladesh | Animal Products            | 1993           | 64                                                             |
| 16               | Bangladesh | Bananas                    | 1993           | 9                                                              |
| 16               | Bangladesh | Beans                      | 1993           | 6                                                              |
| 16               | Bangladesh | Bovine Meat                | 1993           | 6                                                              |
| 16               | Bangladesh | Butter, Ghee               | 1993           | 3                                                              |
| 16               | Bangladesh | Cereals - Excluding Beer   | 1993           | 1,665                                                          |
| 16               | Bangladesh | Cereals, Other             | 1993           | 1                                                              |
| 16               | Bangladesh | Coconut Oil                | 1993           | 11                                                             |
| 16               | Bangladesh | Cottonseed Oil             | 1993           | 1                                                              |
| 16               | Bangladesh | Demersal Fish              | 1993           | 1                                                              |
| 16               | Bangladesh | Eggs                       | 1993           | 3                                                              |
| 16               | Bangladesh | Fats, Animals, Raw         | 1993           | 2                                                              |
| 16               | Bangladesh | Fish, Seafood              | 1993           | 15                                                             |
| 16               | Bangladesh | Freshwater Fish            | 1993           | 12                                                             |
| 16               | Bangladesh | Fruits - Excluding Wine    | 1993           | 15                                                             |
| 16               | Bangladesh | Fruits, Other              | 1993           | 5                                                              |
| 16               | Bangladesh | Grand Total                | 1993           | 2,010                                                          |
| 16               | Bangladesh | Groundnut Oil              | 1993           | 2                                                              |
| 16               | Bangladesh | Marine Fish, Other         | 1993           | 1                                                              |
| 16               | Bangladesh | Meat                       | 1993           | 14                                                             |
| 16               | Bangladesh | Milk - Excluding Butter    | 1993           | 25                                                             |
| 16               | Bangladesh | Millet and products        | 1993           | 5                                                              |
| 16               | Bangladesh | Mutton & Goat Meat         | 1993           | 3                                                              |
| 16               | Bangladesh | Offals                     | 1993           | 1                                                              |
| 16               | Bangladesh | Oilcrops                   | 1993           | 4                                                              |
| 16               | Bangladesh | Oilcrops Oil, Other        | 1993           | 1                                                              |
| 16               | Bangladesh | Onions                     | 1993           | 2                                                              |
| 16               | Bangladesh | Palm Oil                   | 1993           | 12                                                             |
| 16               | Bangladesh | Peas                       | 1993           | 2                                                              |
| 16               | Bangladesh | Pelagic Fish               | 1993           | 1                                                              |
| 16               | Bangladesh | Pimento                    | 1993           | 4                                                              |
| 16               | Bangladesh | Pineapples and products    | 1993           | 1                                                              |
| 16               | Bangladesh | Potatoes and products      | 1993           | 19                                                             |
| 16               | Bangladesh | Poultry Meat               | 1993           | 4                                                              |
| 16               | Bangladesh | Pulses                     | 1993           | 44                                                             |
| 16               | Bangladesh | Pulses, Other and products | 1993           | 35                                                             |
| 16               | Bangladesh | Rape and Mustard Oil       | 1993           | 19                                                             |
| 16               | Bangladesh | Rape and Mustardseed       | 1993           | 3                                                              |
| 16               | Bangladesh | Rice (Milled Equivalent)   | 1993           | 1,508                                                          |
| 16               | Bangladesh | Sesameseed Oil             | 1993           | 5                                                              |
| 16               | Bangladesh | Soyabean Oil               | 1993           | 45                                                             |
| 16               | Bangladesh | Spices                     | 1993           | 11                                                             |
| 16               | Bangladesh | Spices, Other              | 1993           | 8                                                              |
| 16               | Bangladesh | Starchy Roots              | 1993           | 28                                                             |
| 16               | Bangladesh | Sugar & Sweeteners         | 1993           | 70                                                             |
| 16               | Bangladesh | Sugar (Raw Equivalent)     | 1993           | 24                                                             |
| 16               | Bangladesh | Sugar cane                 | 1993           | 3                                                              |
| 16               | Bangladesh | Sugar Crops                | 1993           | 3                                                              |
| 16               | Bangladesh | Sugar non-centrifugal      | 1993           | 40                                                             |
| 16               | Bangladesh | Sweet potatoes             | 1993           | 9                                                              |
| 16               | Bangladesh | Sweeteners, Other          | 1993           | 6                                                              |
| 16               | Bangladesh | Treenuts                   | 1993           | 2                                                              |
| 16               | Bangladesh | Vegetable Oils             | 1993           | 96                                                             |
| 16               | Bangladesh | Vegetables                 | 1993           | 8                                                              |
| 16               | Bangladesh | Vegetables, Other          | 1993           | 6                                                              |
| 16               | Bangladesh | Vegetal Products           | 1993           | 1,946                                                          |
| 16               | Bangladesh | Wheat and products         | 1993           | 150                                                            |
| 16               | Bangladesh | Animal fats                | 1994           | 6                                                              |
| 16               | Bangladesh | Animal Products            | 1994           | 63                                                             |



Dietary calcium and zinc deficiency risks are decreasing but remain prevalent

| FAO Country code | Country    | Food item                  | Reference year | Net energy supply (kcal capita <sup>-1</sup> d <sup>-1</sup> ) |
|------------------|------------|----------------------------|----------------|----------------------------------------------------------------|
| 16               | Bangladesh | Bananas                    | 1994           | 8                                                              |
| 16               | Bangladesh | Beans                      | 1994           | 7                                                              |
| 16               | Bangladesh | Bovine Meat                | 1994           | 6                                                              |
| 16               | Bangladesh | Butter, Ghee               | 1994           | 3                                                              |
| 16               | Bangladesh | Cereals - Excluding Beer   | 1994           | 1,661                                                          |
| 16               | Bangladesh | Coconut Oil                | 1994           | 8                                                              |
| 16               | Bangladesh | Cottonseed Oil             | 1994           | 1                                                              |
| 16               | Bangladesh | Eggs                       | 1994           | 3                                                              |
| 16               | Bangladesh | Fats, Animals, Raw         | 1994           | 2                                                              |
| 16               | Bangladesh | Fish, Seafood              | 1994           | 15                                                             |
| 16               | Bangladesh | Freshwater Fish            | 1994           | 13                                                             |
| 16               | Bangladesh | Fruits - Excluding Wine    | 1994           | 15                                                             |
| 16               | Bangladesh | Fruits, Other              | 1994           | 5                                                              |
| 16               | Bangladesh | Grand Total                | 1994           | 2,003                                                          |
| 16               | Bangladesh | Groundnut Oil              | 1994           | 2                                                              |
| 16               | Bangladesh | Marine Fish, Other         | 1994           | 1                                                              |
| 16               | Bangladesh | Meat                       | 1994           | 14                                                             |
| 16               | Bangladesh | Milk - Excluding Butter    | 1994           | 24                                                             |
| 16               | Bangladesh | Millet and products        | 1994           | 5                                                              |
| 16               | Bangladesh | Mutton & Goat Meat         | 1994           | 4                                                              |
| 16               | Bangladesh | Offals                     | 1994           | 1                                                              |
| 16               | Bangladesh | Oilcrops                   | 1994           | 12                                                             |
| 16               | Bangladesh | Oilcrops Oil, Other        | 1994           | 1                                                              |
| 16               | Bangladesh | Onions                     | 1994           | 2                                                              |
| 16               | Bangladesh | Palm Oil                   | 1994           | 25                                                             |
| 16               | Bangladesh | Peas                       | 1994           | 5                                                              |
| 16               | Bangladesh | Pelagic Fish               | 1994           | 1                                                              |
| 16               | Bangladesh | Pimento                    | 1994           | 4                                                              |
| 16               | Bangladesh | Pineapples and products    | 1994           | 1                                                              |
| 16               | Bangladesh | Potatoes and products      | 1994           | 19                                                             |
| 16               | Bangladesh | Poultry Meat               | 1994           | 4                                                              |
| 16               | Bangladesh | Pulses                     | 1994           | 48                                                             |
| 16               | Bangladesh | Pulses, Other and products | 1994           | 37                                                             |
| 16               | Bangladesh | Rape and Mustard Oil       | 1994           | 18                                                             |
| 16               | Bangladesh | Rape and Mustardseed       | 1994           | 11                                                             |
| 16               | Bangladesh | Rice (Milled Equivalent)   | 1994           | 1,505                                                          |
| 16               | Bangladesh | Sesameseed Oil             | 1994           | 4                                                              |
| 16               | Bangladesh | Soyabean Oil               | 1994           | 26                                                             |
| 16               | Bangladesh | Spices                     | 1994           | 11                                                             |
| 16               | Bangladesh | Spices, Other              | 1994           | 7                                                              |
| 16               | Bangladesh | Starchy Roots              | 1994           | 28                                                             |
| 16               | Bangladesh | Sugar & Sweeteners         | 1994           | 67                                                             |
| 16               | Bangladesh | Sugar (Raw Equivalent)     | 1994           | 28                                                             |
| 16               | Bangladesh | Sugar cane                 | 1994           | 3                                                              |
| 16               | Bangladesh | Sugar Crops                | 1994           | 3                                                              |
| 16               | Bangladesh | Sugar non-centrifugal      | 1994           | 34                                                             |
| 16               | Bangladesh | Sweet potatoes             | 1994           | 9                                                              |
| 16               | Bangladesh | Sweeteners, Other          | 1994           | 6                                                              |
| 16               | Bangladesh | Treenuts                   | 1994           | 2                                                              |
| 16               | Bangladesh | Vegetable Oils             | 1994           | 84                                                             |
| 16               | Bangladesh | Vegetables                 | 1994           | 8                                                              |
| 16               | Bangladesh | Vegetables, Other          | 1994           | 6                                                              |
| 16               | Bangladesh | Vegetal Products           | 1994           | 1,939                                                          |
| 16               | Bangladesh | Wheat and products         | 1994           | 151                                                            |
| 16               | Bangladesh | Animal fats                | 1995           | 6                                                              |
| 16               | Bangladesh | Animal Products            | 1995           | 64                                                             |
| 16               | Bangladesh | Bananas                    | 1995           | 8                                                              |
| 16               | Bangladesh | Beans                      | 1995           | 6                                                              |
| 16               | Bangladesh | Bovine Meat                | 1995           | 6                                                              |
| 16               | Bangladesh | Butter, Ghee               | 1995           | 4                                                              |
| 16               | Bangladesh | Cereals - Excluding Beer   | 1995           | 1,697                                                          |
| 16               | Bangladesh | Coconut Oil                | 1995           | 10                                                             |
| 16               | Bangladesh | Cottonseed Oil             | 1995           | 1                                                              |
| 16               | Bangladesh | Eggs                       | 1995           | 3                                                              |
| 16               | Bangladesh | Fats, Animals, Raw         | 1995           | 2                                                              |
| 16               | Bangladesh | Fish, Seafood              | 1995           | 15                                                             |
| 16               | Bangladesh | Freshwater Fish            | 1995           | 13                                                             |
| 16               | Bangladesh | Fruits - Excluding Wine    | 1995           | 15                                                             |
| 16               | Bangladesh | Fruits, Other              | 1995           | 5                                                              |
| 16               | Bangladesh | Grand Total                | 1995           | 2,043                                                          |
| 16               | Bangladesh | Groundnut Oil              | 1995           | 2                                                              |
| 16               | Bangladesh | Maize and products         | 1995           | 1                                                              |
| 16               | Bangladesh | Marine Fish, Other         | 1995           | 1                                                              |
| 16               | Bangladesh | Meat                       | 1995           | 14                                                             |
| 16               | Bangladesh | Milk - Excluding Butter    | 1995           | 24                                                             |
| 16               | Bangladesh | Millet and products        | 1995           | 4                                                              |
| 16               | Bangladesh | Mutton & Goat Meat         | 1995           | 4                                                              |
| 16               | Bangladesh | Offals                     | 1995           | 2                                                              |
| 16               | Bangladesh | Oilcrops                   | 1995           | 13                                                             |
| 16               | Bangladesh | Oilcrops Oil, Other        | 1995           | 1                                                              |
| 16               | Bangladesh | Onions                     | 1995           | 1                                                              |
| 16               | Bangladesh | Palm Oil                   | 1995           | 17                                                             |
| 16               | Bangladesh | Peas                       | 1995           | 3                                                              |
| 16               | Bangladesh | Pelagic Fish               | 1995           | 1                                                              |
| 16               | Bangladesh | Pimento                    | 1995           | 3                                                              |
| 16               | Bangladesh | Pineapples and products    | 1995           | 1                                                              |
| 16               | Bangladesh | Potatoes and products      | 1995           | 19                                                             |
| 16               | Bangladesh | Poultry Meat               | 1995           | 4                                                              |
| 16               | Bangladesh | Pulses                     | 1995           | 40                                                             |
| 16               | Bangladesh | Pulses, Other and products | 1995           | 31                                                             |
| 16               | Bangladesh | Rape and Mustard Oil       | 1995           | 21                                                             |
| 16               | Bangladesh | Rape and Mustardseed       | 1995           | 12                                                             |
| 16               | Bangladesh | Rice (Milled Equivalent)   | 1995           | 1,528                                                          |
| 16               | Bangladesh | Sesameseed Oil             | 1995           | 4                                                              |
| 16               | Bangladesh | Sorghum and products       | 1995           | 1                                                              |
| 16               | Bangladesh | Soyabean Oil               | 1995           | 40                                                             |
| 16               | Bangladesh | Spices                     | 1995           | 11                                                             |

Dietary calcium and zinc deficiency risks are decreasing but remain prevalent

| FAO Country code | Country    | Food item                  | Reference year | Net energy supply (kcal capita <sup>-1</sup> d <sup>-1</sup> ) |
|------------------|------------|----------------------------|----------------|----------------------------------------------------------------|
| 16               | Bangladesh | Spices, Other              | 1995           | 8                                                              |
| 16               | Bangladesh | Starchy Roots              | 1995           | 28                                                             |
| 16               | Bangladesh | Sugar & Sweeteners         | 1995           | 65                                                             |
| 16               | Bangladesh | Sugar (Raw Equivalent)     | 1995           | 31                                                             |
| 16               | Bangladesh | Sugar cane                 | 1995           | 3                                                              |
| 16               | Bangladesh | Sugar Crops                | 1995           | 3                                                              |
| 16               | Bangladesh | Sugar non-centrifugal      | 1995           | 28                                                             |
| 16               | Bangladesh | Sweet potatoes             | 1995           | 9                                                              |
| 16               | Bangladesh | Sweeteners, Other          | 1995           | 6                                                              |
| 16               | Bangladesh | Treenuts                   | 1995           | 2                                                              |
| 16               | Bangladesh | Vegetable Oils             | 1995           | 97                                                             |
| 16               | Bangladesh | Vegetables                 | 1995           | 8                                                              |
| 16               | Bangladesh | Vegetables, Other          | 1995           | 6                                                              |
| 16               | Bangladesh | Vegetal Products           | 1995           | 1,978                                                          |
| 16               | Bangladesh | Wheat and products         | 1995           | 163                                                            |
| 16               | Bangladesh | Animal fats                | 1996           | 6                                                              |
| 16               | Bangladesh | Animal Products            | 1996           | 67                                                             |
| 16               | Bangladesh | Bananas                    | 1996           | 8                                                              |
| 16               | Bangladesh | Beans                      | 1996           | 6                                                              |
| 16               | Bangladesh | Bovine Meat                | 1996           | 6                                                              |
| 16               | Bangladesh | Butter, Ghee               | 1996           | 3                                                              |
| 16               | Bangladesh | Cereals - Excluding Beer   | 1996           | 1,701                                                          |
| 16               | Bangladesh | Coconut Oil                | 1996           | 6                                                              |
| 16               | Bangladesh | Cottonseed Oil             | 1996           | 1                                                              |
| 16               | Bangladesh | Eggs                       | 1996           | 4                                                              |
| 16               | Bangladesh | Fats, Animals, Raw         | 1996           | 3                                                              |
| 16               | Bangladesh | Fish, Seafood              | 1996           | 16                                                             |
| 16               | Bangladesh | Freshwater Fish            | 1996           | 14                                                             |
| 16               | Bangladesh | Fruits - Excluding Wine    | 1996           | 15                                                             |
| 16               | Bangladesh | Fruits, Other              | 1996           | 5                                                              |
| 16               | Bangladesh | Grand Total                | 1996           | 2,048                                                          |
| 16               | Bangladesh | Groundnut Oil              | 1996           | 2                                                              |
| 16               | Bangladesh | Maize and products         | 1996           | 1                                                              |
| 16               | Bangladesh | Marine Fish, Other         | 1996           | 1                                                              |
| 16               | Bangladesh | Meat                       | 1996           | 14                                                             |
| 16               | Bangladesh | Milk - Excluding Butter    | 1996           | 25                                                             |
| 16               | Bangladesh | Millet and products        | 1996           | 4                                                              |
| 16               | Bangladesh | Mutton & Goat Meat         | 1996           | 4                                                              |
| 16               | Bangladesh | Offals                     | 1996           | 2                                                              |
| 16               | Bangladesh | Oilcrops                   | 1996           | 9                                                              |
| 16               | Bangladesh | Oilcrops Oil, Other        | 1996           | 1                                                              |
| 16               | Bangladesh | Onions                     | 1996           | 1                                                              |
| 16               | Bangladesh | Palm Oil                   | 1996           | 23                                                             |
| 16               | Bangladesh | Peas                       | 1996           | 2                                                              |
| 16               | Bangladesh | Pelagic Fish               | 1996           | 1                                                              |
| 16               | Bangladesh | Pimento                    | 1996           | 4                                                              |
| 16               | Bangladesh | Pineapples and products    | 1996           | 1                                                              |
| 16               | Bangladesh | Potatoes and products      | 1996           | 19                                                             |
| 16               | Bangladesh | Poultry Meat               | 1996           | 4                                                              |
| 16               | Bangladesh | Pulses                     | 1996           | 40                                                             |
| 16               | Bangladesh | Pulses, Other and products | 1996           | 32                                                             |
| 16               | Bangladesh | Rape and Mustard Oil       | 1996           | 21                                                             |
| 16               | Bangladesh | Rape and Mustardseed       | 1996           | 8                                                              |
| 16               | Bangladesh | Rice (Milled Equivalent)   | 1996           | 1,524                                                          |
| 16               | Bangladesh | Sesameseed Oil             | 1996           | 4                                                              |
| 16               | Bangladesh | Sorghum and products       | 1996           | 3                                                              |
| 16               | Bangladesh | Soyabean Oil               | 1996           | 43                                                             |
| 16               | Bangladesh | Spices                     | 1996           | 11                                                             |
| 16               | Bangladesh | Spices, Other              | 1996           | 7                                                              |
| 16               | Bangladesh | Starchy Roots              | 1996           | 28                                                             |
| 16               | Bangladesh | Sugar & Sweeteners         | 1996           | 64                                                             |
| 16               | Bangladesh | Sugar (Raw Equivalent)     | 1996           | 24                                                             |
| 16               | Bangladesh | Sugar cane                 | 1996           | 3                                                              |
| 16               | Bangladesh | Sugar Crops                | 1996           | 3                                                              |
| 16               | Bangladesh | Sugar non-centrifugal      | 1996           | 34                                                             |
| 16               | Bangladesh | Sweet potatoes             | 1996           | 8                                                              |
| 16               | Bangladesh | Sweeteners, Other          | 1996           | 6                                                              |
| 16               | Bangladesh | Treenuts                   | 1996           | 2                                                              |
| 16               | Bangladesh | Vegetable Oils             | 1996           | 101                                                            |
| 16               | Bangladesh | Vegetables                 | 1996           | 8                                                              |
| 16               | Bangladesh | Vegetables, Other          | 1996           | 6                                                              |
| 16               | Bangladesh | Vegetal Products           | 1996           | 1,980                                                          |
| 16               | Bangladesh | Wheat and products         | 1996           | 168                                                            |
| 16               | Bangladesh | Animal fats                | 1997           | 6                                                              |
| 16               | Bangladesh | Animal Products            | 1997           | 71                                                             |
| 16               | Bangladesh | Bananas                    | 1997           | 8                                                              |
| 16               | Bangladesh | Beans                      | 1997           | 6                                                              |
| 16               | Bangladesh | Bovine Meat                | 1997           | 6                                                              |
| 16               | Bangladesh | Butter, Ghee               | 1997           | 4                                                              |
| 16               | Bangladesh | Cassava and products       | 1997           | 1                                                              |
| 16               | Bangladesh | Cereals - Excluding Beer   | 1997           | 1,692                                                          |
| 16               | Bangladesh | Coconut Oil                | 1997           | 12                                                             |
| 16               | Bangladesh | Cottonseed Oil             | 1997           | 1                                                              |
| 16               | Bangladesh | Crustaceans                | 1997           | 1                                                              |
| 16               | Bangladesh | Dates                      | 1997           | 1                                                              |
| 16               | Bangladesh | Demersal Fish              | 1997           | 1                                                              |
| 16               | Bangladesh | Eggs                       | 1997           | 5                                                              |
| 16               | Bangladesh | Fats, Animals, Raw         | 1997           | 3                                                              |
| 16               | Bangladesh | Fish, Seafood              | 1997           | 18                                                             |
| 16               | Bangladesh | Freshwater Fish            | 1997           | 15                                                             |
| 16               | Bangladesh | Fruits - Excluding Wine    | 1997           | 15                                                             |
| 16               | Bangladesh | Fruits, Other              | 1997           | 5                                                              |
| 16               | Bangladesh | Grand Total                | 1997           | 2,096                                                          |
| 16               | Bangladesh | Groundnut Oil              | 1997           | 2                                                              |
| 16               | Bangladesh | Maize and products         | 1997           | 1                                                              |
| 16               | Bangladesh | Marine Fish, Other         | 1997           | 1                                                              |
| 16               | Bangladesh | Meat                       | 1997           | 15                                                             |

Dietary calcium and zinc deficiency risks are decreasing but remain prevalent

| FAO Country code | Country    | Food item                  | Reference year | Net energy supply (kcal capita <sup>-1</sup> d <sup>-1</sup> ) |
|------------------|------------|----------------------------|----------------|----------------------------------------------------------------|
| 16               | Bangladesh | Milk - Excluding Butter    | 1997           | 26                                                             |
| 16               | Bangladesh | Millet and products        | 1997           | 4                                                              |
| 16               | Bangladesh | Mutton & Goat Meat         | 1997           | 4                                                              |
| 16               | Bangladesh | Offals                     | 1997           | 2                                                              |
| 16               | Bangladesh | Oilcrops                   | 1997           | 5                                                              |
| 16               | Bangladesh | Oilcrops Oil, Other        | 1997           | 1                                                              |
| 16               | Bangladesh | Onions                     | 1997           | 1                                                              |
| 16               | Bangladesh | Palm Oil                   | 1997           | 25                                                             |
| 16               | Bangladesh | Peas                       | 1997           | 6                                                              |
| 16               | Bangladesh | Pelagic Fish               | 1997           | 1                                                              |
| 16               | Bangladesh | Pimento                    | 1997           | 3                                                              |
| 16               | Bangladesh | Pineapples and products    | 1997           | 1                                                              |
| 16               | Bangladesh | Potatoes and products      | 1997           | 19                                                             |
| 16               | Bangladesh | Poultry Meat               | 1997           | 4                                                              |
| 16               | Bangladesh | Pulses                     | 1997           | 44                                                             |
| 16               | Bangladesh | Pulses, Other and products | 1997           | 33                                                             |
| 16               | Bangladesh | Rape and Mustard Oil       | 1997           | 20                                                             |
| 16               | Bangladesh | Rape and Mustardseed       | 1997           | 5                                                              |
| 16               | Bangladesh | Rice (Milled Equivalent)   | 1997           | 1,480                                                          |
| 16               | Bangladesh | Sesameseed Oil             | 1997           | 4                                                              |
| 16               | Bangladesh | Soyabean Oil               | 1997           | 79                                                             |
| 16               | Bangladesh | Spices                     | 1997           | 10                                                             |
| 16               | Bangladesh | Spices, Other              | 1997           | 7                                                              |
| 16               | Bangladesh | Starchy Roots              | 1997           | 27                                                             |
| 16               | Bangladesh | Sugar & Sweeteners         | 1997           | 77                                                             |
| 16               | Bangladesh | Sugar (Raw Equivalent)     | 1997           | 29                                                             |
| 16               | Bangladesh | Sugar cane                 | 1997           | 3                                                              |
| 16               | Bangladesh | Sugar Crops                | 1997           | 3                                                              |
| 16               | Bangladesh | Sugar non-centrifugal      | 1997           | 41                                                             |
| 16               | Bangladesh | Sweet potatoes             | 1997           | 8                                                              |
| 16               | Bangladesh | Sweeteners, Other          | 1997           | 7                                                              |
| 16               | Bangladesh | Treenuts                   | 1997           | 2                                                              |
| 16               | Bangladesh | Vegetable Oils             | 1997           | 143                                                            |
| 16               | Bangladesh | Vegetables                 | 1997           | 8                                                              |
| 16               | Bangladesh | Vegetables, Other          | 1997           | 6                                                              |
| 16               | Bangladesh | Vegetal Products           | 1997           | 2,025                                                          |
| 16               | Bangladesh | Wheat and products         | 1997           | 206                                                            |
| 16               | Bangladesh | Animal fats                | 1998           | 6                                                              |
| 16               | Bangladesh | Animal Products            | 1998           | 70                                                             |
| 16               | Bangladesh | Bananas                    | 1998           | 8                                                              |
| 16               | Bangladesh | Beans                      | 1998           | 3                                                              |
| 16               | Bangladesh | Bovine Meat                | 1998           | 6                                                              |
| 16               | Bangladesh | Butter, Ghee               | 1998           | 3                                                              |
| 16               | Bangladesh | Cassava and products       | 1998           | 1                                                              |
| 16               | Bangladesh | Cereals - Excluding Beer   | 1998           | 1,719                                                          |
| 16               | Bangladesh | Coconut Oil                | 1998           | 8                                                              |
| 16               | Bangladesh | Cottonseed Oil             | 1998           | 1                                                              |
| 16               | Bangladesh | Crustaceans                | 1998           | 1                                                              |
| 16               | Bangladesh | Demersal Fish              | 1998           | 1                                                              |
| 16               | Bangladesh | Eggs                       | 1998           | 5                                                              |
| 16               | Bangladesh | Fats, Animals, Raw         | 1998           | 3                                                              |
| 16               | Bangladesh | Fish, Seafood              | 1998           | 19                                                             |
| 16               | Bangladesh | Freshwater Fish            | 1998           | 16                                                             |
| 16               | Bangladesh | Fruits - Excluding Wine    | 1998           | 15                                                             |
| 16               | Bangladesh | Fruits, Other              | 1998           | 5                                                              |
| 16               | Bangladesh | Grand Total                | 1998           | 2,161                                                          |
| 16               | Bangladesh | Groundnut Oil              | 1998           | 2                                                              |
| 16               | Bangladesh | Maize and products         | 1998           | 1                                                              |
| 16               | Bangladesh | Marine Fish, Other         | 1998           | 1                                                              |
| 16               | Bangladesh | Meat                       | 1998           | 15                                                             |
| 16               | Bangladesh | Milk - Excluding Butter    | 1998           | 24                                                             |
| 16               | Bangladesh | Millet and products        | 1998           | 4                                                              |
| 16               | Bangladesh | Mutton & Goat Meat         | 1998           | 4                                                              |
| 16               | Bangladesh | Offals                     | 1998           | 2                                                              |
| 16               | Bangladesh | Oilcrops                   | 1998           | 11                                                             |
| 16               | Bangladesh | Oilcrops Oil, Other        | 1998           | 1                                                              |
| 16               | Bangladesh | Onions                     | 1998           | 1                                                              |
| 16               | Bangladesh | Palm Oil                   | 1998           | 48                                                             |
| 16               | Bangladesh | Peas                       | 1998           | 7                                                              |
| 16               | Bangladesh | Pelagic Fish               | 1998           | 1                                                              |
| 16               | Bangladesh | Pimento                    | 1998           | 3                                                              |
| 16               | Bangladesh | Pineapples and products    | 1998           | 1                                                              |
| 16               | Bangladesh | Potatoes and products      | 1998           | 17                                                             |
| 16               | Bangladesh | Poultry Meat               | 1998           | 4                                                              |
| 16               | Bangladesh | Pulses                     | 1998           | 41                                                             |
| 16               | Bangladesh | Pulses, Other and products | 1998           | 31                                                             |
| 16               | Bangladesh | Rape and Mustard Oil       | 1998           | 25                                                             |
| 16               | Bangladesh | Rape and Mustardseed       | 1998           | 10                                                             |
| 16               | Bangladesh | Rice (Milled Equivalent)   | 1998           | 1,525                                                          |
| 16               | Bangladesh | Sesameseed Oil             | 1998           | 4                                                              |
| 16               | Bangladesh | Soyabean Oil               | 1998           | 99                                                             |
| 16               | Bangladesh | Spices                     | 1998           | 10                                                             |
| 16               | Bangladesh | Spices, Other              | 1998           | 7                                                              |
| 16               | Bangladesh | Starchy Roots              | 1998           | 25                                                             |
| 16               | Bangladesh | Sugar & Sweeteners         | 1998           | 70                                                             |
| 16               | Bangladesh | Sugar (Raw Equivalent)     | 1998           | 27                                                             |
| 16               | Bangladesh | Sugar cane                 | 1998           | 3                                                              |
| 16               | Bangladesh | Sugar Crops                | 1998           | 3                                                              |
| 16               | Bangladesh | Sugar non-centrifugal      | 1998           | 36                                                             |
| 16               | Bangladesh | Sweet potatoes             | 1998           | 7                                                              |
| 16               | Bangladesh | Sweeteners, Other          | 1998           | 7                                                              |
| 16               | Bangladesh | Treenuts                   | 1998           | 2                                                              |
| 16               | Bangladesh | Vegetable Oils             | 1998           | 187                                                            |
| 16               | Bangladesh | Vegetables                 | 1998           | 8                                                              |
| 16               | Bangladesh | Vegetables, Other          | 1998           | 6                                                              |
| 16               | Bangladesh | Vegetal Products           | 1998           | 2,091                                                          |
| 16               | Bangladesh | Wheat and products         | 1998           | 189                                                            |

Dietary calcium and zinc deficiency risks are decreasing but remain prevalent

| FAO Country code | Country    | Food item                  | Reference year | Net energy supply (kcal capita <sup>-1</sup> d <sup>-1</sup> ) |
|------------------|------------|----------------------------|----------------|----------------------------------------------------------------|
| 16               | Bangladesh | Animal fats                | 1999           | 6                                                              |
| 16               | Bangladesh | Animal Products            | 1999           | 73                                                             |
| 16               | Bangladesh | Bananas                    | 1999           | 7                                                              |
| 16               | Bangladesh | Beans                      | 1999           | 4                                                              |
| 16               | Bangladesh | Bovine Meat                | 1999           | 6                                                              |
| 16               | Bangladesh | Butter, Ghee               | 1999           | 3                                                              |
| 16               | Bangladesh | Cereals - Excluding Beer   | 1999           | 1,880                                                          |
| 16               | Bangladesh | Coconut Oil                | 1999           | 7                                                              |
| 16               | Bangladesh | Cottonseed Oil             | 1999           | 1                                                              |
| 16               | Bangladesh | Crustaceans                | 1999           | 1                                                              |
| 16               | Bangladesh | Dates                      | 1999           | 1                                                              |
| 16               | Bangladesh | Demersal Fish              | 1999           | 1                                                              |
| 16               | Bangladesh | Eggs                       | 1999           | 4                                                              |
| 16               | Bangladesh | Fats, Animals, Raw         | 1999           | 3                                                              |
| 16               | Bangladesh | Fish, Seafood              | 1999           | 20                                                             |
| 16               | Bangladesh | Freshwater Fish            | 1999           | 18                                                             |
| 16               | Bangladesh | Fruits - Excluding Wine    | 1999           | 14                                                             |
| 16               | Bangladesh | Fruits, Other              | 1999           | 5                                                              |
| 16               | Bangladesh | Grand Total                | 1999           | 2,266                                                          |
| 16               | Bangladesh | Groundnut Oil              | 1999           | 2                                                              |
| 16               | Bangladesh | Maize and products         | 1999           | 1                                                              |
| 16               | Bangladesh | Marine Fish, Other         | 1999           | 1                                                              |
| 16               | Bangladesh | Meat                       | 1999           | 15                                                             |
| 16               | Bangladesh | Milk - Excluding Butter    | 1999           | 26                                                             |
| 16               | Bangladesh | Millet and products        | 1999           | 4                                                              |
| 16               | Bangladesh | Mutton & Goat Meat         | 1999           | 4                                                              |
| 16               | Bangladesh | Offals                     | 1999           | 2                                                              |
| 16               | Bangladesh | Oilcrops                   | 1999           | 6                                                              |
| 16               | Bangladesh | Oilcrops Oil, Other        | 1999           | 1                                                              |
| 16               | Bangladesh | Onions                     | 1999           | 1                                                              |
| 16               | Bangladesh | Palm Oil                   | 1999           | 32                                                             |
| 16               | Bangladesh | Peas                       | 1999           | 10                                                             |
| 16               | Bangladesh | Pelagic Fish               | 1999           | 1                                                              |
| 16               | Bangladesh | Pimento                    | 1999           | 9                                                              |
| 16               | Bangladesh | Pineapples and products    | 1999           | 1                                                              |
| 16               | Bangladesh | Potatoes and products      | 1999           | 33                                                             |
| 16               | Bangladesh | Poultry Meat               | 1999           | 4                                                              |
| 16               | Bangladesh | Pulses                     | 1999           | 41                                                             |
| 16               | Bangladesh | Pulses, Other and products | 1999           | 27                                                             |
| 16               | Bangladesh | Rape and Mustard Oil       | 1999           | 31                                                             |
| 16               | Bangladesh | Rape and Mustardseed       | 1999           | 5                                                              |
| 16               | Bangladesh | Rice (Milled Equivalent)   | 1999           | 1,621                                                          |
| 16               | Bangladesh | Sesameseed Oil             | 1999           | 2                                                              |
| 16               | Bangladesh | Soyabean Oil               | 1999           | 45                                                             |
| 16               | Bangladesh | Spices                     | 1999           | 15                                                             |
| 16               | Bangladesh | Spices, Other              | 1999           | 6                                                              |
| 16               | Bangladesh | Starchy Roots              | 1999           | 40                                                             |
| 16               | Bangladesh | Sugar & Sweeteners         | 1999           | 63                                                             |
| 16               | Bangladesh | Sugar (Raw Equivalent)     | 1999           | 25                                                             |
| 16               | Bangladesh | Sugar cane                 | 1999           | 2                                                              |
| 16               | Bangladesh | Sugar Crops                | 1999           | 2                                                              |
| 16               | Bangladesh | Sugar non-centrifugal      | 1999           | 31                                                             |
| 16               | Bangladesh | Sweet potatoes             | 1999           | 7                                                              |
| 16               | Bangladesh | Sweeteners, Other          | 1999           | 7                                                              |
| 16               | Bangladesh | Treenuts                   | 1999           | 2                                                              |
| 16               | Bangladesh | Vegetable Oils             | 1999           | 120                                                            |
| 16               | Bangladesh | Vegetables                 | 1999           | 9                                                              |
| 16               | Bangladesh | Vegetables, Other          | 1999           | 7                                                              |
| 16               | Bangladesh | Vegetal Products           | 1999           | 2,193                                                          |
| 16               | Bangladesh | Wheat and products         | 1999           | 254                                                            |
| 16               | Bangladesh | Animal fats                | 2000           | 6                                                              |
| 16               | Bangladesh | Animal Products            | 2000           | 74                                                             |
| 16               | Bangladesh | Bananas                    | 2000           | 7                                                              |
| 16               | Bangladesh | Beans                      | 2000           | 3                                                              |
| 16               | Bangladesh | Bovine Meat                | 2000           | 6                                                              |
| 16               | Bangladesh | Butter, Ghee               | 2000           | 3                                                              |
| 16               | Bangladesh | Cassava and products       | 2000           | 1                                                              |
| 16               | Bangladesh | Cereals - Excluding Beer   | 2000           | 1,842                                                          |
| 16               | Bangladesh | Coconut Oil                | 2000           | 9                                                              |
| 16               | Bangladesh | Cottonseed Oil             | 2000           | 1                                                              |
| 16               | Bangladesh | Crustaceans                | 2000           | 1                                                              |
| 16               | Bangladesh | Dates                      | 2000           | 1                                                              |
| 16               | Bangladesh | Demersal Fish              | 2000           | 1                                                              |
| 16               | Bangladesh | Eggs                       | 2000           | 5                                                              |
| 16               | Bangladesh | Fats, Animals, Raw         | 2000           | 3                                                              |
| 16               | Bangladesh | Fish, Seafood              | 2000           | 21                                                             |
| 16               | Bangladesh | Freshwater Fish            | 2000           | 18                                                             |
| 16               | Bangladesh | Fruits - Excluding Wine    | 2000           | 14                                                             |
| 16               | Bangladesh | Fruits, Other              | 2000           | 5                                                              |
| 16               | Bangladesh | Grand Total                | 2000           | 2,258                                                          |
| 16               | Bangladesh | Groundnut Oil              | 2000           | 1                                                              |
| 16               | Bangladesh | Maize and products         | 2000           | 1                                                              |
| 16               | Bangladesh | Marine Fish, Other         | 2000           | 1                                                              |
| 16               | Bangladesh | Meat                       | 2000           | 15                                                             |
| 16               | Bangladesh | Milk - Excluding Butter    | 2000           | 25                                                             |
| 16               | Bangladesh | Millet and products        | 2000           | 1                                                              |
| 16               | Bangladesh | Mutton & Goat Meat         | 2000           | 4                                                              |
| 16               | Bangladesh | Offals                     | 2000           | 2                                                              |
| 16               | Bangladesh | Oilcrops                   | 2000           | 6                                                              |
| 16               | Bangladesh | Onions                     | 2000           | 1                                                              |
| 16               | Bangladesh | Palm Oil                   | 2000           | 28                                                             |
| 16               | Bangladesh | Peas                       | 2000           | 9                                                              |
| 16               | Bangladesh | Pelagic Fish               | 2000           | 1                                                              |
| 16               | Bangladesh | Pimento                    | 2000           | 8                                                              |
| 16               | Bangladesh | Pineapples and products    | 2000           | 1                                                              |
| 16               | Bangladesh | Potatoes and products      | 2000           | 35                                                             |
| 16               | Bangladesh | Poultry Meat               | 2000           | 5                                                              |

Dietary calcium and zinc deficiency risks are decreasing but remain prevalent

| FAO Country code | Country    | Food item                  | Reference year | Net energy supply (kcal capita <sup>-1</sup> d <sup>-1</sup> ) |
|------------------|------------|----------------------------|----------------|----------------------------------------------------------------|
| 16               | Bangladesh | Pulses                     | 2000           | 38                                                             |
| 16               | Bangladesh | Pulses, Other and products | 2000           | 25                                                             |
| 16               | Bangladesh | Rape and Mustard Oil       | 2000           | 30                                                             |
| 16               | Bangladesh | Rape and Mustardseed       | 2000           | 6                                                              |
| 16               | Bangladesh | Rice (Milled Equivalent)   | 2000           | 1,633                                                          |
| 16               | Bangladesh | Sesameseed Oil             | 2000           | 2                                                              |
| 16               | Bangladesh | Soyabean Oil               | 2000           | 80                                                             |
| 16               | Bangladesh | Spices                     | 2000           | 16                                                             |
| 16               | Bangladesh | Spices, Other              | 2000           | 8                                                              |
| 16               | Bangladesh | Starchy Roots              | 2000           | 42                                                             |
| 16               | Bangladesh | Sugar & Sweeteners         | 2000           | 61                                                             |
| 16               | Bangladesh | Sugar (Raw Equivalent)     | 2000           | 19                                                             |
| 16               | Bangladesh | Sugar cane                 | 2000           | 2                                                              |
| 16               | Bangladesh | Sugar Crops                | 2000           | 2                                                              |
| 16               | Bangladesh | Sugar non-centrifugal      | 2000           | 35                                                             |
| 16               | Bangladesh | Sweet potatoes             | 2000           | 7                                                              |
| 16               | Bangladesh | Sweeteners, Other          | 2000           | 6                                                              |
| 16               | Bangladesh | Treenuts                   | 2000           | 2                                                              |
| 16               | Bangladesh | Vegetable Oils             | 2000           | 152                                                            |
| 16               | Bangladesh | Vegetables                 | 2000           | 9                                                              |
| 16               | Bangladesh | Vegetables, Other          | 2000           | 7                                                              |
| 16               | Bangladesh | Vegetal Products           | 2000           | 2,184                                                          |
| 16               | Bangladesh | Wheat and products         | 2000           | 206                                                            |
| 16               | Bangladesh | Animal fats                | 2001           | 6                                                              |
| 16               | Bangladesh | Animal Products            | 2001           | 74                                                             |
| 16               | Bangladesh | Bananas                    | 2001           | 7                                                              |
| 16               | Bangladesh | Beans                      | 2001           | 3                                                              |
| 16               | Bangladesh | Bovine Meat                | 2001           | 6                                                              |
| 16               | Bangladesh | Butter, Ghee               | 2001           | 3                                                              |
| 16               | Bangladesh | Cereals - Excluding Beer   | 2001           | 1,889                                                          |
| 16               | Bangladesh | Cereals, Other             | 2001           | 1                                                              |
| 16               | Bangladesh | Coconut Oil                | 2001           | 5                                                              |
| 16               | Bangladesh | Cottonseed Oil             | 2001           | 1                                                              |
| 16               | Bangladesh | Crustaceans                | 2001           | 1                                                              |
| 16               | Bangladesh | Dates                      | 2001           | 1                                                              |
| 16               | Bangladesh | Demersal Fish              | 2001           | 1                                                              |
| 16               | Bangladesh | Eggs                       | 2001           | 5                                                              |
| 16               | Bangladesh | Fats, Animals, Raw         | 2001           | 3                                                              |
| 16               | Bangladesh | Fish, Seafood              | 2001           | 22                                                             |
| 16               | Bangladesh | Freshwater Fish            | 2001           | 19                                                             |
| 16               | Bangladesh | Fruits - Excluding Wine    | 2001           | 14                                                             |
| 16               | Bangladesh | Fruits, Other              | 2001           | 5                                                              |
| 16               | Bangladesh | Grand Total                | 2001           | 2,331                                                          |
| 16               | Bangladesh | Groundnut Oil              | 2001           | 1                                                              |
| 16               | Bangladesh | Maize and products         | 2001           | 1                                                              |
| 16               | Bangladesh | Marine Fish, Other         | 2001           | 1                                                              |
| 16               | Bangladesh | Meat                       | 2001           | 15                                                             |
| 16               | Bangladesh | Milk - Excluding Butter    | 2001           | 25                                                             |
| 16               | Bangladesh | Millet and products        | 2001           | 1                                                              |
| 16               | Bangladesh | Mutton & Goat Meat         | 2001           | 4                                                              |
| 16               | Bangladesh | Offals                     | 2001           | 2                                                              |
| 16               | Bangladesh | Oilcrops                   | 2001           | 5                                                              |
| 16               | Bangladesh | Onions                     | 2001           | 1                                                              |
| 16               | Bangladesh | Palm Oil                   | 2001           | 32                                                             |
| 16               | Bangladesh | Peas                       | 2001           | 19                                                             |
| 16               | Bangladesh | Pelagic Fish               | 2001           | 1                                                              |
| 16               | Bangladesh | Pimento                    | 2001           | 8                                                              |
| 16               | Bangladesh | Pineapples and products    | 2001           | 1                                                              |
| 16               | Bangladesh | Potatoes and products      | 2001           | 38                                                             |
| 16               | Bangladesh | Poultry Meat               | 2001           | 5                                                              |
| 16               | Bangladesh | Pulses                     | 2001           | 48                                                             |
| 16               | Bangladesh | Pulses, Other and products | 2001           | 25                                                             |
| 16               | Bangladesh | Rape and Mustard Oil       | 2001           | 25                                                             |
| 16               | Bangladesh | Rape and Mustardseed       | 2001           | 5                                                              |
| 16               | Bangladesh | Rice (Milled Equivalent)   | 2001           | 1,723                                                          |
| 16               | Bangladesh | Sesameseed Oil             | 2001           | 2                                                              |
| 16               | Bangladesh | Soyabean Oil               | 2001           | 84                                                             |
| 16               | Bangladesh | Spices                     | 2001           | 16                                                             |
| 16               | Bangladesh | Spices, Other              | 2001           | 7                                                              |
| 16               | Bangladesh | Starchy Roots              | 2001           | 45                                                             |
| 16               | Bangladesh | Sugar & Sweeteners         | 2001           | 76                                                             |
| 16               | Bangladesh | Sugar (Raw Equivalent)     | 2001           | 34                                                             |
| 16               | Bangladesh | Sugar cane                 | 2001           | 2                                                              |
| 16               | Bangladesh | Sugar Crops                | 2001           | 2                                                              |
| 16               | Bangladesh | Sugar non-centrifugal      | 2001           | 35                                                             |
| 16               | Bangladesh | Sweet potatoes             | 2001           | 6                                                              |
| 16               | Bangladesh | Sweeteners, Other          | 2001           | 6                                                              |
| 16               | Bangladesh | Treenuts                   | 2001           | 2                                                              |
| 16               | Bangladesh | Vegetable Oils             | 2001           | 150                                                            |
| 16               | Bangladesh | Vegetables                 | 2001           | 8                                                              |
| 16               | Bangladesh | Vegetables, Other          | 2001           | 7                                                              |
| 16               | Bangladesh | Vegetal Products           | 2001           | 2,256                                                          |
| 16               | Bangladesh | Wheat and products         | 2001           | 163                                                            |
| 16               | Bangladesh | Animal fats                | 2002           | 6                                                              |
| 16               | Bangladesh | Animal Products            | 2002           | 78                                                             |
| 16               | Bangladesh | Bananas                    | 2002           | 7                                                              |
| 16               | Bangladesh | Beans                      | 2002           | 3                                                              |
| 16               | Bangladesh | Bovine Meat                | 2002           | 6                                                              |
| 16               | Bangladesh | Butter, Ghee               | 2002           | 3                                                              |
| 16               | Bangladesh | Cassava and products       | 2002           | 1                                                              |
| 16               | Bangladesh | Cereals - Excluding Beer   | 2002           | 1,917                                                          |
| 16               | Bangladesh | Coconut Oil                | 2002           | 6                                                              |
| 16               | Bangladesh | Cottonseed Oil             | 2002           | 1                                                              |
| 16               | Bangladesh | Crustaceans                | 2002           | 1                                                              |
| 16               | Bangladesh | Dates                      | 2002           | 1                                                              |
| 16               | Bangladesh | Demersal Fish              | 2002           | 1                                                              |
| 16               | Bangladesh | Eggs                       | 2002           | 5                                                              |

Dietary calcium and zinc deficiency risks are decreasing but remain prevalent

| FAO Country code | Country    | Food item                  | Reference year | Net energy supply (kcal capita <sup>-1</sup> d <sup>-1</sup> ) |
|------------------|------------|----------------------------|----------------|----------------------------------------------------------------|
| 16               | Bangladesh | Fats, Animals, Raw         | 2002           | 3                                                              |
| 16               | Bangladesh | Fish, Seafood              | 2002           | 24                                                             |
| 16               | Bangladesh | Freshwater Fish            | 2002           | 20                                                             |
| 16               | Bangladesh | Fruits - Excluding Wine    | 2002           | 14                                                             |
| 16               | Bangladesh | Fruits, Other              | 2002           | 5                                                              |
| 16               | Bangladesh | Grand Total                | 2002           | 2,313                                                          |
| 16               | Bangladesh | Groundnut Oil              | 2002           | 1                                                              |
| 16               | Bangladesh | Maize and products         | 2002           | 1                                                              |
| 16               | Bangladesh | Marine Fish, Other         | 2002           | 2                                                              |
| 16               | Bangladesh | Meat                       | 2002           | 16                                                             |
| 16               | Bangladesh | Milk - Excluding Butter    | 2002           | 26                                                             |
| 16               | Bangladesh | Millet and products        | 2002           | 1                                                              |
| 16               | Bangladesh | Mutton & Goat Meat         | 2002           | 4                                                              |
| 16               | Bangladesh | Offals                     | 2002           | 2                                                              |
| 16               | Bangladesh | Oilcrops                   | 2002           | 4                                                              |
| 16               | Bangladesh | Onions                     | 2002           | 2                                                              |
| 16               | Bangladesh | Palm Oil                   | 2002           | 39                                                             |
| 16               | Bangladesh | Peas                       | 2002           | 20                                                             |
| 16               | Bangladesh | Pelagic Fish               | 2002           | 1                                                              |
| 16               | Bangladesh | Pimento                    | 2002           | 9                                                              |
| 16               | Bangladesh | Pineapples and products    | 2002           | 1                                                              |
| 16               | Bangladesh | Potatoes and products      | 2002           | 34                                                             |
| 16               | Bangladesh | Poultry Meat               | 2002           | 5                                                              |
| 16               | Bangladesh | Pulses                     | 2002           | 49                                                             |
| 16               | Bangladesh | Pulses, Other and products | 2002           | 26                                                             |
| 16               | Bangladesh | Rape and Mustard Oil       | 2002           | 19                                                             |
| 16               | Bangladesh | Rape and Mustardseed       | 2002           | 4                                                              |
| 16               | Bangladesh | Rice (Milled Equivalent)   | 2002           | 1,723                                                          |
| 16               | Bangladesh | Sesameseed Oil             | 2002           | 2                                                              |
| 16               | Bangladesh | Soyabean Oil               | 2002           | 48                                                             |
| 16               | Bangladesh | Spices                     | 2002           | 16                                                             |
| 16               | Bangladesh | Spices, Other              | 2002           | 7                                                              |
| 16               | Bangladesh | Starchy Roots              | 2002           | 41                                                             |
| 16               | Bangladesh | Sugar & Sweeteners         | 2002           | 62                                                             |
| 16               | Bangladesh | Sugar (Raw Equivalent)     | 2002           | 30                                                             |
| 16               | Bangladesh | Sugar cane                 | 2002           | 2                                                              |
| 16               | Bangladesh | Sugar Crops                | 2002           | 2                                                              |
| 16               | Bangladesh | Sugar non-centrifugal      | 2002           | 27                                                             |
| 16               | Bangladesh | Sweet potatoes             | 2002           | 6                                                              |
| 16               | Bangladesh | Sweeteners, Other          | 2002           | 5                                                              |
| 16               | Bangladesh | Treenuts                   | 2002           | 2                                                              |
| 16               | Bangladesh | Vegetable Oils             | 2002           | 117                                                            |
| 16               | Bangladesh | Vegetables                 | 2002           | 9                                                              |
| 16               | Bangladesh | Vegetables, Other          | 2002           | 7                                                              |
| 16               | Bangladesh | Vegetal Products           | 2002           | 2,235                                                          |
| 16               | Bangladesh | Wheat and products         | 2002           | 191                                                            |
| 16               | Bangladesh | Animal fats                | 2003           | 6                                                              |
| 16               | Bangladesh | Animal Products            | 2003           | 80                                                             |
| 16               | Bangladesh | Bananas                    | 2003           | 7                                                              |
| 16               | Bangladesh | Beans                      | 2003           | 3                                                              |
| 16               | Bangladesh | Bovine Meat                | 2003           | 6                                                              |
| 16               | Bangladesh | Butter, Ghee               | 2003           | 4                                                              |
| 16               | Bangladesh | Cereals - Excluding Beer   | 2003           | 1,939                                                          |
| 16               | Bangladesh | Coconut Oil                | 2003           | 5                                                              |
| 16               | Bangladesh | Cottonseed Oil             | 2003           | 1                                                              |
| 16               | Bangladesh | Crustaceans                | 2003           | 1                                                              |
| 16               | Bangladesh | Dates                      | 2003           | 1                                                              |
| 16               | Bangladesh | Demersal Fish              | 2003           | 1                                                              |
| 16               | Bangladesh | Eggs                       | 2003           | 5                                                              |
| 16               | Bangladesh | Fats, Animals, Raw         | 2003           | 3                                                              |
| 16               | Bangladesh | Fish, Seafood              | 2003           | 24                                                             |
| 16               | Bangladesh | Freshwater Fish            | 2003           | 20                                                             |
| 16               | Bangladesh | Fruits - Excluding Wine    | 2003           | 15                                                             |
| 16               | Bangladesh | Fruits, Other              | 2003           | 6                                                              |
| 16               | Bangladesh | Grand Total                | 2003           | 2,350                                                          |
| 16               | Bangladesh | Groundnut Oil              | 2003           | 1                                                              |
| 16               | Bangladesh | Maize and products         | 2003           | 2                                                              |
| 16               | Bangladesh | Marine Fish, Other         | 2003           | 2                                                              |
| 16               | Bangladesh | Meat                       | 2003           | 16                                                             |
| 16               | Bangladesh | Milk - Excluding Butter    | 2003           | 26                                                             |
| 16               | Bangladesh | Millet and products        | 2003           | 2                                                              |
| 16               | Bangladesh | Mutton & Goat Meat         | 2003           | 4                                                              |
| 16               | Bangladesh | Offals                     | 2003           | 2                                                              |
| 16               | Bangladesh | Oilcrops                   | 2003           | 6                                                              |
| 16               | Bangladesh | Onions                     | 2003           | 3                                                              |
| 16               | Bangladesh | Palm Oil                   | 2003           | 53                                                             |
| 16               | Bangladesh | Peas                       | 2003           | 9                                                              |
| 16               | Bangladesh | Pelagic Fish               | 2003           | 1                                                              |
| 16               | Bangladesh | Pimento                    | 2003           | 8                                                              |
| 16               | Bangladesh | Pineapples and products    | 2003           | 1                                                              |
| 16               | Bangladesh | Potatoes and products      | 2003           | 38                                                             |
| 16               | Bangladesh | Poultry Meat               | 2003           | 5                                                              |
| 16               | Bangladesh | Pulses                     | 2003           | 43                                                             |
| 16               | Bangladesh | Pulses, Other and products | 2003           | 31                                                             |
| 16               | Bangladesh | Rape and Mustard Oil       | 2003           | 20                                                             |
| 16               | Bangladesh | Rape and Mustardseed       | 2003           | 5                                                              |
| 16               | Bangladesh | Rice (Milled Equivalent)   | 2003           | 1,753                                                          |
| 16               | Bangladesh | Sesameseed Oil             | 2003           | 2                                                              |
| 16               | Bangladesh | Soyabean Oil               | 2003           | 50                                                             |
| 16               | Bangladesh | Spices                     | 2003           | 16                                                             |
| 16               | Bangladesh | Spices, Other              | 2003           | 8                                                              |
| 16               | Bangladesh | Starchy Roots              | 2003           | 45                                                             |
| 16               | Bangladesh | Sugar & Sweeteners         | 2003           | 57                                                             |
| 16               | Bangladesh | Sugar (Raw Equivalent)     | 2003           | 25                                                             |
| 16               | Bangladesh | Sugar cane                 | 2003           | 2                                                              |
| 16               | Bangladesh | Sugar Crops                | 2003           | 2                                                              |
| 16               | Bangladesh | Sugar non-centrifugal      | 2003           | 26                                                             |

Dietary calcium and zinc deficiency risks are decreasing but remain prevalent

| FAO Country code | Country    | Food item                  | Reference year | Net energy supply (kcal capita <sup>-1</sup> d <sup>-1</sup> ) |
|------------------|------------|----------------------------|----------------|----------------------------------------------------------------|
| 16               | Bangladesh | Sweet potatoes             | 2003           | 6                                                              |
| 16               | Bangladesh | Sweeteners, Other          | 2003           | 6                                                              |
| 16               | Bangladesh | Treenuts                   | 2003           | 3                                                              |
| 16               | Bangladesh | Vegetable Oils             | 2003           | 133                                                            |
| 16               | Bangladesh | Vegetables                 | 2003           | 11                                                             |
| 16               | Bangladesh | Vegetables, Other          | 2003           | 7                                                              |
| 16               | Bangladesh | Vegetal Products           | 2003           | 2,271                                                          |
| 16               | Bangladesh | Wheat and products         | 2003           | 182                                                            |
| 16               | Bangladesh | Animal fats                | 2004           | 6                                                              |
| 16               | Bangladesh | Animal Products            | 2004           | 83                                                             |
| 16               | Bangladesh | Bananas                    | 2004           | 8                                                              |
| 16               | Bangladesh | Beans                      | 2004           | 3                                                              |
| 16               | Bangladesh | Bovine Meat                | 2004           | 6                                                              |
| 16               | Bangladesh | Butter, Ghee               | 2004           | 4                                                              |
| 16               | Bangladesh | Cassava and products       | 2004           | 1                                                              |
| 16               | Bangladesh | Cereals - Excluding Beer   | 2004           | 1,926                                                          |
| 16               | Bangladesh | Coconut Oil                | 2004           | 4                                                              |
| 16               | Bangladesh | Cottonseed Oil             | 2004           | 1                                                              |
| 16               | Bangladesh | Crustaceans                | 2004           | 1                                                              |
| 16               | Bangladesh | Dates                      | 2004           | 1                                                              |
| 16               | Bangladesh | Demersal Fish              | 2004           | 1                                                              |
| 16               | Bangladesh | Eggs                       | 2004           | 5                                                              |
| 16               | Bangladesh | Fats, Animals, Raw         | 2004           | 3                                                              |
| 16               | Bangladesh | Fish, Seafood              | 2004           | 25                                                             |
| 16               | Bangladesh | Freshwater Fish            | 2004           | 21                                                             |
| 16               | Bangladesh | Fruits - Excluding Wine    | 2004           | 18                                                             |
| 16               | Bangladesh | Fruits, Other              | 2004           | 7                                                              |
| 16               | Bangladesh | Grand Total                | 2004           | 2,382                                                          |
| 16               | Bangladesh | Groundnut Oil              | 2004           | 1                                                              |
| 16               | Bangladesh | Maize and products         | 2004           | 2                                                              |
| 16               | Bangladesh | Marine Fish, Other         | 2004           | 2                                                              |
| 16               | Bangladesh | Meat                       | 2004           | 16                                                             |
| 16               | Bangladesh | Milk - Excluding Butter    | 2004           | 28                                                             |
| 16               | Bangladesh | Millet and products        | 2004           | 2                                                              |
| 16               | Bangladesh | Mutton & Goat Meat         | 2004           | 5                                                              |
| 16               | Bangladesh | Offals                     | 2004           | 2                                                              |
| 16               | Bangladesh | Oilcrops                   | 2004           | 10                                                             |
| 16               | Bangladesh | Onions                     | 2004           | 4                                                              |
| 16               | Bangladesh | Palm Oil                   | 2004           | 65                                                             |
| 16               | Bangladesh | Peas                       | 2004           | 14                                                             |
| 16               | Bangladesh | Pelagic Fish               | 2004           | 1                                                              |
| 16               | Bangladesh | Pimento                    | 2004           | 9                                                              |
| 16               | Bangladesh | Pineapples and products    | 2004           | 1                                                              |
| 16               | Bangladesh | Potatoes and products      | 2004           | 43                                                             |
| 16               | Bangladesh | Poultry Meat               | 2004           | 5                                                              |
| 16               | Bangladesh | Pulses                     | 2004           | 47                                                             |
| 16               | Bangladesh | Pulses, Other and products | 2004           | 31                                                             |
| 16               | Bangladesh | Rape and Mustard Oil       | 2004           | 18                                                             |
| 16               | Bangladesh | Rape and Mustardseed       | 2004           | 3                                                              |
| 16               | Bangladesh | Rice (Milled Equivalent)   | 2004           | 1,736                                                          |
| 16               | Bangladesh | Sesameseed Oil             | 2004           | 2                                                              |
| 16               | Bangladesh | Soyabean Oil               | 2004           | 46                                                             |
| 16               | Bangladesh | Soyabeans                  | 2004           | 6                                                              |
| 16               | Bangladesh | Spices                     | 2004           | 18                                                             |
| 16               | Bangladesh | Spices, Other              | 2004           | 9                                                              |
| 16               | Bangladesh | Starchy Roots              | 2004           | 49                                                             |
| 16               | Bangladesh | Sugar & Sweeteners         | 2004           | 74                                                             |
| 16               | Bangladesh | Sugar (Raw Equivalent)     | 2004           | 42                                                             |
| 16               | Bangladesh | Sugar cane                 | 2004           | 2                                                              |
| 16               | Bangladesh | Sugar Crops                | 2004           | 2                                                              |
| 16               | Bangladesh | Sugar non-centrifugal      | 2004           | 25                                                             |
| 16               | Bangladesh | Sweet potatoes             | 2004           | 5                                                              |
| 16               | Bangladesh | Sweeteners, Other          | 2004           | 7                                                              |
| 16               | Bangladesh | Treenuts                   | 2004           | 2                                                              |
| 16               | Bangladesh | Vegetable Oils             | 2004           | 139                                                            |
| 16               | Bangladesh | Vegetables                 | 2004           | 13                                                             |
| 16               | Bangladesh | Vegetables, Other          | 2004           | 8                                                              |
| 16               | Bangladesh | Vegetal Products           | 2004           | 2,300                                                          |
| 16               | Bangladesh | Wheat and products         | 2004           | 186                                                            |
| 16               | Bangladesh | Animal fats                | 2005           | 7                                                              |
| 16               | Bangladesh | Animal Products            | 2005           | 86                                                             |
| 16               | Bangladesh | Bananas                    | 2005           | 10                                                             |
| 16               | Bangladesh | Beans                      | 2005           | 4                                                              |
| 16               | Bangladesh | Bovine Meat                | 2005           | 6                                                              |
| 16               | Bangladesh | Butter, Ghee               | 2005           | 4                                                              |
| 16               | Bangladesh | Cassava and products       | 2005           | 1                                                              |
| 16               | Bangladesh | Cereals - Excluding Beer   | 2005           | 1,865                                                          |
| 16               | Bangladesh | Coconut Oil                | 2005           | 4                                                              |
| 16               | Bangladesh | Cottonseed Oil             | 2005           | 1                                                              |
| 16               | Bangladesh | Crustaceans                | 2005           | 1                                                              |
| 16               | Bangladesh | Dates                      | 2005           | 1                                                              |
| 16               | Bangladesh | Demersal Fish              | 2005           | 1                                                              |
| 16               | Bangladesh | Eggs                       | 2005           | 6                                                              |
| 16               | Bangladesh | Fats, Animals, Raw         | 2005           | 3                                                              |
| 16               | Bangladesh | Fish, Seafood              | 2005           | 26                                                             |
| 16               | Bangladesh | Freshwater Fish            | 2005           | 22                                                             |
| 16               | Bangladesh | Fruits - Excluding Wine    | 2005           | 25                                                             |
| 16               | Bangladesh | Fruits, Other              | 2005           | 13                                                             |
| 16               | Bangladesh | Grand Total                | 2005           | 2,372                                                          |
| 16               | Bangladesh | Groundnut Oil              | 2005           | 2                                                              |
| 16               | Bangladesh | Maize and products         | 2005           | 2                                                              |
| 16               | Bangladesh | Marine Fish, Other         | 2005           | 2                                                              |
| 16               | Bangladesh | Meat                       | 2005           | 16                                                             |
| 16               | Bangladesh | Milk - Excluding Butter    | 2005           | 29                                                             |
| 16               | Bangladesh | Millet and products        | 2005           | 1                                                              |
| 16               | Bangladesh | Mutton & Goat Meat         | 2005           | 5                                                              |
| 16               | Bangladesh | Offals                     | 2005           | 2                                                              |

Dietary calcium and zinc deficiency risks are decreasing but remain prevalent

| FAO Country code | Country    | Food item                  | Reference year | Net energy supply (kcal capita <sup>-1</sup> d <sup>-1</sup> ) |
|------------------|------------|----------------------------|----------------|----------------------------------------------------------------|
| 16               | Bangladesh | Oilcrops                   | 2005           | 15                                                             |
| 16               | Bangladesh | Onions                     | 2005           | 5                                                              |
| 16               | Bangladesh | Palm Oil                   | 2005           | 69                                                             |
| 16               | Bangladesh | Peas                       | 2005           | 11                                                             |
| 16               | Bangladesh | Pelagic Fish               | 2005           | 1                                                              |
| 16               | Bangladesh | Pimento                    | 2005           | 11                                                             |
| 16               | Bangladesh | Pineapples and products    | 2005           | 1                                                              |
| 16               | Bangladesh | Potatoes and products      | 2005           | 54                                                             |
| 16               | Bangladesh | Poultry Meat               | 2005           | 5                                                              |
| 16               | Bangladesh | Pulses                     | 2005           | 41                                                             |
| 16               | Bangladesh | Pulses, Other and products | 2005           | 26                                                             |
| 16               | Bangladesh | Rape and Mustard Oil       | 2005           | 16                                                             |
| 16               | Bangladesh | Rape and Mustardseed       | 2005           | 7                                                              |
| 16               | Bangladesh | Rice (Milled Equivalent)   | 2005           | 1,688                                                          |
| 16               | Bangladesh | Sesameseed Oil             | 2005           | 3                                                              |
| 16               | Bangladesh | Soyabean Oil               | 2005           | 45                                                             |
| 16               | Bangladesh | Soyabeans                  | 2005           | 8                                                              |
| 16               | Bangladesh | Spices                     | 2005           | 21                                                             |
| 16               | Bangladesh | Spices, Other              | 2005           | 10                                                             |
| 16               | Bangladesh | Starchy Roots              | 2005           | 60                                                             |
| 16               | Bangladesh | Sugar & Sweeteners         | 2005           | 98                                                             |
| 16               | Bangladesh | Sugar (Raw Equivalent)     | 2005           | 59                                                             |
| 16               | Bangladesh | Sugar cane                 | 2005           | 2                                                              |
| 16               | Bangladesh | Sugar Crops                | 2005           | 2                                                              |
| 16               | Bangladesh | Sugar non-centrifugal      | 2005           | 31                                                             |
| 16               | Bangladesh | Sweet potatoes             | 2005           | 5                                                              |
| 16               | Bangladesh | Sweeteners, Other          | 2005           | 8                                                              |
| 16               | Bangladesh | Treenuts                   | 2005           | 5                                                              |
| 16               | Bangladesh | Vegetable Oils             | 2005           | 139                                                            |
| 16               | Bangladesh | Vegetables                 | 2005           | 13                                                             |
| 16               | Bangladesh | Vegetables, Other          | 2005           | 8                                                              |
| 16               | Bangladesh | Vegetal Products           | 2005           | 2,286                                                          |
| 16               | Bangladesh | Wheat and products         | 2005           | 174                                                            |
| 16               | Bangladesh | Animal fats                | 2006           | 7                                                              |
| 16               | Bangladesh | Animal Products            | 2006           | 87                                                             |
| 16               | Bangladesh | Bananas                    | 2006           | 10                                                             |
| 16               | Bangladesh | Beans                      | 2006           | 3                                                              |
| 16               | Bangladesh | Bovine Meat                | 2006           | 6                                                              |
| 16               | Bangladesh | Butter, Ghee               | 2006           | 4                                                              |
| 16               | Bangladesh | Cereals - Excluding Beer   | 2006           | 1,864                                                          |
| 16               | Bangladesh | Coconut Oil                | 2006           | 4                                                              |
| 16               | Bangladesh | Cottonseed Oil             | 2006           | 1                                                              |
| 16               | Bangladesh | Crustaceans                | 2006           | 1                                                              |
| 16               | Bangladesh | Dates                      | 2006           | 1                                                              |
| 16               | Bangladesh | Demersal Fish              | 2006           | 1                                                              |
| 16               | Bangladesh | Eggs                       | 2006           | 6                                                              |
| 16               | Bangladesh | Fats, Animals, Raw         | 2006           | 3                                                              |
| 16               | Bangladesh | Fish, Seafood              | 2006           | 27                                                             |
| 16               | Bangladesh | Freshwater Fish            | 2006           | 23                                                             |
| 16               | Bangladesh | Fruits - Excluding Wine    | 2006           | 26                                                             |
| 16               | Bangladesh | Fruits, Other              | 2006           | 14                                                             |
| 16               | Bangladesh | Grand Total                | 2006           | 2,372                                                          |
| 16               | Bangladesh | Groundnut Oil              | 2006           | 2                                                              |
| 16               | Bangladesh | Maize and products         | 2006           | 2                                                              |
| 16               | Bangladesh | Marine Fish, Other         | 2006           | 1                                                              |
| 16               | Bangladesh | Meat                       | 2006           | 17                                                             |
| 16               | Bangladesh | Milk - Excluding Butter    | 2006           | 29                                                             |
| 16               | Bangladesh | Millet and products        | 2006           | 1                                                              |
| 16               | Bangladesh | Mutton & Goat Meat         | 2006           | 5                                                              |
| 16               | Bangladesh | Offals                     | 2006           | 2                                                              |
| 16               | Bangladesh | Oilcrops                   | 2006           | 17                                                             |
| 16               | Bangladesh | Onions                     | 2006           | 6                                                              |
| 16               | Bangladesh | Palm Oil                   | 2006           | 71                                                             |
| 16               | Bangladesh | Peas                       | 2006           | 8                                                              |
| 16               | Bangladesh | Pelagic Fish               | 2006           | 1                                                              |
| 16               | Bangladesh | Pimento                    | 2006           | 8                                                              |
| 16               | Bangladesh | Pineapples and products    | 2006           | 1                                                              |
| 16               | Bangladesh | Potatoes and products      | 2006           | 60                                                             |
| 16               | Bangladesh | Poultry Meat               | 2006           | 5                                                              |
| 16               | Bangladesh | Pulses                     | 2006           | 33                                                             |
| 16               | Bangladesh | Pulses, Other and products | 2006           | 23                                                             |
| 16               | Bangladesh | Rape and Mustard Oil       | 2006           | 15                                                             |
| 16               | Bangladesh | Rape and Mustardseed       | 2006           | 5                                                              |
| 16               | Bangladesh | Rice (Milled Equivalent)   | 2006           | 1,705                                                          |
| 16               | Bangladesh | Sesameseed Oil             | 2006           | 2                                                              |
| 16               | Bangladesh | Soyabean Oil               | 2006           | 59                                                             |
| 16               | Bangladesh | Soyabeans                  | 2006           | 11                                                             |
| 16               | Bangladesh | Spices                     | 2006           | 20                                                             |
| 16               | Bangladesh | Spices, Other              | 2006           | 11                                                             |
| 16               | Bangladesh | Starchy Roots              | 2006           | 66                                                             |
| 16               | Bangladesh | Sugar & Sweeteners         | 2006           | 84                                                             |
| 16               | Bangladesh | Sugar (Raw Equivalent)     | 2006           | 56                                                             |
| 16               | Bangladesh | Sugar cane                 | 2006           | 2                                                              |
| 16               | Bangladesh | Sugar Crops                | 2006           | 2                                                              |
| 16               | Bangladesh | Sugar non-centrifugal      | 2006           | 22                                                             |
| 16               | Bangladesh | Sweet potatoes             | 2006           | 5                                                              |
| 16               | Bangladesh | Sweeteners, Other          | 2006           | 6                                                              |
| 16               | Bangladesh | Treenuts                   | 2006           | 4                                                              |
| 16               | Bangladesh | Vegetable Oils             | 2006           | 154                                                            |
| 16               | Bangladesh | Vegetables                 | 2006           | 16                                                             |
| 16               | Bangladesh | Vegetables, Other          | 2006           | 9                                                              |
| 16               | Bangladesh | Vegetal Products           | 2006           | 2,285                                                          |
| 16               | Bangladesh | Wheat and products         | 2006           | 156                                                            |
| 16               | Bangladesh | Animal fats                | 2007           | 7                                                              |
| 16               | Bangladesh | Animal Products            | 2007           | 90                                                             |
| 16               | Bangladesh | Bananas                    | 2007           | 11                                                             |
| 16               | Bangladesh | Beans                      | 2007           | 3                                                              |



Dietary calcium and zinc deficiency risks are decreasing but remain prevalent

| FAO Country code | Country    | Food item                       | Reference year | Net energy supply (kcal <i>capita</i> <sup>-1</sup> d <sup>-1</sup> ) |
|------------------|------------|---------------------------------|----------------|-----------------------------------------------------------------------|
| 16               | Bangladesh | Bovine Meat                     | 2007           | 6                                                                     |
| 16               | Bangladesh | Butter, Ghee                    | 2007           | 4                                                                     |
| 16               | Bangladesh | Cereals - Excluding Beer        | 2007           | 1,894                                                                 |
| 16               | Bangladesh | Coconut Oil                     | 2007           | 4                                                                     |
| 16               | Bangladesh | Cottonseed Oil                  | 2007           | 1                                                                     |
| 16               | Bangladesh | Crustaceans                     | 2007           | 1                                                                     |
| 16               | Bangladesh | Dates                           | 2007           | 1                                                                     |
| 16               | Bangladesh | Demersal Fish                   | 2007           | 1                                                                     |
| 16               | Bangladesh | Eggs                            | 2007           | 6                                                                     |
| 16               | Bangladesh | Fats, Animals, Raw              | 2007           | 3                                                                     |
| 16               | Bangladesh | Fish, Seafood                   | 2007           | 28                                                                    |
| 16               | Bangladesh | Freshwater Fish                 | 2007           | 25                                                                    |
| 16               | Bangladesh | Fruits - Excluding Wine         | 2007           | 29                                                                    |
| 16               | Bangladesh | Fruits, Other                   | 2007           | 16                                                                    |
| 16               | Bangladesh | Grand Total                     | 2007           | 2,417                                                                 |
| 16               | Bangladesh | Groundnut Oil                   | 2007           | 2                                                                     |
| 16               | Bangladesh | Maize and products              | 2007           | 4                                                                     |
| 16               | Bangladesh | Marine Fish, Other              | 2007           | 1                                                                     |
| 16               | Bangladesh | Meat                            | 2007           | 17                                                                    |
| 16               | Bangladesh | Milk - Excluding Butter         | 2007           | 30                                                                    |
| 16               | Bangladesh | Millet and products             | 2007           | 1                                                                     |
| 16               | Bangladesh | Mutton & Goat Meat              | 2007           | 5                                                                     |
| 16               | Bangladesh | Offals                          | 2007           | 2                                                                     |
| 16               | Bangladesh | Oilcrops                        | 2007           | 18                                                                    |
| 16               | Bangladesh | Onions                          | 2007           | 7                                                                     |
| 16               | Bangladesh | Palm Oil                        | 2007           | 70                                                                    |
| 16               | Bangladesh | Peas                            | 2007           | 21                                                                    |
| 16               | Bangladesh | Pelagic Fish                    | 2007           | 1                                                                     |
| 16               | Bangladesh | Pimento                         | 2007           | 10                                                                    |
| 16               | Bangladesh | Pineapples and products         | 2007           | 1                                                                     |
| 16               | Bangladesh | Potatoes and products           | 2007           | 56                                                                    |
| 16               | Bangladesh | Poultry Meat                    | 2007           | 6                                                                     |
| 16               | Bangladesh | Pulses                          | 2007           | 49                                                                    |
| 16               | Bangladesh | Pulses, Other and products      | 2007           | 25                                                                    |
| 16               | Bangladesh | Rape and Mustard Oil            | 2007           | 16                                                                    |
| 16               | Bangladesh | Rape and Mustardseed            | 2007           | 5                                                                     |
| 16               | Bangladesh | Rice (Milled Equivalent)        | 2007           | 1,754                                                                 |
| 16               | Bangladesh | Sesameseed Oil                  | 2007           | 2                                                                     |
| 16               | Bangladesh | Soyabean Oil                    | 2007           | 51                                                                    |
| 16               | Bangladesh | Soyabeans                       | 2007           | 12                                                                    |
| 16               | Bangladesh | Spices                          | 2007           | 23                                                                    |
| 16               | Bangladesh | Spices, Other                   | 2007           | 13                                                                    |
| 16               | Bangladesh | Starchy Roots                   | 2007           | 62                                                                    |
| 16               | Bangladesh | Sugar & Sweeteners              | 2007           | 81                                                                    |
| 16               | Bangladesh | Sugar (Raw Equivalent)          | 2007           | 55                                                                    |
| 16               | Bangladesh | Sugar cane                      | 2007           | 2                                                                     |
| 16               | Bangladesh | Sugar Crops                     | 2007           | 2                                                                     |
| 16               | Bangladesh | Sugar non-centrifugal           | 2007           | 20                                                                    |
| 16               | Bangladesh | Sweet potatoes                  | 2007           | 5                                                                     |
| 16               | Bangladesh | Sweeteners, Other               | 2007           | 6                                                                     |
| 16               | Bangladesh | Treenuts                        | 2007           | 4                                                                     |
| 16               | Bangladesh | Vegetable Oils                  | 2007           | 145                                                                   |
| 16               | Bangladesh | Vegetables                      | 2007           | 19                                                                    |
| 16               | Bangladesh | Vegetables, Other               | 2007           | 12                                                                    |
| 16               | Bangladesh | Vegetal Products                | 2007           | 2,327                                                                 |
| 16               | Bangladesh | Wheat and products              | 2007           | 135                                                                   |
| 16               | Bangladesh | Animal fats                     | 2008           | 7                                                                     |
| 16               | Bangladesh | Animal Products                 | 2008           | 91                                                                    |
| 16               | Bangladesh | Apples and products             | 2008           | 1                                                                     |
| 16               | Bangladesh | Bananas                         | 2008           | 9                                                                     |
| 16               | Bangladesh | Beans                           | 2008           | 2                                                                     |
| 16               | Bangladesh | Bovine Meat                     | 2008           | 6                                                                     |
| 16               | Bangladesh | Butter, Ghee                    | 2008           | 4                                                                     |
| 16               | Bangladesh | Cereals - Excluding Beer        | 2008           | 1,879                                                                 |
| 16               | Bangladesh | Coconut Oil                     | 2008           | 4                                                                     |
| 16               | Bangladesh | Crustaceans                     | 2008           | 1                                                                     |
| 16               | Bangladesh | Dates                           | 2008           | 1                                                                     |
| 16               | Bangladesh | Demersal Fish                   | 2008           | 1                                                                     |
| 16               | Bangladesh | Eggs                            | 2008           | 6                                                                     |
| 16               | Bangladesh | Fats, Animals, Raw              | 2008           | 3                                                                     |
| 16               | Bangladesh | Fish, Seafood                   | 2008           | 29                                                                    |
| 16               | Bangladesh | Freshwater Fish                 | 2008           | 25                                                                    |
| 16               | Bangladesh | Fruits - Excluding Wine         | 2008           | 30                                                                    |
| 16               | Bangladesh | Fruits, Other                   | 2008           | 17                                                                    |
| 16               | Bangladesh | Grand Total                     | 2008           | 2,386                                                                 |
| 16               | Bangladesh | Grapes and products (excl wine) | 2008           | 1                                                                     |
| 16               | Bangladesh | Groundnut Oil                   | 2008           | 2                                                                     |
| 16               | Bangladesh | Maize and products              | 2008           | 5                                                                     |
| 16               | Bangladesh | Marine Fish, Other              | 2008           | 1                                                                     |
| 16               | Bangladesh | Meat                            | 2008           | 17                                                                    |
| 16               | Bangladesh | Milk - Excluding Butter         | 2008           | 31                                                                    |
| 16               | Bangladesh | Millet and products             | 2008           | 1                                                                     |
| 16               | Bangladesh | Mutton & Goat Meat              | 2008           | 5                                                                     |
| 16               | Bangladesh | Offals                          | 2008           | 2                                                                     |
| 16               | Bangladesh | Oilcrops                        | 2008           | 10                                                                    |
| 16               | Bangladesh | Onions                          | 2008           | 11                                                                    |
| 16               | Bangladesh | Palm Oil                        | 2008           | 74                                                                    |
| 16               | Bangladesh | Peas                            | 2008           | 8                                                                     |
| 16               | Bangladesh | Pelagic Fish                    | 2008           | 1                                                                     |
| 16               | Bangladesh | Pimento                         | 2008           | 6                                                                     |
| 16               | Bangladesh | Pineapples and products         | 2008           | 1                                                                     |
| 16               | Bangladesh | Potatoes and products           | 2008           | 73                                                                    |
| 16               | Bangladesh | Poultry Meat                    | 2008           | 6                                                                     |
| 16               | Bangladesh | Pulses                          | 2008           | 27                                                                    |
| 16               | Bangladesh | Pulses, Other and products      | 2008           | 16                                                                    |
| 16               | Bangladesh | Rape and Mustard Oil            | 2008           | 16                                                                    |
| 16               | Bangladesh | Rice (Milled Equivalent)        | 2008           | 1,736                                                                 |

Dietary calcium and zinc deficiency risks are decreasing but remain prevalent

| FAO Country code | Country    | Food item                       | Reference year | Net energy supply (kcal <i>capita</i> <sup>-1</sup> d <sup>-1</sup> ) |
|------------------|------------|---------------------------------|----------------|-----------------------------------------------------------------------|
| 16               | Bangladesh | Sesameseed Oil                  | 2008           | 2                                                                     |
| 16               | Bangladesh | Soyabean Oil                    | 2008           | 43                                                                    |
| 16               | Bangladesh | Soyabeans                       | 2008           | 9                                                                     |
| 16               | Bangladesh | Spices                          | 2008           | 22                                                                    |
| 16               | Bangladesh | Spices, Other                   | 2008           | 15                                                                    |
| 16               | Bangladesh | Starchy Roots                   | 2008           | 79                                                                    |
| 16               | Bangladesh | Sugar & Sweeteners              | 2008           | 78                                                                    |
| 16               | Bangladesh | Sugar (Raw Equivalent)          | 2008           | 53                                                                    |
| 16               | Bangladesh | Sugar cane                      | 2008           | 2                                                                     |
| 16               | Bangladesh | Sugar Crops                     | 2008           | 2                                                                     |
| 16               | Bangladesh | Sugar non-centrifugal           | 2008           | 20                                                                    |
| 16               | Bangladesh | Sweet potatoes                  | 2008           | 5                                                                     |
| 16               | Bangladesh | Sweeteners, Other               | 2008           | 5                                                                     |
| 16               | Bangladesh | Treenuts                        | 2008           | 6                                                                     |
| 16               | Bangladesh | Vegetable Oils                  | 2008           | 141                                                                   |
| 16               | Bangladesh | Vegetables                      | 2008           | 23                                                                    |
| 16               | Bangladesh | Vegetables, Other               | 2008           | 12                                                                    |
| 16               | Bangladesh | Vegetal Products                | 2008           | 2,294                                                                 |
| 16               | Bangladesh | Wheat and products              | 2008           | 136                                                                   |
| 16               | Bangladesh | Animal fats                     | 2009           | 7                                                                     |
| 16               | Bangladesh | Animal Products                 | 2009           | 97                                                                    |
| 16               | Bangladesh | Apples and products             | 2009           | 1                                                                     |
| 16               | Bangladesh | Bananas                         | 2009           | 9                                                                     |
| 16               | Bangladesh | Beans                           | 2009           | 3                                                                     |
| 16               | Bangladesh | Bovine Meat                     | 2009           | 6                                                                     |
| 16               | Bangladesh | Butter, Ghee                    | 2009           | 4                                                                     |
| 16               | Bangladesh | Cereals - Excluding Beer        | 2009           | 1,876                                                                 |
| 16               | Bangladesh | Coconut Oil                     | 2009           | 3                                                                     |
| 16               | Bangladesh | Cottonseed Oil                  | 2009           | 1                                                                     |
| 16               | Bangladesh | Crustaceans                     | 2009           | 2                                                                     |
| 16               | Bangladesh | Demersal Fish                   | 2009           | 1                                                                     |
| 16               | Bangladesh | Eggs                            | 2009           | 5                                                                     |
| 16               | Bangladesh | Fats, Animals, Raw              | 2009           | 3                                                                     |
| 16               | Bangladesh | Fish, Seafood                   | 2009           | 32                                                                    |
| 16               | Bangladesh | Freshwater Fish                 | 2009           | 27                                                                    |
| 16               | Bangladesh | Fruits - Excluding Wine         | 2009           | 30                                                                    |
| 16               | Bangladesh | Fruits, Other                   | 2009           | 18                                                                    |
| 16               | Bangladesh | Grand Total                     | 2009           | 2,428                                                                 |
| 16               | Bangladesh | Grapes and products (excl wine) | 2009           | 1                                                                     |
| 16               | Bangladesh | Groundnut Oil                   | 2009           | 2                                                                     |
| 16               | Bangladesh | Maize and products              | 2009           | 10                                                                    |
| 16               | Bangladesh | Marine Fish, Other              | 2009           | 2                                                                     |
| 16               | Bangladesh | Meat                            | 2009           | 17                                                                    |
| 16               | Bangladesh | Milk - Excluding Butter         | 2009           | 34                                                                    |
| 16               | Bangladesh | Millet and products             | 2009           | 1                                                                     |
| 16               | Bangladesh | Mutton & Goat Meat              | 2009           | 5                                                                     |
| 16               | Bangladesh | Offals                          | 2009           | 2                                                                     |
| 16               | Bangladesh | Oilcrops                        | 2009           | 17                                                                    |
| 16               | Bangladesh | Onions                          | 2009           | 10                                                                    |
| 16               | Bangladesh | Palm Oil                        | 2009           | 72                                                                    |
| 16               | Bangladesh | Peas                            | 2009           | 32                                                                    |
| 16               | Bangladesh | Pelagic Fish                    | 2009           | 1                                                                     |
| 16               | Bangladesh | Pimento                         | 2009           | 7                                                                     |
| 16               | Bangladesh | Pineapples and products         | 2009           | 1                                                                     |
| 16               | Bangladesh | Potatoes and products           | 2009           | 56                                                                    |
| 16               | Bangladesh | Poultry Meat                    | 2009           | 6                                                                     |
| 16               | Bangladesh | Pulses                          | 2009           | 63                                                                    |
| 16               | Bangladesh | Pulses, Other and products      | 2009           | 29                                                                    |
| 16               | Bangladesh | Rape and Mustard Oil            | 2009           | 17                                                                    |
| 16               | Bangladesh | Rape and Mustardseed            | 2009           | 2                                                                     |
| 16               | Bangladesh | Rice (Milled Equivalent)        | 2009           | 1,725                                                                 |
| 16               | Bangladesh | Sesameseed Oil                  | 2009           | 2                                                                     |
| 16               | Bangladesh | Soyabean Oil                    | 2009           | 52                                                                    |
| 16               | Bangladesh | Soyabeans                       | 2009           | 14                                                                    |
| 16               | Bangladesh | Spices                          | 2009           | 24                                                                    |
| 16               | Bangladesh | Spices, Other                   | 2009           | 16                                                                    |
| 16               | Bangladesh | Starchy Roots                   | 2009           | 61                                                                    |
| 16               | Bangladesh | Sugar & Sweeteners              | 2009           | 78                                                                    |
| 16               | Bangladesh | Sugar (Raw Equivalent)          | 2009           | 53                                                                    |
| 16               | Bangladesh | Sugar cane                      | 2009           | 2                                                                     |
| 16               | Bangladesh | Sugar Crops                     | 2009           | 2                                                                     |
| 16               | Bangladesh | Sugar non-centrifugal           | 2009           | 20                                                                    |
| 16               | Bangladesh | Sweet potatoes                  | 2009           | 5                                                                     |
| 16               | Bangladesh | Sweeteners, Other               | 2009           | 5                                                                     |
| 16               | Bangladesh | Tomatoes and products           | 2009           | 1                                                                     |
| 16               | Bangladesh | Treenuts                        | 2009           | 6                                                                     |
| 16               | Bangladesh | Vegetable Oils                  | 2009           | 150                                                                   |
| 16               | Bangladesh | Vegetables                      | 2009           | 23                                                                    |
| 16               | Bangladesh | Vegetables, Other               | 2009           | 13                                                                    |
| 16               | Bangladesh | Vegetal Products                | 2009           | 2,331                                                                 |
| 16               | Bangladesh | Wheat and products              | 2009           | 140                                                                   |
| 16               | Bangladesh | Animal fats                     | 2010           | 7                                                                     |
| 16               | Bangladesh | Animal Products                 | 2010           | 102                                                                   |
| 16               | Bangladesh | Apples and products             | 2010           | 1                                                                     |
| 16               | Bangladesh | Bananas                         | 2010           | 8                                                                     |
| 16               | Bangladesh | Beans                           | 2010           | 3                                                                     |
| 16               | Bangladesh | Bovine Meat                     | 2010           | 6                                                                     |
| 16               | Bangladesh | Butter, Ghee                    | 2010           | 4                                                                     |
| 16               | Bangladesh | Cereals - Excluding Beer        | 2010           | 1,873                                                                 |
| 16               | Bangladesh | Coconut Oil                     | 2010           | 3                                                                     |
| 16               | Bangladesh | Cottonseed Oil                  | 2010           | 1                                                                     |
| 16               | Bangladesh | Crustaceans                     | 2010           | 2                                                                     |
| 16               | Bangladesh | Demersal Fish                   | 2010           | 1                                                                     |
| 16               | Bangladesh | Eggs                            | 2010           | 6                                                                     |
| 16               | Bangladesh | Fats, Animals, Raw              | 2010           | 3                                                                     |
| 16               | Bangladesh | Fish, Seafood                   | 2010           | 33                                                                    |
| 16               | Bangladesh | Freshwater Fish                 | 2010           | 27                                                                    |

Dietary calcium and zinc deficiency risks are decreasing but remain prevalent

| FAO Country code | Country    | Food item                       | Reference year | Net energy supply (kcal capita <sup>-1</sup> d <sup>-1</sup> ) |
|------------------|------------|---------------------------------|----------------|----------------------------------------------------------------|
| 16               | Bangladesh | Fruits - Excluding Wine         | 2010           | 32                                                             |
| 16               | Bangladesh | Fruits, Other                   | 2010           | 19                                                             |
| 16               | Bangladesh | Grand Total                     | 2010           | 2,436                                                          |
| 16               | Bangladesh | Grapes and products (excl wine) | 2010           | 1                                                              |
| 16               | Bangladesh | Groundnut Oil                   | 2010           | 2                                                              |
| 16               | Bangladesh | Groundnuts (Shelled Eq)         | 2010           | 1                                                              |
| 16               | Bangladesh | Maize and products              | 2010           | 6                                                              |
| 16               | Bangladesh | Marine Fish, Other              | 2010           | 3                                                              |
| 16               | Bangladesh | Meat                            | 2010           | 18                                                             |
| 16               | Bangladesh | Milk - Excluding Butter         | 2010           | 36                                                             |
| 16               | Bangladesh | Millet and products             | 2010           | 1                                                              |
| 16               | Bangladesh | Mutton & Goat Meat              | 2010           | 5                                                              |
| 16               | Bangladesh | Offals                          | 2010           | 2                                                              |
| 16               | Bangladesh | Oilcrops                        | 2010           | 9                                                              |
| 16               | Bangladesh | Onions                          | 2010           | 9                                                              |
| 16               | Bangladesh | Palm Oil                        | 2010           | 70                                                             |
| 16               | Bangladesh | Peas                            | 2010           | 29                                                             |
| 16               | Bangladesh | Pelagic Fish                    | 2010           | 1                                                              |
| 16               | Bangladesh | Pimento                         | 2010           | 7                                                              |
| 16               | Bangladesh | Pineapples and products         | 2010           | 1                                                              |
| 16               | Bangladesh | Potatoes and products           | 2010           | 86                                                             |
| 16               | Bangladesh | Poultry Meat                    | 2010           | 6                                                              |
| 16               | Bangladesh | Pulses                          | 2010           | 61                                                             |
| 16               | Bangladesh | Pulses, Other and products      | 2010           | 29                                                             |
| 16               | Bangladesh | Rape and Mustard Oil            | 2010           | 22                                                             |
| 16               | Bangladesh | Rape and Mustardseed            | 2010           | 1                                                              |
| 16               | Bangladesh | Rice (Milled Equivalent)        | 2010           | 1,721                                                          |
| 16               | Bangladesh | Sesameseed Oil                  | 2010           | 1                                                              |
| 16               | Bangladesh | Soyabean Oil                    | 2010           | 43                                                             |
| 16               | Bangladesh | Soyabeans                       | 2010           | 7                                                              |
| 16               | Bangladesh | Spices                          | 2010           | 22                                                             |
| 16               | Bangladesh | Spices, Other                   | 2010           | 15                                                             |
| 16               | Bangladesh | Starchy Roots                   | 2010           | 91                                                             |
| 16               | Bangladesh | Stimulants                      | 2010           | 1                                                              |
| 16               | Bangladesh | Sugar & Sweeteners              | 2010           | 76                                                             |
| 16               | Bangladesh | Sugar (Raw Equivalent)          | 2010           | 53                                                             |
| 16               | Bangladesh | Sugar cane                      | 2010           | 1                                                              |
| 16               | Bangladesh | Sugar Crops                     | 2010           | 1                                                              |
| 16               | Bangladesh | Sugar non-centrifugal           | 2010           | 17                                                             |
| 16               | Bangladesh | Sweet potatoes                  | 2010           | 5                                                              |
| 16               | Bangladesh | Sweeteners, Other               | 2010           | 5                                                              |
| 16               | Bangladesh | Tomatoes and products           | 2010           | 1                                                              |
| 16               | Bangladesh | Treenuts                        | 2010           | 5                                                              |
| 16               | Bangladesh | Vegetable Oils                  | 2010           | 143                                                            |
| 16               | Bangladesh | Vegetables                      | 2010           | 22                                                             |
| 16               | Bangladesh | Vegetables, Other               | 2010           | 12                                                             |
| 16               | Bangladesh | Vegetal Products                | 2010           | 2,334                                                          |
| 16               | Bangladesh | Wheat and products              | 2010           | 144                                                            |
| 16               | Bangladesh | Animal fats                     | 2011           | 8                                                              |
| 16               | Bangladesh | Animal Products                 | 2011           | 104                                                            |
| 16               | Bangladesh | Apples and products             | 2011           | 1                                                              |
| 16               | Bangladesh | Bananas                         | 2011           | 8                                                              |
| 16               | Bangladesh | Beans                           | 2011           | 3                                                              |
| 16               | Bangladesh | Bovine Meat                     | 2011           | 6                                                              |
| 16               | Bangladesh | Butter, Ghee                    | 2011           | 5                                                              |
| 16               | Bangladesh | Cereals - Excluding Beer        | 2011           | 1,872                                                          |
| 16               | Bangladesh | Coconut Oil                     | 2011           | 3                                                              |
| 16               | Bangladesh | Cottonseed Oil                  | 2011           | 1                                                              |
| 16               | Bangladesh | Crustaceans                     | 2011           | 2                                                              |
| 16               | Bangladesh | Demersal Fish                   | 2011           | 1                                                              |
| 16               | Bangladesh | Eggs                            | 2011           | 6                                                              |
| 16               | Bangladesh | Fats, Animals, Raw              | 2011           | 3                                                              |
| 16               | Bangladesh | Fish, Seafood                   | 2011           | 34                                                             |
| 16               | Bangladesh | Freshwater Fish                 | 2011           | 29                                                             |
| 16               | Bangladesh | Fruits - Excluding Wine         | 2011           | 29                                                             |
| 16               | Bangladesh | Fruits, Other                   | 2011           | 18                                                             |
| 16               | Bangladesh | Grand Total                     | 2011           | 2,430                                                          |
| 16               | Bangladesh | Groundnut Oil                   | 2011           | 2                                                              |
| 16               | Bangladesh | Groundnuts (Shelled Eq)         | 2011           | 1                                                              |
| 16               | Bangladesh | Maize and products              | 2011           | 4                                                              |
| 16               | Bangladesh | Marine Fish, Other              | 2011           | 1                                                              |
| 16               | Bangladesh | Meat                            | 2011           | 18                                                             |
| 16               | Bangladesh | Milk - Excluding Butter         | 2011           | 36                                                             |
| 16               | Bangladesh | Millet and products             | 2011           | 1                                                              |
| 16               | Bangladesh | Miscellaneous                   | 2011           | 1                                                              |
| 16               | Bangladesh | Mutton & Goat Meat              | 2011           | 6                                                              |
| 16               | Bangladesh | Offals                          | 2011           | 2                                                              |
| 16               | Bangladesh | Oilcrops                        | 2011           | 12                                                             |
| 16               | Bangladesh | Onions                          | 2011           | 9                                                              |
| 16               | Bangladesh | Oranges, Mandarines             | 2011           | 1                                                              |
| 16               | Bangladesh | Palm Oil                        | 2011           | 71                                                             |
| 16               | Bangladesh | Peas                            | 2011           | 14                                                             |
| 16               | Bangladesh | Pelagic Fish                    | 2011           | 1                                                              |
| 16               | Bangladesh | Pimento                         | 2011           | 10                                                             |
| 16               | Bangladesh | Pineapples and products         | 2011           | 1                                                              |
| 16               | Bangladesh | Potatoes and products           | 2011           | 88                                                             |
| 16               | Bangladesh | Poultry Meat                    | 2011           | 6                                                              |
| 16               | Bangladesh | Pulses                          | 2011           | 37                                                             |
| 16               | Bangladesh | Pulses, Other and products      | 2011           | 20                                                             |
| 16               | Bangladesh | Rape and Mustard Oil            | 2011           | 18                                                             |
| 16               | Bangladesh | Rape and Mustardseed            | 2011           | 1                                                              |
| 16               | Bangladesh | Rice (Milled Equivalent)        | 2011           | 1,720                                                          |
| 16               | Bangladesh | Sesameseed Oil                  | 2011           | 1                                                              |
| 16               | Bangladesh | Soyabean Oil                    | 2011           | 53                                                             |
| 16               | Bangladesh | Soyabeans                       | 2011           | 11                                                             |
| 16               | Bangladesh | Spices                          | 2011           | 26                                                             |
| 16               | Bangladesh | Spices, Other                   | 2011           | 16                                                             |

Dietary calcium and zinc deficiency risks are decreasing but remain prevalent

| FAO Country code | Country    | Food item                       | Reference year | Net energy supply (kcal capita <sup>-1</sup> d <sup>-1</sup> ) |
|------------------|------------|---------------------------------|----------------|----------------------------------------------------------------|
| 16               | Bangladesh | Starchy Roots                   | 2011           | 93                                                             |
| 16               | Bangladesh | Stimulants                      | 2011           | 1                                                              |
| 16               | Bangladesh | Sugar & Sweeteners              | 2011           | 77                                                             |
| 16               | Bangladesh | Sugar (Raw Equivalent)          | 2011           | 53                                                             |
| 16               | Bangladesh | Sugar cane                      | 2011           | 1                                                              |
| 16               | Bangladesh | Sugar Crops                     | 2011           | 1                                                              |
| 16               | Bangladesh | Sugar non-centrifugal           | 2011           | 18                                                             |
| 16               | Bangladesh | Sweet potatoes                  | 2011           | 5                                                              |
| 16               | Bangladesh | Sweeteners, Other               | 2011           | 6                                                              |
| 16               | Bangladesh | Tomatoes and products           | 2011           | 1                                                              |
| 16               | Bangladesh | Treenuts                        | 2011           | 6                                                              |
| 16               | Bangladesh | Vegetable Oils                  | 2011           | 149                                                            |
| 16               | Bangladesh | Vegetables                      | 2011           | 22                                                             |
| 16               | Bangladesh | Vegetables, Other               | 2011           | 13                                                             |
| 16               | Bangladesh | Vegetal Products                | 2011           | 2,326                                                          |
| 16               | Bangladesh | Wheat and products              | 2011           | 148                                                            |
| 14               | Barbados   | Alcoholic Beverages             | 1992           | 113                                                            |
| 14               | Barbados   | Animal fats                     | 1992           | 114                                                            |
| 14               | Barbados   | Animal Products                 | 1992           | 751                                                            |
| 14               | Barbados   | Apples and products             | 1992           | 4                                                              |
| 14               | Barbados   | Bananas                         | 1992           | 12                                                             |
| 14               | Barbados   | Beans                           | 1992           | 1                                                              |
| 14               | Barbados   | Beer                            | 1992           | 36                                                             |
| 14               | Barbados   | Beverages, Alcoholic            | 1992           | 73                                                             |
| 14               | Barbados   | Beverages, Fermented            | 1992           | 1                                                              |
| 14               | Barbados   | Bovine Meat                     | 1992           | 58                                                             |
| 14               | Barbados   | Butter, Ghee                    | 1992           | 27                                                             |
| 14               | Barbados   | Cassava and products            | 1992           | 21                                                             |
| 14               | Barbados   | Cereals - Excluding Beer        | 1992           | 927                                                            |
| 14               | Barbados   | Cereals, Other                  | 1992           | 9                                                              |
| 14               | Barbados   | Cocoa Beans and products        | 1992           | 18                                                             |
| 14               | Barbados   | Coconuts - Incl Copra           | 1992           | 39                                                             |
| 14               | Barbados   | Coffee and products             | 1992           | 1                                                              |
| 14               | Barbados   | Cottonseed Oil                  | 1992           | 19                                                             |
| 14               | Barbados   | Crustaceans                     | 1992           | 2                                                              |
| 14               | Barbados   | Demersal Fish                   | 1992           | 6                                                              |
| 14               | Barbados   | Eggs                            | 1992           | 14                                                             |
| 14               | Barbados   | Fats, Animals, Raw              | 1992           | 87                                                             |
| 14               | Barbados   | Fish, Seafood                   | 1992           | 58                                                             |
| 14               | Barbados   | Fruits - Excluding Wine         | 1992           | 69                                                             |
| 14               | Barbados   | Fruits, Other                   | 1992           | 19                                                             |
| 14               | Barbados   | Grand Total                     | 1992           | 2,983                                                          |
| 14               | Barbados   | Grapefruit and products         | 1992           | 3                                                              |
| 14               | Barbados   | Grapes and products (excl wine) | 1992           | 7                                                              |
| 14               | Barbados   | Groundnuts (Shelled Eq)         | 1992           | 43                                                             |
| 14               | Barbados   | Honey                           | 1992           | 1                                                              |
| 14               | Barbados   | Maize and products              | 1992           | 98                                                             |
| 14               | Barbados   | Maize Germ Oil                  | 1992           | 8                                                              |
| 14               | Barbados   | Marine Fish, Other              | 1992           | 5                                                              |
| 14               | Barbados   | Meat                            | 1992           | 378                                                            |
| 14               | Barbados   | Milk - Excluding Butter         | 1992           | 177                                                            |
| 14               | Barbados   | Miscellaneous                   | 1992           | 21                                                             |
| 14               | Barbados   | Mutton & Goat Meat              | 1992           | 58                                                             |
| 14               | Barbados   | Offals                          | 1992           | 9                                                              |
| 14               | Barbados   | Oilcrops                        | 1992           | 88                                                             |
| 14               | Barbados   | Oilcrops Oil, Other             | 1992           | 114                                                            |
| 14               | Barbados   | Olive Oil                       | 1992           | 3                                                              |
| 14               | Barbados   | Onions                          | 1992           | 8                                                              |
| 14               | Barbados   | Oranges, Mandarines             | 1992           | 12                                                             |
| 14               | Barbados   | Peas                            | 1992           | 22                                                             |
| 14               | Barbados   | Pelagic Fish                    | 1992           | 44                                                             |
| 14               | Barbados   | Pepper                          | 1992           | 1                                                              |
| 14               | Barbados   | Pigmeat                         | 1992           | 99                                                             |
| 14               | Barbados   | Pimento                         | 1992           | 1                                                              |
| 14               | Barbados   | Pineapples and products         | 1992           | 4                                                              |
| 14               | Barbados   | Plantains                       | 1992           | 9                                                              |
| 14               | Barbados   | Potatoes and products           | 1992           | 49                                                             |
| 14               | Barbados   | Poultry Meat                    | 1992           | 163                                                            |
| 14               | Barbados   | Pulses                          | 1992           | 65                                                             |
| 14               | Barbados   | Pulses, Other and products      | 1992           | 42                                                             |
| 14               | Barbados   | Rape and Mustardseed            | 1992           | 5                                                              |
| 14               | Barbados   | Rice (Milled Equivalent)        | 1992           | 268                                                            |
| 14               | Barbados   | Roots, Other                    | 1992           | 3                                                              |
| 14               | Barbados   | Sesame seed                     | 1992           | 1                                                              |
| 14               | Barbados   | Soyabean Oil                    | 1992           | 159                                                            |
| 14               | Barbados   | Spices                          | 1992           | 6                                                              |
| 14               | Barbados   | Spices, Other                   | 1992           | 4                                                              |
| 14               | Barbados   | Starchy Roots                   | 1992           | 100                                                            |
| 14               | Barbados   | Stimulants                      | 1992           | 20                                                             |
| 14               | Barbados   | Sugar & Sweeteners              | 1992           | 480                                                            |
| 14               | Barbados   | Sugar (Raw Equivalent)          | 1992           | 460                                                            |
| 14               | Barbados   | Sunflowerseed Oil               | 1992           | 2                                                              |
| 14               | Barbados   | Sweet potatoes                  | 1992           | 13                                                             |
| 14               | Barbados   | Sweeteners, Other               | 1992           | 19                                                             |
| 14               | Barbados   | Tomatoes and products           | 1992           | 2                                                              |
| 14               | Barbados   | Treenuts                        | 1992           | 6                                                              |
| 14               | Barbados   | Vegetable Oils                  | 1992           | 305                                                            |
| 14               | Barbados   | Vegetables                      | 1992           | 33                                                             |
| 14               | Barbados   | Vegetables, Other               | 1992           | 23                                                             |
| 14               | Barbados   | Vegetal Products                | 1992           | 2,232                                                          |
| 14               | Barbados   | Wheat and products              | 1992           | 552                                                            |
| 14               | Barbados   | Wine                            | 1992           | 4                                                              |
| 14               | Barbados   | Yams                            | 1992           | 14                                                             |
| 14               | Barbados   | Alcoholic Beverages             | 1993           | 121                                                            |
| 14               | Barbados   | Animal fats                     | 1993           | 110                                                            |
| 14               | Barbados   | Animal Products                 | 1993           | 736                                                            |
| 14               | Barbados   | Apples and products             | 1993           | 6                                                              |

Dietary calcium and zinc deficiency risks are decreasing but remain prevalent

| FAO Country code | Country  | Food item                       | Reference year | Net energy supply (kcal capita <sup>-1</sup> d <sup>-1</sup> ) |
|------------------|----------|---------------------------------|----------------|----------------------------------------------------------------|
| 14               | Barbados | Bananas                         | 1993           | 9                                                              |
| 14               | Barbados | Barley and products             | 1993           | 1                                                              |
| 14               | Barbados | Beans                           | 1993           | 1                                                              |
| 14               | Barbados | Beer                            | 1993           | 42                                                             |
| 14               | Barbados | Beverages, Alcoholic            | 1993           | 74                                                             |
| 14               | Barbados | Beverages, Fermented            | 1993           | 1                                                              |
| 14               | Barbados | Bovine Meat                     | 1993           | 56                                                             |
| 14               | Barbados | Butter, Ghee                    | 1993           | 29                                                             |
| 14               | Barbados | Cassava and products            | 1993           | 6                                                              |
| 14               | Barbados | Cereals - Excluding Beer        | 1993           | 905                                                            |
| 14               | Barbados | Cereals, Other                  | 1993           | 9                                                              |
| 14               | Barbados | Cocoa Beans and products        | 1993           | 18                                                             |
| 14               | Barbados | Coconuts - Incl Copra           | 1993           | 39                                                             |
| 14               | Barbados | Coffee and products             | 1993           | 1                                                              |
| 14               | Barbados | Cottonseed Oil                  | 1993           | 11                                                             |
| 14               | Barbados | Crustaceans                     | 1993           | 1                                                              |
| 14               | Barbados | Demersal Fish                   | 1993           | 4                                                              |
| 14               | Barbados | Eggs                            | 1993           | 14                                                             |
| 14               | Barbados | Fats, Animals, Raw              | 1993           | 82                                                             |
| 14               | Barbados | Fish, Seafood                   | 1993           | 61                                                             |
| 14               | Barbados | Fruits - Excluding Wine         | 1993           | 69                                                             |
| 14               | Barbados | Fruits, Other                   | 1993           | 18                                                             |
| 14               | Barbados | Grand Total                     | 1993           | 2,912                                                          |
| 14               | Barbados | Grapefruit and products         | 1993           | 1                                                              |
| 14               | Barbados | Grapes and products (excl wine) | 1993           | 6                                                              |
| 14               | Barbados | Groundnuts (Shelled Eq)         | 1993           | 33                                                             |
| 14               | Barbados | Honey                           | 1993           | 2                                                              |
| 14               | Barbados | Maize and products              | 1993           | 113                                                            |
| 14               | Barbados | Maize Germ Oil                  | 1993           | 19                                                             |
| 14               | Barbados | Marine Fish, Other              | 1993           | 5                                                              |
| 14               | Barbados | Meat                            | 1993           | 362                                                            |
| 14               | Barbados | Milk - Excluding Butter         | 1993           | 181                                                            |
| 14               | Barbados | Miscellaneous                   | 1993           | 30                                                             |
| 14               | Barbados | Mutton & Goat Meat              | 1993           | 47                                                             |
| 14               | Barbados | Offals                          | 1993           | 8                                                              |
| 14               | Barbados | Oilcrops                        | 1993           | 79                                                             |
| 14               | Barbados | Oilcrops Oil, Other             | 1993           | 91                                                             |
| 14               | Barbados | Olive Oil                       | 1993           | 3                                                              |
| 14               | Barbados | Onions                          | 1993           | 10                                                             |
| 14               | Barbados | Oranges, Mandarines             | 1993           | 15                                                             |
| 14               | Barbados | Peas                            | 1993           | 21                                                             |
| 14               | Barbados | Pelagic Fish                    | 1993           | 51                                                             |
| 14               | Barbados | Pepper                          | 1993           | 2                                                              |
| 14               | Barbados | Pigmeat                         | 1993           | 97                                                             |
| 14               | Barbados | Pimento                         | 1993           | 1                                                              |
| 14               | Barbados | Pineapples and products         | 1993           | 3                                                              |
| 14               | Barbados | Plantains                       | 1993           | 9                                                              |
| 14               | Barbados | Potatoes and products           | 1993           | 62                                                             |
| 14               | Barbados | Poultry Meat                    | 1993           | 161                                                            |
| 14               | Barbados | Pulses                          | 1993           | 64                                                             |
| 14               | Barbados | Pulses, Other and products      | 1993           | 41                                                             |
| 14               | Barbados | Rape and Mustardseed            | 1993           | 5                                                              |
| 14               | Barbados | Rice (Milled Equivalent)        | 1993           | 289                                                            |
| 14               | Barbados | Roots, Other                    | 1993           | 5                                                              |
| 14               | Barbados | Sesame seed                     | 1993           | 1                                                              |
| 14               | Barbados | Soyabean Oil                    | 1993           | 161                                                            |
| 14               | Barbados | Spices                          | 1993           | 8                                                              |
| 14               | Barbados | Spices, Other                   | 1993           | 6                                                              |
| 14               | Barbados | Starchy Roots                   | 1993           | 106                                                            |
| 14               | Barbados | Stimulants                      | 1993           | 20                                                             |
| 14               | Barbados | Sugar & Sweeteners              | 1993           | 442                                                            |
| 14               | Barbados | Sugar (Raw Equivalent)          | 1993           | 421                                                            |
| 14               | Barbados | Sunflowerseed Oil               | 1993           | 2                                                              |
| 14               | Barbados | Sweet potatoes                  | 1993           | 15                                                             |
| 14               | Barbados | Sweeteners, Other               | 1993           | 19                                                             |
| 14               | Barbados | Tomatoes and products           | 1993           | 2                                                              |
| 14               | Barbados | Treenuts                        | 1993           | 6                                                              |
| 14               | Barbados | Vegetable Oils                  | 1993           | 288                                                            |
| 14               | Barbados | Vegetables                      | 1993           | 39                                                             |
| 14               | Barbados | Vegetables, Other               | 1993           | 27                                                             |
| 14               | Barbados | Vegetal Products                | 1993           | 2,176                                                          |
| 14               | Barbados | Wheat and products              | 1993           | 494                                                            |
| 14               | Barbados | Wine                            | 1993           | 4                                                              |
| 14               | Barbados | Yams                            | 1993           | 17                                                             |
| 14               | Barbados | Alcoholic Beverages             | 1994           | 119                                                            |
| 14               | Barbados | Animal fats                     | 1994           | 111                                                            |
| 14               | Barbados | Animal Products                 | 1994           | 736                                                            |
| 14               | Barbados | Apples and products             | 1994           | 7                                                              |
| 14               | Barbados | Bananas                         | 1994           | 12                                                             |
| 14               | Barbados | Barley and products             | 1994           | 1                                                              |
| 14               | Barbados | Beans                           | 1994           | 1                                                              |
| 14               | Barbados | Beer                            | 1994           | 44                                                             |
| 14               | Barbados | Beverages, Alcoholic            | 1994           | 68                                                             |
| 14               | Barbados | Beverages, Fermented            | 1994           | 1                                                              |
| 14               | Barbados | Bovine Meat                     | 1994           | 68                                                             |
| 14               | Barbados | Butter, Ghee                    | 1994           | 25                                                             |
| 14               | Barbados | Cassava and products            | 1994           | 4                                                              |
| 14               | Barbados | Cereals - Excluding Beer        | 1994           | 868                                                            |
| 14               | Barbados | Cereals, Other                  | 1994           | 8                                                              |
| 14               | Barbados | Cocoa Beans and products        | 1994           | 18                                                             |
| 14               | Barbados | Coconuts - Incl Copra           | 1994           | 38                                                             |
| 14               | Barbados | Coffee and products             | 1994           | 1                                                              |
| 14               | Barbados | Cottonseed Oil                  | 1994           | 12                                                             |
| 14               | Barbados | Crustaceans                     | 1994           | 1                                                              |
| 14               | Barbados | Demersal Fish                   | 1994           | 4                                                              |
| 14               | Barbados | Eggs                            | 1994           | 14                                                             |
| 14               | Barbados | Fats, Animals, Raw              | 1994           | 86                                                             |

Dietary calcium and zinc deficiency risks are decreasing but remain prevalent

| FAO Country code | Country  | Food item                       | Reference year | Net energy supply (kcal <i>capita</i> <sup>-1</sup> d <sup>-1</sup> ) |
|------------------|----------|---------------------------------|----------------|-----------------------------------------------------------------------|
| 14               | Barbados | Fish, Seafood                   | 1994           | 57                                                                    |
| 14               | Barbados | Fruits - Excluding Wine         | 1994           | 77                                                                    |
| 14               | Barbados | Fruits, Other                   | 1994           | 20                                                                    |
| 14               | Barbados | Grand Total                     | 1994           | 2,905                                                                 |
| 14               | Barbados | Grapefruit and products         | 1994           | 2                                                                     |
| 14               | Barbados | Grapes and products (excl wine) | 1994           | 8                                                                     |
| 14               | Barbados | Groundnuts (Shelled Eq)         | 1994           | 45                                                                    |
| 14               | Barbados | Honey                           | 1994           | 2                                                                     |
| 14               | Barbados | Maize and products              | 1994           | 111                                                                   |
| 14               | Barbados | Maize Germ Oil                  | 1994           | 18                                                                    |
| 14               | Barbados | Marine Fish, Other              | 1994           | 8                                                                     |
| 14               | Barbados | Meat                            | 1994           | 380                                                                   |
| 14               | Barbados | Milk - Excluding Butter         | 1994           | 165                                                                   |
| 14               | Barbados | Miscellaneous                   | 1994           | 26                                                                    |
| 14               | Barbados | Mutton & Goat Meat              | 1994           | 47                                                                    |
| 14               | Barbados | Offals                          | 1994           | 10                                                                    |
| 14               | Barbados | Oilcrops                        | 1994           | 88                                                                    |
| 14               | Barbados | Oilcrops Oil, Other             | 1994           | 79                                                                    |
| 14               | Barbados | Olive Oil                       | 1994           | 4                                                                     |
| 14               | Barbados | Onions                          | 1994           | 9                                                                     |
| 14               | Barbados | Oranges, Mandarines             | 1994           | 15                                                                    |
| 14               | Barbados | Peas                            | 1994           | 21                                                                    |
| 14               | Barbados | Pelagic Fish                    | 1994           | 44                                                                    |
| 14               | Barbados | Pepper                          | 1994           | 2                                                                     |
| 14               | Barbados | Pigmeat                         | 1994           | 101                                                                   |
| 14               | Barbados | Pimento                         | 1994           | 1                                                                     |
| 14               | Barbados | Pineapples and products         | 1994           | 5                                                                     |
| 14               | Barbados | Plantains                       | 1994           | 7                                                                     |
| 14               | Barbados | Potatoes and products           | 1994           | 56                                                                    |
| 14               | Barbados | Poultry Meat                    | 1994           | 163                                                                   |
| 14               | Barbados | Pulses                          | 1994           | 67                                                                    |
| 14               | Barbados | Pulses, Other and products      | 1994           | 45                                                                    |
| 14               | Barbados | Rape and Mustardseed            | 1994           | 4                                                                     |
| 14               | Barbados | Rice (Milled Equivalent)        | 1994           | 135                                                                   |
| 14               | Barbados | Roots, Other                    | 1994           | 2                                                                     |
| 14               | Barbados | Soyabean Oil                    | 1994           | 163                                                                   |
| 14               | Barbados | Spices                          | 1994           | 9                                                                     |
| 14               | Barbados | Spices, Other                   | 1994           | 6                                                                     |
| 14               | Barbados | Starchy Roots                   | 1994           | 94                                                                    |
| 14               | Barbados | Stimulants                      | 1994           | 20                                                                    |
| 14               | Barbados | Sugar & Sweeteners              | 1994           | 483                                                                   |
| 14               | Barbados | Sugar (Raw Equivalent)          | 1994           | 450                                                                   |
| 14               | Barbados | Sweet potatoes                  | 1994           | 22                                                                    |
| 14               | Barbados | Sweeteners, Other               | 1994           | 30                                                                    |
| 14               | Barbados | Tomatoes and products           | 1994           | 2                                                                     |
| 14               | Barbados | Treenuts                        | 1994           | 5                                                                     |
| 14               | Barbados | Vegetable Oils                  | 1994           | 277                                                                   |
| 14               | Barbados | Vegetables                      | 1994           | 35                                                                    |
| 14               | Barbados | Vegetables, Other               | 1994           | 25                                                                    |
| 14               | Barbados | Vegetal Products                | 1994           | 2,169                                                                 |
| 14               | Barbados | Wheat and products              | 1994           | 612                                                                   |
| 14               | Barbados | Wine                            | 1994           | 6                                                                     |
| 14               | Barbados | Yams                            | 1994           | 10                                                                    |
| 14               | Barbados | Alcoholic Beverages             | 1995           | 93                                                                    |
| 14               | Barbados | Animal fats                     | 1995           | 105                                                                   |
| 14               | Barbados | Animal Products                 | 1995           | 731                                                                   |
| 14               | Barbados | Apples and products             | 1995           | 7                                                                     |
| 14               | Barbados | Bananas                         | 1995           | 14                                                                    |
| 14               | Barbados | Barley and products             | 1995           | 1                                                                     |
| 14               | Barbados | Beans                           | 1995           | 1                                                                     |
| 14               | Barbados | Beer                            | 1995           | 30                                                                    |
| 14               | Barbados | Beverages, Alcoholic            | 1995           | 57                                                                    |
| 14               | Barbados | Beverages, Fermented            | 1995           | 1                                                                     |
| 14               | Barbados | Bovine Meat                     | 1995           | 64                                                                    |
| 14               | Barbados | Butter, Chee                    | 1995           | 20                                                                    |
| 14               | Barbados | Cassava and products            | 1995           | 7                                                                     |
| 14               | Barbados | Cereals - Excluding Beer        | 1995           | 794                                                                   |
| 14               | Barbados | Cereals, Other                  | 1995           | 17                                                                    |
| 14               | Barbados | Cocoa Beans and products        | 1995           | 19                                                                    |
| 14               | Barbados | Coconuts - Incl Copra           | 1995           | 38                                                                    |
| 14               | Barbados | Coffee and products             | 1995           | 2                                                                     |
| 14               | Barbados | Cottonseed Oil                  | 1995           | 19                                                                    |
| 14               | Barbados | Cream                           | 1995           | 21                                                                    |
| 14               | Barbados | Crustaceans                     | 1995           | 1                                                                     |
| 14               | Barbados | Demersal Fish                   | 1995           | 4                                                                     |
| 14               | Barbados | Eggs                            | 1995           | 11                                                                    |
| 14               | Barbados | Fats, Animals, Raw              | 1995           | 64                                                                    |
| 14               | Barbados | Fish, Seafood                   | 1995           | 69                                                                    |
| 14               | Barbados | Freshwater Fish                 | 1995           | 1                                                                     |
| 14               | Barbados | Fruits - Excluding Wine         | 1995           | 84                                                                    |
| 14               | Barbados | Fruits, Other                   | 1995           | 21                                                                    |
| 14               | Barbados | Grand Total                     | 1995           | 2,867                                                                 |
| 14               | Barbados | Grapefruit and products         | 1995           | 3                                                                     |
| 14               | Barbados | Grapes and products (excl wine) | 1995           | 8                                                                     |
| 14               | Barbados | Groundnuts (Shelled Eq)         | 1995           | 44                                                                    |
| 14               | Barbados | Honey                           | 1995           | 3                                                                     |
| 14               | Barbados | Maize and products              | 1995           | 116                                                                   |
| 14               | Barbados | Maize Germ Oil                  | 1995           | 17                                                                    |
| 14               | Barbados | Marine Fish, Other              | 1995           | 8                                                                     |
| 14               | Barbados | Meat                            | 1995           | 378                                                                   |
| 14               | Barbados | Milk - Excluding Butter         | 1995           | 158                                                                   |
| 14               | Barbados | Miscellaneous                   | 1995           | 29                                                                    |
| 14               | Barbados | Mutton & Goat Meat              | 1995           | 37                                                                    |
| 14               | Barbados | Offals                          | 1995           | 9                                                                     |
| 14               | Barbados | Oilcrops                        | 1995           | 88                                                                    |
| 14               | Barbados | Oilcrops Oil, Other             | 1995           | 80                                                                    |
| 14               | Barbados | Olive Oil                       | 1995           | 5                                                                     |

Dietary calcium and zinc deficiency risks are decreasing but remain prevalent

| FAO Country code | Country  | Food item                       | Reference year | Net energy supply (kcal capita <sup>-1</sup> d <sup>-1</sup> ) |
|------------------|----------|---------------------------------|----------------|----------------------------------------------------------------|
| 14               | Barbados | Onions                          | 1995           | 9                                                              |
| 14               | Barbados | Oranges, Mandarines             | 1995           | 15                                                             |
| 14               | Barbados | Peas                            | 1995           | 19                                                             |
| 14               | Barbados | Pelagic Fish                    | 1995           | 55                                                             |
| 14               | Barbados | Pepper                          | 1995           | 2                                                              |
| 14               | Barbados | Pigmeat                         | 1995           | 97                                                             |
| 14               | Barbados | Pimento                         | 1995           | 1                                                              |
| 14               | Barbados | Pineapples and products         | 1995           | 5                                                              |
| 14               | Barbados | Plantains                       | 1995           | 10                                                             |
| 14               | Barbados | Potatoes and products           | 1995           | 58                                                             |
| 14               | Barbados | Poultry Meat                    | 1995           | 180                                                            |
| 14               | Barbados | Pulses                          | 1995           | 62                                                             |
| 14               | Barbados | Pulses, Other and products      | 1995           | 42                                                             |
| 14               | Barbados | Rape and Mustardseed            | 1995           | 5                                                              |
| 14               | Barbados | Rice (Milled Equivalent)        | 1995           | 135                                                            |
| 14               | Barbados | Roots, Other                    | 1995           | 3                                                              |
| 14               | Barbados | Sesame seed                     | 1995           | 1                                                              |
| 14               | Barbados | Soyabean Oil                    | 1995           | 166                                                            |
| 14               | Barbados | Spices                          | 1995           | 10                                                             |
| 14               | Barbados | Spices, Other                   | 1995           | 7                                                              |
| 14               | Barbados | Starchy Roots                   | 1995           | 124                                                            |
| 14               | Barbados | Stimulants                      | 1995           | 21                                                             |
| 14               | Barbados | Sugar & Sweeteners              | 1995           | 482                                                            |
| 14               | Barbados | Sugar (Raw Equivalent)          | 1995           | 462                                                            |
| 14               | Barbados | Sweet potatoes                  | 1995           | 33                                                             |
| 14               | Barbados | Sweeteners, Other               | 1995           | 18                                                             |
| 14               | Barbados | Tomatoes and products           | 1995           | 3                                                              |
| 14               | Barbados | Treenuts                        | 1995           | 4                                                              |
| 14               | Barbados | Vegetable Oils                  | 1995           | 287                                                            |
| 14               | Barbados | Vegetables                      | 1995           | 56                                                             |
| 14               | Barbados | Vegetables, Other               | 1995           | 44                                                             |
| 14               | Barbados | Vegetal Products                | 1995           | 2,136                                                          |
| 14               | Barbados | Wheat and products              | 1995           | 525                                                            |
| 14               | Barbados | Wine                            | 1995           | 5                                                              |
| 14               | Barbados | Yams                            | 1995           | 22                                                             |
| 14               | Barbados | Alcoholic Beverages             | 1996           | 95                                                             |
| 14               | Barbados | Animal fats                     | 1996           | 93                                                             |
| 14               | Barbados | Animal Products                 | 1996           | 712                                                            |
| 14               | Barbados | Apples and products             | 1996           | 7                                                              |
| 14               | Barbados | Bananas                         | 1996           | 11                                                             |
| 14               | Barbados | Barley and products             | 1996           | 1                                                              |
| 14               | Barbados | Beans                           | 1996           | 1                                                              |
| 14               | Barbados | Beer                            | 1996           | 30                                                             |
| 14               | Barbados | Beverages, Alcoholic            | 1996           | 59                                                             |
| 14               | Barbados | Beverages, Fermented            | 1996           | 1                                                              |
| 14               | Barbados | Bovine Meat                     | 1996           | 66                                                             |
| 14               | Barbados | Butter, Ghee                    | 1996           | 22                                                             |
| 14               | Barbados | Cassava and products            | 1996           | 6                                                              |
| 14               | Barbados | Cereals - Excluding Beer        | 1996           | 806                                                            |
| 14               | Barbados | Cereals, Other                  | 1996           | 18                                                             |
| 14               | Barbados | Cocoa Beans and products        | 1996           | 18                                                             |
| 14               | Barbados | Coconuts - Incl Copra           | 1996           | 33                                                             |
| 14               | Barbados | Coffee and products             | 1996           | 2                                                              |
| 14               | Barbados | Cottonseed Oil                  | 1996           | 22                                                             |
| 14               | Barbados | Cream                           | 1996           | 23                                                             |
| 14               | Barbados | Crustaceans                     | 1996           | 2                                                              |
| 14               | Barbados | Demersal Fish                   | 1996           | 5                                                              |
| 14               | Barbados | Eggs                            | 1996           | 13                                                             |
| 14               | Barbados | Fats, Animals, Raw              | 1996           | 49                                                             |
| 14               | Barbados | Fish, Seafood                   | 1996           | 66                                                             |
| 14               | Barbados | Freshwater Fish                 | 1996           | 1                                                              |
| 14               | Barbados | Fruits - Excluding Wine         | 1996           | 75                                                             |
| 14               | Barbados | Fruits, Other                   | 1996           | 22                                                             |
| 14               | Barbados | Grand Total                     | 1996           | 2,904                                                          |
| 14               | Barbados | Grapefruit and products         | 1996           | 2                                                              |
| 14               | Barbados | Grapes and products (excl wine) | 1996           | 6                                                              |
| 14               | Barbados | Groundnuts (Shelled Eq)         | 1996           | 35                                                             |
| 14               | Barbados | Honey                           | 1996           | 2                                                              |
| 14               | Barbados | Maize and products              | 1996           | 122                                                            |
| 14               | Barbados | Maize Germ Oil                  | 1996           | 18                                                             |
| 14               | Barbados | Marine Fish, Other              | 1996           | 9                                                              |
| 14               | Barbados | Meat                            | 1996           | 373                                                            |
| 14               | Barbados | Milk - Excluding Butter         | 1996           | 158                                                            |
| 14               | Barbados | Miscellaneous                   | 1996           | 22                                                             |
| 14               | Barbados | Mutton & Goat Meat              | 1996           | 38                                                             |
| 14               | Barbados | Offals                          | 1996           | 8                                                              |
| 14               | Barbados | Oilcrops                        | 1996           | 73                                                             |
| 14               | Barbados | Oilcrops Oil, Other             | 1996           | 79                                                             |
| 14               | Barbados | Olive Oil                       | 1996           | 5                                                              |
| 14               | Barbados | Onions                          | 1996           | 9                                                              |
| 14               | Barbados | Oranges, Mandarines             | 1996           | 14                                                             |
| 14               | Barbados | Peas                            | 1996           | 21                                                             |
| 14               | Barbados | Pelagic Fish                    | 1996           | 50                                                             |
| 14               | Barbados | Pepper                          | 1996           | 1                                                              |
| 14               | Barbados | Pigmeat                         | 1996           | 78                                                             |
| 14               | Barbados | Pimento                         | 1996           | 1                                                              |
| 14               | Barbados | Pineapples and products         | 1996           | 4                                                              |
| 14               | Barbados | Plantains                       | 1996           | 9                                                              |
| 14               | Barbados | Potatoes and products           | 1996           | 62                                                             |
| 14               | Barbados | Poultry Meat                    | 1996           | 191                                                            |
| 14               | Barbados | Pulses                          | 1996           | 63                                                             |
| 14               | Barbados | Pulses, Other and products      | 1996           | 41                                                             |
| 14               | Barbados | Rape and Mustardseed            | 1996           | 4                                                              |
| 14               | Barbados | Rice (Milled Equivalent)        | 1996           | 171                                                            |
| 14               | Barbados | Roots, Other                    | 1996           | 3                                                              |
| 14               | Barbados | Sesame seed                     | 1996           | 1                                                              |
| 14               | Barbados | Soyabean Oil                    | 1996           | 168                                                            |

Dietary calcium and zinc deficiency risks are decreasing but remain prevalent

| FAO Country code | Country  | Food item                       | Reference year | Net energy supply (kcal capita <sup>-1</sup> d <sup>-1</sup> ) |
|------------------|----------|---------------------------------|----------------|----------------------------------------------------------------|
| 14               | Barbados | Spices                          | 1996           | 9                                                              |
| 14               | Barbados | Spices, Other                   | 1996           | 6                                                              |
| 14               | Barbados | Starchy Roots                   | 1996           | 119                                                            |
| 14               | Barbados | Stimulants                      | 1996           | 21                                                             |
| 14               | Barbados | Sugar & Sweeteners              | 1996           | 554                                                            |
| 14               | Barbados | Sugar (Raw Equivalent)          | 1996           | 531                                                            |
| 14               | Barbados | Sweet potatoes                  | 1996           | 36                                                             |
| 14               | Barbados | Sweeteners, Other               | 1996           | 20                                                             |
| 14               | Barbados | Tomatoes and products           | 1996           | 3                                                              |
| 14               | Barbados | Treenuts                        | 1996           | 7                                                              |
| 14               | Barbados | Vegetable Oils                  | 1996           | 292                                                            |
| 14               | Barbados | Vegetables                      | 1996           | 56                                                             |
| 14               | Barbados | Vegetables, Other               | 1996           | 44                                                             |
| 14               | Barbados | Vegetal Products                | 1996           | 2,193                                                          |
| 14               | Barbados | Wheat and products              | 1996           | 494                                                            |
| 14               | Barbados | Wine                            | 1996           | 5                                                              |
| 14               | Barbados | Yams                            | 1996           | 12                                                             |
| 14               | Barbados | Alcoholic Beverages             | 1997           | 96                                                             |
| 14               | Barbados | Animal fats                     | 1997           | 85                                                             |
| 14               | Barbados | Animal Products                 | 1997           | 712                                                            |
| 14               | Barbados | Apples and products             | 1997           | 11                                                             |
| 14               | Barbados | Bananas                         | 1997           | 8                                                              |
| 14               | Barbados | Barley and products             | 1997           | 1                                                              |
| 14               | Barbados | Beans                           | 1997           | 2                                                              |
| 14               | Barbados | Beer                            | 1997           | 32                                                             |
| 14               | Barbados | Beverages, Alcoholic            | 1997           | 58                                                             |
| 14               | Barbados | Beverages, Fermented            | 1997           | 1                                                              |
| 14               | Barbados | Bovine Meat                     | 1997           | 73                                                             |
| 14               | Barbados | Butter, Ghee                    | 1997           | 22                                                             |
| 14               | Barbados | Cassava and products            | 1997           | 6                                                              |
| 14               | Barbados | Cereals - Excluding Beer        | 1997           | 771                                                            |
| 14               | Barbados | Cereals, Other                  | 1997           | 12                                                             |
| 14               | Barbados | Cocoa Beans and products        | 1997           | 28                                                             |
| 14               | Barbados | Coconuts - Incl Copra           | 1997           | 24                                                             |
| 14               | Barbados | Coffee and products             | 1997           | 2                                                              |
| 14               | Barbados | Cottonseed Oil                  | 1997           | 20                                                             |
| 14               | Barbados | Cream                           | 1997           | 23                                                             |
| 14               | Barbados | Crustaceans                     | 1997           | 2                                                              |
| 14               | Barbados | Demersal Fish                   | 1997           | 5                                                              |
| 14               | Barbados | Eggs                            | 1997           | 8                                                              |
| 14               | Barbados | Fats, Animals, Raw              | 1997           | 40                                                             |
| 14               | Barbados | Fish, Seafood                   | 1997           | 70                                                             |
| 14               | Barbados | Freshwater Fish                 | 1997           | 2                                                              |
| 14               | Barbados | Fruits - Excluding Wine         | 1997           | 81                                                             |
| 14               | Barbados | Fruits, Other                   | 1997           | 19                                                             |
| 14               | Barbados | Grand Total                     | 1997           | 2,980                                                          |
| 14               | Barbados | Grapefruit and products         | 1997           | 2                                                              |
| 14               | Barbados | Grapes and products (excl wine) | 1997           | 10                                                             |
| 14               | Barbados | Groundnuts (Shelled Eq)         | 1997           | 42                                                             |
| 14               | Barbados | Honey                           | 1997           | 2                                                              |
| 14               | Barbados | Maize and products              | 1997           | 107                                                            |
| 14               | Barbados | Maize Germ Oil                  | 1997           | 18                                                             |
| 14               | Barbados | Marine Fish, Other              | 1997           | 9                                                              |
| 14               | Barbados | Meat                            | 1997           | 373                                                            |
| 14               | Barbados | Milk - Excluding Butter         | 1997           | 168                                                            |
| 14               | Barbados | Miscellaneous                   | 1997           | 26                                                             |
| 14               | Barbados | Mutton & Goat Meat              | 1997           | 37                                                             |
| 14               | Barbados | Offals                          | 1997           | 7                                                              |
| 14               | Barbados | Oilcrops                        | 1997           | 73                                                             |
| 14               | Barbados | Oilcrops Oil, Other             | 1997           | 81                                                             |
| 14               | Barbados | Olive Oil                       | 1997           | 5                                                              |
| 14               | Barbados | Onions                          | 1997           | 8                                                              |
| 14               | Barbados | Oranges, Mandarines             | 1997           | 19                                                             |
| 14               | Barbados | Peas                            | 1997           | 21                                                             |
| 14               | Barbados | Pelagic Fish                    | 1997           | 52                                                             |
| 14               | Barbados | Pepper                          | 1997           | 1                                                              |
| 14               | Barbados | Pigmeat                         | 1997           | 71                                                             |
| 14               | Barbados | Pimento                         | 1997           | 1                                                              |
| 14               | Barbados | Pineapples and products         | 1997           | 5                                                              |
| 14               | Barbados | Plantains                       | 1997           | 7                                                              |
| 14               | Barbados | Potatoes and products           | 1997           | 68                                                             |
| 14               | Barbados | Poultry Meat                    | 1997           | 193                                                            |
| 14               | Barbados | Pulses                          | 1997           | 70                                                             |
| 14               | Barbados | Pulses, Other and products      | 1997           | 47                                                             |
| 14               | Barbados | Rape and Mustardseed            | 1997           | 5                                                              |
| 14               | Barbados | Rice (Milled Equivalent)        | 1997           | 137                                                            |
| 14               | Barbados | Roots, Other                    | 1997           | 2                                                              |
| 14               | Barbados | Sesame seed                     | 1997           | 1                                                              |
| 14               | Barbados | Soyabean Oil                    | 1997           | 247                                                            |
| 14               | Barbados | Spices                          | 1997           | 8                                                              |
| 14               | Barbados | Spices, Other                   | 1997           | 6                                                              |
| 14               | Barbados | Starchy Roots                   | 1997           | 120                                                            |
| 14               | Barbados | Stimulants                      | 1997           | 30                                                             |
| 14               | Barbados | Sugar & Sweeteners              | 1997           | 564                                                            |
| 14               | Barbados | Sugar (Raw Equivalent)          | 1997           | 544                                                            |
| 14               | Barbados | Sunflowerseed Oil               | 1997           | 1                                                              |
| 14               | Barbados | Sweet potatoes                  | 1997           | 33                                                             |
| 14               | Barbados | Sweeteners, Other               | 1997           | 18                                                             |
| 14               | Barbados | Tomatoes and products           | 1997           | 3                                                              |
| 14               | Barbados | Treenuts                        | 1997           | 4                                                              |
| 14               | Barbados | Vegetable Oils                  | 1997           | 373                                                            |
| 14               | Barbados | Vegetables                      | 1997           | 51                                                             |
| 14               | Barbados | Vegetables, Other               | 1997           | 41                                                             |
| 14               | Barbados | Vegetal Products                | 1997           | 2,269                                                          |
| 14               | Barbados | Wheat and products              | 1997           | 513                                                            |
| 14               | Barbados | Wine                            | 1997           | 6                                                              |
| 14               | Barbados | Yams                            | 1997           | 12                                                             |



Dietary calcium and zinc deficiency risks are decreasing but remain prevalent

| FAO Country code | Country  | Food item                       | Reference year | Net energy supply (kcal capita <sup>-1</sup> d <sup>-1</sup> ) |
|------------------|----------|---------------------------------|----------------|----------------------------------------------------------------|
| 14               | Barbados | Alcoholic Beverages             | 1998           | 91                                                             |
| 14               | Barbados | Animal fats                     | 1998           | 86                                                             |
| 14               | Barbados | Animal Products                 | 1998           | 700                                                            |
| 14               | Barbados | Apples and products             | 1998           | 10                                                             |
| 14               | Barbados | Bananas                         | 1998           | 8                                                              |
| 14               | Barbados | Barley and products             | 1998           | 1                                                              |
| 14               | Barbados | Beans                           | 1998           | 14                                                             |
| 14               | Barbados | Beer                            | 1998           | 32                                                             |
| 14               | Barbados | Beverages, Alcoholic            | 1998           | 55                                                             |
| 14               | Barbados | Bovine Meat                     | 1998           | 68                                                             |
| 14               | Barbados | Butter, Ghee                    | 1998           | 23                                                             |
| 14               | Barbados | Cassava and products            | 1998           | 5                                                              |
| 14               | Barbados | Cereals - Excluding Beer        | 1998           | 823                                                            |
| 14               | Barbados | Cereals, Other                  | 1998           | 4                                                              |
| 14               | Barbados | Cocoa Beans and products        | 1998           | 13                                                             |
| 14               | Barbados | Coconuts - Incl Copra           | 1998           | 22                                                             |
| 14               | Barbados | Coffee and products             | 1998           | 1                                                              |
| 14               | Barbados | Cottonseed Oil                  | 1998           | 19                                                             |
| 14               | Barbados | Cream                           | 1998           | 24                                                             |
| 14               | Barbados | Crustaceans                     | 1998           | 1                                                              |
| 14               | Barbados | Demersal Fish                   | 1998           | 3                                                              |
| 14               | Barbados | Eggs                            | 1998           | 7                                                              |
| 14               | Barbados | Fats, Animals, Raw              | 1998           | 39                                                             |
| 14               | Barbados | Fish, Seafood                   | 1998           | 57                                                             |
| 14               | Barbados | Freshwater Fish                 | 1998           | 1                                                              |
| 14               | Barbados | Fruits - Excluding Wine         | 1998           | 68                                                             |
| 14               | Barbados | Fruits, Other                   | 1998           | 18                                                             |
| 14               | Barbados | Grand Total                     | 1998           | 2,827                                                          |
| 14               | Barbados | Grapefruit and products         | 1998           | 1                                                              |
| 14               | Barbados | Grapes and products (excl wine) | 1998           | 7                                                              |
| 14               | Barbados | Groundnuts (Shelled Eq)         | 1998           | 30                                                             |
| 14               | Barbados | Honey                           | 1998           | 1                                                              |
| 14               | Barbados | Maize and products              | 1998           | 123                                                            |
| 14               | Barbados | Maize Germ Oil                  | 1998           | 18                                                             |
| 14               | Barbados | Marine Fish, Other              | 1998           | 5                                                              |
| 14               | Barbados | Meat                            | 1998           | 381                                                            |
| 14               | Barbados | Milk - Excluding Butter         | 1998           | 164                                                            |
| 14               | Barbados | Miscellaneous                   | 1998           | 19                                                             |
| 14               | Barbados | Mutton & Goat Meat              | 1998           | 38                                                             |
| 14               | Barbados | Offals                          | 1998           | 5                                                              |
| 14               | Barbados | Oilcrops                        | 1998           | 56                                                             |
| 14               | Barbados | Oilcrops Oil, Other             | 1998           | 84                                                             |
| 14               | Barbados | Olive Oil                       | 1998           | 7                                                              |
| 14               | Barbados | Onions                          | 1998           | 5                                                              |
| 14               | Barbados | Oranges, Mandarines             | 1998           | 17                                                             |
| 14               | Barbados | Peas                            | 1998           | 22                                                             |
| 14               | Barbados | Pelagic Fish                    | 1998           | 47                                                             |
| 14               | Barbados | Pepper                          | 1998           | 1                                                              |
| 14               | Barbados | Pigmeat                         | 1998           | 67                                                             |
| 14               | Barbados | Pineapples and products         | 1998           | 3                                                              |
| 14               | Barbados | Plantains                       | 1998           | 4                                                              |
| 14               | Barbados | Potatoes and products           | 1998           | 54                                                             |
| 14               | Barbados | Poultry Meat                    | 1998           | 207                                                            |
| 14               | Barbados | Pulses                          | 1998           | 78                                                             |
| 14               | Barbados | Pulses, Other and products      | 1998           | 41                                                             |
| 14               | Barbados | Rape and Mustardseed            | 1998           | 2                                                              |
| 14               | Barbados | Rice (Milled Equivalent)        | 1998           | 162                                                            |
| 14               | Barbados | Roots, Other                    | 1998           | 1                                                              |
| 14               | Barbados | Soyabean Oil                    | 1998           | 173                                                            |
| 14               | Barbados | Spices                          | 1998           | 7                                                              |
| 14               | Barbados | Spices, Other                   | 1998           | 5                                                              |
| 14               | Barbados | Starchy Roots                   | 1998           | 102                                                            |
| 14               | Barbados | Stimulants                      | 1998           | 14                                                             |
| 14               | Barbados | Sugar & Sweeteners              | 1998           | 516                                                            |
| 14               | Barbados | Sugar (Raw Equivalent)          | 1998           | 500                                                            |
| 14               | Barbados | Sunflowerseed Oil               | 1998           | 1                                                              |
| 14               | Barbados | Sweet potatoes                  | 1998           | 30                                                             |
| 14               | Barbados | Sweeteners, Other               | 1998           | 14                                                             |
| 14               | Barbados | Tomatoes and products           | 1998           | 2                                                              |
| 14               | Barbados | Treenuts                        | 1998           | 8                                                              |
| 14               | Barbados | Vegetable Oils                  | 1998           | 302                                                            |
| 14               | Barbados | Vegetables                      | 1998           | 44                                                             |
| 14               | Barbados | Vegetables, Other               | 1998           | 37                                                             |
| 14               | Barbados | Vegetal Products                | 1998           | 2,127                                                          |
| 14               | Barbados | Wheat and products              | 1998           | 533                                                            |
| 14               | Barbados | Wine                            | 1998           | 3                                                              |
| 14               | Barbados | Yams                            | 1998           | 12                                                             |
| 14               | Barbados | Alcoholic Beverages             | 1999           | 101                                                            |
| 14               | Barbados | Animal fats                     | 1999           | 89                                                             |
| 14               | Barbados | Animal Products                 | 1999           | 713                                                            |
| 14               | Barbados | Apples and products             | 1999           | 14                                                             |
| 14               | Barbados | Bananas                         | 1999           | 13                                                             |
| 14               | Barbados | Barley and products             | 1999           | 2                                                              |
| 14               | Barbados | Beans                           | 1999           | 14                                                             |
| 14               | Barbados | Beer                            | 1999           | 34                                                             |
| 14               | Barbados | Beverages, Alcoholic            | 1999           | 60                                                             |
| 14               | Barbados | Beverages, Fermented            | 1999           | 1                                                              |
| 14               | Barbados | Bovine Meat                     | 1999           | 74                                                             |
| 14               | Barbados | Butter, Ghee                    | 1999           | 25                                                             |
| 14               | Barbados | Cassava and products            | 1999           | 5                                                              |
| 14               | Barbados | Cereals - Excluding Beer        | 1999           | 846                                                            |
| 14               | Barbados | Cereals, Other                  | 1999           | 6                                                              |
| 14               | Barbados | Cocoa Beans and products        | 1999           | 33                                                             |
| 14               | Barbados | Coconuts - Incl Copra           | 1999           | 25                                                             |
| 14               | Barbados | Coffee and products             | 1999           | 2                                                              |
| 14               | Barbados | Cottonseed Oil                  | 1999           | 20                                                             |
| 14               | Barbados | Cream                           | 1999           | 22                                                             |

Dietary calcium and zinc deficiency risks are decreasing but remain prevalent

| FAO Country code | Country  | Food item                       | Reference year | Net energy supply (kcal capita <sup>-1</sup> d <sup>-1</sup> ) |
|------------------|----------|---------------------------------|----------------|----------------------------------------------------------------|
| 14               | Barbados | Crustaceans                     | 1999           | 2                                                              |
| 14               | Barbados | Demersal Fish                   | 1999           | 6                                                              |
| 14               | Barbados | Eggs                            | 1999           | 11                                                             |
| 14               | Barbados | Fats, Animals, Raw              | 1999           | 42                                                             |
| 14               | Barbados | Fish, Seafood                   | 1999           | 73                                                             |
| 14               | Barbados | Freshwater Fish                 | 1999           | 1                                                              |
| 14               | Barbados | Fruits - Excluding Wine         | 1999           | 95                                                             |
| 14               | Barbados | Fruits, Other                   | 1999           | 23                                                             |
| 14               | Barbados | Grand Total                     | 1999           | 2,951                                                          |
| 14               | Barbados | Grapefruit and products         | 1999           | 1                                                              |
| 14               | Barbados | Grapes and products (excl wine) | 1999           | 10                                                             |
| 14               | Barbados | Groundnuts (Shelled Eq)         | 1999           | 25                                                             |
| 14               | Barbados | Honey                           | 1999           | 3                                                              |
| 14               | Barbados | Maize and products              | 1999           | 122                                                            |
| 14               | Barbados | Maize Germ Oil                  | 1999           | 19                                                             |
| 14               | Barbados | Marine Fish, Other              | 1999           | 10                                                             |
| 14               | Barbados | Meat                            | 1999           | 374                                                            |
| 14               | Barbados | Milk - Excluding Butter         | 1999           | 159                                                            |
| 14               | Barbados | Miscellaneous                   | 1999           | 28                                                             |
| 14               | Barbados | Mutton & Goat Meat              | 1999           | 37                                                             |
| 14               | Barbados | Offals                          | 1999           | 7                                                              |
| 14               | Barbados | Oilcrops                        | 1999           | 59                                                             |
| 14               | Barbados | Oilcrops Oil, Other             | 1999           | 79                                                             |
| 14               | Barbados | Olive Oil                       | 1999           | 9                                                              |
| 14               | Barbados | Onions                          | 1999           | 6                                                              |
| 14               | Barbados | Oranges, Mandarines             | 1999           | 19                                                             |
| 14               | Barbados | Peas                            | 1999           | 22                                                             |
| 14               | Barbados | Pelagic Fish                    | 1999           | 53                                                             |
| 14               | Barbados | Pepper                          | 1999           | 2                                                              |
| 14               | Barbados | Pigmeat                         | 1999           | 59                                                             |
| 14               | Barbados | Pimento                         | 1999           | 1                                                              |
| 14               | Barbados | Pineapples and products         | 1999           | 7                                                              |
| 14               | Barbados | Plantains                       | 1999           | 8                                                              |
| 14               | Barbados | Potatoes and products           | 1999           | 61                                                             |
| 14               | Barbados | Poultry Meat                    | 1999           | 204                                                            |
| 14               | Barbados | Pulses                          | 1999           | 66                                                             |
| 14               | Barbados | Pulses, Other and products      | 1999           | 31                                                             |
| 14               | Barbados | Rape and Mustardseed            | 1999           | 7                                                              |
| 14               | Barbados | Rice (Milled Equivalent)        | 1999           | 177                                                            |
| 14               | Barbados | Roots, Other                    | 1999           | 2                                                              |
| 14               | Barbados | Sesame seed                     | 1999           | 1                                                              |
| 14               | Barbados | Soyabean Oil                    | 1999           | 167                                                            |
| 14               | Barbados | Spices                          | 1999           | 11                                                             |
| 14               | Barbados | Spices, Other                   | 1999           | 8                                                              |
| 14               | Barbados | Starchy Roots                   | 1999           | 104                                                            |
| 14               | Barbados | Stimulants                      | 1999           | 35                                                             |
| 14               | Barbados | Sugar & Sweeteners              | 1999           | 528                                                            |
| 14               | Barbados | Sugar (Raw Equivalent)          | 1999           | 510                                                            |
| 14               | Barbados | Sunflowerseed Oil               | 1999           | 1                                                              |
| 14               | Barbados | Sweet potatoes                  | 1999           | 26                                                             |
| 14               | Barbados | Sweeteners, Other               | 1999           | 16                                                             |
| 14               | Barbados | Tomatoes and products           | 1999           | 4                                                              |
| 14               | Barbados | Treenuts                        | 1999           | 9                                                              |
| 14               | Barbados | Vegetable Oils                  | 1999           | 295                                                            |
| 14               | Barbados | Vegetables                      | 1999           | 61                                                             |
| 14               | Barbados | Vegetables, Other               | 1999           | 51                                                             |
| 14               | Barbados | Vegetal Products                | 1999           | 2,238                                                          |
| 14               | Barbados | Wheat and products              | 1999           | 538                                                            |
| 14               | Barbados | Wine                            | 1999           | 7                                                              |
| 14               | Barbados | Yams                            | 1999           | 9                                                              |
| 14               | Barbados | Alcoholic Beverages             | 2000           | 99                                                             |
| 14               | Barbados | Animal fats                     | 2000           | 85                                                             |
| 14               | Barbados | Animal Products                 | 2000           | 656                                                            |
| 14               | Barbados | Apples and products             | 2000           | 15                                                             |
| 14               | Barbados | Bananas                         | 2000           | 11                                                             |
| 14               | Barbados | Barley and products             | 2000           | 3                                                              |
| 14               | Barbados | Beans                           | 2000           | 14                                                             |
| 14               | Barbados | Beer                            | 2000           | 32                                                             |
| 14               | Barbados | Beverages, Alcoholic            | 2000           | 59                                                             |
| 14               | Barbados | Bovine Meat                     | 2000           | 69                                                             |
| 14               | Barbados | Butter, Ghee                    | 2000           | 29                                                             |
| 14               | Barbados | Cassava and products            | 2000           | 5                                                              |
| 14               | Barbados | Cephalopods                     | 2000           | 1                                                              |
| 14               | Barbados | Cereals - Excluding Beer        | 2000           | 847                                                            |
| 14               | Barbados | Cereals, Other                  | 2000           | 15                                                             |
| 14               | Barbados | Cocoa Beans and products        | 2000           | 12                                                             |
| 14               | Barbados | Coconuts - Incl Copra           | 2000           | 28                                                             |
| 14               | Barbados | Coffee and products             | 2000           | 2                                                              |
| 14               | Barbados | Cottonseed Oil                  | 2000           | 20                                                             |
| 14               | Barbados | Cream                           | 2000           | 21                                                             |
| 14               | Barbados | Crustaceans                     | 2000           | 2                                                              |
| 14               | Barbados | Demersal Fish                   | 2000           | 9                                                              |
| 14               | Barbados | Eggs                            | 2000           | 11                                                             |
| 14               | Barbados | Fats, Animals, Raw              | 2000           | 34                                                             |
| 14               | Barbados | Fish, Seafood                   | 2000           | 78                                                             |
| 14               | Barbados | Freshwater Fish                 | 2000           | 2                                                              |
| 14               | Barbados | Fruits - Excluding Wine         | 2000           | 86                                                             |
| 14               | Barbados | Fruits, Other                   | 2000           | 22                                                             |
| 14               | Barbados | Grand Total                     | 2000           | 2,841                                                          |
| 14               | Barbados | Grapefruit and products         | 2000           | 1                                                              |
| 14               | Barbados | Grapes and products (excl wine) | 2000           | 11                                                             |
| 14               | Barbados | Groundnuts (Shelled Eq)         | 2000           | 24                                                             |
| 14               | Barbados | Honey                           | 2000           | 3                                                              |
| 14               | Barbados | Maize and products              | 2000           | 118                                                            |
| 14               | Barbados | Maize Germ Oil                  | 2000           | 18                                                             |
| 14               | Barbados | Marine Fish, Other              | 2000           | 11                                                             |
| 14               | Barbados | Meat                            | 2000           | 321                                                            |

Dietary calcium and zinc deficiency risks are decreasing but remain prevalent

| FAO Country code | Country  | Food item                       | Reference year | Net energy supply (kcal capita <sup>-1</sup> d <sup>-1</sup> ) |
|------------------|----------|---------------------------------|----------------|----------------------------------------------------------------|
| 14               | Barbados | Milk - Excluding Butter         | 2000           | 155                                                            |
| 14               | Barbados | Miscellaneous                   | 2000           | 30                                                             |
| 14               | Barbados | Mutton & Goat Meat              | 2000           | 34                                                             |
| 14               | Barbados | Offals                          | 2000           | 5                                                              |
| 14               | Barbados | Oilcrops                        | 2000           | 56                                                             |
| 14               | Barbados | Oilcrops Oil, Other             | 2000           | 80                                                             |
| 14               | Barbados | Olive Oil                       | 2000           | 11                                                             |
| 14               | Barbados | Onions                          | 2000           | 7                                                              |
| 14               | Barbados | Oranges, Mandarines             | 2000           | 13                                                             |
| 14               | Barbados | Peas                            | 2000           | 22                                                             |
| 14               | Barbados | Pelagic Fish                    | 2000           | 54                                                             |
| 14               | Barbados | Pepper                          | 2000           | 1                                                              |
| 14               | Barbados | Pigmeat                         | 2000           | 41                                                             |
| 14               | Barbados | Pineapples and products         | 2000           | 5                                                              |
| 14               | Barbados | Plantains                       | 2000           | 8                                                              |
| 14               | Barbados | Potatoes and products           | 2000           | 67                                                             |
| 14               | Barbados | Poultry Meat                    | 2000           | 178                                                            |
| 14               | Barbados | Pulses                          | 2000           | 67                                                             |
| 14               | Barbados | Pulses, Other and products      | 2000           | 31                                                             |
| 14               | Barbados | Rape and Mustardseed            | 2000           | 2                                                              |
| 14               | Barbados | Rice (Milled Equivalent)        | 2000           | 162                                                            |
| 14               | Barbados | Roots, Other                    | 2000           | 3                                                              |
| 14               | Barbados | Sesame seed                     | 2000           | 1                                                              |
| 14               | Barbados | Soyabean Oil                    | 2000           | 162                                                            |
| 14               | Barbados | Spices                          | 2000           | 8                                                              |
| 14               | Barbados | Spices, Other                   | 2000           | 7                                                              |
| 14               | Barbados | Starchy Roots                   | 2000           | 105                                                            |
| 14               | Barbados | Stimulants                      | 2000           | 14                                                             |
| 14               | Barbados | Sugar & Sweeteners              | 2000           | 522                                                            |
| 14               | Barbados | Sugar (Raw Equivalent)          | 2000           | 507                                                            |
| 14               | Barbados | Sunflower seed                  | 2000           | 1                                                              |
| 14               | Barbados | Sunflowerseed Oil               | 2000           | 1                                                              |
| 14               | Barbados | Sweet potatoes                  | 2000           | 21                                                             |
| 14               | Barbados | Sweeteners, Other               | 2000           | 13                                                             |
| 14               | Barbados | Tomatoes and products           | 2000           | 3                                                              |
| 14               | Barbados | Treenuts                        | 2000           | 7                                                              |
| 14               | Barbados | Vegetable Oils                  | 2000           | 292                                                            |
| 14               | Barbados | Vegetables                      | 2000           | 51                                                             |
| 14               | Barbados | Vegetables, Other               | 2000           | 41                                                             |
| 14               | Barbados | Vegetal Products                | 2000           | 2,185                                                          |
| 14               | Barbados | Wheat and products              | 2000           | 550                                                            |
| 14               | Barbados | Wine                            | 2000           | 7                                                              |
| 14               | Barbados | Yams                            | 2000           | 10                                                             |
| 14               | Barbados | Alcoholic Beverages             | 2001           | 62                                                             |
| 14               | Barbados | Animal fats                     | 2001           | 70                                                             |
| 14               | Barbados | Animal Products                 | 2001           | 638                                                            |
| 14               | Barbados | Apples and products             | 2001           | 17                                                             |
| 14               | Barbados | Bananas                         | 2001           | 18                                                             |
| 14               | Barbados | Barley and products             | 2001           | 17                                                             |
| 14               | Barbados | Beans                           | 2001           | 16                                                             |
| 14               | Barbados | Beer                            | 2001           | 33                                                             |
| 14               | Barbados | Beverages, Alcoholic            | 2001           | 22                                                             |
| 14               | Barbados | Bovine Meat                     | 2001           | 60                                                             |
| 14               | Barbados | Butter, Ghee                    | 2001           | 25                                                             |
| 14               | Barbados | Cassava and products            | 2001           | 4                                                              |
| 14               | Barbados | Cephalopods                     | 2001           | 1                                                              |
| 14               | Barbados | Cereals - Excluding Beer        | 2001           | 883                                                            |
| 14               | Barbados | Cereals, Other                  | 2001           | 14                                                             |
| 14               | Barbados | Cocoa Beans and products        | 2001           | 14                                                             |
| 14               | Barbados | Coconuts - Incl Copra           | 2001           | 25                                                             |
| 14               | Barbados | Coffee and products             | 2001           | 3                                                              |
| 14               | Barbados | Cottonseed Oil                  | 2001           | 15                                                             |
| 14               | Barbados | Cream                           | 2001           | 18                                                             |
| 14               | Barbados | Crustaceans                     | 2001           | 2                                                              |
| 14               | Barbados | Demersal Fish                   | 2001           | 10                                                             |
| 14               | Barbados | Eggs                            | 2001           | 15                                                             |
| 14               | Barbados | Fats, Animals, Raw              | 2001           | 27                                                             |
| 14               | Barbados | Fish, Seafood                   | 2001           | 79                                                             |
| 14               | Barbados | Freshwater Fish                 | 2001           | 2                                                              |
| 14               | Barbados | Fruits - Excluding Wine         | 2001           | 104                                                            |
| 14               | Barbados | Fruits, Other                   | 2001           | 32                                                             |
| 14               | Barbados | Grand Total                     | 2001           | 2,869                                                          |
| 14               | Barbados | Grapefruit and products         | 2001           | 2                                                              |
| 14               | Barbados | Grapes and products (excl wine) | 2001           | 8                                                              |
| 14               | Barbados | Groundnuts (Shelled Eq)         | 2001           | 34                                                             |
| 14               | Barbados | Honey                           | 2001           | 2                                                              |
| 14               | Barbados | Maize and products              | 2001           | 114                                                            |
| 14               | Barbados | Maize Germ Oil                  | 2001           | 20                                                             |
| 14               | Barbados | Marine Fish, Other              | 2001           | 11                                                             |
| 14               | Barbados | Meat                            | 2001           | 309                                                            |
| 14               | Barbados | Milk - Excluding Butter         | 2001           | 154                                                            |
| 14               | Barbados | Miscellaneous                   | 2001           | 36                                                             |
| 14               | Barbados | Mutton & Goat Meat              | 2001           | 28                                                             |
| 14               | Barbados | Oats                            | 2001           | 3                                                              |
| 14               | Barbados | Offals                          | 2001           | 10                                                             |
| 14               | Barbados | Oilcrops                        | 2001           | 72                                                             |
| 14               | Barbados | Olive Oil                       | 2001           | 17                                                             |
| 14               | Barbados | Olives (including preserved)    | 2001           | 4                                                              |
| 14               | Barbados | Onions                          | 2001           | 8                                                              |
| 14               | Barbados | Oranges, Mandarines             | 2001           | 12                                                             |
| 14               | Barbados | Peas                            | 2001           | 22                                                             |
| 14               | Barbados | Pelagic Fish                    | 2001           | 52                                                             |
| 14               | Barbados | Pepper                          | 2001           | 2                                                              |
| 14               | Barbados | Pigmeat                         | 2001           | 33                                                             |
| 14               | Barbados | Pimento                         | 2001           | 1                                                              |
| 14               | Barbados | Pineapples and products         | 2001           | 8                                                              |
| 14               | Barbados | Plantains                       | 2001           | 6                                                              |

Dietary calcium and zinc deficiency risks are decreasing but remain prevalent

| FAO Country code | Country  | Food item                       | Reference year | Net energy supply (kcal capita <sup>-1</sup> d <sup>-1</sup> ) |
|------------------|----------|---------------------------------|----------------|----------------------------------------------------------------|
| 14               | Barbados | Potatoes and products           | 2001           | 72                                                             |
| 14               | Barbados | Poultry Meat                    | 2001           | 187                                                            |
| 14               | Barbados | Pulses                          | 2001           | 69                                                             |
| 14               | Barbados | Pulses, Other and products      | 2001           | 32                                                             |
| 14               | Barbados | Rape and Mustardseed            | 2001           | 7                                                              |
| 14               | Barbados | Rice (Milled Equivalent)        | 2001           | 183                                                            |
| 14               | Barbados | Roots, Other                    | 2001           | 3                                                              |
| 14               | Barbados | Rye and products                | 2001           | 1                                                              |
| 14               | Barbados | Sesame seed                     | 2001           | 1                                                              |
| 14               | Barbados | Soyabean Oil                    | 2001           | 213                                                            |
| 14               | Barbados | Soyabeans                       | 2001           | 1                                                              |
| 14               | Barbados | Spices                          | 2001           | 11                                                             |
| 14               | Barbados | Spices, Other                   | 2001           | 8                                                              |
| 14               | Barbados | Starchy Roots                   | 2001           | 110                                                            |
| 14               | Barbados | Stimulants                      | 2001           | 17                                                             |
| 14               | Barbados | Sugar & Sweeteners              | 2001           | 526                                                            |
| 14               | Barbados | Sugar (Raw Equivalent)          | 2001           | 512                                                            |
| 14               | Barbados | Sunflower seed                  | 2001           | 1                                                              |
| 14               | Barbados | Sunflowerseed Oil               | 2001           | 1                                                              |
| 14               | Barbados | Sweet potatoes                  | 2001           | 20                                                             |
| 14               | Barbados | Sweeteners, Other               | 2001           | 12                                                             |
| 14               | Barbados | Tea (including mate)            | 2001           | 1                                                              |
| 14               | Barbados | Tomatoes and products           | 2001           | 3                                                              |
| 14               | Barbados | Treenuts                        | 2001           | 9                                                              |
| 14               | Barbados | Vegetable Oils                  | 2001           | 265                                                            |
| 14               | Barbados | Vegetables                      | 2001           | 66                                                             |
| 14               | Barbados | Vegetables, Other               | 2001           | 55                                                             |
| 14               | Barbados | Vegetal Products                | 2001           | 2,231                                                          |
| 14               | Barbados | Wheat and products              | 2001           | 551                                                            |
| 14               | Barbados | Wine                            | 2001           | 6                                                              |
| 14               | Barbados | Yams                            | 2001           | 11                                                             |
| 14               | Barbados | Alcoholic Beverages             | 2002           | 61                                                             |
| 14               | Barbados | Animal fats                     | 2002           | 69                                                             |
| 14               | Barbados | Animal Products                 | 2002           | 639                                                            |
| 14               | Barbados | Apples and products             | 2002           | 15                                                             |
| 14               | Barbados | Bananas                         | 2002           | 13                                                             |
| 14               | Barbados | Barley and products             | 2002           | 16                                                             |
| 14               | Barbados | Beans                           | 2002           | 14                                                             |
| 14               | Barbados | Beer                            | 2002           | 32                                                             |
| 14               | Barbados | Beverages, Alcoholic            | 2002           | 21                                                             |
| 14               | Barbados | Bovine Meat                     | 2002           | 66                                                             |
| 14               | Barbados | Butter, Ghee                    | 2002           | 20                                                             |
| 14               | Barbados | Cassava and products            | 2002           | 3                                                              |
| 14               | Barbados | Cereals - Excluding Beer        | 2002           | 871                                                            |
| 14               | Barbados | Cereals, Other                  | 2002           | 15                                                             |
| 14               | Barbados | Cloves                          | 2002           | 1                                                              |
| 14               | Barbados | Cocoa Beans and products        | 2002           | 12                                                             |
| 14               | Barbados | Coconuts - Incl Copra           | 2002           | 26                                                             |
| 14               | Barbados | Coffee and products             | 2002           | 3                                                              |
| 14               | Barbados | Cottonseed Oil                  | 2002           | 13                                                             |
| 14               | Barbados | Cream                           | 2002           | 14                                                             |
| 14               | Barbados | Crustaceans                     | 2002           | 2                                                              |
| 14               | Barbados | Demersal Fish                   | 2002           | 10                                                             |
| 14               | Barbados | Eggs                            | 2002           | 16                                                             |
| 14               | Barbados | Fats, Animals, Raw              | 2002           | 36                                                             |
| 14               | Barbados | Fish, Seafood                   | 2002           | 83                                                             |
| 14               | Barbados | Freshwater Fish                 | 2002           | 2                                                              |
| 14               | Barbados | Fruits - Excluding Wine         | 2002           | 108                                                            |
| 14               | Barbados | Fruits, Other                   | 2002           | 33                                                             |
| 14               | Barbados | Grand Total                     | 2002           | 2,837                                                          |
| 14               | Barbados | Grapefruit and products         | 2002           | 2                                                              |
| 14               | Barbados | Grapes and products (excl wine) | 2002           | 7                                                              |
| 14               | Barbados | Groundnuts (Shelled Eq)         | 2002           | 40                                                             |
| 14               | Barbados | Honey                           | 2002           | 2                                                              |
| 14               | Barbados | Lemons, Limes and products      | 2002           | 1                                                              |
| 14               | Barbados | Maize and products              | 2002           | 116                                                            |
| 14               | Barbados | Maize Germ Oil                  | 2002           | 20                                                             |
| 14               | Barbados | Marine Fish, Other              | 2002           | 14                                                             |
| 14               | Barbados | Meat                            | 2002           | 305                                                            |
| 14               | Barbados | Milk - Excluding Butter         | 2002           | 155                                                            |
| 14               | Barbados | Miscellaneous                   | 2002           | 45                                                             |
| 14               | Barbados | Mutton & Goat Meat              | 2002           | 26                                                             |
| 14               | Barbados | Oats                            | 2002           | 4                                                              |
| 14               | Barbados | Offals                          | 2002           | 11                                                             |
| 14               | Barbados | Oilcrops                        | 2002           | 78                                                             |
| 14               | Barbados | Olive Oil                       | 2002           | 16                                                             |
| 14               | Barbados | Olives (including preserved)    | 2002           | 4                                                              |
| 14               | Barbados | Onions                          | 2002           | 6                                                              |
| 14               | Barbados | Oranges, Mandarines             | 2002           | 24                                                             |
| 14               | Barbados | Peas                            | 2002           | 21                                                             |
| 14               | Barbados | Pelagic Fish                    | 2002           | 54                                                             |
| 14               | Barbados | Pepper                          | 2002           | 2                                                              |
| 14               | Barbados | Pigmeat                         | 2002           | 35                                                             |
| 14               | Barbados | Pimento                         | 2002           | 1                                                              |
| 14               | Barbados | Pineapples and products         | 2002           | 6                                                              |
| 14               | Barbados | Plantains                       | 2002           | 7                                                              |
| 14               | Barbados | Potatoes and products           | 2002           | 71                                                             |
| 14               | Barbados | Poultry Meat                    | 2002           | 178                                                            |
| 14               | Barbados | Pulses                          | 2002           | 67                                                             |
| 14               | Barbados | Pulses, Other and products      | 2002           | 32                                                             |
| 14               | Barbados | Rape and Mustardseed            | 2002           | 7                                                              |
| 14               | Barbados | Rice (Milled Equivalent)        | 2002           | 178                                                            |
| 14               | Barbados | Roots, Other                    | 2002           | 4                                                              |
| 14               | Barbados | Rye and products                | 2002           | 1                                                              |
| 14               | Barbados | Sesame seed                     | 2002           | 1                                                              |
| 14               | Barbados | Soyabean Oil                    | 2002           | 203                                                            |
| 14               | Barbados | Soyabeans                       | 2002           | 1                                                              |

Dietary calcium and zinc deficiency risks are decreasing but remain prevalent

| FAO Country code | Country  | Food item                       | Reference year | Net energy supply (kcal capita <sup>-1</sup> d <sup>-1</sup> ) |
|------------------|----------|---------------------------------|----------------|----------------------------------------------------------------|
| 14               | Barbados | Spices                          | 2002           | 11                                                             |
| 14               | Barbados | Spices, Other                   | 2002           | 8                                                              |
| 14               | Barbados | Starchy Roots                   | 2002           | 92                                                             |
| 14               | Barbados | Stimulants                      | 2002           | 16                                                             |
| 14               | Barbados | Sugar & Sweeteners              | 2002           | 521                                                            |
| 14               | Barbados | Sugar (Raw Equivalent)          | 2002           | 506                                                            |
| 14               | Barbados | Sunflowerseed Oil               | 2002           | 1                                                              |
| 14               | Barbados | Sweet potatoes                  | 2002           | 11                                                             |
| 14               | Barbados | Sweeteners, Other               | 2002           | 14                                                             |
| 14               | Barbados | Tea (including mate)            | 2002           | 1                                                              |
| 14               | Barbados | Tomatoes and products           | 2002           | 3                                                              |
| 14               | Barbados | Treenuts                        | 2002           | 11                                                             |
| 14               | Barbados | Vegetable Oils                  | 2002           | 254                                                            |
| 14               | Barbados | Vegetables                      | 2002           | 63                                                             |
| 14               | Barbados | Vegetables, Other               | 2002           | 53                                                             |
| 14               | Barbados | Vegetal Products                | 2002           | 2,198                                                          |
| 14               | Barbados | Wheat and products              | 2002           | 542                                                            |
| 14               | Barbados | Wine                            | 2002           | 7                                                              |
| 14               | Barbados | Yams                            | 2002           | 3                                                              |
| 14               | Barbados | Alcoholic Beverages             | 2003           | 59                                                             |
| 14               | Barbados | Animal fats                     | 2003           | 70                                                             |
| 14               | Barbados | Animal Products                 | 2003           | 654                                                            |
| 14               | Barbados | Apples and products             | 2003           | 14                                                             |
| 14               | Barbados | Bananas                         | 2003           | 17                                                             |
| 14               | Barbados | Barley and products             | 2003           | 10                                                             |
| 14               | Barbados | Beans                           | 2003           | 16                                                             |
| 14               | Barbados | Beer                            | 2003           | 32                                                             |
| 14               | Barbados | Beverages, Alcoholic            | 2003           | 20                                                             |
| 14               | Barbados | Bovine Meat                     | 2003           | 59                                                             |
| 14               | Barbados | Butter, Ghee                    | 2003           | 20                                                             |
| 14               | Barbados | Cassava and products            | 2003           | 4                                                              |
| 14               | Barbados | Cephalopods                     | 2003           | 1                                                              |
| 14               | Barbados | Cereals - Excluding Beer        | 2003           | 877                                                            |
| 14               | Barbados | Cereals, Other                  | 2003           | 11                                                             |
| 14               | Barbados | Cocoa Beans and products        | 2003           | 12                                                             |
| 14               | Barbados | Coconuts - Incl Copra           | 2003           | 25                                                             |
| 14               | Barbados | Coffee and products             | 2003           | 3                                                              |
| 14               | Barbados | Cottonseed Oil                  | 2003           | 9                                                              |
| 14               | Barbados | Cream                           | 2003           | 15                                                             |
| 14               | Barbados | Crustaceans                     | 2003           | 2                                                              |
| 14               | Barbados | Demersal Fish                   | 2003           | 10                                                             |
| 14               | Barbados | Eggs                            | 2003           | 18                                                             |
| 14               | Barbados | Fats, Animals, Raw              | 2003           | 34                                                             |
| 14               | Barbados | Fish, Seafood                   | 2003           | 86                                                             |
| 14               | Barbados | Freshwater Fish                 | 2003           | 2                                                              |
| 14               | Barbados | Fruits - Excluding Wine         | 2003           | 115                                                            |
| 14               | Barbados | Fruits, Other                   | 2003           | 36                                                             |
| 14               | Barbados | Grand Total                     | 2003           | 2,890                                                          |
| 14               | Barbados | Grapefruit and products         | 2003           | 2                                                              |
| 14               | Barbados | Grapes and products (excl wine) | 2003           | 9                                                              |
| 14               | Barbados | Groundnuts (Shelled Eq)         | 2003           | 33                                                             |
| 14               | Barbados | Honey                           | 2003           | 4                                                              |
| 14               | Barbados | Lemons, Limes and products      | 2003           | 1                                                              |
| 14               | Barbados | Maize and products              | 2003           | 118                                                            |
| 14               | Barbados | Maize Germ Oil                  | 2003           | 23                                                             |
| 14               | Barbados | Marine Fish, Other              | 2003           | 17                                                             |
| 14               | Barbados | Meat                            | 2003           | 306                                                            |
| 14               | Barbados | Milk - Excluding Butter         | 2003           | 163                                                            |
| 14               | Barbados | Miscellaneous                   | 2003           | 45                                                             |
| 14               | Barbados | Mutton & Goat Meat              | 2003           | 29                                                             |
| 14               | Barbados | Oats                            | 2003           | 6                                                              |
| 14               | Barbados | Offals                          | 2003           | 10                                                             |
| 14               | Barbados | Oilcrops                        | 2003           | 72                                                             |
| 14               | Barbados | Olive Oil                       | 2003           | 21                                                             |
| 14               | Barbados | Olives (including preserved)    | 2003           | 5                                                              |
| 14               | Barbados | Onions                          | 2003           | 7                                                              |
| 14               | Barbados | Oranges, Mandarines             | 2003           | 23                                                             |
| 14               | Barbados | Peas                            | 2003           | 20                                                             |
| 14               | Barbados | Pelagic Fish                    | 2003           | 55                                                             |
| 14               | Barbados | Pepper                          | 2003           | 2                                                              |
| 14               | Barbados | Pigmeat                         | 2003           | 35                                                             |
| 14               | Barbados | Pimento                         | 2003           | 1                                                              |
| 14               | Barbados | Pineapples and products         | 2003           | 7                                                              |
| 14               | Barbados | Plantains                       | 2003           | 7                                                              |
| 14               | Barbados | Potatoes and products           | 2003           | 77                                                             |
| 14               | Barbados | Poultry Meat                    | 2003           | 183                                                            |
| 14               | Barbados | Pulses                          | 2003           | 69                                                             |
| 14               | Barbados | Pulses, Other and products      | 2003           | 33                                                             |
| 14               | Barbados | Rape and Mustardseed            | 2003           | 7                                                              |
| 14               | Barbados | Rice (Milled Equivalent)        | 2003           | 180                                                            |
| 14               | Barbados | Roots, Other                    | 2003           | 4                                                              |
| 14               | Barbados | Rye and products                | 2003           | 1                                                              |
| 14               | Barbados | Sesame seed                     | 2003           | 1                                                              |
| 14               | Barbados | Soyabean Oil                    | 2003           | 196                                                            |
| 14               | Barbados | Spices                          | 2003           | 13                                                             |
| 14               | Barbados | Spices, Other                   | 2003           | 9                                                              |
| 14               | Barbados | Starchy Roots                   | 2003           | 114                                                            |
| 14               | Barbados | Stimulants                      | 2003           | 15                                                             |
| 14               | Barbados | Sugar & Sweeteners              | 2003           | 523                                                            |
| 14               | Barbados | Sugar (Raw Equivalent)          | 2003           | 507                                                            |
| 14               | Barbados | Sunflowerseed Oil               | 2003           | 1                                                              |
| 14               | Barbados | Sweet potatoes                  | 2003           | 20                                                             |
| 14               | Barbados | Sweeteners, Other               | 2003           | 13                                                             |
| 14               | Barbados | Tea (including mate)            | 2003           | 1                                                              |
| 14               | Barbados | Tomatoes and products           | 2003           | 3                                                              |
| 14               | Barbados | Treenuts                        | 2003           | 12                                                             |
| 14               | Barbados | Vegetable Oils                  | 2003           | 251                                                            |

Dietary calcium and zinc deficiency risks are decreasing but remain prevalent

| FAO Country code | Country  | Food item                       | Reference year | Net energy supply (kcal capita <sup>-1</sup> d <sup>-1</sup> ) |
|------------------|----------|---------------------------------|----------------|----------------------------------------------------------------|
| 14               | Barbados | Vegetables                      | 2003           | 71                                                             |
| 14               | Barbados | Vegetables, Other               | 2003           | 60                                                             |
| 14               | Barbados | Vegetal Products                | 2003           | 2,237                                                          |
| 14               | Barbados | Wheat and products              | 2003           | 551                                                            |
| 14               | Barbados | Wine                            | 2003           | 7                                                              |
| 14               | Barbados | Yams                            | 2003           | 11                                                             |
| 14               | Barbados | Alcoholic Beverages             | 2004           | 52                                                             |
| 14               | Barbados | Animal fats                     | 2004           | 68                                                             |
| 14               | Barbados | Animal Products                 | 2004           | 649                                                            |
| 14               | Barbados | Apples and products             | 2004           | 8                                                              |
| 14               | Barbados | Bananas                         | 2004           | 28                                                             |
| 14               | Barbados | Barley and products             | 2004           | 2                                                              |
| 14               | Barbados | Beans                           | 2004           | 15                                                             |
| 14               | Barbados | Beer                            | 2004           | 24                                                             |
| 14               | Barbados | Beverages, Alcoholic            | 2004           | 19                                                             |
| 14               | Barbados | Bovine Meat                     | 2004           | 59                                                             |
| 14               | Barbados | Butter, Ghee                    | 2004           | 20                                                             |
| 14               | Barbados | Cassava and products            | 2004           | 3                                                              |
| 14               | Barbados | Cephalopods                     | 2004           | 1                                                              |
| 14               | Barbados | Cereals - Excluding Beer        | 2004           | 835                                                            |
| 14               | Barbados | Cereals, Other                  | 2004           | 5                                                              |
| 14               | Barbados | Cocoa Beans and products        | 2004           | 12                                                             |
| 14               | Barbados | Coconuts - Incl Copra           | 2004           | 26                                                             |
| 14               | Barbados | Coffee and products             | 2004           | 3                                                              |
| 14               | Barbados | Cottonseed Oil                  | 2004           | 7                                                              |
| 14               | Barbados | Cream                           | 2004           | 10                                                             |
| 14               | Barbados | Crustaceans                     | 2004           | 1                                                              |
| 14               | Barbados | Demersal Fish                   | 2004           | 9                                                              |
| 14               | Barbados | Eggs                            | 2004           | 23                                                             |
| 14               | Barbados | Fats, Animals, Raw              | 2004           | 38                                                             |
| 14               | Barbados | Fish, Seafood                   | 2004           | 76                                                             |
| 14               | Barbados | Freshwater Fish                 | 2004           | 2                                                              |
| 14               | Barbados | Fruits - Excluding Wine         | 2004           | 94                                                             |
| 14               | Barbados | Fruits, Other                   | 2004           | 26                                                             |
| 14               | Barbados | Grand Total                     | 2004           | 2,726                                                          |
| 14               | Barbados | Grapefruit and products         | 2004           | 2                                                              |
| 14               | Barbados | Grapes and products (excl wine) | 2004           | 11                                                             |
| 14               | Barbados | Groundnuts (Shelled Eq)         | 2004           | 26                                                             |
| 14               | Barbados | Honey                           | 2004           | 3                                                              |
| 14               | Barbados | Lemons, Limes and products      | 2004           | 1                                                              |
| 14               | Barbados | Maize and products              | 2004           | 115                                                            |
| 14               | Barbados | Maize Germ Oil                  | 2004           | 24                                                             |
| 14               | Barbados | Marine Fish, Other              | 2004           | 14                                                             |
| 14               | Barbados | Meat                            | 2004           | 299                                                            |
| 14               | Barbados | Milk - Excluding Butter         | 2004           | 174                                                            |
| 14               | Barbados | Miscellaneous                   | 2004           | 37                                                             |
| 14               | Barbados | Mutton & Goat Meat              | 2004           | 25                                                             |
| 14               | Barbados | Oats                            | 2004           | 3                                                              |
| 14               | Barbados | Offals                          | 2004           | 10                                                             |
| 14               | Barbados | Oilcrops                        | 2004           | 65                                                             |
| 14               | Barbados | Olive Oil                       | 2004           | 15                                                             |
| 14               | Barbados | Olives (including preserved)    | 2004           | 4                                                              |
| 14               | Barbados | Onions                          | 2004           | 3                                                              |
| 14               | Barbados | Oranges, Mandarines             | 2004           | 13                                                             |
| 14               | Barbados | Peas                            | 2004           | 17                                                             |
| 14               | Barbados | Pelagic Fish                    | 2004           | 49                                                             |
| 14               | Barbados | Pepper                          | 2004           | 1                                                              |
| 14               | Barbados | Pigmeat                         | 2004           | 38                                                             |
| 14               | Barbados | Pimento                         | 2004           | 1                                                              |
| 14               | Barbados | Pineapples and products         | 2004           | 5                                                              |
| 14               | Barbados | Plantains                       | 2004           | 1                                                              |
| 14               | Barbados | Potatoes and products           | 2004           | 49                                                             |
| 14               | Barbados | Poultry Meat                    | 2004           | 177                                                            |
| 14               | Barbados | Pulses                          | 2004           | 64                                                             |
| 14               | Barbados | Pulses, Other and products      | 2004           | 32                                                             |
| 14               | Barbados | Rape and Mustardseed            | 2004           | 7                                                              |
| 14               | Barbados | Rice (Milled Equivalent)        | 2004           | 178                                                            |
| 14               | Barbados | Roots, Other                    | 2004           | 2                                                              |
| 14               | Barbados | Sesame seed                     | 2004           | 1                                                              |
| 14               | Barbados | Soyabean Oil                    | 2004           | 194                                                            |
| 14               | Barbados | Spices                          | 2004           | 7                                                              |
| 14               | Barbados | Spices, Other                   | 2004           | 4                                                              |
| 14               | Barbados | Starchy Roots                   | 2004           | 73                                                             |
| 14               | Barbados | Stimulants                      | 2004           | 15                                                             |
| 14               | Barbados | Sugar & Sweeteners              | 2004           | 517                                                            |
| 14               | Barbados | Sugar (Raw Equivalent)          | 2004           | 503                                                            |
| 14               | Barbados | Sunflower seed                  | 2004           | 1                                                              |
| 14               | Barbados | Sunflowerseed Oil               | 2004           | 5                                                              |
| 14               | Barbados | Sweet potatoes                  | 2004           | 14                                                             |
| 14               | Barbados | Sweeteners, Other               | 2004           | 11                                                             |
| 14               | Barbados | Tea (including mate)            | 2004           | 1                                                              |
| 14               | Barbados | Tomatoes and products           | 2004           | 3                                                              |
| 14               | Barbados | Treenuts                        | 2004           | 14                                                             |
| 14               | Barbados | Vegetable Oils                  | 2004           | 245                                                            |
| 14               | Barbados | Vegetables                      | 2004           | 59                                                             |
| 14               | Barbados | Vegetables, Other               | 2004           | 52                                                             |
| 14               | Barbados | Vegetal Products                | 2004           | 2,076                                                          |
| 14               | Barbados | Wheat and products              | 2004           | 531                                                            |
| 14               | Barbados | Wine                            | 2004           | 9                                                              |
| 14               | Barbados | Yams                            | 2004           | 5                                                              |
| 14               | Barbados | Alcoholic Beverages             | 2005           | 71                                                             |
| 14               | Barbados | Animal fats                     | 2005           | 68                                                             |
| 14               | Barbados | Animal Products                 | 2005           | 729                                                            |
| 14               | Barbados | Apples and products             | 2005           | 12                                                             |
| 14               | Barbados | Bananas                         | 2005           | 13                                                             |
| 14               | Barbados | Barley and products             | 2005           | 9                                                              |
| 14               | Barbados | Beans                           | 2005           | 14                                                             |

Dietary calcium and zinc deficiency risks are decreasing but remain prevalent

| FAO Country code | Country  | Food item                       | Reference year | Net energy supply (kcal capita <sup>-1</sup> d <sup>-1</sup> ) |
|------------------|----------|---------------------------------|----------------|----------------------------------------------------------------|
| 14               | Barbados | Beer                            | 2005           | 38                                                             |
| 14               | Barbados | Beverages, Alcoholic            | 2005           | 15                                                             |
| 14               | Barbados | Beverages, Fermented            | 2005           | 1                                                              |
| 14               | Barbados | Bovine Meat                     | 2005           | 71                                                             |
| 14               | Barbados | Butter, Ghee                    | 2005           | 21                                                             |
| 14               | Barbados | Cassava and products            | 2005           | 2                                                              |
| 14               | Barbados | Cephalopods                     | 2005           | 1                                                              |
| 14               | Barbados | Cereals - Excluding Beer        | 2005           | 734                                                            |
| 14               | Barbados | Cereals, Other                  | 2005           | 2                                                              |
| 14               | Barbados | Cocoa Beans and products        | 2005           | 10                                                             |
| 14               | Barbados | Coconuts - Incl Copra           | 2005           | 29                                                             |
| 14               | Barbados | Coffee and products             | 2005           | 2                                                              |
| 14               | Barbados | Cottonseed Oil                  | 2005           | 8                                                              |
| 14               | Barbados | Cream                           | 2005           | 8                                                              |
| 14               | Barbados | Crustaceans                     | 2005           | 2                                                              |
| 14               | Barbados | Demersal Fish                   | 2005           | 10                                                             |
| 14               | Barbados | Eggs                            | 2005           | 14                                                             |
| 14               | Barbados | Fats, Animals, Raw              | 2005           | 38                                                             |
| 14               | Barbados | Fish, Seafood                   | 2005           | 83                                                             |
| 14               | Barbados | Freshwater Fish                 | 2005           | 3                                                              |
| 14               | Barbados | Fruits - Excluding Wine         | 2005           | 106                                                            |
| 14               | Barbados | Fruits, Other                   | 2005           | 34                                                             |
| 14               | Barbados | Grand Total                     | 2005           | 2,836                                                          |
| 14               | Barbados | Grapefruit and products         | 2005           | 2                                                              |
| 14               | Barbados | Grapes and products (excl wine) | 2005           | 12                                                             |
| 14               | Barbados | Groundnuts (Shelled Eq)         | 2005           | 25                                                             |
| 14               | Barbados | Honey                           | 2005           | 3                                                              |
| 14               | Barbados | Lemons, Limes and products      | 2005           | 1                                                              |
| 14               | Barbados | Maize and products              | 2005           | 116                                                            |
| 14               | Barbados | Maize Germ Oil                  | 2005           | 22                                                             |
| 14               | Barbados | Marine Fish, Other              | 2005           | 17                                                             |
| 14               | Barbados | Meat                            | 2005           | 350                                                            |
| 14               | Barbados | Milk - Excluding Butter         | 2005           | 206                                                            |
| 14               | Barbados | Miscellaneous                   | 2005           | 53                                                             |
| 14               | Barbados | Mutton & Goat Meat              | 2005           | 25                                                             |
| 14               | Barbados | Oats                            | 2005           | 5                                                              |
| 14               | Barbados | Offals                          | 2005           | 8                                                              |
| 14               | Barbados | Oilcrops                        | 2005           | 73                                                             |
| 14               | Barbados | Olive Oil                       | 2005           | 24                                                             |
| 14               | Barbados | Olives (including preserved)    | 2005           | 7                                                              |
| 14               | Barbados | Onions                          | 2005           | 10                                                             |
| 14               | Barbados | Oranges, Mandarines             | 2005           | 16                                                             |
| 14               | Barbados | Peas                            | 2005           | 24                                                             |
| 14               | Barbados | Pelagic Fish                    | 2005           | 48                                                             |
| 14               | Barbados | Pepper                          | 2005           | 2                                                              |
| 14               | Barbados | Pigmeat                         | 2005           | 39                                                             |
| 14               | Barbados | Pimento                         | 2005           | 2                                                              |
| 14               | Barbados | Pineapples and products         | 2005           | 7                                                              |
| 14               | Barbados | Plantains                       | 2005           | 6                                                              |
| 14               | Barbados | Potatoes and products           | 2005           | 77                                                             |
| 14               | Barbados | Poultry Meat                    | 2005           | 216                                                            |
| 14               | Barbados | Pulses                          | 2005           | 73                                                             |
| 14               | Barbados | Pulses, Other and products      | 2005           | 35                                                             |
| 14               | Barbados | Rape and Mustardseed            | 2005           | 9                                                              |
| 14               | Barbados | Rice (Milled Equivalent)        | 2005           | 159                                                            |
| 14               | Barbados | Roots, Other                    | 2005           | 2                                                              |
| 14               | Barbados | Sesame seed                     | 2005           | 1                                                              |
| 14               | Barbados | Sesameseed Oil                  | 2005           | 1                                                              |
| 14               | Barbados | Soyabean Oil                    | 2005           | 199                                                            |
| 14               | Barbados | Soyabeans                       | 2005           | 1                                                              |
| 14               | Barbados | Spices                          | 2005           | 16                                                             |
| 14               | Barbados | Spices, Other                   | 2005           | 11                                                             |
| 14               | Barbados | Starchy Roots                   | 2005           | 102                                                            |
| 14               | Barbados | Stimulants                      | 2005           | 13                                                             |
| 14               | Barbados | Sugar & Sweeteners              | 2005           | 525                                                            |
| 14               | Barbados | Sugar (Raw Equivalent)          | 2005           | 506                                                            |
| 14               | Barbados | Sunflower seed                  | 2005           | 1                                                              |
| 14               | Barbados | Sunflowerseed Oil               | 2005           | 1                                                              |
| 14               | Barbados | Sweet potatoes                  | 2005           | 15                                                             |
| 14               | Barbados | Sweeteners, Other               | 2005           | 16                                                             |
| 14               | Barbados | Tea (including mate)            | 2005           | 1                                                              |
| 14               | Barbados | Tomatoes and products           | 2005           | 4                                                              |
| 14               | Barbados | Treenuts                        | 2005           | 13                                                             |
| 14               | Barbados | Vegetable Oils                  | 2005           | 255                                                            |
| 14               | Barbados | Vegetables                      | 2005           | 74                                                             |
| 14               | Barbados | Vegetables, Other               | 2005           | 60                                                             |
| 14               | Barbados | Vegetal Products                | 2005           | 2,108                                                          |
| 14               | Barbados | Wheat and products              | 2005           | 444                                                            |
| 14               | Barbados | Wine                            | 2005           | 17                                                             |
| 14               | Barbados | Yams                            | 2005           | 7                                                              |
| 14               | Barbados | Alcoholic Beverages             | 2006           | 82                                                             |
| 14               | Barbados | Animal fats                     | 2006           | 70                                                             |
| 14               | Barbados | Animal Products                 | 2006           | 704                                                            |
| 14               | Barbados | Apples and products             | 2006           | 14                                                             |
| 14               | Barbados | Bananas                         | 2006           | 15                                                             |
| 14               | Barbados | Beans                           | 2006           | 13                                                             |
| 14               | Barbados | Beer                            | 2006           | 41                                                             |
| 14               | Barbados | Beverages, Alcoholic            | 2006           | 24                                                             |
| 14               | Barbados | Beverages, Fermented            | 2006           | 1                                                              |
| 14               | Barbados | Bovine Meat                     | 2006           | 64                                                             |
| 14               | Barbados | Butter, Ghee                    | 2006           | 25                                                             |
| 14               | Barbados | Cassava and products            | 2006           | 4                                                              |
| 14               | Barbados | Cephalopods                     | 2006           | 1                                                              |
| 14               | Barbados | Cereals - Excluding Beer        | 2006           | 757                                                            |
| 14               | Barbados | Cereals, Other                  | 2006           | 13                                                             |
| 14               | Barbados | Cocoa Beans and products        | 2006           | 12                                                             |
| 14               | Barbados | Coconuts - Incl Copra           | 2006           | 30                                                             |

Dietary calcium and zinc deficiency risks are decreasing but remain prevalent

| FAO Country code | Country  | Food item                       | Reference year | Net energy supply (kcal capita <sup>-1</sup> d <sup>-1</sup> ) |
|------------------|----------|---------------------------------|----------------|----------------------------------------------------------------|
| 14               | Barbados | Coffee and products             | 2006           | 2                                                              |
| 14               | Barbados | Cottonseed Oil                  | 2006           | 9                                                              |
| 14               | Barbados | Cream                           | 2006           | 9                                                              |
| 14               | Barbados | Crustaceans                     | 2006           | 2                                                              |
| 14               | Barbados | Demersal Fish                   | 2006           | 17                                                             |
| 14               | Barbados | Eggs                            | 2006           | 20                                                             |
| 14               | Barbados | Fats, Animals, Raw              | 2006           | 37                                                             |
| 14               | Barbados | Fish, Seafood                   | 2006           | 81                                                             |
| 14               | Barbados | Freshwater Fish                 | 2006           | 2                                                              |
| 14               | Barbados | Fruits - Excluding Wine         | 2006           | 109                                                            |
| 14               | Barbados | Fruits, Other                   | 2006           | 33                                                             |
| 14               | Barbados | Grand Total                     | 2006           | 2,839                                                          |
| 14               | Barbados | Grapefruit and products         | 2006           | 2                                                              |
| 14               | Barbados | Grapes and products (excl wine) | 2006           | 11                                                             |
| 14               | Barbados | Groundnuts (Shelled Eq)         | 2006           | 36                                                             |
| 14               | Barbados | Honey                           | 2006           | 2                                                              |
| 14               | Barbados | Maize and products              | 2006           | 114                                                            |
| 14               | Barbados | Maize Germ Oil                  | 2006           | 21                                                             |
| 14               | Barbados | Marine Fish, Other              | 2006           | 15                                                             |
| 14               | Barbados | Meat                            | 2006           | 324                                                            |
| 14               | Barbados | Milk - Excluding Butter         | 2006           | 200                                                            |
| 14               | Barbados | Miscellaneous                   | 2006           | 54                                                             |
| 14               | Barbados | Mutton & Goat Meat              | 2006           | 28                                                             |
| 14               | Barbados | Oats                            | 2006           | 6                                                              |
| 14               | Barbados | Offals                          | 2006           | 9                                                              |
| 14               | Barbados | Oilcrops                        | 2006           | 77                                                             |
| 14               | Barbados | Olive Oil                       | 2006           | 23                                                             |
| 14               | Barbados | Olives (including preserved)    | 2006           | 1                                                              |
| 14               | Barbados | Onions                          | 2006           | 9                                                              |
| 14               | Barbados | Oranges, Mandarines             | 2006           | 17                                                             |
| 14               | Barbados | Peas                            | 2006           | 23                                                             |
| 14               | Barbados | Pelagic Fish                    | 2006           | 43                                                             |
| 14               | Barbados | Pepper                          | 2006           | 2                                                              |
| 14               | Barbados | Pigmeat                         | 2006           | 44                                                             |
| 14               | Barbados | Pimento                         | 2006           | 2                                                              |
| 14               | Barbados | Pineapples and products         | 2006           | 7                                                              |
| 14               | Barbados | Plantains                       | 2006           | 8                                                              |
| 14               | Barbados | Potatoes and products           | 2006           | 79                                                             |
| 14               | Barbados | Poultry Meat                    | 2006           | 187                                                            |
| 14               | Barbados | Pulses                          | 2006           | 73                                                             |
| 14               | Barbados | Pulses, Other and products      | 2006           | 37                                                             |
| 14               | Barbados | Rape and Mustardseed            | 2006           | 9                                                              |
| 14               | Barbados | Rice (Milled Equivalent)        | 2006           | 146                                                            |
| 14               | Barbados | Roots, Other                    | 2006           | 2                                                              |
| 14               | Barbados | Sesame seed                     | 2006           | 1                                                              |
| 14               | Barbados | Sesameseed Oil                  | 2006           | 1                                                              |
| 14               | Barbados | Soyabean Oil                    | 2006           | 180                                                            |
| 14               | Barbados | Soyabeans                       | 2006           | 1                                                              |
| 14               | Barbados | Spices                          | 2006           | 12                                                             |
| 14               | Barbados | Spices, Other                   | 2006           | 8                                                              |
| 14               | Barbados | Starchy Roots                   | 2006           | 108                                                            |
| 14               | Barbados | Stimulants                      | 2006           | 16                                                             |
| 14               | Barbados | Sugar & Sweeteners              | 2006           | 524                                                            |
| 14               | Barbados | Sugar (Raw Equivalent)          | 2006           | 508                                                            |
| 14               | Barbados | Sunflowerseed Oil               | 2006           | 5                                                              |
| 14               | Barbados | Sweet potatoes                  | 2006           | 16                                                             |
| 14               | Barbados | Sweeteners, Other               | 2006           | 14                                                             |
| 14               | Barbados | Tea (including mate)            | 2006           | 1                                                              |
| 14               | Barbados | Tomatoes and products           | 2006           | 3                                                              |
| 14               | Barbados | Treenuts                        | 2006           | 15                                                             |
| 14               | Barbados | Vegetable Oils                  | 2006           | 239                                                            |
| 14               | Barbados | Vegetables                      | 2006           | 69                                                             |
| 14               | Barbados | Vegetables, Other               | 2006           | 57                                                             |
| 14               | Barbados | Vegetal Products                | 2006           | 2,136                                                          |
| 14               | Barbados | Wheat and products              | 2006           | 477                                                            |
| 14               | Barbados | Wine                            | 2006           | 16                                                             |
| 14               | Barbados | Yams                            | 2006           | 7                                                              |
| 14               | Barbados | Alcoholic Beverages             | 2007           | 84                                                             |
| 14               | Barbados | Animal fats                     | 2007           | 61                                                             |
| 14               | Barbados | Animal Products                 | 2007           | 756                                                            |
| 14               | Barbados | Apples and products             | 2007           | 16                                                             |
| 14               | Barbados | Bananas                         | 2007           | 14                                                             |
| 14               | Barbados | Beans                           | 2007           | 11                                                             |
| 14               | Barbados | Beer                            | 2007           | 41                                                             |
| 14               | Barbados | Beverages, Alcoholic            | 2007           | 24                                                             |
| 14               | Barbados | Beverages, Fermented            | 2007           | 1                                                              |
| 14               | Barbados | Bovine Meat                     | 2007           | 66                                                             |
| 14               | Barbados | Butter, Ghee                    | 2007           | 22                                                             |
| 14               | Barbados | Cassava and products            | 2007           | 4                                                              |
| 14               | Barbados | Cereals - Excluding Beer        | 2007           | 754                                                            |
| 14               | Barbados | Cereals, Other                  | 2007           | 8                                                              |
| 14               | Barbados | Cocoa Beans and products        | 2007           | 13                                                             |
| 14               | Barbados | Coconuts - Incl Copra           | 2007           | 33                                                             |
| 14               | Barbados | Coffee and products             | 2007           | 2                                                              |
| 14               | Barbados | Cottonseed Oil                  | 2007           | 6                                                              |
| 14               | Barbados | Cream                           | 2007           | 1                                                              |
| 14               | Barbados | Crustaceans                     | 2007           | 1                                                              |
| 14               | Barbados | Demersal Fish                   | 2007           | 16                                                             |
| 14               | Barbados | Eggs                            | 2007           | 24                                                             |
| 14               | Barbados | Fats, Animals, Raw              | 2007           | 38                                                             |
| 14               | Barbados | Fish, Seafood                   | 2007           | 82                                                             |
| 14               | Barbados | Freshwater Fish                 | 2007           | 2                                                              |
| 14               | Barbados | Fruits - Excluding Wine         | 2007           | 115                                                            |
| 14               | Barbados | Fruits, Other                   | 2007           | 32                                                             |
| 14               | Barbados | Grand Total                     | 2007           | 2,879                                                          |
| 14               | Barbados | Grapefruit and products         | 2007           | 2                                                              |
| 14               | Barbados | Grapes and products (excl wine) | 2007           | 14                                                             |



Dietary calcium and zinc deficiency risks are decreasing but remain prevalent

| FAO Country code | Country  | Food item                       | Reference year | Net energy supply (kcal <i>capita</i> <sup>-1</sup> d <sup>-1</sup> ) |
|------------------|----------|---------------------------------|----------------|-----------------------------------------------------------------------|
| 14               | Barbados | Groundnuts (Shelled Eq)         | 2007           | 37                                                                    |
| 14               | Barbados | Honey                           | 2007           | 2                                                                     |
| 14               | Barbados | Maize and products              | 2007           | 116                                                                   |
| 14               | Barbados | Maize Germ Oil                  | 2007           | 22                                                                    |
| 14               | Barbados | Marine Fish, Other              | 2007           | 17                                                                    |
| 14               | Barbados | Meat                            | 2007           | 369                                                                   |
| 14               | Barbados | Milk - Excluding Butter         | 2007           | 210                                                                   |
| 14               | Barbados | Miscellaneous                   | 2007           | 41                                                                    |
| 14               | Barbados | Mutton & Goat Meat              | 2007           | 66                                                                    |
| 14               | Barbados | Oats                            | 2007           | 8                                                                     |
| 14               | Barbados | Offals                          | 2007           | 10                                                                    |
| 14               | Barbados | Oilcrops                        | 2007           | 81                                                                    |
| 14               | Barbados | Olive Oil                       | 2007           | 22                                                                    |
| 14               | Barbados | Olives (including preserved)    | 2007           | 1                                                                     |
| 14               | Barbados | Onions                          | 2007           | 8                                                                     |
| 14               | Barbados | Oranges, Mandarines             | 2007           | 21                                                                    |
| 14               | Barbados | Peas                            | 2007           | 18                                                                    |
| 14               | Barbados | Pelagic Fish                    | 2007           | 45                                                                    |
| 14               | Barbados | Pepper                          | 2007           | 2                                                                     |
| 14               | Barbados | Pigmeat                         | 2007           | 43                                                                    |
| 14               | Barbados | Pimento                         | 2007           | 2                                                                     |
| 14               | Barbados | Pineapples and products         | 2007           | 7                                                                     |
| 14               | Barbados | Plantains                       | 2007           | 8                                                                     |
| 14               | Barbados | Potatoes and products           | 2007           | 77                                                                    |
| 14               | Barbados | Poultry Meat                    | 2007           | 193                                                                   |
| 14               | Barbados | Pulses                          | 2007           | 61                                                                    |
| 14               | Barbados | Pulses, Other and products      | 2007           | 33                                                                    |
| 14               | Barbados | Rape and Mustardseed            | 2007           | 8                                                                     |
| 14               | Barbados | Rice (Milled Equivalent)        | 2007           | 152                                                                   |
| 14               | Barbados | Roots, Other                    | 2007           | 2                                                                     |
| 14               | Barbados | Sesame seed                     | 2007           | 1                                                                     |
| 14               | Barbados | Sesameseed Oil                  | 2007           | 1                                                                     |
| 14               | Barbados | Soyabean Oil                    | 2007           | 183                                                                   |
| 14               | Barbados | Soyabeans                       | 2007           | 1                                                                     |
| 14               | Barbados | Spices                          | 2007           | 14                                                                    |
| 14               | Barbados | Spices, Other                   | 2007           | 9                                                                     |
| 14               | Barbados | Starchy Roots                   | 2007           | 99                                                                    |
| 14               | Barbados | Stimulants                      | 2007           | 16                                                                    |
| 14               | Barbados | Sugar & Sweeteners              | 2007           | 533                                                                   |
| 14               | Barbados | Sugar (Raw Equivalent)          | 2007           | 515                                                                   |
| 14               | Barbados | Sunflower seed                  | 2007           | 1                                                                     |
| 14               | Barbados | Sunflowerseed Oil               | 2007           | 5                                                                     |
| 14               | Barbados | Sweet potatoes                  | 2007           | 10                                                                    |
| 14               | Barbados | Sweeteners, Other               | 2007           | 16                                                                    |
| 14               | Barbados | Tea (including mate)            | 2007           | 1                                                                     |
| 14               | Barbados | Tomatoes and products           | 2007           | 4                                                                     |
| 14               | Barbados | Treenuts                        | 2007           | 13                                                                    |
| 14               | Barbados | Vegetable Oils                  | 2007           | 238                                                                   |
| 14               | Barbados | Vegetables                      | 2007           | 74                                                                    |
| 14               | Barbados | Vegetables, Other               | 2007           | 62                                                                    |
| 14               | Barbados | Vegetal Products                | 2007           | 2,123                                                                 |
| 14               | Barbados | Wheat and products              | 2007           | 470                                                                   |
| 14               | Barbados | Wine                            | 2007           | 18                                                                    |
| 14               | Barbados | Yams                            | 2007           | 6                                                                     |
| 14               | Barbados | Alcoholic Beverages             | 2008           | 84                                                                    |
| 14               | Barbados | Animal fats                     | 2008           | 94                                                                    |
| 14               | Barbados | Animal Products                 | 2008           | 719                                                                   |
| 14               | Barbados | Apples and products             | 2008           | 17                                                                    |
| 14               | Barbados | Bananas                         | 2008           | 13                                                                    |
| 14               | Barbados | Beans                           | 2008           | 7                                                                     |
| 14               | Barbados | Beer                            | 2008           | 41                                                                    |
| 14               | Barbados | Beverages, Alcoholic            | 2008           | 24                                                                    |
| 14               | Barbados | Bovine Meat                     | 2008           | 61                                                                    |
| 14               | Barbados | Butter, Ghee                    | 2008           | 48                                                                    |
| 14               | Barbados | Cassava and products            | 2008           | 4                                                                     |
| 14               | Barbados | Cephalopods                     | 2008           | 1                                                                     |
| 14               | Barbados | Cereals - Excluding Beer        | 2008           | 807                                                                   |
| 14               | Barbados | Cereals, Other                  | 2008           | 12                                                                    |
| 14               | Barbados | Cloves                          | 2008           | 1                                                                     |
| 14               | Barbados | Cocoa Beans and products        | 2008           | 12                                                                    |
| 14               | Barbados | Coconuts - Incl Copra           | 2008           | 32                                                                    |
| 14               | Barbados | Coffee and products             | 2008           | 3                                                                     |
| 14               | Barbados | Cottonseed Oil                  | 2008           | 7                                                                     |
| 14               | Barbados | Cream                           | 2008           | 7                                                                     |
| 14               | Barbados | Crustaceans                     | 2008           | 2                                                                     |
| 14               | Barbados | Demersal Fish                   | 2008           | 11                                                                    |
| 14               | Barbados | Eggs                            | 2008           | 19                                                                    |
| 14               | Barbados | Fats, Animals, Raw              | 2008           | 39                                                                    |
| 14               | Barbados | Fish, Seafood                   | 2008           | 83                                                                    |
| 14               | Barbados | Freshwater Fish                 | 2008           | 2                                                                     |
| 14               | Barbados | Fruits - Excluding Wine         | 2008           | 116                                                                   |
| 14               | Barbados | Fruits, Other                   | 2008           | 33                                                                    |
| 14               | Barbados | Grand Total                     | 2008           | 2,962                                                                 |
| 14               | Barbados | Grapefruit and products         | 2008           | 2                                                                     |
| 14               | Barbados | Grapes and products (excl wine) | 2008           | 13                                                                    |
| 14               | Barbados | Groundnuts (Shelled Eq)         | 2008           | 40                                                                    |
| 14               | Barbados | Honey                           | 2008           | 3                                                                     |
| 14               | Barbados | Maize and products              | 2008           | 116                                                                   |
| 14               | Barbados | Maize Germ Oil                  | 2008           | 33                                                                    |
| 14               | Barbados | Marine Fish, Other              | 2008           | 18                                                                    |
| 14               | Barbados | Meat                            | 2008           | 327                                                                   |
| 14               | Barbados | Milk - Excluding Butter         | 2008           | 189                                                                   |
| 14               | Barbados | Miscellaneous                   | 2008           | 57                                                                    |
| 14               | Barbados | Mutton & Goat Meat              | 2008           | 33                                                                    |
| 14               | Barbados | Oats                            | 2008           | 9                                                                     |
| 14               | Barbados | Offals                          | 2008           | 7                                                                     |
| 14               | Barbados | Oilcrops                        | 2008           | 84                                                                    |

Dietary calcium and zinc deficiency risks are decreasing but remain prevalent

| FAO Country code | Country  | Food item                       | Reference year | Net energy supply (kcal <i>capita</i> <sup>-1</sup> d <sup>-1</sup> ) |
|------------------|----------|---------------------------------|----------------|-----------------------------------------------------------------------|
| 14               | Barbados | Olive Oil                       | 2008           | 23                                                                    |
| 14               | Barbados | Olives (including preserved)    | 2008           | 1                                                                     |
| 14               | Barbados | Onions                          | 2008           | 8                                                                     |
| 14               | Barbados | Oranges, Mandarines             | 2008           | 21                                                                    |
| 14               | Barbados | Palmkernel Oil                  | 2008           | 4                                                                     |
| 14               | Barbados | Peas                            | 2008           | 22                                                                    |
| 14               | Barbados | Pelagic Fish                    | 2008           | 48                                                                    |
| 14               | Barbados | Pepper                          | 2008           | 2                                                                     |
| 14               | Barbados | Pigmeat                         | 2008           | 50                                                                    |
| 14               | Barbados | Pimento                         | 2008           | 2                                                                     |
| 14               | Barbados | Pineapples and products         | 2008           | 7                                                                     |
| 14               | Barbados | Plantains                       | 2008           | 8                                                                     |
| 14               | Barbados | Potatoes and products           | 2008           | 76                                                                    |
| 14               | Barbados | Poultry Meat                    | 2008           | 183                                                                   |
| 14               | Barbados | Pulses                          | 2008           | 68                                                                    |
| 14               | Barbados | Pulses, Other and products      | 2008           | 39                                                                    |
| 14               | Barbados | Rape and Mustardseed            | 2008           | 10                                                                    |
| 14               | Barbados | Rice (Milled Equivalent)        | 2008           | 152                                                                   |
| 14               | Barbados | Roots, Other                    | 2008           | 2                                                                     |
| 14               | Barbados | Sesame seed                     | 2008           | 1                                                                     |
| 14               | Barbados | Soybean Oil                     | 2008           | 197                                                                   |
| 14               | Barbados | Soybeans                        | 2008           | 1                                                                     |
| 14               | Barbados | Spices                          | 2008           | 14                                                                    |
| 14               | Barbados | Spices, Other                   | 2008           | 10                                                                    |
| 14               | Barbados | Starchy Roots                   | 2008           | 92                                                                    |
| 14               | Barbados | Stimulants                      | 2008           | 15                                                                    |
| 14               | Barbados | Sugar & Sweeteners              | 2008           | 560                                                                   |
| 14               | Barbados | Sugar (Raw Equivalent)          | 2008           | 541                                                                   |
| 14               | Barbados | Sunflower seed                  | 2008           | 1                                                                     |
| 14               | Barbados | Sunflowerseed Oil               | 2008           | 3                                                                     |
| 14               | Barbados | Sweet potatoes                  | 2008           | 7                                                                     |
| 14               | Barbados | Sweeteners, Other               | 2008           | 17                                                                    |
| 14               | Barbados | Tea (including mate)            | 2008           | 1                                                                     |
| 14               | Barbados | Tomatoes and products           | 2008           | 3                                                                     |
| 14               | Barbados | Treenuts                        | 2008           | 12                                                                    |
| 14               | Barbados | Vegetable Oils                  | 2008           | 267                                                                   |
| 14               | Barbados | Vegetables                      | 2008           | 65                                                                    |
| 14               | Barbados | Vegetables, Other               | 2008           | 54                                                                    |
| 14               | Barbados | Vegetal Products                | 2008           | 2,243                                                                 |
| 14               | Barbados | Wheat and products              | 2008           | 518                                                                   |
| 14               | Barbados | Wine                            | 2008           | 19                                                                    |
| 14               | Barbados | Yams                            | 2008           | 3                                                                     |
| 14               | Barbados | Alcoholic Beverages             | 2009           | 98                                                                    |
| 14               | Barbados | Animal fats                     | 2009           | 79                                                                    |
| 14               | Barbados | Animal Products                 | 2009           | 749                                                                   |
| 14               | Barbados | Apples and products             | 2009           | 13                                                                    |
| 14               | Barbados | Bananas                         | 2009           | 16                                                                    |
| 14               | Barbados | Beans                           | 2009           | 6                                                                     |
| 14               | Barbados | Beer                            | 2009           | 43                                                                    |
| 14               | Barbados | Beverages, Alcoholic            | 2009           | 36                                                                    |
| 14               | Barbados | Bovine Meat                     | 2009           | 64                                                                    |
| 14               | Barbados | Butter, Ghee                    | 2009           | 21                                                                    |
| 14               | Barbados | Cassava and products            | 2009           | 7                                                                     |
| 14               | Barbados | Cephalopods                     | 2009           | 1                                                                     |
| 14               | Barbados | Cereals - Excluding Beer        | 2009           | 824                                                                   |
| 14               | Barbados | Cereals, Other                  | 2009           | 10                                                                    |
| 14               | Barbados | Cocoa Beans and products        | 2009           | 12                                                                    |
| 14               | Barbados | Coconuts - Incl Copra           | 2009           | 28                                                                    |
| 14               | Barbados | Coffee and products             | 2009           | 4                                                                     |
| 14               | Barbados | Cottonseed Oil                  | 2009           | 7                                                                     |
| 14               | Barbados | Cream                           | 2009           | 17                                                                    |
| 14               | Barbados | Crustaceans                     | 2009           | 2                                                                     |
| 14               | Barbados | Demersal Fish                   | 2009           | 6                                                                     |
| 14               | Barbados | Eggs                            | 2009           | 21                                                                    |
| 14               | Barbados | Fats, Animals, Raw              | 2009           | 42                                                                    |
| 14               | Barbados | Fish, Seafood                   | 2009           | 83                                                                    |
| 14               | Barbados | Freshwater Fish                 | 2009           | 2                                                                     |
| 14               | Barbados | Fruits - Excluding Wine         | 2009           | 117                                                                   |
| 14               | Barbados | Fruits, Other                   | 2009           | 33                                                                    |
| 14               | Barbados | Grand Total                     | 2009           | 3,049                                                                 |
| 14               | Barbados | Grapefruit and products         | 2009           | 2                                                                     |
| 14               | Barbados | Grapes and products (excl wine) | 2009           | 15                                                                    |
| 14               | Barbados | Groundnuts (Shelled Eq)         | 2009           | 42                                                                    |
| 14               | Barbados | Honey                           | 2009           | 3                                                                     |
| 14               | Barbados | Maize and products              | 2009           | 122                                                                   |
| 14               | Barbados | Maize Germ Oil                  | 2009           | 38                                                                    |
| 14               | Barbados | Marine Fish, Other              | 2009           | 14                                                                    |
| 14               | Barbados | Meat                            | 2009           | 361                                                                   |
| 14               | Barbados | Milk - Excluding Butter         | 2009           | 197                                                                   |
| 14               | Barbados | Miscellaneous                   | 2009           | 56                                                                    |
| 14               | Barbados | Mutton & Goat Meat              | 2009           | 36                                                                    |
| 14               | Barbados | Oats                            | 2009           | 8                                                                     |
| 14               | Barbados | Offals                          | 2009           | 7                                                                     |
| 14               | Barbados | Oilcrops                        | 2009           | 81                                                                    |
| 14               | Barbados | Olive Oil                       | 2009           | 21                                                                    |
| 14               | Barbados | Onions                          | 2009           | 10                                                                    |
| 14               | Barbados | Oranges, Mandarines             | 2009           | 21                                                                    |
| 14               | Barbados | Palmkernel Oil                  | 2009           | 1                                                                     |
| 14               | Barbados | Peas                            | 2009           | 18                                                                    |
| 14               | Barbados | Pelagic Fish                    | 2009           | 59                                                                    |
| 14               | Barbados | Pepper                          | 2009           | 2                                                                     |
| 14               | Barbados | Pigmeat                         | 2009           | 51                                                                    |
| 14               | Barbados | Pimento                         | 2009           | 2                                                                     |
| 14               | Barbados | Pineapples and products         | 2009           | 8                                                                     |
| 14               | Barbados | Plantains                       | 2009           | 8                                                                     |
| 14               | Barbados | Potatoes and products           | 2009           | 75                                                                    |
| 14               | Barbados | Poultry Meat                    | 2009           | 209                                                                   |

Dietary calcium and zinc deficiency risks are decreasing but remain prevalent

| FAO Country code | Country  | Food item                       | Reference year | Net energy supply (kcal capita <sup>-1</sup> d <sup>-1</sup> ) |
|------------------|----------|---------------------------------|----------------|----------------------------------------------------------------|
| 14               | Barbados | Pulses                          | 2009           | 61                                                             |
| 14               | Barbados | Pulses, Other and products      | 2009           | 36                                                             |
| 14               | Barbados | Rape and Mustardseed            | 2009           | 10                                                             |
| 14               | Barbados | Rice (Milled Equivalent)        | 2009           | 157                                                            |
| 14               | Barbados | Roots, Other                    | 2009           | 1                                                              |
| 14               | Barbados | Sesame seed                     | 2009           | 1                                                              |
| 14               | Barbados | Soyabean Oil                    | 2009           | 199                                                            |
| 14               | Barbados | Spices                          | 2009           | 13                                                             |
| 14               | Barbados | Spices, Other                   | 2009           | 8                                                              |
| 14               | Barbados | Starchy Roots                   | 2009           | 97                                                             |
| 14               | Barbados | Stimulants                      | 2009           | 16                                                             |
| 14               | Barbados | Sugar & Sweeteners              | 2009           | 558                                                            |
| 14               | Barbados | Sugar (Raw Equivalent)          | 2009           | 540                                                            |
| 14               | Barbados | Sunflower seed                  | 2009           | 1                                                              |
| 14               | Barbados | Sunflowerseed Oil               | 2009           | 31                                                             |
| 14               | Barbados | Sweet potatoes                  | 2009           | 7                                                              |
| 14               | Barbados | Sweeteners, Other               | 2009           | 16                                                             |
| 14               | Barbados | Tea (including mate)            | 2009           | 1                                                              |
| 14               | Barbados | Tomatoes and products           | 2009           | 3                                                              |
| 14               | Barbados | Treenuts                        | 2009           | 13                                                             |
| 14               | Barbados | Vegetable Oils                  | 2009           | 297                                                            |
| 14               | Barbados | Vegetables                      | 2009           | 68                                                             |
| 14               | Barbados | Vegetables, Other               | 2009           | 56                                                             |
| 14               | Barbados | Vegetal Products                | 2009           | 2,301                                                          |
| 14               | Barbados | Wheat and products              | 2009           | 527                                                            |
| 14               | Barbados | Wine                            | 2009           | 19                                                             |
| 14               | Barbados | Yams                            | 2009           | 7                                                              |
| 14               | Barbados | Alcoholic Beverages             | 2010           | 76                                                             |
| 14               | Barbados | Animal fats                     | 2010           | 82                                                             |
| 14               | Barbados | Animal Products                 | 2010           | 736                                                            |
| 14               | Barbados | Apples and products             | 2010           | 17                                                             |
| 14               | Barbados | Bananas                         | 2010           | 17                                                             |
| 14               | Barbados | Beans                           | 2010           | 8                                                              |
| 14               | Barbados | Beer                            | 2010           | 49                                                             |
| 14               | Barbados | Beverages, Alcoholic            | 2010           | 10                                                             |
| 14               | Barbados | Bovine Meat                     | 2010           | 58                                                             |
| 14               | Barbados | Butter, Ghee                    | 2010           | 16                                                             |
| 14               | Barbados | Cassava and products            | 2010           | 4                                                              |
| 14               | Barbados | Cereals - Excluding Beer        | 2010           | 910                                                            |
| 14               | Barbados | Cereals, Other                  | 2010           | 25                                                             |
| 14               | Barbados | Cloves                          | 2010           | 1                                                              |
| 14               | Barbados | Cocoa Beans and products        | 2010           | 13                                                             |
| 14               | Barbados | Coconuts - Incl Copra           | 2010           | 30                                                             |
| 14               | Barbados | Coffee and products             | 2010           | 3                                                              |
| 14               | Barbados | Cream                           | 2010           | 13                                                             |
| 14               | Barbados | Crustaceans                     | 2010           | 2                                                              |
| 14               | Barbados | Demersal Fish                   | 2010           | 6                                                              |
| 14               | Barbados | Eggs                            | 2010           | 23                                                             |
| 14               | Barbados | Fats, Animals, Raw              | 2010           | 53                                                             |
| 14               | Barbados | Fish, Seafood                   | 2010           | 81                                                             |
| 14               | Barbados | Freshwater Fish                 | 2010           | 2                                                              |
| 14               | Barbados | Fruits - Excluding Wine         | 2010           | 116                                                            |
| 14               | Barbados | Fruits, Other                   | 2010           | 35                                                             |
| 14               | Barbados | Grand Total                     | 2010           | 3,060                                                          |
| 14               | Barbados | Grapefruit and products         | 2010           | 3                                                              |
| 14               | Barbados | Grapes and products (excl wine) | 2010           | 13                                                             |
| 14               | Barbados | Groundnuts (Shelled Eq)         | 2010           | 36                                                             |
| 14               | Barbados | Honey                           | 2010           | 3                                                              |
| 14               | Barbados | Lemons, Limes and products      | 2010           | 1                                                              |
| 14               | Barbados | Maize and products              | 2010           | 123                                                            |
| 14               | Barbados | Maize Germ Oil                  | 2010           | 35                                                             |
| 14               | Barbados | Marine Fish, Other              | 2010           | 16                                                             |
| 14               | Barbados | Meat                            | 2010           | 343                                                            |
| 14               | Barbados | Milk - Excluding Butter         | 2010           | 199                                                            |
| 14               | Barbados | Miscellaneous                   | 2010           | 53                                                             |
| 14               | Barbados | Mutton & Goat Meat              | 2010           | 37                                                             |
| 14               | Barbados | Oats                            | 2010           | 7                                                              |
| 14               | Barbados | Offals                          | 2010           | 8                                                              |
| 14               | Barbados | Oilcrops                        | 2010           | 79                                                             |
| 14               | Barbados | Olive Oil                       | 2010           | 18                                                             |
| 14               | Barbados | Onions                          | 2010           | 10                                                             |
| 14               | Barbados | Oranges, Mandarines             | 2010           | 17                                                             |
| 14               | Barbados | Peas                            | 2010           | 17                                                             |
| 14               | Barbados | Pelagic Fish                    | 2010           | 54                                                             |
| 14               | Barbados | Pepper                          | 2010           | 2                                                              |
| 14               | Barbados | Pigmeat                         | 2010           | 42                                                             |
| 14               | Barbados | Pimento                         | 2010           | 2                                                              |
| 14               | Barbados | Pineapples and products         | 2010           | 6                                                              |
| 14               | Barbados | Plantains                       | 2010           | 7                                                              |
| 14               | Barbados | Potatoes and products           | 2010           | 72                                                             |
| 14               | Barbados | Poultry Meat                    | 2010           | 206                                                            |
| 14               | Barbados | Pulses                          | 2010           | 72                                                             |
| 14               | Barbados | Pulses, Other and products      | 2010           | 48                                                             |
| 14               | Barbados | Rape and Mustardseed            | 2010           | 9                                                              |
| 14               | Barbados | Rice (Milled Equivalent)        | 2010           | 173                                                            |
| 14               | Barbados | Roots, Other                    | 2010           | 3                                                              |
| 14               | Barbados | Sesame seed                     | 2010           | 1                                                              |
| 14               | Barbados | Sesameseed Oil                  | 2010           | 1                                                              |
| 14               | Barbados | Soyabean Oil                    | 2010           | 162                                                            |
| 14               | Barbados | Spices                          | 2010           | 14                                                             |
| 14               | Barbados | Spices, Other                   | 2010           | 10                                                             |
| 14               | Barbados | Starchy Roots                   | 2010           | 95                                                             |
| 14               | Barbados | Stimulants                      | 2010           | 17                                                             |
| 14               | Barbados | Sugar & Sweeteners              | 2010           | 570                                                            |
| 14               | Barbados | Sugar (Raw Equivalent)          | 2010           | 544                                                            |
| 14               | Barbados | Sunflower seed                  | 2010           | 1                                                              |
| 14               | Barbados | Sunflowerseed Oil               | 2010           | 31                                                             |

Dietary calcium and zinc deficiency risks are decreasing but remain prevalent

| FAO Country code | Country  | Food item                       | Reference year | Net energy supply (kcal capita <sup>-1</sup> d <sup>-1</sup> ) |
|------------------|----------|---------------------------------|----------------|----------------------------------------------------------------|
| 14               | Barbados | Sweet potatoes                  | 2010           | 9                                                              |
| 14               | Barbados | Sweeteners, Other               | 2010           | 24                                                             |
| 14               | Barbados | Tea (including mate)            | 2010           | 1                                                              |
| 14               | Barbados | Tomatoes and products           | 2010           | 3                                                              |
| 14               | Barbados | Treenuts                        | 2010           | 11                                                             |
| 14               | Barbados | Vegetable Oils                  | 2010           | 246                                                            |
| 14               | Barbados | Vegetables                      | 2010           | 65                                                             |
| 14               | Barbados | Vegetables, Other               | 2010           | 52                                                             |
| 14               | Barbados | Vegetal Products                | 2010           | 2,323                                                          |
| 14               | Barbados | Wheat and products              | 2010           | 581                                                            |
| 14               | Barbados | Wine                            | 2010           | 16                                                             |
| 14               | Barbados | Yams                            | 2010           | 7                                                              |
| 14               | Barbados | Alcoholic Beverages             | 2011           | 75                                                             |
| 14               | Barbados | Animal fats                     | 2011           | 81                                                             |
| 14               | Barbados | Animal Products                 | 2011           | 713                                                            |
| 14               | Barbados | Apples and products             | 2011           | 16                                                             |
| 14               | Barbados | Bananas                         | 2011           | 17                                                             |
| 14               | Barbados | Beans                           | 2011           | 9                                                              |
| 14               | Barbados | Beer                            | 2011           | 46                                                             |
| 14               | Barbados | Beverages, Alcoholic            | 2011           | 13                                                             |
| 14               | Barbados | Bovine Meat                     | 2011           | 63                                                             |
| 14               | Barbados | Butter, Ghee                    | 2011           | 16                                                             |
| 14               | Barbados | Cassava and products            | 2011           | 3                                                              |
| 14               | Barbados | Cereals - Excluding Beer        | 2011           | 897                                                            |
| 14               | Barbados | Cereals, Other                  | 2011           | 23                                                             |
| 14               | Barbados | Cocoa Beans and products        | 2011           | 11                                                             |
| 14               | Barbados | Coconuts - Incl Copra           | 2011           | 30                                                             |
| 14               | Barbados | Coffee and products             | 2011           | 3                                                              |
| 14               | Barbados | Cream                           | 2011           | 12                                                             |
| 14               | Barbados | Crustaceans                     | 2011           | 2                                                              |
| 14               | Barbados | Dates                           | 2011           | 1                                                              |
| 14               | Barbados | Demersal Fish                   | 2011           | 6                                                              |
| 14               | Barbados | Eggs                            | 2011           | 22                                                             |
| 14               | Barbados | Fats, Animals, Raw              | 2011           | 52                                                             |
| 14               | Barbados | Fish, Seafood                   | 2011           | 80                                                             |
| 14               | Barbados | Freshwater Fish                 | 2011           | 2                                                              |
| 14               | Barbados | Fruits - Excluding Wine         | 2011           | 111                                                            |
| 14               | Barbados | Fruits, Other                   | 2011           | 32                                                             |
| 14               | Barbados | Grand Total                     | 2011           | 3,047                                                          |
| 14               | Barbados | Grapefruit and products         | 2011           | 3                                                              |
| 14               | Barbados | Grapes and products (excl wine) | 2011           | 14                                                             |
| 14               | Barbados | Groundnuts (Shelled Eq)         | 2011           | 33                                                             |
| 14               | Barbados | Honey                           | 2011           | 3                                                              |
| 14               | Barbados | Lemons, Limes and products      | 2011           | 1                                                              |
| 14               | Barbados | Maize and products              | 2011           | 120                                                            |
| 14               | Barbados | Maize Germ Oil                  | 2011           | 25                                                             |
| 14               | Barbados | Marine Fish, Other              | 2011           | 16                                                             |
| 14               | Barbados | Meat                            | 2011           | 328                                                            |
| 14               | Barbados | Milk - Excluding Butter         | 2011           | 194                                                            |
| 14               | Barbados | Miscellaneous                   | 2011           | 56                                                             |
| 14               | Barbados | Mutton & Goat Meat              | 2011           | 22                                                             |
| 14               | Barbados | Oats                            | 2011           | 6                                                              |
| 14               | Barbados | Offals                          | 2011           | 8                                                              |
| 14               | Barbados | Oilcrops                        | 2011           | 74                                                             |
| 14               | Barbados | Olive Oil                       | 2011           | 17                                                             |
| 14               | Barbados | Onions                          | 2011           | 10                                                             |
| 14               | Barbados | Oranges, Mandarines             | 2011           | 16                                                             |
| 14               | Barbados | Peas                            | 2011           | 22                                                             |
| 14               | Barbados | Pelagic Fish                    | 2011           | 54                                                             |
| 14               | Barbados | Pepper                          | 2011           | 3                                                              |
| 14               | Barbados | Pigmeat                         | 2011           | 32                                                             |
| 14               | Barbados | Pimento                         | 2011           | 1                                                              |
| 14               | Barbados | Pineapples and products         | 2011           | 6                                                              |
| 14               | Barbados | Plantains                       | 2011           | 7                                                              |
| 14               | Barbados | Potatoes and products           | 2011           | 71                                                             |
| 14               | Barbados | Poultry Meat                    | 2011           | 212                                                            |
| 14               | Barbados | Pulses                          | 2011           | 88                                                             |
| 14               | Barbados | Pulses, Other and products      | 2011           | 57                                                             |
| 14               | Barbados | Rape and Mustardseed            | 2011           | 8                                                              |
| 14               | Barbados | Rice (Milled Equivalent)        | 2011           | 178                                                            |
| 14               | Barbados | Roots, Other                    | 2011           | 1                                                              |
| 14               | Barbados | Sesame seed                     | 2011           | 1                                                              |
| 14               | Barbados | Soyabean Oil                    | 2011           | 266                                                            |
| 14               | Barbados | Spices                          | 2011           | 14                                                             |
| 14               | Barbados | Spices, Other                   | 2011           | 9                                                              |
| 14               | Barbados | Starchy Roots                   | 2011           | 81                                                             |
| 14               | Barbados | Stimulants                      | 2011           | 15                                                             |
| 14               | Barbados | Sugar & Sweeteners              | 2011           | 512                                                            |
| 14               | Barbados | Sugar (Raw Equivalent)          | 2011           | 493                                                            |
| 14               | Barbados | Sunflower seed                  | 2011           | 1                                                              |
| 14               | Barbados | Sunflowerseed Oil               | 2011           | 24                                                             |
| 14               | Barbados | Sweet potatoes                  | 2011           | 4                                                              |
| 14               | Barbados | Sweeteners, Other               | 2011           | 16                                                             |
| 14               | Barbados | Tea (including mate)            | 2011           | 1                                                              |
| 14               | Barbados | Tomatoes and products           | 2011           | 3                                                              |
| 14               | Barbados | Treenuts                        | 2011           | 14                                                             |
| 14               | Barbados | Vegetable Oils                  | 2011           | 332                                                            |
| 14               | Barbados | Vegetables                      | 2011           | 65                                                             |
| 14               | Barbados | Vegetables, Other               | 2011           | 52                                                             |
| 14               | Barbados | Vegetal Products                | 2011           | 2,334                                                          |
| 14               | Barbados | Wheat and products              | 2011           | 570                                                            |
| 14               | Barbados | Wine                            | 2011           | 15                                                             |
| 14               | Barbados | Yams                            | 2011           | 2                                                              |
| 57               | Belarus  | Alcoholic Beverages             | 1992           | 140                                                            |
| 57               | Belarus  | Animal fats                     | 1992           | 179                                                            |
| 57               | Belarus  | Animal Products                 | 1992           | 934                                                            |
| 57               | Belarus  | Apples and products             | 1992           | 26                                                             |

## Dietary calcium and zinc deficiency risks are decreasing but remain prevalent

| FAO Country code | Country | Food item                | Reference year | Net energy supply (kcal capita <sup>-1</sup> d <sup>-1</sup> ) |
|------------------|---------|--------------------------|----------------|----------------------------------------------------------------|
| 57               | Belarus | Barley and products      | 1992           | 100                                                            |
| 57               | Belarus | Beer                     | 1992           | 36                                                             |
| 57               | Belarus | Beverages, Alcoholic     | 1992           | 98                                                             |
| 57               | Belarus | Beverages, Fermented     | 1992           | 3                                                              |
| 57               | Belarus | Bovine Meat              | 1992           | 221                                                            |
| 57               | Belarus | Butter, Ghee             | 1992           | 149                                                            |
| 57               | Belarus | Cereals - Excluding Beer | 1992           | 1,167                                                          |
| 57               | Belarus | Cereals, Other           | 1992           | 2                                                              |
| 57               | Belarus | Cocoa Beans and products | 1992           | 4                                                              |
| 57               | Belarus | Cream                    | 1992           | 14                                                             |
| 57               | Belarus | Eggs                     | 1992           | 66                                                             |
| 57               | Belarus | Fats, Animals, Raw       | 1992           | 15                                                             |
| 57               | Belarus | Fish, Seafood            | 1992           | 2                                                              |
| 57               | Belarus | Freshwater Fish          | 1992           | 2                                                              |
| 57               | Belarus | Fruits - Excluding Wine  | 1992           | 49                                                             |
| 57               | Belarus | Fruits, Other            | 1992           | 21                                                             |
| 57               | Belarus | Grand Total              | 1992           | 3,099                                                          |
| 57               | Belarus | Honey                    | 1992           | 3                                                              |
| 57               | Belarus | Meat                     | 1992           | 405                                                            |
| 57               | Belarus | Meat, Other              | 1992           | 1                                                              |
| 57               | Belarus | Milk - Excluding Butter  | 1992           | 278                                                            |
| 57               | Belarus | Mutton & Goat Meat       | 1992           | 4                                                              |
| 57               | Belarus | Oats                     | 1992           | 75                                                             |
| 57               | Belarus | Offals                   | 1992           | 4                                                              |
| 57               | Belarus | Olive Oil                | 1992           | 1                                                              |
| 57               | Belarus | Onions                   | 1992           | 4                                                              |
| 57               | Belarus | Pigmeat                  | 1992           | 139                                                            |
| 57               | Belarus | Potatoes and products    | 1992           | 314                                                            |
| 57               | Belarus | Poultry Meat             | 1992           | 39                                                             |
| 57               | Belarus | Rape and Mustard Oil     | 1992           | 27                                                             |
| 57               | Belarus | Rice (Milled Equivalent) | 1992           | 27                                                             |
| 57               | Belarus | Rye and products         | 1992           | 511                                                            |
| 57               | Belarus | Starchy Roots            | 1992           | 314                                                            |
| 57               | Belarus | Stimulants               | 1992           | 4                                                              |
| 57               | Belarus | Sugar & Sweeteners       | 1992           | 336                                                            |
| 57               | Belarus | Sugar (Raw Equivalent)   | 1992           | 333                                                            |
| 57               | Belarus | Sunflowerseed Oil        | 1992           | 78                                                             |
| 57               | Belarus | Tomatoes and products    | 1992           | 3                                                              |
| 57               | Belarus | Treenuts                 | 1992           | 5                                                              |
| 57               | Belarus | Vegetable Oils           | 1992           | 106                                                            |
| 57               | Belarus | Vegetables               | 1992           | 45                                                             |
| 57               | Belarus | Vegetables, Other        | 1992           | 37                                                             |
| 57               | Belarus | Vegetal Products         | 1992           | 2,165                                                          |
| 57               | Belarus | Wheat and products       | 1992           | 451                                                            |
| 57               | Belarus | Wine                     | 1992           | 2                                                              |
| 57               | Belarus | Alcoholic Beverages      | 1993           | 160                                                            |
| 57               | Belarus | Animal fats              | 1993           | 170                                                            |
| 57               | Belarus | Animal Products          | 1993           | 965                                                            |
| 57               | Belarus | Apples and products      | 1993           | 29                                                             |
| 57               | Belarus | Barley and products      | 1993           | 39                                                             |
| 57               | Belarus | Beer                     | 1993           | 29                                                             |
| 57               | Belarus | Beverages, Alcoholic     | 1993           | 120                                                            |
| 57               | Belarus | Beverages, Fermented     | 1993           | 6                                                              |
| 57               | Belarus | Bovine Meat              | 1993           | 206                                                            |
| 57               | Belarus | Butter, Ghee             | 1993           | 123                                                            |
| 57               | Belarus | Cereals - Excluding Beer | 1993           | 1,193                                                          |
| 57               | Belarus | Cereals, Other           | 1993           | 3                                                              |
| 57               | Belarus | Cocoa Beans and products | 1993           | 6                                                              |
| 57               | Belarus | Cream                    | 1993           | 10                                                             |
| 57               | Belarus | Eggs                     | 1993           | 66                                                             |
| 57               | Belarus | Fats, Animals, Raw       | 1993           | 38                                                             |
| 57               | Belarus | Fish, Seafood            | 1993           | 2                                                              |
| 57               | Belarus | Freshwater Fish          | 1993           | 2                                                              |
| 57               | Belarus | Fruits - Excluding Wine  | 1993           | 57                                                             |
| 57               | Belarus | Fruits, Other            | 1993           | 27                                                             |
| 57               | Belarus | Grand Total              | 1993           | 3,194                                                          |
| 57               | Belarus | Honey                    | 1993           | 3                                                              |
| 57               | Belarus | Meat                     | 1993           | 379                                                            |
| 57               | Belarus | Meat, Other              | 1993           | 1                                                              |
| 57               | Belarus | Milk - Excluding Butter  | 1993           | 336                                                            |
| 57               | Belarus | Mutton & Goat Meat       | 1993           | 4                                                              |
| 57               | Belarus | Oats                     | 1993           | 76                                                             |
| 57               | Belarus | Offals                   | 1993           | 10                                                             |
| 57               | Belarus | Onions                   | 1993           | 4                                                              |
| 57               | Belarus | Pigmeat                  | 1993           | 125                                                            |
| 57               | Belarus | Potatoes and products    | 1993           | 330                                                            |
| 57               | Belarus | Poultry Meat             | 1993           | 43                                                             |
| 57               | Belarus | Rape and Mustard Oil     | 1993           | 21                                                             |
| 57               | Belarus | Rice (Milled Equivalent) | 1993           | 25                                                             |
| 57               | Belarus | Rye and products         | 1993           | 568                                                            |
| 57               | Belarus | Starchy Roots            | 1993           | 330                                                            |
| 57               | Belarus | Stimulants               | 1993           | 6                                                              |
| 57               | Belarus | Sugar & Sweeteners       | 1993           | 324                                                            |
| 57               | Belarus | Sugar (Raw Equivalent)   | 1993           | 321                                                            |
| 57               | Belarus | Sunflowerseed Oil        | 1993           | 86                                                             |
| 57               | Belarus | Tomatoes and products    | 1993           | 4                                                              |
| 57               | Belarus | Treenuts                 | 1993           | 8                                                              |
| 57               | Belarus | Vegetable Oils           | 1993           | 107                                                            |
| 57               | Belarus | Vegetables               | 1993           | 45                                                             |
| 57               | Belarus | Vegetables, Other        | 1993           | 37                                                             |
| 57               | Belarus | Vegetal Products         | 1993           | 2,230                                                          |
| 57               | Belarus | Wheat and products       | 1993           | 482                                                            |
| 57               | Belarus | Wine                     | 1993           | 5                                                              |
| 57               | Belarus | Alcoholic Beverages      | 1994           | 149                                                            |
| 57               | Belarus | Animal fats              | 1994           | 193                                                            |
| 57               | Belarus | Animal Products          | 1994           | 981                                                            |
| 57               | Belarus | Apples and products      | 1994           | 29                                                             |

Dietary calcium and zinc deficiency risks are decreasing but remain prevalent

| FAO Country code | Country | Food item                | Reference year | Net energy supply (kcal capita <sup>-1</sup> d <sup>-1</sup> ) |
|------------------|---------|--------------------------|----------------|----------------------------------------------------------------|
| 57               | Belarus | Bananas                  | 1994           | 1                                                              |
| 57               | Belarus | Barley and products      | 1994           | 41                                                             |
| 57               | Belarus | Beer                     | 1994           | 21                                                             |
| 57               | Belarus | Beverages, Alcoholic     | 1994           | 115                                                            |
| 57               | Belarus | Beverages, Fermented     | 1994           | 7                                                              |
| 57               | Belarus | Bovine Meat              | 1994           | 184                                                            |
| 57               | Belarus | Butter, Ghee             | 1994           | 113                                                            |
| 57               | Belarus | Cereals - Excluding Beer | 1994           | 1,180                                                          |
| 57               | Belarus | Cereals, Other           | 1994           | 3                                                              |
| 57               | Belarus | Cocoa Beans and products | 1994           | 8                                                              |
| 57               | Belarus | Cream                    | 1994           | 5                                                              |
| 57               | Belarus | Eggs                     | 1994           | 66                                                             |
| 57               | Belarus | Fats, Animals, Raw       | 1994           | 75                                                             |
| 57               | Belarus | Fish, Seafood            | 1994           | 3                                                              |
| 57               | Belarus | Freshwater Fish          | 1994           | 1                                                              |
| 57               | Belarus | Fruits - Excluding Wine  | 1994           | 51                                                             |
| 57               | Belarus | Fruits, Other            | 1994           | 20                                                             |
| 57               | Belarus | Grand Total              | 1994           | 3,125                                                          |
| 57               | Belarus | Honey                    | 1994           | 3                                                              |
| 57               | Belarus | Maize Germ Oil           | 1994           | 1                                                              |
| 57               | Belarus | Marine Fish, Other       | 1994           | 1                                                              |
| 57               | Belarus | Meat                     | 1994           | 340                                                            |
| 57               | Belarus | Meat, Other              | 1994           | 1                                                              |
| 57               | Belarus | Milk - Excluding Butter  | 1994           | 368                                                            |
| 57               | Belarus | Mutton & Goat Meat       | 1994           | 3                                                              |
| 57               | Belarus | Oats                     | 1994           | 62                                                             |
| 57               | Belarus | Offals                   | 1994           | 10                                                             |
| 57               | Belarus | Olive Oil                | 1994           | 1                                                              |
| 57               | Belarus | Onions                   | 1994           | 5                                                              |
| 57               | Belarus | Oranges, Mandarines      | 1994           | 1                                                              |
| 57               | Belarus | Pelagic Fish             | 1994           | 1                                                              |
| 57               | Belarus | Pigmeat                  | 1994           | 121                                                            |
| 57               | Belarus | Potatoes and products    | 1994           | 327                                                            |
| 57               | Belarus | Poultry Meat             | 1994           | 31                                                             |
| 57               | Belarus | Rape and Mustard Oil     | 1994           | 13                                                             |
| 57               | Belarus | Rice (Milled Equivalent) | 1994           | 14                                                             |
| 57               | Belarus | Rye and products         | 1994           | 586                                                            |
| 57               | Belarus | Soyabean Oil             | 1994           | 2                                                              |
| 57               | Belarus | Starchy Roots            | 1994           | 327                                                            |
| 57               | Belarus | Stimulants               | 1994           | 9                                                              |
| 57               | Belarus | Sugar & Sweeteners       | 1994           | 267                                                            |
| 57               | Belarus | Sugar (Raw Equivalent)   | 1994           | 263                                                            |
| 57               | Belarus | Sunflowerseed Oil        | 1994           | 94                                                             |
| 57               | Belarus | Tomatoes and products    | 1994           | 4                                                              |
| 57               | Belarus | Treenuts                 | 1994           | 6                                                              |
| 57               | Belarus | Vegetable Oils           | 1994           | 110                                                            |
| 57               | Belarus | Vegetables               | 1994           | 45                                                             |
| 57               | Belarus | Vegetables, Other        | 1994           | 36                                                             |
| 57               | Belarus | Vegetal Products         | 1994           | 2,144                                                          |
| 57               | Belarus | Wheat and products       | 1994           | 474                                                            |
| 57               | Belarus | Wine                     | 1994           | 6                                                              |
| 57               | Belarus | Alcoholic Beverages      | 1995           | 143                                                            |
| 57               | Belarus | Animal fats              | 1995           | 184                                                            |
| 57               | Belarus | Animal Products          | 1995           | 939                                                            |
| 57               | Belarus | Apples and products      | 1995           | 18                                                             |
| 57               | Belarus | Bananas                  | 1995           | 6                                                              |
| 57               | Belarus | Barley and products      | 1995           | 25                                                             |
| 57               | Belarus | Beer                     | 1995           | 19                                                             |
| 57               | Belarus | Beverages, Alcoholic     | 1995           | 113                                                            |
| 57               | Belarus | Beverages, Fermented     | 1995           | 7                                                              |
| 57               | Belarus | Bovine Meat              | 1995           | 163                                                            |
| 57               | Belarus | Butter, Ghee             | 1995           | 105                                                            |
| 57               | Belarus | Cereals - Excluding Beer | 1995           | 1,170                                                          |
| 57               | Belarus | Cereals, Other           | 1995           | 3                                                              |
| 57               | Belarus | Cocoa Beans and products | 1995           | 6                                                              |
| 57               | Belarus | Cream                    | 1995           | 2                                                              |
| 57               | Belarus | Eggs                     | 1995           | 63                                                             |
| 57               | Belarus | Fats, Animals, Raw       | 1995           | 78                                                             |
| 57               | Belarus | Fish, Seafood            | 1995           | 10                                                             |
| 57               | Belarus | Freshwater Fish          | 1995           | 1                                                              |
| 57               | Belarus | Fruits - Excluding Wine  | 1995           | 49                                                             |
| 57               | Belarus | Fruits, Other            | 1995           | 21                                                             |
| 57               | Belarus | Grand Total              | 1995           | 3,195                                                          |
| 57               | Belarus | Honey                    | 1995           | 3                                                              |
| 57               | Belarus | Maize Germ Oil           | 1995           | 1                                                              |
| 57               | Belarus | Marine Fish, Other       | 1995           | 8                                                              |
| 57               | Belarus | Meat                     | 1995           | 317                                                            |
| 57               | Belarus | Meat, Other              | 1995           | 1                                                              |
| 57               | Belarus | Milk - Excluding Butter  | 1995           | 355                                                            |
| 57               | Belarus | Mutton & Goat Meat       | 1995           | 2                                                              |
| 57               | Belarus | Oats                     | 1995           | 62                                                             |
| 57               | Belarus | Offals                   | 1995           | 10                                                             |
| 57               | Belarus | Onions                   | 1995           | 4                                                              |
| 57               | Belarus | Oranges, Mandarines      | 1995           | 3                                                              |
| 57               | Belarus | Pigmeat                  | 1995           | 127                                                            |
| 57               | Belarus | Potatoes and products    | 1995           | 334                                                            |
| 57               | Belarus | Poultry Meat             | 1995           | 23                                                             |
| 57               | Belarus | Rape and Mustard Oil     | 1995           | 22                                                             |
| 57               | Belarus | Rice (Milled Equivalent) | 1995           | 3                                                              |
| 57               | Belarus | Rye and products         | 1995           | 598                                                            |
| 57               | Belarus | Starchy Roots            | 1995           | 334                                                            |
| 57               | Belarus | Stimulants               | 1995           | 7                                                              |
| 57               | Belarus | Sugar & Sweeteners       | 1995           | 351                                                            |
| 57               | Belarus | Sugar (Raw Equivalent)   | 1995           | 347                                                            |
| 57               | Belarus | Sunflowerseed Oil        | 1995           | 125                                                            |
| 57               | Belarus | Tomatoes and products    | 1995           | 5                                                              |
| 57               | Belarus | Treenuts                 | 1995           | 7                                                              |

Dietary calcium and zinc deficiency risks are decreasing but remain prevalent

| FAO Country code | Country | Food item                | Reference year | Net energy supply (kcal <i>capita</i> <sup>-1</sup> d <sup>-1</sup> ) |
|------------------|---------|--------------------------|----------------|-----------------------------------------------------------------------|
| 57               | Belarus | Vegetable Oils           | 1995           | 148                                                                   |
| 57               | Belarus | Vegetables               | 1995           | 48                                                                    |
| 57               | Belarus | Vegetables, Other        | 1995           | 38                                                                    |
| 57               | Belarus | Vegetal Products         | 1995           | 2,256                                                                 |
| 57               | Belarus | Wheat and products       | 1995           | 479                                                                   |
| 57               | Belarus | Wine                     | 1995           | 5                                                                     |
| 57               | Belarus | Alcoholic Beverages      | 1996           | 170                                                                   |
| 57               | Belarus | Animal fats              | 1996           | 195                                                                   |
| 57               | Belarus | Animal Products          | 1996           | 966                                                                   |
| 57               | Belarus | Apples and products      | 1996           | 21                                                                    |
| 57               | Belarus | Bananas                  | 1996           | 7                                                                     |
| 57               | Belarus | Barley and products      | 1996           | 30                                                                    |
| 57               | Belarus | Beer                     | 1996           | 23                                                                    |
| 57               | Belarus | Beverages, Alcoholic     | 1996           | 131                                                                   |
| 57               | Belarus | Beverages, Fermented     | 1996           | 10                                                                    |
| 57               | Belarus | Bovine Meat              | 1996           | 159                                                                   |
| 57               | Belarus | Butter, Ghee             | 1996           | 105                                                                   |
| 57               | Belarus | Cereals - Excluding Beer | 1996           | 1,182                                                                 |
| 57               | Belarus | Cereals, Other           | 1996           | 11                                                                    |
| 57               | Belarus | Cocoa Beans and products | 1996           | 4                                                                     |
| 57               | Belarus | Cream                    | 1996           | 2                                                                     |
| 57               | Belarus | Eggs                     | 1996           | 64                                                                    |
| 57               | Belarus | Fats, Animals, Raw       | 1996           | 88                                                                    |
| 57               | Belarus | Fish, Seafood            | 1996           | 11                                                                    |
| 57               | Belarus | Freshwater Fish          | 1996           | 1                                                                     |
| 57               | Belarus | Fruits - Excluding Wine  | 1996           | 51                                                                    |
| 57               | Belarus | Fruits, Other            | 1996           | 18                                                                    |
| 57               | Belarus | Grand Total              | 1996           | 3,284                                                                 |
| 57               | Belarus | Honey                    | 1996           | 3                                                                     |
| 57               | Belarus | Maize Germ Oil           | 1996           | 1                                                                     |
| 57               | Belarus | Marine Fish, Other       | 1996           | 9                                                                     |
| 57               | Belarus | Meat                     | 1996           | 316                                                                   |
| 57               | Belarus | Meat, Other              | 1996           | 1                                                                     |
| 57               | Belarus | Milk - Excluding Butter  | 1996           | 365                                                                   |
| 57               | Belarus | Mutton & Goat Meat       | 1996           | 2                                                                     |
| 57               | Belarus | Oats                     | 1996           | 64                                                                    |
| 57               | Belarus | Offals                   | 1996           | 16                                                                    |
| 57               | Belarus | Onions                   | 1996           | 5                                                                     |
| 57               | Belarus | Oranges, Mandarines      | 1996           | 4                                                                     |
| 57               | Belarus | Pigmeat                  | 1996           | 132                                                                   |
| 57               | Belarus | Potatoes and products    | 1996           | 345                                                                   |
| 57               | Belarus | Poultry Meat             | 1996           | 21                                                                    |
| 57               | Belarus | Rape and Mustard Oil     | 1996           | 12                                                                    |
| 57               | Belarus | Rice (Milled Equivalent) | 1996           | 14                                                                    |
| 57               | Belarus | Rye and products         | 1996           | 566                                                                   |
| 57               | Belarus | Soyabean Oil             | 1996           | 1                                                                     |
| 57               | Belarus | Starchy Roots            | 1996           | 345                                                                   |
| 57               | Belarus | Stimulants               | 1996           | 5                                                                     |
| 57               | Belarus | Sugar & Sweeteners       | 1996           | 354                                                                   |
| 57               | Belarus | Sugar (Raw Equivalent)   | 1996           | 351                                                                   |
| 57               | Belarus | Sunflowerseed Oil        | 1996           | 141                                                                   |
| 57               | Belarus | Tomatoes and products    | 1996           | 6                                                                     |
| 57               | Belarus | Treenuts                 | 1996           | 7                                                                     |
| 57               | Belarus | Vegetable Oils           | 1996           | 155                                                                   |
| 57               | Belarus | Vegetables               | 1996           | 49                                                                    |
| 57               | Belarus | Vegetables, Other        | 1996           | 39                                                                    |
| 57               | Belarus | Vegetal Products         | 1996           | 2,318                                                                 |
| 57               | Belarus | Wheat and products       | 1996           | 497                                                                   |
| 57               | Belarus | Wine                     | 1996           | 5                                                                     |
| 57               | Belarus | Alcoholic Beverages      | 1997           | 176                                                                   |
| 57               | Belarus | Animal fats              | 1997           | 185                                                                   |
| 57               | Belarus | Animal Products          | 1997           | 927                                                                   |
| 57               | Belarus | Apples and products      | 1997           | 23                                                                    |
| 57               | Belarus | Bananas                  | 1997           | 6                                                                     |
| 57               | Belarus | Barley and products      | 1997           | 17                                                                    |
| 57               | Belarus | Beer                     | 1997           | 27                                                                    |
| 57               | Belarus | Beverages, Alcoholic     | 1997           | 128                                                                   |
| 57               | Belarus | Beverages, Fermented     | 1997           | 15                                                                    |
| 57               | Belarus | Bovine Meat              | 1997           | 153                                                                   |
| 57               | Belarus | Butter, Ghee             | 1997           | 104                                                                   |
| 57               | Belarus | Cereals - Excluding Beer | 1997           | 1,184                                                                 |
| 57               | Belarus | Cereals, Other           | 1997           | 25                                                                    |
| 57               | Belarus | Cocoa Beans and products | 1997           | 9                                                                     |
| 57               | Belarus | Cream                    | 1997           | 3                                                                     |
| 57               | Belarus | Eggs                     | 1997           | 63                                                                    |
| 57               | Belarus | Fats, Animals, Raw       | 1997           | 78                                                                    |
| 57               | Belarus | Fish, Seafood            | 1997           | 19                                                                    |
| 57               | Belarus | Freshwater Fish          | 1997           | 1                                                                     |
| 57               | Belarus | Fruits - Excluding Wine  | 1997           | 48                                                                    |
| 57               | Belarus | Fruits, Other            | 1997           | 16                                                                    |
| 57               | Belarus | Grand Total              | 1997           | 3,282                                                                 |
| 57               | Belarus | Honey                    | 1997           | 3                                                                     |
| 57               | Belarus | Maize Germ Oil           | 1997           | 1                                                                     |
| 57               | Belarus | Marine Fish, Other       | 1997           | 14                                                                    |
| 57               | Belarus | Meat                     | 1997           | 321                                                                   |
| 57               | Belarus | Meat, Other              | 1997           | 1                                                                     |
| 57               | Belarus | Milk - Excluding Butter  | 1997           | 326                                                                   |
| 57               | Belarus | Mutton & Goat Meat       | 1997           | 2                                                                     |
| 57               | Belarus | Oats                     | 1997           | 68                                                                    |
| 57               | Belarus | Offals                   | 1997           | 13                                                                    |
| 57               | Belarus | Onions                   | 1997           | 6                                                                     |
| 57               | Belarus | Oranges, Mandarines      | 1997           | 3                                                                     |
| 57               | Belarus | Pelagic Fish             | 1997           | 4                                                                     |
| 57               | Belarus | Pigmeat                  | 1997           | 141                                                                   |
| 57               | Belarus | Potatoes and products    | 1997           | 334                                                                   |
| 57               | Belarus | Poultry Meat             | 1997           | 24                                                                    |
| 57               | Belarus | Rape and Mustard Oil     | 1997           | 29                                                                    |

Dietary calcium and zinc deficiency risks are decreasing but remain prevalent

| FAO Country code | Country | Food item                       | Reference year | Net energy supply (kcal capita <sup>-1</sup> d <sup>-1</sup> ) |
|------------------|---------|---------------------------------|----------------|----------------------------------------------------------------|
| 57               | Belarus | Rice (Milled Equivalent)        | 1997           | 12                                                             |
| 57               | Belarus | Rye and products                | 1997           | 544                                                            |
| 57               | Belarus | Soyabean Oil                    | 1997           | 3                                                              |
| 57               | Belarus | Starchy Roots                   | 1997           | 334                                                            |
| 57               | Belarus | Stimulants                      | 1997           | 9                                                              |
| 57               | Belarus | Sugar & Sweeteners              | 1997           | 379                                                            |
| 57               | Belarus | Sugar (Raw Equivalent)          | 1997           | 376                                                            |
| 57               | Belarus | Sunflowerseed Oil               | 1997           | 131                                                            |
| 57               | Belarus | Tomatoes and products           | 1997           | 5                                                              |
| 57               | Belarus | Treenuts                        | 1997           | 10                                                             |
| 57               | Belarus | Vegetable Oils                  | 1997           | 164                                                            |
| 57               | Belarus | Vegetables                      | 1997           | 50                                                             |
| 57               | Belarus | Vegetables, Other               | 1997           | 39                                                             |
| 57               | Belarus | Vegetal Products                | 1997           | 2,355                                                          |
| 57               | Belarus | Wheat and products              | 1997           | 519                                                            |
| 57               | Belarus | Wine                            | 1997           | 6                                                              |
| 57               | Belarus | Alcoholic Beverages             | 1998           | 138                                                            |
| 57               | Belarus | Animal fats                     | 1998           | 193                                                            |
| 57               | Belarus | Animal Products                 | 1998           | 961                                                            |
| 57               | Belarus | Apples and products             | 1998           | 8                                                              |
| 57               | Belarus | Bananas                         | 1998           | 2                                                              |
| 57               | Belarus | Barley and products             | 1998           | 21                                                             |
| 57               | Belarus | Beer                            | 1998           | 29                                                             |
| 57               | Belarus | Beverages, Alcoholic            | 1998           | 95                                                             |
| 57               | Belarus | Beverages, Fermented            | 1998           | 9                                                              |
| 57               | Belarus | Bovine Meat                     | 1998           | 159                                                            |
| 57               | Belarus | Butter, Ghee                    | 1998           | 111                                                            |
| 57               | Belarus | Cereals - Excluding Beer        | 1998           | 1,146                                                          |
| 57               | Belarus | Cereals, Other                  | 1998           | 12                                                             |
| 57               | Belarus | Cocoa Beans and products        | 1998           | 6                                                              |
| 57               | Belarus | Coconut Oil                     | 1998           | 2                                                              |
| 57               | Belarus | Cream                           | 1998           | 2                                                              |
| 57               | Belarus | Demersal Fish                   | 1998           | 2                                                              |
| 57               | Belarus | Eggs                            | 1998           | 58                                                             |
| 57               | Belarus | Fats, Animals, Raw              | 1998           | 80                                                             |
| 57               | Belarus | Fish, Seafood                   | 1998           | 13                                                             |
| 57               | Belarus | Freshwater Fish                 | 1998           | 2                                                              |
| 57               | Belarus | Fruits - Excluding Wine         | 1998           | 25                                                             |
| 57               | Belarus | Fruits, Other                   | 1998           | 9                                                              |
| 57               | Belarus | Grand Total                     | 1998           | 3,219                                                          |
| 57               | Belarus | Grapes and products (excl wine) | 1998           | 2                                                              |
| 57               | Belarus | Groundnuts (Shelled Eq)         | 1998           | 2                                                              |
| 57               | Belarus | Honey                           | 1998           | 3                                                              |
| 57               | Belarus | Maize and products              | 1998           | 1                                                              |
| 57               | Belarus | Maize Germ Oil                  | 1998           | 2                                                              |
| 57               | Belarus | Marine Fish, Other              | 1998           | 1                                                              |
| 57               | Belarus | Meat                            | 1998           | 332                                                            |
| 57               | Belarus | Meat, Other                     | 1998           | 5                                                              |
| 57               | Belarus | Milk - Excluding Butter         | 1998           | 351                                                            |
| 57               | Belarus | Millet and products             | 1998           | 3                                                              |
| 57               | Belarus | Mutton & Goat Meat              | 1998           | 2                                                              |
| 57               | Belarus | Oats                            | 1998           | 44                                                             |
| 57               | Belarus | Offals                          | 1998           | 13                                                             |
| 57               | Belarus | Oilcrops                        | 1998           | 2                                                              |
| 57               | Belarus | Oilcrops Oil, Other             | 1998           | 1                                                              |
| 57               | Belarus | Onions                          | 1998           | 6                                                              |
| 57               | Belarus | Oranges, Mandarines             | 1998           | 3                                                              |
| 57               | Belarus | Pelagic Fish                    | 1998           | 9                                                              |
| 57               | Belarus | Pigmeat                         | 1998           | 147                                                            |
| 57               | Belarus | Potatoes and products           | 1998           | 318                                                            |
| 57               | Belarus | Poultry Meat                    | 1998           | 20                                                             |
| 57               | Belarus | Rape and Mustard Oil            | 1998           | 50                                                             |
| 57               | Belarus | Rice (Milled Equivalent)        | 1998           | 18                                                             |
| 57               | Belarus | Rye and products                | 1998           | 476                                                            |
| 57               | Belarus | Soyabean Oil                    | 1998           | 2                                                              |
| 57               | Belarus | Spices                          | 1998           | 1                                                              |
| 57               | Belarus | Starchy Roots                   | 1998           | 318                                                            |
| 57               | Belarus | Stimulants                      | 1998           | 7                                                              |
| 57               | Belarus | Sugar & Sweeteners              | 1998           | 405                                                            |
| 57               | Belarus | Sugar (Raw Equivalent)          | 1998           | 401                                                            |
| 57               | Belarus | Sunflowerseed Oil               | 1998           | 93                                                             |
| 57               | Belarus | Sweeteners, Other               | 1998           | 2                                                              |
| 57               | Belarus | Tomatoes and products           | 1998           | 5                                                              |
| 57               | Belarus | Treenuts                        | 1998           | 12                                                             |
| 57               | Belarus | Vegetable Oils                  | 1998           | 151                                                            |
| 57               | Belarus | Vegetables                      | 1998           | 52                                                             |
| 57               | Belarus | Vegetables, Other               | 1998           | 41                                                             |
| 57               | Belarus | Vegetal Products                | 1998           | 2,258                                                          |
| 57               | Belarus | Wheat and products              | 1998           | 571                                                            |
| 57               | Belarus | Wine                            | 1998           | 6                                                              |
| 57               | Belarus | Alcoholic Beverages             | 1999           | 140                                                            |
| 57               | Belarus | Animal fats                     | 1999           | 186                                                            |
| 57               | Belarus | Animal Products                 | 1999           | 907                                                            |
| 57               | Belarus | Apples and products             | 1999           | 18                                                             |
| 57               | Belarus | Bananas                         | 1999           | 3                                                              |
| 57               | Belarus | Barley and products             | 1999           | 22                                                             |
| 57               | Belarus | Beer                            | 1999           | 30                                                             |
| 57               | Belarus | Beverages, Alcoholic            | 1999           | 105                                                            |
| 57               | Belarus | Beverages, Fermented            | 1999           | 2                                                              |
| 57               | Belarus | Bovine Meat                     | 1999           | 152                                                            |
| 57               | Belarus | Butter, Ghee                    | 1999           | 95                                                             |
| 57               | Belarus | Cereals - Excluding Beer        | 1999           | 1,123                                                          |
| 57               | Belarus | Cereals, Other                  | 1999           | 13                                                             |
| 57               | Belarus | Cocoa Beans and products        | 1999           | 7                                                              |
| 57               | Belarus | Coconut Oil                     | 1999           | 4                                                              |
| 57               | Belarus | Cream                           | 1999           | 1                                                              |
| 57               | Belarus | Demersal Fish                   | 1999           | 1                                                              |



## Dietary calcium and zinc deficiency risks are decreasing but remain prevalent

| FAO Country code | Country | Food item                       | Reference year | Net energy supply (kcal capita <sup>-1</sup> d <sup>-1</sup> ) |
|------------------|---------|---------------------------------|----------------|----------------------------------------------------------------|
| 57               | Belarus | Eggs                            | 1999           | 51                                                             |
| 57               | Belarus | Fats, Animals, Raw              | 1999           | 90                                                             |
| 57               | Belarus | Fish, Seafood                   | 1999           | 12                                                             |
| 57               | Belarus | Freshwater Fish                 | 1999           | 2                                                              |
| 57               | Belarus | Fruits - Excluding Wine         | 1999           | 32                                                             |
| 57               | Belarus | Fruits, Other                   | 1999           | 8                                                              |
| 57               | Belarus | Grand Total                     | 1999           | 3,117                                                          |
| 57               | Belarus | Grapes and products (excl wine) | 1999           | 1                                                              |
| 57               | Belarus | Groundnuts (Shelled Eq)         | 1999           | 2                                                              |
| 57               | Belarus | Honey                           | 1999           | 3                                                              |
| 57               | Belarus | Maize and products              | 1999           | 3                                                              |
| 57               | Belarus | Maize Germ Oil                  | 1999           | 1                                                              |
| 57               | Belarus | Marine Fish, Other              | 1999           | 1                                                              |
| 57               | Belarus | Meat                            | 1999           | 330                                                            |
| 57               | Belarus | Meat, Other                     | 1999           | 4                                                              |
| 57               | Belarus | Milk - Excluding Butter         | 1999           | 317                                                            |
| 57               | Belarus | Millet and products             | 1999           | 1                                                              |
| 57               | Belarus | Mutton & Goat Meat              | 1999           | 2                                                              |
| 57               | Belarus | Oats                            | 1999           | 51                                                             |
| 57               | Belarus | Offals                          | 1999           | 12                                                             |
| 57               | Belarus | Oilcrops                        | 1999           | 3                                                              |
| 57               | Belarus | Onions                          | 1999           | 6                                                              |
| 57               | Belarus | Oranges, Mandarines             | 1999           | 2                                                              |
| 57               | Belarus | Pelagic Fish                    | 1999           | 8                                                              |
| 57               | Belarus | Pigmeat                         | 1999           | 147                                                            |
| 57               | Belarus | Potatoes and products           | 1999           | 313                                                            |
| 57               | Belarus | Poultry Meat                    | 1999           | 26                                                             |
| 57               | Belarus | Rape and Mustard Oil            | 1999           | 85                                                             |
| 57               | Belarus | Rice (Milled Equivalent)        | 1999           | 20                                                             |
| 57               | Belarus | Rye and products                | 1999           | 388                                                            |
| 57               | Belarus | Soyabean Oil                    | 1999           | 9                                                              |
| 57               | Belarus | Soyabeans                       | 1999           | 1                                                              |
| 57               | Belarus | Spices                          | 1999           | 1                                                              |
| 57               | Belarus | Starchy Roots                   | 1999           | 313                                                            |
| 57               | Belarus | Stimulants                      | 1999           | 7                                                              |
| 57               | Belarus | Sugar & Sweeteners              | 1999           | 334                                                            |
| 57               | Belarus | Sugar (Raw Equivalent)          | 1999           | 328                                                            |
| 57               | Belarus | Sunflowerseed Oil               | 1999           | 93                                                             |
| 57               | Belarus | Sweeteners, Other               | 1999           | 3                                                              |
| 57               | Belarus | Tomatoes and products           | 1999           | 5                                                              |
| 57               | Belarus | Treenuts                        | 1999           | 12                                                             |
| 57               | Belarus | Vegetable Oils                  | 1999           | 192                                                            |
| 57               | Belarus | Vegetables                      | 1999           | 53                                                             |
| 57               | Belarus | Vegetables, Other               | 1999           | 42                                                             |
| 57               | Belarus | Vegetal Products                | 1999           | 2,209                                                          |
| 57               | Belarus | Wheat and products              | 1999           | 625                                                            |
| 57               | Belarus | Wine                            | 1999           | 4                                                              |
| 57               | Belarus | Alcoholic Beverages             | 2000           | 120                                                            |
| 57               | Belarus | Animal fats                     | 2000           | 168                                                            |
| 57               | Belarus | Animal Products                 | 2000           | 790                                                            |
| 57               | Belarus | Apples and products             | 2000           | 14                                                             |
| 57               | Belarus | Bananas                         | 2000           | 5                                                              |
| 57               | Belarus | Barley and products             | 2000           | 28                                                             |
| 57               | Belarus | Beer                            | 2000           | 26                                                             |
| 57               | Belarus | Beverages, Alcoholic            | 2000           | 86                                                             |
| 57               | Belarus | Beverages, Fermented            | 2000           | 3                                                              |
| 57               | Belarus | Bovine Meat                     | 2000           | 124                                                            |
| 57               | Belarus | Butter, Ghee                    | 2000           | 95                                                             |
| 57               | Belarus | Cereals - Excluding Beer        | 2000           | 1,079                                                          |
| 57               | Belarus | Cereals, Other                  | 2000           | 16                                                             |
| 57               | Belarus | Cocoa Beans and products        | 2000           | 10                                                             |
| 57               | Belarus | Coconut Oil                     | 2000           | 5                                                              |
| 57               | Belarus | Cream                           | 2000           | 4                                                              |
| 57               | Belarus | Demersal Fish                   | 2000           | 1                                                              |
| 57               | Belarus | Eggs                            | 2000           | 48                                                             |
| 57               | Belarus | Fats, Animals, Raw              | 2000           | 69                                                             |
| 57               | Belarus | Fish, Seafood                   | 2000           | 18                                                             |
| 57               | Belarus | Freshwater Fish                 | 2000           | 2                                                              |
| 57               | Belarus | Fruits - Excluding Wine         | 2000           | 34                                                             |
| 57               | Belarus | Fruits, Other                   | 2000           | 11                                                             |
| 57               | Belarus | Grand Total                     | 2000           | 2,993                                                          |
| 57               | Belarus | Grapes and products (excl wine) | 2000           | 1                                                              |
| 57               | Belarus | Groundnuts (Shelled Eq)         | 2000           | 4                                                              |
| 57               | Belarus | Honey                           | 2000           | 3                                                              |
| 57               | Belarus | Maize and products              | 2000           | 3                                                              |
| 57               | Belarus | Marine Fish, Other              | 2000           | 5                                                              |
| 57               | Belarus | Meat                            | 2000           | 303                                                            |
| 57               | Belarus | Meat, Other                     | 2000           | 3                                                              |
| 57               | Belarus | Milk - Excluding Butter         | 2000           | 238                                                            |
| 57               | Belarus | Millet and products             | 2000           | 4                                                              |
| 57               | Belarus | Mutton & Goat Meat              | 2000           | 2                                                              |
| 57               | Belarus | Oats                            | 2000           | 53                                                             |
| 57               | Belarus | Offals                          | 2000           | 15                                                             |
| 57               | Belarus | Oilcrops                        | 2000           | 6                                                              |
| 57               | Belarus | Oilcrops Oil, Other             | 2000           | 1                                                              |
| 57               | Belarus | Onions                          | 2000           | 6                                                              |
| 57               | Belarus | Oranges, Mandarines             | 2000           | 2                                                              |
| 57               | Belarus | Pelagic Fish                    | 2000           | 10                                                             |
| 57               | Belarus | Pigmeat                         | 2000           | 143                                                            |
| 57               | Belarus | Potatoes and products           | 2000           | 320                                                            |
| 57               | Belarus | Poultry Meat                    | 2000           | 31                                                             |
| 57               | Belarus | Rape and Mustard Oil            | 2000           | 60                                                             |
| 57               | Belarus | Rice (Milled Equivalent)        | 2000           | 18                                                             |
| 57               | Belarus | Rye and products                | 2000           | 304                                                            |
| 57               | Belarus | Soyabean Oil                    | 2000           | 9                                                              |
| 57               | Belarus | Soyabeans                       | 2000           | 2                                                              |
| 57               | Belarus | Spices                          | 2000           | 1                                                              |

Dietary calcium and zinc deficiency risks are decreasing but remain prevalent

| FAO Country code | Country | Food item                       | Reference year | Net energy supply (kcal capita <sup>-1</sup> d <sup>-1</sup> ) |
|------------------|---------|---------------------------------|----------------|----------------------------------------------------------------|
| 57               | Belarus | Spices, Other                   | 2000           | 1                                                              |
| 57               | Belarus | Starchy Roots                   | 2000           | 320                                                            |
| 57               | Belarus | Stimulants                      | 2000           | 10                                                             |
| 57               | Belarus | Sugar & Sweeteners              | 2000           | 356                                                            |
| 57               | Belarus | Sugar (Raw Equivalent)          | 2000           | 338                                                            |
| 57               | Belarus | Sunflowerseed Oil               | 2000           | 133                                                            |
| 57               | Belarus | Sweeteners, Other               | 2000           | 15                                                             |
| 57               | Belarus | Tomatoes and products           | 2000           | 6                                                              |
| 57               | Belarus | Treenuts                        | 2000           | 13                                                             |
| 57               | Belarus | Vegetable Oils                  | 2000           | 209                                                            |
| 57               | Belarus | Vegetables                      | 2000           | 54                                                             |
| 57               | Belarus | Vegetables, Other               | 2000           | 42                                                             |
| 57               | Belarus | Vegetal Products                | 2000           | 2,203                                                          |
| 57               | Belarus | Wheat and products              | 2000           | 653                                                            |
| 57               | Belarus | Wine                            | 2000           | 5                                                              |
| 57               | Belarus | Alcoholic Beverages             | 2001           | 113                                                            |
| 57               | Belarus | Animal fats                     | 2001           | 148                                                            |
| 57               | Belarus | Animal Products                 | 2001           | 814                                                            |
| 57               | Belarus | Apples and products             | 2001           | 22                                                             |
| 57               | Belarus | Bananas                         | 2001           | 3                                                              |
| 57               | Belarus | Barley and products             | 2001           | 31                                                             |
| 57               | Belarus | Beer                            | 2001           | 26                                                             |
| 57               | Belarus | Beverages, Alcoholic            | 2001           | 79                                                             |
| 57               | Belarus | Beverages, Fermented            | 2001           | 3                                                              |
| 57               | Belarus | Bovine Meat                     | 2001           | 126                                                            |
| 57               | Belarus | Butter, Ghee                    | 2001           | 79                                                             |
| 57               | Belarus | Cereals - Excluding Beer        | 2001           | 1,030                                                          |
| 57               | Belarus | Cereals, Other                  | 2001           | 22                                                             |
| 57               | Belarus | Cocoa Beans and products        | 2001           | 7                                                              |
| 57               | Belarus | Coconut Oil                     | 2001           | 6                                                              |
| 57               | Belarus | Cream                           | 2001           | 5                                                              |
| 57               | Belarus | Demersal Fish                   | 2001           | 3                                                              |
| 57               | Belarus | Eggs                            | 2001           | 48                                                             |
| 57               | Belarus | Fats, Animals, Raw              | 2001           | 64                                                             |
| 57               | Belarus | Fish, Seafood                   | 2001           | 24                                                             |
| 57               | Belarus | Freshwater Fish                 | 2001           | 2                                                              |
| 57               | Belarus | Fruits - Excluding Wine         | 2001           | 43                                                             |
| 57               | Belarus | Fruits, Other                   | 2001           | 13                                                             |
| 57               | Belarus | Grand Total                     | 2001           | 3,046                                                          |
| 57               | Belarus | Grapes and products (excl wine) | 2001           | 3                                                              |
| 57               | Belarus | Groundnuts (Shelled Eq)         | 2001           | 3                                                              |
| 57               | Belarus | Honey                           | 2001           | 3                                                              |
| 57               | Belarus | Maize and products              | 2001           | 1                                                              |
| 57               | Belarus | Maize Germ Oil                  | 2001           | 1                                                              |
| 57               | Belarus | Marine Fish, Other              | 2001           | 3                                                              |
| 57               | Belarus | Meat                            | 2001           | 301                                                            |
| 57               | Belarus | Meat, Other                     | 2001           | 4                                                              |
| 57               | Belarus | Milk - Excluding Butter         | 2001           | 277                                                            |
| 57               | Belarus | Miscellaneous                   | 2001           | 2                                                              |
| 57               | Belarus | Mutton & Goat Meat              | 2001           | 2                                                              |
| 57               | Belarus | Oats                            | 2001           | 51                                                             |
| 57               | Belarus | Offals                          | 2001           | 16                                                             |
| 57               | Belarus | Oilcrops                        | 2001           | 4                                                              |
| 57               | Belarus | Onions                          | 2001           | 6                                                              |
| 57               | Belarus | Oranges, Mandarines             | 2001           | 2                                                              |
| 57               | Belarus | Pelagic Fish                    | 2001           | 17                                                             |
| 57               | Belarus | Pigmeat                         | 2001           | 137                                                            |
| 57               | Belarus | Potatoes and products           | 2001           | 317                                                            |
| 57               | Belarus | Poultry Meat                    | 2001           | 32                                                             |
| 57               | Belarus | Rape and Mustard Oil            | 2001           | 38                                                             |
| 57               | Belarus | Rape and Mustardseed            | 2001           | 1                                                              |
| 57               | Belarus | Rice (Milled Equivalent)        | 2001           | 23                                                             |
| 57               | Belarus | Rye and products                | 2001           | 297                                                            |
| 57               | Belarus | Soyabean Oil                    | 2001           | 34                                                             |
| 57               | Belarus | Spices                          | 2001           | 1                                                              |
| 57               | Belarus | Starchy Roots                   | 2001           | 317                                                            |
| 57               | Belarus | Stimulants                      | 2001           | 8                                                              |
| 57               | Belarus | Sugar & Sweeteners              | 2001           | 361                                                            |
| 57               | Belarus | Sugar (Raw Equivalent)          | 2001           | 344                                                            |
| 57               | Belarus | Sunflowerseed Oil               | 2001           | 204                                                            |
| 57               | Belarus | Sweeteners, Other               | 2001           | 14                                                             |
| 57               | Belarus | Tomatoes and products           | 2001           | 7                                                              |
| 57               | Belarus | Treenuts                        | 2001           | 14                                                             |
| 57               | Belarus | Vegetable Oils                  | 2001           | 283                                                            |
| 57               | Belarus | Vegetables                      | 2001           | 58                                                             |
| 57               | Belarus | Vegetables, Other               | 2001           | 44                                                             |
| 57               | Belarus | Vegetal Products                | 2001           | 2,233                                                          |
| 57               | Belarus | Wheat and products              | 2001           | 604                                                            |
| 57               | Belarus | Wine                            | 2001           | 5                                                              |
| 57               | Belarus | Alcoholic Beverages             | 2002           | 113                                                            |
| 57               | Belarus | Animal fats                     | 2002           | 144                                                            |
| 57               | Belarus | Animal Products                 | 2002           | 799                                                            |
| 57               | Belarus | Apples and products             | 2002           | 34                                                             |
| 57               | Belarus | Bananas                         | 2002           | 3                                                              |
| 57               | Belarus | Barley and products             | 2002           | 29                                                             |
| 57               | Belarus | Beer                            | 2002           | 24                                                             |
| 57               | Belarus | Beverages, Alcoholic            | 2002           | 78                                                             |
| 57               | Belarus | Beverages, Fermented            | 2002           | 5                                                              |
| 57               | Belarus | Bovine Meat                     | 2002           | 120                                                            |
| 57               | Belarus | Butter, Ghee                    | 2002           | 73                                                             |
| 57               | Belarus | Cereals - Excluding Beer        | 2002           | 964                                                            |
| 57               | Belarus | Cereals, Other                  | 2002           | 28                                                             |
| 57               | Belarus | Cocoa Beans and products        | 2002           | 6                                                              |
| 57               | Belarus | Coconut Oil                     | 2002           | 10                                                             |
| 57               | Belarus | Cream                           | 2002           | 5                                                              |
| 57               | Belarus | Demersal Fish                   | 2002           | 6                                                              |
| 57               | Belarus | Eggs                            | 2002           | 49                                                             |

Dietary calcium and zinc deficiency risks are decreasing but remain prevalent

| FAO Country code | Country | Food item                       | Reference year | Net energy supply (kcal <i>capita</i> <sup>-1</sup> d <sup>-1</sup> ) |
|------------------|---------|---------------------------------|----------------|-----------------------------------------------------------------------|
| 57               | Belarus | Fats, Animals, Raw              | 2002           | 67                                                                    |
| 57               | Belarus | Fish, Seafood                   | 2002           | 29                                                                    |
| 57               | Belarus | Freshwater Fish                 | 2002           | 3                                                                     |
| 57               | Belarus | Fruits - Excluding Wine         | 2002           | 64                                                                    |
| 57               | Belarus | Fruits, Other                   | 2002           | 19                                                                    |
| 57               | Belarus | Grand Total                     | 2002           | 2,981                                                                 |
| 57               | Belarus | Grapes and products (excl wine) | 2002           | 2                                                                     |
| 57               | Belarus | Groundnuts (Shelled Eq)         | 2002           | 3                                                                     |
| 57               | Belarus | Honey                           | 2002           | 3                                                                     |
| 57               | Belarus | Maize and products              | 2002           | 3                                                                     |
| 57               | Belarus | Maize Germ Oil                  | 2002           | 1                                                                     |
| 57               | Belarus | Marine Fish, Other              | 2002           | 4                                                                     |
| 57               | Belarus | Meat                            | 2002           | 292                                                                   |
| 57               | Belarus | Meat, Other                     | 2002           | 1                                                                     |
| 57               | Belarus | Milk - Excluding Butter         | 2002           | 270                                                                   |
| 57               | Belarus | Miscellaneous                   | 2002           | 3                                                                     |
| 57               | Belarus | Mutton & Goat Meat              | 2002           | 1                                                                     |
| 57               | Belarus | Oats                            | 2002           | 53                                                                    |
| 57               | Belarus | Offals                          | 2002           | 14                                                                    |
| 57               | Belarus | Oilcrops                        | 2002           | 5                                                                     |
| 57               | Belarus | Oilcrops Oil, Other             | 2002           | 1                                                                     |
| 57               | Belarus | Onions                          | 2002           | 7                                                                     |
| 57               | Belarus | Oranges, Mandarines             | 2002           | 4                                                                     |
| 57               | Belarus | Pelagic Fish                    | 2002           | 16                                                                    |
| 57               | Belarus | Pigmeat                         | 2002           | 138                                                                   |
| 57               | Belarus | Pineapples and products         | 2002           | 1                                                                     |
| 57               | Belarus | Potatoes and products           | 2002           | 314                                                                   |
| 57               | Belarus | Poultry Meat                    | 2002           | 32                                                                    |
| 57               | Belarus | Rape and Mustard Oil            | 2002           | 34                                                                    |
| 57               | Belarus | Rape and Mustardseed            | 2002           | 1                                                                     |
| 57               | Belarus | Rice (Milled Equivalent)        | 2002           | 26                                                                    |
| 57               | Belarus | Rye and products                | 2002           | 250                                                                   |
| 57               | Belarus | Soyabean Oil                    | 2002           | 59                                                                    |
| 57               | Belarus | Soyabeans                       | 2002           | 1                                                                     |
| 57               | Belarus | Spices                          | 2002           | 1                                                                     |
| 57               | Belarus | Spices, Other                   | 2002           | 1                                                                     |
| 57               | Belarus | Starchy Roots                   | 2002           | 314                                                                   |
| 57               | Belarus | Stimulants                      | 2002           | 6                                                                     |
| 57               | Belarus | Sugar & Sweeteners              | 2002           | 356                                                                   |
| 57               | Belarus | Sugar (Raw Equivalent)          | 2002           | 335                                                                   |
| 57               | Belarus | Sunflowerseed Oil               | 2002           | 176                                                                   |
| 57               | Belarus | Sweeteners, Other               | 2002           | 18                                                                    |
| 57               | Belarus | Tomatoes and products           | 2002           | 7                                                                     |
| 57               | Belarus | Treenuts                        | 2002           | 15                                                                    |
| 57               | Belarus | Vegetable Oils                  | 2002           | 282                                                                   |
| 57               | Belarus | Vegetables                      | 2002           | 61                                                                    |
| 57               | Belarus | Vegetables, Other               | 2002           | 47                                                                    |
| 57               | Belarus | Vegetal Products                | 2002           | 2,182                                                                 |
| 57               | Belarus | Wheat and products              | 2002           | 574                                                                   |
| 57               | Belarus | Wine                            | 2002           | 7                                                                     |
| 57               | Belarus | Alcoholic Beverages             | 2003           | 102                                                                   |
| 57               | Belarus | Animal fats                     | 2003           | 146                                                                   |
| 57               | Belarus | Animal Products                 | 2003           | 775                                                                   |
| 57               | Belarus | Apples and products             | 2003           | 35                                                                    |
| 57               | Belarus | Bananas                         | 2003           | 3                                                                     |
| 57               | Belarus | Barley and products             | 2003           | 33                                                                    |
| 57               | Belarus | Beer                            | 2003           | 26                                                                    |
| 57               | Belarus | Beverages, Alcoholic            | 2003           | 65                                                                    |
| 57               | Belarus | Beverages, Fermented            | 2003           | 4                                                                     |
| 57               | Belarus | Bovine Meat                     | 2003           | 104                                                                   |
| 57               | Belarus | Butter, Ghee                    | 2003           | 71                                                                    |
| 57               | Belarus | Cereals - Excluding Beer        | 2003           | 953                                                                   |
| 57               | Belarus | Cereals, Other                  | 2003           | 16                                                                    |
| 57               | Belarus | Cocoa Beans and products        | 2003           | 12                                                                    |
| 57               | Belarus | Coconut Oil                     | 2003           | 7                                                                     |
| 57               | Belarus | Cream                           | 2003           | 3                                                                     |
| 57               | Belarus | Demersal Fish                   | 2003           | 6                                                                     |
| 57               | Belarus | Eggs                            | 2003           | 48                                                                    |
| 57               | Belarus | Fats, Animals, Raw              | 2003           | 72                                                                    |
| 57               | Belarus | Fish, Seafood                   | 2003           | 28                                                                    |
| 57               | Belarus | Freshwater Fish                 | 2003           | 2                                                                     |
| 57               | Belarus | Fruits - Excluding Wine         | 2003           | 60                                                                    |
| 57               | Belarus | Fruits, Other                   | 2003           | 14                                                                    |
| 57               | Belarus | Grand Total                     | 2003           | 2,821                                                                 |
| 57               | Belarus | Grapes and products (excl wine) | 2003           | 1                                                                     |
| 57               | Belarus | Groundnuts (Shelled Eq)         | 2003           | 3                                                                     |
| 57               | Belarus | Honey                           | 2003           | 2                                                                     |
| 57               | Belarus | Maize and products              | 2003           | 2                                                                     |
| 57               | Belarus | Maize Germ Oil                  | 2003           | 1                                                                     |
| 57               | Belarus | Marine Fish, Other              | 2003           | 4                                                                     |
| 57               | Belarus | Meat                            | 2003           | 302                                                                   |
| 57               | Belarus | Meat, Other                     | 2003           | 1                                                                     |
| 57               | Belarus | Milk - Excluding Butter         | 2003           | 237                                                                   |
| 57               | Belarus | Miscellaneous                   | 2003           | 3                                                                     |
| 57               | Belarus | Mutton & Goat Meat              | 2003           | 1                                                                     |
| 57               | Belarus | Oats                            | 2003           | 54                                                                    |
| 57               | Belarus | Offals                          | 2003           | 14                                                                    |
| 57               | Belarus | Oilcrops                        | 2003           | 4                                                                     |
| 57               | Belarus | Oilcrops Oil, Other             | 2003           | 1                                                                     |
| 57               | Belarus | Onions                          | 2003           | 11                                                                    |
| 57               | Belarus | Oranges, Mandarines             | 2003           | 3                                                                     |
| 57               | Belarus | Pelagic Fish                    | 2003           | 16                                                                    |
| 57               | Belarus | Pigmeat                         | 2003           | 164                                                                   |
| 57               | Belarus | Pineapples and products         | 2003           | 2                                                                     |
| 57               | Belarus | Potatoes and products           | 2003           | 318                                                                   |
| 57               | Belarus | Poultry Meat                    | 2003           | 31                                                                    |
| 57               | Belarus | Rape and Mustard Oil            | 2003           | 14                                                                    |

Dietary calcium and zinc deficiency risks are decreasing but remain prevalent

| FAO Country code | Country | Food item                       | Reference year | Net energy supply (kcal <i>capita</i> <sup>-1</sup> d <sup>-1</sup> ) |
|------------------|---------|---------------------------------|----------------|-----------------------------------------------------------------------|
| 57               | Belarus | Rice (Milled Equivalent)        | 2003           | 53                                                                    |
| 57               | Belarus | Rye and products                | 2003           | 244                                                                   |
| 57               | Belarus | Soyabean Oil                    | 2003           | 21                                                                    |
| 57               | Belarus | Spices                          | 2003           | 1                                                                     |
| 57               | Belarus | Spices, Other                   | 2003           | 1                                                                     |
| 57               | Belarus | Starchy Roots                   | 2003           | 318                                                                   |
| 57               | Belarus | Stimulants                      | 2003           | 13                                                                    |
| 57               | Belarus | Sugar & Sweeteners              | 2003           | 289                                                                   |
| 57               | Belarus | Sugar (Raw Equivalent)          | 2003           | 282                                                                   |
| 57               | Belarus | Sunflowerseed Oil               | 2003           | 166                                                                   |
| 57               | Belarus | Sweeteners, Other               | 2003           | 5                                                                     |
| 57               | Belarus | Tea (including mate)            | 2003           | 1                                                                     |
| 57               | Belarus | Tomatoes and products           | 2003           | 11                                                                    |
| 57               | Belarus | Treenuts                        | 2003           | 19                                                                    |
| 57               | Belarus | Vegetable Oils                  | 2003           | 210                                                                   |
| 57               | Belarus | Vegetables                      | 2003           | 76                                                                    |
| 57               | Belarus | Vegetables, Other               | 2003           | 53                                                                    |
| 57               | Belarus | Vegetal Products                | 2003           | 2,046                                                                 |
| 57               | Belarus | Wheat and products              | 2003           | 551                                                                   |
| 57               | Belarus | Wine                            | 2003           | 7                                                                     |
| 57               | Belarus | Alcoholic Beverages             | 2004           | 106                                                                   |
| 57               | Belarus | Animal fats                     | 2004           | 151                                                                   |
| 57               | Belarus | Animal Products                 | 2004           | 761                                                                   |
| 57               | Belarus | Apples and products             | 2004           | 33                                                                    |
| 57               | Belarus | Bananas                         | 2004           | 2                                                                     |
| 57               | Belarus | Barley and products             | 2004           | 32                                                                    |
| 57               | Belarus | Beer                            | 2004           | 31                                                                    |
| 57               | Belarus | Beverages, Alcoholic            | 2004           | 60                                                                    |
| 57               | Belarus | Beverages, Fermented            | 2004           | 4                                                                     |
| 57               | Belarus | Bovine Meat                     | 2004           | 109                                                                   |
| 57               | Belarus | Butter, Ghee                    | 2004           | 72                                                                    |
| 57               | Belarus | Cereals - Excluding Beer        | 2004           | 984                                                                   |
| 57               | Belarus | Cereals, Other                  | 2004           | 30                                                                    |
| 57               | Belarus | Cocoa Beans and products        | 2004           | 7                                                                     |
| 57               | Belarus | Coconut Oil                     | 2004           | 8                                                                     |
| 57               | Belarus | Coffee and products             | 2004           | 1                                                                     |
| 57               | Belarus | Cream                           | 2004           | 2                                                                     |
| 57               | Belarus | Demersal Fish                   | 2004           | 7                                                                     |
| 57               | Belarus | Eggs                            | 2004           | 52                                                                    |
| 57               | Belarus | Fats, Animals, Raw              | 2004           | 77                                                                    |
| 57               | Belarus | Fish, Seafood                   | 2004           | 29                                                                    |
| 57               | Belarus | Freshwater Fish                 | 2004           | 2                                                                     |
| 57               | Belarus | Fruits - Excluding Wine         | 2004           | 62                                                                    |
| 57               | Belarus | Fruits, Other                   | 2004           | 19                                                                    |
| 57               | Belarus | Grand Total                     | 2004           | 2,901                                                                 |
| 57               | Belarus | Grapes and products (excl wine) | 2004           | 2                                                                     |
| 57               | Belarus | Groundnuts (Shelled Eq)         | 2004           | 4                                                                     |
| 57               | Belarus | Honey                           | 2004           | 2                                                                     |
| 57               | Belarus | Maize and products              | 2004           | 4                                                                     |
| 57               | Belarus | Maize Germ Oil                  | 2004           | 1                                                                     |
| 57               | Belarus | Marine Fish, Other              | 2004           | 4                                                                     |
| 57               | Belarus | Meat                            | 2004           | 296                                                                   |
| 57               | Belarus | Meat, Other                     | 2004           | 3                                                                     |
| 57               | Belarus | Milk - Excluding Butter         | 2004           | 215                                                                   |
| 57               | Belarus | Miscellaneous                   | 2004           | 4                                                                     |
| 57               | Belarus | Mutton & Goat Meat              | 2004           | 1                                                                     |
| 57               | Belarus | Oats                            | 2004           | 68                                                                    |
| 57               | Belarus | Offals                          | 2004           | 17                                                                    |
| 57               | Belarus | Oilcrops                        | 2004           | 5                                                                     |
| 57               | Belarus | Oilcrops Oil, Other             | 2004           | 1                                                                     |
| 57               | Belarus | Onions                          | 2004           | 14                                                                    |
| 57               | Belarus | Oranges, Mandarines             | 2004           | 4                                                                     |
| 57               | Belarus | Pelagic Fish                    | 2004           | 16                                                                    |
| 57               | Belarus | Pigmeat                         | 2004           | 146                                                                   |
| 57               | Belarus | Pineapples and products         | 2004           | 1                                                                     |
| 57               | Belarus | Potatoes and products           | 2004           | 341                                                                   |
| 57               | Belarus | Poultry Meat                    | 2004           | 38                                                                    |
| 57               | Belarus | Rape and Mustard Oil            | 2004           | 21                                                                    |
| 57               | Belarus | Rice (Milled Equivalent)        | 2004           | 30                                                                    |
| 57               | Belarus | Rye and products                | 2004           | 255                                                                   |
| 57               | Belarus | Soyabean Oil                    | 2004           | 17                                                                    |
| 57               | Belarus | Spices                          | 2004           | 1                                                                     |
| 57               | Belarus | Spices, Other                   | 2004           | 1                                                                     |
| 57               | Belarus | Starchy Roots                   | 2004           | 341                                                                   |
| 57               | Belarus | Stimulants                      | 2004           | 8                                                                     |
| 57               | Belarus | Sugar & Sweeteners              | 2004           | 302                                                                   |
| 57               | Belarus | Sugar (Raw Equivalent)          | 2004           | 280                                                                   |
| 57               | Belarus | Sunflowerseed Oil               | 2004           | 179                                                                   |
| 57               | Belarus | Sweeteners, Other               | 2004           | 19                                                                    |
| 57               | Belarus | Tomatoes and products           | 2004           | 12                                                                    |
| 57               | Belarus | Treenuts                        | 2004           | 16                                                                    |
| 57               | Belarus | Vegetable Oils                  | 2004           | 227                                                                   |
| 57               | Belarus | Vegetables                      | 2004           | 85                                                                    |
| 57               | Belarus | Vegetables, Other               | 2004           | 58                                                                    |
| 57               | Belarus | Vegetal Products                | 2004           | 2,140                                                                 |
| 57               | Belarus | Wheat and products              | 2004           | 566                                                                   |
| 57               | Belarus | Wine                            | 2004           | 11                                                                    |
| 57               | Belarus | Alcoholic Beverages             | 2005           | 132                                                                   |
| 57               | Belarus | Animal fats                     | 2005           | 148                                                                   |
| 57               | Belarus | Animal Products                 | 2005           | 797                                                                   |
| 57               | Belarus | Apples and products             | 2005           | 29                                                                    |
| 57               | Belarus | Bananas                         | 2005           | 3                                                                     |
| 57               | Belarus | Barley and products             | 2005           | 32                                                                    |
| 57               | Belarus | Beer                            | 2005           | 43                                                                    |
| 57               | Belarus | Beverages, Alcoholic            | 2005           | 70                                                                    |
| 57               | Belarus | Beverages, Fermented            | 2005           | 6                                                                     |
| 57               | Belarus | Bovine Meat                     | 2005           | 131                                                                   |

Dietary calcium and zinc deficiency risks are decreasing but remain prevalent

| FAO Country code | Country | Food item                       | Reference year | Net energy supply (kcal capita <sup>-1</sup> d <sup>-1</sup> ) |
|------------------|---------|---------------------------------|----------------|----------------------------------------------------------------|
| 57               | Belarus | Butter, Ghee                    | 2005           | 70                                                             |
| 57               | Belarus | Cereals - Excluding Beer        | 2005           | 933                                                            |
| 57               | Belarus | Cereals, Other                  | 2005           | 28                                                             |
| 57               | Belarus | Cocoa Beans and products        | 2005           | 8                                                              |
| 57               | Belarus | Coconut Oil                     | 2005           | 6                                                              |
| 57               | Belarus | Coffee and products             | 2005           | 2                                                              |
| 57               | Belarus | Cream                           | 2005           | 3                                                              |
| 57               | Belarus | Demersal Fish                   | 2005           | 8                                                              |
| 57               | Belarus | Eggs                            | 2005           | 56                                                             |
| 57               | Belarus | Fats, Animals, Raw              | 2005           | 75                                                             |
| 57               | Belarus | Fish, Seafood                   | 2005           | 31                                                             |
| 57               | Belarus | Freshwater Fish                 | 2005           | 3                                                              |
| 57               | Belarus | Fruits - Excluding Wine         | 2005           | 63                                                             |
| 57               | Belarus | Fruits, Other                   | 2005           | 23                                                             |
| 57               | Belarus | Grand Total                     | 2005           | 2,987                                                          |
| 57               | Belarus | Grapes and products (excl wine) | 2005           | 2                                                              |
| 57               | Belarus | Groundnuts (Shelled Eq)         | 2005           | 5                                                              |
| 57               | Belarus | Honey                           | 2005           | 3                                                              |
| 57               | Belarus | Maize and products              | 2005           | 3                                                              |
| 57               | Belarus | Maize Germ Oil                  | 2005           | 1                                                              |
| 57               | Belarus | Marine Fish, Other              | 2005           | 4                                                              |
| 57               | Belarus | Meat                            | 2005           | 305                                                            |
| 57               | Belarus | Meat, Other                     | 2005           | 3                                                              |
| 57               | Belarus | Milk - Excluding Butter         | 2005           | 238                                                            |
| 57               | Belarus | Miscellaneous                   | 2005           | 4                                                              |
| 57               | Belarus | Mutton & Goat Meat              | 2005           | 1                                                              |
| 57               | Belarus | Oats                            | 2005           | 58                                                             |
| 57               | Belarus | Offals                          | 2005           | 19                                                             |
| 57               | Belarus | Oilcrops                        | 2005           | 6                                                              |
| 57               | Belarus | Oilcrops Oil, Other             | 2005           | 1                                                              |
| 57               | Belarus | Olive Oil                       | 2005           | 1                                                              |
| 57               | Belarus | Olives (including preserved)    | 2005           | 1                                                              |
| 57               | Belarus | Onions                          | 2005           | 14                                                             |
| 57               | Belarus | Oranges, Mandarines             | 2005           | 4                                                              |
| 57               | Belarus | Pelagic Fish                    | 2005           | 16                                                             |
| 57               | Belarus | Pigmeat                         | 2005           | 126                                                            |
| 57               | Belarus | Pineapples and products         | 2005           | 1                                                              |
| 57               | Belarus | Potatoes and products           | 2005           | 337                                                            |
| 57               | Belarus | Poultry Meat                    | 2005           | 44                                                             |
| 57               | Belarus | Rape and Mustard Oil            | 2005           | 48                                                             |
| 57               | Belarus | Rice (Milled Equivalent)        | 2005           | 26                                                             |
| 57               | Belarus | Rye and products                | 2005           | 256                                                            |
| 57               | Belarus | Soyabean Oil                    | 2005           | 24                                                             |
| 57               | Belarus | Spices                          | 2005           | 1                                                              |
| 57               | Belarus | Spices, Other                   | 2005           | 1                                                              |
| 57               | Belarus | Starchy Roots                   | 2005           | 337                                                            |
| 57               | Belarus | Stimulants                      | 2005           | 10                                                             |
| 57               | Belarus | Sugar & Sweeteners              | 2005           | 324                                                            |
| 57               | Belarus | Sugar (Raw Equivalent)          | 2005           | 304                                                            |
| 57               | Belarus | Sunflowerseed Oil               | 2005           | 191                                                            |
| 57               | Belarus | Sweeteners, Other               | 2005           | 18                                                             |
| 57               | Belarus | Tomatoes and products           | 2005           | 14                                                             |
| 57               | Belarus | Treenuts                        | 2005           | 19                                                             |
| 57               | Belarus | Vegetable Oils                  | 2005           | 271                                                            |
| 57               | Belarus | Vegetables                      | 2005           | 90                                                             |
| 57               | Belarus | Vegetables, Other               | 2005           | 62                                                             |
| 57               | Belarus | Vegetal Products                | 2005           | 2,191                                                          |
| 57               | Belarus | Wheat and products              | 2005           | 530                                                            |
| 57               | Belarus | Wine                            | 2005           | 12                                                             |
| 57               | Belarus | Alcoholic Beverages             | 2006           | 164                                                            |
| 57               | Belarus | Animal fats                     | 2006           | 152                                                            |
| 57               | Belarus | Animal Products                 | 2006           | 814                                                            |
| 57               | Belarus | Apples and products             | 2006           | 33                                                             |
| 57               | Belarus | Bananas                         | 2006           | 4                                                              |
| 57               | Belarus | Barley and products             | 2006           | 28                                                             |
| 57               | Belarus | Beer                            | 2006           | 56                                                             |
| 57               | Belarus | Beverages, Alcoholic            | 2006           | 92                                                             |
| 57               | Belarus | Beverages, Fermented            | 2006           | 3                                                              |
| 57               | Belarus | Bovine Meat                     | 2006           | 139                                                            |
| 57               | Belarus | Butter, Ghee                    | 2006           | 72                                                             |
| 57               | Belarus | Cereals - Excluding Beer        | 2006           | 915                                                            |
| 57               | Belarus | Cereals, Other                  | 2006           | 27                                                             |
| 57               | Belarus | Cocoa Beans and products        | 2006           | 13                                                             |
| 57               | Belarus | Coconut Oil                     | 2006           | 7                                                              |
| 57               | Belarus | Coffee and products             | 2006           | 2                                                              |
| 57               | Belarus | Cream                           | 2006           | 4                                                              |
| 57               | Belarus | Demersal Fish                   | 2006           | 8                                                              |
| 57               | Belarus | Eggs                            | 2006           | 59                                                             |
| 57               | Belarus | Fats, Animals, Raw              | 2006           | 76                                                             |
| 57               | Belarus | Fish, Seafood                   | 2006           | 31                                                             |
| 57               | Belarus | Freshwater Fish                 | 2006           | 3                                                              |
| 57               | Belarus | Fruits - Excluding Wine         | 2006           | 81                                                             |
| 57               | Belarus | Fruits, Other                   | 2006           | 34                                                             |
| 57               | Belarus | Grand Total                     | 2006           | 3,084                                                          |
| 57               | Belarus | Grapes and products (excl wine) | 2006           | 3                                                              |
| 57               | Belarus | Groundnuts (Shelled Eq)         | 2006           | 8                                                              |
| 57               | Belarus | Honey                           | 2006           | 3                                                              |
| 57               | Belarus | Maize and products              | 2006           | 2                                                              |
| 57               | Belarus | Maize Germ Oil                  | 2006           | 1                                                              |
| 57               | Belarus | Marine Fish, Other              | 2006           | 3                                                              |
| 57               | Belarus | Meat                            | 2006           | 336                                                            |
| 57               | Belarus | Meat, Other                     | 2006           | 1                                                              |
| 57               | Belarus | Milk - Excluding Butter         | 2006           | 217                                                            |
| 57               | Belarus | Miscellaneous                   | 2006           | 6                                                              |
| 57               | Belarus | Mutton & Goat Meat              | 2006           | 1                                                              |
| 57               | Belarus | Oats                            | 2006           | 52                                                             |
| 57               | Belarus | Offals                          | 2006           | 18                                                             |

Dietary calcium and zinc deficiency risks are decreasing but remain prevalent

| FAO Country code | Country | Food item                       | Reference year | Net energy supply (kcal capita <sup>-1</sup> d <sup>-1</sup> ) |
|------------------|---------|---------------------------------|----------------|----------------------------------------------------------------|
| 57               | Belarus | Oilcrops                        | 2006           | 10                                                             |
| 57               | Belarus | Oilcrops Oil, Other             | 2006           | 1                                                              |
| 57               | Belarus | Olive Oil                       | 2006           | 1                                                              |
| 57               | Belarus | Olives (including preserved)    | 2006           | 1                                                              |
| 57               | Belarus | Onions                          | 2006           | 15                                                             |
| 57               | Belarus | Oranges, Mandarines             | 2006           | 5                                                              |
| 57               | Belarus | Pelagic Fish                    | 2006           | 17                                                             |
| 57               | Belarus | Pigmeat                         | 2006           | 141                                                            |
| 57               | Belarus | Pineapples and products         | 2006           | 1                                                              |
| 57               | Belarus | Potatoes and products           | 2006           | 352                                                            |
| 57               | Belarus | Poultry Meat                    | 2006           | 55                                                             |
| 57               | Belarus | Rape and Mustard Oil            | 2006           | 32                                                             |
| 57               | Belarus | Rice (Milled Equivalent)        | 2006           | 31                                                             |
| 57               | Belarus | Rye and products                | 2006           | 229                                                            |
| 57               | Belarus | Soyabean Oil                    | 2006           | 20                                                             |
| 57               | Belarus | Spices                          | 2006           | 1                                                              |
| 57               | Belarus | Spices, Other                   | 2006           | 1                                                              |
| 57               | Belarus | Starchy Roots                   | 2006           | 352                                                            |
| 57               | Belarus | Stimulants                      | 2006           | 16                                                             |
| 57               | Belarus | Sugar & Sweeteners              | 2006           | 283                                                            |
| 57               | Belarus | Sugar (Raw Equivalent)          | 2006           | 262                                                            |
| 57               | Belarus | Sunflowerseed Oil               | 2006           | 273                                                            |
| 57               | Belarus | Sweeteners, Other               | 2006           | 18                                                             |
| 57               | Belarus | Tea (including mate)            | 2006           | 1                                                              |
| 57               | Belarus | Tomatoes and products           | 2006           | 15                                                             |
| 57               | Belarus | Treenuts                        | 2006           | 14                                                             |
| 57               | Belarus | Vegetable Oils                  | 2006           | 334                                                            |
| 57               | Belarus | Vegetables                      | 2006           | 95                                                             |
| 57               | Belarus | Vegetables, Other               | 2006           | 66                                                             |
| 57               | Belarus | Vegetal Products                | 2006           | 2,271                                                          |
| 57               | Belarus | Wheat and products              | 2006           | 545                                                            |
| 57               | Belarus | Wine                            | 2006           | 13                                                             |
| 57               | Belarus | Alcoholic Beverages             | 2007           | 189                                                            |
| 57               | Belarus | Animal fats                     | 2007           | 151                                                            |
| 57               | Belarus | Animal Products                 | 2007           | 834                                                            |
| 57               | Belarus | Apples and products             | 2007           | 38                                                             |
| 57               | Belarus | Bananas                         | 2007           | 5                                                              |
| 57               | Belarus | Barley and products             | 2007           | 27                                                             |
| 57               | Belarus | Beer                            | 2007           | 67                                                             |
| 57               | Belarus | Beverages, Alcoholic            | 2007           | 105                                                            |
| 57               | Belarus | Beverages, Fermented            | 2007           | 3                                                              |
| 57               | Belarus | Bovine Meat                     | 2007           | 135                                                            |
| 57               | Belarus | Butter, Ghee                    | 2007           | 68                                                             |
| 57               | Belarus | Cephalopods                     | 2007           | 1                                                              |
| 57               | Belarus | Cereals - Excluding Beer        | 2007           | 904                                                            |
| 57               | Belarus | Cereals, Other                  | 2007           | 25                                                             |
| 57               | Belarus | Cocoa Beans and products        | 2007           | 16                                                             |
| 57               | Belarus | Coconut Oil                     | 2007           | 6                                                              |
| 57               | Belarus | Coconuts - Incl Copra           | 2007           | 1                                                              |
| 57               | Belarus | Coffee and products             | 2007           | 3                                                              |
| 57               | Belarus | Cream                           | 2007           | 5                                                              |
| 57               | Belarus | Demersal Fish                   | 2007           | 7                                                              |
| 57               | Belarus | Eggs                            | 2007           | 58                                                             |
| 57               | Belarus | Fats, Animals, Raw              | 2007           | 79                                                             |
| 57               | Belarus | Fish, Seafood                   | 2007           | 35                                                             |
| 57               | Belarus | Freshwater Fish                 | 2007           | 5                                                              |
| 57               | Belarus | Fruits - Excluding Wine         | 2007           | 80                                                             |
| 57               | Belarus | Fruits, Other                   | 2007           | 25                                                             |
| 57               | Belarus | Grand Total                     | 2007           | 3,186                                                          |
| 57               | Belarus | Grapes and products (excl wine) | 2007           | 4                                                              |
| 57               | Belarus | Groundnuts (Shelled Eq)         | 2007           | 8                                                              |
| 57               | Belarus | Honey                           | 2007           | 3                                                              |
| 57               | Belarus | Maize and products              | 2007           | 3                                                              |
| 57               | Belarus | Maize Germ Oil                  | 2007           | 1                                                              |
| 57               | Belarus | Marine Fish, Other              | 2007           | 3                                                              |
| 57               | Belarus | Meat                            | 2007           | 353                                                            |
| 57               | Belarus | Meat, Other                     | 2007           | 1                                                              |
| 57               | Belarus | Milk - Excluding Butter         | 2007           | 220                                                            |
| 57               | Belarus | Miscellaneous                   | 2007           | 7                                                              |
| 57               | Belarus | Mutton & Goat Meat              | 2007           | 1                                                              |
| 57               | Belarus | Oats                            | 2007           | 55                                                             |
| 57               | Belarus | Offals                          | 2007           | 16                                                             |
| 57               | Belarus | Oilcrops                        | 2007           | 11                                                             |
| 57               | Belarus | Oilcrops Oil, Other             | 2007           | 1                                                              |
| 57               | Belarus | Olive Oil                       | 2007           | 2                                                              |
| 57               | Belarus | Olives (including preserved)    | 2007           | 1                                                              |
| 57               | Belarus | Onions                          | 2007           | 16                                                             |
| 57               | Belarus | Oranges, Mandarines             | 2007           | 6                                                              |
| 57               | Belarus | Pelagic Fish                    | 2007           | 19                                                             |
| 57               | Belarus | Pigmeat                         | 2007           | 156                                                            |
| 57               | Belarus | Pineapples and products         | 2007           | 1                                                              |
| 57               | Belarus | Potatoes and products           | 2007           | 352                                                            |
| 57               | Belarus | Poultry Meat                    | 2007           | 60                                                             |
| 57               | Belarus | Rape and Mustard Oil            | 2007           | 55                                                             |
| 57               | Belarus | Rice (Milled Equivalent)        | 2007           | 34                                                             |
| 57               | Belarus | Rye and products                | 2007           | 242                                                            |
| 57               | Belarus | Soyabean Oil                    | 2007           | 25                                                             |
| 57               | Belarus | Soyabeans                       | 2007           | 1                                                              |
| 57               | Belarus | Spices                          | 2007           | 1                                                              |
| 57               | Belarus | Spices, Other                   | 2007           | 1                                                              |
| 57               | Belarus | Starchy Roots                   | 2007           | 352                                                            |
| 57               | Belarus | Stimulants                      | 2007           | 19                                                             |
| 57               | Belarus | Sugar & Sweeteners              | 2007           | 306                                                            |
| 57               | Belarus | Sugar (Raw Equivalent)          | 2007           | 288                                                            |
| 57               | Belarus | Sunflowerseed Oil               | 2007           | 282                                                            |
| 57               | Belarus | Sweeteners, Other               | 2007           | 15                                                             |
| 57               | Belarus | Tea (including mate)            | 2007           | 1                                                              |

## Dietary calcium and zinc deficiency risks are decreasing but remain prevalent

| FAO Country code | Country | Food item                       | Reference year | Net energy supply (kcal capita <sup>-1</sup> d <sup>-1</sup> ) |
|------------------|---------|---------------------------------|----------------|----------------------------------------------------------------|
| 57               | Belarus | Tomatoes and products           | 2007           | 16                                                             |
| 57               | Belarus | Treenuts                        | 2007           | 14                                                             |
| 57               | Belarus | Vegetable Oils                  | 2007           | 372                                                            |
| 57               | Belarus | Vegetables                      | 2007           | 97                                                             |
| 57               | Belarus | Vegetables, Other               | 2007           | 66                                                             |
| 57               | Belarus | Vegetal Products                | 2007           | 2,352                                                          |
| 57               | Belarus | Wheat and products              | 2007           | 519                                                            |
| 57               | Belarus | Wine                            | 2007           | 13                                                             |
| 57               | Belarus | Alcoholic Beverages             | 2008           | 208                                                            |
| 57               | Belarus | Animal fats                     | 2008           | 159                                                            |
| 57               | Belarus | Animal Products                 | 2008           | 812                                                            |
| 57               | Belarus | Apples and products             | 2008           | 31                                                             |
| 57               | Belarus | Bananas                         | 2008           | 7                                                              |
| 57               | Belarus | Barley and products             | 2008           | 26                                                             |
| 57               | Belarus | Beer                            | 2008           | 70                                                             |
| 57               | Belarus | Beverages, Alcoholic            | 2008           | 121                                                            |
| 57               | Belarus | Beverages, Fermented            | 2008           | 3                                                              |
| 57               | Belarus | Bovine Meat                     | 2008           | 130                                                            |
| 57               | Belarus | Butter, Ghee                    | 2008           | 76                                                             |
| 57               | Belarus | Cereals - Excluding Beer        | 2008           | 875                                                            |
| 57               | Belarus | Cereals, Other                  | 2008           | 27                                                             |
| 57               | Belarus | Cocoa Beans and products        | 2008           | 19                                                             |
| 57               | Belarus | Coconut Oil                     | 2008           | 5                                                              |
| 57               | Belarus | Coconuts - Incl Copra           | 2008           | 1                                                              |
| 57               | Belarus | Coffee and products             | 2008           | 3                                                              |
| 57               | Belarus | Cream                           | 2008           | 5                                                              |
| 57               | Belarus | Demersal Fish                   | 2008           | 7                                                              |
| 57               | Belarus | Eggs                            | 2008           | 60                                                             |
| 57               | Belarus | Fats, Animals, Raw              | 2008           | 78                                                             |
| 57               | Belarus | Fish, Seafood                   | 2008           | 36                                                             |
| 57               | Belarus | Freshwater Fish                 | 2008           | 6                                                              |
| 57               | Belarus | Fruits - Excluding Wine         | 2008           | 83                                                             |
| 57               | Belarus | Fruits, Other                   | 2008           | 32                                                             |
| 57               | Belarus | Grand Total                     | 2008           | 3,202                                                          |
| 57               | Belarus | Grapes and products (excl wine) | 2008           | 4                                                              |
| 57               | Belarus | Groundnuts (Shelled Eq)         | 2008           | 8                                                              |
| 57               | Belarus | Honey                           | 2008           | 3                                                              |
| 57               | Belarus | Maize and products              | 2008           | 3                                                              |
| 57               | Belarus | Maize Germ Oil                  | 2008           | 1                                                              |
| 57               | Belarus | Marine Fish, Other              | 2008           | 2                                                              |
| 57               | Belarus | Meat                            | 2008           | 370                                                            |
| 57               | Belarus | Meat, Other                     | 2008           | 1                                                              |
| 57               | Belarus | Milk - Excluding Butter         | 2008           | 168                                                            |
| 57               | Belarus | Miscellaneous                   | 2008           | 7                                                              |
| 57               | Belarus | Mutton & Goat Meat              | 2008           | 1                                                              |
| 57               | Belarus | Oats                            | 2008           | 55                                                             |
| 57               | Belarus | Offals                          | 2008           | 19                                                             |
| 57               | Belarus | Oilcrops                        | 2008           | 11                                                             |
| 57               | Belarus | Oilcrops Oil, Other             | 2008           | 2                                                              |
| 57               | Belarus | Olive Oil                       | 2008           | 2                                                              |
| 57               | Belarus | Olives (including preserved)    | 2008           | 1                                                              |
| 57               | Belarus | Onions                          | 2008           | 18                                                             |
| 57               | Belarus | Oranges, Mandarines             | 2008           | 6                                                              |
| 57               | Belarus | Pelagic Fish                    | 2008           | 20                                                             |
| 57               | Belarus | Pigmeat                         | 2008           | 168                                                            |
| 57               | Belarus | Pineapples and products         | 2008           | 2                                                              |
| 57               | Belarus | Potatoes and products           | 2008           | 355                                                            |
| 57               | Belarus | Poultry Meat                    | 2008           | 70                                                             |
| 57               | Belarus | Rape and Mustard Oil            | 2008           | 105                                                            |
| 57               | Belarus | Rice (Milled Equivalent)        | 2008           | 34                                                             |
| 57               | Belarus | Rye and products                | 2008           | 243                                                            |
| 57               | Belarus | Soyabean Oil                    | 2008           | 65                                                             |
| 57               | Belarus | Soybeans                        | 2008           | 1                                                              |
| 57               | Belarus | Spices                          | 2008           | 1                                                              |
| 57               | Belarus | Spices, Other                   | 2008           | 1                                                              |
| 57               | Belarus | Starchy Roots                   | 2008           | 355                                                            |
| 57               | Belarus | Stimulants                      | 2008           | 22                                                             |
| 57               | Belarus | Sugar & Sweeteners              | 2008           | 340                                                            |
| 57               | Belarus | Sugar (Raw Equivalent)          | 2008           | 321                                                            |
| 57               | Belarus | Sunflowerseed Oil               | 2008           | 193                                                            |
| 57               | Belarus | Sweeteners, Other               | 2008           | 16                                                             |
| 57               | Belarus | Tea (including mate)            | 2008           | 1                                                              |
| 57               | Belarus | Tomatoes and products           | 2008           | 16                                                             |
| 57               | Belarus | Treenuts                        | 2008           | 16                                                             |
| 57               | Belarus | Vegetable Oils                  | 2008           | 372                                                            |
| 57               | Belarus | Vegetables                      | 2008           | 101                                                            |
| 57               | Belarus | Vegetables, Other               | 2008           | 67                                                             |
| 57               | Belarus | Vegetal Products                | 2008           | 2,391                                                          |
| 57               | Belarus | Wheat and products              | 2008           | 486                                                            |
| 57               | Belarus | Wine                            | 2008           | 14                                                             |
| 57               | Belarus | Alcoholic Beverages             | 2009           | 203                                                            |
| 57               | Belarus | Animal fats                     | 2009           | 138                                                            |
| 57               | Belarus | Animal Products                 | 2009           | 820                                                            |
| 57               | Belarus | Apples and products             | 2009           | 30                                                             |
| 57               | Belarus | Bananas                         | 2009           | 6                                                              |
| 57               | Belarus | Barley and products             | 2009           | 30                                                             |
| 57               | Belarus | Beer                            | 2009           | 64                                                             |
| 57               | Belarus | Beverages, Alcoholic            | 2009           | 124                                                            |
| 57               | Belarus | Beverages, Fermented            | 2009           | 3                                                              |
| 57               | Belarus | Bovine Meat                     | 2009           | 124                                                            |
| 57               | Belarus | Butter, Ghee                    | 2009           | 63                                                             |
| 57               | Belarus | Cereals - Excluding Beer        | 2009           | 844                                                            |
| 57               | Belarus | Cereals, Other                  | 2009           | 35                                                             |
| 57               | Belarus | Cocoa Beans and products        | 2009           | 18                                                             |
| 57               | Belarus | Coconut Oil                     | 2009           | 4                                                              |
| 57               | Belarus | Coconuts - Incl Copra           | 2009           | 1                                                              |
| 57               | Belarus | Coffee and products             | 2009           | 2                                                              |

Dietary calcium and zinc deficiency risks are decreasing but remain prevalent

| FAO Country code | Country | Food item                       | Reference year | Net energy supply (kcal capita <sup>-1</sup> d <sup>-1</sup> ) |
|------------------|---------|---------------------------------|----------------|----------------------------------------------------------------|
| 57               | Belarus | Cream                           | 2009           | 4                                                              |
| 57               | Belarus | Demersal Fish                   | 2009           | 4                                                              |
| 57               | Belarus | Eggs                            | 2009           | 60                                                             |
| 57               | Belarus | Fats, Animals, Raw              | 2009           | 70                                                             |
| 57               | Belarus | Fish, Seafood                   | 2009           | 35                                                             |
| 57               | Belarus | Freshwater Fish                 | 2009           | 8                                                              |
| 57               | Belarus | Fruits - Excluding Wine         | 2009           | 83                                                             |
| 57               | Belarus | Fruits, Other                   | 2009           | 35                                                             |
| 57               | Belarus | Grand Total                     | 2009           | 3,129                                                          |
| 57               | Belarus | Grapes and products (excl wine) | 2009           | 4                                                              |
| 57               | Belarus | Groundnuts (Shelled Eq)         | 2009           | 7                                                              |
| 57               | Belarus | Honey                           | 2009           | 3                                                              |
| 57               | Belarus | Maize and products              | 2009           | 4                                                              |
| 57               | Belarus | Marine Fish, Other              | 2009           | 4                                                              |
| 57               | Belarus | Meat                            | 2009           | 373                                                            |
| 57               | Belarus | Meat, Other                     | 2009           | 1                                                              |
| 57               | Belarus | Milk - Excluding Butter         | 2009           | 191                                                            |
| 57               | Belarus | Miscellaneous                   | 2009           | 7                                                              |
| 57               | Belarus | Mutton & Goat Meat              | 2009           | 1                                                              |
| 57               | Belarus | Oats                            | 2009           | 52                                                             |
| 57               | Belarus | Offals                          | 2009           | 21                                                             |
| 57               | Belarus | Oilcrops                        | 2009           | 9                                                              |
| 57               | Belarus | Oilcrops Oil, Other             | 2009           | 1                                                              |
| 57               | Belarus | Olive Oil                       | 2009           | 1                                                              |
| 57               | Belarus | Olives (including preserved)    | 2009           | 1                                                              |
| 57               | Belarus | Onions                          | 2009           | 16                                                             |
| 57               | Belarus | Oranges, Mandarines             | 2009           | 5                                                              |
| 57               | Belarus | Pelagic Fish                    | 2009           | 19                                                             |
| 57               | Belarus | Pigmeat                         | 2009           | 174                                                            |
| 57               | Belarus | Pineapples and products         | 2009           | 1                                                              |
| 57               | Belarus | Potatoes and products           | 2009           | 341                                                            |
| 57               | Belarus | Poultry Meat                    | 2009           | 75                                                             |
| 57               | Belarus | Rape and Mustard Oil            | 2009           | 118                                                            |
| 57               | Belarus | Rice (Milled Equivalent)        | 2009           | 28                                                             |
| 57               | Belarus | Rye and products                | 2009           | 247                                                            |
| 57               | Belarus | Soyabean Oil                    | 2009           | 38                                                             |
| 57               | Belarus | Soyabeans                       | 2009           | 1                                                              |
| 57               | Belarus | Spices                          | 2009           | 1                                                              |
| 57               | Belarus | Spices, Other                   | 2009           | 1                                                              |
| 57               | Belarus | Starchy Roots                   | 2009           | 341                                                            |
| 57               | Belarus | Stimulants                      | 2009           | 20                                                             |
| 57               | Belarus | Sugar & Sweeteners              | 2009           | 367                                                            |
| 57               | Belarus | Sugar (Raw Equivalent)          | 2009           | 352                                                            |
| 57               | Belarus | Sunflowerseed Oil               | 2009           | 153                                                            |
| 57               | Belarus | Sweeteners, Other               | 2009           | 12                                                             |
| 57               | Belarus | Tea (including mate)            | 2009           | 1                                                              |
| 57               | Belarus | Tomatoes and products           | 2009           | 16                                                             |
| 57               | Belarus | Treenuts                        | 2009           | 16                                                             |
| 57               | Belarus | Vegetable Oils                  | 2009           | 316                                                            |
| 57               | Belarus | Vegetables                      | 2009           | 102                                                            |
| 57               | Belarus | Vegetables, Other               | 2009           | 69                                                             |
| 57               | Belarus | Vegetal Products                | 2009           | 2,309                                                          |
| 57               | Belarus | Wheat and products              | 2009           | 447                                                            |
| 57               | Belarus | Wine                            | 2009           | 13                                                             |
| 57               | Belarus | Alcoholic Beverages             | 2010           | 213                                                            |
| 57               | Belarus | Animal fats                     | 2010           | 155                                                            |
| 57               | Belarus | Animal Products                 | 2010           | 839                                                            |
| 57               | Belarus | Apples and products             | 2010           | 29                                                             |
| 57               | Belarus | Bananas                         | 2010           | 7                                                              |
| 57               | Belarus | Barley and products             | 2010           | 28                                                             |
| 57               | Belarus | Beer                            | 2010           | 70                                                             |
| 57               | Belarus | Beverages, Alcoholic            | 2010           | 125                                                            |
| 57               | Belarus | Beverages, Fermented            | 2010           | 3                                                              |
| 57               | Belarus | Bovine Meat                     | 2010           | 113                                                            |
| 57               | Belarus | Butter, Chee                    | 2010           | 80                                                             |
| 57               | Belarus | Cereals - Excluding Beer        | 2010           | 847                                                            |
| 57               | Belarus | Cereals, Other                  | 2010           | 10                                                             |
| 57               | Belarus | Cocoa Beans and products        | 2010           | 22                                                             |
| 57               | Belarus | Coconut Oil                     | 2010           | 5                                                              |
| 57               | Belarus | Coconuts - Incl Copra           | 2010           | 1                                                              |
| 57               | Belarus | Coffee and products             | 2010           | 2                                                              |
| 57               | Belarus | Cream                           | 2010           | 3                                                              |
| 57               | Belarus | Demersal Fish                   | 2010           | 5                                                              |
| 57               | Belarus | Eggs                            | 2010           | 62                                                             |
| 57               | Belarus | Fats, Animals, Raw              | 2010           | 72                                                             |
| 57               | Belarus | Fish, Seafood                   | 2010           | 32                                                             |
| 57               | Belarus | Freshwater Fish                 | 2010           | 8                                                              |
| 57               | Belarus | Fruits - Excluding Wine         | 2010           | 88                                                             |
| 57               | Belarus | Fruits, Other                   | 2010           | 40                                                             |
| 57               | Belarus | Grand Total                     | 2010           | 3,168                                                          |
| 57               | Belarus | Grapes and products (excl wine) | 2010           | 3                                                              |
| 57               | Belarus | Groundnuts (Shelled Eq)         | 2010           | 9                                                              |
| 57               | Belarus | Honey                           | 2010           | 4                                                              |
| 57               | Belarus | Maize and products              | 2010           | 4                                                              |
| 57               | Belarus | Maize Germ Oil                  | 2010           | 1                                                              |
| 57               | Belarus | Marine Fish, Other              | 2010           | 3                                                              |
| 57               | Belarus | Meat                            | 2010           | 388                                                            |
| 57               | Belarus | Meat, Other                     | 2010           | 1                                                              |
| 57               | Belarus | Milk - Excluding Butter         | 2010           | 180                                                            |
| 57               | Belarus | Miscellaneous                   | 2010           | 6                                                              |
| 57               | Belarus | Mutton & Goat Meat              | 2010           | 1                                                              |
| 57               | Belarus | Oats                            | 2010           | 52                                                             |
| 57               | Belarus | Offals                          | 2010           | 22                                                             |
| 57               | Belarus | Oilcrops                        | 2010           | 16                                                             |
| 57               | Belarus | Oilcrops Oil, Other             | 2010           | 2                                                              |
| 57               | Belarus | Olive Oil                       | 2010           | 2                                                              |
| 57               | Belarus | Olives (including preserved)    | 2010           | 1                                                              |



## Dietary calcium and zinc deficiency risks are decreasing but remain prevalent

| FAO Country code | Country | Food item                       | Reference year | Net energy supply (kcal capita <sup>-1</sup> d <sup>-1</sup> ) |
|------------------|---------|---------------------------------|----------------|----------------------------------------------------------------|
| 57               | Belarus | Onions                          | 2010           | 16                                                             |
| 57               | Belarus | Oranges, Mandarines             | 2010           | 6                                                              |
| 57               | Belarus | Pelagic Fish                    | 2010           | 16                                                             |
| 57               | Belarus | Pigmeat                         | 2010           | 191                                                            |
| 57               | Belarus | Pineapples and products         | 2010           | 1                                                              |
| 57               | Belarus | Potatoes and products           | 2010           | 340                                                            |
| 57               | Belarus | Poultry Meat                    | 2010           | 82                                                             |
| 57               | Belarus | Rape and Mustard Oil            | 2010           | 133                                                            |
| 57               | Belarus | Rice (Milled Equivalent)        | 2010           | 31                                                             |
| 57               | Belarus | Rye and products                | 2010           | 205                                                            |
| 57               | Belarus | Soyabean Oil                    | 2010           | 41                                                             |
| 57               | Belarus | Soyabeans                       | 2010           | 6                                                              |
| 57               | Belarus | Spices                          | 2010           | 1                                                              |
| 57               | Belarus | Spices, Other                   | 2010           | 1                                                              |
| 57               | Belarus | Starchy Roots                   | 2010           | 340                                                            |
| 57               | Belarus | Stimulants                      | 2010           | 25                                                             |
| 57               | Belarus | Sugar & Sweeteners              | 2010           | 305                                                            |
| 57               | Belarus | Sugar (Raw Equivalent)          | 2010           | 289                                                            |
| 57               | Belarus | Sunflowerseed Oil               | 2010           | 183                                                            |
| 57               | Belarus | Sweeteners, Other               | 2010           | 13                                                             |
| 57               | Belarus | Tea (including mate)            | 2010           | 1                                                              |
| 57               | Belarus | Tomatoes and products           | 2010           | 17                                                             |
| 57               | Belarus | Treenuts                        | 2010           | 17                                                             |
| 57               | Belarus | Vegetable Oils                  | 2010           | 366                                                            |
| 57               | Belarus | Vegetables                      | 2010           | 105                                                            |
| 57               | Belarus | Vegetables, Other               | 2010           | 71                                                             |
| 57               | Belarus | Vegetal Products                | 2010           | 2,329                                                          |
| 57               | Belarus | Wheat and products              | 2010           | 517                                                            |
| 57               | Belarus | Wine                            | 2010           | 15                                                             |
| 57               | Belarus | Alcoholic Beverages             | 2011           | 226                                                            |
| 57               | Belarus | Animal fats                     | 2011           | 164                                                            |
| 57               | Belarus | Animal Products                 | 2011           | 824                                                            |
| 57               | Belarus | Apples and products             | 2011           | 27                                                             |
| 57               | Belarus | Bananas                         | 2011           | 7                                                              |
| 57               | Belarus | Barley and products             | 2011           | 28                                                             |
| 57               | Belarus | Beer                            | 2011           | 70                                                             |
| 57               | Belarus | Beverages, Alcoholic            | 2011           | 139                                                            |
| 57               | Belarus | Beverages, Fermented            | 2011           | 3                                                              |
| 57               | Belarus | Bovine Meat                     | 2011           | 111                                                            |
| 57               | Belarus | Butter, Ghee                    | 2011           | 88                                                             |
| 57               | Belarus | Cereals - Excluding Beer        | 2011           | 914                                                            |
| 57               | Belarus | Cereals, Other                  | 2011           | 37                                                             |
| 57               | Belarus | Cocoa Beans and products        | 2011           | 16                                                             |
| 57               | Belarus | Coconut Oil                     | 2011           | 4                                                              |
| 57               | Belarus | Coconuts - Incl Copra           | 2011           | 1                                                              |
| 57               | Belarus | Coffee and products             | 2011           | 2                                                              |
| 57               | Belarus | Cream                           | 2011           | 3                                                              |
| 57               | Belarus | Demersal Fish                   | 2011           | 5                                                              |
| 57               | Belarus | Eggs                            | 2011           | 63                                                             |
| 57               | Belarus | Fats, Animals, Raw              | 2011           | 72                                                             |
| 57               | Belarus | Fish, Seafood                   | 2011           | 33                                                             |
| 57               | Belarus | Freshwater Fish                 | 2011           | 8                                                              |
| 57               | Belarus | Fruits - Excluding Wine         | 2011           | 78                                                             |
| 57               | Belarus | Fruits, Other                   | 2011           | 33                                                             |
| 57               | Belarus | Grand Total                     | 2011           | 3,253                                                          |
| 57               | Belarus | Grapes and products (excl wine) | 2011           | 3                                                              |
| 57               | Belarus | Groundnuts (Shelled Eq)         | 2011           | 7                                                              |
| 57               | Belarus | Honey                           | 2011           | 3                                                              |
| 57               | Belarus | Maize and products              | 2011           | 4                                                              |
| 57               | Belarus | Maize Germ Oil                  | 2011           | 1                                                              |
| 57               | Belarus | Marine Fish, Other              | 2011           | 3                                                              |
| 57               | Belarus | Meat                            | 2011           | 364                                                            |
| 57               | Belarus | Meat, Other                     | 2011           | 1                                                              |
| 57               | Belarus | Milk - Excluding Butter         | 2011           | 179                                                            |
| 57               | Belarus | Miscellaneous                   | 2011           | 5                                                              |
| 57               | Belarus | Mutton & Goat Meat              | 2011           | 1                                                              |
| 57               | Belarus | Oats                            | 2011           | 52                                                             |
| 57               | Belarus | Offals                          | 2011           | 22                                                             |
| 57               | Belarus | Oilcrops                        | 2011           | 18                                                             |
| 57               | Belarus | Oilcrops Oil, Other             | 2011           | 1                                                              |
| 57               | Belarus | Olive Oil                       | 2011           | 1                                                              |
| 57               | Belarus | Olives (including preserved)    | 2011           | 1                                                              |
| 57               | Belarus | Onions                          | 2011           | 15                                                             |
| 57               | Belarus | Oranges, Mandarines             | 2011           | 6                                                              |
| 57               | Belarus | Pelagic Fish                    | 2011           | 16                                                             |
| 57               | Belarus | Pigmeat                         | 2011           | 167                                                            |
| 57               | Belarus | Pineapples and products         | 2011           | 1                                                              |
| 57               | Belarus | Potatoes and products           | 2011           | 340                                                            |
| 57               | Belarus | Poultry Meat                    | 2011           | 85                                                             |
| 57               | Belarus | Rape and Mustard Oil            | 2011           | 155                                                            |
| 57               | Belarus | Rice (Milled Equivalent)        | 2011           | 29                                                             |
| 57               | Belarus | Rye and products                | 2011           | 247                                                            |
| 57               | Belarus | Soyabean Oil                    | 2011           | 40                                                             |
| 57               | Belarus | Soyabeans                       | 2011           | 9                                                              |
| 57               | Belarus | Spices                          | 2011           | 1                                                              |
| 57               | Belarus | Spices, Other                   | 2011           | 1                                                              |
| 57               | Belarus | Starchy Roots                   | 2011           | 340                                                            |
| 57               | Belarus | Stimulants                      | 2011           | 18                                                             |
| 57               | Belarus | Sugar & Sweeteners              | 2011           | 297                                                            |
| 57               | Belarus | Sugar (Raw Equivalent)          | 2011           | 280                                                            |
| 57               | Belarus | Sunflowerseed Oil               | 2011           | 213                                                            |
| 57               | Belarus | Sweeteners, Other               | 2011           | 15                                                             |
| 57               | Belarus | Tea (including mate)            | 2011           | 1                                                              |
| 57               | Belarus | Tomatoes and products           | 2011           | 8                                                              |
| 57               | Belarus | Treenuts                        | 2011           | 20                                                             |
| 57               | Belarus | Vegetable Oils                  | 2011           | 415                                                            |
| 57               | Belarus | Vegetables                      | 2011           | 96                                                             |

Dietary calcium and zinc deficiency risks are decreasing but remain prevalent

| FAO Country code | Country | Food item                       | Reference year | Net energy supply (kcal capita <sup>-1</sup> d <sup>-1</sup> ) |
|------------------|---------|---------------------------------|----------------|----------------------------------------------------------------|
| 57               | Belarus | Vegetables, Other               | 2011           | 73                                                             |
| 57               | Belarus | Vegetal Products                | 2011           | 2,429                                                          |
| 57               | Belarus | Wheat and products              | 2011           | 515                                                            |
| 57               | Belarus | Wine                            | 2011           | 15                                                             |
| 255              | Belgium | Alcoholic Beverages             | 1992           | 228                                                            |
| 255              | Belgium | Animal fats                     | 1992           | 445                                                            |
| 255              | Belgium | Animal Products                 | 1992           | 1,197                                                          |
| 255              | Belgium | Apples and products             | 1992           | 67                                                             |
| 255              | Belgium | Bananas                         | 1992           | 26                                                             |
| 255              | Belgium | Barley and products             | 1992           | 5                                                              |
| 255              | Belgium | Beans                           | 1992           | 7                                                              |
| 255              | Belgium | Beer                            | 1992           | 155                                                            |
| 255              | Belgium | Beverages, Alcoholic            | 1992           | 22                                                             |
| 255              | Belgium | Beverages, Fermented            | 1992           | 1                                                              |
| 255              | Belgium | Bovine Meat                     | 1992           | 57                                                             |
| 255              | Belgium | Butter, Ghee                    | 1992           | 142                                                            |
| 255              | Belgium | Cereals - Excluding Beer        | 1992           | 778                                                            |
| 255              | Belgium | Cereals, Other                  | 1992           | 8                                                              |
| 255              | Belgium | Cocoa Beans and products        | 1992           | 10                                                             |
| 255              | Belgium | Coconut Oil                     | 1992           | 5                                                              |
| 255              | Belgium | Coconuts - Incl Copra           | 1992           | 4                                                              |
| 255              | Belgium | Coffee and products             | 1992           | 11                                                             |
| 255              | Belgium | Cream                           | 1992           | 22                                                             |
| 255              | Belgium | Crustaceans                     | 1992           | 3                                                              |
| 255              | Belgium | Dates                           | 1992           | 2                                                              |
| 255              | Belgium | Demersal Fish                   | 1992           | 15                                                             |
| 255              | Belgium | Eggs                            | 1992           | 50                                                             |
| 255              | Belgium | Fats, Animals, Raw              | 1992           | 281                                                            |
| 255              | Belgium | Fish, Seafood                   | 1992           | 43                                                             |
| 255              | Belgium | Freshwater Fish                 | 1992           | 4                                                              |
| 255              | Belgium | Fruits - Excluding Wine         | 1992           | 178                                                            |
| 255              | Belgium | Fruits, Other                   | 1992           | 35                                                             |
| 255              | Belgium | Grand Total                     | 1992           | 3,649                                                          |
| 255              | Belgium | Grapefruit and products         | 1992           | 4                                                              |
| 255              | Belgium | Grapes and products (excl wine) | 1992           | 12                                                             |
| 255              | Belgium | Groundnut Oil                   | 1992           | 21                                                             |
| 255              | Belgium | Groundnuts (Shelled Eq)         | 1992           | 5                                                              |
| 255              | Belgium | Honey                           | 1992           | 5                                                              |
| 255              | Belgium | Lemons, Limes and products      | 1992           | 1                                                              |
| 255              | Belgium | Maize and products              | 1992           | 13                                                             |
| 255              | Belgium | Maize Germ Oil                  | 1992           | 46                                                             |
| 255              | Belgium | Marine Fish, Other              | 1992           | 5                                                              |
| 255              | Belgium | Meat                            | 1992           | 357                                                            |
| 255              | Belgium | Meat, Other                     | 1992           | 24                                                             |
| 255              | Belgium | Milk - Excluding Butter         | 1992           | 282                                                            |
| 255              | Belgium | Molluscs, Other                 | 1992           | 3                                                              |
| 255              | Belgium | Mutton & Goat Meat              | 1992           | 13                                                             |
| 255              | Belgium | Oats                            | 1992           | 2                                                              |
| 255              | Belgium | Offals                          | 1992           | 21                                                             |
| 255              | Belgium | Oilcrops                        | 1992           | 14                                                             |
| 255              | Belgium | Oilcrops Oil, Other             | 1992           | 56                                                             |
| 255              | Belgium | Olive Oil                       | 1992           | 7                                                              |
| 255              | Belgium | Olives (including preserved)    | 1992           | 1                                                              |
| 255              | Belgium | Onions                          | 1992           | 8                                                              |
| 255              | Belgium | Oranges, Mandarines             | 1992           | 28                                                             |
| 255              | Belgium | Palm Oil                        | 1992           | 78                                                             |
| 255              | Belgium | Palmkernel Oil                  | 1992           | 11                                                             |
| 255              | Belgium | Peas                            | 1992           | 11                                                             |
| 255              | Belgium | Pelagic Fish                    | 1992           | 12                                                             |
| 255              | Belgium | Pepper                          | 1992           | 1                                                              |
| 255              | Belgium | Pigmeat                         | 1992           | 201                                                            |
| 255              | Belgium | Pineapples and products         | 1992           | 2                                                              |
| 255              | Belgium | Potatoes and products           | 1992           | 202                                                            |
| 255              | Belgium | Poultry Meat                    | 1992           | 62                                                             |
| 255              | Belgium | Pulses                          | 1992           | 25                                                             |
| 255              | Belgium | Pulses, Other and products      | 1992           | 7                                                              |
| 255              | Belgium | Rape and Mustard Oil            | 1992           | 30                                                             |
| 255              | Belgium | Rape and Mustardseed            | 1992           | 4                                                              |
| 255              | Belgium | Rice (Milled Equivalent)        | 1992           | 42                                                             |
| 255              | Belgium | Rye and products                | 1992           | 10                                                             |
| 255              | Belgium | Soyabean Oil                    | 1992           | 101                                                            |
| 255              | Belgium | Spices                          | 1992           | 5                                                              |
| 255              | Belgium | Spices, Other                   | 1992           | 3                                                              |
| 255              | Belgium | Starchy Roots                   | 1992           | 202                                                            |
| 255              | Belgium | Stimulants                      | 1992           | 21                                                             |
| 255              | Belgium | Sugar & Sweeteners              | 1992           | 425                                                            |
| 255              | Belgium | Sugar (Raw Equivalent)          | 1992           | 395                                                            |
| 255              | Belgium | Sunflowerseed Oil               | 1992           | 99                                                             |
| 255              | Belgium | Sweeteners, Other               | 1992           | 24                                                             |
| 255              | Belgium | Tomatoes and products           | 1992           | 13                                                             |
| 255              | Belgium | Treenuts                        | 1992           | 32                                                             |
| 255              | Belgium | Vegetable Oils                  | 1992           | 454                                                            |
| 255              | Belgium | Vegetables                      | 1992           | 91                                                             |
| 255              | Belgium | Vegetables, Other               | 1992           | 70                                                             |
| 255              | Belgium | Vegetal Products                | 1992           | 2,453                                                          |
| 255              | Belgium | Wheat and products              | 1992           | 698                                                            |
| 255              | Belgium | Wine                            | 1992           | 51                                                             |
| 255              | Belgium | Alcoholic Beverages             | 1993           | 226                                                            |
| 255              | Belgium | Animal fats                     | 1993           | 433                                                            |
| 255              | Belgium | Animal Products                 | 1993           | 1,202                                                          |
| 255              | Belgium | Apples and products             | 1993           | 46                                                             |
| 255              | Belgium | Bananas                         | 1993           | 24                                                             |
| 255              | Belgium | Barley and products             | 1993           | 5                                                              |
| 255              | Belgium | Beans                           | 1993           | 6                                                              |
| 255              | Belgium | Beer                            | 1993           | 154                                                            |
| 255              | Belgium | Beverages, Alcoholic            | 1993           | 24                                                             |
| 255              | Belgium | Bovine Meat                     | 1993           | 61                                                             |

## Dietary calcium and zinc deficiency risks are decreasing but remain prevalent

| FAO Country code | Country | Food item                       | Reference year | Net energy supply (kcal capita <sup>-1</sup> d <sup>-1</sup> ) |
|------------------|---------|---------------------------------|----------------|----------------------------------------------------------------|
| 255              | Belgium | Butter, Ghee                    | 1993           | 139                                                            |
| 255              | Belgium | Cereals - Excluding Beer        | 1993           | 769                                                            |
| 255              | Belgium | Cereals, Other                  | 1993           | 8                                                              |
| 255              | Belgium | Cocoa Beans and products        | 1993           | 11                                                             |
| 255              | Belgium | Coconut Oil                     | 1993           | 62                                                             |
| 255              | Belgium | Coconuts - Incl Copra           | 1993           | 6                                                              |
| 255              | Belgium | Coffee and products             | 1993           | 5                                                              |
| 255              | Belgium | Cream                           | 1993           | 21                                                             |
| 255              | Belgium | Crustaceans                     | 1993           | 3                                                              |
| 255              | Belgium | Dates                           | 1993           | 1                                                              |
| 255              | Belgium | Demersal Fish                   | 1993           | 17                                                             |
| 255              | Belgium | Eggs                            | 1993           | 51                                                             |
| 255              | Belgium | Fats, Animals, Raw              | 1993           | 272                                                            |
| 255              | Belgium | Fish, Liver Oil                 | 1993           | 1                                                              |
| 255              | Belgium | Fish, Seafood                   | 1993           | 40                                                             |
| 255              | Belgium | Freshwater Fish                 | 1993           | 4                                                              |
| 255              | Belgium | Fruits - Excluding Wine         | 1993           | 128                                                            |
| 255              | Belgium | Fruits, Other                   | 1993           | 23                                                             |
| 255              | Belgium | Grand Total                     | 1993           | 3,598                                                          |
| 255              | Belgium | Grapefruit and products         | 1993           | 1                                                              |
| 255              | Belgium | Grapes and products (excl wine) | 1993           | 11                                                             |
| 255              | Belgium | Groundnut Oil                   | 1993           | 18                                                             |
| 255              | Belgium | Groundnuts (Shelled Eq)         | 1993           | 4                                                              |
| 255              | Belgium | Honey                           | 1993           | 3                                                              |
| 255              | Belgium | Lemons, Limes and products      | 1993           | 1                                                              |
| 255              | Belgium | Maize and products              | 1993           | 14                                                             |
| 255              | Belgium | Maize Germ Oil                  | 1993           | 30                                                             |
| 255              | Belgium | Marine Fish, Other              | 1993           | 4                                                              |
| 255              | Belgium | Meat                            | 1993           | 366                                                            |
| 255              | Belgium | Meat, Other                     | 1993           | 22                                                             |
| 255              | Belgium | Milk - Excluding Butter         | 1993           | 294                                                            |
| 255              | Belgium | Molluscs, Other                 | 1993           | 3                                                              |
| 255              | Belgium | Mutton & Goat Meat              | 1993           | 13                                                             |
| 255              | Belgium | Oats                            | 1993           | 4                                                              |
| 255              | Belgium | Offals                          | 1993           | 18                                                             |
| 255              | Belgium | Oilcrops                        | 1993           | 16                                                             |
| 255              | Belgium | Oilcrops Oil, Other             | 1993           | 44                                                             |
| 255              | Belgium | Olive Oil                       | 1993           | 9                                                              |
| 255              | Belgium | Olives (including preserved)    | 1993           | 1                                                              |
| 255              | Belgium | Onions                          | 1993           | 9                                                              |
| 255              | Belgium | Oranges, Mandarines             | 1993           | 19                                                             |
| 255              | Belgium | Palm Oil                        | 1993           | 60                                                             |
| 255              | Belgium | Palmkernel Oil                  | 1993           | 16                                                             |
| 255              | Belgium | Peas                            | 1993           | 8                                                              |
| 255              | Belgium | Pelagic Fish                    | 1993           | 9                                                              |
| 255              | Belgium | Pepper                          | 1993           | 1                                                              |
| 255              | Belgium | Pigmeat                         | 1993           | 206                                                            |
| 255              | Belgium | Pimento                         | 1993           | 1                                                              |
| 255              | Belgium | Pineapples and products         | 1993           | 2                                                              |
| 255              | Belgium | Potatoes and products           | 1993           | 201                                                            |
| 255              | Belgium | Poultry Meat                    | 1993           | 63                                                             |
| 255              | Belgium | Pulses                          | 1993           | 26                                                             |
| 255              | Belgium | Pulses, Other and products      | 1993           | 11                                                             |
| 255              | Belgium | Rape and Mustard Oil            | 1993           | 66                                                             |
| 255              | Belgium | Rape and Mustardseed            | 1993           | 5                                                              |
| 255              | Belgium | Rice (Milled Equivalent)        | 1993           | 41                                                             |
| 255              | Belgium | Rye and products                | 1993           | 9                                                              |
| 255              | Belgium | Soyabean Oil                    | 1993           | 105                                                            |
| 255              | Belgium | Spices                          | 1993           | 5                                                              |
| 255              | Belgium | Spices, Other                   | 1993           | 3                                                              |
| 255              | Belgium | Starchy Roots                   | 1993           | 201                                                            |
| 255              | Belgium | Stimulants                      | 1993           | 16                                                             |
| 255              | Belgium | Sugar & Sweeteners              | 1993           | 422                                                            |
| 255              | Belgium | Sugar (Raw Equivalent)          | 1993           | 396                                                            |
| 255              | Belgium | Sunflowerseed Oil               | 1993           | 51                                                             |
| 255              | Belgium | Sweeteners, Other               | 1993           | 23                                                             |
| 255              | Belgium | Tomatoes and products           | 1993           | 14                                                             |
| 255              | Belgium | Treenuts                        | 1993           | 32                                                             |
| 255              | Belgium | Vegetable Oils                  | 1993           | 461                                                            |
| 255              | Belgium | Vegetables                      | 1993           | 95                                                             |
| 255              | Belgium | Vegetables, Other               | 1993           | 73                                                             |
| 255              | Belgium | Vegetal Products                | 1993           | 2,397                                                          |
| 255              | Belgium | Wheat and products              | 1993           | 690                                                            |
| 255              | Belgium | Wine                            | 1993           | 49                                                             |
| 255              | Belgium | Alcoholic Beverages             | 1994           | 215                                                            |
| 255              | Belgium | Animal fats                     | 1994           | 413                                                            |
| 255              | Belgium | Animal Products                 | 1994           | 1,149                                                          |
| 255              | Belgium | Apples and products             | 1994           | 47                                                             |
| 255              | Belgium | Bananas                         | 1994           | 19                                                             |
| 255              | Belgium | Barley and products             | 1994           | 4                                                              |
| 255              | Belgium | Beans                           | 1994           | 6                                                              |
| 255              | Belgium | Beer                            | 1994           | 147                                                            |
| 255              | Belgium | Beverages, Alcoholic            | 1994           | 22                                                             |
| 255              | Belgium | Bovine Meat                     | 1994           | 62                                                             |
| 255              | Belgium | Butter, Ghee                    | 1994           | 132                                                            |
| 255              | Belgium | Cereals - Excluding Beer        | 1994           | 756                                                            |
| 255              | Belgium | Cereals, Other                  | 1994           | 2                                                              |
| 255              | Belgium | Cocoa Beans and products        | 1994           | 12                                                             |
| 255              | Belgium | Coconut Oil                     | 1994           | 72                                                             |
| 255              | Belgium | Coconuts - Incl Copra           | 1994           | 5                                                              |
| 255              | Belgium | Coffee and products             | 1994           | 4                                                              |
| 255              | Belgium | Cream                           | 1994           | 20                                                             |
| 255              | Belgium | Crustaceans                     | 1994           | 3                                                              |
| 255              | Belgium | Dates                           | 1994           | 2                                                              |
| 255              | Belgium | Demersal Fish                   | 1994           | 17                                                             |
| 255              | Belgium | Eggs                            | 1994           | 56                                                             |
| 255              | Belgium | Fats, Animals, Raw              | 1994           | 262                                                            |

## Dietary calcium and zinc deficiency risks are decreasing but remain prevalent

| FAO Country code | Country | Food item                       | Reference year | Net energy supply (kcal capita <sup>-1</sup> d <sup>-1</sup> ) |
|------------------|---------|---------------------------------|----------------|----------------------------------------------------------------|
| 255              | Belgium | Fish, Seafood                   | 1994           | 42                                                             |
| 255              | Belgium | Freshwater Fish                 | 1994           | 5                                                              |
| 255              | Belgium | Fruits - Excluding Wine         | 1994           | 135                                                            |
| 255              | Belgium | Fruits, Other                   | 1994           | 28                                                             |
| 255              | Belgium | Grand Total                     | 1994           | 3,571                                                          |
| 255              | Belgium | Grapefruit and products         | 1994           | 2                                                              |
| 255              | Belgium | Grapes and products (excl wine) | 1994           | 12                                                             |
| 255              | Belgium | Groundnut Oil                   | 1994           | 24                                                             |
| 255              | Belgium | Groundnuts (Shelled Eq)         | 1994           | 6                                                              |
| 255              | Belgium | Honey                           | 1994           | 3                                                              |
| 255              | Belgium | Lemons, Limes and products      | 1994           | 1                                                              |
| 255              | Belgium | Maize and products              | 1994           | 11                                                             |
| 255              | Belgium | Maize Germ Oil                  | 1994           | 41                                                             |
| 255              | Belgium | Marine Fish, Other              | 1994           | 4                                                              |
| 255              | Belgium | Meat                            | 1994           | 332                                                            |
| 255              | Belgium | Meat, Other                     | 1994           | 22                                                             |
| 255              | Belgium | Milk - Excluding Butter         | 1994           | 287                                                            |
| 255              | Belgium | Molluscs, Other                 | 1994           | 2                                                              |
| 255              | Belgium | Mutton & Goat Meat              | 1994           | 14                                                             |
| 255              | Belgium | Oats                            | 1994           | 2                                                              |
| 255              | Belgium | Offals                          | 1994           | 18                                                             |
| 255              | Belgium | Oilcrops                        | 1994           | 18                                                             |
| 255              | Belgium | Oilcrops Oil, Other             | 1994           | 80                                                             |
| 255              | Belgium | Olive Oil                       | 1994           | 10                                                             |
| 255              | Belgium | Olives (including preserved)    | 1994           | 1                                                              |
| 255              | Belgium | Onions                          | 1994           | 11                                                             |
| 255              | Belgium | Oranges, Mandarines             | 1994           | 24                                                             |
| 255              | Belgium | Palm Oil                        | 1994           | 18                                                             |
| 255              | Belgium | Palmkernel Oil                  | 1994           | 40                                                             |
| 255              | Belgium | Peas                            | 1994           | 11                                                             |
| 255              | Belgium | Pelagic Fish                    | 1994           | 10                                                             |
| 255              | Belgium | Pepper                          | 1994           | 1                                                              |
| 255              | Belgium | Pigmeat                         | 1994           | 162                                                            |
| 255              | Belgium | Pineapples and products         | 1994           | 1                                                              |
| 255              | Belgium | Potatoes and products           | 1994           | 195                                                            |
| 255              | Belgium | Poultry Meat                    | 1994           | 71                                                             |
| 255              | Belgium | Pulses                          | 1994           | 24                                                             |
| 255              | Belgium | Pulses, Other and products      | 1994           | 7                                                              |
| 255              | Belgium | Rape and Mustard Oil            | 1994           | 58                                                             |
| 255              | Belgium | Rape and Mustardseed            | 1994           | 6                                                              |
| 255              | Belgium | Rice (Milled Equivalent)        | 1994           | 39                                                             |
| 255              | Belgium | Rye and products                | 1994           | 11                                                             |
| 255              | Belgium | Sesameseed Oil                  | 1994           | 1                                                              |
| 255              | Belgium | Soyabean Oil                    | 1994           | 93                                                             |
| 255              | Belgium | Spices                          | 1994           | 5                                                              |
| 255              | Belgium | Spices, Other                   | 1994           | 3                                                              |
| 255              | Belgium | Starchy Roots                   | 1994           | 195                                                            |
| 255              | Belgium | Stimulants                      | 1994           | 16                                                             |
| 255              | Belgium | Sugar & Sweeteners              | 1994           | 435                                                            |
| 255              | Belgium | Sugar (Raw Equivalent)          | 1994           | 414                                                            |
| 255              | Belgium | Sunflowerseed Oil               | 1994           | 54                                                             |
| 255              | Belgium | Sweeteners, Other               | 1994           | 18                                                             |
| 255              | Belgium | Tomatoes and products           | 1994           | 8                                                              |
| 255              | Belgium | Treenuts                        | 1994           | 38                                                             |
| 255              | Belgium | Vegetable Oils                  | 1994           | 490                                                            |
| 255              | Belgium | Vegetables                      | 1994           | 95                                                             |
| 255              | Belgium | Vegetables, Other               | 1994           | 75                                                             |
| 255              | Belgium | Vegetal Products                | 1994           | 2,422                                                          |
| 255              | Belgium | Wheat and products              | 1994           | 688                                                            |
| 255              | Belgium | Wine                            | 1994           | 46                                                             |
| 255              | Belgium | Alcoholic Beverages             | 1995           | 213                                                            |
| 255              | Belgium | Animal fats                     | 1995           | 413                                                            |
| 255              | Belgium | Animal Products                 | 1995           | 1,142                                                          |
| 255              | Belgium | Apples and products             | 1995           | 44                                                             |
| 255              | Belgium | Bananas                         | 1995           | 12                                                             |
| 255              | Belgium | Barley and products             | 1995           | 5                                                              |
| 255              | Belgium | Beans                           | 1995           | 5                                                              |
| 255              | Belgium | Beer                            | 1995           | 146                                                            |
| 255              | Belgium | Beverages, Alcoholic            | 1995           | 22                                                             |
| 255              | Belgium | Bovine Meat                     | 1995           | 62                                                             |
| 255              | Belgium | Butter, Ghee                    | 1995           | 123                                                            |
| 255              | Belgium | Cereals - Excluding Beer        | 1995           | 753                                                            |
| 255              | Belgium | Cereals, Other                  | 1995           | 1                                                              |
| 255              | Belgium | Cocoa Beans and products        | 1995           | 4                                                              |
| 255              | Belgium | Coconut Oil                     | 1995           | 98                                                             |
| 255              | Belgium | Coconuts - Incl Copra           | 1995           | 4                                                              |
| 255              | Belgium | Coffee and products             | 1995           | 3                                                              |
| 255              | Belgium | Cream                           | 1995           | 35                                                             |
| 255              | Belgium | Crustaceans                     | 1995           | 4                                                              |
| 255              | Belgium | Dates                           | 1995           | 1                                                              |
| 255              | Belgium | Demersal Fish                   | 1995           | 16                                                             |
| 255              | Belgium | Eggs                            | 1995           | 54                                                             |
| 255              | Belgium | Fats, Animals, Raw              | 1995           | 255                                                            |
| 255              | Belgium | Fish, Seafood                   | 1995           | 45                                                             |
| 255              | Belgium | Freshwater Fish                 | 1995           | 5                                                              |
| 255              | Belgium | Fruits - Excluding Wine         | 1995           | 119                                                            |
| 255              | Belgium | Fruits, Other                   | 1995           | 23                                                             |
| 255              | Belgium | Grand Total                     | 1995           | 3,554                                                          |
| 255              | Belgium | Grapefruit and products         | 1995           | 1                                                              |
| 255              | Belgium | Grapes and products (excl wine) | 1995           | 10                                                             |
| 255              | Belgium | Groundnut Oil                   | 1995           | 19                                                             |
| 255              | Belgium | Groundnuts (Shelled Eq)         | 1995           | 4                                                              |
| 255              | Belgium | Honey                           | 1995           | 4                                                              |
| 255              | Belgium | Lemons, Limes and products      | 1995           | 1                                                              |
| 255              | Belgium | Maize and products              | 1995           | 14                                                             |
| 255              | Belgium | Maize Germ Oil                  | 1995           | 24                                                             |
| 255              | Belgium | Marine Fish, Other              | 1995           | 4                                                              |

## Dietary calcium and zinc deficiency risks are decreasing but remain prevalent

| FAO Country code | Country | Food item                       | Reference year | Net energy supply (kcal capita <sup>-1</sup> d <sup>-1</sup> ) |
|------------------|---------|---------------------------------|----------------|----------------------------------------------------------------|
| 255              | Belgium | Meat                            | 1995           | 328                                                            |
| 255              | Belgium | Meat, Other                     | 1995           | 22                                                             |
| 255              | Belgium | Milk - Excluding Butter         | 1995           | 286                                                            |
| 255              | Belgium | Molluscs, Other                 | 1995           | 3                                                              |
| 255              | Belgium | Mutton & Goat Meat              | 1995           | 13                                                             |
| 255              | Belgium | Oats                            | 1995           | 1                                                              |
| 255              | Belgium | Offals                          | 1995           | 17                                                             |
| 255              | Belgium | Oilcrops                        | 1995           | 15                                                             |
| 255              | Belgium | Oilcrops Oil, Other             | 1995           | 48                                                             |
| 255              | Belgium | Olive Oil                       | 1995           | 13                                                             |
| 255              | Belgium | Olives (including preserved)    | 1995           | 1                                                              |
| 255              | Belgium | Onions                          | 1995           | 7                                                              |
| 255              | Belgium | Oranges, Mandarines             | 1995           | 25                                                             |
| 255              | Belgium | Palm Oil                        | 1995           | 54                                                             |
| 255              | Belgium | Palmkernel Oil                  | 1995           | 14                                                             |
| 255              | Belgium | Peas                            | 1995           | 12                                                             |
| 255              | Belgium | Pelagic Fish                    | 1995           | 12                                                             |
| 255              | Belgium | Pepper                          | 1995           | 1                                                              |
| 255              | Belgium | Pigmeat                         | 1995           | 153                                                            |
| 255              | Belgium | Pineapples and products         | 1995           | 1                                                              |
| 255              | Belgium | Potatoes and products           | 1995           | 192                                                            |
| 255              | Belgium | Poultry Meat                    | 1995           | 78                                                             |
| 255              | Belgium | Pulses                          | 1995           | 24                                                             |
| 255              | Belgium | Pulses, Other and products      | 1995           | 7                                                              |
| 255              | Belgium | Rape and Mustard Oil            | 1995           | 63                                                             |
| 255              | Belgium | Rape and Mustardseed            | 1995           | 6                                                              |
| 255              | Belgium | Rice (Milled Equivalent)        | 1995           | 38                                                             |
| 255              | Belgium | Rye and products                | 1995           | 9                                                              |
| 255              | Belgium | Soyabean Oil                    | 1995           | 117                                                            |
| 255              | Belgium | Spices                          | 1995           | 5                                                              |
| 255              | Belgium | Spices, Other                   | 1995           | 4                                                              |
| 255              | Belgium | Starchy Roots                   | 1995           | 192                                                            |
| 255              | Belgium | Stimulants                      | 1995           | 8                                                              |
| 255              | Belgium | Sugar & Sweeteners              | 1995           | 436                                                            |
| 255              | Belgium | Sugar (Raw Equivalent)          | 1995           | 414                                                            |
| 255              | Belgium | Sunflowerseed Oil               | 1995           | 62                                                             |
| 255              | Belgium | Sweeteners, Other               | 1995           | 18                                                             |
| 255              | Belgium | Tomatoes and products           | 1995           | 15                                                             |
| 255              | Belgium | Treenuts                        | 1995           | 33                                                             |
| 255              | Belgium | Vegetable Oils                  | 1995           | 511                                                            |
| 255              | Belgium | Vegetables                      | 1995           | 102                                                            |
| 255              | Belgium | Vegetables, Other               | 1995           | 80                                                             |
| 255              | Belgium | Vegetal Products                | 1995           | 2,412                                                          |
| 255              | Belgium | Wheat and products              | 1995           | 684                                                            |
| 255              | Belgium | Wine                            | 1995           | 44                                                             |
| 255              | Belgium | Alcoholic Beverages             | 1996           | 209                                                            |
| 255              | Belgium | Animal fats                     | 1996           | 413                                                            |
| 255              | Belgium | Animal Products                 | 1996           | 1,130                                                          |
| 255              | Belgium | Apples and products             | 1996           | 32                                                             |
| 255              | Belgium | Bananas                         | 1996           | 34                                                             |
| 255              | Belgium | Barley and products             | 1996           | 3                                                              |
| 255              | Belgium | Beans                           | 1996           | 7                                                              |
| 255              | Belgium | Beer                            | 1996           | 144                                                            |
| 255              | Belgium | Beverages, Alcoholic            | 1996           | 20                                                             |
| 255              | Belgium | Bovine Meat                     | 1996           | 66                                                             |
| 255              | Belgium | Butter, Ghee                    | 1996           | 120                                                            |
| 255              | Belgium | Cereals - Excluding Beer        | 1996           | 732                                                            |
| 255              | Belgium | Cereals, Other                  | 1996           | 1                                                              |
| 255              | Belgium | Cocoa Beans and products        | 1996           | 2                                                              |
| 255              | Belgium | Coconut Oil                     | 1996           | 55                                                             |
| 255              | Belgium | Coconuts - Incl Copra           | 1996           | 6                                                              |
| 255              | Belgium | Coffee and products             | 1996           | 8                                                              |
| 255              | Belgium | Cottonseed Oil                  | 1996           | 7                                                              |
| 255              | Belgium | Cream                           | 1996           | 37                                                             |
| 255              | Belgium | Crustaceans                     | 1996           | 3                                                              |
| 255              | Belgium | Dates                           | 1996           | 1                                                              |
| 255              | Belgium | Demersal Fish                   | 1996           | 15                                                             |
| 255              | Belgium | Eggs                            | 1996           | 50                                                             |
| 255              | Belgium | Fats, Animals, Raw              | 1996           | 256                                                            |
| 255              | Belgium | Fish, Seafood                   | 1996           | 39                                                             |
| 255              | Belgium | Freshwater Fish                 | 1996           | 5                                                              |
| 255              | Belgium | Fruits - Excluding Wine         | 1996           | 134                                                            |
| 255              | Belgium | Fruits, Other                   | 1996           | 23                                                             |
| 255              | Belgium | Grand Total                     | 1996           | 3,591                                                          |
| 255              | Belgium | Grapefruit and products         | 1996           | 2                                                              |
| 255              | Belgium | Grapes and products (excl wine) | 1996           | 10                                                             |
| 255              | Belgium | Groundnut Oil                   | 1996           | 12                                                             |
| 255              | Belgium | Groundnuts (Shelled Eq)         | 1996           | 3                                                              |
| 255              | Belgium | Honey                           | 1996           | 5                                                              |
| 255              | Belgium | Lemons, Limes and products      | 1996           | 1                                                              |
| 255              | Belgium | Maize and products              | 1996           | 19                                                             |
| 255              | Belgium | Maize Germ Oil                  | 1996           | 16                                                             |
| 255              | Belgium | Marine Fish, Other              | 1996           | 4                                                              |
| 255              | Belgium | Meat                            | 1996           | 323                                                            |
| 255              | Belgium | Meat, Other                     | 1996           | 18                                                             |
| 255              | Belgium | Milk - Excluding Butter         | 1996           | 289                                                            |
| 255              | Belgium | Molluscs, Other                 | 1996           | 3                                                              |
| 255              | Belgium | Mutton & Goat Meat              | 1996           | 13                                                             |
| 255              | Belgium | Oats                            | 1996           | 1                                                              |
| 255              | Belgium | Offals                          | 1996           | 15                                                             |
| 255              | Belgium | Oilcrops                        | 1996           | 15                                                             |
| 255              | Belgium | Oilcrops Oil, Other             | 1996           | 63                                                             |
| 255              | Belgium | Olive Oil                       | 1996           | 15                                                             |
| 255              | Belgium | Olives (including preserved)    | 1996           | 1                                                              |
| 255              | Belgium | Onions                          | 1996           | 9                                                              |
| 255              | Belgium | Oranges, Mandarines             | 1996           | 27                                                             |
| 255              | Belgium | Palm Oil                        | 1996           | 24                                                             |

## Dietary calcium and zinc deficiency risks are decreasing but remain prevalent

| FAO Country code | Country | Food item                       | Reference year | Net energy supply (kcal <i>capita</i> <sup>-1</sup> d <sup>-1</sup> ) |
|------------------|---------|---------------------------------|----------------|-----------------------------------------------------------------------|
| 255              | Belgium | Palmkernel Oil                  | 1996           | 21                                                                    |
| 255              | Belgium | Peas                            | 1996           | 12                                                                    |
| 255              | Belgium | Pelagic Fish                    | 1996           | 10                                                                    |
| 255              | Belgium | Pepper                          | 1996           | 1                                                                     |
| 255              | Belgium | Pigmeat                         | 1996           | 149                                                                   |
| 255              | Belgium | Pineapples and products         | 1996           | 2                                                                     |
| 255              | Belgium | Plantains                       | 1996           | 1                                                                     |
| 255              | Belgium | Potatoes and products           | 1996           | 192                                                                   |
| 255              | Belgium | Poultry Meat                    | 1996           | 76                                                                    |
| 255              | Belgium | Pulses                          | 1996           | 23                                                                    |
| 255              | Belgium | Pulses, Other and products      | 1996           | 3                                                                     |
| 255              | Belgium | Rape and Mustard Oil            | 1996           | 97                                                                    |
| 255              | Belgium | Rape and Mustardseed            | 1996           | 5                                                                     |
| 255              | Belgium | Rice (Milled Equivalent)        | 1996           | 38                                                                    |
| 255              | Belgium | Rye and products                | 1996           | 8                                                                     |
| 255              | Belgium | Soyabean Oil                    | 1996           | 120                                                                   |
| 255              | Belgium | Spices                          | 1996           | 6                                                                     |
| 255              | Belgium | Spices, Other                   | 1996           | 4                                                                     |
| 255              | Belgium | Starchy Roots                   | 1996           | 192                                                                   |
| 255              | Belgium | Stimulants                      | 1996           | 11                                                                    |
| 255              | Belgium | Sugar & Sweeteners              | 1996           | 463                                                                   |
| 255              | Belgium | Sugar (Raw Equivalent)          | 1996           | 441                                                                   |
| 255              | Belgium | Sunflowerseed Oil               | 1996           | 100                                                                   |
| 255              | Belgium | Sweeteners, Other               | 1996           | 16                                                                    |
| 255              | Belgium | Tomatoes and products           | 1996           | 13                                                                    |
| 255              | Belgium | Treenuts                        | 1996           | 34                                                                    |
| 255              | Belgium | Vegetable Oils                  | 1996           | 530                                                                   |
| 255              | Belgium | Vegetables                      | 1996           | 112                                                                   |
| 255              | Belgium | Vegetables, Other               | 1996           | 90                                                                    |
| 255              | Belgium | Vegetal Products                | 1996           | 2,461                                                                 |
| 255              | Belgium | Wheat and products              | 1996           | 661                                                                   |
| 255              | Belgium | Wine                            | 1996           | 45                                                                    |
| 255              | Belgium | Alcoholic Beverages             | 1997           | 228                                                                   |
| 255              | Belgium | Animal fats                     | 1997           | 436                                                                   |
| 255              | Belgium | Animal Products                 | 1997           | 1,147                                                                 |
| 255              | Belgium | Apples and products             | 1997           | 36                                                                    |
| 255              | Belgium | Bananas                         | 1997           | 34                                                                    |
| 255              | Belgium | Barley and products             | 1997           | 5                                                                     |
| 255              | Belgium | Beans                           | 1997           | 7                                                                     |
| 255              | Belgium | Beer                            | 1997           | 163                                                                   |
| 255              | Belgium | Beverages, Alcoholic            | 1997           | 21                                                                    |
| 255              | Belgium | Bovine Meat                     | 1997           | 61                                                                    |
| 255              | Belgium | Butter, Ghee                    | 1997           | 126                                                                   |
| 255              | Belgium | Cereals - Excluding Beer        | 1997           | 766                                                                   |
| 255              | Belgium | Cereals, Other                  | 1997           | 5                                                                     |
| 255              | Belgium | Cocoa Beans and products        | 1997           | 1                                                                     |
| 255              | Belgium | Coconut Oil                     | 1997           | 36                                                                    |
| 255              | Belgium | Coconuts - Incl Copra           | 1997           | 14                                                                    |
| 255              | Belgium | Coffee and products             | 1997           | 6                                                                     |
| 255              | Belgium | Cottonseed Oil                  | 1997           | 35                                                                    |
| 255              | Belgium | Cream                           | 1997           | 36                                                                    |
| 255              | Belgium | Crustaceans                     | 1997           | 3                                                                     |
| 255              | Belgium | Dates                           | 1997           | 1                                                                     |
| 255              | Belgium | Demersal Fish                   | 1997           | 14                                                                    |
| 255              | Belgium | Eggs                            | 1997           | 55                                                                    |
| 255              | Belgium | Fats, Animals, Raw              | 1997           | 274                                                                   |
| 255              | Belgium | Fish, Seafood                   | 1997           | 40                                                                    |
| 255              | Belgium | Freshwater Fish                 | 1997           | 6                                                                     |
| 255              | Belgium | Fruits - Excluding Wine         | 1997           | 130                                                                   |
| 255              | Belgium | Fruits, Other                   | 1997           | 24                                                                    |
| 255              | Belgium | Grand Total                     | 1997           | 3,665                                                                 |
| 255              | Belgium | Grapefruit and products         | 1997           | 2                                                                     |
| 255              | Belgium | Grapes and products (excl wine) | 1997           | 9                                                                     |
| 255              | Belgium | Groundnut Oil                   | 1997           | 13                                                                    |
| 255              | Belgium | Groundnuts (Shelled Eq)         | 1997           | 5                                                                     |
| 255              | Belgium | Honey                           | 1997           | 5                                                                     |
| 255              | Belgium | Lemons, Limes and products      | 1997           | 1                                                                     |
| 255              | Belgium | Maize and products              | 1997           | 14                                                                    |
| 255              | Belgium | Maize Germ Oil                  | 1997           | 28                                                                    |
| 255              | Belgium | Marine Fish, Other              | 1997           | 5                                                                     |
| 255              | Belgium | Meat                            | 1997           | 293                                                                   |
| 255              | Belgium | Meat, Other                     | 1997           | 19                                                                    |
| 255              | Belgium | Milk - Excluding Butter         | 1997           | 308                                                                   |
| 255              | Belgium | Molluscs, Other                 | 1997           | 2                                                                     |
| 255              | Belgium | Mutton & Goat Meat              | 1997           | 12                                                                    |
| 255              | Belgium | Oats                            | 1997           | 1                                                                     |
| 255              | Belgium | Offals                          | 1997           | 15                                                                    |
| 255              | Belgium | Oilcrops                        | 1997           | 27                                                                    |
| 255              | Belgium | Oilcrops Oil, Other             | 1997           | 46                                                                    |
| 255              | Belgium | Olive Oil                       | 1997           | 16                                                                    |
| 255              | Belgium | Olives (including preserved)    | 1997           | 1                                                                     |
| 255              | Belgium | Onions                          | 1997           | 8                                                                     |
| 255              | Belgium | Oranges, Mandarines             | 1997           | 19                                                                    |
| 255              | Belgium | Palm Oil                        | 1997           | 68                                                                    |
| 255              | Belgium | Palmkernel Oil                  | 1997           | 11                                                                    |
| 255              | Belgium | Peas                            | 1997           | 12                                                                    |
| 255              | Belgium | Pelagic Fish                    | 1997           | 10                                                                    |
| 255              | Belgium | Pepper                          | 1997           | 1                                                                     |
| 255              | Belgium | Pigmeat                         | 1997           | 133                                                                   |
| 255              | Belgium | Pimento                         | 1997           | 1                                                                     |
| 255              | Belgium | Pineapples and products         | 1997           | 3                                                                     |
| 255              | Belgium | Potatoes and products           | 1997           | 192                                                                   |
| 255              | Belgium | Poultry Meat                    | 1997           | 67                                                                    |
| 255              | Belgium | Pulses                          | 1997           | 22                                                                    |
| 255              | Belgium | Pulses, Other and products      | 1997           | 2                                                                     |
| 255              | Belgium | Rape and Mustard Oil            | 1997           | 100                                                                   |
| 255              | Belgium | Rape and Mustardseed            | 1997           | 6                                                                     |

Dietary calcium and zinc deficiency risks are decreasing but remain prevalent

| FAO Country code | Country | Food item                       | Reference year | Net energy supply (kcal capita <sup>-1</sup> d <sup>-1</sup> ) |
|------------------|---------|---------------------------------|----------------|----------------------------------------------------------------|
| 255              | Belgium | Rice (Milled Equivalent)        | 1997           | 67                                                             |
| 255              | Belgium | Rye and products                | 1997           | 11                                                             |
| 255              | Belgium | Soyabean Oil                    | 1997           | 110                                                            |
| 255              | Belgium | Spices                          | 1997           | 5                                                              |
| 255              | Belgium | Spices, Other                   | 1997           | 3                                                              |
| 255              | Belgium | Starchy Roots                   | 1997           | 192                                                            |
| 255              | Belgium | Stimulants                      | 1997           | 7                                                              |
| 255              | Belgium | Sugar & Sweeteners              | 1997           | 465                                                            |
| 255              | Belgium | Sugar (Raw Equivalent)          | 1997           | 445                                                            |
| 255              | Belgium | Sunflowerseed Oil               | 1997           | 55                                                             |
| 255              | Belgium | Sweeteners, Other               | 1997           | 14                                                             |
| 255              | Belgium | Tomatoes and products           | 1997           | 15                                                             |
| 255              | Belgium | Treenuts                        | 1997           | 37                                                             |
| 255              | Belgium | Vegetable Oils                  | 1997           | 519                                                            |
| 255              | Belgium | Vegetables                      | 1997           | 121                                                            |
| 255              | Belgium | Vegetables, Other               | 1997           | 97                                                             |
| 255              | Belgium | Vegetal Products                | 1997           | 2,518                                                          |
| 255              | Belgium | Wheat and products              | 1997           | 664                                                            |
| 255              | Belgium | Wine                            | 1997           | 44                                                             |
| 255              | Belgium | Alcoholic Beverages             | 1998           | 219                                                            |
| 255              | Belgium | Animal fats                     | 1998           | 423                                                            |
| 255              | Belgium | Animal Products                 | 1998           | 1,148                                                          |
| 255              | Belgium | Apples and products             | 1998           | 38                                                             |
| 255              | Belgium | Bananas                         | 1998           | 10                                                             |
| 255              | Belgium | Barley and products             | 1998           | 5                                                              |
| 255              | Belgium | Beans                           | 1998           | 6                                                              |
| 255              | Belgium | Beer                            | 1998           | 141                                                            |
| 255              | Belgium | Beverages, Alcoholic            | 1998           | 28                                                             |
| 255              | Belgium | Bovine Meat                     | 1998           | 56                                                             |
| 255              | Belgium | Butter, Ghee                    | 1998           | 114                                                            |
| 255              | Belgium | Cereals - Excluding Beer        | 1998           | 759                                                            |
| 255              | Belgium | Cereals, Other                  | 1998           | 1                                                              |
| 255              | Belgium | Cocoa Beans and products        | 1998           | 1                                                              |
| 255              | Belgium | Coconut Oil                     | 1998           | 27                                                             |
| 255              | Belgium | Coconuts - Incl Copra           | 1998           | 7                                                              |
| 255              | Belgium | Coffee and products             | 1998           | 10                                                             |
| 255              | Belgium | Cottonseed Oil                  | 1998           | 32                                                             |
| 255              | Belgium | Cream                           | 1998           | 41                                                             |
| 255              | Belgium | Crustaceans                     | 1998           | 3                                                              |
| 255              | Belgium | Dates                           | 1998           | 2                                                              |
| 255              | Belgium | Demersal Fish                   | 1998           | 15                                                             |
| 255              | Belgium | Eggs                            | 1998           | 58                                                             |
| 255              | Belgium | Fats, Animals, Raw              | 1998           | 268                                                            |
| 255              | Belgium | Fish, Seafood                   | 1998           | 42                                                             |
| 255              | Belgium | Freshwater Fish                 | 1998           | 6                                                              |
| 255              | Belgium | Fruits - Excluding Wine         | 1998           | 112                                                            |
| 255              | Belgium | Fruits, Other                   | 1998           | 24                                                             |
| 255              | Belgium | Grand Total                     | 1998           | 3,654                                                          |
| 255              | Belgium | Grapefruit and products         | 1998           | 1                                                              |
| 255              | Belgium | Grapes and products (excl wine) | 1998           | 11                                                             |
| 255              | Belgium | Groundnut Oil                   | 1998           | 12                                                             |
| 255              | Belgium | Groundnuts (Shelled Eq)         | 1998           | 4                                                              |
| 255              | Belgium | Honey                           | 1998           | 6                                                              |
| 255              | Belgium | Lemons, Limes and products      | 1998           | 1                                                              |
| 255              | Belgium | Maize and products              | 1998           | 14                                                             |
| 255              | Belgium | Maize Germ Oil                  | 1998           | 21                                                             |
| 255              | Belgium | Marine Fish, Other              | 1998           | 4                                                              |
| 255              | Belgium | Meat                            | 1998           | 286                                                            |
| 255              | Belgium | Meat, Other                     | 1998           | 22                                                             |
| 255              | Belgium | Milk - Excluding Butter         | 1998           | 316                                                            |
| 255              | Belgium | Molluscs, Other                 | 1998           | 2                                                              |
| 255              | Belgium | Mutton & Goat Meat              | 1998           | 13                                                             |
| 255              | Belgium | Oats                            | 1998           | 1                                                              |
| 255              | Belgium | Offals                          | 1998           | 23                                                             |
| 255              | Belgium | Oilcrops                        | 1998           | 20                                                             |
| 255              | Belgium | Oilcrops Oil, Other             | 1998           | 43                                                             |
| 255              | Belgium | Olive Oil                       | 1998           | 20                                                             |
| 255              | Belgium | Olives (including preserved)    | 1998           | 1                                                              |
| 255              | Belgium | Onions                          | 1998           | 7                                                              |
| 255              | Belgium | Oranges, Mandarines             | 1998           | 23                                                             |
| 255              | Belgium | Palm Oil                        | 1998           | 62                                                             |
| 255              | Belgium | Palmkernel Oil                  | 1998           | 10                                                             |
| 255              | Belgium | Peas                            | 1998           | 12                                                             |
| 255              | Belgium | Pelagic Fish                    | 1998           | 12                                                             |
| 255              | Belgium | Pepper                          | 1998           | 1                                                              |
| 255              | Belgium | Pigmeat                         | 1998           | 129                                                            |
| 255              | Belgium | Pimento                         | 1998           | 1                                                              |
| 255              | Belgium | Pineapples and products         | 1998           | 3                                                              |
| 255              | Belgium | Plantains                       | 1998           | 1                                                              |
| 255              | Belgium | Potatoes and products           | 1998           | 186                                                            |
| 255              | Belgium | Poultry Meat                    | 1998           | 66                                                             |
| 255              | Belgium | Pulses                          | 1998           | 20                                                             |
| 255              | Belgium | Pulses, Other and products      | 1998           | 2                                                              |
| 255              | Belgium | Rape and Mustard Oil            | 1998           | 98                                                             |
| 255              | Belgium | Rape and Mustardseed            | 1998           | 7                                                              |
| 255              | Belgium | Rice (Milled Equivalent)        | 1998           | 39                                                             |
| 255              | Belgium | Rye and products                | 1998           | 12                                                             |
| 255              | Belgium | Soyabean Oil                    | 1998           | 138                                                            |
| 255              | Belgium | Spices                          | 1998           | 4                                                              |
| 255              | Belgium | Spices, Other                   | 1998           | 2                                                              |
| 255              | Belgium | Starchy Roots                   | 1998           | 186                                                            |
| 255              | Belgium | Stimulants                      | 1998           | 11                                                             |
| 255              | Belgium | Sugar & Sweeteners              | 1998           | 495                                                            |
| 255              | Belgium | Sugar (Raw Equivalent)          | 1998           | 471                                                            |
| 255              | Belgium | Sunflowerseed Oil               | 1998           | 66                                                             |
| 255              | Belgium | Sweeteners, Other               | 1998           | 18                                                             |
| 255              | Belgium | Tomatoes and products           | 1998           | 17                                                             |

## Dietary calcium and zinc deficiency risks are decreasing but remain prevalent

| FAO Country code | Country | Food item                       | Reference year | Net energy supply (kcal <i>capita</i> <sup>-1</sup> d <sup>-1</sup> ) |
|------------------|---------|---------------------------------|----------------|-----------------------------------------------------------------------|
| 255              | Belgium | Treenuts                        | 1998           | 36                                                                    |
| 255              | Belgium | Vegetable Oils                  | 1998           | 528                                                                   |
| 255              | Belgium | Vegetables                      | 1998           | 115                                                                   |
| 255              | Belgium | Vegetables, Other               | 1998           | 91                                                                    |
| 255              | Belgium | Vegetal Products                | 1998           | 2,506                                                                 |
| 255              | Belgium | Wheat and products              | 1998           | 688                                                                   |
| 255              | Belgium | Wine                            | 1998           | 51                                                                    |
| 255              | Belgium | Alcoholic Beverages             | 1999           | 200                                                                   |
| 255              | Belgium | Animal fats                     | 1999           | 402                                                                   |
| 255              | Belgium | Animal Products                 | 1999           | 1,145                                                                 |
| 255              | Belgium | Apples and products             | 1999           | 44                                                                    |
| 255              | Belgium | Bananas                         | 1999           | 7                                                                     |
| 255              | Belgium | Barley and products             | 1999           | 2                                                                     |
| 255              | Belgium | Beans                           | 1999           | 9                                                                     |
| 255              | Belgium | Beer                            | 1999           | 134                                                                   |
| 255              | Belgium | Beverages, Alcoholic            | 1999           | 18                                                                    |
| 255              | Belgium | Bovine Meat                     | 1999           | 59                                                                    |
| 255              | Belgium | Butter, Ghee                    | 1999           | 102                                                                   |
| 255              | Belgium | Cereals - Excluding Beer        | 1999           | 752                                                                   |
| 255              | Belgium | Cereals, Other                  | 1999           | 1                                                                     |
| 255              | Belgium | Coconut Oil                     | 1999           | 106                                                                   |
| 255              | Belgium | Coconuts - Incl Copra           | 1999           | 6                                                                     |
| 255              | Belgium | Coffee and products             | 1999           | 8                                                                     |
| 255              | Belgium | Cottonseed Oil                  | 1999           | 14                                                                    |
| 255              | Belgium | Cream                           | 1999           | 36                                                                    |
| 255              | Belgium | Crustaceans                     | 1999           | 3                                                                     |
| 255              | Belgium | Dates                           | 1999           | 1                                                                     |
| 255              | Belgium | Demersal Fish                   | 1999           | 16                                                                    |
| 255              | Belgium | Eggs                            | 1999           | 56                                                                    |
| 255              | Belgium | Fats, Animals, Raw              | 1999           | 265                                                                   |
| 255              | Belgium | Fish, Seafood                   | 1999           | 45                                                                    |
| 255              | Belgium | Freshwater Fish                 | 1999           | 7                                                                     |
| 255              | Belgium | Fruits - Excluding Wine         | 1999           | 127                                                                   |
| 255              | Belgium | Fruits, Other                   | 1999           | 38                                                                    |
| 255              | Belgium | Grand Total                     | 1999           | 3,670                                                                 |
| 255              | Belgium | Grapefruit and products         | 1999           | 2                                                                     |
| 255              | Belgium | Grapes and products (excl wine) | 1999           | 11                                                                    |
| 255              | Belgium | Groundnut Oil                   | 1999           | 1                                                                     |
| 255              | Belgium | Groundnuts (Shelled Eq)         | 1999           | 3                                                                     |
| 255              | Belgium | Honey                           | 1999           | 5                                                                     |
| 255              | Belgium | Lemons, Limes and products      | 1999           | 1                                                                     |
| 255              | Belgium | Maize and products              | 1999           | 14                                                                    |
| 255              | Belgium | Maize Germ Oil                  | 1999           | 30                                                                    |
| 255              | Belgium | Marine Fish, Other              | 1999           | 4                                                                     |
| 255              | Belgium | Meat                            | 1999           | 310                                                                   |
| 255              | Belgium | Meat, Other                     | 1999           | 21                                                                    |
| 255              | Belgium | Milk - Excluding Butter         | 1999           | 306                                                                   |
| 255              | Belgium | Molluscs, Other                 | 1999           | 2                                                                     |
| 255              | Belgium | Mutton & Goat Meat              | 1999           | 12                                                                    |
| 255              | Belgium | Oats                            | 1999           | 1                                                                     |
| 255              | Belgium | Offals                          | 1999           | 26                                                                    |
| 255              | Belgium | Oilcrops                        | 1999           | 15                                                                    |
| 255              | Belgium | Oilcrops Oil, Other             | 1999           | 39                                                                    |
| 255              | Belgium | Olive Oil                       | 1999           | 24                                                                    |
| 255              | Belgium | Olives (including preserved)    | 1999           | 2                                                                     |
| 255              | Belgium | Onions                          | 1999           | 13                                                                    |
| 255              | Belgium | Oranges, Mandarines             | 1999           | 19                                                                    |
| 255              | Belgium | Palm Oil                        | 1999           | 59                                                                    |
| 255              | Belgium | Palmkernel Oil                  | 1999           | 11                                                                    |
| 255              | Belgium | Peas                            | 1999           | 11                                                                    |
| 255              | Belgium | Pelagic Fish                    | 1999           | 12                                                                    |
| 255              | Belgium | Pepper                          | 1999           | 1                                                                     |
| 255              | Belgium | Pigmeat                         | 1999           | 150                                                                   |
| 255              | Belgium | Pimento                         | 1999           | 1                                                                     |
| 255              | Belgium | Pineapples and products         | 1999           | 2                                                                     |
| 255              | Belgium | Plantains                       | 1999           | 3                                                                     |
| 255              | Belgium | Potatoes and products           | 1999           | 202                                                                   |
| 255              | Belgium | Poultry Meat                    | 1999           | 68                                                                    |
| 255              | Belgium | Pulses                          | 1999           | 22                                                                    |
| 255              | Belgium | Pulses, Other and products      | 1999           | 2                                                                     |
| 255              | Belgium | Rape and Mustard Oil            | 1999           | 55                                                                    |
| 255              | Belgium | Rape and Mustardseed            | 1999           | 5                                                                     |
| 255              | Belgium | Rice (Milled Equivalent)        | 1999           | 41                                                                    |
| 255              | Belgium | Rye and products                | 1999           | 6                                                                     |
| 255              | Belgium | Sesameseed Oil                  | 1999           | 1                                                                     |
| 255              | Belgium | Soyabean Oil                    | 1999           | 134                                                                   |
| 255              | Belgium | Spices                          | 1999           | 4                                                                     |
| 255              | Belgium | Spices, Other                   | 1999           | 2                                                                     |
| 255              | Belgium | Starchy Roots                   | 1999           | 202                                                                   |
| 255              | Belgium | Stimulants                      | 1999           | 8                                                                     |
| 255              | Belgium | Sugar & Sweeteners              | 1999           | 493                                                                   |
| 255              | Belgium | Sugar (Raw Equivalent)          | 1999           | 471                                                                   |
| 255              | Belgium | Sunflowerseed Oil               | 1999           | 61                                                                    |
| 255              | Belgium | Sweeteners, Other               | 1999           | 16                                                                    |
| 255              | Belgium | Tomatoes and products           | 1999           | 15                                                                    |
| 255              | Belgium | Treenuts                        | 1999           | 33                                                                    |
| 255              | Belgium | Vegetable Oils                  | 1999           | 535                                                                   |
| 255              | Belgium | Vegetables                      | 1999           | 132                                                                   |
| 255              | Belgium | Vegetables, Other               | 1999           | 104                                                                   |
| 255              | Belgium | Vegetal Products                | 1999           | 2,525                                                                 |
| 255              | Belgium | Wheat and products              | 1999           | 688                                                                   |
| 255              | Belgium | Wine                            | 1999           | 48                                                                    |
| 23               | Belize  | Alcoholic Beverages             | 1992           | 64                                                                    |
| 23               | Belize  | Animal fats                     | 1992           | 207                                                                   |
| 23               | Belize  | Animal Products                 | 1992           | 621                                                                   |
| 23               | Belize  | Apples and products             | 1992           | 4                                                                     |
| 23               | Belize  | Bananas                         | 1992           | 5                                                                     |



Dietary calcium and zinc deficiency risks are decreasing but remain prevalent

| FAO Country code | Country | Food item                       | Reference year | Net energy supply (kcal capita <sup>-1</sup> d <sup>-1</sup> ) |
|------------------|---------|---------------------------------|----------------|----------------------------------------------------------------|
| 23               | Belize  | Beans                           | 1992           | 99                                                             |
| 23               | Belize  | Beer                            | 1992           | 23                                                             |
| 23               | Belize  | Beverages, Alcoholic            | 1992           | 40                                                             |
| 23               | Belize  | Beverages, Fermented            | 1992           | 1                                                              |
| 23               | Belize  | Bovine Meat                     | 1992           | 57                                                             |
| 23               | Belize  | Butter, Ghee                    | 1992           | 4                                                              |
| 23               | Belize  | Cassava and products            | 1992           | 15                                                             |
| 23               | Belize  | Cereals - Excluding Beer        | 1992           | 959                                                            |
| 23               | Belize  | Cereals, Other                  | 1992           | 3                                                              |
| 23               | Belize  | Cocoa Beans and products        | 1992           | 14                                                             |
| 23               | Belize  | Coconuts - Incl Copra           | 1992           | 52                                                             |
| 23               | Belize  | Coffee and products             | 1992           | 2                                                              |
| 23               | Belize  | Crustaceans                     | 1992           | 2                                                              |
| 23               | Belize  | Eggs                            | 1992           | 19                                                             |
| 23               | Belize  | Fats, Animals, Raw              | 1992           | 203                                                            |
| 23               | Belize  | Fish, Seafood                   | 1992           | 11                                                             |
| 23               | Belize  | Fruits - Excluding Wine         | 1992           | 237                                                            |
| 23               | Belize  | Fruits, Other                   | 1992           | 30                                                             |
| 23               | Belize  | Grand Total                     | 1992           | 2,707                                                          |
| 23               | Belize  | Grapefruit and products         | 1992           | 90                                                             |
| 23               | Belize  | Grapes and products (excl wine) | 1992           | 3                                                              |
| 23               | Belize  | Groundnuts (Shelled Eq)         | 1992           | 5                                                              |
| 23               | Belize  | Maize and products              | 1992           | 136                                                            |
| 23               | Belize  | Maize Germ Oil                  | 1992           | 11                                                             |
| 23               | Belize  | Marine Fish, Other              | 1992           | 1                                                              |
| 23               | Belize  | Meat                            | 1992           | 212                                                            |
| 23               | Belize  | Meat, Other                     | 1992           | 1                                                              |
| 23               | Belize  | Milk - Excluding Butter         | 1992           | 169                                                            |
| 23               | Belize  | Miscellaneous                   | 1992           | 34                                                             |
| 23               | Belize  | Molluscs, Other                 | 1992           | 2                                                              |
| 23               | Belize  | Offals                          | 1992           | 3                                                              |
| 23               | Belize  | Oilcrops                        | 1992           | 66                                                             |
| 23               | Belize  | Oilcrops Oil, Other             | 1992           | 49                                                             |
| 23               | Belize  | Olive Oil                       | 1992           | 1                                                              |
| 23               | Belize  | Onions                          | 1992           | 8                                                              |
| 23               | Belize  | Oranges, Mandarines             | 1992           | 70                                                             |
| 23               | Belize  | Peas                            | 1992           | 5                                                              |
| 23               | Belize  | Pelagic Fish                    | 1992           | 6                                                              |
| 23               | Belize  | Pepper                          | 1992           | 1                                                              |
| 23               | Belize  | Pigmeat                         | 1992           | 66                                                             |
| 23               | Belize  | Pineapples and products         | 1992           | 9                                                              |
| 23               | Belize  | Plantains                       | 1992           | 26                                                             |
| 23               | Belize  | Potatoes and products           | 1992           | 26                                                             |
| 23               | Belize  | Poultry Meat                    | 1992           | 88                                                             |
| 23               | Belize  | Pulses                          | 1992           | 104                                                            |
| 23               | Belize  | Rape and Mustardseed            | 1992           | 2                                                              |
| 23               | Belize  | Rice (Milled Equivalent)        | 1992           | 244                                                            |
| 23               | Belize  | Roots, Other                    | 1992           | 14                                                             |
| 23               | Belize  | Sorghum and products            | 1992           | 22                                                             |
| 23               | Belize  | Soyabean Oil                    | 1992           | 14                                                             |
| 23               | Belize  | Soyabeans                       | 1992           | 7                                                              |
| 23               | Belize  | Spices                          | 1992           | 2                                                              |
| 23               | Belize  | Spices, Other                   | 1992           | 1                                                              |
| 23               | Belize  | Starchy Roots                   | 1992           | 72                                                             |
| 23               | Belize  | Stimulants                      | 1992           | 17                                                             |
| 23               | Belize  | Sugar & Sweeteners              | 1992           | 404                                                            |
| 23               | Belize  | Sugar (Raw Equivalent)          | 1992           | 397                                                            |
| 23               | Belize  | Sunflowerseed Oil               | 1992           | 18                                                             |
| 23               | Belize  | Sweet potatoes                  | 1992           | 6                                                              |
| 23               | Belize  | Sweeteners, Other               | 1992           | 6                                                              |
| 23               | Belize  | Tomatoes and products           | 1992           | 5                                                              |
| 23               | Belize  | Vegetable Oils                  | 1992           | 92                                                             |
| 23               | Belize  | Vegetables                      | 1992           | 36                                                             |
| 23               | Belize  | Vegetables, Other               | 1992           | 24                                                             |
| 23               | Belize  | Vegetal Products                | 1992           | 2,086                                                          |
| 23               | Belize  | Wheat and products              | 1992           | 553                                                            |
| 23               | Belize  | Wine                            | 1992           | 1                                                              |
| 23               | Belize  | Yams                            | 1992           | 11                                                             |
| 23               | Belize  | Alcoholic Beverages             | 1993           | 73                                                             |
| 23               | Belize  | Animal fats                     | 1993           | 206                                                            |
| 23               | Belize  | Animal Products                 | 1993           | 622                                                            |
| 23               | Belize  | Apples and products             | 1993           | 2                                                              |
| 23               | Belize  | Bananas                         | 1993           | 10                                                             |
| 23               | Belize  | Beans                           | 1993           | 101                                                            |
| 23               | Belize  | Beer                            | 1993           | 41                                                             |
| 23               | Belize  | Beverages, Alcoholic            | 1993           | 30                                                             |
| 23               | Belize  | Beverages, Fermented            | 1993           | 1                                                              |
| 23               | Belize  | Bovine Meat                     | 1993           | 50                                                             |
| 23               | Belize  | Butter, Ghee                    | 1993           | 5                                                              |
| 23               | Belize  | Cassava and products            | 1993           | 12                                                             |
| 23               | Belize  | Cephalopods                     | 1993           | 1                                                              |
| 23               | Belize  | Cereals - Excluding Beer        | 1993           | 945                                                            |
| 23               | Belize  | Cereals, Other                  | 1993           | 3                                                              |
| 23               | Belize  | Cocoa Beans and products        | 1993           | 8                                                              |
| 23               | Belize  | Coconuts - Incl Copra           | 1993           | 50                                                             |
| 23               | Belize  | Coffee and products             | 1993           | 2                                                              |
| 23               | Belize  | Cream                           | 1993           | 1                                                              |
| 23               | Belize  | Crustaceans                     | 1993           | 2                                                              |
| 23               | Belize  | Eggs                            | 1993           | 18                                                             |
| 23               | Belize  | Fats, Animals, Raw              | 1993           | 200                                                            |
| 23               | Belize  | Fish, Seafood                   | 1993           | 18                                                             |
| 23               | Belize  | Fruits - Excluding Wine         | 1993           | 228                                                            |
| 23               | Belize  | Fruits, Other                   | 1993           | 30                                                             |
| 23               | Belize  | Grand Total                     | 1993           | 2,690                                                          |
| 23               | Belize  | Grapefruit and products         | 1993           | 78                                                             |
| 23               | Belize  | Grapes and products (excl wine) | 1993           | 2                                                              |
| 23               | Belize  | Groundnuts (Shelled Eq)         | 1993           | 8                                                              |

Dietary calcium and zinc deficiency risks are decreasing but remain prevalent

| FAO Country code | Country | Food item                       | Reference year | Net energy supply (kcal capita <sup>-1</sup> d <sup>-1</sup> ) |
|------------------|---------|---------------------------------|----------------|----------------------------------------------------------------|
| 23               | Belize  | Honey                           | 1993           | 2                                                              |
| 23               | Belize  | Maize and products              | 1993           | 144                                                            |
| 23               | Belize  | Maize Germ Oil                  | 1993           | 8                                                              |
| 23               | Belize  | Marine Fish, Other              | 1993           | 2                                                              |
| 23               | Belize  | Meat                            | 1993           | 203                                                            |
| 23               | Belize  | Milk - Excluding Butter         | 1993           | 176                                                            |
| 23               | Belize  | Miscellaneous                   | 1993           | 35                                                             |
| 23               | Belize  | Molluscs, Other                 | 1993           | 1                                                              |
| 23               | Belize  | Offals                          | 1993           | 2                                                              |
| 23               | Belize  | Oilcrops                        | 1993           | 69                                                             |
| 23               | Belize  | Oilcrops Oil, Other             | 1993           | 40                                                             |
| 23               | Belize  | Olive Oil                       | 1993           | 1                                                              |
| 23               | Belize  | Onions                          | 1993           | 7                                                              |
| 23               | Belize  | Oranges, Mandarines             | 1993           | 60                                                             |
| 23               | Belize  | Pelagic Fish                    | 1993           | 11                                                             |
| 23               | Belize  | Pepper                          | 1993           | 1                                                              |
| 23               | Belize  | Pigmeat                         | 1993           | 62                                                             |
| 23               | Belize  | Pineapples and products         | 1993           | 10                                                             |
| 23               | Belize  | Plantains                       | 1993           | 36                                                             |
| 23               | Belize  | Potatoes and products           | 1993           | 24                                                             |
| 23               | Belize  | Poultry Meat                    | 1993           | 90                                                             |
| 23               | Belize  | Pulses                          | 1993           | 101                                                            |
| 23               | Belize  | Rape and Mustardseed            | 1993           | 1                                                              |
| 23               | Belize  | Rice (Milled Equivalent)        | 1993           | 240                                                            |
| 23               | Belize  | Roots, Other                    | 1993           | 18                                                             |
| 23               | Belize  | Sesameseed Oil                  | 1993           | 1                                                              |
| 23               | Belize  | Sorghum and products            | 1993           | 23                                                             |
| 23               | Belize  | Soyabean Oil                    | 1993           | 13                                                             |
| 23               | Belize  | Soyabeans                       | 1993           | 9                                                              |
| 23               | Belize  | Spices                          | 1993           | 2                                                              |
| 23               | Belize  | Spices, Other                   | 1993           | 1                                                              |
| 23               | Belize  | Starchy Roots                   | 1993           | 72                                                             |
| 23               | Belize  | Stimulants                      | 1993           | 11                                                             |
| 23               | Belize  | Sugar & Sweeteners              | 1993           | 413                                                            |
| 23               | Belize  | Sugar (Raw Equivalent)          | 1993           | 404                                                            |
| 23               | Belize  | Sunflowerseed Oil               | 1993           | 20                                                             |
| 23               | Belize  | Sweet potatoes                  | 1993           | 8                                                              |
| 23               | Belize  | Sweeteners, Other               | 1993           | 7                                                              |
| 23               | Belize  | Tomatoes and products           | 1993           | 4                                                              |
| 23               | Belize  | Treenuts                        | 1993           | 1                                                              |
| 23               | Belize  | Vegetable Oils                  | 1993           | 82                                                             |
| 23               | Belize  | Vegetables                      | 1993           | 36                                                             |
| 23               | Belize  | Vegetables, Other               | 1993           | 25                                                             |
| 23               | Belize  | Vegetal Products                | 1993           | 2,068                                                          |
| 23               | Belize  | Wheat and products              | 1993           | 536                                                            |
| 23               | Belize  | Wine                            | 1993           | 1                                                              |
| 23               | Belize  | Yams                            | 1993           | 10                                                             |
| 23               | Belize  | Alcoholic Beverages             | 1994           | 65                                                             |
| 23               | Belize  | Animal fats                     | 1994           | 192                                                            |
| 23               | Belize  | Animal Products                 | 1994           | 622                                                            |
| 23               | Belize  | Apples and products             | 1994           | 2                                                              |
| 23               | Belize  | Bananas                         | 1994           | 11                                                             |
| 23               | Belize  | Beans                           | 1994           | 99                                                             |
| 23               | Belize  | Beer                            | 1994           | 32                                                             |
| 23               | Belize  | Beverages, Alcoholic            | 1994           | 31                                                             |
| 23               | Belize  | Beverages, Fermented            | 1994           | 1                                                              |
| 23               | Belize  | Bovine Meat                     | 1994           | 54                                                             |
| 23               | Belize  | Butter, Ghee                    | 1994           | 5                                                              |
| 23               | Belize  | Cassava and products            | 1994           | 8                                                              |
| 23               | Belize  | Cephalopods                     | 1994           | 1                                                              |
| 23               | Belize  | Cereals - Excluding Beer        | 1994           | 973                                                            |
| 23               | Belize  | Cereals, Other                  | 1994           | 3                                                              |
| 23               | Belize  | Cocoa Beans and products        | 1994           | 10                                                             |
| 23               | Belize  | Coconuts - Incl Copra           | 1994           | 50                                                             |
| 23               | Belize  | Coffee and products             | 1994           | 2                                                              |
| 23               | Belize  | Crustaceans                     | 1994           | 5                                                              |
| 23               | Belize  | Eggs                            | 1994           | 20                                                             |
| 23               | Belize  | Fats, Animals, Raw              | 1994           | 187                                                            |
| 23               | Belize  | Fish, Seafood                   | 1994           | 17                                                             |
| 23               | Belize  | Fruits - Excluding Wine         | 1994           | 189                                                            |
| 23               | Belize  | Fruits, Other                   | 1994           | 28                                                             |
| 23               | Belize  | Grand Total                     | 1994           | 2,647                                                          |
| 23               | Belize  | Grapefruit and products         | 1994           | 54                                                             |
| 23               | Belize  | Grapes and products (excl wine) | 1994           | 2                                                              |
| 23               | Belize  | Groundnuts (Shelled Eq)         | 1994           | 2                                                              |
| 23               | Belize  | Honey                           | 1994           | 2                                                              |
| 23               | Belize  | Maize and products              | 1994           | 181                                                            |
| 23               | Belize  | Maize Germ Oil                  | 1994           | 9                                                              |
| 23               | Belize  | Marine Fish, Other              | 1994           | 1                                                              |
| 23               | Belize  | Meat                            | 1994           | 206                                                            |
| 23               | Belize  | Milk - Excluding Butter         | 1994           | 184                                                            |
| 23               | Belize  | Miscellaneous                   | 1994           | 30                                                             |
| 23               | Belize  | Molluscs, Other                 | 1994           | 2                                                              |
| 23               | Belize  | Offals                          | 1994           | 3                                                              |
| 23               | Belize  | Oilcrops                        | 1994           | 62                                                             |
| 23               | Belize  | Oilcrops Oil, Other             | 1994           | 48                                                             |
| 23               | Belize  | Olive Oil                       | 1994           | 1                                                              |
| 23               | Belize  | Onions                          | 1994           | 6                                                              |
| 23               | Belize  | Oranges, Mandarines             | 1994           | 57                                                             |
| 23               | Belize  | Pelagic Fish                    | 1994           | 9                                                              |
| 23               | Belize  | Pigmeat                         | 1994           | 76                                                             |
| 23               | Belize  | Pineapples and products         | 1994           | 6                                                              |
| 23               | Belize  | Plantains                       | 1994           | 27                                                             |
| 23               | Belize  | Potatoes and products           | 1994           | 25                                                             |
| 23               | Belize  | Poultry Meat                    | 1994           | 75                                                             |
| 23               | Belize  | Pulses                          | 1994           | 99                                                             |
| 23               | Belize  | Rape and Mustardseed            | 1994           | 2                                                              |

Dietary calcium and zinc deficiency risks are decreasing but remain prevalent

| FAO Country code | Country | Food item                       | Reference year | Net energy supply (kcal capita <sup>-1</sup> d <sup>-1</sup> ) |
|------------------|---------|---------------------------------|----------------|----------------------------------------------------------------|
| 23               | Belize  | Rice (Milled Equivalent)        | 1994           | 227                                                            |
| 23               | Belize  | Roots, Other                    | 1994           | 4                                                              |
| 23               | Belize  | Sorghum and products            | 1994           | 25                                                             |
| 23               | Belize  | Soyabean Oil                    | 1994           | 14                                                             |
| 23               | Belize  | Soyabeans                       | 1994           | 8                                                              |
| 23               | Belize  | Spices                          | 1994           | 2                                                              |
| 23               | Belize  | Spices, Other                   | 1994           | 1                                                              |
| 23               | Belize  | Starchy Roots                   | 1994           | 39                                                             |
| 23               | Belize  | Stimulants                      | 1994           | 12                                                             |
| 23               | Belize  | Sugar & Sweeteners              | 1994           | 432                                                            |
| 23               | Belize  | Sugar (Raw Equivalent)          | 1994           | 417                                                            |
| 23               | Belize  | Sunflowerseed Oil               | 1994           | 24                                                             |
| 23               | Belize  | Sweet potatoes                  | 1994           | 2                                                              |
| 23               | Belize  | Sweeteners, Other               | 1994           | 13                                                             |
| 23               | Belize  | Tomatoes and products           | 1994           | 3                                                              |
| 23               | Belize  | Treenuts                        | 1994           | 1                                                              |
| 23               | Belize  | Vegetable Oils                  | 1994           | 97                                                             |
| 23               | Belize  | Vegetables                      | 1994           | 24                                                             |
| 23               | Belize  | Vegetables, Other               | 1994           | 16                                                             |
| 23               | Belize  | Vegetal Products                | 1994           | 2,026                                                          |
| 23               | Belize  | Wheat and products              | 1994           | 538                                                            |
| 23               | Belize  | Wine                            | 1994           | 1                                                              |
| 23               | Belize  | Yams                            | 1994           | 1                                                              |
| 23               | Belize  | Alcoholic Beverages             | 1995           | 71                                                             |
| 23               | Belize  | Animal fats                     | 1995           | 191                                                            |
| 23               | Belize  | Animal Products                 | 1995           | 625                                                            |
| 23               | Belize  | Apples and products             | 1995           | 2                                                              |
| 23               | Belize  | Bananas                         | 1995           | 14                                                             |
| 23               | Belize  | Beans                           | 1995           | 94                                                             |
| 23               | Belize  | Beer                            | 1995           | 32                                                             |
| 23               | Belize  | Beverages, Alcoholic            | 1995           | 37                                                             |
| 23               | Belize  | Bovine Meat                     | 1995           | 62                                                             |
| 23               | Belize  | Butter, Ghee                    | 1995           | 5                                                              |
| 23               | Belize  | Cassava and products            | 1995           | 10                                                             |
| 23               | Belize  | Cephalopods                     | 1995           | 1                                                              |
| 23               | Belize  | Cereals - Excluding Beer        | 1995           | 960                                                            |
| 23               | Belize  | Cereals, Other                  | 1995           | 4                                                              |
| 23               | Belize  | Cocoa Beans and products        | 1995           | 11                                                             |
| 23               | Belize  | Coconuts - Incl Copra           | 1995           | 44                                                             |
| 23               | Belize  | Coffee and products             | 1995           | 2                                                              |
| 23               | Belize  | Crustaceans                     | 1995           | 4                                                              |
| 23               | Belize  | Demersal Fish                   | 1995           | 1                                                              |
| 23               | Belize  | Eggs                            | 1995           | 21                                                             |
| 23               | Belize  | Fats, Animals, Raw              | 1995           | 186                                                            |
| 23               | Belize  | Fish, Seafood                   | 1995           | 16                                                             |
| 23               | Belize  | Fruits - Excluding Wine         | 1995           | 206                                                            |
| 23               | Belize  | Fruits, Other                   | 1995           | 28                                                             |
| 23               | Belize  | Grand Total                     | 1995           | 2,692                                                          |
| 23               | Belize  | Grapefruit and products         | 1995           | 64                                                             |
| 23               | Belize  | Grapes and products (excl wine) | 1995           | 2                                                              |
| 23               | Belize  | Groundnuts (Shelled Eq)         | 1995           | 16                                                             |
| 23               | Belize  | Honey                           | 1995           | 3                                                              |
| 23               | Belize  | Maize and products              | 1995           | 177                                                            |
| 23               | Belize  | Maize Germ Oil                  | 1995           | 8                                                              |
| 23               | Belize  | Marine Fish, Other              | 1995           | 1                                                              |
| 23               | Belize  | Meat                            | 1995           | 219                                                            |
| 23               | Belize  | Milk - Excluding Butter         | 1995           | 175                                                            |
| 23               | Belize  | Miscellaneous                   | 1995           | 28                                                             |
| 23               | Belize  | Molluscs, Other                 | 1995           | 1                                                              |
| 23               | Belize  | Oats                            | 1995           | 1                                                              |
| 23               | Belize  | Offals                          | 1995           | 3                                                              |
| 23               | Belize  | Oilcrops                        | 1995           | 70                                                             |
| 23               | Belize  | Oilcrops Oil, Other             | 1995           | 42                                                             |
| 23               | Belize  | Olive Oil                       | 1995           | 2                                                              |
| 23               | Belize  | Onions                          | 1995           | 8                                                              |
| 23               | Belize  | Oranges, Mandarines             | 1995           | 62                                                             |
| 23               | Belize  | Peas                            | 1995           | 5                                                              |
| 23               | Belize  | Pelagic Fish                    | 1995           | 8                                                              |
| 23               | Belize  | Pigmeat                         | 1995           | 71                                                             |
| 23               | Belize  | Pineapples and products         | 1995           | 6                                                              |
| 23               | Belize  | Plantains                       | 1995           | 28                                                             |
| 23               | Belize  | Potatoes and products           | 1995           | 24                                                             |
| 23               | Belize  | Poultry Meat                    | 1995           | 85                                                             |
| 23               | Belize  | Pulses                          | 1995           | 100                                                            |
| 23               | Belize  | Rape and Mustardseed            | 1995           | 2                                                              |
| 23               | Belize  | Rice (Milled Equivalent)        | 1995           | 234                                                            |
| 23               | Belize  | Roots, Other                    | 1995           | 9                                                              |
| 23               | Belize  | Sorghum and products            | 1995           | 24                                                             |
| 23               | Belize  | Soyabean Oil                    | 1995           | 24                                                             |
| 23               | Belize  | Soyabeans                       | 1995           | 7                                                              |
| 23               | Belize  | Spices                          | 1995           | 1                                                              |
| 23               | Belize  | Spices, Other                   | 1995           | 1                                                              |
| 23               | Belize  | Starchy Roots                   | 1995           | 46                                                             |
| 23               | Belize  | Stimulants                      | 1995           | 14                                                             |
| 23               | Belize  | Sugar & Sweeteners              | 1995           | 437                                                            |
| 23               | Belize  | Sugar (Raw Equivalent)          | 1995           | 421                                                            |
| 23               | Belize  | Sunflowerseed Oil               | 1995           | 30                                                             |
| 23               | Belize  | Sweet potatoes                  | 1995           | 2                                                              |
| 23               | Belize  | Sweeteners, Other               | 1995           | 12                                                             |
| 23               | Belize  | Tomatoes and products           | 1995           | 3                                                              |
| 23               | Belize  | Treenuts                        | 1995           | 2                                                              |
| 23               | Belize  | Vegetable Oils                  | 1995           | 106                                                            |
| 23               | Belize  | Vegetables                      | 1995           | 26                                                             |
| 23               | Belize  | Vegetables, Other               | 1995           | 15                                                             |
| 23               | Belize  | Vegetal Products                | 1995           | 2,066                                                          |
| 23               | Belize  | Wheat and products              | 1995           | 520                                                            |
| 23               | Belize  | Wine                            | 1995           | 1                                                              |

Dietary calcium and zinc deficiency risks are decreasing but remain prevalent

| FAO Country code | Country | Food item                       | Reference year | Net energy supply (kcal capita <sup>-1</sup> d <sup>-1</sup> ) |
|------------------|---------|---------------------------------|----------------|----------------------------------------------------------------|
| 23               | Belize  | Yams                            | 1995           | 2                                                              |
| 23               | Belize  | Alcoholic Beverages             | 1996           | 63                                                             |
| 23               | Belize  | Animal fats                     | 1996           | 178                                                            |
| 23               | Belize  | Animal Products                 | 1996           | 586                                                            |
| 23               | Belize  | Apples and products             | 1996           | 1                                                              |
| 23               | Belize  | Bananas                         | 1996           | 15                                                             |
| 23               | Belize  | Beans                           | 1996           | 96                                                             |
| 23               | Belize  | Beer                            | 1996           | 25                                                             |
| 23               | Belize  | Beverages, Alcoholic            | 1996           | 36                                                             |
| 23               | Belize  | Bovine Meat                     | 1996           | 55                                                             |
| 23               | Belize  | Butter, Ghee                    | 1996           | 5                                                              |
| 23               | Belize  | Cassava and products            | 1996           | 9                                                              |
| 23               | Belize  | Cereals - Excluding Beer        | 1996           | 976                                                            |
| 23               | Belize  | Cereals, Other                  | 1996           | 3                                                              |
| 23               | Belize  | Cocoa Beans and products        | 1996           | 9                                                              |
| 23               | Belize  | Coconut Oil                     | 1996           | 1                                                              |
| 23               | Belize  | Coconuts - Incl Copra           | 1996           | 43                                                             |
| 23               | Belize  | Coffee and products             | 1996           | 4                                                              |
| 23               | Belize  | Crustaceans                     | 1996           | 4                                                              |
| 23               | Belize  | Eggs                            | 1996           | 22                                                             |
| 23               | Belize  | Fats, Animals, Raw              | 1996           | 173                                                            |
| 23               | Belize  | Fish, Seafood                   | 1996           | 19                                                             |
| 23               | Belize  | Freshwater Fish                 | 1996           | 3                                                              |
| 23               | Belize  | Fruits - Excluding Wine         | 1996           | 198                                                            |
| 23               | Belize  | Fruits, Other                   | 1996           | 25                                                             |
| 23               | Belize  | Grand Total                     | 1996           | 2,645                                                          |
| 23               | Belize  | Grapefruit and products         | 1996           | 55                                                             |
| 23               | Belize  | Grapes and products (excl wine) | 1996           | 2                                                              |
| 23               | Belize  | Groundnuts (Shelled Eq)         | 1996           | 11                                                             |
| 23               | Belize  | Honey                           | 1996           | 2                                                              |
| 23               | Belize  | Maize and products              | 1996           | 172                                                            |
| 23               | Belize  | Maize Germ Oil                  | 1996           | 10                                                             |
| 23               | Belize  | Marine Fish, Other              | 1996           | 2                                                              |
| 23               | Belize  | Meat                            | 1996           | 204                                                            |
| 23               | Belize  | Milk - Excluding Butter         | 1996           | 161                                                            |
| 23               | Belize  | Miscellaneous                   | 1996           | 31                                                             |
| 23               | Belize  | Molluscs, Other                 | 1996           | 1                                                              |
| 23               | Belize  | Offals                          | 1996           | 3                                                              |
| 23               | Belize  | Oilcrops                        | 1996           | 64                                                             |
| 23               | Belize  | Oilcrops Oil, Other             | 1996           | 40                                                             |
| 23               | Belize  | Olive Oil                       | 1996           | 2                                                              |
| 23               | Belize  | Onions                          | 1996           | 8                                                              |
| 23               | Belize  | Oranges, Mandarines             | 1996           | 51                                                             |
| 23               | Belize  | Peas                            | 1996           | 5                                                              |
| 23               | Belize  | Pelagic Fish                    | 1996           | 9                                                              |
| 23               | Belize  | Pigmeat                         | 1996           | 60                                                             |
| 23               | Belize  | Pineapples and products         | 1996           | 6                                                              |
| 23               | Belize  | Plantains                       | 1996           | 43                                                             |
| 23               | Belize  | Potatoes and products           | 1996           | 28                                                             |
| 23               | Belize  | Poultry Meat                    | 1996           | 89                                                             |
| 23               | Belize  | Pulses                          | 1996           | 102                                                            |
| 23               | Belize  | Rape and Mustardseed            | 1996           | 1                                                              |
| 23               | Belize  | Rice (Milled Equivalent)        | 1996           | 265                                                            |
| 23               | Belize  | Roots, Other                    | 1996           | 3                                                              |
| 23               | Belize  | Sorghum and products            | 1996           | 22                                                             |
| 23               | Belize  | Soyabean Oil                    | 1996           | 21                                                             |
| 23               | Belize  | Soyabeans                       | 1996           | 8                                                              |
| 23               | Belize  | Spices                          | 1996           | 2                                                              |
| 23               | Belize  | Spices, Other                   | 1996           | 1                                                              |
| 23               | Belize  | Starchy Roots                   | 1996           | 42                                                             |
| 23               | Belize  | Stimulants                      | 1996           | 13                                                             |
| 23               | Belize  | Sugar & Sweeteners              | 1996           | 431                                                            |
| 23               | Belize  | Sugar (Raw Equivalent)          | 1996           | 426                                                            |
| 23               | Belize  | Sunflowerseed Oil               | 1996           | 34                                                             |
| 23               | Belize  | Sweet potatoes                  | 1996           | 2                                                              |
| 23               | Belize  | Sweeteners, Other               | 1996           | 3                                                              |
| 23               | Belize  | Tomatoes and products           | 1996           | 2                                                              |
| 23               | Belize  | Treenuts                        | 1996           | 1                                                              |
| 23               | Belize  | Vegetable Oils                  | 1996           | 108                                                            |
| 23               | Belize  | Vegetables                      | 1996           | 29                                                             |
| 23               | Belize  | Vegetables, Other               | 1996           | 19                                                             |
| 23               | Belize  | Vegetal Products                | 1996           | 2,059                                                          |
| 23               | Belize  | Wheat and products              | 1996           | 513                                                            |
| 23               | Belize  | Wine                            | 1996           | 1                                                              |
| 23               | Belize  | Yams                            | 1996           | 1                                                              |
| 23               | Belize  | Alcoholic Beverages             | 1997           | 63                                                             |
| 23               | Belize  | Animal fats                     | 1997           | 191                                                            |
| 23               | Belize  | Animal Products                 | 1997           | 612                                                            |
| 23               | Belize  | Apples and products             | 1997           | 4                                                              |
| 23               | Belize  | Bananas                         | 1997           | 13                                                             |
| 23               | Belize  | Beans                           | 1997           | 95                                                             |
| 23               | Belize  | Beer                            | 1997           | 26                                                             |
| 23               | Belize  | Beverages, Alcoholic            | 1997           | 36                                                             |
| 23               | Belize  | Bovine Meat                     | 1997           | 56                                                             |
| 23               | Belize  | Butter, Ghee                    | 1997           | 6                                                              |
| 23               | Belize  | Cassava and products            | 1997           | 5                                                              |
| 23               | Belize  | Cephalopods                     | 1997           | 1                                                              |
| 23               | Belize  | Cereals - Excluding Beer        | 1997           | 983                                                            |
| 23               | Belize  | Cereals, Other                  | 1997           | 6                                                              |
| 23               | Belize  | Cocoa Beans and products        | 1997           | 12                                                             |
| 23               | Belize  | Coconut Oil                     | 1997           | 1                                                              |
| 23               | Belize  | Coconuts - Incl Copra           | 1997           | 26                                                             |
| 23               | Belize  | Coffee and products             | 1997           | 3                                                              |
| 23               | Belize  | Crustaceans                     | 1997           | 8                                                              |
| 23               | Belize  | Demersal Fish                   | 1997           | 1                                                              |
| 23               | Belize  | Eggs                            | 1997           | 21                                                             |
| 23               | Belize  | Fats, Animals, Raw              | 1997           | 185                                                            |

Dietary calcium and zinc deficiency risks are decreasing but remain prevalent

| FAO Country code | Country | Food item                       | Reference year | Net energy supply (kcal capita <sup>-1</sup> d <sup>-1</sup> ) |
|------------------|---------|---------------------------------|----------------|----------------------------------------------------------------|
| 23               | Belize  | Fish, Seafood                   | 1997           | 22                                                             |
| 23               | Belize  | Freshwater Fish                 | 1997           | 1                                                              |
| 23               | Belize  | Fruits - Excluding Wine         | 1997           | 189                                                            |
| 23               | Belize  | Fruits, Other                   | 1997           | 28                                                             |
| 23               | Belize  | Grand Total                     | 1997           | 2,659                                                          |
| 23               | Belize  | Grapefruit and products         | 1997           | 51                                                             |
| 23               | Belize  | Grapes and products (excl wine) | 1997           | 2                                                              |
| 23               | Belize  | Groundnuts (Shelled Eq)         | 1997           | 18                                                             |
| 23               | Belize  | Honey                           | 1997           | 1                                                              |
| 23               | Belize  | Maize and products              | 1997           | 173                                                            |
| 23               | Belize  | Maize Germ Oil                  | 1997           | 9                                                              |
| 23               | Belize  | Marine Fish, Other              | 1997           | 1                                                              |
| 23               | Belize  | Meat                            | 1997           | 227                                                            |
| 23               | Belize  | Milk - Excluding Butter         | 1997           | 148                                                            |
| 23               | Belize  | Miscellaneous                   | 1997           | 25                                                             |
| 23               | Belize  | Molluscs, Other                 | 1997           | 1                                                              |
| 23               | Belize  | Offals                          | 1997           | 3                                                              |
| 23               | Belize  | Oilcrops                        | 1997           | 64                                                             |
| 23               | Belize  | Oilcrops Oil, Other             | 1997           | 39                                                             |
| 23               | Belize  | Olive Oil                       | 1997           | 2                                                              |
| 23               | Belize  | Onions                          | 1997           | 8                                                              |
| 23               | Belize  | Oranges, Mandarines             | 1997           | 58                                                             |
| 23               | Belize  | Peas                            | 1997           | 6                                                              |
| 23               | Belize  | Pelagic Fish                    | 1997           | 9                                                              |
| 23               | Belize  | Pigmeat                         | 1997           | 64                                                             |
| 23               | Belize  | Pineapples and products         | 1997           | 6                                                              |
| 23               | Belize  | Plantains                       | 1997           | 26                                                             |
| 23               | Belize  | Potatoes and products           | 1997           | 30                                                             |
| 23               | Belize  | Poultry Meat                    | 1997           | 107                                                            |
| 23               | Belize  | Pulses                          | 1997           | 101                                                            |
| 23               | Belize  | Rape and Mustardseed            | 1997           | 2                                                              |
| 23               | Belize  | Rice (Milled Equivalent)        | 1997           | 274                                                            |
| 23               | Belize  | Roots, Other                    | 1997           | 3                                                              |
| 23               | Belize  | Sorghum and products            | 1997           | 24                                                             |
| 23               | Belize  | Soyabean Oil                    | 1997           | 15                                                             |
| 23               | Belize  | Soyabeans                       | 1997           | 18                                                             |
| 23               | Belize  | Spices                          | 1997           | 2                                                              |
| 23               | Belize  | Spices, Other                   | 1997           | 2                                                              |
| 23               | Belize  | Starchy Roots                   | 1997           | 38                                                             |
| 23               | Belize  | Stimulants                      | 1997           | 16                                                             |
| 23               | Belize  | Sugar & Sweeteners              | 1997           | 431                                                            |
| 23               | Belize  | Sugar (Raw Equivalent)          | 1997           | 426                                                            |
| 23               | Belize  | Sunflowerseed Oil               | 1997           | 38                                                             |
| 23               | Belize  | Sweet potatoes                  | 1997           | 1                                                              |
| 23               | Belize  | Sweeteners, Other               | 1997           | 4                                                              |
| 23               | Belize  | Tomatoes and products           | 1997           | 2                                                              |
| 23               | Belize  | Treenuts                        | 1997           | 1                                                              |
| 23               | Belize  | Vegetable Oils                  | 1997           | 105                                                            |
| 23               | Belize  | Vegetables                      | 1997           | 29                                                             |
| 23               | Belize  | Vegetables, Other               | 1997           | 20                                                             |
| 23               | Belize  | Vegetal Products                | 1997           | 2,048                                                          |
| 23               | Belize  | Wheat and products              | 1997           | 507                                                            |
| 23               | Belize  | Wine                            | 1997           | 1                                                              |
| 23               | Belize  | Alcoholic Beverages             | 1998           | 64                                                             |
| 23               | Belize  | Animal fats                     | 1998           | 182                                                            |
| 23               | Belize  | Animal Products                 | 1998           | 580                                                            |
| 23               | Belize  | Apples and products             | 1998           | 2                                                              |
| 23               | Belize  | Bananas                         | 1998           | 12                                                             |
| 23               | Belize  | Beans                           | 1998           | 94                                                             |
| 23               | Belize  | Beer                            | 1998           | 26                                                             |
| 23               | Belize  | Beverages, Alcoholic            | 1998           | 36                                                             |
| 23               | Belize  | Bovine Meat                     | 1998           | 42                                                             |
| 23               | Belize  | Butter, Ghee                    | 1998           | 8                                                              |
| 23               | Belize  | Cassava and products            | 1998           | 14                                                             |
| 23               | Belize  | Cephalopods                     | 1998           | 2                                                              |
| 23               | Belize  | Cereals - Excluding Beer        | 1998           | 1,007                                                          |
| 23               | Belize  | Cereals, Other                  | 1998           | 7                                                              |
| 23               | Belize  | Cocoa Beans and products        | 1998           | 13                                                             |
| 23               | Belize  | Coconut Oil                     | 1998           | 4                                                              |
| 23               | Belize  | Coconuts - Incl Copra           | 1998           | 22                                                             |
| 23               | Belize  | Coffee and products             | 1998           | 4                                                              |
| 23               | Belize  | Crustaceans                     | 1998           | 4                                                              |
| 23               | Belize  | Demersal Fish                   | 1998           | 1                                                              |
| 23               | Belize  | Eggs                            | 1998           | 22                                                             |
| 23               | Belize  | Fats, Animals, Raw              | 1998           | 173                                                            |
| 23               | Belize  | Fish, Seafood                   | 1998           | 20                                                             |
| 23               | Belize  | Fruits - Excluding Wine         | 1998           | 190                                                            |
| 23               | Belize  | Fruits, Other                   | 1998           | 28                                                             |
| 23               | Belize  | Grand Total                     | 1998           | 2,650                                                          |
| 23               | Belize  | Grapefruit and products         | 1998           | 53                                                             |
| 23               | Belize  | Grapes and products (excl wine) | 1998           | 3                                                              |
| 23               | Belize  | Groundnuts (Shelled Eq)         | 1998           | 7                                                              |
| 23               | Belize  | Maize and products              | 1998           | 177                                                            |
| 23               | Belize  | Maize Germ Oil                  | 1998           | 6                                                              |
| 23               | Belize  | Marine Fish, Other              | 1998           | 2                                                              |
| 23               | Belize  | Meat                            | 1998           | 208                                                            |
| 23               | Belize  | Milk - Excluding Butter         | 1998           | 146                                                            |
| 23               | Belize  | Miscellaneous                   | 1998           | 23                                                             |
| 23               | Belize  | Molluscs, Other                 | 1998           | 1                                                              |
| 23               | Belize  | Offals                          | 1998           | 3                                                              |
| 23               | Belize  | Oilcrops                        | 1998           | 47                                                             |
| 23               | Belize  | Oilcrops Oil, Other             | 1998           | 35                                                             |
| 23               | Belize  | Olive Oil                       | 1998           | 1                                                              |
| 23               | Belize  | Onions                          | 1998           | 7                                                              |
| 23               | Belize  | Oranges, Mandarines             | 1998           | 61                                                             |
| 23               | Belize  | Peas                            | 1998           | 7                                                              |
| 23               | Belize  | Pelagic Fish                    | 1998           | 10                                                             |

Dietary calcium and zinc deficiency risks are decreasing but remain prevalent

| FAO Country code | Country | Food item                       | Reference year | Net energy supply (kcal capita <sup>-1</sup> d <sup>-1</sup> ) |
|------------------|---------|---------------------------------|----------------|----------------------------------------------------------------|
| 23               | Belize  | Pigmeat                         | 1998           | 54                                                             |
| 23               | Belize  | Pineapples and products         | 1998           | 5                                                              |
| 23               | Belize  | Plantains                       | 1998           | 26                                                             |
| 23               | Belize  | Potatoes and products           | 1998           | 31                                                             |
| 23               | Belize  | Poultry Meat                    | 1998           | 112                                                            |
| 23               | Belize  | Pulses                          | 1998           | 102                                                            |
| 23               | Belize  | Rape and Mustardseed            | 1998           | 2                                                              |
| 23               | Belize  | Rice (Milled Equivalent)        | 1998           | 272                                                            |
| 23               | Belize  | Roots, Other                    | 1998           | 7                                                              |
| 23               | Belize  | Sorghum and products            | 1998           | 22                                                             |
| 23               | Belize  | Soyabean Oil                    | 1998           | 9                                                              |
| 23               | Belize  | Soyabeans                       | 1998           | 17                                                             |
| 23               | Belize  | Spices                          | 1998           | 2                                                              |
| 23               | Belize  | Spices, Other                   | 1998           | 1                                                              |
| 23               | Belize  | Starchy Roots                   | 1998           | 54                                                             |
| 23               | Belize  | Stimulants                      | 1998           | 17                                                             |
| 23               | Belize  | Sugar & Sweeteners              | 1998           | 431                                                            |
| 23               | Belize  | Sugar (Raw Equivalent)          | 1998           | 426                                                            |
| 23               | Belize  | Sunflowerseed Oil               | 1998           | 38                                                             |
| 23               | Belize  | Sweet potatoes                  | 1998           | 2                                                              |
| 23               | Belize  | Sweeteners, Other               | 1998           | 4                                                              |
| 23               | Belize  | Tomatoes and products           | 1998           | 5                                                              |
| 23               | Belize  | Treenuts                        | 1998           | 2                                                              |
| 23               | Belize  | Vegetable Oils                  | 1998           | 93                                                             |
| 23               | Belize  | Vegetables                      | 1998           | 40                                                             |
| 23               | Belize  | Vegetables, Other               | 1998           | 27                                                             |
| 23               | Belize  | Vegetal Products                | 1998           | 2,071                                                          |
| 23               | Belize  | Wheat and products              | 1998           | 529                                                            |
| 23               | Belize  | Wine                            | 1998           | 1                                                              |
| 23               | Belize  | Yams                            | 1998           | 1                                                              |
| 23               | Belize  | Alcoholic Beverages             | 1999           | 64                                                             |
| 23               | Belize  | Animal fats                     | 1999           | 172                                                            |
| 23               | Belize  | Animal Products                 | 1999           | 559                                                            |
| 23               | Belize  | Apples and products             | 1999           | 2                                                              |
| 23               | Belize  | Bananas                         | 1999           | 13                                                             |
| 23               | Belize  | Beans                           | 1999           | 92                                                             |
| 23               | Belize  | Beer                            | 1999           | 27                                                             |
| 23               | Belize  | Beverages, Alcoholic            | 1999           | 36                                                             |
| 23               | Belize  | Bovine Meat                     | 1999           | 30                                                             |
| 23               | Belize  | Butter, Ghee                    | 1999           | 8                                                              |
| 23               | Belize  | Cassava and products            | 1999           | 9                                                              |
| 23               | Belize  | Cephalopods                     | 1999           | 1                                                              |
| 23               | Belize  | Cereals - Excluding Beer        | 1999           | 1,001                                                          |
| 23               | Belize  | Cereals, Other                  | 1999           | 9                                                              |
| 23               | Belize  | Cocoa Beans and products        | 1999           | 8                                                              |
| 23               | Belize  | Coconut Oil                     | 1999           | 5                                                              |
| 23               | Belize  | Coconuts - Incl Copra           | 1999           | 13                                                             |
| 23               | Belize  | Coffee and products             | 1999           | 3                                                              |
| 23               | Belize  | Crustaceans                     | 1999           | 12                                                             |
| 23               | Belize  | Demersal Fish                   | 1999           | 1                                                              |
| 23               | Belize  | Eggs                            | 1999           | 21                                                             |
| 23               | Belize  | Fats, Animals, Raw              | 1999           | 164                                                            |
| 23               | Belize  | Fish, Seafood                   | 1999           | 26                                                             |
| 23               | Belize  | Fruits - Excluding Wine         | 1999           | 216                                                            |
| 23               | Belize  | Fruits, Other                   | 1999           | 26                                                             |
| 23               | Belize  | Grand Total                     | 1999           | 2,639                                                          |
| 23               | Belize  | Grapefruit and products         | 1999           | 53                                                             |
| 23               | Belize  | Grapes and products (excl wine) | 1999           | 3                                                              |
| 23               | Belize  | Groundnuts (Shelled Eq)         | 1999           | 8                                                              |
| 23               | Belize  | Honey                           | 1999           | 2                                                              |
| 23               | Belize  | Maize and products              | 1999           | 175                                                            |
| 23               | Belize  | Maize Germ Oil                  | 1999           | 2                                                              |
| 23               | Belize  | Marine Fish, Other              | 1999           | 2                                                              |
| 23               | Belize  | Meat                            | 1999           | 192                                                            |
| 23               | Belize  | Milk - Excluding Butter         | 1999           | 146                                                            |
| 23               | Belize  | Miscellaneous                   | 1999           | 14                                                             |
| 23               | Belize  | Molluscs, Other                 | 1999           | 2                                                              |
| 23               | Belize  | Oats                            | 1999           | 5                                                              |
| 23               | Belize  | Offals                          | 1999           | 2                                                              |
| 23               | Belize  | Oilcrops                        | 1999           | 39                                                             |
| 23               | Belize  | Oilcrops Oil, Other             | 1999           | 37                                                             |
| 23               | Belize  | Onions                          | 1999           | 8                                                              |
| 23               | Belize  | Oranges, Mandarines             | 1999           | 65                                                             |
| 23               | Belize  | Peas                            | 1999           | 13                                                             |
| 23               | Belize  | Pelagic Fish                    | 1999           | 8                                                              |
| 23               | Belize  | Pigmeat                         | 1999           | 50                                                             |
| 23               | Belize  | Pineapples and products         | 1999           | 6                                                              |
| 23               | Belize  | Plantains                       | 1999           | 48                                                             |
| 23               | Belize  | Potatoes and products           | 1999           | 32                                                             |
| 23               | Belize  | Poultry Meat                    | 1999           | 112                                                            |
| 23               | Belize  | Pulses                          | 1999           | 105                                                            |
| 23               | Belize  | Rape and Mustardseed            | 1999           | 2                                                              |
| 23               | Belize  | Rice (Milled Equivalent)        | 1999           | 272                                                            |
| 23               | Belize  | Roots, Other                    | 1999           | 12                                                             |
| 23               | Belize  | Sorghum and products            | 1999           | 26                                                             |
| 23               | Belize  | Soyabean Oil                    | 1999           | 8                                                              |
| 23               | Belize  | Soyabeans                       | 1999           | 17                                                             |
| 23               | Belize  | Spices                          | 1999           | 2                                                              |
| 23               | Belize  | Spices, Other                   | 1999           | 2                                                              |
| 23               | Belize  | Starchy Roots                   | 1999           | 54                                                             |
| 23               | Belize  | Stimulants                      | 1999           | 12                                                             |
| 23               | Belize  | Sugar & Sweeteners              | 1999           | 435                                                            |
| 23               | Belize  | Sugar (Raw Equivalent)          | 1999           | 428                                                            |
| 23               | Belize  | Sunflowerseed Oil               | 1999           | 39                                                             |
| 23               | Belize  | Sweet potatoes                  | 1999           | 1                                                              |
| 23               | Belize  | Sweeteners, Other               | 1999           | 5                                                              |
| 23               | Belize  | Tomatoes and products           | 1999           | 2                                                              |

Dietary calcium and zinc deficiency risks are decreasing but remain prevalent

| FAO Country code | Country | Food item                       | Reference year | Net energy supply (kcal capita <sup>-1</sup> d <sup>-1</sup> ) |
|------------------|---------|---------------------------------|----------------|----------------------------------------------------------------|
| 23               | Belize  | Treenuts                        | 1999           | 11                                                             |
| 23               | Belize  | Vegetable Oils                  | 1999           | 91                                                             |
| 23               | Belize  | Vegetables                      | 1999           | 35                                                             |
| 23               | Belize  | Vegetables, Other               | 1999           | 25                                                             |
| 23               | Belize  | Vegetal Products                | 1999           | 2,079                                                          |
| 23               | Belize  | Wheat and products              | 1999           | 515                                                            |
| 23               | Belize  | Wine                            | 1999           | 1                                                              |
| 23               | Belize  | Alcoholic Beverages             | 2000           | 65                                                             |
| 23               | Belize  | Animal fats                     | 2000           | 169                                                            |
| 23               | Belize  | Animal Products                 | 2000           | 577                                                            |
| 23               | Belize  | Apples and products             | 2000           | 2                                                              |
| 23               | Belize  | Bananas                         | 2000           | 13                                                             |
| 23               | Belize  | Beans                           | 2000           | 91                                                             |
| 23               | Belize  | Beer                            | 2000           | 27                                                             |
| 23               | Belize  | Beverages, Alcoholic            | 2000           | 36                                                             |
| 23               | Belize  | Bovine Meat                     | 2000           | 34                                                             |
| 23               | Belize  | Butter, Ghee                    | 2000           | 7                                                              |
| 23               | Belize  | Cassava and products            | 2000           | 11                                                             |
| 23               | Belize  | Cephalopods                     | 2000           | 1                                                              |
| 23               | Belize  | Cereals - Excluding Beer        | 2000           | 988                                                            |
| 23               | Belize  | Cereals, Other                  | 2000           | 5                                                              |
| 23               | Belize  | Cocoa Beans and products        | 2000           | 15                                                             |
| 23               | Belize  | Coconut Oil                     | 2000           | 4                                                              |
| 23               | Belize  | Coconuts - Incl Copra           | 2000           | 13                                                             |
| 23               | Belize  | Coffee and products             | 2000           | 4                                                              |
| 23               | Belize  | Cream                           | 2000           | 1                                                              |
| 23               | Belize  | Crustaceans                     | 2000           | 19                                                             |
| 23               | Belize  | Eggs                            | 2000           | 21                                                             |
| 23               | Belize  | Fats, Animals, Raw              | 2000           | 160                                                            |
| 23               | Belize  | Fish, Seafood                   | 2000           | 32                                                             |
| 23               | Belize  | Fruits - Excluding Wine         | 2000           | 221                                                            |
| 23               | Belize  | Fruits, Other                   | 2000           | 27                                                             |
| 23               | Belize  | Grand Total                     | 2000           | 2,688                                                          |
| 23               | Belize  | Grapefruit and products         | 2000           | 48                                                             |
| 23               | Belize  | Grapes and products (excl wine) | 2000           | 2                                                              |
| 23               | Belize  | Groundnuts (Shelled Eq)         | 2000           | 12                                                             |
| 23               | Belize  | Honey                           | 2000           | 2                                                              |
| 23               | Belize  | Maize and products              | 2000           | 173                                                            |
| 23               | Belize  | Maize Germ Oil                  | 2000           | 4                                                              |
| 23               | Belize  | Marine Fish, Other              | 2000           | 1                                                              |
| 23               | Belize  | Meat                            | 2000           | 205                                                            |
| 23               | Belize  | Milk - Excluding Butter         | 2000           | 147                                                            |
| 23               | Belize  | Miscellaneous                   | 2000           | 25                                                             |
| 23               | Belize  | Molluscs, Other                 | 2000           | 1                                                              |
| 23               | Belize  | Oats                            | 2000           | 3                                                              |
| 23               | Belize  | Offals                          | 2000           | 2                                                              |
| 23               | Belize  | Oilcrops                        | 2000           | 46                                                             |
| 23               | Belize  | Oilcrops Oil, Other             | 2000           | 40                                                             |
| 23               | Belize  | Olive Oil                       | 2000           | 5                                                              |
| 23               | Belize  | Onions                          | 2000           | 6                                                              |
| 23               | Belize  | Oranges, Mandarines             | 2000           | 63                                                             |
| 23               | Belize  | Peas                            | 2000           | 3                                                              |
| 23               | Belize  | Pelagic Fish                    | 2000           | 10                                                             |
| 23               | Belize  | Pigmeat                         | 2000           | 58                                                             |
| 23               | Belize  | Pineapples and products         | 2000           | 8                                                              |
| 23               | Belize  | Plantains                       | 2000           | 59                                                             |
| 23               | Belize  | Potatoes and products           | 2000           | 30                                                             |
| 23               | Belize  | Poultry Meat                    | 2000           | 112                                                            |
| 23               | Belize  | Pulses                          | 2000           | 97                                                             |
| 23               | Belize  | Pulses, Other and products      | 2000           | 2                                                              |
| 23               | Belize  | Rape and Mustardseed            | 2000           | 2                                                              |
| 23               | Belize  | Rice (Milled Equivalent)        | 2000           | 275                                                            |
| 23               | Belize  | Roots, Other                    | 2000           | 12                                                             |
| 23               | Belize  | Sorghum and products            | 2000           | 25                                                             |
| 23               | Belize  | Soyabean Oil                    | 2000           | 9                                                              |
| 23               | Belize  | Soyabeans                       | 2000           | 20                                                             |
| 23               | Belize  | Spices                          | 2000           | 1                                                              |
| 23               | Belize  | Spices, Other                   | 2000           | 1                                                              |
| 23               | Belize  | Starchy Roots                   | 2000           | 56                                                             |
| 23               | Belize  | Stimulants                      | 2000           | 19                                                             |
| 23               | Belize  | Sugar & Sweeteners              | 2000           | 430                                                            |
| 23               | Belize  | Sugar (Raw Equivalent)          | 2000           | 420                                                            |
| 23               | Belize  | Sunflowerseed Oil               | 2000           | 37                                                             |
| 23               | Belize  | Sweet potatoes                  | 2000           | 2                                                              |
| 23               | Belize  | Sweeteners, Other               | 2000           | 8                                                              |
| 23               | Belize  | Tomatoes and products           | 2000           | 6                                                              |
| 23               | Belize  | Treenuts                        | 2000           | 25                                                             |
| 23               | Belize  | Vegetable Oils                  | 2000           | 100                                                            |
| 23               | Belize  | Vegetables                      | 2000           | 39                                                             |
| 23               | Belize  | Vegetables, Other               | 2000           | 27                                                             |
| 23               | Belize  | Vegetal Products                | 2000           | 2,111                                                          |
| 23               | Belize  | Wheat and products              | 2000           | 507                                                            |
| 23               | Belize  | Wine                            | 2000           | 1                                                              |
| 23               | Belize  | Alcoholic Beverages             | 2001           | 70                                                             |
| 23               | Belize  | Animal fats                     | 2001           | 166                                                            |
| 23               | Belize  | Animal Products                 | 2001           | 635                                                            |
| 23               | Belize  | Apples and products             | 2001           | 2                                                              |
| 23               | Belize  | Bananas                         | 2001           | 14                                                             |
| 23               | Belize  | Beans                           | 2001           | 92                                                             |
| 23               | Belize  | Beer                            | 2001           | 28                                                             |
| 23               | Belize  | Beverages, Alcoholic            | 2001           | 40                                                             |
| 23               | Belize  | Bovine Meat                     | 2001           | 34                                                             |
| 23               | Belize  | Butter, Ghee                    | 2001           | 6                                                              |
| 23               | Belize  | Cassava and products            | 2001           | 20                                                             |
| 23               | Belize  | Cephalopods                     | 2001           | 1                                                              |
| 23               | Belize  | Cereals - Excluding Beer        | 2001           | 1,033                                                          |
| 23               | Belize  | Cereals, Other                  | 2001           | 5                                                              |

Dietary calcium and zinc deficiency risks are decreasing but remain prevalent

| FAO Country code | Country | Food item                       | Reference year | Net energy supply (kcal capita <sup>-1</sup> d <sup>-1</sup> ) |
|------------------|---------|---------------------------------|----------------|----------------------------------------------------------------|
| 23               | Belize  | Cocoa Beans and products        | 2001           | 9                                                              |
| 23               | Belize  | Coconut Oil                     | 2001           | 5                                                              |
| 23               | Belize  | Coconuts - Incl Copra           | 2001           | 12                                                             |
| 23               | Belize  | Coffee and products             | 2001           | 3                                                              |
| 23               | Belize  | Crustaceans                     | 2001           | 14                                                             |
| 23               | Belize  | Eggs                            | 2001           | 19                                                             |
| 23               | Belize  | Fats, Animals, Raw              | 2001           | 160                                                            |
| 23               | Belize  | Fish, Seafood                   | 2001           | 32                                                             |
| 23               | Belize  | Fruits - Excluding Wine         | 2001           | 235                                                            |
| 23               | Belize  | Fruits, Other                   | 2001           | 26                                                             |
| 23               | Belize  | Grand Total                     | 2001           | 2,756                                                          |
| 23               | Belize  | Grapefruit and products         | 2001           | 64                                                             |
| 23               | Belize  | Grapes and products (excl wine) | 2001           | 1                                                              |
| 23               | Belize  | Groundnuts (Shelled Eq)         | 2001           | 12                                                             |
| 23               | Belize  | Honey                           | 2001           | 1                                                              |
| 23               | Belize  | Maize and products              | 2001           | 192                                                            |
| 23               | Belize  | Maize Germ Oil                  | 2001           | 4                                                              |
| 23               | Belize  | Marine Fish, Other              | 2001           | 1                                                              |
| 23               | Belize  | Meat                            | 2001           | 225                                                            |
| 23               | Belize  | Milk - Excluding Butter         | 2001           | 190                                                            |
| 23               | Belize  | Miscellaneous                   | 2001           | 13                                                             |
| 23               | Belize  | Molluscs, Other                 | 2001           | 1                                                              |
| 23               | Belize  | Oats                            | 2001           | 17                                                             |
| 23               | Belize  | Offals                          | 2001           | 3                                                              |
| 23               | Belize  | Oilcrops                        | 2001           | 47                                                             |
| 23               | Belize  | Oilcrops Oil, Other             | 2001           | 13                                                             |
| 23               | Belize  | Olive Oil                       | 2001           | 3                                                              |
| 23               | Belize  | Onions                          | 2001           | 8                                                              |
| 23               | Belize  | Oranges, Mandarines             | 2001           | 60                                                             |
| 23               | Belize  | Peas                            | 2001           | 5                                                              |
| 23               | Belize  | Pelagic Fish                    | 2001           | 14                                                             |
| 23               | Belize  | Pigmeat                         | 2001           | 60                                                             |
| 23               | Belize  | Pineapples and products         | 2001           | 7                                                              |
| 23               | Belize  | Plantains                       | 2001           | 61                                                             |
| 23               | Belize  | Potatoes and products           | 2001           | 28                                                             |
| 23               | Belize  | Poultry Meat                    | 2001           | 131                                                            |
| 23               | Belize  | Pulses                          | 2001           | 100                                                            |
| 23               | Belize  | Pulses, Other and products      | 2001           | 4                                                              |
| 23               | Belize  | Rape and Mustardseed            | 2001           | 1                                                              |
| 23               | Belize  | Rice (Milled Equivalent)        | 2001           | 279                                                            |
| 23               | Belize  | Roots, Other                    | 2001           | 16                                                             |
| 23               | Belize  | Sorghum and products            | 2001           | 29                                                             |
| 23               | Belize  | Soyabean Oil                    | 2001           | 9                                                              |
| 23               | Belize  | Soyabeans                       | 2001           | 22                                                             |
| 23               | Belize  | Spices                          | 2001           | 1                                                              |
| 23               | Belize  | Spices, Other                   | 2001           | 1                                                              |
| 23               | Belize  | Starchy Roots                   | 2001           | 66                                                             |
| 23               | Belize  | Stimulants                      | 2001           | 12                                                             |
| 23               | Belize  | Sugar & Sweeteners              | 2001           | 418                                                            |
| 23               | Belize  | Sugar (Raw Equivalent)          | 2001           | 412                                                            |
| 23               | Belize  | Sunflowerseed Oil               | 2001           | 25                                                             |
| 23               | Belize  | Sweet potatoes                  | 2001           | 3                                                              |
| 23               | Belize  | Sweeteners, Other               | 2001           | 4                                                              |
| 23               | Belize  | Tomatoes and products           | 2001           | 4                                                              |
| 23               | Belize  | Treenuts                        | 2001           | 33                                                             |
| 23               | Belize  | Vegetable Oils                  | 2001           | 58                                                             |
| 23               | Belize  | Vegetables                      | 2001           | 37                                                             |
| 23               | Belize  | Vegetables, Other               | 2001           | 25                                                             |
| 23               | Belize  | Vegetal Products                | 2001           | 2,121                                                          |
| 23               | Belize  | Wheat and products              | 2001           | 510                                                            |
| 23               | Belize  | Wine                            | 2001           | 1                                                              |
| 23               | Belize  | Alcoholic Beverages             | 2002           | 69                                                             |
| 23               | Belize  | Animal fats                     | 2002           | 169                                                            |
| 23               | Belize  | Animal Products                 | 2002           | 631                                                            |
| 23               | Belize  | Apples and products             | 2002           | 2                                                              |
| 23               | Belize  | Bananas                         | 2002           | 14                                                             |
| 23               | Belize  | Beans                           | 2002           | 90                                                             |
| 23               | Belize  | Beer                            | 2002           | 28                                                             |
| 23               | Belize  | Beverages, Alcoholic            | 2002           | 40                                                             |
| 23               | Belize  | Bovine Meat                     | 2002           | 41                                                             |
| 23               | Belize  | Butter, Ghee                    | 2002           | 6                                                              |
| 23               | Belize  | Cassava and products            | 2002           | 18                                                             |
| 23               | Belize  | Cephalopods                     | 2002           | 1                                                              |
| 23               | Belize  | Cereals - Excluding Beer        | 2002           | 1,044                                                          |
| 23               | Belize  | Cereals, Other                  | 2002           | 4                                                              |
| 23               | Belize  | Cocoa Beans and products        | 2002           | 8                                                              |
| 23               | Belize  | Coconut Oil                     | 2002           | 6                                                              |
| 23               | Belize  | Coconuts - Incl Copra           | 2002           | 12                                                             |
| 23               | Belize  | Coffee and products             | 2002           | 2                                                              |
| 23               | Belize  | Crustaceans                     | 2002           | 10                                                             |
| 23               | Belize  | Demersal Fish                   | 2002           | 1                                                              |
| 23               | Belize  | Eggs                            | 2002           | 17                                                             |
| 23               | Belize  | Fats, Animals, Raw              | 2002           | 162                                                            |
| 23               | Belize  | Fish, Seafood                   | 2002           | 32                                                             |
| 23               | Belize  | Fruits - Excluding Wine         | 2002           | 217                                                            |
| 23               | Belize  | Fruits, Other                   | 2002           | 26                                                             |
| 23               | Belize  | Grand Total                     | 2002           | 2,778                                                          |
| 23               | Belize  | Grapefruit and products         | 2002           | 52                                                             |
| 23               | Belize  | Grapes and products (excl wine) | 2002           | 1                                                              |
| 23               | Belize  | Groundnuts (Shelled Eq)         | 2002           | 11                                                             |
| 23               | Belize  | Honey                           | 2002           | 2                                                              |
| 23               | Belize  | Maize and products              | 2002           | 207                                                            |
| 23               | Belize  | Maize Germ Oil                  | 2002           | 2                                                              |
| 23               | Belize  | Marine Fish, Other              | 2002           | 1                                                              |
| 23               | Belize  | Meat                            | 2002           | 244                                                            |
| 23               | Belize  | Milk - Excluding Butter         | 2002           | 167                                                            |
| 23               | Belize  | Miscellaneous                   | 2002           | 15                                                             |



Dietary calcium and zinc deficiency risks are decreasing but remain prevalent

| FAO Country code | Country | Food item                       | Reference year | Net energy supply (kcal <i>capita</i> <sup>-1</sup> d <sup>-1</sup> ) |
|------------------|---------|---------------------------------|----------------|-----------------------------------------------------------------------|
| 23               | Belize  | Molluscs, Other                 | 2002           | 1                                                                     |
| 23               | Belize  | Oats                            | 2002           | 19                                                                    |
| 23               | Belize  | Offals                          | 2002           | 3                                                                     |
| 23               | Belize  | Oilcrops                        | 2002           | 51                                                                    |
| 23               | Belize  | Oilcrops Oil, Other             | 2002           | 26                                                                    |
| 23               | Belize  | Olive Oil                       | 2002           | 3                                                                     |
| 23               | Belize  | Onions                          | 2002           | 8                                                                     |
| 23               | Belize  | Oranges, Mandarines             | 2002           | 58                                                                    |
| 23               | Belize  | Peas                            | 2002           | 19                                                                    |
| 23               | Belize  | Pelagic Fish                    | 2002           | 18                                                                    |
| 23               | Belize  | Pigmeat                         | 2002           | 58                                                                    |
| 23               | Belize  | Pineapples and products         | 2002           | 7                                                                     |
| 23               | Belize  | Plantains                       | 2002           | 58                                                                    |
| 23               | Belize  | Potatoes and products           | 2002           | 30                                                                    |
| 23               | Belize  | Poultry Meat                    | 2002           | 146                                                                   |
| 23               | Belize  | Pulses                          | 2002           | 112                                                                   |
| 23               | Belize  | Pulses, Other and products      | 2002           | 3                                                                     |
| 23               | Belize  | Rice (Milled Equivalent)        | 2002           | 257                                                                   |
| 23               | Belize  | Roots, Other                    | 2002           | 10                                                                    |
| 23               | Belize  | Sorghum and products            | 2002           | 34                                                                    |
| 23               | Belize  | Soyabean Oil                    | 2002           | 8                                                                     |
| 23               | Belize  | Soyabeans                       | 2002           | 27                                                                    |
| 23               | Belize  | Starchy Roots                   | 2002           | 60                                                                    |
| 23               | Belize  | Stimulants                      | 2002           | 11                                                                    |
| 23               | Belize  | Sugar & Sweeteners              | 2002           | 422                                                                   |
| 23               | Belize  | Sugar (Raw Equivalent)          | 2002           | 411                                                                   |
| 23               | Belize  | Sunflowerseed Oil               | 2002           | 24                                                                    |
| 23               | Belize  | Sweet potatoes                  | 2002           | 1                                                                     |
| 23               | Belize  | Sweeteners, Other               | 2002           | 9                                                                     |
| 23               | Belize  | Tomatoes and products           | 2002           | 4                                                                     |
| 23               | Belize  | Treenuts                        | 2002           | 38                                                                    |
| 23               | Belize  | Vegetable Oils                  | 2002           | 71                                                                    |
| 23               | Belize  | Vegetables                      | 2002           | 38                                                                    |
| 23               | Belize  | Vegetables, Other               | 2002           | 26                                                                    |
| 23               | Belize  | Vegetal Products                | 2002           | 2,147                                                                 |
| 23               | Belize  | Wheat and products              | 2002           | 523                                                                   |
| 23               | Belize  | Wine                            | 2002           | 1                                                                     |
| 23               | Belize  | Alcoholic Beverages             | 2003           | 60                                                                    |
| 23               | Belize  | Animal fats                     | 2003           | 144                                                                   |
| 23               | Belize  | Animal Products                 | 2003           | 588                                                                   |
| 23               | Belize  | Apples and products             | 2003           | 4                                                                     |
| 23               | Belize  | Bananas                         | 2003           | 13                                                                    |
| 23               | Belize  | Beans                           | 2003           | 100                                                                   |
| 23               | Belize  | Beer                            | 2003           | 28                                                                    |
| 23               | Belize  | Beverages, Alcoholic            | 2003           | 24                                                                    |
| 23               | Belize  | Beverages, Fermented            | 2003           | 2                                                                     |
| 23               | Belize  | Bovine Meat                     | 2003           | 51                                                                    |
| 23               | Belize  | Butter, Ghee                    | 2003           | 8                                                                     |
| 23               | Belize  | Cassava and products            | 2003           | 14                                                                    |
| 23               | Belize  | Cephalopods                     | 2003           | 1                                                                     |
| 23               | Belize  | Cereals - Excluding Beer        | 2003           | 991                                                                   |
| 23               | Belize  | Cereals, Other                  | 2003           | 5                                                                     |
| 23               | Belize  | Cocoa Beans and products        | 2003           | 28                                                                    |
| 23               | Belize  | Coconut Oil                     | 2003           | 7                                                                     |
| 23               | Belize  | Coconuts - Incl Copra           | 2003           | 9                                                                     |
| 23               | Belize  | Coffee and products             | 2003           | 5                                                                     |
| 23               | Belize  | Cream                           | 2003           | 2                                                                     |
| 23               | Belize  | Crustaceans                     | 2003           | 10                                                                    |
| 23               | Belize  | Eggs                            | 2003           | 18                                                                    |
| 23               | Belize  | Fats, Animals, Raw              | 2003           | 134                                                                   |
| 23               | Belize  | Fish, Seafood                   | 2003           | 30                                                                    |
| 23               | Belize  | Fruits - Excluding Wine         | 2003           | 229                                                                   |
| 23               | Belize  | Fruits, Other                   | 2003           | 31                                                                    |
| 23               | Belize  | Grand Total                     | 2003           | 2,806                                                                 |
| 23               | Belize  | Grapefruit and products         | 2003           | 50                                                                    |
| 23               | Belize  | Grapes and products (excl wine) | 2003           | 4                                                                     |
| 23               | Belize  | Groundnuts (Shelled Eq)         | 2003           | 19                                                                    |
| 23               | Belize  | Honey                           | 2003           | 2                                                                     |
| 23               | Belize  | Maize and products              | 2003           | 189                                                                   |
| 23               | Belize  | Maize Germ Oil                  | 2003           | 2                                                                     |
| 23               | Belize  | Marine Fish, Other              | 2003           | 1                                                                     |
| 23               | Belize  | Meat                            | 2003           | 237                                                                   |
| 23               | Belize  | Milk - Excluding Butter         | 2003           | 156                                                                   |
| 23               | Belize  | Miscellaneous                   | 2003           | 32                                                                    |
| 23               | Belize  | Molluscs, Other                 | 2003           | 1                                                                     |
| 23               | Belize  | Mutton & Goat Meat              | 2003           | 1                                                                     |
| 23               | Belize  | Oats                            | 2003           | 11                                                                    |
| 23               | Belize  | Offals                          | 2003           | 3                                                                     |
| 23               | Belize  | Oilcrops                        | 2003           | 59                                                                    |
| 23               | Belize  | Oilcrops Oil, Other             | 2003           | 55                                                                    |
| 23               | Belize  | Olive Oil                       | 2003           | 4                                                                     |
| 23               | Belize  | Olives (including preserved)    | 2003           | 1                                                                     |
| 23               | Belize  | Onions                          | 2003           | 9                                                                     |
| 23               | Belize  | Oranges, Mandarines             | 2003           | 64                                                                    |
| 23               | Belize  | Peas                            | 2003           | 17                                                                    |
| 23               | Belize  | Pelagic Fish                    | 2003           | 17                                                                    |
| 23               | Belize  | Pigmeat                         | 2003           | 52                                                                    |
| 23               | Belize  | Pimento                         | 2003           | 5                                                                     |
| 23               | Belize  | Pineapples and products         | 2003           | 6                                                                     |
| 23               | Belize  | Plantains                       | 2003           | 57                                                                    |
| 23               | Belize  | Potatoes and products           | 2003           | 40                                                                    |
| 23               | Belize  | Poultry Meat                    | 2003           | 132                                                                   |
| 23               | Belize  | Pulses                          | 2003           | 120                                                                   |
| 23               | Belize  | Pulses, Other and products      | 2003           | 3                                                                     |
| 23               | Belize  | Rape and Mustardseed            | 2003           | 4                                                                     |
| 23               | Belize  | Rice (Milled Equivalent)        | 2003           | 262                                                                   |
| 23               | Belize  | Roots, Other                    | 2003           | 7                                                                     |

Dietary calcium and zinc deficiency risks are decreasing but remain prevalent

| FAO Country code | Country | Food item                       | Reference year | Net energy supply (kcal <i>capita</i> <sup>-1</sup> d <sup>-1</sup> ) |
|------------------|---------|---------------------------------|----------------|-----------------------------------------------------------------------|
| 23               | Belize  | Sesameseed Oil                  | 2003           | 1                                                                     |
| 23               | Belize  | Sorghum and products            | 2003           | 25                                                                    |
| 23               | Belize  | Soyabean Oil                    | 2003           | 7                                                                     |
| 23               | Belize  | Soyabeans                       | 2003           | 26                                                                    |
| 23               | Belize  | Spices                          | 2003           | 7                                                                     |
| 23               | Belize  | Spices, Other                   | 2003           | 3                                                                     |
| 23               | Belize  | Starchy Roots                   | 2003           | 69                                                                    |
| 23               | Belize  | Stimulants                      | 2003           | 34                                                                    |
| 23               | Belize  | Sugar & Sweeteners              | 2003           | 431                                                                   |
| 23               | Belize  | Sugar (Raw Equivalent)          | 2003           | 412                                                                   |
| 23               | Belize  | Sunflowerseed Oil               | 2003           | 24                                                                    |
| 23               | Belize  | Sweet potatoes                  | 2003           | 2                                                                     |
| 23               | Belize  | Sweeteners, Other               | 2003           | 17                                                                    |
| 23               | Belize  | Tea (including mate)            | 2003           | 1                                                                     |
| 23               | Belize  | Tomatoes and products           | 2003           | 4                                                                     |
| 23               | Belize  | Treenuts                        | 2003           | 39                                                                    |
| 23               | Belize  | Vegetable Oils                  | 2003           | 100                                                                   |
| 23               | Belize  | Vegetables                      | 2003           | 47                                                                    |
| 23               | Belize  | Vegetables, Other               | 2003           | 35                                                                    |
| 23               | Belize  | Vegetal Products                | 2003           | 2,218                                                                 |
| 23               | Belize  | Wheat and products              | 2003           | 500                                                                   |
| 23               | Belize  | Wine                            | 2003           | 6                                                                     |
| 23               | Belize  | Yams                            | 2003           | 5                                                                     |
| 23               | Belize  | Alcoholic Beverages             | 2004           | 59                                                                    |
| 23               | Belize  | Animal fats                     | 2004           | 146                                                                   |
| 23               | Belize  | Animal Products                 | 2004           | 579                                                                   |
| 23               | Belize  | Apples and products             | 2004           | 1                                                                     |
| 23               | Belize  | Bananas                         | 2004           | 13                                                                    |
| 23               | Belize  | Barley and products             | 2004           | 2                                                                     |
| 23               | Belize  | Beans                           | 2004           | 97                                                                    |
| 23               | Belize  | Beer                            | 2004           | 10                                                                    |
| 23               | Belize  | Beverages, Alcoholic            | 2004           | 48                                                                    |
| 23               | Belize  | Bovine Meat                     | 2004           | 57                                                                    |
| 23               | Belize  | Butter, Ghee                    | 2004           | 8                                                                     |
| 23               | Belize  | Cassava and products            | 2004           | 13                                                                    |
| 23               | Belize  | Cephalopods                     | 2004           | 1                                                                     |
| 23               | Belize  | Cereals - Excluding Beer        | 2004           | 1,100                                                                 |
| 23               | Belize  | Cereals, Other                  | 2004           | 1                                                                     |
| 23               | Belize  | Cocoa Beans and products        | 2004           | 14                                                                    |
| 23               | Belize  | Coconut Oil                     | 2004           | 6                                                                     |
| 23               | Belize  | Coconuts - Incl Copra           | 2004           | 12                                                                    |
| 23               | Belize  | Coffee and products             | 2004           | 3                                                                     |
| 23               | Belize  | Crustaceans                     | 2004           | 10                                                                    |
| 23               | Belize  | Eggs                            | 2004           | 16                                                                    |
| 23               | Belize  | Fats, Animals, Raw              | 2004           | 138                                                                   |
| 23               | Belize  | Fish, Seafood                   | 2004           | 25                                                                    |
| 23               | Belize  | Freshwater Fish                 | 2004           | 3                                                                     |
| 23               | Belize  | Fruits - Excluding Wine         | 2004           | 212                                                                   |
| 23               | Belize  | Fruits, Other                   | 2004           | 24                                                                    |
| 23               | Belize  | Grand Total                     | 2004           | 2,777                                                                 |
| 23               | Belize  | Grapefruit and products         | 2004           | 52                                                                    |
| 23               | Belize  | Grapes and products (excl wine) | 2004           | 1                                                                     |
| 23               | Belize  | Groundnuts (Shelled Eq)         | 2004           | 5                                                                     |
| 23               | Belize  | Honey                           | 2004           | 1                                                                     |
| 23               | Belize  | Maize and products              | 2004           | 214                                                                   |
| 23               | Belize  | Maize Germ Oil                  | 2004           | 3                                                                     |
| 23               | Belize  | Meat                            | 2004           | 240                                                                   |
| 23               | Belize  | Milk - Excluding Butter         | 2004           | 149                                                                   |
| 23               | Belize  | Miscellaneous                   | 2004           | 29                                                                    |
| 23               | Belize  | Molluscs, Other                 | 2004           | 3                                                                     |
| 23               | Belize  | Oats                            | 2004           | 5                                                                     |
| 23               | Belize  | Offals                          | 2004           | 3                                                                     |
| 23               | Belize  | Oilcrops                        | 2004           | 42                                                                    |
| 23               | Belize  | Oilcrops Oil, Other             | 2004           | 53                                                                    |
| 23               | Belize  | Olive Oil                       | 2004           | 1                                                                     |
| 23               | Belize  | Onions                          | 2004           | 2                                                                     |
| 23               | Belize  | Oranges, Mandarines             | 2004           | 47                                                                    |
| 23               | Belize  | Peas                            | 2004           | 27                                                                    |
| 23               | Belize  | Pelagic Fish                    | 2004           | 8                                                                     |
| 23               | Belize  | Pigmeat                         | 2004           | 50                                                                    |
| 23               | Belize  | Pineapples and products         | 2004           | 6                                                                     |
| 23               | Belize  | Plantains                       | 2004           | 67                                                                    |
| 23               | Belize  | Potatoes and products           | 2004           | 20                                                                    |
| 23               | Belize  | Poultry Meat                    | 2004           | 133                                                                   |
| 23               | Belize  | Pulses                          | 2004           | 127                                                                   |
| 23               | Belize  | Pulses, Other and products      | 2004           | 3                                                                     |
| 23               | Belize  | Rape and Mustardseed            | 2004           | 1                                                                     |
| 23               | Belize  | Rice (Milled Equivalent)        | 2004           | 316                                                                   |
| 23               | Belize  | Roots, Other                    | 2004           | 3                                                                     |
| 23               | Belize  | Sesameseed Oil                  | 2004           | 1                                                                     |
| 23               | Belize  | Sorghum and products            | 2004           | 40                                                                    |
| 23               | Belize  | Soyabean Oil                    | 2004           | 2                                                                     |
| 23               | Belize  | Soyabeans                       | 2004           | 24                                                                    |
| 23               | Belize  | Spices                          | 2004           | 1                                                                     |
| 23               | Belize  | Starchy Roots                   | 2004           | 38                                                                    |
| 23               | Belize  | Stimulants                      | 2004           | 17                                                                    |
| 23               | Belize  | Sugar & Sweeteners              | 2004           | 420                                                                   |
| 23               | Belize  | Sugar (Raw Equivalent)          | 2004           | 409                                                                   |
| 23               | Belize  | Sunflowerseed Oil               | 2004           | 18                                                                    |
| 23               | Belize  | Sweet potatoes                  | 2004           | 1                                                                     |
| 23               | Belize  | Sweeteners, Other               | 2004           | 10                                                                    |
| 23               | Belize  | Tomatoes and products           | 2004           | 1                                                                     |
| 23               | Belize  | Treenuts                        | 2004           | 40                                                                    |
| 23               | Belize  | Vegetable Oils                  | 2004           | 84                                                                    |
| 23               | Belize  | Vegetables                      | 2004           | 29                                                                    |
| 23               | Belize  | Vegetables, Other               | 2004           | 25                                                                    |
| 23               | Belize  | Vegetal Products                | 2004           | 2,198                                                                 |

Dietary calcium and zinc deficiency risks are decreasing but remain prevalent

| FAO Country code | Country | Food item                       | Reference year | Net energy supply (kcal capita <sup>-1</sup> d <sup>-1</sup> ) |
|------------------|---------|---------------------------------|----------------|----------------------------------------------------------------|
| 23               | Belize  | Wheat and products              | 2004           | 523                                                            |
| 23               | Belize  | Wine                            | 2004           | 1                                                              |
| 23               | Belize  | Alcoholic Beverages             | 2005           | 66                                                             |
| 23               | Belize  | Animal fats                     | 2005           | 165                                                            |
| 23               | Belize  | Animal Products                 | 2005           | 601                                                            |
| 23               | Belize  | Apples and products             | 2005           | 2                                                              |
| 23               | Belize  | Bananas                         | 2005           | 19                                                             |
| 23               | Belize  | Beans                           | 2005           | 96                                                             |
| 23               | Belize  | Beer                            | 2005           | 20                                                             |
| 23               | Belize  | Beverages, Alcoholic            | 2005           | 42                                                             |
| 23               | Belize  | Bovine Meat                     | 2005           | 37                                                             |
| 23               | Belize  | Butter, Ghee                    | 2005           | 9                                                              |
| 23               | Belize  | Cassava and products            | 2005           | 2                                                              |
| 23               | Belize  | Cephalopods                     | 2005           | 1                                                              |
| 23               | Belize  | Cereals - Excluding Beer        | 2005           | 1,098                                                          |
| 23               | Belize  | Cereals, Other                  | 2005           | 3                                                              |
| 23               | Belize  | Cocoa Beans and products        | 2005           | 12                                                             |
| 23               | Belize  | Coconut Oil                     | 2005           | 10                                                             |
| 23               | Belize  | Coconuts - Incl Copra           | 2005           | 12                                                             |
| 23               | Belize  | Coffee and products             | 2005           | 3                                                              |
| 23               | Belize  | Cream                           | 2005           | 2                                                              |
| 23               | Belize  | Crustaceans                     | 2005           | 9                                                              |
| 23               | Belize  | Demersal Fish                   | 2005           | 1                                                              |
| 23               | Belize  | Eggs                            | 2005           | 12                                                             |
| 23               | Belize  | Fats, Animals, Raw              | 2005           | 154                                                            |
| 23               | Belize  | Fish, Seafood                   | 2005           | 26                                                             |
| 23               | Belize  | Freshwater Fish                 | 2005           | 3                                                              |
| 23               | Belize  | Fruits - Excluding Wine         | 2005           | 218                                                            |
| 23               | Belize  | Fruits, Other                   | 2005           | 28                                                             |
| 23               | Belize  | Grand Total                     | 2005           | 2,817                                                          |
| 23               | Belize  | Grapefruit and products         | 2005           | 89                                                             |
| 23               | Belize  | Grapes and products (excl wine) | 2005           | 1                                                              |
| 23               | Belize  | Groundnuts (Shelled Eq)         | 2005           | 9                                                              |
| 23               | Belize  | Honey                           | 2005           | 1                                                              |
| 23               | Belize  | Maize and products              | 2005           | 204                                                            |
| 23               | Belize  | Maize Germ Oil                  | 2005           | 3                                                              |
| 23               | Belize  | Marine Fish, Other              | 2005           | 1                                                              |
| 23               | Belize  | Meat                            | 2005           | 231                                                            |
| 23               | Belize  | Milk - Excluding Butter         | 2005           | 166                                                            |
| 23               | Belize  | Miscellaneous                   | 2005           | 36                                                             |
| 23               | Belize  | Molluscs, Other                 | 2005           | 1                                                              |
| 23               | Belize  | Mutton & Goat Meat              | 2005           | 1                                                              |
| 23               | Belize  | Oats                            | 2005           | 4                                                              |
| 23               | Belize  | Offals                          | 2005           | 2                                                              |
| 23               | Belize  | Oilcrops                        | 2005           | 47                                                             |
| 23               | Belize  | Oilcrops Oil, Other             | 2005           | 55                                                             |
| 23               | Belize  | Olive Oil                       | 2005           | 5                                                              |
| 23               | Belize  | Onions                          | 2005           | 4                                                              |
| 23               | Belize  | Oranges, Mandarines             | 2005           | 30                                                             |
| 23               | Belize  | Peas                            | 2005           | 27                                                             |
| 23               | Belize  | Pelagic Fish                    | 2005           | 9                                                              |
| 23               | Belize  | Pepper                          | 2005           | 1                                                              |
| 23               | Belize  | Pigmeat                         | 2005           | 66                                                             |
| 23               | Belize  | Pineapples and products         | 2005           | 7                                                              |
| 23               | Belize  | Plantains                       | 2005           | 40                                                             |
| 23               | Belize  | Potatoes and products           | 2005           | 20                                                             |
| 23               | Belize  | Poultry Meat                    | 2005           | 127                                                            |
| 23               | Belize  | Pulses                          | 2005           | 124                                                            |
| 23               | Belize  | Pulses, Other and products      | 2005           | 1                                                              |
| 23               | Belize  | Rape and Mustardseed            | 2005           | 2                                                              |
| 23               | Belize  | Rice (Milled Equivalent)        | 2005           | 287                                                            |
| 23               | Belize  | Roots, Other                    | 2005           | 4                                                              |
| 23               | Belize  | Sorghum and products            | 2005           | 25                                                             |
| 23               | Belize  | Soyabean Oil                    | 2005           | 10                                                             |
| 23               | Belize  | Soyabeans                       | 2005           | 24                                                             |
| 23               | Belize  | Spices                          | 2005           | 2                                                              |
| 23               | Belize  | Spices, Other                   | 2005           | 1                                                              |
| 23               | Belize  | Starchy Roots                   | 2005           | 28                                                             |
| 23               | Belize  | Stimulants                      | 2005           | 16                                                             |
| 23               | Belize  | Sugar & Sweeteners              | 2005           | 418                                                            |
| 23               | Belize  | Sugar (Raw Equivalent)          | 2005           | 411                                                            |
| 23               | Belize  | Sunflowerseed Oil               | 2005           | 19                                                             |
| 23               | Belize  | Sweet potatoes                  | 2005           | 1                                                              |
| 23               | Belize  | Sweeteners, Other               | 2005           | 6                                                              |
| 23               | Belize  | Tomatoes and products           | 2005           | 2                                                              |
| 23               | Belize  | Treenuts                        | 2005           | 33                                                             |
| 23               | Belize  | Vegetable Oils                  | 2005           | 103                                                            |
| 23               | Belize  | Vegetables                      | 2005           | 28                                                             |
| 23               | Belize  | Vegetables, Other               | 2005           | 23                                                             |
| 23               | Belize  | Vegetal Products                | 2005           | 2,216                                                          |
| 23               | Belize  | Wheat and products              | 2005           | 574                                                            |
| 23               | Belize  | Wine                            | 2005           | 4                                                              |
| 23               | Belize  | Yams                            | 2005           | 1                                                              |
| 23               | Belize  | Alcoholic Beverages             | 2006           | 86                                                             |
| 23               | Belize  | Animal fats                     | 2006           | 156                                                            |
| 23               | Belize  | Animal Products                 | 2006           | 562                                                            |
| 23               | Belize  | Apples and products             | 2006           | 2                                                              |
| 23               | Belize  | Bananas                         | 2006           | 14                                                             |
| 23               | Belize  | Beans                           | 2006           | 98                                                             |
| 23               | Belize  | Beer                            | 2006           | 34                                                             |
| 23               | Belize  | Beverages, Alcoholic            | 2006           | 47                                                             |
| 23               | Belize  | Bovine Meat                     | 2006           | 34                                                             |
| 23               | Belize  | Butter, Ghee                    | 2006           | 7                                                              |
| 23               | Belize  | Cassava and products            | 2006           | 3                                                              |
| 23               | Belize  | Cereals - Excluding Beer        | 2006           | 1,081                                                          |
| 23               | Belize  | Cereals, Other                  | 2006           | 2                                                              |
| 23               | Belize  | Cocoa Beans and products        | 2006           | 13                                                             |

Dietary calcium and zinc deficiency risks are decreasing but remain prevalent

| FAO Country code | Country | Food item                       | Reference year | Net energy supply (kcal capita <sup>-1</sup> d <sup>-1</sup> ) |
|------------------|---------|---------------------------------|----------------|----------------------------------------------------------------|
| 23               | Belize  | Coconut Oil                     | 2006           | 9                                                              |
| 23               | Belize  | Coconuts - Incl Copra           | 2006           | 12                                                             |
| 23               | Belize  | Coffee and products             | 2006           | 4                                                              |
| 23               | Belize  | Cream                           | 2006           | 3                                                              |
| 23               | Belize  | Crustaceans                     | 2006           | 3                                                              |
| 23               | Belize  | Eggs                            | 2006           | 14                                                             |
| 23               | Belize  | Fats, Animals, Raw              | 2006           | 146                                                            |
| 23               | Belize  | Fish, Liver Oil                 | 2006           | 1                                                              |
| 23               | Belize  | Fish, Seafood                   | 2006           | 18                                                             |
| 23               | Belize  | Freshwater Fish                 | 2006           | 3                                                              |
| 23               | Belize  | Fruits - Excluding Wine         | 2006           | 218                                                            |
| 23               | Belize  | Fruits, Other                   | 2006           | 21                                                             |
| 23               | Belize  | Grand Total                     | 2006           | 2,792                                                          |
| 23               | Belize  | Grapefruit and products         | 2006           | 92                                                             |
| 23               | Belize  | Grapes and products (excl wine) | 2006           | 2                                                              |
| 23               | Belize  | Groundnuts (Shelled Eq)         | 2006           | 5                                                              |
| 23               | Belize  | Honey                           | 2006           | 2                                                              |
| 23               | Belize  | Maize and products              | 2006           | 275                                                            |
| 23               | Belize  | Maize Germ Oil                  | 2006           | 3                                                              |
| 23               | Belize  | Marine Fish, Other              | 2006           | 1                                                              |
| 23               | Belize  | Meat                            | 2006           | 219                                                            |
| 23               | Belize  | Milk - Excluding Butter         | 2006           | 153                                                            |
| 23               | Belize  | Miscellaneous                   | 2006           | 30                                                             |
| 23               | Belize  | Molluscs, Other                 | 2006           | 1                                                              |
| 23               | Belize  | Mutton & Goat Meat              | 2006           | 1                                                              |
| 23               | Belize  | Oats                            | 2006           | 4                                                              |
| 23               | Belize  | Offals                          | 2006           | 2                                                              |
| 23               | Belize  | Oilcrops                        | 2006           | 43                                                             |
| 23               | Belize  | Oilcrops Oil, Other             | 2006           | 45                                                             |
| 23               | Belize  | Olive Oil                       | 2006           | 6                                                              |
| 23               | Belize  | Onions                          | 2006           | 4                                                              |
| 23               | Belize  | Oranges, Mandarines             | 2006           | 30                                                             |
| 23               | Belize  | Peas                            | 2006           | 4                                                              |
| 23               | Belize  | Pelagic Fish                    | 2006           | 10                                                             |
| 23               | Belize  | Pepper                          | 2006           | 1                                                              |
| 23               | Belize  | Pigmeat                         | 2006           | 64                                                             |
| 23               | Belize  | Pineapples and products         | 2006           | 4                                                              |
| 23               | Belize  | Plantains                       | 2006           | 54                                                             |
| 23               | Belize  | Potatoes and products           | 2006           | 23                                                             |
| 23               | Belize  | Poultry Meat                    | 2006           | 120                                                            |
| 23               | Belize  | Pulses                          | 2006           | 104                                                            |
| 23               | Belize  | Pulses, Other and products      | 2006           | 2                                                              |
| 23               | Belize  | Rape and Mustardseed            | 2006           | 1                                                              |
| 23               | Belize  | Rice (Milled Equivalent)        | 2006           | 291                                                            |
| 23               | Belize  | Roots, Other                    | 2006           | 4                                                              |
| 23               | Belize  | Sorghum and products            | 2006           | 26                                                             |
| 23               | Belize  | Soyabean Oil                    | 2006           | 12                                                             |
| 23               | Belize  | Soyabeans                       | 2006           | 24                                                             |
| 23               | Belize  | Spices                          | 2006           | 2                                                              |
| 23               | Belize  | Spices, Other                   | 2006           | 1                                                              |
| 23               | Belize  | Starchy Roots                   | 2006           | 31                                                             |
| 23               | Belize  | Stimulants                      | 2006           | 16                                                             |
| 23               | Belize  | Sugar & Sweeteners              | 2006           | 415                                                            |
| 23               | Belize  | Sugar (Raw Equivalent)          | 2006           | 411                                                            |
| 23               | Belize  | Sunflowerseed Oil               | 2006           | 55                                                             |
| 23               | Belize  | Sweet potatoes                  | 2006           | 1                                                              |
| 23               | Belize  | Sweeteners, Other               | 2006           | 3                                                              |
| 23               | Belize  | Tomatoes and products           | 2006           | 2                                                              |
| 23               | Belize  | Treenuts                        | 2006           | 42                                                             |
| 23               | Belize  | Vegetable Oils                  | 2006           | 130                                                            |
| 23               | Belize  | Vegetables                      | 2006           | 29                                                             |
| 23               | Belize  | Vegetables, Other               | 2006           | 23                                                             |
| 23               | Belize  | Vegetal Products                | 2006           | 2,229                                                          |
| 23               | Belize  | Wheat and products              | 2006           | 483                                                            |
| 23               | Belize  | Wine                            | 2006           | 4                                                              |
| 23               | Belize  | Yams                            | 2006           | 1                                                              |
| 23               | Belize  | Alcoholic Beverages             | 2007           | 95                                                             |
| 23               | Belize  | Animal fats                     | 2007           | 132                                                            |
| 23               | Belize  | Animal Products                 | 2007           | 533                                                            |
| 23               | Belize  | Apples and products             | 2007           | 2                                                              |
| 23               | Belize  | Bananas                         | 2007           | 17                                                             |
| 23               | Belize  | Beans                           | 2007           | 99                                                             |
| 23               | Belize  | Beer                            | 2007           | 45                                                             |
| 23               | Belize  | Beverages, Alcoholic            | 2007           | 47                                                             |
| 23               | Belize  | Bovine Meat                     | 2007           | 31                                                             |
| 23               | Belize  | Butter, Ghee                    | 2007           | 5                                                              |
| 23               | Belize  | Cassava and products            | 2007           | 3                                                              |
| 23               | Belize  | Cephalopods                     | 2007           | 1                                                              |
| 23               | Belize  | Cereals - Excluding Beer        | 2007           | 1,108                                                          |
| 23               | Belize  | Cereals, Other                  | 2007           | 1                                                              |
| 23               | Belize  | Cocoa Beans and products        | 2007           | 11                                                             |
| 23               | Belize  | Coconut Oil                     | 2007           | 12                                                             |
| 23               | Belize  | Coconuts - Incl Copra           | 2007           | 12                                                             |
| 23               | Belize  | Coffee and products             | 2007           | 2                                                              |
| 23               | Belize  | Cream                           | 2007           | 2                                                              |
| 23               | Belize  | Crustaceans                     | 2007           | 2                                                              |
| 23               | Belize  | Demersal Fish                   | 2007           | 1                                                              |
| 23               | Belize  | Eggs                            | 2007           | 15                                                             |
| 23               | Belize  | Fats, Animals, Raw              | 2007           | 125                                                            |
| 23               | Belize  | Fish, Seafood                   | 2007           | 18                                                             |
| 23               | Belize  | Freshwater Fish                 | 2007           | 3                                                              |
| 23               | Belize  | Fruits - Excluding Wine         | 2007           | 211                                                            |
| 23               | Belize  | Fruits, Other                   | 2007           | 21                                                             |
| 23               | Belize  | Grand Total                     | 2007           | 2,784                                                          |
| 23               | Belize  | Grapefruit and products         | 2007           | 93                                                             |
| 23               | Belize  | Grapes and products (excl wine) | 2007           | 1                                                              |
| 23               | Belize  | Groundnuts (Shelled Eq)         | 2007           | 5                                                              |

Dietary calcium and zinc deficiency risks are decreasing but remain prevalent

| FAO Country code | Country | Food item                       | Reference year | Net energy supply (kcal capita <sup>-1</sup> d <sup>-1</sup> ) |
|------------------|---------|---------------------------------|----------------|----------------------------------------------------------------|
| 23               | Belize  | Honey                           | 2007           | 1                                                              |
| 23               | Belize  | Maize and products              | 2007           | 276                                                            |
| 23               | Belize  | Maize Germ Oil                  | 2007           | 4                                                              |
| 23               | Belize  | Marine Fish, Other              | 2007           | 1                                                              |
| 23               | Belize  | Meat                            | 2007           | 217                                                            |
| 23               | Belize  | Milk - Excluding Butter         | 2007           | 148                                                            |
| 23               | Belize  | Miscellaneous                   | 2007           | 30                                                             |
| 23               | Belize  | Molluscs, Other                 | 2007           | 1                                                              |
| 23               | Belize  | Mutton & Goat Meat              | 2007           | 1                                                              |
| 23               | Belize  | Oats                            | 2007           | 4                                                              |
| 23               | Belize  | Offals                          | 2007           | 2                                                              |
| 23               | Belize  | Oilcrops                        | 2007           | 41                                                             |
| 23               | Belize  | Oilcrops Oil, Other             | 2007           | 47                                                             |
| 23               | Belize  | Olive Oil                       | 2007           | 5                                                              |
| 23               | Belize  | Onions                          | 2007           | 4                                                              |
| 23               | Belize  | Oranges, Mandarines             | 2007           | 52                                                             |
| 23               | Belize  | Peas                            | 2007           | 3                                                              |
| 23               | Belize  | Pelagic Fish                    | 2007           | 9                                                              |
| 23               | Belize  | Pigmeat                         | 2007           | 71                                                             |
| 23               | Belize  | Pineapples and products         | 2007           | 6                                                              |
| 23               | Belize  | Plantains                       | 2007           | 20                                                             |
| 23               | Belize  | Potatoes and products           | 2007           | 19                                                             |
| 23               | Belize  | Poultry Meat                    | 2007           | 115                                                            |
| 23               | Belize  | Pulses                          | 2007           | 103                                                            |
| 23               | Belize  | Pulses, Other and products      | 2007           | 1                                                              |
| 23               | Belize  | Rape and Mustardseed            | 2007           | 2                                                              |
| 23               | Belize  | Rice (Milled Equivalent)        | 2007           | 323                                                            |
| 23               | Belize  | Roots, Other                    | 2007           | 3                                                              |
| 23               | Belize  | Sorghum and products            | 2007           | 26                                                             |
| 23               | Belize  | Soyabean Oil                    | 2007           | 16                                                             |
| 23               | Belize  | Soyabeans                       | 2007           | 22                                                             |
| 23               | Belize  | Spices                          | 2007           | 2                                                              |
| 23               | Belize  | Spices, Other                   | 2007           | 1                                                              |
| 23               | Belize  | Starchy Roots                   | 2007           | 26                                                             |
| 23               | Belize  | Stimulants                      | 2007           | 14                                                             |
| 23               | Belize  | Sugar & Sweeteners              | 2007           | 424                                                            |
| 23               | Belize  | Sugar (Raw Equivalent)          | 2007           | 417                                                            |
| 23               | Belize  | Sunflowerseed Oil               | 2007           | 47                                                             |
| 23               | Belize  | Sweeteners, Other               | 2007           | 6                                                              |
| 23               | Belize  | Tomatoes and products           | 2007           | 2                                                              |
| 23               | Belize  | Treenuts                        | 2007           | 39                                                             |
| 23               | Belize  | Vegetable Oils                  | 2007           | 132                                                            |
| 23               | Belize  | Vegetables                      | 2007           | 27                                                             |
| 23               | Belize  | Vegetables, Other               | 2007           | 21                                                             |
| 23               | Belize  | Vegetal Products                | 2007           | 2,251                                                          |
| 23               | Belize  | Wheat and products              | 2007           | 478                                                            |
| 23               | Belize  | Wine                            | 2007           | 3                                                              |
| 23               | Belize  | Yams                            | 2007           | 1                                                              |
| 23               | Belize  | Alcoholic Beverages             | 2008           | 93                                                             |
| 23               | Belize  | Animal fats                     | 2008           | 127                                                            |
| 23               | Belize  | Animal Products                 | 2008           | 506                                                            |
| 23               | Belize  | Apples and products             | 2008           | 2                                                              |
| 23               | Belize  | Bananas                         | 2008           | 12                                                             |
| 23               | Belize  | Beans                           | 2008           | 87                                                             |
| 23               | Belize  | Beer                            | 2008           | 36                                                             |
| 23               | Belize  | Beverages, Alcoholic            | 2008           | 54                                                             |
| 23               | Belize  | Bovine Meat                     | 2008           | 31                                                             |
| 23               | Belize  | Butter, Ghee                    | 2008           | 7                                                              |
| 23               | Belize  | Cassava and products            | 2008           | 3                                                              |
| 23               | Belize  | Cereals - Excluding Beer        | 2008           | 1,048                                                          |
| 23               | Belize  | Cereals, Other                  | 2008           | 1                                                              |
| 23               | Belize  | Cocoa Beans and products        | 2008           | 12                                                             |
| 23               | Belize  | Coconut Oil                     | 2008           | 9                                                              |
| 23               | Belize  | Coconuts - Incl Copra           | 2008           | 11                                                             |
| 23               | Belize  | Coffee and products             | 2008           | 2                                                              |
| 23               | Belize  | Cream                           | 2008           | 1                                                              |
| 23               | Belize  | Crustaceans                     | 2008           | 3                                                              |
| 23               | Belize  | Demersal Fish                   | 2008           | 1                                                              |
| 23               | Belize  | Eggs                            | 2008           | 18                                                             |
| 23               | Belize  | Fats, Animals, Raw              | 2008           | 119                                                            |
| 23               | Belize  | Fish, Liver Oil                 | 2008           | 1                                                              |
| 23               | Belize  | Fish, Seafood                   | 2008           | 21                                                             |
| 23               | Belize  | Freshwater Fish                 | 2008           | 3                                                              |
| 23               | Belize  | Fruits - Excluding Wine         | 2008           | 230                                                            |
| 23               | Belize  | Fruits, Other                   | 2008           | 21                                                             |
| 23               | Belize  | Grand Total                     | 2008           | 2,708                                                          |
| 23               | Belize  | Grapefruit and products         | 2008           | 92                                                             |
| 23               | Belize  | Grapes and products (excl wine) | 2008           | 2                                                              |
| 23               | Belize  | Groundnuts (Shelled Eq)         | 2008           | 7                                                              |
| 23               | Belize  | Honey                           | 2008           | 1                                                              |
| 23               | Belize  | Maize and products              | 2008           | 209                                                            |
| 23               | Belize  | Maize Germ Oil                  | 2008           | 4                                                              |
| 23               | Belize  | Marine Fish, Other              | 2008           | 1                                                              |
| 23               | Belize  | Meat                            | 2008           | 218                                                            |
| 23               | Belize  | Milk - Excluding Butter         | 2008           | 121                                                            |
| 23               | Belize  | Miscellaneous                   | 2008           | 33                                                             |
| 23               | Belize  | Molluscs, Other                 | 2008           | 1                                                              |
| 23               | Belize  | Mutton & Goat Meat              | 2008           | 1                                                              |
| 23               | Belize  | Oats                            | 2008           | 3                                                              |
| 23               | Belize  | Offals                          | 2008           | 2                                                              |
| 23               | Belize  | Oilcrops                        | 2008           | 31                                                             |
| 23               | Belize  | Oilcrops Oil, Other             | 2008           | 71                                                             |
| 23               | Belize  | Olive Oil                       | 2008           | 4                                                              |
| 23               | Belize  | Onions                          | 2008           | 3                                                              |
| 23               | Belize  | Oranges, Mandarines             | 2008           | 68                                                             |
| 23               | Belize  | Peas                            | 2008           | 14                                                             |
| 23               | Belize  | Pelagic Fish                    | 2008           | 12                                                             |

Dietary calcium and zinc deficiency risks are decreasing but remain prevalent

| FAO Country code | Country | Food item                       | Reference year | Net energy supply (kcal capita <sup>-1</sup> d <sup>-1</sup> ) |
|------------------|---------|---------------------------------|----------------|----------------------------------------------------------------|
| 23               | Belize  | Pigmeat                         | 2008           | 78                                                             |
| 23               | Belize  | Pimento                         | 2008           | 1                                                              |
| 23               | Belize  | Pineapples and products         | 2008           | 3                                                              |
| 23               | Belize  | Plantains                       | 2008           | 32                                                             |
| 23               | Belize  | Potatoes and products           | 2008           | 21                                                             |
| 23               | Belize  | Poultry Meat                    | 2008           | 107                                                            |
| 23               | Belize  | Pulses                          | 2008           | 102                                                            |
| 23               | Belize  | Pulses, Other and products      | 2008           | 1                                                              |
| 23               | Belize  | Rape and Mustardseed            | 2008           | 1                                                              |
| 23               | Belize  | Rice (Milled Equivalent)        | 2008           | 311                                                            |
| 23               | Belize  | Roots, Other                    | 2008           | 3                                                              |
| 23               | Belize  | Sorghum and products            | 2008           | 39                                                             |
| 23               | Belize  | Soyabean Oil                    | 2008           | 16                                                             |
| 23               | Belize  | Soyabeans                       | 2008           | 11                                                             |
| 23               | Belize  | Spices                          | 2008           | 2                                                              |
| 23               | Belize  | Spices, Other                   | 2008           | 1                                                              |
| 23               | Belize  | Starchy Roots                   | 2008           | 28                                                             |
| 23               | Belize  | Stimulants                      | 2008           | 14                                                             |
| 23               | Belize  | Sugar & Sweeteners              | 2008           | 407                                                            |
| 23               | Belize  | Sugar (Raw Equivalent)          | 2008           | 400                                                            |
| 23               | Belize  | Sunflowerseed Oil               | 2008           | 48                                                             |
| 23               | Belize  | Sweet potatoes                  | 2008           | 1                                                              |
| 23               | Belize  | Sweeteners, Other               | 2008           | 6                                                              |
| 23               | Belize  | Tomatoes and products           | 2008           | 2                                                              |
| 23               | Belize  | Treenuts                        | 2008           | 34                                                             |
| 23               | Belize  | Vegetable Oils                  | 2008           | 152                                                            |
| 23               | Belize  | Vegetables                      | 2008           | 29                                                             |
| 23               | Belize  | Vegetables, Other               | 2008           | 24                                                             |
| 23               | Belize  | Vegetal Products                | 2008           | 2,202                                                          |
| 23               | Belize  | Wheat and products              | 2008           | 486                                                            |
| 23               | Belize  | Wine                            | 2008           | 3                                                              |
| 23               | Belize  | Yams                            | 2008           | 1                                                              |
| 23               | Belize  | Alcoholic Beverages             | 2009           | 89                                                             |
| 23               | Belize  | Animal fats                     | 2009           | 123                                                            |
| 23               | Belize  | Animal Products                 | 2009           | 507                                                            |
| 23               | Belize  | Apples and products             | 2009           | 3                                                              |
| 23               | Belize  | Bananas                         | 2009           | 11                                                             |
| 23               | Belize  | Beans                           | 2009           | 60                                                             |
| 23               | Belize  | Beer                            | 2009           | 35                                                             |
| 23               | Belize  | Beverages, Alcoholic            | 2009           | 52                                                             |
| 23               | Belize  | Bovine Meat                     | 2009           | 31                                                             |
| 23               | Belize  | Butter, Ghee                    | 2009           | 5                                                              |
| 23               | Belize  | Cassava and products            | 2009           | 3                                                              |
| 23               | Belize  | Cereals - Excluding Beer        | 2009           | 1,104                                                          |
| 23               | Belize  | Cereals, Other                  | 2009           | 1                                                              |
| 23               | Belize  | Cocoa Beans and products        | 2009           | 12                                                             |
| 23               | Belize  | Coconut Oil                     | 2009           | 8                                                              |
| 23               | Belize  | Coconuts - Incl Copra           | 2009           | 8                                                              |
| 23               | Belize  | Coffee and products             | 2009           | 3                                                              |
| 23               | Belize  | Cream                           | 2009           | 1                                                              |
| 23               | Belize  | Crustaceans                     | 2009           | 2                                                              |
| 23               | Belize  | Demersal Fish                   | 2009           | 1                                                              |
| 23               | Belize  | Eggs                            | 2009           | 18                                                             |
| 23               | Belize  | Fats, Animals, Raw              | 2009           | 117                                                            |
| 23               | Belize  | Fish, Seafood                   | 2009           | 17                                                             |
| 23               | Belize  | Freshwater Fish                 | 2009           | 3                                                              |
| 23               | Belize  | Fruits - Excluding Wine         | 2009           | 206                                                            |
| 23               | Belize  | Fruits, Other                   | 2009           | 23                                                             |
| 23               | Belize  | Grand Total                     | 2009           | 2,752                                                          |
| 23               | Belize  | Grapefruit and products         | 2009           | 61                                                             |
| 23               | Belize  | Grapes and products (excl wine) | 2009           | 1                                                              |
| 23               | Belize  | Groundnuts (Shelled Eq)         | 2009           | 6                                                              |
| 23               | Belize  | Honey                           | 2009           | 2                                                              |
| 23               | Belize  | Maize and products              | 2009           | 249                                                            |
| 23               | Belize  | Maize Germ Oil                  | 2009           | 4                                                              |
| 23               | Belize  | Meat                            | 2009           | 214                                                            |
| 23               | Belize  | Milk - Excluding Butter         | 2009           | 133                                                            |
| 23               | Belize  | Miscellaneous                   | 2009           | 22                                                             |
| 23               | Belize  | Molluscs, Other                 | 2009           | 2                                                              |
| 23               | Belize  | Oats                            | 2009           | 5                                                              |
| 23               | Belize  | Offals                          | 2009           | 2                                                              |
| 23               | Belize  | Oilcrops                        | 2009           | 32                                                             |
| 23               | Belize  | Oilcrops Oil, Other             | 2009           | 91                                                             |
| 23               | Belize  | Olive Oil                       | 2009           | 5                                                              |
| 23               | Belize  | Onions                          | 2009           | 3                                                              |
| 23               | Belize  | Oranges, Mandarines             | 2009           | 63                                                             |
| 23               | Belize  | Peas                            | 2009           | 43                                                             |
| 23               | Belize  | Pelagic Fish                    | 2009           | 10                                                             |
| 23               | Belize  | Pigmeat                         | 2009           | 72                                                             |
| 23               | Belize  | Pimento                         | 2009           | 1                                                              |
| 23               | Belize  | Pineapples and products         | 2009           | 3                                                              |
| 23               | Belize  | Plantains                       | 2009           | 41                                                             |
| 23               | Belize  | Potatoes and products           | 2009           | 22                                                             |
| 23               | Belize  | Poultry Meat                    | 2009           | 111                                                            |
| 23               | Belize  | Pulses                          | 2009           | 103                                                            |
| 23               | Belize  | Rice (Milled Equivalent)        | 2009           | 319                                                            |
| 23               | Belize  | Roots, Other                    | 2009           | 3                                                              |
| 23               | Belize  | Sorghum and products            | 2009           | 34                                                             |
| 23               | Belize  | Soyabean Oil                    | 2009           | 17                                                             |
| 23               | Belize  | Soyabeans                       | 2009           | 18                                                             |
| 23               | Belize  | Spices                          | 2009           | 4                                                              |
| 23               | Belize  | Spices, Other                   | 2009           | 3                                                              |
| 23               | Belize  | Starchy Roots                   | 2009           | 30                                                             |
| 23               | Belize  | Stimulants                      | 2009           | 14                                                             |
| 23               | Belize  | Sugar & Sweeteners              | 2009           | 414                                                            |
| 23               | Belize  | Sugar (Raw Equivalent)          | 2009           | 401                                                            |
| 23               | Belize  | Sunflowerseed Oil               | 2009           | 48                                                             |

Dietary calcium and zinc deficiency risks are decreasing but remain prevalent

| FAO Country code | Country | Food item                       | Reference year | Net energy supply (kcal capita <sup>-1</sup> d <sup>-1</sup> ) |
|------------------|---------|---------------------------------|----------------|----------------------------------------------------------------|
| 23               | Belize  | Sweeteners, Other               | 2009           | 11                                                             |
| 23               | Belize  | Tomatoes and products           | 2009           | 2                                                              |
| 23               | Belize  | Treenuts                        | 2009           | 27                                                             |
| 23               | Belize  | Vegetable Oils                  | 2009           | 174                                                            |
| 23               | Belize  | Vegetables                      | 2009           | 26                                                             |
| 23               | Belize  | Vegetables, Other               | 2009           | 22                                                             |
| 23               | Belize  | Vegetal Products                | 2009           | 2,244                                                          |
| 23               | Belize  | Wheat and products              | 2009           | 497                                                            |
| 23               | Belize  | Wine                            | 2009           | 2                                                              |
| 23               | Belize  | Yams                            | 2009           | 1                                                              |
| 23               | Belize  | Alcoholic Beverages             | 2010           | 95                                                             |
| 23               | Belize  | Animal fats                     | 2010           | 148                                                            |
| 23               | Belize  | Animal Products                 | 2010           | 541                                                            |
| 23               | Belize  | Apples and products             | 2010           | 2                                                              |
| 23               | Belize  | Bananas                         | 2010           | 21                                                             |
| 23               | Belize  | Beans                           | 2010           | 56                                                             |
| 23               | Belize  | Beer                            | 2010           | 34                                                             |
| 23               | Belize  | Beverages, Alcoholic            | 2010           | 57                                                             |
| 23               | Belize  | Bovine Meat                     | 2010           | 25                                                             |
| 23               | Belize  | Butter, Ghee                    | 2010           | 6                                                              |
| 23               | Belize  | Cassava and products            | 2010           | 3                                                              |
| 23               | Belize  | Cereals - Excluding Beer        | 2010           | 1,112                                                          |
| 23               | Belize  | Cocoa Beans and products        | 2010           | 16                                                             |
| 23               | Belize  | Coconut Oil                     | 2010           | 6                                                              |
| 23               | Belize  | Coconuts - Incl Copra           | 2010           | 7                                                              |
| 23               | Belize  | Coffee and products             | 2010           | 2                                                              |
| 23               | Belize  | Cream                           | 2010           | 1                                                              |
| 23               | Belize  | Crustaceans                     | 2010           | 2                                                              |
| 23               | Belize  | Eggs                            | 2010           | 21                                                             |
| 23               | Belize  | Fats, Animals, Raw              | 2010           | 141                                                            |
| 23               | Belize  | Fish, Seafood                   | 2010           | 20                                                             |
| 23               | Belize  | Freshwater Fish                 | 2010           | 3                                                              |
| 23               | Belize  | Fruits - Excluding Wine         | 2010           | 198                                                            |
| 23               | Belize  | Fruits, Other                   | 2010           | 21                                                             |
| 23               | Belize  | Grand Total                     | 2010           | 2,823                                                          |
| 23               | Belize  | Grapefruit and products         | 2010           | 80                                                             |
| 23               | Belize  | Grapes and products (excl wine) | 2010           | 2                                                              |
| 23               | Belize  | Groundnuts (Shelled Eq)         | 2010           | 7                                                              |
| 23               | Belize  | Honey                           | 2010           | 1                                                              |
| 23               | Belize  | Maize and products              | 2010           | 249                                                            |
| 23               | Belize  | Maize Germ Oil                  | 2010           | 5                                                              |
| 23               | Belize  | Marine Fish, Other              | 2010           | 2                                                              |
| 23               | Belize  | Meat                            | 2010           | 225                                                            |
| 23               | Belize  | Meat, Other                     | 2010           | 2                                                              |
| 23               | Belize  | Milk - Excluding Butter         | 2010           | 124                                                            |
| 23               | Belize  | Miscellaneous                   | 2010           | 32                                                             |
| 23               | Belize  | Molluscs, Other                 | 2010           | 2                                                              |
| 23               | Belize  | Oats                            | 2010           | 5                                                              |
| 23               | Belize  | Offals                          | 2010           | 2                                                              |
| 23               | Belize  | Oilcrops                        | 2010           | 36                                                             |
| 23               | Belize  | Oilcrops Oil, Other             | 2010           | 74                                                             |
| 23               | Belize  | Olive Oil                       | 2010           | 4                                                              |
| 23               | Belize  | Onions                          | 2010           | 3                                                              |
| 23               | Belize  | Oranges, Mandarines             | 2010           | 57                                                             |
| 23               | Belize  | Peas                            | 2010           | 49                                                             |
| 23               | Belize  | Pelagic Fish                    | 2010           | 11                                                             |
| 23               | Belize  | Pigmeat                         | 2010           | 85                                                             |
| 23               | Belize  | Pimento                         | 2010           | 1                                                              |
| 23               | Belize  | Pineapples and products         | 2010           | 3                                                              |
| 23               | Belize  | Plantains                       | 2010           | 13                                                             |
| 23               | Belize  | Potatoes and products           | 2010           | 23                                                             |
| 23               | Belize  | Poultry Meat                    | 2010           | 113                                                            |
| 23               | Belize  | Pulses                          | 2010           | 105                                                            |
| 23               | Belize  | Rape and Mustardseed            | 2010           | 2                                                              |
| 23               | Belize  | Rice (Milled Equivalent)        | 2010           | 314                                                            |
| 23               | Belize  | Roots, Other                    | 2010           | 3                                                              |
| 23               | Belize  | Sorghum and products            | 2010           | 36                                                             |
| 23               | Belize  | Soyabean Oil                    | 2010           | 21                                                             |
| 23               | Belize  | Soyabeans                       | 2010           | 19                                                             |
| 23               | Belize  | Spices                          | 2010           | 3                                                              |
| 23               | Belize  | Spices, Other                   | 2010           | 1                                                              |
| 23               | Belize  | Starchy Roots                   | 2010           | 30                                                             |
| 23               | Belize  | Stimulants                      | 2010           | 19                                                             |
| 23               | Belize  | Sugar & Sweeteners              | 2010           | 429                                                            |
| 23               | Belize  | Sugar (Raw Equivalent)          | 2010           | 417                                                            |
| 23               | Belize  | Sunflowerseed Oil               | 2010           | 51                                                             |
| 23               | Belize  | Sweeteners, Other               | 2010           | 11                                                             |
| 23               | Belize  | Tomatoes and products           | 2010           | 2                                                              |
| 23               | Belize  | Treenuts                        | 2010           | 31                                                             |
| 23               | Belize  | Vegetable Oils                  | 2010           | 161                                                            |
| 23               | Belize  | Vegetables                      | 2010           | 30                                                             |
| 23               | Belize  | Vegetables, Other               | 2010           | 25                                                             |
| 23               | Belize  | Vegetal Products                | 2010           | 2,282                                                          |
| 23               | Belize  | Wheat and products              | 2010           | 507                                                            |
| 23               | Belize  | Wine                            | 2010           | 4                                                              |
| 23               | Belize  | Alcoholic Beverages             | 2011           | 89                                                             |
| 23               | Belize  | Animal fats                     | 2011           | 134                                                            |
| 23               | Belize  | Animal Products                 | 2011           | 517                                                            |
| 23               | Belize  | Apples and products             | 2011           | 2                                                              |
| 23               | Belize  | Bananas                         | 2011           | 11                                                             |
| 23               | Belize  | Beans                           | 2011           | 54                                                             |
| 23               | Belize  | Beer                            | 2011           | 34                                                             |
| 23               | Belize  | Beverages, Alcoholic            | 2011           | 53                                                             |
| 23               | Belize  | Bovine Meat                     | 2011           | 27                                                             |
| 23               | Belize  | Butter, Ghee                    | 2011           | 4                                                              |
| 23               | Belize  | Cassava and products            | 2011           | 3                                                              |
| 23               | Belize  | Cereals - Excluding Beer        | 2011           | 1,073                                                          |

Dietary calcium and zinc deficiency risks are decreasing but remain prevalent

| FAO Country code | Country | Food item                       | Reference year | Net energy supply (kcal capita <sup>-1</sup> d <sup>-1</sup> ) |
|------------------|---------|---------------------------------|----------------|----------------------------------------------------------------|
| 23               | Belize  | Cocoa Beans and products        | 2011           | 15                                                             |
| 23               | Belize  | Coconut Oil                     | 2011           | 4                                                              |
| 23               | Belize  | Coconuts - Incl Copra           | 2011           | 7                                                              |
| 23               | Belize  | Coffee and products             | 2011           | 3                                                              |
| 23               | Belize  | Cream                           | 2011           | 1                                                              |
| 23               | Belize  | Crustaceans                     | 2011           | 2                                                              |
| 23               | Belize  | Eggs                            | 2011           | 18                                                             |
| 23               | Belize  | Fats, Animals, Raw              | 2011           | 129                                                            |
| 23               | Belize  | Fish, Seafood                   | 2011           | 20                                                             |
| 23               | Belize  | Freshwater Fish                 | 2011           | 3                                                              |
| 23               | Belize  | Fruits - Excluding Wine         | 2011           | 168                                                            |
| 23               | Belize  | Fruits, Other                   | 2011           | 20                                                             |
| 23               | Belize  | Grand Total                     | 2011           | 2,757                                                          |
| 23               | Belize  | Grapefruit and products         | 2011           | 37                                                             |
| 23               | Belize  | Grapes and products (excl wine) | 2011           | 2                                                              |
| 23               | Belize  | Groundnuts (Shelled Eq)         | 2011           | 4                                                              |
| 23               | Belize  | Honey                           | 2011           | 2                                                              |
| 23               | Belize  | Maize and products              | 2011           | 251                                                            |
| 23               | Belize  | Maize Germ Oil                  | 2011           | 4                                                              |
| 23               | Belize  | Marine Fish, Other              | 2011           | 2                                                              |
| 23               | Belize  | Meat                            | 2011           | 226                                                            |
| 23               | Belize  | Meat, Other                     | 2011           | 2                                                              |
| 23               | Belize  | Milk - Excluding Butter         | 2011           | 118                                                            |
| 23               | Belize  | Miscellaneous                   | 2011           | 30                                                             |
| 23               | Belize  | Molluscs, Other                 | 2011           | 2                                                              |
| 23               | Belize  | Oats                            | 2011           | 6                                                              |
| 23               | Belize  | Offals                          | 2011           | 2                                                              |
| 23               | Belize  | Oilcrops                        | 2011           | 33                                                             |
| 23               | Belize  | Oilcrops Oil, Other             | 2011           | 92                                                             |
| 23               | Belize  | Olive Oil                       | 2011           | 4                                                              |
| 23               | Belize  | Onions                          | 2011           | 3                                                              |
| 23               | Belize  | Oranges, Mandarines             | 2011           | 79                                                             |
| 23               | Belize  | Peas                            | 2011           | 49                                                             |
| 23               | Belize  | Pelagic Fish                    | 2011           | 11                                                             |
| 23               | Belize  | Pepper                          | 2011           | 1                                                              |
| 23               | Belize  | Pigmeat                         | 2011           | 85                                                             |
| 23               | Belize  | Pimento                         | 2011           | 1                                                              |
| 23               | Belize  | Pineapples and products         | 2011           | 3                                                              |
| 23               | Belize  | Plantains                       | 2011           | 15                                                             |
| 23               | Belize  | Potatoes and products           | 2011           | 23                                                             |
| 23               | Belize  | Poultry Meat                    | 2011           | 112                                                            |
| 23               | Belize  | Pulses                          | 2011           | 104                                                            |
| 23               | Belize  | Rape and Mustardseed            | 2011           | 2                                                              |
| 23               | Belize  | Rice (Milled Equivalent)        | 2011           | 294                                                            |
| 23               | Belize  | Roots, Other                    | 2011           | 3                                                              |
| 23               | Belize  | Sorghum and products            | 2011           | 38                                                             |
| 23               | Belize  | Soyabean Oil                    | 2011           | 32                                                             |
| 23               | Belize  | Soyabeans                       | 2011           | 20                                                             |
| 23               | Belize  | Spices                          | 2011           | 3                                                              |
| 23               | Belize  | Spices, Other                   | 2011           | 1                                                              |
| 23               | Belize  | Starchy Roots                   | 2011           | 30                                                             |
| 23               | Belize  | Stimulants                      | 2011           | 18                                                             |
| 23               | Belize  | Sugar & Sweeteners              | 2011           | 431                                                            |
| 23               | Belize  | Sugar (Raw Equivalent)          | 2011           | 424                                                            |
| 23               | Belize  | Sunflowerseed Oil               | 2011           | 54                                                             |
| 23               | Belize  | Sweeteners, Other               | 2011           | 6                                                              |
| 23               | Belize  | Tomatoes and products           | 2011           | 2                                                              |
| 23               | Belize  | Treenuts                        | 2011           | 39                                                             |
| 23               | Belize  | Vegetable Oils                  | 2011           | 191                                                            |
| 23               | Belize  | Vegetables                      | 2011           | 31                                                             |
| 23               | Belize  | Vegetables, Other               | 2011           | 26                                                             |
| 23               | Belize  | Vegetal Products                | 2011           | 2,240                                                          |
| 23               | Belize  | Wheat and products              | 2011           | 483                                                            |
| 23               | Belize  | Wine                            | 2011           | 2                                                              |
| 53               | Benin   | Alcoholic Beverages             | 1992           | 15                                                             |
| 53               | Benin   | Animal fats                     | 1992           | 5                                                              |
| 53               | Benin   | Animal Products                 | 1992           | 85                                                             |
| 53               | Benin   | Bananas                         | 1992           | 4                                                              |
| 53               | Benin   | Beans                           | 1992           | 71                                                             |
| 53               | Benin   | Beer                            | 1992           | 7                                                              |
| 53               | Benin   | Beverages, Alcoholic            | 1992           | 3                                                              |
| 53               | Benin   | Beverages, Fermented            | 1992           | 4                                                              |
| 53               | Benin   | Bovine Meat                     | 1992           | 21                                                             |
| 53               | Benin   | Cassava and products            | 1992           | 418                                                            |
| 53               | Benin   | Cereals - Excluding Beer        | 1992           | 863                                                            |
| 53               | Benin   | Cereals, Other                  | 1992           | 14                                                             |
| 53               | Benin   | Coconut Oil                     | 1992           | 9                                                              |
| 53               | Benin   | Coconuts - Incl Copra           | 1992           | 2                                                              |
| 53               | Benin   | Cottonseed Oil                  | 1992           | 1                                                              |
| 53               | Benin   | Crustaceans                     | 1992           | 2                                                              |
| 53               | Benin   | Dates                           | 1992           | 1                                                              |
| 53               | Benin   | Demersal Fish                   | 1992           | 1                                                              |
| 53               | Benin   | Eggs                            | 1992           | 3                                                              |
| 53               | Benin   | Fats, Animals, Raw              | 1992           | 5                                                              |
| 53               | Benin   | Fish, Seafood                   | 1992           | 16                                                             |
| 53               | Benin   | Freshwater Fish                 | 1992           | 6                                                              |
| 53               | Benin   | Fruits - Excluding Wine         | 1992           | 37                                                             |
| 53               | Benin   | Fruits, Other                   | 1992           | 26                                                             |
| 53               | Benin   | Grand Total                     | 1992           | 2,143                                                          |
| 53               | Benin   | Groundnut Oil                   | 1992           | 25                                                             |
| 53               | Benin   | Groundnuts (Shelled Eq)         | 1992           | 94                                                             |
| 53               | Benin   | Maize and products              | 1992           | 451                                                            |
| 53               | Benin   | Marine Fish, Other              | 1992           | 2                                                              |
| 53               | Benin   | Meat                            | 1992           | 47                                                             |
| 53               | Benin   | Meat, Other                     | 1992           | 3                                                              |
| 53               | Benin   | Milk - Excluding Butter         | 1992           | 11                                                             |
| 53               | Benin   | Millet and products             | 1992           | 25                                                             |



Dietary calcium and zinc deficiency risks are decreasing but remain prevalent

| FAO Country code | Country | Food item                  | Reference year | Net energy supply (kcal capita <sup>-1</sup> d <sup>-1</sup> ) |
|------------------|---------|----------------------------|----------------|----------------------------------------------------------------|
| 53               | Benin   | Mutton & Goat Meat         | 1992           | 4                                                              |
| 53               | Benin   | Offals                     | 1992           | 3                                                              |
| 53               | Benin   | Oilcrops                   | 1992           | 113                                                            |
| 53               | Benin   | Oilcrops Oil, Other        | 1992           | 6                                                              |
| 53               | Benin   | Onions                     | 1992           | 1                                                              |
| 53               | Benin   | Oranges, Mandarines        | 1992           | 2                                                              |
| 53               | Benin   | Palm Oil                   | 1992           | 61                                                             |
| 53               | Benin   | Palmkernel Oil             | 1992           | 14                                                             |
| 53               | Benin   | Pelagic Fish               | 1992           | 5                                                              |
| 53               | Benin   | Pigmeat                    | 1992           | 9                                                              |
| 53               | Benin   | Pimento                    | 1992           | 28                                                             |
| 53               | Benin   | Pineapples and products    | 1992           | 4                                                              |
| 53               | Benin   | Poultry Meat               | 1992           | 9                                                              |
| 53               | Benin   | Pulses                     | 1992           | 83                                                             |
| 53               | Benin   | Pulses, Other and products | 1992           | 11                                                             |
| 53               | Benin   | Rice (Milled Equivalent)   | 1992           | 140                                                            |
| 53               | Benin   | Roots, Other               | 1992           | 1                                                              |
| 53               | Benin   | Sesame seed                | 1992           | 16                                                             |
| 53               | Benin   | Sorghum and products       | 1992           | 133                                                            |
| 53               | Benin   | Soyabean Oil               | 1992           | 4                                                              |
| 53               | Benin   | Spices                     | 1992           | 28                                                             |
| 53               | Benin   | Starchy Roots              | 1992           | 724                                                            |
| 53               | Benin   | Sugar & Sweeteners         | 1992           | 43                                                             |
| 53               | Benin   | Sugar (Raw Equivalent)     | 1992           | 43                                                             |
| 53               | Benin   | Sunflower seed             | 1992           | 1                                                              |
| 53               | Benin   | Sweet potatoes             | 1992           | 15                                                             |
| 53               | Benin   | Tomatoes and products      | 1992           | 8                                                              |
| 53               | Benin   | Treenuts                   | 1992           | 4                                                              |
| 53               | Benin   | Vegetable Oils             | 1992           | 119                                                            |
| 53               | Benin   | Vegetables                 | 1992           | 28                                                             |
| 53               | Benin   | Vegetables, Other          | 1992           | 18                                                             |
| 53               | Benin   | Vegetal Products           | 1992           | 2,058                                                          |
| 53               | Benin   | Wheat and products         | 1992           | 101                                                            |
| 53               | Benin   | Wine                       | 1992           | 1                                                              |
| 53               | Benin   | Yams                       | 1992           | 290                                                            |
| 53               | Benin   | Alcoholic Beverages        | 1993           | 16                                                             |
| 53               | Benin   | Animal fats                | 1993           | 5                                                              |
| 53               | Benin   | Animal Products            | 1993           | 94                                                             |
| 53               | Benin   | Bananas                    | 1993           | 5                                                              |
| 53               | Benin   | Beans                      | 1993           | 65                                                             |
| 53               | Benin   | Beer                       | 1993           | 8                                                              |
| 53               | Benin   | Beverages, Alcoholic       | 1993           | 4                                                              |
| 53               | Benin   | Beverages, Fermented       | 1993           | 3                                                              |
| 53               | Benin   | Bovine Meat                | 1993           | 22                                                             |
| 53               | Benin   | Cassava and products       | 1993           | 416                                                            |
| 53               | Benin   | Cereals - Excluding Beer   | 1993           | 844                                                            |
| 53               | Benin   | Cereals, Other             | 1993           | 5                                                              |
| 53               | Benin   | Coconut Oil                | 1993           | 10                                                             |
| 53               | Benin   | Coconuts - Incl Copra      | 1993           | 2                                                              |
| 53               | Benin   | Cottonseed Oil             | 1993           | 11                                                             |
| 53               | Benin   | Crustaceans                | 1993           | 2                                                              |
| 53               | Benin   | Dates                      | 1993           | 1                                                              |
| 53               | Benin   | Demersal Fish              | 1993           | 1                                                              |
| 53               | Benin   | Eggs                       | 1993           | 3                                                              |
| 53               | Benin   | Fats, Animals, Raw         | 1993           | 5                                                              |
| 53               | Benin   | Fish, Seafood              | 1993           | 19                                                             |
| 53               | Benin   | Freshwater Fish            | 1993           | 8                                                              |
| 53               | Benin   | Fruits - Excluding Wine    | 1993           | 36                                                             |
| 53               | Benin   | Fruits, Other              | 1993           | 24                                                             |
| 53               | Benin   | Grand Total                | 1993           | 2,155                                                          |
| 53               | Benin   | Groundnut Oil              | 1993           | 24                                                             |
| 53               | Benin   | Groundnuts (Shelled Eq)    | 1993           | 91                                                             |
| 53               | Benin   | Maize and products         | 1993           | 453                                                            |
| 53               | Benin   | Marine Fish, Other         | 1993           | 3                                                              |
| 53               | Benin   | Meat                       | 1993           | 52                                                             |
| 53               | Benin   | Meat, Other                | 1993           | 4                                                              |
| 53               | Benin   | Milk - Excluding Butter    | 1993           | 13                                                             |
| 53               | Benin   | Millet and products        | 1993           | 21                                                             |
| 53               | Benin   | Miscellaneous              | 1993           | 1                                                              |
| 53               | Benin   | Mutton & Goat Meat         | 1993           | 4                                                              |
| 53               | Benin   | Offals                     | 1993           | 3                                                              |
| 53               | Benin   | Oilcrops                   | 1993           | 110                                                            |
| 53               | Benin   | Oilcrops Oil, Other        | 1993           | 26                                                             |
| 53               | Benin   | Onions                     | 1993           | 1                                                              |
| 53               | Benin   | Oranges, Mandarines        | 1993           | 2                                                              |
| 53               | Benin   | Palm Oil                   | 1993           | 52                                                             |
| 53               | Benin   | Palmkernel Oil             | 1993           | 16                                                             |
| 53               | Benin   | Pelagic Fish               | 1993           | 6                                                              |
| 53               | Benin   | Pigmeat                    | 1993           | 9                                                              |
| 53               | Benin   | Pimento                    | 1993           | 23                                                             |
| 53               | Benin   | Pineapples and products    | 1993           | 4                                                              |
| 53               | Benin   | Poultry Meat               | 1993           | 13                                                             |
| 53               | Benin   | Pulses                     | 1993           | 75                                                             |
| 53               | Benin   | Pulses, Other and products | 1993           | 10                                                             |
| 53               | Benin   | Rape and Mustard Oil       | 1993           | 1                                                              |
| 53               | Benin   | Rice (Milled Equivalent)   | 1993           | 183                                                            |
| 53               | Benin   | Roots, Other               | 1993           | 1                                                              |
| 53               | Benin   | Sesame seed                | 1993           | 17                                                             |
| 53               | Benin   | Sorghum and products       | 1993           | 123                                                            |
| 53               | Benin   | Soyabean Oil               | 1993           | 2                                                              |
| 53               | Benin   | Spices                     | 1993           | 24                                                             |
| 53               | Benin   | Starchy Roots              | 1993           | 730                                                            |
| 53               | Benin   | Sugar & Sweeteners         | 1993           | 54                                                             |
| 53               | Benin   | Sugar (Raw Equivalent)     | 1993           | 54                                                             |
| 53               | Benin   | Sweet potatoes             | 1993           | 17                                                             |
| 53               | Benin   | Tomatoes and products      | 1993           | 8                                                              |
| 53               | Benin   | Treenuts                   | 1993           | 1                                                              |

Dietary calcium and zinc deficiency risks are decreasing but remain prevalent

| FAO Country code | Country | Food item                  | Reference year | Net energy supply (kcal <i>capita</i> <sup>-1</sup> d <sup>-1</sup> ) |
|------------------|---------|----------------------------|----------------|-----------------------------------------------------------------------|
| 53               | Benin   | Vegetable Oils             | 1993           | 142                                                                   |
| 53               | Benin   | Vegetables                 | 1993           | 27                                                                    |
| 53               | Benin   | Vegetables, Other          | 1993           | 18                                                                    |
| 53               | Benin   | Vegetal Products           | 1993           | 2,060                                                                 |
| 53               | Benin   | Wheat and products         | 1993           | 59                                                                    |
| 53               | Benin   | Wine                       | 1993           | 1                                                                     |
| 53               | Benin   | Yams                       | 1993           | 295                                                                   |
| 53               | Benin   | Alcoholic Beverages        | 1994           | 13                                                                    |
| 53               | Benin   | Animal fats                | 1994           | 5                                                                     |
| 53               | Benin   | Animal Products            | 1994           | 86                                                                    |
| 53               | Benin   | Bananas                    | 1994           | 5                                                                     |
| 53               | Benin   | Beans                      | 1994           | 70                                                                    |
| 53               | Benin   | Beer                       | 1994           | 7                                                                     |
| 53               | Benin   | Beverages, Alcoholic       | 1994           | 2                                                                     |
| 53               | Benin   | Beverages, Fermented       | 1994           | 3                                                                     |
| 53               | Benin   | Bovine Meat                | 1994           | 19                                                                    |
| 53               | Benin   | Cassava and products       | 1994           | 416                                                                   |
| 53               | Benin   | Cereals - Excluding Beer   | 1994           | 864                                                                   |
| 53               | Benin   | Cereals, Other             | 1994           | 6                                                                     |
| 53               | Benin   | Coconut Oil                | 1994           | 9                                                                     |
| 53               | Benin   | Coconuts - Incl Copra      | 1994           | 2                                                                     |
| 53               | Benin   | Cottonseed Oil             | 1994           | 5                                                                     |
| 53               | Benin   | Crustaceans                | 1994           | 2                                                                     |
| 53               | Benin   | Dates                      | 1994           | 1                                                                     |
| 53               | Benin   | Demersal Fish              | 1994           | 1                                                                     |
| 53               | Benin   | Eggs                       | 1994           | 3                                                                     |
| 53               | Benin   | Fats, Animals, Raw         | 1994           | 5                                                                     |
| 53               | Benin   | Fish, Seafood              | 1994           | 16                                                                    |
| 53               | Benin   | Freshwater Fish            | 1994           | 7                                                                     |
| 53               | Benin   | Fruits - Excluding Wine    | 1994           | 36                                                                    |
| 53               | Benin   | Fruits, Other              | 1994           | 24                                                                    |
| 53               | Benin   | Grand Total                | 1994           | 2,179                                                                 |
| 53               | Benin   | Groundnut Oil              | 1994           | 25                                                                    |
| 53               | Benin   | Groundnuts (Shelled Eq)    | 1994           | 88                                                                    |
| 53               | Benin   | Maize and products         | 1994           | 466                                                                   |
| 53               | Benin   | Marine Fish, Other         | 1994           | 2                                                                     |
| 53               | Benin   | Meat                       | 1994           | 48                                                                    |
| 53               | Benin   | Meat, Other                | 1994           | 4                                                                     |
| 53               | Benin   | Milk - Excluding Butter    | 1994           | 11                                                                    |
| 53               | Benin   | Millet and products        | 1994           | 20                                                                    |
| 53               | Benin   | Mutton & Goat Meat         | 1994           | 4                                                                     |
| 53               | Benin   | Offals                     | 1994           | 3                                                                     |
| 53               | Benin   | Oilcrops                   | 1994           | 108                                                                   |
| 53               | Benin   | Oilcrops Oil, Other        | 1994           | 10                                                                    |
| 53               | Benin   | Onions                     | 1994           | 2                                                                     |
| 53               | Benin   | Oranges, Mandarines        | 1994           | 2                                                                     |
| 53               | Benin   | Palm Oil                   | 1994           | 51                                                                    |
| 53               | Benin   | Palmkernel Oil             | 1994           | 8                                                                     |
| 53               | Benin   | Pelagic Fish               | 1994           | 4                                                                     |
| 53               | Benin   | Pigmeat                    | 1994           | 10                                                                    |
| 53               | Benin   | Pimento                    | 1994           | 22                                                                    |
| 53               | Benin   | Pineapples and products    | 1994           | 4                                                                     |
| 53               | Benin   | Poultry Meat               | 1994           | 11                                                                    |
| 53               | Benin   | Pulses                     | 1994           | 78                                                                    |
| 53               | Benin   | Pulses, Other and products | 1994           | 8                                                                     |
| 53               | Benin   | Rape and Mustard Oil       | 1994           | 1                                                                     |
| 53               | Benin   | Rice (Milled Equivalent)   | 1994           | 174                                                                   |
| 53               | Benin   | Roots, Other               | 1994           | 1                                                                     |
| 53               | Benin   | Sesame seed                | 1994           | 18                                                                    |
| 53               | Benin   | Sorghum and products       | 1994           | 120                                                                   |
| 53               | Benin   | Soyabean Oil               | 1994           | 4                                                                     |
| 53               | Benin   | Spices                     | 1994           | 22                                                                    |
| 53               | Benin   | Starchy Roots              | 1994           | 744                                                                   |
| 53               | Benin   | Sugar & Sweeteners         | 1994           | 82                                                                    |
| 53               | Benin   | Sugar (Raw Equivalent)     | 1994           | 81                                                                    |
| 53               | Benin   | Sweet potatoes             | 1994           | 19                                                                    |
| 53               | Benin   | Tomatoes and products      | 1994           | 10                                                                    |
| 53               | Benin   | Treenuts                   | 1994           | 2                                                                     |
| 53               | Benin   | Vegetable Oils             | 1994           | 114                                                                   |
| 53               | Benin   | Vegetables                 | 1994           | 31                                                                    |
| 53               | Benin   | Vegetables, Other          | 1994           | 19                                                                    |
| 53               | Benin   | Vegetal Products           | 1994           | 2,093                                                                 |
| 53               | Benin   | Wheat and products         | 1994           | 78                                                                    |
| 53               | Benin   | Yams                       | 1994           | 307                                                                   |
| 53               | Benin   | Alcoholic Beverages        | 1995           | 14                                                                    |
| 53               | Benin   | Animal fats                | 1995           | 5                                                                     |
| 53               | Benin   | Animal Products            | 1995           | 84                                                                    |
| 53               | Benin   | Bananas                    | 1995           | 5                                                                     |
| 53               | Benin   | Beans                      | 1995           | 62                                                                    |
| 53               | Benin   | Beer                       | 1995           | 7                                                                     |
| 53               | Benin   | Beverages, Alcoholic       | 1995           | 4                                                                     |
| 53               | Benin   | Beverages, Fermented       | 1995           | 4                                                                     |
| 53               | Benin   | Bovine Meat                | 1995           | 15                                                                    |
| 53               | Benin   | Cassava and products       | 1995           | 429                                                                   |
| 53               | Benin   | Cereals - Excluding Beer   | 1995           | 864                                                                   |
| 53               | Benin   | Cereals, Other             | 1995           | 6                                                                     |
| 53               | Benin   | Coconut Oil                | 1995           | 9                                                                     |
| 53               | Benin   | Coconuts - Incl Copra      | 1995           | 2                                                                     |
| 53               | Benin   | Cottonseed Oil             | 1995           | 9                                                                     |
| 53               | Benin   | Crustaceans                | 1995           | 2                                                                     |
| 53               | Benin   | Dates                      | 1995           | 1                                                                     |
| 53               | Benin   | Demersal Fish              | 1995           | 1                                                                     |
| 53               | Benin   | Eggs                       | 1995           | 3                                                                     |
| 53               | Benin   | Fats, Animals, Raw         | 1995           | 5                                                                     |
| 53               | Benin   | Fish, Seafood              | 1995           | 17                                                                    |
| 53               | Benin   | Freshwater Fish            | 1995           | 9                                                                     |
| 53               | Benin   | Fruits - Excluding Wine    | 1995           | 35                                                                    |

Dietary calcium and zinc deficiency risks are decreasing but remain prevalent

| FAO Country code | Country | Food item                  | Reference year | Net energy supply (kcal <i>capita</i> <sup>-1</sup> d <sup>-1</sup> ) |
|------------------|---------|----------------------------|----------------|-----------------------------------------------------------------------|
| 53               | Benin   | Fruits, Other              | 1995           | 23                                                                    |
| 53               | Benin   | Grand Total                | 1995           | 2,204                                                                 |
| 53               | Benin   | Groundnut Oil              | 1995           | 29                                                                    |
| 53               | Benin   | Groundnuts (Shelled Eq)    | 1995           | 109                                                                   |
| 53               | Benin   | Maize and products         | 1995           | 420                                                                   |
| 53               | Benin   | Marine Fish, Other         | 1995           | 4                                                                     |
| 53               | Benin   | Meat                       | 1995           | 44                                                                    |
| 53               | Benin   | Meat, Other                | 1995           | 4                                                                     |
| 53               | Benin   | Milk - Excluding Butter    | 1995           | 13                                                                    |
| 53               | Benin   | Millet and products        | 1995           | 19                                                                    |
| 53               | Benin   | Miscellaneous              | 1995           | 1                                                                     |
| 53               | Benin   | Mutton & Goat Meat         | 1995           | 4                                                                     |
| 53               | Benin   | Offals                     | 1995           | 2                                                                     |
| 53               | Benin   | Oilcrops                   | 1995           | 134                                                                   |
| 53               | Benin   | Oilcrops Oil, Other        | 1995           | 7                                                                     |
| 53               | Benin   | Onions                     | 1995           | 1                                                                     |
| 53               | Benin   | Oranges, Mandarines        | 1995           | 2                                                                     |
| 53               | Benin   | Palm Oil                   | 1995           | 51                                                                    |
| 53               | Benin   | Palmkernel Oil             | 1995           | 6                                                                     |
| 53               | Benin   | Pelagic Fish               | 1995           | 3                                                                     |
| 53               | Benin   | Pigmeat                    | 1995           | 10                                                                    |
| 53               | Benin   | Pimento                    | 1995           | 32                                                                    |
| 53               | Benin   | Pineapples and products    | 1995           | 5                                                                     |
| 53               | Benin   | Poultry Meat               | 1995           | 12                                                                    |
| 53               | Benin   | Pulses                     | 1995           | 70                                                                    |
| 53               | Benin   | Pulses, Other and products | 1995           | 9                                                                     |
| 53               | Benin   | Rape and Mustard Oil       | 1995           | 2                                                                     |
| 53               | Benin   | Rice (Milled Equivalent)   | 1995           | 208                                                                   |
| 53               | Benin   | Roots, Other               | 1995           | 1                                                                     |
| 53               | Benin   | Sesame seed                | 1995           | 23                                                                    |
| 53               | Benin   | Sorghum and products       | 1995           | 126                                                                   |
| 53               | Benin   | Soyabean Oil               | 1995           | 2                                                                     |
| 53               | Benin   | Spices                     | 1995           | 32                                                                    |
| 53               | Benin   | Starchy Roots              | 1995           | 741                                                                   |
| 53               | Benin   | Sugar & Sweeteners         | 1995           | 78                                                                    |
| 53               | Benin   | Sugar (Raw Equivalent)     | 1995           | 78                                                                    |
| 53               | Benin   | Sweet potatoes             | 1995           | 20                                                                    |
| 53               | Benin   | Tomatoes and products      | 1995           | 11                                                                    |
| 53               | Benin   | Treenuts                   | 1995           | 9                                                                     |
| 53               | Benin   | Vegetable Oils             | 1995           | 114                                                                   |
| 53               | Benin   | Vegetables                 | 1995           | 27                                                                    |
| 53               | Benin   | Vegetables, Other          | 1995           | 16                                                                    |
| 53               | Benin   | Vegetal Products           | 1995           | 2,120                                                                 |
| 53               | Benin   | Wheat and products         | 1995           | 85                                                                    |
| 53               | Benin   | Wine                       | 1995           | 1                                                                     |
| 53               | Benin   | Yams                       | 1995           | 291                                                                   |
| 53               | Benin   | Alcoholic Beverages        | 1996           | 20                                                                    |
| 53               | Benin   | Animal fats                | 1996           | 5                                                                     |
| 53               | Benin   | Animal Products            | 1996           | 83                                                                    |
| 53               | Benin   | Bananas                    | 1996           | 3                                                                     |
| 53               | Benin   | Beans                      | 1996           | 61                                                                    |
| 53               | Benin   | Beer                       | 1996           | 10                                                                    |
| 53               | Benin   | Beverages, Alcoholic       | 1996           | 6                                                                     |
| 53               | Benin   | Beverages, Fermented       | 1996           | 3                                                                     |
| 53               | Benin   | Bovine Meat                | 1996           | 13                                                                    |
| 53               | Benin   | Cassava and products       | 1996           | 458                                                                   |
| 53               | Benin   | Cereals - Excluding Beer   | 1996           | 873                                                                   |
| 53               | Benin   | Cereals, Other             | 1996           | 4                                                                     |
| 53               | Benin   | Coconut Oil                | 1996           | 7                                                                     |
| 53               | Benin   | Coconuts - Incl Copra      | 1996           | 1                                                                     |
| 53               | Benin   | Cottonseed Oil             | 1996           | 11                                                                    |
| 53               | Benin   | Crustaceans                | 1996           | 1                                                                     |
| 53               | Benin   | Dates                      | 1996           | 1                                                                     |
| 53               | Benin   | Demersal Fish              | 1996           | 1                                                                     |
| 53               | Benin   | Eggs                       | 1996           | 3                                                                     |
| 53               | Benin   | Fats, Animals, Raw         | 1996           | 5                                                                     |
| 53               | Benin   | Fish, Seafood              | 1996           | 15                                                                    |
| 53               | Benin   | Freshwater Fish            | 1996           | 7                                                                     |
| 53               | Benin   | Fruits - Excluding Wine    | 1996           | 39                                                                    |
| 53               | Benin   | Fruits, Other              | 1996           | 22                                                                    |
| 53               | Benin   | Grand Total                | 1996           | 2,236                                                                 |
| 53               | Benin   | Groundnut Oil              | 1996           | 32                                                                    |
| 53               | Benin   | Groundnuts (Shelled Eq)    | 1996           | 100                                                                   |
| 53               | Benin   | Maize and products         | 1996           | 470                                                                   |
| 53               | Benin   | Marine Fish, Other         | 1996           | 4                                                                     |
| 53               | Benin   | Meat                       | 1996           | 42                                                                    |
| 53               | Benin   | Meat, Other                | 1996           | 4                                                                     |
| 53               | Benin   | Milk - Excluding Butter    | 1996           | 15                                                                    |
| 53               | Benin   | Millet and products        | 1996           | 20                                                                    |
| 53               | Benin   | Miscellaneous              | 1996           | 1                                                                     |
| 53               | Benin   | Mutton & Goat Meat         | 1996           | 4                                                                     |
| 53               | Benin   | Offals                     | 1996           | 2                                                                     |
| 53               | Benin   | Oilcrops                   | 1996           | 122                                                                   |
| 53               | Benin   | Oilcrops Oil, Other        | 1996           | 8                                                                     |
| 53               | Benin   | Onions                     | 1996           | 1                                                                     |
| 53               | Benin   | Oranges, Mandarines        | 1996           | 2                                                                     |
| 53               | Benin   | Palm Oil                   | 1996           | 42                                                                    |
| 53               | Benin   | Palmkernel Oil             | 1996           | 12                                                                    |
| 53               | Benin   | Pelagic Fish               | 1996           | 2                                                                     |
| 53               | Benin   | Pigmeat                    | 1996           | 10                                                                    |
| 53               | Benin   | Pimento                    | 1996           | 26                                                                    |
| 53               | Benin   | Pineapples and products    | 1996           | 11                                                                    |
| 53               | Benin   | Poultry Meat               | 1996           | 11                                                                    |
| 53               | Benin   | Pulses                     | 1996           | 72                                                                    |
| 53               | Benin   | Pulses, Other and products | 1996           | 11                                                                    |
| 53               | Benin   | Rape and Mustard Oil       | 1996           | 1                                                                     |
| 53               | Benin   | Rice (Milled Equivalent)   | 1996           | 209                                                                   |

Dietary calcium and zinc deficiency risks are decreasing but remain prevalent

| FAO Country code | Country | Food item                  | Reference year | Net energy supply (kcal <i>capita</i> <sup>-1</sup> d <sup>-1</sup> ) |
|------------------|---------|----------------------------|----------------|-----------------------------------------------------------------------|
| 53               | Benin   | Roots, Other               | 1996           | 1                                                                     |
| 53               | Benin   | Sesame seed                | 1996           | 19                                                                    |
| 53               | Benin   | Sorghum and products       | 1996           | 112                                                                   |
| 53               | Benin   | Soyabean Oil               | 1996           | 3                                                                     |
| 53               | Benin   | Spices                     | 1996           | 26                                                                    |
| 53               | Benin   | Starchy Roots              | 1996           | 787                                                                   |
| 53               | Benin   | Sugar & Sweeteners         | 1996           | 53                                                                    |
| 53               | Benin   | Sugar (Raw Equivalent)     | 1996           | 53                                                                    |
| 53               | Benin   | Sunflower seed             | 1996           | 1                                                                     |
| 53               | Benin   | Sweet potatoes             | 1996           | 24                                                                    |
| 53               | Benin   | Tomatoes and products      | 1996           | 11                                                                    |
| 53               | Benin   | Treenuts                   | 1996           | 12                                                                    |
| 53               | Benin   | Vegetable Oils             | 1996           | 116                                                                   |
| 53               | Benin   | Vegetables                 | 1996           | 32                                                                    |
| 53               | Benin   | Vegetables, Other          | 1996           | 20                                                                    |
| 53               | Benin   | Vegetal Products           | 1996           | 2,153                                                                 |
| 53               | Benin   | Wheat and products         | 1996           | 58                                                                    |
| 53               | Benin   | Wine                       | 1996           | 1                                                                     |
| 53               | Benin   | Yams                       | 1996           | 304                                                                   |
| 53               | Benin   | Alcoholic Beverages        | 1997           | 19                                                                    |
| 53               | Benin   | Animal fats                | 1997           | 5                                                                     |
| 53               | Benin   | Animal Products            | 1997           | 84                                                                    |
| 53               | Benin   | Apples and products        | 1997           | 1                                                                     |
| 53               | Benin   | Bananas                    | 1997           | 2                                                                     |
| 53               | Benin   | Beans                      | 1997           | 71                                                                    |
| 53               | Benin   | Beer                       | 1997           | 9                                                                     |
| 53               | Benin   | Beverages, Alcoholic       | 1997           | 6                                                                     |
| 53               | Benin   | Beverages, Fermented       | 1997           | 3                                                                     |
| 53               | Benin   | Bovine Meat                | 1997           | 13                                                                    |
| 53               | Benin   | Cassava and products       | 1997           | 483                                                                   |
| 53               | Benin   | Cereals - Excluding Beer   | 1997           | 870                                                                   |
| 53               | Benin   | Cereals, Other             | 1997           | 7                                                                     |
| 53               | Benin   | Coconut Oil                | 1997           | 7                                                                     |
| 53               | Benin   | Coconuts - Incl Copra      | 1997           | 1                                                                     |
| 53               | Benin   | Cottonseed Oil             | 1997           | 9                                                                     |
| 53               | Benin   | Crustaceans                | 1997           | 1                                                                     |
| 53               | Benin   | Dates                      | 1997           | 1                                                                     |
| 53               | Benin   | Demersal Fish              | 1997           | 1                                                                     |
| 53               | Benin   | Eggs                       | 1997           | 3                                                                     |
| 53               | Benin   | Fats, Animals, Raw         | 1997           | 4                                                                     |
| 53               | Benin   | Fish, Seafood              | 1997           | 16                                                                    |
| 53               | Benin   | Freshwater Fish            | 1997           | 7                                                                     |
| 53               | Benin   | Fruits - Excluding Wine    | 1997           | 34                                                                    |
| 53               | Benin   | Fruits, Other              | 1997           | 21                                                                    |
| 53               | Benin   | Grand Total                | 1997           | 2,244                                                                 |
| 53               | Benin   | Groundnut Oil              | 1997           | 39                                                                    |
| 53               | Benin   | Groundnuts (Shelled Eq)    | 1997           | 99                                                                    |
| 53               | Benin   | Maize and products         | 1997           | 528                                                                   |
| 53               | Benin   | Marine Fish, Other         | 1997           | 5                                                                     |
| 53               | Benin   | Meat                       | 1997           | 42                                                                    |
| 53               | Benin   | Meat, Other                | 1997           | 4                                                                     |
| 53               | Benin   | Milk - Excluding Butter    | 1997           | 17                                                                    |
| 53               | Benin   | Millet and products        | 1997           | 21                                                                    |
| 53               | Benin   | Miscellaneous              | 1997           | 1                                                                     |
| 53               | Benin   | Mutton & Goat Meat         | 1997           | 4                                                                     |
| 53               | Benin   | Offals                     | 1997           | 2                                                                     |
| 53               | Benin   | Oilcrops                   | 1997           | 123                                                                   |
| 53               | Benin   | Oilcrops Oil, Other        | 1997           | 12                                                                    |
| 53               | Benin   | Onions                     | 1997           | 1                                                                     |
| 53               | Benin   | Oranges, Mandarines        | 1997           | 2                                                                     |
| 53               | Benin   | Palm Oil                   | 1997           | 26                                                                    |
| 53               | Benin   | Palmkernel Oil             | 1997           | 16                                                                    |
| 53               | Benin   | Peas                       | 1997           | 1                                                                     |
| 53               | Benin   | Pelagic Fish               | 1997           | 2                                                                     |
| 53               | Benin   | Pigmeat                    | 1997           | 8                                                                     |
| 53               | Benin   | Pimento                    | 1997           | 22                                                                    |
| 53               | Benin   | Pineapples and products    | 1997           | 7                                                                     |
| 53               | Benin   | Poultry Meat               | 1997           | 13                                                                    |
| 53               | Benin   | Pulses                     | 1997           | 85                                                                    |
| 53               | Benin   | Pulses, Other and products | 1997           | 12                                                                    |
| 53               | Benin   | Rape and Mustard Oil       | 1997           | 2                                                                     |
| 53               | Benin   | Rice (Milled Equivalent)   | 1997           | 146                                                                   |
| 53               | Benin   | Roots, Other               | 1997           | 1                                                                     |
| 53               | Benin   | Sesame seed                | 1997           | 22                                                                    |
| 53               | Benin   | Sorghum and products       | 1997           | 118                                                                   |
| 53               | Benin   | Soyabean Oil               | 1997           | 3                                                                     |
| 53               | Benin   | Spices                     | 1997           | 22                                                                    |
| 53               | Benin   | Starchy Roots              | 1997           | 804                                                                   |
| 53               | Benin   | Sugar & Sweeteners         | 1997           | 49                                                                    |
| 53               | Benin   | Sugar (Raw Equivalent)     | 1997           | 49                                                                    |
| 53               | Benin   | Sunflower seed             | 1997           | 1                                                                     |
| 53               | Benin   | Sweet potatoes             | 1997           | 21                                                                    |
| 53               | Benin   | Tomatoes and products      | 1997           | 13                                                                    |
| 53               | Benin   | Treenuts                   | 1997           | 9                                                                     |
| 53               | Benin   | Vegetable Oils             | 1997           | 113                                                                   |
| 53               | Benin   | Vegetables                 | 1997           | 32                                                                    |
| 53               | Benin   | Vegetables, Other          | 1997           | 17                                                                    |
| 53               | Benin   | Vegetal Products           | 1997           | 2,160                                                                 |
| 53               | Benin   | Wheat and products         | 1997           | 50                                                                    |
| 53               | Benin   | Wine                       | 1997           | 1                                                                     |
| 53               | Benin   | Yams                       | 1997           | 298                                                                   |
| 53               | Benin   | Alcoholic Beverages        | 1998           | 20                                                                    |
| 53               | Benin   | Animal fats                | 1998           | 4                                                                     |
| 53               | Benin   | Animal Products            | 1998           | 89                                                                    |
| 53               | Benin   | Apples and products        | 1998           | 1                                                                     |
| 53               | Benin   | Bananas                    | 1998           | 2                                                                     |
| 53               | Benin   | Beans                      | 1998           | 71                                                                    |

## Dietary calcium and zinc deficiency risks are decreasing but remain prevalent

| FAO Country code | Country | Food item                  | Reference year | Net energy supply (kcal capita <sup>-1</sup> d <sup>-1</sup> ) |
|------------------|---------|----------------------------|----------------|----------------------------------------------------------------|
| 53               | Benin   | Beer                       | 1998           | 8                                                              |
| 53               | Benin   | Beverages, Alcoholic       | 1998           | 7                                                              |
| 53               | Benin   | Beverages, Fermented       | 1998           | 4                                                              |
| 53               | Benin   | Bovine Meat                | 1998           | 16                                                             |
| 53               | Benin   | Butter, Ghee               | 1998           | 1                                                              |
| 53               | Benin   | Cassava and products       | 1998           | 400                                                            |
| 53               | Benin   | Cereals - Excluding Beer   | 1998           | 886                                                            |
| 53               | Benin   | Cereals, Other             | 1998           | 5                                                              |
| 53               | Benin   | Coconut Oil                | 1998           | 7                                                              |
| 53               | Benin   | Coconuts - Incl Copra      | 1998           | 1                                                              |
| 53               | Benin   | Cottonseed Oil             | 1998           | 14                                                             |
| 53               | Benin   | Crustaceans                | 1998           | 1                                                              |
| 53               | Benin   | Dates                      | 1998           | 1                                                              |
| 53               | Benin   | Demersal Fish              | 1998           | 1                                                              |
| 53               | Benin   | Eggs                       | 1998           | 3                                                              |
| 53               | Benin   | Fats, Animals, Raw         | 1998           | 4                                                              |
| 53               | Benin   | Fish, Seafood              | 1998           | 14                                                             |
| 53               | Benin   | Freshwater Fish            | 1998           | 6                                                              |
| 53               | Benin   | Fruits - Excluding Wine    | 1998           | 26                                                             |
| 53               | Benin   | Fruits, Other              | 1998           | 16                                                             |
| 53               | Benin   | Grand Total                | 1998           | 2,227                                                          |
| 53               | Benin   | Groundnut Oil              | 1998           | 37                                                             |
| 53               | Benin   | Groundnuts (Shelled Eq)    | 1998           | 92                                                             |
| 53               | Benin   | Maize and products         | 1998           | 525                                                            |
| 53               | Benin   | Marine Fish, Other         | 1998           | 2                                                              |
| 53               | Benin   | Meat                       | 1998           | 40                                                             |
| 53               | Benin   | Meat, Other                | 1998           | 4                                                              |
| 53               | Benin   | Milk - Excluding Butter    | 1998           | 25                                                             |
| 53               | Benin   | Millet and products        | 1998           | 23                                                             |
| 53               | Benin   | Miscellaneous              | 1998           | 1                                                              |
| 53               | Benin   | Mutton & Goat Meat         | 1998           | 4                                                              |
| 53               | Benin   | Offals                     | 1998           | 3                                                              |
| 53               | Benin   | Oilcrops                   | 1998           | 116                                                            |
| 53               | Benin   | Oilcrops Oil, Other        | 1998           | 8                                                              |
| 53               | Benin   | Onions                     | 1998           | 2                                                              |
| 53               | Benin   | Oranges, Mandarines        | 1998           | 2                                                              |
| 53               | Benin   | Palm Oil                   | 1998           | 26                                                             |
| 53               | Benin   | Palmkernel Oil             | 1998           | 18                                                             |
| 53               | Benin   | Peas                       | 1998           | 1                                                              |
| 53               | Benin   | Pelagic Fish               | 1998           | 4                                                              |
| 53               | Benin   | Pigmeat                    | 1998           | 4                                                              |
| 53               | Benin   | Pimento                    | 1998           | 20                                                             |
| 53               | Benin   | Pineapples and products    | 1998           | 5                                                              |
| 53               | Benin   | Poultry Meat               | 1998           | 13                                                             |
| 53               | Benin   | Pulses                     | 1998           | 85                                                             |
| 53               | Benin   | Pulses, Other and products | 1998           | 13                                                             |
| 53               | Benin   | Rape and Mustard Oil       | 1998           | 5                                                              |
| 53               | Benin   | Rice (Milled Equivalent)   | 1998           | 135                                                            |
| 53               | Benin   | Roots, Other               | 1998           | 1                                                              |
| 53               | Benin   | Sesame seed                | 1998           | 23                                                             |
| 53               | Benin   | Sorghum and products       | 1998           | 133                                                            |
| 53               | Benin   | Soyabean Oil               | 1998           | 8                                                              |
| 53               | Benin   | Spices                     | 1998           | 20                                                             |
| 53               | Benin   | Starchy Roots              | 1998           | 763                                                            |
| 53               | Benin   | Sugar & Sweeteners         | 1998           | 48                                                             |
| 53               | Benin   | Sugar (Raw Equivalent)     | 1998           | 48                                                             |
| 53               | Benin   | Sweet potatoes             | 1998           | 15                                                             |
| 53               | Benin   | Tomatoes and products      | 1998           | 14                                                             |
| 53               | Benin   | Treenuts                   | 1998           | 15                                                             |
| 53               | Benin   | Vegetable Oils             | 1998           | 124                                                            |
| 53               | Benin   | Vegetables                 | 1998           | 32                                                             |
| 53               | Benin   | Vegetables, Other          | 1998           | 16                                                             |
| 53               | Benin   | Vegetal Products           | 1998           | 2,138                                                          |
| 53               | Benin   | Wheat and products         | 1998           | 66                                                             |
| 53               | Benin   | Wine                       | 1998           | 1                                                              |
| 53               | Benin   | Yams                       | 1998           | 348                                                            |
| 53               | Benin   | Alcoholic Beverages        | 1999           | 18                                                             |
| 53               | Benin   | Animal fats                | 1999           | 4                                                              |
| 53               | Benin   | Animal Products            | 1999           | 91                                                             |
| 53               | Benin   | Apples and products        | 1999           | 1                                                              |
| 53               | Benin   | Bananas                    | 1999           | 2                                                              |
| 53               | Benin   | Beans                      | 1999           | 68                                                             |
| 53               | Benin   | Beer                       | 1999           | 6                                                              |
| 53               | Benin   | Beverages, Alcoholic       | 1999           | 8                                                              |
| 53               | Benin   | Beverages, Fermented       | 1999           | 3                                                              |
| 53               | Benin   | Bovine Meat                | 1999           | 15                                                             |
| 53               | Benin   | Butter, Ghee               | 1999           | 1                                                              |
| 53               | Benin   | Cassava and products       | 1999           | 406                                                            |
| 53               | Benin   | Cereals - Excluding Beer   | 1999           | 856                                                            |
| 53               | Benin   | Cereals, Other             | 1999           | 3                                                              |
| 53               | Benin   | Coconut Oil                | 1999           | 6                                                              |
| 53               | Benin   | Coconuts - Incl Copra      | 1999           | 1                                                              |
| 53               | Benin   | Cottonseed Oil             | 1999           | 7                                                              |
| 53               | Benin   | Crustaceans                | 1999           | 1                                                              |
| 53               | Benin   | Dates                      | 1999           | 1                                                              |
| 53               | Benin   | Demersal Fish              | 1999           | 1                                                              |
| 53               | Benin   | Eggs                       | 1999           | 3                                                              |
| 53               | Benin   | Fats, Animals, Raw         | 1999           | 3                                                              |
| 53               | Benin   | Fish, Seafood              | 1999           | 15                                                             |
| 53               | Benin   | Freshwater Fish            | 1999           | 6                                                              |
| 53               | Benin   | Fruits - Excluding Wine    | 1999           | 34                                                             |
| 53               | Benin   | Fruits, Other              | 1999           | 20                                                             |
| 53               | Benin   | Grand Total                | 1999           | 2,236                                                          |
| 53               | Benin   | Groundnut Oil              | 1999           | 36                                                             |
| 53               | Benin   | Groundnuts (Shelled Eq)    | 1999           | 92                                                             |
| 53               | Benin   | Maize and products         | 1999           | 550                                                            |
| 53               | Benin   | Marine Fish, Other         | 1999           | 2                                                              |

Dietary calcium and zinc deficiency risks are decreasing but remain prevalent

| FAO Country code | Country | Food item                  | Reference year | Net energy supply (kcal capita <sup>-1</sup> d <sup>-1</sup> ) |
|------------------|---------|----------------------------|----------------|----------------------------------------------------------------|
| 53               | Benin   | Meat                       | 1999           | 47                                                             |
| 53               | Benin   | Meat, Other                | 1999           | 3                                                              |
| 53               | Benin   | Milk - Excluding Butter    | 1999           | 20                                                             |
| 53               | Benin   | Millet and products        | 1999           | 22                                                             |
| 53               | Benin   | Miscellaneous              | 1999           | 1                                                              |
| 53               | Benin   | Mutton & Goat Meat         | 1999           | 3                                                              |
| 53               | Benin   | Offals                     | 1999           | 2                                                              |
| 53               | Benin   | Oilcrops                   | 1999           | 111                                                            |
| 53               | Benin   | Oilcrops Oil, Other        | 1999           | 7                                                              |
| 53               | Benin   | Onions                     | 1999           | 2                                                              |
| 53               | Benin   | Oranges, Mandarines        | 1999           | 2                                                              |
| 53               | Benin   | Palm Oil                   | 1999           | 25                                                             |
| 53               | Benin   | Palmkernel Oil             | 1999           | 20                                                             |
| 53               | Benin   | Pelagic Fish               | 1999           | 6                                                              |
| 53               | Benin   | Pigmeat                    | 1999           | 3                                                              |
| 53               | Benin   | Pimento                    | 1999           | 18                                                             |
| 53               | Benin   | Pineapples and products    | 1999           | 9                                                              |
| 53               | Benin   | Poultry Meat               | 1999           | 22                                                             |
| 53               | Benin   | Pulses                     | 1999           | 84                                                             |
| 53               | Benin   | Pulses, Other and products | 1999           | 16                                                             |
| 53               | Benin   | Rape and Mustard Oil       | 1999           | 25                                                             |
| 53               | Benin   | Rice (Milled Equivalent)   | 1999           | 103                                                            |
| 53               | Benin   | Roots, Other               | 1999           | 1                                                              |
| 53               | Benin   | Sesame seed                | 1999           | 18                                                             |
| 53               | Benin   | Sorghum and products       | 1999           | 117                                                            |
| 53               | Benin   | Soyabean Oil               | 1999           | 14                                                             |
| 53               | Benin   | Spices                     | 1999           | 18                                                             |
| 53               | Benin   | Starchy Roots              | 1999           | 777                                                            |
| 53               | Benin   | Sugar & Sweeteners         | 1999           | 59                                                             |
| 53               | Benin   | Sugar (Raw Equivalent)     | 1999           | 58                                                             |
| 53               | Benin   | Sweet potatoes             | 1999           | 24                                                             |
| 53               | Benin   | Tomatoes and products      | 1999           | 15                                                             |
| 53               | Benin   | Treenuts                   | 1999           | 6                                                              |
| 53               | Benin   | Vegetable Oils             | 1999           | 141                                                            |
| 53               | Benin   | Vegetables                 | 1999           | 38                                                             |
| 53               | Benin   | Vegetables, Other          | 1999           | 21                                                             |
| 53               | Benin   | Vegetal Products           | 1999           | 2,145                                                          |
| 53               | Benin   | Wheat and products         | 1999           | 62                                                             |
| 53               | Benin   | Wine                       | 1999           | 2                                                              |
| 53               | Benin   | Yams                       | 1999           | 346                                                            |
| 53               | Benin   | Alcoholic Beverages        | 2000           | 16                                                             |
| 53               | Benin   | Animal fats                | 2000           | 4                                                              |
| 53               | Benin   | Animal Products            | 2000           | 94                                                             |
| 53               | Benin   | Apples and products        | 2000           | 1                                                              |
| 53               | Benin   | Bananas                    | 2000           | 2                                                              |
| 53               | Benin   | Beans                      | 2000           | 76                                                             |
| 53               | Benin   | Beer                       | 2000           | 7                                                              |
| 53               | Benin   | Beverages, Alcoholic       | 2000           | 3                                                              |
| 53               | Benin   | Beverages, Fermented       | 2000           | 4                                                              |
| 53               | Benin   | Bovine Meat                | 2000           | 14                                                             |
| 53               | Benin   | Butter, Ghee               | 2000           | 1                                                              |
| 53               | Benin   | Cassava and products       | 2000           | 422                                                            |
| 53               | Benin   | Cereals - Excluding Beer   | 2000           | 822                                                            |
| 53               | Benin   | Cereals, Other             | 2000           | 2                                                              |
| 53               | Benin   | Coconut Oil                | 2000           | 6                                                              |
| 53               | Benin   | Coconuts - Incl Copra      | 2000           | 1                                                              |
| 53               | Benin   | Cottonseed Oil             | 2000           | 5                                                              |
| 53               | Benin   | Crustaceans                | 2000           | 1                                                              |
| 53               | Benin   | Dates                      | 2000           | 1                                                              |
| 53               | Benin   | Demersal Fish              | 2000           | 1                                                              |
| 53               | Benin   | Eggs                       | 2000           | 3                                                              |
| 53               | Benin   | Fats, Animals, Raw         | 2000           | 4                                                              |
| 53               | Benin   | Fish, Seafood              | 2000           | 15                                                             |
| 53               | Benin   | Freshwater Fish            | 2000           | 5                                                              |
| 53               | Benin   | Fruits - Excluding Wine    | 2000           | 25                                                             |
| 53               | Benin   | Fruits, Other              | 2000           | 14                                                             |
| 53               | Benin   | Grand Total                | 2000           | 2,242                                                          |
| 53               | Benin   | Groundnut Oil              | 2000           | 35                                                             |
| 53               | Benin   | Groundnuts (Shelled Eq)    | 2000           | 117                                                            |
| 53               | Benin   | Maize and products         | 2000           | 508                                                            |
| 53               | Benin   | Marine Fish, Other         | 2000           | 1                                                              |
| 53               | Benin   | Meat                       | 2000           | 51                                                             |
| 53               | Benin   | Meat, Other                | 2000           | 4                                                              |
| 53               | Benin   | Milk - Excluding Butter    | 2000           | 18                                                             |
| 53               | Benin   | Millet and products        | 2000           | 27                                                             |
| 53               | Benin   | Miscellaneous              | 2000           | 1                                                              |
| 53               | Benin   | Mutton & Goat Meat         | 2000           | 3                                                              |
| 53               | Benin   | Offals                     | 2000           | 2                                                              |
| 53               | Benin   | Oilcrops                   | 2000           | 141                                                            |
| 53               | Benin   | Oilcrops Oil, Other        | 2000           | 10                                                             |
| 53               | Benin   | Onions                     | 2000           | 2                                                              |
| 53               | Benin   | Oranges, Mandarines        | 2000           | 2                                                              |
| 53               | Benin   | Palm Oil                   | 2000           | 39                                                             |
| 53               | Benin   | Palmkernel Oil             | 2000           | 20                                                             |
| 53               | Benin   | Pelagic Fish               | 2000           | 7                                                              |
| 53               | Benin   | Pigmeat                    | 2000           | 5                                                              |
| 53               | Benin   | Pimento                    | 2000           | 19                                                             |
| 53               | Benin   | Pineapples and products    | 2000           | 6                                                              |
| 53               | Benin   | Poultry Meat               | 2000           | 26                                                             |
| 53               | Benin   | Pulses                     | 2000           | 93                                                             |
| 53               | Benin   | Pulses, Other and products | 2000           | 16                                                             |
| 53               | Benin   | Rape and Mustard Oil       | 2000           | 5                                                              |
| 53               | Benin   | Rice (Milled Equivalent)   | 2000           | 94                                                             |
| 53               | Benin   | Roots, Other               | 2000           | 1                                                              |
| 53               | Benin   | Sesame seed                | 2000           | 23                                                             |
| 53               | Benin   | Sorghum and products       | 2000           | 141                                                            |
| 53               | Benin   | Soyabean Oil               | 2000           | 15                                                             |

Dietary calcium and zinc deficiency risks are decreasing but remain prevalent

| FAO Country code | Country | Food item                       | Reference year | Net energy supply (kcal capita <sup>-1</sup> d <sup>-1</sup> ) |
|------------------|---------|---------------------------------|----------------|----------------------------------------------------------------|
| 53               | Benin   | Spices                          | 2000           | 19                                                             |
| 53               | Benin   | Starchy Roots                   | 2000           | 810                                                            |
| 53               | Benin   | Sugar & Sweeteners              | 2000           | 47                                                             |
| 53               | Benin   | Sugar (Raw Equivalent)          | 2000           | 47                                                             |
| 53               | Benin   | Sweet potatoes                  | 2000           | 22                                                             |
| 53               | Benin   | Tomatoes and products           | 2000           | 14                                                             |
| 53               | Benin   | Treenuts                        | 2000           | 4                                                              |
| 53               | Benin   | Vegetable Oils                  | 2000           | 135                                                            |
| 53               | Benin   | Vegetables                      | 2000           | 34                                                             |
| 53               | Benin   | Vegetables, Other               | 2000           | 19                                                             |
| 53               | Benin   | Vegetal Products                | 2000           | 2,149                                                          |
| 53               | Benin   | Wheat and products              | 2000           | 51                                                             |
| 53               | Benin   | Wine                            | 2000           | 1                                                              |
| 53               | Benin   | Yams                            | 2000           | 365                                                            |
| 53               | Benin   | Alcoholic Beverages             | 2001           | 14                                                             |
| 53               | Benin   | Animal fats                     | 2001           | 4                                                              |
| 53               | Benin   | Animal Products                 | 2001           | 88                                                             |
| 53               | Benin   | Apples and products             | 2001           | 1                                                              |
| 53               | Benin   | Bananas                         | 2001           | 2                                                              |
| 53               | Benin   | Beans                           | 2001           | 67                                                             |
| 53               | Benin   | Beer                            | 2001           | 7                                                              |
| 53               | Benin   | Beverages, Alcoholic            | 2001           | 1                                                              |
| 53               | Benin   | Beverages, Fermented            | 2001           | 4                                                              |
| 53               | Benin   | Bovine Meat                     | 2001           | 14                                                             |
| 53               | Benin   | Butter, Ghee                    | 2001           | 1                                                              |
| 53               | Benin   | Cassava and products            | 2001           | 473                                                            |
| 53               | Benin   | Cereals - Excluding Beer        | 2001           | 856                                                            |
| 53               | Benin   | Cereals, Other                  | 2001           | 1                                                              |
| 53               | Benin   | Coconut Oil                     | 2001           | 6                                                              |
| 53               | Benin   | Coconuts - Incl Copra           | 2001           | 1                                                              |
| 53               | Benin   | Cottonseed Oil                  | 2001           | 69                                                             |
| 53               | Benin   | Crustaceans                     | 2001           | 1                                                              |
| 53               | Benin   | Dates                           | 2001           | 1                                                              |
| 53               | Benin   | Demersal Fish                   | 2001           | 1                                                              |
| 53               | Benin   | Eggs                            | 2001           | 2                                                              |
| 53               | Benin   | Fats, Animals, Raw              | 2001           | 4                                                              |
| 53               | Benin   | Fish, Seafood                   | 2001           | 13                                                             |
| 53               | Benin   | Freshwater Fish                 | 2001           | 5                                                              |
| 53               | Benin   | Fruits - Excluding Wine         | 2001           | 27                                                             |
| 53               | Benin   | Fruits, Other                   | 2001           | 15                                                             |
| 53               | Benin   | Grand Total                     | 2001           | 2,307                                                          |
| 53               | Benin   | Grapes and products (excl wine) | 2001           | 1                                                              |
| 53               | Benin   | Groundnut Oil                   | 2001           | 34                                                             |
| 53               | Benin   | Groundnuts (Shelled Eq)         | 2001           | 117                                                            |
| 53               | Benin   | Maize and products              | 2001           | 494                                                            |
| 53               | Benin   | Marine Fish, Other              | 2001           | 1                                                              |
| 53               | Benin   | Meat                            | 2001           | 47                                                             |
| 53               | Benin   | Meat, Other                     | 2001           | 4                                                              |
| 53               | Benin   | Milk - Excluding Butter         | 2001           | 20                                                             |
| 53               | Benin   | Millet and products             | 2001           | 25                                                             |
| 53               | Benin   | Miscellaneous                   | 2001           | 2                                                              |
| 53               | Benin   | Mutton & Goat Meat              | 2001           | 3                                                              |
| 53               | Benin   | Offals                          | 2001           | 2                                                              |
| 53               | Benin   | Oilcrops                        | 2001           | 141                                                            |
| 53               | Benin   | Oilcrops Oil, Other             | 2001           | 9                                                              |
| 53               | Benin   | Oilcrops, Other                 | 2001           | 1                                                              |
| 53               | Benin   | Onions                          | 2001           | 2                                                              |
| 53               | Benin   | Oranges, Mandarines             | 2001           | 2                                                              |
| 53               | Benin   | Palm Oil                        | 2001           | 42                                                             |
| 53               | Benin   | Palmkernel Oil                  | 2001           | 19                                                             |
| 53               | Benin   | Pelagic Fish                    | 2001           | 5                                                              |
| 53               | Benin   | Pigmeat                         | 2001           | 4                                                              |
| 53               | Benin   | Pimento                         | 2001           | 19                                                             |
| 53               | Benin   | Pineapples and products         | 2001           | 6                                                              |
| 53               | Benin   | Poultry Meat                    | 2001           | 21                                                             |
| 53               | Benin   | Pulses                          | 2001           | 81                                                             |
| 53               | Benin   | Pulses, Other and products      | 2001           | 13                                                             |
| 53               | Benin   | Rape and Mustard Oil            | 2001           | 2                                                              |
| 53               | Benin   | Rice (Milled Equivalent)        | 2001           | 142                                                            |
| 53               | Benin   | Roots, Other                    | 2001           | 1                                                              |
| 53               | Benin   | Sesame seed                     | 2001           | 22                                                             |
| 53               | Benin   | Sorghum and products            | 2001           | 144                                                            |
| 53               | Benin   | Soyabean Oil                    | 2001           | 8                                                              |
| 53               | Benin   | Spices                          | 2001           | 20                                                             |
| 53               | Benin   | Starchy Roots                   | 2001           | 812                                                            |
| 53               | Benin   | Stimulants                      | 2001           | 1                                                              |
| 53               | Benin   | Sugar & Sweeteners              | 2001           | 41                                                             |
| 53               | Benin   | Sugar (Raw Equivalent)          | 2001           | 41                                                             |
| 53               | Benin   | Sweet potatoes                  | 2001           | 19                                                             |
| 53               | Benin   | Tomatoes and products           | 2001           | 12                                                             |
| 53               | Benin   | Treenuts                        | 2001           | 6                                                              |
| 53               | Benin   | Vegetable Oils                  | 2001           | 188                                                            |
| 53               | Benin   | Vegetables                      | 2001           | 31                                                             |
| 53               | Benin   | Vegetables, Other               | 2001           | 17                                                             |
| 53               | Benin   | Vegetal Products                | 2001           | 2,219                                                          |
| 53               | Benin   | Wheat and products              | 2001           | 50                                                             |
| 53               | Benin   | Wine                            | 2001           | 1                                                              |
| 53               | Benin   | Yams                            | 2001           | 319                                                            |
| 53               | Benin   | Alcoholic Beverages             | 2002           | 13                                                             |
| 53               | Benin   | Animal fats                     | 2002           | 5                                                              |
| 53               | Benin   | Animal Products                 | 2002           | 106                                                            |
| 53               | Benin   | Apples and products             | 2002           | 2                                                              |
| 53               | Benin   | Bananas                         | 2002           | 2                                                              |
| 53               | Benin   | Beans                           | 2002           | 84                                                             |
| 53               | Benin   | Beer                            | 2002           | 8                                                              |
| 53               | Benin   | Beverages, Fermented            | 2002           | 4                                                              |
| 53               | Benin   | Bovine Meat                     | 2002           | 14                                                             |

Dietary calcium and zinc deficiency risks are decreasing but remain prevalent

| FAO Country code | Country | Food item                  | Reference year | Net energy supply (kcal capita <sup>-1</sup> d <sup>-1</sup> ) |
|------------------|---------|----------------------------|----------------|----------------------------------------------------------------|
| 53               | Benin   | Butter, Ghee               | 2002           | 1                                                              |
| 53               | Benin   | Cassava and products       | 2002           | 384                                                            |
| 53               | Benin   | Cereals - Excluding Beer   | 2002           | 886                                                            |
| 53               | Benin   | Cereals, Other             | 2002           | 2                                                              |
| 53               | Benin   | Cocoa Beans and products   | 2002           | 1                                                              |
| 53               | Benin   | Coconut Oil                | 2002           | 6                                                              |
| 53               | Benin   | Coconuts - Incl Copra      | 2002           | 1                                                              |
| 53               | Benin   | Cottonseed Oil             | 2002           | 72                                                             |
| 53               | Benin   | Crustaceans                | 2002           | 1                                                              |
| 53               | Benin   | Dates                      | 2002           | 1                                                              |
| 53               | Benin   | Demersal Fish              | 2002           | 1                                                              |
| 53               | Benin   | Eggs                       | 2002           | 2                                                              |
| 53               | Benin   | Fats, Animals, Raw         | 2002           | 3                                                              |
| 53               | Benin   | Fish, Seafood              | 2002           | 16                                                             |
| 53               | Benin   | Freshwater Fish            | 2002           | 5                                                              |
| 53               | Benin   | Fruits - Excluding Wine    | 2002           | 29                                                             |
| 53               | Benin   | Fruits, Other              | 2002           | 15                                                             |
| 53               | Benin   | Grand Total                | 2002           | 2,395                                                          |
| 53               | Benin   | Groundnut Oil              | 2002           | 33                                                             |
| 53               | Benin   | Groundnuts (Shelled Eq)    | 2002           | 142                                                            |
| 53               | Benin   | Maize and products         | 2002           | 481                                                            |
| 53               | Benin   | Marine Fish, Other         | 2002           | 2                                                              |
| 53               | Benin   | Meat                       | 2002           | 59                                                             |
| 53               | Benin   | Meat, Other                | 2002           | 8                                                              |
| 53               | Benin   | Milk - Excluding Butter    | 2002           | 22                                                             |
| 53               | Benin   | Millet and products        | 2002           | 29                                                             |
| 53               | Benin   | Miscellaneous              | 2002           | 2                                                              |
| 53               | Benin   | Mutton & Goat Meat         | 2002           | 3                                                              |
| 53               | Benin   | Offals                     | 2002           | 2                                                              |
| 53               | Benin   | Oilcrops                   | 2002           | 165                                                            |
| 53               | Benin   | Oilcrops Oil, Other        | 2002           | 10                                                             |
| 53               | Benin   | Onions                     | 2002           | 2                                                              |
| 53               | Benin   | Oranges, Mandarines        | 2002           | 2                                                              |
| 53               | Benin   | Palm Oil                   | 2002           | 52                                                             |
| 53               | Benin   | Palmkernel Oil             | 2002           | 17                                                             |
| 53               | Benin   | Pelagic Fish               | 2002           | 7                                                              |
| 53               | Benin   | Pigmeat                    | 2002           | 4                                                              |
| 53               | Benin   | Pimento                    | 2002           | 19                                                             |
| 53               | Benin   | Pineapples and products    | 2002           | 9                                                              |
| 53               | Benin   | Poultry Meat               | 2002           | 29                                                             |
| 53               | Benin   | Pulses                     | 2002           | 100                                                            |
| 53               | Benin   | Pulses, Other and products | 2002           | 15                                                             |
| 53               | Benin   | Rape and Mustard Oil       | 2002           | 1                                                              |
| 53               | Benin   | Rice (Milled Equivalent)   | 2002           | 175                                                            |
| 53               | Benin   | Roots, Other               | 2002           | 1                                                              |
| 53               | Benin   | Sesame seed                | 2002           | 21                                                             |
| 53               | Benin   | Sorghum and products       | 2002           | 140                                                            |
| 53               | Benin   | Soyabean Oil               | 2002           | 9                                                              |
| 53               | Benin   | Spices                     | 2002           | 19                                                             |
| 53               | Benin   | Starchy Roots              | 2002           | 778                                                            |
| 53               | Benin   | Stimulants                 | 2002           | 1                                                              |
| 53               | Benin   | Sugar & Sweeteners         | 2002           | 50                                                             |
| 53               | Benin   | Sugar (Raw Equivalent)     | 2002           | 49                                                             |
| 53               | Benin   | Sweet potatoes             | 2002           | 24                                                             |
| 53               | Benin   | Tomatoes and products      | 2002           | 12                                                             |
| 53               | Benin   | Treenuts                   | 2002           | 10                                                             |
| 53               | Benin   | Vegetable Oils             | 2002           | 202                                                            |
| 53               | Benin   | Vegetables                 | 2002           | 33                                                             |
| 53               | Benin   | Vegetables, Other          | 2002           | 19                                                             |
| 53               | Benin   | Vegetal Products           | 2002           | 2,289                                                          |
| 53               | Benin   | Wheat and products         | 2002           | 59                                                             |
| 53               | Benin   | Wine                       | 2002           | 1                                                              |
| 53               | Benin   | Yams                       | 2002           | 369                                                            |
| 53               | Benin   | Alcoholic Beverages        | 2003           | 15                                                             |
| 53               | Benin   | Animal fats                | 2003           | 4                                                              |
| 53               | Benin   | Animal Products            | 2003           | 104                                                            |
| 53               | Benin   | Apples and products        | 2003           | 1                                                              |
| 53               | Benin   | Bananas                    | 2003           | 3                                                              |
| 53               | Benin   | Beans                      | 2003           | 66                                                             |
| 53               | Benin   | Beer                       | 2003           | 8                                                              |
| 53               | Benin   | Beverages, Alcoholic       | 2003           | 2                                                              |
| 53               | Benin   | Beverages, Fermented       | 2003           | 4                                                              |
| 53               | Benin   | Bovine Meat                | 2003           | 14                                                             |
| 53               | Benin   | Butter, Ghee               | 2003           | 1                                                              |
| 53               | Benin   | Cassava and products       | 2003           | 370                                                            |
| 53               | Benin   | Cereals - Excluding Beer   | 2003           | 897                                                            |
| 53               | Benin   | Cereals, Other             | 2003           | 1                                                              |
| 53               | Benin   | Cocoa Beans and products   | 2003           | 1                                                              |
| 53               | Benin   | Coconut Oil                | 2003           | 6                                                              |
| 53               | Benin   | Coconuts - Incl Copra      | 2003           | 1                                                              |
| 53               | Benin   | Cottonseed Oil             | 2003           | 79                                                             |
| 53               | Benin   | Crustaceans                | 2003           | 1                                                              |
| 53               | Benin   | Dates                      | 2003           | 1                                                              |
| 53               | Benin   | Demersal Fish              | 2003           | 1                                                              |
| 53               | Benin   | Eggs                       | 2003           | 2                                                              |
| 53               | Benin   | Fats, Animals, Raw         | 2003           | 3                                                              |
| 53               | Benin   | Fish, Seafood              | 2003           | 17                                                             |
| 53               | Benin   | Freshwater Fish            | 2003           | 5                                                              |
| 53               | Benin   | Fruits - Excluding Wine    | 2003           | 32                                                             |
| 53               | Benin   | Fruits, Other              | 2003           | 15                                                             |
| 53               | Benin   | Grand Total                | 2003           | 2,349                                                          |
| 53               | Benin   | Groundnut Oil              | 2003           | 33                                                             |
| 53               | Benin   | Groundnuts (Shelled Eq)    | 2003           | 109                                                            |
| 53               | Benin   | Maize and products         | 2003           | 475                                                            |
| 53               | Benin   | Marine Fish, Other         | 2003           | 4                                                              |
| 53               | Benin   | Meat                       | 2003           | 61                                                             |
| 53               | Benin   | Meat, Other                | 2003           | 11                                                             |



## Dietary calcium and zinc deficiency risks are decreasing but remain prevalent

| FAO Country code | Country | Food item                  | Reference year | Net energy supply (kcal capita <sup>-1</sup> d <sup>-1</sup> ) |
|------------------|---------|----------------------------|----------------|----------------------------------------------------------------|
| 53               | Benin   | Milk - Excluding Butter    | 2003           | 18                                                             |
| 53               | Benin   | Millet and products        | 2003           | 24                                                             |
| 53               | Benin   | Miscellaneous              | 2003           | 1                                                              |
| 53               | Benin   | Mutton & Goat Meat         | 2003           | 3                                                              |
| 53               | Benin   | Offals                     | 2003           | 2                                                              |
| 53               | Benin   | Oilcrops                   | 2003           | 133                                                            |
| 53               | Benin   | Oilcrops Oil, Other        | 2003           | 12                                                             |
| 53               | Benin   | Onions                     | 2003           | 2                                                              |
| 53               | Benin   | Oranges, Mandarines        | 2003           | 2                                                              |
| 53               | Benin   | Palm Oil                   | 2003           | 48                                                             |
| 53               | Benin   | Palmkernel Oil             | 2003           | 16                                                             |
| 53               | Benin   | Pelagic Fish               | 2003           | 6                                                              |
| 53               | Benin   | Pigmeat                    | 2003           | 4                                                              |
| 53               | Benin   | Pimento                    | 2003           | 19                                                             |
| 53               | Benin   | Pineapples and products    | 2003           | 10                                                             |
| 53               | Benin   | Potatoes and products      | 2003           | 1                                                              |
| 53               | Benin   | Poultry Meat               | 2003           | 29                                                             |
| 53               | Benin   | Pulses                     | 2003           | 81                                                             |
| 53               | Benin   | Pulses, Other and products | 2003           | 15                                                             |
| 53               | Benin   | Rape and Mustard Oil       | 2003           | 3                                                              |
| 53               | Benin   | Rice (Milled Equivalent)   | 2003           | 214                                                            |
| 53               | Benin   | Roots, Other               | 2003           | 1                                                              |
| 53               | Benin   | Sesame seed                | 2003           | 22                                                             |
| 53               | Benin   | Sorghum and products       | 2003           | 133                                                            |
| 53               | Benin   | Soyabean Oil               | 2003           | 6                                                              |
| 53               | Benin   | Spices                     | 2003           | 20                                                             |
| 53               | Benin   | Starchy Roots              | 2003           | 766                                                            |
| 53               | Benin   | Stimulants                 | 2003           | 1                                                              |
| 53               | Benin   | Sugar & Sweeteners         | 2003           | 54                                                             |
| 53               | Benin   | Sugar (Raw Equivalent)     | 2003           | 54                                                             |
| 53               | Benin   | Sweet potatoes             | 2003           | 16                                                             |
| 53               | Benin   | Tomatoes and products      | 2003           | 11                                                             |
| 53               | Benin   | Treenuts                   | 2003           | 8                                                              |
| 53               | Benin   | Vegetable Oils             | 2003           | 202                                                            |
| 53               | Benin   | Vegetables                 | 2003           | 33                                                             |
| 53               | Benin   | Vegetables, Other          | 2003           | 20                                                             |
| 53               | Benin   | Vegetal Products           | 2003           | 2,245                                                          |
| 53               | Benin   | Wheat and products         | 2003           | 50                                                             |
| 53               | Benin   | Wine                       | 2003           | 1                                                              |
| 53               | Benin   | Yams                       | 2003           | 379                                                            |
| 53               | Benin   | Alcoholic Beverages        | 2004           | 17                                                             |
| 53               | Benin   | Animal fats                | 2004           | 12                                                             |
| 53               | Benin   | Animal Products            | 2004           | 102                                                            |
| 53               | Benin   | Apples and products        | 2004           | 1                                                              |
| 53               | Benin   | Bananas                    | 2004           | 3                                                              |
| 53               | Benin   | Beans                      | 2004           | 90                                                             |
| 53               | Benin   | Beer                       | 2004           | 10                                                             |
| 53               | Benin   | Beverages, Alcoholic       | 2004           | 2                                                              |
| 53               | Benin   | Beverages, Fermented       | 2004           | 4                                                              |
| 53               | Benin   | Bovine Meat                | 2004           | 14                                                             |
| 53               | Benin   | Butter, Ghee               | 2004           | 1                                                              |
| 53               | Benin   | Cassava and products       | 2004           | 381                                                            |
| 53               | Benin   | Cereals - Excluding Beer   | 2004           | 1,019                                                          |
| 53               | Benin   | Cereals, Other             | 2004           | 1                                                              |
| 53               | Benin   | Cocoa Beans and products   | 2004           | 1                                                              |
| 53               | Benin   | Coconut Oil                | 2004           | 6                                                              |
| 53               | Benin   | Coconuts - Incl Copra      | 2004           | 1                                                              |
| 53               | Benin   | Cottonseed Oil             | 2004           | 73                                                             |
| 53               | Benin   | Crustaceans                | 2004           | 1                                                              |
| 53               | Benin   | Dates                      | 2004           | 1                                                              |
| 53               | Benin   | Demersal Fish              | 2004           | 1                                                              |
| 53               | Benin   | Eggs                       | 2004           | 2                                                              |
| 53               | Benin   | Fats, Animals, Raw         | 2004           | 11                                                             |
| 53               | Benin   | Fish, Seafood              | 2004           | 16                                                             |
| 53               | Benin   | Freshwater Fish            | 2004           | 5                                                              |
| 53               | Benin   | Fruits - Excluding Wine    | 2004           | 31                                                             |
| 53               | Benin   | Fruits, Other              | 2004           | 14                                                             |
| 53               | Benin   | Grand Total                | 2004           | 2,468                                                          |
| 53               | Benin   | Groundnut Oil              | 2004           | 31                                                             |
| 53               | Benin   | Groundnuts (Shelled Eq)    | 2004           | 113                                                            |
| 53               | Benin   | Maize and products         | 2004           | 475                                                            |
| 53               | Benin   | Marine Fish, Other         | 2004           | 4                                                              |
| 53               | Benin   | Meat                       | 2004           | 49                                                             |
| 53               | Benin   | Meat, Other                | 2004           | 3                                                              |
| 53               | Benin   | Milk - Excluding Butter    | 2004           | 20                                                             |
| 53               | Benin   | Millet and products        | 2004           | 24                                                             |
| 53               | Benin   | Miscellaneous              | 2004           | 1                                                              |
| 53               | Benin   | Mutton & Goat Meat         | 2004           | 3                                                              |
| 53               | Benin   | Offals                     | 2004           | 3                                                              |
| 53               | Benin   | Oilcrops                   | 2004           | 132                                                            |
| 53               | Benin   | Oilcrops Oil, Other        | 2004           | 9                                                              |
| 53               | Benin   | Onions                     | 2004           | 1                                                              |
| 53               | Benin   | Oranges, Mandarines        | 2004           | 2                                                              |
| 53               | Benin   | Palm Oil                   | 2004           | 53                                                             |
| 53               | Benin   | Palmkernel Oil             | 2004           | 15                                                             |
| 53               | Benin   | Peas                       | 2004           | 1                                                              |
| 53               | Benin   | Pelagic Fish               | 2004           | 5                                                              |
| 53               | Benin   | Pigmeat                    | 2004           | 4                                                              |
| 53               | Benin   | Pimento                    | 2004           | 16                                                             |
| 53               | Benin   | Pineapples and products    | 2004           | 11                                                             |
| 53               | Benin   | Poultry Meat               | 2004           | 24                                                             |
| 53               | Benin   | Pulses                     | 2004           | 111                                                            |
| 53               | Benin   | Pulses, Other and products | 2004           | 21                                                             |
| 53               | Benin   | Rape and Mustard Oil       | 2004           | 1                                                              |
| 53               | Benin   | Rice (Milled Equivalent)   | 2004           | 356                                                            |
| 53               | Benin   | Roots, Other               | 2004           | 1                                                              |
| 53               | Benin   | Sesame seed                | 2004           | 17                                                             |

## Dietary calcium and zinc deficiency risks are decreasing but remain prevalent

| FAO Country code | Country | Food item                  | Reference year | Net energy supply (kcal capita <sup>-1</sup> d <sup>-1</sup> ) |
|------------------|---------|----------------------------|----------------|----------------------------------------------------------------|
| 53               | Benin   | Sorghum and products       | 2004           | 129                                                            |
| 53               | Benin   | Soybean Oil                | 2004           | 3                                                              |
| 53               | Benin   | Spices                     | 2004           | 16                                                             |
| 53               | Benin   | Starchy Roots              | 2004           | 778                                                            |
| 53               | Benin   | Stimulants                 | 2004           | 1                                                              |
| 53               | Benin   | Sugar & Sweeteners         | 2004           | 37                                                             |
| 53               | Benin   | Sugar (Raw Equivalent)     | 2004           | 36                                                             |
| 53               | Benin   | Sweet potatoes             | 2004           | 15                                                             |
| 53               | Benin   | Tomatoes and products      | 2004           | 11                                                             |
| 53               | Benin   | Treenuts                   | 2004           | 2                                                              |
| 53               | Benin   | Vegetable Oils             | 2004           | 190                                                            |
| 53               | Benin   | Vegetables                 | 2004           | 30                                                             |
| 53               | Benin   | Vegetables, Other          | 2004           | 18                                                             |
| 53               | Benin   | Vegetal Products           | 2004           | 2,367                                                          |
| 53               | Benin   | Wheat and products         | 2004           | 34                                                             |
| 53               | Benin   | Wine                       | 2004           | 1                                                              |
| 53               | Benin   | Yams                       | 2004           | 381                                                            |
| 53               | Benin   | Alcoholic Beverages        | 2005           | 16                                                             |
| 53               | Benin   | Animal fats                | 2005           | 28                                                             |
| 53               | Benin   | Animal Products            | 2005           | 112                                                            |
| 53               | Benin   | Apples and products        | 2005           | 1                                                              |
| 53               | Benin   | Bananas                    | 2005           | 3                                                              |
| 53               | Benin   | Beans                      | 2005           | 75                                                             |
| 53               | Benin   | Beer                       | 2005           | 10                                                             |
| 53               | Benin   | Beverages, Alcoholic       | 2005           | 2                                                              |
| 53               | Benin   | Beverages, Fermented       | 2005           | 4                                                              |
| 53               | Benin   | Bovine Meat                | 2005           | 14                                                             |
| 53               | Benin   | Butter, Chee               | 2005           | 1                                                              |
| 53               | Benin   | Cassava and products       | 2005           | 376                                                            |
| 53               | Benin   | Cereals - Excluding Beer   | 2005           | 1,066                                                          |
| 53               | Benin   | Cereals, Other             | 2005           | 1                                                              |
| 53               | Benin   | Cocoa Beans and products   | 2005           | 1                                                              |
| 53               | Benin   | Coconut Oil                | 2005           | 5                                                              |
| 53               | Benin   | Coconuts - Incl Copra      | 2005           | 1                                                              |
| 53               | Benin   | Cottonseed Oil             | 2005           | 49                                                             |
| 53               | Benin   | Crustaceans                | 2005           | 1                                                              |
| 53               | Benin   | Dates                      | 2005           | 1                                                              |
| 53               | Benin   | Demersal Fish              | 2005           | 1                                                              |
| 53               | Benin   | Eggs                       | 2005           | 2                                                              |
| 53               | Benin   | Fats, Animals, Raw         | 2005           | 27                                                             |
| 53               | Benin   | Fish, Seafood              | 2005           | 17                                                             |
| 53               | Benin   | Freshwater Fish            | 2005           | 6                                                              |
| 53               | Benin   | Fruits - Excluding Wine    | 2005           | 33                                                             |
| 53               | Benin   | Fruits, Other              | 2005           | 15                                                             |
| 53               | Benin   | Grand Total                | 2005           | 2,440                                                          |
| 53               | Benin   | Groundnut Oil              | 2005           | 30                                                             |
| 53               | Benin   | Groundnuts (Shelled Eq)    | 2005           | 127                                                            |
| 53               | Benin   | Maize and products         | 2005           | 470                                                            |
| 53               | Benin   | Marine Fish, Other         | 2005           | 7                                                              |
| 53               | Benin   | Meat                       | 2005           | 45                                                             |
| 53               | Benin   | Meat, Other                | 2005           | 3                                                              |
| 53               | Benin   | Milk - Excluding Butter    | 2005           | 18                                                             |
| 53               | Benin   | Millet and products        | 2005           | 24                                                             |
| 53               | Benin   | Miscellaneous              | 2005           | 2                                                              |
| 53               | Benin   | Mutton & Goat Meat         | 2005           | 3                                                              |
| 53               | Benin   | Offals                     | 2005           | 2                                                              |
| 53               | Benin   | Oilcrops                   | 2005           | 154                                                            |
| 53               | Benin   | Oilcrops Oil, Other        | 2005           | 6                                                              |
| 53               | Benin   | Onions                     | 2005           | 2                                                              |
| 53               | Benin   | Oranges, Mandarines        | 2005           | 2                                                              |
| 53               | Benin   | Palm Oil                   | 2005           | 59                                                             |
| 53               | Benin   | Palmkernel Oil             | 2005           | 20                                                             |
| 53               | Benin   | Pelagic Fish               | 2005           | 2                                                              |
| 53               | Benin   | Pigmeat                    | 2005           | 4                                                              |
| 53               | Benin   | Pimento                    | 2005           | 17                                                             |
| 53               | Benin   | Pineapples and products    | 2005           | 11                                                             |
| 53               | Benin   | Poultry Meat               | 2005           | 20                                                             |
| 53               | Benin   | Pulses                     | 2005           | 90                                                             |
| 53               | Benin   | Pulses, Other and products | 2005           | 15                                                             |
| 53               | Benin   | Rape and Mustard Oil       | 2005           | 2                                                              |
| 53               | Benin   | Rice (Milled Equivalent)   | 2005           | 422                                                            |
| 53               | Benin   | Roots, Other               | 2005           | 1                                                              |
| 53               | Benin   | Sesame seed                | 2005           | 25                                                             |
| 53               | Benin   | Sorghum and products       | 2005           | 125                                                            |
| 53               | Benin   | Soybean Oil                | 2005           | 5                                                              |
| 53               | Benin   | Spices                     | 2005           | 17                                                             |
| 53               | Benin   | Starchy Roots              | 2005           | 704                                                            |
| 53               | Benin   | Stimulants                 | 2005           | 1                                                              |
| 53               | Benin   | Sugar & Sweeteners         | 2005           | 35                                                             |
| 53               | Benin   | Sugar (Raw Equivalent)     | 2005           | 34                                                             |
| 53               | Benin   | Sweet potatoes             | 2005           | 19                                                             |
| 53               | Benin   | Tomatoes and products      | 2005           | 11                                                             |
| 53               | Benin   | Treenuts                   | 2005           | 2                                                              |
| 53               | Benin   | Vegetable Oils             | 2005           | 175                                                            |
| 53               | Benin   | Vegetables                 | 2005           | 33                                                             |
| 53               | Benin   | Vegetables, Other          | 2005           | 20                                                             |
| 53               | Benin   | Vegetal Products           | 2005           | 2,327                                                          |
| 53               | Benin   | Wheat and products         | 2005           | 25                                                             |
| 53               | Benin   | Wine                       | 2005           | 1                                                              |
| 53               | Benin   | Yams                       | 2005           | 308                                                            |
| 53               | Benin   | Alcoholic Beverages        | 2006           | 18                                                             |
| 53               | Benin   | Animal fats                | 2006           | 22                                                             |
| 53               | Benin   | Animal Products            | 2006           | 111                                                            |
| 53               | Benin   | Apples and products        | 2006           | 2                                                              |
| 53               | Benin   | Bananas                    | 2006           | 2                                                              |
| 53               | Benin   | Beans                      | 2006           | 89                                                             |
| 53               | Benin   | Beer                       | 2006           | 11                                                             |

## Dietary calcium and zinc deficiency risks are decreasing but remain prevalent

| FAO Country code | Country | Food item                       | Reference year | Net energy supply (kcal capita <sup>-1</sup> d <sup>-1</sup> ) |
|------------------|---------|---------------------------------|----------------|----------------------------------------------------------------|
| 53               | Benin   | Beverages, Alcoholic            | 2006           | 2                                                              |
| 53               | Benin   | Beverages, Fermented            | 2006           | 3                                                              |
| 53               | Benin   | Bovine Meat                     | 2006           | 14                                                             |
| 53               | Benin   | Butter, Ghee                    | 2006           | 1                                                              |
| 53               | Benin   | Cassava and products            | 2006           | 383                                                            |
| 53               | Benin   | Cereals - Excluding Beer        | 2006           | 1,083                                                          |
| 53               | Benin   | Cereals, Other                  | 2006           | 1                                                              |
| 53               | Benin   | Cocoa Beans and products        | 2006           | 1                                                              |
| 53               | Benin   | Coconut Oil                     | 2006           | 5                                                              |
| 53               | Benin   | Coconuts - Incl Copra           | 2006           | 1                                                              |
| 53               | Benin   | Cottonseed Oil                  | 2006           | 57                                                             |
| 53               | Benin   | Crustaceans                     | 2006           | 1                                                              |
| 53               | Benin   | Dates                           | 2006           | 1                                                              |
| 53               | Benin   | Demersal Fish                   | 2006           | 1                                                              |
| 53               | Benin   | Eggs                            | 2006           | 3                                                              |
| 53               | Benin   | Fats, Animals, Raw              | 2006           | 21                                                             |
| 53               | Benin   | Fish, Seafood                   | 2006           | 21                                                             |
| 53               | Benin   | Freshwater Fish                 | 2006           | 6                                                              |
| 53               | Benin   | Fruits - Excluding Wine         | 2006           | 28                                                             |
| 53               | Benin   | Fruits, Other                   | 2006           | 15                                                             |
| 53               | Benin   | Grand Total                     | 2006           | 2,459                                                          |
| 53               | Benin   | Grapes and products (excl wine) | 2006           | 1                                                              |
| 53               | Benin   | Groundnut Oil                   | 2006           | 29                                                             |
| 53               | Benin   | Groundnuts (Shelled Eq)         | 2006           | 98                                                             |
| 53               | Benin   | Maize and products              | 2006           | 403                                                            |
| 53               | Benin   | Marine Fish, Other              | 2006           | 11                                                             |
| 53               | Benin   | Meat                            | 2006           | 45                                                             |
| 53               | Benin   | Meat, Other                     | 2006           | 4                                                              |
| 53               | Benin   | Milk - Excluding Butter         | 2006           | 17                                                             |
| 53               | Benin   | Millet and products             | 2006           | 24                                                             |
| 53               | Benin   | Miscellaneous                   | 2006           | 1                                                              |
| 53               | Benin   | Mutton & Goat Meat              | 2006           | 3                                                              |
| 53               | Benin   | Offals                          | 2006           | 2                                                              |
| 53               | Benin   | Oilcrops                        | 2006           | 110                                                            |
| 53               | Benin   | Oilcrops Oil, Other             | 2006           | 9                                                              |
| 53               | Benin   | Oilcrops, Other                 | 2006           | 1                                                              |
| 53               | Benin   | Onions                          | 2006           | 3                                                              |
| 53               | Benin   | Oranges, Mandarines             | 2006           | 2                                                              |
| 53               | Benin   | Palm Oil                        | 2006           | 32                                                             |
| 53               | Benin   | Palmkernel Oil                  | 2006           | 16                                                             |
| 53               | Benin   | Peas                            | 2006           | 1                                                              |
| 53               | Benin   | Pelagic Fish                    | 2006           | 3                                                              |
| 53               | Benin   | Pigmeat                         | 2006           | 4                                                              |
| 53               | Benin   | Pimento                         | 2006           | 18                                                             |
| 53               | Benin   | Pineapples and products         | 2006           | 7                                                              |
| 53               | Benin   | Poultry Meat                    | 2006           | 20                                                             |
| 53               | Benin   | Pulses                          | 2006           | 96                                                             |
| 53               | Benin   | Pulses, Other and products      | 2006           | 6                                                              |
| 53               | Benin   | Rape and Mustard Oil            | 2006           | 1                                                              |
| 53               | Benin   | Rice (Milled Equivalent)        | 2006           | 489                                                            |
| 53               | Benin   | Roots, Other                    | 2006           | 1                                                              |
| 53               | Benin   | Sesame seed                     | 2006           | 9                                                              |
| 53               | Benin   | Sorghum and products            | 2006           | 117                                                            |
| 53               | Benin   | Soyabean Oil                    | 2006           | 2                                                              |
| 53               | Benin   | Spices                          | 2006           | 19                                                             |
| 53               | Benin   | Spices, Other                   | 2006           | 1                                                              |
| 53               | Benin   | Starchy Roots                   | 2006           | 770                                                            |
| 53               | Benin   | Stimulants                      | 2006           | 1                                                              |
| 53               | Benin   | Sugar & Sweeteners              | 2006           | 34                                                             |
| 53               | Benin   | Sugar (Raw Equivalent)          | 2006           | 33                                                             |
| 53               | Benin   | Sweet potatoes                  | 2006           | 15                                                             |
| 53               | Benin   | Sweeteners, Other               | 2006           | 1                                                              |
| 53               | Benin   | Tomatoes and products           | 2006           | 11                                                             |
| 53               | Benin   | Treenuts                        | 2006           | 2                                                              |
| 53               | Benin   | Vegetable Oils                  | 2006           | 152                                                            |
| 53               | Benin   | Vegetables                      | 2006           | 33                                                             |
| 53               | Benin   | Vegetables, Other               | 2006           | 19                                                             |
| 53               | Benin   | Vegetal Products                | 2006           | 2,348                                                          |
| 53               | Benin   | Wheat and products              | 2006           | 49                                                             |
| 53               | Benin   | Wine                            | 2006           | 2                                                              |
| 53               | Benin   | Yams                            | 2006           | 371                                                            |
| 53               | Benin   | Alcoholic Beverages             | 2007           | 15                                                             |
| 53               | Benin   | Animal fats                     | 2007           | 21                                                             |
| 53               | Benin   | Animal Products                 | 2007           | 111                                                            |
| 53               | Benin   | Apples and products             | 2007           | 2                                                              |
| 53               | Benin   | Bananas                         | 2007           | 3                                                              |
| 53               | Benin   | Barley and products             | 2007           | 2                                                              |
| 53               | Benin   | Beans                           | 2007           | 93                                                             |
| 53               | Benin   | Beer                            | 2007           | 11                                                             |
| 53               | Benin   | Beverages, Alcoholic            | 2007           | 1                                                              |
| 53               | Benin   | Beverages, Fermented            | 2007           | 3                                                              |
| 53               | Benin   | Bovine Meat                     | 2007           | 14                                                             |
| 53               | Benin   | Butter, Ghee                    | 2007           | 1                                                              |
| 53               | Benin   | Cassava and products            | 2007           | 444                                                            |
| 53               | Benin   | Cereals - Excluding Beer        | 2007           | 1,058                                                          |
| 53               | Benin   | Cereals, Other                  | 2007           | 1                                                              |
| 53               | Benin   | Cocoa Beans and products        | 2007           | 2                                                              |
| 53               | Benin   | Coconut Oil                     | 2007           | 4                                                              |
| 53               | Benin   | Coconuts - Incl Copra           | 2007           | 1                                                              |
| 53               | Benin   | Cottonseed Oil                  | 2007           | 50                                                             |
| 53               | Benin   | Crustaceans                     | 2007           | 1                                                              |
| 53               | Benin   | Dates                           | 2007           | 1                                                              |
| 53               | Benin   | Demersal Fish                   | 2007           | 1                                                              |
| 53               | Benin   | Eggs                            | 2007           | 3                                                              |
| 53               | Benin   | Fats, Animals, Raw              | 2007           | 20                                                             |
| 53               | Benin   | Fish, Seafood                   | 2007           | 22                                                             |
| 53               | Benin   | Freshwater Fish                 | 2007           | 8                                                              |

## Dietary calcium and zinc deficiency risks are decreasing but remain prevalent

| FAO Country code | Country | Food item                       | Reference year | Net energy supply (kcal <i>capita</i> <sup>-1</sup> d <sup>-1</sup> ) |
|------------------|---------|---------------------------------|----------------|-----------------------------------------------------------------------|
| 53               | Benin   | Fruits - Excluding Wine         | 2007           | 34                                                                    |
| 53               | Benin   | Fruits, Other                   | 2007           | 16                                                                    |
| 53               | Benin   | Grand Total                     | 2007           | 2,567                                                                 |
| 53               | Benin   | Grapes and products (excl wine) | 2007           | 1                                                                     |
| 53               | Benin   | Groundnut Oil                   | 2007           | 28                                                                    |
| 53               | Benin   | Groundnuts (Shelled Eq)         | 2007           | 87                                                                    |
| 53               | Benin   | Maize and products              | 2007           | 385                                                                   |
| 53               | Benin   | Marine Fish, Other              | 2007           | 10                                                                    |
| 53               | Benin   | Meat                            | 2007           | 44                                                                    |
| 53               | Benin   | Meat, Other                     | 2007           | 2                                                                     |
| 53               | Benin   | Milk - Excluding Butter         | 2007           | 18                                                                    |
| 53               | Benin   | Millet and products             | 2007           | 25                                                                    |
| 53               | Benin   | Miscellaneous                   | 2007           | 2                                                                     |
| 53               | Benin   | Mutton & Goat Meat              | 2007           | 3                                                                     |
| 53               | Benin   | Offals                          | 2007           | 2                                                                     |
| 53               | Benin   | Oilcrops                        | 2007           | 106                                                                   |
| 53               | Benin   | Oilcrops Oil, Other             | 2007           | 4                                                                     |
| 53               | Benin   | Onions                          | 2007           | 2                                                                     |
| 53               | Benin   | Oranges, Mandarines             | 2007           | 1                                                                     |
| 53               | Benin   | Palm Oil                        | 2007           | 56                                                                    |
| 53               | Benin   | Palmkernel Oil                  | 2007           | 15                                                                    |
| 53               | Benin   | Pelagic Fish                    | 2007           | 2                                                                     |
| 53               | Benin   | Pigmeat                         | 2007           | 4                                                                     |
| 53               | Benin   | Pimento                         | 2007           | 27                                                                    |
| 53               | Benin   | Pineapples and products         | 2007           | 11                                                                    |
| 53               | Benin   | Poultry Meat                    | 2007           | 21                                                                    |
| 53               | Benin   | Pulses                          | 2007           | 128                                                                   |
| 53               | Benin   | Pulses, Other and products      | 2007           | 36                                                                    |
| 53               | Benin   | Rape and Mustard Oil            | 2007           | 2                                                                     |
| 53               | Benin   | Rice (Milled Equivalent)        | 2007           | 487                                                                   |
| 53               | Benin   | Roots, Other                    | 2007           | 1                                                                     |
| 53               | Benin   | Sesame seed                     | 2007           | 18                                                                    |
| 53               | Benin   | Sorghum and products            | 2007           | 114                                                                   |
| 53               | Benin   | Soyabean Oil                    | 2007           | 7                                                                     |
| 53               | Benin   | Spices                          | 2007           | 27                                                                    |
| 53               | Benin   | Starchy Roots                   | 2007           | 835                                                                   |
| 53               | Benin   | Stimulants                      | 2007           | 2                                                                     |
| 53               | Benin   | Sugar & Sweeteners              | 2007           | 33                                                                    |
| 53               | Benin   | Sugar (Raw Equivalent)          | 2007           | 32                                                                    |
| 53               | Benin   | Sweet potatoes                  | 2007           | 19                                                                    |
| 53               | Benin   | Sweeteners, Other               | 2007           | 1                                                                     |
| 53               | Benin   | Tomatoes and products           | 2007           | 12                                                                    |
| 53               | Benin   | Treenuts                        | 2007           | 18                                                                    |
| 53               | Benin   | Vegetable Oils                  | 2007           | 167                                                                   |
| 53               | Benin   | Vegetables                      | 2007           | 30                                                                    |
| 53               | Benin   | Vegetables, Other               | 2007           | 15                                                                    |
| 53               | Benin   | Vegetal Products                | 2007           | 2,456                                                                 |
| 53               | Benin   | Wheat and products              | 2007           | 44                                                                    |
| 53               | Benin   | Yams                            | 2007           | 372                                                                   |
| 53               | Benin   | Alcoholic Beverages             | 2008           | 18                                                                    |
| 53               | Benin   | Animal fats                     | 2008           | 6                                                                     |
| 53               | Benin   | Animal Products                 | 2008           | 114                                                                   |
| 53               | Benin   | Apples and products             | 2008           | 3                                                                     |
| 53               | Benin   | Bananas                         | 2008           | 3                                                                     |
| 53               | Benin   | Beans                           | 2008           | 97                                                                    |
| 53               | Benin   | Beer                            | 2008           | 11                                                                    |
| 53               | Benin   | Beverages, Alcoholic            | 2008           | 3                                                                     |
| 53               | Benin   | Beverages, Fermented            | 2008           | 3                                                                     |
| 53               | Benin   | Bovine Meat                     | 2008           | 14                                                                    |
| 53               | Benin   | Butter, Ghee                    | 2008           | 1                                                                     |
| 53               | Benin   | Cassava and products            | 2008           | 276                                                                   |
| 53               | Benin   | Cereals - Excluding Beer        | 2008           | 1,090                                                                 |
| 53               | Benin   | Cereals, Other                  | 2008           | 1                                                                     |
| 53               | Benin   | Cocoa Beans and products        | 2008           | 3                                                                     |
| 53               | Benin   | Coconut Oil                     | 2008           | 5                                                                     |
| 53               | Benin   | Coconuts - Incl Copra           | 2008           | 1                                                                     |
| 53               | Benin   | Cottonseed Oil                  | 2008           | 50                                                                    |
| 53               | Benin   | Crustaceans                     | 2008           | 1                                                                     |
| 53               | Benin   | Dates                           | 2008           | 1                                                                     |
| 53               | Benin   | Demersal Fish                   | 2008           | 1                                                                     |
| 53               | Benin   | Eggs                            | 2008           | 4                                                                     |
| 53               | Benin   | Fats, Animals, Raw              | 2008           | 5                                                                     |
| 53               | Benin   | Fish, Seafood                   | 2008           | 24                                                                    |
| 53               | Benin   | Freshwater Fish                 | 2008           | 8                                                                     |
| 53               | Benin   | Fruits - Excluding Wine         | 2008           | 34                                                                    |
| 53               | Benin   | Fruits, Other                   | 2008           | 16                                                                    |
| 53               | Benin   | Grand Total                     | 2008           | 2,530                                                                 |
| 53               | Benin   | Groundnut Oil                   | 2008           | 43                                                                    |
| 53               | Benin   | Groundnuts (Shelled Eq)         | 2008           | 89                                                                    |
| 53               | Benin   | Maize and products              | 2008           | 379                                                                   |
| 53               | Benin   | Marine Fish, Other              | 2008           | 12                                                                    |
| 53               | Benin   | Meat                            | 2008           | 57                                                                    |
| 53               | Benin   | Meat, Other                     | 2008           | 2                                                                     |
| 53               | Benin   | Milk - Excluding Butter         | 2008           | 21                                                                    |
| 53               | Benin   | Millet and products             | 2008           | 21                                                                    |
| 53               | Benin   | Miscellaneous                   | 2008           | 3                                                                     |
| 53               | Benin   | Mutton & Goat Meat              | 2008           | 3                                                                     |
| 53               | Benin   | Offals                          | 2008           | 2                                                                     |
| 53               | Benin   | Oilcrops                        | 2008           | 110                                                                   |
| 53               | Benin   | Oilcrops Oil, Other             | 2008           | 4                                                                     |
| 53               | Benin   | Onions                          | 2008           | 1                                                                     |
| 53               | Benin   | Oranges, Mandarines             | 2008           | 1                                                                     |
| 53               | Benin   | Palm Oil                        | 2008           | 55                                                                    |
| 53               | Benin   | Palmkernel Oil                  | 2008           | 25                                                                    |
| 53               | Benin   | Pelagic Fish                    | 2008           | 2                                                                     |
| 53               | Benin   | Pigmeat                         | 2008           | 5                                                                     |
| 53               | Benin   | Pimento                         | 2008           | 44                                                                    |

## Dietary calcium and zinc deficiency risks are decreasing but remain prevalent

| FAO Country code | Country | Food item                  | Reference year | Net energy supply (kcal capita <sup>-1</sup> d <sup>-1</sup> ) |
|------------------|---------|----------------------------|----------------|----------------------------------------------------------------|
| 53               | Benin   | Pineapples and products    | 2008           | 11                                                             |
| 53               | Benin   | Poultry Meat               | 2008           | 33                                                             |
| 53               | Benin   | Pulses                     | 2008           | 131                                                            |
| 53               | Benin   | Pulses, Other and products | 2008           | 35                                                             |
| 53               | Benin   | Rape and Mustard Oil       | 2008           | 1                                                              |
| 53               | Benin   | Rice (Milled Equivalent)   | 2008           | 531                                                            |
| 53               | Benin   | Roots, Other               | 2008           | 1                                                              |
| 53               | Benin   | Sesame seed                | 2008           | 19                                                             |
| 53               | Benin   | Sorghum and products       | 2008           | 102                                                            |
| 53               | Benin   | Soyabean Oil               | 2008           | 4                                                              |
| 53               | Benin   | Spices                     | 2008           | 44                                                             |
| 53               | Benin   | Starchy Roots              | 2008           | 683                                                            |
| 53               | Benin   | Stimulants                 | 2008           | 3                                                              |
| 53               | Benin   | Sugar & Sweeteners         | 2008           | 52                                                             |
| 53               | Benin   | Sugar (Raw Equivalent)     | 2008           | 51                                                             |
| 53               | Benin   | Sunflowerseed Oil          | 2008           | 1                                                              |
| 53               | Benin   | Sweet potatoes             | 2008           | 19                                                             |
| 53               | Benin   | Sweeteners, Other          | 2008           | 1                                                              |
| 53               | Benin   | Tomatoes and products      | 2008           | 17                                                             |
| 53               | Benin   | Treenuts                   | 2008           | 27                                                             |
| 53               | Benin   | Vegetable Oils             | 2008           | 188                                                            |
| 53               | Benin   | Vegetables                 | 2008           | 32                                                             |
| 53               | Benin   | Vegetables, Other          | 2008           | 14                                                             |
| 53               | Benin   | Vegetal Products           | 2008           | 2,416                                                          |
| 53               | Benin   | Wheat and products         | 2008           | 56                                                             |
| 53               | Benin   | Wine                       | 2008           | 1                                                              |
| 53               | Benin   | Yams                       | 2008           | 387                                                            |
| 53               | Benin   | Alcoholic Beverages        | 2009           | 17                                                             |
| 53               | Benin   | Animal fats                | 2009           | 4                                                              |
| 53               | Benin   | Animal Products            | 2009           | 117                                                            |
| 53               | Benin   | Apples and products        | 2009           | 3                                                              |
| 53               | Benin   | Bananas                    | 2009           | 3                                                              |
| 53               | Benin   | Beans                      | 2009           | 104                                                            |
| 53               | Benin   | Beer                       | 2009           | 12                                                             |
| 53               | Benin   | Beverages, Alcoholic       | 2009           | 2                                                              |
| 53               | Benin   | Beverages, Fermented       | 2009           | 3                                                              |
| 53               | Benin   | Bovine Meat                | 2009           | 17                                                             |
| 53               | Benin   | Cassava and products       | 2009           | 352                                                            |
| 53               | Benin   | Cereals - Excluding Beer   | 2009           | 1,106                                                          |
| 53               | Benin   | Cereals, Other             | 2009           | 1                                                              |
| 53               | Benin   | Cocoa Beans and products   | 2009           | 2                                                              |
| 53               | Benin   | Coconut Oil                | 2009           | 4                                                              |
| 53               | Benin   | Coconuts - Incl Copra      | 2009           | 1                                                              |
| 53               | Benin   | Cottonseed Oil             | 2009           | 44                                                             |
| 53               | Benin   | Dates                      | 2009           | 1                                                              |
| 53               | Benin   | Demersal Fish              | 2009           | 1                                                              |
| 53               | Benin   | Eggs                       | 2009           | 4                                                              |
| 53               | Benin   | Fats, Animals, Raw         | 2009           | 4                                                              |
| 53               | Benin   | Fish, Seafood              | 2009           | 23                                                             |
| 53               | Benin   | Freshwater Fish            | 2009           | 9                                                              |
| 53               | Benin   | Fruits - Excluding Wine    | 2009           | 42                                                             |
| 53               | Benin   | Fruits, Other              | 2009           | 17                                                             |
| 53               | Benin   | Grand Total                | 2009           | 2,592                                                          |
| 53               | Benin   | Groundnut Oil              | 2009           | 47                                                             |
| 53               | Benin   | Groundnuts (Shelled Eq)    | 2009           | 101                                                            |
| 53               | Benin   | Maize and products         | 2009           | 382                                                            |
| 53               | Benin   | Marine Fish, Other         | 2009           | 10                                                             |
| 53               | Benin   | Meat                       | 2009           | 56                                                             |
| 53               | Benin   | Meat, Other                | 2009           | 2                                                              |
| 53               | Benin   | Milk - Excluding Butter    | 2009           | 28                                                             |
| 53               | Benin   | Millet and products        | 2009           | 16                                                             |
| 53               | Benin   | Miscellaneous              | 2009           | 3                                                              |
| 53               | Benin   | Mutton & Goat Meat         | 2009           | 3                                                              |
| 53               | Benin   | Offals                     | 2009           | 3                                                              |
| 53               | Benin   | Oilcrops                   | 2009           | 119                                                            |
| 53               | Benin   | Oilcrops Oil, Other        | 2009           | 5                                                              |
| 53               | Benin   | Onions                     | 2009           | 4                                                              |
| 53               | Benin   | Oranges, Mandarines        | 2009           | 1                                                              |
| 53               | Benin   | Palm Oil                   | 2009           | 46                                                             |
| 53               | Benin   | Palmkernel Oil             | 2009           | 17                                                             |
| 53               | Benin   | Pelagic Fish               | 2009           | 2                                                              |
| 53               | Benin   | Pigmeat                    | 2009           | 5                                                              |
| 53               | Benin   | Pimento                    | 2009           | 24                                                             |
| 53               | Benin   | Pineapples and products    | 2009           | 18                                                             |
| 53               | Benin   | Poultry Meat               | 2009           | 28                                                             |
| 53               | Benin   | Pulses                     | 2009           | 130                                                            |
| 53               | Benin   | Pulses, Other and products | 2009           | 27                                                             |
| 53               | Benin   | Rice (Milled Equivalent)   | 2009           | 554                                                            |
| 53               | Benin   | Roots, Other               | 2009           | 1                                                              |
| 53               | Benin   | Sesame seed                | 2009           | 17                                                             |
| 53               | Benin   | Sorghum and products       | 2009           | 98                                                             |
| 53               | Benin   | Soyabean Oil               | 2009           | 5                                                              |
| 53               | Benin   | Spices                     | 2009           | 25                                                             |
| 53               | Benin   | Starchy Roots              | 2009           | 729                                                            |
| 53               | Benin   | Stimulants                 | 2009           | 2                                                              |
| 53               | Benin   | Sugar & Sweeteners         | 2009           | 51                                                             |
| 53               | Benin   | Sugar (Raw Equivalent)     | 2009           | 50                                                             |
| 53               | Benin   | Sweet potatoes             | 2009           | 16                                                             |
| 53               | Benin   | Sweeteners, Other          | 2009           | 1                                                              |
| 53               | Benin   | Tomatoes and products      | 2009           | 13                                                             |
| 53               | Benin   | Treenuts                   | 2009           | 52                                                             |
| 53               | Benin   | Vegetable Oils             | 2009           | 168                                                            |
| 53               | Benin   | Vegetables                 | 2009           | 30                                                             |
| 53               | Benin   | Vegetables, Other          | 2009           | 12                                                             |
| 53               | Benin   | Vegetal Products           | 2009           | 2,475                                                          |
| 53               | Benin   | Wheat and products         | 2009           | 56                                                             |
| 53               | Benin   | Wine                       | 2009           | 1                                                              |

Dietary calcium and zinc deficiency risks are decreasing but remain prevalent

| FAO Country code | Country | Food item                  | Reference year | Net energy supply (kcal capita <sup>-1</sup> d <sup>-1</sup> ) |
|------------------|---------|----------------------------|----------------|----------------------------------------------------------------|
| 53               | Benin   | Yams                       | 2009           | 360                                                            |
| 53               | Benin   | Alcoholic Beverages        | 2010           | 19                                                             |
| 53               | Benin   | Animal fats                | 2010           | 4                                                              |
| 53               | Benin   | Animal Products            | 2010           | 100                                                            |
| 53               | Benin   | Apples and products        | 2010           | 2                                                              |
| 53               | Benin   | Bananas                    | 2010           | 3                                                              |
| 53               | Benin   | Beans                      | 2010           | 74                                                             |
| 53               | Benin   | Beer                       | 2010           | 13                                                             |
| 53               | Benin   | Beverages, Alcoholic       | 2010           | 2                                                              |
| 53               | Benin   | Beverages, Fermented       | 2010           | 3                                                              |
| 53               | Benin   | Bovine Meat                | 2010           | 16                                                             |
| 53               | Benin   | Cassava and products       | 2010           | 343                                                            |
| 53               | Benin   | Cereals - Excluding Beer   | 2010           | 1,022                                                          |
| 53               | Benin   | Cereals, Other             | 2010           | 1                                                              |
| 53               | Benin   | Cocoa Beans and products   | 2010           | 2                                                              |
| 53               | Benin   | Coconut Oil                | 2010           | 4                                                              |
| 53               | Benin   | Coconuts - Incl Copra      | 2010           | 1                                                              |
| 53               | Benin   | Cottonseed Oil             | 2010           | 21                                                             |
| 53               | Benin   | Dates                      | 2010           | 1                                                              |
| 53               | Benin   | Demersal Fish              | 2010           | 1                                                              |
| 53               | Benin   | Eggs                       | 2010           | 2                                                              |
| 53               | Benin   | Fats, Animals, Raw         | 2010           | 4                                                              |
| 53               | Benin   | Fish, Seafood              | 2010           | 23                                                             |
| 53               | Benin   | Freshwater Fish            | 2010           | 10                                                             |
| 53               | Benin   | Fruits - Excluding Wine    | 2010           | 46                                                             |
| 53               | Benin   | Fruits, Other              | 2010           | 18                                                             |
| 53               | Benin   | Grand Total                | 2010           | 2,538                                                          |
| 53               | Benin   | Groundnut Oil              | 2010           | 76                                                             |
| 53               | Benin   | Groundnuts (Shelled Eq)    | 2010           | 125                                                            |
| 53               | Benin   | Maize and products         | 2010           | 353                                                            |
| 53               | Benin   | Marine Fish, Other         | 2010           | 10                                                             |
| 53               | Benin   | Meat                       | 2010           | 49                                                             |
| 53               | Benin   | Meat, Other                | 2010           | 2                                                              |
| 53               | Benin   | Milk - Excluding Butter    | 2010           | 19                                                             |
| 53               | Benin   | Millet and products        | 2010           | 14                                                             |
| 53               | Benin   | Miscellaneous              | 2010           | 3                                                              |
| 53               | Benin   | Mutton & Goat Meat         | 2010           | 3                                                              |
| 53               | Benin   | Offals                     | 2010           | 3                                                              |
| 53               | Benin   | Oilcrops                   | 2010           | 143                                                            |
| 53               | Benin   | Oilcrops Oil, Other        | 2010           | 2                                                              |
| 53               | Benin   | Olive Oil                  | 2010           | 1                                                              |
| 53               | Benin   | Onions                     | 2010           | 1                                                              |
| 53               | Benin   | Oranges, Mandarines        | 2010           | 1                                                              |
| 53               | Benin   | Palm Oil                   | 2010           | 47                                                             |
| 53               | Benin   | Palmkernel Oil             | 2010           | 20                                                             |
| 53               | Benin   | Pelagic Fish               | 2010           | 3                                                              |
| 53               | Benin   | Pigmeat                    | 2010           | 5                                                              |
| 53               | Benin   | Pimento                    | 2010           | 26                                                             |
| 53               | Benin   | Pineapples and products    | 2010           | 22                                                             |
| 53               | Benin   | Poultry Meat               | 2010           | 23                                                             |
| 53               | Benin   | Pulses                     | 2010           | 103                                                            |
| 53               | Benin   | Pulses, Other and products | 2010           | 29                                                             |
| 53               | Benin   | Rice (Milled Equivalent)   | 2010           | 504                                                            |
| 53               | Benin   | Sesame seed                | 2010           | 16                                                             |
| 53               | Benin   | Sorghum and products       | 2010           | 98                                                             |
| 53               | Benin   | Soyabean Oil               | 2010           | 5                                                              |
| 53               | Benin   | Spices                     | 2010           | 26                                                             |
| 53               | Benin   | Starchy Roots              | 2010           | 781                                                            |
| 53               | Benin   | Stimulants                 | 2010           | 2                                                              |
| 53               | Benin   | Sugar & Sweeteners         | 2010           | 53                                                             |
| 53               | Benin   | Sugar (Raw Equivalent)     | 2010           | 51                                                             |
| 53               | Benin   | Sweet potatoes             | 2010           | 19                                                             |
| 53               | Benin   | Sweeteners, Other          | 2010           | 2                                                              |
| 53               | Benin   | Tomatoes and products      | 2010           | 15                                                             |
| 53               | Benin   | Treenuts                   | 2010           | 38                                                             |
| 53               | Benin   | Vegetable Oils             | 2010           | 176                                                            |
| 53               | Benin   | Vegetables                 | 2010           | 24                                                             |
| 53               | Benin   | Vegetables, Other          | 2010           | 8                                                              |
| 53               | Benin   | Vegetal Products           | 2010           | 2,438                                                          |
| 53               | Benin   | Wheat and products         | 2010           | 53                                                             |
| 53               | Benin   | Wine                       | 2010           | 2                                                              |
| 53               | Benin   | Yams                       | 2010           | 418                                                            |
| 53               | Benin   | Alcoholic Beverages        | 2011           | 20                                                             |
| 53               | Benin   | Animal fats                | 2011           | 5                                                              |
| 53               | Benin   | Animal Products            | 2011           | 112                                                            |
| 53               | Benin   | Apples and products        | 2011           | 4                                                              |
| 53               | Benin   | Bananas                    | 2011           | 3                                                              |
| 53               | Benin   | Beans                      | 2011           | 64                                                             |
| 53               | Benin   | Beer                       | 2011           | 13                                                             |
| 53               | Benin   | Beverages, Alcoholic       | 2011           | 2                                                              |
| 53               | Benin   | Beverages, Fermented       | 2011           | 3                                                              |
| 53               | Benin   | Bovine Meat                | 2011           | 16                                                             |
| 53               | Benin   | Cassava and products       | 2011           | 418                                                            |
| 53               | Benin   | Cereals - Excluding Beer   | 2011           | 1,036                                                          |
| 53               | Benin   | Cereals, Other             | 2011           | 1                                                              |
| 53               | Benin   | Cocoa Beans and products   | 2011           | 2                                                              |
| 53               | Benin   | Coconut Oil                | 2011           | 5                                                              |
| 53               | Benin   | Coconuts - Incl Copra      | 2011           | 1                                                              |
| 53               | Benin   | Cottonseed Oil             | 2011           | 24                                                             |
| 53               | Benin   | Dates                      | 2011           | 1                                                              |
| 53               | Benin   | Demersal Fish              | 2011           | 1                                                              |
| 53               | Benin   | Eggs                       | 2011           | 3                                                              |
| 53               | Benin   | Fats, Animals, Raw         | 2011           | 4                                                              |
| 53               | Benin   | Fish, Seafood              | 2011           | 23                                                             |
| 53               | Benin   | Freshwater Fish            | 2011           | 9                                                              |
| 53               | Benin   | Fruits - Excluding Wine    | 2011           | 45                                                             |
| 53               | Benin   | Fruits, Other              | 2011           | 18                                                             |

| FAO Country code | Country | Food item                  | Reference year | Net energy supply (kcal capita <sup>-1</sup> d <sup>-1</sup> ) |
|------------------|---------|----------------------------|----------------|----------------------------------------------------------------|
| 53               | Benin   | Grand Total                | 2011           | 2,594                                                          |
| 53               | Benin   | Groundnut Oil              | 2011           | 60                                                             |
| 53               | Benin   | Groundnuts (Shelled Eq)    | 2011           | 98                                                             |
| 53               | Benin   | Maize and products         | 2011           | 331                                                            |
| 53               | Benin   | Marine Fish, Other         | 2011           | 10                                                             |
| 53               | Benin   | Meat                       | 2011           | 59                                                             |
| 53               | Benin   | Meat, Other                | 2011           | 2                                                              |
| 53               | Benin   | Milk - Excluding Butter    | 2011           | 20                                                             |
| 53               | Benin   | Millet and products        | 2011           | 12                                                             |
| 53               | Benin   | Miscellaneous              | 2011           | 2                                                              |
| 53               | Benin   | Mutton & Goat Meat         | 2011           | 3                                                              |
| 53               | Benin   | Offals                     | 2011           | 3                                                              |
| 53               | Benin   | Oilcrops                   | 2011           | 117                                                            |
| 53               | Benin   | Oilcrops Oil, Other        | 2011           | 12                                                             |
| 53               | Benin   | Oilcrops, Other            | 2011           | 2                                                              |
| 53               | Benin   | Onions                     | 2011           | 2                                                              |
| 53               | Benin   | Oranges, Mandarines        | 2011           | 1                                                              |
| 53               | Benin   | Palm Oil                   | 2011           | 54                                                             |
| 53               | Benin   | Palmkernel Oil             | 2011           | 19                                                             |
| 53               | Benin   | Pelagic Fish               | 2011           | 3                                                              |
| 53               | Benin   | Pigmeat                    | 2011           | 6                                                              |
| 53               | Benin   | Pimento                    | 2011           | 25                                                             |
| 53               | Benin   | Pineapples and products    | 2011           | 19                                                             |
| 53               | Benin   | Poultry Meat               | 2011           | 32                                                             |
| 53               | Benin   | Pulses                     | 2011           | 90                                                             |
| 53               | Benin   | Pulses, Other and products | 2011           | 26                                                             |
| 53               | Benin   | Rice (Milled Equivalent)   | 2011           | 532                                                            |
| 53               | Benin   | Sesame seed                | 2011           | 16                                                             |
| 53               | Benin   | Sorghum and products       | 2011           | 94                                                             |
| 53               | Benin   | Soyabean Oil               | 2011           | 5                                                              |
| 53               | Benin   | Spices                     | 2011           | 25                                                             |
| 53               | Benin   | Starchy Roots              | 2011           | 853                                                            |
| 53               | Benin   | Stimulants                 | 2011           | 2                                                              |
| 53               | Benin   | Sugar & Sweeteners         | 2011           | 55                                                             |
| 53               | Benin   | Sugar (Raw Equivalent)     | 2011           | 53                                                             |
| 53               | Benin   | Sweet potatoes             | 2011           | 12                                                             |
| 53               | Benin   | Sweeteners, Other          | 2011           | 1                                                              |
| 53               | Benin   | Tomatoes and products      | 2011           | 12                                                             |
| 53               | Benin   | Treenuts                   | 2011           | 34                                                             |
| 53               | Benin   | Vegetable Oils             | 2011           | 180                                                            |
| 53               | Benin   | Vegetables                 | 2011           | 22                                                             |
| 53               | Benin   | Vegetables, Other          | 2011           | 8                                                              |
| 53               | Benin   | Vegetal Products           | 2011           | 2,481                                                          |
| 53               | Benin   | Wheat and products         | 2011           | 67                                                             |
| 53               | Benin   | Wine                       | 2011           | 2                                                              |
| 53               | Benin   | Yams                       | 2011           | 422                                                            |
| 17               | Bermuda | Alcoholic Beverages        | 1992           | 227                                                            |
| 17               | Bermuda | Animal fats                | 1992           | 117                                                            |
| 17               | Bermuda | Animal Products            | 1992           | 936                                                            |
| 17               | Bermuda | Apples and products        | 1992           | 12                                                             |
| 17               | Bermuda | Bananas                    | 1992           | 18                                                             |
| 17               | Bermuda | Barley and products        | 1992           | 2                                                              |
| 17               | Bermuda | Beer                       | 1992           | 93                                                             |
| 17               | Bermuda | Beverages, Alcoholic       | 1992           | 106                                                            |
| 17               | Bermuda | Beverages, Fermented       | 1992           | 1                                                              |
| 17               | Bermuda | Bovine Meat                | 1992           | 143                                                            |
| 17               | Bermuda | Butter, Ghee               | 1992           | 85                                                             |
| 17               | Bermuda | Cassava and products       | 1992           | 44                                                             |
| 17               | Bermuda | Cereals - Excluding Beer   | 1992           | 620                                                            |
| 17               | Bermuda | Cereals, Other             | 1992           | 81                                                             |
| 17               | Bermuda | Cocoa Beans and products   | 1992           | 79                                                             |
| 17               | Bermuda | Coffee and products        | 1992           | 5                                                              |
| 17               | Bermuda | Cream                      | 1992           | 30                                                             |
| 17               | Bermuda | Crustaceans                | 1992           | 20                                                             |
| 17               | Bermuda | Demersal Fish              | 1992           | 2                                                              |
| 17               | Bermuda | Eggs                       | 1992           | 58                                                             |
| 17               | Bermuda | Fats, Animals, Raw         | 1992           | 2                                                              |
| 17               | Bermuda | Fish, Seafood              | 1992           | 77                                                             |
| 17               | Bermuda | Fruits - Excluding Wine    | 1992           | 183                                                            |
| 17               | Bermuda | Fruits, Other              | 1992           | 142                                                            |
| 17               | Bermuda | Grand Total                | 1992           | 3,014                                                          |
| 17               | Bermuda | Groundnuts (Shelled Eq)    | 1992           | 13                                                             |
| 17               | Bermuda | Honey                      | 1992           | 1                                                              |
| 17               | Bermuda | Marine Fish, Other         | 1992           | 55                                                             |
| 17               | Bermuda | Meat                       | 1992           | 493                                                            |
| 17               | Bermuda | Meat, Other                | 1992           | 39                                                             |
| 17               | Bermuda | Milk - Excluding Butter    | 1992           | 191                                                            |
| 17               | Bermuda | Miscellaneous              | 1992           | 41                                                             |
| 17               | Bermuda | Mutton & Goat Meat         | 1992           | 37                                                             |
| 17               | Bermuda | Oilcrops                   | 1992           | 13                                                             |
| 17               | Bermuda | Oilcrops Oil, Other        | 1992           | 309                                                            |
| 17               | Bermuda | Onions                     | 1992           | 1                                                              |
| 17               | Bermuda | Oranges, Mandarines        | 1992           | 11                                                             |
| 17               | Bermuda | Pigmeat                    | 1992           | 148                                                            |
| 17               | Bermuda | Pimento                    | 1992           | 25                                                             |
| 17               | Bermuda | Potatoes and products      | 1992           | 51                                                             |
| 17               | Bermuda | Poultry Meat               | 1992           | 126                                                            |
| 17               | Bermuda | Pulses                     | 1992           | 13                                                             |
| 17               | Bermuda | Pulses, Other and products | 1992           | 13                                                             |
| 17               | Bermuda | Rice (Milled Equivalent)   | 1992           | 45                                                             |
| 17               | Bermuda | Spices                     | 1992           | 25                                                             |
| 17               | Bermuda | Starchy Roots              | 1992           | 99                                                             |
| 17               | Bermuda | Stimulants                 | 1992           | 86                                                             |
| 17               | Bermuda | Sugar & Sweeteners         | 1992           | 300                                                            |
| 17               | Bermuda | Sugar (Raw Equivalent)     | 1992           | 242                                                            |
| 17               | Bermuda | Sweet potatoes             | 1992           | 3                                                              |
| 17               | Bermuda | Sweeteners, Other          | 1992           | 58                                                             |

Dietary calcium and zinc deficiency risks are decreasing but remain prevalent

| FAO Country code | Country | Food item                  | Reference year | Net energy supply (kcal capita <sup>-1</sup> d <sup>-1</sup> ) |
|------------------|---------|----------------------------|----------------|----------------------------------------------------------------|
| 17               | Bermuda | Tea (including mate)       | 1992           | 2                                                              |
| 17               | Bermuda | Tomatoes and products      | 1992           | 1                                                              |
| 17               | Bermuda | Treenuts                   | 1992           | 33                                                             |
| 17               | Bermuda | Vegetable Oils             | 1992           | 309                                                            |
| 17               | Bermuda | Vegetables                 | 1992           | 130                                                            |
| 17               | Bermuda | Vegetables, Other          | 1992           | 127                                                            |
| 17               | Bermuda | Vegetal Products           | 1992           | 2,078                                                          |
| 17               | Bermuda | Wheat and products         | 1992           | 492                                                            |
| 17               | Bermuda | Wine                       | 1992           | 27                                                             |
| 17               | Bermuda | Alcoholic Beverages        | 1993           | 235                                                            |
| 17               | Bermuda | Animal fats                | 1993           | 112                                                            |
| 17               | Bermuda | Animal Products            | 1993           | 914                                                            |
| 17               | Bermuda | Apples and products        | 1993           | 10                                                             |
| 17               | Bermuda | Bananas                    | 1993           | 16                                                             |
| 17               | Bermuda | Barley and products        | 1993           | 3                                                              |
| 17               | Bermuda | Beer                       | 1993           | 92                                                             |
| 17               | Bermuda | Beverages, Alcoholic       | 1993           | 94                                                             |
| 17               | Bermuda | Beverages, Fermented       | 1993           | 1                                                              |
| 17               | Bermuda | Bovine Meat                | 1993           | 154                                                            |
| 17               | Bermuda | Butter, Ghee               | 1993           | 94                                                             |
| 17               | Bermuda | Cassava and products       | 1993           | 9                                                              |
| 17               | Bermuda | Cereals - Excluding Beer   | 1993           | 614                                                            |
| 17               | Bermuda | Cereals, Other             | 1993           | 75                                                             |
| 17               | Bermuda | Cocoa Beans and products   | 1993           | 83                                                             |
| 17               | Bermuda | Coffee and products        | 1993           | 5                                                              |
| 17               | Bermuda | Cream                      | 1993           | 16                                                             |
| 17               | Bermuda | Crustaceans                | 1993           | 19                                                             |
| 17               | Bermuda | Demersal Fish              | 1993           | 2                                                              |
| 17               | Bermuda | Eggs                       | 1993           | 54                                                             |
| 17               | Bermuda | Fats, Animals, Raw         | 1993           | 2                                                              |
| 17               | Bermuda | Fish, Seafood              | 1993           | 67                                                             |
| 17               | Bermuda | Fruits - Excluding Wine    | 1993           | 184                                                            |
| 17               | Bermuda | Fruits, Other              | 1993           | 147                                                            |
| 17               | Bermuda | Grand Total                | 1993           | 2,974                                                          |
| 17               | Bermuda | Groundnuts (Shelled Eq)    | 1993           | 8                                                              |
| 17               | Bermuda | Honey                      | 1993           | 1                                                              |
| 17               | Bermuda | Marine Fish, Other         | 1993           | 46                                                             |
| 17               | Bermuda | Meat                       | 1993           | 452                                                            |
| 17               | Bermuda | Meat, Other                | 1993           | 26                                                             |
| 17               | Bermuda | Milk - Excluding Butter    | 1993           | 229                                                            |
| 17               | Bermuda | Miscellaneous              | 1993           | 37                                                             |
| 17               | Bermuda | Mutton & Goat Meat         | 1993           | 35                                                             |
| 17               | Bermuda | Oilcrops                   | 1993           | 8                                                              |
| 17               | Bermuda | Oilcrops Oil, Other        | 1993           | 324                                                            |
| 17               | Bermuda | Onions                     | 1993           | 1                                                              |
| 17               | Bermuda | Oranges, Mandarines        | 1993           | 11                                                             |
| 17               | Bermuda | Pigmeat                    | 1993           | 114                                                            |
| 17               | Bermuda | Pimento                    | 1993           | 26                                                             |
| 17               | Bermuda | Potatoes and products      | 1993           | 48                                                             |
| 17               | Bermuda | Poultry Meat               | 1993           | 123                                                            |
| 17               | Bermuda | Pulses                     | 1993           | 15                                                             |
| 17               | Bermuda | Pulses, Other and products | 1993           | 15                                                             |
| 17               | Bermuda | Rice (Milled Equivalent)   | 1993           | 50                                                             |
| 17               | Bermuda | Spices                     | 1993           | 26                                                             |
| 17               | Bermuda | Starchy Roots              | 1993           | 61                                                             |
| 17               | Bermuda | Stimulants                 | 1993           | 91                                                             |
| 17               | Bermuda | Sugar & Sweeteners         | 1993           | 301                                                            |
| 17               | Bermuda | Sugar (Raw Equivalent)     | 1993           | 242                                                            |
| 17               | Bermuda | Sweet potatoes             | 1993           | 4                                                              |
| 17               | Bermuda | Sweeteners, Other          | 1993           | 58                                                             |
| 17               | Bermuda | Tea (including mate)       | 1993           | 4                                                              |
| 17               | Bermuda | Tomatoes and products      | 1993           | 1                                                              |
| 17               | Bermuda | Treenuts                   | 1993           | 28                                                             |
| 17               | Bermuda | Vegetable Oils             | 1993           | 324                                                            |
| 17               | Bermuda | Vegetables                 | 1993           | 136                                                            |
| 17               | Bermuda | Vegetables, Other          | 1993           | 133                                                            |
| 17               | Bermuda | Vegetal Products           | 1993           | 2,060                                                          |
| 17               | Bermuda | Wheat and products         | 1993           | 485                                                            |
| 17               | Bermuda | Wine                       | 1993           | 49                                                             |
| 17               | Bermuda | Alcoholic Beverages        | 1994           | 202                                                            |
| 17               | Bermuda | Animal fats                | 1994           | 111                                                            |
| 17               | Bermuda | Animal Products            | 1994           | 890                                                            |
| 17               | Bermuda | Apples and products        | 1994           | 9                                                              |
| 17               | Bermuda | Bananas                    | 1994           | 8                                                              |
| 17               | Bermuda | Barley and products        | 1994           | 3                                                              |
| 17               | Bermuda | Beer                       | 1994           | 90                                                             |
| 17               | Bermuda | Beverages, Alcoholic       | 1994           | 70                                                             |
| 17               | Bermuda | Beverages, Fermented       | 1994           | 3                                                              |
| 17               | Bermuda | Bovine Meat                | 1994           | 157                                                            |
| 17               | Bermuda | Butter, Ghee               | 1994           | 91                                                             |
| 17               | Bermuda | Cassava and products       | 1994           | 9                                                              |
| 17               | Bermuda | Cereals - Excluding Beer   | 1994           | 585                                                            |
| 17               | Bermuda | Cereals, Other             | 1994           | 71                                                             |
| 17               | Bermuda | Cocoa Beans and products   | 1994           | 66                                                             |
| 17               | Bermuda | Coffee and products        | 1994           | 5                                                              |
| 17               | Bermuda | Cream                      | 1994           | 18                                                             |
| 17               | Bermuda | Crustaceans                | 1994           | 19                                                             |
| 17               | Bermuda | Demersal Fish              | 1994           | 2                                                              |
| 17               | Bermuda | Eggs                       | 1994           | 45                                                             |
| 17               | Bermuda | Fats, Animals, Raw         | 1994           | 2                                                              |
| 17               | Bermuda | Fish, Seafood              | 1994           | 66                                                             |
| 17               | Bermuda | Fruits - Excluding Wine    | 1994           | 192                                                            |
| 17               | Bermuda | Fruits, Other              | 1994           | 164                                                            |
| 17               | Bermuda | Grand Total                | 1994           | 2,810                                                          |
| 17               | Bermuda | Groundnuts (Shelled Eq)    | 1994           | 11                                                             |
| 17               | Bermuda | Honey                      | 1994           | 1                                                              |
| 17               | Bermuda | Marine Fish, Other         | 1994           | 45                                                             |



## Dietary calcium and zinc deficiency risks are decreasing but remain prevalent

| FAO Country code | Country | Food item                  | Reference year | Net energy supply (kcal capita <sup>-1</sup> d <sup>-1</sup> ) |
|------------------|---------|----------------------------|----------------|----------------------------------------------------------------|
| 17               | Bermuda | Meat                       | 1994           | 450                                                            |
| 17               | Bermuda | Meat, Other                | 1994           | 25                                                             |
| 17               | Bermuda | Milk - Excluding Butter    | 1994           | 218                                                            |
| 17               | Bermuda | Miscellaneous              | 1994           | 37                                                             |
| 17               | Bermuda | Mutton & Goat Meat         | 1994           | 34                                                             |
| 17               | Bermuda | Oilcrops                   | 1994           | 11                                                             |
| 17               | Bermuda | Oilcrops Oil, Other        | 1994           | 158                                                            |
| 17               | Bermuda | Oranges, Mandarines        | 1994           | 11                                                             |
| 17               | Bermuda | Pigmeat                    | 1994           | 114                                                            |
| 17               | Bermuda | Pimento                    | 1994           | 26                                                             |
| 17               | Bermuda | Potatoes and products      | 1994           | 57                                                             |
| 17               | Bermuda | Poultry Meat               | 1994           | 121                                                            |
| 17               | Bermuda | Pulses                     | 1994           | 14                                                             |
| 17               | Bermuda | Pulses, Other and products | 1994           | 14                                                             |
| 17               | Bermuda | Rice (Milled Equivalent)   | 1994           | 42                                                             |
| 17               | Bermuda | Spices                     | 1994           | 26                                                             |
| 17               | Bermuda | Starchy Roots              | 1994           | 71                                                             |
| 17               | Bermuda | Stimulants                 | 1994           | 74                                                             |
| 17               | Bermuda | Sugar & Sweeteners         | 1994           | 350                                                            |
| 17               | Bermuda | Sugar (Raw Equivalent)     | 1994           | 225                                                            |
| 17               | Bermuda | Sweet potatoes             | 1994           | 4                                                              |
| 17               | Bermuda | Sweeteners, Other          | 1994           | 124                                                            |
| 17               | Bermuda | Tea (including mate)       | 1994           | 3                                                              |
| 17               | Bermuda | Tomatoes and products      | 1994           | 1                                                              |
| 17               | Bermuda | Treenuts                   | 1994           | 26                                                             |
| 17               | Bermuda | Vegetable Oils             | 1994           | 158                                                            |
| 17               | Bermuda | Vegetables                 | 1994           | 175                                                            |
| 17               | Bermuda | Vegetables, Other          | 1994           | 173                                                            |
| 17               | Bermuda | Vegetal Products           | 1994           | 1,920                                                          |
| 17               | Bermuda | Wheat and products         | 1994           | 469                                                            |
| 17               | Bermuda | Wine                       | 1994           | 39                                                             |
| 17               | Bermuda | Alcoholic Beverages        | 1995           | 210                                                            |
| 17               | Bermuda | Animal fats                | 1995           | 94                                                             |
| 17               | Bermuda | Animal Products            | 1995           | 840                                                            |
| 17               | Bermuda | Apples and products        | 1995           | 11                                                             |
| 17               | Bermuda | Bananas                    | 1995           | 81                                                             |
| 17               | Bermuda | Barley and products        | 1995           | 3                                                              |
| 17               | Bermuda | Beer                       | 1995           | 94                                                             |
| 17               | Bermuda | Beverages, Alcoholic       | 1995           | 73                                                             |
| 17               | Bermuda | Bovine Meat                | 1995           | 179                                                            |
| 17               | Bermuda | Butter, Ghee               | 1995           | 83                                                             |
| 17               | Bermuda | Cassava and products       | 1995           | 9                                                              |
| 17               | Bermuda | Cephalopods                | 1995           | 1                                                              |
| 17               | Bermuda | Cereals - Excluding Beer   | 1995           | 580                                                            |
| 17               | Bermuda | Cereals, Other             | 1995           | 67                                                             |
| 17               | Bermuda | Cocoa Beans and products   | 1995           | 60                                                             |
| 17               | Bermuda | Coffee and products        | 1995           | 4                                                              |
| 17               | Bermuda | Cream                      | 1995           | 9                                                              |
| 17               | Bermuda | Crustaceans                | 1995           | 7                                                              |
| 17               | Bermuda | Demersal Fish              | 1995           | 14                                                             |
| 17               | Bermuda | Eggs                       | 1995           | 37                                                             |
| 17               | Bermuda | Fats, Animals, Raw         | 1995           | 2                                                              |
| 17               | Bermuda | Fish, Seafood              | 1995           | 53                                                             |
| 17               | Bermuda | Freshwater Fish            | 1995           | 2                                                              |
| 17               | Bermuda | Fruits - Excluding Wine    | 1995           | 262                                                            |
| 17               | Bermuda | Fruits, Other              | 1995           | 159                                                            |
| 17               | Bermuda | Grand Total                | 1995           | 2,911                                                          |
| 17               | Bermuda | Groundnuts (Shelled Eq)    | 1995           | 8                                                              |
| 17               | Bermuda | Honey                      | 1995           | 2                                                              |
| 17               | Bermuda | Marine Fish, Other         | 1995           | 27                                                             |
| 17               | Bermuda | Meat                       | 1995           | 502                                                            |
| 17               | Bermuda | Meat, Other                | 1995           | 2                                                              |
| 17               | Bermuda | Milk - Excluding Butter    | 1995           | 154                                                            |
| 17               | Bermuda | Miscellaneous              | 1995           | 37                                                             |
| 17               | Bermuda | Molluscs, Other            | 1995           | 1                                                              |
| 17               | Bermuda | Mutton & Goat Meat         | 1995           | 36                                                             |
| 17               | Bermuda | Oilcrops                   | 1995           | 8                                                              |
| 17               | Bermuda | Oilcrops Oil, Other        | 1995           | 91                                                             |
| 17               | Bermuda | Onions                     | 1995           | 1                                                              |
| 17               | Bermuda | Oranges, Mandarines        | 1995           | 11                                                             |
| 17               | Bermuda | Palm Oil                   | 1995           | 108                                                            |
| 17               | Bermuda | Pelagic Fish               | 1995           | 1                                                              |
| 17               | Bermuda | Pigmeat                    | 1995           | 137                                                            |
| 17               | Bermuda | Pimento                    | 1995           | 26                                                             |
| 17               | Bermuda | Potatoes and products      | 1995           | 47                                                             |
| 17               | Bermuda | Poultry Meat               | 1995           | 148                                                            |
| 17               | Bermuda | Pulses                     | 1995           | 14                                                             |
| 17               | Bermuda | Pulses, Other and products | 1995           | 14                                                             |
| 17               | Bermuda | Rice (Milled Equivalent)   | 1995           | 36                                                             |
| 17               | Bermuda | Spices                     | 1995           | 26                                                             |
| 17               | Bermuda | Starchy Roots              | 1995           | 60                                                             |
| 17               | Bermuda | Stimulants                 | 1995           | 68                                                             |
| 17               | Bermuda | Sugar & Sweeteners         | 1995           | 384                                                            |
| 17               | Bermuda | Sugar (Raw Equivalent)     | 1995           | 257                                                            |
| 17               | Bermuda | Sweet potatoes             | 1995           | 4                                                              |
| 17               | Bermuda | Sweeteners, Other          | 1995           | 125                                                            |
| 17               | Bermuda | Tea (including mate)       | 1995           | 4                                                              |
| 17               | Bermuda | Tomatoes and products      | 1995           | 1                                                              |
| 17               | Bermuda | Treenuts                   | 1995           | 24                                                             |
| 17               | Bermuda | Vegetable Oils             | 1995           | 199                                                            |
| 17               | Bermuda | Vegetables                 | 1995           | 200                                                            |
| 17               | Bermuda | Vegetables, Other          | 1995           | 198                                                            |
| 17               | Bermuda | Vegetal Products           | 1995           | 2,070                                                          |
| 17               | Bermuda | Wheat and products         | 1995           | 473                                                            |
| 17               | Bermuda | Wine                       | 1995           | 43                                                             |
| 17               | Bermuda | Alcoholic Beverages        | 1996           | 214                                                            |
| 17               | Bermuda | Animal fats                | 1996           | 83                                                             |

Dietary calcium and zinc deficiency risks are decreasing but remain prevalent

| FAO Country code | Country | Food item                  | Reference year | Net energy supply (kcal capita <sup>-1</sup> d <sup>-1</sup> ) |
|------------------|---------|----------------------------|----------------|----------------------------------------------------------------|
| 17               | Bermuda | Animal Products            | 1996           | 812                                                            |
| 17               | Bermuda | Apples and products        | 1996           | 11                                                             |
| 17               | Bermuda | Bananas                    | 1996           | 49                                                             |
| 17               | Bermuda | Barley and products        | 1996           | 3                                                              |
| 17               | Bermuda | Beer                       | 1996           | 98                                                             |
| 17               | Bermuda | Beverages, Alcoholic       | 1996           | 78                                                             |
| 17               | Bermuda | Beverages, Fermented       | 1996           | 2                                                              |
| 17               | Bermuda | Bovine Meat                | 1996           | 201                                                            |
| 17               | Bermuda | Butter, Ghee               | 1996           | 74                                                             |
| 17               | Bermuda | Cassava and products       | 1996           | 9                                                              |
| 17               | Bermuda | Cephalopods                | 1996           | 1                                                              |
| 17               | Bermuda | Cereals - Excluding Beer   | 1996           | 625                                                            |
| 17               | Bermuda | Cereals, Other             | 1996           | 57                                                             |
| 17               | Bermuda | Cocoa Beans and products   | 1996           | 64                                                             |
| 17               | Bermuda | Coffee and products        | 1996           | 8                                                              |
| 17               | Bermuda | Cream                      | 1996           | 9                                                              |
| 17               | Bermuda | Crustaceans                | 1996           | 7                                                              |
| 17               | Bermuda | Demersal Fish              | 1996           | 13                                                             |
| 17               | Bermuda | Eggs                       | 1996           | 33                                                             |
| 17               | Bermuda | Fats, Animals, Raw         | 1996           | 1                                                              |
| 17               | Bermuda | Fish, Seafood              | 1996           | 45                                                             |
| 17               | Bermuda | Freshwater Fish            | 1996           | 4                                                              |
| 17               | Bermuda | Fruits - Excluding Wine    | 1996           | 228                                                            |
| 17               | Bermuda | Fruits, Other              | 1996           | 158                                                            |
| 17               | Bermuda | Grand Total                | 1996           | 2,858                                                          |
| 17               | Bermuda | Groundnuts (Shelled Eq)    | 1996           | 8                                                              |
| 17               | Bermuda | Honey                      | 1996           | 3                                                              |
| 17               | Bermuda | Marine Fish, Other         | 1996           | 18                                                             |
| 17               | Bermuda | Meat                       | 1996           | 508                                                            |
| 17               | Bermuda | Meat, Other                | 1996           | 1                                                              |
| 17               | Bermuda | Milk - Excluding Butter    | 1996           | 142                                                            |
| 17               | Bermuda | Miscellaneous              | 1996           | 31                                                             |
| 17               | Bermuda | Molluscs, Other            | 1996           | 1                                                              |
| 17               | Bermuda | Mutton & Goat Meat         | 1996           | 41                                                             |
| 17               | Bermuda | Oilcrops                   | 1996           | 8                                                              |
| 17               | Bermuda | Oilcrops Oil, Other        | 1996           | 93                                                             |
| 17               | Bermuda | Onions                     | 1996           | 1                                                              |
| 17               | Bermuda | Oranges, Mandarines        | 1996           | 10                                                             |
| 17               | Bermuda | Palm Oil                   | 1996           | 107                                                            |
| 17               | Bermuda | Pelagic Fish               | 1996           | 2                                                              |
| 17               | Bermuda | Pigmeat                    | 1996           | 141                                                            |
| 17               | Bermuda | Pimento                    | 1996           | 18                                                             |
| 17               | Bermuda | Potatoes and products      | 1996           | 50                                                             |
| 17               | Bermuda | Poultry Meat               | 1996           | 124                                                            |
| 17               | Bermuda | Pulses                     | 1996           | 14                                                             |
| 17               | Bermuda | Pulses, Other and products | 1996           | 14                                                             |
| 17               | Bermuda | Rice (Milled Equivalent)   | 1996           | 37                                                             |
| 17               | Bermuda | Spices                     | 1996           | 18                                                             |
| 17               | Bermuda | Starchy Roots              | 1996           | 63                                                             |
| 17               | Bermuda | Stimulants                 | 1996           | 75                                                             |
| 17               | Bermuda | Sugar & Sweeteners         | 1996           | 377                                                            |
| 17               | Bermuda | Sugar (Raw Equivalent)     | 1996           | 242                                                            |
| 17               | Bermuda | Sweet potatoes             | 1996           | 4                                                              |
| 17               | Bermuda | Sweeteners, Other          | 1996           | 132                                                            |
| 17               | Bermuda | Tea (including mate)       | 1996           | 4                                                              |
| 17               | Bermuda | Tomatoes and products      | 1996           | 1                                                              |
| 17               | Bermuda | Treenuts                   | 1996           | 23                                                             |
| 17               | Bermuda | Vegetable Oils             | 1996           | 200                                                            |
| 17               | Bermuda | Vegetables                 | 1996           | 171                                                            |
| 17               | Bermuda | Vegetables, Other          | 1996           | 170                                                            |
| 17               | Bermuda | Vegetal Products           | 1996           | 2,046                                                          |
| 17               | Bermuda | Wheat and products         | 1996           | 528                                                            |
| 17               | Bermuda | Wine                       | 1996           | 36                                                             |
| 17               | Bermuda | Alcoholic Beverages        | 1997           | 202                                                            |
| 17               | Bermuda | Animal fats                | 1997           | 86                                                             |
| 17               | Bermuda | Animal Products            | 1997           | 888                                                            |
| 17               | Bermuda | Apples and products        | 1997           | 11                                                             |
| 17               | Bermuda | Bananas                    | 1997           | 28                                                             |
| 17               | Bermuda | Barley and products        | 1997           | 3                                                              |
| 17               | Bermuda | Beer                       | 1997           | 89                                                             |
| 17               | Bermuda | Beverages, Alcoholic       | 1997           | 81                                                             |
| 17               | Bermuda | Beverages, Fermented       | 1997           | 2                                                              |
| 17               | Bermuda | Bovine Meat                | 1997           | 206                                                            |
| 17               | Bermuda | Butter, Ghee               | 1997           | 76                                                             |
| 17               | Bermuda | Cassava and products       | 1997           | 9                                                              |
| 17               | Bermuda | Cephalopods                | 1997           | 1                                                              |
| 17               | Bermuda | Cereals - Excluding Beer   | 1997           | 568                                                            |
| 17               | Bermuda | Cereals, Other             | 1997           | 66                                                             |
| 17               | Bermuda | Cocoa Beans and products   | 1997           | 53                                                             |
| 17               | Bermuda | Coffee and products        | 1997           | 4                                                              |
| 17               | Bermuda | Cream                      | 1997           | 9                                                              |
| 17               | Bermuda | Crustaceans                | 1997           | 17                                                             |
| 17               | Bermuda | Demersal Fish              | 1997           | 6                                                              |
| 17               | Bermuda | Eggs                       | 1997           | 33                                                             |
| 17               | Bermuda | Fats, Animals, Raw         | 1997           | 1                                                              |
| 17               | Bermuda | Fish, Seafood              | 1997           | 60                                                             |
| 17               | Bermuda | Freshwater Fish            | 1997           | 1                                                              |
| 17               | Bermuda | Fruits - Excluding Wine    | 1997           | 193                                                            |
| 17               | Bermuda | Fruits, Other              | 1997           | 143                                                            |
| 17               | Bermuda | Grand Total                | 1997           | 2,783                                                          |
| 17               | Bermuda | Groundnuts (Shelled Eq)    | 1997           | 8                                                              |
| 17               | Bermuda | Honey                      | 1997           | 5                                                              |
| 17               | Bermuda | Marine Fish, Other         | 1997           | 22                                                             |
| 17               | Bermuda | Meat                       | 1997           | 547                                                            |
| 17               | Bermuda | Meat, Other                | 1997           | 1                                                              |
| 17               | Bermuda | Milk - Excluding Butter    | 1997           | 161                                                            |
| 17               | Bermuda | Miscellaneous              | 1997           | 42                                                             |

Dietary calcium and zinc deficiency risks are decreasing but remain prevalent

| FAO Country code | Country | Food item                  | Reference year | Net energy supply (kcal capita <sup>-1</sup> d <sup>-1</sup> ) |
|------------------|---------|----------------------------|----------------|----------------------------------------------------------------|
| 17               | Bermuda | Molluscs, Other            | 1997           | 1                                                              |
| 17               | Bermuda | Mutton & Goat Meat         | 1997           | 41                                                             |
| 17               | Bermuda | Oilcrops                   | 1997           | 8                                                              |
| 17               | Bermuda | Oilcrops Oil, Other        | 1997           | 118                                                            |
| 17               | Bermuda | Onions                     | 1997           | 1                                                              |
| 17               | Bermuda | Oranges, Mandarines        | 1997           | 10                                                             |
| 17               | Bermuda | Palm Oil                   | 1997           | 94                                                             |
| 17               | Bermuda | Pelagic Fish               | 1997           | 12                                                             |
| 17               | Bermuda | Pigmeat                    | 1997           | 164                                                            |
| 17               | Bermuda | Pimento                    | 1997           | 18                                                             |
| 17               | Bermuda | Potatoes and products      | 1997           | 30                                                             |
| 17               | Bermuda | Poultry Meat               | 1997           | 135                                                            |
| 17               | Bermuda | Pulses                     | 1997           | 14                                                             |
| 17               | Bermuda | Pulses, Other and products | 1997           | 14                                                             |
| 17               | Bermuda | Rice (Milled Equivalent)   | 1997           | 39                                                             |
| 17               | Bermuda | Spices                     | 1997           | 18                                                             |
| 17               | Bermuda | Starchy Roots              | 1997           | 43                                                             |
| 17               | Bermuda | Stimulants                 | 1997           | 61                                                             |
| 17               | Bermuda | Sugar & Sweeteners         | 1997           | 355                                                            |
| 17               | Bermuda | Sugar (Raw Equivalent)     | 1997           | 249                                                            |
| 17               | Bermuda | Sweet potatoes             | 1997           | 4                                                              |
| 17               | Bermuda | Sweeteners, Other          | 1997           | 101                                                            |
| 17               | Bermuda | Tea (including mate)       | 1997           | 4                                                              |
| 17               | Bermuda | Tomatoes and products      | 1997           | 1                                                              |
| 17               | Bermuda | Treenuts                   | 1997           | 23                                                             |
| 17               | Bermuda | Vegetable Oils             | 1997           | 211                                                            |
| 17               | Bermuda | Vegetables                 | 1997           | 157                                                            |
| 17               | Bermuda | Vegetables, Other          | 1997           | 155                                                            |
| 17               | Bermuda | Vegetal Products           | 1997           | 1,895                                                          |
| 17               | Bermuda | Wheat and products         | 1997           | 459                                                            |
| 17               | Bermuda | Wine                       | 1997           | 31                                                             |
| 17               | Bermuda | Alcoholic Beverages        | 1998           | 202                                                            |
| 17               | Bermuda | Animal fats                | 1998           | 79                                                             |
| 17               | Bermuda | Animal Products            | 1998           | 859                                                            |
| 17               | Bermuda | Apples and products        | 1998           | 11                                                             |
| 17               | Bermuda | Bananas                    | 1998           | 28                                                             |
| 17               | Bermuda | Barley and products        | 1998           | 3                                                              |
| 17               | Bermuda | Beer                       | 1998           | 75                                                             |
| 17               | Bermuda | Beverages, Alcoholic       | 1998           | 83                                                             |
| 17               | Bermuda | Beverages, Fermented       | 1998           | 2                                                              |
| 17               | Bermuda | Bovine Meat                | 1998           | 210                                                            |
| 17               | Bermuda | Butter, Ghee               | 1998           | 69                                                             |
| 17               | Bermuda | Cassava and products       | 1998           | 9                                                              |
| 17               | Bermuda | Cephalopods                | 1998           | 1                                                              |
| 17               | Bermuda | Cereals - Excluding Beer   | 1998           | 552                                                            |
| 17               | Bermuda | Cereals, Other             | 1998           | 66                                                             |
| 17               | Bermuda | Cocoa Beans and products   | 1998           | 50                                                             |
| 17               | Bermuda | Coffee and products        | 1998           | 4                                                              |
| 17               | Bermuda | Cream                      | 1998           | 9                                                              |
| 17               | Bermuda | Crustaceans                | 1998           | 6                                                              |
| 17               | Bermuda | Demersal Fish              | 1998           | 5                                                              |
| 17               | Bermuda | Eggs                       | 1998           | 34                                                             |
| 17               | Bermuda | Fats, Animals, Raw         | 1998           | 1                                                              |
| 17               | Bermuda | Fish, Seafood              | 1998           | 46                                                             |
| 17               | Bermuda | Freshwater Fish            | 1998           | 1                                                              |
| 17               | Bermuda | Fruits - Excluding Wine    | 1998           | 195                                                            |
| 17               | Bermuda | Fruits, Other              | 1998           | 145                                                            |
| 17               | Bermuda | Grand Total                | 1998           | 2,763                                                          |
| 17               | Bermuda | Groundnuts (Shelled Eq)    | 1998           | 10                                                             |
| 17               | Bermuda | Honey                      | 1998           | 3                                                              |
| 17               | Bermuda | Marine Fish, Other         | 1998           | 20                                                             |
| 17               | Bermuda | Meat                       | 1998           | 557                                                            |
| 17               | Bermuda | Meat, Other                | 1998           | 1                                                              |
| 17               | Bermuda | Milk - Excluding Butter    | 1998           | 144                                                            |
| 17               | Bermuda | Miscellaneous              | 1998           | 28                                                             |
| 17               | Bermuda | Molluscs, Other            | 1998           | 2                                                              |
| 17               | Bermuda | Mutton & Goat Meat         | 1998           | 41                                                             |
| 17               | Bermuda | Oilcrops                   | 1998           | 10                                                             |
| 17               | Bermuda | Oilcrops Oil, Other        | 1998           | 122                                                            |
| 17               | Bermuda | Onions                     | 1998           | 1                                                              |
| 17               | Bermuda | Oranges, Mandarines        | 1998           | 12                                                             |
| 17               | Bermuda | Palm Oil                   | 1998           | 101                                                            |
| 17               | Bermuda | Pelagic Fish               | 1998           | 11                                                             |
| 17               | Bermuda | Pigmeat                    | 1998           | 180                                                            |
| 17               | Bermuda | Pimento                    | 1998           | 18                                                             |
| 17               | Bermuda | Potatoes and products      | 1998           | 29                                                             |
| 17               | Bermuda | Poultry Meat               | 1998           | 124                                                            |
| 17               | Bermuda | Pulses                     | 1998           | 14                                                             |
| 17               | Bermuda | Pulses, Other and products | 1998           | 14                                                             |
| 17               | Bermuda | Rice (Milled Equivalent)   | 1998           | 41                                                             |
| 17               | Bermuda | Spices                     | 1998           | 18                                                             |
| 17               | Bermuda | Starchy Roots              | 1998           | 42                                                             |
| 17               | Bermuda | Stimulants                 | 1998           | 58                                                             |
| 17               | Bermuda | Sugar & Sweeteners         | 1998           | 381                                                            |
| 17               | Bermuda | Sugar (Raw Equivalent)     | 1998           | 270                                                            |
| 17               | Bermuda | Sweet potatoes             | 1998           | 3                                                              |
| 17               | Bermuda | Sweeteners, Other          | 1998           | 109                                                            |
| 17               | Bermuda | Tea (including mate)       | 1998           | 4                                                              |
| 17               | Bermuda | Tomatoes and products      | 1998           | 1                                                              |
| 17               | Bermuda | Treenuts                   | 1998           | 23                                                             |
| 17               | Bermuda | Vegetable Oils             | 1998           | 223                                                            |
| 17               | Bermuda | Vegetables                 | 1998           | 157                                                            |
| 17               | Bermuda | Vegetables, Other          | 1998           | 155                                                            |
| 17               | Bermuda | Vegetal Products           | 1998           | 1,904                                                          |
| 17               | Bermuda | Wheat and products         | 1998           | 442                                                            |
| 17               | Bermuda | Wine                       | 1998           | 41                                                             |
| 17               | Bermuda | Alcoholic Beverages        | 1999           | 195                                                            |

Dietary calcium and zinc deficiency risks are decreasing but remain prevalent

| FAO Country code | Country | Food item                  | Reference year | Net energy supply (kcal capita <sup>-1</sup> d <sup>-1</sup> ) |
|------------------|---------|----------------------------|----------------|----------------------------------------------------------------|
| 17               | Bermuda | Animal fats                | 1999           | 79                                                             |
| 17               | Bermuda | Animal Products            | 1999           | 788                                                            |
| 17               | Bermuda | Apples and products        | 1999           | 11                                                             |
| 17               | Bermuda | Bananas                    | 1999           | 40                                                             |
| 17               | Bermuda | Barley and products        | 1999           | 3                                                              |
| 17               | Bermuda | Beer                       | 1999           | 81                                                             |
| 17               | Bermuda | Beverages, Alcoholic       | 1999           | 77                                                             |
| 17               | Bermuda | Beverages, Fermented       | 1999           | 4                                                              |
| 17               | Bermuda | Bovine Meat                | 1999           | 208                                                            |
| 17               | Bermuda | Butter, Ghee               | 1999           | 70                                                             |
| 17               | Bermuda | Cassava and products       | 1999           | 9                                                              |
| 17               | Bermuda | Cephalopods                | 1999           | 1                                                              |
| 17               | Bermuda | Cereals - Excluding Beer   | 1999           | 599                                                            |
| 17               | Bermuda | Cereals, Other             | 1999           | 65                                                             |
| 17               | Bermuda | Cocoa Beans and products   | 1999           | 28                                                             |
| 17               | Bermuda | Coffee and products        | 1999           | 5                                                              |
| 17               | Bermuda | Cream                      | 1999           | 8                                                              |
| 17               | Bermuda | Crustaceans                | 1999           | 8                                                              |
| 17               | Bermuda | Demersal Fish              | 1999           | 5                                                              |
| 17               | Bermuda | Eggs                       | 1999           | 22                                                             |
| 17               | Bermuda | Fats, Animals, Raw         | 1999           | 1                                                              |
| 17               | Bermuda | Fish, Seafood              | 1999           | 48                                                             |
| 17               | Bermuda | Freshwater Fish            | 1999           | 3                                                              |
| 17               | Bermuda | Fruits - Excluding Wine    | 1999           | 181                                                            |
| 17               | Bermuda | Fruits, Other              | 1999           | 118                                                            |
| 17               | Bermuda | Grand Total                | 1999           | 2,634                                                          |
| 17               | Bermuda | Groundnuts (Shelled Eq)    | 1999           | 10                                                             |
| 17               | Bermuda | Marine Fish, Other         | 1999           | 22                                                             |
| 17               | Bermuda | Meat                       | 1999           | 499                                                            |
| 17               | Bermuda | Meat, Other                | 1999           | 1                                                              |
| 17               | Bermuda | Milk - Excluding Butter    | 1999           | 139                                                            |
| 17               | Bermuda | Miscellaneous              | 1999           | 28                                                             |
| 17               | Bermuda | Molluscs, Other            | 1999           | 3                                                              |
| 17               | Bermuda | Mutton & Goat Meat         | 1999           | 16                                                             |
| 17               | Bermuda | Oilcrops                   | 1999           | 10                                                             |
| 17               | Bermuda | Oilcrops Oil, Other        | 1999           | 130                                                            |
| 17               | Bermuda | Olive Oil                  | 1999           | 4                                                              |
| 17               | Bermuda | Onions                     | 1999           | 1                                                              |
| 17               | Bermuda | Oranges, Mandarines        | 1999           | 11                                                             |
| 17               | Bermuda | Palm Oil                   | 1999           | 91                                                             |
| 17               | Bermuda | Pelagic Fish               | 1999           | 8                                                              |
| 17               | Bermuda | Pigmeat                    | 1999           | 141                                                            |
| 17               | Bermuda | Pimento                    | 1999           | 25                                                             |
| 17               | Bermuda | Potatoes and products      | 1999           | 32                                                             |
| 17               | Bermuda | Poultry Meat               | 1999           | 133                                                            |
| 17               | Bermuda | Pulses                     | 1999           | 13                                                             |
| 17               | Bermuda | Pulses, Other and products | 1999           | 13                                                             |
| 17               | Bermuda | Rice (Milled Equivalent)   | 1999           | 42                                                             |
| 17               | Bermuda | Spices                     | 1999           | 25                                                             |
| 17               | Bermuda | Starchy Roots              | 1999           | 44                                                             |
| 17               | Bermuda | Stimulants                 | 1999           | 36                                                             |
| 17               | Bermuda | Sugar & Sweeteners         | 1999           | 393                                                            |
| 17               | Bermuda | Sugar (Raw Equivalent)     | 1999           | 290                                                            |
| 17               | Bermuda | Sweet potatoes             | 1999           | 3                                                              |
| 17               | Bermuda | Sweeteners, Other          | 1999           | 104                                                            |
| 17               | Bermuda | Tea (including mate)       | 1999           | 3                                                              |
| 17               | Bermuda | Tomatoes and products      | 1999           | 1                                                              |
| 17               | Bermuda | Treenuts                   | 1999           | 23                                                             |
| 17               | Bermuda | Vegetable Oils             | 1999           | 224                                                            |
| 17               | Bermuda | Vegetables                 | 1999           | 74                                                             |
| 17               | Bermuda | Vegetables, Other          | 1999           | 72                                                             |
| 17               | Bermuda | Vegetal Products           | 1999           | 1,847                                                          |
| 17               | Bermuda | Wheat and products         | 1999           | 488                                                            |
| 17               | Bermuda | Wine                       | 1999           | 33                                                             |
| 17               | Bermuda | Alcoholic Beverages        | 2000           | 196                                                            |
| 17               | Bermuda | Animal fats                | 2000           | 71                                                             |
| 17               | Bermuda | Animal Products            | 2000           | 813                                                            |
| 17               | Bermuda | Apples and products        | 2000           | 11                                                             |
| 17               | Bermuda | Bananas                    | 2000           | 48                                                             |
| 17               | Bermuda | Barley and products        | 2000           | 3                                                              |
| 17               | Bermuda | Beer                       | 2000           | 78                                                             |
| 17               | Bermuda | Beverages, Alcoholic       | 2000           | 77                                                             |
| 17               | Bermuda | Beverages, Fermented       | 2000           | 3                                                              |
| 17               | Bermuda | Bovine Meat                | 2000           | 214                                                            |
| 17               | Bermuda | Butter, Ghee               | 2000           | 62                                                             |
| 17               | Bermuda | Cassava and products       | 2000           | 9                                                              |
| 17               | Bermuda | Cereals - Excluding Beer   | 2000           | 565                                                            |
| 17               | Bermuda | Cereals, Other             | 2000           | 65                                                             |
| 17               | Bermuda | Cocoa Beans and products   | 2000           | 38                                                             |
| 17               | Bermuda | Coffee and products        | 2000           | 5                                                              |
| 17               | Bermuda | Cream                      | 2000           | 8                                                              |
| 17               | Bermuda | Crustaceans                | 2000           | 6                                                              |
| 17               | Bermuda | Demersal Fish              | 2000           | 4                                                              |
| 17               | Bermuda | Eggs                       | 2000           | 22                                                             |
| 17               | Bermuda | Fats, Animals, Raw         | 2000           | 1                                                              |
| 17               | Bermuda | Fish, Seafood              | 2000           | 49                                                             |
| 17               | Bermuda | Freshwater Fish            | 2000           | 2                                                              |
| 17               | Bermuda | Fruits - Excluding Wine    | 2000           | 176                                                            |
| 17               | Bermuda | Fruits, Other              | 2000           | 105                                                            |
| 17               | Bermuda | Grand Total                | 2000           | 2,646                                                          |
| 17               | Bermuda | Groundnuts (Shelled Eq)    | 2000           | 10                                                             |
| 17               | Bermuda | Marine Fish, Other         | 2000           | 26                                                             |
| 17               | Bermuda | Meat                       | 2000           | 511                                                            |
| 17               | Bermuda | Meat, Other                | 2000           | 1                                                              |
| 17               | Bermuda | Milk - Excluding Butter    | 2000           | 160                                                            |
| 17               | Bermuda | Miscellaneous              | 2000           | 28                                                             |
| 17               | Bermuda | Molluscs, Other            | 2000           | 2                                                              |

Dietary calcium and zinc deficiency risks are decreasing but remain prevalent

| FAO Country code | Country | Food item                  | Reference year | Net energy supply (kcal capita <sup>-1</sup> d <sup>-1</sup> ) |
|------------------|---------|----------------------------|----------------|----------------------------------------------------------------|
| 17               | Bermuda | Mutton & Goat Meat         | 2000           | 17                                                             |
| 17               | Bermuda | Oilcrops                   | 2000           | 10                                                             |
| 17               | Bermuda | Oilcrops Oil, Other        | 2000           | 135                                                            |
| 17               | Bermuda | Olive Oil                  | 2000           | 3                                                              |
| 17               | Bermuda | Onions                     | 2000           | 1                                                              |
| 17               | Bermuda | Oranges, Mandarines        | 2000           | 12                                                             |
| 17               | Bermuda | Palm Oil                   | 2000           | 108                                                            |
| 17               | Bermuda | Pelagic Fish               | 2000           | 8                                                              |
| 17               | Bermuda | Pigmeat                    | 2000           | 124                                                            |
| 17               | Bermuda | Pimento                    | 2000           | 25                                                             |
| 17               | Bermuda | Potatoes and products      | 2000           | 40                                                             |
| 17               | Bermuda | Poultry Meat               | 2000           | 154                                                            |
| 17               | Bermuda | Pulses                     | 2000           | 13                                                             |
| 17               | Bermuda | Pulses, Other and products | 2000           | 13                                                             |
| 17               | Bermuda | Rice (Milled Equivalent)   | 2000           | 39                                                             |
| 17               | Bermuda | Spices                     | 2000           | 25                                                             |
| 17               | Bermuda | Starchy Roots              | 2000           | 53                                                             |
| 17               | Bermuda | Stimulants                 | 2000           | 46                                                             |
| 17               | Bermuda | Sugar & Sweeteners         | 2000           | 372                                                            |
| 17               | Bermuda | Sugar (Raw Equivalent)     | 2000           | 276                                                            |
| 17               | Bermuda | Sweet potatoes             | 2000           | 4                                                              |
| 17               | Bermuda | Sweeteners, Other          | 2000           | 96                                                             |
| 17               | Bermuda | Tea (including mate)       | 2000           | 3                                                              |
| 17               | Bermuda | Tomatoes and products      | 2000           | 1                                                              |
| 17               | Bermuda | Treenuts                   | 2000           | 23                                                             |
| 17               | Bermuda | Vegetable Oils             | 2000           | 245                                                            |
| 17               | Bermuda | Vegetables                 | 2000           | 81                                                             |
| 17               | Bermuda | Vegetables, Other          | 2000           | 79                                                             |
| 17               | Bermuda | Vegetal Products           | 2000           | 1,833                                                          |
| 17               | Bermuda | Wheat and products         | 2000           | 459                                                            |
| 17               | Bermuda | Wine                       | 2000           | 38                                                             |
| 17               | Bermuda | Alcoholic Beverages        | 2001           | 201                                                            |
| 17               | Bermuda | Animal fats                | 2001           | 74                                                             |
| 17               | Bermuda | Animal Products            | 2001           | 805                                                            |
| 17               | Bermuda | Apples and products        | 2001           | 2                                                              |
| 17               | Bermuda | Bananas                    | 2001           | 40                                                             |
| 17               | Bermuda | Barley and products        | 2001           | 3                                                              |
| 17               | Bermuda | Beer                       | 2001           | 81                                                             |
| 17               | Bermuda | Beverages, Alcoholic       | 2001           | 78                                                             |
| 17               | Bermuda | Beverages, Fermented       | 2001           | 3                                                              |
| 17               | Bermuda | Bovine Meat                | 2001           | 209                                                            |
| 17               | Bermuda | Butter, Ghee               | 2001           | 64                                                             |
| 17               | Bermuda | Cassava and products       | 2001           | 9                                                              |
| 17               | Bermuda | Cereals - Excluding Beer   | 2001           | 564                                                            |
| 17               | Bermuda | Cereals, Other             | 2001           | 65                                                             |
| 17               | Bermuda | Cocoa Beans and products   | 2001           | 38                                                             |
| 17               | Bermuda | Coffee and products        | 2001           | 5                                                              |
| 17               | Bermuda | Cream                      | 2001           | 8                                                              |
| 17               | Bermuda | Crustaceans                | 2001           | 7                                                              |
| 17               | Bermuda | Demersal Fish              | 2001           | 10                                                             |
| 17               | Bermuda | Eggs                       | 2001           | 22                                                             |
| 17               | Bermuda | Fats, Animals, Raw         | 2001           | 1                                                              |
| 17               | Bermuda | Fish, Seafood              | 2001           | 62                                                             |
| 17               | Bermuda | Freshwater Fish            | 2001           | 2                                                              |
| 17               | Bermuda | Fruits - Excluding Wine    | 2001           | 133                                                            |
| 17               | Bermuda | Fruits, Other              | 2001           | 79                                                             |
| 17               | Bermuda | Grand Total                | 2001           | 2,605                                                          |
| 17               | Bermuda | Groundnuts (Shelled Eq)    | 2001           | 10                                                             |
| 17               | Bermuda | Marine Fish, Other         | 2001           | 26                                                             |
| 17               | Bermuda | Meat                       | 2001           | 496                                                            |
| 17               | Bermuda | Meat, Other                | 2001           | 1                                                              |
| 17               | Bermuda | Milk - Excluding Butter    | 2001           | 150                                                            |
| 17               | Bermuda | Miscellaneous              | 2001           | 28                                                             |
| 17               | Bermuda | Molluscs, Other            | 2001           | 3                                                              |
| 17               | Bermuda | Mutton & Goat Meat         | 2001           | 16                                                             |
| 17               | Bermuda | Oilcrops                   | 2001           | 10                                                             |
| 17               | Bermuda | Oilcrops Oil, Other        | 2001           | 143                                                            |
| 17               | Bermuda | Olive Oil                  | 2001           | 8                                                              |
| 17               | Bermuda | Onions                     | 2001           | 1                                                              |
| 17               | Bermuda | Oranges, Mandarines        | 2001           | 12                                                             |
| 17               | Bermuda | Palm Oil                   | 2001           | 112                                                            |
| 17               | Bermuda | Pelagic Fish               | 2001           | 13                                                             |
| 17               | Bermuda | Pigmeat                    | 2001           | 137                                                            |
| 17               | Bermuda | Pimento                    | 2001           | 25                                                             |
| 17               | Bermuda | Potatoes and products      | 2001           | 42                                                             |
| 17               | Bermuda | Poultry Meat               | 2001           | 133                                                            |
| 17               | Bermuda | Pulses                     | 2001           | 13                                                             |
| 17               | Bermuda | Pulses, Other and products | 2001           | 13                                                             |
| 17               | Bermuda | Rice (Milled Equivalent)   | 2001           | 36                                                             |
| 17               | Bermuda | Spices                     | 2001           | 25                                                             |
| 17               | Bermuda | Starchy Roots              | 2001           | 54                                                             |
| 17               | Bermuda | Stimulants                 | 2001           | 46                                                             |
| 17               | Bermuda | Sugar & Sweeteners         | 2001           | 363                                                            |
| 17               | Bermuda | Sugar (Raw Equivalent)     | 2001           | 276                                                            |
| 17               | Bermuda | Sweet potatoes             | 2001           | 4                                                              |
| 17               | Bermuda | Sweeteners, Other          | 2001           | 86                                                             |
| 17               | Bermuda | Tea (including mate)       | 2001           | 3                                                              |
| 17               | Bermuda | Tomatoes and products      | 2001           | 1                                                              |
| 17               | Bermuda | Treenuts                   | 2001           | 23                                                             |
| 17               | Bermuda | Vegetable Oils             | 2001           | 264                                                            |
| 17               | Bermuda | Vegetables                 | 2001           | 76                                                             |
| 17               | Bermuda | Vegetables, Other          | 2001           | 75                                                             |
| 17               | Bermuda | Vegetal Products           | 2001           | 1,800                                                          |
| 17               | Bermuda | Wheat and products         | 2001           | 460                                                            |
| 17               | Bermuda | Wine                       | 2001           | 38                                                             |
| 17               | Bermuda | Alcoholic Beverages        | 2002           | 201                                                            |
| 17               | Bermuda | Animal fats                | 2002           | 72                                                             |

Dietary calcium and zinc deficiency risks are decreasing but remain prevalent

| FAO Country code | Country | Food item                  | Reference year | Net energy supply (kcal capita <sup>-1</sup> d <sup>-1</sup> ) |
|------------------|---------|----------------------------|----------------|----------------------------------------------------------------|
| 17               | Bermuda | Animal Products            | 2002           | 806                                                            |
| 17               | Bermuda | Apples and products        | 2002           | 2                                                              |
| 17               | Bermuda | Bananas                    | 2002           | 28                                                             |
| 17               | Bermuda | Barley and products        | 2002           | 3                                                              |
| 17               | Bermuda | Beer                       | 2002           | 85                                                             |
| 17               | Bermuda | Beverages, Alcoholic       | 2002           | 75                                                             |
| 17               | Bermuda | Beverages, Fermented       | 2002           | 2                                                              |
| 17               | Bermuda | Bovine Meat                | 2002           | 210                                                            |
| 17               | Bermuda | Butter, Ghee               | 2002           | 64                                                             |
| 17               | Bermuda | Cassava and products       | 2002           | 9                                                              |
| 17               | Bermuda | Cereals - Excluding Beer   | 2002           | 539                                                            |
| 17               | Bermuda | Cereals, Other             | 2002           | 65                                                             |
| 17               | Bermuda | Cocoa Beans and products   | 2002           | 33                                                             |
| 17               | Bermuda | Coffee and products        | 2002           | 10                                                             |
| 17               | Bermuda | Cream                      | 2002           | 7                                                              |
| 17               | Bermuda | Crustaceans                | 2002           | 8                                                              |
| 17               | Bermuda | Demersal Fish              | 2002           | 9                                                              |
| 17               | Bermuda | Eggs                       | 2002           | 22                                                             |
| 17               | Bermuda | Fats, Animals, Raw         | 2002           | 1                                                              |
| 17               | Bermuda | Fish, Seafood              | 2002           | 61                                                             |
| 17               | Bermuda | Freshwater Fish            | 2002           | 1                                                              |
| 17               | Bermuda | Fruits - Excluding Wine    | 2002           | 106                                                            |
| 17               | Bermuda | Fruits, Other              | 2002           | 63                                                             |
| 17               | Bermuda | Grand Total                | 2002           | 2,574                                                          |
| 17               | Bermuda | Groundnuts (Shelled Eq)    | 2002           | 17                                                             |
| 17               | Bermuda | Honey                      | 2002           | 2                                                              |
| 17               | Bermuda | Marine Fish, Other         | 2002           | 28                                                             |
| 17               | Bermuda | Meat                       | 2002           | 514                                                            |
| 17               | Bermuda | Milk - Excluding Butter    | 2002           | 137                                                            |
| 17               | Bermuda | Miscellaneous              | 2002           | 28                                                             |
| 17               | Bermuda | Molluscs, Other            | 2002           | 3                                                              |
| 17               | Bermuda | Mutton & Goat Meat         | 2002           | 32                                                             |
| 17               | Bermuda | Oilcrops                   | 2002           | 17                                                             |
| 17               | Bermuda | Oilcrops Oil, Other        | 2002           | 133                                                            |
| 17               | Bermuda | Olive Oil                  | 2002           | 8                                                              |
| 17               | Bermuda | Onions                     | 2002           | 1                                                              |
| 17               | Bermuda | Oranges, Mandarines        | 2002           | 13                                                             |
| 17               | Bermuda | Palm Oil                   | 2002           | 128                                                            |
| 17               | Bermuda | Pelagic Fish               | 2002           | 11                                                             |
| 17               | Bermuda | Pigmeat                    | 2002           | 139                                                            |
| 17               | Bermuda | Pimento                    | 2002           | 25                                                             |
| 17               | Bermuda | Potatoes and products      | 2002           | 55                                                             |
| 17               | Bermuda | Poultry Meat               | 2002           | 131                                                            |
| 17               | Bermuda | Pulses                     | 2002           | 13                                                             |
| 17               | Bermuda | Pulses, Other and products | 2002           | 13                                                             |
| 17               | Bermuda | Rice (Milled Equivalent)   | 2002           | 31                                                             |
| 17               | Bermuda | Spices                     | 2002           | 25                                                             |
| 17               | Bermuda | Starchy Roots              | 2002           | 67                                                             |
| 17               | Bermuda | Stimulants                 | 2002           | 43                                                             |
| 17               | Bermuda | Sugar & Sweeteners         | 2002           | 355                                                            |
| 17               | Bermuda | Sugar (Raw Equivalent)     | 2002           | 266                                                            |
| 17               | Bermuda | Sweet potatoes             | 2002           | 3                                                              |
| 17               | Bermuda | Sweeteners, Other          | 2002           | 87                                                             |
| 17               | Bermuda | Tomatoes and products      | 2002           | 1                                                              |
| 17               | Bermuda | Treenuts                   | 2002           | 23                                                             |
| 17               | Bermuda | Vegetable Oils             | 2002           | 268                                                            |
| 17               | Bermuda | Vegetables                 | 2002           | 84                                                             |
| 17               | Bermuda | Vegetables, Other          | 2002           | 82                                                             |
| 17               | Bermuda | Vegetal Products           | 2002           | 1,769                                                          |
| 17               | Bermuda | Wheat and products         | 2002           | 439                                                            |
| 17               | Bermuda | Wine                       | 2002           | 38                                                             |
| 17               | Bermuda | Alcoholic Beverages        | 2003           | 195                                                            |
| 17               | Bermuda | Animal fats                | 2003           | 72                                                             |
| 17               | Bermuda | Animal Products            | 2003           | 781                                                            |
| 17               | Bermuda | Apples and products        | 2003           | 2                                                              |
| 17               | Bermuda | Bananas                    | 2003           | 15                                                             |
| 17               | Bermuda | Barley and products        | 2003           | 3                                                              |
| 17               | Bermuda | Beer                       | 2003           | 84                                                             |
| 17               | Bermuda | Beverages, Alcoholic       | 2003           | 72                                                             |
| 17               | Bermuda | Beverages, Fermented       | 2003           | 1                                                              |
| 17               | Bermuda | Bovine Meat                | 2003           | 207                                                            |
| 17               | Bermuda | Butter, Ghee               | 2003           | 62                                                             |
| 17               | Bermuda | Cassava and products       | 2003           | 9                                                              |
| 17               | Bermuda | Cereals - Excluding Beer   | 2003           | 520                                                            |
| 17               | Bermuda | Cereals, Other             | 2003           | 64                                                             |
| 17               | Bermuda | Cocoa Beans and products   | 2003           | 29                                                             |
| 17               | Bermuda | Coffee and products        | 2003           | 1                                                              |
| 17               | Bermuda | Cream                      | 2003           | 9                                                              |
| 17               | Bermuda | Crustaceans                | 2003           | 7                                                              |
| 17               | Bermuda | Demersal Fish              | 2003           | 9                                                              |
| 17               | Bermuda | Eggs                       | 2003           | 22                                                             |
| 17               | Bermuda | Fats, Animals, Raw         | 2003           | 1                                                              |
| 17               | Bermuda | Fish, Seafood              | 2003           | 57                                                             |
| 17               | Bermuda | Freshwater Fish            | 2003           | 2                                                              |
| 17               | Bermuda | Fruits - Excluding Wine    | 2003           | 84                                                             |
| 17               | Bermuda | Fruits, Other              | 2003           | 66                                                             |
| 17               | Bermuda | Grand Total                | 2003           | 2,481                                                          |
| 17               | Bermuda | Groundnuts (Shelled Eq)    | 2003           | 13                                                             |
| 17               | Bermuda | Honey                      | 2003           | 1                                                              |
| 17               | Bermuda | Marine Fish, Other         | 2003           | 27                                                             |
| 17               | Bermuda | Meat                       | 2003           | 493                                                            |
| 17               | Bermuda | Milk - Excluding Butter    | 2003           | 136                                                            |
| 17               | Bermuda | Miscellaneous              | 2003           | 2                                                              |
| 17               | Bermuda | Molluscs, Other            | 2003           | 4                                                              |
| 17               | Bermuda | Mutton & Goat Meat         | 2003           | 15                                                             |
| 17               | Bermuda | Oilcrops                   | 2003           | 13                                                             |
| 17               | Bermuda | Oilcrops Oil, Other        | 2003           | 142                                                            |

Dietary calcium and zinc deficiency risks are decreasing but remain prevalent

| FAO Country code | Country | Food item                  | Reference year | Net energy supply (kcal <i>capita</i> <sup>-1</sup> d <sup>-1</sup> ) |
|------------------|---------|----------------------------|----------------|-----------------------------------------------------------------------|
| 17               | Bermuda | Olive Oil                  | 2003           | 27                                                                    |
| 17               | Bermuda | Onions                     | 2003           | 1                                                                     |
| 17               | Bermuda | Palm Oil                   | 2003           | 144                                                                   |
| 17               | Bermuda | Pelagic Fish               | 2003           | 8                                                                     |
| 17               | Bermuda | Pigmeat                    | 2003           | 151                                                                   |
| 17               | Bermuda | Pimento                    | 2003           | 24                                                                    |
| 17               | Bermuda | Potatoes and products      | 2003           | 30                                                                    |
| 17               | Bermuda | Poultry Meat               | 2003           | 120                                                                   |
| 17               | Bermuda | Pulses                     | 2003           | 13                                                                    |
| 17               | Bermuda | Pulses, Other and products | 2003           | 13                                                                    |
| 17               | Bermuda | Rice (Milled Equivalent)   | 2003           | 31                                                                    |
| 17               | Bermuda | Spices                     | 2003           | 24                                                                    |
| 17               | Bermuda | Starchy Roots              | 2003           | 43                                                                    |
| 17               | Bermuda | Stimulants                 | 2003           | 31                                                                    |
| 17               | Bermuda | Sugar & Sweeteners         | 2003           | 351                                                                   |
| 17               | Bermuda | Sugar (Raw Equivalent)     | 2003           | 265                                                                   |
| 17               | Bermuda | Sweet potatoes             | 2003           | 4                                                                     |
| 17               | Bermuda | Sweeteners, Other          | 2003           | 85                                                                    |
| 17               | Bermuda | Tomatoes and products      | 2003           | 1                                                                     |
| 17               | Bermuda | Treenuts                   | 2003           | 22                                                                    |
| 17               | Bermuda | Vegetable Oils             | 2003           | 313                                                                   |
| 17               | Bermuda | Vegetables                 | 2003           | 89                                                                    |
| 17               | Bermuda | Vegetables, Other          | 2003           | 88                                                                    |
| 17               | Bermuda | Vegetal Products           | 2003           | 1,700                                                                 |
| 17               | Bermuda | Wheat and products         | 2003           | 421                                                                   |
| 17               | Bermuda | Wine                       | 2003           | 38                                                                    |
| 17               | Bermuda | Alcoholic Beverages        | 2004           | 186                                                                   |
| 17               | Bermuda | Animal fats                | 2004           | 66                                                                    |
| 17               | Bermuda | Animal Products            | 2004           | 707                                                                   |
| 17               | Bermuda | Apples and products        | 2004           | 15                                                                    |
| 17               | Bermuda | Bananas                    | 2004           | 18                                                                    |
| 17               | Bermuda | Barley and products        | 2004           | 3                                                                     |
| 17               | Bermuda | Beer                       | 2004           | 78                                                                    |
| 17               | Bermuda | Beverages, Alcoholic       | 2004           | 78                                                                    |
| 17               | Bermuda | Beverages, Fermented       | 2004           | 1                                                                     |
| 17               | Bermuda | Bovine Meat                | 2004           | 187                                                                   |
| 17               | Bermuda | Butter, Ghee               | 2004           | 57                                                                    |
| 17               | Bermuda | Cassava and products       | 2004           | 9                                                                     |
| 17               | Bermuda | Cereals - Excluding Beer   | 2004           | 567                                                                   |
| 17               | Bermuda | Cereals, Other             | 2004           | 70                                                                    |
| 17               | Bermuda | Cocoa Beans and products   | 2004           | 34                                                                    |
| 17               | Bermuda | Coffee and products        | 2004           | 1                                                                     |
| 17               | Bermuda | Cream                      | 2004           | 7                                                                     |
| 17               | Bermuda | Crustaceans                | 2004           | 7                                                                     |
| 17               | Bermuda | Demersal Fish              | 2004           | 4                                                                     |
| 17               | Bermuda | Eggs                       | 2004           | 22                                                                    |
| 17               | Bermuda | Fats, Animals, Raw         | 2004           | 1                                                                     |
| 17               | Bermuda | Fish, Seafood              | 2004           | 55                                                                    |
| 17               | Bermuda | Freshwater Fish            | 2004           | 2                                                                     |
| 17               | Bermuda | Fruits - Excluding Wine    | 2004           | 83                                                                    |
| 17               | Bermuda | Fruits, Other              | 2004           | 49                                                                    |
| 17               | Bermuda | Grand Total                | 2004           | 2,446                                                                 |
| 17               | Bermuda | Groundnuts (Shelled Eq)    | 2004           | 9                                                                     |
| 17               | Bermuda | Honey                      | 2004           | 3                                                                     |
| 17               | Bermuda | Marine Fish, Other         | 2004           | 29                                                                    |
| 17               | Bermuda | Meat                       | 2004           | 419                                                                   |
| 17               | Bermuda | Meat, Other                | 2004           | 1                                                                     |
| 17               | Bermuda | Milk - Excluding Butter    | 2004           | 144                                                                   |
| 17               | Bermuda | Miscellaneous              | 2004           | 2                                                                     |
| 17               | Bermuda | Molluscs, Other            | 2004           | 5                                                                     |
| 17               | Bermuda | Mutton & Goat Meat         | 2004           | 14                                                                    |
| 17               | Bermuda | Oilcrops                   | 2004           | 9                                                                     |
| 17               | Bermuda | Oilcrops Oil, Other        | 2004           | 146                                                                   |
| 17               | Bermuda | Olive Oil                  | 2004           | 29                                                                    |
| 17               | Bermuda | Onions                     | 2004           | 1                                                                     |
| 17               | Bermuda | Oranges, Mandarines        | 2004           | 1                                                                     |
| 17               | Bermuda | Palm Oil                   | 2004           | 146                                                                   |
| 17               | Bermuda | Pelagic Fish               | 2004           | 8                                                                     |
| 17               | Bermuda | Pigmeat                    | 2004           | 124                                                                   |
| 17               | Bermuda | Pimento                    | 2004           | 24                                                                    |
| 17               | Bermuda | Potatoes and products      | 2004           | 26                                                                    |
| 17               | Bermuda | Poultry Meat               | 2004           | 94                                                                    |
| 17               | Bermuda | Pulses                     | 2004           | 13                                                                    |
| 17               | Bermuda | Pulses, Other and products | 2004           | 13                                                                    |
| 17               | Bermuda | Rice (Milled Equivalent)   | 2004           | 32                                                                    |
| 17               | Bermuda | Spices                     | 2004           | 24                                                                    |
| 17               | Bermuda | Starchy Roots              | 2004           | 39                                                                    |
| 17               | Bermuda | Stimulants                 | 2004           | 36                                                                    |
| 17               | Bermuda | Sugar & Sweeteners         | 2004           | 367                                                                   |
| 17               | Bermuda | Sugar (Raw Equivalent)     | 2004           | 277                                                                   |
| 17               | Bermuda | Sweet potatoes             | 2004           | 4                                                                     |
| 17               | Bermuda | Sweeteners, Other          | 2004           | 87                                                                    |
| 17               | Bermuda | Tomatoes and products      | 2004           | 1                                                                     |
| 17               | Bermuda | Treenuts                   | 2004           | 11                                                                    |
| 17               | Bermuda | Vegetable Oils             | 2004           | 321                                                                   |
| 17               | Bermuda | Vegetables                 | 2004           | 80                                                                    |
| 17               | Bermuda | Vegetables, Other          | 2004           | 78                                                                    |
| 17               | Bermuda | Vegetal Products           | 2004           | 1,739                                                                 |
| 17               | Bermuda | Wheat and products         | 2004           | 462                                                                   |
| 17               | Bermuda | Wine                       | 2004           | 29                                                                    |
| 17               | Bermuda | Alcoholic Beverages        | 2005           | 196                                                                   |
| 17               | Bermuda | Animal fats                | 2005           | 69                                                                    |
| 17               | Bermuda | Animal Products            | 2005           | 734                                                                   |
| 17               | Bermuda | Apples and products        | 2005           | 12                                                                    |
| 17               | Bermuda | Bananas                    | 2005           | 12                                                                    |
| 17               | Bermuda | Barley and products        | 2005           | 3                                                                     |
| 17               | Bermuda | Beer                       | 2005           | 81                                                                    |

Dietary calcium and zinc deficiency risks are decreasing but remain prevalent

| FAO Country code | Country | Food item                  | Reference year | Net energy supply (kcal <i>capita</i> <sup>-1</sup> d <sup>-1</sup> ) |
|------------------|---------|----------------------------|----------------|-----------------------------------------------------------------------|
| 17               | Bermuda | Beverages, Alcoholic       | 2005           | 78                                                                    |
| 17               | Bermuda | Beverages, Fermented       | 2005           | 1                                                                     |
| 17               | Bermuda | Bovine Meat                | 2005           | 191                                                                   |
| 17               | Bermuda | Butter, Ghee               | 2005           | 61                                                                    |
| 17               | Bermuda | Cassava and products       | 2005           | 9                                                                     |
| 17               | Bermuda | Cereals - Excluding Beer   | 2005           | 597                                                                   |
| 17               | Bermuda | Cereals, Other             | 2005           | 64                                                                    |
| 17               | Bermuda | Cocoa Beans and products   | 2005           | 42                                                                    |
| 17               | Bermuda | Coffee and products        | 2005           | 2                                                                     |
| 17               | Bermuda | Cream                      | 2005           | 6                                                                     |
| 17               | Bermuda | Crustaceans                | 2005           | 6                                                                     |
| 17               | Bermuda | Demersal Fish              | 2005           | 5                                                                     |
| 17               | Bermuda | Eggs                       | 2005           | 31                                                                    |
| 17               | Bermuda | Fats, Animals, Raw         | 2005           | 1                                                                     |
| 17               | Bermuda | Fish, Seafood              | 2005           | 52                                                                    |
| 17               | Bermuda | Freshwater Fish            | 2005           | 2                                                                     |
| 17               | Bermuda | Fruits - Excluding Wine    | 2005           | 73                                                                    |
| 17               | Bermuda | Fruits, Other              | 2005           | 48                                                                    |
| 17               | Bermuda | Grand Total                | 2005           | 2,506                                                                 |
| 17               | Bermuda | Groundnuts (Shelled Eq)    | 2005           | 10                                                                    |
| 17               | Bermuda | Honey                      | 2005           | 2                                                                     |
| 17               | Bermuda | Marine Fish, Other         | 2005           | 29                                                                    |
| 17               | Bermuda | Meat                       | 2005           | 429                                                                   |
| 17               | Bermuda | Meat, Other                | 2005           | 1                                                                     |
| 17               | Bermuda | Milk - Excluding Butter    | 2005           | 152                                                                   |
| 17               | Bermuda | Miscellaneous              | 2005           | 6                                                                     |
| 17               | Bermuda | Molluscs, Other            | 2005           | 4                                                                     |
| 17               | Bermuda | Mutton & Goat Meat         | 2005           | 26                                                                    |
| 17               | Bermuda | Oilcrops                   | 2005           | 10                                                                    |
| 17               | Bermuda | Oilcrops Oil, Other        | 2005           | 131                                                                   |
| 17               | Bermuda | Olive Oil                  | 2005           | 30                                                                    |
| 17               | Bermuda | Onions                     | 2005           | 1                                                                     |
| 17               | Bermuda | Oranges, Mandarines        | 2005           | 1                                                                     |
| 17               | Bermuda | Palm Oil                   | 2005           | 174                                                                   |
| 17               | Bermuda | Pelagic Fish               | 2005           | 6                                                                     |
| 17               | Bermuda | Pigmeat                    | 2005           | 118                                                                   |
| 17               | Bermuda | Pimento                    | 2005           | 24                                                                    |
| 17               | Bermuda | Potatoes and products      | 2005           | 28                                                                    |
| 17               | Bermuda | Poultry Meat               | 2005           | 94                                                                    |
| 17               | Bermuda | Pulses                     | 2005           | 13                                                                    |
| 17               | Bermuda | Pulses, Other and products | 2005           | 13                                                                    |
| 17               | Bermuda | Rice (Milled Equivalent)   | 2005           | 32                                                                    |
| 17               | Bermuda | Spices                     | 2005           | 24                                                                    |
| 17               | Bermuda | Starchy Roots              | 2005           | 41                                                                    |
| 17               | Bermuda | Stimulants                 | 2005           | 44                                                                    |
| 17               | Bermuda | Sugar & Sweeteners         | 2005           | 343                                                                   |
| 17               | Bermuda | Sugar (Raw Equivalent)     | 2005           | 253                                                                   |
| 17               | Bermuda | Sweet potatoes             | 2005           | 4                                                                     |
| 17               | Bermuda | Sweeteners, Other          | 2005           | 88                                                                    |
| 17               | Bermuda | Tea (including mate)       | 2005           | 1                                                                     |
| 17               | Bermuda | Tomatoes and products      | 2005           | 1                                                                     |
| 17               | Bermuda | Treenuts                   | 2005           | 11                                                                    |
| 17               | Bermuda | Vegetable Oils             | 2005           | 335                                                                   |
| 17               | Bermuda | Vegetables                 | 2005           | 79                                                                    |
| 17               | Bermuda | Vegetables, Other          | 2005           | 77                                                                    |
| 17               | Bermuda | Vegetal Products           | 2005           | 1,772                                                                 |
| 17               | Bermuda | Wheat and products         | 2005           | 498                                                                   |
| 17               | Bermuda | Wine                       | 2005           | 36                                                                    |
| 17               | Bermuda | Alcoholic Beverages        | 2006           | 201                                                                   |
| 17               | Bermuda | Animal fats                | 2006           | 68                                                                    |
| 17               | Bermuda | Animal Products            | 2006           | 787                                                                   |
| 17               | Bermuda | Apples and products        | 2006           | 8                                                                     |
| 17               | Bermuda | Bananas                    | 2006           | 29                                                                    |
| 17               | Bermuda | Barley and products        | 2006           | 3                                                                     |
| 17               | Bermuda | Beer                       | 2006           | 79                                                                    |
| 17               | Bermuda | Beverages, Alcoholic       | 2006           | 84                                                                    |
| 17               | Bermuda | Beverages, Fermented       | 2006           | 1                                                                     |
| 17               | Bermuda | Bovine Meat                | 2006           | 199                                                                   |
| 17               | Bermuda | Butter, Ghee               | 2006           | 59                                                                    |
| 17               | Bermuda | Cassava and products       | 2006           | 9                                                                     |
| 17               | Bermuda | Cephalopods                | 2006           | 1                                                                     |
| 17               | Bermuda | Cereals - Excluding Beer   | 2006           | 579                                                                   |
| 17               | Bermuda | Cereals, Other             | 2006           | 64                                                                    |
| 17               | Bermuda | Cocoa Beans and products   | 2006           | 49                                                                    |
| 17               | Bermuda | Coffee and products        | 2006           | 3                                                                     |
| 17               | Bermuda | Cream                      | 2006           | 8                                                                     |
| 17               | Bermuda | Crustaceans                | 2006           | 5                                                                     |
| 17               | Bermuda | Demersal Fish              | 2006           | 3                                                                     |
| 17               | Bermuda | Eggs                       | 2006           | 37                                                                    |
| 17               | Bermuda | Fats, Animals, Raw         | 2006           | 1                                                                     |
| 17               | Bermuda | Fish, Seafood              | 2006           | 53                                                                    |
| 17               | Bermuda | Freshwater Fish            | 2006           | 5                                                                     |
| 17               | Bermuda | Fruits - Excluding Wine    | 2006           | 85                                                                    |
| 17               | Bermuda | Fruits, Other              | 2006           | 47                                                                    |
| 17               | Bermuda | Grand Total                | 2006           | 2,576                                                                 |
| 17               | Bermuda | Groundnuts (Shelled Eq)    | 2006           | 10                                                                    |
| 17               | Bermuda | Honey                      | 2006           | 2                                                                     |
| 17               | Bermuda | Marine Fish, Other         | 2006           | 30                                                                    |
| 17               | Bermuda | Meat                       | 2006           | 491                                                                   |
| 17               | Bermuda | Meat, Other                | 2006           | 1                                                                     |
| 17               | Bermuda | Milk - Excluding Butter    | 2006           | 138                                                                   |
| 17               | Bermuda | Miscellaneous              | 2006           | 17                                                                    |
| 17               | Bermuda | Molluscs, Other            | 2006           | 2                                                                     |
| 17               | Bermuda | Mutton & Goat Meat         | 2006           | 35                                                                    |
| 17               | Bermuda | Oilcrops                   | 2006           | 10                                                                    |
| 17               | Bermuda | Oilcrops Oil, Other        | 2006           | 140                                                                   |
| 17               | Bermuda | Olive Oil                  | 2006           | 34                                                                    |



Dietary calcium and zinc deficiency risks are decreasing but remain prevalent

| FAO Country code | Country | Food item                  | Reference year | Net energy supply (kcal capita <sup>-1</sup> d <sup>-1</sup> ) |
|------------------|---------|----------------------------|----------------|----------------------------------------------------------------|
| 17               | Bermuda | Onions                     | 2006           | 1                                                              |
| 17               | Bermuda | Oranges, Mandarines        | 2006           | 1                                                              |
| 17               | Bermuda | Palm Oil                   | 2006           | 135                                                            |
| 17               | Bermuda | Pelagic Fish               | 2006           | 6                                                              |
| 17               | Bermuda | Pigmeat                    | 2006           | 126                                                            |
| 17               | Bermuda | Pimento                    | 2006           | 24                                                             |
| 17               | Bermuda | Potatoes and products      | 2006           | 25                                                             |
| 17               | Bermuda | Poultry Meat               | 2006           | 129                                                            |
| 17               | Bermuda | Pulses                     | 2006           | 13                                                             |
| 17               | Bermuda | Pulses, Other and products | 2006           | 13                                                             |
| 17               | Bermuda | Rice (Milled Equivalent)   | 2006           | 31                                                             |
| 17               | Bermuda | Spices                     | 2006           | 24                                                             |
| 17               | Bermuda | Starchy Roots              | 2006           | 38                                                             |
| 17               | Bermuda | Stimulants                 | 2006           | 53                                                             |
| 17               | Bermuda | Sugar & Sweeteners         | 2006           | 360                                                            |
| 17               | Bermuda | Sugar (Raw Equivalent)     | 2006           | 272                                                            |
| 17               | Bermuda | Sweet potatoes             | 2006           | 4                                                              |
| 17               | Bermuda | Sweeteners, Other          | 2006           | 87                                                             |
| 17               | Bermuda | Tomatoes and products      | 2006           | 1                                                              |
| 17               | Bermuda | Treenuts                   | 2006           | 11                                                             |
| 17               | Bermuda | Vegetable Oils             | 2006           | 309                                                            |
| 17               | Bermuda | Vegetables                 | 2006           | 88                                                             |
| 17               | Bermuda | Vegetables, Other          | 2006           | 86                                                             |
| 17               | Bermuda | Vegetal Products           | 2006           | 1,788                                                          |
| 17               | Bermuda | Wheat and products         | 2006           | 481                                                            |
| 17               | Bermuda | Wine                       | 2006           | 37                                                             |
| 17               | Bermuda | Alcoholic Beverages        | 2007           | 195                                                            |
| 17               | Bermuda | Animal fats                | 2007           | 80                                                             |
| 17               | Bermuda | Animal Products            | 2007           | 808                                                            |
| 17               | Bermuda | Apples and products        | 2007           | 6                                                              |
| 17               | Bermuda | Bananas                    | 2007           | 28                                                             |
| 17               | Bermuda | Barley and products        | 2007           | 3                                                              |
| 17               | Bermuda | Beer                       | 2007           | 72                                                             |
| 17               | Bermuda | Beverages, Alcoholic       | 2007           | 85                                                             |
| 17               | Bermuda | Bovine Meat                | 2007           | 210                                                            |
| 17               | Bermuda | Butter, Chee               | 2007           | 70                                                             |
| 17               | Bermuda | Cassava and products       | 2007           | 11                                                             |
| 17               | Bermuda | Cereals - Excluding Beer   | 2007           | 610                                                            |
| 17               | Bermuda | Cereals, Other             | 2007           | 63                                                             |
| 17               | Bermuda | Cocoa Beans and products   | 2007           | 53                                                             |
| 17               | Bermuda | Coffee and products        | 2007           | 7                                                              |
| 17               | Bermuda | Cream                      | 2007           | 8                                                              |
| 17               | Bermuda | Crustaceans                | 2007           | 5                                                              |
| 17               | Bermuda | Demersal Fish              | 2007           | 2                                                              |
| 17               | Bermuda | Eggs                       | 2007           | 39                                                             |
| 17               | Bermuda | Fats, Animals, Raw         | 2007           | 2                                                              |
| 17               | Bermuda | Fish, Seafood              | 2007           | 48                                                             |
| 17               | Bermuda | Freshwater Fish            | 2007           | 4                                                              |
| 17               | Bermuda | Fruits - Excluding Wine    | 2007           | 81                                                             |
| 17               | Bermuda | Fruits, Other              | 2007           | 46                                                             |
| 17               | Bermuda | Grand Total                | 2007           | 2,607                                                          |
| 17               | Bermuda | Groundnuts (Shelled Eq)    | 2007           | 11                                                             |
| 17               | Bermuda | Marine Fish, Other         | 2007           | 23                                                             |
| 17               | Bermuda | Meat                       | 2007           | 507                                                            |
| 17               | Bermuda | Meat, Other                | 2007           | 1                                                              |
| 17               | Bermuda | Milk - Excluding Butter    | 2007           | 134                                                            |
| 17               | Bermuda | Miscellaneous              | 2007           | 19                                                             |
| 17               | Bermuda | Molluscs, Other            | 2007           | 4                                                              |
| 17               | Bermuda | Mutton & Goat Meat         | 2007           | 34                                                             |
| 17               | Bermuda | Offals                     | 2007           | 1                                                              |
| 17               | Bermuda | Oilcrops                   | 2007           | 11                                                             |
| 17               | Bermuda | Oilcrops Oil, Other        | 2007           | 139                                                            |
| 17               | Bermuda | Olive Oil                  | 2007           | 34                                                             |
| 17               | Bermuda | Onions                     | 2007           | 1                                                              |
| 17               | Bermuda | Oranges, Mandarines        | 2007           | 1                                                              |
| 17               | Bermuda | Palm Oil                   | 2007           | 147                                                            |
| 17               | Bermuda | Pelagic Fish               | 2007           | 9                                                              |
| 17               | Bermuda | Pigmeat                    | 2007           | 136                                                            |
| 17               | Bermuda | Pimento                    | 2007           | 24                                                             |
| 17               | Bermuda | Potatoes and products      | 2007           | 30                                                             |
| 17               | Bermuda | Poultry Meat               | 2007           | 126                                                            |
| 17               | Bermuda | Pulses                     | 2007           | 13                                                             |
| 17               | Bermuda | Pulses, Other and products | 2007           | 13                                                             |
| 17               | Bermuda | Rice (Milled Equivalent)   | 2007           | 32                                                             |
| 17               | Bermuda | Spices                     | 2007           | 24                                                             |
| 17               | Bermuda | Starchy Roots              | 2007           | 45                                                             |
| 17               | Bermuda | Stimulants                 | 2007           | 60                                                             |
| 17               | Bermuda | Sugar & Sweeteners         | 2007           | 341                                                            |
| 17               | Bermuda | Sugar (Raw Equivalent)     | 2007           | 256                                                            |
| 17               | Bermuda | Sweet potatoes             | 2007           | 4                                                              |
| 17               | Bermuda | Sweeteners, Other          | 2007           | 84                                                             |
| 17               | Bermuda | Tomatoes and products      | 2007           | 1                                                              |
| 17               | Bermuda | Treenuts                   | 2007           | 1                                                              |
| 17               | Bermuda | Vegetable Oils             | 2007           | 320                                                            |
| 17               | Bermuda | Vegetables                 | 2007           | 78                                                             |
| 17               | Bermuda | Vegetables, Other          | 2007           | 76                                                             |
| 17               | Bermuda | Vegetal Products           | 2007           | 1,799                                                          |
| 17               | Bermuda | Wheat and products         | 2007           | 512                                                            |
| 17               | Bermuda | Wine                       | 2007           | 37                                                             |
| 17               | Bermuda | Alcoholic Beverages        | 2008           | 200                                                            |
| 17               | Bermuda | Animal fats                | 2008           | 77                                                             |
| 17               | Bermuda | Animal Products            | 2008           | 837                                                            |
| 17               | Bermuda | Apples and products        | 2008           | 6                                                              |
| 17               | Bermuda | Bananas                    | 2008           | 29                                                             |
| 17               | Bermuda | Barley and products        | 2008           | 1                                                              |
| 17               | Bermuda | Beer                       | 2008           | 81                                                             |
| 17               | Bermuda | Beverages, Alcoholic       | 2008           | 81                                                             |

Dietary calcium and zinc deficiency risks are decreasing but remain prevalent

| FAO Country code | Country | Food item                  | Reference year | Net energy supply (kcal capita <sup>-1</sup> d <sup>-1</sup> ) |
|------------------|---------|----------------------------|----------------|----------------------------------------------------------------|
| 17               | Bermuda | Beverages, Fermented       | 2008           | 1                                                              |
| 17               | Bermuda | Bovine Meat                | 2008           | 206                                                            |
| 17               | Bermuda | Butter, Ghee               | 2008           | 71                                                             |
| 17               | Bermuda | Cassava and products       | 2008           | 11                                                             |
| 17               | Bermuda | Cephalopods                | 2008           | 1                                                              |
| 17               | Bermuda | Cereals - Excluding Beer   | 2008           | 589                                                            |
| 17               | Bermuda | Cereals, Other             | 2008           | 58                                                             |
| 17               | Bermuda | Cocoa Beans and products   | 2008           | 58                                                             |
| 17               | Bermuda | Coffee and products        | 2008           | 5                                                              |
| 17               | Bermuda | Cream                      | 2008           | 5                                                              |
| 17               | Bermuda | Crustaceans                | 2008           | 4                                                              |
| 17               | Bermuda | Demersal Fish              | 2008           | 4                                                              |
| 17               | Bermuda | Eggs                       | 2008           | 40                                                             |
| 17               | Bermuda | Fats, Animals, Raw         | 2008           | 2                                                              |
| 17               | Bermuda | Fish, Seafood              | 2008           | 51                                                             |
| 17               | Bermuda | Freshwater Fish            | 2008           | 2                                                              |
| 17               | Bermuda | Fruits - Excluding Wine    | 2008           | 82                                                             |
| 17               | Bermuda | Fruits, Other              | 2008           | 46                                                             |
| 17               | Bermuda | Grand Total                | 2008           | 2,678                                                          |
| 17               | Bermuda | Groundnuts (Shelled Eq)    | 2008           | 11                                                             |
| 17               | Bermuda | Marine Fish, Other         | 2008           | 23                                                             |
| 17               | Bermuda | Meat                       | 2008           | 525                                                            |
| 17               | Bermuda | Meat, Other                | 2008           | 1                                                              |
| 17               | Bermuda | Milk - Excluding Butter    | 2008           | 144                                                            |
| 17               | Bermuda | Miscellaneous              | 2008           | 27                                                             |
| 17               | Bermuda | Molluscs, Other            | 2008           | 1                                                              |
| 17               | Bermuda | Mutton & Goat Meat         | 2008           | 36                                                             |
| 17               | Bermuda | Oilcrops                   | 2008           | 11                                                             |
| 17               | Bermuda | Oilcrops Oil, Other        | 2008           | 147                                                            |
| 17               | Bermuda | Olive Oil                  | 2008           | 34                                                             |
| 17               | Bermuda | Onions                     | 2008           | 1                                                              |
| 17               | Bermuda | Oranges, Mandarines        | 2008           | 1                                                              |
| 17               | Bermuda | Palm Oil                   | 2008           | 167                                                            |
| 17               | Bermuda | Pelagic Fish               | 2008           | 15                                                             |
| 17               | Bermuda | Pigmeat                    | 2008           | 104                                                            |
| 17               | Bermuda | Pimento                    | 2008           | 27                                                             |
| 17               | Bermuda | Potatoes and products      | 2008           | 29                                                             |
| 17               | Bermuda | Poultry Meat               | 2008           | 178                                                            |
| 17               | Bermuda | Pulses                     | 2008           | 13                                                             |
| 17               | Bermuda | Pulses, Other and products | 2008           | 13                                                             |
| 17               | Bermuda | Rice (Milled Equivalent)   | 2008           | 26                                                             |
| 17               | Bermuda | Spices                     | 2008           | 27                                                             |
| 17               | Bermuda | Starchy Roots              | 2008           | 44                                                             |
| 17               | Bermuda | Stimulants                 | 2008           | 64                                                             |
| 17               | Bermuda | Sugar & Sweeteners         | 2008           | 348                                                            |
| 17               | Bermuda | Sugar (Raw Equivalent)     | 2008           | 256                                                            |
| 17               | Bermuda | Sweet potatoes             | 2008           | 4                                                              |
| 17               | Bermuda | Sweeteners, Other          | 2008           | 92                                                             |
| 17               | Bermuda | Tomatoes and products      | 2008           | 1                                                              |
| 17               | Bermuda | Treenuts                   | 2008           | 11                                                             |
| 17               | Bermuda | Vegetable Oils             | 2008           | 349                                                            |
| 17               | Bermuda | Vegetables                 | 2008           | 77                                                             |
| 17               | Bermuda | Vegetables, Other          | 2008           | 75                                                             |
| 17               | Bermuda | Vegetal Products           | 2008           | 1,841                                                          |
| 17               | Bermuda | Wheat and products         | 2008           | 505                                                            |
| 17               | Bermuda | Wine                       | 2008           | 37                                                             |
| 17               | Bermuda | Alcoholic Beverages        | 2009           | 211                                                            |
| 17               | Bermuda | Animal fats                | 2009           | 81                                                             |
| 17               | Bermuda | Animal Products            | 2009           | 839                                                            |
| 17               | Bermuda | Apples and products        | 2009           | 5                                                              |
| 17               | Bermuda | Bananas                    | 2009           | 25                                                             |
| 17               | Bermuda | Barley and products        | 2009           | 1                                                              |
| 17               | Bermuda | Beer                       | 2009           | 85                                                             |
| 17               | Bermuda | Beverages, Alcoholic       | 2009           | 87                                                             |
| 17               | Bermuda | Beverages, Fermented       | 2009           | 2                                                              |
| 17               | Bermuda | Bovine Meat                | 2009           | 196                                                            |
| 17               | Bermuda | Butter, Ghee               | 2009           | 74                                                             |
| 17               | Bermuda | Cassava and products       | 2009           | 11                                                             |
| 17               | Bermuda | Cephalopods                | 2009           | 4                                                              |
| 17               | Bermuda | Cereals - Excluding Beer   | 2009           | 616                                                            |
| 17               | Bermuda | Cereals, Other             | 2009           | 58                                                             |
| 17               | Bermuda | Cocoa Beans and products   | 2009           | 59                                                             |
| 17               | Bermuda | Coffee and products        | 2009           | 6                                                              |
| 17               | Bermuda | Cream                      | 2009           | 5                                                              |
| 17               | Bermuda | Crustaceans                | 2009           | 6                                                              |
| 17               | Bermuda | Demersal Fish              | 2009           | 4                                                              |
| 17               | Bermuda | Eggs                       | 2009           | 37                                                             |
| 17               | Bermuda | Fats, Animals, Raw         | 2009           | 2                                                              |
| 17               | Bermuda | Fish, Seafood              | 2009           | 62                                                             |
| 17               | Bermuda | Freshwater Fish            | 2009           | 10                                                             |
| 17               | Bermuda | Fruits - Excluding Wine    | 2009           | 83                                                             |
| 17               | Bermuda | Fruits, Other              | 2009           | 52                                                             |
| 17               | Bermuda | Grand Total                | 2009           | 2,741                                                          |
| 17               | Bermuda | Groundnuts (Shelled Eq)    | 2009           | 14                                                             |
| 17               | Bermuda | Marine Fish, Other         | 2009           | 32                                                             |
| 17               | Bermuda | Meat                       | 2009           | 497                                                            |
| 17               | Bermuda | Meat, Other                | 2009           | 1                                                              |
| 17               | Bermuda | Milk - Excluding Butter    | 2009           | 162                                                            |
| 17               | Bermuda | Miscellaneous              | 2009           | 27                                                             |
| 17               | Bermuda | Mutton & Goat Meat         | 2009           | 37                                                             |
| 17               | Bermuda | Offals                     | 2009           | 1                                                              |
| 17               | Bermuda | Oilcrops                   | 2009           | 14                                                             |
| 17               | Bermuda | Oilcrops Oil, Other        | 2009           | 156                                                            |
| 17               | Bermuda | Olive Oil                  | 2009           | 34                                                             |
| 17               | Bermuda | Onions                     | 2009           | 1                                                              |
| 17               | Bermuda | Oranges, Mandarines        | 2009           | 2                                                              |
| 17               | Bermuda | Palm Oil                   | 2009           | 170                                                            |

Dietary calcium and zinc deficiency risks are decreasing but remain prevalent

| FAO Country code | Country | Food item                  | Reference year | Net energy supply (kcal capita <sup>-1</sup> d <sup>-1</sup> ) |
|------------------|---------|----------------------------|----------------|----------------------------------------------------------------|
| 17               | Bermuda | Pelagic Fish               | 2009           | 6                                                              |
| 17               | Bermuda | Pigmeat                    | 2009           | 104                                                            |
| 17               | Bermuda | Pimento                    | 2009           | 27                                                             |
| 17               | Bermuda | Potatoes and products      | 2009           | 29                                                             |
| 17               | Bermuda | Poultry Meat               | 2009           | 159                                                            |
| 17               | Bermuda | Pulses                     | 2009           | 13                                                             |
| 17               | Bermuda | Pulses, Other and products | 2009           | 13                                                             |
| 17               | Bermuda | Rice (Milled Equivalent)   | 2009           | 56                                                             |
| 17               | Bermuda | Spices                     | 2009           | 27                                                             |
| 17               | Bermuda | Starchy Roots              | 2009           | 44                                                             |
| 17               | Bermuda | Stimulants                 | 2009           | 65                                                             |
| 17               | Bermuda | Sugar & Sweeteners         | 2009           | 351                                                            |
| 17               | Bermuda | Sugar (Raw Equivalent)     | 2009           | 256                                                            |
| 17               | Bermuda | Sweet potatoes             | 2009           | 4                                                              |
| 17               | Bermuda | Sweeteners, Other          | 2009           | 95                                                             |
| 17               | Bermuda | Tomatoes and products      | 2009           | 1                                                              |
| 17               | Bermuda | Treenuts                   | 2009           | 11                                                             |
| 17               | Bermuda | Vegetable Oils             | 2009           | 360                                                            |
| 17               | Bermuda | Vegetables                 | 2009           | 79                                                             |
| 17               | Bermuda | Vegetables, Other          | 2009           | 76                                                             |
| 17               | Bermuda | Vegetal Products           | 2009           | 1,901                                                          |
| 17               | Bermuda | Wheat and products         | 2009           | 502                                                            |
| 17               | Bermuda | Wine                       | 2009           | 37                                                             |
| 17               | Bermuda | Alcoholic Beverages        | 2010           | 146                                                            |
| 17               | Bermuda | Animal fats                | 2010           | 65                                                             |
| 17               | Bermuda | Animal Products            | 2010           | 800                                                            |
| 17               | Bermuda | Apples and products        | 2010           | 4                                                              |
| 17               | Bermuda | Bananas                    | 2010           | 65                                                             |
| 17               | Bermuda | Barley and products        | 2010           | 1                                                              |
| 17               | Bermuda | Beer                       | 2010           | 84                                                             |
| 17               | Bermuda | Beverages, Alcoholic       | 2010           | 30                                                             |
| 17               | Bermuda | Beverages, Fermented       | 2010           | 1                                                              |
| 17               | Bermuda | Bovine Meat                | 2010           | 156                                                            |
| 17               | Bermuda | Butter, Ghee               | 2010           | 60                                                             |
| 17               | Bermuda | Cassava and products       | 2010           | 10                                                             |
| 17               | Bermuda | Cephalopods                | 2010           | 2                                                              |
| 17               | Bermuda | Cereals - Excluding Beer   | 2010           | 712                                                            |
| 17               | Bermuda | Cereals, Other             | 2010           | 2                                                              |
| 17               | Bermuda | Cocoa Beans and products   | 2010           | 59                                                             |
| 17               | Bermuda | Coffee and products        | 2010           | 3                                                              |
| 17               | Bermuda | Cream                      | 2010           | 4                                                              |
| 17               | Bermuda | Crustaceans                | 2010           | 8                                                              |
| 17               | Bermuda | Demersal Fish              | 2010           | 9                                                              |
| 17               | Bermuda | Eggs                       | 2010           | 38                                                             |
| 17               | Bermuda | Fats, Animals, Raw         | 2010           | 2                                                              |
| 17               | Bermuda | Fish, Seafood              | 2010           | 68                                                             |
| 17               | Bermuda | Freshwater Fish            | 2010           | 7                                                              |
| 17               | Bermuda | Fruits - Excluding Wine    | 2010           | 98                                                             |
| 17               | Bermuda | Fruits, Other              | 2010           | 28                                                             |
| 17               | Bermuda | Grand Total                | 2010           | 2,752                                                          |
| 17               | Bermuda | Groundnuts (Shelled Eq)    | 2010           | 14                                                             |
| 17               | Bermuda | Honey                      | 2010           | 2                                                              |
| 17               | Bermuda | Marine Fish, Other         | 2010           | 33                                                             |
| 17               | Bermuda | Meat                       | 2010           | 496                                                            |
| 17               | Bermuda | Meat, Other                | 2010           | 1                                                              |
| 17               | Bermuda | Milk - Excluding Butter    | 2010           | 132                                                            |
| 17               | Bermuda | Miscellaneous              | 2010           | 23                                                             |
| 17               | Bermuda | Molluscs, Other            | 2010           | 2                                                              |
| 17               | Bermuda | Mutton & Goat Meat         | 2010           | 50                                                             |
| 17               | Bermuda | Offals                     | 2010           | 1                                                              |
| 17               | Bermuda | Oilcrops                   | 2010           | 14                                                             |
| 17               | Bermuda | Oilcrops Oil, Other        | 2010           | 158                                                            |
| 17               | Bermuda | Olive Oil                  | 2010           | 35                                                             |
| 17               | Bermuda | Onions                     | 2010           | 2                                                              |
| 17               | Bermuda | Oranges, Mandarines        | 2010           | 1                                                              |
| 17               | Bermuda | Palm Oil                   | 2010           | 167                                                            |
| 17               | Bermuda | Pelagic Fish               | 2010           | 6                                                              |
| 17               | Bermuda | Pigmeat                    | 2010           | 157                                                            |
| 17               | Bermuda | Pimento                    | 2010           | 20                                                             |
| 17               | Bermuda | Potatoes and products      | 2010           | 27                                                             |
| 17               | Bermuda | Poultry Meat               | 2010           | 132                                                            |
| 17               | Bermuda | Pulses                     | 2010           | 13                                                             |
| 17               | Bermuda | Pulses, Other and products | 2010           | 13                                                             |
| 17               | Bermuda | Rice (Milled Equivalent)   | 2010           | 41                                                             |
| 17               | Bermuda | Spices                     | 2010           | 23                                                             |
| 17               | Bermuda | Spices, Other              | 2010           | 2                                                              |
| 17               | Bermuda | Starchy Roots              | 2010           | 42                                                             |
| 17               | Bermuda | Stimulants                 | 2010           | 62                                                             |
| 17               | Bermuda | Sugar & Sweeteners         | 2010           | 360                                                            |
| 17               | Bermuda | Sugar (Raw Equivalent)     | 2010           | 274                                                            |
| 17               | Bermuda | Sweet potatoes             | 2010           | 5                                                              |
| 17               | Bermuda | Sweeteners, Other          | 2010           | 84                                                             |
| 17               | Bermuda | Tomatoes and products      | 2010           | 1                                                              |
| 17               | Bermuda | Treenuts                   | 2010           | 11                                                             |
| 17               | Bermuda | Vegetable Oils             | 2010           | 360                                                            |
| 17               | Bermuda | Vegetables                 | 2010           | 88                                                             |
| 17               | Bermuda | Vegetables, Other          | 2010           | 86                                                             |
| 17               | Bermuda | Vegetal Products           | 2010           | 1,952                                                          |
| 17               | Bermuda | Wheat and products         | 2010           | 669                                                            |
| 17               | Bermuda | Wine                       | 2010           | 30                                                             |
| 17               | Bermuda | Alcoholic Beverages        | 2011           | 147                                                            |
| 17               | Bermuda | Animal fats                | 2011           | 46                                                             |
| 17               | Bermuda | Animal Products            | 2011           | 865                                                            |
| 17               | Bermuda | Apples and products        | 2011           | 3                                                              |
| 17               | Bermuda | Bananas                    | 2011           | 26                                                             |
| 17               | Bermuda | Barley and products        | 2011           | 1                                                              |
| 17               | Bermuda | Beer                       | 2011           | 82                                                             |

Dietary calcium and zinc deficiency risks are decreasing but remain prevalent

| FAO Country code | Country | Food item                       | Reference year | Net energy supply (kcal capita <sup>-1</sup> d <sup>-1</sup> ) |
|------------------|---------|---------------------------------|----------------|----------------------------------------------------------------|
| 17               | Bermuda | Beverages, Alcoholic            | 2011           | 31                                                             |
| 17               | Bermuda | Beverages, Fermented            | 2011           | 1                                                              |
| 17               | Bermuda | Bovine Meat                     | 2011           | 230                                                            |
| 17               | Bermuda | Butter, Ghee                    | 2011           | 40                                                             |
| 17               | Bermuda | Cassava and products            | 2011           | 12                                                             |
| 17               | Bermuda | Cephalopods                     | 2011           | 2                                                              |
| 17               | Bermuda | Cereals - Excluding Beer        | 2011           | 691                                                            |
| 17               | Bermuda | Cereals, Other                  | 2011           | 3                                                              |
| 17               | Bermuda | Cocoa Beans and products        | 2011           | 62                                                             |
| 17               | Bermuda | Coffee and products             | 2011           | 3                                                              |
| 17               | Bermuda | Cream                           | 2011           | 4                                                              |
| 17               | Bermuda | Crustaceans                     | 2011           | 8                                                              |
| 17               | Bermuda | Demersal Fish                   | 2011           | 9                                                              |
| 17               | Bermuda | Eggs                            | 2011           | 39                                                             |
| 17               | Bermuda | Fats, Animals, Raw              | 2011           | 2                                                              |
| 17               | Bermuda | Fish, Seafood                   | 2011           | 68                                                             |
| 17               | Bermuda | Freshwater Fish                 | 2011           | 7                                                              |
| 17               | Bermuda | Fruits - Excluding Wine         | 2011           | 59                                                             |
| 17               | Bermuda | Fruits, Other                   | 2011           | 29                                                             |
| 17               | Bermuda | Grand Total                     | 2011           | 2,765                                                          |
| 17               | Bermuda | Groundnuts (Shelled Eq)         | 2011           | 17                                                             |
| 17               | Bermuda | Honey                           | 2011           | 5                                                              |
| 17               | Bermuda | Marine Fish, Other              | 2011           | 33                                                             |
| 17               | Bermuda | Meat                            | 2011           | 573                                                            |
| 17               | Bermuda | Milk - Excluding Butter         | 2011           | 138                                                            |
| 17               | Bermuda | Miscellaneous                   | 2011           | 19                                                             |
| 17               | Bermuda | Molluscs, Other                 | 2011           | 2                                                              |
| 17               | Bermuda | Mutton & Goat Meat              | 2011           | 61                                                             |
| 17               | Bermuda | Offals                          | 2011           | 1                                                              |
| 17               | Bermuda | Oilcrops                        | 2011           | 17                                                             |
| 17               | Bermuda | Oilcrops Oil, Other             | 2011           | 146                                                            |
| 17               | Bermuda | Olive Oil                       | 2011           | 35                                                             |
| 17               | Bermuda | Onions                          | 2011           | 1                                                              |
| 17               | Bermuda | Oranges, Mandarines             | 2011           | 1                                                              |
| 17               | Bermuda | Palm Oil                        | 2011           | 189                                                            |
| 17               | Bermuda | Pelagic Fish                    | 2011           | 6                                                              |
| 17               | Bermuda | Pigmeat                         | 2011           | 148                                                            |
| 17               | Bermuda | Pimento                         | 2011           | 20                                                             |
| 17               | Bermuda | Potatoes and products           | 2011           | 30                                                             |
| 17               | Bermuda | Poultry Meat                    | 2011           | 134                                                            |
| 17               | Bermuda | Pulses                          | 2011           | 13                                                             |
| 17               | Bermuda | Pulses, Other and products      | 2011           | 13                                                             |
| 17               | Bermuda | Rice (Milled Equivalent)        | 2011           | 69                                                             |
| 17               | Bermuda | Spices                          | 2011           | 24                                                             |
| 17               | Bermuda | Spices, Other                   | 2011           | 4                                                              |
| 17               | Bermuda | Starchy Roots                   | 2011           | 48                                                             |
| 17               | Bermuda | Stimulants                      | 2011           | 65                                                             |
| 17               | Bermuda | Sugar & Sweeteners              | 2011           | 358                                                            |
| 17               | Bermuda | Sugar (Raw Equivalent)          | 2011           | 253                                                            |
| 17               | Bermuda | Sweet potatoes                  | 2011           | 6                                                              |
| 17               | Bermuda | Sweeteners, Other               | 2011           | 100                                                            |
| 17               | Bermuda | Tea (including mate)            | 2011           | 1                                                              |
| 17               | Bermuda | Tomatoes and products           | 2011           | 1                                                              |
| 17               | Bermuda | Treenuts                        | 2011           | 11                                                             |
| 17               | Bermuda | Vegetable Oils                  | 2011           | 370                                                            |
| 17               | Bermuda | Vegetables                      | 2011           | 77                                                             |
| 17               | Bermuda | Vegetables, Other               | 2011           | 75                                                             |
| 17               | Bermuda | Vegetal Products                | 2011           | 1,900                                                          |
| 17               | Bermuda | Wheat and products              | 2011           | 619                                                            |
| 17               | Bermuda | Wine                            | 2011           | 32                                                             |
| 19               | Bolivia | Alcoholic Beverages             | 1992           | 34                                                             |
| 19               | Bolivia | Animal fats                     | 1992           | 45                                                             |
| 19               | Bolivia | Animal Products                 | 1992           | 288                                                            |
| 19               | Bolivia | Apples and products             | 1992           | 2                                                              |
| 19               | Bolivia | Bananas                         | 1992           | 27                                                             |
| 19               | Bolivia | Barley and products             | 1992           | 2                                                              |
| 19               | Bolivia | Beans                           | 1992           | 3                                                              |
| 19               | Bolivia | Beer                            | 1992           | 16                                                             |
| 19               | Bolivia | Beverages, Alcoholic            | 1992           | 18                                                             |
| 19               | Bolivia | Bovine Meat                     | 1992           | 83                                                             |
| 19               | Bolivia | Butter, Ghee                    | 1992           | 2                                                              |
| 19               | Bolivia | Cassava and products            | 1992           | 44                                                             |
| 19               | Bolivia | Cereals - Excluding Beer        | 1992           | 895                                                            |
| 19               | Bolivia | Cereals, Other                  | 1992           | 27                                                             |
| 19               | Bolivia | Cocoa Beans and products        | 1992           | 3                                                              |
| 19               | Bolivia | Coffee and products             | 1992           | 2                                                              |
| 19               | Bolivia | Cottonseed Oil                  | 1992           | 8                                                              |
| 19               | Bolivia | Eggs                            | 1992           | 23                                                             |
| 19               | Bolivia | Fats, Animals, Raw              | 1992           | 43                                                             |
| 19               | Bolivia | Fish, Seafood                   | 1992           | 2                                                              |
| 19               | Bolivia | Freshwater Fish                 | 1992           | 1                                                              |
| 19               | Bolivia | Fruits - Excluding Wine         | 1992           | 138                                                            |
| 19               | Bolivia | Fruits, Other                   | 1992           | 12                                                             |
| 19               | Bolivia | Grand Total                     | 1992           | 2,022                                                          |
| 19               | Bolivia | Grapefruit and products         | 1992           | 2                                                              |
| 19               | Bolivia | Grapes and products (excl wine) | 1992           | 3                                                              |
| 19               | Bolivia | Groundnut Oil                   | 1992           | 2                                                              |
| 19               | Bolivia | Groundnuts (Shelled Eq)         | 1992           | 13                                                             |
| 19               | Bolivia | Honey                           | 1992           | 1                                                              |
| 19               | Bolivia | Lemons, Limes and products      | 1992           | 3                                                              |
| 19               | Bolivia | Maize and products              | 1992           | 199                                                            |
| 19               | Bolivia | Meat                            | 1992           | 171                                                            |
| 19               | Bolivia | Meat, Other                     | 1992           | 3                                                              |
| 19               | Bolivia | Milk - Excluding Butter         | 1992           | 36                                                             |
| 19               | Bolivia | Miscellaneous                   | 1992           | 1                                                              |
| 19               | Bolivia | Mutton & Goat Meat              | 1992           | 13                                                             |
| 19               | Bolivia | Oats                            | 1992           | 2                                                              |

Dietary calcium and zinc deficiency risks are decreasing but remain prevalent

| FAO Country code | Country | Food item                       | Reference year | Net energy supply (kcal capita <sup>-1</sup> d <sup>-1</sup> ) |
|------------------|---------|---------------------------------|----------------|----------------------------------------------------------------|
| 19               | Bolivia | Offals                          | 1992           | 12                                                             |
| 19               | Bolivia | Oilcrops                        | 1992           | 14                                                             |
| 19               | Bolivia | Oilcrops Oil, Other             | 1992           | 1                                                              |
| 19               | Bolivia | Onions                          | 1992           | 6                                                              |
| 19               | Bolivia | Oranges, Mandarines             | 1992           | 12                                                             |
| 19               | Bolivia | Peas                            | 1992           | 7                                                              |
| 19               | Bolivia | Pigmeat                         | 1992           | 39                                                             |
| 19               | Bolivia | Pineapples and products         | 1992           | 1                                                              |
| 19               | Bolivia | Plantains                       | 1992           | 77                                                             |
| 19               | Bolivia | Potatoes and products           | 1992           | 102                                                            |
| 19               | Bolivia | Poultry Meat                    | 1992           | 33                                                             |
| 19               | Bolivia | Pulses                          | 1992           | 27                                                             |
| 19               | Bolivia | Pulses, Other and products      | 1992           | 17                                                             |
| 19               | Bolivia | Rice (Milled Equivalent)        | 1992           | 202                                                            |
| 19               | Bolivia | Roots, Other                    | 1992           | 14                                                             |
| 19               | Bolivia | Soyabean Oil                    | 1992           | 57                                                             |
| 19               | Bolivia | Spices                          | 1992           | 1                                                              |
| 19               | Bolivia | Spices, Other                   | 1992           | 1                                                              |
| 19               | Bolivia | Starchy Roots                   | 1992           | 162                                                            |
| 19               | Bolivia | Stimulants                      | 1992           | 5                                                              |
| 19               | Bolivia | Sugar & Sweeteners              | 1992           | 279                                                            |
| 19               | Bolivia | Sugar (Raw Equivalent)          | 1992           | 277                                                            |
| 19               | Bolivia | Sunflowerseed Oil               | 1992           | 43                                                             |
| 19               | Bolivia | Sweet potatoes                  | 1992           | 3                                                              |
| 19               | Bolivia | Sweeteners, Other               | 1992           | 2                                                              |
| 19               | Bolivia | Tomatoes and products           | 1992           | 3                                                              |
| 19               | Bolivia | Treenuts                        | 1992           | 30                                                             |
| 19               | Bolivia | Vegetable Oils                  | 1992           | 111                                                            |
| 19               | Bolivia | Vegetables                      | 1992           | 38                                                             |
| 19               | Bolivia | Vegetables, Other               | 1992           | 29                                                             |
| 19               | Bolivia | Vegetal Products                | 1992           | 1,734                                                          |
| 19               | Bolivia | Wheat and products              | 1992           | 462                                                            |
| 19               | Bolivia | Wine                            | 1992           | 1                                                              |
| 19               | Bolivia | Alcoholic Beverages             | 1993           | 34                                                             |
| 19               | Bolivia | Animal fats                     | 1993           | 40                                                             |
| 19               | Bolivia | Animal Products                 | 1993           | 292                                                            |
| 19               | Bolivia | Apples and products             | 1993           | 3                                                              |
| 19               | Bolivia | Bananas                         | 1993           | 26                                                             |
| 19               | Bolivia | Barley and products             | 1993           | 1                                                              |
| 19               | Bolivia | Beans                           | 1993           | 1                                                              |
| 19               | Bolivia | Beer                            | 1993           | 19                                                             |
| 19               | Bolivia | Beverages, Alcoholic            | 1993           | 15                                                             |
| 19               | Bolivia | Bovine Meat                     | 1993           | 84                                                             |
| 19               | Bolivia | Butter, Ghee                    | 1993           | 2                                                              |
| 19               | Bolivia | Cassava and products            | 1993           | 39                                                             |
| 19               | Bolivia | Cereals - Excluding Beer        | 1993           | 917                                                            |
| 19               | Bolivia | Cereals, Other                  | 1993           | 25                                                             |
| 19               | Bolivia | Cocoa Beans and products        | 1993           | 4                                                              |
| 19               | Bolivia | Coffee and products             | 1993           | 2                                                              |
| 19               | Bolivia | Cottonseed Oil                  | 1993           | 7                                                              |
| 19               | Bolivia | Eggs                            | 1993           | 22                                                             |
| 19               | Bolivia | Fats, Animals, Raw              | 1993           | 38                                                             |
| 19               | Bolivia | Fish, Seafood                   | 1993           | 3                                                              |
| 19               | Bolivia | Freshwater Fish                 | 1993           | 1                                                              |
| 19               | Bolivia | Fruits - Excluding Wine         | 1993           | 134                                                            |
| 19               | Bolivia | Fruits, Other                   | 1993           | 12                                                             |
| 19               | Bolivia | Grand Total                     | 1993           | 2,007                                                          |
| 19               | Bolivia | Grapefruit and products         | 1993           | 2                                                              |
| 19               | Bolivia | Grapes and products (excl wine) | 1993           | 4                                                              |
| 19               | Bolivia | Groundnuts (Shelled Eq)         | 1993           | 13                                                             |
| 19               | Bolivia | Honey                           | 1993           | 1                                                              |
| 19               | Bolivia | Lemons, Limes and products      | 1993           | 3                                                              |
| 19               | Bolivia | Maize and products              | 1993           | 215                                                            |
| 19               | Bolivia | Marine Fish, Other              | 1993           | 1                                                              |
| 19               | Bolivia | Meat                            | 1993           | 175                                                            |
| 19               | Bolivia | Meat, Other                     | 1993           | 3                                                              |
| 19               | Bolivia | Milk - Excluding Butter         | 1993           | 41                                                             |
| 19               | Bolivia | Miscellaneous                   | 1993           | 1                                                              |
| 19               | Bolivia | Mutton & Goat Meat              | 1993           | 13                                                             |
| 19               | Bolivia | Oats                            | 1993           | 3                                                              |
| 19               | Bolivia | Offals                          | 1993           | 12                                                             |
| 19               | Bolivia | Oilcrops                        | 1993           | 13                                                             |
| 19               | Bolivia | Onions                          | 1993           | 6                                                              |
| 19               | Bolivia | Oranges, Mandarines             | 1993           | 12                                                             |
| 19               | Bolivia | Peas                            | 1993           | 7                                                              |
| 19               | Bolivia | Pigmeat                         | 1993           | 33                                                             |
| 19               | Bolivia | Pineapples and products         | 1993           | 2                                                              |
| 19               | Bolivia | Plantains                       | 1993           | 71                                                             |
| 19               | Bolivia | Potatoes and products           | 1993           | 81                                                             |
| 19               | Bolivia | Poultry Meat                    | 1993           | 42                                                             |
| 19               | Bolivia | Pulses                          | 1993           | 27                                                             |
| 19               | Bolivia | Pulses, Other and products      | 1993           | 19                                                             |
| 19               | Bolivia | Rice (Milled Equivalent)        | 1993           | 192                                                            |
| 19               | Bolivia | Roots, Other                    | 1993           | 15                                                             |
| 19               | Bolivia | Soyabean Oil                    | 1993           | 56                                                             |
| 19               | Bolivia | Spices                          | 1993           | 1                                                              |
| 19               | Bolivia | Starchy Roots                   | 1993           | 137                                                            |
| 19               | Bolivia | Stimulants                      | 1993           | 6                                                              |
| 19               | Bolivia | Sugar & Sweeteners              | 1993           | 284                                                            |
| 19               | Bolivia | Sugar (Raw Equivalent)          | 1993           | 282                                                            |
| 19               | Bolivia | Sunflowerseed Oil               | 1993           | 31                                                             |
| 19               | Bolivia | Sweet potatoes                  | 1993           | 3                                                              |
| 19               | Bolivia | Sweeteners, Other               | 1993           | 1                                                              |
| 19               | Bolivia | Tomatoes and products           | 1993           | 3                                                              |
| 19               | Bolivia | Treenuts                        | 1993           | 25                                                             |
| 19               | Bolivia | Vegetable Oils                  | 1993           | 96                                                             |
| 19               | Bolivia | Vegetables                      | 1993           | 40                                                             |

Dietary calcium and zinc deficiency risks are decreasing but remain prevalent

| FAO Country code | Country | Food item                       | Reference year | Net energy supply (kcal capita <sup>-1</sup> d <sup>-1</sup> ) |
|------------------|---------|---------------------------------|----------------|----------------------------------------------------------------|
| 19               | Bolivia | Vegetables, Other               | 1993           | 31                                                             |
| 19               | Bolivia | Vegetal Products                | 1993           | 1,715                                                          |
| 19               | Bolivia | Wheat and products              | 1993           | 482                                                            |
| 19               | Bolivia | Wine                            | 1993           | 1                                                              |
| 19               | Bolivia | Alcoholic Beverages             | 1994           | 36                                                             |
| 19               | Bolivia | Animal fats                     | 1994           | 41                                                             |
| 19               | Bolivia | Animal Products                 | 1994           | 305                                                            |
| 19               | Bolivia | Apples and products             | 1994           | 3                                                              |
| 19               | Bolivia | Bananas                         | 1994           | 18                                                             |
| 19               | Bolivia | Beans                           | 1994           | 2                                                              |
| 19               | Bolivia | Beer                            | 1994           | 18                                                             |
| 19               | Bolivia | Beverages, Alcoholic            | 1994           | 17                                                             |
| 19               | Bolivia | Bovine Meat                     | 1994           | 85                                                             |
| 19               | Bolivia | Butter, Ghee                    | 1994           | 2                                                              |
| 19               | Bolivia | Cassava and products            | 1994           | 40                                                             |
| 19               | Bolivia | Cereals - Excluding Beer        | 1994           | 845                                                            |
| 19               | Bolivia | Cereals, Other                  | 1994           | 24                                                             |
| 19               | Bolivia | Cocoa Beans and products        | 1994           | 5                                                              |
| 19               | Bolivia | Coffee and products             | 1994           | 3                                                              |
| 19               | Bolivia | Cottonseed Oil                  | 1994           | 10                                                             |
| 19               | Bolivia | Eggs                            | 1994           | 24                                                             |
| 19               | Bolivia | Fats, Animals, Raw              | 1994           | 40                                                             |
| 19               | Bolivia | Fish, Seafood                   | 1994           | 3                                                              |
| 19               | Bolivia | Freshwater Fish                 | 1994           | 1                                                              |
| 19               | Bolivia | Fruits - Excluding Wine         | 1994           | 130                                                            |
| 19               | Bolivia | Fruits, Other                   | 1994           | 13                                                             |
| 19               | Bolivia | Grand Total                     | 1994           | 1,959                                                          |
| 19               | Bolivia | Grapefruit and products         | 1994           | 2                                                              |
| 19               | Bolivia | Grapes and products (excl wine) | 1994           | 4                                                              |
| 19               | Bolivia | Groundnuts (Shelled Eq)         | 1994           | 13                                                             |
| 19               | Bolivia | Honey                           | 1994           | 1                                                              |
| 19               | Bolivia | Lemons, Limes and products      | 1994           | 3                                                              |
| 19               | Bolivia | Maize and products              | 1994           | 216                                                            |
| 19               | Bolivia | Marine Fish, Other              | 1994           | 1                                                              |
| 19               | Bolivia | Meat                            | 1994           | 186                                                            |
| 19               | Bolivia | Meat, Other                     | 1994           | 3                                                              |
| 19               | Bolivia | Milk - Excluding Butter         | 1994           | 39                                                             |
| 19               | Bolivia | Miscellaneous                   | 1994           | 1                                                              |
| 19               | Bolivia | Mutton & Goat Meat              | 1994           | 14                                                             |
| 19               | Bolivia | Oats                            | 1994           | 3                                                              |
| 19               | Bolivia | Offals                          | 1994           | 12                                                             |
| 19               | Bolivia | Oilcrops                        | 1994           | 13                                                             |
| 19               | Bolivia | Onions                          | 1994           | 7                                                              |
| 19               | Bolivia | Oranges, Mandarines             | 1994           | 13                                                             |
| 19               | Bolivia | Peas                            | 1994           | 6                                                              |
| 19               | Bolivia | Pelagic Fish                    | 1994           | 1                                                              |
| 19               | Bolivia | Pigmeat                         | 1994           | 33                                                             |
| 19               | Bolivia | Pineapples and products         | 1994           | 1                                                              |
| 19               | Bolivia | Plantains                       | 1994           | 74                                                             |
| 19               | Bolivia | Potatoes and products           | 1994           | 96                                                             |
| 19               | Bolivia | Poultry Meat                    | 1994           | 51                                                             |
| 19               | Bolivia | Pulses                          | 1994           | 23                                                             |
| 19               | Bolivia | Pulses, Other and products      | 1994           | 15                                                             |
| 19               | Bolivia | Rice (Milled Equivalent)        | 1994           | 215                                                            |
| 19               | Bolivia | Roots, Other                    | 1994           | 14                                                             |
| 19               | Bolivia | Soyabean Oil                    | 1994           | 61                                                             |
| 19               | Bolivia | Starchy Roots                   | 1994           | 152                                                            |
| 19               | Bolivia | Stimulants                      | 1994           | 7                                                              |
| 19               | Bolivia | Sugar & Sweeteners              | 1994           | 282                                                            |
| 19               | Bolivia | Sugar (Raw Equivalent)          | 1994           | 280                                                            |
| 19               | Bolivia | Sunflowerseed Oil               | 1994           | 27                                                             |
| 19               | Bolivia | Sweet potatoes                  | 1994           | 3                                                              |
| 19               | Bolivia | Sweeteners, Other               | 1994           | 1                                                              |
| 19               | Bolivia | Tomatoes and products           | 1994           | 3                                                              |
| 19               | Bolivia | Treenuts                        | 1994           | 23                                                             |
| 19               | Bolivia | Vegetable Oils                  | 1994           | 99                                                             |
| 19               | Bolivia | Vegetables                      | 1994           | 42                                                             |
| 19               | Bolivia | Vegetables, Other               | 1994           | 31                                                             |
| 19               | Bolivia | Vegetal Products                | 1994           | 1,654                                                          |
| 19               | Bolivia | Wheat and products              | 1994           | 388                                                            |
| 19               | Bolivia | Wine                            | 1994           | 1                                                              |
| 19               | Bolivia | Alcoholic Beverages             | 1995           | 40                                                             |
| 19               | Bolivia | Animal fats                     | 1995           | 42                                                             |
| 19               | Bolivia | Animal Products                 | 1995           | 325                                                            |
| 19               | Bolivia | Apples and products             | 1995           | 2                                                              |
| 19               | Bolivia | Bananas                         | 1995           | 26                                                             |
| 19               | Bolivia | Beans                           | 1995           | 3                                                              |
| 19               | Bolivia | Beer                            | 1995           | 20                                                             |
| 19               | Bolivia | Beverages, Alcoholic            | 1995           | 19                                                             |
| 19               | Bolivia | Bovine Meat                     | 1995           | 86                                                             |
| 19               | Bolivia | Butter, Ghee                    | 1995           | 2                                                              |
| 19               | Bolivia | Cassava and products            | 1995           | 43                                                             |
| 19               | Bolivia | Cereals - Excluding Beer        | 1995           | 961                                                            |
| 19               | Bolivia | Cereals, Other                  | 1995           | 24                                                             |
| 19               | Bolivia | Cocoa Beans and products        | 1995           | 4                                                              |
| 19               | Bolivia | Coffee and products             | 1995           | 3                                                              |
| 19               | Bolivia | Cottonseed Oil                  | 1995           | 15                                                             |
| 19               | Bolivia | Eggs                            | 1995           | 26                                                             |
| 19               | Bolivia | Fats, Animals, Raw              | 1995           | 40                                                             |
| 19               | Bolivia | Fish, Seafood                   | 1995           | 2                                                              |
| 19               | Bolivia | Freshwater Fish                 | 1995           | 1                                                              |
| 19               | Bolivia | Fruits - Excluding Wine         | 1995           | 138                                                            |
| 19               | Bolivia | Fruits, Other                   | 1995           | 12                                                             |
| 19               | Bolivia | Grand Total                     | 1995           | 2,106                                                          |
| 19               | Bolivia | Grapefruit and products         | 1995           | 2                                                              |
| 19               | Bolivia | Grapes and products (excl wine) | 1995           | 4                                                              |
| 19               | Bolivia | Groundnuts (Shelled Eq)         | 1995           | 11                                                             |

Dietary calcium and zinc deficiency risks are decreasing but remain prevalent

| FAO Country code | Country | Food item                       | Reference year | Net energy supply (kcal <i>capita</i> <sup>-1</sup> d <sup>-1</sup> ) |
|------------------|---------|---------------------------------|----------------|-----------------------------------------------------------------------|
| 19               | Bolivia | Honey                           | 1995           | 1                                                                     |
| 19               | Bolivia | Lemons, Limes and products      | 1995           | 3                                                                     |
| 19               | Bolivia | Maize and products              | 1995           | 302                                                                   |
| 19               | Bolivia | Meat                            | 1995           | 189                                                                   |
| 19               | Bolivia | Meat, Other                     | 1995           | 3                                                                     |
| 19               | Bolivia | Milk - Excluding Butter         | 1995           | 53                                                                    |
| 19               | Bolivia | Miscellaneous                   | 1995           | 1                                                                     |
| 19               | Bolivia | Mutton & Goat Meat              | 1995           | 14                                                                    |
| 19               | Bolivia | Oats                            | 1995           | 3                                                                     |
| 19               | Bolivia | Offals                          | 1995           | 12                                                                    |
| 19               | Bolivia | Oilcrops                        | 1995           | 12                                                                    |
| 19               | Bolivia | Oilcrops Oil, Other             | 1995           | 1                                                                     |
| 19               | Bolivia | Onions                          | 1995           | 6                                                                     |
| 19               | Bolivia | Oranges, Mandarines             | 1995           | 12                                                                    |
| 19               | Bolivia | Peas                            | 1995           | 4                                                                     |
| 19               | Bolivia | Pelagic Fish                    | 1995           | 1                                                                     |
| 19               | Bolivia | Pigmeat                         | 1995           | 33                                                                    |
| 19               | Bolivia | Pineapples and products         | 1995           | 2                                                                     |
| 19               | Bolivia | Plantains                       | 1995           | 75                                                                    |
| 19               | Bolivia | Potatoes and products           | 1995           | 79                                                                    |
| 19               | Bolivia | Poultry Meat                    | 1995           | 53                                                                    |
| 19               | Bolivia | Pulses                          | 1995           | 19                                                                    |
| 19               | Bolivia | Pulses, Other and products      | 1995           | 12                                                                    |
| 19               | Bolivia | Rice (Milled Equivalent)        | 1995           | 217                                                                   |
| 19               | Bolivia | Roots, Other                    | 1995           | 13                                                                    |
| 19               | Bolivia | Soyabean Oil                    | 1995           | 61                                                                    |
| 19               | Bolivia | Starchy Roots                   | 1995           | 138                                                                   |
| 19               | Bolivia | Stimulants                      | 1995           | 7                                                                     |
| 19               | Bolivia | Sugar & Sweeteners              | 1995           | 280                                                                   |
| 19               | Bolivia | Sugar (Raw Equivalent)          | 1995           | 278                                                                   |
| 19               | Bolivia | Sunflowerseed Oil               | 1995           | 41                                                                    |
| 19               | Bolivia | Sweet potatoes                  | 1995           | 3                                                                     |
| 19               | Bolivia | Sweeteners, Other               | 1995           | 2                                                                     |
| 19               | Bolivia | Tomatoes and products           | 1995           | 4                                                                     |
| 19               | Bolivia | Treenuts                        | 1995           | 26                                                                    |
| 19               | Bolivia | Vegetable Oils                  | 1995           | 118                                                                   |
| 19               | Bolivia | Vegetables                      | 1995           | 42                                                                    |
| 19               | Bolivia | Vegetables, Other               | 1995           | 32                                                                    |
| 19               | Bolivia | Vegetal Products                | 1995           | 1,782                                                                 |
| 19               | Bolivia | Wheat and products              | 1995           | 415                                                                   |
| 19               | Bolivia | Wine                            | 1995           | 1                                                                     |
| 19               | Bolivia | Alcoholic Beverages             | 1996           | 39                                                                    |
| 19               | Bolivia | Animal fats                     | 1996           | 46                                                                    |
| 19               | Bolivia | Animal Products                 | 1996           | 338                                                                   |
| 19               | Bolivia | Apples and products             | 1996           | 2                                                                     |
| 19               | Bolivia | Bananas                         | 1996           | 25                                                                    |
| 19               | Bolivia | Barley and products             | 1996           | 1                                                                     |
| 19               | Bolivia | Beans                           | 1996           | 2                                                                     |
| 19               | Bolivia | Beer                            | 1996           | 19                                                                    |
| 19               | Bolivia | Beverages, Alcoholic            | 1996           | 20                                                                    |
| 19               | Bolivia | Bovine Meat                     | 1996           | 86                                                                    |
| 19               | Bolivia | Butter, Ghee                    | 1996           | 1                                                                     |
| 19               | Bolivia | Cassava and products            | 1996           | 43                                                                    |
| 19               | Bolivia | Cereals - Excluding Beer        | 1996           | 864                                                                   |
| 19               | Bolivia | Cereals, Other                  | 1996           | 27                                                                    |
| 19               | Bolivia | Cocoa Beans and products        | 1996           | 4                                                                     |
| 19               | Bolivia | Coffee and products             | 1996           | 3                                                                     |
| 19               | Bolivia | Cottonseed Oil                  | 1996           | 21                                                                    |
| 19               | Bolivia | Eggs                            | 1996           | 25                                                                    |
| 19               | Bolivia | Fats, Animals, Raw              | 1996           | 44                                                                    |
| 19               | Bolivia | Fish, Seafood                   | 1996           | 2                                                                     |
| 19               | Bolivia | Freshwater Fish                 | 1996           | 1                                                                     |
| 19               | Bolivia | Fruits - Excluding Wine         | 1996           | 137                                                                   |
| 19               | Bolivia | Fruits, Other                   | 1996           | 12                                                                    |
| 19               | Bolivia | Grand Total                     | 1996           | 2,047                                                                 |
| 19               | Bolivia | Grapefruit and products         | 1996           | 2                                                                     |
| 19               | Bolivia | Grapes and products (excl wine) | 1996           | 4                                                                     |
| 19               | Bolivia | Groundnuts (Shelled Eq)         | 1996           | 14                                                                    |
| 19               | Bolivia | Honey                           | 1996           | 1                                                                     |
| 19               | Bolivia | Lemons, Limes and products      | 1996           | 3                                                                     |
| 19               | Bolivia | Maize and products              | 1996           | 319                                                                   |
| 19               | Bolivia | Meat                            | 1996           | 195                                                                   |
| 19               | Bolivia | Meat, Other                     | 1996           | 3                                                                     |
| 19               | Bolivia | Milk - Excluding Butter         | 1996           | 57                                                                    |
| 19               | Bolivia | Miscellaneous                   | 1996           | 1                                                                     |
| 19               | Bolivia | Mutton & Goat Meat              | 1996           | 14                                                                    |
| 19               | Bolivia | Oats                            | 1996           | 3                                                                     |
| 19               | Bolivia | Offals                          | 1996           | 12                                                                    |
| 19               | Bolivia | Oilcrops                        | 1996           | 15                                                                    |
| 19               | Bolivia | Onions                          | 1996           | 6                                                                     |
| 19               | Bolivia | Oranges, Mandarines             | 1996           | 12                                                                    |
| 19               | Bolivia | Peas                            | 1996           | 4                                                                     |
| 19               | Bolivia | Pelagic Fish                    | 1996           | 1                                                                     |
| 19               | Bolivia | Pigmeat                         | 1996           | 35                                                                    |
| 19               | Bolivia | Pineapples and products         | 1996           | 2                                                                     |
| 19               | Bolivia | Plantains                       | 1996           | 75                                                                    |
| 19               | Bolivia | Potatoes and products           | 1996           | 83                                                                    |
| 19               | Bolivia | Poultry Meat                    | 1996           | 57                                                                    |
| 19               | Bolivia | Pulses                          | 1996           | 17                                                                    |
| 19               | Bolivia | Pulses, Other and products      | 1996           | 10                                                                    |
| 19               | Bolivia | Rice (Milled Equivalent)        | 1996           | 245                                                                   |
| 19               | Bolivia | Roots, Other                    | 1996           | 12                                                                    |
| 19               | Bolivia | Soyabean Oil                    | 1996           | 70                                                                    |
| 19               | Bolivia | Starchy Roots                   | 1996           | 141                                                                   |
| 19               | Bolivia | Stimulants                      | 1996           | 7                                                                     |
| 19               | Bolivia | Sugar & Sweeteners              | 1996           | 278                                                                   |
| 19               | Bolivia | Sugar (Raw Equivalent)          | 1996           | 275                                                                   |

Dietary calcium and zinc deficiency risks are decreasing but remain prevalent

| FAO Country code | Country | Food item                       | Reference year | Net energy supply (kcal capita <sup>-1</sup> d <sup>-1</sup> ) |
|------------------|---------|---------------------------------|----------------|----------------------------------------------------------------|
| 19               | Bolivia | Sunflowerseed Oil               | 1996           | 41                                                             |
| 19               | Bolivia | Sweet potatoes                  | 1996           | 3                                                              |
| 19               | Bolivia | Sweeteners, Other               | 1996           | 2                                                              |
| 19               | Bolivia | Tomatoes and products           | 1996           | 5                                                              |
| 19               | Bolivia | Treenuts                        | 1996           | 33                                                             |
| 19               | Bolivia | Vegetable Oils                  | 1996           | 133                                                            |
| 19               | Bolivia | Vegetables                      | 1996           | 44                                                             |
| 19               | Bolivia | Vegetables, Other               | 1996           | 33                                                             |
| 19               | Bolivia | Vegetal Products                | 1996           | 1,709                                                          |
| 19               | Bolivia | Wheat and products              | 1996           | 269                                                            |
| 19               | Bolivia | Wine                            | 1996           | 1                                                              |
| 19               | Bolivia | Alcoholic Beverages             | 1997           | 38                                                             |
| 19               | Bolivia | Animal fats                     | 1997           | 35                                                             |
| 19               | Bolivia | Animal Products                 | 1997           | 332                                                            |
| 19               | Bolivia | Apples and products             | 1997           | 3                                                              |
| 19               | Bolivia | Bananas                         | 1997           | 24                                                             |
| 19               | Bolivia | Beans                           | 1997           | 2                                                              |
| 19               | Bolivia | Beer                            | 1997           | 20                                                             |
| 19               | Bolivia | Beverages, Alcoholic            | 1997           | 17                                                             |
| 19               | Bolivia | Bovine Meat                     | 1997           | 87                                                             |
| 19               | Bolivia | Butter, Ghee                    | 1997           | 2                                                              |
| 19               | Bolivia | Cassava and products            | 1997           | 39                                                             |
| 19               | Bolivia | Cereals - Excluding Beer        | 1997           | 869                                                            |
| 19               | Bolivia | Cereals, Other                  | 1997           | 29                                                             |
| 19               | Bolivia | Cocoa Beans and products        | 1997           | 4                                                              |
| 19               | Bolivia | Coffee and products             | 1997           | 3                                                              |
| 19               | Bolivia | Cottonseed Oil                  | 1997           | 19                                                             |
| 19               | Bolivia | Demersal Fish                   | 1997           | 1                                                              |
| 19               | Bolivia | Eggs                            | 1997           | 26                                                             |
| 19               | Bolivia | Fats, Animals, Raw              | 1997           | 34                                                             |
| 19               | Bolivia | Fish, Seafood                   | 1997           | 3                                                              |
| 19               | Bolivia | Freshwater Fish                 | 1997           | 1                                                              |
| 19               | Bolivia | Fruits - Excluding Wine         | 1997           | 142                                                            |
| 19               | Bolivia | Fruits, Other                   | 1997           | 12                                                             |
| 19               | Bolivia | Grand Total                     | 1997           | 2,055                                                          |
| 19               | Bolivia | Grapefruit and products         | 1997           | 1                                                              |
| 19               | Bolivia | Grapes and products (excl wine) | 1997           | 4                                                              |
| 19               | Bolivia | Groundnuts (Shelled Eq)         | 1997           | 15                                                             |
| 19               | Bolivia | Honey                           | 1997           | 1                                                              |
| 19               | Bolivia | Lemons, Limes and products      | 1997           | 3                                                              |
| 19               | Bolivia | Maize and products              | 1997           | 325                                                            |
| 19               | Bolivia | Meat                            | 1997           | 201                                                            |
| 19               | Bolivia | Meat, Other                     | 1997           | 3                                                              |
| 19               | Bolivia | Milk - Excluding Butter         | 1997           | 55                                                             |
| 19               | Bolivia | Miscellaneous                   | 1997           | 2                                                              |
| 19               | Bolivia | Mutton & Goat Meat              | 1997           | 14                                                             |
| 19               | Bolivia | Oats                            | 1997           | 3                                                              |
| 19               | Bolivia | Offals                          | 1997           | 12                                                             |
| 19               | Bolivia | Oilcrops                        | 1997           | 16                                                             |
| 19               | Bolivia | Oilcrops Oil, Other             | 1997           | 2                                                              |
| 19               | Bolivia | Onions                          | 1997           | 6                                                              |
| 19               | Bolivia | Oranges, Mandarines             | 1997           | 13                                                             |
| 19               | Bolivia | Peas                            | 1997           | 4                                                              |
| 19               | Bolivia | Pelagic Fish                    | 1997           | 1                                                              |
| 19               | Bolivia | Pigmeat                         | 1997           | 35                                                             |
| 19               | Bolivia | Pineapples and products         | 1997           | 4                                                              |
| 19               | Bolivia | Plantains                       | 1997           | 77                                                             |
| 19               | Bolivia | Potatoes and products           | 1997           | 81                                                             |
| 19               | Bolivia | Poultry Meat                    | 1997           | 61                                                             |
| 19               | Bolivia | Pulses                          | 1997           | 22                                                             |
| 19               | Bolivia | Pulses, Other and products      | 1997           | 15                                                             |
| 19               | Bolivia | Rice (Milled Equivalent)        | 1997           | 239                                                            |
| 19               | Bolivia | Roots, Other                    | 1997           | 11                                                             |
| 19               | Bolivia | Soyabean Oil                    | 1997           | 69                                                             |
| 19               | Bolivia | Starchy Roots                   | 1997           | 134                                                            |
| 19               | Bolivia | Stimulants                      | 1997           | 8                                                              |
| 19               | Bolivia | Sugar & Sweeteners              | 1997           | 276                                                            |
| 19               | Bolivia | Sugar (Raw Equivalent)          | 1997           | 275                                                            |
| 19               | Bolivia | Sunflowerseed Oil               | 1997           | 48                                                             |
| 19               | Bolivia | Sweet potatoes                  | 1997           | 3                                                              |
| 19               | Bolivia | Sweeteners, Other               | 1997           | 1                                                              |
| 19               | Bolivia | Tomatoes and products           | 1997           | 5                                                              |
| 19               | Bolivia | Treenuts                        | 1997           | 32                                                             |
| 19               | Bolivia | Vegetable Oils                  | 1997           | 140                                                            |
| 19               | Bolivia | Vegetables                      | 1997           | 45                                                             |
| 19               | Bolivia | Vegetables, Other               | 1997           | 33                                                             |
| 19               | Bolivia | Vegetal Products                | 1997           | 1,723                                                          |
| 19               | Bolivia | Wheat and products              | 1997           | 273                                                            |
| 19               | Bolivia | Wine                            | 1997           | 1                                                              |
| 19               | Bolivia | Alcoholic Beverages             | 1998           | 38                                                             |
| 19               | Bolivia | Animal fats                     | 1998           | 36                                                             |
| 19               | Bolivia | Animal Products                 | 1998           | 331                                                            |
| 19               | Bolivia | Apples and products             | 1998           | 4                                                              |
| 19               | Bolivia | Bananas                         | 1998           | 24                                                             |
| 19               | Bolivia | Beans                           | 1998           | 2                                                              |
| 19               | Bolivia | Beer                            | 1998           | 20                                                             |
| 19               | Bolivia | Beverages, Alcoholic            | 1998           | 17                                                             |
| 19               | Bolivia | Bovine Meat                     | 1998           | 89                                                             |
| 19               | Bolivia | Butter, Ghee                    | 1998           | 2                                                              |
| 19               | Bolivia | Cassava and products            | 1998           | 43                                                             |
| 19               | Bolivia | Cereals - Excluding Beer        | 1998           | 837                                                            |
| 19               | Bolivia | Cereals, Other                  | 1998           | 25                                                             |
| 19               | Bolivia | Cocoa Beans and products        | 1998           | 4                                                              |
| 19               | Bolivia | Coffee and products             | 1998           | 3                                                              |
| 19               | Bolivia | Cottonseed Oil                  | 1998           | 15                                                             |
| 19               | Bolivia | Eggs                            | 1998           | 13                                                             |
| 19               | Bolivia | Fats, Animals, Raw              | 1998           | 34                                                             |



Dietary calcium and zinc deficiency risks are decreasing but remain prevalent

| FAO Country code | Country | Food item                       | Reference year | Net energy supply (kcal capita <sup>-1</sup> d <sup>-1</sup> ) |
|------------------|---------|---------------------------------|----------------|----------------------------------------------------------------|
| 19               | Bolivia | Fish, Seafood                   | 1998           | 3                                                              |
| 19               | Bolivia | Freshwater Fish                 | 1998           | 1                                                              |
| 19               | Bolivia | Fruits - Excluding Wine         | 1998           | 139                                                            |
| 19               | Bolivia | Fruits, Other                   | 1998           | 12                                                             |
| 19               | Bolivia | Grand Total                     | 1998           | 1,951                                                          |
| 19               | Bolivia | Grapefruit and products         | 1998           | 1                                                              |
| 19               | Bolivia | Grapes and products (excl wine) | 1998           | 4                                                              |
| 19               | Bolivia | Groundnuts (Shelled Eq)         | 1998           | 13                                                             |
| 19               | Bolivia | Honey                           | 1998           | 1                                                              |
| 19               | Bolivia | Lemons, Limes and products      | 1998           | 3                                                              |
| 19               | Bolivia | Maize and products              | 1998           | 306                                                            |
| 19               | Bolivia | Marine Fish, Other              | 1998           | 1                                                              |
| 19               | Bolivia | Meat                            | 1998           | 213                                                            |
| 19               | Bolivia | Meat, Other                     | 1998           | 3                                                              |
| 19               | Bolivia | Milk - Excluding Butter         | 1998           | 55                                                             |
| 19               | Bolivia | Miscellaneous                   | 1998           | 2                                                              |
| 19               | Bolivia | Mutton & Goat Meat              | 1998           | 14                                                             |
| 19               | Bolivia | Oats                            | 1998           | 3                                                              |
| 19               | Bolivia | Offals                          | 1998           | 12                                                             |
| 19               | Bolivia | Oilcrops                        | 1998           | 14                                                             |
| 19               | Bolivia | Oilcrops Oil, Other             | 1998           | 2                                                              |
| 19               | Bolivia | Onions                          | 1998           | 6                                                              |
| 19               | Bolivia | Oranges, Mandarines             | 1998           | 13                                                             |
| 19               | Bolivia | Peas                            | 1998           | 5                                                              |
| 19               | Bolivia | Pelagic Fish                    | 1998           | 1                                                              |
| 19               | Bolivia | Pepper                          | 1998           | 1                                                              |
| 19               | Bolivia | Pigmeat                         | 1998           | 37                                                             |
| 19               | Bolivia | Pineapples and products         | 1998           | 4                                                              |
| 19               | Bolivia | Plantains                       | 1998           | 74                                                             |
| 19               | Bolivia | Potatoes and products           | 1998           | 72                                                             |
| 19               | Bolivia | Poultry Meat                    | 1998           | 70                                                             |
| 19               | Bolivia | Pulses                          | 1998           | 18                                                             |
| 19               | Bolivia | Pulses, Other and products      | 1998           | 11                                                             |
| 19               | Bolivia | Rice (Milled Equivalent)        | 1998           | 224                                                            |
| 19               | Bolivia | Roots, Other                    | 1998           | 9                                                              |
| 19               | Bolivia | Soyabean Oil                    | 1998           | 43                                                             |
| 19               | Bolivia | Spices                          | 1998           | 1                                                              |
| 19               | Bolivia | Starchy Roots                   | 1998           | 127                                                            |
| 19               | Bolivia | Stimulants                      | 1998           | 7                                                              |
| 19               | Bolivia | Sugar & Sweeteners              | 1998           | 272                                                            |
| 19               | Bolivia | Sugar (Raw Equivalent)          | 1998           | 270                                                            |
| 19               | Bolivia | Sunflowerseed Oil               | 1998           | 40                                                             |
| 19               | Bolivia | Sweet potatoes                  | 1998           | 2                                                              |
| 19               | Bolivia | Sweeteners, Other               | 1998           | 1                                                              |
| 19               | Bolivia | Tomatoes and products           | 1998           | 5                                                              |
| 19               | Bolivia | Treenuts                        | 1998           | 26                                                             |
| 19               | Bolivia | Vegetable Oils                  | 1998           | 100                                                            |
| 19               | Bolivia | Vegetables                      | 1998           | 42                                                             |
| 19               | Bolivia | Vegetables, Other               | 1998           | 31                                                             |
| 19               | Bolivia | Vegetal Products                | 1998           | 1,620                                                          |
| 19               | Bolivia | Wheat and products              | 1998           | 278                                                            |
| 19               | Bolivia | Wine                            | 1998           | 1                                                              |
| 19               | Bolivia | Alcoholic Beverages             | 1999           | 42                                                             |
| 19               | Bolivia | Animal fats                     | 1999           | 36                                                             |
| 19               | Bolivia | Animal Products                 | 1999           | 332                                                            |
| 19               | Bolivia | Apples and products             | 1999           | 4                                                              |
| 19               | Bolivia | Bananas                         | 1999           | 23                                                             |
| 19               | Bolivia | Beans                           | 1999           | 2                                                              |
| 19               | Bolivia | Beer                            | 1999           | 26                                                             |
| 19               | Bolivia | Beverages, Alcoholic            | 1999           | 16                                                             |
| 19               | Bolivia | Bovine Meat                     | 1999           | 88                                                             |
| 19               | Bolivia | Butter, Ghee                    | 1999           | 1                                                              |
| 19               | Bolivia | Cassava and products            | 1999           | 46                                                             |
| 19               | Bolivia | Cereals - Excluding Beer        | 1999           | 882                                                            |
| 19               | Bolivia | Cereals, Other                  | 1999           | 25                                                             |
| 19               | Bolivia | Cocoa Beans and products        | 1999           | 6                                                              |
| 19               | Bolivia | Coffee and products             | 1999           | 3                                                              |
| 19               | Bolivia | Cottonseed Oil                  | 1999           | 11                                                             |
| 19               | Bolivia | Eggs                            | 1999           | 13                                                             |
| 19               | Bolivia | Fats, Animals, Raw              | 1999           | 35                                                             |
| 19               | Bolivia | Fish, Seafood                   | 1999           | 3                                                              |
| 19               | Bolivia | Freshwater Fish                 | 1999           | 1                                                              |
| 19               | Bolivia | Fruits - Excluding Wine         | 1999           | 139                                                            |
| 19               | Bolivia | Fruits, Other                   | 1999           | 12                                                             |
| 19               | Bolivia | Grand Total                     | 1999           | 2,037                                                          |
| 19               | Bolivia | Grapefruit and products         | 1999           | 1                                                              |
| 19               | Bolivia | Grapes and products (excl wine) | 1999           | 4                                                              |
| 19               | Bolivia | Groundnuts (Shelled Eq)         | 1999           | 12                                                             |
| 19               | Bolivia | Honey                           | 1999           | 1                                                              |
| 19               | Bolivia | Lemons, Limes and products      | 1999           | 3                                                              |
| 19               | Bolivia | Maize and products              | 1999           | 271                                                            |
| 19               | Bolivia | Marine Fish, Other              | 1999           | 1                                                              |
| 19               | Bolivia | Meat                            | 1999           | 213                                                            |
| 19               | Bolivia | Meat, Other                     | 1999           | 3                                                              |
| 19               | Bolivia | Milk - Excluding Butter         | 1999           | 55                                                             |
| 19               | Bolivia | Miscellaneous                   | 1999           | 3                                                              |
| 19               | Bolivia | Mutton & Goat Meat              | 1999           | 14                                                             |
| 19               | Bolivia | Oats                            | 1999           | 3                                                              |
| 19               | Bolivia | Offals                          | 1999           | 12                                                             |
| 19               | Bolivia | Oilcrops                        | 1999           | 13                                                             |
| 19               | Bolivia | Oilcrops Oil, Other             | 1999           | 3                                                              |
| 19               | Bolivia | Onions                          | 1999           | 6                                                              |
| 19               | Bolivia | Oranges, Mandarines             | 1999           | 13                                                             |
| 19               | Bolivia | Peas                            | 1999           | 4                                                              |
| 19               | Bolivia | Pelagic Fish                    | 1999           | 1                                                              |
| 19               | Bolivia | Pepper                          | 1999           | 1                                                              |
| 19               | Bolivia | Pigmeat                         | 1999           | 37                                                             |

Dietary calcium and zinc deficiency risks are decreasing but remain prevalent

| FAO Country code | Country | Food item                       | Reference year | Net energy supply (kcal <i>capita</i> <sup>-1</sup> d <sup>-1</sup> ) |
|------------------|---------|---------------------------------|----------------|-----------------------------------------------------------------------|
| 19               | Bolivia | Pineapples and products         | 1999           | 5                                                                     |
| 19               | Bolivia | Plantains                       | 1999           | 74                                                                    |
| 19               | Bolivia | Potatoes and products           | 1999           | 94                                                                    |
| 19               | Bolivia | Poultry Meat                    | 1999           | 72                                                                    |
| 19               | Bolivia | Pulses                          | 1999           | 22                                                                    |
| 19               | Bolivia | Pulses, Other and products      | 1999           | 16                                                                    |
| 19               | Bolivia | Rice (Milled Equivalent)        | 1999           | 207                                                                   |
| 19               | Bolivia | Roots, Other                    | 1999           | 10                                                                    |
| 19               | Bolivia | Soyabean Oil                    | 1999           | 40                                                                    |
| 19               | Bolivia | Spices                          | 1999           | 1                                                                     |
| 19               | Bolivia | Starchy Roots                   | 1999           | 152                                                                   |
| 19               | Bolivia | Stimulants                      | 1999           | 10                                                                    |
| 19               | Bolivia | Sugar & Sweeteners              | 1999           | 272                                                                   |
| 19               | Bolivia | Sugar (Raw Equivalent)          | 1999           | 270                                                                   |
| 19               | Bolivia | Sunflowerseed Oil               | 1999           | 42                                                                    |
| 19               | Bolivia | Sweet potatoes                  | 1999           | 3                                                                     |
| 19               | Bolivia | Sweeteners, Other               | 1999           | 1                                                                     |
| 19               | Bolivia | Tomatoes and products           | 1999           | 5                                                                     |
| 19               | Bolivia | Treenuts                        | 1999           | 29                                                                    |
| 19               | Bolivia | Vegetable Oils                  | 1999           | 97                                                                    |
| 19               | Bolivia | Vegetables                      | 1999           | 43                                                                    |
| 19               | Bolivia | Vegetables, Other               | 1999           | 32                                                                    |
| 19               | Bolivia | Vegetal Products                | 1999           | 1,705                                                                 |
| 19               | Bolivia | Wheat and products              | 1999           | 375                                                                   |
| 19               | Bolivia | Wine                            | 1999           | 1                                                                     |
| 19               | Bolivia | Alcoholic Beverages             | 2000           | 44                                                                    |
| 19               | Bolivia | Animal fats                     | 2000           | 37                                                                    |
| 19               | Bolivia | Animal Products                 | 2000           | 331                                                                   |
| 19               | Bolivia | Apples and products             | 2000           | 3                                                                     |
| 19               | Bolivia | Bananas                         | 2000           | 23                                                                    |
| 19               | Bolivia | Beans                           | 2000           | 2                                                                     |
| 19               | Bolivia | Beer                            | 2000           | 25                                                                    |
| 19               | Bolivia | Beverages, Alcoholic            | 2000           | 18                                                                    |
| 19               | Bolivia | Bovine Meat                     | 2000           | 89                                                                    |
| 19               | Bolivia | Butter, Ghee                    | 2000           | 1                                                                     |
| 19               | Bolivia | Cassava and products            | 2000           | 47                                                                    |
| 19               | Bolivia | Cereals - Excluding Beer        | 2000           | 917                                                                   |
| 19               | Bolivia | Cereals, Other                  | 2000           | 27                                                                    |
| 19               | Bolivia | Cocoa Beans and products        | 2000           | 8                                                                     |
| 19               | Bolivia | Coconuts - Incl Copra           | 2000           | 1                                                                     |
| 19               | Bolivia | Coffee and products             | 2000           | 4                                                                     |
| 19               | Bolivia | Cottonseed Oil                  | 2000           | 12                                                                    |
| 19               | Bolivia | Eggs                            | 2000           | 12                                                                    |
| 19               | Bolivia | Fats, Animals, Raw              | 2000           | 36                                                                    |
| 19               | Bolivia | Fish, Seafood                   | 2000           | 6                                                                     |
| 19               | Bolivia | Freshwater Fish                 | 2000           | 1                                                                     |
| 19               | Bolivia | Fruits - Excluding Wine         | 2000           | 143                                                                   |
| 19               | Bolivia | Fruits, Other                   | 2000           | 13                                                                    |
| 19               | Bolivia | Grand Total                     | 2000           | 2,076                                                                 |
| 19               | Bolivia | Grapefruit and products         | 2000           | 1                                                                     |
| 19               | Bolivia | Grapes and products (excl wine) | 2000           | 5                                                                     |
| 19               | Bolivia | Groundnuts (Shelled Eq)         | 2000           | 14                                                                    |
| 19               | Bolivia | Honey                           | 2000           | 1                                                                     |
| 19               | Bolivia | Lemons, Limes and products      | 2000           | 3                                                                     |
| 19               | Bolivia | Maize and products              | 2000           | 277                                                                   |
| 19               | Bolivia | Marine Fish, Other              | 2000           | 2                                                                     |
| 19               | Bolivia | Meat                            | 2000           | 212                                                                   |
| 19               | Bolivia | Meat, Other                     | 2000           | 3                                                                     |
| 19               | Bolivia | Milk - Excluding Butter         | 2000           | 52                                                                    |
| 19               | Bolivia | Miscellaneous                   | 2000           | 3                                                                     |
| 19               | Bolivia | Mutton & Goat Meat              | 2000           | 14                                                                    |
| 19               | Bolivia | Oats                            | 2000           | 3                                                                     |
| 19               | Bolivia | Offals                          | 2000           | 12                                                                    |
| 19               | Bolivia | Oilcrops                        | 2000           | 15                                                                    |
| 19               | Bolivia | Oilcrops Oil, Other             | 2000           | 12                                                                    |
| 19               | Bolivia | Onions                          | 2000           | 6                                                                     |
| 19               | Bolivia | Oranges, Mandarines             | 2000           | 14                                                                    |
| 19               | Bolivia | Peas                            | 2000           | 5                                                                     |
| 19               | Bolivia | Pelagic Fish                    | 2000           | 3                                                                     |
| 19               | Bolivia | Pepper                          | 2000           | 1                                                                     |
| 19               | Bolivia | Pigmeat                         | 2000           | 37                                                                    |
| 19               | Bolivia | Pineapples and products         | 2000           | 5                                                                     |
| 19               | Bolivia | Plantains                       | 2000           | 75                                                                    |
| 19               | Bolivia | Potatoes and products           | 2000           | 90                                                                    |
| 19               | Bolivia | Poultry Meat                    | 2000           | 69                                                                    |
| 19               | Bolivia | Pulses                          | 2000           | 21                                                                    |
| 19               | Bolivia | Pulses, Other and products      | 2000           | 14                                                                    |
| 19               | Bolivia | Rice (Milled Equivalent)        | 2000           | 222                                                                   |
| 19               | Bolivia | Roots, Other                    | 2000           | 10                                                                    |
| 19               | Bolivia | Soyabean Oil                    | 2000           | 31                                                                    |
| 19               | Bolivia | Spices                          | 2000           | 1                                                                     |
| 19               | Bolivia | Starchy Roots                   | 2000           | 150                                                                   |
| 19               | Bolivia | Stimulants                      | 2000           | 12                                                                    |
| 19               | Bolivia | Sugar & Sweeteners              | 2000           | 281                                                                   |
| 19               | Bolivia | Sugar (Raw Equivalent)          | 2000           | 279                                                                   |
| 19               | Bolivia | Sunflowerseed Oil               | 2000           | 32                                                                    |
| 19               | Bolivia | Sweet potatoes                  | 2000           | 3                                                                     |
| 19               | Bolivia | Sweeteners, Other               | 2000           | 1                                                                     |
| 19               | Bolivia | Tomatoes and products           | 2000           | 6                                                                     |
| 19               | Bolivia | Treenuts                        | 2000           | 28                                                                    |
| 19               | Bolivia | Vegetable Oils                  | 2000           | 87                                                                    |
| 19               | Bolivia | Vegetables                      | 2000           | 43                                                                    |
| 19               | Bolivia | Vegetables, Other               | 2000           | 32                                                                    |
| 19               | Bolivia | Vegetal Products                | 2000           | 1,745                                                                 |
| 19               | Bolivia | Wheat and products              | 2000           | 388                                                                   |
| 19               | Bolivia | Wine                            | 2000           | 1                                                                     |
| 19               | Bolivia | Alcoholic Beverages             | 2001           | 41                                                                    |

Dietary calcium and zinc deficiency risks are decreasing but remain prevalent

| FAO Country code | Country | Food item                       | Reference year | Net energy supply (kcal capita <sup>-1</sup> d <sup>-1</sup> ) |
|------------------|---------|---------------------------------|----------------|----------------------------------------------------------------|
| 19               | Bolivia | Animal fats                     | 2001           | 43                                                             |
| 19               | Bolivia | Animal Products                 | 2001           | 327                                                            |
| 19               | Bolivia | Apples and products             | 2001           | 4                                                              |
| 19               | Bolivia | Bananas                         | 2001           | 22                                                             |
| 19               | Bolivia | Beans                           | 2001           | 1                                                              |
| 19               | Bolivia | Beer                            | 2001           | 24                                                             |
| 19               | Bolivia | Beverages, Alcoholic            | 2001           | 16                                                             |
| 19               | Bolivia | Bovine Meat                     | 2001           | 87                                                             |
| 19               | Bolivia | Butter, Ghee                    | 2001           | 1                                                              |
| 19               | Bolivia | Cassava and products            | 2001           | 43                                                             |
| 19               | Bolivia | Cereals - Excluding Beer        | 2001           | 934                                                            |
| 19               | Bolivia | Cereals, Other                  | 2001           | 23                                                             |
| 19               | Bolivia | Cocoa Beans and products        | 2001           | 7                                                              |
| 19               | Bolivia | Coffee and products             | 2001           | 4                                                              |
| 19               | Bolivia | Cottonseed Oil                  | 2001           | 13                                                             |
| 19               | Bolivia | Eggs                            | 2001           | 12                                                             |
| 19               | Bolivia | Fats, Animals, Raw              | 2001           | 41                                                             |
| 19               | Bolivia | Fish, Seafood                   | 2001           | 4                                                              |
| 19               | Bolivia | Freshwater Fish                 | 2001           | 1                                                              |
| 19               | Bolivia | Fruits - Excluding Wine         | 2001           | 145                                                            |
| 19               | Bolivia | Fruits, Other                   | 2001           | 13                                                             |
| 19               | Bolivia | Grand Total                     | 2001           | 2,083                                                          |
| 19               | Bolivia | Grapefruit and products         | 2001           | 1                                                              |
| 19               | Bolivia | Grapes and products (excl wine) | 2001           | 5                                                              |
| 19               | Bolivia | Groundnuts (Shelled Eq)         | 2001           | 11                                                             |
| 19               | Bolivia | Honey                           | 2001           | 1                                                              |
| 19               | Bolivia | Lemons, Limes and products      | 2001           | 3                                                              |
| 19               | Bolivia | Maize and products              | 2001           | 273                                                            |
| 19               | Bolivia | Marine Fish, Other              | 2001           | 1                                                              |
| 19               | Bolivia | Meat                            | 2001           | 214                                                            |
| 19               | Bolivia | Meat, Other                     | 2001           | 3                                                              |
| 19               | Bolivia | Milk - Excluding Butter         | 2001           | 41                                                             |
| 19               | Bolivia | Miscellaneous                   | 2001           | 3                                                              |
| 19               | Bolivia | Mutton & Goat Meat              | 2001           | 14                                                             |
| 19               | Bolivia | Oats                            | 2001           | 3                                                              |
| 19               | Bolivia | Offals                          | 2001           | 13                                                             |
| 19               | Bolivia | Oilcrops                        | 2001           | 12                                                             |
| 19               | Bolivia | Oilcrops Oil, Other             | 2001           | 7                                                              |
| 19               | Bolivia | Onions                          | 2001           | 6                                                              |
| 19               | Bolivia | Oranges, Mandarines             | 2001           | 14                                                             |
| 19               | Bolivia | Peas                            | 2001           | 5                                                              |
| 19               | Bolivia | Pelagic Fish                    | 2001           | 2                                                              |
| 19               | Bolivia | Pepper                          | 2001           | 1                                                              |
| 19               | Bolivia | Pigmeat                         | 2001           | 46                                                             |
| 19               | Bolivia | Pineapples and products         | 2001           | 5                                                              |
| 19               | Bolivia | Plantains                       | 2001           | 77                                                             |
| 19               | Bolivia | Potatoes and products           | 2001           | 87                                                             |
| 19               | Bolivia | Poultry Meat                    | 2001           | 64                                                             |
| 19               | Bolivia | Pulses                          | 2001           | 21                                                             |
| 19               | Bolivia | Pulses, Other and products      | 2001           | 15                                                             |
| 19               | Bolivia | Rice (Milled Equivalent)        | 2001           | 232                                                            |
| 19               | Bolivia | Roots, Other                    | 2001           | 9                                                              |
| 19               | Bolivia | Soyabean Oil                    | 2001           | 35                                                             |
| 19               | Bolivia | Spices                          | 2001           | 1                                                              |
| 19               | Bolivia | Starchy Roots                   | 2001           | 141                                                            |
| 19               | Bolivia | Stimulants                      | 2001           | 10                                                             |
| 19               | Bolivia | Sugar & Sweeteners              | 2001           | 286                                                            |
| 19               | Bolivia | Sugar (Raw Equivalent)          | 2001           | 284                                                            |
| 19               | Bolivia | Sunflowerseed Oil               | 2001           | 31                                                             |
| 19               | Bolivia | Sweet potatoes                  | 2001           | 3                                                              |
| 19               | Bolivia | Sweeteners, Other               | 2001           | 1                                                              |
| 19               | Bolivia | Tomatoes and products           | 2001           | 6                                                              |
| 19               | Bolivia | Treenuts                        | 2001           | 32                                                             |
| 19               | Bolivia | Vegetable Oils                  | 2001           | 87                                                             |
| 19               | Bolivia | Vegetables                      | 2001           | 42                                                             |
| 19               | Bolivia | Vegetables, Other               | 2001           | 31                                                             |
| 19               | Bolivia | Vegetal Products                | 2001           | 1,756                                                          |
| 19               | Bolivia | Wheat and products              | 2001           | 402                                                            |
| 19               | Bolivia | Wine                            | 2001           | 1                                                              |
| 19               | Bolivia | Alcoholic Beverages             | 2002           | 41                                                             |
| 19               | Bolivia | Animal fats                     | 2002           | 44                                                             |
| 19               | Bolivia | Animal Products                 | 2002           | 350                                                            |
| 19               | Bolivia | Apples and products             | 2002           | 4                                                              |
| 19               | Bolivia | Bananas                         | 2002           | 22                                                             |
| 19               | Bolivia | Beans                           | 2002           | 1                                                              |
| 19               | Bolivia | Beer                            | 2002           | 23                                                             |
| 19               | Bolivia | Beverages, Alcoholic            | 2002           | 17                                                             |
| 19               | Bolivia | Bovine Meat                     | 2002           | 88                                                             |
| 19               | Bolivia | Butter, Ghee                    | 2002           | 1                                                              |
| 19               | Bolivia | Cassava and products            | 2002           | 43                                                             |
| 19               | Bolivia | Cereals - Excluding Beer        | 2002           | 928                                                            |
| 19               | Bolivia | Cereals, Other                  | 2002           | 23                                                             |
| 19               | Bolivia | Cocoa Beans and products        | 2002           | 6                                                              |
| 19               | Bolivia | Coconuts - Incl Copra           | 2002           | 1                                                              |
| 19               | Bolivia | Coffee and products             | 2002           | 3                                                              |
| 19               | Bolivia | Cottonseed Oil                  | 2002           | 26                                                             |
| 19               | Bolivia | Eggs                            | 2002           | 12                                                             |
| 19               | Bolivia | Fats, Animals, Raw              | 2002           | 43                                                             |
| 19               | Bolivia | Fish, Seafood                   | 2002           | 4                                                              |
| 19               | Bolivia | Freshwater Fish                 | 2002           | 1                                                              |
| 19               | Bolivia | Fruits - Excluding Wine         | 2002           | 143                                                            |
| 19               | Bolivia | Fruits, Other                   | 2002           | 12                                                             |
| 19               | Bolivia | Grand Total                     | 2002           | 2,102                                                          |
| 19               | Bolivia | Grapefruit and products         | 2002           | 1                                                              |
| 19               | Bolivia | Grapes and products (excl wine) | 2002           | 5                                                              |
| 19               | Bolivia | Groundnuts (Shelled Eq)         | 2002           | 11                                                             |
| 19               | Bolivia | Honey                           | 2002           | 1                                                              |

Dietary calcium and zinc deficiency risks are decreasing but remain prevalent

| FAO Country code | Country | Food item                       | Reference year | Net energy supply (kcal <i>capita</i> <sup>-1</sup> d <sup>-1</sup> ) |
|------------------|---------|---------------------------------|----------------|-----------------------------------------------------------------------|
| 19               | Bolivia | Lemons, Limes and products      | 2002           | 3                                                                     |
| 19               | Bolivia | Maize and products              | 2002           | 273                                                                   |
| 19               | Bolivia | Marine Fish, Other              | 2002           | 2                                                                     |
| 19               | Bolivia | Meat                            | 2002           | 217                                                                   |
| 19               | Bolivia | Meat, Other                     | 2002           | 3                                                                     |
| 19               | Bolivia | Milk - Excluding Butter         | 2002           | 60                                                                    |
| 19               | Bolivia | Miscellaneous                   | 2002           | 3                                                                     |
| 19               | Bolivia | Mutton & Goat Meat              | 2002           | 14                                                                    |
| 19               | Bolivia | Oats                            | 2002           | 3                                                                     |
| 19               | Bolivia | Offals                          | 2002           | 13                                                                    |
| 19               | Bolivia | Oilcrops                        | 2002           | 12                                                                    |
| 19               | Bolivia | Oilcrops Oil, Other             | 2002           | 5                                                                     |
| 19               | Bolivia | Onions                          | 2002           | 6                                                                     |
| 19               | Bolivia | Oranges, Mandarines             | 2002           | 13                                                                    |
| 19               | Bolivia | Peas                            | 2002           | 5                                                                     |
| 19               | Bolivia | Pelagic Fish                    | 2002           | 1                                                                     |
| 19               | Bolivia | Pepper                          | 2002           | 1                                                                     |
| 19               | Bolivia | Pigmeat                         | 2002           | 47                                                                    |
| 19               | Bolivia | Pineapples and products         | 2002           | 5                                                                     |
| 19               | Bolivia | Plantains                       | 2002           | 78                                                                    |
| 19               | Bolivia | Potatoes and products           | 2002           | 91                                                                    |
| 19               | Bolivia | Poultry Meat                    | 2002           | 66                                                                    |
| 19               | Bolivia | Pulses                          | 2002           | 19                                                                    |
| 19               | Bolivia | Pulses, Other and products      | 2002           | 13                                                                    |
| 19               | Bolivia | Rice (Milled Equivalent)        | 2002           | 225                                                                   |
| 19               | Bolivia | Roots, Other                    | 2002           | 9                                                                     |
| 19               | Bolivia | Soyabean Oil                    | 2002           | 33                                                                    |
| 19               | Bolivia | Spices                          | 2002           | 1                                                                     |
| 19               | Bolivia | Starchy Roots                   | 2002           | 146                                                                   |
| 19               | Bolivia | Stimulants                      | 2002           | 9                                                                     |
| 19               | Bolivia | Sugar & Sweeteners              | 2002           | 280                                                                   |
| 19               | Bolivia | Sugar (Raw Equivalent)          | 2002           | 278                                                                   |
| 19               | Bolivia | Sunflowerseed Oil               | 2002           | 28                                                                    |
| 19               | Bolivia | Sweet potatoes                  | 2002           | 3                                                                     |
| 19               | Bolivia | Sweeteners, Other               | 2002           | 1                                                                     |
| 19               | Bolivia | Tomatoes and products           | 2002           | 6                                                                     |
| 19               | Bolivia | Treenuts                        | 2002           | 36                                                                    |
| 19               | Bolivia | Vegetable Oils                  | 2002           | 92                                                                    |
| 19               | Bolivia | Vegetables                      | 2002           | 42                                                                    |
| 19               | Bolivia | Vegetables, Other               | 2002           | 30                                                                    |
| 19               | Bolivia | Vegetal Products                | 2002           | 1,752                                                                 |
| 19               | Bolivia | Wheat and products              | 2002           | 404                                                                   |
| 19               | Bolivia | Alcoholic Beverages             | 2003           | 34                                                                    |
| 19               | Bolivia | Animal fats                     | 2003           | 55                                                                    |
| 19               | Bolivia | Animal Products                 | 2003           | 361                                                                   |
| 19               | Bolivia | Apples and products             | 2003           | 3                                                                     |
| 19               | Bolivia | Bananas                         | 2003           | 20                                                                    |
| 19               | Bolivia | Beans                           | 2003           | 1                                                                     |
| 19               | Bolivia | Beer                            | 2003           | 18                                                                    |
| 19               | Bolivia | Beverages, Alcoholic            | 2003           | 16                                                                    |
| 19               | Bolivia | Bovine Meat                     | 2003           | 88                                                                    |
| 19               | Bolivia | Butter, Ghee                    | 2003           | 1                                                                     |
| 19               | Bolivia | Cassava and products            | 2003           | 40                                                                    |
| 19               | Bolivia | Cereals - Excluding Beer        | 2003           | 950                                                                   |
| 19               | Bolivia | Cereals, Other                  | 2003           | 22                                                                    |
| 19               | Bolivia | Cocoa Beans and products        | 2003           | 7                                                                     |
| 19               | Bolivia | Coconuts - Incl Copra           | 2003           | 1                                                                     |
| 19               | Bolivia | Coffee and products             | 2003           | 3                                                                     |
| 19               | Bolivia | Cottonseed Oil                  | 2003           | 29                                                                    |
| 19               | Bolivia | Eggs                            | 2003           | 15                                                                    |
| 19               | Bolivia | Fats, Animals, Raw              | 2003           | 54                                                                    |
| 19               | Bolivia | Fish, Seafood                   | 2003           | 3                                                                     |
| 19               | Bolivia | Freshwater Fish                 | 2003           | 1                                                                     |
| 19               | Bolivia | Fruits - Excluding Wine         | 2003           | 132                                                                   |
| 19               | Bolivia | Fruits, Other                   | 2003           | 8                                                                     |
| 19               | Bolivia | Grand Total                     | 2003           | 2,109                                                                 |
| 19               | Bolivia | Grapefruit and products         | 2003           | 1                                                                     |
| 19               | Bolivia | Grapes and products (excl wine) | 2003           | 4                                                                     |
| 19               | Bolivia | Groundnuts (Shelled Eq)         | 2003           | 11                                                                    |
| 19               | Bolivia | Honey                           | 2003           | 1                                                                     |
| 19               | Bolivia | Lemons, Limes and products      | 2003           | 3                                                                     |
| 19               | Bolivia | Maize and products              | 2003           | 276                                                                   |
| 19               | Bolivia | Marine Fish, Other              | 2003           | 1                                                                     |
| 19               | Bolivia | Meat                            | 2003           | 217                                                                   |
| 19               | Bolivia | Meat, Other                     | 2003           | 3                                                                     |
| 19               | Bolivia | Milk - Excluding Butter         | 2003           | 57                                                                    |
| 19               | Bolivia | Miscellaneous                   | 2003           | 3                                                                     |
| 19               | Bolivia | Mutton & Goat Meat              | 2003           | 14                                                                    |
| 19               | Bolivia | Oats                            | 2003           | 4                                                                     |
| 19               | Bolivia | Offals                          | 2003           | 13                                                                    |
| 19               | Bolivia | Oilcrops                        | 2003           | 12                                                                    |
| 19               | Bolivia | Oilcrops Oil, Other             | 2003           | 2                                                                     |
| 19               | Bolivia | Onions                          | 2003           | 3                                                                     |
| 19               | Bolivia | Oranges, Mandarines             | 2003           | 9                                                                     |
| 19               | Bolivia | Peas                            | 2003           | 7                                                                     |
| 19               | Bolivia | Pelagic Fish                    | 2003           | 1                                                                     |
| 19               | Bolivia | Pepper                          | 2003           | 1                                                                     |
| 19               | Bolivia | Pigmeat                         | 2003           | 47                                                                    |
| 19               | Bolivia | Pineapples and products         | 2003           | 5                                                                     |
| 19               | Bolivia | Plantains                       | 2003           | 79                                                                    |
| 19               | Bolivia | Potatoes and products           | 2003           | 92                                                                    |
| 19               | Bolivia | Poultry Meat                    | 2003           | 65                                                                    |
| 19               | Bolivia | Pulses                          | 2003           | 23                                                                    |
| 19               | Bolivia | Pulses, Other and products      | 2003           | 15                                                                    |
| 19               | Bolivia | Rice (Milled Equivalent)        | 2003           | 242                                                                   |
| 19               | Bolivia | Roots, Other                    | 2003           | 8                                                                     |
| 19               | Bolivia | Soyabean Oil                    | 2003           | 30                                                                    |

Dietary calcium and zinc deficiency risks are decreasing but remain prevalent

| FAO Country code | Country | Food item                       | Reference year | Net energy supply (kcal <i>capita</i> <sup>-1</sup> d <sup>-1</sup> ) |
|------------------|---------|---------------------------------|----------------|-----------------------------------------------------------------------|
| 19               | Bolivia | Spices                          | 2003           | 1                                                                     |
| 19               | Bolivia | Spices, Other                   | 2003           | 1                                                                     |
| 19               | Bolivia | Starchy Roots                   | 2003           | 141                                                                   |
| 19               | Bolivia | Stimulants                      | 2003           | 10                                                                    |
| 19               | Bolivia | Sugar & Sweeteners              | 2003           | 276                                                                   |
| 19               | Bolivia | Sugar (Raw Equivalent)          | 2003           | 274                                                                   |
| 19               | Bolivia | Sunflowerseed Oil               | 2003           | 30                                                                    |
| 19               | Bolivia | Sweet potatoes                  | 2003           | 1                                                                     |
| 19               | Bolivia | Sweeteners, Other               | 2003           | 1                                                                     |
| 19               | Bolivia | Tomatoes and products           | 2003           | 6                                                                     |
| 19               | Bolivia | Treenuts                        | 2003           | 35                                                                    |
| 19               | Bolivia | Vegetable Oils                  | 2003           | 93                                                                    |
| 19               | Bolivia | Vegetables                      | 2003           | 36                                                                    |
| 19               | Bolivia | Vegetables, Other               | 2003           | 26                                                                    |
| 19               | Bolivia | Vegetal Products                | 2003           | 1,748                                                                 |
| 19               | Bolivia | Wheat and products              | 2003           | 406                                                                   |
| 19               | Bolivia | Wine                            | 2003           | 1                                                                     |
| 19               | Bolivia | Alcoholic Beverages             | 2004           | 31                                                                    |
| 19               | Bolivia | Animal fats                     | 2004           | 51                                                                    |
| 19               | Bolivia | Animal Products                 | 2004           | 360                                                                   |
| 19               | Bolivia | Apples and products             | 2004           | 3                                                                     |
| 19               | Bolivia | Bananas                         | 2004           | 18                                                                    |
| 19               | Bolivia | Beans                           | 2004           | 1                                                                     |
| 19               | Bolivia | Beer                            | 2004           | 22                                                                    |
| 19               | Bolivia | Beverages, Alcoholic            | 2004           | 8                                                                     |
| 19               | Bolivia | Bovine Meat                     | 2004           | 88                                                                    |
| 19               | Bolivia | Butter, Ghee                    | 2004           | 1                                                                     |
| 19               | Bolivia | Cassava and products            | 2004           | 43                                                                    |
| 19               | Bolivia | Cereals - Excluding Beer        | 2004           | 902                                                                   |
| 19               | Bolivia | Cereals, Other                  | 2004           | 20                                                                    |
| 19               | Bolivia | Cocoa Beans and products        | 2004           | 7                                                                     |
| 19               | Bolivia | Coffee and products             | 2004           | 3                                                                     |
| 19               | Bolivia | Cottonseed Oil                  | 2004           | 27                                                                    |
| 19               | Bolivia | Eggs                            | 2004           | 15                                                                    |
| 19               | Bolivia | Fats, Animals, Raw              | 2004           | 50                                                                    |
| 19               | Bolivia | Fish, Seafood                   | 2004           | 3                                                                     |
| 19               | Bolivia | Freshwater Fish                 | 2004           | 1                                                                     |
| 19               | Bolivia | Fruits - Excluding Wine         | 2004           | 121                                                                   |
| 19               | Bolivia | Fruits, Other                   | 2004           | 7                                                                     |
| 19               | Bolivia | Grand Total                     | 2004           | 2,042                                                                 |
| 19               | Bolivia | Grapes and products (excl wine) | 2004           | 4                                                                     |
| 19               | Bolivia | Groundnuts (Shelled Eq)         | 2004           | 11                                                                    |
| 19               | Bolivia | Honey                           | 2004           | 1                                                                     |
| 19               | Bolivia | Lemons, Limes and products      | 2004           | 1                                                                     |
| 19               | Bolivia | Maize and products              | 2004           | 255                                                                   |
| 19               | Bolivia | Marine Fish, Other              | 2004           | 1                                                                     |
| 19               | Bolivia | Meat                            | 2004           | 223                                                                   |
| 19               | Bolivia | Meat, Other                     | 2004           | 3                                                                     |
| 19               | Bolivia | Milk - Excluding Butter         | 2004           | 55                                                                    |
| 19               | Bolivia | Miscellaneous                   | 2004           | 3                                                                     |
| 19               | Bolivia | Mutton & Goat Meat              | 2004           | 14                                                                    |
| 19               | Bolivia | Oats                            | 2004           | 4                                                                     |
| 19               | Bolivia | Offals                          | 2004           | 13                                                                    |
| 19               | Bolivia | Oilcrops                        | 2004           | 12                                                                    |
| 19               | Bolivia | Oilcrops Oil, Other             | 2004           | 2                                                                     |
| 19               | Bolivia | Onions                          | 2004           | 3                                                                     |
| 19               | Bolivia | Oranges, Mandarines             | 2004           | 9                                                                     |
| 19               | Bolivia | Peas                            | 2004           | 5                                                                     |
| 19               | Bolivia | Pelagic Fish                    | 2004           | 1                                                                     |
| 19               | Bolivia | Pepper                          | 2004           | 1                                                                     |
| 19               | Bolivia | Pigmeat                         | 2004           | 48                                                                    |
| 19               | Bolivia | Pineapples and products         | 2004           | 1                                                                     |
| 19               | Bolivia | Plantains                       | 2004           | 79                                                                    |
| 19               | Bolivia | Potatoes and products           | 2004           | 92                                                                    |
| 19               | Bolivia | Poultry Meat                    | 2004           | 70                                                                    |
| 19               | Bolivia | Pulses                          | 2004           | 19                                                                    |
| 19               | Bolivia | Pulses, Other and products      | 2004           | 12                                                                    |
| 19               | Bolivia | Rice (Milled Equivalent)        | 2004           | 266                                                                   |
| 19               | Bolivia | Roots, Other                    | 2004           | 6                                                                     |
| 19               | Bolivia | Soyabean Oil                    | 2004           | 39                                                                    |
| 19               | Bolivia | Spices                          | 2004           | 1                                                                     |
| 19               | Bolivia | Starchy Roots                   | 2004           | 142                                                                   |
| 19               | Bolivia | Stimulants                      | 2004           | 10                                                                    |
| 19               | Bolivia | Sugar & Sweeteners              | 2004           | 276                                                                   |
| 19               | Bolivia | Sugar (Raw Equivalent)          | 2004           | 274                                                                   |
| 19               | Bolivia | Sunflowerseed Oil               | 2004           | 19                                                                    |
| 19               | Bolivia | Sweet potatoes                  | 2004           | 1                                                                     |
| 19               | Bolivia | Sweeteners, Other               | 2004           | 1                                                                     |
| 19               | Bolivia | Tomatoes and products           | 2004           | 6                                                                     |
| 19               | Bolivia | Treenuts                        | 2004           | 42                                                                    |
| 19               | Bolivia | Vegetable Oils                  | 2004           | 88                                                                    |
| 19               | Bolivia | Vegetables                      | 2004           | 36                                                                    |
| 19               | Bolivia | Vegetables, Other               | 2004           | 26                                                                    |
| 19               | Bolivia | Vegetal Products                | 2004           | 1,682                                                                 |
| 19               | Bolivia | Wheat and products              | 2004           | 357                                                                   |
| 19               | Bolivia | Wine                            | 2004           | 2                                                                     |
| 19               | Bolivia | Alcoholic Beverages             | 2005           | 33                                                                    |
| 19               | Bolivia | Animal fats                     | 2005           | 61                                                                    |
| 19               | Bolivia | Animal Products                 | 2005           | 390                                                                   |
| 19               | Bolivia | Apples and products             | 2005           | 3                                                                     |
| 19               | Bolivia | Bananas                         | 2005           | 16                                                                    |
| 19               | Bolivia | Beans                           | 2005           | 1                                                                     |
| 19               | Bolivia | Beer                            | 2005           | 24                                                                    |
| 19               | Bolivia | Beverages, Alcoholic            | 2005           | 8                                                                     |
| 19               | Bolivia | Bovine Meat                     | 2005           | 88                                                                    |
| 19               | Bolivia | Butter, Ghee                    | 2005           | 1                                                                     |
| 19               | Bolivia | Cassava and products            | 2005           | 43                                                                    |

Dietary calcium and zinc deficiency risks are decreasing but remain prevalent

| FAO Country code | Country | Food item                       | Reference year | Net energy supply (kcal capita <sup>-1</sup> d <sup>-1</sup> ) |
|------------------|---------|---------------------------------|----------------|----------------------------------------------------------------|
| 19               | Bolivia | Cereals - Excluding Beer        | 2005           | 935                                                            |
| 19               | Bolivia | Cereals, Other                  | 2005           | 19                                                             |
| 19               | Bolivia | Cocoa Beans and products        | 2005           | 7                                                              |
| 19               | Bolivia | Coconuts - Incl Copra           | 2005           | 1                                                              |
| 19               | Bolivia | Coffee and products             | 2005           | 3                                                              |
| 19               | Bolivia | Cottonseed Oil                  | 2005           | 26                                                             |
| 19               | Bolivia | Eggs                            | 2005           | 16                                                             |
| 19               | Bolivia | Fats, Animals, Raw              | 2005           | 59                                                             |
| 19               | Bolivia | Fish, Seafood                   | 2005           | 3                                                              |
| 19               | Bolivia | Freshwater Fish                 | 2005           | 1                                                              |
| 19               | Bolivia | Fruits - Excluding Wine         | 2005           | 119                                                            |
| 19               | Bolivia | Fruits, Other                   | 2005           | 6                                                              |
| 19               | Bolivia | Grand Total                     | 2005           | 2,096                                                          |
| 19               | Bolivia | Grapes and products (excl wine) | 2005           | 4                                                              |
| 19               | Bolivia | Groundnuts (Shelled Eq)         | 2005           | 9                                                              |
| 19               | Bolivia | Honey                           | 2005           | 1                                                              |
| 19               | Bolivia | Lemons, Limes and products      | 2005           | 1                                                              |
| 19               | Bolivia | Maize and products              | 2005           | 279                                                            |
| 19               | Bolivia | Marine Fish, Other              | 2005           | 2                                                              |
| 19               | Bolivia | Meat                            | 2005           | 237                                                            |
| 19               | Bolivia | Meat, Other                     | 2005           | 3                                                              |
| 19               | Bolivia | Milk - Excluding Butter         | 2005           | 60                                                             |
| 19               | Bolivia | Miscellaneous                   | 2005           | 3                                                              |
| 19               | Bolivia | Mutton & Goat Meat              | 2005           | 14                                                             |
| 19               | Bolivia | Oats                            | 2005           | 5                                                              |
| 19               | Bolivia | Offals                          | 2005           | 13                                                             |
| 19               | Bolivia | Oilcrops                        | 2005           | 10                                                             |
| 19               | Bolivia | Oilcrops Oil, Other             | 2005           | 3                                                              |
| 19               | Bolivia | Onions                          | 2005           | 3                                                              |
| 19               | Bolivia | Oranges, Mandarines             | 2005           | 9                                                              |
| 19               | Bolivia | Peas                            | 2005           | 6                                                              |
| 19               | Bolivia | Pelagic Fish                    | 2005           | 1                                                              |
| 19               | Bolivia | Pepper                          | 2005           | 1                                                              |
| 19               | Bolivia | Pigmeat                         | 2005           | 47                                                             |
| 19               | Bolivia | Pineapples and products         | 2005           | 1                                                              |
| 19               | Bolivia | Plantains                       | 2005           | 80                                                             |
| 19               | Bolivia | Potatoes and products           | 2005           | 92                                                             |
| 19               | Bolivia | Poultry Meat                    | 2005           | 85                                                             |
| 19               | Bolivia | Pulses                          | 2005           | 21                                                             |
| 19               | Bolivia | Pulses, Other and products      | 2005           | 14                                                             |
| 19               | Bolivia | Rice (Milled Equivalent)        | 2005           | 281                                                            |
| 19               | Bolivia | Roots, Other                    | 2005           | 7                                                              |
| 19               | Bolivia | Soyabean Oil                    | 2005           | 38                                                             |
| 19               | Bolivia | Spices                          | 2005           | 1                                                              |
| 19               | Bolivia | Starchy Roots                   | 2005           | 144                                                            |
| 19               | Bolivia | Stimulants                      | 2005           | 10                                                             |
| 19               | Bolivia | Sugar & Sweeteners              | 2005           | 275                                                            |
| 19               | Bolivia | Sugar (Raw Equivalent)          | 2005           | 273                                                            |
| 19               | Bolivia | Sunflowerseed Oil               | 2005           | 9                                                              |
| 19               | Bolivia | Sweet potatoes                  | 2005           | 1                                                              |
| 19               | Bolivia | Sweeteners, Other               | 2005           | 1                                                              |
| 19               | Bolivia | Tomatoes and products           | 2005           | 7                                                              |
| 19               | Bolivia | Treenuts                        | 2005           | 42                                                             |
| 19               | Bolivia | Vegetable Oils                  | 2005           | 76                                                             |
| 19               | Bolivia | Vegetables                      | 2005           | 37                                                             |
| 19               | Bolivia | Vegetables, Other               | 2005           | 27                                                             |
| 19               | Bolivia | Vegetal Products                | 2005           | 1,706                                                          |
| 19               | Bolivia | Wheat and products              | 2005           | 352                                                            |
| 19               | Bolivia | Wine                            | 2005           | 2                                                              |
| 19               | Bolivia | Alcoholic Beverages             | 2006           | 36                                                             |
| 19               | Bolivia | Animal fats                     | 2006           | 62                                                             |
| 19               | Bolivia | Animal Products                 | 2006           | 413                                                            |
| 19               | Bolivia | Apples and products             | 2006           | 2                                                              |
| 19               | Bolivia | Bananas                         | 2006           | 11                                                             |
| 19               | Bolivia | Beans                           | 2006           | 1                                                              |
| 19               | Bolivia | Beer                            | 2006           | 26                                                             |
| 19               | Bolivia | Beverages, Alcoholic            | 2006           | 8                                                              |
| 19               | Bolivia | Bovine Meat                     | 2006           | 98                                                             |
| 19               | Bolivia | Cassava and products            | 2006           | 43                                                             |
| 19               | Bolivia | Cereals - Excluding Beer        | 2006           | 1,005                                                          |
| 19               | Bolivia | Cereals, Other                  | 2006           | 17                                                             |
| 19               | Bolivia | Cocoa Beans and products        | 2006           | 7                                                              |
| 19               | Bolivia | Coconuts - Incl Copra           | 2006           | 1                                                              |
| 19               | Bolivia | Coffee and products             | 2006           | 3                                                              |
| 19               | Bolivia | Cottonseed Oil                  | 2006           | 26                                                             |
| 19               | Bolivia | Eggs                            | 2006           | 15                                                             |
| 19               | Bolivia | Fats, Animals, Raw              | 2006           | 62                                                             |
| 19               | Bolivia | Fish, Seafood                   | 2006           | 3                                                              |
| 19               | Bolivia | Freshwater Fish                 | 2006           | 1                                                              |
| 19               | Bolivia | Fruits - Excluding Wine         | 2006           | 112                                                            |
| 19               | Bolivia | Fruits, Other                   | 2006           | 6                                                              |
| 19               | Bolivia | Grand Total                     | 2006           | 2,146                                                          |
| 19               | Bolivia | Grapes and products (excl wine) | 2006           | 4                                                              |
| 19               | Bolivia | Groundnuts (Shelled Eq)         | 2006           | 9                                                              |
| 19               | Bolivia | Honey                           | 2006           | 1                                                              |
| 19               | Bolivia | Lemons, Limes and products      | 2006           | 1                                                              |
| 19               | Bolivia | Maize and products              | 2006           | 308                                                            |
| 19               | Bolivia | Marine Fish, Other              | 2006           | 2                                                              |
| 19               | Bolivia | Meat                            | 2006           | 276                                                            |
| 19               | Bolivia | Meat, Other                     | 2006           | 3                                                              |
| 19               | Bolivia | Milk - Excluding Butter         | 2006           | 42                                                             |
| 19               | Bolivia | Miscellaneous                   | 2006           | 3                                                              |
| 19               | Bolivia | Mutton & Goat Meat              | 2006           | 14                                                             |
| 19               | Bolivia | Oats                            | 2006           | 5                                                              |
| 19               | Bolivia | Offals                          | 2006           | 14                                                             |
| 19               | Bolivia | Oilcrops                        | 2006           | 10                                                             |
| 19               | Bolivia | Oilcrops Oil, Other             | 2006           | 1                                                              |

Dietary calcium and zinc deficiency risks are decreasing but remain prevalent

| FAO Country code | Country | Food item                       | Reference year | Net energy supply (kcal capita <sup>-1</sup> d <sup>-1</sup> ) |
|------------------|---------|---------------------------------|----------------|----------------------------------------------------------------|
| 19               | Bolivia | Onions                          | 2006           | 4                                                              |
| 19               | Bolivia | Oranges, Mandarines             | 2006           | 9                                                              |
| 19               | Bolivia | Peas                            | 2006           | 5                                                              |
| 19               | Bolivia | Pelagic Fish                    | 2006           | 1                                                              |
| 19               | Bolivia | Pepper                          | 2006           | 1                                                              |
| 19               | Bolivia | Pigmeat                         | 2006           | 48                                                             |
| 19               | Bolivia | Pineapples and products         | 2006           | 1                                                              |
| 19               | Bolivia | Plantains                       | 2006           | 78                                                             |
| 19               | Bolivia | Potatoes and products           | 2006           | 89                                                             |
| 19               | Bolivia | Poultry Meat                    | 2006           | 114                                                            |
| 19               | Bolivia | Pulses                          | 2006           | 19                                                             |
| 19               | Bolivia | Pulses, Other and products      | 2006           | 13                                                             |
| 19               | Bolivia | Rice (Milled Equivalent)        | 2006           | 307                                                            |
| 19               | Bolivia | Roots, Other                    | 2006           | 5                                                              |
| 19               | Bolivia | Soyabean Oil                    | 2006           | 36                                                             |
| 19               | Bolivia | Spices                          | 2006           | 1                                                              |
| 19               | Bolivia | Starchy Roots                   | 2006           | 139                                                            |
| 19               | Bolivia | Stimulants                      | 2006           | 11                                                             |
| 19               | Bolivia | Sugar & Sweeteners              | 2006           | 264                                                            |
| 19               | Bolivia | Sugar (Raw Equivalent)          | 2006           | 261                                                            |
| 19               | Bolivia | Sunflowerseed Oil               | 2006           | 9                                                              |
| 19               | Bolivia | Sweet potatoes                  | 2006           | 1                                                              |
| 19               | Bolivia | Sweeteners, Other               | 2006           | 2                                                              |
| 19               | Bolivia | Tomatoes and products           | 2006           | 6                                                              |
| 19               | Bolivia | Treenuts                        | 2006           | 33                                                             |
| 19               | Bolivia | Vegetable Oils                  | 2006           | 72                                                             |
| 19               | Bolivia | Vegetables                      | 2006           | 30                                                             |
| 19               | Bolivia | Vegetables, Other               | 2006           | 20                                                             |
| 19               | Bolivia | Vegetal Products                | 2006           | 1,734                                                          |
| 19               | Bolivia | Wheat and products              | 2006           | 367                                                            |
| 19               | Bolivia | Wine                            | 2006           | 2                                                              |
| 19               | Bolivia | Alcoholic Beverages             | 2007           | 38                                                             |
| 19               | Bolivia | Animal fats                     | 2007           | 60                                                             |
| 19               | Bolivia | Animal Products                 | 2007           | 445                                                            |
| 19               | Bolivia | Apples and products             | 2007           | 2                                                              |
| 19               | Bolivia | Bananas                         | 2007           | 11                                                             |
| 19               | Bolivia | Beans                           | 2007           | 1                                                              |
| 19               | Bolivia | Beer                            | 2007           | 28                                                             |
| 19               | Bolivia | Beverages, Alcoholic            | 2007           | 8                                                              |
| 19               | Bolivia | Bovine Meat                     | 2007           | 118                                                            |
| 19               | Bolivia | Cassava and products            | 2007           | 40                                                             |
| 19               | Bolivia | Cereals - Excluding Beer        | 2007           | 985                                                            |
| 19               | Bolivia | Cereals, Other                  | 2007           | 14                                                             |
| 19               | Bolivia | Cocoa Beans and products        | 2007           | 8                                                              |
| 19               | Bolivia | Coconuts - Incl Copra           | 2007           | 1                                                              |
| 19               | Bolivia | Coffee and products             | 2007           | 3                                                              |
| 19               | Bolivia | Cottonseed Oil                  | 2007           | 26                                                             |
| 19               | Bolivia | Eggs                            | 2007           | 16                                                             |
| 19               | Bolivia | Fats, Animals, Raw              | 2007           | 60                                                             |
| 19               | Bolivia | Fish, Seafood                   | 2007           | 3                                                              |
| 19               | Bolivia | Freshwater Fish                 | 2007           | 1                                                              |
| 19               | Bolivia | Fruits - Excluding Wine         | 2007           | 111                                                            |
| 19               | Bolivia | Fruits, Other                   | 2007           | 6                                                              |
| 19               | Bolivia | Grand Total                     | 2007           | 2,152                                                          |
| 19               | Bolivia | Grapes and products (excl wine) | 2007           | 4                                                              |
| 19               | Bolivia | Groundnut Oil                   | 2007           | 1                                                              |
| 19               | Bolivia | Groundnuts (Shelled Eq)         | 2007           | 9                                                              |
| 19               | Bolivia | Honey                           | 2007           | 1                                                              |
| 19               | Bolivia | Lemons, Limes and products      | 2007           | 1                                                              |
| 19               | Bolivia | Maize and products              | 2007           | 289                                                            |
| 19               | Bolivia | Marine Fish, Other              | 2007           | 1                                                              |
| 19               | Bolivia | Meat                            | 2007           | 309                                                            |
| 19               | Bolivia | Meat, Other                     | 2007           | 2                                                              |
| 19               | Bolivia | Milk - Excluding Butter         | 2007           | 41                                                             |
| 19               | Bolivia | Miscellaneous                   | 2007           | 3                                                              |
| 19               | Bolivia | Mutton & Goat Meat              | 2007           | 14                                                             |
| 19               | Bolivia | Oats                            | 2007           | 5                                                              |
| 19               | Bolivia | Offals                          | 2007           | 16                                                             |
| 19               | Bolivia | Oilcrops                        | 2007           | 10                                                             |
| 19               | Bolivia | Oilcrops Oil, Other             | 2007           | 1                                                              |
| 19               | Bolivia | Onions                          | 2007           | 3                                                              |
| 19               | Bolivia | Oranges, Mandarines             | 2007           | 9                                                              |
| 19               | Bolivia | Peas                            | 2007           | 6                                                              |
| 19               | Bolivia | Pepper                          | 2007           | 1                                                              |
| 19               | Bolivia | Pigmeat                         | 2007           | 48                                                             |
| 19               | Bolivia | Pineapples and products         | 2007           | 1                                                              |
| 19               | Bolivia | Plantains                       | 2007           | 77                                                             |
| 19               | Bolivia | Potatoes and products           | 2007           | 87                                                             |
| 19               | Bolivia | Poultry Meat                    | 2007           | 126                                                            |
| 19               | Bolivia | Pulses                          | 2007           | 21                                                             |
| 19               | Bolivia | Pulses, Other and products      | 2007           | 14                                                             |
| 19               | Bolivia | Rape and Mustardseed            | 2007           | 1                                                              |
| 19               | Bolivia | Rice (Milled Equivalent)        | 2007           | 272                                                            |
| 19               | Bolivia | Roots, Other                    | 2007           | 7                                                              |
| 19               | Bolivia | Soyabean Oil                    | 2007           | 33                                                             |
| 19               | Bolivia | Spices                          | 2007           | 1                                                              |
| 19               | Bolivia | Starchy Roots                   | 2007           | 135                                                            |
| 19               | Bolivia | Stimulants                      | 2007           | 11                                                             |
| 19               | Bolivia | Sugar & Sweeteners              | 2007           | 261                                                            |
| 19               | Bolivia | Sugar (Raw Equivalent)          | 2007           | 257                                                            |
| 19               | Bolivia | Sunflowerseed Oil               | 2007           | 12                                                             |
| 19               | Bolivia | Sweet potatoes                  | 2007           | 1                                                              |
| 19               | Bolivia | Sweeteners, Other               | 2007           | 3                                                              |
| 19               | Bolivia | Tomatoes and products           | 2007           | 6                                                              |
| 19               | Bolivia | Treenuts                        | 2007           | 28                                                             |
| 19               | Bolivia | Vegetable Oils                  | 2007           | 73                                                             |
| 19               | Bolivia | Vegetables                      | 2007           | 31                                                             |

Dietary calcium and zinc deficiency risks are decreasing but remain prevalent

| FAO Country code | Country | Food item                       | Reference year | Net energy supply (kcal capita <sup>-1</sup> d <sup>-1</sup> ) |
|------------------|---------|---------------------------------|----------------|----------------------------------------------------------------|
| 19               | Bolivia | Vegetables, Other               | 2007           | 21                                                             |
| 19               | Bolivia | Vegetal Products                | 2007           | 1,708                                                          |
| 19               | Bolivia | Wheat and products              | 2007           | 405                                                            |
| 19               | Bolivia | Wine                            | 2007           | 2                                                              |
| 19               | Bolivia | Alcoholic Beverages             | 2008           | 41                                                             |
| 19               | Bolivia | Animal fats                     | 2008           | 58                                                             |
| 19               | Bolivia | Animal Products                 | 2008           | 454                                                            |
| 19               | Bolivia | Apples and products             | 2008           | 2                                                              |
| 19               | Bolivia | Bananas                         | 2008           | 10                                                             |
| 19               | Bolivia | Beans                           | 2008           | 2                                                              |
| 19               | Bolivia | Beer                            | 2008           | 30                                                             |
| 19               | Bolivia | Beverages, Alcoholic            | 2008           | 9                                                              |
| 19               | Bolivia | Bovine Meat                     | 2008           | 119                                                            |
| 19               | Bolivia | Butter, Ghee                    | 2008           | 1                                                              |
| 19               | Bolivia | Cassava and products            | 2008           | 39                                                             |
| 19               | Bolivia | Cereals - Excluding Beer        | 2008           | 944                                                            |
| 19               | Bolivia | Cereals, Other                  | 2008           | 14                                                             |
| 19               | Bolivia | Cocoa Beans and products        | 2008           | 10                                                             |
| 19               | Bolivia | Coconuts - Incl Copra           | 2008           | 1                                                              |
| 19               | Bolivia | Coffee and products             | 2008           | 3                                                              |
| 19               | Bolivia | Cottonseed Oil                  | 2008           | 22                                                             |
| 19               | Bolivia | Eggs                            | 2008           | 16                                                             |
| 19               | Bolivia | Fats, Animals, Raw              | 2008           | 57                                                             |
| 19               | Bolivia | Fish, Seafood                   | 2008           | 5                                                              |
| 19               | Bolivia | Freshwater Fish                 | 2008           | 1                                                              |
| 19               | Bolivia | Fruits - Excluding Wine         | 2008           | 110                                                            |
| 19               | Bolivia | Fruits, Other                   | 2008           | 6                                                              |
| 19               | Bolivia | Grand Total                     | 2008           | 2,137                                                          |
| 19               | Bolivia | Grapes and products (excl wine) | 2008           | 3                                                              |
| 19               | Bolivia | Groundnut Oil                   | 2008           | 1                                                              |
| 19               | Bolivia | Groundnuts (Shelled Eq)         | 2008           | 8                                                              |
| 19               | Bolivia | Honey                           | 2008           | 1                                                              |
| 19               | Bolivia | Lemons, Limes and products      | 2008           | 1                                                              |
| 19               | Bolivia | Maize and products              | 2008           | 269                                                            |
| 19               | Bolivia | Marine Fish, Other              | 2008           | 2                                                              |
| 19               | Bolivia | Meat                            | 2008           | 316                                                            |
| 19               | Bolivia | Meat, Other                     | 2008           | 2                                                              |
| 19               | Bolivia | Milk - Excluding Butter         | 2008           | 43                                                             |
| 19               | Bolivia | Miscellaneous                   | 2008           | 3                                                              |
| 19               | Bolivia | Mutton & Goat Meat              | 2008           | 15                                                             |
| 19               | Bolivia | Oats                            | 2008           | 5                                                              |
| 19               | Bolivia | Offals                          | 2008           | 16                                                             |
| 19               | Bolivia | Oilcrops                        | 2008           | 9                                                              |
| 19               | Bolivia | Oilcrops Oil, Other             | 2008           | 5                                                              |
| 19               | Bolivia | Onions                          | 2008           | 3                                                              |
| 19               | Bolivia | Oranges, Mandarines             | 2008           | 9                                                              |
| 19               | Bolivia | Peas                            | 2008           | 5                                                              |
| 19               | Bolivia | Pelagic Fish                    | 2008           | 2                                                              |
| 19               | Bolivia | Pepper                          | 2008           | 1                                                              |
| 19               | Bolivia | Pigmeat                         | 2008           | 48                                                             |
| 19               | Bolivia | Pineapples and products         | 2008           | 1                                                              |
| 19               | Bolivia | Plantains                       | 2008           | 77                                                             |
| 19               | Bolivia | Potatoes and products           | 2008           | 88                                                             |
| 19               | Bolivia | Poultry Meat                    | 2008           | 133                                                            |
| 19               | Bolivia | Pulses                          | 2008           | 18                                                             |
| 19               | Bolivia | Pulses, Other and products      | 2008           | 11                                                             |
| 19               | Bolivia | Rice (Milled Equivalent)        | 2008           | 266                                                            |
| 19               | Bolivia | Roots, Other                    | 2008           | 6                                                              |
| 19               | Bolivia | Soyabean Oil                    | 2008           | 36                                                             |
| 19               | Bolivia | Spices                          | 2008           | 1                                                              |
| 19               | Bolivia | Starchy Roots                   | 2008           | 135                                                            |
| 19               | Bolivia | Stimulants                      | 2008           | 14                                                             |
| 19               | Bolivia | Sugar & Sweeteners              | 2008           | 264                                                            |
| 19               | Bolivia | Sugar (Raw Equivalent)          | 2008           | 259                                                            |
| 19               | Bolivia | Sunflowerseed Oil               | 2008           | 16                                                             |
| 19               | Bolivia | Sweet potatoes                  | 2008           | 1                                                              |
| 19               | Bolivia | Sweeteners, Other               | 2008           | 3                                                              |
| 19               | Bolivia | Tomatoes and products           | 2008           | 6                                                              |
| 19               | Bolivia | Treenuts                        | 2008           | 35                                                             |
| 19               | Bolivia | Vegetable Oils                  | 2008           | 80                                                             |
| 19               | Bolivia | Vegetables                      | 2008           | 30                                                             |
| 19               | Bolivia | Vegetables, Other               | 2008           | 20                                                             |
| 19               | Bolivia | Vegetal Products                | 2008           | 1,683                                                          |
| 19               | Bolivia | Wheat and products              | 2008           | 389                                                            |
| 19               | Bolivia | Wine                            | 2008           | 2                                                              |
| 19               | Bolivia | Alcoholic Beverages             | 2009           | 35                                                             |
| 19               | Bolivia | Animal fats                     | 2009           | 50                                                             |
| 19               | Bolivia | Animal Products                 | 2009           | 423                                                            |
| 19               | Bolivia | Apples and products             | 2009           | 3                                                              |
| 19               | Bolivia | Bananas                         | 2009           | 5                                                              |
| 19               | Bolivia | Beer                            | 2009           | 30                                                             |
| 19               | Bolivia | Beverages, Alcoholic            | 2009           | 3                                                              |
| 19               | Bolivia | Bovine Meat                     | 2009           | 95                                                             |
| 19               | Bolivia | Butter, Ghee                    | 2009           | 1                                                              |
| 19               | Bolivia | Cassava and products            | 2009           | 37                                                             |
| 19               | Bolivia | Cereals - Excluding Beer        | 2009           | 992                                                            |
| 19               | Bolivia | Cereals, Other                  | 2009           | 21                                                             |
| 19               | Bolivia | Cocoa Beans and products        | 2009           | 9                                                              |
| 19               | Bolivia | Coconuts - Incl Copra           | 2009           | 1                                                              |
| 19               | Bolivia | Coffee and products             | 2009           | 3                                                              |
| 19               | Bolivia | Cottonseed Oil                  | 2009           | 24                                                             |
| 19               | Bolivia | Eggs                            | 2009           | 17                                                             |
| 19               | Bolivia | Fats, Animals, Raw              | 2009           | 49                                                             |
| 19               | Bolivia | Fish, Seafood                   | 2009           | 5                                                              |
| 19               | Bolivia | Freshwater Fish                 | 2009           | 1                                                              |
| 19               | Bolivia | Fruits - Excluding Wine         | 2009           | 99                                                             |
| 19               | Bolivia | Fruits, Other                   | 2009           | 8                                                              |



Dietary calcium and zinc deficiency risks are decreasing but remain prevalent

| FAO Country code | Country | Food item                       | Reference year | Net energy supply (kcal capita <sup>-1</sup> d <sup>-1</sup> ) |
|------------------|---------|---------------------------------|----------------|----------------------------------------------------------------|
| 19               | Bolivia | Grand Total                     | 2009           | 2,141                                                          |
| 19               | Bolivia | Grapes and products (excl wine) | 2009           | 2                                                              |
| 19               | Bolivia | Groundnut Oil                   | 2009           | 2                                                              |
| 19               | Bolivia | Groundnuts (Shelled Eq)         | 2009           | 8                                                              |
| 19               | Bolivia | Honey                           | 2009           | 1                                                              |
| 19               | Bolivia | Lemons, Limes and products      | 2009           | 1                                                              |
| 19               | Bolivia | Maize and products              | 2009           | 295                                                            |
| 19               | Bolivia | Marine Fish, Other              | 2009           | 2                                                              |
| 19               | Bolivia | Meat                            | 2009           | 281                                                            |
| 19               | Bolivia | Meat, Other                     | 2009           | 2                                                              |
| 19               | Bolivia | Milk - Excluding Butter         | 2009           | 56                                                             |
| 19               | Bolivia | Miscellaneous                   | 2009           | 3                                                              |
| 19               | Bolivia | Mutton & Goat Meat              | 2009           | 9                                                              |
| 19               | Bolivia | Oats                            | 2009           | 4                                                              |
| 19               | Bolivia | Offals                          | 2009           | 14                                                             |
| 19               | Bolivia | Oilcrops                        | 2009           | 9                                                              |
| 19               | Bolivia | Oilcrops Oil, Other             | 2009           | 4                                                              |
| 19               | Bolivia | Onions                          | 2009           | 8                                                              |
| 19               | Bolivia | Oranges, Mandarines             | 2009           | 20                                                             |
| 19               | Bolivia | Peas                            | 2009           | 5                                                              |
| 19               | Bolivia | Pelagic Fish                    | 2009           | 1                                                              |
| 19               | Bolivia | Pepper                          | 2009           | 1                                                              |
| 19               | Bolivia | Pigmeat                         | 2009           | 34                                                             |
| 19               | Bolivia | Pineapples and products         | 2009           | 3                                                              |
| 19               | Bolivia | Plantains                       | 2009           | 55                                                             |
| 19               | Bolivia | Potatoes and products           | 2009           | 110                                                            |
| 19               | Bolivia | Poultry Meat                    | 2009           | 139                                                            |
| 19               | Bolivia | Pulses                          | 2009           | 18                                                             |
| 19               | Bolivia | Pulses, Other and products      | 2009           | 12                                                             |
| 19               | Bolivia | Rice (Milled Equivalent)        | 2009           | 277                                                            |
| 19               | Bolivia | Roots, Other                    | 2009           | 6                                                              |
| 19               | Bolivia | Soyabean Oil                    | 2009           | 27                                                             |
| 19               | Bolivia | Spices                          | 2009           | 1                                                              |
| 19               | Bolivia | Starchy Roots                   | 2009           | 155                                                            |
| 19               | Bolivia | Stimulants                      | 2009           | 13                                                             |
| 19               | Bolivia | Sugar & Sweeteners              | 2009           | 258                                                            |
| 19               | Bolivia | Sugar (Raw Equivalent)          | 2009           | 254                                                            |
| 19               | Bolivia | Sunflowerseed Oil               | 2009           | 15                                                             |
| 19               | Bolivia | Sweet potatoes                  | 2009           | 1                                                              |
| 19               | Bolivia | Sweeteners, Other               | 2009           | 3                                                              |
| 19               | Bolivia | Tomatoes and products           | 2009           | 3                                                              |
| 19               | Bolivia | Treenuts                        | 2009           | 32                                                             |
| 19               | Bolivia | Vegetable Oils                  | 2009           | 72                                                             |
| 19               | Bolivia | Vegetables                      | 2009           | 31                                                             |
| 19               | Bolivia | Vegetables, Other               | 2009           | 20                                                             |
| 19               | Bolivia | Vegetal Products                | 2009           | 1,718                                                          |
| 19               | Bolivia | Wheat and products              | 2009           | 396                                                            |
| 19               | Bolivia | Wine                            | 2009           | 1                                                              |
| 19               | Bolivia | Alcoholic Beverages             | 2010           | 36                                                             |
| 19               | Bolivia | Animal fats                     | 2010           | 46                                                             |
| 19               | Bolivia | Animal Products                 | 2010           | 444                                                            |
| 19               | Bolivia | Apples and products             | 2010           | 3                                                              |
| 19               | Bolivia | Bananas                         | 2010           | 8                                                              |
| 19               | Bolivia | Beans                           | 2010           | 18                                                             |
| 19               | Bolivia | Beer                            | 2010           | 30                                                             |
| 19               | Bolivia | Beverages, Alcoholic            | 2010           | 4                                                              |
| 19               | Bolivia | Bovine Meat                     | 2010           | 94                                                             |
| 19               | Bolivia | Cassava and products            | 2010           | 40                                                             |
| 19               | Bolivia | Cereals - Excluding Beer        | 2010           | 971                                                            |
| 19               | Bolivia | Cereals, Other                  | 2010           | 18                                                             |
| 19               | Bolivia | Cocoa Beans and products        | 2010           | 9                                                              |
| 19               | Bolivia | Coffee and products             | 2010           | 3                                                              |
| 19               | Bolivia | Cottonseed Oil                  | 2010           | 24                                                             |
| 19               | Bolivia | Eggs                            | 2010           | 18                                                             |
| 19               | Bolivia | Fats, Animals, Raw              | 2010           | 45                                                             |
| 19               | Bolivia | Fish, Seafood                   | 2010           | 4                                                              |
| 19               | Bolivia | Freshwater Fish                 | 2010           | 1                                                              |
| 19               | Bolivia | Fruits - Excluding Wine         | 2010           | 102                                                            |
| 19               | Bolivia | Fruits, Other                   | 2010           | 8                                                              |
| 19               | Bolivia | Grand Total                     | 2010           | 2,168                                                          |
| 19               | Bolivia | Grapes and products (excl wine) | 2010           | 2                                                              |
| 19               | Bolivia | Groundnut Oil                   | 2010           | 1                                                              |
| 19               | Bolivia | Groundnuts (Shelled Eq)         | 2010           | 6                                                              |
| 19               | Bolivia | Honey                           | 2010           | 1                                                              |
| 19               | Bolivia | Lemons, Limes and products      | 2010           | 1                                                              |
| 19               | Bolivia | Maize and products              | 2010           | 283                                                            |
| 19               | Bolivia | Marine Fish, Other              | 2010           | 2                                                              |
| 19               | Bolivia | Meat                            | 2010           | 303                                                            |
| 19               | Bolivia | Meat, Other                     | 2010           | 2                                                              |
| 19               | Bolivia | Milk - Excluding Butter         | 2010           | 63                                                             |
| 19               | Bolivia | Miscellaneous                   | 2010           | 4                                                              |
| 19               | Bolivia | Mutton & Goat Meat              | 2010           | 10                                                             |
| 19               | Bolivia | Oats                            | 2010           | 4                                                              |
| 19               | Bolivia | Offals                          | 2010           | 10                                                             |
| 19               | Bolivia | Oilcrops                        | 2010           | 7                                                              |
| 19               | Bolivia | Oilcrops Oil, Other             | 2010           | 2                                                              |
| 19               | Bolivia | Olive Oil                       | 2010           | 1                                                              |
| 19               | Bolivia | Onions                          | 2010           | 7                                                              |
| 19               | Bolivia | Oranges, Mandarines             | 2010           | 19                                                             |
| 19               | Bolivia | Peas                            | 2010           | 6                                                              |
| 19               | Bolivia | Pelagic Fish                    | 2010           | 1                                                              |
| 19               | Bolivia | Pepper                          | 2010           | 1                                                              |
| 19               | Bolivia | Pigmeat                         | 2010           | 35                                                             |
| 19               | Bolivia | Pineapples and products         | 2010           | 3                                                              |
| 19               | Bolivia | Plantains                       | 2010           | 57                                                             |
| 19               | Bolivia | Potatoes and products           | 2010           | 115                                                            |
| 19               | Bolivia | Poultry Meat                    | 2010           | 162                                                            |

Dietary calcium and zinc deficiency risks are decreasing but remain prevalent

| FAO Country code | Country  | Food item                       | Reference year | Net energy supply (kcal capita <sup>-1</sup> d <sup>-1</sup> ) |
|------------------|----------|---------------------------------|----------------|----------------------------------------------------------------|
| 19               | Bolivia  | Pulses                          | 2010           | 33                                                             |
| 19               | Bolivia  | Pulses, Other and products      | 2010           | 10                                                             |
| 19               | Bolivia  | Rice (Milled Equivalent)        | 2010           | 275                                                            |
| 19               | Bolivia  | Roots, Other                    | 2010           | 6                                                              |
| 19               | Bolivia  | Soyabean Oil                    | 2010           | 33                                                             |
| 19               | Bolivia  | Spices                          | 2010           | 1                                                              |
| 19               | Bolivia  | Starchy Roots                   | 2010           | 163                                                            |
| 19               | Bolivia  | Stimulants                      | 2010           | 13                                                             |
| 19               | Bolivia  | Sugar & Sweeteners              | 2010           | 261                                                            |
| 19               | Bolivia  | Sugar (Raw Equivalent)          | 2010           | 257                                                            |
| 19               | Bolivia  | Sunflowerseed Oil               | 2010           | 8                                                              |
| 19               | Bolivia  | Sweet potatoes                  | 2010           | 1                                                              |
| 19               | Bolivia  | Sweeteners, Other               | 2010           | 4                                                              |
| 19               | Bolivia  | Tomatoes and products           | 2010           | 3                                                              |
| 19               | Bolivia  | Treenuts                        | 2010           | 36                                                             |
| 19               | Bolivia  | Vegetable Oils                  | 2010           | 68                                                             |
| 19               | Bolivia  | Vegetables                      | 2010           | 29                                                             |
| 19               | Bolivia  | Vegetables, Other               | 2010           | 19                                                             |
| 19               | Bolivia  | Vegetal Products                | 2010           | 1,723                                                          |
| 19               | Bolivia  | Wheat and products              | 2010           | 392                                                            |
| 19               | Bolivia  | Wine                            | 2010           | 2                                                              |
| 19               | Bolivia  | Alcoholic Beverages             | 2011           | 35                                                             |
| 19               | Bolivia  | Animal fats                     | 2011           | 47                                                             |
| 19               | Bolivia  | Animal Products                 | 2011           | 450                                                            |
| 19               | Bolivia  | Apples and products             | 2011           | 3                                                              |
| 19               | Bolivia  | Bananas                         | 2011           | 3                                                              |
| 19               | Bolivia  | Beans                           | 2011           | 30                                                             |
| 19               | Bolivia  | Beer                            | 2011           | 26                                                             |
| 19               | Bolivia  | Beverages, Alcoholic            | 2011           | 7                                                              |
| 19               | Bolivia  | Bovine Meat                     | 2011           | 93                                                             |
| 19               | Bolivia  | Butter, Ghee                    | 2011           | 1                                                              |
| 19               | Bolivia  | Cassava and products            | 2011           | 43                                                             |
| 19               | Bolivia  | Cereals - Excluding Beer        | 2011           | 978                                                            |
| 19               | Bolivia  | Cereals, Other                  | 2011           | 14                                                             |
| 19               | Bolivia  | Cocoa Beans and products        | 2011           | 10                                                             |
| 19               | Bolivia  | Coffee and products             | 2011           | 3                                                              |
| 19               | Bolivia  | Cottonseed Oil                  | 2011           | 24                                                             |
| 19               | Bolivia  | Eggs                            | 2011           | 19                                                             |
| 19               | Bolivia  | Fats, Animals, Raw              | 2011           | 46                                                             |
| 19               | Bolivia  | Fish, Seafood                   | 2011           | 4                                                              |
| 19               | Bolivia  | Freshwater Fish                 | 2011           | 1                                                              |
| 19               | Bolivia  | Fruits - Excluding Wine         | 2011           | 99                                                             |
| 19               | Bolivia  | Fruits, Other                   | 2011           | 8                                                              |
| 19               | Bolivia  | Grand Total                     | 2011           | 2,254                                                          |
| 19               | Bolivia  | Grapes and products (excl wine) | 2011           | 3                                                              |
| 19               | Bolivia  | Groundnut Oil                   | 2011           | 1                                                              |
| 19               | Bolivia  | Groundnuts (Shelled Eq)         | 2011           | 4                                                              |
| 19               | Bolivia  | Honey                           | 2011           | 1                                                              |
| 19               | Bolivia  | Lemons, Limes and products      | 2011           | 1                                                              |
| 19               | Bolivia  | Maize and products              | 2011           | 286                                                            |
| 19               | Bolivia  | Marine Fish, Other              | 2011           | 2                                                              |
| 19               | Bolivia  | Meat                            | 2011           | 298                                                            |
| 19               | Bolivia  | Meat, Other                     | 2011           | 2                                                              |
| 19               | Bolivia  | Milk - Excluding Butter         | 2011           | 70                                                             |
| 19               | Bolivia  | Miscellaneous                   | 2011           | 4                                                              |
| 19               | Bolivia  | Mutton & Goat Meat              | 2011           | 10                                                             |
| 19               | Bolivia  | Oats                            | 2011           | 5                                                              |
| 19               | Bolivia  | Offals                          | 2011           | 10                                                             |
| 19               | Bolivia  | Oilcrops                        | 2011           | 5                                                              |
| 19               | Bolivia  | Oilcrops Oil, Other             | 2011           | 5                                                              |
| 19               | Bolivia  | Olive Oil                       | 2011           | 1                                                              |
| 19               | Bolivia  | Onions                          | 2011           | 7                                                              |
| 19               | Bolivia  | Oranges, Mandarines             | 2011           | 19                                                             |
| 19               | Bolivia  | Peas                            | 2011           | 4                                                              |
| 19               | Bolivia  | Pelagic Fish                    | 2011           | 1                                                              |
| 19               | Bolivia  | Pepper                          | 2011           | 1                                                              |
| 19               | Bolivia  | Pigmeat                         | 2011           | 36                                                             |
| 19               | Bolivia  | Pineapples and products         | 2011           | 3                                                              |
| 19               | Bolivia  | Plantains                       | 2011           | 58                                                             |
| 19               | Bolivia  | Potatoes and products           | 2011           | 121                                                            |
| 19               | Bolivia  | Poultry Meat                    | 2011           | 157                                                            |
| 19               | Bolivia  | Pulses                          | 2011           | 44                                                             |
| 19               | Bolivia  | Pulses, Other and products      | 2011           | 10                                                             |
| 19               | Bolivia  | Rape and Mustardseed            | 2011           | 1                                                              |
| 19               | Bolivia  | Rice (Milled Equivalent)        | 2011           | 281                                                            |
| 19               | Bolivia  | Roots, Other                    | 2011           | 6                                                              |
| 19               | Bolivia  | Soyabean Oil                    | 2011           | 67                                                             |
| 19               | Bolivia  | Spices                          | 2011           | 1                                                              |
| 19               | Bolivia  | Starchy Roots                   | 2011           | 170                                                            |
| 19               | Bolivia  | Stimulants                      | 2011           | 14                                                             |
| 19               | Bolivia  | Sugar & Sweeteners              | 2011           | 264                                                            |
| 19               | Bolivia  | Sugar (Raw Equivalent)          | 2011           | 258                                                            |
| 19               | Bolivia  | Sunflowerseed Oil               | 2011           | 31                                                             |
| 19               | Bolivia  | Sweet potatoes                  | 2011           | 1                                                              |
| 19               | Bolivia  | Sweeteners, Other               | 2011           | 5                                                              |
| 19               | Bolivia  | Tomatoes and products           | 2011           | 3                                                              |
| 19               | Bolivia  | Treenuts                        | 2011           | 34                                                             |
| 19               | Bolivia  | Vegetable Oils                  | 2011           | 128                                                            |
| 19               | Bolivia  | Vegetables                      | 2011           | 29                                                             |
| 19               | Bolivia  | Vegetables, Other               | 2011           | 19                                                             |
| 19               | Bolivia  | Vegetal Products                | 2011           | 1,804                                                          |
| 19               | Bolivia  | Wheat and products              | 2011           | 392                                                            |
| 19               | Bolivia  | Wine                            | 2011           | 2                                                              |
| 20               | Botswana | Alcoholic Beverages             | 1992           | 81                                                             |
| 20               | Botswana | Animal fats                     | 1992           | 151                                                            |
| 20               | Botswana | Animal Products                 | 1992           | 523                                                            |
| 20               | Botswana | Apples and products             | 1992           | 4                                                              |

Dietary calcium and zinc deficiency risks are decreasing but remain prevalent

| FAO Country code | Country  | Food item                       | Reference year | Net energy supply (kcal capita <sup>-1</sup> d <sup>-1</sup> ) |
|------------------|----------|---------------------------------|----------------|----------------------------------------------------------------|
| 20               | Botswana | Bananas                         | 1992           | 3                                                              |
| 20               | Botswana | Beans                           | 1992           | 4                                                              |
| 20               | Botswana | Beer                            | 1992           | 45                                                             |
| 20               | Botswana | Beverages, Alcoholic            | 1992           | 10                                                             |
| 20               | Botswana | Beverages, Fermented            | 1992           | 17                                                             |
| 20               | Botswana | Bovine Meat                     | 1992           | 84                                                             |
| 20               | Botswana | Butter, Ghee                    | 1992           | 20                                                             |
| 20               | Botswana | Cereals - Excluding Beer        | 1992           | 891                                                            |
| 20               | Botswana | Cereals, Other                  | 1992           | 11                                                             |
| 20               | Botswana | Cocoa Beans and products        | 1992           | 8                                                              |
| 20               | Botswana | Coconut Oil                     | 1992           | 1                                                              |
| 20               | Botswana | Coffee and products             | 1992           | 1                                                              |
| 20               | Botswana | Cottonseed Oil                  | 1992           | 5                                                              |
| 20               | Botswana | Cream                           | 1992           | 3                                                              |
| 20               | Botswana | Crustaceans                     | 1992           | 1                                                              |
| 20               | Botswana | Eggs                            | 1992           | 4                                                              |
| 20               | Botswana | Fats, Animals, Raw              | 1992           | 128                                                            |
| 20               | Botswana | Fish, Seafood                   | 1992           | 10                                                             |
| 20               | Botswana | Freshwater Fish                 | 1992           | 1                                                              |
| 20               | Botswana | Fruits - Excluding Wine         | 1992           | 35                                                             |
| 20               | Botswana | Fruits, Other                   | 1992           | 20                                                             |
| 20               | Botswana | Grand Total                     | 1992           | 2,203                                                          |
| 20               | Botswana | Grapes and products (excl wine) | 1992           | 3                                                              |
| 20               | Botswana | Groundnut Oil                   | 1992           | 2                                                              |
| 20               | Botswana | Groundnuts (Shelled Eq)         | 1992           | 3                                                              |
| 20               | Botswana | Maize and products              | 1992           | 311                                                            |
| 20               | Botswana | Marine Fish, Other              | 1992           | 7                                                              |
| 20               | Botswana | Meat                            | 1992           | 138                                                            |
| 20               | Botswana | Meat, Other                     | 1992           | 15                                                             |
| 20               | Botswana | Milk - Excluding Butter         | 1992           | 207                                                            |
| 20               | Botswana | Millet and products             | 1992           | 1                                                              |
| 20               | Botswana | Miscellaneous                   | 1992           | 10                                                             |
| 20               | Botswana | Mutton & Goat Meat              | 1992           | 16                                                             |
| 20               | Botswana | Offals                          | 1992           | 13                                                             |
| 20               | Botswana | Oilcrops                        | 1992           | 7                                                              |
| 20               | Botswana | Oilcrops Oil, Other             | 1992           | 45                                                             |
| 20               | Botswana | Onions                          | 1992           | 2                                                              |
| 20               | Botswana | Oranges, Mandarines             | 1992           | 4                                                              |
| 20               | Botswana | Palm Oil                        | 1992           | 2                                                              |
| 20               | Botswana | Peas                            | 1992           | 16                                                             |
| 20               | Botswana | Pelagic Fish                    | 1992           | 1                                                              |
| 20               | Botswana | Pepper                          | 1992           | 2                                                              |
| 20               | Botswana | Pigmeat                         | 1992           | 7                                                              |
| 20               | Botswana | Potatoes and products           | 1992           | 26                                                             |
| 20               | Botswana | Poultry Meat                    | 1992           | 17                                                             |
| 20               | Botswana | Pulses                          | 1992           | 108                                                            |
| 20               | Botswana | Pulses, Other and products      | 1992           | 88                                                             |
| 20               | Botswana | Rice (Milled Equivalent)        | 1992           | 63                                                             |
| 20               | Botswana | Roots, Other                    | 1992           | 108                                                            |
| 20               | Botswana | Rye and products                | 1992           | 1                                                              |
| 20               | Botswana | Sorghum and products            | 1992           | 200                                                            |
| 20               | Botswana | Soyabean Oil                    | 1992           | 19                                                             |
| 20               | Botswana | Soyabeans                       | 1992           | 3                                                              |
| 20               | Botswana | Spices                          | 1992           | 8                                                              |
| 20               | Botswana | Spices, Other                   | 1992           | 6                                                              |
| 20               | Botswana | Starchy Roots                   | 1992           | 134                                                            |
| 20               | Botswana | Stimulants                      | 1992           | 10                                                             |
| 20               | Botswana | Sugar & Sweeteners              | 1992           | 266                                                            |
| 20               | Botswana | Sugar (Raw Equivalent)          | 1992           | 188                                                            |
| 20               | Botswana | Sunflowerseed Oil               | 1992           | 33                                                             |
| 20               | Botswana | Sweeteners, Other               | 1992           | 77                                                             |
| 20               | Botswana | Tea (including mate)            | 1992           | 2                                                              |
| 20               | Botswana | Tomatoes and products           | 1992           | 1                                                              |
| 20               | Botswana | Treenuts                        | 1992           | 2                                                              |
| 20               | Botswana | Vegetable Oils                  | 1992           | 107                                                            |
| 20               | Botswana | Vegetables                      | 1992           | 22                                                             |
| 20               | Botswana | Vegetables, Other               | 1992           | 19                                                             |
| 20               | Botswana | Vegetal Products                | 1992           | 1,681                                                          |
| 20               | Botswana | Wheat and products              | 1992           | 304                                                            |
| 20               | Botswana | Wine                            | 1992           | 9                                                              |
| 20               | Botswana | Alcoholic Beverages             | 1993           | 74                                                             |
| 20               | Botswana | Animal fats                     | 1993           | 120                                                            |
| 20               | Botswana | Animal Products                 | 1993           | 429                                                            |
| 20               | Botswana | Apples and products             | 1993           | 4                                                              |
| 20               | Botswana | Bananas                         | 1993           | 3                                                              |
| 20               | Botswana | Beans                           | 1993           | 5                                                              |
| 20               | Botswana | Beer                            | 1993           | 47                                                             |
| 20               | Botswana | Beverages, Alcoholic            | 1993           | 7                                                              |
| 20               | Botswana | Beverages, Fermented            | 1993           | 18                                                             |
| 20               | Botswana | Bovine Meat                     | 1993           | 70                                                             |
| 20               | Botswana | Butter, Ghee                    | 1993           | 17                                                             |
| 20               | Botswana | Cereals - Excluding Beer        | 1993           | 920                                                            |
| 20               | Botswana | Cereals, Other                  | 1993           | 5                                                              |
| 20               | Botswana | Cocoa Beans and products        | 1993           | 10                                                             |
| 20               | Botswana | Coffee and products             | 1993           | 1                                                              |
| 20               | Botswana | Cottonseed Oil                  | 1993           | 5                                                              |
| 20               | Botswana | Cream                           | 1993           | 1                                                              |
| 20               | Botswana | Eggs                            | 1993           | 4                                                              |
| 20               | Botswana | Fats, Animals, Raw              | 1993           | 102                                                            |
| 20               | Botswana | Fish, Seafood                   | 1993           | 8                                                              |
| 20               | Botswana | Freshwater Fish                 | 1993           | 1                                                              |
| 20               | Botswana | Fruits - Excluding Wine         | 1993           | 42                                                             |
| 20               | Botswana | Fruits, Other                   | 1993           | 26                                                             |
| 20               | Botswana | Grand Total                     | 1993           | 2,069                                                          |
| 20               | Botswana | Grapes and products (excl wine) | 1993           | 4                                                              |
| 20               | Botswana | Groundnut Oil                   | 1993           | 1                                                              |
| 20               | Botswana | Groundnuts (Shelled Eq)         | 1993           | 3                                                              |

Dietary calcium and zinc deficiency risks are decreasing but remain prevalent

| FAO Country code | Country  | Food item                       | Reference year | Net energy supply (kcal capita <sup>-1</sup> d <sup>-1</sup> ) |
|------------------|----------|---------------------------------|----------------|----------------------------------------------------------------|
| 20               | Botswana | Honey                           | 1993           | 1                                                              |
| 20               | Botswana | Maize and products              | 1993           | 235                                                            |
| 20               | Botswana | Marine Fish, Other              | 1993           | 6                                                              |
| 20               | Botswana | Meat                            | 1993           | 122                                                            |
| 20               | Botswana | Meat, Other                     | 1993           | 14                                                             |
| 20               | Botswana | Milk - Excluding Butter         | 1993           | 161                                                            |
| 20               | Botswana | Millet and products             | 1993           | 5                                                              |
| 20               | Botswana | Miscellaneous                   | 1993           | 4                                                              |
| 20               | Botswana | Mutton & Goat Meat              | 1993           | 17                                                             |
| 20               | Botswana | Offals                          | 1993           | 14                                                             |
| 20               | Botswana | Oilcrops                        | 1993           | 6                                                              |
| 20               | Botswana | Oilcrops Oil, Other             | 1993           | 31                                                             |
| 20               | Botswana | Onions                          | 1993           | 2                                                              |
| 20               | Botswana | Oranges, Mandarines             | 1993           | 4                                                              |
| 20               | Botswana | Palm Oil                        | 1993           | 1                                                              |
| 20               | Botswana | Peas                            | 1993           | 4                                                              |
| 20               | Botswana | Pelagic Fish                    | 1993           | 1                                                              |
| 20               | Botswana | Pepper                          | 1993           | 1                                                              |
| 20               | Botswana | Pigmeat                         | 1993           | 4                                                              |
| 20               | Botswana | Potatoes and products           | 1993           | 16                                                             |
| 20               | Botswana | Poultry Meat                    | 1993           | 17                                                             |
| 20               | Botswana | Pulses                          | 1993           | 106                                                            |
| 20               | Botswana | Pulses, Other and products      | 1993           | 98                                                             |
| 20               | Botswana | Rape and Mustardseed            | 1993           | 1                                                              |
| 20               | Botswana | Rice (Milled Equivalent)        | 1993           | 72                                                             |
| 20               | Botswana | Roots, Other                    | 1993           | 106                                                            |
| 20               | Botswana | Rye and products                | 1993           | 1                                                              |
| 20               | Botswana | Sorghum and products            | 1993           | 196                                                            |
| 20               | Botswana | Soyabean Oil                    | 1993           | 14                                                             |
| 20               | Botswana | Soyabeans                       | 1993           | 2                                                              |
| 20               | Botswana | Spices                          | 1993           | 5                                                              |
| 20               | Botswana | Spices, Other                   | 1993           | 4                                                              |
| 20               | Botswana | Starchy Roots                   | 1993           | 123                                                            |
| 20               | Botswana | Stimulants                      | 1993           | 13                                                             |
| 20               | Botswana | Sugar & Sweeteners              | 1993           | 237                                                            |
| 20               | Botswana | Sugar (Raw Equivalent)          | 1993           | 197                                                            |
| 20               | Botswana | Sunflowerseed Oil               | 1993           | 29                                                             |
| 20               | Botswana | Sweeteners, Other               | 1993           | 38                                                             |
| 20               | Botswana | Tea (including mate)            | 1993           | 2                                                              |
| 20               | Botswana | Tomatoes and products           | 1993           | 1                                                              |
| 20               | Botswana | Treenuts                        | 1993           | 2                                                              |
| 20               | Botswana | Vegetable Oils                  | 1993           | 82                                                             |
| 20               | Botswana | Vegetables                      | 1993           | 26                                                             |
| 20               | Botswana | Vegetables, Other               | 1993           | 22                                                             |
| 20               | Botswana | Vegetal Products                | 1993           | 1,640                                                          |
| 20               | Botswana | Wheat and products              | 1993           | 406                                                            |
| 20               | Botswana | Wine                            | 1993           | 2                                                              |
| 20               | Botswana | Alcoholic Beverages             | 1994           | 66                                                             |
| 20               | Botswana | Animal fats                     | 1994           | 86                                                             |
| 20               | Botswana | Animal Products                 | 1994           | 374                                                            |
| 20               | Botswana | Apples and products             | 1994           | 3                                                              |
| 20               | Botswana | Bananas                         | 1994           | 3                                                              |
| 20               | Botswana | Barley and products             | 1994           | 1                                                              |
| 20               | Botswana | Beans                           | 1994           | 2                                                              |
| 20               | Botswana | Beer                            | 1994           | 34                                                             |
| 20               | Botswana | Beverages, Alcoholic            | 1994           | 7                                                              |
| 20               | Botswana | Beverages, Fermented            | 1994           | 22                                                             |
| 20               | Botswana | Bovine Meat                     | 1994           | 42                                                             |
| 20               | Botswana | Butter, Ghee                    | 1994           | 18                                                             |
| 20               | Botswana | Cereals - Excluding Beer        | 1994           | 1,087                                                          |
| 20               | Botswana | Cereals, Other                  | 1994           | 27                                                             |
| 20               | Botswana | Cocoa Beans and products        | 1994           | 12                                                             |
| 20               | Botswana | Coconut Oil                     | 1994           | 1                                                              |
| 20               | Botswana | Coffee and products             | 1994           | 1                                                              |
| 20               | Botswana | Cottonseed Oil                  | 1994           | 6                                                              |
| 20               | Botswana | Cream                           | 1994           | 1                                                              |
| 20               | Botswana | Eggs                            | 1994           | 4                                                              |
| 20               | Botswana | Fats, Animals, Raw              | 1994           | 68                                                             |
| 20               | Botswana | Fish, Seafood                   | 1994           | 8                                                              |
| 20               | Botswana | Freshwater Fish                 | 1994           | 1                                                              |
| 20               | Botswana | Fruits - Excluding Wine         | 1994           | 32                                                             |
| 20               | Botswana | Fruits, Other                   | 1994           | 20                                                             |
| 20               | Botswana | Grand Total                     | 1994           | 2,186                                                          |
| 20               | Botswana | Grapes and products (excl wine) | 1994           | 1                                                              |
| 20               | Botswana | Groundnut Oil                   | 1994           | 2                                                              |
| 20               | Botswana | Groundnuts (Shelled Eq)         | 1994           | 3                                                              |
| 20               | Botswana | Maize and products              | 1994           | 341                                                            |
| 20               | Botswana | Marine Fish, Other              | 1994           | 6                                                              |
| 20               | Botswana | Meat                            | 1994           | 92                                                             |
| 20               | Botswana | Meat, Other                     | 1994           | 14                                                             |
| 20               | Botswana | Milk - Excluding Butter         | 1994           | 174                                                            |
| 20               | Botswana | Millet and products             | 1994           | 9                                                              |
| 20               | Botswana | Miscellaneous                   | 1994           | 3                                                              |
| 20               | Botswana | Mutton & Goat Meat              | 1994           | 16                                                             |
| 20               | Botswana | Offals                          | 1994           | 11                                                             |
| 20               | Botswana | Oilcrops                        | 1994           | 11                                                             |
| 20               | Botswana | Oilcrops Oil, Other             | 1994           | 19                                                             |
| 20               | Botswana | Olive Oil                       | 1994           | 1                                                              |
| 20               | Botswana | Onions                          | 1994           | 3                                                              |
| 20               | Botswana | Oranges, Mandarines             | 1994           | 3                                                              |
| 20               | Botswana | Peas                            | 1994           | 16                                                             |
| 20               | Botswana | Pelagic Fish                    | 1994           | 1                                                              |
| 20               | Botswana | Pepper                          | 1994           | 1                                                              |
| 20               | Botswana | Pigmeat                         | 1994           | 5                                                              |
| 20               | Botswana | Potatoes and products           | 1994           | 20                                                             |
| 20               | Botswana | Poultry Meat                    | 1994           | 15                                                             |
| 20               | Botswana | Pulses                          | 1994           | 118                                                            |

Dietary calcium and zinc deficiency risks are decreasing but remain prevalent

| FAO Country code | Country  | Food item                       | Reference year | Net energy supply (kcal <i>capita</i> <sup>-1</sup> d <sup>-1</sup> ) |
|------------------|----------|---------------------------------|----------------|-----------------------------------------------------------------------|
| 20               | Botswana | Pulses, Other and products      | 1994           | 99                                                                    |
| 20               | Botswana | Rape and Mustard Oil            | 1994           | 17                                                                    |
| 20               | Botswana | Rape and Mustardseed            | 1994           | 1                                                                     |
| 20               | Botswana | Rice (Milled Equivalent)        | 1994           | 60                                                                    |
| 20               | Botswana | Roots, Other                    | 1994           | 107                                                                   |
| 20               | Botswana | Rye and products                | 1994           | 1                                                                     |
| 20               | Botswana | Sorghum and products            | 1994           | 240                                                                   |
| 20               | Botswana | Soyabean Oil                    | 1994           | 17                                                                    |
| 20               | Botswana | Soyabeans                       | 1994           | 7                                                                     |
| 20               | Botswana | Spices                          | 1994           | 6                                                                     |
| 20               | Botswana | Spices, Other                   | 1994           | 6                                                                     |
| 20               | Botswana | Starchy Roots                   | 1994           | 128                                                                   |
| 20               | Botswana | Stimulants                      | 1994           | 14                                                                    |
| 20               | Botswana | Sugar & Sweeteners              | 1994           | 232                                                                   |
| 20               | Botswana | Sugar (Raw Equivalent)          | 1994           | 199                                                                   |
| 20               | Botswana | Sunflowerseed Oil               | 1994           | 26                                                                    |
| 20               | Botswana | Sweeteners, Other               | 1994           | 32                                                                    |
| 20               | Botswana | Tea (including mate)            | 1994           | 1                                                                     |
| 20               | Botswana | Tomatoes and products           | 1994           | 2                                                                     |
| 20               | Botswana | Treenuts                        | 1994           | 3                                                                     |
| 20               | Botswana | Vegetable Oils                  | 1994           | 90                                                                    |
| 20               | Botswana | Vegetables                      | 1994           | 23                                                                    |
| 20               | Botswana | Vegetables, Other               | 1994           | 19                                                                    |
| 20               | Botswana | Vegetal Products                | 1994           | 1,813                                                                 |
| 20               | Botswana | Wheat and products              | 1994           | 407                                                                   |
| 20               | Botswana | Wine                            | 1994           | 3                                                                     |
| 20               | Botswana | Alcoholic Beverages             | 1995           | 67                                                                    |
| 20               | Botswana | Animal fats                     | 1995           | 50                                                                    |
| 20               | Botswana | Animal Products                 | 1995           | 392                                                                   |
| 20               | Botswana | Apples and products             | 1995           | 3                                                                     |
| 20               | Botswana | Bananas                         | 1995           | 2                                                                     |
| 20               | Botswana | Beans                           | 1995           | 16                                                                    |
| 20               | Botswana | Beer                            | 1995           | 32                                                                    |
| 20               | Botswana | Beverages, Alcoholic            | 1995           | 5                                                                     |
| 20               | Botswana | Beverages, Fermented            | 1995           | 27                                                                    |
| 20               | Botswana | Bovine Meat                     | 1995           | 73                                                                    |
| 20               | Botswana | Butter, Ghee                    | 1995           | 17                                                                    |
| 20               | Botswana | Cereals - Excluding Beer        | 1995           | 1,060                                                                 |
| 20               | Botswana | Cereals, Other                  | 1995           | 26                                                                    |
| 20               | Botswana | Cocoa Beans and products        | 1995           | 10                                                                    |
| 20               | Botswana | Coffee and products             | 1995           | 1                                                                     |
| 20               | Botswana | Cottonseed Oil                  | 1995           | 6                                                                     |
| 20               | Botswana | Cream                           | 1995           | 1                                                                     |
| 20               | Botswana | Eggs                            | 1995           | 6                                                                     |
| 20               | Botswana | Fats, Animals, Raw              | 1995           | 32                                                                    |
| 20               | Botswana | Fish, Seafood                   | 1995           | 6                                                                     |
| 20               | Botswana | Fruits - Excluding Wine         | 1995           | 29                                                                    |
| 20               | Botswana | Fruits, Other                   | 1995           | 19                                                                    |
| 20               | Botswana | Grand Total                     | 1995           | 2,188                                                                 |
| 20               | Botswana | Grapes and products (excl wine) | 1995           | 2                                                                     |
| 20               | Botswana | Groundnut Oil                   | 1995           | 4                                                                     |
| 20               | Botswana | Groundnuts (Shelled Eq)         | 1995           | 3                                                                     |
| 20               | Botswana | Maize and products              | 1995           | 423                                                                   |
| 20               | Botswana | Marine Fish, Other              | 1995           | 5                                                                     |
| 20               | Botswana | Meat                            | 1995           | 131                                                                   |
| 20               | Botswana | Meat, Other                     | 1995           | 11                                                                    |
| 20               | Botswana | Milk - Excluding Butter         | 1995           | 185                                                                   |
| 20               | Botswana | Millet and products             | 1995           | 8                                                                     |
| 20               | Botswana | Miscellaneous                   | 1995           | 2                                                                     |
| 20               | Botswana | Mutton & Goat Meat              | 1995           | 24                                                                    |
| 20               | Botswana | Offals                          | 1995           | 13                                                                    |
| 20               | Botswana | Oilcrops                        | 1995           | 11                                                                    |
| 20               | Botswana | Oilcrops Oil, Other             | 1995           | 21                                                                    |
| 20               | Botswana | Olive Oil                       | 1995           | 1                                                                     |
| 20               | Botswana | Onions                          | 1995           | 2                                                                     |
| 20               | Botswana | Oranges, Mandarines             | 1995           | 3                                                                     |
| 20               | Botswana | Peas                            | 1995           | 5                                                                     |
| 20               | Botswana | Pelagic Fish                    | 1995           | 1                                                                     |
| 20               | Botswana | Pepper                          | 1995           | 1                                                                     |
| 20               | Botswana | Pigmeat                         | 1995           | 5                                                                     |
| 20               | Botswana | Potatoes and products           | 1995           | 14                                                                    |
| 20               | Botswana | Poultry Meat                    | 1995           | 18                                                                    |
| 20               | Botswana | Pulses                          | 1995           | 98                                                                    |
| 20               | Botswana | Pulses, Other and products      | 1995           | 77                                                                    |
| 20               | Botswana | Rape and Mustard Oil            | 1995           | 6                                                                     |
| 20               | Botswana | Rape and Mustardseed            | 1995           | 1                                                                     |
| 20               | Botswana | Rice (Milled Equivalent)        | 1995           | 47                                                                    |
| 20               | Botswana | Roots, Other                    | 1995           | 107                                                                   |
| 20               | Botswana | Rye and products                | 1995           | 3                                                                     |
| 20               | Botswana | Sorghum and products            | 1995           | 248                                                                   |
| 20               | Botswana | Soyabean Oil                    | 1995           | 25                                                                    |
| 20               | Botswana | Soyabeans                       | 1995           | 6                                                                     |
| 20               | Botswana | Spices                          | 1995           | 8                                                                     |
| 20               | Botswana | Spices, Other                   | 1995           | 7                                                                     |
| 20               | Botswana | Starchy Roots                   | 1995           | 121                                                                   |
| 20               | Botswana | Stimulants                      | 1995           | 12                                                                    |
| 20               | Botswana | Sugar & Sweeteners              | 1995           | 219                                                                   |
| 20               | Botswana | Sugar (Raw Equivalent)          | 1995           | 194                                                                   |
| 20               | Botswana | Sunflowerseed Oil               | 1995           | 86                                                                    |
| 20               | Botswana | Sweeteners, Other               | 1995           | 25                                                                    |
| 20               | Botswana | Tea (including mate)            | 1995           | 1                                                                     |
| 20               | Botswana | Tomatoes and products           | 1995           | 1                                                                     |
| 20               | Botswana | Treenuts                        | 1995           | 3                                                                     |
| 20               | Botswana | Vegetable Oils                  | 1995           | 151                                                                   |
| 20               | Botswana | Vegetables                      | 1995           | 17                                                                    |
| 20               | Botswana | Vegetables, Other               | 1995           | 13                                                                    |
| 20               | Botswana | Vegetal Products                | 1995           | 1,796                                                                 |

Dietary calcium and zinc deficiency risks are decreasing but remain prevalent

| FAO Country code | Country  | Food item                       | Reference year | Net energy supply (kcal capita <sup>-1</sup> d <sup>-1</sup> ) |
|------------------|----------|---------------------------------|----------------|----------------------------------------------------------------|
| 20               | Botswana | Wheat and products              | 1995           | 305                                                            |
| 20               | Botswana | Wine                            | 1995           | 2                                                              |
| 20               | Botswana | Alcoholic Beverages             | 1996           | 71                                                             |
| 20               | Botswana | Animal fats                     | 1996           | 45                                                             |
| 20               | Botswana | Animal Products                 | 1996           | 371                                                            |
| 20               | Botswana | Apples and products             | 1996           | 4                                                              |
| 20               | Botswana | Bananas                         | 1996           | 3                                                              |
| 20               | Botswana | Beans                           | 1996           | 20                                                             |
| 20               | Botswana | Beer                            | 1996           | 37                                                             |
| 20               | Botswana | Beverages, Alcoholic            | 1996           | 5                                                              |
| 20               | Botswana | Beverages, Fermented            | 1996           | 27                                                             |
| 20               | Botswana | Bovine Meat                     | 1996           | 76                                                             |
| 20               | Botswana | Butter, Ghee                    | 1996           | 15                                                             |
| 20               | Botswana | Cereals - Excluding Beer        | 1996           | 1,060                                                          |
| 20               | Botswana | Cereals, Other                  | 1996           | 84                                                             |
| 20               | Botswana | Cocoa Beans and products        | 1996           | 8                                                              |
| 20               | Botswana | Coconut Oil                     | 1996           | 1                                                              |
| 20               | Botswana | Coffee and products             | 1996           | 1                                                              |
| 20               | Botswana | Cottonseed Oil                  | 1996           | 5                                                              |
| 20               | Botswana | Cream                           | 1996           | 1                                                              |
| 20               | Botswana | Eggs                            | 1996           | 2                                                              |
| 20               | Botswana | Fats, Animals, Raw              | 1996           | 30                                                             |
| 20               | Botswana | Fish, Seafood                   | 1996           | 7                                                              |
| 20               | Botswana | Fruits - Excluding Wine         | 1996           | 31                                                             |
| 20               | Botswana | Fruits, Other                   | 1996           | 18                                                             |
| 20               | Botswana | Grand Total                     | 1996           | 2,214                                                          |
| 20               | Botswana | Grapes and products (excl wine) | 1996           | 2                                                              |
| 20               | Botswana | Groundnut Oil                   | 1996           | 2                                                              |
| 20               | Botswana | Groundnuts (Shelled Eq)         | 1996           | 3                                                              |
| 20               | Botswana | Maize and products              | 1996           | 334                                                            |
| 20               | Botswana | Marine Fish, Other              | 1996           | 6                                                              |
| 20               | Botswana | Meat                            | 1996           | 131                                                            |
| 20               | Botswana | Meat, Other                     | 1996           | 13                                                             |
| 20               | Botswana | Milk - Excluding Butter         | 1996           | 174                                                            |
| 20               | Botswana | Millet and products             | 1996           | 10                                                             |
| 20               | Botswana | Miscellaneous                   | 1996           | 2                                                              |
| 20               | Botswana | Mutton & Goat Meat              | 1996           | 18                                                             |
| 20               | Botswana | Offals                          | 1996           | 13                                                             |
| 20               | Botswana | Oilcrops                        | 1996           | 11                                                             |
| 20               | Botswana | Oilcrops Oil, Other             | 1996           | 55                                                             |
| 20               | Botswana | Onions                          | 1996           | 3                                                              |
| 20               | Botswana | Oranges, Mandarines             | 1996           | 4                                                              |
| 20               | Botswana | Peas                            | 1996           | 12                                                             |
| 20               | Botswana | Pepper                          | 1996           | 1                                                              |
| 20               | Botswana | Pigmeat                         | 1996           | 8                                                              |
| 20               | Botswana | Potatoes and products           | 1996           | 15                                                             |
| 20               | Botswana | Poultry Meat                    | 1996           | 16                                                             |
| 20               | Botswana | Pulses                          | 1996           | 116                                                            |
| 20               | Botswana | Pulses, Other and products      | 1996           | 83                                                             |
| 20               | Botswana | Rape and Mustard Oil            | 1996           | 1                                                              |
| 20               | Botswana | Rape and Mustardseed            | 1996           | 1                                                              |
| 20               | Botswana | Rice (Milled Equivalent)        | 1996           | 68                                                             |
| 20               | Botswana | Roots, Other                    | 1996           | 106                                                            |
| 20               | Botswana | Rye and products                | 1996           | 1                                                              |
| 20               | Botswana | Sorghum and products            | 1996           | 298                                                            |
| 20               | Botswana | Soyabean Oil                    | 1996           | 29                                                             |
| 20               | Botswana | Soyabeans                       | 1996           | 6                                                              |
| 20               | Botswana | Spices                          | 1996           | 7                                                              |
| 20               | Botswana | Spices, Other                   | 1996           | 5                                                              |
| 20               | Botswana | Starchy Roots                   | 1996           | 121                                                            |
| 20               | Botswana | Stimulants                      | 1996           | 10                                                             |
| 20               | Botswana | Sugar & Sweeteners              | 1996           | 214                                                            |
| 20               | Botswana | Sugar (Raw Equivalent)          | 1996           | 203                                                            |
| 20               | Botswana | Sunflowerseed Oil               | 1996           | 86                                                             |
| 20               | Botswana | Sweeteners, Other               | 1996           | 11                                                             |
| 20               | Botswana | Tea (including mate)            | 1996           | 1                                                              |
| 20               | Botswana | Tomatoes and products           | 1996           | 1                                                              |
| 20               | Botswana | Treenuts                        | 1996           | 3                                                              |
| 20               | Botswana | Vegetable Oils                  | 1996           | 180                                                            |
| 20               | Botswana | Vegetables                      | 1996           | 18                                                             |
| 20               | Botswana | Vegetables, Other               | 1996           | 14                                                             |
| 20               | Botswana | Vegetal Products                | 1996           | 1,843                                                          |
| 20               | Botswana | Wheat and products              | 1996           | 265                                                            |
| 20               | Botswana | Wine                            | 1996           | 2                                                              |
| 20               | Botswana | Alcoholic Beverages             | 1997           | 65                                                             |
| 20               | Botswana | Animal fats                     | 1997           | 41                                                             |
| 20               | Botswana | Animal Products                 | 1997           | 340                                                            |
| 20               | Botswana | Apples and products             | 1997           | 4                                                              |
| 20               | Botswana | Bananas                         | 1997           | 4                                                              |
| 20               | Botswana | Beans                           | 1997           | 18                                                             |
| 20               | Botswana | Beer                            | 1997           | 32                                                             |
| 20               | Botswana | Beverages, Alcoholic            | 1997           | 7                                                              |
| 20               | Botswana | Beverages, Fermented            | 1997           | 24                                                             |
| 20               | Botswana | Bovine Meat                     | 1997           | 48                                                             |
| 20               | Botswana | Butter, Ghee                    | 1997           | 14                                                             |
| 20               | Botswana | Cereals - Excluding Beer        | 1997           | 1,027                                                          |
| 20               | Botswana | Cereals, Other                  | 1997           | 55                                                             |
| 20               | Botswana | Cocoa Beans and products        | 1997           | 9                                                              |
| 20               | Botswana | Coconut Oil                     | 1997           | 1                                                              |
| 20               | Botswana | Coffee and products             | 1997           | 2                                                              |
| 20               | Botswana | Cottonseed Oil                  | 1997           | 4                                                              |
| 20               | Botswana | Cream                           | 1997           | 2                                                              |
| 20               | Botswana | Eggs                            | 1997           | 3                                                              |
| 20               | Botswana | Fats, Animals, Raw              | 1997           | 25                                                             |
| 20               | Botswana | Fish, Seafood                   | 1997           | 8                                                              |
| 20               | Botswana | Freshwater Fish                 | 1997           | 2                                                              |
| 20               | Botswana | Fruits - Excluding Wine         | 1997           | 34                                                             |

Dietary calcium and zinc deficiency risks are decreasing but remain prevalent

| FAO Country code | Country  | Food item                       | Reference year | Net energy supply (kcal <i>capita</i> <sup>-1</sup> d <sup>-1</sup> ) |
|------------------|----------|---------------------------------|----------------|-----------------------------------------------------------------------|
| 20               | Botswana | Fruits, Other                   | 1997           | 20                                                                    |
| 20               | Botswana | Grand Total                     | 1997           | 2,165                                                                 |
| 20               | Botswana | Grapes and products (excl wine) | 1997           | 1                                                                     |
| 20               | Botswana | Groundnut Oil                   | 1997           | 2                                                                     |
| 20               | Botswana | Groundnuts (Shelled Eq)         | 1997           | 3                                                                     |
| 20               | Botswana | Maize and products              | 1997           | 342                                                                   |
| 20               | Botswana | Marine Fish, Other              | 1997           | 4                                                                     |
| 20               | Botswana | Meat                            | 1997           | 107                                                                   |
| 20               | Botswana | Meat, Other                     | 1997           | 11                                                                    |
| 20               | Botswana | Milk - Excluding Butter         | 1997           | 170                                                                   |
| 20               | Botswana | Millet and products             | 1997           | 10                                                                    |
| 20               | Botswana | Miscellaneous                   | 1997           | 4                                                                     |
| 20               | Botswana | Mutton & Goat Meat              | 1997           | 20                                                                    |
| 20               | Botswana | Offals                          | 1997           | 11                                                                    |
| 20               | Botswana | Oilcrops                        | 1997           | 10                                                                    |
| 20               | Botswana | Oilcrops Oil, Other             | 1997           | 61                                                                    |
| 20               | Botswana | Olive Oil                       | 1997           | 2                                                                     |
| 20               | Botswana | Onions                          | 1997           | 3                                                                     |
| 20               | Botswana | Oranges, Mandarines             | 1997           | 5                                                                     |
| 20               | Botswana | Pelagic Fish                    | 1997           | 1                                                                     |
| 20               | Botswana | Pepper                          | 1997           | 2                                                                     |
| 20               | Botswana | Pigmeat                         | 1997           | 8                                                                     |
| 20               | Botswana | Potatoes and products           | 1997           | 21                                                                    |
| 20               | Botswana | Poultry Meat                    | 1997           | 19                                                                    |
| 20               | Botswana | Pulses                          | 1997           | 97                                                                    |
| 20               | Botswana | Pulses, Other and products      | 1997           | 78                                                                    |
| 20               | Botswana | Rape and Mustard Oil            | 1997           | 1                                                                     |
| 20               | Botswana | Rice (Milled Equivalent)        | 1997           | 68                                                                    |
| 20               | Botswana | Roots, Other                    | 1997           | 106                                                                   |
| 20               | Botswana | Rye and products                | 1997           | 2                                                                     |
| 20               | Botswana | Sorghum and products            | 1997           | 255                                                                   |
| 20               | Botswana | Soyabean Oil                    | 1997           | 27                                                                    |
| 20               | Botswana | Soyabeans                       | 1997           | 7                                                                     |
| 20               | Botswana | Spices                          | 1997           | 7                                                                     |
| 20               | Botswana | Spices, Other                   | 1997           | 6                                                                     |
| 20               | Botswana | Starchy Roots                   | 1997           | 128                                                                   |
| 20               | Botswana | Stimulants                      | 1997           | 13                                                                    |
| 20               | Botswana | Sugar & Sweeteners              | 1997           | 229                                                                   |
| 20               | Botswana | Sugar (Raw Equivalent)          | 1997           | 205                                                                   |
| 20               | Botswana | Sunflowerseed Oil               | 1997           | 92                                                                    |
| 20               | Botswana | Sweeteners, Other               | 1997           | 24                                                                    |
| 20               | Botswana | Tea (including mate)            | 1997           | 2                                                                     |
| 20               | Botswana | Tomatoes and products           | 1997           | 2                                                                     |
| 20               | Botswana | Treenuts                        | 1997           | 4                                                                     |
| 20               | Botswana | Vegetable Oils                  | 1997           | 190                                                                   |
| 20               | Botswana | Vegetables                      | 1997           | 19                                                                    |
| 20               | Botswana | Vegetables, Other               | 1997           | 14                                                                    |
| 20               | Botswana | Vegetal Products                | 1997           | 1,826                                                                 |
| 20               | Botswana | Wheat and products              | 1997           | 293                                                                   |
| 20               | Botswana | Wine                            | 1997           | 3                                                                     |
| 20               | Botswana | Alcoholic Beverages             | 1998           | 68                                                                    |
| 20               | Botswana | Animal fats                     | 1998           | 39                                                                    |
| 20               | Botswana | Animal Products                 | 1998           | 326                                                                   |
| 20               | Botswana | Apples and products             | 1998           | 4                                                                     |
| 20               | Botswana | Bananas                         | 1998           | 5                                                                     |
| 20               | Botswana | Beans                           | 1998           | 21                                                                    |
| 20               | Botswana | Beer                            | 1998           | 34                                                                    |
| 20               | Botswana | Beverages, Alcoholic            | 1998           | 8                                                                     |
| 20               | Botswana | Beverages, Fermented            | 1998           | 24                                                                    |
| 20               | Botswana | Bovine Meat                     | 1998           | 33                                                                    |
| 20               | Botswana | Butter, Ghee                    | 1998           | 14                                                                    |
| 20               | Botswana | Cereals - Excluding Beer        | 1998           | 992                                                                   |
| 20               | Botswana | Cereals, Other                  | 1998           | 24                                                                    |
| 20               | Botswana | Cocoa Beans and products        | 1998           | 8                                                                     |
| 20               | Botswana | Coffee and products             | 1998           | 1                                                                     |
| 20               | Botswana | Cottonseed Oil                  | 1998           | 10                                                                    |
| 20               | Botswana | Cream                           | 1998           | 2                                                                     |
| 20               | Botswana | Eggs                            | 1998           | 4                                                                     |
| 20               | Botswana | Fats, Animals, Raw              | 1998           | 23                                                                    |
| 20               | Botswana | Fish, Seafood                   | 1998           | 6                                                                     |
| 20               | Botswana | Freshwater Fish                 | 1998           | 1                                                                     |
| 20               | Botswana | Fruits - Excluding Wine         | 1998           | 35                                                                    |
| 20               | Botswana | Fruits, Other                   | 1998           | 19                                                                    |
| 20               | Botswana | Grand Total                     | 1998           | 2,081                                                                 |
| 20               | Botswana | Grapes and products (excl wine) | 1998           | 1                                                                     |
| 20               | Botswana | Groundnut Oil                   | 1998           | 1                                                                     |
| 20               | Botswana | Groundnuts (Shelled Eq)         | 1998           | 2                                                                     |
| 20               | Botswana | Maize and products              | 1998           | 362                                                                   |
| 20               | Botswana | Marine Fish, Other              | 1998           | 3                                                                     |
| 20               | Botswana | Meat                            | 1998           | 88                                                                    |
| 20               | Botswana | Meat, Other                     | 1998           | 12                                                                    |
| 20               | Botswana | Milk - Excluding Butter         | 1998           | 179                                                                   |
| 20               | Botswana | Millet and products             | 1998           | 9                                                                     |
| 20               | Botswana | Miscellaneous                   | 1998           | 4                                                                     |
| 20               | Botswana | Mutton & Goat Meat              | 1998           | 18                                                                    |
| 20               | Botswana | Offals                          | 1998           | 11                                                                    |
| 20               | Botswana | Oilcrops                        | 1998           | 7                                                                     |
| 20               | Botswana | Oilcrops Oil, Other             | 1998           | 53                                                                    |
| 20               | Botswana | Olive Oil                       | 1998           | 2                                                                     |
| 20               | Botswana | Onions                          | 1998           | 3                                                                     |
| 20               | Botswana | Oranges, Mandarines             | 1998           | 6                                                                     |
| 20               | Botswana | Peas                            | 1998           | 4                                                                     |
| 20               | Botswana | Pelagic Fish                    | 1998           | 1                                                                     |
| 20               | Botswana | Pepper                          | 1998           | 2                                                                     |
| 20               | Botswana | Pigmeat                         | 1998           | 10                                                                    |
| 20               | Botswana | Potatoes and products           | 1998           | 19                                                                    |
| 20               | Botswana | Poultry Meat                    | 1998           | 15                                                                    |

Dietary calcium and zinc deficiency risks are decreasing but remain prevalent

| FAO Country code | Country  | Food item                       | Reference year | Net energy supply (kcal <i>capita</i> <sup>-1</sup> d <sup>-1</sup> ) |
|------------------|----------|---------------------------------|----------------|-----------------------------------------------------------------------|
| 20               | Botswana | Pulses                          | 1998           | 81                                                                    |
| 20               | Botswana | Pulses, Other and products      | 1998           | 56                                                                    |
| 20               | Botswana | Rape and Mustardseed            | 1998           | 1                                                                     |
| 20               | Botswana | Rice (Milled Equivalent)        | 1998           | 65                                                                    |
| 20               | Botswana | Roots, Other                    | 1998           | 108                                                                   |
| 20               | Botswana | Rye and products                | 1998           | 6                                                                     |
| 20               | Botswana | Sorghum and products            | 1998           | 252                                                                   |
| 20               | Botswana | Soyabean Oil                    | 1998           | 28                                                                    |
| 20               | Botswana | Soyabeans                       | 1998           | 3                                                                     |
| 20               | Botswana | Spices                          | 1998           | 9                                                                     |
| 20               | Botswana | Spices, Other                   | 1998           | 6                                                                     |
| 20               | Botswana | Starchy Roots                   | 1998           | 127                                                                   |
| 20               | Botswana | Stimulants                      | 1998           | 9                                                                     |
| 20               | Botswana | Sugar & Sweeteners              | 1998           | 230                                                                   |
| 20               | Botswana | Sugar (Raw Equivalent)          | 1998           | 207                                                                   |
| 20               | Botswana | Sunflowerseed Oil               | 1998           | 80                                                                    |
| 20               | Botswana | Sweeteners, Other               | 1998           | 23                                                                    |
| 20               | Botswana | Tea (including mate)            | 1998           | 1                                                                     |
| 20               | Botswana | Tomatoes and products           | 1998           | 2                                                                     |
| 20               | Botswana | Treenuts                        | 1998           | 1                                                                     |
| 20               | Botswana | Vegetable Oils                  | 1998           | 174                                                                   |
| 20               | Botswana | Vegetables                      | 1998           | 18                                                                    |
| 20               | Botswana | Vegetables, Other               | 1998           | 14                                                                    |
| 20               | Botswana | Vegetal Products                | 1998           | 1,754                                                                 |
| 20               | Botswana | Wheat and products              | 1998           | 272                                                                   |
| 20               | Botswana | Wine                            | 1998           | 2                                                                     |
| 20               | Botswana | Alcoholic Beverages             | 1999           | 62                                                                    |
| 20               | Botswana | Animal fats                     | 1999           | 40                                                                    |
| 20               | Botswana | Animal Products                 | 1999           | 317                                                                   |
| 20               | Botswana | Apples and products             | 1999           | 4                                                                     |
| 20               | Botswana | Bananas                         | 1999           | 8                                                                     |
| 20               | Botswana | Beans                           | 1999           | 22                                                                    |
| 20               | Botswana | Beer                            | 1999           | 33                                                                    |
| 20               | Botswana | Beverages, Alcoholic            | 1999           | 5                                                                     |
| 20               | Botswana | Beverages, Fermented            | 1999           | 21                                                                    |
| 20               | Botswana | Bovine Meat                     | 1999           | 21                                                                    |
| 20               | Botswana | Butter, Ghee                    | 1999           | 13                                                                    |
| 20               | Botswana | Cereals - Excluding Beer        | 1999           | 954                                                                   |
| 20               | Botswana | Cereals, Other                  | 1999           | 8                                                                     |
| 20               | Botswana | Cocoa Beans and products        | 1999           | 8                                                                     |
| 20               | Botswana | Coconuts - Incl Copra           | 1999           | 1                                                                     |
| 20               | Botswana | Coffee and products             | 1999           | 1                                                                     |
| 20               | Botswana | Cottonseed Oil                  | 1999           | 3                                                                     |
| 20               | Botswana | Cream                           | 1999           | 7                                                                     |
| 20               | Botswana | Eggs                            | 1999           | 6                                                                     |
| 20               | Botswana | Fats, Animals, Raw              | 1999           | 20                                                                    |
| 20               | Botswana | Fish, Seafood                   | 1999           | 7                                                                     |
| 20               | Botswana | Fruits - Excluding Wine         | 1999           | 50                                                                    |
| 20               | Botswana | Fruits, Other                   | 1999           | 32                                                                    |
| 20               | Botswana | Grand Total                     | 1999           | 2,117                                                                 |
| 20               | Botswana | Grapes and products (excl wine) | 1999           | 1                                                                     |
| 20               | Botswana | Groundnut Oil                   | 1999           | 1                                                                     |
| 20               | Botswana | Groundnuts (Shelled Eq)         | 1999           | 1                                                                     |
| 20               | Botswana | Maize and products              | 1999           | 363                                                                   |
| 20               | Botswana | Marine Fish, Other              | 1999           | 1                                                                     |
| 20               | Botswana | Meat                            | 1999           | 79                                                                    |
| 20               | Botswana | Meat, Other                     | 1999           | 16                                                                    |
| 20               | Botswana | Milk - Excluding Butter         | 1999           | 177                                                                   |
| 20               | Botswana | Millet and products             | 1999           | 4                                                                     |
| 20               | Botswana | Miscellaneous                   | 1999           | 8                                                                     |
| 20               | Botswana | Mutton & Goat Meat              | 1999           | 17                                                                    |
| 20               | Botswana | Offals                          | 1999           | 9                                                                     |
| 20               | Botswana | Oilcrops                        | 1999           | 11                                                                    |
| 20               | Botswana | Oilcrops Oil, Other             | 1999           | 47                                                                    |
| 20               | Botswana | Olive Oil                       | 1999           | 1                                                                     |
| 20               | Botswana | Onions                          | 1999           | 3                                                                     |
| 20               | Botswana | Oranges, Mandarines             | 1999           | 5                                                                     |
| 20               | Botswana | Palm Oil                        | 1999           | 2                                                                     |
| 20               | Botswana | Peas                            | 1999           | 7                                                                     |
| 20               | Botswana | Pelagic Fish                    | 1999           | 5                                                                     |
| 20               | Botswana | Pepper                          | 1999           | 2                                                                     |
| 20               | Botswana | Pigmeat                         | 1999           | 10                                                                    |
| 20               | Botswana | Potatoes and products           | 1999           | 26                                                                    |
| 20               | Botswana | Poultry Meat                    | 1999           | 15                                                                    |
| 20               | Botswana | Pulses                          | 1999           | 111                                                                   |
| 20               | Botswana | Pulses, Other and products      | 1999           | 82                                                                    |
| 20               | Botswana | Rape and Mustardseed            | 1999           | 1                                                                     |
| 20               | Botswana | Rice (Milled Equivalent)        | 1999           | 71                                                                    |
| 20               | Botswana | Roots, Other                    | 1999           | 107                                                                   |
| 20               | Botswana | Rye and products                | 1999           | 2                                                                     |
| 20               | Botswana | Sorghum and products            | 1999           | 202                                                                   |
| 20               | Botswana | Soyabean Oil                    | 1999           | 38                                                                    |
| 20               | Botswana | Soyabeans                       | 1999           | 8                                                                     |
| 20               | Botswana | Spices                          | 1999           | 9                                                                     |
| 20               | Botswana | Spices, Other                   | 1999           | 6                                                                     |
| 20               | Botswana | Starchy Roots                   | 1999           | 133                                                                   |
| 20               | Botswana | Stimulants                      | 1999           | 10                                                                    |
| 20               | Botswana | Sugar & Sweeteners              | 1999           | 232                                                                   |
| 20               | Botswana | Sugar (Raw Equivalent)          | 1999           | 209                                                                   |
| 20               | Botswana | Sunflowerseed Oil               | 1999           | 106                                                                   |
| 20               | Botswana | Sweeteners, Other               | 1999           | 23                                                                    |
| 20               | Botswana | Tea (including mate)            | 1999           | 1                                                                     |
| 20               | Botswana | Tomatoes and products           | 1999           | 2                                                                     |
| 20               | Botswana | Treenuts                        | 1999           | 1                                                                     |
| 20               | Botswana | Vegetable Oils                  | 1999           | 199                                                                   |
| 20               | Botswana | Vegetables                      | 1999           | 19                                                                    |
| 20               | Botswana | Vegetables, Other               | 1999           | 15                                                                    |



Dietary calcium and zinc deficiency risks are decreasing but remain prevalent

| FAO Country code | Country  | Food item                       | Reference year | Net energy supply (kcal capita <sup>-1</sup> d <sup>-1</sup> ) |
|------------------|----------|---------------------------------|----------------|----------------------------------------------------------------|
| 20               | Botswana | Vegetal Products                | 1999           | 1,799                                                          |
| 20               | Botswana | Wheat and products              | 1999           | 304                                                            |
| 20               | Botswana | Wine                            | 1999           | 3                                                              |
| 20               | Botswana | Alcoholic Beverages             | 2000           | 67                                                             |
| 20               | Botswana | Animal fats                     | 2000           | 40                                                             |
| 20               | Botswana | Animal Products                 | 2000           | 357                                                            |
| 20               | Botswana | Apples and products             | 2000           | 13                                                             |
| 20               | Botswana | Bananas                         | 2000           | 11                                                             |
| 20               | Botswana | Barley and products             | 2000           | 1                                                              |
| 20               | Botswana | Beans                           | 2000           | 23                                                             |
| 20               | Botswana | Beer                            | 2000           | 33                                                             |
| 20               | Botswana | Beverages, Alcoholic            | 2000           | 7                                                              |
| 20               | Botswana | Beverages, Fermented            | 2000           | 25                                                             |
| 20               | Botswana | Bovine Meat                     | 2000           | 24                                                             |
| 20               | Botswana | Butter, Ghee                    | 2000           | 14                                                             |
| 20               | Botswana | Cereals - Excluding Beer        | 2000           | 897                                                            |
| 20               | Botswana | Cereals, Other                  | 2000           | 6                                                              |
| 20               | Botswana | Cocoa Beans and products        | 2000           | 9                                                              |
| 20               | Botswana | Coconut Oil                     | 2000           | 1                                                              |
| 20               | Botswana | Coconuts - Incl Copra           | 2000           | 1                                                              |
| 20               | Botswana | Coffee and products             | 2000           | 1                                                              |
| 20               | Botswana | Cottonseed Oil                  | 2000           | 14                                                             |
| 20               | Botswana | Cream                           | 2000           | 9                                                              |
| 20               | Botswana | Eggs                            | 2000           | 7                                                              |
| 20               | Botswana | Fats, Animals, Raw              | 2000           | 17                                                             |
| 20               | Botswana | Fish, Seafood                   | 2000           | 10                                                             |
| 20               | Botswana | Fruits - Excluding Wine         | 2000           | 57                                                             |
| 20               | Botswana | Fruits, Other                   | 2000           | 24                                                             |
| 20               | Botswana | Grand Total                     | 2000           | 2,080                                                          |
| 20               | Botswana | Grapes and products (excl wine) | 2000           | 1                                                              |
| 20               | Botswana | Groundnut Oil                   | 2000           | 4                                                              |
| 20               | Botswana | Groundnuts (Shelled Eq)         | 2000           | 3                                                              |
| 20               | Botswana | Maize and products              | 2000           | 348                                                            |
| 20               | Botswana | Meat                            | 2000           | 91                                                             |
| 20               | Botswana | Meat, Other                     | 2000           | 19                                                             |
| 20               | Botswana | Milk - Excluding Butter         | 2000           | 200                                                            |
| 20               | Botswana | Millet and products             | 2000           | 2                                                              |
| 20               | Botswana | Miscellaneous                   | 2000           | 8                                                              |
| 20               | Botswana | Mutton & Goat Meat              | 2000           | 15                                                             |
| 20               | Botswana | Offals                          | 2000           | 9                                                              |
| 20               | Botswana | Oilcrops                        | 2000           | 9                                                              |
| 20               | Botswana | Oilcrops Oil, Other             | 2000           | 34                                                             |
| 20               | Botswana | Olive Oil                       | 2000           | 1                                                              |
| 20               | Botswana | Onions                          | 2000           | 9                                                              |
| 20               | Botswana | Oranges, Mandarines             | 2000           | 9                                                              |
| 20               | Botswana | Palm Oil                        | 2000           | 4                                                              |
| 20               | Botswana | Peas                            | 2000           | 5                                                              |
| 20               | Botswana | Pelagic Fish                    | 2000           | 8                                                              |
| 20               | Botswana | Pepper                          | 2000           | 2                                                              |
| 20               | Botswana | Pigmeat                         | 2000           | 15                                                             |
| 20               | Botswana | Potatoes and products           | 2000           | 25                                                             |
| 20               | Botswana | Poultry Meat                    | 2000           | 18                                                             |
| 20               | Botswana | Pulses                          | 2000           | 114                                                            |
| 20               | Botswana | Pulses, Other and products      | 2000           | 87                                                             |
| 20               | Botswana | Rice (Milled Equivalent)        | 2000           | 56                                                             |
| 20               | Botswana | Roots, Other                    | 2000           | 106                                                            |
| 20               | Botswana | Rye and products                | 2000           | 2                                                              |
| 20               | Botswana | Sorghum and products            | 2000           | 203                                                            |
| 20               | Botswana | Soyabean Oil                    | 2000           | 19                                                             |
| 20               | Botswana | Soyabeans                       | 2000           | 5                                                              |
| 20               | Botswana | Spices                          | 2000           | 9                                                              |
| 20               | Botswana | Spices, Other                   | 2000           | 7                                                              |
| 20               | Botswana | Starchy Roots                   | 2000           | 132                                                            |
| 20               | Botswana | Stimulants                      | 2000           | 11                                                             |
| 20               | Botswana | Sugar & Sweeteners              | 2000           | 226                                                            |
| 20               | Botswana | Sugar (Raw Equivalent)          | 2000           | 193                                                            |
| 20               | Botswana | Sunflowerseed Oil               | 2000           | 80                                                             |
| 20               | Botswana | Sweet potatoes                  | 2000           | 1                                                              |
| 20               | Botswana | Sweeteners, Other               | 2000           | 33                                                             |
| 20               | Botswana | Tea (including mate)            | 2000           | 1                                                              |
| 20               | Botswana | Tomatoes and products           | 2000           | 6                                                              |
| 20               | Botswana | Treenuts                        | 2000           | 3                                                              |
| 20               | Botswana | Vegetable Oils                  | 2000           | 157                                                            |
| 20               | Botswana | Vegetables                      | 2000           | 34                                                             |
| 20               | Botswana | Vegetables, Other               | 2000           | 18                                                             |
| 20               | Botswana | Vegetal Products                | 2000           | 1,723                                                          |
| 20               | Botswana | Wheat and products              | 2000           | 278                                                            |
| 20               | Botswana | Wine                            | 2000           | 3                                                              |
| 20               | Botswana | Alcoholic Beverages             | 2001           | 70                                                             |
| 20               | Botswana | Animal fats                     | 2001           | 31                                                             |
| 20               | Botswana | Animal Products                 | 2001           | 348                                                            |
| 20               | Botswana | Apples and products             | 2001           | 6                                                              |
| 20               | Botswana | Bananas                         | 2001           | 9                                                              |
| 20               | Botswana | Beans                           | 2001           | 22                                                             |
| 20               | Botswana | Beer                            | 2001           | 39                                                             |
| 20               | Botswana | Beverages, Alcoholic            | 2001           | 4                                                              |
| 20               | Botswana | Beverages, Fermented            | 2001           | 25                                                             |
| 20               | Botswana | Bovine Meat                     | 2001           | 16                                                             |
| 20               | Botswana | Butter, Ghee                    | 2001           | 13                                                             |
| 20               | Botswana | Cereals - Excluding Beer        | 2001           | 966                                                            |
| 20               | Botswana | Cereals, Other                  | 2001           | 6                                                              |
| 20               | Botswana | Cocoa Beans and products        | 2001           | 7                                                              |
| 20               | Botswana | Coconuts - Incl Copra           | 2001           | 1                                                              |
| 20               | Botswana | Coffee and products             | 2001           | 1                                                              |
| 20               | Botswana | Cottonseed Oil                  | 2001           | 34                                                             |
| 20               | Botswana | Cream                           | 2001           | 2                                                              |
| 20               | Botswana | Crustaceans                     | 2001           | 1                                                              |

Dietary calcium and zinc deficiency risks are decreasing but remain prevalent

| FAO Country code | Country  | Food item                       | Reference year | Net energy supply (kcal <i>capita</i> <sup>-1</sup> d <sup>-1</sup> ) |
|------------------|----------|---------------------------------|----------------|-----------------------------------------------------------------------|
| 20               | Botswana | Eggs                            | 2001           | 9                                                                     |
| 20               | Botswana | Fats, Animals, Raw              | 2001           | 17                                                                    |
| 20               | Botswana | Fish, Seafood                   | 2001           | 8                                                                     |
| 20               | Botswana | Fruits - Excluding Wine         | 2001           | 43                                                                    |
| 20               | Botswana | Fruits, Other                   | 2001           | 22                                                                    |
| 20               | Botswana | Grand Total                     | 2001           | 2,154                                                                 |
| 20               | Botswana | Grapes and products (excl wine) | 2001           | 1                                                                     |
| 20               | Botswana | Groundnut Oil                   | 2001           | 1                                                                     |
| 20               | Botswana | Groundnuts (Shelled Eq)         | 2001           | 5                                                                     |
| 20               | Botswana | Maize and products              | 2001           | 376                                                                   |
| 20               | Botswana | Meat                            | 2001           | 75                                                                    |
| 20               | Botswana | Meat, Other                     | 2001           | 19                                                                    |
| 20               | Botswana | Milk - Excluding Butter         | 2001           | 216                                                                   |
| 20               | Botswana | Miscellaneous                   | 2001           | 7                                                                     |
| 20               | Botswana | Mutton & Goat Meat              | 2001           | 16                                                                    |
| 20               | Botswana | Offals                          | 2001           | 9                                                                     |
| 20               | Botswana | Oilcrops                        | 2001           | 16                                                                    |
| 20               | Botswana | Oilcrops Oil, Other             | 2001           | 13                                                                    |
| 20               | Botswana | Olive Oil                       | 2001           | 1                                                                     |
| 20               | Botswana | Onions                          | 2001           | 4                                                                     |
| 20               | Botswana | Oranges, Mandarines             | 2001           | 5                                                                     |
| 20               | Botswana | Peas                            | 2001           | 10                                                                    |
| 20               | Botswana | Pelagic Fish                    | 2001           | 6                                                                     |
| 20               | Botswana | Pepper                          | 2001           | 3                                                                     |
| 20               | Botswana | Pigmeat                         | 2001           | 5                                                                     |
| 20               | Botswana | Potatoes and products           | 2001           | 27                                                                    |
| 20               | Botswana | Poultry Meat                    | 2001           | 19                                                                    |
| 20               | Botswana | Pulses                          | 2001           | 126                                                                   |
| 20               | Botswana | Pulses, Other and products      | 2001           | 93                                                                    |
| 20               | Botswana | Rice (Milled Equivalent)        | 2001           | 102                                                                   |
| 20               | Botswana | Roots, Other                    | 2001           | 113                                                                   |
| 20               | Botswana | Rye and products                | 2001           | 1                                                                     |
| 20               | Botswana | Sorghum and products            | 2001           | 217                                                                   |
| 20               | Botswana | Soyabean Oil                    | 2001           | 13                                                                    |
| 20               | Botswana | Soyabeans                       | 2001           | 9                                                                     |
| 20               | Botswana | Spices                          | 2001           | 9                                                                     |
| 20               | Botswana | Spices, Other                   | 2001           | 6                                                                     |
| 20               | Botswana | Starchy Roots                   | 2001           | 141                                                                   |
| 20               | Botswana | Stimulants                      | 2001           | 9                                                                     |
| 20               | Botswana | Sugar & Sweeteners              | 2001           | 233                                                                   |
| 20               | Botswana | Sugar (Raw Equivalent)          | 2001           | 208                                                                   |
| 20               | Botswana | Sunflowerseed Oil               | 2001           | 93                                                                    |
| 20               | Botswana | Sweet potatoes                  | 2001           | 1                                                                     |
| 20               | Botswana | Sweeteners, Other               | 2001           | 25                                                                    |
| 20               | Botswana | Tea (including mate)            | 2001           | 1                                                                     |
| 20               | Botswana | Tomatoes and products           | 2001           | 2                                                                     |
| 20               | Botswana | Treenuts                        | 2001           | 5                                                                     |
| 20               | Botswana | Vegetable Oils                  | 2001           | 157                                                                   |
| 20               | Botswana | Vegetables                      | 2001           | 26                                                                    |
| 20               | Botswana | Vegetables, Other               | 2001           | 20                                                                    |
| 20               | Botswana | Vegetal Products                | 2001           | 1,806                                                                 |
| 20               | Botswana | Wheat and products              | 2001           | 265                                                                   |
| 20               | Botswana | Wine                            | 2001           | 2                                                                     |
| 20               | Botswana | Alcoholic Beverages             | 2002           | 86                                                                    |
| 20               | Botswana | Animal fats                     | 2002           | 36                                                                    |
| 20               | Botswana | Animal Products                 | 2002           | 322                                                                   |
| 20               | Botswana | Apples and products             | 2002           | 6                                                                     |
| 20               | Botswana | Bananas                         | 2002           | 7                                                                     |
| 20               | Botswana | Beans                           | 2002           | 20                                                                    |
| 20               | Botswana | Beer                            | 2002           | 43                                                                    |
| 20               | Botswana | Beverages, Alcoholic            | 2002           | 15                                                                    |
| 20               | Botswana | Beverages, Fermented            | 2002           | 23                                                                    |
| 20               | Botswana | Bovine Meat                     | 2002           | 28                                                                    |
| 20               | Botswana | Butter, Ghee                    | 2002           | 15                                                                    |
| 20               | Botswana | Cereals - Excluding Beer        | 2002           | 894                                                                   |
| 20               | Botswana | Cereals, Other                  | 2002           | 12                                                                    |
| 20               | Botswana | Citrus, Other                   | 2002           | 1                                                                     |
| 20               | Botswana | Cocoa Beans and products        | 2002           | 9                                                                     |
| 20               | Botswana | Coconut Oil                     | 2002           | 1                                                                     |
| 20               | Botswana | Coconuts - Incl Copra           | 2002           | 3                                                                     |
| 20               | Botswana | Coffee and products             | 2002           | 2                                                                     |
| 20               | Botswana | Cottonseed Oil                  | 2002           | 29                                                                    |
| 20               | Botswana | Cream                           | 2002           | 6                                                                     |
| 20               | Botswana | Dates                           | 2002           | 1                                                                     |
| 20               | Botswana | Eggs                            | 2002           | 9                                                                     |
| 20               | Botswana | Fats, Animals, Raw              | 2002           | 16                                                                    |
| 20               | Botswana | Fish, Seafood                   | 2002           | 6                                                                     |
| 20               | Botswana | Freshwater Fish                 | 2002           | 1                                                                     |
| 20               | Botswana | Fruits - Excluding Wine         | 2002           | 57                                                                    |
| 20               | Botswana | Fruits, Other                   | 2002           | 36                                                                    |
| 20               | Botswana | Grand Total                     | 2002           | 2,111                                                                 |
| 20               | Botswana | Grapes and products (excl wine) | 2002           | 1                                                                     |
| 20               | Botswana | Groundnut Oil                   | 2002           | 1                                                                     |
| 20               | Botswana | Groundnuts (Shelled Eq)         | 2002           | 5                                                                     |
| 20               | Botswana | Maize and products              | 2002           | 299                                                                   |
| 20               | Botswana | Meat                            | 2002           | 84                                                                    |
| 20               | Botswana | Meat, Other                     | 2002           | 19                                                                    |
| 20               | Botswana | Milk - Excluding Butter         | 2002           | 179                                                                   |
| 20               | Botswana | Miscellaneous                   | 2002           | 25                                                                    |
| 20               | Botswana | Mutton & Goat Meat              | 2002           | 14                                                                    |
| 20               | Botswana | Offals                          | 2002           | 8                                                                     |
| 20               | Botswana | Oilcrops                        | 2002           | 21                                                                    |
| 20               | Botswana | Oilcrops Oil, Other             | 2002           | 17                                                                    |
| 20               | Botswana | Oilcrops, Other                 | 2002           | 2                                                                     |
| 20               | Botswana | Olive Oil                       | 2002           | 1                                                                     |
| 20               | Botswana | Onions                          | 2002           | 4                                                                     |
| 20               | Botswana | Oranges, Mandarines             | 2002           | 4                                                                     |

Dietary calcium and zinc deficiency risks are decreasing but remain prevalent

| FAO Country code | Country  | Food item                       | Reference year | Net energy supply (kcal capita <sup>-1</sup> d <sup>-1</sup> ) |
|------------------|----------|---------------------------------|----------------|----------------------------------------------------------------|
| 20               | Botswana | Palm Oil                        | 2002           | 1                                                              |
| 20               | Botswana | Peas                            | 2002           | 3                                                              |
| 20               | Botswana | Pelagic Fish                    | 2002           | 5                                                              |
| 20               | Botswana | Pepper                          | 2002           | 2                                                              |
| 20               | Botswana | Pigmeat                         | 2002           | 5                                                              |
| 20               | Botswana | Pineapples and products         | 2002           | 1                                                              |
| 20               | Botswana | Potatoes and products           | 2002           | 33                                                             |
| 20               | Botswana | Poultry Meat                    | 2002           | 18                                                             |
| 20               | Botswana | Pulses                          | 2002           | 116                                                            |
| 20               | Botswana | Pulses, Other and products      | 2002           | 92                                                             |
| 20               | Botswana | Rice (Milled Equivalent)        | 2002           | 73                                                             |
| 20               | Botswana | Roots, Other                    | 2002           | 113                                                            |
| 20               | Botswana | Rye and products                | 2002           | 10                                                             |
| 20               | Botswana | Sorghum and products            | 2002           | 219                                                            |
| 20               | Botswana | Soyabean Oil                    | 2002           | 13                                                             |
| 20               | Botswana | Soyabeans                       | 2002           | 10                                                             |
| 20               | Botswana | Spices                          | 2002           | 14                                                             |
| 20               | Botswana | Spices, Other                   | 2002           | 12                                                             |
| 20               | Botswana | Starchy Roots                   | 2002           | 147                                                            |
| 20               | Botswana | Stimulants                      | 2002           | 13                                                             |
| 20               | Botswana | Sugar & Sweeteners              | 2002           | 227                                                            |
| 20               | Botswana | Sugar (Raw Equivalent)          | 2002           | 188                                                            |
| 20               | Botswana | Sunflowerseed Oil               | 2002           | 84                                                             |
| 20               | Botswana | Sweet potatoes                  | 2002           | 1                                                              |
| 20               | Botswana | Sweeteners, Other               | 2002           | 39                                                             |
| 20               | Botswana | Tea (including mate)            | 2002           | 2                                                              |
| 20               | Botswana | Tomatoes and products           | 2002           | 2                                                              |
| 20               | Botswana | Treenuts                        | 2002           | 8                                                              |
| 20               | Botswana | Vegetable Oils                  | 2002           | 148                                                            |
| 20               | Botswana | Vegetables                      | 2002           | 32                                                             |
| 20               | Botswana | Vegetables, Other               | 2002           | 26                                                             |
| 20               | Botswana | Vegetal Products                | 2002           | 1,789                                                          |
| 20               | Botswana | Wheat and products              | 2002           | 280                                                            |
| 20               | Botswana | Wine                            | 2002           | 5                                                              |
| 20               | Botswana | Alcoholic Beverages             | 2003           | 79                                                             |
| 20               | Botswana | Animal fats                     | 2003           | 33                                                             |
| 20               | Botswana | Animal Products                 | 2003           | 262                                                            |
| 20               | Botswana | Apples and products             | 2003           | 5                                                              |
| 20               | Botswana | Bananas                         | 2003           | 7                                                              |
| 20               | Botswana | Beans                           | 2003           | 22                                                             |
| 20               | Botswana | Beer                            | 2003           | 42                                                             |
| 20               | Botswana | Beverages, Alcoholic            | 2003           | 10                                                             |
| 20               | Botswana | Beverages, Fermented            | 2003           | 22                                                             |
| 20               | Botswana | Bovine Meat                     | 2003           | 22                                                             |
| 20               | Botswana | Butter, Ghee                    | 2003           | 14                                                             |
| 20               | Botswana | Cereals - Excluding Beer        | 2003           | 919                                                            |
| 20               | Botswana | Cereals, Other                  | 2003           | 16                                                             |
| 20               | Botswana | Cocoa Beans and products        | 2003           | 10                                                             |
| 20               | Botswana | Coconut Oil                     | 2003           | 1                                                              |
| 20               | Botswana | Coconuts - Incl Copra           | 2003           | 2                                                              |
| 20               | Botswana | Coffee and products             | 2003           | 1                                                              |
| 20               | Botswana | Cottonseed Oil                  | 2003           | 18                                                             |
| 20               | Botswana | Cream                           | 2003           | 3                                                              |
| 20               | Botswana | Eggs                            | 2003           | 10                                                             |
| 20               | Botswana | Fats, Animals, Raw              | 2003           | 17                                                             |
| 20               | Botswana | Fish, Seafood                   | 2003           | 7                                                              |
| 20               | Botswana | Fruits - Excluding Wine         | 2003           | 39                                                             |
| 20               | Botswana | Fruits, Other                   | 2003           | 23                                                             |
| 20               | Botswana | Grand Total                     | 2003           | 2,113                                                          |
| 20               | Botswana | Grapes and products (excl wine) | 2003           | 1                                                              |
| 20               | Botswana | Groundnut Oil                   | 2003           | 1                                                              |
| 20               | Botswana | Groundnuts (Shelled Eq)         | 2003           | 4                                                              |
| 20               | Botswana | Maize and products              | 2003           | 311                                                            |
| 20               | Botswana | Meat                            | 2003           | 69                                                             |
| 20               | Botswana | Meat, Other                     | 2003           | 21                                                             |
| 20               | Botswana | Milk - Excluding Butter         | 2003           | 136                                                            |
| 20               | Botswana | Miscellaneous                   | 2003           | 15                                                             |
| 20               | Botswana | Mutton & Goat Meat              | 2003           | 11                                                             |
| 20               | Botswana | Offals                          | 2003           | 8                                                              |
| 20               | Botswana | Oilcrops                        | 2003           | 17                                                             |
| 20               | Botswana | Oilcrops Oil, Other             | 2003           | 11                                                             |
| 20               | Botswana | Olive Oil                       | 2003           | 1                                                              |
| 20               | Botswana | Onions                          | 2003           | 3                                                              |
| 20               | Botswana | Oranges, Mandarines             | 2003           | 4                                                              |
| 20               | Botswana | Palm Oil                        | 2003           | 3                                                              |
| 20               | Botswana | Peas                            | 2003           | 2                                                              |
| 20               | Botswana | Pelagic Fish                    | 2003           | 6                                                              |
| 20               | Botswana | Pepper                          | 2003           | 2                                                              |
| 20               | Botswana | Pigmeat                         | 2003           | 4                                                              |
| 20               | Botswana | Potatoes and products           | 2003           | 29                                                             |
| 20               | Botswana | Poultry Meat                    | 2003           | 11                                                             |
| 20               | Botswana | Pulses                          | 2003           | 130                                                            |
| 20               | Botswana | Pulses, Other and products      | 2003           | 106                                                            |
| 20               | Botswana | Rape and Mustard Oil            | 2003           | 1                                                              |
| 20               | Botswana | Rice (Milled Equivalent)        | 2003           | 99                                                             |
| 20               | Botswana | Roots, Other                    | 2003           | 101                                                            |
| 20               | Botswana | Rye and products                | 2003           | 3                                                              |
| 20               | Botswana | Sorghum and products            | 2003           | 215                                                            |
| 20               | Botswana | Soyabean Oil                    | 2003           | 14                                                             |
| 20               | Botswana | Soyabeans                       | 2003           | 11                                                             |
| 20               | Botswana | Spices                          | 2003           | 9                                                              |
| 20               | Botswana | Spices, Other                   | 2003           | 7                                                              |
| 20               | Botswana | Starchy Roots                   | 2003           | 131                                                            |
| 20               | Botswana | Stimulants                      | 2003           | 12                                                             |
| 20               | Botswana | Sugar & Sweeteners              | 2003           | 280                                                            |
| 20               | Botswana | Sugar (Raw Equivalent)          | 2003           | 255                                                            |
| 20               | Botswana | Sunflowerseed Oil               | 2003           | 135                                                            |

Dietary calcium and zinc deficiency risks are decreasing but remain prevalent

| FAO Country code | Country  | Food item                       | Reference year | Net energy supply (kcal capita <sup>-1</sup> d <sup>-1</sup> ) |
|------------------|----------|---------------------------------|----------------|----------------------------------------------------------------|
| 20               | Botswana | Sweet potatoes                  | 2003           | 1                                                              |
| 20               | Botswana | Sweeteners, Other               | 2003           | 26                                                             |
| 20               | Botswana | Tea (including mate)            | 2003           | 1                                                              |
| 20               | Botswana | Tomatoes and products           | 2003           | 2                                                              |
| 20               | Botswana | Treenuts                        | 2003           | 8                                                              |
| 20               | Botswana | Vegetable Oils                  | 2003           | 185                                                            |
| 20               | Botswana | Vegetables                      | 2003           | 26                                                             |
| 20               | Botswana | Vegetables, Other               | 2003           | 22                                                             |
| 20               | Botswana | Vegetal Products                | 2003           | 1,851                                                          |
| 20               | Botswana | Wheat and products              | 2003           | 275                                                            |
| 20               | Botswana | Wine                            | 2003           | 5                                                              |
| 20               | Botswana | Alcoholic Beverages             | 2004           | 78                                                             |
| 20               | Botswana | Animal fats                     | 2004           | 37                                                             |
| 20               | Botswana | Animal Products                 | 2004           | 304                                                            |
| 20               | Botswana | Apples and products             | 2004           | 5                                                              |
| 20               | Botswana | Bananas                         | 2004           | 6                                                              |
| 20               | Botswana | Beans                           | 2004           | 18                                                             |
| 20               | Botswana | Beer                            | 2004           | 41                                                             |
| 20               | Botswana | Beverages, Alcoholic            | 2004           | 11                                                             |
| 20               | Botswana | Beverages, Fermented            | 2004           | 19                                                             |
| 20               | Botswana | Bovine Meat                     | 2004           | 45                                                             |
| 20               | Botswana | Butter, Ghee                    | 2004           | 13                                                             |
| 20               | Botswana | Cereals - Excluding Beer        | 2004           | 924                                                            |
| 20               | Botswana | Cereals, Other                  | 2004           | 13                                                             |
| 20               | Botswana | Cocoa Beans and products        | 2004           | 8                                                              |
| 20               | Botswana | Coconut Oil                     | 2004           | 3                                                              |
| 20               | Botswana | Coconuts - Incl Copra           | 2004           | 2                                                              |
| 20               | Botswana | Coffee and products             | 2004           | 1                                                              |
| 20               | Botswana | Cottonseed Oil                  | 2004           | 19                                                             |
| 20               | Botswana | Cream                           | 2004           | 6                                                              |
| 20               | Botswana | Eggs                            | 2004           | 7                                                              |
| 20               | Botswana | Fats, Animals, Raw              | 2004           | 18                                                             |
| 20               | Botswana | Fish, Seafood                   | 2004           | 6                                                              |
| 20               | Botswana | Fruits - Excluding Wine         | 2004           | 37                                                             |
| 20               | Botswana | Fruits, Other                   | 2004           | 23                                                             |
| 20               | Botswana | Grand Total                     | 2004           | 2,191                                                          |
| 20               | Botswana | Grapes and products (excl wine) | 2004           | 1                                                              |
| 20               | Botswana | Groundnut Oil                   | 2004           | 1                                                              |
| 20               | Botswana | Groundnuts (Shelled Eq)         | 2004           | 1                                                              |
| 20               | Botswana | Maize and products              | 2004           | 361                                                            |
| 20               | Botswana | Maize Germ Oil                  | 2004           | 1                                                              |
| 20               | Botswana | Meat                            | 2004           | 96                                                             |
| 20               | Botswana | Meat, Other                     | 2004           | 23                                                             |
| 20               | Botswana | Milk - Excluding Butter         | 2004           | 149                                                            |
| 20               | Botswana | Mutton & Goat Meat              | 2004           | 13                                                             |
| 20               | Botswana | Offals                          | 2004           | 9                                                              |
| 20               | Botswana | Oilcrops                        | 2004           | 2                                                              |
| 20               | Botswana | Oilcrops Oil, Other             | 2004           | 45                                                             |
| 20               | Botswana | Olive Oil                       | 2004           | 1                                                              |
| 20               | Botswana | Onions                          | 2004           | 3                                                              |
| 20               | Botswana | Oranges, Mandarines             | 2004           | 1                                                              |
| 20               | Botswana | Palm Oil                        | 2004           | 3                                                              |
| 20               | Botswana | Peas                            | 2004           | 2                                                              |
| 20               | Botswana | Pelagic Fish                    | 2004           | 6                                                              |
| 20               | Botswana | Pepper                          | 2004           | 1                                                              |
| 20               | Botswana | Pigmeat                         | 2004           | 3                                                              |
| 20               | Botswana | Potatoes and products           | 2004           | 32                                                             |
| 20               | Botswana | Poultry Meat                    | 2004           | 12                                                             |
| 20               | Botswana | Pulses                          | 2004           | 133                                                            |
| 20               | Botswana | Pulses, Other and products      | 2004           | 113                                                            |
| 20               | Botswana | Rape and Mustard Oil            | 2004           | 1                                                              |
| 20               | Botswana | Rice (Milled Equivalent)        | 2004           | 108                                                            |
| 20               | Botswana | Roots, Other                    | 2004           | 120                                                            |
| 20               | Botswana | Sorghum and products            | 2004           | 176                                                            |
| 20               | Botswana | Soyabean Oil                    | 2004           | 13                                                             |
| 20               | Botswana | Spices                          | 2004           | 8                                                              |
| 20               | Botswana | Spices, Other                   | 2004           | 7                                                              |
| 20               | Botswana | Starchy Roots                   | 2004           | 153                                                            |
| 20               | Botswana | Stimulants                      | 2004           | 9                                                              |
| 20               | Botswana | Sugar & Sweeteners              | 2004           | 270                                                            |
| 20               | Botswana | Sugar (Raw Equivalent)          | 2004           | 251                                                            |
| 20               | Botswana | Sunflowerseed Oil               | 2004           | 159                                                            |
| 20               | Botswana | Sweet potatoes                  | 2004           | 1                                                              |
| 20               | Botswana | Sweeteners, Other               | 2004           | 18                                                             |
| 20               | Botswana | Tomatoes and products           | 2004           | 2                                                              |
| 20               | Botswana | Treenuts                        | 2004           | 7                                                              |
| 20               | Botswana | Vegetable Oils                  | 2004           | 245                                                            |
| 20               | Botswana | Vegetables                      | 2004           | 20                                                             |
| 20               | Botswana | Vegetables, Other               | 2004           | 15                                                             |
| 20               | Botswana | Vegetal Products                | 2004           | 1,886                                                          |
| 20               | Botswana | Wheat and products              | 2004           | 266                                                            |
| 20               | Botswana | Wine                            | 2004           | 7                                                              |
| 20               | Botswana | Alcoholic Beverages             | 2005           | 82                                                             |
| 20               | Botswana | Animal fats                     | 2005           | 41                                                             |
| 20               | Botswana | Animal Products                 | 2005           | 314                                                            |
| 20               | Botswana | Apples and products             | 2005           | 5                                                              |
| 20               | Botswana | Bananas                         | 2005           | 6                                                              |
| 20               | Botswana | Beans                           | 2005           | 15                                                             |
| 20               | Botswana | Beer                            | 2005           | 38                                                             |
| 20               | Botswana | Beverages, Alcoholic            | 2005           | 13                                                             |
| 20               | Botswana | Beverages, Fermented            | 2005           | 22                                                             |
| 20               | Botswana | Bovine Meat                     | 2005           | 52                                                             |
| 20               | Botswana | Butter, Ghee                    | 2005           | 13                                                             |
| 20               | Botswana | Cereals - Excluding Beer        | 2005           | 932                                                            |
| 20               | Botswana | Cereals, Other                  | 2005           | 15                                                             |
| 20               | Botswana | Cocoa Beans and products        | 2005           | 8                                                              |
| 20               | Botswana | Coconut Oil                     | 2005           | 3                                                              |

Dietary calcium and zinc deficiency risks are decreasing but remain prevalent

| FAO Country code | Country  | Food item                       | Reference year | Net energy supply (kcal capita <sup>-1</sup> d <sup>-1</sup> ) |
|------------------|----------|---------------------------------|----------------|----------------------------------------------------------------|
| 20               | Botswana | Coconuts - Incl Copra           | 2005           | 2                                                              |
| 20               | Botswana | Coffee and products             | 2005           | 1                                                              |
| 20               | Botswana | Cottonseed Oil                  | 2005           | 20                                                             |
| 20               | Botswana | Cream                           | 2005           | 10                                                             |
| 20               | Botswana | Demersal Fish                   | 2005           | 1                                                              |
| 20               | Botswana | Eggs                            | 2005           | 7                                                              |
| 20               | Botswana | Fats, Animals, Raw              | 2005           | 18                                                             |
| 20               | Botswana | Fish, Seafood                   | 2005           | 6                                                              |
| 20               | Botswana | Fruits - Excluding Wine         | 2005           | 37                                                             |
| 20               | Botswana | Fruits, Other                   | 2005           | 24                                                             |
| 20               | Botswana | Grand Total                     | 2005           | 2,198                                                          |
| 20               | Botswana | Grapes and products (excl wine) | 2005           | 1                                                              |
| 20               | Botswana | Groundnut Oil                   | 2005           | 1                                                              |
| 20               | Botswana | Groundnuts (Shelled Eq)         | 2005           | 1                                                              |
| 20               | Botswana | Maize and products              | 2005           | 332                                                            |
| 20               | Botswana | Maize Germ Oil                  | 2005           | 1                                                              |
| 20               | Botswana | Meat                            | 2005           | 102                                                            |
| 20               | Botswana | Meat, Other                     | 2005           | 24                                                             |
| 20               | Botswana | Milk - Excluding Butter         | 2005           | 148                                                            |
| 20               | Botswana | Mutton & Goat Meat              | 2005           | 14                                                             |
| 20               | Botswana | Offals                          | 2005           | 9                                                              |
| 20               | Botswana | Oilcrops                        | 2005           | 3                                                              |
| 20               | Botswana | Oilcrops Oil, Other             | 2005           | 68                                                             |
| 20               | Botswana | Olive Oil                       | 2005           | 1                                                              |
| 20               | Botswana | Onions                          | 2005           | 3                                                              |
| 20               | Botswana | Oranges, Mandarines             | 2005           | 1                                                              |
| 20               | Botswana | Palm Oil                        | 2005           | 4                                                              |
| 20               | Botswana | Peas                            | 2005           | 2                                                              |
| 20               | Botswana | Pelagic Fish                    | 2005           | 5                                                              |
| 20               | Botswana | Pepper                          | 2005           | 1                                                              |
| 20               | Botswana | Pigmeat                         | 2005           | 3                                                              |
| 20               | Botswana | Potatoes and products           | 2005           | 31                                                             |
| 20               | Botswana | Poultry Meat                    | 2005           | 9                                                              |
| 20               | Botswana | Pulses                          | 2005           | 82                                                             |
| 20               | Botswana | Pulses, Other and products      | 2005           | 65                                                             |
| 20               | Botswana | Rape and Mustard Oil            | 2005           | 1                                                              |
| 20               | Botswana | Rice (Milled Equivalent)        | 2005           | 113                                                            |
| 20               | Botswana | Roots, Other                    | 2005           | 117                                                            |
| 20               | Botswana | Sorghum and products            | 2005           | 195                                                            |
| 20               | Botswana | Soyabean Oil                    | 2005           | 21                                                             |
| 20               | Botswana | Spices                          | 2005           | 7                                                              |
| 20               | Botswana | Spices, Other                   | 2005           | 7                                                              |
| 20               | Botswana | Starchy Roots                   | 2005           | 148                                                            |
| 20               | Botswana | Stimulants                      | 2005           | 9                                                              |
| 20               | Botswana | Sugar & Sweeteners              | 2005           | 277                                                            |
| 20               | Botswana | Sugar (Raw Equivalent)          | 2005           | 260                                                            |
| 20               | Botswana | Sunflowerseed Oil               | 2005           | 169                                                            |
| 20               | Botswana | Sweeteners, Other               | 2005           | 17                                                             |
| 20               | Botswana | Tomatoes and products           | 2005           | 2                                                              |
| 20               | Botswana | Vegetable Oils                  | 2005           | 290                                                            |
| 20               | Botswana | Vegetables                      | 2005           | 18                                                             |
| 20               | Botswana | Vegetables, Other               | 2005           | 13                                                             |
| 20               | Botswana | Vegetal Products                | 2005           | 1,885                                                          |
| 20               | Botswana | Wheat and products              | 2005           | 276                                                            |
| 20               | Botswana | Wine                            | 2005           | 9                                                              |
| 20               | Botswana | Alcoholic Beverages             | 2006           | 92                                                             |
| 20               | Botswana | Animal fats                     | 2006           | 48                                                             |
| 20               | Botswana | Animal Products                 | 2006           | 308                                                            |
| 20               | Botswana | Apples and products             | 2006           | 5                                                              |
| 20               | Botswana | Bananas                         | 2006           | 5                                                              |
| 20               | Botswana | Beans                           | 2006           | 13                                                             |
| 20               | Botswana | Beer                            | 2006           | 39                                                             |
| 20               | Botswana | Beverages, Alcoholic            | 2006           | 14                                                             |
| 20               | Botswana | Beverages, Fermented            | 2006           | 24                                                             |
| 20               | Botswana | Bovine Meat                     | 2006           | 45                                                             |
| 20               | Botswana | Butter, Ghee                    | 2006           | 13                                                             |
| 20               | Botswana | Cereals - Excluding Beer        | 2006           | 984                                                            |
| 20               | Botswana | Cereals, Other                  | 2006           | 13                                                             |
| 20               | Botswana | Cocoa Beans and products        | 2006           | 9                                                              |
| 20               | Botswana | Coconut Oil                     | 2006           | 1                                                              |
| 20               | Botswana | Coconuts - Incl Copra           | 2006           | 2                                                              |
| 20               | Botswana | Coffee and products             | 2006           | 1                                                              |
| 20               | Botswana | Cottonseed Oil                  | 2006           | 22                                                             |
| 20               | Botswana | Cream                           | 2006           | 17                                                             |
| 20               | Botswana | Eggs                            | 2006           | 8                                                              |
| 20               | Botswana | Fats, Animals, Raw              | 2006           | 18                                                             |
| 20               | Botswana | Fish, Seafood                   | 2006           | 5                                                              |
| 20               | Botswana | Fruits - Excluding Wine         | 2006           | 38                                                             |
| 20               | Botswana | Fruits, Other                   | 2006           | 25                                                             |
| 20               | Botswana | Grand Total                     | 2006           | 2,150                                                          |
| 20               | Botswana | Grapes and products (excl wine) | 2006           | 1                                                              |
| 20               | Botswana | Groundnut Oil                   | 2006           | 1                                                              |
| 20               | Botswana | Groundnuts (Shelled Eq)         | 2006           | 1                                                              |
| 20               | Botswana | Maize and products              | 2006           | 327                                                            |
| 20               | Botswana | Maize Germ Oil                  | 2006           | 1                                                              |
| 20               | Botswana | Meat                            | 2006           | 94                                                             |
| 20               | Botswana | Meat, Other                     | 2006           | 20                                                             |
| 20               | Botswana | Milk - Excluding Butter         | 2006           | 144                                                            |
| 20               | Botswana | Millet and products             | 2006           | 2                                                              |
| 20               | Botswana | Mutton & Goat Meat              | 2006           | 14                                                             |
| 20               | Botswana | Oats                            | 2006           | 1                                                              |
| 20               | Botswana | Offals                          | 2006           | 9                                                              |
| 20               | Botswana | Oilcrops                        | 2006           | 2                                                              |
| 20               | Botswana | Oilcrops Oil, Other             | 2006           | 13                                                             |
| 20               | Botswana | Olive Oil                       | 2006           | 1                                                              |
| 20               | Botswana | Onions                          | 2006           | 3                                                              |
| 20               | Botswana | Oranges, Mandarines             | 2006           | 1                                                              |

Dietary calcium and zinc deficiency risks are decreasing but remain prevalent

| FAO Country code | Country  | Food item                       | Reference year | Net energy supply (kcal capita <sup>-1</sup> d <sup>-1</sup> ) |
|------------------|----------|---------------------------------|----------------|----------------------------------------------------------------|
| 20               | Botswana | Palm Oil                        | 2006           | 5                                                              |
| 20               | Botswana | Peas                            | 2006           | 2                                                              |
| 20               | Botswana | Pelagic Fish                    | 2006           | 4                                                              |
| 20               | Botswana | Pigmeat                         | 2006           | 3                                                              |
| 20               | Botswana | Potatoes and products           | 2006           | 29                                                             |
| 20               | Botswana | Poultry Meat                    | 2006           | 11                                                             |
| 20               | Botswana | Pulses                          | 2006           | 47                                                             |
| 20               | Botswana | Pulses, Other and products      | 2006           | 32                                                             |
| 20               | Botswana | Rape and Mustard Oil            | 2006           | 1                                                              |
| 20               | Botswana | Rice (Milled Equivalent)        | 2006           | 124                                                            |
| 20               | Botswana | Roots, Other                    | 2006           | 108                                                            |
| 20               | Botswana | Sorghum and products            | 2006           | 215                                                            |
| 20               | Botswana | Soyabean Oil                    | 2006           | 4                                                              |
| 20               | Botswana | Spices                          | 2006           | 6                                                              |
| 20               | Botswana | Spices, Other                   | 2006           | 6                                                              |
| 20               | Botswana | Starchy Roots                   | 2006           | 137                                                            |
| 20               | Botswana | Stimulants                      | 2006           | 10                                                             |
| 20               | Botswana | Sugar & Sweeteners              | 2006           | 285                                                            |
| 20               | Botswana | Sugar (Raw Equivalent)          | 2006           | 262                                                            |
| 20               | Botswana | Sunflowerseed Oil               | 2006           | 173                                                            |
| 20               | Botswana | Sweeteners, Other               | 2006           | 22                                                             |
| 20               | Botswana | Tomatoes and products           | 2006           | 3                                                              |
| 20               | Botswana | Vegetable Oils                  | 2006           | 221                                                            |
| 20               | Botswana | Vegetables                      | 2006           | 18                                                             |
| 20               | Botswana | Vegetables, Other               | 2006           | 13                                                             |
| 20               | Botswana | Vegetal Products                | 2006           | 1,842                                                          |
| 20               | Botswana | Wheat and products              | 2006           | 303                                                            |
| 20               | Botswana | Wine                            | 2006           | 14                                                             |
| 20               | Botswana | Alcoholic Beverages             | 2007           | 89                                                             |
| 20               | Botswana | Animal fats                     | 2007           | 54                                                             |
| 20               | Botswana | Animal Products                 | 2007           | 306                                                            |
| 20               | Botswana | Apples and products             | 2007           | 5                                                              |
| 20               | Botswana | Bananas                         | 2007           | 5                                                              |
| 20               | Botswana | Beans                           | 2007           | 13                                                             |
| 20               | Botswana | Beer                            | 2007           | 40                                                             |
| 20               | Botswana | Beverages, Alcoholic            | 2007           | 7                                                              |
| 20               | Botswana | Beverages, Fermented            | 2007           | 24                                                             |
| 20               | Botswana | Bovine Meat                     | 2007           | 32                                                             |
| 20               | Botswana | Butter, Ghee                    | 2007           | 13                                                             |
| 20               | Botswana | Cereals - Excluding Beer        | 2007           | 971                                                            |
| 20               | Botswana | Cereals, Other                  | 2007           | 21                                                             |
| 20               | Botswana | Cocoa Beans and products        | 2007           | 8                                                              |
| 20               | Botswana | Coconut Oil                     | 2007           | 1                                                              |
| 20               | Botswana | Cottonseed Oil                  | 2007           | 27                                                             |
| 20               | Botswana | Cream                           | 2007           | 23                                                             |
| 20               | Botswana | Eggs                            | 2007           | 9                                                              |
| 20               | Botswana | Fats, Animals, Raw              | 2007           | 17                                                             |
| 20               | Botswana | Fish, Seafood                   | 2007           | 7                                                              |
| 20               | Botswana | Fruits - Excluding Wine         | 2007           | 40                                                             |
| 20               | Botswana | Fruits, Other                   | 2007           | 25                                                             |
| 20               | Botswana | Grand Total                     | 2007           | 2,166                                                          |
| 20               | Botswana | Grapes and products (excl wine) | 2007           | 2                                                              |
| 20               | Botswana | Groundnut Oil                   | 2007           | 1                                                              |
| 20               | Botswana | Groundnuts (Shelled Eq)         | 2007           | 6                                                              |
| 20               | Botswana | Maize and products              | 2007           | 329                                                            |
| 20               | Botswana | Maize Germ Oil                  | 2007           | 1                                                              |
| 20               | Botswana | Meat                            | 2007           | 89                                                             |
| 20               | Botswana | Meat, Other                     | 2007           | 27                                                             |
| 20               | Botswana | Milk - Excluding Butter         | 2007           | 138                                                            |
| 20               | Botswana | Millet and products             | 2007           | 2                                                              |
| 20               | Botswana | Miscellaneous                   | 2007           | 13                                                             |
| 20               | Botswana | Mutton & Goat Meat              | 2007           | 14                                                             |
| 20               | Botswana | Oats                            | 2007           | 1                                                              |
| 20               | Botswana | Offals                          | 2007           | 9                                                              |
| 20               | Botswana | Oilcrops                        | 2007           | 12                                                             |
| 20               | Botswana | Oilcrops Oil, Other             | 2007           | 13                                                             |
| 20               | Botswana | Oilcrops, Other                 | 2007           | 1                                                              |
| 20               | Botswana | Olive Oil                       | 2007           | 2                                                              |
| 20               | Botswana | Onions                          | 2007           | 3                                                              |
| 20               | Botswana | Oranges, Mandarines             | 2007           | 3                                                              |
| 20               | Botswana | Palm Oil                        | 2007           | 6                                                              |
| 20               | Botswana | Peas                            | 2007           | 2                                                              |
| 20               | Botswana | Pelagic Fish                    | 2007           | 6                                                              |
| 20               | Botswana | Pepper                          | 2007           | 5                                                              |
| 20               | Botswana | Pigmeat                         | 2007           | 4                                                              |
| 20               | Botswana | Pimento                         | 2007           | 1                                                              |
| 20               | Botswana | Potatoes and products           | 2007           | 27                                                             |
| 20               | Botswana | Poultry Meat                    | 2007           | 12                                                             |
| 20               | Botswana | Pulses                          | 2007           | 17                                                             |
| 20               | Botswana | Pulses, Other and products      | 2007           | 2                                                              |
| 20               | Botswana | Rice (Milled Equivalent)        | 2007           | 140                                                            |
| 20               | Botswana | Roots, Other                    | 2007           | 108                                                            |
| 20               | Botswana | Sorghum and products            | 2007           | 202                                                            |
| 20               | Botswana | Soyabean Oil                    | 2007           | 6                                                              |
| 20               | Botswana | Soyabeans                       | 2007           | 5                                                              |
| 20               | Botswana | Spices                          | 2007           | 14                                                             |
| 20               | Botswana | Spices, Other                   | 2007           | 8                                                              |
| 20               | Botswana | Starchy Roots                   | 2007           | 135                                                            |
| 20               | Botswana | Stimulants                      | 2007           | 10                                                             |
| 20               | Botswana | Sugar & Sweeteners              | 2007           | 296                                                            |
| 20               | Botswana | Sugar (Raw Equivalent)          | 2007           | 260                                                            |
| 20               | Botswana | Sunflowerseed Oil               | 2007           | 175                                                            |
| 20               | Botswana | Sweeteners, Other               | 2007           | 37                                                             |
| 20               | Botswana | Tea (including mate)            | 2007           | 1                                                              |
| 20               | Botswana | Tomatoes and products           | 2007           | 3                                                              |
| 20               | Botswana | Treenuts                        | 2007           | 6                                                              |
| 20               | Botswana | Vegetable Oils                  | 2007           | 231                                                            |

Dietary calcium and zinc deficiency risks are decreasing but remain prevalent

| FAO Country code | Country  | Food item                       | Reference year | Net energy supply (kcal capita <sup>-1</sup> d <sup>-1</sup> ) |
|------------------|----------|---------------------------------|----------------|----------------------------------------------------------------|
| 20               | Botswana | Vegetables                      | 2007           | 26                                                             |
| 20               | Botswana | Vegetables, Other               | 2007           | 20                                                             |
| 20               | Botswana | Vegetal Products                | 2007           | 1,860                                                          |
| 20               | Botswana | Wheat and products              | 2007           | 275                                                            |
| 20               | Botswana | Wine                            | 2007           | 19                                                             |
| 20               | Botswana | Alcoholic Beverages             | 2008           | 114                                                            |
| 20               | Botswana | Animal fats                     | 2008           | 43                                                             |
| 20               | Botswana | Animal Products                 | 2008           | 305                                                            |
| 20               | Botswana | Apples and products             | 2008           | 5                                                              |
| 20               | Botswana | Bananas                         | 2008           | 6                                                              |
| 20               | Botswana | Beans                           | 2008           | 26                                                             |
| 20               | Botswana | Beer                            | 2008           | 45                                                             |
| 20               | Botswana | Beverages, Alcoholic            | 2008           | 28                                                             |
| 20               | Botswana | Beverages, Fermented            | 2008           | 29                                                             |
| 20               | Botswana | Bovine Meat                     | 2008           | 28                                                             |
| 20               | Botswana | Butter, Chee                    | 2008           | 16                                                             |
| 20               | Botswana | Cereals - Excluding Beer        | 2008           | 953                                                            |
| 20               | Botswana | Cereals, Other                  | 2008           | 25                                                             |
| 20               | Botswana | Cocoa Beans and products        | 2008           | 8                                                              |
| 20               | Botswana | Coconut Oil                     | 2008           | 1                                                              |
| 20               | Botswana | Coffee and products             | 2008           | 2                                                              |
| 20               | Botswana | Cottonseed Oil                  | 2008           | 39                                                             |
| 20               | Botswana | Cream                           | 2008           | 6                                                              |
| 20               | Botswana | Eggs                            | 2008           | 8                                                              |
| 20               | Botswana | Fats, Animals, Raw              | 2008           | 20                                                             |
| 20               | Botswana | Fish, Seafood                   | 2008           | 7                                                              |
| 20               | Botswana | Fruits - Excluding Wine         | 2008           | 44                                                             |
| 20               | Botswana | Fruits, Other                   | 2008           | 27                                                             |
| 20               | Botswana | Grand Total                     | 2008           | 2,184                                                          |
| 20               | Botswana | Grapes and products (excl wine) | 2008           | 1                                                              |
| 20               | Botswana | Groundnut Oil                   | 2008           | 3                                                              |
| 20               | Botswana | Groundnuts (Shelled Eq)         | 2008           | 8                                                              |
| 20               | Botswana | Maize and products              | 2008           | 309                                                            |
| 20               | Botswana | Maize Germ Oil                  | 2008           | 1                                                              |
| 20               | Botswana | Meat                            | 2008           | 98                                                             |
| 20               | Botswana | Meat, Other                     | 2008           | 32                                                             |
| 20               | Botswana | Milk - Excluding Butter         | 2008           | 141                                                            |
| 20               | Botswana | Millet and products             | 2008           | 6                                                              |
| 20               | Botswana | Miscellaneous                   | 2008           | 11                                                             |
| 20               | Botswana | Mutton & Goat Meat              | 2008           | 15                                                             |
| 20               | Botswana | Offals                          | 2008           | 10                                                             |
| 20               | Botswana | Oilcrops                        | 2008           | 21                                                             |
| 20               | Botswana | Oilcrops Oil, Other             | 2008           | 19                                                             |
| 20               | Botswana | Oilcrops, Other                 | 2008           | 1                                                              |
| 20               | Botswana | Olive Oil                       | 2008           | 2                                                              |
| 20               | Botswana | Onions                          | 2008           | 2                                                              |
| 20               | Botswana | Oranges, Mandarines             | 2008           | 4                                                              |
| 20               | Botswana | Palm Oil                        | 2008           | 13                                                             |
| 20               | Botswana | Peas                            | 2008           | 4                                                              |
| 20               | Botswana | Pelagic Fish                    | 2008           | 6                                                              |
| 20               | Botswana | Pepper                          | 2008           | 8                                                              |
| 20               | Botswana | Pigmeat                         | 2008           | 6                                                              |
| 20               | Botswana | Potatoes and products           | 2008           | 28                                                             |
| 20               | Botswana | Poultry Meat                    | 2008           | 16                                                             |
| 20               | Botswana | Pulses                          | 2008           | 37                                                             |
| 20               | Botswana | Pulses, Other and products      | 2008           | 8                                                              |
| 20               | Botswana | Rice (Milled Equivalent)        | 2008           | 129                                                            |
| 20               | Botswana | Roots, Other                    | 2008           | 102                                                            |
| 20               | Botswana | Sorghum and products            | 2008           | 179                                                            |
| 20               | Botswana | Soyabean Oil                    | 2008           | 1                                                              |
| 20               | Botswana | Soyabeans                       | 2008           | 12                                                             |
| 20               | Botswana | Spices                          | 2008           | 20                                                             |
| 20               | Botswana | Spices, Other                   | 2008           | 12                                                             |
| 20               | Botswana | Starchy Roots                   | 2008           | 131                                                            |
| 20               | Botswana | Stimulants                      | 2008           | 11                                                             |
| 20               | Botswana | Sugar & Sweeteners              | 2008           | 277                                                            |
| 20               | Botswana | Sugar (Raw Equivalent)          | 2008           | 252                                                            |
| 20               | Botswana | Sunflowerseed Oil               | 2008           | 150                                                            |
| 20               | Botswana | Sweeteners, Other               | 2008           | 25                                                             |
| 20               | Botswana | Tea (including mate)            | 2008           | 1                                                              |
| 20               | Botswana | Tomatoes and products           | 2008           | 2                                                              |
| 20               | Botswana | Treenuts                        | 2008           | 7                                                              |
| 20               | Botswana | Vegetable Oils                  | 2008           | 229                                                            |
| 20               | Botswana | Vegetables                      | 2008           | 24                                                             |
| 20               | Botswana | Vegetables, Other               | 2008           | 20                                                             |
| 20               | Botswana | Vegetal Products                | 2008           | 1,878                                                          |
| 20               | Botswana | Wheat and products              | 2008           | 305                                                            |
| 20               | Botswana | Wine                            | 2008           | 12                                                             |
| 20               | Botswana | Alcoholic Beverages             | 2009           | 88                                                             |
| 20               | Botswana | Animal fats                     | 2009           | 42                                                             |
| 20               | Botswana | Animal Products                 | 2009           | 318                                                            |
| 20               | Botswana | Apples and products             | 2009           | 6                                                              |
| 20               | Botswana | Bananas                         | 2009           | 6                                                              |
| 20               | Botswana | Beans                           | 2009           | 29                                                             |
| 20               | Botswana | Beer                            | 2009           | 50                                                             |
| 20               | Botswana | Beverages, Alcoholic            | 2009           | 9                                                              |
| 20               | Botswana | Beverages, Fermented            | 2009           | 22                                                             |
| 20               | Botswana | Bovine Meat                     | 2009           | 34                                                             |
| 20               | Botswana | Butter, Chee                    | 2009           | 19                                                             |
| 20               | Botswana | Cereals - Excluding Beer        | 2009           | 951                                                            |
| 20               | Botswana | Cereals, Other                  | 2009           | 15                                                             |
| 20               | Botswana | Citrus, Other                   | 2009           | 1                                                              |
| 20               | Botswana | Cocoa Beans and products        | 2009           | 9                                                              |
| 20               | Botswana | Coffee and products             | 2009           | 1                                                              |
| 20               | Botswana | Cottonseed Oil                  | 2009           | 22                                                             |
| 20               | Botswana | Cream                           | 2009           | 3                                                              |
| 20               | Botswana | Demersal Fish                   | 2009           | 1                                                              |

Dietary calcium and zinc deficiency risks are decreasing but remain prevalent

| FAO Country code | Country  | Food item                       | Reference year | Net energy supply (kcal <i>capita</i> <sup>-1</sup> d <sup>-1</sup> ) |
|------------------|----------|---------------------------------|----------------|-----------------------------------------------------------------------|
| 20               | Botswana | Eggs                            | 2009           | 7                                                                     |
| 20               | Botswana | Fats, Animals, Raw              | 2009           | 20                                                                    |
| 20               | Botswana | Fish, Seafood                   | 2009           | 7                                                                     |
| 20               | Botswana | Fruits - Excluding Wine         | 2009           | 40                                                                    |
| 20               | Botswana | Fruits, Other                   | 2009           | 22                                                                    |
| 20               | Botswana | Grand Total                     | 2009           | 2,199                                                                 |
| 20               | Botswana | Grapes and products (excl wine) | 2009           | 1                                                                     |
| 20               | Botswana | Groundnut Oil                   | 2009           | 4                                                                     |
| 20               | Botswana | Groundnuts (Shelled Eq)         | 2009           | 8                                                                     |
| 20               | Botswana | Maize and products              | 2009           | 329                                                                   |
| 20               | Botswana | Maize Germ Oil                  | 2009           | 2                                                                     |
| 20               | Botswana | Meat                            | 2009           | 102                                                                   |
| 20               | Botswana | Meat, Other                     | 2009           | 33                                                                    |
| 20               | Botswana | Milk - Excluding Butter         | 2009           | 149                                                                   |
| 20               | Botswana | Millet and products             | 2009           | 10                                                                    |
| 20               | Botswana | Miscellaneous                   | 2009           | 25                                                                    |
| 20               | Botswana | Mutton & Goat Meat              | 2009           | 14                                                                    |
| 20               | Botswana | Offals                          | 2009           | 10                                                                    |
| 20               | Botswana | Oilcrops                        | 2009           | 44                                                                    |
| 20               | Botswana | Oilcrops Oil, Other             | 2009           | 14                                                                    |
| 20               | Botswana | Olive Oil                       | 2009           | 4                                                                     |
| 20               | Botswana | Onions                          | 2009           | 3                                                                     |
| 20               | Botswana | Oranges, Mandarines             | 2009           | 3                                                                     |
| 20               | Botswana | Palm Oil                        | 2009           | 8                                                                     |
| 20               | Botswana | Peas                            | 2009           | 2                                                                     |
| 20               | Botswana | Pelagic Fish                    | 2009           | 6                                                                     |
| 20               | Botswana | Pepper                          | 2009           | 9                                                                     |
| 20               | Botswana | Pigmeat                         | 2009           | 6                                                                     |
| 20               | Botswana | Potatoes and products           | 2009           | 9                                                                     |
| 20               | Botswana | Poultry Meat                    | 2009           | 15                                                                    |
| 20               | Botswana | Pulses                          | 2009           | 48                                                                    |
| 20               | Botswana | Pulses, Other and products      | 2009           | 17                                                                    |
| 20               | Botswana | Rice (Milled Equivalent)        | 2009           | 95                                                                    |
| 20               | Botswana | Roots, Other                    | 2009           | 93                                                                    |
| 20               | Botswana | Sorghum and products            | 2009           | 185                                                                   |
| 20               | Botswana | Soyabeans                       | 2009           | 35                                                                    |
| 20               | Botswana | Spices                          | 2009           | 21                                                                    |
| 20               | Botswana | Spices, Other                   | 2009           | 11                                                                    |
| 20               | Botswana | Starchy Roots                   | 2009           | 103                                                                   |
| 20               | Botswana | Stimulants                      | 2009           | 12                                                                    |
| 20               | Botswana | Sugar & Sweeteners              | 2009           | 292                                                                   |
| 20               | Botswana | Sugar (Raw Equivalent)          | 2009           | 255                                                                   |
| 20               | Botswana | Sunflowerseed Oil               | 2009           | 178                                                                   |
| 20               | Botswana | Sweeteners, Other               | 2009           | 36                                                                    |
| 20               | Botswana | Tea (including mate)            | 2009           | 1                                                                     |
| 20               | Botswana | Tomatoes and products           | 2009           | 1                                                                     |
| 20               | Botswana | Treenuts                        | 2009           | 4                                                                     |
| 20               | Botswana | Vegetable Oils                  | 2009           | 232                                                                   |
| 20               | Botswana | Vegetables                      | 2009           | 22                                                                    |
| 20               | Botswana | Vegetables, Other               | 2009           | 18                                                                    |
| 20               | Botswana | Vegetal Products                | 2009           | 1,881                                                                 |
| 20               | Botswana | Wheat and products              | 2009           | 316                                                                   |
| 20               | Botswana | Wine                            | 2009           | 7                                                                     |
| 20               | Botswana | Alcoholic Beverages             | 2010           | 81                                                                    |
| 20               | Botswana | Animal fats                     | 2010           | 40                                                                    |
| 20               | Botswana | Animal Products                 | 2010           | 309                                                                   |
| 20               | Botswana | Apples and products             | 2010           | 6                                                                     |
| 20               | Botswana | Bananas                         | 2010           | 8                                                                     |
| 20               | Botswana | Beans                           | 2010           | 30                                                                    |
| 20               | Botswana | Beer                            | 2010           | 39                                                                    |
| 20               | Botswana | Beverages, Alcoholic            | 2010           | 9                                                                     |
| 20               | Botswana | Beverages, Fermented            | 2010           | 26                                                                    |
| 20               | Botswana | Bovine Meat                     | 2010           | 31                                                                    |
| 20               | Botswana | Butter, Ghee                    | 2010           | 17                                                                    |
| 20               | Botswana | Cereals - Excluding Beer        | 2010           | 991                                                                   |
| 20               | Botswana | Cereals, Other                  | 2010           | 38                                                                    |
| 20               | Botswana | Cocoa Beans and products        | 2010           | 8                                                                     |
| 20               | Botswana | Coffee and products             | 2010           | 1                                                                     |
| 20               | Botswana | Cottonseed Oil                  | 2010           | 30                                                                    |
| 20               | Botswana | Cream                           | 2010           | 1                                                                     |
| 20               | Botswana | Eggs                            | 2010           | 7                                                                     |
| 20               | Botswana | Fats, Animals, Raw              | 2010           | 22                                                                    |
| 20               | Botswana | Fish, Seafood                   | 2010           | 9                                                                     |
| 20               | Botswana | Fruits - Excluding Wine         | 2010           | 43                                                                    |
| 20               | Botswana | Fruits, Other                   | 2010           | 24                                                                    |
| 20               | Botswana | Grand Total                     | 2010           | 2,231                                                                 |
| 20               | Botswana | Grapes and products (excl wine) | 2010           | 1                                                                     |
| 20               | Botswana | Groundnut Oil                   | 2010           | 5                                                                     |
| 20               | Botswana | Groundnuts (Shelled Eq)         | 2010           | 7                                                                     |
| 20               | Botswana | Maize and products              | 2010           | 301                                                                   |
| 20               | Botswana | Meat                            | 2010           | 105                                                                   |
| 20               | Botswana | Meat, Other                     | 2010           | 37                                                                    |
| 20               | Botswana | Milk - Excluding Butter         | 2010           | 138                                                                   |
| 20               | Botswana | Millet and products             | 2010           | 13                                                                    |
| 20               | Botswana | Miscellaneous                   | 2010           | 14                                                                    |
| 20               | Botswana | Mutton & Goat Meat              | 2010           | 14                                                                    |
| 20               | Botswana | Offals                          | 2010           | 12                                                                    |
| 20               | Botswana | Oilcrops                        | 2010           | 27                                                                    |
| 20               | Botswana | Oilcrops Oil, Other             | 2010           | 13                                                                    |
| 20               | Botswana | Olive Oil                       | 2010           | 2                                                                     |
| 20               | Botswana | Onions                          | 2010           | 3                                                                     |
| 20               | Botswana | Oranges, Mandarines             | 2010           | 4                                                                     |
| 20               | Botswana | Palm Oil                        | 2010           | 10                                                                    |
| 20               | Botswana | Pelagic Fish                    | 2010           | 8                                                                     |
| 20               | Botswana | Pepper                          | 2010           | 7                                                                     |
| 20               | Botswana | Pigmeat                         | 2010           | 4                                                                     |
| 20               | Botswana | Potatoes and products           | 2010           | 17                                                                    |



Dietary calcium and zinc deficiency risks are decreasing but remain prevalent

| FAO Country code | Country  | Food item                       | Reference year | Net energy supply (kcal <i>capita</i> <sup>-1</sup> d <sup>-1</sup> ) |
|------------------|----------|---------------------------------|----------------|-----------------------------------------------------------------------|
| 20               | Botswana | Poultry Meat                    | 2010           | 18                                                                    |
| 20               | Botswana | Pulses                          | 2010           | 43                                                                    |
| 20               | Botswana | Pulses, Other and products      | 2010           | 13                                                                    |
| 20               | Botswana | Rice (Milled Equivalent)        | 2010           | 107                                                                   |
| 20               | Botswana | Roots, Other                    | 2010           | 104                                                                   |
| 20               | Botswana | Sorghum and products            | 2010           | 208                                                                   |
| 20               | Botswana | Soyabeans                       | 2010           | 19                                                                    |
| 20               | Botswana | Spices                          | 2010           | 21                                                                    |
| 20               | Botswana | Spices, Other                   | 2010           | 14                                                                    |
| 20               | Botswana | Starchy Roots                   | 2010           | 122                                                                   |
| 20               | Botswana | Stimulants                      | 2010           | 10                                                                    |
| 20               | Botswana | Sugar & Sweeteners              | 2010           | 322                                                                   |
| 20               | Botswana | Sugar (Raw Equivalent)          | 2010           | 253                                                                   |
| 20               | Botswana | Sunflowerseed Oil               | 2010           | 155                                                                   |
| 20               | Botswana | Sweet potatoes                  | 2010           | 1                                                                     |
| 20               | Botswana | Sweeteners, Other               | 2010           | 69                                                                    |
| 20               | Botswana | Tea (including mate)            | 2010           | 1                                                                     |
| 20               | Botswana | Tomatoes and products           | 2010           | 1                                                                     |
| 20               | Botswana | Treenuts                        | 2010           | 5                                                                     |
| 20               | Botswana | Vegetable Oils                  | 2010           | 214                                                                   |
| 20               | Botswana | Vegetables                      | 2010           | 28                                                                    |
| 20               | Botswana | Vegetables, Other               | 2010           | 24                                                                    |
| 20               | Botswana | Vegetal Products                | 2010           | 1,922                                                                 |
| 20               | Botswana | Wheat and products              | 2010           | 324                                                                   |
| 20               | Botswana | Wine                            | 2010           | 8                                                                     |
| 20               | Botswana | Alcoholic Beverages             | 2011           | 98                                                                    |
| 20               | Botswana | Animal fats                     | 2011           | 38                                                                    |
| 20               | Botswana | Animal Products                 | 2011           | 333                                                                   |
| 20               | Botswana | Apples and products             | 2011           | 4                                                                     |
| 20               | Botswana | Bananas                         | 2011           | 5                                                                     |
| 20               | Botswana | Beans                           | 2011           | 30                                                                    |
| 20               | Botswana | Beer                            | 2011           | 42                                                                    |
| 20               | Botswana | Beverages, Alcoholic            | 2011           | 21                                                                    |
| 20               | Botswana | Beverages, Fermented            | 2011           | 28                                                                    |
| 20               | Botswana | Bovine Meat                     | 2011           | 35                                                                    |
| 20               | Botswana | Butter, Chee                    | 2011           | 16                                                                    |
| 20               | Botswana | Cereals - Excluding Beer        | 2011           | 1,002                                                                 |
| 20               | Botswana | Cereals, Other                  | 2011           | 43                                                                    |
| 20               | Botswana | Cocoa Beans and products        | 2011           | 12                                                                    |
| 20               | Botswana | Coffee and products             | 2011           | 1                                                                     |
| 20               | Botswana | Cottonseed Oil                  | 2011           | 16                                                                    |
| 20               | Botswana | Eggs                            | 2011           | 7                                                                     |
| 20               | Botswana | Fats, Animals, Raw              | 2011           | 22                                                                    |
| 20               | Botswana | Fish, Seafood                   | 2011           | 7                                                                     |
| 20               | Botswana | Fruits - Excluding Wine         | 2011           | 39                                                                    |
| 20               | Botswana | Fruits, Other                   | 2011           | 24                                                                    |
| 20               | Botswana | Grand Total                     | 2011           | 2,285                                                                 |
| 20               | Botswana | Grapes and products (excl wine) | 2011           | 1                                                                     |
| 20               | Botswana | Groundnut Oil                   | 2011           | 14                                                                    |
| 20               | Botswana | Groundnuts (Shelled Eq)         | 2011           | 12                                                                    |
| 20               | Botswana | Maize and products              | 2011           | 310                                                                   |
| 20               | Botswana | Maize Germ Oil                  | 2011           | 3                                                                     |
| 20               | Botswana | Meat                            | 2011           | 107                                                                   |
| 20               | Botswana | Meat, Other                     | 2011           | 36                                                                    |
| 20               | Botswana | Milk - Excluding Butter         | 2011           | 163                                                                   |
| 20               | Botswana | Millet and products             | 2011           | 6                                                                     |
| 20               | Botswana | Miscellaneous                   | 2011           | 17                                                                    |
| 20               | Botswana | Mutton & Goat Meat              | 2011           | 14                                                                    |
| 20               | Botswana | Oats                            | 2011           | 5                                                                     |
| 20               | Botswana | Offals                          | 2011           | 11                                                                    |
| 20               | Botswana | Oilcrops                        | 2011           | 28                                                                    |
| 20               | Botswana | Oilcrops Oil, Other             | 2011           | 21                                                                    |
| 20               | Botswana | Olive Oil                       | 2011           | 5                                                                     |
| 20               | Botswana | Onions                          | 2011           | 2                                                                     |
| 20               | Botswana | Oranges, Mandarines             | 2011           | 3                                                                     |
| 20               | Botswana | Palm Oil                        | 2011           | 7                                                                     |
| 20               | Botswana | Pelagic Fish                    | 2011           | 6                                                                     |
| 20               | Botswana | Pepper                          | 2011           | 7                                                                     |
| 20               | Botswana | Pigmeat                         | 2011           | 5                                                                     |
| 20               | Botswana | Potatoes and products           | 2011           | 18                                                                    |
| 20               | Botswana | Poultry Meat                    | 2011           | 17                                                                    |
| 20               | Botswana | Pulses                          | 2011           | 43                                                                    |
| 20               | Botswana | Pulses, Other and products      | 2011           | 12                                                                    |
| 20               | Botswana | Rice (Milled Equivalent)        | 2011           | 107                                                                   |
| 20               | Botswana | Roots, Other                    | 2011           | 107                                                                   |
| 20               | Botswana | Rye and products                | 2011           | 5                                                                     |
| 20               | Botswana | Sesameseed Oil                  | 2011           | 6                                                                     |
| 20               | Botswana | Sorghum and products            | 2011           | 204                                                                   |
| 20               | Botswana | Soyabean Oil                    | 2011           | 1                                                                     |
| 20               | Botswana | Soyabeans                       | 2011           | 15                                                                    |
| 20               | Botswana | Spices                          | 2011           | 20                                                                    |
| 20               | Botswana | Spices, Other                   | 2011           | 13                                                                    |
| 20               | Botswana | Starchy Roots                   | 2011           | 126                                                                   |
| 20               | Botswana | Stimulants                      | 2011           | 14                                                                    |
| 20               | Botswana | Sugar & Sweeteners              | 2011           | 286                                                                   |
| 20               | Botswana | Sugar (Raw Equivalent)          | 2011           | 251                                                                   |
| 20               | Botswana | Sunflowerseed Oil               | 2011           | 173                                                                   |
| 20               | Botswana | Sweet potatoes                  | 2011           | 1                                                                     |
| 20               | Botswana | Sweeteners, Other               | 2011           | 35                                                                    |
| 20               | Botswana | Tea (including mate)            | 2011           | 1                                                                     |
| 20               | Botswana | Tomatoes and products           | 2011           | 1                                                                     |
| 20               | Botswana | Treenuts                        | 2011           | 3                                                                     |
| 20               | Botswana | Vegetable Oils                  | 2011           | 248                                                                   |
| 20               | Botswana | Vegetables                      | 2011           | 27                                                                    |
| 20               | Botswana | Vegetables, Other               | 2011           | 24                                                                    |
| 20               | Botswana | Vegetal Products                | 2011           | 1,952                                                                 |
| 20               | Botswana | Wheat and products              | 2011           | 323                                                                   |

| FAO Country code | Country  | Food item                       | Reference year | Net energy supply (kcal capita <sup>-1</sup> d <sup>-1</sup> ) |
|------------------|----------|---------------------------------|----------------|----------------------------------------------------------------|
| 20               | Botswana | Wine                            | 2011           | 6                                                              |
| 21               | Brazil   | Alcoholic Beverages             | 1992           | 61                                                             |
| 21               | Brazil   | Animal fats                     | 1992           | 42                                                             |
| 21               | Brazil   | Animal Products                 | 1992           | 480                                                            |
| 21               | Brazil   | Apples and products             | 1992           | 5                                                              |
| 21               | Brazil   | Bananas                         | 1992           | 54                                                             |
| 21               | Brazil   | Beans                           | 1992           | 144                                                            |
| 21               | Brazil   | Beer                            | 1992           | 27                                                             |
| 21               | Brazil   | Beverages, Alcoholic            | 1992           | 29                                                             |
| 21               | Brazil   | Bovine Meat                     | 1992           | 113                                                            |
| 21               | Brazil   | Butter, Ghee                    | 1992           | 9                                                              |
| 21               | Brazil   | Cassava and products            | 1992           | 108                                                            |
| 21               | Brazil   | Cereals - Excluding Beer        | 1992           | 912                                                            |
| 21               | Brazil   | Cereals, Other                  | 1992           | 2                                                              |
| 21               | Brazil   | Cocoa Beans and products        | 1992           | 1                                                              |
| 21               | Brazil   | Coconut Oil                     | 1992           | 1                                                              |
| 21               | Brazil   | Coconuts - Incl Copra           | 1992           | 13                                                             |
| 21               | Brazil   | Coffee and products             | 1992           | 1                                                              |
| 21               | Brazil   | Cottonseed Oil                  | 1992           | 16                                                             |
| 21               | Brazil   | Crustaceans                     | 1992           | 1                                                              |
| 21               | Brazil   | Demersal Fish                   | 1992           | 2                                                              |
| 21               | Brazil   | Eggs                            | 1992           | 27                                                             |
| 21               | Brazil   | Fats, Animals, Raw              | 1992           | 33                                                             |
| 21               | Brazil   | Fish, Seafood                   | 1992           | 8                                                              |
| 21               | Brazil   | Freshwater Fish                 | 1992           | 2                                                              |
| 21               | Brazil   | Fruits - Excluding Wine         | 1992           | 116                                                            |
| 21               | Brazil   | Fruits, Other                   | 1992           | 18                                                             |
| 21               | Brazil   | Grand Total                     | 1992           | 2,771                                                          |
| 21               | Brazil   | Grapes and products (excl wine) | 1992           | 3                                                              |
| 21               | Brazil   | Groundnut Oil                   | 1992           | 1                                                              |
| 21               | Brazil   | Groundnuts (Shelled Eq)         | 1992           | 7                                                              |
| 21               | Brazil   | Honey                           | 1992           | 1                                                              |
| 21               | Brazil   | Lemons, Limes and products      | 1992           | 1                                                              |
| 21               | Brazil   | Maize and products              | 1992           | 187                                                            |
| 21               | Brazil   | Maize Germ Oil                  | 1992           | 5                                                              |
| 21               | Brazil   | Marine Fish, Other              | 1992           | 1                                                              |
| 21               | Brazil   | Meat                            | 1992           | 238                                                            |
| 21               | Brazil   | Milk - Excluding Butter         | 1992           | 161                                                            |
| 21               | Brazil   | Mutton & Goat Meat              | 1992           | 4                                                              |
| 21               | Brazil   | Oats                            | 1992           | 8                                                              |
| 21               | Brazil   | Offals                          | 1992           | 5                                                              |
| 21               | Brazil   | Oilcrops                        | 1992           | 31                                                             |
| 21               | Brazil   | Olive Oil                       | 1992           | 2                                                              |
| 21               | Brazil   | Olives (including preserved)    | 1992           | 1                                                              |
| 21               | Brazil   | Onions                          | 1992           | 6                                                              |
| 21               | Brazil   | Oranges, Mandarines             | 1992           | 29                                                             |
| 21               | Brazil   | Palm Oil                        | 1992           | 12                                                             |
| 21               | Brazil   | Peas                            | 1992           | 1                                                              |
| 21               | Brazil   | Pelagic Fish                    | 1992           | 2                                                              |
| 21               | Brazil   | Pepper                          | 1992           | 1                                                              |
| 21               | Brazil   | Pigmeat                         | 1992           | 49                                                             |
| 21               | Brazil   | Pineapples and products         | 1992           | 6                                                              |
| 21               | Brazil   | Potatoes and products           | 1992           | 24                                                             |
| 21               | Brazil   | Poultry Meat                    | 1992           | 72                                                             |
| 21               | Brazil   | Pulses                          | 1992           | 147                                                            |
| 21               | Brazil   | Pulses, Other and products      | 1992           | 2                                                              |
| 21               | Brazil   | Rice (Milled Equivalent)        | 1992           | 392                                                            |
| 21               | Brazil   | Ricebran Oil                    | 1992           | 2                                                              |
| 21               | Brazil   | Sesame seed                     | 1992           | 1                                                              |
| 21               | Brazil   | Soyabean Oil                    | 1992           | 323                                                            |
| 21               | Brazil   | Soyabeans                       | 1992           | 10                                                             |
| 21               | Brazil   | Spices                          | 1992           | 1                                                              |
| 21               | Brazil   | Starchy Roots                   | 1992           | 138                                                            |
| 21               | Brazil   | Stimulants                      | 1992           | 3                                                              |
| 21               | Brazil   | Sugar & Sweeteners              | 1992           | 488                                                            |
| 21               | Brazil   | Sugar (Raw Equivalent)          | 1992           | 471                                                            |
| 21               | Brazil   | Sugar cane                      | 1992           | 4                                                              |
| 21               | Brazil   | Sugar Crops                     | 1992           | 4                                                              |
| 21               | Brazil   | Sugar non-centrifugal           | 1992           | 15                                                             |
| 21               | Brazil   | Sunflowerseed Oil               | 1992           | 3                                                              |
| 21               | Brazil   | Sweet potatoes                  | 1992           | 4                                                              |
| 21               | Brazil   | Tea (including mate)            | 1992           | 1                                                              |
| 21               | Brazil   | Tomatoes and products           | 1992           | 7                                                              |
| 21               | Brazil   | Treenuts                        | 1992           | 2                                                              |
| 21               | Brazil   | Vegetable Oils                  | 1992           | 364                                                            |
| 21               | Brazil   | Vegetables                      | 1992           | 23                                                             |
| 21               | Brazil   | Vegetables, Other               | 1992           | 10                                                             |
| 21               | Brazil   | Vegetal Products                | 1992           | 2,291                                                          |
| 21               | Brazil   | Wheat and products              | 1992           | 323                                                            |
| 21               | Brazil   | Wine                            | 1992           | 4                                                              |
| 21               | Brazil   | Yams                            | 1992           | 2                                                              |
| 21               | Brazil   | Alcoholic Beverages             | 1993           | 60                                                             |
| 21               | Brazil   | Animal fats                     | 1993           | 43                                                             |
| 21               | Brazil   | Animal Products                 | 1993           | 483                                                            |
| 21               | Brazil   | Apples and products             | 1993           | 6                                                              |
| 21               | Brazil   | Bananas                         | 1993           | 53                                                             |
| 21               | Brazil   | Beans                           | 1993           | 155                                                            |
| 21               | Brazil   | Beer                            | 1993           | 28                                                             |
| 21               | Brazil   | Beverages, Alcoholic            | 1993           | 29                                                             |
| 21               | Brazil   | Bovine Meat                     | 1993           | 104                                                            |
| 21               | Brazil   | Butter, Ghee                    | 1993           | 10                                                             |
| 21               | Brazil   | Cassava and products            | 1993           | 108                                                            |
| 21               | Brazil   | Cereals - Excluding Beer        | 1993           | 931                                                            |
| 21               | Brazil   | Cereals, Other                  | 1993           | 3                                                              |
| 21               | Brazil   | Cocoa Beans and products        | 1993           | 1                                                              |
| 21               | Brazil   | Coconuts - Incl Copra           | 1993           | 12                                                             |
| 21               | Brazil   | Coffee and products             | 1993           | 1                                                              |

| FAO Country code | Country | Food item                       | Reference year | Net energy supply (kcal <i>capita</i> <sup>-1</sup> d <sup>-1</sup> ) |
|------------------|---------|---------------------------------|----------------|-----------------------------------------------------------------------|
| 21               | Brazil  | Cottonseed Oil                  | 1993           | 14                                                                    |
| 21               | Brazil  | Demersal Fish                   | 1993           | 2                                                                     |
| 21               | Brazil  | Eggs                            | 1993           | 26                                                                    |
| 21               | Brazil  | Fats, Animals, Raw              | 1993           | 33                                                                    |
| 21               | Brazil  | Fish, Seafood                   | 1993           | 9                                                                     |
| 21               | Brazil  | Freshwater Fish                 | 1993           | 2                                                                     |
| 21               | Brazil  | Fruits - Excluding Wine         | 1993           | 102                                                                   |
| 21               | Brazil  | Fruits, Other                   | 1993           | 19                                                                    |
| 21               | Brazil  | Grand Total                     | 1993           | 2,774                                                                 |
| 21               | Brazil  | Grapes and products (excl wine) | 1993           | 4                                                                     |
| 21               | Brazil  | Groundnut Oil                   | 1993           | 1                                                                     |
| 21               | Brazil  | Groundnuts (Shelled Eq)         | 1993           | 5                                                                     |
| 21               | Brazil  | Honey                           | 1993           | 1                                                                     |
| 21               | Brazil  | Lemons, Limes and products      | 1993           | 1                                                                     |
| 21               | Brazil  | Maize and products              | 1993           | 186                                                                   |
| 21               | Brazil  | Maize Germ Oil                  | 1993           | 6                                                                     |
| 21               | Brazil  | Marine Fish, Other              | 1993           | 2                                                                     |
| 21               | Brazil  | Meat                            | 1993           | 243                                                                   |
| 21               | Brazil  | Milk - Excluding Butter         | 1993           | 156                                                                   |
| 21               | Brazil  | Mutton & Goat Meat              | 1993           | 4                                                                     |
| 21               | Brazil  | Oats                            | 1993           | 8                                                                     |
| 21               | Brazil  | Offals                          | 1993           | 6                                                                     |
| 21               | Brazil  | Oilcrops                        | 1993           | 30                                                                    |
| 21               | Brazil  | Olive Oil                       | 1993           | 2                                                                     |
| 21               | Brazil  | Olives (including preserved)    | 1993           | 1                                                                     |
| 21               | Brazil  | Onions                          | 1993           | 6                                                                     |
| 21               | Brazil  | Oranges, Mandarines             | 1993           | 14                                                                    |
| 21               | Brazil  | Palm Oil                        | 1993           | 14                                                                    |
| 21               | Brazil  | Peas                            | 1993           | 1                                                                     |
| 21               | Brazil  | Pelagic Fish                    | 1993           | 2                                                                     |
| 21               | Brazil  | Pepper                          | 1993           | 1                                                                     |
| 21               | Brazil  | Pigmeat                         | 1993           | 61                                                                    |
| 21               | Brazil  | Pineapples and products         | 1993           | 6                                                                     |
| 21               | Brazil  | Potatoes and products           | 1993           | 23                                                                    |
| 21               | Brazil  | Poultry Meat                    | 1993           | 74                                                                    |
| 21               | Brazil  | Pulses                          | 1993           | 157                                                                   |
| 21               | Brazil  | Pulses, Other and products      | 1993           | 1                                                                     |
| 21               | Brazil  | Rice (Milled Equivalent)        | 1993           | 422                                                                   |
| 21               | Brazil  | Ricebran Oil                    | 1993           | 2                                                                     |
| 21               | Brazil  | Sesame seed                     | 1993           | 1                                                                     |
| 21               | Brazil  | Soyabean Oil                    | 1993           | 306                                                                   |
| 21               | Brazil  | Soyabeans                       | 1993           | 11                                                                    |
| 21               | Brazil  | Spices                          | 1993           | 1                                                                     |
| 21               | Brazil  | Starchy Roots                   | 1993           | 135                                                                   |
| 21               | Brazil  | Stimulants                      | 1993           | 4                                                                     |
| 21               | Brazil  | Sugar & Sweeteners              | 1993           | 492                                                                   |
| 21               | Brazil  | Sugar (Raw Equivalent)          | 1993           | 475                                                                   |
| 21               | Brazil  | Sugar cane                      | 1993           | 4                                                                     |
| 21               | Brazil  | Sugar Crops                     | 1993           | 4                                                                     |
| 21               | Brazil  | Sugar non-centrifugal           | 1993           | 15                                                                    |
| 21               | Brazil  | Sunflowerseed Oil               | 1993           | 3                                                                     |
| 21               | Brazil  | Sweet potatoes                  | 1993           | 3                                                                     |
| 21               | Brazil  | Sweeteners, Other               | 1993           | 1                                                                     |
| 21               | Brazil  | Tea (including mate)            | 1993           | 1                                                                     |
| 21               | Brazil  | Tomatoes and products           | 1993           | 8                                                                     |
| 21               | Brazil  | Treenuts                        | 1993           | 2                                                                     |
| 21               | Brazil  | Vegetable Oils                  | 1993           | 349                                                                   |
| 21               | Brazil  | Vegetables                      | 1993           | 25                                                                    |
| 21               | Brazil  | Vegetables, Other               | 1993           | 11                                                                    |
| 21               | Brazil  | Vegetal Products                | 1993           | 2,291                                                                 |
| 21               | Brazil  | Wheat and products              | 1993           | 311                                                                   |
| 21               | Brazil  | Wine                            | 1993           | 3                                                                     |
| 21               | Brazil  | Yams                            | 1993           | 2                                                                     |
| 21               | Brazil  | Alcoholic Beverages             | 1994           | 66                                                                    |
| 21               | Brazil  | Animal fats                     | 1994           | 44                                                                    |
| 21               | Brazil  | Animal Products                 | 1994           | 509                                                                   |
| 21               | Brazil  | Apples and products             | 1994           | 6                                                                     |
| 21               | Brazil  | Bananas                         | 1994           | 54                                                                    |
| 21               | Brazil  | Beans                           | 1994           | 160                                                                   |
| 21               | Brazil  | Beer                            | 1994           | 32                                                                    |
| 21               | Brazil  | Beverages, Alcoholic            | 1994           | 30                                                                    |
| 21               | Brazil  | Bovine Meat                     | 1994           | 105                                                                   |
| 21               | Brazil  | Butter, Chee                    | 1994           | 10                                                                    |
| 21               | Brazil  | Cassava and products            | 1994           | 117                                                                   |
| 21               | Brazil  | Cereals - Excluding Beer        | 1994           | 917                                                                   |
| 21               | Brazil  | Cereals, Other                  | 1994           | 4                                                                     |
| 21               | Brazil  | Cocoa Beans and products        | 1994           | 2                                                                     |
| 21               | Brazil  | Coconuts - Incl Copra           | 1994           | 13                                                                    |
| 21               | Brazil  | Coffee and products             | 1994           | 1                                                                     |
| 21               | Brazil  | Cottonseed Oil                  | 1994           | 15                                                                    |
| 21               | Brazil  | Demersal Fish                   | 1994           | 2                                                                     |
| 21               | Brazil  | Eggs                            | 1994           | 27                                                                    |
| 21               | Brazil  | Fats, Animals, Raw              | 1994           | 34                                                                    |
| 21               | Brazil  | Fish, Seafood                   | 1994           | 9                                                                     |
| 21               | Brazil  | Freshwater Fish                 | 1994           | 2                                                                     |
| 21               | Brazil  | Fruits - Excluding Wine         | 1994           | 99                                                                    |
| 21               | Brazil  | Fruits, Other                   | 1994           | 19                                                                    |
| 21               | Brazil  | Grand Total                     | 1994           | 2,818                                                                 |
| 21               | Brazil  | Grapes and products (excl wine) | 1994           | 4                                                                     |
| 21               | Brazil  | Groundnut Oil                   | 1994           | 2                                                                     |
| 21               | Brazil  | Groundnuts (Shelled Eq)         | 1994           | 5                                                                     |
| 21               | Brazil  | Honey                           | 1994           | 1                                                                     |
| 21               | Brazil  | Lemons, Limes and products      | 1994           | 1                                                                     |
| 21               | Brazil  | Maize and products              | 1994           | 176                                                                   |
| 21               | Brazil  | Maize Germ Oil                  | 1994           | 6                                                                     |
| 21               | Brazil  | Marine Fish, Other              | 1994           | 2                                                                     |
| 21               | Brazil  | Meat                            | 1994           | 261                                                                   |

## Dietary calcium and zinc deficiency risks are decreasing but remain prevalent

| FAO Country code | Country | Food item                       | Reference year | Net energy supply (kcal <i>capita</i> <sup>-1</sup> d <sup>-1</sup> ) |
|------------------|---------|---------------------------------|----------------|-----------------------------------------------------------------------|
| 21               | Brazil  | Milk - Excluding Butter         | 1994           | 162                                                                   |
| 21               | Brazil  | Mutton & Goat Meat              | 1994           | 5                                                                     |
| 21               | Brazil  | Oats                            | 1994           | 8                                                                     |
| 21               | Brazil  | Offals                          | 1994           | 6                                                                     |
| 21               | Brazil  | Oilcrops                        | 1994           | 33                                                                    |
| 21               | Brazil  | Olive Oil                       | 1994           | 3                                                                     |
| 21               | Brazil  | Olives (including preserved)    | 1994           | 1                                                                     |
| 21               | Brazil  | Onions                          | 1994           | 6                                                                     |
| 21               | Brazil  | Oranges, Mandarines             | 1994           | 9                                                                     |
| 21               | Brazil  | Palm Oil                        | 1994           | 15                                                                    |
| 21               | Brazil  | Peas                            | 1994           | 2                                                                     |
| 21               | Brazil  | Pelagic Fish                    | 1994           | 2                                                                     |
| 21               | Brazil  | Pepper                          | 1994           | 1                                                                     |
| 21               | Brazil  | Pigmeat                         | 1994           | 70                                                                    |
| 21               | Brazil  | Pineapples and products         | 1994           | 7                                                                     |
| 21               | Brazil  | Potatoes and products           | 1994           | 26                                                                    |
| 21               | Brazil  | Poultry Meat                    | 1994           | 81                                                                    |
| 21               | Brazil  | Pulses                          | 1994           | 163                                                                   |
| 21               | Brazil  | Pulses, Other and products      | 1994           | 1                                                                     |
| 21               | Brazil  | Rice (Milled Equivalent)        | 1994           | 399                                                                   |
| 21               | Brazil  | Ricebran Oil                    | 1994           | 2                                                                     |
| 21               | Brazil  | Sesame seed                     | 1994           | 1                                                                     |
| 21               | Brazil  | Soyabean Oil                    | 1994           | 289                                                                   |
| 21               | Brazil  | Soyabeans                       | 1994           | 12                                                                    |
| 21               | Brazil  | Spices                          | 1994           | 1                                                                     |
| 21               | Brazil  | Starchy Roots                   | 1994           | 148                                                                   |
| 21               | Brazil  | Stimulants                      | 1994           | 4                                                                     |
| 21               | Brazil  | Sugar & Sweeteners              | 1994           | 506                                                                   |
| 21               | Brazil  | Sugar (Raw Equivalent)          | 1994           | 489                                                                   |
| 21               | Brazil  | Sugar cane                      | 1994           | 4                                                                     |
| 21               | Brazil  | Sugar Crops                     | 1994           | 4                                                                     |
| 21               | Brazil  | Sugar non-centrifugal           | 1994           | 15                                                                    |
| 21               | Brazil  | Sunflowerseed Oil               | 1994           | 5                                                                     |
| 21               | Brazil  | Sweet potatoes                  | 1994           | 4                                                                     |
| 21               | Brazil  | Sweeteners, Other               | 1994           | 1                                                                     |
| 21               | Brazil  | Tea (including mate)            | 1994           | 1                                                                     |
| 21               | Brazil  | Tomatoes and products           | 1994           | 9                                                                     |
| 21               | Brazil  | Treenuts                        | 1994           | 3                                                                     |
| 21               | Brazil  | Vegetable Oils                  | 1994           | 337                                                                   |
| 21               | Brazil  | Vegetables                      | 1994           | 27                                                                    |
| 21               | Brazil  | Vegetables, Other               | 1994           | 11                                                                    |
| 21               | Brazil  | Vegetal Products                | 1994           | 2,309                                                                 |
| 21               | Brazil  | Wheat and products              | 1994           | 331                                                                   |
| 21               | Brazil  | Wine                            | 1994           | 4                                                                     |
| 21               | Brazil  | Yams                            | 1994           | 2                                                                     |
| 21               | Brazil  | Alcoholic Beverages             | 1995           | 77                                                                    |
| 21               | Brazil  | Animal fats                     | 1995           | 46                                                                    |
| 21               | Brazil  | Animal Products                 | 1995           | 576                                                                   |
| 21               | Brazil  | Apples and products             | 1995           | 7                                                                     |
| 21               | Brazil  | Bananas                         | 1995           | 52                                                                    |
| 21               | Brazil  | Beans                           | 1995           | 122                                                                   |
| 21               | Brazil  | Beer                            | 1995           | 42                                                                    |
| 21               | Brazil  | Beverages, Alcoholic            | 1995           | 31                                                                    |
| 21               | Brazil  | Bovine Meat                     | 1995           | 123                                                                   |
| 21               | Brazil  | Butter, Ghee                    | 1995           | 10                                                                    |
| 21               | Brazil  | Cassava and products            | 1995           | 120                                                                   |
| 21               | Brazil  | Cereals - Excluding Beer        | 1995           | 863                                                                   |
| 21               | Brazil  | Cereals, Other                  | 1995           | 3                                                                     |
| 21               | Brazil  | Cocoa Beans and products        | 1995           | 2                                                                     |
| 21               | Brazil  | Coconuts - Incl Copra           | 1995           | 14                                                                    |
| 21               | Brazil  | Coffee and products             | 1995           | 1                                                                     |
| 21               | Brazil  | Cottonseed Oil                  | 1995           | 13                                                                    |
| 21               | Brazil  | Crustaceans                     | 1995           | 1                                                                     |
| 21               | Brazil  | Demersal Fish                   | 1995           | 3                                                                     |
| 21               | Brazil  | Eggs                            | 1995           | 27                                                                    |
| 21               | Brazil  | Fats, Animals, Raw              | 1995           | 36                                                                    |
| 21               | Brazil  | Fish, Seafood                   | 1995           | 10                                                                    |
| 21               | Brazil  | Freshwater Fish                 | 1995           | 3                                                                     |
| 21               | Brazil  | Fruits - Excluding Wine         | 1995           | 122                                                                   |
| 21               | Brazil  | Fruits, Other                   | 1995           | 20                                                                    |
| 21               | Brazil  | Grand Total                     | 1995           | 2,812                                                                 |
| 21               | Brazil  | Grapes and products (excl wine) | 1995           | 5                                                                     |
| 21               | Brazil  | Groundnut Oil                   | 1995           | 2                                                                     |
| 21               | Brazil  | Groundnuts (Shelled Eq)         | 1995           | 4                                                                     |
| 21               | Brazil  | Honey                           | 1995           | 1                                                                     |
| 21               | Brazil  | Lemons, Limes and products      | 1995           | 1                                                                     |
| 21               | Brazil  | Maize and products              | 1995           | 163                                                                   |
| 21               | Brazil  | Maize Germ Oil                  | 1995           | 6                                                                     |
| 21               | Brazil  | Marine Fish, Other              | 1995           | 1                                                                     |
| 21               | Brazil  | Meat                            | 1995           | 301                                                                   |
| 21               | Brazil  | Milk - Excluding Butter         | 1995           | 187                                                                   |
| 21               | Brazil  | Mutton & Goat Meat              | 1995           | 5                                                                     |
| 21               | Brazil  | Oats                            | 1995           | 5                                                                     |
| 21               | Brazil  | Offals                          | 1995           | 6                                                                     |
| 21               | Brazil  | Oilcrops                        | 1995           | 34                                                                    |
| 21               | Brazil  | Olive Oil                       | 1995           | 3                                                                     |
| 21               | Brazil  | Olives (including preserved)    | 1995           | 1                                                                     |
| 21               | Brazil  | Onions                          | 1995           | 6                                                                     |
| 21               | Brazil  | Oranges, Mandarines             | 1995           | 29                                                                    |
| 21               | Brazil  | Palm Oil                        | 1995           | 9                                                                     |
| 21               | Brazil  | Peas                            | 1995           | 1                                                                     |
| 21               | Brazil  | Pelagic Fish                    | 1995           | 2                                                                     |
| 21               | Brazil  | Pigmeat                         | 1995           | 75                                                                    |
| 21               | Brazil  | Pineapples and products         | 1995           | 7                                                                     |
| 21               | Brazil  | Potatoes and products           | 1995           | 27                                                                    |
| 21               | Brazil  | Poultry Meat                    | 1995           | 98                                                                    |
| 21               | Brazil  | Pulses                          | 1995           | 125                                                                   |

Dietary calcium and zinc deficiency risks are decreasing but remain prevalent

| FAO Country code | Country | Food item                       | Reference year | Net energy supply (kcal <i>capita</i> <sup>-1</sup> d <sup>-1</sup> ) |
|------------------|---------|---------------------------------|----------------|-----------------------------------------------------------------------|
| 21               | Brazil  | Pulses, Other and products      | 1995           | 1                                                                     |
| 21               | Brazil  | Rice (Milled Equivalent)        | 1995           | 328                                                                   |
| 21               | Brazil  | Ricebran Oil                    | 1995           | 2                                                                     |
| 21               | Brazil  | Sesame seed                     | 1995           | 1                                                                     |
| 21               | Brazil  | Soyabean Oil                    | 1995           | 265                                                                   |
| 21               | Brazil  | Soyabeans                       | 1995           | 13                                                                    |
| 21               | Brazil  | Spices                          | 1995           | 1                                                                     |
| 21               | Brazil  | Starchy Roots                   | 1995           | 153                                                                   |
| 21               | Brazil  | Stimulants                      | 1995           | 5                                                                     |
| 21               | Brazil  | Sugar & Sweeteners              | 1995           | 514                                                                   |
| 21               | Brazil  | Sugar (Raw Equivalent)          | 1995           | 497                                                                   |
| 21               | Brazil  | Sugar cane                      | 1995           | 4                                                                     |
| 21               | Brazil  | Sugar Crops                     | 1995           | 4                                                                     |
| 21               | Brazil  | Sugar non-centrifugal           | 1995           | 14                                                                    |
| 21               | Brazil  | Sunflowerseed Oil               | 1995           | 9                                                                     |
| 21               | Brazil  | Sweet potatoes                  | 1995           | 4                                                                     |
| 21               | Brazil  | Sweeteners, Other               | 1995           | 1                                                                     |
| 21               | Brazil  | Tea (including mate)            | 1995           | 2                                                                     |
| 21               | Brazil  | Tomatoes and products           | 1995           | 9                                                                     |
| 21               | Brazil  | Treenuts                        | 1995           | 3                                                                     |
| 21               | Brazil  | Vegetable Oils                  | 1995           | 309                                                                   |
| 21               | Brazil  | Vegetables                      | 1995           | 27                                                                    |
| 21               | Brazil  | Vegetables, Other               | 1995           | 12                                                                    |
| 21               | Brazil  | Vegetal Products                | 1995           | 2,236                                                                 |
| 21               | Brazil  | Wheat and products              | 1995           | 363                                                                   |
| 21               | Brazil  | Wine                            | 1995           | 4                                                                     |
| 21               | Brazil  | Yams                            | 1995           | 2                                                                     |
| 21               | Brazil  | Alcoholic Beverages             | 1996           | 73                                                                    |
| 21               | Brazil  | Animal fats                     | 1996           | 45                                                                    |
| 21               | Brazil  | Animal Products                 | 1996           | 584                                                                   |
| 21               | Brazil  | Apples and products             | 1996           | 7                                                                     |
| 21               | Brazil  | Bananas                         | 1996           | 46                                                                    |
| 21               | Brazil  | Beans                           | 1996           | 177                                                                   |
| 21               | Brazil  | Beer                            | 1996           | 39                                                                    |
| 21               | Brazil  | Beverages, Alcoholic            | 1996           | 31                                                                    |
| 21               | Brazil  | Bovine Meat                     | 1996           | 129                                                                   |
| 21               | Brazil  | Butter, Ghee                    | 1996           | 9                                                                     |
| 21               | Brazil  | Cassava and products            | 1996           | 89                                                                    |
| 21               | Brazil  | Cereals - Excluding Beer        | 1996           | 882                                                                   |
| 21               | Brazil  | Cereals, Other                  | 1996           | 2                                                                     |
| 21               | Brazil  | Cocoa Beans and products        | 1996           | 3                                                                     |
| 21               | Brazil  | Coconuts - Incl Copra           | 1996           | 13                                                                    |
| 21               | Brazil  | Coffee and products             | 1996           | 3                                                                     |
| 21               | Brazil  | Cottonseed Oil                  | 1996           | 12                                                                    |
| 21               | Brazil  | Demersal Fish                   | 1996           | 3                                                                     |
| 21               | Brazil  | Eggs                            | 1996           | 25                                                                    |
| 21               | Brazil  | Fats, Animals, Raw              | 1996           | 35                                                                    |
| 21               | Brazil  | Fish, Seafood                   | 1996           | 11                                                                    |
| 21               | Brazil  | Freshwater Fish                 | 1996           | 3                                                                     |
| 21               | Brazil  | Fruits - Excluding Wine         | 1996           | 117                                                                   |
| 21               | Brazil  | Fruits, Other                   | 1996           | 19                                                                    |
| 21               | Brazil  | Grand Total                     | 1996           | 2,840                                                                 |
| 21               | Brazil  | Grapes and products (excl wine) | 1996           | 4                                                                     |
| 21               | Brazil  | Groundnut Oil                   | 1996           | 3                                                                     |
| 21               | Brazil  | Groundnuts (Shelled Eq)         | 1996           | 7                                                                     |
| 21               | Brazil  | Honey                           | 1996           | 1                                                                     |
| 21               | Brazil  | Lemons, Limes and products      | 1996           | 1                                                                     |
| 21               | Brazil  | Maize and products              | 1996           | 160                                                                   |
| 21               | Brazil  | Maize Germ Oil                  | 1996           | 6                                                                     |
| 21               | Brazil  | Marine Fish, Other              | 1996           | 1                                                                     |
| 21               | Brazil  | Meat                            | 1996           | 303                                                                   |
| 21               | Brazil  | Milk - Excluding Butter         | 1996           | 193                                                                   |
| 21               | Brazil  | Mutton & Goat Meat              | 1996           | 4                                                                     |
| 21               | Brazil  | Oats                            | 1996           | 6                                                                     |
| 21               | Brazil  | Offals                          | 1996           | 6                                                                     |
| 21               | Brazil  | Oilcrops                        | 1996           | 35                                                                    |
| 21               | Brazil  | Olive Oil                       | 1996           | 3                                                                     |
| 21               | Brazil  | Olives (including preserved)    | 1996           | 1                                                                     |
| 21               | Brazil  | Onions                          | 1996           | 6                                                                     |
| 21               | Brazil  | Oranges, Mandarines             | 1996           | 35                                                                    |
| 21               | Brazil  | Palm Oil                        | 1996           | 8                                                                     |
| 21               | Brazil  | Peas                            | 1996           | 2                                                                     |
| 21               | Brazil  | Pelagic Fish                    | 1996           | 3                                                                     |
| 21               | Brazil  | Pigmeat                         | 1996           | 78                                                                    |
| 21               | Brazil  | Pineapples and products         | 1996           | 5                                                                     |
| 21               | Brazil  | Potatoes and products           | 1996           | 23                                                                    |
| 21               | Brazil  | Poultry Meat                    | 1996           | 93                                                                    |
| 21               | Brazil  | Pulses                          | 1996           | 180                                                                   |
| 21               | Brazil  | Pulses, Other and products      | 1996           | 1                                                                     |
| 21               | Brazil  | Rice (Milled Equivalent)        | 1996           | 382                                                                   |
| 21               | Brazil  | Ricebran Oil                    | 1996           | 2                                                                     |
| 21               | Brazil  | Sesame seed                     | 1996           | 1                                                                     |
| 21               | Brazil  | Soyabean Oil                    | 1996           | 271                                                                   |
| 21               | Brazil  | Soyabeans                       | 1996           | 13                                                                    |
| 21               | Brazil  | Spices                          | 1996           | 1                                                                     |
| 21               | Brazil  | Spices, Other                   | 1996           | 1                                                                     |
| 21               | Brazil  | Starchy Roots                   | 1996           | 115                                                                   |
| 21               | Brazil  | Stimulants                      | 1996           | 7                                                                     |
| 21               | Brazil  | Sugar & Sweeteners              | 1996           | 501                                                                   |
| 21               | Brazil  | Sugar (Raw Equivalent)          | 1996           | 484                                                                   |
| 21               | Brazil  | Sugar cane                      | 1996           | 4                                                                     |
| 21               | Brazil  | Sugar Crops                     | 1996           | 4                                                                     |
| 21               | Brazil  | Sugar non-centrifugal           | 1996           | 14                                                                    |
| 21               | Brazil  | Sunflowerseed Oil               | 1996           | 9                                                                     |
| 21               | Brazil  | Sweet potatoes                  | 1996           | 2                                                                     |
| 21               | Brazil  | Sweeteners, Other               | 1996           | 1                                                                     |
| 21               | Brazil  | Tea (including mate)            | 1996           | 1                                                                     |

Dietary calcium and zinc deficiency risks are decreasing but remain prevalent

| FAO Country code | Country | Food item                       | Reference year | Net energy supply (kcal <i>capita</i> <sup>-1</sup> d <sup>-1</sup> ) |
|------------------|---------|---------------------------------|----------------|-----------------------------------------------------------------------|
| 21               | Brazil  | Tomatoes and products           | 1996           | 9                                                                     |
| 21               | Brazil  | Treenuts                        | 1996           | 2                                                                     |
| 21               | Brazil  | Vegetable Oils                  | 1996           | 315                                                                   |
| 21               | Brazil  | Vegetables                      | 1996           | 26                                                                    |
| 21               | Brazil  | Vegetables, Other               | 1996           | 12                                                                    |
| 21               | Brazil  | Vegetal Products                | 1996           | 2,257                                                                 |
| 21               | Brazil  | Wheat and products              | 1996           | 332                                                                   |
| 21               | Brazil  | Wine                            | 1996           | 3                                                                     |
| 21               | Brazil  | Yams                            | 1996           | 2                                                                     |
| 21               | Brazil  | Alcoholic Beverages             | 1997           | 77                                                                    |
| 21               | Brazil  | Animal fats                     | 1997           | 47                                                                    |
| 21               | Brazil  | Animal Products                 | 1997           | 596                                                                   |
| 21               | Brazil  | Apples and products             | 1997           | 7                                                                     |
| 21               | Brazil  | Bananas                         | 1997           | 47                                                                    |
| 21               | Brazil  | Beans                           | 1997           | 138                                                                   |
| 21               | Brazil  | Beer                            | 1997           | 39                                                                    |
| 21               | Brazil  | Beverages, Alcoholic            | 1997           | 34                                                                    |
| 21               | Brazil  | Bovine Meat                     | 1997           | 123                                                                   |
| 21               | Brazil  | Butter, Ghee                    | 1997           | 8                                                                     |
| 21               | Brazil  | Cassava and products            | 1997           | 95                                                                    |
| 21               | Brazil  | Cereals - Excluding Beer        | 1997           | 882                                                                   |
| 21               | Brazil  | Cereals, Other                  | 1997           | 2                                                                     |
| 21               | Brazil  | Cocoa Beans and products        | 1997           | 2                                                                     |
| 21               | Brazil  | Coconuts - Incl Copra           | 1997           | 30                                                                    |
| 21               | Brazil  | Coffee and products             | 1997           | 3                                                                     |
| 21               | Brazil  | Cottonseed Oil                  | 1997           | 15                                                                    |
| 21               | Brazil  | Crustaceans                     | 1997           | 1                                                                     |
| 21               | Brazil  | Demersal Fish                   | 1997           | 3                                                                     |
| 21               | Brazil  | Eggs                            | 1997           | 27                                                                    |
| 21               | Brazil  | Fats, Animals, Raw              | 1997           | 38                                                                    |
| 21               | Brazil  | Fish, Seafood                   | 1997           | 10                                                                    |
| 21               | Brazil  | Freshwater Fish                 | 1997           | 3                                                                     |
| 21               | Brazil  | Fruits - Excluding Wine         | 1997           | 130                                                                   |
| 21               | Brazil  | Fruits, Other                   | 1997           | 20                                                                    |
| 21               | Brazil  | Grand Total                     | 1997           | 2,854                                                                 |
| 21               | Brazil  | Grapes and products (excl wine) | 1997           | 5                                                                     |
| 21               | Brazil  | Groundnut Oil                   | 1997           | 2                                                                     |
| 21               | Brazil  | Groundnuts (Shelled Eq)         | 1997           | 5                                                                     |
| 21               | Brazil  | Honey                           | 1997           | 1                                                                     |
| 21               | Brazil  | Lemons, Limes and products      | 1997           | 1                                                                     |
| 21               | Brazil  | Maize and products              | 1997           | 168                                                                   |
| 21               | Brazil  | Maize Germ Oil                  | 1997           | 7                                                                     |
| 21               | Brazil  | Marine Fish, Other              | 1997           | 1                                                                     |
| 21               | Brazil  | Meat                            | 1997           | 318                                                                   |
| 21               | Brazil  | Milk - Excluding Butter         | 1997           | 188                                                                   |
| 21               | Brazil  | Mutton & Goat Meat              | 1997           | 4                                                                     |
| 21               | Brazil  | Oats                            | 1997           | 6                                                                     |
| 21               | Brazil  | Offals                          | 1997           | 6                                                                     |
| 21               | Brazil  | Oilcrops                        | 1997           | 49                                                                    |
| 21               | Brazil  | Olive Oil                       | 1997           | 4                                                                     |
| 21               | Brazil  | Olives (including preserved)    | 1997           | 1                                                                     |
| 21               | Brazil  | Onions                          | 1997           | 5                                                                     |
| 21               | Brazil  | Oranges, Mandarines             | 1997           | 42                                                                    |
| 21               | Brazil  | Palm Oil                        | 1997           | 12                                                                    |
| 21               | Brazil  | Peas                            | 1997           | 2                                                                     |
| 21               | Brazil  | Pelagic Fish                    | 1997           | 3                                                                     |
| 21               | Brazil  | Pigmeat                         | 1997           | 84                                                                    |
| 21               | Brazil  | Pineapples and products         | 1997           | 7                                                                     |
| 21               | Brazil  | Potatoes and products           | 1997           | 25                                                                    |
| 21               | Brazil  | Poultry Meat                    | 1997           | 107                                                                   |
| 21               | Brazil  | Pulses                          | 1997           | 141                                                                   |
| 21               | Brazil  | Pulses, Other and products      | 1997           | 1                                                                     |
| 21               | Brazil  | Rice (Milled Equivalent)        | 1997           | 377                                                                   |
| 21               | Brazil  | Ricebran Oil                    | 1997           | 2                                                                     |
| 21               | Brazil  | Sesame seed                     | 1997           | 1                                                                     |
| 21               | Brazil  | Soyabean Oil                    | 1997           | 268                                                                   |
| 21               | Brazil  | Soyabeans                       | 1997           | 11                                                                    |
| 21               | Brazil  | Spices                          | 1997           | 1                                                                     |
| 21               | Brazil  | Starchy Roots                   | 1997           | 125                                                                   |
| 21               | Brazil  | Stimulants                      | 1997           | 7                                                                     |
| 21               | Brazil  | Sugar & Sweeteners              | 1997           | 493                                                                   |
| 21               | Brazil  | Sugar (Raw Equivalent)          | 1997           | 476                                                                   |
| 21               | Brazil  | Sugar cane                      | 1997           | 4                                                                     |
| 21               | Brazil  | Sugar Crops                     | 1997           | 4                                                                     |
| 21               | Brazil  | Sugar non-centrifugal           | 1997           | 14                                                                    |
| 21               | Brazil  | Sunflowerseed Oil               | 1997           | 11                                                                    |
| 21               | Brazil  | Sweet potatoes                  | 1997           | 3                                                                     |
| 21               | Brazil  | Sweeteners, Other               | 1997           | 1                                                                     |
| 21               | Brazil  | Tea (including mate)            | 1997           | 2                                                                     |
| 21               | Brazil  | Tomatoes and products           | 1997           | 9                                                                     |
| 21               | Brazil  | Treenuts                        | 1997           | 2                                                                     |
| 21               | Brazil  | Vegetable Oils                  | 1997           | 321                                                                   |
| 21               | Brazil  | Vegetables                      | 1997           | 27                                                                    |
| 21               | Brazil  | Vegetables, Other               | 1997           | 12                                                                    |
| 21               | Brazil  | Vegetal Products                | 1997           | 2,258                                                                 |
| 21               | Brazil  | Wheat and products              | 1997           | 328                                                                   |
| 21               | Brazil  | Wine                            | 1997           | 3                                                                     |
| 21               | Brazil  | Yams                            | 1997           | 2                                                                     |
| 21               | Brazil  | Alcoholic Beverages             | 1998           | 75                                                                    |
| 21               | Brazil  | Animal fats                     | 1998           | 48                                                                    |
| 21               | Brazil  | Animal Products                 | 1998           | 604                                                                   |
| 21               | Brazil  | Apples and products             | 1998           | 7                                                                     |
| 21               | Brazil  | Bananas                         | 1998           | 45                                                                    |
| 21               | Brazil  | Beans                           | 1998           | 141                                                                   |
| 21               | Brazil  | Beer                            | 1998           | 39                                                                    |
| 21               | Brazil  | Beverages, Alcoholic            | 1998           | 34                                                                    |
| 21               | Brazil  | Bovine Meat                     | 1998           | 115                                                                   |

Dietary calcium and zinc deficiency risks are decreasing but remain prevalent

| FAO Country code | Country | Food item                       | Reference year | Net energy supply (kcal <i>capita</i> <sup>-1</sup> d <sup>-1</sup> ) |
|------------------|---------|---------------------------------|----------------|-----------------------------------------------------------------------|
| 21               | Brazil  | Butter, Ghee                    | 1998           | 9                                                                     |
| 21               | Brazil  | Cassava and products            | 1998           | 93                                                                    |
| 21               | Brazil  | Cereals - Excluding Beer        | 1998           | 888                                                                   |
| 21               | Brazil  | Cereals, Other                  | 1998           | 2                                                                     |
| 21               | Brazil  | Cocoa Beans and products        | 1998           | 2                                                                     |
| 21               | Brazil  | Coconuts - Incl Copra           | 1998           | 30                                                                    |
| 21               | Brazil  | Coffee and products             | 1998           | 3                                                                     |
| 21               | Brazil  | Cottonseed Oil                  | 1998           | 15                                                                    |
| 21               | Brazil  | Demersal Fish                   | 1998           | 3                                                                     |
| 21               | Brazil  | Eggs                            | 1998           | 25                                                                    |
| 21               | Brazil  | Fats, Animals, Raw              | 1998           | 39                                                                    |
| 21               | Brazil  | Fish, Seafood                   | 1998           | 10                                                                    |
| 21               | Brazil  | Freshwater Fish                 | 1998           | 3                                                                     |
| 21               | Brazil  | Fruits - Excluding Wine         | 1998           | 115                                                                   |
| 21               | Brazil  | Fruits, Other                   | 1998           | 18                                                                    |
| 21               | Brazil  | Grand Total                     | 1998           | 2,853                                                                 |
| 21               | Brazil  | Grapes and products (excl wine) | 1998           | 5                                                                     |
| 21               | Brazil  | Groundnut Oil                   | 1998           | 3                                                                     |
| 21               | Brazil  | Groundnuts (Shelled Eq)         | 1998           | 6                                                                     |
| 21               | Brazil  | Honey                           | 1998           | 1                                                                     |
| 21               | Brazil  | Lemons, Limes and products      | 1998           | 1                                                                     |
| 21               | Brazil  | Maize and products              | 1998           | 145                                                                   |
| 21               | Brazil  | Maize Germ Oil                  | 1998           | 7                                                                     |
| 21               | Brazil  | Marine Fish, Other              | 1998           | 1                                                                     |
| 21               | Brazil  | Meat                            | 1998           | 327                                                                   |
| 21               | Brazil  | Milk - Excluding Butter         | 1998           | 188                                                                   |
| 21               | Brazil  | Mutton & Goat Meat              | 1998           | 3                                                                     |
| 21               | Brazil  | Oats                            | 1998           | 5                                                                     |
| 21               | Brazil  | Offals                          | 1998           | 7                                                                     |
| 21               | Brazil  | Oilcrops                        | 1998           | 52                                                                    |
| 21               | Brazil  | Olive Oil                       | 1998           | 4                                                                     |
| 21               | Brazil  | Olives (including preserved)    | 1998           | 1                                                                     |
| 21               | Brazil  | Onions                          | 1998           | 5                                                                     |
| 21               | Brazil  | Oranges, Mandarines             | 1998           | 31                                                                    |
| 21               | Brazil  | Palm Oil                        | 1998           | 14                                                                    |
| 21               | Brazil  | Peas                            | 1998           | 2                                                                     |
| 21               | Brazil  | Pelagic Fish                    | 1998           | 2                                                                     |
| 21               | Brazil  | Pigmeat                         | 1998           | 99                                                                    |
| 21               | Brazil  | Pineapples and products         | 1998           | 7                                                                     |
| 21               | Brazil  | Potatoes and products           | 1998           | 27                                                                    |
| 21               | Brazil  | Poultry Meat                    | 1998           | 110                                                                   |
| 21               | Brazil  | Pulses                          | 1998           | 144                                                                   |
| 21               | Brazil  | Pulses, Other and products      | 1998           | 2                                                                     |
| 21               | Brazil  | Rice (Milled Equivalent)        | 1998           | 404                                                                   |
| 21               | Brazil  | Ricebran Oil                    | 1998           | 2                                                                     |
| 21               | Brazil  | Sesame seed                     | 1998           | 1                                                                     |
| 21               | Brazil  | Soyabean Oil                    | 1998           | 265                                                                   |
| 21               | Brazil  | Soyabeans                       | 1998           | 13                                                                    |
| 21               | Brazil  | Spices                          | 1998           | 1                                                                     |
| 21               | Brazil  | Spices, Other                   | 1998           | 1                                                                     |
| 21               | Brazil  | Starchy Roots                   | 1998           | 124                                                                   |
| 21               | Brazil  | Stimulants                      | 1998           | 8                                                                     |
| 21               | Brazil  | Sugar & Sweeteners              | 1998           | 486                                                                   |
| 21               | Brazil  | Sugar (Raw Equivalent)          | 1998           | 469                                                                   |
| 21               | Brazil  | Sugar cane                      | 1998           | 4                                                                     |
| 21               | Brazil  | Sugar Crops                     | 1998           | 4                                                                     |
| 21               | Brazil  | Sugar non-centrifugal           | 1998           | 14                                                                    |
| 21               | Brazil  | Sunflowerseed Oil               | 1998           | 13                                                                    |
| 21               | Brazil  | Sweet potatoes                  | 1998           | 3                                                                     |
| 21               | Brazil  | Sweeteners, Other               | 1998           | 1                                                                     |
| 21               | Brazil  | Tea (including mate)            | 1998           | 3                                                                     |
| 21               | Brazil  | Tomatoes and products           | 1998           | 9                                                                     |
| 21               | Brazil  | Treenuts                        | 1998           | 2                                                                     |
| 21               | Brazil  | Vegetable Oils                  | 1998           | 323                                                                   |
| 21               | Brazil  | Vegetables                      | 1998           | 26                                                                    |
| 21               | Brazil  | Vegetables, Other               | 1998           | 13                                                                    |
| 21               | Brazil  | Vegetal Products                | 1998           | 2,248                                                                 |
| 21               | Brazil  | Wheat and products              | 1998           | 332                                                                   |
| 21               | Brazil  | Wine                            | 1998           | 3                                                                     |
| 21               | Brazil  | Yams                            | 1998           | 2                                                                     |
| 21               | Brazil  | Alcoholic Beverages             | 1999           | 72                                                                    |
| 21               | Brazil  | Animal fats                     | 1999           | 50                                                                    |
| 21               | Brazil  | Animal Products                 | 1999           | 629                                                                   |
| 21               | Brazil  | Apples and products             | 1999           | 7                                                                     |
| 21               | Brazil  | Bananas                         | 1999           | 46                                                                    |
| 21               | Brazil  | Beans                           | 1999           | 143                                                                   |
| 21               | Brazil  | Beer                            | 1999           | 36                                                                    |
| 21               | Brazil  | Beverages, Alcoholic            | 1999           | 33                                                                    |
| 21               | Brazil  | Bovine Meat                     | 1999           | 125                                                                   |
| 21               | Brazil  | Butter, Ghee                    | 1999           | 9                                                                     |
| 21               | Brazil  | Cassava and products            | 1999           | 96                                                                    |
| 21               | Brazil  | Cereals - Excluding Beer        | 1999           | 896                                                                   |
| 21               | Brazil  | Cereals, Other                  | 1999           | 2                                                                     |
| 21               | Brazil  | Cocoa Beans and products        | 1999           | 2                                                                     |
| 21               | Brazil  | Coconuts - Incl Copra           | 1999           | 36                                                                    |
| 21               | Brazil  | Coffee and products             | 1999           | 4                                                                     |
| 21               | Brazil  | Cottonseed Oil                  | 1999           | 14                                                                    |
| 21               | Brazil  | Demersal Fish                   | 1999           | 2                                                                     |
| 21               | Brazil  | Eggs                            | 1999           | 26                                                                    |
| 21               | Brazil  | Fats, Animals, Raw              | 1999           | 40                                                                    |
| 21               | Brazil  | Fish, Seafood                   | 1999           | 9                                                                     |
| 21               | Brazil  | Freshwater Fish                 | 1999           | 3                                                                     |
| 21               | Brazil  | Fruits - Excluding Wine         | 1999           | 125                                                                   |
| 21               | Brazil  | Fruits, Other                   | 1999           | 18                                                                    |
| 21               | Brazil  | Grand Total                     | 1999           | 2,865                                                                 |
| 21               | Brazil  | Grapes and products (excl wine) | 1999           | 4                                                                     |
| 21               | Brazil  | Groundnut Oil                   | 1999           | 3                                                                     |

Dietary calcium and zinc deficiency risks are decreasing but remain prevalent

| FAO Country code | Country | Food item                       | Reference year | Net energy supply (kcal <i>capita</i> <sup>-1</sup> d <sup>-1</sup> ) |
|------------------|---------|---------------------------------|----------------|-----------------------------------------------------------------------|
| 21               | Brazil  | Groundnuts (Shelled Eq)         | 1999           | 6                                                                     |
| 21               | Brazil  | Honey                           | 1999           | 1                                                                     |
| 21               | Brazil  | Lemons, Limes and products      | 1999           | 1                                                                     |
| 21               | Brazil  | Maize and products              | 1999           | 143                                                                   |
| 21               | Brazil  | Maize Germ Oil                  | 1999           | 6                                                                     |
| 21               | Brazil  | Marine Fish, Other              | 1999           | 1                                                                     |
| 21               | Brazil  | Meat                            | 1999           | 347                                                                   |
| 21               | Brazil  | Milk - Excluding Butter         | 1999           | 189                                                                   |
| 21               | Brazil  | Mutton & Goat Meat              | 1999           | 4                                                                     |
| 21               | Brazil  | Oats                            | 1999           | 7                                                                     |
| 21               | Brazil  | Offals                          | 1999           | 7                                                                     |
| 21               | Brazil  | Oilcrops                        | 1999           | 57                                                                    |
| 21               | Brazil  | Olive Oil                       | 1999           | 3                                                                     |
| 21               | Brazil  | Olives (including preserved)    | 1999           | 1                                                                     |
| 21               | Brazil  | Onions                          | 1999           | 6                                                                     |
| 21               | Brazil  | Oranges, Mandarines             | 1999           | 41                                                                    |
| 21               | Brazil  | Palm Oil                        | 1999           | 12                                                                    |
| 21               | Brazil  | Peas                            | 1999           | 2                                                                     |
| 21               | Brazil  | Pelagic Fish                    | 1999           | 2                                                                     |
| 21               | Brazil  | Pigmeat                         | 1999           | 97                                                                    |
| 21               | Brazil  | Pineapples and products         | 1999           | 8                                                                     |
| 21               | Brazil  | Potatoes and products           | 1999           | 27                                                                    |
| 21               | Brazil  | Poultry Meat                    | 1999           | 121                                                                   |
| 21               | Brazil  | Pulses                          | 1999           | 145                                                                   |
| 21               | Brazil  | Pulses, Other and products      | 1999           | 1                                                                     |
| 21               | Brazil  | Rice (Milled Equivalent)        | 1999           | 403                                                                   |
| 21               | Brazil  | Ricebran Oil                    | 1999           | 2                                                                     |
| 21               | Brazil  | Sesame seed                     | 1999           | 2                                                                     |
| 21               | Brazil  | Soyabean Oil                    | 1999           | 332                                                                   |
| 21               | Brazil  | Soyabeans                       | 1999           | 13                                                                    |
| 21               | Brazil  | Spices                          | 1999           | 1                                                                     |
| 21               | Brazil  | Starchy Roots                   | 1999           | 128                                                                   |
| 21               | Brazil  | Stimulants                      | 1999           | 9                                                                     |
| 21               | Brazil  | Sugar & Sweeteners              | 1999           | 382                                                                   |
| 21               | Brazil  | Sugar (Raw Equivalent)          | 1999           | 370                                                                   |
| 21               | Brazil  | Sugar cane                      | 1999           | 4                                                                     |
| 21               | Brazil  | Sugar Crops                     | 1999           | 4                                                                     |
| 21               | Brazil  | Sugar non-centrifugal           | 1999           | 10                                                                    |
| 21               | Brazil  | Sunflowerseed Oil               | 1999           | 13                                                                    |
| 21               | Brazil  | Sweet potatoes                  | 1999           | 3                                                                     |
| 21               | Brazil  | Sweeteners, Other               | 1999           | 1                                                                     |
| 21               | Brazil  | Tea (including mate)            | 1999           | 3                                                                     |
| 21               | Brazil  | Tomatoes and products           | 1999           | 10                                                                    |
| 21               | Brazil  | Treenuts                        | 1999           | 3                                                                     |
| 21               | Brazil  | Vegetable Oils                  | 1999           | 387                                                                   |
| 21               | Brazil  | Vegetables                      | 1999           | 28                                                                    |
| 21               | Brazil  | Vegetables, Other               | 1999           | 12                                                                    |
| 21               | Brazil  | Vegetal Products                | 1999           | 2,237                                                                 |
| 21               | Brazil  | Wheat and products              | 1999           | 341                                                                   |
| 21               | Brazil  | Wine                            | 1999           | 4                                                                     |
| 21               | Brazil  | Yams                            | 1999           | 2                                                                     |
| 21               | Brazil  | Alcoholic Beverages             | 2000           | 85                                                                    |
| 21               | Brazil  | Animal fats                     | 2000           | 53                                                                    |
| 21               | Brazil  | Animal Products                 | 2000           | 643                                                                   |
| 21               | Brazil  | Apples and products             | 2000           | 8                                                                     |
| 21               | Brazil  | Bananas                         | 2000           | 47                                                                    |
| 21               | Brazil  | Beans                           | 2000           | 152                                                                   |
| 21               | Brazil  | Beer                            | 2000           | 49                                                                    |
| 21               | Brazil  | Beverages, Alcoholic            | 2000           | 32                                                                    |
| 21               | Brazil  | Bovine Meat                     | 2000           | 125                                                                   |
| 21               | Brazil  | Butter, Ghee                    | 2000           | 9                                                                     |
| 21               | Brazil  | Cassava and products            | 2000           | 106                                                                   |
| 21               | Brazil  | Cereals - Excluding Beer        | 2000           | 844                                                                   |
| 21               | Brazil  | Cereals, Other                  | 2000           | 2                                                                     |
| 21               | Brazil  | Cocoa Beans and products        | 2000           | 3                                                                     |
| 21               | Brazil  | Coconuts - Incl Copra           | 2000           | 38                                                                    |
| 21               | Brazil  | Coffee and products             | 2000           | 4                                                                     |
| 21               | Brazil  | Cottonseed Oil                  | 2000           | 19                                                                    |
| 21               | Brazil  | Crustaceans                     | 2000           | 1                                                                     |
| 21               | Brazil  | Demersal Fish                   | 2000           | 2                                                                     |
| 21               | Brazil  | Eggs                            | 2000           | 27                                                                    |
| 21               | Brazil  | Fats, Animals, Raw              | 2000           | 44                                                                    |
| 21               | Brazil  | Fish, Seafood                   | 2000           | 10                                                                    |
| 21               | Brazil  | Freshwater Fish                 | 2000           | 4                                                                     |
| 21               | Brazil  | Fruits - Excluding Wine         | 2000           | 120                                                                   |
| 21               | Brazil  | Fruits, Other                   | 2000           | 18                                                                    |
| 21               | Brazil  | Grand Total                     | 2000           | 2,880                                                                 |
| 21               | Brazil  | Grapes and products (excl wine) | 2000           | 5                                                                     |
| 21               | Brazil  | Groundnut Oil                   | 2000           | 4                                                                     |
| 21               | Brazil  | Groundnuts (Shelled Eq)         | 2000           | 6                                                                     |
| 21               | Brazil  | Honey                           | 2000           | 1                                                                     |
| 21               | Brazil  | Lemons, Limes and products      | 2000           | 1                                                                     |
| 21               | Brazil  | Maize and products              | 2000           | 134                                                                   |
| 21               | Brazil  | Maize Germ Oil                  | 2000           | 6                                                                     |
| 21               | Brazil  | Marine Fish, Other              | 2000           | 1                                                                     |
| 21               | Brazil  | Meat                            | 2000           | 357                                                                   |
| 21               | Brazil  | Milk - Excluding Butter         | 2000           | 189                                                                   |
| 21               | Brazil  | Mutton & Goat Meat              | 2000           | 4                                                                     |
| 21               | Brazil  | Oats                            | 2000           | 4                                                                     |
| 21               | Brazil  | Offals                          | 2000           | 8                                                                     |
| 21               | Brazil  | Oilcrops                        | 2000           | 58                                                                    |
| 21               | Brazil  | Olive Oil                       | 2000           | 4                                                                     |
| 21               | Brazil  | Olives (including preserved)    | 2000           | 1                                                                     |
| 21               | Brazil  | Onions                          | 2000           | 7                                                                     |
| 21               | Brazil  | Oranges, Mandarines             | 2000           | 32                                                                    |
| 21               | Brazil  | Palm Oil                        | 2000           | 14                                                                    |
| 21               | Brazil  | Peas                            | 2000           | 2                                                                     |



Dietary calcium and zinc deficiency risks are decreasing but remain prevalent

| FAO Country code | Country | Food item                       | Reference year | Net energy supply (kcal capita <sup>-1</sup> d <sup>-1</sup> ) |
|------------------|---------|---------------------------------|----------------|----------------------------------------------------------------|
| 21               | Brazil  | Pelagic Fish                    | 2000           | 2                                                              |
| 21               | Brazil  | Pepper                          | 2000           | 1                                                              |
| 21               | Brazil  | Pigmeat                         | 2000           | 101                                                            |
| 21               | Brazil  | Pineapples and products         | 2000           | 8                                                              |
| 21               | Brazil  | Potatoes and products           | 2000           | 24                                                             |
| 21               | Brazil  | Poultry Meat                    | 2000           | 127                                                            |
| 21               | Brazil  | Pulses                          | 2000           | 155                                                            |
| 21               | Brazil  | Pulses, Other and products      | 2000           | 1                                                              |
| 21               | Brazil  | Rice (Milled Equivalent)        | 2000           | 389                                                            |
| 21               | Brazil  | Ricebran Oil                    | 2000           | 2                                                              |
| 21               | Brazil  | Sesame seed                     | 2000           | 2                                                              |
| 21               | Brazil  | Soyabean Oil                    | 2000           | 341                                                            |
| 21               | Brazil  | Soyabeans                       | 2000           | 12                                                             |
| 21               | Brazil  | Spices                          | 2000           | 1                                                              |
| 21               | Brazil  | Starchy Roots                   | 2000           | 134                                                            |
| 21               | Brazil  | Stimulants                      | 2000           | 9                                                              |
| 21               | Brazil  | Sugar & Sweeteners              | 2000           | 390                                                            |
| 21               | Brazil  | Sugar (Raw Equivalent)          | 2000           | 368                                                            |
| 21               | Brazil  | Sugar cane                      | 2000           | 9                                                              |
| 21               | Brazil  | Sugar Crops                     | 2000           | 9                                                              |
| 21               | Brazil  | Sugar non-centrifugal           | 2000           | 20                                                             |
| 21               | Brazil  | Sunflowerseed Oil               | 2000           | 13                                                             |
| 21               | Brazil  | Sweet potatoes                  | 2000           | 3                                                              |
| 21               | Brazil  | Sweeteners, Other               | 2000           | 1                                                              |
| 21               | Brazil  | Tea (including mate)            | 2000           | 3                                                              |
| 21               | Brazil  | Tomatoes and products           | 2000           | 9                                                              |
| 21               | Brazil  | Treenuts                        | 2000           | 2                                                              |
| 21               | Brazil  | Vegetable Oils                  | 2000           | 402                                                            |
| 21               | Brazil  | Vegetables                      | 2000           | 27                                                             |
| 21               | Brazil  | Vegetables, Other               | 2000           | 12                                                             |
| 21               | Brazil  | Vegetal Products                | 2000           | 2,237                                                          |
| 21               | Brazil  | Wheat and products              | 2000           | 314                                                            |
| 21               | Brazil  | Wine                            | 2000           | 3                                                              |
| 21               | Brazil  | Yams                            | 2000           | 2                                                              |
| 21               | Brazil  | Alcoholic Beverages             | 2001           | 86                                                             |
| 21               | Brazil  | Animal fats                     | 2001           | 53                                                             |
| 21               | Brazil  | Animal Products                 | 2001           | 629                                                            |
| 21               | Brazil  | Apples and products             | 2001           | 5                                                              |
| 21               | Brazil  | Bananas                         | 2001           | 50                                                             |
| 21               | Brazil  | Beans                           | 2001           | 152                                                            |
| 21               | Brazil  | Beer                            | 2001           | 51                                                             |
| 21               | Brazil  | Beverages, Alcoholic            | 2001           | 32                                                             |
| 21               | Brazil  | Bovine Meat                     | 2001           | 127                                                            |
| 21               | Brazil  | Butter, Ghee                    | 2001           | 8                                                              |
| 21               | Brazil  | Cassava and products            | 2001           | 102                                                            |
| 21               | Brazil  | Cereals - Excluding Beer        | 2001           | 891                                                            |
| 21               | Brazil  | Cereals, Other                  | 2001           | 3                                                              |
| 21               | Brazil  | Cocoa Beans and products        | 2001           | 2                                                              |
| 21               | Brazil  | Coconuts - Incl Copra           | 2001           | 41                                                             |
| 21               | Brazil  | Coffee and products             | 2001           | 4                                                              |
| 21               | Brazil  | Cottonseed Oil                  | 2001           | 22                                                             |
| 21               | Brazil  | Demersal Fish                   | 2001           | 2                                                              |
| 21               | Brazil  | Eggs                            | 2001           | 27                                                             |
| 21               | Brazil  | Fats, Animals, Raw              | 2001           | 45                                                             |
| 21               | Brazil  | Fish, Seafood                   | 2001           | 10                                                             |
| 21               | Brazil  | Freshwater Fish                 | 2001           | 4                                                              |
| 21               | Brazil  | Fruits - Excluding Wine         | 2001           | 103                                                            |
| 21               | Brazil  | Fruits, Other                   | 2001           | 21                                                             |
| 21               | Brazil  | Grand Total                     | 2001           | 2,892                                                          |
| 21               | Brazil  | Grapes and products (excl wine) | 2001           | 6                                                              |
| 21               | Brazil  | Groundnut Oil                   | 2001           | 4                                                              |
| 21               | Brazil  | Groundnuts (Shelled Eq)         | 2001           | 6                                                              |
| 21               | Brazil  | Honey                           | 2001           | 1                                                              |
| 21               | Brazil  | Lemons, Limes and products      | 2001           | 2                                                              |
| 21               | Brazil  | Maize and products              | 2001           | 164                                                            |
| 21               | Brazil  | Maize Germ Oil                  | 2001           | 7                                                              |
| 21               | Brazil  | Marine Fish, Other              | 2001           | 1                                                              |
| 21               | Brazil  | Meat                            | 2001           | 348                                                            |
| 21               | Brazil  | Milk - Excluding Butter         | 2001           | 184                                                            |
| 21               | Brazil  | Mutton & Goat Meat              | 2001           | 3                                                              |
| 21               | Brazil  | Oats                            | 2001           | 9                                                              |
| 21               | Brazil  | Offals                          | 2001           | 8                                                              |
| 21               | Brazil  | Oilcrops                        | 2001           | 62                                                             |
| 21               | Brazil  | Olive Oil                       | 2001           | 3                                                              |
| 21               | Brazil  | Olives (including preserved)    | 2001           | 1                                                              |
| 21               | Brazil  | Onions                          | 2001           | 6                                                              |
| 21               | Brazil  | Oranges, Mandarines             | 2001           | 10                                                             |
| 21               | Brazil  | Palm Oil                        | 2001           | 14                                                             |
| 21               | Brazil  | Peas                            | 2001           | 2                                                              |
| 21               | Brazil  | Pelagic Fish                    | 2001           | 2                                                              |
| 21               | Brazil  | Pigmeat                         | 2001           | 96                                                             |
| 21               | Brazil  | Pineapples and products         | 2001           | 9                                                              |
| 21               | Brazil  | Potatoes and products           | 2001           | 26                                                             |
| 21               | Brazil  | Poultry Meat                    | 2001           | 122                                                            |
| 21               | Brazil  | Pulses                          | 2001           | 155                                                            |
| 21               | Brazil  | Pulses, Other and products      | 2001           | 1                                                              |
| 21               | Brazil  | Rice (Milled Equivalent)        | 2001           | 360                                                            |
| 21               | Brazil  | Ricebran Oil                    | 2001           | 2                                                              |
| 21               | Brazil  | Sesame seed                     | 2001           | 1                                                              |
| 21               | Brazil  | Soyabean Oil                    | 2001           | 343                                                            |
| 21               | Brazil  | Soyabeans                       | 2001           | 13                                                             |
| 21               | Brazil  | Spices                          | 2001           | 1                                                              |
| 21               | Brazil  | Starchy Roots                   | 2001           | 132                                                            |
| 21               | Brazil  | Stimulants                      | 2001           | 10                                                             |
| 21               | Brazil  | Sugar & Sweeteners              | 2001           | 387                                                            |
| 21               | Brazil  | Sugar (Raw Equivalent)          | 2001           | 365                                                            |
| 21               | Brazil  | Sugar cane                      | 2001           | 4                                                              |

Dietary calcium and zinc deficiency risks are decreasing but remain prevalent

| FAO Country code | Country | Food item                       | Reference year | Net energy supply (kcal capita <sup>-1</sup> d <sup>-1</sup> ) |
|------------------|---------|---------------------------------|----------------|----------------------------------------------------------------|
| 21               | Brazil  | Sugar Crops                     | 2001           | 4                                                              |
| 21               | Brazil  | Sugar non-centrifugal           | 2001           | 19                                                             |
| 21               | Brazil  | Sunflowerseed Oil               | 2001           | 8                                                              |
| 21               | Brazil  | Sweet potatoes                  | 2001           | 3                                                              |
| 21               | Brazil  | Sweeteners, Other               | 2001           | 1                                                              |
| 21               | Brazil  | Tea (including mate)            | 2001           | 4                                                              |
| 21               | Brazil  | Tomatoes and products           | 2001           | 9                                                              |
| 21               | Brazil  | Treenuts                        | 2001           | 2                                                              |
| 21               | Brazil  | Vegetable Oils                  | 2001           | 403                                                            |
| 21               | Brazil  | Vegetables                      | 2001           | 27                                                             |
| 21               | Brazil  | Vegetables, Other               | 2001           | 12                                                             |
| 21               | Brazil  | Vegetal Products                | 2001           | 2,263                                                          |
| 21               | Brazil  | Wheat and products              | 2001           | 355                                                            |
| 21               | Brazil  | Wine                            | 2001           | 3                                                              |
| 21               | Brazil  | Yams                            | 2001           | 2                                                              |
| 21               | Brazil  | Alcoholic Beverages             | 2002           | 79                                                             |
| 21               | Brazil  | Animal fats                     | 2002           | 56                                                             |
| 21               | Brazil  | Animal Products                 | 2002           | 655                                                            |
| 21               | Brazil  | Apples and products             | 2002           | 5                                                              |
| 21               | Brazil  | Bananas                         | 2002           | 50                                                             |
| 21               | Brazil  | Beans                           | 2002           | 147                                                            |
| 21               | Brazil  | Beer                            | 2002           | 44                                                             |
| 21               | Brazil  | Beverages, Alcoholic            | 2002           | 31                                                             |
| 21               | Brazil  | Bovine Meat                     | 2002           | 133                                                            |
| 21               | Brazil  | Butter, Ghee                    | 2002           | 9                                                              |
| 21               | Brazil  | Cassava and products            | 2002           | 102                                                            |
| 21               | Brazil  | Cereals - Excluding Beer        | 2002           | 890                                                            |
| 21               | Brazil  | Cereals, Other                  | 2002           | 2                                                              |
| 21               | Brazil  | Cocoa Beans and products        | 2002           | 2                                                              |
| 21               | Brazil  | Coconuts - Incl Copra           | 2002           | 54                                                             |
| 21               | Brazil  | Coffee and products             | 2002           | 4                                                              |
| 21               | Brazil  | Cottonseed Oil                  | 2002           | 19                                                             |
| 21               | Brazil  | Crustaceans                     | 2002           | 1                                                              |
| 21               | Brazil  | Demersal Fish                   | 2002           | 2                                                              |
| 21               | Brazil  | Eggs                            | 2002           | 26                                                             |
| 21               | Brazil  | Fats, Animals, Raw              | 2002           | 47                                                             |
| 21               | Brazil  | Fish, Seafood                   | 2002           | 10                                                             |
| 21               | Brazil  | Freshwater Fish                 | 2002           | 4                                                              |
| 21               | Brazil  | Fruits - Excluding Wine         | 2002           | 123                                                            |
| 21               | Brazil  | Fruits, Other                   | 2002           | 22                                                             |
| 21               | Brazil  | Grand Total                     | 2002           | 2,927                                                          |
| 21               | Brazil  | Grapes and products (excl wine) | 2002           | 6                                                              |
| 21               | Brazil  | Groundnut Oil                   | 2002           | 4                                                              |
| 21               | Brazil  | Groundnuts (Shelled Eq)         | 2002           | 5                                                              |
| 21               | Brazil  | Honey                           | 2002           | 1                                                              |
| 21               | Brazil  | Lemons, Limes and products      | 2002           | 2                                                              |
| 21               | Brazil  | Maize and products              | 2002           | 178                                                            |
| 21               | Brazil  | Maize Germ Oil                  | 2002           | 7                                                              |
| 21               | Brazil  | Marine Fish, Other              | 2002           | 1                                                              |
| 21               | Brazil  | Meat                            | 2002           | 360                                                            |
| 21               | Brazil  | Milk - Excluding Butter         | 2002           | 195                                                            |
| 21               | Brazil  | Mutton & Goat Meat              | 2002           | 3                                                              |
| 21               | Brazil  | Oats                            | 2002           | 7                                                              |
| 21               | Brazil  | Offals                          | 2002           | 8                                                              |
| 21               | Brazil  | Oilcrops                        | 2002           | 76                                                             |
| 21               | Brazil  | Olive Oil                       | 2002           | 3                                                              |
| 21               | Brazil  | Olives (including preserved)    | 2002           | 1                                                              |
| 21               | Brazil  | Onions                          | 2002           | 7                                                              |
| 21               | Brazil  | Oranges, Mandarines             | 2002           | 30                                                             |
| 21               | Brazil  | Palm Oil                        | 2002           | 16                                                             |
| 21               | Brazil  | Peas                            | 2002           | 2                                                              |
| 21               | Brazil  | Pelagic Fish                    | 2002           | 2                                                              |
| 21               | Brazil  | Pepper                          | 2002           | 1                                                              |
| 21               | Brazil  | Pigmeat                         | 2002           | 92                                                             |
| 21               | Brazil  | Pineapples and products         | 2002           | 9                                                              |
| 21               | Brazil  | Potatoes and products           | 2002           | 29                                                             |
| 21               | Brazil  | Poultry Meat                    | 2002           | 132                                                            |
| 21               | Brazil  | Pulses                          | 2002           | 150                                                            |
| 21               | Brazil  | Pulses, Other and products      | 2002           | 1                                                              |
| 21               | Brazil  | Rice (Milled Equivalent)        | 2002           | 349                                                            |
| 21               | Brazil  | Ricebran Oil                    | 2002           | 2                                                              |
| 21               | Brazil  | Sesame seed                     | 2002           | 2                                                              |
| 21               | Brazil  | Soyabean Oil                    | 2002           | 332                                                            |
| 21               | Brazil  | Soyabeans                       | 2002           | 14                                                             |
| 21               | Brazil  | Spices                          | 2002           | 1                                                              |
| 21               | Brazil  | Spices, Other                   | 2002           | 1                                                              |
| 21               | Brazil  | Starchy Roots                   | 2002           | 135                                                            |
| 21               | Brazil  | Stimulants                      | 2002           | 9                                                              |
| 21               | Brazil  | Sugar & Sweeteners              | 2002           | 385                                                            |
| 21               | Brazil  | Sugar (Raw Equivalent)          | 2002           | 372                                                            |
| 21               | Brazil  | Sugar cane                      | 2002           | 4                                                              |
| 21               | Brazil  | Sugar Crops                     | 2002           | 4                                                              |
| 21               | Brazil  | Sugar non-centrifugal           | 2002           | 11                                                             |
| 21               | Brazil  | Sunflowerseed Oil               | 2002           | 4                                                              |
| 21               | Brazil  | Sweet potatoes                  | 2002           | 3                                                              |
| 21               | Brazil  | Sweeteners, Other               | 2002           | 1                                                              |
| 21               | Brazil  | Tea (including mate)            | 2002           | 3                                                              |
| 21               | Brazil  | Tomatoes and products           | 2002           | 11                                                             |
| 21               | Brazil  | Treenuts                        | 2002           | 2                                                              |
| 21               | Brazil  | Vegetable Oils                  | 2002           | 387                                                            |
| 21               | Brazil  | Vegetables                      | 2002           | 31                                                             |
| 21               | Brazil  | Vegetables, Other               | 2002           | 13                                                             |
| 21               | Brazil  | Vegetal Products                | 2002           | 2,272                                                          |
| 21               | Brazil  | Wheat and products              | 2002           | 354                                                            |
| 21               | Brazil  | Wine                            | 2002           | 3                                                              |
| 21               | Brazil  | Yams                            | 2002           | 2                                                              |
| 21               | Brazil  | Alcoholic Beverages             | 2003           | 75                                                             |

Dietary calcium and zinc deficiency risks are decreasing but remain prevalent

| FAO Country code | Country | Food item                       | Reference year | Net energy supply (kcal <i>capita</i> <sup>-1</sup> d <sup>-1</sup> ) |
|------------------|---------|---------------------------------|----------------|-----------------------------------------------------------------------|
| 21               | Brazil  | Animal fats                     | 2003           | 55                                                                    |
| 21               | Brazil  | Animal Products                 | 2003           | 661                                                                   |
| 21               | Brazil  | Apples and products             | 2003           | 5                                                                     |
| 21               | Brazil  | Bananas                         | 2003           | 53                                                                    |
| 21               | Brazil  | Beans                           | 2003           | 159                                                                   |
| 21               | Brazil  | Beer                            | 2003           | 42                                                                    |
| 21               | Brazil  | Beverages, Alcoholic            | 2003           | 31                                                                    |
| 21               | Brazil  | Bovine Meat                     | 2003           | 128                                                                   |
| 21               | Brazil  | Butter, Ghee                    | 2003           | 9                                                                     |
| 21               | Brazil  | Cassava and products            | 2003           | 94                                                                    |
| 21               | Brazil  | Cereals - Excluding Beer        | 2003           | 997                                                                   |
| 21               | Brazil  | Cereals, Other                  | 2003           | 3                                                                     |
| 21               | Brazil  | Cocoa Beans and products        | 2003           | 2                                                                     |
| 21               | Brazil  | Coconuts - Incl Copra           | 2003           | 55                                                                    |
| 21               | Brazil  | Coffee and products             | 2003           | 4                                                                     |
| 21               | Brazil  | Cottonseed Oil                  | 2003           | 24                                                                    |
| 21               | Brazil  | Crustaceans                     | 2003           | 1                                                                     |
| 21               | Brazil  | Demersal Fish                   | 2003           | 2                                                                     |
| 21               | Brazil  | Eggs                            | 2003           | 26                                                                    |
| 21               | Brazil  | Fats, Animals, Raw              | 2003           | 46                                                                    |
| 21               | Brazil  | Fish, Seafood                   | 2003           | 10                                                                    |
| 21               | Brazil  | Freshwater Fish                 | 2003           | 4                                                                     |
| 21               | Brazil  | Fruits - Excluding Wine         | 2003           | 115                                                                   |
| 21               | Brazil  | Fruits, Other                   | 2003           | 22                                                                    |
| 21               | Brazil  | Grand Total                     | 2003           | 3,067                                                                 |
| 21               | Brazil  | Grapes and products (excl wine) | 2003           | 6                                                                     |
| 21               | Brazil  | Groundnut Oil                   | 2003           | 2                                                                     |
| 21               | Brazil  | Groundnuts (Shelled Eq)         | 2003           | 5                                                                     |
| 21               | Brazil  | Lemons, Limes and products      | 2003           | 2                                                                     |
| 21               | Brazil  | Maize and products              | 2003           | 219                                                                   |
| 21               | Brazil  | Maize Germ Oil                  | 2003           | 6                                                                     |
| 21               | Brazil  | Marine Fish, Other              | 2003           | 1                                                                     |
| 21               | Brazil  | Meat                            | 2003           | 371                                                                   |
| 21               | Brazil  | Milk - Excluding Butter         | 2003           | 191                                                                   |
| 21               | Brazil  | Mutton & Goat Meat              | 2003           | 3                                                                     |
| 21               | Brazil  | Oats                            | 2003           | 10                                                                    |
| 21               | Brazil  | Offals                          | 2003           | 8                                                                     |
| 21               | Brazil  | Oilcrops                        | 2003           | 78                                                                    |
| 21               | Brazil  | Olive Oil                       | 2003           | 3                                                                     |
| 21               | Brazil  | Olives (including preserved)    | 2003           | 1                                                                     |
| 21               | Brazil  | Onions                          | 2003           | 7                                                                     |
| 21               | Brazil  | Oranges, Mandarines             | 2003           | 20                                                                    |
| 21               | Brazil  | Palm Oil                        | 2003           | 20                                                                    |
| 21               | Brazil  | Peas                            | 2003           | 1                                                                     |
| 21               | Brazil  | Pelagic Fish                    | 2003           | 2                                                                     |
| 21               | Brazil  | Pepper                          | 2003           | 1                                                                     |
| 21               | Brazil  | Pigmeat                         | 2003           | 101                                                                   |
| 21               | Brazil  | Pineapples and products         | 2003           | 8                                                                     |
| 21               | Brazil  | Potatoes and products           | 2003           | 28                                                                    |
| 21               | Brazil  | Poultry Meat                    | 2003           | 139                                                                   |
| 21               | Brazil  | Pulses                          | 2003           | 161                                                                   |
| 21               | Brazil  | Pulses, Other and products      | 2003           | 1                                                                     |
| 21               | Brazil  | Rice (Milled Equivalent)        | 2003           | 365                                                                   |
| 21               | Brazil  | Ricebran Oil                    | 2003           | 2                                                                     |
| 21               | Brazil  | Sesame seed                     | 2003           | 2                                                                     |
| 21               | Brazil  | Soyabean Oil                    | 2003           | 334                                                                   |
| 21               | Brazil  | Soyabeans                       | 2003           | 16                                                                    |
| 21               | Brazil  | Spices                          | 2003           | 2                                                                     |
| 21               | Brazil  | Starchy Roots                   | 2003           | 127                                                                   |
| 21               | Brazil  | Stimulants                      | 2003           | 9                                                                     |
| 21               | Brazil  | Sugar & Sweeteners              | 2003           | 406                                                                   |
| 21               | Brazil  | Sugar (Raw Equivalent)          | 2003           | 385                                                                   |
| 21               | Brazil  | Sugar cane                      | 2003           | 4                                                                     |
| 21               | Brazil  | Sugar Crops                     | 2003           | 4                                                                     |
| 21               | Brazil  | Sugar non-centrifugal           | 2003           | 19                                                                    |
| 21               | Brazil  | Sunflowerseed Oil               | 2003           | 7                                                                     |
| 21               | Brazil  | Sweet potatoes                  | 2003           | 3                                                                     |
| 21               | Brazil  | Sweeteners, Other               | 2003           | 1                                                                     |
| 21               | Brazil  | Tea (including mate)            | 2003           | 3                                                                     |
| 21               | Brazil  | Tomatoes and products           | 2003           | 11                                                                    |
| 21               | Brazil  | Treenuts                        | 2003           | 2                                                                     |
| 21               | Brazil  | Vegetable Oils                  | 2003           | 398                                                                   |
| 21               | Brazil  | Vegetables                      | 2003           | 32                                                                    |
| 21               | Brazil  | Vegetables, Other               | 2003           | 14                                                                    |
| 21               | Brazil  | Vegetal Products                | 2003           | 2,406                                                                 |
| 21               | Brazil  | Wheat and products              | 2003           | 400                                                                   |
| 21               | Brazil  | Wine                            | 2003           | 3                                                                     |
| 21               | Brazil  | Yams                            | 2003           | 1                                                                     |
| 21               | Brazil  | Alcoholic Beverages             | 2004           | 81                                                                    |
| 21               | Brazil  | Animal fats                     | 2004           | 63                                                                    |
| 21               | Brazil  | Animal Products                 | 2004           | 680                                                                   |
| 21               | Brazil  | Apples and products             | 2004           | 5                                                                     |
| 21               | Brazil  | Bananas                         | 2004           | 51                                                                    |
| 21               | Brazil  | Beans                           | 2004           | 140                                                                   |
| 21               | Brazil  | Beer                            | 2004           | 46                                                                    |
| 21               | Brazil  | Beverages, Alcoholic            | 2004           | 31                                                                    |
| 21               | Brazil  | Bovine Meat                     | 2004           | 128                                                                   |
| 21               | Brazil  | Butter, Ghee                    | 2004           | 9                                                                     |
| 21               | Brazil  | Cassava and products            | 2004           | 102                                                                   |
| 21               | Brazil  | Cereals - Excluding Beer        | 2004           | 986                                                                   |
| 21               | Brazil  | Cereals, Other                  | 2004           | 3                                                                     |
| 21               | Brazil  | Cocoa Beans and products        | 2004           | 2                                                                     |
| 21               | Brazil  | Coconuts - Incl Copra           | 2004           | 57                                                                    |
| 21               | Brazil  | Coffee and products             | 2004           | 5                                                                     |
| 21               | Brazil  | Cottonseed Oil                  | 2004           | 29                                                                    |
| 21               | Brazil  | Crustaceans                     | 2004           | 1                                                                     |
| 21               | Brazil  | Demersal Fish                   | 2004           | 2                                                                     |

## Dietary calcium and zinc deficiency risks are decreasing but remain prevalent

| FAO Country code | Country | Food item                       | Reference year | Net energy supply (kcal capita <sup>-1</sup> d <sup>-1</sup> ) |
|------------------|---------|---------------------------------|----------------|----------------------------------------------------------------|
| 21               | Brazil  | Eggs                            | 2004           | 26                                                             |
| 21               | Brazil  | Fats, Animals, Raw              | 2004           | 54                                                             |
| 21               | Brazil  | Fish, Seafood                   | 2004           | 10                                                             |
| 21               | Brazil  | Freshwater Fish                 | 2004           | 4                                                              |
| 21               | Brazil  | Fruits - Excluding Wine         | 2004           | 119                                                            |
| 21               | Brazil  | Fruits, Other                   | 2004           | 22                                                             |
| 21               | Brazil  | Grand Total                     | 2004           | 3,082                                                          |
| 21               | Brazil  | Grapes and products (excl wine) | 2004           | 6                                                              |
| 21               | Brazil  | Groundnut Oil                   | 2004           | 2                                                              |
| 21               | Brazil  | Groundnuts (Shelled Eq)         | 2004           | 6                                                              |
| 21               | Brazil  | Honey                           | 2004           | 1                                                              |
| 21               | Brazil  | Lemons, Limes and products      | 2004           | 2                                                              |
| 21               | Brazil  | Maize and products              | 2004           | 205                                                            |
| 21               | Brazil  | Maize Germ Oil                  | 2004           | 5                                                              |
| 21               | Brazil  | Marine Fish, Other              | 2004           | 1                                                              |
| 21               | Brazil  | Meat                            | 2004           | 376                                                            |
| 21               | Brazil  | Milk - Excluding Butter         | 2004           | 197                                                            |
| 21               | Brazil  | Mutton & Goat Meat              | 2004           | 3                                                              |
| 21               | Brazil  | Oats                            | 2004           | 11                                                             |
| 21               | Brazil  | Offals                          | 2004           | 8                                                              |
| 21               | Brazil  | Oilcrops                        | 2004           | 81                                                             |
| 21               | Brazil  | Olive Oil                       | 2004           | 3                                                              |
| 21               | Brazil  | Olives (including preserved)    | 2004           | 1                                                              |
| 21               | Brazil  | Onions                          | 2004           | 6                                                              |
| 21               | Brazil  | Oranges, Mandarines             | 2004           | 25                                                             |
| 21               | Brazil  | Palm Oil                        | 2004           | 20                                                             |
| 21               | Brazil  | Peas                            | 2004           | 2                                                              |
| 21               | Brazil  | Pelagic Fish                    | 2004           | 2                                                              |
| 21               | Brazil  | Pepper                          | 2004           | 1                                                              |
| 21               | Brazil  | Pigmeat                         | 2004           | 98                                                             |
| 21               | Brazil  | Pineapples and products         | 2004           | 9                                                              |
| 21               | Brazil  | Potatoes and products           | 2004           | 27                                                             |
| 21               | Brazil  | Poultry Meat                    | 2004           | 147                                                            |
| 21               | Brazil  | Pulses                          | 2004           | 143                                                            |
| 21               | Brazil  | Pulses, Other and products      | 2004           | 1                                                              |
| 21               | Brazil  | Rice (Milled Equivalent)        | 2004           | 390                                                            |
| 21               | Brazil  | Ricebran Oil                    | 2004           | 2                                                              |
| 21               | Brazil  | Sesame seed                     | 2004           | 1                                                              |
| 21               | Brazil  | Soyabean Oil                    | 2004           | 334                                                            |
| 21               | Brazil  | Soyabeans                       | 2004           | 16                                                             |
| 21               | Brazil  | Spices                          | 2004           | 1                                                              |
| 21               | Brazil  | Spices, Other                   | 2004           | 1                                                              |
| 21               | Brazil  | Starchy Roots                   | 2004           | 134                                                            |
| 21               | Brazil  | Stimulants                      | 2004           | 8                                                              |
| 21               | Brazil  | Sugar & Sweeteners              | 2004           | 409                                                            |
| 21               | Brazil  | Sugar (Raw Equivalent)          | 2004           | 392                                                            |
| 21               | Brazil  | Sugar cane                      | 2004           | 9                                                              |
| 21               | Brazil  | Sugar Crops                     | 2004           | 9                                                              |
| 21               | Brazil  | Sugar non-centrifugal           | 2004           | 15                                                             |
| 21               | Brazil  | Sunflowerseed Oil               | 2004           | 4                                                              |
| 21               | Brazil  | Sweet potatoes                  | 2004           | 3                                                              |
| 21               | Brazil  | Sweeteners, Other               | 2004           | 2                                                              |
| 21               | Brazil  | Tea (including mate)            | 2004           | 2                                                              |
| 21               | Brazil  | Tomatoes and products           | 2004           | 10                                                             |
| 21               | Brazil  | Treenuts                        | 2004           | 2                                                              |
| 21               | Brazil  | Vegetable Oils                  | 2004           | 399                                                            |
| 21               | Brazil  | Vegetables                      | 2004           | 30                                                             |
| 21               | Brazil  | Vegetables, Other               | 2004           | 14                                                             |
| 21               | Brazil  | Vegetal Products                | 2004           | 2,402                                                          |
| 21               | Brazil  | Wheat and products              | 2004           | 379                                                            |
| 21               | Brazil  | Wine                            | 2004           | 4                                                              |
| 21               | Brazil  | Yams                            | 2004           | 2                                                              |
| 21               | Brazil  | Alcoholic Beverages             | 2005           | 81                                                             |
| 21               | Brazil  | Animal fats                     | 2005           | 62                                                             |
| 21               | Brazil  | Animal Products                 | 2005           | 648                                                            |
| 21               | Brazil  | Apples and products             | 2005           | 4                                                              |
| 21               | Brazil  | Bananas                         | 2005           | 51                                                             |
| 21               | Brazil  | Beans                           | 2005           | 142                                                            |
| 21               | Brazil  | Beer                            | 2005           | 47                                                             |
| 21               | Brazil  | Beverages, Alcoholic            | 2005           | 30                                                             |
| 21               | Brazil  | Bovine Meat                     | 2005           | 143                                                            |
| 21               | Brazil  | Butter, Ghee                    | 2005           | 9                                                              |
| 21               | Brazil  | Cassava and products            | 2005           | 108                                                            |
| 21               | Brazil  | Cereals - Excluding Beer        | 2005           | 1,007                                                          |
| 21               | Brazil  | Cereals, Other                  | 2005           | 15                                                             |
| 21               | Brazil  | Cocoa Beans and products        | 2005           | 2                                                              |
| 21               | Brazil  | Coconuts - Incl Copra           | 2005           | 56                                                             |
| 21               | Brazil  | Coffee and products             | 2005           | 5                                                              |
| 21               | Brazil  | Cottonseed Oil                  | 2005           | 25                                                             |
| 21               | Brazil  | Crustaceans                     | 2005           | 1                                                              |
| 21               | Brazil  | Demersal Fish                   | 2005           | 2                                                              |
| 21               | Brazil  | Eggs                            | 2005           | 26                                                             |
| 21               | Brazil  | Fats, Animals, Raw              | 2005           | 53                                                             |
| 21               | Brazil  | Fish, Seafood                   | 2005           | 10                                                             |
| 21               | Brazil  | Freshwater Fish                 | 2005           | 4                                                              |
| 21               | Brazil  | Fruits - Excluding Wine         | 2005           | 115                                                            |
| 21               | Brazil  | Fruits, Other                   | 2005           | 22                                                             |
| 21               | Brazil  | Grand Total                     | 2005           | 3,078                                                          |
| 21               | Brazil  | Grapes and products (excl wine) | 2005           | 6                                                              |
| 21               | Brazil  | Groundnut Oil                   | 2005           | 1                                                              |
| 21               | Brazil  | Groundnuts (Shelled Eq)         | 2005           | 5                                                              |
| 21               | Brazil  | Honey                           | 2005           | 1                                                              |
| 21               | Brazil  | Lemons, Limes and products      | 2005           | 2                                                              |
| 21               | Brazil  | Maize and products              | 2005           | 192                                                            |
| 21               | Brazil  | Maize Germ Oil                  | 2005           | 5                                                              |
| 21               | Brazil  | Marine Fish, Other              | 2005           | 1                                                              |
| 21               | Brazil  | Meat                            | 2005           | 338                                                            |

Dietary calcium and zinc deficiency risks are decreasing but remain prevalent

| FAO Country code | Country | Food item                       | Reference year | Net energy supply (kcal <i>capita</i> <sup>-1</sup> d <sup>-1</sup> ) |
|------------------|---------|---------------------------------|----------------|-----------------------------------------------------------------------|
| 21               | Brazil  | Milk - Excluding Butter         | 2005           | 205                                                                   |
| 21               | Brazil  | Mutton & Goat Meat              | 2005           | 3                                                                     |
| 21               | Brazil  | Oats                            | 2005           | 12                                                                    |
| 21               | Brazil  | Offals                          | 2005           | 7                                                                     |
| 21               | Brazil  | Oilcrops                        | 2005           | 80                                                                    |
| 21               | Brazil  | Olive Oil                       | 2005           | 4                                                                     |
| 21               | Brazil  | Olives (including preserved)    | 2005           | 1                                                                     |
| 21               | Brazil  | Onions                          | 2005           | 6                                                                     |
| 21               | Brazil  | Oranges, Mandarines             | 2005           | 21                                                                    |
| 21               | Brazil  | Palm Oil                        | 2005           | 20                                                                    |
| 21               | Brazil  | Peas                            | 2005           | 1                                                                     |
| 21               | Brazil  | Pelagic Fish                    | 2005           | 2                                                                     |
| 21               | Brazil  | Pepper                          | 2005           | 2                                                                     |
| 21               | Brazil  | Pigmeat                         | 2005           | 74                                                                    |
| 21               | Brazil  | Pineapples and products         | 2005           | 9                                                                     |
| 21               | Brazil  | Potatoes and products           | 2005           | 28                                                                    |
| 21               | Brazil  | Poultry Meat                    | 2005           | 118                                                                   |
| 21               | Brazil  | Pulses                          | 2005           | 144                                                                   |
| 21               | Brazil  | Pulses, Other and products      | 2005           | 1                                                                     |
| 21               | Brazil  | Rice (Milled Equivalent)        | 2005           | 399                                                                   |
| 21               | Brazil  | Ricebran Oil                    | 2005           | 2                                                                     |
| 21               | Brazil  | Sesame seed                     | 2005           | 2                                                                     |
| 21               | Brazil  | Soyabean Oil                    | 2005           | 338                                                                   |
| 21               | Brazil  | Soyabeans                       | 2005           | 16                                                                    |
| 21               | Brazil  | Spices                          | 2005           | 2                                                                     |
| 21               | Brazil  | Starchy Roots                   | 2005           | 140                                                                   |
| 21               | Brazil  | Stimulants                      | 2005           | 9                                                                     |
| 21               | Brazil  | Sugar & Sweeteners              | 2005           | 410                                                                   |
| 21               | Brazil  | Sugar (Raw Equivalent)          | 2005           | 393                                                                   |
| 21               | Brazil  | Sugar cane                      | 2005           | 9                                                                     |
| 21               | Brazil  | Sugar Crops                     | 2005           | 9                                                                     |
| 21               | Brazil  | Sugar non-centrifugal           | 2005           | 15                                                                    |
| 21               | Brazil  | Sunflowerseed Oil               | 2005           | 4                                                                     |
| 21               | Brazil  | Sweet potatoes                  | 2005           | 3                                                                     |
| 21               | Brazil  | Sweeteners, Other               | 2005           | 2                                                                     |
| 21               | Brazil  | Tea (including mate)            | 2005           | 2                                                                     |
| 21               | Brazil  | Tomatoes and products           | 2005           | 10                                                                    |
| 21               | Brazil  | Treenuts                        | 2005           | 2                                                                     |
| 21               | Brazil  | Vegetable Oils                  | 2005           | 400                                                                   |
| 21               | Brazil  | Vegetables                      | 2005           | 30                                                                    |
| 21               | Brazil  | Vegetables, Other               | 2005           | 14                                                                    |
| 21               | Brazil  | Vegetal Products                | 2005           | 2,430                                                                 |
| 21               | Brazil  | Wheat and products              | 2005           | 389                                                                   |
| 21               | Brazil  | Wine                            | 2005           | 4                                                                     |
| 21               | Brazil  | Yams                            | 2005           | 2                                                                     |
| 21               | Brazil  | Alcoholic Beverages             | 2006           | 82                                                                    |
| 21               | Brazil  | Animal fats                     | 2006           | 60                                                                    |
| 21               | Brazil  | Animal Products                 | 2006           | 674                                                                   |
| 21               | Brazil  | Apples and products             | 2006           | 5                                                                     |
| 21               | Brazil  | Bananas                         | 2006           | 52                                                                    |
| 21               | Brazil  | Beans                           | 2006           | 150                                                                   |
| 21               | Brazil  | Beer                            | 2006           | 49                                                                    |
| 21               | Brazil  | Beverages, Alcoholic            | 2006           | 30                                                                    |
| 21               | Brazil  | Bovine Meat                     | 2006           | 149                                                                   |
| 21               | Brazil  | Butter, Ghee                    | 2006           | 9                                                                     |
| 21               | Brazil  | Cassava and products            | 2006           | 109                                                                   |
| 21               | Brazil  | Cereals - Excluding Beer        | 2006           | 971                                                                   |
| 21               | Brazil  | Cereals, Other                  | 2006           | 12                                                                    |
| 21               | Brazil  | Cocoa Beans and products        | 2006           | 2                                                                     |
| 21               | Brazil  | Coconuts - Incl Copra           | 2006           | 53                                                                    |
| 21               | Brazil  | Coffee and products             | 2006           | 4                                                                     |
| 21               | Brazil  | Cottonseed Oil                  | 2006           | 27                                                                    |
| 21               | Brazil  | Crustaceans                     | 2006           | 1                                                                     |
| 21               | Brazil  | Demersal Fish                   | 2006           | 2                                                                     |
| 21               | Brazil  | Eggs                            | 2006           | 28                                                                    |
| 21               | Brazil  | Fats, Animals, Raw              | 2006           | 51                                                                    |
| 21               | Brazil  | Fish, Seafood                   | 2006           | 11                                                                    |
| 21               | Brazil  | Freshwater Fish                 | 2006           | 5                                                                     |
| 21               | Brazil  | Fruits - Excluding Wine         | 2006           | 125                                                                   |
| 21               | Brazil  | Fruits, Other                   | 2006           | 24                                                                    |
| 21               | Brazil  | Grand Total                     | 2006           | 3,096                                                                 |
| 21               | Brazil  | Grapes and products (excl wine) | 2006           | 8                                                                     |
| 21               | Brazil  | Groundnut Oil                   | 2006           | 2                                                                     |
| 21               | Brazil  | Groundnuts (Shelled Eq)         | 2006           | 6                                                                     |
| 21               | Brazil  | Honey                           | 2006           | 1                                                                     |
| 21               | Brazil  | Lemons, Limes and products      | 2006           | 2                                                                     |
| 21               | Brazil  | Maize and products              | 2006           | 208                                                                   |
| 21               | Brazil  | Maize Germ Oil                  | 2006           | 5                                                                     |
| 21               | Brazil  | Marine Fish, Other              | 2006           | 1                                                                     |
| 21               | Brazil  | Meat                            | 2006           | 359                                                                   |
| 21               | Brazil  | Milk - Excluding Butter         | 2006           | 209                                                                   |
| 21               | Brazil  | Mutton & Goat Meat              | 2006           | 3                                                                     |
| 21               | Brazil  | Oats                            | 2006           | 10                                                                    |
| 21               | Brazil  | Offals                          | 2006           | 7                                                                     |
| 21               | Brazil  | Oilcrops                        | 2006           | 76                                                                    |
| 21               | Brazil  | Olive Oil                       | 2006           | 4                                                                     |
| 21               | Brazil  | Olives (including preserved)    | 2006           | 1                                                                     |
| 21               | Brazil  | Onions                          | 2006           | 7                                                                     |
| 21               | Brazil  | Oranges, Mandarines             | 2006           | 24                                                                    |
| 21               | Brazil  | Palm Oil                        | 2006           | 30                                                                    |
| 21               | Brazil  | Peas                            | 2006           | 2                                                                     |
| 21               | Brazil  | Pelagic Fish                    | 2006           | 2                                                                     |
| 21               | Brazil  | Pepper                          | 2006           | 1                                                                     |
| 21               | Brazil  | Pigmeat                         | 2006           | 80                                                                    |
| 21               | Brazil  | Pineapples and products         | 2006           | 10                                                                    |
| 21               | Brazil  | Potatoes and products           | 2006           | 28                                                                    |
| 21               | Brazil  | Poultry Meat                    | 2006           | 126                                                                   |

Dietary calcium and zinc deficiency risks are decreasing but remain prevalent

| FAO Country code | Country | Food item                       | Reference year | Net energy supply (kcal capita <sup>-1</sup> d <sup>-1</sup> ) |
|------------------|---------|---------------------------------|----------------|----------------------------------------------------------------|
| 21               | Brazil  | Pulses                          | 2006           | 153                                                            |
| 21               | Brazil  | Pulses, Other and products      | 2006           | 1                                                              |
| 21               | Brazil  | Rice (Milled Equivalent)        | 2006           | 352                                                            |
| 21               | Brazil  | Ricebran Oil                    | 2006           | 2                                                              |
| 21               | Brazil  | Sesame seed                     | 2006           | 1                                                              |
| 21               | Brazil  | Soyabean Oil                    | 2006           | 336                                                            |
| 21               | Brazil  | Soyabeans                       | 2006           | 15                                                             |
| 21               | Brazil  | Spices                          | 2006           | 2                                                              |
| 21               | Brazil  | Starchy Roots                   | 2006           | 142                                                            |
| 21               | Brazil  | Stimulants                      | 2006           | 8                                                              |
| 21               | Brazil  | Sugar & Sweeteners              | 2006           | 409                                                            |
| 21               | Brazil  | Sugar (Raw Equivalent)          | 2006           | 389                                                            |
| 21               | Brazil  | Sugar cane                      | 2006           | 11                                                             |
| 21               | Brazil  | Sugar Crops                     | 2006           | 11                                                             |
| 21               | Brazil  | Sugar non-centrifugal           | 2006           | 18                                                             |
| 21               | Brazil  | Sunflowerseed Oil               | 2006           | 5                                                              |
| 21               | Brazil  | Sweet potatoes                  | 2006           | 3                                                              |
| 21               | Brazil  | Sweeteners, Other               | 2006           | 1                                                              |
| 21               | Brazil  | Tea (including mate)            | 2006           | 2                                                              |
| 21               | Brazil  | Tomatoes and products           | 2006           | 9                                                              |
| 21               | Brazil  | Treenuts                        | 2006           | 2                                                              |
| 21               | Brazil  | Vegetable Oils                  | 2006           | 411                                                            |
| 21               | Brazil  | Vegetables                      | 2006           | 31                                                             |
| 21               | Brazil  | Vegetables, Other               | 2006           | 15                                                             |
| 21               | Brazil  | Vegetal Products                | 2006           | 2,422                                                          |
| 21               | Brazil  | Wheat and products              | 2006           | 390                                                            |
| 21               | Brazil  | Wine                            | 2006           | 3                                                              |
| 21               | Brazil  | Yams                            | 2006           | 2                                                              |
| 21               | Brazil  | Alcoholic Beverages             | 2007           | 83                                                             |
| 21               | Brazil  | Animal fats                     | 2007           | 65                                                             |
| 21               | Brazil  | Animal Products                 | 2007           | 687                                                            |
| 21               | Brazil  | Apples and products             | 2007           | 6                                                              |
| 21               | Brazil  | Bananas                         | 2007           | 53                                                             |
| 21               | Brazil  | Beans                           | 2007           | 149                                                            |
| 21               | Brazil  | Beer                            | 2007           | 50                                                             |
| 21               | Brazil  | Beverages, Alcoholic            | 2007           | 30                                                             |
| 21               | Brazil  | Bovine Meat                     | 2007           | 153                                                            |
| 21               | Brazil  | Butter, Ghee                    | 2007           | 9                                                              |
| 21               | Brazil  | Cassava and products            | 2007           | 108                                                            |
| 21               | Brazil  | Cereals - Excluding Beer        | 2007           | 956                                                            |
| 21               | Brazil  | Cereals, Other                  | 2007           | 10                                                             |
| 21               | Brazil  | Cocoa Beans and products        | 2007           | 2                                                              |
| 21               | Brazil  | Coconuts - Incl Copra           | 2007           | 50                                                             |
| 21               | Brazil  | Coffee and products             | 2007           | 4                                                              |
| 21               | Brazil  | Cottonseed Oil                  | 2007           | 31                                                             |
| 21               | Brazil  | Crustaceans                     | 2007           | 1                                                              |
| 21               | Brazil  | Demersal Fish                   | 2007           | 2                                                              |
| 21               | Brazil  | Eggs                            | 2007           | 27                                                             |
| 21               | Brazil  | Fats, Animals, Raw              | 2007           | 56                                                             |
| 21               | Brazil  | Fish, Seafood                   | 2007           | 11                                                             |
| 21               | Brazil  | Freshwater Fish                 | 2007           | 5                                                              |
| 21               | Brazil  | Fruits - Excluding Wine         | 2007           | 125                                                            |
| 21               | Brazil  | Fruits, Other                   | 2007           | 23                                                             |
| 21               | Brazil  | Grand Total                     | 2007           | 3,106                                                          |
| 21               | Brazil  | Grapes and products (excl wine) | 2007           | 7                                                              |
| 21               | Brazil  | Groundnut Oil                   | 2007           | 2                                                              |
| 21               | Brazil  | Groundnuts (Shelled Eq)         | 2007           | 7                                                              |
| 21               | Brazil  | Honey                           | 2007           | 1                                                              |
| 21               | Brazil  | Lemons, Limes and products      | 2007           | 1                                                              |
| 21               | Brazil  | Maize and products              | 2007           | 214                                                            |
| 21               | Brazil  | Maize Germ Oil                  | 2007           | 6                                                              |
| 21               | Brazil  | Marine Fish, Other              | 2007           | 1                                                              |
| 21               | Brazil  | Meat                            | 2007           | 373                                                            |
| 21               | Brazil  | Milk - Excluding Butter         | 2007           | 204                                                            |
| 21               | Brazil  | Mutton & Goat Meat              | 2007           | 3                                                              |
| 21               | Brazil  | Oats                            | 2007           | 6                                                              |
| 21               | Brazil  | Offals                          | 2007           | 8                                                              |
| 21               | Brazil  | Oilcrops                        | 2007           | 75                                                             |
| 21               | Brazil  | Olive Oil                       | 2007           | 5                                                              |
| 21               | Brazil  | Olives (including preserved)    | 2007           | 1                                                              |
| 21               | Brazil  | Onions                          | 2007           | 7                                                              |
| 21               | Brazil  | Oranges, Mandarines             | 2007           | 24                                                             |
| 21               | Brazil  | Palm Oil                        | 2007           | 36                                                             |
| 21               | Brazil  | Peas                            | 2007           | 2                                                              |
| 21               | Brazil  | Pelagic Fish                    | 2007           | 2                                                              |
| 21               | Brazil  | Pepper                          | 2007           | 1                                                              |
| 21               | Brazil  | Pigmeat                         | 2007           | 81                                                             |
| 21               | Brazil  | Pineapples and products         | 2007           | 10                                                             |
| 21               | Brazil  | Potatoes and products           | 2007           | 31                                                             |
| 21               | Brazil  | Poultry Meat                    | 2007           | 135                                                            |
| 21               | Brazil  | Pulses                          | 2007           | 153                                                            |
| 21               | Brazil  | Pulses, Other and products      | 2007           | 1                                                              |
| 21               | Brazil  | Rice (Milled Equivalent)        | 2007           | 338                                                            |
| 21               | Brazil  | Ricebran Oil                    | 2007           | 2                                                              |
| 21               | Brazil  | Sesame seed                     | 2007           | 1                                                              |
| 21               | Brazil  | Soyabean Oil                    | 2007           | 331                                                            |
| 21               | Brazil  | Soyabeans                       | 2007           | 17                                                             |
| 21               | Brazil  | Spices                          | 2007           | 2                                                              |
| 21               | Brazil  | Starchy Roots                   | 2007           | 143                                                            |
| 21               | Brazil  | Stimulants                      | 2007           | 9                                                              |
| 21               | Brazil  | Sugar & Sweeteners              | 2007           | 407                                                            |
| 21               | Brazil  | Sugar (Raw Equivalent)          | 2007           | 385                                                            |
| 21               | Brazil  | Sugar cane                      | 2007           | 11                                                             |
| 21               | Brazil  | Sugar Crops                     | 2007           | 11                                                             |
| 21               | Brazil  | Sugar non-centrifugal           | 2007           | 18                                                             |
| 21               | Brazil  | Sunflowerseed Oil               | 2007           | 7                                                              |
| 21               | Brazil  | Sweet potatoes                  | 2007           | 3                                                              |

Dietary calcium and zinc deficiency risks are decreasing but remain prevalent

| FAO Country code | Country | Food item                       | Reference year | Net energy supply (kcal capita <sup>-1</sup> d <sup>-1</sup> ) |
|------------------|---------|---------------------------------|----------------|----------------------------------------------------------------|
| 21               | Brazil  | Sweeteners, Other               | 2007           | 2                                                              |
| 21               | Brazil  | Tea (including mate)            | 2007           | 2                                                              |
| 21               | Brazil  | Tomatoes and products           | 2007           | 9                                                              |
| 21               | Brazil  | Treenuts                        | 2007           | 2                                                              |
| 21               | Brazil  | Vegetable Oils                  | 2007           | 421                                                            |
| 21               | Brazil  | Vegetables                      | 2007           | 32                                                             |
| 21               | Brazil  | Vegetables, Other               | 2007           | 15                                                             |
| 21               | Brazil  | Vegetal Products                | 2007           | 2,419                                                          |
| 21               | Brazil  | Wheat and products              | 2007           | 387                                                            |
| 21               | Brazil  | Wine                            | 2007           | 4                                                              |
| 21               | Brazil  | Yams                            | 2007           | 2                                                              |
| 21               | Brazil  | Alcoholic Beverages             | 2008           | 88                                                             |
| 21               | Brazil  | Animal fats                     | 2008           | 64                                                             |
| 21               | Brazil  | Animal Products                 | 2008           | 724                                                            |
| 21               | Brazil  | Apples and products             | 2008           | 6                                                              |
| 21               | Brazil  | Bananas                         | 2008           | 52                                                             |
| 21               | Brazil  | Beans                           | 2008           | 151                                                            |
| 21               | Brazil  | Beer                            | 2008           | 54                                                             |
| 21               | Brazil  | Beverages, Alcoholic            | 2008           | 30                                                             |
| 21               | Brazil  | Bovine Meat                     | 2008           | 151                                                            |
| 21               | Brazil  | Butter, Ghee                    | 2008           | 9                                                              |
| 21               | Brazil  | Cassava and products            | 2008           | 108                                                            |
| 21               | Brazil  | Cereals - Excluding Beer        | 2008           | 954                                                            |
| 21               | Brazil  | Cereals, Other                  | 2008           | 11                                                             |
| 21               | Brazil  | Cocoa Beans and products        | 2008           | 2                                                              |
| 21               | Brazil  | Coconuts - Incl Copra           | 2008           | 56                                                             |
| 21               | Brazil  | Coffee and products             | 2008           | 5                                                              |
| 21               | Brazil  | Cottonseed Oil                  | 2008           | 32                                                             |
| 21               | Brazil  | Crustaceans                     | 2008           | 1                                                              |
| 21               | Brazil  | Demersal Fish                   | 2008           | 2                                                              |
| 21               | Brazil  | Eggs                            | 2008           | 28                                                             |
| 21               | Brazil  | Fats, Animals, Raw              | 2008           | 55                                                             |
| 21               | Brazil  | Fish, Seafood                   | 2008           | 12                                                             |
| 21               | Brazil  | Freshwater Fish                 | 2008           | 6                                                              |
| 21               | Brazil  | Fruits - Excluding Wine         | 2008           | 128                                                            |
| 21               | Brazil  | Fruits, Other                   | 2008           | 23                                                             |
| 21               | Brazil  | Grand Total                     | 2008           | 3,178                                                          |
| 21               | Brazil  | Grapes and products (excl wine) | 2008           | 7                                                              |
| 21               | Brazil  | Groundnut Oil                   | 2008           | 2                                                              |
| 21               | Brazil  | Groundnuts (Shelled Eq)         | 2008           | 7                                                              |
| 21               | Brazil  | Honey                           | 2008           | 1                                                              |
| 21               | Brazil  | Lemons, Limes and products      | 2008           | 1                                                              |
| 21               | Brazil  | Maize and products              | 2008           | 214                                                            |
| 21               | Brazil  | Maize Germ Oil                  | 2008           | 7                                                              |
| 21               | Brazil  | Marine Fish, Other              | 2008           | 1                                                              |
| 21               | Brazil  | Meat                            | 2008           | 394                                                            |
| 21               | Brazil  | Milk - Excluding Butter         | 2008           | 219                                                            |
| 21               | Brazil  | Mutton & Goat Meat              | 2008           | 4                                                              |
| 21               | Brazil  | Oats                            | 2008           | 5                                                              |
| 21               | Brazil  | Offals                          | 2008           | 7                                                              |
| 21               | Brazil  | Oilcrops                        | 2008           | 82                                                             |
| 21               | Brazil  | Olive Oil                       | 2008           | 6                                                              |
| 21               | Brazil  | Olives (including preserved)    | 2008           | 1                                                              |
| 21               | Brazil  | Onions                          | 2008           | 7                                                              |
| 21               | Brazil  | Oranges, Mandarines             | 2008           | 29                                                             |
| 21               | Brazil  | Palm Oil                        | 2008           | 45                                                             |
| 21               | Brazil  | Peas                            | 2008           | 2                                                              |
| 21               | Brazil  | Pelagic Fish                    | 2008           | 2                                                              |
| 21               | Brazil  | Pepper                          | 2008           | 1                                                              |
| 21               | Brazil  | Pigmeat                         | 2008           | 83                                                             |
| 21               | Brazil  | Pineapples and products         | 2008           | 10                                                             |
| 21               | Brazil  | Potatoes and products           | 2008           | 33                                                             |
| 21               | Brazil  | Poultry Meat                    | 2008           | 156                                                            |
| 21               | Brazil  | Pulses                          | 2008           | 155                                                            |
| 21               | Brazil  | Pulses, Other and products      | 2008           | 2                                                              |
| 21               | Brazil  | Rice (Milled Equivalent)        | 2008           | 338                                                            |
| 21               | Brazil  | Ricebran Oil                    | 2008           | 2                                                              |
| 21               | Brazil  | Sesame seed                     | 2008           | 1                                                              |
| 21               | Brazil  | Soyabean Oil                    | 2008           | 329                                                            |
| 21               | Brazil  | Soyabeans                       | 2008           | 17                                                             |
| 21               | Brazil  | Spices                          | 2008           | 2                                                              |
| 21               | Brazil  | Starchy Roots                   | 2008           | 145                                                            |
| 21               | Brazil  | Stimulants                      | 2008           | 10                                                             |
| 21               | Brazil  | Sugar & Sweeteners              | 2008           | 412                                                            |
| 21               | Brazil  | Sugar (Raw Equivalent)          | 2008           | 387                                                            |
| 21               | Brazil  | Sugar cane                      | 2008           | 12                                                             |
| 21               | Brazil  | Sugar Crops                     | 2008           | 12                                                             |
| 21               | Brazil  | Sugar non-centrifugal           | 2008           | 21                                                             |
| 21               | Brazil  | Sunflowerseed Oil               | 2008           | 8                                                              |
| 21               | Brazil  | Sweet potatoes                  | 2008           | 3                                                              |
| 21               | Brazil  | Sweeteners, Other               | 2008           | 3                                                              |
| 21               | Brazil  | Tea (including mate)            | 2008           | 2                                                              |
| 21               | Brazil  | Tomatoes and products           | 2008           | 11                                                             |
| 21               | Brazil  | Treenuts                        | 2008           | 3                                                              |
| 21               | Brazil  | Vegetable Oils                  | 2008           | 431                                                            |
| 21               | Brazil  | Vegetables                      | 2008           | 33                                                             |
| 21               | Brazil  | Vegetables, Other               | 2008           | 15                                                             |
| 21               | Brazil  | Vegetal Products                | 2008           | 2,455                                                          |
| 21               | Brazil  | Wheat and products              | 2008           | 385                                                            |
| 21               | Brazil  | Wine                            | 2008           | 4                                                              |
| 21               | Brazil  | Yams                            | 2008           | 2                                                              |
| 21               | Brazil  | Alcoholic Beverages             | 2009           | 87                                                             |
| 21               | Brazil  | Animal fats                     | 2009           | 66                                                             |
| 21               | Brazil  | Animal Products                 | 2009           | 747                                                            |
| 21               | Brazil  | Apples and products             | 2009           | 7                                                              |
| 21               | Brazil  | Bananas                         | 2009           | 50                                                             |
| 21               | Brazil  | Beans                           | 2009           | 151                                                            |

Dietary calcium and zinc deficiency risks are decreasing but remain prevalent

| FAO Country code | Country | Food item                       | Reference year | Net energy supply (kcal <i>capita</i> <sup>-1</sup> d <sup>-1</sup> ) |
|------------------|---------|---------------------------------|----------------|-----------------------------------------------------------------------|
| 21               | Brazil  | Beer                            | 2009           | 54                                                                    |
| 21               | Brazil  | Beverages, Alcoholic            | 2009           | 29                                                                    |
| 21               | Brazil  | Bovine Meat                     | 2009           | 162                                                                   |
| 21               | Brazil  | Butter, Ghee                    | 2009           | 9                                                                     |
| 21               | Brazil  | Cassava and products            | 2009           | 99                                                                    |
| 21               | Brazil  | Cereals - Excluding Beer        | 2009           | 957                                                                   |
| 21               | Brazil  | Cereals, Other                  | 2009           | 8                                                                     |
| 21               | Brazil  | Cocoa Beans and products        | 2009           | 3                                                                     |
| 21               | Brazil  | Coconuts - Incl Copra           | 2009           | 51                                                                    |
| 21               | Brazil  | Coffee and products             | 2009           | 4                                                                     |
| 21               | Brazil  | Cottonseed Oil                  | 2009           | 28                                                                    |
| 21               | Brazil  | Crustaceans                     | 2009           | 1                                                                     |
| 21               | Brazil  | Demersal Fish                   | 2009           | 3                                                                     |
| 21               | Brazil  | Eggs                            | 2009           | 29                                                                    |
| 21               | Brazil  | Fats, Animals, Raw              | 2009           | 57                                                                    |
| 21               | Brazil  | Fish, Seafood                   | 2009           | 13                                                                    |
| 21               | Brazil  | Freshwater Fish                 | 2009           | 6                                                                     |
| 21               | Brazil  | Fruits - Excluding Wine         | 2009           | 129                                                                   |
| 21               | Brazil  | Fruits, Other                   | 2009           | 23                                                                    |
| 21               | Brazil  | Grand Total                     | 2009           | 3,176                                                                 |
| 21               | Brazil  | Grapes and products (excl wine) | 2009           | 7                                                                     |
| 21               | Brazil  | Groundnuts (Shelled Eq)         | 2009           | 3                                                                     |
| 21               | Brazil  | Honey                           | 2009           | 1                                                                     |
| 21               | Brazil  | Lemons, Limes and products      | 2009           | 1                                                                     |
| 21               | Brazil  | Maize and products              | 2009           | 209                                                                   |
| 21               | Brazil  | Maize Germ Oil                  | 2009           | 5                                                                     |
| 21               | Brazil  | Marine Fish, Other              | 2009           | 1                                                                     |
| 21               | Brazil  | Meat                            | 2009           | 401                                                                   |
| 21               | Brazil  | Milk - Excluding Butter         | 2009           | 231                                                                   |
| 21               | Brazil  | Mutton & Goat Meat              | 2009           | 3                                                                     |
| 21               | Brazil  | Oats                            | 2009           | 5                                                                     |
| 21               | Brazil  | Offals                          | 2009           | 7                                                                     |
| 21               | Brazil  | Oilcrops                        | 2009           | 72                                                                    |
| 21               | Brazil  | Olive Oil                       | 2009           | 6                                                                     |
| 21               | Brazil  | Olives (including preserved)    | 2009           | 1                                                                     |
| 21               | Brazil  | Onions                          | 2009           | 8                                                                     |
| 21               | Brazil  | Oranges, Mandarines             | 2009           | 32                                                                    |
| 21               | Brazil  | Palm Oil                        | 2009           | 43                                                                    |
| 21               | Brazil  | Peas                            | 2009           | 2                                                                     |
| 21               | Brazil  | Pelagic Fish                    | 2009           | 2                                                                     |
| 21               | Brazil  | Pepper                          | 2009           | 1                                                                     |
| 21               | Brazil  | Pigmeat                         | 2009           | 86                                                                    |
| 21               | Brazil  | Pineapples and products         | 2009           | 8                                                                     |
| 21               | Brazil  | Potatoes and products           | 2009           | 30                                                                    |
| 21               | Brazil  | Poultry Meat                    | 2009           | 149                                                                   |
| 21               | Brazil  | Pulses                          | 2009           | 154                                                                   |
| 21               | Brazil  | Pulses, Other and products      | 2009           | 2                                                                     |
| 21               | Brazil  | Rice (Milled Equivalent)        | 2009           | 351                                                                   |
| 21               | Brazil  | Ricebran Oil                    | 2009           | 2                                                                     |
| 21               | Brazil  | Sesame seed                     | 2009           | 1                                                                     |
| 21               | Brazil  | Soyabean Oil                    | 2009           | 332                                                                   |
| 21               | Brazil  | Soyabeans                       | 2009           | 16                                                                    |
| 21               | Brazil  | Spices                          | 2009           | 2                                                                     |
| 21               | Brazil  | Spices, Other                   | 2009           | 1                                                                     |
| 21               | Brazil  | Starchy Roots                   | 2009           | 133                                                                   |
| 21               | Brazil  | Stimulants                      | 2009           | 9                                                                     |
| 21               | Brazil  | Sugar & Sweeteners              | 2009           | 410                                                                   |
| 21               | Brazil  | Sugar (Raw Equivalent)          | 2009           | 384                                                                   |
| 21               | Brazil  | Sugar cane                      | 2009           | 13                                                                    |
| 21               | Brazil  | Sugar Crops                     | 2009           | 13                                                                    |
| 21               | Brazil  | Sugar non-centrifugal           | 2009           | 23                                                                    |
| 21               | Brazil  | Sunflowerseed Oil               | 2009           | 7                                                                     |
| 21               | Brazil  | Sweet potatoes                  | 2009           | 2                                                                     |
| 21               | Brazil  | Sweeteners, Other               | 2009           | 4                                                                     |
| 21               | Brazil  | Tea (including mate)            | 2009           | 2                                                                     |
| 21               | Brazil  | Tomatoes and products           | 2009           | 12                                                                    |
| 21               | Brazil  | Treenuts                        | 2009           | 4                                                                     |
| 21               | Brazil  | Vegetable Oils                  | 2009           | 424                                                                   |
| 21               | Brazil  | Vegetables                      | 2009           | 35                                                                    |
| 21               | Brazil  | Vegetables, Other               | 2009           | 16                                                                    |
| 21               | Brazil  | Vegetal Products                | 2009           | 2,428                                                                 |
| 21               | Brazil  | Wheat and products              | 2009           | 384                                                                   |
| 21               | Brazil  | Wine                            | 2009           | 3                                                                     |
| 21               | Brazil  | Yams                            | 2009           | 1                                                                     |
| 21               | Brazil  | Alcoholic Beverages             | 2010           | 98                                                                    |
| 21               | Brazil  | Animal fats                     | 2010           | 66                                                                    |
| 21               | Brazil  | Animal Products                 | 2010           | 771                                                                   |
| 21               | Brazil  | Apples and products             | 2010           | 7                                                                     |
| 21               | Brazil  | Bananas                         | 2010           | 51                                                                    |
| 21               | Brazil  | Beans                           | 2010           | 150                                                                   |
| 21               | Brazil  | Beer                            | 2010           | 65                                                                    |
| 21               | Brazil  | Beverages, Alcoholic            | 2010           | 29                                                                    |
| 21               | Brazil  | Bovine Meat                     | 2010           | 157                                                                   |
| 21               | Brazil  | Butter, Ghee                    | 2010           | 9                                                                     |
| 21               | Brazil  | Cassava and products            | 2010           | 100                                                                   |
| 21               | Brazil  | Cereals - Excluding Beer        | 2010           | 955                                                                   |
| 21               | Brazil  | Cereals, Other                  | 2010           | 8                                                                     |
| 21               | Brazil  | Cocoa Beans and products        | 2010           | 3                                                                     |
| 21               | Brazil  | Coconuts - Incl Copra           | 2010           | 49                                                                    |
| 21               | Brazil  | Coffee and products             | 2010           | 4                                                                     |
| 21               | Brazil  | Cottonseed Oil                  | 2010           | 30                                                                    |
| 21               | Brazil  | Crustaceans                     | 2010           | 1                                                                     |
| 21               | Brazil  | Demersal Fish                   | 2010           | 3                                                                     |
| 21               | Brazil  | Eggs                            | 2010           | 30                                                                    |
| 21               | Brazil  | Fats, Animals, Raw              | 2010           | 57                                                                    |
| 21               | Brazil  | Fish, Seafood                   | 2010           | 14                                                                    |
| 21               | Brazil  | Freshwater Fish                 | 2010           | 7                                                                     |



## Dietary calcium and zinc deficiency risks are decreasing but remain prevalent

| FAO Country code | Country | Food item                       | Reference year | Net energy supply (kcal capita <sup>-1</sup> d <sup>-1</sup> ) |
|------------------|---------|---------------------------------|----------------|----------------------------------------------------------------|
| 21               | Brazil  | Fruits - Excluding Wine         | 2010           | 138                                                            |
| 21               | Brazil  | Fruits, Other                   | 2010           | 24                                                             |
| 21               | Brazil  | Grand Total                     | 2010           | 3,229                                                          |
| 21               | Brazil  | Grapes and products (excl wine) | 2010           | 7                                                              |
| 21               | Brazil  | Groundnuts (Shelled Eq)         | 2010           | 5                                                              |
| 21               | Brazil  | Honey                           | 2010           | 1                                                              |
| 21               | Brazil  | Lemons, Limes and products      | 2010           | 1                                                              |
| 21               | Brazil  | Maize and products              | 2010           | 208                                                            |
| 21               | Brazil  | Maize Germ Oil                  | 2010           | 6                                                              |
| 21               | Brazil  | Marine Fish, Other              | 2010           | 1                                                              |
| 21               | Brazil  | Meat                            | 2010           | 411                                                            |
| 21               | Brazil  | Milk - Excluding Butter         | 2010           | 242                                                            |
| 21               | Brazil  | Mutton & Goat Meat              | 2010           | 4                                                              |
| 21               | Brazil  | Oats                            | 2010           | 9                                                              |
| 21               | Brazil  | Offals                          | 2010           | 7                                                              |
| 21               | Brazil  | Oilcrops                        | 2010           | 75                                                             |
| 21               | Brazil  | Olive Oil                       | 2010           | 7                                                              |
| 21               | Brazil  | Olives (including preserved)    | 2010           | 1                                                              |
| 21               | Brazil  | Onions                          | 2010           | 9                                                              |
| 21               | Brazil  | Oranges, Mandarines             | 2010           | 39                                                             |
| 21               | Brazil  | Palm Oil                        | 2010           | 41                                                             |
| 21               | Brazil  | Peas                            | 2010           | 2                                                              |
| 21               | Brazil  | Pelagic Fish                    | 2010           | 2                                                              |
| 21               | Brazil  | Pepper                          | 2010           | 1                                                              |
| 21               | Brazil  | Pigmeat                         | 2010           | 90                                                             |
| 21               | Brazil  | Pineapples and products         | 2010           | 8                                                              |
| 21               | Brazil  | Potatoes and products           | 2010           | 32                                                             |
| 21               | Brazil  | Poultry Meat                    | 2010           | 161                                                            |
| 21               | Brazil  | Pulses                          | 2010           | 154                                                            |
| 21               | Brazil  | Pulses, Other and products      | 2010           | 1                                                              |
| 21               | Brazil  | Rice (Milled Equivalent)        | 2010           | 341                                                            |
| 21               | Brazil  | Ricebran Oil                    | 2010           | 2                                                              |
| 21               | Brazil  | Sesame seed                     | 2010           | 1                                                              |
| 21               | Brazil  | Soyabean Oil                    | 2010           | 330                                                            |
| 21               | Brazil  | Soyabeans                       | 2010           | 18                                                             |
| 21               | Brazil  | Spices                          | 2010           | 1                                                              |
| 21               | Brazil  | Starchy Roots                   | 2010           | 136                                                            |
| 21               | Brazil  | Stimulants                      | 2010           | 10                                                             |
| 21               | Brazil  | Sugar & Sweeteners              | 2010           | 415                                                            |
| 21               | Brazil  | Sugar (Raw Equivalent)          | 2010           | 386                                                            |
| 21               | Brazil  | Sugar cane                      | 2010           | 13                                                             |
| 21               | Brazil  | Sugar Crops                     | 2010           | 13                                                             |
| 21               | Brazil  | Sugar non-centrifugal           | 2010           | 23                                                             |
| 21               | Brazil  | Sunflowerseed Oil               | 2010           | 8                                                              |
| 21               | Brazil  | Sweet potatoes                  | 2010           | 2                                                              |
| 21               | Brazil  | Sweeteners, Other               | 2010           | 4                                                              |
| 21               | Brazil  | Tea (including mate)            | 2010           | 2                                                              |
| 21               | Brazil  | Tomatoes and products           | 2010           | 12                                                             |
| 21               | Brazil  | Treenuts                        | 2010           | 3                                                              |
| 21               | Brazil  | Vegetable Oils                  | 2010           | 424                                                            |
| 21               | Brazil  | Vegetables                      | 2010           | 37                                                             |
| 21               | Brazil  | Vegetables, Other               | 2010           | 17                                                             |
| 21               | Brazil  | Vegetal Products                | 2010           | 2,458                                                          |
| 21               | Brazil  | Wheat and products              | 2010           | 388                                                            |
| 21               | Brazil  | Wine                            | 2010           | 4                                                              |
| 21               | Brazil  | Yams                            | 2010           | 2                                                              |
| 21               | Brazil  | Alcoholic Beverages             | 2011           | 100                                                            |
| 21               | Brazil  | Animal fats                     | 2011           | 67                                                             |
| 21               | Brazil  | Animal Products                 | 2011           | 803                                                            |
| 21               | Brazil  | Apples and products             | 2011           | 8                                                              |
| 21               | Brazil  | Bananas                         | 2011           | 54                                                             |
| 21               | Brazil  | Beans                           | 2011           | 151                                                            |
| 21               | Brazil  | Beer                            | 2011           | 66                                                             |
| 21               | Brazil  | Beverages, Alcoholic            | 2011           | 29                                                             |
| 21               | Brazil  | Bovine Meat                     | 2011           | 158                                                            |
| 21               | Brazil  | Butter, Ghee                    | 2011           | 9                                                              |
| 21               | Brazil  | Cassava and products            | 2011           | 100                                                            |
| 21               | Brazil  | Cereals - Excluding Beer        | 2011           | 955                                                            |
| 21               | Brazil  | Cereals, Other                  | 2011           | 6                                                              |
| 21               | Brazil  | Cocoa Beans and products        | 2011           | 3                                                              |
| 21               | Brazil  | Coconuts - Incl Copra           | 2011           | 50                                                             |
| 21               | Brazil  | Coffee and products             | 2011           | 4                                                              |
| 21               | Brazil  | Cottonseed Oil                  | 2011           | 31                                                             |
| 21               | Brazil  | Crustaceans                     | 2011           | 1                                                              |
| 21               | Brazil  | Demersal Fish                   | 2011           | 4                                                              |
| 21               | Brazil  | Eggs                            | 2011           | 32                                                             |
| 21               | Brazil  | Fats, Animals, Raw              | 2011           | 57                                                             |
| 21               | Brazil  | Fish, Seafood                   | 2011           | 16                                                             |
| 21               | Brazil  | Freshwater Fish                 | 2011           | 8                                                              |
| 21               | Brazil  | Fruits - Excluding Wine         | 2011           | 149                                                            |
| 21               | Brazil  | Fruits, Other                   | 2011           | 25                                                             |
| 21               | Brazil  | Grand Total                     | 2011           | 3,287                                                          |
| 21               | Brazil  | Grapes and products (excl wine) | 2011           | 9                                                              |
| 21               | Brazil  | Groundnuts (Shelled Eq)         | 2011           | 8                                                              |
| 21               | Brazil  | Honey                           | 2011           | 1                                                              |
| 21               | Brazil  | Lemons, Limes and products      | 2011           | 2                                                              |
| 21               | Brazil  | Maize and products              | 2011           | 208                                                            |
| 21               | Brazil  | Maize Germ Oil                  | 2011           | 6                                                              |
| 21               | Brazil  | Marine Fish, Other              | 2011           | 1                                                              |
| 21               | Brazil  | Meat                            | 2011           | 427                                                            |
| 21               | Brazil  | Milk - Excluding Butter         | 2011           | 254                                                            |
| 21               | Brazil  | Mutton & Goat Meat              | 2011           | 3                                                              |
| 21               | Brazil  | Oats                            | 2011           | 8                                                              |
| 21               | Brazil  | Offals                          | 2011           | 7                                                              |
| 21               | Brazil  | Oilcrops                        | 2011           | 80                                                             |
| 21               | Brazil  | Olive Oil                       | 2011           | 8                                                              |
| 21               | Brazil  | Olives (including preserved)    | 2011           | 1                                                              |

Dietary calcium and zinc deficiency risks are decreasing but remain prevalent

| FAO Country code | Country           | Food item                       | Reference year | Net energy supply (kcal <i>capita</i> <sup>-1</sup> d <sup>-1</sup> ) |
|------------------|-------------------|---------------------------------|----------------|-----------------------------------------------------------------------|
| 21               | Brazil            | Onions                          | 2011           | 8                                                                     |
| 21               | Brazil            | Oranges, Mandarines             | 2011           | 43                                                                    |
| 21               | Brazil            | Palm Oil                        | 2011           | 42                                                                    |
| 21               | Brazil            | Peas                            | 2011           | 2                                                                     |
| 21               | Brazil            | Pelagic Fish                    | 2011           | 2                                                                     |
| 21               | Brazil            | Pigmeat                         | 2011           | 91                                                                    |
| 21               | Brazil            | Pineapples and products         | 2011           | 9                                                                     |
| 21               | Brazil            | Potatoes and products           | 2011           | 35                                                                    |
| 21               | Brazil            | Poultry Meat                    | 2011           | 173                                                                   |
| 21               | Brazil            | Pulses                          | 2011           | 155                                                                   |
| 21               | Brazil            | Pulses, Other and products      | 2011           | 2                                                                     |
| 21               | Brazil            | Rice (Milled Equivalent)        | 2011           | 347                                                                   |
| 21               | Brazil            | Ricebran Oil                    | 2011           | 2                                                                     |
| 21               | Brazil            | Sesame seed                     | 2011           | 1                                                                     |
| 21               | Brazil            | Soyabean Oil                    | 2011           | 328                                                                   |
| 21               | Brazil            | Soyabeans                       | 2011           | 19                                                                    |
| 21               | Brazil            | Spices                          | 2011           | 1                                                                     |
| 21               | Brazil            | Spices, Other                   | 2011           | 1                                                                     |
| 21               | Brazil            | Starchy Roots                   | 2011           | 140                                                                   |
| 21               | Brazil            | Stimulants                      | 2011           | 9                                                                     |
| 21               | Brazil            | Sugar & Sweeteners              | 2011           | 414                                                                   |
| 21               | Brazil            | Sugar (Raw Equivalent)          | 2011           | 386                                                                   |
| 21               | Brazil            | Sugar cane                      | 2011           | 13                                                                    |
| 21               | Brazil            | Sugar Crops                     | 2011           | 13                                                                    |
| 21               | Brazil            | Sugar non-centrifugal           | 2011           | 24                                                                    |
| 21               | Brazil            | Sunflowerseed Oil               | 2011           | 8                                                                     |
| 21               | Brazil            | Sweet potatoes                  | 2011           | 3                                                                     |
| 21               | Brazil            | Sweeteners, Other               | 2011           | 4                                                                     |
| 21               | Brazil            | Tea (including mate)            | 2011           | 2                                                                     |
| 21               | Brazil            | Tomatoes and products           | 2011           | 12                                                                    |
| 21               | Brazil            | Treenuts                        | 2011           | 7                                                                     |
| 21               | Brazil            | Vegetable Oils                  | 2011           | 425                                                                   |
| 21               | Brazil            | Vegetables                      | 2011           | 38                                                                    |
| 21               | Brazil            | Vegetables, Other               | 2011           | 18                                                                    |
| 21               | Brazil            | Vegetal Products                | 2011           | 2,484                                                                 |
| 21               | Brazil            | Wheat and products              | 2011           | 385                                                                   |
| 21               | Brazil            | Wine                            | 2011           | 4                                                                     |
| 21               | Brazil            | Yams                            | 2011           | 2                                                                     |
| 26               | Brunei Darussalam | Alcoholic Beverages             | 1992           | 10                                                                    |
| 26               | Brunei Darussalam | Animal fats                     | 1992           | 26                                                                    |
| 26               | Brunei Darussalam | Animal Products                 | 1992           | 515                                                                   |
| 26               | Brunei Darussalam | Apples and products             | 1992           | 9                                                                     |
| 26               | Brunei Darussalam | Bananas                         | 1992           | 5                                                                     |
| 26               | Brunei Darussalam | Beans                           | 1992           | 15                                                                    |
| 26               | Brunei Darussalam | Beer                            | 1992           | 6                                                                     |
| 26               | Brunei Darussalam | Beverages, Alcoholic            | 1992           | 4                                                                     |
| 26               | Brunei Darussalam | Bovine Meat                     | 1992           | 100                                                                   |
| 26               | Brunei Darussalam | Butter, Ghee                    | 1992           | 21                                                                    |
| 26               | Brunei Darussalam | Cassava and products            | 1992           | 14                                                                    |
| 26               | Brunei Darussalam | Cereals - Excluding Beer        | 1992           | 1,406                                                                 |
| 26               | Brunei Darussalam | Cereals, Other                  | 1992           | 91                                                                    |
| 26               | Brunei Darussalam | Cocoa Beans and products        | 1992           | 20                                                                    |
| 26               | Brunei Darussalam | Coconuts - Incl Copra           | 1992           | 11                                                                    |
| 26               | Brunei Darussalam | Coffee and products             | 1992           | 2                                                                     |
| 26               | Brunei Darussalam | Crustaceans                     | 1992           | 6                                                                     |
| 26               | Brunei Darussalam | Eggs                            | 1992           | 47                                                                    |
| 26               | Brunei Darussalam | Fats, Animals, Raw              | 1992           | 5                                                                     |
| 26               | Brunei Darussalam | Fish, Seafood                   | 1992           | 29                                                                    |
| 26               | Brunei Darussalam | Fruits - Excluding Wine         | 1992           | 76                                                                    |
| 26               | Brunei Darussalam | Fruits, Other                   | 1992           | 37                                                                    |
| 26               | Brunei Darussalam | Grand Total                     | 1992           | 2,831                                                                 |
| 26               | Brunei Darussalam | Grapes and products (excl wine) | 1992           | 2                                                                     |
| 26               | Brunei Darussalam | Groundnut Oil                   | 1992           | 13                                                                    |
| 26               | Brunei Darussalam | Groundnuts (Shelled Eq)         | 1992           | 30                                                                    |
| 26               | Brunei Darussalam | Honey                           | 1992           | 1                                                                     |
| 26               | Brunei Darussalam | Maize and products              | 1992           | 256                                                                   |
| 26               | Brunei Darussalam | Maine Fish, Other               | 1992           | 16                                                                    |
| 26               | Brunei Darussalam | Meat                            | 1992           | 262                                                                   |
| 26               | Brunei Darussalam | Meat, Other                     | 1992           | 2                                                                     |
| 26               | Brunei Darussalam | Milk - Excluding Butter         | 1992           | 147                                                                   |
| 26               | Brunei Darussalam | Miscellaneous                   | 1992           | 17                                                                    |
| 26               | Brunei Darussalam | Molluscs, Other                 | 1992           | 2                                                                     |
| 26               | Brunei Darussalam | Mutton & Goat Meat              | 1992           | 5                                                                     |
| 26               | Brunei Darussalam | Offals                          | 1992           | 6                                                                     |
| 26               | Brunei Darussalam | Oilcrops                        | 1992           | 59                                                                    |
| 26               | Brunei Darussalam | Oilcrops Oil, Other             | 1992           | 29                                                                    |
| 26               | Brunei Darussalam | Onions                          | 1992           | 8                                                                     |
| 26               | Brunei Darussalam | Oranges, Mandarines             | 1992           | 18                                                                    |
| 26               | Brunei Darussalam | Palm Oil                        | 1992           | 151                                                                   |
| 26               | Brunei Darussalam | Pelagic Fish                    | 1992           | 4                                                                     |
| 26               | Brunei Darussalam | Pepper                          | 1992           | 1                                                                     |
| 26               | Brunei Darussalam | Pigmeat                         | 1992           | 46                                                                    |
| 26               | Brunei Darussalam | Pimento                         | 1992           | 5                                                                     |
| 26               | Brunei Darussalam | Pineapples and products         | 1992           | 4                                                                     |
| 26               | Brunei Darussalam | Potatoes and products           | 1992           | 12                                                                    |
| 26               | Brunei Darussalam | Poultry Meat                    | 1992           | 110                                                                   |
| 26               | Brunei Darussalam | Pulses                          | 1992           | 16                                                                    |
| 26               | Brunei Darussalam | Pulses, Other and products      | 1992           | 1                                                                     |
| 26               | Brunei Darussalam | Rice (Milled Equivalent)        | 1992           | 681                                                                   |
| 26               | Brunei Darussalam | Roots, Other                    | 1992           | 6                                                                     |
| 26               | Brunei Darussalam | Sesame seed                     | 1992           | 1                                                                     |
| 26               | Brunei Darussalam | Sesameseed Oil                  | 1992           | 4                                                                     |
| 26               | Brunei Darussalam | Soyabean Oil                    | 1992           | 5                                                                     |
| 26               | Brunei Darussalam | Soyabeans                       | 1992           | 17                                                                    |
| 26               | Brunei Darussalam | Spices                          | 1992           | 32                                                                    |
| 26               | Brunei Darussalam | Spices, Other                   | 1992           | 26                                                                    |
| 26               | Brunei Darussalam | Starchy Roots                   | 1992           | 34                                                                    |

Dietary calcium and zinc deficiency risks are decreasing but remain prevalent

| FAO Country code | Country           | Food item                       | Reference year | Net energy supply (kcal <i>capita</i> <sup>-1</sup> d <sup>-1</sup> ) |
|------------------|-------------------|---------------------------------|----------------|-----------------------------------------------------------------------|
| 26               | Brunei Darussalam | Stimulants                      | 1992           | 22                                                                    |
| 26               | Brunei Darussalam | Sugar & Sweeteners              | 1992           | 360                                                                   |
| 26               | Brunei Darussalam | Sugar (Raw Equivalent)          | 1992           | 305                                                                   |
| 26               | Brunei Darussalam | Sweet potatoes                  | 1992           | 1                                                                     |
| 26               | Brunei Darussalam | Sweeteners, Other               | 1992           | 55                                                                    |
| 26               | Brunei Darussalam | Tomatoes and products           | 1992           | 1                                                                     |
| 26               | Brunei Darussalam | Treenuts                        | 1992           | 18                                                                    |
| 26               | Brunei Darussalam | Vegetable Oils                  | 1992           | 203                                                                   |
| 26               | Brunei Darussalam | Vegetables                      | 1992           | 62                                                                    |
| 26               | Brunei Darussalam | Vegetables, Other               | 1992           | 53                                                                    |
| 26               | Brunei Darussalam | Vegetal Products                | 1992           | 2,315                                                                 |
| 26               | Brunei Darussalam | Wheat and products              | 1992           | 378                                                                   |
| 26               | Brunei Darussalam | Alcoholic Beverages             | 1993           | 10                                                                    |
| 26               | Brunei Darussalam | Animal fats                     | 1993           | 32                                                                    |
| 26               | Brunei Darussalam | Animal Products                 | 1993           | 549                                                                   |
| 26               | Brunei Darussalam | Apples and products             | 1993           | 9                                                                     |
| 26               | Brunei Darussalam | Bananas                         | 1993           | 7                                                                     |
| 26               | Brunei Darussalam | Beans                           | 1993           | 15                                                                    |
| 26               | Brunei Darussalam | Beer                            | 1993           | 7                                                                     |
| 26               | Brunei Darussalam | Beverages, Alcoholic            | 1993           | 4                                                                     |
| 26               | Brunei Darussalam | Bovine Meat                     | 1993           | 97                                                                    |
| 26               | Brunei Darussalam | Butter, Ghee                    | 1993           | 28                                                                    |
| 26               | Brunei Darussalam | Cassava and products            | 1993           | 15                                                                    |
| 26               | Brunei Darussalam | Cephalopods                     | 1993           | 3                                                                     |
| 26               | Brunei Darussalam | Cereals - Excluding Beer        | 1993           | 1,369                                                                 |
| 26               | Brunei Darussalam | Cereals, Other                  | 1993           | 125                                                                   |
| 26               | Brunei Darussalam | Cocoa Beans and products        | 1993           | 19                                                                    |
| 26               | Brunei Darussalam | Coconuts - Incl Copra           | 1993           | 12                                                                    |
| 26               | Brunei Darussalam | Coffee and products             | 1993           | 2                                                                     |
| 26               | Brunei Darussalam | Crustaceans                     | 1993           | 13                                                                    |
| 26               | Brunei Darussalam | Demersal Fish                   | 1993           | 1                                                                     |
| 26               | Brunei Darussalam | Eggs                            | 1993           | 48                                                                    |
| 26               | Brunei Darussalam | Fats, Animals, Raw              | 1993           | 4                                                                     |
| 26               | Brunei Darussalam | Fish, Seafood                   | 1993           | 51                                                                    |
| 26               | Brunei Darussalam | Freshwater Fish                 | 1993           | 7                                                                     |
| 26               | Brunei Darussalam | Fruits - Excluding Wine         | 1993           | 75                                                                    |
| 26               | Brunei Darussalam | Fruits, Other                   | 1993           | 36                                                                    |
| 26               | Brunei Darussalam | Grand Total                     | 1993           | 2,801                                                                 |
| 26               | Brunei Darussalam | Grapes and products (excl wine) | 1993           | 4                                                                     |
| 26               | Brunei Darussalam | Groundnut Oil                   | 1993           | 2                                                                     |
| 26               | Brunei Darussalam | Groundnuts (Shelled Eq)         | 1993           | 31                                                                    |
| 26               | Brunei Darussalam | Honey                           | 1993           | 2                                                                     |
| 26               | Brunei Darussalam | Maize and products              | 1993           | 183                                                                   |
| 26               | Brunei Darussalam | Marine Fish, Other              | 1993           | 18                                                                    |
| 26               | Brunei Darussalam | Meat                            | 1993           | 281                                                                   |
| 26               | Brunei Darussalam | Meat, Other                     | 1993           | 2                                                                     |
| 26               | Brunei Darussalam | Milk - Excluding Butter         | 1993           | 132                                                                   |
| 26               | Brunei Darussalam | Miscellaneous                   | 1993           | 16                                                                    |
| 26               | Brunei Darussalam | Molluscs, Other                 | 1993           | 6                                                                     |
| 26               | Brunei Darussalam | Mutton & Goat Meat              | 1993           | 5                                                                     |
| 26               | Brunei Darussalam | Offals                          | 1993           | 5                                                                     |
| 26               | Brunei Darussalam | Oilcrops                        | 1993           | 62                                                                    |
| 26               | Brunei Darussalam | Oilcrops Oil, Other             | 1993           | 28                                                                    |
| 26               | Brunei Darussalam | Onions                          | 1993           | 8                                                                     |
| 26               | Brunei Darussalam | Oranges, Mandarines             | 1993           | 14                                                                    |
| 26               | Brunei Darussalam | Palm Oil                        | 1993           | 147                                                                   |
| 26               | Brunei Darussalam | Pelagic Fish                    | 1993           | 3                                                                     |
| 26               | Brunei Darussalam | Pepper                          | 1993           | 1                                                                     |
| 26               | Brunei Darussalam | Pigmeat                         | 1993           | 71                                                                    |
| 26               | Brunei Darussalam | Pimento                         | 1993           | 11                                                                    |
| 26               | Brunei Darussalam | Pineapples and products         | 1993           | 4                                                                     |
| 26               | Brunei Darussalam | Potatoes and products           | 1993           | 12                                                                    |
| 26               | Brunei Darussalam | Poultry Meat                    | 1993           | 106                                                                   |
| 26               | Brunei Darussalam | Pulses                          | 1993           | 17                                                                    |
| 26               | Brunei Darussalam | Pulses, Other and products      | 1993           | 1                                                                     |
| 26               | Brunei Darussalam | Rice (Milled Equivalent)        | 1993           | 666                                                                   |
| 26               | Brunei Darussalam | Roots, Other                    | 1993           | 4                                                                     |
| 26               | Brunei Darussalam | Sesame seed                     | 1993           | 1                                                                     |
| 26               | Brunei Darussalam | Sesameseed Oil                  | 1993           | 4                                                                     |
| 26               | Brunei Darussalam | Soybeans                        | 1993           | 17                                                                    |
| 26               | Brunei Darussalam | Spices                          | 1993           | 38                                                                    |
| 26               | Brunei Darussalam | Spices, Other                   | 1993           | 25                                                                    |
| 26               | Brunei Darussalam | Starchy Roots                   | 1993           | 32                                                                    |
| 26               | Brunei Darussalam | Stimulants                      | 1993           | 21                                                                    |
| 26               | Brunei Darussalam | Sugar & Sweeteners              | 1993           | 349                                                                   |
| 26               | Brunei Darussalam | Sugar (Raw Equivalent)          | 1993           | 296                                                                   |
| 26               | Brunei Darussalam | Sweet potatoes                  | 1993           | 1                                                                     |
| 26               | Brunei Darussalam | Sweeteners, Other               | 1993           | 52                                                                    |
| 26               | Brunei Darussalam | Tomatoes and products           | 1993           | 1                                                                     |
| 26               | Brunei Darussalam | Treenuts                        | 1993           | 17                                                                    |
| 26               | Brunei Darussalam | Vegetable Oils                  | 1993           | 181                                                                   |
| 26               | Brunei Darussalam | Vegetables                      | 1993           | 64                                                                    |
| 26               | Brunei Darussalam | Vegetables, Other               | 1993           | 55                                                                    |
| 26               | Brunei Darussalam | Vegetal Products                | 1993           | 2,252                                                                 |
| 26               | Brunei Darussalam | Wheat and products              | 1993           | 395                                                                   |
| 26               | Brunei Darussalam | Alcoholic Beverages             | 1994           | 6                                                                     |
| 26               | Brunei Darussalam | Animal fats                     | 1994           | 33                                                                    |
| 26               | Brunei Darussalam | Animal Products                 | 1994           | 648                                                                   |
| 26               | Brunei Darussalam | Apples and products             | 1994           | 7                                                                     |
| 26               | Brunei Darussalam | Bananas                         | 1994           | 8                                                                     |
| 26               | Brunei Darussalam | Beans                           | 1994           | 20                                                                    |
| 26               | Brunei Darussalam | Beer                            | 1994           | 5                                                                     |
| 26               | Brunei Darussalam | Bovine Meat                     | 1994           | 116                                                                   |
| 26               | Brunei Darussalam | Butter, Ghee                    | 1994           | 24                                                                    |
| 26               | Brunei Darussalam | Cassava and products            | 1994           | 16                                                                    |
| 26               | Brunei Darussalam | Cephalopods                     | 1994           | 1                                                                     |
| 26               | Brunei Darussalam | Cereals - Excluding Beer        | 1994           | 1,332                                                                 |

Dietary calcium and zinc deficiency risks are decreasing but remain prevalent

| FAO Country code | Country           | Food item                       | Reference year | Net energy supply (kcal capita <sup>-1</sup> d <sup>-1</sup> ) |
|------------------|-------------------|---------------------------------|----------------|----------------------------------------------------------------|
| 26               | Brunei Darussalam | Cereals, Other                  | 1994           | 43                                                             |
| 26               | Brunei Darussalam | Citrus, Other                   | 1994           | 1                                                              |
| 26               | Brunei Darussalam | Cocoa Beans and products        | 1994           | 22                                                             |
| 26               | Brunei Darussalam | Coconuts - Incl Copra           | 1994           | 14                                                             |
| 26               | Brunei Darussalam | Coffee and products             | 1994           | 4                                                              |
| 26               | Brunei Darussalam | Cream                           | 1994           | 4                                                              |
| 26               | Brunei Darussalam | Crustaceans                     | 1994           | 21                                                             |
| 26               | Brunei Darussalam | Dates                           | 1994           | 1                                                              |
| 26               | Brunei Darussalam | Demersal Fish                   | 1994           | 2                                                              |
| 26               | Brunei Darussalam | Eggs                            | 1994           | 52                                                             |
| 26               | Brunei Darussalam | Fats, Animals, Raw              | 1994           | 5                                                              |
| 26               | Brunei Darussalam | Fish, Seafood                   | 1994           | 91                                                             |
| 26               | Brunei Darussalam | Freshwater Fish                 | 1994           | 14                                                             |
| 26               | Brunei Darussalam | Fruits - Excluding Wine         | 1994           | 91                                                             |
| 26               | Brunei Darussalam | Fruits, Other                   | 1994           | 40                                                             |
| 26               | Brunei Darussalam | Grand Total                     | 1994           | 2,889                                                          |
| 26               | Brunei Darussalam | Grapes and products (excl wine) | 1994           | 6                                                              |
| 26               | Brunei Darussalam | Groundnut Oil                   | 1994           | 4                                                              |
| 26               | Brunei Darussalam | Groundnuts (Shelled Eq)         | 1994           | 37                                                             |
| 26               | Brunei Darussalam | Honey                           | 1994           | 1                                                              |
| 26               | Brunei Darussalam | Lemons, Limes and products      | 1994           | 1                                                              |
| 26               | Brunei Darussalam | Maize and products              | 1994           | 190                                                            |
| 26               | Brunei Darussalam | Marine Fish, Other              | 1994           | 35                                                             |
| 26               | Brunei Darussalam | Meat                            | 1994           | 332                                                            |
| 26               | Brunei Darussalam | Meat, Other                     | 1994           | 8                                                              |
| 26               | Brunei Darussalam | Milk - Excluding Butter         | 1994           | 127                                                            |
| 26               | Brunei Darussalam | Miscellaneous                   | 1994           | 17                                                             |
| 26               | Brunei Darussalam | Molluscs, Other                 | 1994           | 6                                                              |
| 26               | Brunei Darussalam | Mutton & Goat Meat              | 1994           | 7                                                              |
| 26               | Brunei Darussalam | Oats                            | 1994           | 1                                                              |
| 26               | Brunei Darussalam | Offals                          | 1994           | 13                                                             |
| 26               | Brunei Darussalam | Oilcrops                        | 1994           | 62                                                             |
| 26               | Brunei Darussalam | Oilcrops Oil, Other             | 1994           | 31                                                             |
| 26               | Brunei Darussalam | Onions                          | 1994           | 9                                                              |
| 26               | Brunei Darussalam | Oranges, Mandarines             | 1994           | 23                                                             |
| 26               | Brunei Darussalam | Palm Oil                        | 1994           | 127                                                            |
| 26               | Brunei Darussalam | Pelagic Fish                    | 1994           | 12                                                             |
| 26               | Brunei Darussalam | Pepper                          | 1994           | 1                                                              |
| 26               | Brunei Darussalam | Pigmeat                         | 1994           | 80                                                             |
| 26               | Brunei Darussalam | Pimento                         | 1994           | 11                                                             |
| 26               | Brunei Darussalam | Pineapples and products         | 1994           | 4                                                              |
| 26               | Brunei Darussalam | Potatoes and products           | 1994           | 9                                                              |
| 26               | Brunei Darussalam | Poultry Meat                    | 1994           | 121                                                            |
| 26               | Brunei Darussalam | Pulses                          | 1994           | 21                                                             |
| 26               | Brunei Darussalam | Pulses, Other and products      | 1994           | 1                                                              |
| 26               | Brunei Darussalam | Rape and Mustardseed            | 1994           | 1                                                              |
| 26               | Brunei Darussalam | Rice (Milled Equivalent)        | 1994           | 644                                                            |
| 26               | Brunei Darussalam | Roots, Other                    | 1994           | 4                                                              |
| 26               | Brunei Darussalam | Sesame seed                     | 1994           | 1                                                              |
| 26               | Brunei Darussalam | Sesameseed Oil                  | 1994           | 3                                                              |
| 26               | Brunei Darussalam | Soyabean Oil                    | 1994           | 5                                                              |
| 26               | Brunei Darussalam | Soyabeans                       | 1994           | 9                                                              |
| 26               | Brunei Darussalam | Spices                          | 1994           | 28                                                             |
| 26               | Brunei Darussalam | Spices, Other                   | 1994           | 16                                                             |
| 26               | Brunei Darussalam | Starchy Roots                   | 1994           | 29                                                             |
| 26               | Brunei Darussalam | Stimulants                      | 1994           | 27                                                             |
| 26               | Brunei Darussalam | Sugar & Sweeteners              | 1994           | 357                                                            |
| 26               | Brunei Darussalam | Sugar (Raw Equivalent)          | 1994           | 302                                                            |
| 26               | Brunei Darussalam | Sunflowerseed Oil               | 1994           | 2                                                              |
| 26               | Brunei Darussalam | Sweet potatoes                  | 1994           | 1                                                              |
| 26               | Brunei Darussalam | Sweeteners, Other               | 1994           | 54                                                             |
| 26               | Brunei Darussalam | Tea (including mate)            | 1994           | 1                                                              |
| 26               | Brunei Darussalam | Tomatoes and products           | 1994           | 1                                                              |
| 26               | Brunei Darussalam | Treenuts                        | 1994           | 26                                                             |
| 26               | Brunei Darussalam | Vegetable Oils                  | 1994           | 171                                                            |
| 26               | Brunei Darussalam | Vegetables                      | 1994           | 74                                                             |
| 26               | Brunei Darussalam | Vegetables, Other               | 1994           | 65                                                             |
| 26               | Brunei Darussalam | Vegetal Products                | 1994           | 2,241                                                          |
| 26               | Brunei Darussalam | Wheat and products              | 1994           | 454                                                            |
| 26               | Brunei Darussalam | Alcoholic Beverages             | 1995           | 9                                                              |
| 26               | Brunei Darussalam | Animal fats                     | 1995           | 32                                                             |
| 26               | Brunei Darussalam | Animal Products                 | 1995           | 594                                                            |
| 26               | Brunei Darussalam | Apples and products             | 1995           | 9                                                              |
| 26               | Brunei Darussalam | Bananas                         | 1995           | 4                                                              |
| 26               | Brunei Darussalam | Beans                           | 1995           | 16                                                             |
| 26               | Brunei Darussalam | Beer                            | 1995           | 4                                                              |
| 26               | Brunei Darussalam | Beverages, Alcoholic            | 1995           | 5                                                              |
| 26               | Brunei Darussalam | Bovine Meat                     | 1995           | 99                                                             |
| 26               | Brunei Darussalam | Butter, Ghee                    | 1995           | 27                                                             |
| 26               | Brunei Darussalam | Cassava and products            | 1995           | 17                                                             |
| 26               | Brunei Darussalam | Cephalopods                     | 1995           | 1                                                              |
| 26               | Brunei Darussalam | Cereals - Excluding Beer        | 1995           | 1,379                                                          |
| 26               | Brunei Darussalam | Cereals, Other                  | 1995           | 43                                                             |
| 26               | Brunei Darussalam | Cocoa Beans and products        | 1995           | 25                                                             |
| 26               | Brunei Darussalam | Coconuts - Incl Copra           | 1995           | 11                                                             |
| 26               | Brunei Darussalam | Coffee and products             | 1995           | 4                                                              |
| 26               | Brunei Darussalam | Cream                           | 1995           | 1                                                              |
| 26               | Brunei Darussalam | Crustaceans                     | 1995           | 5                                                              |
| 26               | Brunei Darussalam | Dates                           | 1995           | 1                                                              |
| 26               | Brunei Darussalam | Eggs                            | 1995           | 69                                                             |
| 26               | Brunei Darussalam | Fats, Animals, Raw              | 1995           | 4                                                              |
| 26               | Brunei Darussalam | Fish, Seafood                   | 1995           | 62                                                             |
| 26               | Brunei Darussalam | Freshwater Fish                 | 1995           | 8                                                              |
| 26               | Brunei Darussalam | Fruits - Excluding Wine         | 1995           | 69                                                             |
| 26               | Brunei Darussalam | Fruits, Other                   | 1995           | 35                                                             |
| 26               | Brunei Darussalam | Grand Total                     | 1995           | 2,836                                                          |
| 26               | Brunei Darussalam | Grapes and products (excl wine) | 1995           | 3                                                              |

Dietary calcium and zinc deficiency risks are decreasing but remain prevalent

| FAO Country code | Country           | Food item                       | Reference year | Net energy supply (kcal <i>capita</i> <sup>-1</sup> d <sup>-1</sup> ) |
|------------------|-------------------|---------------------------------|----------------|-----------------------------------------------------------------------|
| 26               | Brunei Darussalam | Groundnut Oil                   | 1995           | 6                                                                     |
| 26               | Brunei Darussalam | Groundnuts (Shelled Eq)         | 1995           | 25                                                                    |
| 26               | Brunei Darussalam | Honey                           | 1995           | 1                                                                     |
| 26               | Brunei Darussalam | Maize and products              | 1995           | 246                                                                   |
| 26               | Brunei Darussalam | Marine Fish, Other              | 1995           | 39                                                                    |
| 26               | Brunei Darussalam | Meat                            | 1995           | 300                                                                   |
| 26               | Brunei Darussalam | Meat, Other                     | 1995           | 6                                                                     |
| 26               | Brunei Darussalam | Milk - Excluding Butter         | 1995           | 125                                                                   |
| 26               | Brunei Darussalam | Miscellaneous                   | 1995           | 14                                                                    |
| 26               | Brunei Darussalam | Molluscs, Other                 | 1995           | 1                                                                     |
| 26               | Brunei Darussalam | Mutton & Goat Meat              | 1995           | 5                                                                     |
| 26               | Brunei Darussalam | Offals                          | 1995           | 6                                                                     |
| 26               | Brunei Darussalam | Oilcrops                        | 1995           | 45                                                                    |
| 26               | Brunei Darussalam | Oilcrops Oil, Other             | 1995           | 32                                                                    |
| 26               | Brunei Darussalam | Olive Oil                       | 1995           | 1                                                                     |
| 26               | Brunei Darussalam | Onions                          | 1995           | 10                                                                    |
| 26               | Brunei Darussalam | Oranges, Mandarines             | 1995           | 13                                                                    |
| 26               | Brunei Darussalam | Palm Oil                        | 1995           | 123                                                                   |
| 26               | Brunei Darussalam | Pelagic Fish                    | 1995           | 8                                                                     |
| 26               | Brunei Darussalam | Pepper                          | 1995           | 1                                                                     |
| 26               | Brunei Darussalam | Pigmeat                         | 1995           | 76                                                                    |
| 26               | Brunei Darussalam | Pimento                         | 1995           | 12                                                                    |
| 26               | Brunei Darussalam | Pineapples and products         | 1995           | 4                                                                     |
| 26               | Brunei Darussalam | Potatoes and products           | 1995           | 14                                                                    |
| 26               | Brunei Darussalam | Poultry Meat                    | 1995           | 113                                                                   |
| 26               | Brunei Darussalam | Pulses                          | 1995           | 16                                                                    |
| 26               | Brunei Darussalam | Rice (Milled Equivalent)        | 1995           | 655                                                                   |
| 26               | Brunei Darussalam | Roots, Other                    | 1995           | 4                                                                     |
| 26               | Brunei Darussalam | Sesame seed                     | 1995           | 1                                                                     |
| 26               | Brunei Darussalam | Sesameseed Oil                  | 1995           | 3                                                                     |
| 26               | Brunei Darussalam | Soyabean Oil                    | 1995           | 3                                                                     |
| 26               | Brunei Darussalam | Soyabeans                       | 1995           | 7                                                                     |
| 26               | Brunei Darussalam | Spices                          | 1995           | 39                                                                    |
| 26               | Brunei Darussalam | Spices, Other                   | 1995           | 26                                                                    |
| 26               | Brunei Darussalam | Starchy Roots                   | 1995           | 36                                                                    |
| 26               | Brunei Darussalam | Stimulants                      | 1995           | 29                                                                    |
| 26               | Brunei Darussalam | Sugar & Sweeteners              | 1995           | 346                                                                   |
| 26               | Brunei Darussalam | Sugar (Raw Equivalent)          | 1995           | 288                                                                   |
| 26               | Brunei Darussalam | Sunflowerseed Oil               | 1995           | 2                                                                     |
| 26               | Brunei Darussalam | Sweet potatoes                  | 1995           | 1                                                                     |
| 26               | Brunei Darussalam | Sweeteners, Other               | 1995           | 57                                                                    |
| 26               | Brunei Darussalam | Tea (including mate)            | 1995           | 1                                                                     |
| 26               | Brunei Darussalam | Tomatoes and products           | 1995           | 1                                                                     |
| 26               | Brunei Darussalam | Treenuts                        | 1995           | 12                                                                    |
| 26               | Brunei Darussalam | Vegetable Oils                  | 1995           | 169                                                                   |
| 26               | Brunei Darussalam | Vegetables                      | 1995           | 80                                                                    |
| 26               | Brunei Darussalam | Vegetables, Other               | 1995           | 70                                                                    |
| 26               | Brunei Darussalam | Vegetal Products                | 1995           | 2,242                                                                 |
| 26               | Brunei Darussalam | Wheat and products              | 1995           | 435                                                                   |
| 26               | Brunei Darussalam | Alcoholic Beverages             | 1996           | 8                                                                     |
| 26               | Brunei Darussalam | Animal fats                     | 1996           | 31                                                                    |
| 26               | Brunei Darussalam | Animal Products                 | 1996           | 640                                                                   |
| 26               | Brunei Darussalam | Apples and products             | 1996           | 7                                                                     |
| 26               | Brunei Darussalam | Bananas                         | 1996           | 6                                                                     |
| 26               | Brunei Darussalam | Beans                           | 1996           | 8                                                                     |
| 26               | Brunei Darussalam | Beer                            | 1996           | 3                                                                     |
| 26               | Brunei Darussalam | Beverages, Alcoholic            | 1996           | 5                                                                     |
| 26               | Brunei Darussalam | Bovine Meat                     | 1996           | 116                                                                   |
| 26               | Brunei Darussalam | Butter, Ghee                    | 1996           | 26                                                                    |
| 26               | Brunei Darussalam | Cassava and products            | 1996           | 19                                                                    |
| 26               | Brunei Darussalam | Cereals - Excluding Beer        | 1996           | 1,433                                                                 |
| 26               | Brunei Darussalam | Cereals, Other                  | 1996           | 43                                                                    |
| 26               | Brunei Darussalam | Cocoa Beans and products        | 1996           | 26                                                                    |
| 26               | Brunei Darussalam | Coconuts - Incl Copra           | 1996           | 11                                                                    |
| 26               | Brunei Darussalam | Coffee and products             | 1996           | 10                                                                    |
| 26               | Brunei Darussalam | Cream                           | 1996           | 2                                                                     |
| 26               | Brunei Darussalam | Crustaceans                     | 1996           | 6                                                                     |
| 26               | Brunei Darussalam | Dates                           | 1996           | 1                                                                     |
| 26               | Brunei Darussalam | Eggs                            | 1996           | 78                                                                    |
| 26               | Brunei Darussalam | Fats, Animals, Raw              | 1996           | 4                                                                     |
| 26               | Brunei Darussalam | Fish, Seafood                   | 1996           | 64                                                                    |
| 26               | Brunei Darussalam | Freshwater Fish                 | 1996           | 7                                                                     |
| 26               | Brunei Darussalam | Fruits - Excluding Wine         | 1996           | 89                                                                    |
| 26               | Brunei Darussalam | Fruits, Other                   | 1996           | 53                                                                    |
| 26               | Brunei Darussalam | Grand Total                     | 1996           | 2,912                                                                 |
| 26               | Brunei Darussalam | Grapes and products (excl wine) | 1996           | 3                                                                     |
| 26               | Brunei Darussalam | Groundnut Oil                   | 1996           | 1                                                                     |
| 26               | Brunei Darussalam | Groundnuts (Shelled Eq)         | 1996           | 22                                                                    |
| 26               | Brunei Darussalam | Honey                           | 1996           | 1                                                                     |
| 26               | Brunei Darussalam | Maize and products              | 1996           | 255                                                                   |
| 26               | Brunei Darussalam | Marine Fish, Other              | 1996           | 42                                                                    |
| 26               | Brunei Darussalam | Meat                            | 1996           | 319                                                                   |
| 26               | Brunei Darussalam | Meat, Other                     | 1996           | 4                                                                     |
| 26               | Brunei Darussalam | Milk - Excluding Butter         | 1996           | 141                                                                   |
| 26               | Brunei Darussalam | Miscellaneous                   | 1996           | 10                                                                    |
| 26               | Brunei Darussalam | Molluscs, Other                 | 1996           | 1                                                                     |
| 26               | Brunei Darussalam | Mutton & Goat Meat              | 1996           | 6                                                                     |
| 26               | Brunei Darussalam | Offals                          | 1996           | 7                                                                     |
| 26               | Brunei Darussalam | Oilcrops                        | 1996           | 42                                                                    |
| 26               | Brunei Darussalam | Oilcrops Oil, Other             | 1996           | 26                                                                    |
| 26               | Brunei Darussalam | Olive Oil                       | 1996           | 1                                                                     |
| 26               | Brunei Darussalam | Onions                          | 1996           | 10                                                                    |
| 26               | Brunei Darussalam | Oranges, Mandarines             | 1996           | 15                                                                    |
| 26               | Brunei Darussalam | Palm Oil                        | 1996           | 120                                                                   |
| 26               | Brunei Darussalam | Pelagic Fish                    | 1996           | 7                                                                     |
| 26               | Brunei Darussalam | Pepper                          | 1996           | 1                                                                     |
| 26               | Brunei Darussalam | Pigmeat                         | 1996           | 83                                                                    |

Dietary calcium and zinc deficiency risks are decreasing but remain prevalent

| FAO Country code | Country           | Food item                       | Reference year | Net energy supply (kcal <i>capita</i> <sup>-1</sup> d <sup>-1</sup> ) |
|------------------|-------------------|---------------------------------|----------------|-----------------------------------------------------------------------|
| 26               | Brunei Darussalam | Pimento                         | 1996           | 8                                                                     |
| 26               | Brunei Darussalam | Pineapples and products         | 1996           | 4                                                                     |
| 26               | Brunei Darussalam | Potatoes and products           | 1996           | 17                                                                    |
| 26               | Brunei Darussalam | Poultry Meat                    | 1996           | 109                                                                   |
| 26               | Brunei Darussalam | Pulses                          | 1996           | 19                                                                    |
| 26               | Brunei Darussalam | Pulses, Other and products      | 1996           | 11                                                                    |
| 26               | Brunei Darussalam | Rape and Mustardseed            | 1996           | 1                                                                     |
| 26               | Brunei Darussalam | Rice (Milled Equivalent)        | 1996           | 681                                                                   |
| 26               | Brunei Darussalam | Roots, Other                    | 1996           | 6                                                                     |
| 26               | Brunei Darussalam | Sesame seed                     | 1996           | 2                                                                     |
| 26               | Brunei Darussalam | Sesameseed Oil                  | 1996           | 2                                                                     |
| 26               | Brunei Darussalam | Soyabean Oil                    | 1996           | 3                                                                     |
| 26               | Brunei Darussalam | Soyabeans                       | 1996           | 6                                                                     |
| 26               | Brunei Darussalam | Spices                          | 1996           | 41                                                                    |
| 26               | Brunei Darussalam | Spices, Other                   | 1996           | 33                                                                    |
| 26               | Brunei Darussalam | Starchy Roots                   | 1996           | 43                                                                    |
| 26               | Brunei Darussalam | Stimulants                      | 1996           | 37                                                                    |
| 26               | Brunei Darussalam | Sugar & Sweeteners              | 1996           | 297                                                                   |
| 26               | Brunei Darussalam | Sugar (Raw Equivalent)          | 1996           | 230                                                                   |
| 26               | Brunei Darussalam | Sunflowerseed Oil               | 1996           | 3                                                                     |
| 26               | Brunei Darussalam | Sweet potatoes                  | 1996           | 1                                                                     |
| 26               | Brunei Darussalam | Sweeteners, Other               | 1996           | 66                                                                    |
| 26               | Brunei Darussalam | Tea (including mate)            | 1996           | 1                                                                     |
| 26               | Brunei Darussalam | Tomatoes and products           | 1996           | 1                                                                     |
| 26               | Brunei Darussalam | Treenuts                        | 1996           | 13                                                                    |
| 26               | Brunei Darussalam | Vegetable Oils                  | 1996           | 156                                                                   |
| 26               | Brunei Darussalam | Vegetables                      | 1996           | 83                                                                    |
| 26               | Brunei Darussalam | Vegetables, Other               | 1996           | 72                                                                    |
| 26               | Brunei Darussalam | Vegetal Products                | 1996           | 2,272                                                                 |
| 26               | Brunei Darussalam | Wheat and products              | 1996           | 454                                                                   |
| 26               | Brunei Darussalam | Alcoholic Beverages             | 1997           | 3                                                                     |
| 26               | Brunei Darussalam | Animal fats                     | 1997           | 29                                                                    |
| 26               | Brunei Darussalam | Animal Products                 | 1997           | 565                                                                   |
| 26               | Brunei Darussalam | Apples and products             | 1997           | 9                                                                     |
| 26               | Brunei Darussalam | Bananas                         | 1997           | 4                                                                     |
| 26               | Brunei Darussalam | Barley and products             | 1997           | 1                                                                     |
| 26               | Brunei Darussalam | Beans                           | 1997           | 13                                                                    |
| 26               | Brunei Darussalam | Beer                            | 1997           | 3                                                                     |
| 26               | Brunei Darussalam | Bovine Meat                     | 1997           | 79                                                                    |
| 26               | Brunei Darussalam | Butter, Ghee                    | 1997           | 22                                                                    |
| 26               | Brunei Darussalam | Cassava and products            | 1997           | 13                                                                    |
| 26               | Brunei Darussalam | Cephalopods                     | 1997           | 1                                                                     |
| 26               | Brunei Darussalam | Cereals - Excluding Beer        | 1997           | 1,347                                                                 |
| 26               | Brunei Darussalam | Cereals, Other                  | 1997           | 40                                                                    |
| 26               | Brunei Darussalam | Citrus, Other                   | 1997           | 1                                                                     |
| 26               | Brunei Darussalam | Cocoa Beans and products        | 1997           | 51                                                                    |
| 26               | Brunei Darussalam | Coconuts - Incl Copra           | 1997           | 12                                                                    |
| 26               | Brunei Darussalam | Coffee and products             | 1997           | 5                                                                     |
| 26               | Brunei Darussalam | Cream                           | 1997           | 1                                                                     |
| 26               | Brunei Darussalam | Crustaceans                     | 1997           | 7                                                                     |
| 26               | Brunei Darussalam | Dates                           | 1997           | 3                                                                     |
| 26               | Brunei Darussalam | Demersal Fish                   | 1997           | 3                                                                     |
| 26               | Brunei Darussalam | Eggs                            | 1997           | 51                                                                    |
| 26               | Brunei Darussalam | Fats, Animals, Raw              | 1997           | 6                                                                     |
| 26               | Brunei Darussalam | Fish, Seafood                   | 1997           | 98                                                                    |
| 26               | Brunei Darussalam | Freshwater Fish                 | 1997           | 10                                                                    |
| 26               | Brunei Darussalam | Fruits - Excluding Wine         | 1997           | 83                                                                    |
| 26               | Brunei Darussalam | Fruits, Other                   | 1997           | 44                                                                    |
| 26               | Brunei Darussalam | Grand Total                     | 1997           | 2,824                                                                 |
| 26               | Brunei Darussalam | Grapes and products (excl wine) | 1997           | 6                                                                     |
| 26               | Brunei Darussalam | Groundnut Oil                   | 1997           | 5                                                                     |
| 26               | Brunei Darussalam | Groundnuts (Shelled Eq)         | 1997           | 24                                                                    |
| 26               | Brunei Darussalam | Honey                           | 1997           | 1                                                                     |
| 26               | Brunei Darussalam | Lemons, Limes and products      | 1997           | 1                                                                     |
| 26               | Brunei Darussalam | Maize and products              | 1997           | 243                                                                   |
| 26               | Brunei Darussalam | Maize Germ Oil                  | 1997           | 19                                                                    |
| 26               | Brunei Darussalam | Marine Fish, Other              | 1997           | 61                                                                    |
| 26               | Brunei Darussalam | Meat                            | 1997           | 250                                                                   |
| 26               | Brunei Darussalam | Meat, Other                     | 1997           | 1                                                                     |
| 26               | Brunei Darussalam | Milk - Excluding Butter         | 1997           | 130                                                                   |
| 26               | Brunei Darussalam | Miscellaneous                   | 1997           | 23                                                                    |
| 26               | Brunei Darussalam | Molluscs, Other                 | 1997           | 1                                                                     |
| 26               | Brunei Darussalam | Mutton & Goat Meat              | 1997           | 8                                                                     |
| 26               | Brunei Darussalam | Oats                            | 1997           | 1                                                                     |
| 26               | Brunei Darussalam | Offals                          | 1997           | 6                                                                     |
| 26               | Brunei Darussalam | Oilcrops                        | 1997           | 56                                                                    |
| 26               | Brunei Darussalam | Oilcrops Oil, Other             | 1997           | 25                                                                    |
| 26               | Brunei Darussalam | Olive Oil                       | 1997           | 1                                                                     |
| 26               | Brunei Darussalam | Onions                          | 1997           | 10                                                                    |
| 26               | Brunei Darussalam | Oranges, Mandarines             | 1997           | 12                                                                    |
| 26               | Brunei Darussalam | Palm Oil                        | 1997           | 117                                                                   |
| 26               | Brunei Darussalam | Peas                            | 1997           | 2                                                                     |
| 26               | Brunei Darussalam | Pelagic Fish                    | 1997           | 15                                                                    |
| 26               | Brunei Darussalam | Pepper                          | 1997           | 1                                                                     |
| 26               | Brunei Darussalam | Pigmeat                         | 1997           | 70                                                                    |
| 26               | Brunei Darussalam | Pimento                         | 1997           | 3                                                                     |
| 26               | Brunei Darussalam | Pineapples and products         | 1997           | 3                                                                     |
| 26               | Brunei Darussalam | Potatoes and products           | 1997           | 16                                                                    |
| 26               | Brunei Darussalam | Poultry Meat                    | 1997           | 93                                                                    |
| 26               | Brunei Darussalam | Pulses                          | 1997           | 30                                                                    |
| 26               | Brunei Darussalam | Pulses, Other and products      | 1997           | 15                                                                    |
| 26               | Brunei Darussalam | Rape and Mustardseed            | 1997           | 4                                                                     |
| 26               | Brunei Darussalam | Rice (Milled Equivalent)        | 1997           | 732                                                                   |
| 26               | Brunei Darussalam | Roots, Other                    | 1997           | 5                                                                     |
| 26               | Brunei Darussalam | Sesame seed                     | 1997           | 1                                                                     |
| 26               | Brunei Darussalam | Sesameseed Oil                  | 1997           | 5                                                                     |
| 26               | Brunei Darussalam | Sorghum and products            | 1997           | 3                                                                     |

Dietary calcium and zinc deficiency risks are decreasing but remain prevalent

| FAO Country code | Country           | Food item                       | Reference year | Net energy supply (kcal <i>capita</i> <sup>-1</sup> d <sup>-1</sup> ) |
|------------------|-------------------|---------------------------------|----------------|-----------------------------------------------------------------------|
| 26               | Brunei Darussalam | Soyabeans                       | 1997           | 14                                                                    |
| 26               | Brunei Darussalam | Spices                          | 1997           | 38                                                                    |
| 26               | Brunei Darussalam | Spices, Other                   | 1997           | 33                                                                    |
| 26               | Brunei Darussalam | Starchy Roots                   | 1997           | 37                                                                    |
| 26               | Brunei Darussalam | Stimulants                      | 1997           | 57                                                                    |
| 26               | Brunei Darussalam | Sugar & Sweeteners              | 1997           | 299                                                                   |
| 26               | Brunei Darussalam | Sugar (Raw Equivalent)          | 1997           | 234                                                                   |
| 26               | Brunei Darussalam | Sunflower seed                  | 1997           | 1                                                                     |
| 26               | Brunei Darussalam | Sunflowerseed Oil               | 1997           | 22                                                                    |
| 26               | Brunei Darussalam | Sweet potatoes                  | 1997           | 3                                                                     |
| 26               | Brunei Darussalam | Sweeteners, Other               | 1997           | 64                                                                    |
| 26               | Brunei Darussalam | Tea (including mate)            | 1997           | 1                                                                     |
| 26               | Brunei Darussalam | Tomatoes and products           | 1997           | 1                                                                     |
| 26               | Brunei Darussalam | Treenuts                        | 1997           | 16                                                                    |
| 26               | Brunei Darussalam | Vegetable Oils                  | 1997           | 195                                                                   |
| 26               | Brunei Darussalam | Vegetables                      | 1997           | 75                                                                    |
| 26               | Brunei Darussalam | Vegetables, Other               | 1997           | 63                                                                    |
| 26               | Brunei Darussalam | Vegetal Products                | 1997           | 2,259                                                                 |
| 26               | Brunei Darussalam | Wheat and products              | 1997           | 327                                                                   |
| 26               | Brunei Darussalam | Alcoholic Beverages             | 1998           | 2                                                                     |
| 26               | Brunei Darussalam | Animal fats                     | 1998           | 60                                                                    |
| 26               | Brunei Darussalam | Animal Products                 | 1998           | 591                                                                   |
| 26               | Brunei Darussalam | Apples and products             | 1998           | 8                                                                     |
| 26               | Brunei Darussalam | Bananas                         | 1998           | 5                                                                     |
| 26               | Brunei Darussalam | Barley and products             | 1998           | 1                                                                     |
| 26               | Brunei Darussalam | Beans                           | 1998           | 13                                                                    |
| 26               | Brunei Darussalam | Beer                            | 1998           | 2                                                                     |
| 26               | Brunei Darussalam | Bovine Meat                     | 1998           | 67                                                                    |
| 26               | Brunei Darussalam | Butter, Ghee                    | 1998           | 52                                                                    |
| 26               | Brunei Darussalam | Cassava and products            | 1998           | 14                                                                    |
| 26               | Brunei Darussalam | Cephalopods                     | 1998           | 1                                                                     |
| 26               | Brunei Darussalam | Cereals - Excluding Beer        | 1998           | 1,372                                                                 |
| 26               | Brunei Darussalam | Cereals, Other                  | 1998           | 63                                                                    |
| 26               | Brunei Darussalam | Citrus, Other                   | 1998           | 2                                                                     |
| 26               | Brunei Darussalam | Cloves                          | 1998           | 1                                                                     |
| 26               | Brunei Darussalam | Cocoa Beans and products        | 1998           | 59                                                                    |
| 26               | Brunei Darussalam | Coconuts - Incl Copra           | 1998           | 9                                                                     |
| 26               | Brunei Darussalam | Coffee and products             | 1998           | 5                                                                     |
| 26               | Brunei Darussalam | Cream                           | 1998           | 2                                                                     |
| 26               | Brunei Darussalam | Crustaceans                     | 1998           | 7                                                                     |
| 26               | Brunei Darussalam | Dates                           | 1998           | 2                                                                     |
| 26               | Brunei Darussalam | Demersal Fish                   | 1998           | 2                                                                     |
| 26               | Brunei Darussalam | Eggs                            | 1998           | 62                                                                    |
| 26               | Brunei Darussalam | Fats, Animals, Raw              | 1998           | 6                                                                     |
| 26               | Brunei Darussalam | Fish, Seafood                   | 1998           | 91                                                                    |
| 26               | Brunei Darussalam | Freshwater Fish                 | 1998           | 9                                                                     |
| 26               | Brunei Darussalam | Fruits - Excluding Wine         | 1998           | 94                                                                    |
| 26               | Brunei Darussalam | Fruits, Other                   | 1998           | 55                                                                    |
| 26               | Brunei Darussalam | Grand Total                     | 1998           | 2,852                                                                 |
| 26               | Brunei Darussalam | Grapefruit and products         | 1998           | 1                                                                     |
| 26               | Brunei Darussalam | Grapes and products (excl wine) | 1998           | 7                                                                     |
| 26               | Brunei Darussalam | Groundnuts (Shelled Eq)         | 1998           | 30                                                                    |
| 26               | Brunei Darussalam | Honey                           | 1998           | 1                                                                     |
| 26               | Brunei Darussalam | Lemons, Limes and products      | 1998           | 1                                                                     |
| 26               | Brunei Darussalam | Maize and products              | 1998           | 204                                                                   |
| 26               | Brunei Darussalam | Maize Germ Oil                  | 1998           | 37                                                                    |
| 26               | Brunei Darussalam | Marine Fish, Other              | 1998           | 61                                                                    |
| 26               | Brunei Darussalam | Meat                            | 1998           | 246                                                                   |
| 26               | Brunei Darussalam | Meat, Other                     | 1998           | 1                                                                     |
| 26               | Brunei Darussalam | Milk - Excluding Butter         | 1998           | 126                                                                   |
| 26               | Brunei Darussalam | Miscellaneous                   | 1998           | 28                                                                    |
| 26               | Brunei Darussalam | Molluscs, Other                 | 1998           | 2                                                                     |
| 26               | Brunei Darussalam | Mutton & Goat Meat              | 1998           | 9                                                                     |
| 26               | Brunei Darussalam | Oats                            | 1998           | 6                                                                     |
| 26               | Brunei Darussalam | Offals                          | 1998           | 6                                                                     |
| 26               | Brunei Darussalam | Oilcrops                        | 1998           | 63                                                                    |
| 26               | Brunei Darussalam | Oilcrops Oil, Other             | 1998           | 27                                                                    |
| 26               | Brunei Darussalam | Olive Oil                       | 1998           | 2                                                                     |
| 26               | Brunei Darussalam | Onions                          | 1998           | 7                                                                     |
| 26               | Brunei Darussalam | Oranges, Mandarines             | 1998           | 11                                                                    |
| 26               | Brunei Darussalam | Palm Oil                        | 1998           | 118                                                                   |
| 26               | Brunei Darussalam | Pelagic Fish                    | 1998           | 10                                                                    |
| 26               | Brunei Darussalam | Pepper                          | 1998           | 2                                                                     |
| 26               | Brunei Darussalam | Pigmeat                         | 1998           | 52                                                                    |
| 26               | Brunei Darussalam | Pimento                         | 1998           | 2                                                                     |
| 26               | Brunei Darussalam | Pineapples and products         | 1998           | 4                                                                     |
| 26               | Brunei Darussalam | Potatoes and products           | 1998           | 18                                                                    |
| 26               | Brunei Darussalam | Poultry Meat                    | 1998           | 117                                                                   |
| 26               | Brunei Darussalam | Pulses                          | 1998           | 21                                                                    |
| 26               | Brunei Darussalam | Pulses, Other and products      | 1998           | 8                                                                     |
| 26               | Brunei Darussalam | Rape and Mustardseed            | 1998           | 3                                                                     |
| 26               | Brunei Darussalam | Rice (Milled Equivalent)        | 1998           | 715                                                                   |
| 26               | Brunei Darussalam | Roots, Other                    | 1998           | 3                                                                     |
| 26               | Brunei Darussalam | Sesame seed                     | 1998           | 1                                                                     |
| 26               | Brunei Darussalam | Sesameseed Oil                  | 1998           | 3                                                                     |
| 26               | Brunei Darussalam | Sorghum and products            | 1998           | 1                                                                     |
| 26               | Brunei Darussalam | Soyabean Oil                    | 1998           | 2                                                                     |
| 26               | Brunei Darussalam | Soyabeans                       | 1998           | 18                                                                    |
| 26               | Brunei Darussalam | Spices                          | 1998           | 30                                                                    |
| 26               | Brunei Darussalam | Spices, Other                   | 1998           | 25                                                                    |
| 26               | Brunei Darussalam | Starchy Roots                   | 1998           | 41                                                                    |
| 26               | Brunei Darussalam | Stimulants                      | 1998           | 66                                                                    |
| 26               | Brunei Darussalam | Sugar & Sweeteners              | 1998           | 238                                                                   |
| 26               | Brunei Darussalam | Sugar (Raw Equivalent)          | 1998           | 185                                                                   |
| 26               | Brunei Darussalam | Sunflower seed                  | 1998           | 1                                                                     |
| 26               | Brunei Darussalam | Sunflowerseed Oil               | 1998           | 21                                                                    |
| 26               | Brunei Darussalam | Sweet potatoes                  | 1998           | 6                                                                     |

Dietary calcium and zinc deficiency risks are decreasing but remain prevalent

| FAO Country code | Country           | Food item                       | Reference year | Net energy supply (kcal capita <sup>-1</sup> d <sup>-1</sup> ) |
|------------------|-------------------|---------------------------------|----------------|----------------------------------------------------------------|
| 26               | Brunei Darussalam | Sweeteners, Other               | 1998           | 52                                                             |
| 26               | Brunei Darussalam | Tea (including mate)            | 1998           | 1                                                              |
| 26               | Brunei Darussalam | Tomatoes and products           | 1998           | 2                                                              |
| 26               | Brunei Darussalam | Treenuts                        | 1998           | 18                                                             |
| 26               | Brunei Darussalam | Vegetable Oils                  | 1998           | 211                                                            |
| 26               | Brunei Darussalam | Vegetables                      | 1998           | 77                                                             |
| 26               | Brunei Darussalam | Vegetables, Other               | 1998           | 68                                                             |
| 26               | Brunei Darussalam | Vegetal Products                | 1998           | 2,261                                                          |
| 26               | Brunei Darussalam | Wheat and products              | 1998           | 381                                                            |
| 26               | Brunei Darussalam | Alcoholic Beverages             | 1999           | 6                                                              |
| 26               | Brunei Darussalam | Animal fats                     | 1999           | 38                                                             |
| 26               | Brunei Darussalam | Animal Products                 | 1999           | 560                                                            |
| 26               | Brunei Darussalam | Apples and products             | 1999           | 4                                                              |
| 26               | Brunei Darussalam | Bananas                         | 1999           | 3                                                              |
| 26               | Brunei Darussalam | Beans                           | 1999           | 9                                                              |
| 26               | Brunei Darussalam | Beer                            | 1999           | 3                                                              |
| 26               | Brunei Darussalam | Beverages, Alcoholic            | 1999           | 3                                                              |
| 26               | Brunei Darussalam | Bovine Meat                     | 1999           | 94                                                             |
| 26               | Brunei Darussalam | Butter, Ghee                    | 1999           | 27                                                             |
| 26               | Brunei Darussalam | Cassava and products            | 1999           | 20                                                             |
| 26               | Brunei Darussalam | Cephalopods                     | 1999           | 3                                                              |
| 26               | Brunei Darussalam | Cereals - Excluding Beer        | 1999           | 1,409                                                          |
| 26               | Brunei Darussalam | Cereals, Other                  | 1999           | 61                                                             |
| 26               | Brunei Darussalam | Citrus, Other                   | 1999           | 2                                                              |
| 26               | Brunei Darussalam | Cocoa Beans and products        | 1999           | 61                                                             |
| 26               | Brunei Darussalam | Coconuts - Incl Copra           | 1999           | 8                                                              |
| 26               | Brunei Darussalam | Coffee and products             | 1999           | 3                                                              |
| 26               | Brunei Darussalam | Cream                           | 1999           | 1                                                              |
| 26               | Brunei Darussalam | Crustaceans                     | 1999           | 3                                                              |
| 26               | Brunei Darussalam | Dates                           | 1999           | 1                                                              |
| 26               | Brunei Darussalam | Eggs                            | 1999           | 48                                                             |
| 26               | Brunei Darussalam | Fats, Animals, Raw              | 1999           | 11                                                             |
| 26               | Brunei Darussalam | Fish, Seafood                   | 1999           | 58                                                             |
| 26               | Brunei Darussalam | Freshwater Fish                 | 1999           | 3                                                              |
| 26               | Brunei Darussalam | Fruits - Excluding Wine         | 1999           | 69                                                             |
| 26               | Brunei Darussalam | Fruits, Other                   | 1999           | 40                                                             |
| 26               | Brunei Darussalam | Grand Total                     | 1999           | 2,809                                                          |
| 26               | Brunei Darussalam | Grapes and products (excl wine) | 1999           | 4                                                              |
| 26               | Brunei Darussalam | Groundnuts (Shelled Eq)         | 1999           | 27                                                             |
| 26               | Brunei Darussalam | Maize and products              | 1999           | 198                                                            |
| 26               | Brunei Darussalam | Maize Germ Oil                  | 1999           | 34                                                             |
| 26               | Brunei Darussalam | Marine Fish, Other              | 1999           | 38                                                             |
| 26               | Brunei Darussalam | Meat                            | 1999           | 278                                                            |
| 26               | Brunei Darussalam | Meat, Other                     | 1999           | 1                                                              |
| 26               | Brunei Darussalam | Milk - Excluding Butter         | 1999           | 129                                                            |
| 26               | Brunei Darussalam | Miscellaneous                   | 1999           | 27                                                             |
| 26               | Brunei Darussalam | Mutton & Goat Meat              | 1999           | 6                                                              |
| 26               | Brunei Darussalam | Oats                            | 1999           | 1                                                              |
| 26               | Brunei Darussalam | Offals                          | 1999           | 9                                                              |
| 26               | Brunei Darussalam | Oilcrops                        | 1999           | 53                                                             |
| 26               | Brunei Darussalam | Oilcrops Oil, Other             | 1999           | 24                                                             |
| 26               | Brunei Darussalam | Olive Oil                       | 1999           | 1                                                              |
| 26               | Brunei Darussalam | Onions                          | 1999           | 6                                                              |
| 26               | Brunei Darussalam | Oranges, Mandarines             | 1999           | 12                                                             |
| 26               | Brunei Darussalam | Palm Oil                        | 1999           | 119                                                            |
| 26               | Brunei Darussalam | Pelagic Fish                    | 1999           | 11                                                             |
| 26               | Brunei Darussalam | Pepper                          | 1999           | 1                                                              |
| 26               | Brunei Darussalam | Pigmeat                         | 1999           | 28                                                             |
| 26               | Brunei Darussalam | Pimento                         | 1999           | 7                                                              |
| 26               | Brunei Darussalam | Pineapples and products         | 1999           | 4                                                              |
| 26               | Brunei Darussalam | Potatoes and products           | 1999           | 16                                                             |
| 26               | Brunei Darussalam | Poultry Meat                    | 1999           | 149                                                            |
| 26               | Brunei Darussalam | Pulses                          | 1999           | 20                                                             |
| 26               | Brunei Darussalam | Pulses, Other and products      | 1999           | 10                                                             |
| 26               | Brunei Darussalam | Rice (Milled Equivalent)        | 1999           | 699                                                            |
| 26               | Brunei Darussalam | Roots, Other                    | 1999           | 3                                                              |
| 26               | Brunei Darussalam | Sesame seed                     | 1999           | 1                                                              |
| 26               | Brunei Darussalam | Sesameseed Oil                  | 1999           | 2                                                              |
| 26               | Brunei Darussalam | Soyabean Oil                    | 1999           | 1                                                              |
| 26               | Brunei Darussalam | Soyabeans                       | 1999           | 16                                                             |
| 26               | Brunei Darussalam | Spices                          | 1999           | 32                                                             |
| 26               | Brunei Darussalam | Spices, Other                   | 1999           | 25                                                             |
| 26               | Brunei Darussalam | Starchy Roots                   | 1999           | 41                                                             |
| 26               | Brunei Darussalam | Stimulants                      | 1999           | 65                                                             |
| 26               | Brunei Darussalam | Sugar & Sweeteners              | 1999           | 258                                                            |
| 26               | Brunei Darussalam | Sugar (Raw Equivalent)          | 1999           | 205                                                            |
| 26               | Brunei Darussalam | Sunflowerseed Oil               | 1999           | 19                                                             |
| 26               | Brunei Darussalam | Sweet potatoes                  | 1999           | 1                                                              |
| 26               | Brunei Darussalam | Sweeteners, Other               | 1999           | 53                                                             |
| 26               | Brunei Darussalam | Tea (including mate)            | 1999           | 1                                                              |
| 26               | Brunei Darussalam | Tomatoes and products           | 1999           | 1                                                              |
| 26               | Brunei Darussalam | Treenuts                        | 1999           | 11                                                             |
| 26               | Brunei Darussalam | Vegetable Oils                  | 1999           | 201                                                            |
| 26               | Brunei Darussalam | Vegetables                      | 1999           | 56                                                             |
| 26               | Brunei Darussalam | Vegetables, Other               | 1999           | 49                                                             |
| 26               | Brunei Darussalam | Vegetal Products                | 1999           | 2,249                                                          |
| 26               | Brunei Darussalam | Wheat and products              | 1999           | 450                                                            |
| 26               | Brunei Darussalam | Alcoholic Beverages             | 2000           | 5                                                              |
| 26               | Brunei Darussalam | Animal fats                     | 2000           | 39                                                             |
| 26               | Brunei Darussalam | Animal Products                 | 2000           | 537                                                            |
| 26               | Brunei Darussalam | Apples and products             | 2000           | 6                                                              |
| 26               | Brunei Darussalam | Bananas                         | 2000           | 3                                                              |
| 26               | Brunei Darussalam | Beans                           | 2000           | 11                                                             |
| 26               | Brunei Darussalam | Beer                            | 2000           | 3                                                              |
| 26               | Brunei Darussalam | Beverages, Alcoholic            | 2000           | 2                                                              |
| 26               | Brunei Darussalam | Bovine Meat                     | 2000           | 62                                                             |
| 26               | Brunei Darussalam | Butter, Ghee                    | 2000           | 30                                                             |



Dietary calcium and zinc deficiency risks are decreasing but remain prevalent

| FAO Country code | Country           | Food item                       | Reference year | Net energy supply (kcal <i>capita</i> <sup>-1</sup> d <sup>-1</sup> ) |
|------------------|-------------------|---------------------------------|----------------|-----------------------------------------------------------------------|
| 26               | Brunei Darussalam | Cassava and products            | 2000           | 18                                                                    |
| 26               | Brunei Darussalam | Cephalopods                     | 2000           | 3                                                                     |
| 26               | Brunei Darussalam | Cereals - Excluding Beer        | 2000           | 1,427                                                                 |
| 26               | Brunei Darussalam | Cereals, Other                  | 2000           | 57                                                                    |
| 26               | Brunei Darussalam | Cocoa Beans and products        | 2000           | 40                                                                    |
| 26               | Brunei Darussalam | Coconuts - Incl Copra           | 2000           | 11                                                                    |
| 26               | Brunei Darussalam | Coffee and products             | 2000           | 3                                                                     |
| 26               | Brunei Darussalam | Cream                           | 2000           | 1                                                                     |
| 26               | Brunei Darussalam | Crustaceans                     | 2000           | 6                                                                     |
| 26               | Brunei Darussalam | Demersal Fish                   | 2000           | 1                                                                     |
| 26               | Brunei Darussalam | Eggs                            | 2000           | 48                                                                    |
| 26               | Brunei Darussalam | Fats, Animals, Raw              | 2000           | 8                                                                     |
| 26               | Brunei Darussalam | Fish, Seafood                   | 2000           | 60                                                                    |
| 26               | Brunei Darussalam | Freshwater Fish                 | 2000           | 1                                                                     |
| 26               | Brunei Darussalam | Fruits - Excluding Wine         | 2000           | 70                                                                    |
| 26               | Brunei Darussalam | Fruits, Other                   | 2000           | 47                                                                    |
| 26               | Brunei Darussalam | Grand Total                     | 2000           | 2,799                                                                 |
| 26               | Brunei Darussalam | Grapes and products (excl wine) | 2000           | 3                                                                     |
| 26               | Brunei Darussalam | Groundnut Oil                   | 2000           | 1                                                                     |
| 26               | Brunei Darussalam | Groundnuts (Shelled Eq)         | 2000           | 27                                                                    |
| 26               | Brunei Darussalam | Honey                           | 2000           | 1                                                                     |
| 26               | Brunei Darussalam | Maize and products              | 2000           | 178                                                                   |
| 26               | Brunei Darussalam | Maize Germ Oil                  | 2000           | 16                                                                    |
| 26               | Brunei Darussalam | Marine Fish, Other              | 2000           | 31                                                                    |
| 26               | Brunei Darussalam | Meat                            | 2000           | 244                                                                   |
| 26               | Brunei Darussalam | Milk - Excluding Butter         | 2000           | 141                                                                   |
| 26               | Brunei Darussalam | Miscellaneous                   | 2000           | 27                                                                    |
| 26               | Brunei Darussalam | Molluscs, Other                 | 2000           | 1                                                                     |
| 26               | Brunei Darussalam | Mutton & Goat Meat              | 2000           | 4                                                                     |
| 26               | Brunei Darussalam | Offals                          | 2000           | 6                                                                     |
| 26               | Brunei Darussalam | Oilcrops                        | 2000           | 53                                                                    |
| 26               | Brunei Darussalam | Oilcrops Oil, Other             | 2000           | 29                                                                    |
| 26               | Brunei Darussalam | Olive Oil                       | 2000           | 1                                                                     |
| 26               | Brunei Darussalam | Onions                          | 2000           | 5                                                                     |
| 26               | Brunei Darussalam | Oranges, Mandarines             | 2000           | 8                                                                     |
| 26               | Brunei Darussalam | Palm Oil                        | 2000           | 128                                                                   |
| 26               | Brunei Darussalam | Pelagic Fish                    | 2000           | 17                                                                    |
| 26               | Brunei Darussalam | Pepper                          | 2000           | 1                                                                     |
| 26               | Brunei Darussalam | Pigmeat                         | 2000           | 24                                                                    |
| 26               | Brunei Darussalam | Pimento                         | 2000           | 9                                                                     |
| 26               | Brunei Darussalam | Pineapples and products         | 2000           | 3                                                                     |
| 26               | Brunei Darussalam | Potatoes and products           | 2000           | 14                                                                    |
| 26               | Brunei Darussalam | Poultry Meat                    | 2000           | 152                                                                   |
| 26               | Brunei Darussalam | Pulses                          | 2000           | 21                                                                    |
| 26               | Brunei Darussalam | Pulses, Other and products      | 2000           | 10                                                                    |
| 26               | Brunei Darussalam | Rape and Mustardseed            | 2000           | 1                                                                     |
| 26               | Brunei Darussalam | Rice (Milled Equivalent)        | 2000           | 728                                                                   |
| 26               | Brunei Darussalam | Roots, Other                    | 2000           | 3                                                                     |
| 26               | Brunei Darussalam | Sesame seed                     | 2000           | 2                                                                     |
| 26               | Brunei Darussalam | Sesameseed Oil                  | 2000           | 2                                                                     |
| 26               | Brunei Darussalam | Soyabean Oil                    | 2000           | 5                                                                     |
| 26               | Brunei Darussalam | Soyabeans                       | 2000           | 12                                                                    |
| 26               | Brunei Darussalam | Spices                          | 2000           | 30                                                                    |
| 26               | Brunei Darussalam | Spices, Other                   | 2000           | 20                                                                    |
| 26               | Brunei Darussalam | Starchy Roots                   | 2000           | 37                                                                    |
| 26               | Brunei Darussalam | Stimulants                      | 2000           | 45                                                                    |
| 26               | Brunei Darussalam | Sugar & Sweeteners              | 2000           | 271                                                                   |
| 26               | Brunei Darussalam | Sugar (Raw Equivalent)          | 2000           | 226                                                                   |
| 26               | Brunei Darussalam | Sunflowerseed Oil               | 2000           | 22                                                                    |
| 26               | Brunei Darussalam | Sweet potatoes                  | 2000           | 2                                                                     |
| 26               | Brunei Darussalam | Sweeteners, Other               | 2000           | 44                                                                    |
| 26               | Brunei Darussalam | Tea (including mate)            | 2000           | 2                                                                     |
| 26               | Brunei Darussalam | Tomatoes and products           | 2000           | 2                                                                     |
| 26               | Brunei Darussalam | Treenuts                        | 2000           | 11                                                                    |
| 26               | Brunei Darussalam | Vegetable Oils                  | 2000           | 204                                                                   |
| 26               | Brunei Darussalam | Vegetables                      | 2000           | 61                                                                    |
| 26               | Brunei Darussalam | Vegetables, Other               | 2000           | 53                                                                    |
| 26               | Brunei Darussalam | Vegetal Products                | 2000           | 2,262                                                                 |
| 26               | Brunei Darussalam | Wheat and products              | 2000           | 464                                                                   |
| 26               | Brunei Darussalam | Alcoholic Beverages             | 2001           | 6                                                                     |
| 26               | Brunei Darussalam | Animal fats                     | 2001           | 31                                                                    |
| 26               | Brunei Darussalam | Animal Products                 | 2001           | 574                                                                   |
| 26               | Brunei Darussalam | Apples and products             | 2001           | 7                                                                     |
| 26               | Brunei Darussalam | Bananas                         | 2001           | 4                                                                     |
| 26               | Brunei Darussalam | Beans                           | 2001           | 7                                                                     |
| 26               | Brunei Darussalam | Beer                            | 2001           | 3                                                                     |
| 26               | Brunei Darussalam | Beverages, Alcoholic            | 2001           | 2                                                                     |
| 26               | Brunei Darussalam | Bovine Meat                     | 2001           | 57                                                                    |
| 26               | Brunei Darussalam | Butter, Ghee                    | 2001           | 23                                                                    |
| 26               | Brunei Darussalam | Cassava and products            | 2001           | 16                                                                    |
| 26               | Brunei Darussalam | Cephalopods                     | 2001           | 3                                                                     |
| 26               | Brunei Darussalam | Cereals - Excluding Beer        | 2001           | 1,394                                                                 |
| 26               | Brunei Darussalam | Cereals, Other                  | 2001           | 59                                                                    |
| 26               | Brunei Darussalam | Cocoa Beans and products        | 2001           | 21                                                                    |
| 26               | Brunei Darussalam | Coconuts - Incl Copra           | 2001           | 12                                                                    |
| 26               | Brunei Darussalam | Coffee and products             | 2001           | 4                                                                     |
| 26               | Brunei Darussalam | Crustaceans                     | 2001           | 12                                                                    |
| 26               | Brunei Darussalam | Demersal Fish                   | 2001           | 1                                                                     |
| 26               | Brunei Darussalam | Eggs                            | 2001           | 49                                                                    |
| 26               | Brunei Darussalam | Fats, Animals, Raw              | 2001           | 8                                                                     |
| 26               | Brunei Darussalam | Fish, Seafood                   | 2001           | 68                                                                    |
| 26               | Brunei Darussalam | Freshwater Fish                 | 2001           | 9                                                                     |
| 26               | Brunei Darussalam | Fruits - Excluding Wine         | 2001           | 85                                                                    |
| 26               | Brunei Darussalam | Fruits, Other                   | 2001           | 53                                                                    |
| 26               | Brunei Darussalam | Grand Total                     | 2001           | 2,876                                                                 |
| 26               | Brunei Darussalam | Grapes and products (excl wine) | 2001           | 3                                                                     |
| 26               | Brunei Darussalam | Groundnuts (Shelled Eq)         | 2001           | 22                                                                    |

Dietary calcium and zinc deficiency risks are decreasing but remain prevalent

| FAO Country code | Country           | Food item                       | Reference year | Net energy supply (kcal capita <sup>-1</sup> d <sup>-1</sup> ) |
|------------------|-------------------|---------------------------------|----------------|----------------------------------------------------------------|
| 26               | Brunei Darussalam | Honey                           | 2001           | 1                                                              |
| 26               | Brunei Darussalam | Maize and products              | 2001           | 180                                                            |
| 26               | Brunei Darussalam | Maize Germ Oil                  | 2001           | 17                                                             |
| 26               | Brunei Darussalam | Marine Fish, Other              | 2001           | 24                                                             |
| 26               | Brunei Darussalam | Meat                            | 2001           | 259                                                            |
| 26               | Brunei Darussalam | Milk - Excluding Butter         | 2001           | 161                                                            |
| 26               | Brunei Darussalam | Miscellaneous                   | 2001           | 32                                                             |
| 26               | Brunei Darussalam | Molluscs, Other                 | 2001           | 2                                                              |
| 26               | Brunei Darussalam | Mutton & Goat Meat              | 2001           | 5                                                              |
| 26               | Brunei Darussalam | Oats                            | 2001           | 1                                                              |
| 26               | Brunei Darussalam | Offals                          | 2001           | 5                                                              |
| 26               | Brunei Darussalam | Oilcrops                        | 2001           | 52                                                             |
| 26               | Brunei Darussalam | Oilcrops Oil, Other             | 2001           | 31                                                             |
| 26               | Brunei Darussalam | Olive Oil                       | 2001           | 1                                                              |
| 26               | Brunei Darussalam | Onions                          | 2001           | 7                                                              |
| 26               | Brunei Darussalam | Oranges, Mandarines             | 2001           | 12                                                             |
| 26               | Brunei Darussalam | Palm Oil                        | 2001           | 125                                                            |
| 26               | Brunei Darussalam | Pelagic Fish                    | 2001           | 18                                                             |
| 26               | Brunei Darussalam | Pepper                          | 2001           | 1                                                              |
| 26               | Brunei Darussalam | Pigmeat                         | 2001           | 30                                                             |
| 26               | Brunei Darussalam | Pimento                         | 2001           | 7                                                              |
| 26               | Brunei Darussalam | Pineapples and products         | 2001           | 4                                                              |
| 26               | Brunei Darussalam | Potatoes and products           | 2001           | 26                                                             |
| 26               | Brunei Darussalam | Poultry Meat                    | 2001           | 168                                                            |
| 26               | Brunei Darussalam | Pulses                          | 2001           | 17                                                             |
| 26               | Brunei Darussalam | Pulses, Other and products      | 2001           | 10                                                             |
| 26               | Brunei Darussalam | Rape and Mustardseed            | 2001           | 1                                                              |
| 26               | Brunei Darussalam | Rice (Milled Equivalent)        | 2001           | 697                                                            |
| 26               | Brunei Darussalam | Roots, Other                    | 2001           | 4                                                              |
| 26               | Brunei Darussalam | Sesame seed                     | 2001           | 1                                                              |
| 26               | Brunei Darussalam | Sesameseed Oil                  | 2001           | 2                                                              |
| 26               | Brunei Darussalam | Soyabean Oil                    | 2001           | 4                                                              |
| 26               | Brunei Darussalam | Soyabeans                       | 2001           | 16                                                             |
| 26               | Brunei Darussalam | Spices                          | 2001           | 39                                                             |
| 26               | Brunei Darussalam | Spices, Other                   | 2001           | 31                                                             |
| 26               | Brunei Darussalam | Starchy Roots                   | 2001           | 49                                                             |
| 26               | Brunei Darussalam | Stimulants                      | 2001           | 25                                                             |
| 26               | Brunei Darussalam | Sugar & Sweeteners              | 2001           | 322                                                            |
| 26               | Brunei Darussalam | Sugar (Raw Equivalent)          | 2001           | 258                                                            |
| 26               | Brunei Darussalam | Sunflowerseed Oil               | 2001           | 19                                                             |
| 26               | Brunei Darussalam | Sweet potatoes                  | 2001           | 2                                                              |
| 26               | Brunei Darussalam | Sweeteners, Other               | 2001           | 63                                                             |
| 26               | Brunei Darussalam | Tea (including mate)            | 2001           | 1                                                              |
| 26               | Brunei Darussalam | Tomatoes and products           | 2001           | 3                                                              |
| 26               | Brunei Darussalam | Treenuts                        | 2001           | 15                                                             |
| 26               | Brunei Darussalam | Vegetable Oils                  | 2001           | 199                                                            |
| 26               | Brunei Darussalam | Vegetables                      | 2001           | 64                                                             |
| 26               | Brunei Darussalam | Vegetables, Other               | 2001           | 54                                                             |
| 26               | Brunei Darussalam | Vegetal Products                | 2001           | 2,301                                                          |
| 26               | Brunei Darussalam | Wheat and products              | 2001           | 457                                                            |
| 26               | Brunei Darussalam | Alcoholic Beverages             | 2002           | 2                                                              |
| 26               | Brunei Darussalam | Animal fats                     | 2002           | 41                                                             |
| 26               | Brunei Darussalam | Animal Products                 | 2002           | 613                                                            |
| 26               | Brunei Darussalam | Apples and products             | 2002           | 7                                                              |
| 26               | Brunei Darussalam | Bananas                         | 2002           | 6                                                              |
| 26               | Brunei Darussalam | Barley and products             | 2002           | 3                                                              |
| 26               | Brunei Darussalam | Beans                           | 2002           | 9                                                              |
| 26               | Brunei Darussalam | Beer                            | 2002           | 2                                                              |
| 26               | Brunei Darussalam | Bovine Meat                     | 2002           | 61                                                             |
| 26               | Brunei Darussalam | Butter, Ghee                    | 2002           | 28                                                             |
| 26               | Brunei Darussalam | Cassava and products            | 2002           | 14                                                             |
| 26               | Brunei Darussalam | Cephalopods                     | 2002           | 2                                                              |
| 26               | Brunei Darussalam | Cereals - Excluding Beer        | 2002           | 1,374                                                          |
| 26               | Brunei Darussalam | Cereals, Other                  | 2002           | 63                                                             |
| 26               | Brunei Darussalam | Citrus, Other                   | 2002           | 1                                                              |
| 26               | Brunei Darussalam | Cocoa Beans and products        | 2002           | 27                                                             |
| 26               | Brunei Darussalam | Coconuts - Incl Copra           | 2002           | 26                                                             |
| 26               | Brunei Darussalam | Coffee and products             | 2002           | 5                                                              |
| 26               | Brunei Darussalam | Cream                           | 2002           | 4                                                              |
| 26               | Brunei Darussalam | Crustaceans                     | 2002           | 8                                                              |
| 26               | Brunei Darussalam | Dates                           | 2002           | 1                                                              |
| 26               | Brunei Darussalam | Demersal Fish                   | 2002           | 1                                                              |
| 26               | Brunei Darussalam | Eggs                            | 2002           | 84                                                             |
| 26               | Brunei Darussalam | Fats, Animals, Raw              | 2002           | 9                                                              |
| 26               | Brunei Darussalam | Fish, Seafood                   | 2002           | 60                                                             |
| 26               | Brunei Darussalam | Freshwater Fish                 | 2002           | 9                                                              |
| 26               | Brunei Darussalam | Fruits - Excluding Wine         | 2002           | 89                                                             |
| 26               | Brunei Darussalam | Fruits, Other                   | 2002           | 52                                                             |
| 26               | Brunei Darussalam | Grand Total                     | 2002           | 2,928                                                          |
| 26               | Brunei Darussalam | Grapes and products (excl wine) | 2002           | 4                                                              |
| 26               | Brunei Darussalam | Groundnuts (Shelled Eq)         | 2002           | 26                                                             |
| 26               | Brunei Darussalam | Honey                           | 2002           | 1                                                              |
| 26               | Brunei Darussalam | Lemons, Limes and products      | 2002           | 1                                                              |
| 26               | Brunei Darussalam | Maize and products              | 2002           | 131                                                            |
| 26               | Brunei Darussalam | Maize Germ Oil                  | 2002           | 19                                                             |
| 26               | Brunei Darussalam | Marine Fish, Other              | 2002           | 25                                                             |
| 26               | Brunei Darussalam | Meat                            | 2002           | 295                                                            |
| 26               | Brunei Darussalam | Milk - Excluding Butter         | 2002           | 125                                                            |
| 26               | Brunei Darussalam | Miscellaneous                   | 2002           | 44                                                             |
| 26               | Brunei Darussalam | Molluscs, Other                 | 2002           | 3                                                              |
| 26               | Brunei Darussalam | Mutton & Goat Meat              | 2002           | 4                                                              |
| 26               | Brunei Darussalam | Oats                            | 2002           | 1                                                              |
| 26               | Brunei Darussalam | Offals                          | 2002           | 8                                                              |
| 26               | Brunei Darussalam | Oilcrops                        | 2002           | 78                                                             |
| 26               | Brunei Darussalam | Oilcrops Oil, Other             | 2002           | 32                                                             |
| 26               | Brunei Darussalam | Olive Oil                       | 2002           | 6                                                              |
| 26               | Brunei Darussalam | Onions                          | 2002           | 9                                                              |

Dietary calcium and zinc deficiency risks are decreasing but remain prevalent

| FAO Country code | Country           | Food item                       | Reference year | Net energy supply (kcal <i>capita</i> <sup>-1</sup> d <sup>-1</sup> ) |
|------------------|-------------------|---------------------------------|----------------|-----------------------------------------------------------------------|
| 26               | Brunei Darussalam | Oranges, Mandarines             | 2002           | 12                                                                    |
| 26               | Brunei Darussalam | Palm Oil                        | 2002           | 126                                                                   |
| 26               | Brunei Darussalam | Pelagic Fish                    | 2002           | 11                                                                    |
| 26               | Brunei Darussalam | Pepper                          | 2002           | 1                                                                     |
| 26               | Brunei Darussalam | Pigmeat                         | 2002           | 32                                                                    |
| 26               | Brunei Darussalam | Pimento                         | 2002           | 11                                                                    |
| 26               | Brunei Darussalam | Pineapples and products         | 2002           | 6                                                                     |
| 26               | Brunei Darussalam | Potatoes and products           | 2002           | 18                                                                    |
| 26               | Brunei Darussalam | Poultry Meat                    | 2002           | 197                                                                   |
| 26               | Brunei Darussalam | Pulses                          | 2002           | 22                                                                    |
| 26               | Brunei Darussalam | Pulses, Other and products      | 2002           | 13                                                                    |
| 26               | Brunei Darussalam | Rape and Mustardseed            | 2002           | 4                                                                     |
| 26               | Brunei Darussalam | Rice (Milled Equivalent)        | 2002           | 713                                                                   |
| 26               | Brunei Darussalam | Roots, Other                    | 2002           | 4                                                                     |
| 26               | Brunei Darussalam | Sesame seed                     | 2002           | 1                                                                     |
| 26               | Brunei Darussalam | Sesameseed Oil                  | 2002           | 4                                                                     |
| 26               | Brunei Darussalam | Soyabean Oil                    | 2002           | 1                                                                     |
| 26               | Brunei Darussalam | Soyabeans                       | 2002           | 20                                                                    |
| 26               | Brunei Darussalam | Spices                          | 2002           | 54                                                                    |
| 26               | Brunei Darussalam | Spices, Other                   | 2002           | 41                                                                    |
| 26               | Brunei Darussalam | Starchy Roots                   | 2002           | 39                                                                    |
| 26               | Brunei Darussalam | Stimulants                      | 2002           | 33                                                                    |
| 26               | Brunei Darussalam | Sugar & Sweeteners              | 2002           | 282                                                                   |
| 26               | Brunei Darussalam | Sugar (Raw Equivalent)          | 2002           | 258                                                                   |
| 26               | Brunei Darussalam | Sunflower seed                  | 2002           | 2                                                                     |
| 26               | Brunei Darussalam | Sunflowerseed Oil               | 2002           | 25                                                                    |
| 26               | Brunei Darussalam | Sweet potatoes                  | 2002           | 3                                                                     |
| 26               | Brunei Darussalam | Sweeteners, Other               | 2002           | 23                                                                    |
| 26               | Brunei Darussalam | Tea (including mate)            | 2002           | 1                                                                     |
| 26               | Brunei Darussalam | Tomatoes and products           | 2002           | 1                                                                     |
| 26               | Brunei Darussalam | Treenuts                        | 2002           | 12                                                                    |
| 26               | Brunei Darussalam | Vegetable Oils                  | 2002           | 213                                                                   |
| 26               | Brunei Darussalam | Vegetables                      | 2002           | 72                                                                    |
| 26               | Brunei Darussalam | Vegetables, Other               | 2002           | 62                                                                    |
| 26               | Brunei Darussalam | Vegetal Products                | 2002           | 2,315                                                                 |
| 26               | Brunei Darussalam | Wheat and products              | 2002           | 462                                                                   |
| 26               | Brunei Darussalam | Alcoholic Beverages             | 2003           | 2                                                                     |
| 26               | Brunei Darussalam | Animal fats                     | 2003           | 42                                                                    |
| 26               | Brunei Darussalam | Animal Products                 | 2003           | 614                                                                   |
| 26               | Brunei Darussalam | Apples and products             | 2003           | 10                                                                    |
| 26               | Brunei Darussalam | Bananas                         | 2003           | 7                                                                     |
| 26               | Brunei Darussalam | Barley and products             | 2003           | 3                                                                     |
| 26               | Brunei Darussalam | Beans                           | 2003           | 9                                                                     |
| 26               | Brunei Darussalam | Beer                            | 2003           | 1                                                                     |
| 26               | Brunei Darussalam | Bovine Meat                     | 2003           | 60                                                                    |
| 26               | Brunei Darussalam | Butter, Ghee                    | 2003           | 28                                                                    |
| 26               | Brunei Darussalam | Cassava and products            | 2003           | 17                                                                    |
| 26               | Brunei Darussalam | Cephalopods                     | 2003           | 2                                                                     |
| 26               | Brunei Darussalam | Cereals - Excluding Beer        | 2003           | 1,322                                                                 |
| 26               | Brunei Darussalam | Cereals, Other                  | 2003           | 59                                                                    |
| 26               | Brunei Darussalam | Citrus, Other                   | 2003           | 1                                                                     |
| 26               | Brunei Darussalam | Cocoa Beans and products        | 2003           | 28                                                                    |
| 26               | Brunei Darussalam | Coconuts - Incl Copra           | 2003           | 29                                                                    |
| 26               | Brunei Darussalam | Coffee and products             | 2003           | 5                                                                     |
| 26               | Brunei Darussalam | Cream                           | 2003           | 4                                                                     |
| 26               | Brunei Darussalam | Crustaceans                     | 2003           | 6                                                                     |
| 26               | Brunei Darussalam | Dates                           | 2003           | 2                                                                     |
| 26               | Brunei Darussalam | Demersal Fish                   | 2003           | 1                                                                     |
| 26               | Brunei Darussalam | Eggs                            | 2003           | 64                                                                    |
| 26               | Brunei Darussalam | Fats, Animals, Raw              | 2003           | 10                                                                    |
| 26               | Brunei Darussalam | Fish, Seafood                   | 2003           | 60                                                                    |
| 26               | Brunei Darussalam | Freshwater Fish                 | 2003           | 7                                                                     |
| 26               | Brunei Darussalam | Fruits - Excluding Wine         | 2003           | 92                                                                    |
| 26               | Brunei Darussalam | Fruits, Other                   | 2003           | 51                                                                    |
| 26               | Brunei Darussalam | Grand Total                     | 2003           | 2,992                                                                 |
| 26               | Brunei Darussalam | Grapes and products (excl wine) | 2003           | 3                                                                     |
| 26               | Brunei Darussalam | Groundnuts (Shelled Eq)         | 2003           | 21                                                                    |
| 26               | Brunei Darussalam | Honey                           | 2003           | 2                                                                     |
| 26               | Brunei Darussalam | Lemons, Limes and products      | 2003           | 1                                                                     |
| 26               | Brunei Darussalam | Maize and products              | 2003           | 114                                                                   |
| 26               | Brunei Darussalam | Maize Germ Oil                  | 2003           | 24                                                                    |
| 26               | Brunei Darussalam | Marine Fish, Other              | 2003           | 33                                                                    |
| 26               | Brunei Darussalam | Meat                            | 2003           | 300                                                                   |
| 26               | Brunei Darussalam | Milk - Excluding Butter         | 2003           | 141                                                                   |
| 26               | Brunei Darussalam | Miscellaneous                   | 2003           | 38                                                                    |
| 26               | Brunei Darussalam | Molluscs, Other                 | 2003           | 2                                                                     |
| 26               | Brunei Darussalam | Mutton & Goat Meat              | 2003           | 5                                                                     |
| 26               | Brunei Darussalam | Oats                            | 2003           | 2                                                                     |
| 26               | Brunei Darussalam | Offals                          | 2003           | 6                                                                     |
| 26               | Brunei Darussalam | Oilcrops                        | 2003           | 79                                                                    |
| 26               | Brunei Darussalam | Oilcrops Oil, Other             | 2003           | 31                                                                    |
| 26               | Brunei Darussalam | Olive Oil                       | 2003           | 8                                                                     |
| 26               | Brunei Darussalam | Onions                          | 2003           | 11                                                                    |
| 26               | Brunei Darussalam | Oranges, Mandarines             | 2003           | 12                                                                    |
| 26               | Brunei Darussalam | Palm Oil                        | 2003           | 130                                                                   |
| 26               | Brunei Darussalam | Pelagic Fish                    | 2003           | 9                                                                     |
| 26               | Brunei Darussalam | Pepper                          | 2003           | 1                                                                     |
| 26               | Brunei Darussalam | Pigmeat                         | 2003           | 30                                                                    |
| 26               | Brunei Darussalam | Pimento                         | 2003           | 9                                                                     |
| 26               | Brunei Darussalam | Pineapples and products         | 2003           | 5                                                                     |
| 26               | Brunei Darussalam | Potatoes and products           | 2003           | 22                                                                    |
| 26               | Brunei Darussalam | Poultry Meat                    | 2003           | 204                                                                   |
| 26               | Brunei Darussalam | Pulses                          | 2003           | 24                                                                    |
| 26               | Brunei Darussalam | Pulses, Other and products      | 2003           | 15                                                                    |
| 26               | Brunei Darussalam | Rape and Mustardseed            | 2003           | 11                                                                    |
| 26               | Brunei Darussalam | Rice (Milled Equivalent)        | 2003           | 726                                                                   |
| 26               | Brunei Darussalam | Roots, Other                    | 2003           | 7                                                                     |

Dietary calcium and zinc deficiency risks are decreasing but remain prevalent

| FAO Country code | Country           | Food item                       | Reference year | Net energy supply (kcal capita <sup>-1</sup> d <sup>-1</sup> ) |
|------------------|-------------------|---------------------------------|----------------|----------------------------------------------------------------|
| 26               | Brunei Darussalam | Sesame seed                     | 2003           | 3                                                              |
| 26               | Brunei Darussalam | Sesameseed Oil                  | 2003           | 2                                                              |
| 26               | Brunei Darussalam | Soyabean Oil                    | 2003           | 1                                                              |
| 26               | Brunei Darussalam | Soyabeans                       | 2003           | 15                                                             |
| 26               | Brunei Darussalam | Spices                          | 2003           | 50                                                             |
| 26               | Brunei Darussalam | Spices, Other                   | 2003           | 39                                                             |
| 26               | Brunei Darussalam | Starchy Roots                   | 2003           | 49                                                             |
| 26               | Brunei Darussalam | Stimulants                      | 2003           | 35                                                             |
| 26               | Brunei Darussalam | Sugar & Sweeteners              | 2003           | 361                                                            |
| 26               | Brunei Darussalam | Sugar (Raw Equivalent)          | 2003           | 327                                                            |
| 26               | Brunei Darussalam | Sunflowerseed Oil               | 2003           | 28                                                             |
| 26               | Brunei Darussalam | Sweet potatoes                  | 2003           | 3                                                              |
| 26               | Brunei Darussalam | Sweeteners, Other               | 2003           | 32                                                             |
| 26               | Brunei Darussalam | Tea (including mate)            | 2003           | 1                                                              |
| 26               | Brunei Darussalam | Tomatoes and products           | 2003           | 1                                                              |
| 26               | Brunei Darussalam | Treenuts                        | 2003           | 25                                                             |
| 26               | Brunei Darussalam | Vegetable Oils                  | 2003           | 224                                                            |
| 26               | Brunei Darussalam | Vegetables                      | 2003           | 78                                                             |
| 26               | Brunei Darussalam | Vegetables, Other               | 2003           | 66                                                             |
| 26               | Brunei Darussalam | Vegetal Products                | 2003           | 2,378                                                          |
| 26               | Brunei Darussalam | Wheat and products              | 2003           | 418                                                            |
| 26               | Brunei Darussalam | Alcoholic Beverages             | 2004           | 2                                                              |
| 26               | Brunei Darussalam | Animal fats                     | 2004           | 37                                                             |
| 26               | Brunei Darussalam | Animal Products                 | 2004           | 629                                                            |
| 26               | Brunei Darussalam | Apples and products             | 2004           | 6                                                              |
| 26               | Brunei Darussalam | Bananas                         | 2004           | 4                                                              |
| 26               | Brunei Darussalam | Barley and products             | 2004           | 6                                                              |
| 26               | Brunei Darussalam | Beans                           | 2004           | 11                                                             |
| 26               | Brunei Darussalam | Beer                            | 2004           | 1                                                              |
| 26               | Brunei Darussalam | Bovine Meat                     | 2004           | 48                                                             |
| 26               | Brunei Darussalam | Butter, Ghee                    | 2004           | 29                                                             |
| 26               | Brunei Darussalam | Cassava and products            | 2004           | 19                                                             |
| 26               | Brunei Darussalam | Cephalopods                     | 2004           | 1                                                              |
| 26               | Brunei Darussalam | Cereals - Excluding Beer        | 2004           | 1,340                                                          |
| 26               | Brunei Darussalam | Cereals, Other                  | 2004           | 60                                                             |
| 26               | Brunei Darussalam | Cocoa Beans and products        | 2004           | 30                                                             |
| 26               | Brunei Darussalam | Coconuts - Incl Copra           | 2004           | 30                                                             |
| 26               | Brunei Darussalam | Coffee and products             | 2004           | 4                                                              |
| 26               | Brunei Darussalam | Cream                           | 2004           | 2                                                              |
| 26               | Brunei Darussalam | Crustaceans                     | 2004           | 5                                                              |
| 26               | Brunei Darussalam | Dates                           | 2004           | 2                                                              |
| 26               | Brunei Darussalam | Demersal Fish                   | 2004           | 1                                                              |
| 26               | Brunei Darussalam | Eggs                            | 2004           | 67                                                             |
| 26               | Brunei Darussalam | Fats, Animals, Raw              | 2004           | 7                                                              |
| 26               | Brunei Darussalam | Fish, Seafood                   | 2004           | 58                                                             |
| 26               | Brunei Darussalam | Freshwater Fish                 | 2004           | 5                                                              |
| 26               | Brunei Darussalam | Fruits - Excluding Wine         | 2004           | 88                                                             |
| 26               | Brunei Darussalam | Fruits, Other                   | 2004           | 56                                                             |
| 26               | Brunei Darussalam | Grand Total                     | 2004           | 3,009                                                          |
| 26               | Brunei Darussalam | Grapes and products (excl wine) | 2004           | 3                                                              |
| 26               | Brunei Darussalam | Groundnut Oil                   | 2004           | 1                                                              |
| 26               | Brunei Darussalam | Groundnuts (Shelled Eq)         | 2004           | 21                                                             |
| 26               | Brunei Darussalam | Honey                           | 2004           | 1                                                              |
| 26               | Brunei Darussalam | Maize and products              | 2004           | 101                                                            |
| 26               | Brunei Darussalam | Maize Germ Oil                  | 2004           | 27                                                             |
| 26               | Brunei Darussalam | Marine Fish, Other              | 2004           | 31                                                             |
| 26               | Brunei Darussalam | Meat                            | 2004           | 274                                                            |
| 26               | Brunei Darussalam | Meat, Other                     | 2004           | 1                                                              |
| 26               | Brunei Darussalam | Milk - Excluding Butter         | 2004           | 188                                                            |
| 26               | Brunei Darussalam | Millet and products             | 2004           | 1                                                              |
| 26               | Brunei Darussalam | Miscellaneous                   | 2004           | 29                                                             |
| 26               | Brunei Darussalam | Molluscs, Other                 | 2004           | 2                                                              |
| 26               | Brunei Darussalam | Mutton & Goat Meat              | 2004           | 10                                                             |
| 26               | Brunei Darussalam | Oats                            | 2004           | 5                                                              |
| 26               | Brunei Darussalam | Offals                          | 2004           | 5                                                              |
| 26               | Brunei Darussalam | Oilcrops                        | 2004           | 67                                                             |
| 26               | Brunei Darussalam | Oilcrops Oil, Other             | 2004           | 33                                                             |
| 26               | Brunei Darussalam | Olive Oil                       | 2004           | 5                                                              |
| 26               | Brunei Darussalam | Onions                          | 2004           | 9                                                              |
| 26               | Brunei Darussalam | Oranges, Mandarines             | 2004           | 10                                                             |
| 26               | Brunei Darussalam | Palm Oil                        | 2004           | 134                                                            |
| 26               | Brunei Darussalam | Pelagic Fish                    | 2004           | 13                                                             |
| 26               | Brunei Darussalam | Pepper                          | 2004           | 1                                                              |
| 26               | Brunei Darussalam | Pigmeat                         | 2004           | 35                                                             |
| 26               | Brunei Darussalam | Pimento                         | 2004           | 5                                                              |
| 26               | Brunei Darussalam | Pineapples and products         | 2004           | 6                                                              |
| 26               | Brunei Darussalam | Potatoes and products           | 2004           | 20                                                             |
| 26               | Brunei Darussalam | Poultry Meat                    | 2004           | 181                                                            |
| 26               | Brunei Darussalam | Pulses                          | 2004           | 24                                                             |
| 26               | Brunei Darussalam | Pulses, Other and products      | 2004           | 13                                                             |
| 26               | Brunei Darussalam | Rape and Mustardseed            | 2004           | 6                                                              |
| 26               | Brunei Darussalam | Rice (Milled Equivalent)        | 2004           | 729                                                            |
| 26               | Brunei Darussalam | Roots, Other                    | 2004           | 4                                                              |
| 26               | Brunei Darussalam | Sesame seed                     | 2004           | 1                                                              |
| 26               | Brunei Darussalam | Sesameseed Oil                  | 2004           | 3                                                              |
| 26               | Brunei Darussalam | Soyabean Oil                    | 2004           | 3                                                              |
| 26               | Brunei Darussalam | Soyabeans                       | 2004           | 9                                                              |
| 26               | Brunei Darussalam | Spices                          | 2004           | 44                                                             |
| 26               | Brunei Darussalam | Spices, Other                   | 2004           | 38                                                             |
| 26               | Brunei Darussalam | Starchy Roots                   | 2004           | 44                                                             |
| 26               | Brunei Darussalam | Stimulants                      | 2004           | 35                                                             |
| 26               | Brunei Darussalam | Sugar & Sweeteners              | 2004           | 381                                                            |
| 26               | Brunei Darussalam | Sugar (Raw Equivalent)          | 2004           | 319                                                            |
| 26               | Brunei Darussalam | Sunflower seed                  | 2004           | 1                                                              |
| 26               | Brunei Darussalam | Sunflowerseed Oil               | 2004           | 29                                                             |
| 26               | Brunei Darussalam | Sweet potatoes                  | 2004           | 2                                                              |
| 26               | Brunei Darussalam | Sweeteners, Other               | 2004           | 61                                                             |

Dietary calcium and zinc deficiency risks are decreasing but remain prevalent

| FAO Country code | Country           | Food item                       | Reference year | Net energy supply (kcal capita <sup>-1</sup> d <sup>-1</sup> ) |
|------------------|-------------------|---------------------------------|----------------|----------------------------------------------------------------|
| 26               | Brunei Darussalam | Tea (including mate)            | 2004           | 1                                                              |
| 26               | Brunei Darussalam | Tomatoes and products           | 2004           | 2                                                              |
| 26               | Brunei Darussalam | Treenuts                        | 2004           | 22                                                             |
| 26               | Brunei Darussalam | Vegetable Oils                  | 2004           | 235                                                            |
| 26               | Brunei Darussalam | Vegetables                      | 2004           | 68                                                             |
| 26               | Brunei Darussalam | Vegetables, Other               | 2004           | 57                                                             |
| 26               | Brunei Darussalam | Vegetal Products                | 2004           | 2,380                                                          |
| 26               | Brunei Darussalam | Wheat and products              | 2004           | 439                                                            |
| 26               | Brunei Darussalam | Alcoholic Beverages             | 2005           | 2                                                              |
| 26               | Brunei Darussalam | Animal fats                     | 2005           | 39                                                             |
| 26               | Brunei Darussalam | Animal Products                 | 2005           | 590                                                            |
| 26               | Brunei Darussalam | Apples and products             | 2005           | 6                                                              |
| 26               | Brunei Darussalam | Bananas                         | 2005           | 5                                                              |
| 26               | Brunei Darussalam | Barley and products             | 2005           | 13                                                             |
| 26               | Brunei Darussalam | Beans                           | 2005           | 11                                                             |
| 26               | Brunei Darussalam | Beer                            | 2005           | 1                                                              |
| 26               | Brunei Darussalam | Beverages, Alcoholic            | 2005           | 1                                                              |
| 26               | Brunei Darussalam | Bovine Meat                     | 2005           | 41                                                             |
| 26               | Brunei Darussalam | Butter, Ghee                    | 2005           | 32                                                             |
| 26               | Brunei Darussalam | Cassava and products            | 2005           | 17                                                             |
| 26               | Brunei Darussalam | Cephalopods                     | 2005           | 1                                                              |
| 26               | Brunei Darussalam | Cereals - Excluding Beer        | 2005           | 1,348                                                          |
| 26               | Brunei Darussalam | Cereals, Other                  | 2005           | 57                                                             |
| 26               | Brunei Darussalam | Cocoa Beans and products        | 2005           | 30                                                             |
| 26               | Brunei Darussalam | Coconuts - Incl Copra           | 2005           | 23                                                             |
| 26               | Brunei Darussalam | Coffee and products             | 2005           | 4                                                              |
| 26               | Brunei Darussalam | Cream                           | 2005           | 1                                                              |
| 26               | Brunei Darussalam | Crustaceans                     | 2005           | 5                                                              |
| 26               | Brunei Darussalam | Dates                           | 2005           | 2                                                              |
| 26               | Brunei Darussalam | Eggs                            | 2005           | 64                                                             |
| 26               | Brunei Darussalam | Fats, Animals, Raw              | 2005           | 5                                                              |
| 26               | Brunei Darussalam | Fish, Seafood                   | 2005           | 58                                                             |
| 26               | Brunei Darussalam | Freshwater Fish                 | 2005           | 3                                                              |
| 26               | Brunei Darussalam | Fruits - Excluding Wine         | 2005           | 90                                                             |
| 26               | Brunei Darussalam | Fruits, Other                   | 2005           | 56                                                             |
| 26               | Brunei Darussalam | Grand Total                     | 2005           | 2,985                                                          |
| 26               | Brunei Darussalam | Grapes and products (excl wine) | 2005           | 3                                                              |
| 26               | Brunei Darussalam | Groundnut Oil                   | 2005           | 1                                                              |
| 26               | Brunei Darussalam | Groundnuts (Shelled Eq)         | 2005           | 22                                                             |
| 26               | Brunei Darussalam | Honey                           | 2005           | 1                                                              |
| 26               | Brunei Darussalam | Lemons, Limes and products      | 2005           | 1                                                              |
| 26               | Brunei Darussalam | Maize and products              | 2005           | 106                                                            |
| 26               | Brunei Darussalam | Maize Germ Oil                  | 2005           | 25                                                             |
| 26               | Brunei Darussalam | Marine Fish, Other              | 2005           | 35                                                             |
| 26               | Brunei Darussalam | Meat                            | 2005           | 248                                                            |
| 26               | Brunei Darussalam | Milk - Excluding Butter         | 2005           | 179                                                            |
| 26               | Brunei Darussalam | Miscellaneous                   | 2005           | 32                                                             |
| 26               | Brunei Darussalam | Molluscs, Other                 | 2005           | 2                                                              |
| 26               | Brunei Darussalam | Mutton & Goat Meat              | 2005           | 8                                                              |
| 26               | Brunei Darussalam | Oats                            | 2005           | 5                                                              |
| 26               | Brunei Darussalam | Offals                          | 2005           | 4                                                              |
| 26               | Brunei Darussalam | Oilcrops                        | 2005           | 60                                                             |
| 26               | Brunei Darussalam | Oilcrops Oil, Other             | 2005           | 44                                                             |
| 26               | Brunei Darussalam | Olive Oil                       | 2005           | 2                                                              |
| 26               | Brunei Darussalam | Onions                          | 2005           | 8                                                              |
| 26               | Brunei Darussalam | Oranges, Mandarines             | 2005           | 13                                                             |
| 26               | Brunei Darussalam | Palm Oil                        | 2005           | 125                                                            |
| 26               | Brunei Darussalam | Pelagic Fish                    | 2005           | 12                                                             |
| 26               | Brunei Darussalam | Pepper                          | 2005           | 1                                                              |
| 26               | Brunei Darussalam | Pigmeat                         | 2005           | 40                                                             |
| 26               | Brunei Darussalam | Pimento                         | 2005           | 3                                                              |
| 26               | Brunei Darussalam | Pineapples and products         | 2005           | 5                                                              |
| 26               | Brunei Darussalam | Potatoes and products           | 2005           | 20                                                             |
| 26               | Brunei Darussalam | Poultry Meat                    | 2005           | 158                                                            |
| 26               | Brunei Darussalam | Pulses                          | 2005           | 21                                                             |
| 26               | Brunei Darussalam | Pulses, Other and products      | 2005           | 10                                                             |
| 26               | Brunei Darussalam | Rape and Mustardseed            | 2005           | 3                                                              |
| 26               | Brunei Darussalam | Rice (Milled Equivalent)        | 2005           | 743                                                            |
| 26               | Brunei Darussalam | Roots, Other                    | 2005           | 7                                                              |
| 26               | Brunei Darussalam | Sesame seed                     | 2005           | 1                                                              |
| 26               | Brunei Darussalam | Sesameseed Oil                  | 2005           | 12                                                             |
| 26               | Brunei Darussalam | Soyabean Oil                    | 2005           | 2                                                              |
| 26               | Brunei Darussalam | Soyabeans                       | 2005           | 10                                                             |
| 26               | Brunei Darussalam | Spices                          | 2005           | 46                                                             |
| 26               | Brunei Darussalam | Spices, Other                   | 2005           | 42                                                             |
| 26               | Brunei Darussalam | Starchy Roots                   | 2005           | 47                                                             |
| 26               | Brunei Darussalam | Stimulants                      | 2005           | 35                                                             |
| 26               | Brunei Darussalam | Sugar & Sweeteners              | 2005           | 374                                                            |
| 26               | Brunei Darussalam | Sugar (Raw Equivalent)          | 2005           | 305                                                            |
| 26               | Brunei Darussalam | Sunflower seed                  | 2005           | 1                                                              |
| 26               | Brunei Darussalam | Sunflowerseed Oil               | 2005           | 32                                                             |
| 26               | Brunei Darussalam | Sweet potatoes                  | 2005           | 2                                                              |
| 26               | Brunei Darussalam | Sweeteners, Other               | 2005           | 69                                                             |
| 26               | Brunei Darussalam | Tea (including mate)            | 2005           | 1                                                              |
| 26               | Brunei Darussalam | Tomatoes and products           | 2005           | 2                                                              |
| 26               | Brunei Darussalam | Treenuts                        | 2005           | 20                                                             |
| 26               | Brunei Darussalam | Vegetable Oils                  | 2005           | 245                                                            |
| 26               | Brunei Darussalam | Vegetables                      | 2005           | 73                                                             |
| 26               | Brunei Darussalam | Vegetables, Other               | 2005           | 63                                                             |
| 26               | Brunei Darussalam | Vegetal Products                | 2005           | 2,395                                                          |
| 26               | Brunei Darussalam | Wheat and products              | 2005           | 424                                                            |
| 26               | Brunei Darussalam | Alcoholic Beverages             | 2006           | 10                                                             |
| 26               | Brunei Darussalam | Animal fats                     | 2006           | 31                                                             |
| 26               | Brunei Darussalam | Animal Products                 | 2006           | 578                                                            |
| 26               | Brunei Darussalam | Apples and products             | 2006           | 7                                                              |
| 26               | Brunei Darussalam | Bananas                         | 2006           | 9                                                              |
| 26               | Brunei Darussalam | Barley and products             | 2006           | 5                                                              |

Dietary calcium and zinc deficiency risks are decreasing but remain prevalent

| FAO Country code | Country           | Food item                       | Reference year | Net energy supply (kcal capita <sup>-1</sup> d <sup>-1</sup> ) |
|------------------|-------------------|---------------------------------|----------------|----------------------------------------------------------------|
| 26               | Brunei Darussalam | Beans                           | 2006           | 4                                                              |
| 26               | Brunei Darussalam | Beer                            | 2006           | 8                                                              |
| 26               | Brunei Darussalam | Beverages, Alcoholic            | 2006           | 1                                                              |
| 26               | Brunei Darussalam | Bovine Meat                     | 2006           | 44                                                             |
| 26               | Brunei Darussalam | Butter, Ghee                    | 2006           | 25                                                             |
| 26               | Brunei Darussalam | Cassava and products            | 2006           | 19                                                             |
| 26               | Brunei Darussalam | Cephalopods                     | 2006           | 2                                                              |
| 26               | Brunei Darussalam | Cereals - Excluding Beer        | 2006           | 1,397                                                          |
| 26               | Brunei Darussalam | Cereals, Other                  | 2006           | 57                                                             |
| 26               | Brunei Darussalam | Cocoa Beans and products        | 2006           | 28                                                             |
| 26               | Brunei Darussalam | Coconuts - Incl Copra           | 2006           | 31                                                             |
| 26               | Brunei Darussalam | Coffee and products             | 2006           | 6                                                              |
| 26               | Brunei Darussalam | Cream                           | 2006           | 2                                                              |
| 26               | Brunei Darussalam | Crustaceans                     | 2006           | 7                                                              |
| 26               | Brunei Darussalam | Dates                           | 2006           | 1                                                              |
| 26               | Brunei Darussalam | Demersal Fish                   | 2006           | 1                                                              |
| 26               | Brunei Darussalam | Eggs                            | 2006           | 62                                                             |
| 26               | Brunei Darussalam | Fats, Animals, Raw              | 2006           | 3                                                              |
| 26               | Brunei Darussalam | Fish, Seafood                   | 2006           | 63                                                             |
| 26               | Brunei Darussalam | Freshwater Fish                 | 2006           | 2                                                              |
| 26               | Brunei Darussalam | Fruits - Excluding Wine         | 2006           | 83                                                             |
| 26               | Brunei Darussalam | Fruits, Other                   | 2006           | 49                                                             |
| 26               | Brunei Darussalam | Grand Total                     | 2006           | 2,982                                                          |
| 26               | Brunei Darussalam | Grapes and products (excl wine) | 2006           | 2                                                              |
| 26               | Brunei Darussalam | Groundnut Oil                   | 2006           | 1                                                              |
| 26               | Brunei Darussalam | Groundnuts (Shelled Eq)         | 2006           | 27                                                             |
| 26               | Brunei Darussalam | Honey                           | 2006           | 1                                                              |
| 26               | Brunei Darussalam | Lemons, Limes and products      | 2006           | 1                                                              |
| 26               | Brunei Darussalam | Maize and products              | 2006           | 104                                                            |
| 26               | Brunei Darussalam | Maize Germ Oil                  | 2006           | 19                                                             |
| 26               | Brunei Darussalam | Marine Fish, Other              | 2006           | 28                                                             |
| 26               | Brunei Darussalam | Meat                            | 2006           | 256                                                            |
| 26               | Brunei Darussalam | Milk - Excluding Butter         | 2006           | 163                                                            |
| 26               | Brunei Darussalam | Miscellaneous                   | 2006           | 35                                                             |
| 26               | Brunei Darussalam | Molluscs, Other                 | 2006           | 1                                                              |
| 26               | Brunei Darussalam | Mutton & Goat Meat              | 2006           | 7                                                              |
| 26               | Brunei Darussalam | Oats                            | 2006           | 3                                                              |
| 26               | Brunei Darussalam | Offals                          | 2006           | 3                                                              |
| 26               | Brunei Darussalam | Oilcrops                        | 2006           | 69                                                             |
| 26               | Brunei Darussalam | Oilcrops Oil, Other             | 2006           | 38                                                             |
| 26               | Brunei Darussalam | Olive Oil                       | 2006           | 1                                                              |
| 26               | Brunei Darussalam | Onions                          | 2006           | 10                                                             |
| 26               | Brunei Darussalam | Oranges, Mandarines             | 2006           | 9                                                              |
| 26               | Brunei Darussalam | Palm Oil                        | 2006           | 136                                                            |
| 26               | Brunei Darussalam | Pelagic Fish                    | 2006           | 21                                                             |
| 26               | Brunei Darussalam | Pepper                          | 2006           | 1                                                              |
| 26               | Brunei Darussalam | Pigmeat                         | 2006           | 30                                                             |
| 26               | Brunei Darussalam | Pimento                         | 2006           | 2                                                              |
| 26               | Brunei Darussalam | Pineapples and products         | 2006           | 5                                                              |
| 26               | Brunei Darussalam | Potatoes and products           | 2006           | 16                                                             |
| 26               | Brunei Darussalam | Poultry Meat                    | 2006           | 176                                                            |
| 26               | Brunei Darussalam | Pulses                          | 2006           | 10                                                             |
| 26               | Brunei Darussalam | Pulses, Other and products      | 2006           | 6                                                              |
| 26               | Brunei Darussalam | Rice (Milled Equivalent)        | 2006           | 785                                                            |
| 26               | Brunei Darussalam | Roots, Other                    | 2006           | 3                                                              |
| 26               | Brunei Darussalam | Sesame seed                     | 2006           | 2                                                              |
| 26               | Brunei Darussalam | Sesameseed Oil                  | 2006           | 3                                                              |
| 26               | Brunei Darussalam | Soyabean Oil                    | 2006           | 1                                                              |
| 26               | Brunei Darussalam | Soybeans                        | 2006           | 9                                                              |
| 26               | Brunei Darussalam | Spices                          | 2006           | 32                                                             |
| 26               | Brunei Darussalam | Spices, Other                   | 2006           | 29                                                             |
| 26               | Brunei Darussalam | Starchy Roots                   | 2006           | 41                                                             |
| 26               | Brunei Darussalam | Stimulants                      | 2006           | 35                                                             |
| 26               | Brunei Darussalam | Sugar & Sweeteners              | 2006           | 391                                                            |
| 26               | Brunei Darussalam | Sugar (Raw Equivalent)          | 2006           | 323                                                            |
| 26               | Brunei Darussalam | Sunflowerseed Oil               | 2006           | 33                                                             |
| 26               | Brunei Darussalam | Sweet potatoes                  | 2006           | 2                                                              |
| 26               | Brunei Darussalam | Sweeteners, Other               | 2006           | 67                                                             |
| 26               | Brunei Darussalam | Tea (including mate)            | 2006           | 1                                                              |
| 26               | Brunei Darussalam | Tomatoes and products           | 2006           | 1                                                              |
| 26               | Brunei Darussalam | Treenuts                        | 2006           | 17                                                             |
| 26               | Brunei Darussalam | Vegetable Oils                  | 2006           | 233                                                            |
| 26               | Brunei Darussalam | Vegetables                      | 2006           | 49                                                             |
| 26               | Brunei Darussalam | Vegetables, Other               | 2006           | 39                                                             |
| 26               | Brunei Darussalam | Vegetal Products                | 2006           | 2,403                                                          |
| 26               | Brunei Darussalam | Wheat and products              | 2006           | 443                                                            |
| 26               | Brunei Darussalam | Alcoholic Beverages             | 2007           | 13                                                             |
| 26               | Brunei Darussalam | Animal fats                     | 2007           | 32                                                             |
| 26               | Brunei Darussalam | Animal Products                 | 2007           | 569                                                            |
| 26               | Brunei Darussalam | Apples and products             | 2007           | 9                                                              |
| 26               | Brunei Darussalam | Bananas                         | 2007           | 4                                                              |
| 26               | Brunei Darussalam | Barley and products             | 2007           | 4                                                              |
| 26               | Brunei Darussalam | Beans                           | 2007           | 2                                                              |
| 26               | Brunei Darussalam | Beer                            | 2007           | 13                                                             |
| 26               | Brunei Darussalam | Beverages, Alcoholic            | 2007           | 1                                                              |
| 26               | Brunei Darussalam | Bovine Meat                     | 2007           | 37                                                             |
| 26               | Brunei Darussalam | Butter, Ghee                    | 2007           | 27                                                             |
| 26               | Brunei Darussalam | Cassava and products            | 2007           | 19                                                             |
| 26               | Brunei Darussalam | Cephalopods                     | 2007           | 2                                                              |
| 26               | Brunei Darussalam | Cereals - Excluding Beer        | 2007           | 1,310                                                          |
| 26               | Brunei Darussalam | Cereals, Other                  | 2007           | 44                                                             |
| 26               | Brunei Darussalam | Cocoa Beans and products        | 2007           | 27                                                             |
| 26               | Brunei Darussalam | Coconuts - Incl Copra           | 2007           | 20                                                             |
| 26               | Brunei Darussalam | Coffee and products             | 2007           | 6                                                              |
| 26               | Brunei Darussalam | Cream                           | 2007           | 3                                                              |
| 26               | Brunei Darussalam | Crustaceans                     | 2007           | 4                                                              |
| 26               | Brunei Darussalam | Eggs                            | 2007           | 53                                                             |

Dietary calcium and zinc deficiency risks are decreasing but remain prevalent

| FAO Country code | Country           | Food item                       | Reference year | Net energy supply (kcal <i>capita</i> <sup>-1</sup> d <sup>-1</sup> ) |
|------------------|-------------------|---------------------------------|----------------|-----------------------------------------------------------------------|
| 26               | Brunei Darussalam | Fats, Animals, Raw              | 2007           | 3                                                                     |
| 26               | Brunei Darussalam | Fish, Seafood                   | 2007           | 48                                                                    |
| 26               | Brunei Darussalam | Freshwater Fish                 | 2007           | 1                                                                     |
| 26               | Brunei Darussalam | Fruits - Excluding Wine         | 2007           | 74                                                                    |
| 26               | Brunei Darussalam | Fruits, Other                   | 2007           | 41                                                                    |
| 26               | Brunei Darussalam | Grand Total                     | 2007           | 2,909                                                                 |
| 26               | Brunei Darussalam | Grapes and products (excl wine) | 2007           | 3                                                                     |
| 26               | Brunei Darussalam | Groundnuts (Shelled Eq)         | 2007           | 25                                                                    |
| 26               | Brunei Darussalam | Honey                           | 2007           | 1                                                                     |
| 26               | Brunei Darussalam | Lemons, Limes and products      | 2007           | 1                                                                     |
| 26               | Brunei Darussalam | Maize and products              | 2007           | 93                                                                    |
| 26               | Brunei Darussalam | Maize Germ Oil                  | 2007           | 13                                                                    |
| 26               | Brunei Darussalam | Marine Fish, Other              | 2007           | 28                                                                    |
| 26               | Brunei Darussalam | Meat                            | 2007           | 266                                                                   |
| 26               | Brunei Darussalam | Milk - Excluding Butter         | 2007           | 168                                                                   |
| 26               | Brunei Darussalam | Miscellaneous                   | 2007           | 40                                                                    |
| 26               | Brunei Darussalam | Molluscs, Other                 | 2007           | 2                                                                     |
| 26               | Brunei Darussalam | Mutton & Goat Meat              | 2007           | 8                                                                     |
| 26               | Brunei Darussalam | Oats                            | 2007           | 7                                                                     |
| 26               | Brunei Darussalam | Offals                          | 2007           | 2                                                                     |
| 26               | Brunei Darussalam | Oilcrops                        | 2007           | 56                                                                    |
| 26               | Brunei Darussalam | Oilcrops Oil, Other             | 2007           | 49                                                                    |
| 26               | Brunei Darussalam | Olive Oil                       | 2007           | 1                                                                     |
| 26               | Brunei Darussalam | Onions                          | 2007           | 10                                                                    |
| 26               | Brunei Darussalam | Oranges, Mandarines             | 2007           | 11                                                                    |
| 26               | Brunei Darussalam | Palm Oil                        | 2007           | 159                                                                   |
| 26               | Brunei Darussalam | Pelagic Fish                    | 2007           | 11                                                                    |
| 26               | Brunei Darussalam | Pepper                          | 2007           | 1                                                                     |
| 26               | Brunei Darussalam | Pigmeat                         | 2007           | 35                                                                    |
| 26               | Brunei Darussalam | Pimento                         | 2007           | 4                                                                     |
| 26               | Brunei Darussalam | Pineapples and products         | 2007           | 4                                                                     |
| 26               | Brunei Darussalam | Potatoes and products           | 2007           | 18                                                                    |
| 26               | Brunei Darussalam | Poultry Meat                    | 2007           | 186                                                                   |
| 26               | Brunei Darussalam | Pulses                          | 2007           | 10                                                                    |
| 26               | Brunei Darussalam | Pulses, Other and products      | 2007           | 8                                                                     |
| 26               | Brunei Darussalam | Rice (Milled Equivalent)        | 2007           | 745                                                                   |
| 26               | Brunei Darussalam | Roots, Other                    | 2007           | 4                                                                     |
| 26               | Brunei Darussalam | Sesame seed                     | 2007           | 1                                                                     |
| 26               | Brunei Darussalam | Sesameseed Oil                  | 2007           | 5                                                                     |
| 26               | Brunei Darussalam | Soyabean Oil                    | 2007           | 2                                                                     |
| 26               | Brunei Darussalam | Soyabeans                       | 2007           | 11                                                                    |
| 26               | Brunei Darussalam | Spices                          | 2007           | 35                                                                    |
| 26               | Brunei Darussalam | Spices, Other                   | 2007           | 30                                                                    |
| 26               | Brunei Darussalam | Starchy Roots                   | 2007           | 44                                                                    |
| 26               | Brunei Darussalam | Stimulants                      | 2007           | 34                                                                    |
| 26               | Brunei Darussalam | Sugar & Sweeteners              | 2007           | 397                                                                   |
| 26               | Brunei Darussalam | Sugar (Raw Equivalent)          | 2007           | 305                                                                   |
| 26               | Brunei Darussalam | Sunflowerseed Oil               | 2007           | 34                                                                    |
| 26               | Brunei Darussalam | Sweet potatoes                  | 2007           | 2                                                                     |
| 26               | Brunei Darussalam | Sweeteners, Other               | 2007           | 91                                                                    |
| 26               | Brunei Darussalam | Tea (including mate)            | 2007           | 1                                                                     |
| 26               | Brunei Darussalam | Tomatoes and products           | 2007           | 1                                                                     |
| 26               | Brunei Darussalam | Treenuts                        | 2007           | 18                                                                    |
| 26               | Brunei Darussalam | Vegetable Oils                  | 2007           | 262                                                                   |
| 26               | Brunei Darussalam | Vegetables                      | 2007           | 48                                                                    |
| 26               | Brunei Darussalam | Vegetables, Other               | 2007           | 38                                                                    |
| 26               | Brunei Darussalam | Vegetal Products                | 2007           | 2,340                                                                 |
| 26               | Brunei Darussalam | Wheat and products              | 2007           | 417                                                                   |
| 26               | Brunei Darussalam | Alcoholic Beverages             | 2008           | 11                                                                    |
| 26               | Brunei Darussalam | Animal fats                     | 2008           | 26                                                                    |
| 26               | Brunei Darussalam | Animal Products                 | 2008           | 586                                                                   |
| 26               | Brunei Darussalam | Apples and products             | 2008           | 11                                                                    |
| 26               | Brunei Darussalam | Bananas                         | 2008           | 3                                                                     |
| 26               | Brunei Darussalam | Barley and products             | 2008           | 3                                                                     |
| 26               | Brunei Darussalam | Beans                           | 2008           | 4                                                                     |
| 26               | Brunei Darussalam | Beer                            | 2008           | 10                                                                    |
| 26               | Brunei Darussalam | Beverages, Alcoholic            | 2008           | 1                                                                     |
| 26               | Brunei Darussalam | Bovine Meat                     | 2008           | 32                                                                    |
| 26               | Brunei Darussalam | Butter, Ghee                    | 2008           | 22                                                                    |
| 26               | Brunei Darussalam | Cassava and products            | 2008           | 21                                                                    |
| 26               | Brunei Darussalam | Cereals - Excluding Beer        | 2008           | 1,264                                                                 |
| 26               | Brunei Darussalam | Cereals, Other                  | 2008           | 23                                                                    |
| 26               | Brunei Darussalam | Cocoa Beans and products        | 2008           | 31                                                                    |
| 26               | Brunei Darussalam | Coconuts - Incl Copra           | 2008           | 17                                                                    |
| 26               | Brunei Darussalam | Coffee and products             | 2008           | 7                                                                     |
| 26               | Brunei Darussalam | Cream                           | 2008           | 2                                                                     |
| 26               | Brunei Darussalam | Crustaceans                     | 2008           | 3                                                                     |
| 26               | Brunei Darussalam | Dates                           | 2008           | 1                                                                     |
| 26               | Brunei Darussalam | Eggs                            | 2008           | 59                                                                    |
| 26               | Brunei Darussalam | Fats, Animals, Raw              | 2008           | 2                                                                     |
| 26               | Brunei Darussalam | Fish, Seafood                   | 2008           | 46                                                                    |
| 26               | Brunei Darussalam | Freshwater Fish                 | 2008           | 4                                                                     |
| 26               | Brunei Darussalam | Fruits - Excluding Wine         | 2008           | 73                                                                    |
| 26               | Brunei Darussalam | Fruits, Other                   | 2008           | 38                                                                    |
| 26               | Brunei Darussalam | Grand Total                     | 2008           | 2,904                                                                 |
| 26               | Brunei Darussalam | Grapes and products (excl wine) | 2008           | 4                                                                     |
| 26               | Brunei Darussalam | Groundnuts (Shelled Eq)         | 2008           | 33                                                                    |
| 26               | Brunei Darussalam | Honey                           | 2008           | 3                                                                     |
| 26               | Brunei Darussalam | Maize and products              | 2008           | 96                                                                    |
| 26               | Brunei Darussalam | Maize Germ Oil                  | 2008           | 10                                                                    |
| 26               | Brunei Darussalam | Marine Fish, Other              | 2008           | 24                                                                    |
| 26               | Brunei Darussalam | Meat                            | 2008           | 271                                                                   |
| 26               | Brunei Darussalam | Milk - Excluding Butter         | 2008           | 182                                                                   |
| 26               | Brunei Darussalam | Miscellaneous                   | 2008           | 52                                                                    |
| 26               | Brunei Darussalam | Molluscs, Other                 | 2008           | 2                                                                     |
| 26               | Brunei Darussalam | Mutton & Goat Meat              | 2008           | 8                                                                     |
| 26               | Brunei Darussalam | Oats                            | 2008           | 7                                                                     |

Dietary calcium and zinc deficiency risks are decreasing but remain prevalent

| FAO Country code | Country           | Food item                       | Reference year | Net energy supply (kcal capita <sup>-1</sup> d <sup>-1</sup> ) |
|------------------|-------------------|---------------------------------|----------------|----------------------------------------------------------------|
| 26               | Brunei Darussalam | Offals                          | 2008           | 2                                                              |
| 26               | Brunei Darussalam | Oilcrops                        | 2008           | 66                                                             |
| 26               | Brunei Darussalam | Oilcrops Oil, Other             | 2008           | 66                                                             |
| 26               | Brunei Darussalam | Olive Oil                       | 2008           | 1                                                              |
| 26               | Brunei Darussalam | Onions                          | 2008           | 9                                                              |
| 26               | Brunei Darussalam | Oranges, Mandarines             | 2008           | 10                                                             |
| 26               | Brunei Darussalam | Palm Oil                        | 2008           | 162                                                            |
| 26               | Brunei Darussalam | Pelagic Fish                    | 2008           | 12                                                             |
| 26               | Brunei Darussalam | Pepper                          | 2008           | 1                                                              |
| 26               | Brunei Darussalam | Pigmeat                         | 2008           | 45                                                             |
| 26               | Brunei Darussalam | Pimento                         | 2008           | 4                                                              |
| 26               | Brunei Darussalam | Pineapples and products         | 2008           | 5                                                              |
| 26               | Brunei Darussalam | Potatoes and products           | 2008           | 17                                                             |
| 26               | Brunei Darussalam | Poultry Meat                    | 2008           | 186                                                            |
| 26               | Brunei Darussalam | Pulses                          | 2008           | 12                                                             |
| 26               | Brunei Darussalam | Pulses, Other and products      | 2008           | 8                                                              |
| 26               | Brunei Darussalam | Rice (Milled Equivalent)        | 2008           | 733                                                            |
| 26               | Brunei Darussalam | Roots, Other                    | 2008           | 4                                                              |
| 26               | Brunei Darussalam | Sesame seed                     | 2008           | 1                                                              |
| 26               | Brunei Darussalam | Sesameseed Oil                  | 2008           | 4                                                              |
| 26               | Brunei Darussalam | Soyabean Oil                    | 2008           | 1                                                              |
| 26               | Brunei Darussalam | Soyabeans                       | 2008           | 15                                                             |
| 26               | Brunei Darussalam | Spices                          | 2008           | 28                                                             |
| 26               | Brunei Darussalam | Spices, Other                   | 2008           | 23                                                             |
| 26               | Brunei Darussalam | Starchy Roots                   | 2008           | 43                                                             |
| 26               | Brunei Darussalam | Stimulants                      | 2008           | 39                                                             |
| 26               | Brunei Darussalam | Sugar & Sweeteners              | 2008           | 366                                                            |
| 26               | Brunei Darussalam | Sugar (Raw Equivalent)          | 2008           | 294                                                            |
| 26               | Brunei Darussalam | Sunflowerseed Oil               | 2008           | 33                                                             |
| 26               | Brunei Darussalam | Sweet potatoes                  | 2008           | 2                                                              |
| 26               | Brunei Darussalam | Sweeteners, Other               | 2008           | 69                                                             |
| 26               | Brunei Darussalam | Tea (including mate)            | 2008           | 1                                                              |
| 26               | Brunei Darussalam | Tomatoes and products           | 2008           | 1                                                              |
| 26               | Brunei Darussalam | Treenuts                        | 2008           | 23                                                             |
| 26               | Brunei Darussalam | Vegetable Oils                  | 2008           | 277                                                            |
| 26               | Brunei Darussalam | Vegetables                      | 2008           | 64                                                             |
| 26               | Brunei Darussalam | Vegetables, Other               | 2008           | 54                                                             |
| 26               | Brunei Darussalam | Vegetal Products                | 2008           | 2,318                                                          |
| 26               | Brunei Darussalam | Wheat and products              | 2008           | 401                                                            |
| 26               | Brunei Darussalam | Alcoholic Beverages             | 2009           | 4                                                              |
| 26               | Brunei Darussalam | Animal fats                     | 2009           | 26                                                             |
| 26               | Brunei Darussalam | Animal Products                 | 2009           | 565                                                            |
| 26               | Brunei Darussalam | Apples and products             | 2009           | 12                                                             |
| 26               | Brunei Darussalam | Bananas                         | 2009           | 3                                                              |
| 26               | Brunei Darussalam | Barley and products             | 2009           | 3                                                              |
| 26               | Brunei Darussalam | Beans                           | 2009           | 4                                                              |
| 26               | Brunei Darussalam | Beer                            | 2009           | 3                                                              |
| 26               | Brunei Darussalam | Beverages, Alcoholic            | 2009           | 1                                                              |
| 26               | Brunei Darussalam | Bovine Meat                     | 2009           | 33                                                             |
| 26               | Brunei Darussalam | Butter, Ghee                    | 2009           | 22                                                             |
| 26               | Brunei Darussalam | Cassava and products            | 2009           | 22                                                             |
| 26               | Brunei Darussalam | Cereals - Excluding Beer        | 2009           | 1,275                                                          |
| 26               | Brunei Darussalam | Cereals, Other                  | 2009           | 10                                                             |
| 26               | Brunei Darussalam | Cocoa Beans and products        | 2009           | 25                                                             |
| 26               | Brunei Darussalam | Coconuts - Incl Copra           | 2009           | 14                                                             |
| 26               | Brunei Darussalam | Coffee and products             | 2009           | 11                                                             |
| 26               | Brunei Darussalam | Cream                           | 2009           | 2                                                              |
| 26               | Brunei Darussalam | Crustaceans                     | 2009           | 3                                                              |
| 26               | Brunei Darussalam | Dates                           | 2009           | 1                                                              |
| 26               | Brunei Darussalam | Eggs                            | 2009           | 60                                                             |
| 26               | Brunei Darussalam | Fats, Animals, Raw              | 2009           | 2                                                              |
| 26               | Brunei Darussalam | Fish, Seafood                   | 2009           | 38                                                             |
| 26               | Brunei Darussalam | Freshwater Fish                 | 2009           | 2                                                              |
| 26               | Brunei Darussalam | Fruits - Excluding Wine         | 2009           | 72                                                             |
| 26               | Brunei Darussalam | Fruits, Other                   | 2009           | 39                                                             |
| 26               | Brunei Darussalam | Grand Total                     | 2009           | 2,888                                                          |
| 26               | Brunei Darussalam | Grapes and products (excl wine) | 2009           | 4                                                              |
| 26               | Brunei Darussalam | Groundnuts (Shelled Eq)         | 2009           | 33                                                             |
| 26               | Brunei Darussalam | Honey                           | 2009           | 1                                                              |
| 26               | Brunei Darussalam | Maize and products              | 2009           | 94                                                             |
| 26               | Brunei Darussalam | Maize Germ Oil                  | 2009           | 9                                                              |
| 26               | Brunei Darussalam | Marine Fish, Other              | 2009           | 19                                                             |
| 26               | Brunei Darussalam | Meat                            | 2009           | 270                                                            |
| 26               | Brunei Darussalam | Milk - Excluding Butter         | 2009           | 169                                                            |
| 26               | Brunei Darussalam | Miscellaneous                   | 2009           | 47                                                             |
| 26               | Brunei Darussalam | Molluscs, Other                 | 2009           | 2                                                              |
| 26               | Brunei Darussalam | Mutton & Goat Meat              | 2009           | 9                                                              |
| 26               | Brunei Darussalam | Oats                            | 2009           | 8                                                              |
| 26               | Brunei Darussalam | Offals                          | 2009           | 2                                                              |
| 26               | Brunei Darussalam | Oilcrops                        | 2009           | 71                                                             |
| 26               | Brunei Darussalam | Oilcrops Oil, Other             | 2009           | 56                                                             |
| 26               | Brunei Darussalam | Olive Oil                       | 2009           | 2                                                              |
| 26               | Brunei Darussalam | Onions                          | 2009           | 12                                                             |
| 26               | Brunei Darussalam | Oranges, Mandarines             | 2009           | 7                                                              |
| 26               | Brunei Darussalam | Palm Oil                        | 2009           | 163                                                            |
| 26               | Brunei Darussalam | Pelagic Fish                    | 2009           | 11                                                             |
| 26               | Brunei Darussalam | Pepper                          | 2009           | 1                                                              |
| 26               | Brunei Darussalam | Pigmeat                         | 2009           | 39                                                             |
| 26               | Brunei Darussalam | Pimento                         | 2009           | 5                                                              |
| 26               | Brunei Darussalam | Pineapples and products         | 2009           | 4                                                              |
| 26               | Brunei Darussalam | Potatoes and products           | 2009           | 18                                                             |
| 26               | Brunei Darussalam | Poultry Meat                    | 2009           | 188                                                            |
| 26               | Brunei Darussalam | Pulses                          | 2009           | 13                                                             |
| 26               | Brunei Darussalam | Pulses, Other and products      | 2009           | 9                                                              |
| 26               | Brunei Darussalam | Rice (Milled Equivalent)        | 2009           | 736                                                            |
| 26               | Brunei Darussalam | Roots, Other                    | 2009           | 4                                                              |
| 26               | Brunei Darussalam | Sesame seed                     | 2009           | 1                                                              |



Dietary calcium and zinc deficiency risks are decreasing but remain prevalent

| FAO Country code | Country           | Food item                       | Reference year | Net energy supply (kcal <i>capita</i> <sup>-1</sup> d <sup>-1</sup> ) |
|------------------|-------------------|---------------------------------|----------------|-----------------------------------------------------------------------|
| 26               | Brunei Darussalam | Sesameseed Oil                  | 2009           | 4                                                                     |
| 26               | Brunei Darussalam | Soyabean Oil                    | 2009           | 2                                                                     |
| 26               | Brunei Darussalam | Soyabeans                       | 2009           | 23                                                                    |
| 26               | Brunei Darussalam | Spices                          | 2009           | 26                                                                    |
| 26               | Brunei Darussalam | Spices, Other                   | 2009           | 20                                                                    |
| 26               | Brunei Darussalam | Starchy Roots                   | 2009           | 45                                                                    |
| 26               | Brunei Darussalam | Stimulants                      | 2009           | 37                                                                    |
| 26               | Brunei Darussalam | Sugar & Sweeteners              | 2009           | 389                                                                   |
| 26               | Brunei Darussalam | Sugar (Raw Equivalent)          | 2009           | 306                                                                   |
| 26               | Brunei Darussalam | Sunflowerseed Oil               | 2009           | 31                                                                    |
| 26               | Brunei Darussalam | Sweet potatoes                  | 2009           | 2                                                                     |
| 26               | Brunei Darussalam | Sweeteners, Other               | 2009           | 82                                                                    |
| 26               | Brunei Darussalam | Tea (including mate)            | 2009           | 1                                                                     |
| 26               | Brunei Darussalam | Tomatoes and products           | 2009           | 1                                                                     |
| 26               | Brunei Darussalam | Treenuts                        | 2009           | 15                                                                    |
| 26               | Brunei Darussalam | Vegetable Oils                  | 2009           | 266                                                                   |
| 26               | Brunei Darussalam | Vegetables                      | 2009           | 62                                                                    |
| 26               | Brunei Darussalam | Vegetables, Other               | 2009           | 49                                                                    |
| 26               | Brunei Darussalam | Vegetal Products                | 2009           | 2,323                                                                 |
| 26               | Brunei Darussalam | Wheat and products              | 2009           | 424                                                                   |
| 26               | Brunei Darussalam | Alcoholic Beverages             | 2010           | 14                                                                    |
| 26               | Brunei Darussalam | Animal fats                     | 2010           | 27                                                                    |
| 26               | Brunei Darussalam | Animal Products                 | 2010           | 564                                                                   |
| 26               | Brunei Darussalam | Apples and products             | 2010           | 11                                                                    |
| 26               | Brunei Darussalam | Bananas                         | 2010           | 4                                                                     |
| 26               | Brunei Darussalam | Barley and products             | 2010           | 3                                                                     |
| 26               | Brunei Darussalam | Beans                           | 2010           | 2                                                                     |
| 26               | Brunei Darussalam | Beer                            | 2010           | 14                                                                    |
| 26               | Brunei Darussalam | Bovine Meat                     | 2010           | 33                                                                    |
| 26               | Brunei Darussalam | Butter, Ghee                    | 2010           | 24                                                                    |
| 26               | Brunei Darussalam | Cassava and products            | 2010           | 22                                                                    |
| 26               | Brunei Darussalam | Cereals - Excluding Beer        | 2010           | 1,273                                                                 |
| 26               | Brunei Darussalam | Cereals, Other                  | 2010           | 11                                                                    |
| 26               | Brunei Darussalam | Cocoa Beans and products        | 2010           | 28                                                                    |
| 26               | Brunei Darussalam | Coconuts - Incl Copra           | 2010           | 12                                                                    |
| 26               | Brunei Darussalam | Coffee and products             | 2010           | 7                                                                     |
| 26               | Brunei Darussalam | Cream                           | 2010           | 1                                                                     |
| 26               | Brunei Darussalam | Crustaceans                     | 2010           | 3                                                                     |
| 26               | Brunei Darussalam | Dates                           | 2010           | 1                                                                     |
| 26               | Brunei Darussalam | Eggs                            | 2010           | 60                                                                    |
| 26               | Brunei Darussalam | Fats, Animals, Raw              | 2010           | 1                                                                     |
| 26               | Brunei Darussalam | Fish, Seafood                   | 2010           | 37                                                                    |
| 26               | Brunei Darussalam | Freshwater Fish                 | 2010           | 2                                                                     |
| 26               | Brunei Darussalam | Fruits - Excluding Wine         | 2010           | 79                                                                    |
| 26               | Brunei Darussalam | Fruits, Other                   | 2010           | 43                                                                    |
| 26               | Brunei Darussalam | Grand Total                     | 2010           | 2,887                                                                 |
| 26               | Brunei Darussalam | Grapes and products (excl wine) | 2010           | 6                                                                     |
| 26               | Brunei Darussalam | Groundnuts (Shelled Eq)         | 2010           | 31                                                                    |
| 26               | Brunei Darussalam | Honey                           | 2010           | 1                                                                     |
| 26               | Brunei Darussalam | Maize and products              | 2010           | 91                                                                    |
| 26               | Brunei Darussalam | Maize Germ Oil                  | 2010           | 6                                                                     |
| 26               | Brunei Darussalam | Marine Fish, Other              | 2010           | 19                                                                    |
| 26               | Brunei Darussalam | Meat                            | 2010           | 281                                                                   |
| 26               | Brunei Darussalam | Meat, Other                     | 2010           | 7                                                                     |
| 26               | Brunei Darussalam | Milk - Excluding Butter         | 2010           | 157                                                                   |
| 26               | Brunei Darussalam | Miscellaneous                   | 2010           | 48                                                                    |
| 26               | Brunei Darussalam | Molluscs, Other                 | 2010           | 2                                                                     |
| 26               | Brunei Darussalam | Mutton & Goat Meat              | 2010           | 11                                                                    |
| 26               | Brunei Darussalam | Oats                            | 2010           | 8                                                                     |
| 26               | Brunei Darussalam | Offals                          | 2010           | 2                                                                     |
| 26               | Brunei Darussalam | Oilcrops                        | 2010           | 69                                                                    |
| 26               | Brunei Darussalam | Oilcrops Oil, Other             | 2010           | 56                                                                    |
| 26               | Brunei Darussalam | Olive Oil                       | 2010           | 3                                                                     |
| 26               | Brunei Darussalam | Onions                          | 2010           | 12                                                                    |
| 26               | Brunei Darussalam | Oranges, Mandarines             | 2010           | 9                                                                     |
| 26               | Brunei Darussalam | Palm Oil                        | 2010           | 163                                                                   |
| 26               | Brunei Darussalam | Pelagic Fish                    | 2010           | 10                                                                    |
| 26               | Brunei Darussalam | Pepper                          | 2010           | 1                                                                     |
| 26               | Brunei Darussalam | Pigmeat                         | 2010           | 38                                                                    |
| 26               | Brunei Darussalam | Pimento                         | 2010           | 5                                                                     |
| 26               | Brunei Darussalam | Pineapples and products         | 2010           | 4                                                                     |
| 26               | Brunei Darussalam | Potatoes and products           | 2010           | 20                                                                    |
| 26               | Brunei Darussalam | Poultry Meat                    | 2010           | 193                                                                   |
| 26               | Brunei Darussalam | Pulses                          | 2010           | 9                                                                     |
| 26               | Brunei Darussalam | Pulses, Other and products      | 2010           | 7                                                                     |
| 26               | Brunei Darussalam | Rape and Mustardseed            | 2010           | 1                                                                     |
| 26               | Brunei Darussalam | Rice (Milled Equivalent)        | 2010           | 744                                                                   |
| 26               | Brunei Darussalam | Roots, Other                    | 2010           | 3                                                                     |
| 26               | Brunei Darussalam | Sesame seed                     | 2010           | 1                                                                     |
| 26               | Brunei Darussalam | Sesameseed Oil                  | 2010           | 4                                                                     |
| 26               | Brunei Darussalam | Soyabean Oil                    | 2010           | 4                                                                     |
| 26               | Brunei Darussalam | Soyabeans                       | 2010           | 24                                                                    |
| 26               | Brunei Darussalam | Spices                          | 2010           | 20                                                                    |
| 26               | Brunei Darussalam | Spices, Other                   | 2010           | 14                                                                    |
| 26               | Brunei Darussalam | Starchy Roots                   | 2010           | 47                                                                    |
| 26               | Brunei Darussalam | Stimulants                      | 2010           | 36                                                                    |
| 26               | Brunei Darussalam | Sugar & Sweeteners              | 2010           | 387                                                                   |
| 26               | Brunei Darussalam | Sugar (Raw Equivalent)          | 2010           | 303                                                                   |
| 26               | Brunei Darussalam | Sunflowerseed Oil               | 2010           | 31                                                                    |
| 26               | Brunei Darussalam | Sweet potatoes                  | 2010           | 2                                                                     |
| 26               | Brunei Darussalam | Sweeteners, Other               | 2010           | 83                                                                    |
| 26               | Brunei Darussalam | Tea (including mate)            | 2010           | 1                                                                     |
| 26               | Brunei Darussalam | Tomatoes and products           | 2010           | 1                                                                     |
| 26               | Brunei Darussalam | Treenuts                        | 2010           | 20                                                                    |
| 26               | Brunei Darussalam | Vegetable Oils                  | 2010           | 266                                                                   |
| 26               | Brunei Darussalam | Vegetables                      | 2010           | 54                                                                    |
| 26               | Brunei Darussalam | Vegetables, Other               | 2010           | 41                                                                    |

Dietary calcium and zinc deficiency risks are decreasing but remain prevalent

| FAO Country code | Country           | Food item                       | Reference year | Net energy supply (kcal capita <sup>-1</sup> d <sup>-1</sup> ) |
|------------------|-------------------|---------------------------------|----------------|----------------------------------------------------------------|
| 26               | Brunei Darussalam | Vegetal Products                | 2010           | 2,323                                                          |
| 26               | Brunei Darussalam | Wheat and products              | 2010           | 416                                                            |
| 26               | Brunei Darussalam | Alcoholic Beverages             | 2011           | 15                                                             |
| 26               | Brunei Darussalam | Animal fats                     | 2011           | 27                                                             |
| 26               | Brunei Darussalam | Animal Products                 | 2011           | 601                                                            |
| 26               | Brunei Darussalam | Apples and products             | 2011           | 7                                                              |
| 26               | Brunei Darussalam | Bananas                         | 2011           | 4                                                              |
| 26               | Brunei Darussalam | Barley and products             | 2011           | 2                                                              |
| 26               | Brunei Darussalam | Beans                           | 2011           | 4                                                              |
| 26               | Brunei Darussalam | Beer                            | 2011           | 14                                                             |
| 26               | Brunei Darussalam | Beverages, Alcoholic            | 2011           | 1                                                              |
| 26               | Brunei Darussalam | Bovine Meat                     | 2011           | 39                                                             |
| 26               | Brunei Darussalam | Butter, Ghee                    | 2011           | 22                                                             |
| 26               | Brunei Darussalam | Cassava and products            | 2011           | 20                                                             |
| 26               | Brunei Darussalam | Cereals - Excluding Beer        | 2011           | 1,305                                                          |
| 26               | Brunei Darussalam | Cereals, Other                  | 2011           | 1                                                              |
| 26               | Brunei Darussalam | Cocoa Beans and products        | 2011           | 29                                                             |
| 26               | Brunei Darussalam | Coconuts - Incl Copra           | 2011           | 6                                                              |
| 26               | Brunei Darussalam | Coffee and products             | 2011           | 9                                                              |
| 26               | Brunei Darussalam | Cream                           | 2011           | 3                                                              |
| 26               | Brunei Darussalam | Crustaceans                     | 2011           | 3                                                              |
| 26               | Brunei Darussalam | Eggs                            | 2011           | 60                                                             |
| 26               | Brunei Darussalam | Fats, Animals, Raw              | 2011           | 2                                                              |
| 26               | Brunei Darussalam | Fish, Seafood                   | 2011           | 36                                                             |
| 26               | Brunei Darussalam | Freshwater Fish                 | 2011           | 2                                                              |
| 26               | Brunei Darussalam | Fruits - Excluding Wine         | 2011           | 63                                                             |
| 26               | Brunei Darussalam | Fruits, Other                   | 2011           | 34                                                             |
| 26               | Brunei Darussalam | Grand Total                     | 2011           | 2,949                                                          |
| 26               | Brunei Darussalam | Grapes and products (excl wine) | 2011           | 3                                                              |
| 26               | Brunei Darussalam | Groundnuts (Shelled Eq)         | 2011           | 32                                                             |
| 26               | Brunei Darussalam | Honey                           | 2011           | 1                                                              |
| 26               | Brunei Darussalam | Lemons, Limes and products      | 2011           | 1                                                              |
| 26               | Brunei Darussalam | Maize and products              | 2011           | 112                                                            |
| 26               | Brunei Darussalam | Maize Germ Oil                  | 2011           | 7                                                              |
| 26               | Brunei Darussalam | Marine Fish, Other              | 2011           | 19                                                             |
| 26               | Brunei Darussalam | Meat                            | 2011           | 315                                                            |
| 26               | Brunei Darussalam | Meat, Other                     | 2011           | 11                                                             |
| 26               | Brunei Darussalam | Milk - Excluding Butter         | 2011           | 160                                                            |
| 26               | Brunei Darussalam | Miscellaneous                   | 2011           | 51                                                             |
| 26               | Brunei Darussalam | Molluscs, Other                 | 2011           | 2                                                              |
| 26               | Brunei Darussalam | Mutton & Goat Meat              | 2011           | 11                                                             |
| 26               | Brunei Darussalam | Oats                            | 2011           | 6                                                              |
| 26               | Brunei Darussalam | Offals                          | 2011           | 3                                                              |
| 26               | Brunei Darussalam | Oilcrops                        | 2011           | 64                                                             |
| 26               | Brunei Darussalam | Oilcrops Oil, Other             | 2011           | 56                                                             |
| 26               | Brunei Darussalam | Olive Oil                       | 2011           | 2                                                              |
| 26               | Brunei Darussalam | Onions                          | 2011           | 12                                                             |
| 26               | Brunei Darussalam | Oranges, Mandarines             | 2011           | 9                                                              |
| 26               | Brunei Darussalam | Palm Oil                        | 2011           | 164                                                            |
| 26               | Brunei Darussalam | Pelagic Fish                    | 2011           | 10                                                             |
| 26               | Brunei Darussalam | Pepper                          | 2011           | 1                                                              |
| 26               | Brunei Darussalam | Pigmeat                         | 2011           | 42                                                             |
| 26               | Brunei Darussalam | Pimento                         | 2011           | 5                                                              |
| 26               | Brunei Darussalam | Pineapples and products         | 2011           | 5                                                              |
| 26               | Brunei Darussalam | Potatoes and products           | 2011           | 22                                                             |
| 26               | Brunei Darussalam | Poultry Meat                    | 2011           | 212                                                            |
| 26               | Brunei Darussalam | Pulses                          | 2011           | 11                                                             |
| 26               | Brunei Darussalam | Pulses, Other and products      | 2011           | 7                                                              |
| 26               | Brunei Darussalam | Rape and Mustardseed            | 2011           | 1                                                              |
| 26               | Brunei Darussalam | Rice (Milled Equivalent)        | 2011           | 748                                                            |
| 26               | Brunei Darussalam | Roots, Other                    | 2011           | 3                                                              |
| 26               | Brunei Darussalam | Sesame seed                     | 2011           | 1                                                              |
| 26               | Brunei Darussalam | Sesameseed Oil                  | 2011           | 5                                                              |
| 26               | Brunei Darussalam | Soyabean Oil                    | 2011           | 3                                                              |
| 26               | Brunei Darussalam | Soyabeans                       | 2011           | 24                                                             |
| 26               | Brunei Darussalam | Spices                          | 2011           | 21                                                             |
| 26               | Brunei Darussalam | Spices, Other                   | 2011           | 15                                                             |
| 26               | Brunei Darussalam | Starchy Roots                   | 2011           | 47                                                             |
| 26               | Brunei Darussalam | Stimulants                      | 2011           | 39                                                             |
| 26               | Brunei Darussalam | Sugar & Sweeteners              | 2011           | 397                                                            |
| 26               | Brunei Darussalam | Sugar (Raw Equivalent)          | 2011           | 311                                                            |
| 26               | Brunei Darussalam | Sunflowerseed Oil               | 2011           | 30                                                             |
| 26               | Brunei Darussalam | Sweet potatoes                  | 2011           | 2                                                              |
| 26               | Brunei Darussalam | Sweeteners, Other               | 2011           | 85                                                             |
| 26               | Brunei Darussalam | Tea (including mate)            | 2011           | 1                                                              |
| 26               | Brunei Darussalam | Tomatoes and products           | 2011           | 1                                                              |
| 26               | Brunei Darussalam | Treenuts                        | 2011           | 20                                                             |
| 26               | Brunei Darussalam | Vegetable Oils                  | 2011           | 265                                                            |
| 26               | Brunei Darussalam | Vegetables                      | 2011           | 50                                                             |
| 26               | Brunei Darussalam | Vegetables, Other               | 2011           | 37                                                             |
| 26               | Brunei Darussalam | Vegetal Products                | 2011           | 2,347                                                          |
| 26               | Brunei Darussalam | Wheat and products              | 2011           | 435                                                            |
| 26               | Brunei Darussalam | Wine                            | 2011           | 1                                                              |
| 27               | Bulgaria          | Alcoholic Beverages             | 1992           | 165                                                            |
| 27               | Bulgaria          | Animal fats                     | 1992           | 171                                                            |
| 27               | Bulgaria          | Animal Products                 | 1992           | 714                                                            |
| 27               | Bulgaria          | Apples and products             | 1992           | 25                                                             |
| 27               | Bulgaria          | Bananas                         | 1992           | 4                                                              |
| 27               | Bulgaria          | Barley and products             | 1992           | 9                                                              |
| 27               | Bulgaria          | Beans                           | 1992           | 27                                                             |
| 27               | Bulgaria          | Beer                            | 1992           | 58                                                             |
| 27               | Bulgaria          | Beverages, Alcoholic            | 1992           | 86                                                             |
| 27               | Bulgaria          | Bovine Meat                     | 1992           | 69                                                             |
| 27               | Bulgaria          | Butter, Ghee                    | 1992           | 23                                                             |
| 27               | Bulgaria          | Cephalopods                     | 1992           | 1                                                              |
| 27               | Bulgaria          | Cereals - Excluding Beer        | 1992           | 1,180                                                          |
| 27               | Bulgaria          | Citrus, Other                   | 1992           | 1                                                              |

Dietary calcium and zinc deficiency risks are decreasing but remain prevalent

| FAO Country code | Country  | Food item                       | Reference year | Net energy supply (kcal capita <sup>-1</sup> d <sup>-1</sup> ) |
|------------------|----------|---------------------------------|----------------|----------------------------------------------------------------|
| 27               | Bulgaria | Cocoa Beans and products        | 1992           | 6                                                              |
| 27               | Bulgaria | Coffee and products             | 1992           | 2                                                              |
| 27               | Bulgaria | Eggs                            | 1992           | 37                                                             |
| 27               | Bulgaria | Fats, Animals, Raw              | 1992           | 148                                                            |
| 27               | Bulgaria | Fish, Seafood                   | 1992           | 6                                                              |
| 27               | Bulgaria | Freshwater Fish                 | 1992           | 2                                                              |
| 27               | Bulgaria | Fruits - Excluding Wine         | 1992           | 99                                                             |
| 27               | Bulgaria | Fruits, Other                   | 1992           | 50                                                             |
| 27               | Bulgaria | Grand Total                     | 1992           | 3,022                                                          |
| 27               | Bulgaria | Grapes and products (excl wine) | 1992           | 17                                                             |
| 27               | Bulgaria | Groundnut Oil                   | 1992           | 7                                                              |
| 27               | Bulgaria | Groundnuts (Shelled Eq)         | 1992           | 4                                                              |
| 27               | Bulgaria | Honey                           | 1992           | 3                                                              |
| 27               | Bulgaria | Maize and products              | 1992           | 11                                                             |
| 27               | Bulgaria | Meat                            | 1992           | 241                                                            |
| 27               | Bulgaria | Meat, Other                     | 1992           | 1                                                              |
| 27               | Bulgaria | Milk - Excluding Butter         | 1992           | 237                                                            |
| 27               | Bulgaria | Miscellaneous                   | 1992           | 1                                                              |
| 27               | Bulgaria | Mutton & Goat Meat              | 1992           | 38                                                             |
| 27               | Bulgaria | Offals                          | 1992           | 23                                                             |
| 27               | Bulgaria | Oilcrops                        | 1992           | 31                                                             |
| 27               | Bulgaria | Oilcrops Oil, Other             | 1992           | 3                                                              |
| 27               | Bulgaria | Olives (including preserved)    | 1992           | 2                                                              |
| 27               | Bulgaria | Onions                          | 1992           | 11                                                             |
| 27               | Bulgaria | Oranges, Mandarines             | 1992           | 3                                                              |
| 27               | Bulgaria | Peas                            | 1992           | 11                                                             |
| 27               | Bulgaria | Pelagic Fish                    | 1992           | 3                                                              |
| 27               | Bulgaria | Pigmeat                         | 1992           | 104                                                            |
| 27               | Bulgaria | Pimento                         | 1992           | 1                                                              |
| 27               | Bulgaria | Potatoes and products           | 1992           | 58                                                             |
| 27               | Bulgaria | Poultry Meat                    | 1992           | 28                                                             |
| 27               | Bulgaria | Pulses                          | 1992           | 38                                                             |
| 27               | Bulgaria | Pulses, Other and products      | 1992           | 1                                                              |
| 27               | Bulgaria | Rice (Milled Equivalent)        | 1992           | 45                                                             |
| 27               | Bulgaria | Rye and products                | 1992           | 1                                                              |
| 27               | Bulgaria | Sesame seed                     | 1992           | 9                                                              |
| 27               | Bulgaria | Soyabean Oil                    | 1992           | 9                                                              |
| 27               | Bulgaria | Soybeans                        | 1992           | 1                                                              |
| 27               | Bulgaria | Spices                          | 1992           | 1                                                              |
| 27               | Bulgaria | Starchy Roots                   | 1992           | 58                                                             |
| 27               | Bulgaria | Stimulants                      | 1992           | 8                                                              |
| 27               | Bulgaria | Sugar & Sweeteners              | 1992           | 317                                                            |
| 27               | Bulgaria | Sugar (Raw Equivalent)          | 1992           | 310                                                            |
| 27               | Bulgaria | Sunflower seed                  | 1992           | 15                                                             |
| 27               | Bulgaria | Sunflowerseed Oil               | 1992           | 306                                                            |
| 27               | Bulgaria | Sweeteners, Other               | 1992           | 3                                                              |
| 27               | Bulgaria | Tomatoes and products           | 1992           | 20                                                             |
| 27               | Bulgaria | Treenuts                        | 1992           | 14                                                             |
| 27               | Bulgaria | Vegetable Oils                  | 1992           | 326                                                            |
| 27               | Bulgaria | Vegetables                      | 1992           | 69                                                             |
| 27               | Bulgaria | Vegetables, Other               | 1992           | 38                                                             |
| 27               | Bulgaria | Vegetal Products                | 1992           | 2,308                                                          |
| 27               | Bulgaria | Wheat and products              | 1992           | 1,114                                                          |
| 27               | Bulgaria | Wine                            | 1992           | 21                                                             |
| 27               | Bulgaria | Alcoholic Beverages             | 1993           | 183                                                            |
| 27               | Bulgaria | Animal fats                     | 1993           | 122                                                            |
| 27               | Bulgaria | Animal Products                 | 1993           | 711                                                            |
| 27               | Bulgaria | Apples and products             | 1993           | 18                                                             |
| 27               | Bulgaria | Bananas                         | 1993           | 7                                                              |
| 27               | Bulgaria | Barley and products             | 1993           | 10                                                             |
| 27               | Bulgaria | Beans                           | 1993           | 26                                                             |
| 27               | Bulgaria | Beer                            | 1993           | 67                                                             |
| 27               | Bulgaria | Beverages, Alcoholic            | 1993           | 95                                                             |
| 27               | Bulgaria | Bovine Meat                     | 1993           | 72                                                             |
| 27               | Bulgaria | Butter, Chee                    | 1993           | 19                                                             |
| 27               | Bulgaria | Cereals - Excluding Beer        | 1993           | 1,165                                                          |
| 27               | Bulgaria | Citrus, Other                   | 1993           | 2                                                              |
| 27               | Bulgaria | Cocoa Beans and products        | 1993           | 12                                                             |
| 27               | Bulgaria | Coffee and products             | 1993           | 2                                                              |
| 27               | Bulgaria | Eggs                            | 1993           | 38                                                             |
| 27               | Bulgaria | Fats, Animals, Raw              | 1993           | 103                                                            |
| 27               | Bulgaria | Fish, Seafood                   | 1993           | 4                                                              |
| 27               | Bulgaria | Freshwater Fish                 | 1993           | 2                                                              |
| 27               | Bulgaria | Fruits - Excluding Wine         | 1993           | 71                                                             |
| 27               | Bulgaria | Fruits, Other                   | 1993           | 29                                                             |
| 27               | Bulgaria | Grand Total                     | 1993           | 2,958                                                          |
| 27               | Bulgaria | Grapes and products (excl wine) | 1993           | 10                                                             |
| 27               | Bulgaria | Groundnut Oil                   | 1993           | 6                                                              |
| 27               | Bulgaria | Groundnuts (Shelled Eq)         | 1993           | 4                                                              |
| 27               | Bulgaria | Honey                           | 1993           | 2                                                              |
| 27               | Bulgaria | Maize and products              | 1993           | 12                                                             |
| 27               | Bulgaria | Meat                            | 1993           | 279                                                            |
| 27               | Bulgaria | Meat, Other                     | 1993           | 2                                                              |
| 27               | Bulgaria | Milk - Excluding Butter         | 1993           | 248                                                            |
| 27               | Bulgaria | Miscellaneous                   | 1993           | 1                                                              |
| 27               | Bulgaria | Mutton & Goat Meat              | 1993           | 38                                                             |
| 27               | Bulgaria | Offals                          | 1993           | 21                                                             |
| 27               | Bulgaria | Oilcrops                        | 1993           | 20                                                             |
| 27               | Bulgaria | Oilcrops Oil, Other             | 1993           | 13                                                             |
| 27               | Bulgaria | Olives (including preserved)    | 1993           | 3                                                              |
| 27               | Bulgaria | Onions                          | 1993           | 6                                                              |
| 27               | Bulgaria | Oranges, Mandarines             | 1993           | 4                                                              |
| 27               | Bulgaria | Peas                            | 1993           | 10                                                             |
| 27               | Bulgaria | Pelagic Fish                    | 1993           | 1                                                              |
| 27               | Bulgaria | Pigmeat                         | 1993           | 133                                                            |
| 27               | Bulgaria | Pimento                         | 1993           | 1                                                              |
| 27               | Bulgaria | Potatoes and products           | 1993           | 54                                                             |

Dietary calcium and zinc deficiency risks are decreasing but remain prevalent

| FAO Country code | Country  | Food item                       | Reference year | Net energy supply (kcal capita <sup>-1</sup> d <sup>-1</sup> ) |
|------------------|----------|---------------------------------|----------------|----------------------------------------------------------------|
| 27               | Bulgaria | Poultry Meat                    | 1993           | 34                                                             |
| 27               | Bulgaria | Pulses                          | 1993           | 37                                                             |
| 27               | Bulgaria | Pulses, Other and products      | 1993           | 2                                                              |
| 27               | Bulgaria | Rape and Mustardseed            | 1993           | 1                                                              |
| 27               | Bulgaria | Rice (Milled Equivalent)        | 1993           | 43                                                             |
| 27               | Bulgaria | Rye and products                | 1993           | 2                                                              |
| 27               | Bulgaria | Soyabean Oil                    | 1993           | 10                                                             |
| 27               | Bulgaria | Soyabeans                       | 1993           | 1                                                              |
| 27               | Bulgaria | Spices                          | 1993           | 3                                                              |
| 27               | Bulgaria | Spices, Other                   | 1993           | 3                                                              |
| 27               | Bulgaria | Starchy Roots                   | 1993           | 54                                                             |
| 27               | Bulgaria | Stimulants                      | 1993           | 15                                                             |
| 27               | Bulgaria | Sugar & Sweeteners              | 1993           | 308                                                            |
| 27               | Bulgaria | Sugar (Raw Equivalent)          | 1993           | 303                                                            |
| 27               | Bulgaria | Sunflower seed                  | 1993           | 12                                                             |
| 27               | Bulgaria | Sunflowerseed Oil               | 1993           | 288                                                            |
| 27               | Bulgaria | Sweeteners, Other               | 1993           | 3                                                              |
| 27               | Bulgaria | Tomatoes and products           | 1993           | 22                                                             |
| 27               | Bulgaria | Treenuts                        | 1993           | 11                                                             |
| 27               | Bulgaria | Vegetable Oils                  | 1993           | 317                                                            |
| 27               | Bulgaria | Vegetables                      | 1993           | 60                                                             |
| 27               | Bulgaria | Vegetables, Other               | 1993           | 32                                                             |
| 27               | Bulgaria | Vegetal Products                | 1993           | 2,246                                                          |
| 27               | Bulgaria | Wheat and products              | 1993           | 1,098                                                          |
| 27               | Bulgaria | Wine                            | 1993           | 22                                                             |
| 27               | Bulgaria | Alcoholic Beverages             | 1994           | 188                                                            |
| 27               | Bulgaria | Animal fats                     | 1994           | 97                                                             |
| 27               | Bulgaria | Animal Products                 | 1994           | 659                                                            |
| 27               | Bulgaria | Apples and products             | 1994           | 13                                                             |
| 27               | Bulgaria | Bananas                         | 1994           | 9                                                              |
| 27               | Bulgaria | Barley and products             | 1994           | 10                                                             |
| 27               | Bulgaria | Beans                           | 1994           | 24                                                             |
| 27               | Bulgaria | Beer                            | 1994           | 75                                                             |
| 27               | Bulgaria | Beverages, Alcoholic            | 1994           | 94                                                             |
| 27               | Bulgaria | Bovine Meat                     | 1994           | 58                                                             |
| 27               | Bulgaria | Butter, Chee                    | 1994           | 13                                                             |
| 27               | Bulgaria | Cereals - Excluding Beer        | 1994           | 1,175                                                          |
| 27               | Bulgaria | Cocoa Beans and products        | 1994           | 11                                                             |
| 27               | Bulgaria | Coffee and products             | 1994           | 3                                                              |
| 27               | Bulgaria | Eggs                            | 1994           | 41                                                             |
| 27               | Bulgaria | Fats, Animals, Raw              | 1994           | 85                                                             |
| 27               | Bulgaria | Fish, Seafood                   | 1994           | 3                                                              |
| 27               | Bulgaria | Freshwater Fish                 | 1994           | 1                                                              |
| 27               | Bulgaria | Fruits - Excluding Wine         | 1994           | 74                                                             |
| 27               | Bulgaria | Fruits, Other                   | 1994           | 37                                                             |
| 27               | Bulgaria | Grand Total                     | 1994           | 2,873                                                          |
| 27               | Bulgaria | Grapes and products (excl wine) | 1994           | 9                                                              |
| 27               | Bulgaria | Groundnut Oil                   | 1994           | 6                                                              |
| 27               | Bulgaria | Groundnuts (Shelled Eq)         | 1994           | 3                                                              |
| 27               | Bulgaria | Honey                           | 1994           | 1                                                              |
| 27               | Bulgaria | Maize and products              | 1994           | 22                                                             |
| 27               | Bulgaria | Meat                            | 1994           | 260                                                            |
| 27               | Bulgaria | Meat, Other                     | 1994           | 2                                                              |
| 27               | Bulgaria | Milk - Excluding Butter         | 1994           | 241                                                            |
| 27               | Bulgaria | Miscellaneous                   | 1994           | 2                                                              |
| 27               | Bulgaria | Mutton & Goat Meat              | 1994           | 30                                                             |
| 27               | Bulgaria | Offals                          | 1994           | 17                                                             |
| 27               | Bulgaria | Oilcrops                        | 1994           | 22                                                             |
| 27               | Bulgaria | Oilcrops Oil, Other             | 1994           | 12                                                             |
| 27               | Bulgaria | Olives (including preserved)    | 1994           | 2                                                              |
| 27               | Bulgaria | Onions                          | 1994           | 9                                                              |
| 27               | Bulgaria | Oranges, Mandarines             | 1994           | 4                                                              |
| 27               | Bulgaria | Peas                            | 1994           | 9                                                              |
| 27               | Bulgaria | Pelagic Fish                    | 1994           | 1                                                              |
| 27               | Bulgaria | Pigmeat                         | 1994           | 130                                                            |
| 27               | Bulgaria | Potatoes and products           | 1994           | 54                                                             |
| 27               | Bulgaria | Poultry Meat                    | 1994           | 40                                                             |
| 27               | Bulgaria | Pulses                          | 1994           | 34                                                             |
| 27               | Bulgaria | Pulses, Other and products      | 1994           | 2                                                              |
| 27               | Bulgaria | Rice (Milled Equivalent)        | 1994           | 51                                                             |
| 27               | Bulgaria | Rye and products                | 1994           | 2                                                              |
| 27               | Bulgaria | Sesame seed                     | 1994           | 1                                                              |
| 27               | Bulgaria | Soyabean Oil                    | 1994           | 8                                                              |
| 27               | Bulgaria | Soyabeans                       | 1994           | 1                                                              |
| 27               | Bulgaria | Spices                          | 1994           | 2                                                              |
| 27               | Bulgaria | Spices, Other                   | 1994           | 1                                                              |
| 27               | Bulgaria | Starchy Roots                   | 1994           | 54                                                             |
| 27               | Bulgaria | Stimulants                      | 1994           | 14                                                             |
| 27               | Bulgaria | Sugar & Sweeteners              | 1994           | 290                                                            |
| 27               | Bulgaria | Sugar (Raw Equivalent)          | 1994           | 285                                                            |
| 27               | Bulgaria | Sunflower seed                  | 1994           | 15                                                             |
| 27               | Bulgaria | Sunflowerseed Oil               | 1994           | 259                                                            |
| 27               | Bulgaria | Sweeteners, Other               | 1994           | 4                                                              |
| 27               | Bulgaria | Tomatoes and products           | 1994           | 20                                                             |
| 27               | Bulgaria | Treenuts                        | 1994           | 9                                                              |
| 27               | Bulgaria | Vegetable Oils                  | 1994           | 285                                                            |
| 27               | Bulgaria | Vegetables                      | 1994           | 66                                                             |
| 27               | Bulgaria | Vegetables, Other               | 1994           | 37                                                             |
| 27               | Bulgaria | Vegetal Products                | 1994           | 2,214                                                          |
| 27               | Bulgaria | Wheat and products              | 1994           | 1,089                                                          |
| 27               | Bulgaria | Wine                            | 1994           | 19                                                             |
| 27               | Bulgaria | Alcoholic Beverages             | 1995           | 164                                                            |
| 27               | Bulgaria | Animal fats                     | 1995           | 91                                                             |
| 27               | Bulgaria | Animal Products                 | 1995           | 664                                                            |
| 27               | Bulgaria | Apples and products             | 1995           | 21                                                             |
| 27               | Bulgaria | Bananas                         | 1995           | 6                                                              |
| 27               | Bulgaria | Barley and products             | 1995           | 11                                                             |

Dietary calcium and zinc deficiency risks are decreasing but remain prevalent

| FAO Country code | Country  | Food item                       | Reference year | Net energy supply (kcal <i>capita</i> <sup>-1</sup> d <sup>-1</sup> ) |
|------------------|----------|---------------------------------|----------------|-----------------------------------------------------------------------|
| 27               | Bulgaria | Beans                           | 1995           | 25                                                                    |
| 27               | Bulgaria | Beer                            | 1995           | 68                                                                    |
| 27               | Bulgaria | Beverages, Alcoholic            | 1995           | 77                                                                    |
| 27               | Bulgaria | Bovine Meat                     | 1995           | 45                                                                    |
| 27               | Bulgaria | Butter, Ghee                    | 1995           | 9                                                                     |
| 27               | Bulgaria | Cereals - Excluding Beer        | 1995           | 1,175                                                                 |
| 27               | Bulgaria | Cocoa Beans and products        | 1995           | 12                                                                    |
| 27               | Bulgaria | Coffee and products             | 1995           | 4                                                                     |
| 27               | Bulgaria | Eggs                            | 1995           | 44                                                                    |
| 27               | Bulgaria | Fats, Animals, Raw              | 1995           | 82                                                                    |
| 27               | Bulgaria | Fish, Seafood                   | 1995           | 2                                                                     |
| 27               | Bulgaria | Freshwater Fish                 | 1995           | 1                                                                     |
| 27               | Bulgaria | Fruits - Excluding Wine         | 1995           | 94                                                                    |
| 27               | Bulgaria | Fruits, Other                   | 1995           | 42                                                                    |
| 27               | Bulgaria | Grand Total                     | 1995           | 2,896                                                                 |
| 27               | Bulgaria | Grapes and products (excl wine) | 1995           | 20                                                                    |
| 27               | Bulgaria | Groundnut Oil                   | 1995           | 8                                                                     |
| 27               | Bulgaria | Groundnuts (Shelled Eq)         | 1995           | 4                                                                     |
| 27               | Bulgaria | Honey                           | 1995           | 1                                                                     |
| 27               | Bulgaria | Maize and products              | 1995           | 27                                                                    |
| 27               | Bulgaria | Maize Germ Oil                  | 1995           | 2                                                                     |
| 27               | Bulgaria | Meat                            | 1995           | 262                                                                   |
| 27               | Bulgaria | Meat, Other                     | 1995           | 2                                                                     |
| 27               | Bulgaria | Milk - Excluding Butter         | 1995           | 246                                                                   |
| 27               | Bulgaria | Miscellaneous                   | 1995           | 1                                                                     |
| 27               | Bulgaria | Mutton & Goat Meat              | 1995           | 31                                                                    |
| 27               | Bulgaria | Offals                          | 1995           | 19                                                                    |
| 27               | Bulgaria | Oilcrops                        | 1995           | 23                                                                    |
| 27               | Bulgaria | Oilcrops Oil, Other             | 1995           | 10                                                                    |
| 27               | Bulgaria | Olives (including preserved)    | 1995           | 2                                                                     |
| 27               | Bulgaria | Onions                          | 1995           | 13                                                                    |
| 27               | Bulgaria | Oranges, Mandarines             | 1995           | 5                                                                     |
| 27               | Bulgaria | Peas                            | 1995           | 10                                                                    |
| 27               | Bulgaria | Pigmeat                         | 1995           | 140                                                                   |
| 27               | Bulgaria | Pimento                         | 1995           | 1                                                                     |
| 27               | Bulgaria | Potatoes and products           | 1995           | 55                                                                    |
| 27               | Bulgaria | Poultry Meat                    | 1995           | 42                                                                    |
| 27               | Bulgaria | Pulses                          | 1995           | 38                                                                    |
| 27               | Bulgaria | Pulses, Other and products      | 1995           | 3                                                                     |
| 27               | Bulgaria | Rape and Mustardseed            | 1995           | 1                                                                     |
| 27               | Bulgaria | Rice (Milled Equivalent)        | 1995           | 48                                                                    |
| 27               | Bulgaria | Rye and products                | 1995           | 4                                                                     |
| 27               | Bulgaria | Soyabean Oil                    | 1995           | 7                                                                     |
| 27               | Bulgaria | Soyabeans                       | 1995           | 1                                                                     |
| 27               | Bulgaria | Spices                          | 1995           | 2                                                                     |
| 27               | Bulgaria | Spices, Other                   | 1995           | 1                                                                     |
| 27               | Bulgaria | Starchy Roots                   | 1995           | 55                                                                    |
| 27               | Bulgaria | Stimulants                      | 1995           | 15                                                                    |
| 27               | Bulgaria | Sugar & Sweeteners              | 1995           | 292                                                                   |
| 27               | Bulgaria | Sugar (Raw Equivalent)          | 1995           | 287                                                                   |
| 27               | Bulgaria | Sunflower seed                  | 1995           | 15                                                                    |
| 27               | Bulgaria | Sunflowerseed Oil               | 1995           | 268                                                                   |
| 27               | Bulgaria | Sweeteners, Other               | 1995           | 4                                                                     |
| 27               | Bulgaria | Tomatoes and products           | 1995           | 18                                                                    |
| 27               | Bulgaria | Treenuts                        | 1995           | 3                                                                     |
| 27               | Bulgaria | Vegetable Oils                  | 1995           | 294                                                                   |
| 27               | Bulgaria | Vegetables                      | 1995           | 77                                                                    |
| 27               | Bulgaria | Vegetables, Other               | 1995           | 46                                                                    |
| 27               | Bulgaria | Vegetal Products                | 1995           | 2,232                                                                 |
| 27               | Bulgaria | Wheat and products              | 1995           | 1,086                                                                 |
| 27               | Bulgaria | Wine                            | 1995           | 19                                                                    |
| 27               | Bulgaria | Alcoholic Beverages             | 1996           | 145                                                                   |
| 27               | Bulgaria | Animal fats                     | 1996           | 73                                                                    |
| 27               | Bulgaria | Animal Products                 | 1996           | 635                                                                   |
| 27               | Bulgaria | Apples and products             | 1996           | 24                                                                    |
| 27               | Bulgaria | Bananas                         | 1996           | 4                                                                     |
| 27               | Bulgaria | Barley and products             | 1996           | 12                                                                    |
| 27               | Bulgaria | Beans                           | 1996           | 22                                                                    |
| 27               | Bulgaria | Beer                            | 1996           | 67                                                                    |
| 27               | Bulgaria | Beverages, Alcoholic            | 1996           | 59                                                                    |
| 27               | Bulgaria | Bovine Meat                     | 1996           | 42                                                                    |
| 27               | Bulgaria | Butter, Ghee                    | 1996           | 7                                                                     |
| 27               | Bulgaria | Cereals - Excluding Beer        | 1996           | 1,111                                                                 |
| 27               | Bulgaria | Cocoa Beans and products        | 1996           | 6                                                                     |
| 27               | Bulgaria | Coffee and products             | 1996           | 2                                                                     |
| 27               | Bulgaria | Eggs                            | 1996           | 44                                                                    |
| 27               | Bulgaria | Fats, Animals, Raw              | 1996           | 66                                                                    |
| 27               | Bulgaria | Fish, Seafood                   | 1996           | 2                                                                     |
| 27               | Bulgaria | Freshwater Fish                 | 1996           | 1                                                                     |
| 27               | Bulgaria | Fruits - Excluding Wine         | 1996           | 86                                                                    |
| 27               | Bulgaria | Fruits, Other                   | 1996           | 40                                                                    |
| 27               | Bulgaria | Grand Total                     | 1996           | 2,741                                                                 |
| 27               | Bulgaria | Grapes and products (excl wine) | 1996           | 15                                                                    |
| 27               | Bulgaria | Groundnut Oil                   | 1996           | 7                                                                     |
| 27               | Bulgaria | Groundnuts (Shelled Eq)         | 1996           | 3                                                                     |
| 27               | Bulgaria | Maize and products              | 1996           | 32                                                                    |
| 27               | Bulgaria | Meat                            | 1996           | 258                                                                   |
| 27               | Bulgaria | Meat, Other                     | 1996           | 3                                                                     |
| 27               | Bulgaria | Milk - Excluding Butter         | 1996           | 240                                                                   |
| 27               | Bulgaria | Miscellaneous                   | 1996           | 1                                                                     |
| 27               | Bulgaria | Mutton & Goat Meat              | 1996           | 37                                                                    |
| 27               | Bulgaria | Offals                          | 1996           | 18                                                                    |
| 27               | Bulgaria | Oilcrops                        | 1996           | 21                                                                    |
| 27               | Bulgaria | Oilcrops Oil, Other             | 1996           | 7                                                                     |
| 27               | Bulgaria | Olives (including preserved)    | 1996           | 1                                                                     |
| 27               | Bulgaria | Onions                          | 1996           | 11                                                                    |
| 27               | Bulgaria | Oranges, Mandarines             | 1996           | 2                                                                     |

Dietary calcium and zinc deficiency risks are decreasing but remain prevalent

| FAO Country code | Country  | Food item                       | Reference year | Net energy supply (kcal capita <sup>-1</sup> d <sup>-1</sup> ) |
|------------------|----------|---------------------------------|----------------|----------------------------------------------------------------|
| 27               | Bulgaria | Peas                            | 1996           | 11                                                             |
| 27               | Bulgaria | Pelagic Fish                    | 1996           | 1                                                              |
| 27               | Bulgaria | Pigmeat                         | 1996           | 130                                                            |
| 27               | Bulgaria | Potatoes and products           | 1996           | 56                                                             |
| 27               | Bulgaria | Poultry Meat                    | 1996           | 46                                                             |
| 27               | Bulgaria | Pulses                          | 1996           | 35                                                             |
| 27               | Bulgaria | Pulses, Other and products      | 1996           | 3                                                              |
| 27               | Bulgaria | Rice (Milled Equivalent)        | 1996           | 50                                                             |
| 27               | Bulgaria | Rye and products                | 1996           | 3                                                              |
| 27               | Bulgaria | Soyabean Oil                    | 1996           | 4                                                              |
| 27               | Bulgaria | Spices                          | 1996           | 5                                                              |
| 27               | Bulgaria | Spices, Other                   | 1996           | 5                                                              |
| 27               | Bulgaria | Starchy Roots                   | 1996           | 56                                                             |
| 27               | Bulgaria | Stimulants                      | 1996           | 8                                                              |
| 27               | Bulgaria | Sugar & Sweeteners              | 1996           | 272                                                            |
| 27               | Bulgaria | Sugar (Raw Equivalent)          | 1996           | 267                                                            |
| 27               | Bulgaria | Sunflower seed                  | 1996           | 15                                                             |
| 27               | Bulgaria | Sunflowerseed Oil               | 1996           | 277                                                            |
| 27               | Bulgaria | Sweeteners, Other               | 1996           | 5                                                              |
| 27               | Bulgaria | Tomatoes and products           | 1996           | 17                                                             |
| 27               | Bulgaria | Treenuts                        | 1996           | 2                                                              |
| 27               | Bulgaria | Vegetable Oils                  | 1996           | 295                                                            |
| 27               | Bulgaria | Vegetables                      | 1996           | 69                                                             |
| 27               | Bulgaria | Vegetables, Other               | 1996           | 40                                                             |
| 27               | Bulgaria | Vegetal Products                | 1996           | 2,106                                                          |
| 27               | Bulgaria | Wheat and products              | 1996           | 1,013                                                          |
| 27               | Bulgaria | Wine                            | 1996           | 19                                                             |
| 27               | Bulgaria | Alcoholic Beverages             | 1997           | 130                                                            |
| 27               | Bulgaria | Animal fats                     | 1997           | 65                                                             |
| 27               | Bulgaria | Animal Products                 | 1997           | 628                                                            |
| 27               | Bulgaria | Apples and products             | 1997           | 22                                                             |
| 27               | Bulgaria | Bananas                         | 1997           | 3                                                              |
| 27               | Bulgaria | Barley and products             | 1997           | 14                                                             |
| 27               | Bulgaria | Beans                           | 1997           | 21                                                             |
| 27               | Bulgaria | Beer                            | 1997           | 49                                                             |
| 27               | Bulgaria | Beverages, Alcoholic            | 1997           | 67                                                             |
| 27               | Bulgaria | Bovine Meat                     | 1997           | 37                                                             |
| 27               | Bulgaria | Butter, Ghee                    | 1997           | 5                                                              |
| 27               | Bulgaria | Cereals - Excluding Beer        | 1997           | 1,076                                                          |
| 27               | Bulgaria | Cocoa Beans and products        | 1997           | 4                                                              |
| 27               | Bulgaria | Coffee and products             | 1997           | 3                                                              |
| 27               | Bulgaria | Eggs                            | 1997           | 39                                                             |
| 27               | Bulgaria | Fats, Animals, Raw              | 1997           | 60                                                             |
| 27               | Bulgaria | Fish, Seafood                   | 1997           | 5                                                              |
| 27               | Bulgaria | Freshwater Fish                 | 1997           | 2                                                              |
| 27               | Bulgaria | Fruits - Excluding Wine         | 1997           | 78                                                             |
| 27               | Bulgaria | Fruits, Other                   | 1997           | 34                                                             |
| 27               | Bulgaria | Grand Total                     | 1997           | 2,676                                                          |
| 27               | Bulgaria | Grapes and products (excl wine) | 1997           | 16                                                             |
| 27               | Bulgaria | Groundnut Oil                   | 1997           | 8                                                              |
| 27               | Bulgaria | Groundnuts (Shelled Eq)         | 1997           | 3                                                              |
| 27               | Bulgaria | Honey                           | 1997           | 1                                                              |
| 27               | Bulgaria | Maize and products              | 1997           | 33                                                             |
| 27               | Bulgaria | Maize Germ Oil                  | 1997           | 2                                                              |
| 27               | Bulgaria | Meat                            | 1997           | 249                                                            |
| 27               | Bulgaria | Meat, Other                     | 1997           | 5                                                              |
| 27               | Bulgaria | Milk - Excluding Butter         | 1997           | 252                                                            |
| 27               | Bulgaria | Miscellaneous                   | 1997           | 1                                                              |
| 27               | Bulgaria | Mutton & Goat Meat              | 1997           | 34                                                             |
| 27               | Bulgaria | Offals                          | 1997           | 17                                                             |
| 27               | Bulgaria | Oilcrops                        | 1997           | 17                                                             |
| 27               | Bulgaria | Oilcrops Oil, Other             | 1997           | 7                                                              |
| 27               | Bulgaria | Olives (including preserved)    | 1997           | 2                                                              |
| 27               | Bulgaria | Onions                          | 1997           | 9                                                              |
| 27               | Bulgaria | Oranges, Mandarines             | 1997           | 2                                                              |
| 27               | Bulgaria | Peas                            | 1997           | 9                                                              |
| 27               | Bulgaria | Pelagic Fish                    | 1997           | 3                                                              |
| 27               | Bulgaria | Pigmeat                         | 1997           | 123                                                            |
| 27               | Bulgaria | Pimento                         | 1997           | 1                                                              |
| 27               | Bulgaria | Potatoes and products           | 1997           | 52                                                             |
| 27               | Bulgaria | Poultry Meat                    | 1997           | 50                                                             |
| 27               | Bulgaria | Pulses                          | 1997           | 35                                                             |
| 27               | Bulgaria | Pulses, Other and products      | 1997           | 5                                                              |
| 27               | Bulgaria | Rice (Milled Equivalent)        | 1997           | 42                                                             |
| 27               | Bulgaria | Rye and products                | 1997           | 5                                                              |
| 27               | Bulgaria | Soyabean Oil                    | 1997           | 6                                                              |
| 27               | Bulgaria | Spices                          | 1997           | 3                                                              |
| 27               | Bulgaria | Spices, Other                   | 1997           | 2                                                              |
| 27               | Bulgaria | Starchy Roots                   | 1997           | 52                                                             |
| 27               | Bulgaria | Stimulants                      | 1997           | 7                                                              |
| 27               | Bulgaria | Sugar & Sweeteners              | 1997           | 280                                                            |
| 27               | Bulgaria | Sugar (Raw Equivalent)          | 1997           | 274                                                            |
| 27               | Bulgaria | Sunflower seed                  | 1997           | 12                                                             |
| 27               | Bulgaria | Sunflowerseed Oil               | 1997           | 273                                                            |
| 27               | Bulgaria | Sweeteners, Other               | 1997           | 4                                                              |
| 27               | Bulgaria | Tomatoes and products           | 1997           | 15                                                             |
| 27               | Bulgaria | Treenuts                        | 1997           | 3                                                              |
| 27               | Bulgaria | Vegetable Oils                  | 1997           | 295                                                            |
| 27               | Bulgaria | Vegetables                      | 1997           | 72                                                             |
| 27               | Bulgaria | Vegetables, Other               | 1997           | 48                                                             |
| 27               | Bulgaria | Vegetal Products                | 1997           | 2,048                                                          |
| 27               | Bulgaria | Wheat and products              | 1997           | 981                                                            |
| 27               | Bulgaria | Wine                            | 1997           | 14                                                             |
| 27               | Bulgaria | Alcoholic Beverages             | 1998           | 131                                                            |
| 27               | Bulgaria | Animal fats                     | 1998           | 64                                                             |
| 27               | Bulgaria | Animal Products                 | 1998           | 700                                                            |
| 27               | Bulgaria | Apples and products             | 1998           | 16                                                             |

Dietary calcium and zinc deficiency risks are decreasing but remain prevalent

| FAO Country code | Country  | Food item                       | Reference year | Net energy supply (kcal capita <sup>-1</sup> d <sup>-1</sup> ) |
|------------------|----------|---------------------------------|----------------|----------------------------------------------------------------|
| 27               | Bulgaria | Bananas                         | 1998           | 5                                                              |
| 27               | Bulgaria | Barley and products             | 1998           | 10                                                             |
| 27               | Bulgaria | Beans                           | 1998           | 23                                                             |
| 27               | Bulgaria | Beer                            | 1998           | 62                                                             |
| 27               | Bulgaria | Beverages, Alcoholic            | 1998           | 64                                                             |
| 27               | Bulgaria | Bovine Meat                     | 1998           | 40                                                             |
| 27               | Bulgaria | Butter, Ghee                    | 1998           | 6                                                              |
| 27               | Bulgaria | Cereals - Excluding Beer        | 1998           | 1,097                                                          |
| 27               | Bulgaria | Cocoa Beans and products        | 1998           | 5                                                              |
| 27               | Bulgaria | Coffee and products             | 1998           | 3                                                              |
| 27               | Bulgaria | Eggs                            | 1998           | 44                                                             |
| 27               | Bulgaria | Fats, Animals, Raw              | 1998           | 58                                                             |
| 27               | Bulgaria | Fish, Seafood                   | 1998           | 11                                                             |
| 27               | Bulgaria | Freshwater Fish                 | 1998           | 2                                                              |
| 27               | Bulgaria | Fruits - Excluding Wine         | 1998           | 64                                                             |
| 27               | Bulgaria | Fruits, Other                   | 1998           | 29                                                             |
| 27               | Bulgaria | Grand Total                     | 1998           | 2,819                                                          |
| 27               | Bulgaria | Grapes and products (excl wine) | 1998           | 10                                                             |
| 27               | Bulgaria | Groundnut Oil                   | 1998           | 11                                                             |
| 27               | Bulgaria | Groundnuts (Shelled Eq)         | 1998           | 5                                                              |
| 27               | Bulgaria | Honey                           | 1998           | 3                                                              |
| 27               | Bulgaria | Maize and products              | 1998           | 54                                                             |
| 27               | Bulgaria | Maize Germ Oil                  | 1998           | 2                                                              |
| 27               | Bulgaria | Marine Fish, Other              | 1998           | 1                                                              |
| 27               | Bulgaria | Meat                            | 1998           | 287                                                            |
| 27               | Bulgaria | Meat, Other                     | 1998           | 3                                                              |
| 27               | Bulgaria | Milk - Excluding Butter         | 1998           | 275                                                            |
| 27               | Bulgaria | Miscellaneous                   | 1998           | 1                                                              |
| 27               | Bulgaria | Mutton & Goat Meat              | 1998           | 36                                                             |
| 27               | Bulgaria | Offals                          | 1998           | 20                                                             |
| 27               | Bulgaria | Oilcrops                        | 1998           | 21                                                             |
| 27               | Bulgaria | Oilcrops Oil, Other             | 1998           | 4                                                              |
| 27               | Bulgaria | Olives (including preserved)    | 1998           | 3                                                              |
| 27               | Bulgaria | Onions                          | 1998           | 11                                                             |
| 27               | Bulgaria | Oranges, Mandarines             | 1998           | 3                                                              |
| 27               | Bulgaria | Peas                            | 1998           | 8                                                              |
| 27               | Bulgaria | Pelagic Fish                    | 1998           | 8                                                              |
| 27               | Bulgaria | Pigmeat                         | 1998           | 152                                                            |
| 27               | Bulgaria | Pimento                         | 1998           | 1                                                              |
| 27               | Bulgaria | Potatoes and products           | 1998           | 58                                                             |
| 27               | Bulgaria | Poultry Meat                    | 1998           | 56                                                             |
| 27               | Bulgaria | Pulses                          | 1998           | 35                                                             |
| 27               | Bulgaria | Pulses, Other and products      | 1998           | 5                                                              |
| 27               | Bulgaria | Rape and Mustardseed            | 1998           | 1                                                              |
| 27               | Bulgaria | Rice (Milled Equivalent)        | 1998           | 30                                                             |
| 27               | Bulgaria | Rye and products                | 1998           | 4                                                              |
| 27               | Bulgaria | Soyabean Oil                    | 1998           | 14                                                             |
| 27               | Bulgaria | Spices                          | 1998           | 3                                                              |
| 27               | Bulgaria | Spices, Other                   | 1998           | 1                                                              |
| 27               | Bulgaria | Starchy Roots                   | 1998           | 58                                                             |
| 27               | Bulgaria | Stimulants                      | 1998           | 7                                                              |
| 27               | Bulgaria | Sugar & Sweeteners              | 1998           | 270                                                            |
| 27               | Bulgaria | Sugar (Raw Equivalent)          | 1998           | 263                                                            |
| 27               | Bulgaria | Sunflower seed                  | 1998           | 12                                                             |
| 27               | Bulgaria | Sunflowerseed Oil               | 1998           | 306                                                            |
| 27               | Bulgaria | Sweeteners, Other               | 1998           | 4                                                              |
| 27               | Bulgaria | Tomatoes and products           | 1998           | 24                                                             |
| 27               | Bulgaria | Treenuts                        | 1998           | 2                                                              |
| 27               | Bulgaria | Vegetable Oils                  | 1998           | 338                                                            |
| 27               | Bulgaria | Vegetables                      | 1998           | 92                                                             |
| 27               | Bulgaria | Vegetables, Other               | 1998           | 57                                                             |
| 27               | Bulgaria | Vegetal Products                | 1998           | 2,119                                                          |
| 27               | Bulgaria | Wheat and products              | 1998           | 999                                                            |
| 27               | Bulgaria | Wine                            | 1998           | 6                                                              |
| 27               | Bulgaria | Alcoholic Beverages             | 1999           | 151                                                            |
| 27               | Bulgaria | Animal fats                     | 1999           | 66                                                             |
| 27               | Bulgaria | Animal Products                 | 1999           | 653                                                            |
| 27               | Bulgaria | Apples and products             | 1999           | 15                                                             |
| 27               | Bulgaria | Bananas                         | 1999           | 7                                                              |
| 27               | Bulgaria | Barley and products             | 1999           | 11                                                             |
| 27               | Bulgaria | Beans                           | 1999           | 23                                                             |
| 27               | Bulgaria | Beer                            | 1999           | 68                                                             |
| 27               | Bulgaria | Beverages, Alcoholic            | 1999           | 64                                                             |
| 27               | Bulgaria | Bovine Meat                     | 1999           | 41                                                             |
| 27               | Bulgaria | Butter, Ghee                    | 1999           | 5                                                              |
| 27               | Bulgaria | Cereals - Excluding Beer        | 1999           | 1,172                                                          |
| 27               | Bulgaria | Cocoa Beans and products        | 1999           | 6                                                              |
| 27               | Bulgaria | Coffee and products             | 1999           | 3                                                              |
| 27               | Bulgaria | Eggs                            | 1999           | 42                                                             |
| 27               | Bulgaria | Fats, Animals, Raw              | 1999           | 60                                                             |
| 27               | Bulgaria | Fish, Seafood                   | 1999           | 9                                                              |
| 27               | Bulgaria | Freshwater Fish                 | 1999           | 2                                                              |
| 27               | Bulgaria | Fruits - Excluding Wine         | 1999           | 67                                                             |
| 27               | Bulgaria | Fruits, Other                   | 1999           | 30                                                             |
| 27               | Bulgaria | Grand Total                     | 1999           | 2,879                                                          |
| 27               | Bulgaria | Grapes and products (excl wine) | 1999           | 9                                                              |
| 27               | Bulgaria | Groundnut Oil                   | 1999           | 10                                                             |
| 27               | Bulgaria | Groundnuts (Shelled Eq)         | 1999           | 4                                                              |
| 27               | Bulgaria | Maize and products              | 1999           | 92                                                             |
| 27               | Bulgaria | Maize Germ Oil                  | 1999           | 5                                                              |
| 27               | Bulgaria | Marine Fish, Other              | 1999           | 1                                                              |
| 27               | Bulgaria | Meat                            | 1999           | 249                                                            |
| 27               | Bulgaria | Meat, Other                     | 1999           | 2                                                              |
| 27               | Bulgaria | Milk - Excluding Butter         | 1999           | 268                                                            |
| 27               | Bulgaria | Miscellaneous                   | 1999           | 1                                                              |
| 27               | Bulgaria | Mutton & Goat Meat              | 1999           | 39                                                             |
| 27               | Bulgaria | Offals                          | 1999           | 20                                                             |

Dietary calcium and zinc deficiency risks are decreasing but remain prevalent

| FAO Country code | Country  | Food item                       | Reference year | Net energy supply (kcal capita <sup>-1</sup> d <sup>-1</sup> ) |
|------------------|----------|---------------------------------|----------------|----------------------------------------------------------------|
| 27               | Bulgaria | Oilcrops                        | 1999           | 22                                                             |
| 27               | Bulgaria | Oilcrops Oil, Other             | 1999           | 2                                                              |
| 27               | Bulgaria | Olive Oil                       | 1999           | 1                                                              |
| 27               | Bulgaria | Olives (including preserved)    | 1999           | 3                                                              |
| 27               | Bulgaria | Onions                          | 1999           | 11                                                             |
| 27               | Bulgaria | Oranges, Mandarines             | 1999           | 5                                                              |
| 27               | Bulgaria | Peas                            | 1999           | 9                                                              |
| 27               | Bulgaria | Pelagic Fish                    | 1999           | 5                                                              |
| 27               | Bulgaria | Pepper                          | 1999           | 1                                                              |
| 27               | Bulgaria | Pigmeat                         | 1999           | 111                                                            |
| 27               | Bulgaria | Pimento                         | 1999           | 1                                                              |
| 27               | Bulgaria | Potatoes and products           | 1999           | 60                                                             |
| 27               | Bulgaria | Poultry Meat                    | 1999           | 55                                                             |
| 27               | Bulgaria | Pulses                          | 1999           | 36                                                             |
| 27               | Bulgaria | Pulses, Other and products      | 1999           | 4                                                              |
| 27               | Bulgaria | Rape and Mustardseed            | 1999           | 2                                                              |
| 27               | Bulgaria | Rice (Milled Equivalent)        | 1999           | 25                                                             |
| 27               | Bulgaria | Rye and products                | 1999           | 6                                                              |
| 27               | Bulgaria | Soyabean Oil                    | 1999           | 9                                                              |
| 27               | Bulgaria | Spices                          | 1999           | 3                                                              |
| 27               | Bulgaria | Spices, Other                   | 1999           | 1                                                              |
| 27               | Bulgaria | Starchy Roots                   | 1999           | 60                                                             |
| 27               | Bulgaria | Stimulants                      | 1999           | 9                                                              |
| 27               | Bulgaria | Sugar & Sweeteners              | 1999           | 285                                                            |
| 27               | Bulgaria | Sugar (Raw Equivalent)          | 1999           | 281                                                            |
| 27               | Bulgaria | Sunflower seed                  | 1999           | 13                                                             |
| 27               | Bulgaria | Sunflowerseed Oil               | 1999           | 304                                                            |
| 27               | Bulgaria | Sweeteners, Other               | 1999           | 4                                                              |
| 27               | Bulgaria | Tomatoes and products           | 1999           | 21                                                             |
| 27               | Bulgaria | Treenuts                        | 1999           | 3                                                              |
| 27               | Bulgaria | Vegetable Oils                  | 1999           | 332                                                            |
| 27               | Bulgaria | Vegetables                      | 1999           | 84                                                             |
| 27               | Bulgaria | Vegetables, Other               | 1999           | 52                                                             |
| 27               | Bulgaria | Vegetal Products                | 1999           | 2,226                                                          |
| 27               | Bulgaria | Wheat and products              | 1999           | 1,038                                                          |
| 27               | Bulgaria | Wine                            | 1999           | 20                                                             |
| 27               | Bulgaria | Alcoholic Beverages             | 2000           | 145                                                            |
| 27               | Bulgaria | Animal fats                     | 2000           | 68                                                             |
| 27               | Bulgaria | Animal Products                 | 2000           | 645                                                            |
| 27               | Bulgaria | Apples and products             | 2000           | 16                                                             |
| 27               | Bulgaria | Bananas                         | 2000           | 6                                                              |
| 27               | Bulgaria | Barley and products             | 2000           | 13                                                             |
| 27               | Bulgaria | Beans                           | 2000           | 16                                                             |
| 27               | Bulgaria | Beer                            | 2000           | 69                                                             |
| 27               | Bulgaria | Beverages, Alcoholic            | 2000           | 56                                                             |
| 27               | Bulgaria | Bovine Meat                     | 2000           | 34                                                             |
| 27               | Bulgaria | Butter, Ghee                    | 2000           | 6                                                              |
| 27               | Bulgaria | Cereals - Excluding Beer        | 2000           | 1,138                                                          |
| 27               | Bulgaria | Cocoa Beans and products        | 2000           | 5                                                              |
| 27               | Bulgaria | Coffee and products             | 2000           | 3                                                              |
| 27               | Bulgaria | Eggs                            | 2000           | 38                                                             |
| 27               | Bulgaria | Fats, Animals, Raw              | 2000           | 62                                                             |
| 27               | Bulgaria | Fish, Seafood                   | 2000           | 7                                                              |
| 27               | Bulgaria | Freshwater Fish                 | 2000           | 1                                                              |
| 27               | Bulgaria | Fruits - Excluding Wine         | 2000           | 71                                                             |
| 27               | Bulgaria | Fruits, Other                   | 2000           | 30                                                             |
| 27               | Bulgaria | Grand Total                     | 2000           | 2,813                                                          |
| 27               | Bulgaria | Grapes and products (excl wine) | 2000           | 14                                                             |
| 27               | Bulgaria | Groundnut Oil                   | 2000           | 11                                                             |
| 27               | Bulgaria | Groundnuts (Shelled Eq)         | 2000           | 4                                                              |
| 27               | Bulgaria | Honey                           | 2000           | 2                                                              |
| 27               | Bulgaria | Maize and products              | 2000           | 106                                                            |
| 27               | Bulgaria | Maize Germ Oil                  | 2000           | 5                                                              |
| 27               | Bulgaria | Marine Fish, Other              | 2000           | 1                                                              |
| 27               | Bulgaria | Meat                            | 2000           | 248                                                            |
| 27               | Bulgaria | Meat, Other                     | 2000           | 3                                                              |
| 27               | Bulgaria | Milk - Excluding Butter         | 2000           | 265                                                            |
| 27               | Bulgaria | Mutton & Goat Meat              | 2000           | 40                                                             |
| 27               | Bulgaria | Offals                          | 2000           | 19                                                             |
| 27               | Bulgaria | Oilcrops                        | 2000           | 22                                                             |
| 27               | Bulgaria | Oilcrops Oil, Other             | 2000           | 6                                                              |
| 27               | Bulgaria | Olives (including preserved)    | 2000           | 2                                                              |
| 27               | Bulgaria | Onions                          | 2000           | 8                                                              |
| 27               | Bulgaria | Oranges, Mandarines             | 2000           | 4                                                              |
| 27               | Bulgaria | Peas                            | 2000           | 6                                                              |
| 27               | Bulgaria | Pelagic Fish                    | 2000           | 5                                                              |
| 27               | Bulgaria | Pepper                          | 2000           | 1                                                              |
| 27               | Bulgaria | Pigmeat                         | 2000           | 111                                                            |
| 27               | Bulgaria | Pimento                         | 2000           | 1                                                              |
| 27               | Bulgaria | Potatoes and products           | 2000           | 58                                                             |
| 27               | Bulgaria | Poultry Meat                    | 2000           | 60                                                             |
| 27               | Bulgaria | Pulses                          | 2000           | 25                                                             |
| 27               | Bulgaria | Pulses, Other and products      | 2000           | 4                                                              |
| 27               | Bulgaria | Rape and Mustardseed            | 2000           | 2                                                              |
| 27               | Bulgaria | Rice (Milled Equivalent)        | 2000           | 36                                                             |
| 27               | Bulgaria | Rye and products                | 2000           | 5                                                              |
| 27               | Bulgaria | Sesame seed                     | 2000           | 2                                                              |
| 27               | Bulgaria | Soyabean Oil                    | 2000           | 19                                                             |
| 27               | Bulgaria | Spices                          | 2000           | 3                                                              |
| 27               | Bulgaria | Spices, Other                   | 2000           | 2                                                              |
| 27               | Bulgaria | Starchy Roots                   | 2000           | 58                                                             |
| 27               | Bulgaria | Stimulants                      | 2000           | 8                                                              |
| 27               | Bulgaria | Sugar & Sweeteners              | 2000           | 279                                                            |
| 27               | Bulgaria | Sugar (Raw Equivalent)          | 2000           | 274                                                            |
| 27               | Bulgaria | Sunflower seed                  | 2000           | 13                                                             |
| 27               | Bulgaria | Sunflowerseed Oil               | 2000           | 294                                                            |
| 27               | Bulgaria | Sweeteners, Other               | 2000           | 3                                                              |



Dietary calcium and zinc deficiency risks are decreasing but remain prevalent

| FAO Country code | Country  | Food item                       | Reference year | Net energy supply (kcal capita <sup>-1</sup> d <sup>-1</sup> ) |
|------------------|----------|---------------------------------|----------------|----------------------------------------------------------------|
| 27               | Bulgaria | Tomatoes and products           | 2000           | 21                                                             |
| 27               | Bulgaria | Treenuts                        | 2000           | 3                                                              |
| 27               | Bulgaria | Vegetable Oils                  | 2000           | 335                                                            |
| 27               | Bulgaria | Vegetables                      | 2000           | 80                                                             |
| 27               | Bulgaria | Vegetables, Other               | 2000           | 52                                                             |
| 27               | Bulgaria | Vegetal Products                | 2000           | 2,168                                                          |
| 27               | Bulgaria | Wheat and products              | 2000           | 977                                                            |
| 27               | Bulgaria | Wine                            | 2000           | 21                                                             |
| 27               | Bulgaria | Alcoholic Beverages             | 2001           | 143                                                            |
| 27               | Bulgaria | Animal fats                     | 2001           | 73                                                             |
| 27               | Bulgaria | Animal Products                 | 2001           | 603                                                            |
| 27               | Bulgaria | Apples and products             | 2001           | 10                                                             |
| 27               | Bulgaria | Bananas                         | 2001           | 6                                                              |
| 27               | Bulgaria | Barley and products             | 2001           | 11                                                             |
| 27               | Bulgaria | Beans                           | 2001           | 20                                                             |
| 27               | Bulgaria | Beer                            | 2001           | 70                                                             |
| 27               | Bulgaria | Beverages, Alcoholic            | 2001           | 58                                                             |
| 27               | Bulgaria | Bovine Meat                     | 2001           | 44                                                             |
| 27               | Bulgaria | Butter, Ghee                    | 2001           | 5                                                              |
| 27               | Bulgaria | Cereals - Excluding Beer        | 2001           | 1,124                                                          |
| 27               | Bulgaria | Cocoa Beans and products        | 2001           | 6                                                              |
| 27               | Bulgaria | Coffee and products             | 2001           | 3                                                              |
| 27               | Bulgaria | Eggs                            | 2001           | 38                                                             |
| 27               | Bulgaria | Fats, Animals, Raw              | 2001           | 68                                                             |
| 27               | Bulgaria | Fish, Seafood                   | 2001           | 7                                                              |
| 27               | Bulgaria | Freshwater Fish                 | 2001           | 1                                                              |
| 27               | Bulgaria | Fruits - Excluding Wine         | 2001           | 75                                                             |
| 27               | Bulgaria | Fruits, Other                   | 2001           | 24                                                             |
| 27               | Bulgaria | Grand Total                     | 2001           | 2,816                                                          |
| 27               | Bulgaria | Grapes and products (excl wine) | 2001           | 30                                                             |
| 27               | Bulgaria | Groundnut Oil                   | 2001           | 8                                                              |
| 27               | Bulgaria | Groundnuts (Shelled Eq)         | 2001           | 5                                                              |
| 27               | Bulgaria | Honey                           | 2001           | 2                                                              |
| 27               | Bulgaria | Lemons, Limes and products      | 2001           | 1                                                              |
| 27               | Bulgaria | Maize and products              | 2001           | 95                                                             |
| 27               | Bulgaria | Maize Germ Oil                  | 2001           | 3                                                              |
| 27               | Bulgaria | Marine Fish, Other              | 2001           | 1                                                              |
| 27               | Bulgaria | Meat                            | 2001           | 238                                                            |
| 27               | Bulgaria | Meat, Other                     | 2001           | 2                                                              |
| 27               | Bulgaria | Milk - Excluding Butter         | 2001           | 224                                                            |
| 27               | Bulgaria | Miscellaneous                   | 2001           | 4                                                              |
| 27               | Bulgaria | Mutton & Goat Meat              | 2001           | 34                                                             |
| 27               | Bulgaria | Offals                          | 2001           | 22                                                             |
| 27               | Bulgaria | Oilcrops                        | 2001           | 22                                                             |
| 27               | Bulgaria | Oilcrops Oil, Other             | 2001           | 10                                                             |
| 27               | Bulgaria | Olive Oil                       | 2001           | 2                                                              |
| 27               | Bulgaria | Olives (including preserved)    | 2001           | 2                                                              |
| 27               | Bulgaria | Onions                          | 2001           | 6                                                              |
| 27               | Bulgaria | Oranges, Mandarines             | 2001           | 4                                                              |
| 27               | Bulgaria | Peas                            | 2001           | 10                                                             |
| 27               | Bulgaria | Pelagic Fish                    | 2001           | 6                                                              |
| 27               | Bulgaria | Pigmeat                         | 2001           | 94                                                             |
| 27               | Bulgaria | Pimento                         | 2001           | 1                                                              |
| 27               | Bulgaria | Potatoes and products           | 2001           | 62                                                             |
| 27               | Bulgaria | Poultry Meat                    | 2001           | 65                                                             |
| 27               | Bulgaria | Pulses                          | 2001           | 35                                                             |
| 27               | Bulgaria | Pulses, Other and products      | 2001           | 5                                                              |
| 27               | Bulgaria | Rice (Milled Equivalent)        | 2001           | 42                                                             |
| 27               | Bulgaria | Rye and products                | 2001           | 4                                                              |
| 27               | Bulgaria | Sesame seed                     | 2001           | 1                                                              |
| 27               | Bulgaria | Soyabean Oil                    | 2001           | 30                                                             |
| 27               | Bulgaria | Soyabeans                       | 2001           | 1                                                              |
| 27               | Bulgaria | Spices                          | 2001           | 2                                                              |
| 27               | Bulgaria | Spices, Other                   | 2001           | 1                                                              |
| 27               | Bulgaria | Starchy Roots                   | 2001           | 62                                                             |
| 27               | Bulgaria | Stimulants                      | 2001           | 10                                                             |
| 27               | Bulgaria | Sugar & Sweeteners              | 2001           | 302                                                            |
| 27               | Bulgaria | Sugar (Raw Equivalent)          | 2001           | 296                                                            |
| 27               | Bulgaria | Sunflower seed                  | 2001           | 13                                                             |
| 27               | Bulgaria | Sunflowerseed Oil               | 2001           | 309                                                            |
| 27               | Bulgaria | Sweeteners, Other               | 2001           | 5                                                              |
| 27               | Bulgaria | Tomatoes and products           | 2001           | 20                                                             |
| 27               | Bulgaria | Treenuts                        | 2001           | 4                                                              |
| 27               | Bulgaria | Vegetable Oils                  | 2001           | 361                                                            |
| 27               | Bulgaria | Vegetables                      | 2001           | 68                                                             |
| 27               | Bulgaria | Vegetables, Other               | 2001           | 42                                                             |
| 27               | Bulgaria | Vegetal Products                | 2001           | 2,213                                                          |
| 27               | Bulgaria | Wheat and products              | 2001           | 971                                                            |
| 27               | Bulgaria | Wine                            | 2001           | 15                                                             |
| 27               | Bulgaria | Alcoholic Beverages             | 2002           | 144                                                            |
| 27               | Bulgaria | Animal fats                     | 2002           | 56                                                             |
| 27               | Bulgaria | Animal Products                 | 2002           | 580                                                            |
| 27               | Bulgaria | Apples and products             | 2002           | 7                                                              |
| 27               | Bulgaria | Bananas                         | 2002           | 7                                                              |
| 27               | Bulgaria | Barley and products             | 2002           | 12                                                             |
| 27               | Bulgaria | Beans                           | 2002           | 23                                                             |
| 27               | Bulgaria | Beer                            | 2002           | 68                                                             |
| 27               | Bulgaria | Beverages, Alcoholic            | 2002           | 60                                                             |
| 27               | Bulgaria | Bovine Meat                     | 2002           | 21                                                             |
| 27               | Bulgaria | Butter, Ghee                    | 2002           | 6                                                              |
| 27               | Bulgaria | Cereals - Excluding Beer        | 2002           | 1,108                                                          |
| 27               | Bulgaria | Cocoa Beans and products        | 2002           | 9                                                              |
| 27               | Bulgaria | Coconuts - Incl Copra           | 2002           | 1                                                              |
| 27               | Bulgaria | Coffee and products             | 2002           | 3                                                              |
| 27               | Bulgaria | Eggs                            | 2002           | 42                                                             |
| 27               | Bulgaria | Fats, Animals, Raw              | 2002           | 51                                                             |
| 27               | Bulgaria | Fish, Seafood                   | 2002           | 9                                                              |

Dietary calcium and zinc deficiency risks are decreasing but remain prevalent

| FAO Country code | Country  | Food item                       | Reference year | Net energy supply (kcal <i>capita</i> <sup>-1</sup> d <sup>-1</sup> ) |
|------------------|----------|---------------------------------|----------------|-----------------------------------------------------------------------|
| 27               | Bulgaria | Freshwater Fish                 | 2002           | 1                                                                     |
| 27               | Bulgaria | Fruits - Excluding Wine         | 2002           | 64                                                                    |
| 27               | Bulgaria | Fruits, Other                   | 2002           | 17                                                                    |
| 27               | Bulgaria | Grand Total                     | 2002           | 2,779                                                                 |
| 27               | Bulgaria | Grapefruit and products         | 2002           | 1                                                                     |
| 27               | Bulgaria | Grapes and products (excl wine) | 2002           | 28                                                                    |
| 27               | Bulgaria | Groundnut Oil                   | 2002           | 6                                                                     |
| 27               | Bulgaria | Groundnuts (Shelled Eq)         | 2002           | 6                                                                     |
| 27               | Bulgaria | Honey                           | 2002           | 1                                                                     |
| 27               | Bulgaria | Lemons, Limes and products      | 2002           | 1                                                                     |
| 27               | Bulgaria | Maize and products              | 2002           | 99                                                                    |
| 27               | Bulgaria | Maize Germ Oil                  | 2002           | 9                                                                     |
| 27               | Bulgaria | Meat                            | 2002           | 224                                                                   |
| 27               | Bulgaria | Meat, Other                     | 2002           | 2                                                                     |
| 27               | Bulgaria | Milk - Excluding Butter         | 2002           | 239                                                                   |
| 27               | Bulgaria | Miscellaneous                   | 2002           | 6                                                                     |
| 27               | Bulgaria | Mutton & Goat Meat              | 2002           | 35                                                                    |
| 27               | Bulgaria | Offals                          | 2002           | 10                                                                    |
| 27               | Bulgaria | Oilcrops                        | 2002           | 24                                                                    |
| 27               | Bulgaria | Oilcrops Oil, Other             | 2002           | 4                                                                     |
| 27               | Bulgaria | Olive Oil                       | 2002           | 2                                                                     |
| 27               | Bulgaria | Olives (including preserved)    | 2002           | 3                                                                     |
| 27               | Bulgaria | Onions                          | 2002           | 5                                                                     |
| 27               | Bulgaria | Oranges, Mandarines             | 2002           | 4                                                                     |
| 27               | Bulgaria | Peas                            | 2002           | 9                                                                     |
| 27               | Bulgaria | Pelagic Fish                    | 2002           | 8                                                                     |
| 27               | Bulgaria | Pepper                          | 2002           | 1                                                                     |
| 27               | Bulgaria | Pigmeat                         | 2002           | 91                                                                    |
| 27               | Bulgaria | Pimento                         | 2002           | 1                                                                     |
| 27               | Bulgaria | Potatoes and products           | 2002           | 63                                                                    |
| 27               | Bulgaria | Poultry Meat                    | 2002           | 75                                                                    |
| 27               | Bulgaria | Pulses                          | 2002           | 38                                                                    |
| 27               | Bulgaria | Pulses, Other and products      | 2002           | 5                                                                     |
| 27               | Bulgaria | Rice (Milled Equivalent)        | 2002           | 38                                                                    |
| 27               | Bulgaria | Rye and products                | 2002           | 5                                                                     |
| 27               | Bulgaria | Sesame seed                     | 2002           | 1                                                                     |
| 27               | Bulgaria | Soyabean Oil                    | 2002           | 42                                                                    |
| 27               | Bulgaria | Spices                          | 2002           | 3                                                                     |
| 27               | Bulgaria | Spices, Other                   | 2002           | 2                                                                     |
| 27               | Bulgaria | Starchy Roots                   | 2002           | 63                                                                    |
| 27               | Bulgaria | Stimulants                      | 2002           | 12                                                                    |
| 27               | Bulgaria | Sugar & Sweeteners              | 2002           | 298                                                                   |
| 27               | Bulgaria | Sugar (Raw Equivalent)          | 2002           | 293                                                                   |
| 27               | Bulgaria | Sunflower seed                  | 2002           | 13                                                                    |
| 27               | Bulgaria | Sunflowerseed Oil               | 2002           | 315                                                                   |
| 27               | Bulgaria | Sweeteners, Other               | 2002           | 4                                                                     |
| 27               | Bulgaria | Tomatoes and products           | 2002           | 14                                                                    |
| 27               | Bulgaria | Treenuts                        | 2002           | 5                                                                     |
| 27               | Bulgaria | Vegetable Oils                  | 2002           | 378                                                                   |
| 27               | Bulgaria | Vegetables                      | 2002           | 56                                                                    |
| 27               | Bulgaria | Vegetables, Other               | 2002           | 36                                                                    |
| 27               | Bulgaria | Vegetal Products                | 2002           | 2,200                                                                 |
| 27               | Bulgaria | Wheat and products              | 2002           | 954                                                                   |
| 27               | Bulgaria | Wine                            | 2002           | 16                                                                    |
| 27               | Bulgaria | Alcoholic Beverages             | 2003           | 157                                                                   |
| 27               | Bulgaria | Animal fats                     | 2003           | 63                                                                    |
| 27               | Bulgaria | Animal Products                 | 2003           | 552                                                                   |
| 27               | Bulgaria | Apples and products             | 2003           | 5                                                                     |
| 27               | Bulgaria | Bananas                         | 2003           | 10                                                                    |
| 27               | Bulgaria | Barley and products             | 2003           | 9                                                                     |
| 27               | Bulgaria | Beans                           | 2003           | 27                                                                    |
| 27               | Bulgaria | Beer                            | 2003           | 76                                                                    |
| 27               | Bulgaria | Beverages, Alcoholic            | 2003           | 66                                                                    |
| 27               | Bulgaria | Bovine Meat                     | 2003           | 23                                                                    |
| 27               | Bulgaria | Butter, Chee                    | 2003           | 8                                                                     |
| 27               | Bulgaria | Cereals - Excluding Beer        | 2003           | 1,065                                                                 |
| 27               | Bulgaria | Cocoa Beans and products        | 2003           | 8                                                                     |
| 27               | Bulgaria | Coffee and products             | 2003           | 4                                                                     |
| 27               | Bulgaria | Eggs                            | 2003           | 44                                                                    |
| 27               | Bulgaria | Fats, Animals, Raw              | 2003           | 55                                                                    |
| 27               | Bulgaria | Fish, Seafood                   | 2003           | 10                                                                    |
| 27               | Bulgaria | Freshwater Fish                 | 2003           | 1                                                                     |
| 27               | Bulgaria | Fruits - Excluding Wine         | 2003           | 53                                                                    |
| 27               | Bulgaria | Fruits, Other                   | 2003           | 17                                                                    |
| 27               | Bulgaria | Grand Total                     | 2003           | 2,757                                                                 |
| 27               | Bulgaria | Grapes and products (excl wine) | 2003           | 15                                                                    |
| 27               | Bulgaria | Groundnut Oil                   | 2003           | 4                                                                     |
| 27               | Bulgaria | Groundnuts (Shelled Eq)         | 2003           | 5                                                                     |
| 27               | Bulgaria | Honey                           | 2003           | 3                                                                     |
| 27               | Bulgaria | Lemons, Limes and products      | 2003           | 1                                                                     |
| 27               | Bulgaria | Maize and products              | 2003           | 108                                                                   |
| 27               | Bulgaria | Maize Germ Oil                  | 2003           | 3                                                                     |
| 27               | Bulgaria | Meat                            | 2003           | 181                                                                   |
| 27               | Bulgaria | Meat, Other                     | 2003           | 2                                                                     |
| 27               | Bulgaria | Milk - Excluding Butter         | 2003           | 245                                                                   |
| 27               | Bulgaria | Miscellaneous                   | 2003           | 4                                                                     |
| 27               | Bulgaria | Mutton & Goat Meat              | 2003           | 7                                                                     |
| 27               | Bulgaria | Oats                            | 2003           | 1                                                                     |
| 27               | Bulgaria | Offals                          | 2003           | 9                                                                     |
| 27               | Bulgaria | Oilcrops                        | 2003           | 26                                                                    |
| 27               | Bulgaria | Oilcrops Oil, Other             | 2003           | 4                                                                     |
| 27               | Bulgaria | Olive Oil                       | 2003           | 3                                                                     |
| 27               | Bulgaria | Olives (including preserved)    | 2003           | 3                                                                     |
| 27               | Bulgaria | Onions                          | 2003           | 5                                                                     |
| 27               | Bulgaria | Oranges, Mandarines             | 2003           | 4                                                                     |
| 27               | Bulgaria | Peas                            | 2003           | 4                                                                     |
| 27               | Bulgaria | Pelagic Fish                    | 2003           | 9                                                                     |

Dietary calcium and zinc deficiency risks are decreasing but remain prevalent

| FAO Country code | Country  | Food item                       | Reference year | Net energy supply (kcal <i>capita</i> <sup>-1</sup> d <sup>-1</sup> ) |
|------------------|----------|---------------------------------|----------------|-----------------------------------------------------------------------|
| 27               | Bulgaria | Pepper                          | 2003           | 1                                                                     |
| 27               | Bulgaria | Pigmeat                         | 2003           | 97                                                                    |
| 27               | Bulgaria | Pimento                         | 2003           | 1                                                                     |
| 27               | Bulgaria | Potatoes and products           | 2003           | 65                                                                    |
| 27               | Bulgaria | Poultry Meat                    | 2003           | 52                                                                    |
| 27               | Bulgaria | Pulses                          | 2003           | 35                                                                    |
| 27               | Bulgaria | Pulses, Other and products      | 2003           | 4                                                                     |
| 27               | Bulgaria | Rice (Milled Equivalent)        | 2003           | 42                                                                    |
| 27               | Bulgaria | Rye and products                | 2003           | 5                                                                     |
| 27               | Bulgaria | Sesame seed                     | 2003           | 1                                                                     |
| 27               | Bulgaria | Soyabean Oil                    | 2003           | 47                                                                    |
| 27               | Bulgaria | Spices                          | 2003           | 3                                                                     |
| 27               | Bulgaria | Spices, Other                   | 2003           | 1                                                                     |
| 27               | Bulgaria | Starchy Roots                   | 2003           | 65                                                                    |
| 27               | Bulgaria | Stimulants                      | 2003           | 12                                                                    |
| 27               | Bulgaria | Sugar & Sweeteners              | 2003           | 295                                                                   |
| 27               | Bulgaria | Sugar (Raw Equivalent)          | 2003           | 287                                                                   |
| 27               | Bulgaria | Sunflower seed                  | 2003           | 15                                                                    |
| 27               | Bulgaria | Sunflowerseed Oil               | 2003           | 353                                                                   |
| 27               | Bulgaria | Sweeteners, Other               | 2003           | 5                                                                     |
| 27               | Bulgaria | Tomatoes and products           | 2003           | 22                                                                    |
| 27               | Bulgaria | Treenuts                        | 2003           | 5                                                                     |
| 27               | Bulgaria | Vegetable Oils                  | 2003           | 414                                                                   |
| 27               | Bulgaria | Vegetables                      | 2003           | 72                                                                    |
| 27               | Bulgaria | Vegetables, Other               | 2003           | 46                                                                    |
| 27               | Bulgaria | Vegetal Products                | 2003           | 2,205                                                                 |
| 27               | Bulgaria | Wheat and products              | 2003           | 901                                                                   |
| 27               | Bulgaria | Wine                            | 2003           | 15                                                                    |
| 27               | Bulgaria | Alcoholic Beverages             | 2004           | 149                                                                   |
| 27               | Bulgaria | Animal fats                     | 2004           | 72                                                                    |
| 27               | Bulgaria | Animal Products                 | 2004           | 599                                                                   |
| 27               | Bulgaria | Apples and products             | 2004           | 7                                                                     |
| 27               | Bulgaria | Bananas                         | 2004           | 10                                                                    |
| 27               | Bulgaria | Barley and products             | 2004           | 9                                                                     |
| 27               | Bulgaria | Beans                           | 2004           | 21                                                                    |
| 27               | Bulgaria | Beer                            | 2004           | 69                                                                    |
| 27               | Bulgaria | Beverages, Alcoholic            | 2004           | 63                                                                    |
| 27               | Bulgaria | Bovine Meat                     | 2004           | 30                                                                    |
| 27               | Bulgaria | Butter, Chee                    | 2004           | 8                                                                     |
| 27               | Bulgaria | Cereals - Excluding Beer        | 2004           | 1,061                                                                 |
| 27               | Bulgaria | Cocoa Beans and products        | 2004           | 6                                                                     |
| 27               | Bulgaria | Coconuts - Incl Copra           | 2004           | 1                                                                     |
| 27               | Bulgaria | Coffee and products             | 2004           | 4                                                                     |
| 27               | Bulgaria | Eggs                            | 2004           | 47                                                                    |
| 27               | Bulgaria | Fats, Animals, Raw              | 2004           | 64                                                                    |
| 27               | Bulgaria | Fish, Seafood                   | 2004           | 9                                                                     |
| 27               | Bulgaria | Freshwater Fish                 | 2004           | 1                                                                     |
| 27               | Bulgaria | Fruits - Excluding Wine         | 2004           | 56                                                                    |
| 27               | Bulgaria | Fruits, Other                   | 2004           | 20                                                                    |
| 27               | Bulgaria | Grand Total                     | 2004           | 2,764                                                                 |
| 27               | Bulgaria | Grapefruit and products         | 2004           | 1                                                                     |
| 27               | Bulgaria | Grapes and products (excl wine) | 2004           | 13                                                                    |
| 27               | Bulgaria | Groundnut Oil                   | 2004           | 17                                                                    |
| 27               | Bulgaria | Groundnuts (Shelled Eq)         | 2004           | 6                                                                     |
| 27               | Bulgaria | Honey                           | 2004           | 3                                                                     |
| 27               | Bulgaria | Lemons, Limes and products      | 2004           | 1                                                                     |
| 27               | Bulgaria | Maize and products              | 2004           | 139                                                                   |
| 27               | Bulgaria | Maize Germ Oil                  | 2004           | 2                                                                     |
| 27               | Bulgaria | Meat                            | 2004           | 206                                                                   |
| 27               | Bulgaria | Meat, Other                     | 2004           | 3                                                                     |
| 27               | Bulgaria | Milk - Excluding Butter         | 2004           | 254                                                                   |
| 27               | Bulgaria | Miscellaneous                   | 2004           | 4                                                                     |
| 27               | Bulgaria | Mutton & Goat Meat              | 2004           | 9                                                                     |
| 27               | Bulgaria | Oats                            | 2004           | 1                                                                     |
| 27               | Bulgaria | Offals                          | 2004           | 11                                                                    |
| 27               | Bulgaria | Oilcrops                        | 2004           | 29                                                                    |
| 27               | Bulgaria | Oilcrops Oil, Other             | 2004           | 13                                                                    |
| 27               | Bulgaria | Olive Oil                       | 2004           | 3                                                                     |
| 27               | Bulgaria | Olives (including preserved)    | 2004           | 3                                                                     |
| 27               | Bulgaria | Onions                          | 2004           | 5                                                                     |
| 27               | Bulgaria | Oranges, Mandarines             | 2004           | 4                                                                     |
| 27               | Bulgaria | Peas                            | 2004           | 4                                                                     |
| 27               | Bulgaria | Pelagic Fish                    | 2004           | 7                                                                     |
| 27               | Bulgaria | Pepper                          | 2004           | 1                                                                     |
| 27               | Bulgaria | Pigmeat                         | 2004           | 103                                                                   |
| 27               | Bulgaria | Pimento                         | 2004           | 1                                                                     |
| 27               | Bulgaria | Potatoes and products           | 2004           | 67                                                                    |
| 27               | Bulgaria | Poultry Meat                    | 2004           | 62                                                                    |
| 27               | Bulgaria | Pulses                          | 2004           | 29                                                                    |
| 27               | Bulgaria | Pulses, Other and products      | 2004           | 4                                                                     |
| 27               | Bulgaria | Rape and Mustardseed            | 2004           | 1                                                                     |
| 27               | Bulgaria | Rice (Milled Equivalent)        | 2004           | 46                                                                    |
| 27               | Bulgaria | Rye and products                | 2004           | 5                                                                     |
| 27               | Bulgaria | Sesame seed                     | 2004           | 1                                                                     |
| 27               | Bulgaria | Soyabean Oil                    | 2004           | 39                                                                    |
| 27               | Bulgaria | Spices                          | 2004           | 3                                                                     |
| 27               | Bulgaria | Spices, Other                   | 2004           | 1                                                                     |
| 27               | Bulgaria | Starchy Roots                   | 2004           | 67                                                                    |
| 27               | Bulgaria | Stimulants                      | 2004           | 10                                                                    |
| 27               | Bulgaria | Sugar & Sweeteners              | 2004           | 302                                                                   |
| 27               | Bulgaria | Sugar (Raw Equivalent)          | 2004           | 293                                                                   |
| 27               | Bulgaria | Sunflower seed                  | 2004           | 16                                                                    |
| 27               | Bulgaria | Sunflowerseed Oil               | 2004           | 318                                                                   |
| 27               | Bulgaria | Sweeteners, Other               | 2004           | 6                                                                     |
| 27               | Bulgaria | Tomatoes and products           | 2004           | 14                                                                    |
| 27               | Bulgaria | Treenuts                        | 2004           | 5                                                                     |
| 27               | Bulgaria | Vegetable Oils                  | 2004           | 391                                                                   |

Dietary calcium and zinc deficiency risks are decreasing but remain prevalent

| FAO Country code | Country  | Food item                       | Reference year | Net energy supply (kcal capita <sup>-1</sup> d <sup>-1</sup> ) |
|------------------|----------|---------------------------------|----------------|----------------------------------------------------------------|
| 27               | Bulgaria | Vegetables                      | 2004           | 59                                                             |
| 27               | Bulgaria | Vegetables, Other               | 2004           | 40                                                             |
| 27               | Bulgaria | Vegetal Products                | 2004           | 2,165                                                          |
| 27               | Bulgaria | Wheat and products              | 2004           | 862                                                            |
| 27               | Bulgaria | Wine                            | 2004           | 17                                                             |
| 27               | Bulgaria | Alcoholic Beverages             | 2005           | 147                                                            |
| 27               | Bulgaria | Animal fats                     | 2005           | 78                                                             |
| 27               | Bulgaria | Animal Products                 | 2005           | 593                                                            |
| 27               | Bulgaria | Apples and products             | 2005           | 6                                                              |
| 27               | Bulgaria | Bananas                         | 2005           | 11                                                             |
| 27               | Bulgaria | Barley and products             | 2005           | 10                                                             |
| 27               | Bulgaria | Beans                           | 2005           | 24                                                             |
| 27               | Bulgaria | Beer                            | 2005           | 73                                                             |
| 27               | Bulgaria | Beverages, Alcoholic            | 2005           | 53                                                             |
| 27               | Bulgaria | Bovine Meat                     | 2005           | 39                                                             |
| 27               | Bulgaria | Butter, Ghee                    | 2005           | 2                                                              |
| 27               | Bulgaria | Cereals - Excluding Beer        | 2005           | 1,023                                                          |
| 27               | Bulgaria | Cocoa Beans and products        | 2005           | 7                                                              |
| 27               | Bulgaria | Coconuts - Incl Copra           | 2005           | 1                                                              |
| 27               | Bulgaria | Coffee and products             | 2005           | 5                                                              |
| 27               | Bulgaria | Eggs                            | 2005           | 47                                                             |
| 27               | Bulgaria | Fats, Animals, Raw              | 2005           | 76                                                             |
| 27               | Bulgaria | Fish, Seafood                   | 2005           | 10                                                             |
| 27               | Bulgaria | Freshwater Fish                 | 2005           | 1                                                              |
| 27               | Bulgaria | Fruits - Excluding Wine         | 2005           | 43                                                             |
| 27               | Bulgaria | Fruits, Other                   | 2005           | 13                                                             |
| 27               | Bulgaria | Grand Total                     | 2005           | 2,723                                                          |
| 27               | Bulgaria | Grapes and products (excl wine) | 2005           | 6                                                              |
| 27               | Bulgaria | Groundnut Oil                   | 2005           | 12                                                             |
| 27               | Bulgaria | Groundnuts (Shelled Eq)         | 2005           | 6                                                              |
| 27               | Bulgaria | Honey                           | 2005           | 8                                                              |
| 27               | Bulgaria | Lemons, Limes and products      | 2005           | 1                                                              |
| 27               | Bulgaria | Maize and products              | 2005           | 126                                                            |
| 27               | Bulgaria | Maize Germ Oil                  | 2005           | 1                                                              |
| 27               | Bulgaria | Marine Fish, Other              | 2005           | 1                                                              |
| 27               | Bulgaria | Meat                            | 2005           | 203                                                            |
| 27               | Bulgaria | Meat, Other                     | 2005           | 3                                                              |
| 27               | Bulgaria | Milk - Excluding Butter         | 2005           | 243                                                            |
| 27               | Bulgaria | Miscellaneous                   | 2005           | 4                                                              |
| 27               | Bulgaria | Mutton & Goat Meat              | 2005           | 11                                                             |
| 27               | Bulgaria | Oats                            | 2005           | 1                                                              |
| 27               | Bulgaria | Offals                          | 2005           | 12                                                             |
| 27               | Bulgaria | Oilcrops                        | 2005           | 29                                                             |
| 27               | Bulgaria | Oilcrops Oil, Other             | 2005           | 11                                                             |
| 27               | Bulgaria | Olive Oil                       | 2005           | 4                                                              |
| 27               | Bulgaria | Olives (including preserved)    | 2005           | 4                                                              |
| 27               | Bulgaria | Onions                          | 2005           | 3                                                              |
| 27               | Bulgaria | Oranges, Mandarines             | 2005           | 5                                                              |
| 27               | Bulgaria | Peas                            | 2005           | 2                                                              |
| 27               | Bulgaria | Pelagic Fish                    | 2005           | 7                                                              |
| 27               | Bulgaria | Pepper                          | 2005           | 1                                                              |
| 27               | Bulgaria | Pigmeat                         | 2005           | 81                                                             |
| 27               | Bulgaria | Pimento                         | 2005           | 1                                                              |
| 27               | Bulgaria | Pineapples and products         | 2005           | 1                                                              |
| 27               | Bulgaria | Potatoes and products           | 2005           | 69                                                             |
| 27               | Bulgaria | Poultry Meat                    | 2005           | 69                                                             |
| 27               | Bulgaria | Pulses                          | 2005           | 31                                                             |
| 27               | Bulgaria | Pulses, Other and products      | 2005           | 4                                                              |
| 27               | Bulgaria | Rice (Milled Equivalent)        | 2005           | 45                                                             |
| 27               | Bulgaria | Rye and products                | 2005           | 5                                                              |
| 27               | Bulgaria | Sesame seed                     | 2005           | 2                                                              |
| 27               | Bulgaria | Soyabean Oil                    | 2005           | 37                                                             |
| 27               | Bulgaria | Spices                          | 2005           | 3                                                              |
| 27               | Bulgaria | Spices, Other                   | 2005           | 1                                                              |
| 27               | Bulgaria | Starchy Roots                   | 2005           | 69                                                             |
| 27               | Bulgaria | Stimulants                      | 2005           | 12                                                             |
| 27               | Bulgaria | Sugar & Sweeteners              | 2005           | 330                                                            |
| 27               | Bulgaria | Sugar (Raw Equivalent)          | 2005           | 316                                                            |
| 27               | Bulgaria | Sunflower seed                  | 2005           | 16                                                             |
| 27               | Bulgaria | Sunflowerseed Oil               | 2005           | 336                                                            |
| 27               | Bulgaria | Sweeteners, Other               | 2005           | 7                                                              |
| 27               | Bulgaria | Tomatoes and products           | 2005           | 9                                                              |
| 27               | Bulgaria | Treenuts                        | 2005           | 5                                                              |
| 27               | Bulgaria | Vegetable Oils                  | 2005           | 401                                                            |
| 27               | Bulgaria | Vegetables                      | 2005           | 35                                                             |
| 27               | Bulgaria | Vegetables, Other               | 2005           | 23                                                             |
| 27               | Bulgaria | Vegetal Products                | 2005           | 2,130                                                          |
| 27               | Bulgaria | Wheat and products              | 2005           | 837                                                            |
| 27               | Bulgaria | Wine                            | 2005           | 21                                                             |
| 27               | Bulgaria | Alcoholic Beverages             | 2006           | 164                                                            |
| 27               | Bulgaria | Animal fats                     | 2006           | 90                                                             |
| 27               | Bulgaria | Animal Products                 | 2006           | 607                                                            |
| 27               | Bulgaria | Apples and products             | 2006           | 5                                                              |
| 27               | Bulgaria | Bananas                         | 2006           | 10                                                             |
| 27               | Bulgaria | Barley and products             | 2006           | 10                                                             |
| 27               | Bulgaria | Beans                           | 2006           | 18                                                             |
| 27               | Bulgaria | Beer                            | 2006           | 88                                                             |
| 27               | Bulgaria | Beverages, Alcoholic            | 2006           | 52                                                             |
| 27               | Bulgaria | Bovine Meat                     | 2006           | 43                                                             |
| 27               | Bulgaria | Butter, Ghee                    | 2006           | 6                                                              |
| 27               | Bulgaria | Cereals - Excluding Beer        | 2006           | 1,048                                                          |
| 27               | Bulgaria | Cocoa Beans and products        | 2006           | 10                                                             |
| 27               | Bulgaria | Coconuts - Incl Copra           | 2006           | 2                                                              |
| 27               | Bulgaria | Coffee and products             | 2006           | 5                                                              |
| 27               | Bulgaria | Demersal Fish                   | 2006           | 1                                                              |
| 27               | Bulgaria | Eggs                            | 2006           | 47                                                             |
| 27               | Bulgaria | Fats, Animals, Raw              | 2006           | 84                                                             |

Dietary calcium and zinc deficiency risks are decreasing but remain prevalent

| FAO Country code | Country  | Food item                       | Reference year | Net energy supply (kcal capita <sup>-1</sup> d <sup>-1</sup> ) |
|------------------|----------|---------------------------------|----------------|----------------------------------------------------------------|
| 27               | Bulgaria | Fish, Seafood                   | 2006           | 12                                                             |
| 27               | Bulgaria | Freshwater Fish                 | 2006           | 2                                                              |
| 27               | Bulgaria | Fruits - Excluding Wine         | 2006           | 42                                                             |
| 27               | Bulgaria | Fruits, Other                   | 2006           | 17                                                             |
| 27               | Bulgaria | Grand Total                     | 2006           | 2,759                                                          |
| 27               | Bulgaria | Grapefruit and products         | 2006           | 1                                                              |
| 27               | Bulgaria | Grapes and products (excl wine) | 2006           | 3                                                              |
| 27               | Bulgaria | Groundnut Oil                   | 2006           | 19                                                             |
| 27               | Bulgaria | Groundnuts (Shelled Eq)         | 2006           | 5                                                              |
| 27               | Bulgaria | Honey                           | 2006           | 6                                                              |
| 27               | Bulgaria | Lemons, Limes and products      | 2006           | 1                                                              |
| 27               | Bulgaria | Maize and products              | 2006           | 129                                                            |
| 27               | Bulgaria | Maize Germ Oil                  | 2006           | 1                                                              |
| 27               | Bulgaria | Marine Fish, Other              | 2006           | 1                                                              |
| 27               | Bulgaria | Meat                            | 2006           | 188                                                            |
| 27               | Bulgaria | Meat, Other                     | 2006           | 3                                                              |
| 27               | Bulgaria | Milk - Excluding Butter         | 2006           | 255                                                            |
| 27               | Bulgaria | Miscellaneous                   | 2006           | 4                                                              |
| 27               | Bulgaria | Mutton & Goat Meat              | 2006           | 11                                                             |
| 27               | Bulgaria | Oats                            | 2006           | 1                                                              |
| 27               | Bulgaria | Offals                          | 2006           | 14                                                             |
| 27               | Bulgaria | Oilcrops                        | 2006           | 31                                                             |
| 27               | Bulgaria | Oilcrops Oil, Other             | 2006           | 13                                                             |
| 27               | Bulgaria | Olive Oil                       | 2006           | 4                                                              |
| 27               | Bulgaria | Olives (including preserved)    | 2006           | 5                                                              |
| 27               | Bulgaria | Onions                          | 2006           | 6                                                              |
| 27               | Bulgaria | Oranges, Mandarines             | 2006           | 5                                                              |
| 27               | Bulgaria | Peas                            | 2006           | 1                                                              |
| 27               | Bulgaria | Pelagic Fish                    | 2006           | 8                                                              |
| 27               | Bulgaria | Pepper                          | 2006           | 1                                                              |
| 27               | Bulgaria | Pigmeat                         | 2006           | 59                                                             |
| 27               | Bulgaria | Pimento                         | 2006           | 1                                                              |
| 27               | Bulgaria | Pineapples and products         | 2006           | 1                                                              |
| 27               | Bulgaria | Potatoes and products           | 2006           | 63                                                             |
| 27               | Bulgaria | Poultry Meat                    | 2006           | 73                                                             |
| 27               | Bulgaria | Pulses                          | 2006           | 24                                                             |
| 27               | Bulgaria | Pulses, Other and products      | 2006           | 4                                                              |
| 27               | Bulgaria | Rape and Mustardseed            | 2006           | 1                                                              |
| 27               | Bulgaria | Rice (Milled Equivalent)        | 2006           | 45                                                             |
| 27               | Bulgaria | Rye and products                | 2006           | 5                                                              |
| 27               | Bulgaria | Sesame seed                     | 2006           | 1                                                              |
| 27               | Bulgaria | Soyabean Oil                    | 2006           | 39                                                             |
| 27               | Bulgaria | Spices                          | 2006           | 3                                                              |
| 27               | Bulgaria | Spices, Other                   | 2006           | 1                                                              |
| 27               | Bulgaria | Starchy Roots                   | 2006           | 63                                                             |
| 27               | Bulgaria | Stimulants                      | 2006           | 16                                                             |
| 27               | Bulgaria | Sugar & Sweeteners              | 2006           | 340                                                            |
| 27               | Bulgaria | Sugar (Raw Equivalent)          | 2006           | 324                                                            |
| 27               | Bulgaria | Sunflower seed                  | 2006           | 17                                                             |
| 27               | Bulgaria | Sunflowerseed Oil               | 2006           | 285                                                            |
| 27               | Bulgaria | Sweeteners, Other               | 2006           | 10                                                             |
| 27               | Bulgaria | Tomatoes and products           | 2006           | 14                                                             |
| 27               | Bulgaria | Treenuts                        | 2006           | 5                                                              |
| 27               | Bulgaria | Vegetable Oils                  | 2006           | 361                                                            |
| 27               | Bulgaria | Vegetables                      | 2006           | 51                                                             |
| 27               | Bulgaria | Vegetables, Other               | 2006           | 32                                                             |
| 27               | Bulgaria | Vegetal Products                | 2006           | 2,152                                                          |
| 27               | Bulgaria | Wheat and products              | 2006           | 858                                                            |
| 27               | Bulgaria | Wine                            | 2006           | 25                                                             |
| 27               | Bulgaria | Alcoholic Beverages             | 2007           | 173                                                            |
| 27               | Bulgaria | Animal fats                     | 2007           | 97                                                             |
| 27               | Bulgaria | Animal Products                 | 2007           | 588                                                            |
| 27               | Bulgaria | Apples and products             | 2007           | 9                                                              |
| 27               | Bulgaria | Bananas                         | 2007           | 8                                                              |
| 27               | Bulgaria | Barley and products             | 2007           | 10                                                             |
| 27               | Bulgaria | Beans                           | 2007           | 18                                                             |
| 27               | Bulgaria | Beer                            | 2007           | 98                                                             |
| 27               | Bulgaria | Beverages, Alcoholic            | 2007           | 49                                                             |
| 27               | Bulgaria | Bovine Meat                     | 2007           | 16                                                             |
| 27               | Bulgaria | Butter, Ghee                    | 2007           | 7                                                              |
| 27               | Bulgaria | Cereals - Excluding Beer        | 2007           | 1,017                                                          |
| 27               | Bulgaria | Cocoa Beans and products        | 2007           | 10                                                             |
| 27               | Bulgaria | Coconuts - Incl Copra           | 2007           | 2                                                              |
| 27               | Bulgaria | Coffee and products             | 2007           | 6                                                              |
| 27               | Bulgaria | Demersal Fish                   | 2007           | 1                                                              |
| 27               | Bulgaria | Eggs                            | 2007           | 44                                                             |
| 27               | Bulgaria | Fats, Animals, Raw              | 2007           | 90                                                             |
| 27               | Bulgaria | Fish, Seafood                   | 2007           | 10                                                             |
| 27               | Bulgaria | Freshwater Fish                 | 2007           | 2                                                              |
| 27               | Bulgaria | Fruits - Excluding Wine         | 2007           | 73                                                             |
| 27               | Bulgaria | Fruits, Other                   | 2007           | 26                                                             |
| 27               | Bulgaria | Grand Total                     | 2007           | 2,733                                                          |
| 27               | Bulgaria | Grapefruit and products         | 2007           | 1                                                              |
| 27               | Bulgaria | Grapes and products (excl wine) | 2007           | 21                                                             |
| 27               | Bulgaria | Groundnut Oil                   | 2007           | 15                                                             |
| 27               | Bulgaria | Groundnuts (Shelled Eq)         | 2007           | 6                                                              |
| 27               | Bulgaria | Honey                           | 2007           | 3                                                              |
| 27               | Bulgaria | Lemons, Limes and products      | 2007           | 1                                                              |
| 27               | Bulgaria | Maize and products              | 2007           | 119                                                            |
| 27               | Bulgaria | Maize Germ Oil                  | 2007           | 4                                                              |
| 27               | Bulgaria | Meat                            | 2007           | 195                                                            |
| 27               | Bulgaria | Meat, Other                     | 2007           | 4                                                              |
| 27               | Bulgaria | Milk - Excluding Butter         | 2007           | 227                                                            |
| 27               | Bulgaria | Miscellaneous                   | 2007           | 5                                                              |
| 27               | Bulgaria | Mutton & Goat Meat              | 2007           | 10                                                             |
| 27               | Bulgaria | Oats                            | 2007           | 1                                                              |
| 27               | Bulgaria | Offals                          | 2007           | 15                                                             |

Dietary calcium and zinc deficiency risks are decreasing but remain prevalent

| FAO Country code | Country  | Food item                       | Reference year | Net energy supply (kcal capita <sup>-1</sup> d <sup>-1</sup> ) |
|------------------|----------|---------------------------------|----------------|----------------------------------------------------------------|
| 27               | Bulgaria | Oilcrops                        | 2007           | 32                                                             |
| 27               | Bulgaria | Oilcrops Oil, Other             | 2007           | 18                                                             |
| 27               | Bulgaria | Olive Oil                       | 2007           | 4                                                              |
| 27               | Bulgaria | Olives (including preserved)    | 2007           | 5                                                              |
| 27               | Bulgaria | Onions                          | 2007           | 5                                                              |
| 27               | Bulgaria | Oranges, Mandarines             | 2007           | 5                                                              |
| 27               | Bulgaria | Peas                            | 2007           | 2                                                              |
| 27               | Bulgaria | Pelagic Fish                    | 2007           | 7                                                              |
| 27               | Bulgaria | Pepper                          | 2007           | 1                                                              |
| 27               | Bulgaria | Pigmeat                         | 2007           | 90                                                             |
| 27               | Bulgaria | Pimento                         | 2007           | 1                                                              |
| 27               | Bulgaria | Pineapples and products         | 2007           | 1                                                              |
| 27               | Bulgaria | Potatoes and products           | 2007           | 64                                                             |
| 27               | Bulgaria | Poultry Meat                    | 2007           | 75                                                             |
| 27               | Bulgaria | Pulses                          | 2007           | 23                                                             |
| 27               | Bulgaria | Pulses, Other and products      | 2007           | 3                                                              |
| 27               | Bulgaria | Rape and Mustardseed            | 2007           | 1                                                              |
| 27               | Bulgaria | Rice (Milled Equivalent)        | 2007           | 34                                                             |
| 27               | Bulgaria | Rye and products                | 2007           | 5                                                              |
| 27               | Bulgaria | Sesame seed                     | 2007           | 2                                                              |
| 27               | Bulgaria | Soyabean Oil                    | 2007           | 53                                                             |
| 27               | Bulgaria | Spices                          | 2007           | 4                                                              |
| 27               | Bulgaria | Spices, Other                   | 2007           | 2                                                              |
| 27               | Bulgaria | Starchy Roots                   | 2007           | 64                                                             |
| 27               | Bulgaria | Stimulants                      | 2007           | 16                                                             |
| 27               | Bulgaria | Sugar & Sweeteners              | 2007           | 323                                                            |
| 27               | Bulgaria | Sugar (Raw Equivalent)          | 2007           | 308                                                            |
| 27               | Bulgaria | Sunflower seed                  | 2007           | 17                                                             |
| 27               | Bulgaria | Sunflowerseed Oil               | 2007           | 275                                                            |
| 27               | Bulgaria | Sweeteners, Other               | 2007           | 13                                                             |
| 27               | Bulgaria | Tomatoes and products           | 2007           | 12                                                             |
| 27               | Bulgaria | Treenuts                        | 2007           | 4                                                              |
| 27               | Bulgaria | Vegetable Oils                  | 2007           | 368                                                            |
| 27               | Bulgaria | Vegetables                      | 2007           | 43                                                             |
| 27               | Bulgaria | Vegetables, Other               | 2007           | 26                                                             |
| 27               | Bulgaria | Vegetal Products                | 2007           | 2,145                                                          |
| 27               | Bulgaria | Wheat and products              | 2007           | 848                                                            |
| 27               | Bulgaria | Wine                            | 2007           | 25                                                             |
| 27               | Bulgaria | Alcoholic Beverages             | 2008           | 182                                                            |
| 27               | Bulgaria | Animal fats                     | 2008           | 107                                                            |
| 27               | Bulgaria | Animal Products                 | 2008           | 620                                                            |
| 27               | Bulgaria | Apples and products             | 2008           | 8                                                              |
| 27               | Bulgaria | Bananas                         | 2008           | 7                                                              |
| 27               | Bulgaria | Barley and products             | 2008           | 15                                                             |
| 27               | Bulgaria | Beans                           | 2008           | 18                                                             |
| 27               | Bulgaria | Beer                            | 2008           | 99                                                             |
| 27               | Bulgaria | Beverages, Alcoholic            | 2008           | 54                                                             |
| 27               | Bulgaria | Bovine Meat                     | 2008           | 16                                                             |
| 27               | Bulgaria | Butter, Ghee                    | 2008           | 4                                                              |
| 27               | Bulgaria | Cereals - Excluding Beer        | 2008           | 1,067                                                          |
| 27               | Bulgaria | Cocoa Beans and products        | 2008           | 14                                                             |
| 27               | Bulgaria | Coconuts - Incl Copra           | 2008           | 2                                                              |
| 27               | Bulgaria | Coffee and products             | 2008           | 7                                                              |
| 27               | Bulgaria | Demersal Fish                   | 2008           | 1                                                              |
| 27               | Bulgaria | Eggs                            | 2008           | 40                                                             |
| 27               | Bulgaria | Fats, Animals, Raw              | 2008           | 102                                                            |
| 27               | Bulgaria | Fish, Seafood                   | 2008           | 13                                                             |
| 27               | Bulgaria | Freshwater Fish                 | 2008           | 2                                                              |
| 27               | Bulgaria | Fruits - Excluding Wine         | 2008           | 46                                                             |
| 27               | Bulgaria | Fruits, Other                   | 2008           | 20                                                             |
| 27               | Bulgaria | Grand Total                     | 2008           | 2,699                                                          |
| 27               | Bulgaria | Grapefruit and products         | 2008           | 1                                                              |
| 27               | Bulgaria | Grapes and products (excl wine) | 2008           | 3                                                              |
| 27               | Bulgaria | Groundnut Oil                   | 2008           | 17                                                             |
| 27               | Bulgaria | Groundnuts (Shelled Eq)         | 2008           | 6                                                              |
| 27               | Bulgaria | Honey                           | 2008           | 10                                                             |
| 27               | Bulgaria | Lemons, Limes and products      | 2008           | 1                                                              |
| 27               | Bulgaria | Maize and products              | 2008           | 181                                                            |
| 27               | Bulgaria | Maize Germ Oil                  | 2008           | 11                                                             |
| 27               | Bulgaria | Marine Fish, Other              | 2008           | 1                                                              |
| 27               | Bulgaria | Meat                            | 2008           | 212                                                            |
| 27               | Bulgaria | Meat, Other                     | 2008           | 6                                                              |
| 27               | Bulgaria | Milk - Excluding Butter         | 2008           | 232                                                            |
| 27               | Bulgaria | Miscellaneous                   | 2008           | 4                                                              |
| 27               | Bulgaria | Mutton & Goat Meat              | 2008           | 11                                                             |
| 27               | Bulgaria | Oats                            | 2008           | 1                                                              |
| 27               | Bulgaria | Offals                          | 2008           | 15                                                             |
| 27               | Bulgaria | Oilcrops                        | 2008           | 37                                                             |
| 27               | Bulgaria | Oilcrops Oil, Other             | 2008           | 29                                                             |
| 27               | Bulgaria | Olive Oil                       | 2008           | 4                                                              |
| 27               | Bulgaria | Olives (including preserved)    | 2008           | 8                                                              |
| 27               | Bulgaria | Onions                          | 2008           | 5                                                              |
| 27               | Bulgaria | Oranges, Mandarines             | 2008           | 4                                                              |
| 27               | Bulgaria | Peas                            | 2008           | 2                                                              |
| 27               | Bulgaria | Pelagic Fish                    | 2008           | 9                                                              |
| 27               | Bulgaria | Pepper                          | 2008           | 1                                                              |
| 27               | Bulgaria | Pigmeat                         | 2008           | 101                                                            |
| 27               | Bulgaria | Pimento                         | 2008           | 2                                                              |
| 27               | Bulgaria | Pineapples and products         | 2008           | 1                                                              |
| 27               | Bulgaria | Plantains                       | 2008           | 1                                                              |
| 27               | Bulgaria | Potatoes and products           | 2008           | 71                                                             |
| 27               | Bulgaria | Poultry Meat                    | 2008           | 78                                                             |
| 27               | Bulgaria | Pulses                          | 2008           | 24                                                             |
| 27               | Bulgaria | Pulses, Other and products      | 2008           | 3                                                              |
| 27               | Bulgaria | Rape and Mustardseed            | 2008           | 2                                                              |
| 27               | Bulgaria | Rice (Milled Equivalent)        | 2008           | 24                                                             |
| 27               | Bulgaria | Rye and products                | 2008           | 5                                                              |

Dietary calcium and zinc deficiency risks are decreasing but remain prevalent

| FAO Country code | Country  | Food item                       | Reference year | Net energy supply (kcal <i>capita</i> <sup>-1</sup> d <sup>-1</sup> ) |
|------------------|----------|---------------------------------|----------------|-----------------------------------------------------------------------|
| 27               | Bulgaria | Sesame seed                     | 2008           | 1                                                                     |
| 27               | Bulgaria | Soyabean Oil                    | 2008           | 50                                                                    |
| 27               | Bulgaria | Spices                          | 2008           | 4                                                                     |
| 27               | Bulgaria | Spices, Other                   | 2008           | 2                                                                     |
| 27               | Bulgaria | Starchy Roots                   | 2008           | 71                                                                    |
| 27               | Bulgaria | Stimulants                      | 2008           | 21                                                                    |
| 27               | Bulgaria | Sugar & Sweeteners              | 2008           | 320                                                                   |
| 27               | Bulgaria | Sugar (Raw Equivalent)          | 2008           | 299                                                                   |
| 27               | Bulgaria | Sunflower seed                  | 2008           | 17                                                                    |
| 27               | Bulgaria | Sunflowerseed Oil               | 2008           | 140                                                                   |
| 27               | Bulgaria | Sweeteners, Other               | 2008           | 11                                                                    |
| 27               | Bulgaria | Tomatoes and products           | 2008           | 12                                                                    |
| 27               | Bulgaria | Treenuts                        | 2008           | 7                                                                     |
| 27               | Bulgaria | Vegetable Oils                  | 2008           | 251                                                                   |
| 27               | Bulgaria | Vegetables                      | 2008           | 45                                                                    |
| 27               | Bulgaria | Vegetables, Other               | 2008           | 28                                                                    |
| 27               | Bulgaria | Vegetal Products                | 2008           | 2,079                                                                 |
| 27               | Bulgaria | Wheat and products              | 2008           | 841                                                                   |
| 27               | Bulgaria | Wine                            | 2008           | 28                                                                    |
| 27               | Bulgaria | Alcoholic Beverages             | 2009           | 170                                                                   |
| 27               | Bulgaria | Animal fats                     | 2009           | 112                                                                   |
| 27               | Bulgaria | Animal Products                 | 2009           | 620                                                                   |
| 27               | Bulgaria | Apples and products             | 2009           | 11                                                                    |
| 27               | Bulgaria | Bananas                         | 2009           | 5                                                                     |
| 27               | Bulgaria | Barley and products             | 2009           | 5                                                                     |
| 27               | Bulgaria | Beans                           | 2009           | 18                                                                    |
| 27               | Bulgaria | Beer                            | 2009           | 92                                                                    |
| 27               | Bulgaria | Beverages, Alcoholic            | 2009           | 54                                                                    |
| 27               | Bulgaria | Bovine Meat                     | 2009           | 16                                                                    |
| 27               | Bulgaria | Butter, Ghee                    | 2009           | 1                                                                     |
| 27               | Bulgaria | Cereals - Excluding Beer        | 2009           | 1,094                                                                 |
| 27               | Bulgaria | Citrus, Other                   | 2009           | 1                                                                     |
| 27               | Bulgaria | Cocoa Beans and products        | 2009           | 22                                                                    |
| 27               | Bulgaria | Coconuts - Incl Copra           | 2009           | 2                                                                     |
| 27               | Bulgaria | Coffee and products             | 2009           | 6                                                                     |
| 27               | Bulgaria | Cream                           | 2009           | 1                                                                     |
| 27               | Bulgaria | Demersal Fish                   | 2009           | 1                                                                     |
| 27               | Bulgaria | Eggs                            | 2009           | 38                                                                    |
| 27               | Bulgaria | Fats, Animals, Raw              | 2009           | 109                                                                   |
| 27               | Bulgaria | Fish, Seafood                   | 2009           | 14                                                                    |
| 27               | Bulgaria | Freshwater Fish                 | 2009           | 3                                                                     |
| 27               | Bulgaria | Fruits - Excluding Wine         | 2009           | 46                                                                    |
| 27               | Bulgaria | Fruits, Other                   | 2009           | 16                                                                    |
| 27               | Bulgaria | Grand Total                     | 2009           | 2,822                                                                 |
| 27               | Bulgaria | Grapefruit and products         | 2009           | 1                                                                     |
| 27               | Bulgaria | Grapes and products (excl wine) | 2009           | 2                                                                     |
| 27               | Bulgaria | Groundnut Oil                   | 2009           | 11                                                                    |
| 27               | Bulgaria | Groundnuts (Shelled Eq)         | 2009           | 6                                                                     |
| 27               | Bulgaria | Honey                           | 2009           | 4                                                                     |
| 27               | Bulgaria | Lemons, Limes and products      | 2009           | 1                                                                     |
| 27               | Bulgaria | Maize and products              | 2009           | 187                                                                   |
| 27               | Bulgaria | Maize Germ Oil                  | 2009           | 18                                                                    |
| 27               | Bulgaria | Meat                            | 2009           | 232                                                                   |
| 27               | Bulgaria | Meat, Other                     | 2009           | 5                                                                     |
| 27               | Bulgaria | Milk - Excluding Butter         | 2009           | 210                                                                   |
| 27               | Bulgaria | Miscellaneous                   | 2009           | 4                                                                     |
| 27               | Bulgaria | Mutton & Goat Meat              | 2009           | 9                                                                     |
| 27               | Bulgaria | Oats                            | 2009           | 1                                                                     |
| 27               | Bulgaria | Offals                          | 2009           | 15                                                                    |
| 27               | Bulgaria | Oilcrops                        | 2009           | 39                                                                    |
| 27               | Bulgaria | Oilcrops Oil, Other             | 2009           | 17                                                                    |
| 27               | Bulgaria | Olive Oil                       | 2009           | 3                                                                     |
| 27               | Bulgaria | Olives (including preserved)    | 2009           | 9                                                                     |
| 27               | Bulgaria | Onions                          | 2009           | 3                                                                     |
| 27               | Bulgaria | Oranges, Mandarines             | 2009           | 5                                                                     |
| 27               | Bulgaria | Peas                            | 2009           | 1                                                                     |
| 27               | Bulgaria | Pelagic Fish                    | 2009           | 8                                                                     |
| 27               | Bulgaria | Pigmeat                         | 2009           | 117                                                                   |
| 27               | Bulgaria | Pimento                         | 2009           | 3                                                                     |
| 27               | Bulgaria | Pineapples and products         | 2009           | 1                                                                     |
| 27               | Bulgaria | Plantains                       | 2009           | 4                                                                     |
| 27               | Bulgaria | Potatoes and products           | 2009           | 57                                                                    |
| 27               | Bulgaria | Poultry Meat                    | 2009           | 85                                                                    |
| 27               | Bulgaria | Pulses                          | 2009           | 23                                                                    |
| 27               | Bulgaria | Pulses, Other and products      | 2009           | 4                                                                     |
| 27               | Bulgaria | Rape and Mustardseed            | 2009           | 2                                                                     |
| 27               | Bulgaria | Rice (Milled Equivalent)        | 2009           | 33                                                                    |
| 27               | Bulgaria | Rye and products                | 2009           | 5                                                                     |
| 27               | Bulgaria | Sesame seed                     | 2009           | 2                                                                     |
| 27               | Bulgaria | Soyabean Oil                    | 2009           | 37                                                                    |
| 27               | Bulgaria | Spices                          | 2009           | 5                                                                     |
| 27               | Bulgaria | Spices, Other                   | 2009           | 2                                                                     |
| 27               | Bulgaria | Starchy Roots                   | 2009           | 57                                                                    |
| 27               | Bulgaria | Stimulants                      | 2009           | 29                                                                    |
| 27               | Bulgaria | Sugar & Sweeteners              | 2009           | 302                                                                   |
| 27               | Bulgaria | Sugar (Raw Equivalent)          | 2009           | 286                                                                   |
| 27               | Bulgaria | Sunflower seed                  | 2009           | 17                                                                    |
| 27               | Bulgaria | Sunflowerseed Oil               | 2009           | 300                                                                   |
| 27               | Bulgaria | Sweeteners, Other               | 2009           | 12                                                                    |
| 27               | Bulgaria | Tomatoes and products           | 2009           | 12                                                                    |
| 27               | Bulgaria | Treenuts                        | 2009           | 5                                                                     |
| 27               | Bulgaria | Vegetable Oils                  | 2009           | 387                                                                   |
| 27               | Bulgaria | Vegetables                      | 2009           | 39                                                                    |
| 27               | Bulgaria | Vegetables, Other               | 2009           | 24                                                                    |
| 27               | Bulgaria | Vegetal Products                | 2009           | 2,202                                                                 |
| 27               | Bulgaria | Wheat and products              | 2009           | 863                                                                   |
| 27               | Bulgaria | Wine                            | 2009           | 23                                                                    |

Dietary calcium and zinc deficiency risks are decreasing but remain prevalent

| FAO Country code | Country  | Food item                       | Reference year | Net energy supply (kcal capita <sup>-1</sup> d <sup>-1</sup> ) |
|------------------|----------|---------------------------------|----------------|----------------------------------------------------------------|
| 27               | Bulgaria | Alcoholic Beverages             | 2010           | 178                                                            |
| 27               | Bulgaria | Animal fats                     | 2010           | 118                                                            |
| 27               | Bulgaria | Animal Products                 | 2010           | 631                                                            |
| 27               | Bulgaria | Apples and products             | 2010           | 5                                                              |
| 27               | Bulgaria | Bananas                         | 2010           | 5                                                              |
| 27               | Bulgaria | Barley and products             | 2010           | 73                                                             |
| 27               | Bulgaria | Beans                           | 2010           | 19                                                             |
| 27               | Bulgaria | Beer                            | 2010           | 92                                                             |
| 27               | Bulgaria | Beverages, Alcoholic            | 2010           | 60                                                             |
| 27               | Bulgaria | Bovine Meat                     | 2010           | 15                                                             |
| 27               | Bulgaria | Butter, Ghee                    | 2010           | 10                                                             |
| 27               | Bulgaria | Cereals - Excluding Beer        | 2010           | 1,168                                                          |
| 27               | Bulgaria | Cocoa Beans and products        | 2010           | 12                                                             |
| 27               | Bulgaria | Coconuts - Incl Copra           | 2010           | 2                                                              |
| 27               | Bulgaria | Coffee and products             | 2010           | 6                                                              |
| 27               | Bulgaria | Demersal Fish                   | 2010           | 1                                                              |
| 27               | Bulgaria | Eggs                            | 2010           | 39                                                             |
| 27               | Bulgaria | Fats, Animals, Raw              | 2010           | 107                                                            |
| 27               | Bulgaria | Fish, Seafood                   | 2010           | 14                                                             |
| 27               | Bulgaria | Freshwater Fish                 | 2010           | 4                                                              |
| 27               | Bulgaria | Fruits - Excluding Wine         | 2010           | 48                                                             |
| 27               | Bulgaria | Fruits, Other                   | 2010           | 24                                                             |
| 27               | Bulgaria | Grand Total                     | 2010           | 2,782                                                          |
| 27               | Bulgaria | Grapefruit and products         | 2010           | 1                                                              |
| 27               | Bulgaria | Grapes and products (excl wine) | 2010           | 2                                                              |
| 27               | Bulgaria | Groundnut Oil                   | 2010           | 12                                                             |
| 27               | Bulgaria | Groundnuts (Shelled Eq)         | 2010           | 5                                                              |
| 27               | Bulgaria | Honey                           | 2010           | 3                                                              |
| 27               | Bulgaria | Lemons, Limes and products      | 2010           | 1                                                              |
| 27               | Bulgaria | Maize and products              | 2010           | 233                                                            |
| 27               | Bulgaria | Maize Germ Oil                  | 2010           | 21                                                             |
| 27               | Bulgaria | Meat                            | 2010           | 228                                                            |
| 27               | Bulgaria | Meat, Other                     | 2010           | 3                                                              |
| 27               | Bulgaria | Milk - Excluding Butter         | 2010           | 220                                                            |
| 27               | Bulgaria | Miscellaneous                   | 2010           | 2                                                              |
| 27               | Bulgaria | Mutton & Goat Meat              | 2010           | 10                                                             |
| 27               | Bulgaria | Oats                            | 2010           | 2                                                              |
| 27               | Bulgaria | Offals                          | 2010           | 13                                                             |
| 27               | Bulgaria | Oilcrops                        | 2010           | 35                                                             |
| 27               | Bulgaria | Oilcrops Oil, Other             | 2010           | 17                                                             |
| 27               | Bulgaria | Olive Oil                       | 2010           | 5                                                              |
| 27               | Bulgaria | Olives (including preserved)    | 2010           | 5                                                              |
| 27               | Bulgaria | Onions                          | 2010           | 5                                                              |
| 27               | Bulgaria | Oranges, Mandarines             | 2010           | 5                                                              |
| 27               | Bulgaria | Peas                            | 2010           | 1                                                              |
| 27               | Bulgaria | Pelagic Fish                    | 2010           | 9                                                              |
| 27               | Bulgaria | Pigmeat                         | 2010           | 122                                                            |
| 27               | Bulgaria | Pimento                         | 2010           | 3                                                              |
| 27               | Bulgaria | Plantains                       | 2010           | 5                                                              |
| 27               | Bulgaria | Potatoes and products           | 2010           | 55                                                             |
| 27               | Bulgaria | Poultry Meat                    | 2010           | 77                                                             |
| 27               | Bulgaria | Pulses                          | 2010           | 25                                                             |
| 27               | Bulgaria | Pulses, Other and products      | 2010           | 5                                                              |
| 27               | Bulgaria | Rape and Mustardseed            | 2010           | 2                                                              |
| 27               | Bulgaria | Rice (Milled Equivalent)        | 2010           | 19                                                             |
| 27               | Bulgaria | Rye and products                | 2010           | 6                                                              |
| 27               | Bulgaria | Sesame seed                     | 2010           | 2                                                              |
| 27               | Bulgaria | Soyabean Oil                    | 2010           | 41                                                             |
| 27               | Bulgaria | Soyabeans                       | 2010           | 1                                                              |
| 27               | Bulgaria | Spices                          | 2010           | 18                                                             |
| 27               | Bulgaria | Spices, Other                   | 2010           | 15                                                             |
| 27               | Bulgaria | Starchy Roots                   | 2010           | 55                                                             |
| 27               | Bulgaria | Stimulants                      | 2010           | 19                                                             |
| 27               | Bulgaria | Sugar & Sweeteners              | 2010           | 249                                                            |
| 27               | Bulgaria | Sugar (Raw Equivalent)          | 2010           | 235                                                            |
| 27               | Bulgaria | Sunflower seed                  | 2010           | 17                                                             |
| 27               | Bulgaria | Sunflowerseed Oil               | 2010           | 209                                                            |
| 27               | Bulgaria | Sweeteners, Other               | 2010           | 12                                                             |
| 27               | Bulgaria | Tomatoes and products           | 2010           | 11                                                             |
| 27               | Bulgaria | Treenuts                        | 2010           | 5                                                              |
| 27               | Bulgaria | Vegetable Oils                  | 2010           | 306                                                            |
| 27               | Bulgaria | Vegetables                      | 2010           | 45                                                             |
| 27               | Bulgaria | Vegetables, Other               | 2010           | 29                                                             |
| 27               | Bulgaria | Vegetal Products                | 2010           | 2,151                                                          |
| 27               | Bulgaria | Wheat and products              | 2010           | 836                                                            |
| 27               | Bulgaria | Wine                            | 2010           | 27                                                             |
| 27               | Bulgaria | Alcoholic Beverages             | 2011           | 178                                                            |
| 27               | Bulgaria | Animal fats                     | 2011           | 111                                                            |
| 27               | Bulgaria | Animal Products                 | 2011           | 644                                                            |
| 27               | Bulgaria | Apples and products             | 2011           | 8                                                              |
| 27               | Bulgaria | Bananas                         | 2011           | 6                                                              |
| 27               | Bulgaria | Barley and products             | 2011           | 4                                                              |
| 27               | Bulgaria | Beans                           | 2011           | 15                                                             |
| 27               | Bulgaria | Beer                            | 2011           | 94                                                             |
| 27               | Bulgaria | Beverages, Alcoholic            | 2011           | 66                                                             |
| 27               | Bulgaria | Bovine Meat                     | 2011           | 14                                                             |
| 27               | Bulgaria | Butter, Ghee                    | 2011           | 10                                                             |
| 27               | Bulgaria | Cereals - Excluding Beer        | 2011           | 1,222                                                          |
| 27               | Bulgaria | Cocoa Beans and products        | 2011           | 16                                                             |
| 27               | Bulgaria | Coconuts - Incl Copra           | 2011           | 1                                                              |
| 27               | Bulgaria | Coffee and products             | 2011           | 6                                                              |
| 27               | Bulgaria | Cream                           | 2011           | 1                                                              |
| 27               | Bulgaria | Demersal Fish                   | 2011           | 1                                                              |
| 27               | Bulgaria | Eggs                            | 2011           | 32                                                             |
| 27               | Bulgaria | Fats, Animals, Raw              | 2011           | 100                                                            |
| 27               | Bulgaria | Fish, Seafood                   | 2011           | 14                                                             |
| 27               | Bulgaria | Freshwater Fish                 | 2011           | 4                                                              |



Dietary calcium and zinc deficiency risks are decreasing but remain prevalent

| FAO Country code | Country    | Food item                       | Reference year | Net energy supply (kcal <i>capita</i> <sup>-1</sup> d <sup>-1</sup> ) |
|------------------|------------|---------------------------------|----------------|-----------------------------------------------------------------------|
| 27               | Bulgaria   | Fruits - Excluding Wine         | 2011           | 64                                                                    |
| 27               | Bulgaria   | Fruits, Other                   | 2011           | 28                                                                    |
| 27               | Bulgaria   | Grand Total                     | 2011           | 2,877                                                                 |
| 27               | Bulgaria   | Grapefruit and products         | 2011           | 1                                                                     |
| 27               | Bulgaria   | Grapes and products (excl wine) | 2011           | 9                                                                     |
| 27               | Bulgaria   | Groundnut Oil                   | 2011           | 12                                                                    |
| 27               | Bulgaria   | Groundnuts (Shelled Eq)         | 2011           | 7                                                                     |
| 27               | Bulgaria   | Honey                           | 2011           | 3                                                                     |
| 27               | Bulgaria   | Lemons, Limes and products      | 2011           | 1                                                                     |
| 27               | Bulgaria   | Maize and products              | 2011           | 305                                                                   |
| 27               | Bulgaria   | Maize Germ Oil                  | 2011           | 19                                                                    |
| 27               | Bulgaria   | Meat                            | 2011           | 243                                                                   |
| 27               | Bulgaria   | Meat, Other                     | 2011           | 3                                                                     |
| 27               | Bulgaria   | Milk - Excluding Butter         | 2011           | 230                                                                   |
| 27               | Bulgaria   | Miscellaneous                   | 2011           | 2                                                                     |
| 27               | Bulgaria   | Mutton & Goat Meat              | 2011           | 11                                                                    |
| 27               | Bulgaria   | Oats                            | 2011           | 1                                                                     |
| 27               | Bulgaria   | Offals                          | 2011           | 13                                                                    |
| 27               | Bulgaria   | Oilcrops                        | 2011           | 35                                                                    |
| 27               | Bulgaria   | Oilcrops Oil, Other             | 2011           | 18                                                                    |
| 27               | Bulgaria   | Olive Oil                       | 2011           | 7                                                                     |
| 27               | Bulgaria   | Olives (including preserved)    | 2011           | 5                                                                     |
| 27               | Bulgaria   | Onions                          | 2011           | 5                                                                     |
| 27               | Bulgaria   | Oranges, Mandarines             | 2011           | 5                                                                     |
| 27               | Bulgaria   | Peas                            | 2011           | 1                                                                     |
| 27               | Bulgaria   | Pelagic Fish                    | 2011           | 9                                                                     |
| 27               | Bulgaria   | Pigmeat                         | 2011           | 130                                                                   |
| 27               | Bulgaria   | Pimento                         | 2011           | 3                                                                     |
| 27               | Bulgaria   | Pineapples and products         | 2011           | 1                                                                     |
| 27               | Bulgaria   | Plantains                       | 2011           | 4                                                                     |
| 27               | Bulgaria   | Potatoes and products           | 2011           | 54                                                                    |
| 27               | Bulgaria   | Poultry Meat                    | 2011           | 85                                                                    |
| 27               | Bulgaria   | Pulses                          | 2011           | 21                                                                    |
| 27               | Bulgaria   | Pulses, Other and products      | 2011           | 4                                                                     |
| 27               | Bulgaria   | Rape and Mustardseed            | 2011           | 2                                                                     |
| 27               | Bulgaria   | Rice (Milled Equivalent)        | 2011           | 40                                                                    |
| 27               | Bulgaria   | Rye and products                | 2011           | 5                                                                     |
| 27               | Bulgaria   | Sesame seed                     | 2011           | 2                                                                     |
| 27               | Bulgaria   | Soyabean Oil                    | 2011           | 37                                                                    |
| 27               | Bulgaria   | Spices                          | 2011           | 13                                                                    |
| 27               | Bulgaria   | Spices, Other                   | 2011           | 9                                                                     |
| 27               | Bulgaria   | Starchy Roots                   | 2011           | 55                                                                    |
| 27               | Bulgaria   | Stimulants                      | 2011           | 22                                                                    |
| 27               | Bulgaria   | Sugar & Sweeteners              | 2011           | 268                                                                   |
| 27               | Bulgaria   | Sugar (Raw Equivalent)          | 2011           | 253                                                                   |
| 27               | Bulgaria   | Sunflower seed                  | 2011           | 17                                                                    |
| 27               | Bulgaria   | Sunflowerseed Oil               | 2011           | 215                                                                   |
| 27               | Bulgaria   | Sweet potatoes                  | 2011           | 1                                                                     |
| 27               | Bulgaria   | Sweeteners, Other               | 2011           | 12                                                                    |
| 27               | Bulgaria   | Tomatoes and products           | 2011           | 9                                                                     |
| 27               | Bulgaria   | Treenuts                        | 2011           | 6                                                                     |
| 27               | Bulgaria   | Vegetable Oils                  | 2011           | 306                                                                   |
| 27               | Bulgaria   | Vegetables                      | 2011           | 41                                                                    |
| 27               | Bulgaria   | Vegetables, Other               | 2011           | 27                                                                    |
| 27               | Bulgaria   | Vegetal Products                | 2011           | 2,233                                                                 |
| 27               | Bulgaria   | Wheat and products              | 2011           | 867                                                                   |
| 27               | Bulgaria   | Wine                            | 2011           | 18                                                                    |
| 35               | Cabo Verde | Alcoholic Beverages             | 1992           | 36                                                                    |
| 35               | Cabo Verde | Animal fats                     | 1992           | 89                                                                    |
| 35               | Cabo Verde | Animal Products                 | 1992           | 497                                                                   |
| 35               | Cabo Verde | Bananas                         | 1992           | 15                                                                    |
| 35               | Cabo Verde | Beer                            | 1992           | 10                                                                    |
| 35               | Cabo Verde | Beverages, Alcoholic            | 1992           | 5                                                                     |
| 35               | Cabo Verde | Bovine Meat                     | 1992           | 28                                                                    |
| 35               | Cabo Verde | Butter, Chee                    | 1992           | 3                                                                     |
| 35               | Cabo Verde | Cassava and products            | 1992           | 21                                                                    |
| 35               | Cabo Verde | Cereals - Excluding Beer        | 1992           | 1,264                                                                 |
| 35               | Cabo Verde | Cereals, Other                  | 1992           | 3                                                                     |
| 35               | Cabo Verde | Cocoa Beans and products        | 1992           | 2                                                                     |
| 35               | Cabo Verde | Coconuts - Incl Copra           | 1992           | 19                                                                    |
| 35               | Cabo Verde | Coffee and products             | 1992           | 3                                                                     |
| 35               | Cabo Verde | Eggs                            | 1992           | 10                                                                    |
| 35               | Cabo Verde | Fats, Animals, Raw              | 1992           | 86                                                                    |
| 35               | Cabo Verde | Fish, Seafood                   | 1992           | 22                                                                    |
| 35               | Cabo Verde | Fruits - Excluding Wine         | 1992           | 55                                                                    |
| 35               | Cabo Verde | Fruits, Other                   | 1992           | 39                                                                    |
| 35               | Cabo Verde | Grand Total                     | 1992           | 2,511                                                                 |
| 35               | Cabo Verde | Groundnut Oil                   | 1992           | 1                                                                     |
| 35               | Cabo Verde | Groundnuts (Shelled Eq)         | 1992           | 1                                                                     |
| 35               | Cabo Verde | Maize and products              | 1992           | 710                                                                   |
| 35               | Cabo Verde | Marine Fish, Other              | 1992           | 16                                                                    |
| 35               | Cabo Verde | Meat                            | 1992           | 211                                                                   |
| 35               | Cabo Verde | Milk - Excluding Butter         | 1992           | 160                                                                   |
| 35               | Cabo Verde | Miscellaneous                   | 1992           | 8                                                                     |
| 35               | Cabo Verde | Mutton & Goat Meat              | 1992           | 5                                                                     |
| 35               | Cabo Verde | Offals                          | 1992           | 4                                                                     |
| 35               | Cabo Verde | Oilcrops                        | 1992           | 19                                                                    |
| 35               | Cabo Verde | Oilcrops Oil, Other             | 1992           | 82                                                                    |
| 35               | Cabo Verde | Olive Oil                       | 1992           | 49                                                                    |
| 35               | Cabo Verde | Onions                          | 1992           | 3                                                                     |
| 35               | Cabo Verde | Pelagic Fish                    | 1992           | 6                                                                     |
| 35               | Cabo Verde | Pigmeat                         | 1992           | 172                                                                   |
| 35               | Cabo Verde | Pimento                         | 1992           | 10                                                                    |
| 35               | Cabo Verde | Potatoes and products           | 1992           | 31                                                                    |
| 35               | Cabo Verde | Poultry Meat                    | 1992           | 6                                                                     |
| 35               | Cabo Verde | Pulses                          | 1992           | 73                                                                    |
| 35               | Cabo Verde | Pulses, Other and products      | 1992           | 73                                                                    |

Dietary calcium and zinc deficiency risks are decreasing but remain prevalent

| FAO Country code | Country    | Food item                       | Reference year | Net energy supply (kcal <i>capita</i> <sup>-1</sup> d <sup>-1</sup> ) |
|------------------|------------|---------------------------------|----------------|-----------------------------------------------------------------------|
| 35               | Cabo Verde | Rape and Mustard Oil            | 1992           | 115                                                                   |
| 35               | Cabo Verde | Rice (Milled Equivalent)        | 1992           | 257                                                                   |
| 35               | Cabo Verde | Roots, Other                    | 1992           | 2                                                                     |
| 35               | Cabo Verde | Soyabean Oil                    | 1992           | 24                                                                    |
| 35               | Cabo Verde | Spices                          | 1992           | 11                                                                    |
| 35               | Cabo Verde | Spices, Other                   | 1992           | 1                                                                     |
| 35               | Cabo Verde | Starchy Roots                   | 1992           | 73                                                                    |
| 35               | Cabo Verde | Stimulants                      | 1992           | 5                                                                     |
| 35               | Cabo Verde | Sugar & Sweeteners              | 1992           | 179                                                                   |
| 35               | Cabo Verde | Sugar (Raw Equivalent)          | 1992           | 175                                                                   |
| 35               | Cabo Verde | Sweet potatoes                  | 1992           | 20                                                                    |
| 35               | Cabo Verde | Sweeteners, Other               | 1992           | 4                                                                     |
| 35               | Cabo Verde | Tomatoes and products           | 1992           | 4                                                                     |
| 35               | Cabo Verde | Treenuts                        | 1992           | 1                                                                     |
| 35               | Cabo Verde | Vegetable Oils                  | 1992           | 271                                                                   |
| 35               | Cabo Verde | Vegetables                      | 1992           | 19                                                                    |
| 35               | Cabo Verde | Vegetables, Other               | 1992           | 12                                                                    |
| 35               | Cabo Verde | Vegetal Products                | 1992           | 2,014                                                                 |
| 35               | Cabo Verde | Wheat and products              | 1992           | 295                                                                   |
| 35               | Cabo Verde | Wine                            | 1992           | 21                                                                    |
| 35               | Cabo Verde | Alcoholic Beverages             | 1993           | 43                                                                    |
| 35               | Cabo Verde | Animal fats                     | 1993           | 91                                                                    |
| 35               | Cabo Verde | Animal Products                 | 1993           | 448                                                                   |
| 35               | Cabo Verde | Apples and products             | 1993           | 2                                                                     |
| 35               | Cabo Verde | Bananas                         | 1993           | 22                                                                    |
| 35               | Cabo Verde | Beer                            | 1993           | 8                                                                     |
| 35               | Cabo Verde | Beverages, Alcoholic            | 1993           | 6                                                                     |
| 35               | Cabo Verde | Bovine Meat                     | 1993           | 18                                                                    |
| 35               | Cabo Verde | Butter, Ghee                    | 1993           | 5                                                                     |
| 35               | Cabo Verde | Cassava and products            | 1993           | 23                                                                    |
| 35               | Cabo Verde | Cereals - Excluding Beer        | 1993           | 1,296                                                                 |
| 35               | Cabo Verde | Cereals, Other                  | 1993           | 2                                                                     |
| 35               | Cabo Verde | Cocoa Beans and products        | 1993           | 3                                                                     |
| 35               | Cabo Verde | Coconuts - Incl Copra           | 1993           | 21                                                                    |
| 35               | Cabo Verde | Coffee and products             | 1993           | 2                                                                     |
| 35               | Cabo Verde | Eggs                            | 1993           | 15                                                                    |
| 35               | Cabo Verde | Fats, Animals, Raw              | 1993           | 86                                                                    |
| 35               | Cabo Verde | Fish, Seafood                   | 1993           | 27                                                                    |
| 35               | Cabo Verde | Fruits - Excluding Wine         | 1993           | 62                                                                    |
| 35               | Cabo Verde | Fruits, Other                   | 1993           | 35                                                                    |
| 35               | Cabo Verde | Grand Total                     | 1993           | 2,445                                                                 |
| 35               | Cabo Verde | Grapes and products (excl wine) | 1993           | 2                                                                     |
| 35               | Cabo Verde | Groundnuts (Shelled Eq)         | 1993           | 1                                                                     |
| 35               | Cabo Verde | Maize and products              | 1993           | 723                                                                   |
| 35               | Cabo Verde | Marine Fish, Other              | 1993           | 18                                                                    |
| 35               | Cabo Verde | Meat                            | 1993           | 194                                                                   |
| 35               | Cabo Verde | Milk - Excluding Butter         | 1993           | 118                                                                   |
| 35               | Cabo Verde | Miscellaneous                   | 1993           | 5                                                                     |
| 35               | Cabo Verde | Mutton & Goat Meat              | 1993           | 5                                                                     |
| 35               | Cabo Verde | Offals                          | 1993           | 4                                                                     |
| 35               | Cabo Verde | Oilcrops                        | 1993           | 22                                                                    |
| 35               | Cabo Verde | Oilcrops Oil, Other             | 1993           | 33                                                                    |
| 35               | Cabo Verde | Olive Oil                       | 1993           | 28                                                                    |
| 35               | Cabo Verde | Onions                          | 1993           | 4                                                                     |
| 35               | Cabo Verde | Oranges, Mandarines             | 1993           | 1                                                                     |
| 35               | Cabo Verde | Pelagic Fish                    | 1993           | 9                                                                     |
| 35               | Cabo Verde | Pigmeat                         | 1993           | 163                                                                   |
| 35               | Cabo Verde | Pimento                         | 1993           | 19                                                                    |
| 35               | Cabo Verde | Potatoes and products           | 1993           | 38                                                                    |
| 35               | Cabo Verde | Poultry Meat                    | 1993           | 7                                                                     |
| 35               | Cabo Verde | Pulses                          | 1993           | 49                                                                    |
| 35               | Cabo Verde | Pulses, Other and products      | 1993           | 49                                                                    |
| 35               | Cabo Verde | Rape and Mustard Oil            | 1993           | 150                                                                   |
| 35               | Cabo Verde | Rice (Milled Equivalent)        | 1993           | 276                                                                   |
| 35               | Cabo Verde | Roots, Other                    | 1993           | 1                                                                     |
| 35               | Cabo Verde | Soyabean Oil                    | 1993           | 6                                                                     |
| 35               | Cabo Verde | Spices                          | 1993           | 20                                                                    |
| 35               | Cabo Verde | Spices, Other                   | 1993           | 1                                                                     |
| 35               | Cabo Verde | Starchy Roots                   | 1993           | 81                                                                    |
| 35               | Cabo Verde | Stimulants                      | 1993           | 5                                                                     |
| 35               | Cabo Verde | Sugar & Sweeteners              | 1993           | 180                                                                   |
| 35               | Cabo Verde | Sugar (Raw Equivalent)          | 1993           | 176                                                                   |
| 35               | Cabo Verde | Sweet potatoes                  | 1993           | 19                                                                    |
| 35               | Cabo Verde | Sweeteners, Other               | 1993           | 4                                                                     |
| 35               | Cabo Verde | Tomatoes and products           | 1993           | 3                                                                     |
| 35               | Cabo Verde | Treenuts                        | 1993           | 1                                                                     |
| 35               | Cabo Verde | Vegetable Oils                  | 1993           | 216                                                                   |
| 35               | Cabo Verde | Vegetables                      | 1993           | 18                                                                    |
| 35               | Cabo Verde | Vegetables, Other               | 1993           | 11                                                                    |
| 35               | Cabo Verde | Vegetal Products                | 1993           | 1,997                                                                 |
| 35               | Cabo Verde | Wheat and products              | 1993           | 295                                                                   |
| 35               | Cabo Verde | Wine                            | 1993           | 28                                                                    |
| 35               | Cabo Verde | Alcoholic Beverages             | 1994           | 45                                                                    |
| 35               | Cabo Verde | Animal fats                     | 1994           | 71                                                                    |
| 35               | Cabo Verde | Animal Products                 | 1994           | 379                                                                   |
| 35               | Cabo Verde | Apples and products             | 1994           | 3                                                                     |
| 35               | Cabo Verde | Bananas                         | 1994           | 19                                                                    |
| 35               | Cabo Verde | Beans                           | 1994           | 43                                                                    |
| 35               | Cabo Verde | Beer                            | 1994           | 19                                                                    |
| 35               | Cabo Verde | Beverages, Alcoholic            | 1994           | 4                                                                     |
| 35               | Cabo Verde | Bovine Meat                     | 1994           | 14                                                                    |
| 35               | Cabo Verde | Butter, Ghee                    | 1994           | 3                                                                     |
| 35               | Cabo Verde | Cassava and products            | 1994           | 22                                                                    |
| 35               | Cabo Verde | Cereals - Excluding Beer        | 1994           | 1,134                                                                 |
| 35               | Cabo Verde | Cereals, Other                  | 1994           | 2                                                                     |
| 35               | Cabo Verde | Cocoa Beans and products        | 1994           | 4                                                                     |
| 35               | Cabo Verde | Coconuts - Incl Copra           | 1994           | 19                                                                    |

Dietary calcium and zinc deficiency risks are decreasing but remain prevalent

| FAO Country code | Country    | Food item                  | Reference year | Net energy supply (kcal capita <sup>-1</sup> d <sup>-1</sup> ) |
|------------------|------------|----------------------------|----------------|----------------------------------------------------------------|
| 35               | Cabo Verde | Coffee and products        | 1994           | 2                                                              |
| 35               | Cabo Verde | Eggs                       | 1994           | 15                                                             |
| 35               | Cabo Verde | Fats, Animals, Raw         | 1994           | 68                                                             |
| 35               | Cabo Verde | Fish, Seafood              | 1994           | 31                                                             |
| 35               | Cabo Verde | Fruits - Excluding Wine    | 1994           | 56                                                             |
| 35               | Cabo Verde | Fruits, Other              | 1994           | 32                                                             |
| 35               | Cabo Verde | Grand Total                | 1994           | 2,435                                                          |
| 35               | Cabo Verde | Groundnut Oil              | 1994           | 2                                                              |
| 35               | Cabo Verde | Maize and products         | 1994           | 522                                                            |
| 35               | Cabo Verde | Marine Fish, Other         | 1994           | 21                                                             |
| 35               | Cabo Verde | Meat                       | 1994           | 137                                                            |
| 35               | Cabo Verde | Milk - Excluding Butter    | 1994           | 122                                                            |
| 35               | Cabo Verde | Miscellaneous              | 1994           | 8                                                              |
| 35               | Cabo Verde | Mutton & Goat Meat         | 1994           | 5                                                              |
| 35               | Cabo Verde | Offals                     | 1994           | 3                                                              |
| 35               | Cabo Verde | Oilcrops                   | 1994           | 20                                                             |
| 35               | Cabo Verde | Oilcrops Oil, Other        | 1994           | 291                                                            |
| 35               | Cabo Verde | Oilcrops, Other            | 1994           | 1                                                              |
| 35               | Cabo Verde | Olive Oil                  | 1994           | 44                                                             |
| 35               | Cabo Verde | Onions                     | 1994           | 3                                                              |
| 35               | Cabo Verde | Oranges, Mandarines        | 1994           | 1                                                              |
| 35               | Cabo Verde | Pelagic Fish               | 1994           | 10                                                             |
| 35               | Cabo Verde | Pigmeat                    | 1994           | 112                                                            |
| 35               | Cabo Verde | Pimento                    | 1994           | 19                                                             |
| 35               | Cabo Verde | Potatoes and products      | 1994           | 29                                                             |
| 35               | Cabo Verde | Poultry Meat               | 1994           | 6                                                              |
| 35               | Cabo Verde | Pulses                     | 1994           | 60                                                             |
| 35               | Cabo Verde | Pulses, Other and products | 1994           | 17                                                             |
| 35               | Cabo Verde | Rape and Mustard Oil       | 1994           | 54                                                             |
| 35               | Cabo Verde | Rice (Milled Equivalent)   | 1994           | 322                                                            |
| 35               | Cabo Verde | Roots, Other               | 1994           | 1                                                              |
| 35               | Cabo Verde | Soyabean Oil               | 1994           | 43                                                             |
| 35               | Cabo Verde | Spices                     | 1994           | 20                                                             |
| 35               | Cabo Verde | Spices, Other              | 1994           | 1                                                              |
| 35               | Cabo Verde | Starchy Roots              | 1994           | 72                                                             |
| 35               | Cabo Verde | Stimulants                 | 1994           | 6                                                              |
| 35               | Cabo Verde | Sugar & Sweeteners         | 1994           | 185                                                            |
| 35               | Cabo Verde | Sugar (Raw Equivalent)     | 1994           | 181                                                            |
| 35               | Cabo Verde | Sweet potatoes             | 1994           | 19                                                             |
| 35               | Cabo Verde | Sweeteners, Other          | 1994           | 4                                                              |
| 35               | Cabo Verde | Tomatoes and products      | 1994           | 4                                                              |
| 35               | Cabo Verde | Treenuts                   | 1994           | 1                                                              |
| 35               | Cabo Verde | Vegetable Oils             | 1994           | 433                                                            |
| 35               | Cabo Verde | Vegetables                 | 1994           | 16                                                             |
| 35               | Cabo Verde | Vegetables, Other          | 1994           | 9                                                              |
| 35               | Cabo Verde | Vegetal Products           | 1994           | 2,056                                                          |
| 35               | Cabo Verde | Wheat and products         | 1994           | 287                                                            |
| 35               | Cabo Verde | Wine                       | 1994           | 21                                                             |
| 35               | Cabo Verde | Alcoholic Beverages        | 1995           | 38                                                             |
| 35               | Cabo Verde | Animal fats                | 1995           | 104                                                            |
| 35               | Cabo Verde | Animal Products            | 1995           | 469                                                            |
| 35               | Cabo Verde | Apples and products        | 1995           | 2                                                              |
| 35               | Cabo Verde | Bananas                    | 1995           | 22                                                             |
| 35               | Cabo Verde | Beans                      | 1995           | 46                                                             |
| 35               | Cabo Verde | Beer                       | 1995           | 12                                                             |
| 35               | Cabo Verde | Beverages, Alcoholic       | 1995           | 6                                                              |
| 35               | Cabo Verde | Bovine Meat                | 1995           | 17                                                             |
| 35               | Cabo Verde | Butter, Ghee               | 1995           | 1                                                              |
| 35               | Cabo Verde | Cassava and products       | 1995           | 22                                                             |
| 35               | Cabo Verde | Cereals - Excluding Beer   | 1995           | 1,004                                                          |
| 35               | Cabo Verde | Cereals, Other             | 1995           | 17                                                             |
| 35               | Cabo Verde | Cocoa Beans and products   | 1995           | 4                                                              |
| 35               | Cabo Verde | Coconuts - Incl Copra      | 1995           | 19                                                             |
| 35               | Cabo Verde | Coffee and products        | 1995           | 3                                                              |
| 35               | Cabo Verde | Eggs                       | 1995           | 17                                                             |
| 35               | Cabo Verde | Fats, Animals, Raw         | 1995           | 103                                                            |
| 35               | Cabo Verde | Fish, Seafood              | 1995           | 32                                                             |
| 35               | Cabo Verde | Fruits - Excluding Wine    | 1995           | 63                                                             |
| 35               | Cabo Verde | Fruits, Other              | 1995           | 37                                                             |
| 35               | Cabo Verde | Grand Total                | 1995           | 2,305                                                          |
| 35               | Cabo Verde | Groundnut Oil              | 1995           | 13                                                             |
| 35               | Cabo Verde | Maize and products         | 1995           | 383                                                            |
| 35               | Cabo Verde | Marine Fish, Other         | 1995           | 21                                                             |
| 35               | Cabo Verde | Meat                       | 1995           | 161                                                            |
| 35               | Cabo Verde | Milk - Excluding Butter    | 1995           | 151                                                            |
| 35               | Cabo Verde | Miscellaneous              | 1995           | 11                                                             |
| 35               | Cabo Verde | Mutton & Goat Meat         | 1995           | 4                                                              |
| 35               | Cabo Verde | Offals                     | 1995           | 4                                                              |
| 35               | Cabo Verde | Oilcrops                   | 1995           | 20                                                             |
| 35               | Cabo Verde | Oilcrops Oil, Other        | 1995           | 160                                                            |
| 35               | Cabo Verde | Olive Oil                  | 1995           | 33                                                             |
| 35               | Cabo Verde | Onions                     | 1995           | 4                                                              |
| 35               | Cabo Verde | Oranges, Mandarines        | 1995           | 1                                                              |
| 35               | Cabo Verde | Pelagic Fish               | 1995           | 11                                                             |
| 35               | Cabo Verde | Pigmeat                    | 1995           | 134                                                            |
| 35               | Cabo Verde | Pimento                    | 1995           | 17                                                             |
| 35               | Cabo Verde | Potatoes and products      | 1995           | 34                                                             |
| 35               | Cabo Verde | Poultry Meat               | 1995           | 5                                                              |
| 35               | Cabo Verde | Pulses                     | 1995           | 54                                                             |
| 35               | Cabo Verde | Pulses, Other and products | 1995           | 8                                                              |
| 35               | Cabo Verde | Rape and Mustard Oil       | 1995           | 95                                                             |
| 35               | Cabo Verde | Rice (Milled Equivalent)   | 1995           | 324                                                            |
| 35               | Cabo Verde | Roots, Other               | 1995           | 2                                                              |
| 35               | Cabo Verde | Soyabean Oil               | 1995           | 38                                                             |
| 35               | Cabo Verde | Spices                     | 1995           | 18                                                             |
| 35               | Cabo Verde | Spices, Other              | 1995           | 1                                                              |
| 35               | Cabo Verde | Starchy Roots              | 1995           | 77                                                             |

## Dietary calcium and zinc deficiency risks are decreasing but remain prevalent

| FAO Country code | Country    | Food item                       | Reference year | Net energy supply (kcal capita <sup>-1</sup> d <sup>-1</sup> ) |
|------------------|------------|---------------------------------|----------------|----------------------------------------------------------------|
| 35               | Cabo Verde | Stimulants                      | 1995           | 7                                                              |
| 35               | Cabo Verde | Sugar & Sweeteners              | 1995           | 186                                                            |
| 35               | Cabo Verde | Sugar (Raw Equivalent)          | 1995           | 176                                                            |
| 35               | Cabo Verde | Sweet potatoes                  | 1995           | 19                                                             |
| 35               | Cabo Verde | Sweeteners, Other               | 1995           | 10                                                             |
| 35               | Cabo Verde | Tomatoes and products           | 1995           | 4                                                              |
| 35               | Cabo Verde | Treenuts                        | 1995           | 1                                                              |
| 35               | Cabo Verde | Vegetable Oils                  | 1995           | 338                                                            |
| 35               | Cabo Verde | Vegetables                      | 1995           | 18                                                             |
| 35               | Cabo Verde | Vegetables, Other               | 1995           | 10                                                             |
| 35               | Cabo Verde | Vegetal Products                | 1995           | 1,836                                                          |
| 35               | Cabo Verde | Wheat and products              | 1995           | 280                                                            |
| 35               | Cabo Verde | Wine                            | 1995           | 20                                                             |
| 35               | Cabo Verde | Alcoholic Beverages             | 1996           | 45                                                             |
| 35               | Cabo Verde | Animal fats                     | 1996           | 81                                                             |
| 35               | Cabo Verde | Animal Products                 | 1996           | 426                                                            |
| 35               | Cabo Verde | Apples and products             | 1996           | 3                                                              |
| 35               | Cabo Verde | Bananas                         | 1996           | 22                                                             |
| 35               | Cabo Verde | Beans                           | 1996           | 72                                                             |
| 35               | Cabo Verde | Beer                            | 1996           | 19                                                             |
| 35               | Cabo Verde | Beverages, Alcoholic            | 1996           | 6                                                              |
| 35               | Cabo Verde | Bovine Meat                     | 1996           | 19                                                             |
| 35               | Cabo Verde | Butter, Ghee                    | 1996           | 2                                                              |
| 35               | Cabo Verde | Cassava and products            | 1996           | 21                                                             |
| 35               | Cabo Verde | Cereals - Excluding Beer        | 1996           | 1,027                                                          |
| 35               | Cabo Verde | Cereals, Other                  | 1996           | 1                                                              |
| 35               | Cabo Verde | Cocoa Beans and products        | 1996           | 5                                                              |
| 35               | Cabo Verde | Coconuts - Incl Copra           | 1996           | 18                                                             |
| 35               | Cabo Verde | Coffee and products             | 1996           | 3                                                              |
| 35               | Cabo Verde | Eggs                            | 1996           | 16                                                             |
| 35               | Cabo Verde | Fats, Animals, Raw              | 1996           | 78                                                             |
| 35               | Cabo Verde | Fish, Seafood                   | 1996           | 33                                                             |
| 35               | Cabo Verde | Fruits - Excluding Wine         | 1996           | 59                                                             |
| 35               | Cabo Verde | Fruits, Other                   | 1996           | 32                                                             |
| 35               | Cabo Verde | Grand Total                     | 1996           | 2,310                                                          |
| 35               | Cabo Verde | Grapes and products (excl wine) | 1996           | 1                                                              |
| 35               | Cabo Verde | Maize and products              | 1996           | 415                                                            |
| 35               | Cabo Verde | Marine Fish, Other              | 1996           | 28                                                             |
| 35               | Cabo Verde | Meat                            | 1996           | 154                                                            |
| 35               | Cabo Verde | Milk - Excluding Butter         | 1996           | 140                                                            |
| 35               | Cabo Verde | Miscellaneous                   | 1996           | 8                                                              |
| 35               | Cabo Verde | Mutton & Goat Meat              | 1996           | 4                                                              |
| 35               | Cabo Verde | Offals                          | 1996           | 2                                                              |
| 35               | Cabo Verde | Oilcrops                        | 1996           | 18                                                             |
| 35               | Cabo Verde | Oilcrops Oil, Other             | 1996           | 140                                                            |
| 35               | Cabo Verde | Olive Oil                       | 1996           | 22                                                             |
| 35               | Cabo Verde | Onions                          | 1996           | 4                                                              |
| 35               | Cabo Verde | Oranges, Mandarines             | 1996           | 1                                                              |
| 35               | Cabo Verde | Pelagic Fish                    | 1996           | 4                                                              |
| 35               | Cabo Verde | Pigmeat                         | 1996           | 126                                                            |
| 35               | Cabo Verde | Pimento                         | 1996           | 26                                                             |
| 35               | Cabo Verde | Potatoes and products           | 1996           | 28                                                             |
| 35               | Cabo Verde | Poultry Meat                    | 1996           | 5                                                              |
| 35               | Cabo Verde | Pulses                          | 1996           | 84                                                             |
| 35               | Cabo Verde | Pulses, Other and products      | 1996           | 11                                                             |
| 35               | Cabo Verde | Rape and Mustard Oil            | 1996           | 113                                                            |
| 35               | Cabo Verde | Rice (Milled Equivalent)        | 1996           | 326                                                            |
| 35               | Cabo Verde | Roots, Other                    | 1996           | 1                                                              |
| 35               | Cabo Verde | Soyabean Oil                    | 1996           | 52                                                             |
| 35               | Cabo Verde | Spices                          | 1996           | 27                                                             |
| 35               | Cabo Verde | Spices, Other                   | 1996           | 1                                                              |
| 35               | Cabo Verde | Starchy Roots                   | 1996           | 69                                                             |
| 35               | Cabo Verde | Stimulants                      | 1996           | 8                                                              |
| 35               | Cabo Verde | Sugar & Sweeteners              | 1996           | 181                                                            |
| 35               | Cabo Verde | Sugar (Raw Equivalent)          | 1996           | 175                                                            |
| 35               | Cabo Verde | Sweet potatoes                  | 1996           | 19                                                             |
| 35               | Cabo Verde | Sweeteners, Other               | 1996           | 5                                                              |
| 35               | Cabo Verde | Tomatoes and products           | 1996           | 6                                                              |
| 35               | Cabo Verde | Treenuts                        | 1996           | 2                                                              |
| 35               | Cabo Verde | Vegetable Oils                  | 1996           | 328                                                            |
| 35               | Cabo Verde | Vegetables                      | 1996           | 29                                                             |
| 35               | Cabo Verde | Vegetables, Other               | 1996           | 19                                                             |
| 35               | Cabo Verde | Vegetal Products                | 1996           | 1,884                                                          |
| 35               | Cabo Verde | Wheat and products              | 1996           | 285                                                            |
| 35               | Cabo Verde | Wine                            | 1996           | 19                                                             |
| 35               | Cabo Verde | Alcoholic Beverages             | 1997           | 38                                                             |
| 35               | Cabo Verde | Animal fats                     | 1997           | 90                                                             |
| 35               | Cabo Verde | Animal Products                 | 1997           | 415                                                            |
| 35               | Cabo Verde | Apples and products             | 1997           | 2                                                              |
| 35               | Cabo Verde | Bananas                         | 1997           | 19                                                             |
| 35               | Cabo Verde | Beans                           | 1997           | 74                                                             |
| 35               | Cabo Verde | Beer                            | 1997           | 18                                                             |
| 35               | Cabo Verde | Beverages, Alcoholic            | 1997           | 4                                                              |
| 35               | Cabo Verde | Bovine Meat                     | 1997           | 14                                                             |
| 35               | Cabo Verde | Butter, Ghee                    | 1997           | 2                                                              |
| 35               | Cabo Verde | Cassava and products            | 1997           | 20                                                             |
| 35               | Cabo Verde | Cereals - Excluding Beer        | 1997           | 1,147                                                          |
| 35               | Cabo Verde | Cereals, Other                  | 1997           | 72                                                             |
| 35               | Cabo Verde | Cocoa Beans and products        | 1997           | 5                                                              |
| 35               | Cabo Verde | Coconuts - Incl Copra           | 1997           | 16                                                             |
| 35               | Cabo Verde | Coffee and products             | 1997           | 2                                                              |
| 35               | Cabo Verde | Demersal Fish                   | 1997           | 4                                                              |
| 35               | Cabo Verde | Eggs                            | 1997           | 17                                                             |
| 35               | Cabo Verde | Fats, Animals, Raw              | 1997           | 87                                                             |
| 35               | Cabo Verde | Fish, Seafood                   | 1997           | 41                                                             |
| 35               | Cabo Verde | Fruits - Excluding Wine         | 1997           | 55                                                             |
| 35               | Cabo Verde | Fruits, Other                   | 1997           | 31                                                             |

Dietary calcium and zinc deficiency risks are decreasing but remain prevalent

| FAO Country code | Country    | Food item                  | Reference year | Net energy supply (kcal capita <sup>-1</sup> d <sup>-1</sup> ) |
|------------------|------------|----------------------------|----------------|----------------------------------------------------------------|
| 35               | Cabo Verde | Grand Total                | 1997           | 2,341                                                          |
| 35               | Cabo Verde | Groundnut Oil              | 1997           | 1                                                              |
| 35               | Cabo Verde | Maize and products         | 1997           | 450                                                            |
| 35               | Cabo Verde | Marine Fish, Other         | 1997           | 4                                                              |
| 35               | Cabo Verde | Meat                       | 1997           | 136                                                            |
| 35               | Cabo Verde | Milk - Excluding Butter    | 1997           | 128                                                            |
| 35               | Cabo Verde | Miscellaneous              | 1997           | 11                                                             |
| 35               | Cabo Verde | Mutton & Goat Meat         | 1997           | 4                                                              |
| 35               | Cabo Verde | Offals                     | 1997           | 3                                                              |
| 35               | Cabo Verde | Oilcrops                   | 1997           | 16                                                             |
| 35               | Cabo Verde | Oilcrops Oil, Other        | 1997           | 113                                                            |
| 35               | Cabo Verde | Olive Oil                  | 1997           | 35                                                             |
| 35               | Cabo Verde | Onions                     | 1997           | 4                                                              |
| 35               | Cabo Verde | Oranges, Mandarines        | 1997           | 1                                                              |
| 35               | Cabo Verde | Palm Oil                   | 1997           | 7                                                              |
| 35               | Cabo Verde | Pelagic Fish               | 1997           | 32                                                             |
| 35               | Cabo Verde | Pigmeat                    | 1997           | 113                                                            |
| 35               | Cabo Verde | Pimento                    | 1997           | 17                                                             |
| 35               | Cabo Verde | Potatoes and products      | 1997           | 37                                                             |
| 35               | Cabo Verde | Poultry Meat               | 1997           | 5                                                              |
| 35               | Cabo Verde | Pulses                     | 1997           | 93                                                             |
| 35               | Cabo Verde | Pulses, Other and products | 1997           | 19                                                             |
| 35               | Cabo Verde | Rape and Mustard Oil       | 1997           | 23                                                             |
| 35               | Cabo Verde | Rice (Milled Equivalent)   | 1997           | 350                                                            |
| 35               | Cabo Verde | Roots, Other               | 1997           | 4                                                              |
| 35               | Cabo Verde | Soyabean Oil               | 1997           | 57                                                             |
| 35               | Cabo Verde | Spices                     | 1997           | 18                                                             |
| 35               | Cabo Verde | Spices, Other              | 1997           | 1                                                              |
| 35               | Cabo Verde | Starchy Roots              | 1997           | 80                                                             |
| 35               | Cabo Verde | Stimulants                 | 1997           | 7                                                              |
| 35               | Cabo Verde | Sugar & Sweeteners         | 1997           | 193                                                            |
| 35               | Cabo Verde | Sugar (Raw Equivalent)     | 1997           | 190                                                            |
| 35               | Cabo Verde | Sweet potatoes             | 1997           | 19                                                             |
| 35               | Cabo Verde | Sweeteners, Other          | 1997           | 3                                                              |
| 35               | Cabo Verde | Tomatoes and products      | 1997           | 7                                                              |
| 35               | Cabo Verde | Treenuts                   | 1997           | 1                                                              |
| 35               | Cabo Verde | Vegetable Oils             | 1997           | 236                                                            |
| 35               | Cabo Verde | Vegetables                 | 1997           | 30                                                             |
| 35               | Cabo Verde | Vegetables, Other          | 1997           | 19                                                             |
| 35               | Cabo Verde | Vegetal Products           | 1997           | 1,926                                                          |
| 35               | Cabo Verde | Wheat and products         | 1997           | 275                                                            |
| 35               | Cabo Verde | Wine                       | 1997           | 16                                                             |
| 35               | Cabo Verde | Alcoholic Beverages        | 1998           | 41                                                             |
| 35               | Cabo Verde | Animal fats                | 1998           | 96                                                             |
| 35               | Cabo Verde | Animal Products            | 1998           | 459                                                            |
| 35               | Cabo Verde | Apples and products        | 1998           | 2                                                              |
| 35               | Cabo Verde | Bananas                    | 1998           | 23                                                             |
| 35               | Cabo Verde | Beans                      | 1998           | 68                                                             |
| 35               | Cabo Verde | Beer                       | 1998           | 21                                                             |
| 35               | Cabo Verde | Beverages, Alcoholic       | 1998           | 4                                                              |
| 35               | Cabo Verde | Beverages, Fermented       | 1998           | 1                                                              |
| 35               | Cabo Verde | Bovine Meat                | 1998           | 10                                                             |
| 35               | Cabo Verde | Butter, Ghee               | 1998           | 2                                                              |
| 35               | Cabo Verde | Cassava and products       | 1998           | 20                                                             |
| 35               | Cabo Verde | Cereals - Excluding Beer   | 1998           | 1,098                                                          |
| 35               | Cabo Verde | Cocoa Beans and products   | 1998           | 5                                                              |
| 35               | Cabo Verde | Coconuts - Incl Copra      | 1998           | 17                                                             |
| 35               | Cabo Verde | Coffee and products        | 1998           | 2                                                              |
| 35               | Cabo Verde | Demersal Fish              | 1998           | 2                                                              |
| 35               | Cabo Verde | Eggs                       | 1998           | 16                                                             |
| 35               | Cabo Verde | Fats, Animals, Raw         | 1998           | 94                                                             |
| 35               | Cabo Verde | Fish, Seafood              | 1998           | 40                                                             |
| 35               | Cabo Verde | Fruits - Excluding Wine    | 1998           | 60                                                             |
| 35               | Cabo Verde | Fruits, Other              | 1998           | 31                                                             |
| 35               | Cabo Verde | Grand Total                | 1998           | 2,339                                                          |
| 35               | Cabo Verde | Groundnut Oil              | 1998           | 2                                                              |
| 35               | Cabo Verde | Groundnuts (Shelled Eq)    | 1998           | 2                                                              |
| 35               | Cabo Verde | Maize and products         | 1998           | 450                                                            |
| 35               | Cabo Verde | Marine Fish, Other         | 1998           | 1                                                              |
| 35               | Cabo Verde | Meat                       | 1998           | 167                                                            |
| 35               | Cabo Verde | Meat, Other                | 1998           | 3                                                              |
| 35               | Cabo Verde | Milk - Excluding Butter    | 1998           | 136                                                            |
| 35               | Cabo Verde | Miscellaneous              | 1998           | 11                                                             |
| 35               | Cabo Verde | Mutton & Goat Meat         | 1998           | 4                                                              |
| 35               | Cabo Verde | Offals                     | 1998           | 4                                                              |
| 35               | Cabo Verde | Oilcrops                   | 1998           | 19                                                             |
| 35               | Cabo Verde | Oilcrops Oil, Other        | 1998           | 74                                                             |
| 35               | Cabo Verde | Olive Oil                  | 1998           | 68                                                             |
| 35               | Cabo Verde | Onions                     | 1998           | 5                                                              |
| 35               | Cabo Verde | Oranges, Mandarines        | 1998           | 2                                                              |
| 35               | Cabo Verde | Palm Oil                   | 1998           | 11                                                             |
| 35               | Cabo Verde | Peas                       | 1998           | 10                                                             |
| 35               | Cabo Verde | Pelagic Fish               | 1998           | 37                                                             |
| 35               | Cabo Verde | Pigmeat                    | 1998           | 143                                                            |
| 35               | Cabo Verde | Pimento                    | 1998           | 19                                                             |
| 35               | Cabo Verde | Potatoes and products      | 1998           | 39                                                             |
| 35               | Cabo Verde | Poultry Meat               | 1998           | 7                                                              |
| 35               | Cabo Verde | Pulses                     | 1998           | 92                                                             |
| 35               | Cabo Verde | Pulses, Other and products | 1998           | 14                                                             |
| 35               | Cabo Verde | Rice (Milled Equivalent)   | 1998           | 365                                                            |
| 35               | Cabo Verde | Roots, Other               | 1998           | 2                                                              |
| 35               | Cabo Verde | Soyabean Oil               | 1998           | 70                                                             |
| 35               | Cabo Verde | Spices                     | 1998           | 20                                                             |
| 35               | Cabo Verde | Spices, Other              | 1998           | 1                                                              |
| 35               | Cabo Verde | Starchy Roots              | 1998           | 80                                                             |
| 35               | Cabo Verde | Stimulants                 | 1998           | 7                                                              |
| 35               | Cabo Verde | Sugar & Sweeteners         | 1998           | 189                                                            |

Dietary calcium and zinc deficiency risks are decreasing but remain prevalent

| FAO Country code | Country    | Food item                       | Reference year | Net energy supply (kcal capita <sup>-1</sup> d <sup>-1</sup> ) |
|------------------|------------|---------------------------------|----------------|----------------------------------------------------------------|
| 35               | Cabo Verde | Sugar (Raw Equivalent)          | 1998           | 186                                                            |
| 35               | Cabo Verde | Sunflowerseed Oil               | 1998           | 6                                                              |
| 35               | Cabo Verde | Sweet potatoes                  | 1998           | 19                                                             |
| 35               | Cabo Verde | Sweeteners, Other               | 1998           | 3                                                              |
| 35               | Cabo Verde | Tomatoes and products           | 1998           | 6                                                              |
| 35               | Cabo Verde | Vegetable Oils                  | 1998           | 230                                                            |
| 35               | Cabo Verde | Vegetables                      | 1998           | 30                                                             |
| 35               | Cabo Verde | Vegetables, Other               | 1998           | 20                                                             |
| 35               | Cabo Verde | Vegetal Products                | 1998           | 1,880                                                          |
| 35               | Cabo Verde | Wheat and products              | 1998           | 283                                                            |
| 35               | Cabo Verde | Wine                            | 1998           | 14                                                             |
| 35               | Cabo Verde | Alcoholic Beverages             | 1999           | 47                                                             |
| 35               | Cabo Verde | Animal fats                     | 1999           | 84                                                             |
| 35               | Cabo Verde | Animal Products                 | 1999           | 483                                                            |
| 35               | Cabo Verde | Apples and products             | 1999           | 3                                                              |
| 35               | Cabo Verde | Bananas                         | 1999           | 26                                                             |
| 35               | Cabo Verde | Beans                           | 1999           | 69                                                             |
| 35               | Cabo Verde | Beer                            | 1999           | 30                                                             |
| 35               | Cabo Verde | Beverages, Alcoholic            | 1999           | 5                                                              |
| 35               | Cabo Verde | Bovine Meat                     | 1999           | 7                                                              |
| 35               | Cabo Verde | Butter, Ghee                    | 1999           | 3                                                              |
| 35               | Cabo Verde | Cassava and products            | 1999           | 21                                                             |
| 35               | Cabo Verde | Cereals - Excluding Beer        | 1999           | 1,092                                                          |
| 35               | Cabo Verde | Cocoa Beans and products        | 1999           | 6                                                              |
| 35               | Cabo Verde | Coconuts - Incl Copra           | 1999           | 17                                                             |
| 35               | Cabo Verde | Coffee and products             | 1999           | 2                                                              |
| 35               | Cabo Verde | Demersal Fish                   | 1999           | 1                                                              |
| 35               | Cabo Verde | Eggs                            | 1999           | 16                                                             |
| 35               | Cabo Verde | Fats, Animals, Raw              | 1999           | 81                                                             |
| 35               | Cabo Verde | Fish, Seafood                   | 1999           | 45                                                             |
| 35               | Cabo Verde | Fruits - Excluding Wine         | 1999           | 62                                                             |
| 35               | Cabo Verde | Fruits, Other                   | 1999           | 30                                                             |
| 35               | Cabo Verde | Grand Total                     | 1999           | 2,356                                                          |
| 35               | Cabo Verde | Grapes and products (excl wine) | 1999           | 1                                                              |
| 35               | Cabo Verde | Groundnuts (Shelled Eq)         | 1999           | 2                                                              |
| 35               | Cabo Verde | Maize and products              | 1999           | 454                                                            |
| 35               | Cabo Verde | Marine Fish, Other              | 1999           | 1                                                              |
| 35               | Cabo Verde | Meat                            | 1999           | 175                                                            |
| 35               | Cabo Verde | Milk - Excluding Butter         | 1999           | 159                                                            |
| 35               | Cabo Verde | Miscellaneous                   | 1999           | 12                                                             |
| 35               | Cabo Verde | Mutton & Goat Meat              | 1999           | 4                                                              |
| 35               | Cabo Verde | Offals                          | 1999           | 4                                                              |
| 35               | Cabo Verde | Oilcrops                        | 1999           | 20                                                             |
| 35               | Cabo Verde | Oilcrops Oil, Other             | 1999           | 61                                                             |
| 35               | Cabo Verde | Olive Oil                       | 1999           | 29                                                             |
| 35               | Cabo Verde | Onions                          | 1999           | 5                                                              |
| 35               | Cabo Verde | Oranges, Mandarines             | 1999           | 2                                                              |
| 35               | Cabo Verde | Palm Oil                        | 1999           | 11                                                             |
| 35               | Cabo Verde | Peas                            | 1999           | 9                                                              |
| 35               | Cabo Verde | Pelagic Fish                    | 1999           | 43                                                             |
| 35               | Cabo Verde | Pigmeat                         | 1999           | 156                                                            |
| 35               | Cabo Verde | Pimento                         | 1999           | 20                                                             |
| 35               | Cabo Verde | Potatoes and products           | 1999           | 43                                                             |
| 35               | Cabo Verde | Poultry Meat                    | 1999           | 8                                                              |
| 35               | Cabo Verde | Pulses                          | 1999           | 96                                                             |
| 35               | Cabo Verde | Pulses, Other and products      | 1999           | 17                                                             |
| 35               | Cabo Verde | Rape and Mustard Oil            | 1999           | 8                                                              |
| 35               | Cabo Verde | Rice (Milled Equivalent)        | 1999           | 363                                                            |
| 35               | Cabo Verde | Roots, Other                    | 1999           | 3                                                              |
| 35               | Cabo Verde | Soyabean Oil                    | 1999           | 75                                                             |
| 35               | Cabo Verde | Spices                          | 1999           | 22                                                             |
| 35               | Cabo Verde | Spices, Other                   | 1999           | 1                                                              |
| 35               | Cabo Verde | Starchy Roots                   | 1999           | 88                                                             |
| 35               | Cabo Verde | Stimulants                      | 1999           | 8                                                              |
| 35               | Cabo Verde | Sugar & Sweeteners              | 1999           | 204                                                            |
| 35               | Cabo Verde | Sugar (Raw Equivalent)          | 1999           | 193                                                            |
| 35               | Cabo Verde | Sunflowerseed Oil               | 1999           | 1                                                              |
| 35               | Cabo Verde | Sweet potatoes                  | 1999           | 21                                                             |
| 35               | Cabo Verde | Sweeteners, Other               | 1999           | 11                                                             |
| 35               | Cabo Verde | Tomatoes and products           | 1999           | 9                                                              |
| 35               | Cabo Verde | Treenuts                        | 1999           | 1                                                              |
| 35               | Cabo Verde | Vegetable Oils                  | 1999           | 184                                                            |
| 35               | Cabo Verde | Vegetables                      | 1999           | 37                                                             |
| 35               | Cabo Verde | Vegetables, Other               | 1999           | 23                                                             |
| 35               | Cabo Verde | Vegetal Products                | 1999           | 1,873                                                          |
| 35               | Cabo Verde | Wheat and products              | 1999           | 274                                                            |
| 35               | Cabo Verde | Wine                            | 1999           | 12                                                             |
| 35               | Cabo Verde | Alcoholic Beverages             | 2000           | 42                                                             |
| 35               | Cabo Verde | Animal fats                     | 2000           | 79                                                             |
| 35               | Cabo Verde | Animal Products                 | 2000           | 452                                                            |
| 35               | Cabo Verde | Apples and products             | 2000           | 4                                                              |
| 35               | Cabo Verde | Bananas                         | 2000           | 24                                                             |
| 35               | Cabo Verde | Beans                           | 2000           | 57                                                             |
| 35               | Cabo Verde | Beer                            | 2000           | 29                                                             |
| 35               | Cabo Verde | Beverages, Alcoholic            | 2000           | 5                                                              |
| 35               | Cabo Verde | Bovine Meat                     | 2000           | 8                                                              |
| 35               | Cabo Verde | Butter, Ghee                    | 2000           | 4                                                              |
| 35               | Cabo Verde | Cassava and products            | 2000           | 18                                                             |
| 35               | Cabo Verde | Cereals - Excluding Beer        | 2000           | 1,102                                                          |
| 35               | Cabo Verde | Cocoa Beans and products        | 2000           | 6                                                              |
| 35               | Cabo Verde | Coconuts - Incl Copra           | 2000           | 20                                                             |
| 35               | Cabo Verde | Coffee and products             | 2000           | 2                                                              |
| 35               | Cabo Verde | Cream                           | 2000           | 1                                                              |
| 35               | Cabo Verde | Demersal Fish                   | 2000           | 3                                                              |
| 35               | Cabo Verde | Eggs                            | 2000           | 14                                                             |
| 35               | Cabo Verde | Fats, Animals, Raw              | 2000           | 74                                                             |
| 35               | Cabo Verde | Fish, Seafood                   | 2000           | 49                                                             |

Dietary calcium and zinc deficiency risks are decreasing but remain prevalent

| FAO Country code | Country    | Food item                       | Reference year | Net energy supply (kcal <i>capita</i> <sup>-1</sup> d <sup>-1</sup> ) |
|------------------|------------|---------------------------------|----------------|-----------------------------------------------------------------------|
| 35               | Cabo Verde | Fruits - Excluding Wine         | 2000           | 59                                                                    |
| 35               | Cabo Verde | Fruits, Other                   | 2000           | 27                                                                    |
| 35               | Cabo Verde | Grand Total                     | 2000           | 2,315                                                                 |
| 35               | Cabo Verde | Grapes and products (excl wine) | 2000           | 1                                                                     |
| 35               | Cabo Verde | Groundnuts (Shelled Eq)         | 2000           | 3                                                                     |
| 35               | Cabo Verde | Maize and products              | 2000           | 425                                                                   |
| 35               | Cabo Verde | Marine Fish, Other              | 2000           | 3                                                                     |
| 35               | Cabo Verde | Meat                            | 2000           | 172                                                                   |
| 35               | Cabo Verde | Milk - Excluding Butter         | 2000           | 134                                                                   |
| 35               | Cabo Verde | Miscellaneous                   | 2000           | 13                                                                    |
| 35               | Cabo Verde | Mutton & Goat Meat              | 2000           | 4                                                                     |
| 35               | Cabo Verde | Offals                          | 2000           | 4                                                                     |
| 35               | Cabo Verde | Oilcrops                        | 2000           | 23                                                                    |
| 35               | Cabo Verde | Oilcrops Oil, Other             | 2000           | 50                                                                    |
| 35               | Cabo Verde | Olive Oil                       | 2000           | 36                                                                    |
| 35               | Cabo Verde | Onions                          | 2000           | 6                                                                     |
| 35               | Cabo Verde | Oranges, Mandarines             | 2000           | 2                                                                     |
| 35               | Cabo Verde | Palm Oil                        | 2000           | 24                                                                    |
| 35               | Cabo Verde | Peas                            | 2000           | 3                                                                     |
| 35               | Cabo Verde | Pelagic Fish                    | 2000           | 44                                                                    |
| 35               | Cabo Verde | Pigmeat                         | 2000           | 145                                                                   |
| 35               | Cabo Verde | Pimento                         | 2000           | 18                                                                    |
| 35               | Cabo Verde | Potatoes and products           | 2000           | 42                                                                    |
| 35               | Cabo Verde | Poultry Meat                    | 2000           | 14                                                                    |
| 35               | Cabo Verde | Pulses                          | 2000           | 68                                                                    |
| 35               | Cabo Verde | Pulses, Other and products      | 2000           | 8                                                                     |
| 35               | Cabo Verde | Rape and Mustard Oil            | 2000           | 3                                                                     |
| 35               | Cabo Verde | Rice (Milled Equivalent)        | 2000           | 389                                                                   |
| 35               | Cabo Verde | Roots, Other                    | 2000           | 2                                                                     |
| 35               | Cabo Verde | Soyabean Oil                    | 2000           | 81                                                                    |
| 35               | Cabo Verde | Spices                          | 2000           | 19                                                                    |
| 35               | Cabo Verde | Spices, Other                   | 2000           | 1                                                                     |
| 35               | Cabo Verde | Starchy Roots                   | 2000           | 83                                                                    |
| 35               | Cabo Verde | Stimulants                      | 2000           | 8                                                                     |
| 35               | Cabo Verde | Sugar & Sweeteners              | 2000           | 216                                                                   |
| 35               | Cabo Verde | Sugar (Raw Equivalent)          | 2000           | 199                                                                   |
| 35               | Cabo Verde | Sweet potatoes                  | 2000           | 21                                                                    |
| 35               | Cabo Verde | Sweeteners, Other               | 2000           | 17                                                                    |
| 35               | Cabo Verde | Tomatoes and products           | 2000           | 7                                                                     |
| 35               | Cabo Verde | Treenuts                        | 2000           | 1                                                                     |
| 35               | Cabo Verde | Vegetable Oils                  | 2000           | 194                                                                   |
| 35               | Cabo Verde | Vegetables                      | 2000           | 34                                                                    |
| 35               | Cabo Verde | Vegetables, Other               | 2000           | 21                                                                    |
| 35               | Cabo Verde | Vegetal Products                | 2000           | 1,863                                                                 |
| 35               | Cabo Verde | Wheat and products              | 2000           | 288                                                                   |
| 35               | Cabo Verde | Wine                            | 2000           | 8                                                                     |
| 35               | Cabo Verde | Alcoholic Beverages             | 2001           | 45                                                                    |
| 35               | Cabo Verde | Animal fats                     | 2001           | 74                                                                    |
| 35               | Cabo Verde | Animal Products                 | 2001           | 475                                                                   |
| 35               | Cabo Verde | Apples and products             | 2001           | 3                                                                     |
| 35               | Cabo Verde | Bananas                         | 2001           | 24                                                                    |
| 35               | Cabo Verde | Beans                           | 2001           | 34                                                                    |
| 35               | Cabo Verde | Beer                            | 2001           | 30                                                                    |
| 35               | Cabo Verde | Beverages, Alcoholic            | 2001           | 6                                                                     |
| 35               | Cabo Verde | Bovine Meat                     | 2001           | 8                                                                     |
| 35               | Cabo Verde | Butter, Ghee                    | 2001           | 4                                                                     |
| 35               | Cabo Verde | Cassava and products            | 2001           | 18                                                                    |
| 35               | Cabo Verde | Cereals - Excluding Beer        | 2001           | 1,089                                                                 |
| 35               | Cabo Verde | Cocoa Beans and products        | 2001           | 6                                                                     |
| 35               | Cabo Verde | Coconuts - Incl Copra           | 2001           | 18                                                                    |
| 35               | Cabo Verde | Coffee and products             | 2001           | 2                                                                     |
| 35               | Cabo Verde | Demersal Fish                   | 2001           | 3                                                                     |
| 35               | Cabo Verde | Eggs                            | 2001           | 14                                                                    |
| 35               | Cabo Verde | Fats, Animals, Raw              | 2001           | 70                                                                    |
| 35               | Cabo Verde | Fish, Seafood                   | 2001           | 41                                                                    |
| 35               | Cabo Verde | Fruits - Excluding Wine         | 2001           | 59                                                                    |
| 35               | Cabo Verde | Fruits, Other                   | 2001           | 28                                                                    |
| 35               | Cabo Verde | Grand Total                     | 2001           | 2,360                                                                 |
| 35               | Cabo Verde | Grapes and products (excl wine) | 2001           | 1                                                                     |
| 35               | Cabo Verde | Groundnuts (Shelled Eq)         | 2001           | 2                                                                     |
| 35               | Cabo Verde | Maize and products              | 2001           | 395                                                                   |
| 35               | Cabo Verde | Marine Fish, Other              | 2001           | 2                                                                     |
| 35               | Cabo Verde | Meat                            | 2001           | 186                                                                   |
| 35               | Cabo Verde | Meat, Other                     | 2001           | 1                                                                     |
| 35               | Cabo Verde | Milk - Excluding Butter         | 2001           | 156                                                                   |
| 35               | Cabo Verde | Miscellaneous                   | 2001           | 13                                                                    |
| 35               | Cabo Verde | Mutton & Goat Meat              | 2001           | 4                                                                     |
| 35               | Cabo Verde | Offals                          | 2001           | 4                                                                     |
| 35               | Cabo Verde | Oilcrops                        | 2001           | 21                                                                    |
| 35               | Cabo Verde | Oilcrops Oil, Other             | 2001           | 57                                                                    |
| 35               | Cabo Verde | Olive Oil                       | 2001           | 32                                                                    |
| 35               | Cabo Verde | Onions                          | 2001           | 6                                                                     |
| 35               | Cabo Verde | Oranges, Mandarines             | 2001           | 2                                                                     |
| 35               | Cabo Verde | Palm Oil                        | 2001           | 13                                                                    |
| 35               | Cabo Verde | Peas                            | 2001           | 2                                                                     |
| 35               | Cabo Verde | Pelagic Fish                    | 2001           | 36                                                                    |
| 35               | Cabo Verde | Pigmeat                         | 2001           | 154                                                                   |
| 35               | Cabo Verde | Pimento                         | 2001           | 19                                                                    |
| 35               | Cabo Verde | Potatoes and products           | 2001           | 44                                                                    |
| 35               | Cabo Verde | Poultry Meat                    | 2001           | 21                                                                    |
| 35               | Cabo Verde | Pulses                          | 2001           | 65                                                                    |
| 35               | Cabo Verde | Pulses, Other and products      | 2001           | 29                                                                    |
| 35               | Cabo Verde | Rape and Mustard Oil            | 2001           | 4                                                                     |
| 35               | Cabo Verde | Rice (Milled Equivalent)        | 2001           | 399                                                                   |
| 35               | Cabo Verde | Roots, Other                    | 2001           | 2                                                                     |
| 35               | Cabo Verde | Soyabean Oil                    | 2001           | 88                                                                    |
| 35               | Cabo Verde | Spices                          | 2001           | 20                                                                    |

## Dietary calcium and zinc deficiency risks are decreasing but remain prevalent

| FAO Country code | Country    | Food item                       | Reference year | Net energy supply (kcal capita <sup>-1</sup> d <sup>-1</sup> ) |
|------------------|------------|---------------------------------|----------------|----------------------------------------------------------------|
| 35               | Cabo Verde | Spices, Other                   | 2001           | 1                                                              |
| 35               | Cabo Verde | Starchy Roots                   | 2001           | 86                                                             |
| 35               | Cabo Verde | Stimulants                      | 2001           | 8                                                              |
| 35               | Cabo Verde | Sugar & Sweeteners              | 2001           | 248                                                            |
| 35               | Cabo Verde | Sugar (Raw Equivalent)          | 2001           | 225                                                            |
| 35               | Cabo Verde | Sweet potatoes                  | 2001           | 21                                                             |
| 35               | Cabo Verde | Sweeteners, Other               | 2001           | 23                                                             |
| 35               | Cabo Verde | Tomatoes and products           | 2001           | 8                                                              |
| 35               | Cabo Verde | Vegetable Oils                  | 2001           | 194                                                            |
| 35               | Cabo Verde | Vegetables                      | 2001           | 38                                                             |
| 35               | Cabo Verde | Vegetables, Other               | 2001           | 24                                                             |
| 35               | Cabo Verde | Vegetal Products                | 2001           | 1,885                                                          |
| 35               | Cabo Verde | Wheat and products              | 2001           | 294                                                            |
| 35               | Cabo Verde | Wine                            | 2001           | 10                                                             |
| 35               | Cabo Verde | Alcoholic Beverages             | 2002           | 46                                                             |
| 35               | Cabo Verde | Animal fats                     | 2002           | 55                                                             |
| 35               | Cabo Verde | Animal Products                 | 2002           | 453                                                            |
| 35               | Cabo Verde | Apples and products             | 2002           | 3                                                              |
| 35               | Cabo Verde | Bananas                         | 2002           | 25                                                             |
| 35               | Cabo Verde | Beans                           | 2002           | 32                                                             |
| 35               | Cabo Verde | Beer                            | 2002           | 29                                                             |
| 35               | Cabo Verde | Beverages, Alcoholic            | 2002           | 3                                                              |
| 35               | Cabo Verde | Bovine Meat                     | 2002           | 6                                                              |
| 35               | Cabo Verde | Butter, Ghee                    | 2002           | 4                                                              |
| 35               | Cabo Verde | Cassava and products            | 2002           | 19                                                             |
| 35               | Cabo Verde | Cereals - Excluding Beer        | 2002           | 1,069                                                          |
| 35               | Cabo Verde | Cereals, Other                  | 2002           | 1                                                              |
| 35               | Cabo Verde | Cocoa Beans and products        | 2002           | 3                                                              |
| 35               | Cabo Verde | Coconuts - Incl Copra           | 2002           | 19                                                             |
| 35               | Cabo Verde | Coffee and products             | 2002           | 1                                                              |
| 35               | Cabo Verde | Demersal Fish                   | 2002           | 3                                                              |
| 35               | Cabo Verde | Eggs                            | 2002           | 13                                                             |
| 35               | Cabo Verde | Fats, Animals, Raw              | 2002           | 50                                                             |
| 35               | Cabo Verde | Fish, Seafood                   | 2002           | 38                                                             |
| 35               | Cabo Verde | Fruits - Excluding Wine         | 2002           | 63                                                             |
| 35               | Cabo Verde | Fruits, Other                   | 2002           | 32                                                             |
| 35               | Cabo Verde | Grand Total                     | 2002           | 2,340                                                          |
| 35               | Cabo Verde | Grapes and products (excl wine) | 2002           | 1                                                              |
| 35               | Cabo Verde | Groundnuts (Shelled Eq)         | 2002           | 2                                                              |
| 35               | Cabo Verde | Maize and products              | 2002           | 371                                                            |
| 35               | Cabo Verde | Marine Fish, Other              | 2002           | 1                                                              |
| 35               | Cabo Verde | Meat                            | 2002           | 183                                                            |
| 35               | Cabo Verde | Meat, Other                     | 2002           | 1                                                              |
| 35               | Cabo Verde | Milk - Excluding Butter         | 2002           | 161                                                            |
| 35               | Cabo Verde | Miscellaneous                   | 2002           | 8                                                              |
| 35               | Cabo Verde | Mutton & Goat Meat              | 2002           | 4                                                              |
| 35               | Cabo Verde | Offals                          | 2002           | 4                                                              |
| 35               | Cabo Verde | Oilcrops                        | 2002           | 22                                                             |
| 35               | Cabo Verde | Oilcrops Oil, Other             | 2002           | 59                                                             |
| 35               | Cabo Verde | Olive Oil                       | 2002           | 31                                                             |
| 35               | Cabo Verde | Olives (including preserved)    | 2002           | 1                                                              |
| 35               | Cabo Verde | Onions                          | 2002           | 7                                                              |
| 35               | Cabo Verde | Oranges, Mandarines             | 2002           | 1                                                              |
| 35               | Cabo Verde | Palm Oil                        | 2002           | 6                                                              |
| 35               | Cabo Verde | Peas                            | 2002           | 11                                                             |
| 35               | Cabo Verde | Pelagic Fish                    | 2002           | 34                                                             |
| 35               | Cabo Verde | Pigmeat                         | 2002           | 151                                                            |
| 35               | Cabo Verde | Pimento                         | 2002           | 19                                                             |
| 35               | Cabo Verde | Potatoes and products           | 2002           | 50                                                             |
| 35               | Cabo Verde | Poultry Meat                    | 2002           | 21                                                             |
| 35               | Cabo Verde | Pulses                          | 2002           | 94                                                             |
| 35               | Cabo Verde | Pulses, Other and products      | 2002           | 51                                                             |
| 35               | Cabo Verde | Rape and Mustard Oil            | 2002           | 14                                                             |
| 35               | Cabo Verde | Rice (Milled Equivalent)        | 2002           | 390                                                            |
| 35               | Cabo Verde | Roots, Other                    | 2002           | 2                                                              |
| 35               | Cabo Verde | Soyabean Oil                    | 2002           | 97                                                             |
| 35               | Cabo Verde | Spices                          | 2002           | 21                                                             |
| 35               | Cabo Verde | Spices, Other                   | 2002           | 1                                                              |
| 35               | Cabo Verde | Starchy Roots                   | 2002           | 91                                                             |
| 35               | Cabo Verde | Stimulants                      | 2002           | 4                                                              |
| 35               | Cabo Verde | Sugar & Sweeteners              | 2002           | 223                                                            |
| 35               | Cabo Verde | Sugar (Raw Equivalent)          | 2002           | 204                                                            |
| 35               | Cabo Verde | Sunflowerseed Oil               | 2002           | 1                                                              |
| 35               | Cabo Verde | Sweet potatoes                  | 2002           | 20                                                             |
| 35               | Cabo Verde | Sweeteners, Other               | 2002           | 19                                                             |
| 35               | Cabo Verde | Tomatoes and products           | 2002           | 7                                                              |
| 35               | Cabo Verde | Vegetable Oils                  | 2002           | 208                                                            |
| 35               | Cabo Verde | Vegetables                      | 2002           | 38                                                             |
| 35               | Cabo Verde | Vegetables, Other               | 2002           | 24                                                             |
| 35               | Cabo Verde | Vegetal Products                | 2002           | 1,887                                                          |
| 35               | Cabo Verde | Wheat and products              | 2002           | 306                                                            |
| 35               | Cabo Verde | Wine                            | 2002           | 13                                                             |
| 35               | Cabo Verde | Alcoholic Beverages             | 2003           | 46                                                             |
| 35               | Cabo Verde | Animal fats                     | 2003           | 54                                                             |
| 35               | Cabo Verde | Animal Products                 | 2003           | 448                                                            |
| 35               | Cabo Verde | Apples and products             | 2003           | 3                                                              |
| 35               | Cabo Verde | Bananas                         | 2003           | 24                                                             |
| 35               | Cabo Verde | Beans                           | 2003           | 23                                                             |
| 35               | Cabo Verde | Beer                            | 2003           | 28                                                             |
| 35               | Cabo Verde | Beverages, Alcoholic            | 2003           | 6                                                              |
| 35               | Cabo Verde | Bovine Meat                     | 2003           | 11                                                             |
| 35               | Cabo Verde | Butter, Ghee                    | 2003           | 4                                                              |
| 35               | Cabo Verde | Cassava and products            | 2003           | 23                                                             |
| 35               | Cabo Verde | Cereals - Excluding Beer        | 2003           | 1,146                                                          |
| 35               | Cabo Verde | Cereals, Other                  | 2003           | 3                                                              |
| 35               | Cabo Verde | Cocoa Beans and products        | 2003           | 4                                                              |
| 35               | Cabo Verde | Coconuts - Incl Copra           | 2003           | 19                                                             |



Dietary calcium and zinc deficiency risks are decreasing but remain prevalent

| FAO Country code | Country    | Food item                       | Reference year | Net energy supply (kcal capita <sup>-1</sup> d <sup>-1</sup> ) |
|------------------|------------|---------------------------------|----------------|----------------------------------------------------------------|
| 35               | Cabo Verde | Coffee and products             | 2003           | 2                                                              |
| 35               | Cabo Verde | Cream                           | 2003           | 1                                                              |
| 35               | Cabo Verde | Demersal Fish                   | 2003           | 3                                                              |
| 35               | Cabo Verde | Eggs                            | 2003           | 12                                                             |
| 35               | Cabo Verde | Fats, Animals, Raw              | 2003           | 49                                                             |
| 35               | Cabo Verde | Fish, Seafood                   | 2003           | 38                                                             |
| 35               | Cabo Verde | Fruits - Excluding Wine         | 2003           | 65                                                             |
| 35               | Cabo Verde | Fruits, Other                   | 2003           | 35                                                             |
| 35               | Cabo Verde | Grand Total                     | 2003           | 2,411                                                          |
| 35               | Cabo Verde | Groundnuts (Shelled Eq)         | 2003           | 3                                                              |
| 35               | Cabo Verde | Maize and products              | 2003           | 377                                                            |
| 35               | Cabo Verde | Marine Fish, Other              | 2003           | 2                                                              |
| 35               | Cabo Verde | Meat                            | 2003           | 193                                                            |
| 35               | Cabo Verde | Meat, Other                     | 2003           | 1                                                              |
| 35               | Cabo Verde | Milk - Excluding Butter         | 2003           | 147                                                            |
| 35               | Cabo Verde | Miscellaneous                   | 2003           | 14                                                             |
| 35               | Cabo Verde | Mutton & Goat Meat              | 2003           | 4                                                              |
| 35               | Cabo Verde | Offals                          | 2003           | 4                                                              |
| 35               | Cabo Verde | Oilcrops                        | 2003           | 22                                                             |
| 35               | Cabo Verde | Oilcrops Oil, Other             | 2003           | 64                                                             |
| 35               | Cabo Verde | Olive Oil                       | 2003           | 28                                                             |
| 35               | Cabo Verde | Onions                          | 2003           | 7                                                              |
| 35               | Cabo Verde | Oranges, Mandarines             | 2003           | 2                                                              |
| 35               | Cabo Verde | Palm Oil                        | 2003           | 13                                                             |
| 35               | Cabo Verde | Peas                            | 2003           | 11                                                             |
| 35               | Cabo Verde | Pelagic Fish                    | 2003           | 33                                                             |
| 35               | Cabo Verde | Pigmeat                         | 2003           | 149                                                            |
| 35               | Cabo Verde | Pimento                         | 2003           | 20                                                             |
| 35               | Cabo Verde | Potatoes and products           | 2003           | 51                                                             |
| 35               | Cabo Verde | Poultry Meat                    | 2003           | 29                                                             |
| 35               | Cabo Verde | Pulses                          | 2003           | 76                                                             |
| 35               | Cabo Verde | Pulses, Other and products      | 2003           | 41                                                             |
| 35               | Cabo Verde | Rice (Milled Equivalent)        | 2003           | 452                                                            |
| 35               | Cabo Verde | Roots, Other                    | 2003           | 2                                                              |
| 35               | Cabo Verde | Soyabean Oil                    | 2003           | 100                                                            |
| 35               | Cabo Verde | Spices                          | 2003           | 21                                                             |
| 35               | Cabo Verde | Spices, Other                   | 2003           | 1                                                              |
| 35               | Cabo Verde | Starchy Roots                   | 2003           | 96                                                             |
| 35               | Cabo Verde | Stimulants                      | 2003           | 6                                                              |
| 35               | Cabo Verde | Sugar & Sweeteners              | 2003           | 232                                                            |
| 35               | Cabo Verde | Sugar (Raw Equivalent)          | 2003           | 213                                                            |
| 35               | Cabo Verde | Sweet potatoes                  | 2003           | 20                                                             |
| 35               | Cabo Verde | Sweeteners, Other               | 2003           | 19                                                             |
| 35               | Cabo Verde | Tomatoes and products           | 2003           | 7                                                              |
| 35               | Cabo Verde | Vegetable Oils                  | 2003           | 205                                                            |
| 35               | Cabo Verde | Vegetables                      | 2003           | 32                                                             |
| 35               | Cabo Verde | Vegetables, Other               | 2003           | 17                                                             |
| 35               | Cabo Verde | Vegetal Products                | 2003           | 1,963                                                          |
| 35               | Cabo Verde | Wheat and products              | 2003           | 313                                                            |
| 35               | Cabo Verde | Wine                            | 2003           | 12                                                             |
| 35               | Cabo Verde | Alcoholic Beverages             | 2004           | 51                                                             |
| 35               | Cabo Verde | Animal fats                     | 2004           | 52                                                             |
| 35               | Cabo Verde | Animal Products                 | 2004           | 478                                                            |
| 35               | Cabo Verde | Apples and products             | 2004           | 3                                                              |
| 35               | Cabo Verde | Bananas                         | 2004           | 24                                                             |
| 35               | Cabo Verde | Beans                           | 2004           | 35                                                             |
| 35               | Cabo Verde | Beer                            | 2004           | 28                                                             |
| 35               | Cabo Verde | Beverages, Alcoholic            | 2004           | 6                                                              |
| 35               | Cabo Verde | Bovine Meat                     | 2004           | 7                                                              |
| 35               | Cabo Verde | Butter, Ghee                    | 2004           | 5                                                              |
| 35               | Cabo Verde | Cassava and products            | 2004           | 23                                                             |
| 35               | Cabo Verde | Cereals - Excluding Beer        | 2004           | 1,162                                                          |
| 35               | Cabo Verde | Cereals, Other                  | 2004           | 6                                                              |
| 35               | Cabo Verde | Cocoa Beans and products        | 2004           | 5                                                              |
| 35               | Cabo Verde | Coconuts - Incl Copra           | 2004           | 17                                                             |
| 35               | Cabo Verde | Coffee and products             | 2004           | 3                                                              |
| 35               | Cabo Verde | Demersal Fish                   | 2004           | 3                                                              |
| 35               | Cabo Verde | Eggs                            | 2004           | 12                                                             |
| 35               | Cabo Verde | Fats, Animals, Raw              | 2004           | 47                                                             |
| 35               | Cabo Verde | Fish, Seafood                   | 2004           | 38                                                             |
| 35               | Cabo Verde | Fruits - Excluding Wine         | 2004           | 67                                                             |
| 35               | Cabo Verde | Fruits, Other                   | 2004           | 38                                                             |
| 35               | Cabo Verde | Grand Total                     | 2004           | 2,497                                                          |
| 35               | Cabo Verde | Grapes and products (excl wine) | 2004           | 1                                                              |
| 35               | Cabo Verde | Groundnuts (Shelled Eq)         | 2004           | 2                                                              |
| 35               | Cabo Verde | Maize and products              | 2004           | 345                                                            |
| 35               | Cabo Verde | Marine Fish, Other              | 2004           | 1                                                              |
| 35               | Cabo Verde | Meat                            | 2004           | 201                                                            |
| 35               | Cabo Verde | Meat, Other                     | 2004           | 1                                                              |
| 35               | Cabo Verde | Milk - Excluding Butter         | 2004           | 170                                                            |
| 35               | Cabo Verde | Miscellaneous                   | 2004           | 21                                                             |
| 35               | Cabo Verde | Mutton & Goat Meat              | 2004           | 5                                                              |
| 35               | Cabo Verde | Offals                          | 2004           | 5                                                              |
| 35               | Cabo Verde | Oilcrops                        | 2004           | 21                                                             |
| 35               | Cabo Verde | Oilcrops Oil, Other             | 2004           | 75                                                             |
| 35               | Cabo Verde | Olive Oil                       | 2004           | 35                                                             |
| 35               | Cabo Verde | Olives (including preserved)    | 2004           | 1                                                              |
| 35               | Cabo Verde | Onions                          | 2004           | 7                                                              |
| 35               | Cabo Verde | Oranges, Mandarines             | 2004           | 1                                                              |
| 35               | Cabo Verde | Palm Oil                        | 2004           | 9                                                              |
| 35               | Cabo Verde | Peas                            | 2004           | 10                                                             |
| 35               | Cabo Verde | Pelagic Fish                    | 2004           | 34                                                             |
| 35               | Cabo Verde | Pigmeat                         | 2004           | 150                                                            |
| 35               | Cabo Verde | Pimento                         | 2004           | 21                                                             |
| 35               | Cabo Verde | Potatoes and products           | 2004           | 53                                                             |
| 35               | Cabo Verde | Poultry Meat                    | 2004           | 38                                                             |
| 35               | Cabo Verde | Pulses                          | 2004           | 63                                                             |

Dietary calcium and zinc deficiency risks are decreasing but remain prevalent

| FAO Country code | Country    | Food item                       | Reference year | Net energy supply (kcal <i>capita</i> <sup>-1</sup> d <sup>-1</sup> ) |
|------------------|------------|---------------------------------|----------------|-----------------------------------------------------------------------|
| 35               | Cabo Verde | Pulses, Other and products      | 2004           | 18                                                                    |
| 35               | Cabo Verde | Rice (Milled Equivalent)        | 2004           | 486                                                                   |
| 35               | Cabo Verde | Roots, Other                    | 2004           | 2                                                                     |
| 35               | Cabo Verde | Soyabean Oil                    | 2004           | 109                                                                   |
| 35               | Cabo Verde | Soyabeans                       | 2004           | 1                                                                     |
| 35               | Cabo Verde | Spices                          | 2004           | 22                                                                    |
| 35               | Cabo Verde | Spices, Other                   | 2004           | 1                                                                     |
| 35               | Cabo Verde | Starchy Roots                   | 2004           | 98                                                                    |
| 35               | Cabo Verde | Stimulants                      | 2004           | 7                                                                     |
| 35               | Cabo Verde | Sugar & Sweeteners              | 2004           | 244                                                                   |
| 35               | Cabo Verde | Sugar (Raw Equivalent)          | 2004           | 230                                                                   |
| 35               | Cabo Verde | Sunflowerseed Oil               | 2004           | 1                                                                     |
| 35               | Cabo Verde | Sweet potatoes                  | 2004           | 21                                                                    |
| 35               | Cabo Verde | Sweeteners, Other               | 2004           | 13                                                                    |
| 35               | Cabo Verde | Tomatoes and products           | 2004           | 9                                                                     |
| 35               | Cabo Verde | Treenuts                        | 2004           | 1                                                                     |
| 35               | Cabo Verde | Vegetable Oils                  | 2004           | 229                                                                   |
| 35               | Cabo Verde | Vegetables                      | 2004           | 33                                                                    |
| 35               | Cabo Verde | Vegetables, Other               | 2004           | 18                                                                    |
| 35               | Cabo Verde | Vegetal Products                | 2004           | 2,019                                                                 |
| 35               | Cabo Verde | Wheat and products              | 2004           | 325                                                                   |
| 35               | Cabo Verde | Wine                            | 2004           | 16                                                                    |
| 35               | Cabo Verde | Alcoholic Beverages             | 2005           | 48                                                                    |
| 35               | Cabo Verde | Animal fats                     | 2005           | 69                                                                    |
| 35               | Cabo Verde | Animal Products                 | 2005           | 514                                                                   |
| 35               | Cabo Verde | Apples and products             | 2005           | 3                                                                     |
| 35               | Cabo Verde | Bananas                         | 2005           | 19                                                                    |
| 35               | Cabo Verde | Beans                           | 2005           | 53                                                                    |
| 35               | Cabo Verde | Beer                            | 2005           | 28                                                                    |
| 35               | Cabo Verde | Beverages, Alcoholic            | 2005           | 2                                                                     |
| 35               | Cabo Verde | Bovine Meat                     | 2005           | 9                                                                     |
| 35               | Cabo Verde | Butter, Chee                    | 2005           | 6                                                                     |
| 35               | Cabo Verde | Cassava and products            | 2005           | 23                                                                    |
| 35               | Cabo Verde | Cereals - Excluding Beer        | 2005           | 1,186                                                                 |
| 35               | Cabo Verde | Cereals, Other                  | 2005           | 6                                                                     |
| 35               | Cabo Verde | Cocoa Beans and products        | 2005           | 4                                                                     |
| 35               | Cabo Verde | Coconuts - Incl Copra           | 2005           | 18                                                                    |
| 35               | Cabo Verde | Coffee and products             | 2005           | 2                                                                     |
| 35               | Cabo Verde | Cream                           | 2005           | 1                                                                     |
| 35               | Cabo Verde | Demersal Fish                   | 2005           | 3                                                                     |
| 35               | Cabo Verde | Eggs                            | 2005           | 12                                                                    |
| 35               | Cabo Verde | Fats, Animals, Raw              | 2005           | 62                                                                    |
| 35               | Cabo Verde | Fish, Seafood                   | 2005           | 30                                                                    |
| 35               | Cabo Verde | Fruits - Excluding Wine         | 2005           | 55                                                                    |
| 35               | Cabo Verde | Fruits, Other                   | 2005           | 29                                                                    |
| 35               | Cabo Verde | Grand Total                     | 2005           | 2,540                                                                 |
| 35               | Cabo Verde | Grapes and products (excl wine) | 2005           | 1                                                                     |
| 35               | Cabo Verde | Groundnuts (Shelled Eq)         | 2005           | 3                                                                     |
| 35               | Cabo Verde | Maize and products              | 2005           | 314                                                                   |
| 35               | Cabo Verde | Marine Fish, Other              | 2005           | 1                                                                     |
| 35               | Cabo Verde | Meat                            | 2005           | 213                                                                   |
| 35               | Cabo Verde | Meat, Other                     | 2005           | 1                                                                     |
| 35               | Cabo Verde | Milk - Excluding Butter         | 2005           | 185                                                                   |
| 35               | Cabo Verde | Miscellaneous                   | 2005           | 16                                                                    |
| 35               | Cabo Verde | Mutton & Goat Meat              | 2005           | 5                                                                     |
| 35               | Cabo Verde | Offals                          | 2005           | 5                                                                     |
| 35               | Cabo Verde | Oilcrops                        | 2005           | 22                                                                    |
| 35               | Cabo Verde | Oilcrops Oil, Other             | 2005           | 57                                                                    |
| 35               | Cabo Verde | Olive Oil                       | 2005           | 29                                                                    |
| 35               | Cabo Verde | Olives (including preserved)    | 2005           | 1                                                                     |
| 35               | Cabo Verde | Onions                          | 2005           | 8                                                                     |
| 35               | Cabo Verde | Oranges, Mandarines             | 2005           | 3                                                                     |
| 35               | Cabo Verde | Palm Oil                        | 2005           | 3                                                                     |
| 35               | Cabo Verde | Peas                            | 2005           | 6                                                                     |
| 35               | Cabo Verde | Pelagic Fish                    | 2005           | 26                                                                    |
| 35               | Cabo Verde | Pigmeat                         | 2005           | 154                                                                   |
| 35               | Cabo Verde | Pimento                         | 2005           | 19                                                                    |
| 35               | Cabo Verde | Potatoes and products           | 2005           | 61                                                                    |
| 35               | Cabo Verde | Poultry Meat                    | 2005           | 44                                                                    |
| 35               | Cabo Verde | Pulses                          | 2005           | 95                                                                    |
| 35               | Cabo Verde | Pulses, Other and products      | 2005           | 36                                                                    |
| 35               | Cabo Verde | Rape and Mustard Oil            | 2005           | 1                                                                     |
| 35               | Cabo Verde | Rice (Milled Equivalent)        | 2005           | 523                                                                   |
| 35               | Cabo Verde | Roots, Other                    | 2005           | 2                                                                     |
| 35               | Cabo Verde | Soyabean Oil                    | 2005           | 109                                                                   |
| 35               | Cabo Verde | Spices                          | 2005           | 20                                                                    |
| 35               | Cabo Verde | Spices, Other                   | 2005           | 1                                                                     |
| 35               | Cabo Verde | Starchy Roots                   | 2005           | 108                                                                   |
| 35               | Cabo Verde | Stimulants                      | 2005           | 6                                                                     |
| 35               | Cabo Verde | Sugar & Sweeteners              | 2005           | 228                                                                   |
| 35               | Cabo Verde | Sugar (Raw Equivalent)          | 2005           | 214                                                                   |
| 35               | Cabo Verde | Sunflowerseed Oil               | 2005           | 1                                                                     |
| 35               | Cabo Verde | Sweet potatoes                  | 2005           | 23                                                                    |
| 35               | Cabo Verde | Sweeteners, Other               | 2005           | 13                                                                    |
| 35               | Cabo Verde | Tomatoes and products           | 2005           | 9                                                                     |
| 35               | Cabo Verde | Treenuts                        | 2005           | 2                                                                     |
| 35               | Cabo Verde | Vegetable Oils                  | 2005           | 199                                                                   |
| 35               | Cabo Verde | Vegetables                      | 2005           | 42                                                                    |
| 35               | Cabo Verde | Vegetables, Other               | 2005           | 25                                                                    |
| 35               | Cabo Verde | Vegetal Products                | 2005           | 2,026                                                                 |
| 35               | Cabo Verde | Wheat and products              | 2005           | 343                                                                   |
| 35               | Cabo Verde | Wine                            | 2005           | 18                                                                    |
| 35               | Cabo Verde | Alcoholic Beverages             | 2006           | 57                                                                    |
| 35               | Cabo Verde | Animal fats                     | 2006           | 87                                                                    |
| 35               | Cabo Verde | Animal Products                 | 2006           | 560                                                                   |
| 35               | Cabo Verde | Apples and products             | 2006           | 5                                                                     |
| 35               | Cabo Verde | Bananas                         | 2006           | 20                                                                    |

Dietary calcium and zinc deficiency risks are decreasing but remain prevalent

| FAO Country code | Country    | Food item                       | Reference year | Net energy supply (kcal capita <sup>-1</sup> d <sup>-1</sup> ) |
|------------------|------------|---------------------------------|----------------|----------------------------------------------------------------|
| 35               | Cabo Verde | Beans                           | 2006           | 55                                                             |
| 35               | Cabo Verde | Beer                            | 2006           | 29                                                             |
| 35               | Cabo Verde | Beverages, Alcoholic            | 2006           | 6                                                              |
| 35               | Cabo Verde | Bovine Meat                     | 2006           | 11                                                             |
| 35               | Cabo Verde | Butter, Ghee                    | 2006           | 6                                                              |
| 35               | Cabo Verde | Cassava and products            | 2006           | 21                                                             |
| 35               | Cabo Verde | Cereals - Excluding Beer        | 2006           | 1,145                                                          |
| 35               | Cabo Verde | Cereals, Other                  | 2006           | 5                                                              |
| 35               | Cabo Verde | Cocoa Beans and products        | 2006           | 6                                                              |
| 35               | Cabo Verde | Coconuts - Incl Copra           | 2006           | 17                                                             |
| 35               | Cabo Verde | Coffee and products             | 2006           | 2                                                              |
| 35               | Cabo Verde | Cream                           | 2006           | 3                                                              |
| 35               | Cabo Verde | Demersal Fish                   | 2006           | 3                                                              |
| 35               | Cabo Verde | Eggs                            | 2006           | 13                                                             |
| 35               | Cabo Verde | Fats, Animals, Raw              | 2006           | 77                                                             |
| 35               | Cabo Verde | Fish, Seafood                   | 2006           | 22                                                             |
| 35               | Cabo Verde | Fruits - Excluding Wine         | 2006           | 70                                                             |
| 35               | Cabo Verde | Fruits, Other                   | 2006           | 37                                                             |
| 35               | Cabo Verde | Grand Total                     | 2006           | 2,565                                                          |
| 35               | Cabo Verde | Grapes and products (excl wine) | 2006           | 1                                                              |
| 35               | Cabo Verde | Groundnuts (Shelled Eq)         | 2006           | 3                                                              |
| 35               | Cabo Verde | Maize and products              | 2006           | 319                                                            |
| 35               | Cabo Verde | Marine Fish, Other              | 2006           | 1                                                              |
| 35               | Cabo Verde | Meat                            | 2006           | 226                                                            |
| 35               | Cabo Verde | Meat, Other                     | 2006           | 2                                                              |
| 35               | Cabo Verde | Milk - Excluding Butter         | 2006           | 208                                                            |
| 35               | Cabo Verde | Miscellaneous                   | 2006           | 16                                                             |
| 35               | Cabo Verde | Mutton & Goat Meat              | 2006           | 6                                                              |
| 35               | Cabo Verde | Offals                          | 2006           | 5                                                              |
| 35               | Cabo Verde | Oilcrops                        | 2006           | 22                                                             |
| 35               | Cabo Verde | Oilcrops Oil, Other             | 2006           | 59                                                             |
| 35               | Cabo Verde | Olive Oil                       | 2006           | 29                                                             |
| 35               | Cabo Verde | Olives (including preserved)    | 2006           | 1                                                              |
| 35               | Cabo Verde | Onions                          | 2006           | 8                                                              |
| 35               | Cabo Verde | Oranges, Mandarines             | 2006           | 5                                                              |
| 35               | Cabo Verde | Palm Oil                        | 2006           | 5                                                              |
| 35               | Cabo Verde | Peas                            | 2006           | 7                                                              |
| 35               | Cabo Verde | Pelagic Fish                    | 2006           | 17                                                             |
| 35               | Cabo Verde | Pigmeat                         | 2006           | 164                                                            |
| 35               | Cabo Verde | Pimento                         | 2006           | 20                                                             |
| 35               | Cabo Verde | Pineapples and products         | 2006           | 1                                                              |
| 35               | Cabo Verde | Potatoes and products           | 2006           | 51                                                             |
| 35               | Cabo Verde | Poultry Meat                    | 2006           | 43                                                             |
| 35               | Cabo Verde | Pulses                          | 2006           | 106                                                            |
| 35               | Cabo Verde | Pulses, Other and products      | 2006           | 43                                                             |
| 35               | Cabo Verde | Rice (Milled Equivalent)        | 2006           | 486                                                            |
| 35               | Cabo Verde | Roots, Other                    | 2006           | 2                                                              |
| 35               | Cabo Verde | Soyabean Oil                    | 2006           | 106                                                            |
| 35               | Cabo Verde | Soyabeans                       | 2006           | 1                                                              |
| 35               | Cabo Verde | Spices                          | 2006           | 22                                                             |
| 35               | Cabo Verde | Spices, Other                   | 2006           | 1                                                              |
| 35               | Cabo Verde | Starchy Roots                   | 2006           | 96                                                             |
| 35               | Cabo Verde | Stimulants                      | 2006           | 9                                                              |
| 35               | Cabo Verde | Sugar & Sweeteners              | 2006           | 216                                                            |
| 35               | Cabo Verde | Sugar (Raw Equivalent)          | 2006           | 206                                                            |
| 35               | Cabo Verde | Sweet potatoes                  | 2006           | 22                                                             |
| 35               | Cabo Verde | Sweeteners, Other               | 2006           | 9                                                              |
| 35               | Cabo Verde | Tomatoes and products           | 2006           | 9                                                              |
| 35               | Cabo Verde | Treenuts                        | 2006           | 3                                                              |
| 35               | Cabo Verde | Vegetable Oils                  | 2006           | 199                                                            |
| 35               | Cabo Verde | Vegetables                      | 2006           | 45                                                             |
| 35               | Cabo Verde | Vegetables, Other               | 2006           | 28                                                             |
| 35               | Cabo Verde | Vegetal Products                | 2006           | 2,005                                                          |
| 35               | Cabo Verde | Wheat and products              | 2006           | 335                                                            |
| 35               | Cabo Verde | Wine                            | 2006           | 22                                                             |
| 35               | Cabo Verde | Alcoholic Beverages             | 2007           | 65                                                             |
| 35               | Cabo Verde | Animal fats                     | 2007           | 90                                                             |
| 35               | Cabo Verde | Animal Products                 | 2007           | 596                                                            |
| 35               | Cabo Verde | Apples and products             | 2007           | 5                                                              |
| 35               | Cabo Verde | Bananas                         | 2007           | 21                                                             |
| 35               | Cabo Verde | Beans                           | 2007           | 56                                                             |
| 35               | Cabo Verde | Beer                            | 2007           | 31                                                             |
| 35               | Cabo Verde | Beverages, Alcoholic            | 2007           | 10                                                             |
| 35               | Cabo Verde | Bovine Meat                     | 2007           | 13                                                             |
| 35               | Cabo Verde | Butter, Ghee                    | 2007           | 6                                                              |
| 35               | Cabo Verde | Cassava and products            | 2007           | 23                                                             |
| 35               | Cabo Verde | Cereals - Excluding Beer        | 2007           | 1,170                                                          |
| 35               | Cabo Verde | Cereals, Other                  | 2007           | 10                                                             |
| 35               | Cabo Verde | Cocoa Beans and products        | 2007           | 7                                                              |
| 35               | Cabo Verde | Coconuts - Incl Copra           | 2007           | 18                                                             |
| 35               | Cabo Verde | Coffee and products             | 2007           | 2                                                              |
| 35               | Cabo Verde | Cream                           | 2007           | 5                                                              |
| 35               | Cabo Verde | Demersal Fish                   | 2007           | 3                                                              |
| 35               | Cabo Verde | Eggs                            | 2007           | 14                                                             |
| 35               | Cabo Verde | Fats, Animals, Raw              | 2007           | 79                                                             |
| 35               | Cabo Verde | Fish, Seafood                   | 2007           | 26                                                             |
| 35               | Cabo Verde | Fruits - Excluding Wine         | 2007           | 69                                                             |
| 35               | Cabo Verde | Fruits, Other                   | 2007           | 35                                                             |
| 35               | Cabo Verde | Grand Total                     | 2007           | 2,649                                                          |
| 35               | Cabo Verde | Grapes and products (excl wine) | 2007           | 1                                                              |
| 35               | Cabo Verde | Groundnuts (Shelled Eq)         | 2007           | 4                                                              |
| 35               | Cabo Verde | Maize and products              | 2007           | 317                                                            |
| 35               | Cabo Verde | Marine Fish, Other              | 2007           | 1                                                              |
| 35               | Cabo Verde | Meat                            | 2007           | 241                                                            |
| 35               | Cabo Verde | Meat, Other                     | 2007           | 1                                                              |
| 35               | Cabo Verde | Milk - Excluding Butter         | 2007           | 220                                                            |
| 35               | Cabo Verde | Miscellaneous                   | 2007           | 17                                                             |

## Dietary calcium and zinc deficiency risks are decreasing but remain prevalent

| FAO Country code | Country    | Food item                       | Reference year | Net energy supply (kcal capita <sup>-1</sup> d <sup>-1</sup> ) |
|------------------|------------|---------------------------------|----------------|----------------------------------------------------------------|
| 35               | Cabo Verde | Mutton & Goat Meat              | 2007           | 6                                                              |
| 35               | Cabo Verde | Offals                          | 2007           | 5                                                              |
| 35               | Cabo Verde | Oilcrops                        | 2007           | 25                                                             |
| 35               | Cabo Verde | Oilcrops Oil, Other             | 2007           | 60                                                             |
| 35               | Cabo Verde | Olive Oil                       | 2007           | 33                                                             |
| 35               | Cabo Verde | Olives (including preserved)    | 2007           | 1                                                              |
| 35               | Cabo Verde | Onions                          | 2007           | 8                                                              |
| 35               | Cabo Verde | Oranges, Mandarines             | 2007           | 6                                                              |
| 35               | Cabo Verde | Palm Oil                        | 2007           | 2                                                              |
| 35               | Cabo Verde | Peas                            | 2007           | 9                                                              |
| 35               | Cabo Verde | Pelagic Fish                    | 2007           | 21                                                             |
| 35               | Cabo Verde | Pigmeat                         | 2007           | 169                                                            |
| 35               | Cabo Verde | Pimento                         | 2007           | 23                                                             |
| 35               | Cabo Verde | Pineapples and products         | 2007           | 1                                                              |
| 35               | Cabo Verde | Potatoes and products           | 2007           | 54                                                             |
| 35               | Cabo Verde | Poultry Meat                    | 2007           | 52                                                             |
| 35               | Cabo Verde | Pulses                          | 2007           | 101                                                            |
| 35               | Cabo Verde | Pulses, Other and products      | 2007           | 36                                                             |
| 35               | Cabo Verde | Rice (Milled Equivalent)        | 2007           | 500                                                            |
| 35               | Cabo Verde | Roots, Other                    | 2007           | 2                                                              |
| 35               | Cabo Verde | Soyabean Oil                    | 2007           | 109                                                            |
| 35               | Cabo Verde | Soyabeans                       | 2007           | 3                                                              |
| 35               | Cabo Verde | Spices                          | 2007           | 24                                                             |
| 35               | Cabo Verde | Spices, Other                   | 2007           | 1                                                              |
| 35               | Cabo Verde | Starchy Roots                   | 2007           | 102                                                            |
| 35               | Cabo Verde | Stimulants                      | 2007           | 9                                                              |
| 35               | Cabo Verde | Sugar & Sweeteners              | 2007           | 211                                                            |
| 35               | Cabo Verde | Sugar (Raw Equivalent)          | 2007           | 201                                                            |
| 35               | Cabo Verde | Sunflowerseed Oil               | 2007           | 1                                                              |
| 35               | Cabo Verde | Sweet potatoes                  | 2007           | 23                                                             |
| 35               | Cabo Verde | Sweeteners, Other               | 2007           | 10                                                             |
| 35               | Cabo Verde | Tomatoes and products           | 2007           | 10                                                             |
| 35               | Cabo Verde | Treenuts                        | 2007           | 2                                                              |
| 35               | Cabo Verde | Vegetable Oils                  | 2007           | 206                                                            |
| 35               | Cabo Verde | Vegetables                      | 2007           | 50                                                             |
| 35               | Cabo Verde | Vegetables, Other               | 2007           | 32                                                             |
| 35               | Cabo Verde | Vegetal Products                | 2007           | 2,052                                                          |
| 35               | Cabo Verde | Wheat and products              | 2007           | 343                                                            |
| 35               | Cabo Verde | Wine                            | 2007           | 24                                                             |
| 35               | Cabo Verde | Alcoholic Beverages             | 2008           | 52                                                             |
| 35               | Cabo Verde | Animal fats                     | 2008           | 93                                                             |
| 35               | Cabo Verde | Animal Products                 | 2008           | 618                                                            |
| 35               | Cabo Verde | Apples and products             | 2008           | 6                                                              |
| 35               | Cabo Verde | Bananas                         | 2008           | 21                                                             |
| 35               | Cabo Verde | Beans                           | 2008           | 61                                                             |
| 35               | Cabo Verde | Beer                            | 2008           | 31                                                             |
| 35               | Cabo Verde | Beverages, Alcoholic            | 2008           | 1                                                              |
| 35               | Cabo Verde | Bovine Meat                     | 2008           | 14                                                             |
| 35               | Cabo Verde | Butter, Ghee                    | 2008           | 5                                                              |
| 35               | Cabo Verde | Cassava and products            | 2008           | 23                                                             |
| 35               | Cabo Verde | Cereals - Excluding Beer        | 2008           | 1,116                                                          |
| 35               | Cabo Verde | Cereals, Other                  | 2008           | 10                                                             |
| 35               | Cabo Verde | Cocoa Beans and products        | 2008           | 6                                                              |
| 35               | Cabo Verde | Coconuts - Incl Copra           | 2008           | 18                                                             |
| 35               | Cabo Verde | Coffee and products             | 2008           | 3                                                              |
| 35               | Cabo Verde | Cream                           | 2008           | 8                                                              |
| 35               | Cabo Verde | Demersal Fish                   | 2008           | 3                                                              |
| 35               | Cabo Verde | Eggs                            | 2008           | 14                                                             |
| 35               | Cabo Verde | Fats, Animals, Raw              | 2008           | 80                                                             |
| 35               | Cabo Verde | Fish, Seafood                   | 2008           | 26                                                             |
| 35               | Cabo Verde | Fruits - Excluding Wine         | 2008           | 75                                                             |
| 35               | Cabo Verde | Fruits, Other                   | 2008           | 38                                                             |
| 35               | Cabo Verde | Grand Total                     | 2008           | 2,612                                                          |
| 35               | Cabo Verde | Grapes and products (excl wine) | 2008           | 1                                                              |
| 35               | Cabo Verde | Groundnuts (Shelled Eq)         | 2008           | 3                                                              |
| 35               | Cabo Verde | Maize and products              | 2008           | 312                                                            |
| 35               | Cabo Verde | Marine Fish, Other              | 2008           | 2                                                              |
| 35               | Cabo Verde | Meat                            | 2008           | 253                                                            |
| 35               | Cabo Verde | Meat, Other                     | 2008           | 1                                                              |
| 35               | Cabo Verde | Milk - Excluding Butter         | 2008           | 225                                                            |
| 35               | Cabo Verde | Miscellaneous                   | 2008           | 22                                                             |
| 35               | Cabo Verde | Mutton & Goat Meat              | 2008           | 7                                                              |
| 35               | Cabo Verde | Offals                          | 2008           | 6                                                              |
| 35               | Cabo Verde | Oilcrops                        | 2008           | 23                                                             |
| 35               | Cabo Verde | Oilcrops Oil, Other             | 2008           | 62                                                             |
| 35               | Cabo Verde | Olive Oil                       | 2008           | 28                                                             |
| 35               | Cabo Verde | Olives (including preserved)    | 2008           | 1                                                              |
| 35               | Cabo Verde | Onions                          | 2008           | 9                                                              |
| 35               | Cabo Verde | Oranges, Mandarines             | 2008           | 7                                                              |
| 35               | Cabo Verde | Peas                            | 2008           | 9                                                              |
| 35               | Cabo Verde | Pelagic Fish                    | 2008           | 21                                                             |
| 35               | Cabo Verde | Pigmeat                         | 2008           | 177                                                            |
| 35               | Cabo Verde | Pimento                         | 2008           | 26                                                             |
| 35               | Cabo Verde | Pineapples and products         | 2008           | 1                                                              |
| 35               | Cabo Verde | Potatoes and products           | 2008           | 54                                                             |
| 35               | Cabo Verde | Poultry Meat                    | 2008           | 53                                                             |
| 35               | Cabo Verde | Pulses                          | 2008           | 97                                                             |
| 35               | Cabo Verde | Pulses, Other and products      | 2008           | 27                                                             |
| 35               | Cabo Verde | Rice (Milled Equivalent)        | 2008           | 451                                                            |
| 35               | Cabo Verde | Roots, Other                    | 2008           | 2                                                              |
| 35               | Cabo Verde | Soyabean Oil                    | 2008           | 107                                                            |
| 35               | Cabo Verde | Soyabeans                       | 2008           | 1                                                              |
| 35               | Cabo Verde | Spices                          | 2008           | 28                                                             |
| 35               | Cabo Verde | Spices, Other                   | 2008           | 1                                                              |
| 35               | Cabo Verde | Starchy Roots                   | 2008           | 102                                                            |
| 35               | Cabo Verde | Stimulants                      | 2008           | 9                                                              |
| 35               | Cabo Verde | Sugar & Sweeteners              | 2008           | 212                                                            |

Dietary calcium and zinc deficiency risks are decreasing but remain prevalent

| FAO Country code | Country    | Food item                       | Reference year | Net energy supply (kcal capita <sup>-1</sup> d <sup>-1</sup> ) |
|------------------|------------|---------------------------------|----------------|----------------------------------------------------------------|
| 35               | Cabo Verde | Sugar (Raw Equivalent)          | 2008           | 202                                                            |
| 35               | Cabo Verde | Sunflowerseed Oil               | 2008           | 1                                                              |
| 35               | Cabo Verde | Sweet potatoes                  | 2008           | 23                                                             |
| 35               | Cabo Verde | Sweeteners, Other               | 2008           | 9                                                              |
| 35               | Cabo Verde | Tomatoes and products           | 2008           | 13                                                             |
| 35               | Cabo Verde | Treenuts                        | 2008           | 3                                                              |
| 35               | Cabo Verde | Vegetable Oils                  | 2008           | 199                                                            |
| 35               | Cabo Verde | Vegetables                      | 2008           | 57                                                             |
| 35               | Cabo Verde | Vegetables, Other               | 2008           | 35                                                             |
| 35               | Cabo Verde | Vegetal Products                | 2008           | 1,994                                                          |
| 35               | Cabo Verde | Wheat and products              | 2008           | 342                                                            |
| 35               | Cabo Verde | Wine                            | 2008           | 20                                                             |
| 35               | Cabo Verde | Alcoholic Beverages             | 2009           | 59                                                             |
| 35               | Cabo Verde | Animal fats                     | 2009           | 90                                                             |
| 35               | Cabo Verde | Animal Products                 | 2009           | 633                                                            |
| 35               | Cabo Verde | Apples and products             | 2009           | 9                                                              |
| 35               | Cabo Verde | Bananas                         | 2009           | 21                                                             |
| 35               | Cabo Verde | Beans                           | 2009           | 60                                                             |
| 35               | Cabo Verde | Beer                            | 2009           | 35                                                             |
| 35               | Cabo Verde | Beverages, Alcoholic            | 2009           | 6                                                              |
| 35               | Cabo Verde | Bovine Meat                     | 2009           | 14                                                             |
| 35               | Cabo Verde | Butter, Ghee                    | 2009           | 4                                                              |
| 35               | Cabo Verde | Cassava and products            | 2009           | 23                                                             |
| 35               | Cabo Verde | Cereals - Excluding Beer        | 2009           | 1,115                                                          |
| 35               | Cabo Verde | Cereals, Other                  | 2009           | 11                                                             |
| 35               | Cabo Verde | Cocoa Beans and products        | 2009           | 6                                                              |
| 35               | Cabo Verde | Coconuts - Incl Copra           | 2009           | 16                                                             |
| 35               | Cabo Verde | Coffee and products             | 2009           | 3                                                              |
| 35               | Cabo Verde | Cream                           | 2009           | 5                                                              |
| 35               | Cabo Verde | Demersal Fish                   | 2009           | 4                                                              |
| 35               | Cabo Verde | Eggs                            | 2009           | 15                                                             |
| 35               | Cabo Verde | Fats, Animals, Raw              | 2009           | 81                                                             |
| 35               | Cabo Verde | Fish, Seafood                   | 2009           | 25                                                             |
| 35               | Cabo Verde | Fruits - Excluding Wine         | 2009           | 83                                                             |
| 35               | Cabo Verde | Fruits, Other                   | 2009           | 40                                                             |
| 35               | Cabo Verde | Grand Total                     | 2009           | 2,658                                                          |
| 35               | Cabo Verde | Grapes and products (excl wine) | 2009           | 2                                                              |
| 35               | Cabo Verde | Groundnuts (Shelled Eq)         | 2009           | 3                                                              |
| 35               | Cabo Verde | Maize and products              | 2009           | 305                                                            |
| 35               | Cabo Verde | Maize Germ Oil                  | 2009           | 1                                                              |
| 35               | Cabo Verde | Marine Fish, Other              | 2009           | 3                                                              |
| 35               | Cabo Verde | Meat                            | 2009           | 265                                                            |
| 35               | Cabo Verde | Meat, Other                     | 2009           | 1                                                              |
| 35               | Cabo Verde | Milk - Excluding Butter         | 2009           | 231                                                            |
| 35               | Cabo Verde | Miscellaneous                   | 2009           | 18                                                             |
| 35               | Cabo Verde | Mutton & Goat Meat              | 2009           | 7                                                              |
| 35               | Cabo Verde | Offals                          | 2009           | 6                                                              |
| 35               | Cabo Verde | Oilcrops                        | 2009           | 21                                                             |
| 35               | Cabo Verde | Oilcrops Oil, Other             | 2009           | 62                                                             |
| 35               | Cabo Verde | Olive Oil                       | 2009           | 42                                                             |
| 35               | Cabo Verde | Olives (including preserved)    | 2009           | 1                                                              |
| 35               | Cabo Verde | Onions                          | 2009           | 10                                                             |
| 35               | Cabo Verde | Oranges, Mandarines             | 2009           | 7                                                              |
| 35               | Cabo Verde | Peas                            | 2009           | 6                                                              |
| 35               | Cabo Verde | Pelagic Fish                    | 2009           | 18                                                             |
| 35               | Cabo Verde | Pigmeat                         | 2009           | 180                                                            |
| 35               | Cabo Verde | Pimento                         | 2009           | 26                                                             |
| 35               | Cabo Verde | Pineapples and products         | 2009           | 2                                                              |
| 35               | Cabo Verde | Potatoes and products           | 2009           | 55                                                             |
| 35               | Cabo Verde | Poultry Meat                    | 2009           | 63                                                             |
| 35               | Cabo Verde | Pulses                          | 2009           | 92                                                             |
| 35               | Cabo Verde | Pulses, Other and products      | 2009           | 26                                                             |
| 35               | Cabo Verde | Rice (Milled Equivalent)        | 2009           | 477                                                            |
| 35               | Cabo Verde | Roots, Other                    | 2009           | 1                                                              |
| 35               | Cabo Verde | Soyabean Oil                    | 2009           | 109                                                            |
| 35               | Cabo Verde | Spices                          | 2009           | 28                                                             |
| 35               | Cabo Verde | Spices, Other                   | 2009           | 1                                                              |
| 35               | Cabo Verde | Starchy Roots                   | 2009           | 103                                                            |
| 35               | Cabo Verde | Stimulants                      | 2009           | 8                                                              |
| 35               | Cabo Verde | Sugar & Sweeteners              | 2009           | 220                                                            |
| 35               | Cabo Verde | Sugar (Raw Equivalent)          | 2009           | 212                                                            |
| 35               | Cabo Verde | Sunflowerseed Oil               | 2009           | 2                                                              |
| 35               | Cabo Verde | Sweet potatoes                  | 2009           | 24                                                             |
| 35               | Cabo Verde | Sweeteners, Other               | 2009           | 8                                                              |
| 35               | Cabo Verde | Tomatoes and products           | 2009           | 18                                                             |
| 35               | Cabo Verde | Treenuts                        | 2009           | 3                                                              |
| 35               | Cabo Verde | Vegetable Oils                  | 2009           | 217                                                            |
| 35               | Cabo Verde | Vegetables                      | 2009           | 58                                                             |
| 35               | Cabo Verde | Vegetables, Other               | 2009           | 29                                                             |
| 35               | Cabo Verde | Vegetal Products                | 2009           | 2,025                                                          |
| 35               | Cabo Verde | Wheat and products              | 2009           | 322                                                            |
| 35               | Cabo Verde | Wine                            | 2009           | 18                                                             |
| 35               | Cabo Verde | Alcoholic Beverages             | 2010           | 69                                                             |
| 35               | Cabo Verde | Animal fats                     | 2010           | 72                                                             |
| 35               | Cabo Verde | Animal Products                 | 2010           | 622                                                            |
| 35               | Cabo Verde | Apples and products             | 2010           | 11                                                             |
| 35               | Cabo Verde | Bananas                         | 2010           | 21                                                             |
| 35               | Cabo Verde | Beans                           | 2010           | 62                                                             |
| 35               | Cabo Verde | Beer                            | 2010           | 40                                                             |
| 35               | Cabo Verde | Beverages, Alcoholic            | 2010           | 8                                                              |
| 35               | Cabo Verde | Bovine Meat                     | 2010           | 15                                                             |
| 35               | Cabo Verde | Butter, Ghee                    | 2010           | 4                                                              |
| 35               | Cabo Verde | Cassava and products            | 2010           | 23                                                             |
| 35               | Cabo Verde | Cereals - Excluding Beer        | 2010           | 1,140                                                          |
| 35               | Cabo Verde | Cereals, Other                  | 2010           | 12                                                             |
| 35               | Cabo Verde | Cocoa Beans and products        | 2010           | 6                                                              |
| 35               | Cabo Verde | Coconuts - Incl Copra           | 2010           | 16                                                             |

Dietary calcium and zinc deficiency risks are decreasing but remain prevalent

| FAO Country code | Country    | Food item                       | Reference year | Net energy supply (kcal capita <sup>-1</sup> d <sup>-1</sup> ) |
|------------------|------------|---------------------------------|----------------|----------------------------------------------------------------|
| 35               | Cabo Verde | Coffee and products             | 2010           | 3                                                              |
| 35               | Cabo Verde | Cream                           | 2010           | 1                                                              |
| 35               | Cabo Verde | Demersal Fish                   | 2010           | 4                                                              |
| 35               | Cabo Verde | Eggs                            | 2010           | 15                                                             |
| 35               | Cabo Verde | Fats, Animals, Raw              | 2010           | 67                                                             |
| 35               | Cabo Verde | Fish, Seafood                   | 2010           | 21                                                             |
| 35               | Cabo Verde | Fruits - Excluding Wine         | 2010           | 91                                                             |
| 35               | Cabo Verde | Fruits, Other                   | 2010           | 42                                                             |
| 35               | Cabo Verde | Grand Total                     | 2010           | 2,671                                                          |
| 35               | Cabo Verde | Grapes and products (excl wine) | 2010           | 3                                                              |
| 35               | Cabo Verde | Groundnuts (Shelled Eq)         | 2010           | 4                                                              |
| 35               | Cabo Verde | Maize and products              | 2010           | 333                                                            |
| 35               | Cabo Verde | Marine Fish, Other              | 2010           | 2                                                              |
| 35               | Cabo Verde | Meat                            | 2010           | 269                                                            |
| 35               | Cabo Verde | Milk - Excluding Butter         | 2010           | 239                                                            |
| 35               | Cabo Verde | Miscellaneous                   | 2010           | 20                                                             |
| 35               | Cabo Verde | Mutton & Goat Meat              | 2010           | 7                                                              |
| 35               | Cabo Verde | Offals                          | 2010           | 6                                                              |
| 35               | Cabo Verde | Oilcrops                        | 2010           | 22                                                             |
| 35               | Cabo Verde | Oilcrops Oil, Other             | 2010           | 59                                                             |
| 35               | Cabo Verde | Olive Oil                       | 2010           | 39                                                             |
| 35               | Cabo Verde | Olives (including preserved)    | 2010           | 1                                                              |
| 35               | Cabo Verde | Onions                          | 2010           | 11                                                             |
| 35               | Cabo Verde | Oranges, Mandarines             | 2010           | 9                                                              |
| 35               | Cabo Verde | Palm Oil                        | 2010           | 2                                                              |
| 35               | Cabo Verde | Peas                            | 2010           | 7                                                              |
| 35               | Cabo Verde | Pelagic Fish                    | 2010           | 14                                                             |
| 35               | Cabo Verde | Pigmeat                         | 2010           | 184                                                            |
| 35               | Cabo Verde | Pimento                         | 2010           | 24                                                             |
| 35               | Cabo Verde | Pineapples and products         | 2010           | 4                                                              |
| 35               | Cabo Verde | Potatoes and products           | 2010           | 50                                                             |
| 35               | Cabo Verde | Poultry Meat                    | 2010           | 63                                                             |
| 35               | Cabo Verde | Pulses                          | 2010           | 91                                                             |
| 35               | Cabo Verde | Pulses, Other and products      | 2010           | 23                                                             |
| 35               | Cabo Verde | Rice (Milled Equivalent)        | 2010           | 494                                                            |
| 35               | Cabo Verde | Roots, Other                    | 2010           | 1                                                              |
| 35               | Cabo Verde | Soyabean Oil                    | 2010           | 110                                                            |
| 35               | Cabo Verde | Spices                          | 2010           | 25                                                             |
| 35               | Cabo Verde | Spices, Other                   | 2010           | 1                                                              |
| 35               | Cabo Verde | Starchy Roots                   | 2010           | 99                                                             |
| 35               | Cabo Verde | Stimulants                      | 2010           | 9                                                              |
| 35               | Cabo Verde | Sugar & Sweeteners              | 2010           | 211                                                            |
| 35               | Cabo Verde | Sugar (Raw Equivalent)          | 2010           | 202                                                            |
| 35               | Cabo Verde | Sweet potatoes                  | 2010           | 25                                                             |
| 35               | Cabo Verde | Sweeteners, Other               | 2010           | 9                                                              |
| 35               | Cabo Verde | Tomatoes and products           | 2010           | 17                                                             |
| 35               | Cabo Verde | Treenuts                        | 2010           | 3                                                              |
| 35               | Cabo Verde | Vegetable Oils                  | 2010           | 210                                                            |
| 35               | Cabo Verde | Vegetables                      | 2010           | 58                                                             |
| 35               | Cabo Verde | Vegetables, Other               | 2010           | 31                                                             |
| 35               | Cabo Verde | Vegetal Products                | 2010           | 2,049                                                          |
| 35               | Cabo Verde | Wheat and products              | 2010           | 301                                                            |
| 35               | Cabo Verde | Wine                            | 2010           | 21                                                             |
| 35               | Cabo Verde | Alcoholic Beverages             | 2011           | 74                                                             |
| 35               | Cabo Verde | Animal fats                     | 2011           | 79                                                             |
| 35               | Cabo Verde | Animal Products                 | 2011           | 646                                                            |
| 35               | Cabo Verde | Apples and products             | 2011           | 8                                                              |
| 35               | Cabo Verde | Bananas                         | 2011           | 22                                                             |
| 35               | Cabo Verde | Beans                           | 2011           | 64                                                             |
| 35               | Cabo Verde | Beer                            | 2011           | 46                                                             |
| 35               | Cabo Verde | Beverages, Alcoholic            | 2011           | 10                                                             |
| 35               | Cabo Verde | Bovine Meat                     | 2011           | 15                                                             |
| 35               | Cabo Verde | Butter, Ghee                    | 2011           | 4                                                              |
| 35               | Cabo Verde | Cassava and products            | 2011           | 23                                                             |
| 35               | Cabo Verde | Cephalopods                     | 2011           | 1                                                              |
| 35               | Cabo Verde | Cereals - Excluding Beer        | 2011           | 1,125                                                          |
| 35               | Cabo Verde | Cereals, Other                  | 2011           | 13                                                             |
| 35               | Cabo Verde | Cocoa Beans and products        | 2011           | 7                                                              |
| 35               | Cabo Verde | Coconuts - Incl Copra           | 2011           | 16                                                             |
| 35               | Cabo Verde | Coffee and products             | 2011           | 2                                                              |
| 35               | Cabo Verde | Cream                           | 2011           | 4                                                              |
| 35               | Cabo Verde | Crustaceans                     | 2011           | 1                                                              |
| 35               | Cabo Verde | Demersal Fish                   | 2011           | 4                                                              |
| 35               | Cabo Verde | Eggs                            | 2011           | 16                                                             |
| 35               | Cabo Verde | Fats, Animals, Raw              | 2011           | 71                                                             |
| 35               | Cabo Verde | Fish, Seafood                   | 2011           | 23                                                             |
| 35               | Cabo Verde | Fruits - Excluding Wine         | 2011           | 86                                                             |
| 35               | Cabo Verde | Fruits, Other                   | 2011           | 43                                                             |
| 35               | Cabo Verde | Grand Total                     | 2011           | 2,716                                                          |
| 35               | Cabo Verde | Grapes and products (excl wine) | 2011           | 2                                                              |
| 35               | Cabo Verde | Groundnuts (Shelled Eq)         | 2011           | 3                                                              |
| 35               | Cabo Verde | Maize and products              | 2011           | 323                                                            |
| 35               | Cabo Verde | Marine Fish, Other              | 2011           | 3                                                              |
| 35               | Cabo Verde | Meat                            | 2011           | 282                                                            |
| 35               | Cabo Verde | Meat, Other                     | 2011           | 1                                                              |
| 35               | Cabo Verde | Milk - Excluding Butter         | 2011           | 241                                                            |
| 35               | Cabo Verde | Miscellaneous                   | 2011           | 22                                                             |
| 35               | Cabo Verde | Mutton & Goat Meat              | 2011           | 8                                                              |
| 35               | Cabo Verde | Offals                          | 2011           | 6                                                              |
| 35               | Cabo Verde | Oilcrops                        | 2011           | 21                                                             |
| 35               | Cabo Verde | Oilcrops Oil, Other             | 2011           | 63                                                             |
| 35               | Cabo Verde | Olive Oil                       | 2011           | 52                                                             |
| 35               | Cabo Verde | Olives (including preserved)    | 2011           | 1                                                              |
| 35               | Cabo Verde | Onions                          | 2011           | 12                                                             |
| 35               | Cabo Verde | Oranges, Mandarines             | 2011           | 7                                                              |
| 35               | Cabo Verde | Palm Oil                        | 2011           | 2                                                              |
| 35               | Cabo Verde | Peas                            | 2011           | 8                                                              |

Dietary calcium and zinc deficiency risks are decreasing but remain prevalent

| FAO Country code | Country    | Food item                  | Reference year | Net energy supply (kcal capita <sup>-1</sup> d <sup>-1</sup> ) |
|------------------|------------|----------------------------|----------------|----------------------------------------------------------------|
| 35               | Cabo Verde | Pelagic Fish               | 2011           | 15                                                             |
| 35               | Cabo Verde | Pigmeat                    | 2011           | 196                                                            |
| 35               | Cabo Verde | Pimento                    | 2011           | 24                                                             |
| 35               | Cabo Verde | Pineapples and products    | 2011           | 3                                                              |
| 35               | Cabo Verde | Potatoes and products      | 2011           | 48                                                             |
| 35               | Cabo Verde | Poultry Meat               | 2011           | 63                                                             |
| 35               | Cabo Verde | Pulses                     | 2011           | 113                                                            |
| 35               | Cabo Verde | Pulses, Other and products | 2011           | 40                                                             |
| 35               | Cabo Verde | Rice (Milled Equivalent)   | 2011           | 491                                                            |
| 35               | Cabo Verde | Roots, Other               | 2011           | 1                                                              |
| 35               | Cabo Verde | Soyabean Oil               | 2011           | 104                                                            |
| 35               | Cabo Verde | Spices                     | 2011           | 26                                                             |
| 35               | Cabo Verde | Spices, Other              | 2011           | 1                                                              |
| 35               | Cabo Verde | Starchy Roots              | 2011           | 97                                                             |
| 35               | Cabo Verde | Stimulants                 | 2011           | 9                                                              |
| 35               | Cabo Verde | Sugar & Sweeteners         | 2011           | 216                                                            |
| 35               | Cabo Verde | Sugar (Raw Equivalent)     | 2011           | 209                                                            |
| 35               | Cabo Verde | Sweet potatoes             | 2011           | 25                                                             |
| 35               | Cabo Verde | Sweeteners, Other          | 2011           | 7                                                              |
| 35               | Cabo Verde | Tomatoes and products      | 2011           | 17                                                             |
| 35               | Cabo Verde | Treenuts                   | 2011           | 3                                                              |
| 35               | Cabo Verde | Vegetable Oils             | 2011           | 221                                                            |
| 35               | Cabo Verde | Vegetables                 | 2011           | 60                                                             |
| 35               | Cabo Verde | Vegetables, Other          | 2011           | 31                                                             |
| 35               | Cabo Verde | Vegetal Products           | 2011           | 2,070                                                          |
| 35               | Cabo Verde | Wheat and products         | 2011           | 298                                                            |
| 35               | Cabo Verde | Wine                       | 2011           | 18                                                             |
| 32               | Cameroon   | Alcoholic Beverages        | 1992           | 56                                                             |
| 32               | Cameroon   | Animal fats                | 1992           | 6                                                              |
| 32               | Cameroon   | Animal Products            | 1992           | 126                                                            |
| 32               | Cameroon   | Bananas                    | 1992           | 87                                                             |
| 32               | Cameroon   | Barley and products        | 1992           | 8                                                              |
| 32               | Cameroon   | Beans                      | 1992           | 52                                                             |
| 32               | Cameroon   | Beer                       | 1992           | 23                                                             |
| 32               | Cameroon   | Beverages, Fermented       | 1992           | 32                                                             |
| 32               | Cameroon   | Bovine Meat                | 1992           | 32                                                             |
| 32               | Cameroon   | Butter, Ghee               | 1992           | 1                                                              |
| 32               | Cameroon   | Cassava and products       | 1992           | 288                                                            |
| 32               | Cameroon   | Cereals - Excluding Beer   | 1992           | 861                                                            |
| 32               | Cameroon   | Cocoa Beans and products   | 1992           | 4                                                              |
| 32               | Cameroon   | Coconut Oil                | 1992           | 1                                                              |
| 32               | Cameroon   | Cottonseed Oil             | 1992           | 21                                                             |
| 32               | Cameroon   | Demersal Fish              | 1992           | 1                                                              |
| 32               | Cameroon   | Eggs                       | 1992           | 3                                                              |
| 32               | Cameroon   | Fats, Animals, Raw         | 1992           | 5                                                              |
| 32               | Cameroon   | Fish, Seafood              | 1992           | 20                                                             |
| 32               | Cameroon   | Freshwater Fish            | 1992           | 3                                                              |
| 32               | Cameroon   | Fruits - Excluding Wine    | 1992           | 221                                                            |
| 32               | Cameroon   | Fruits, Other              | 1992           | 13                                                             |
| 32               | Cameroon   | Grand Total                | 1992           | 2,113                                                          |
| 32               | Cameroon   | Groundnut Oil              | 1992           | 18                                                             |
| 32               | Cameroon   | Groundnuts (Shelled Eq)    | 1992           | 8                                                              |
| 32               | Cameroon   | Honey                      | 1992           | 2                                                              |
| 32               | Cameroon   | Maize and products         | 1992           | 355                                                            |
| 32               | Cameroon   | Marine Fish, Other         | 1992           | 6                                                              |
| 32               | Cameroon   | Meat                       | 1992           | 66                                                             |
| 32               | Cameroon   | Meat, Other                | 1992           | 10                                                             |
| 32               | Cameroon   | Milk - Excluding Butter    | 1992           | 27                                                             |
| 32               | Cameroon   | Millet and products        | 1992           | 34                                                             |
| 32               | Cameroon   | Miscellaneous              | 1992           | 2                                                              |
| 32               | Cameroon   | Mutton & Goat Meat         | 1992           | 10                                                             |
| 32               | Cameroon   | Offals                     | 1992           | 4                                                              |
| 32               | Cameroon   | Oilcrops                   | 1992           | 51                                                             |
| 32               | Cameroon   | Oilcrops Oil, Other        | 1992           | 5                                                              |
| 32               | Cameroon   | Oilcrops, Other            | 1992           | 34                                                             |
| 32               | Cameroon   | Onions                     | 1992           | 2                                                              |
| 32               | Cameroon   | Palm kernels               | 1992           | 1                                                              |
| 32               | Cameroon   | Palm Oil                   | 1992           | 114                                                            |
| 32               | Cameroon   | Palmkernel Oil             | 1992           | 9                                                              |
| 32               | Cameroon   | Pelagic Fish               | 1992           | 9                                                              |
| 32               | Cameroon   | Pigmeat                    | 1992           | 9                                                              |
| 32               | Cameroon   | Pimento                    | 1992           | 7                                                              |
| 32               | Cameroon   | Pineapples and products    | 1992           | 2                                                              |
| 32               | Cameroon   | Plantains                  | 1992           | 119                                                            |
| 32               | Cameroon   | Potatoes and products      | 1992           | 3                                                              |
| 32               | Cameroon   | Poultry Meat               | 1992           | 5                                                              |
| 32               | Cameroon   | Pulses                     | 1992           | 57                                                             |
| 32               | Cameroon   | Pulses, Other and products | 1992           | 4                                                              |
| 32               | Cameroon   | Rice (Milled Equivalent)   | 1992           | 87                                                             |
| 32               | Cameroon   | Roots, Other               | 1992           | 63                                                             |
| 32               | Cameroon   | Sesame seed                | 1992           | 4                                                              |
| 32               | Cameroon   | Sorghum and products       | 1992           | 193                                                            |
| 32               | Cameroon   | Soyabean Oil               | 1992           | 6                                                              |
| 32               | Cameroon   | Soyabeans                  | 1992           | 3                                                              |
| 32               | Cameroon   | Spices                     | 1992           | 8                                                              |
| 32               | Cameroon   | Spices, Other              | 1992           | 1                                                              |
| 32               | Cameroon   | Starchy Roots              | 1992           | 403                                                            |
| 32               | Cameroon   | Stimulants                 | 1992           | 4                                                              |
| 32               | Cameroon   | Sugar & Sweeteners         | 1992           | 65                                                             |
| 32               | Cameroon   | Sugar (Raw Equivalent)     | 1992           | 63                                                             |
| 32               | Cameroon   | Sugar cane                 | 1992           | 34                                                             |
| 32               | Cameroon   | Sugar Crops                | 1992           | 34                                                             |
| 32               | Cameroon   | Sweet potatoes             | 1992           | 33                                                             |
| 32               | Cameroon   | Tomatoes and products      | 1992           | 3                                                              |
| 32               | Cameroon   | Treenuts                   | 1992           | 22                                                             |
| 32               | Cameroon   | Vegetable Oils             | 1992           | 175                                                            |
| 32               | Cameroon   | Vegetables                 | 1992           | 28                                                             |

## Dietary calcium and zinc deficiency risks are decreasing but remain prevalent

| FAO Country code | Country  | Food item                  | Reference year | Net energy supply (kcal capita <sup>-1</sup> d <sup>-1</sup> ) |
|------------------|----------|----------------------------|----------------|----------------------------------------------------------------|
| 32               | Cameroon | Vegetables, Other          | 1992           | 23                                                             |
| 32               | Cameroon | Vegetal Products           | 1992           | 1,987                                                          |
| 32               | Cameroon | Wheat and products         | 1992           | 184                                                            |
| 32               | Cameroon | Wine                       | 1992           | 1                                                              |
| 32               | Cameroon | Yams                       | 1992           | 15                                                             |
| 32               | Cameroon | Alcoholic Beverages        | 1993           | 55                                                             |
| 32               | Cameroon | Animal fats                | 1993           | 5                                                              |
| 32               | Cameroon | Animal Products            | 1993           | 121                                                            |
| 32               | Cameroon | Bananas                    | 1993           | 88                                                             |
| 32               | Cameroon | Barley and products        | 1993           | 8                                                              |
| 32               | Cameroon | Beans                      | 1993           | 57                                                             |
| 32               | Cameroon | Beer                       | 1993           | 21                                                             |
| 32               | Cameroon | Beverages, Fermented       | 1993           | 33                                                             |
| 32               | Cameroon | Bovine Meat                | 1993           | 31                                                             |
| 32               | Cameroon | Butter, Ghee               | 1993           | 1                                                              |
| 32               | Cameroon | Cassava and products       | 1993           | 282                                                            |
| 32               | Cameroon | Cereals - Excluding Beer   | 1993           | 764                                                            |
| 32               | Cameroon | Cocoa Beans and products   | 1993           | 4                                                              |
| 32               | Cameroon | Coconut Oil                | 1993           | 1                                                              |
| 32               | Cameroon | Cottonseed Oil             | 1993           | 19                                                             |
| 32               | Cameroon | Demersal Fish              | 1993           | 1                                                              |
| 32               | Cameroon | Eggs                       | 1993           | 3                                                              |
| 32               | Cameroon | Fats, Animals, Raw         | 1993           | 4                                                              |
| 32               | Cameroon | Fish, Seafood              | 1993           | 16                                                             |
| 32               | Cameroon | Freshwater Fish            | 1993           | 3                                                              |
| 32               | Cameroon | Fruits - Excluding Wine    | 1993           | 228                                                            |
| 32               | Cameroon | Fruits, Other              | 1993           | 13                                                             |
| 32               | Cameroon | Grand Total                | 1993           | 2,021                                                          |
| 32               | Cameroon | Groundnut Oil              | 1993           | 17                                                             |
| 32               | Cameroon | Groundnuts (Shelled Eq)    | 1993           | 18                                                             |
| 32               | Cameroon | Honey                      | 1993           | 2                                                              |
| 32               | Cameroon | Maize and products         | 1993           | 304                                                            |
| 32               | Cameroon | Marine Fish, Other         | 1993           | 5                                                              |
| 32               | Cameroon | Meat                       | 1993           | 65                                                             |
| 32               | Cameroon | Meat, Other                | 1993           | 10                                                             |
| 32               | Cameroon | Milk - Excluding Butter    | 1993           | 28                                                             |
| 32               | Cameroon | Millet and products        | 1993           | 36                                                             |
| 32               | Cameroon | Miscellaneous              | 1993           | 1                                                              |
| 32               | Cameroon | Mutton & Goat Meat         | 1993           | 10                                                             |
| 32               | Cameroon | Offals                     | 1993           | 4                                                              |
| 32               | Cameroon | Oilcrops                   | 1993           | 59                                                             |
| 32               | Cameroon | Oilcrops Oil, Other        | 1993           | 5                                                              |
| 32               | Cameroon | Oilcrops, Other            | 1993           | 34                                                             |
| 32               | Cameroon | Onions                     | 1993           | 1                                                              |
| 32               | Cameroon | Palm kernels               | 1993           | 1                                                              |
| 32               | Cameroon | Palm Oil                   | 1993           | 114                                                            |
| 32               | Cameroon | Palmkernel Oil             | 1993           | 9                                                              |
| 32               | Cameroon | Pelagic Fish               | 1993           | 7                                                              |
| 32               | Cameroon | Pigmeat                    | 1993           | 8                                                              |
| 32               | Cameroon | Pimento                    | 1993           | 6                                                              |
| 32               | Cameroon | Pineapples and products    | 1993           | 2                                                              |
| 32               | Cameroon | Plantains                  | 1993           | 124                                                            |
| 32               | Cameroon | Potatoes and products      | 1993           | 3                                                              |
| 32               | Cameroon | Poultry Meat               | 1993           | 5                                                              |
| 32               | Cameroon | Pulses                     | 1993           | 61                                                             |
| 32               | Cameroon | Pulses, Other and products | 1993           | 4                                                              |
| 32               | Cameroon | Rice (Milled Equivalent)   | 1993           | 85                                                             |
| 32               | Cameroon | Roots, Other               | 1993           | 61                                                             |
| 32               | Cameroon | Sesame seed                | 1993           | 3                                                              |
| 32               | Cameroon | Sorghum and products       | 1993           | 234                                                            |
| 32               | Cameroon | Soyabean Oil               | 1993           | 1                                                              |
| 32               | Cameroon | Soyabeans                  | 1993           | 4                                                              |
| 32               | Cameroon | Spices                     | 1993           | 7                                                              |
| 32               | Cameroon | Spices, Other              | 1993           | 1                                                              |
| 32               | Cameroon | Starchy Roots              | 1993           | 395                                                            |
| 32               | Cameroon | Stimulants                 | 1993           | 5                                                              |
| 32               | Cameroon | Sugar & Sweeteners         | 1993           | 66                                                             |
| 32               | Cameroon | Sugar (Raw Equivalent)     | 1993           | 64                                                             |
| 32               | Cameroon | Sugar cane                 | 1993           | 38                                                             |
| 32               | Cameroon | Sugar Crops                | 1993           | 38                                                             |
| 32               | Cameroon | Sweet potatoes             | 1993           | 36                                                             |
| 32               | Cameroon | Sweeteners, Other          | 1993           | 1                                                              |
| 32               | Cameroon | Tomatoes and products      | 1993           | 3                                                              |
| 32               | Cameroon | Treenuts                   | 1993           | 25                                                             |
| 32               | Cameroon | Vegetable Oils             | 1993           | 167                                                            |
| 32               | Cameroon | Vegetables                 | 1993           | 28                                                             |
| 32               | Cameroon | Vegetables, Other          | 1993           | 24                                                             |
| 32               | Cameroon | Vegetal Products           | 1993           | 1,901                                                          |
| 32               | Cameroon | Wheat and products         | 1993           | 97                                                             |
| 32               | Cameroon | Wine                       | 1993           | 1                                                              |
| 32               | Cameroon | Yams                       | 1993           | 13                                                             |
| 32               | Cameroon | Alcoholic Beverages        | 1994           | 47                                                             |
| 32               | Cameroon | Animal fats                | 1994           | 5                                                              |
| 32               | Cameroon | Animal Products            | 1994           | 115                                                            |
| 32               | Cameroon | Bananas                    | 1994           | 87                                                             |
| 32               | Cameroon | Barley and products        | 1994           | 16                                                             |
| 32               | Cameroon | Beans                      | 1994           | 61                                                             |
| 32               | Cameroon | Beer                       | 1994           | 16                                                             |
| 32               | Cameroon | Beverages, Fermented       | 1994           | 30                                                             |
| 32               | Cameroon | Bovine Meat                | 1994           | 28                                                             |
| 32               | Cameroon | Cassava and products       | 1994           | 285                                                            |
| 32               | Cameroon | Cereals - Excluding Beer   | 1994           | 756                                                            |
| 32               | Cameroon | Cocoa Beans and products   | 1994           | 4                                                              |
| 32               | Cameroon | Coconut Oil                | 1994           | 1                                                              |
| 32               | Cameroon | Cottonseed Oil             | 1994           | 21                                                             |
| 32               | Cameroon | Demersal Fish              | 1994           | 1                                                              |
| 32               | Cameroon | Eggs                       | 1994           | 3                                                              |



## Dietary calcium and zinc deficiency risks are decreasing but remain prevalent

| FAO Country code | Country  | Food item                  | Reference year | Net energy supply (kcal <i>capita</i> <sup>-1</sup> d <sup>-1</sup> ) |
|------------------|----------|----------------------------|----------------|-----------------------------------------------------------------------|
| 32               | Cameroon | Fats, Animals, Raw         | 1994           | 4                                                                     |
| 32               | Cameroon | Fish, Seafood              | 1994           | 17                                                                    |
| 32               | Cameroon | Freshwater Fish            | 1994           | 4                                                                     |
| 32               | Cameroon | Fruits - Excluding Wine    | 1994           | 234                                                                   |
| 32               | Cameroon | Fruits, Other              | 1994           | 13                                                                    |
| 32               | Cameroon | Grand Total                | 1994           | 2,032                                                                 |
| 32               | Cameroon | Groundnut Oil              | 1994           | 17                                                                    |
| 32               | Cameroon | Groundnuts (Shelled Eq)    | 1994           | 29                                                                    |
| 32               | Cameroon | Honey                      | 1994           | 2                                                                     |
| 32               | Cameroon | Maize and products         | 1994           | 326                                                                   |
| 32               | Cameroon | Marine Fish, Other         | 1994           | 4                                                                     |
| 32               | Cameroon | Meat                       | 1994           | 61                                                                    |
| 32               | Cameroon | Meat, Other                | 1994           | 10                                                                    |
| 32               | Cameroon | Milk - Excluding Butter    | 1994           | 27                                                                    |
| 32               | Cameroon | Millet and products        | 1994           | 35                                                                    |
| 32               | Cameroon | Miscellaneous              | 1994           | 1                                                                     |
| 32               | Cameroon | Mutton & Goat Meat         | 1994           | 10                                                                    |
| 32               | Cameroon | Offals                     | 1994           | 4                                                                     |
| 32               | Cameroon | Oilcrops                   | 1994           | 76                                                                    |
| 32               | Cameroon | Oilcrops Oil, Other        | 1994           | 2                                                                     |
| 32               | Cameroon | Oilcrops, Other            | 1994           | 40                                                                    |
| 32               | Cameroon | Onions                     | 1994           | 1                                                                     |
| 32               | Cameroon | Palm kernels               | 1994           | 1                                                                     |
| 32               | Cameroon | Palm Oil                   | 1994           | 111                                                                   |
| 32               | Cameroon | Palmkernel Oil             | 1994           | 9                                                                     |
| 32               | Cameroon | Pelagic Fish               | 1994           | 8                                                                     |
| 32               | Cameroon | Pigmeat                    | 1994           | 8                                                                     |
| 32               | Cameroon | Pimento                    | 1994           | 6                                                                     |
| 32               | Cameroon | Pineapples and products    | 1994           | 2                                                                     |
| 32               | Cameroon | Plantains                  | 1994           | 131                                                                   |
| 32               | Cameroon | Potatoes and products      | 1994           | 3                                                                     |
| 32               | Cameroon | Poultry Meat               | 1994           | 5                                                                     |
| 32               | Cameroon | Pulses                     | 1994           | 72                                                                    |
| 32               | Cameroon | Pulses, Other and products | 1994           | 11                                                                    |
| 32               | Cameroon | Rice (Milled Equivalent)   | 1994           | 89                                                                    |
| 32               | Cameroon | Roots, Other               | 1994           | 60                                                                    |
| 32               | Cameroon | Sesame seed                | 1994           | 3                                                                     |
| 32               | Cameroon | Sorghum and products       | 1994           | 202                                                                   |
| 32               | Cameroon | Soyabean Oil               | 1994           | 4                                                                     |
| 32               | Cameroon | Soyabeans                  | 1994           | 3                                                                     |
| 32               | Cameroon | Spices                     | 1994           | 8                                                                     |
| 32               | Cameroon | Spices, Other              | 1994           | 2                                                                     |
| 32               | Cameroon | Starchy Roots              | 1994           | 399                                                                   |
| 32               | Cameroon | Stimulants                 | 1994           | 5                                                                     |
| 32               | Cameroon | Sugar & Sweeteners         | 1994           | 62                                                                    |
| 32               | Cameroon | Sugar (Raw Equivalent)     | 1994           | 59                                                                    |
| 32               | Cameroon | Sugar cane                 | 1994           | 36                                                                    |
| 32               | Cameroon | Sugar Crops                | 1994           | 36                                                                    |
| 32               | Cameroon | Sweet potatoes             | 1994           | 36                                                                    |
| 32               | Cameroon | Sweeteners, Other          | 1994           | 1                                                                     |
| 32               | Cameroon | Tomatoes and products      | 1994           | 3                                                                     |
| 32               | Cameroon | Treenuts                   | 1994           | 29                                                                    |
| 32               | Cameroon | Vegetable Oils             | 1994           | 164                                                                   |
| 32               | Cameroon | Vegetables                 | 1994           | 29                                                                    |
| 32               | Cameroon | Vegetables, Other          | 1994           | 25                                                                    |
| 32               | Cameroon | Vegetal Products           | 1994           | 1,917                                                                 |
| 32               | Cameroon | Wheat and products         | 1994           | 88                                                                    |
| 32               | Cameroon | Yams                       | 1994           | 15                                                                    |
| 32               | Cameroon | Alcoholic Beverages        | 1995           | 51                                                                    |
| 32               | Cameroon | Animal fats                | 1995           | 5                                                                     |
| 32               | Cameroon | Animal Products            | 1995           | 117                                                                   |
| 32               | Cameroon | Bananas                    | 1995           | 85                                                                    |
| 32               | Cameroon | Barley and products        | 1995           | 36                                                                    |
| 32               | Cameroon | Beans                      | 1995           | 65                                                                    |
| 32               | Cameroon | Beer                       | 1995           | 15                                                                    |
| 32               | Cameroon | Beverages, Fermented       | 1995           | 36                                                                    |
| 32               | Cameroon | Bovine Meat                | 1995           | 27                                                                    |
| 32               | Cameroon | Cassava and products       | 1995           | 288                                                                   |
| 32               | Cameroon | Cereals - Excluding Beer   | 1995           | 767                                                                   |
| 32               | Cameroon | Cocoa Beans and products   | 1995           | 4                                                                     |
| 32               | Cameroon | Coconut Oil                | 1995           | 1                                                                     |
| 32               | Cameroon | Cottonseed Oil             | 1995           | 25                                                                    |
| 32               | Cameroon | Demersal Fish              | 1995           | 1                                                                     |
| 32               | Cameroon | Eggs                       | 1995           | 2                                                                     |
| 32               | Cameroon | Fats, Animals, Raw         | 1995           | 5                                                                     |
| 32               | Cameroon | Fish, Seafood              | 1995           | 19                                                                    |
| 32               | Cameroon | Freshwater Fish            | 1995           | 4                                                                     |
| 32               | Cameroon | Fruits - Excluding Wine    | 1995           | 232                                                                   |
| 32               | Cameroon | Fruits, Other              | 1995           | 13                                                                    |
| 32               | Cameroon | Grand Total                | 1995           | 2,048                                                                 |
| 32               | Cameroon | Groundnut Oil              | 1995           | 19                                                                    |
| 32               | Cameroon | Groundnuts (Shelled Eq)    | 1995           | 18                                                                    |
| 32               | Cameroon | Honey                      | 1995           | 2                                                                     |
| 32               | Cameroon | Maize and products         | 1995           | 333                                                                   |
| 32               | Cameroon | Marine Fish, Other         | 1995           | 5                                                                     |
| 32               | Cameroon | Meat                       | 1995           | 60                                                                    |
| 32               | Cameroon | Meat, Other                | 1995           | 10                                                                    |
| 32               | Cameroon | Milk - Excluding Butter    | 1995           | 27                                                                    |
| 32               | Cameroon | Millet and products        | 1995           | 37                                                                    |
| 32               | Cameroon | Miscellaneous              | 1995           | 1                                                                     |
| 32               | Cameroon | Mutton & Goat Meat         | 1995           | 10                                                                    |
| 32               | Cameroon | Offals                     | 1995           | 4                                                                     |
| 32               | Cameroon | Oilcrops                   | 1995           | 57                                                                    |
| 32               | Cameroon | Oilcrops Oil, Other        | 1995           | 3                                                                     |
| 32               | Cameroon | Oilcrops, Other            | 1995           | 31                                                                    |
| 32               | Cameroon | Onions                     | 1995           | 2                                                                     |
| 32               | Cameroon | Palm kernels               | 1995           | 1                                                                     |

Dietary calcium and zinc deficiency risks are decreasing but remain prevalent

| FAO Country code | Country  | Food item                  | Reference year | Net energy supply (kcal <i>capita</i> <sup>-1</sup> d <sup>-1</sup> ) |
|------------------|----------|----------------------------|----------------|-----------------------------------------------------------------------|
| 32               | Cameroon | Palm Oil                   | 1995           | 113                                                                   |
| 32               | Cameroon | Palmkernel Oil             | 1995           | 9                                                                     |
| 32               | Cameroon | Pelagic Fish               | 1995           | 9                                                                     |
| 32               | Cameroon | Pigmeat                    | 1995           | 8                                                                     |
| 32               | Cameroon | Pimento                    | 1995           | 5                                                                     |
| 32               | Cameroon | Pineapples and products    | 1995           | 2                                                                     |
| 32               | Cameroon | Plantains                  | 1995           | 131                                                                   |
| 32               | Cameroon | Potatoes and products      | 1995           | 3                                                                     |
| 32               | Cameroon | Poultry Meat               | 1995           | 5                                                                     |
| 32               | Cameroon | Pulses                     | 1995           | 82                                                                    |
| 32               | Cameroon | Pulses, Other and products | 1995           | 17                                                                    |
| 32               | Cameroon | Rice (Milled Equivalent)   | 1995           | 86                                                                    |
| 32               | Cameroon | Roots, Other               | 1995           | 61                                                                    |
| 32               | Cameroon | Sesame seed                | 1995           | 3                                                                     |
| 32               | Cameroon | Sorghum and products       | 1995           | 218                                                                   |
| 32               | Cameroon | Soyabean Oil               | 1995           | 3                                                                     |
| 32               | Cameroon | Soyabeans                  | 1995           | 3                                                                     |
| 32               | Cameroon | Spices                     | 1995           | 7                                                                     |
| 32               | Cameroon | Spices, Other              | 1995           | 2                                                                     |
| 32               | Cameroon | Starchy Roots              | 1995           | 402                                                                   |
| 32               | Cameroon | Stimulants                 | 1995           | 5                                                                     |
| 32               | Cameroon | Sugar & Sweeteners         | 1995           | 64                                                                    |
| 32               | Cameroon | Sugar (Raw Equivalent)     | 1995           | 61                                                                    |
| 32               | Cameroon | Sugar cane                 | 1995           | 36                                                                    |
| 32               | Cameroon | Sugar Crops                | 1995           | 36                                                                    |
| 32               | Cameroon | Sweet potatoes             | 1995           | 36                                                                    |
| 32               | Cameroon | Sweeteners, Other          | 1995           | 1                                                                     |
| 32               | Cameroon | Tomatoes and products      | 1995           | 3                                                                     |
| 32               | Cameroon | Treenuts                   | 1995           | 25                                                                    |
| 32               | Cameroon | Vegetable Oils             | 1995           | 172                                                                   |
| 32               | Cameroon | Vegetables                 | 1995           | 29                                                                    |
| 32               | Cameroon | Vegetables, Other          | 1995           | 25                                                                    |
| 32               | Cameroon | Vegetal Products           | 1995           | 1,930                                                                 |
| 32               | Cameroon | Wheat and products         | 1995           | 57                                                                    |
| 32               | Cameroon | Wine                       | 1995           | 1                                                                     |
| 32               | Cameroon | Yams                       | 1995           | 14                                                                    |
| 32               | Cameroon | Alcoholic Beverages        | 1996           | 47                                                                    |
| 32               | Cameroon | Animal fats                | 1996           | 5                                                                     |
| 32               | Cameroon | Animal Products            | 1996           | 120                                                                   |
| 32               | Cameroon | Bananas                    | 1996           | 87                                                                    |
| 32               | Cameroon | Barley and products        | 1996           | 15                                                                    |
| 32               | Cameroon | Beans                      | 1996           | 68                                                                    |
| 32               | Cameroon | Beer                       | 1996           | 13                                                                    |
| 32               | Cameroon | Beverages, Fermented       | 1996           | 34                                                                    |
| 32               | Cameroon | Bovine Meat                | 1996           | 32                                                                    |
| 32               | Cameroon | Cassava and products       | 1996           | 291                                                                   |
| 32               | Cameroon | Cereals - Excluding Beer   | 1996           | 771                                                                   |
| 32               | Cameroon | Cocoa Beans and products   | 1996           | 4                                                                     |
| 32               | Cameroon | Coconut Oil                | 1996           | 1                                                                     |
| 32               | Cameroon | Cottonseed Oil             | 1996           | 22                                                                    |
| 32               | Cameroon | Demersal Fish              | 1996           | 1                                                                     |
| 32               | Cameroon | Eggs                       | 1996           | 2                                                                     |
| 32               | Cameroon | Fats, Animals, Raw         | 1996           | 4                                                                     |
| 32               | Cameroon | Fish, Seafood              | 1996           | 18                                                                    |
| 32               | Cameroon | Freshwater Fish            | 1996           | 4                                                                     |
| 32               | Cameroon | Fruits - Excluding Wine    | 1996           | 234                                                                   |
| 32               | Cameroon | Fruits, Other              | 1996           | 13                                                                    |
| 32               | Cameroon | Grand Total                | 1996           | 2,033                                                                 |
| 32               | Cameroon | Groundnut Oil              | 1996           | 22                                                                    |
| 32               | Cameroon | Groundnuts (Shelled Eq)    | 1996           | 24                                                                    |
| 32               | Cameroon | Honey                      | 1996           | 2                                                                     |
| 32               | Cameroon | Maize and products         | 1996           | 350                                                                   |
| 32               | Cameroon | Marine Fish, Other         | 1996           | 3                                                                     |
| 32               | Cameroon | Meat                       | 1996           | 64                                                                    |
| 32               | Cameroon | Meat, Other                | 1996           | 9                                                                     |
| 32               | Cameroon | Milk - Excluding Butter    | 1996           | 27                                                                    |
| 32               | Cameroon | Millet and products        | 1996           | 39                                                                    |
| 32               | Cameroon | Miscellaneous              | 1996           | 1                                                                     |
| 32               | Cameroon | Mutton & Goat Meat         | 1996           | 10                                                                    |
| 32               | Cameroon | Offals                     | 1996           | 4                                                                     |
| 32               | Cameroon | Oilcrops                   | 1996           | 62                                                                    |
| 32               | Cameroon | Oilcrops Oil, Other        | 1996           | 3                                                                     |
| 32               | Cameroon | Oilcrops, Other            | 1996           | 30                                                                    |
| 32               | Cameroon | Onions                     | 1996           | 1                                                                     |
| 32               | Cameroon | Palm kernels               | 1996           | 1                                                                     |
| 32               | Cameroon | Palm Oil                   | 1996           | 101                                                                   |
| 32               | Cameroon | Palmkernel Oil             | 1996           | 8                                                                     |
| 32               | Cameroon | Pelagic Fish               | 1996           | 10                                                                    |
| 32               | Cameroon | Pigmeat                    | 1996           | 7                                                                     |
| 32               | Cameroon | Pimento                    | 1996           | 5                                                                     |
| 32               | Cameroon | Pineapples and products    | 1996           | 2                                                                     |
| 32               | Cameroon | Plantains                  | 1996           | 132                                                                   |
| 32               | Cameroon | Potatoes and products      | 1996           | 3                                                                     |
| 32               | Cameroon | Poultry Meat               | 1996           | 6                                                                     |
| 32               | Cameroon | Pulses                     | 1996           | 91                                                                    |
| 32               | Cameroon | Pulses, Other and products | 1996           | 23                                                                    |
| 32               | Cameroon | Rice (Milled Equivalent)   | 1996           | 102                                                                   |
| 32               | Cameroon | Roots, Other               | 1996           | 43                                                                    |
| 32               | Cameroon | Sesame seed                | 1996           | 4                                                                     |
| 32               | Cameroon | Sorghum and products       | 1996           | 203                                                                   |
| 32               | Cameroon | Soyabeans                  | 1996           | 3                                                                     |
| 32               | Cameroon | Spices                     | 1996           | 7                                                                     |
| 32               | Cameroon | Spices, Other              | 1996           | 3                                                                     |
| 32               | Cameroon | Starchy Roots              | 1996           | 387                                                                   |
| 32               | Cameroon | Stimulants                 | 1996           | 4                                                                     |
| 32               | Cameroon | Sugar & Sweeteners         | 1996           | 68                                                                    |
| 32               | Cameroon | Sugar (Raw Equivalent)     | 1996           | 65                                                                    |

Dietary calcium and zinc deficiency risks are decreasing but remain prevalent

| FAO Country code | Country  | Food item                  | Reference year | Net energy supply (kcal capita <sup>-1</sup> d <sup>-1</sup> ) |
|------------------|----------|----------------------------|----------------|----------------------------------------------------------------|
| 32               | Cameroon | Sugar cane                 | 1996           | 29                                                             |
| 32               | Cameroon | Sugar Crops                | 1996           | 29                                                             |
| 32               | Cameroon | Sweet potatoes             | 1996           | 37                                                             |
| 32               | Cameroon | Sweeteners, Other          | 1996           | 1                                                              |
| 32               | Cameroon | Tomatoes and products      | 1996           | 2                                                              |
| 32               | Cameroon | Treenuts                   | 1996           | 24                                                             |
| 32               | Cameroon | Vegetable Oils             | 1996           | 159                                                            |
| 32               | Cameroon | Vegetables                 | 1996           | 29                                                             |
| 32               | Cameroon | Vegetables, Other          | 1996           | 26                                                             |
| 32               | Cameroon | Vegetal Products           | 1996           | 1,913                                                          |
| 32               | Cameroon | Wheat and products         | 1996           | 61                                                             |
| 32               | Cameroon | Yams                       | 1996           | 14                                                             |
| 32               | Cameroon | Alcoholic Beverages        | 1997           | 44                                                             |
| 32               | Cameroon | Animal fats                | 1997           | 5                                                              |
| 32               | Cameroon | Animal Products            | 1997           | 119                                                            |
| 32               | Cameroon | Bananas                    | 1997           | 63                                                             |
| 32               | Cameroon | Barley and products        | 1997           | 15                                                             |
| 32               | Cameroon | Beans                      | 1997           | 70                                                             |
| 32               | Cameroon | Beer                       | 1997           | 12                                                             |
| 32               | Cameroon | Beverages, Fermented       | 1997           | 31                                                             |
| 32               | Cameroon | Bovine Meat                | 1997           | 27                                                             |
| 32               | Cameroon | Cassava and products       | 1997           | 294                                                            |
| 32               | Cameroon | Cereals - Excluding Beer   | 1997           | 785                                                            |
| 32               | Cameroon | Cocoa Beans and products   | 1997           | 3                                                              |
| 32               | Cameroon | Coconut Oil                | 1997           | 1                                                              |
| 32               | Cameroon | Cottonseed Oil             | 1997           | 33                                                             |
| 32               | Cameroon | Demersal Fish              | 1997           | 1                                                              |
| 32               | Cameroon | Eggs                       | 1997           | 2                                                              |
| 32               | Cameroon | Fats, Animals, Raw         | 1997           | 4                                                              |
| 32               | Cameroon | Fish, Seafood              | 1997           | 21                                                             |
| 32               | Cameroon | Freshwater Fish            | 1997           | 5                                                              |
| 32               | Cameroon | Fruits - Excluding Wine    | 1997           | 210                                                            |
| 32               | Cameroon | Fruits, Other              | 1997           | 13                                                             |
| 32               | Cameroon | Grand Total                | 1997           | 2,097                                                          |
| 32               | Cameroon | Groundnut Oil              | 1997           | 15                                                             |
| 32               | Cameroon | Groundnuts (Shelled Eq)    | 1997           | 21                                                             |
| 32               | Cameroon | Honey                      | 1997           | 2                                                              |
| 32               | Cameroon | Maize and products         | 1997           | 337                                                            |
| 32               | Cameroon | Marine Fish, Other         | 1997           | 5                                                              |
| 32               | Cameroon | Meat                       | 1997           | 60                                                             |
| 32               | Cameroon | Meat, Other                | 1997           | 9                                                              |
| 32               | Cameroon | Milk - Excluding Butter    | 1997           | 28                                                             |
| 32               | Cameroon | Millet and products        | 1997           | 38                                                             |
| 32               | Cameroon | Miscellaneous              | 1997           | 1                                                              |
| 32               | Cameroon | Mutton & Goat Meat         | 1997           | 10                                                             |
| 32               | Cameroon | Offals                     | 1997           | 4                                                              |
| 32               | Cameroon | Oilcrops                   | 1997           | 58                                                             |
| 32               | Cameroon | Oilcrops Oil, Other        | 1997           | 3                                                              |
| 32               | Cameroon | Oilcrops, Other            | 1997           | 29                                                             |
| 32               | Cameroon | Onions                     | 1997           | 3                                                              |
| 32               | Cameroon | Palm kernels               | 1997           | 1                                                              |
| 32               | Cameroon | Palm Oil                   | 1997           | 107                                                            |
| 32               | Cameroon | Palmkernel Oil             | 1997           | 8                                                              |
| 32               | Cameroon | Pelagic Fish               | 1997           | 10                                                             |
| 32               | Cameroon | Pigmeat                    | 1997           | 7                                                              |
| 32               | Cameroon | Pimento                    | 1997           | 4                                                              |
| 32               | Cameroon | Pineapples and products    | 1997           | 2                                                              |
| 32               | Cameroon | Plantains                  | 1997           | 132                                                            |
| 32               | Cameroon | Potatoes and products      | 1997           | 3                                                              |
| 32               | Cameroon | Poultry Meat               | 1997           | 7                                                              |
| 32               | Cameroon | Pulses                     | 1997           | 98                                                             |
| 32               | Cameroon | Pulses, Other and products | 1997           | 29                                                             |
| 32               | Cameroon | Rice (Milled Equivalent)   | 1997           | 114                                                            |
| 32               | Cameroon | Roots, Other               | 1997           | 79                                                             |
| 32               | Cameroon | Sesame seed                | 1997           | 3                                                              |
| 32               | Cameroon | Sorghum and products       | 1997           | 178                                                            |
| 32               | Cameroon | Soyabean Oil               | 1997           | 1                                                              |
| 32               | Cameroon | Soyabeans                  | 1997           | 3                                                              |
| 32               | Cameroon | Spices                     | 1997           | 7                                                              |
| 32               | Cameroon | Spices, Other              | 1997           | 3                                                              |
| 32               | Cameroon | Starchy Roots              | 1997           | 430                                                            |
| 32               | Cameroon | Stimulants                 | 1997           | 4                                                              |
| 32               | Cameroon | Sugar & Sweeteners         | 1997           | 88                                                             |
| 32               | Cameroon | Sugar (Raw Equivalent)     | 1997           | 85                                                             |
| 32               | Cameroon | Sugar cane                 | 1997           | 28                                                             |
| 32               | Cameroon | Sugar Crops                | 1997           | 28                                                             |
| 32               | Cameroon | Sweet potatoes             | 1997           | 37                                                             |
| 32               | Cameroon | Sweeteners, Other          | 1997           | 2                                                              |
| 32               | Cameroon | Tomatoes and products      | 1997           | 2                                                              |
| 32               | Cameroon | Treenuts                   | 1997           | 24                                                             |
| 32               | Cameroon | Vegetable Oils             | 1997           | 168                                                            |
| 32               | Cameroon | Vegetables                 | 1997           | 32                                                             |
| 32               | Cameroon | Vegetables, Other          | 1997           | 27                                                             |
| 32               | Cameroon | Vegetal Products           | 1997           | 1,978                                                          |
| 32               | Cameroon | Wheat and products         | 1997           | 104                                                            |
| 32               | Cameroon | Wine                       | 1997           | 1                                                              |
| 32               | Cameroon | Yams                       | 1997           | 17                                                             |
| 32               | Cameroon | Alcoholic Beverages        | 1998           | 56                                                             |
| 32               | Cameroon | Animal fats                | 1998           | 5                                                              |
| 32               | Cameroon | Animal Products            | 1998           | 121                                                            |
| 32               | Cameroon | Bananas                    | 1998           | 59                                                             |
| 32               | Cameroon | Barley and products        | 1998           | 15                                                             |
| 32               | Cameroon | Beans                      | 1998           | 72                                                             |
| 32               | Cameroon | Beer                       | 1998           | 19                                                             |
| 32               | Cameroon | Beverages, Fermented       | 1998           | 36                                                             |
| 32               | Cameroon | Bovine Meat                | 1998           | 26                                                             |
| 32               | Cameroon | Cassava and products       | 1998           | 293                                                            |

Dietary calcium and zinc deficiency risks are decreasing but remain prevalent

| FAO Country code | Country  | Food item                  | Reference year | Net energy supply (kcal capita <sup>-1</sup> d <sup>-1</sup> ) |
|------------------|----------|----------------------------|----------------|----------------------------------------------------------------|
| 32               | Cameroon | Cereals - Excluding Beer   | 1998           | 790                                                            |
| 32               | Cameroon | Cocoa Beans and products   | 1998           | 3                                                              |
| 32               | Cameroon | Coconut Oil                | 1998           | 4                                                              |
| 32               | Cameroon | Cottonseed Oil             | 1998           | 27                                                             |
| 32               | Cameroon | Demersal Fish              | 1998           | 1                                                              |
| 32               | Cameroon | Eggs                       | 1998           | 2                                                              |
| 32               | Cameroon | Fats, Animals, Raw         | 1998           | 4                                                              |
| 32               | Cameroon | Fish, Seafood              | 1998           | 23                                                             |
| 32               | Cameroon | Freshwater Fish            | 1998           | 5                                                              |
| 32               | Cameroon | Fruits - Excluding Wine    | 1998           | 206                                                            |
| 32               | Cameroon | Fruits, Other              | 1998           | 13                                                             |
| 32               | Cameroon | Grand Total                | 1998           | 2,100                                                          |
| 32               | Cameroon | Groundnut Oil              | 1998           | 13                                                             |
| 32               | Cameroon | Groundnuts (Shelled Eq)    | 1998           | 26                                                             |
| 32               | Cameroon | Honey                      | 1998           | 2                                                              |
| 32               | Cameroon | Maize and products         | 1998           | 340                                                            |
| 32               | Cameroon | Marine Fish, Other         | 1998           | 7                                                              |
| 32               | Cameroon | Meat                       | 1998           | 62                                                             |
| 32               | Cameroon | Meat, Other                | 1998           | 10                                                             |
| 32               | Cameroon | Milk - Excluding Butter    | 1998           | 26                                                             |
| 32               | Cameroon | Millet and products        | 1998           | 34                                                             |
| 32               | Cameroon | Miscellaneous              | 1998           | 1                                                              |
| 32               | Cameroon | Mutton & Goat Meat         | 1998           | 10                                                             |
| 32               | Cameroon | Offals                     | 1998           | 4                                                              |
| 32               | Cameroon | Oilcrops                   | 1998           | 63                                                             |
| 32               | Cameroon | Oilcrops Oil, Other        | 1998           | 4                                                              |
| 32               | Cameroon | Oilcrops, Other            | 1998           | 29                                                             |
| 32               | Cameroon | Onions                     | 1998           | 3                                                              |
| 32               | Cameroon | Palm kernels               | 1998           | 1                                                              |
| 32               | Cameroon | Palm Oil                   | 1998           | 120                                                            |
| 32               | Cameroon | Palmkernel Oil             | 1998           | 8                                                              |
| 32               | Cameroon | Pelagic Fish               | 1998           | 9                                                              |
| 32               | Cameroon | Pigmeat                    | 1998           | 8                                                              |
| 32               | Cameroon | Pimento                    | 1998           | 4                                                              |
| 32               | Cameroon | Pineapples and products    | 1998           | 2                                                              |
| 32               | Cameroon | Plantains                  | 1998           | 132                                                            |
| 32               | Cameroon | Potatoes and products      | 1998           | 3                                                              |
| 32               | Cameroon | Poultry Meat               | 1998           | 8                                                              |
| 32               | Cameroon | Pulses                     | 1998           | 106                                                            |
| 32               | Cameroon | Pulses, Other and products | 1998           | 34                                                             |
| 32               | Cameroon | Rice (Milled Equivalent)   | 1998           | 97                                                             |
| 32               | Cameroon | Roots, Other               | 1998           | 67                                                             |
| 32               | Cameroon | Sesame seed                | 1998           | 3                                                              |
| 32               | Cameroon | Sorghum and products       | 1998           | 224                                                            |
| 32               | Cameroon | Soyabean Oil               | 1998           | 1                                                              |
| 32               | Cameroon | Soyabeans                  | 1998           | 4                                                              |
| 32               | Cameroon | Spices                     | 1998           | 8                                                              |
| 32               | Cameroon | Spices, Other              | 1998           | 4                                                              |
| 32               | Cameroon | Starchy Roots              | 1998           | 412                                                            |
| 32               | Cameroon | Stimulants                 | 1998           | 4                                                              |
| 32               | Cameroon | Sugar & Sweeteners         | 1998           | 73                                                             |
| 32               | Cameroon | Sugar (Raw Equivalent)     | 1998           | 69                                                             |
| 32               | Cameroon | Sugar cane                 | 1998           | 27                                                             |
| 32               | Cameroon | Sugar Crops                | 1998           | 27                                                             |
| 32               | Cameroon | Sweet potatoes             | 1998           | 22                                                             |
| 32               | Cameroon | Sweeteners, Other          | 1998           | 2                                                              |
| 32               | Cameroon | Tomatoes and products      | 1998           | 3                                                              |
| 32               | Cameroon | Treenuts                   | 1998           | 23                                                             |
| 32               | Cameroon | Vegetable Oils             | 1998           | 177                                                            |
| 32               | Cameroon | Vegetables                 | 1998           | 33                                                             |
| 32               | Cameroon | Vegetables, Other          | 1998           | 28                                                             |
| 32               | Cameroon | Vegetal Products           | 1998           | 1,979                                                          |
| 32               | Cameroon | Wheat and products         | 1998           | 80                                                             |
| 32               | Cameroon | Wine                       | 1998           | 1                                                              |
| 32               | Cameroon | Yams                       | 1998           | 27                                                             |
| 32               | Cameroon | Alcoholic Beverages        | 1999           | 50                                                             |
| 32               | Cameroon | Animal fats                | 1999           | 5                                                              |
| 32               | Cameroon | Animal Products            | 1999           | 126                                                            |
| 32               | Cameroon | Bananas                    | 1999           | 44                                                             |
| 32               | Cameroon | Beans                      | 1999           | 82                                                             |
| 32               | Cameroon | Beer                       | 1999           | 27                                                             |
| 32               | Cameroon | Beverages, Fermented       | 1999           | 22                                                             |
| 32               | Cameroon | Bovine Meat                | 1999           | 31                                                             |
| 32               | Cameroon | Cassava and products       | 1999           | 274                                                            |
| 32               | Cameroon | Cereals - Excluding Beer   | 1999           | 813                                                            |
| 32               | Cameroon | Cocoa Beans and products   | 1999           | 3                                                              |
| 32               | Cameroon | Coconut Oil                | 1999           | 1                                                              |
| 32               | Cameroon | Cottonseed Oil             | 1999           | 29                                                             |
| 32               | Cameroon | Demersal Fish              | 1999           | 1                                                              |
| 32               | Cameroon | Eggs                       | 1999           | 2                                                              |
| 32               | Cameroon | Fats, Animals, Raw         | 1999           | 4                                                              |
| 32               | Cameroon | Fish, Seafood              | 1999           | 22                                                             |
| 32               | Cameroon | Freshwater Fish            | 1999           | 6                                                              |
| 32               | Cameroon | Fruits - Excluding Wine    | 1999           | 168                                                            |
| 32               | Cameroon | Fruits, Other              | 1999           | 12                                                             |
| 32               | Cameroon | Grand Total                | 1999           | 2,120                                                          |
| 32               | Cameroon | Groundnut Oil              | 1999           | 16                                                             |
| 32               | Cameroon | Groundnuts (Shelled Eq)    | 1999           | 38                                                             |
| 32               | Cameroon | Honey                      | 1999           | 2                                                              |
| 32               | Cameroon | Maize and products         | 1999           | 428                                                            |
| 32               | Cameroon | Marine Fish, Other         | 1999           | 7                                                              |
| 32               | Cameroon | Meat                       | 1999           | 65                                                             |
| 32               | Cameroon | Meat, Other                | 1999           | 9                                                              |
| 32               | Cameroon | Milk - Excluding Butter    | 1999           | 28                                                             |
| 32               | Cameroon | Millet and products        | 1999           | 31                                                             |
| 32               | Cameroon | Miscellaneous              | 1999           | 1                                                              |
| 32               | Cameroon | Mutton & Goat Meat         | 1999           | 9                                                              |

Dietary calcium and zinc deficiency risks are decreasing but remain prevalent

| FAO Country code | Country  | Food item                  | Reference year | Net energy supply (kcal <i>capita</i> <sup>-1</sup> d <sup>-1</sup> ) |
|------------------|----------|----------------------------|----------------|-----------------------------------------------------------------------|
| 32               | Cameroon | Offals                     | 1999           | 4                                                                     |
| 32               | Cameroon | Oilcrops                   | 1999           | 73                                                                    |
| 32               | Cameroon | Oilcrops Oil, Other        | 1999           | 4                                                                     |
| 32               | Cameroon | Oilcrops, Other            | 1999           | 28                                                                    |
| 32               | Cameroon | Onions                     | 1999           | 3                                                                     |
| 32               | Cameroon | Palm kernels               | 1999           | 1                                                                     |
| 32               | Cameroon | Palm Oil                   | 1999           | 128                                                                   |
| 32               | Cameroon | Palmkernel Oil             | 1999           | 8                                                                     |
| 32               | Cameroon | Pelagic Fish               | 1999           | 9                                                                     |
| 32               | Cameroon | Pigmeat                    | 1999           | 7                                                                     |
| 32               | Cameroon | Pimento                    | 1999           | 3                                                                     |
| 32               | Cameroon | Pineapples and products    | 1999           | 2                                                                     |
| 32               | Cameroon | Plantains                  | 1999           | 109                                                                   |
| 32               | Cameroon | Potatoes and products      | 1999           | 12                                                                    |
| 32               | Cameroon | Poultry Meat               | 1999           | 8                                                                     |
| 32               | Cameroon | Pulses                     | 1999           | 122                                                                   |
| 32               | Cameroon | Pulses, Other and products | 1999           | 40                                                                    |
| 32               | Cameroon | Rice (Milled Equivalent)   | 1999           | 124                                                                   |
| 32               | Cameroon | Roots, Other               | 1999           | 65                                                                    |
| 32               | Cameroon | Sesame seed                | 1999           | 2                                                                     |
| 32               | Cameroon | Sorghum and products       | 1999           | 115                                                                   |
| 32               | Cameroon | Soyabean Oil               | 1999           | 5                                                                     |
| 32               | Cameroon | Soyabeans                  | 1999           | 4                                                                     |
| 32               | Cameroon | Spices                     | 1999           | 8                                                                     |
| 32               | Cameroon | Spices, Other              | 1999           | 5                                                                     |
| 32               | Cameroon | Starchy Roots              | 1999           | 406                                                                   |
| 32               | Cameroon | Stimulants                 | 1999           | 4                                                                     |
| 32               | Cameroon | Sugar & Sweeteners         | 1999           | 68                                                                    |
| 32               | Cameroon | Sugar (Raw Equivalent)     | 1999           | 65                                                                    |
| 32               | Cameroon | Sugar cane                 | 1999           | 27                                                                    |
| 32               | Cameroon | Sugar Crops                | 1999           | 27                                                                    |
| 32               | Cameroon | Sweet potatoes             | 1999           | 27                                                                    |
| 32               | Cameroon | Sweeteners, Other          | 1999           | 2                                                                     |
| 32               | Cameroon | Tomatoes and products      | 1999           | 11                                                                    |
| 32               | Cameroon | Treenuts                   | 1999           | 22                                                                    |
| 32               | Cameroon | Vegetable Oils             | 1999           | 190                                                                   |
| 32               | Cameroon | Vegetables                 | 1999           | 44                                                                    |
| 32               | Cameroon | Vegetables, Other          | 1999           | 29                                                                    |
| 32               | Cameroon | Vegetal Products           | 1999           | 1,995                                                                 |
| 32               | Cameroon | Wheat and products         | 1999           | 116                                                                   |
| 32               | Cameroon | Wine                       | 1999           | 1                                                                     |
| 32               | Cameroon | Yams                       | 1999           | 28                                                                    |
| 32               | Cameroon | Alcoholic Beverages        | 2000           | 57                                                                    |
| 32               | Cameroon | Animal fats                | 2000           | 6                                                                     |
| 32               | Cameroon | Animal Products            | 2000           | 128                                                                   |
| 32               | Cameroon | Bananas                    | 2000           | 36                                                                    |
| 32               | Cameroon | Barley and products        | 2000           | 1                                                                     |
| 32               | Cameroon | Beans                      | 2000           | 83                                                                    |
| 32               | Cameroon | Beer                       | 2000           | 27                                                                    |
| 32               | Cameroon | Beverages, Fermented       | 2000           | 29                                                                    |
| 32               | Cameroon | Bovine Meat                | 2000           | 30                                                                    |
| 32               | Cameroon | Cassava and products       | 2000           | 271                                                                   |
| 32               | Cameroon | Cereals - Excluding Beer   | 2000           | 778                                                                   |
| 32               | Cameroon | Cocoa Beans and products   | 2000           | 3                                                                     |
| 32               | Cameroon | Coconut Oil                | 2000           | 1                                                                     |
| 32               | Cameroon | Cottonseed Oil             | 2000           | 29                                                                    |
| 32               | Cameroon | Demersal Fish              | 2000           | 1                                                                     |
| 32               | Cameroon | Eggs                       | 2000           | 2                                                                     |
| 32               | Cameroon | Fats, Animals, Raw         | 2000           | 5                                                                     |
| 32               | Cameroon | Fish, Seafood              | 2000           | 23                                                                    |
| 32               | Cameroon | Freshwater Fish            | 2000           | 6                                                                     |
| 32               | Cameroon | Fruits - Excluding Wine    | 2000           | 157                                                                   |
| 32               | Cameroon | Fruits, Other              | 2000           | 12                                                                    |
| 32               | Cameroon | Grand Total                | 2000           | 2,116                                                                 |
| 32               | Cameroon | Groundnut Oil              | 2000           | 13                                                                    |
| 32               | Cameroon | Groundnuts (Shelled Eq)    | 2000           | 58                                                                    |
| 32               | Cameroon | Honey                      | 2000           | 2                                                                     |
| 32               | Cameroon | Maize and products         | 2000           | 374                                                                   |
| 32               | Cameroon | Marine Fish, Other         | 2000           | 6                                                                     |
| 32               | Cameroon | Meat                       | 2000           | 66                                                                    |
| 32               | Cameroon | Meat, Other                | 2000           | 9                                                                     |
| 32               | Cameroon | Milk - Excluding Butter    | 2000           | 27                                                                    |
| 32               | Cameroon | Millet and products        | 2000           | 26                                                                    |
| 32               | Cameroon | Miscellaneous              | 2000           | 1                                                                     |
| 32               | Cameroon | Mutton & Goat Meat         | 2000           | 10                                                                    |
| 32               | Cameroon | Offals                     | 2000           | 4                                                                     |
| 32               | Cameroon | Oilcrops                   | 2000           | 95                                                                    |
| 32               | Cameroon | Oilcrops Oil, Other        | 2000           | 6                                                                     |
| 32               | Cameroon | Oilcrops, Other            | 2000           | 27                                                                    |
| 32               | Cameroon | Onions                     | 2000           | 5                                                                     |
| 32               | Cameroon | Palm kernels               | 2000           | 1                                                                     |
| 32               | Cameroon | Palm Oil                   | 2000           | 122                                                                   |
| 32               | Cameroon | Palmkernel Oil             | 2000           | 8                                                                     |
| 32               | Cameroon | Pelagic Fish               | 2000           | 10                                                                    |
| 32               | Cameroon | Pigmeat                    | 2000           | 9                                                                     |
| 32               | Cameroon | Pimento                    | 2000           | 3                                                                     |
| 32               | Cameroon | Pineapples and products    | 2000           | 2                                                                     |
| 32               | Cameroon | Plantains                  | 2000           | 107                                                                   |
| 32               | Cameroon | Potatoes and products      | 2000           | 12                                                                    |
| 32               | Cameroon | Poultry Meat               | 2000           | 7                                                                     |
| 32               | Cameroon | Pulses                     | 2000           | 126                                                                   |
| 32               | Cameroon | Pulses, Other and products | 2000           | 44                                                                    |
| 32               | Cameroon | Rice (Milled Equivalent)   | 2000           | 100                                                                   |
| 32               | Cameroon | Roots, Other               | 2000           | 63                                                                    |
| 32               | Cameroon | Sesame seed                | 2000           | 5                                                                     |
| 32               | Cameroon | Sorghum and products       | 2000           | 174                                                                   |
| 32               | Cameroon | Soyabean Oil               | 2000           | 7                                                                     |

Dietary calcium and zinc deficiency risks are decreasing but remain prevalent

| FAO Country code | Country  | Food item                  | Reference year | Net energy supply (kcal capita <sup>-1</sup> d <sup>-1</sup> ) |
|------------------|----------|----------------------------|----------------|----------------------------------------------------------------|
| 32               | Cameroon | Soybeans                   | 2000           | 4                                                              |
| 32               | Cameroon | Spices                     | 2000           | 8                                                              |
| 32               | Cameroon | Spices, Other              | 2000           | 4                                                              |
| 32               | Cameroon | Starchy Roots              | 2000           | 399                                                            |
| 32               | Cameroon | Stimulants                 | 2000           | 4                                                              |
| 32               | Cameroon | Sugar & Sweeteners         | 2000           | 85                                                             |
| 32               | Cameroon | Sugar (Raw Equivalent)     | 2000           | 82                                                             |
| 32               | Cameroon | Sugar cane                 | 2000           | 26                                                             |
| 32               | Cameroon | Sugar Crops                | 2000           | 26                                                             |
| 32               | Cameroon | Sweet potatoes             | 2000           | 25                                                             |
| 32               | Cameroon | Sweeteners, Other          | 2000           | 1                                                              |
| 32               | Cameroon | Tomatoes and products      | 2000           | 12                                                             |
| 32               | Cameroon | Treenuts                   | 2000           | 22                                                             |
| 32               | Cameroon | Vegetable Oils             | 2000           | 185                                                            |
| 32               | Cameroon | Vegetables                 | 2000           | 45                                                             |
| 32               | Cameroon | Vegetables, Other          | 2000           | 29                                                             |
| 32               | Cameroon | Vegetal Products           | 2000           | 1,987                                                          |
| 32               | Cameroon | Wheat and products         | 2000           | 103                                                            |
| 32               | Cameroon | Wine                       | 2000           | 1                                                              |
| 32               | Cameroon | Yams                       | 2000           | 27                                                             |
| 32               | Cameroon | Alcoholic Beverages        | 2001           | 63                                                             |
| 32               | Cameroon | Animal fats                | 2001           | 6                                                              |
| 32               | Cameroon | Animal Products            | 2001           | 130                                                            |
| 32               | Cameroon | Bananas                    | 2001           | 34                                                             |
| 32               | Cameroon | Barley and products        | 2001           | 1                                                              |
| 32               | Cameroon | Beans                      | 2001           | 77                                                             |
| 32               | Cameroon | Beer                       | 2001           | 29                                                             |
| 32               | Cameroon | Beverages, Fermented       | 2001           | 32                                                             |
| 32               | Cameroon | Bovine Meat                | 2001           | 30                                                             |
| 32               | Cameroon | Cassava and products       | 2001           | 268                                                            |
| 32               | Cameroon | Cereals - Excluding Beer   | 2001           | 849                                                            |
| 32               | Cameroon | Cocoa Beans and products   | 2001           | 3                                                              |
| 32               | Cameroon | Coconut Oil                | 2001           | 1                                                              |
| 32               | Cameroon | Cottonseed Oil             | 2001           | 28                                                             |
| 32               | Cameroon | Crustaceans                | 2001           | 1                                                              |
| 32               | Cameroon | Demersal Fish              | 2001           | 1                                                              |
| 32               | Cameroon | Eggs                       | 2001           | 2                                                              |
| 32               | Cameroon | Fats, Animals, Raw         | 2001           | 5                                                              |
| 32               | Cameroon | Fish, Seafood              | 2001           | 25                                                             |
| 32               | Cameroon | Freshwater Fish            | 2001           | 6                                                              |
| 32               | Cameroon | Fruits - Excluding Wine    | 2001           | 154                                                            |
| 32               | Cameroon | Fruits, Other              | 2001           | 12                                                             |
| 32               | Cameroon | Grand Total                | 2001           | 2,162                                                          |
| 32               | Cameroon | Groundnut Oil              | 2001           | 12                                                             |
| 32               | Cameroon | Groundnuts (Shelled Eq)    | 2001           | 63                                                             |
| 32               | Cameroon | Honey                      | 2001           | 2                                                              |
| 32               | Cameroon | Maize and products         | 2001           | 307                                                            |
| 32               | Cameroon | Marine Fish, Other         | 2001           | 6                                                              |
| 32               | Cameroon | Meat                       | 2001           | 65                                                             |
| 32               | Cameroon | Meat, Other                | 2001           | 9                                                              |
| 32               | Cameroon | Milk - Excluding Butter    | 2001           | 27                                                             |
| 32               | Cameroon | Millet and products        | 2001           | 24                                                             |
| 32               | Cameroon | Miscellaneous              | 2001           | 1                                                              |
| 32               | Cameroon | Mutton & Goat Meat         | 2001           | 10                                                             |
| 32               | Cameroon | Offals                     | 2001           | 4                                                              |
| 32               | Cameroon | Oilcrops                   | 2001           | 100                                                            |
| 32               | Cameroon | Oilcrops Oil, Other        | 2001           | 5                                                              |
| 32               | Cameroon | Oilcrops, Other            | 2001           | 27                                                             |
| 32               | Cameroon | Onions                     | 2001           | 4                                                              |
| 32               | Cameroon | Palm kernels               | 2001           | 1                                                              |
| 32               | Cameroon | Palm Oil                   | 2001           | 92                                                             |
| 32               | Cameroon | Palmkernel Oil             | 2001           | 7                                                              |
| 32               | Cameroon | Pelagic Fish               | 2001           | 11                                                             |
| 32               | Cameroon | Pigmeat                    | 2001           | 9                                                              |
| 32               | Cameroon | Pimento                    | 2001           | 3                                                              |
| 32               | Cameroon | Pineapples and products    | 2001           | 2                                                              |
| 32               | Cameroon | Plantains                  | 2001           | 106                                                            |
| 32               | Cameroon | Potatoes and products      | 2001           | 11                                                             |
| 32               | Cameroon | Poultry Meat               | 2001           | 8                                                              |
| 32               | Cameroon | Pulses                     | 2001           | 129                                                            |
| 32               | Cameroon | Pulses, Other and products | 2001           | 52                                                             |
| 32               | Cameroon | Rice (Milled Equivalent)   | 2001           | 174                                                            |
| 32               | Cameroon | Roots, Other               | 2001           | 62                                                             |
| 32               | Cameroon | Sesame seed                | 2001           | 6                                                              |
| 32               | Cameroon | Sorghum and products       | 2001           | 206                                                            |
| 32               | Cameroon | Soyabean Oil               | 2001           | 7                                                              |
| 32               | Cameroon | Soyabbeans                 | 2001           | 4                                                              |
| 32               | Cameroon | Spices                     | 2001           | 8                                                              |
| 32               | Cameroon | Spices, Other              | 2001           | 4                                                              |
| 32               | Cameroon | Starchy Roots              | 2001           | 392                                                            |
| 32               | Cameroon | Stimulants                 | 2001           | 4                                                              |
| 32               | Cameroon | Sugar & Sweeteners         | 2001           | 87                                                             |
| 32               | Cameroon | Sugar (Raw Equivalent)     | 2001           | 83                                                             |
| 32               | Cameroon | Sugar cane                 | 2001           | 25                                                             |
| 32               | Cameroon | Sugar Crops                | 2001           | 25                                                             |
| 32               | Cameroon | Sweet potatoes             | 2001           | 25                                                             |
| 32               | Cameroon | Sweeteners, Other          | 2001           | 2                                                              |
| 32               | Cameroon | Tomatoes and products      | 2001           | 12                                                             |
| 32               | Cameroon | Treenuts                   | 2001           | 22                                                             |
| 32               | Cameroon | Vegetable Oils             | 2001           | 153                                                            |
| 32               | Cameroon | Vegetables                 | 2001           | 44                                                             |
| 32               | Cameroon | Vegetables, Other          | 2001           | 28                                                             |
| 32               | Cameroon | Vegetal Products           | 2001           | 2,032                                                          |
| 32               | Cameroon | Wheat and products         | 2001           | 136                                                            |
| 32               | Cameroon | Wine                       | 2001           | 1                                                              |
| 32               | Cameroon | Yams                       | 2001           | 27                                                             |
| 32               | Cameroon | Alcoholic Beverages        | 2002           | 65                                                             |

Dietary calcium and zinc deficiency risks are decreasing but remain prevalent

| FAO Country code | Country  | Food item                  | Reference year | Net energy supply (kcal capita <sup>-1</sup> d <sup>-1</sup> ) |
|------------------|----------|----------------------------|----------------|----------------------------------------------------------------|
| 32               | Cameroon | Animal fats                | 2002           | 7                                                              |
| 32               | Cameroon | Animal Products            | 2002           | 127                                                            |
| 32               | Cameroon | Bananas                    | 2002           | 40                                                             |
| 32               | Cameroon | Barley and products        | 2002           | 2                                                              |
| 32               | Cameroon | Beans                      | 2002           | 82                                                             |
| 32               | Cameroon | Beer                       | 2002           | 31                                                             |
| 32               | Cameroon | Beverages, Fermented       | 2002           | 33                                                             |
| 32               | Cameroon | Bovine Meat                | 2002           | 28                                                             |
| 32               | Cameroon | Cassava and products       | 2002           | 269                                                            |
| 32               | Cameroon | Cereals - Excluding Beer   | 2002           | 820                                                            |
| 32               | Cameroon | Cocoa Beans and products   | 2002           | 2                                                              |
| 32               | Cameroon | Coconut Oil                | 2002           | 1                                                              |
| 32               | Cameroon | Cottonseed Oil             | 2002           | 26                                                             |
| 32               | Cameroon | Crustaceans                | 2002           | 1                                                              |
| 32               | Cameroon | Demersal Fish              | 2002           | 1                                                              |
| 32               | Cameroon | Eggs                       | 2002           | 2                                                              |
| 32               | Cameroon | Fats, Animals, Raw         | 2002           | 6                                                              |
| 32               | Cameroon | Fish, Seafood              | 2002           | 23                                                             |
| 32               | Cameroon | Freshwater Fish            | 2002           | 7                                                              |
| 32               | Cameroon | Fruits - Excluding Wine    | 2002           | 162                                                            |
| 32               | Cameroon | Fruits, Other              | 2002           | 12                                                             |
| 32               | Cameroon | Grand Total                | 2002           | 2,204                                                          |
| 32               | Cameroon | Groundnut Oil              | 2002           | 22                                                             |
| 32               | Cameroon | Groundnuts (Shelled Eq)    | 2002           | 62                                                             |
| 32               | Cameroon | Honey                      | 2002           | 2                                                              |
| 32               | Cameroon | Maize and products         | 2002           | 273                                                            |
| 32               | Cameroon | Marine Fish, Other         | 2002           | 5                                                              |
| 32               | Cameroon | Meat                       | 2002           | 65                                                             |
| 32               | Cameroon | Meat, Other                | 2002           | 9                                                              |
| 32               | Cameroon | Milk - Excluding Butter    | 2002           | 27                                                             |
| 32               | Cameroon | Millet and products        | 2002           | 24                                                             |
| 32               | Cameroon | Miscellaneous              | 2002           | 2                                                              |
| 32               | Cameroon | Mutton & Goat Meat         | 2002           | 9                                                              |
| 32               | Cameroon | Offals                     | 2002           | 4                                                              |
| 32               | Cameroon | Oilcrops                   | 2002           | 97                                                             |
| 32               | Cameroon | Oilcrops Oil, Other        | 2002           | 5                                                              |
| 32               | Cameroon | Oilcrops, Other            | 2002           | 26                                                             |
| 32               | Cameroon | Onions                     | 2002           | 4                                                              |
| 32               | Cameroon | Palm kernels               | 2002           | 1                                                              |
| 32               | Cameroon | Palm Oil                   | 2002           | 130                                                            |
| 32               | Cameroon | Palmkernel Oil             | 2002           | 7                                                              |
| 32               | Cameroon | Pelagic Fish               | 2002           | 9                                                              |
| 32               | Cameroon | Pigmeat                    | 2002           | 9                                                              |
| 32               | Cameroon | Pimento                    | 2002           | 3                                                              |
| 32               | Cameroon | Pineapples and products    | 2002           | 2                                                              |
| 32               | Cameroon | Plantains                  | 2002           | 108                                                            |
| 32               | Cameroon | Potatoes and products      | 2002           | 11                                                             |
| 32               | Cameroon | Poultry Meat               | 2002           | 9                                                              |
| 32               | Cameroon | Pulses                     | 2002           | 134                                                            |
| 32               | Cameroon | Pulses, Other and products | 2002           | 52                                                             |
| 32               | Cameroon | Rice (Milled Equivalent)   | 2002           | 173                                                            |
| 32               | Cameroon | Roots, Other               | 2002           | 60                                                             |
| 32               | Cameroon | Sesame seed                | 2002           | 5                                                              |
| 32               | Cameroon | Sorghum and products       | 2002           | 216                                                            |
| 32               | Cameroon | Soyabean Oil               | 2002           | 14                                                             |
| 32               | Cameroon | Soyabeans                  | 2002           | 4                                                              |
| 32               | Cameroon | Spices                     | 2002           | 8                                                              |
| 32               | Cameroon | Spices, Other              | 2002           | 4                                                              |
| 32               | Cameroon | Starchy Roots              | 2002           | 392                                                            |
| 32               | Cameroon | Stimulants                 | 2002           | 3                                                              |
| 32               | Cameroon | Sugar & Sweeteners         | 2002           | 104                                                            |
| 32               | Cameroon | Sugar (Raw Equivalent)     | 2002           | 100                                                            |
| 32               | Cameroon | Sugar cane                 | 2002           | 19                                                             |
| 32               | Cameroon | Sugar Crops                | 2002           | 19                                                             |
| 32               | Cameroon | Sweet potatoes             | 2002           | 25                                                             |
| 32               | Cameroon | Sweeteners, Other          | 2002           | 2                                                              |
| 32               | Cameroon | Tomatoes and products      | 2002           | 12                                                             |
| 32               | Cameroon | Treenuts                   | 2002           | 21                                                             |
| 32               | Cameroon | Vegetable Oils             | 2002           | 206                                                            |
| 32               | Cameroon | Vegetables                 | 2002           | 45                                                             |
| 32               | Cameroon | Vegetables, Other          | 2002           | 29                                                             |
| 32               | Cameroon | Vegetal Products           | 2002           | 2,076                                                          |
| 32               | Cameroon | Wheat and products         | 2002           | 134                                                            |
| 32               | Cameroon | Wine                       | 2002           | 1                                                              |
| 32               | Cameroon | Yams                       | 2002           | 27                                                             |
| 32               | Cameroon | Alcoholic Beverages        | 2003           | 66                                                             |
| 32               | Cameroon | Animal fats                | 2003           | 6                                                              |
| 32               | Cameroon | Animal Products            | 2003           | 132                                                            |
| 32               | Cameroon | Bananas                    | 2003           | 36                                                             |
| 32               | Cameroon | Barley and products        | 2003           | 1                                                              |
| 32               | Cameroon | Beans                      | 2003           | 83                                                             |
| 32               | Cameroon | Beer                       | 2003           | 31                                                             |
| 32               | Cameroon | Beverages, Alcoholic       | 2003           | 1                                                              |
| 32               | Cameroon | Beverages, Fermented       | 2003           | 34                                                             |
| 32               | Cameroon | Bovine Meat                | 2003           | 27                                                             |
| 32               | Cameroon | Cassava and products       | 2003           | 268                                                            |
| 32               | Cameroon | Cereals - Excluding Beer   | 2003           | 844                                                            |
| 32               | Cameroon | Cocoa Beans and products   | 2003           | 2                                                              |
| 32               | Cameroon | Coconut Oil                | 2003           | 2                                                              |
| 32               | Cameroon | Cottonseed Oil             | 2003           | 30                                                             |
| 32               | Cameroon | Crustaceans                | 2003           | 1                                                              |
| 32               | Cameroon | Demersal Fish              | 2003           | 1                                                              |
| 32               | Cameroon | Eggs                       | 2003           | 2                                                              |
| 32               | Cameroon | Fats, Animals, Raw         | 2003           | 6                                                              |
| 32               | Cameroon | Fish, Seafood              | 2003           | 26                                                             |
| 32               | Cameroon | Freshwater Fish            | 2003           | 6                                                              |
| 32               | Cameroon | Fruits - Excluding Wine    | 2003           | 159                                                            |

## Dietary calcium and zinc deficiency risks are decreasing but remain prevalent

| FAO Country code | Country  | Food item                  | Reference year | Net energy supply (kcal capita <sup>-1</sup> d <sup>-1</sup> ) |
|------------------|----------|----------------------------|----------------|----------------------------------------------------------------|
| 32               | Cameroon | Fruits, Other              | 2003           | 12                                                             |
| 32               | Cameroon | Grand Total                | 2003           | 2,233                                                          |
| 32               | Cameroon | Groundnut Oil              | 2003           | 23                                                             |
| 32               | Cameroon | Groundnuts (Shelled Eq)    | 2003           | 61                                                             |
| 32               | Cameroon | Honey                      | 2003           | 2                                                              |
| 32               | Cameroon | Maize and products         | 2003           | 289                                                            |
| 32               | Cameroon | Marine Fish, Other         | 2003           | 9                                                              |
| 32               | Cameroon | Meat                       | 2003           | 65                                                             |
| 32               | Cameroon | Meat, Other                | 2003           | 9                                                              |
| 32               | Cameroon | Milk - Excluding Butter    | 2003           | 28                                                             |
| 32               | Cameroon | Millet and products        | 2003           | 24                                                             |
| 32               | Cameroon | Miscellaneous              | 2003           | 1                                                              |
| 32               | Cameroon | Mutton & Goat Meat         | 2003           | 9                                                              |
| 32               | Cameroon | Offals                     | 2003           | 4                                                              |
| 32               | Cameroon | Oilcrops                   | 2003           | 97                                                             |
| 32               | Cameroon | Oilcrops Oil, Other        | 2003           | 3                                                              |
| 32               | Cameroon | Oilcrops, Other            | 2003           | 28                                                             |
| 32               | Cameroon | Onions                     | 2003           | 4                                                              |
| 32               | Cameroon | Palm kernels               | 2003           | 1                                                              |
| 32               | Cameroon | Palm Oil                   | 2003           | 129                                                            |
| 32               | Cameroon | Palmkernel Oil             | 2003           | 7                                                              |
| 32               | Cameroon | Pelagic Fish               | 2003           | 10                                                             |
| 32               | Cameroon | Pigmeat                    | 2003           | 9                                                              |
| 32               | Cameroon | Pimento                    | 2003           | 5                                                              |
| 32               | Cameroon | Pineapples and products    | 2003           | 2                                                              |
| 32               | Cameroon | Plantains                  | 2003           | 108                                                            |
| 32               | Cameroon | Potatoes and products      | 2003           | 10                                                             |
| 32               | Cameroon | Poultry Meat               | 2003           | 10                                                             |
| 32               | Cameroon | Pulses                     | 2003           | 136                                                            |
| 32               | Cameroon | Pulses, Other and products | 2003           | 53                                                             |
| 32               | Cameroon | Rice (Milled Equivalent)   | 2003           | 186                                                            |
| 32               | Cameroon | Roots, Other               | 2003           | 59                                                             |
| 32               | Cameroon | Sesame seed                | 2003           | 5                                                              |
| 32               | Cameroon | Sorghum and products       | 2003           | 222                                                            |
| 32               | Cameroon | Soyabean Oil               | 2003           | 23                                                             |
| 32               | Cameroon | Soyabeans                  | 2003           | 3                                                              |
| 32               | Cameroon | Spices                     | 2003           | 9                                                              |
| 32               | Cameroon | Spices, Other              | 2003           | 4                                                              |
| 32               | Cameroon | Starchy Roots              | 2003           | 388                                                            |
| 32               | Cameroon | Stimulants                 | 2003           | 3                                                              |
| 32               | Cameroon | Sugar & Sweeteners         | 2003           | 97                                                             |
| 32               | Cameroon | Sugar (Raw Equivalent)     | 2003           | 93                                                             |
| 32               | Cameroon | Sugar cane                 | 2003           | 17                                                             |
| 32               | Cameroon | Sugar Crops                | 2003           | 17                                                             |
| 32               | Cameroon | Sweet potatoes             | 2003           | 25                                                             |
| 32               | Cameroon | Sweeteners, Other          | 2003           | 2                                                              |
| 32               | Cameroon | Tomatoes and products      | 2003           | 12                                                             |
| 32               | Cameroon | Treenuts                   | 2003           | 21                                                             |
| 32               | Cameroon | Vegetable Oils             | 2003           | 218                                                            |
| 32               | Cameroon | Vegetables                 | 2003           | 44                                                             |
| 32               | Cameroon | Vegetables, Other          | 2003           | 28                                                             |
| 32               | Cameroon | Vegetal Products           | 2003           | 2,101                                                          |
| 32               | Cameroon | Wheat and products         | 2003           | 121                                                            |
| 32               | Cameroon | Wine                       | 2003           | 1                                                              |
| 32               | Cameroon | Yams                       | 2003           | 27                                                             |
| 32               | Cameroon | Alcoholic Beverages        | 2004           | 67                                                             |
| 32               | Cameroon | Animal fats                | 2004           | 7                                                              |
| 32               | Cameroon | Animal Products            | 2004           | 145                                                            |
| 32               | Cameroon | Bananas                    | 2004           | 42                                                             |
| 32               | Cameroon | Barley and products        | 2004           | 2                                                              |
| 32               | Cameroon | Beans                      | 2004           | 84                                                             |
| 32               | Cameroon | Beer                       | 2004           | 32                                                             |
| 32               | Cameroon | Beverages, Alcoholic       | 2004           | 1                                                              |
| 32               | Cameroon | Beverages, Fermented       | 2004           | 34                                                             |
| 32               | Cameroon | Bovine Meat                | 2004           | 27                                                             |
| 32               | Cameroon | Cassava and products       | 2004           | 267                                                            |
| 32               | Cameroon | Cereals - Excluding Beer   | 2004           | 850                                                            |
| 32               | Cameroon | Cocoa Beans and products   | 2004           | 3                                                              |
| 32               | Cameroon | Coconut Oil                | 2004           | 2                                                              |
| 32               | Cameroon | Cottonseed Oil             | 2004           | 27                                                             |
| 32               | Cameroon | Crustaceans                | 2004           | 1                                                              |
| 32               | Cameroon | Demersal Fish              | 2004           | 1                                                              |
| 32               | Cameroon | Eggs                       | 2004           | 2                                                              |
| 32               | Cameroon | Fats, Animals, Raw         | 2004           | 7                                                              |
| 32               | Cameroon | Fish, Seafood              | 2004           | 28                                                             |
| 32               | Cameroon | Freshwater Fish            | 2004           | 7                                                              |
| 32               | Cameroon | Fruits - Excluding Wine    | 2004           | 165                                                            |
| 32               | Cameroon | Fruits, Other              | 2004           | 12                                                             |
| 32               | Cameroon | Grand Total                | 2004           | 2,246                                                          |
| 32               | Cameroon | Groundnut Oil              | 2004           | 23                                                             |
| 32               | Cameroon | Groundnuts (Shelled Eq)    | 2004           | 65                                                             |
| 32               | Cameroon | Honey                      | 2004           | 2                                                              |
| 32               | Cameroon | Maize and products         | 2004           | 291                                                            |
| 32               | Cameroon | Marine Fish, Other         | 2004           | 4                                                              |
| 32               | Cameroon | Meat                       | 2004           | 76                                                             |
| 32               | Cameroon | Meat, Other                | 2004           | 9                                                              |
| 32               | Cameroon | Milk - Excluding Butter    | 2004           | 28                                                             |
| 32               | Cameroon | Millet and products        | 2004           | 27                                                             |
| 32               | Cameroon | Miscellaneous              | 2004           | 1                                                              |
| 32               | Cameroon | Mutton & Goat Meat         | 2004           | 9                                                              |
| 32               | Cameroon | Offals                     | 2004           | 5                                                              |
| 32               | Cameroon | Oilcrops                   | 2004           | 101                                                            |
| 32               | Cameroon | Oilcrops Oil, Other        | 2004           | 4                                                              |
| 32               | Cameroon | Oilcrops, Other            | 2004           | 26                                                             |
| 32               | Cameroon | Onions                     | 2004           | 4                                                              |
| 32               | Cameroon | Palm kernels               | 2004           | 1                                                              |
| 32               | Cameroon | Palm Oil                   | 2004           | 127                                                            |



Dietary calcium and zinc deficiency risks are decreasing but remain prevalent

| FAO Country code | Country  | Food item                  | Reference year | Net energy supply (kcal <i>capita</i> <sup>-1</sup> d <sup>-1</sup> ) |
|------------------|----------|----------------------------|----------------|-----------------------------------------------------------------------|
| 32               | Cameroon | Palmkernel Oil             | 2004           | 7                                                                     |
| 32               | Cameroon | Pelagic Fish               | 2004           | 15                                                                    |
| 32               | Cameroon | Pigmeat                    | 2004           | 14                                                                    |
| 32               | Cameroon | Pimento                    | 2004           | 4                                                                     |
| 32               | Cameroon | Pineapples and products    | 2004           | 2                                                                     |
| 32               | Cameroon | Plantains                  | 2004           | 109                                                                   |
| 32               | Cameroon | Potatoes and products      | 2004           | 10                                                                    |
| 32               | Cameroon | Poultry Meat               | 2004           | 16                                                                    |
| 32               | Cameroon | Pulses                     | 2004           | 137                                                                   |
| 32               | Cameroon | Pulses, Other and products | 2004           | 53                                                                    |
| 32               | Cameroon | Rice (Milled Equivalent)   | 2004           | 190                                                                   |
| 32               | Cameroon | Roots, Other               | 2004           | 57                                                                    |
| 32               | Cameroon | Sesame seed                | 2004           | 5                                                                     |
| 32               | Cameroon | Sorghum and products       | 2004           | 221                                                                   |
| 32               | Cameroon | Soyabean Oil               | 2004           | 16                                                                    |
| 32               | Cameroon | Soyabeans                  | 2004           | 3                                                                     |
| 32               | Cameroon | Spices                     | 2004           | 8                                                                     |
| 32               | Cameroon | Spices, Other              | 2004           | 4                                                                     |
| 32               | Cameroon | Starchy Roots              | 2004           | 385                                                                   |
| 32               | Cameroon | Stimulants                 | 2004           | 4                                                                     |
| 32               | Cameroon | Sugar & Sweeteners         | 2004           | 95                                                                    |
| 32               | Cameroon | Sugar (Raw Equivalent)     | 2004           | 92                                                                    |
| 32               | Cameroon | Sugar cane                 | 2004           | 19                                                                    |
| 32               | Cameroon | Sugar Crops                | 2004           | 19                                                                    |
| 32               | Cameroon | Sweet potatoes             | 2004           | 25                                                                    |
| 32               | Cameroon | Sweeteners, Other          | 2004           | 1                                                                     |
| 32               | Cameroon | Tomatoes and products      | 2004           | 12                                                                    |
| 32               | Cameroon | Treenuts                   | 2004           | 20                                                                    |
| 32               | Cameroon | Vegetable Oils             | 2004           | 207                                                                   |
| 32               | Cameroon | Vegetables                 | 2004           | 44                                                                    |
| 32               | Cameroon | Vegetables, Other          | 2004           | 28                                                                    |
| 32               | Cameroon | Vegetal Products           | 2004           | 2,101                                                                 |
| 32               | Cameroon | Wheat and products         | 2004           | 120                                                                   |
| 32               | Cameroon | Yams                       | 2004           | 27                                                                    |
| 32               | Cameroon | Alcoholic Beverages        | 2005           | 65                                                                    |
| 32               | Cameroon | Animal fats                | 2005           | 7                                                                     |
| 32               | Cameroon | Animal Products            | 2005           | 137                                                                   |
| 32               | Cameroon | Bananas                    | 2005           | 54                                                                    |
| 32               | Cameroon | Barley and products        | 2005           | 2                                                                     |
| 32               | Cameroon | Beans                      | 2005           | 93                                                                    |
| 32               | Cameroon | Beer                       | 2005           | 28                                                                    |
| 32               | Cameroon | Beverages, Fermented       | 2005           | 37                                                                    |
| 32               | Cameroon | Bovine Meat                | 2005           | 27                                                                    |
| 32               | Cameroon | Cassava and products       | 2005           | 271                                                                   |
| 32               | Cameroon | Cereals - Excluding Beer   | 2005           | 870                                                                   |
| 32               | Cameroon | Cocoa Beans and products   | 2005           | 3                                                                     |
| 32               | Cameroon | Coconut Oil                | 2005           | 2                                                                     |
| 32               | Cameroon | Coffee and products        | 2005           | 1                                                                     |
| 32               | Cameroon | Cottonseed Oil             | 2005           | 21                                                                    |
| 32               | Cameroon | Crustaceans                | 2005           | 1                                                                     |
| 32               | Cameroon | Demersal Fish              | 2005           | 1                                                                     |
| 32               | Cameroon | Eggs                       | 2005           | 1                                                                     |
| 32               | Cameroon | Fats, Animals, Raw         | 2005           | 6                                                                     |
| 32               | Cameroon | Fish, Seafood              | 2005           | 27                                                                    |
| 32               | Cameroon | Freshwater Fish            | 2005           | 8                                                                     |
| 32               | Cameroon | Fruits - Excluding Wine    | 2005           | 179                                                                   |
| 32               | Cameroon | Fruits, Other              | 2005           | 12                                                                    |
| 32               | Cameroon | Grand Total                | 2005           | 2,311                                                                 |
| 32               | Cameroon | Groundnut Oil              | 2005           | 23                                                                    |
| 32               | Cameroon | Groundnuts (Shelled Eq)    | 2005           | 97                                                                    |
| 32               | Cameroon | Honey                      | 2005           | 1                                                                     |
| 32               | Cameroon | Maize and products         | 2005           | 292                                                                   |
| 32               | Cameroon | Marine Fish, Other         | 2005           | 3                                                                     |
| 32               | Cameroon | Meat                       | 2005           | 70                                                                    |
| 32               | Cameroon | Meat, Other                | 2005           | 9                                                                     |
| 32               | Cameroon | Milk - Excluding Butter    | 2005           | 27                                                                    |
| 32               | Cameroon | Millet and products        | 2005           | 28                                                                    |
| 32               | Cameroon | Miscellaneous              | 2005           | 1                                                                     |
| 32               | Cameroon | Mutton & Goat Meat         | 2005           | 9                                                                     |
| 32               | Cameroon | Offals                     | 2005           | 4                                                                     |
| 32               | Cameroon | Oilcrops                   | 2005           | 141                                                                   |
| 32               | Cameroon | Oilcrops Oil, Other        | 2005           | 2                                                                     |
| 32               | Cameroon | Oilcrops, Other            | 2005           | 35                                                                    |
| 32               | Cameroon | Onions                     | 2005           | 4                                                                     |
| 32               | Cameroon | Palm kernels               | 2005           | 1                                                                     |
| 32               | Cameroon | Palm Oil                   | 2005           | 127                                                                   |
| 32               | Cameroon | Palmkernel Oil             | 2005           | 8                                                                     |
| 32               | Cameroon | Pelagic Fish               | 2005           | 15                                                                    |
| 32               | Cameroon | Pigmeat                    | 2005           | 14                                                                    |
| 32               | Cameroon | Pimento                    | 2005           | 6                                                                     |
| 32               | Cameroon | Pineapples and products    | 2005           | 4                                                                     |
| 32               | Cameroon | Plantains                  | 2005           | 108                                                                   |
| 32               | Cameroon | Potatoes and products      | 2005           | 8                                                                     |
| 32               | Cameroon | Poultry Meat               | 2005           | 11                                                                    |
| 32               | Cameroon | Pulses                     | 2005           | 148                                                                   |
| 32               | Cameroon | Pulses, Other and products | 2005           | 55                                                                    |
| 32               | Cameroon | Rice (Milled Equivalent)   | 2005           | 199                                                                   |
| 32               | Cameroon | Roots, Other               | 2005           | 57                                                                    |
| 32               | Cameroon | Sesame seed                | 2005           | 5                                                                     |
| 32               | Cameroon | Sorghum and products       | 2005           | 222                                                                   |
| 32               | Cameroon | Soyabean Oil               | 2005           | 8                                                                     |
| 32               | Cameroon | Soyabeans                  | 2005           | 4                                                                     |
| 32               | Cameroon | Spices                     | 2005           | 11                                                                    |
| 32               | Cameroon | Spices, Other              | 2005           | 4                                                                     |
| 32               | Cameroon | Starchy Roots              | 2005           | 386                                                                   |
| 32               | Cameroon | Stimulants                 | 2005           | 4                                                                     |
| 32               | Cameroon | Sugar & Sweeteners         | 2005           | 90                                                                    |

## Dietary calcium and zinc deficiency risks are decreasing but remain prevalent

| FAO Country code | Country  | Food item                  | Reference year | Net energy supply (kcal capita <sup>-1</sup> d <sup>-1</sup> ) |
|------------------|----------|----------------------------|----------------|----------------------------------------------------------------|
| 32               | Cameroon | Sugar (Raw Equivalent)     | 2005           | 87                                                             |
| 32               | Cameroon | Sugar cane                 | 2005           | 19                                                             |
| 32               | Cameroon | Sugar Crops                | 2005           | 19                                                             |
| 32               | Cameroon | Sweet potatoes             | 2005           | 21                                                             |
| 32               | Cameroon | Sweeteners, Other          | 2005           | 1                                                              |
| 32               | Cameroon | Tomatoes and products      | 2005           | 14                                                             |
| 32               | Cameroon | Treenuts                   | 2005           | 22                                                             |
| 32               | Cameroon | Vegetable Oils             | 2005           | 191                                                            |
| 32               | Cameroon | Vegetables                 | 2005           | 46                                                             |
| 32               | Cameroon | Vegetables, Other          | 2005           | 28                                                             |
| 32               | Cameroon | Vegetal Products           | 2005           | 2,174                                                          |
| 32               | Cameroon | Wheat and products         | 2005           | 126                                                            |
| 32               | Cameroon | Yams                       | 2005           | 28                                                             |
| 32               | Cameroon | Alcoholic Beverages        | 2006           | 66                                                             |
| 32               | Cameroon | Animal fats                | 2006           | 8                                                              |
| 32               | Cameroon | Animal Products            | 2006           | 137                                                            |
| 32               | Cameroon | Bananas                    | 2006           | 57                                                             |
| 32               | Cameroon | Barley and products        | 2006           | 1                                                              |
| 32               | Cameroon | Beans                      | 2006           | 102                                                            |
| 32               | Cameroon | Beer                       | 2006           | 27                                                             |
| 32               | Cameroon | Beverages, Fermented       | 2006           | 39                                                             |
| 32               | Cameroon | Bovine Meat                | 2006           | 26                                                             |
| 32               | Cameroon | Cassava and products       | 2006           | 276                                                            |
| 32               | Cameroon | Cereals - Excluding Beer   | 2006           | 885                                                            |
| 32               | Cameroon | Cocoa Beans and products   | 2006           | 3                                                              |
| 32               | Cameroon | Coconut Oil                | 2006           | 1                                                              |
| 32               | Cameroon | Coffee and products        | 2006           | 1                                                              |
| 32               | Cameroon | Cottonseed Oil             | 2006           | 28                                                             |
| 32               | Cameroon | Crustaceans                | 2006           | 1                                                              |
| 32               | Cameroon | Eggs                       | 2006           | 1                                                              |
| 32               | Cameroon | Fats, Animals, Raw         | 2006           | 8                                                              |
| 32               | Cameroon | Fish, Seafood              | 2006           | 25                                                             |
| 32               | Cameroon | Freshwater Fish            | 2006           | 8                                                              |
| 32               | Cameroon | Fruits - Excluding Wine    | 2006           | 180                                                            |
| 32               | Cameroon | Fruits, Other              | 2006           | 12                                                             |
| 32               | Cameroon | Grand Total                | 2006           | 2,354                                                          |
| 32               | Cameroon | Groundnut Oil              | 2006           | 23                                                             |
| 32               | Cameroon | Groundnuts (Shelled Eq)    | 2006           | 97                                                             |
| 32               | Cameroon | Honey                      | 2006           | 1                                                              |
| 32               | Cameroon | Maize and products         | 2006           | 303                                                            |
| 32               | Cameroon | Marine Fish, Other         | 2006           | 2                                                              |
| 32               | Cameroon | Meat                       | 2006           | 70                                                             |
| 32               | Cameroon | Meat, Other                | 2006           | 9                                                              |
| 32               | Cameroon | Milk - Excluding Butter    | 2006           | 29                                                             |
| 32               | Cameroon | Millet and products        | 2006           | 28                                                             |
| 32               | Cameroon | Miscellaneous              | 2006           | 1                                                              |
| 32               | Cameroon | Mutton & Goat Meat         | 2006           | 9                                                              |
| 32               | Cameroon | Offals                     | 2006           | 4                                                              |
| 32               | Cameroon | Oilcrops                   | 2006           | 134                                                            |
| 32               | Cameroon | Oilcrops Oil, Other        | 2006           | 3                                                              |
| 32               | Cameroon | Oilcrops, Other            | 2006           | 27                                                             |
| 32               | Cameroon | Onions                     | 2006           | 5                                                              |
| 32               | Cameroon | Palm kernels               | 2006           | 1                                                              |
| 32               | Cameroon | Palm Oil                   | 2006           | 127                                                            |
| 32               | Cameroon | Palmkernel Oil             | 2006           | 9                                                              |
| 32               | Cameroon | Pelagic Fish               | 2006           | 15                                                             |
| 32               | Cameroon | Pigmeat                    | 2006           | 14                                                             |
| 32               | Cameroon | Pimento                    | 2006           | 8                                                              |
| 32               | Cameroon | Pineapples and products    | 2006           | 4                                                              |
| 32               | Cameroon | Plantains                  | 2006           | 106                                                            |
| 32               | Cameroon | Potatoes and products      | 2006           | 9                                                              |
| 32               | Cameroon | Poultry Meat               | 2006           | 11                                                             |
| 32               | Cameroon | Pulses                     | 2006           | 163                                                            |
| 32               | Cameroon | Pulses, Other and products | 2006           | 61                                                             |
| 32               | Cameroon | Rice (Milled Equivalent)   | 2006           | 196                                                            |
| 32               | Cameroon | Roots, Other               | 2006           | 58                                                             |
| 32               | Cameroon | Sesame seed                | 2006           | 5                                                              |
| 32               | Cameroon | Sorghum and products       | 2006           | 229                                                            |
| 32               | Cameroon | Soyabean Oil               | 2006           | 9                                                              |
| 32               | Cameroon | Soyabeans                  | 2006           | 4                                                              |
| 32               | Cameroon | Spices                     | 2006           | 14                                                             |
| 32               | Cameroon | Spices, Other              | 2006           | 6                                                              |
| 32               | Cameroon | Starchy Roots              | 2006           | 402                                                            |
| 32               | Cameroon | Stimulants                 | 2006           | 4                                                              |
| 32               | Cameroon | Sugar & Sweeteners         | 2006           | 83                                                             |
| 32               | Cameroon | Sugar (Raw Equivalent)     | 2006           | 80                                                             |
| 32               | Cameroon | Sugar cane                 | 2006           | 14                                                             |
| 32               | Cameroon | Sugar Crops                | 2006           | 14                                                             |
| 32               | Cameroon | Sweet potatoes             | 2006           | 27                                                             |
| 32               | Cameroon | Sweeteners, Other          | 2006           | 2                                                              |
| 32               | Cameroon | Tomatoes and products      | 2006           | 14                                                             |
| 32               | Cameroon | Treenuts                   | 2006           | 19                                                             |
| 32               | Cameroon | Vegetable Oils             | 2006           | 200                                                            |
| 32               | Cameroon | Vegetables                 | 2006           | 52                                                             |
| 32               | Cameroon | Vegetables, Other          | 2006           | 33                                                             |
| 32               | Cameroon | Vegetal Products           | 2006           | 2,217                                                          |
| 32               | Cameroon | Wheat and products         | 2006           | 129                                                            |
| 32               | Cameroon | Wine                       | 2006           | 1                                                              |
| 32               | Cameroon | Yams                       | 2006           | 32                                                             |
| 32               | Cameroon | Alcoholic Beverages        | 2007           | 68                                                             |
| 32               | Cameroon | Animal fats                | 2007           | 8                                                              |
| 32               | Cameroon | Animal Products            | 2007           | 138                                                            |
| 32               | Cameroon | Bananas                    | 2007           | 58                                                             |
| 32               | Cameroon | Barley and products        | 2007           | 1                                                              |
| 32               | Cameroon | Beans                      | 2007           | 104                                                            |
| 32               | Cameroon | Beer                       | 2007           | 28                                                             |
| 32               | Cameroon | Beverages, Fermented       | 2007           | 39                                                             |

Dietary calcium and zinc deficiency risks are decreasing but remain prevalent

| FAO Country code | Country  | Food item                  | Reference year | Net energy supply (kcal capita <sup>-1</sup> d <sup>-1</sup> ) |
|------------------|----------|----------------------------|----------------|----------------------------------------------------------------|
| 32               | Cameroon | Bovine Meat                | 2007           | 26                                                             |
| 32               | Cameroon | Cassava and products       | 2007           | 281                                                            |
| 32               | Cameroon | Cereals - Excluding Beer   | 2007           | 886                                                            |
| 32               | Cameroon | Cocoa Beans and products   | 2007           | 2                                                              |
| 32               | Cameroon | Coconut Oil                | 2007           | 1                                                              |
| 32               | Cameroon | Cottonseed Oil             | 2007           | 18                                                             |
| 32               | Cameroon | Crustaceans                | 2007           | 1                                                              |
| 32               | Cameroon | Eggs                       | 2007           | 1                                                              |
| 32               | Cameroon | Fats, Animals, Raw         | 2007           | 7                                                              |
| 32               | Cameroon | Fish, Seafood              | 2007           | 29                                                             |
| 32               | Cameroon | Freshwater Fish            | 2007           | 7                                                              |
| 32               | Cameroon | Fruits - Excluding Wine    | 2007           | 181                                                            |
| 32               | Cameroon | Fruits, Other              | 2007           | 11                                                             |
| 32               | Cameroon | Grand Total                | 2007           | 2,378                                                          |
| 32               | Cameroon | Groundnut Oil              | 2007           | 31                                                             |
| 32               | Cameroon | Groundnuts (Shelled Eq)    | 2007           | 95                                                             |
| 32               | Cameroon | Honey                      | 2007           | 2                                                              |
| 32               | Cameroon | Maize and products         | 2007           | 305                                                            |
| 32               | Cameroon | Marine Fish, Other         | 2007           | 4                                                              |
| 32               | Cameroon | Meat                       | 2007           | 70                                                             |
| 32               | Cameroon | Meat, Other                | 2007           | 9                                                              |
| 32               | Cameroon | Milk - Excluding Butter    | 2007           | 26                                                             |
| 32               | Cameroon | Millet and products        | 2007           | 29                                                             |
| 32               | Cameroon | Miscellaneous              | 2007           | 1                                                              |
| 32               | Cameroon | Mutton & Goat Meat         | 2007           | 8                                                              |
| 32               | Cameroon | Offals                     | 2007           | 4                                                              |
| 32               | Cameroon | Oilcrops                   | 2007           | 129                                                            |
| 32               | Cameroon | Oilcrops Oil, Other        | 2007           | 4                                                              |
| 32               | Cameroon | Oilcrops, Other            | 2007           | 23                                                             |
| 32               | Cameroon | Onions                     | 2007           | 5                                                              |
| 32               | Cameroon | Palm kernels               | 2007           | 1                                                              |
| 32               | Cameroon | Palm Oil                   | 2007           | 127                                                            |
| 32               | Cameroon | Palmkernel Oil             | 2007           | 9                                                              |
| 32               | Cameroon | Pelagic Fish               | 2007           | 16                                                             |
| 32               | Cameroon | Pigmeat                    | 2007           | 14                                                             |
| 32               | Cameroon | Pimento                    | 2007           | 9                                                              |
| 32               | Cameroon | Pineapples and products    | 2007           | 4                                                              |
| 32               | Cameroon | Plantains                  | 2007           | 108                                                            |
| 32               | Cameroon | Potatoes and products      | 2007           | 9                                                              |
| 32               | Cameroon | Poultry Meat               | 2007           | 12                                                             |
| 32               | Cameroon | Pulses                     | 2007           | 171                                                            |
| 32               | Cameroon | Pulses, Other and products | 2007           | 67                                                             |
| 32               | Cameroon | Rice (Milled Equivalent)   | 2007           | 194                                                            |
| 32               | Cameroon | Roots, Other               | 2007           | 58                                                             |
| 32               | Cameroon | Sesame seed                | 2007           | 7                                                              |
| 32               | Cameroon | Sorghum and products       | 2007           | 229                                                            |
| 32               | Cameroon | Soyabean Oil               | 2007           | 9                                                              |
| 32               | Cameroon | Soyabeans                  | 2007           | 4                                                              |
| 32               | Cameroon | Spices                     | 2007           | 15                                                             |
| 32               | Cameroon | Spices, Other              | 2007           | 6                                                              |
| 32               | Cameroon | Starchy Roots              | 2007           | 406                                                            |
| 32               | Cameroon | Stimulants                 | 2007           | 2                                                              |
| 32               | Cameroon | Sugar & Sweeteners         | 2007           | 96                                                             |
| 32               | Cameroon | Sugar (Raw Equivalent)     | 2007           | 94                                                             |
| 32               | Cameroon | Sugar cane                 | 2007           | 9                                                              |
| 32               | Cameroon | Sugar Crops                | 2007           | 9                                                              |
| 32               | Cameroon | Sweet potatoes             | 2007           | 25                                                             |
| 32               | Cameroon | Sweeteners, Other          | 2007           | 1                                                              |
| 32               | Cameroon | Tomatoes and products      | 2007           | 15                                                             |
| 32               | Cameroon | Treenuts                   | 2007           | 18                                                             |
| 32               | Cameroon | Vegetable Oils             | 2007           | 199                                                            |
| 32               | Cameroon | Vegetables                 | 2007           | 57                                                             |
| 32               | Cameroon | Vegetables, Other          | 2007           | 37                                                             |
| 32               | Cameroon | Vegetal Products           | 2007           | 2,240                                                          |
| 32               | Cameroon | Wheat and products         | 2007           | 127                                                            |
| 32               | Cameroon | Wine                       | 2007           | 1                                                              |
| 32               | Cameroon | Yams                       | 2007           | 33                                                             |
| 32               | Cameroon | Alcoholic Beverages        | 2008           | 71                                                             |
| 32               | Cameroon | Animal fats                | 2008           | 9                                                              |
| 32               | Cameroon | Animal Products            | 2008           | 142                                                            |
| 32               | Cameroon | Bananas                    | 2008           | 56                                                             |
| 32               | Cameroon | Barley and products        | 2008           | 1                                                              |
| 32               | Cameroon | Beans                      | 2008           | 109                                                            |
| 32               | Cameroon | Beer                       | 2008           | 30                                                             |
| 32               | Cameroon | Beverages, Fermented       | 2008           | 40                                                             |
| 32               | Cameroon | Bovine Meat                | 2008           | 29                                                             |
| 32               | Cameroon | Cassava and products       | 2008           | 286                                                            |
| 32               | Cameroon | Cereals - Excluding Beer   | 2008           | 917                                                            |
| 32               | Cameroon | Cocoa Beans and products   | 2008           | 2                                                              |
| 32               | Cameroon | Coconut Oil                | 2008           | 1                                                              |
| 32               | Cameroon | Coffee and products        | 2008           | 1                                                              |
| 32               | Cameroon | Cottonseed Oil             | 2008           | 14                                                             |
| 32               | Cameroon | Crustaceans                | 2008           | 1                                                              |
| 32               | Cameroon | Eggs                       | 2008           | 1                                                              |
| 32               | Cameroon | Fats, Animals, Raw         | 2008           | 8                                                              |
| 32               | Cameroon | Fish, Seafood              | 2008           | 30                                                             |
| 32               | Cameroon | Freshwater Fish            | 2008           | 7                                                              |
| 32               | Cameroon | Fruits - Excluding Wine    | 2008           | 181                                                            |
| 32               | Cameroon | Fruits, Other              | 2008           | 11                                                             |
| 32               | Cameroon | Grand Total                | 2008           | 2,447                                                          |
| 32               | Cameroon | Groundnut Oil              | 2008           | 45                                                             |
| 32               | Cameroon | Groundnuts (Shelled Eq)    | 2008           | 99                                                             |
| 32               | Cameroon | Honey                      | 2008           | 2                                                              |
| 32               | Cameroon | Maize and products         | 2008           | 319                                                            |
| 32               | Cameroon | Marine Fish, Other         | 2008           | 3                                                              |
| 32               | Cameroon | Meat                       | 2008           | 72                                                             |
| 32               | Cameroon | Meat, Other                | 2008           | 9                                                              |

Dietary calcium and zinc deficiency risks are decreasing but remain prevalent

| FAO Country code | Country  | Food item                  | Reference year | Net energy supply (kcal capita <sup>-1</sup> d <sup>-1</sup> ) |
|------------------|----------|----------------------------|----------------|----------------------------------------------------------------|
| 32               | Cameroon | Milk - Excluding Butter    | 2008           | 26                                                             |
| 32               | Cameroon | Millet and products        | 2008           | 30                                                             |
| 32               | Cameroon | Miscellaneous              | 2008           | 2                                                              |
| 32               | Cameroon | Mutton & Goat Meat         | 2008           | 8                                                              |
| 32               | Cameroon | Offals                     | 2008           | 4                                                              |
| 32               | Cameroon | Oilcrops                   | 2008           | 135                                                            |
| 32               | Cameroon | Oilcrops Oil, Other        | 2008           | 5                                                              |
| 32               | Cameroon | Oilcrops, Other            | 2008           | 24                                                             |
| 32               | Cameroon | Onions                     | 2008           | 6                                                              |
| 32               | Cameroon | Palm kernels               | 2008           | 1                                                              |
| 32               | Cameroon | Palm Oil                   | 2008           | 127                                                            |
| 32               | Cameroon | Palmkernel Oil             | 2008           | 9                                                              |
| 32               | Cameroon | Pelagic Fish               | 2008           | 18                                                             |
| 32               | Cameroon | Pigmeat                    | 2008           | 15                                                             |
| 32               | Cameroon | Pimento                    | 2008           | 9                                                              |
| 32               | Cameroon | Pineapples and products    | 2008           | 5                                                              |
| 32               | Cameroon | Plantains                  | 2008           | 109                                                            |
| 32               | Cameroon | Potatoes and products      | 2008           | 8                                                              |
| 32               | Cameroon | Poultry Meat               | 2008           | 12                                                             |
| 32               | Cameroon | Pulses                     | 2008           | 178                                                            |
| 32               | Cameroon | Pulses, Other and products | 2008           | 69                                                             |
| 32               | Cameroon | Rice (Milled Equivalent)   | 2008           | 202                                                            |
| 32               | Cameroon | Roots, Other               | 2008           | 58                                                             |
| 32               | Cameroon | Sesame seed                | 2008           | 7                                                              |
| 32               | Cameroon | Sorghum and products       | 2008           | 231                                                            |
| 32               | Cameroon | Soyabean Oil               | 2008           | 8                                                              |
| 32               | Cameroon | Soyabeans                  | 2008           | 4                                                              |
| 32               | Cameroon | Spices                     | 2008           | 15                                                             |
| 32               | Cameroon | Spices, Other              | 2008           | 6                                                              |
| 32               | Cameroon | Starchy Roots              | 2008           | 413                                                            |
| 32               | Cameroon | Stimulants                 | 2008           | 4                                                              |
| 32               | Cameroon | Sugar & Sweeteners         | 2008           | 92                                                             |
| 32               | Cameroon | Sugar (Raw Equivalent)     | 2008           | 90                                                             |
| 32               | Cameroon | Sugar cane                 | 2008           | 10                                                             |
| 32               | Cameroon | Sugar Crops                | 2008           | 10                                                             |
| 32               | Cameroon | Sweet potatoes             | 2008           | 27                                                             |
| 32               | Cameroon | Sweeteners, Other          | 2008           | 1                                                              |
| 32               | Cameroon | Tomatoes and products      | 2008           | 15                                                             |
| 32               | Cameroon | Treenuts                   | 2008           | 20                                                             |
| 32               | Cameroon | Vegetable Oils             | 2008           | 210                                                            |
| 32               | Cameroon | Vegetables                 | 2008           | 57                                                             |
| 32               | Cameroon | Vegetables, Other          | 2008           | 37                                                             |
| 32               | Cameroon | Vegetal Products           | 2008           | 2,304                                                          |
| 32               | Cameroon | Wheat and products         | 2008           | 134                                                            |
| 32               | Cameroon | Wine                       | 2008           | 1                                                              |
| 32               | Cameroon | Yams                       | 2008           | 34                                                             |
| 32               | Cameroon | Alcoholic Beverages        | 2009           | 78                                                             |
| 32               | Cameroon | Animal fats                | 2009           | 8                                                              |
| 32               | Cameroon | Animal Products            | 2009           | 143                                                            |
| 32               | Cameroon | Bananas                    | 2009           | 63                                                             |
| 32               | Cameroon | Barley and products        | 2009           | 2                                                              |
| 32               | Cameroon | Beans                      | 2009           | 109                                                            |
| 32               | Cameroon | Beer                       | 2009           | 36                                                             |
| 32               | Cameroon | Beverages, Fermented       | 2009           | 41                                                             |
| 32               | Cameroon | Bovine Meat                | 2009           | 28                                                             |
| 32               | Cameroon | Cassava and products       | 2009           | 291                                                            |
| 32               | Cameroon | Cereals - Excluding Beer   | 2009           | 936                                                            |
| 32               | Cameroon | Cocoa Beans and products   | 2009           | 2                                                              |
| 32               | Cameroon | Coconut Oil                | 2009           | 1                                                              |
| 32               | Cameroon | Coffee and products        | 2009           | 1                                                              |
| 32               | Cameroon | Cottonseed Oil             | 2009           | 16                                                             |
| 32               | Cameroon | Crustaceans                | 2009           | 1                                                              |
| 32               | Cameroon | Demersal Fish              | 2009           | 1                                                              |
| 32               | Cameroon | Eggs                       | 2009           | 1                                                              |
| 32               | Cameroon | Fats, Animals, Raw         | 2009           | 7                                                              |
| 32               | Cameroon | Fish, Seafood              | 2009           | 34                                                             |
| 32               | Cameroon | Freshwater Fish            | 2009           | 7                                                              |
| 32               | Cameroon | Fruits - Excluding Wine    | 2009           | 191                                                            |
| 32               | Cameroon | Fruits, Other              | 2009           | 11                                                             |
| 32               | Cameroon | Grand Total                | 2009           | 2,492                                                          |
| 32               | Cameroon | Groundnut Oil              | 2009           | 52                                                             |
| 32               | Cameroon | Groundnuts (Shelled Eq)    | 2009           | 98                                                             |
| 32               | Cameroon | Honey                      | 2009           | 2                                                              |
| 32               | Cameroon | Maize and products         | 2009           | 317                                                            |
| 32               | Cameroon | Marine Fish, Other         | 2009           | 5                                                              |
| 32               | Cameroon | Meat                       | 2009           | 69                                                             |
| 32               | Cameroon | Meat, Other                | 2009           | 9                                                              |
| 32               | Cameroon | Milk - Excluding Butter    | 2009           | 27                                                             |
| 32               | Cameroon | Millet and products        | 2009           | 33                                                             |
| 32               | Cameroon | Miscellaneous              | 2009           | 2                                                              |
| 32               | Cameroon | Mutton & Goat Meat         | 2009           | 7                                                              |
| 32               | Cameroon | Offals                     | 2009           | 4                                                              |
| 32               | Cameroon | Oilcrops                   | 2009           | 134                                                            |
| 32               | Cameroon | Oilcrops Oil, Other        | 2009           | 4                                                              |
| 32               | Cameroon | Oilcrops, Other            | 2009           | 23                                                             |
| 32               | Cameroon | Onions                     | 2009           | 3                                                              |
| 32               | Cameroon | Palm kernels               | 2009           | 1                                                              |
| 32               | Cameroon | Palm Oil                   | 2009           | 128                                                            |
| 32               | Cameroon | Palmkernel Oil             | 2009           | 9                                                              |
| 32               | Cameroon | Peas                       | 2009           | 1                                                              |
| 32               | Cameroon | Pelagic Fish               | 2009           | 21                                                             |
| 32               | Cameroon | Pigmeat                    | 2009           | 14                                                             |
| 32               | Cameroon | Pimento                    | 2009           | 9                                                              |
| 32               | Cameroon | Pineapples and products    | 2009           | 5                                                              |
| 32               | Cameroon | Plantains                  | 2009           | 111                                                            |
| 32               | Cameroon | Potatoes and products      | 2009           | 9                                                              |
| 32               | Cameroon | Poultry Meat               | 2009           | 11                                                             |

Dietary calcium and zinc deficiency risks are decreasing but remain prevalent

| FAO Country code | Country  | Food item                  | Reference year | Net energy supply (kcal capita <sup>-1</sup> d <sup>-1</sup> ) |
|------------------|----------|----------------------------|----------------|----------------------------------------------------------------|
| 32               | Cameroon | Pulses                     | 2009           | 182                                                            |
| 32               | Cameroon | Pulses, Other and products | 2009           | 73                                                             |
| 32               | Cameroon | Rice (Milled Equivalent)   | 2009           | 211                                                            |
| 32               | Cameroon | Roots, Other               | 2009           | 58                                                             |
| 32               | Cameroon | Sesame seed                | 2009           | 8                                                              |
| 32               | Cameroon | Sorghum and products       | 2009           | 233                                                            |
| 32               | Cameroon | Soyabean Oil               | 2009           | 2                                                              |
| 32               | Cameroon | Soyabeans                  | 2009           | 5                                                              |
| 32               | Cameroon | Spices                     | 2009           | 16                                                             |
| 32               | Cameroon | Spices, Other              | 2009           | 6                                                              |
| 32               | Cameroon | Starchy Roots              | 2009           | 426                                                            |
| 32               | Cameroon | Stimulants                 | 2009           | 3                                                              |
| 32               | Cameroon | Sugar & Sweeteners         | 2009           | 75                                                             |
| 32               | Cameroon | Sugar (Raw Equivalent)     | 2009           | 73                                                             |
| 32               | Cameroon | Sugar cane                 | 2009           | 17                                                             |
| 32               | Cameroon | Sugar Crops                | 2009           | 17                                                             |
| 32               | Cameroon | Sunflowerseed Oil          | 2009           | 1                                                              |
| 32               | Cameroon | Sweet potatoes             | 2009           | 30                                                             |
| 32               | Cameroon | Sweeteners, Other          | 2009           | 1                                                              |
| 32               | Cameroon | Tomatoes and products      | 2009           | 17                                                             |
| 32               | Cameroon | Treenuts                   | 2009           | 18                                                             |
| 32               | Cameroon | Vegetable Oils             | 2009           | 213                                                            |
| 32               | Cameroon | Vegetables                 | 2009           | 58                                                             |
| 32               | Cameroon | Vegetables, Other          | 2009           | 38                                                             |
| 32               | Cameroon | Vegetal Products           | 2009           | 2,349                                                          |
| 32               | Cameroon | Wheat and products         | 2009           | 140                                                            |
| 32               | Cameroon | Wine                       | 2009           | 1                                                              |
| 32               | Cameroon | Yams                       | 2009           | 38                                                             |
| 32               | Cameroon | Alcoholic Beverages        | 2010           | 79                                                             |
| 32               | Cameroon | Animal fats                | 2010           | 9                                                              |
| 32               | Cameroon | Animal Products            | 2010           | 141                                                            |
| 32               | Cameroon | Bananas                    | 2010           | 70                                                             |
| 32               | Cameroon | Barley and products        | 2010           | 2                                                              |
| 32               | Cameroon | Beans                      | 2010           | 109                                                            |
| 32               | Cameroon | Beer                       | 2010           | 34                                                             |
| 32               | Cameroon | Beverages, Fermented       | 2010           | 45                                                             |
| 32               | Cameroon | Bovine Meat                | 2010           | 26                                                             |
| 32               | Cameroon | Cassava and products       | 2010           | 280                                                            |
| 32               | Cameroon | Cereals - Excluding Beer   | 2010           | 938                                                            |
| 32               | Cameroon | Cocoa Beans and products   | 2010           | 4                                                              |
| 32               | Cameroon | Coconut Oil                | 2010           | 1                                                              |
| 32               | Cameroon | Coffee and products        | 2010           | 1                                                              |
| 32               | Cameroon | Cottonseed Oil             | 2010           | 15                                                             |
| 32               | Cameroon | Crustaceans                | 2010           | 1                                                              |
| 32               | Cameroon | Eggs                       | 2010           | 1                                                              |
| 32               | Cameroon | Fats, Animals, Raw         | 2010           | 9                                                              |
| 32               | Cameroon | Fish, Seafood              | 2010           | 29                                                             |
| 32               | Cameroon | Freshwater Fish            | 2010           | 7                                                              |
| 32               | Cameroon | Fruits - Excluding Wine    | 2010           | 196                                                            |
| 32               | Cameroon | Fruits, Other              | 2010           | 11                                                             |
| 32               | Cameroon | Grand Total                | 2010           | 2,521                                                          |
| 32               | Cameroon | Groundnut Oil              | 2010           | 55                                                             |
| 32               | Cameroon | Groundnuts (Shelled Eq)    | 2010           | 99                                                             |
| 32               | Cameroon | Honey                      | 2010           | 2                                                              |
| 32               | Cameroon | Maize and products         | 2010           | 321                                                            |
| 32               | Cameroon | Marine Fish, Other         | 2010           | 4                                                              |
| 32               | Cameroon | Meat                       | 2010           | 71                                                             |
| 32               | Cameroon | Meat, Other                | 2010           | 9                                                              |
| 32               | Cameroon | Milk - Excluding Butter    | 2010           | 27                                                             |
| 32               | Cameroon | Millet and products        | 2010           | 34                                                             |
| 32               | Cameroon | Miscellaneous              | 2010           | 2                                                              |
| 32               | Cameroon | Mutton & Goat Meat         | 2010           | 9                                                              |
| 32               | Cameroon | Offals                     | 2010           | 4                                                              |
| 32               | Cameroon | Oilcrops                   | 2010           | 136                                                            |
| 32               | Cameroon | Oilcrops Oil, Other        | 2010           | 5                                                              |
| 32               | Cameroon | Oilcrops, Other            | 2010           | 23                                                             |
| 32               | Cameroon | Onions                     | 2010           | 3                                                              |
| 32               | Cameroon | Palm kernels               | 2010           | 1                                                              |
| 32               | Cameroon | Palm Oil                   | 2010           | 127                                                            |
| 32               | Cameroon | Palmkernel Oil             | 2010           | 9                                                              |
| 32               | Cameroon | Peas                       | 2010           | 1                                                              |
| 32               | Cameroon | Pelagic Fish               | 2010           | 17                                                             |
| 32               | Cameroon | Pigmeat                    | 2010           | 16                                                             |
| 32               | Cameroon | Pimento                    | 2010           | 10                                                             |
| 32               | Cameroon | Pineapples and products    | 2010           | 5                                                              |
| 32               | Cameroon | Plantains                  | 2010           | 109                                                            |
| 32               | Cameroon | Potatoes and products      | 2010           | 11                                                             |
| 32               | Cameroon | Poultry Meat               | 2010           | 11                                                             |
| 32               | Cameroon | Pulses                     | 2010           | 185                                                            |
| 32               | Cameroon | Pulses, Other and products | 2010           | 75                                                             |
| 32               | Cameroon | Rice (Milled Equivalent)   | 2010           | 209                                                            |
| 32               | Cameroon | Roots, Other               | 2010           | 58                                                             |
| 32               | Cameroon | Sesame seed                | 2010           | 8                                                              |
| 32               | Cameroon | Sorghum and products       | 2010           | 233                                                            |
| 32               | Cameroon | Soyabean Oil               | 2010           | 5                                                              |
| 32               | Cameroon | Soyabeans                  | 2010           | 6                                                              |
| 32               | Cameroon | Spices                     | 2010           | 18                                                             |
| 32               | Cameroon | Spices, Other              | 2010           | 8                                                              |
| 32               | Cameroon | Starchy Roots              | 2010           | 419                                                            |
| 32               | Cameroon | Stimulants                 | 2010           | 6                                                              |
| 32               | Cameroon | Sugar & Sweeteners         | 2010           | 93                                                             |
| 32               | Cameroon | Sugar (Raw Equivalent)     | 2010           | 90                                                             |
| 32               | Cameroon | Sugar cane                 | 2010           | 16                                                             |
| 32               | Cameroon | Sugar Crops                | 2010           | 16                                                             |
| 32               | Cameroon | Sweet potatoes             | 2010           | 31                                                             |
| 32               | Cameroon | Sweeteners, Other          | 2010           | 1                                                              |
| 32               | Cameroon | Tomatoes and products      | 2010           | 19                                                             |

Dietary calcium and zinc deficiency risks are decreasing but remain prevalent

| FAO Country code | Country  | Food item                  | Reference year | Net energy supply (kcal capita <sup>-1</sup> d <sup>-1</sup> ) |
|------------------|----------|----------------------------|----------------|----------------------------------------------------------------|
| 32               | Cameroon | Treenuts                   | 2010           | 18                                                             |
| 32               | Cameroon | Vegetable Oils             | 2010           | 218                                                            |
| 32               | Cameroon | Vegetables                 | 2010           | 57                                                             |
| 32               | Cameroon | Vegetables, Other          | 2010           | 34                                                             |
| 32               | Cameroon | Vegetal Products           | 2010           | 2,379                                                          |
| 32               | Cameroon | Wheat and products         | 2010           | 139                                                            |
| 32               | Cameroon | Wine                       | 2010           | 1                                                              |
| 32               | Cameroon | Yams                       | 2010           | 40                                                             |
| 32               | Cameroon | Alcoholic Beverages        | 2011           | 81                                                             |
| 32               | Cameroon | Animal fats                | 2011           | 9                                                              |
| 32               | Cameroon | Animal Products            | 2011           | 149                                                            |
| 32               | Cameroon | Bananas                    | 2011           | 73                                                             |
| 32               | Cameroon | Barley and products        | 2011           | 3                                                              |
| 32               | Cameroon | Beans                      | 2011           | 114                                                            |
| 32               | Cameroon | Beer                       | 2011           | 33                                                             |
| 32               | Cameroon | Beverages, Fermented       | 2011           | 46                                                             |
| 32               | Cameroon | Bovine Meat                | 2011           | 28                                                             |
| 32               | Cameroon | Cassava and products       | 2011           | 279                                                            |
| 32               | Cameroon | Cereals - Excluding Beer   | 2011           | 960                                                            |
| 32               | Cameroon | Cocoa Beans and products   | 2011           | 4                                                              |
| 32               | Cameroon | Coconut Oil                | 2011           | 1                                                              |
| 32               | Cameroon | Coffee and products        | 2011           | 2                                                              |
| 32               | Cameroon | Cottonseed Oil             | 2011           | 18                                                             |
| 32               | Cameroon | Crustaceans                | 2011           | 1                                                              |
| 32               | Cameroon | Demersal Fish              | 2011           | 1                                                              |
| 32               | Cameroon | Eggs                       | 2011           | 1                                                              |
| 32               | Cameroon | Fats, Animals, Raw         | 2011           | 9                                                              |
| 32               | Cameroon | Fish, Seafood              | 2011           | 34                                                             |
| 32               | Cameroon | Freshwater Fish            | 2011           | 7                                                              |
| 32               | Cameroon | Fruits - Excluding Wine    | 2011           | 205                                                            |
| 32               | Cameroon | Fruits, Other              | 2011           | 13                                                             |
| 32               | Cameroon | Grand Total                | 2011           | 2,586                                                          |
| 32               | Cameroon | Groundnut Oil              | 2011           | 56                                                             |
| 32               | Cameroon | Groundnuts (Shelled Eq)    | 2011           | 102                                                            |
| 32               | Cameroon | Honey                      | 2011           | 2                                                              |
| 32               | Cameroon | Maize and products         | 2011           | 324                                                            |
| 32               | Cameroon | Marine Fish, Other         | 2011           | 6                                                              |
| 32               | Cameroon | Meat                       | 2011           | 73                                                             |
| 32               | Cameroon | Meat, Other                | 2011           | 9                                                              |
| 32               | Cameroon | Milk - Excluding Butter    | 2011           | 27                                                             |
| 32               | Cameroon | Millet and products        | 2011           | 35                                                             |
| 32               | Cameroon | Miscellaneous              | 2011           | 2                                                              |
| 32               | Cameroon | Mutton & Goat Meat         | 2011           | 9                                                              |
| 32               | Cameroon | Offals                     | 2011           | 4                                                              |
| 32               | Cameroon | Oilcrops                   | 2011           | 132                                                            |
| 32               | Cameroon | Oilcrops Oil, Other        | 2011           | 6                                                              |
| 32               | Cameroon | Oilcrops, Other            | 2011           | 15                                                             |
| 32               | Cameroon | Onions                     | 2011           | 9                                                              |
| 32               | Cameroon | Palm kernels               | 2011           | 1                                                              |
| 32               | Cameroon | Palm Oil                   | 2011           | 128                                                            |
| 32               | Cameroon | Palmkernel Oil             | 2011           | 9                                                              |
| 32               | Cameroon | Pelagic Fish               | 2011           | 19                                                             |
| 32               | Cameroon | Pigmeat                    | 2011           | 16                                                             |
| 32               | Cameroon | Pimento                    | 2011           | 9                                                              |
| 32               | Cameroon | Pineapples and products    | 2011           | 6                                                              |
| 32               | Cameroon | Plantains                  | 2011           | 112                                                            |
| 32               | Cameroon | Potatoes and products      | 2011           | 11                                                             |
| 32               | Cameroon | Poultry Meat               | 2011           | 11                                                             |
| 32               | Cameroon | Pulses                     | 2011           | 192                                                            |
| 32               | Cameroon | Pulses, Other and products | 2011           | 77                                                             |
| 32               | Cameroon | Rice (Milled Equivalent)   | 2011           | 217                                                            |
| 32               | Cameroon | Roots, Other               | 2011           | 57                                                             |
| 32               | Cameroon | Sesame seed                | 2011           | 8                                                              |
| 32               | Cameroon | Sorghum and products       | 2011           | 236                                                            |
| 32               | Cameroon | Soyabeans                  | 2011           | 6                                                              |
| 32               | Cameroon | Spices                     | 2011           | 18                                                             |
| 32               | Cameroon | Spices, Other              | 2011           | 8                                                              |
| 32               | Cameroon | Starchy Roots              | 2011           | 419                                                            |
| 32               | Cameroon | Stimulants                 | 2011           | 6                                                              |
| 32               | Cameroon | Sugar & Sweeteners         | 2011           | 104                                                            |
| 32               | Cameroon | Sugar (Raw Equivalent)     | 2011           | 101                                                            |
| 32               | Cameroon | Sugar cane                 | 2011           | 16                                                             |
| 32               | Cameroon | Sugar Crops                | 2011           | 16                                                             |
| 32               | Cameroon | Sweet potatoes             | 2011           | 32                                                             |
| 32               | Cameroon | Sweeteners, Other          | 2011           | 1                                                              |
| 32               | Cameroon | Tomatoes and products      | 2011           | 20                                                             |
| 32               | Cameroon | Treenuts                   | 2011           | 21                                                             |
| 32               | Cameroon | Vegetable Oils             | 2011           | 220                                                            |
| 32               | Cameroon | Vegetables                 | 2011           | 64                                                             |
| 32               | Cameroon | Vegetables, Other          | 2011           | 35                                                             |
| 32               | Cameroon | Vegetal Products           | 2011           | 2,438                                                          |
| 32               | Cameroon | Wheat and products         | 2011           | 145                                                            |
| 32               | Cameroon | Wine                       | 2011           | 1                                                              |
| 32               | Cameroon | Yams                       | 2011           | 40                                                             |
| 33               | Canada   | Alcoholic Beverages        | 1992           | 124                                                            |
| 33               | Canada   | Animal fats                | 1992           | 217                                                            |
| 33               | Canada   | Animal Products            | 1992           | 904                                                            |
| 33               | Canada   | Apples and products        | 1992           | 26                                                             |
| 33               | Canada   | Bananas                    | 1992           | 22                                                             |
| 33               | Canada   | Barley and products        | 1992           | 2                                                              |
| 33               | Canada   | Beans                      | 1992           | 23                                                             |
| 33               | Canada   | Beer                       | 1992           | 82                                                             |
| 33               | Canada   | Beverages, Alcoholic       | 1992           | 8                                                              |
| 33               | Canada   | Beverages, Fermented       | 1992           | 22                                                             |
| 33               | Canada   | Bovine Meat                | 1992           | 104                                                            |
| 33               | Canada   | Butter, Ghee               | 1992           | 59                                                             |
| 33               | Canada   | Cereals - Excluding Beer   | 1992           | 651                                                            |

Dietary calcium and zinc deficiency risks are decreasing but remain prevalent

| FAO Country code | Country | Food item                       | Reference year | Net energy supply (kcal capita <sup>-1</sup> d <sup>-1</sup> ) |
|------------------|---------|---------------------------------|----------------|----------------------------------------------------------------|
| 33               | Canada  | Cereals, Other                  | 1992           | 1                                                              |
| 33               | Canada  | Cocoa Beans and products        | 1992           | 7                                                              |
| 33               | Canada  | Coconut Oil                     | 1992           | 5                                                              |
| 33               | Canada  | Coconuts - Incl Copra           | 1992           | 5                                                              |
| 33               | Canada  | Coffee and products             | 1992           | 6                                                              |
| 33               | Canada  | Cottonseed Oil                  | 1992           | 2                                                              |
| 33               | Canada  | Cream                           | 1992           | 27                                                             |
| 33               | Canada  | Crustaceans                     | 1992           | 4                                                              |
| 33               | Canada  | Dates                           | 1992           | 1                                                              |
| 33               | Canada  | Demersal Fish                   | 1992           | 7                                                              |
| 33               | Canada  | Eggs                            | 1992           | 40                                                             |
| 33               | Canada  | Fats, Animals, Raw              | 1992           | 130                                                            |
| 33               | Canada  | Fish, Seafood                   | 1992           | 35                                                             |
| 33               | Canada  | Freshwater Fish                 | 1992           | 7                                                              |
| 33               | Canada  | Fruits - Excluding Wine         | 1992           | 116                                                            |
| 33               | Canada  | Fruits, Other                   | 1992           | 23                                                             |
| 33               | Canada  | Grand Total                     | 1992           | 3,093                                                          |
| 33               | Canada  | Grapefruit and products         | 1992           | 2                                                              |
| 33               | Canada  | Grapes and products (excl wine) | 1992           | 17                                                             |
| 33               | Canada  | Groundnut Oil                   | 1992           | 4                                                              |
| 33               | Canada  | Groundnuts (Shelled Eq)         | 1992           | 42                                                             |
| 33               | Canada  | Honey                           | 1992           | 6                                                              |
| 33               | Canada  | Lemons, Limes and products      | 1992           | 1                                                              |
| 33               | Canada  | Maize and products              | 1992           | 20                                                             |
| 33               | Canada  | Maize Germ Oil                  | 1992           | 21                                                             |
| 33               | Canada  | Marine Fish, Other              | 1992           | 1                                                              |
| 33               | Canada  | Meat                            | 1992           | 352                                                            |
| 33               | Canada  | Milk - Excluding Butter         | 1992           | 256                                                            |
| 33               | Canada  | Miscellaneous                   | 1992           | 1                                                              |
| 33               | Canada  | Molluscs, Other                 | 1992           | 2                                                              |
| 33               | Canada  | Mutton & Goat Meat              | 1992           | 5                                                              |
| 33               | Canada  | Oats                            | 1992           | 23                                                             |
| 33               | Canada  | Offals                          | 1992           | 5                                                              |
| 33               | Canada  | Oilcrops                        | 1992           | 73                                                             |
| 33               | Canada  | Olive Oil                       | 1992           | 10                                                             |
| 33               | Canada  | Olives (including preserved)    | 1992           | 1                                                              |
| 33               | Canada  | Onions                          | 1992           | 6                                                              |
| 33               | Canada  | Oranges, Mandarines             | 1992           | 20                                                             |
| 33               | Canada  | Palm Oil                        | 1992           | 5                                                              |
| 33               | Canada  | Peas                            | 1992           | 10                                                             |
| 33               | Canada  | Pelagic Fish                    | 1992           | 13                                                             |
| 33               | Canada  | Pepper                          | 1992           | 1                                                              |
| 33               | Canada  | Pigmeat                         | 1992           | 132                                                            |
| 33               | Canada  | Pimento                         | 1992           | 1                                                              |
| 33               | Canada  | Pineapples and products         | 1992           | 4                                                              |
| 33               | Canada  | Potatoes and products           | 1992           | 134                                                            |
| 33               | Canada  | Poultry Meat                    | 1992           | 110                                                            |
| 33               | Canada  | Pulses                          | 1992           | 66                                                             |
| 33               | Canada  | Pulses, Other and products      | 1992           | 33                                                             |
| 33               | Canada  | Rape and Mustard Oil            | 1992           | 301                                                            |
| 33               | Canada  | Rape and Mustardseed            | 1992           | 19                                                             |
| 33               | Canada  | Rice (Milled Equivalent)        | 1992           | 58                                                             |
| 33               | Canada  | Roots, Other                    | 1992           | 1                                                              |
| 33               | Canada  | Rye and products                | 1992           | 4                                                              |
| 33               | Canada  | Sesame seed                     | 1992           | 2                                                              |
| 33               | Canada  | Soyabean Oil                    | 1992           | 103                                                            |
| 33               | Canada  | Soyabeans                       | 1992           | 3                                                              |
| 33               | Canada  | Spices                          | 1992           | 4                                                              |
| 33               | Canada  | Spices, Other                   | 1992           | 2                                                              |
| 33               | Canada  | Starchy Roots                   | 1992           | 135                                                            |
| 33               | Canada  | Stimulants                      | 1992           | 13                                                             |
| 33               | Canada  | Sugar & Sweeteners              | 1992           | 441                                                            |
| 33               | Canada  | Sugar (Raw Equivalent)          | 1992           | 412                                                            |
| 33               | Canada  | Sunflowerseed Oil               | 1992           | 14                                                             |
| 33               | Canada  | Sweet potatoes                  | 1992           | 1                                                              |
| 33               | Canada  | Sweeteners, Other               | 1992           | 23                                                             |
| 33               | Canada  | Tea (including mate)            | 1992           | 1                                                              |
| 33               | Canada  | Tomatoes and products           | 1992           | 15                                                             |
| 33               | Canada  | Treenuts                        | 1992           | 17                                                             |
| 33               | Canada  | Vegetable Oils                  | 1992           | 464                                                            |
| 33               | Canada  | Vegetables                      | 1992           | 84                                                             |
| 33               | Canada  | Vegetables, Other               | 1992           | 63                                                             |
| 33               | Canada  | Vegetal Products                | 1992           | 2,190                                                          |
| 33               | Canada  | Wheat and products              | 1992           | 543                                                            |
| 33               | Canada  | Wine                            | 1992           | 12                                                             |
| 33               | Canada  | Alcoholic Beverages             | 1993           | 124                                                            |
| 33               | Canada  | Animal fats                     | 1993           | 202                                                            |
| 33               | Canada  | Animal Products                 | 1993           | 880                                                            |
| 33               | Canada  | Apples and products             | 1993           | 25                                                             |
| 33               | Canada  | Bananas                         | 1993           | 21                                                             |
| 33               | Canada  | Barley and products             | 1993           | 2                                                              |
| 33               | Canada  | Beans                           | 1993           | 15                                                             |
| 33               | Canada  | Beer                            | 1993           | 85                                                             |
| 33               | Canada  | Beverages, Alcoholic            | 1993           | 11                                                             |
| 33               | Canada  | Beverages, Fermented            | 1993           | 17                                                             |
| 33               | Canada  | Bovine Meat                     | 1993           | 100                                                            |
| 33               | Canada  | Butter, Ghee                    | 1993           | 59                                                             |
| 33               | Canada  | Cereals - Excluding Beer        | 1993           | 681                                                            |
| 33               | Canada  | Cereals, Other                  | 1993           | 1                                                              |
| 33               | Canada  | Cocoa Beans and products        | 1993           | 6                                                              |
| 33               | Canada  | Coconut Oil                     | 1993           | 4                                                              |
| 33               | Canada  | Coconuts - Incl Copra           | 1993           | 5                                                              |
| 33               | Canada  | Coffee and products             | 1993           | 6                                                              |
| 33               | Canada  | Cottonseed Oil                  | 1993           | 2                                                              |
| 33               | Canada  | Cream                           | 1993           | 28                                                             |
| 33               | Canada  | Crustaceans                     | 1993           | 5                                                              |
| 33               | Canada  | Dates                           | 1993           | 1                                                              |

Dietary calcium and zinc deficiency risks are decreasing but remain prevalent

| FAO Country code | Country | Food item                       | Reference year | Net energy supply (kcal capita <sup>-1</sup> d <sup>-1</sup> ) |
|------------------|---------|---------------------------------|----------------|----------------------------------------------------------------|
| 33               | Canada  | Demersal Fish                   | 1993           | 8                                                              |
| 33               | Canada  | Eggs                            | 1993           | 39                                                             |
| 33               | Canada  | Fats, Animals, Raw              | 1993           | 115                                                            |
| 33               | Canada  | Fish, Seafood                   | 1993           | 38                                                             |
| 33               | Canada  | Freshwater Fish                 | 1993           | 5                                                              |
| 33               | Canada  | Fruits - Excluding Wine         | 1993           | 117                                                            |
| 33               | Canada  | Fruits, Other                   | 1993           | 22                                                             |
| 33               | Canada  | Grand Total                     | 1993           | 3,122                                                          |
| 33               | Canada  | Grapefruit and products         | 1993           | 2                                                              |
| 33               | Canada  | Grapes and products (excl wine) | 1993           | 18                                                             |
| 33               | Canada  | Groundnut Oil                   | 1993           | 3                                                              |
| 33               | Canada  | Groundnuts (Shelled Eq)         | 1993           | 40                                                             |
| 33               | Canada  | Honey                           | 1993           | 7                                                              |
| 33               | Canada  | Lemons, Limes and products      | 1993           | 1                                                              |
| 33               | Canada  | Maize and products              | 1993           | 20                                                             |
| 33               | Canada  | Maize Germ Oil                  | 1993           | 23                                                             |
| 33               | Canada  | Marine Fish, Other              | 1993           | 1                                                              |
| 33               | Canada  | Meat                            | 1993           | 348                                                            |
| 33               | Canada  | Milk - Excluding Butter         | 1993           | 249                                                            |
| 33               | Canada  | Miscellaneous                   | 1993           | 1                                                              |
| 33               | Canada  | Molluscs, Other                 | 1993           | 2                                                              |
| 33               | Canada  | Mutton & Goat Meat              | 1993           | 5                                                              |
| 33               | Canada  | Oats                            | 1993           | 22                                                             |
| 33               | Canada  | Offals                          | 1993           | 3                                                              |
| 33               | Canada  | Oilcrops                        | 1993           | 72                                                             |
| 33               | Canada  | Olive Oil                       | 1993           | 11                                                             |
| 33               | Canada  | Olives (including preserved)    | 1993           | 1                                                              |
| 33               | Canada  | Onions                          | 1993           | 8                                                              |
| 33               | Canada  | Oranges, Mandarines             | 1993           | 22                                                             |
| 33               | Canada  | Palm Oil                        | 1993           | 4                                                              |
| 33               | Canada  | Peas                            | 1993           | 12                                                             |
| 33               | Canada  | Pelagic Fish                    | 1993           | 17                                                             |
| 33               | Canada  | Pepper                          | 1993           | 1                                                              |
| 33               | Canada  | Pigmeat                         | 1993           | 129                                                            |
| 33               | Canada  | Pimento                         | 1993           | 1                                                              |
| 33               | Canada  | Pineapples and products         | 1993           | 4                                                              |
| 33               | Canada  | Potatoes and products           | 1993           | 131                                                            |
| 33               | Canada  | Poultry Meat                    | 1993           | 114                                                            |
| 33               | Canada  | Pulses                          | 1993           | 59                                                             |
| 33               | Canada  | Pulses, Other and products      | 1993           | 32                                                             |
| 33               | Canada  | Rape and Mustard Oil            | 1993           | 326                                                            |
| 33               | Canada  | Rape and Mustardseed            | 1993           | 19                                                             |
| 33               | Canada  | Rice (Milled Equivalent)        | 1993           | 62                                                             |
| 33               | Canada  | Roots, Other                    | 1993           | 1                                                              |
| 33               | Canada  | Rye and products                | 1993           | 4                                                              |
| 33               | Canada  | Sesame seed                     | 1993           | 2                                                              |
| 33               | Canada  | Soyabean Oil                    | 1993           | 88                                                             |
| 33               | Canada  | Soyabeans                       | 1993           | 4                                                              |
| 33               | Canada  | Spices                          | 1993           | 4                                                              |
| 33               | Canada  | Spices, Other                   | 1993           | 2                                                              |
| 33               | Canada  | Starchy Roots                   | 1993           | 133                                                            |
| 33               | Canada  | Stimulants                      | 1993           | 13                                                             |
| 33               | Canada  | Sugar & Sweeteners              | 1993           | 460                                                            |
| 33               | Canada  | Sugar (Raw Equivalent)          | 1993           | 434                                                            |
| 33               | Canada  | Sunflowerseed Oil               | 1993           | 13                                                             |
| 33               | Canada  | Sweet potatoes                  | 1993           | 1                                                              |
| 33               | Canada  | Sweeteners, Other               | 1993           | 19                                                             |
| 33               | Canada  | Tea (including mate)            | 1993           | 1                                                              |
| 33               | Canada  | Tomatoes and products           | 1993           | 17                                                             |
| 33               | Canada  | Treenuts                        | 1993           | 18                                                             |
| 33               | Canada  | Vegetable Oils                  | 1993           | 474                                                            |
| 33               | Canada  | Vegetables                      | 1993           | 87                                                             |
| 33               | Canada  | Vegetables, Other               | 1993           | 62                                                             |
| 33               | Canada  | Vegetal Products                | 1993           | 2,242                                                          |
| 33               | Canada  | Wheat and products              | 1993           | 571                                                            |
| 33               | Canada  | Wine                            | 1993           | 12                                                             |
| 33               | Canada  | Alcoholic Beverages             | 1994           | 128                                                            |
| 33               | Canada  | Animal fats                     | 1994           | 204                                                            |
| 33               | Canada  | Animal Products                 | 1994           | 894                                                            |
| 33               | Canada  | Apples and products             | 1994           | 29                                                             |
| 33               | Canada  | Bananas                         | 1994           | 21                                                             |
| 33               | Canada  | Barley and products             | 1994           | 2                                                              |
| 33               | Canada  | Beans                           | 1994           | 23                                                             |
| 33               | Canada  | Beer                            | 1994           | 85                                                             |
| 33               | Canada  | Beverages, Alcoholic            | 1994           | 12                                                             |
| 33               | Canada  | Beverages, Fermented            | 1994           | 19                                                             |
| 33               | Canada  | Bovine Meat                     | 1994           | 101                                                            |
| 33               | Canada  | Butter, Ghee                    | 1994           | 60                                                             |
| 33               | Canada  | Cereals - Excluding Beer        | 1994           | 716                                                            |
| 33               | Canada  | Cereals, Other                  | 1994           | 1                                                              |
| 33               | Canada  | Cocoa Beans and products        | 1994           | 6                                                              |
| 33               | Canada  | Coconut Oil                     | 1994           | 4                                                              |
| 33               | Canada  | Coconuts - Incl Copra           | 1994           | 4                                                              |
| 33               | Canada  | Coffee and products             | 1994           | 7                                                              |
| 33               | Canada  | Cottonseed Oil                  | 1994           | 1                                                              |
| 33               | Canada  | Cream                           | 1994           | 28                                                             |
| 33               | Canada  | Crustaceans                     | 1994           | 4                                                              |
| 33               | Canada  | Dates                           | 1994           | 1                                                              |
| 33               | Canada  | Demersal Fish                   | 1994           | 9                                                              |
| 33               | Canada  | Eggs                            | 1994           | 39                                                             |
| 33               | Canada  | Fats, Animals, Raw              | 1994           | 116                                                            |
| 33               | Canada  | Fish, Seafood                   | 1994           | 36                                                             |
| 33               | Canada  | Freshwater Fish                 | 1994           | 5                                                              |
| 33               | Canada  | Fruits - Excluding Wine         | 1994           | 121                                                            |
| 33               | Canada  | Fruits, Other                   | 1994           | 23                                                             |
| 33               | Canada  | Grand Total                     | 1994           | 3,209                                                          |
| 33               | Canada  | Grapefruit and products         | 1994           | 2                                                              |



Dietary calcium and zinc deficiency risks are decreasing but remain prevalent

| FAO Country code | Country | Food item                       | Reference year | Net energy supply (kcal capita <sup>-1</sup> d <sup>-1</sup> ) |
|------------------|---------|---------------------------------|----------------|----------------------------------------------------------------|
| 33               | Canada  | Grapes and products (excl wine) | 1994           | 16                                                             |
| 33               | Canada  | Groundnut Oil                   | 1994           | 3                                                              |
| 33               | Canada  | Groundnuts (Shelled Eq)         | 1994           | 40                                                             |
| 33               | Canada  | Honey                           | 1994           | 8                                                              |
| 33               | Canada  | Lemons, Limes and products      | 1994           | 1                                                              |
| 33               | Canada  | Maize and products              | 1994           | 24                                                             |
| 33               | Canada  | Maize Germ Oil                  | 1994           | 20                                                             |
| 33               | Canada  | Marine Fish, Other              | 1994           | 1                                                              |
| 33               | Canada  | Meat                            | 1994           | 361                                                            |
| 33               | Canada  | Milk - Excluding Butter         | 1994           | 249                                                            |
| 33               | Canada  | Miscellaneous                   | 1994           | 2                                                              |
| 33               | Canada  | Molluscs, Other                 | 1994           | 2                                                              |
| 33               | Canada  | Mutton & Goat Meat              | 1994           | 5                                                              |
| 33               | Canada  | Oats                            | 1994           | 20                                                             |
| 33               | Canada  | Offals                          | 1994           | 5                                                              |
| 33               | Canada  | Oilcrops                        | 1994           | 79                                                             |
| 33               | Canada  | Oilcrops, Other                 | 1994           | 1                                                              |
| 33               | Canada  | Olive Oil                       | 1994           | 10                                                             |
| 33               | Canada  | Olives (including preserved)    | 1994           | 1                                                              |
| 33               | Canada  | Onions                          | 1994           | 6                                                              |
| 33               | Canada  | Oranges, Mandarines             | 1994           | 23                                                             |
| 33               | Canada  | Palm Oil                        | 1994           | 3                                                              |
| 33               | Canada  | Peas                            | 1994           | 14                                                             |
| 33               | Canada  | Pelagic Fish                    | 1994           | 15                                                             |
| 33               | Canada  | Pepper                          | 1994           | 1                                                              |
| 33               | Canada  | Pigmeat                         | 1994           | 133                                                            |
| 33               | Canada  | Pimento                         | 1994           | 1                                                              |
| 33               | Canada  | Pineapples and products         | 1994           | 4                                                              |
| 33               | Canada  | Potatoes and products           | 1994           | 134                                                            |
| 33               | Canada  | Poultry Meat                    | 1994           | 122                                                            |
| 33               | Canada  | Pulses                          | 1994           | 72                                                             |
| 33               | Canada  | Pulses, Other and products      | 1994           | 36                                                             |
| 33               | Canada  | Rape and Mustard Oil            | 1994           | 354                                                            |
| 33               | Canada  | Rape and Mustardseed            | 1994           | 26                                                             |
| 33               | Canada  | Rice (Milled Equivalent)        | 1994           | 60                                                             |
| 33               | Canada  | Roots, Other                    | 1994           | 1                                                              |
| 33               | Canada  | Rye and products                | 1994           | 4                                                              |
| 33               | Canada  | Sesame seed                     | 1994           | 2                                                              |
| 33               | Canada  | Soyabean Oil                    | 1994           | 65                                                             |
| 33               | Canada  | Soyabeans                       | 1994           | 4                                                              |
| 33               | Canada  | Spices                          | 1994           | 5                                                              |
| 33               | Canada  | Spices, Other                   | 1994           | 3                                                              |
| 33               | Canada  | Starchy Roots                   | 1994           | 135                                                            |
| 33               | Canada  | Stimulants                      | 1994           | 13                                                             |
| 33               | Canada  | Sugar & Sweeteners              | 1994           | 464                                                            |
| 33               | Canada  | Sugar (Raw Equivalent)          | 1994           | 428                                                            |
| 33               | Canada  | Sunflowerseed Oil               | 1994           | 13                                                             |
| 33               | Canada  | Sweet potatoes                  | 1994           | 1                                                              |
| 33               | Canada  | Sweeteners, Other               | 1994           | 27                                                             |
| 33               | Canada  | Tea (including mate)            | 1994           | 1                                                              |
| 33               | Canada  | Tomatoes and products           | 1994           | 17                                                             |
| 33               | Canada  | Treenuts                        | 1994           | 17                                                             |
| 33               | Canada  | Vegetable Oils                  | 1994           | 475                                                            |
| 33               | Canada  | Vegetables                      | 1994           | 87                                                             |
| 33               | Canada  | Vegetables, Other               | 1994           | 64                                                             |
| 33               | Canada  | Vegetal Products                | 1994           | 2,314                                                          |
| 33               | Canada  | Wheat and products              | 1994           | 605                                                            |
| 33               | Canada  | Wine                            | 1994           | 12                                                             |
| 33               | Canada  | Alcoholic Beverages             | 1995           | 130                                                            |
| 33               | Canada  | Animal fats                     | 1995           | 204                                                            |
| 33               | Canada  | Animal Products                 | 1995           | 888                                                            |
| 33               | Canada  | Apples and products             | 1995           | 28                                                             |
| 33               | Canada  | Bananas                         | 1995           | 22                                                             |
| 33               | Canada  | Barley and products             | 1995           | 2                                                              |
| 33               | Canada  | Beans                           | 1995           | 12                                                             |
| 33               | Canada  | Beer                            | 1995           | 86                                                             |
| 33               | Canada  | Beverages, Alcoholic            | 1995           | 14                                                             |
| 33               | Canada  | Beverages, Fermented            | 1995           | 18                                                             |
| 33               | Canada  | Bovine Meat                     | 1995           | 102                                                            |
| 33               | Canada  | Butter, Ghee                    | 1995           | 57                                                             |
| 33               | Canada  | Cereals - Excluding Beer        | 1995           | 708                                                            |
| 33               | Canada  | Cereals, Other                  | 1995           | 1                                                              |
| 33               | Canada  | Cocoa Beans and products        | 1995           | 6                                                              |
| 33               | Canada  | Coconut Oil                     | 1995           | 4                                                              |
| 33               | Canada  | Coconuts - Incl Copra           | 1995           | 4                                                              |
| 33               | Canada  | Coffee and products             | 1995           | 6                                                              |
| 33               | Canada  | Cottonseed Oil                  | 1995           | 1                                                              |
| 33               | Canada  | Cream                           | 1995           | 29                                                             |
| 33               | Canada  | Crustaceans                     | 1995           | 6                                                              |
| 33               | Canada  | Dates                           | 1995           | 1                                                              |
| 33               | Canada  | Demersal Fish                   | 1995           | 6                                                              |
| 33               | Canada  | Eggs                            | 1995           | 39                                                             |
| 33               | Canada  | Fats, Animals, Raw              | 1995           | 118                                                            |
| 33               | Canada  | Fish, Seafood                   | 1995           | 38                                                             |
| 33               | Canada  | Freshwater Fish                 | 1995           | 8                                                              |
| 33               | Canada  | Fruits - Excluding Wine         | 1995           | 121                                                            |
| 33               | Canada  | Fruits, Other                   | 1995           | 24                                                             |
| 33               | Canada  | Grand Total                     | 1995           | 3,209                                                          |
| 33               | Canada  | Grapefruit and products         | 1995           | 2                                                              |
| 33               | Canada  | Grapes and products (excl wine) | 1995           | 17                                                             |
| 33               | Canada  | Groundnut Oil                   | 1995           | 3                                                              |
| 33               | Canada  | Groundnuts (Shelled Eq)         | 1995           | 43                                                             |
| 33               | Canada  | Honey                           | 1995           | 5                                                              |
| 33               | Canada  | Lemons, Limes and products      | 1995           | 1                                                              |
| 33               | Canada  | Maize and products              | 1995           | 24                                                             |
| 33               | Canada  | Maize Germ Oil                  | 1995           | 22                                                             |
| 33               | Canada  | Marine Fish, Other              | 1995           | 1                                                              |

Dietary calcium and zinc deficiency risks are decreasing but remain prevalent

| FAO Country code | Country | Food item                       | Reference year | Net energy supply (kcal capita <sup>-1</sup> d <sup>-1</sup> ) |
|------------------|---------|---------------------------------|----------------|----------------------------------------------------------------|
| 33               | Canada  | Meat                            | 1995           | 356                                                            |
| 33               | Canada  | Milk - Excluding Butter         | 1995           | 247                                                            |
| 33               | Canada  | Miscellaneous                   | 1995           | 2                                                              |
| 33               | Canada  | Molluscs, Other                 | 1995           | 2                                                              |
| 33               | Canada  | Mutton & Goat Meat              | 1995           | 5                                                              |
| 33               | Canada  | Oats                            | 1995           | 14                                                             |
| 33               | Canada  | Offals                          | 1995           | 5                                                              |
| 33               | Canada  | Oilcrops                        | 1995           | 80                                                             |
| 33               | Canada  | Oilcrops, Other                 | 1995           | 1                                                              |
| 33               | Canada  | Olive Oil                       | 1995           | 11                                                             |
| 33               | Canada  | Olives (including preserved)    | 1995           | 2                                                              |
| 33               | Canada  | Onions                          | 1995           | 7                                                              |
| 33               | Canada  | Oranges, Mandarines             | 1995           | 23                                                             |
| 33               | Canada  | Palm Oil                        | 1995           | 4                                                              |
| 33               | Canada  | Peas                            | 1995           | 9                                                              |
| 33               | Canada  | Pelagic Fish                    | 1995           | 16                                                             |
| 33               | Canada  | Pepper                          | 1995           | 1                                                              |
| 33               | Canada  | Pigmeat                         | 1995           | 129                                                            |
| 33               | Canada  | Pimento                         | 1995           | 1                                                              |
| 33               | Canada  | Pineapples and products         | 1995           | 3                                                              |
| 33               | Canada  | Potatoes and products           | 1995           | 132                                                            |
| 33               | Canada  | Poultry Meat                    | 1995           | 120                                                            |
| 33               | Canada  | Pulses                          | 1995           | 60                                                             |
| 33               | Canada  | Pulses, Other and products      | 1995           | 39                                                             |
| 33               | Canada  | Rape and Mustard Oil            | 1995           | 377                                                            |
| 33               | Canada  | Rape and Mustardseed            | 1995           | 23                                                             |
| 33               | Canada  | Rice (Milled Equivalent)        | 1995           | 68                                                             |
| 33               | Canada  | Roots, Other                    | 1995           | 1                                                              |
| 33               | Canada  | Rye and products                | 1995           | 4                                                              |
| 33               | Canada  | Sesame seed                     | 1995           | 2                                                              |
| 33               | Canada  | Soyabean Oil                    | 1995           | 71                                                             |
| 33               | Canada  | Soyabeans                       | 1995           | 4                                                              |
| 33               | Canada  | Spices                          | 1995           | 4                                                              |
| 33               | Canada  | Spices, Other                   | 1995           | 2                                                              |
| 33               | Canada  | Starchy Roots                   | 1995           | 134                                                            |
| 33               | Canada  | Stimulants                      | 1995           | 13                                                             |
| 33               | Canada  | Sugar & Sweeteners              | 1995           | 464                                                            |
| 33               | Canada  | Sugar (Raw Equivalent)          | 1995           | 418                                                            |
| 33               | Canada  | Sunflowerseed Oil               | 1995           | 11                                                             |
| 33               | Canada  | Sweet potatoes                  | 1995           | 1                                                              |
| 33               | Canada  | Sweeteners, Other               | 1995           | 40                                                             |
| 33               | Canada  | Tomatoes and products           | 1995           | 16                                                             |
| 33               | Canada  | Treenuts                        | 1995           | 13                                                             |
| 33               | Canada  | Vegetable Oils                  | 1995           | 504                                                            |
| 33               | Canada  | Vegetables                      | 1995           | 87                                                             |
| 33               | Canada  | Vegetables, Other               | 1995           | 63                                                             |
| 33               | Canada  | Vegetal Products                | 1995           | 2,320                                                          |
| 33               | Canada  | Wheat and products              | 1995           | 597                                                            |
| 33               | Canada  | Wine                            | 1995           | 12                                                             |
| 33               | Canada  | Alcoholic Beverages             | 1996           | 125                                                            |
| 33               | Canada  | Animal fats                     | 1996           | 180                                                            |
| 33               | Canada  | Animal Products                 | 1996           | 852                                                            |
| 33               | Canada  | Apples and products             | 1996           | 22                                                             |
| 33               | Canada  | Bananas                         | 1996           | 22                                                             |
| 33               | Canada  | Barley and products             | 1996           | 2                                                              |
| 33               | Canada  | Beans                           | 1996           | 15                                                             |
| 33               | Canada  | Beer                            | 1996           | 83                                                             |
| 33               | Canada  | Beverages, Alcoholic            | 1996           | 11                                                             |
| 33               | Canada  | Beverages, Fermented            | 1996           | 18                                                             |
| 33               | Canada  | Bovine Meat                     | 1996           | 101                                                            |
| 33               | Canada  | Butter, Ghee                    | 1996           | 58                                                             |
| 33               | Canada  | Cereals - Excluding Beer        | 1996           | 744                                                            |
| 33               | Canada  | Cereals, Other                  | 1996           | 1                                                              |
| 33               | Canada  | Cocoa Beans and products        | 1996           | 6                                                              |
| 33               | Canada  | Coconut Oil                     | 1996           | 7                                                              |
| 33               | Canada  | Coconuts - Incl Copra           | 1996           | 3                                                              |
| 33               | Canada  | Coffee and products             | 1996           | 6                                                              |
| 33               | Canada  | Cottonseed Oil                  | 1996           | 9                                                              |
| 33               | Canada  | Cream                           | 1996           | 29                                                             |
| 33               | Canada  | Crustaceans                     | 1996           | 8                                                              |
| 33               | Canada  | Dates                           | 1996           | 1                                                              |
| 33               | Canada  | Demersal Fish                   | 1996           | 8                                                              |
| 33               | Canada  | Eggs                            | 1996           | 40                                                             |
| 33               | Canada  | Fats, Animals, Raw              | 1996           | 92                                                             |
| 33               | Canada  | Fish, Seafood                   | 1996           | 38                                                             |
| 33               | Canada  | Freshwater Fish                 | 1996           | 5                                                              |
| 33               | Canada  | Fruits - Excluding Wine         | 1996           | 116                                                            |
| 33               | Canada  | Fruits, Other                   | 1996           | 23                                                             |
| 33               | Canada  | Grand Total                     | 1996           | 3,252                                                          |
| 33               | Canada  | Grapefruit and products         | 1996           | 2                                                              |
| 33               | Canada  | Grapes and products (excl wine) | 1996           | 17                                                             |
| 33               | Canada  | Groundnut Oil                   | 1996           | 2                                                              |
| 33               | Canada  | Groundnuts (Shelled Eq)         | 1996           | 41                                                             |
| 33               | Canada  | Honey                           | 1996           | 9                                                              |
| 33               | Canada  | Lemons, Limes and products      | 1996           | 1                                                              |
| 33               | Canada  | Maize and products              | 1996           | 40                                                             |
| 33               | Canada  | Maize Germ Oil                  | 1996           | 23                                                             |
| 33               | Canada  | Marine Fish, Other              | 1996           | 1                                                              |
| 33               | Canada  | Meat                            | 1996           | 347                                                            |
| 33               | Canada  | Milk - Excluding Butter         | 1996           | 242                                                            |
| 33               | Canada  | Miscellaneous                   | 1996           | 4                                                              |
| 33               | Canada  | Molluscs, Other                 | 1996           | 2                                                              |
| 33               | Canada  | Mutton & Goat Meat              | 1996           | 5                                                              |
| 33               | Canada  | Oats                            | 1996           | 21                                                             |
| 33               | Canada  | Offals                          | 1996           | 5                                                              |
| 33               | Canada  | Oilcrops                        | 1996           | 79                                                             |
| 33               | Canada  | Oilcrops, Other                 | 1996           | 1                                                              |

Dietary calcium and zinc deficiency risks are decreasing but remain prevalent

| FAO Country code | Country | Food item                       | Reference year | Net energy supply (kcal capita <sup>-1</sup> d <sup>-1</sup> ) |
|------------------|---------|---------------------------------|----------------|----------------------------------------------------------------|
| 33               | Canada  | Olive Oil                       | 1996           | 13                                                             |
| 33               | Canada  | Olives (including preserved)    | 1996           | 2                                                              |
| 33               | Canada  | Onions                          | 1996           | 7                                                              |
| 33               | Canada  | Oranges, Mandarines             | 1996           | 25                                                             |
| 33               | Canada  | Palm Oil                        | 1996           | 5                                                              |
| 33               | Canada  | Peas                            | 1996           | 11                                                             |
| 33               | Canada  | Pelagic Fish                    | 1996           | 15                                                             |
| 33               | Canada  | Pepper                          | 1996           | 1                                                              |
| 33               | Canada  | Pigmeat                         | 1996           | 120                                                            |
| 33               | Canada  | Pimento                         | 1996           | 1                                                              |
| 33               | Canada  | Pineapples and products         | 1996           | 3                                                              |
| 33               | Canada  | Potatoes and products           | 1996           | 139                                                            |
| 33               | Canada  | Poultry Meat                    | 1996           | 121                                                            |
| 33               | Canada  | Pulses                          | 1996           | 58                                                             |
| 33               | Canada  | Pulses, Other and products      | 1996           | 31                                                             |
| 33               | Canada  | Rape and Mustard Oil            | 1996           | 358                                                            |
| 33               | Canada  | Rape and Mustardseed            | 1996           | 25                                                             |
| 33               | Canada  | Rice (Milled Equivalent)        | 1996           | 71                                                             |
| 33               | Canada  | Roots, Other                    | 1996           | 1                                                              |
| 33               | Canada  | Rye and products                | 1996           | 4                                                              |
| 33               | Canada  | Sesame seed                     | 1996           | 3                                                              |
| 33               | Canada  | Soyabean Oil                    | 1996           | 117                                                            |
| 33               | Canada  | Soyabeans                       | 1996           | 4                                                              |
| 33               | Canada  | Spices                          | 1996           | 5                                                              |
| 33               | Canada  | Spices, Other                   | 1996           | 3                                                              |
| 33               | Canada  | Starchy Roots                   | 1996           | 140                                                            |
| 33               | Canada  | Stimulants                      | 1996           | 13                                                             |
| 33               | Canada  | Sugar & Sweeteners              | 1996           | 467                                                            |
| 33               | Canada  | Sugar (Raw Equivalent)          | 1996           | 400                                                            |
| 33               | Canada  | Sunflowerseed Oil               | 1996           | 12                                                             |
| 33               | Canada  | Sweet potatoes                  | 1996           | 1                                                              |
| 33               | Canada  | Sweeteners, Other               | 1996           | 59                                                             |
| 33               | Canada  | Tomatoes and products           | 1996           | 17                                                             |
| 33               | Canada  | Treenuts                        | 1996           | 15                                                             |
| 33               | Canada  | Vegetable Oils                  | 1996           | 545                                                            |
| 33               | Canada  | Vegetables                      | 1996           | 90                                                             |
| 33               | Canada  | Vegetables, Other               | 1996           | 66                                                             |
| 33               | Canada  | Vegetal Products                | 1996           | 2,401                                                          |
| 33               | Canada  | Wheat and products              | 1996           | 606                                                            |
| 33               | Canada  | Wine                            | 1996           | 13                                                             |
| 33               | Canada  | Alcoholic Beverages             | 1997           | 126                                                            |
| 33               | Canada  | Animal fats                     | 1997           | 187                                                            |
| 33               | Canada  | Animal Products                 | 1997           | 849                                                            |
| 33               | Canada  | Apples and products             | 1997           | 22                                                             |
| 33               | Canada  | Bananas                         | 1997           | 23                                                             |
| 33               | Canada  | Barley and products             | 1997           | 3                                                              |
| 33               | Canada  | Beans                           | 1997           | 16                                                             |
| 33               | Canada  | Beer                            | 1997           | 82                                                             |
| 33               | Canada  | Beverages, Alcoholic            | 1997           | 13                                                             |
| 33               | Canada  | Beverages, Fermented            | 1997           | 18                                                             |
| 33               | Canada  | Bovine Meat                     | 1997           | 102                                                            |
| 33               | Canada  | Butter, Ghee                    | 1997           | 55                                                             |
| 33               | Canada  | Cephalopods                     | 1997           | 1                                                              |
| 33               | Canada  | Cereals - Excluding Beer        | 1997           | 815                                                            |
| 33               | Canada  | Cereals, Other                  | 1997           | 1                                                              |
| 33               | Canada  | Cocoa Beans and products        | 1997           | 6                                                              |
| 33               | Canada  | Coconut Oil                     | 1997           | 5                                                              |
| 33               | Canada  | Coconuts - Incl Copra           | 1997           | 4                                                              |
| 33               | Canada  | Coffee and products             | 1997           | 6                                                              |
| 33               | Canada  | Cottonseed Oil                  | 1997           | 11                                                             |
| 33               | Canada  | Cream                           | 1997           | 30                                                             |
| 33               | Canada  | Crustaceans                     | 1997           | 7                                                              |
| 33               | Canada  | Dates                           | 1997           | 1                                                              |
| 33               | Canada  | Demersal Fish                   | 1997           | 7                                                              |
| 33               | Canada  | Eggs                            | 1997           | 41                                                             |
| 33               | Canada  | Fats, Animals, Raw              | 1997           | 102                                                            |
| 33               | Canada  | Fish, Seafood                   | 1997           | 37                                                             |
| 33               | Canada  | Freshwater Fish                 | 1997           | 5                                                              |
| 33               | Canada  | Fruits - Excluding Wine         | 1997           | 120                                                            |
| 33               | Canada  | Fruits, Other                   | 1997           | 24                                                             |
| 33               | Canada  | Grand Total                     | 1997           | 3,388                                                          |
| 33               | Canada  | Grapefruit and products         | 1997           | 2                                                              |
| 33               | Canada  | Grapes and products (excl wine) | 1997           | 18                                                             |
| 33               | Canada  | Groundnut Oil                   | 1997           | 2                                                              |
| 33               | Canada  | Groundnuts (Shelled Eq)         | 1997           | 40                                                             |
| 33               | Canada  | Honey                           | 1997           | 7                                                              |
| 33               | Canada  | Lemons, Limes and products      | 1997           | 1                                                              |
| 33               | Canada  | Maize and products              | 1997           | 67                                                             |
| 33               | Canada  | Maize Germ Oil                  | 1997           | 25                                                             |
| 33               | Canada  | Marine Fish, Other              | 1997           | 1                                                              |
| 33               | Canada  | Meat                            | 1997           | 350                                                            |
| 33               | Canada  | Milk - Excluding Butter         | 1997           | 230                                                            |
| 33               | Canada  | Miscellaneous                   | 1997           | 4                                                              |
| 33               | Canada  | Molluscs, Other                 | 1997           | 2                                                              |
| 33               | Canada  | Mutton & Goat Meat              | 1997           | 5                                                              |
| 33               | Canada  | Oats                            | 1997           | 18                                                             |
| 33               | Canada  | Offals                          | 1997           | 4                                                              |
| 33               | Canada  | Oilcrops                        | 1997           | 79                                                             |
| 33               | Canada  | Olive Oil                       | 1997           | 14                                                             |
| 33               | Canada  | Olives (including preserved)    | 1997           | 2                                                              |
| 33               | Canada  | Onions                          | 1997           | 7                                                              |
| 33               | Canada  | Oranges, Mandarines             | 1997           | 26                                                             |
| 33               | Canada  | Palm Oil                        | 1997           | 4                                                              |
| 33               | Canada  | Peas                            | 1997           | 15                                                             |
| 33               | Canada  | Pelagic Fish                    | 1997           | 14                                                             |
| 33               | Canada  | Pepper                          | 1997           | 1                                                              |
| 33               | Canada  | Pigmeat                         | 1997           | 118                                                            |

Dietary calcium and zinc deficiency risks are decreasing but remain prevalent

| FAO Country code | Country | Food item                       | Reference year | Net energy supply (kcal <i>capita</i> <sup>-1</sup> d <sup>-1</sup> ) |
|------------------|---------|---------------------------------|----------------|-----------------------------------------------------------------------|
| 33               | Canada  | Pimento                         | 1997           | 1                                                                     |
| 33               | Canada  | Pineapples and products         | 1997           | 4                                                                     |
| 33               | Canada  | Potatoes and products           | 1997           | 141                                                                   |
| 33               | Canada  | Poultry Meat                    | 1997           | 125                                                                   |
| 33               | Canada  | Pulses                          | 1997           | 61                                                                    |
| 33               | Canada  | Pulses, Other and products      | 1997           | 29                                                                    |
| 33               | Canada  | Rape and Mustard Oil            | 1997           | 405                                                                   |
| 33               | Canada  | Rape and Mustardseed            | 1997           | 25                                                                    |
| 33               | Canada  | Rice (Milled Equivalent)        | 1997           | 82                                                                    |
| 33               | Canada  | Roots, Other                    | 1997           | 1                                                                     |
| 33               | Canada  | Rye and products                | 1997           | 3                                                                     |
| 33               | Canada  | Sesame seed                     | 1997           | 3                                                                     |
| 33               | Canada  | Sesameseed Oil                  | 1997           | 1                                                                     |
| 33               | Canada  | Soyabean Oil                    | 1997           | 110                                                                   |
| 33               | Canada  | Soyabeans                       | 1997           | 5                                                                     |
| 33               | Canada  | Spices                          | 1997           | 5                                                                     |
| 33               | Canada  | Spices, Other                   | 1997           | 3                                                                     |
| 33               | Canada  | Starchy Roots                   | 1997           | 143                                                                   |
| 33               | Canada  | Stimulants                      | 1997           | 12                                                                    |
| 33               | Canada  | Sugar & Sweeteners              | 1997           | 480                                                                   |
| 33               | Canada  | Sugar (Raw Equivalent)          | 1997           | 406                                                                   |
| 33               | Canada  | Sunflowerseed Oil               | 1997           | 12                                                                    |
| 33               | Canada  | Sweet potatoes                  | 1997           | 1                                                                     |
| 33               | Canada  | Sweeteners, Other               | 1997           | 67                                                                    |
| 33               | Canada  | Tea (including mate)            | 1997           | 1                                                                     |
| 33               | Canada  | Tomatoes and products           | 1997           | 16                                                                    |
| 33               | Canada  | Treenuts                        | 1997           | 14                                                                    |
| 33               | Canada  | Vegetable Oils                  | 1997           | 588                                                                   |
| 33               | Canada  | Vegetables                      | 1997           | 90                                                                    |
| 33               | Canada  | Vegetables, Other               | 1997           | 68                                                                    |
| 33               | Canada  | Vegetal Products                | 1997           | 2,538                                                                 |
| 33               | Canada  | Wheat and products              | 1997           | 641                                                                   |
| 33               | Canada  | Wine                            | 1997           | 14                                                                    |
| 33               | Canada  | Alcoholic Beverages             | 1998           | 130                                                                   |
| 33               | Canada  | Animal fats                     | 1998           | 212                                                                   |
| 33               | Canada  | Animal Products                 | 1998           | 908                                                                   |
| 33               | Canada  | Apples and products             | 1998           | 24                                                                    |
| 33               | Canada  | Bananas                         | 1998           | 22                                                                    |
| 33               | Canada  | Barley and products             | 1998           | 3                                                                     |
| 33               | Canada  | Beans                           | 1998           | 9                                                                     |
| 33               | Canada  | Beer                            | 1998           | 84                                                                    |
| 33               | Canada  | Beverages, Alcoholic            | 1998           | 15                                                                    |
| 33               | Canada  | Beverages, Fermented            | 1998           | 16                                                                    |
| 33               | Canada  | Bovine Meat                     | 1998           | 103                                                                   |
| 33               | Canada  | Butter, Ghee                    | 1998           | 57                                                                    |
| 33               | Canada  | Cereals - Excluding Beer        | 1998           | 821                                                                   |
| 33               | Canada  | Cereals, Other                  | 1998           | 2                                                                     |
| 33               | Canada  | Cocoa Beans and products        | 1998           | 6                                                                     |
| 33               | Canada  | Coconut Oil                     | 1998           | 5                                                                     |
| 33               | Canada  | Coconuts - Incl Copra           | 1998           | 4                                                                     |
| 33               | Canada  | Coffee and products             | 1998           | 6                                                                     |
| 33               | Canada  | Cottonseed Oil                  | 1998           | 10                                                                    |
| 33               | Canada  | Cream                           | 1998           | 32                                                                    |
| 33               | Canada  | Crustaceans                     | 1998           | 8                                                                     |
| 33               | Canada  | Dates                           | 1998           | 1                                                                     |
| 33               | Canada  | Demersal Fish                   | 1998           | 8                                                                     |
| 33               | Canada  | Eggs                            | 1998           | 43                                                                    |
| 33               | Canada  | Fats, Animals, Raw              | 1998           | 123                                                                   |
| 33               | Canada  | Fish, Seafood                   | 1998           | 38                                                                    |
| 33               | Canada  | Freshwater Fish                 | 1998           | 5                                                                     |
| 33               | Canada  | Fruits - Excluding Wine         | 1998           | 120                                                                   |
| 33               | Canada  | Fruits, Other                   | 1998           | 26                                                                    |
| 33               | Canada  | Grand Total                     | 1998           | 3,452                                                                 |
| 33               | Canada  | Grapefruit and products         | 1998           | 2                                                                     |
| 33               | Canada  | Grapes and products (excl wine) | 1998           | 16                                                                    |
| 33               | Canada  | Groundnut Oil                   | 1998           | 1                                                                     |
| 33               | Canada  | Groundnuts (Shelled Eq)         | 1998           | 41                                                                    |
| 33               | Canada  | Honey                           | 1998           | 10                                                                    |
| 33               | Canada  | Lemons, Limes and products      | 1998           | 1                                                                     |
| 33               | Canada  | Maize and products              | 1998           | 66                                                                    |
| 33               | Canada  | Maize Germ Oil                  | 1998           | 26                                                                    |
| 33               | Canada  | Marine Fish, Other              | 1998           | 1                                                                     |
| 33               | Canada  | Meat                            | 1998           | 372                                                                   |
| 33               | Canada  | Milk - Excluding Butter         | 1998           | 237                                                                   |
| 33               | Canada  | Miscellaneous                   | 1998           | 7                                                                     |
| 33               | Canada  | Molluscs, Other                 | 1998           | 2                                                                     |
| 33               | Canada  | Mutton & Goat Meat              | 1998           | 5                                                                     |
| 33               | Canada  | Oats                            | 1998           | 18                                                                    |
| 33               | Canada  | Offals                          | 1998           | 5                                                                     |
| 33               | Canada  | Oilcrops                        | 1998           | 79                                                                    |
| 33               | Canada  | Oilcrops, Other                 | 1998           | 1                                                                     |
| 33               | Canada  | Olive Oil                       | 1998           | 14                                                                    |
| 33               | Canada  | Olives (including preserved)    | 1998           | 2                                                                     |
| 33               | Canada  | Onions                          | 1998           | 6                                                                     |
| 33               | Canada  | Oranges, Mandarines             | 1998           | 25                                                                    |
| 33               | Canada  | Palm Oil                        | 1998           | 3                                                                     |
| 33               | Canada  | Peas                            | 1998           | 11                                                                    |
| 33               | Canada  | Pelagic Fish                    | 1998           | 13                                                                    |
| 33               | Canada  | Pepper                          | 1998           | 1                                                                     |
| 33               | Canada  | Pigmeat                         | 1998           | 133                                                                   |
| 33               | Canada  | Pimento                         | 1998           | 1                                                                     |
| 33               | Canada  | Pineapples and products         | 1998           | 3                                                                     |
| 33               | Canada  | Potatoes and products           | 1998           | 139                                                                   |
| 33               | Canada  | Poultry Meat                    | 1998           | 131                                                                   |
| 33               | Canada  | Pulses                          | 1998           | 51                                                                    |
| 33               | Canada  | Pulses, Other and products      | 1998           | 31                                                                    |
| 33               | Canada  | Rape and Mustard Oil            | 1998           | 421                                                                   |

Dietary calcium and zinc deficiency risks are decreasing but remain prevalent

| FAO Country code | Country | Food item                       | Reference year | Net energy supply (kcal <i>capita</i> <sup>-1</sup> d <sup>-1</sup> ) |
|------------------|---------|---------------------------------|----------------|-----------------------------------------------------------------------|
| 33               | Canada  | Rape and Mustardseed            | 1998           | 25                                                                    |
| 33               | Canada  | Rice (Milled Equivalent)        | 1998           | 78                                                                    |
| 33               | Canada  | Roots, Other                    | 1998           | 1                                                                     |
| 33               | Canada  | Rye and products                | 1998           | 3                                                                     |
| 33               | Canada  | Sesame seed                     | 1998           | 3                                                                     |
| 33               | Canada  | Sesameseed Oil                  | 1998           | 1                                                                     |
| 33               | Canada  | Soyabean Oil                    | 1998           | 104                                                                   |
| 33               | Canada  | Soyabeans                       | 1998           | 5                                                                     |
| 33               | Canada  | Spices                          | 1998           | 5                                                                     |
| 33               | Canada  | Spices, Other                   | 1998           | 3                                                                     |
| 33               | Canada  | Starchy Roots                   | 1998           | 141                                                                   |
| 33               | Canada  | Stimulants                      | 1998           | 13                                                                    |
| 33               | Canada  | Sugar & Sweeteners              | 1998           | 474                                                                   |
| 33               | Canada  | Sugar (Raw Equivalent)          | 1998           | 369                                                                   |
| 33               | Canada  | Sunflowerseed Oil               | 1998           | 10                                                                    |
| 33               | Canada  | Sweet potatoes                  | 1998           | 1                                                                     |
| 33               | Canada  | Sweeteners, Other               | 1998           | 95                                                                    |
| 33               | Canada  | Tea (including mate)            | 1998           | 1                                                                     |
| 33               | Canada  | Tomatoes and products           | 1998           | 16                                                                    |
| 33               | Canada  | Treenuts                        | 1998           | 17                                                                    |
| 33               | Canada  | Vegetable Oils                  | 1998           | 593                                                                   |
| 33               | Canada  | Vegetables                      | 1998           | 92                                                                    |
| 33               | Canada  | Vegetables, Other               | 1998           | 69                                                                    |
| 33               | Canada  | Vegetal Products                | 1998           | 2,545                                                                 |
| 33               | Canada  | Wheat and products              | 1998           | 651                                                                   |
| 33               | Canada  | Wine                            | 1998           | 15                                                                    |
| 33               | Canada  | Alcoholic Beverages             | 1999           | 135                                                                   |
| 33               | Canada  | Animal fats                     | 1999           | 219                                                                   |
| 33               | Canada  | Animal Products                 | 1999           | 928                                                                   |
| 33               | Canada  | Apples and products             | 1999           | 27                                                                    |
| 33               | Canada  | Bananas                         | 1999           | 22                                                                    |
| 33               | Canada  | Barley and products             | 1999           | 3                                                                     |
| 33               | Canada  | Beans                           | 1999           | 12                                                                    |
| 33               | Canada  | Beer                            | 1999           | 85                                                                    |
| 33               | Canada  | Beverages, Alcoholic            | 1999           | 14                                                                    |
| 33               | Canada  | Beverages, Fermented            | 1999           | 19                                                                    |
| 33               | Canada  | Bovine Meat                     | 1999           | 105                                                                   |
| 33               | Canada  | Butter, Ghee                    | 1999           | 53                                                                    |
| 33               | Canada  | Cereals - Excluding Beer        | 1999           | 870                                                                   |
| 33               | Canada  | Cereals, Other                  | 1999           | 11                                                                    |
| 33               | Canada  | Cocoa Beans and products        | 1999           | 5                                                                     |
| 33               | Canada  | Coconut Oil                     | 1999           | 6                                                                     |
| 33               | Canada  | Coconuts - Incl Copra           | 1999           | 4                                                                     |
| 33               | Canada  | Coffee and products             | 1999           | 6                                                                     |
| 33               | Canada  | Cottonseed Oil                  | 1999           | 11                                                                    |
| 33               | Canada  | Cream                           | 1999           | 33                                                                    |
| 33               | Canada  | Crustaceans                     | 1999           | 8                                                                     |
| 33               | Canada  | Dates                           | 1999           | 1                                                                     |
| 33               | Canada  | Demersal Fish                   | 1999           | 8                                                                     |
| 33               | Canada  | Eggs                            | 1999           | 42                                                                    |
| 33               | Canada  | Fats, Animals, Raw              | 1999           | 133                                                                   |
| 33               | Canada  | Fish, Seafood                   | 1999           | 40                                                                    |
| 33               | Canada  | Freshwater Fish                 | 1999           | 6                                                                     |
| 33               | Canada  | Fruits - Excluding Wine         | 1999           | 124                                                                   |
| 33               | Canada  | Fruits, Other                   | 1999           | 28                                                                    |
| 33               | Canada  | Grand Total                     | 1999           | 3,492                                                                 |
| 33               | Canada  | Grapefruit and products         | 1999           | 2                                                                     |
| 33               | Canada  | Grapes and products (excl wine) | 1999           | 16                                                                    |
| 33               | Canada  | Groundnut Oil                   | 1999           | 1                                                                     |
| 33               | Canada  | Groundnuts (Shelled Eq)         | 1999           | 37                                                                    |
| 33               | Canada  | Honey                           | 1999           | 7                                                                     |
| 33               | Canada  | Lemons, Limes and products      | 1999           | 1                                                                     |
| 33               | Canada  | Maize and products              | 1999           | 105                                                                   |
| 33               | Canada  | Maize Germ Oil                  | 1999           | 30                                                                    |
| 33               | Canada  | Marine Fish, Other              | 1999           | 1                                                                     |
| 33               | Canada  | Meat                            | 1999           | 389                                                                   |
| 33               | Canada  | Milk - Excluding Butter         | 1999           | 233                                                                   |
| 33               | Canada  | Miscellaneous                   | 1999           | 8                                                                     |
| 33               | Canada  | Molluscs, Other                 | 1999           | 2                                                                     |
| 33               | Canada  | Mutton & Goat Meat              | 1999           | 5                                                                     |
| 33               | Canada  | Oats                            | 1999           | 19                                                                    |
| 33               | Canada  | Offals                          | 1999           | 6                                                                     |
| 33               | Canada  | Oilcrops                        | 1999           | 77                                                                    |
| 33               | Canada  | Olive Oil                       | 1999           | 14                                                                    |
| 33               | Canada  | Olives (including preserved)    | 1999           | 2                                                                     |
| 33               | Canada  | Onions                          | 1999           | 7                                                                     |
| 33               | Canada  | Oranges, Mandarines             | 1999           | 23                                                                    |
| 33               | Canada  | Palm Oil                        | 1999           | 1                                                                     |
| 33               | Canada  | Peas                            | 1999           | 11                                                                    |
| 33               | Canada  | Pelagic Fish                    | 1999           | 13                                                                    |
| 33               | Canada  | Pepper                          | 1999           | 1                                                                     |
| 33               | Canada  | Pigmeat                         | 1999           | 141                                                                   |
| 33               | Canada  | Pimento                         | 1999           | 1                                                                     |
| 33               | Canada  | Pineapples and products         | 1999           | 4                                                                     |
| 33               | Canada  | Potatoes and products           | 1999           | 132                                                                   |
| 33               | Canada  | Poultry Meat                    | 1999           | 137                                                                   |
| 33               | Canada  | Pulses                          | 1999           | 73                                                                    |
| 33               | Canada  | Pulses, Other and products      | 1999           | 49                                                                    |
| 33               | Canada  | Rape and Mustard Oil            | 1999           | 366                                                                   |
| 33               | Canada  | Rape and Mustardseed            | 1999           | 26                                                                    |
| 33               | Canada  | Rice (Milled Equivalent)        | 1999           | 80                                                                    |
| 33               | Canada  | Roots, Other                    | 1999           | 1                                                                     |
| 33               | Canada  | Rye and products                | 1999           | 3                                                                     |
| 33               | Canada  | Sesame seed                     | 1999           | 3                                                                     |
| 33               | Canada  | Sesameseed Oil                  | 1999           | 1                                                                     |
| 33               | Canada  | Soyabean Oil                    | 1999           | 119                                                                   |
| 33               | Canada  | Soyabeans                       | 1999           | 5                                                                     |

Dietary calcium and zinc deficiency risks are decreasing but remain prevalent

| FAO Country code | Country | Food item                       | Reference year | Net energy supply (kcal capita <sup>-1</sup> d <sup>-1</sup> ) |
|------------------|---------|---------------------------------|----------------|----------------------------------------------------------------|
| 33               | Canada  | Spices                          | 1999           | 6                                                              |
| 33               | Canada  | Spices, Other                   | 1999           | 3                                                              |
| 33               | Canada  | Starchy Roots                   | 1999           | 134                                                            |
| 33               | Canada  | Stimulants                      | 1999           | 12                                                             |
| 33               | Canada  | Sugar & Sweeteners              | 1999           | 451                                                            |
| 33               | Canada  | Sugar (Raw Equivalent)          | 1999           | 370                                                            |
| 33               | Canada  | Sunflowerseed Oil               | 1999           | 15                                                             |
| 33               | Canada  | Sweet potatoes                  | 1999           | 1                                                              |
| 33               | Canada  | Sweeteners, Other               | 1999           | 74                                                             |
| 33               | Canada  | Tea (including mate)            | 1999           | 1                                                              |
| 33               | Canada  | Tomatoes and products           | 1999           | 16                                                             |
| 33               | Canada  | Treenuts                        | 1999           | 20                                                             |
| 33               | Canada  | Vegetable Oils                  | 1999           | 563                                                            |
| 33               | Canada  | Vegetables                      | 1999           | 92                                                             |
| 33               | Canada  | Vegetables, Other               | 1999           | 68                                                             |
| 33               | Canada  | Vegetal Products                | 1999           | 2,564                                                          |
| 33               | Canada  | Wheat and products              | 1999           | 648                                                            |
| 33               | Canada  | Wine                            | 1999           | 17                                                             |
| 33               | Canada  | Alcoholic Beverages             | 2000           | 139                                                            |
| 33               | Canada  | Animal fats                     | 2000           | 227                                                            |
| 33               | Canada  | Animal Products                 | 2000           | 946                                                            |
| 33               | Canada  | Apples and products             | 2000           | 22                                                             |
| 33               | Canada  | Bananas                         | 2000           | 21                                                             |
| 33               | Canada  | Barley and products             | 2000           | 3                                                              |
| 33               | Canada  | Beans                           | 2000           | 10                                                             |
| 33               | Canada  | Beer                            | 2000           | 83                                                             |
| 33               | Canada  | Beverages, Alcoholic            | 2000           | 15                                                             |
| 33               | Canada  | Beverages, Fermented            | 2000           | 23                                                             |
| 33               | Canada  | Bovine Meat                     | 2000           | 104                                                            |
| 33               | Canada  | Butter, Ghee                    | 2000           | 57                                                             |
| 33               | Canada  | Cereals - Excluding Beer        | 2000           | 865                                                            |
| 33               | Canada  | Cereals, Other                  | 2000           | 11                                                             |
| 33               | Canada  | Cocoa Beans and products        | 2000           | 5                                                              |
| 33               | Canada  | Coconut Oil                     | 2000           | 6                                                              |
| 33               | Canada  | Coconuts - Incl Copra           | 2000           | 5                                                              |
| 33               | Canada  | Coffee and products             | 2000           | 6                                                              |
| 33               | Canada  | Cottonseed Oil                  | 2000           | 11                                                             |
| 33               | Canada  | Cream                           | 2000           | 36                                                             |
| 33               | Canada  | Crustaceans                     | 2000           | 8                                                              |
| 33               | Canada  | Dates                           | 2000           | 1                                                              |
| 33               | Canada  | Demersal Fish                   | 2000           | 7                                                              |
| 33               | Canada  | Eggs                            | 2000           | 42                                                             |
| 33               | Canada  | Fats, Animals, Raw              | 2000           | 133                                                            |
| 33               | Canada  | Fish, Seafood                   | 2000           | 40                                                             |
| 33               | Canada  | Freshwater Fish                 | 2000           | 8                                                              |
| 33               | Canada  | Fruits - Excluding Wine         | 2000           | 120                                                            |
| 33               | Canada  | Fruits, Other                   | 2000           | 28                                                             |
| 33               | Canada  | Grand Total                     | 2000           | 3,512                                                          |
| 33               | Canada  | Grapefruit and products         | 2000           | 2                                                              |
| 33               | Canada  | Grapes and products (excl wine) | 2000           | 17                                                             |
| 33               | Canada  | Groundnut Oil                   | 2000           | 1                                                              |
| 33               | Canada  | Groundnuts (Shelled Eq)         | 2000           | 38                                                             |
| 33               | Canada  | Honey                           | 2000           | 5                                                              |
| 33               | Canada  | Lemons, Limes and products      | 2000           | 1                                                              |
| 33               | Canada  | Maize and products              | 2000           | 114                                                            |
| 33               | Canada  | Maize Germ Oil                  | 2000           | 37                                                             |
| 33               | Canada  | Marine Fish, Other              | 2000           | 1                                                              |
| 33               | Canada  | Meat                            | 2000           | 386                                                            |
| 33               | Canada  | Milk - Excluding Butter         | 2000           | 247                                                            |
| 33               | Canada  | Miscellaneous                   | 2000           | 9                                                              |
| 33               | Canada  | Molluscs, Other                 | 2000           | 2                                                              |
| 33               | Canada  | Mutton & Goat Meat              | 2000           | 6                                                              |
| 33               | Canada  | Oats                            | 2000           | 4                                                              |
| 33               | Canada  | Offals                          | 2000           | 4                                                              |
| 33               | Canada  | Oilcrops                        | 2000           | 70                                                             |
| 33               | Canada  | Oilcrops, Other                 | 2000           | 1                                                              |
| 33               | Canada  | Olive Oil                       | 2000           | 19                                                             |
| 33               | Canada  | Olives (including preserved)    | 2000           | 2                                                              |
| 33               | Canada  | Onions                          | 2000           | 7                                                              |
| 33               | Canada  | Oranges, Mandarines             | 2000           | 24                                                             |
| 33               | Canada  | Palm Oil                        | 2000           | 1                                                              |
| 33               | Canada  | Peas                            | 2000           | 12                                                             |
| 33               | Canada  | Pelagic Fish                    | 2000           | 15                                                             |
| 33               | Canada  | Pepper                          | 2000           | 1                                                              |
| 33               | Canada  | Pigmeat                         | 2000           | 135                                                            |
| 33               | Canada  | Pimento                         | 2000           | 1                                                              |
| 33               | Canada  | Pineapples and products         | 2000           | 4                                                              |
| 33               | Canada  | Potatoes and products           | 2000           | 129                                                            |
| 33               | Canada  | Poultry Meat                    | 2000           | 142                                                            |
| 33               | Canada  | Pulses                          | 2000           | 74                                                             |
| 33               | Canada  | Pulses, Other and products      | 2000           | 53                                                             |
| 33               | Canada  | Rape and Mustard Oil            | 2000           | 359                                                            |
| 33               | Canada  | Rape and Mustardseed            | 2000           | 17                                                             |
| 33               | Canada  | Rice (Milled Equivalent)        | 2000           | 78                                                             |
| 33               | Canada  | Roots, Other                    | 2000           | 1                                                              |
| 33               | Canada  | Rye and products                | 2000           | 3                                                              |
| 33               | Canada  | Sesame seed                     | 2000           | 3                                                              |
| 33               | Canada  | Sesameseed Oil                  | 2000           | 1                                                              |
| 33               | Canada  | Soyabean Oil                    | 2000           | 114                                                            |
| 33               | Canada  | Soyabeans                       | 2000           | 5                                                              |
| 33               | Canada  | Spices                          | 2000           | 6                                                              |
| 33               | Canada  | Spices, Other                   | 2000           | 3                                                              |
| 33               | Canada  | Starchy Roots                   | 2000           | 131                                                            |
| 33               | Canada  | Stimulants                      | 2000           | 12                                                             |
| 33               | Canada  | Sugar & Sweeteners              | 2000           | 467                                                            |
| 33               | Canada  | Sugar (Raw Equivalent)          | 2000           | 384                                                            |
| 33               | Canada  | Sunflowerseed Oil               | 2000           | 15                                                             |

Dietary calcium and zinc deficiency risks are decreasing but remain prevalent

| FAO Country code | Country | Food item                       | Reference year | Net energy supply (kcal capita <sup>-1</sup> d <sup>-1</sup> ) |
|------------------|---------|---------------------------------|----------------|----------------------------------------------------------------|
| 33               | Canada  | Sweet potatoes                  | 2000           | 1                                                              |
| 33               | Canada  | Sweeteners, Other               | 2000           | 78                                                             |
| 33               | Canada  | Tea (including mate)            | 2000           | 1                                                              |
| 33               | Canada  | Tomatoes and products           | 2000           | 16                                                             |
| 33               | Canada  | Treenuts                        | 2000           | 21                                                             |
| 33               | Canada  | Vegetable Oils                  | 2000           | 565                                                            |
| 33               | Canada  | Vegetables                      | 2000           | 88                                                             |
| 33               | Canada  | Vegetables, Other               | 2000           | 64                                                             |
| 33               | Canada  | Vegetal Products                | 2000           | 2,566                                                          |
| 33               | Canada  | Wheat and products              | 2000           | 651                                                            |
| 33               | Canada  | Wine                            | 2000           | 17                                                             |
| 33               | Canada  | Alcoholic Beverages             | 2001           | 140                                                            |
| 33               | Canada  | Animal fats                     | 2001           | 234                                                            |
| 33               | Canada  | Animal Products                 | 2001           | 947                                                            |
| 33               | Canada  | Apples and products             | 2001           | 19                                                             |
| 33               | Canada  | Bananas                         | 2001           | 21                                                             |
| 33               | Canada  | Barley and products             | 2001           | 3                                                              |
| 33               | Canada  | Beans                           | 2001           | 9                                                              |
| 33               | Canada  | Beer                            | 2001           | 86                                                             |
| 33               | Canada  | Beverages, Alcoholic            | 2001           | 18                                                             |
| 33               | Canada  | Beverages, Fermented            | 2001           | 19                                                             |
| 33               | Canada  | Bovine Meat                     | 2001           | 100                                                            |
| 33               | Canada  | Butter, Ghee                    | 2001           | 57                                                             |
| 33               | Canada  | Cereals - Excluding Beer        | 2001           | 861                                                            |
| 33               | Canada  | Cereals, Other                  | 2001           | 12                                                             |
| 33               | Canada  | Cocoa Beans and products        | 2001           | 5                                                              |
| 33               | Canada  | Coconut Oil                     | 2001           | 5                                                              |
| 33               | Canada  | Coconuts - Incl Copra           | 2001           | 4                                                              |
| 33               | Canada  | Coffee and products             | 2001           | 7                                                              |
| 33               | Canada  | Cottonseed Oil                  | 2001           | 9                                                              |
| 33               | Canada  | Cream                           | 2001           | 38                                                             |
| 33               | Canada  | Crustaceans                     | 2001           | 9                                                              |
| 33               | Canada  | Dates                           | 2001           | 1                                                              |
| 33               | Canada  | Demersal Fish                   | 2001           | 9                                                              |
| 33               | Canada  | Eggs                            | 2001           | 45                                                             |
| 33               | Canada  | Fats, Animals, Raw              | 2001           | 139                                                            |
| 33               | Canada  | Fish, Seafood                   | 2001           | 40                                                             |
| 33               | Canada  | Freshwater Fish                 | 2001           | 7                                                              |
| 33               | Canada  | Fruits - Excluding Wine         | 2001           | 117                                                            |
| 33               | Canada  | Fruits, Other                   | 2001           | 29                                                             |
| 33               | Canada  | Grand Total                     | 2001           | 3,513                                                          |
| 33               | Canada  | Grapefruit and products         | 2001           | 2                                                              |
| 33               | Canada  | Grapes and products (excl wine) | 2001           | 16                                                             |
| 33               | Canada  | Groundnuts (Shelled Eq)         | 2001           | 34                                                             |
| 33               | Canada  | Honey                           | 2001           | 7                                                              |
| 33               | Canada  | Lemons, Limes and products      | 2001           | 1                                                              |
| 33               | Canada  | Maize and products              | 2001           | 109                                                            |
| 33               | Canada  | Maize Germ Oil                  | 2001           | 31                                                             |
| 33               | Canada  | Marine Fish, Other              | 2001           | 1                                                              |
| 33               | Canada  | Meat                            | 2001           | 389                                                            |
| 33               | Canada  | Milk - Excluding Butter         | 2001           | 236                                                            |
| 33               | Canada  | Miscellaneous                   | 2001           | 8                                                              |
| 33               | Canada  | Molluscs, Other                 | 2001           | 2                                                              |
| 33               | Canada  | Mutton & Goat Meat              | 2001           | 7                                                              |
| 33               | Canada  | Oats                            | 2001           | 4                                                              |
| 33               | Canada  | Offals                          | 2001           | 4                                                              |
| 33               | Canada  | Oilcrops                        | 2001           | 63                                                             |
| 33               | Canada  | Olive Oil                       | 2001           | 18                                                             |
| 33               | Canada  | Olives (including preserved)    | 2001           | 2                                                              |
| 33               | Canada  | Onions                          | 2001           | 8                                                              |
| 33               | Canada  | Oranges, Mandarines             | 2001           | 24                                                             |
| 33               | Canada  | Palm Oil                        | 2001           | 1                                                              |
| 33               | Canada  | Peas                            | 2001           | 14                                                             |
| 33               | Canada  | Pelagic Fish                    | 2001           | 13                                                             |
| 33               | Canada  | Pepper                          | 2001           | 1                                                              |
| 33               | Canada  | Pigmeat                         | 2001           | 137                                                            |
| 33               | Canada  | Pimento                         | 2001           | 1                                                              |
| 33               | Canada  | Pineapples and products         | 2001           | 4                                                              |
| 33               | Canada  | Potatoes and products           | 2001           | 128                                                            |
| 33               | Canada  | Poultry Meat                    | 2001           | 145                                                            |
| 33               | Canada  | Pulses                          | 2001           | 70                                                             |
| 33               | Canada  | Pulses, Other and products      | 2001           | 47                                                             |
| 33               | Canada  | Rape and Mustard Oil            | 2001           | 352                                                            |
| 33               | Canada  | Rape and Mustardseed            | 2001           | 15                                                             |
| 33               | Canada  | Rice (Milled Equivalent)        | 2001           | 75                                                             |
| 33               | Canada  | Roots, Other                    | 2001           | 1                                                              |
| 33               | Canada  | Rye and products                | 2001           | 4                                                              |
| 33               | Canada  | Sesame seed                     | 2001           | 3                                                              |
| 33               | Canada  | Sesameseed Oil                  | 2001           | 1                                                              |
| 33               | Canada  | Soyabean Oil                    | 2001           | 125                                                            |
| 33               | Canada  | Soyabeans                       | 2001           | 5                                                              |
| 33               | Canada  | Spices                          | 2001           | 6                                                              |
| 33               | Canada  | Spices, Other                   | 2001           | 4                                                              |
| 33               | Canada  | Starchy Roots                   | 2001           | 131                                                            |
| 33               | Canada  | Stimulants                      | 2001           | 12                                                             |
| 33               | Canada  | Sugar & Sweeteners              | 2001           | 490                                                            |
| 33               | Canada  | Sugar (Raw Equivalent)          | 2001           | 407                                                            |
| 33               | Canada  | Sunflowerseed Oil               | 2001           | 14                                                             |
| 33               | Canada  | Sweet potatoes                  | 2001           | 1                                                              |
| 33               | Canada  | Sweeteners, Other               | 2001           | 75                                                             |
| 33               | Canada  | Tea (including mate)            | 2001           | 1                                                              |
| 33               | Canada  | Tomatoes and products           | 2001           | 16                                                             |
| 33               | Canada  | Treenuts                        | 2001           | 23                                                             |
| 33               | Canada  | Vegetable Oils                  | 2001           | 555                                                            |
| 33               | Canada  | Vegetables                      | 2001           | 89                                                             |
| 33               | Canada  | Vegetables, Other               | 2001           | 66                                                             |
| 33               | Canada  | Vegetal Products                | 2001           | 2,566                                                          |

Dietary calcium and zinc deficiency risks are decreasing but remain prevalent

| FAO Country code | Country | Food item                       | Reference year | Net energy supply (kcal capita <sup>-1</sup> d <sup>-1</sup> ) |
|------------------|---------|---------------------------------|----------------|----------------------------------------------------------------|
| 33               | Canada  | Wheat and products              | 2001           | 653                                                            |
| 33               | Canada  | Wine                            | 2001           | 17                                                             |
| 33               | Canada  | Alcoholic Beverages             | 2002           | 142                                                            |
| 33               | Canada  | Animal fats                     | 2002           | 241                                                            |
| 33               | Canada  | Animal Products                 | 2002           | 948                                                            |
| 33               | Canada  | Apples and products             | 2002           | 18                                                             |
| 33               | Canada  | Bananas                         | 2002           | 21                                                             |
| 33               | Canada  | Barley and products             | 2002           | 2                                                              |
| 33               | Canada  | Beans                           | 2002           | 15                                                             |
| 33               | Canada  | Beer                            | 2002           | 87                                                             |
| 33               | Canada  | Beverages, Alcoholic            | 2002           | 17                                                             |
| 33               | Canada  | Beverages, Fermented            | 2002           | 20                                                             |
| 33               | Canada  | Bovine Meat                     | 2002           | 100                                                            |
| 33               | Canada  | Butter, Ghee                    | 2002           | 57                                                             |
| 33               | Canada  | Cereals - Excluding Beer        | 2002           | 871                                                            |
| 33               | Canada  | Cereals, Other                  | 2002           | 16                                                             |
| 33               | Canada  | Cocoa Beans and products        | 2002           | 4                                                              |
| 33               | Canada  | Coconut Oil                     | 2002           | 5                                                              |
| 33               | Canada  | Coconuts - Incl Copra           | 2002           | 4                                                              |
| 33               | Canada  | Coffee and products             | 2002           | 6                                                              |
| 33               | Canada  | Cottonseed Oil                  | 2002           | 9                                                              |
| 33               | Canada  | Cream                           | 2002           | 39                                                             |
| 33               | Canada  | Crustaceans                     | 2002           | 8                                                              |
| 33               | Canada  | Dates                           | 2002           | 1                                                              |
| 33               | Canada  | Demersal Fish                   | 2002           | 8                                                              |
| 33               | Canada  | Eggs                            | 2002           | 43                                                             |
| 33               | Canada  | Fats, Animals, Raw              | 2002           | 145                                                            |
| 33               | Canada  | Fish, Seafood                   | 2002           | 39                                                             |
| 33               | Canada  | Freshwater Fish                 | 2002           | 6                                                              |
| 33               | Canada  | Fruits - Excluding Wine         | 2002           | 118                                                            |
| 33               | Canada  | Fruits, Other                   | 2002           | 30                                                             |
| 33               | Canada  | Grand Total                     | 2002           | 3,536                                                          |
| 33               | Canada  | Grapefruit and products         | 2002           | 2                                                              |
| 33               | Canada  | Grapes and products (excl wine) | 2002           | 17                                                             |
| 33               | Canada  | Groundnuts (Shelled Eq)         | 2002           | 38                                                             |
| 33               | Canada  | Honey                           | 2002           | 6                                                              |
| 33               | Canada  | Lemons, Limes and products      | 2002           | 1                                                              |
| 33               | Canada  | Maize and products              | 2002           | 121                                                            |
| 33               | Canada  | Maize Germ Oil                  | 2002           | 27                                                             |
| 33               | Canada  | Marine Fish, Other              | 2002           | 1                                                              |
| 33               | Canada  | Meat                            | 2002           | 385                                                            |
| 33               | Canada  | Milk - Excluding Butter         | 2002           | 235                                                            |
| 33               | Canada  | Miscellaneous                   | 2002           | 7                                                              |
| 33               | Canada  | Molluscs, Other                 | 2002           | 2                                                              |
| 33               | Canada  | Mutton & Goat Meat              | 2002           | 7                                                              |
| 33               | Canada  | Oats                            | 2002           | 4                                                              |
| 33               | Canada  | Offals                          | 2002           | 5                                                              |
| 33               | Canada  | Oilcrops                        | 2002           | 66                                                             |
| 33               | Canada  | Oilcrops, Other                 | 2002           | 1                                                              |
| 33               | Canada  | Olive Oil                       | 2002           | 19                                                             |
| 33               | Canada  | Olives (including preserved)    | 2002           | 2                                                              |
| 33               | Canada  | Onions                          | 2002           | 7                                                              |
| 33               | Canada  | Oranges, Mandarines             | 2002           | 23                                                             |
| 33               | Canada  | Palm Oil                        | 2002           | 1                                                              |
| 33               | Canada  | Peas                            | 2002           | 11                                                             |
| 33               | Canada  | Pelagic Fish                    | 2002           | 14                                                             |
| 33               | Canada  | Pepper                          | 2002           | 1                                                              |
| 33               | Canada  | Pigmeat                         | 2002           | 134                                                            |
| 33               | Canada  | Pimento                         | 2002           | 1                                                              |
| 33               | Canada  | Pineapples and products         | 2002           | 4                                                              |
| 33               | Canada  | Potatoes and products           | 2002           | 130                                                            |
| 33               | Canada  | Poultry Meat                    | 2002           | 144                                                            |
| 33               | Canada  | Pulses                          | 2002           | 73                                                             |
| 33               | Canada  | Pulses, Other and products      | 2002           | 47                                                             |
| 33               | Canada  | Rape and Mustard Oil            | 2002           | 306                                                            |
| 33               | Canada  | Rape and Mustardseed            | 2002           | 12                                                             |
| 33               | Canada  | Rice (Milled Equivalent)        | 2002           | 68                                                             |
| 33               | Canada  | Roots, Other                    | 2002           | 1                                                              |
| 33               | Canada  | Rye and products                | 2002           | 4                                                              |
| 33               | Canada  | Sesame seed                     | 2002           | 3                                                              |
| 33               | Canada  | Sesameseed Oil                  | 2002           | 1                                                              |
| 33               | Canada  | Soyabean Oil                    | 2002           | 129                                                            |
| 33               | Canada  | Soyabeans                       | 2002           | 5                                                              |
| 33               | Canada  | Spices                          | 2002           | 7                                                              |
| 33               | Canada  | Spices, Other                   | 2002           | 4                                                              |
| 33               | Canada  | Starchy Roots                   | 2002           | 132                                                            |
| 33               | Canada  | Stimulants                      | 2002           | 10                                                             |
| 33               | Canada  | Sugar & Sweeteners              | 2002           | 535                                                            |
| 33               | Canada  | Sugar (Raw Equivalent)          | 2002           | 442                                                            |
| 33               | Canada  | Sunflowerseed Oil               | 2002           | 14                                                             |
| 33               | Canada  | Sweet potatoes                  | 2002           | 1                                                              |
| 33               | Canada  | Sweeteners, Other               | 2002           | 87                                                             |
| 33               | Canada  | Tea (including mate)            | 2002           | 1                                                              |
| 33               | Canada  | Tomatoes and products           | 2002           | 17                                                             |
| 33               | Canada  | Treenuts                        | 2002           | 24                                                             |
| 33               | Canada  | Vegetable Oils                  | 2002           | 511                                                            |
| 33               | Canada  | Vegetables                      | 2002           | 92                                                             |
| 33               | Canada  | Vegetables, Other               | 2002           | 68                                                             |
| 33               | Canada  | Vegetal Products                | 2002           | 2,588                                                          |
| 33               | Canada  | Wheat and products              | 2002           | 657                                                            |
| 33               | Canada  | Wine                            | 2002           | 18                                                             |
| 33               | Canada  | Alcoholic Beverages             | 2003           | 126                                                            |
| 33               | Canada  | Animal fats                     | 2003           | 249                                                            |
| 33               | Canada  | Animal Products                 | 2003           | 924                                                            |
| 33               | Canada  | Apples and products             | 2003           | 14                                                             |
| 33               | Canada  | Bananas                         | 2003           | 22                                                             |
| 33               | Canada  | Barley and products             | 2003           | 2                                                              |



Dietary calcium and zinc deficiency risks are decreasing but remain prevalent

| FAO Country code | Country | Food item                       | Reference year | Net energy supply (kcal capita <sup>-1</sup> d <sup>-1</sup> ) |
|------------------|---------|---------------------------------|----------------|----------------------------------------------------------------|
| 33               | Canada  | Beans                           | 2003           | 12                                                             |
| 33               | Canada  | Beer                            | 2003           | 73                                                             |
| 33               | Canada  | Beverages, Alcoholic            | 2003           | 16                                                             |
| 33               | Canada  | Beverages, Fermented            | 2003           | 19                                                             |
| 33               | Canada  | Bovine Meat                     | 2003           | 106                                                            |
| 33               | Canada  | Butter, Ghee                    | 2003           | 58                                                             |
| 33               | Canada  | Cereals - Excluding Beer        | 2003           | 851                                                            |
| 33               | Canada  | Cereals, Other                  | 2003           | 13                                                             |
| 33               | Canada  | Cocoa Beans and products        | 2003           | 4                                                              |
| 33               | Canada  | Coconut Oil                     | 2003           | 5                                                              |
| 33               | Canada  | Coconuts - Incl Copra           | 2003           | 5                                                              |
| 33               | Canada  | Coffee and products             | 2003           | 5                                                              |
| 33               | Canada  | Cottonseed Oil                  | 2003           | 10                                                             |
| 33               | Canada  | Cream                           | 2003           | 42                                                             |
| 33               | Canada  | Crustaceans                     | 2003           | 8                                                              |
| 33               | Canada  | Dates                           | 2003           | 1                                                              |
| 33               | Canada  | Demersal Fish                   | 2003           | 8                                                              |
| 33               | Canada  | Eggs                            | 2003           | 43                                                             |
| 33               | Canada  | Fats, Animals, Raw              | 2003           | 149                                                            |
| 33               | Canada  | Fish, Seafood                   | 2003           | 38                                                             |
| 33               | Canada  | Freshwater Fish                 | 2003           | 8                                                              |
| 33               | Canada  | Fruits - Excluding Wine         | 2003           | 114                                                            |
| 33               | Canada  | Fruits, Other                   | 2003           | 31                                                             |
| 33               | Canada  | Grand Total                     | 2003           | 3,537                                                          |
| 33               | Canada  | Grapefruit and products         | 2003           | 2                                                              |
| 33               | Canada  | Grapes and products (excl wine) | 2003           | 18                                                             |
| 33               | Canada  | Groundnut Oil                   | 2003           | 1                                                              |
| 33               | Canada  | Groundnuts (Shelled Eq)         | 2003           | 34                                                             |
| 33               | Canada  | Honey                           | 2003           | 7                                                              |
| 33               | Canada  | Lemons, Limes and products      | 2003           | 1                                                              |
| 33               | Canada  | Maize and products              | 2003           | 125                                                            |
| 33               | Canada  | Maize Germ Oil                  | 2003           | 25                                                             |
| 33               | Canada  | Marine Fish, Other              | 2003           | 1                                                              |
| 33               | Canada  | Meat                            | 2003           | 377                                                            |
| 33               | Canada  | Milk - Excluding Butter         | 2003           | 212                                                            |
| 33               | Canada  | Miscellaneous                   | 2003           | 7                                                              |
| 33               | Canada  | Molluscs, Other                 | 2003           | 2                                                              |
| 33               | Canada  | Mutton & Goat Meat              | 2003           | 7                                                              |
| 33               | Canada  | Oats                            | 2003           | 3                                                              |
| 33               | Canada  | Offals                          | 2003           | 5                                                              |
| 33               | Canada  | Oilcrops                        | 2003           | 72                                                             |
| 33               | Canada  | Olive Oil                       | 2003           | 19                                                             |
| 33               | Canada  | Olives (including preserved)    | 2003           | 2                                                              |
| 33               | Canada  | Onions                          | 2003           | 7                                                              |
| 33               | Canada  | Oranges, Mandarines             | 2003           | 22                                                             |
| 33               | Canada  | Palm Oil                        | 2003           | 1                                                              |
| 33               | Canada  | Peas                            | 2003           | 10                                                             |
| 33               | Canada  | Pelagic Fish                    | 2003           | 11                                                             |
| 33               | Canada  | Pepper                          | 2003           | 1                                                              |
| 33               | Canada  | Pigmeat                         | 2003           | 121                                                            |
| 33               | Canada  | Pimento                         | 2003           | 1                                                              |
| 33               | Canada  | Pineapples and products         | 2003           | 4                                                              |
| 33               | Canada  | Potatoes and products           | 2003           | 135                                                            |
| 33               | Canada  | Poultry Meat                    | 2003           | 143                                                            |
| 33               | Canada  | Pulses                          | 2003           | 64                                                             |
| 33               | Canada  | Pulses, Other and products      | 2003           | 43                                                             |
| 33               | Canada  | Rape and Mustard Oil            | 2003           | 364                                                            |
| 33               | Canada  | Rape and Mustardseed            | 2003           | 23                                                             |
| 33               | Canada  | Rice (Milled Equivalent)        | 2003           | 64                                                             |
| 33               | Canada  | Roots, Other                    | 2003           | 1                                                              |
| 33               | Canada  | Rye and products                | 2003           | 4                                                              |
| 33               | Canada  | Sesame seed                     | 2003           | 3                                                              |
| 33               | Canada  | Sesameseed Oil                  | 2003           | 1                                                              |
| 33               | Canada  | Soyabean Oil                    | 2003           | 136                                                            |
| 33               | Canada  | Soyabeans                       | 2003           | 5                                                              |
| 33               | Canada  | Spices                          | 2003           | 6                                                              |
| 33               | Canada  | Spices, Other                   | 2003           | 4                                                              |
| 33               | Canada  | Starchy Roots                   | 2003           | 137                                                            |
| 33               | Canada  | Stimulants                      | 2003           | 10                                                             |
| 33               | Canada  | Sugar & Sweeteners              | 2003           | 534                                                            |
| 33               | Canada  | Sugar (Raw Equivalent)          | 2003           | 440                                                            |
| 33               | Canada  | Sunflowerseed Oil               | 2003           | 14                                                             |
| 33               | Canada  | Sweet potatoes                  | 2003           | 1                                                              |
| 33               | Canada  | Sweeteners, Other               | 2003           | 87                                                             |
| 33               | Canada  | Tea (including mate)            | 2003           | 1                                                              |
| 33               | Canada  | Tomatoes and products           | 2003           | 15                                                             |
| 33               | Canada  | Treenuts                        | 2003           | 25                                                             |
| 33               | Canada  | Vegetable Oils                  | 2003           | 576                                                            |
| 33               | Canada  | Vegetables                      | 2003           | 91                                                             |
| 33               | Canada  | Vegetables, Other               | 2003           | 69                                                             |
| 33               | Canada  | Vegetal Products                | 2003           | 2,613                                                          |
| 33               | Canada  | Wheat and products              | 2003           | 640                                                            |
| 33               | Canada  | Wine                            | 2003           | 18                                                             |
| 33               | Canada  | Alcoholic Beverages             | 2004           | 136                                                            |
| 33               | Canada  | Animal fats                     | 2004           | 255                                                            |
| 33               | Canada  | Animal Products                 | 2004           | 939                                                            |
| 33               | Canada  | Apples and products             | 2004           | 18                                                             |
| 33               | Canada  | Bananas                         | 2004           | 22                                                             |
| 33               | Canada  | Barley and products             | 2004           | 1                                                              |
| 33               | Canada  | Beans                           | 2004           | 7                                                              |
| 33               | Canada  | Beer                            | 2004           | 83                                                             |
| 33               | Canada  | Beverages, Alcoholic            | 2004           | 15                                                             |
| 33               | Canada  | Beverages, Fermented            | 2004           | 19                                                             |
| 33               | Canada  | Bovine Meat                     | 2004           | 101                                                            |
| 33               | Canada  | Butter, Ghee                    | 2004           | 56                                                             |
| 33               | Canada  | Cereals - Excluding Beer        | 2004           | 867                                                            |
| 33               | Canada  | Cereals, Other                  | 2004           | 6                                                              |

Dietary calcium and zinc deficiency risks are decreasing but remain prevalent

| FAO Country code | Country | Food item                       | Reference year | Net energy supply (kcal capita <sup>-1</sup> d <sup>-1</sup> ) |
|------------------|---------|---------------------------------|----------------|----------------------------------------------------------------|
| 33               | Canada  | Cocoa Beans and products        | 2004           | 6                                                              |
| 33               | Canada  | Coconut Oil                     | 2004           | 5                                                              |
| 33               | Canada  | Coconuts - Incl Copra           | 2004           | 4                                                              |
| 33               | Canada  | Coffee and products             | 2004           | 7                                                              |
| 33               | Canada  | Cottonseed Oil                  | 2004           | 9                                                              |
| 33               | Canada  | Cream                           | 2004           | 44                                                             |
| 33               | Canada  | Crustaceans                     | 2004           | 7                                                              |
| 33               | Canada  | Dates                           | 2004           | 1                                                              |
| 33               | Canada  | Demersal Fish                   | 2004           | 9                                                              |
| 33               | Canada  | Eggs                            | 2004           | 43                                                             |
| 33               | Canada  | Fats, Animals, Raw              | 2004           | 155                                                            |
| 33               | Canada  | Fish, Seafood                   | 2004           | 38                                                             |
| 33               | Canada  | Freshwater Fish                 | 2004           | 6                                                              |
| 33               | Canada  | Fruits - Excluding Wine         | 2004           | 116                                                            |
| 33               | Canada  | Fruits, Other                   | 2004           | 30                                                             |
| 33               | Canada  | Grand Total                     | 2004           | 3,543                                                          |
| 33               | Canada  | Grapefruit and products         | 2004           | 2                                                              |
| 33               | Canada  | Grapes and products (excl wine) | 2004           | 17                                                             |
| 33               | Canada  | Groundnut Oil                   | 2004           | 1                                                              |
| 33               | Canada  | Groundnuts (Shelled Eq)         | 2004           | 41                                                             |
| 33               | Canada  | Honey                           | 2004           | 8                                                              |
| 33               | Canada  | Lemons, Limes and products      | 2004           | 1                                                              |
| 33               | Canada  | Maize and products              | 2004           | 119                                                            |
| 33               | Canada  | Maize Germ Oil                  | 2004           | 34                                                             |
| 33               | Canada  | Marine Fish, Other              | 2004           | 1                                                              |
| 33               | Canada  | Meat                            | 2004           | 381                                                            |
| 33               | Canada  | Milk - Excluding Butter         | 2004           | 218                                                            |
| 33               | Canada  | Miscellaneous                   | 2004           | 7                                                              |
| 33               | Canada  | Molluscs, Other                 | 2004           | 2                                                              |
| 33               | Canada  | Mutton & Goat Meat              | 2004           | 7                                                              |
| 33               | Canada  | Oats                            | 2004           | 3                                                              |
| 33               | Canada  | Offals                          | 2004           | 6                                                              |
| 33               | Canada  | Oilcrops                        | 2004           | 80                                                             |
| 33               | Canada  | Olive Oil                       | 2004           | 21                                                             |
| 33               | Canada  | Olives (including preserved)    | 2004           | 2                                                              |
| 33               | Canada  | Onions                          | 2004           | 7                                                              |
| 33               | Canada  | Oranges, Mandarines             | 2004           | 21                                                             |
| 33               | Canada  | Palm Oil                        | 2004           | 1                                                              |
| 33               | Canada  | Peas                            | 2004           | 13                                                             |
| 33               | Canada  | Pelagic Fish                    | 2004           | 13                                                             |
| 33               | Canada  | Pepper                          | 2004           | 1                                                              |
| 33               | Canada  | Pigmeat                         | 2004           | 128                                                            |
| 33               | Canada  | Pimento                         | 2004           | 1                                                              |
| 33               | Canada  | Pineapples and products         | 2004           | 4                                                              |
| 33               | Canada  | Potatoes and products           | 2004           | 125                                                            |
| 33               | Canada  | Poultry Meat                    | 2004           | 144                                                            |
| 33               | Canada  | Pulses                          | 2004           | 64                                                             |
| 33               | Canada  | Pulses, Other and products      | 2004           | 44                                                             |
| 33               | Canada  | Rape and Mustard Oil            | 2004           | 331                                                            |
| 33               | Canada  | Rape and Mustardseed            | 2004           | 23                                                             |
| 33               | Canada  | Rice (Milled Equivalent)        | 2004           | 89                                                             |
| 33               | Canada  | Roots, Other                    | 2004           | 1                                                              |
| 33               | Canada  | Rye and products                | 2004           | 4                                                              |
| 33               | Canada  | Sesame seed                     | 2004           | 3                                                              |
| 33               | Canada  | Sesameseed Oil                  | 2004           | 1                                                              |
| 33               | Canada  | Soyabean Oil                    | 2004           | 129                                                            |
| 33               | Canada  | Soyabeans                       | 2004           | 6                                                              |
| 33               | Canada  | Spices                          | 2004           | 8                                                              |
| 33               | Canada  | Spices, Other                   | 2004           | 5                                                              |
| 33               | Canada  | Starchy Roots                   | 2004           | 128                                                            |
| 33               | Canada  | Stimulants                      | 2004           | 13                                                             |
| 33               | Canada  | Sugar & Sweeteners              | 2004           | 524                                                            |
| 33               | Canada  | Sugar (Raw Equivalent)          | 2004           | 431                                                            |
| 33               | Canada  | Sunflowerseed Oil               | 2004           | 13                                                             |
| 33               | Canada  | Sweet potatoes                  | 2004           | 2                                                              |
| 33               | Canada  | Sweeteners, Other               | 2004           | 86                                                             |
| 33               | Canada  | Tea (including mate)            | 2004           | 1                                                              |
| 33               | Canada  | Tomatoes and products           | 2004           | 17                                                             |
| 33               | Canada  | Treenuts                        | 2004           | 26                                                             |
| 33               | Canada  | Vegetable Oils                  | 2004           | 545                                                            |
| 33               | Canada  | Vegetables                      | 2004           | 88                                                             |
| 33               | Canada  | Vegetables, Other               | 2004           | 64                                                             |
| 33               | Canada  | Vegetal Products                | 2004           | 2,604                                                          |
| 33               | Canada  | Wheat and products              | 2004           | 644                                                            |
| 33               | Canada  | Wine                            | 2004           | 19                                                             |
| 33               | Canada  | Alcoholic Beverages             | 2005           | 134                                                            |
| 33               | Canada  | Animal fats                     | 2005           | 247                                                            |
| 33               | Canada  | Animal Products                 | 2005           | 906                                                            |
| 33               | Canada  | Apples and products             | 2005           | 23                                                             |
| 33               | Canada  | Bananas                         | 2005           | 22                                                             |
| 33               | Canada  | Barley and products             | 2005           | 1                                                              |
| 33               | Canada  | Beans                           | 2005           | 9                                                              |
| 33               | Canada  | Beer                            | 2005           | 87                                                             |
| 33               | Canada  | Beverages, Alcoholic            | 2005           | 8                                                              |
| 33               | Canada  | Beverages, Fermented            | 2005           | 21                                                             |
| 33               | Canada  | Bovine Meat                     | 2005           | 99                                                             |
| 33               | Canada  | Butter, Ghee                    | 2005           | 55                                                             |
| 33               | Canada  | Cereals - Excluding Beer        | 2005           | 871                                                            |
| 33               | Canada  | Cereals, Other                  | 2005           | 6                                                              |
| 33               | Canada  | Cocoa Beans and products        | 2005           | 2                                                              |
| 33               | Canada  | Coconut Oil                     | 2005           | 5                                                              |
| 33               | Canada  | Coconuts - Incl Copra           | 2005           | 4                                                              |
| 33               | Canada  | Coffee and products             | 2005           | 7                                                              |
| 33               | Canada  | Cottonseed Oil                  | 2005           | 6                                                              |
| 33               | Canada  | Cream                           | 2005           | 45                                                             |
| 33               | Canada  | Crustaceans                     | 2005           | 7                                                              |
| 33               | Canada  | Dates                           | 2005           | 1                                                              |

Dietary calcium and zinc deficiency risks are decreasing but remain prevalent

| FAO Country code | Country | Food item                       | Reference year | Net energy supply (kcal capita <sup>-1</sup> d <sup>-1</sup> ) |
|------------------|---------|---------------------------------|----------------|----------------------------------------------------------------|
| 33               | Canada  | Demersal Fish                   | 2005           | 9                                                              |
| 33               | Canada  | Eggs                            | 2005           | 43                                                             |
| 33               | Canada  | Fats, Animals, Raw              | 2005           | 147                                                            |
| 33               | Canada  | Fish, Seafood                   | 2005           | 36                                                             |
| 33               | Canada  | Freshwater Fish                 | 2005           | 6                                                              |
| 33               | Canada  | Fruits - Excluding Wine         | 2005           | 124                                                            |
| 33               | Canada  | Fruits, Other                   | 2005           | 31                                                             |
| 33               | Canada  | Grand Total                     | 2005           | 3,506                                                          |
| 33               | Canada  | Grapefruit and products         | 2005           | 2                                                              |
| 33               | Canada  | Grapes and products (excl wine) | 2005           | 17                                                             |
| 33               | Canada  | Groundnut Oil                   | 2005           | 1                                                              |
| 33               | Canada  | Groundnuts (Shelled Eq)         | 2005           | 42                                                             |
| 33               | Canada  | Honey                           | 2005           | 8                                                              |
| 33               | Canada  | Lemons, Limes and products      | 2005           | 1                                                              |
| 33               | Canada  | Maize and products              | 2005           | 117                                                            |
| 33               | Canada  | Maize Germ Oil                  | 2005           | 35                                                             |
| 33               | Canada  | Marine Fish, Other              | 2005           | 1                                                              |
| 33               | Canada  | Meat                            | 2005           | 363                                                            |
| 33               | Canada  | Milk - Excluding Butter         | 2005           | 212                                                            |
| 33               | Canada  | Miscellaneous                   | 2005           | 8                                                              |
| 33               | Canada  | Molluscs, Other                 | 2005           | 2                                                              |
| 33               | Canada  | Mutton & Goat Meat              | 2005           | 7                                                              |
| 33               | Canada  | Oats                            | 2005           | 3                                                              |
| 33               | Canada  | Offals                          | 2005           | 4                                                              |
| 33               | Canada  | Oilcrops                        | 2005           | 71                                                             |
| 33               | Canada  | Olive Oil                       | 2005           | 22                                                             |
| 33               | Canada  | Olives (including preserved)    | 2005           | 2                                                              |
| 33               | Canada  | Onions                          | 2005           | 7                                                              |
| 33               | Canada  | Oranges, Mandarines             | 2005           | 22                                                             |
| 33               | Canada  | Palm Oil                        | 2005           | 1                                                              |
| 33               | Canada  | Peas                            | 2005           | 14                                                             |
| 33               | Canada  | Pelagic Fish                    | 2005           | 12                                                             |
| 33               | Canada  | Pepper                          | 2005           | 1                                                              |
| 33               | Canada  | Pigmeat                         | 2005           | 112                                                            |
| 33               | Canada  | Pimento                         | 2005           | 1                                                              |
| 33               | Canada  | Pineapples and products         | 2005           | 5                                                              |
| 33               | Canada  | Potatoes and products           | 2005           | 127                                                            |
| 33               | Canada  | Poultry Meat                    | 2005           | 145                                                            |
| 33               | Canada  | Pulses                          | 2005           | 67                                                             |
| 33               | Canada  | Pulses, Other and products      | 2005           | 44                                                             |
| 33               | Canada  | Rape and Mustard Oil            | 2005           | 336                                                            |
| 33               | Canada  | Rape and Mustardseed            | 2005           | 14                                                             |
| 33               | Canada  | Rice (Milled Equivalent)        | 2005           | 89                                                             |
| 33               | Canada  | Roots, Other                    | 2005           | 1                                                              |
| 33               | Canada  | Rye and products                | 2005           | 4                                                              |
| 33               | Canada  | Sesame seed                     | 2005           | 3                                                              |
| 33               | Canada  | Sesameseed Oil                  | 2005           | 1                                                              |
| 33               | Canada  | Soyabean Oil                    | 2005           | 129                                                            |
| 33               | Canada  | Soyabeans                       | 2005           | 6                                                              |
| 33               | Canada  | Spices                          | 2005           | 7                                                              |
| 33               | Canada  | Spices, Other                   | 2005           | 5                                                              |
| 33               | Canada  | Starchy Roots                   | 2005           | 130                                                            |
| 33               | Canada  | Stimulants                      | 2005           | 10                                                             |
| 33               | Canada  | Sugar & Sweeteners              | 2005           | 518                                                            |
| 33               | Canada  | Sugar (Raw Equivalent)          | 2005           | 429                                                            |
| 33               | Canada  | Sunflowerseed Oil               | 2005           | 13                                                             |
| 33               | Canada  | Sweet potatoes                  | 2005           | 2                                                              |
| 33               | Canada  | Sweeteners, Other               | 2005           | 81                                                             |
| 33               | Canada  | Tea (including mate)            | 2005           | 1                                                              |
| 33               | Canada  | Tomatoes and products           | 2005           | 17                                                             |
| 33               | Canada  | Treenuts                        | 2005           | 25                                                             |
| 33               | Canada  | Vegetable Oils                  | 2005           | 549                                                            |
| 33               | Canada  | Vegetables                      | 2005           | 86                                                             |
| 33               | Canada  | Vegetables, Other               | 2005           | 62                                                             |
| 33               | Canada  | Vegetal Products                | 2005           | 2,600                                                          |
| 33               | Canada  | Wheat and products              | 2005           | 650                                                            |
| 33               | Canada  | Wine                            | 2005           | 18                                                             |
| 33               | Canada  | Alcoholic Beverages             | 2006           | 128                                                            |
| 33               | Canada  | Animal fats                     | 2006           | 231                                                            |
| 33               | Canada  | Animal Products                 | 2006           | 903                                                            |
| 33               | Canada  | Apples and products             | 2006           | 23                                                             |
| 33               | Canada  | Bananas                         | 2006           | 23                                                             |
| 33               | Canada  | Barley and products             | 2006           | 1                                                              |
| 33               | Canada  | Beans                           | 2006           | 9                                                              |
| 33               | Canada  | Beer                            | 2006           | 79                                                             |
| 33               | Canada  | Beverages, Alcoholic            | 2006           | 12                                                             |
| 33               | Canada  | Beverages, Fermented            | 2006           | 16                                                             |
| 33               | Canada  | Bovine Meat                     | 2006           | 99                                                             |
| 33               | Canada  | Butter, Ghee                    | 2006           | 46                                                             |
| 33               | Canada  | Cassava and products            | 2006           | 1                                                              |
| 33               | Canada  | Cereals - Excluding Beer        | 2006           | 883                                                            |
| 33               | Canada  | Cereals, Other                  | 2006           | 4                                                              |
| 33               | Canada  | Cocoa Beans and products        | 2006           | 5                                                              |
| 33               | Canada  | Coconut Oil                     | 2006           | 5                                                              |
| 33               | Canada  | Coconuts - Incl Copra           | 2006           | 5                                                              |
| 33               | Canada  | Coffee and products             | 2006           | 9                                                              |
| 33               | Canada  | Cottonseed Oil                  | 2006           | 5                                                              |
| 33               | Canada  | Cream                           | 2006           | 46                                                             |
| 33               | Canada  | Crustaceans                     | 2006           | 6                                                              |
| 33               | Canada  | Dates                           | 2006           | 2                                                              |
| 33               | Canada  | Demersal Fish                   | 2006           | 8                                                              |
| 33               | Canada  | Eggs                            | 2006           | 42                                                             |
| 33               | Canada  | Fats, Animals, Raw              | 2006           | 139                                                            |
| 33               | Canada  | Fish, Seafood                   | 2006           | 38                                                             |
| 33               | Canada  | Freshwater Fish                 | 2006           | 7                                                              |
| 33               | Canada  | Fruits - Excluding Wine         | 2006           | 127                                                            |
| 33               | Canada  | Fruits, Other                   | 2006           | 34                                                             |

Dietary calcium and zinc deficiency risks are decreasing but remain prevalent

| FAO Country code | Country | Food item                       | Reference year | Net energy supply (kcal capita <sup>-1</sup> d <sup>-1</sup> ) |
|------------------|---------|---------------------------------|----------------|----------------------------------------------------------------|
| 33               | Canada  | Grand Total                     | 2006           | 3,491                                                          |
| 33               | Canada  | Grapefruit and products         | 2006           | 1                                                              |
| 33               | Canada  | Grapes and products (excl wine) | 2006           | 18                                                             |
| 33               | Canada  | Groundnut Oil                   | 2006           | 1                                                              |
| 33               | Canada  | Groundnuts (Shelled Eq)         | 2006           | 42                                                             |
| 33               | Canada  | Honey                           | 2006           | 10                                                             |
| 33               | Canada  | Lemons, Limes and products      | 2006           | 1                                                              |
| 33               | Canada  | Maize and products              | 2006           | 116                                                            |
| 33               | Canada  | Maize Germ Oil                  | 2006           | 34                                                             |
| 33               | Canada  | Marine Fish, Other              | 2006           | 1                                                              |
| 33               | Canada  | Meat                            | 2006           | 364                                                            |
| 33               | Canada  | Milk - Excluding Butter         | 2006           | 224                                                            |
| 33               | Canada  | Miscellaneous                   | 2006           | 8                                                              |
| 33               | Canada  | Molluscs, Other                 | 2006           | 2                                                              |
| 33               | Canada  | Mutton & Goat Meat              | 2006           | 8                                                              |
| 33               | Canada  | Oats                            | 2006           | 4                                                              |
| 33               | Canada  | Offals                          | 2006           | 4                                                              |
| 33               | Canada  | Oilcrops                        | 2006           | 80                                                             |
| 33               | Canada  | Olive Oil                       | 2006           | 22                                                             |
| 33               | Canada  | Olives (including preserved)    | 2006           | 2                                                              |
| 33               | Canada  | Onions                          | 2006           | 7                                                              |
| 33               | Canada  | Oranges, Mandarines             | 2006           | 21                                                             |
| 33               | Canada  | Palm Oil                        | 2006           | 2                                                              |
| 33               | Canada  | Peas                            | 2006           | 3                                                              |
| 33               | Canada  | Pelagic Fish                    | 2006           | 14                                                             |
| 33               | Canada  | Pepper                          | 2006           | 1                                                              |
| 33               | Canada  | Pigmeat                         | 2006           | 113                                                            |
| 33               | Canada  | Pimento                         | 2006           | 2                                                              |
| 33               | Canada  | Pineapples and products         | 2006           | 5                                                              |
| 33               | Canada  | Potatoes and products           | 2006           | 124                                                            |
| 33               | Canada  | Poultry Meat                    | 2006           | 145                                                            |
| 33               | Canada  | Pulses                          | 2006           | 58                                                             |
| 33               | Canada  | Pulses, Other and products      | 2006           | 46                                                             |
| 33               | Canada  | Rape and Mustard Oil            | 2006           | 346                                                            |
| 33               | Canada  | Rape and Mustardseed            | 2006           | 23                                                             |
| 33               | Canada  | Rice (Milled Equivalent)        | 2006           | 96                                                             |
| 33               | Canada  | Roots, Other                    | 2006           | 1                                                              |
| 33               | Canada  | Rye and products                | 2006           | 4                                                              |
| 33               | Canada  | Sesame seed                     | 2006           | 3                                                              |
| 33               | Canada  | Sesameseed Oil                  | 2006           | 1                                                              |
| 33               | Canada  | Soyabean Oil                    | 2006           | 114                                                            |
| 33               | Canada  | Soyabeans                       | 2006           | 6                                                              |
| 33               | Canada  | Spices                          | 2006           | 8                                                              |
| 33               | Canada  | Spices, Other                   | 2006           | 5                                                              |
| 33               | Canada  | Starchy Roots                   | 2006           | 127                                                            |
| 33               | Canada  | Stimulants                      | 2006           | 14                                                             |
| 33               | Canada  | Sugar & Sweeteners              | 2006           | 496                                                            |
| 33               | Canada  | Sugar (Raw Equivalent)          | 2006           | 406                                                            |
| 33               | Canada  | Sunflowerseed Oil               | 2006           | 14                                                             |
| 33               | Canada  | Sweet potatoes                  | 2006           | 2                                                              |
| 33               | Canada  | Sweeteners, Other               | 2006           | 80                                                             |
| 33               | Canada  | Tomatoes and products           | 2006           | 16                                                             |
| 33               | Canada  | Treenuts                        | 2006           | 27                                                             |
| 33               | Canada  | Vegetable Oils                  | 2006           | 544                                                            |
| 33               | Canada  | Vegetables                      | 2006           | 87                                                             |
| 33               | Canada  | Vegetables, Other               | 2006           | 63                                                             |
| 33               | Canada  | Vegetal Products                | 2006           | 2,588                                                          |
| 33               | Canada  | Wheat and products              | 2006           | 658                                                            |
| 33               | Canada  | Wine                            | 2006           | 21                                                             |
| 33               | Canada  | Alcoholic Beverages             | 2007           | 120                                                            |
| 33               | Canada  | Animal fats                     | 2007           | 232                                                            |
| 33               | Canada  | Animal Products                 | 2007           | 913                                                            |
| 33               | Canada  | Apples and products             | 2007           | 25                                                             |
| 33               | Canada  | Bananas                         | 2007           | 23                                                             |
| 33               | Canada  | Barley and products             | 2007           | 1                                                              |
| 33               | Canada  | Beans                           | 2007           | 8                                                              |
| 33               | Canada  | Beer                            | 2007           | 80                                                             |
| 33               | Canada  | Beverages, Alcoholic            | 2007           | 2                                                              |
| 33               | Canada  | Beverages, Fermented            | 2007           | 17                                                             |
| 33               | Canada  | Bovine Meat                     | 2007           | 101                                                            |
| 33               | Canada  | Butter, Ghee                    | 2007           | 49                                                             |
| 33               | Canada  | Cassava and products            | 2007           | 1                                                              |
| 33               | Canada  | Cereals - Excluding Beer        | 2007           | 876                                                            |
| 33               | Canada  | Cereals, Other                  | 2007           | 4                                                              |
| 33               | Canada  | Cocoa Beans and products        | 2007           | 3                                                              |
| 33               | Canada  | Coconut Oil                     | 2007           | 5                                                              |
| 33               | Canada  | Coconuts - Incl Copra           | 2007           | 4                                                              |
| 33               | Canada  | Coffee and products             | 2007           | 10                                                             |
| 33               | Canada  | Cottonseed Oil                  | 2007           | 7                                                              |
| 33               | Canada  | Cream                           | 2007           | 47                                                             |
| 33               | Canada  | Crustaceans                     | 2007           | 7                                                              |
| 33               | Canada  | Dates                           | 2007           | 2                                                              |
| 33               | Canada  | Demersal Fish                   | 2007           | 7                                                              |
| 33               | Canada  | Eggs                            | 2007           | 42                                                             |
| 33               | Canada  | Fats, Animals, Raw              | 2007           | 135                                                            |
| 33               | Canada  | Fish, Seafood                   | 2007           | 37                                                             |
| 33               | Canada  | Freshwater Fish                 | 2007           | 8                                                              |
| 33               | Canada  | Fruits - Excluding Wine         | 2007           | 132                                                            |
| 33               | Canada  | Fruits, Other                   | 2007           | 35                                                             |
| 33               | Canada  | Grand Total                     | 2007           | 3,493                                                          |
| 33               | Canada  | Grapefruit and products         | 2007           | 1                                                              |
| 33               | Canada  | Grapes and products (excl wine) | 2007           | 18                                                             |
| 33               | Canada  | Groundnut Oil                   | 2007           | 1                                                              |
| 33               | Canada  | Groundnuts (Shelled Eq)         | 2007           | 41                                                             |
| 33               | Canada  | Honey                           | 2007           | 5                                                              |
| 33               | Canada  | Lemons, Limes and products      | 2007           | 1                                                              |
| 33               | Canada  | Maize and products              | 2007           | 116                                                            |

Dietary calcium and zinc deficiency risks are decreasing but remain prevalent

| FAO Country code | Country | Food item                       | Reference year | Net energy supply (kcal <i>capita</i> <sup>-1</sup> d <sup>-1</sup> ) |
|------------------|---------|---------------------------------|----------------|-----------------------------------------------------------------------|
| 33               | Canada  | Maize Germ Oil                  | 2007           | 36                                                                    |
| 33               | Canada  | Marine Fish, Other              | 2007           | 1                                                                     |
| 33               | Canada  | Meat                            | 2007           | 378                                                                   |
| 33               | Canada  | Milk - Excluding Butter         | 2007           | 220                                                                   |
| 33               | Canada  | Miscellaneous                   | 2007           | 11                                                                    |
| 33               | Canada  | Molluscs, Other                 | 2007           | 2                                                                     |
| 33               | Canada  | Mutton & Goat Meat              | 2007           | 8                                                                     |
| 33               | Canada  | Oats                            | 2007           | 4                                                                     |
| 33               | Canada  | Offals                          | 2007           | 4                                                                     |
| 33               | Canada  | Oilcrops                        | 2007           | 71                                                                    |
| 33               | Canada  | Olive Oil                       | 2007           | 25                                                                    |
| 33               | Canada  | Olives (including preserved)    | 2007           | 2                                                                     |
| 33               | Canada  | Onions                          | 2007           | 7                                                                     |
| 33               | Canada  | Oranges, Mandarines             | 2007           | 22                                                                    |
| 33               | Canada  | Palm Oil                        | 2007           | 2                                                                     |
| 33               | Canada  | Peas                            | 2007           | 14                                                                    |
| 33               | Canada  | Pelagic Fish                    | 2007           | 13                                                                    |
| 33               | Canada  | Pepper                          | 2007           | 1                                                                     |
| 33               | Canada  | Pigmeat                         | 2007           | 122                                                                   |
| 33               | Canada  | Pimento                         | 2007           | 1                                                                     |
| 33               | Canada  | Pineapples and products         | 2007           | 5                                                                     |
| 33               | Canada  | Potatoes and products           | 2007           | 112                                                                   |
| 33               | Canada  | Poultry Meat                    | 2007           | 147                                                                   |
| 33               | Canada  | Pulses                          | 2007           | 71                                                                    |
| 33               | Canada  | Pulses, Other and products      | 2007           | 48                                                                    |
| 33               | Canada  | Rape and Mustard Oil            | 2007           | 341                                                                   |
| 33               | Canada  | Rape and Mustardseed            | 2007           | 15                                                                    |
| 33               | Canada  | Rice (Milled Equivalent)        | 2007           | 98                                                                    |
| 33               | Canada  | Roots, Other                    | 2007           | 1                                                                     |
| 33               | Canada  | Rye and products                | 2007           | 4                                                                     |
| 33               | Canada  | Sesame seed                     | 2007           | 3                                                                     |
| 33               | Canada  | Sesameseed Oil                  | 2007           | 1                                                                     |
| 33               | Canada  | Soyabean Oil                    | 2007           | 117                                                                   |
| 33               | Canada  | Soyabeans                       | 2007           | 6                                                                     |
| 33               | Canada  | Spices                          | 2007           | 8                                                                     |
| 33               | Canada  | Spices, Other                   | 2007           | 5                                                                     |
| 33               | Canada  | Starchy Roots                   | 2007           | 115                                                                   |
| 33               | Canada  | Stimulants                      | 2007           | 13                                                                    |
| 33               | Canada  | Sugar & Sweeteners              | 2007           | 492                                                                   |
| 33               | Canada  | Sugar (Raw Equivalent)          | 2007           | 398                                                                   |
| 33               | Canada  | Sunflowerseed Oil               | 2007           | 13                                                                    |
| 33               | Canada  | Sweet potatoes                  | 2007           | 1                                                                     |
| 33               | Canada  | Sweeteners, Other               | 2007           | 88                                                                    |
| 33               | Canada  | Tea (including mate)            | 2007           | 1                                                                     |
| 33               | Canada  | Tomatoes and products           | 2007           | 16                                                                    |
| 33               | Canada  | Treenuts                        | 2007           | 33                                                                    |
| 33               | Canada  | Vegetable Oils                  | 2007           | 549                                                                   |
| 33               | Canada  | Vegetables                      | 2007           | 89                                                                    |
| 33               | Canada  | Vegetables, Other               | 2007           | 65                                                                    |
| 33               | Canada  | Vegetal Products                | 2007           | 2,580                                                                 |
| 33               | Canada  | Wheat and products              | 2007           | 649                                                                   |
| 33               | Canada  | Wine                            | 2007           | 21                                                                    |
| 33               | Canada  | Alcoholic Beverages             | 2008           | 124                                                                   |
| 33               | Canada  | Animal fats                     | 2008           | 228                                                                   |
| 33               | Canada  | Animal Products                 | 2008           | 900                                                                   |
| 33               | Canada  | Apples and products             | 2008           | 23                                                                    |
| 33               | Canada  | Bananas                         | 2008           | 23                                                                    |
| 33               | Canada  | Barley and products             | 2008           | 1                                                                     |
| 33               | Canada  | Beans                           | 2008           | 10                                                                    |
| 33               | Canada  | Beer                            | 2008           | 80                                                                    |
| 33               | Canada  | Beverages, Alcoholic            | 2008           | 6                                                                     |
| 33               | Canada  | Beverages, Fermented            | 2008           | 17                                                                    |
| 33               | Canada  | Bovine Meat                     | 2008           | 96                                                                    |
| 33               | Canada  | Butter, Ghee                    | 2008           | 54                                                                    |
| 33               | Canada  | Cassava and products            | 2008           | 1                                                                     |
| 33               | Canada  | Cereals - Excluding Beer        | 2008           | 858                                                                   |
| 33               | Canada  | Citrus, Other                   | 2008           | 1                                                                     |
| 33               | Canada  | Cocoa Beans and products        | 2008           | 7                                                                     |
| 33               | Canada  | Coconut Oil                     | 2008           | 5                                                                     |
| 33               | Canada  | Coconuts - Incl Copra           | 2008           | 4                                                                     |
| 33               | Canada  | Coffee and products             | 2008           | 9                                                                     |
| 33               | Canada  | Cottonseed Oil                  | 2008           | 9                                                                     |
| 33               | Canada  | Cream                           | 2008           | 46                                                                    |
| 33               | Canada  | Crustaceans                     | 2008           | 8                                                                     |
| 33               | Canada  | Dates                           | 2008           | 1                                                                     |
| 33               | Canada  | Demersal Fish                   | 2008           | 7                                                                     |
| 33               | Canada  | Eggs                            | 2008           | 44                                                                    |
| 33               | Canada  | Fats, Animals, Raw              | 2008           | 128                                                                   |
| 33               | Canada  | Fish, Seafood                   | 2008           | 36                                                                    |
| 33               | Canada  | Freshwater Fish                 | 2008           | 7                                                                     |
| 33               | Canada  | Fruits - Excluding Wine         | 2008           | 129                                                                   |
| 33               | Canada  | Fruits, Other                   | 2008           | 37                                                                    |
| 33               | Canada  | Grand Total                     | 2008           | 3,461                                                                 |
| 33               | Canada  | Grapefruit and products         | 2008           | 1                                                                     |
| 33               | Canada  | Grapes and products (excl wine) | 2008           | 17                                                                    |
| 33               | Canada  | Groundnut Oil                   | 2008           | 1                                                                     |
| 33               | Canada  | Groundnuts (Shelled Eq)         | 2008           | 42                                                                    |
| 33               | Canada  | Honey                           | 2008           | 3                                                                     |
| 33               | Canada  | Lemons, Limes and products      | 2008           | 1                                                                     |
| 33               | Canada  | Maize and products              | 2008           | 117                                                                   |
| 33               | Canada  | Maize Germ Oil                  | 2008           | 37                                                                    |
| 33               | Canada  | Marine Fish, Other              | 2008           | 1                                                                     |
| 33               | Canada  | Meat                            | 2008           | 370                                                                   |
| 33               | Canada  | Milk - Excluding Butter         | 2008           | 218                                                                   |
| 33               | Canada  | Miscellaneous                   | 2008           | 10                                                                    |
| 33               | Canada  | Molluscs, Other                 | 2008           | 2                                                                     |
| 33               | Canada  | Mutton & Goat Meat              | 2008           | 7                                                                     |

Dietary calcium and zinc deficiency risks are decreasing but remain prevalent

| FAO Country code | Country | Food item                       | Reference year | Net energy supply (kcal capita <sup>-1</sup> d <sup>-1</sup> ) |
|------------------|---------|---------------------------------|----------------|----------------------------------------------------------------|
| 33               | Canada  | Oats                            | 2008           | 4                                                              |
| 33               | Canada  | Offals                          | 2008           | 4                                                              |
| 33               | Canada  | Oilcrops                        | 2008           | 84                                                             |
| 33               | Canada  | Oilcrops, Other                 | 2008           | 13                                                             |
| 33               | Canada  | Olive Oil                       | 2008           | 24                                                             |
| 33               | Canada  | Olives (including preserved)    | 2008           | 2                                                              |
| 33               | Canada  | Onions                          | 2008           | 6                                                              |
| 33               | Canada  | Oranges, Mandarines             | 2008           | 20                                                             |
| 33               | Canada  | Palm Oil                        | 2008           | 2                                                              |
| 33               | Canada  | Peas                            | 2008           | 19                                                             |
| 33               | Canada  | Pelagic Fish                    | 2008           | 11                                                             |
| 33               | Canada  | Pepper                          | 2008           | 1                                                              |
| 33               | Canada  | Pigmeat                         | 2008           | 118                                                            |
| 33               | Canada  | Pimento                         | 2008           | 2                                                              |
| 33               | Canada  | Pineapples and products         | 2008           | 5                                                              |
| 33               | Canada  | Potatoes and products           | 2008           | 102                                                            |
| 33               | Canada  | Poultry Meat                    | 2008           | 147                                                            |
| 33               | Canada  | Pulses                          | 2008           | 80                                                             |
| 33               | Canada  | Pulses, Other and products      | 2008           | 50                                                             |
| 33               | Canada  | Rape and Mustard Oil            | 2008           | 345                                                            |
| 33               | Canada  | Rape and Mustardseed            | 2008           | 15                                                             |
| 33               | Canada  | Rice (Milled Equivalent)        | 2008           | 105                                                            |
| 33               | Canada  | Roots, Other                    | 2008           | 1                                                              |
| 33               | Canada  | Rye and products                | 2008           | 9                                                              |
| 33               | Canada  | Sesame seed                     | 2008           | 3                                                              |
| 33               | Canada  | Sesameseed Oil                  | 2008           | 1                                                              |
| 33               | Canada  | Soyabean Oil                    | 2008           | 121                                                            |
| 33               | Canada  | Soyabeans                       | 2008           | 6                                                              |
| 33               | Canada  | Spices                          | 2008           | 8                                                              |
| 33               | Canada  | Spices, Other                   | 2008           | 5                                                              |
| 33               | Canada  | Starchy Roots                   | 2008           | 105                                                            |
| 33               | Canada  | Stimulants                      | 2008           | 17                                                             |
| 33               | Canada  | Sugar & Sweeteners              | 2008           | 475                                                            |
| 33               | Canada  | Sugar (Raw Equivalent)          | 2008           | 396                                                            |
| 33               | Canada  | Sunflowerseed Oil               | 2008           | 13                                                             |
| 33               | Canada  | Sweet potatoes                  | 2008           | 2                                                              |
| 33               | Canada  | Sweeteners, Other               | 2008           | 76                                                             |
| 33               | Canada  | Tomatoes and products           | 2008           | 15                                                             |
| 33               | Canada  | Treenuts                        | 2008           | 33                                                             |
| 33               | Canada  | Vegetable Oils                  | 2008           | 557                                                            |
| 33               | Canada  | Vegetables                      | 2008           | 82                                                             |
| 33               | Canada  | Vegetables, Other               | 2008           | 60                                                             |
| 33               | Canada  | Vegetal Products                | 2008           | 2,561                                                          |
| 33               | Canada  | Wheat and products              | 2008           | 623                                                            |
| 33               | Canada  | Wine                            | 2008           | 21                                                             |
| 33               | Canada  | Alcoholic Beverages             | 2009           | 117                                                            |
| 33               | Canada  | Animal fats                     | 2009           | 229                                                            |
| 33               | Canada  | Animal Products                 | 2009           | 893                                                            |
| 33               | Canada  | Apples and products             | 2009           | 27                                                             |
| 33               | Canada  | Bananas                         | 2009           | 23                                                             |
| 33               | Canada  | Barley and products             | 2009           | 1                                                              |
| 33               | Canada  | Beans                           | 2009           | 7                                                              |
| 33               | Canada  | Beer                            | 2009           | 78                                                             |
| 33               | Canada  | Beverages, Alcoholic            | 2009           | 2                                                              |
| 33               | Canada  | Beverages, Fermented            | 2009           | 16                                                             |
| 33               | Canada  | Bovine Meat                     | 2009           | 95                                                             |
| 33               | Canada  | Butter, Ghee                    | 2009           | 55                                                             |
| 33               | Canada  | Cassava and products            | 2009           | 1                                                              |
| 33               | Canada  | Cereals - Excluding Beer        | 2009           | 857                                                            |
| 33               | Canada  | Citrus, Other                   | 2009           | 1                                                              |
| 33               | Canada  | Cocoa Beans and products        | 2009           | 9                                                              |
| 33               | Canada  | Coconut Oil                     | 2009           | 5                                                              |
| 33               | Canada  | Coconuts - Incl Copra           | 2009           | 4                                                              |
| 33               | Canada  | Coffee and products             | 2009           | 9                                                              |
| 33               | Canada  | Cottonseed Oil                  | 2009           | 6                                                              |
| 33               | Canada  | Cream                           | 2009           | 45                                                             |
| 33               | Canada  | Crustaceans                     | 2009           | 7                                                              |
| 33               | Canada  | Dates                           | 2009           | 1                                                              |
| 33               | Canada  | Demersal Fish                   | 2009           | 6                                                              |
| 33               | Canada  | Eggs                            | 2009           | 46                                                             |
| 33               | Canada  | Fats, Animals, Raw              | 2009           | 130                                                            |
| 33               | Canada  | Fish, Seafood                   | 2009           | 37                                                             |
| 33               | Canada  | Freshwater Fish                 | 2009           | 8                                                              |
| 33               | Canada  | Fruits - Excluding Wine         | 2009           | 130                                                            |
| 33               | Canada  | Fruits, Other                   | 2009           | 36                                                             |
| 33               | Canada  | Grand Total                     | 2009           | 3,392                                                          |
| 33               | Canada  | Grapefruit and products         | 2009           | 1                                                              |
| 33               | Canada  | Grapes and products (excl wine) | 2009           | 16                                                             |
| 33               | Canada  | Groundnut Oil                   | 2009           | 1                                                              |
| 33               | Canada  | Groundnuts (Shelled Eq)         | 2009           | 41                                                             |
| 33               | Canada  | Honey                           | 2009           | 6                                                              |
| 33               | Canada  | Lemons, Limes and products      | 2009           | 1                                                              |
| 33               | Canada  | Maize and products              | 2009           | 117                                                            |
| 33               | Canada  | Maize Germ Oil                  | 2009           | 38                                                             |
| 33               | Canada  | Marine Fish, Other              | 2009           | 1                                                              |
| 33               | Canada  | Meat                            | 2009           | 361                                                            |
| 33               | Canada  | Milk - Excluding Butter         | 2009           | 216                                                            |
| 33               | Canada  | Miscellaneous                   | 2009           | 12                                                             |
| 33               | Canada  | Molluscs, Other                 | 2009           | 2                                                              |
| 33               | Canada  | Mutton & Goat Meat              | 2009           | 7                                                              |
| 33               | Canada  | Oats                            | 2009           | 4                                                              |
| 33               | Canada  | Offals                          | 2009           | 5                                                              |
| 33               | Canada  | Oilcrops                        | 2009           | 72                                                             |
| 33               | Canada  | Oilcrops, Other                 | 2009           | 2                                                              |
| 33               | Canada  | Olive Oil                       | 2009           | 23                                                             |
| 33               | Canada  | Olives (including preserved)    | 2009           | 2                                                              |
| 33               | Canada  | Onions                          | 2009           | 9                                                              |

Dietary calcium and zinc deficiency risks are decreasing but remain prevalent

| FAO Country code | Country | Food item                       | Reference year | Net energy supply (kcal capita <sup>-1</sup> d <sup>-1</sup> ) |
|------------------|---------|---------------------------------|----------------|----------------------------------------------------------------|
| 33               | Canada  | Oranges, Mandarines             | 2009           | 20                                                             |
| 33               | Canada  | Palm Oil                        | 2009           | 15                                                             |
| 33               | Canada  | Peas                            | 2009           | 12                                                             |
| 33               | Canada  | Pelagic Fish                    | 2009           | 12                                                             |
| 33               | Canada  | Pepper                          | 2009           | 1                                                              |
| 33               | Canada  | Pigmeat                         | 2009           | 115                                                            |
| 33               | Canada  | Pimento                         | 2009           | 2                                                              |
| 33               | Canada  | Pineapples and products         | 2009           | 5                                                              |
| 33               | Canada  | Potatoes and products           | 2009           | 118                                                            |
| 33               | Canada  | Poultry Meat                    | 2009           | 144                                                            |
| 33               | Canada  | Pulses                          | 2009           | 78                                                             |
| 33               | Canada  | Pulses, Other and products      | 2009           | 59                                                             |
| 33               | Canada  | Rape and Mustard Oil            | 2009           | 344                                                            |
| 33               | Canada  | Rape and Mustardseed            | 2009           | 14                                                             |
| 33               | Canada  | Rice (Milled Equivalent)        | 2009           | 98                                                             |
| 33               | Canada  | Roots, Other                    | 2009           | 1                                                              |
| 33               | Canada  | Rye and products                | 2009           | 7                                                              |
| 33               | Canada  | Sesame seed                     | 2009           | 3                                                              |
| 33               | Canada  | Sesameseed Oil                  | 2009           | 1                                                              |
| 33               | Canada  | Soyabean Oil                    | 2009           | 115                                                            |
| 33               | Canada  | Soyabeans                       | 2009           | 6                                                              |
| 33               | Canada  | Spices                          | 2009           | 9                                                              |
| 33               | Canada  | Spices, Other                   | 2009           | 6                                                              |
| 33               | Canada  | Starchy Roots                   | 2009           | 121                                                            |
| 33               | Canada  | Stimulants                      | 2009           | 19                                                             |
| 33               | Canada  | Sugar & Sweeteners              | 2009           | 409                                                            |
| 33               | Canada  | Sugar (Raw Equivalent)          | 2009           | 321                                                            |
| 33               | Canada  | Sunflowerseed Oil               | 2009           | 13                                                             |
| 33               | Canada  | Sweet potatoes                  | 2009           | 2                                                              |
| 33               | Canada  | Sweeteners, Other               | 2009           | 81                                                             |
| 33               | Canada  | Tomatoes and products           | 2009           | 11                                                             |
| 33               | Canada  | Treenuts                        | 2009           | 32                                                             |
| 33               | Canada  | Vegetable Oils                  | 2009           | 561                                                            |
| 33               | Canada  | Vegetables                      | 2009           | 84                                                             |
| 33               | Canada  | Vegetables, Other               | 2009           | 64                                                             |
| 33               | Canada  | Vegetal Products                | 2009           | 2,499                                                          |
| 33               | Canada  | Wheat and products              | 2009           | 631                                                            |
| 33               | Canada  | Wine                            | 2009           | 21                                                             |
| 33               | Canada  | Alcoholic Beverages             | 2010           | 105                                                            |
| 33               | Canada  | Animal fats                     | 2010           | 224                                                            |
| 33               | Canada  | Animal Products                 | 2010           | 885                                                            |
| 33               | Canada  | Apples and products             | 2010           | 25                                                             |
| 33               | Canada  | Bananas                         | 2010           | 23                                                             |
| 33               | Canada  | Barley and products             | 2010           | 2                                                              |
| 33               | Canada  | Beans                           | 2010           | 7                                                              |
| 33               | Canada  | Beer                            | 2010           | 66                                                             |
| 33               | Canada  | Beverages, Alcoholic            | 2010           | 2                                                              |
| 33               | Canada  | Beverages, Fermented            | 2010           | 16                                                             |
| 33               | Canada  | Bovine Meat                     | 2010           | 92                                                             |
| 33               | Canada  | Butter, Ghee                    | 2010           | 50                                                             |
| 33               | Canada  | Cassava and products            | 2010           | 1                                                              |
| 33               | Canada  | Cereals - Excluding Beer        | 2010           | 857                                                            |
| 33               | Canada  | Cereals, Other                  | 2010           | 4                                                              |
| 33               | Canada  | Citrus, Other                   | 2010           | 1                                                              |
| 33               | Canada  | Cocoa Beans and products        | 2010           | 7                                                              |
| 33               | Canada  | Coconut Oil                     | 2010           | 5                                                              |
| 33               | Canada  | Coconuts - Incl Copra           | 2010           | 4                                                              |
| 33               | Canada  | Coffee and products             | 2010           | 9                                                              |
| 33               | Canada  | Cottonseed Oil                  | 2010           | 7                                                              |
| 33               | Canada  | Cream                           | 2010           | 45                                                             |
| 33               | Canada  | Crustaceans                     | 2010           | 8                                                              |
| 33               | Canada  | Dates                           | 2010           | 2                                                              |
| 33               | Canada  | Demersal Fish                   | 2010           | 6                                                              |
| 33               | Canada  | Eggs                            | 2010           | 46                                                             |
| 33               | Canada  | Fats, Animals, Raw              | 2010           | 128                                                            |
| 33               | Canada  | Fish, Seafood                   | 2010           | 36                                                             |
| 33               | Canada  | Freshwater Fish                 | 2010           | 6                                                              |
| 33               | Canada  | Fruits - Excluding Wine         | 2010           | 129                                                            |
| 33               | Canada  | Fruits, Other                   | 2010           | 35                                                             |
| 33               | Canada  | Grand Total                     | 2010           | 3,397                                                          |
| 33               | Canada  | Grapefruit and products         | 2010           | 1                                                              |
| 33               | Canada  | Grapes and products (excl wine) | 2010           | 16                                                             |
| 33               | Canada  | Groundnut Oil                   | 2010           | 1                                                              |
| 33               | Canada  | Groundnuts (Shelled Eq)         | 2010           | 43                                                             |
| 33               | Canada  | Honey                           | 2010           | 5                                                              |
| 33               | Canada  | Lemons, Limes and products      | 2010           | 1                                                              |
| 33               | Canada  | Maize and products              | 2010           | 117                                                            |
| 33               | Canada  | Maize Germ Oil                  | 2010           | 39                                                             |
| 33               | Canada  | Marine Fish, Other              | 2010           | 1                                                              |
| 33               | Canada  | Meat                            | 2010           | 354                                                            |
| 33               | Canada  | Milk - Excluding Butter         | 2010           | 221                                                            |
| 33               | Canada  | Miscellaneous                   | 2010           | 14                                                             |
| 33               | Canada  | Molluscs, Other                 | 2010           | 2                                                              |
| 33               | Canada  | Mutton & Goat Meat              | 2010           | 7                                                              |
| 33               | Canada  | Oats                            | 2010           | 1                                                              |
| 33               | Canada  | Offals                          | 2010           | 5                                                              |
| 33               | Canada  | Oilcrops                        | 2010           | 74                                                             |
| 33               | Canada  | Olive Oil                       | 2010           | 27                                                             |
| 33               | Canada  | Olives (including preserved)    | 2010           | 2                                                              |
| 33               | Canada  | Onions                          | 2010           | 7                                                              |
| 33               | Canada  | Oranges, Mandarines             | 2010           | 21                                                             |
| 33               | Canada  | Palm Oil                        | 2010           | 15                                                             |
| 33               | Canada  | Peas                            | 2010           | 12                                                             |
| 33               | Canada  | Pelagic Fish                    | 2010           | 13                                                             |
| 33               | Canada  | Pepper                          | 2010           | 1                                                              |
| 33               | Canada  | Pigmeat                         | 2010           | 111                                                            |
| 33               | Canada  | Pimento                         | 2010           | 1                                                              |

Dietary calcium and zinc deficiency risks are decreasing but remain prevalent

| FAO Country code | Country | Food item                       | Reference year | Net energy supply (kcal capita <sup>-1</sup> d <sup>-1</sup> ) |
|------------------|---------|---------------------------------|----------------|----------------------------------------------------------------|
| 33               | Canada  | Pineapples and products         | 2010           | 4                                                              |
| 33               | Canada  | Potatoes and products           | 2010           | 130                                                            |
| 33               | Canada  | Poultry Meat                    | 2010           | 144                                                            |
| 33               | Canada  | Pulses                          | 2010           | 95                                                             |
| 33               | Canada  | Pulses, Other and products      | 2010           | 77                                                             |
| 33               | Canada  | Rape and Mustard Oil            | 2010           | 357                                                            |
| 33               | Canada  | Rape and Mustardseed            | 2010           | 15                                                             |
| 33               | Canada  | Rice (Milled Equivalent)        | 2010           | 95                                                             |
| 33               | Canada  | Roots, Other                    | 2010           | 1                                                              |
| 33               | Canada  | Rye and products                | 2010           | 6                                                              |
| 33               | Canada  | Sesame seed                     | 2010           | 3                                                              |
| 33               | Canada  | Sesameseed Oil                  | 2010           | 1                                                              |
| 33               | Canada  | Soyabean Oil                    | 2010           | 123                                                            |
| 33               | Canada  | Soyabeans                       | 2010           | 7                                                              |
| 33               | Canada  | Spices                          | 2010           | 8                                                              |
| 33               | Canada  | Spices, Other                   | 2010           | 6                                                              |
| 33               | Canada  | Starchy Roots                   | 2010           | 135                                                            |
| 33               | Canada  | Stimulants                      | 2010           | 17                                                             |
| 33               | Canada  | Sugar & Sweeteners              | 2010           | 372                                                            |
| 33               | Canada  | Sugar (Raw Equivalent)          | 2010           | 287                                                            |
| 33               | Canada  | Sunflowerseed Oil               | 2010           | 13                                                             |
| 33               | Canada  | Sweet potatoes                  | 2010           | 3                                                              |
| 33               | Canada  | Sweeteners, Other               | 2010           | 80                                                             |
| 33               | Canada  | Tomatoes and products           | 2010           | 11                                                             |
| 33               | Canada  | Treenuts                        | 2010           | 34                                                             |
| 33               | Canada  | Vegetable Oils                  | 2010           | 587                                                            |
| 33               | Canada  | Vegetables                      | 2010           | 82                                                             |
| 33               | Canada  | Vegetables, Other               | 2010           | 64                                                             |
| 33               | Canada  | Vegetal Products                | 2010           | 2,512                                                          |
| 33               | Canada  | Wheat and products              | 2010           | 633                                                            |
| 33               | Canada  | Wine                            | 2010           | 22                                                             |
| 33               | Canada  | Alcoholic Beverages             | 2011           | 106                                                            |
| 33               | Canada  | Animal fats                     | 2011           | 234                                                            |
| 33               | Canada  | Animal Products                 | 2011           | 913                                                            |
| 33               | Canada  | Apples and products             | 2011           | 27                                                             |
| 33               | Canada  | Bananas                         | 2011           | 24                                                             |
| 33               | Canada  | Barley and products             | 2011           | 1                                                              |
| 33               | Canada  | Beans                           | 2011           | 10                                                             |
| 33               | Canada  | Beer                            | 2011           | 66                                                             |
| 33               | Canada  | Beverages, Alcoholic            | 2011           | 1                                                              |
| 33               | Canada  | Beverages, Fermented            | 2011           | 17                                                             |
| 33               | Canada  | Bovine Meat                     | 2011           | 92                                                             |
| 33               | Canada  | Butter, Ghee                    | 2011           | 55                                                             |
| 33               | Canada  | Cassava and products            | 2011           | 1                                                              |
| 33               | Canada  | Cereals - Excluding Beer        | 2011           | 770                                                            |
| 33               | Canada  | Cereals, Other                  | 2011           | 7                                                              |
| 33               | Canada  | Cocoa Beans and products        | 2011           | 9                                                              |
| 33               | Canada  | Coconut Oil                     | 2011           | 5                                                              |
| 33               | Canada  | Coconuts - Incl Copra           | 2011           | 5                                                              |
| 33               | Canada  | Coffee and products             | 2011           | 9                                                              |
| 33               | Canada  | Cottonseed Oil                  | 2011           | 9                                                              |
| 33               | Canada  | Cream                           | 2011           | 47                                                             |
| 33               | Canada  | Crustaceans                     | 2011           | 8                                                              |
| 33               | Canada  | Dates                           | 2011           | 2                                                              |
| 33               | Canada  | Demersal Fish                   | 2011           | 6                                                              |
| 33               | Canada  | Eggs                            | 2011           | 46                                                             |
| 33               | Canada  | Fats, Animals, Raw              | 2011           | 131                                                            |
| 33               | Canada  | Fish, Seafood                   | 2011           | 36                                                             |
| 33               | Canada  | Freshwater Fish                 | 2011           | 6                                                              |
| 33               | Canada  | Fruits - Excluding Wine         | 2011           | 129                                                            |
| 33               | Canada  | Fruits, Other                   | 2011           | 37                                                             |
| 33               | Canada  | Grand Total                     | 2011           | 3,419                                                          |
| 33               | Canada  | Grapefruit and products         | 2011           | 1                                                              |
| 33               | Canada  | Grapes and products (excl wine) | 2011           | 15                                                             |
| 33               | Canada  | Groundnut Oil                   | 2011           | 1                                                              |
| 33               | Canada  | Groundnuts (Shelled Eq)         | 2011           | 42                                                             |
| 33               | Canada  | Honey                           | 2011           | 7                                                              |
| 33               | Canada  | Lemons, Limes and products      | 2011           | 1                                                              |
| 33               | Canada  | Maize and products              | 2011           | 116                                                            |
| 33               | Canada  | Maize Germ Oil                  | 2011           | 35                                                             |
| 33               | Canada  | Marine Fish, Other              | 2011           | 1                                                              |
| 33               | Canada  | Meat                            | 2011           | 356                                                            |
| 33               | Canada  | Milk - Excluding Butter         | 2011           | 239                                                            |
| 33               | Canada  | Miscellaneous                   | 2011           | 14                                                             |
| 33               | Canada  | Molluscs, Other                 | 2011           | 2                                                              |
| 33               | Canada  | Mutton & Goat Meat              | 2011           | 7                                                              |
| 33               | Canada  | Oats                            | 2011           | 5                                                              |
| 33               | Canada  | Offals                          | 2011           | 3                                                              |
| 33               | Canada  | Oilcrops                        | 2011           | 74                                                             |
| 33               | Canada  | Olive Oil                       | 2011           | 28                                                             |
| 33               | Canada  | Olives (including preserved)    | 2011           | 2                                                              |
| 33               | Canada  | Onions                          | 2011           | 8                                                              |
| 33               | Canada  | Oranges, Mandarines             | 2011           | 18                                                             |
| 33               | Canada  | Palm Oil                        | 2011           | 15                                                             |
| 33               | Canada  | Peas                            | 2011           | 16                                                             |
| 33               | Canada  | Pelagic Fish                    | 2011           | 13                                                             |
| 33               | Canada  | Pepper                          | 2011           | 1                                                              |
| 33               | Canada  | Pigmeat                         | 2011           | 112                                                            |
| 33               | Canada  | Pimento                         | 2011           | 2                                                              |
| 33               | Canada  | Pineapples and products         | 2011           | 4                                                              |
| 33               | Canada  | Potatoes and products           | 2011           | 126                                                            |
| 33               | Canada  | Poultry Meat                    | 2011           | 145                                                            |
| 33               | Canada  | Pulses                          | 2011           | 108                                                            |
| 33               | Canada  | Pulses, Other and products      | 2011           | 82                                                             |
| 33               | Canada  | Rape and Mustard Oil            | 2011           | 357                                                            |
| 33               | Canada  | Rape and Mustardseed            | 2011           | 15                                                             |
| 33               | Canada  | Rice (Milled Equivalent)        | 2011           | 104                                                            |



Dietary calcium and zinc deficiency risks are decreasing but remain prevalent

| FAO Country code | Country                  | Food item                  | Reference year | Net energy supply (kcal capita <sup>-1</sup> d <sup>-1</sup> ) |
|------------------|--------------------------|----------------------------|----------------|----------------------------------------------------------------|
| 33               | Canada                   | Roots, Other               | 2011           | 1                                                              |
| 33               | Canada                   | Rye and products           | 2011           | 6                                                              |
| 33               | Canada                   | Sesame seed                | 2011           | 3                                                              |
| 33               | Canada                   | Sesameseed Oil             | 2011           | 1                                                              |
| 33               | Canada                   | Soyabean Oil               | 2011           | 119                                                            |
| 33               | Canada                   | Soyabeans                  | 2011           | 7                                                              |
| 33               | Canada                   | Spices                     | 2011           | 10                                                             |
| 33               | Canada                   | Spices, Other              | 2011           | 7                                                              |
| 33               | Canada                   | Starchy Roots              | 2011           | 131                                                            |
| 33               | Canada                   | Stimulants                 | 2011           | 18                                                             |
| 33               | Canada                   | Sugar & Sweeteners         | 2011           | 443                                                            |
| 33               | Canada                   | Sugar (Raw Equivalent)     | 2011           | 353                                                            |
| 33               | Canada                   | Sunflowerseed Oil          | 2011           | 13                                                             |
| 33               | Canada                   | Sweet potatoes             | 2011           | 3                                                              |
| 33               | Canada                   | Sweeteners, Other          | 2011           | 84                                                             |
| 33               | Canada                   | Tea (including mate)       | 2011           | 1                                                              |
| 33               | Canada                   | Tomatoes and products      | 2011           | 12                                                             |
| 33               | Canada                   | Treenuts                   | 2011           | 37                                                             |
| 33               | Canada                   | Vegetable Oils             | 2011           | 582                                                            |
| 33               | Canada                   | Vegetables                 | 2011           | 84                                                             |
| 33               | Canada                   | Vegetables, Other          | 2011           | 65                                                             |
| 33               | Canada                   | Vegetal Products           | 2011           | 2,507                                                          |
| 33               | Canada                   | Wheat and products         | 2011           | 532                                                            |
| 33               | Canada                   | Wine                       | 2011           | 22                                                             |
| 37               | Central African Republic | Alcoholic Beverages        | 1992           | 27                                                             |
| 37               | Central African Republic | Animal fats                | 1992           | 18                                                             |
| 37               | Central African Republic | Animal Products            | 1992           | 191                                                            |
| 37               | Central African Republic | Bananas                    | 1992           | 46                                                             |
| 37               | Central African Republic | Beer                       | 1992           | 11                                                             |
| 37               | Central African Republic | Beverages, Fermented       | 1992           | 15                                                             |
| 37               | Central African Republic | Bovine Meat                | 1992           | 75                                                             |
| 37               | Central African Republic | Cassava and products       | 1992           | 472                                                            |
| 37               | Central African Republic | Cereals - Excluding Beer   | 1992           | 389                                                            |
| 37               | Central African Republic | Cereals, Other             | 1992           | 10                                                             |
| 37               | Central African Republic | Cottonseed Oil             | 1992           | 12                                                             |
| 37               | Central African Republic | Eggs                       | 1992           | 2                                                              |
| 37               | Central African Republic | Fats, Animals, Raw         | 1992           | 18                                                             |
| 37               | Central African Republic | Fish, Seafood              | 1992           | 9                                                              |
| 37               | Central African Republic | Freshwater Fish            | 1992           | 8                                                              |
| 37               | Central African Republic | Fruits - Excluding Wine    | 1992           | 80                                                             |
| 37               | Central African Republic | Fruits, Other              | 1992           | 4                                                              |
| 37               | Central African Republic | Grand Total                | 1992           | 1,904                                                          |
| 37               | Central African Republic | Groundnut Oil              | 1992           | 153                                                            |
| 37               | Central African Republic | Honey                      | 1992           | 27                                                             |
| 37               | Central African Republic | Maize and products         | 1992           | 184                                                            |
| 37               | Central African Republic | Meat                       | 1992           | 127                                                            |
| 37               | Central African Republic | Meat, Other                | 1992           | 20                                                             |
| 37               | Central African Republic | Milk - Excluding Butter    | 1992           | 27                                                             |
| 37               | Central African Republic | Millet and products        | 1992           | 24                                                             |
| 37               | Central African Republic | Mutton & Goat Meat         | 1992           | 7                                                              |
| 37               | Central African Republic | Offals                     | 1992           | 7                                                              |
| 37               | Central African Republic | Oilcrops                   | 1992           | 122                                                            |
| 37               | Central African Republic | Oilcrops Oil, Other        | 1992           | 2                                                              |
| 37               | Central African Republic | Oilcrops, Other            | 1992           | 33                                                             |
| 37               | Central African Republic | Oranges, Mandarines        | 1992           | 4                                                              |
| 37               | Central African Republic | Palm kernels               | 1992           | 25                                                             |
| 37               | Central African Republic | Palm Oil                   | 1992           | 55                                                             |
| 37               | Central African Republic | Pigmeat                    | 1992           | 23                                                             |
| 37               | Central African Republic | Pineapples and products    | 1992           | 3                                                              |
| 37               | Central African Republic | Plantains                  | 1992           | 23                                                             |
| 37               | Central African Republic | Poultry Meat               | 1992           | 3                                                              |
| 37               | Central African Republic | Pulses                     | 1992           | 52                                                             |
| 37               | Central African Republic | Pulses, Other and products | 1992           | 52                                                             |
| 37               | Central African Republic | Rape and Mustard Oil       | 1992           | 1                                                              |
| 37               | Central African Republic | Rice (Milled Equivalent)   | 1992           | 32                                                             |
| 37               | Central African Republic | Roots, Other               | 1992           | 44                                                             |
| 37               | Central African Republic | Sesame seed                | 1992           | 65                                                             |
| 37               | Central African Republic | Sesameseed Oil             | 1992           | 32                                                             |
| 37               | Central African Republic | Sorghum and products       | 1992           | 75                                                             |
| 37               | Central African Republic | Starchy Roots              | 1992           | 715                                                            |
| 37               | Central African Republic | Sugar & Sweeteners         | 1992           | 59                                                             |
| 37               | Central African Republic | Sugar (Raw Equivalent)     | 1992           | 32                                                             |
| 37               | Central African Republic | Vegetable Oils             | 1992           | 256                                                            |
| 37               | Central African Republic | Vegetables                 | 1992           | 12                                                             |
| 37               | Central African Republic | Vegetables, Other          | 1992           | 12                                                             |
| 37               | Central African Republic | Vegetal Products           | 1992           | 1,713                                                          |
| 37               | Central African Republic | Wheat and products         | 1992           | 64                                                             |
| 37               | Central African Republic | Wine                       | 1992           | 1                                                              |
| 37               | Central African Republic | Yams                       | 1992           | 198                                                            |
| 37               | Central African Republic | Alcoholic Beverages        | 1993           | 31                                                             |
| 37               | Central African Republic | Animal fats                | 1993           | 18                                                             |
| 37               | Central African Republic | Animal Products            | 1993           | 195                                                            |
| 37               | Central African Republic | Bananas                    | 1993           | 45                                                             |
| 37               | Central African Republic | Beer                       | 1993           | 15                                                             |
| 37               | Central African Republic | Beverages, Fermented       | 1993           | 15                                                             |
| 37               | Central African Republic | Bovine Meat                | 1993           | 75                                                             |
| 37               | Central African Republic | Cassava and products       | 1993           | 457                                                            |
| 37               | Central African Republic | Cereals - Excluding Beer   | 1993           | 388                                                            |
| 37               | Central African Republic | Coffee and products        | 1993           | 3                                                              |
| 37               | Central African Republic | Cottonseed Oil             | 1993           | 7                                                              |
| 37               | Central African Republic | Eggs                       | 1993           | 2                                                              |
| 37               | Central African Republic | Fats, Animals, Raw         | 1993           | 18                                                             |
| 37               | Central African Republic | Fish, Seafood              | 1993           | 9                                                              |
| 37               | Central African Republic | Freshwater Fish            | 1993           | 8                                                              |
| 37               | Central African Republic | Fruits - Excluding Wine    | 1993           | 81                                                             |
| 37               | Central African Republic | Fruits, Other              | 1993           | 4                                                              |
| 37               | Central African Republic | Grand Total                | 1993           | 1,877                                                          |

Dietary calcium and zinc deficiency risks are decreasing but remain prevalent

| FAO Country code | Country                  | Food item                  | Reference year | Net energy supply (kcal capita <sup>-1</sup> d <sup>-1</sup> ) |
|------------------|--------------------------|----------------------------|----------------|----------------------------------------------------------------|
| 37               | Central African Republic | Groundnut Oil              | 1993           | 149                                                            |
| 37               | Central African Republic | Honey                      | 1993           | 26                                                             |
| 37               | Central African Republic | Maize and products         | 1993           | 195                                                            |
| 37               | Central African Republic | Meat                       | 1993           | 129                                                            |
| 37               | Central African Republic | Meat, Other                | 1993           | 19                                                             |
| 37               | Central African Republic | Milk - Excluding Butter    | 1993           | 30                                                             |
| 37               | Central African Republic | Millet and products        | 1993           | 24                                                             |
| 37               | Central African Republic | Mutton & Goat Meat         | 1993           | 7                                                              |
| 37               | Central African Republic | Offals                     | 1993           | 7                                                              |
| 37               | Central African Republic | Oilcrops                   | 1993           | 117                                                            |
| 37               | Central African Republic | Oilcrops Oil, Other        | 1993           | 2                                                              |
| 37               | Central African Republic | Oilcrops, Other            | 1993           | 32                                                             |
| 37               | Central African Republic | Oranges, Mandarines        | 1993           | 4                                                              |
| 37               | Central African Republic | Palm kernels               | 1993           | 22                                                             |
| 37               | Central African Republic | Palm Oil                   | 1993           | 54                                                             |
| 37               | Central African Republic | Pigmeat                    | 1993           | 24                                                             |
| 37               | Central African Republic | Pineapples and products    | 1993           | 3                                                              |
| 37               | Central African Republic | Plantains                  | 1993           | 23                                                             |
| 37               | Central African Republic | Poultry Meat               | 1993           | 3                                                              |
| 37               | Central African Republic | Pulses                     | 1993           | 57                                                             |
| 37               | Central African Republic | Pulses, Other and products | 1993           | 56                                                             |
| 37               | Central African Republic | Rice (Milled Equivalent)   | 1993           | 29                                                             |
| 37               | Central African Republic | Roots, Other               | 1993           | 43                                                             |
| 37               | Central African Republic | Sesame seed                | 1993           | 63                                                             |
| 37               | Central African Republic | Sesameseed Oil             | 1993           | 33                                                             |
| 37               | Central African Republic | Sorghum and products       | 1993           | 71                                                             |
| 37               | Central African Republic | Starchy Roots              | 1993           | 692                                                            |
| 37               | Central African Republic | Stimulants                 | 1993           | 3                                                              |
| 37               | Central African Republic | Sugar & Sweeteners         | 1993           | 56                                                             |
| 37               | Central African Republic | Sugar (Raw Equivalent)     | 1993           | 29                                                             |
| 37               | Central African Republic | Vegetable Oils             | 1993           | 246                                                            |
| 37               | Central African Republic | Vegetables                 | 1993           | 12                                                             |
| 37               | Central African Republic | Vegetables, Other          | 1993           | 12                                                             |
| 37               | Central African Republic | Vegetal Products           | 1993           | 1,682                                                          |
| 37               | Central African Republic | Wheat and products         | 1993           | 69                                                             |
| 37               | Central African Republic | Wine                       | 1993           | 1                                                              |
| 37               | Central African Republic | Yams                       | 1993           | 192                                                            |
| 37               | Central African Republic | Alcoholic Beverages        | 1994           | 27                                                             |
| 37               | Central African Republic | Animal fats                | 1994           | 18                                                             |
| 37               | Central African Republic | Animal Products            | 1994           | 192                                                            |
| 37               | Central African Republic | Bananas                    | 1994           | 45                                                             |
| 37               | Central African Republic | Beer                       | 1994           | 10                                                             |
| 37               | Central African Republic | Beverages, Fermented       | 1994           | 17                                                             |
| 37               | Central African Republic | Bovine Meat                | 1994           | 73                                                             |
| 37               | Central African Republic | Cassava and products       | 1994           | 401                                                            |
| 37               | Central African Republic | Cereals - Excluding Beer   | 1994           | 389                                                            |
| 37               | Central African Republic | Coffee and products        | 1994           | 3                                                              |
| 37               | Central African Republic | Cottonseed Oil             | 1994           | 15                                                             |
| 37               | Central African Republic | Eggs                       | 1994           | 2                                                              |
| 37               | Central African Republic | Fats, Animals, Raw         | 1994           | 18                                                             |
| 37               | Central African Republic | Fish, Seafood              | 1994           | 8                                                              |
| 37               | Central African Republic | Freshwater Fish            | 1994           | 8                                                              |
| 37               | Central African Republic | Fruits - Excluding Wine    | 1994           | 81                                                             |
| 37               | Central African Republic | Fruits, Other              | 1994           | 4                                                              |
| 37               | Central African Republic | Grand Total                | 1994           | 1,880                                                          |
| 37               | Central African Republic | Groundnut Oil              | 1994           | 168                                                            |
| 37               | Central African Republic | Honey                      | 1994           | 27                                                             |
| 37               | Central African Republic | Maize and products         | 1994           | 214                                                            |
| 37               | Central African Republic | Meat                       | 1994           | 128                                                            |
| 37               | Central African Republic | Meat, Other                | 1994           | 19                                                             |
| 37               | Central African Republic | Milk - Excluding Butter    | 1994           | 28                                                             |
| 37               | Central African Republic | Millet and products        | 1994           | 21                                                             |
| 37               | Central African Republic | Mutton & Goat Meat         | 1994           | 8                                                              |
| 37               | Central African Republic | Offals                     | 1994           | 7                                                              |
| 37               | Central African Republic | Oilcrops                   | 1994           | 128                                                            |
| 37               | Central African Republic | Oilcrops Oil, Other        | 1994           | 2                                                              |
| 37               | Central African Republic | Oilcrops, Other            | 1994           | 34                                                             |
| 37               | Central African Republic | Oranges, Mandarines        | 1994           | 4                                                              |
| 37               | Central African Republic | Palm kernels               | 1994           | 22                                                             |
| 37               | Central African Republic | Palm Oil                   | 1994           | 54                                                             |
| 37               | Central African Republic | Pigmeat                    | 1994           | 25                                                             |
| 37               | Central African Republic | Pineapples and products    | 1994           | 3                                                              |
| 37               | Central African Republic | Plantains                  | 1994           | 23                                                             |
| 37               | Central African Republic | Poultry Meat               | 1994           | 3                                                              |
| 37               | Central African Republic | Pulses                     | 1994           | 52                                                             |
| 37               | Central African Republic | Pulses, Other and products | 1994           | 52                                                             |
| 37               | Central African Republic | Rice (Milled Equivalent)   | 1994           | 29                                                             |
| 37               | Central African Republic | Roots, Other               | 1994           | 49                                                             |
| 37               | Central African Republic | Sesame seed                | 1994           | 72                                                             |
| 37               | Central African Republic | Sesameseed Oil             | 1994           | 32                                                             |
| 37               | Central African Republic | Sorghum and products       | 1994           | 79                                                             |
| 37               | Central African Republic | Starchy Roots              | 1994           | 654                                                            |
| 37               | Central African Republic | Stimulants                 | 1994           | 3                                                              |
| 37               | Central African Republic | Sugar & Sweeteners         | 1994           | 69                                                             |
| 37               | Central African Republic | Sugar (Raw Equivalent)     | 1994           | 42                                                             |
| 37               | Central African Republic | Vegetable Oils             | 1994           | 271                                                            |
| 37               | Central African Republic | Vegetables                 | 1994           | 13                                                             |
| 37               | Central African Republic | Vegetables, Other          | 1994           | 12                                                             |
| 37               | Central African Republic | Vegetal Products           | 1994           | 1,688                                                          |
| 37               | Central African Republic | Wheat and products         | 1994           | 46                                                             |
| 37               | Central African Republic | Wine                       | 1994           | 1                                                              |
| 37               | Central African Republic | Yams                       | 1994           | 204                                                            |
| 37               | Central African Republic | Alcoholic Beverages        | 1995           | 25                                                             |
| 37               | Central African Republic | Animal fats                | 1995           | 19                                                             |
| 37               | Central African Republic | Animal Products            | 1995           | 196                                                            |
| 37               | Central African Republic | Bananas                    | 1995           | 45                                                             |
| 37               | Central African Republic | Beer                       | 1995           | 8                                                              |

Dietary calcium and zinc deficiency risks are decreasing but remain prevalent

| FAO Country code | Country                  | Food item                  | Reference year | Net energy supply (kcal <i>capita</i> <sup>-1</sup> d <sup>-1</sup> ) |
|------------------|--------------------------|----------------------------|----------------|-----------------------------------------------------------------------|
| 37               | Central African Republic | Beverages, Fermented       | 1995           | 15                                                                    |
| 37               | Central African Republic | Bovine Meat                | 1995           | 76                                                                    |
| 37               | Central African Republic | Cassava and products       | 1995           | 373                                                                   |
| 37               | Central African Republic | Cereals - Excluding Beer   | 1995           | 389                                                                   |
| 37               | Central African Republic | Coffee and products        | 1995           | 2                                                                     |
| 37               | Central African Republic | Cottonseed Oil             | 1995           | 14                                                                    |
| 37               | Central African Republic | Eggs                       | 1995           | 2                                                                     |
| 37               | Central African Republic | Fats, Animals, Raw         | 1995           | 18                                                                    |
| 37               | Central African Republic | Fish, Seafood              | 1995           | 8                                                                     |
| 37               | Central African Republic | Freshwater Fish            | 1995           | 8                                                                     |
| 37               | Central African Republic | Fruits - Excluding Wine    | 1995           | 80                                                                    |
| 37               | Central African Republic | Fruits, Other              | 1995           | 4                                                                     |
| 37               | Central African Republic | Grand Total                | 1995           | 1,881                                                                 |
| 37               | Central African Republic | Grapefruit and products    | 1995           | 1                                                                     |
| 37               | Central African Republic | Groundnut Oil              | 1995           | 150                                                                   |
| 37               | Central African Republic | Honey                      | 1995           | 27                                                                    |
| 37               | Central African Republic | Maize and products         | 1995           | 191                                                                   |
| 37               | Central African Republic | Meat                       | 1995           | 133                                                                   |
| 37               | Central African Republic | Meat, Other                | 1995           | 19                                                                    |
| 37               | Central African Republic | Milk - Excluding Butter    | 1995           | 28                                                                    |
| 37               | Central African Republic | Millet and products        | 1995           | 23                                                                    |
| 37               | Central African Republic | Mutton & Goat Meat         | 1995           | 8                                                                     |
| 37               | Central African Republic | Offals                     | 1995           | 7                                                                     |
| 37               | Central African Republic | Oilcrops                   | 1995           | 137                                                                   |
| 37               | Central African Republic | Oilcrops Oil, Other        | 1995           | 1                                                                     |
| 37               | Central African Republic | Oilcrops, Other            | 1995           | 37                                                                    |
| 37               | Central African Republic | Oranges, Mandarines        | 1995           | 5                                                                     |
| 37               | Central African Republic | Palm kernels               | 1995           | 23                                                                    |
| 37               | Central African Republic | Palm Oil                   | 1995           | 53                                                                    |
| 37               | Central African Republic | Pigmeat                    | 1995           | 26                                                                    |
| 37               | Central African Republic | Pineapples and products    | 1995           | 3                                                                     |
| 37               | Central African Republic | Plantains                  | 1995           | 23                                                                    |
| 37               | Central African Republic | Poultry Meat               | 1995           | 3                                                                     |
| 37               | Central African Republic | Pulses                     | 1995           | 53                                                                    |
| 37               | Central African Republic | Pulses, Other and products | 1995           | 53                                                                    |
| 37               | Central African Republic | Rice (Milled Equivalent)   | 1995           | 30                                                                    |
| 37               | Central African Republic | Roots, Other               | 1995           | 61                                                                    |
| 37               | Central African Republic | Sesame seed                | 1995           | 77                                                                    |
| 37               | Central African Republic | Sesameseed Oil             | 1995           | 31                                                                    |
| 37               | Central African Republic | Sorghum and products       | 1995           | 68                                                                    |
| 37               | Central African Republic | Starchy Roots              | 1995           | 662                                                                   |
| 37               | Central African Republic | Stimulants                 | 1995           | 2                                                                     |
| 37               | Central African Republic | Sugar & Sweeteners         | 1995           | 72                                                                    |
| 37               | Central African Republic | Sugar (Raw Equivalent)     | 1995           | 45                                                                    |
| 37               | Central African Republic | Vegetable Oils             | 1995           | 249                                                                   |
| 37               | Central African Republic | Vegetables                 | 1995           | 14                                                                    |
| 37               | Central African Republic | Vegetables, Other          | 1995           | 14                                                                    |
| 37               | Central African Republic | Vegetal Products           | 1995           | 1,685                                                                 |
| 37               | Central African Republic | Wheat and products         | 1995           | 77                                                                    |
| 37               | Central African Republic | Wine                       | 1995           | 1                                                                     |
| 37               | Central African Republic | Yams                       | 1995           | 227                                                                   |
| 37               | Central African Republic | Alcoholic Beverages        | 1996           | 23                                                                    |
| 37               | Central African Republic | Animal fats                | 1996           | 20                                                                    |
| 37               | Central African Republic | Animal Products            | 1996           | 221                                                                   |
| 37               | Central African Republic | Bananas                    | 1996           | 46                                                                    |
| 37               | Central African Republic | Beer                       | 1996           | 4                                                                     |
| 37               | Central African Republic | Beverages, Fermented       | 1996           | 18                                                                    |
| 37               | Central African Republic | Bovine Meat                | 1996           | 96                                                                    |
| 37               | Central African Republic | Cassava and products       | 1996           | 390                                                                   |
| 37               | Central African Republic | Cereals - Excluding Beer   | 1996           | 371                                                                   |
| 37               | Central African Republic | Coffee and products        | 1996           | 2                                                                     |
| 37               | Central African Republic | Cottonseed Oil             | 1996           | 12                                                                    |
| 37               | Central African Republic | Eggs                       | 1996           | 2                                                                     |
| 37               | Central African Republic | Fats, Animals, Raw         | 1996           | 20                                                                    |
| 37               | Central African Republic | Fish, Seafood              | 1996           | 8                                                                     |
| 37               | Central African Republic | Freshwater Fish            | 1996           | 8                                                                     |
| 37               | Central African Republic | Fruits - Excluding Wine    | 1996           | 81                                                                    |
| 37               | Central African Republic | Fruits, Other              | 1996           | 4                                                                     |
| 37               | Central African Republic | Grand Total                | 1996           | 1,896                                                                 |
| 37               | Central African Republic | Groundnut Oil              | 1996           | 167                                                                   |
| 37               | Central African Republic | Honey                      | 1996           | 28                                                                    |
| 37               | Central African Republic | Maize and products         | 1996           | 239                                                                   |
| 37               | Central African Republic | Meat                       | 1996           | 155                                                                   |
| 37               | Central African Republic | Meat, Other                | 1996           | 19                                                                    |
| 37               | Central African Republic | Milk - Excluding Butter    | 1996           | 29                                                                    |
| 37               | Central African Republic | Millet and products        | 1996           | 23                                                                    |
| 37               | Central African Republic | Mutton & Goat Meat         | 1996           | 8                                                                     |
| 37               | Central African Republic | Offals                     | 1996           | 8                                                                     |
| 37               | Central African Republic | Oilcrops                   | 1996           | 125                                                                   |
| 37               | Central African Republic | Oilcrops Oil, Other        | 1996           | 1                                                                     |
| 37               | Central African Republic | Oilcrops, Other            | 1996           | 38                                                                    |
| 37               | Central African Republic | Oranges, Mandarines        | 1996           | 4                                                                     |
| 37               | Central African Republic | Palm kernels               | 1996           | 8                                                                     |
| 37               | Central African Republic | Palm Oil                   | 1996           | 19                                                                    |
| 37               | Central African Republic | Pigmeat                    | 1996           | 29                                                                    |
| 37               | Central African Republic | Pineapples and products    | 1996           | 3                                                                     |
| 37               | Central African Republic | Plantains                  | 1996           | 23                                                                    |
| 37               | Central African Republic | Potatoes and products      | 1996           | 1                                                                     |
| 37               | Central African Republic | Poultry Meat               | 1996           | 3                                                                     |
| 37               | Central African Republic | Pulses                     | 1996           | 71                                                                    |
| 37               | Central African Republic | Pulses, Other and products | 1996           | 71                                                                    |
| 37               | Central African Republic | Rice (Milled Equivalent)   | 1996           | 14                                                                    |
| 37               | Central African Republic | Roots, Other               | 1996           | 64                                                                    |
| 37               | Central African Republic | Sesame seed                | 1996           | 78                                                                    |
| 37               | Central African Republic | Sesameseed Oil             | 1996           | 35                                                                    |
| 37               | Central African Republic | Sorghum and products       | 1996           | 78                                                                    |
| 37               | Central African Republic | Soyabean Oil               | 1996           | 2                                                                     |

Dietary calcium and zinc deficiency risks are decreasing but remain prevalent

| FAO Country code | Country                  | Food item                  | Reference year | Net energy supply (kcal <i>capita</i> <sup>-1</sup> d <sup>-1</sup> ) |
|------------------|--------------------------|----------------------------|----------------|-----------------------------------------------------------------------|
| 37               | Central African Republic | Starchy Roots              | 1996           | 698                                                                   |
| 37               | Central African Republic | Stimulants                 | 1996           | 2                                                                     |
| 37               | Central African Republic | Sugar & Sweeteners         | 1996           | 56                                                                    |
| 37               | Central African Republic | Sugar (Raw Equivalent)     | 1996           | 28                                                                    |
| 37               | Central African Republic | Vegetable Oils             | 1996           | 235                                                                   |
| 37               | Central African Republic | Vegetables                 | 1996           | 12                                                                    |
| 37               | Central African Republic | Vegetables, Other          | 1996           | 12                                                                    |
| 37               | Central African Republic | Vegetal Products           | 1996           | 1,675                                                                 |
| 37               | Central African Republic | Wheat and products         | 1996           | 17                                                                    |
| 37               | Central African Republic | Yams                       | 1996           | 243                                                                   |
| 37               | Central African Republic | Alcoholic Beverages        | 1997           | 20                                                                    |
| 37               | Central African Republic | Animal fats                | 1997           | 20                                                                    |
| 37               | Central African Republic | Animal Products            | 1997           | 204                                                                   |
| 37               | Central African Republic | Bananas                    | 1997           | 48                                                                    |
| 37               | Central African Republic | Beer                       | 1997           | 5                                                                     |
| 37               | Central African Republic | Beverages, Fermented       | 1997           | 15                                                                    |
| 37               | Central African Republic | Bovine Meat                | 1997           | 76                                                                    |
| 37               | Central African Republic | Cassava and products       | 1997           | 419                                                                   |
| 37               | Central African Republic | Cereals - Excluding Beer   | 1997           | 334                                                                   |
| 37               | Central African Republic | Coffee and products        | 1997           | 1                                                                     |
| 37               | Central African Republic | Cottonseed Oil             | 1997           | 15                                                                    |
| 37               | Central African Republic | Eggs                       | 1997           | 2                                                                     |
| 37               | Central African Republic | Fats, Animals, Raw         | 1997           | 20                                                                    |
| 37               | Central African Republic | Fish, Seafood              | 1997           | 8                                                                     |
| 37               | Central African Republic | Freshwater Fish            | 1997           | 8                                                                     |
| 37               | Central African Republic | Fruits - Excluding Wine    | 1997           | 83                                                                    |
| 37               | Central African Republic | Fruits, Other              | 1997           | 4                                                                     |
| 37               | Central African Republic | Grand Total                | 1997           | 1,916                                                                 |
| 37               | Central African Republic | Grapefruit and products    | 1997           | 1                                                                     |
| 37               | Central African Republic | Groundnut Oil              | 1997           | 175                                                                   |
| 37               | Central African Republic | Honey                      | 1997           | 29                                                                    |
| 37               | Central African Republic | Maize and products         | 1997           | 174                                                                   |
| 37               | Central African Republic | Meat                       | 1997           | 136                                                                   |
| 37               | Central African Republic | Meat, Other                | 1997           | 19                                                                    |
| 37               | Central African Republic | Milk - Excluding Butter    | 1997           | 29                                                                    |
| 37               | Central African Republic | Millet and products        | 1997           | 24                                                                    |
| 37               | Central African Republic | Mutton & Goat Meat         | 1997           | 9                                                                     |
| 37               | Central African Republic | Offals                     | 1997           | 8                                                                     |
| 37               | Central African Republic | Oilcrops                   | 1997           | 124                                                                   |
| 37               | Central African Republic | Oilcrops Oil, Other        | 1997           | 1                                                                     |
| 37               | Central African Republic | Oilcrops, Other            | 1997           | 40                                                                    |
| 37               | Central African Republic | Oranges, Mandarines        | 1997           | 5                                                                     |
| 37               | Central African Republic | Palm kernels               | 1997           | 11                                                                    |
| 37               | Central African Republic | Palm Oil                   | 1997           | 26                                                                    |
| 37               | Central African Republic | Pigmeat                    | 1997           | 29                                                                    |
| 37               | Central African Republic | Pineapples and products    | 1997           | 3                                                                     |
| 37               | Central African Republic | Plantains                  | 1997           | 23                                                                    |
| 37               | Central African Republic | Potatoes and products      | 1997           | 1                                                                     |
| 37               | Central African Republic | Poultry Meat               | 1997           | 3                                                                     |
| 37               | Central African Republic | Pulses                     | 1997           | 53                                                                    |
| 37               | Central African Republic | Pulses, Other and products | 1997           | 53                                                                    |
| 37               | Central African Republic | Rice (Milled Equivalent)   | 1997           | 35                                                                    |
| 37               | Central African Republic | Roots, Other               | 1997           | 65                                                                    |
| 37               | Central African Republic | Sesame seed                | 1997           | 73                                                                    |
| 37               | Central African Republic | Sesameseed Oil             | 1997           | 41                                                                    |
| 37               | Central African Republic | Sorghum and products       | 1997           | 71                                                                    |
| 37               | Central African Republic | Starchy Roots              | 1997           | 744                                                                   |
| 37               | Central African Republic | Stimulants                 | 1997           | 1                                                                     |
| 37               | Central African Republic | Sugar & Sweeteners         | 1997           | 82                                                                    |
| 37               | Central African Republic | Sugar (Raw Equivalent)     | 1997           | 53                                                                    |
| 37               | Central African Republic | Vegetable Oils             | 1997           | 258                                                                   |
| 37               | Central African Republic | Vegetables                 | 1997           | 13                                                                    |
| 37               | Central African Republic | Vegetables, Other          | 1997           | 13                                                                    |
| 37               | Central African Republic | Vegetal Products           | 1997           | 1,712                                                                 |
| 37               | Central African Republic | Wheat and products         | 1997           | 30                                                                    |
| 37               | Central African Republic | Yams                       | 1997           | 258                                                                   |
| 37               | Central African Republic | Alcoholic Beverages        | 1998           | 22                                                                    |
| 37               | Central African Republic | Animal fats                | 1998           | 20                                                                    |
| 37               | Central African Republic | Animal Products            | 1998           | 203                                                                   |
| 37               | Central African Republic | Bananas                    | 1998           | 49                                                                    |
| 37               | Central African Republic | Beer                       | 1998           | 6                                                                     |
| 37               | Central African Republic | Beverages, Fermented       | 1998           | 15                                                                    |
| 37               | Central African Republic | Bovine Meat                | 1998           | 76                                                                    |
| 37               | Central African Republic | Cassava and products       | 1998           | 431                                                                   |
| 37               | Central African Republic | Cereals - Excluding Beer   | 1998           | 386                                                                   |
| 37               | Central African Republic | Cereals, Other             | 1998           | 3                                                                     |
| 37               | Central African Republic | Coffee and products        | 1998           | 3                                                                     |
| 37               | Central African Republic | Cottonseed Oil             | 1998           | 14                                                                    |
| 37               | Central African Republic | Eggs                       | 1998           | 2                                                                     |
| 37               | Central African Republic | Fats, Animals, Raw         | 1998           | 20                                                                    |
| 37               | Central African Republic | Fish, Seafood              | 1998           | 8                                                                     |
| 37               | Central African Republic | Freshwater Fish            | 1998           | 8                                                                     |
| 37               | Central African Republic | Fruits - Excluding Wine    | 1998           | 84                                                                    |
| 37               | Central African Republic | Fruits, Other              | 1998           | 4                                                                     |
| 37               | Central African Republic | Grand Total                | 1998           | 1,987                                                                 |
| 37               | Central African Republic | Grapefruit and products    | 1998           | 1                                                                     |
| 37               | Central African Republic | Groundnut Oil              | 1998           | 165                                                                   |
| 37               | Central African Republic | Honey                      | 1998           | 29                                                                    |
| 37               | Central African Republic | Maize and products         | 1998           | 183                                                                   |
| 37               | Central African Republic | Meat                       | 1998           | 136                                                                   |
| 37               | Central African Republic | Meat, Other                | 1998           | 19                                                                    |
| 37               | Central African Republic | Milk - Excluding Butter    | 1998           | 29                                                                    |
| 37               | Central African Republic | Millet and products        | 1998           | 31                                                                    |
| 37               | Central African Republic | Mutton & Goat Meat         | 1998           | 9                                                                     |
| 37               | Central African Republic | Offals                     | 1998           | 8                                                                     |
| 37               | Central African Republic | Oilcrops                   | 1998           | 119                                                                   |
| 37               | Central African Republic | Oilcrops, Other            | 1998           | 42                                                                    |

Dietary calcium and zinc deficiency risks are decreasing but remain prevalent

| FAO Country code | Country                  | Food item                  | Reference year | Net energy supply (kcal capita <sup>-1</sup> d <sup>-1</sup> ) |
|------------------|--------------------------|----------------------------|----------------|----------------------------------------------------------------|
| 37               | Central African Republic | Oranges, Mandarines        | 1998           | 5                                                              |
| 37               | Central African Republic | Palm kernels               | 1998           | 11                                                             |
| 37               | Central African Republic | Palm Oil                   | 1998           | 16                                                             |
| 37               | Central African Republic | Pigmeat                    | 1998           | 29                                                             |
| 37               | Central African Republic | Pineapples and products    | 1998           | 3                                                              |
| 37               | Central African Republic | Plantains                  | 1998           | 23                                                             |
| 37               | Central African Republic | Poultry Meat               | 1998           | 3                                                              |
| 37               | Central African Republic | Pulses                     | 1998           | 71                                                             |
| 37               | Central African Republic | Pulses, Other and products | 1998           | 71                                                             |
| 37               | Central African Republic | Rice (Milled Equivalent)   | 1998           | 40                                                             |
| 37               | Central African Republic | Roots, Other               | 1998           | 70                                                             |
| 37               | Central African Republic | Sesame seed                | 1998           | 67                                                             |
| 37               | Central African Republic | Sesameseed Oil             | 1998           | 47                                                             |
| 37               | Central African Republic | Sorghum and products       | 1998           | 70                                                             |
| 37               | Central African Republic | Starchy Roots              | 1998           | 762                                                            |
| 37               | Central African Republic | Stimulants                 | 1998           | 3                                                              |
| 37               | Central African Republic | Sugar & Sweeteners         | 1998           | 83                                                             |
| 37               | Central African Republic | Sugar (Raw Equivalent)     | 1998           | 53                                                             |
| 37               | Central African Republic | Vegetable Oils             | 1998           | 241                                                            |
| 37               | Central African Republic | Vegetables                 | 1998           | 13                                                             |
| 37               | Central African Republic | Vegetables, Other          | 1998           | 13                                                             |
| 37               | Central African Republic | Vegetal Products           | 1998           | 1,784                                                          |
| 37               | Central African Republic | Wheat and products         | 1998           | 59                                                             |
| 37               | Central African Republic | Yams                       | 1998           | 260                                                            |
| 37               | Central African Republic | Alcoholic Beverages        | 1999           | 19                                                             |
| 37               | Central African Republic | Animal fats                | 1999           | 20                                                             |
| 37               | Central African Republic | Animal Products            | 1999           | 202                                                            |
| 37               | Central African Republic | Bananas                    | 1999           | 44                                                             |
| 37               | Central African Republic | Beer                       | 1999           | 4                                                              |
| 37               | Central African Republic | Beverages, Fermented       | 1999           | 15                                                             |
| 37               | Central African Republic | Bovine Meat                | 1999           | 74                                                             |
| 37               | Central African Republic | Cassava and products       | 1999           | 389                                                            |
| 37               | Central African Republic | Cereals - Excluding Beer   | 1999           | 411                                                            |
| 37               | Central African Republic | Coffee and products        | 1999           | 1                                                              |
| 37               | Central African Republic | Cottonseed Oil             | 1999           | 10                                                             |
| 37               | Central African Republic | Eggs                       | 1999           | 2                                                              |
| 37               | Central African Republic | Fats, Animals, Raw         | 1999           | 20                                                             |
| 37               | Central African Republic | Fish, Seafood              | 1999           | 8                                                              |
| 37               | Central African Republic | Freshwater Fish            | 1999           | 8                                                              |
| 37               | Central African Republic | Fruits - Excluding Wine    | 1999           | 78                                                             |
| 37               | Central African Republic | Fruits, Other              | 1999           | 4                                                              |
| 37               | Central African Republic | Grand Total                | 1999           | 1,930                                                          |
| 37               | Central African Republic | Grapefruit and products    | 1999           | 1                                                              |
| 37               | Central African Republic | Groundnut Oil              | 1999           | 179                                                            |
| 37               | Central African Republic | Honey                      | 1999           | 30                                                             |
| 37               | Central African Republic | Maize and products         | 1999           | 196                                                            |
| 37               | Central African Republic | Meat                       | 1999           | 134                                                            |
| 37               | Central African Republic | Meat, Other                | 1999           | 19                                                             |
| 37               | Central African Republic | Milk - Excluding Butter    | 1999           | 30                                                             |
| 37               | Central African Republic | Millet and products        | 1999           | 19                                                             |
| 37               | Central African Republic | Mutton & Goat Meat         | 1999           | 9                                                              |
| 37               | Central African Republic | Offals                     | 1999           | 8                                                              |
| 37               | Central African Republic | Oilcrops                   | 1999           | 128                                                            |
| 37               | Central African Republic | Oilcrops Oil, Other        | 1999           | 1                                                              |
| 37               | Central African Republic | Oilcrops, Other            | 1999           | 49                                                             |
| 37               | Central African Republic | Oranges, Mandarines        | 1999           | 5                                                              |
| 37               | Central African Republic | Palm kernels               | 1999           | 11                                                             |
| 37               | Central African Republic | Palm Oil                   | 1999           | 22                                                             |
| 37               | Central African Republic | Pigmeat                    | 1999           | 29                                                             |
| 37               | Central African Republic | Pineapples and products    | 1999           | 3                                                              |
| 37               | Central African Republic | Plantains                  | 1999           | 21                                                             |
| 37               | Central African Republic | Poultry Meat               | 1999           | 2                                                              |
| 37               | Central African Republic | Pulses                     | 1999           | 53                                                             |
| 37               | Central African Republic | Pulses, Other and products | 1999           | 53                                                             |
| 37               | Central African Republic | Rice (Milled Equivalent)   | 1999           | 42                                                             |
| 37               | Central African Republic | Roots, Other               | 1999           | 63                                                             |
| 37               | Central African Republic | Sesame seed                | 1999           | 68                                                             |
| 37               | Central African Republic | Sesameseed Oil             | 1999           | 52                                                             |
| 37               | Central African Republic | Sorghum and products       | 1999           | 86                                                             |
| 37               | Central African Republic | Soyabean Oil               | 1999           | 1                                                              |
| 37               | Central African Republic | Starchy Roots              | 1999           | 687                                                            |
| 37               | Central African Republic | Stimulants                 | 1999           | 1                                                              |
| 37               | Central African Republic | Sugar & Sweeteners         | 1999           | 70                                                             |
| 37               | Central African Republic | Sugar (Raw Equivalent)     | 1999           | 40                                                             |
| 37               | Central African Republic | Vegetable Oils             | 1999           | 266                                                            |
| 37               | Central African Republic | Vegetables                 | 1999           | 13                                                             |
| 37               | Central African Republic | Vegetables, Other          | 1999           | 13                                                             |
| 37               | Central African Republic | Vegetal Products           | 1999           | 1,727                                                          |
| 37               | Central African Republic | Wheat and products         | 1999           | 68                                                             |
| 37               | Central African Republic | Yams                       | 1999           | 235                                                            |
| 37               | Central African Republic | Alcoholic Beverages        | 2000           | 24                                                             |
| 37               | Central African Republic | Animal fats                | 2000           | 21                                                             |
| 37               | Central African Republic | Animal Products            | 2000           | 227                                                            |
| 37               | Central African Republic | Bananas                    | 2000           | 48                                                             |
| 37               | Central African Republic | Beer                       | 2000           | 8                                                              |
| 37               | Central African Republic | Beverages, Fermented       | 2000           | 16                                                             |
| 37               | Central African Republic | Bovine Meat                | 2000           | 96                                                             |
| 37               | Central African Republic | Cassava and products       | 2000           | 382                                                            |
| 37               | Central African Republic | Cereals - Excluding Beer   | 2000           | 416                                                            |
| 37               | Central African Republic | Cocoa Beans and products   | 2000           | 1                                                              |
| 37               | Central African Republic | Coffee and products        | 2000           | 1                                                              |
| 37               | Central African Republic | Cottonseed Oil             | 2000           | 9                                                              |
| 37               | Central African Republic | Eggs                       | 2000           | 2                                                              |
| 37               | Central African Republic | Fats, Animals, Raw         | 2000           | 21                                                             |
| 37               | Central African Republic | Fish, Seafood              | 2000           | 8                                                              |
| 37               | Central African Republic | Freshwater Fish            | 2000           | 8                                                              |
| 37               | Central African Republic | Fruits - Excluding Wine    | 2000           | 83                                                             |

Dietary calcium and zinc deficiency risks are decreasing but remain prevalent

| FAO Country code | Country                  | Food item                  | Reference year | Net energy supply (kcal <i>capita</i> <sup>-1</sup> d <sup>-1</sup> ) |
|------------------|--------------------------|----------------------------|----------------|-----------------------------------------------------------------------|
| 37               | Central African Republic | Fruits, Other              | 2000           | 4                                                                     |
| 37               | Central African Republic | Grand Total                | 2000           | 1,983                                                                 |
| 37               | Central African Republic | Grapefruit and products    | 2000           | 1                                                                     |
| 37               | Central African Republic | Groundnut Oil              | 2000           | 163                                                                   |
| 37               | Central African Republic | Honey                      | 2000           | 30                                                                    |
| 37               | Central African Republic | Maize and products         | 2000           | 201                                                                   |
| 37               | Central African Republic | Meat                       | 2000           | 157                                                                   |
| 37               | Central African Republic | Meat, Other                | 2000           | 19                                                                    |
| 37               | Central African Republic | Milk - Excluding Butter    | 2000           | 30                                                                    |
| 37               | Central African Republic | Millet and products        | 2000           | 17                                                                    |
| 37               | Central African Republic | Mutton & Goat Meat         | 2000           | 11                                                                    |
| 37               | Central African Republic | Offals                     | 2000           | 8                                                                     |
| 37               | Central African Republic | Oilcrops                   | 2000           | 123                                                                   |
| 37               | Central African Republic | Oilcrops Oil, Other        | 2000           | 1                                                                     |
| 37               | Central African Republic | Oilcrops, Other            | 2000           | 51                                                                    |
| 37               | Central African Republic | Oranges, Mandarines        | 2000           | 5                                                                     |
| 37               | Central African Republic | Palm kernels               | 2000           | 9                                                                     |
| 37               | Central African Republic | Palm Oil                   | 2000           | 17                                                                    |
| 37               | Central African Republic | Pigmeat                    | 2000           | 28                                                                    |
| 37               | Central African Republic | Pineapples and products    | 2000           | 3                                                                     |
| 37               | Central African Republic | Plantains                  | 2000           | 22                                                                    |
| 37               | Central African Republic | Poultry Meat               | 2000           | 3                                                                     |
| 37               | Central African Republic | Pulses                     | 2000           | 59                                                                    |
| 37               | Central African Republic | Pulses, Other and products | 2000           | 59                                                                    |
| 37               | Central African Republic | Rape and Mustard Oil       | 2000           | 1                                                                     |
| 37               | Central African Republic | Rice (Milled Equivalent)   | 2000           | 45                                                                    |
| 37               | Central African Republic | Roots, Other               | 2000           | 65                                                                    |
| 37               | Central African Republic | Sesame seed                | 2000           | 63                                                                    |
| 37               | Central African Republic | Sesameseed Oil             | 2000           | 58                                                                    |
| 37               | Central African Republic | Sorghum and products       | 2000           | 76                                                                    |
| 37               | Central African Republic | Soyabean Oil               | 2000           | 1                                                                     |
| 37               | Central African Republic | Starchy Roots              | 2000           | 691                                                                   |
| 37               | Central African Republic | Stimulants                 | 2000           | 2                                                                     |
| 37               | Central African Republic | Sugar & Sweeteners         | 2000           | 94                                                                    |
| 37               | Central African Republic | Sugar (Raw Equivalent)     | 2000           | 64                                                                    |
| 37               | Central African Republic | Vegetable Oils             | 2000           | 249                                                                   |
| 37               | Central African Republic | Vegetables                 | 2000           | 13                                                                    |
| 37               | Central African Republic | Vegetables, Other          | 2000           | 13                                                                    |
| 37               | Central African Republic | Vegetal Products           | 2000           | 1,756                                                                 |
| 37               | Central African Republic | Wheat and products         | 2000           | 76                                                                    |
| 37               | Central African Republic | Yams                       | 2000           | 243                                                                   |
| 37               | Central African Republic | Alcoholic Beverages        | 2001           | 23                                                                    |
| 37               | Central African Republic | Animal fats                | 2001           | 21                                                                    |
| 37               | Central African Republic | Animal Products            | 2001           | 226                                                                   |
| 37               | Central African Republic | Bananas                    | 2001           | 47                                                                    |
| 37               | Central African Republic | Beer                       | 2001           | 6                                                                     |
| 37               | Central African Republic | Beverages, Fermented       | 2001           | 16                                                                    |
| 37               | Central African Republic | Bovine Meat                | 2001           | 94                                                                    |
| 37               | Central African Republic | Cassava and products       | 2001           | 377                                                                   |
| 37               | Central African Republic | Cereals - Excluding Beer   | 2001           | 422                                                                   |
| 37               | Central African Republic | Coffee and products        | 2001           | 2                                                                     |
| 37               | Central African Republic | Cottonseed Oil             | 2001           | 10                                                                    |
| 37               | Central African Republic | Eggs                       | 2001           | 2                                                                     |
| 37               | Central African Republic | Fats, Animals, Raw         | 2001           | 21                                                                    |
| 37               | Central African Republic | Fish, Seafood              | 2001           | 9                                                                     |
| 37               | Central African Republic | Freshwater Fish            | 2001           | 9                                                                     |
| 37               | Central African Republic | Fruits - Excluding Wine    | 2001           | 83                                                                    |
| 37               | Central African Republic | Fruits, Other              | 2001           | 5                                                                     |
| 37               | Central African Republic | Grand Total                | 2001           | 1,988                                                                 |
| 37               | Central African Republic | Groundnut Oil              | 2001           | 188                                                                   |
| 37               | Central African Republic | Honey                      | 2001           | 32                                                                    |
| 37               | Central African Republic | Maize and products         | 2001           | 209                                                                   |
| 37               | Central African Republic | Meat                       | 2001           | 156                                                                   |
| 37               | Central African Republic | Meat, Other                | 2001           | 19                                                                    |
| 37               | Central African Republic | Milk - Excluding Butter    | 2001           | 29                                                                    |
| 37               | Central African Republic | Millet and products        | 2001           | 21                                                                    |
| 37               | Central African Republic | Mutton & Goat Meat         | 2001           | 11                                                                    |
| 37               | Central African Republic | Offals                     | 2001           | 8                                                                     |
| 37               | Central African Republic | Oilcrops                   | 2001           | 141                                                                   |
| 37               | Central African Republic | Oilcrops Oil, Other        | 2001           | 1                                                                     |
| 37               | Central African Republic | Oilcrops, Other            | 2001           | 53                                                                    |
| 37               | Central African Republic | Oranges, Mandarines        | 2001           | 5                                                                     |
| 37               | Central African Republic | Palm kernels               | 2001           | 10                                                                    |
| 37               | Central African Republic | Palm Oil                   | 2001           | 15                                                                    |
| 37               | Central African Republic | Pigmeat                    | 2001           | 29                                                                    |
| 37               | Central African Republic | Pineapples and products    | 2001           | 3                                                                     |
| 37               | Central African Republic | Plantains                  | 2001           | 22                                                                    |
| 37               | Central African Republic | Poultry Meat               | 2001           | 3                                                                     |
| 37               | Central African Republic | Pulses                     | 2001           | 63                                                                    |
| 37               | Central African Republic | Pulses, Other and products | 2001           | 63                                                                    |
| 37               | Central African Republic | Rice (Milled Equivalent)   | 2001           | 54                                                                    |
| 37               | Central African Republic | Roots, Other               | 2001           | 64                                                                    |
| 37               | Central African Republic | Rye and products           | 2001           | 2                                                                     |
| 37               | Central African Republic | Sesame seed                | 2001           | 78                                                                    |
| 37               | Central African Republic | Sesameseed Oil             | 2001           | 50                                                                    |
| 37               | Central African Republic | Sorghum and products       | 2001           | 80                                                                    |
| 37               | Central African Republic | Starchy Roots              | 2001           | 680                                                                   |
| 37               | Central African Republic | Stimulants                 | 2001           | 2                                                                     |
| 37               | Central African Republic | Sugar & Sweeteners         | 2001           | 72                                                                    |
| 37               | Central African Republic | Sugar (Raw Equivalent)     | 2001           | 40                                                                    |
| 37               | Central African Republic | Vegetable Oils             | 2001           | 265                                                                   |
| 37               | Central African Republic | Vegetables                 | 2001           | 13                                                                    |
| 37               | Central African Republic | Vegetables, Other          | 2001           | 13                                                                    |
| 37               | Central African Republic | Vegetal Products           | 2001           | 1,763                                                                 |
| 37               | Central African Republic | Wheat and products         | 2001           | 56                                                                    |
| 37               | Central African Republic | Yams                       | 2001           | 239                                                                   |
| 37               | Central African Republic | Alcoholic Beverages        | 2002           | 21                                                                    |

Dietary calcium and zinc deficiency risks are decreasing but remain prevalent

| FAO Country code | Country                  | Food item                  | Reference year | Net energy supply (kcal capita <sup>-1</sup> d <sup>-1</sup> ) |
|------------------|--------------------------|----------------------------|----------------|----------------------------------------------------------------|
| 37               | Central African Republic | Animal fats                | 2002           | 22                                                             |
| 37               | Central African Republic | Animal Products            | 2002           | 230                                                            |
| 37               | Central African Republic | Bananas                    | 2002           | 45                                                             |
| 37               | Central African Republic | Beer                       | 2002           | 4                                                              |
| 37               | Central African Republic | Beverages, Fermented       | 2002           | 17                                                             |
| 37               | Central African Republic | Bovine Meat                | 2002           | 95                                                             |
| 37               | Central African Republic | Cassava and products       | 2002           | 371                                                            |
| 37               | Central African Republic | Cereals - Excluding Beer   | 2002           | 449                                                            |
| 37               | Central African Republic | Coffee and products        | 2002           | 2                                                              |
| 37               | Central African Republic | Cottonseed Oil             | 2002           | 6                                                              |
| 37               | Central African Republic | Eggs                       | 2002           | 2                                                              |
| 37               | Central African Republic | Fats, Animals, Raw         | 2002           | 22                                                             |
| 37               | Central African Republic | Fish, Seafood              | 2002           | 10                                                             |
| 37               | Central African Republic | Freshwater Fish            | 2002           | 9                                                              |
| 37               | Central African Republic | Fruits - Excluding Wine    | 2002           | 78                                                             |
| 37               | Central African Republic | Fruits, Other              | 2002           | 4                                                              |
| 37               | Central African Republic | Grand Total                | 2002           | 1,996                                                          |
| 37               | Central African Republic | Groundnut Oil              | 2002           | 193                                                            |
| 37               | Central African Republic | Honey                      | 2002           | 33                                                             |
| 37               | Central African Republic | Maize and products         | 2002           | 220                                                            |
| 37               | Central African Republic | Meat                       | 2002           | 158                                                            |
| 37               | Central African Republic | Meat, Other                | 2002           | 19                                                             |
| 37               | Central African Republic | Milk - Excluding Butter    | 2002           | 30                                                             |
| 37               | Central African Republic | Millet and products        | 2002           | 22                                                             |
| 37               | Central African Republic | Mutton & Goat Meat         | 2002           | 12                                                             |
| 37               | Central African Republic | Offals                     | 2002           | 9                                                              |
| 37               | Central African Republic | Oilcrops                   | 2002           | 145                                                            |
| 37               | Central African Republic | Oilcrops Oil, Other        | 2002           | 11                                                             |
| 37               | Central African Republic | Oilcrops, Other            | 2002           | 55                                                             |
| 37               | Central African Republic | Oranges, Mandarines        | 2002           | 4                                                              |
| 37               | Central African Republic | Palm kernels               | 2002           | 8                                                              |
| 37               | Central African Republic | Palm Oil                   | 2002           | 13                                                             |
| 37               | Central African Republic | Pigmeat                    | 2002           | 28                                                             |
| 37               | Central African Republic | Pineapples and products    | 2002           | 3                                                              |
| 37               | Central African Republic | Plantains                  | 2002           | 21                                                             |
| 37               | Central African Republic | Poultry Meat               | 2002           | 4                                                              |
| 37               | Central African Republic | Pulses                     | 2002           | 65                                                             |
| 37               | Central African Republic | Pulses, Other and products | 2002           | 65                                                             |
| 37               | Central African Republic | Rice (Milled Equivalent)   | 2002           | 54                                                             |
| 37               | Central African Republic | Roots, Other               | 2002           | 59                                                             |
| 37               | Central African Republic | Sesame seed                | 2002           | 83                                                             |
| 37               | Central African Republic | Sesameseed Oil             | 2002           | 49                                                             |
| 37               | Central African Republic | Sorghum and products       | 2002           | 94                                                             |
| 37               | Central African Republic | Soyabean Oil               | 2002           | 1                                                              |
| 37               | Central African Republic | Starchy Roots              | 2002           | 647                                                            |
| 37               | Central African Republic | Stimulants                 | 2002           | 2                                                              |
| 37               | Central African Republic | Sugar & Sweeteners         | 2002           | 71                                                             |
| 37               | Central African Republic | Sugar (Raw Equivalent)     | 2002           | 38                                                             |
| 37               | Central African Republic | Vegetable Oils             | 2002           | 273                                                            |
| 37               | Central African Republic | Vegetables                 | 2002           | 13                                                             |
| 37               | Central African Republic | Vegetables, Other          | 2002           | 13                                                             |
| 37               | Central African Republic | Vegetal Products           | 2002           | 1,766                                                          |
| 37               | Central African Republic | Wheat and products         | 2002           | 58                                                             |
| 37               | Central African Republic | Yams                       | 2002           | 216                                                            |
| 37               | Central African Republic | Alcoholic Beverages        | 2003           | 21                                                             |
| 37               | Central African Republic | Animal fats                | 2003           | 22                                                             |
| 37               | Central African Republic | Animal Products            | 2003           | 226                                                            |
| 37               | Central African Republic | Bananas                    | 2003           | 42                                                             |
| 37               | Central African Republic | Beans                      | 2003           | 1                                                              |
| 37               | Central African Republic | Beer                       | 2003           | 3                                                              |
| 37               | Central African Republic | Beverages, Fermented       | 2003           | 17                                                             |
| 37               | Central African Republic | Bovine Meat                | 2003           | 89                                                             |
| 37               | Central African Republic | Cassava and products       | 2003           | 366                                                            |
| 37               | Central African Republic | Cereals - Excluding Beer   | 2003           | 453                                                            |
| 37               | Central African Republic | Coffee and products        | 2003           | 1                                                              |
| 37               | Central African Republic | Eggs                       | 2003           | 2                                                              |
| 37               | Central African Republic | Fats, Animals, Raw         | 2003           | 22                                                             |
| 37               | Central African Republic | Fish, Seafood              | 2003           | 11                                                             |
| 37               | Central African Republic | Freshwater Fish            | 2003           | 10                                                             |
| 37               | Central African Republic | Fruits - Excluding Wine    | 2003           | 74                                                             |
| 37               | Central African Republic | Fruits, Other              | 2003           | 4                                                              |
| 37               | Central African Republic | Grand Total                | 2003           | 1,966                                                          |
| 37               | Central African Republic | Groundnut Oil              | 2003           | 200                                                            |
| 37               | Central African Republic | Honey                      | 2003           | 36                                                             |
| 37               | Central African Republic | Maize and products         | 2003           | 229                                                            |
| 37               | Central African Republic | Meat                       | 2003           | 153                                                            |
| 37               | Central African Republic | Meat, Other                | 2003           | 19                                                             |
| 37               | Central African Republic | Milk - Excluding Butter    | 2003           | 30                                                             |
| 37               | Central African Republic | Millet and products        | 2003           | 21                                                             |
| 37               | Central African Republic | Mutton & Goat Meat         | 2003           | 12                                                             |
| 37               | Central African Republic | Offals                     | 2003           | 9                                                              |
| 37               | Central African Republic | Oilcrops                   | 2003           | 151                                                            |
| 37               | Central African Republic | Oilcrops Oil, Other        | 2003           | 2                                                              |
| 37               | Central African Republic | Oilcrops, Other            | 2003           | 56                                                             |
| 37               | Central African Republic | Oranges, Mandarines        | 2003           | 4                                                              |
| 37               | Central African Republic | Palm kernels               | 2003           | 7                                                              |
| 37               | Central African Republic | Palm Oil                   | 2003           | 13                                                             |
| 37               | Central African Republic | Pelagic Fish               | 2003           | 1                                                              |
| 37               | Central African Republic | Pigmeat                    | 2003           | 29                                                             |
| 37               | Central African Republic | Pineapples and products    | 2003           | 3                                                              |
| 37               | Central African Republic | Plantains                  | 2003           | 20                                                             |
| 37               | Central African Republic | Poultry Meat               | 2003           | 4                                                              |
| 37               | Central African Republic | Pulses                     | 2003           | 53                                                             |
| 37               | Central African Republic | Pulses, Other and products | 2003           | 52                                                             |
| 37               | Central African Republic | Rice (Milled Equivalent)   | 2003           | 57                                                             |
| 37               | Central African Republic | Roots, Other               | 2003           | 47                                                             |
| 37               | Central African Republic | Sesame seed                | 2003           | 87                                                             |

## Dietary calcium and zinc deficiency risks are decreasing but remain prevalent

| FAO Country code | Country                  | Food item                  | Reference year | Net energy supply (kcal capita <sup>-1</sup> d <sup>-1</sup> ) |
|------------------|--------------------------|----------------------------|----------------|----------------------------------------------------------------|
| 37               | Central African Republic | Sesameseed Oil             | 2003           | 49                                                             |
| 37               | Central African Republic | Sorghum and products       | 2003           | 80                                                             |
| 37               | Central African Republic | Soyabean Oil               | 2003           | 8                                                              |
| 37               | Central African Republic | Starchy Roots              | 2003           | 614                                                            |
| 37               | Central African Republic | Stimulants                 | 2003           | 1                                                              |
| 37               | Central African Republic | Sugar & Sweeteners         | 2003           | 88                                                             |
| 37               | Central African Republic | Sugar (Raw Equivalent)     | 2003           | 53                                                             |
| 37               | Central African Republic | Vegetable Oils             | 2003           | 272                                                            |
| 37               | Central African Republic | Vegetables                 | 2003           | 13                                                             |
| 37               | Central African Republic | Vegetables, Other          | 2003           | 13                                                             |
| 37               | Central African Republic | Vegetal Products           | 2003           | 1,740                                                          |
| 37               | Central African Republic | Wheat and products         | 2003           | 64                                                             |
| 37               | Central African Republic | Yams                       | 2003           | 201                                                            |
| 37               | Central African Republic | Alcoholic Beverages        | 2004           | 22                                                             |
| 37               | Central African Republic | Animal fats                | 2004           | 24                                                             |
| 37               | Central African Republic | Animal Products            | 2004           | 240                                                            |
| 37               | Central African Republic | Bananas                    | 2004           | 44                                                             |
| 37               | Central African Republic | Beer                       | 2004           | 4                                                              |
| 37               | Central African Republic | Beverages, Fermented       | 2004           | 17                                                             |
| 37               | Central African Republic | Bovine Meat                | 2004           | 99                                                             |
| 37               | Central African Republic | Cassava and products       | 2004           | 361                                                            |
| 37               | Central African Republic | Cereals - Excluding Beer   | 2004           | 423                                                            |
| 37               | Central African Republic | Coffee and products        | 2004           | 1                                                              |
| 37               | Central African Republic | Eggs                       | 2004           | 2                                                              |
| 37               | Central African Republic | Fats, Animals, Raw         | 2004           | 23                                                             |
| 37               | Central African Republic | Fish, Seafood              | 2004           | 12                                                             |
| 37               | Central African Republic | Freshwater Fish            | 2004           | 11                                                             |
| 37               | Central African Republic | Fruits - Excluding Wine    | 2004           | 76                                                             |
| 37               | Central African Republic | Fruits, Other              | 2004           | 4                                                              |
| 37               | Central African Republic | Grand Total                | 2004           | 1,989                                                          |
| 37               | Central African Republic | Groundnut Oil              | 2004           | 204                                                            |
| 37               | Central African Republic | Honey                      | 2004           | 35                                                             |
| 37               | Central African Republic | Maize and products         | 2004           | 239                                                            |
| 37               | Central African Republic | Meat                       | 2004           | 163                                                            |
| 37               | Central African Republic | Meat, Other                | 2004           | 19                                                             |
| 37               | Central African Republic | Milk - Excluding Butter    | 2004           | 31                                                             |
| 37               | Central African Republic | Millet and products        | 2004           | 19                                                             |
| 37               | Central African Republic | Mutton & Goat Meat         | 2004           | 12                                                             |
| 37               | Central African Republic | Offals                     | 2004           | 9                                                              |
| 37               | Central African Republic | Oilcrops                   | 2004           | 155                                                            |
| 37               | Central African Republic | Oilcrops Oil, Other        | 2004           | 7                                                              |
| 37               | Central African Republic | Oilcrops, Other            | 2004           | 55                                                             |
| 37               | Central African Republic | Oranges, Mandarines        | 2004           | 4                                                              |
| 37               | Central African Republic | Palm kernels               | 2004           | 8                                                              |
| 37               | Central African Republic | Palm Oil                   | 2004           | 19                                                             |
| 37               | Central African Republic | Peas                       | 2004           | 2                                                              |
| 37               | Central African Republic | Pelagic Fish               | 2004           | 1                                                              |
| 37               | Central African Republic | Pigmeat                    | 2004           | 30                                                             |
| 37               | Central African Republic | Pineapples and products    | 2004           | 3                                                              |
| 37               | Central African Republic | Plantains                  | 2004           | 20                                                             |
| 37               | Central African Republic | Poultry Meat               | 2004           | 4                                                              |
| 37               | Central African Republic | Pulses                     | 2004           | 54                                                             |
| 37               | Central African Republic | Pulses, Other and products | 2004           | 52                                                             |
| 37               | Central African Republic | Rice (Milled Equivalent)   | 2004           | 37                                                             |
| 37               | Central African Republic | Roots, Other               | 2004           | 57                                                             |
| 37               | Central African Republic | Sesame seed                | 2004           | 93                                                             |
| 37               | Central African Republic | Sesameseed Oil             | 2004           | 48                                                             |
| 37               | Central African Republic | Sorghum and products       | 2004           | 79                                                             |
| 37               | Central African Republic | Soyabean Oil               | 2004           | 2                                                              |
| 37               | Central African Republic | Starchy Roots              | 2004           | 628                                                            |
| 37               | Central African Republic | Stimulants                 | 2004           | 2                                                              |
| 37               | Central African Republic | Sugar & Sweeteners         | 2004           | 96                                                             |
| 37               | Central African Republic | Sugar (Raw Equivalent)     | 2004           | 61                                                             |
| 37               | Central African Republic | Vegetable Oils             | 2004           | 281                                                            |
| 37               | Central African Republic | Vegetables                 | 2004           | 13                                                             |
| 37               | Central African Republic | Vegetables, Other          | 2004           | 12                                                             |
| 37               | Central African Republic | Vegetal Products           | 2004           | 1,750                                                          |
| 37               | Central African Republic | Wheat and products         | 2004           | 49                                                             |
| 37               | Central African Republic | Yams                       | 2004           | 209                                                            |
| 37               | Central African Republic | Alcoholic Beverages        | 2005           | 24                                                             |
| 37               | Central African Republic | Animal fats                | 2005           | 23                                                             |
| 37               | Central African Republic | Animal Products            | 2005           | 241                                                            |
| 37               | Central African Republic | Bananas                    | 2005           | 42                                                             |
| 37               | Central African Republic | Beer                       | 2005           | 6                                                              |
| 37               | Central African Republic | Beverages, Fermented       | 2005           | 18                                                             |
| 37               | Central African Republic | Bovine Meat                | 2005           | 100                                                            |
| 37               | Central African Republic | Cassava and products       | 2005           | 362                                                            |
| 37               | Central African Republic | Cereals - Excluding Beer   | 2005           | 482                                                            |
| 37               | Central African Republic | Coffee and products        | 2005           | 1                                                              |
| 37               | Central African Republic | Eggs                       | 2005           | 2                                                              |
| 37               | Central African Republic | Fats, Animals, Raw         | 2005           | 23                                                             |
| 37               | Central African Republic | Fish, Seafood              | 2005           | 13                                                             |
| 37               | Central African Republic | Freshwater Fish            | 2005           | 12                                                             |
| 37               | Central African Republic | Fruits - Excluding Wine    | 2005           | 73                                                             |
| 37               | Central African Republic | Fruits, Other              | 2005           | 4                                                              |
| 37               | Central African Republic | Grand Total                | 2005           | 2,026                                                          |
| 37               | Central African Republic | Groundnut Oil              | 2005           | 211                                                            |
| 37               | Central African Republic | Honey                      | 2005           | 29                                                             |
| 37               | Central African Republic | Maize and products         | 2005           | 250                                                            |
| 37               | Central African Republic | Meat                       | 2005           | 164                                                            |
| 37               | Central African Republic | Meat, Other                | 2005           | 19                                                             |
| 37               | Central African Republic | Milk - Excluding Butter    | 2005           | 30                                                             |
| 37               | Central African Republic | Millet and products        | 2005           | 21                                                             |
| 37               | Central African Republic | Mutton & Goat Meat         | 2005           | 12                                                             |
| 37               | Central African Republic | Offals                     | 2005           | 9                                                              |
| 37               | Central African Republic | Oilcrops                   | 2005           | 115                                                            |
| 37               | Central African Republic | Oilcrops Oil, Other        | 2005           | 5                                                              |



## Dietary calcium and zinc deficiency risks are decreasing but remain prevalent

| FAO Country code | Country                  | Food item                  | Reference year | Net energy supply (kcal capita <sup>-1</sup> d <sup>-1</sup> ) |
|------------------|--------------------------|----------------------------|----------------|----------------------------------------------------------------|
| 37               | Central African Republic | Oilcrops, Other            | 2005           | 53                                                             |
| 37               | Central African Republic | Oranges, Mandarines        | 2005           | 4                                                              |
| 37               | Central African Republic | Palm kemels                | 2005           | 7                                                              |
| 37               | Central African Republic | Palm Oil                   | 2005           | 27                                                             |
| 37               | Central African Republic | Peas                       | 2005           | 2                                                              |
| 37               | Central African Republic | Pelagic Fish               | 2005           | 1                                                              |
| 37               | Central African Republic | Pigmeat                    | 2005           | 29                                                             |
| 37               | Central African Republic | Pineapples and products    | 2005           | 3                                                              |
| 37               | Central African Republic | Plantains                  | 2005           | 20                                                             |
| 37               | Central African Republic | Poultry Meat               | 2005           | 4                                                              |
| 37               | Central African Republic | Pulses                     | 2005           | 57                                                             |
| 37               | Central African Republic | Pulses, Other and products | 2005           | 55                                                             |
| 37               | Central African Republic | Rape and Mustard Oil       | 2005           | 1                                                              |
| 37               | Central African Republic | Rice (Milled Equivalent)   | 2005           | 60                                                             |
| 37               | Central African Republic | Roots, Other               | 2005           | 58                                                             |
| 37               | Central African Republic | Sesame seed                | 2005           | 54                                                             |
| 37               | Central African Republic | Sesameseed Oil             | 2005           | 47                                                             |
| 37               | Central African Republic | Sorghum and products       | 2005           | 88                                                             |
| 37               | Central African Republic | Soyabean Oil               | 2005           | 1                                                              |
| 37               | Central African Republic | Starchy Roots              | 2005           | 631                                                            |
| 37               | Central African Republic | Stimulants                 | 2005           | 1                                                              |
| 37               | Central African Republic | Sugar & Sweeteners         | 2005           | 98                                                             |
| 37               | Central African Republic | Sugar (Raw Equivalent)     | 2005           | 68                                                             |
| 37               | Central African Republic | Vegetable Oils             | 2005           | 291                                                            |
| 37               | Central African Republic | Vegetables                 | 2005           | 13                                                             |
| 37               | Central African Republic | Vegetables, Other          | 2005           | 13                                                             |
| 37               | Central African Republic | Vegetal Products           | 2005           | 1,785                                                          |
| 37               | Central African Republic | Wheat and products         | 2005           | 62                                                             |
| 37               | Central African Republic | Yams                       | 2005           | 210                                                            |
| 37               | Central African Republic | Alcoholic Beverages        | 2006           | 25                                                             |
| 37               | Central African Republic | Animal fats                | 2006           | 24                                                             |
| 37               | Central African Republic | Animal Products            | 2006           | 241                                                            |
| 37               | Central African Republic | Bananas                    | 2006           | 42                                                             |
| 37               | Central African Republic | Beer                       | 2006           | 7                                                              |
| 37               | Central African Republic | Beverages, Fermented       | 2006           | 17                                                             |
| 37               | Central African Republic | Bovine Meat                | 2006           | 101                                                            |
| 37               | Central African Republic | Cassava and products       | 2006           | 352                                                            |
| 37               | Central African Republic | Cereals - Excluding Beer   | 2006           | 496                                                            |
| 37               | Central African Republic | Cottonseed Oil             | 2006           | 1                                                              |
| 37               | Central African Republic | Eggs                       | 2006           | 2                                                              |
| 37               | Central African Republic | Fats, Animals, Raw         | 2006           | 24                                                             |
| 37               | Central African Republic | Fish, Seafood              | 2006           | 13                                                             |
| 37               | Central African Republic | Freshwater Fish            | 2006           | 13                                                             |
| 37               | Central African Republic | Fruits - Excluding Wine    | 2006           | 74                                                             |
| 37               | Central African Republic | Fruits, Other              | 2006           | 4                                                              |
| 37               | Central African Republic | Grand Total                | 2006           | 2,029                                                          |
| 37               | Central African Republic | Groundnut Oil              | 2006           | 206                                                            |
| 37               | Central African Republic | Honey                      | 2006           | 30                                                             |
| 37               | Central African Republic | Maize and products         | 2006           | 250                                                            |
| 37               | Central African Republic | Meat                       | 2006           | 165                                                            |
| 37               | Central African Republic | Meat, Other                | 2006           | 19                                                             |
| 37               | Central African Republic | Milk - Excluding Butter    | 2006           | 28                                                             |
| 37               | Central African Republic | Millet and products        | 2006           | 21                                                             |
| 37               | Central African Republic | Miscellaneous              | 2006           | 1                                                              |
| 37               | Central African Republic | Mutton & Goat Meat         | 2006           | 13                                                             |
| 37               | Central African Republic | Offals                     | 2006           | 9                                                              |
| 37               | Central African Republic | Oilcrops                   | 2006           | 143                                                            |
| 37               | Central African Republic | Oilcrops Oil, Other        | 2006           | 10                                                             |
| 37               | Central African Republic | Oilcrops, Other            | 2006           | 57                                                             |
| 37               | Central African Republic | Oranges, Mandarines        | 2006           | 4                                                              |
| 37               | Central African Republic | Palm kemels                | 2006           | 6                                                              |
| 37               | Central African Republic | Palm Oil                   | 2006           | 11                                                             |
| 37               | Central African Republic | Peas                       | 2006           | 3                                                              |
| 37               | Central African Republic | Pelagic Fish               | 2006           | 1                                                              |
| 37               | Central African Republic | Pigmeat                    | 2006           | 29                                                             |
| 37               | Central African Republic | Pineapples and products    | 2006           | 3                                                              |
| 37               | Central African Republic | Plantains                  | 2006           | 21                                                             |
| 37               | Central African Republic | Poultry Meat               | 2006           | 4                                                              |
| 37               | Central African Republic | Pulses                     | 2006           | 58                                                             |
| 37               | Central African Republic | Pulses, Other and products | 2006           | 55                                                             |
| 37               | Central African Republic | Rice (Milled Equivalent)   | 2006           | 68                                                             |
| 37               | Central African Republic | Roots, Other               | 2006           | 56                                                             |
| 37               | Central African Republic | Sesame seed                | 2006           | 80                                                             |
| 37               | Central African Republic | Sesameseed Oil             | 2006           | 46                                                             |
| 37               | Central African Republic | Sorghum and products       | 2006           | 82                                                             |
| 37               | Central African Republic | Starchy Roots              | 2006           | 622                                                            |
| 37               | Central African Republic | Stimulants                 | 2006           | 1                                                              |
| 37               | Central African Republic | Sugar & Sweeteners         | 2006           | 81                                                             |
| 37               | Central African Republic | Sugar (Raw Equivalent)     | 2006           | 52                                                             |
| 37               | Central African Republic | Vegetable Oils             | 2006           | 274                                                            |
| 37               | Central African Republic | Vegetables                 | 2006           | 13                                                             |
| 37               | Central African Republic | Vegetables, Other          | 2006           | 13                                                             |
| 37               | Central African Republic | Vegetal Products           | 2006           | 1,788                                                          |
| 37               | Central African Republic | Wheat and products         | 2006           | 75                                                             |
| 37               | Central African Republic | Yams                       | 2006           | 214                                                            |
| 37               | Central African Republic | Alcoholic Beverages        | 2007           | 23                                                             |
| 37               | Central African Republic | Animal fats                | 2007           | 24                                                             |
| 37               | Central African Republic | Animal Products            | 2007           | 251                                                            |
| 37               | Central African Republic | Bananas                    | 2007           | 43                                                             |
| 37               | Central African Republic | Beer                       | 2007           | 5                                                              |
| 37               | Central African Republic | Beverages, Fermented       | 2007           | 18                                                             |
| 37               | Central African Republic | Bovine Meat                | 2007           | 107                                                            |
| 37               | Central African Republic | Cassava and products       | 2007           | 361                                                            |
| 37               | Central African Republic | Cereals - Excluding Beer   | 2007           | 490                                                            |
| 37               | Central African Republic | Cereals, Other             | 2007           | 3                                                              |
| 37               | Central African Republic | Cottonseed Oil             | 2007           | 1                                                              |
| 37               | Central African Republic | Eggs                       | 2007           | 2                                                              |

## Dietary calcium and zinc deficiency risks are decreasing but remain prevalent

| FAO Country code | Country                  | Food item                  | Reference year | Net energy supply (kcal <i>capita</i> <sup>-1</sup> d <sup>-1</sup> ) |
|------------------|--------------------------|----------------------------|----------------|-----------------------------------------------------------------------|
| 37               | Central African Republic | Fats, Animals, Raw         | 2007           | 24                                                                    |
| 37               | Central African Republic | Fish, Seafood              | 2007           | 15                                                                    |
| 37               | Central African Republic | Freshwater Fish            | 2007           | 13                                                                    |
| 37               | Central African Republic | Fruits - Excluding Wine    | 2007           | 74                                                                    |
| 37               | Central African Republic | Fruits, Other              | 2007           | 4                                                                     |
| 37               | Central African Republic | Grand Total                | 2007           | 2,090                                                                 |
| 37               | Central African Republic | Groundnut Oil              | 2007           | 217                                                                   |
| 37               | Central African Republic | Honey                      | 2007           | 29                                                                    |
| 37               | Central African Republic | Maize and products         | 2007           | 263                                                                   |
| 37               | Central African Republic | Meat                       | 2007           | 170                                                                   |
| 37               | Central African Republic | Meat, Other                | 2007           | 19                                                                    |
| 37               | Central African Republic | Milk - Excluding Butter    | 2007           | 30                                                                    |
| 37               | Central African Republic | Millet and products        | 2007           | 18                                                                    |
| 37               | Central African Republic | Miscellaneous              | 2007           | 1                                                                     |
| 37               | Central African Republic | Mutton & Goat Meat         | 2007           | 13                                                                    |
| 37               | Central African Republic | Offals                     | 2007           | 10                                                                    |
| 37               | Central African Republic | Oilcrops                   | 2007           | 163                                                                   |
| 37               | Central African Republic | Oilcrops Oil, Other        | 2007           | 8                                                                     |
| 37               | Central African Republic | Oilcrops, Other            | 2007           | 60                                                                    |
| 37               | Central African Republic | Oranges, Mandarines        | 2007           | 4                                                                     |
| 37               | Central African Republic | Palm kernels               | 2007           | 5                                                                     |
| 37               | Central African Republic | Palm Oil                   | 2007           | 26                                                                    |
| 37               | Central African Republic | Peas                       | 2007           | 4                                                                     |
| 37               | Central African Republic | Pelagic Fish               | 2007           | 1                                                                     |
| 37               | Central African Republic | Pigmeat                    | 2007           | 27                                                                    |
| 37               | Central African Republic | Pineapples and products    | 2007           | 3                                                                     |
| 37               | Central African Republic | Plantains                  | 2007           | 19                                                                    |
| 37               | Central African Republic | Poultry Meat               | 2007           | 4                                                                     |
| 37               | Central African Republic | Pulses                     | 2007           | 50                                                                    |
| 37               | Central African Republic | Pulses, Other and products | 2007           | 45                                                                    |
| 37               | Central African Republic | Rape and Mustard Oil       | 2007           | 1                                                                     |
| 37               | Central African Republic | Rice (Milled Equivalent)   | 2007           | 71                                                                    |
| 37               | Central African Republic | Roots, Other               | 2007           | 58                                                                    |
| 37               | Central African Republic | Sesame seed                | 2007           | 98                                                                    |
| 37               | Central African Republic | Sesameseed Oil             | 2007           | 45                                                                    |
| 37               | Central African Republic | Sorghum and products       | 2007           | 89                                                                    |
| 37               | Central African Republic | Starchy Roots              | 2007           | 639                                                                   |
| 37               | Central African Republic | Stimulants                 | 2007           | 1                                                                     |
| 37               | Central African Republic | Sugar & Sweeteners         | 2007           | 88                                                                    |
| 37               | Central African Republic | Sugar (Raw Equivalent)     | 2007           | 58                                                                    |
| 37               | Central African Republic | Vegetable Oils             | 2007           | 298                                                                   |
| 37               | Central African Republic | Vegetables                 | 2007           | 13                                                                    |
| 37               | Central African Republic | Vegetables, Other          | 2007           | 13                                                                    |
| 37               | Central African Republic | Vegetal Products           | 2007           | 1,839                                                                 |
| 37               | Central African Republic | Wheat and products         | 2007           | 47                                                                    |
| 37               | Central African Republic | Yams                       | 2007           | 219                                                                   |
| 37               | Central African Republic | Alcoholic Beverages        | 2008           | 25                                                                    |
| 37               | Central African Republic | Animal fats                | 2008           | 25                                                                    |
| 37               | Central African Republic | Animal Products            | 2008           | 255                                                                   |
| 37               | Central African Republic | Bananas                    | 2008           | 44                                                                    |
| 37               | Central African Republic | Beer                       | 2008           | 6                                                                     |
| 37               | Central African Republic | Beverages, Fermented       | 2008           | 18                                                                    |
| 37               | Central African Republic | Bovine Meat                | 2008           | 101                                                                   |
| 37               | Central African Republic | Cassava and products       | 2008           | 369                                                                   |
| 37               | Central African Republic | Cereals - Excluding Beer   | 2008           | 487                                                                   |
| 37               | Central African Republic | Coffee and products        | 2008           | 1                                                                     |
| 37               | Central African Republic | Eggs                       | 2008           | 2                                                                     |
| 37               | Central African Republic | Fats, Animals, Raw         | 2008           | 25                                                                    |
| 37               | Central African Republic | Fish, Seafood              | 2008           | 15                                                                    |
| 37               | Central African Republic | Freshwater Fish            | 2008           | 14                                                                    |
| 37               | Central African Republic | Fruits - Excluding Wine    | 2008           | 74                                                                    |
| 37               | Central African Republic | Fruits, Other              | 2008           | 4                                                                     |
| 37               | Central African Republic | Grand Total                | 2008           | 2,133                                                                 |
| 37               | Central African Republic | Groundnut Oil              | 2008           | 217                                                                   |
| 37               | Central African Republic | Honey                      | 2008           | 30                                                                    |
| 37               | Central African Republic | Maize and products         | 2008           | 273                                                                   |
| 37               | Central African Republic | Meat                       | 2008           | 173                                                                   |
| 37               | Central African Republic | Meat, Other                | 2008           | 18                                                                    |
| 37               | Central African Republic | Milk - Excluding Butter    | 2008           | 29                                                                    |
| 37               | Central African Republic | Millet and products        | 2008           | 18                                                                    |
| 37               | Central African Republic | Miscellaneous              | 2008           | 1                                                                     |
| 37               | Central African Republic | Mutton & Goat Meat         | 2008           | 15                                                                    |
| 37               | Central African Republic | Offals                     | 2008           | 10                                                                    |
| 37               | Central African Republic | Oilcrops                   | 2008           | 162                                                                   |
| 37               | Central African Republic | Oilcrops Oil, Other        | 2008           | 8                                                                     |
| 37               | Central African Republic | Oilcrops, Other            | 2008           | 59                                                                    |
| 37               | Central African Republic | Oranges, Mandarines        | 2008           | 4                                                                     |
| 37               | Central African Republic | Palm kernels               | 2008           | 4                                                                     |
| 37               | Central African Republic | Palm Oil                   | 2008           | 42                                                                    |
| 37               | Central African Republic | Peas                       | 2008           | 4                                                                     |
| 37               | Central African Republic | Pelagic Fish               | 2008           | 1                                                                     |
| 37               | Central African Republic | Pigmeat                    | 2008           | 35                                                                    |
| 37               | Central African Republic | Pineapples and products    | 2008           | 3                                                                     |
| 37               | Central African Republic | Plantains                  | 2008           | 19                                                                    |
| 37               | Central African Republic | Poultry Meat               | 2008           | 4                                                                     |
| 37               | Central African Republic | Pulses                     | 2008           | 62                                                                    |
| 37               | Central African Republic | Pulses, Other and products | 2008           | 58                                                                    |
| 37               | Central African Republic | Rice (Milled Equivalent)   | 2008           | 76                                                                    |
| 37               | Central African Republic | Roots, Other               | 2008           | 59                                                                    |
| 37               | Central African Republic | Sesame seed                | 2008           | 99                                                                    |
| 37               | Central African Republic | Sesameseed Oil             | 2008           | 45                                                                    |
| 37               | Central African Republic | Sorghum and products       | 2008           | 71                                                                    |
| 37               | Central African Republic | Soyabean Oil               | 2008           | 2                                                                     |
| 37               | Central African Republic | Starchy Roots              | 2008           | 652                                                                   |
| 37               | Central African Republic | Stimulants                 | 2008           | 1                                                                     |
| 37               | Central African Republic | Sugar & Sweeteners         | 2008           | 87                                                                    |
| 37               | Central African Republic | Sugar (Raw Equivalent)     | 2008           | 58                                                                    |

## Dietary calcium and zinc deficiency risks are decreasing but remain prevalent

| FAO Country code | Country                  | Food item                  | Reference year | Net energy supply (kcal <i>capita</i> <sup>-1</sup> d <sup>-1</sup> ) |
|------------------|--------------------------|----------------------------|----------------|-----------------------------------------------------------------------|
| 37               | Central African Republic | Vegetable Oils             | 2008           | 315                                                                   |
| 37               | Central African Republic | Vegetables                 | 2008           | 13                                                                    |
| 37               | Central African Republic | Vegetables, Other          | 2008           | 13                                                                    |
| 37               | Central African Republic | Vegetal Products           | 2008           | 1,879                                                                 |
| 37               | Central African Republic | Wheat and products         | 2008           | 48                                                                    |
| 37               | Central African Republic | Yams                       | 2008           | 224                                                                   |
| 37               | Central African Republic | Alcoholic Beverages        | 2009           | 22                                                                    |
| 37               | Central African Republic | Animal fats                | 2009           | 26                                                                    |
| 37               | Central African Republic | Animal Products            | 2009           | 257                                                                   |
| 37               | Central African Republic | Bananas                    | 2009           | 43                                                                    |
| 37               | Central African Republic | Beer                       | 2009           | 5                                                                     |
| 37               | Central African Republic | Beverages, Fermented       | 2009           | 17                                                                    |
| 37               | Central African Republic | Bovine Meat                | 2009           | 101                                                                   |
| 37               | Central African Republic | Cassava and products       | 2009           | 374                                                                   |
| 37               | Central African Republic | Cereals - Excluding Beer   | 2009           | 509                                                                   |
| 37               | Central African Republic | Cereals, Other             | 2009           | 2                                                                     |
| 37               | Central African Republic | Eggs                       | 2009           | 2                                                                     |
| 37               | Central African Republic | Fats, Animals, Raw         | 2009           | 25                                                                    |
| 37               | Central African Republic | Fish, Seafood              | 2009           | 16                                                                    |
| 37               | Central African Republic | Freshwater Fish            | 2009           | 14                                                                    |
| 37               | Central African Republic | Fruits - Excluding Wine    | 2009           | 74                                                                    |
| 37               | Central African Republic | Fruits, Other              | 2009           | 4                                                                     |
| 37               | Central African Republic | Grand Total                | 2009           | 2,139                                                                 |
| 37               | Central African Republic | Groundnut Oil              | 2009           | 207                                                                   |
| 37               | Central African Republic | Honey                      | 2009           | 29                                                                    |
| 37               | Central African Republic | Maize and products         | 2009           | 287                                                                   |
| 37               | Central African Republic | Marine Fish, Other         | 2009           | 1                                                                     |
| 37               | Central African Republic | Meat                       | 2009           | 174                                                                   |
| 37               | Central African Republic | Meat, Other                | 2009           | 18                                                                    |
| 37               | Central African Republic | Milk - Excluding Butter    | 2009           | 29                                                                    |
| 37               | Central African Republic | Millet and products        | 2009           | 18                                                                    |
| 37               | Central African Republic | Miscellaneous              | 2009           | 1                                                                     |
| 37               | Central African Republic | Mutton & Goat Meat         | 2009           | 16                                                                    |
| 37               | Central African Republic | Offals                     | 2009           | 10                                                                    |
| 37               | Central African Republic | Oilcrops                   | 2009           | 150                                                                   |
| 37               | Central African Republic | Oilcrops Oil, Other        | 2009           | 12                                                                    |
| 37               | Central African Republic | Oilcrops, Other            | 2009           | 61                                                                    |
| 37               | Central African Republic | Oranges, Mandarines        | 2009           | 4                                                                     |
| 37               | Central African Republic | Palm kernels               | 2009           | 2                                                                     |
| 37               | Central African Republic | Palm Oil                   | 2009           | 33                                                                    |
| 37               | Central African Republic | Peas                       | 2009           | 4                                                                     |
| 37               | Central African Republic | Pelagic Fish               | 2009           | 1                                                                     |
| 37               | Central African Republic | Pigmeat                    | 2009           | 35                                                                    |
| 37               | Central African Republic | Pineapples and products    | 2009           | 3                                                                     |
| 37               | Central African Republic | Plantains                  | 2009           | 19                                                                    |
| 37               | Central African Republic | Poultry Meat               | 2009           | 4                                                                     |
| 37               | Central African Republic | Pulses                     | 2009           | 66                                                                    |
| 37               | Central African Republic | Pulses, Other and products | 2009           | 61                                                                    |
| 37               | Central African Republic | Rice (Milled Equivalent)   | 2009           | 64                                                                    |
| 37               | Central African Republic | Roots, Other               | 2009           | 60                                                                    |
| 37               | Central African Republic | Sesame seed                | 2009           | 86                                                                    |
| 37               | Central African Republic | Sesameseed Oil             | 2009           | 44                                                                    |
| 37               | Central African Republic | Sorghum and products       | 2009           | 87                                                                    |
| 37               | Central African Republic | Soybean Oil                | 2009           | 6                                                                     |
| 37               | Central African Republic | Starchy Roots              | 2009           | 661                                                                   |
| 37               | Central African Republic | Stimulants                 | 2009           | 1                                                                     |
| 37               | Central African Republic | Sugar & Sweeteners         | 2009           | 84                                                                    |
| 37               | Central African Republic | Sugar (Raw Equivalent)     | 2009           | 54                                                                    |
| 37               | Central African Republic | Vegetable Oils             | 2009           | 302                                                                   |
| 37               | Central African Republic | Vegetables                 | 2009           | 13                                                                    |
| 37               | Central African Republic | Vegetables, Other          | 2009           | 13                                                                    |
| 37               | Central African Republic | Vegetal Products           | 2009           | 1,882                                                                 |
| 37               | Central African Republic | Wheat and products         | 2009           | 52                                                                    |
| 37               | Central African Republic | Yams                       | 2009           | 227                                                                   |
| 37               | Central African Republic | Alcoholic Beverages        | 2010           | 24                                                                    |
| 37               | Central African Republic | Animal fats                | 2010           | 26                                                                    |
| 37               | Central African Republic | Animal Products            | 2010           | 266                                                                   |
| 37               | Central African Republic | Bananas                    | 2010           | 43                                                                    |
| 37               | Central African Republic | Beans                      | 2010           | 1                                                                     |
| 37               | Central African Republic | Beer                       | 2010           | 4                                                                     |
| 37               | Central African Republic | Beverages, Fermented       | 2010           | 20                                                                    |
| 37               | Central African Republic | Bovine Meat                | 2010           | 102                                                                   |
| 37               | Central African Republic | Cassava and products       | 2010           | 388                                                                   |
| 37               | Central African Republic | Cereals - Excluding Beer   | 2010           | 541                                                                   |
| 37               | Central African Republic | Cereals, Other             | 2010           | 1                                                                     |
| 37               | Central African Republic | Coffee and products        | 2010           | 1                                                                     |
| 37               | Central African Republic | Cottonseed Oil             | 2010           | 2                                                                     |
| 37               | Central African Republic | Eggs                       | 2010           | 2                                                                     |
| 37               | Central African Republic | Fats, Animals, Raw         | 2010           | 26                                                                    |
| 37               | Central African Republic | Fish, Seafood              | 2010           | 18                                                                    |
| 37               | Central African Republic | Freshwater Fish            | 2010           | 15                                                                    |
| 37               | Central African Republic | Fruits - Excluding Wine    | 2010           | 74                                                                    |
| 37               | Central African Republic | Fruits, Other              | 2010           | 4                                                                     |
| 37               | Central African Republic | Grand Total                | 2010           | 2,164                                                                 |
| 37               | Central African Republic | Groundnut Oil              | 2010           | 204                                                                   |
| 37               | Central African Republic | Honey                      | 2010           | 29                                                                    |
| 37               | Central African Republic | Maize and products         | 2010           | 305                                                                   |
| 37               | Central African Republic | Marine Fish, Other         | 2010           | 1                                                                     |
| 37               | Central African Republic | Meat                       | 2010           | 181                                                                   |
| 37               | Central African Republic | Meat, Other                | 2010           | 22                                                                    |
| 37               | Central African Republic | Milk - Excluding Butter    | 2010           | 29                                                                    |
| 37               | Central African Republic | Millet and products        | 2010           | 18                                                                    |
| 37               | Central African Republic | Miscellaneous              | 2010           | 1                                                                     |
| 37               | Central African Republic | Mutton & Goat Meat         | 2010           | 16                                                                    |
| 37               | Central African Republic | Offals                     | 2010           | 10                                                                    |
| 37               | Central African Republic | Oilcrops                   | 2010           | 114                                                                   |
| 37               | Central African Republic | Oilcrops Oil, Other        | 2010           | 4                                                                     |

Dietary calcium and zinc deficiency risks are decreasing but remain prevalent

| FAO Country code | Country                  | Food item                  | Reference year | Net energy supply (kcal capita <sup>-1</sup> d <sup>-1</sup> ) |
|------------------|--------------------------|----------------------------|----------------|----------------------------------------------------------------|
| 37               | Central African Republic | Oilcrops, Other            | 2010           | 65                                                             |
| 37               | Central African Republic | Oranges, Mandarines        | 2010           | 4                                                              |
| 37               | Central African Republic | Palm kernels               | 2010           | 1                                                              |
| 37               | Central African Republic | Palm Oil                   | 2010           | 32                                                             |
| 37               | Central African Republic | Peas                       | 2010           | 6                                                              |
| 37               | Central African Republic | Pelagic Fish               | 2010           | 1                                                              |
| 37               | Central African Republic | Pigmeat                    | 2010           | 36                                                             |
| 37               | Central African Republic | Pineapples and products    | 2010           | 3                                                              |
| 37               | Central African Republic | Plantains                  | 2010           | 20                                                             |
| 37               | Central African Republic | Poultry Meat               | 2010           | 5                                                              |
| 37               | Central African Republic | Pulses                     | 2010           | 79                                                             |
| 37               | Central African Republic | Pulses, Other and products | 2010           | 72                                                             |
| 37               | Central African Republic | Rice (Milled Equivalent)   | 2010           | 72                                                             |
| 37               | Central African Republic | Roots, Other               | 2010           | 61                                                             |
| 37               | Central African Republic | Sesame seed                | 2010           | 47                                                             |
| 37               | Central African Republic | Sesameseed Oil             | 2010           | 44                                                             |
| 37               | Central African Republic | Sorghum and products       | 2010           | 85                                                             |
| 37               | Central African Republic | Soyabean Oil               | 2010           | 6                                                              |
| 37               | Central African Republic | Starchy Roots              | 2010           | 681                                                            |
| 37               | Central African Republic | Stimulants                 | 2010           | 1                                                              |
| 37               | Central African Republic | Sugar & Sweeteners         | 2010           | 79                                                             |
| 37               | Central African Republic | Sugar (Raw Equivalent)     | 2010           | 50                                                             |
| 37               | Central African Republic | Vegetable Oils             | 2010           | 292                                                            |
| 37               | Central African Republic | Vegetables                 | 2010           | 11                                                             |
| 37               | Central African Republic | Vegetables, Other          | 2010           | 11                                                             |
| 37               | Central African Republic | Vegetal Products           | 2010           | 1,898                                                          |
| 37               | Central African Republic | Wheat and products         | 2010           | 60                                                             |
| 37               | Central African Republic | Yams                       | 2010           | 233                                                            |
| 37               | Central African Republic | Alcoholic Beverages        | 2011           | 24                                                             |
| 37               | Central African Republic | Animal fats                | 2011           | 26                                                             |
| 37               | Central African Republic | Animal Products            | 2011           | 268                                                            |
| 37               | Central African Republic | Bananas                    | 2011           | 41                                                             |
| 37               | Central African Republic | Beer                       | 2011           | 5                                                              |
| 37               | Central African Republic | Beverages, Fermented       | 2011           | 19                                                             |
| 37               | Central African Republic | Bovine Meat                | 2011           | 103                                                            |
| 37               | Central African Republic | Cassava and products       | 2011           | 395                                                            |
| 37               | Central African Republic | Cereals - Excluding Beer   | 2011           | 537                                                            |
| 37               | Central African Republic | Coffee and products        | 2011           | 2                                                              |
| 37               | Central African Republic | Cottonseed Oil             | 2011           | 2                                                              |
| 37               | Central African Republic | Eggs                       | 2011           | 2                                                              |
| 37               | Central African Republic | Fats, Animals, Raw         | 2011           | 26                                                             |
| 37               | Central African Republic | Fish, Seafood              | 2011           | 17                                                             |
| 37               | Central African Republic | Freshwater Fish            | 2011           | 15                                                             |
| 37               | Central African Republic | Fruits - Excluding Wine    | 2011           | 73                                                             |
| 37               | Central African Republic | Fruits, Other              | 2011           | 5                                                              |
| 37               | Central African Republic | Grand Total                | 2011           | 2,154                                                          |
| 37               | Central African Republic | Groundnut Oil              | 2011           | 211                                                            |
| 37               | Central African Republic | Honey                      | 2011           | 30                                                             |
| 37               | Central African Republic | Maize and products         | 2011           | 299                                                            |
| 37               | Central African Republic | Marine Fish, Other         | 2011           | 1                                                              |
| 37               | Central African Republic | Meat                       | 2011           | 182                                                            |
| 37               | Central African Republic | Meat, Other                | 2011           | 22                                                             |
| 37               | Central African Republic | Milk - Excluding Butter    | 2011           | 30                                                             |
| 37               | Central African Republic | Millet and products        | 2011           | 19                                                             |
| 37               | Central African Republic | Miscellaneous              | 2011           | 1                                                              |
| 37               | Central African Republic | Mutton & Goat Meat         | 2011           | 18                                                             |
| 37               | Central African Republic | Offals                     | 2011           | 10                                                             |
| 37               | Central African Republic | Oilcrops                   | 2011           | 95                                                             |
| 37               | Central African Republic | Oilcrops Oil, Other        | 2011           | 1                                                              |
| 37               | Central African Republic | Oilcrops, Other            | 2011           | 61                                                             |
| 37               | Central African Republic | Olive Oil                  | 2011           | 2                                                              |
| 37               | Central African Republic | Oranges, Mandarines        | 2011           | 5                                                              |
| 37               | Central African Republic | Palm kernels               | 2011           | 1                                                              |
| 37               | Central African Republic | Palm Oil                   | 2011           | 25                                                             |
| 37               | Central African Republic | Peas                       | 2011           | 4                                                              |
| 37               | Central African Republic | Pelagic Fish               | 2011           | 1                                                              |
| 37               | Central African Republic | Pigmeat                    | 2011           | 34                                                             |
| 37               | Central African Republic | Pineapples and products    | 2011           | 3                                                              |
| 37               | Central African Republic | Plantains                  | 2011           | 18                                                             |
| 37               | Central African Republic | Poultry Meat               | 2011           | 5                                                              |
| 37               | Central African Republic | Pulses                     | 2011           | 78                                                             |
| 37               | Central African Republic | Pulses, Other and products | 2011           | 74                                                             |
| 37               | Central African Republic | Rape and Mustard Oil       | 2011           | 1                                                              |
| 37               | Central African Republic | Rice (Milled Equivalent)   | 2011           | 70                                                             |
| 37               | Central African Republic | Roots, Other               | 2011           | 62                                                             |
| 37               | Central African Republic | Sesame seed                | 2011           | 34                                                             |
| 37               | Central African Republic | Sesameseed Oil             | 2011           | 43                                                             |
| 37               | Central African Republic | Sorghum and products       | 2011           | 80                                                             |
| 37               | Central African Republic | Soyabean Oil               | 2011           | 2                                                              |
| 37               | Central African Republic | Starchy Roots              | 2011           | 695                                                            |
| 37               | Central African Republic | Stimulants                 | 2011           | 2                                                              |
| 37               | Central African Republic | Sugar & Sweeteners         | 2011           | 82                                                             |
| 37               | Central African Republic | Sugar (Raw Equivalent)     | 2011           | 52                                                             |
| 37               | Central African Republic | Vegetable Oils             | 2011           | 287                                                            |
| 37               | Central African Republic | Vegetables                 | 2011           | 11                                                             |
| 37               | Central African Republic | Vegetables, Other          | 2011           | 11                                                             |
| 37               | Central African Republic | Vegetal Products           | 2011           | 1,886                                                          |
| 37               | Central African Republic | Wheat and products         | 2011           | 69                                                             |
| 37               | Central African Republic | Yams                       | 2011           | 237                                                            |
| 39               | Chad                     | Alcoholic Beverages        | 1992           | 4                                                              |
| 39               | Chad                     | Animal fats                | 1992           | 10                                                             |
| 39               | Chad                     | Animal Products            | 1992           | 154                                                            |
| 39               | Chad                     | Beans                      | 1992           | 16                                                             |
| 39               | Chad                     | Beer                       | 1992           | 3                                                              |
| 39               | Chad                     | Beverages, Fermented       | 1992           | 1                                                              |
| 39               | Chad                     | Bovine Meat                | 1992           | 54                                                             |
| 39               | Chad                     | Butter, Ghee               | 1992           | 1                                                              |

Dietary calcium and zinc deficiency risks are decreasing but remain prevalent

| FAO Country code | Country | Food item                  | Reference year | Net energy supply (kcal capita <sup>-1</sup> d <sup>-1</sup> ) |
|------------------|---------|----------------------------|----------------|----------------------------------------------------------------|
| 39               | Chad    | Cassava and products       | 1992           | 84                                                             |
| 39               | Chad    | Cereals - Excluding Beer   | 1992           | 979                                                            |
| 39               | Chad    | Cereals, Other             | 1992           | 99                                                             |
| 39               | Chad    | Cottonseed Oil             | 1992           | 36                                                             |
| 39               | Chad    | Dates                      | 1992           | 19                                                             |
| 39               | Chad    | Eggs                       | 1992           | 1                                                              |
| 39               | Chad    | Fats, Animals, Raw         | 1992           | 9                                                              |
| 39               | Chad    | Fish, Seafood              | 1992           | 16                                                             |
| 39               | Chad    | Freshwater Fish            | 1992           | 16                                                             |
| 39               | Chad    | Fruits - Excluding Wine    | 1992           | 33                                                             |
| 39               | Chad    | Fruits, Other              | 1992           | 15                                                             |
| 39               | Chad    | Grand Total                | 1992           | 1,819                                                          |
| 39               | Chad    | Groundnut Oil              | 1992           | 65                                                             |
| 39               | Chad    | Groundnuts (Shelled Eq)    | 1992           | 194                                                            |
| 39               | Chad    | Honey                      | 1992           | 1                                                              |
| 39               | Chad    | Maize and products         | 1992           | 97                                                             |
| 39               | Chad    | Meat                       | 1992           | 74                                                             |
| 39               | Chad    | Meat, Other                | 1992           | 2                                                              |
| 39               | Chad    | Milk - Excluding Butter    | 1992           | 45                                                             |
| 39               | Chad    | Millet and products        | 1992           | 271                                                            |
| 39               | Chad    | Mutton & Goat Meat         | 1992           | 15                                                             |
| 39               | Chad    | Offals                     | 1992           | 7                                                              |
| 39               | Chad    | Oilcrops                   | 1992           | 254                                                            |
| 39               | Chad    | Oilcrops, Other            | 1992           | 27                                                             |
| 39               | Chad    | Onions                     | 1992           | 2                                                              |
| 39               | Chad    | Potatoes and products      | 1992           | 5                                                              |
| 39               | Chad    | Poultry Meat               | 1992           | 2                                                              |
| 39               | Chad    | Pulses                     | 1992           | 38                                                             |
| 39               | Chad    | Pulses, Other and products | 1992           | 22                                                             |
| 39               | Chad    | Rice (Milled Equivalent)   | 1992           | 97                                                             |
| 39               | Chad    | Roots, Other               | 1992           | 9                                                              |
| 39               | Chad    | Sesame seed                | 1992           | 34                                                             |
| 39               | Chad    | Sorghum and products       | 1992           | 365                                                            |
| 39               | Chad    | Starchy Roots              | 1992           | 195                                                            |
| 39               | Chad    | Sugar & Sweeteners         | 1992           | 52                                                             |
| 39               | Chad    | Sugar (Raw Equivalent)     | 1992           | 51                                                             |
| 39               | Chad    | Sweet potatoes             | 1992           | 17                                                             |
| 39               | Chad    | Vegetable Oils             | 1992           | 102                                                            |
| 39               | Chad    | Vegetables                 | 1992           | 8                                                              |
| 39               | Chad    | Vegetables, Other          | 1992           | 5                                                              |
| 39               | Chad    | Vegetal Products           | 1992           | 1,664                                                          |
| 39               | Chad    | Wheat and products         | 1992           | 50                                                             |
| 39               | Chad    | Yams                       | 1992           | 80                                                             |
| 39               | Chad    | Alcoholic Beverages        | 1993           | 3                                                              |
| 39               | Chad    | Animal fats                | 1993           | 10                                                             |
| 39               | Chad    | Animal Products            | 1993           | 148                                                            |
| 39               | Chad    | Beans                      | 1993           | 10                                                             |
| 39               | Chad    | Beer                       | 1993           | 2                                                              |
| 39               | Chad    | Beverages, Fermented       | 1993           | 1                                                              |
| 39               | Chad    | Bovine Meat                | 1993           | 47                                                             |
| 39               | Chad    | Butter, Ghee               | 1993           | 1                                                              |
| 39               | Chad    | Cassava and products       | 1993           | 79                                                             |
| 39               | Chad    | Cereals - Excluding Beer   | 1993           | 853                                                            |
| 39               | Chad    | Cereals, Other             | 1993           | 98                                                             |
| 39               | Chad    | Cottonseed Oil             | 1993           | 30                                                             |
| 39               | Chad    | Dates                      | 1993           | 12                                                             |
| 39               | Chad    | Eggs                       | 1993           | 1                                                              |
| 39               | Chad    | Fats, Animals, Raw         | 1993           | 9                                                              |
| 39               | Chad    | Fish, Seafood              | 1993           | 18                                                             |
| 39               | Chad    | Freshwater Fish            | 1993           | 18                                                             |
| 39               | Chad    | Fruits - Excluding Wine    | 1993           | 27                                                             |
| 39               | Chad    | Fruits, Other              | 1993           | 15                                                             |
| 39               | Chad    | Grand Total                | 1993           | 1,652                                                          |
| 39               | Chad    | Groundnut Oil              | 1993           | 65                                                             |
| 39               | Chad    | Groundnuts (Shelled Eq)    | 1993           | 203                                                            |
| 39               | Chad    | Honey                      | 1993           | 1                                                              |
| 39               | Chad    | Maize and products         | 1993           | 63                                                             |
| 39               | Chad    | Meat                       | 1993           | 67                                                             |
| 39               | Chad    | Meat, Other                | 1993           | 2                                                              |
| 39               | Chad    | Milk - Excluding Butter    | 1993           | 45                                                             |
| 39               | Chad    | Millet and products        | 1993           | 242                                                            |
| 39               | Chad    | Mutton & Goat Meat         | 1993           | 16                                                             |
| 39               | Chad    | Offals                     | 1993           | 7                                                              |
| 39               | Chad    | Oilcrops                   | 1993           | 248                                                            |
| 39               | Chad    | Oilcrops, Other            | 1993           | 21                                                             |
| 39               | Chad    | Onions                     | 1993           | 2                                                              |
| 39               | Chad    | Potatoes and products      | 1993           | 5                                                              |
| 39               | Chad    | Poultry Meat               | 1993           | 2                                                              |
| 39               | Chad    | Pulses                     | 1993           | 32                                                             |
| 39               | Chad    | Pulses, Other and products | 1993           | 22                                                             |
| 39               | Chad    | Rice (Milled Equivalent)   | 1993           | 98                                                             |
| 39               | Chad    | Roots, Other               | 1993           | 10                                                             |
| 39               | Chad    | Sesame seed                | 1993           | 23                                                             |
| 39               | Chad    | Sorghum and products       | 1993           | 301                                                            |
| 39               | Chad    | Starchy Roots              | 1993           | 179                                                            |
| 39               | Chad    | Sugar & Sweeteners         | 1993           | 60                                                             |
| 39               | Chad    | Sugar (Raw Equivalent)     | 1993           | 59                                                             |
| 39               | Chad    | Sweet potatoes             | 1993           | 15                                                             |
| 39               | Chad    | Vegetable Oils             | 1993           | 95                                                             |
| 39               | Chad    | Vegetables                 | 1993           | 7                                                              |
| 39               | Chad    | Vegetables, Other          | 1993           | 5                                                              |
| 39               | Chad    | Vegetal Products           | 1993           | 1,504                                                          |
| 39               | Chad    | Wheat and products         | 1993           | 51                                                             |
| 39               | Chad    | Yams                       | 1993           | 71                                                             |
| 39               | Chad    | Alcoholic Beverages        | 1994           | 3                                                              |
| 39               | Chad    | Animal fats                | 1994           | 8                                                              |
| 39               | Chad    | Animal Products            | 1994           | 133                                                            |

Dietary calcium and zinc deficiency risks are decreasing but remain prevalent

| FAO Country code | Country | Food item                  | Reference year | Net energy supply (kcal capita <sup>-1</sup> d <sup>-1</sup> ) |
|------------------|---------|----------------------------|----------------|----------------------------------------------------------------|
| 39               | Chad    | Beans                      | 1994           | 26                                                             |
| 39               | Chad    | Beer                       | 1994           | 2                                                              |
| 39               | Chad    | Beverages, Fermented       | 1994           | 1                                                              |
| 39               | Chad    | Bovine Meat                | 1994           | 37                                                             |
| 39               | Chad    | Butter, Ghee               | 1994           | 1                                                              |
| 39               | Chad    | Cassava and products       | 1994           | 74                                                             |
| 39               | Chad    | Cereals - Excluding Beer   | 1994           | 1,210                                                          |
| 39               | Chad    | Cereals, Other             | 1994           | 120                                                            |
| 39               | Chad    | Cottonseed Oil             | 1994           | 34                                                             |
| 39               | Chad    | Dates                      | 1994           | 12                                                             |
| 39               | Chad    | Eggs                       | 1994           | 1                                                              |
| 39               | Chad    | Fats, Animals, Raw         | 1994           | 7                                                              |
| 39               | Chad    | Fish, Seafood              | 1994           | 18                                                             |
| 39               | Chad    | Freshwater Fish            | 1994           | 18                                                             |
| 39               | Chad    | Fruits - Excluding Wine    | 1994           | 27                                                             |
| 39               | Chad    | Fruits, Other              | 1994           | 15                                                             |
| 39               | Chad    | Grand Total                | 1994           | 1,979                                                          |
| 39               | Chad    | Groundnut Oil              | 1994           | 52                                                             |
| 39               | Chad    | Groundnuts (Shelled Eq)    | 1994           | 173                                                            |
| 39               | Chad    | Honey                      | 1994           | 1                                                              |
| 39               | Chad    | Maize and products         | 1994           | 176                                                            |
| 39               | Chad    | Meat                       | 1994           | 57                                                             |
| 39               | Chad    | Meat, Other                | 1994           | 2                                                              |
| 39               | Chad    | Milk - Excluding Butter    | 1994           | 42                                                             |
| 39               | Chad    | Millet and products        | 1994           | 292                                                            |
| 39               | Chad    | Mutton & Goat Meat         | 1994           | 16                                                             |
| 39               | Chad    | Offals                     | 1994           | 6                                                              |
| 39               | Chad    | Oilcrops                   | 1994           | 226                                                            |
| 39               | Chad    | Oilcrops Oil, Other        | 1994           | 3                                                              |
| 39               | Chad    | Oilcrops, Other            | 1994           | 28                                                             |
| 39               | Chad    | Onions                     | 1994           | 2                                                              |
| 39               | Chad    | Potatoes and products      | 1994           | 4                                                              |
| 39               | Chad    | Poultry Meat               | 1994           | 2                                                              |
| 39               | Chad    | Pulses                     | 1994           | 45                                                             |
| 39               | Chad    | Pulses, Other and products | 1994           | 19                                                             |
| 39               | Chad    | Rice (Milled Equivalent)   | 1994           | 98                                                             |
| 39               | Chad    | Roots, Other               | 1994           | 11                                                             |
| 39               | Chad    | Sesame seed                | 1994           | 26                                                             |
| 39               | Chad    | Sorghum and products       | 1994           | 478                                                            |
| 39               | Chad    | Starchy Roots              | 1994           | 182                                                            |
| 39               | Chad    | Sugar & Sweeteners         | 1994           | 56                                                             |
| 39               | Chad    | Sugar (Raw Equivalent)     | 1994           | 54                                                             |
| 39               | Chad    | Sweet potatoes             | 1994           | 14                                                             |
| 39               | Chad    | Vegetable Oils             | 1994           | 89                                                             |
| 39               | Chad    | Vegetables                 | 1994           | 7                                                              |
| 39               | Chad    | Vegetables, Other          | 1994           | 5                                                              |
| 39               | Chad    | Vegetal Products           | 1994           | 1,846                                                          |
| 39               | Chad    | Wheat and products         | 1994           | 46                                                             |
| 39               | Chad    | Yams                       | 1994           | 79                                                             |
| 39               | Chad    | Alcoholic Beverages        | 1995           | 2                                                              |
| 39               | Chad    | Animal fats                | 1995           | 9                                                              |
| 39               | Chad    | Animal Products            | 1995           | 140                                                            |
| 39               | Chad    | Beans                      | 1995           | 22                                                             |
| 39               | Chad    | Beer                       | 1995           | 1                                                              |
| 39               | Chad    | Beverages, Fermented       | 1995           | 1                                                              |
| 39               | Chad    | Bovine Meat                | 1995           | 39                                                             |
| 39               | Chad    | Butter, Ghee               | 1995           | 1                                                              |
| 39               | Chad    | Cassava and products       | 1995           | 104                                                            |
| 39               | Chad    | Cereals - Excluding Beer   | 1995           | 900                                                            |
| 39               | Chad    | Cereals, Other             | 1995           | 90                                                             |
| 39               | Chad    | Cottonseed Oil             | 1995           | 37                                                             |
| 39               | Chad    | Dates                      | 1995           | 9                                                              |
| 39               | Chad    | Eggs                       | 1995           | 1                                                              |
| 39               | Chad    | Fats, Animals, Raw         | 1995           | 8                                                              |
| 39               | Chad    | Fish, Seafood              | 1995           | 18                                                             |
| 39               | Chad    | Freshwater Fish            | 1995           | 18                                                             |
| 39               | Chad    | Fruits - Excluding Wine    | 1995           | 20                                                             |
| 39               | Chad    | Fruits, Other              | 1995           | 11                                                             |
| 39               | Chad    | Grand Total                | 1995           | 1,798                                                          |
| 39               | Chad    | Groundnut Oil              | 1995           | 83                                                             |
| 39               | Chad    | Groundnuts (Shelled Eq)    | 1995           | 245                                                            |
| 39               | Chad    | Honey                      | 1995           | 1                                                              |
| 39               | Chad    | Maize and products         | 1995           | 67                                                             |
| 39               | Chad    | Meat                       | 1995           | 60                                                             |
| 39               | Chad    | Meat, Other                | 1995           | 2                                                              |
| 39               | Chad    | Milk - Excluding Butter    | 1995           | 46                                                             |
| 39               | Chad    | Millet and products        | 1995           | 228                                                            |
| 39               | Chad    | Mutton & Goat Meat         | 1995           | 17                                                             |
| 39               | Chad    | Offals                     | 1995           | 6                                                              |
| 39               | Chad    | Oilcrops                   | 1995           | 295                                                            |
| 39               | Chad    | Oilcrops Oil, Other        | 1995           | 2                                                              |
| 39               | Chad    | Oilcrops, Other            | 1995           | 30                                                             |
| 39               | Chad    | Onions                     | 1995           | 2                                                              |
| 39               | Chad    | Pigmeat                    | 1995           | 1                                                              |
| 39               | Chad    | Potatoes and products      | 1995           | 4                                                              |
| 39               | Chad    | Poultry Meat               | 1995           | 2                                                              |
| 39               | Chad    | Pulses                     | 1995           | 39                                                             |
| 39               | Chad    | Pulses, Other and products | 1995           | 17                                                             |
| 39               | Chad    | Rice (Milled Equivalent)   | 1995           | 90                                                             |
| 39               | Chad    | Roots, Other               | 1995           | 10                                                             |
| 39               | Chad    | Sesame seed                | 1995           | 20                                                             |
| 39               | Chad    | Sorghum and products       | 1995           | 388                                                            |
| 39               | Chad    | Starchy Roots              | 1995           | 205                                                            |
| 39               | Chad    | Sugar & Sweeteners         | 1995           | 66                                                             |
| 39               | Chad    | Sugar (Raw Equivalent)     | 1995           | 64                                                             |
| 39               | Chad    | Sweet potatoes             | 1995           | 17                                                             |
| 39               | Chad    | Vegetable Oils             | 1995           | 122                                                            |

Dietary calcium and zinc deficiency risks are decreasing but remain prevalent

| FAO Country code | Country | Food item                  | Reference year | Net energy supply (kcal capita <sup>-1</sup> d <sup>-1</sup> ) |
|------------------|---------|----------------------------|----------------|----------------------------------------------------------------|
| 39               | Chad    | Vegetables                 | 1995           | 9                                                              |
| 39               | Chad    | Vegetables, Other          | 1995           | 7                                                              |
| 39               | Chad    | Vegetal Products           | 1995           | 1,658                                                          |
| 39               | Chad    | Wheat and products         | 1995           | 36                                                             |
| 39               | Chad    | Yams                       | 1995           | 69                                                             |
| 39               | Chad    | Alcoholic Beverages        | 1996           | 4                                                              |
| 39               | Chad    | Animal fats                | 1996           | 9                                                              |
| 39               | Chad    | Animal Products            | 1996           | 141                                                            |
| 39               | Chad    | Beans                      | 1996           | 21                                                             |
| 39               | Chad    | Beer                       | 1996           | 3                                                              |
| 39               | Chad    | Beverages, Fermented       | 1996           | 1                                                              |
| 39               | Chad    | Bovine Meat                | 1996           | 40                                                             |
| 39               | Chad    | Butter, Ghee               | 1996           | 1                                                              |
| 39               | Chad    | Cassava and products       | 1996           | 103                                                            |
| 39               | Chad    | Cereals - Excluding Beer   | 1996           | 888                                                            |
| 39               | Chad    | Cereals, Other             | 1996           | 82                                                             |
| 39               | Chad    | Cottonseed Oil             | 1996           | 39                                                             |
| 39               | Chad    | Dates                      | 1996           | 8                                                              |
| 39               | Chad    | Eggs                       | 1996           | 1                                                              |
| 39               | Chad    | Fats, Animals, Raw         | 1996           | 8                                                              |
| 39               | Chad    | Fish, Seafood              | 1996           | 20                                                             |
| 39               | Chad    | Freshwater Fish            | 1996           | 19                                                             |
| 39               | Chad    | Fruits - Excluding Wine    | 1996           | 19                                                             |
| 39               | Chad    | Fruits, Other              | 1996           | 10                                                             |
| 39               | Chad    | Grand Total                | 1996           | 1,815                                                          |
| 39               | Chad    | Groundnut Oil              | 1996           | 79                                                             |
| 39               | Chad    | Groundnuts (Shelled Eq)    | 1996           | 243                                                            |
| 39               | Chad    | Honey                      | 1996           | 1                                                              |
| 39               | Chad    | Maize and products         | 1996           | 87                                                             |
| 39               | Chad    | Marine Fish, Other         | 1996           | 1                                                              |
| 39               | Chad    | Meat                       | 1996           | 61                                                             |
| 39               | Chad    | Meat, Other                | 1996           | 2                                                              |
| 39               | Chad    | Milk - Excluding Butter    | 1996           | 44                                                             |
| 39               | Chad    | Millet and products        | 1996           | 239                                                            |
| 39               | Chad    | Mutton & Goat Meat         | 1996           | 16                                                             |
| 39               | Chad    | Offals                     | 1996           | 6                                                              |
| 39               | Chad    | Oilcrops                   | 1996           | 299                                                            |
| 39               | Chad    | Oilcrops Oil, Other        | 1996           | 4                                                              |
| 39               | Chad    | Oilcrops, Other            | 1996           | 34                                                             |
| 39               | Chad    | Onions                     | 1996           | 2                                                              |
| 39               | Chad    | Potatoes and products      | 1996           | 4                                                              |
| 39               | Chad    | Poultry Meat               | 1996           | 2                                                              |
| 39               | Chad    | Pulses                     | 1996           | 44                                                             |
| 39               | Chad    | Pulses, Other and products | 1996           | 23                                                             |
| 39               | Chad    | Rice (Milled Equivalent)   | 1996           | 83                                                             |
| 39               | Chad    | Roots, Other               | 1996           | 10                                                             |
| 39               | Chad    | Sesame seed                | 1996           | 23                                                             |
| 39               | Chad    | Sorghum and products       | 1996           | 353                                                            |
| 39               | Chad    | Starchy Roots              | 1996           | 201                                                            |
| 39               | Chad    | Stimulants                 | 1996           | 1                                                              |
| 39               | Chad    | Sugar & Sweeteners         | 1996           | 86                                                             |
| 39               | Chad    | Sugar (Raw Equivalent)     | 1996           | 84                                                             |
| 39               | Chad    | Sweet potatoes             | 1996           | 17                                                             |
| 39               | Chad    | Sweeteners, Other          | 1996           | 1                                                              |
| 39               | Chad    | Tea (including mate)       | 1996           | 1                                                              |
| 39               | Chad    | Vegetable Oils             | 1996           | 122                                                            |
| 39               | Chad    | Vegetables                 | 1996           | 9                                                              |
| 39               | Chad    | Vegetables, Other          | 1996           | 7                                                              |
| 39               | Chad    | Vegetal Products           | 1996           | 1,673                                                          |
| 39               | Chad    | Wheat and products         | 1996           | 44                                                             |
| 39               | Chad    | Yams                       | 1996           | 67                                                             |
| 39               | Chad    | Alcoholic Beverages        | 1997           | 3                                                              |
| 39               | Chad    | Animal fats                | 1997           | 10                                                             |
| 39               | Chad    | Animal Products            | 1997           | 148                                                            |
| 39               | Chad    | Beans                      | 1997           | 19                                                             |
| 39               | Chad    | Beer                       | 1997           | 2                                                              |
| 39               | Chad    | Beverages, Fermented       | 1997           | 1                                                              |
| 39               | Chad    | Bovine Meat                | 1997           | 42                                                             |
| 39               | Chad    | Butter, Ghee               | 1997           | 1                                                              |
| 39               | Chad    | Cassava and products       | 1997           | 102                                                            |
| 39               | Chad    | Cereals - Excluding Beer   | 1997           | 921                                                            |
| 39               | Chad    | Cereals, Other             | 1997           | 80                                                             |
| 39               | Chad    | Cottonseed Oil             | 1997           | 41                                                             |
| 39               | Chad    | Dates                      | 1997           | 8                                                              |
| 39               | Chad    | Eggs                       | 1997           | 1                                                              |
| 39               | Chad    | Fats, Animals, Raw         | 1997           | 9                                                              |
| 39               | Chad    | Fish, Seafood              | 1997           | 18                                                             |
| 39               | Chad    | Freshwater Fish            | 1997           | 18                                                             |
| 39               | Chad    | Fruits - Excluding Wine    | 1997           | 21                                                             |
| 39               | Chad    | Fruits, Other              | 1997           | 13                                                             |
| 39               | Chad    | Grand Total                | 1997           | 1,897                                                          |
| 39               | Chad    | Groundnut Oil              | 1997           | 92                                                             |
| 39               | Chad    | Groundnuts (Shelled Eq)    | 1997           | 274                                                            |
| 39               | Chad    | Honey                      | 1997           | 1                                                              |
| 39               | Chad    | Maize and products         | 1997           | 97                                                             |
| 39               | Chad    | Meat                       | 1997           | 65                                                             |
| 39               | Chad    | Meat, Other                | 1997           | 2                                                              |
| 39               | Chad    | Milk - Excluding Butter    | 1997           | 47                                                             |
| 39               | Chad    | Millet and products        | 1997           | 216                                                            |
| 39               | Chad    | Mutton & Goat Meat         | 1997           | 19                                                             |
| 39               | Chad    | Offals                     | 1997           | 7                                                              |
| 39               | Chad    | Oilcrops                   | 1997           | 360                                                            |
| 39               | Chad    | Oilcrops Oil, Other        | 1997           | 2                                                              |
| 39               | Chad    | Oilcrops, Other            | 1997           | 40                                                             |
| 39               | Chad    | Onions                     | 1997           | 2                                                              |
| 39               | Chad    | Potatoes and products      | 1997           | 4                                                              |
| 39               | Chad    | Poultry Meat               | 1997           | 2                                                              |

Dietary calcium and zinc deficiency risks are decreasing but remain prevalent

| FAO Country code | Country | Food item                  | Reference year | Net energy supply (kcal capita <sup>-1</sup> d <sup>-1</sup> ) |
|------------------|---------|----------------------------|----------------|----------------------------------------------------------------|
| 39               | Chad    | Pulses                     | 1997           | 39                                                             |
| 39               | Chad    | Pulses, Other and products | 1997           | 21                                                             |
| 39               | Chad    | Rice (Milled Equivalent)   | 1997           | 93                                                             |
| 39               | Chad    | Roots, Other               | 1997           | 10                                                             |
| 39               | Chad    | Sesame seed                | 1997           | 47                                                             |
| 39               | Chad    | Sorghum and products       | 1997           | 383                                                            |
| 39               | Chad    | Starchy Roots              | 1997           | 197                                                            |
| 39               | Chad    | Sugar & Sweeteners         | 1997           | 64                                                             |
| 39               | Chad    | Sugar (Raw Equivalent)     | 1997           | 63                                                             |
| 39               | Chad    | Sweet potatoes             | 1997           | 17                                                             |
| 39               | Chad    | Vegetable Oils             | 1997           | 134                                                            |
| 39               | Chad    | Vegetables                 | 1997           | 8                                                              |
| 39               | Chad    | Vegetables, Other          | 1997           | 6                                                              |
| 39               | Chad    | Vegetal Products           | 1997           | 1,749                                                          |
| 39               | Chad    | Wheat and products         | 1997           | 52                                                             |
| 39               | Chad    | Yams                       | 1997           | 64                                                             |
| 39               | Chad    | Alcoholic Beverages        | 1998           | 3                                                              |
| 39               | Chad    | Animal fats                | 1998           | 10                                                             |
| 39               | Chad    | Animal Products            | 1998           | 150                                                            |
| 39               | Chad    | Beans                      | 1998           | 37                                                             |
| 39               | Chad    | Beer                       | 1998           | 2                                                              |
| 39               | Chad    | Beverages, Fermented       | 1998           | 1                                                              |
| 39               | Chad    | Bovine Meat                | 1998           | 45                                                             |
| 39               | Chad    | Butter, Ghee               | 1998           | 1                                                              |
| 39               | Chad    | Cassava and products       | 1998           | 102                                                            |
| 39               | Chad    | Cereals - Excluding Beer   | 1998           | 1,017                                                          |
| 39               | Chad    | Cereals, Other             | 1998           | 111                                                            |
| 39               | Chad    | Cottonseed Oil             | 1998           | 40                                                             |
| 39               | Chad    | Dates                      | 1998           | 8                                                              |
| 39               | Chad    | Eggs                       | 1998           | 1                                                              |
| 39               | Chad    | Fats, Animals, Raw         | 1998           | 9                                                              |
| 39               | Chad    | Fish, Seafood              | 1998           | 17                                                             |
| 39               | Chad    | Freshwater Fish            | 1998           | 17                                                             |
| 39               | Chad    | Fruits - Excluding Wine    | 1998           | 20                                                             |
| 39               | Chad    | Fruits, Other              | 1998           | 12                                                             |
| 39               | Chad    | Grand Total                | 1998           | 2,037                                                          |
| 39               | Chad    | Groundnut Oil              | 1998           | 87                                                             |
| 39               | Chad    | Groundnuts (Shelled Eq)    | 1998           | 262                                                            |
| 39               | Chad    | Honey                      | 1998           | 1                                                              |
| 39               | Chad    | Maize and products         | 1998           | 152                                                            |
| 39               | Chad    | Meat                       | 1998           | 67                                                             |
| 39               | Chad    | Meat, Other                | 1998           | 2                                                              |
| 39               | Chad    | Milk - Excluding Butter    | 1998           | 46                                                             |
| 39               | Chad    | Millet and products        | 1998           | 255                                                            |
| 39               | Chad    | Mutton & Goat Meat         | 1998           | 18                                                             |
| 39               | Chad    | Offals                     | 1998           | 7                                                              |
| 39               | Chad    | Oilcrops                   | 1998           | 349                                                            |
| 39               | Chad    | Oilcrops Oil, Other        | 1998           | 2                                                              |
| 39               | Chad    | Oilcrops, Other            | 1998           | 36                                                             |
| 39               | Chad    | Onions                     | 1998           | 2                                                              |
| 39               | Chad    | Pigmeat                    | 1998           | 1                                                              |
| 39               | Chad    | Potatoes and products      | 1998           | 4                                                              |
| 39               | Chad    | Poultry Meat               | 1998           | 2                                                              |
| 39               | Chad    | Pulses                     | 1998           | 84                                                             |
| 39               | Chad    | Pulses, Other and products | 1998           | 46                                                             |
| 39               | Chad    | Rice (Milled Equivalent)   | 1998           | 93                                                             |
| 39               | Chad    | Roots, Other               | 1998           | 10                                                             |
| 39               | Chad    | Sesame seed                | 1998           | 50                                                             |
| 39               | Chad    | Sorghum and products       | 1998           | 367                                                            |
| 39               | Chad    | Starchy Roots              | 1998           | 199                                                            |
| 39               | Chad    | Sugar & Sweeteners         | 1998           | 79                                                             |
| 39               | Chad    | Sugar (Raw Equivalent)     | 1998           | 78                                                             |
| 39               | Chad    | Sweet potatoes             | 1998           | 18                                                             |
| 39               | Chad    | Vegetable Oils             | 1998           | 129                                                            |
| 39               | Chad    | Vegetables                 | 1998           | 8                                                              |
| 39               | Chad    | Vegetables, Other          | 1998           | 6                                                              |
| 39               | Chad    | Vegetal Products           | 1998           | 1,888                                                          |
| 39               | Chad    | Wheat and products         | 1998           | 38                                                             |
| 39               | Chad    | Yams                       | 1998           | 65                                                             |
| 39               | Chad    | Alcoholic Beverages        | 1999           | 3                                                              |
| 39               | Chad    | Animal fats                | 1999           | 10                                                             |
| 39               | Chad    | Animal Products            | 1999           | 148                                                            |
| 39               | Chad    | Beans                      | 1999           | 44                                                             |
| 39               | Chad    | Beer                       | 1999           | 1                                                              |
| 39               | Chad    | Beverages, Fermented       | 1999           | 1                                                              |
| 39               | Chad    | Bovine Meat                | 1999           | 42                                                             |
| 39               | Chad    | Butter, Ghee               | 1999           | 1                                                              |
| 39               | Chad    | Cassava and products       | 1999           | 110                                                            |
| 39               | Chad    | Cereals - Excluding Beer   | 1999           | 969                                                            |
| 39               | Chad    | Cereals, Other             | 1999           | 143                                                            |
| 39               | Chad    | Cottonseed Oil             | 1999           | 37                                                             |
| 39               | Chad    | Dates                      | 1999           | 7                                                              |
| 39               | Chad    | Eggs                       | 1999           | 1                                                              |
| 39               | Chad    | Fats, Animals, Raw         | 1999           | 9                                                              |
| 39               | Chad    | Fish, Seafood              | 1999           | 19                                                             |
| 39               | Chad    | Freshwater Fish            | 1999           | 19                                                             |
| 39               | Chad    | Fruits - Excluding Wine    | 1999           | 18                                                             |
| 39               | Chad    | Fruits, Other              | 1999           | 11                                                             |
| 39               | Chad    | Grand Total                | 1999           | 1,989                                                          |
| 39               | Chad    | Groundnut Oil              | 1999           | 99                                                             |
| 39               | Chad    | Groundnuts (Shelled Eq)    | 1999           | 297                                                            |
| 39               | Chad    | Honey                      | 1999           | 1                                                              |
| 39               | Chad    | Maize and products         | 1999           | 58                                                             |
| 39               | Chad    | Meat                       | 1999           | 64                                                             |
| 39               | Chad    | Meat, Other                | 1999           | 2                                                              |
| 39               | Chad    | Milk - Excluding Butter    | 1999           | 47                                                             |
| 39               | Chad    | Millet and products        | 1999           | 272                                                            |



Dietary calcium and zinc deficiency risks are decreasing but remain prevalent

| FAO Country code | Country | Food item                  | Reference year | Net energy supply (kcal <i>capita</i> <sup>-1</sup> d <sup>-1</sup> ) |
|------------------|---------|----------------------------|----------------|-----------------------------------------------------------------------|
| 39               | Chad    | Mutton & Goat Meat         | 1999           | 17                                                                    |
| 39               | Chad    | Offals                     | 1999           | 7                                                                     |
| 39               | Chad    | Oilcrops                   | 1999           | 363                                                                   |
| 39               | Chad    | Oilcrops Oil, Other        | 1999           | 2                                                                     |
| 39               | Chad    | Oilcrops, Other            | 1999           | 31                                                                    |
| 39               | Chad    | Onions                     | 1999           | 2                                                                     |
| 39               | Chad    | Pigmeat                    | 1999           | 1                                                                     |
| 39               | Chad    | Potatoes and products      | 1999           | 5                                                                     |
| 39               | Chad    | Poultry Meat               | 1999           | 2                                                                     |
| 39               | Chad    | Pulses                     | 1999           | 75                                                                    |
| 39               | Chad    | Pulses, Other and products | 1999           | 31                                                                    |
| 39               | Chad    | Rice (Milled Equivalent)   | 1999           | 80                                                                    |
| 39               | Chad    | Roots, Other               | 1999           | 12                                                                    |
| 39               | Chad    | Sesame seed                | 1999           | 35                                                                    |
| 39               | Chad    | Sorghum and products       | 1999           | 369                                                                   |
| 39               | Chad    | Starchy Roots              | 1999           | 206                                                                   |
| 39               | Chad    | Sugar & Sweeteners         | 1999           | 61                                                                    |
| 39               | Chad    | Sugar (Raw Equivalent)     | 1999           | 60                                                                    |
| 39               | Chad    | Sweet potatoes             | 1999           | 16                                                                    |
| 39               | Chad    | Vegetable Oils             | 1999           | 137                                                                   |
| 39               | Chad    | Vegetables                 | 1999           | 8                                                                     |
| 39               | Chad    | Vegetables, Other          | 1999           | 6                                                                     |
| 39               | Chad    | Vegetal Products           | 1999           | 1,841                                                                 |
| 39               | Chad    | Wheat and products         | 1999           | 48                                                                    |
| 39               | Chad    | Yams                       | 1999           | 64                                                                    |
| 39               | Chad    | Alcoholic Beverages        | 2000           | 2                                                                     |
| 39               | Chad    | Animal fats                | 2000           | 10                                                                    |
| 39               | Chad    | Animal Products            | 2000           | 149                                                                   |
| 39               | Chad    | Beans                      | 2000           | 62                                                                    |
| 39               | Chad    | Beer                       | 2000           | 1                                                                     |
| 39               | Chad    | Beverages, Fermented       | 2000           | 1                                                                     |
| 39               | Chad    | Bovine Meat                | 2000           | 39                                                                    |
| 39               | Chad    | Butter, Ghee               | 2000           | 1                                                                     |
| 39               | Chad    | Cassava and products       | 2000           | 84                                                                    |
| 39               | Chad    | Cereals - Excluding Beer   | 2000           | 974                                                                   |
| 39               | Chad    | Cereals, Other             | 2000           | 92                                                                    |
| 39               | Chad    | Cottonseed Oil             | 2000           | 39                                                                    |
| 39               | Chad    | Dates                      | 2000           | 7                                                                     |
| 39               | Chad    | Eggs                       | 2000           | 1                                                                     |
| 39               | Chad    | Fats, Animals, Raw         | 2000           | 9                                                                     |
| 39               | Chad    | Fish, Seafood              | 2000           | 24                                                                    |
| 39               | Chad    | Freshwater Fish            | 2000           | 24                                                                    |
| 39               | Chad    | Fruits - Excluding Wine    | 2000           | 17                                                                    |
| 39               | Chad    | Fruits, Other              | 2000           | 11                                                                    |
| 39               | Chad    | Grand Total                | 2000           | 1,947                                                                 |
| 39               | Chad    | Groundnut Oil              | 2000           | 56                                                                    |
| 39               | Chad    | Groundnuts (Shelled Eq)    | 2000           | 309                                                                   |
| 39               | Chad    | Honey                      | 2000           | 1                                                                     |
| 39               | Chad    | Maize and products         | 2000           | 88                                                                    |
| 39               | Chad    | Meat                       | 2000           | 61                                                                    |
| 39               | Chad    | Meat, Other                | 2000           | 2                                                                     |
| 39               | Chad    | Milk - Excluding Butter    | 2000           | 46                                                                    |
| 39               | Chad    | Millet and products        | 2000           | 267                                                                   |
| 39               | Chad    | Mutton & Goat Meat         | 2000           | 18                                                                    |
| 39               | Chad    | Offals                     | 2000           | 7                                                                     |
| 39               | Chad    | Oilcrops                   | 2000           | 391                                                                   |
| 39               | Chad    | Oilcrops, Other            | 2000           | 29                                                                    |
| 39               | Chad    | Onions                     | 2000           | 2                                                                     |
| 39               | Chad    | Potatoes and products      | 2000           | 4                                                                     |
| 39               | Chad    | Poultry Meat               | 2000           | 2                                                                     |
| 39               | Chad    | Pulses                     | 2000           | 78                                                                    |
| 39               | Chad    | Pulses, Other and products | 2000           | 16                                                                    |
| 39               | Chad    | Rice (Milled Equivalent)   | 2000           | 89                                                                    |
| 39               | Chad    | Roots, Other               | 2000           | 12                                                                    |
| 39               | Chad    | Sesame seed                | 2000           | 53                                                                    |
| 39               | Chad    | Sorghum and products       | 2000           | 393                                                                   |
| 39               | Chad    | Starchy Roots              | 2000           | 160                                                                   |
| 39               | Chad    | Sugar & Sweeteners         | 2000           | 72                                                                    |
| 39               | Chad    | Sugar (Raw Equivalent)     | 2000           | 70                                                                    |
| 39               | Chad    | Sweet potatoes             | 2000           | 12                                                                    |
| 39               | Chad    | Vegetable Oils             | 2000           | 95                                                                    |
| 39               | Chad    | Vegetables                 | 2000           | 7                                                                     |
| 39               | Chad    | Vegetables, Other          | 2000           | 6                                                                     |
| 39               | Chad    | Vegetal Products           | 2000           | 1,798                                                                 |
| 39               | Chad    | Wheat and products         | 2000           | 45                                                                    |
| 39               | Chad    | Yams                       | 2000           | 49                                                                    |
| 39               | Chad    | Alcoholic Beverages        | 2001           | 3                                                                     |
| 39               | Chad    | Animal fats                | 2001           | 10                                                                    |
| 39               | Chad    | Animal Products            | 2001           | 145                                                                   |
| 39               | Chad    | Beans                      | 2001           | 72                                                                    |
| 39               | Chad    | Beer                       | 2001           | 1                                                                     |
| 39               | Chad    | Beverages, Fermented       | 2001           | 1                                                                     |
| 39               | Chad    | Bovine Meat                | 2001           | 39                                                                    |
| 39               | Chad    | Butter, Ghee               | 2001           | 1                                                                     |
| 39               | Chad    | Cassava and products       | 2001           | 96                                                                    |
| 39               | Chad    | Cereals - Excluding Beer   | 2001           | 990                                                                   |
| 39               | Chad    | Cereals, Other             | 2001           | 157                                                                   |
| 39               | Chad    | Cottonseed Oil             | 2001           | 34                                                                    |
| 39               | Chad    | Dates                      | 2001           | 7                                                                     |
| 39               | Chad    | Eggs                       | 2001           | 1                                                                     |
| 39               | Chad    | Fats, Animals, Raw         | 2001           | 9                                                                     |
| 39               | Chad    | Fish, Seafood              | 2001           | 21                                                                    |
| 39               | Chad    | Freshwater Fish            | 2001           | 21                                                                    |
| 39               | Chad    | Fruits - Excluding Wine    | 2001           | 17                                                                    |
| 39               | Chad    | Fruits, Other              | 2001           | 10                                                                    |
| 39               | Chad    | Grand Total                | 2001           | 2,018                                                                 |
| 39               | Chad    | Groundnut Oil              | 2001           | 77                                                                    |

Dietary calcium and zinc deficiency risks are decreasing but remain prevalent

| FAO Country code | Country | Food item                  | Reference year | Net energy supply (kcal capita <sup>-1</sup> d <sup>-1</sup> ) |
|------------------|---------|----------------------------|----------------|----------------------------------------------------------------|
| 39               | Chad    | Groundnuts (Shelled Eq)    | 2001           | 304                                                            |
| 39               | Chad    | Honey                      | 2001           | 1                                                              |
| 39               | Chad    | Maize and products         | 2001           | 70                                                             |
| 39               | Chad    | Meat                       | 2001           | 61                                                             |
| 39               | Chad    | Meat, Other                | 2001           | 2                                                              |
| 39               | Chad    | Milk - Excluding Butter    | 2001           | 45                                                             |
| 39               | Chad    | Millet and products        | 2001           | 263                                                            |
| 39               | Chad    | Mutton & Goat Meat         | 2001           | 18                                                             |
| 39               | Chad    | Offals                     | 2001           | 7                                                              |
| 39               | Chad    | Oilcrops                   | 2001           | 388                                                            |
| 39               | Chad    | Oilcrops, Other            | 2001           | 34                                                             |
| 39               | Chad    | Onions                     | 2001           | 3                                                              |
| 39               | Chad    | Potatoes and products      | 2001           | 4                                                              |
| 39               | Chad    | Poultry Meat               | 2001           | 2                                                              |
| 39               | Chad    | Pulses                     | 2001           | 104                                                            |
| 39               | Chad    | Pulses, Other and products | 2001           | 31                                                             |
| 39               | Chad    | Rice (Milled Equivalent)   | 2001           | 79                                                             |
| 39               | Chad    | Roots, Other               | 2001           | 11                                                             |
| 39               | Chad    | Sesame seed                | 2001           | 50                                                             |
| 39               | Chad    | Sorghum and products       | 2001           | 377                                                            |
| 39               | Chad    | Starchy Roots              | 2001           | 183                                                            |
| 39               | Chad    | Sugar & Sweeteners         | 2001           | 69                                                             |
| 39               | Chad    | Sugar (Raw Equivalent)     | 2001           | 68                                                             |
| 39               | Chad    | Sweet potatoes             | 2001           | 16                                                             |
| 39               | Chad    | Vegetable Oils             | 2001           | 112                                                            |
| 39               | Chad    | Vegetables                 | 2001           | 8                                                              |
| 39               | Chad    | Vegetables, Other          | 2001           | 5                                                              |
| 39               | Chad    | Vegetal Products           | 2001           | 1,874                                                          |
| 39               | Chad    | Wheat and products         | 2001           | 44                                                             |
| 39               | Chad    | Yams                       | 2001           | 56                                                             |
| 39               | Chad    | Alcoholic Beverages        | 2002           | 2                                                              |
| 39               | Chad    | Animal fats                | 2002           | 10                                                             |
| 39               | Chad    | Animal Products            | 2002           | 140                                                            |
| 39               | Chad    | Beans                      | 2002           | 64                                                             |
| 39               | Chad    | Beer                       | 2002           | 1                                                              |
| 39               | Chad    | Beverages, Fermented       | 2002           | 1                                                              |
| 39               | Chad    | Bovine Meat                | 2002           | 37                                                             |
| 39               | Chad    | Butter, Ghee               | 2002           | 1                                                              |
| 39               | Chad    | Cassava and products       | 2002           | 97                                                             |
| 39               | Chad    | Cereals - Excluding Beer   | 2002           | 940                                                            |
| 39               | Chad    | Cereals, Other             | 2002           | 105                                                            |
| 39               | Chad    | Cottonseed Oil             | 2002           | 38                                                             |
| 39               | Chad    | Dates                      | 2002           | 6                                                              |
| 39               | Chad    | Eggs                       | 2002           | 1                                                              |
| 39               | Chad    | Fats, Animals, Raw         | 2002           | 9                                                              |
| 39               | Chad    | Fish, Seafood              | 2002           | 19                                                             |
| 39               | Chad    | Freshwater Fish            | 2002           | 19                                                             |
| 39               | Chad    | Fruits - Excluding Wine    | 2002           | 17                                                             |
| 39               | Chad    | Fruits, Other              | 2002           | 10                                                             |
| 39               | Chad    | Grand Total                | 2002           | 1,968                                                          |
| 39               | Chad    | Groundnut Oil              | 2002           | 76                                                             |
| 39               | Chad    | Groundnuts (Shelled Eq)    | 2002           | 294                                                            |
| 39               | Chad    | Honey                      | 2002           | 1                                                              |
| 39               | Chad    | Maize and products         | 2002           | 71                                                             |
| 39               | Chad    | Meat                       | 2002           | 59                                                             |
| 39               | Chad    | Meat, Other                | 2002           | 2                                                              |
| 39               | Chad    | Milk - Excluding Butter    | 2002           | 44                                                             |
| 39               | Chad    | Millet and products        | 2002           | 264                                                            |
| 39               | Chad    | Mutton & Goat Meat         | 2002           | 18                                                             |
| 39               | Chad    | Offals                     | 2002           | 7                                                              |
| 39               | Chad    | Oilcrops                   | 2002           | 394                                                            |
| 39               | Chad    | Oilcrops, Other            | 2002           | 32                                                             |
| 39               | Chad    | Onions                     | 2002           | 3                                                              |
| 39               | Chad    | Potatoes and products      | 2002           | 4                                                              |
| 39               | Chad    | Poultry Meat               | 2002           | 2                                                              |
| 39               | Chad    | Pulses                     | 2002           | 95                                                             |
| 39               | Chad    | Pulses, Other and products | 2002           | 31                                                             |
| 39               | Chad    | Rice (Milled Equivalent)   | 2002           | 91                                                             |
| 39               | Chad    | Roots, Other               | 2002           | 11                                                             |
| 39               | Chad    | Sesame seed                | 2002           | 67                                                             |
| 39               | Chad    | Sorghum and products       | 2002           | 359                                                            |
| 39               | Chad    | Starchy Roots              | 2002           | 185                                                            |
| 39               | Chad    | Sugar & Sweeteners         | 2002           | 73                                                             |
| 39               | Chad    | Sugar (Raw Equivalent)     | 2002           | 72                                                             |
| 39               | Chad    | Sweet potatoes             | 2002           | 16                                                             |
| 39               | Chad    | Vegetable Oils             | 2002           | 114                                                            |
| 39               | Chad    | Vegetables                 | 2002           | 8                                                              |
| 39               | Chad    | Vegetables, Other          | 2002           | 5                                                              |
| 39               | Chad    | Vegetal Products           | 2002           | 1,828                                                          |
| 39               | Chad    | Wheat and products         | 2002           | 50                                                             |
| 39               | Chad    | Yams                       | 2002           | 57                                                             |
| 39               | Chad    | Alcoholic Beverages        | 2003           | 3                                                              |
| 39               | Chad    | Animal fats                | 2003           | 10                                                             |
| 39               | Chad    | Animal Products            | 2003           | 138                                                            |
| 39               | Chad    | Beans                      | 2003           | 62                                                             |
| 39               | Chad    | Beer                       | 2003           | 1                                                              |
| 39               | Chad    | Beverages, Fermented       | 2003           | 2                                                              |
| 39               | Chad    | Bovine Meat                | 2003           | 37                                                             |
| 39               | Chad    | Butter, Ghee               | 2003           | 1                                                              |
| 39               | Chad    | Cassava and products       | 2003           | 95                                                             |
| 39               | Chad    | Cereals - Excluding Beer   | 2003           | 1,046                                                          |
| 39               | Chad    | Cereals, Other             | 2003           | 200                                                            |
| 39               | Chad    | Cottonseed Oil             | 2003           | 34                                                             |
| 39               | Chad    | Dates                      | 2003           | 6                                                              |
| 39               | Chad    | Eggs                       | 2003           | 1                                                              |
| 39               | Chad    | Fats, Animals, Raw         | 2003           | 9                                                              |
| 39               | Chad    | Fish, Seafood              | 2003           | 17                                                             |

## Dietary calcium and zinc deficiency risks are decreasing but remain prevalent

| FAO Country code | Country | Food item                  | Reference year | Net energy supply (kcal capita <sup>-1</sup> d <sup>-1</sup> ) |
|------------------|---------|----------------------------|----------------|----------------------------------------------------------------|
| 39               | Chad    | Freshwater Fish            | 2003           | 17                                                             |
| 39               | Chad    | Fruits - Excluding Wine    | 2003           | 16                                                             |
| 39               | Chad    | Fruits, Other              | 2003           | 10                                                             |
| 39               | Chad    | Grand Total                | 2003           | 2,024                                                          |
| 39               | Chad    | Groundnut Oil              | 2003           | 73                                                             |
| 39               | Chad    | Groundnuts (Shelled Eq)    | 2003           | 283                                                            |
| 39               | Chad    | Honey                      | 2003           | 1                                                              |
| 39               | Chad    | Maize and products         | 2003           | 73                                                             |
| 39               | Chad    | Meat                       | 2003           | 58                                                             |
| 39               | Chad    | Meat, Other                | 2003           | 2                                                              |
| 39               | Chad    | Milk - Excluding Butter    | 2003           | 45                                                             |
| 39               | Chad    | Millet and products        | 2003           | 291                                                            |
| 39               | Chad    | Mutton & Goat Meat         | 2003           | 17                                                             |
| 39               | Chad    | Offals                     | 2003           | 7                                                              |
| 39               | Chad    | Oilcrops                   | 2003           | 361                                                            |
| 39               | Chad    | Oilcrops, Other            | 2003           | 28                                                             |
| 39               | Chad    | Onions                     | 2003           | 3                                                              |
| 39               | Chad    | Potatoes and products      | 2003           | 4                                                              |
| 39               | Chad    | Poultry Meat               | 2003           | 2                                                              |
| 39               | Chad    | Pulses                     | 2003           | 92                                                             |
| 39               | Chad    | Pulses, Other and products | 2003           | 30                                                             |
| 39               | Chad    | Rice (Milled Equivalent)   | 2003           | 71                                                             |
| 39               | Chad    | Roots, Other               | 2003           | 11                                                             |
| 39               | Chad    | Sesame seed                | 2003           | 50                                                             |
| 39               | Chad    | Sorghum and products       | 2003           | 359                                                            |
| 39               | Chad    | Starchy Roots              | 2003           | 183                                                            |
| 39               | Chad    | Sugar & Sweeteners         | 2003           | 70                                                             |
| 39               | Chad    | Sugar (Raw Equivalent)     | 2003           | 68                                                             |
| 39               | Chad    | Sweet potatoes             | 2003           | 18                                                             |
| 39               | Chad    | Vegetable Oils             | 2003           | 107                                                            |
| 39               | Chad    | Vegetables                 | 2003           | 8                                                              |
| 39               | Chad    | Vegetables, Other          | 2003           | 5                                                              |
| 39               | Chad    | Vegetal Products           | 2003           | 1,886                                                          |
| 39               | Chad    | Wheat and products         | 2003           | 52                                                             |
| 39               | Chad    | Yams                       | 2003           | 55                                                             |
| 39               | Chad    | Alcoholic Beverages        | 2004           | 2                                                              |
| 39               | Chad    | Animal fats                | 2004           | 9                                                              |
| 39               | Chad    | Animal Products            | 2004           | 133                                                            |
| 39               | Chad    | Beans                      | 2004           | 60                                                             |
| 39               | Chad    | Beer                       | 2004           | 1                                                              |
| 39               | Chad    | Beverages, Fermented       | 2004           | 1                                                              |
| 39               | Chad    | Bovine Meat                | 2004           | 36                                                             |
| 39               | Chad    | Butter, Ghee               | 2004           | 1                                                              |
| 39               | Chad    | Cassava and products       | 2004           | 92                                                             |
| 39               | Chad    | Cereals - Excluding Beer   | 2004           | 1,049                                                          |
| 39               | Chad    | Cereals, Other             | 2004           | 177                                                            |
| 39               | Chad    | Cottonseed Oil             | 2004           | 36                                                             |
| 39               | Chad    | Dates                      | 2004           | 6                                                              |
| 39               | Chad    | Eggs                       | 2004           | 1                                                              |
| 39               | Chad    | Fats, Animals, Raw         | 2004           | 8                                                              |
| 39               | Chad    | Fish, Seafood              | 2004           | 16                                                             |
| 39               | Chad    | Freshwater Fish            | 2004           | 16                                                             |
| 39               | Chad    | Fruits - Excluding Wine    | 2004           | 16                                                             |
| 39               | Chad    | Fruits, Other              | 2004           | 10                                                             |
| 39               | Chad    | Grand Total                | 2004           | 2,026                                                          |
| 39               | Chad    | Groundnut Oil              | 2004           | 70                                                             |
| 39               | Chad    | Groundnuts (Shelled Eq)    | 2004           | 273                                                            |
| 39               | Chad    | Honey                      | 2004           | 1                                                              |
| 39               | Chad    | Maize and products         | 2004           | 101                                                            |
| 39               | Chad    | Meat                       | 2004           | 57                                                             |
| 39               | Chad    | Meat, Other                | 2004           | 2                                                              |
| 39               | Chad    | Milk - Excluding Butter    | 2004           | 43                                                             |
| 39               | Chad    | Millet and products        | 2004           | 291                                                            |
| 39               | Chad    | Mutton & Goat Meat         | 2004           | 17                                                             |
| 39               | Chad    | Offals                     | 2004           | 7                                                              |
| 39               | Chad    | Oilcrops                   | 2004           | 353                                                            |
| 39               | Chad    | Oilcrops Oil, Other        | 2004           | 6                                                              |
| 39               | Chad    | Oilcrops, Other            | 2004           | 32                                                             |
| 39               | Chad    | Onions                     | 2004           | 2                                                              |
| 39               | Chad    | Potatoes and products      | 2004           | 4                                                              |
| 39               | Chad    | Poultry Meat               | 2004           | 2                                                              |
| 39               | Chad    | Pulses                     | 2004           | 90                                                             |
| 39               | Chad    | Pulses, Other and products | 2004           | 30                                                             |
| 39               | Chad    | Rice (Milled Equivalent)   | 2004           | 70                                                             |
| 39               | Chad    | Roots, Other               | 2004           | 11                                                             |
| 39               | Chad    | Sesame seed                | 2004           | 48                                                             |
| 39               | Chad    | Sorghum and products       | 2004           | 377                                                            |
| 39               | Chad    | Starchy Roots              | 2004           | 180                                                            |
| 39               | Chad    | Sugar & Sweeteners         | 2004           | 82                                                             |
| 39               | Chad    | Sugar (Raw Equivalent)     | 2004           | 81                                                             |
| 39               | Chad    | Sweet potatoes             | 2004           | 19                                                             |
| 39               | Chad    | Vegetable Oils             | 2004           | 113                                                            |
| 39               | Chad    | Vegetables                 | 2004           | 8                                                              |
| 39               | Chad    | Vegetables, Other          | 2004           | 5                                                              |
| 39               | Chad    | Vegetal Products           | 2004           | 1,893                                                          |
| 39               | Chad    | Wheat and products         | 2004           | 33                                                             |
| 39               | Chad    | Yams                       | 2004           | 54                                                             |
| 39               | Chad    | Alcoholic Beverages        | 2005           | 3                                                              |
| 39               | Chad    | Animal fats                | 2005           | 9                                                              |
| 39               | Chad    | Animal Products            | 2005           | 129                                                            |
| 39               | Chad    | Beans                      | 2005           | 69                                                             |
| 39               | Chad    | Beer                       | 2005           | 1                                                              |
| 39               | Chad    | Beverages, Fermented       | 2005           | 2                                                              |
| 39               | Chad    | Bovine Meat                | 2005           | 35                                                             |
| 39               | Chad    | Butter, Ghee               | 2005           | 1                                                              |
| 39               | Chad    | Cassava and products       | 2005           | 81                                                             |
| 39               | Chad    | Cereals - Excluding Beer   | 2005           | 1,066                                                          |

Dietary calcium and zinc deficiency risks are decreasing but remain prevalent

| FAO Country code | Country | Food item                  | Reference year | Net energy supply (kcal capita <sup>-1</sup> d <sup>-1</sup> ) |
|------------------|---------|----------------------------|----------------|----------------------------------------------------------------|
| 39               | Chad    | Cereals, Other             | 2005           | 217                                                            |
| 39               | Chad    | Cottonseed Oil             | 2005           | 28                                                             |
| 39               | Chad    | Dates                      | 2005           | 6                                                              |
| 39               | Chad    | Eggs                       | 2005           | 1                                                              |
| 39               | Chad    | Fats, Animals, Raw         | 2005           | 8                                                              |
| 39               | Chad    | Fish, Seafood              | 2005           | 14                                                             |
| 39               | Chad    | Freshwater Fish            | 2005           | 14                                                             |
| 39               | Chad    | Fruits - Excluding Wine    | 2005           | 16                                                             |
| 39               | Chad    | Fruits, Other              | 2005           | 10                                                             |
| 39               | Chad    | Grand Total                | 2005           | 2,034                                                          |
| 39               | Chad    | Groundnut Oil              | 2005           | 75                                                             |
| 39               | Chad    | Groundnuts (Shelled Eq)    | 2005           | 263                                                            |
| 39               | Chad    | Honey                      | 2005           | 1                                                              |
| 39               | Chad    | Maize and products         | 2005           | 100                                                            |
| 39               | Chad    | Meat                       | 2005           | 57                                                             |
| 39               | Chad    | Meat, Other                | 2005           | 2                                                              |
| 39               | Chad    | Milk - Excluding Butter    | 2005           | 42                                                             |
| 39               | Chad    | Millet and products        | 2005           | 298                                                            |
| 39               | Chad    | Mutton & Goat Meat         | 2005           | 17                                                             |
| 39               | Chad    | Offals                     | 2005           | 7                                                              |
| 39               | Chad    | Oilcrops                   | 2005           | 340                                                            |
| 39               | Chad    | Oilcrops Oil, Other        | 2005           | 8                                                              |
| 39               | Chad    | Oilcrops, Other            | 2005           | 30                                                             |
| 39               | Chad    | Onions                     | 2005           | 2                                                              |
| 39               | Chad    | Potatoes and products      | 2005           | 5                                                              |
| 39               | Chad    | Poultry Meat               | 2005           | 2                                                              |
| 39               | Chad    | Pulses                     | 2005           | 103                                                            |
| 39               | Chad    | Pulses, Other and products | 2005           | 34                                                             |
| 39               | Chad    | Rice (Milled Equivalent)   | 2005           | 75                                                             |
| 39               | Chad    | Roots, Other               | 2005           | 7                                                              |
| 39               | Chad    | Sesame seed                | 2005           | 47                                                             |
| 39               | Chad    | Sorghum and products       | 2005           | 328                                                            |
| 39               | Chad    | Starchy Roots              | 2005           | 167                                                            |
| 39               | Chad    | Sugar & Sweeteners         | 2005           | 89                                                             |
| 39               | Chad    | Sugar (Raw Equivalent)     | 2005           | 88                                                             |
| 39               | Chad    | Sweet potatoes             | 2005           | 19                                                             |
| 39               | Chad    | Vegetable Oils             | 2005           | 111                                                            |
| 39               | Chad    | Vegetables                 | 2005           | 8                                                              |
| 39               | Chad    | Vegetables, Other          | 2005           | 5                                                              |
| 39               | Chad    | Vegetal Products           | 2005           | 1,905                                                          |
| 39               | Chad    | Wheat and products         | 2005           | 48                                                             |
| 39               | Chad    | Yams                       | 2005           | 55                                                             |
| 39               | Chad    | Alcoholic Beverages        | 2006           | 5                                                              |
| 39               | Chad    | Animal fats                | 2006           | 9                                                              |
| 39               | Chad    | Animal Products            | 2006           | 128                                                            |
| 39               | Chad    | Beans                      | 2006           | 67                                                             |
| 39               | Chad    | Beer                       | 2006           | 3                                                              |
| 39               | Chad    | Beverages, Fermented       | 2006           | 2                                                              |
| 39               | Chad    | Bovine Meat                | 2006           | 35                                                             |
| 39               | Chad    | Butter, Ghee               | 2006           | 1                                                              |
| 39               | Chad    | Cassava and products       | 2006           | 73                                                             |
| 39               | Chad    | Cereals - Excluding Beer   | 2006           | 1,089                                                          |
| 39               | Chad    | Cereals, Other             | 2006           | 208                                                            |
| 39               | Chad    | Cottonseed Oil             | 2006           | 17                                                             |
| 39               | Chad    | Dates                      | 2006           | 6                                                              |
| 39               | Chad    | Eggs                       | 2006           | 1                                                              |
| 39               | Chad    | Fats, Animals, Raw         | 2006           | 8                                                              |
| 39               | Chad    | Fish, Seafood              | 2006           | 12                                                             |
| 39               | Chad    | Freshwater Fish            | 2006           | 12                                                             |
| 39               | Chad    | Fruits - Excluding Wine    | 2006           | 17                                                             |
| 39               | Chad    | Fruits, Other              | 2006           | 10                                                             |
| 39               | Chad    | Grand Total                | 2006           | 2,022                                                          |
| 39               | Chad    | Groundnut Oil              | 2006           | 75                                                             |
| 39               | Chad    | Groundnuts (Shelled Eq)    | 2006           | 258                                                            |
| 39               | Chad    | Honey                      | 2006           | 1                                                              |
| 39               | Chad    | Maize and products         | 2006           | 102                                                            |
| 39               | Chad    | Meat                       | 2006           | 56                                                             |
| 39               | Chad    | Meat, Other                | 2006           | 2                                                              |
| 39               | Chad    | Milk - Excluding Butter    | 2006           | 42                                                             |
| 39               | Chad    | Millet and products        | 2006           | 300                                                            |
| 39               | Chad    | Mutton & Goat Meat         | 2006           | 17                                                             |
| 39               | Chad    | Offals                     | 2006           | 7                                                              |
| 39               | Chad    | Oilcrops                   | 2006           | 327                                                            |
| 39               | Chad    | Oilcrops Oil, Other        | 2006           | 4                                                              |
| 39               | Chad    | Oilcrops, Other            | 2006           | 24                                                             |
| 39               | Chad    | Onions                     | 2006           | 3                                                              |
| 39               | Chad    | Potatoes and products      | 2006           | 7                                                              |
| 39               | Chad    | Poultry Meat               | 2006           | 2                                                              |
| 39               | Chad    | Pulses                     | 2006           | 98                                                             |
| 39               | Chad    | Pulses, Other and products | 2006           | 31                                                             |
| 39               | Chad    | Rice (Milled Equivalent)   | 2006           | 63                                                             |
| 39               | Chad    | Roots, Other               | 2006           | 6                                                              |
| 39               | Chad    | Sesame seed                | 2006           | 45                                                             |
| 39               | Chad    | Sorghum and products       | 2006           | 357                                                            |
| 39               | Chad    | Starchy Roots              | 2006           | 163                                                            |
| 39               | Chad    | Sugar & Sweeteners         | 2006           | 89                                                             |
| 39               | Chad    | Sugar (Raw Equivalent)     | 2006           | 89                                                             |
| 39               | Chad    | Sweet potatoes             | 2006           | 19                                                             |
| 39               | Chad    | Vegetable Oils             | 2006           | 96                                                             |
| 39               | Chad    | Vegetables                 | 2006           | 9                                                              |
| 39               | Chad    | Vegetables, Other          | 2006           | 6                                                              |
| 39               | Chad    | Vegetal Products           | 2006           | 1,894                                                          |
| 39               | Chad    | Wheat and products         | 2006           | 58                                                             |
| 39               | Chad    | Yams                       | 2006           | 59                                                             |
| 39               | Chad    | Alcoholic Beverages        | 2007           | 5                                                              |
| 39               | Chad    | Animal fats                | 2007           | 9                                                              |
| 39               | Chad    | Animal Products            | 2007           | 124                                                            |

Dietary calcium and zinc deficiency risks are decreasing but remain prevalent

| FAO Country code | Country | Food item                  | Reference year | Net energy supply (kcal capita <sup>-1</sup> d <sup>-1</sup> ) |
|------------------|---------|----------------------------|----------------|----------------------------------------------------------------|
| 39               | Chad    | Beans                      | 2007           | 46                                                             |
| 39               | Chad    | Beer                       | 2007           | 3                                                              |
| 39               | Chad    | Beverages, Fermented       | 2007           | 1                                                              |
| 39               | Chad    | Bovine Meat                | 2007           | 35                                                             |
| 39               | Chad    | Butter, Ghee               | 2007           | 1                                                              |
| 39               | Chad    | Cassava and products       | 2007           | 63                                                             |
| 39               | Chad    | Cereals - Excluding Beer   | 2007           | 1,200                                                          |
| 39               | Chad    | Cereals, Other             | 2007           | 261                                                            |
| 39               | Chad    | Cottonseed Oil             | 2007           | 17                                                             |
| 39               | Chad    | Dates                      | 2007           | 8                                                              |
| 39               | Chad    | Eggs                       | 2007           | 1                                                              |
| 39               | Chad    | Fats, Animals, Raw         | 2007           | 8                                                              |
| 39               | Chad    | Fish, Seafood              | 2007           | 10                                                             |
| 39               | Chad    | Freshwater Fish            | 2007           | 10                                                             |
| 39               | Chad    | Fruits - Excluding Wine    | 2007           | 18                                                             |
| 39               | Chad    | Fruits, Other              | 2007           | 10                                                             |
| 39               | Chad    | Grand Total                | 2007           | 2,008                                                          |
| 39               | Chad    | Groundnut Oil              | 2007           | 66                                                             |
| 39               | Chad    | Groundnuts (Shelled Eq)    | 2007           | 176                                                            |
| 39               | Chad    | Honey                      | 2007           | 1                                                              |
| 39               | Chad    | Maize and products         | 2007           | 103                                                            |
| 39               | Chad    | Meat                       | 2007           | 56                                                             |
| 39               | Chad    | Meat, Other                | 2007           | 2                                                              |
| 39               | Chad    | Milk - Excluding Butter    | 2007           | 42                                                             |
| 39               | Chad    | Millet and products        | 2007           | 309                                                            |
| 39               | Chad    | Mutton & Goat Meat         | 2007           | 17                                                             |
| 39               | Chad    | Offals                     | 2007           | 7                                                              |
| 39               | Chad    | Oilcrops                   | 2007           | 241                                                            |
| 39               | Chad    | Oilcrops Oil, Other        | 2007           | 10                                                             |
| 39               | Chad    | Oilcrops, Other            | 2007           | 15                                                             |
| 39               | Chad    | Olive Oil                  | 2007           | 1                                                              |
| 39               | Chad    | Onions                     | 2007           | 1                                                              |
| 39               | Chad    | Potatoes and products      | 2007           | 10                                                             |
| 39               | Chad    | Poultry Meat               | 2007           | 2                                                              |
| 39               | Chad    | Pulses                     | 2007           | 75                                                             |
| 39               | Chad    | Pulses, Other and products | 2007           | 29                                                             |
| 39               | Chad    | Rice (Milled Equivalent)   | 2007           | 70                                                             |
| 39               | Chad    | Roots, Other               | 2007           | 5                                                              |
| 39               | Chad    | Sesame seed                | 2007           | 50                                                             |
| 39               | Chad    | Sorghum and products       | 2007           | 386                                                            |
| 39               | Chad    | Starchy Roots              | 2007           | 157                                                            |
| 39               | Chad    | Sugar & Sweeteners         | 2007           | 89                                                             |
| 39               | Chad    | Sugar (Raw Equivalent)     | 2007           | 88                                                             |
| 39               | Chad    | Sweet potatoes             | 2007           | 13                                                             |
| 39               | Chad    | Vegetable Oils             | 2007           | 93                                                             |
| 39               | Chad    | Vegetables                 | 2007           | 6                                                              |
| 39               | Chad    | Vegetables, Other          | 2007           | 4                                                              |
| 39               | Chad    | Vegetal Products           | 2007           | 1,884                                                          |
| 39               | Chad    | Wheat and products         | 2007           | 71                                                             |
| 39               | Chad    | Yams                       | 2007           | 66                                                             |
| 39               | Chad    | Alcoholic Beverages        | 2008           | 5                                                              |
| 39               | Chad    | Animal fats                | 2008           | 9                                                              |
| 39               | Chad    | Animal Products            | 2008           | 122                                                            |
| 39               | Chad    | Beans                      | 2008           | 49                                                             |
| 39               | Chad    | Beer                       | 2008           | 3                                                              |
| 39               | Chad    | Beverages, Fermented       | 2008           | 1                                                              |
| 39               | Chad    | Bovine Meat                | 2008           | 35                                                             |
| 39               | Chad    | Butter, Ghee               | 2008           | 1                                                              |
| 39               | Chad    | Cassava and products       | 2008           | 40                                                             |
| 39               | Chad    | Cereals - Excluding Beer   | 2008           | 1,217                                                          |
| 39               | Chad    | Cereals, Other             | 2008           | 237                                                            |
| 39               | Chad    | Cottonseed Oil             | 2008           | 17                                                             |
| 39               | Chad    | Dates                      | 2008           | 7                                                              |
| 39               | Chad    | Eggs                       | 2008           | 1                                                              |
| 39               | Chad    | Fats, Animals, Raw         | 2008           | 8                                                              |
| 39               | Chad    | Fish, Seafood              | 2008           | 9                                                              |
| 39               | Chad    | Freshwater Fish            | 2008           | 9                                                              |
| 39               | Chad    | Fruits - Excluding Wine    | 2008           | 17                                                             |
| 39               | Chad    | Fruits, Other              | 2008           | 10                                                             |
| 39               | Chad    | Grand Total                | 2008           | 2,027                                                          |
| 39               | Chad    | Groundnut Oil              | 2008           | 70                                                             |
| 39               | Chad    | Groundnuts (Shelled Eq)    | 2008           | 212                                                            |
| 39               | Chad    | Honey                      | 2008           | 1                                                              |
| 39               | Chad    | Maize and products         | 2008           | 101                                                            |
| 39               | Chad    | Meat                       | 2008           | 55                                                             |
| 39               | Chad    | Meat, Other                | 2008           | 1                                                              |
| 39               | Chad    | Milk - Excluding Butter    | 2008           | 42                                                             |
| 39               | Chad    | Millet and products        | 2008           | 332                                                            |
| 39               | Chad    | Mutton & Goat Meat         | 2008           | 17                                                             |
| 39               | Chad    | Offals                     | 2008           | 7                                                              |
| 39               | Chad    | Oilcrops                   | 2008           | 276                                                            |
| 39               | Chad    | Oilcrops Oil, Other        | 2008           | 8                                                              |
| 39               | Chad    | Oilcrops, Other            | 2008           | 17                                                             |
| 39               | Chad    | Onions                     | 2008           | 1                                                              |
| 39               | Chad    | Potatoes and products      | 2008           | 6                                                              |
| 39               | Chad    | Poultry Meat               | 2008           | 2                                                              |
| 39               | Chad    | Pulses                     | 2008           | 77                                                             |
| 39               | Chad    | Pulses, Other and products | 2008           | 28                                                             |
| 39               | Chad    | Rice (Milled Equivalent)   | 2008           | 94                                                             |
| 39               | Chad    | Roots, Other               | 2008           | 4                                                              |
| 39               | Chad    | Sesame seed                | 2008           | 47                                                             |
| 39               | Chad    | Sorghum and products       | 2008           | 382                                                            |
| 39               | Chad    | Starchy Roots              | 2008           | 129                                                            |
| 39               | Chad    | Sugar & Sweeteners         | 2008           | 80                                                             |
| 39               | Chad    | Sugar (Raw Equivalent)     | 2008           | 79                                                             |
| 39               | Chad    | Sweet potatoes             | 2008           | 14                                                             |
| 39               | Chad    | Vegetable Oils             | 2008           | 96                                                             |

Dietary calcium and zinc deficiency risks are decreasing but remain prevalent

| FAO Country code | Country | Food item                  | Reference year | Net energy supply (kcal capita <sup>-1</sup> d <sup>-1</sup> ) |
|------------------|---------|----------------------------|----------------|----------------------------------------------------------------|
| 39               | Chad    | Vegetables                 | 2008           | 6                                                              |
| 39               | Chad    | Vegetables, Other          | 2008           | 4                                                              |
| 39               | Chad    | Vegetal Products           | 2008           | 1,904                                                          |
| 39               | Chad    | Wheat and products         | 2008           | 71                                                             |
| 39               | Chad    | Yams                       | 2008           | 65                                                             |
| 39               | Chad    | Alcoholic Beverages        | 2009           | 5                                                              |
| 39               | Chad    | Animal fats                | 2009           | 9                                                              |
| 39               | Chad    | Animal Products            | 2009           | 122                                                            |
| 39               | Chad    | Beans                      | 2009           | 55                                                             |
| 39               | Chad    | Beer                       | 2009           | 4                                                              |
| 39               | Chad    | Beverages, Fermented       | 2009           | 1                                                              |
| 39               | Chad    | Bovine Meat                | 2009           | 35                                                             |
| 39               | Chad    | Butter, Ghee               | 2009           | 1                                                              |
| 39               | Chad    | Cassava and products       | 2009           | 55                                                             |
| 39               | Chad    | Cereals - Excluding Beer   | 2009           | 1,221                                                          |
| 39               | Chad    | Cereals, Other             | 2009           | 259                                                            |
| 39               | Chad    | Cottonseed Oil             | 2009           | 10                                                             |
| 39               | Chad    | Dates                      | 2009           | 7                                                              |
| 39               | Chad    | Eggs                       | 2009           | 1                                                              |
| 39               | Chad    | Fats, Animals, Raw         | 2009           | 8                                                              |
| 39               | Chad    | Fish, Seafood              | 2009           | 9                                                              |
| 39               | Chad    | Freshwater Fish            | 2009           | 8                                                              |
| 39               | Chad    | Fruits - Excluding Wine    | 2009           | 16                                                             |
| 39               | Chad    | Fruits, Other              | 2009           | 9                                                              |
| 39               | Chad    | Grand Total                | 2009           | 2,006                                                          |
| 39               | Chad    | Groundnut Oil              | 2009           | 68                                                             |
| 39               | Chad    | Groundnuts (Shelled Eq)    | 2009           | 188                                                            |
| 39               | Chad    | Honey                      | 2009           | 1                                                              |
| 39               | Chad    | Maize and products         | 2009           | 112                                                            |
| 39               | Chad    | Meat                       | 2009           | 55                                                             |
| 39               | Chad    | Meat, Other                | 2009           | 1                                                              |
| 39               | Chad    | Milk - Excluding Butter    | 2009           | 41                                                             |
| 39               | Chad    | Millet and products        | 2009           | 304                                                            |
| 39               | Chad    | Miscellaneous              | 2009           | 1                                                              |
| 39               | Chad    | Mutton & Goat Meat         | 2009           | 17                                                             |
| 39               | Chad    | Offals                     | 2009           | 6                                                              |
| 39               | Chad    | Oilcrops                   | 2009           | 244                                                            |
| 39               | Chad    | Oilcrops Oil, Other        | 2009           | 8                                                              |
| 39               | Chad    | Oilcrops, Other            | 2009           | 16                                                             |
| 39               | Chad    | Onions                     | 2009           | 2                                                              |
| 39               | Chad    | Potatoes and products      | 2009           | 7                                                              |
| 39               | Chad    | Poultry Meat               | 2009           | 2                                                              |
| 39               | Chad    | Pulses                     | 2009           | 81                                                             |
| 39               | Chad    | Pulses, Other and products | 2009           | 27                                                             |
| 39               | Chad    | Rice (Milled Equivalent)   | 2009           | 93                                                             |
| 39               | Chad    | Roots, Other               | 2009           | 6                                                              |
| 39               | Chad    | Sesame seed                | 2009           | 41                                                             |
| 39               | Chad    | Sorghum and products       | 2009           | 374                                                            |
| 39               | Chad    | Starchy Roots              | 2009           | 148                                                            |
| 39               | Chad    | Sugar & Sweeteners         | 2009           | 75                                                             |
| 39               | Chad    | Sugar (Raw Equivalent)     | 2009           | 75                                                             |
| 39               | Chad    | Sweet potatoes             | 2009           | 17                                                             |
| 39               | Chad    | Vegetable Oils             | 2009           | 86                                                             |
| 39               | Chad    | Vegetables                 | 2009           | 6                                                              |
| 39               | Chad    | Vegetables, Other          | 2009           | 4                                                              |
| 39               | Chad    | Vegetal Products           | 2009           | 1,884                                                          |
| 39               | Chad    | Wheat and products         | 2009           | 79                                                             |
| 39               | Chad    | Yams                       | 2009           | 64                                                             |
| 39               | Chad    | Alcoholic Beverages        | 2010           | 6                                                              |
| 39               | Chad    | Animal fats                | 2010           | 9                                                              |
| 39               | Chad    | Animal Products            | 2010           | 124                                                            |
| 39               | Chad    | Beans                      | 2010           | 47                                                             |
| 39               | Chad    | Beer                       | 2010           | 4                                                              |
| 39               | Chad    | Beverages, Fermented       | 2010           | 2                                                              |
| 39               | Chad    | Bovine Meat                | 2010           | 35                                                             |
| 39               | Chad    | Butter, Ghee               | 2010           | 1                                                              |
| 39               | Chad    | Cassava and products       | 2010           | 53                                                             |
| 39               | Chad    | Cereals - Excluding Beer   | 2010           | 1,235                                                          |
| 39               | Chad    | Cereals, Other             | 2010           | 256                                                            |
| 39               | Chad    | Cottonseed Oil             | 2010           | 6                                                              |
| 39               | Chad    | Dates                      | 2010           | 7                                                              |
| 39               | Chad    | Eggs                       | 2010           | 1                                                              |
| 39               | Chad    | Fats, Animals, Raw         | 2010           | 8                                                              |
| 39               | Chad    | Fish, Seafood              | 2010           | 11                                                             |
| 39               | Chad    | Freshwater Fish            | 2010           | 11                                                             |
| 39               | Chad    | Fruits - Excluding Wine    | 2010           | 16                                                             |
| 39               | Chad    | Fruits, Other              | 2010           | 9                                                              |
| 39               | Chad    | Grand Total                | 2010           | 2,043                                                          |
| 39               | Chad    | Groundnut Oil              | 2010           | 71                                                             |
| 39               | Chad    | Groundnuts (Shelled Eq)    | 2010           | 198                                                            |
| 39               | Chad    | Honey                      | 2010           | 1                                                              |
| 39               | Chad    | Maize and products         | 2010           | 126                                                            |
| 39               | Chad    | Meat                       | 2010           | 55                                                             |
| 39               | Chad    | Meat, Other                | 2010           | 2                                                              |
| 39               | Chad    | Milk - Excluding Butter    | 2010           | 41                                                             |
| 39               | Chad    | Millet and products        | 2010           | 289                                                            |
| 39               | Chad    | Miscellaneous              | 2010           | 1                                                              |
| 39               | Chad    | Mutton & Goat Meat         | 2010           | 17                                                             |
| 39               | Chad    | Offals                     | 2010           | 7                                                              |
| 39               | Chad    | Oilcrops                   | 2010           | 254                                                            |
| 39               | Chad    | Oilcrops Oil, Other        | 2010           | 2                                                              |
| 39               | Chad    | Oilcrops, Other            | 2010           | 14                                                             |
| 39               | Chad    | Onions                     | 2010           | 1                                                              |
| 39               | Chad    | Potatoes and products      | 2010           | 7                                                              |
| 39               | Chad    | Poultry Meat               | 2010           | 2                                                              |
| 39               | Chad    | Pulses                     | 2010           | 75                                                             |
| 39               | Chad    | Pulses, Other and products | 2010           | 28                                                             |

Dietary calcium and zinc deficiency risks are decreasing but remain prevalent

| FAO Country code | Country | Food item                       | Reference year | Net energy supply (kcal capita <sup>-1</sup> d <sup>-1</sup> ) |
|------------------|---------|---------------------------------|----------------|----------------------------------------------------------------|
| 39               | Chad    | Rice (Milled Equivalent)        | 2010           | 92                                                             |
| 39               | Chad    | Roots, Other                    | 2010           | 4                                                              |
| 39               | Chad    | Sesame seed                     | 2010           | 42                                                             |
| 39               | Chad    | Sorghum and products            | 2010           | 393                                                            |
| 39               | Chad    | Starchy Roots                   | 2010           | 158                                                            |
| 39               | Chad    | Sugar & Sweeteners              | 2010           | 90                                                             |
| 39               | Chad    | Sugar (Raw Equivalent)          | 2010           | 89                                                             |
| 39               | Chad    | Sweet potatoes                  | 2010           | 16                                                             |
| 39               | Chad    | Vegetable Oils                  | 2010           | 79                                                             |
| 39               | Chad    | Vegetables                      | 2010           | 5                                                              |
| 39               | Chad    | Vegetables, Other               | 2010           | 4                                                              |
| 39               | Chad    | Vegetal Products                | 2010           | 1,919                                                          |
| 39               | Chad    | Wheat and products              | 2010           | 79                                                             |
| 39               | Chad    | Yams                            | 2010           | 78                                                             |
| 39               | Chad    | Alcoholic Beverages             | 2011           | 6                                                              |
| 39               | Chad    | Animal fats                     | 2011           | 9                                                              |
| 39               | Chad    | Animal Products                 | 2011           | 124                                                            |
| 39               | Chad    | Beans                           | 2011           | 44                                                             |
| 39               | Chad    | Beer                            | 2011           | 4                                                              |
| 39               | Chad    | Beverages, Fermented            | 2011           | 1                                                              |
| 39               | Chad    | Bovine Meat                     | 2011           | 35                                                             |
| 39               | Chad    | Butter, Ghee                    | 2011           | 1                                                              |
| 39               | Chad    | Cassava and products            | 2011           | 52                                                             |
| 39               | Chad    | Cereals - Excluding Beer        | 2011           | 1,248                                                          |
| 39               | Chad    | Cereals, Other                  | 2011           | 248                                                            |
| 39               | Chad    | Cottonseed Oil                  | 2011           | 7                                                              |
| 39               | Chad    | Dates                           | 2011           | 7                                                              |
| 39               | Chad    | Eggs                            | 2011           | 1                                                              |
| 39               | Chad    | Fats, Animals, Raw              | 2011           | 8                                                              |
| 39               | Chad    | Fish, Seafood                   | 2011           | 13                                                             |
| 39               | Chad    | Freshwater Fish                 | 2011           | 12                                                             |
| 39               | Chad    | Fruits - Excluding Wine         | 2011           | 16                                                             |
| 39               | Chad    | Fruits, Other                   | 2011           | 9                                                              |
| 39               | Chad    | Grand Total                     | 2011           | 2,061                                                          |
| 39               | Chad    | Groundnut Oil                   | 2011           | 72                                                             |
| 39               | Chad    | Groundnuts (Shelled Eq)         | 2011           | 202                                                            |
| 39               | Chad    | Honey                           | 2011           | 1                                                              |
| 39               | Chad    | Maize and products              | 2011           | 133                                                            |
| 39               | Chad    | Meat                            | 2011           | 55                                                             |
| 39               | Chad    | Meat, Other                     | 2011           | 2                                                              |
| 39               | Chad    | Milk - Excluding Butter         | 2011           | 40                                                             |
| 39               | Chad    | Millet and products             | 2011           | 296                                                            |
| 39               | Chad    | Miscellaneous                   | 2011           | 1                                                              |
| 39               | Chad    | Mutton & Goat Meat              | 2011           | 16                                                             |
| 39               | Chad    | Offals                          | 2011           | 6                                                              |
| 39               | Chad    | Oilcrops                        | 2011           | 257                                                            |
| 39               | Chad    | Oilcrops Oil, Other             | 2011           | 3                                                              |
| 39               | Chad    | Oilcrops, Other                 | 2011           | 14                                                             |
| 39               | Chad    | Onions                          | 2011           | 1                                                              |
| 39               | Chad    | Potatoes and products           | 2011           | 6                                                              |
| 39               | Chad    | Poultry Meat                    | 2011           | 1                                                              |
| 39               | Chad    | Pulses                          | 2011           | 73                                                             |
| 39               | Chad    | Pulses, Other and products      | 2011           | 29                                                             |
| 39               | Chad    | Rice (Milled Equivalent)        | 2011           | 90                                                             |
| 39               | Chad    | Roots, Other                    | 2011           | 4                                                              |
| 39               | Chad    | Sesame seed                     | 2011           | 41                                                             |
| 39               | Chad    | Sorghum and products            | 2011           | 411                                                            |
| 39               | Chad    | Starchy Roots                   | 2011           | 150                                                            |
| 39               | Chad    | Sugar & Sweeteners              | 2011           | 99                                                             |
| 39               | Chad    | Sugar (Raw Equivalent)          | 2011           | 97                                                             |
| 39               | Chad    | Sweet potatoes                  | 2011           | 15                                                             |
| 39               | Chad    | Sweeteners, Other               | 2011           | 1                                                              |
| 39               | Chad    | Vegetable Oils                  | 2011           | 82                                                             |
| 39               | Chad    | Vegetables                      | 2011           | 5                                                              |
| 39               | Chad    | Vegetables, Other               | 2011           | 4                                                              |
| 39               | Chad    | Vegetal Products                | 2011           | 1,936                                                          |
| 39               | Chad    | Wheat and products              | 2011           | 70                                                             |
| 39               | Chad    | Yams                            | 2011           | 73                                                             |
| 40               | Chile   | Alcoholic Beverages             | 1992           | 65                                                             |
| 40               | Chile   | Animal fats                     | 1992           | 38                                                             |
| 40               | Chile   | Animal Products                 | 1992           | 503                                                            |
| 40               | Chile   | Apples and products             | 1992           | 13                                                             |
| 40               | Chile   | Bananas                         | 1992           | 10                                                             |
| 40               | Chile   | Barley and products             | 1992           | 12                                                             |
| 40               | Chile   | Beans                           | 1992           | 13                                                             |
| 40               | Chile   | Beer                            | 1992           | 22                                                             |
| 40               | Chile   | Beverages, Alcoholic            | 1992           | 11                                                             |
| 40               | Chile   | Bovine Meat                     | 1992           | 104                                                            |
| 40               | Chile   | Butter, Ghee                    | 1992           | 16                                                             |
| 40               | Chile   | Cereals - Excluding Beer        | 1992           | 1,169                                                          |
| 40               | Chile   | Cocoa Beans and products        | 1992           | 4                                                              |
| 40               | Chile   | Coconuts - Incl Copra           | 1992           | 1                                                              |
| 40               | Chile   | Coffee and products             | 1992           | 1                                                              |
| 40               | Chile   | Crustaceans                     | 1992           | 1                                                              |
| 40               | Chile   | Demersal Fish                   | 1992           | 2                                                              |
| 40               | Chile   | Eggs                            | 1992           | 22                                                             |
| 40               | Chile   | Fats, Animals, Raw              | 1992           | 21                                                             |
| 40               | Chile   | Fish, Seafood                   | 1992           | 31                                                             |
| 40               | Chile   | Freshwater Fish                 | 1992           | 1                                                              |
| 40               | Chile   | Fruits - Excluding Wine         | 1992           | 59                                                             |
| 40               | Chile   | Fruits, Other                   | 1992           | 20                                                             |
| 40               | Chile   | Grand Total                     | 1992           | 2,708                                                          |
| 40               | Chile   | Grapes and products (excl wine) | 1992           | 8                                                              |
| 40               | Chile   | Groundnuts (Shelled Eq)         | 1992           | 4                                                              |
| 40               | Chile   | Honey                           | 1992           | 2                                                              |
| 40               | Chile   | Lemons, Limes and products      | 1992           | 2                                                              |
| 40               | Chile   | Maize and products              | 1992           | 53                                                             |

Dietary calcium and zinc deficiency risks are decreasing but remain prevalent

| FAO Country code | Country | Food item                       | Reference year | Net energy supply (kcal capita <sup>-1</sup> d <sup>-1</sup> ) |
|------------------|---------|---------------------------------|----------------|----------------------------------------------------------------|
| 40               | Chile   | Meat                            | 1992           | 247                                                            |
| 40               | Chile   | Meat, Other                     | 1992           | 1                                                              |
| 40               | Chile   | Milk - Excluding Butter         | 1992           | 155                                                            |
| 40               | Chile   | Molluscs, Other                 | 1992           | 1                                                              |
| 40               | Chile   | Mutton & Goat Meat              | 1992           | 6                                                              |
| 40               | Chile   | Oats                            | 1992           | 4                                                              |
| 40               | Chile   | Offals                          | 1992           | 9                                                              |
| 40               | Chile   | Oilcrops                        | 1992           | 6                                                              |
| 40               | Chile   | Oilcrops Oil, Other             | 1992           | 2                                                              |
| 40               | Chile   | Olive Oil                       | 1992           | 2                                                              |
| 40               | Chile   | Onions                          | 1992           | 15                                                             |
| 40               | Chile   | Oranges, Mandarines             | 1992           | 5                                                              |
| 40               | Chile   | Peas                            | 1992           | 6                                                              |
| 40               | Chile   | Pelagic Fish                    | 1992           | 27                                                             |
| 40               | Chile   | Pigmeat                         | 1992           | 75                                                             |
| 40               | Chile   | Pineapples and products         | 1992           | 1                                                              |
| 40               | Chile   | Potatoes and products           | 1992           | 124                                                            |
| 40               | Chile   | Poultry Meat                    | 1992           | 63                                                             |
| 40               | Chile   | Pulses                          | 1992           | 34                                                             |
| 40               | Chile   | Pulses, Other and products      | 1992           | 15                                                             |
| 40               | Chile   | Rape and Mustard Oil            | 1992           | 44                                                             |
| 40               | Chile   | Rice (Milled Equivalent)        | 1992           | 74                                                             |
| 40               | Chile   | Rye and products                | 1992           | 4                                                              |
| 40               | Chile   | Soyabean Oil                    | 1992           | 131                                                            |
| 40               | Chile   | Starchy Roots                   | 1992           | 126                                                            |
| 40               | Chile   | Stimulants                      | 1992           | 7                                                              |
| 40               | Chile   | Sugar & Sweeteners              | 1992           | 422                                                            |
| 40               | Chile   | Sugar (Raw Equivalent)          | 1992           | 419                                                            |
| 40               | Chile   | Sunflowerseed Oil               | 1992           | 60                                                             |
| 40               | Chile   | Sweet potatoes                  | 1992           | 1                                                              |
| 40               | Chile   | Sweeteners, Other               | 1992           | 1                                                              |
| 40               | Chile   | Tea (including mate)            | 1992           | 1                                                              |
| 40               | Chile   | Tomatoes and products           | 1992           | 6                                                              |
| 40               | Chile   | Treenuts                        | 1992           | 2                                                              |
| 40               | Chile   | Vegetable Oils                  | 1992           | 239                                                            |
| 40               | Chile   | Vegetables                      | 1992           | 77                                                             |
| 40               | Chile   | Vegetables, Other               | 1992           | 56                                                             |
| 40               | Chile   | Vegetal Products                | 1992           | 2,205                                                          |
| 40               | Chile   | Wheat and products              | 1992           | 1,022                                                          |
| 40               | Chile   | Wine                            | 1992           | 32                                                             |
| 40               | Chile   | Alcoholic Beverages             | 1993           | 65                                                             |
| 40               | Chile   | Animal fats                     | 1993           | 36                                                             |
| 40               | Chile   | Animal Products                 | 1993           | 542                                                            |
| 40               | Chile   | Apples and products             | 1993           | 17                                                             |
| 40               | Chile   | Bananas                         | 1993           | 15                                                             |
| 40               | Chile   | Barley and products             | 1993           | 9                                                              |
| 40               | Chile   | Beans                           | 1993           | 11                                                             |
| 40               | Chile   | Beer                            | 1993           | 24                                                             |
| 40               | Chile   | Beverages, Alcoholic            | 1993           | 11                                                             |
| 40               | Chile   | Bovine Meat                     | 1993           | 115                                                            |
| 40               | Chile   | Butter, Ghee                    | 1993           | 15                                                             |
| 40               | Chile   | Cereals - Excluding Beer        | 1993           | 1,132                                                          |
| 40               | Chile   | Cocoa Beans and products        | 1993           | 4                                                              |
| 40               | Chile   | Coconuts - Incl Copra           | 1993           | 1                                                              |
| 40               | Chile   | Coffee and products             | 1993           | 1                                                              |
| 40               | Chile   | Demersal Fish                   | 1993           | 4                                                              |
| 40               | Chile   | Eggs                            | 1993           | 22                                                             |
| 40               | Chile   | Fats, Animals, Raw              | 1993           | 21                                                             |
| 40               | Chile   | Fish, Seafood                   | 1993           | 35                                                             |
| 40               | Chile   | Freshwater Fish                 | 1993           | 1                                                              |
| 40               | Chile   | Fruits - Excluding Wine         | 1993           | 75                                                             |
| 40               | Chile   | Fruits, Other                   | 1993           | 25                                                             |
| 40               | Chile   | Grand Total                     | 1993           | 2,712                                                          |
| 40               | Chile   | Grapes and products (excl wine) | 1993           | 9                                                              |
| 40               | Chile   | Groundnuts (Shelled Eq)         | 1993           | 5                                                              |
| 40               | Chile   | Honey                           | 1993           | 2                                                              |
| 40               | Chile   | Lemons, Limes and products      | 1993           | 2                                                              |
| 40               | Chile   | Maize and products              | 1993           | 65                                                             |
| 40               | Chile   | Meat                            | 1993           | 275                                                            |
| 40               | Chile   | Meat, Other                     | 1993           | 1                                                              |
| 40               | Chile   | Milk - Excluding Butter         | 1993           | 165                                                            |
| 40               | Chile   | Molluscs, Other                 | 1993           | 1                                                              |
| 40               | Chile   | Mutton & Goat Meat              | 1993           | 5                                                              |
| 40               | Chile   | Oats                            | 1993           | 2                                                              |
| 40               | Chile   | Offals                          | 1993           | 9                                                              |
| 40               | Chile   | Oilcrops                        | 1993           | 6                                                              |
| 40               | Chile   | Oilcrops Oil, Other             | 1993           | 2                                                              |
| 40               | Chile   | Olive Oil                       | 1993           | 3                                                              |
| 40               | Chile   | Onions                          | 1993           | 16                                                             |
| 40               | Chile   | Oranges, Mandarines             | 1993           | 5                                                              |
| 40               | Chile   | Peas                            | 1993           | 4                                                              |
| 40               | Chile   | Pelagic Fish                    | 1993           | 28                                                             |
| 40               | Chile   | Pigmeat                         | 1993           | 80                                                             |
| 40               | Chile   | Pineapples and products         | 1993           | 1                                                              |
| 40               | Chile   | Potatoes and products           | 1993           | 110                                                            |
| 40               | Chile   | Poultry Meat                    | 1993           | 74                                                             |
| 40               | Chile   | Pulses                          | 1993           | 31                                                             |
| 40               | Chile   | Pulses, Other and products      | 1993           | 15                                                             |
| 40               | Chile   | Rape and Mustard Oil            | 1993           | 18                                                             |
| 40               | Chile   | Rice (Milled Equivalent)        | 1993           | 67                                                             |
| 40               | Chile   | Rye and products                | 1993           | 1                                                              |
| 40               | Chile   | Soyabean Oil                    | 1993           | 139                                                            |
| 40               | Chile   | Starchy Roots                   | 1993           | 111                                                            |
| 40               | Chile   | Stimulants                      | 1993           | 7                                                              |
| 40               | Chile   | Sugar & Sweeteners              | 1993           | 420                                                            |
| 40               | Chile   | Sugar (Raw Equivalent)          | 1993           | 418                                                            |
| 40               | Chile   | Sunflowerseed Oil               | 1993           | 72                                                             |



Dietary calcium and zinc deficiency risks are decreasing but remain prevalent

| FAO Country code | Country | Food item                       | Reference year | Net energy supply (kcal capita <sup>-1</sup> d <sup>-1</sup> ) |
|------------------|---------|---------------------------------|----------------|----------------------------------------------------------------|
| 40               | Chile   | Sweet potatoes                  | 1993           | 1                                                              |
| 40               | Chile   | Sweeteners, Other               | 1993           | 1                                                              |
| 40               | Chile   | Tea (including mate)            | 1993           | 1                                                              |
| 40               | Chile   | Tomatoes and products           | 1993           | 14                                                             |
| 40               | Chile   | Treenuts                        | 1993           | 2                                                              |
| 40               | Chile   | Vegetable Oils                  | 1993           | 234                                                            |
| 40               | Chile   | Vegetables                      | 1993           | 88                                                             |
| 40               | Chile   | Vegetables, Other               | 1993           | 58                                                             |
| 40               | Chile   | Vegetal Products                | 1993           | 2,171                                                          |
| 40               | Chile   | Wheat and products              | 1993           | 987                                                            |
| 40               | Chile   | Wine                            | 1993           | 30                                                             |
| 40               | Chile   | Alcoholic Beverages             | 1994           | 65                                                             |
| 40               | Chile   | Animal fats                     | 1994           | 33                                                             |
| 40               | Chile   | Animal Products                 | 1994           | 555                                                            |
| 40               | Chile   | Apples and products             | 1994           | 16                                                             |
| 40               | Chile   | Bananas                         | 1994           | 17                                                             |
| 40               | Chile   | Barley and products             | 1994           | 8                                                              |
| 40               | Chile   | Beans                           | 1994           | 8                                                              |
| 40               | Chile   | Beer                            | 1994           | 21                                                             |
| 40               | Chile   | Beverages, Alcoholic            | 1994           | 11                                                             |
| 40               | Chile   | Bovine Meat                     | 1994           | 122                                                            |
| 40               | Chile   | Butter, Ghee                    | 1994           | 13                                                             |
| 40               | Chile   | Cereals - Excluding Beer        | 1994           | 1,140                                                          |
| 40               | Chile   | Cocoa Beans and products        | 1994           | 5                                                              |
| 40               | Chile   | Coconuts - Incl Copra           | 1994           | 1                                                              |
| 40               | Chile   | Coffee and products             | 1994           | 1                                                              |
| 40               | Chile   | Demersal Fish                   | 1994           | 2                                                              |
| 40               | Chile   | Eggs                            | 1994           | 19                                                             |
| 40               | Chile   | Fats, Animals, Raw              | 1994           | 20                                                             |
| 40               | Chile   | Fish, Seafood                   | 1994           | 31                                                             |
| 40               | Chile   | Freshwater Fish                 | 1994           | 2                                                              |
| 40               | Chile   | Fruits - Excluding Wine         | 1994           | 75                                                             |
| 40               | Chile   | Fruits, Other                   | 1994           | 27                                                             |
| 40               | Chile   | Grand Total                     | 1994           | 2,745                                                          |
| 40               | Chile   | Grapes and products (excl wine) | 1994           | 6                                                              |
| 40               | Chile   | Groundnuts (Shelled Eq)         | 1994           | 4                                                              |
| 40               | Chile   | Honey                           | 1994           | 1                                                              |
| 40               | Chile   | Lemons, Limes and products      | 1994           | 2                                                              |
| 40               | Chile   | Maize and products              | 1994           | 75                                                             |
| 40               | Chile   | Meat                            | 1994           | 299                                                            |
| 40               | Chile   | Meat, Other                     | 1994           | 1                                                              |
| 40               | Chile   | Milk - Excluding Butter         | 1994           | 164                                                            |
| 40               | Chile   | Mutton & Goat Meat              | 1994           | 4                                                              |
| 40               | Chile   | Oats                            | 1994           | 3                                                              |
| 40               | Chile   | Offals                          | 1994           | 10                                                             |
| 40               | Chile   | Oilcrops                        | 1994           | 6                                                              |
| 40               | Chile   | Oilcrops Oil, Other             | 1994           | 2                                                              |
| 40               | Chile   | Olive Oil                       | 1994           | 2                                                              |
| 40               | Chile   | Onions                          | 1994           | 18                                                             |
| 40               | Chile   | Oranges, Mandarines             | 1994           | 5                                                              |
| 40               | Chile   | Peas                            | 1994           | 4                                                              |
| 40               | Chile   | Pelagic Fish                    | 1994           | 26                                                             |
| 40               | Chile   | Pigmeat                         | 1994           | 86                                                             |
| 40               | Chile   | Pineapples and products         | 1994           | 1                                                              |
| 40               | Chile   | Potatoes and products           | 1994           | 106                                                            |
| 40               | Chile   | Poultry Meat                    | 1994           | 86                                                             |
| 40               | Chile   | Pulses                          | 1994           | 28                                                             |
| 40               | Chile   | Pulses, Other and products      | 1994           | 15                                                             |
| 40               | Chile   | Rape and Mustard Oil            | 1994           | 16                                                             |
| 40               | Chile   | Rice (Milled Equivalent)        | 1994           | 75                                                             |
| 40               | Chile   | Soyabean Oil                    | 1994           | 141                                                            |
| 40               | Chile   | Spices                          | 1994           | 1                                                              |
| 40               | Chile   | Starchy Roots                   | 1994           | 107                                                            |
| 40               | Chile   | Stimulants                      | 1994           | 7                                                              |
| 40               | Chile   | Sugar & Sweeteners              | 1994           | 425                                                            |
| 40               | Chile   | Sugar (Raw Equivalent)          | 1994           | 423                                                            |
| 40               | Chile   | Sunflowerseed Oil               | 1994           | 83                                                             |
| 40               | Chile   | Sweet potatoes                  | 1994           | 1                                                              |
| 40               | Chile   | Sweeteners, Other               | 1994           | 1                                                              |
| 40               | Chile   | Tea (including mate)            | 1994           | 2                                                              |
| 40               | Chile   | Tomatoes and products           | 1994           | 17                                                             |
| 40               | Chile   | Treenuts                        | 1994           | 1                                                              |
| 40               | Chile   | Vegetable Oils                  | 1994           | 243                                                            |
| 40               | Chile   | Vegetables                      | 1994           | 92                                                             |
| 40               | Chile   | Vegetables, Other               | 1994           | 57                                                             |
| 40               | Chile   | Vegetal Products                | 1994           | 2,190                                                          |
| 40               | Chile   | Wheat and products              | 1994           | 979                                                            |
| 40               | Chile   | Wine                            | 1994           | 33                                                             |
| 40               | Chile   | Alcoholic Beverages             | 1995           | 62                                                             |
| 40               | Chile   | Animal fats                     | 1995           | 34                                                             |
| 40               | Chile   | Animal Products                 | 1995           | 591                                                            |
| 40               | Chile   | Apples and products             | 1995           | 9                                                              |
| 40               | Chile   | Bananas                         | 1995           | 16                                                             |
| 40               | Chile   | Barley and products             | 1995           | 7                                                              |
| 40               | Chile   | Beans                           | 1995           | 10                                                             |
| 40               | Chile   | Beer                            | 1995           | 23                                                             |
| 40               | Chile   | Beverages, Alcoholic            | 1995           | 11                                                             |
| 40               | Chile   | Bovine Meat                     | 1995           | 131                                                            |
| 40               | Chile   | Butter, Ghee                    | 1995           | 12                                                             |
| 40               | Chile   | Cereals - Excluding Beer        | 1995           | 1,107                                                          |
| 40               | Chile   | Cocoa Beans and products        | 1995           | 5                                                              |
| 40               | Chile   | Coconuts - Incl Copra           | 1995           | 2                                                              |
| 40               | Chile   | Coffee and products             | 1995           | 1                                                              |
| 40               | Chile   | Crustaceans                     | 1995           | 1                                                              |
| 40               | Chile   | Demersal Fish                   | 1995           | 4                                                              |
| 40               | Chile   | Eggs                            | 1995           | 18                                                             |
| 40               | Chile   | Fats, Animals, Raw              | 1995           | 22                                                             |

Dietary calcium and zinc deficiency risks are decreasing but remain prevalent

| FAO Country code | Country | Food item                       | Reference year | Net energy supply (kcal capita <sup>-1</sup> d <sup>-1</sup> ) |
|------------------|---------|---------------------------------|----------------|----------------------------------------------------------------|
| 40               | Chile   | Fish, Seafood                   | 1995           | 35                                                             |
| 40               | Chile   | Freshwater Fish                 | 1995           | 3                                                              |
| 40               | Chile   | Fruits - Excluding Wine         | 1995           | 74                                                             |
| 40               | Chile   | Fruits, Other                   | 1995           | 27                                                             |
| 40               | Chile   | Grand Total                     | 1995           | 2,756                                                          |
| 40               | Chile   | Grapes and products (excl wine) | 1995           | 13                                                             |
| 40               | Chile   | Groundnuts (Shelled Eq)         | 1995           | 5                                                              |
| 40               | Chile   | Honey                           | 1995           | 1                                                              |
| 40               | Chile   | Lemons, Limes and products      | 1995           | 3                                                              |
| 40               | Chile   | Maize and products              | 1995           | 78                                                             |
| 40               | Chile   | Meat                            | 1995           | 317                                                            |
| 40               | Chile   | Meat, Other                     | 1995           | 1                                                              |
| 40               | Chile   | Milk - Excluding Butter         | 1995           | 176                                                            |
| 40               | Chile   | Mutton & Goat Meat              | 1995           | 4                                                              |
| 40               | Chile   | Oats                            | 1995           | 2                                                              |
| 40               | Chile   | Offals                          | 1995           | 10                                                             |
| 40               | Chile   | Oilcrops                        | 1995           | 7                                                              |
| 40               | Chile   | Oilcrops Oil, Other             | 1995           | 1                                                              |
| 40               | Chile   | Olive Oil                       | 1995           | 3                                                              |
| 40               | Chile   | Onions                          | 1995           | 18                                                             |
| 40               | Chile   | Oranges, Mandarines             | 1995           | 5                                                              |
| 40               | Chile   | Peas                            | 1995           | 5                                                              |
| 40               | Chile   | Pelagic Fish                    | 1995           | 27                                                             |
| 40               | Chile   | Pigmeat                         | 1995           | 92                                                             |
| 40               | Chile   | Pineapples and products         | 1995           | 1                                                              |
| 40               | Chile   | Potatoes and products           | 1995           | 100                                                            |
| 40               | Chile   | Poultry Meat                    | 1995           | 89                                                             |
| 40               | Chile   | Pulses                          | 1995           | 32                                                             |
| 40               | Chile   | Pulses, Other and products      | 1995           | 17                                                             |
| 40               | Chile   | Rape and Mustard Oil            | 1995           | 18                                                             |
| 40               | Chile   | Rice (Milled Equivalent)        | 1995           | 62                                                             |
| 40               | Chile   | Rye and products                | 1995           | 1                                                              |
| 40               | Chile   | Soyabean Oil                    | 1995           | 135                                                            |
| 40               | Chile   | Spices                          | 1995           | 1                                                              |
| 40               | Chile   | Starchy Roots                   | 1995           | 101                                                            |
| 40               | Chile   | Stimulants                      | 1995           | 7                                                              |
| 40               | Chile   | Sugar & Sweeteners              | 1995           | 434                                                            |
| 40               | Chile   | Sugar (Raw Equivalent)          | 1995           | 429                                                            |
| 40               | Chile   | Sunflowerseed Oil               | 1995           | 90                                                             |
| 40               | Chile   | Sweet potatoes                  | 1995           | 1                                                              |
| 40               | Chile   | Sweeteners, Other               | 1995           | 3                                                              |
| 40               | Chile   | Tea (including mate)            | 1995           | 2                                                              |
| 40               | Chile   | Tomatoes and products           | 1995           | 15                                                             |
| 40               | Chile   | Treenuts                        | 1995           | 2                                                              |
| 40               | Chile   | Vegetable Oils                  | 1995           | 248                                                            |
| 40               | Chile   | Vegetables                      | 1995           | 92                                                             |
| 40               | Chile   | Vegetables, Other               | 1995           | 58                                                             |
| 40               | Chile   | Vegetal Products                | 1995           | 2,166                                                          |
| 40               | Chile   | Wheat and products              | 1995           | 958                                                            |
| 40               | Chile   | Wine                            | 1995           | 28                                                             |
| 40               | Chile   | Alcoholic Beverages             | 1996           | 63                                                             |
| 40               | Chile   | Animal fats                     | 1996           | 34                                                             |
| 40               | Chile   | Animal Products                 | 1996           | 603                                                            |
| 40               | Chile   | Apples and products             | 1996           | 12                                                             |
| 40               | Chile   | Bananas                         | 1996           | 16                                                             |
| 40               | Chile   | Barley and products             | 1996           | 10                                                             |
| 40               | Chile   | Beans                           | 1996           | 16                                                             |
| 40               | Chile   | Beer                            | 1996           | 22                                                             |
| 40               | Chile   | Beverages, Alcoholic            | 1996           | 11                                                             |
| 40               | Chile   | Bovine Meat                     | 1996           | 133                                                            |
| 40               | Chile   | Butter, Ghee                    | 1996           | 12                                                             |
| 40               | Chile   | Cereals - Excluding Beer        | 1996           | 1,094                                                          |
| 40               | Chile   | Cocoa Beans and products        | 1996           | 5                                                              |
| 40               | Chile   | Coconuts - Incl Copra           | 1996           | 1                                                              |
| 40               | Chile   | Coffee and products             | 1996           | 1                                                              |
| 40               | Chile   | Crustaceans                     | 1996           | 1                                                              |
| 40               | Chile   | Demersal Fish                   | 1996           | 6                                                              |
| 40               | Chile   | Eggs                            | 1996           | 19                                                             |
| 40               | Chile   | Fats, Animals, Raw              | 1996           | 22                                                             |
| 40               | Chile   | Fish, Seafood                   | 1996           | 29                                                             |
| 40               | Chile   | Freshwater Fish                 | 1996           | 3                                                              |
| 40               | Chile   | Fruits - Excluding Wine         | 1996           | 83                                                             |
| 40               | Chile   | Fruits, Other                   | 1996           | 31                                                             |
| 40               | Chile   | Grand Total                     | 1996           | 2,779                                                          |
| 40               | Chile   | Grapes and products (excl wine) | 1996           | 14                                                             |
| 40               | Chile   | Groundnuts (Shelled Eq)         | 1996           | 5                                                              |
| 40               | Chile   | Lemons, Limes and products      | 1996           | 2                                                              |
| 40               | Chile   | Maize and products              | 1996           | 65                                                             |
| 40               | Chile   | Maize Germ Oil                  | 1996           | 1                                                              |
| 40               | Chile   | Meat                            | 1996           | 328                                                            |
| 40               | Chile   | Meat, Other                     | 1996           | 1                                                              |
| 40               | Chile   | Milk - Excluding Butter         | 1996           | 181                                                            |
| 40               | Chile   | Mutton & Goat Meat              | 1996           | 4                                                              |
| 40               | Chile   | Oats                            | 1996           | 2                                                              |
| 40               | Chile   | Offals                          | 1996           | 10                                                             |
| 40               | Chile   | Oilcrops                        | 1996           | 6                                                              |
| 40               | Chile   | Oilcrops Oil, Other             | 1996           | 1                                                              |
| 40               | Chile   | Olive Oil                       | 1996           | 3                                                              |
| 40               | Chile   | Onions                          | 1996           | 24                                                             |
| 40               | Chile   | Oranges, Mandarines             | 1996           | 6                                                              |
| 40               | Chile   | Peas                            | 1996           | 5                                                              |
| 40               | Chile   | Pelagic Fish                    | 1996           | 20                                                             |
| 40               | Chile   | Pigmeat                         | 1996           | 97                                                             |
| 40               | Chile   | Pineapples and products         | 1996           | 1                                                              |
| 40               | Chile   | Potatoes and products           | 1996           | 91                                                             |
| 40               | Chile   | Poultry Meat                    | 1996           | 94                                                             |
| 40               | Chile   | Pulses                          | 1996           | 39                                                             |

Dietary calcium and zinc deficiency risks are decreasing but remain prevalent

| FAO Country code | Country | Food item                       | Reference year | Net energy supply (kcal capita <sup>-1</sup> d <sup>-1</sup> ) |
|------------------|---------|---------------------------------|----------------|----------------------------------------------------------------|
| 40               | Chile   | Pulses, Other and products      | 1996           | 18                                                             |
| 40               | Chile   | Rape and Mustard Oil            | 1996           | 20                                                             |
| 40               | Chile   | Rice (Milled Equivalent)        | 1996           | 72                                                             |
| 40               | Chile   | Rye and products                | 1996           | 1                                                              |
| 40               | Chile   | Soyabean Oil                    | 1996           | 136                                                            |
| 40               | Chile   | Spices                          | 1996           | 1                                                              |
| 40               | Chile   | Spices, Other                   | 1996           | 1                                                              |
| 40               | Chile   | Starchy Roots                   | 1996           | 92                                                             |
| 40               | Chile   | Stimulants                      | 1996           | 7                                                              |
| 40               | Chile   | Sugar & Sweeteners              | 1996           | 442                                                            |
| 40               | Chile   | Sugar (Raw Equivalent)          | 1996           | 436                                                            |
| 40               | Chile   | Sunflowerseed Oil               | 1996           | 89                                                             |
| 40               | Chile   | Sweet potatoes                  | 1996           | 1                                                              |
| 40               | Chile   | Sweeteners, Other               | 1996           | 6                                                              |
| 40               | Chile   | Tea (including mate)            | 1996           | 1                                                              |
| 40               | Chile   | Tomatoes and products           | 1996           | 19                                                             |
| 40               | Chile   | Treenuts                        | 1996           | 4                                                              |
| 40               | Chile   | Vegetable Oils                  | 1996           | 249                                                            |
| 40               | Chile   | Vegetables                      | 1996           | 96                                                             |
| 40               | Chile   | Vegetables, Other               | 1996           | 53                                                             |
| 40               | Chile   | Vegetal Products                | 1996           | 2,176                                                          |
| 40               | Chile   | Wheat and products              | 1996           | 945                                                            |
| 40               | Chile   | Wine                            | 1996           | 29                                                             |
| 40               | Chile   | Alcoholic Beverages             | 1997           | 60                                                             |
| 40               | Chile   | Animal fats                     | 1997           | 43                                                             |
| 40               | Chile   | Animal Products                 | 1997           | 612                                                            |
| 40               | Chile   | Apples and products             | 1997           | 4                                                              |
| 40               | Chile   | Bananas                         | 1997           | 16                                                             |
| 40               | Chile   | Barley and products             | 1997           | 10                                                             |
| 40               | Chile   | Beans                           | 1997           | 16                                                             |
| 40               | Chile   | Beer                            | 1997           | 23                                                             |
| 40               | Chile   | Beverages, Alcoholic            | 1997           | 13                                                             |
| 40               | Chile   | Bovine Meat                     | 1997           | 138                                                            |
| 40               | Chile   | Butter, Ghee                    | 1997           | 14                                                             |
| 40               | Chile   | Cereals - Excluding Beer        | 1997           | 1,132                                                          |
| 40               | Chile   | Cocoa Beans and products        | 1997           | 4                                                              |
| 40               | Chile   | Coconuts - Incl Copra           | 1997           | 1                                                              |
| 40               | Chile   | Coffee and products             | 1997           | 1                                                              |
| 40               | Chile   | Crustaceans                     | 1997           | 1                                                              |
| 40               | Chile   | Demersal Fish                   | 1997           | 4                                                              |
| 40               | Chile   | Eggs                            | 1997           | 20                                                             |
| 40               | Chile   | Fats, Animals, Raw              | 1997           | 29                                                             |
| 40               | Chile   | Fish, Seafood                   | 1997           | 29                                                             |
| 40               | Chile   | Freshwater Fish                 | 1997           | 1                                                              |
| 40               | Chile   | Fruits - Excluding Wine         | 1997           | 68                                                             |
| 40               | Chile   | Fruits, Other                   | 1997           | 25                                                             |
| 40               | Chile   | Grand Total                     | 1997           | 2,789                                                          |
| 40               | Chile   | Grapes and products (excl wine) | 1997           | 14                                                             |
| 40               | Chile   | Groundnuts (Shelled Eq)         | 1997           | 6                                                              |
| 40               | Chile   | Honey                           | 1997           | 1                                                              |
| 40               | Chile   | Lemons, Limes and products      | 1997           | 3                                                              |
| 40               | Chile   | Maize and products              | 1997           | 147                                                            |
| 40               | Chile   | Maize Germ Oil                  | 1997           | 1                                                              |
| 40               | Chile   | Meat                            | 1997           | 339                                                            |
| 40               | Chile   | Meat, Other                     | 1997           | 1                                                              |
| 40               | Chile   | Milk - Excluding Butter         | 1997           | 171                                                            |
| 40               | Chile   | Molluscs, Other                 | 1997           | 1                                                              |
| 40               | Chile   | Mutton & Goat Meat              | 1997           | 4                                                              |
| 40               | Chile   | Oats                            | 1997           | 2                                                              |
| 40               | Chile   | Offals                          | 1997           | 10                                                             |
| 40               | Chile   | Oilcrops                        | 1997           | 7                                                              |
| 40               | Chile   | Oilcrops Oil, Other             | 1997           | 1                                                              |
| 40               | Chile   | Olive Oil                       | 1997           | 4                                                              |
| 40               | Chile   | Onions                          | 1997           | 12                                                             |
| 40               | Chile   | Oranges, Mandarines             | 1997           | 4                                                              |
| 40               | Chile   | Peas                            | 1997           | 4                                                              |
| 40               | Chile   | Pelagic Fish                    | 1997           | 22                                                             |
| 40               | Chile   | Pigmeat                         | 1997           | 103                                                            |
| 40               | Chile   | Pineapples and products         | 1997           | 2                                                              |
| 40               | Chile   | Potatoes and products           | 1997           | 115                                                            |
| 40               | Chile   | Poultry Meat                    | 1997           | 93                                                             |
| 40               | Chile   | Pulses                          | 1997           | 33                                                             |
| 40               | Chile   | Pulses, Other and products      | 1997           | 13                                                             |
| 40               | Chile   | Rape and Mustard Oil            | 1997           | 23                                                             |
| 40               | Chile   | Rice (Milled Equivalent)        | 1997           | 71                                                             |
| 40               | Chile   | Rye and products                | 1997           | 2                                                              |
| 40               | Chile   | Soyabean Oil                    | 1997           | 108                                                            |
| 40               | Chile   | Spices                          | 1997           | 1                                                              |
| 40               | Chile   | Starchy Roots                   | 1997           | 116                                                            |
| 40               | Chile   | Stimulants                      | 1997           | 6                                                              |
| 40               | Chile   | Sugar & Sweeteners              | 1997           | 449                                                            |
| 40               | Chile   | Sugar (Raw Equivalent)          | 1997           | 443                                                            |
| 40               | Chile   | Sunflowerseed Oil               | 1997           | 93                                                             |
| 40               | Chile   | Sweet potatoes                  | 1997           | 1                                                              |
| 40               | Chile   | Sweeteners, Other               | 1997           | 6                                                              |
| 40               | Chile   | Tea (including mate)            | 1997           | 1                                                              |
| 40               | Chile   | Tomatoes and products           | 1997           | 13                                                             |
| 40               | Chile   | Treenuts                        | 1997           | 4                                                              |
| 40               | Chile   | Vegetable Oils                  | 1997           | 229                                                            |
| 40               | Chile   | Vegetables                      | 1997           | 71                                                             |
| 40               | Chile   | Vegetables, Other               | 1997           | 46                                                             |
| 40               | Chile   | Vegetal Products                | 1997           | 2,177                                                          |
| 40               | Chile   | Wheat and products              | 1997           | 902                                                            |
| 40               | Chile   | Wine                            | 1997           | 24                                                             |
| 40               | Chile   | Alcoholic Beverages             | 1998           | 69                                                             |
| 40               | Chile   | Animal fats                     | 1998           | 49                                                             |
| 40               | Chile   | Animal Products                 | 1998           | 623                                                            |

Dietary calcium and zinc deficiency risks are decreasing but remain prevalent

| FAO Country code | Country | Food item                       | Reference year | Net energy supply (kcal capita <sup>-1</sup> d <sup>-1</sup> ) |
|------------------|---------|---------------------------------|----------------|----------------------------------------------------------------|
| 40               | Chile   | Apples and products             | 1998           | 4                                                              |
| 40               | Chile   | Bananas                         | 1998           | 15                                                             |
| 40               | Chile   | Barley and products             | 1998           | 10                                                             |
| 40               | Chile   | Beans                           | 1998           | 15                                                             |
| 40               | Chile   | Beer                            | 1998           | 23                                                             |
| 40               | Chile   | Beverages, Alcoholic            | 1998           | 12                                                             |
| 40               | Chile   | Bovine Meat                     | 1998           | 131                                                            |
| 40               | Chile   | Butter, Ghee                    | 1998           | 16                                                             |
| 40               | Chile   | Cereals - Excluding Beer        | 1998           | 1,126                                                          |
| 40               | Chile   | Cocoa Beans and products        | 1998           | 4                                                              |
| 40               | Chile   | Coconuts - Incl Copra           | 1998           | 1                                                              |
| 40               | Chile   | Coffee and products             | 1998           | 1                                                              |
| 40               | Chile   | Crustaceans                     | 1998           | 1                                                              |
| 40               | Chile   | Demersal Fish                   | 1998           | 1                                                              |
| 40               | Chile   | Eggs                            | 1998           | 20                                                             |
| 40               | Chile   | Fats, Animals, Raw              | 1998           | 34                                                             |
| 40               | Chile   | Fish, Seafood                   | 1998           | 24                                                             |
| 40               | Chile   | Freshwater Fish                 | 1998           | 1                                                              |
| 40               | Chile   | Fruits - Excluding Wine         | 1998           | 65                                                             |
| 40               | Chile   | Fruits, Other                   | 1998           | 22                                                             |
| 40               | Chile   | Grand Total                     | 1998           | 2,795                                                          |
| 40               | Chile   | Grapes and products (excl wine) | 1998           | 16                                                             |
| 40               | Chile   | Groundnuts (Shelled Eq)         | 1998           | 6                                                              |
| 40               | Chile   | Lemons, Limes and products      | 1998           | 3                                                              |
| 40               | Chile   | Maize and products              | 1998           | 135                                                            |
| 40               | Chile   | Maize Germ Oil                  | 1998           | 1                                                              |
| 40               | Chile   | Meat                            | 1998           | 349                                                            |
| 40               | Chile   | Meat, Other                     | 1998           | 1                                                              |
| 40               | Chile   | Milk - Excluding Butter         | 1998           | 170                                                            |
| 40               | Chile   | Molluscs, Other                 | 1998           | 1                                                              |
| 40               | Chile   | Mutton & Goat Meat              | 1998           | 4                                                              |
| 40               | Chile   | Oats                            | 1998           | 1                                                              |
| 40               | Chile   | Offals                          | 1998           | 9                                                              |
| 40               | Chile   | Oilcrops                        | 1998           | 7                                                              |
| 40               | Chile   | Oilcrops Oil, Other             | 1998           | 1                                                              |
| 40               | Chile   | Olive Oil                       | 1998           | 4                                                              |
| 40               | Chile   | Onions                          | 1998           | 13                                                             |
| 40               | Chile   | Oranges, Mandarines             | 1998           | 4                                                              |
| 40               | Chile   | Peas                            | 1998           | 5                                                              |
| 40               | Chile   | Pelagic Fish                    | 1998           | 21                                                             |
| 40               | Chile   | Pigmeat                         | 1998           | 113                                                            |
| 40               | Chile   | Pineapples and products         | 1998           | 1                                                              |
| 40               | Chile   | Potatoes and products           | 1998           | 100                                                            |
| 40               | Chile   | Poultry Meat                    | 1998           | 100                                                            |
| 40               | Chile   | Pulses                          | 1998           | 32                                                             |
| 40               | Chile   | Pulses, Other and products      | 1998           | 12                                                             |
| 40               | Chile   | Rape and Mustard Oil            | 1998           | 24                                                             |
| 40               | Chile   | Rice (Milled Equivalent)        | 1998           | 64                                                             |
| 40               | Chile   | Rye and products                | 1998           | 1                                                              |
| 40               | Chile   | Soyabean Oil                    | 1998           | 107                                                            |
| 40               | Chile   | Starchy Roots                   | 1998           | 101                                                            |
| 40               | Chile   | Stimulants                      | 1998           | 7                                                              |
| 40               | Chile   | Sugar & Sweeteners              | 1998           | 456                                                            |
| 40               | Chile   | Sugar (Raw Equivalent)          | 1998           | 450                                                            |
| 40               | Chile   | Sunflowerseed Oil               | 1998           | 92                                                             |
| 40               | Chile   | Sweet potatoes                  | 1998           | 1                                                              |
| 40               | Chile   | Sweeteners, Other               | 1998           | 5                                                              |
| 40               | Chile   | Tea (including mate)            | 1998           | 1                                                              |
| 40               | Chile   | Tomatoes and products           | 1998           | 13                                                             |
| 40               | Chile   | Treenuts                        | 1998           | 5                                                              |
| 40               | Chile   | Vegetable Oils                  | 1998           | 230                                                            |
| 40               | Chile   | Vegetables                      | 1998           | 74                                                             |
| 40               | Chile   | Vegetables, Other               | 1998           | 48                                                             |
| 40               | Chile   | Vegetal Products                | 1998           | 2,172                                                          |
| 40               | Chile   | Wheat and products              | 1998           | 914                                                            |
| 40               | Chile   | Wine                            | 1998           | 34                                                             |
| 40               | Chile   | Alcoholic Beverages             | 1999           | 57                                                             |
| 40               | Chile   | Animal fats                     | 1999           | 47                                                             |
| 40               | Chile   | Animal Products                 | 1999           | 601                                                            |
| 40               | Chile   | Apples and products             | 1999           | 6                                                              |
| 40               | Chile   | Bananas                         | 1999           | 16                                                             |
| 40               | Chile   | Barley and products             | 1999           | 10                                                             |
| 40               | Chile   | Beans                           | 1999           | 15                                                             |
| 40               | Chile   | Beer                            | 1999           | 22                                                             |
| 40               | Chile   | Beverages, Alcoholic            | 1999           | 10                                                             |
| 40               | Chile   | Bovine Meat                     | 1999           | 119                                                            |
| 40               | Chile   | Butter, Ghee                    | 1999           | 15                                                             |
| 40               | Chile   | Cereals - Excluding Beer        | 1999           | 1,138                                                          |
| 40               | Chile   | Cocoa Beans and products        | 1999           | 4                                                              |
| 40               | Chile   | Coconuts - Incl Copra           | 1999           | 1                                                              |
| 40               | Chile   | Coffee and products             | 1999           | 1                                                              |
| 40               | Chile   | Demersal Fish                   | 1999           | 4                                                              |
| 40               | Chile   | Eggs                            | 1999           | 20                                                             |
| 40               | Chile   | Fats, Animals, Raw              | 1999           | 32                                                             |
| 40               | Chile   | Fish, Seafood                   | 1999           | 21                                                             |
| 40               | Chile   | Freshwater Fish                 | 1999           | 1                                                              |
| 40               | Chile   | Fruits - Excluding Wine         | 1999           | 67                                                             |
| 40               | Chile   | Fruits, Other                   | 1999           | 22                                                             |
| 40               | Chile   | Grand Total                     | 1999           | 2,800                                                          |
| 40               | Chile   | Grapes and products (excl wine) | 1999           | 16                                                             |
| 40               | Chile   | Groundnuts (Shelled Eq)         | 1999           | 5                                                              |
| 40               | Chile   | Honey                           | 1999           | 4                                                              |
| 40               | Chile   | Lemons, Limes and products      | 1999           | 2                                                              |
| 40               | Chile   | Maize and products              | 1999           | 146                                                            |
| 40               | Chile   | Maize Germ Oil                  | 1999           | 1                                                              |
| 40               | Chile   | Meat                            | 1999           | 345                                                            |
| 40               | Chile   | Meat, Other                     | 1999           | 1                                                              |

Dietary calcium and zinc deficiency risks are decreasing but remain prevalent

| FAO Country code | Country | Food item                       | Reference year | Net energy supply (kcal capita <sup>-1</sup> d <sup>-1</sup> ) |
|------------------|---------|---------------------------------|----------------|----------------------------------------------------------------|
| 40               | Chile   | Milk - Excluding Butter         | 1999           | 159                                                            |
| 40               | Chile   | Molluscs, Other                 | 1999           | 1                                                              |
| 40               | Chile   | Mutton & Goat Meat              | 1999           | 4                                                              |
| 40               | Chile   | Oats                            | 1999           | 2                                                              |
| 40               | Chile   | Offals                          | 1999           | 9                                                              |
| 40               | Chile   | Oilcrops                        | 1999           | 7                                                              |
| 40               | Chile   | Oilcrops Oil, Other             | 1999           | 1                                                              |
| 40               | Chile   | Olive Oil                       | 1999           | 3                                                              |
| 40               | Chile   | Olives (including preserved)    | 1999           | 1                                                              |
| 40               | Chile   | Onions                          | 1999           | 14                                                             |
| 40               | Chile   | Oranges, Mandarines             | 1999           | 4                                                              |
| 40               | Chile   | Peas                            | 1999           | 5                                                              |
| 40               | Chile   | Pelagic Fish                    | 1999           | 14                                                             |
| 40               | Chile   | Pigmeat                         | 1999           | 121                                                            |
| 40               | Chile   | Pineapples and products         | 1999           | 1                                                              |
| 40               | Chile   | Potatoes and products           | 1999           | 110                                                            |
| 40               | Chile   | Poultry Meat                    | 1999           | 101                                                            |
| 40               | Chile   | Pulses                          | 1999           | 33                                                             |
| 40               | Chile   | Pulses, Other and products      | 1999           | 14                                                             |
| 40               | Chile   | Rape and Mustard Oil            | 1999           | 26                                                             |
| 40               | Chile   | Rice (Milled Equivalent)        | 1999           | 65                                                             |
| 40               | Chile   | Rye and products                | 1999           | 2                                                              |
| 40               | Chile   | Soyabean Oil                    | 1999           | 113                                                            |
| 40               | Chile   | Spices                          | 1999           | 1                                                              |
| 40               | Chile   | Starchy Roots                   | 1999           | 111                                                            |
| 40               | Chile   | Stimulants                      | 1999           | 6                                                              |
| 40               | Chile   | Sugar & Sweeteners              | 1999           | 464                                                            |
| 40               | Chile   | Sugar (Raw Equivalent)          | 1999           | 451                                                            |
| 40               | Chile   | Sunflowerseed Oil               | 1999           | 95                                                             |
| 40               | Chile   | Sweet potatoes                  | 1999           | 1                                                              |
| 40               | Chile   | Sweeteners, Other               | 1999           | 10                                                             |
| 40               | Chile   | Tea (including mate)            | 1999           | 1                                                              |
| 40               | Chile   | Tomatoes and products           | 1999           | 12                                                             |
| 40               | Chile   | Treenuts                        | 1999           | 3                                                              |
| 40               | Chile   | Vegetable Oils                  | 1999           | 239                                                            |
| 40               | Chile   | Vegetables                      | 1999           | 74                                                             |
| 40               | Chile   | Vegetables, Other               | 1999           | 47                                                             |
| 40               | Chile   | Vegetal Products                | 1999           | 2,198                                                          |
| 40               | Chile   | Wheat and products              | 1999           | 913                                                            |
| 40               | Chile   | Wine                            | 1999           | 24                                                             |
| 40               | Chile   | Alcoholic Beverages             | 2000           | 58                                                             |
| 40               | Chile   | Animal fats                     | 2000           | 54                                                             |
| 40               | Chile   | Animal Products                 | 2000           | 625                                                            |
| 40               | Chile   | Apples and products             | 2000           | 1                                                              |
| 40               | Chile   | Bananas                         | 2000           | 20                                                             |
| 40               | Chile   | Barley and products             | 2000           | 10                                                             |
| 40               | Chile   | Beans                           | 2000           | 18                                                             |
| 40               | Chile   | Beer                            | 2000           | 19                                                             |
| 40               | Chile   | Beverages, Alcoholic            | 2000           | 14                                                             |
| 40               | Chile   | Bovine Meat                     | 2000           | 119                                                            |
| 40               | Chile   | Butter, Ghee                    | 2000           | 15                                                             |
| 40               | Chile   | Cereals - Excluding Beer        | 2000           | 1,144                                                          |
| 40               | Chile   | Cocoa Beans and products        | 2000           | 6                                                              |
| 40               | Chile   | Coconuts - Incl Copra           | 2000           | 1                                                              |
| 40               | Chile   | Coffee and products             | 2000           | 1                                                              |
| 40               | Chile   | Demersal Fish                   | 2000           | 4                                                              |
| 40               | Chile   | Eggs                            | 2000           | 21                                                             |
| 40               | Chile   | Fats, Animals, Raw              | 2000           | 39                                                             |
| 40               | Chile   | Fish, Seafood                   | 2000           | 22                                                             |
| 40               | Chile   | Freshwater Fish                 | 2000           | 3                                                              |
| 40               | Chile   | Fruits - Excluding Wine         | 2000           | 69                                                             |
| 40               | Chile   | Fruits, Other                   | 2000           | 25                                                             |
| 40               | Chile   | Grand Total                     | 2000           | 2,834                                                          |
| 40               | Chile   | Grapes and products (excl wine) | 2000           | 15                                                             |
| 40               | Chile   | Groundnuts (Shelled Eq)         | 2000           | 5                                                              |
| 40               | Chile   | Honey                           | 2000           | 3                                                              |
| 40               | Chile   | Lemons, Limes and products      | 2000           | 3                                                              |
| 40               | Chile   | Maize and products              | 2000           | 146                                                            |
| 40               | Chile   | Meat                            | 2000           | 357                                                            |
| 40               | Chile   | Meat, Other                     | 2000           | 1                                                              |
| 40               | Chile   | Milk - Excluding Butter         | 2000           | 161                                                            |
| 40               | Chile   | Molluscs, Other                 | 2000           | 1                                                              |
| 40               | Chile   | Mutton & Goat Meat              | 2000           | 4                                                              |
| 40               | Chile   | Oats                            | 2000           | 2                                                              |
| 40               | Chile   | Offals                          | 2000           | 9                                                              |
| 40               | Chile   | Oilcrops                        | 2000           | 8                                                              |
| 40               | Chile   | Oilcrops Oil, Other             | 2000           | 3                                                              |
| 40               | Chile   | Olive Oil                       | 2000           | 4                                                              |
| 40               | Chile   | Olives (including preserved)    | 2000           | 1                                                              |
| 40               | Chile   | Onions                          | 2000           | 16                                                             |
| 40               | Chile   | Oranges, Mandarines             | 2000           | 4                                                              |
| 40               | Chile   | Peas                            | 2000           | 5                                                              |
| 40               | Chile   | Pelagic Fish                    | 2000           | 14                                                             |
| 40               | Chile   | Pigmeat                         | 2000           | 123                                                            |
| 40               | Chile   | Pineapples and products         | 2000           | 1                                                              |
| 40               | Chile   | Potatoes and products           | 2000           | 107                                                            |
| 40               | Chile   | Poultry Meat                    | 2000           | 111                                                            |
| 40               | Chile   | Pulses                          | 2000           | 37                                                             |
| 40               | Chile   | Pulses, Other and products      | 2000           | 14                                                             |
| 40               | Chile   | Rape and Mustard Oil            | 2000           | 26                                                             |
| 40               | Chile   | Rice (Milled Equivalent)        | 2000           | 66                                                             |
| 40               | Chile   | Rye and products                | 2000           | 1                                                              |
| 40               | Chile   | Soyabean Oil                    | 2000           | 111                                                            |
| 40               | Chile   | Spices                          | 2000           | 1                                                              |
| 40               | Chile   | Starchy Roots                   | 2000           | 109                                                            |
| 40               | Chile   | Stimulants                      | 2000           | 8                                                              |
| 40               | Chile   | Sugar & Sweeteners              | 2000           | 446                                                            |

Dietary calcium and zinc deficiency risks are decreasing but remain prevalent

| FAO Country code | Country | Food item                       | Reference year | Net energy supply (kcal <i>capita</i> <sup>-1</sup> d <sup>-1</sup> ) |
|------------------|---------|---------------------------------|----------------|-----------------------------------------------------------------------|
| 40               | Chile   | Sugar (Raw Equivalent)          | 2000           | 431                                                                   |
| 40               | Chile   | Sunflowerseed Oil               | 2000           | 107                                                                   |
| 40               | Chile   | Sweet potatoes                  | 2000           | 1                                                                     |
| 40               | Chile   | Sweeteners, Other               | 2000           | 12                                                                    |
| 40               | Chile   | Tea (including mate)            | 2000           | 1                                                                     |
| 40               | Chile   | Tomatoes and products           | 2000           | 15                                                                    |
| 40               | Chile   | Treenuts                        | 2000           | 3                                                                     |
| 40               | Chile   | Vegetable Oils                  | 2000           | 251                                                                   |
| 40               | Chile   | Vegetables                      | 2000           | 78                                                                    |
| 40               | Chile   | Vegetables, Other               | 2000           | 46                                                                    |
| 40               | Chile   | Vegetal Products                | 2000           | 2,209                                                                 |
| 40               | Chile   | Wheat and products              | 2000           | 918                                                                   |
| 40               | Chile   | Wine                            | 2000           | 24                                                                    |
| 40               | Chile   | Alcoholic Beverages             | 2001           | 65                                                                    |
| 40               | Chile   | Animal fats                     | 2001           | 56                                                                    |
| 40               | Chile   | Animal Products                 | 2001           | 626                                                                   |
| 40               | Chile   | Apples and products             | 2001           | 1                                                                     |
| 40               | Chile   | Bananas                         | 2001           | 12                                                                    |
| 40               | Chile   | Barley and products             | 2001           | 9                                                                     |
| 40               | Chile   | Beans                           | 2001           | 21                                                                    |
| 40               | Chile   | Beer                            | 2001           | 22                                                                    |
| 40               | Chile   | Beverages, Alcoholic            | 2001           | 17                                                                    |
| 40               | Chile   | Bovine Meat                     | 2001           | 110                                                                   |
| 40               | Chile   | Butter, Ghee                    | 2001           | 15                                                                    |
| 40               | Chile   | Cereals - Excluding Beer        | 2001           | 1,169                                                                 |
| 40               | Chile   | Cocoa Beans and products        | 2001           | 5                                                                     |
| 40               | Chile   | Coconuts - Incl Copra           | 2001           | 1                                                                     |
| 40               | Chile   | Demersal Fish                   | 2001           | 5                                                                     |
| 40               | Chile   | Eggs                            | 2001           | 22                                                                    |
| 40               | Chile   | Fats, Animals, Raw              | 2001           | 40                                                                    |
| 40               | Chile   | Fish, Seafood                   | 2001           | 21                                                                    |
| 40               | Chile   | Freshwater Fish                 | 2001           | 1                                                                     |
| 40               | Chile   | Fruits - Excluding Wine         | 2001           | 57                                                                    |
| 40               | Chile   | Fruits, Other                   | 2001           | 22                                                                    |
| 40               | Chile   | Grand Total                     | 2001           | 2,868                                                                 |
| 40               | Chile   | Grapes and products (excl wine) | 2001           | 14                                                                    |
| 40               | Chile   | Groundnuts (Shelled Eq)         | 2001           | 5                                                                     |
| 40               | Chile   | Honey                           | 2001           | 1                                                                     |
| 40               | Chile   | Lemons, Limes and products      | 2001           | 3                                                                     |
| 40               | Chile   | Maize and products              | 2001           | 147                                                                   |
| 40               | Chile   | Maize Germ Oil                  | 2001           | 1                                                                     |
| 40               | Chile   | Meat                            | 2001           | 362                                                                   |
| 40               | Chile   | Meat, Other                     | 2001           | 1                                                                     |
| 40               | Chile   | Milk - Excluding Butter         | 2001           | 157                                                                   |
| 40               | Chile   | Molluscs, Other                 | 2001           | 1                                                                     |
| 40               | Chile   | Mutton & Goat Meat              | 2001           | 3                                                                     |
| 40               | Chile   | Oats                            | 2001           | 3                                                                     |
| 40               | Chile   | Offals                          | 2001           | 8                                                                     |
| 40               | Chile   | Oilcrops                        | 2001           | 7                                                                     |
| 40               | Chile   | Oilcrops Oil, Other             | 2001           | 2                                                                     |
| 40               | Chile   | Olive Oil                       | 2001           | 4                                                                     |
| 40               | Chile   | Olives (including preserved)    | 2001           | 1                                                                     |
| 40               | Chile   | Onions                          | 2001           | 16                                                                    |
| 40               | Chile   | Oranges, Mandarines             | 2001           | 4                                                                     |
| 40               | Chile   | Peas                            | 2001           | 4                                                                     |
| 40               | Chile   | Pelagic Fish                    | 2001           | 13                                                                    |
| 40               | Chile   | Pigmeat                         | 2001           | 131                                                                   |
| 40               | Chile   | Pineapples and products         | 2001           | 1                                                                     |
| 40               | Chile   | Potatoes and products           | 2001           | 133                                                                   |
| 40               | Chile   | Poultry Meat                    | 2001           | 117                                                                   |
| 40               | Chile   | Pulses                          | 2001           | 37                                                                    |
| 40               | Chile   | Pulses, Other and products      | 2001           | 12                                                                    |
| 40               | Chile   | Rape and Mustard Oil            | 2001           | 26                                                                    |
| 40               | Chile   | Rice (Milled Equivalent)        | 2001           | 69                                                                    |
| 40               | Chile   | Rye and products                | 2001           | 2                                                                     |
| 40               | Chile   | Soyabean Oil                    | 2001           | 128                                                                   |
| 40               | Chile   | Spices                          | 2001           | 1                                                                     |
| 40               | Chile   | Starchy Roots                   | 2001           | 134                                                                   |
| 40               | Chile   | Stimulants                      | 2001           | 7                                                                     |
| 40               | Chile   | Sugar & Sweeteners              | 2001           | 433                                                                   |
| 40               | Chile   | Sugar (Raw Equivalent)          | 2001           | 421                                                                   |
| 40               | Chile   | Sunflowerseed Oil               | 2001           | 91                                                                    |
| 40               | Chile   | Sweet potatoes                  | 2001           | 1                                                                     |
| 40               | Chile   | Sweeteners, Other               | 2001           | 11                                                                    |
| 40               | Chile   | Tea (including mate)            | 2001           | 1                                                                     |
| 40               | Chile   | Tomatoes and products           | 2001           | 14                                                                    |
| 40               | Chile   | Treenuts                        | 2001           | 5                                                                     |
| 40               | Chile   | Vegetable Oils                  | 2001           | 253                                                                   |
| 40               | Chile   | Vegetables                      | 2001           | 76                                                                    |
| 40               | Chile   | Vegetables, Other               | 2001           | 46                                                                    |
| 40               | Chile   | Vegetal Products                | 2001           | 2,242                                                                 |
| 40               | Chile   | Wheat and products              | 2001           | 939                                                                   |
| 40               | Chile   | Wine                            | 2001           | 26                                                                    |
| 40               | Chile   | Alcoholic Beverages             | 2002           | 63                                                                    |
| 40               | Chile   | Animal fats                     | 2002           | 61                                                                    |
| 40               | Chile   | Animal Products                 | 2002           | 625                                                                   |
| 40               | Chile   | Apples and products             | 2002           | 10                                                                    |
| 40               | Chile   | Bananas                         | 2002           | 15                                                                    |
| 40               | Chile   | Barley and products             | 2002           | 10                                                                    |
| 40               | Chile   | Beans                           | 2002           | 21                                                                    |
| 40               | Chile   | Beer                            | 2002           | 21                                                                    |
| 40               | Chile   | Beverages, Alcoholic            | 2002           | 16                                                                    |
| 40               | Chile   | Bovine Meat                     | 2002           | 109                                                                   |
| 40               | Chile   | Butter, Ghee                    | 2002           | 15                                                                    |
| 40               | Chile   | Cereals - Excluding Beer        | 2002           | 1,151                                                                 |
| 40               | Chile   | Cocoa Beans and products        | 2002           | 7                                                                     |
| 40               | Chile   | Coconuts - Incl Copra           | 2002           | 1                                                                     |

Dietary calcium and zinc deficiency risks are decreasing but remain prevalent

| FAO Country code | Country | Food item                       | Reference year | Net energy supply (kcal capita <sup>-1</sup> d <sup>-1</sup> ) |
|------------------|---------|---------------------------------|----------------|----------------------------------------------------------------|
| 40               | Chile   | Demersal Fish                   | 2002           | 3                                                              |
| 40               | Chile   | Eggs                            | 2002           | 22                                                             |
| 40               | Chile   | Fats, Animals, Raw              | 2002           | 46                                                             |
| 40               | Chile   | Fish, Seafood                   | 2002           | 28                                                             |
| 40               | Chile   | Freshwater Fish                 | 2002           | 1                                                              |
| 40               | Chile   | Fruits - Excluding Wine         | 2002           | 72                                                             |
| 40               | Chile   | Fruits, Other                   | 2002           | 27                                                             |
| 40               | Chile   | Grand Total                     | 2002           | 2,899                                                          |
| 40               | Chile   | Grapes and products (excl wine) | 2002           | 11                                                             |
| 40               | Chile   | Groundnuts (Shelled Eq)         | 2002           | 6                                                              |
| 40               | Chile   | Honey                           | 2002           | 2                                                              |
| 40               | Chile   | Lemons, Limes and products      | 2002           | 3                                                              |
| 40               | Chile   | Maize and products              | 2002           | 117                                                            |
| 40               | Chile   | Meat                            | 2002           | 352                                                            |
| 40               | Chile   | Meat, Other                     | 2002           | 1                                                              |
| 40               | Chile   | Milk - Excluding Butter         | 2002           | 154                                                            |
| 40               | Chile   | Molluscs, Other                 | 2002           | 1                                                              |
| 40               | Chile   | Mutton & Goat Meat              | 2002           | 3                                                              |
| 40               | Chile   | Oats                            | 2002           | 3                                                              |
| 40               | Chile   | Offals                          | 2002           | 9                                                              |
| 40               | Chile   | Oilcrops                        | 2002           | 9                                                              |
| 40               | Chile   | Oilcrops Oil, Other             | 2002           | 3                                                              |
| 40               | Chile   | Olive Oil                       | 2002           | 4                                                              |
| 40               | Chile   | Olives (including preserved)    | 2002           | 1                                                              |
| 40               | Chile   | Onions                          | 2002           | 17                                                             |
| 40               | Chile   | Oranges, Mandarines             | 2002           | 5                                                              |
| 40               | Chile   | Peas                            | 2002           | 4                                                              |
| 40               | Chile   | Pelagic Fish                    | 2002           | 23                                                             |
| 40               | Chile   | Pigmeat                         | 2002           | 128                                                            |
| 40               | Chile   | Pineapples and products         | 2002           | 1                                                              |
| 40               | Chile   | Potatoes and products           | 2002           | 145                                                            |
| 40               | Chile   | Poultry Meat                    | 2002           | 111                                                            |
| 40               | Chile   | Pulses                          | 2002           | 40                                                             |
| 40               | Chile   | Pulses, Other and products      | 2002           | 15                                                             |
| 40               | Chile   | Rape and Mustard Oil            | 2002           | 27                                                             |
| 40               | Chile   | Rice (Milled Equivalent)        | 2002           | 69                                                             |
| 40               | Chile   | Rye and products                | 2002           | 4                                                              |
| 40               | Chile   | Soyabean Oil                    | 2002           | 136                                                            |
| 40               | Chile   | Starchy Roots                   | 2002           | 147                                                            |
| 40               | Chile   | Stimulants                      | 2002           | 9                                                              |
| 40               | Chile   | Sugar & Sweeteners              | 2002           | 440                                                            |
| 40               | Chile   | Sugar (Raw Equivalent)          | 2002           | 428                                                            |
| 40               | Chile   | Sunflowerseed Oil               | 2002           | 87                                                             |
| 40               | Chile   | Sweet potatoes                  | 2002           | 1                                                              |
| 40               | Chile   | Sweeteners, Other               | 2002           | 11                                                             |
| 40               | Chile   | Tea (including mate)            | 2002           | 1                                                              |
| 40               | Chile   | Tomatoes and products           | 2002           | 16                                                             |
| 40               | Chile   | Treenuts                        | 2002           | 6                                                              |
| 40               | Chile   | Vegetable Oils                  | 2002           | 258                                                            |
| 40               | Chile   | Vegetables                      | 2002           | 79                                                             |
| 40               | Chile   | Vegetables, Other               | 2002           | 46                                                             |
| 40               | Chile   | Vegetal Products                | 2002           | 2,274                                                          |
| 40               | Chile   | Wheat and products              | 2002           | 949                                                            |
| 40               | Chile   | Wine                            | 2002           | 26                                                             |
| 40               | Chile   | Alcoholic Beverages             | 2003           | 66                                                             |
| 40               | Chile   | Animal fats                     | 2003           | 67                                                             |
| 40               | Chile   | Animal Products                 | 2003           | 662                                                            |
| 40               | Chile   | Apples and products             | 2003           | 15                                                             |
| 40               | Chile   | Bananas                         | 2003           | 16                                                             |
| 40               | Chile   | Barley and products             | 2003           | 10                                                             |
| 40               | Chile   | Beans                           | 2003           | 21                                                             |
| 40               | Chile   | Beer                            | 2003           | 26                                                             |
| 40               | Chile   | Beverages, Alcoholic            | 2003           | 12                                                             |
| 40               | Chile   | Bovine Meat                     | 2003           | 107                                                            |
| 40               | Chile   | Butter, Ghee                    | 2003           | 17                                                             |
| 40               | Chile   | Cereals - Excluding Beer        | 2003           | 1,171                                                          |
| 40               | Chile   | Cocoa Beans and products        | 2003           | 7                                                              |
| 40               | Chile   | Coconuts - Incl Copra           | 2003           | 1                                                              |
| 40               | Chile   | Coffee and products             | 2003           | 1                                                              |
| 40               | Chile   | Demersal Fish                   | 2003           | 9                                                              |
| 40               | Chile   | Eggs                            | 2003           | 22                                                             |
| 40               | Chile   | Fats, Animals, Raw              | 2003           | 49                                                             |
| 40               | Chile   | Fish, Seafood                   | 2003           | 43                                                             |
| 40               | Chile   | Freshwater Fish                 | 2003           | 1                                                              |
| 40               | Chile   | Fruits - Excluding Wine         | 2003           | 66                                                             |
| 40               | Chile   | Fruits, Other                   | 2003           | 21                                                             |
| 40               | Chile   | Grand Total                     | 2003           | 2,893                                                          |
| 40               | Chile   | Grapes and products (excl wine) | 2003           | 4                                                              |
| 40               | Chile   | Groundnuts (Shelled Eq)         | 2003           | 6                                                              |
| 40               | Chile   | Lemons, Limes and products      | 2003           | 3                                                              |
| 40               | Chile   | Maize and products              | 2003           | 156                                                            |
| 40               | Chile   | Meat                            | 2003           | 362                                                            |
| 40               | Chile   | Meat, Other                     | 2003           | 1                                                              |
| 40               | Chile   | Milk - Excluding Butter         | 2003           | 160                                                            |
| 40               | Chile   | Miscellaneous                   | 2003           | 1                                                              |
| 40               | Chile   | Molluscs, Other                 | 2003           | 1                                                              |
| 40               | Chile   | Mutton & Goat Meat              | 2003           | 3                                                              |
| 40               | Chile   | Oats                            | 2003           | 3                                                              |
| 40               | Chile   | Offals                          | 2003           | 8                                                              |
| 40               | Chile   | Oilcrops                        | 2003           | 9                                                              |
| 40               | Chile   | Oilcrops Oil, Other             | 2003           | 4                                                              |
| 40               | Chile   | Olive Oil                       | 2003           | 4                                                              |
| 40               | Chile   | Olives (including preserved)    | 2003           | 1                                                              |
| 40               | Chile   | Onions                          | 2003           | 17                                                             |
| 40               | Chile   | Oranges, Mandarines             | 2003           | 5                                                              |
| 40               | Chile   | Peas                            | 2003           | 4                                                              |
| 40               | Chile   | Pelagic Fish                    | 2003           | 32                                                             |

Dietary calcium and zinc deficiency risks are decreasing but remain prevalent

| FAO Country code | Country | Food item                       | Reference year | Net energy supply (kcal capita <sup>-1</sup> d <sup>-1</sup> ) |
|------------------|---------|---------------------------------|----------------|----------------------------------------------------------------|
| 40               | Chile   | Pigmeat                         | 2003           | 140                                                            |
| 40               | Chile   | Pineapples and products         | 2003           | 1                                                              |
| 40               | Chile   | Potatoes and products           | 2003           | 119                                                            |
| 40               | Chile   | Poultry Meat                    | 2003           | 112                                                            |
| 40               | Chile   | Pulses                          | 2003           | 41                                                             |
| 40               | Chile   | Pulses, Other and products      | 2003           | 16                                                             |
| 40               | Chile   | Rape and Mustard Oil            | 2003           | 27                                                             |
| 40               | Chile   | Rice (Milled Equivalent)        | 2003           | 72                                                             |
| 40               | Chile   | Rye and products                | 2003           | 5                                                              |
| 40               | Chile   | Soyabean Oil                    | 2003           | 124                                                            |
| 40               | Chile   | Spices                          | 2003           | 1                                                              |
| 40               | Chile   | Starchy Roots                   | 2003           | 120                                                            |
| 40               | Chile   | Stimulants                      | 2003           | 10                                                             |
| 40               | Chile   | Sugar & Sweeteners              | 2003           | 413                                                            |
| 40               | Chile   | Sugar (Raw Equivalent)          | 2003           | 402                                                            |
| 40               | Chile   | Sunflowerseed Oil               | 2003           | 87                                                             |
| 40               | Chile   | Sweet potatoes                  | 2003           | 1                                                              |
| 40               | Chile   | Sweeteners, Other               | 2003           | 11                                                             |
| 40               | Chile   | Tea (including mate)            | 2003           | 1                                                              |
| 40               | Chile   | Tomatoes and products           | 2003           | 19                                                             |
| 40               | Chile   | Treenuts                        | 2003           | 6                                                              |
| 40               | Chile   | Vegetable Oils                  | 2003           | 246                                                            |
| 40               | Chile   | Vegetables                      | 2003           | 83                                                             |
| 40               | Chile   | Vegetables, Other               | 2003           | 47                                                             |
| 40               | Chile   | Vegetal Products                | 2003           | 2,231                                                          |
| 40               | Chile   | Wheat and products              | 2003           | 924                                                            |
| 40               | Chile   | Wine                            | 2003           | 27                                                             |
| 40               | Chile   | Alcoholic Beverages             | 2004           | 68                                                             |
| 40               | Chile   | Animal fats                     | 2004           | 67                                                             |
| 40               | Chile   | Animal Products                 | 2004           | 652                                                            |
| 40               | Chile   | Apples and products             | 2004           | 6                                                              |
| 40               | Chile   | Bananas                         | 2004           | 16                                                             |
| 40               | Chile   | Barley and products             | 2004           | 10                                                             |
| 40               | Chile   | Beans                           | 2004           | 23                                                             |
| 40               | Chile   | Beer                            | 2004           | 26                                                             |
| 40               | Chile   | Beverages, Alcoholic            | 2004           | 16                                                             |
| 40               | Chile   | Bovine Meat                     | 2004           | 114                                                            |
| 40               | Chile   | Butter, Ghee                    | 2004           | 18                                                             |
| 40               | Chile   | Cephalopods                     | 2004           | 1                                                              |
| 40               | Chile   | Cereals - Excluding Beer        | 2004           | 1,195                                                          |
| 40               | Chile   | Cocoa Beans and products        | 2004           | 6                                                              |
| 40               | Chile   | Coconuts - Incl Copra           | 2004           | 1                                                              |
| 40               | Chile   | Coffee and products             | 2004           | 1                                                              |
| 40               | Chile   | Demersal Fish                   | 2004           | 6                                                              |
| 40               | Chile   | Eggs                            | 2004           | 22                                                             |
| 40               | Chile   | Fats, Animals, Raw              | 2004           | 49                                                             |
| 40               | Chile   | Fish, Seafood                   | 2004           | 41                                                             |
| 40               | Chile   | Freshwater Fish                 | 2004           | 1                                                              |
| 40               | Chile   | Fruits - Excluding Wine         | 2004           | 69                                                             |
| 40               | Chile   | Fruits, Other                   | 2004           | 24                                                             |
| 40               | Chile   | Grand Total                     | 2004           | 2,918                                                          |
| 40               | Chile   | Grapes and products (excl wine) | 2004           | 13                                                             |
| 40               | Chile   | Groundnuts (Shelled Eq)         | 2004           | 7                                                              |
| 40               | Chile   | Honey                           | 2004           | 2                                                              |
| 40               | Chile   | Lemons, Limes and products      | 2004           | 3                                                              |
| 40               | Chile   | Maize and products              | 2004           | 165                                                            |
| 40               | Chile   | Meat                            | 2004           | 371                                                            |
| 40               | Chile   | Meat, Other                     | 2004           | 1                                                              |
| 40               | Chile   | Milk - Excluding Butter         | 2004           | 144                                                            |
| 40               | Chile   | Molluscs, Other                 | 2004           | 1                                                              |
| 40               | Chile   | Mutton & Goat Meat              | 2004           | 3                                                              |
| 40               | Chile   | Oats                            | 2004           | 3                                                              |
| 40               | Chile   | Offals                          | 2004           | 7                                                              |
| 40               | Chile   | Oilcrops                        | 2004           | 11                                                             |
| 40               | Chile   | Oilcrops Oil, Other             | 2004           | 2                                                              |
| 40               | Chile   | Olive Oil                       | 2004           | 5                                                              |
| 40               | Chile   | Olives (including preserved)    | 2004           | 2                                                              |
| 40               | Chile   | Onions                          | 2004           | 17                                                             |
| 40               | Chile   | Oranges, Mandarines             | 2004           | 5                                                              |
| 40               | Chile   | Peas                            | 2004           | 4                                                              |
| 40               | Chile   | Pelagic Fish                    | 2004           | 33                                                             |
| 40               | Chile   | Pigmeat                         | 2004           | 131                                                            |
| 40               | Chile   | Pineapples and products         | 2004           | 2                                                              |
| 40               | Chile   | Potatoes and products           | 2004           | 123                                                            |
| 40               | Chile   | Poultry Meat                    | 2004           | 122                                                            |
| 40               | Chile   | Pulses                          | 2004           | 44                                                             |
| 40               | Chile   | Pulses, Other and products      | 2004           | 17                                                             |
| 40               | Chile   | Rape and Mustard Oil            | 2004           | 24                                                             |
| 40               | Chile   | Rice (Milled Equivalent)        | 2004           | 80                                                             |
| 40               | Chile   | Rye and products                | 2004           | 4                                                              |
| 40               | Chile   | Soyabean Oil                    | 2004           | 120                                                            |
| 40               | Chile   | Starchy Roots                   | 2004           | 124                                                            |
| 40               | Chile   | Stimulants                      | 2004           | 9                                                              |
| 40               | Chile   | Sugar & Sweeteners              | 2004           | 423                                                            |
| 40               | Chile   | Sugar (Raw Equivalent)          | 2004           | 409                                                            |
| 40               | Chile   | Sunflowerseed Oil               | 2004           | 85                                                             |
| 40               | Chile   | Sweet potatoes                  | 2004           | 1                                                              |
| 40               | Chile   | Sweeteners, Other               | 2004           | 12                                                             |
| 40               | Chile   | Tea (including mate)            | 2004           | 2                                                              |
| 40               | Chile   | Tomatoes and products           | 2004           | 18                                                             |
| 40               | Chile   | Treenuts                        | 2004           | 5                                                              |
| 40               | Chile   | Vegetable Oils                  | 2004           | 236                                                            |
| 40               | Chile   | Vegetables                      | 2004           | 81                                                             |
| 40               | Chile   | Vegetables, Other               | 2004           | 46                                                             |
| 40               | Chile   | Vegetal Products                | 2004           | 2,266                                                          |
| 40               | Chile   | Wheat and products              | 2004           | 933                                                            |
| 40               | Chile   | Wine                            | 2004           | 27                                                             |



Dietary calcium and zinc deficiency risks are decreasing but remain prevalent

| FAO Country code | Country | Food item                       | Reference year | Net energy supply (kcal <i>capita</i> <sup>-1</sup> d <sup>-1</sup> ) |
|------------------|---------|---------------------------------|----------------|-----------------------------------------------------------------------|
| 40               | Chile   | Alcoholic Beverages             | 2005           | 71                                                                    |
| 40               | Chile   | Animal fats                     | 2005           | 73                                                                    |
| 40               | Chile   | Animal Products                 | 2005           | 669                                                                   |
| 40               | Chile   | Apples and products             | 2005           | 8                                                                     |
| 40               | Chile   | Bananas                         | 2005           | 16                                                                    |
| 40               | Chile   | Barley and products             | 2005           | 11                                                                    |
| 40               | Chile   | Beans                           | 2005           | 21                                                                    |
| 40               | Chile   | Beer                            | 2005           | 27                                                                    |
| 40               | Chile   | Beverages, Alcoholic            | 2005           | 16                                                                    |
| 40               | Chile   | Bovine Meat                     | 2005           | 117                                                                   |
| 40               | Chile   | Butter, Ghee                    | 2005           | 20                                                                    |
| 40               | Chile   | Cephalopods                     | 2005           | 1                                                                     |
| 40               | Chile   | Cereals - Excluding Beer        | 2005           | 1,219                                                                 |
| 40               | Chile   | Cereals, Other                  | 2005           | 1                                                                     |
| 40               | Chile   | Cocoa Beans and products        | 2005           | 7                                                                     |
| 40               | Chile   | Coconuts - Incl Copra           | 2005           | 1                                                                     |
| 40               | Chile   | Coffee and products             | 2005           | 1                                                                     |
| 40               | Chile   | Demersal Fish                   | 2005           | 7                                                                     |
| 40               | Chile   | Eggs                            | 2005           | 23                                                                    |
| 40               | Chile   | Fats, Animals, Raw              | 2005           | 53                                                                    |
| 40               | Chile   | Fish, Seafood                   | 2005           | 45                                                                    |
| 40               | Chile   | Freshwater Fish                 | 2005           | 1                                                                     |
| 40               | Chile   | Fruits - Excluding Wine         | 2005           | 67                                                                    |
| 40               | Chile   | Fruits, Other                   | 2005           | 21                                                                    |
| 40               | Chile   | Grand Total                     | 2005           | 2,911                                                                 |
| 40               | Chile   | Grapes and products (excl wine) | 2005           | 12                                                                    |
| 40               | Chile   | Groundnuts (Shelled Eq)         | 2005           | 8                                                                     |
| 40               | Chile   | Honey                           | 2005           | 1                                                                     |
| 40               | Chile   | Lemons, Limes and products      | 2005           | 3                                                                     |
| 40               | Chile   | Maize and products              | 2005           | 190                                                                   |
| 40               | Chile   | Meat                            | 2005           | 378                                                                   |
| 40               | Chile   | Meat, Other                     | 2005           | 1                                                                     |
| 40               | Chile   | Milk - Excluding Butter         | 2005           | 142                                                                   |
| 40               | Chile   | Molluscs, Other                 | 2005           | 1                                                                     |
| 40               | Chile   | Mutton & Goat Meat              | 2005           | 2                                                                     |
| 40               | Chile   | Oats                            | 2005           | 2                                                                     |
| 40               | Chile   | Offals                          | 2005           | 7                                                                     |
| 40               | Chile   | Oilcrops                        | 2005           | 11                                                                    |
| 40               | Chile   | Oilcrops Oil, Other             | 2005           | 2                                                                     |
| 40               | Chile   | Olive Oil                       | 2005           | 5                                                                     |
| 40               | Chile   | Olives (including preserved)    | 2005           | 2                                                                     |
| 40               | Chile   | Onions                          | 2005           | 20                                                                    |
| 40               | Chile   | Oranges, Mandarines             | 2005           | 5                                                                     |
| 40               | Chile   | Peas                            | 2005           | 4                                                                     |
| 40               | Chile   | Pelagic Fish                    | 2005           | 35                                                                    |
| 40               | Chile   | Pigmeat                         | 2005           | 137                                                                   |
| 40               | Chile   | Pineapples and products         | 2005           | 2                                                                     |
| 40               | Chile   | Potatoes and products           | 2005           | 119                                                                   |
| 40               | Chile   | Poultry Meat                    | 2005           | 121                                                                   |
| 40               | Chile   | Pulses                          | 2005           | 43                                                                    |
| 40               | Chile   | Pulses, Other and products      | 2005           | 17                                                                    |
| 40               | Chile   | Rape and Mustard Oil            | 2005           | 21                                                                    |
| 40               | Chile   | Rice (Milled Equivalent)        | 2005           | 81                                                                    |
| 40               | Chile   | Rye and products                | 2005           | 1                                                                     |
| 40               | Chile   | Soyabean Oil                    | 2005           | 126                                                                   |
| 40               | Chile   | Spices                          | 2005           | 1                                                                     |
| 40               | Chile   | Spices, Other                   | 2005           | 1                                                                     |
| 40               | Chile   | Starchy Roots                   | 2005           | 121                                                                   |
| 40               | Chile   | Stimulants                      | 2005           | 9                                                                     |
| 40               | Chile   | Sugar & Sweeteners              | 2005           | 423                                                                   |
| 40               | Chile   | Sugar (Raw Equivalent)          | 2005           | 410                                                                   |
| 40               | Chile   | Sunflowerseed Oil               | 2005           | 40                                                                    |
| 40               | Chile   | Sweet potatoes                  | 2005           | 1                                                                     |
| 40               | Chile   | Sweeteners, Other               | 2005           | 12                                                                    |
| 40               | Chile   | Tea (including mate)            | 2005           | 2                                                                     |
| 40               | Chile   | Tomatoes and products           | 2005           | 16                                                                    |
| 40               | Chile   | Treenuts                        | 2005           | 2                                                                     |
| 40               | Chile   | Vegetable Oils                  | 2005           | 194                                                                   |
| 40               | Chile   | Vegetables                      | 2005           | 81                                                                    |
| 40               | Chile   | Vegetables, Other               | 2005           | 45                                                                    |
| 40               | Chile   | Vegetal Products                | 2005           | 2,242                                                                 |
| 40               | Chile   | Wheat and products              | 2005           | 933                                                                   |
| 40               | Chile   | Wine                            | 2005           | 29                                                                    |
| 40               | Chile   | Alcoholic Beverages             | 2006           | 78                                                                    |
| 40               | Chile   | Animal fats                     | 2006           | 78                                                                    |
| 40               | Chile   | Animal Products                 | 2006           | 706                                                                   |
| 40               | Chile   | Apples and products             | 2006           | 3                                                                     |
| 40               | Chile   | Bananas                         | 2006           | 16                                                                    |
| 40               | Chile   | Barley and products             | 2006           | 9                                                                     |
| 40               | Chile   | Beans                           | 2006           | 19                                                                    |
| 40               | Chile   | Beer                            | 2006           | 33                                                                    |
| 40               | Chile   | Beverages, Alcoholic            | 2006           | 17                                                                    |
| 40               | Chile   | Bovine Meat                     | 2006           | 114                                                                   |
| 40               | Chile   | Butter, Ghee                    | 2006           | 21                                                                    |
| 40               | Chile   | Cereals - Excluding Beer        | 2006           | 1,201                                                                 |
| 40               | Chile   | Cocoa Beans and products        | 2006           | 7                                                                     |
| 40               | Chile   | Coconuts - Incl Copra           | 2006           | 1                                                                     |
| 40               | Chile   | Coffee and products             | 2006           | 1                                                                     |
| 40               | Chile   | Crustaceans                     | 2006           | 1                                                                     |
| 40               | Chile   | Demersal Fish                   | 2006           | 3                                                                     |
| 40               | Chile   | Eggs                            | 2006           | 23                                                                    |
| 40               | Chile   | Fats, Animals, Raw              | 2006           | 57                                                                    |
| 40               | Chile   | Fish, Seafood                   | 2006           | 43                                                                    |
| 40               | Chile   | Freshwater Fish                 | 2006           | 1                                                                     |
| 40               | Chile   | Fruits - Excluding Wine         | 2006           | 70                                                                    |
| 40               | Chile   | Fruits, Other                   | 2006           | 31                                                                    |
| 40               | Chile   | Grand Total                     | 2006           | 2,957                                                                 |

Dietary calcium and zinc deficiency risks are decreasing but remain prevalent

| FAO Country code | Country | Food item                       | Reference year | Net energy supply (kcal capita <sup>-1</sup> d <sup>-1</sup> ) |
|------------------|---------|---------------------------------|----------------|----------------------------------------------------------------|
| 40               | Chile   | Grapes and products (excl wine) | 2006           | 10                                                             |
| 40               | Chile   | Groundnuts (Shelled Eq)         | 2006           | 8                                                              |
| 40               | Chile   | Lemons, Limes and products      | 2006           | 2                                                              |
| 40               | Chile   | Maize and products              | 2006           | 196                                                            |
| 40               | Chile   | Meat                            | 2006           | 410                                                            |
| 40               | Chile   | Meat, Other                     | 2006           | 1                                                              |
| 40               | Chile   | Milk - Excluding Butter         | 2006           | 145                                                            |
| 40               | Chile   | Molluscs, Other                 | 2006           | 1                                                              |
| 40               | Chile   | Mutton & Goat Meat              | 2006           | 3                                                              |
| 40               | Chile   | Oats                            | 2006           | 2                                                              |
| 40               | Chile   | Offals                          | 2006           | 8                                                              |
| 40               | Chile   | Oilcrops                        | 2006           | 12                                                             |
| 40               | Chile   | Oilcrops Oil, Other             | 2006           | 2                                                              |
| 40               | Chile   | Olive Oil                       | 2006           | 5                                                              |
| 40               | Chile   | Olives (including preserved)    | 2006           | 2                                                              |
| 40               | Chile   | Onions                          | 2006           | 22                                                             |
| 40               | Chile   | Oranges, Mandarines             | 2006           | 5                                                              |
| 40               | Chile   | Peas                            | 2006           | 4                                                              |
| 40               | Chile   | Pelagic Fish                    | 2006           | 38                                                             |
| 40               | Chile   | Pigmeat                         | 2006           | 153                                                            |
| 40               | Chile   | Pineapples and products         | 2006           | 2                                                              |
| 40               | Chile   | Potatoes and products           | 2006           | 123                                                            |
| 40               | Chile   | Poultry Meat                    | 2006           | 139                                                            |
| 40               | Chile   | Pulses                          | 2006           | 45                                                             |
| 40               | Chile   | Pulses, Other and products      | 2006           | 22                                                             |
| 40               | Chile   | Rape and Mustard Oil            | 2006           | 34                                                             |
| 40               | Chile   | Rice (Milled Equivalent)        | 2006           | 84                                                             |
| 40               | Chile   | Rye and products                | 2006           | 1                                                              |
| 40               | Chile   | Soyabean Oil                    | 2006           | 122                                                            |
| 40               | Chile   | Spices                          | 2006           | 1                                                              |
| 40               | Chile   | Spices, Other                   | 2006           | 1                                                              |
| 40               | Chile   | Starchy Roots                   | 2006           | 124                                                            |
| 40               | Chile   | Stimulants                      | 2006           | 10                                                             |
| 40               | Chile   | Sugar & Sweeteners              | 2006           | 421                                                            |
| 40               | Chile   | Sugar (Raw Equivalent)          | 2006           | 406                                                            |
| 40               | Chile   | Sunflowerseed Oil               | 2006           | 33                                                             |
| 40               | Chile   | Sweet potatoes                  | 2006           | 1                                                              |
| 40               | Chile   | Sweeteners, Other               | 2006           | 15                                                             |
| 40               | Chile   | Tea (including mate)            | 2006           | 2                                                              |
| 40               | Chile   | Tomatoes and products           | 2006           | 16                                                             |
| 40               | Chile   | Treenuts                        | 2006           | 12                                                             |
| 40               | Chile   | Vegetable Oils                  | 2006           | 196                                                            |
| 40               | Chile   | Vegetables                      | 2006           | 80                                                             |
| 40               | Chile   | Vegetables, Other               | 2006           | 42                                                             |
| 40               | Chile   | Vegetal Products                | 2006           | 2,251                                                          |
| 40               | Chile   | Wheat and products              | 2006           | 910                                                            |
| 40               | Chile   | Wine                            | 2006           | 28                                                             |
| 40               | Chile   | Alcoholic Beverages             | 2007           | 82                                                             |
| 40               | Chile   | Animal fats                     | 2007           | 82                                                             |
| 40               | Chile   | Animal Products                 | 2007           | 721                                                            |
| 40               | Chile   | Apples and products             | 2007           | 10                                                             |
| 40               | Chile   | Bananas                         | 2007           | 17                                                             |
| 40               | Chile   | Barley and products             | 2007           | 7                                                              |
| 40               | Chile   | Beans                           | 2007           | 15                                                             |
| 40               | Chile   | Beer                            | 2007           | 35                                                             |
| 40               | Chile   | Beverages, Alcoholic            | 2007           | 20                                                             |
| 40               | Chile   | Bovine Meat                     | 2007           | 119                                                            |
| 40               | Chile   | Butter, Ghee                    | 2007           | 20                                                             |
| 40               | Chile   | Cephalopods                     | 2007           | 1                                                              |
| 40               | Chile   | Cereals - Excluding Beer        | 2007           | 1,156                                                          |
| 40               | Chile   | Cereals, Other                  | 2007           | 3                                                              |
| 40               | Chile   | Cocoa Beans and products        | 2007           | 8                                                              |
| 40               | Chile   | Coconuts - Incl Copra           | 2007           | 2                                                              |
| 40               | Chile   | Coffee and products             | 2007           | 1                                                              |
| 40               | Chile   | Demersal Fish                   | 2007           | 2                                                              |
| 40               | Chile   | Eggs                            | 2007           | 24                                                             |
| 40               | Chile   | Fats, Animals, Raw              | 2007           | 62                                                             |
| 40               | Chile   | Fish, Seafood                   | 2007           | 48                                                             |
| 40               | Chile   | Fruits - Excluding Wine         | 2007           | 72                                                             |
| 40               | Chile   | Fruits, Other                   | 2007           | 27                                                             |
| 40               | Chile   | Grand Total                     | 2007           | 2,940                                                          |
| 40               | Chile   | Grapes and products (excl wine) | 2007           | 8                                                              |
| 40               | Chile   | Groundnuts (Shelled Eq)         | 2007           | 10                                                             |
| 40               | Chile   | Honey                           | 2007           | 1                                                              |
| 40               | Chile   | Lemons, Limes and products      | 2007           | 2                                                              |
| 40               | Chile   | Maize and products              | 2007           | 199                                                            |
| 40               | Chile   | Meat                            | 2007           | 426                                                            |
| 40               | Chile   | Meat, Other                     | 2007           | 1                                                              |
| 40               | Chile   | Milk - Excluding Butter         | 2007           | 132                                                            |
| 40               | Chile   | Miscellaneous                   | 2007           | 2                                                              |
| 40               | Chile   | Molluscs, Other                 | 2007           | 1                                                              |
| 40               | Chile   | Mutton & Goat Meat              | 2007           | 3                                                              |
| 40               | Chile   | Oats                            | 2007           | 2                                                              |
| 40               | Chile   | Offals                          | 2007           | 8                                                              |
| 40               | Chile   | Oilcrops                        | 2007           | 14                                                             |
| 40               | Chile   | Oilcrops Oil, Other             | 2007           | 3                                                              |
| 40               | Chile   | Olive Oil                       | 2007           | 5                                                              |
| 40               | Chile   | Olives (including preserved)    | 2007           | 2                                                              |
| 40               | Chile   | Onions                          | 2007           | 14                                                             |
| 40               | Chile   | Oranges, Mandarines             | 2007           | 5                                                              |
| 40               | Chile   | Peas                            | 2007           | 5                                                              |
| 40               | Chile   | Pelagic Fish                    | 2007           | 44                                                             |
| 40               | Chile   | Pigmeat                         | 2007           | 161                                                            |
| 40               | Chile   | Pineapples and products         | 2007           | 2                                                              |
| 40               | Chile   | Potatoes and products           | 2007           | 104                                                            |
| 40               | Chile   | Poultry Meat                    | 2007           | 143                                                            |
| 40               | Chile   | Pulses                          | 2007           | 35                                                             |

Dietary calcium and zinc deficiency risks are decreasing but remain prevalent

| FAO Country code | Country | Food item                       | Reference year | Net energy supply (kcal capita <sup>-1</sup> d <sup>-1</sup> ) |
|------------------|---------|---------------------------------|----------------|----------------------------------------------------------------|
| 40               | Chile   | Pulses, Other and products      | 2007           | 16                                                             |
| 40               | Chile   | Rape and Mustard Oil            | 2007           | 33                                                             |
| 40               | Chile   | Rice (Milled Equivalent)        | 2007           | 87                                                             |
| 40               | Chile   | Rye and products                | 2007           | 2                                                              |
| 40               | Chile   | Soyabean Oil                    | 2007           | 139                                                            |
| 40               | Chile   | Spices                          | 2007           | 1                                                              |
| 40               | Chile   | Spices, Other                   | 2007           | 1                                                              |
| 40               | Chile   | Starchy Roots                   | 2007           | 105                                                            |
| 40               | Chile   | Stimulants                      | 2007           | 10                                                             |
| 40               | Chile   | Sugar & Sweeteners              | 2007           | 458                                                            |
| 40               | Chile   | Sugar (Raw Equivalent)          | 2007           | 442                                                            |
| 40               | Chile   | Sunflowerseed Oil               | 2007           | 30                                                             |
| 40               | Chile   | Sweet potatoes                  | 2007           | 1                                                              |
| 40               | Chile   | Sweeteners, Other               | 2007           | 15                                                             |
| 40               | Chile   | Tea (including mate)            | 2007           | 2                                                              |
| 40               | Chile   | Tomatoes and products           | 2007           | 8                                                              |
| 40               | Chile   | Treenuts                        | 2007           | 10                                                             |
| 40               | Chile   | Vegetable Oils                  | 2007           | 211                                                            |
| 40               | Chile   | Vegetables                      | 2007           | 62                                                             |
| 40               | Chile   | Vegetables, Other               | 2007           | 40                                                             |
| 40               | Chile   | Vegetal Products                | 2007           | 2,219                                                          |
| 40               | Chile   | Wheat and products              | 2007           | 856                                                            |
| 40               | Chile   | Wine                            | 2007           | 28                                                             |
| 40               | Chile   | Alcoholic Beverages             | 2008           | 86                                                             |
| 40               | Chile   | Animal fats                     | 2008           | 80                                                             |
| 40               | Chile   | Animal Products                 | 2008           | 736                                                            |
| 40               | Chile   | Apples and products             | 2008           | 15                                                             |
| 40               | Chile   | Bananas                         | 2008           | 17                                                             |
| 40               | Chile   | Barley and products             | 2008           | 7                                                              |
| 40               | Chile   | Beans                           | 2008           | 13                                                             |
| 40               | Chile   | Beer                            | 2008           | 36                                                             |
| 40               | Chile   | Beverages, Alcoholic            | 2008           | 20                                                             |
| 40               | Chile   | Bovine Meat                     | 2008           | 114                                                            |
| 40               | Chile   | Butter, Ghee                    | 2008           | 18                                                             |
| 40               | Chile   | Cephalopods                     | 2008           | 2                                                              |
| 40               | Chile   | Cereals - Excluding Beer        | 2008           | 1,169                                                          |
| 40               | Chile   | Cereals, Other                  | 2008           | 4                                                              |
| 40               | Chile   | Cocoa Beans and products        | 2008           | 9                                                              |
| 40               | Chile   | Coconuts - Incl Copra           | 2008           | 1                                                              |
| 40               | Chile   | Crustaceans                     | 2008           | 1                                                              |
| 40               | Chile   | Demersal Fish                   | 2008           | 4                                                              |
| 40               | Chile   | Eggs                            | 2008           | 25                                                             |
| 40               | Chile   | Fats, Animals, Raw              | 2008           | 62                                                             |
| 40               | Chile   | Fish, Seafood                   | 2008           | 43                                                             |
| 40               | Chile   | Fruits - Excluding Wine         | 2008           | 74                                                             |
| 40               | Chile   | Fruits, Other                   | 2008           | 24                                                             |
| 40               | Chile   | Grand Total                     | 2008           | 2,952                                                          |
| 40               | Chile   | Grapes and products (excl wine) | 2008           | 8                                                              |
| 40               | Chile   | Groundnuts (Shelled Eq)         | 2008           | 9                                                              |
| 40               | Chile   | Lemons, Limes and products      | 2008           | 3                                                              |
| 40               | Chile   | Maize and products              | 2008           | 208                                                            |
| 40               | Chile   | Meat                            | 2008           | 428                                                            |
| 40               | Chile   | Meat, Other                     | 2008           | 1                                                              |
| 40               | Chile   | Milk - Excluding Butter         | 2008           | 151                                                            |
| 40               | Chile   | Molluscs, Other                 | 2008           | 1                                                              |
| 40               | Chile   | Mutton & Goat Meat              | 2008           | 3                                                              |
| 40               | Chile   | Oats                            | 2008           | 9                                                              |
| 40               | Chile   | Offals                          | 2008           | 9                                                              |
| 40               | Chile   | Oilcrops                        | 2008           | 13                                                             |
| 40               | Chile   | Oilcrops Oil, Other             | 2008           | 4                                                              |
| 40               | Chile   | Olive Oil                       | 2008           | 4                                                              |
| 40               | Chile   | Olives (including preserved)    | 2008           | 3                                                              |
| 40               | Chile   | Onions                          | 2008           | 11                                                             |
| 40               | Chile   | Oranges, Mandarines             | 2008           | 5                                                              |
| 40               | Chile   | Peas                            | 2008           | 4                                                              |
| 40               | Chile   | Pelagic Fish                    | 2008           | 35                                                             |
| 40               | Chile   | Pepper                          | 2008           | 1                                                              |
| 40               | Chile   | Pigmeat                         | 2008           | 170                                                            |
| 40               | Chile   | Pineapples and products         | 2008           | 2                                                              |
| 40               | Chile   | Potatoes and products           | 2008           | 104                                                            |
| 40               | Chile   | Poultry Meat                    | 2008           | 139                                                            |
| 40               | Chile   | Pulses                          | 2008           | 33                                                             |
| 40               | Chile   | Pulses, Other and products      | 2008           | 16                                                             |
| 40               | Chile   | Rape and Mustard Oil            | 2008           | 37                                                             |
| 40               | Chile   | Rice (Milled Equivalent)        | 2008           | 94                                                             |
| 40               | Chile   | Rye and products                | 2008           | 2                                                              |
| 40               | Chile   | Soyabean Oil                    | 2008           | 112                                                            |
| 40               | Chile   | Spices                          | 2008           | 1                                                              |
| 40               | Chile   | Spices, Other                   | 2008           | 1                                                              |
| 40               | Chile   | Starchy Roots                   | 2008           | 105                                                            |
| 40               | Chile   | Stimulants                      | 2008           | 11                                                             |
| 40               | Chile   | Sugar & Sweeteners              | 2008           | 462                                                            |
| 40               | Chile   | Sugar (Raw Equivalent)          | 2008           | 450                                                            |
| 40               | Chile   | Sunflowerseed Oil               | 2008           | 32                                                             |
| 40               | Chile   | Sweet potatoes                  | 2008           | 1                                                              |
| 40               | Chile   | Sweeteners, Other               | 2008           | 12                                                             |
| 40               | Chile   | Tea (including mate)            | 2008           | 2                                                              |
| 40               | Chile   | Tomatoes and products           | 2008           | 10                                                             |
| 40               | Chile   | Treenuts                        | 2008           | 7                                                              |
| 40               | Chile   | Vegetable Oils                  | 2008           | 191                                                            |
| 40               | Chile   | Vegetables                      | 2008           | 64                                                             |
| 40               | Chile   | Vegetables, Other               | 2008           | 43                                                             |
| 40               | Chile   | Vegetal Products                | 2008           | 2,216                                                          |
| 40               | Chile   | Wheat and products              | 2008           | 846                                                            |
| 40               | Chile   | Wine                            | 2008           | 30                                                             |
| 40               | Chile   | Alcoholic Beverages             | 2009           | 90                                                             |
| 40               | Chile   | Animal fats                     | 2009           | 78                                                             |

Dietary calcium and zinc deficiency risks are decreasing but remain prevalent

| FAO Country code | Country | Food item                       | Reference year | Net energy supply (kcal capita <sup>-1</sup> d <sup>-1</sup> ) |
|------------------|---------|---------------------------------|----------------|----------------------------------------------------------------|
| 40               | Chile   | Animal Products                 | 2009           | 692                                                            |
| 40               | Chile   | Apples and products             | 2009           | 13                                                             |
| 40               | Chile   | Bananas                         | 2009           | 17                                                             |
| 40               | Chile   | Barley and products             | 2009           | 7                                                              |
| 40               | Chile   | Beans                           | 2009           | 15                                                             |
| 40               | Chile   | Beer                            | 2009           | 36                                                             |
| 40               | Chile   | Beverages, Alcoholic            | 2009           | 24                                                             |
| 40               | Chile   | Bovine Meat                     | 2009           | 108                                                            |
| 40               | Chile   | Butter, Ghee                    | 2009           | 20                                                             |
| 40               | Chile   | Cephalopods                     | 2009           | 1                                                              |
| 40               | Chile   | Cereals - Excluding Beer        | 2009           | 1,174                                                          |
| 40               | Chile   | Cereals, Other                  | 2009           | 7                                                              |
| 40               | Chile   | Cocoa Beans and products        | 2009           | 8                                                              |
| 40               | Chile   | Coconuts - Incl Copra           | 2009           | 1                                                              |
| 40               | Chile   | Crustaceans                     | 2009           | 1                                                              |
| 40               | Chile   | Demersal Fish                   | 2009           | 4                                                              |
| 40               | Chile   | Eggs                            | 2009           | 34                                                             |
| 40               | Chile   | Fats, Animals, Raw              | 2009           | 58                                                             |
| 40               | Chile   | Fish, Seafood                   | 2009           | 33                                                             |
| 40               | Chile   | Fruits - Excluding Wine         | 2009           | 77                                                             |
| 40               | Chile   | Fruits, Other                   | 2009           | 33                                                             |
| 40               | Chile   | Grand Total                     | 2009           | 2,911                                                          |
| 40               | Chile   | Grapes and products (excl wine) | 2009           | 7                                                              |
| 40               | Chile   | Groundnuts (Shelled Eq)         | 2009           | 9                                                              |
| 40               | Chile   | Lemons, Limes and products      | 2009           | 3                                                              |
| 40               | Chile   | Maize and products              | 2009           | 211                                                            |
| 40               | Chile   | Meat                            | 2009           | 405                                                            |
| 40               | Chile   | Milk - Excluding Butter         | 2009           | 135                                                            |
| 40               | Chile   | Molluscs, Other                 | 2009           | 1                                                              |
| 40               | Chile   | Mutton & Goat Meat              | 2009           | 3                                                              |
| 40               | Chile   | Oats                            | 2009           | 9                                                              |
| 40               | Chile   | Offals                          | 2009           | 7                                                              |
| 40               | Chile   | Oilcrops                        | 2009           | 15                                                             |
| 40               | Chile   | Oilcrops Oil, Other             | 2009           | 4                                                              |
| 40               | Chile   | Olive Oil                       | 2009           | 4                                                              |
| 40               | Chile   | Olives (including preserved)    | 2009           | 4                                                              |
| 40               | Chile   | Onions                          | 2009           | 16                                                             |
| 40               | Chile   | Oranges, Mandarines             | 2009           | 4                                                              |
| 40               | Chile   | Peas                            | 2009           | 4                                                              |
| 40               | Chile   | Pelagic Fish                    | 2009           | 26                                                             |
| 40               | Chile   | Pigmeat                         | 2009           | 163                                                            |
| 40               | Chile   | Pineapples and products         | 2009           | 2                                                              |
| 40               | Chile   | Potatoes and products           | 2009           | 98                                                             |
| 40               | Chile   | Poultry Meat                    | 2009           | 130                                                            |
| 40               | Chile   | Pulses                          | 2009           | 28                                                             |
| 40               | Chile   | Pulses, Other and products      | 2009           | 10                                                             |
| 40               | Chile   | Rape and Mustard Oil            | 2009           | 39                                                             |
| 40               | Chile   | Rice (Milled Equivalent)        | 2009           | 90                                                             |
| 40               | Chile   | Rye and products                | 2009           | 3                                                              |
| 40               | Chile   | Soyabean Oil                    | 2009           | 111                                                            |
| 40               | Chile   | Spices                          | 2009           | 1                                                              |
| 40               | Chile   | Starchy Roots                   | 2009           | 100                                                            |
| 40               | Chile   | Stimulants                      | 2009           | 10                                                             |
| 40               | Chile   | Sugar & Sweeteners              | 2009           | 461                                                            |
| 40               | Chile   | Sugar (Raw Equivalent)          | 2009           | 448                                                            |
| 40               | Chile   | Sunflowerseed Oil               | 2009           | 36                                                             |
| 40               | Chile   | Sweet potatoes                  | 2009           | 1                                                              |
| 40               | Chile   | Sweeteners, Other               | 2009           | 13                                                             |
| 40               | Chile   | Tea (including mate)            | 2009           | 1                                                              |
| 40               | Chile   | Tomatoes and products           | 2009           | 4                                                              |
| 40               | Chile   | Treenuts                        | 2009           | 5                                                              |
| 40               | Chile   | Vegetable Oils                  | 2009           | 194                                                            |
| 40               | Chile   | Vegetables                      | 2009           | 65                                                             |
| 40               | Chile   | Vegetables, Other               | 2009           | 45                                                             |
| 40               | Chile   | Vegetal Products                | 2009           | 2,219                                                          |
| 40               | Chile   | Wheat and products              | 2009           | 847                                                            |
| 40               | Chile   | Wine                            | 2009           | 30                                                             |
| 40               | Chile   | Alcoholic Beverages             | 2010           | 90                                                             |
| 40               | Chile   | Animal fats                     | 2010           | 85                                                             |
| 40               | Chile   | Animal Products                 | 2010           | 702                                                            |
| 40               | Chile   | Apples and products             | 2010           | 21                                                             |
| 40               | Chile   | Bananas                         | 2010           | 16                                                             |
| 40               | Chile   | Barley and products             | 2010           | 7                                                              |
| 40               | Chile   | Beans                           | 2010           | 11                                                             |
| 40               | Chile   | Beer                            | 2010           | 36                                                             |
| 40               | Chile   | Beverages, Alcoholic            | 2010           | 24                                                             |
| 40               | Chile   | Bovine Meat                     | 2010           | 111                                                            |
| 40               | Chile   | Butter, Ghee                    | 2010           | 22                                                             |
| 40               | Chile   | Cephalopods                     | 2010           | 2                                                              |
| 40               | Chile   | Cereals - Excluding Beer        | 2010           | 1,171                                                          |
| 40               | Chile   | Cereals, Other                  | 2010           | 9                                                              |
| 40               | Chile   | Cocoa Beans and products        | 2010           | 9                                                              |
| 40               | Chile   | Coconuts - Incl Copra           | 2010           | 2                                                              |
| 40               | Chile   | Coffee and products             | 2010           | 1                                                              |
| 40               | Chile   | Crustaceans                     | 2010           | 1                                                              |
| 40               | Chile   | Demersal Fish                   | 2010           | 5                                                              |
| 40               | Chile   | Eggs                            | 2010           | 34                                                             |
| 40               | Chile   | Fats, Animals, Raw              | 2010           | 63                                                             |
| 40               | Chile   | Fish, Seafood                   | 2010           | 29                                                             |
| 40               | Chile   | Freshwater Fish                 | 2010           | 1                                                              |
| 40               | Chile   | Fruits - Excluding Wine         | 2010           | 83                                                             |
| 40               | Chile   | Fruits, Other                   | 2010           | 28                                                             |
| 40               | Chile   | Grand Total                     | 2010           | 2,949                                                          |
| 40               | Chile   | Grapes and products (excl wine) | 2010           | 10                                                             |
| 40               | Chile   | Groundnuts (Shelled Eq)         | 2010           | 10                                                             |
| 40               | Chile   | Lemons, Limes and products      | 2010           | 2                                                              |
| 40               | Chile   | Maize and products              | 2010           | 198                                                            |

Dietary calcium and zinc deficiency risks are decreasing but remain prevalent

| FAO Country code | Country | Food item                       | Reference year | Net energy supply (kcal capita <sup>-1</sup> d <sup>-1</sup> ) |
|------------------|---------|---------------------------------|----------------|----------------------------------------------------------------|
| 40               | Chile   | Meat                            | 2010           | 413                                                            |
| 40               | Chile   | Meat, Other                     | 2010           | 1                                                              |
| 40               | Chile   | Milk - Excluding Butter         | 2010           | 135                                                            |
| 40               | Chile   | Miscellaneous                   | 2010           | 1                                                              |
| 40               | Chile   | Mutton & Goat Meat              | 2010           | 2                                                              |
| 40               | Chile   | Oats                            | 2010           | 11                                                             |
| 40               | Chile   | Offals                          | 2010           | 6                                                              |
| 40               | Chile   | Oilcrops                        | 2010           | 17                                                             |
| 40               | Chile   | Oilcrops Oil, Other             | 2010           | 4                                                              |
| 40               | Chile   | Olive Oil                       | 2010           | 3                                                              |
| 40               | Chile   | Olives (including preserved)    | 2010           | 5                                                              |
| 40               | Chile   | Onions                          | 2010           | 12                                                             |
| 40               | Chile   | Oranges, Mandarines             | 2010           | 3                                                              |
| 40               | Chile   | Peas                            | 2010           | 5                                                              |
| 40               | Chile   | Pelagic Fish                    | 2010           | 20                                                             |
| 40               | Chile   | Pigmeat                         | 2010           | 162                                                            |
| 40               | Chile   | Pineapples and products         | 2010           | 2                                                              |
| 40               | Chile   | Potatoes and products           | 2010           | 115                                                            |
| 40               | Chile   | Poultry Meat                    | 2010           | 137                                                            |
| 40               | Chile   | Pulses                          | 2010           | 36                                                             |
| 40               | Chile   | Pulses, Other and products      | 2010           | 21                                                             |
| 40               | Chile   | Rape and Mustard Oil            | 2010           | 31                                                             |
| 40               | Chile   | Rice (Milled Equivalent)        | 2010           | 78                                                             |
| 40               | Chile   | Rye and products                | 2010           | 2                                                              |
| 40               | Chile   | Soyabean Oil                    | 2010           | 108                                                            |
| 40               | Chile   | Spices                          | 2010           | 1                                                              |
| 40               | Chile   | Starchy Roots                   | 2010           | 116                                                            |
| 40               | Chile   | Stimulants                      | 2010           | 11                                                             |
| 40               | Chile   | Sugar & Sweeteners              | 2010           | 470                                                            |
| 40               | Chile   | Sugar (Raw Equivalent)          | 2010           | 445                                                            |
| 40               | Chile   | Sunflowerseed Oil               | 2010           | 35                                                             |
| 40               | Chile   | Sweet potatoes                  | 2010           | 2                                                              |
| 40               | Chile   | Sweeteners, Other               | 2010           | 25                                                             |
| 40               | Chile   | Tea (including mate)            | 2010           | 2                                                              |
| 40               | Chile   | Tomatoes and products           | 2010           | 3                                                              |
| 40               | Chile   | Treenuts                        | 2010           | 11                                                             |
| 40               | Chile   | Vegetable Oils                  | 2010           | 181                                                            |
| 40               | Chile   | Vegetables                      | 2010           | 59                                                             |
| 40               | Chile   | Vegetables, Other               | 2010           | 43                                                             |
| 40               | Chile   | Vegetal Products                | 2010           | 2,246                                                          |
| 40               | Chile   | Wheat and products              | 2010           | 867                                                            |
| 40               | Chile   | Wine                            | 2010           | 30                                                             |
| 40               | Chile   | Alcoholic Beverages             | 2011           | 89                                                             |
| 40               | Chile   | Animal fats                     | 2011           | 93                                                             |
| 40               | Chile   | Animal Products                 | 2011           | 734                                                            |
| 40               | Chile   | Apples and products             | 2011           | 12                                                             |
| 40               | Chile   | Bananas                         | 2011           | 17                                                             |
| 40               | Chile   | Barley and products             | 2011           | 7                                                              |
| 40               | Chile   | Beans                           | 2011           | 12                                                             |
| 40               | Chile   | Beer                            | 2011           | 38                                                             |
| 40               | Chile   | Beverages, Alcoholic            | 2011           | 20                                                             |
| 40               | Chile   | Bovine Meat                     | 2011           | 101                                                            |
| 40               | Chile   | Butter, Ghee                    | 2011           | 21                                                             |
| 40               | Chile   | Cephalopods                     | 2011           | 2                                                              |
| 40               | Chile   | Cereals - Excluding Beer        | 2011           | 1,185                                                          |
| 40               | Chile   | Cereals, Other                  | 2011           | 11                                                             |
| 40               | Chile   | Cocoa Beans and products        | 2011           | 6                                                              |
| 40               | Chile   | Coconuts - Incl Copra           | 2011           | 2                                                              |
| 40               | Chile   | Crustaceans                     | 2011           | 1                                                              |
| 40               | Chile   | Demersal Fish                   | 2011           | 5                                                              |
| 40               | Chile   | Eggs                            | 2011           | 35                                                             |
| 40               | Chile   | Fats, Animals, Raw              | 2011           | 72                                                             |
| 40               | Chile   | Fish, Seafood                   | 2011           | 29                                                             |
| 40               | Chile   | Freshwater Fish                 | 2011           | 1                                                              |
| 40               | Chile   | Fruits - Excluding Wine         | 2011           | 65                                                             |
| 40               | Chile   | Fruits, Other                   | 2011           | 21                                                             |
| 40               | Chile   | Grand Total                     | 2011           | 2,989                                                          |
| 40               | Chile   | Grapes and products (excl wine) | 2011           | 7                                                              |
| 40               | Chile   | Groundnuts (Shelled Eq)         | 2011           | 11                                                             |
| 40               | Chile   | Honey                           | 2011           | 1                                                              |
| 40               | Chile   | Lemons, Limes and products      | 2011           | 2                                                              |
| 40               | Chile   | Maize and products              | 2011           | 203                                                            |
| 40               | Chile   | Maize Germ Oil                  | 2011           | 1                                                              |
| 40               | Chile   | Meat                            | 2011           | 423                                                            |
| 40               | Chile   | Meat, Other                     | 2011           | 1                                                              |
| 40               | Chile   | Milk - Excluding Butter         | 2011           | 148                                                            |
| 40               | Chile   | Miscellaneous                   | 2011           | 2                                                              |
| 40               | Chile   | Mutton & Goat Meat              | 2011           | 3                                                              |
| 40               | Chile   | Oats                            | 2011           | 10                                                             |
| 40               | Chile   | Offals                          | 2011           | 6                                                              |
| 40               | Chile   | Oilcrops                        | 2011           | 17                                                             |
| 40               | Chile   | Oilcrops Oil, Other             | 2011           | 2                                                              |
| 40               | Chile   | Olive Oil                       | 2011           | 2                                                              |
| 40               | Chile   | Olives (including preserved)    | 2011           | 4                                                              |
| 40               | Chile   | Onions                          | 2011           | 12                                                             |
| 40               | Chile   | Oranges, Mandarines             | 2011           | 3                                                              |
| 40               | Chile   | Peas                            | 2011           | 4                                                              |
| 40               | Chile   | Pelagic Fish                    | 2011           | 20                                                             |
| 40               | Chile   | Pigmeat                         | 2011           | 167                                                            |
| 40               | Chile   | Pineapples and products         | 2011           | 3                                                              |
| 40               | Chile   | Potatoes and products           | 2011           | 133                                                            |
| 40               | Chile   | Poultry Meat                    | 2011           | 152                                                            |
| 40               | Chile   | Pulses                          | 2011           | 32                                                             |
| 40               | Chile   | Pulses, Other and products      | 2011           | 16                                                             |
| 40               | Chile   | Rape and Mustard Oil            | 2011           | 32                                                             |
| 40               | Chile   | Rice (Milled Equivalent)        | 2011           | 79                                                             |
| 40               | Chile   | Rye and products                | 2011           | 3                                                              |

Dietary calcium and zinc deficiency risks are decreasing but remain prevalent

| FAO Country code | Country         | Food item                  | Reference year | Net energy supply (kcal capita <sup>-1</sup> d <sup>-1</sup> ) |
|------------------|-----------------|----------------------------|----------------|----------------------------------------------------------------|
| 40               | Chile           | Soyabean Oil               | 2011           | 115                                                            |
| 40               | Chile           | Spices                     | 2011           | 1                                                              |
| 40               | Chile           | Spices, Other              | 2011           | 1                                                              |
| 40               | Chile           | Starchy Roots              | 2011           | 135                                                            |
| 40               | Chile           | Stimulants                 | 2011           | 8                                                              |
| 40               | Chile           | Sugar & Sweeteners         | 2011           | 470                                                            |
| 40               | Chile           | Sugar (Raw Equivalent)     | 2011           | 440                                                            |
| 40               | Chile           | Sunflowerseed Oil          | 2011           | 36                                                             |
| 40               | Chile           | Sweet potatoes             | 2011           | 2                                                              |
| 40               | Chile           | Sweeteners, Other          | 2011           | 30                                                             |
| 40               | Chile           | Tea (including mate)       | 2011           | 2                                                              |
| 40               | Chile           | Tomatoes and products      | 2011           | 3                                                              |
| 40               | Chile           | Treenuts                   | 2011           | 7                                                              |
| 40               | Chile           | Vegetable Oils             | 2011           | 187                                                            |
| 40               | Chile           | Vegetables                 | 2011           | 57                                                             |
| 40               | Chile           | Vegetables, Other          | 2011           | 42                                                             |
| 40               | Chile           | Vegetal Products           | 2011           | 2,256                                                          |
| 40               | Chile           | Wheat and products         | 2011           | 873                                                            |
| 40               | Chile           | Wine                       | 2011           | 32                                                             |
| 41               | China, mainland | Alcoholic Beverages        | 1992           | 61                                                             |
| 41               | China, mainland | Animal fats                | 1992           | 26                                                             |
| 41               | China, mainland | Animal Products            | 1992           | 331                                                            |
| 41               | China, mainland | Apples and products        | 1992           | 5                                                              |
| 41               | China, mainland | Aquatic Plants             | 1992           | 3                                                              |
| 41               | China, mainland | Aquatic Products, Other    | 1992           | 3                                                              |
| 41               | China, mainland | Bananas                    | 1992           | 3                                                              |
| 41               | China, mainland | Barley and products        | 1992           | 7                                                              |
| 41               | China, mainland | Beans                      | 1992           | 3                                                              |
| 41               | China, mainland | Beer                       | 1992           | 11                                                             |
| 41               | China, mainland | Beverages, Alcoholic       | 1992           | 49                                                             |
| 41               | China, mainland | Bovine Meat                | 1992           | 7                                                              |
| 41               | China, mainland | Butter, Chee               | 1992           | 1                                                              |
| 41               | China, mainland | Cassava and products       | 1992           | 3                                                              |
| 41               | China, mainland | Cereals - Excluding Beer   | 1992           | 1,543                                                          |
| 41               | China, mainland | Cereals, Other             | 1992           | 6                                                              |
| 41               | China, mainland | Coconut Oil                | 1992           | 1                                                              |
| 41               | China, mainland | Cottonseed Oil             | 1992           | 16                                                             |
| 41               | China, mainland | Crustaceans                | 1992           | 1                                                              |
| 41               | China, mainland | Demersal Fish              | 1992           | 1                                                              |
| 41               | China, mainland | Eggs                       | 1992           | 31                                                             |
| 41               | China, mainland | Fats, Animals, Raw         | 1992           | 24                                                             |
| 41               | China, mainland | Fish, Seafood              | 1992           | 18                                                             |
| 41               | China, mainland | Freshwater Fish            | 1992           | 9                                                              |
| 41               | China, mainland | Fruits - Excluding Wine    | 1992           | 20                                                             |
| 41               | China, mainland | Fruits, Other              | 1992           | 8                                                              |
| 41               | China, mainland | Grand Total                | 1992           | 2,456                                                          |
| 41               | China, mainland | Groundnut Oil              | 1992           | 17                                                             |
| 41               | China, mainland | Groundnuts (Shelled Eq)    | 1992           | 17                                                             |
| 41               | China, mainland | Honey                      | 1992           | 1                                                              |
| 41               | China, mainland | Maize and products         | 1992           | 41                                                             |
| 41               | China, mainland | Maize Germ Oil             | 1992           | 1                                                              |
| 41               | China, mainland | Marine Fish, Other         | 1992           | 3                                                              |
| 41               | China, mainland | Meat                       | 1992           | 238                                                            |
| 41               | China, mainland | Meat, Other                | 1992           | 1                                                              |
| 41               | China, mainland | Milk - Excluding Butter    | 1992           | 11                                                             |
| 41               | China, mainland | Millet and products        | 1992           | 16                                                             |
| 41               | China, mainland | Molluscs, Other            | 1992           | 1                                                              |
| 41               | China, mainland | Mutton & Goat Meat         | 1992           | 6                                                              |
| 41               | China, mainland | Oats                       | 1992           | 2                                                              |
| 41               | China, mainland | Offals                     | 1992           | 4                                                              |
| 41               | China, mainland | Oilcrops                   | 1992           | 52                                                             |
| 41               | China, mainland | Oilcrops Oil, Other        | 1992           | 1                                                              |
| 41               | China, mainland | Onions                     | 1992           | 4                                                              |
| 41               | China, mainland | Oranges, Mandarines        | 1992           | 3                                                              |
| 41               | China, mainland | Palm Oil                   | 1992           | 14                                                             |
| 41               | China, mainland | Peas                       | 1992           | 4                                                              |
| 41               | China, mainland | Pelagic Fish               | 1992           | 1                                                              |
| 41               | China, mainland | Pigmeat                    | 1992           | 206                                                            |
| 41               | China, mainland | Pimento                    | 1992           | 1                                                              |
| 41               | China, mainland | Potatoes and products      | 1992           | 28                                                             |
| 41               | China, mainland | Poultry Meat               | 1992           | 18                                                             |
| 41               | China, mainland | Pulses                     | 1992           | 10                                                             |
| 41               | China, mainland | Pulses, Other and products | 1992           | 3                                                              |
| 41               | China, mainland | Rape and Mustard Oil       | 1992           | 46                                                             |
| 41               | China, mainland | Rice (Milled Equivalent)   | 1992           | 764                                                            |
| 41               | China, mainland | Ricebran Oil               | 1992           | 2                                                              |
| 41               | China, mainland | Roots, Other               | 1992           | 2                                                              |
| 41               | China, mainland | Rye and products           | 1992           | 5                                                              |
| 41               | China, mainland | Sesame seed                | 1992           | 1                                                              |
| 41               | China, mainland | Sesameseed Oil             | 1992           | 3                                                              |
| 41               | China, mainland | Sorghum and products       | 1992           | 14                                                             |
| 41               | China, mainland | Soyabean Oil               | 1992           | 18                                                             |
| 41               | China, mainland | Soyabeans                  | 1992           | 33                                                             |
| 41               | China, mainland | Spices                     | 1992           | 2                                                              |
| 41               | China, mainland | Spices, Other              | 1992           | 1                                                              |
| 41               | China, mainland | Starchy Roots              | 1992           | 163                                                            |
| 41               | China, mainland | Sugar & Sweeteners         | 1992           | 67                                                             |
| 41               | China, mainland | Sugar (Raw Equivalent)     | 1992           | 62                                                             |
| 41               | China, mainland | Sugar non-centrifugal      | 1992           | 4                                                              |
| 41               | China, mainland | Sunflowerseed Oil          | 1992           | 9                                                              |
| 41               | China, mainland | Sweet potatoes             | 1992           | 130                                                            |
| 41               | China, mainland | Tomatoes and products      | 1992           | 3                                                              |
| 41               | China, mainland | Treenuts                   | 1992           | 3                                                              |
| 41               | China, mainland | Vegetable Oils             | 1992           | 128                                                            |
| 41               | China, mainland | Vegetables                 | 1992           | 75                                                             |
| 41               | China, mainland | Vegetables, Other          | 1992           | 68                                                             |
| 41               | China, mainland | Vegetal Products           | 1992           | 2,124                                                          |

Dietary calcium and zinc deficiency risks are decreasing but remain prevalent

| FAO Country code | Country         | Food item                       | Reference year | Net energy supply (kcal <i>capita</i> <sup>-1</sup> d <sup>-1</sup> ) |
|------------------|-----------------|---------------------------------|----------------|-----------------------------------------------------------------------|
| 41               | China, mainland | Wheat and products              | 1992           | 688                                                                   |
| 41               | China, mainland | Wine                            | 1992           | 1                                                                     |
| 41               | China, mainland | Alcoholic Beverages             | 1993           | 66                                                                    |
| 41               | China, mainland | Animal fats                     | 1993           | 27                                                                    |
| 41               | China, mainland | Animal Products                 | 1993           | 354                                                                   |
| 41               | China, mainland | Apples and products             | 1993           | 7                                                                     |
| 41               | China, mainland | Aquatic Plants                  | 1993           | 3                                                                     |
| 41               | China, mainland | Aquatic Products, Other         | 1993           | 3                                                                     |
| 41               | China, mainland | Bananas                         | 1993           | 3                                                                     |
| 41               | China, mainland | Barley and products             | 1993           | 6                                                                     |
| 41               | China, mainland | Beans                           | 1993           | 4                                                                     |
| 41               | China, mainland | Beer                            | 1993           | 13                                                                    |
| 41               | China, mainland | Beverages, Alcoholic            | 1993           | 52                                                                    |
| 41               | China, mainland | Beverages, Fermented            | 1993           | 1                                                                     |
| 41               | China, mainland | Bovine Meat                     | 1993           | 9                                                                     |
| 41               | China, mainland | Butter, Ghee                    | 1993           | 1                                                                     |
| 41               | China, mainland | Cassava and products            | 1993           | 3                                                                     |
| 41               | China, mainland | Cereals - Excluding Beer        | 1993           | 1,567                                                                 |
| 41               | China, mainland | Cereals, Other                  | 1993           | 5                                                                     |
| 41               | China, mainland | Cottonseed Oil                  | 1993           | 16                                                                    |
| 41               | China, mainland | Crustaceans                     | 1993           | 1                                                                     |
| 41               | China, mainland | Demersal Fish                   | 1993           | 1                                                                     |
| 41               | China, mainland | Eggs                            | 1993           | 36                                                                    |
| 41               | China, mainland | Fats, Animals, Raw              | 1993           | 25                                                                    |
| 41               | China, mainland | Fish, Seafood                   | 1993           | 20                                                                    |
| 41               | China, mainland | Freshwater Fish                 | 1993           | 11                                                                    |
| 41               | China, mainland | Fruits - Excluding Wine         | 1993           | 24                                                                    |
| 41               | China, mainland | Fruits, Other                   | 1993           | 8                                                                     |
| 41               | China, mainland | Grand Total                     | 1993           | 2,538                                                                 |
| 41               | China, mainland | Grapes and products (excl wine) | 1993           | 1                                                                     |
| 41               | China, mainland | Groundnut Oil                   | 1993           | 20                                                                    |
| 41               | China, mainland | Groundnuts (Shelled Eq)         | 1993           | 25                                                                    |
| 41               | China, mainland | Honey                           | 1993           | 1                                                                     |
| 41               | China, mainland | Maize and products              | 1993           | 44                                                                    |
| 41               | China, mainland | Maize Germ Oil                  | 1993           | 1                                                                     |
| 41               | China, mainland | Marine Fish, Other              | 1993           | 4                                                                     |
| 41               | China, mainland | Meat                            | 1993           | 252                                                                   |
| 41               | China, mainland | Meat, Other                     | 1993           | 1                                                                     |
| 41               | China, mainland | Milk - Excluding Butter         | 1993           | 11                                                                    |
| 41               | China, mainland | Millet and products             | 1993           | 18                                                                    |
| 41               | China, mainland | Molluscs, Other                 | 1993           | 1                                                                     |
| 41               | China, mainland | Mutton & Goat Meat              | 1993           | 6                                                                     |
| 41               | China, mainland | Oats                            | 1993           | 3                                                                     |
| 41               | China, mainland | Offals                          | 1993           | 5                                                                     |
| 41               | China, mainland | Oilcrops                        | 1993           | 70                                                                    |
| 41               | China, mainland | Oilcrops Oil, Other             | 1993           | 1                                                                     |
| 41               | China, mainland | Onions                          | 1993           | 5                                                                     |
| 41               | China, mainland | Oranges, Mandarines             | 1993           | 4                                                                     |
| 41               | China, mainland | Palm Oil                        | 1993           | 16                                                                    |
| 41               | China, mainland | Peas                            | 1993           | 4                                                                     |
| 41               | China, mainland | Pelagic Fish                    | 1993           | 1                                                                     |
| 41               | China, mainland | Pigmeat                         | 1993           | 213                                                                   |
| 41               | China, mainland | Pimento                         | 1993           | 1                                                                     |
| 41               | China, mainland | Potatoes and products           | 1993           | 28                                                                    |
| 41               | China, mainland | Poultry Meat                    | 1993           | 22                                                                    |
| 41               | China, mainland | Pulses                          | 1993           | 14                                                                    |
| 41               | China, mainland | Pulses, Other and products      | 1993           | 6                                                                     |
| 41               | China, mainland | Rape and Mustard Oil            | 1993           | 47                                                                    |
| 41               | China, mainland | Rice (Milled Equivalent)        | 1993           | 777                                                                   |
| 41               | China, mainland | Ricebran Oil                    | 1993           | 2                                                                     |
| 41               | China, mainland | Roots, Other                    | 1993           | 2                                                                     |
| 41               | China, mainland | Rye and products                | 1993           | 3                                                                     |
| 41               | China, mainland | Sesame seed                     | 1993           | 1                                                                     |
| 41               | China, mainland | Sesameseed Oil                  | 1993           | 3                                                                     |
| 41               | China, mainland | Sorghum and products            | 1993           | 16                                                                    |
| 41               | China, mainland | Soyabean Oil                    | 1993           | 17                                                                    |
| 41               | China, mainland | Soyabeans                       | 1993           | 43                                                                    |
| 41               | China, mainland | Spices                          | 1993           | 2                                                                     |
| 41               | China, mainland | Spices, Other                   | 1993           | 1                                                                     |
| 41               | China, mainland | Starchy Roots                   | 1993           | 173                                                                   |
| 41               | China, mainland | Sugar & Sweeteners              | 1993           | 50                                                                    |
| 41               | China, mainland | Sugar (Raw Equivalent)          | 1993           | 45                                                                    |
| 41               | China, mainland | Sugar non-centrifugal           | 1993           | 4                                                                     |
| 41               | China, mainland | Sunflowerseed Oil               | 1993           | 7                                                                     |
| 41               | China, mainland | Sweet potatoes                  | 1993           | 140                                                                   |
| 41               | China, mainland | Tomatoes and products           | 1993           | 4                                                                     |
| 41               | China, mainland | Treenuts                        | 1993           | 3                                                                     |
| 41               | China, mainland | Vegetable Oils                  | 1993           | 131                                                                   |
| 41               | China, mainland | Vegetables                      | 1993           | 85                                                                    |
| 41               | China, mainland | Vegetables, Other               | 1993           | 76                                                                    |
| 41               | China, mainland | Vegetal Products                | 1993           | 2,184                                                                 |
| 41               | China, mainland | Wheat and products              | 1993           | 695                                                                   |
| 41               | China, mainland | Wine                            | 1993           | 1                                                                     |
| 41               | China, mainland | Alcoholic Beverages             | 1994           | 68                                                                    |
| 41               | China, mainland | Animal fats                     | 1994           | 29                                                                    |
| 41               | China, mainland | Animal Products                 | 1994           | 390                                                                   |
| 41               | China, mainland | Apples and products             | 1994           | 8                                                                     |
| 41               | China, mainland | Aquatic Plants                  | 1994           | 3                                                                     |
| 41               | China, mainland | Aquatic Products, Other         | 1994           | 3                                                                     |
| 41               | China, mainland | Bananas                         | 1994           | 4                                                                     |
| 41               | China, mainland | Barley and products             | 1994           | 5                                                                     |
| 41               | China, mainland | Beans                           | 1994           | 3                                                                     |
| 41               | China, mainland | Beer                            | 1994           | 15                                                                    |
| 41               | China, mainland | Beverages, Alcoholic            | 1994           | 51                                                                    |
| 41               | China, mainland | Beverages, Fermented            | 1994           | 1                                                                     |
| 41               | China, mainland | Bovine Meat                     | 1994           | 10                                                                    |
| 41               | China, mainland | Butter, Ghee                    | 1994           | 1                                                                     |

Dietary calcium and zinc deficiency risks are decreasing but remain prevalent

| FAO Country code | Country         | Food item                       | Reference year | Net energy supply (kcal capita <sup>-1</sup> d <sup>-1</sup> ) |
|------------------|-----------------|---------------------------------|----------------|----------------------------------------------------------------|
| 41               | China, mainland | Cassava and products            | 1994           | 3                                                              |
| 41               | China, mainland | Cereals - Excluding Beer        | 1994           | 1,571                                                          |
| 41               | China, mainland | Cereals, Other                  | 1994           | 5                                                              |
| 41               | China, mainland | Coconut Oil                     | 1994           | 1                                                              |
| 41               | China, mainland | Cottonseed Oil                  | 1994           | 15                                                             |
| 41               | China, mainland | Crustaceans                     | 1994           | 2                                                              |
| 41               | China, mainland | Demersal Fish                   | 1994           | 2                                                              |
| 41               | China, mainland | Eggs                            | 1994           | 45                                                             |
| 41               | China, mainland | Fats, Animals, Raw              | 1994           | 27                                                             |
| 41               | China, mainland | Fish, Seafood                   | 1994           | 24                                                             |
| 41               | China, mainland | Freshwater Fish                 | 1994           | 13                                                             |
| 41               | China, mainland | Fruits - Excluding Wine         | 1994           | 28                                                             |
| 41               | China, mainland | Fruits, Other                   | 1994           | 10                                                             |
| 41               | China, mainland | Grand Total                     | 1994           | 2,603                                                          |
| 41               | China, mainland | Grapes and products (excl wine) | 1994           | 1                                                              |
| 41               | China, mainland | Groundnut Oil                   | 1994           | 22                                                             |
| 41               | China, mainland | Groundnuts (Shelled Eq)         | 1994           | 24                                                             |
| 41               | China, mainland | Maize and products              | 1994           | 50                                                             |
| 41               | China, mainland | Maize Germ Oil                  | 1994           | 1                                                              |
| 41               | China, mainland | Marine Fish, Other              | 1994           | 4                                                              |
| 41               | China, mainland | Meat                            | 1994           | 271                                                            |
| 41               | China, mainland | Meat, Other                     | 1994           | 1                                                              |
| 41               | China, mainland | Milk - Excluding Butter         | 1994           | 12                                                             |
| 41               | China, mainland | Millet and products             | 1994           | 18                                                             |
| 41               | China, mainland | Molluscs, Other                 | 1994           | 2                                                              |
| 41               | China, mainland | Mutton & Goat Meat              | 1994           | 7                                                              |
| 41               | China, mainland | Oats                            | 1994           | 2                                                              |
| 41               | China, mainland | Offals                          | 1994           | 5                                                              |
| 41               | China, mainland | Oilcrops                        | 1994           | 76                                                             |
| 41               | China, mainland | Oilcrops Oil, Other             | 1994           | 1                                                              |
| 41               | China, mainland | Onions                          | 1994           | 6                                                              |
| 41               | China, mainland | Oranges, Mandarines             | 1994           | 4                                                              |
| 41               | China, mainland | Palm Oil                        | 1994           | 25                                                             |
| 41               | China, mainland | Peas                            | 1994           | 5                                                              |
| 41               | China, mainland | Pelagic Fish                    | 1994           | 1                                                              |
| 41               | China, mainland | Pigmeat                         | 1994           | 228                                                            |
| 41               | China, mainland | Pimento                         | 1994           | 1                                                              |
| 41               | China, mainland | Potatoes and products           | 1994           | 25                                                             |
| 41               | China, mainland | Poultry Meat                    | 1994           | 25                                                             |
| 41               | China, mainland | Pulses                          | 1994           | 13                                                             |
| 41               | China, mainland | Pulses, Other and products      | 1994           | 5                                                              |
| 41               | China, mainland | Rape and Mustard Oil            | 1994           | 47                                                             |
| 41               | China, mainland | Rice (Milled Equivalent)        | 1994           | 780                                                            |
| 41               | China, mainland | Ricebran Oil                    | 1994           | 1                                                              |
| 41               | China, mainland | Roots, Other                    | 1994           | 2                                                              |
| 41               | China, mainland | Rye and products                | 1994           | 2                                                              |
| 41               | China, mainland | Sesame seed                     | 1994           | 2                                                              |
| 41               | China, mainland | Sesameseed Oil                  | 1994           | 3                                                              |
| 41               | China, mainland | Sorghum and products            | 1994           | 16                                                             |
| 41               | China, mainland | Soyabean Oil                    | 1994           | 20                                                             |
| 41               | China, mainland | Soyabean                        | 1994           | 50                                                             |
| 41               | China, mainland | Spices                          | 1994           | 1                                                              |
| 41               | China, mainland | Spices, Other                   | 1994           | 1                                                              |
| 41               | China, mainland | Starchy Roots                   | 1994           | 162                                                            |
| 41               | China, mainland | Sugar & Sweeteners              | 1994           | 56                                                             |
| 41               | China, mainland | Sugar (Raw Equivalent)          | 1994           | 51                                                             |
| 41               | China, mainland | Sugar non-centrifugal           | 1994           | 4                                                              |
| 41               | China, mainland | Sunflowerseed Oil               | 1994           | 7                                                              |
| 41               | China, mainland | Sweet potatoes                  | 1994           | 132                                                            |
| 41               | China, mainland | Tomatoes and products           | 1994           | 5                                                              |
| 41               | China, mainland | Treenuts                        | 1994           | 3                                                              |
| 41               | China, mainland | Vegetable Oils                  | 1994           | 143                                                            |
| 41               | China, mainland | Vegetables                      | 1994           | 92                                                             |
| 41               | China, mainland | Vegetables, Other               | 1994           | 82                                                             |
| 41               | China, mainland | Vegetal Products                | 1994           | 2,214                                                          |
| 41               | China, mainland | Wheat and products              | 1994           | 692                                                            |
| 41               | China, mainland | Wine                            | 1994           | 1                                                              |
| 41               | China, mainland | Alcoholic Beverages             | 1995           | 80                                                             |
| 41               | China, mainland | Animal fats                     | 1995           | 31                                                             |
| 41               | China, mainland | Animal Products                 | 1995           | 416                                                            |
| 41               | China, mainland | Apples and products             | 1995           | 10                                                             |
| 41               | China, mainland | Aquatic Plants                  | 1995           | 3                                                              |
| 41               | China, mainland | Aquatic Products, Other         | 1995           | 3                                                              |
| 41               | China, mainland | Bananas                         | 1995           | 4                                                              |
| 41               | China, mainland | Barley and products             | 1995           | 5                                                              |
| 41               | China, mainland | Beans                           | 1995           | 3                                                              |
| 41               | China, mainland | Beer                            | 1995           | 17                                                             |
| 41               | China, mainland | Beverages, Alcoholic            | 1995           | 61                                                             |
| 41               | China, mainland | Beverages, Fermented            | 1995           | 1                                                              |
| 41               | China, mainland | Bovine Meat                     | 1995           | 12                                                             |
| 41               | China, mainland | Butter, Ghee                    | 1995           | 1                                                              |
| 41               | China, mainland | Cassava and products            | 1995           | 4                                                              |
| 41               | China, mainland | Cereals - Excluding Beer        | 1995           | 1,586                                                          |
| 41               | China, mainland | Cereals, Other                  | 1995           | 4                                                              |
| 41               | China, mainland | Coconut Oil                     | 1995           | 1                                                              |
| 41               | China, mainland | Cottonseed Oil                  | 1995           | 14                                                             |
| 41               | China, mainland | Crustaceans                     | 1995           | 2                                                              |
| 41               | China, mainland | Demersal Fish                   | 1995           | 3                                                              |
| 41               | China, mainland | Eggs                            | 1995           | 50                                                             |
| 41               | China, mainland | Fats, Animals, Raw              | 1995           | 29                                                             |
| 41               | China, mainland | Fish, Seafood                   | 1995           | 28                                                             |
| 41               | China, mainland | Freshwater Fish                 | 1995           | 15                                                             |
| 41               | China, mainland | Fruits - Excluding Wine         | 1995           | 33                                                             |
| 41               | China, mainland | Fruits, Other                   | 1995           | 12                                                             |
| 41               | China, mainland | Grand Total                     | 1995           | 2,691                                                          |
| 41               | China, mainland | Grapes and products (excl wine) | 1995           | 1                                                              |
| 41               | China, mainland | Groundnut Oil                   | 1995           | 22                                                             |



Dietary calcium and zinc deficiency risks are decreasing but remain prevalent

| FAO Country code | Country         | Food item                       | Reference year | Net energy supply (kcal <i>capita</i> <sup>-1</sup> d <sup>-1</sup> ) |
|------------------|-----------------|---------------------------------|----------------|-----------------------------------------------------------------------|
| 41               | China, mainland | Groundnuts (Shelled Eq)         | 1995           | 27                                                                    |
| 41               | China, mainland | Honey                           | 1995           | 1                                                                     |
| 41               | China, mainland | Maize and products              | 1995           | 55                                                                    |
| 41               | China, mainland | Maize Germ Oil                  | 1995           | 1                                                                     |
| 41               | China, mainland | Marine Fish, Other              | 1995           | 4                                                                     |
| 41               | China, mainland | Meat                            | 1995           | 285                                                                   |
| 41               | China, mainland | Meat, Other                     | 1995           | 2                                                                     |
| 41               | China, mainland | Milk - Excluding Butter         | 1995           | 13                                                                    |
| 41               | China, mainland | Millet and products             | 1995           | 10                                                                    |
| 41               | China, mainland | Molluscs, Other                 | 1995           | 2                                                                     |
| 41               | China, mainland | Mutton & Goat Meat              | 1995           | 8                                                                     |
| 41               | China, mainland | Oats                            | 1995           | 2                                                                     |
| 41               | China, mainland | Offals                          | 1995           | 6                                                                     |
| 41               | China, mainland | Oilcrops                        | 1995           | 73                                                                    |
| 41               | China, mainland | Oilcrops Oil, Other             | 1995           | 1                                                                     |
| 41               | China, mainland | Onions                          | 1995           | 6                                                                     |
| 41               | China, mainland | Oranges, Mandarines             | 1995           | 5                                                                     |
| 41               | China, mainland | Palm Oil                        | 1995           | 26                                                                    |
| 41               | China, mainland | Peas                            | 1995           | 5                                                                     |
| 41               | China, mainland | Pelagic Fish                    | 1995           | 1                                                                     |
| 41               | China, mainland | Pigmeat                         | 1995           | 232                                                                   |
| 41               | China, mainland | Pimento                         | 1995           | 1                                                                     |
| 41               | China, mainland | Potatoes and products           | 1995           | 29                                                                    |
| 41               | China, mainland | Poultry Meat                    | 1995           | 31                                                                    |
| 41               | China, mainland | Pulses                          | 1995           | 14                                                                    |
| 41               | China, mainland | Pulses, Other and products      | 1995           | 6                                                                     |
| 41               | China, mainland | Rape and Mustard Oil            | 1995           | 46                                                                    |
| 41               | China, mainland | Rice (Milled Equivalent)        | 1995           | 801                                                                   |
| 41               | China, mainland | Ricebran Oil                    | 1995           | 2                                                                     |
| 41               | China, mainland | Roots, Other                    | 1995           | 2                                                                     |
| 41               | China, mainland | Rye and products                | 1995           | 3                                                                     |
| 41               | China, mainland | Sesame seed                     | 1995           | 1                                                                     |
| 41               | China, mainland | Sesameseed Oil                  | 1995           | 3                                                                     |
| 41               | China, mainland | Sorghum and products            | 1995           | 12                                                                    |
| 41               | China, mainland | Soyabean Oil                    | 1995           | 22                                                                    |
| 41               | China, mainland | Soyabeans                       | 1995           | 44                                                                    |
| 41               | China, mainland | Spices                          | 1995           | 2                                                                     |
| 41               | China, mainland | Spices, Other                   | 1995           | 1                                                                     |
| 41               | China, mainland | Starchy Roots                   | 1995           | 175                                                                   |
| 41               | China, mainland | Sugar & Sweeteners              | 1995           | 64                                                                    |
| 41               | China, mainland | Sugar (Raw Equivalent)          | 1995           | 60                                                                    |
| 41               | China, mainland | Sugar non-centrifugal           | 1995           | 4                                                                     |
| 41               | China, mainland | Sunflowerseed Oil               | 1995           | 7                                                                     |
| 41               | China, mainland | Sweet potatoes                  | 1995           | 139                                                                   |
| 41               | China, mainland | Tomatoes and products           | 1995           | 5                                                                     |
| 41               | China, mainland | Treenuts                        | 1995           | 3                                                                     |
| 41               | China, mainland | Vegetable Oils                  | 1995           | 145                                                                   |
| 41               | China, mainland | Vegetables                      | 1995           | 99                                                                    |
| 41               | China, mainland | Vegetables, Other               | 1995           | 88                                                                    |
| 41               | China, mainland | Vegetal Products                | 1995           | 2,275                                                                 |
| 41               | China, mainland | Wheat and products              | 1995           | 693                                                                   |
| 41               | China, mainland | Wine                            | 1995           | 1                                                                     |
| 41               | China, mainland | Alcoholic Beverages             | 1996           | 68                                                                    |
| 41               | China, mainland | Animal fats                     | 1996           | 28                                                                    |
| 41               | China, mainland | Animal Products                 | 1996           | 428                                                                   |
| 41               | China, mainland | Apples and products             | 1996           | 13                                                                    |
| 41               | China, mainland | Aquatic Plants                  | 1996           | 4                                                                     |
| 41               | China, mainland | Aquatic Products, Other         | 1996           | 4                                                                     |
| 41               | China, mainland | Bananas                         | 1996           | 4                                                                     |
| 41               | China, mainland | Barley and products             | 1996           | 4                                                                     |
| 41               | China, mainland | Beans                           | 1996           | 3                                                                     |
| 41               | China, mainland | Beer                            | 1996           | 18                                                                    |
| 41               | China, mainland | Beverages, Alcoholic            | 1996           | 48                                                                    |
| 41               | China, mainland | Beverages, Fermented            | 1996           | 1                                                                     |
| 41               | China, mainland | Bovine Meat                     | 1996           | 14                                                                    |
| 41               | China, mainland | Butter, Ghee                    | 1996           | 1                                                                     |
| 41               | China, mainland | Cassava and products            | 1996           | 4                                                                     |
| 41               | China, mainland | Cereals - Excluding Beer        | 1996           | 1,593                                                                 |
| 41               | China, mainland | Cereals, Other                  | 1996           | 4                                                                     |
| 41               | China, mainland | Coconut Oil                     | 1996           | 1                                                                     |
| 41               | China, mainland | Cottonseed Oil                  | 1996           | 13                                                                    |
| 41               | China, mainland | Crustaceans                     | 1996           | 3                                                                     |
| 41               | China, mainland | Demersal Fish                   | 1996           | 3                                                                     |
| 41               | China, mainland | Eggs                            | 1996           | 58                                                                    |
| 41               | China, mainland | Fats, Animals, Raw              | 1996           | 27                                                                    |
| 41               | China, mainland | Fish, Seafood                   | 1996           | 31                                                                    |
| 41               | China, mainland | Freshwater Fish                 | 1996           | 17                                                                    |
| 41               | China, mainland | Fruits - Excluding Wine         | 1996           | 36                                                                    |
| 41               | China, mainland | Fruits, Other                   | 1996           | 13                                                                    |
| 41               | China, mainland | Grand Total                     | 1996           | 2,694                                                                 |
| 41               | China, mainland | Grapes and products (excl wine) | 1996           | 1                                                                     |
| 41               | China, mainland | Groundnut Oil                   | 1996           | 23                                                                    |
| 41               | China, mainland | Groundnuts (Shelled Eq)         | 1996           | 25                                                                    |
| 41               | China, mainland | Honey                           | 1996           | 1                                                                     |
| 41               | China, mainland | Maize and products              | 1996           | 63                                                                    |
| 41               | China, mainland | Maize Germ Oil                  | 1996           | 1                                                                     |
| 41               | China, mainland | Marine Fish, Other              | 1996           | 5                                                                     |
| 41               | China, mainland | Meat                            | 1996           | 287                                                                   |
| 41               | China, mainland | Meat, Other                     | 1996           | 2                                                                     |
| 41               | China, mainland | Milk - Excluding Butter         | 1996           | 14                                                                    |
| 41               | China, mainland | Millet and products             | 1996           | 11                                                                    |
| 41               | China, mainland | Molluscs, Other                 | 1996           | 2                                                                     |
| 41               | China, mainland | Mutton & Goat Meat              | 1996           | 8                                                                     |
| 41               | China, mainland | Oats                            | 1996           | 2                                                                     |
| 41               | China, mainland | Offals                          | 1996           | 6                                                                     |
| 41               | China, mainland | Oilcrops                        | 1996           | 70                                                                    |
| 41               | China, mainland | Oilcrops Oil, Other             | 1996           | 1                                                                     |

Dietary calcium and zinc deficiency risks are decreasing but remain prevalent

| FAO Country code | Country         | Food item                       | Reference year | Net energy supply (kcal capita <sup>-1</sup> d <sup>-1</sup> ) |
|------------------|-----------------|---------------------------------|----------------|----------------------------------------------------------------|
| 41               | China, mainland | Onions                          | 1996           | 7                                                              |
| 41               | China, mainland | Oranges, Mandarines             | 1996           | 5                                                              |
| 41               | China, mainland | Palm Oil                        | 1996           | 20                                                             |
| 41               | China, mainland | Peas                            | 1996           | 5                                                              |
| 41               | China, mainland | Pelagic Fish                    | 1996           | 1                                                              |
| 41               | China, mainland | Pigmeat                         | 1996           | 232                                                            |
| 41               | China, mainland | Pimento                         | 1996           | 1                                                              |
| 41               | China, mainland | Potatoes and products           | 1996           | 32                                                             |
| 41               | China, mainland | Poultry Meat                    | 1996           | 31                                                             |
| 41               | China, mainland | Pulses                          | 1996           | 13                                                             |
| 41               | China, mainland | Pulses, Other and products      | 1996           | 5                                                              |
| 41               | China, mainland | Rape and Mustard Oil            | 1996           | 42                                                             |
| 41               | China, mainland | Rice (Milled Equivalent)        | 1996           | 805                                                            |
| 41               | China, mainland | Ricebran Oil                    | 1996           | 2                                                              |
| 41               | China, mainland | Roots, Other                    | 1996           | 2                                                              |
| 41               | China, mainland | Rye and products                | 1996           | 4                                                              |
| 41               | China, mainland | Sesame seed                     | 1996           | 1                                                              |
| 41               | China, mainland | Sesameseed Oil                  | 1996           | 3                                                              |
| 41               | China, mainland | Sorghum and products            | 1996           | 14                                                             |
| 41               | China, mainland | Soyabean Oil                    | 1996           | 26                                                             |
| 41               | China, mainland | Soyabeans                       | 1996           | 44                                                             |
| 41               | China, mainland | Spices                          | 1996           | 2                                                              |
| 41               | China, mainland | Spices, Other                   | 1996           | 1                                                              |
| 41               | China, mainland | Starchy Roots                   | 1996           | 159                                                            |
| 41               | China, mainland | Sugar & Sweeteners              | 1996           | 72                                                             |
| 41               | China, mainland | Sugar (Raw Equivalent)          | 1996           | 68                                                             |
| 41               | China, mainland | Sugar non-centrifugal           | 1996           | 4                                                              |
| 41               | China, mainland | Sunflowerseed Oil               | 1996           | 8                                                              |
| 41               | China, mainland | Sweet potatoes                  | 1996           | 121                                                            |
| 41               | China, mainland | Tomatoes and products           | 1996           | 6                                                              |
| 41               | China, mainland | Treenuts                        | 1996           | 3                                                              |
| 41               | China, mainland | Vegetable Oils                  | 1996           | 139                                                            |
| 41               | China, mainland | Vegetables                      | 1996           | 108                                                            |
| 41               | China, mainland | Vegetables, Other               | 1996           | 95                                                             |
| 41               | China, mainland | Vegetal Products                | 1996           | 2,266                                                          |
| 41               | China, mainland | Wheat and products              | 1996           | 687                                                            |
| 41               | China, mainland | Wine                            | 1996           | 1                                                              |
| 41               | China, mainland | Alcoholic Beverages             | 1997           | 71                                                             |
| 41               | China, mainland | Animal fats                     | 1997           | 28                                                             |
| 41               | China, mainland | Animal Products                 | 1997           | 442                                                            |
| 41               | China, mainland | Apples and products             | 1997           | 12                                                             |
| 41               | China, mainland | Aquatic Plants                  | 1997           | 4                                                              |
| 41               | China, mainland | Aquatic Products, Other         | 1997           | 4                                                              |
| 41               | China, mainland | Bananas                         | 1997           | 4                                                              |
| 41               | China, mainland | Barley and products             | 1997           | 4                                                              |
| 41               | China, mainland | Beans                           | 1997           | 4                                                              |
| 41               | China, mainland | Beer                            | 1997           | 20                                                             |
| 41               | China, mainland | Beverages, Alcoholic            | 1997           | 48                                                             |
| 41               | China, mainland | Beverages, Fermented            | 1997           | 1                                                              |
| 41               | China, mainland | Bovine Meat                     | 1997           | 17                                                             |
| 41               | China, mainland | Butter, Ghee                    | 1997           | 1                                                              |
| 41               | China, mainland | Cassava and products            | 1997           | 4                                                              |
| 41               | China, mainland | Cereals - Excluding Beer        | 1997           | 1,579                                                          |
| 41               | China, mainland | Cereals, Other                  | 1997           | 7                                                              |
| 41               | China, mainland | Coconuts - Incl Copra           | 1997           | 1                                                              |
| 41               | China, mainland | Cottonseed Oil                  | 1997           | 13                                                             |
| 41               | China, mainland | Crustaceans                     | 1997           | 3                                                              |
| 41               | China, mainland | Demersal Fish                   | 1997           | 3                                                              |
| 41               | China, mainland | Eggs                            | 1997           | 55                                                             |
| 41               | China, mainland | Fats, Animals, Raw              | 1997           | 27                                                             |
| 41               | China, mainland | Fish, Seafood                   | 1997           | 31                                                             |
| 41               | China, mainland | Freshwater Fish                 | 1997           | 17                                                             |
| 41               | China, mainland | Fruits - Excluding Wine         | 1997           | 39                                                             |
| 41               | China, mainland | Fruits, Other                   | 1997           | 15                                                             |
| 41               | China, mainland | Grand Total                     | 1997           | 2,725                                                          |
| 41               | China, mainland | Grapes and products (excl wine) | 1997           | 1                                                              |
| 41               | China, mainland | Groundnut Oil                   | 1997           | 23                                                             |
| 41               | China, mainland | Groundnuts (Shelled Eq)         | 1997           | 24                                                             |
| 41               | China, mainland | Honey                           | 1997           | 1                                                              |
| 41               | China, mainland | Maize and products              | 1997           | 49                                                             |
| 41               | China, mainland | Maize Germ Oil                  | 1997           | 1                                                              |
| 41               | China, mainland | Marine Fish, Other              | 1997           | 5                                                              |
| 41               | China, mainland | Meat                            | 1997           | 303                                                            |
| 41               | China, mainland | Meat, Other                     | 1997           | 2                                                              |
| 41               | China, mainland | Milk - Excluding Butter         | 1997           | 14                                                             |
| 41               | China, mainland | Millet and products             | 1997           | 10                                                             |
| 41               | China, mainland | Molluscs, Other                 | 1997           | 2                                                              |
| 41               | China, mainland | Mutton & Goat Meat              | 1997           | 10                                                             |
| 41               | China, mainland | Oats                            | 1997           | 2                                                              |
| 41               | China, mainland | Offals                          | 1997           | 6                                                              |
| 41               | China, mainland | Oilcrops                        | 1997           | 80                                                             |
| 41               | China, mainland | Oilcrops Oil, Other             | 1997           | 1                                                              |
| 41               | China, mainland | Onions                          | 1997           | 7                                                              |
| 41               | China, mainland | Oranges, Mandarines             | 1997           | 6                                                              |
| 41               | China, mainland | Palm Oil                        | 1997           | 21                                                             |
| 41               | China, mainland | Peas                            | 1997           | 3                                                              |
| 41               | China, mainland | Pigmeat                         | 1997           | 240                                                            |
| 41               | China, mainland | Pimento                         | 1997           | 1                                                              |
| 41               | China, mainland | Potatoes and products           | 1997           | 48                                                             |
| 41               | China, mainland | Poultry Meat                    | 1997           | 35                                                             |
| 41               | China, mainland | Pulses                          | 1997           | 12                                                             |
| 41               | China, mainland | Pulses, Other and products      | 1997           | 5                                                              |
| 41               | China, mainland | Rape and Mustard Oil            | 1997           | 39                                                             |
| 41               | China, mainland | Rice (Milled Equivalent)        | 1997           | 810                                                            |
| 41               | China, mainland | Ricebran Oil                    | 1997           | 2                                                              |
| 41               | China, mainland | Roots, Other                    | 1997           | 2                                                              |
| 41               | China, mainland | Rye and products                | 1997           | 2                                                              |

Dietary calcium and zinc deficiency risks are decreasing but remain prevalent

| FAO Country code | Country         | Food item                       | Reference year | Net energy supply (kcal capita <sup>-1</sup> d <sup>-1</sup> ) |
|------------------|-----------------|---------------------------------|----------------|----------------------------------------------------------------|
| 41               | China, mainland | Sesame seed                     | 1997           | 2                                                              |
| 41               | China, mainland | Sesameseed Oil                  | 1997           | 3                                                              |
| 41               | China, mainland | Sorghum and products            | 1997           | 8                                                              |
| 41               | China, mainland | Soyabean Oil                    | 1997           | 31                                                             |
| 41               | China, mainland | Soyabeans                       | 1997           | 53                                                             |
| 41               | China, mainland | Spices                          | 1997           | 2                                                              |
| 41               | China, mainland | Spices, Other                   | 1997           | 1                                                              |
| 41               | China, mainland | Starchy Roots                   | 1997           | 159                                                            |
| 41               | China, mainland | Sugar & Sweeteners              | 1997           | 81                                                             |
| 41               | China, mainland | Sugar (Raw Equivalent)          | 1997           | 77                                                             |
| 41               | China, mainland | Sugar non-centrifugal           | 1997           | 3                                                              |
| 41               | China, mainland | Sunflowerseed Oil               | 1997           | 6                                                              |
| 41               | China, mainland | Sweet potatoes                  | 1997           | 106                                                            |
| 41               | China, mainland | Tomatoes and products           | 1997           | 6                                                              |
| 41               | China, mainland | Treenuts                        | 1997           | 3                                                              |
| 41               | China, mainland | Vegetable Oils                  | 1997           | 142                                                            |
| 41               | China, mainland | Vegetables                      | 1997           | 113                                                            |
| 41               | China, mainland | Vegetables, Other               | 1997           | 100                                                            |
| 41               | China, mainland | Vegetal Products                | 1997           | 2,283                                                          |
| 41               | China, mainland | Wheat and products              | 1997           | 686                                                            |
| 41               | China, mainland | Wine                            | 1997           | 1                                                              |
| 41               | China, mainland | Alcoholic Beverages             | 1998           | 60                                                             |
| 41               | China, mainland | Animal fats                     | 1998           | 30                                                             |
| 41               | China, mainland | Animal Products                 | 1998           | 471                                                            |
| 41               | China, mainland | Apples and products             | 1998           | 13                                                             |
| 41               | China, mainland | Aquatic Plants                  | 1998           | 4                                                              |
| 41               | China, mainland | Aquatic Products, Other         | 1998           | 5                                                              |
| 41               | China, mainland | Bananas                         | 1998           | 5                                                              |
| 41               | China, mainland | Barley and products             | 1998           | 3                                                              |
| 41               | China, mainland | Beans                           | 1998           | 4                                                              |
| 41               | China, mainland | Beer                            | 1998           | 21                                                             |
| 41               | China, mainland | Beverages, Alcoholic            | 1998           | 36                                                             |
| 41               | China, mainland | Beverages, Fermented            | 1998           | 2                                                              |
| 41               | China, mainland | Bovine Meat                     | 1998           | 19                                                             |
| 41               | China, mainland | Butter, Ghee                    | 1998           | 1                                                              |
| 41               | China, mainland | Cassava and products            | 1998           | 4                                                              |
| 41               | China, mainland | Cereals - Excluding Beer        | 1998           | 1,581                                                          |
| 41               | China, mainland | Cereals, Other                  | 1998           | 4                                                              |
| 41               | China, mainland | Coconut Oil                     | 1998           | 1                                                              |
| 41               | China, mainland | Coconuts - Incl Copra           | 1998           | 1                                                              |
| 41               | China, mainland | Cottonseed Oil                  | 1998           | 13                                                             |
| 41               | China, mainland | Crustaceans                     | 1998           | 3                                                              |
| 41               | China, mainland | Demersal Fish                   | 1998           | 4                                                              |
| 41               | China, mainland | Eggs                            | 1998           | 59                                                             |
| 41               | China, mainland | Fats, Animals, Raw              | 1998           | 28                                                             |
| 41               | China, mainland | Fish, Seafood                   | 1998           | 32                                                             |
| 41               | China, mainland | Freshwater Fish                 | 1998           | 18                                                             |
| 41               | China, mainland | Fruits - Excluding Wine         | 1998           | 41                                                             |
| 41               | China, mainland | Fruits, Other                   | 1998           | 16                                                             |
| 41               | China, mainland | Grand Total                     | 1998           | 2,769                                                          |
| 41               | China, mainland | Grapes and products (excl wine) | 1998           | 1                                                              |
| 41               | China, mainland | Groundnut Oil                   | 1998           | 24                                                             |
| 41               | China, mainland | Groundnuts (Shelled Eq)         | 1998           | 36                                                             |
| 41               | China, mainland | Honey                           | 1998           | 1                                                              |
| 41               | China, mainland | Maize and products              | 1998           | 54                                                             |
| 41               | China, mainland | Maize Germ Oil                  | 1998           | 1                                                              |
| 41               | China, mainland | Marine Fish, Other              | 1998           | 5                                                              |
| 41               | China, mainland | Meat                            | 1998           | 325                                                            |
| 41               | China, mainland | Meat, Other                     | 1998           | 2                                                              |
| 41               | China, mainland | Milk - Excluding Butter         | 1998           | 14                                                             |
| 41               | China, mainland | Millet and products             | 1998           | 9                                                              |
| 41               | China, mainland | Molluscs, Other                 | 1998           | 2                                                              |
| 41               | China, mainland | Mutton & Goat Meat              | 1998           | 10                                                             |
| 41               | China, mainland | Oats                            | 1998           | 2                                                              |
| 41               | China, mainland | Offals                          | 1998           | 7                                                              |
| 41               | China, mainland | Oilcrops                        | 1998           | 81                                                             |
| 41               | China, mainland | Oilcrops Oil, Other             | 1998           | 1                                                              |
| 41               | China, mainland | Onions                          | 1998           | 8                                                              |
| 41               | China, mainland | Oranges, Mandarines             | 1998           | 5                                                              |
| 41               | China, mainland | Palm Oil                        | 1998           | 22                                                             |
| 41               | China, mainland | Peas                            | 1998           | 4                                                              |
| 41               | China, mainland | Pigmeat                         | 1998           | 255                                                            |
| 41               | China, mainland | Pimento                         | 1998           | 1                                                              |
| 41               | China, mainland | Potatoes and products           | 1998           | 59                                                             |
| 41               | China, mainland | Poultry Meat                    | 1998           | 39                                                             |
| 41               | China, mainland | Pulses                          | 1998           | 13                                                             |
| 41               | China, mainland | Pulses, Other and products      | 1998           | 6                                                              |
| 41               | China, mainland | Rape and Mustard Oil            | 1998           | 41                                                             |
| 41               | China, mainland | Rice (Milled Equivalent)        | 1998           | 815                                                            |
| 41               | China, mainland | Ricebran Oil                    | 1998           | 2                                                              |
| 41               | China, mainland | Roots, Other                    | 1998           | 2                                                              |
| 41               | China, mainland | Rye and products                | 1998           | 3                                                              |
| 41               | China, mainland | Sesame seed                     | 1998           | 2                                                              |
| 41               | China, mainland | Sesameseed Oil                  | 1998           | 3                                                              |
| 41               | China, mainland | Sorghum and products            | 1998           | 9                                                              |
| 41               | China, mainland | Soyabean Oil                    | 1998           | 30                                                             |
| 41               | China, mainland | Soyabeans                       | 1998           | 42                                                             |
| 41               | China, mainland | Spices                          | 1998           | 2                                                              |
| 41               | China, mainland | Spices, Other                   | 1998           | 1                                                              |
| 41               | China, mainland | Starchy Roots                   | 1998           | 173                                                            |
| 41               | China, mainland | Sugar & Sweeteners              | 1998           | 79                                                             |
| 41               | China, mainland | Sugar (Raw Equivalent)          | 1998           | 75                                                             |
| 41               | China, mainland | Sugar non-centrifugal           | 1998           | 4                                                              |
| 41               | China, mainland | Sunflowerseed Oil               | 1998           | 6                                                              |
| 41               | China, mainland | Sweet potatoes                  | 1998           | 108                                                            |
| 41               | China, mainland | Tomatoes and products           | 1998           | 6                                                              |
| 41               | China, mainland | Treenuts                        | 1998           | 4                                                              |

Dietary calcium and zinc deficiency risks are decreasing but remain prevalent

| FAO Country code | Country         | Food item                       | Reference year | Net energy supply (kcal <i>capita</i> <sup>-1</sup> d <sup>-1</sup> ) |
|------------------|-----------------|---------------------------------|----------------|-----------------------------------------------------------------------|
| 41               | China, mainland | Vegetable Oils                  | 1998           | 145                                                                   |
| 41               | China, mainland | Vegetables                      | 1998           | 117                                                                   |
| 41               | China, mainland | Vegetables, Other               | 1998           | 103                                                                   |
| 41               | China, mainland | Vegetal Products                | 1998           | 2,298                                                                 |
| 41               | China, mainland | Wheat and products              | 1998           | 683                                                                   |
| 41               | China, mainland | Wine                            | 1998           | 2                                                                     |
| 41               | China, mainland | Alcoholic Beverages             | 1999           | 57                                                                    |
| 41               | China, mainland | Animal fats                     | 1999           | 32                                                                    |
| 41               | China, mainland | Animal Products                 | 1999           | 488                                                                   |
| 41               | China, mainland | Apples and products             | 1999           | 14                                                                    |
| 41               | China, mainland | Aquatic Plants                  | 1999           | 5                                                                     |
| 41               | China, mainland | Aquatic Products, Other         | 1999           | 5                                                                     |
| 41               | China, mainland | Bananas                         | 1999           | 6                                                                     |
| 41               | China, mainland | Barley and products             | 1999           | 3                                                                     |
| 41               | China, mainland | Beans                           | 1999           | 3                                                                     |
| 41               | China, mainland | Beer                            | 1999           | 22                                                                    |
| 41               | China, mainland | Beverages, Alcoholic            | 1999           | 31                                                                    |
| 41               | China, mainland | Beverages, Fermented            | 1999           | 2                                                                     |
| 41               | China, mainland | Bovine Meat                     | 1999           | 20                                                                    |
| 41               | China, mainland | Butter, Ghee                    | 1999           | 1                                                                     |
| 41               | China, mainland | Cassava and products            | 1999           | 4                                                                     |
| 41               | China, mainland | Cephalopods                     | 1999           | 1                                                                     |
| 41               | China, mainland | Cereals - Excluding Beer        | 1999           | 1,565                                                                 |
| 41               | China, mainland | Cereals, Other                  | 1999           | 4                                                                     |
| 41               | China, mainland | Coconut Oil                     | 1999           | 1                                                                     |
| 41               | China, mainland | Coconuts - Incl Copra           | 1999           | 1                                                                     |
| 41               | China, mainland | Cottonseed Oil                  | 1999           | 14                                                                    |
| 41               | China, mainland | Crustaceans                     | 1999           | 3                                                                     |
| 41               | China, mainland | Demersal Fish                   | 1999           | 4                                                                     |
| 41               | China, mainland | Eggs                            | 1999           | 62                                                                    |
| 41               | China, mainland | Fats, Animals, Raw              | 1999           | 31                                                                    |
| 41               | China, mainland | Fish, Seafood                   | 1999           | 33                                                                    |
| 41               | China, mainland | Freshwater Fish                 | 1999           | 18                                                                    |
| 41               | China, mainland | Fruits - Excluding Wine         | 1999           | 47                                                                    |
| 41               | China, mainland | Fruits, Other                   | 1999           | 19                                                                    |
| 41               | China, mainland | Grand Total                     | 1999           | 2,763                                                                 |
| 41               | China, mainland | Grapes and products (excl wine) | 1999           | 1                                                                     |
| 41               | China, mainland | Groundnut Oil                   | 1999           | 23                                                                    |
| 41               | China, mainland | Groundnuts (Shelled Eq)         | 1999           | 36                                                                    |
| 41               | China, mainland | Honey                           | 1999           | 1                                                                     |
| 41               | China, mainland | Maize and products              | 1999           | 52                                                                    |
| 41               | China, mainland | Maize Germ Oil                  | 1999           | 1                                                                     |
| 41               | China, mainland | Marine Fish, Other              | 1999           | 4                                                                     |
| 41               | China, mainland | Meat                            | 1999           | 333                                                                   |
| 41               | China, mainland | Meat, Other                     | 1999           | 2                                                                     |
| 41               | China, mainland | Milk - Excluding Butter         | 1999           | 16                                                                    |
| 41               | China, mainland | Millet and products             | 1999           | 7                                                                     |
| 41               | China, mainland | Molluscs, Other                 | 1999           | 2                                                                     |
| 41               | China, mainland | Mutton & Goat Meat              | 1999           | 11                                                                    |
| 41               | China, mainland | Oats                            | 1999           | 1                                                                     |
| 41               | China, mainland | Offals                          | 1999           | 7                                                                     |
| 41               | China, mainland | Oilcrops                        | 1999           | 71                                                                    |
| 41               | China, mainland | Oilcrops Oil, Other             | 1999           | 1                                                                     |
| 41               | China, mainland | Onions                          | 1999           | 8                                                                     |
| 41               | China, mainland | Oranges, Mandarines             | 1999           | 6                                                                     |
| 41               | China, mainland | Palm Oil                        | 1999           | 22                                                                    |
| 41               | China, mainland | Peas                            | 1999           | 4                                                                     |
| 41               | China, mainland | Pelagic Fish                    | 1999           | 1                                                                     |
| 41               | China, mainland | Pigmeat                         | 1999           | 258                                                                   |
| 41               | China, mainland | Pimento                         | 1999           | 1                                                                     |
| 41               | China, mainland | Pineapples and products         | 1999           | 1                                                                     |
| 41               | China, mainland | Potatoes and products           | 1999           | 56                                                                    |
| 41               | China, mainland | Poultry Meat                    | 1999           | 43                                                                    |
| 41               | China, mainland | Pulses                          | 1999           | 12                                                                    |
| 41               | China, mainland | Pulses, Other and products      | 1999           | 6                                                                     |
| 41               | China, mainland | Rape and Mustard Oil            | 1999           | 41                                                                    |
| 41               | China, mainland | Rice (Milled Equivalent)        | 1999           | 816                                                                   |
| 41               | China, mainland | Ricebran Oil                    | 1999           | 2                                                                     |
| 41               | China, mainland | Roots, Other                    | 1999           | 2                                                                     |
| 41               | China, mainland | Rye and products                | 1999           | 2                                                                     |
| 41               | China, mainland | Sesame seed                     | 1999           | 3                                                                     |
| 41               | China, mainland | Sesameseed Oil                  | 1999           | 3                                                                     |
| 41               | China, mainland | Sorghum and products            | 1999           | 7                                                                     |
| 41               | China, mainland | Soyabean Oil                    | 1999           | 33                                                                    |
| 41               | China, mainland | Soyabeans                       | 1999           | 32                                                                    |
| 41               | China, mainland | Spices                          | 1999           | 2                                                                     |
| 41               | China, mainland | Spices, Other                   | 1999           | 1                                                                     |
| 41               | China, mainland | Starchy Roots                   | 1999           | 178                                                                   |
| 41               | China, mainland | Stimulants                      | 1999           | 1                                                                     |
| 41               | China, mainland | Sugar & Sweeteners              | 1999           | 60                                                                    |
| 41               | China, mainland | Sugar (Raw Equivalent)          | 1999           | 56                                                                    |
| 41               | China, mainland | Sugar non-centrifugal           | 1999           | 4                                                                     |
| 41               | China, mainland | Sunflowerseed Oil               | 1999           | 7                                                                     |
| 41               | China, mainland | Sweet potatoes                  | 1999           | 116                                                                   |
| 41               | China, mainland | Tomatoes and products           | 1999           | 7                                                                     |
| 41               | China, mainland | Treenuts                        | 1999           | 4                                                                     |
| 41               | China, mainland | Vegetable Oils                  | 1999           | 148                                                                   |
| 41               | China, mainland | Vegetables                      | 1999           | 128                                                                   |
| 41               | China, mainland | Vegetables, Other               | 1999           | 112                                                                   |
| 41               | China, mainland | Vegetal Products                | 1999           | 2,274                                                                 |
| 41               | China, mainland | Wheat and products              | 1999           | 671                                                                   |
| 41               | China, mainland | Wine                            | 1999           | 2                                                                     |
| 41               | China, mainland | Alcoholic Beverages             | 2000           | 56                                                                    |
| 41               | China, mainland | Animal fats                     | 2000           | 38                                                                    |
| 41               | China, mainland | Animal Products                 | 2000           | 518                                                                   |
| 41               | China, mainland | Apples and products             | 2000           | 13                                                                    |
| 41               | China, mainland | Aquatic Plants                  | 2000           | 5                                                                     |

Dietary calcium and zinc deficiency risks are decreasing but remain prevalent

| FAO Country code | Country         | Food item                       | Reference year | Net energy supply (kcal capita <sup>-1</sup> d <sup>-1</sup> ) |
|------------------|-----------------|---------------------------------|----------------|----------------------------------------------------------------|
| 41               | China, mainland | Aquatic Products, Other         | 2000           | 6                                                              |
| 41               | China, mainland | Bananas                         | 2000           | 7                                                              |
| 41               | China, mainland | Barley and products             | 2000           | 1                                                              |
| 41               | China, mainland | Beans                           | 2000           | 3                                                              |
| 41               | China, mainland | Beer                            | 2000           | 23                                                             |
| 41               | China, mainland | Beverages, Alcoholic            | 2000           | 29                                                             |
| 41               | China, mainland | Beverages, Fermented            | 2000           | 2                                                              |
| 41               | China, mainland | Bovine Meat                     | 2000           | 22                                                             |
| 41               | China, mainland | Butter, Ghee                    | 2000           | 1                                                              |
| 41               | China, mainland | Cassava and products            | 2000           | 4                                                              |
| 41               | China, mainland | Cephalopods                     | 2000           | 1                                                              |
| 41               | China, mainland | Cereals - Excluding Beer        | 2000           | 1,545                                                          |
| 41               | China, mainland | Cereals, Other                  | 2000           | 4                                                              |
| 41               | China, mainland | Coconut Oil                     | 2000           | 2                                                              |
| 41               | China, mainland | Coconuts - Incl Copra           | 2000           | 1                                                              |
| 41               | China, mainland | Cottonseed Oil                  | 2000           | 14                                                             |
| 41               | China, mainland | Crustaceans                     | 2000           | 3                                                              |
| 41               | China, mainland | Demersal Fish                   | 2000           | 4                                                              |
| 41               | China, mainland | Eggs                            | 2000           | 62                                                             |
| 41               | China, mainland | Fats, Animals, Raw              | 2000           | 37                                                             |
| 41               | China, mainland | Fish, Seafood                   | 2000           | 34                                                             |
| 41               | China, mainland | Freshwater Fish                 | 2000           | 18                                                             |
| 41               | China, mainland | Fruits - Excluding Wine         | 2000           | 47                                                             |
| 41               | China, mainland | Fruits, Other                   | 2000           | 20                                                             |
| 41               | China, mainland | Grand Total                     | 2000           | 2,806                                                          |
| 41               | China, mainland | Grapes and products (excl wine) | 2000           | 2                                                              |
| 41               | China, mainland | Groundnut Oil                   | 2000           | 23                                                             |
| 41               | China, mainland | Groundnuts (Shelled Eq)         | 2000           | 37                                                             |
| 41               | China, mainland | Honey                           | 2000           | 1                                                              |
| 41               | China, mainland | Maize and products              | 2000           | 51                                                             |
| 41               | China, mainland | Maize Germ Oil                  | 2000           | 2                                                              |
| 41               | China, mainland | Marine Fish, Other              | 2000           | 4                                                              |
| 41               | China, mainland | Meat                            | 2000           | 353                                                            |
| 41               | China, mainland | Meat, Other                     | 2000           | 2                                                              |
| 41               | China, mainland | Milk - Excluding Butter         | 2000           | 17                                                             |
| 41               | China, mainland | Millet and products             | 2000           | 7                                                              |
| 41               | China, mainland | Molluscs, Other                 | 2000           | 3                                                              |
| 41               | China, mainland | Mutton & Goat Meat              | 2000           | 12                                                             |
| 41               | China, mainland | Oats                            | 2000           | 2                                                              |
| 41               | China, mainland | Offals                          | 2000           | 8                                                              |
| 41               | China, mainland | Oilcrops                        | 2000           | 78                                                             |
| 41               | China, mainland | Oilcrops Oil, Other             | 2000           | 1                                                              |
| 41               | China, mainland | Onions                          | 2000           | 10                                                             |
| 41               | China, mainland | Oranges, Mandarines             | 2000           | 5                                                              |
| 41               | China, mainland | Palm Oil                        | 2000           | 23                                                             |
| 41               | China, mainland | Peas                            | 2000           | 3                                                              |
| 41               | China, mainland | Pelagic Fish                    | 2000           | 2                                                              |
| 41               | China, mainland | Pigmeat                         | 2000           | 273                                                            |
| 41               | China, mainland | Pimento                         | 2000           | 1                                                              |
| 41               | China, mainland | Pineapples and products         | 2000           | 1                                                              |
| 41               | China, mainland | Potatoes and products           | 2000           | 65                                                             |
| 41               | China, mainland | Poultry Meat                    | 2000           | 45                                                             |
| 41               | China, mainland | Pulses                          | 2000           | 12                                                             |
| 41               | China, mainland | Pulses, Other and products      | 2000           | 6                                                              |
| 41               | China, mainland | Rape and Mustard Oil            | 2000           | 38                                                             |
| 41               | China, mainland | Rice (Milled Equivalent)        | 2000           | 817                                                            |
| 41               | China, mainland | Ricebran Oil                    | 2000           | 2                                                              |
| 41               | China, mainland | Roots, Other                    | 2000           | 2                                                              |
| 41               | China, mainland | Rye and products                | 2000           | 2                                                              |
| 41               | China, mainland | Sesame seed                     | 2000           | 3                                                              |
| 41               | China, mainland | Sesameseed Oil                  | 2000           | 4                                                              |
| 41               | China, mainland | Sorghum and products            | 2000           | 7                                                              |
| 41               | China, mainland | Soyabean Oil                    | 2000           | 36                                                             |
| 41               | China, mainland | Soyabeans                       | 2000           | 37                                                             |
| 41               | China, mainland | Spices                          | 2000           | 2                                                              |
| 41               | China, mainland | Spices, Other                   | 2000           | 1                                                              |
| 41               | China, mainland | Starchy Roots                   | 2000           | 184                                                            |
| 41               | China, mainland | Stimulants                      | 2000           | 1                                                              |
| 41               | China, mainland | Sugar & Sweeteners              | 2000           | 56                                                             |
| 41               | China, mainland | Sugar (Raw Equivalent)          | 2000           | 52                                                             |
| 41               | China, mainland | Sugar non-centrifugal           | 2000           | 3                                                              |
| 41               | China, mainland | Sunflowerseed Oil               | 2000           | 6                                                              |
| 41               | China, mainland | Sweet potatoes                  | 2000           | 113                                                            |
| 41               | China, mainland | Tomatoes and products           | 2000           | 8                                                              |
| 41               | China, mainland | Treenuts                        | 2000           | 4                                                              |
| 41               | China, mainland | Vegetable Oils                  | 2000           | 150                                                            |
| 41               | China, mainland | Vegetables                      | 2000           | 152                                                            |
| 41               | China, mainland | Vegetables, Other               | 2000           | 134                                                            |
| 41               | China, mainland | Vegetal Products                | 2000           | 2,288                                                          |
| 41               | China, mainland | Wheat and products              | 2000           | 654                                                            |
| 41               | China, mainland | Wine                            | 2000           | 2                                                              |
| 41               | China, mainland | Alcoholic Beverages             | 2001           | 70                                                             |
| 41               | China, mainland | Animal fats                     | 2001           | 36                                                             |
| 41               | China, mainland | Animal Products                 | 2001           | 518                                                            |
| 41               | China, mainland | Apples and products             | 2001           | 12                                                             |
| 41               | China, mainland | Aquatic Plants                  | 2001           | 6                                                              |
| 41               | China, mainland | Aquatic Products, Other         | 2001           | 6                                                              |
| 41               | China, mainland | Bananas                         | 2001           | 7                                                              |
| 41               | China, mainland | Barley and products             | 2001           | 2                                                              |
| 41               | China, mainland | Beans                           | 2001           | 3                                                              |
| 41               | China, mainland | Beer                            | 2001           | 24                                                             |
| 41               | China, mainland | Beverages, Alcoholic            | 2001           | 43                                                             |
| 41               | China, mainland | Beverages, Fermented            | 2001           | 2                                                              |
| 41               | China, mainland | Bovine Meat                     | 2001           | 22                                                             |
| 41               | China, mainland | Butter, Ghee                    | 2001           | 1                                                              |
| 41               | China, mainland | Cassava and products            | 2001           | 4                                                              |
| 41               | China, mainland | Cephalopods                     | 2001           | 1                                                              |

Dietary calcium and zinc deficiency risks are decreasing but remain prevalent

| FAO Country code | Country         | Food item                       | Reference year | Net energy supply (kcal capita <sup>-1</sup> d <sup>-1</sup> ) |
|------------------|-----------------|---------------------------------|----------------|----------------------------------------------------------------|
| 41               | China, mainland | Cereals - Excluding Beer        | 2001           | 1,526                                                          |
| 41               | China, mainland | Cereals, Other                  | 2001           | 4                                                              |
| 41               | China, mainland | Coconut Oil                     | 2001           | 2                                                              |
| 41               | China, mainland | Coconuts - Incl Copra           | 2001           | 1                                                              |
| 41               | China, mainland | Cottonseed Oil                  | 2001           | 14                                                             |
| 41               | China, mainland | Crustaceans                     | 2001           | 3                                                              |
| 41               | China, mainland | Demersal Fish                   | 2001           | 4                                                              |
| 41               | China, mainland | Eggs                            | 2001           | 63                                                             |
| 41               | China, mainland | Fats, Animals, Raw              | 2001           | 34                                                             |
| 41               | China, mainland | Fish, Seafood                   | 2001           | 33                                                             |
| 41               | China, mainland | Freshwater Fish                 | 2001           | 19                                                             |
| 41               | China, mainland | Fruits - Excluding Wine         | 2001           | 50                                                             |
| 41               | China, mainland | Fruits, Other                   | 2001           | 20                                                             |
| 41               | China, mainland | Grand Total                     | 2001           | 2,814                                                          |
| 41               | China, mainland | Grapes and products (excl wine) | 2001           | 2                                                              |
| 41               | China, mainland | Groundnut Oil                   | 2001           | 23                                                             |
| 41               | China, mainland | Groundnuts (Shelled Eq)         | 2001           | 38                                                             |
| 41               | China, mainland | Honey                           | 2001           | 1                                                              |
| 41               | China, mainland | Maize and products              | 2001           | 53                                                             |
| 41               | China, mainland | Maize Germ Oil                  | 2001           | 1                                                              |
| 41               | China, mainland | Marine Fish, Other              | 2001           | 2                                                              |
| 41               | China, mainland | Meat                            | 2001           | 352                                                            |
| 41               | China, mainland | Meat, Other                     | 2001           | 2                                                              |
| 41               | China, mainland | Milk - Excluding Butter         | 2001           | 20                                                             |
| 41               | China, mainland | Millet and products             | 2001           | 7                                                              |
| 41               | China, mainland | Molluscs, Other                 | 2001           | 3                                                              |
| 41               | China, mainland | Mutton & Goat Meat              | 2001           | 12                                                             |
| 41               | China, mainland | Oats                            | 2001           | 1                                                              |
| 41               | China, mainland | Offals                          | 2001           | 8                                                              |
| 41               | China, mainland | Oilcrops                        | 2001           | 78                                                             |
| 41               | China, mainland | Oilcrops Oil, Other             | 2001           | 2                                                              |
| 41               | China, mainland | Onions                          | 2001           | 11                                                             |
| 41               | China, mainland | Oranges, Mandarines             | 2001           | 7                                                              |
| 41               | China, mainland | Palm Oil                        | 2001           | 24                                                             |
| 41               | China, mainland | Peas                            | 2001           | 3                                                              |
| 41               | China, mainland | Pelagic Fish                    | 2001           | 1                                                              |
| 41               | China, mainland | Pigmeat                         | 2001           | 272                                                            |
| 41               | China, mainland | Pimento                         | 2001           | 1                                                              |
| 41               | China, mainland | Pineapples and products         | 2001           | 1                                                              |
| 41               | China, mainland | Potatoes and products           | 2001           | 63                                                             |
| 41               | China, mainland | Poultry Meat                    | 2001           | 44                                                             |
| 41               | China, mainland | Pulses                          | 2001           | 13                                                             |
| 41               | China, mainland | Pulses, Other and products      | 2001           | 7                                                              |
| 41               | China, mainland | Rape and Mustard Oil            | 2001           | 38                                                             |
| 41               | China, mainland | Rice (Milled Equivalent)        | 2001           | 812                                                            |
| 41               | China, mainland | Ricebran Oil                    | 2001           | 2                                                              |
| 41               | China, mainland | Roots, Other                    | 2001           | 2                                                              |
| 41               | China, mainland | Rye and products                | 2001           | 1                                                              |
| 41               | China, mainland | Sesame seed                     | 2001           | 3                                                              |
| 41               | China, mainland | Sesameseed Oil                  | 2001           | 4                                                              |
| 41               | China, mainland | Sorghum and products            | 2001           | 6                                                              |
| 41               | China, mainland | Soyabean Oil                    | 2001           | 38                                                             |
| 41               | China, mainland | Soyabeans                       | 2001           | 37                                                             |
| 41               | China, mainland | Spices                          | 2001           | 2                                                              |
| 41               | China, mainland | Spices, Other                   | 2001           | 1                                                              |
| 41               | China, mainland | Starchy Roots                   | 2001           | 184                                                            |
| 41               | China, mainland | Stimulants                      | 2001           | 1                                                              |
| 41               | China, mainland | Sugar & Sweeteners              | 2001           | 59                                                             |
| 41               | China, mainland | Sugar (Raw Equivalent)          | 2001           | 54                                                             |
| 41               | China, mainland | Sugar non-centrifugal           | 2001           | 3                                                              |
| 41               | China, mainland | Sunflowerseed Oil               | 2001           | 4                                                              |
| 41               | China, mainland | Sweet potatoes                  | 2001           | 115                                                            |
| 41               | China, mainland | Tomatoes and products           | 2001           | 9                                                              |
| 41               | China, mainland | Treenuts                        | 2001           | 4                                                              |
| 41               | China, mainland | Vegetable Oils                  | 2001           | 152                                                            |
| 41               | China, mainland | Vegetables                      | 2001           | 159                                                            |
| 41               | China, mainland | Vegetables, Other               | 2001           | 139                                                            |
| 41               | China, mainland | Vegetal Products                | 2001           | 2,297                                                          |
| 41               | China, mainland | Wheat and products              | 2001           | 640                                                            |
| 41               | China, mainland | Wine                            | 2001           | 2                                                              |
| 41               | China, mainland | Alcoholic Beverages             | 2002           | 72                                                             |
| 41               | China, mainland | Animal fats                     | 2002           | 34                                                             |
| 41               | China, mainland | Animal Products                 | 2002           | 529                                                            |
| 41               | China, mainland | Apples and products             | 2002           | 11                                                             |
| 41               | China, mainland | Aquatic Plants                  | 2002           | 6                                                              |
| 41               | China, mainland | Aquatic Products, Other         | 2002           | 6                                                              |
| 41               | China, mainland | Bananas                         | 2002           | 7                                                              |
| 41               | China, mainland | Barley and products             | 2002           | 2                                                              |
| 41               | China, mainland | Beans                           | 2002           | 3                                                              |
| 41               | China, mainland | Beer                            | 2002           | 25                                                             |
| 41               | China, mainland | Beverages, Alcoholic            | 2002           | 44                                                             |
| 41               | China, mainland | Beverages, Fermented            | 2002           | 2                                                              |
| 41               | China, mainland | Bovine Meat                     | 2002           | 22                                                             |
| 41               | China, mainland | Butter, Ghee                    | 2002           | 1                                                              |
| 41               | China, mainland | Cassava and products            | 2002           | 4                                                              |
| 41               | China, mainland | Cephalopods                     | 2002           | 1                                                              |
| 41               | China, mainland | Cereals - Excluding Beer        | 2002           | 1,511                                                          |
| 41               | China, mainland | Cereals, Other                  | 2002           | 4                                                              |
| 41               | China, mainland | Coconut Oil                     | 2002           | 3                                                              |
| 41               | China, mainland | Coconuts - Incl Copra           | 2002           | 1                                                              |
| 41               | China, mainland | Cottonseed Oil                  | 2002           | 15                                                             |
| 41               | China, mainland | Crustaceans                     | 2002           | 3                                                              |
| 41               | China, mainland | Dates                           | 2002           | 1                                                              |
| 41               | China, mainland | Demersal Fish                   | 2002           | 4                                                              |
| 41               | China, mainland | Eggs                            | 2002           | 64                                                             |
| 41               | China, mainland | Fats, Animals, Raw              | 2002           | 33                                                             |
| 41               | China, mainland | Fish, Seafood                   | 2002           | 35                                                             |

Dietary calcium and zinc deficiency risks are decreasing but remain prevalent

| FAO Country code | Country         | Food item                       | Reference year | Net energy supply (kcal <i>capita</i> <sup>-1</sup> d <sup>-1</sup> ) |
|------------------|-----------------|---------------------------------|----------------|-----------------------------------------------------------------------|
| 41               | China, mainland | Freshwater Fish                 | 2002           | 20                                                                    |
| 41               | China, mainland | Fruits - Excluding Wine         | 2002           | 51                                                                    |
| 41               | China, mainland | Fruits, Other                   | 2002           | 22                                                                    |
| 41               | China, mainland | Grand Total                     | 2002           | 2,830                                                                 |
| 41               | China, mainland | Grapes and products (excl wine) | 2002           | 2                                                                     |
| 41               | China, mainland | Groundnut Oil                   | 2002           | 23                                                                    |
| 41               | China, mainland | Groundnuts (Shelled Eq)         | 2002           | 37                                                                    |
| 41               | China, mainland | Honey                           | 2002           | 1                                                                     |
| 41               | China, mainland | Maize and products              | 2002           | 54                                                                    |
| 41               | China, mainland | Maize Germ Oil                  | 2002           | 1                                                                     |
| 41               | China, mainland | Marine Fish, Other              | 2002           | 2                                                                     |
| 41               | China, mainland | Meat                            | 2002           | 359                                                                   |
| 41               | China, mainland | Meat, Other                     | 2002           | 3                                                                     |
| 41               | China, mainland | Milk - Excluding Butter         | 2002           | 24                                                                    |
| 41               | China, mainland | Millet and products             | 2002           | 7                                                                     |
| 41               | China, mainland | Molluscs, Other                 | 2002           | 3                                                                     |
| 41               | China, mainland | Mutton & Goat Meat              | 2002           | 13                                                                    |
| 41               | China, mainland | Oats                            | 2002           | 1                                                                     |
| 41               | China, mainland | Offals                          | 2002           | 8                                                                     |
| 41               | China, mainland | Oilcrops                        | 2002           | 72                                                                    |
| 41               | China, mainland | Oilcrops Oil, Other             | 2002           | 1                                                                     |
| 41               | China, mainland | Onions                          | 2002           | 12                                                                    |
| 41               | China, mainland | Oranges, Mandarines             | 2002           | 7                                                                     |
| 41               | China, mainland | Palm Oil                        | 2002           | 29                                                                    |
| 41               | China, mainland | Peas                            | 2002           | 4                                                                     |
| 41               | China, mainland | Pelagic Fish                    | 2002           | 2                                                                     |
| 41               | China, mainland | Pigmeat                         | 2002           | 278                                                                   |
| 41               | China, mainland | Pimento                         | 2002           | 1                                                                     |
| 41               | China, mainland | Potatoes and products           | 2002           | 70                                                                    |
| 41               | China, mainland | Poultry Meat                    | 2002           | 44                                                                    |
| 41               | China, mainland | Pulses                          | 2002           | 13                                                                    |
| 41               | China, mainland | Pulses, Other and products      | 2002           | 6                                                                     |
| 41               | China, mainland | Rape and Mustard Oil            | 2002           | 39                                                                    |
| 41               | China, mainland | Rice (Milled Equivalent)        | 2002           | 807                                                                   |
| 41               | China, mainland | Ricebran Oil                    | 2002           | 1                                                                     |
| 41               | China, mainland | Roots, Other                    | 2002           | 2                                                                     |
| 41               | China, mainland | Rye and products                | 2002           | 1                                                                     |
| 41               | China, mainland | Sesame seed                     | 2002           | 3                                                                     |
| 41               | China, mainland | Sesameseed Oil                  | 2002           | 4                                                                     |
| 41               | China, mainland | Sorghum and products            | 2002           | 10                                                                    |
| 41               | China, mainland | Soyabean Oil                    | 2002           | 42                                                                    |
| 41               | China, mainland | Soyabeans                       | 2002           | 32                                                                    |
| 41               | China, mainland | Spices                          | 2002           | 2                                                                     |
| 41               | China, mainland | Spices, Other                   | 2002           | 1                                                                     |
| 41               | China, mainland | Starchy Roots                   | 2002           | 186                                                                   |
| 41               | China, mainland | Stimulants                      | 2002           | 1                                                                     |
| 41               | China, mainland | Sugar & Sweeteners              | 2002           | 56                                                                    |
| 41               | China, mainland | Sugar (Raw Equivalent)          | 2002           | 51                                                                    |
| 41               | China, mainland | Sugar non-centrifugal           | 2002           | 3                                                                     |
| 41               | China, mainland | Sunflowerseed Oil               | 2002           | 4                                                                     |
| 41               | China, mainland | Sweet potatoes                  | 2002           | 110                                                                   |
| 41               | China, mainland | Tomatoes and products           | 2002           | 10                                                                    |
| 41               | China, mainland | Treenuts                        | 2002           | 5                                                                     |
| 41               | China, mainland | Vegetable Oils                  | 2002           | 162                                                                   |
| 41               | China, mainland | Vegetables                      | 2002           | 170                                                                   |
| 41               | China, mainland | Vegetables, Other               | 2002           | 149                                                                   |
| 41               | China, mainland | Vegetal Products                | 2002           | 2,301                                                                 |
| 41               | China, mainland | Wheat and products              | 2002           | 625                                                                   |
| 41               | China, mainland | Wine                            | 2002           | 2                                                                     |
| 41               | China, mainland | Alcoholic Beverages             | 2003           | 66                                                                    |
| 41               | China, mainland | Animal fats                     | 2003           | 35                                                                    |
| 41               | China, mainland | Animal Products                 | 2003           | 556                                                                   |
| 41               | China, mainland | Apples and products             | 2003           | 12                                                                    |
| 41               | China, mainland | Aquatic Plants                  | 2003           | 7                                                                     |
| 41               | China, mainland | Aquatic Products, Other         | 2003           | 7                                                                     |
| 41               | China, mainland | Bananas                         | 2003           | 8                                                                     |
| 41               | China, mainland | Barley and products             | 2003           | 2                                                                     |
| 41               | China, mainland | Beans                           | 2003           | 2                                                                     |
| 41               | China, mainland | Beer                            | 2003           | 26                                                                    |
| 41               | China, mainland | Beverages, Alcoholic            | 2003           | 36                                                                    |
| 41               | China, mainland | Beverages, Fermented            | 2003           | 2                                                                     |
| 41               | China, mainland | Bovine Meat                     | 2003           | 23                                                                    |
| 41               | China, mainland | Butter, Ghee                    | 2003           | 2                                                                     |
| 41               | China, mainland | Cassava and products            | 2003           | 4                                                                     |
| 41               | China, mainland | Cephalopods                     | 2003           | 1                                                                     |
| 41               | China, mainland | Cereals - Excluding Beer        | 2003           | 1,483                                                                 |
| 41               | China, mainland | Cereals, Other                  | 2003           | 2                                                                     |
| 41               | China, mainland | Citrus, Other                   | 2003           | 1                                                                     |
| 41               | China, mainland | Coconut Oil                     | 2003           | 3                                                                     |
| 41               | China, mainland | Coconuts - Incl Copra           | 2003           | 1                                                                     |
| 41               | China, mainland | Cottonseed Oil                  | 2003           | 15                                                                    |
| 41               | China, mainland | Crustaceans                     | 2003           | 3                                                                     |
| 41               | China, mainland | Demersal Fish                   | 2003           | 5                                                                     |
| 41               | China, mainland | Eggs                            | 2003           | 66                                                                    |
| 41               | China, mainland | Fats, Animals, Raw              | 2003           | 33                                                                    |
| 41               | China, mainland | Fish, Seafood                   | 2003           | 36                                                                    |
| 41               | China, mainland | Freshwater Fish                 | 2003           | 20                                                                    |
| 41               | China, mainland | Fruits - Excluding Wine         | 2003           | 55                                                                    |
| 41               | China, mainland | Fruits, Other                   | 2003           | 23                                                                    |
| 41               | China, mainland | Grand Total                     | 2003           | 2,831                                                                 |
| 41               | China, mainland | Grapes and products (excl wine) | 2003           | 3                                                                     |
| 41               | China, mainland | Groundnut Oil                   | 2003           | 22                                                                    |
| 41               | China, mainland | Groundnuts (Shelled Eq)         | 2003           | 29                                                                    |
| 41               | China, mainland | Honey                           | 2003           | 1                                                                     |
| 41               | China, mainland | Maize and products              | 2003           | 55                                                                    |
| 41               | China, mainland | Maize Germ Oil                  | 2003           | 1                                                                     |
| 41               | China, mainland | Marine Fish, Other              | 2003           | 1                                                                     |

Dietary calcium and zinc deficiency risks are decreasing but remain prevalent

| FAO Country code | Country         | Food item                       | Reference year | Net energy supply (kcal capita <sup>-1</sup> d <sup>-1</sup> ) |
|------------------|-----------------|---------------------------------|----------------|----------------------------------------------------------------|
| 41               | China, mainland | Meat                            | 2003           | 375                                                            |
| 41               | China, mainland | Meat, Other                     | 2003           | 3                                                              |
| 41               | China, mainland | Milk - Excluding Butter         | 2003           | 29                                                             |
| 41               | China, mainland | Millet and products             | 2003           | 6                                                              |
| 41               | China, mainland | Molluscs, Other                 | 2003           | 3                                                              |
| 41               | China, mainland | Mutton & Goat Meat              | 2003           | 13                                                             |
| 41               | China, mainland | Offals                          | 2003           | 8                                                              |
| 41               | China, mainland | Oilcrops                        | 2003           | 65                                                             |
| 41               | China, mainland | Oilcrops Oil, Other             | 2003           | 1                                                              |
| 41               | China, mainland | Onions                          | 2003           | 12                                                             |
| 41               | China, mainland | Oranges, Mandarines             | 2003           | 7                                                              |
| 41               | China, mainland | Palm Oil                        | 2003           | 31                                                             |
| 41               | China, mainland | Palmkernel Oil                  | 2003           | 1                                                              |
| 41               | China, mainland | Peas                            | 2003           | 3                                                              |
| 41               | China, mainland | Pelagic Fish                    | 2003           | 2                                                              |
| 41               | China, mainland | Pigmeat                         | 2003           | 291                                                            |
| 41               | China, mainland | Pimento                         | 2003           | 1                                                              |
| 41               | China, mainland | Potatoes and products           | 2003           | 69                                                             |
| 41               | China, mainland | Poultry Meat                    | 2003           | 45                                                             |
| 41               | China, mainland | Pulses                          | 2003           | 12                                                             |
| 41               | China, mainland | Pulses, Other and products      | 2003           | 6                                                              |
| 41               | China, mainland | Rape and Mustard Oil            | 2003           | 38                                                             |
| 41               | China, mainland | Rice (Milled Equivalent)        | 2003           | 797                                                            |
| 41               | China, mainland | Ricebran Oil                    | 2003           | 1                                                              |
| 41               | China, mainland | Roots, Other                    | 2003           | 2                                                              |
| 41               | China, mainland | Rye and products                | 2003           | 1                                                              |
| 41               | China, mainland | Sesame seed                     | 2003           | 1                                                              |
| 41               | China, mainland | Sesameseed Oil                  | 2003           | 4                                                              |
| 41               | China, mainland | Sorghum and products            | 2003           | 8                                                              |
| 41               | China, mainland | Soyabean Oil                    | 2003           | 45                                                             |
| 41               | China, mainland | Soyabeans                       | 2003           | 34                                                             |
| 41               | China, mainland | Spices                          | 2003           | 2                                                              |
| 41               | China, mainland | Spices, Other                   | 2003           | 1                                                              |
| 41               | China, mainland | Starchy Roots                   | 2003           | 184                                                            |
| 41               | China, mainland | Stimulants                      | 2003           | 1                                                              |
| 41               | China, mainland | Sugar & Sweeteners              | 2003           | 62                                                             |
| 41               | China, mainland | Sugar (Raw Equivalent)          | 2003           | 56                                                             |
| 41               | China, mainland | Sugar non-centrifugal           | 2003           | 4                                                              |
| 41               | China, mainland | Sunflowerseed Oil               | 2003           | 5                                                              |
| 41               | China, mainland | Sweet potatoes                  | 2003           | 108                                                            |
| 41               | China, mainland | Tomatoes and products           | 2003           | 10                                                             |
| 41               | China, mainland | Treenuts                        | 2003           | 6                                                              |
| 41               | China, mainland | Vegetable Oils                  | 2003           | 167                                                            |
| 41               | China, mainland | Vegetables                      | 2003           | 173                                                            |
| 41               | China, mainland | Vegetables, Other               | 2003           | 151                                                            |
| 41               | China, mainland | Vegetal Products                | 2003           | 2,275                                                          |
| 41               | China, mainland | Wheat and products              | 2003           | 613                                                            |
| 41               | China, mainland | Wine                            | 2003           | 2                                                              |
| 41               | China, mainland | Alcoholic Beverages             | 2004           | 73                                                             |
| 41               | China, mainland | Animal fats                     | 2004           | 37                                                             |
| 41               | China, mainland | Animal Products                 | 2004           | 570                                                            |
| 41               | China, mainland | Apples and products             | 2004           | 14                                                             |
| 41               | China, mainland | Aquatic Plants                  | 2004           | 7                                                              |
| 41               | China, mainland | Aquatic Products, Other         | 2004           | 8                                                              |
| 41               | China, mainland | Bananas                         | 2004           | 8                                                              |
| 41               | China, mainland | Barley and products             | 2004           | 2                                                              |
| 41               | China, mainland | Beans                           | 2004           | 1                                                              |
| 41               | China, mainland | Beer                            | 2004           | 30                                                             |
| 41               | China, mainland | Beverages, Alcoholic            | 2004           | 39                                                             |
| 41               | China, mainland | Beverages, Fermented            | 2004           | 3                                                              |
| 41               | China, mainland | Bovine Meat                     | 2004           | 24                                                             |
| 41               | China, mainland | Butter, Ghee                    | 2004           | 2                                                              |
| 41               | China, mainland | Cassava and products            | 2004           | 4                                                              |
| 41               | China, mainland | Cephalopods                     | 2004           | 2                                                              |
| 41               | China, mainland | Cereals - Excluding Beer        | 2004           | 1,473                                                          |
| 41               | China, mainland | Cereals, Other                  | 2004           | 2                                                              |
| 41               | China, mainland | Citrus, Other                   | 2004           | 1                                                              |
| 41               | China, mainland | Coconut Oil                     | 2004           | 2                                                              |
| 41               | China, mainland | Coconuts - Incl Copra           | 2004           | 1                                                              |
| 41               | China, mainland | Cottonseed Oil                  | 2004           | 15                                                             |
| 41               | China, mainland | Crustaceans                     | 2004           | 3                                                              |
| 41               | China, mainland | Dates                           | 2004           | 1                                                              |
| 41               | China, mainland | Demersal Fish                   | 2004           | 5                                                              |
| 41               | China, mainland | Eggs                            | 2004           | 66                                                             |
| 41               | China, mainland | Fats, Animals, Raw              | 2004           | 36                                                             |
| 41               | China, mainland | Fish, Seafood                   | 2004           | 37                                                             |
| 41               | China, mainland | Freshwater Fish                 | 2004           | 21                                                             |
| 41               | China, mainland | Fruits - Excluding Wine         | 2004           | 60                                                             |
| 41               | China, mainland | Fruits, Other                   | 2004           | 26                                                             |
| 41               | China, mainland | Grand Total                     | 2004           | 2,854                                                          |
| 41               | China, mainland | Grapes and products (excl wine) | 2004           | 3                                                              |
| 41               | China, mainland | Groundnut Oil                   | 2004           | 19                                                             |
| 41               | China, mainland | Groundnuts (Shelled Eq)         | 2004           | 29                                                             |
| 41               | China, mainland | Honey                           | 2004           | 1                                                              |
| 41               | China, mainland | Maize and products              | 2004           | 55                                                             |
| 41               | China, mainland | Marine Fish, Other              | 2004           | 2                                                              |
| 41               | China, mainland | Meat                            | 2004           | 376                                                            |
| 41               | China, mainland | Meat, Other                     | 2004           | 3                                                              |
| 41               | China, mainland | Milk - Excluding Butter         | 2004           | 38                                                             |
| 41               | China, mainland | Millet and products             | 2004           | 6                                                              |
| 41               | China, mainland | Molluscs, Other                 | 2004           | 3                                                              |
| 41               | China, mainland | Mutton & Goat Meat              | 2004           | 14                                                             |
| 41               | China, mainland | Offals                          | 2004           | 8                                                              |
| 41               | China, mainland | Oilcrops                        | 2004           | 67                                                             |
| 41               | China, mainland | Oilcrops Oil, Other             | 2004           | 1                                                              |
| 41               | China, mainland | Onions                          | 2004           | 13                                                             |
| 41               | China, mainland | Oranges, Mandarines             | 2004           | 8                                                              |



Dietary calcium and zinc deficiency risks are decreasing but remain prevalent

| FAO Country code | Country         | Food item                       | Reference year | Net energy supply (kcal <i>capita</i> <sup>-1</sup> d <sup>-1</sup> ) |
|------------------|-----------------|---------------------------------|----------------|-----------------------------------------------------------------------|
| 41               | China, mainland | Palm Oil                        | 2004           | 31                                                                    |
| 41               | China, mainland | Palmkernel Oil                  | 2004           | 1                                                                     |
| 41               | China, mainland | Peas                            | 2004           | 3                                                                     |
| 41               | China, mainland | Pelagic Fish                    | 2004           | 3                                                                     |
| 41               | China, mainland | Pigmeat                         | 2004           | 291                                                                   |
| 41               | China, mainland | Pimento                         | 2004           | 1                                                                     |
| 41               | China, mainland | Potatoes and products           | 2004           | 78                                                                    |
| 41               | China, mainland | Poultry Meat                    | 2004           | 45                                                                    |
| 41               | China, mainland | Pulses                          | 2004           | 10                                                                    |
| 41               | China, mainland | Pulses, Other and products      | 2004           | 6                                                                     |
| 41               | China, mainland | Rape and Mustard Oil            | 2004           | 40                                                                    |
| 41               | China, mainland | Rice (Milled Equivalent)        | 2004           | 792                                                                   |
| 41               | China, mainland | Ricebran Oil                    | 2004           | 1                                                                     |
| 41               | China, mainland | Roots, Other                    | 2004           | 2                                                                     |
| 41               | China, mainland | Rye and products                | 2004           | 1                                                                     |
| 41               | China, mainland | Sesame seed                     | 2004           | 2                                                                     |
| 41               | China, mainland | Sesameseed Oil                  | 2004           | 4                                                                     |
| 41               | China, mainland | Sorghum and products            | 2004           | 6                                                                     |
| 41               | China, mainland | Soyabean Oil                    | 2004           | 48                                                                    |
| 41               | China, mainland | Soyabeans                       | 2004           | 35                                                                    |
| 41               | China, mainland | Spices                          | 2004           | 2                                                                     |
| 41               | China, mainland | Spices, Other                   | 2004           | 1                                                                     |
| 41               | China, mainland | Starchy Roots                   | 2004           | 189                                                                   |
| 41               | China, mainland | Stimulants                      | 2004           | 1                                                                     |
| 41               | China, mainland | Sugar & Sweeteners              | 2004           | 59                                                                    |
| 41               | China, mainland | Sugar (Raw Equivalent)          | 2004           | 55                                                                    |
| 41               | China, mainland | Sugar non-centrifugal           | 2004           | 3                                                                     |
| 41               | China, mainland | Sunflowerseed Oil               | 2004           | 4                                                                     |
| 41               | China, mainland | Sweet potatoes                  | 2004           | 105                                                                   |
| 41               | China, mainland | Tomatoes and products           | 2004           | 10                                                                    |
| 41               | China, mainland | Treenuts                        | 2004           | 7                                                                     |
| 41               | China, mainland | Vegetable Oils                  | 2004           | 166                                                                   |
| 41               | China, mainland | Vegetables                      | 2004           | 176                                                                   |
| 41               | China, mainland | Vegetables, Other               | 2004           | 153                                                                   |
| 41               | China, mainland | Vegetal Products                | 2004           | 2,284                                                                 |
| 41               | China, mainland | Wheat and products              | 2004           | 609                                                                   |
| 41               | China, mainland | Wine                            | 2004           | 2                                                                     |
| 41               | China, mainland | Alcoholic Beverages             | 2005           | 76                                                                    |
| 41               | China, mainland | Animal fats                     | 2005           | 34                                                                    |
| 41               | China, mainland | Animal Products                 | 2005           | 586                                                                   |
| 41               | China, mainland | Apples and products             | 2005           | 14                                                                    |
| 41               | China, mainland | Aquatic Plants                  | 2005           | 7                                                                     |
| 41               | China, mainland | Aquatic Products, Other         | 2005           | 8                                                                     |
| 41               | China, mainland | Bananas                         | 2005           | 8                                                                     |
| 41               | China, mainland | Barley and products             | 2005           | 2                                                                     |
| 41               | China, mainland | Beans                           | 2005           | 1                                                                     |
| 41               | China, mainland | Beer                            | 2005           | 32                                                                    |
| 41               | China, mainland | Beverages, Alcoholic            | 2005           | 40                                                                    |
| 41               | China, mainland | Beverages, Fermented            | 2005           | 3                                                                     |
| 41               | China, mainland | Bovine Meat                     | 2005           | 24                                                                    |
| 41               | China, mainland | Butter, Ghee                    | 2005           | 2                                                                     |
| 41               | China, mainland | Cassava and products            | 2005           | 4                                                                     |
| 41               | China, mainland | Cephalopods                     | 2005           | 1                                                                     |
| 41               | China, mainland | Cereals - Excluding Beer        | 2005           | 1,458                                                                 |
| 41               | China, mainland | Cereals, Other                  | 2005           | 2                                                                     |
| 41               | China, mainland | Citrus, Other                   | 2005           | 1                                                                     |
| 41               | China, mainland | Coconut Oil                     | 2005           | 2                                                                     |
| 41               | China, mainland | Coconuts - Incl Copra           | 2005           | 1                                                                     |
| 41               | China, mainland | Cottonseed Oil                  | 2005           | 16                                                                    |
| 41               | China, mainland | Crustaceans                     | 2005           | 3                                                                     |
| 41               | China, mainland | Dates                           | 2005           | 1                                                                     |
| 41               | China, mainland | Demersal Fish                   | 2005           | 5                                                                     |
| 41               | China, mainland | Eggs                            | 2005           | 68                                                                    |
| 41               | China, mainland | Fats, Animals, Raw              | 2005           | 32                                                                    |
| 41               | China, mainland | Fish, Seafood                   | 2005           | 38                                                                    |
| 41               | China, mainland | Freshwater Fish                 | 2005           | 22                                                                    |
| 41               | China, mainland | Fruits - Excluding Wine         | 2005           | 63                                                                    |
| 41               | China, mainland | Fruits, Other                   | 2005           | 28                                                                    |
| 41               | China, mainland | Grand Total                     | 2005           | 2,877                                                                 |
| 41               | China, mainland | Grapes and products (excl wine) | 2005           | 3                                                                     |
| 41               | China, mainland | Groundnut Oil                   | 2005           | 20                                                                    |
| 41               | China, mainland | Groundnuts (Shelled Eq)         | 2005           | 33                                                                    |
| 41               | China, mainland | Honey                           | 2005           | 1                                                                     |
| 41               | China, mainland | Maize and products              | 2005           | 56                                                                    |
| 41               | China, mainland | Maize Germ Oil                  | 2005           | 1                                                                     |
| 41               | China, mainland | Marine Fish, Other              | 2005           | 1                                                                     |
| 41               | China, mainland | Meat                            | 2005           | 389                                                                   |
| 41               | China, mainland | Meat, Other                     | 2005           | 3                                                                     |
| 41               | China, mainland | Milk - Excluding Butter         | 2005           | 42                                                                    |
| 41               | China, mainland | Millet and products             | 2005           | 5                                                                     |
| 41               | China, mainland | Molluscs, Other                 | 2005           | 3                                                                     |
| 41               | China, mainland | Mutton & Goat Meat              | 2005           | 15                                                                    |
| 41               | China, mainland | Offals                          | 2005           | 8                                                                     |
| 41               | China, mainland | Oilcrops                        | 2005           | 74                                                                    |
| 41               | China, mainland | Oilcrops Oil, Other             | 2005           | 1                                                                     |
| 41               | China, mainland | Onions                          | 2005           | 13                                                                    |
| 41               | China, mainland | Oranges, Mandarines             | 2005           | 9                                                                     |
| 41               | China, mainland | Palm Oil                        | 2005           | 33                                                                    |
| 41               | China, mainland | Palmkernel Oil                  | 2005           | 1                                                                     |
| 41               | China, mainland | Peas                            | 2005           | 3                                                                     |
| 41               | China, mainland | Pelagic Fish                    | 2005           | 2                                                                     |
| 41               | China, mainland | Pigmeat                         | 2005           | 299                                                                   |
| 41               | China, mainland | Pimento                         | 2005           | 1                                                                     |
| 41               | China, mainland | Potatoes and products           | 2005           | 77                                                                    |
| 41               | China, mainland | Poultry Meat                    | 2005           | 48                                                                    |
| 41               | China, mainland | Pulses                          | 2005           | 10                                                                    |
| 41               | China, mainland | Pulses, Other and products      | 2005           | 6                                                                     |

Dietary calcium and zinc deficiency risks are decreasing but remain prevalent

| FAO Country code | Country         | Food item                       | Reference year | Net energy supply (kcal <i>capita</i> <sup>-1</sup> d <sup>-1</sup> ) |
|------------------|-----------------|---------------------------------|----------------|-----------------------------------------------------------------------|
| 41               | China, mainland | Rape and Mustard Oil            | 2005           | 40                                                                    |
| 41               | China, mainland | Rice (Milled Equivalent)        | 2005           | 793                                                                   |
| 41               | China, mainland | Ricebran Oil                    | 2005           | 2                                                                     |
| 41               | China, mainland | Roots, Other                    | 2005           | 2                                                                     |
| 41               | China, mainland | Rye and products                | 2005           | 1                                                                     |
| 41               | China, mainland | Sesame seed                     | 2005           | 3                                                                     |
| 41               | China, mainland | Sesameseed Oil                  | 2005           | 4                                                                     |
| 41               | China, mainland | Sorghum and products            | 2005           | 6                                                                     |
| 41               | China, mainland | Soyabean Oil                    | 2005           | 49                                                                    |
| 41               | China, mainland | Soyabeans                       | 2005           | 37                                                                    |
| 41               | China, mainland | Spices                          | 2005           | 2                                                                     |
| 41               | China, mainland | Spices, Other                   | 2005           | 1                                                                     |
| 41               | China, mainland | Starchy Roots                   | 2005           | 187                                                                   |
| 41               | China, mainland | Stimulants                      | 2005           | 1                                                                     |
| 41               | China, mainland | Sugar & Sweeteners              | 2005           | 60                                                                    |
| 41               | China, mainland | Sugar (Raw Equivalent)          | 2005           | 55                                                                    |
| 41               | China, mainland | Sugar non-centrifugal           | 2005           | 3                                                                     |
| 41               | China, mainland | Sunflowerseed Oil               | 2005           | 4                                                                     |
| 41               | China, mainland | Sweet potatoes                  | 2005           | 104                                                                   |
| 41               | China, mainland | Sweeteners, Other               | 2005           | 1                                                                     |
| 41               | China, mainland | Tea (including mate)            | 2005           | 1                                                                     |
| 41               | China, mainland | Tomatoes and products           | 2005           | 11                                                                    |
| 41               | China, mainland | Treenuts                        | 2005           | 7                                                                     |
| 41               | China, mainland | Vegetable Oils                  | 2005           | 172                                                                   |
| 41               | China, mainland | Vegetables                      | 2005           | 182                                                                   |
| 41               | China, mainland | Vegetables, Other               | 2005           | 158                                                                   |
| 41               | China, mainland | Vegetal Products                | 2005           | 2,291                                                                 |
| 41               | China, mainland | Wheat and products              | 2005           | 593                                                                   |
| 41               | China, mainland | Wine                            | 2005           | 2                                                                     |
| 41               | China, mainland | Alcoholic Beverages             | 2006           | 80                                                                    |
| 41               | China, mainland | Animal fats                     | 2006           | 37                                                                    |
| 41               | China, mainland | Animal Products                 | 2006           | 608                                                                   |
| 41               | China, mainland | Apples and products             | 2006           | 16                                                                    |
| 41               | China, mainland | Aquatic Plants                  | 2006           | 7                                                                     |
| 41               | China, mainland | Aquatic Products, Other         | 2006           | 8                                                                     |
| 41               | China, mainland | Bananas                         | 2006           | 8                                                                     |
| 41               | China, mainland | Barley and products             | 2006           | 2                                                                     |
| 41               | China, mainland | Beans                           | 2006           | 1                                                                     |
| 41               | China, mainland | Beer                            | 2006           | 36                                                                    |
| 41               | China, mainland | Beverages, Alcoholic            | 2006           | 40                                                                    |
| 41               | China, mainland | Beverages, Fermented            | 2006           | 3                                                                     |
| 41               | China, mainland | Bovine Meat                     | 2006           | 24                                                                    |
| 41               | China, mainland | Butter, Ghee                    | 2006           | 2                                                                     |
| 41               | China, mainland | Cassava and products            | 2006           | 6                                                                     |
| 41               | China, mainland | Cephalopods                     | 2006           | 1                                                                     |
| 41               | China, mainland | Cereals - Excluding Beer        | 2006           | 1,451                                                                 |
| 41               | China, mainland | Cereals, Other                  | 2006           | 1                                                                     |
| 41               | China, mainland | Citrus, Other                   | 2006           | 1                                                                     |
| 41               | China, mainland | Coconut Oil                     | 2006           | 3                                                                     |
| 41               | China, mainland | Coconuts - Incl Copra           | 2006           | 1                                                                     |
| 41               | China, mainland | Cottonseed Oil                  | 2006           | 16                                                                    |
| 41               | China, mainland | Crustaceans                     | 2006           | 3                                                                     |
| 41               | China, mainland | Dates                           | 2006           | 1                                                                     |
| 41               | China, mainland | Demersal Fish                   | 2006           | 5                                                                     |
| 41               | China, mainland | Eggs                            | 2006           | 67                                                                    |
| 41               | China, mainland | Fats, Animals, Raw              | 2006           | 35                                                                    |
| 41               | China, mainland | Fish, Seafood                   | 2006           | 40                                                                    |
| 41               | China, mainland | Freshwater Fish                 | 2006           | 24                                                                    |
| 41               | China, mainland | Fruits - Excluding Wine         | 2006           | 67                                                                    |
| 41               | China, mainland | Fruits, Other                   | 2006           | 27                                                                    |
| 41               | China, mainland | Grand Total                     | 2006           | 2,881                                                                 |
| 41               | China, mainland | Grapes and products (excl wine) | 2006           | 3                                                                     |
| 41               | China, mainland | Groundnut Oil                   | 2006           | 21                                                                    |
| 41               | China, mainland | Groundnuts (Shelled Eq)         | 2006           | 23                                                                    |
| 41               | China, mainland | Honey                           | 2006           | 2                                                                     |
| 41               | China, mainland | Maize and products              | 2006           | 53                                                                    |
| 41               | China, mainland | Maize Germ Oil                  | 2006           | 1                                                                     |
| 41               | China, mainland | Marine Fish, Other              | 2006           | 1                                                                     |
| 41               | China, mainland | Meat                            | 2006           | 402                                                                   |
| 41               | China, mainland | Meat, Other                     | 2006           | 3                                                                     |
| 41               | China, mainland | Milk - Excluding Butter         | 2006           | 47                                                                    |
| 41               | China, mainland | Millet and products             | 2006           | 5                                                                     |
| 41               | China, mainland | Molluscs, Other                 | 2006           | 3                                                                     |
| 41               | China, mainland | Mutton & Goat Meat              | 2006           | 15                                                                    |
| 41               | China, mainland | Offals                          | 2006           | 8                                                                     |
| 41               | China, mainland | Oilcrops                        | 2006           | 65                                                                    |
| 41               | China, mainland | Oilcrops Oil, Other             | 2006           | 2                                                                     |
| 41               | China, mainland | Onions                          | 2006           | 13                                                                    |
| 41               | China, mainland | Oranges, Mandarines             | 2006           | 10                                                                    |
| 41               | China, mainland | Palm Oil                        | 2006           | 40                                                                    |
| 41               | China, mainland | Palmkernel Oil                  | 2006           | 1                                                                     |
| 41               | China, mainland | Peas                            | 2006           | 4                                                                     |
| 41               | China, mainland | Pelagic Fish                    | 2006           | 2                                                                     |
| 41               | China, mainland | Pigmeat                         | 2006           | 310                                                                   |
| 41               | China, mainland | Pimento                         | 2006           | 1                                                                     |
| 41               | China, mainland | Potatoes and products           | 2006           | 58                                                                    |
| 41               | China, mainland | Poultry Meat                    | 2006           | 49                                                                    |
| 41               | China, mainland | Pulses                          | 2006           | 11                                                                    |
| 41               | China, mainland | Pulses, Other and products      | 2006           | 6                                                                     |
| 41               | China, mainland | Rape and Mustard Oil            | 2006           | 41                                                                    |
| 41               | China, mainland | Rice (Milled Equivalent)        | 2006           | 794                                                                   |
| 41               | China, mainland | Ricebran Oil                    | 2006           | 2                                                                     |
| 41               | China, mainland | Roots, Other                    | 2006           | 2                                                                     |
| 41               | China, mainland | Rye and products                | 2006           | 1                                                                     |
| 41               | China, mainland | Sesame seed                     | 2006           | 4                                                                     |
| 41               | China, mainland | Sesameseed Oil                  | 2006           | 4                                                                     |
| 41               | China, mainland | Sorghum and products            | 2006           | 6                                                                     |

Dietary calcium and zinc deficiency risks are decreasing but remain prevalent

| FAO Country code | Country         | Food item                       | Reference year | Net energy supply (kcal <i>capita</i> <sup>-1</sup> d <sup>-1</sup> ) |
|------------------|-----------------|---------------------------------|----------------|-----------------------------------------------------------------------|
| 41               | China, mainland | Soyabean Oil                    | 2006           | 55                                                                    |
| 41               | China, mainland | Soyabean Oil                    | 2006           | 36                                                                    |
| 41               | China, mainland | Soybeans                        | 2006           | 2                                                                     |
| 41               | China, mainland | Spices                          | 2006           | 2                                                                     |
| 41               | China, mainland | Spices, Other                   | 2006           | 1                                                                     |
| 41               | China, mainland | Starchy Roots                   | 2006           | 151                                                                   |
| 41               | China, mainland | Stimulants                      | 2006           | 1                                                                     |
| 41               | China, mainland | Sugar & Sweeteners              | 2006           | 61                                                                    |
| 41               | China, mainland | Sugar (Raw Equivalent)          | 2006           | 56                                                                    |
| 41               | China, mainland | Sugar non-centrifugal           | 2006           | 2                                                                     |
| 41               | China, mainland | Sunflowerseed Oil               | 2006           | 4                                                                     |
| 41               | China, mainland | Sweet potatoes                  | 2006           | 86                                                                    |
| 41               | China, mainland | Tea (including mate)            | 2006           | 1                                                                     |
| 41               | China, mainland | Tomatoes and products           | 2006           | 11                                                                    |
| 41               | China, mainland | Treenuts                        | 2006           | 7                                                                     |
| 41               | China, mainland | Vegetable Oils                  | 2006           | 189                                                                   |
| 41               | China, mainland | Vegetables                      | 2006           | 188                                                                   |
| 41               | China, mainland | Vegetables, Other               | 2006           | 163                                                                   |
| 41               | China, mainland | Vegetal Products                | 2006           | 2,272                                                                 |
| 41               | China, mainland | Wheat and products              | 2006           | 589                                                                   |
| 41               | China, mainland | Wine                            | 2006           | 2                                                                     |
| 41               | China, mainland | Alcoholic Beverages             | 2007           | 89                                                                    |
| 41               | China, mainland | Animal fats                     | 2007           | 39                                                                    |
| 41               | China, mainland | Animal Products                 | 2007           | 627                                                                   |
| 41               | China, mainland | Apples and products             | 2007           | 16                                                                    |
| 41               | China, mainland | Aquatic Plants                  | 2007           | 7                                                                     |
| 41               | China, mainland | Aquatic Products, Other         | 2007           | 8                                                                     |
| 41               | China, mainland | Bananas                         | 2007           | 9                                                                     |
| 41               | China, mainland | Barley and products             | 2007           | 1                                                                     |
| 41               | China, mainland | Beans                           | 2007           | 2                                                                     |
| 41               | China, mainland | Beer                            | 2007           | 40                                                                    |
| 41               | China, mainland | Beverages, Alcoholic            | 2007           | 45                                                                    |
| 41               | China, mainland | Beverages, Fermented            | 2007           | 3                                                                     |
| 41               | China, mainland | Bovine Meat                     | 2007           | 26                                                                    |
| 41               | China, mainland | Butter, Ghee                    | 2007           | 2                                                                     |
| 41               | China, mainland | Cassava and products            | 2007           | 5                                                                     |
| 41               | China, mainland | Cephalopods                     | 2007           | 2                                                                     |
| 41               | China, mainland | Cereals - Excluding Beer        | 2007           | 1,433                                                                 |
| 41               | China, mainland | Cereals, Other                  | 2007           | 2                                                                     |
| 41               | China, mainland | Citrus, Other                   | 2007           | 2                                                                     |
| 41               | China, mainland | Coconut Oil                     | 2007           | 2                                                                     |
| 41               | China, mainland | Coconuts - Incl Copra           | 2007           | 1                                                                     |
| 41               | China, mainland | Cottonseed Oil                  | 2007           | 17                                                                    |
| 41               | China, mainland | Crustaceans                     | 2007           | 4                                                                     |
| 41               | China, mainland | Dates                           | 2007           | 1                                                                     |
| 41               | China, mainland | Demersal Fish                   | 2007           | 5                                                                     |
| 41               | China, mainland | Eggs                            | 2007           | 69                                                                    |
| 41               | China, mainland | Fats, Animals, Raw              | 2007           | 38                                                                    |
| 41               | China, mainland | Fish, Seafood                   | 2007           | 42                                                                    |
| 41               | China, mainland | Freshwater Fish                 | 2007           | 25                                                                    |
| 41               | China, mainland | Fruits - Excluding Wine         | 2007           | 68                                                                    |
| 41               | China, mainland | Fruits, Other                   | 2007           | 29                                                                    |
| 41               | China, mainland | Grand Total                     | 2007           | 2,915                                                                 |
| 41               | China, mainland | Grapefruit and products         | 2007           | 1                                                                     |
| 41               | China, mainland | Grapes and products (excl wine) | 2007           | 4                                                                     |
| 41               | China, mainland | Groundnut Oil                   | 2007           | 17                                                                    |
| 41               | China, mainland | Groundnuts (Shelled Eq)         | 2007           | 30                                                                    |
| 41               | China, mainland | Honey                           | 2007           | 2                                                                     |
| 41               | China, mainland | Maize and products              | 2007           | 52                                                                    |
| 41               | China, mainland | Maize Germ Oil                  | 2007           | 3                                                                     |
| 41               | China, mainland | Marine Fish, Other              | 2007           | 1                                                                     |
| 41               | China, mainland | Meat                            | 2007           | 409                                                                   |
| 41               | China, mainland | Meat, Other                     | 2007           | 4                                                                     |
| 41               | China, mainland | Milk - Excluding Butter         | 2007           | 50                                                                    |
| 41               | China, mainland | Millet and products             | 2007           | 4                                                                     |
| 41               | China, mainland | Molluscs, Other                 | 2007           | 3                                                                     |
| 41               | China, mainland | Mutton & Goat Meat              | 2007           | 16                                                                    |
| 41               | China, mainland | Offals                          | 2007           | 9                                                                     |
| 41               | China, mainland | Oilcrops                        | 2007           | 70                                                                    |
| 41               | China, mainland | Oilcrops Oil, Other             | 2007           | 2                                                                     |
| 41               | China, mainland | Onions                          | 2007           | 14                                                                    |
| 41               | China, mainland | Oranges, Mandarines             | 2007           | 6                                                                     |
| 41               | China, mainland | Palm Oil                        | 2007           | 40                                                                    |
| 41               | China, mainland | Palmkernel Oil                  | 2007           | 1                                                                     |
| 41               | China, mainland | Peas                            | 2007           | 4                                                                     |
| 41               | China, mainland | Pelagic Fish                    | 2007           | 2                                                                     |
| 41               | China, mainland | Pigmeat                         | 2007           | 312                                                                   |
| 41               | China, mainland | Pimento                         | 2007           | 1                                                                     |
| 41               | China, mainland | Potatoes and products           | 2007           | 68                                                                    |
| 41               | China, mainland | Poultry Meat                    | 2007           | 52                                                                    |
| 41               | China, mainland | Pulses                          | 2007           | 12                                                                    |
| 41               | China, mainland | Pulses, Other and products      | 2007           | 7                                                                     |
| 41               | China, mainland | Rape and Mustard Oil            | 2007           | 45                                                                    |
| 41               | China, mainland | Rice (Milled Equivalent)        | 2007           | 790                                                                   |
| 41               | China, mainland | Ricebran Oil                    | 2007           | 2                                                                     |
| 41               | China, mainland | Roots, Other                    | 2007           | 2                                                                     |
| 41               | China, mainland | Rye and products                | 2007           | 1                                                                     |
| 41               | China, mainland | Sesame seed                     | 2007           | 3                                                                     |
| 41               | China, mainland | Sesameseed Oil                  | 2007           | 3                                                                     |
| 41               | China, mainland | Sorghum and products            | 2007           | 4                                                                     |
| 41               | China, mainland | Soyabean Oil                    | 2007           | 56                                                                    |
| 41               | China, mainland | Soyabean Oil                    | 2007           | 35                                                                    |
| 41               | China, mainland | Soybeans                        | 2007           | 2                                                                     |
| 41               | China, mainland | Spices                          | 2007           | 2                                                                     |
| 41               | China, mainland | Spices, Other                   | 2007           | 1                                                                     |
| 41               | China, mainland | Starchy Roots                   | 2007           | 149                                                                   |
| 41               | China, mainland | Stimulants                      | 2007           | 1                                                                     |
| 41               | China, mainland | Sugar & Sweeteners              | 2007           | 63                                                                    |
| 41               | China, mainland | Sugar (Raw Equivalent)          | 2007           | 59                                                                    |

Dietary calcium and zinc deficiency risks are decreasing but remain prevalent

| FAO Country code | Country         | Food item                       | Reference year | Net energy supply (kcal capita <sup>-1</sup> d <sup>-1</sup> ) |
|------------------|-----------------|---------------------------------|----------------|----------------------------------------------------------------|
| 41               | China, mainland | Sugar non-centrifugal           | 2007           | 2                                                              |
| 41               | China, mainland | Sunflowerseed Oil               | 2007           | 4                                                              |
| 41               | China, mainland | Sweet potatoes                  | 2007           | 73                                                             |
| 41               | China, mainland | Tea (including mate)            | 2007           | 1                                                              |
| 41               | China, mainland | Tomatoes and products           | 2007           | 12                                                             |
| 41               | China, mainland | Treenuts                        | 2007           | 9                                                              |
| 41               | China, mainland | Vegetable Oils                  | 2007           | 191                                                            |
| 41               | China, mainland | Vegetables                      | 2007           | 203                                                            |
| 41               | China, mainland | Vegetables, Other               | 2007           | 177                                                            |
| 41               | China, mainland | Vegetal Products                | 2007           | 2,289                                                          |
| 41               | China, mainland | Wheat and products              | 2007           | 579                                                            |
| 41               | China, mainland | Wine                            | 2007           | 2                                                              |
| 41               | China, mainland | Alcoholic Beverages             | 2008           | 91                                                             |
| 41               | China, mainland | Animal fats                     | 2008           | 39                                                             |
| 41               | China, mainland | Animal Products                 | 2008           | 651                                                            |
| 41               | China, mainland | Apples and products             | 2008           | 17                                                             |
| 41               | China, mainland | Aquatic Animals, Others         | 2008           | 1                                                              |
| 41               | China, mainland | Aquatic Plants                  | 2008           | 8                                                              |
| 41               | China, mainland | Aquatic Products, Other         | 2008           | 8                                                              |
| 41               | China, mainland | Bananas                         | 2008           | 8                                                              |
| 41               | China, mainland | Barley and products             | 2008           | 1                                                              |
| 41               | China, mainland | Beans                           | 2008           | 1                                                              |
| 41               | China, mainland | Beer                            | 2008           | 41                                                             |
| 41               | China, mainland | Beverages, Alcoholic            | 2008           | 45                                                             |
| 41               | China, mainland | Beverages, Fermented            | 2008           | 3                                                              |
| 41               | China, mainland | Bovine Meat                     | 2008           | 25                                                             |
| 41               | China, mainland | Butter, Ghee                    | 2008           | 2                                                              |
| 41               | China, mainland | Cassava and products            | 2008           | 5                                                              |
| 41               | China, mainland | Cephalopods                     | 2008           | 2                                                              |
| 41               | China, mainland | Cereals - Excluding Beer        | 2008           | 1,443                                                          |
| 41               | China, mainland | Cereals, Other                  | 2008           | 2                                                              |
| 41               | China, mainland | Citrus, Other                   | 2008           | 2                                                              |
| 41               | China, mainland | Coconut Oil                     | 2008           | 3                                                              |
| 41               | China, mainland | Coconuts - Incl Copra           | 2008           | 2                                                              |
| 41               | China, mainland | Cottonseed Oil                  | 2008           | 17                                                             |
| 41               | China, mainland | Crustaceans                     | 2008           | 4                                                              |
| 41               | China, mainland | Dates                           | 2008           | 1                                                              |
| 41               | China, mainland | Demersal Fish                   | 2008           | 6                                                              |
| 41               | China, mainland | Eggs                            | 2008           | 74                                                             |
| 41               | China, mainland | Fats, Animals, Raw              | 2008           | 37                                                             |
| 41               | China, mainland | Fish, Seafood                   | 2008           | 44                                                             |
| 41               | China, mainland | Freshwater Fish                 | 2008           | 26                                                             |
| 41               | China, mainland | Fruits - Excluding Wine         | 2008           | 72                                                             |
| 41               | China, mainland | Fruits, Other                   | 2008           | 30                                                             |
| 41               | China, mainland | Grand Total                     | 2008           | 2,974                                                          |
| 41               | China, mainland | Grapefruit and products         | 2008           | 1                                                              |
| 41               | China, mainland | Grapes and products (excl wine) | 2008           | 4                                                              |
| 41               | China, mainland | Groundnut Oil                   | 2008           | 15                                                             |
| 41               | China, mainland | Groundnuts (Shelled Eq)         | 2008           | 37                                                             |
| 41               | China, mainland | Honey                           | 2008           | 2                                                              |
| 41               | China, mainland | Lemons, Limes and products      | 2008           | 2                                                              |
| 41               | China, mainland | Maize and products              | 2008           | 57                                                             |
| 41               | China, mainland | Maize Germ Oil                  | 2008           | 3                                                              |
| 41               | China, mainland | Marine Fish, Other              | 2008           | 2                                                              |
| 41               | China, mainland | Meat                            | 2008           | 426                                                            |
| 41               | China, mainland | Meat, Other                     | 2008           | 4                                                              |
| 41               | China, mainland | Milk - Excluding Butter         | 2008           | 51                                                             |
| 41               | China, mainland | Millet and products             | 2008           | 3                                                              |
| 41               | China, mainland | Molluscs, Other                 | 2008           | 3                                                              |
| 41               | China, mainland | Mutton & Goat Meat              | 2008           | 16                                                             |
| 41               | China, mainland | Offals                          | 2008           | 9                                                              |
| 41               | China, mainland | Oilcrops                        | 2008           | 78                                                             |
| 41               | China, mainland | Oilcrops Oil, Other             | 2008           | 2                                                              |
| 41               | China, mainland | Onions                          | 2008           | 14                                                             |
| 41               | China, mainland | Oranges, Mandarines             | 2008           | 7                                                              |
| 41               | China, mainland | Palm Oil                        | 2008           | 41                                                             |
| 41               | China, mainland | Palmkernel Oil                  | 2008           | 1                                                              |
| 41               | China, mainland | Peas                            | 2008           | 3                                                              |
| 41               | China, mainland | Pelagic Fish                    | 2008           | 3                                                              |
| 41               | China, mainland | Pigmeat                         | 2008           | 326                                                            |
| 41               | China, mainland | Pimento                         | 2008           | 1                                                              |
| 41               | China, mainland | Potatoes and products           | 2008           | 74                                                             |
| 41               | China, mainland | Poultry Meat                    | 2008           | 55                                                             |
| 41               | China, mainland | Pulses                          | 2008           | 11                                                             |
| 41               | China, mainland | Pulses, Other and products      | 2008           | 6                                                              |
| 41               | China, mainland | Rape and Mustard Oil            | 2008           | 43                                                             |
| 41               | China, mainland | Rice (Milled Equivalent)        | 2008           | 810                                                            |
| 41               | China, mainland | Ricebran Oil                    | 2008           | 2                                                              |
| 41               | China, mainland | Roots, Other                    | 2008           | 2                                                              |
| 41               | China, mainland | Rye and products                | 2008           | 1                                                              |
| 41               | China, mainland | Sesame seed                     | 2008           | 3                                                              |
| 41               | China, mainland | Sesameseed Oil                  | 2008           | 3                                                              |
| 41               | China, mainland | Sorghum and products            | 2008           | 5                                                              |
| 41               | China, mainland | Soyabean Oil                    | 2008           | 48                                                             |
| 41               | China, mainland | Soyabeans                       | 2008           | 36                                                             |
| 41               | China, mainland | Spices                          | 2008           | 2                                                              |
| 41               | China, mainland | Spices, Other                   | 2008           | 1                                                              |
| 41               | China, mainland | Starchy Roots                   | 2008           | 158                                                            |
| 41               | China, mainland | Stimulants                      | 2008           | 1                                                              |
| 41               | China, mainland | Sugar & Sweeteners              | 2008           | 62                                                             |
| 41               | China, mainland | Sugar (Raw Equivalent)          | 2008           | 56                                                             |
| 41               | China, mainland | Sugar non-centrifugal           | 2008           | 3                                                              |
| 41               | China, mainland | Sunflowerseed Oil               | 2008           | 3                                                              |
| 41               | China, mainland | Sweet potatoes                  | 2008           | 76                                                             |
| 41               | China, mainland | Sweeteners, Other               | 2008           | 1                                                              |
| 41               | China, mainland | Tea (including mate)            | 2008           | 1                                                              |
| 41               | China, mainland | Tomatoes and products           | 2008           | 13                                                             |

Dietary calcium and zinc deficiency risks are decreasing but remain prevalent

| FAO Country code | Country         | Food item                       | Reference year | Net energy supply (kcal <i>capita</i> <sup>-1</sup> d <sup>-1</sup> ) |
|------------------|-----------------|---------------------------------|----------------|-----------------------------------------------------------------------|
| 41               | China, mainland | Treenuts                        | 2008           | 11                                                                    |
| 41               | China, mainland | Vegetable Oils                  | 2008           | 179                                                                   |
| 41               | China, mainland | Vegetables                      | 2008           | 216                                                                   |
| 41               | China, mainland | Vegetables, Other               | 2008           | 188                                                                   |
| 41               | China, mainland | Vegetal Products                | 2008           | 2,324                                                                 |
| 41               | China, mainland | Wheat and products              | 2008           | 563                                                                   |
| 41               | China, mainland | Wine                            | 2008           | 2                                                                     |
| 41               | China, mainland | Alcoholic Beverages             | 2009           | 92                                                                    |
| 41               | China, mainland | Animal fats                     | 2009           | 37                                                                    |
| 41               | China, mainland | Animal Products                 | 2009           | 668                                                                   |
| 41               | China, mainland | Apples and products             | 2009           | 17                                                                    |
| 41               | China, mainland | Aquatic Animals, Others         | 2009           | 1                                                                     |
| 41               | China, mainland | Aquatic Plants                  | 2009           | 8                                                                     |
| 41               | China, mainland | Aquatic Products, Other         | 2009           | 8                                                                     |
| 41               | China, mainland | Bananas                         | 2009           | 10                                                                    |
| 41               | China, mainland | Barley and products             | 2009           | 1                                                                     |
| 41               | China, mainland | Beans                           | 2009           | 1                                                                     |
| 41               | China, mainland | Beer                            | 2009           | 41                                                                    |
| 41               | China, mainland | Beverages, Alcoholic            | 2009           | 45                                                                    |
| 41               | China, mainland | Beverages, Fermented            | 2009           | 3                                                                     |
| 41               | China, mainland | Bovine Meat                     | 2009           | 26                                                                    |
| 41               | China, mainland | Butter, Ghee                    | 2009           | 2                                                                     |
| 41               | China, mainland | Cassava and products            | 2009           | 6                                                                     |
| 41               | China, mainland | Cephalopods                     | 2009           | 1                                                                     |
| 41               | China, mainland | Cereals - Excluding Beer        | 2009           | 1,423                                                                 |
| 41               | China, mainland | Cereals, Other                  | 2009           | 2                                                                     |
| 41               | China, mainland | Citrus, Other                   | 2009           | 2                                                                     |
| 41               | China, mainland | Coconut Oil                     | 2009           | 3                                                                     |
| 41               | China, mainland | Coconuts - Incl Copra           | 2009           | 1                                                                     |
| 41               | China, mainland | Cottonseed Oil                  | 2009           | 14                                                                    |
| 41               | China, mainland | Crustaceans                     | 2009           | 4                                                                     |
| 41               | China, mainland | Dates                           | 2009           | 1                                                                     |
| 41               | China, mainland | Demersal Fish                   | 2009           | 6                                                                     |
| 41               | China, mainland | Eggs                            | 2009           | 74                                                                    |
| 41               | China, mainland | Fats, Animals, Raw              | 2009           | 35                                                                    |
| 41               | China, mainland | Fish, Seafood                   | 2009           | 46                                                                    |
| 41               | China, mainland | Freshwater Fish                 | 2009           | 27                                                                    |
| 41               | China, mainland | Fruits - Excluding Wine         | 2009           | 78                                                                    |
| 41               | China, mainland | Fruits, Other                   | 2009           | 33                                                                    |
| 41               | China, mainland | Grand Total                     | 2009           | 2,992                                                                 |
| 41               | China, mainland | Grapefruit and products         | 2009           | 1                                                                     |
| 41               | China, mainland | Grapes and products (excl wine) | 2009           | 4                                                                     |
| 41               | China, mainland | Groundnut Oil                   | 2009           | 16                                                                    |
| 41               | China, mainland | Groundnuts (Shelled Eq)         | 2009           | 38                                                                    |
| 41               | China, mainland | Honey                           | 2009           | 2                                                                     |
| 41               | China, mainland | Lemons, Limes and products      | 2009           | 2                                                                     |
| 41               | China, mainland | Maize and products              | 2009           | 56                                                                    |
| 41               | China, mainland | Maize Germ Oil                  | 2009           | 4                                                                     |
| 41               | China, mainland | Marine Fish, Other              | 2009           | 3                                                                     |
| 41               | China, mainland | Meat                            | 2009           | 441                                                                   |
| 41               | China, mainland | Meat, Other                     | 2009           | 4                                                                     |
| 41               | China, mainland | Milk - Excluding Butter         | 2009           | 53                                                                    |
| 41               | China, mainland | Millet and products             | 2009           | 2                                                                     |
| 41               | China, mainland | Molluscs, Other                 | 2009           | 3                                                                     |
| 41               | China, mainland | Mutton & Goat Meat              | 2009           | 16                                                                    |
| 41               | China, mainland | Offals                          | 2009           | 9                                                                     |
| 41               | China, mainland | Oilcrops                        | 2009           | 80                                                                    |
| 41               | China, mainland | Oilcrops Oil, Other             | 2009           | 2                                                                     |
| 41               | China, mainland | Onions                          | 2009           | 14                                                                    |
| 41               | China, mainland | Oranges, Mandarines             | 2009           | 8                                                                     |
| 41               | China, mainland | Palm Oil                        | 2009           | 56                                                                    |
| 41               | China, mainland | Palmkernel Oil                  | 2009           | 1                                                                     |
| 41               | China, mainland | Peas                            | 2009           | 3                                                                     |
| 41               | China, mainland | Pelagic Fish                    | 2009           | 2                                                                     |
| 41               | China, mainland | Pigmeat                         | 2009           | 338                                                                   |
| 41               | China, mainland | Pimento                         | 2009           | 1                                                                     |
| 41               | China, mainland | Pineapples and products         | 2009           | 1                                                                     |
| 41               | China, mainland | Potatoes and products           | 2009           | 74                                                                    |
| 41               | China, mainland | Poultry Meat                    | 2009           | 57                                                                    |
| 41               | China, mainland | Pulses                          | 2009           | 11                                                                    |
| 41               | China, mainland | Pulses, Other and products      | 2009           | 6                                                                     |
| 41               | China, mainland | Rape and Mustard Oil            | 2009           | 41                                                                    |
| 41               | China, mainland | Rice (Milled Equivalent)        | 2009           | 812                                                                   |
| 41               | China, mainland | Ricebran Oil                    | 2009           | 2                                                                     |
| 41               | China, mainland | Roots, Other                    | 2009           | 2                                                                     |
| 41               | China, mainland | Rye and products                | 2009           | 1                                                                     |
| 41               | China, mainland | Sesame seed                     | 2009           | 4                                                                     |
| 41               | China, mainland | Sesameseed Oil                  | 2009           | 4                                                                     |
| 41               | China, mainland | Sorghum and products            | 2009           | 5                                                                     |
| 41               | China, mainland | Soyabean Oil                    | 2009           | 45                                                                    |
| 41               | China, mainland | Soyabeans                       | 2009           | 37                                                                    |
| 41               | China, mainland | Spices                          | 2009           | 2                                                                     |
| 41               | China, mainland | Spices, Other                   | 2009           | 1                                                                     |
| 41               | China, mainland | Starchy Roots                   | 2009           | 152                                                                   |
| 41               | China, mainland | Stimulants                      | 2009           | 1                                                                     |
| 41               | China, mainland | Sugar & Sweeteners              | 2009           | 64                                                                    |
| 41               | China, mainland | Sugar (Raw Equivalent)          | 2009           | 58                                                                    |
| 41               | China, mainland | Sugar non-centrifugal           | 2009           | 3                                                                     |
| 41               | China, mainland | Sunflowerseed Oil               | 2009           | 3                                                                     |
| 41               | China, mainland | Sweet potatoes                  | 2009           | 69                                                                    |
| 41               | China, mainland | Sweeteners, Other               | 2009           | 1                                                                     |
| 41               | China, mainland | Tea (including mate)            | 2009           | 1                                                                     |
| 41               | China, mainland | Tomatoes and products           | 2009           | 15                                                                    |
| 41               | China, mainland | Treenuts                        | 2009           | 13                                                                    |
| 41               | China, mainland | Vegetable Oils                  | 2009           | 191                                                                   |
| 41               | China, mainland | Vegetables                      | 2009           | 217                                                                   |
| 41               | China, mainland | Vegetables, Other               | 2009           | 188                                                                   |

Dietary calcium and zinc deficiency risks are decreasing but remain prevalent

| FAO Country code | Country         | Food item                       | Reference year | Net energy supply (kcal capita <sup>-1</sup> d <sup>-1</sup> ) |
|------------------|-----------------|---------------------------------|----------------|----------------------------------------------------------------|
| 41               | China, mainland | Vegetal Products                | 2009           | 2,323                                                          |
| 41               | China, mainland | Wheat and products              | 2009           | 544                                                            |
| 41               | China, mainland | Wine                            | 2009           | 2                                                              |
| 41               | China, mainland | Alcoholic Beverages             | 2010           | 91                                                             |
| 41               | China, mainland | Animal fats                     | 2010           | 37                                                             |
| 41               | China, mainland | Animal Products                 | 2010           | 688                                                            |
| 41               | China, mainland | Apples and products             | 2010           | 19                                                             |
| 41               | China, mainland | Aquatic Animals, Others         | 2010           | 1                                                              |
| 41               | China, mainland | Aquatic Plants                  | 2010           | 8                                                              |
| 41               | China, mainland | Aquatic Products, Other         | 2010           | 9                                                              |
| 41               | China, mainland | Bananas                         | 2010           | 10                                                             |
| 41               | China, mainland | Barley and products             | 2010           | 1                                                              |
| 41               | China, mainland | Beans                           | 2010           | 1                                                              |
| 41               | China, mainland | Beer                            | 2010           | 44                                                             |
| 41               | China, mainland | Beverages, Alcoholic            | 2010           | 41                                                             |
| 41               | China, mainland | Beverages, Fermented            | 2010           | 3                                                              |
| 41               | China, mainland | Bovine Meat                     | 2010           | 27                                                             |
| 41               | China, mainland | Butter, Ghee                    | 2010           | 2                                                              |
| 41               | China, mainland | Cassava and products            | 2010           | 6                                                              |
| 41               | China, mainland | Cephalopods                     | 2010           | 1                                                              |
| 41               | China, mainland | Cereals - Excluding Beer        | 2010           | 1,433                                                          |
| 41               | China, mainland | Cereals, Other                  | 2010           | 2                                                              |
| 41               | China, mainland | Citrus, Other                   | 2010           | 3                                                              |
| 41               | China, mainland | Coconut Oil                     | 2010           | 5                                                              |
| 41               | China, mainland | Coconuts - Incl Copra           | 2010           | 1                                                              |
| 41               | China, mainland | Cottonseed Oil                  | 2010           | 12                                                             |
| 41               | China, mainland | Crustaceans                     | 2010           | 4                                                              |
| 41               | China, mainland | Dates                           | 2010           | 1                                                              |
| 41               | China, mainland | Demersal Fish                   | 2010           | 6                                                              |
| 41               | China, mainland | Eggs                            | 2010           | 75                                                             |
| 41               | China, mainland | Fats, Animals, Raw              | 2010           | 35                                                             |
| 41               | China, mainland | Fish, Seafood                   | 2010           | 47                                                             |
| 41               | China, mainland | Freshwater Fish                 | 2010           | 29                                                             |
| 41               | China, mainland | Fruits - Excluding Wine         | 2010           | 82                                                             |
| 41               | China, mainland | Fruits, Other                   | 2010           | 33                                                             |
| 41               | China, mainland | Grand Total                     | 2010           | 3,042                                                          |
| 41               | China, mainland | Grapefruit and products         | 2010           | 1                                                              |
| 41               | China, mainland | Grapes and products (excl wine) | 2010           | 5                                                              |
| 41               | China, mainland | Groundnut Oil                   | 2010           | 16                                                             |
| 41               | China, mainland | Groundnuts (Shelled Eq)         | 2010           | 45                                                             |
| 41               | China, mainland | Honey                           | 2010           | 2                                                              |
| 41               | China, mainland | Lemons, Limes and products      | 2010           | 1                                                              |
| 41               | China, mainland | Maize and products              | 2010           | 59                                                             |
| 41               | China, mainland | Maize Germ Oil                  | 2010           | 4                                                              |
| 41               | China, mainland | Marine Fish, Other              | 2010           | 3                                                              |
| 41               | China, mainland | Meat                            | 2010           | 454                                                            |
| 41               | China, mainland | Meat, Other                     | 2010           | 4                                                              |
| 41               | China, mainland | Milk - Excluding Butter         | 2010           | 55                                                             |
| 41               | China, mainland | Millet and products             | 2010           | 4                                                              |
| 41               | China, mainland | Molluscs, Other                 | 2010           | 3                                                              |
| 41               | China, mainland | Mutton & Goat Meat              | 2010           | 16                                                             |
| 41               | China, mainland | Offals                          | 2010           | 10                                                             |
| 41               | China, mainland | Oilcrops                        | 2010           | 90                                                             |
| 41               | China, mainland | Oilcrops Oil, Other             | 2010           | 2                                                              |
| 41               | China, mainland | Onions                          | 2010           | 14                                                             |
| 41               | China, mainland | Oranges, Mandarines             | 2010           | 9                                                              |
| 41               | China, mainland | Palm Oil                        | 2010           | 48                                                             |
| 41               | China, mainland | Palmkernel Oil                  | 2010           | 1                                                              |
| 41               | China, mainland | Peas                            | 2010           | 4                                                              |
| 41               | China, mainland | Pelagic Fish                    | 2010           | 1                                                              |
| 41               | China, mainland | Pigmeat                         | 2010           | 348                                                            |
| 41               | China, mainland | Pimento                         | 2010           | 1                                                              |
| 41               | China, mainland | Pineapples and products         | 2010           | 1                                                              |
| 41               | China, mainland | Potatoes and products           | 2010           | 81                                                             |
| 41               | China, mainland | Poultry Meat                    | 2010           | 59                                                             |
| 41               | China, mainland | Pulses                          | 2010           | 11                                                             |
| 41               | China, mainland | Pulses, Other and products      | 2010           | 6                                                              |
| 41               | China, mainland | Rape and Mustard Oil            | 2010           | 45                                                             |
| 41               | China, mainland | Rice (Milled Equivalent)        | 2010           | 814                                                            |
| 41               | China, mainland | Ricebran Oil                    | 2010           | 2                                                              |
| 41               | China, mainland | Roots, Other                    | 2010           | 2                                                              |
| 41               | China, mainland | Sesame seed                     | 2010           | 5                                                              |
| 41               | China, mainland | Sesameseed Oil                  | 2010           | 4                                                              |
| 41               | China, mainland | Sorghum and products            | 2010           | 5                                                              |
| 41               | China, mainland | Soyabean Oil                    | 2010           | 45                                                             |
| 41               | China, mainland | Soyabeans                       | 2010           | 38                                                             |
| 41               | China, mainland | Spices                          | 2010           | 3                                                              |
| 41               | China, mainland | Spices, Other                   | 2010           | 1                                                              |
| 41               | China, mainland | Starchy Roots                   | 2010           | 155                                                            |
| 41               | China, mainland | Stimulants                      | 2010           | 1                                                              |
| 41               | China, mainland | Sugar & Sweeteners              | 2010           | 63                                                             |
| 41               | China, mainland | Sugar (Raw Equivalent)          | 2010           | 58                                                             |
| 41               | China, mainland | Sugar non-centrifugal           | 2010           | 3                                                              |
| 41               | China, mainland | Sunflowerseed Oil               | 2010           | 3                                                              |
| 41               | China, mainland | Sweet potatoes                  | 2010           | 65                                                             |
| 41               | China, mainland | Sweeteners, Other               | 2010           | 1                                                              |
| 41               | China, mainland | Tea (including mate)            | 2010           | 1                                                              |
| 41               | China, mainland | Tomatoes and products           | 2010           | 15                                                             |
| 41               | China, mainland | Treenuts                        | 2010           | 15                                                             |
| 41               | China, mainland | Vegetable Oils                  | 2010           | 187                                                            |
| 41               | China, mainland | Vegetables                      | 2010           | 224                                                            |
| 41               | China, mainland | Vegetables, Other               | 2010           | 194                                                            |
| 41               | China, mainland | Vegetal Products                | 2010           | 2,354                                                          |
| 41               | China, mainland | Wheat and products              | 2010           | 547                                                            |
| 41               | China, mainland | Wine                            | 2010           | 3                                                              |
| 41               | China, mainland | Alcoholic Beverages             | 2011           | 94                                                             |
| 41               | China, mainland | Animal fats                     | 2011           | 39                                                             |

Dietary calcium and zinc deficiency risks are decreasing but remain prevalent

| FAO Country code | Country         | Food item                       | Reference year | Net energy supply (kcal capita <sup>-1</sup> d <sup>-1</sup> ) |
|------------------|-----------------|---------------------------------|----------------|----------------------------------------------------------------|
| 41               | China, mainland | Animal Products                 | 2011           | 689                                                            |
| 41               | China, mainland | Apples and products             | 2011           | 20                                                             |
| 41               | China, mainland | Aquatic Animals, Others         | 2011           | 1                                                              |
| 41               | China, mainland | Aquatic Plants                  | 2011           | 9                                                              |
| 41               | China, mainland | Aquatic Products, Other         | 2011           | 9                                                              |
| 41               | China, mainland | Bananas                         | 2011           | 11                                                             |
| 41               | China, mainland | Barley and products             | 2011           | 1                                                              |
| 41               | China, mainland | Beans                           | 2011           | 1                                                              |
| 41               | China, mainland | Beer                            | 2011           | 47                                                             |
| 41               | China, mainland | Beverages, Alcoholic            | 2011           | 41                                                             |
| 41               | China, mainland | Beverages, Fermented            | 2011           | 3                                                              |
| 41               | China, mainland | Bovine Meat                     | 2011           | 27                                                             |
| 41               | China, mainland | Butter, Ghee                    | 2011           | 2                                                              |
| 41               | China, mainland | Cassava and products            | 2011           | 6                                                              |
| 41               | China, mainland | Cephalopods                     | 2011           | 1                                                              |
| 41               | China, mainland | Cereals - Excluding Beer        | 2011           | 1,452                                                          |
| 41               | China, mainland | Cereals, Other                  | 2011           | 2                                                              |
| 41               | China, mainland | Citrus, Other                   | 2011           | 3                                                              |
| 41               | China, mainland | Coconut Oil                     | 2011           | 3                                                              |
| 41               | China, mainland | Coconuts - Incl Copra           | 2011           | 1                                                              |
| 41               | China, mainland | Cottonseed Oil                  | 2011           | 12                                                             |
| 41               | China, mainland | Crustaceans                     | 2011           | 4                                                              |
| 41               | China, mainland | Dates                           | 2011           | 1                                                              |
| 41               | China, mainland | Demersal Fish                   | 2011           | 6                                                              |
| 41               | China, mainland | Eggs                            | 2011           | 75                                                             |
| 41               | China, mainland | Fats, Animals, Raw              | 2011           | 37                                                             |
| 41               | China, mainland | Fish, Seafood                   | 2011           | 48                                                             |
| 41               | China, mainland | Freshwater Fish                 | 2011           | 29                                                             |
| 41               | China, mainland | Fruits - Excluding Wine         | 2011           | 89                                                             |
| 41               | China, mainland | Fruits, Other                   | 2011           | 36                                                             |
| 41               | China, mainland | Grand Total                     | 2011           | 3,075                                                          |
| 41               | China, mainland | Grapefruit and products         | 2011           | 1                                                              |
| 41               | China, mainland | Grapes and products (excl wine) | 2011           | 5                                                              |
| 41               | China, mainland | Groundnut Oil                   | 2011           | 16                                                             |
| 41               | China, mainland | Groundnuts (Shelled Eq)         | 2011           | 41                                                             |
| 41               | China, mainland | Honey                           | 2011           | 2                                                              |
| 41               | China, mainland | Lemons, Limes and products      | 2011           | 1                                                              |
| 41               | China, mainland | Maize and products              | 2011           | 59                                                             |
| 41               | China, mainland | Maize Germ Oil                  | 2011           | 3                                                              |
| 41               | China, mainland | Marine Fish, Other              | 2011           | 3                                                              |
| 41               | China, mainland | Meat                            | 2011           | 451                                                            |
| 41               | China, mainland | Meat, Other                     | 2011           | 4                                                              |
| 41               | China, mainland | Milk - Excluding Butter         | 2011           | 56                                                             |
| 41               | China, mainland | Millet and products             | 2011           | 4                                                              |
| 41               | China, mainland | Miscellaneous                   | 2011           | 1                                                              |
| 41               | China, mainland | Molluscs, Other                 | 2011           | 3                                                              |
| 41               | China, mainland | Mutton & Goat Meat              | 2011           | 16                                                             |
| 41               | China, mainland | Offals                          | 2011           | 10                                                             |
| 41               | China, mainland | Oilcrops                        | 2011           | 83                                                             |
| 41               | China, mainland | Oilcrops Oil, Other             | 2011           | 2                                                              |
| 41               | China, mainland | Olive Oil                       | 2011           | 1                                                              |
| 41               | China, mainland | Onions                          | 2011           | 14                                                             |
| 41               | China, mainland | Oranges, Mandarines             | 2011           | 10                                                             |
| 41               | China, mainland | Palm Oil                        | 2011           | 53                                                             |
| 41               | China, mainland | Palmkernel Oil                  | 2011           | 1                                                              |
| 41               | China, mainland | Peas                            | 2011           | 4                                                              |
| 41               | China, mainland | Pelagic Fish                    | 2011           | 1                                                              |
| 41               | China, mainland | Pigmeat                         | 2011           | 346                                                            |
| 41               | China, mainland | Pimento                         | 2011           | 1                                                              |
| 41               | China, mainland | Pineapples and products         | 2011           | 1                                                              |
| 41               | China, mainland | Potatoes and products           | 2011           | 81                                                             |
| 41               | China, mainland | Poultry Meat                    | 2011           | 58                                                             |
| 41               | China, mainland | Pulses                          | 2011           | 10                                                             |
| 41               | China, mainland | Pulses, Other and products      | 2011           | 5                                                              |
| 41               | China, mainland | Rape and Mustard Oil            | 2011           | 40                                                             |
| 41               | China, mainland | Rice (Milled Equivalent)        | 2011           | 827                                                            |
| 41               | China, mainland | Ricebran Oil                    | 2011           | 2                                                              |
| 41               | China, mainland | Roots, Other                    | 2011           | 2                                                              |
| 41               | China, mainland | Rye and products                | 2011           | 1                                                              |
| 41               | China, mainland | Sesame seed                     | 2011           | 5                                                              |
| 41               | China, mainland | Sesameseed Oil                  | 2011           | 4                                                              |
| 41               | China, mainland | Sorghum and products            | 2011           | 5                                                              |
| 41               | China, mainland | Soyabean Oil                    | 2011           | 48                                                             |
| 41               | China, mainland | Soyabeans                       | 2011           | 36                                                             |
| 41               | China, mainland | Spices                          | 2011           | 2                                                              |
| 41               | China, mainland | Spices, Other                   | 2011           | 1                                                              |
| 41               | China, mainland | Starchy Roots                   | 2011           | 155                                                            |
| 41               | China, mainland | Stimulants                      | 2011           | 1                                                              |
| 41               | China, mainland | Sugar & Sweeteners              | 2011           | 66                                                             |
| 41               | China, mainland | Sugar (Raw Equivalent)          | 2011           | 61                                                             |
| 41               | China, mainland | Sugar non-centrifugal           | 2011           | 3                                                              |
| 41               | China, mainland | Sunflowerseed Oil               | 2011           | 3                                                              |
| 41               | China, mainland | Sweet potatoes                  | 2011           | 66                                                             |
| 41               | China, mainland | Sweeteners, Other               | 2011           | 1                                                              |
| 41               | China, mainland | Tea (including mate)            | 2011           | 1                                                              |
| 41               | China, mainland | Tomatoes and products           | 2011           | 15                                                             |
| 41               | China, mainland | Treenuts                        | 2011           | 17                                                             |
| 41               | China, mainland | Vegetable Oils                  | 2011           | 189                                                            |
| 41               | China, mainland | Vegetables                      | 2011           | 227                                                            |
| 41               | China, mainland | Vegetables, Other               | 2011           | 197                                                            |
| 41               | China, mainland | Vegetal Products                | 2011           | 2,386                                                          |
| 41               | China, mainland | Wheat and products              | 2011           | 552                                                            |
| 41               | China, mainland | Wine                            | 2011           | 3                                                              |
| 44               | Colombia        | Alcoholic Beverages             | 1992           | 48                                                             |
| 44               | Colombia        | Animal fats                     | 1992           | 31                                                             |
| 44               | Colombia        | Animal Products                 | 1992           | 404                                                            |
| 44               | Colombia        | Apples and products             | 1992           | 1                                                              |

Dietary calcium and zinc deficiency risks are decreasing but remain prevalent

| FAO Country code | Country  | Food item                       | Reference year | Net energy supply (kcal capita <sup>-1</sup> d <sup>-1</sup> ) |
|------------------|----------|---------------------------------|----------------|----------------------------------------------------------------|
| 44               | Colombia | Bananas                         | 1992           | 15                                                             |
| 44               | Colombia | Barley and products             | 1992           | 6                                                              |
| 44               | Colombia | Beans                           | 1992           | 32                                                             |
| 44               | Colombia | Beer                            | 1992           | 17                                                             |
| 44               | Colombia | Beverages, Alcoholic            | 1992           | 30                                                             |
| 44               | Colombia | Bovine Meat                     | 1992           | 98                                                             |
| 44               | Colombia | Butter, Ghee                    | 1992           | 8                                                              |
| 44               | Colombia | Cassava and products            | 1992           | 91                                                             |
| 44               | Colombia | Cereals - Excluding Beer        | 1992           | 808                                                            |
| 44               | Colombia | Cocoa Beans and products        | 1992           | 4                                                              |
| 44               | Colombia | Coconuts - Incl Copra           | 1992           | 8                                                              |
| 44               | Colombia | Coffee and products             | 1992           | 3                                                              |
| 44               | Colombia | Cottonseed Oil                  | 1992           | 19                                                             |
| 44               | Colombia | Eggs                            | 1992           | 23                                                             |
| 44               | Colombia | Fats, Animals, Raw              | 1992           | 23                                                             |
| 44               | Colombia | Fish, Seafood                   | 1992           | 7                                                              |
| 44               | Colombia | Freshwater Fish                 | 1992           | 3                                                              |
| 44               | Colombia | Fruits - Excluding Wine         | 1992           | 189                                                            |
| 44               | Colombia | Fruits, Other                   | 1992           | 22                                                             |
| 44               | Colombia | Grand Total                     | 1992           | 2,442                                                          |
| 44               | Colombia | Grapes and products (excl wine) | 1992           | 2                                                              |
| 44               | Colombia | Groundnuts (Shelled Eq)         | 1992           | 1                                                              |
| 44               | Colombia | Honey                           | 1992           | 1                                                              |
| 44               | Colombia | Maize and products              | 1992           | 293                                                            |
| 44               | Colombia | Maize Germ Oil                  | 1992           | 15                                                             |
| 44               | Colombia | Meat                            | 1992           | 167                                                            |
| 44               | Colombia | Meat, Other                     | 1992           | 1                                                              |
| 44               | Colombia | Milk - Excluding Butter         | 1992           | 167                                                            |
| 44               | Colombia | Mutton & Goat Meat              | 1992           | 1                                                              |
| 44               | Colombia | Oats                            | 1992           | 3                                                              |
| 44               | Colombia | Offals                          | 1992           | 9                                                              |
| 44               | Colombia | Oilcrops                        | 1992           | 20                                                             |
| 44               | Colombia | Oilcrops, Other                 | 1992           | 10                                                             |
| 44               | Colombia | Onions                          | 1992           | 5                                                              |
| 44               | Colombia | Oranges, Mandarines             | 1992           | 6                                                              |
| 44               | Colombia | Palm Oil                        | 1992           | 108                                                            |
| 44               | Colombia | Palmkernel Oil                  | 1992           | 17                                                             |
| 44               | Colombia | Peas                            | 1992           | 22                                                             |
| 44               | Colombia | Pelagic Fish                    | 1992           | 3                                                              |
| 44               | Colombia | Pigmeat                         | 1992           | 26                                                             |
| 44               | Colombia | Pineapples and products         | 1992           | 6                                                              |
| 44               | Colombia | Plantains                       | 1992           | 137                                                            |
| 44               | Colombia | Potatoes and products           | 1992           | 86                                                             |
| 44               | Colombia | Poultry Meat                    | 1992           | 41                                                             |
| 44               | Colombia | Pulses                          | 1992           | 72                                                             |
| 44               | Colombia | Pulses, Other and products      | 1992           | 18                                                             |
| 44               | Colombia | Rice (Milled Equivalent)        | 1992           | 307                                                            |
| 44               | Colombia | Roots, Other                    | 1992           | 4                                                              |
| 44               | Colombia | Sesameseed Oil                  | 1992           | 1                                                              |
| 44               | Colombia | Soyabean Oil                    | 1992           | 63                                                             |
| 44               | Colombia | Soyabeans                       | 1992           | 1                                                              |
| 44               | Colombia | Spices                          | 1992           | 1                                                              |
| 44               | Colombia | Spices, Other                   | 1992           | 1                                                              |
| 44               | Colombia | Starchy Roots                   | 1992           | 186                                                            |
| 44               | Colombia | Stimulants                      | 1992           | 7                                                              |
| 44               | Colombia | Sugar & Sweeteners              | 1992           | 462                                                            |
| 44               | Colombia | Sugar (Raw Equivalent)          | 1992           | 346                                                            |
| 44               | Colombia | Sugar non-centrifugal           | 1992           | 114                                                            |
| 44               | Colombia | Sunflowerseed Oil               | 1992           | 5                                                              |
| 44               | Colombia | Sweeteners, Other               | 1992           | 1                                                              |
| 44               | Colombia | Tomatoes and products           | 1992           | 5                                                              |
| 44               | Colombia | Vegetable Oils                  | 1992           | 229                                                            |
| 44               | Colombia | Vegetables                      | 1992           | 17                                                             |
| 44               | Colombia | Vegetables, Other               | 1992           | 7                                                              |
| 44               | Colombia | Vegetal Products                | 1992           | 2,038                                                          |
| 44               | Colombia | Wheat and products              | 1992           | 198                                                            |
| 44               | Colombia | Yams                            | 1992           | 5                                                              |
| 44               | Colombia | Alcoholic Beverages             | 1993           | 62                                                             |
| 44               | Colombia | Animal fats                     | 1993           | 32                                                             |
| 44               | Colombia | Animal Products                 | 1993           | 418                                                            |
| 44               | Colombia | Apples and products             | 1993           | 1                                                              |
| 44               | Colombia | Bananas                         | 1993           | 15                                                             |
| 44               | Colombia | Barley and products             | 1993           | 12                                                             |
| 44               | Colombia | Beans                           | 1993           | 32                                                             |
| 44               | Colombia | Beer                            | 1993           | 31                                                             |
| 44               | Colombia | Beverages, Alcoholic            | 1993           | 31                                                             |
| 44               | Colombia | Bovine Meat                     | 1993           | 99                                                             |
| 44               | Colombia | Butter, Ghee                    | 1993           | 8                                                              |
| 44               | Colombia | Cassava and products            | 1993           | 93                                                             |
| 44               | Colombia | Cereals - Excluding Beer        | 1993           | 803                                                            |
| 44               | Colombia | Cocoa Beans and products        | 1993           | 4                                                              |
| 44               | Colombia | Coconuts - Incl Copra           | 1993           | 7                                                              |
| 44               | Colombia | Coffee and products             | 1993           | 3                                                              |
| 44               | Colombia | Cottonseed Oil                  | 1993           | 11                                                             |
| 44               | Colombia | Eggs                            | 1993           | 25                                                             |
| 44               | Colombia | Fats, Animals, Raw              | 1993           | 24                                                             |
| 44               | Colombia | Fish, Seafood                   | 1993           | 8                                                              |
| 44               | Colombia | Freshwater Fish                 | 1993           | 3                                                              |
| 44               | Colombia | Fruits - Excluding Wine         | 1993           | 182                                                            |
| 44               | Colombia | Fruits, Other                   | 1993           | 18                                                             |
| 44               | Colombia | Grand Total                     | 1993           | 2,487                                                          |
| 44               | Colombia | Grapes and products (excl wine) | 1993           | 1                                                              |
| 44               | Colombia | Groundnuts (Shelled Eq)         | 1993           | 3                                                              |
| 44               | Colombia | Honey                           | 1993           | 1                                                              |
| 44               | Colombia | Maize and products              | 1993           | 312                                                            |
| 44               | Colombia | Maize Germ Oil                  | 1993           | 16                                                             |
| 44               | Colombia | Marine Fish, Other              | 1993           | 1                                                              |



Dietary calcium and zinc deficiency risks are decreasing but remain prevalent

| FAO Country code | Country  | Food item                       | Reference year | Net energy supply (kcal <i>capita</i> <sup>-1</sup> d <sup>-1</sup> ) |
|------------------|----------|---------------------------------|----------------|-----------------------------------------------------------------------|
| 44               | Colombia | Meat                            | 1993           | 171                                                                   |
| 44               | Colombia | Meat, Other                     | 1993           | 1                                                                     |
| 44               | Colombia | Milk - Excluding Butter         | 1993           | 173                                                                   |
| 44               | Colombia | Mutton & Goat Meat              | 1993           | 1                                                                     |
| 44               | Colombia | Oats                            | 1993           | 2                                                                     |
| 44               | Colombia | Offals                          | 1993           | 9                                                                     |
| 44               | Colombia | Oilcrops                        | 1993           | 26                                                                    |
| 44               | Colombia | Oilcrops, Other                 | 1993           | 16                                                                    |
| 44               | Colombia | Onions                          | 1993           | 6                                                                     |
| 44               | Colombia | Oranges, Mandarines             | 1993           | 8                                                                     |
| 44               | Colombia | Palm Oil                        | 1993           | 122                                                                   |
| 44               | Colombia | Palmkernel Oil                  | 1993           | 18                                                                    |
| 44               | Colombia | Peas                            | 1993           | 15                                                                    |
| 44               | Colombia | Pelagic Fish                    | 1993           | 5                                                                     |
| 44               | Colombia | Pigmeat                         | 1993           | 25                                                                    |
| 44               | Colombia | Pineapples and products         | 1993           | 7                                                                     |
| 44               | Colombia | Plantains                       | 1993           | 132                                                                   |
| 44               | Colombia | Potatoes and products           | 1993           | 109                                                                   |
| 44               | Colombia | Poultry Meat                    | 1993           | 45                                                                    |
| 44               | Colombia | Pulses                          | 1993           | 62                                                                    |
| 44               | Colombia | Pulses, Other and products      | 1993           | 16                                                                    |
| 44               | Colombia | Rice (Milled Equivalent)        | 1993           | 279                                                                   |
| 44               | Colombia | Roots, Other                    | 1993           | 5                                                                     |
| 44               | Colombia | Sesameseed Oil                  | 1993           | 3                                                                     |
| 44               | Colombia | Soyabean Oil                    | 1993           | 76                                                                    |
| 44               | Colombia | Soybeans                        | 1993           | 1                                                                     |
| 44               | Colombia | Spices                          | 1993           | 1                                                                     |
| 44               | Colombia | Spices, Other                   | 1993           | 1                                                                     |
| 44               | Colombia | Starchy Roots                   | 1993           | 212                                                                   |
| 44               | Colombia | Stimulants                      | 1993           | 7                                                                     |
| 44               | Colombia | Sugar & Sweeteners              | 1993           | 440                                                                   |
| 44               | Colombia | Sugar (Raw Equivalent)          | 1993           | 320                                                                   |
| 44               | Colombia | Sugar non-centrifugal           | 1993           | 118                                                                   |
| 44               | Colombia | Sunflowerseed Oil               | 1993           | 8                                                                     |
| 44               | Colombia | Sweeteners, Other               | 1993           | 1                                                                     |
| 44               | Colombia | Tomatoes and products           | 1993           | 4                                                                     |
| 44               | Colombia | Vegetable Oils                  | 1993           | 254                                                                   |
| 44               | Colombia | Vegetables                      | 1993           | 18                                                                    |
| 44               | Colombia | Vegetables, Other               | 1993           | 8                                                                     |
| 44               | Colombia | Vegetal Products                | 1993           | 2,069                                                                 |
| 44               | Colombia | Wheat and products              | 1993           | 199                                                                   |
| 44               | Colombia | Yams                            | 1993           | 4                                                                     |
| 44               | Colombia | Alcoholic Beverages             | 1994           | 53                                                                    |
| 44               | Colombia | Animal fats                     | 1994           | 39                                                                    |
| 44               | Colombia | Animal Products                 | 1994           | 437                                                                   |
| 44               | Colombia | Apples and products             | 1994           | 2                                                                     |
| 44               | Colombia | Bananas                         | 1994           | 12                                                                    |
| 44               | Colombia | Barley and products             | 1994           | 13                                                                    |
| 44               | Colombia | Beans                           | 1994           | 37                                                                    |
| 44               | Colombia | Beer                            | 1994           | 27                                                                    |
| 44               | Colombia | Beverages, Alcoholic            | 1994           | 25                                                                    |
| 44               | Colombia | Bovine Meat                     | 1994           | 104                                                                   |
| 44               | Colombia | Butter, Ghee                    | 1994           | 8                                                                     |
| 44               | Colombia | Cassava and products            | 1994           | 87                                                                    |
| 44               | Colombia | Cereals - Excluding Beer        | 1994           | 825                                                                   |
| 44               | Colombia | Cocoa Beans and products        | 1994           | 4                                                                     |
| 44               | Colombia | Coconuts - Incl Copra           | 1994           | 9                                                                     |
| 44               | Colombia | Coffee and products             | 1994           | 3                                                                     |
| 44               | Colombia | Cottonseed Oil                  | 1994           | 9                                                                     |
| 44               | Colombia | Eggs                            | 1994           | 25                                                                    |
| 44               | Colombia | Fats, Animals, Raw              | 1994           | 31                                                                    |
| 44               | Colombia | Fish, Seafood                   | 1994           | 6                                                                     |
| 44               | Colombia | Freshwater Fish                 | 1994           | 3                                                                     |
| 44               | Colombia | Fruits - Excluding Wine         | 1994           | 172                                                                   |
| 44               | Colombia | Fruits, Other                   | 1994           | 18                                                                    |
| 44               | Colombia | Grand Total                     | 1994           | 2,521                                                                 |
| 44               | Colombia | Grapes and products (excl wine) | 1994           | 2                                                                     |
| 44               | Colombia | Groundnuts (Shelled Eq)         | 1994           | 3                                                                     |
| 44               | Colombia | Honey                           | 1994           | 1                                                                     |
| 44               | Colombia | Maize and products              | 1994           | 305                                                                   |
| 44               | Colombia | Maize Germ Oil                  | 1994           | 15                                                                    |
| 44               | Colombia | Meat                            | 1994           | 180                                                                   |
| 44               | Colombia | Meat, Other                     | 1994           | 1                                                                     |
| 44               | Colombia | Milk - Excluding Butter         | 1994           | 178                                                                   |
| 44               | Colombia | Mutton & Goat Meat              | 1994           | 1                                                                     |
| 44               | Colombia | Oats                            | 1994           | 3                                                                     |
| 44               | Colombia | Offals                          | 1994           | 10                                                                    |
| 44               | Colombia | Oilcrops                        | 1994           | 40                                                                    |
| 44               | Colombia | Oilcrops, Other                 | 1994           | 28                                                                    |
| 44               | Colombia | Onions                          | 1994           | 6                                                                     |
| 44               | Colombia | Oranges, Mandarines             | 1994           | 9                                                                     |
| 44               | Colombia | Palm Oil                        | 1994           | 128                                                                   |
| 44               | Colombia | Palmkernel Oil                  | 1994           | 21                                                                    |
| 44               | Colombia | Peas                            | 1994           | 12                                                                    |
| 44               | Colombia | Pelagic Fish                    | 1994           | 3                                                                     |
| 44               | Colombia | Pigmeat                         | 1994           | 25                                                                    |
| 44               | Colombia | Pineapples and products         | 1994           | 7                                                                     |
| 44               | Colombia | Plantains                       | 1994           | 122                                                                   |
| 44               | Colombia | Potatoes and products           | 1994           | 111                                                                   |
| 44               | Colombia | Poultry Meat                    | 1994           | 49                                                                    |
| 44               | Colombia | Pulses                          | 1994           | 64                                                                    |
| 44               | Colombia | Pulses, Other and products      | 1994           | 14                                                                    |
| 44               | Colombia | Rice (Milled Equivalent)        | 1994           | 308                                                                   |
| 44               | Colombia | Roots, Other                    | 1994           | 5                                                                     |
| 44               | Colombia | Sesameseed Oil                  | 1994           | 2                                                                     |
| 44               | Colombia | Soyabean Oil                    | 1994           | 69                                                                    |
| 44               | Colombia | Soybeans                        | 1994           | 1                                                                     |

Dietary calcium and zinc deficiency risks are decreasing but remain prevalent

| FAO Country code | Country  | Food item                       | Reference year | Net energy supply (kcal <i>capita</i> <sup>-1</sup> d <sup>-1</sup> ) |
|------------------|----------|---------------------------------|----------------|-----------------------------------------------------------------------|
| 44               | Colombia | Spices                          | 1994           | 1                                                                     |
| 44               | Colombia | Spices, Other                   | 1994           | 1                                                                     |
| 44               | Colombia | Starchy Roots                   | 1994           | 210                                                                   |
| 44               | Colombia | Stimulants                      | 1994           | 7                                                                     |
| 44               | Colombia | Sugar & Sweeteners              | 1994           | 439                                                                   |
| 44               | Colombia | Sugar (Raw Equivalent)          | 1994           | 321                                                                   |
| 44               | Colombia | Sugar non-centrifugal           | 1994           | 116                                                                   |
| 44               | Colombia | Sunflowerseed Oil               | 1994           | 10                                                                    |
| 44               | Colombia | Sweeteners, Other               | 1994           | 2                                                                     |
| 44               | Colombia | Tomatoes and products           | 1994           | 5                                                                     |
| 44               | Colombia | Vegetable Oils                  | 1994           | 254                                                                   |
| 44               | Colombia | Vegetables                      | 1994           | 19                                                                    |
| 44               | Colombia | Vegetables, Other               | 1994           | 8                                                                     |
| 44               | Colombia | Vegetal Products                | 1994           | 2,084                                                                 |
| 44               | Colombia | Wheat and products              | 1994           | 196                                                                   |
| 44               | Colombia | Yams                            | 1994           | 7                                                                     |
| 44               | Colombia | Alcoholic Beverages             | 1995           | 58                                                                    |
| 44               | Colombia | Animal fats                     | 1995           | 39                                                                    |
| 44               | Colombia | Animal Products                 | 1995           | 467                                                                   |
| 44               | Colombia | Apples and products             | 1995           | 2                                                                     |
| 44               | Colombia | Bananas                         | 1995           | 13                                                                    |
| 44               | Colombia | Barley and products             | 1995           | 12                                                                    |
| 44               | Colombia | Beans                           | 1995           | 40                                                                    |
| 44               | Colombia | Beer                            | 1995           | 29                                                                    |
| 44               | Colombia | Beverages, Alcoholic            | 1995           | 28                                                                    |
| 44               | Colombia | Bovine Meat                     | 1995           | 111                                                                   |
| 44               | Colombia | Butter, Ghee                    | 1995           | 8                                                                     |
| 44               | Colombia | Cassava and products            | 1995           | 86                                                                    |
| 44               | Colombia | Cereals - Excluding Beer        | 1995           | 822                                                                   |
| 44               | Colombia | Cocoa Beans and products        | 1995           | 5                                                                     |
| 44               | Colombia | Coconuts - Incl Copra           | 1995           | 9                                                                     |
| 44               | Colombia | Coffee and products             | 1995           | 3                                                                     |
| 44               | Colombia | Cottonseed Oil                  | 1995           | 9                                                                     |
| 44               | Colombia | Eggs                            | 1995           | 26                                                                    |
| 44               | Colombia | Fats, Animals, Raw              | 1995           | 31                                                                    |
| 44               | Colombia | Fish, Seafood                   | 1995           | 11                                                                    |
| 44               | Colombia | Freshwater Fish                 | 1995           | 3                                                                     |
| 44               | Colombia | Fruits - Excluding Wine         | 1995           | 194                                                                   |
| 44               | Colombia | Fruits, Other                   | 1995           | 21                                                                    |
| 44               | Colombia | Grand Total                     | 1995           | 2,579                                                                 |
| 44               | Colombia | Grapes and products (excl wine) | 1995           | 2                                                                     |
| 44               | Colombia | Groundnuts (Shelled Eq)         | 1995           | 2                                                                     |
| 44               | Colombia | Honey                           | 1995           | 1                                                                     |
| 44               | Colombia | Maize and products              | 1995           | 303                                                                   |
| 44               | Colombia | Maize Germ Oil                  | 1995           | 15                                                                    |
| 44               | Colombia | Marine Fish, Other              | 1995           | 1                                                                     |
| 44               | Colombia | Meat                            | 1995           | 192                                                                   |
| 44               | Colombia | Meat, Other                     | 1995           | 1                                                                     |
| 44               | Colombia | Milk - Excluding Butter         | 1995           | 188                                                                   |
| 44               | Colombia | Mutton & Goat Meat              | 1995           | 1                                                                     |
| 44               | Colombia | Oats                            | 1995           | 3                                                                     |
| 44               | Colombia | Offals                          | 1995           | 10                                                                    |
| 44               | Colombia | Oilcrops                        | 1995           | 39                                                                    |
| 44               | Colombia | Oilcrops, Other                 | 1995           | 26                                                                    |
| 44               | Colombia | Onions                          | 1995           | 13                                                                    |
| 44               | Colombia | Oranges, Mandarines             | 1995           | 9                                                                     |
| 44               | Colombia | Palm Oil                        | 1995           | 126                                                                   |
| 44               | Colombia | Palmkernel Oil                  | 1995           | 20                                                                    |
| 44               | Colombia | Peas                            | 1995           | 9                                                                     |
| 44               | Colombia | Pelagic Fish                    | 1995           | 7                                                                     |
| 44               | Colombia | Pigmeat                         | 1995           | 25                                                                    |
| 44               | Colombia | Pineapples and products         | 1995           | 7                                                                     |
| 44               | Colombia | Plantains                       | 1995           | 140                                                                   |
| 44               | Colombia | Potatoes and products           | 1995           | 109                                                                   |
| 44               | Colombia | Poultry Meat                    | 1995           | 54                                                                    |
| 44               | Colombia | Pulses                          | 1995           | 61                                                                    |
| 44               | Colombia | Pulses, Other and products      | 1995           | 11                                                                    |
| 44               | Colombia | Rice (Milled Equivalent)        | 1995           | 287                                                                   |
| 44               | Colombia | Roots, Other                    | 1995           | 5                                                                     |
| 44               | Colombia | Sesameseed Oil                  | 1995           | 2                                                                     |
| 44               | Colombia | Soyabean Oil                    | 1995           | 73                                                                    |
| 44               | Colombia | Soyabeans                       | 1995           | 1                                                                     |
| 44               | Colombia | Spices                          | 1995           | 1                                                                     |
| 44               | Colombia | Spices, Other                   | 1995           | 1                                                                     |
| 44               | Colombia | Starchy Roots                   | 1995           | 207                                                                   |
| 44               | Colombia | Stimulants                      | 1995           | 7                                                                     |
| 44               | Colombia | Sugar & Sweeteners              | 1995           | 441                                                                   |
| 44               | Colombia | Sugar (Raw Equivalent)          | 1995           | 324                                                                   |
| 44               | Colombia | Sugar non-centrifugal           | 1995           | 115                                                                   |
| 44               | Colombia | Sunflowerseed Oil               | 1995           | 12                                                                    |
| 44               | Colombia | Sweeteners, Other               | 1995           | 2                                                                     |
| 44               | Colombia | Tomatoes and products           | 1995           | 4                                                                     |
| 44               | Colombia | Vegetable Oils                  | 1995           | 257                                                                   |
| 44               | Colombia | Vegetables                      | 1995           | 25                                                                    |
| 44               | Colombia | Vegetables, Other               | 1995           | 9                                                                     |
| 44               | Colombia | Vegetal Products                | 1995           | 2,112                                                                 |
| 44               | Colombia | Wheat and products              | 1995           | 216                                                                   |
| 44               | Colombia | Yams                            | 1995           | 7                                                                     |
| 44               | Colombia | Alcoholic Beverages             | 1996           | 55                                                                    |
| 44               | Colombia | Animal fats                     | 1996           | 34                                                                    |
| 44               | Colombia | Animal Products                 | 1996           | 464                                                                   |
| 44               | Colombia | Apples and products             | 1996           | 2                                                                     |
| 44               | Colombia | Bananas                         | 1996           | 1                                                                     |
| 44               | Colombia | Barley and products             | 1996           | 12                                                                    |
| 44               | Colombia | Beans                           | 1996           | 38                                                                    |
| 44               | Colombia | Beer                            | 1996           | 27                                                                    |
| 44               | Colombia | Beverages, Alcoholic            | 1996           | 28                                                                    |

Dietary calcium and zinc deficiency risks are decreasing but remain prevalent

| FAO Country code | Country  | Food item                       | Reference year | Net energy supply (kcal capita <sup>-1</sup> d <sup>-1</sup> ) |
|------------------|----------|---------------------------------|----------------|----------------------------------------------------------------|
| 44               | Colombia | Bovine Meat                     | 1996           | 114                                                            |
| 44               | Colombia | Butter, Ghee                    | 1996           | 8                                                              |
| 44               | Colombia | Cassava and products            | 1996           | 88                                                             |
| 44               | Colombia | Cereals - Excluding Beer        | 1996           | 838                                                            |
| 44               | Colombia | Cocoa Beans and products        | 1996           | 4                                                              |
| 44               | Colombia | Coconuts - Incl Copra           | 1996           | 11                                                             |
| 44               | Colombia | Coffee and products             | 1996           | 2                                                              |
| 44               | Colombia | Cottonseed Oil                  | 1996           | 14                                                             |
| 44               | Colombia | Eggs                            | 1996           | 28                                                             |
| 44               | Colombia | Fats, Animals, Raw              | 1996           | 26                                                             |
| 44               | Colombia | Fish, Seafood                   | 1996           | 11                                                             |
| 44               | Colombia | Freshwater Fish                 | 1996           | 3                                                              |
| 44               | Colombia | Fruits - Excluding Wine         | 1996           | 165                                                            |
| 44               | Colombia | Fruits, Other                   | 1996           | 23                                                             |
| 44               | Colombia | Grand Total                     | 1996           | 2,569                                                          |
| 44               | Colombia | Grapes and products (excl wine) | 1996           | 1                                                              |
| 44               | Colombia | Groundnuts (Shelled Eq)         | 1996           | 3                                                              |
| 44               | Colombia | Honey                           | 1996           | 1                                                              |
| 44               | Colombia | Maize and products              | 1996           | 319                                                            |
| 44               | Colombia | Maize Germ Oil                  | 1996           | 16                                                             |
| 44               | Colombia | Marine Fish, Other              | 1996           | 1                                                              |
| 44               | Colombia | Meat                            | 1996           | 184                                                            |
| 44               | Colombia | Meat, Other                     | 1996           | 1                                                              |
| 44               | Colombia | Milk - Excluding Butter         | 1996           | 197                                                            |
| 44               | Colombia | Mutton & Goat Meat              | 1996           | 1                                                              |
| 44               | Colombia | Oats                            | 1996           | 2                                                              |
| 44               | Colombia | Offals                          | 1996           | 10                                                             |
| 44               | Colombia | Oilcrops                        | 1996           | 50                                                             |
| 44               | Colombia | Oilcrops, Other                 | 1996           | 27                                                             |
| 44               | Colombia | Onions                          | 1996           | 19                                                             |
| 44               | Colombia | Oranges, Mandarines             | 1996           | 9                                                              |
| 44               | Colombia | Palm Oil                        | 1996           | 119                                                            |
| 44               | Colombia | Palmkernel Oil                  | 1996           | 20                                                             |
| 44               | Colombia | Peas                            | 1996           | 17                                                             |
| 44               | Colombia | Pelagic Fish                    | 1996           | 7                                                              |
| 44               | Colombia | Pigmeat                         | 1996           | 23                                                             |
| 44               | Colombia | Pineapples and products         | 1996           | 6                                                              |
| 44               | Colombia | Plantains                       | 1996           | 123                                                            |
| 44               | Colombia | Potatoes and products           | 1996           | 104                                                            |
| 44               | Colombia | Poultry Meat                    | 1996           | 45                                                             |
| 44               | Colombia | Pulses                          | 1996           | 66                                                             |
| 44               | Colombia | Pulses, Other and products      | 1996           | 12                                                             |
| 44               | Colombia | Rice (Milled Equivalent)        | 1996           | 296                                                            |
| 44               | Colombia | Roots, Other                    | 1996           | 4                                                              |
| 44               | Colombia | Sesameseed Oil                  | 1996           | 2                                                              |
| 44               | Colombia | Soyabean Oil                    | 1996           | 85                                                             |
| 44               | Colombia | Soyabeans                       | 1996           | 9                                                              |
| 44               | Colombia | Spices                          | 1996           | 1                                                              |
| 44               | Colombia | Spices, Other                   | 1996           | 1                                                              |
| 44               | Colombia | Starchy Roots                   | 1996           | 207                                                            |
| 44               | Colombia | Stimulants                      | 1996           | 5                                                              |
| 44               | Colombia | Sugar & Sweeteners              | 1996           | 417                                                            |
| 44               | Colombia | Sugar (Raw Equivalent)          | 1996           | 301                                                            |
| 44               | Colombia | Sugar non-centrifugal           | 1996           | 113                                                            |
| 44               | Colombia | Sunflowerseed Oil               | 1996           | 12                                                             |
| 44               | Colombia | Sweeteners, Other               | 1996           | 2                                                              |
| 44               | Colombia | Tomatoes and products           | 1996           | 4                                                              |
| 44               | Colombia | Vegetable Oils                  | 1996           | 269                                                            |
| 44               | Colombia | Vegetables                      | 1996           | 31                                                             |
| 44               | Colombia | Vegetables, Other               | 1996           | 8                                                              |
| 44               | Colombia | Vegetal Products                | 1996           | 2,105                                                          |
| 44               | Colombia | Wheat and products              | 1996           | 209                                                            |
| 44               | Colombia | Yams                            | 1996           | 12                                                             |
| 44               | Colombia | Alcoholic Beverages             | 1997           | 53                                                             |
| 44               | Colombia | Animal fats                     | 1997           | 33                                                             |
| 44               | Colombia | Animal Products                 | 1997           | 462                                                            |
| 44               | Colombia | Apples and products             | 1997           | 2                                                              |
| 44               | Colombia | Bananas                         | 1997           | 2                                                              |
| 44               | Colombia | Barley and products             | 1997           | 12                                                             |
| 44               | Colombia | Beans                           | 1997           | 34                                                             |
| 44               | Colombia | Beer                            | 1997           | 27                                                             |
| 44               | Colombia | Beverages, Alcoholic            | 1997           | 26                                                             |
| 44               | Colombia | Bovine Meat                     | 1997           | 117                                                            |
| 44               | Colombia | Butter, Ghee                    | 1997           | 9                                                              |
| 44               | Colombia | Cassava and products            | 1997           | 89                                                             |
| 44               | Colombia | Cereals - Excluding Beer        | 1997           | 847                                                            |
| 44               | Colombia | Cocoa Beans and products        | 1997           | 4                                                              |
| 44               | Colombia | Coconuts - Incl Copra           | 1997           | 8                                                              |
| 44               | Colombia | Coffee and products             | 1997           | 1                                                              |
| 44               | Colombia | Cottonseed Oil                  | 1997           | 8                                                              |
| 44               | Colombia | Eggs                            | 1997           | 29                                                             |
| 44               | Colombia | Fats, Animals, Raw              | 1997           | 24                                                             |
| 44               | Colombia | Fish, Seafood                   | 1997           | 11                                                             |
| 44               | Colombia | Freshwater Fish                 | 1997           | 3                                                              |
| 44               | Colombia | Fruits - Excluding Wine         | 1997           | 167                                                            |
| 44               | Colombia | Fruits, Other                   | 1997           | 24                                                             |
| 44               | Colombia | Grand Total                     | 1997           | 2,578                                                          |
| 44               | Colombia | Grapes and products (excl wine) | 1997           | 2                                                              |
| 44               | Colombia | Groundnuts (Shelled Eq)         | 1997           | 2                                                              |
| 44               | Colombia | Maize and products              | 1997           | 317                                                            |
| 44               | Colombia | Maize Germ Oil                  | 1997           | 15                                                             |
| 44               | Colombia | Marine Fish, Other              | 1997           | 1                                                              |
| 44               | Colombia | Meat                            | 1997           | 179                                                            |
| 44               | Colombia | Meat, Other                     | 1997           | 1                                                              |
| 44               | Colombia | Milk - Excluding Butter         | 1997           | 200                                                            |
| 44               | Colombia | Mutton & Goat Meat              | 1997           | 1                                                              |
| 44               | Colombia | Oats                            | 1997           | 3                                                              |

Dietary calcium and zinc deficiency risks are decreasing but remain prevalent

| FAO Country code | Country  | Food item                       | Reference year | Net energy supply (kcal capita <sup>-1</sup> d <sup>-1</sup> ) |
|------------------|----------|---------------------------------|----------------|----------------------------------------------------------------|
| 44               | Colombia | Offals                          | 1997           | 10                                                             |
| 44               | Colombia | Oilcrops                        | 1997           | 41                                                             |
| 44               | Colombia | Oilcrops, Other                 | 1997           | 24                                                             |
| 44               | Colombia | Olive Oil                       | 1997           | 1                                                              |
| 44               | Colombia | Onions                          | 1997           | 23                                                             |
| 44               | Colombia | Oranges, Mandarines             | 1997           | 9                                                              |
| 44               | Colombia | Palm Oil                        | 1997           | 125                                                            |
| 44               | Colombia | Palmkernel Oil                  | 1997           | 22                                                             |
| 44               | Colombia | Peas                            | 1997           | 17                                                             |
| 44               | Colombia | Pelagic Fish                    | 1997           | 7                                                              |
| 44               | Colombia | Pigmeat                         | 1997           | 18                                                             |
| 44               | Colombia | Pineapples and products         | 1997           | 5                                                              |
| 44               | Colombia | Plantains                       | 1997           | 122                                                            |
| 44               | Colombia | Potatoes and products           | 1997           | 100                                                            |
| 44               | Colombia | Poultry Meat                    | 1997           | 42                                                             |
| 44               | Colombia | Pulses                          | 1997           | 68                                                             |
| 44               | Colombia | Pulses, Other and products      | 1997           | 17                                                             |
| 44               | Colombia | Rice (Milled Equivalent)        | 1997           | 305                                                            |
| 44               | Colombia | Roots, Other                    | 1997           | 5                                                              |
| 44               | Colombia | Sesameseed Oil                  | 1997           | 3                                                              |
| 44               | Colombia | Soyabean Oil                    | 1997           | 84                                                             |
| 44               | Colombia | Soyabeans                       | 1997           | 7                                                              |
| 44               | Colombia | Spices                          | 1997           | 1                                                              |
| 44               | Colombia | Spices, Other                   | 1997           | 1                                                              |
| 44               | Colombia | Starchy Roots                   | 1997           | 201                                                            |
| 44               | Colombia | Stimulants                      | 1997           | 5                                                              |
| 44               | Colombia | Sugar & Sweeteners              | 1997           | 424                                                            |
| 44               | Colombia | Sugar (Raw Equivalent)          | 1997           | 309                                                            |
| 44               | Colombia | Sugar beet                      | 1997           | 1                                                              |
| 44               | Colombia | Sugar Crops                     | 1997           | 1                                                              |
| 44               | Colombia | Sugar non-centrifugal           | 1997           | 113                                                            |
| 44               | Colombia | Sunflowerseed Oil               | 1997           | 14                                                             |
| 44               | Colombia | Sweeteners, Other               | 1997           | 2                                                              |
| 44               | Colombia | Tomatoes and products           | 1997           | 5                                                              |
| 44               | Colombia | Vegetable Oils                  | 1997           | 271                                                            |
| 44               | Colombia | Vegetables                      | 1997           | 37                                                             |
| 44               | Colombia | Vegetables, Other               | 1997           | 9                                                              |
| 44               | Colombia | Vegetal Products                | 1997           | 2,117                                                          |
| 44               | Colombia | Wheat and products              | 1997           | 210                                                            |
| 44               | Colombia | Yams                            | 1997           | 7                                                              |
| 44               | Colombia | Alcoholic Beverages             | 1998           | 49                                                             |
| 44               | Colombia | Animal fats                     | 1998           | 32                                                             |
| 44               | Colombia | Animal Products                 | 1998           | 465                                                            |
| 44               | Colombia | Apples and products             | 1998           | 2                                                              |
| 44               | Colombia | Bananas                         | 1998           | 4                                                              |
| 44               | Colombia | Barley and products             | 1998           | 11                                                             |
| 44               | Colombia | Beans                           | 1998           | 33                                                             |
| 44               | Colombia | Beer                            | 1998           | 26                                                             |
| 44               | Colombia | Beverages, Alcoholic            | 1998           | 22                                                             |
| 44               | Colombia | Bovine Meat                     | 1998           | 115                                                            |
| 44               | Colombia | Butter, Ghee                    | 1998           | 9                                                              |
| 44               | Colombia | Cassava and products            | 1998           | 87                                                             |
| 44               | Colombia | Cereals - Excluding Beer        | 1998           | 851                                                            |
| 44               | Colombia | Cereals, Other                  | 1998           | 1                                                              |
| 44               | Colombia | Cocoa Beans and products        | 1998           | 4                                                              |
| 44               | Colombia | Coconuts - Incl Copra           | 1998           | 7                                                              |
| 44               | Colombia | Coffee and products             | 1998           | 2                                                              |
| 44               | Colombia | Cottonseed Oil                  | 1998           | 7                                                              |
| 44               | Colombia | Eggs                            | 1998           | 30                                                             |
| 44               | Colombia | Fats, Animals, Raw              | 1998           | 23                                                             |
| 44               | Colombia | Fish, Seafood                   | 1998           | 11                                                             |
| 44               | Colombia | Freshwater Fish                 | 1998           | 3                                                              |
| 44               | Colombia | Fruits - Excluding Wine         | 1998           | 145                                                            |
| 44               | Colombia | Fruits, Other                   | 1998           | 20                                                             |
| 44               | Colombia | Grand Total                     | 1998           | 2,551                                                          |
| 44               | Colombia | Grapes and products (excl wine) | 1998           | 1                                                              |
| 44               | Colombia | Groundnuts (Shelled Eq)         | 1998           | 1                                                              |
| 44               | Colombia | Maize and products              | 1998           | 317                                                            |
| 44               | Colombia | Maize Germ Oil                  | 1998           | 16                                                             |
| 44               | Colombia | Marine Fish, Other              | 1998           | 1                                                              |
| 44               | Colombia | Meat                            | 1998           | 178                                                            |
| 44               | Colombia | Meat, Other                     | 1998           | 1                                                              |
| 44               | Colombia | Milk - Excluding Butter         | 1998           | 205                                                            |
| 44               | Colombia | Mutton & Goat Meat              | 1998           | 1                                                              |
| 44               | Colombia | Oats                            | 1998           | 3                                                              |
| 44               | Colombia | Offals                          | 1998           | 9                                                              |
| 44               | Colombia | Oilcrops                        | 1998           | 37                                                             |
| 44               | Colombia | Oilcrops, Other                 | 1998           | 24                                                             |
| 44               | Colombia | Onions                          | 1998           | 19                                                             |
| 44               | Colombia | Oranges, Mandarines             | 1998           | 7                                                              |
| 44               | Colombia | Palm Oil                        | 1998           | 135                                                            |
| 44               | Colombia | Palmkernel Oil                  | 1998           | 22                                                             |
| 44               | Colombia | Peas                            | 1998           | 16                                                             |
| 44               | Colombia | Pelagic Fish                    | 1998           | 7                                                              |
| 44               | Colombia | Pigmeat                         | 1998           | 14                                                             |
| 44               | Colombia | Pineapples and products         | 1998           | 2                                                              |
| 44               | Colombia | Plantains                       | 1998           | 108                                                            |
| 44               | Colombia | Potatoes and products           | 1998           | 91                                                             |
| 44               | Colombia | Poultry Meat                    | 1998           | 47                                                             |
| 44               | Colombia | Pulses                          | 1998           | 64                                                             |
| 44               | Colombia | Pulses, Other and products      | 1998           | 15                                                             |
| 44               | Colombia | Rice (Milled Equivalent)        | 1998           | 307                                                            |
| 44               | Colombia | Roots, Other                    | 1998           | 4                                                              |
| 44               | Colombia | Sesameseed Oil                  | 1998           | 1                                                              |
| 44               | Colombia | Soyabean Oil                    | 1998           | 85                                                             |
| 44               | Colombia | Soyabeans                       | 1998           | 5                                                              |
| 44               | Colombia | Spices                          | 1998           | 1                                                              |

Dietary calcium and zinc deficiency risks are decreasing but remain prevalent

| FAO Country code | Country  | Food item                       | Reference year | Net energy supply (kcal <i>capita</i> <sup>-1</sup> d <sup>-1</sup> ) |
|------------------|----------|---------------------------------|----------------|-----------------------------------------------------------------------|
| 44               | Colombia | Spices, Other                   | 1998           | 1                                                                     |
| 44               | Colombia | Starchy Roots                   | 1998           | 192                                                                   |
| 44               | Colombia | Stimulants                      | 1998           | 6                                                                     |
| 44               | Colombia | Sugar & Sweeteners              | 1998           | 426                                                                   |
| 44               | Colombia | Sugar (Raw Equivalent)          | 1998           | 309                                                                   |
| 44               | Colombia | Sugar beet                      | 1998           | 1                                                                     |
| 44               | Colombia | Sugar Crops                     | 1998           | 1                                                                     |
| 44               | Colombia | Sugar non-centrifugal           | 1998           | 114                                                                   |
| 44               | Colombia | Sunflowerseed Oil               | 1998           | 14                                                                    |
| 44               | Colombia | Sweeteners, Other               | 1998           | 1                                                                     |
| 44               | Colombia | Tomatoes and products           | 1998           | 4                                                                     |
| 44               | Colombia | Vegetable Oils                  | 1998           | 281                                                                   |
| 44               | Colombia | Vegetables                      | 1998           | 33                                                                    |
| 44               | Colombia | Vegetables, Other               | 1998           | 9                                                                     |
| 44               | Colombia | Vegetal Products                | 1998           | 2,086                                                                 |
| 44               | Colombia | Wheat and products              | 1998           | 212                                                                   |
| 44               | Colombia | Yams                            | 1998           | 9                                                                     |
| 44               | Colombia | Alcoholic Beverages             | 1999           | 53                                                                    |
| 44               | Colombia | Animal fats                     | 1999           | 34                                                                    |
| 44               | Colombia | Animal Products                 | 1999           | 449                                                                   |
| 44               | Colombia | Apples and products             | 1999           | 2                                                                     |
| 44               | Colombia | Bananas                         | 1999           | 1                                                                     |
| 44               | Colombia | Barley and products             | 1999           | 6                                                                     |
| 44               | Colombia | Beans                           | 1999           | 33                                                                    |
| 44               | Colombia | Beer                            | 1999           | 24                                                                    |
| 44               | Colombia | Beverages, Alcoholic            | 1999           | 30                                                                    |
| 44               | Colombia | Bovine Meat                     | 1999           | 106                                                                   |
| 44               | Colombia | Butter, Chee                    | 1999           | 9                                                                     |
| 44               | Colombia | Cassava and products            | 1999           | 87                                                                    |
| 44               | Colombia | Cereals - Excluding Beer        | 1999           | 866                                                                   |
| 44               | Colombia | Citrus, Other                   | 1999           | 12                                                                    |
| 44               | Colombia | Cocoa Beans and products        | 1999           | 5                                                                     |
| 44               | Colombia | Coconuts - Incl Copra           | 1999           | 10                                                                    |
| 44               | Colombia | Coffee and products             | 1999           | 1                                                                     |
| 44               | Colombia | Cottonseed Oil                  | 1999           | 6                                                                     |
| 44               | Colombia | Eggs                            | 1999           | 29                                                                    |
| 44               | Colombia | Fats, Animals, Raw              | 1999           | 25                                                                    |
| 44               | Colombia | Fish, Seafood                   | 1999           | 9                                                                     |
| 44               | Colombia | Freshwater Fish                 | 1999           | 4                                                                     |
| 44               | Colombia | Fruits - Excluding Wine         | 1999           | 159                                                                   |
| 44               | Colombia | Fruits, Other                   | 1999           | 28                                                                    |
| 44               | Colombia | Grand Total                     | 1999           | 2,600                                                                 |
| 44               | Colombia | Grapes and products (excl wine) | 1999           | 1                                                                     |
| 44               | Colombia | Groundnuts (Shelled Eq)         | 1999           | 2                                                                     |
| 44               | Colombia | Lemons, Limes and products      | 1999           | 1                                                                     |
| 44               | Colombia | Maize and products              | 1999           | 322                                                                   |
| 44               | Colombia | Maize Germ Oil                  | 1999           | 16                                                                    |
| 44               | Colombia | Meat                            | 1999           | 172                                                                   |
| 44               | Colombia | Meat, Other                     | 1999           | 1                                                                     |
| 44               | Colombia | Milk - Excluding Butter         | 1999           | 196                                                                   |
| 44               | Colombia | Mutton & Goat Meat              | 1999           | 1                                                                     |
| 44               | Colombia | Oats                            | 1999           | 4                                                                     |
| 44               | Colombia | Offals                          | 1999           | 9                                                                     |
| 44               | Colombia | Oilcrops                        | 1999           | 31                                                                    |
| 44               | Colombia | Oilcrops, Other                 | 1999           | 13                                                                    |
| 44               | Colombia | Onions                          | 1999           | 13                                                                    |
| 44               | Colombia | Oranges, Mandarines             | 1999           | 8                                                                     |
| 44               | Colombia | Palm Oil                        | 1999           | 139                                                                   |
| 44               | Colombia | Palmkernel Oil                  | 1999           | 21                                                                    |
| 44               | Colombia | Peas                            | 1999           | 16                                                                    |
| 44               | Colombia | Pelagic Fish                    | 1999           | 5                                                                     |
| 44               | Colombia | Pigmeat                         | 1999           | 19                                                                    |
| 44               | Colombia | Pineapples and products         | 1999           | 6                                                                     |
| 44               | Colombia | Plantains                       | 1999           | 99                                                                    |
| 44               | Colombia | Potatoes and products           | 1999           | 100                                                                   |
| 44               | Colombia | Poultry Meat                    | 1999           | 46                                                                    |
| 44               | Colombia | Pulses                          | 1999           | 67                                                                    |
| 44               | Colombia | Pulses, Other and products      | 1999           | 18                                                                    |
| 44               | Colombia | Rice (Milled Equivalent)        | 1999           | 321                                                                   |
| 44               | Colombia | Roots, Other                    | 1999           | 3                                                                     |
| 44               | Colombia | Sesameseed Oil                  | 1999           | 1                                                                     |
| 44               | Colombia | Soyabean Oil                    | 1999           | 85                                                                    |
| 44               | Colombia | Soyabeans                       | 1999           | 6                                                                     |
| 44               | Colombia | Spices                          | 1999           | 4                                                                     |
| 44               | Colombia | Spices, Other                   | 1999           | 4                                                                     |
| 44               | Colombia | Starchy Roots                   | 1999           | 202                                                                   |
| 44               | Colombia | Stimulants                      | 1999           | 6                                                                     |
| 44               | Colombia | Sugar & Sweeteners              | 1999           | 449                                                                   |
| 44               | Colombia | Sugar (Raw Equivalent)          | 1999           | 335                                                                   |
| 44               | Colombia | Sugar beet                      | 1999           | 1                                                                     |
| 44               | Colombia | Sugar Crops                     | 1999           | 1                                                                     |
| 44               | Colombia | Sugar non-centrifugal           | 1999           | 112                                                                   |
| 44               | Colombia | Sunflowerseed Oil               | 1999           | 12                                                                    |
| 44               | Colombia | Sweeteners, Other               | 1999           | 1                                                                     |
| 44               | Colombia | Tomatoes and products           | 1999           | 5                                                                     |
| 44               | Colombia | Vegetable Oils                  | 1999           | 282                                                                   |
| 44               | Colombia | Vegetables                      | 1999           | 30                                                                    |
| 44               | Colombia | Vegetables, Other               | 1999           | 11                                                                    |
| 44               | Colombia | Vegetal Products                | 1999           | 2,150                                                                 |
| 44               | Colombia | Wheat and products              | 1999           | 214                                                                   |
| 44               | Colombia | Yams                            | 1999           | 11                                                                    |
| 44               | Colombia | Alcoholic Beverages             | 2000           | 61                                                                    |
| 44               | Colombia | Animal fats                     | 2000           | 35                                                                    |
| 44               | Colombia | Animal Products                 | 2000           | 465                                                                   |
| 44               | Colombia | Apples and products             | 2000           | 2                                                                     |
| 44               | Colombia | Bananas                         | 2000           | 4                                                                     |
| 44               | Colombia | Barley and products             | 2000           | 5                                                                     |

Dietary calcium and zinc deficiency risks are decreasing but remain prevalent

| FAO Country code | Country  | Food item                       | Reference year | Net energy supply (kcal capita <sup>-1</sup> d <sup>-1</sup> ) |
|------------------|----------|---------------------------------|----------------|----------------------------------------------------------------|
| 44               | Colombia | Beans                           | 2000           | 34                                                             |
| 44               | Colombia | Beer                            | 2000           | 33                                                             |
| 44               | Colombia | Beverages, Alcoholic            | 2000           | 27                                                             |
| 44               | Colombia | Bovine Meat                     | 2000           | 106                                                            |
| 44               | Colombia | Butter, Ghee                    | 2000           | 9                                                              |
| 44               | Colombia | Cassava and products            | 2000           | 87                                                             |
| 44               | Colombia | Cereals - Excluding Beer        | 2000           | 911                                                            |
| 44               | Colombia | Citrus, Other                   | 2000           | 12                                                             |
| 44               | Colombia | Cocoa Beans and products        | 2000           | 3                                                              |
| 44               | Colombia | Coconuts - Incl Copra           | 2000           | 9                                                              |
| 44               | Colombia | Coffee and products             | 2000           | 2                                                              |
| 44               | Colombia | Cottonseed Oil                  | 2000           | 5                                                              |
| 44               | Colombia | Eggs                            | 2000           | 30                                                             |
| 44               | Colombia | Fats, Animals, Raw              | 2000           | 26                                                             |
| 44               | Colombia | Fish, Seafood                   | 2000           | 10                                                             |
| 44               | Colombia | Freshwater Fish                 | 2000           | 4                                                              |
| 44               | Colombia | Fruits - Excluding Wine         | 2000           | 177                                                            |
| 44               | Colombia | Fruits, Other                   | 2000           | 27                                                             |
| 44               | Colombia | Grand Total                     | 2000           | 2,661                                                          |
| 44               | Colombia | Grapes and products (excl wine) | 2000           | 2                                                              |
| 44               | Colombia | Groundnuts (Shelled Eq)         | 2000           | 2                                                              |
| 44               | Colombia | Lemons, Limes and products      | 2000           | 1                                                              |
| 44               | Colombia | Maize and products              | 2000           | 326                                                            |
| 44               | Colombia | Maize Germ Oil                  | 2000           | 17                                                             |
| 44               | Colombia | Marine Fish, Other              | 2000           | 1                                                              |
| 44               | Colombia | Meat                            | 2000           | 173                                                            |
| 44               | Colombia | Meat, Other                     | 2000           | 1                                                              |
| 44               | Colombia | Milk - Excluding Butter         | 2000           | 208                                                            |
| 44               | Colombia | Mutton & Goat Meat              | 2000           | 1                                                              |
| 44               | Colombia | Oats                            | 2000           | 4                                                              |
| 44               | Colombia | Offals                          | 2000           | 9                                                              |
| 44               | Colombia | Oilcrops                        | 2000           | 35                                                             |
| 44               | Colombia | Oilcrops, Other                 | 2000           | 14                                                             |
| 44               | Colombia | Olive Oil                       | 2000           | 1                                                              |
| 44               | Colombia | Onions                          | 2000           | 17                                                             |
| 44               | Colombia | Oranges, Mandarines             | 2000           | 9                                                              |
| 44               | Colombia | Palm Oil                        | 2000           | 143                                                            |
| 44               | Colombia | Palmkernel Oil                  | 2000           | 20                                                             |
| 44               | Colombia | Peas                            | 2000           | 19                                                             |
| 44               | Colombia | Pelagic Fish                    | 2000           | 5                                                              |
| 44               | Colombia | Pigmeat                         | 2000           | 18                                                             |
| 44               | Colombia | Pineapples and products         | 2000           | 5                                                              |
| 44               | Colombia | Plantains                       | 2000           | 115                                                            |
| 44               | Colombia | Potatoes and products           | 2000           | 47                                                             |
| 44               | Colombia | Poultry Meat                    | 2000           | 46                                                             |
| 44               | Colombia | Pulses                          | 2000           | 70                                                             |
| 44               | Colombia | Pulses, Other and products      | 2000           | 17                                                             |
| 44               | Colombia | Rice (Milled Equivalent)        | 2000           | 364                                                            |
| 44               | Colombia | Roots, Other                    | 2000           | 3                                                              |
| 44               | Colombia | Sesameseed Oil                  | 2000           | 1                                                              |
| 44               | Colombia | Soyabean Oil                    | 2000           | 116                                                            |
| 44               | Colombia | Soyabeans                       | 2000           | 10                                                             |
| 44               | Colombia | Spices                          | 2000           | 5                                                              |
| 44               | Colombia | Spices, Other                   | 2000           | 5                                                              |
| 44               | Colombia | Starchy Roots                   | 2000           | 150                                                            |
| 44               | Colombia | Stimulants                      | 2000           | 5                                                              |
| 44               | Colombia | Sugar & Sweeteners              | 2000           | 432                                                            |
| 44               | Colombia | Sugar (Raw Equivalent)          | 2000           | 317                                                            |
| 44               | Colombia | Sugar beet                      | 2000           | 1                                                              |
| 44               | Colombia | Sugar Crops                     | 2000           | 1                                                              |
| 44               | Colombia | Sugar non-centrifugal           | 2000           | 112                                                            |
| 44               | Colombia | Sunflowerseed Oil               | 2000           | 13                                                             |
| 44               | Colombia | Sweeteners, Other               | 2000           | 2                                                              |
| 44               | Colombia | Tomatoes and products           | 2000           | 5                                                              |
| 44               | Colombia | Vegetable Oils                  | 2000           | 315                                                            |
| 44               | Colombia | Vegetables                      | 2000           | 34                                                             |
| 44               | Colombia | Vegetables, Other               | 2000           | 11                                                             |
| 44               | Colombia | Vegetal Products                | 2000           | 2,196                                                          |
| 44               | Colombia | Wheat and products              | 2000           | 214                                                            |
| 44               | Colombia | Yams                            | 2000           | 14                                                             |
| 44               | Colombia | Alcoholic Beverages             | 2001           | 63                                                             |
| 44               | Colombia | Animal fats                     | 2001           | 34                                                             |
| 44               | Colombia | Animal Products                 | 2001           | 466                                                            |
| 44               | Colombia | Apples and products             | 2001           | 2                                                              |
| 44               | Colombia | Bananas                         | 2001           | 4                                                              |
| 44               | Colombia | Barley and products             | 2001           | 10                                                             |
| 44               | Colombia | Beans                           | 2001           | 34                                                             |
| 44               | Colombia | Beer                            | 2001           | 34                                                             |
| 44               | Colombia | Beverages, Alcoholic            | 2001           | 29                                                             |
| 44               | Colombia | Bovine Meat                     | 2001           | 98                                                             |
| 44               | Colombia | Butter, Ghee                    | 2001           | 9                                                              |
| 44               | Colombia | Cassava and products            | 2001           | 88                                                             |
| 44               | Colombia | Cereals - Excluding Beer        | 2001           | 924                                                            |
| 44               | Colombia | Citrus, Other                   | 2001           | 12                                                             |
| 44               | Colombia | Cocoa Beans and products        | 2001           | 3                                                              |
| 44               | Colombia | Coconuts - Incl Copra           | 2001           | 9                                                              |
| 44               | Colombia | Coffee and products             | 2001           | 2                                                              |
| 44               | Colombia | Cottonseed Oil                  | 2001           | 5                                                              |
| 44               | Colombia | Eggs                            | 2001           | 33                                                             |
| 44               | Colombia | Fats, Animals, Raw              | 2001           | 25                                                             |
| 44               | Colombia | Fish, Seafood                   | 2001           | 12                                                             |
| 44               | Colombia | Freshwater Fish                 | 2001           | 4                                                              |
| 44               | Colombia | Fruits - Excluding Wine         | 2001           | 185                                                            |
| 44               | Colombia | Fruits, Other                   | 2001           | 27                                                             |
| 44               | Colombia | Grand Total                     | 2001           | 2,682                                                          |
| 44               | Colombia | Grapes and products (excl wine) | 2001           | 2                                                              |
| 44               | Colombia | Groundnuts (Shelled Eq)         | 2001           | 1                                                              |

Dietary calcium and zinc deficiency risks are decreasing but remain prevalent

| FAO Country code | Country  | Food item                       | Reference year | Net energy supply (kcal <i>capita</i> <sup>-1</sup> d <sup>-1</sup> ) |
|------------------|----------|---------------------------------|----------------|-----------------------------------------------------------------------|
| 44               | Colombia | Lemons, Limes and products      | 2001           | 1                                                                     |
| 44               | Colombia | Maize and products              | 2001           | 323                                                                   |
| 44               | Colombia | Maize Germ Oil                  | 2001           | 16                                                                    |
| 44               | Colombia | Marine Fish, Other              | 2001           | 1                                                                     |
| 44               | Colombia | Meat                            | 2001           | 171                                                                   |
| 44               | Colombia | Meat, Other                     | 2001           | 1                                                                     |
| 44               | Colombia | Milk - Excluding Butter         | 2001           | 208                                                                   |
| 44               | Colombia | Mutton & Goat Meat              | 2001           | 1                                                                     |
| 44               | Colombia | Oats                            | 2001           | 5                                                                     |
| 44               | Colombia | Offals                          | 2001           | 9                                                                     |
| 44               | Colombia | Oilcrops                        | 2001           | 28                                                                    |
| 44               | Colombia | Oilcrops, Other                 | 2001           | 6                                                                     |
| 44               | Colombia | Olive Oil                       | 2001           | 1                                                                     |
| 44               | Colombia | Onions                          | 2001           | 10                                                                    |
| 44               | Colombia | Oranges, Mandarines             | 2001           | 6                                                                     |
| 44               | Colombia | Palm Oil                        | 2001           | 145                                                                   |
| 44               | Colombia | Palmkernel Oil                  | 2001           | 20                                                                    |
| 44               | Colombia | Peas                            | 2001           | 20                                                                    |
| 44               | Colombia | Pelagic Fish                    | 2001           | 7                                                                     |
| 44               | Colombia | Pigmeat                         | 2001           | 17                                                                    |
| 44               | Colombia | Pineapples and products         | 2001           | 5                                                                     |
| 44               | Colombia | Plantains                       | 2001           | 126                                                                   |
| 44               | Colombia | Potatoes and products           | 2001           | 59                                                                    |
| 44               | Colombia | Poultry Meat                    | 2001           | 54                                                                    |
| 44               | Colombia | Pulses                          | 2001           | 72                                                                    |
| 44               | Colombia | Pulses, Other and products      | 2001           | 18                                                                    |
| 44               | Colombia | Rice (Milled Equivalent)        | 2001           | 361                                                                   |
| 44               | Colombia | Roots, Other                    | 2001           | 2                                                                     |
| 44               | Colombia | Sesameseed Oil                  | 2001           | 1                                                                     |
| 44               | Colombia | Soyabean Oil                    | 2001           | 114                                                                   |
| 44               | Colombia | Soyabeans                       | 2001           | 12                                                                    |
| 44               | Colombia | Spices                          | 2001           | 4                                                                     |
| 44               | Colombia | Spices, Other                   | 2001           | 4                                                                     |
| 44               | Colombia | Starchy Roots                   | 2001           | 163                                                                   |
| 44               | Colombia | Stimulants                      | 2001           | 4                                                                     |
| 44               | Colombia | Sugar & Sweeteners              | 2001           | 427                                                                   |
| 44               | Colombia | Sugar (Raw Equivalent)          | 2001           | 304                                                                   |
| 44               | Colombia | Sugar beet                      | 2001           | 1                                                                     |
| 44               | Colombia | Sugar Crops                     | 2001           | 1                                                                     |
| 44               | Colombia | Sugar non-centrifugal           | 2001           | 121                                                                   |
| 44               | Colombia | Sunflowerseed Oil               | 2001           | 14                                                                    |
| 44               | Colombia | Sweeteners, Other               | 2001           | 2                                                                     |
| 44               | Colombia | Tomatoes and products           | 2001           | 6                                                                     |
| 44               | Colombia | Vegetable Oils                  | 2001           | 317                                                                   |
| 44               | Colombia | Vegetables                      | 2001           | 28                                                                    |
| 44               | Colombia | Vegetables, Other               | 2001           | 12                                                                    |
| 44               | Colombia | Vegetal Products                | 2001           | 2,216                                                                 |
| 44               | Colombia | Wheat and products              | 2001           | 225                                                                   |
| 44               | Colombia | Yams                            | 2001           | 13                                                                    |
| 44               | Colombia | Alcoholic Beverages             | 2002           | 59                                                                    |
| 44               | Colombia | Animal fats                     | 2002           | 35                                                                    |
| 44               | Colombia | Animal Products                 | 2002           | 467                                                                   |
| 44               | Colombia | Apples and products             | 2002           | 2                                                                     |
| 44               | Colombia | Bananas                         | 2002           | 3                                                                     |
| 44               | Colombia | Barley and products             | 2002           | 10                                                                    |
| 44               | Colombia | Beans                           | 2002           | 33                                                                    |
| 44               | Colombia | Beer                            | 2002           | 29                                                                    |
| 44               | Colombia | Beverages, Alcoholic            | 2002           | 29                                                                    |
| 44               | Colombia | Bovine Meat                     | 2002           | 93                                                                    |
| 44               | Colombia | Butter, Ghee                    | 2002           | 9                                                                     |
| 44               | Colombia | Cassava and products            | 2002           | 74                                                                    |
| 44               | Colombia | Cereals - Excluding Beer        | 2002           | 897                                                                   |
| 44               | Colombia | Citrus, Other                   | 2002           | 12                                                                    |
| 44               | Colombia | Cocoa Beans and products        | 2002           | 3                                                                     |
| 44               | Colombia | Coconuts - Incl Copra           | 2002           | 8                                                                     |
| 44               | Colombia | Coffee and products             | 2002           | 2                                                                     |
| 44               | Colombia | Cottonseed Oil                  | 2002           | 6                                                                     |
| 44               | Colombia | Eggs                            | 2002           | 31                                                                    |
| 44               | Colombia | Fats, Animals, Raw              | 2002           | 26                                                                    |
| 44               | Colombia | Fish, Seafood                   | 2002           | 11                                                                    |
| 44               | Colombia | Freshwater Fish                 | 2002           | 3                                                                     |
| 44               | Colombia | Fruits - Excluding Wine         | 2002           | 184                                                                   |
| 44               | Colombia | Fruits, Other                   | 2002           | 28                                                                    |
| 44               | Colombia | Grand Total                     | 2002           | 2,630                                                                 |
| 44               | Colombia | Grapes and products (excl wine) | 2002           | 2                                                                     |
| 44               | Colombia | Groundnuts (Shelled Eq)         | 2002           | 1                                                                     |
| 44               | Colombia | Lemons, Limes and products      | 2002           | 1                                                                     |
| 44               | Colombia | Maize and products              | 2002           | 325                                                                   |
| 44               | Colombia | Maize Germ Oil                  | 2002           | 16                                                                    |
| 44               | Colombia | Marine Fish, Other              | 2002           | 1                                                                     |
| 44               | Colombia | Meat                            | 2002           | 170                                                                   |
| 44               | Colombia | Meat, Other                     | 2002           | 1                                                                     |
| 44               | Colombia | Milk - Excluding Butter         | 2002           | 212                                                                   |
| 44               | Colombia | Miscellaneous                   | 2002           | 1                                                                     |
| 44               | Colombia | Mutton & Goat Meat              | 2002           | 1                                                                     |
| 44               | Colombia | Oats                            | 2002           | 4                                                                     |
| 44               | Colombia | Offals                          | 2002           | 8                                                                     |
| 44               | Colombia | Oilcrops                        | 2002           | 27                                                                    |
| 44               | Colombia | Oilcrops, Other                 | 2002           | 2                                                                     |
| 44               | Colombia | Olive Oil                       | 2002           | 1                                                                     |
| 44               | Colombia | Onions                          | 2002           | 10                                                                    |
| 44               | Colombia | Oranges, Mandarines             | 2002           | 7                                                                     |
| 44               | Colombia | Palm Oil                        | 2002           | 145                                                                   |
| 44               | Colombia | Palmkernel Oil                  | 2002           | 21                                                                    |
| 44               | Colombia | Peas                            | 2002           | 20                                                                    |
| 44               | Colombia | Pelagic Fish                    | 2002           | 7                                                                     |
| 44               | Colombia | Pigmeat                         | 2002           | 18                                                                    |

## Dietary calcium and zinc deficiency risks are decreasing but remain prevalent

| FAO Country code | Country  | Food item                       | Reference year | Net energy supply (kcal <i>capita</i> <sup>-1</sup> d <sup>-1</sup> ) |
|------------------|----------|---------------------------------|----------------|-----------------------------------------------------------------------|
| 44               | Colombia | Pineapples and products         | 2002           | 6                                                                     |
| 44               | Colombia | Plantains                       | 2002           | 124                                                                   |
| 44               | Colombia | Potatoes and products           | 2002           | 57                                                                    |
| 44               | Colombia | Poultry Meat                    | 2002           | 57                                                                    |
| 44               | Colombia | Pulses                          | 2002           | 70                                                                    |
| 44               | Colombia | Pulses, Other and products      | 2002           | 17                                                                    |
| 44               | Colombia | Rice (Milled Equivalent)        | 2002           | 336                                                                   |
| 44               | Colombia | Roots, Other                    | 2002           | 3                                                                     |
| 44               | Colombia | Sesameseed Oil                  | 2002           | 1                                                                     |
| 44               | Colombia | Soyabean Oil                    | 2002           | 115                                                                   |
| 44               | Colombia | Soyabeans                       | 2002           | 16                                                                    |
| 44               | Colombia | Spices                          | 2002           | 4                                                                     |
| 44               | Colombia | Spices, Other                   | 2002           | 4                                                                     |
| 44               | Colombia | Starchy Roots                   | 2002           | 147                                                                   |
| 44               | Colombia | Stimulants                      | 2002           | 5                                                                     |
| 44               | Colombia | Sugar & Sweeteners              | 2002           | 422                                                                   |
| 44               | Colombia | Sugar (Raw Equivalent)          | 2002           | 306                                                                   |
| 44               | Colombia | Sugar beet                      | 2002           | 1                                                                     |
| 44               | Colombia | Sugar Crops                     | 2002           | 1                                                                     |
| 44               | Colombia | Sugar non-centrifugal           | 2002           | 114                                                                   |
| 44               | Colombia | Sunflowerseed Oil               | 2002           | 13                                                                    |
| 44               | Colombia | Sweeteners, Other               | 2002           | 1                                                                     |
| 44               | Colombia | Tomatoes and products           | 2002           | 6                                                                     |
| 44               | Colombia | Vegetable Oils                  | 2002           | 318                                                                   |
| 44               | Colombia | Vegetables                      | 2002           | 28                                                                    |
| 44               | Colombia | Vegetables, Other               | 2002           | 12                                                                    |
| 44               | Colombia | Vegetal Products                | 2002           | 2,162                                                                 |
| 44               | Colombia | Wheat and products              | 2002           | 222                                                                   |
| 44               | Colombia | Yams                            | 2002           | 13                                                                    |
| 44               | Colombia | Alcoholic Beverages             | 2003           | 66                                                                    |
| 44               | Colombia | Animal fats                     | 2003           | 35                                                                    |
| 44               | Colombia | Animal Products                 | 2003           | 466                                                                   |
| 44               | Colombia | Apples and products             | 2003           | 2                                                                     |
| 44               | Colombia | Bananas                         | 2003           | 8                                                                     |
| 44               | Colombia | Barley and products             | 2003           | 10                                                                    |
| 44               | Colombia | Beans                           | 2003           | 28                                                                    |
| 44               | Colombia | Beer                            | 2003           | 36                                                                    |
| 44               | Colombia | Beverages, Alcoholic            | 2003           | 30                                                                    |
| 44               | Colombia | Bovine Meat                     | 2003           | 87                                                                    |
| 44               | Colombia | Butter, Ghee                    | 2003           | 9                                                                     |
| 44               | Colombia | Cassava and products            | 2003           | 68                                                                    |
| 44               | Colombia | Cereals - Excluding Beer        | 2003           | 904                                                                   |
| 44               | Colombia | Citrus, Other                   | 2003           | 12                                                                    |
| 44               | Colombia | Cocoa Beans and products        | 2003           | 3                                                                     |
| 44               | Colombia | Coconuts - Incl Copra           | 2003           | 9                                                                     |
| 44               | Colombia | Coffee and products             | 2003           | 3                                                                     |
| 44               | Colombia | Cottonseed Oil                  | 2003           | 4                                                                     |
| 44               | Colombia | Eggs                            | 2003           | 33                                                                    |
| 44               | Colombia | Fats, Animals, Raw              | 2003           | 25                                                                    |
| 44               | Colombia | Fish, Seafood                   | 2003           | 12                                                                    |
| 44               | Colombia | Freshwater Fish                 | 2003           | 4                                                                     |
| 44               | Colombia | Fruits - Excluding Wine         | 2003           | 179                                                                   |
| 44               | Colombia | Fruits, Other                   | 2003           | 29                                                                    |
| 44               | Colombia | Grand Total                     | 2003           | 2,649                                                                 |
| 44               | Colombia | Grapes and products (excl wine) | 2003           | 2                                                                     |
| 44               | Colombia | Groundnuts (Shelled Eq)         | 2003           | 2                                                                     |
| 44               | Colombia | Lemons, Limes and products      | 2003           | 1                                                                     |
| 44               | Colombia | Maize and products              | 2003           | 326                                                                   |
| 44               | Colombia | Maize Germ Oil                  | 2003           | 17                                                                    |
| 44               | Colombia | Marine Fish, Other              | 2003           | 1                                                                     |
| 44               | Colombia | Meat                            | 2003           | 168                                                                   |
| 44               | Colombia | Meat, Other                     | 2003           | 1                                                                     |
| 44               | Colombia | Milk - Excluding Butter         | 2003           | 210                                                                   |
| 44               | Colombia | Miscellaneous                   | 2003           | 1                                                                     |
| 44               | Colombia | Mutton & Goat Meat              | 2003           | 1                                                                     |
| 44               | Colombia | Oats                            | 2003           | 5                                                                     |
| 44               | Colombia | Offals                          | 2003           | 8                                                                     |
| 44               | Colombia | Oilcrops                        | 2003           | 21                                                                    |
| 44               | Colombia | Oilcrops, Other                 | 2003           | 1                                                                     |
| 44               | Colombia | Olive Oil                       | 2003           | 1                                                                     |
| 44               | Colombia | Onions                          | 2003           | 13                                                                    |
| 44               | Colombia | Oranges, Mandarines             | 2003           | 3                                                                     |
| 44               | Colombia | Palm Oil                        | 2003           | 144                                                                   |
| 44               | Colombia | Palmkernel Oil                  | 2003           | 21                                                                    |
| 44               | Colombia | Peas                            | 2003           | 22                                                                    |
| 44               | Colombia | Pelagic Fish                    | 2003           | 7                                                                     |
| 44               | Colombia | Pigmeat                         | 2003           | 20                                                                    |
| 44               | Colombia | Pineapples and products         | 2003           | 6                                                                     |
| 44               | Colombia | Plantains                       | 2003           | 117                                                                   |
| 44               | Colombia | Potatoes and products           | 2003           | 71                                                                    |
| 44               | Colombia | Poultry Meat                    | 2003           | 58                                                                    |
| 44               | Colombia | Pulses                          | 2003           | 69                                                                    |
| 44               | Colombia | Pulses, Other and products      | 2003           | 19                                                                    |
| 44               | Colombia | Rice (Milled Equivalent)        | 2003           | 340                                                                   |
| 44               | Colombia | Roots, Other                    | 2003           | 5                                                                     |
| 44               | Colombia | Sesameseed Oil                  | 2003           | 1                                                                     |
| 44               | Colombia | Soyabean Oil                    | 2003           | 116                                                                   |
| 44               | Colombia | Soyabeans                       | 2003           | 9                                                                     |
| 44               | Colombia | Spices                          | 2003           | 4                                                                     |
| 44               | Colombia | Spices, Other                   | 2003           | 4                                                                     |
| 44               | Colombia | Starchy Roots                   | 2003           | 159                                                                   |
| 44               | Colombia | Stimulants                      | 2003           | 5                                                                     |
| 44               | Colombia | Sugar & Sweeteners              | 2003           | 427                                                                   |
| 44               | Colombia | Sugar (Raw Equivalent)          | 2003           | 308                                                                   |
| 44               | Colombia | Sugar beet                      | 2003           | 1                                                                     |
| 44               | Colombia | Sugar Crops                     | 2003           | 1                                                                     |
| 44               | Colombia | Sugar non-centrifugal           | 2003           | 118                                                                   |



## Dietary calcium and zinc deficiency risks are decreasing but remain prevalent

| FAO Country code | Country  | Food item                       | Reference year | Net energy supply (kcal capita <sup>-1</sup> d <sup>-1</sup> ) |
|------------------|----------|---------------------------------|----------------|----------------------------------------------------------------|
| 44               | Colombia | Sunflowerseed Oil               | 2003           | 13                                                             |
| 44               | Colombia | Sweeteners, Other               | 2003           | 1                                                              |
| 44               | Colombia | Tomatoes and products           | 2003           | 6                                                              |
| 44               | Colombia | Vegetable Oils                  | 2003           | 317                                                            |
| 44               | Colombia | Vegetables                      | 2003           | 32                                                             |
| 44               | Colombia | Vegetables, Other               | 2003           | 13                                                             |
| 44               | Colombia | Vegetal Products                | 2003           | 2,184                                                          |
| 44               | Colombia | Wheat and products              | 2003           | 224                                                            |
| 44               | Colombia | Yams                            | 2003           | 15                                                             |
| 44               | Colombia | Alcoholic Beverages             | 2004           | 64                                                             |
| 44               | Colombia | Animal fats                     | 2004           | 35                                                             |
| 44               | Colombia | Animal Products                 | 2004           | 464                                                            |
| 44               | Colombia | Apples and products             | 2004           | 2                                                              |
| 44               | Colombia | Bananas                         | 2004           | 8                                                              |
| 44               | Colombia | Barley and products             | 2004           | 9                                                              |
| 44               | Colombia | Beans                           | 2004           | 28                                                             |
| 44               | Colombia | Beer                            | 2004           | 37                                                             |
| 44               | Colombia | Beverages, Alcoholic            | 2004           | 26                                                             |
| 44               | Colombia | Bovine Meat                     | 2004           | 94                                                             |
| 44               | Colombia | Butter, Ghee                    | 2004           | 9                                                              |
| 44               | Colombia | Cassava and products            | 2004           | 68                                                             |
| 44               | Colombia | Cereals - Excluding Beer        | 2004           | 906                                                            |
| 44               | Colombia | Citrus, Other                   | 2004           | 12                                                             |
| 44               | Colombia | Cocoa Beans and products        | 2004           | 2                                                              |
| 44               | Colombia | Coconuts - Incl Copra           | 2004           | 9                                                              |
| 44               | Colombia | Coffee and products             | 2004           | 2                                                              |
| 44               | Colombia | Cottonseed Oil                  | 2004           | 5                                                              |
| 44               | Colombia | Eggs                            | 2004           | 33                                                             |
| 44               | Colombia | Fats, Animals, Raw              | 2004           | 27                                                             |
| 44               | Colombia | Fish, Seafood                   | 2004           | 11                                                             |
| 44               | Colombia | Freshwater Fish                 | 2004           | 3                                                              |
| 44               | Colombia | Fruits - Excluding Wine         | 2004           | 185                                                            |
| 44               | Colombia | Fruits, Other                   | 2004           | 30                                                             |
| 44               | Colombia | Grand Total                     | 2004           | 2,631                                                          |
| 44               | Colombia | Grapes and products (excl wine) | 2004           | 2                                                              |
| 44               | Colombia | Groundnuts (Shelled Eq)         | 2004           | 2                                                              |
| 44               | Colombia | Lemons, Limes and products      | 2004           | 1                                                              |
| 44               | Colombia | Maize and products              | 2004           | 325                                                            |
| 44               | Colombia | Maize Germ Oil                  | 2004           | 17                                                             |
| 44               | Colombia | Meat                            | 2004           | 177                                                            |
| 44               | Colombia | Meat, Other                     | 2004           | 2                                                              |
| 44               | Colombia | Milk - Excluding Butter         | 2004           | 199                                                            |
| 44               | Colombia | Miscellaneous                   | 2004           | 1                                                              |
| 44               | Colombia | Mutton & Goat Meat              | 2004           | 1                                                              |
| 44               | Colombia | Oats                            | 2004           | 5                                                              |
| 44               | Colombia | Offals                          | 2004           | 9                                                              |
| 44               | Colombia | Oilcrops                        | 2004           | 16                                                             |
| 44               | Colombia | Oilcrops, Other                 | 2004           | 1                                                              |
| 44               | Colombia | Olive Oil                       | 2004           | 1                                                              |
| 44               | Colombia | Onions                          | 2004           | 11                                                             |
| 44               | Colombia | Oranges, Mandarines             | 2004           | 3                                                              |
| 44               | Colombia | Palm Oil                        | 2004           | 132                                                            |
| 44               | Colombia | Palmkernel Oil                  | 2004           | 24                                                             |
| 44               | Colombia | Peas                            | 2004           | 16                                                             |
| 44               | Colombia | Pelagic Fish                    | 2004           | 7                                                              |
| 44               | Colombia | Pigmeat                         | 2004           | 20                                                             |
| 44               | Colombia | Pineapples and products         | 2004           | 6                                                              |
| 44               | Colombia | Plantains                       | 2004           | 122                                                            |
| 44               | Colombia | Potatoes and products           | 2004           | 66                                                             |
| 44               | Colombia | Poultry Meat                    | 2004           | 59                                                             |
| 44               | Colombia | Pulses                          | 2004           | 62                                                             |
| 44               | Colombia | Pulses, Other and products      | 2004           | 18                                                             |
| 44               | Colombia | Rape and Mustard Oil            | 2004           | 1                                                              |
| 44               | Colombia | Rice (Milled Equivalent)        | 2004           | 343                                                            |
| 44               | Colombia | Roots, Other                    | 2004           | 5                                                              |
| 44               | Colombia | Sesameseed Oil                  | 2004           | 1                                                              |
| 44               | Colombia | Soyabean Oil                    | 2004           | 114                                                            |
| 44               | Colombia | Soyabeans                       | 2004           | 4                                                              |
| 44               | Colombia | Spices                          | 2004           | 5                                                              |
| 44               | Colombia | Spices, Other                   | 2004           | 4                                                              |
| 44               | Colombia | Starchy Roots                   | 2004           | 154                                                            |
| 44               | Colombia | Stimulants                      | 2004           | 5                                                              |
| 44               | Colombia | Sugar & Sweeteners              | 2004           | 429                                                            |
| 44               | Colombia | Sugar (Raw Equivalent)          | 2004           | 314                                                            |
| 44               | Colombia | Sugar beet                      | 2004           | 1                                                              |
| 44               | Colombia | Sugar Crops                     | 2004           | 1                                                              |
| 44               | Colombia | Sugar non-centrifugal           | 2004           | 115                                                            |
| 44               | Colombia | Sunflowerseed Oil               | 2004           | 15                                                             |
| 44               | Colombia | Sweeteners, Other               | 2004           | 1                                                              |
| 44               | Colombia | Tomatoes and products           | 2004           | 6                                                              |
| 44               | Colombia | Vegetable Oils                  | 2004           | 310                                                            |
| 44               | Colombia | Vegetables                      | 2004           | 29                                                             |
| 44               | Colombia | Vegetables, Other               | 2004           | 13                                                             |
| 44               | Colombia | Vegetal Products                | 2004           | 2,167                                                          |
| 44               | Colombia | Wheat and products              | 2004           | 224                                                            |
| 44               | Colombia | Yams                            | 2004           | 15                                                             |
| 44               | Colombia | Alcoholic Beverages             | 2005           | 66                                                             |
| 44               | Colombia | Animal fats                     | 2005           | 35                                                             |
| 44               | Colombia | Animal Products                 | 2005           | 473                                                            |
| 44               | Colombia | Apples and products             | 2005           | 2                                                              |
| 44               | Colombia | Bananas                         | 2005           | 6                                                              |
| 44               | Colombia | Barley and products             | 2005           | 10                                                             |
| 44               | Colombia | Beans                           | 2005           | 34                                                             |
| 44               | Colombia | Beer                            | 2005           | 38                                                             |
| 44               | Colombia | Beverages, Alcoholic            | 2005           | 28                                                             |
| 44               | Colombia | Bovine Meat                     | 2005           | 103                                                            |
| 44               | Colombia | Butter, Ghee                    | 2005           | 9                                                              |

Dietary calcium and zinc deficiency risks are decreasing but remain prevalent

| FAO Country code | Country  | Food item                       | Reference year | Net energy supply (kcal capita <sup>-1</sup> d <sup>-1</sup> ) |
|------------------|----------|---------------------------------|----------------|----------------------------------------------------------------|
| 44               | Colombia | Cassava and products            | 2005           | 64                                                             |
| 44               | Colombia | Cereals - Excluding Beer        | 2005           | 872                                                            |
| 44               | Colombia | Citrus, Other                   | 2005           | 12                                                             |
| 44               | Colombia | Cocoa Beans and products        | 2005           | 2                                                              |
| 44               | Colombia | Coconuts - Incl Copra           | 2005           | 9                                                              |
| 44               | Colombia | Coffee and products             | 2005           | 2                                                              |
| 44               | Colombia | Cottonseed Oil                  | 2005           | 7                                                              |
| 44               | Colombia | Eggs                            | 2005           | 35                                                             |
| 44               | Colombia | Fats, Animals, Raw              | 2005           | 26                                                             |
| 44               | Colombia | Fish, Seafood                   | 2005           | 12                                                             |
| 44               | Colombia | Freshwater Fish                 | 2005           | 3                                                              |
| 44               | Colombia | Fruits - Excluding Wine         | 2005           | 179                                                            |
| 44               | Colombia | Fruits, Other                   | 2005           | 30                                                             |
| 44               | Colombia | Grand Total                     | 2005           | 2,599                                                          |
| 44               | Colombia | Grapes and products (excl wine) | 2005           | 2                                                              |
| 44               | Colombia | Groundnuts (Shelled Eq)         | 2005           | 2                                                              |
| 44               | Colombia | Lemons, Limes and products      | 2005           | 1                                                              |
| 44               | Colombia | Maize and products              | 2005           | 310                                                            |
| 44               | Colombia | Maize Germ Oil                  | 2005           | 15                                                             |
| 44               | Colombia | Marine Fish, Other              | 2005           | 2                                                              |
| 44               | Colombia | Meat                            | 2005           | 190                                                            |
| 44               | Colombia | Meat, Other                     | 2005           | 2                                                              |
| 44               | Colombia | Milk - Excluding Butter         | 2005           | 191                                                            |
| 44               | Colombia | Miscellaneous                   | 2005           | 1                                                              |
| 44               | Colombia | Mutton & Goat Meat              | 2005           | 1                                                              |
| 44               | Colombia | Oats                            | 2005           | 5                                                              |
| 44               | Colombia | Offals                          | 2005           | 9                                                              |
| 44               | Colombia | Oilcrops                        | 2005           | 16                                                             |
| 44               | Colombia | Oilcrops, Other                 | 2005           | 1                                                              |
| 44               | Colombia | Olive Oil                       | 2005           | 1                                                              |
| 44               | Colombia | Onions                          | 2005           | 11                                                             |
| 44               | Colombia | Oranges, Mandarines             | 2005           | 4                                                              |
| 44               | Colombia | Palm Oil                        | 2005           | 146                                                            |
| 44               | Colombia | Palmkernel Oil                  | 2005           | 24                                                             |
| 44               | Colombia | Peas                            | 2005           | 17                                                             |
| 44               | Colombia | Pelagic Fish                    | 2005           | 7                                                              |
| 44               | Colombia | Pigmeat                         | 2005           | 20                                                             |
| 44               | Colombia | Pineapples and products         | 2005           | 6                                                              |
| 44               | Colombia | Plantains                       | 2005           | 118                                                            |
| 44               | Colombia | Potatoes and products           | 2005           | 57                                                             |
| 44               | Colombia | Poultry Meat                    | 2005           | 63                                                             |
| 44               | Colombia | Pulses                          | 2005           | 69                                                             |
| 44               | Colombia | Pulses, Other and products      | 2005           | 18                                                             |
| 44               | Colombia | Rape and Mustard Oil            | 2005           | 1                                                              |
| 44               | Colombia | Rice (Milled Equivalent)        | 2005           | 329                                                            |
| 44               | Colombia | Roots, Other                    | 2005           | 5                                                              |
| 44               | Colombia | Soyabean Oil                    | 2005           | 113                                                            |
| 44               | Colombia | Soyabeans                       | 2005           | 4                                                              |
| 44               | Colombia | Spices                          | 2005           | 4                                                              |
| 44               | Colombia | Spices, Other                   | 2005           | 4                                                              |
| 44               | Colombia | Starchy Roots                   | 2005           | 140                                                            |
| 44               | Colombia | Stimulants                      | 2005           | 5                                                              |
| 44               | Colombia | Sugar & Sweeteners              | 2005           | 423                                                            |
| 44               | Colombia | Sugar (Raw Equivalent)          | 2005           | 312                                                            |
| 44               | Colombia | Sugar beet                      | 2005           | 1                                                              |
| 44               | Colombia | Sugar Crops                     | 2005           | 1                                                              |
| 44               | Colombia | Sugar non-centrifugal           | 2005           | 110                                                            |
| 44               | Colombia | Sunflowerseed Oil               | 2005           | 13                                                             |
| 44               | Colombia | Sweeteners, Other               | 2005           | 1                                                              |
| 44               | Colombia | Tomatoes and products           | 2005           | 6                                                              |
| 44               | Colombia | Vegetable Oils                  | 2005           | 319                                                            |
| 44               | Colombia | Vegetables                      | 2005           | 30                                                             |
| 44               | Colombia | Vegetables, Other               | 2005           | 13                                                             |
| 44               | Colombia | Vegetal Products                | 2005           | 2,126                                                          |
| 44               | Colombia | Wheat and products              | 2005           | 218                                                            |
| 44               | Colombia | Yams                            | 2005           | 14                                                             |
| 44               | Colombia | Alcoholic Beverages             | 2006           | 61                                                             |
| 44               | Colombia | Animal fats                     | 2006           | 34                                                             |
| 44               | Colombia | Animal Products                 | 2006           | 501                                                            |
| 44               | Colombia | Apples and products             | 2006           | 2                                                              |
| 44               | Colombia | Bananas                         | 2006           | 10                                                             |
| 44               | Colombia | Barley and products             | 2006           | 10                                                             |
| 44               | Colombia | Beans                           | 2006           | 29                                                             |
| 44               | Colombia | Beer                            | 2006           | 40                                                             |
| 44               | Colombia | Beverages, Alcoholic            | 2006           | 20                                                             |
| 44               | Colombia | Bovine Meat                     | 2006           | 105                                                            |
| 44               | Colombia | Butter, Ghee                    | 2006           | 9                                                              |
| 44               | Colombia | Cassava and products            | 2006           | 67                                                             |
| 44               | Colombia | Cereals - Excluding Beer        | 2006           | 861                                                            |
| 44               | Colombia | Citrus, Other                   | 2006           | 12                                                             |
| 44               | Colombia | Cocoa Beans and products        | 2006           | 3                                                              |
| 44               | Colombia | Coconuts - Incl Copra           | 2006           | 10                                                             |
| 44               | Colombia | Coffee and products             | 2006           | 2                                                              |
| 44               | Colombia | Cottonseed Oil                  | 2006           | 6                                                              |
| 44               | Colombia | Eggs                            | 2006           | 37                                                             |
| 44               | Colombia | Fats, Animals, Raw              | 2006           | 25                                                             |
| 44               | Colombia | Fish, Seafood                   | 2006           | 13                                                             |
| 44               | Colombia | Freshwater Fish                 | 2006           | 3                                                              |
| 44               | Colombia | Fruits - Excluding Wine         | 2006           | 195                                                            |
| 44               | Colombia | Fruits, Other                   | 2006           | 32                                                             |
| 44               | Colombia | Grand Total                     | 2006           | 2,594                                                          |
| 44               | Colombia | Grapes and products (excl wine) | 2006           | 2                                                              |
| 44               | Colombia | Groundnuts (Shelled Eq)         | 2006           | 2                                                              |
| 44               | Colombia | Lemons, Limes and products      | 2006           | 1                                                              |
| 44               | Colombia | Maize and products              | 2006           | 301                                                            |
| 44               | Colombia | Maize Germ Oil                  | 2006           | 13                                                             |
| 44               | Colombia | Marine Fish, Other              | 2006           | 1                                                              |

Dietary calcium and zinc deficiency risks are decreasing but remain prevalent

| FAO Country code | Country  | Food item                       | Reference year | Net energy supply (kcal capita <sup>-1</sup> d <sup>-1</sup> ) |
|------------------|----------|---------------------------------|----------------|----------------------------------------------------------------|
| 44               | Colombia | Meat                            | 2006           | 200                                                            |
| 44               | Colombia | Meat, Other                     | 2006           | 2                                                              |
| 44               | Colombia | Milk - Excluding Butter         | 2006           | 207                                                            |
| 44               | Colombia | Miscellaneous                   | 2006           | 1                                                              |
| 44               | Colombia | Mutton & Goat Meat              | 2006           | 1                                                              |
| 44               | Colombia | Oats                            | 2006           | 5                                                              |
| 44               | Colombia | Offals                          | 2006           | 9                                                              |
| 44               | Colombia | Oilcrops                        | 2006           | 17                                                             |
| 44               | Colombia | Olive Oil                       | 2006           | 1                                                              |
| 44               | Colombia | Onions                          | 2006           | 7                                                              |
| 44               | Colombia | Oranges, Mandarines             | 2006           | 10                                                             |
| 44               | Colombia | Palm Oil                        | 2006           | 143                                                            |
| 44               | Colombia | Palmkernel Oil                  | 2006           | 30                                                             |
| 44               | Colombia | Peas                            | 2006           | 14                                                             |
| 44               | Colombia | Pelagic Fish                    | 2006           | 9                                                              |
| 44               | Colombia | Pigmeat                         | 2006           | 23                                                             |
| 44               | Colombia | Pineapples and products         | 2006           | 6                                                              |
| 44               | Colombia | Plantains                       | 2006           | 119                                                            |
| 44               | Colombia | Potatoes and products           | 2006           | 67                                                             |
| 44               | Colombia | Poultry Meat                    | 2006           | 69                                                             |
| 44               | Colombia | Pulses                          | 2006           | 62                                                             |
| 44               | Colombia | Pulses, Other and products      | 2006           | 19                                                             |
| 44               | Colombia | Rape and Mustard Oil            | 2006           | 1                                                              |
| 44               | Colombia | Rice (Milled Equivalent)        | 2006           | 319                                                            |
| 44               | Colombia | Roots, Other                    | 2006           | 5                                                              |
| 44               | Colombia | Sesameseed Oil                  | 2006           | 1                                                              |
| 44               | Colombia | Soyabean Oil                    | 2006           | 114                                                            |
| 44               | Colombia | Soyabeans                       | 2006           | 5                                                              |
| 44               | Colombia | Spices                          | 2006           | 4                                                              |
| 44               | Colombia | Spices, Other                   | 2006           | 4                                                              |
| 44               | Colombia | Starchy Roots                   | 2006           | 152                                                            |
| 44               | Colombia | Stimulants                      | 2006           | 6                                                              |
| 44               | Colombia | Sugar & Sweeteners              | 2006           | 387                                                            |
| 44               | Colombia | Sugar (Raw Equivalent)          | 2006           | 275                                                            |
| 44               | Colombia | Sugar beet                      | 2006           | 1                                                              |
| 44               | Colombia | Sugar Crops                     | 2006           | 1                                                              |
| 44               | Colombia | Sugar non-centrifugal           | 2006           | 110                                                            |
| 44               | Colombia | Sunflowerseed Oil               | 2006           | 11                                                             |
| 44               | Colombia | Sweeteners, Other               | 2006           | 1                                                              |
| 44               | Colombia | Tomatoes and products           | 2006           | 6                                                              |
| 44               | Colombia | Vegetable Oils                  | 2006           | 321                                                            |
| 44               | Colombia | Vegetables                      | 2006           | 26                                                             |
| 44               | Colombia | Vegetables, Other               | 2006           | 13                                                             |
| 44               | Colombia | Vegetal Products                | 2006           | 2,093                                                          |
| 44               | Colombia | Wheat and products              | 2006           | 226                                                            |
| 44               | Colombia | Wine                            | 2006           | 1                                                              |
| 44               | Colombia | Yams                            | 2006           | 13                                                             |
| 44               | Colombia | Alcoholic Beverages             | 2007           | 61                                                             |
| 44               | Colombia | Animal fats                     | 2007           | 35                                                             |
| 44               | Colombia | Animal Products                 | 2007           | 499                                                            |
| 44               | Colombia | Apples and products             | 2007           | 2                                                              |
| 44               | Colombia | Bananas                         | 2007           | 6                                                              |
| 44               | Colombia | Barley and products             | 2007           | 9                                                              |
| 44               | Colombia | Beans                           | 2007           | 25                                                             |
| 44               | Colombia | Beer                            | 2007           | 40                                                             |
| 44               | Colombia | Beverages, Alcoholic            | 2007           | 20                                                             |
| 44               | Colombia | Bovine Meat                     | 2007           | 99                                                             |
| 44               | Colombia | Butter, Ghee                    | 2007           | 9                                                              |
| 44               | Colombia | Cassava and products            | 2007           | 81                                                             |
| 44               | Colombia | Cereals - Excluding Beer        | 2007           | 838                                                            |
| 44               | Colombia | Citrus, Other                   | 2007           | 12                                                             |
| 44               | Colombia | Cocoa Beans and products        | 2007           | 5                                                              |
| 44               | Colombia | Coconuts - Incl Copra           | 2007           | 9                                                              |
| 44               | Colombia | Coffee and products             | 2007           | 1                                                              |
| 44               | Colombia | Cottonseed Oil                  | 2007           | 6                                                              |
| 44               | Colombia | Eggs                            | 2007           | 34                                                             |
| 44               | Colombia | Fats, Animals, Raw              | 2007           | 26                                                             |
| 44               | Colombia | Fish, Seafood                   | 2007           | 13                                                             |
| 44               | Colombia | Freshwater Fish                 | 2007           | 3                                                              |
| 44               | Colombia | Fruits - Excluding Wine         | 2007           | 194                                                            |
| 44               | Colombia | Fruits, Other                   | 2007           | 33                                                             |
| 44               | Colombia | Grand Total                     | 2007           | 2,610                                                          |
| 44               | Colombia | Grapes and products (excl wine) | 2007           | 3                                                              |
| 44               | Colombia | Groundnuts (Shelled Eq)         | 2007           | 3                                                              |
| 44               | Colombia | Lemons, Limes and products      | 2007           | 1                                                              |
| 44               | Colombia | Maize and products              | 2007           | 301                                                            |
| 44               | Colombia | Maize Germ Oil                  | 2007           | 14                                                             |
| 44               | Colombia | Marine Fish, Other              | 2007           | 1                                                              |
| 44               | Colombia | Meat                            | 2007           | 205                                                            |
| 44               | Colombia | Meat, Other                     | 2007           | 2                                                              |
| 44               | Colombia | Milk - Excluding Butter         | 2007           | 202                                                            |
| 44               | Colombia | Miscellaneous                   | 2007           | 1                                                              |
| 44               | Colombia | Mutton & Goat Meat              | 2007           | 2                                                              |
| 44               | Colombia | Oats                            | 2007           | 4                                                              |
| 44               | Colombia | Offals                          | 2007           | 9                                                              |
| 44               | Colombia | Oilcrops                        | 2007           | 16                                                             |
| 44               | Colombia | Olive Oil                       | 2007           | 1                                                              |
| 44               | Colombia | Onions                          | 2007           | 7                                                              |
| 44               | Colombia | Oranges, Mandarines             | 2007           | 8                                                              |
| 44               | Colombia | Palm Oil                        | 2007           | 141                                                            |
| 44               | Colombia | Palmkernel Oil                  | 2007           | 27                                                             |
| 44               | Colombia | Peas                            | 2007           | 17                                                             |
| 44               | Colombia | Pelagic Fish                    | 2007           | 8                                                              |
| 44               | Colombia | Pigmeat                         | 2007           | 27                                                             |
| 44               | Colombia | Pineapples and products         | 2007           | 6                                                              |
| 44               | Colombia | Plantains                       | 2007           | 123                                                            |
| 44               | Colombia | Potatoes and products           | 2007           | 92                                                             |

## Dietary calcium and zinc deficiency risks are decreasing but remain prevalent

| FAO Country code | Country  | Food item                       | Reference year | Net energy supply (kcal <i>capita</i> <sup>-1</sup> d <sup>-1</sup> ) |
|------------------|----------|---------------------------------|----------------|-----------------------------------------------------------------------|
| 44               | Colombia | Poultry Meat                    | 2007           | 75                                                                    |
| 44               | Colombia | Pulses                          | 2007           | 61                                                                    |
| 44               | Colombia | Pulses, Other and products      | 2007           | 19                                                                    |
| 44               | Colombia | Rape and Mustard Oil            | 2007           | 2                                                                     |
| 44               | Colombia | Rice (Milled Equivalent)        | 2007           | 307                                                                   |
| 44               | Colombia | Roots, Other                    | 2007           | 6                                                                     |
| 44               | Colombia | Sesameseed Oil                  | 2007           | 1                                                                     |
| 44               | Colombia | Soyabean Oil                    | 2007           | 115                                                                   |
| 44               | Colombia | Soyabeans                       | 2007           | 4                                                                     |
| 44               | Colombia | Spices                          | 2007           | 5                                                                     |
| 44               | Colombia | Spices, Other                   | 2007           | 4                                                                     |
| 44               | Colombia | Starchy Roots                   | 2007           | 191                                                                   |
| 44               | Colombia | Stimulants                      | 2007           | 6                                                                     |
| 44               | Colombia | Sugar & Sweeteners              | 2007           | 386                                                                   |
| 44               | Colombia | Sugar (Raw Equivalent)          | 2007           | 277                                                                   |
| 44               | Colombia | Sugar non-centrifugal           | 2007           | 106                                                                   |
| 44               | Colombia | Sunflowerseed Oil               | 2007           | 15                                                                    |
| 44               | Colombia | Sweeteners, Other               | 2007           | 3                                                                     |
| 44               | Colombia | Tomatoes and products           | 2007           | 6                                                                     |
| 44               | Colombia | Treenuts                        | 2007           | 1                                                                     |
| 44               | Colombia | Vegetable Oils                  | 2007           | 322                                                                   |
| 44               | Colombia | Vegetables                      | 2007           | 28                                                                    |
| 44               | Colombia | Vegetables, Other               | 2007           | 14                                                                    |
| 44               | Colombia | Vegetal Products                | 2007           | 2,112                                                                 |
| 44               | Colombia | Wheat and products              | 2007           | 218                                                                   |
| 44               | Colombia | Wine                            | 2007           | 1                                                                     |
| 44               | Colombia | Yams                            | 2007           | 12                                                                    |
| 44               | Colombia | Alcoholic Beverages             | 2008           | 60                                                                    |
| 44               | Colombia | Animal fats                     | 2008           | 36                                                                    |
| 44               | Colombia | Animal Products                 | 2008           | 522                                                                   |
| 44               | Colombia | Apples and products             | 2008           | 2                                                                     |
| 44               | Colombia | Bananas                         | 2008           | 10                                                                    |
| 44               | Colombia | Barley and products             | 2008           | 9                                                                     |
| 44               | Colombia | Beans                           | 2008           | 27                                                                    |
| 44               | Colombia | Beer                            | 2008           | 42                                                                    |
| 44               | Colombia | Beverages, Alcoholic            | 2008           | 18                                                                    |
| 44               | Colombia | Bovine Meat                     | 2008           | 97                                                                    |
| 44               | Colombia | Butter, Ghee                    | 2008           | 9                                                                     |
| 44               | Colombia | Cassava and products            | 2008           | 77                                                                    |
| 44               | Colombia | Cereals - Excluding Beer        | 2008           | 840                                                                   |
| 44               | Colombia | Citrus, Other                   | 2008           | 12                                                                    |
| 44               | Colombia | Cocoa Beans and products        | 2008           | 4                                                                     |
| 44               | Colombia | Coconuts - Incl Copra           | 2008           | 8                                                                     |
| 44               | Colombia | Coffee and products             | 2008           | 1                                                                     |
| 44               | Colombia | Cottonseed Oil                  | 2008           | 5                                                                     |
| 44               | Colombia | Eggs                            | 2008           | 36                                                                    |
| 44               | Colombia | Fats, Animals, Raw              | 2008           | 27                                                                    |
| 44               | Colombia | Fish, Seafood                   | 2008           | 12                                                                    |
| 44               | Colombia | Freshwater Fish                 | 2008           | 3                                                                     |
| 44               | Colombia | Fruits - Excluding Wine         | 2008           | 199                                                                   |
| 44               | Colombia | Fruits, Other                   | 2008           | 32                                                                    |
| 44               | Colombia | Grand Total                     | 2008           | 2,634                                                                 |
| 44               | Colombia | Grapes and products (excl wine) | 2008           | 2                                                                     |
| 44               | Colombia | Groundnuts (Shelled Eq)         | 2008           | 3                                                                     |
| 44               | Colombia | Lemons, Limes and products      | 2008           | 1                                                                     |
| 44               | Colombia | Maize and products              | 2008           | 286                                                                   |
| 44               | Colombia | Maize Germ Oil                  | 2008           | 14                                                                    |
| 44               | Colombia | Marine Fish, Other              | 2008           | 1                                                                     |
| 44               | Colombia | Meat                            | 2008           | 207                                                                   |
| 44               | Colombia | Meat, Other                     | 2008           | 2                                                                     |
| 44               | Colombia | Milk - Excluding Butter         | 2008           | 222                                                                   |
| 44               | Colombia | Miscellaneous                   | 2008           | 1                                                                     |
| 44               | Colombia | Mutton & Goat Meat              | 2008           | 2                                                                     |
| 44               | Colombia | Oats                            | 2008           | 3                                                                     |
| 44               | Colombia | Offals                          | 2008           | 10                                                                    |
| 44               | Colombia | Oilcrops                        | 2008           | 16                                                                    |
| 44               | Colombia | Olive Oil                       | 2008           | 1                                                                     |
| 44               | Colombia | Onions                          | 2008           | 8                                                                     |
| 44               | Colombia | Oranges, Mandarines             | 2008           | 6                                                                     |
| 44               | Colombia | Palm Oil                        | 2008           | 146                                                                   |
| 44               | Colombia | Palmkernel Oil                  | 2008           | 26                                                                    |
| 44               | Colombia | Peas                            | 2008           | 16                                                                    |
| 44               | Colombia | Pelagic Fish                    | 2008           | 8                                                                     |
| 44               | Colombia | Pigmeat                         | 2008           | 26                                                                    |
| 44               | Colombia | Pineapples and products         | 2008           | 6                                                                     |
| 44               | Colombia | Plantains                       | 2008           | 128                                                                   |
| 44               | Colombia | Potatoes and products           | 2008           | 76                                                                    |
| 44               | Colombia | Poultry Meat                    | 2008           | 80                                                                    |
| 44               | Colombia | Pulses                          | 2008           | 60                                                                    |
| 44               | Colombia | Pulses, Other and products      | 2008           | 17                                                                    |
| 44               | Colombia | Rape and Mustard Oil            | 2008           | 3                                                                     |
| 44               | Colombia | Rice (Milled Equivalent)        | 2008           | 311                                                                   |
| 44               | Colombia | Roots, Other                    | 2008           | 5                                                                     |
| 44               | Colombia | Sesameseed Oil                  | 2008           | 1                                                                     |
| 44               | Colombia | Soyabean Oil                    | 2008           | 116                                                                   |
| 44               | Colombia | Soyabeans                       | 2008           | 4                                                                     |
| 44               | Colombia | Spices                          | 2008           | 4                                                                     |
| 44               | Colombia | Spices, Other                   | 2008           | 4                                                                     |
| 44               | Colombia | Starchy Roots                   | 2008           | 171                                                                   |
| 44               | Colombia | Stimulants                      | 2008           | 5                                                                     |
| 44               | Colombia | Sugar & Sweeteners              | 2008           | 399                                                                   |
| 44               | Colombia | Sugar (Raw Equivalent)          | 2008           | 290                                                                   |
| 44               | Colombia | Sugar beet                      | 2008           | 1                                                                     |
| 44               | Colombia | Sugar Crops                     | 2008           | 1                                                                     |
| 44               | Colombia | Sugar non-centrifugal           | 2008           | 106                                                                   |
| 44               | Colombia | Sunflowerseed Oil               | 2008           | 12                                                                    |
| 44               | Colombia | Sweeteners, Other               | 2008           | 3                                                                     |

Dietary calcium and zinc deficiency risks are decreasing but remain prevalent

| FAO Country code | Country  | Food item                       | Reference year | Net energy supply (kcal capita <sup>-1</sup> d <sup>-1</sup> ) |
|------------------|----------|---------------------------------|----------------|----------------------------------------------------------------|
| 44               | Colombia | Tomatoes and products           | 2008           | 7                                                              |
| 44               | Colombia | Treenuts                        | 2008           | 1                                                              |
| 44               | Colombia | Vegetable Oils                  | 2008           | 324                                                            |
| 44               | Colombia | Vegetables                      | 2008           | 30                                                             |
| 44               | Colombia | Vegetables, Other               | 2008           | 16                                                             |
| 44               | Colombia | Vegetal Products                | 2008           | 2,111                                                          |
| 44               | Colombia | Wheat and products              | 2008           | 231                                                            |
| 44               | Colombia | Wine                            | 2008           | 1                                                              |
| 44               | Colombia | Yams                            | 2008           | 12                                                             |
| 44               | Colombia | Alcoholic Beverages             | 2009           | 61                                                             |
| 44               | Colombia | Animal fats                     | 2009           | 33                                                             |
| 44               | Colombia | Animal Products                 | 2009           | 474                                                            |
| 44               | Colombia | Apples and products             | 2009           | 2                                                              |
| 44               | Colombia | Bananas                         | 2009           | 5                                                              |
| 44               | Colombia | Barley and products             | 2009           | 9                                                              |
| 44               | Colombia | Beans                           | 2009           | 31                                                             |
| 44               | Colombia | Beer                            | 2009           | 41                                                             |
| 44               | Colombia | Beverages, Alcoholic            | 2009           | 19                                                             |
| 44               | Colombia | Bovine Meat                     | 2009           | 89                                                             |
| 44               | Colombia | Butter, Chee                    | 2009           | 9                                                              |
| 44               | Colombia | Cassava and products            | 2009           | 93                                                             |
| 44               | Colombia | Cereals - Excluding Beer        | 2009           | 801                                                            |
| 44               | Colombia | Citrus, Other                   | 2009           | 11                                                             |
| 44               | Colombia | Cocoa Beans and products        | 2009           | 5                                                              |
| 44               | Colombia | Coconuts - Incl Copra           | 2009           | 7                                                              |
| 44               | Colombia | Coffee and products             | 2009           | 1                                                              |
| 44               | Colombia | Cottonseed Oil                  | 2009           | 4                                                              |
| 44               | Colombia | Eggs                            | 2009           | 39                                                             |
| 44               | Colombia | Fats, Animals, Raw              | 2009           | 24                                                             |
| 44               | Colombia | Fish, Seafood                   | 2009           | 12                                                             |
| 44               | Colombia | Freshwater Fish                 | 2009           | 3                                                              |
| 44               | Colombia | Fruits - Excluding Wine         | 2009           | 179                                                            |
| 44               | Colombia | Fruits, Other                   | 2009           | 32                                                             |
| 44               | Colombia | Grand Total                     | 2009           | 2,538                                                          |
| 44               | Colombia | Grapes and products (excl wine) | 2009           | 2                                                              |
| 44               | Colombia | Groundnuts (Shelled Eq)         | 2009           | 3                                                              |
| 44               | Colombia | Lemons, Limes and products      | 2009           | 1                                                              |
| 44               | Colombia | Maize and products              | 2009           | 257                                                            |
| 44               | Colombia | Maize Germ Oil                  | 2009           | 13                                                             |
| 44               | Colombia | Marine Fish, Other              | 2009           | 1                                                              |
| 44               | Colombia | Meat                            | 2009           | 198                                                            |
| 44               | Colombia | Meat, Other                     | 2009           | 4                                                              |
| 44               | Colombia | Milk - Excluding Butter         | 2009           | 184                                                            |
| 44               | Colombia | Miscellaneous                   | 2009           | 1                                                              |
| 44               | Colombia | Mutton & Goat Meat              | 2009           | 1                                                              |
| 44               | Colombia | Oats                            | 2009           | 1                                                              |
| 44               | Colombia | Offals                          | 2009           | 9                                                              |
| 44               | Colombia | Oilcrops                        | 2009           | 17                                                             |
| 44               | Colombia | Olive Oil                       | 2009           | 1                                                              |
| 44               | Colombia | Onions                          | 2009           | 10                                                             |
| 44               | Colombia | Oranges, Mandarines             | 2009           | 5                                                              |
| 44               | Colombia | Palm Oil                        | 2009           | 144                                                            |
| 44               | Colombia | Palmkernel Oil                  | 2009           | 25                                                             |
| 44               | Colombia | Peas                            | 2009           | 17                                                             |
| 44               | Colombia | Pelagic Fish                    | 2009           | 7                                                              |
| 44               | Colombia | Pigmeat                         | 2009           | 25                                                             |
| 44               | Colombia | Pineapples and products         | 2009           | 5                                                              |
| 44               | Colombia | Plantains                       | 2009           | 116                                                            |
| 44               | Colombia | Potatoes and products           | 2009           | 72                                                             |
| 44               | Colombia | Poultry Meat                    | 2009           | 80                                                             |
| 44               | Colombia | Pulses                          | 2009           | 63                                                             |
| 44               | Colombia | Pulses, Other and products      | 2009           | 15                                                             |
| 44               | Colombia | Rape and Mustard Oil            | 2009           | 4                                                              |
| 44               | Colombia | Rice (Milled Equivalent)        | 2009           | 310                                                            |
| 44               | Colombia | Roots, Other                    | 2009           | 2                                                              |
| 44               | Colombia | Sesameseed Oil                  | 2009           | 1                                                              |
| 44               | Colombia | Soyabean Oil                    | 2009           | 128                                                            |
| 44               | Colombia | Soyabeans                       | 2009           | 7                                                              |
| 44               | Colombia | Spices                          | 2009           | 4                                                              |
| 44               | Colombia | Spices, Other                   | 2009           | 4                                                              |
| 44               | Colombia | Starchy Roots                   | 2009           | 185                                                            |
| 44               | Colombia | Stimulants                      | 2009           | 5                                                              |
| 44               | Colombia | Sugar & Sweeteners              | 2009           | 385                                                            |
| 44               | Colombia | Sugar (Raw Equivalent)          | 2009           | 288                                                            |
| 44               | Colombia | Sugar beet                      | 2009           | 1                                                              |
| 44               | Colombia | Sugar Crops                     | 2009           | 1                                                              |
| 44               | Colombia | Sugar non-centrifugal           | 2009           | 96                                                             |
| 44               | Colombia | Sunflowerseed Oil               | 2009           | 9                                                              |
| 44               | Colombia | Sweeteners, Other               | 2009           | 1                                                              |
| 44               | Colombia | Tomatoes and products           | 2009           | 7                                                              |
| 44               | Colombia | Treenuts                        | 2009           | 1                                                              |
| 44               | Colombia | Vegetable Oils                  | 2009           | 329                                                            |
| 44               | Colombia | Vegetables                      | 2009           | 31                                                             |
| 44               | Colombia | Vegetables, Other               | 2009           | 14                                                             |
| 44               | Colombia | Vegetal Products                | 2009           | 2,063                                                          |
| 44               | Colombia | Wheat and products              | 2009           | 223                                                            |
| 44               | Colombia | Wine                            | 2009           | 1                                                              |
| 44               | Colombia | Yams                            | 2009           | 18                                                             |
| 44               | Colombia | Alcoholic Beverages             | 2010           | 58                                                             |
| 44               | Colombia | Animal fats                     | 2010           | 32                                                             |
| 44               | Colombia | Animal Products                 | 2010           | 482                                                            |
| 44               | Colombia | Apples and products             | 2010           | 3                                                              |
| 44               | Colombia | Bananas                         | 2010           | 11                                                             |
| 44               | Colombia | Barley and products             | 2010           | 8                                                              |
| 44               | Colombia | Beans                           | 2010           | 29                                                             |
| 44               | Colombia | Beer                            | 2010           | 39                                                             |
| 44               | Colombia | Beverages, Alcoholic            | 2010           | 19                                                             |

Dietary calcium and zinc deficiency risks are decreasing but remain prevalent

| FAO Country code | Country  | Food item                       | Reference year | Net energy supply (kcal capita <sup>-1</sup> d <sup>-1</sup> ) |
|------------------|----------|---------------------------------|----------------|----------------------------------------------------------------|
| 44               | Colombia | Bovine Meat                     | 2010           | 94                                                             |
| 44               | Colombia | Butter, Ghee                    | 2010           | 9                                                              |
| 44               | Colombia | Cassava and products            | 2010           | 92                                                             |
| 44               | Colombia | Cereals - Excluding Beer        | 2010           | 775                                                            |
| 44               | Colombia | Citrus, Other                   | 2010           | 11                                                             |
| 44               | Colombia | Cocoa Beans and products        | 2010           | 5                                                              |
| 44               | Colombia | Coconuts - Incl Copra           | 2010           | 8                                                              |
| 44               | Colombia | Coffee and products             | 2010           | 2                                                              |
| 44               | Colombia | Cottonseed Oil                  | 2010           | 4                                                              |
| 44               | Colombia | Eggs                            | 2010           | 39                                                             |
| 44               | Colombia | Fats, Animals, Raw              | 2010           | 24                                                             |
| 44               | Colombia | Fish, Seafood                   | 2010           | 12                                                             |
| 44               | Colombia | Freshwater Fish                 | 2010           | 3                                                              |
| 44               | Colombia | Fruits - Excluding Wine         | 2010           | 194                                                            |
| 44               | Colombia | Fruits, Other                   | 2010           | 31                                                             |
| 44               | Colombia | Grand Total                     | 2010           | 2,546                                                          |
| 44               | Colombia | Grapes and products (excl wine) | 2010           | 3                                                              |
| 44               | Colombia | Groundnuts (Shelled Eq)         | 2010           | 4                                                              |
| 44               | Colombia | Lemons, Limes and products      | 2010           | 1                                                              |
| 44               | Colombia | Maize and products              | 2010           | 238                                                            |
| 44               | Colombia | Maize Germ Oil                  | 2010           | 11                                                             |
| 44               | Colombia | Meat                            | 2010           | 210                                                            |
| 44               | Colombia | Meat, Other                     | 2010           | 3                                                              |
| 44               | Colombia | Milk - Excluding Butter         | 2010           | 181                                                            |
| 44               | Colombia | Miscellaneous                   | 2010           | 1                                                              |
| 44               | Colombia | Mutton & Goat Meat              | 2010           | 2                                                              |
| 44               | Colombia | Oats                            | 2010           | 1                                                              |
| 44               | Colombia | Offals                          | 2010           | 8                                                              |
| 44               | Colombia | Oilcrops                        | 2010           | 17                                                             |
| 44               | Colombia | Olive Oil                       | 2010           | 1                                                              |
| 44               | Colombia | Onions                          | 2010           | 11                                                             |
| 44               | Colombia | Oranges, Mandarines             | 2010           | 6                                                              |
| 44               | Colombia | Palm Oil                        | 2010           | 229                                                            |
| 44               | Colombia | Palmkernel Oil                  | 2010           | 24                                                             |
| 44               | Colombia | Peas                            | 2010           | 17                                                             |
| 44               | Colombia | Pelagic Fish                    | 2010           | 8                                                              |
| 44               | Colombia | Pigmeat                         | 2010           | 29                                                             |
| 44               | Colombia | Pineapples and products         | 2010           | 6                                                              |
| 44               | Colombia | Plantains                       | 2010           | 123                                                            |
| 44               | Colombia | Potatoes and products           | 2010           | 58                                                             |
| 44               | Colombia | Poultry Meat                    | 2010           | 83                                                             |
| 44               | Colombia | Pulses                          | 2010           | 63                                                             |
| 44               | Colombia | Pulses, Other and products      | 2010           | 17                                                             |
| 44               | Colombia | Rape and Mustard Oil            | 2010           | 5                                                              |
| 44               | Colombia | Rice (Milled Equivalent)        | 2010           | 295                                                            |
| 44               | Colombia | Roots, Other                    | 2010           | 3                                                              |
| 44               | Colombia | Sesameseed Oil                  | 2010           | 1                                                              |
| 44               | Colombia | Soyabean Oil                    | 2010           | 132                                                            |
| 44               | Colombia | Soyabeans                       | 2010           | 6                                                              |
| 44               | Colombia | Spices                          | 2010           | 4                                                              |
| 44               | Colombia | Spices, Other                   | 2010           | 4                                                              |
| 44               | Colombia | Starchy Roots                   | 2010           | 170                                                            |
| 44               | Colombia | Stimulants                      | 2010           | 7                                                              |
| 44               | Colombia | Sugar & Sweeteners              | 2010           | 320                                                            |
| 44               | Colombia | Sugar (Raw Equivalent)          | 2010           | 225                                                            |
| 44               | Colombia | Sugar beet                      | 2010           | 1                                                              |
| 44               | Colombia | Sugar Crops                     | 2010           | 1                                                              |
| 44               | Colombia | Sugar non-centrifugal           | 2010           | 92                                                             |
| 44               | Colombia | Sunflowerseed Oil               | 2010           | 14                                                             |
| 44               | Colombia | Sweeteners, Other               | 2010           | 2                                                              |
| 44               | Colombia | Tomatoes and products           | 2010           | 7                                                              |
| 44               | Colombia | Treenuts                        | 2010           | 1                                                              |
| 44               | Colombia | Vegetable Oils                  | 2010           | 422                                                            |
| 44               | Colombia | Vegetables                      | 2010           | 31                                                             |
| 44               | Colombia | Vegetables, Other               | 2010           | 13                                                             |
| 44               | Colombia | Vegetal Products                | 2010           | 2,064                                                          |
| 44               | Colombia | Wheat and products              | 2010           | 232                                                            |
| 44               | Colombia | Wine                            | 2010           | 1                                                              |
| 44               | Colombia | Yams                            | 2010           | 17                                                             |
| 44               | Colombia | Alcoholic Beverages             | 2011           | 60                                                             |
| 44               | Colombia | Animal fats                     | 2011           | 32                                                             |
| 44               | Colombia | Animal Products                 | 2011           | 494                                                            |
| 44               | Colombia | Apples and products             | 2011           | 3                                                              |
| 44               | Colombia | Bananas                         | 2011           | 6                                                              |
| 44               | Colombia | Barley and products             | 2011           | 8                                                              |
| 44               | Colombia | Beans                           | 2011           | 31                                                             |
| 44               | Colombia | Beer                            | 2011           | 40                                                             |
| 44               | Colombia | Beverages, Alcoholic            | 2011           | 19                                                             |
| 44               | Colombia | Bovine Meat                     | 2011           | 99                                                             |
| 44               | Colombia | Butter, Ghee                    | 2011           | 9                                                              |
| 44               | Colombia | Cassava and products            | 2011           | 88                                                             |
| 44               | Colombia | Cereals - Excluding Beer        | 2011           | 790                                                            |
| 44               | Colombia | Citrus, Other                   | 2011           | 12                                                             |
| 44               | Colombia | Cocoa Beans and products        | 2011           | 5                                                              |
| 44               | Colombia | Coconuts - Incl Copra           | 2011           | 8                                                              |
| 44               | Colombia | Coffee and products             | 2011           | 1                                                              |
| 44               | Colombia | Cottonseed Oil                  | 2011           | 5                                                              |
| 44               | Colombia | Eggs                            | 2011           | 42                                                             |
| 44               | Colombia | Fats, Animals, Raw              | 2011           | 24                                                             |
| 44               | Colombia | Fish, Seafood                   | 2011           | 12                                                             |
| 44               | Colombia | Freshwater Fish                 | 2011           | 3                                                              |
| 44               | Colombia | Fruits - Excluding Wine         | 2011           | 192                                                            |
| 44               | Colombia | Fruits, Other                   | 2011           | 33                                                             |
| 44               | Colombia | Grand Total                     | 2011           | 2,593                                                          |
| 44               | Colombia | Grapes and products (excl wine) | 2011           | 2                                                              |
| 44               | Colombia | Groundnuts (Shelled Eq)         | 2011           | 5                                                              |
| 44               | Colombia | Lemons, Limes and products      | 2011           | 1                                                              |

Dietary calcium and zinc deficiency risks are decreasing but remain prevalent

| FAO Country code | Country  | Food item                  | Reference year | Net energy supply (kcal capita <sup>-1</sup> d <sup>-1</sup> ) |
|------------------|----------|----------------------------|----------------|----------------------------------------------------------------|
| 44               | Colombia | Maize and products         | 2011           | 245                                                            |
| 44               | Colombia | Maize Germ Oil             | 2011           | 12                                                             |
| 44               | Colombia | Meat                       | 2011           | 218                                                            |
| 44               | Colombia | Meat, Other                | 2011           | 3                                                              |
| 44               | Colombia | Milk - Excluding Butter    | 2011           | 181                                                            |
| 44               | Colombia | Miscellaneous              | 2011           | 2                                                              |
| 44               | Colombia | Mutton & Goat Meat         | 2011           | 2                                                              |
| 44               | Colombia | Oats                       | 2011           | 1                                                              |
| 44               | Colombia | Offals                     | 2011           | 9                                                              |
| 44               | Colombia | Oilcrops                   | 2011           | 13                                                             |
| 44               | Colombia | Olive Oil                  | 2011           | 2                                                              |
| 44               | Colombia | Onions                     | 2011           | 10                                                             |
| 44               | Colombia | Oranges, Mandarines        | 2011           | 7                                                              |
| 44               | Colombia | Palm Oil                   | 2011           | 234                                                            |
| 44               | Colombia | Palmkernel Oil             | 2011           | 28                                                             |
| 44               | Colombia | Peas                       | 2011           | 14                                                             |
| 44               | Colombia | Pelagic Fish               | 2011           | 8                                                              |
| 44               | Colombia | Pigmeat                    | 2011           | 32                                                             |
| 44               | Colombia | Pineapples and products    | 2011           | 7                                                              |
| 44               | Colombia | Plantains                  | 2011           | 122                                                            |
| 44               | Colombia | Potatoes and products      | 2011           | 52                                                             |
| 44               | Colombia | Poultry Meat               | 2011           | 82                                                             |
| 44               | Colombia | Pulses                     | 2011           | 62                                                             |
| 44               | Colombia | Pulses, Other and products | 2011           | 16                                                             |
| 44               | Colombia | Rape and Mustard Oil       | 2011           | 7                                                              |
| 44               | Colombia | Rice (Milled Equivalent)   | 2011           | 285                                                            |
| 44               | Colombia | Roots, Other               | 2011           | 4                                                              |
| 44               | Colombia | Sesameseed Oil             | 2011           | 1                                                              |
| 44               | Colombia | Soyabean Oil               | 2011           | 135                                                            |
| 44               | Colombia | Soyabeans                  | 2011           | 1                                                              |
| 44               | Colombia | Spices                     | 2011           | 4                                                              |
| 44               | Colombia | Spices, Other              | 2011           | 4                                                              |
| 44               | Colombia | Starchy Roots              | 2011           | 161                                                            |
| 44               | Colombia | Stimulants                 | 2011           | 6                                                              |
| 44               | Colombia | Sugar & Sweeteners         | 2011           | 342                                                            |
| 44               | Colombia | Sugar (Raw Equivalent)     | 2011           | 246                                                            |
| 44               | Colombia | Sugar beet                 | 2011           | 1                                                              |
| 44               | Colombia | Sugar Crops                | 2011           | 1                                                              |
| 44               | Colombia | Sugar non-centrifugal      | 2011           | 93                                                             |
| 44               | Colombia | Sunflowerseed Oil          | 2011           | 13                                                             |
| 44               | Colombia | Sweeteners, Other          | 2011           | 3                                                              |
| 44               | Colombia | Tomatoes and products      | 2011           | 8                                                              |
| 44               | Colombia | Treenuts                   | 2011           | 1                                                              |
| 44               | Colombia | Vegetable Oils             | 2011           | 436                                                            |
| 44               | Colombia | Vegetables                 | 2011           | 30                                                             |
| 44               | Colombia | Vegetables, Other          | 2011           | 13                                                             |
| 44               | Colombia | Vegetal Products           | 2011           | 2,099                                                          |
| 44               | Colombia | Wheat and products         | 2011           | 250                                                            |
| 44               | Colombia | Wine                       | 2011           | 1                                                              |
| 44               | Colombia | Yams                       | 2011           | 17                                                             |
| 46               | Congo    | Alcoholic Beverages        | 1992           | 37                                                             |
| 46               | Congo    | Animal fats                | 1992           | 6                                                              |
| 46               | Congo    | Animal Products            | 1992           | 197                                                            |
| 46               | Congo    | Bananas                    | 1992           | 22                                                             |
| 46               | Congo    | Beans                      | 1992           | 22                                                             |
| 46               | Congo    | Beer                       | 1992           | 33                                                             |
| 46               | Congo    | Beverages, Alcoholic       | 1992           | 1                                                              |
| 46               | Congo    | Bovine Meat                | 1992           | 44                                                             |
| 46               | Congo    | Butter, Ghee               | 1992           | 4                                                              |
| 46               | Congo    | Cassava and products       | 1992           | 679                                                            |
| 46               | Congo    | Cereals - Excluding Beer   | 1992           | 418                                                            |
| 46               | Congo    | Cereals, Other             | 1992           | 12                                                             |
| 46               | Congo    | Cocoa Beans and products   | 1992           | 1                                                              |
| 46               | Congo    | Demersal Fish              | 1992           | 12                                                             |
| 46               | Congo    | Eggs                       | 1992           | 2                                                              |
| 46               | Congo    | Fats, Animals, Raw         | 1992           | 2                                                              |
| 46               | Congo    | Fish, Seafood              | 1992           | 61                                                             |
| 46               | Congo    | Freshwater Fish            | 1992           | 16                                                             |
| 46               | Congo    | Fruits - Excluding Wine    | 1992           | 104                                                            |
| 46               | Congo    | Fruits, Other              | 1992           | 16                                                             |
| 46               | Congo    | Grand Total                | 1992           | 2,012                                                          |
| 46               | Congo    | Groundnut Oil              | 1992           | 19                                                             |
| 46               | Congo    | Groundnuts (Shelled Eq)    | 1992           | 75                                                             |
| 46               | Congo    | Maize and products         | 1992           | 22                                                             |
| 46               | Congo    | Marine Fish, Other         | 1992           | 1                                                              |
| 46               | Congo    | Meat                       | 1992           | 104                                                            |
| 46               | Congo    | Meat, Other                | 1992           | 13                                                             |
| 46               | Congo    | Milk - Excluding Butter    | 1992           | 23                                                             |
| 46               | Congo    | Miscellaneous              | 1992           | 3                                                              |
| 46               | Congo    | Mutton & Goat Meat         | 1992           | 2                                                              |
| 46               | Congo    | Offals                     | 1992           | 1                                                              |
| 46               | Congo    | Oilcrops                   | 1992           | 106                                                            |
| 46               | Congo    | Oilcrops Oil, Other        | 1992           | 80                                                             |
| 46               | Congo    | Oilcrops, Other            | 1992           | 14                                                             |
| 46               | Congo    | Onions                     | 1992           | 2                                                              |
| 46               | Congo    | Oranges, Mandarines        | 1992           | 1                                                              |
| 46               | Congo    | Palm kernels               | 1992           | 15                                                             |
| 46               | Congo    | Palm Oil                   | 1992           | 138                                                            |
| 46               | Congo    | Palmkernel Oil             | 1992           | 1                                                              |
| 46               | Congo    | Peas                       | 1992           | 13                                                             |
| 46               | Congo    | Pelagic Fish               | 1992           | 32                                                             |
| 46               | Congo    | Pigmeat                    | 1992           | 20                                                             |
| 46               | Congo    | Pineapples and products    | 1992           | 1                                                              |
| 46               | Congo    | Plantains                  | 1992           | 64                                                             |
| 46               | Congo    | Potatoes and products      | 1992           | 2                                                              |
| 46               | Congo    | Poultry Meat               | 1992           | 25                                                             |
| 46               | Congo    | Pulses                     | 1992           | 35                                                             |

Dietary calcium and zinc deficiency risks are decreasing but remain prevalent

| FAO Country code | Country | Food item                | Reference year | Net energy supply (kcal <i>capita</i> <sup>-1</sup> d <sup>-1</sup> ) |
|------------------|---------|--------------------------|----------------|-----------------------------------------------------------------------|
| 46               | Congo   | Rape and Mustard Oil     | 1992           | 13                                                                    |
| 46               | Congo   | Rice (Milled Equivalent) | 1992           | 117                                                                   |
| 46               | Congo   | Roots, Other             | 1992           | 30                                                                    |
| 46               | Congo   | Sesame seed              | 1992           | 2                                                                     |
| 46               | Congo   | Soyabean Oil             | 1992           | 14                                                                    |
| 46               | Congo   | Starchy Roots            | 1992           | 732                                                                   |
| 46               | Congo   | Stimulants               | 1992           | 1                                                                     |
| 46               | Congo   | Sugar & Sweeteners       | 1992           | 66                                                                    |
| 46               | Congo   | Sugar (Raw Equivalent)   | 1992           | 66                                                                    |
| 46               | Congo   | Sugar cane               | 1992           | 2                                                                     |
| 46               | Congo   | Sugar Crops              | 1992           | 2                                                                     |
| 46               | Congo   | Sunflowerseed Oil        | 1992           | 9                                                                     |
| 46               | Congo   | Sweet potatoes           | 1992           | 9                                                                     |
| 46               | Congo   | Tomatoes and products    | 1992           | 3                                                                     |
| 46               | Congo   | Vegetable Oils           | 1992           | 276                                                                   |
| 46               | Congo   | Vegetables               | 1992           | 35                                                                    |
| 46               | Congo   | Vegetables, Other        | 1992           | 30                                                                    |
| 46               | Congo   | Vegetal Products         | 1992           | 1,815                                                                 |
| 46               | Congo   | Wheat and products       | 1992           | 267                                                                   |
| 46               | Congo   | Wine                     | 1992           | 3                                                                     |
| 46               | Congo   | Yams                     | 1992           | 11                                                                    |
| 46               | Congo   | Alcoholic Beverages      | 1993           | 38                                                                    |
| 46               | Congo   | Animal fats              | 1993           | 5                                                                     |
| 46               | Congo   | Animal Products          | 1993           | 194                                                                   |
| 46               | Congo   | Bananas                  | 1993           | 23                                                                    |
| 46               | Congo   | Beans                    | 1993           | 7                                                                     |
| 46               | Congo   | Beer                     | 1993           | 35                                                                    |
| 46               | Congo   | Bovine Meat              | 1993           | 32                                                                    |
| 46               | Congo   | Butter, Ghee             | 1993           | 3                                                                     |
| 46               | Congo   | Cassava and products     | 1993           | 749                                                                   |
| 46               | Congo   | Cereals - Excluding Beer | 1993           | 394                                                                   |
| 46               | Congo   | Cereals, Other           | 1993           | 15                                                                    |
| 46               | Congo   | Demersal Fish            | 1993           | 13                                                                    |
| 46               | Congo   | Eggs                     | 1993           | 2                                                                     |
| 46               | Congo   | Fats, Animals, Raw       | 1993           | 2                                                                     |
| 46               | Congo   | Fish, Seafood            | 1993           | 62                                                                    |
| 46               | Congo   | Freshwater Fish          | 1993           | 20                                                                    |
| 46               | Congo   | Fruits - Excluding Wine  | 1993           | 105                                                                   |
| 46               | Congo   | Fruits, Other            | 1993           | 15                                                                    |
| 46               | Congo   | Grand Total              | 1993           | 1,995                                                                 |
| 46               | Congo   | Groundnut Oil            | 1993           | 20                                                                    |
| 46               | Congo   | Groundnuts (Shelled Eq)  | 1993           | 76                                                                    |
| 46               | Congo   | Maize and products       | 1993           | 17                                                                    |
| 46               | Congo   | Marine Fish, Other       | 1993           | 1                                                                     |
| 46               | Congo   | Meat                     | 1993           | 92                                                                    |
| 46               | Congo   | Meat, Other              | 1993           | 13                                                                    |
| 46               | Congo   | Milk - Excluding Butter  | 1993           | 31                                                                    |
| 46               | Congo   | Miscellaneous            | 1993           | 4                                                                     |
| 46               | Congo   | Mutton & Goat Meat       | 1993           | 2                                                                     |
| 46               | Congo   | Oats                     | 1993           | 1                                                                     |
| 46               | Congo   | Offals                   | 1993           | 2                                                                     |
| 46               | Congo   | Oilcrops                 | 1993           | 107                                                                   |
| 46               | Congo   | Oilcrops Oil, Other      | 1993           | 51                                                                    |
| 46               | Congo   | Oilcrops, Other          | 1993           | 14                                                                    |
| 46               | Congo   | Onions                   | 1993           | 1                                                                     |
| 46               | Congo   | Oranges, Mandarines      | 1993           | 1                                                                     |
| 46               | Congo   | Palm kernels             | 1993           | 15                                                                    |
| 46               | Congo   | Palm Oil                 | 1993           | 133                                                                   |
| 46               | Congo   | Peas                     | 1993           | 14                                                                    |
| 46               | Congo   | Pelagic Fish             | 1993           | 29                                                                    |
| 46               | Congo   | Pigmeat                  | 1993           | 21                                                                    |
| 46               | Congo   | Pineapples and products  | 1993           | 1                                                                     |
| 46               | Congo   | Plantains                | 1993           | 64                                                                    |
| 46               | Congo   | Potatoes and products    | 1993           | 2                                                                     |
| 46               | Congo   | Poultry Meat             | 1993           | 24                                                                    |
| 46               | Congo   | Pulses                   | 1993           | 21                                                                    |
| 46               | Congo   | Rape and Mustard Oil     | 1993           | 6                                                                     |
| 46               | Congo   | Rice (Milled Equivalent) | 1993           | 84                                                                    |
| 46               | Congo   | Roots, Other             | 1993           | 31                                                                    |
| 46               | Congo   | Sesame seed              | 1993           | 2                                                                     |
| 46               | Congo   | Soyabean Oil             | 1993           | 14                                                                    |
| 46               | Congo   | Starchy Roots            | 1993           | 804                                                                   |
| 46               | Congo   | Sugar & Sweeteners       | 1993           | 64                                                                    |
| 46               | Congo   | Sugar (Raw Equivalent)   | 1993           | 64                                                                    |
| 46               | Congo   | Sugar cane               | 1993           | 2                                                                     |
| 46               | Congo   | Sugar Crops              | 1993           | 2                                                                     |
| 46               | Congo   | Sunflowerseed Oil        | 1993           | 4                                                                     |
| 46               | Congo   | Sweet potatoes           | 1993           | 10                                                                    |
| 46               | Congo   | Tomatoes and products    | 1993           | 2                                                                     |
| 46               | Congo   | Vegetable Oils           | 1993           | 228                                                                   |
| 46               | Congo   | Vegetables               | 1993           | 34                                                                    |
| 46               | Congo   | Vegetables, Other        | 1993           | 30                                                                    |
| 46               | Congo   | Vegetal Products         | 1993           | 1,801                                                                 |
| 46               | Congo   | Wheat and products       | 1993           | 277                                                                   |
| 46               | Congo   | Wine                     | 1993           | 3                                                                     |
| 46               | Congo   | Yams                     | 1993           | 11                                                                    |
| 46               | Congo   | Alcoholic Beverages      | 1994           | 27                                                                    |
| 46               | Congo   | Animal fats              | 1994           | 4                                                                     |
| 46               | Congo   | Animal Products          | 1994           | 149                                                                   |
| 46               | Congo   | Bananas                  | 1994           | 23                                                                    |
| 46               | Congo   | Beans                    | 1994           | 8                                                                     |
| 46               | Congo   | Beer                     | 1994           | 24                                                                    |
| 46               | Congo   | Beverages, Alcoholic     | 1994           | 1                                                                     |
| 46               | Congo   | Bovine Meat              | 1994           | 26                                                                    |
| 46               | Congo   | Butter, Ghee             | 1994           | 2                                                                     |
| 46               | Congo   | Cassava and products     | 1994           | 782                                                                   |
| 46               | Congo   | Cereals - Excluding Beer | 1994           | 384                                                                   |



Dietary calcium and zinc deficiency risks are decreasing but remain prevalent

| FAO Country code | Country | Food item                | Reference year | Net energy supply (kcal capita <sup>-1</sup> d <sup>-1</sup> ) |
|------------------|---------|--------------------------|----------------|----------------------------------------------------------------|
| 46               | Congo   | Cereals, Other           | 1994           | 11                                                             |
| 46               | Congo   | Demersal Fish            | 1994           | 9                                                              |
| 46               | Congo   | Eggs                     | 1994           | 1                                                              |
| 46               | Congo   | Fats, Animals, Raw       | 1994           | 2                                                              |
| 46               | Congo   | Fish, Seafood            | 1994           | 52                                                             |
| 46               | Congo   | Freshwater Fish          | 1994           | 17                                                             |
| 46               | Congo   | Fruits - Excluding Wine  | 1994           | 105                                                            |
| 46               | Congo   | Fruits, Other            | 1994           | 15                                                             |
| 46               | Congo   | Grand Total              | 1994           | 1,980                                                          |
| 46               | Congo   | Groundnut Oil            | 1994           | 20                                                             |
| 46               | Congo   | Groundnuts (Shelled Eq)  | 1994           | 81                                                             |
| 46               | Congo   | Maize and products       | 1994           | 17                                                             |
| 46               | Congo   | Maize Germ Oil           | 1994           | 4                                                              |
| 46               | Congo   | Meat                     | 1994           | 73                                                             |
| 46               | Congo   | Meat, Other              | 1994           | 13                                                             |
| 46               | Congo   | Milk - Excluding Butter  | 1994           | 17                                                             |
| 46               | Congo   | Miscellaneous            | 1994           | 2                                                              |
| 46               | Congo   | Mutton & Goat Meat       | 1994           | 2                                                              |
| 46               | Congo   | Offals                   | 1994           | 2                                                              |
| 46               | Congo   | Oilcrops                 | 1994           | 112                                                            |
| 46               | Congo   | Oilcrops Oil, Other      | 1994           | 39                                                             |
| 46               | Congo   | Oilcrops, Other          | 1994           | 14                                                             |
| 46               | Congo   | Onions                   | 1994           | 1                                                              |
| 46               | Congo   | Oranges, Mandarines      | 1994           | 1                                                              |
| 46               | Congo   | Palm kernels             | 1994           | 15                                                             |
| 46               | Congo   | Palm Oil                 | 1994           | 125                                                            |
| 46               | Congo   | Peas                     | 1994           | 14                                                             |
| 46               | Congo   | Pelagic Fish             | 1994           | 26                                                             |
| 46               | Congo   | Pigmeat                  | 1994           | 17                                                             |
| 46               | Congo   | Pineapples and products  | 1994           | 1                                                              |
| 46               | Congo   | Plantains                | 1994           | 64                                                             |
| 46               | Congo   | Potatoes and products    | 1994           | 2                                                              |
| 46               | Congo   | Poultry Meat             | 1994           | 15                                                             |
| 46               | Congo   | Pulses                   | 1994           | 22                                                             |
| 46               | Congo   | Rape and Mustard Oil     | 1994           | 10                                                             |
| 46               | Congo   | Rice (Milled Equivalent) | 1994           | 110                                                            |
| 46               | Congo   | Roots, Other             | 1994           | 32                                                             |
| 46               | Congo   | Sesame seed              | 1994           | 2                                                              |
| 46               | Congo   | Soyabean Oil             | 1994           | 23                                                             |
| 46               | Congo   | Starchy Roots            | 1994           | 838                                                            |
| 46               | Congo   | Sugar & Sweeteners       | 1994           | 73                                                             |
| 46               | Congo   | Sugar (Raw Equivalent)   | 1994           | 72                                                             |
| 46               | Congo   | Sugar cane               | 1994           | 2                                                              |
| 46               | Congo   | Sugar Crops              | 1994           | 2                                                              |
| 46               | Congo   | Sunflowerseed Oil        | 1994           | 13                                                             |
| 46               | Congo   | Sweet potatoes           | 1994           | 11                                                             |
| 46               | Congo   | Tomatoes and products    | 1994           | 2                                                              |
| 46               | Congo   | Vegetable Oils           | 1994           | 234                                                            |
| 46               | Congo   | Vegetables               | 1994           | 33                                                             |
| 46               | Congo   | Vegetables, Other        | 1994           | 30                                                             |
| 46               | Congo   | Vegetal Products         | 1994           | 1,832                                                          |
| 46               | Congo   | Wheat and products       | 1994           | 245                                                            |
| 46               | Congo   | Wine                     | 1994           | 2                                                              |
| 46               | Congo   | Yams                     | 1994           | 11                                                             |
| 46               | Congo   | Alcoholic Beverages      | 1995           | 26                                                             |
| 46               | Congo   | Animal fats              | 1995           | 3                                                              |
| 46               | Congo   | Animal Products          | 1995           | 145                                                            |
| 46               | Congo   | Bananas                  | 1995           | 24                                                             |
| 46               | Congo   | Beans                    | 1995           | 8                                                              |
| 46               | Congo   | Beer                     | 1995           | 22                                                             |
| 46               | Congo   | Beverages, Alcoholic     | 1995           | 1                                                              |
| 46               | Congo   | Bovine Meat              | 1995           | 21                                                             |
| 46               | Congo   | Butter, Ghee             | 1995           | 2                                                              |
| 46               | Congo   | Cassava and products     | 1995           | 808                                                            |
| 46               | Congo   | Cereals - Excluding Beer | 1995           | 369                                                            |
| 46               | Congo   | Demersal Fish            | 1995           | 4                                                              |
| 46               | Congo   | Eggs                     | 1995           | 1                                                              |
| 46               | Congo   | Fats, Animals, Raw       | 1995           | 2                                                              |
| 46               | Congo   | Fish, Seafood            | 1995           | 44                                                             |
| 46               | Congo   | Freshwater Fish          | 1995           | 18                                                             |
| 46               | Congo   | Fruits - Excluding Wine  | 1995           | 111                                                            |
| 46               | Congo   | Fruits, Other            | 1995           | 23                                                             |
| 46               | Congo   | Grand Total              | 1995           | 1,978                                                          |
| 46               | Congo   | Groundnut Oil            | 1995           | 18                                                             |
| 46               | Congo   | Groundnuts (Shelled Eq)  | 1995           | 70                                                             |
| 46               | Congo   | Maize and products       | 1995           | 37                                                             |
| 46               | Congo   | Marine Fish, Other       | 1995           | 1                                                              |
| 46               | Congo   | Meat                     | 1995           | 72                                                             |
| 46               | Congo   | Meat, Other              | 1995           | 13                                                             |
| 46               | Congo   | Milk - Excluding Butter  | 1995           | 24                                                             |
| 46               | Congo   | Miscellaneous            | 1995           | 1                                                              |
| 46               | Congo   | Mutton & Goat Meat       | 1995           | 2                                                              |
| 46               | Congo   | Offals                   | 1995           | 2                                                              |
| 46               | Congo   | Oilcrops                 | 1995           | 100                                                            |
| 46               | Congo   | Oilcrops Oil, Other      | 1995           | 45                                                             |
| 46               | Congo   | Oilcrops, Other          | 1995           | 13                                                             |
| 46               | Congo   | Onions                   | 1995           | 1                                                              |
| 46               | Congo   | Oranges, Mandarines      | 1995           | 1                                                              |
| 46               | Congo   | Palm kernels             | 1995           | 15                                                             |
| 46               | Congo   | Palm Oil                 | 1995           | 113                                                            |
| 46               | Congo   | Peas                     | 1995           | 14                                                             |
| 46               | Congo   | Pelagic Fish             | 1995           | 21                                                             |
| 46               | Congo   | Pigmeat                  | 1995           | 18                                                             |
| 46               | Congo   | Pineapples and products  | 1995           | 1                                                              |
| 46               | Congo   | Plantains                | 1995           | 62                                                             |
| 46               | Congo   | Potatoes and products    | 1995           | 2                                                              |
| 46               | Congo   | Poultry Meat             | 1995           | 18                                                             |

Dietary calcium and zinc deficiency risks are decreasing but remain prevalent

| FAO Country code | Country | Food item                  | Reference year | Net energy supply (kcal capita <sup>-1</sup> d <sup>-1</sup> ) |
|------------------|---------|----------------------------|----------------|----------------------------------------------------------------|
| 46               | Congo   | Pulses                     | 1995           | 22                                                             |
| 46               | Congo   | Rape and Mustard Oil       | 1995           | 4                                                              |
| 46               | Congo   | Rice (Milled Equivalent)   | 1995           | 128                                                            |
| 46               | Congo   | Roots, Other               | 1995           | 33                                                             |
| 46               | Congo   | Sesame seed                | 1995           | 2                                                              |
| 46               | Congo   | Soyabean Oil               | 1995           | 44                                                             |
| 46               | Congo   | Starchy Roots              | 1995           | 866                                                            |
| 46               | Congo   | Sugar & Sweeteners         | 1995           | 80                                                             |
| 46               | Congo   | Sugar (Raw Equivalent)     | 1995           | 79                                                             |
| 46               | Congo   | Sugar cane                 | 1995           | 2                                                              |
| 46               | Congo   | Sugar Crops                | 1995           | 2                                                              |
| 46               | Congo   | Sweet potatoes             | 1995           | 11                                                             |
| 46               | Congo   | Tomatoes and products      | 1995           | 2                                                              |
| 46               | Congo   | Vegetable Oils             | 1995           | 224                                                            |
| 46               | Congo   | Vegetables                 | 1995           | 32                                                             |
| 46               | Congo   | Vegetables, Other          | 1995           | 30                                                             |
| 46               | Congo   | Vegetal Products           | 1995           | 1,833                                                          |
| 46               | Congo   | Wheat and products         | 1995           | 203                                                            |
| 46               | Congo   | Wine                       | 1995           | 3                                                              |
| 46               | Congo   | Yams                       | 1995           | 12                                                             |
| 46               | Congo   | Alcoholic Beverages        | 1996           | 27                                                             |
| 46               | Congo   | Animal fats                | 1996           | 3                                                              |
| 46               | Congo   | Animal Products            | 1996           | 152                                                            |
| 46               | Congo   | Bananas                    | 1996           | 26                                                             |
| 46               | Congo   | Beans                      | 1996           | 10                                                             |
| 46               | Congo   | Beer                       | 1996           | 22                                                             |
| 46               | Congo   | Beverages, Alcoholic       | 1996           | 3                                                              |
| 46               | Congo   | Bovine Meat                | 1996           | 7                                                              |
| 46               | Congo   | Butter, Ghee               | 1996           | 1                                                              |
| 46               | Congo   | Cassava and products       | 1996           | 833                                                            |
| 46               | Congo   | Cereals - Excluding Beer   | 1996           | 310                                                            |
| 46               | Congo   | Cocoa Beans and products   | 1996           | 1                                                              |
| 46               | Congo   | Coconuts - Incl Copra      | 1996           | 7                                                              |
| 46               | Congo   | Cottonseed Oil             | 1996           | 4                                                              |
| 46               | Congo   | Demersal Fish              | 1996           | 4                                                              |
| 46               | Congo   | Eggs                       | 1996           | 2                                                              |
| 46               | Congo   | Fats, Animals, Raw         | 1996           | 2                                                              |
| 46               | Congo   | Fish, Seafood              | 1996           | 46                                                             |
| 46               | Congo   | Freshwater Fish            | 1996           | 18                                                             |
| 46               | Congo   | Fruits - Excluding Wine    | 1996           | 112                                                            |
| 46               | Congo   | Fruits, Other              | 1996           | 24                                                             |
| 46               | Congo   | Grand Total                | 1996           | 1,970                                                          |
| 46               | Congo   | Grapefruit and products    | 1996           | 1                                                              |
| 46               | Congo   | Groundnut Oil              | 1996           | 21                                                             |
| 46               | Congo   | Groundnuts (Shelled Eq)    | 1996           | 48                                                             |
| 46               | Congo   | Lemons, Limes and products | 1996           | 1                                                              |
| 46               | Congo   | Maize and products         | 1996           | 35                                                             |
| 46               | Congo   | Marine Fish, Other         | 1996           | 1                                                              |
| 46               | Congo   | Meat                       | 1996           | 71                                                             |
| 46               | Congo   | Meat, Other                | 1996           | 13                                                             |
| 46               | Congo   | Milk - Excluding Butter    | 1996           | 28                                                             |
| 46               | Congo   | Miscellaneous              | 1996           | 2                                                              |
| 46               | Congo   | Mutton & Goat Meat         | 1996           | 2                                                              |
| 46               | Congo   | Offals                     | 1996           | 3                                                              |
| 46               | Congo   | Oilcrops                   | 1996           | 85                                                             |
| 46               | Congo   | Oilcrops Oil, Other        | 1996           | 16                                                             |
| 46               | Congo   | Oilcrops, Other            | 1996           | 13                                                             |
| 46               | Congo   | Onions                     | 1996           | 1                                                              |
| 46               | Congo   | Oranges, Mandarines        | 1996           | 1                                                              |
| 46               | Congo   | Palm kernels               | 1996           | 15                                                             |
| 46               | Congo   | Palm Oil                   | 1996           | 125                                                            |
| 46               | Congo   | Peas                       | 1996           | 14                                                             |
| 46               | Congo   | Pelagic Fish               | 1996           | 24                                                             |
| 46               | Congo   | Pigmeat                    | 1996           | 26                                                             |
| 46               | Congo   | Pineapples and products    | 1996           | 1                                                              |
| 46               | Congo   | Plantains                  | 1996           | 59                                                             |
| 46               | Congo   | Potatoes and products      | 1996           | 2                                                              |
| 46               | Congo   | Poultry Meat               | 1996           | 23                                                             |
| 46               | Congo   | Pulses                     | 1996           | 24                                                             |
| 46               | Congo   | Rape and Mustard Oil       | 1996           | 15                                                             |
| 46               | Congo   | Rice (Milled Equivalent)   | 1996           | 65                                                             |
| 46               | Congo   | Roots, Other               | 1996           | 34                                                             |
| 46               | Congo   | Sesame seed                | 1996           | 2                                                              |
| 46               | Congo   | Soyabean Oil               | 1996           | 64                                                             |
| 46               | Congo   | Starchy Roots              | 1996           | 885                                                            |
| 46               | Congo   | Stimulants                 | 1996           | 1                                                              |
| 46               | Congo   | Sugar & Sweeteners         | 1996           | 77                                                             |
| 46               | Congo   | Sugar (Raw Equivalent)     | 1996           | 77                                                             |
| 46               | Congo   | Sugar cane                 | 1996           | 1                                                              |
| 46               | Congo   | Sugar Crops                | 1996           | 1                                                              |
| 46               | Congo   | Sunflowerseed Oil          | 1996           | 12                                                             |
| 46               | Congo   | Sweet potatoes             | 1996           | 9                                                              |
| 46               | Congo   | Tomatoes and products      | 1996           | 2                                                              |
| 46               | Congo   | Vegetable Oils             | 1996           | 257                                                            |
| 46               | Congo   | Vegetables                 | 1996           | 35                                                             |
| 46               | Congo   | Vegetables, Other          | 1996           | 32                                                             |
| 46               | Congo   | Vegetal Products           | 1996           | 1,818                                                          |
| 46               | Congo   | Wheat and products         | 1996           | 211                                                            |
| 46               | Congo   | Wine                       | 1996           | 2                                                              |
| 46               | Congo   | Yams                       | 1996           | 7                                                              |
| 46               | Congo   | Alcoholic Beverages        | 1997           | 22                                                             |
| 46               | Congo   | Animal fats                | 1997           | 3                                                              |
| 46               | Congo   | Animal Products            | 1997           | 127                                                            |
| 46               | Congo   | Bananas                    | 1997           | 26                                                             |
| 46               | Congo   | Beans                      | 1997           | 13                                                             |
| 46               | Congo   | Beer                       | 1997           | 14                                                             |
| 46               | Congo   | Beverages, Alcoholic       | 1997           | 4                                                              |

## Dietary calcium and zinc deficiency risks are decreasing but remain prevalent

| FAO Country code | Country | Food item                  | Reference year | Net energy supply (kcal capita <sup>-1</sup> d <sup>-1</sup> ) |
|------------------|---------|----------------------------|----------------|----------------------------------------------------------------|
| 46               | Congo   | Bovine Meat                | 1997           | 10                                                             |
| 46               | Congo   | Butter, Ghee               | 1997           | 1                                                              |
| 46               | Congo   | Cassava and products       | 1997           | 820                                                            |
| 46               | Congo   | Cereals - Excluding Beer   | 1997           | 395                                                            |
| 46               | Congo   | Cocoa Beans and products   | 1997           | 1                                                              |
| 46               | Congo   | Coconuts - Incl Copra      | 1997           | 7                                                              |
| 46               | Congo   | Cottonseed Oil             | 1997           | 29                                                             |
| 46               | Congo   | Demersal Fish              | 1997           | 6                                                              |
| 46               | Congo   | Eggs                       | 1997           | 1                                                              |
| 46               | Congo   | Fats, Animals, Raw         | 1997           | 2                                                              |
| 46               | Congo   | Fish, Seafood              | 1997           | 42                                                             |
| 46               | Congo   | Freshwater Fish            | 1997           | 13                                                             |
| 46               | Congo   | Fruits - Excluding Wine    | 1997           | 111                                                            |
| 46               | Congo   | Fruits, Other              | 1997           | 24                                                             |
| 46               | Congo   | Grand Total                | 1997           | 1,993                                                          |
| 46               | Congo   | Grapefruit and products    | 1997           | 1                                                              |
| 46               | Congo   | Groundnut Oil              | 1997           | 14                                                             |
| 46               | Congo   | Groundnuts (Shelled Eq)    | 1997           | 51                                                             |
| 46               | Congo   | Lemons, Limes and products | 1997           | 1                                                              |
| 46               | Congo   | Maize and products         | 1997           | 38                                                             |
| 46               | Congo   | Marine Fish, Other         | 1997           | 1                                                              |
| 46               | Congo   | Meat                       | 1997           | 56                                                             |
| 46               | Congo   | Meat, Other                | 1997           | 13                                                             |
| 46               | Congo   | Milk - Excluding Butter    | 1997           | 24                                                             |
| 46               | Congo   | Miscellaneous              | 1997           | 3                                                              |
| 46               | Congo   | Mutton & Goat Meat         | 1997           | 1                                                              |
| 46               | Congo   | Offals                     | 1997           | 2                                                              |
| 46               | Congo   | Oilcrops                   | 1997           | 85                                                             |
| 46               | Congo   | Oilcrops Oil, Other        | 1997           | 16                                                             |
| 46               | Congo   | Oilcrops, Other            | 1997           | 12                                                             |
| 46               | Congo   | Onions                     | 1997           | 1                                                              |
| 46               | Congo   | Oranges, Mandarines        | 1997           | 1                                                              |
| 46               | Congo   | Palm kernels               | 1997           | 14                                                             |
| 46               | Congo   | Palm Oil                   | 1997           | 109                                                            |
| 46               | Congo   | Peas                       | 1997           | 13                                                             |
| 46               | Congo   | Pelagic Fish               | 1997           | 22                                                             |
| 46               | Congo   | Pigmeat                    | 1997           | 17                                                             |
| 46               | Congo   | Pineapples and products    | 1997           | 1                                                              |
| 46               | Congo   | Plantains                  | 1997           | 58                                                             |
| 46               | Congo   | Potatoes and products      | 1997           | 2                                                              |
| 46               | Congo   | Poultry Meat               | 1997           | 14                                                             |
| 46               | Congo   | Pulses                     | 1997           | 26                                                             |
| 46               | Congo   | Rape and Mustard Oil       | 1997           | 6                                                              |
| 46               | Congo   | Rice (Milled Equivalent)   | 1997           | 88                                                             |
| 46               | Congo   | Roots, Other               | 1997           | 31                                                             |
| 46               | Congo   | Sesame seed                | 1997           | 2                                                              |
| 46               | Congo   | Soyabean Oil               | 1997           | 72                                                             |
| 46               | Congo   | Starchy Roots              | 1997           | 870                                                            |
| 46               | Congo   | Stimulants                 | 1997           | 1                                                              |
| 46               | Congo   | Sugar & Sweeteners         | 1997           | 62                                                             |
| 46               | Congo   | Sugar (Raw Equivalent)     | 1997           | 62                                                             |
| 46               | Congo   | Sugar cane                 | 1997           | 1                                                              |
| 46               | Congo   | Sugar Crops                | 1997           | 1                                                              |
| 46               | Congo   | Sunflowerseed Oil          | 1997           | 7                                                              |
| 46               | Congo   | Sweet potatoes             | 1997           | 9                                                              |
| 46               | Congo   | Tomatoes and products      | 1997           | 4                                                              |
| 46               | Congo   | Vegetable Oils             | 1997           | 254                                                            |
| 46               | Congo   | Vegetables                 | 1997           | 36                                                             |
| 46               | Congo   | Vegetables, Other          | 1997           | 31                                                             |
| 46               | Congo   | Vegetal Products           | 1997           | 1,866                                                          |
| 46               | Congo   | Wheat and products         | 1997           | 269                                                            |
| 46               | Congo   | Wine                       | 1997           | 3                                                              |
| 46               | Congo   | Yams                       | 1997           | 8                                                              |
| 46               | Congo   | Alcoholic Beverages        | 1998           | 24                                                             |
| 46               | Congo   | Animal fats                | 1998           | 3                                                              |
| 46               | Congo   | Animal Products            | 1998           | 143                                                            |
| 46               | Congo   | Bananas                    | 1998           | 26                                                             |
| 46               | Congo   | Beans                      | 1998           | 21                                                             |
| 46               | Congo   | Beer                       | 1998           | 20                                                             |
| 46               | Congo   | Beverages, Alcoholic       | 1998           | 2                                                              |
| 46               | Congo   | Bovine Meat                | 1998           | 7                                                              |
| 46               | Congo   | Butter, Ghee               | 1998           | 1                                                              |
| 46               | Congo   | Cassava and products       | 1998           | 750                                                            |
| 46               | Congo   | Cereals - Excluding Beer   | 1998           | 489                                                            |
| 46               | Congo   | Cocoa Beans and products   | 1998           | 2                                                              |
| 46               | Congo   | Coconuts - Incl Copra      | 1998           | 6                                                              |
| 46               | Congo   | Cottonseed Oil             | 1998           | 6                                                              |
| 46               | Congo   | Demersal Fish              | 1998           | 5                                                              |
| 46               | Congo   | Eggs                       | 1998           | 2                                                              |
| 46               | Congo   | Fats, Animals, Raw         | 1998           | 2                                                              |
| 46               | Congo   | Fish, Seafood              | 1998           | 39                                                             |
| 46               | Congo   | Freshwater Fish            | 1998           | 16                                                             |
| 46               | Congo   | Fruits - Excluding Wine    | 1998           | 112                                                            |
| 46               | Congo   | Fruits, Other              | 1998           | 24                                                             |
| 46               | Congo   | Grand Total                | 1998           | 2,045                                                          |
| 46               | Congo   | Grapefruit and products    | 1998           | 1                                                              |
| 46               | Congo   | Groundnut Oil              | 1998           | 12                                                             |
| 46               | Congo   | Groundnuts (Shelled Eq)    | 1998           | 32                                                             |
| 46               | Congo   | Lemons, Limes and products | 1998           | 1                                                              |
| 46               | Congo   | Maize and products         | 1998           | 52                                                             |
| 46               | Congo   | Marine Fish, Other         | 1998           | 1                                                              |
| 46               | Congo   | Meat                       | 1998           | 67                                                             |
| 46               | Congo   | Meat, Other                | 1998           | 14                                                             |
| 46               | Congo   | Milk - Excluding Butter    | 1998           | 30                                                             |
| 46               | Congo   | Miscellaneous              | 1998           | 3                                                              |
| 46               | Congo   | Mutton & Goat Meat         | 1998           | 1                                                              |
| 46               | Congo   | Offals                     | 1998           | 3                                                              |

Dietary calcium and zinc deficiency risks are decreasing but remain prevalent

| FAO Country code | Country | Food item                  | Reference year | Net energy supply (kcal capita <sup>-1</sup> d <sup>-1</sup> ) |
|------------------|---------|----------------------------|----------------|----------------------------------------------------------------|
| 46               | Congo   | Oilcrops                   | 1998           | 66                                                             |
| 46               | Congo   | Oilcrops Oil, Other        | 1998           | 19                                                             |
| 46               | Congo   | Oilcrops, Other            | 1998           | 12                                                             |
| 46               | Congo   | Onions                     | 1998           | 1                                                              |
| 46               | Congo   | Oranges, Mandarines        | 1998           | 8                                                              |
| 46               | Congo   | Palm kernels               | 1998           | 14                                                             |
| 46               | Congo   | Palm Oil                   | 1998           | 113                                                            |
| 46               | Congo   | Peas                       | 1998           | 13                                                             |
| 46               | Congo   | Pelagic Fish               | 1998           | 16                                                             |
| 46               | Congo   | Pigmeat                    | 1998           | 25                                                             |
| 46               | Congo   | Pineapples and products    | 1998           | 1                                                              |
| 46               | Congo   | Plantains                  | 1998           | 52                                                             |
| 46               | Congo   | Potatoes and products      | 1998           | 2                                                              |
| 46               | Congo   | Poultry Meat               | 1998           | 19                                                             |
| 46               | Congo   | Pulses                     | 1998           | 34                                                             |
| 46               | Congo   | Rape and Mustard Oil       | 1998           | 7                                                              |
| 46               | Congo   | Rice (Milled Equivalent)   | 1998           | 122                                                            |
| 46               | Congo   | Roots, Other               | 1998           | 29                                                             |
| 46               | Congo   | Sesame seed                | 1998           | 2                                                              |
| 46               | Congo   | Soyabean Oil               | 1998           | 92                                                             |
| 46               | Congo   | Starchy Roots              | 1998           | 797                                                            |
| 46               | Congo   | Stimulants                 | 1998           | 2                                                              |
| 46               | Congo   | Sugar & Sweeteners         | 1998           | 85                                                             |
| 46               | Congo   | Sugar (Raw Equivalent)     | 1998           | 84                                                             |
| 46               | Congo   | Sugar cane                 | 1998           | 1                                                              |
| 46               | Congo   | Sugar Crops                | 1998           | 1                                                              |
| 46               | Congo   | Sunflowerseed Oil          | 1998           | 2                                                              |
| 46               | Congo   | Sweet potatoes             | 1998           | 8                                                              |
| 46               | Congo   | Tomatoes and products      | 1998           | 4                                                              |
| 46               | Congo   | Vegetable Oils             | 1998           | 252                                                            |
| 46               | Congo   | Vegetables                 | 1998           | 35                                                             |
| 46               | Congo   | Vegetables, Other          | 1998           | 30                                                             |
| 46               | Congo   | Vegetal Products           | 1998           | 1,902                                                          |
| 46               | Congo   | Wheat and products         | 1998           | 315                                                            |
| 46               | Congo   | Wine                       | 1998           | 3                                                              |
| 46               | Congo   | Yams                       | 1998           | 9                                                              |
| 46               | Congo   | Alcoholic Beverages        | 1999           | 27                                                             |
| 46               | Congo   | Animal fats                | 1999           | 2                                                              |
| 46               | Congo   | Animal Products            | 1999           | 115                                                            |
| 46               | Congo   | Bananas                    | 1999           | 39                                                             |
| 46               | Congo   | Beans                      | 1999           | 13                                                             |
| 46               | Congo   | Beer                       | 1999           | 19                                                             |
| 46               | Congo   | Beverages, Alcoholic       | 1999           | 6                                                              |
| 46               | Congo   | Bovine Meat                | 1999           | 5                                                              |
| 46               | Congo   | Butter, Ghee               | 1999           | 1                                                              |
| 46               | Congo   | Cassava and products       | 1999           | 754                                                            |
| 46               | Congo   | Cereals - Excluding Beer   | 1999           | 513                                                            |
| 46               | Congo   | Cocoa Beans and products   | 1999           | 1                                                              |
| 46               | Congo   | Coconuts - Incl Copra      | 1999           | 6                                                              |
| 46               | Congo   | Cottonseed Oil             | 1999           | 5                                                              |
| 46               | Congo   | Demersal Fish              | 1999           | 3                                                              |
| 46               | Congo   | Eggs                       | 1999           | 1                                                              |
| 46               | Congo   | Fats, Animals, Raw         | 1999           | 1                                                              |
| 46               | Congo   | Fish, Seafood              | 1999           | 37                                                             |
| 46               | Congo   | Freshwater Fish            | 1999           | 16                                                             |
| 46               | Congo   | Fruits - Excluding Wine    | 1999           | 115                                                            |
| 46               | Congo   | Fruits, Other              | 1999           | 24                                                             |
| 46               | Congo   | Grand Total                | 1999           | 2,099                                                          |
| 46               | Congo   | Grapefruit and products    | 1999           | 1                                                              |
| 46               | Congo   | Groundnut Oil              | 1999           | 18                                                             |
| 46               | Congo   | Groundnuts (Shelled Eq)    | 1999           | 42                                                             |
| 46               | Congo   | Lemons, Limes and products | 1999           | 1                                                              |
| 46               | Congo   | Maize and products         | 1999           | 57                                                             |
| 46               | Congo   | Marine Fish, Other         | 1999           | 2                                                              |
| 46               | Congo   | Meat                       | 1999           | 50                                                             |
| 46               | Congo   | Meat, Other                | 1999           | 15                                                             |
| 46               | Congo   | Milk - Excluding Butter    | 1999           | 23                                                             |
| 46               | Congo   | Miscellaneous              | 1999           | 2                                                              |
| 46               | Congo   | Mutton & Goat Meat         | 1999           | 1                                                              |
| 46               | Congo   | Offals                     | 1999           | 1                                                              |
| 46               | Congo   | Oilcrops                   | 1999           | 76                                                             |
| 46               | Congo   | Oilcrops Oil, Other        | 1999           | 25                                                             |
| 46               | Congo   | Oilcrops, Other            | 1999           | 12                                                             |
| 46               | Congo   | Olive Oil                  | 1999           | 1                                                              |
| 46               | Congo   | Onions                     | 1999           | 1                                                              |
| 46               | Congo   | Oranges, Mandarines        | 1999           | 1                                                              |
| 46               | Congo   | Palm kernels               | 1999           | 14                                                             |
| 46               | Congo   | Palm Oil                   | 1999           | 136                                                            |
| 46               | Congo   | Peas                       | 1999           | 13                                                             |
| 46               | Congo   | Pelagic Fish               | 1999           | 17                                                             |
| 46               | Congo   | Pigmeat                    | 1999           | 14                                                             |
| 46               | Congo   | Pineapples and products    | 1999           | 1                                                              |
| 46               | Congo   | Plantains                  | 1999           | 49                                                             |
| 46               | Congo   | Potatoes and products      | 1999           | 2                                                              |
| 46               | Congo   | Poultry Meat               | 1999           | 15                                                             |
| 46               | Congo   | Pulses                     | 1999           | 26                                                             |
| 46               | Congo   | Rape and Mustard Oil       | 1999           | 42                                                             |
| 46               | Congo   | Rice (Milled Equivalent)   | 1999           | 120                                                            |
| 46               | Congo   | Roots, Other               | 1999           | 30                                                             |
| 46               | Congo   | Sesame seed                | 1999           | 2                                                              |
| 46               | Congo   | Soyabean Oil               | 1999           | 72                                                             |
| 46               | Congo   | Starchy Roots              | 1999           | 800                                                            |
| 46               | Congo   | Stimulants                 | 1999           | 1                                                              |
| 46               | Congo   | Sugar & Sweeteners         | 1999           | 88                                                             |
| 46               | Congo   | Sugar (Raw Equivalent)     | 1999           | 88                                                             |
| 46               | Congo   | Sugar cane                 | 1999           | 1                                                              |
| 46               | Congo   | Sugar Crops                | 1999           | 1                                                              |

Dietary calcium and zinc deficiency risks are decreasing but remain prevalent

| FAO Country code | Country | Food item                  | Reference year | Net energy supply (kcal capita <sup>-1</sup> d <sup>-1</sup> ) |
|------------------|---------|----------------------------|----------------|----------------------------------------------------------------|
| 46               | Congo   | Sweet potatoes             | 1999           | 7                                                              |
| 46               | Congo   | Tomatoes and products      | 1999           | 4                                                              |
| 46               | Congo   | Vegetable Oils             | 1999           | 298                                                            |
| 46               | Congo   | Vegetables                 | 1999           | 36                                                             |
| 46               | Congo   | Vegetables, Other          | 1999           | 31                                                             |
| 46               | Congo   | Vegetal Products           | 1999           | 1,984                                                          |
| 46               | Congo   | Wheat and products         | 1999           | 336                                                            |
| 46               | Congo   | Wine                       | 1999           | 2                                                              |
| 46               | Congo   | Yams                       | 1999           | 7                                                              |
| 46               | Congo   | Alcoholic Beverages        | 2000           | 29                                                             |
| 46               | Congo   | Animal fats                | 2000           | 3                                                              |
| 46               | Congo   | Animal Products            | 2000           | 137                                                            |
| 46               | Congo   | Bananas                    | 2000           | 38                                                             |
| 46               | Congo   | Beans                      | 2000           | 14                                                             |
| 46               | Congo   | Beer                       | 2000           | 22                                                             |
| 46               | Congo   | Beverages, Alcoholic       | 2000           | 5                                                              |
| 46               | Congo   | Bovine Meat                | 2000           | 7                                                              |
| 46               | Congo   | Butter, Ghee               | 2000           | 1                                                              |
| 46               | Congo   | Cassava and products       | 2000           | 769                                                            |
| 46               | Congo   | Cereals - Excluding Beer   | 2000           | 525                                                            |
| 46               | Congo   | Cocoa Beans and products   | 2000           | 2                                                              |
| 46               | Congo   | Coconuts - Incl Copra      | 2000           | 6                                                              |
| 46               | Congo   | Cottonseed Oil             | 2000           | 5                                                              |
| 46               | Congo   | Demersal Fish              | 2000           | 4                                                              |
| 46               | Congo   | Eggs                       | 2000           | 2                                                              |
| 46               | Congo   | Fats, Animals, Raw         | 2000           | 1                                                              |
| 46               | Congo   | Fish, Seafood              | 2000           | 39                                                             |
| 46               | Congo   | Freshwater Fish            | 2000           | 16                                                             |
| 46               | Congo   | Fruits - Excluding Wine    | 2000           | 114                                                            |
| 46               | Congo   | Fruits, Other              | 2000           | 23                                                             |
| 46               | Congo   | Grand Total                | 2000           | 2,177                                                          |
| 46               | Congo   | Grapefruit and products    | 2000           | 1                                                              |
| 46               | Congo   | Groundnut Oil              | 2000           | 17                                                             |
| 46               | Congo   | Groundnuts (Shelled Eq)    | 2000           | 40                                                             |
| 46               | Congo   | Lemons, Limes and products | 2000           | 1                                                              |
| 46               | Congo   | Maize and products         | 2000           | 55                                                             |
| 46               | Congo   | Marine Fish, Other         | 2000           | 3                                                              |
| 46               | Congo   | Meat                       | 2000           | 56                                                             |
| 46               | Congo   | Meat, Other                | 2000           | 15                                                             |
| 46               | Congo   | Milk - Excluding Butter    | 2000           | 33                                                             |
| 46               | Congo   | Miscellaneous              | 2000           | 4                                                              |
| 46               | Congo   | Mutton & Goat Meat         | 2000           | 1                                                              |
| 46               | Congo   | Offals                     | 2000           | 3                                                              |
| 46               | Congo   | Oilcrops                   | 2000           | 74                                                             |
| 46               | Congo   | Oilcrops Oil, Other        | 2000           | 37                                                             |
| 46               | Congo   | Oilcrops, Other            | 2000           | 12                                                             |
| 46               | Congo   | Onions                     | 2000           | 1                                                              |
| 46               | Congo   | Oranges, Mandarines        | 2000           | 1                                                              |
| 46               | Congo   | Palm kernels               | 2000           | 14                                                             |
| 46               | Congo   | Palm Oil                   | 2000           | 123                                                            |
| 46               | Congo   | Peas                       | 2000           | 13                                                             |
| 46               | Congo   | Pelagic Fish               | 2000           | 17                                                             |
| 46               | Congo   | Pigmeat                    | 2000           | 17                                                             |
| 46               | Congo   | Pineapples and products    | 2000           | 1                                                              |
| 46               | Congo   | Plantains                  | 2000           | 49                                                             |
| 46               | Congo   | Potatoes and products      | 2000           | 2                                                              |
| 46               | Congo   | Poultry Meat               | 2000           | 17                                                             |
| 46               | Congo   | Pulses                     | 2000           | 27                                                             |
| 46               | Congo   | Rape and Mustard Oil       | 2000           | 25                                                             |
| 46               | Congo   | Rice (Milled Equivalent)   | 2000           | 119                                                            |
| 46               | Congo   | Roots, Other               | 2000           | 27                                                             |
| 46               | Congo   | Sesame seed                | 2000           | 2                                                              |
| 46               | Congo   | Soyabean Oil               | 2000           | 96                                                             |
| 46               | Congo   | Starchy Roots              | 2000           | 812                                                            |
| 46               | Congo   | Stimulants                 | 2000           | 2                                                              |
| 46               | Congo   | Sugar & Sweeteners         | 2000           | 100                                                            |
| 46               | Congo   | Sugar (Raw Equivalent)     | 2000           | 100                                                            |
| 46               | Congo   | Sugar cane                 | 2000           | 1                                                              |
| 46               | Congo   | Sugar Crops                | 2000           | 1                                                              |
| 46               | Congo   | Sunflowerseed Oil          | 2000           | 7                                                              |
| 46               | Congo   | Sweet potatoes             | 2000           | 6                                                              |
| 46               | Congo   | Tomatoes and products      | 2000           | 8                                                              |
| 46               | Congo   | Vegetable Oils             | 2000           | 310                                                            |
| 46               | Congo   | Vegetables                 | 2000           | 40                                                             |
| 46               | Congo   | Vegetables, Other          | 2000           | 31                                                             |
| 46               | Congo   | Vegetal Products           | 2000           | 2,041                                                          |
| 46               | Congo   | Wheat and products         | 2000           | 351                                                            |
| 46               | Congo   | Wine                       | 2000           | 2                                                              |
| 46               | Congo   | Yams                       | 2000           | 8                                                              |
| 46               | Congo   | Alcoholic Beverages        | 2001           | 29                                                             |
| 46               | Congo   | Animal fats                | 2001           | 2                                                              |
| 46               | Congo   | Animal Products            | 2001           | 130                                                            |
| 46               | Congo   | Bananas                    | 2001           | 38                                                             |
| 46               | Congo   | Beans                      | 2001           | 15                                                             |
| 46               | Congo   | Beer                       | 2001           | 21                                                             |
| 46               | Congo   | Beverages, Alcoholic       | 2001           | 5                                                              |
| 46               | Congo   | Bovine Meat                | 2001           | 4                                                              |
| 46               | Congo   | Butter, Ghee               | 2001           | 1                                                              |
| 46               | Congo   | Cassava and products       | 2001           | 759                                                            |
| 46               | Congo   | Cereals - Excluding Beer   | 2001           | 552                                                            |
| 46               | Congo   | Cocoa Beans and products   | 2001           | 2                                                              |
| 46               | Congo   | Coconuts - Incl Copra      | 2001           | 6                                                              |
| 46               | Congo   | Cottonseed Oil             | 2001           | 3                                                              |
| 46               | Congo   | Demersal Fish              | 2001           | 8                                                              |
| 46               | Congo   | Eggs                       | 2001           | 2                                                              |
| 46               | Congo   | Fats, Animals, Raw         | 2001           | 1                                                              |
| 46               | Congo   | Fish, Seafood              | 2001           | 46                                                             |

## Dietary calcium and zinc deficiency risks are decreasing but remain prevalent

| FAO Country code | Country | Food item                  | Reference year | Net energy supply (kcal capita <sup>-1</sup> d <sup>-1</sup> ) |
|------------------|---------|----------------------------|----------------|----------------------------------------------------------------|
| 46               | Congo   | Freshwater Fish            | 2001           | 16                                                             |
| 46               | Congo   | Fruits - Excluding Wine    | 2001           | 113                                                            |
| 46               | Congo   | Fruits, Other              | 2001           | 23                                                             |
| 46               | Congo   | Grand Total                | 2001           | 2,232                                                          |
| 46               | Congo   | Groundnut Oil              | 2001           | 17                                                             |
| 46               | Congo   | Groundnuts (Shelled Eq)    | 2001           | 42                                                             |
| 46               | Congo   | Lemons, Limes and products | 2001           | 1                                                              |
| 46               | Congo   | Maize and products         | 2001           | 56                                                             |
| 46               | Congo   | Marine Fish, Other         | 2001           | 3                                                              |
| 46               | Congo   | Meat                       | 2001           | 50                                                             |
| 46               | Congo   | Meat, Other                | 2001           | 14                                                             |
| 46               | Congo   | Milk - Excluding Butter    | 2001           | 27                                                             |
| 46               | Congo   | Miscellaneous              | 2001           | 3                                                              |
| 46               | Congo   | Mutton & Goat Meat         | 2001           | 1                                                              |
| 46               | Congo   | Offals                     | 2001           | 4                                                              |
| 46               | Congo   | Oilcrops                   | 2001           | 75                                                             |
| 46               | Congo   | Oilcrops Oil, Other        | 2001           | 40                                                             |
| 46               | Congo   | Oilcrops, Other            | 2001           | 12                                                             |
| 46               | Congo   | Onions                     | 2001           | 1                                                              |
| 46               | Congo   | Oranges, Mandarines        | 2001           | 1                                                              |
| 46               | Congo   | Palm kernels               | 2001           | 13                                                             |
| 46               | Congo   | Palm Oil                   | 2001           | 153                                                            |
| 46               | Congo   | Peas                       | 2001           | 13                                                             |
| 46               | Congo   | Pelagic Fish               | 2001           | 19                                                             |
| 46               | Congo   | Pigmeat                    | 2001           | 16                                                             |
| 46               | Congo   | Pineapples and products    | 2001           | 1                                                              |
| 46               | Congo   | Plantains                  | 2001           | 49                                                             |
| 46               | Congo   | Potatoes and products      | 2001           | 2                                                              |
| 46               | Congo   | Poultry Meat               | 2001           | 14                                                             |
| 46               | Congo   | Pulses                     | 2001           | 35                                                             |
| 46               | Congo   | Pulses, Other and products | 2001           | 6                                                              |
| 46               | Congo   | Rape and Mustard Oil       | 2001           | 3                                                              |
| 46               | Congo   | Rice (Milled Equivalent)   | 2001           | 127                                                            |
| 46               | Congo   | Roots, Other               | 2001           | 26                                                             |
| 46               | Congo   | Sesame seed                | 2001           | 2                                                              |
| 46               | Congo   | Soyabean Oil               | 2001           | 117                                                            |
| 46               | Congo   | Starchy Roots              | 2001           | 798                                                            |
| 46               | Congo   | Stimulants                 | 2001           | 2                                                              |
| 46               | Congo   | Sugar & Sweeteners         | 2001           | 115                                                            |
| 46               | Congo   | Sugar (Raw Equivalent)     | 2001           | 114                                                            |
| 46               | Congo   | Sugar cane                 | 2001           | 1                                                              |
| 46               | Congo   | Sugar Crops                | 2001           | 1                                                              |
| 46               | Congo   | Sunflowerseed Oil          | 2001           | 7                                                              |
| 46               | Congo   | Sweet potatoes             | 2001           | 5                                                              |
| 46               | Congo   | Sweeteners, Other          | 2001           | 1                                                              |
| 46               | Congo   | Tomatoes and products      | 2001           | 6                                                              |
| 46               | Congo   | Vegetable Oils             | 2001           | 340                                                            |
| 46               | Congo   | Vegetables                 | 2001           | 38                                                             |
| 46               | Congo   | Vegetables, Other          | 2001           | 31                                                             |
| 46               | Congo   | Vegetal Products           | 2001           | 2,102                                                          |
| 46               | Congo   | Wheat and products         | 2001           | 369                                                            |
| 46               | Congo   | Wine                       | 2001           | 3                                                              |
| 46               | Congo   | Yams                       | 2001           | 6                                                              |
| 46               | Congo   | Alcoholic Beverages        | 2002           | 32                                                             |
| 46               | Congo   | Animal fats                | 2002           | 3                                                              |
| 46               | Congo   | Animal Products            | 2002           | 140                                                            |
| 46               | Congo   | Bananas                    | 2002           | 38                                                             |
| 46               | Congo   | Beans                      | 2002           | 17                                                             |
| 46               | Congo   | Beer                       | 2002           | 24                                                             |
| 46               | Congo   | Beverages, Alcoholic       | 2002           | 6                                                              |
| 46               | Congo   | Bovine Meat                | 2002           | 6                                                              |
| 46               | Congo   | Butter, Ghee               | 2002           | 1                                                              |
| 46               | Congo   | Cassava and products       | 2002           | 754                                                            |
| 46               | Congo   | Cereals - Excluding Beer   | 2002           | 563                                                            |
| 46               | Congo   | Cereals, Other             | 2002           | 1                                                              |
| 46               | Congo   | Cocoa Beans and products   | 2002           | 2                                                              |
| 46               | Congo   | Coconuts - Incl Copra      | 2002           | 6                                                              |
| 46               | Congo   | Cottonseed Oil             | 2002           | 3                                                              |
| 46               | Congo   | Demersal Fish              | 2002           | 4                                                              |
| 46               | Congo   | Eggs                       | 2002           | 3                                                              |
| 46               | Congo   | Fats, Animals, Raw         | 2002           | 2                                                              |
| 46               | Congo   | Fish, Seafood              | 2002           | 38                                                             |
| 46               | Congo   | Freshwater Fish            | 2002           | 17                                                             |
| 46               | Congo   | Fruits - Excluding Wine    | 2002           | 105                                                            |
| 46               | Congo   | Fruits, Other              | 2002           | 24                                                             |
| 46               | Congo   | Grand Total                | 2002           | 2,259                                                          |
| 46               | Congo   | Groundnut Oil              | 2002           | 16                                                             |
| 46               | Congo   | Groundnuts (Shelled Eq)    | 2002           | 42                                                             |
| 46               | Congo   | Maize and products         | 2002           | 58                                                             |
| 46               | Congo   | Marine Fish, Other         | 2002           | 2                                                              |
| 46               | Congo   | Meat                       | 2002           | 59                                                             |
| 46               | Congo   | Meat, Other                | 2002           | 16                                                             |
| 46               | Congo   | Milk - Excluding Butter    | 2002           | 31                                                             |
| 46               | Congo   | Miscellaneous              | 2002           | 3                                                              |
| 46               | Congo   | Mutton & Goat Meat         | 2002           | 1                                                              |
| 46               | Congo   | Offals                     | 2002           | 6                                                              |
| 46               | Congo   | Oilcrops                   | 2002           | 76                                                             |
| 46               | Congo   | Oilcrops Oil, Other        | 2002           | 50                                                             |
| 46               | Congo   | Oilcrops, Other            | 2002           | 14                                                             |
| 46               | Congo   | Onions                     | 2002           | 1                                                              |
| 46               | Congo   | Oranges, Mandarines        | 2002           | 1                                                              |
| 46               | Congo   | Palm kernels               | 2002           | 13                                                             |
| 46               | Congo   | Palm Oil                   | 2002           | 160                                                            |
| 46               | Congo   | Peas                       | 2002           | 14                                                             |
| 46               | Congo   | Pelagic Fish               | 2002           | 14                                                             |
| 46               | Congo   | Pigmeat                    | 2002           | 19                                                             |
| 46               | Congo   | Pineapples and products    | 2002           | 1                                                              |

Dietary calcium and zinc deficiency risks are decreasing but remain prevalent

| FAO Country code | Country | Food item                  | Reference year | Net energy supply (kcal capita <sup>-1</sup> d <sup>-1</sup> ) |
|------------------|---------|----------------------------|----------------|----------------------------------------------------------------|
| 46               | Congo   | Plantains                  | 2002           | 40                                                             |
| 46               | Congo   | Potatoes and products      | 2002           | 2                                                              |
| 46               | Congo   | Poultry Meat               | 2002           | 16                                                             |
| 46               | Congo   | Pulses                     | 2002           | 34                                                             |
| 46               | Congo   | Pulses, Other and products | 2002           | 3                                                              |
| 46               | Congo   | Rape and Mustard Oil       | 2002           | 1                                                              |
| 46               | Congo   | Rice (Milled Equivalent)   | 2002           | 138                                                            |
| 46               | Congo   | Roots, Other               | 2002           | 27                                                             |
| 46               | Congo   | Sesame seed                | 2002           | 2                                                              |
| 46               | Congo   | Soyabean Oil               | 2002           | 110                                                            |
| 46               | Congo   | Starchy Roots              | 2002           | 796                                                            |
| 46               | Congo   | Stimulants                 | 2002           | 2                                                              |
| 46               | Congo   | Sugar & Sweeteners         | 2002           | 125                                                            |
| 46               | Congo   | Sugar (Raw Equivalent)     | 2002           | 125                                                            |
| 46               | Congo   | Sugar cane                 | 2002           | 1                                                              |
| 46               | Congo   | Sugar Crops                | 2002           | 1                                                              |
| 46               | Congo   | Sunflowerseed Oil          | 2002           | 1                                                              |
| 46               | Congo   | Sweet potatoes             | 2002           | 4                                                              |
| 46               | Congo   | Sweeteners, Other          | 2002           | 1                                                              |
| 46               | Congo   | Tomatoes and products      | 2002           | 5                                                              |
| 46               | Congo   | Vegetable Oils             | 2002           | 342                                                            |
| 46               | Congo   | Vegetables                 | 2002           | 38                                                             |
| 46               | Congo   | Vegetables, Other          | 2002           | 32                                                             |
| 46               | Congo   | Vegetal Products           | 2002           | 2,118                                                          |
| 46               | Congo   | Wheat and products         | 2002           | 366                                                            |
| 46               | Congo   | Wine                       | 2002           | 2                                                              |
| 46               | Congo   | Yams                       | 2002           | 8                                                              |
| 46               | Congo   | Alcoholic Beverages        | 2003           | 31                                                             |
| 46               | Congo   | Animal fats                | 2003           | 2                                                              |
| 46               | Congo   | Animal Products            | 2003           | 158                                                            |
| 46               | Congo   | Bananas                    | 2003           | 35                                                             |
| 46               | Congo   | Beans                      | 2003           | 15                                                             |
| 46               | Congo   | Beer                       | 2003           | 24                                                             |
| 46               | Congo   | Beverages, Alcoholic       | 2003           | 6                                                              |
| 46               | Congo   | Bovine Meat                | 2003           | 7                                                              |
| 46               | Congo   | Butter, Chee               | 2003           | 1                                                              |
| 46               | Congo   | Cassava and products       | 2003           | 751                                                            |
| 46               | Congo   | Cereals - Excluding Beer   | 2003           | 545                                                            |
| 46               | Congo   | Cocoa Beans and products   | 2003           | 2                                                              |
| 46               | Congo   | Coconuts - Incl Copra      | 2003           | 6                                                              |
| 46               | Congo   | Coffee and products        | 2003           | 1                                                              |
| 46               | Congo   | Cottonseed Oil             | 2003           | 3                                                              |
| 46               | Congo   | Demersal Fish              | 2003           | 6                                                              |
| 46               | Congo   | Eggs                       | 2003           | 2                                                              |
| 46               | Congo   | Fats, Animals, Raw         | 2003           | 1                                                              |
| 46               | Congo   | Fish, Seafood              | 2003           | 36                                                             |
| 46               | Congo   | Freshwater Fish            | 2003           | 18                                                             |
| 46               | Congo   | Fruits - Excluding Wine    | 2003           | 100                                                            |
| 46               | Congo   | Fruits, Other              | 2003           | 24                                                             |
| 46               | Congo   | Grand Total                | 2003           | 2,236                                                          |
| 46               | Congo   | Groundnut Oil              | 2003           | 16                                                             |
| 46               | Congo   | Groundnuts (Shelled Eq)    | 2003           | 39                                                             |
| 46               | Congo   | Lemons, Limes and products | 2003           | 1                                                              |
| 46               | Congo   | Maize and products         | 2003           | 57                                                             |
| 46               | Congo   | Marine Fish, Other         | 2003           | 1                                                              |
| 46               | Congo   | Meat                       | 2003           | 76                                                             |
| 46               | Congo   | Meat, Other                | 2003           | 15                                                             |
| 46               | Congo   | Milk - Excluding Butter    | 2003           | 32                                                             |
| 46               | Congo   | Miscellaneous              | 2003           | 4                                                              |
| 46               | Congo   | Mutton & Goat Meat         | 2003           | 1                                                              |
| 46               | Congo   | Offals                     | 2003           | 9                                                              |
| 46               | Congo   | Oilcrops                   | 2003           | 68                                                             |
| 46               | Congo   | Oilcrops Oil, Other        | 2003           | 32                                                             |
| 46               | Congo   | Oilcrops, Other            | 2003           | 11                                                             |
| 46               | Congo   | Onions                     | 2003           | 1                                                              |
| 46               | Congo   | Oranges, Mandarines        | 2003           | 1                                                              |
| 46               | Congo   | Palm kernels               | 2003           | 11                                                             |
| 46               | Congo   | Palm Oil                   | 2003           | 166                                                            |
| 46               | Congo   | Peas                       | 2003           | 14                                                             |
| 46               | Congo   | Pelagic Fish               | 2003           | 12                                                             |
| 46               | Congo   | Pigmeat                    | 2003           | 11                                                             |
| 46               | Congo   | Pineapples and products    | 2003           | 1                                                              |
| 46               | Congo   | Plantains                  | 2003           | 38                                                             |
| 46               | Congo   | Potatoes and products      | 2003           | 2                                                              |
| 46               | Congo   | Poultry Meat               | 2003           | 42                                                             |
| 46               | Congo   | Pulses                     | 2003           | 36                                                             |
| 46               | Congo   | Pulses, Other and products | 2003           | 7                                                              |
| 46               | Congo   | Rape and Mustard Oil       | 2003           | 7                                                              |
| 46               | Congo   | Rice (Milled Equivalent)   | 2003           | 126                                                            |
| 46               | Congo   | Roots, Other               | 2003           | 26                                                             |
| 46               | Congo   | Sesame seed                | 2003           | 2                                                              |
| 46               | Congo   | Soyabean Oil               | 2003           | 90                                                             |
| 46               | Congo   | Starchy Roots              | 2003           | 792                                                            |
| 46               | Congo   | Stimulants                 | 2003           | 3                                                              |
| 46               | Congo   | Sugar & Sweeteners         | 2003           | 139                                                            |
| 46               | Congo   | Sugar (Raw Equivalent)     | 2003           | 138                                                            |
| 46               | Congo   | Sugar cane                 | 2003           | 1                                                              |
| 46               | Congo   | Sugar Crops                | 2003           | 1                                                              |
| 46               | Congo   | Sunflowerseed Oil          | 2003           | 2                                                              |
| 46               | Congo   | Sweet potatoes             | 2003           | 4                                                              |
| 46               | Congo   | Sweeteners, Other          | 2003           | 1                                                              |
| 46               | Congo   | Tomatoes and products      | 2003           | 7                                                              |
| 46               | Congo   | Vegetable Oils             | 2003           | 317                                                            |
| 46               | Congo   | Vegetables                 | 2003           | 41                                                             |
| 46               | Congo   | Vegetables, Other          | 2003           | 33                                                             |
| 46               | Congo   | Vegetal Products           | 2003           | 2,078                                                          |
| 46               | Congo   | Wheat and products         | 2003           | 362                                                            |

Dietary calcium and zinc deficiency risks are decreasing but remain prevalent

| FAO Country code | Country | Food item                  | Reference year | Net energy supply (kcal capita <sup>-1</sup> d <sup>-1</sup> ) |
|------------------|---------|----------------------------|----------------|----------------------------------------------------------------|
| 46               | Congo   | Wine                       | 2003           | 2                                                              |
| 46               | Congo   | Yams                       | 2003           | 8                                                              |
| 46               | Congo   | Alcoholic Beverages        | 2004           | 33                                                             |
| 46               | Congo   | Animal fats                | 2004           | 3                                                              |
| 46               | Congo   | Animal Products            | 2004           | 179                                                            |
| 46               | Congo   | Bananas                    | 2004           | 34                                                             |
| 46               | Congo   | Beans                      | 2004           | 18                                                             |
| 46               | Congo   | Beer                       | 2004           | 23                                                             |
| 46               | Congo   | Beverages, Alcoholic       | 2004           | 6                                                              |
| 46               | Congo   | Bovine Meat                | 2004           | 13                                                             |
| 46               | Congo   | Butter, Ghee               | 2004           | 2                                                              |
| 46               | Congo   | Cassava and products       | 2004           | 779                                                            |
| 46               | Congo   | Cereals - Excluding Beer   | 2004           | 532                                                            |
| 46               | Congo   | Cereals, Other             | 2004           | 1                                                              |
| 46               | Congo   | Cocoa Beans and products   | 2004           | 2                                                              |
| 46               | Congo   | Coconuts - Incl Copra      | 2004           | 4                                                              |
| 46               | Congo   | Cottonseed Oil             | 2004           | 3                                                              |
| 46               | Congo   | Demersal Fish              | 2004           | 8                                                              |
| 46               | Congo   | Eggs                       | 2004           | 3                                                              |
| 46               | Congo   | Fats, Animals, Raw         | 2004           | 1                                                              |
| 46               | Congo   | Fish, Seafood              | 2004           | 44                                                             |
| 46               | Congo   | Freshwater Fish            | 2004           | 18                                                             |
| 46               | Congo   | Fruits - Excluding Wine    | 2004           | 100                                                            |
| 46               | Congo   | Fruits, Other              | 2004           | 25                                                             |
| 46               | Congo   | Grand Total                | 2004           | 2,263                                                          |
| 46               | Congo   | Groundnut Oil              | 2004           | 16                                                             |
| 46               | Congo   | Groundnuts (Shelled Eq)    | 2004           | 36                                                             |
| 46               | Congo   | Lemons, Limes and products | 2004           | 1                                                              |
| 46               | Congo   | Maize and products         | 2004           | 55                                                             |
| 46               | Congo   | Marine Fish, Other         | 2004           | 2                                                              |
| 46               | Congo   | Meat                       | 2004           | 76                                                             |
| 46               | Congo   | Meat, Other                | 2004           | 17                                                             |
| 46               | Congo   | Milk - Excluding Butter    | 2004           | 42                                                             |
| 46               | Congo   | Miscellaneous              | 2004           | 4                                                              |
| 46               | Congo   | Mutton & Goat Meat         | 2004           | 1                                                              |
| 46               | Congo   | Offals                     | 2004           | 11                                                             |
| 46               | Congo   | Oilcrops                   | 2004           | 65                                                             |
| 46               | Congo   | Oilcrops Oil, Other        | 2004           | 45                                                             |
| 46               | Congo   | Oilcrops, Other            | 2004           | 11                                                             |
| 46               | Congo   | Onions                     | 2004           | 1                                                              |
| 46               | Congo   | Oranges, Mandarines        | 2004           | 1                                                              |
| 46               | Congo   | Palm kernels               | 2004           | 13                                                             |
| 46               | Congo   | Palm Oil                   | 2004           | 174                                                            |
| 46               | Congo   | Peas                       | 2004           | 14                                                             |
| 46               | Congo   | Pelagic Fish               | 2004           | 17                                                             |
| 46               | Congo   | Pigmeat                    | 2004           | 13                                                             |
| 46               | Congo   | Pineapples and products    | 2004           | 1                                                              |
| 46               | Congo   | Plantains                  | 2004           | 39                                                             |
| 46               | Congo   | Potatoes and products      | 2004           | 2                                                              |
| 46               | Congo   | Poultry Meat               | 2004           | 32                                                             |
| 46               | Congo   | Pulses                     | 2004           | 33                                                             |
| 46               | Congo   | Pulses, Other and products | 2004           | 1                                                              |
| 46               | Congo   | Rice (Milled Equivalent)   | 2004           | 128                                                            |
| 46               | Congo   | Roots, Other               | 2004           | 27                                                             |
| 46               | Congo   | Sesame seed                | 2004           | 1                                                              |
| 46               | Congo   | Soyabean Oil               | 2004           | 56                                                             |
| 46               | Congo   | Starchy Roots              | 2004           | 820                                                            |
| 46               | Congo   | Stimulants                 | 2004           | 2                                                              |
| 46               | Congo   | Sugar & Sweeteners         | 2004           | 152                                                            |
| 46               | Congo   | Sugar (Raw Equivalent)     | 2004           | 151                                                            |
| 46               | Congo   | Sugar cane                 | 2004           | 1                                                              |
| 46               | Congo   | Sugar Crops                | 2004           | 1                                                              |
| 46               | Congo   | Sunflowerseed Oil          | 2004           | 1                                                              |
| 46               | Congo   | Sweet potatoes             | 2004           | 4                                                              |
| 46               | Congo   | Sweeteners, Other          | 2004           | 1                                                              |
| 46               | Congo   | Tomatoes and products      | 2004           | 11                                                             |
| 46               | Congo   | Vegetable Oils             | 2004           | 295                                                            |
| 46               | Congo   | Vegetables                 | 2004           | 46                                                             |
| 46               | Congo   | Vegetables, Other          | 2004           | 33                                                             |
| 46               | Congo   | Vegetal Products           | 2004           | 2,084                                                          |
| 46               | Congo   | Wheat and products         | 2004           | 348                                                            |
| 46               | Congo   | Wine                       | 2004           | 3                                                              |
| 46               | Congo   | Yams                       | 2004           | 8                                                              |
| 46               | Congo   | Alcoholic Beverages        | 2005           | 26                                                             |
| 46               | Congo   | Animal fats                | 2005           | 3                                                              |
| 46               | Congo   | Animal Products            | 2005           | 120                                                            |
| 46               | Congo   | Bananas                    | 2005           | 31                                                             |
| 46               | Congo   | Beans                      | 2005           | 16                                                             |
| 46               | Congo   | Beer                       | 2005           | 21                                                             |
| 46               | Congo   | Beverages, Alcoholic       | 2005           | 3                                                              |
| 46               | Congo   | Bovine Meat                | 2005           | 11                                                             |
| 46               | Congo   | Butter, Ghee               | 2005           | 1                                                              |
| 46               | Congo   | Cassava and products       | 2005           | 762                                                            |
| 46               | Congo   | Cereals - Excluding Beer   | 2005           | 447                                                            |
| 46               | Congo   | Cocoa Beans and products   | 2005           | 2                                                              |
| 46               | Congo   | Coconuts - Incl Copra      | 2005           | 4                                                              |
| 46               | Congo   | Cottonseed Oil             | 2005           | 5                                                              |
| 46               | Congo   | Demersal Fish              | 2005           | 8                                                              |
| 46               | Congo   | Eggs                       | 2005           | 2                                                              |
| 46               | Congo   | Fats, Animals, Raw         | 2005           | 1                                                              |
| 46               | Congo   | Fish, Seafood              | 2005           | 37                                                             |
| 46               | Congo   | Freshwater Fish            | 2005           | 18                                                             |
| 46               | Congo   | Fruits - Excluding Wine    | 2005           | 100                                                            |
| 46               | Congo   | Fruits, Other              | 2005           | 26                                                             |
| 46               | Congo   | Grand Total                | 2005           | 2,043                                                          |
| 46               | Congo   | Groundnut Oil              | 2005           | 16                                                             |
| 46               | Congo   | Groundnuts (Shelled Eq)    | 2005           | 34                                                             |



Dietary calcium and zinc deficiency risks are decreasing but remain prevalent

| FAO Country code | Country | Food item                  | Reference year | Net energy supply (kcal capita <sup>-1</sup> d <sup>-1</sup> ) |
|------------------|---------|----------------------------|----------------|----------------------------------------------------------------|
| 46               | Congo   | Lemons, Limes and products | 2005           | 1                                                              |
| 46               | Congo   | Maize and products         | 2005           | 44                                                             |
| 46               | Congo   | Marine Fish, Other         | 2005           | 1                                                              |
| 46               | Congo   | Meat                       | 2005           | 56                                                             |
| 46               | Congo   | Meat, Other                | 2005           | 19                                                             |
| 46               | Congo   | Milk - Excluding Butter    | 2005           | 18                                                             |
| 46               | Congo   | Miscellaneous              | 2005           | 3                                                              |
| 46               | Congo   | Mutton & Goat Meat         | 2005           | 1                                                              |
| 46               | Congo   | Offals                     | 2005           | 4                                                              |
| 46               | Congo   | Oilcrops                   | 2005           | 65                                                             |
| 46               | Congo   | Oilcrops Oil, Other        | 2005           | 40                                                             |
| 46               | Congo   | Oilcrops, Other            | 2005           | 11                                                             |
| 46               | Congo   | Onions                     | 2005           | 1                                                              |
| 46               | Congo   | Oranges, Mandarines        | 2005           | 1                                                              |
| 46               | Congo   | Palm kernels               | 2005           | 14                                                             |
| 46               | Congo   | Palm Oil                   | 2005           | 166                                                            |
| 46               | Congo   | Peas                       | 2005           | 18                                                             |
| 46               | Congo   | Pelagic Fish               | 2005           | 11                                                             |
| 46               | Congo   | Pigmeat                    | 2005           | 8                                                              |
| 46               | Congo   | Pineapples and products    | 2005           | 1                                                              |
| 46               | Congo   | Plantains                  | 2005           | 40                                                             |
| 46               | Congo   | Potatoes and products      | 2005           | 2                                                              |
| 46               | Congo   | Poultry Meat               | 2005           | 17                                                             |
| 46               | Congo   | Pulses                     | 2005           | 34                                                             |
| 46               | Congo   | Rice (Milled Equivalent)   | 2005           | 168                                                            |
| 46               | Congo   | Roots, Other               | 2005           | 25                                                             |
| 46               | Congo   | Sesame seed                | 2005           | 1                                                              |
| 46               | Congo   | Soyabean Oil               | 2005           | 37                                                             |
| 46               | Congo   | Starchy Roots              | 2005           | 802                                                            |
| 46               | Congo   | Stimulants                 | 2005           | 2                                                              |
| 46               | Congo   | Sugar & Sweeteners         | 2005           | 142                                                            |
| 46               | Congo   | Sugar (Raw Equivalent)     | 2005           | 142                                                            |
| 46               | Congo   | Sugar cane                 | 2005           | 1                                                              |
| 46               | Congo   | Sugar Crops                | 2005           | 1                                                              |
| 46               | Congo   | Sweet potatoes             | 2005           | 4                                                              |
| 46               | Congo   | Tomatoes and products      | 2005           | 1                                                              |
| 46               | Congo   | Vegetable Oils             | 2005           | 265                                                            |
| 46               | Congo   | Vegetables                 | 2005           | 34                                                             |
| 46               | Congo   | Vegetables, Other          | 2005           | 32                                                             |
| 46               | Congo   | Vegetal Products           | 2005           | 1,923                                                          |
| 46               | Congo   | Wheat and products         | 2005           | 234                                                            |
| 46               | Congo   | Wine                       | 2005           | 2                                                              |
| 46               | Congo   | Yams                       | 2005           | 8                                                              |
| 46               | Congo   | Alcoholic Beverages        | 2006           | 29                                                             |
| 46               | Congo   | Animal fats                | 2006           | 2                                                              |
| 46               | Congo   | Animal Products            | 2006           | 166                                                            |
| 46               | Congo   | Bananas                    | 2006           | 30                                                             |
| 46               | Congo   | Beans                      | 2006           | 14                                                             |
| 46               | Congo   | Beer                       | 2006           | 24                                                             |
| 46               | Congo   | Beverages, Alcoholic       | 2006           | 3                                                              |
| 46               | Congo   | Bovine Meat                | 2006           | 9                                                              |
| 46               | Congo   | Butter, Ghee               | 2006           | 1                                                              |
| 46               | Congo   | Cassava and products       | 2006           | 764                                                            |
| 46               | Congo   | Cereals - Excluding Beer   | 2006           | 454                                                            |
| 46               | Congo   | Cocoa Beans and products   | 2006           | 2                                                              |
| 46               | Congo   | Coconuts - Incl Copra      | 2006           | 5                                                              |
| 46               | Congo   | Cottonseed Oil             | 2006           | 5                                                              |
| 46               | Congo   | Demersal Fish              | 2006           | 7                                                              |
| 46               | Congo   | Eggs                       | 2006           | 2                                                              |
| 46               | Congo   | Fats, Animals, Raw         | 2006           | 2                                                              |
| 46               | Congo   | Fish, Seafood              | 2006           | 36                                                             |
| 46               | Congo   | Freshwater Fish            | 2006           | 16                                                             |
| 46               | Congo   | Fruits - Excluding Wine    | 2006           | 102                                                            |
| 46               | Congo   | Fruits, Other              | 2006           | 26                                                             |
| 46               | Congo   | Grand Total                | 2006           | 2,143                                                          |
| 46               | Congo   | Groundnut Oil              | 2006           | 16                                                             |
| 46               | Congo   | Groundnuts (Shelled Eq)    | 2006           | 34                                                             |
| 46               | Congo   | Lemons, Limes and products | 2006           | 1                                                              |
| 46               | Congo   | Maize and products         | 2006           | 33                                                             |
| 46               | Congo   | Marine Fish, Other         | 2006           | 2                                                              |
| 46               | Congo   | Meat                       | 2006           | 70                                                             |
| 46               | Congo   | Meat, Other                | 2006           | 20                                                             |
| 46               | Congo   | Milk - Excluding Butter    | 2006           | 42                                                             |
| 46               | Congo   | Miscellaneous              | 2006           | 6                                                              |
| 46               | Congo   | Mutton & Goat Meat         | 2006           | 2                                                              |
| 46               | Congo   | Offals                     | 2006           | 14                                                             |
| 46               | Congo   | Oilcrops                   | 2006           | 68                                                             |
| 46               | Congo   | Oilcrops Oil, Other        | 2006           | 24                                                             |
| 46               | Congo   | Oilcrops, Other            | 2006           | 10                                                             |
| 46               | Congo   | Onions                     | 2006           | 1                                                              |
| 46               | Congo   | Oranges, Mandarines        | 2006           | 1                                                              |
| 46               | Congo   | Palm kernels               | 2006           | 17                                                             |
| 46               | Congo   | Palm Oil                   | 2006           | 219                                                            |
| 46               | Congo   | Palmkernel Oil             | 2006           | 1                                                              |
| 46               | Congo   | Peas                       | 2006           | 16                                                             |
| 46               | Congo   | Pelagic Fish               | 2006           | 10                                                             |
| 46               | Congo   | Pigmeat                    | 2006           | 12                                                             |
| 46               | Congo   | Pineapples and products    | 2006           | 1                                                              |
| 46               | Congo   | Plantains                  | 2006           | 42                                                             |
| 46               | Congo   | Potatoes and products      | 2006           | 2                                                              |
| 46               | Congo   | Poultry Meat               | 2006           | 27                                                             |
| 46               | Congo   | Pulses                     | 2006           | 30                                                             |
| 46               | Congo   | Rice (Milled Equivalent)   | 2006           | 188                                                            |
| 46               | Congo   | Roots, Other               | 2006           | 25                                                             |
| 46               | Congo   | Sesame seed                | 2006           | 1                                                              |
| 46               | Congo   | Soyabean Oil               | 2006           | 28                                                             |
| 46               | Congo   | Starchy Roots              | 2006           | 804                                                            |

Dietary calcium and zinc deficiency risks are decreasing but remain prevalent

| FAO Country code | Country | Food item                  | Reference year | Net energy supply (kcal capita <sup>-1</sup> d <sup>-1</sup> ) |
|------------------|---------|----------------------------|----------------|----------------------------------------------------------------|
| 46               | Congo   | Stimulants                 | 2006           | 2                                                              |
| 46               | Congo   | Sugar & Sweeteners         | 2006           | 150                                                            |
| 46               | Congo   | Sugar (Raw Equivalent)     | 2006           | 150                                                            |
| 46               | Congo   | Sugar cane                 | 2006           | 1                                                              |
| 46               | Congo   | Sugar Crops                | 2006           | 1                                                              |
| 46               | Congo   | Sweet potatoes             | 2006           | 5                                                              |
| 46               | Congo   | Tomatoes and products      | 2006           | 2                                                              |
| 46               | Congo   | Vegetable Oils             | 2006           | 293                                                            |
| 46               | Congo   | Vegetables                 | 2006           | 37                                                             |
| 46               | Congo   | Vegetables, Other          | 2006           | 34                                                             |
| 46               | Congo   | Vegetal Products           | 2006           | 1,977                                                          |
| 46               | Congo   | Wheat and products         | 2006           | 234                                                            |
| 46               | Congo   | Wine                       | 2006           | 2                                                              |
| 46               | Congo   | Yams                       | 2006           | 8                                                              |
| 46               | Congo   | Alcoholic Beverages        | 2007           | 36                                                             |
| 46               | Congo   | Animal fats                | 2007           | 3                                                              |
| 46               | Congo   | Animal Products            | 2007           | 152                                                            |
| 46               | Congo   | Bananas                    | 2007           | 30                                                             |
| 46               | Congo   | Beans                      | 2007           | 20                                                             |
| 46               | Congo   | Beer                       | 2007           | 29                                                             |
| 46               | Congo   | Beverages, Alcoholic       | 2007           | 4                                                              |
| 46               | Congo   | Bovine Meat                | 2007           | 10                                                             |
| 46               | Congo   | Butter, Ghee               | 2007           | 1                                                              |
| 46               | Congo   | Cassava and products       | 2007           | 732                                                            |
| 46               | Congo   | Cereals - Excluding Beer   | 2007           | 466                                                            |
| 46               | Congo   | Cocoa Beans and products   | 2007           | 3                                                              |
| 46               | Congo   | Coconuts - Incl Copra      | 2007           | 5                                                              |
| 46               | Congo   | Cottonseed Oil             | 2007           | 1                                                              |
| 46               | Congo   | Demersal Fish              | 2007           | 8                                                              |
| 46               | Congo   | Eggs                       | 2007           | 2                                                              |
| 46               | Congo   | Fats, Animals, Raw         | 2007           | 2                                                              |
| 46               | Congo   | Fish, Seafood              | 2007           | 33                                                             |
| 46               | Congo   | Freshwater Fish            | 2007           | 15                                                             |
| 46               | Congo   | Fruits - Excluding Wine    | 2007           | 102                                                            |
| 46               | Congo   | Fruits, Other              | 2007           | 26                                                             |
| 46               | Congo   | Grand Total                | 2007           | 2,135                                                          |
| 46               | Congo   | Groundnut Oil              | 2007           | 16                                                             |
| 46               | Congo   | Groundnuts (Shelled Eq)    | 2007           | 33                                                             |
| 46               | Congo   | Lemons, Limes and products | 2007           | 1                                                              |
| 46               | Congo   | Maize and products         | 2007           | 32                                                             |
| 46               | Congo   | Marine Fish, Other         | 2007           | 2                                                              |
| 46               | Congo   | Meat                       | 2007           | 80                                                             |
| 46               | Congo   | Meat, Other                | 2007           | 21                                                             |
| 46               | Congo   | Milk - Excluding Butter    | 2007           | 19                                                             |
| 46               | Congo   | Miscellaneous              | 2007           | 7                                                              |
| 46               | Congo   | Mutton & Goat Meat         | 2007           | 2                                                              |
| 46               | Congo   | Offals                     | 2007           | 15                                                             |
| 46               | Congo   | Oilcrops                   | 2007           | 66                                                             |
| 46               | Congo   | Oilcrops Oil, Other        | 2007           | 51                                                             |
| 46               | Congo   | Oilcrops, Other            | 2007           | 9                                                              |
| 46               | Congo   | Onions                     | 2007           | 1                                                              |
| 46               | Congo   | Oranges, Mandarines        | 2007           | 1                                                              |
| 46               | Congo   | Palm kernels               | 2007           | 17                                                             |
| 46               | Congo   | Palm Oil                   | 2007           | 188                                                            |
| 46               | Congo   | Peas                       | 2007           | 12                                                             |
| 46               | Congo   | Pelagic Fish               | 2007           | 8                                                              |
| 46               | Congo   | Pigmeat                    | 2007           | 16                                                             |
| 46               | Congo   | Pineapples and products    | 2007           | 1                                                              |
| 46               | Congo   | Plantains                  | 2007           | 43                                                             |
| 46               | Congo   | Potatoes and products      | 2007           | 2                                                              |
| 46               | Congo   | Poultry Meat               | 2007           | 32                                                             |
| 46               | Congo   | Pulses                     | 2007           | 33                                                             |
| 46               | Congo   | Rape and Mustardseed       | 2007           | 1                                                              |
| 46               | Congo   | Rice (Milled Equivalent)   | 2007           | 194                                                            |
| 46               | Congo   | Roots, Other               | 2007           | 23                                                             |
| 46               | Congo   | Sesame seed                | 2007           | 1                                                              |
| 46               | Congo   | Soyabean Oil               | 2007           | 20                                                             |
| 46               | Congo   | Starchy Roots              | 2007           | 769                                                            |
| 46               | Congo   | Stimulants                 | 2007           | 3                                                              |
| 46               | Congo   | Sugar & Sweeteners         | 2007           | 185                                                            |
| 46               | Congo   | Sugar (Raw Equivalent)     | 2007           | 185                                                            |
| 46               | Congo   | Sugar cane                 | 2007           | 1                                                              |
| 46               | Congo   | Sugar Crops                | 2007           | 1                                                              |
| 46               | Congo   | Sweet potatoes             | 2007           | 4                                                              |
| 46               | Congo   | Tomatoes and products      | 2007           | 1                                                              |
| 46               | Congo   | Vegetable Oils             | 2007           | 276                                                            |
| 46               | Congo   | Vegetables                 | 2007           | 36                                                             |
| 46               | Congo   | Vegetables, Other          | 2007           | 34                                                             |
| 46               | Congo   | Vegetal Products           | 2007           | 1,983                                                          |
| 46               | Congo   | Wheat and products         | 2007           | 240                                                            |
| 46               | Congo   | Wine                       | 2007           | 2                                                              |
| 46               | Congo   | Yams                       | 2007           | 8                                                              |
| 46               | Congo   | Alcoholic Beverages        | 2008           | 33                                                             |
| 46               | Congo   | Animal fats                | 2008           | 3                                                              |
| 46               | Congo   | Animal Products            | 2008           | 149                                                            |
| 46               | Congo   | Bananas                    | 2008           | 30                                                             |
| 46               | Congo   | Barley and products        | 2008           | 1                                                              |
| 46               | Congo   | Beans                      | 2008           | 18                                                             |
| 46               | Congo   | Beer                       | 2008           | 27                                                             |
| 46               | Congo   | Beverages, Alcoholic       | 2008           | 3                                                              |
| 46               | Congo   | Bovine Meat                | 2008           | 15                                                             |
| 46               | Congo   | Butter, Ghee               | 2008           | 1                                                              |
| 46               | Congo   | Cassava and products       | 2008           | 752                                                            |
| 46               | Congo   | Cereals - Excluding Beer   | 2008           | 461                                                            |
| 46               | Congo   | Cocoa Beans and products   | 2008           | 3                                                              |
| 46               | Congo   | Coconuts - Incl Copra      | 2008           | 5                                                              |
| 46               | Congo   | Cottonseed Oil             | 2008           | 5                                                              |

Dietary calcium and zinc deficiency risks are decreasing but remain prevalent

| FAO Country code | Country | Food item                  | Reference year | Net energy supply (kcal capita <sup>-1</sup> d <sup>-1</sup> ) |
|------------------|---------|----------------------------|----------------|----------------------------------------------------------------|
| 46               | Congo   | Demersal Fish              | 2008           | 6                                                              |
| 46               | Congo   | Eggs                       | 2008           | 1                                                              |
| 46               | Congo   | Fats, Animals, Raw         | 2008           | 2                                                              |
| 46               | Congo   | Fish, Seafood              | 2008           | 42                                                             |
| 46               | Congo   | Freshwater Fish            | 2008           | 15                                                             |
| 46               | Congo   | Fruits - Excluding Wine    | 2008           | 104                                                            |
| 46               | Congo   | Fruits, Other              | 2008           | 26                                                             |
| 46               | Congo   | Grand Total                | 2008           | 2,110                                                          |
| 46               | Congo   | Groundnut Oil              | 2008           | 16                                                             |
| 46               | Congo   | Groundnuts (Shelled Eq)    | 2008           | 42                                                             |
| 46               | Congo   | Lemons, Limes and products | 2008           | 1                                                              |
| 46               | Congo   | Maize and products         | 2008           | 33                                                             |
| 46               | Congo   | Marine Fish, Other         | 2008           | 2                                                              |
| 46               | Congo   | Meat                       | 2008           | 77                                                             |
| 46               | Congo   | Meat, Other                | 2008           | 22                                                             |
| 46               | Congo   | Milk - Excluding Butter    | 2008           | 19                                                             |
| 46               | Congo   | Miscellaneous              | 2008           | 8                                                              |
| 46               | Congo   | Mutton & Goat Meat         | 2008           | 1                                                              |
| 46               | Congo   | Offals                     | 2008           | 6                                                              |
| 46               | Congo   | Oilcrops                   | 2008           | 75                                                             |
| 46               | Congo   | Oilcrops Oil, Other        | 2008           | 13                                                             |
| 46               | Congo   | Oilcrops, Other            | 2008           | 10                                                             |
| 46               | Congo   | Onions                     | 2008           | 2                                                              |
| 46               | Congo   | Oranges, Mandarines        | 2008           | 1                                                              |
| 46               | Congo   | Palm kernels               | 2008           | 17                                                             |
| 46               | Congo   | Palm Oil                   | 2008           | 178                                                            |
| 46               | Congo   | Palmkernel Oil             | 2008           | 1                                                              |
| 46               | Congo   | Peas                       | 2008           | 12                                                             |
| 46               | Congo   | Pelagic Fish               | 2008           | 19                                                             |
| 46               | Congo   | Pigmeat                    | 2008           | 9                                                              |
| 46               | Congo   | Pineapples and products    | 2008           | 1                                                              |
| 46               | Congo   | Plantains                  | 2008           | 45                                                             |
| 46               | Congo   | Potatoes and products      | 2008           | 2                                                              |
| 46               | Congo   | Poultry Meat               | 2008           | 29                                                             |
| 46               | Congo   | Pulses                     | 2008           | 29                                                             |
| 46               | Congo   | Rape and Mustardseed       | 2008           | 1                                                              |
| 46               | Congo   | Rice (Milled Equivalent)   | 2008           | 185                                                            |
| 46               | Congo   | Roots, Other               | 2008           | 23                                                             |
| 46               | Congo   | Sesame seed                | 2008           | 1                                                              |
| 46               | Congo   | Soyabean Oil               | 2008           | 20                                                             |
| 46               | Congo   | Starchy Roots              | 2008           | 789                                                            |
| 46               | Congo   | Stimulants                 | 2008           | 4                                                              |
| 46               | Congo   | Sugar & Sweeteners         | 2008           | 186                                                            |
| 46               | Congo   | Sugar (Raw Equivalent)     | 2008           | 185                                                            |
| 46               | Congo   | Sugar cane                 | 2008           | 1                                                              |
| 46               | Congo   | Sugar Crops                | 2008           | 1                                                              |
| 46               | Congo   | Sweet potatoes             | 2008           | 4                                                              |
| 46               | Congo   | Tomatoes and products      | 2008           | 1                                                              |
| 46               | Congo   | Vegetable Oils             | 2008           | 233                                                            |
| 46               | Congo   | Vegetables                 | 2008           | 38                                                             |
| 46               | Congo   | Vegetables, Other          | 2008           | 34                                                             |
| 46               | Congo   | Vegetal Products           | 2008           | 1,961                                                          |
| 46               | Congo   | Wheat and products         | 2008           | 242                                                            |
| 46               | Congo   | Wine                       | 2008           | 3                                                              |
| 46               | Congo   | Yams                       | 2008           | 8                                                              |
| 46               | Congo   | Alcoholic Beverages        | 2009           | 45                                                             |
| 46               | Congo   | Animal fats                | 2009           | 3                                                              |
| 46               | Congo   | Animal Products            | 2009           | 160                                                            |
| 46               | Congo   | Bananas                    | 2009           | 30                                                             |
| 46               | Congo   | Barley and products        | 2009           | 11                                                             |
| 46               | Congo   | Beans                      | 2009           | 17                                                             |
| 46               | Congo   | Beer                       | 2009           | 39                                                             |
| 46               | Congo   | Beverages, Alcoholic       | 2009           | 4                                                              |
| 46               | Congo   | Bovine Meat                | 2009           | 15                                                             |
| 46               | Congo   | Butter, Ghee               | 2009           | 1                                                              |
| 46               | Congo   | Cassava and products       | 2009           | 747                                                            |
| 46               | Congo   | Cereals - Excluding Beer   | 2009           | 524                                                            |
| 46               | Congo   | Cocoa Beans and products   | 2009           | 3                                                              |
| 46               | Congo   | Coconuts - Incl Copra      | 2009           | 4                                                              |
| 46               | Congo   | Cottonseed Oil             | 2009           | 5                                                              |
| 46               | Congo   | Demersal Fish              | 2009           | 8                                                              |
| 46               | Congo   | Eggs                       | 2009           | 2                                                              |
| 46               | Congo   | Fats, Animals, Raw         | 2009           | 2                                                              |
| 46               | Congo   | Fish, Seafood              | 2009           | 43                                                             |
| 46               | Congo   | Freshwater Fish            | 2009           | 14                                                             |
| 46               | Congo   | Fruits - Excluding Wine    | 2009           | 103                                                            |
| 46               | Congo   | Fruits, Other              | 2009           | 26                                                             |
| 46               | Congo   | Grand Total                | 2009           | 2,141                                                          |
| 46               | Congo   | Groundnut Oil              | 2009           | 16                                                             |
| 46               | Congo   | Groundnuts (Shelled Eq)    | 2009           | 42                                                             |
| 46               | Congo   | Lemons, Limes and products | 2009           | 1                                                              |
| 46               | Congo   | Maize and products         | 2009           | 32                                                             |
| 46               | Congo   | Marine Fish, Other         | 2009           | 1                                                              |
| 46               | Congo   | Meat                       | 2009           | 84                                                             |
| 46               | Congo   | Meat, Other                | 2009           | 23                                                             |
| 46               | Congo   | Milk - Excluding Butter    | 2009           | 24                                                             |
| 46               | Congo   | Miscellaneous              | 2009           | 8                                                              |
| 46               | Congo   | Mutton & Goat Meat         | 2009           | 2                                                              |
| 46               | Congo   | Offals                     | 2009           | 5                                                              |
| 46               | Congo   | Oilcrops                   | 2009           | 73                                                             |
| 46               | Congo   | Oilcrops Oil, Other        | 2009           | 8                                                              |
| 46               | Congo   | Oilcrops, Other            | 2009           | 9                                                              |
| 46               | Congo   | Onions                     | 2009           | 2                                                              |
| 46               | Congo   | Oranges, Mandarines        | 2009           | 1                                                              |
| 46               | Congo   | Palm kernels               | 2009           | 16                                                             |
| 46               | Congo   | Palm Oil                   | 2009           | 171                                                            |
| 46               | Congo   | Palmkernel Oil             | 2009           | 2                                                              |

Dietary calcium and zinc deficiency risks are decreasing but remain prevalent

| FAO Country code | Country | Food item                  | Reference year | Net energy supply (kcal <i>capita</i> <sup>-1</sup> d <sup>-1</sup> ) |
|------------------|---------|----------------------------|----------------|-----------------------------------------------------------------------|
| 46               | Congo   | Peas                       | 2009           | 13                                                                    |
| 46               | Congo   | Pelagic Fish               | 2009           | 20                                                                    |
| 46               | Congo   | Pigmeat                    | 2009           | 11                                                                    |
| 46               | Congo   | Pineapples and products    | 2009           | 1                                                                     |
| 46               | Congo   | Plantains                  | 2009           | 44                                                                    |
| 46               | Congo   | Potatoes and products      | 2009           | 3                                                                     |
| 46               | Congo   | Poultry Meat               | 2009           | 33                                                                    |
| 46               | Congo   | Pulses                     | 2009           | 30                                                                    |
| 46               | Congo   | Rice (Milled Equivalent)   | 2009           | 183                                                                   |
| 46               | Congo   | Roots, Other               | 2009           | 29                                                                    |
| 46               | Congo   | Sesame seed                | 2009           | 1                                                                     |
| 46               | Congo   | Soyabean Oil               | 2009           | 21                                                                    |
| 46               | Congo   | Starchy Roots              | 2009           | 790                                                                   |
| 46               | Congo   | Stimulants                 | 2009           | 3                                                                     |
| 46               | Congo   | Sugar & Sweeteners         | 2009           | 138                                                                   |
| 46               | Congo   | Sugar (Raw Equivalent)     | 2009           | 137                                                                   |
| 46               | Congo   | Sugar cane                 | 2009           | 1                                                                     |
| 46               | Congo   | Sugar Crops                | 2009           | 1                                                                     |
| 46               | Congo   | Sweet potatoes             | 2009           | 4                                                                     |
| 46               | Congo   | Sweeteners, Other          | 2009           | 1                                                                     |
| 46               | Congo   | Tomatoes and products      | 2009           | 2                                                                     |
| 46               | Congo   | Vegetable Oils             | 2009           | 224                                                                   |
| 46               | Congo   | Vegetables                 | 2009           | 40                                                                    |
| 46               | Congo   | Vegetables, Other          | 2009           | 35                                                                    |
| 46               | Congo   | Vegetal Products           | 2009           | 1,980                                                                 |
| 46               | Congo   | Wheat and products         | 2009           | 297                                                                   |
| 46               | Congo   | Wine                       | 2009           | 2                                                                     |
| 46               | Congo   | Yams                       | 2009           | 8                                                                     |
| 46               | Congo   | Alcoholic Beverages        | 2010           | 46                                                                    |
| 46               | Congo   | Animal fats                | 2010           | 3                                                                     |
| 46               | Congo   | Animal Products            | 2010           | 155                                                                   |
| 46               | Congo   | Bananas                    | 2010           | 31                                                                    |
| 46               | Congo   | Barley and products        | 2010           | 11                                                                    |
| 46               | Congo   | Beans                      | 2010           | 16                                                                    |
| 46               | Congo   | Beer                       | 2010           | 39                                                                    |
| 46               | Congo   | Beverages, Alcoholic       | 2010           | 4                                                                     |
| 46               | Congo   | Bovine Meat                | 2010           | 11                                                                    |
| 46               | Congo   | Butter, Ghee               | 2010           | 1                                                                     |
| 46               | Congo   | Cassava and products       | 2010           | 733                                                                   |
| 46               | Congo   | Cereals - Excluding Beer   | 2010           | 551                                                                   |
| 46               | Congo   | Cocoa Beans and products   | 2010           | 3                                                                     |
| 46               | Congo   | Coconuts - Incl Copra      | 2010           | 4                                                                     |
| 46               | Congo   | Crustaceans                | 2010           | 1                                                                     |
| 46               | Congo   | Demersal Fish              | 2010           | 10                                                                    |
| 46               | Congo   | Eggs                       | 2010           | 2                                                                     |
| 46               | Congo   | Fats, Animals, Raw         | 2010           | 2                                                                     |
| 46               | Congo   | Fish, Seafood              | 2010           | 36                                                                    |
| 46               | Congo   | Freshwater Fish            | 2010           | 14                                                                    |
| 46               | Congo   | Fruits - Excluding Wine    | 2010           | 103                                                                   |
| 46               | Congo   | Fruits, Other              | 2010           | 26                                                                    |
| 46               | Congo   | Grand Total                | 2010           | 2,136                                                                 |
| 46               | Congo   | Groundnut Oil              | 2010           | 17                                                                    |
| 46               | Congo   | Groundnuts (Shelled Eq)    | 2010           | 40                                                                    |
| 46               | Congo   | Lemons, Limes and products | 2010           | 1                                                                     |
| 46               | Congo   | Maize and products         | 2010           | 33                                                                    |
| 46               | Congo   | Marine Fish, Other         | 2010           | 1                                                                     |
| 46               | Congo   | Meat                       | 2010           | 89                                                                    |
| 46               | Congo   | Meat, Other                | 2010           | 28                                                                    |
| 46               | Congo   | Milk - Excluding Butter    | 2010           | 23                                                                    |
| 46               | Congo   | Miscellaneous              | 2010           | 8                                                                     |
| 46               | Congo   | Mutton & Goat Meat         | 2010           | 1                                                                     |
| 46               | Congo   | Offals                     | 2010           | 2                                                                     |
| 46               | Congo   | Oilcrops                   | 2010           | 71                                                                    |
| 46               | Congo   | Oilcrops Oil, Other        | 2010           | 10                                                                    |
| 46               | Congo   | Oilcrops, Other            | 2010           | 9                                                                     |
| 46               | Congo   | Onions                     | 2010           | 2                                                                     |
| 46               | Congo   | Oranges, Mandarines        | 2010           | 1                                                                     |
| 46               | Congo   | Palm kernels               | 2010           | 16                                                                    |
| 46               | Congo   | Palm Oil                   | 2010           | 182                                                                   |
| 46               | Congo   | Palmkernel Oil             | 2010           | 2                                                                     |
| 46               | Congo   | Peas                       | 2010           | 12                                                                    |
| 46               | Congo   | Pelagic Fish               | 2010           | 10                                                                    |
| 46               | Congo   | Pigmeat                    | 2010           | 8                                                                     |
| 46               | Congo   | Pineapples and products    | 2010           | 1                                                                     |
| 46               | Congo   | Plantains                  | 2010           | 43                                                                    |
| 46               | Congo   | Potatoes and products      | 2010           | 3                                                                     |
| 46               | Congo   | Poultry Meat               | 2010           | 40                                                                    |
| 46               | Congo   | Pulses                     | 2010           | 28                                                                    |
| 46               | Congo   | Rice (Milled Equivalent)   | 2010           | 196                                                                   |
| 46               | Congo   | Roots, Other               | 2010           | 30                                                                    |
| 46               | Congo   | Sesame seed                | 2010           | 1                                                                     |
| 46               | Congo   | Soyabean Oil               | 2010           | 3                                                                     |
| 46               | Congo   | Starchy Roots              | 2010           | 778                                                                   |
| 46               | Congo   | Stimulants                 | 2010           | 3                                                                     |
| 46               | Congo   | Sugar & Sweeteners         | 2010           | 132                                                                   |
| 46               | Congo   | Sugar (Raw Equivalent)     | 2010           | 132                                                                   |
| 46               | Congo   | Sugar cane                 | 2010           | 1                                                                     |
| 46               | Congo   | Sugar Crops                | 2010           | 1                                                                     |
| 46               | Congo   | Sweet potatoes             | 2010           | 4                                                                     |
| 46               | Congo   | Sweeteners, Other          | 2010           | 1                                                                     |
| 46               | Congo   | Tomatoes and products      | 2010           | 2                                                                     |
| 46               | Congo   | Vegetable Oils             | 2010           | 214                                                                   |
| 46               | Congo   | Vegetables                 | 2010           | 44                                                                    |
| 46               | Congo   | Vegetables, Other          | 2010           | 39                                                                    |
| 46               | Congo   | Vegetal Products           | 2010           | 1,981                                                                 |
| 46               | Congo   | Wheat and products         | 2010           | 311                                                                   |
| 46               | Congo   | Wine                       | 2010           | 2                                                                     |

Dietary calcium and zinc deficiency risks are decreasing but remain prevalent

| FAO Country code | Country    | Food item                  | Reference year | Net energy supply (kcal capita <sup>-1</sup> d <sup>-1</sup> ) |
|------------------|------------|----------------------------|----------------|----------------------------------------------------------------|
| 46               | Congo      | Yams                       | 2010           | 8                                                              |
| 46               | Congo      | Alcoholic Beverages        | 2011           | 50                                                             |
| 46               | Congo      | Animal fats                | 2011           | 4                                                              |
| 46               | Congo      | Animal Products            | 2011           | 222                                                            |
| 46               | Congo      | Bananas                    | 2011           | 32                                                             |
| 46               | Congo      | Barley and products        | 2011           | 11                                                             |
| 46               | Congo      | Beans                      | 2011           | 20                                                             |
| 46               | Congo      | Beer                       | 2011           | 44                                                             |
| 46               | Congo      | Beverages, Alcoholic       | 2011           | 4                                                              |
| 46               | Congo      | Bovine Meat                | 2011           | 12                                                             |
| 46               | Congo      | Butter, Ghee               | 2011           | 2                                                              |
| 46               | Congo      | Cassava and products       | 2011           | 714                                                            |
| 46               | Congo      | Cereals - Excluding Beer   | 2011           | 557                                                            |
| 46               | Congo      | Cocoa Beans and products   | 2011           | 5                                                              |
| 46               | Congo      | Coconuts - Incl Copra      | 2011           | 4                                                              |
| 46               | Congo      | Demersal Fish              | 2011           | 12                                                             |
| 46               | Congo      | Eggs                       | 2011           | 2                                                              |
| 46               | Congo      | Fats, Animals, Raw         | 2011           | 2                                                              |
| 46               | Congo      | Fish, Seafood              | 2011           | 47                                                             |
| 46               | Congo      | Freshwater Fish            | 2011           | 15                                                             |
| 46               | Congo      | Fruits - Excluding Wine    | 2011           | 104                                                            |
| 46               | Congo      | Fruits, Other              | 2011           | 25                                                             |
| 46               | Congo      | Grand Total                | 2011           | 2,195                                                          |
| 46               | Congo      | Grapefruit and products    | 2011           | 1                                                              |
| 46               | Congo      | Groundnut Oil              | 2011           | 16                                                             |
| 46               | Congo      | Groundnuts (Shelled Eq)    | 2011           | 37                                                             |
| 46               | Congo      | Lemons, Limes and products | 2011           | 1                                                              |
| 46               | Congo      | Maize and products         | 2011           | 33                                                             |
| 46               | Congo      | Marine Fish, Other         | 2011           | 2                                                              |
| 46               | Congo      | Meat                       | 2011           | 134                                                            |
| 46               | Congo      | Meat, Other                | 2011           | 28                                                             |
| 46               | Congo      | Milk - Excluding Butter    | 2011           | 26                                                             |
| 46               | Congo      | Miscellaneous              | 2011           | 6                                                              |
| 46               | Congo      | Mutton & Goat Meat         | 2011           | 1                                                              |
| 46               | Congo      | Offals                     | 2011           | 9                                                              |
| 46               | Congo      | Oilcrops                   | 2011           | 67                                                             |
| 46               | Congo      | Oilcrops Oil, Other        | 2011           | 15                                                             |
| 46               | Congo      | Oilcrops, Other            | 2011           | 8                                                              |
| 46               | Congo      | Olive Oil                  | 2011           | 1                                                              |
| 46               | Congo      | Onions                     | 2011           | 2                                                              |
| 46               | Congo      | Oranges, Mandarines        | 2011           | 2                                                              |
| 46               | Congo      | Palm kernels               | 2011           | 16                                                             |
| 46               | Congo      | Palm Oil                   | 2011           | 176                                                            |
| 46               | Congo      | Palmkernel Oil             | 2011           | 2                                                              |
| 46               | Congo      | Peas                       | 2011           | 13                                                             |
| 46               | Congo      | Pelagic Fish               | 2011           | 17                                                             |
| 46               | Congo      | Pigmeat                    | 2011           | 17                                                             |
| 46               | Congo      | Pineapples and products    | 2011           | 1                                                              |
| 46               | Congo      | Plantains                  | 2011           | 43                                                             |
| 46               | Congo      | Potatoes and products      | 2011           | 3                                                              |
| 46               | Congo      | Poultry Meat               | 2011           | 75                                                             |
| 46               | Congo      | Pulses                     | 2011           | 33                                                             |
| 46               | Congo      | Rice (Milled Equivalent)   | 2011           | 197                                                            |
| 46               | Congo      | Roots, Other               | 2011           | 29                                                             |
| 46               | Congo      | Sesame seed                | 2011           | 1                                                              |
| 46               | Congo      | Soyabean Oil               | 2011           | 3                                                              |
| 46               | Congo      | Starchy Roots              | 2011           | 759                                                            |
| 46               | Congo      | Stimulants                 | 2011           | 5                                                              |
| 46               | Congo      | Sugar & Sweeteners         | 2011           | 134                                                            |
| 46               | Congo      | Sugar (Raw Equivalent)     | 2011           | 133                                                            |
| 46               | Congo      | Sugar cane                 | 2011           | 1                                                              |
| 46               | Congo      | Sugar Crops                | 2011           | 1                                                              |
| 46               | Congo      | Sunflowerseed Oil          | 2011           | 1                                                              |
| 46               | Congo      | Sweet potatoes             | 2011           | 5                                                              |
| 46               | Congo      | Sweeteners, Other          | 2011           | 2                                                              |
| 46               | Congo      | Tomatoes and products      | 2011           | 2                                                              |
| 46               | Congo      | Vegetable Oils             | 2011           | 214                                                            |
| 46               | Congo      | Vegetables                 | 2011           | 42                                                             |
| 46               | Congo      | Vegetables, Other          | 2011           | 38                                                             |
| 46               | Congo      | Vegetal Products           | 2011           | 1,973                                                          |
| 46               | Congo      | Wheat and products         | 2011           | 316                                                            |
| 46               | Congo      | Wine                       | 2011           | 2                                                              |
| 46               | Congo      | Yams                       | 2011           | 9                                                              |
| 48               | Costa Rica | Alcoholic Beverages        | 1992           | 72                                                             |
| 48               | Costa Rica | Animal fats                | 1992           | 42                                                             |
| 48               | Costa Rica | Animal Products            | 1992           | 476                                                            |
| 48               | Costa Rica | Apples and products        | 1992           | 1                                                              |
| 48               | Costa Rica | Bananas                    | 1992           | 47                                                             |
| 48               | Costa Rica | Barley and products        | 1992           | 10                                                             |
| 48               | Costa Rica | Beans                      | 1992           | 84                                                             |
| 48               | Costa Rica | Beer                       | 1992           | 10                                                             |
| 48               | Costa Rica | Beverages, Alcoholic       | 1992           | 61                                                             |
| 48               | Costa Rica | Bovine Meat                | 1992           | 71                                                             |
| 48               | Costa Rica | Butter, Ghee               | 1992           | 21                                                             |
| 48               | Costa Rica | Cassava and products       | 1992           | 2                                                              |
| 48               | Costa Rica | Cereals - Excluding Beer   | 1992           | 847                                                            |
| 48               | Costa Rica | Cereals, Other             | 1992           | 4                                                              |
| 48               | Costa Rica | Cocoa Beans and products   | 1992           | 3                                                              |
| 48               | Costa Rica | Coconut Oil                | 1992           | 9                                                              |
| 48               | Costa Rica | Coconuts - Incl Copra      | 1992           | 6                                                              |
| 48               | Costa Rica | Coffee and products        | 1992           | 10                                                             |
| 48               | Costa Rica | Crustaceans                | 1992           | 1                                                              |
| 48               | Costa Rica | Demersal Fish              | 1992           | 1                                                              |
| 48               | Costa Rica | Eggs                       | 1992           | 40                                                             |
| 48               | Costa Rica | Fats, Animals, Raw         | 1992           | 21                                                             |
| 48               | Costa Rica | Fish, Seafood              | 1992           | 7                                                              |
| 48               | Costa Rica | Freshwater Fish            | 1992           | 1                                                              |

Dietary calcium and zinc deficiency risks are decreasing but remain prevalent

| FAO Country code | Country    | Food item                  | Reference year | Net energy supply (kcal <i>capita</i> <sup>-1</sup> d <sup>-1</sup> ) |
|------------------|------------|----------------------------|----------------|-----------------------------------------------------------------------|
| 48               | Costa Rica | Fruits - Excluding Wine    | 1992           | 191                                                                   |
| 48               | Costa Rica | Fruits, Other              | 1992           | 29                                                                    |
| 48               | Costa Rica | Grand Total                | 1992           | 2,710                                                                 |
| 48               | Costa Rica | Grapefruit and products    | 1992           | 2                                                                     |
| 48               | Costa Rica | Groundnuts (Shelled Eq)    | 1992           | 4                                                                     |
| 48               | Costa Rica | Honey                      | 1992           | 4                                                                     |
| 48               | Costa Rica | Maize and products         | 1992           | 172                                                                   |
| 48               | Costa Rica | Marine Fish, Other         | 1992           | 1                                                                     |
| 48               | Costa Rica | Meat                       | 1992           | 143                                                                   |
| 48               | Costa Rica | Milk - Excluding Butter    | 1992           | 237                                                                   |
| 48               | Costa Rica | Offals                     | 1992           | 8                                                                     |
| 48               | Costa Rica | Oilcrops                   | 1992           | 11                                                                    |
| 48               | Costa Rica | Oilcrops Oil, Other        | 1992           | 3                                                                     |
| 48               | Costa Rica | Olive Oil                  | 1992           | 1                                                                     |
| 48               | Costa Rica | Onions                     | 1992           | 7                                                                     |
| 48               | Costa Rica | Oranges, Mandarines        | 1992           | 10                                                                    |
| 48               | Costa Rica | Palm Oil                   | 1992           | 231                                                                   |
| 48               | Costa Rica | Pelagic Fish               | 1992           | 3                                                                     |
| 48               | Costa Rica | Pepper                     | 1992           | 2                                                                     |
| 48               | Costa Rica | Pigmeat                    | 1992           | 18                                                                    |
| 48               | Costa Rica | Pineapples and products    | 1992           | 78                                                                    |
| 48               | Costa Rica | Plantains                  | 1992           | 23                                                                    |
| 48               | Costa Rica | Potatoes and products      | 1992           | 33                                                                    |
| 48               | Costa Rica | Poultry Meat               | 1992           | 53                                                                    |
| 48               | Costa Rica | Pulses                     | 1992           | 87                                                                    |
| 48               | Costa Rica | Pulses, Other and products | 1992           | 3                                                                     |
| 48               | Costa Rica | Rice (Milled Equivalent)   | 1992           | 445                                                                   |
| 48               | Costa Rica | Roots, Other               | 1992           | 11                                                                    |
| 48               | Costa Rica | Soyabean Oil               | 1992           | 104                                                                   |
| 48               | Costa Rica | Soyabeans                  | 1992           | 1                                                                     |
| 48               | Costa Rica | Spices                     | 1992           | 20                                                                    |
| 48               | Costa Rica | Spices, Other              | 1992           | 19                                                                    |
| 48               | Costa Rica | Starchy Roots              | 1992           | 47                                                                    |
| 48               | Costa Rica | Stimulants                 | 1992           | 13                                                                    |
| 48               | Costa Rica | Sugar & Sweeteners         | 1992           | 571                                                                   |
| 48               | Costa Rica | Sugar (Raw Equivalent)     | 1992           | 525                                                                   |
| 48               | Costa Rica | Sugar non-centrifugal      | 1992           | 35                                                                    |
| 48               | Costa Rica | Sweeteners, Other          | 1992           | 8                                                                     |
| 48               | Costa Rica | Tomatoes and products      | 1992           | 2                                                                     |
| 48               | Costa Rica | Treenuts                   | 1992           | 3                                                                     |
| 48               | Costa Rica | Vegetable Oils             | 1992           | 348                                                                   |
| 48               | Costa Rica | Vegetables                 | 1992           | 25                                                                    |
| 48               | Costa Rica | Vegetables, Other          | 1992           | 16                                                                    |
| 48               | Costa Rica | Vegetal Products           | 1992           | 2,234                                                                 |
| 48               | Costa Rica | Wheat and products         | 1992           | 216                                                                   |
| 48               | Costa Rica | Wine                       | 1992           | 1                                                                     |
| 48               | Costa Rica | Alcoholic Beverages        | 1993           | 73                                                                    |
| 48               | Costa Rica | Animal fats                | 1993           | 41                                                                    |
| 48               | Costa Rica | Animal Products            | 1993           | 499                                                                   |
| 48               | Costa Rica | Apples and products        | 1993           | 1                                                                     |
| 48               | Costa Rica | Barley and products        | 1993           | 10                                                                    |
| 48               | Costa Rica | Beans                      | 1993           | 77                                                                    |
| 48               | Costa Rica | Beer                       | 1993           | 11                                                                    |
| 48               | Costa Rica | Beverages, Alcoholic       | 1993           | 62                                                                    |
| 48               | Costa Rica | Bovine Meat                | 1993           | 68                                                                    |
| 48               | Costa Rica | Butter, Ghee               | 1993           | 21                                                                    |
| 48               | Costa Rica | Cassava and products       | 1993           | 3                                                                     |
| 48               | Costa Rica | Cereals - Excluding Beer   | 1993           | 941                                                                   |
| 48               | Costa Rica | Cereals, Other             | 1993           | 6                                                                     |
| 48               | Costa Rica | Cocoa Beans and products   | 1993           | 3                                                                     |
| 48               | Costa Rica | Coconut Oil                | 1993           | 7                                                                     |
| 48               | Costa Rica | Coconuts - Incl Copra      | 1993           | 2                                                                     |
| 48               | Costa Rica | Coffee and products        | 1993           | 10                                                                    |
| 48               | Costa Rica | Crustaceans                | 1993           | 1                                                                     |
| 48               | Costa Rica | Demersal Fish              | 1993           | 1                                                                     |
| 48               | Costa Rica | Eggs                       | 1993           | 41                                                                    |
| 48               | Costa Rica | Fats, Animals, Raw         | 1993           | 21                                                                    |
| 48               | Costa Rica | Fish, Seafood              | 1993           | 10                                                                    |
| 48               | Costa Rica | Freshwater Fish            | 1993           | 2                                                                     |
| 48               | Costa Rica | Fruits - Excluding Wine    | 1993           | 149                                                                   |
| 48               | Costa Rica | Fruits, Other              | 1993           | 34                                                                    |
| 48               | Costa Rica | Grand Total                | 1993           | 2,749                                                                 |
| 48               | Costa Rica | Grapefruit and products    | 1993           | 2                                                                     |
| 48               | Costa Rica | Groundnuts (Shelled Eq)    | 1993           | 3                                                                     |
| 48               | Costa Rica | Honey                      | 1993           | 4                                                                     |
| 48               | Costa Rica | Maize and products         | 1993           | 156                                                                   |
| 48               | Costa Rica | Marine Fish, Other         | 1993           | 4                                                                     |
| 48               | Costa Rica | Meat                       | 1993           | 141                                                                   |
| 48               | Costa Rica | Milk - Excluding Butter    | 1993           | 256                                                                   |
| 48               | Costa Rica | Offals                     | 1993           | 9                                                                     |
| 48               | Costa Rica | Oilcrops                   | 1993           | 7                                                                     |
| 48               | Costa Rica | Oilcrops Oil, Other        | 1993           | 3                                                                     |
| 48               | Costa Rica | Olive Oil                  | 1993           | 1                                                                     |
| 48               | Costa Rica | Onions                     | 1993           | 8                                                                     |
| 48               | Costa Rica | Oranges, Mandarines        | 1993           | 12                                                                    |
| 48               | Costa Rica | Palm Oil                   | 1993           | 221                                                                   |
| 48               | Costa Rica | Pelagic Fish               | 1993           | 2                                                                     |
| 48               | Costa Rica | Pepper                     | 1993           | 2                                                                     |
| 48               | Costa Rica | Pigmeat                    | 1993           | 18                                                                    |
| 48               | Costa Rica | Pineapples and products    | 1993           | 76                                                                    |
| 48               | Costa Rica | Plantains                  | 1993           | 24                                                                    |
| 48               | Costa Rica | Potatoes and products      | 1993           | 26                                                                    |
| 48               | Costa Rica | Poultry Meat               | 1993           | 54                                                                    |
| 48               | Costa Rica | Pulses                     | 1993           | 81                                                                    |
| 48               | Costa Rica | Pulses, Other and products | 1993           | 3                                                                     |
| 48               | Costa Rica | Rice (Milled Equivalent)   | 1993           | 587                                                                   |
| 48               | Costa Rica | Roots, Other               | 1993           | 22                                                                    |

Dietary calcium and zinc deficiency risks are decreasing but remain prevalent

| FAO Country code | Country    | Food item                       | Reference year | Net energy supply (kcal capita <sup>-1</sup> d <sup>-1</sup> ) |
|------------------|------------|---------------------------------|----------------|----------------------------------------------------------------|
| 48               | Costa Rica | Soyabean Oil                    | 1993           | 93                                                             |
| 48               | Costa Rica | Soyabeans                       | 1993           | 2                                                              |
| 48               | Costa Rica | Spices                          | 1993           | 10                                                             |
| 48               | Costa Rica | Spices, Other                   | 1993           | 7                                                              |
| 48               | Costa Rica | Starchy Roots                   | 1993           | 52                                                             |
| 48               | Costa Rica | Stimulants                      | 1993           | 13                                                             |
| 48               | Costa Rica | Sugar & Sweeteners              | 1993           | 569                                                            |
| 48               | Costa Rica | Sugar (Raw Equivalent)          | 1993           | 525                                                            |
| 48               | Costa Rica | Sugar non-centrifugal           | 1993           | 34                                                             |
| 48               | Costa Rica | Sweeteners, Other               | 1993           | 6                                                              |
| 48               | Costa Rica | Tomatoes and products           | 1993           | 2                                                              |
| 48               | Costa Rica | Treenuts                        | 1993           | 3                                                              |
| 48               | Costa Rica | Vegetable Oils                  | 1993           | 326                                                            |
| 48               | Costa Rica | Vegetables                      | 1993           | 27                                                             |
| 48               | Costa Rica | Vegetables, Other               | 1993           | 17                                                             |
| 48               | Costa Rica | Vegetal Products                | 1993           | 2,251                                                          |
| 48               | Costa Rica | Wheat and products              | 1993           | 182                                                            |
| 48               | Costa Rica | Wine                            | 1993           | 1                                                              |
| 48               | Costa Rica | Alcoholic Beverages             | 1994           | 79                                                             |
| 48               | Costa Rica | Animal fats                     | 1994           | 60                                                             |
| 48               | Costa Rica | Animal Products                 | 1994           | 513                                                            |
| 48               | Costa Rica | Apples and products             | 1994           | 3                                                              |
| 48               | Costa Rica | Bananas                         | 1994           | 1                                                              |
| 48               | Costa Rica | Barley and products             | 1994           | 23                                                             |
| 48               | Costa Rica | Beans                           | 1994           | 86                                                             |
| 48               | Costa Rica | Beer                            | 1994           | 12                                                             |
| 48               | Costa Rica | Beverages, Alcoholic            | 1994           | 65                                                             |
| 48               | Costa Rica | Bovine Meat                     | 1994           | 65                                                             |
| 48               | Costa Rica | Butter, Ghee                    | 1994           | 20                                                             |
| 48               | Costa Rica | Cassava and products            | 1994           | 2                                                              |
| 48               | Costa Rica | Cereals - Excluding Beer        | 1994           | 886                                                            |
| 48               | Costa Rica | Cocoa Beans and products        | 1994           | 1                                                              |
| 48               | Costa Rica | Coconut Oil                     | 1994           | 7                                                              |
| 48               | Costa Rica | Coconuts - Incl Copra           | 1994           | 2                                                              |
| 48               | Costa Rica | Coffee and products             | 1994           | 7                                                              |
| 48               | Costa Rica | Crustaceans                     | 1994           | 1                                                              |
| 48               | Costa Rica | Eggs                            | 1994           | 40                                                             |
| 48               | Costa Rica | Fats, Animals, Raw              | 1994           | 40                                                             |
| 48               | Costa Rica | Fish, Seafood                   | 1994           | 8                                                              |
| 48               | Costa Rica | Freshwater Fish                 | 1994           | 2                                                              |
| 48               | Costa Rica | Fruits - Excluding Wine         | 1994           | 157                                                            |
| 48               | Costa Rica | Fruits, Other                   | 1994           | 39                                                             |
| 48               | Costa Rica | Grand Total                     | 1994           | 2,744                                                          |
| 48               | Costa Rica | Grapefruit and products         | 1994           | 2                                                              |
| 48               | Costa Rica | Grapes and products (excl wine) | 1994           | 3                                                              |
| 48               | Costa Rica | Groundnuts (Shelled Eq)         | 1994           | 7                                                              |
| 48               | Costa Rica | Honey                           | 1994           | 4                                                              |
| 48               | Costa Rica | Maize and products              | 1994           | 82                                                             |
| 48               | Costa Rica | Maize Germ Oil                  | 1994           | 4                                                              |
| 48               | Costa Rica | Marine Fish, Other              | 1994           | 3                                                              |
| 48               | Costa Rica | Meat                            | 1994           | 141                                                            |
| 48               | Costa Rica | Milk - Excluding Butter         | 1994           | 255                                                            |
| 48               | Costa Rica | Oats                            | 1994           | 6                                                              |
| 48               | Costa Rica | Offals                          | 1994           | 9                                                              |
| 48               | Costa Rica | Oilcrops                        | 1994           | 31                                                             |
| 48               | Costa Rica | Olive Oil                       | 1994           | 1                                                              |
| 48               | Costa Rica | Onions                          | 1994           | 7                                                              |
| 48               | Costa Rica | Oranges, Mandarines             | 1994           | 17                                                             |
| 48               | Costa Rica | Palm Oil                        | 1994           | 177                                                            |
| 48               | Costa Rica | Palmkernel Oil                  | 1994           | 6                                                              |
| 48               | Costa Rica | Peas                            | 1994           | 1                                                              |
| 48               | Costa Rica | Pelagic Fish                    | 1994           | 2                                                              |
| 48               | Costa Rica | Pepper                          | 1994           | 4                                                              |
| 48               | Costa Rica | Pigmeat                         | 1994           | 21                                                             |
| 48               | Costa Rica | Pineapples and products         | 1994           | 78                                                             |
| 48               | Costa Rica | Plantains                       | 1994           | 16                                                             |
| 48               | Costa Rica | Potatoes and products           | 1994           | 20                                                             |
| 48               | Costa Rica | Poultry Meat                    | 1994           | 54                                                             |
| 48               | Costa Rica | Pulses                          | 1994           | 90                                                             |
| 48               | Costa Rica | Pulses, Other and products      | 1994           | 3                                                              |
| 48               | Costa Rica | Rice (Milled Equivalent)        | 1994           | 445                                                            |
| 48               | Costa Rica | Roots, Other                    | 1994           | 27                                                             |
| 48               | Costa Rica | Sesameseed Oil                  | 1994           | 1                                                              |
| 48               | Costa Rica | Soyabean Oil                    | 1994           | 110                                                            |
| 48               | Costa Rica | Soyabeans                       | 1994           | 21                                                             |
| 48               | Costa Rica | Spices                          | 1994           | 27                                                             |
| 48               | Costa Rica | Spices, Other                   | 1994           | 23                                                             |
| 48               | Costa Rica | Starchy Roots                   | 1994           | 50                                                             |
| 48               | Costa Rica | Stimulants                      | 1994           | 8                                                              |
| 48               | Costa Rica | Sugar & Sweeteners              | 1994           | 565                                                            |
| 48               | Costa Rica | Sugar (Raw Equivalent)          | 1994           | 516                                                            |
| 48               | Costa Rica | Sugar non-centrifugal           | 1994           | 33                                                             |
| 48               | Costa Rica | Sunflowerseed Oil               | 1994           | 2                                                              |
| 48               | Costa Rica | Sweeteners, Other               | 1994           | 12                                                             |
| 48               | Costa Rica | Tomatoes and products           | 1994           | 3                                                              |
| 48               | Costa Rica | Treenuts                        | 1994           | 2                                                              |
| 48               | Costa Rica | Vegetable Oils                  | 1994           | 307                                                            |
| 48               | Costa Rica | Vegetables                      | 1994           | 27                                                             |
| 48               | Costa Rica | Vegetables, Other               | 1994           | 17                                                             |
| 48               | Costa Rica | Vegetal Products                | 1994           | 2,231                                                          |
| 48               | Costa Rica | Wheat and products              | 1994           | 329                                                            |
| 48               | Costa Rica | Wine                            | 1994           | 1                                                              |
| 48               | Costa Rica | Alcoholic Beverages             | 1995           | 77                                                             |
| 48               | Costa Rica | Animal fats                     | 1995           | 59                                                             |
| 48               | Costa Rica | Animal Products                 | 1995           | 530                                                            |
| 48               | Costa Rica | Apples and products             | 1995           | 3                                                              |
| 48               | Costa Rica | Barley and products             | 1995           | 26                                                             |

Dietary calcium and zinc deficiency risks are decreasing but remain prevalent

| FAO Country code | Country    | Food item                       | Reference year | Net energy supply (kcal capita <sup>-1</sup> d <sup>-1</sup> ) |
|------------------|------------|---------------------------------|----------------|----------------------------------------------------------------|
| 48               | Costa Rica | Beans                           | 1995           | 99                                                             |
| 48               | Costa Rica | Beer                            | 1995           | 12                                                             |
| 48               | Costa Rica | Beverages, Alcoholic            | 1995           | 64                                                             |
| 48               | Costa Rica | Bovine Meat                     | 1995           | 64                                                             |
| 48               | Costa Rica | Butter, Ghee                    | 1995           | 19                                                             |
| 48               | Costa Rica | Cassava and products            | 1995           | 3                                                              |
| 48               | Costa Rica | Cereals - Excluding Beer        | 1995           | 901                                                            |
| 48               | Costa Rica | Cocoa Beans and products        | 1995           | 2                                                              |
| 48               | Costa Rica | Coconut Oil                     | 1995           | 7                                                              |
| 48               | Costa Rica | Coconuts - Incl Copra           | 1995           | 4                                                              |
| 48               | Costa Rica | Coffee and products             | 1995           | 6                                                              |
| 48               | Costa Rica | Cottonseed Oil                  | 1995           | 2                                                              |
| 48               | Costa Rica | Crustaceans                     | 1995           | 1                                                              |
| 48               | Costa Rica | Eggs                            | 1995           | 47                                                             |
| 48               | Costa Rica | Fats, Animals, Raw              | 1995           | 40                                                             |
| 48               | Costa Rica | Fish, Seafood                   | 1995           | 9                                                              |
| 48               | Costa Rica | Freshwater Fish                 | 1995           | 3                                                              |
| 48               | Costa Rica | Fruits - Excluding Wine         | 1995           | 106                                                            |
| 48               | Costa Rica | Fruits, Other                   | 1995           | 38                                                             |
| 48               | Costa Rica | Grand Total                     | 1995           | 2,771                                                          |
| 48               | Costa Rica | Grapefruit and products         | 1995           | 2                                                              |
| 48               | Costa Rica | Grapes and products (excl wine) | 1995           | 2                                                              |
| 48               | Costa Rica | Groundnuts (Shelled Eq)         | 1995           | 5                                                              |
| 48               | Costa Rica | Honey                           | 1995           | 4                                                              |
| 48               | Costa Rica | Maize and products              | 1995           | 85                                                             |
| 48               | Costa Rica | Maize Germ Oil                  | 1995           | 5                                                              |
| 48               | Costa Rica | Marine Fish, Other              | 1995           | 3                                                              |
| 48               | Costa Rica | Meat                            | 1995           | 143                                                            |
| 48               | Costa Rica | Milk - Excluding Butter         | 1995           | 264                                                            |
| 48               | Costa Rica | Miscellaneous                   | 1995           | 1                                                              |
| 48               | Costa Rica | Oats                            | 1995           | 5                                                              |
| 48               | Costa Rica | Offals                          | 1995           | 9                                                              |
| 48               | Costa Rica | Oilcrops                        | 1995           | 47                                                             |
| 48               | Costa Rica | Olive Oil                       | 1995           | 2                                                              |
| 48               | Costa Rica | Onions                          | 1995           | 5                                                              |
| 48               | Costa Rica | Oranges, Mandarines             | 1995           | 9                                                              |
| 48               | Costa Rica | Palm Oil                        | 1995           | 193                                                            |
| 48               | Costa Rica | Peas                            | 1995           | 1                                                              |
| 48               | Costa Rica | Pelagic Fish                    | 1995           | 2                                                              |
| 48               | Costa Rica | Pepper                          | 1995           | 4                                                              |
| 48               | Costa Rica | Pigmeat                         | 1995           | 21                                                             |
| 48               | Costa Rica | Pineapples and products         | 1995           | 39                                                             |
| 48               | Costa Rica | Plantains                       | 1995           | 12                                                             |
| 48               | Costa Rica | Potatoes and products           | 1995           | 22                                                             |
| 48               | Costa Rica | Poultry Meat                    | 1995           | 58                                                             |
| 48               | Costa Rica | Pulses                          | 1995           | 103                                                            |
| 48               | Costa Rica | Pulses, Other and products      | 1995           | 3                                                              |
| 48               | Costa Rica | Rice (Milled Equivalent)        | 1995           | 455                                                            |
| 48               | Costa Rica | Roots, Other                    | 1995           | 34                                                             |
| 48               | Costa Rica | Sesameseed Oil                  | 1995           | 1                                                              |
| 48               | Costa Rica | Soyabean Oil                    | 1995           | 116                                                            |
| 48               | Costa Rica | Soyabeans                       | 1995           | 36                                                             |
| 48               | Costa Rica | Spices                          | 1995           | 31                                                             |
| 48               | Costa Rica | Spices, Other                   | 1995           | 26                                                             |
| 48               | Costa Rica | Starchy Roots                   | 1995           | 59                                                             |
| 48               | Costa Rica | Stimulants                      | 1995           | 7                                                              |
| 48               | Costa Rica | Sugar & Sweeteners              | 1995           | 556                                                            |
| 48               | Costa Rica | Sugar (Raw Equivalent)          | 1995           | 509                                                            |
| 48               | Costa Rica | Sugar non-centrifugal           | 1995           | 32                                                             |
| 48               | Costa Rica | Sunflower seed                  | 1995           | 1                                                              |
| 48               | Costa Rica | Sunflowerseed Oil               | 1995           | 1                                                              |
| 48               | Costa Rica | Sweeteners, Other               | 1995           | 11                                                             |
| 48               | Costa Rica | Tomatoes and products           | 1995           | 4                                                              |
| 48               | Costa Rica | Treenuts                        | 1995           | 2                                                              |
| 48               | Costa Rica | Vegetable Oils                  | 1995           | 327                                                            |
| 48               | Costa Rica | Vegetables                      | 1995           | 25                                                             |
| 48               | Costa Rica | Vegetables, Other               | 1995           | 16                                                             |
| 48               | Costa Rica | Vegetal Products                | 1995           | 2,241                                                          |
| 48               | Costa Rica | Wheat and products              | 1995           | 328                                                            |
| 48               | Costa Rica | Wine                            | 1995           | 1                                                              |
| 48               | Costa Rica | Alcoholic Beverages             | 1996           | 74                                                             |
| 48               | Costa Rica | Animal fats                     | 1996           | 53                                                             |
| 48               | Costa Rica | Animal Products                 | 1996           | 487                                                            |
| 48               | Costa Rica | Apples and products             | 1996           | 3                                                              |
| 48               | Costa Rica | Bananas                         | 1996           | 1                                                              |
| 48               | Costa Rica | Barley and products             | 1996           | 14                                                             |
| 48               | Costa Rica | Beans                           | 1996           | 48                                                             |
| 48               | Costa Rica | Beer                            | 1996           | 12                                                             |
| 48               | Costa Rica | Beverages, Alcoholic            | 1996           | 61                                                             |
| 48               | Costa Rica | Bovine Meat                     | 1996           | 65                                                             |
| 48               | Costa Rica | Butter, Ghee                    | 1996           | 19                                                             |
| 48               | Costa Rica | Cassava and products            | 1996           | 3                                                              |
| 48               | Costa Rica | Cereals - Excluding Beer        | 1996           | 918                                                            |
| 48               | Costa Rica | Cocoa Beans and products        | 1996           | 1                                                              |
| 48               | Costa Rica | Coconut Oil                     | 1996           | 5                                                              |
| 48               | Costa Rica | Coconuts - Incl Copra           | 1996           | 4                                                              |
| 48               | Costa Rica | Coffee and products             | 1996           | 6                                                              |
| 48               | Costa Rica | Cottonseed Oil                  | 1996           | 2                                                              |
| 48               | Costa Rica | Eggs                            | 1996           | 39                                                             |
| 48               | Costa Rica | Fats, Animals, Raw              | 1996           | 34                                                             |
| 48               | Costa Rica | Fish, Seafood                   | 1996           | 7                                                              |
| 48               | Costa Rica | Freshwater Fish                 | 1996           | 3                                                              |
| 48               | Costa Rica | Fruits - Excluding Wine         | 1996           | 134                                                            |
| 48               | Costa Rica | Fruits, Other                   | 1996           | 39                                                             |
| 48               | Costa Rica | Grand Total                     | 1996           | 2,713                                                          |
| 48               | Costa Rica | Grapefruit and products         | 1996           | 2                                                              |
| 48               | Costa Rica | Grapes and products (excl wine) | 1996           | 2                                                              |



Dietary calcium and zinc deficiency risks are decreasing but remain prevalent

| FAO Country code | Country    | Food item                       | Reference year | Net energy supply (kcal capita <sup>-1</sup> d <sup>-1</sup> ) |
|------------------|------------|---------------------------------|----------------|----------------------------------------------------------------|
| 48               | Costa Rica | Groundnuts (Shelled Eq)         | 1996           | 7                                                              |
| 48               | Costa Rica | Honey                           | 1996           | 4                                                              |
| 48               | Costa Rica | Maize and products              | 1996           | 61                                                             |
| 48               | Costa Rica | Maize Germ Oil                  | 1996           | 8                                                              |
| 48               | Costa Rica | Marine Fish, Other              | 1996           | 2                                                              |
| 48               | Costa Rica | Meat                            | 1996           | 145                                                            |
| 48               | Costa Rica | Milk - Excluding Butter         | 1996           | 234                                                            |
| 48               | Costa Rica | Miscellaneous                   | 1996           | 2                                                              |
| 48               | Costa Rica | Oats                            | 1996           | 5                                                              |
| 48               | Costa Rica | Offals                          | 1996           | 9                                                              |
| 48               | Costa Rica | Oilcrops                        | 1996           | 46                                                             |
| 48               | Costa Rica | Olive Oil                       | 1996           | 2                                                              |
| 48               | Costa Rica | Onions                          | 1996           | 5                                                              |
| 48               | Costa Rica | Oranges, Mandarines             | 1996           | 11                                                             |
| 48               | Costa Rica | Palm Oil                        | 1996           | 188                                                            |
| 48               | Costa Rica | Palmkernel Oil                  | 1996           | 7                                                              |
| 48               | Costa Rica | Peas                            | 1996           | 1                                                              |
| 48               | Costa Rica | Pelagic Fish                    | 1996           | 2                                                              |
| 48               | Costa Rica | Pepper                          | 1996           | 4                                                              |
| 48               | Costa Rica | Pigmeat                         | 1996           | 18                                                             |
| 48               | Costa Rica | Pineapples and products         | 1996           | 66                                                             |
| 48               | Costa Rica | Plantains                       | 1996           | 11                                                             |
| 48               | Costa Rica | Potatoes and products           | 1996           | 28                                                             |
| 48               | Costa Rica | Poultry Meat                    | 1996           | 63                                                             |
| 48               | Costa Rica | Pulses                          | 1996           | 52                                                             |
| 48               | Costa Rica | Pulses, Other and products      | 1996           | 3                                                              |
| 48               | Costa Rica | Rice (Milled Equivalent)        | 1996           | 398                                                            |
| 48               | Costa Rica | Roots, Other                    | 1996           | 18                                                             |
| 48               | Costa Rica | Sesameseed Oil                  | 1996           | 1                                                              |
| 48               | Costa Rica | Soyabean Oil                    | 1996           | 138                                                            |
| 48               | Costa Rica | Soyabeans                       | 1996           | 34                                                             |
| 48               | Costa Rica | Spices                          | 1996           | 21                                                             |
| 48               | Costa Rica | Spices, Other                   | 1996           | 17                                                             |
| 48               | Costa Rica | Starchy Roots                   | 1996           | 49                                                             |
| 48               | Costa Rica | Stimulants                      | 1996           | 7                                                              |
| 48               | Costa Rica | Sugar & Sweeteners              | 1996           | 547                                                            |
| 48               | Costa Rica | Sugar (Raw Equivalent)          | 1996           | 502                                                            |
| 48               | Costa Rica | Sugar non-centrifugal           | 1996           | 31                                                             |
| 48               | Costa Rica | Sunflower seed                  | 1996           | 1                                                              |
| 48               | Costa Rica | Sunflowerseed Oil               | 1996           | 1                                                              |
| 48               | Costa Rica | Sweeteners, Other               | 1996           | 10                                                             |
| 48               | Costa Rica | Tomatoes and products           | 1996           | 3                                                              |
| 48               | Costa Rica | Treenuts                        | 1996           | 4                                                              |
| 48               | Costa Rica | Vegetable Oils                  | 1996           | 351                                                            |
| 48               | Costa Rica | Vegetables                      | 1996           | 23                                                             |
| 48               | Costa Rica | Vegetables, Other               | 1996           | 15                                                             |
| 48               | Costa Rica | Vegetal Products                | 1996           | 2,226                                                          |
| 48               | Costa Rica | Wheat and products              | 1996           | 439                                                            |
| 48               | Costa Rica | Wine                            | 1996           | 1                                                              |
| 48               | Costa Rica | Alcoholic Beverages             | 1997           | 75                                                             |
| 48               | Costa Rica | Animal fats                     | 1997           | 53                                                             |
| 48               | Costa Rica | Animal Products                 | 1997           | 502                                                            |
| 48               | Costa Rica | Apples and products             | 1997           | 3                                                              |
| 48               | Costa Rica | Barley and products             | 1997           | 17                                                             |
| 48               | Costa Rica | Beans                           | 1997           | 77                                                             |
| 48               | Costa Rica | Beer                            | 1997           | 12                                                             |
| 48               | Costa Rica | Beverages, Alcoholic            | 1997           | 61                                                             |
| 48               | Costa Rica | Bovine Meat                     | 1997           | 63                                                             |
| 48               | Costa Rica | Butter, Ghee                    | 1997           | 18                                                             |
| 48               | Costa Rica | Cassava and products            | 1997           | 4                                                              |
| 48               | Costa Rica | Cephalopods                     | 1997           | 1                                                              |
| 48               | Costa Rica | Cereals - Excluding Beer        | 1997           | 930                                                            |
| 48               | Costa Rica | Cocoa Beans and products        | 1997           | 1                                                              |
| 48               | Costa Rica | Coconut Oil                     | 1997           | 2                                                              |
| 48               | Costa Rica | Coconuts - Incl Copra           | 1997           | 4                                                              |
| 48               | Costa Rica | Coffee and products             | 1997           | 6                                                              |
| 48               | Costa Rica | Eggs                            | 1997           | 41                                                             |
| 48               | Costa Rica | Fats, Animals, Raw              | 1997           | 34                                                             |
| 48               | Costa Rica | Fish, Seafood                   | 1997           | 9                                                              |
| 48               | Costa Rica | Freshwater Fish                 | 1997           | 2                                                              |
| 48               | Costa Rica | Fruits - Excluding Wine         | 1997           | 132                                                            |
| 48               | Costa Rica | Fruits, Other                   | 1997           | 34                                                             |
| 48               | Costa Rica | Grand Total                     | 1997           | 2,718                                                          |
| 48               | Costa Rica | Grapefruit and products         | 1997           | 2                                                              |
| 48               | Costa Rica | Grapes and products (excl wine) | 1997           | 3                                                              |
| 48               | Costa Rica | Groundnuts (Shelled Eq)         | 1997           | 10                                                             |
| 48               | Costa Rica | Honey                           | 1997           | 4                                                              |
| 48               | Costa Rica | Maize and products              | 1997           | 59                                                             |
| 48               | Costa Rica | Maize Germ Oil                  | 1997           | 6                                                              |
| 48               | Costa Rica | Marine Fish, Other              | 1997           | 3                                                              |
| 48               | Costa Rica | Meat                            | 1997           | 140                                                            |
| 48               | Costa Rica | Milk - Excluding Butter         | 1997           | 252                                                            |
| 48               | Costa Rica | Miscellaneous                   | 1997           | 3                                                              |
| 48               | Costa Rica | Oats                            | 1997           | 6                                                              |
| 48               | Costa Rica | Offals                          | 1997           | 8                                                              |
| 48               | Costa Rica | Oilcrops                        | 1997           | 49                                                             |
| 48               | Costa Rica | Olive Oil                       | 1997           | 2                                                              |
| 48               | Costa Rica | Onions                          | 1997           | 4                                                              |
| 48               | Costa Rica | Oranges, Mandarines             | 1997           | 18                                                             |
| 48               | Costa Rica | Palm Oil                        | 1997           | 131                                                            |
| 48               | Costa Rica | Palmkernel Oil                  | 1997           | 9                                                              |
| 48               | Costa Rica | Peas                            | 1997           | 1                                                              |
| 48               | Costa Rica | Pelagic Fish                    | 1997           | 2                                                              |
| 48               | Costa Rica | Pepper                          | 1997           | 4                                                              |
| 48               | Costa Rica | Pigmeat                         | 1997           | 18                                                             |
| 48               | Costa Rica | Pineapples and products         | 1997           | 60                                                             |
| 48               | Costa Rica | Plantains                       | 1997           | 11                                                             |

Dietary calcium and zinc deficiency risks are decreasing but remain prevalent

| FAO Country code | Country    | Food item                       | Reference year | Net energy supply (kcal capita <sup>-1</sup> d <sup>-1</sup> ) |
|------------------|------------|---------------------------------|----------------|----------------------------------------------------------------|
| 48               | Costa Rica | Potatoes and products           | 1997           | 26                                                             |
| 48               | Costa Rica | Poultry Meat                    | 1997           | 58                                                             |
| 48               | Costa Rica | Pulses                          | 1997           | 81                                                             |
| 48               | Costa Rica | Pulses, Other and products      | 1997           | 3                                                              |
| 48               | Costa Rica | Rice (Milled Equivalent)        | 1997           | 495                                                            |
| 48               | Costa Rica | Roots, Other                    | 1997           | 15                                                             |
| 48               | Costa Rica | Sesameseed Oil                  | 1997           | 1                                                              |
| 48               | Costa Rica | Soyabean Oil                    | 1997           | 148                                                            |
| 48               | Costa Rica | Soyabeans                       | 1997           | 33                                                             |
| 48               | Costa Rica | Spices                          | 1997           | 21                                                             |
| 48               | Costa Rica | Spices, Other                   | 1997           | 17                                                             |
| 48               | Costa Rica | Starchy Roots                   | 1997           | 45                                                             |
| 48               | Costa Rica | Stimulants                      | 1997           | 7                                                              |
| 48               | Costa Rica | Sugar & Sweeteners              | 1997           | 542                                                            |
| 48               | Costa Rica | Sugar (Raw Equivalent)          | 1997           | 498                                                            |
| 48               | Costa Rica | Sugar non-centrifugal           | 1997           | 31                                                             |
| 48               | Costa Rica | Sunflower seed                  | 1997           | 1                                                              |
| 48               | Costa Rica | Sunflowerseed Oil               | 1997           | 4                                                              |
| 48               | Costa Rica | Sweeteners, Other               | 1997           | 10                                                             |
| 48               | Costa Rica | Tomatoes and products           | 1997           | 4                                                              |
| 48               | Costa Rica | Treenuts                        | 1997           | 2                                                              |
| 48               | Costa Rica | Vegetable Oils                  | 1997           | 302                                                            |
| 48               | Costa Rica | Vegetables                      | 1997           | 27                                                             |
| 48               | Costa Rica | Vegetables, Other               | 1997           | 19                                                             |
| 48               | Costa Rica | Vegetal Products                | 1997           | 2,216                                                          |
| 48               | Costa Rica | Wheat and products              | 1997           | 354                                                            |
| 48               | Costa Rica | Wine                            | 1997           | 2                                                              |
| 48               | Costa Rica | Alcoholic Beverages             | 1998           | 75                                                             |
| 48               | Costa Rica | Animal fats                     | 1998           | 59                                                             |
| 48               | Costa Rica | Animal Products                 | 1998           | 524                                                            |
| 48               | Costa Rica | Apples and products             | 1998           | 4                                                              |
| 48               | Costa Rica | Bananas                         | 1998           | 1                                                              |
| 48               | Costa Rica | Barley and products             | 1998           | 19                                                             |
| 48               | Costa Rica | Beans                           | 1998           | 69                                                             |
| 48               | Costa Rica | Beer                            | 1998           | 12                                                             |
| 48               | Costa Rica | Beverages, Alcoholic            | 1998           | 61                                                             |
| 48               | Costa Rica | Bovine Meat                     | 1998           | 61                                                             |
| 48               | Costa Rica | Butter, Ghee                    | 1998           | 20                                                             |
| 48               | Costa Rica | Cassava and products            | 1998           | 14                                                             |
| 48               | Costa Rica | Cephalopods                     | 1998           | 1                                                              |
| 48               | Costa Rica | Cereals - Excluding Beer        | 1998           | 971                                                            |
| 48               | Costa Rica | Coconut Oil                     | 1998           | 2                                                              |
| 48               | Costa Rica | Coconuts - Incl Copra           | 1998           | 5                                                              |
| 48               | Costa Rica | Coffee and products             | 1998           | 6                                                              |
| 48               | Costa Rica | Demersal Fish                   | 1998           | 1                                                              |
| 48               | Costa Rica | Eggs                            | 1998           | 34                                                             |
| 48               | Costa Rica | Fats, Animals, Raw              | 1998           | 39                                                             |
| 48               | Costa Rica | Fish, Seafood                   | 1998           | 9                                                              |
| 48               | Costa Rica | Freshwater Fish                 | 1998           | 3                                                              |
| 48               | Costa Rica | Fruits - Excluding Wine         | 1998           | 126                                                            |
| 48               | Costa Rica | Fruits, Other                   | 1998           | 27                                                             |
| 48               | Costa Rica | Grand Total                     | 1998           | 2,759                                                          |
| 48               | Costa Rica | Grapefruit and products         | 1998           | 2                                                              |
| 48               | Costa Rica | Grapes and products (excl wine) | 1998           | 3                                                              |
| 48               | Costa Rica | Groundnuts (Shelled Eq)         | 1998           | 8                                                              |
| 48               | Costa Rica | Honey                           | 1998           | 4                                                              |
| 48               | Costa Rica | Maize and products              | 1998           | 43                                                             |
| 48               | Costa Rica | Maize Germ Oil                  | 1998           | 7                                                              |
| 48               | Costa Rica | Marine Fish, Other              | 1998           | 1                                                              |
| 48               | Costa Rica | Meat                            | 1998           | 140                                                            |
| 48               | Costa Rica | Milk - Excluding Butter         | 1998           | 274                                                            |
| 48               | Costa Rica | Miscellaneous                   | 1998           | 4                                                              |
| 48               | Costa Rica | Oats                            | 1998           | 6                                                              |
| 48               | Costa Rica | Offals                          | 1998           | 7                                                              |
| 48               | Costa Rica | Oilcrops                        | 1998           | 24                                                             |
| 48               | Costa Rica | Olive Oil                       | 1998           | 3                                                              |
| 48               | Costa Rica | Onions                          | 1998           | 5                                                              |
| 48               | Costa Rica | Oranges, Mandarines             | 1998           | 20                                                             |
| 48               | Costa Rica | Palm Oil                        | 1998           | 118                                                            |
| 48               | Costa Rica | Palmkernel Oil                  | 1998           | 4                                                              |
| 48               | Costa Rica | Peas                            | 1998           | 2                                                              |
| 48               | Costa Rica | Pelagic Fish                    | 1998           | 2                                                              |
| 48               | Costa Rica | Pepper                          | 1998           | 1                                                              |
| 48               | Costa Rica | Pigmeat                         | 1998           | 20                                                             |
| 48               | Costa Rica | Pineapples and products         | 1998           | 56                                                             |
| 48               | Costa Rica | Plantains                       | 1998           | 14                                                             |
| 48               | Costa Rica | Potatoes and products           | 1998           | 40                                                             |
| 48               | Costa Rica | Poultry Meat                    | 1998           | 59                                                             |
| 48               | Costa Rica | Pulses                          | 1998           | 73                                                             |
| 48               | Costa Rica | Pulses, Other and products      | 1998           | 3                                                              |
| 48               | Costa Rica | Rice (Milled Equivalent)        | 1998           | 527                                                            |
| 48               | Costa Rica | Roots, Other                    | 1998           | 11                                                             |
| 48               | Costa Rica | Sesameseed Oil                  | 1998           | 1                                                              |
| 48               | Costa Rica | Soyabean Oil                    | 1998           | 152                                                            |
| 48               | Costa Rica | Soyabeans                       | 1998           | 10                                                             |
| 48               | Costa Rica | Spices                          | 1998           | 18                                                             |
| 48               | Costa Rica | Spices, Other                   | 1998           | 17                                                             |
| 48               | Costa Rica | Starchy Roots                   | 1998           | 64                                                             |
| 48               | Costa Rica | Stimulants                      | 1998           | 7                                                              |
| 48               | Costa Rica | Sugar & Sweeteners              | 1998           | 546                                                            |
| 48               | Costa Rica | Sugar (Raw Equivalent)          | 1998           | 500                                                            |
| 48               | Costa Rica | Sugar non-centrifugal           | 1998           | 30                                                             |
| 48               | Costa Rica | Sunflower seed                  | 1998           | 1                                                              |
| 48               | Costa Rica | Sunflowerseed Oil               | 1998           | 7                                                              |
| 48               | Costa Rica | Sweeteners, Other               | 1998           | 11                                                             |
| 48               | Costa Rica | Tomatoes and products           | 1998           | 8                                                              |
| 48               | Costa Rica | Treenuts                        | 1998           | 3                                                              |

Dietary calcium and zinc deficiency risks are decreasing but remain prevalent

| FAO Country code | Country    | Food item                       | Reference year | Net energy supply (kcal <i>capita</i> <sup>-1</sup> d <sup>-1</sup> ) |
|------------------|------------|---------------------------------|----------------|-----------------------------------------------------------------------|
| 48               | Costa Rica | Vegetable Oils                  | 1998           | 293                                                                   |
| 48               | Costa Rica | Vegetables                      | 1998           | 32                                                                    |
| 48               | Costa Rica | Vegetables, Other               | 1998           | 19                                                                    |
| 48               | Costa Rica | Vegetal Products                | 1998           | 2,236                                                                 |
| 48               | Costa Rica | Wheat and products              | 1998           | 376                                                                   |
| 48               | Costa Rica | Wine                            | 1998           | 2                                                                     |
| 48               | Costa Rica | Alcoholic Beverages             | 1999           | 73                                                                    |
| 48               | Costa Rica | Animal fats                     | 1999           | 69                                                                    |
| 48               | Costa Rica | Animal Products                 | 1999           | 549                                                                   |
| 48               | Costa Rica | Apples and products             | 1999           | 4                                                                     |
| 48               | Costa Rica | Barley and products             | 1999           | 22                                                                    |
| 48               | Costa Rica | Beans                           | 1999           | 90                                                                    |
| 48               | Costa Rica | Beer                            | 1999           | 11                                                                    |
| 48               | Costa Rica | Beverages, Alcoholic            | 1999           | 60                                                                    |
| 48               | Costa Rica | Bovine Meat                     | 1999           | 59                                                                    |
| 48               | Costa Rica | Butter, Ghee                    | 1999           | 23                                                                    |
| 48               | Costa Rica | Cassava and products            | 1999           | 14                                                                    |
| 48               | Costa Rica | Cephalopods                     | 1999           | 1                                                                     |
| 48               | Costa Rica | Cereals - Excluding Beer        | 1999           | 923                                                                   |
| 48               | Costa Rica | Coconut Oil                     | 1999           | 1                                                                     |
| 48               | Costa Rica | Coconuts - Incl Copra           | 1999           | 6                                                                     |
| 48               | Costa Rica | Coffee and products             | 1999           | 8                                                                     |
| 48               | Costa Rica | Crustaceans                     | 1999           | 1                                                                     |
| 48               | Costa Rica | Dates                           | 1999           | 1                                                                     |
| 48               | Costa Rica | Demersal Fish                   | 1999           | 2                                                                     |
| 48               | Costa Rica | Eggs                            | 1999           | 32                                                                    |
| 48               | Costa Rica | Fats, Animals, Raw              | 1999           | 46                                                                    |
| 48               | Costa Rica | Fish, Seafood                   | 1999           | 10                                                                    |
| 48               | Costa Rica | Freshwater Fish                 | 1999           | 4                                                                     |
| 48               | Costa Rica | Fruits - Excluding Wine         | 1999           | 160                                                                   |
| 48               | Costa Rica | Fruits, Other                   | 1999           | 30                                                                    |
| 48               | Costa Rica | Grand Total                     | 1999           | 2,803                                                                 |
| 48               | Costa Rica | Grapefruit and products         | 1999           | 2                                                                     |
| 48               | Costa Rica | Grapes and products (excl wine) | 1999           | 3                                                                     |
| 48               | Costa Rica | Groundnuts (Shelled Eq)         | 1999           | 8                                                                     |
| 48               | Costa Rica | Honey                           | 1999           | 4                                                                     |
| 48               | Costa Rica | Maize and products              | 1999           | 45                                                                    |
| 48               | Costa Rica | Maize Germ Oil                  | 1999           | 6                                                                     |
| 48               | Costa Rica | Marine Fish, Other              | 1999           | 1                                                                     |
| 48               | Costa Rica | Meat                            | 1999           | 148                                                                   |
| 48               | Costa Rica | Milk - Excluding Butter         | 1999           | 283                                                                   |
| 48               | Costa Rica | Miscellaneous                   | 1999           | 4                                                                     |
| 48               | Costa Rica | Oats                            | 1999           | 7                                                                     |
| 48               | Costa Rica | Offals                          | 1999           | 7                                                                     |
| 48               | Costa Rica | Oilcrops                        | 1999           | 30                                                                    |
| 48               | Costa Rica | Olive Oil                       | 1999           | 3                                                                     |
| 48               | Costa Rica | Onions                          | 1999           | 8                                                                     |
| 48               | Costa Rica | Oranges, Mandarines             | 1999           | 20                                                                    |
| 48               | Costa Rica | Palm Oil                        | 1999           | 119                                                                   |
| 48               | Costa Rica | Palmkernel Oil                  | 1999           | 8                                                                     |
| 48               | Costa Rica | Peas                            | 1999           | 1                                                                     |
| 48               | Costa Rica | Pelagic Fish                    | 1999           | 1                                                                     |
| 48               | Costa Rica | Pepper                          | 1999           | 1                                                                     |
| 48               | Costa Rica | Pigmeat                         | 1999           | 24                                                                    |
| 48               | Costa Rica | Pineapples and products         | 1999           | 84                                                                    |
| 48               | Costa Rica | Plantains                       | 1999           | 16                                                                    |
| 48               | Costa Rica | Potatoes and products           | 1999           | 34                                                                    |
| 48               | Costa Rica | Poultry Meat                    | 1999           | 65                                                                    |
| 48               | Costa Rica | Pulses                          | 1999           | 94                                                                    |
| 48               | Costa Rica | Pulses, Other and products      | 1999           | 3                                                                     |
| 48               | Costa Rica | Rice (Milled Equivalent)        | 1999           | 481                                                                   |
| 48               | Costa Rica | Roots, Other                    | 1999           | 28                                                                    |
| 48               | Costa Rica | Sesameseed Oil                  | 1999           | 1                                                                     |
| 48               | Costa Rica | Soyabean Oil                    | 1999           | 147                                                                   |
| 48               | Costa Rica | Soyabeans                       | 1999           | 15                                                                    |
| 48               | Costa Rica | Spices                          | 1999           | 12                                                                    |
| 48               | Costa Rica | Spices, Other                   | 1999           | 11                                                                    |
| 48               | Costa Rica | Starchy Roots                   | 1999           | 77                                                                    |
| 48               | Costa Rica | Stimulants                      | 1999           | 8                                                                     |
| 48               | Costa Rica | Sugar & Sweeteners              | 1999           | 548                                                                   |
| 48               | Costa Rica | Sugar (Raw Equivalent)          | 1999           | 502                                                                   |
| 48               | Costa Rica | Sugar non-centrifugal           | 1999           | 29                                                                    |
| 48               | Costa Rica | Sunflower seed                  | 1999           | 1                                                                     |
| 48               | Costa Rica | Sunflowerseed Oil               | 1999           | 8                                                                     |
| 48               | Costa Rica | Sweeteners, Other               | 1999           | 13                                                                    |
| 48               | Costa Rica | Tomatoes and products           | 1999           | 6                                                                     |
| 48               | Costa Rica | Treenuts                        | 1999           | 2                                                                     |
| 48               | Costa Rica | Vegetable Oils                  | 1999           | 293                                                                   |
| 48               | Costa Rica | Vegetables                      | 1999           | 30                                                                    |
| 48               | Costa Rica | Vegetables, Other               | 1999           | 16                                                                    |
| 48               | Costa Rica | Vegetal Products                | 1999           | 2,254                                                                 |
| 48               | Costa Rica | Wheat and products              | 1999           | 368                                                                   |
| 48               | Costa Rica | Wine                            | 1999           | 2                                                                     |
| 48               | Costa Rica | Alcoholic Beverages             | 2000           | 76                                                                    |
| 48               | Costa Rica | Animal fats                     | 2000           | 71                                                                    |
| 48               | Costa Rica | Animal Products                 | 2000           | 542                                                                   |
| 48               | Costa Rica | Apples and products             | 2000           | 5                                                                     |
| 48               | Costa Rica | Bananas                         | 2000           | 1                                                                     |
| 48               | Costa Rica | Barley and products             | 2000           | 22                                                                    |
| 48               | Costa Rica | Beans                           | 2000           | 94                                                                    |
| 48               | Costa Rica | Beer                            | 2000           | 11                                                                    |
| 48               | Costa Rica | Beverages, Alcoholic            | 2000           | 62                                                                    |
| 48               | Costa Rica | Bovine Meat                     | 2000           | 55                                                                    |
| 48               | Costa Rica | Butter, Ghee                    | 2000           | 23                                                                    |
| 48               | Costa Rica | Cassava and products            | 2000           | 9                                                                     |
| 48               | Costa Rica | Cephalopods                     | 2000           | 1                                                                     |
| 48               | Costa Rica | Cereals - Excluding Beer        | 2000           | 907                                                                   |

Dietary calcium and zinc deficiency risks are decreasing but remain prevalent

| FAO Country code | Country    | Food item                       | Reference year | Net energy supply (kcal capita <sup>-1</sup> d <sup>-1</sup> ) |
|------------------|------------|---------------------------------|----------------|----------------------------------------------------------------|
| 48               | Costa Rica | Cocoa Beans and products        | 2000           | 2                                                              |
| 48               | Costa Rica | Coconut Oil                     | 2000           | 1                                                              |
| 48               | Costa Rica | Coconuts - Incl Copra           | 2000           | 6                                                              |
| 48               | Costa Rica | Coffee and products             | 2000           | 7                                                              |
| 48               | Costa Rica | Cottonseed Oil                  | 2000           | 1                                                              |
| 48               | Costa Rica | Crustaceans                     | 2000           | 1                                                              |
| 48               | Costa Rica | Eggs                            | 2000           | 32                                                             |
| 48               | Costa Rica | Fats, Animals, Raw              | 2000           | 48                                                             |
| 48               | Costa Rica | Fish, Seafood                   | 2000           | 7                                                              |
| 48               | Costa Rica | Freshwater Fish                 | 2000           | 2                                                              |
| 48               | Costa Rica | Fruits - Excluding Wine         | 2000           | 158                                                            |
| 48               | Costa Rica | Fruits, Other                   | 2000           | 38                                                             |
| 48               | Costa Rica | Grand Total                     | 2000           | 2,800                                                          |
| 48               | Costa Rica | Grapefruit and products         | 2000           | 2                                                              |
| 48               | Costa Rica | Grapes and products (excl wine) | 2000           | 3                                                              |
| 48               | Costa Rica | Groundnuts (Shelled Eq)         | 2000           | 7                                                              |
| 48               | Costa Rica | Honey                           | 2000           | 4                                                              |
| 48               | Costa Rica | Lemons, Limes and products      | 2000           | 1                                                              |
| 48               | Costa Rica | Maize and products              | 2000           | 27                                                             |
| 48               | Costa Rica | Maize Germ Oil                  | 2000           | 4                                                              |
| 48               | Costa Rica | Marine Fish, Other              | 2000           | 1                                                              |
| 48               | Costa Rica | Meat                            | 2000           | 142                                                            |
| 48               | Costa Rica | Milk - Excluding Butter         | 2000           | 283                                                            |
| 48               | Costa Rica | Miscellaneous                   | 2000           | 4                                                              |
| 48               | Costa Rica | Oats                            | 2000           | 5                                                              |
| 48               | Costa Rica | Offals                          | 2000           | 7                                                              |
| 48               | Costa Rica | Oilcrops                        | 2000           | 71                                                             |
| 48               | Costa Rica | Olive Oil                       | 2000           | 3                                                              |
| 48               | Costa Rica | Onions                          | 2000           | 6                                                              |
| 48               | Costa Rica | Oranges, Mandarines             | 2000           | 7                                                              |
| 48               | Costa Rica | Palm Oil                        | 2000           | 124                                                            |
| 48               | Costa Rica | Palmkernel Oil                  | 2000           | 5                                                              |
| 48               | Costa Rica | Peas                            | 2000           | 1                                                              |
| 48               | Costa Rica | Pelagic Fish                    | 2000           | 1                                                              |
| 48               | Costa Rica | Pepper                          | 2000           | 1                                                              |
| 48               | Costa Rica | Pigmeat                         | 2000           | 24                                                             |
| 48               | Costa Rica | Pineapples and products         | 2000           | 85                                                             |
| 48               | Costa Rica | Plantains                       | 2000           | 17                                                             |
| 48               | Costa Rica | Potatoes and products           | 2000           | 37                                                             |
| 48               | Costa Rica | Poultry Meat                    | 2000           | 62                                                             |
| 48               | Costa Rica | Pulses                          | 2000           | 99                                                             |
| 48               | Costa Rica | Pulses, Other and products      | 2000           | 4                                                              |
| 48               | Costa Rica | Rice (Milled Equivalent)        | 2000           | 495                                                            |
| 48               | Costa Rica | Roots, Other                    | 2000           | 14                                                             |
| 48               | Costa Rica | Sesameseed Oil                  | 2000           | 1                                                              |
| 48               | Costa Rica | Soyabean Oil                    | 2000           | 152                                                            |
| 48               | Costa Rica | Soybeans                        | 2000           | 56                                                             |
| 48               | Costa Rica | Spices                          | 2000           | 9                                                              |
| 48               | Costa Rica | Spices, Other                   | 2000           | 8                                                              |
| 48               | Costa Rica | Starchy Roots                   | 2000           | 61                                                             |
| 48               | Costa Rica | Stimulants                      | 2000           | 9                                                              |
| 48               | Costa Rica | Sugar & Sweeteners              | 2000           | 534                                                            |
| 48               | Costa Rica | Sugar (Raw Equivalent)          | 2000           | 490                                                            |
| 48               | Costa Rica | Sugar non-centrifugal           | 2000           | 29                                                             |
| 48               | Costa Rica | Sunflower seed                  | 2000           | 1                                                              |
| 48               | Costa Rica | Sunflowerseed Oil               | 2000           | 8                                                              |
| 48               | Costa Rica | Sweeteners, Other               | 2000           | 11                                                             |
| 48               | Costa Rica | Tomatoes and products           | 2000           | 7                                                              |
| 48               | Costa Rica | Treenuts                        | 2000           | 3                                                              |
| 48               | Costa Rica | Vegetable Oils                  | 2000           | 298                                                            |
| 48               | Costa Rica | Vegetables                      | 2000           | 30                                                             |
| 48               | Costa Rica | Vegetables, Other               | 2000           | 17                                                             |
| 48               | Costa Rica | Vegetal Products                | 2000           | 2,258                                                          |
| 48               | Costa Rica | Wheat and products              | 2000           | 358                                                            |
| 48               | Costa Rica | Wine                            | 2000           | 2                                                              |
| 48               | Costa Rica | Yams                            | 2000           | 1                                                              |
| 48               | Costa Rica | Alcoholic Beverages             | 2001           | 76                                                             |
| 48               | Costa Rica | Animal fats                     | 2001           | 79                                                             |
| 48               | Costa Rica | Animal Products                 | 2001           | 557                                                            |
| 48               | Costa Rica | Apples and products             | 2001           | 4                                                              |
| 48               | Costa Rica | Bailey and products             | 2001           | 24                                                             |
| 48               | Costa Rica | Beans                           | 2001           | 92                                                             |
| 48               | Costa Rica | Beer                            | 2001           | 12                                                             |
| 48               | Costa Rica | Beverages, Alcoholic            | 2001           | 62                                                             |
| 48               | Costa Rica | Bovine Meat                     | 2001           | 51                                                             |
| 48               | Costa Rica | Butter, Ghee                    | 2001           | 24                                                             |
| 48               | Costa Rica | Cassava and products            | 2001           | 10                                                             |
| 48               | Costa Rica | Cephalopods                     | 2001           | 1                                                              |
| 48               | Costa Rica | Cereals - Excluding Beer        | 2001           | 926                                                            |
| 48               | Costa Rica | Cocoa Beans and products        | 2001           | 2                                                              |
| 48               | Costa Rica | Coconut Oil                     | 2001           | 1                                                              |
| 48               | Costa Rica | Coconuts - Incl Copra           | 2001           | 7                                                              |
| 48               | Costa Rica | Coffee and products             | 2001           | 6                                                              |
| 48               | Costa Rica | Cottonseed Oil                  | 2001           | 1                                                              |
| 48               | Costa Rica | Crustaceans                     | 2001           | 1                                                              |
| 48               | Costa Rica | Eggs                            | 2001           | 36                                                             |
| 48               | Costa Rica | Fats, Animals, Raw              | 2001           | 55                                                             |
| 48               | Costa Rica | Fish, Seafood                   | 2001           | 7                                                              |
| 48               | Costa Rica | Freshwater Fish                 | 2001           | 2                                                              |
| 48               | Costa Rica | Fruits - Excluding Wine         | 2001           | 170                                                            |
| 48               | Costa Rica | Fruits, Other                   | 2001           | 36                                                             |
| 48               | Costa Rica | Grand Total                     | 2001           | 2,801                                                          |
| 48               | Costa Rica | Grapefruit and products         | 2001           | 2                                                              |
| 48               | Costa Rica | Grapes and products (excl wine) | 2001           | 3                                                              |
| 48               | Costa Rica | Groundnuts (Shelled Eq)         | 2001           | 7                                                              |
| 48               | Costa Rica | Honey                           | 2001           | 3                                                              |
| 48               | Costa Rica | Lemons, Limes and products      | 2001           | 1                                                              |

Dietary calcium and zinc deficiency risks are decreasing but remain prevalent

| FAO Country code | Country    | Food item                       | Reference year | Net energy supply (kcal <i>capita</i> <sup>-1</sup> d <sup>-1</sup> ) |
|------------------|------------|---------------------------------|----------------|-----------------------------------------------------------------------|
| 48               | Costa Rica | Maize and products              | 2001           | 31                                                                    |
| 48               | Costa Rica | Maize Germ Oil                  | 2001           | 8                                                                     |
| 48               | Costa Rica | Marine Fish, Other              | 2001           | 1                                                                     |
| 48               | Costa Rica | Meat                            | 2001           | 143                                                                   |
| 48               | Costa Rica | Milk - Excluding Butter         | 2001           | 286                                                                   |
| 48               | Costa Rica | Miscellaneous                   | 2001           | 4                                                                     |
| 48               | Costa Rica | Oats                            | 2001           | 6                                                                     |
| 48               | Costa Rica | Offals                          | 2001           | 6                                                                     |
| 48               | Costa Rica | Oilcrops                        | 2001           | 29                                                                    |
| 48               | Costa Rica | Olive Oil                       | 2001           | 4                                                                     |
| 48               | Costa Rica | Onions                          | 2001           | 8                                                                     |
| 48               | Costa Rica | Oranges, Mandarines             | 2001           | 20                                                                    |
| 48               | Costa Rica | Palm Oil                        | 2001           | 124                                                                   |
| 48               | Costa Rica | Palmkernel Oil                  | 2001           | 1                                                                     |
| 48               | Costa Rica | Peas                            | 2001           | 1                                                                     |
| 48               | Costa Rica | Pelagic Fish                    | 2001           | 2                                                                     |
| 48               | Costa Rica | Pepper                          | 2001           | 1                                                                     |
| 48               | Costa Rica | Pigmeat                         | 2001           | 27                                                                    |
| 48               | Costa Rica | Pineapples and products         | 2001           | 78                                                                    |
| 48               | Costa Rica | Plantains                       | 2001           | 26                                                                    |
| 48               | Costa Rica | Potatoes and products           | 2001           | 40                                                                    |
| 48               | Costa Rica | Poultry Meat                    | 2001           | 65                                                                    |
| 48               | Costa Rica | Pulses                          | 2001           | 97                                                                    |
| 48               | Costa Rica | Pulses, Other and products      | 2001           | 3                                                                     |
| 48               | Costa Rica | Rice (Milled Equivalent)        | 2001           | 501                                                                   |
| 48               | Costa Rica | Roots, Other                    | 2001           | 21                                                                    |
| 48               | Costa Rica | Sesameseed Oil                  | 2001           | 1                                                                     |
| 48               | Costa Rica | Soyabean Oil                    | 2001           | 147                                                                   |
| 48               | Costa Rica | Soyabeans                       | 2001           | 14                                                                    |
| 48               | Costa Rica | Spices                          | 2001           | 5                                                                     |
| 48               | Costa Rica | Spices, Other                   | 2001           | 4                                                                     |
| 48               | Costa Rica | Starchy Roots                   | 2001           | 72                                                                    |
| 48               | Costa Rica | Stimulants                      | 2001           | 8                                                                     |
| 48               | Costa Rica | Sugar & Sweeteners              | 2001           | 526                                                                   |
| 48               | Costa Rica | Sugar (Raw Equivalent)          | 2001           | 483                                                                   |
| 48               | Costa Rica | Sugar non-centrifugal           | 2001           | 28                                                                    |
| 48               | Costa Rica | Sunflower seed                  | 2001           | 1                                                                     |
| 48               | Costa Rica | Sunflowerseed Oil               | 2001           | 8                                                                     |
| 48               | Costa Rica | Sweeteners, Other               | 2001           | 11                                                                    |
| 48               | Costa Rica | Tomatoes and products           | 2001           | 10                                                                    |
| 48               | Costa Rica | Treenuts                        | 2001           | 3                                                                     |
| 48               | Costa Rica | Vegetable Oils                  | 2001           | 295                                                                   |
| 48               | Costa Rica | Vegetables                      | 2001           | 35                                                                    |
| 48               | Costa Rica | Vegetables, Other               | 2001           | 17                                                                    |
| 48               | Costa Rica | Vegetal Products                | 2001           | 2,244                                                                 |
| 48               | Costa Rica | Wheat and products              | 2001           | 363                                                                   |
| 48               | Costa Rica | Wine                            | 2001           | 2                                                                     |
| 48               | Costa Rica | Yams                            | 2001           | 1                                                                     |
| 48               | Costa Rica | Alcoholic Beverages             | 2002           | 76                                                                    |
| 48               | Costa Rica | Animal fats                     | 2002           | 80                                                                    |
| 48               | Costa Rica | Animal Products                 | 2002           | 556                                                                   |
| 48               | Costa Rica | Apples and products             | 2002           | 5                                                                     |
| 48               | Costa Rica | Bananas                         | 2002           | 1                                                                     |
| 48               | Costa Rica | Barley and products             | 2002           | 26                                                                    |
| 48               | Costa Rica | Beans                           | 2002           | 92                                                                    |
| 48               | Costa Rica | Beer                            | 2002           | 11                                                                    |
| 48               | Costa Rica | Beverages, Alcoholic            | 2002           | 62                                                                    |
| 48               | Costa Rica | Bovine Meat                     | 2002           | 40                                                                    |
| 48               | Costa Rica | Butter, Ghee                    | 2002           | 25                                                                    |
| 48               | Costa Rica | Cassava and products            | 2002           | 5                                                                     |
| 48               | Costa Rica | Cephalopods                     | 2002           | 1                                                                     |
| 48               | Costa Rica | Cereals - Excluding Beer        | 2002           | 876                                                                   |
| 48               | Costa Rica | Cocoa Beans and products        | 2002           | 4                                                                     |
| 48               | Costa Rica | Coconut Oil                     | 2002           | 1                                                                     |
| 48               | Costa Rica | Coconuts - Incl Copra           | 2002           | 6                                                                     |
| 48               | Costa Rica | Coffee and products             | 2002           | 5                                                                     |
| 48               | Costa Rica | Cottonseed Oil                  | 2002           | 1                                                                     |
| 48               | Costa Rica | Crustaceans                     | 2002           | 1                                                                     |
| 48               | Costa Rica | Eggs                            | 2002           | 36                                                                    |
| 48               | Costa Rica | Fats, Animals, Raw              | 2002           | 55                                                                    |
| 48               | Costa Rica | Fish, Seafood                   | 2002           | 10                                                                    |
| 48               | Costa Rica | Freshwater Fish                 | 2002           | 6                                                                     |
| 48               | Costa Rica | Fruits - Excluding Wine         | 2002           | 153                                                                   |
| 48               | Costa Rica | Fruits, Other                   | 2002           | 37                                                                    |
| 48               | Costa Rica | Grand Total                     | 2002           | 2,764                                                                 |
| 48               | Costa Rica | Grapefruit and products         | 2002           | 2                                                                     |
| 48               | Costa Rica | Grapes and products (excl wine) | 2002           | 3                                                                     |
| 48               | Costa Rica | Groundnuts (Shelled Eq)         | 2002           | 8                                                                     |
| 48               | Costa Rica | Honey                           | 2002           | 4                                                                     |
| 48               | Costa Rica | Lemons, Limes and products      | 2002           | 1                                                                     |
| 48               | Costa Rica | Maize and products              | 2002           | 35                                                                    |
| 48               | Costa Rica | Maize Germ Oil                  | 2002           | 4                                                                     |
| 48               | Costa Rica | Meat                            | 2002           | 133                                                                   |
| 48               | Costa Rica | Milk - Excluding Butter         | 2002           | 291                                                                   |
| 48               | Costa Rica | Miscellaneous                   | 2002           | 5                                                                     |
| 48               | Costa Rica | Oats                            | 2002           | 6                                                                     |
| 48               | Costa Rica | Offals                          | 2002           | 5                                                                     |
| 48               | Costa Rica | Oilcrops                        | 2002           | 43                                                                    |
| 48               | Costa Rica | Olive Oil                       | 2002           | 5                                                                     |
| 48               | Costa Rica | Onions                          | 2002           | 7                                                                     |
| 48               | Costa Rica | Oranges, Mandarines             | 2002           | 29                                                                    |
| 48               | Costa Rica | Palm Oil                        | 2002           | 127                                                                   |
| 48               | Costa Rica | Palmkernel Oil                  | 2002           | 1                                                                     |
| 48               | Costa Rica | Peas                            | 2002           | 1                                                                     |
| 48               | Costa Rica | Pelagic Fish                    | 2002           | 2                                                                     |
| 48               | Costa Rica | Pepper                          | 2002           | 1                                                                     |
| 48               | Costa Rica | Pigmeat                         | 2002           | 27                                                                    |

Dietary calcium and zinc deficiency risks are decreasing but remain prevalent

| FAO Country code | Country    | Food item                       | Reference year | Net energy supply (kcal capita <sup>-1</sup> d <sup>-1</sup> ) |
|------------------|------------|---------------------------------|----------------|----------------------------------------------------------------|
| 48               | Costa Rica | Pineapples and products         | 2002           | 59                                                             |
| 48               | Costa Rica | Plantains                       | 2002           | 17                                                             |
| 48               | Costa Rica | Potatoes and products           | 2002           | 39                                                             |
| 48               | Costa Rica | Poultry Meat                    | 2002           | 65                                                             |
| 48               | Costa Rica | Pulses                          | 2002           | 97                                                             |
| 48               | Costa Rica | Pulses, Other and products      | 2002           | 4                                                              |
| 48               | Costa Rica | Rice (Milled Equivalent)        | 2002           | 490                                                            |
| 48               | Costa Rica | Roots, Other                    | 2002           | 29                                                             |
| 48               | Costa Rica | Sesameseed Oil                  | 2002           | 1                                                              |
| 48               | Costa Rica | Soyabean Oil                    | 2002           | 152                                                            |
| 48               | Costa Rica | Soyabeans                       | 2002           | 27                                                             |
| 48               | Costa Rica | Spices                          | 2002           | 2                                                              |
| 48               | Costa Rica | Spices, Other                   | 2002           | 1                                                              |
| 48               | Costa Rica | Starchy Roots                   | 2002           | 73                                                             |
| 48               | Costa Rica | Stimulants                      | 2002           | 10                                                             |
| 48               | Costa Rica | Sugar & Sweeteners              | 2002           | 534                                                            |
| 48               | Costa Rica | Sugar (Raw Equivalent)          | 2002           | 491                                                            |
| 48               | Costa Rica | Sugar non-centrifugal           | 2002           | 27                                                             |
| 48               | Costa Rica | Sunflower seed                  | 2002           | 2                                                              |
| 48               | Costa Rica | Sunflowerseed Oil               | 2002           | 10                                                             |
| 48               | Costa Rica | Sweeteners, Other               | 2002           | 13                                                             |
| 48               | Costa Rica | Tomatoes and products           | 2002           | 12                                                             |
| 48               | Costa Rica | Treenuts                        | 2002           | 4                                                              |
| 48               | Costa Rica | Vegetable Oils                  | 2002           | 301                                                            |
| 48               | Costa Rica | Vegetables                      | 2002           | 35                                                             |
| 48               | Costa Rica | Vegetables, Other               | 2002           | 16                                                             |
| 48               | Costa Rica | Vegetal Products                | 2002           | 2,208                                                          |
| 48               | Costa Rica | Wheat and products              | 2002           | 319                                                            |
| 48               | Costa Rica | Wine                            | 2002           | 2                                                              |
| 48               | Costa Rica | Alcoholic Beverages             | 2003           | 74                                                             |
| 48               | Costa Rica | Animal fats                     | 2003           | 78                                                             |
| 48               | Costa Rica | Animal Products                 | 2003           | 554                                                            |
| 48               | Costa Rica | Apples and products             | 2003           | 5                                                              |
| 48               | Costa Rica | Bananas                         | 2003           | 1                                                              |
| 48               | Costa Rica | Barley and products             | 2003           | 23                                                             |
| 48               | Costa Rica | Beans                           | 2003           | 92                                                             |
| 48               | Costa Rica | Beer                            | 2003           | 11                                                             |
| 48               | Costa Rica | Beverages, Alcoholic            | 2003           | 60                                                             |
| 48               | Costa Rica | Bovine Meat                     | 2003           | 49                                                             |
| 48               | Costa Rica | Butter, Ghee                    | 2003           | 25                                                             |
| 48               | Costa Rica | Cassava and products            | 2003           | 5                                                              |
| 48               | Costa Rica | Cephalopods                     | 2003           | 1                                                              |
| 48               | Costa Rica | Cereals - Excluding Beer        | 2003           | 897                                                            |
| 48               | Costa Rica | Cocoa Beans and products        | 2003           | 6                                                              |
| 48               | Costa Rica | Coconut Oil                     | 2003           | 1                                                              |
| 48               | Costa Rica | Coconuts - Incl Copra           | 2003           | 6                                                              |
| 48               | Costa Rica | Coffee and products             | 2003           | 3                                                              |
| 48               | Costa Rica | Crustaceans                     | 2003           | 2                                                              |
| 48               | Costa Rica | Eggs                            | 2003           | 34                                                             |
| 48               | Costa Rica | Fats, Animals, Raw              | 2003           | 54                                                             |
| 48               | Costa Rica | Fish, Seafood                   | 2003           | 12                                                             |
| 48               | Costa Rica | Freshwater Fish                 | 2003           | 7                                                              |
| 48               | Costa Rica | Fruits - Excluding Wine         | 2003           | 124                                                            |
| 48               | Costa Rica | Fruits, Other                   | 2003           | 36                                                             |
| 48               | Costa Rica | Grand Total                     | 2003           | 2,747                                                          |
| 48               | Costa Rica | Grapefruit and products         | 2003           | 2                                                              |
| 48               | Costa Rica | Grapes and products (excl wine) | 2003           | 3                                                              |
| 48               | Costa Rica | Groundnuts (Shelled Eq)         | 2003           | 8                                                              |
| 48               | Costa Rica | Honey                           | 2003           | 3                                                              |
| 48               | Costa Rica | Lemons, Limes and products      | 2003           | 1                                                              |
| 48               | Costa Rica | Maize and products              | 2003           | 62                                                             |
| 48               | Costa Rica | Maize Germ Oil                  | 2003           | 3                                                              |
| 48               | Costa Rica | Meat                            | 2003           | 138                                                            |
| 48               | Costa Rica | Milk - Excluding Butter         | 2003           | 286                                                            |
| 48               | Costa Rica | Miscellaneous                   | 2003           | 6                                                              |
| 48               | Costa Rica | Oats                            | 2003           | 6                                                              |
| 48               | Costa Rica | Offals                          | 2003           | 6                                                              |
| 48               | Costa Rica | Oilcrops                        | 2003           | 42                                                             |
| 48               | Costa Rica | Olive Oil                       | 2003           | 5                                                              |
| 48               | Costa Rica | Onions                          | 2003           | 6                                                              |
| 48               | Costa Rica | Oranges, Mandarines             | 2003           | 15                                                             |
| 48               | Costa Rica | Palm Oil                        | 2003           | 123                                                            |
| 48               | Costa Rica | Peas                            | 2003           | 1                                                              |
| 48               | Costa Rica | Pelagic Fish                    | 2003           | 2                                                              |
| 48               | Costa Rica | Pepper                          | 2003           | 2                                                              |
| 48               | Costa Rica | Pigmeat                         | 2003           | 28                                                             |
| 48               | Costa Rica | Pineapples and products         | 2003           | 44                                                             |
| 48               | Costa Rica | Plantains                       | 2003           | 17                                                             |
| 48               | Costa Rica | Potatoes and products           | 2003           | 35                                                             |
| 48               | Costa Rica | Poultry Meat                    | 2003           | 61                                                             |
| 48               | Costa Rica | Pulses                          | 2003           | 95                                                             |
| 48               | Costa Rica | Pulses, Other and products      | 2003           | 3                                                              |
| 48               | Costa Rica | Rape and Mustardseed            | 2003           | 1                                                              |
| 48               | Costa Rica | Rice (Milled Equivalent)        | 2003           | 484                                                            |
| 48               | Costa Rica | Roots, Other                    | 2003           | 28                                                             |
| 48               | Costa Rica | Sesameseed Oil                  | 2003           | 1                                                              |
| 48               | Costa Rica | Soyabean Oil                    | 2003           | 152                                                            |
| 48               | Costa Rica | Soyabeans                       | 2003           | 25                                                             |
| 48               | Costa Rica | Spices                          | 2003           | 5                                                              |
| 48               | Costa Rica | Spices, Other                   | 2003           | 2                                                              |
| 48               | Costa Rica | Starchy Roots                   | 2003           | 68                                                             |
| 48               | Costa Rica | Stimulants                      | 2003           | 8                                                              |
| 48               | Costa Rica | Sugar & Sweeteners              | 2003           | 539                                                            |
| 48               | Costa Rica | Sugar (Raw Equivalent)          | 2003           | 496                                                            |
| 48               | Costa Rica | Sugar non-centrifugal           | 2003           | 27                                                             |
| 48               | Costa Rica | Sunflower seed                  | 2003           | 1                                                              |
| 48               | Costa Rica | Sunflowerseed Oil               | 2003           | 10                                                             |

Dietary calcium and zinc deficiency risks are decreasing but remain prevalent

| FAO Country code | Country    | Food item                       | Reference year | Net energy supply (kcal capita <sup>-1</sup> d <sup>-1</sup> ) |
|------------------|------------|---------------------------------|----------------|----------------------------------------------------------------|
| 48               | Costa Rica | Sweeteners, Other               | 2003           | 12                                                             |
| 48               | Costa Rica | Tomatoes and products           | 2003           | 10                                                             |
| 48               | Costa Rica | Treenuts                        | 2003           | 6                                                              |
| 48               | Costa Rica | Vegetable Oils                  | 2003           | 295                                                            |
| 48               | Costa Rica | Vegetables                      | 2003           | 34                                                             |
| 48               | Costa Rica | Vegetables, Other               | 2003           | 17                                                             |
| 48               | Costa Rica | Vegetal Products                | 2003           | 2,193                                                          |
| 48               | Costa Rica | Wheat and products              | 2003           | 322                                                            |
| 48               | Costa Rica | Wine                            | 2003           | 2                                                              |
| 48               | Costa Rica | Alcoholic Beverages             | 2004           | 77                                                             |
| 48               | Costa Rica | Animal fats                     | 2004           | 83                                                             |
| 48               | Costa Rica | Animal Products                 | 2004           | 546                                                            |
| 48               | Costa Rica | Apples and products             | 2004           | 5                                                              |
| 48               | Costa Rica | Bananas                         | 2004           | 1                                                              |
| 48               | Costa Rica | Barley and products             | 2004           | 17                                                             |
| 48               | Costa Rica | Beans                           | 2004           | 93                                                             |
| 48               | Costa Rica | Beer                            | 2004           | 11                                                             |
| 48               | Costa Rica | Beverages, Alcoholic            | 2004           | 63                                                             |
| 48               | Costa Rica | Bovine Meat                     | 2004           | 43                                                             |
| 48               | Costa Rica | Butter, Ghee                    | 2004           | 23                                                             |
| 48               | Costa Rica | Cassava and products            | 2004           | 6                                                              |
| 48               | Costa Rica | Cereals - Excluding Beer        | 2004           | 916                                                            |
| 48               | Costa Rica | Cereals, Other                  | 2004           | 1                                                              |
| 48               | Costa Rica | Cocoa Beans and products        | 2004           | 10                                                             |
| 48               | Costa Rica | Coconut Oil                     | 2004           | 2                                                              |
| 48               | Costa Rica | Coconuts - Incl Copra           | 2004           | 9                                                              |
| 48               | Costa Rica | Coffee and products             | 2004           | 5                                                              |
| 48               | Costa Rica | Crustaceans                     | 2004           | 2                                                              |
| 48               | Costa Rica | Eggs                            | 2004           | 36                                                             |
| 48               | Costa Rica | Fats, Animals, Raw              | 2004           | 60                                                             |
| 48               | Costa Rica | Fish, Seafood                   | 2004           | 14                                                             |
| 48               | Costa Rica | Freshwater Fish                 | 2004           | 9                                                              |
| 48               | Costa Rica | Fruits - Excluding Wine         | 2004           | 98                                                             |
| 48               | Costa Rica | Fruits, Other                   | 2004           | 40                                                             |
| 48               | Costa Rica | Grand Total                     | 2004           | 2,760                                                          |
| 48               | Costa Rica | Grapefruit and products         | 2004           | 2                                                              |
| 48               | Costa Rica | Grapes and products (excl wine) | 2004           | 3                                                              |
| 48               | Costa Rica | Groundnuts (Shelled Eq)         | 2004           | 8                                                              |
| 48               | Costa Rica | Honey                           | 2004           | 3                                                              |
| 48               | Costa Rica | Lemons, Limes and products      | 2004           | 1                                                              |
| 48               | Costa Rica | Maize and products              | 2004           | 110                                                            |
| 48               | Costa Rica | Maize Germ Oil                  | 2004           | 4                                                              |
| 48               | Costa Rica | Meat                            | 2004           | 140                                                            |
| 48               | Costa Rica | Milk - Excluding Butter         | 2004           | 267                                                            |
| 48               | Costa Rica | Miscellaneous                   | 2004           | 5                                                              |
| 48               | Costa Rica | Oats                            | 2004           | 7                                                              |
| 48               | Costa Rica | Offals                          | 2004           | 5                                                              |
| 48               | Costa Rica | Oilcrops                        | 2004           | 43                                                             |
| 48               | Costa Rica | Olive Oil                       | 2004           | 6                                                              |
| 48               | Costa Rica | Onions                          | 2004           | 8                                                              |
| 48               | Costa Rica | Oranges, Mandarines             | 2004           | 1                                                              |
| 48               | Costa Rica | Palm Oil                        | 2004           | 130                                                            |
| 48               | Costa Rica | Peas                            | 2004           | 1                                                              |
| 48               | Costa Rica | Pelagic Fish                    | 2004           | 3                                                              |
| 48               | Costa Rica | Pepper                          | 2004           | 2                                                              |
| 48               | Costa Rica | Pigmeat                         | 2004           | 28                                                             |
| 48               | Costa Rica | Pineapples and products         | 2004           | 30                                                             |
| 48               | Costa Rica | Plantains                       | 2004           | 16                                                             |
| 48               | Costa Rica | Potatoes and products           | 2004           | 34                                                             |
| 48               | Costa Rica | Poultry Meat                    | 2004           | 68                                                             |
| 48               | Costa Rica | Pulses                          | 2004           | 98                                                             |
| 48               | Costa Rica | Pulses, Other and products      | 2004           | 4                                                              |
| 48               | Costa Rica | Rice (Milled Equivalent)        | 2004           | 502                                                            |
| 48               | Costa Rica | Roots, Other                    | 2004           | 24                                                             |
| 48               | Costa Rica | Sesameseed Oil                  | 2004           | 1                                                              |
| 48               | Costa Rica | Soyabean Oil                    | 2004           | 161                                                            |
| 48               | Costa Rica | Soyabean                        | 2004           | 25                                                             |
| 48               | Costa Rica | Spices                          | 2004           | 3                                                              |
| 48               | Costa Rica | Spices, Other                   | 2004           | 1                                                              |
| 48               | Costa Rica | Starchy Roots                   | 2004           | 63                                                             |
| 48               | Costa Rica | Stimulants                      | 2004           | 15                                                             |
| 48               | Costa Rica | Sugar & Sweeteners              | 2004           | 532                                                            |
| 48               | Costa Rica | Sugar (Raw Equivalent)          | 2004           | 490                                                            |
| 48               | Costa Rica | Sugar non-centrifugal           | 2004           | 26                                                             |
| 48               | Costa Rica | Sunflower seed                  | 2004           | 1                                                              |
| 48               | Costa Rica | Sunflowerseed Oil               | 2004           | 19                                                             |
| 48               | Costa Rica | Sweeteners, Other               | 2004           | 13                                                             |
| 48               | Costa Rica | Tomatoes and products           | 2004           | 15                                                             |
| 48               | Costa Rica | Treenuts                        | 2004           | 4                                                              |
| 48               | Costa Rica | Vegetable Oils                  | 2004           | 323                                                            |
| 48               | Costa Rica | Vegetables                      | 2004           | 37                                                             |
| 48               | Costa Rica | Vegetables, Other               | 2004           | 14                                                             |
| 48               | Costa Rica | Vegetal Products                | 2004           | 2,214                                                          |
| 48               | Costa Rica | Wheat and products              | 2004           | 278                                                            |
| 48               | Costa Rica | Wine                            | 2004           | 2                                                              |
| 48               | Costa Rica | Alcoholic Beverages             | 2005           | 72                                                             |
| 48               | Costa Rica | Animal fats                     | 2005           | 71                                                             |
| 48               | Costa Rica | Animal Products                 | 2005           | 536                                                            |
| 48               | Costa Rica | Apples and products             | 2005           | 3                                                              |
| 48               | Costa Rica | Bananas                         | 2005           | 1                                                              |
| 48               | Costa Rica | Barley and products             | 2005           | 16                                                             |
| 48               | Costa Rica | Beans                           | 2005           | 94                                                             |
| 48               | Costa Rica | Beer                            | 2005           | 10                                                             |
| 48               | Costa Rica | Beverages, Alcoholic            | 2005           | 60                                                             |
| 48               | Costa Rica | Bovine Meat                     | 2005           | 48                                                             |
| 48               | Costa Rica | Butter, Ghee                    | 2005           | 20                                                             |
| 48               | Costa Rica | Cassava and products            | 2005           | 2                                                              |

Dietary calcium and zinc deficiency risks are decreasing but remain prevalent

| FAO Country code | Country    | Food item                       | Reference year | Net energy supply (kcal capita <sup>-1</sup> d <sup>-1</sup> ) |
|------------------|------------|---------------------------------|----------------|----------------------------------------------------------------|
| 48               | Costa Rica | Cereals - Excluding Beer        | 2005           | 906                                                            |
| 48               | Costa Rica | Cereals, Other                  | 2005           | 1                                                              |
| 48               | Costa Rica | Cocoa Beans and products        | 2005           | 9                                                              |
| 48               | Costa Rica | Coconut Oil                     | 2005           | 4                                                              |
| 48               | Costa Rica | Coconuts - Incl Copra           | 2005           | 6                                                              |
| 48               | Costa Rica | Coffee and products             | 2005           | 4                                                              |
| 48               | Costa Rica | Crustaceans                     | 2005           | 2                                                              |
| 48               | Costa Rica | Eggs                            | 2005           | 33                                                             |
| 48               | Costa Rica | Fats, Animals, Raw              | 2005           | 51                                                             |
| 48               | Costa Rica | Fish, Seafood                   | 2005           | 13                                                             |
| 48               | Costa Rica | Freshwater Fish                 | 2005           | 8                                                              |
| 48               | Costa Rica | Fruits - Excluding Wine         | 2005           | 147                                                            |
| 48               | Costa Rica | Fruits, Other                   | 2005           | 35                                                             |
| 48               | Costa Rica | Grand Total                     | 2005           | 2,811                                                          |
| 48               | Costa Rica | Grapefruit and products         | 2005           | 2                                                              |
| 48               | Costa Rica | Grapes and products (excl wine) | 2005           | 2                                                              |
| 48               | Costa Rica | Groundnuts (Shelled Eq)         | 2005           | 8                                                              |
| 48               | Costa Rica | Honey                           | 2005           | 3                                                              |
| 48               | Costa Rica | Lemons, Limes and products      | 2005           | 2                                                              |
| 48               | Costa Rica | Maize and products              | 2005           | 112                                                            |
| 48               | Costa Rica | Maize Germ Oil                  | 2005           | 3                                                              |
| 48               | Costa Rica | Meat                            | 2005           | 144                                                            |
| 48               | Costa Rica | Milk - Excluding Butter         | 2005           | 271                                                            |
| 48               | Costa Rica | Miscellaneous                   | 2005           | 5                                                              |
| 48               | Costa Rica | Oats                            | 2005           | 2                                                              |
| 48               | Costa Rica | Offals                          | 2005           | 5                                                              |
| 48               | Costa Rica | Oilcrops                        | 2005           | 41                                                             |
| 48               | Costa Rica | Olive Oil                       | 2005           | 6                                                              |
| 48               | Costa Rica | Onions                          | 2005           | 7                                                              |
| 48               | Costa Rica | Oranges, Mandarines             | 2005           | 20                                                             |
| 48               | Costa Rica | Palm Oil                        | 2005           | 132                                                            |
| 48               | Costa Rica | Peas                            | 2005           | 2                                                              |
| 48               | Costa Rica | Pelagic Fish                    | 2005           | 2                                                              |
| 48               | Costa Rica | Pigmeat                         | 2005           | 25                                                             |
| 48               | Costa Rica | Pineapples and products         | 2005           | 69                                                             |
| 48               | Costa Rica | Plantains                       | 2005           | 12                                                             |
| 48               | Costa Rica | Potatoes and products           | 2005           | 31                                                             |
| 48               | Costa Rica | Poultry Meat                    | 2005           | 71                                                             |
| 48               | Costa Rica | Pulses                          | 2005           | 98                                                             |
| 48               | Costa Rica | Pulses, Other and products      | 2005           | 3                                                              |
| 48               | Costa Rica | Rice (Milled Equivalent)        | 2005           | 501                                                            |
| 48               | Costa Rica | Roots, Other                    | 2005           | 22                                                             |
| 48               | Costa Rica | Sesameseed Oil                  | 2005           | 2                                                              |
| 48               | Costa Rica | Soyabean Oil                    | 2005           | 158                                                            |
| 48               | Costa Rica | Soyabeans                       | 2005           | 26                                                             |
| 48               | Costa Rica | Spices                          | 2005           | 7                                                              |
| 48               | Costa Rica | Spices, Other                   | 2005           | 6                                                              |
| 48               | Costa Rica | Starchy Roots                   | 2005           | 56                                                             |
| 48               | Costa Rica | Stimulants                      | 2005           | 12                                                             |
| 48               | Costa Rica | Sugar & Sweeteners              | 2005           | 554                                                            |
| 48               | Costa Rica | Sugar (Raw Equivalent)          | 2005           | 511                                                            |
| 48               | Costa Rica | Sugar non-centrifugal           | 2005           | 26                                                             |
| 48               | Costa Rica | Sunflower seed                  | 2005           | 1                                                              |
| 48               | Costa Rica | Sunflowerseed Oil               | 2005           | 35                                                             |
| 48               | Costa Rica | Sweeteners, Other               | 2005           | 14                                                             |
| 48               | Costa Rica | Tomatoes and products           | 2005           | 14                                                             |
| 48               | Costa Rica | Treenuts                        | 2005           | 4                                                              |
| 48               | Costa Rica | Vegetable Oils                  | 2005           | 340                                                            |
| 48               | Costa Rica | Vegetables                      | 2005           | 32                                                             |
| 48               | Costa Rica | Vegetables, Other               | 2005           | 11                                                             |
| 48               | Costa Rica | Vegetal Products                | 2005           | 2,275                                                          |
| 48               | Costa Rica | Wheat and products              | 2005           | 274                                                            |
| 48               | Costa Rica | Wine                            | 2005           | 2                                                              |
| 48               | Costa Rica | Yams                            | 2005           | 1                                                              |
| 48               | Costa Rica | Alcoholic Beverages             | 2006           | 78                                                             |
| 48               | Costa Rica | Animal fats                     | 2006           | 79                                                             |
| 48               | Costa Rica | Animal Products                 | 2006           | 562                                                            |
| 48               | Costa Rica | Apples and products             | 2006           | 5                                                              |
| 48               | Costa Rica | Bananas                         | 2006           | 1                                                              |
| 48               | Costa Rica | Barley and products             | 2006           | 29                                                             |
| 48               | Costa Rica | Beans                           | 2006           | 101                                                            |
| 48               | Costa Rica | Beer                            | 2006           | 16                                                             |
| 48               | Costa Rica | Beverages, Alcoholic            | 2006           | 59                                                             |
| 48               | Costa Rica | Bovine Meat                     | 2006           | 47                                                             |
| 48               | Costa Rica | Butter, Ghee                    | 2006           | 24                                                             |
| 48               | Costa Rica | Cassava and products            | 2006           | 1                                                              |
| 48               | Costa Rica | Cephalopods                     | 2006           | 1                                                              |
| 48               | Costa Rica | Cereals - Excluding Beer        | 2006           | 886                                                            |
| 48               | Costa Rica | Cereals, Other                  | 2006           | 1                                                              |
| 48               | Costa Rica | Cocoa Beans and products        | 2006           | 18                                                             |
| 48               | Costa Rica | Coconut Oil                     | 2006           | 2                                                              |
| 48               | Costa Rica | Coconuts - Incl Copra           | 2006           | 7                                                              |
| 48               | Costa Rica | Coffee and products             | 2006           | 1                                                              |
| 48               | Costa Rica | Crustaceans                     | 2006           | 2                                                              |
| 48               | Costa Rica | Eggs                            | 2006           | 32                                                             |
| 48               | Costa Rica | Fats, Animals, Raw              | 2006           | 55                                                             |
| 48               | Costa Rica | Fish, Seafood                   | 2006           | 14                                                             |
| 48               | Costa Rica | Freshwater Fish                 | 2006           | 7                                                              |
| 48               | Costa Rica | Fruits - Excluding Wine         | 2006           | 159                                                            |
| 48               | Costa Rica | Fruits, Other                   | 2006           | 38                                                             |
| 48               | Costa Rica | Grand Total                     | 2006           | 2,872                                                          |
| 48               | Costa Rica | Grapefruit and products         | 2006           | 2                                                              |
| 48               | Costa Rica | Grapes and products (excl wine) | 2006           | 4                                                              |
| 48               | Costa Rica | Groundnuts (Shelled Eq)         | 2006           | 12                                                             |
| 48               | Costa Rica | Honey                           | 2006           | 3                                                              |
| 48               | Costa Rica | Lemons, Limes and products      | 2006           | 3                                                              |
| 48               | Costa Rica | Maize and products              | 2006           | 109                                                            |



Dietary calcium and zinc deficiency risks are decreasing but remain prevalent

| FAO Country code | Country    | Food item                       | Reference year | Net energy supply (kcal <i>capita</i> <sup>-1</sup> d <sup>-1</sup> ) |
|------------------|------------|---------------------------------|----------------|-----------------------------------------------------------------------|
| 48               | Costa Rica | Maize Germ Oil                  | 2006           | 4                                                                     |
| 48               | Costa Rica | Marine Fish, Other              | 2006           | 1                                                                     |
| 48               | Costa Rica | Meat                            | 2006           | 153                                                                   |
| 48               | Costa Rica | Milk - Excluding Butter         | 2006           | 279                                                                   |
| 48               | Costa Rica | Miscellaneous                   | 2006           | 7                                                                     |
| 48               | Costa Rica | Oats                            | 2006           | 7                                                                     |
| 48               | Costa Rica | Offals                          | 2006           | 5                                                                     |
| 48               | Costa Rica | Oilcrops                        | 2006           | 48                                                                    |
| 48               | Costa Rica | Olive Oil                       | 2006           | 8                                                                     |
| 48               | Costa Rica | Onions                          | 2006           | 11                                                                    |
| 48               | Costa Rica | Oranges, Mandarines             | 2006           | 26                                                                    |
| 48               | Costa Rica | Palm Oil                        | 2006           | 136                                                                   |
| 48               | Costa Rica | Peas                            | 2006           | 2                                                                     |
| 48               | Costa Rica | Pelagic Fish                    | 2006           | 3                                                                     |
| 48               | Costa Rica | Pepper                          | 2006           | 2                                                                     |
| 48               | Costa Rica | Pigmeat                         | 2006           | 27                                                                    |
| 48               | Costa Rica | Pineapples and products         | 2006           | 66                                                                    |
| 48               | Costa Rica | Plantains                       | 2006           | 14                                                                    |
| 48               | Costa Rica | Potatoes and products           | 2006           | 27                                                                    |
| 48               | Costa Rica | Poultry Meat                    | 2006           | 78                                                                    |
| 48               | Costa Rica | Pulses                          | 2006           | 107                                                                   |
| 48               | Costa Rica | Pulses, Other and products      | 2006           | 4                                                                     |
| 48               | Costa Rica | Rape and Mustardseed            | 2006           | 1                                                                     |
| 48               | Costa Rica | Rice (Milled Equivalent)        | 2006           | 456                                                                   |
| 48               | Costa Rica | Roots, Other                    | 2006           | 16                                                                    |
| 48               | Costa Rica | Sesameseed Oil                  | 2006           | 2                                                                     |
| 48               | Costa Rica | Soyabean Oil                    | 2006           | 156                                                                   |
| 48               | Costa Rica | Soyabeans                       | 2006           | 25                                                                    |
| 48               | Costa Rica | Spices                          | 2006           | 6                                                                     |
| 48               | Costa Rica | Spices, Other                   | 2006           | 3                                                                     |
| 48               | Costa Rica | Starchy Roots                   | 2006           | 51                                                                    |
| 48               | Costa Rica | Stimulants                      | 2006           | 19                                                                    |
| 48               | Costa Rica | Sugar & Sweeteners              | 2006           | 556                                                                   |
| 48               | Costa Rica | Sugar (Raw Equivalent)          | 2006           | 513                                                                   |
| 48               | Costa Rica | Sugar non-centrifugal           | 2006           | 26                                                                    |
| 48               | Costa Rica | Sunflower seed                  | 2006           | 2                                                                     |
| 48               | Costa Rica | Sunflowerseed Oil               | 2006           | 31                                                                    |
| 48               | Costa Rica | Sweeteners, Other               | 2006           | 15                                                                    |
| 48               | Costa Rica | Tomatoes and products           | 2006           | 17                                                                    |
| 48               | Costa Rica | Treenuts                        | 2006           | 6                                                                     |
| 48               | Costa Rica | Vegetable Oils                  | 2006           | 341                                                                   |
| 48               | Costa Rica | Vegetables                      | 2006           | 46                                                                    |
| 48               | Costa Rica | Vegetables, Other               | 2006           | 17                                                                    |
| 48               | Costa Rica | Vegetal Products                | 2006           | 2,310                                                                 |
| 48               | Costa Rica | Wheat and products              | 2006           | 283                                                                   |
| 48               | Costa Rica | Wine                            | 2006           | 3                                                                     |
| 48               | Costa Rica | Yams                            | 2006           | 7                                                                     |
| 48               | Costa Rica | Alcoholic Beverages             | 2007           | 82                                                                    |
| 48               | Costa Rica | Animal fats                     | 2007           | 89                                                                    |
| 48               | Costa Rica | Animal Products                 | 2007           | 587                                                                   |
| 48               | Costa Rica | Apples and products             | 2007           | 5                                                                     |
| 48               | Costa Rica | Bananas                         | 2007           | 1                                                                     |
| 48               | Costa Rica | Barley and products             | 2007           | 30                                                                    |
| 48               | Costa Rica | Beans                           | 2007           | 100                                                                   |
| 48               | Costa Rica | Beer                            | 2007           | 15                                                                    |
| 48               | Costa Rica | Beverages, Alcoholic            | 2007           | 64                                                                    |
| 48               | Costa Rica | Bovine Meat                     | 2007           | 52                                                                    |
| 48               | Costa Rica | Butter, Ghee                    | 2007           | 25                                                                    |
| 48               | Costa Rica | Cassava and products            | 2007           | 1                                                                     |
| 48               | Costa Rica | Cephalopods                     | 2007           | 1                                                                     |
| 48               | Costa Rica | Cereals - Excluding Beer        | 2007           | 901                                                                   |
| 48               | Costa Rica | Cereals, Other                  | 2007           | 3                                                                     |
| 48               | Costa Rica | Cocoa Beans and products        | 2007           | 11                                                                    |
| 48               | Costa Rica | Coconut Oil                     | 2007           | 1                                                                     |
| 48               | Costa Rica | Coconuts - Incl Copra           | 2007           | 5                                                                     |
| 48               | Costa Rica | Coffee and products             | 2007           | 5                                                                     |
| 48               | Costa Rica | Crustaceans                     | 2007           | 2                                                                     |
| 48               | Costa Rica | Eggs                            | 2007           | 27                                                                    |
| 48               | Costa Rica | Fats, Animals, Raw              | 2007           | 64                                                                    |
| 48               | Costa Rica | Fish, Seafood                   | 2007           | 18                                                                    |
| 48               | Costa Rica | Freshwater Fish                 | 2007           | 9                                                                     |
| 48               | Costa Rica | Fruits - Excluding Wine         | 2007           | 111                                                                   |
| 48               | Costa Rica | Fruits, Other                   | 2007           | 40                                                                    |
| 48               | Costa Rica | Grand Total                     | 2007           | 2,857                                                                 |
| 48               | Costa Rica | Grapefruit and products         | 2007           | 2                                                                     |
| 48               | Costa Rica | Grapes and products (excl wine) | 2007           | 3                                                                     |
| 48               | Costa Rica | Groundnuts (Shelled Eq)         | 2007           | 9                                                                     |
| 48               | Costa Rica | Honey                           | 2007           | 3                                                                     |
| 48               | Costa Rica | Lemons, Limes and products      | 2007           | 2                                                                     |
| 48               | Costa Rica | Maize and products              | 2007           | 101                                                                   |
| 48               | Costa Rica | Maize Germ Oil                  | 2007           | 2                                                                     |
| 48               | Costa Rica | Marine Fish, Other              | 2007           | 1                                                                     |
| 48               | Costa Rica | Meat                            | 2007           | 167                                                                   |
| 48               | Costa Rica | Milk - Excluding Butter         | 2007           | 280                                                                   |
| 48               | Costa Rica | Miscellaneous                   | 2007           | 5                                                                     |
| 48               | Costa Rica | Oats                            | 2007           | 8                                                                     |
| 48               | Costa Rica | Offals                          | 2007           | 5                                                                     |
| 48               | Costa Rica | Oilcrops                        | 2007           | 42                                                                    |
| 48               | Costa Rica | Olive Oil                       | 2007           | 6                                                                     |
| 48               | Costa Rica | Onions                          | 2007           | 8                                                                     |
| 48               | Costa Rica | Oranges, Mandarines             | 2007           | 20                                                                    |
| 48               | Costa Rica | Palm Oil                        | 2007           | 142                                                                   |
| 48               | Costa Rica | Peas                            | 2007           | 1                                                                     |
| 48               | Costa Rica | Pelagic Fish                    | 2007           | 4                                                                     |
| 48               | Costa Rica | Pepper                          | 2007           | 2                                                                     |
| 48               | Costa Rica | Pigmeat                         | 2007           | 31                                                                    |
| 48               | Costa Rica | Pineapples and products         | 2007           | 17                                                                    |

Dietary calcium and zinc deficiency risks are decreasing but remain prevalent

| FAO Country code | Country    | Food item                       | Reference year | Net energy supply (kcal <i>capita</i> <sup>-1</sup> d <sup>-1</sup> ) |
|------------------|------------|---------------------------------|----------------|-----------------------------------------------------------------------|
| 48               | Costa Rica | Plantains                       | 2007           | 20                                                                    |
| 48               | Costa Rica | Potatoes and products           | 2007           | 29                                                                    |
| 48               | Costa Rica | Poultry Meat                    | 2007           | 84                                                                    |
| 48               | Costa Rica | Pulses                          | 2007           | 105                                                                   |
| 48               | Costa Rica | Pulses, Other and products      | 2007           | 3                                                                     |
| 48               | Costa Rica | Rice (Milled Equivalent)        | 2007           | 463                                                                   |
| 48               | Costa Rica | Roots, Other                    | 2007           | 6                                                                     |
| 48               | Costa Rica | Sesameseed Oil                  | 2007           | 2                                                                     |
| 48               | Costa Rica | Soyabean Oil                    | 2007           | 162                                                                   |
| 48               | Costa Rica | Soyabeans                       | 2007           | 26                                                                    |
| 48               | Costa Rica | Spices                          | 2007           | 4                                                                     |
| 48               | Costa Rica | Spices, Other                   | 2007           | 2                                                                     |
| 48               | Costa Rica | Starchy Roots                   | 2007           | 43                                                                    |
| 48               | Costa Rica | Stimulants                      | 2007           | 16                                                                    |
| 48               | Costa Rica | Sugar & Sweeteners              | 2007           | 567                                                                   |
| 48               | Costa Rica | Sugar (Raw Equivalent)          | 2007           | 519                                                                   |
| 48               | Costa Rica | Sugar non-centrifugal           | 2007           | 25                                                                    |
| 48               | Costa Rica | Sunflower seed                  | 2007           | 1                                                                     |
| 48               | Costa Rica | Sunflowerseed Oil               | 2007           | 34                                                                    |
| 48               | Costa Rica | Sweeteners, Other               | 2007           | 21                                                                    |
| 48               | Costa Rica | Tomatoes and products           | 2007           | 16                                                                    |
| 48               | Costa Rica | Treenuts                        | 2007           | 4                                                                     |
| 48               | Costa Rica | Vegetable Oils                  | 2007           | 349                                                                   |
| 48               | Costa Rica | Vegetables                      | 2007           | 40                                                                    |
| 48               | Costa Rica | Vegetables, Other               | 2007           | 16                                                                    |
| 48               | Costa Rica | Vegetal Products                | 2007           | 2,270                                                                 |
| 48               | Costa Rica | Wheat and products              | 2007           | 297                                                                   |
| 48               | Costa Rica | Wine                            | 2007           | 3                                                                     |
| 48               | Costa Rica | Yams                            | 2007           | 7                                                                     |
| 48               | Costa Rica | Alcoholic Beverages             | 2008           | 80                                                                    |
| 48               | Costa Rica | Animal fats                     | 2008           | 95                                                                    |
| 48               | Costa Rica | Animal Products                 | 2008           | 615                                                                   |
| 48               | Costa Rica | Apples and products             | 2008           | 6                                                                     |
| 48               | Costa Rica | Bananas                         | 2008           | 1                                                                     |
| 48               | Costa Rica | Barley and products             | 2008           | 25                                                                    |
| 48               | Costa Rica | Beans                           | 2008           | 99                                                                    |
| 48               | Costa Rica | Beer                            | 2008           | 14                                                                    |
| 48               | Costa Rica | Beverages, Alcoholic            | 2008           | 63                                                                    |
| 48               | Costa Rica | Bovine Meat                     | 2008           | 52                                                                    |
| 48               | Costa Rica | Butter, Ghee                    | 2008           | 27                                                                    |
| 48               | Costa Rica | Cassava and products            | 2008           | 1                                                                     |
| 48               | Costa Rica | Cephalopods                     | 2008           | 1                                                                     |
| 48               | Costa Rica | Cereals - Excluding Beer        | 2008           | 898                                                                   |
| 48               | Costa Rica | Cereals, Other                  | 2008           | 2                                                                     |
| 48               | Costa Rica | Cocoa Beans and products        | 2008           | 8                                                                     |
| 48               | Costa Rica | Coconut Oil                     | 2008           | 1                                                                     |
| 48               | Costa Rica | Coconuts - Incl Copra           | 2008           | 7                                                                     |
| 48               | Costa Rica | Coffee and products             | 2008           | 3                                                                     |
| 48               | Costa Rica | Crustaceans                     | 2008           | 2                                                                     |
| 48               | Costa Rica | Eggs                            | 2008           | 35                                                                    |
| 48               | Costa Rica | Fats, Animals, Raw              | 2008           | 68                                                                    |
| 48               | Costa Rica | Fish, Seafood                   | 2008           | 19                                                                    |
| 48               | Costa Rica | Freshwater Fish                 | 2008           | 10                                                                    |
| 48               | Costa Rica | Fruits - Excluding Wine         | 2008           | 102                                                                   |
| 48               | Costa Rica | Fruits, Other                   | 2008           | 39                                                                    |
| 48               | Costa Rica | Grand Total                     | 2008           | 2,844                                                                 |
| 48               | Costa Rica | Grapefruit and products         | 2008           | 2                                                                     |
| 48               | Costa Rica | Grapes and products (excl wine) | 2008           | 3                                                                     |
| 48               | Costa Rica | Groundnuts (Shelled Eq)         | 2008           | 9                                                                     |
| 48               | Costa Rica | Honey                           | 2008           | 3                                                                     |
| 48               | Costa Rica | Lemons, Limes and products      | 2008           | 2                                                                     |
| 48               | Costa Rica | Maize and products              | 2008           | 101                                                                   |
| 48               | Costa Rica | Maize Germ Oil                  | 2008           | 1                                                                     |
| 48               | Costa Rica | Marine Fish, Other              | 2008           | 1                                                                     |
| 48               | Costa Rica | Meat                            | 2008           | 165                                                                   |
| 48               | Costa Rica | Milk - Excluding Butter         | 2008           | 295                                                                   |
| 48               | Costa Rica | Miscellaneous                   | 2008           | 5                                                                     |
| 48               | Costa Rica | Oats                            | 2008           | 8                                                                     |
| 48               | Costa Rica | Offals                          | 2008           | 5                                                                     |
| 48               | Costa Rica | Oilcrops                        | 2008           | 43                                                                    |
| 48               | Costa Rica | Olive Oil                       | 2008           | 7                                                                     |
| 48               | Costa Rica | Onions                          | 2008           | 9                                                                     |
| 48               | Costa Rica | Oranges, Mandarines             | 2008           | 5                                                                     |
| 48               | Costa Rica | Palm Oil                        | 2008           | 146                                                                   |
| 48               | Costa Rica | Peas                            | 2008           | 1                                                                     |
| 48               | Costa Rica | Pelagic Fish                    | 2008           | 5                                                                     |
| 48               | Costa Rica | Pepper                          | 2008           | 2                                                                     |
| 48               | Costa Rica | Pigmeat                         | 2008           | 32                                                                    |
| 48               | Costa Rica | Pineapples and products         | 2008           | 20                                                                    |
| 48               | Costa Rica | Plantains                       | 2008           | 25                                                                    |
| 48               | Costa Rica | Potatoes and products           | 2008           | 30                                                                    |
| 48               | Costa Rica | Poultry Meat                    | 2008           | 81                                                                    |
| 48               | Costa Rica | Pulses                          | 2008           | 104                                                                   |
| 48               | Costa Rica | Pulses, Other and products      | 2008           | 4                                                                     |
| 48               | Costa Rica | Rice (Milled Equivalent)        | 2008           | 455                                                                   |
| 48               | Costa Rica | Roots, Other                    | 2008           | 15                                                                    |
| 48               | Costa Rica | Sesameseed Oil                  | 2008           | 1                                                                     |
| 48               | Costa Rica | Soyabean Oil                    | 2008           | 160                                                                   |
| 48               | Costa Rica | Soyabeans                       | 2008           | 25                                                                    |
| 48               | Costa Rica | Spices                          | 2008           | 4                                                                     |
| 48               | Costa Rica | Spices, Other                   | 2008           | 2                                                                     |
| 48               | Costa Rica | Starchy Roots                   | 2008           | 54                                                                    |
| 48               | Costa Rica | Stimulants                      | 2008           | 11                                                                    |
| 48               | Costa Rica | Sugar & Sweeteners              | 2008           | 543                                                                   |
| 48               | Costa Rica | Sugar (Raw Equivalent)          | 2008           | 500                                                                   |
| 48               | Costa Rica | Sugar non-centrifugal           | 2008           | 25                                                                    |
| 48               | Costa Rica | Sunflower seed                  | 2008           | 2                                                                     |

Dietary calcium and zinc deficiency risks are decreasing but remain prevalent

| FAO Country code | Country    | Food item                       | Reference year | Net energy supply (kcal <i>capita</i> <sup>-1</sup> d <sup>-1</sup> ) |
|------------------|------------|---------------------------------|----------------|-----------------------------------------------------------------------|
| 48               | Costa Rica | Sunflowerseed Oil               | 2008           | 20                                                                    |
| 48               | Costa Rica | Sweeteners, Other               | 2008           | 15                                                                    |
| 48               | Costa Rica | Tomatoes and products           | 2008           | 14                                                                    |
| 48               | Costa Rica | Treenuts                        | 2008           | 4                                                                     |
| 48               | Costa Rica | Vegetable Oils                  | 2008           | 338                                                                   |
| 48               | Costa Rica | Vegetables                      | 2008           | 43                                                                    |
| 48               | Costa Rica | Vegetables, Other               | 2008           | 20                                                                    |
| 48               | Costa Rica | Vegetal Products                | 2008           | 2,229                                                                 |
| 48               | Costa Rica | Wheat and products              | 2008           | 306                                                                   |
| 48               | Costa Rica | Wine                            | 2008           | 3                                                                     |
| 48               | Costa Rica | Yams                            | 2008           | 7                                                                     |
| 48               | Costa Rica | Alcoholic Beverages             | 2009           | 80                                                                    |
| 48               | Costa Rica | Animal fats                     | 2009           | 93                                                                    |
| 48               | Costa Rica | Animal Products                 | 2009           | 612                                                                   |
| 48               | Costa Rica | Apples and products             | 2009           | 6                                                                     |
| 48               | Costa Rica | Bananas                         | 2009           | 1                                                                     |
| 48               | Costa Rica | Barley and products             | 2009           | 22                                                                    |
| 48               | Costa Rica | Beans                           | 2009           | 99                                                                    |
| 48               | Costa Rica | Beer                            | 2009           | 14                                                                    |
| 48               | Costa Rica | Beverages, Alcoholic            | 2009           | 63                                                                    |
| 48               | Costa Rica | Bovine Meat                     | 2009           | 54                                                                    |
| 48               | Costa Rica | Butter, Ghee                    | 2009           | 26                                                                    |
| 48               | Costa Rica | Cassava and products            | 2009           | 6                                                                     |
| 48               | Costa Rica | Cephalopods                     | 2009           | 1                                                                     |
| 48               | Costa Rica | Cereals - Excluding Beer        | 2009           | 898                                                                   |
| 48               | Costa Rica | Cereals, Other                  | 2009           | 2                                                                     |
| 48               | Costa Rica | Cocoa Beans and products        | 2009           | 8                                                                     |
| 48               | Costa Rica | Coconut Oil                     | 2009           | 1                                                                     |
| 48               | Costa Rica | Coconuts - Incl Copra           | 2009           | 8                                                                     |
| 48               | Costa Rica | Coffee and products             | 2009           | 4                                                                     |
| 48               | Costa Rica | Crustaceans                     | 2009           | 2                                                                     |
| 48               | Costa Rica | Demersal Fish                   | 2009           | 1                                                                     |
| 48               | Costa Rica | Eggs                            | 2009           | 34                                                                    |
| 48               | Costa Rica | Fats, Animals, Raw              | 2009           | 67                                                                    |
| 48               | Costa Rica | Fish, Seafood                   | 2009           | 20                                                                    |
| 48               | Costa Rica | Freshwater Fish                 | 2009           | 10                                                                    |
| 48               | Costa Rica | Fruits - Excluding Wine         | 2009           | 102                                                                   |
| 48               | Costa Rica | Fruits, Other                   | 2009           | 40                                                                    |
| 48               | Costa Rica | Grand Total                     | 2009           | 2,842                                                                 |
| 48               | Costa Rica | Grapefruit and products         | 2009           | 2                                                                     |
| 48               | Costa Rica | Grapes and products (excl wine) | 2009           | 3                                                                     |
| 48               | Costa Rica | Groundnuts (Shelled Eq)         | 2009           | 8                                                                     |
| 48               | Costa Rica | Honey                           | 2009           | 2                                                                     |
| 48               | Costa Rica | Lemons, Limes and products      | 2009           | 2                                                                     |
| 48               | Costa Rica | Maize and products              | 2009           | 91                                                                    |
| 48               | Costa Rica | Maize Germ Oil                  | 2009           | 1                                                                     |
| 48               | Costa Rica | Marine Fish, Other              | 2009           | 2                                                                     |
| 48               | Costa Rica | Meat                            | 2009           | 169                                                                   |
| 48               | Costa Rica | Milk - Excluding Butter         | 2009           | 291                                                                   |
| 48               | Costa Rica | Miscellaneous                   | 2009           | 5                                                                     |
| 48               | Costa Rica | Oats                            | 2009           | 8                                                                     |
| 48               | Costa Rica | Offals                          | 2009           | 5                                                                     |
| 48               | Costa Rica | Oilcrops                        | 2009           | 44                                                                    |
| 48               | Costa Rica | Olive Oil                       | 2009           | 6                                                                     |
| 48               | Costa Rica | Onions                          | 2009           | 8                                                                     |
| 48               | Costa Rica | Oranges, Mandarines             | 2009           | 4                                                                     |
| 48               | Costa Rica | Palm Oil                        | 2009           | 150                                                                   |
| 48               | Costa Rica | Peas                            | 2009           | 1                                                                     |
| 48               | Costa Rica | Pelagic Fish                    | 2009           | 5                                                                     |
| 48               | Costa Rica | Pepper                          | 2009           | 2                                                                     |
| 48               | Costa Rica | Pigmeat                         | 2009           | 32                                                                    |
| 48               | Costa Rica | Pineapples and products         | 2009           | 20                                                                    |
| 48               | Costa Rica | Plantains                       | 2009           | 25                                                                    |
| 48               | Costa Rica | Potatoes and products           | 2009           | 33                                                                    |
| 48               | Costa Rica | Poultry Meat                    | 2009           | 83                                                                    |
| 48               | Costa Rica | Pulses                          | 2009           | 105                                                                   |
| 48               | Costa Rica | Pulses, Other and products      | 2009           | 4                                                                     |
| 48               | Costa Rica | Rice (Milled Equivalent)        | 2009           | 461                                                                   |
| 48               | Costa Rica | Roots, Other                    | 2009           | 17                                                                    |
| 48               | Costa Rica | Sesameseed Oil                  | 2009           | 1                                                                     |
| 48               | Costa Rica | Soyabean Oil                    | 2009           | 160                                                                   |
| 48               | Costa Rica | Soyabeans                       | 2009           | 25                                                                    |
| 48               | Costa Rica | Spices                          | 2009           | 4                                                                     |
| 48               | Costa Rica | Spices, Other                   | 2009           | 2                                                                     |
| 48               | Costa Rica | Starchy Roots                   | 2009           | 64                                                                    |
| 48               | Costa Rica | Stimulants                      | 2009           | 12                                                                    |
| 48               | Costa Rica | Sugar & Sweeteners              | 2009           | 532                                                                   |
| 48               | Costa Rica | Sugar (Raw Equivalent)          | 2009           | 490                                                                   |
| 48               | Costa Rica | Sugar non-centrifugal           | 2009           | 24                                                                    |
| 48               | Costa Rica | Sunflower seed                  | 2009           | 1                                                                     |
| 48               | Costa Rica | Sunflowerseed Oil               | 2009           | 18                                                                    |
| 48               | Costa Rica | Sweeteners, Other               | 2009           | 15                                                                    |
| 48               | Costa Rica | Tomatoes and products           | 2009           | 13                                                                    |
| 48               | Costa Rica | Treenuts                        | 2009           | 7                                                                     |
| 48               | Costa Rica | Vegetable Oils                  | 2009           | 337                                                                   |
| 48               | Costa Rica | Vegetables                      | 2009           | 41                                                                    |
| 48               | Costa Rica | Vegetables, Other               | 2009           | 20                                                                    |
| 48               | Costa Rica | Vegetal Products                | 2009           | 2,230                                                                 |
| 48               | Costa Rica | Wheat and products              | 2009           | 314                                                                   |
| 48               | Costa Rica | Wine                            | 2009           | 3                                                                     |
| 48               | Costa Rica | Yams                            | 2009           | 7                                                                     |
| 48               | Costa Rica | Alcoholic Beverages             | 2010           | 81                                                                    |
| 48               | Costa Rica | Animal fats                     | 2010           | 90                                                                    |
| 48               | Costa Rica | Animal Products                 | 2010           | 594                                                                   |
| 48               | Costa Rica | Apples and products             | 2010           | 7                                                                     |
| 48               | Costa Rica | Bananas                         | 2010           | 1                                                                     |
| 48               | Costa Rica | Barley and products             | 2010           | 20                                                                    |

Dietary calcium and zinc deficiency risks are decreasing but remain prevalent

| FAO Country code | Country    | Food item                       | Reference year | Net energy supply (kcal capita <sup>-1</sup> d <sup>-1</sup> ) |
|------------------|------------|---------------------------------|----------------|----------------------------------------------------------------|
| 48               | Costa Rica | Beans                           | 2010           | 98                                                             |
| 48               | Costa Rica | Beer                            | 2010           | 13                                                             |
| 48               | Costa Rica | Beverages, Alcoholic            | 2010           | 65                                                             |
| 48               | Costa Rica | Bovine Meat                     | 2010           | 58                                                             |
| 48               | Costa Rica | Butter, Ghee                    | 2010           | 25                                                             |
| 48               | Costa Rica | Cassava and products            | 2010           | 5                                                              |
| 48               | Costa Rica | Cephalopods                     | 2010           | 1                                                              |
| 48               | Costa Rica | Cereals - Excluding Beer        | 2010           | 913                                                            |
| 48               | Costa Rica | Cereals, Other                  | 2010           | 3                                                              |
| 48               | Costa Rica | Cocoa Beans and products        | 2010           | 6                                                              |
| 48               | Costa Rica | Coconut Oil                     | 2010           | 1                                                              |
| 48               | Costa Rica | Coconuts - Incl Copra           | 2010           | 8                                                              |
| 48               | Costa Rica | Coffee and products             | 2010           | 8                                                              |
| 48               | Costa Rica | Crustaceans                     | 2010           | 2                                                              |
| 48               | Costa Rica | Demersal Fish                   | 2010           | 1                                                              |
| 48               | Costa Rica | Eggs                            | 2010           | 34                                                             |
| 48               | Costa Rica | Fats, Animals, Raw              | 2010           | 65                                                             |
| 48               | Costa Rica | Fish, Seafood                   | 2010           | 20                                                             |
| 48               | Costa Rica | Freshwater Fish                 | 2010           | 9                                                              |
| 48               | Costa Rica | Fruits - Excluding Wine         | 2010           | 129                                                            |
| 48               | Costa Rica | Fruits, Other                   | 2010           | 41                                                             |
| 48               | Costa Rica | Grand Total                     | 2010           | 2,869                                                          |
| 48               | Costa Rica | Grapefruit and products         | 2010           | 2                                                              |
| 48               | Costa Rica | Grapes and products (excl wine) | 2010           | 4                                                              |
| 48               | Costa Rica | Groundnuts (Shelled Eq)         | 2010           | 9                                                              |
| 48               | Costa Rica | Honey                           | 2010           | 2                                                              |
| 48               | Costa Rica | Lemons, Limes and products      | 2010           | 2                                                              |
| 48               | Costa Rica | Maize and products              | 2010           | 100                                                            |
| 48               | Costa Rica | Maize Germ Oil                  | 2010           | 1                                                              |
| 48               | Costa Rica | Marine Fish, Other              | 2010           | 2                                                              |
| 48               | Costa Rica | Meat                            | 2010           | 167                                                            |
| 48               | Costa Rica | Milk - Excluding Butter         | 2010           | 276                                                            |
| 48               | Costa Rica | Miscellaneous                   | 2010           | 6                                                              |
| 48               | Costa Rica | Oats                            | 2010           | 9                                                              |
| 48               | Costa Rica | Offals                          | 2010           | 6                                                              |
| 48               | Costa Rica | Oilcrops                        | 2010           | 44                                                             |
| 48               | Costa Rica | Olive Oil                       | 2010           | 6                                                              |
| 48               | Costa Rica | Onions                          | 2010           | 9                                                              |
| 48               | Costa Rica | Oranges, Mandarines             | 2010           | 1                                                              |
| 48               | Costa Rica | Palm Oil                        | 2010           | 152                                                            |
| 48               | Costa Rica | Peas                            | 2010           | 1                                                              |
| 48               | Costa Rica | Pelagic Fish                    | 2010           | 7                                                              |
| 48               | Costa Rica | Pepper                          | 2010           | 2                                                              |
| 48               | Costa Rica | Pigmeat                         | 2010           | 31                                                             |
| 48               | Costa Rica | Pineapples and products         | 2010           | 39                                                             |
| 48               | Costa Rica | Plantains                       | 2010           | 33                                                             |
| 48               | Costa Rica | Potatoes and products           | 2010           | 26                                                             |
| 48               | Costa Rica | Poultry Meat                    | 2010           | 77                                                             |
| 48               | Costa Rica | Pulses                          | 2010           | 103                                                            |
| 48               | Costa Rica | Pulses, Other and products      | 2010           | 4                                                              |
| 48               | Costa Rica | Rice (Milled Equivalent)        | 2010           | 466                                                            |
| 48               | Costa Rica | Roots, Other                    | 2010           | 12                                                             |
| 48               | Costa Rica | Sesameseed Oil                  | 2010           | 1                                                              |
| 48               | Costa Rica | Soyabean Oil                    | 2010           | 163                                                            |
| 48               | Costa Rica | Soyabeans                       | 2010           | 25                                                             |
| 48               | Costa Rica | Spices                          | 2010           | 5                                                              |
| 48               | Costa Rica | Spices, Other                   | 2010           | 3                                                              |
| 48               | Costa Rica | Starchy Roots                   | 2010           | 50                                                             |
| 48               | Costa Rica | Stimulants                      | 2010           | 14                                                             |
| 48               | Costa Rica | Sugar & Sweeteners              | 2010           | 544                                                            |
| 48               | Costa Rica | Sugar (Raw Equivalent)          | 2010           | 505                                                            |
| 48               | Costa Rica | Sugar non-centrifugal           | 2010           | 22                                                             |
| 48               | Costa Rica | Sunflower seed                  | 2010           | 1                                                              |
| 48               | Costa Rica | Sunflowerseed Oil               | 2010           | 15                                                             |
| 48               | Costa Rica | Sweeteners, Other               | 2010           | 16                                                             |
| 48               | Costa Rica | Tomatoes and products           | 2010           | 13                                                             |
| 48               | Costa Rica | Treenuts                        | 2010           | 6                                                              |
| 48               | Costa Rica | Vegetable Oils                  | 2010           | 339                                                            |
| 48               | Costa Rica | Vegetables                      | 2010           | 40                                                             |
| 48               | Costa Rica | Vegetables, Other               | 2010           | 19                                                             |
| 48               | Costa Rica | Vegetal Products                | 2010           | 2,275                                                          |
| 48               | Costa Rica | Wheat and products              | 2010           | 315                                                            |
| 48               | Costa Rica | Wine                            | 2010           | 3                                                              |
| 48               | Costa Rica | Yams                            | 2010           | 7                                                              |
| 48               | Costa Rica | Alcoholic Beverages             | 2011           | 82                                                             |
| 48               | Costa Rica | Animal fats                     | 2011           | 97                                                             |
| 48               | Costa Rica | Animal Products                 | 2011           | 584                                                            |
| 48               | Costa Rica | Apples and products             | 2011           | 8                                                              |
| 48               | Costa Rica | Bananas                         | 2011           | 1                                                              |
| 48               | Costa Rica | Barley and products             | 2011           | 27                                                             |
| 48               | Costa Rica | Beans                           | 2011           | 97                                                             |
| 48               | Costa Rica | Beer                            | 2011           | 14                                                             |
| 48               | Costa Rica | Beverages, Alcoholic            | 2011           | 63                                                             |
| 48               | Costa Rica | Bovine Meat                     | 2011           | 59                                                             |
| 48               | Costa Rica | Butter, Ghee                    | 2011           | 26                                                             |
| 48               | Costa Rica | Cassava and products            | 2011           | 16                                                             |
| 48               | Costa Rica | Cephalopods                     | 2011           | 1                                                              |
| 48               | Costa Rica | Cereals - Excluding Beer        | 2011           | 918                                                            |
| 48               | Costa Rica | Cereals, Other                  | 2011           | 2                                                              |
| 48               | Costa Rica | Cocoa Beans and products        | 2011           | 8                                                              |
| 48               | Costa Rica | Coconuts - Incl Copra           | 2011           | 10                                                             |
| 48               | Costa Rica | Coffee and products             | 2011           | 9                                                              |
| 48               | Costa Rica | Crustaceans                     | 2011           | 2                                                              |
| 48               | Costa Rica | Demersal Fish                   | 2011           | 1                                                              |
| 48               | Costa Rica | Eggs                            | 2011           | 34                                                             |
| 48               | Costa Rica | Fats, Animals, Raw              | 2011           | 72                                                             |
| 48               | Costa Rica | Fish, Seafood                   | 2011           | 20                                                             |

Dietary calcium and zinc deficiency risks are decreasing but remain prevalent

| FAO Country code | Country    | Food item                       | Reference year | Net energy supply (kcal <i>capita</i> <sup>-1</sup> d <sup>-1</sup> ) |
|------------------|------------|---------------------------------|----------------|-----------------------------------------------------------------------|
| 48               | Costa Rica | Freshwater Fish                 | 2011           | 9                                                                     |
| 48               | Costa Rica | Fruits - Excluding Wine         | 2011           | 141                                                                   |
| 48               | Costa Rica | Fruits, Other                   | 2011           | 40                                                                    |
| 48               | Costa Rica | Grand Total                     | 2011           | 2,898                                                                 |
| 48               | Costa Rica | Grapefruit and products         | 2011           | 2                                                                     |
| 48               | Costa Rica | Grapes and products (excl wine) | 2011           | 4                                                                     |
| 48               | Costa Rica | Groundnuts (Shelled Eq)         | 2011           | 9                                                                     |
| 48               | Costa Rica | Honey                           | 2011           | 2                                                                     |
| 48               | Costa Rica | Lemons, Limes and products      | 2011           | 2                                                                     |
| 48               | Costa Rica | Maize and products              | 2011           | 98                                                                    |
| 48               | Costa Rica | Maize Germ Oil                  | 2011           | 1                                                                     |
| 48               | Costa Rica | Marine Fish, Other              | 2011           | 2                                                                     |
| 48               | Costa Rica | Meat                            | 2011           | 164                                                                   |
| 48               | Costa Rica | Milk - Excluding Butter         | 2011           | 264                                                                   |
| 48               | Costa Rica | Miscellaneous                   | 2011           | 7                                                                     |
| 48               | Costa Rica | Oats                            | 2011           | 8                                                                     |
| 48               | Costa Rica | Offals                          | 2011           | 5                                                                     |
| 48               | Costa Rica | Oilcrops                        | 2011           | 45                                                                    |
| 48               | Costa Rica | Olive Oil                       | 2011           | 7                                                                     |
| 48               | Costa Rica | Onions                          | 2011           | 9                                                                     |
| 48               | Costa Rica | Oranges, Mandarines             | 2011           | 2                                                                     |
| 48               | Costa Rica | Palm Oil                        | 2011           | 156                                                                   |
| 48               | Costa Rica | Peas                            | 2011           | 1                                                                     |
| 48               | Costa Rica | Pelagic Fish                    | 2011           | 6                                                                     |
| 48               | Costa Rica | Pepper                          | 2011           | 2                                                                     |
| 48               | Costa Rica | Pigmeat                         | 2011           | 32                                                                    |
| 48               | Costa Rica | Pineapples and products         | 2011           | 49                                                                    |
| 48               | Costa Rica | Plantains                       | 2011           | 34                                                                    |
| 48               | Costa Rica | Potatoes and products           | 2011           | 29                                                                    |
| 48               | Costa Rica | Poultry Meat                    | 2011           | 73                                                                    |
| 48               | Costa Rica | Pulses                          | 2011           | 102                                                                   |
| 48               | Costa Rica | Pulses, Other and products      | 2011           | 4                                                                     |
| 48               | Costa Rica | Rice (Milled Equivalent)        | 2011           | 462                                                                   |
| 48               | Costa Rica | Roots, Other                    | 2011           | 17                                                                    |
| 48               | Costa Rica | Sesameseed Oil                  | 2011           | 2                                                                     |
| 48               | Costa Rica | Soyabean Oil                    | 2011           | 159                                                                   |
| 48               | Costa Rica | Soyabeans                       | 2011           | 25                                                                    |
| 48               | Costa Rica | Spices                          | 2011           | 6                                                                     |
| 48               | Costa Rica | Spices, Other                   | 2011           | 4                                                                     |
| 48               | Costa Rica | Starchy Roots                   | 2011           | 68                                                                    |
| 48               | Costa Rica | Stimulants                      | 2011           | 18                                                                    |
| 48               | Costa Rica | Sugar & Sweeteners              | 2011           | 537                                                                   |
| 48               | Costa Rica | Sugar (Raw Equivalent)          | 2011           | 498                                                                   |
| 48               | Costa Rica | Sugar non-centrifugal           | 2011           | 22                                                                    |
| 48               | Costa Rica | Sunflower seed                  | 2011           | 1                                                                     |
| 48               | Costa Rica | Sunflowerseed Oil               | 2011           | 19                                                                    |
| 48               | Costa Rica | Sweeteners, Other               | 2011           | 15                                                                    |
| 48               | Costa Rica | Tomatoes and products           | 2011           | 15                                                                    |
| 48               | Costa Rica | Treenuts                        | 2011           | 8                                                                     |
| 48               | Costa Rica | Vegetable Oils                  | 2011           | 344                                                                   |
| 48               | Costa Rica | Vegetables                      | 2011           | 40                                                                    |
| 48               | Costa Rica | Vegetables, Other               | 2011           | 17                                                                    |
| 48               | Costa Rica | Vegetal Products                | 2011           | 2,314                                                                 |
| 48               | Costa Rica | Wheat and products              | 2011           | 322                                                                   |
| 48               | Costa Rica | Wine                            | 2011           | 4                                                                     |
| 48               | Costa Rica | Yams                            | 2011           | 6                                                                     |
| 49               | Cuba       | Alcoholic Beverages             | 1992           | 43                                                                    |
| 49               | Cuba       | Animal fats                     | 1992           | 86                                                                    |
| 49               | Cuba       | Animal Products                 | 1992           | 386                                                                   |
| 49               | Cuba       | Bananas                         | 1992           | 41                                                                    |
| 49               | Cuba       | Beans                           | 1992           | 12                                                                    |
| 49               | Cuba       | Beer                            | 1992           | 18                                                                    |
| 49               | Cuba       | Beverages, Alcoholic            | 1992           | 25                                                                    |
| 49               | Cuba       | Bovine Meat                     | 1992           | 43                                                                    |
| 49               | Cuba       | Butter, Ghee                    | 1992           | 28                                                                    |
| 49               | Cuba       | Cassava and products            | 1992           | 50                                                                    |
| 49               | Cuba       | Cereals - Excluding Beer        | 1992           | 823                                                                   |
| 49               | Cuba       | Cocoa Beans and products        | 1992           | 1                                                                     |
| 49               | Cuba       | Coconut Oil                     | 1992           | 1                                                                     |
| 49               | Cuba       | Coconuts - Incl Copra           | 1992           | 2                                                                     |
| 49               | Cuba       | Coffee and products             | 1992           | 1                                                                     |
| 49               | Cuba       | Demersal Fish                   | 1992           | 7                                                                     |
| 49               | Cuba       | Eggs                            | 1992           | 32                                                                    |
| 49               | Cuba       | Fats, Animals, Raw              | 1992           | 58                                                                    |
| 49               | Cuba       | Fish, Seafood                   | 1992           | 17                                                                    |
| 49               | Cuba       | Freshwater Fish                 | 1992           | 4                                                                     |
| 49               | Cuba       | Fruits - Excluding Wine         | 1992           | 145                                                                   |
| 49               | Cuba       | Fruits, Other                   | 1992           | 14                                                                    |
| 49               | Cuba       | Grand Total                     | 1992           | 2,503                                                                 |
| 49               | Cuba       | Grapefruit and products         | 1992           | 9                                                                     |
| 49               | Cuba       | Groundnut Oil                   | 1992           | 3                                                                     |
| 49               | Cuba       | Groundnuts (Shelled Eq)         | 1992           | 7                                                                     |
| 49               | Cuba       | Honey                           | 1992           | 2                                                                     |
| 49               | Cuba       | Lemons, Limes and products      | 1992           | 1                                                                     |
| 49               | Cuba       | Maize and products              | 1992           | 29                                                                    |
| 49               | Cuba       | Marine Fish, Other              | 1992           | 4                                                                     |
| 49               | Cuba       | Meat                            | 1992           | 127                                                                   |
| 49               | Cuba       | Meat, Other                     | 1992           | 7                                                                     |
| 49               | Cuba       | Milk - Excluding Butter         | 1992           | 117                                                                   |
| 49               | Cuba       | Miscellaneous                   | 1992           | 1                                                                     |
| 49               | Cuba       | Mutton & Goat Meat              | 1992           | 3                                                                     |
| 49               | Cuba       | Offals                          | 1992           | 8                                                                     |
| 49               | Cuba       | Oilcrops                        | 1992           | 9                                                                     |
| 49               | Cuba       | Onions                          | 1992           | 2                                                                     |
| 49               | Cuba       | Oranges, Mandarines             | 1992           | 25                                                                    |
| 49               | Cuba       | Palm Oil                        | 1992           | 34                                                                    |
| 49               | Cuba       | Pelagic Fish                    | 1992           | 2                                                                     |

## Dietary calcium and zinc deficiency risks are decreasing but remain prevalent

| FAO Country code | Country | Food item                  | Reference year | Net energy supply (kcal capita <sup>-1</sup> d <sup>-1</sup> ) |
|------------------|---------|----------------------------|----------------|----------------------------------------------------------------|
| 49               | Cuba    | Pigmeat                    | 1992           | 51                                                             |
| 49               | Cuba    | Pineapples and products    | 1992           | 1                                                              |
| 49               | Cuba    | Plantains                  | 1992           | 52                                                             |
| 49               | Cuba    | Potatoes and products      | 1992           | 44                                                             |
| 49               | Cuba    | Poultry Meat               | 1992           | 23                                                             |
| 49               | Cuba    | Pulses                     | 1992           | 150                                                            |
| 49               | Cuba    | Pulses, Other and products | 1992           | 137                                                            |
| 49               | Cuba    | Rice (Milled Equivalent)   | 1992           | 449                                                            |
| 49               | Cuba    | Roots, Other               | 1992           | 4                                                              |
| 49               | Cuba    | Soyabean Oil               | 1992           | 82                                                             |
| 49               | Cuba    | Spices                     | 1992           | 1                                                              |
| 49               | Cuba    | Starchy Roots              | 1992           | 149                                                            |
| 49               | Cuba    | Stimulants                 | 1992           | 2                                                              |
| 49               | Cuba    | Sugar & Sweeteners         | 1992           | 572                                                            |
| 49               | Cuba    | Sugar (Raw Equivalent)     | 1992           | 571                                                            |
| 49               | Cuba    | Sunflowerseed Oil          | 1992           | 72                                                             |
| 49               | Cuba    | Sweet potatoes             | 1992           | 50                                                             |
| 49               | Cuba    | Tomatoes and products      | 1992           | 12                                                             |
| 49               | Cuba    | Vegetable Oils             | 1992           | 193                                                            |
| 49               | Cuba    | Vegetables                 | 1992           | 31                                                             |
| 49               | Cuba    | Vegetables, Other          | 1992           | 17                                                             |
| 49               | Cuba    | Vegetal Products           | 1992           | 2,117                                                          |
| 49               | Cuba    | Wheat and products         | 1992           | 345                                                            |
| 49               | Cuba    | Yams                       | 1992           | 2                                                              |
| 49               | Cuba    | Alcoholic Beverages        | 1993           | 33                                                             |
| 49               | Cuba    | Animal fats                | 1993           | 75                                                             |
| 49               | Cuba    | Animal Products            | 1993           | 366                                                            |
| 49               | Cuba    | Bananas                    | 1993           | 25                                                             |
| 49               | Cuba    | Beans                      | 1993           | 10                                                             |
| 49               | Cuba    | Beer                       | 1993           | 12                                                             |
| 49               | Cuba    | Beverages, Alcoholic       | 1993           | 20                                                             |
| 49               | Cuba    | Bovine Meat                | 1993           | 36                                                             |
| 49               | Cuba    | Butter, Ghee               | 1993           | 29                                                             |
| 49               | Cuba    | Cassava and products       | 1993           | 37                                                             |
| 49               | Cuba    | Cereals - Excluding Beer   | 1993           | 767                                                            |
| 49               | Cuba    | Cocoa Beans and products   | 1993           | 1                                                              |
| 49               | Cuba    | Coconuts - Incl Copra      | 1993           | 4                                                              |
| 49               | Cuba    | Coffee and products        | 1993           | 1                                                              |
| 49               | Cuba    | Demersal Fish              | 1993           | 9                                                              |
| 49               | Cuba    | Eggs                       | 1993           | 20                                                             |
| 49               | Cuba    | Fats, Animals, Raw         | 1993           | 46                                                             |
| 49               | Cuba    | Fish, Seafood              | 1993           | 17                                                             |
| 49               | Cuba    | Freshwater Fish            | 1993           | 4                                                              |
| 49               | Cuba    | Fruits - Excluding Wine    | 1993           | 109                                                            |
| 49               | Cuba    | Fruits, Other              | 1993           | 9                                                              |
| 49               | Cuba    | Grand Total                | 1993           | 2,321                                                          |
| 49               | Cuba    | Grapefruit and products    | 1993           | 10                                                             |
| 49               | Cuba    | Groundnut Oil              | 1993           | 4                                                              |
| 49               | Cuba    | Groundnuts (Shelled Eq)    | 1993           | 7                                                              |
| 49               | Cuba    | Honey                      | 1993           | 1                                                              |
| 49               | Cuba    | Lemons, Limes and products | 1993           | 1                                                              |
| 49               | Cuba    | Maize and products         | 1993           | 29                                                             |
| 49               | Cuba    | Marine Fish, Other         | 1993           | 2                                                              |
| 49               | Cuba    | Meat                       | 1993           | 134                                                            |
| 49               | Cuba    | Meat, Other                | 1993           | 7                                                              |
| 49               | Cuba    | Milk - Excluding Butter    | 1993           | 112                                                            |
| 49               | Cuba    | Miscellaneous              | 1993           | 1                                                              |
| 49               | Cuba    | Mutton & Goat Meat         | 1993           | 3                                                              |
| 49               | Cuba    | Offals                     | 1993           | 7                                                              |
| 49               | Cuba    | Oilcrops                   | 1993           | 11                                                             |
| 49               | Cuba    | Onions                     | 1993           | 1                                                              |
| 49               | Cuba    | Oranges, Mandarines        | 1993           | 23                                                             |
| 49               | Cuba    | Palm Oil                   | 1993           | 73                                                             |
| 49               | Cuba    | Pelagic Fish               | 1993           | 1                                                              |
| 49               | Cuba    | Pigmeat                    | 1993           | 67                                                             |
| 49               | Cuba    | Pineapples and products    | 1993           | 1                                                              |
| 49               | Cuba    | Plantains                  | 1993           | 40                                                             |
| 49               | Cuba    | Potatoes and products      | 1993           | 43                                                             |
| 49               | Cuba    | Poultry Meat               | 1993           | 22                                                             |
| 49               | Cuba    | Pulses                     | 1993           | 109                                                            |
| 49               | Cuba    | Pulses, Other and products | 1993           | 99                                                             |
| 49               | Cuba    | Rice (Milled Equivalent)   | 1993           | 433                                                            |
| 49               | Cuba    | Roots, Other               | 1993           | 3                                                              |
| 49               | Cuba    | Soyabean Oil               | 1993           | 92                                                             |
| 49               | Cuba    | Starchy Roots              | 1993           | 117                                                            |
| 49               | Cuba    | Stimulants                 | 1993           | 2                                                              |
| 49               | Cuba    | Sugar & Sweeteners         | 1993           | 570                                                            |
| 49               | Cuba    | Sugar (Raw Equivalent)     | 1993           | 570                                                            |
| 49               | Cuba    | Sunflowerseed Oil          | 1993           | 45                                                             |
| 49               | Cuba    | Sweet potatoes             | 1993           | 32                                                             |
| 49               | Cuba    | Tomatoes and products      | 1993           | 8                                                              |
| 49               | Cuba    | Vegetable Oils             | 1993           | 213                                                            |
| 49               | Cuba    | Vegetables                 | 1993           | 23                                                             |
| 49               | Cuba    | Vegetables, Other          | 1993           | 14                                                             |
| 49               | Cuba    | Vegetal Products           | 1993           | 1,955                                                          |
| 49               | Cuba    | Wheat and products         | 1993           | 305                                                            |
| 49               | Cuba    | Yams                       | 1993           | 2                                                              |
| 49               | Cuba    | Alcoholic Beverages        | 1994           | 41                                                             |
| 49               | Cuba    | Animal fats                | 1994           | 70                                                             |
| 49               | Cuba    | Animal Products            | 1994           | 371                                                            |
| 49               | Cuba    | Bananas                    | 1994           | 24                                                             |
| 49               | Cuba    | Beans                      | 1994           | 14                                                             |
| 49               | Cuba    | Beer                       | 1994           | 11                                                             |
| 49               | Cuba    | Beverages, Alcoholic       | 1994           | 30                                                             |
| 49               | Cuba    | Bovine Meat                | 1994           | 35                                                             |
| 49               | Cuba    | Butter, Ghee               | 1994           | 29                                                             |
| 49               | Cuba    | Cassava and products       | 1994           | 30                                                             |

Dietary calcium and zinc deficiency risks are decreasing but remain prevalent

| FAO Country code | Country | Food item                  | Reference year | Net energy supply (kcal <i>capita</i> <sup>-1</sup> d <sup>-1</sup> ) |
|------------------|---------|----------------------------|----------------|-----------------------------------------------------------------------|
| 49               | Cuba    | Cephalopods                | 1994           | 1                                                                     |
| 49               | Cuba    | Cereals - Excluding Beer   | 1994           | 808                                                                   |
| 49               | Cuba    | Cocoa Beans and products   | 1994           | 1                                                                     |
| 49               | Cuba    | Coconuts - Incl Copra      | 1994           | 3                                                                     |
| 49               | Cuba    | Coffee and products        | 1994           | 1                                                                     |
| 49               | Cuba    | Demersal Fish              | 1994           | 7                                                                     |
| 49               | Cuba    | Eggs                       | 1994           | 21                                                                    |
| 49               | Cuba    | Fats, Animals, Raw         | 1994           | 41                                                                    |
| 49               | Cuba    | Fish, Seafood              | 1994           | 16                                                                    |
| 49               | Cuba    | Freshwater Fish            | 1994           | 4                                                                     |
| 49               | Cuba    | Fruits - Excluding Wine    | 1994           | 105                                                                   |
| 49               | Cuba    | Fruits, Other              | 1994           | 11                                                                    |
| 49               | Cuba    | Grand Total                | 1994           | 2,361                                                                 |
| 49               | Cuba    | Grapefruit and products    | 1994           | 10                                                                    |
| 49               | Cuba    | Groundnut Oil              | 1994           | 4                                                                     |
| 49               | Cuba    | Groundnuts (Shelled Eq)    | 1994           | 8                                                                     |
| 49               | Cuba    | Honey                      | 1994           | 1                                                                     |
| 49               | Cuba    | Lemons, Limes and products | 1994           | 1                                                                     |
| 49               | Cuba    | Maize and products         | 1994           | 21                                                                    |
| 49               | Cuba    | Marine Fish, Other         | 1994           | 3                                                                     |
| 49               | Cuba    | Meat                       | 1994           | 136                                                                   |
| 49               | Cuba    | Meat, Other                | 1994           | 7                                                                     |
| 49               | Cuba    | Milk - Excluding Butter    | 1994           | 122                                                                   |
| 49               | Cuba    | Miscellaneous              | 1994           | 1                                                                     |
| 49               | Cuba    | Mutton & Goat Meat         | 1994           | 3                                                                     |
| 49               | Cuba    | Offals                     | 1994           | 6                                                                     |
| 49               | Cuba    | Oilcrops                   | 1994           | 11                                                                    |
| 49               | Cuba    | Oilcrops Oil, Other        | 1994           | 1                                                                     |
| 49               | Cuba    | Onions                     | 1994           | 1                                                                     |
| 49               | Cuba    | Oranges, Mandarines        | 1994           | 18                                                                    |
| 49               | Cuba    | Palm Oil                   | 1994           | 98                                                                    |
| 49               | Cuba    | Pelagic Fish               | 1994           | 1                                                                     |
| 49               | Cuba    | Pigmeat                    | 1994           | 71                                                                    |
| 49               | Cuba    | Pineapples and products    | 1994           | 1                                                                     |
| 49               | Cuba    | Plantains                  | 1994           | 40                                                                    |
| 49               | Cuba    | Potatoes and products      | 1994           | 33                                                                    |
| 49               | Cuba    | Poultry Meat               | 1994           | 21                                                                    |
| 49               | Cuba    | Pulses                     | 1994           | 156                                                                   |
| 49               | Cuba    | Pulses, Other and products | 1994           | 141                                                                   |
| 49               | Cuba    | Rice (Milled Equivalent)   | 1994           | 474                                                                   |
| 49               | Cuba    | Roots, Other               | 1994           | 2                                                                     |
| 49               | Cuba    | Soyabean Oil               | 1994           | 94                                                                    |
| 49               | Cuba    | Spices                     | 1994           | 1                                                                     |
| 49               | Cuba    | Starchy Roots              | 1994           | 102                                                                   |
| 49               | Cuba    | Stimulants                 | 1994           | 3                                                                     |
| 49               | Cuba    | Sugar & Sweeteners         | 1994           | 536                                                                   |
| 49               | Cuba    | Sugar (Raw Equivalent)     | 1994           | 535                                                                   |
| 49               | Cuba    | Sunflowerseed Oil          | 1994           | 11                                                                    |
| 49               | Cuba    | Sweet potatoes             | 1994           | 35                                                                    |
| 49               | Cuba    | Tomatoes and products      | 1994           | 4                                                                     |
| 49               | Cuba    | Vegetable Oils             | 1994           | 208                                                                   |
| 49               | Cuba    | Vegetables                 | 1994           | 19                                                                    |
| 49               | Cuba    | Vegetables, Other          | 1994           | 14                                                                    |
| 49               | Cuba    | Vegetal Products           | 1994           | 1,990                                                                 |
| 49               | Cuba    | Wheat and products         | 1994           | 314                                                                   |
| 49               | Cuba    | Yams                       | 1994           | 2                                                                     |
| 49               | Cuba    | Alcoholic Beverages        | 1995           | 39                                                                    |
| 49               | Cuba    | Animal fats                | 1995           | 29                                                                    |
| 49               | Cuba    | Animal Products            | 1995           | 334                                                                   |
| 49               | Cuba    | Bananas                    | 1995           | 26                                                                    |
| 49               | Cuba    | Beans                      | 1995           | 16                                                                    |
| 49               | Cuba    | Beer                       | 1995           | 13                                                                    |
| 49               | Cuba    | Beverages, Alcoholic       | 1995           | 26                                                                    |
| 49               | Cuba    | Bovine Meat                | 1995           | 36                                                                    |
| 49               | Cuba    | Butter, Chee               | 1995           | 6                                                                     |
| 49               | Cuba    | Cassava and products       | 1995           | 34                                                                    |
| 49               | Cuba    | Cereals - Excluding Beer   | 1995           | 824                                                                   |
| 49               | Cuba    | Cocoa Beans and products   | 1995           | 1                                                                     |
| 49               | Cuba    | Coconuts - Incl Copra      | 1995           | 4                                                                     |
| 49               | Cuba    | Coffee and products        | 1995           | 1                                                                     |
| 49               | Cuba    | Demersal Fish              | 1995           | 8                                                                     |
| 49               | Cuba    | Eggs                       | 1995           | 19                                                                    |
| 49               | Cuba    | Fats, Animals, Raw         | 1995           | 23                                                                    |
| 49               | Cuba    | Fish, Seafood              | 1995           | 18                                                                    |
| 49               | Cuba    | Freshwater Fish            | 1995           | 5                                                                     |
| 49               | Cuba    | Fruits - Excluding Wine    | 1995           | 117                                                                   |
| 49               | Cuba    | Fruits, Other              | 1995           | 16                                                                    |
| 49               | Cuba    | Grand Total                | 1995           | 2,325                                                                 |
| 49               | Cuba    | Grapefruit and products    | 1995           | 12                                                                    |
| 49               | Cuba    | Groundnut Oil              | 1995           | 5                                                                     |
| 49               | Cuba    | Groundnuts (Shelled Eq)    | 1995           | 9                                                                     |
| 49               | Cuba    | Honey                      | 1995           | 1                                                                     |
| 49               | Cuba    | Lemons, Limes and products | 1995           | 1                                                                     |
| 49               | Cuba    | Maize and products         | 1995           | 23                                                                    |
| 49               | Cuba    | Marine Fish, Other         | 1995           | 3                                                                     |
| 49               | Cuba    | Meat                       | 1995           | 132                                                                   |
| 49               | Cuba    | Meat, Other                | 1995           | 7                                                                     |
| 49               | Cuba    | Milk - Excluding Butter    | 1995           | 130                                                                   |
| 49               | Cuba    | Miscellaneous              | 1995           | 1                                                                     |
| 49               | Cuba    | Mutton & Goat Meat         | 1995           | 2                                                                     |
| 49               | Cuba    | Offals                     | 1995           | 5                                                                     |
| 49               | Cuba    | Oilcrops                   | 1995           | 14                                                                    |
| 49               | Cuba    | Oilcrops Oil, Other        | 1995           | 3                                                                     |
| 49               | Cuba    | Onions                     | 1995           | 1                                                                     |
| 49               | Cuba    | Oranges, Mandarines        | 1995           | 19                                                                    |
| 49               | Cuba    | Palm Oil                   | 1995           | 62                                                                    |
| 49               | Cuba    | Pelagic Fish               | 1995           | 1                                                                     |

Dietary calcium and zinc deficiency risks are decreasing but remain prevalent

| FAO Country code | Country | Food item                  | Reference year | Net energy supply (kcal capita <sup>-1</sup> d <sup>-1</sup> ) |
|------------------|---------|----------------------------|----------------|----------------------------------------------------------------|
| 49               | Cuba    | Pigmeat                    | 1995           | 63                                                             |
| 49               | Cuba    | Pineapples and products    | 1995           | 1                                                              |
| 49               | Cuba    | Plantains                  | 1995           | 43                                                             |
| 49               | Cuba    | Potatoes and products      | 1995           | 45                                                             |
| 49               | Cuba    | Poultry Meat               | 1995           | 22                                                             |
| 49               | Cuba    | Pulses                     | 1995           | 123                                                            |
| 49               | Cuba    | Pulses, Other and products | 1995           | 107                                                            |
| 49               | Cuba    | Rice (Milled Equivalent)   | 1995           | 479                                                            |
| 49               | Cuba    | Roots, Other               | 1995           | 3                                                              |
| 49               | Cuba    | Soyabean Oil               | 1995           | 72                                                             |
| 49               | Cuba    | Soyabeans                  | 1995           | 1                                                              |
| 49               | Cuba    | Starchy Roots              | 1995           | 120                                                            |
| 49               | Cuba    | Stimulants                 | 1995           | 3                                                              |
| 49               | Cuba    | Sugar & Sweeteners         | 1995           | 569                                                            |
| 49               | Cuba    | Sugar (Raw Equivalent)     | 1995           | 569                                                            |
| 49               | Cuba    | Sunflowerseed Oil          | 1995           | 16                                                             |
| 49               | Cuba    | Sweet potatoes             | 1995           | 37                                                             |
| 49               | Cuba    | Tomatoes and products      | 1995           | 8                                                              |
| 49               | Cuba    | Vegetable Oils             | 1995           | 156                                                            |
| 49               | Cuba    | Vegetables                 | 1995           | 24                                                             |
| 49               | Cuba    | Vegetables, Other          | 1995           | 15                                                             |
| 49               | Cuba    | Vegetal Products           | 1995           | 1,992                                                          |
| 49               | Cuba    | Wheat and products         | 1995           | 322                                                            |
| 49               | Cuba    | Yams                       | 1995           | 1                                                              |
| 49               | Cuba    | Alcoholic Beverages        | 1996           | 39                                                             |
| 49               | Cuba    | Animal fats                | 1996           | 26                                                             |
| 49               | Cuba    | Animal Products            | 1996           | 330                                                            |
| 49               | Cuba    | Bananas                    | 1996           | 28                                                             |
| 49               | Cuba    | Beans                      | 1996           | 19                                                             |
| 49               | Cuba    | Beer                       | 1996           | 14                                                             |
| 49               | Cuba    | Beverages, Alcoholic       | 1996           | 24                                                             |
| 49               | Cuba    | Bovine Meat                | 1996           | 39                                                             |
| 49               | Cuba    | Butter, Ghee               | 1996           | 3                                                              |
| 49               | Cuba    | Cassava and products       | 1996           | 40                                                             |
| 49               | Cuba    | Cereals - Excluding Beer   | 1996           | 869                                                            |
| 49               | Cuba    | Cocoa Beans and products   | 1996           | 1                                                              |
| 49               | Cuba    | Coconuts - Incl Copra      | 1996           | 5                                                              |
| 49               | Cuba    | Coffee and products        | 1996           | 1                                                              |
| 49               | Cuba    | Demersal Fish              | 1996           | 7                                                              |
| 49               | Cuba    | Eggs                       | 1996           | 18                                                             |
| 49               | Cuba    | Fats, Animals, Raw         | 1996           | 23                                                             |
| 49               | Cuba    | Fish, Seafood              | 1996           | 18                                                             |
| 49               | Cuba    | Freshwater Fish            | 1996           | 8                                                              |
| 49               | Cuba    | Fruits - Excluding Wine    | 1996           | 147                                                            |
| 49               | Cuba    | Fruits, Other              | 1996           | 15                                                             |
| 49               | Cuba    | Grand Total                | 1996           | 2,447                                                          |
| 49               | Cuba    | Grapefruit and products    | 1996           | 16                                                             |
| 49               | Cuba    | Groundnut Oil              | 1996           | 4                                                              |
| 49               | Cuba    | Groundnuts (Shelled Eq)    | 1996           | 9                                                              |
| 49               | Cuba    | Lemons, Limes and products | 1996           | 1                                                              |
| 49               | Cuba    | Maize and products         | 1996           | 23                                                             |
| 49               | Cuba    | Marine Fish, Other         | 1996           | 2                                                              |
| 49               | Cuba    | Meat                       | 1996           | 138                                                            |
| 49               | Cuba    | Meat, Other                | 1996           | 8                                                              |
| 49               | Cuba    | Milk - Excluding Butter    | 1996           | 125                                                            |
| 49               | Cuba    | Miscellaneous              | 1996           | 1                                                              |
| 49               | Cuba    | Mutton & Goat Meat         | 1996           | 1                                                              |
| 49               | Cuba    | Offals                     | 1996           | 5                                                              |
| 49               | Cuba    | Oilcrops                   | 1996           | 15                                                             |
| 49               | Cuba    | Oilcrops Oil, Other        | 1996           | 3                                                              |
| 49               | Cuba    | Onions                     | 1996           | 1                                                              |
| 49               | Cuba    | Oranges, Mandarines        | 1996           | 20                                                             |
| 49               | Cuba    | Palm Oil                   | 1996           | 50                                                             |
| 49               | Cuba    | Pelagic Fish               | 1996           | 1                                                              |
| 49               | Cuba    | Pigmeat                    | 1996           | 67                                                             |
| 49               | Cuba    | Pineapples and products    | 1996           | 1                                                              |
| 49               | Cuba    | Plantains                  | 1996           | 66                                                             |
| 49               | Cuba    | Potatoes and products      | 1996           | 59                                                             |
| 49               | Cuba    | Poultry Meat               | 1996           | 23                                                             |
| 49               | Cuba    | Pulses                     | 1996           | 131                                                            |
| 49               | Cuba    | Pulses, Other and products | 1996           | 111                                                            |
| 49               | Cuba    | Rice (Milled Equivalent)   | 1996           | 507                                                            |
| 49               | Cuba    | Roots, Other               | 1996           | 4                                                              |
| 49               | Cuba    | Soyabean Oil               | 1996           | 70                                                             |
| 49               | Cuba    | Soyabeans                  | 1996           | 1                                                              |
| 49               | Cuba    | Starchy Roots              | 1996           | 142                                                            |
| 49               | Cuba    | Stimulants                 | 1996           | 2                                                              |
| 49               | Cuba    | Sugar & Sweeteners         | 1996           | 594                                                            |
| 49               | Cuba    | Sugar (Raw Equivalent)     | 1996           | 594                                                            |
| 49               | Cuba    | Sunflowerseed Oil          | 1996           | 18                                                             |
| 49               | Cuba    | Sweet potatoes             | 1996           | 38                                                             |
| 49               | Cuba    | Tomatoes and products      | 1996           | 10                                                             |
| 49               | Cuba    | Vegetable Oils             | 1996           | 146                                                            |
| 49               | Cuba    | Vegetables                 | 1996           | 30                                                             |
| 49               | Cuba    | Vegetables, Other          | 1996           | 19                                                             |
| 49               | Cuba    | Vegetal Products           | 1996           | 2,116                                                          |
| 49               | Cuba    | Wheat and products         | 1996           | 339                                                            |
| 49               | Cuba    | Yams                       | 1996           | 1                                                              |
| 49               | Cuba    | Alcoholic Beverages        | 1997           | 38                                                             |
| 49               | Cuba    | Animal fats                | 1997           | 23                                                             |
| 49               | Cuba    | Animal Products            | 1997           | 319                                                            |
| 49               | Cuba    | Bananas                    | 1997           | 21                                                             |
| 49               | Cuba    | Beans                      | 1997           | 23                                                             |
| 49               | Cuba    | Beer                       | 1997           | 13                                                             |
| 49               | Cuba    | Beverages, Alcoholic       | 1997           | 24                                                             |
| 49               | Cuba    | Bovine Meat                | 1997           | 38                                                             |
| 49               | Cuba    | Butter, Ghee               | 1997           | 3                                                              |



Dietary calcium and zinc deficiency risks are decreasing but remain prevalent

| FAO Country code | Country | Food item                  | Reference year | Net energy supply (kcal capita <sup>-1</sup> d <sup>-1</sup> ) |
|------------------|---------|----------------------------|----------------|----------------------------------------------------------------|
| 49               | Cuba    | Cassava and products       | 1997           | 40                                                             |
| 49               | Cuba    | Cereals - Excluding Beer   | 1997           | 926                                                            |
| 49               | Cuba    | Cocoa Beans and products   | 1997           | 1                                                              |
| 49               | Cuba    | Coconuts - Incl Copra      | 1997           | 7                                                              |
| 49               | Cuba    | Coffee and products        | 1997           | 2                                                              |
| 49               | Cuba    | Demersal Fish              | 1997           | 5                                                              |
| 49               | Cuba    | Eggs                       | 1997           | 20                                                             |
| 49               | Cuba    | Fats, Animals, Raw         | 1997           | 19                                                             |
| 49               | Cuba    | Fish, Seafood              | 1997           | 17                                                             |
| 49               | Cuba    | Freshwater Fish            | 1997           | 7                                                              |
| 49               | Cuba    | Fruits - Excluding Wine    | 1997           | 138                                                            |
| 49               | Cuba    | Fruits, Other              | 1997           | 14                                                             |
| 49               | Cuba    | Grand Total                | 1997           | 2,563                                                          |
| 49               | Cuba    | Grapefruit and products    | 1997           | 13                                                             |
| 49               | Cuba    | Groundnut Oil              | 1997           | 5                                                              |
| 49               | Cuba    | Groundnuts (Shelled Eq)    | 1997           | 9                                                              |
| 49               | Cuba    | Honey                      | 1997           | 1                                                              |
| 49               | Cuba    | Lemons, Limes and products | 1997           | 1                                                              |
| 49               | Cuba    | Maize and products         | 1997           | 31                                                             |
| 49               | Cuba    | Marine Fish, Other         | 1997           | 3                                                              |
| 49               | Cuba    | Meat                       | 1997           | 127                                                            |
| 49               | Cuba    | Meat, Other                | 1997           | 8                                                              |
| 49               | Cuba    | Milk - Excluding Butter    | 1997           | 128                                                            |
| 49               | Cuba    | Miscellaneous              | 1997           | 1                                                              |
| 49               | Cuba    | Mutton & Goat Meat         | 1997           | 2                                                              |
| 49               | Cuba    | Offals                     | 1997           | 5                                                              |
| 49               | Cuba    | Oilcrops                   | 1997           | 18                                                             |
| 49               | Cuba    | Onions                     | 1997           | 1                                                              |
| 49               | Cuba    | Oranges, Mandarines        | 1997           | 33                                                             |
| 49               | Cuba    | Palm Oil                   | 1997           | 57                                                             |
| 49               | Cuba    | Pelagic Fish               | 1997           | 1                                                              |
| 49               | Cuba    | Pigmeat                    | 1997           | 51                                                             |
| 49               | Cuba    | Plantains                  | 1997           | 54                                                             |
| 49               | Cuba    | Potatoes and products      | 1997           | 56                                                             |
| 49               | Cuba    | Poultry Meat               | 1997           | 28                                                             |
| 49               | Cuba    | Pulses                     | 1997           | 148                                                            |
| 49               | Cuba    | Pulses, Other and products | 1997           | 125                                                            |
| 49               | Cuba    | Rice (Milled Equivalent)   | 1997           | 535                                                            |
| 49               | Cuba    | Roots, Other               | 1997           | 5                                                              |
| 49               | Cuba    | Soyabean Oil               | 1997           | 71                                                             |
| 49               | Cuba    | Soyabeans                  | 1997           | 1                                                              |
| 49               | Cuba    | Starchy Roots              | 1997           | 138                                                            |
| 49               | Cuba    | Stimulants                 | 1997           | 3                                                              |
| 49               | Cuba    | Sugar & Sweeteners         | 1997           | 650                                                            |
| 49               | Cuba    | Sugar (Raw Equivalent)     | 1997           | 649                                                            |
| 49               | Cuba    | Sunflowerseed Oil          | 1997           | 22                                                             |
| 49               | Cuba    | Sweet potatoes             | 1997           | 36                                                             |
| 49               | Cuba    | Tomatoes and products      | 1997           | 9                                                              |
| 49               | Cuba    | Vegetable Oils             | 1997           | 155                                                            |
| 49               | Cuba    | Vegetables                 | 1997           | 29                                                             |
| 49               | Cuba    | Vegetables, Other          | 1997           | 19                                                             |
| 49               | Cuba    | Vegetal Products           | 1997           | 2,243                                                          |
| 49               | Cuba    | Wheat and products         | 1997           | 360                                                            |
| 49               | Cuba    | Alcoholic Beverages        | 1998           | 44                                                             |
| 49               | Cuba    | Animal fats                | 1998           | 24                                                             |
| 49               | Cuba    | Animal Products            | 1998           | 336                                                            |
| 49               | Cuba    | Bananas                    | 1998           | 24                                                             |
| 49               | Cuba    | Beans                      | 1998           | 30                                                             |
| 49               | Cuba    | Beer                       | 1998           | 18                                                             |
| 49               | Cuba    | Beverages, Alcoholic       | 1998           | 26                                                             |
| 49               | Cuba    | Bovine Meat                | 1998           | 40                                                             |
| 49               | Cuba    | Butter, Ghee               | 1998           | 4                                                              |
| 49               | Cuba    | Cassava and products       | 1998           | 60                                                             |
| 49               | Cuba    | Cereals - Excluding Beer   | 1998           | 953                                                            |
| 49               | Cuba    | Cocoa Beans and products   | 1998           | 1                                                              |
| 49               | Cuba    | Coconuts - Incl Copra      | 1998           | 11                                                             |
| 49               | Cuba    | Coffee and products        | 1998           | 1                                                              |
| 49               | Cuba    | Demersal Fish              | 1998           | 5                                                              |
| 49               | Cuba    | Eggs                       | 1998           | 18                                                             |
| 49               | Cuba    | Fats, Animals, Raw         | 1998           | 20                                                             |
| 49               | Cuba    | Fish, Seafood              | 1998           | 18                                                             |
| 49               | Cuba    | Freshwater Fish            | 1998           | 7                                                              |
| 49               | Cuba    | Fruits - Excluding Wine    | 1998           | 143                                                            |
| 49               | Cuba    | Fruits, Other              | 1998           | 20                                                             |
| 49               | Cuba    | Grand Total                | 1998           | 2,651                                                          |
| 49               | Cuba    | Grapefruit and products    | 1998           | 15                                                             |
| 49               | Cuba    | Groundnut Oil              | 1998           | 5                                                              |
| 49               | Cuba    | Groundnuts (Shelled Eq)    | 1998           | 10                                                             |
| 49               | Cuba    | Honey                      | 1998           | 1                                                              |
| 49               | Cuba    | Lemons, Limes and products | 1998           | 1                                                              |
| 49               | Cuba    | Maize and products         | 1998           | 44                                                             |
| 49               | Cuba    | Marine Fish, Other         | 1998           | 2                                                              |
| 49               | Cuba    | Meat                       | 1998           | 137                                                            |
| 49               | Cuba    | Meat, Other                | 1998           | 8                                                              |
| 49               | Cuba    | Milk - Excluding Butter    | 1998           | 134                                                            |
| 49               | Cuba    | Miscellaneous              | 1998           | 1                                                              |
| 49               | Cuba    | Mutton & Goat Meat         | 1998           | 2                                                              |
| 49               | Cuba    | Offals                     | 1998           | 5                                                              |
| 49               | Cuba    | Oilcrops                   | 1998           | 24                                                             |
| 49               | Cuba    | Oilcrops Oil, Other        | 1998           | 4                                                              |
| 49               | Cuba    | Onions                     | 1998           | 2                                                              |
| 49               | Cuba    | Oranges, Mandarines        | 1998           | 25                                                             |
| 49               | Cuba    | Palm Oil                   | 1998           | 58                                                             |
| 49               | Cuba    | Pelagic Fish               | 1998           | 3                                                              |
| 49               | Cuba    | Pigmeat                    | 1998           | 54                                                             |
| 49               | Cuba    | Pineapples and products    | 1998           | 1                                                              |
| 49               | Cuba    | Plantains                  | 1998           | 56                                                             |

Dietary calcium and zinc deficiency risks are decreasing but remain prevalent

| FAO Country code | Country | Food item                  | Reference year | Net energy supply (kcal capita <sup>-1</sup> d <sup>-1</sup> ) |
|------------------|---------|----------------------------|----------------|----------------------------------------------------------------|
| 49               | Cuba    | Potatoes and products      | 1998           | 36                                                             |
| 49               | Cuba    | Poultry Meat               | 1998           | 34                                                             |
| 49               | Cuba    | Pulses                     | 1998           | 167                                                            |
| 49               | Cuba    | Pulses, Other and products | 1998           | 136                                                            |
| 49               | Cuba    | Rice (Milled Equivalent)   | 1998           | 543                                                            |
| 49               | Cuba    | Roots, Other               | 1998           | 10                                                             |
| 49               | Cuba    | Soyabean Oil               | 1998           | 77                                                             |
| 49               | Cuba    | Soyabeans                  | 1998           | 2                                                              |
| 49               | Cuba    | Starchy Roots              | 1998           | 151                                                            |
| 49               | Cuba    | Stimulants                 | 1998           | 2                                                              |
| 49               | Cuba    | Sugar & Sweeteners         | 1998           | 629                                                            |
| 49               | Cuba    | Sugar (Raw Equivalent)     | 1998           | 628                                                            |
| 49               | Cuba    | Sunflowerseed Oil          | 1998           | 22                                                             |
| 49               | Cuba    | Sweet potatoes             | 1998           | 43                                                             |
| 49               | Cuba    | Tomatoes and products      | 1998           | 7                                                              |
| 49               | Cuba    | Vegetable Oils             | 1998           | 166                                                            |
| 49               | Cuba    | Vegetables                 | 1998           | 35                                                             |
| 49               | Cuba    | Vegetables, Other          | 1998           | 26                                                             |
| 49               | Cuba    | Vegetal Products           | 1998           | 2,315                                                          |
| 49               | Cuba    | Wheat and products         | 1998           | 367                                                            |
| 49               | Cuba    | Yams                       | 1998           | 2                                                              |
| 49               | Cuba    | Alcoholic Beverages        | 1999           | 48                                                             |
| 49               | Cuba    | Animal fats                | 1999           | 25                                                             |
| 49               | Cuba    | Animal Products            | 1999           | 360                                                            |
| 49               | Cuba    | Bananas                    | 1999           | 22                                                             |
| 49               | Cuba    | Beans                      | 1999           | 113                                                            |
| 49               | Cuba    | Beer                       | 1999           | 18                                                             |
| 49               | Cuba    | Beverages, Alcoholic       | 1999           | 27                                                             |
| 49               | Cuba    | Bovine Meat                | 1999           | 43                                                             |
| 49               | Cuba    | Butter, Ghee               | 1999           | 5                                                              |
| 49               | Cuba    | Cassava and products       | 1999           | 73                                                             |
| 49               | Cuba    | Cereals - Excluding Beer   | 1999           | 1,033                                                          |
| 49               | Cuba    | Cereals, Other             | 1999           | 1                                                              |
| 49               | Cuba    | Cocoa Beans and products   | 1999           | 2                                                              |
| 49               | Cuba    | Coconuts - Incl Copra      | 1999           | 14                                                             |
| 49               | Cuba    | Coffee and products        | 1999           | 3                                                              |
| 49               | Cuba    | Demersal Fish              | 1999           | 1                                                              |
| 49               | Cuba    | Eggs                       | 1999           | 22                                                             |
| 49               | Cuba    | Fats, Animals, Raw         | 1999           | 20                                                             |
| 49               | Cuba    | Fish, Seafood              | 1999           | 18                                                             |
| 49               | Cuba    | Freshwater Fish            | 1999           | 7                                                              |
| 49               | Cuba    | Fruits - Excluding Wine    | 1999           | 143                                                            |
| 49               | Cuba    | Fruits, Other              | 1999           | 30                                                             |
| 49               | Cuba    | Grand Total                | 1999           | 2,898                                                          |
| 49               | Cuba    | Grapefruit and products    | 1999           | 6                                                              |
| 49               | Cuba    | Groundnut Oil              | 1999           | 3                                                              |
| 49               | Cuba    | Groundnuts (Shelled Eq)    | 1999           | 5                                                              |
| 49               | Cuba    | Honey                      | 1999           | 1                                                              |
| 49               | Cuba    | Lemons, Limes and products | 1999           | 1                                                              |
| 49               | Cuba    | Maize and products         | 1999           | 64                                                             |
| 49               | Cuba    | Marine Fish, Other         | 1999           | 7                                                              |
| 49               | Cuba    | Meat                       | 1999           | 154                                                            |
| 49               | Cuba    | Milk - Excluding Butter    | 1999           | 133                                                            |
| 49               | Cuba    | Miscellaneous              | 1999           | 2                                                              |
| 49               | Cuba    | Mutton & Goat Meat         | 1999           | 5                                                              |
| 49               | Cuba    | Offals                     | 1999           | 6                                                              |
| 49               | Cuba    | Oilcrops                   | 1999           | 23                                                             |
| 49               | Cuba    | Oilcrops Oil, Other        | 1999           | 6                                                              |
| 49               | Cuba    | Onions                     | 1999           | 4                                                              |
| 49               | Cuba    | Oranges, Mandarines        | 1999           | 19                                                             |
| 49               | Cuba    | Pelagic Fish               | 1999           | 2                                                              |
| 49               | Cuba    | Pigmeat                    | 1999           | 69                                                             |
| 49               | Cuba    | Pineapples and products    | 1999           | 1                                                              |
| 49               | Cuba    | Plantains                  | 1999           | 63                                                             |
| 49               | Cuba    | Potatoes and products      | 1999           | 56                                                             |
| 49               | Cuba    | Poultry Meat               | 1999           | 38                                                             |
| 49               | Cuba    | Pulses                     | 1999           | 222                                                            |
| 49               | Cuba    | Pulses, Other and products | 1999           | 109                                                            |
| 49               | Cuba    | Rice (Milled Equivalent)   | 1999           | 590                                                            |
| 49               | Cuba    | Roots, Other               | 1999           | 19                                                             |
| 49               | Cuba    | Soyabean Oil               | 1999           | 66                                                             |
| 49               | Cuba    | Soyabeans                  | 1999           | 3                                                              |
| 49               | Cuba    | Spices                     | 1999           | 1                                                              |
| 49               | Cuba    | Starchy Roots              | 1999           | 196                                                            |
| 49               | Cuba    | Stimulants                 | 1999           | 5                                                              |
| 49               | Cuba    | Sugar & Sweeteners         | 1999           | 664                                                            |
| 49               | Cuba    | Sugar (Raw Equivalent)     | 1999           | 662                                                            |
| 49               | Cuba    | Sunflowerseed Oil          | 1999           | 65                                                             |
| 49               | Cuba    | Sweet potatoes             | 1999           | 46                                                             |
| 49               | Cuba    | Sweeteners, Other          | 1999           | 1                                                              |
| 49               | Cuba    | Tomatoes and products      | 1999           | 19                                                             |
| 49               | Cuba    | Vegetable Oils             | 1999           | 141                                                            |
| 49               | Cuba    | Vegetables                 | 1999           | 60                                                             |
| 49               | Cuba    | Vegetables, Other          | 1999           | 36                                                             |
| 49               | Cuba    | Vegetal Products           | 1999           | 2,538                                                          |
| 49               | Cuba    | Wheat and products         | 1999           | 379                                                            |
| 49               | Cuba    | Wine                       | 1999           | 3                                                              |
| 49               | Cuba    | Yams                       | 1999           | 2                                                              |
| 49               | Cuba    | Alcoholic Beverages        | 2000           | 47                                                             |
| 49               | Cuba    | Animal fats                | 2000           | 23                                                             |
| 49               | Cuba    | Animal Products            | 2000           | 359                                                            |
| 49               | Cuba    | Bananas                    | 2000           | 32                                                             |
| 49               | Cuba    | Beans                      | 2000           | 123                                                            |
| 49               | Cuba    | Beer                       | 2000           | 19                                                             |
| 49               | Cuba    | Beverages, Alcoholic       | 2000           | 25                                                             |
| 49               | Cuba    | Bovine Meat                | 2000           | 42                                                             |
| 49               | Cuba    | Butter, Ghee               | 2000           | 5                                                              |

Dietary calcium and zinc deficiency risks are decreasing but remain prevalent

| FAO Country code | Country | Food item                  | Reference year | Net energy supply (kcal capita <sup>-1</sup> d <sup>-1</sup> ) |
|------------------|---------|----------------------------|----------------|----------------------------------------------------------------|
| 49               | Cuba    | Cassava and products       | 2000           | 74                                                             |
| 49               | Cuba    | Cereals - Excluding Beer   | 2000           | 1,095                                                          |
| 49               | Cuba    | Cereals, Other             | 2000           | 1                                                              |
| 49               | Cuba    | Cocoa Beans and products   | 2000           | 2                                                              |
| 49               | Cuba    | Coconuts - Incl Copra      | 2000           | 24                                                             |
| 49               | Cuba    | Coffee and products        | 2000           | 1                                                              |
| 49               | Cuba    | Demersal Fish              | 2000           | 1                                                              |
| 49               | Cuba    | Eggs                       | 2000           | 22                                                             |
| 49               | Cuba    | Fats, Animals, Raw         | 2000           | 18                                                             |
| 49               | Cuba    | Fish, Seafood              | 2000           | 24                                                             |
| 49               | Cuba    | Freshwater Fish            | 2000           | 5                                                              |
| 49               | Cuba    | Fruits - Excluding Wine    | 2000           | 187                                                            |
| 49               | Cuba    | Fruits, Other              | 2000           | 38                                                             |
| 49               | Cuba    | Grand Total                | 2000           | 3,031                                                          |
| 49               | Cuba    | Grapefruit and products    | 2000           | 8                                                              |
| 49               | Cuba    | Groundnut Oil              | 2000           | 4                                                              |
| 49               | Cuba    | Groundnuts (Shelled Eq)    | 2000           | 8                                                              |
| 49               | Cuba    | Honey                      | 2000           | 1                                                              |
| 49               | Cuba    | Lemons, Limes and products | 2000           | 1                                                              |
| 49               | Cuba    | Maize and products         | 2000           | 101                                                            |
| 49               | Cuba    | Marine Fish, Other         | 2000           | 11                                                             |
| 49               | Cuba    | Meat                       | 2000           | 152                                                            |
| 49               | Cuba    | Milk - Excluding Butter    | 2000           | 134                                                            |
| 49               | Cuba    | Mutton & Goat Meat         | 2000           | 4                                                              |
| 49               | Cuba    | Offals                     | 2000           | 6                                                              |
| 49               | Cuba    | Oilcrops                   | 2000           | 37                                                             |
| 49               | Cuba    | Oilcrops Oil, Other        | 2000           | 6                                                              |
| 49               | Cuba    | Olive Oil                  | 2000           | 1                                                              |
| 49               | Cuba    | Onions                     | 2000           | 7                                                              |
| 49               | Cuba    | Oranges, Mandarines        | 2000           | 19                                                             |
| 49               | Cuba    | Pelagic Fish               | 2000           | 5                                                              |
| 49               | Cuba    | Pigmeat                    | 2000           | 68                                                             |
| 49               | Cuba    | Pineapples and products    | 2000           | 2                                                              |
| 49               | Cuba    | Plantains                  | 2000           | 88                                                             |
| 49               | Cuba    | Potatoes and products      | 2000           | 60                                                             |
| 49               | Cuba    | Poultry Meat               | 2000           | 38                                                             |
| 49               | Cuba    | Pulses                     | 2000           | 196                                                            |
| 49               | Cuba    | Pulses, Other and products | 2000           | 73                                                             |
| 49               | Cuba    | Rice (Milled Equivalent)   | 2000           | 588                                                            |
| 49               | Cuba    | Roots, Other               | 2000           | 16                                                             |
| 49               | Cuba    | Soyabean Oil               | 2000           | 91                                                             |
| 49               | Cuba    | Soyabeans                  | 2000           | 4                                                              |
| 49               | Cuba    | Starchy Roots              | 2000           | 208                                                            |
| 49               | Cuba    | Stimulants                 | 2000           | 4                                                              |
| 49               | Cuba    | Sugar & Sweeteners         | 2000           | 639                                                            |
| 49               | Cuba    | Sugar (Raw Equivalent)     | 2000           | 637                                                            |
| 49               | Cuba    | Sunflowerseed Oil          | 2000           | 74                                                             |
| 49               | Cuba    | Sweet potatoes             | 2000           | 53                                                             |
| 49               | Cuba    | Sweeteners, Other          | 2000           | 1                                                              |
| 49               | Cuba    | Tomatoes and products      | 2000           | 26                                                             |
| 49               | Cuba    | Vegetable Oils             | 2000           | 176                                                            |
| 49               | Cuba    | Vegetables                 | 2000           | 82                                                             |
| 49               | Cuba    | Vegetables, Other          | 2000           | 50                                                             |
| 49               | Cuba    | Vegetal Products           | 2000           | 2,672                                                          |
| 49               | Cuba    | Wheat and products         | 2000           | 405                                                            |
| 49               | Cuba    | Wine                       | 2000           | 3                                                              |
| 49               | Cuba    | Yams                       | 2000           | 5                                                              |
| 49               | Cuba    | Alcoholic Beverages        | 2001           | 48                                                             |
| 49               | Cuba    | Animal fats                | 2001           | 19                                                             |
| 49               | Cuba    | Animal Products            | 2001           | 341                                                            |
| 49               | Cuba    | Bananas                    | 2001           | 38                                                             |
| 49               | Cuba    | Beans                      | 2001           | 163                                                            |
| 49               | Cuba    | Beer                       | 2001           | 20                                                             |
| 49               | Cuba    | Beverages, Alcoholic       | 2001           | 25                                                             |
| 49               | Cuba    | Bovine Meat                | 2001           | 41                                                             |
| 49               | Cuba    | Butter, Ghee               | 2001           | 5                                                              |
| 49               | Cuba    | Cassava and products       | 2001           | 73                                                             |
| 49               | Cuba    | Cereals - Excluding Beer   | 2001           | 1,141                                                          |
| 49               | Cuba    | Cocoa Beans and products   | 2001           | 2                                                              |
| 49               | Cuba    | Coconut Oil                | 2001           | 2                                                              |
| 49               | Cuba    | Coconuts - Incl Copra      | 2001           | 27                                                             |
| 49               | Cuba    | Coffee and products        | 2001           | 1                                                              |
| 49               | Cuba    | Demersal Fish              | 2001           | 1                                                              |
| 49               | Cuba    | Eggs                       | 2001           | 19                                                             |
| 49               | Cuba    | Fats, Animals, Raw         | 2001           | 14                                                             |
| 49               | Cuba    | Fish, Seafood              | 2001           | 22                                                             |
| 49               | Cuba    | Freshwater Fish            | 2001           | 4                                                              |
| 49               | Cuba    | Fruits - Excluding Wine    | 2001           | 214                                                            |
| 49               | Cuba    | Fruits, Other              | 2001           | 40                                                             |
| 49               | Cuba    | Grand Total                | 2001           | 3,076                                                          |
| 49               | Cuba    | Grapefruit and products    | 2001           | 7                                                              |
| 49               | Cuba    | Groundnut Oil              | 2001           | 2                                                              |
| 49               | Cuba    | Groundnuts (Shelled Eq)    | 2001           | 4                                                              |
| 49               | Cuba    | Lemons, Limes and products | 2001           | 1                                                              |
| 49               | Cuba    | Maize and products         | 2001           | 133                                                            |
| 49               | Cuba    | Marine Fish, Other         | 2001           | 7                                                              |
| 49               | Cuba    | Meat                       | 2001           | 147                                                            |
| 49               | Cuba    | Milk - Excluding Butter    | 2001           | 127                                                            |
| 49               | Cuba    | Miscellaneous              | 2001           | 1                                                              |
| 49               | Cuba    | Molluscs, Other            | 2001           | 1                                                              |
| 49               | Cuba    | Mutton & Goat Meat         | 2001           | 4                                                              |
| 49               | Cuba    | Offals                     | 2001           | 6                                                              |
| 49               | Cuba    | Oilcrops                   | 2001           | 36                                                             |
| 49               | Cuba    | Oilcrops Oil, Other        | 2001           | 7                                                              |
| 49               | Cuba    | Olive Oil                  | 2001           | 1                                                              |
| 49               | Cuba    | Onions                     | 2001           | 8                                                              |
| 49               | Cuba    | Oranges, Mandarines        | 2001           | 27                                                             |

## Dietary calcium and zinc deficiency risks are decreasing but remain prevalent

| FAO Country code | Country | Food item                  | Reference year | Net energy supply (kcal <i>capita</i> <sup>-1</sup> d <sup>-1</sup> ) |
|------------------|---------|----------------------------|----------------|-----------------------------------------------------------------------|
| 49               | Cuba    | Pelagic Fish               | 2001           | 9                                                                     |
| 49               | Cuba    | Pigmeat                    | 2001           | 60                                                                    |
| 49               | Cuba    | Pineapples and products    | 2001           | 2                                                                     |
| 49               | Cuba    | Plantains                  | 2001           | 98                                                                    |
| 49               | Cuba    | Potatoes and products      | 2001           | 55                                                                    |
| 49               | Cuba    | Poultry Meat               | 2001           | 42                                                                    |
| 49               | Cuba    | Pulses                     | 2001           | 218                                                                   |
| 49               | Cuba    | Pulses, Other and products | 2001           | 54                                                                    |
| 49               | Cuba    | Rice (Milled Equivalent)   | 2001           | 590                                                                   |
| 49               | Cuba    | Roots, Other               | 2001           | 17                                                                    |
| 49               | Cuba    | Soyabean Oil               | 2001           | 133                                                                   |
| 49               | Cuba    | Soyabeans                  | 2001           | 5                                                                     |
| 49               | Cuba    | Starchy Roots              | 2001           | 215                                                                   |
| 49               | Cuba    | Stimulants                 | 2001           | 4                                                                     |
| 49               | Cuba    | Sugar & Sweeteners         | 2001           | 607                                                                   |
| 49               | Cuba    | Sugar (Raw Equivalent)     | 2001           | 605                                                                   |
| 49               | Cuba    | Sunflowerseed Oil          | 2001           | 17                                                                    |
| 49               | Cuba    | Sweet potatoes             | 2001           | 63                                                                    |
| 49               | Cuba    | Sweeteners, Other          | 2001           | 1                                                                     |
| 49               | Cuba    | Tomatoes and products      | 2001           | 21                                                                    |
| 49               | Cuba    | Vegetable Oils             | 2001           | 162                                                                   |
| 49               | Cuba    | Vegetables                 | 2001           | 89                                                                    |
| 49               | Cuba    | Vegetables, Other          | 2001           | 59                                                                    |
| 49               | Cuba    | Vegetal Products           | 2001           | 2,735                                                                 |
| 49               | Cuba    | Wheat and products         | 2001           | 418                                                                   |
| 49               | Cuba    | Wine                       | 2001           | 3                                                                     |
| 49               | Cuba    | Yams                       | 2001           | 7                                                                     |
| 49               | Cuba    | Alcoholic Beverages        | 2002           | 49                                                                    |
| 49               | Cuba    | Animal fats                | 2002           | 22                                                                    |
| 49               | Cuba    | Animal Products            | 2002           | 334                                                                   |
| 49               | Cuba    | Bananas                    | 2002           | 25                                                                    |
| 49               | Cuba    | Beans                      | 2002           | 95                                                                    |
| 49               | Cuba    | Beer                       | 2002           | 21                                                                    |
| 49               | Cuba    | Beverages, Alcoholic       | 2002           | 26                                                                    |
| 49               | Cuba    | Bovine Meat                | 2002           | 36                                                                    |
| 49               | Cuba    | Butter, Chee               | 2002           | 6                                                                     |
| 49               | Cuba    | Cassava and products       | 2002           | 61                                                                    |
| 49               | Cuba    | Cephalopods                | 2002           | 1                                                                     |
| 49               | Cuba    | Cereals - Excluding Beer   | 2002           | 1,355                                                                 |
| 49               | Cuba    | Cocoa Beans and products   | 2002           | 2                                                                     |
| 49               | Cuba    | Coconut Oil                | 2002           | 2                                                                     |
| 49               | Cuba    | Coconuts - Incl Copra      | 2002           | 33                                                                    |
| 49               | Cuba    | Coffee and products        | 2002           | 1                                                                     |
| 49               | Cuba    | Demersal Fish              | 2002           | 1                                                                     |
| 49               | Cuba    | Eggs                       | 2002           | 23                                                                    |
| 49               | Cuba    | Fats, Animals, Raw         | 2002           | 16                                                                    |
| 49               | Cuba    | Fish, Seafood              | 2002           | 11                                                                    |
| 49               | Cuba    | Freshwater Fish            | 2002           | 4                                                                     |
| 49               | Cuba    | Fruits - Excluding Wine    | 2002           | 167                                                                   |
| 49               | Cuba    | Fruits, Other              | 2002           | 41                                                                    |
| 49               | Cuba    | Grand Total                | 2002           | 3,154                                                                 |
| 49               | Cuba    | Grapefruit and products    | 2002           | 4                                                                     |
| 49               | Cuba    | Groundnut Oil              | 2002           | 5                                                                     |
| 49               | Cuba    | Groundnuts (Shelled Eq)    | 2002           | 13                                                                    |
| 49               | Cuba    | Lemons, Limes and products | 2002           | 1                                                                     |
| 49               | Cuba    | Maize and products         | 2002           | 171                                                                   |
| 49               | Cuba    | Marine Fish, Other         | 2002           | 3                                                                     |
| 49               | Cuba    | Meat                       | 2002           | 154                                                                   |
| 49               | Cuba    | Milk - Excluding Butter    | 2002           | 117                                                                   |
| 49               | Cuba    | Miscellaneous              | 2002           | 1                                                                     |
| 49               | Cuba    | Mutton & Goat Meat         | 2002           | 4                                                                     |
| 49               | Cuba    | Offals                     | 2002           | 5                                                                     |
| 49               | Cuba    | Oilcrops                   | 2002           | 47                                                                    |
| 49               | Cuba    | Oilcrops Oil, Other        | 2002           | 1                                                                     |
| 49               | Cuba    | Olive Oil                  | 2002           | 1                                                                     |
| 49               | Cuba    | Onions                     | 2002           | 8                                                                     |
| 49               | Cuba    | Oranges, Mandarines        | 2002           | 15                                                                    |
| 49               | Cuba    | Pelagic Fish               | 2002           | 1                                                                     |
| 49               | Cuba    | Pigmeat                    | 2002           | 65                                                                    |
| 49               | Cuba    | Pineapples and products    | 2002           | 3                                                                     |
| 49               | Cuba    | Plantains                  | 2002           | 79                                                                    |
| 49               | Cuba    | Potatoes and products      | 2002           | 53                                                                    |
| 49               | Cuba    | Poultry Meat               | 2002           | 48                                                                    |
| 49               | Cuba    | Pulses                     | 2002           | 142                                                                   |
| 49               | Cuba    | Pulses, Other and products | 2002           | 47                                                                    |
| 49               | Cuba    | Rape and Mustardseed       | 2002           | 1                                                                     |
| 49               | Cuba    | Rice (Milled Equivalent)   | 2002           | 758                                                                   |
| 49               | Cuba    | Roots, Other               | 2002           | 34                                                                    |
| 49               | Cuba    | Soyabean Oil               | 2002           | 160                                                                   |
| 49               | Cuba    | Soyabeans                  | 2002           | 1                                                                     |
| 49               | Cuba    | Spices                     | 2002           | 1                                                                     |
| 49               | Cuba    | Spices, Other              | 2002           | 1                                                                     |
| 49               | Cuba    | Starchy Roots              | 2002           | 240                                                                   |
| 49               | Cuba    | Stimulants                 | 2002           | 3                                                                     |
| 49               | Cuba    | Sugar & Sweeteners         | 2002           | 555                                                                   |
| 49               | Cuba    | Sugar (Raw Equivalent)     | 2002           | 554                                                                   |
| 49               | Cuba    | Sunflowerseed Oil          | 2002           | 3                                                                     |
| 49               | Cuba    | Sweet potatoes             | 2002           | 69                                                                    |
| 49               | Cuba    | Sweeteners, Other          | 2002           | 1                                                                     |
| 49               | Cuba    | Tomatoes and products      | 2002           | 23                                                                    |
| 49               | Cuba    | Vegetable Oils             | 2002           | 173                                                                   |
| 49               | Cuba    | Vegetables                 | 2002           | 88                                                                    |
| 49               | Cuba    | Vegetables, Other          | 2002           | 56                                                                    |
| 49               | Cuba    | Vegetal Products           | 2002           | 2,820                                                                 |
| 49               | Cuba    | Wheat and products         | 2002           | 425                                                                   |
| 49               | Cuba    | Wine                       | 2002           | 2                                                                     |
| 49               | Cuba    | Yams                       | 2002           | 22                                                                    |

Dietary calcium and zinc deficiency risks are decreasing but remain prevalent

| FAO Country code | Country | Food item                  | Reference year | Net energy supply (kcal <i>capita</i> <sup>-1</sup> d <sup>-1</sup> ) |
|------------------|---------|----------------------------|----------------|-----------------------------------------------------------------------|
| 49               | Cuba    | Alcoholic Beverages        | 2003           | 49                                                                    |
| 49               | Cuba    | Animal fats                | 2003           | 21                                                                    |
| 49               | Cuba    | Animal Products            | 2003           | 335                                                                   |
| 49               | Cuba    | Bananas                    | 2003           | 37                                                                    |
| 49               | Cuba    | Beans                      | 2003           | 209                                                                   |
| 49               | Cuba    | Beer                       | 2003           | 21                                                                    |
| 49               | Cuba    | Beverages, Alcoholic       | 2003           | 26                                                                    |
| 49               | Cuba    | Bovine Meat                | 2003           | 31                                                                    |
| 49               | Cuba    | Butter, Ghee               | 2003           | 5                                                                     |
| 49               | Cuba    | Cassava and products       | 2003           | 126                                                                   |
| 49               | Cuba    | Cephalopods                | 2003           | 2                                                                     |
| 49               | Cuba    | Cereals - Excluding Beer   | 2003           | 1,261                                                                 |
| 49               | Cuba    | Cocoa Beans and products   | 2003           | 2                                                                     |
| 49               | Cuba    | Coconut Oil                | 2003           | 2                                                                     |
| 49               | Cuba    | Coconuts - Incl Copra      | 2003           | 33                                                                    |
| 49               | Cuba    | Coffee and products        | 2003           | 1                                                                     |
| 49               | Cuba    | Demersal Fish              | 2003           | 1                                                                     |
| 49               | Cuba    | Eggs                       | 2003           | 23                                                                    |
| 49               | Cuba    | Fats, Animals, Raw         | 2003           | 15                                                                    |
| 49               | Cuba    | Fish, Seafood              | 2003           | 15                                                                    |
| 49               | Cuba    | Freshwater Fish            | 2003           | 5                                                                     |
| 49               | Cuba    | Fruits - Excluding Wine    | 2003           | 240                                                                   |
| 49               | Cuba    | Fruits, Other              | 2003           | 46                                                                    |
| 49               | Cuba    | Grand Total                | 2003           | 3,246                                                                 |
| 49               | Cuba    | Grapefruit and products    | 2003           | 8                                                                     |
| 49               | Cuba    | Groundnut Oil              | 2003           | 2                                                                     |
| 49               | Cuba    | Groundnuts (Shelled Eq)    | 2003           | 14                                                                    |
| 49               | Cuba    | Lemons, Limes and products | 2003           | 1                                                                     |
| 49               | Cuba    | Maize and products         | 2003           | 226                                                                   |
| 49               | Cuba    | Marine Fish, Other         | 2003           | 6                                                                     |
| 49               | Cuba    | Meat                       | 2003           | 149                                                                   |
| 49               | Cuba    | Milk - Excluding Butter    | 2003           | 123                                                                   |
| 49               | Cuba    | Miscellaneous              | 2003           | 1                                                                     |
| 49               | Cuba    | Mutton & Goat Meat         | 2003           | 5                                                                     |
| 49               | Cuba    | Offals                     | 2003           | 5                                                                     |
| 49               | Cuba    | Oilcrops                   | 2003           | 48                                                                    |
| 49               | Cuba    | Oilcrops Oil, Other        | 2003           | 3                                                                     |
| 49               | Cuba    | Onions                     | 2003           | 9                                                                     |
| 49               | Cuba    | Oranges, Mandarines        | 2003           | 24                                                                    |
| 49               | Cuba    | Pelagic Fish               | 2003           | 2                                                                     |
| 49               | Cuba    | Pigmeat                    | 2003           | 65                                                                    |
| 49               | Cuba    | Pineapples and products    | 2003           | 3                                                                     |
| 49               | Cuba    | Plantains                  | 2003           | 119                                                                   |
| 49               | Cuba    | Potatoes and products      | 2003           | 51                                                                    |
| 49               | Cuba    | Poultry Meat               | 2003           | 48                                                                    |
| 49               | Cuba    | Pulses                     | 2003           | 224                                                                   |
| 49               | Cuba    | Pulses, Other and products | 2003           | 15                                                                    |
| 49               | Cuba    | Rape and Mustardseed       | 2003           | 1                                                                     |
| 49               | Cuba    | Rice (Milled Equivalent)   | 2003           | 589                                                                   |
| 49               | Cuba    | Roots, Other               | 2003           | 31                                                                    |
| 49               | Cuba    | Soyabean Oil               | 2003           | 126                                                                   |
| 49               | Cuba    | Soyabeans                  | 2003           | 1                                                                     |
| 49               | Cuba    | Spices                     | 2003           | 1                                                                     |
| 49               | Cuba    | Spices, Other              | 2003           | 1                                                                     |
| 49               | Cuba    | Starchy Roots              | 2003           | 313                                                                   |
| 49               | Cuba    | Stimulants                 | 2003           | 4                                                                     |
| 49               | Cuba    | Sugar & Sweeteners         | 2003           | 528                                                                   |
| 49               | Cuba    | Sugar (Raw Equivalent)     | 2003           | 527                                                                   |
| 49               | Cuba    | Sunflowerseed Oil          | 2003           | 2                                                                     |
| 49               | Cuba    | Sweet potatoes             | 2003           | 89                                                                    |
| 49               | Cuba    | Sweeteners, Other          | 2003           | 1                                                                     |
| 49               | Cuba    | Tomatoes and products      | 2003           | 30                                                                    |
| 49               | Cuba    | Vegetable Oils             | 2003           | 136                                                                   |
| 49               | Cuba    | Vegetables                 | 2003           | 104                                                                   |
| 49               | Cuba    | Vegetables, Other          | 2003           | 65                                                                    |
| 49               | Cuba    | Vegetal Products           | 2003           | 2,911                                                                 |
| 49               | Cuba    | Wheat and products         | 2003           | 446                                                                   |
| 49               | Cuba    | Wine                       | 2003           | 2                                                                     |
| 49               | Cuba    | Yams                       | 2003           | 17                                                                    |
| 49               | Cuba    | Alcoholic Beverages        | 2004           | 46                                                                    |
| 49               | Cuba    | Animal fats                | 2004           | 20                                                                    |
| 49               | Cuba    | Animal Products            | 2004           | 340                                                                   |
| 49               | Cuba    | Bananas                    | 2004           | 54                                                                    |
| 49               | Cuba    | Beans                      | 2004           | 178                                                                   |
| 49               | Cuba    | Beer                       | 2004           | 20                                                                    |
| 49               | Cuba    | Beverages, Alcoholic       | 2004           | 24                                                                    |
| 49               | Cuba    | Bovine Meat                | 2004           | 33                                                                    |
| 49               | Cuba    | Butter, Ghee               | 2004           | 6                                                                     |
| 49               | Cuba    | Cassava and products       | 2004           | 84                                                                    |
| 49               | Cuba    | Cereals - Excluding Beer   | 2004           | 1,284                                                                 |
| 49               | Cuba    | Cocoa Beans and products   | 2004           | 2                                                                     |
| 49               | Cuba    | Coconut Oil                | 2004           | 1                                                                     |
| 49               | Cuba    | Coconuts - Incl Copra      | 2004           | 35                                                                    |
| 49               | Cuba    | Coffee and products        | 2004           | 2                                                                     |
| 49               | Cuba    | Demersal Fish              | 2004           | 1                                                                     |
| 49               | Cuba    | Eggs                       | 2004           | 23                                                                    |
| 49               | Cuba    | Fats, Animals, Raw         | 2004           | 14                                                                    |
| 49               | Cuba    | Fish, Seafood              | 2004           | 16                                                                    |
| 49               | Cuba    | Freshwater Fish            | 2004           | 5                                                                     |
| 49               | Cuba    | Fruits - Excluding Wine    | 2004           | 245                                                                   |
| 49               | Cuba    | Fruits, Other              | 2004           | 46                                                                    |
| 49               | Cuba    | Grand Total                | 2004           | 3,346                                                                 |
| 49               | Cuba    | Grapefruit and products    | 2004           | 7                                                                     |
| 49               | Cuba    | Groundnut Oil              | 2004           | 2                                                                     |
| 49               | Cuba    | Groundnuts (Shelled Eq)    | 2004           | 15                                                                    |
| 49               | Cuba    | Lemons, Limes and products | 2004           | 1                                                                     |
| 49               | Cuba    | Maize and products         | 2004           | 254                                                                   |

Dietary calcium and zinc deficiency risks are decreasing but remain prevalent

| FAO Country code | Country | Food item                  | Reference year | Net energy supply (kcal <i>capita</i> <sup>-1</sup> d <sup>-1</sup> ) |
|------------------|---------|----------------------------|----------------|-----------------------------------------------------------------------|
| 49               | Cuba    | Marine Fish, Other         | 2004           | 9                                                                     |
| 49               | Cuba    | Meat                       | 2004           | 165                                                                   |
| 49               | Cuba    | Milk - Excluding Butter    | 2004           | 112                                                                   |
| 49               | Cuba    | Miscellaneous              | 2004           | 2                                                                     |
| 49               | Cuba    | Mutton & Goat Meat         | 2004           | 5                                                                     |
| 49               | Cuba    | Offals                     | 2004           | 5                                                                     |
| 49               | Cuba    | Oilcrops                   | 2004           | 51                                                                    |
| 49               | Cuba    | Oilcrops Oil, Other        | 2004           | 6                                                                     |
| 49               | Cuba    | Onions                     | 2004           | 13                                                                    |
| 49               | Cuba    | Oranges, Mandarines        | 2004           | 20                                                                    |
| 49               | Cuba    | Pelagic Fish               | 2004           | 1                                                                     |
| 49               | Cuba    | Pigmeat                    | 2004           | 73                                                                    |
| 49               | Cuba    | Pineapples and products    | 2004           | 3                                                                     |
| 49               | Cuba    | Plantains                  | 2004           | 114                                                                   |
| 49               | Cuba    | Potatoes and products      | 2004           | 54                                                                    |
| 49               | Cuba    | Poultry Meat               | 2004           | 55                                                                    |
| 49               | Cuba    | Pulses                     | 2004           | 212                                                                   |
| 49               | Cuba    | Pulses, Other and products | 2004           | 34                                                                    |
| 49               | Cuba    | Rice (Milled Equivalent)   | 2004           | 660                                                                   |
| 49               | Cuba    | Roots, Other               | 2004           | 21                                                                    |
| 49               | Cuba    | Soyabean Oil               | 2004           | 184                                                                   |
| 49               | Cuba    | Soyabeans                  | 2004           | 1                                                                     |
| 49               | Cuba    | Starchy Roots              | 2004           | 257                                                                   |
| 49               | Cuba    | Stimulants                 | 2004           | 4                                                                     |
| 49               | Cuba    | Sugar & Sweeteners         | 2004           | 605                                                                   |
| 49               | Cuba    | Sugar (Raw Equivalent)     | 2004           | 602                                                                   |
| 49               | Cuba    | Sunflowerseed Oil          | 2004           | 4                                                                     |
| 49               | Cuba    | Sweet potatoes             | 2004           | 86                                                                    |
| 49               | Cuba    | Sweeteners, Other          | 2004           | 3                                                                     |
| 49               | Cuba    | Tomatoes and products      | 2004           | 36                                                                    |
| 49               | Cuba    | Vegetable Oils             | 2004           | 197                                                                   |
| 49               | Cuba    | Vegetables                 | 2004           | 101                                                                   |
| 49               | Cuba    | Vegetables, Other          | 2004           | 52                                                                    |
| 49               | Cuba    | Vegetal Products           | 2004           | 3,006                                                                 |
| 49               | Cuba    | Wheat and products         | 2004           | 370                                                                   |
| 49               | Cuba    | Wine                       | 2004           | 2                                                                     |
| 49               | Cuba    | Yams                       | 2004           | 13                                                                    |
| 49               | Cuba    | Alcoholic Beverages        | 2005           | 51                                                                    |
| 49               | Cuba    | Animal fats                | 2005           | 14                                                                    |
| 49               | Cuba    | Animal Products            | 2005           | 328                                                                   |
| 49               | Cuba    | Bananas                    | 2005           | 37                                                                    |
| 49               | Cuba    | Beans                      | 2005           | 166                                                                   |
| 49               | Cuba    | Beer                       | 2005           | 20                                                                    |
| 49               | Cuba    | Beverages, Alcoholic       | 2005           | 29                                                                    |
| 49               | Cuba    | Bovine Meat                | 2005           | 36                                                                    |
| 49               | Cuba    | Butter, Ghee               | 2005           | 6                                                                     |
| 49               | Cuba    | Cassava and products       | 2005           | 76                                                                    |
| 49               | Cuba    | Cereals - Excluding Beer   | 2005           | 1,298                                                                 |
| 49               | Cuba    | Cocoa Beans and products   | 2005           | 3                                                                     |
| 49               | Cuba    | Coconuts - Incl Copra      | 2005           | 34                                                                    |
| 49               | Cuba    | Coffee and products        | 2005           | 3                                                                     |
| 49               | Cuba    | Eggs                       | 2005           | 27                                                                    |
| 49               | Cuba    | Fats, Animals, Raw         | 2005           | 8                                                                     |
| 49               | Cuba    | Fish, Seafood              | 2005           | 14                                                                    |
| 49               | Cuba    | Freshwater Fish            | 2005           | 4                                                                     |
| 49               | Cuba    | Fruits - Excluding Wine    | 2005           | 176                                                                   |
| 49               | Cuba    | Fruits, Other              | 2005           | 36                                                                    |
| 49               | Cuba    | Grand Total                | 2005           | 3,254                                                                 |
| 49               | Cuba    | Grapefruit and products    | 2005           | 5                                                                     |
| 49               | Cuba    | Groundnut Oil              | 2005           | 3                                                                     |
| 49               | Cuba    | Groundnuts (Shelled Eq)    | 2005           | 14                                                                    |
| 49               | Cuba    | Honey                      | 2005           | 1                                                                     |
| 49               | Cuba    | Maize and products         | 2005           | 289                                                                   |
| 49               | Cuba    | Marine Fish, Other         | 2005           | 7                                                                     |
| 49               | Cuba    | Meat                       | 2005           | 152                                                                   |
| 49               | Cuba    | Milk - Excluding Butter    | 2005           | 115                                                                   |
| 49               | Cuba    | Miscellaneous              | 2005           | 1                                                                     |
| 49               | Cuba    | Mutton & Goat Meat         | 2005           | 5                                                                     |
| 49               | Cuba    | Offals                     | 2005           | 5                                                                     |
| 49               | Cuba    | Oilcrops                   | 2005           | 64                                                                    |
| 49               | Cuba    | Oilcrops Oil, Other        | 2005           | 7                                                                     |
| 49               | Cuba    | Onions                     | 2005           | 12                                                                    |
| 49               | Cuba    | Oranges, Mandarines        | 2005           | 14                                                                    |
| 49               | Cuba    | Pelagic Fish               | 2005           | 2                                                                     |
| 49               | Cuba    | Pigmeat                    | 2005           | 71                                                                    |
| 49               | Cuba    | Pineapples and products    | 2005           | 3                                                                     |
| 49               | Cuba    | Plantains                  | 2005           | 81                                                                    |
| 49               | Cuba    | Potatoes and products      | 2005           | 51                                                                    |
| 49               | Cuba    | Poultry Meat               | 2005           | 41                                                                    |
| 49               | Cuba    | Pulses                     | 2005           | 225                                                                   |
| 49               | Cuba    | Pulses, Other and products | 2005           | 59                                                                    |
| 49               | Cuba    | Rice (Milled Equivalent)   | 2005           | 651                                                                   |
| 49               | Cuba    | Roots, Other               | 2005           | 20                                                                    |
| 49               | Cuba    | Soyabean Oil               | 2005           | 204                                                                   |
| 49               | Cuba    | Soyabeans                  | 2005           | 16                                                                    |
| 49               | Cuba    | Spices                     | 2005           | 1                                                                     |
| 49               | Cuba    | Spices, Other              | 2005           | 1                                                                     |
| 49               | Cuba    | Starchy Roots              | 2005           | 238                                                                   |
| 49               | Cuba    | Stimulants                 | 2005           | 6                                                                     |
| 49               | Cuba    | Sugar & Sweeteners         | 2005           | 529                                                                   |
| 49               | Cuba    | Sugar (Raw Equivalent)     | 2005           | 526                                                                   |
| 49               | Cuba    | Sunflowerseed Oil          | 2005           | 17                                                                    |
| 49               | Cuba    | Sweet potatoes             | 2005           | 79                                                                    |
| 49               | Cuba    | Sweeteners, Other          | 2005           | 1                                                                     |
| 49               | Cuba    | Tomatoes and products      | 2005           | 37                                                                    |
| 49               | Cuba    | Vegetable Oils             | 2005           | 231                                                                   |
| 49               | Cuba    | Vegetables                 | 2005           | 106                                                                   |

Dietary calcium and zinc deficiency risks are decreasing but remain prevalent

| FAO Country code | Country | Food item                       | Reference year | Net energy supply (kcal capita <sup>-1</sup> d <sup>-1</sup> ) |
|------------------|---------|---------------------------------|----------------|----------------------------------------------------------------|
| 49               | Cuba    | Vegetables, Other               | 2005           | 57                                                             |
| 49               | Cuba    | Vegetal Products                | 2005           | 2,927                                                          |
| 49               | Cuba    | Wheat and products              | 2005           | 359                                                            |
| 49               | Cuba    | Wine                            | 2005           | 2                                                              |
| 49               | Cuba    | Yams                            | 2005           | 12                                                             |
| 49               | Cuba    | Alcoholic Beverages             | 2006           | 52                                                             |
| 49               | Cuba    | Animal fats                     | 2006           | 15                                                             |
| 49               | Cuba    | Animal Products                 | 2006           | 354                                                            |
| 49               | Cuba    | Bananas                         | 2006           | 48                                                             |
| 49               | Cuba    | Beans                           | 2006           | 164                                                            |
| 49               | Cuba    | Beer                            | 2006           | 20                                                             |
| 49               | Cuba    | Beverages, Alcoholic            | 2006           | 30                                                             |
| 49               | Cuba    | Bovine Meat                     | 2006           | 37                                                             |
| 49               | Cuba    | Butter, Ghee                    | 2006           | 7                                                              |
| 49               | Cuba    | Cassava and products            | 2006           | 79                                                             |
| 49               | Cuba    | Cereals - Excluding Beer        | 2006           | 1,304                                                          |
| 49               | Cuba    | Cereals, Other                  | 2006           | 2                                                              |
| 49               | Cuba    | Cocoa Beans and products        | 2006           | 2                                                              |
| 49               | Cuba    | Coconuts - Incl Copra           | 2006           | 31                                                             |
| 49               | Cuba    | Coffee and products             | 2006           | 2                                                              |
| 49               | Cuba    | Demersal Fish                   | 2006           | 1                                                              |
| 49               | Cuba    | Eggs                            | 2006           | 30                                                             |
| 49               | Cuba    | Fats, Animals, Raw              | 2006           | 7                                                              |
| 49               | Cuba    | Fish, Seafood                   | 2006           | 12                                                             |
| 49               | Cuba    | Freshwater Fish                 | 2006           | 4                                                              |
| 49               | Cuba    | Fruits - Excluding Wine         | 2006           | 201                                                            |
| 49               | Cuba    | Fruits, Other                   | 2006           | 37                                                             |
| 49               | Cuba    | Grand Total                     | 2006           | 3,260                                                          |
| 49               | Cuba    | Grapefruit and products         | 2006           | 7                                                              |
| 49               | Cuba    | Groundnut Oil                   | 2006           | 2                                                              |
| 49               | Cuba    | Groundnuts (Shelled Eq)         | 2006           | 13                                                             |
| 49               | Cuba    | Honey                           | 2006           | 2                                                              |
| 49               | Cuba    | Maize and products              | 2006           | 249                                                            |
| 49               | Cuba    | Marine Fish, Other              | 2006           | 4                                                              |
| 49               | Cuba    | Meat                            | 2006           | 180                                                            |
| 49               | Cuba    | Milk - Excluding Butter         | 2006           | 112                                                            |
| 49               | Cuba    | Miscellaneous                   | 2006           | 1                                                              |
| 49               | Cuba    | Mutton & Goat Meat              | 2006           | 4                                                              |
| 49               | Cuba    | Offals                          | 2006           | 5                                                              |
| 49               | Cuba    | Oilcrops                        | 2006           | 68                                                             |
| 49               | Cuba    | Oilcrops Oil, Other             | 2006           | 2                                                              |
| 49               | Cuba    | Onions                          | 2006           | 10                                                             |
| 49               | Cuba    | Oranges, Mandarines             | 2006           | 11                                                             |
| 49               | Cuba    | Pelagic Fish                    | 2006           | 3                                                              |
| 49               | Cuba    | Pigmeat                         | 2006           | 78                                                             |
| 49               | Cuba    | Pineapples and products         | 2006           | 3                                                              |
| 49               | Cuba    | Plantains                       | 2006           | 94                                                             |
| 49               | Cuba    | Potatoes and products           | 2006           | 43                                                             |
| 49               | Cuba    | Poultry Meat                    | 2006           | 61                                                             |
| 49               | Cuba    | Pulses                          | 2006           | 221                                                            |
| 49               | Cuba    | Pulses, Other and products      | 2006           | 57                                                             |
| 49               | Cuba    | Rice (Milled Equivalent)        | 2006           | 651                                                            |
| 49               | Cuba    | Roots, Other                    | 2006           | 34                                                             |
| 49               | Cuba    | Soyabean Oil                    | 2006           | 206                                                            |
| 49               | Cuba    | Soyabeans                       | 2006           | 24                                                             |
| 49               | Cuba    | Spices                          | 2006           | 1                                                              |
| 49               | Cuba    | Starchy Roots                   | 2006           | 242                                                            |
| 49               | Cuba    | Stimulants                      | 2006           | 4                                                              |
| 49               | Cuba    | Sugar & Sweeteners              | 2006           | 497                                                            |
| 49               | Cuba    | Sugar (Raw Equivalent)          | 2006           | 494                                                            |
| 49               | Cuba    | Sunflowerseed Oil               | 2006           | 5                                                              |
| 49               | Cuba    | Sweet potatoes                  | 2006           | 64                                                             |
| 49               | Cuba    | Sweeteners, Other               | 2006           | 1                                                              |
| 49               | Cuba    | Tomatoes and products           | 2006           | 32                                                             |
| 49               | Cuba    | Vegetable Oils                  | 2006           | 216                                                            |
| 49               | Cuba    | Vegetables                      | 2006           | 100                                                            |
| 49               | Cuba    | Vegetables, Other               | 2006           | 57                                                             |
| 49               | Cuba    | Vegetal Products                | 2006           | 2,906                                                          |
| 49               | Cuba    | Wheat and products              | 2006           | 402                                                            |
| 49               | Cuba    | Wine                            | 2006           | 2                                                              |
| 49               | Cuba    | Yams                            | 2006           | 23                                                             |
| 49               | Cuba    | Alcoholic Beverages             | 2007           | 56                                                             |
| 49               | Cuba    | Animal fats                     | 2007           | 19                                                             |
| 49               | Cuba    | Animal Products                 | 2007           | 398                                                            |
| 49               | Cuba    | Bananas                         | 2007           | 55                                                             |
| 49               | Cuba    | Beans                           | 2007           | 183                                                            |
| 49               | Cuba    | Beer                            | 2007           | 22                                                             |
| 49               | Cuba    | Beverages, Alcoholic            | 2007           | 32                                                             |
| 49               | Cuba    | Bovine Meat                     | 2007           | 34                                                             |
| 49               | Cuba    | Butter, Ghee                    | 2007           | 6                                                              |
| 49               | Cuba    | Cassava and products            | 2007           | 58                                                             |
| 49               | Cuba    | Cephalopods                     | 2007           | 2                                                              |
| 49               | Cuba    | Cereals - Excluding Beer        | 2007           | 1,298                                                          |
| 49               | Cuba    | Cereals, Other                  | 2007           | 1                                                              |
| 49               | Cuba    | Cocoa Beans and products        | 2007           | 2                                                              |
| 49               | Cuba    | Coconuts - Incl Copra           | 2007           | 37                                                             |
| 49               | Cuba    | Coffee and products             | 2007           | 3                                                              |
| 49               | Cuba    | Demersal Fish                   | 2007           | 1                                                              |
| 49               | Cuba    | Eggs                            | 2007           | 31                                                             |
| 49               | Cuba    | Fats, Animals, Raw              | 2007           | 14                                                             |
| 49               | Cuba    | Fish, Seafood                   | 2007           | 16                                                             |
| 49               | Cuba    | Freshwater Fish                 | 2007           | 6                                                              |
| 49               | Cuba    | Fruits - Excluding Wine         | 2007           | 226                                                            |
| 49               | Cuba    | Fruits, Other                   | 2007           | 40                                                             |
| 49               | Cuba    | Grand Total                     | 2007           | 3,251                                                          |
| 49               | Cuba    | Grapefruit and products         | 2007           | 7                                                              |
| 49               | Cuba    | Grapes and products (excl wine) | 2007           | 1                                                              |

Dietary calcium and zinc deficiency risks are decreasing but remain prevalent

| FAO Country code | Country | Food item                  | Reference year | Net energy supply (kcal capita <sup>-1</sup> d <sup>-1</sup> ) |
|------------------|---------|----------------------------|----------------|----------------------------------------------------------------|
| 49               | Cuba    | Groundnut Oil              | 2007           | 2                                                              |
| 49               | Cuba    | Groundnuts (Shelled Eq)    | 2007           | 5                                                              |
| 49               | Cuba    | Honey                      | 2007           | 1                                                              |
| 49               | Cuba    | Maize and products         | 2007           | 302                                                            |
| 49               | Cuba    | Marine Fish, Other         | 2007           | 5                                                              |
| 49               | Cuba    | Meat                       | 2007           | 216                                                            |
| 49               | Cuba    | Milk - Excluding Butter    | 2007           | 112                                                            |
| 49               | Cuba    | Miscellaneous              | 2007           | 1                                                              |
| 49               | Cuba    | Mutton & Goat Meat         | 2007           | 5                                                              |
| 49               | Cuba    | Offals                     | 2007           | 5                                                              |
| 49               | Cuba    | Oilcrops                   | 2007           | 53                                                             |
| 49               | Cuba    | Oilcrops Oil, Other        | 2007           | 3                                                              |
| 49               | Cuba    | Olive Oil                  | 2007           | 1                                                              |
| 49               | Cuba    | Onions                     | 2007           | 10                                                             |
| 49               | Cuba    | Oranges, Mandarines        | 2007           | 13                                                             |
| 49               | Cuba    | Pelagic Fish               | 2007           | 2                                                              |
| 49               | Cuba    | Pigmeat                    | 2007           | 126                                                            |
| 49               | Cuba    | Pineapples and products    | 2007           | 4                                                              |
| 49               | Cuba    | Plantains                  | 2007           | 107                                                            |
| 49               | Cuba    | Potatoes and products      | 2007           | 22                                                             |
| 49               | Cuba    | Poultry Meat               | 2007           | 51                                                             |
| 49               | Cuba    | Pulses                     | 2007           | 240                                                            |
| 49               | Cuba    | Pulses, Other and products | 2007           | 57                                                             |
| 49               | Cuba    | Rice (Milled Equivalent)   | 2007           | 630                                                            |
| 49               | Cuba    | Roots, Other               | 2007           | 24                                                             |
| 49               | Cuba    | Soyabean Oil               | 2007           | 155                                                            |
| 49               | Cuba    | Soyabeans                  | 2007           | 11                                                             |
| 49               | Cuba    | Spices                     | 2007           | 1                                                              |
| 49               | Cuba    | Spices, Other              | 2007           | 1                                                              |
| 49               | Cuba    | Starchy Roots              | 2007           | 208                                                            |
| 49               | Cuba    | Stimulants                 | 2007           | 5                                                              |
| 49               | Cuba    | Sugar & Sweeteners         | 2007           | 490                                                            |
| 49               | Cuba    | Sugar (Raw Equivalent)     | 2007           | 488                                                            |
| 49               | Cuba    | Sunflowerseed Oil          | 2007           | 16                                                             |
| 49               | Cuba    | Sweet potatoes             | 2007           | 76                                                             |
| 49               | Cuba    | Sweeteners, Other          | 2007           | 1                                                              |
| 49               | Cuba    | Tomatoes and products      | 2007           | 32                                                             |
| 49               | Cuba    | Vegetable Oils             | 2007           | 177                                                            |
| 49               | Cuba    | Vegetables                 | 2007           | 98                                                             |
| 49               | Cuba    | Vegetables, Other          | 2007           | 57                                                             |
| 49               | Cuba    | Vegetal Products           | 2007           | 2,853                                                          |
| 49               | Cuba    | Wheat and products         | 2007           | 365                                                            |
| 49               | Cuba    | Wine                       | 2007           | 2                                                              |
| 49               | Cuba    | Yams                       | 2007           | 27                                                             |
| 49               | Cuba    | Alcoholic Beverages        | 2008           | 64                                                             |
| 49               | Cuba    | Animal fats                | 2008           | 22                                                             |
| 49               | Cuba    | Animal Products            | 2008           | 485                                                            |
| 49               | Cuba    | Bananas                    | 2008           | 35                                                             |
| 49               | Cuba    | Beans                      | 2008           | 114                                                            |
| 49               | Cuba    | Beer                       | 2008           | 22                                                             |
| 49               | Cuba    | Beverages, Alcoholic       | 2008           | 39                                                             |
| 49               | Cuba    | Bovine Meat                | 2008           | 39                                                             |
| 49               | Cuba    | Butter, Ghee               | 2008           | 5                                                              |
| 49               | Cuba    | Cassava and products       | 2008           | 61                                                             |
| 49               | Cuba    | Cephalopods                | 2008           | 2                                                              |
| 49               | Cuba    | Cereals - Excluding Beer   | 2008           | 1,193                                                          |
| 49               | Cuba    | Cereals, Other             | 2008           | 9                                                              |
| 49               | Cuba    | Cocoa Beans and products   | 2008           | 2                                                              |
| 49               | Cuba    | Coconut Oil                | 2008           | 1                                                              |
| 49               | Cuba    | Coconuts - Incl Copra      | 2008           | 31                                                             |
| 49               | Cuba    | Coffee and products        | 2008           | 4                                                              |
| 49               | Cuba    | Demersal Fish              | 2008           | 1                                                              |
| 49               | Cuba    | Eggs                       | 2008           | 31                                                             |
| 49               | Cuba    | Fats, Animals, Raw         | 2008           | 17                                                             |
| 49               | Cuba    | Fish, Seafood              | 2008           | 17                                                             |
| 49               | Cuba    | Freshwater Fish            | 2008           | 6                                                              |
| 49               | Cuba    | Fruits - Excluding Wine    | 2008           | 185                                                            |
| 49               | Cuba    | Fruits, Other              | 2008           | 39                                                             |
| 49               | Cuba    | Grand Total                | 2008           | 3,120                                                          |
| 49               | Cuba    | Grapefruit and products    | 2008           | 7                                                              |
| 49               | Cuba    | Groundnut Oil              | 2008           | 2                                                              |
| 49               | Cuba    | Groundnuts (Shelled Eq)    | 2008           | 4                                                              |
| 49               | Cuba    | Maize and products         | 2008           | 176                                                            |
| 49               | Cuba    | Maize Germ Oil             | 2008           | 11                                                             |
| 49               | Cuba    | Marine Fish, Other         | 2008           | 4                                                              |
| 49               | Cuba    | Meat                       | 2008           | 266                                                            |
| 49               | Cuba    | Meat, Other                | 2008           | 32                                                             |
| 49               | Cuba    | Milk - Excluding Butter    | 2008           | 143                                                            |
| 49               | Cuba    | Miscellaneous              | 2008           | 1                                                              |
| 49               | Cuba    | Mutton & Goat Meat         | 2008           | 6                                                              |
| 49               | Cuba    | Offals                     | 2008           | 6                                                              |
| 49               | Cuba    | Oilcrops                   | 2008           | 94                                                             |
| 49               | Cuba    | Oilcrops Oil, Other        | 2008           | 1                                                              |
| 49               | Cuba    | Onions                     | 2008           | 12                                                             |
| 49               | Cuba    | Oranges, Mandarines        | 2008           | 13                                                             |
| 49               | Cuba    | Palm Oil                   | 2008           | 1                                                              |
| 49               | Cuba    | Pelagic Fish               | 2008           | 4                                                              |
| 49               | Cuba    | Pigmeat                    | 2008           | 135                                                            |
| 49               | Cuba    | Pineapples and products    | 2008           | 4                                                              |
| 49               | Cuba    | Plantains                  | 2008           | 86                                                             |
| 49               | Cuba    | Potatoes and products      | 2008           | 30                                                             |
| 49               | Cuba    | Poultry Meat               | 2008           | 55                                                             |
| 49               | Cuba    | Pulses                     | 2008           | 237                                                            |
| 49               | Cuba    | Pulses, Other and products | 2008           | 123                                                            |
| 49               | Cuba    | Rice (Milled Equivalent)   | 2008           | 603                                                            |
| 49               | Cuba    | Roots, Other               | 2008           | 41                                                             |
| 49               | Cuba    | Soyabean Oil               | 2008           | 73                                                             |



Dietary calcium and zinc deficiency risks are decreasing but remain prevalent

| FAO Country code | Country | Food item                  | Reference year | Net energy supply (kcal capita <sup>-1</sup> d <sup>-1</sup> ) |
|------------------|---------|----------------------------|----------------|----------------------------------------------------------------|
| 49               | Cuba    | Soyabeans                  | 2008           | 58                                                             |
| 49               | Cuba    | Starchy Roots              | 2008           | 234                                                            |
| 49               | Cuba    | Stimulants                 | 2008           | 6                                                              |
| 49               | Cuba    | Sugar & Sweeteners         | 2008           | 437                                                            |
| 49               | Cuba    | Sugar (Raw Equivalent)     | 2008           | 434                                                            |
| 49               | Cuba    | Sweet potatoes             | 2008           | 60                                                             |
| 49               | Cuba    | Sweeteners, Other          | 2008           | 2                                                              |
| 49               | Cuba    | Tomatoes and products      | 2008           | 27                                                             |
| 49               | Cuba    | Vegetable Oils             | 2008           | 89                                                             |
| 49               | Cuba    | Vegetables                 | 2008           | 95                                                             |
| 49               | Cuba    | Vegetables, Other          | 2008           | 57                                                             |
| 49               | Cuba    | Vegetal Products           | 2008           | 2,635                                                          |
| 49               | Cuba    | Wheat and products         | 2008           | 405                                                            |
| 49               | Cuba    | Wine                       | 2008           | 3                                                              |
| 49               | Cuba    | Yams                       | 2008           | 41                                                             |
| 49               | Cuba    | Alcoholic Beverages        | 2009           | 58                                                             |
| 49               | Cuba    | Animal fats                | 2009           | 20                                                             |
| 49               | Cuba    | Animal Products            | 2009           | 498                                                            |
| 49               | Cuba    | Bananas                    | 2009           | 31                                                             |
| 49               | Cuba    | Beans                      | 2009           | 120                                                            |
| 49               | Cuba    | Beer                       | 2009           | 22                                                             |
| 49               | Cuba    | Beverages, Alcoholic       | 2009           | 34                                                             |
| 49               | Cuba    | Bovine Meat                | 2009           | 37                                                             |
| 49               | Cuba    | Butter, Ghee               | 2009           | 6                                                              |
| 49               | Cuba    | Cassava and products       | 2009           | 57                                                             |
| 49               | Cuba    | Cephalopods                | 2009           | 1                                                              |
| 49               | Cuba    | Cereals - Excluding Beer   | 2009           | 1,136                                                          |
| 49               | Cuba    | Cereals, Other             | 2009           | 1                                                              |
| 49               | Cuba    | Cocoa Beans and products   | 2009           | 2                                                              |
| 49               | Cuba    | Coconut Oil                | 2009           | 1                                                              |
| 49               | Cuba    | Coconuts - Incl Copra      | 2009           | 23                                                             |
| 49               | Cuba    | Coffee and products        | 2009           | 3                                                              |
| 49               | Cuba    | Demersal Fish              | 2009           | 1                                                              |
| 49               | Cuba    | Eggs                       | 2009           | 32                                                             |
| 49               | Cuba    | Fats, Animals, Raw         | 2009           | 14                                                             |
| 49               | Cuba    | Fish, Seafood              | 2009           | 15                                                             |
| 49               | Cuba    | Freshwater Fish            | 2009           | 6                                                              |
| 49               | Cuba    | Fruits - Excluding Wine    | 2009           | 173                                                            |
| 49               | Cuba    | Fruits, Other              | 2009           | 38                                                             |
| 49               | Cuba    | Grand Total                | 2009           | 3,234                                                          |
| 49               | Cuba    | Grapefruit and products    | 2009           | 3                                                              |
| 49               | Cuba    | Groundnut Oil              | 2009           | 2                                                              |
| 49               | Cuba    | Groundnuts (Shelled Eq)    | 2009           | 3                                                              |
| 49               | Cuba    | Honey                      | 2009           | 1                                                              |
| 49               | Cuba    | Maize and products         | 2009           | 166                                                            |
| 49               | Cuba    | Marine Fish, Other         | 2009           | 2                                                              |
| 49               | Cuba    | Meat                       | 2009           | 280                                                            |
| 49               | Cuba    | Meat, Other                | 2009           | 39                                                             |
| 49               | Cuba    | Milk - Excluding Butter    | 2009           | 145                                                            |
| 49               | Cuba    | Miscellaneous              | 2009           | 1                                                              |
| 49               | Cuba    | Mutton & Goat Meat         | 2009           | 6                                                              |
| 49               | Cuba    | Offals                     | 2009           | 5                                                              |
| 49               | Cuba    | Oilcrops                   | 2009           | 79                                                             |
| 49               | Cuba    | Oilcrops Oil, Other        | 2009           | 1                                                              |
| 49               | Cuba    | Onions                     | 2009           | 12                                                             |
| 49               | Cuba    | Oranges, Mandarines        | 2009           | 18                                                             |
| 49               | Cuba    | Pelagic Fish               | 2009           | 5                                                              |
| 49               | Cuba    | Pigmeat                    | 2009           | 130                                                            |
| 49               | Cuba    | Pineapples and products    | 2009           | 5                                                              |
| 49               | Cuba    | Plantains                  | 2009           | 77                                                             |
| 49               | Cuba    | Potatoes and products      | 2009           | 45                                                             |
| 49               | Cuba    | Poultry Meat               | 2009           | 68                                                             |
| 49               | Cuba    | Pulses                     | 2009           | 206                                                            |
| 49               | Cuba    | Pulses, Other and products | 2009           | 86                                                             |
| 49               | Cuba    | Rice (Milled Equivalent)   | 2009           | 615                                                            |
| 49               | Cuba    | Roots, Other               | 2009           | 34                                                             |
| 49               | Cuba    | Soyabean Oil               | 2009           | 131                                                            |
| 49               | Cuba    | Soyabeans                  | 2009           | 53                                                             |
| 49               | Cuba    | Starchy Roots              | 2009           | 263                                                            |
| 49               | Cuba    | Stimulants                 | 2009           | 5                                                              |
| 49               | Cuba    | Sugar & Sweeteners         | 2009           | 576                                                            |
| 49               | Cuba    | Sugar (Raw Equivalent)     | 2009           | 574                                                            |
| 49               | Cuba    | Sweet potatoes             | 2009           | 71                                                             |
| 49               | Cuba    | Sweeteners, Other          | 2009           | 1                                                              |
| 49               | Cuba    | Tomatoes and products      | 2009           | 34                                                             |
| 49               | Cuba    | Vegetable Oils             | 2009           | 136                                                            |
| 49               | Cuba    | Vegetables                 | 2009           | 101                                                            |
| 49               | Cuba    | Vegetables, Other          | 2009           | 55                                                             |
| 49               | Cuba    | Vegetal Products           | 2009           | 2,735                                                          |
| 49               | Cuba    | Wheat and products         | 2009           | 354                                                            |
| 49               | Cuba    | Wine                       | 2009           | 2                                                              |
| 49               | Cuba    | Yams                       | 2009           | 57                                                             |
| 49               | Cuba    | Alcoholic Beverages        | 2010           | 64                                                             |
| 49               | Cuba    | Animal fats                | 2010           | 21                                                             |
| 49               | Cuba    | Animal Products            | 2010           | 477                                                            |
| 49               | Cuba    | Bananas                    | 2010           | 31                                                             |
| 49               | Cuba    | Beans                      | 2010           | 111                                                            |
| 49               | Cuba    | Beer                       | 2010           | 23                                                             |
| 49               | Cuba    | Beverages, Alcoholic       | 2010           | 38                                                             |
| 49               | Cuba    | Bovine Meat                | 2010           | 38                                                             |
| 49               | Cuba    | Butter, Ghee               | 2010           | 7                                                              |
| 49               | Cuba    | Cassava and products       | 2010           | 57                                                             |
| 49               | Cuba    | Cereals - Excluding Beer   | 2010           | 1,136                                                          |
| 49               | Cuba    | Cereals, Other             | 2010           | 1                                                              |
| 49               | Cuba    | Cocoa Beans and products   | 2010           | 4                                                              |
| 49               | Cuba    | Coconut Oil                | 2010           | 1                                                              |
| 49               | Cuba    | Coconuts - Incl Copra      | 2010           | 21                                                             |

Dietary calcium and zinc deficiency risks are decreasing but remain prevalent

| FAO Country code | Country | Food item                       | Reference year | Net energy supply (kcal <i>capita</i> <sup>-1</sup> d <sup>-1</sup> ) |
|------------------|---------|---------------------------------|----------------|-----------------------------------------------------------------------|
| 49               | Cuba    | Coffee and products             | 2010           | 3                                                                     |
| 49               | Cuba    | Demersal Fish                   | 2010           | 1                                                                     |
| 49               | Cuba    | Eggs                            | 2010           | 32                                                                    |
| 49               | Cuba    | Fats, Animals, Raw              | 2010           | 14                                                                    |
| 49               | Cuba    | Fish, Seafood                   | 2010           | 10                                                                    |
| 49               | Cuba    | Freshwater Fish                 | 2010           | 5                                                                     |
| 49               | Cuba    | Fruits - Excluding Wine         | 2010           | 187                                                                   |
| 49               | Cuba    | Fruits, Other                   | 2010           | 46                                                                    |
| 49               | Cuba    | Grand Total                     | 2010           | 3,159                                                                 |
| 49               | Cuba    | Grapefruit and products         | 2010           | 5                                                                     |
| 49               | Cuba    | Groundnut Oil                   | 2010           | 1                                                                     |
| 49               | Cuba    | Groundnuts (Shelled Eq)         | 2010           | 3                                                                     |
| 49               | Cuba    | Honey                           | 2010           | 1                                                                     |
| 49               | Cuba    | Maize and products              | 2010           | 186                                                                   |
| 49               | Cuba    | Marine Fish, Other              | 2010           | 2                                                                     |
| 49               | Cuba    | Meat                            | 2010           | 271                                                                   |
| 49               | Cuba    | Meat, Other                     | 2010           | 39                                                                    |
| 49               | Cuba    | Milk - Excluding Butter         | 2010           | 139                                                                   |
| 49               | Cuba    | Miscellaneous                   | 2010           | 1                                                                     |
| 49               | Cuba    | Mutton & Goat Meat              | 2010           | 6                                                                     |
| 49               | Cuba    | Offals                          | 2010           | 5                                                                     |
| 49               | Cuba    | Oilcrops                        | 2010           | 70                                                                    |
| 49               | Cuba    | Oilcrops Oil, Other             | 2010           | 2                                                                     |
| 49               | Cuba    | Olive Oil                       | 2010           | 1                                                                     |
| 49               | Cuba    | Onions                          | 2010           | 10                                                                    |
| 49               | Cuba    | Oranges, Mandarines             | 2010           | 11                                                                    |
| 49               | Cuba    | Pelagic Fish                    | 2010           | 2                                                                     |
| 49               | Cuba    | Pigmeat                         | 2010           | 132                                                                   |
| 49               | Cuba    | Pineapples and products         | 2010           | 4                                                                     |
| 49               | Cuba    | Plantains                       | 2010           | 88                                                                    |
| 49               | Cuba    | Potatoes and products           | 2010           | 31                                                                    |
| 49               | Cuba    | Poultry Meat                    | 2010           | 55                                                                    |
| 49               | Cuba    | Pulses                          | 2010           | 131                                                                   |
| 49               | Cuba    | Pulses, Other and products      | 2010           | 21                                                                    |
| 49               | Cuba    | Rice (Milled Equivalent)        | 2010           | 553                                                                   |
| 49               | Cuba    | Roots, Other                    | 2010           | 27                                                                    |
| 49               | Cuba    | Soyabean Oil                    | 2010           | 149                                                                   |
| 49               | Cuba    | Soyabeans                       | 2010           | 45                                                                    |
| 49               | Cuba    | Spices                          | 2010           | 1                                                                     |
| 49               | Cuba    | Starchy Roots                   | 2010           | 255                                                                   |
| 49               | Cuba    | Stimulants                      | 2010           | 6                                                                     |
| 49               | Cuba    | Sugar & Sweeteners              | 2010           | 589                                                                   |
| 49               | Cuba    | Sugar (Raw Equivalent)          | 2010           | 586                                                                   |
| 49               | Cuba    | Sunflowerseed Oil               | 2010           | 4                                                                     |
| 49               | Cuba    | Sweet potatoes                  | 2010           | 71                                                                    |
| 49               | Cuba    | Sweeteners, Other               | 2010           | 2                                                                     |
| 49               | Cuba    | Tomatoes and products           | 2010           | 24                                                                    |
| 49               | Cuba    | Vegetable Oils                  | 2010           | 158                                                                   |
| 49               | Cuba    | Vegetables                      | 2010           | 83                                                                    |
| 49               | Cuba    | Vegetables, Other               | 2010           | 49                                                                    |
| 49               | Cuba    | Vegetal Products                | 2010           | 2,682                                                                 |
| 49               | Cuba    | Wheat and products              | 2010           | 396                                                                   |
| 49               | Cuba    | Wine                            | 2010           | 3                                                                     |
| 49               | Cuba    | Yams                            | 2010           | 68                                                                    |
| 49               | Cuba    | Alcoholic Beverages             | 2011           | 63                                                                    |
| 49               | Cuba    | Animal fats                     | 2011           | 20                                                                    |
| 49               | Cuba    | Animal Products                 | 2011           | 478                                                                   |
| 49               | Cuba    | Bananas                         | 2011           | 32                                                                    |
| 49               | Cuba    | Beans                           | 2011           | 144                                                                   |
| 49               | Cuba    | Beer                            | 2011           | 23                                                                    |
| 49               | Cuba    | Beverages, Alcoholic            | 2011           | 37                                                                    |
| 49               | Cuba    | Bovine Meat                     | 2011           | 36                                                                    |
| 49               | Cuba    | Butter, Ghee                    | 2011           | 5                                                                     |
| 49               | Cuba    | Cassava and products            | 2011           | 69                                                                    |
| 49               | Cuba    | Cereals - Excluding Beer        | 2011           | 1,228                                                                 |
| 49               | Cuba    | Cocoa Beans and products        | 2011           | 2                                                                     |
| 49               | Cuba    | Coconuts - Incl Copra           | 2011           | 19                                                                    |
| 49               | Cuba    | Coffee and products             | 2011           | 2                                                                     |
| 49               | Cuba    | Demersal Fish                   | 2011           | 1                                                                     |
| 49               | Cuba    | Eggs                            | 2011           | 34                                                                    |
| 49               | Cuba    | Fats, Animals, Raw              | 2011           | 14                                                                    |
| 49               | Cuba    | Fish, Seafood                   | 2011           | 10                                                                    |
| 49               | Cuba    | Freshwater Fish                 | 2011           | 5                                                                     |
| 49               | Cuba    | Fruits - Excluding Wine         | 2011           | 210                                                                   |
| 49               | Cuba    | Fruits, Other                   | 2011           | 54                                                                    |
| 49               | Cuba    | Grand Total                     | 2011           | 3,277                                                                 |
| 49               | Cuba    | Grapefruit and products         | 2011           | 4                                                                     |
| 49               | Cuba    | Grapes and products (excl wine) | 2011           | 1                                                                     |
| 49               | Cuba    | Groundnut Oil                   | 2011           | 1                                                                     |
| 49               | Cuba    | Groundnuts (Shelled Eq)         | 2011           | 3                                                                     |
| 49               | Cuba    | Honey                           | 2011           | 1                                                                     |
| 49               | Cuba    | Maize and products              | 2011           | 225                                                                   |
| 49               | Cuba    | Marine Fish, Other              | 2011           | 2                                                                     |
| 49               | Cuba    | Meat                            | 2011           | 264                                                                   |
| 49               | Cuba    | Meat, Other                     | 2011           | 36                                                                    |
| 49               | Cuba    | Milk - Excluding Butter         | 2011           | 145                                                                   |
| 49               | Cuba    | Miscellaneous                   | 2011           | 1                                                                     |
| 49               | Cuba    | Mutton & Goat Meat              | 2011           | 7                                                                     |
| 49               | Cuba    | Offals                          | 2011           | 5                                                                     |
| 49               | Cuba    | Oilcrops                        | 2011           | 74                                                                    |
| 49               | Cuba    | Oilcrops Oil, Other             | 2011           | 4                                                                     |
| 49               | Cuba    | Onions                          | 2011           | 13                                                                    |
| 49               | Cuba    | Oranges, Mandarines             | 2011           | 9                                                                     |
| 49               | Cuba    | Pelagic Fish                    | 2011           | 2                                                                     |
| 49               | Cuba    | Pigmeat                         | 2011           | 126                                                                   |
| 49               | Cuba    | Pineapples and products         | 2011           | 5                                                                     |
| 49               | Cuba    | Plantains                       | 2011           | 106                                                                   |

Dietary calcium and zinc deficiency risks are decreasing but remain prevalent

| FAO Country code | Country | Food item                       | Reference year | Net energy supply (kcal capita <sup>-1</sup> d <sup>-1</sup> ) |
|------------------|---------|---------------------------------|----------------|----------------------------------------------------------------|
| 49               | Cuba    | Potatoes and products           | 2011           | 27                                                             |
| 49               | Cuba    | Poultry Meat                    | 2011           | 59                                                             |
| 49               | Cuba    | Pulses                          | 2011           | 172                                                            |
| 49               | Cuba    | Pulses, Other and products      | 2011           | 28                                                             |
| 49               | Cuba    | Rice (Milled Equivalent)        | 2011           | 630                                                            |
| 49               | Cuba    | Roots, Other                    | 2011           | 26                                                             |
| 49               | Cuba    | Soyabean Oil                    | 2011           | 168                                                            |
| 49               | Cuba    | Soyabeans                       | 2011           | 51                                                             |
| 49               | Cuba    | Spices                          | 2011           | 1                                                              |
| 49               | Cuba    | Spices, Other                   | 2011           | 1                                                              |
| 49               | Cuba    | Starchy Roots                   | 2011           | 238                                                            |
| 49               | Cuba    | Stimulants                      | 2011           | 4                                                              |
| 49               | Cuba    | Sugar & Sweeteners              | 2011           | 550                                                            |
| 49               | Cuba    | Sugar (Raw Equivalent)          | 2011           | 547                                                            |
| 49               | Cuba    | Sweet potatoes                  | 2011           | 58                                                             |
| 49               | Cuba    | Sweeteners, Other               | 2011           | 1                                                              |
| 49               | Cuba    | Tomatoes and products           | 2011           | 28                                                             |
| 49               | Cuba    | Vegetable Oils                  | 2011           | 175                                                            |
| 49               | Cuba    | Vegetables                      | 2011           | 84                                                             |
| 49               | Cuba    | Vegetables, Other               | 2011           | 44                                                             |
| 49               | Cuba    | Vegetal Products                | 2011           | 2,799                                                          |
| 49               | Cuba    | Wheat and products              | 2011           | 374                                                            |
| 49               | Cuba    | Wine                            | 2011           | 3                                                              |
| 49               | Cuba    | Yams                            | 2011           | 59                                                             |
| 50               | Cyprus  | Alcoholic Beverages             | 1992           | 105                                                            |
| 50               | Cyprus  | Animal fats                     | 1992           | 47                                                             |
| 50               | Cyprus  | Animal Products                 | 1992           | 743                                                            |
| 50               | Cyprus  | Apples and products             | 1992           | 14                                                             |
| 50               | Cyprus  | Bananas                         | 1992           | 13                                                             |
| 50               | Cyprus  | Beans                           | 1992           | 36                                                             |
| 50               | Cyprus  | Beer                            | 1992           | 60                                                             |
| 50               | Cyprus  | Beverages, Alcoholic            | 1992           | 27                                                             |
| 50               | Cyprus  | Bovine Meat                     | 1992           | 49                                                             |
| 50               | Cyprus  | Butter, Ghee                    | 1992           | 24                                                             |
| 50               | Cyprus  | Cephalopods                     | 1992           | 6                                                              |
| 50               | Cyprus  | Cereals - Excluding Beer        | 1992           | 779                                                            |
| 50               | Cyprus  | Cereals, Other                  | 1992           | 1                                                              |
| 50               | Cyprus  | Citrus, Other                   | 1992           | 1                                                              |
| 50               | Cyprus  | Cocoa Beans and products        | 1992           | 16                                                             |
| 50               | Cyprus  | Coconuts - Incl Copra           | 1992           | 3                                                              |
| 50               | Cyprus  | Coffee and products             | 1992           | 4                                                              |
| 50               | Cyprus  | Cream                           | 1992           | 1                                                              |
| 50               | Cyprus  | Crustaceans                     | 1992           | 1                                                              |
| 50               | Cyprus  | Demersal Fish                   | 1992           | 7                                                              |
| 50               | Cyprus  | Eggs                            | 1992           | 26                                                             |
| 50               | Cyprus  | Fats, Animals, Raw              | 1992           | 23                                                             |
| 50               | Cyprus  | Fish, Seafood                   | 1992           | 32                                                             |
| 50               | Cyprus  | Freshwater Fish                 | 1992           | 1                                                              |
| 50               | Cyprus  | Fruits - Excluding Wine         | 1992           | 129                                                            |
| 50               | Cyprus  | Fruits, Other                   | 1992           | 22                                                             |
| 50               | Cyprus  | Grand Total                     | 1992           | 2,787                                                          |
| 50               | Cyprus  | Grapefruit and products         | 1992           | 13                                                             |
| 50               | Cyprus  | Grapes and products (excl wine) | 1992           | 22                                                             |
| 50               | Cyprus  | Groundnut Oil                   | 1992           | 2                                                              |
| 50               | Cyprus  | Groundnuts (Shelled Eq)         | 1992           | 20                                                             |
| 50               | Cyprus  | Honey                           | 1992           | 8                                                              |
| 50               | Cyprus  | Lemons, Limes and products      | 1992           | 6                                                              |
| 50               | Cyprus  | Maize and products              | 1992           | 21                                                             |
| 50               | Cyprus  | Maize Germ Oil                  | 1992           | 59                                                             |
| 50               | Cyprus  | Marine Fish, Other              | 1992           | 4                                                              |
| 50               | Cyprus  | Meat                            | 1992           | 344                                                            |
| 50               | Cyprus  | Meat, Other                     | 1992           | 8                                                              |
| 50               | Cyprus  | Milk - Excluding Butter         | 1992           | 280                                                            |
| 50               | Cyprus  | Miscellaneous                   | 1992           | 11                                                             |
| 50               | Cyprus  | Mutton & Goat Meat              | 1992           | 58                                                             |
| 50               | Cyprus  | Oats                            | 1992           | 1                                                              |
| 50               | Cyprus  | Offals                          | 1992           | 13                                                             |
| 50               | Cyprus  | Oilcrops                        | 1992           | 83                                                             |
| 50               | Cyprus  | Oilcrops Oil, Other             | 1992           | 29                                                             |
| 50               | Cyprus  | Olive Oil                       | 1992           | 54                                                             |
| 50               | Cyprus  | Olives (including preserved)    | 1992           | 31                                                             |
| 50               | Cyprus  | Onions                          | 1992           | 10                                                             |
| 50               | Cyprus  | Oranges, Mandarines             | 1992           | 37                                                             |
| 50               | Cyprus  | Peas                            | 1992           | 1                                                              |
| 50               | Cyprus  | Pelagic Fish                    | 1992           | 13                                                             |
| 50               | Cyprus  | Pigmeat                         | 1992           | 139                                                            |
| 50               | Cyprus  | Pineapples and products         | 1992           | 1                                                              |
| 50               | Cyprus  | Potatoes and products           | 1992           | 76                                                             |
| 50               | Cyprus  | Poultry Meat                    | 1992           | 90                                                             |
| 50               | Cyprus  | Pulses                          | 1992           | 63                                                             |
| 50               | Cyprus  | Pulses, Other and products      | 1992           | 26                                                             |
| 50               | Cyprus  | Rape and Mustard Oil            | 1992           | 27                                                             |
| 50               | Cyprus  | Rape and Mustardseed            | 1992           | 1                                                              |
| 50               | Cyprus  | Rice (Milled Equivalent)        | 1992           | 40                                                             |
| 50               | Cyprus  | Roots, Other                    | 1992           | 3                                                              |
| 50               | Cyprus  | Sesame seed                     | 1992           | 27                                                             |
| 50               | Cyprus  | Soyabean Oil                    | 1992           | 82                                                             |
| 50               | Cyprus  | Spices                          | 1992           | 3                                                              |
| 50               | Cyprus  | Spices, Other                   | 1992           | 2                                                              |
| 50               | Cyprus  | Starchy Roots                   | 1992           | 79                                                             |
| 50               | Cyprus  | Stimulants                      | 1992           | 20                                                             |
| 50               | Cyprus  | Sugar & Sweeteners              | 1992           | 350                                                            |
| 50               | Cyprus  | Sugar (Raw Equivalent)          | 1992           | 327                                                            |
| 50               | Cyprus  | Sunflowerseed Oil               | 1992           | 52                                                             |
| 50               | Cyprus  | Sweeteners, Other               | 1992           | 14                                                             |
| 50               | Cyprus  | Tomatoes and products           | 1992           | 18                                                             |
| 50               | Cyprus  | Treenuts                        | 1992           | 39                                                             |

Dietary calcium and zinc deficiency risks are decreasing but remain prevalent

| FAO Country code | Country | Food item                       | Reference year | Net energy supply (kcal capita <sup>-1</sup> d <sup>-1</sup> ) |
|------------------|---------|---------------------------------|----------------|----------------------------------------------------------------|
| 50               | Cyprus  | Vegetable Oils                  | 1992           | 305                                                            |
| 50               | Cyprus  | Vegetables                      | 1992           | 79                                                             |
| 50               | Cyprus  | Vegetables, Other               | 1992           | 51                                                             |
| 50               | Cyprus  | Vegetal Products                | 1992           | 2,043                                                          |
| 50               | Cyprus  | Wheat and products              | 1992           | 716                                                            |
| 50               | Cyprus  | Wine                            | 1992           | 18                                                             |
| 50               | Cyprus  | Alcoholic Beverages             | 1993           | 97                                                             |
| 50               | Cyprus  | Animal fats                     | 1993           | 43                                                             |
| 50               | Cyprus  | Animal Products                 | 1993           | 745                                                            |
| 50               | Cyprus  | Apples and products             | 1993           | 12                                                             |
| 50               | Cyprus  | Bananas                         | 1993           | 9                                                              |
| 50               | Cyprus  | Beans                           | 1993           | 14                                                             |
| 50               | Cyprus  | Beer                            | 1993           | 54                                                             |
| 50               | Cyprus  | Beverages, Alcoholic            | 1993           | 24                                                             |
| 50               | Cyprus  | Beverages, Fermented            | 1993           | 1                                                              |
| 50               | Cyprus  | Bovine Meat                     | 1993           | 43                                                             |
| 50               | Cyprus  | Butter, Ghee                    | 1993           | 16                                                             |
| 50               | Cyprus  | Cephalopods                     | 1993           | 4                                                              |
| 50               | Cyprus  | Cereals - Excluding Beer        | 1993           | 772                                                            |
| 50               | Cyprus  | Cereals, Other                  | 1993           | 2                                                              |
| 50               | Cyprus  | Citrus, Other                   | 1993           | 2                                                              |
| 50               | Cyprus  | Cocoa Beans and products        | 1993           | 21                                                             |
| 50               | Cyprus  | Coconuts - Incl Copra           | 1993           | 3                                                              |
| 50               | Cyprus  | Coffee and products             | 1993           | 4                                                              |
| 50               | Cyprus  | Cream                           | 1993           | 1                                                              |
| 50               | Cyprus  | Crustaceans                     | 1993           | 1                                                              |
| 50               | Cyprus  | Demersal Fish                   | 1993           | 7                                                              |
| 50               | Cyprus  | Eggs                            | 1993           | 32                                                             |
| 50               | Cyprus  | Fats, Animals, Raw              | 1993           | 26                                                             |
| 50               | Cyprus  | Fish, Seafood                   | 1993           | 28                                                             |
| 50               | Cyprus  | Freshwater Fish                 | 1993           | 1                                                              |
| 50               | Cyprus  | Fruits - Excluding Wine         | 1993           | 121                                                            |
| 50               | Cyprus  | Fruits, Other                   | 1993           | 27                                                             |
| 50               | Cyprus  | Grand Total                     | 1993           | 2,799                                                          |
| 50               | Cyprus  | Grapefruit and products         | 1993           | 13                                                             |
| 50               | Cyprus  | Grapes and products (excl wine) | 1993           | 15                                                             |
| 50               | Cyprus  | Groundnut Oil                   | 1993           | 1                                                              |
| 50               | Cyprus  | Groundnuts (Shelled Eq)         | 1993           | 27                                                             |
| 50               | Cyprus  | Honey                           | 1993           | 7                                                              |
| 50               | Cyprus  | Lemons, Limes and products      | 1993           | 5                                                              |
| 50               | Cyprus  | Maize and products              | 1993           | 20                                                             |
| 50               | Cyprus  | Maize Germ Oil                  | 1993           | 52                                                             |
| 50               | Cyprus  | Marine Fish, Other              | 1993           | 5                                                              |
| 50               | Cyprus  | Meat                            | 1993           | 343                                                            |
| 50               | Cyprus  | Meat, Other                     | 1993           | 6                                                              |
| 50               | Cyprus  | Milk - Excluding Butter         | 1993           | 283                                                            |
| 50               | Cyprus  | Miscellaneous                   | 1993           | 12                                                             |
| 50               | Cyprus  | Mutton & Goat Meat              | 1993           | 56                                                             |
| 50               | Cyprus  | Offals                          | 1993           | 14                                                             |
| 50               | Cyprus  | Oilcrops                        | 1993           | 73                                                             |
| 50               | Cyprus  | Oilcrops Oil, Other             | 1993           | 31                                                             |
| 50               | Cyprus  | Olive Oil                       | 1993           | 42                                                             |
| 50               | Cyprus  | Olives (including preserved)    | 1993           | 14                                                             |
| 50               | Cyprus  | Onions                          | 1993           | 12                                                             |
| 50               | Cyprus  | Oranges, Mandarines             | 1993           | 37                                                             |
| 50               | Cyprus  | Peas                            | 1993           | 1                                                              |
| 50               | Cyprus  | Pelagic Fish                    | 1993           | 10                                                             |
| 50               | Cyprus  | Pigmeat                         | 1993           | 148                                                            |
| 50               | Cyprus  | Pineapples and products         | 1993           | 1                                                              |
| 50               | Cyprus  | Potatoes and products           | 1993           | 69                                                             |
| 50               | Cyprus  | Poultry Meat                    | 1993           | 90                                                             |
| 50               | Cyprus  | Pulses                          | 1993           | 35                                                             |
| 50               | Cyprus  | Pulses, Other and products      | 1993           | 20                                                             |
| 50               | Cyprus  | Rape and Mustard Oil            | 1993           | 34                                                             |
| 50               | Cyprus  | Rice (Milled Equivalent)        | 1993           | 31                                                             |
| 50               | Cyprus  | Roots, Other                    | 1993           | 4                                                              |
| 50               | Cyprus  | Sesame seed                     | 1993           | 28                                                             |
| 50               | Cyprus  | Soyabean Oil                    | 1993           | 131                                                            |
| 50               | Cyprus  | Spices                          | 1993           | 2                                                              |
| 50               | Cyprus  | Spices, Other                   | 1993           | 2                                                              |
| 50               | Cyprus  | Starchy Roots                   | 1993           | 73                                                             |
| 50               | Cyprus  | Stimulants                      | 1993           | 25                                                             |
| 50               | Cyprus  | Sugar & Sweeteners              | 1993           | 371                                                            |
| 50               | Cyprus  | Sugar (Raw Equivalent)          | 1993           | 351                                                            |
| 50               | Cyprus  | Sunflower seed                  | 1993           | 1                                                              |
| 50               | Cyprus  | Sunflowerseed Oil               | 1993           | 56                                                             |
| 50               | Cyprus  | Sweeteners, Other               | 1993           | 13                                                             |
| 50               | Cyprus  | Tomatoes and products           | 1993           | 18                                                             |
| 50               | Cyprus  | Treenuts                        | 1993           | 47                                                             |
| 50               | Cyprus  | Vegetable Oils                  | 1993           | 347                                                            |
| 50               | Cyprus  | Vegetables                      | 1993           | 80                                                             |
| 50               | Cyprus  | Vegetables, Other               | 1993           | 50                                                             |
| 50               | Cyprus  | Vegetal Products                | 1993           | 2,054                                                          |
| 50               | Cyprus  | Wheat and products              | 1993           | 718                                                            |
| 50               | Cyprus  | Wine                            | 1993           | 18                                                             |
| 50               | Cyprus  | Alcoholic Beverages             | 1994           | 98                                                             |
| 50               | Cyprus  | Animal fats                     | 1994           | 51                                                             |
| 50               | Cyprus  | Animal Products                 | 1994           | 770                                                            |
| 50               | Cyprus  | Apples and products             | 1994           | 5                                                              |
| 50               | Cyprus  | Bananas                         | 1994           | 13                                                             |
| 50               | Cyprus  | Beans                           | 1994           | 25                                                             |
| 50               | Cyprus  | Beer                            | 1994           | 56                                                             |
| 50               | Cyprus  | Beverages, Alcoholic            | 1994           | 23                                                             |
| 50               | Cyprus  | Bovine Meat                     | 1994           | 39                                                             |
| 50               | Cyprus  | Butter, Ghee                    | 1994           | 22                                                             |
| 50               | Cyprus  | Cephalopods                     | 1994           | 6                                                              |
| 50               | Cyprus  | Cereals - Excluding Beer        | 1994           | 777                                                            |

Dietary calcium and zinc deficiency risks are decreasing but remain prevalent

| FAO Country code | Country | Food item                       | Reference year | Net energy supply (kcal capita <sup>-1</sup> d <sup>-1</sup> ) |
|------------------|---------|---------------------------------|----------------|----------------------------------------------------------------|
| 50               | Cyprus  | Cereals, Other                  | 1994           | 2                                                              |
| 50               | Cyprus  | Citrus, Other                   | 1994           | 1                                                              |
| 50               | Cyprus  | Cocoa Beans and products        | 1994           | 14                                                             |
| 50               | Cyprus  | Coconuts - Incl Copra           | 1994           | 2                                                              |
| 50               | Cyprus  | Coffee and products             | 1994           | 5                                                              |
| 50               | Cyprus  | Cream                           | 1994           | 2                                                              |
| 50               | Cyprus  | Crustaceans                     | 1994           | 1                                                              |
| 50               | Cyprus  | Dates                           | 1994           | 1                                                              |
| 50               | Cyprus  | Demersal Fish                   | 1994           | 7                                                              |
| 50               | Cyprus  | Eggs                            | 1994           | 35                                                             |
| 50               | Cyprus  | Fats, Animals, Raw              | 1994           | 26                                                             |
| 50               | Cyprus  | Fish, Seafood                   | 1994           | 32                                                             |
| 50               | Cyprus  | Freshwater Fish                 | 1994           | 1                                                              |
| 50               | Cyprus  | Fruits - Excluding Wine         | 1994           | 92                                                             |
| 50               | Cyprus  | Fruits, Other                   | 1994           | 25                                                             |
| 50               | Cyprus  | Grand Total                     | 1994           | 2,812                                                          |
| 50               | Cyprus  | Grapefruit and products         | 1994           | 8                                                              |
| 50               | Cyprus  | Grapes and products (excl wine) | 1994           | 19                                                             |
| 50               | Cyprus  | Groundnut Oil                   | 1994           | 1                                                              |
| 50               | Cyprus  | Groundnuts (Shelled Eq)         | 1994           | 22                                                             |
| 50               | Cyprus  | Honey                           | 1994           | 6                                                              |
| 50               | Cyprus  | Lemons, Limes and products      | 1994           | 4                                                              |
| 50               | Cyprus  | Maize and products              | 1994           | 19                                                             |
| 50               | Cyprus  | Maize Germ Oil                  | 1994           | 54                                                             |
| 50               | Cyprus  | Marine Fish, Other              | 1994           | 4                                                              |
| 50               | Cyprus  | Meat                            | 1994           | 355                                                            |
| 50               | Cyprus  | Meat, Other                     | 1994           | 7                                                              |
| 50               | Cyprus  | Milk - Excluding Butter         | 1994           | 283                                                            |
| 50               | Cyprus  | Miscellaneous                   | 1994           | 11                                                             |
| 50               | Cyprus  | Mutton & Goat Meat              | 1994           | 58                                                             |
| 50               | Cyprus  | Oats                            | 1994           | 2                                                              |
| 50               | Cyprus  | Offals                          | 1994           | 15                                                             |
| 50               | Cyprus  | Oilcrops                        | 1994           | 62                                                             |
| 50               | Cyprus  | Oilcrops Oil, Other             | 1994           | 33                                                             |
| 50               | Cyprus  | Olive Oil                       | 1994           | 59                                                             |
| 50               | Cyprus  | Olives (including preserved)    | 1994           | 16                                                             |
| 50               | Cyprus  | Onions                          | 1994           | 10                                                             |
| 50               | Cyprus  | Oranges, Mandarines             | 1994           | 17                                                             |
| 50               | Cyprus  | Peas                            | 1994           | 1                                                              |
| 50               | Cyprus  | Pelagic Fish                    | 1994           | 13                                                             |
| 50               | Cyprus  | Pigmeat                         | 1994           | 158                                                            |
| 50               | Cyprus  | Pineapples and products         | 1994           | 1                                                              |
| 50               | Cyprus  | Potatoes and products           | 1994           | 69                                                             |
| 50               | Cyprus  | Poultry Meat                    | 1994           | 93                                                             |
| 50               | Cyprus  | Pulses                          | 1994           | 39                                                             |
| 50               | Cyprus  | Pulses, Other and products      | 1994           | 14                                                             |
| 50               | Cyprus  | Rape and Mustard Oil            | 1994           | 43                                                             |
| 50               | Cyprus  | Rice (Milled Equivalent)        | 1994           | 39                                                             |
| 50               | Cyprus  | Roots, Other                    | 1994           | 5                                                              |
| 50               | Cyprus  | Sesame seed                     | 1994           | 21                                                             |
| 50               | Cyprus  | Soyabean Oil                    | 1994           | 146                                                            |
| 50               | Cyprus  | Spices                          | 1994           | 3                                                              |
| 50               | Cyprus  | Spices, Other                   | 1994           | 2                                                              |
| 50               | Cyprus  | Starchy Roots                   | 1994           | 74                                                             |
| 50               | Cyprus  | Stimulants                      | 1994           | 19                                                             |
| 50               | Cyprus  | Sugar & Sweeteners              | 1994           | 383                                                            |
| 50               | Cyprus  | Sugar (Raw Equivalent)          | 1994           | 364                                                            |
| 50               | Cyprus  | Sunflower seed                  | 1994           | 1                                                              |
| 50               | Cyprus  | Sunflowerseed Oil               | 1994           | 51                                                             |
| 50               | Cyprus  | Sweeteners, Other               | 1994           | 13                                                             |
| 50               | Cyprus  | Tomatoes and products           | 1994           | 15                                                             |
| 50               | Cyprus  | Treenuts                        | 1994           | 24                                                             |
| 50               | Cyprus  | Vegetable Oils                  | 1994           | 387                                                            |
| 50               | Cyprus  | Vegetables                      | 1994           | 73                                                             |
| 50               | Cyprus  | Vegetables, Other               | 1994           | 47                                                             |
| 50               | Cyprus  | Vegetal Products                | 1994           | 2,042                                                          |
| 50               | Cyprus  | Wheat and products              | 1994           | 715                                                            |
| 50               | Cyprus  | Wine                            | 1994           | 18                                                             |
| 50               | Cyprus  | Alcoholic Beverages             | 1995           | 97                                                             |
| 50               | Cyprus  | Animal fats                     | 1995           | 43                                                             |
| 50               | Cyprus  | Animal Products                 | 1995           | 784                                                            |
| 50               | Cyprus  | Apples and products             | 1995           | 7                                                              |
| 50               | Cyprus  | Bananas                         | 1995           | 18                                                             |
| 50               | Cyprus  | Beans                           | 1995           | 22                                                             |
| 50               | Cyprus  | Beer                            | 1995           | 53                                                             |
| 50               | Cyprus  | Beverages, Alcoholic            | 1995           | 25                                                             |
| 50               | Cyprus  | Bovine Meat                     | 1995           | 39                                                             |
| 50               | Cyprus  | Butter, Ghee                    | 1995           | 17                                                             |
| 50               | Cyprus  | Cephalopods                     | 1995           | 5                                                              |
| 50               | Cyprus  | Cereals - Excluding Beer        | 1995           | 770                                                            |
| 50               | Cyprus  | Cereals, Other                  | 1995           | 1                                                              |
| 50               | Cyprus  | Citrus, Other                   | 1995           | 1                                                              |
| 50               | Cyprus  | Cocoa Beans and products        | 1995           | 17                                                             |
| 50               | Cyprus  | Coconuts - Incl Copra           | 1995           | 1                                                              |
| 50               | Cyprus  | Coffee and products             | 1995           | 4                                                              |
| 50               | Cyprus  | Crustaceans                     | 1995           | 1                                                              |
| 50               | Cyprus  | Demersal Fish                   | 1995           | 8                                                              |
| 50               | Cyprus  | Eggs                            | 1995           | 36                                                             |
| 50               | Cyprus  | Fats, Animals, Raw              | 1995           | 26                                                             |
| 50               | Cyprus  | Fish, Seafood                   | 1995           | 36                                                             |
| 50               | Cyprus  | Freshwater Fish                 | 1995           | 1                                                              |
| 50               | Cyprus  | Fruits - Excluding Wine         | 1995           | 114                                                            |
| 50               | Cyprus  | Fruits, Other                   | 1995           | 28                                                             |
| 50               | Cyprus  | Grand Total                     | 1995           | 2,823                                                          |
| 50               | Cyprus  | Grapefruit and products         | 1995           | 14                                                             |
| 50               | Cyprus  | Grapes and products (excl wine) | 1995           | 21                                                             |
| 50               | Cyprus  | Groundnut Oil                   | 1995           | 2                                                              |

Dietary calcium and zinc deficiency risks are decreasing but remain prevalent

| FAO Country code | Country | Food item                       | Reference year | Net energy supply (kcal <i>capita</i> <sup>-1</sup> d <sup>-1</sup> ) |
|------------------|---------|---------------------------------|----------------|-----------------------------------------------------------------------|
| 50               | Cyprus  | Groundnuts (Shelled Eq)         | 1995           | 14                                                                    |
| 50               | Cyprus  | Honey                           | 1995           | 6                                                                     |
| 50               | Cyprus  | Lemons, Limes and products      | 1995           | 5                                                                     |
| 50               | Cyprus  | Maize and products              | 1995           | 20                                                                    |
| 50               | Cyprus  | Maize Germ Oil                  | 1995           | 40                                                                    |
| 50               | Cyprus  | Marine Fish, Other              | 1995           | 4                                                                     |
| 50               | Cyprus  | Meat                            | 1995           | 357                                                                   |
| 50               | Cyprus  | Meat, Other                     | 1995           | 7                                                                     |
| 50               | Cyprus  | Milk - Excluding Butter         | 1995           | 297                                                                   |
| 50               | Cyprus  | Miscellaneous                   | 1995           | 11                                                                    |
| 50               | Cyprus  | Mutton & Goat Meat              | 1995           | 59                                                                    |
| 50               | Cyprus  | Oats                            | 1995           | 3                                                                     |
| 50               | Cyprus  | Offals                          | 1995           | 15                                                                    |
| 50               | Cyprus  | Oilcrops                        | 1995           | 57                                                                    |
| 50               | Cyprus  | Oilcrops Oil, Other             | 1995           | 41                                                                    |
| 50               | Cyprus  | Olive Oil                       | 1995           | 32                                                                    |
| 50               | Cyprus  | Olives (including preserved)    | 1995           | 16                                                                    |
| 50               | Cyprus  | Onions                          | 1995           | 14                                                                    |
| 50               | Cyprus  | Oranges, Mandarines             | 1995           | 19                                                                    |
| 50               | Cyprus  | Pelagic Fish                    | 1995           | 16                                                                    |
| 50               | Cyprus  | Pepper                          | 1995           | 1                                                                     |
| 50               | Cyprus  | Pigmeat                         | 1995           | 156                                                                   |
| 50               | Cyprus  | Potatoes and products           | 1995           | 52                                                                    |
| 50               | Cyprus  | Poultry Meat                    | 1995           | 97                                                                    |
| 50               | Cyprus  | Pulses                          | 1995           | 42                                                                    |
| 50               | Cyprus  | Pulses, Other and products      | 1995           | 20                                                                    |
| 50               | Cyprus  | Rape and Mustard Oil            | 1995           | 51                                                                    |
| 50               | Cyprus  | Rape and Mustardseed            | 1995           | 1                                                                     |
| 50               | Cyprus  | Rice (Milled Equivalent)        | 1995           | 34                                                                    |
| 50               | Cyprus  | Roots, Other                    | 1995           | 5                                                                     |
| 50               | Cyprus  | Sesame seed                     | 1995           | 24                                                                    |
| 50               | Cyprus  | Soyabean Oil                    | 1995           | 88                                                                    |
| 50               | Cyprus  | Spices                          | 1995           | 3                                                                     |
| 50               | Cyprus  | Spices, Other                   | 1995           | 2                                                                     |
| 50               | Cyprus  | Starchy Roots                   | 1995           | 58                                                                    |
| 50               | Cyprus  | Stimulants                      | 1995           | 21                                                                    |
| 50               | Cyprus  | Sugar & Sweeteners              | 1995           | 411                                                                   |
| 50               | Cyprus  | Sugar (Raw Equivalent)          | 1995           | 392                                                                   |
| 50               | Cyprus  | Sunflowerseed Oil               | 1995           | 49                                                                    |
| 50               | Cyprus  | Sweeteners, Other               | 1995           | 14                                                                    |
| 50               | Cyprus  | Tomatoes and products           | 1995           | 19                                                                    |
| 50               | Cyprus  | Treenuts                        | 1995           | 63                                                                    |
| 50               | Cyprus  | Vegetable Oils                  | 1995           | 304                                                                   |
| 50               | Cyprus  | Vegetables                      | 1995           | 88                                                                    |
| 50               | Cyprus  | Vegetables, Other               | 1995           | 56                                                                    |
| 50               | Cyprus  | Vegetal Products                | 1995           | 2,039                                                                 |
| 50               | Cyprus  | Wheat and products              | 1995           | 713                                                                   |
| 50               | Cyprus  | Wine                            | 1995           | 18                                                                    |
| 50               | Cyprus  | Alcoholic Beverages             | 1996           | 92                                                                    |
| 50               | Cyprus  | Animal fats                     | 1996           | 50                                                                    |
| 50               | Cyprus  | Animal Products                 | 1996           | 770                                                                   |
| 50               | Cyprus  | Apples and products             | 1996           | 8                                                                     |
| 50               | Cyprus  | Bananas                         | 1996           | 16                                                                    |
| 50               | Cyprus  | Beans                           | 1996           | 19                                                                    |
| 50               | Cyprus  | Beer                            | 1996           | 49                                                                    |
| 50               | Cyprus  | Beverages, Alcoholic            | 1996           | 24                                                                    |
| 50               | Cyprus  | Beverages, Fermented            | 1996           | 1                                                                     |
| 50               | Cyprus  | Bovine Meat                     | 1996           | 32                                                                    |
| 50               | Cyprus  | Butter, Ghee                    | 1996           | 20                                                                    |
| 50               | Cyprus  | Cephalopods                     | 1996           | 5                                                                     |
| 50               | Cyprus  | Cereals - Excluding Beer        | 1996           | 749                                                                   |
| 50               | Cyprus  | Citrus, Other                   | 1996           | 1                                                                     |
| 50               | Cyprus  | Cocoa Beans and products        | 1996           | 14                                                                    |
| 50               | Cyprus  | Coconuts - Incl Copra           | 1996           | 3                                                                     |
| 50               | Cyprus  | Coffee and products             | 1996           | 5                                                                     |
| 50               | Cyprus  | Cream                           | 1996           | 1                                                                     |
| 50               | Cyprus  | Crustaceans                     | 1996           | 1                                                                     |
| 50               | Cyprus  | Demersal Fish                   | 1996           | 8                                                                     |
| 50               | Cyprus  | Eggs                            | 1996           | 37                                                                    |
| 50               | Cyprus  | Fats, Animals, Raw              | 1996           | 29                                                                    |
| 50               | Cyprus  | Fish, Seafood                   | 1996           | 32                                                                    |
| 50               | Cyprus  | Freshwater Fish                 | 1996           | 1                                                                     |
| 50               | Cyprus  | Fruits - Excluding Wine         | 1996           | 107                                                                   |
| 50               | Cyprus  | Fruits, Other                   | 1996           | 31                                                                    |
| 50               | Cyprus  | Grand Total                     | 1996           | 2,724                                                                 |
| 50               | Cyprus  | Grapefruit and products         | 1996           | 7                                                                     |
| 50               | Cyprus  | Grapes and products (excl wine) | 1996           | 22                                                                    |
| 50               | Cyprus  | Groundnut Oil                   | 1996           | 1                                                                     |
| 50               | Cyprus  | Groundnuts (Shelled Eq)         | 1996           | 15                                                                    |
| 50               | Cyprus  | Honey                           | 1996           | 4                                                                     |
| 50               | Cyprus  | Lemons, Limes and products      | 1996           | 3                                                                     |
| 50               | Cyprus  | Maize and products              | 1996           | 19                                                                    |
| 50               | Cyprus  | Maize Germ Oil                  | 1996           | 51                                                                    |
| 50               | Cyprus  | Marine Fish, Other              | 1996           | 4                                                                     |
| 50               | Cyprus  | Meat                            | 1996           | 347                                                                   |
| 50               | Cyprus  | Meat, Other                     | 1996           | 6                                                                     |
| 50               | Cyprus  | Milk - Excluding Butter         | 1996           | 289                                                                   |
| 50               | Cyprus  | Miscellaneous                   | 1996           | 11                                                                    |
| 50               | Cyprus  | Mutton & Goat Meat              | 1996           | 50                                                                    |
| 50               | Cyprus  | Oats                            | 1996           | 2                                                                     |
| 50               | Cyprus  | Offals                          | 1996           | 14                                                                    |
| 50               | Cyprus  | Oilcrops                        | 1996           | 57                                                                    |
| 50               | Cyprus  | Oilcrops Oil, Other             | 1996           | 31                                                                    |
| 50               | Cyprus  | Olive Oil                       | 1996           | 39                                                                    |
| 50               | Cyprus  | Olives (including preserved)    | 1996           | 14                                                                    |
| 50               | Cyprus  | Onions                          | 1996           | 15                                                                    |
| 50               | Cyprus  | Oranges, Mandarines             | 1996           | 19                                                                    |

Dietary calcium and zinc deficiency risks are decreasing but remain prevalent

| FAO Country code | Country | Food item                       | Reference year | Net energy supply (kcal <i>capita</i> <sup>-1</sup> d <sup>-1</sup> ) |
|------------------|---------|---------------------------------|----------------|-----------------------------------------------------------------------|
| 50               | Cyprus  | Pelagic Fish                    | 1996           | 12                                                                    |
| 50               | Cyprus  | Pigmeat                         | 1996           | 160                                                                   |
| 50               | Cyprus  | Potatoes and products           | 1996           | 66                                                                    |
| 50               | Cyprus  | Poultry Meat                    | 1996           | 99                                                                    |
| 50               | Cyprus  | Pulses                          | 1996           | 37                                                                    |
| 50               | Cyprus  | Pulses, Other and products      | 1996           | 18                                                                    |
| 50               | Cyprus  | Rape and Mustard Oil            | 1996           | 31                                                                    |
| 50               | Cyprus  | Rape and Mustardseed            | 1996           | 1                                                                     |
| 50               | Cyprus  | Rice (Milled Equivalent)        | 1996           | 36                                                                    |
| 50               | Cyprus  | Roots, Other                    | 1996           | 4                                                                     |
| 50               | Cyprus  | Sesame seed                     | 1996           | 23                                                                    |
| 50               | Cyprus  | Soyabean Oil                    | 1996           | 142                                                                   |
| 50               | Cyprus  | Spices                          | 1996           | 2                                                                     |
| 50               | Cyprus  | Spices, Other                   | 1996           | 1                                                                     |
| 50               | Cyprus  | Starchy Roots                   | 1996           | 69                                                                    |
| 50               | Cyprus  | Stimulants                      | 1996           | 19                                                                    |
| 50               | Cyprus  | Sugar & Sweeteners              | 1996           | 346                                                                   |
| 50               | Cyprus  | Sugar (Raw Equivalent)          | 1996           | 331                                                                   |
| 50               | Cyprus  | Sunflower seed                  | 1996           | 1                                                                     |
| 50               | Cyprus  | Sunflowerseed Oil               | 1996           | 59                                                                    |
| 50               | Cyprus  | Sweeteners, Other               | 1996           | 11                                                                    |
| 50               | Cyprus  | Tomatoes and products           | 1996           | 18                                                                    |
| 50               | Cyprus  | Treenuts                        | 1996           | 26                                                                    |
| 50               | Cyprus  | Vegetable Oils                  | 1996           | 354                                                                   |
| 50               | Cyprus  | Vegetables                      | 1996           | 85                                                                    |
| 50               | Cyprus  | Vegetables, Other               | 1996           | 52                                                                    |
| 50               | Cyprus  | Vegetal Products                | 1996           | 1,954                                                                 |
| 50               | Cyprus  | Wheat and products              | 1996           | 692                                                                   |
| 50               | Cyprus  | Wine                            | 1996           | 18                                                                    |
| 50               | Cyprus  | Alcoholic Beverages             | 1997           | 91                                                                    |
| 50               | Cyprus  | Animal fats                     | 1997           | 47                                                                    |
| 50               | Cyprus  | Animal Products                 | 1997           | 756                                                                   |
| 50               | Cyprus  | Apples and products             | 1997           | 11                                                                    |
| 50               | Cyprus  | Bananas                         | 1997           | 15                                                                    |
| 50               | Cyprus  | Beans                           | 1997           | 19                                                                    |
| 50               | Cyprus  | Beer                            | 1997           | 48                                                                    |
| 50               | Cyprus  | Beverages, Alcoholic            | 1997           | 24                                                                    |
| 50               | Cyprus  | Beverages, Fermented            | 1997           | 1                                                                     |
| 50               | Cyprus  | Bovine Meat                     | 1997           | 33                                                                    |
| 50               | Cyprus  | Butter, Ghee                    | 1997           | 19                                                                    |
| 50               | Cyprus  | Cephalopods                     | 1997           | 5                                                                     |
| 50               | Cyprus  | Cereals - Excluding Beer        | 1997           | 732                                                                   |
| 50               | Cyprus  | Cereals, Other                  | 1997           | 1                                                                     |
| 50               | Cyprus  | Citrus, Other                   | 1997           | 1                                                                     |
| 50               | Cyprus  | Cocoa Beans and products        | 1997           | 21                                                                    |
| 50               | Cyprus  | Coconuts - Incl Copra           | 1997           | 3                                                                     |
| 50               | Cyprus  | Coffee and products             | 1997           | 4                                                                     |
| 50               | Cyprus  | Cream                           | 1997           | 1                                                                     |
| 50               | Cyprus  | Crustaceans                     | 1997           | 1                                                                     |
| 50               | Cyprus  | Dates                           | 1997           | 1                                                                     |
| 50               | Cyprus  | Demersal Fish                   | 1997           | 8                                                                     |
| 50               | Cyprus  | Eggs                            | 1997           | 33                                                                    |
| 50               | Cyprus  | Fats, Animals, Raw              | 1997           | 28                                                                    |
| 50               | Cyprus  | Fish, Seafood                   | 1997           | 33                                                                    |
| 50               | Cyprus  | Freshwater Fish                 | 1997           | 1                                                                     |
| 50               | Cyprus  | Fruits - Excluding Wine         | 1997           | 120                                                                   |
| 50               | Cyprus  | Fruits, Other                   | 1997           | 30                                                                    |
| 50               | Cyprus  | Grand Total                     | 1997           | 2,721                                                                 |
| 50               | Cyprus  | Grapefruit and products         | 1997           | 6                                                                     |
| 50               | Cyprus  | Grapes and products (excl wine) | 1997           | 27                                                                    |
| 50               | Cyprus  | Groundnut Oil                   | 1997           | 1                                                                     |
| 50               | Cyprus  | Groundnuts (Shelled Eq)         | 1997           | 21                                                                    |
| 50               | Cyprus  | Honey                           | 1997           | 4                                                                     |
| 50               | Cyprus  | Lemons, Limes and products      | 1997           | 4                                                                     |
| 50               | Cyprus  | Maize and products              | 1997           | 20                                                                    |
| 50               | Cyprus  | Maize Germ Oil                  | 1997           | 35                                                                    |
| 50               | Cyprus  | Maine Fish, Other               | 1997           | 4                                                                     |
| 50               | Cyprus  | Meat                            | 1997           | 356                                                                   |
| 50               | Cyprus  | Meat, Other                     | 1997           | 6                                                                     |
| 50               | Cyprus  | Milk - Excluding Butter         | 1997           | 275                                                                   |
| 50               | Cyprus  | Miscellaneous                   | 1997           | 13                                                                    |
| 50               | Cyprus  | Mutton & Goat Meat              | 1997           | 54                                                                    |
| 50               | Cyprus  | Oats                            | 1997           | 1                                                                     |
| 50               | Cyprus  | Offals                          | 1997           | 12                                                                    |
| 50               | Cyprus  | Oilcrops                        | 1997           | 64                                                                    |
| 50               | Cyprus  | Oilcrops Oil, Other             | 1997           | 27                                                                    |
| 50               | Cyprus  | Olive Oil                       | 1997           | 32                                                                    |
| 50               | Cyprus  | Olives (including preserved)    | 1997           | 9                                                                     |
| 50               | Cyprus  | Onions                          | 1997           | 15                                                                    |
| 50               | Cyprus  | Oranges, Mandarines             | 1997           | 25                                                                    |
| 50               | Cyprus  | Pelagic Fish                    | 1997           | 13                                                                    |
| 50               | Cyprus  | Pigmeat                         | 1997           | 158                                                                   |
| 50               | Cyprus  | Pineapples and products         | 1997           | 1                                                                     |
| 50               | Cyprus  | Potatoes and products           | 1997           | 63                                                                    |
| 50               | Cyprus  | Poultry Meat                    | 1997           | 104                                                                   |
| 50               | Cyprus  | Pulses                          | 1997           | 37                                                                    |
| 50               | Cyprus  | Pulses, Other and products      | 1997           | 18                                                                    |
| 50               | Cyprus  | Rape and Mustard Oil            | 1997           | 42                                                                    |
| 50               | Cyprus  | Rape and Mustardseed            | 1997           | 1                                                                     |
| 50               | Cyprus  | Rice (Milled Equivalent)        | 1997           | 38                                                                    |
| 50               | Cyprus  | Roots, Other                    | 1997           | 3                                                                     |
| 50               | Cyprus  | Sesame seed                     | 1997           | 22                                                                    |
| 50               | Cyprus  | Soyabean Oil                    | 1997           | 122                                                                   |
| 50               | Cyprus  | Spices                          | 1997           | 2                                                                     |
| 50               | Cyprus  | Spices, Other                   | 1997           | 2                                                                     |
| 50               | Cyprus  | Starchy Roots                   | 1997           | 67                                                                    |
| 50               | Cyprus  | Stimulants                      | 1997           | 25                                                                    |

## Dietary calcium and zinc deficiency risks are decreasing but remain prevalent

| FAO Country code | Country | Food item                       | Reference year | Net energy supply (kcal capita <sup>-1</sup> d <sup>-1</sup> ) |
|------------------|---------|---------------------------------|----------------|----------------------------------------------------------------|
| 50               | Cyprus  | Sugar & Sweeteners              | 1997           | 337                                                            |
| 50               | Cyprus  | Sugar (Raw Equivalent)          | 1997           | 319                                                            |
| 50               | Cyprus  | Sunflower seed                  | 1997           | 9                                                              |
| 50               | Cyprus  | Sunflowerseed Oil               | 1997           | 98                                                             |
| 50               | Cyprus  | Sweeteners, Other               | 1997           | 13                                                             |
| 50               | Cyprus  | Tomatoes and products           | 1997           | 17                                                             |
| 50               | Cyprus  | Treenuts                        | 1997           | 35                                                             |
| 50               | Cyprus  | Vegetable Oils                  | 1997           | 357                                                            |
| 50               | Cyprus  | Vegetables                      | 1997           | 86                                                             |
| 50               | Cyprus  | Vegetables, Other               | 1997           | 53                                                             |
| 50               | Cyprus  | Vegetal Products                | 1997           | 1,965                                                          |
| 50               | Cyprus  | Wheat and products              | 1997           | 671                                                            |
| 50               | Cyprus  | Wine                            | 1997           | 18                                                             |
| 50               | Cyprus  | Alcoholic Beverages             | 1998           | 94                                                             |
| 50               | Cyprus  | Animal fats                     | 1998           | 52                                                             |
| 50               | Cyprus  | Animal Products                 | 1998           | 767                                                            |
| 50               | Cyprus  | Apples and products             | 1998           | 13                                                             |
| 50               | Cyprus  | Bananas                         | 1998           | 20                                                             |
| 50               | Cyprus  | Beans                           | 1998           | 18                                                             |
| 50               | Cyprus  | Beer                            | 1998           | 51                                                             |
| 50               | Cyprus  | Beverages, Alcoholic            | 1998           | 24                                                             |
| 50               | Cyprus  | Beverages, Fermented            | 1998           | 1                                                              |
| 50               | Cyprus  | Bovine Meat                     | 1998           | 27                                                             |
| 50               | Cyprus  | Butter, Ghee                    | 1998           | 20                                                             |
| 50               | Cyprus  | Cephalopods                     | 1998           | 6                                                              |
| 50               | Cyprus  | Cereals - Excluding Beer        | 1998           | 724                                                            |
| 50               | Cyprus  | Cereals, Other                  | 1998           | 1                                                              |
| 50               | Cyprus  | Cocoa Beans and products        | 1998           | 21                                                             |
| 50               | Cyprus  | Coconuts - Incl Copra           | 1998           | 3                                                              |
| 50               | Cyprus  | Coffee and products             | 1998           | 4                                                              |
| 50               | Cyprus  | Cottonseed Oil                  | 1998           | 1                                                              |
| 50               | Cyprus  | Cream                           | 1998           | 1                                                              |
| 50               | Cyprus  | Crustaceans                     | 1998           | 1                                                              |
| 50               | Cyprus  | Demersal Fish                   | 1998           | 9                                                              |
| 50               | Cyprus  | Eggs                            | 1998           | 38                                                             |
| 50               | Cyprus  | Fats, Animals, Raw              | 1998           | 30                                                             |
| 50               | Cyprus  | Fish, Seafood                   | 1998           | 37                                                             |
| 50               | Cyprus  | Freshwater Fish                 | 1998           | 1                                                              |
| 50               | Cyprus  | Fruits - Excluding Wine         | 1998           | 148                                                            |
| 50               | Cyprus  | Fruits, Other                   | 1998           | 34                                                             |
| 50               | Cyprus  | Grand Total                     | 1998           | 2,727                                                          |
| 50               | Cyprus  | Grapefruit and products         | 1998           | 8                                                              |
| 50               | Cyprus  | Grapes and products (excl wine) | 1998           | 32                                                             |
| 50               | Cyprus  | Groundnut Oil                   | 1998           | 1                                                              |
| 50               | Cyprus  | Groundnuts (Shelled Eq)         | 1998           | 28                                                             |
| 50               | Cyprus  | Honey                           | 1998           | 5                                                              |
| 50               | Cyprus  | Lemons, Limes and products      | 1998           | 8                                                              |
| 50               | Cyprus  | Maize and products              | 1998           | 18                                                             |
| 50               | Cyprus  | Maize Germ Oil                  | 1998           | 39                                                             |
| 50               | Cyprus  | Marine Fish, Other              | 1998           | 4                                                              |
| 50               | Cyprus  | Meat                            | 1998           | 355                                                            |
| 50               | Cyprus  | Meat, Other                     | 1998           | 6                                                              |
| 50               | Cyprus  | Milk - Excluding Butter         | 1998           | 271                                                            |
| 50               | Cyprus  | Miscellaneous                   | 1998           | 16                                                             |
| 50               | Cyprus  | Mutton & Goat Meat              | 1998           | 62                                                             |
| 50               | Cyprus  | Oats                            | 1998           | 2                                                              |
| 50               | Cyprus  | Offals                          | 1998           | 14                                                             |
| 50               | Cyprus  | Oilcrops                        | 1998           | 77                                                             |
| 50               | Cyprus  | Oilcrops Oil, Other             | 1998           | 32                                                             |
| 50               | Cyprus  | Olive Oil                       | 1998           | 44                                                             |
| 50               | Cyprus  | Olives (including preserved)    | 1998           | 15                                                             |
| 50               | Cyprus  | Onions                          | 1998           | 16                                                             |
| 50               | Cyprus  | Oranges, Mandarines             | 1998           | 31                                                             |
| 50               | Cyprus  | Pelagic Fish                    | 1998           | 16                                                             |
| 50               | Cyprus  | Pepper                          | 1998           | 1                                                              |
| 50               | Cyprus  | Pigmeat                         | 1998           | 158                                                            |
| 50               | Cyprus  | Pineapples and products         | 1998           | 1                                                              |
| 50               | Cyprus  | Potatoes and products           | 1998           | 64                                                             |
| 50               | Cyprus  | Poultry Meat                    | 1998           | 102                                                            |
| 50               | Cyprus  | Pulses                          | 1998           | 35                                                             |
| 50               | Cyprus  | Pulses, Other and products      | 1998           | 16                                                             |
| 50               | Cyprus  | Rape and Mustard Oil            | 1998           | 39                                                             |
| 50               | Cyprus  | Rape and Mustardseed            | 1998           | 1                                                              |
| 50               | Cyprus  | Rice (Milled Equivalent)        | 1998           | 40                                                             |
| 50               | Cyprus  | Roots, Other                    | 1998           | 5                                                              |
| 50               | Cyprus  | Sesame seed                     | 1998           | 21                                                             |
| 50               | Cyprus  | Sesameseed Oil                  | 1998           | 1                                                              |
| 50               | Cyprus  | Soyabean Oil                    | 1998           | 88                                                             |
| 50               | Cyprus  | Spices                          | 1998           | 2                                                              |
| 50               | Cyprus  | Spices, Other                   | 1998           | 2                                                              |
| 50               | Cyprus  | Starchy Roots                   | 1998           | 69                                                             |
| 50               | Cyprus  | Stimulants                      | 1998           | 26                                                             |
| 50               | Cyprus  | Sugar & Sweeteners              | 1998           | 335                                                            |
| 50               | Cyprus  | Sugar (Raw Equivalent)          | 1998           | 314                                                            |
| 50               | Cyprus  | Sunflower seed                  | 1998           | 9                                                              |
| 50               | Cyprus  | Sunflowerseed Oil               | 1998           | 64                                                             |
| 50               | Cyprus  | Sweeteners, Other               | 1998           | 16                                                             |
| 50               | Cyprus  | Tomatoes and products           | 1998           | 19                                                             |
| 50               | Cyprus  | Treenuts                        | 1998           | 31                                                             |
| 50               | Cyprus  | Vegetable Oils                  | 1998           | 308                                                            |
| 50               | Cyprus  | Vegetables                      | 1998           | 93                                                             |
| 50               | Cyprus  | Vegetables, Other               | 1998           | 58                                                             |
| 50               | Cyprus  | Vegetal Products                | 1998           | 1,959                                                          |
| 50               | Cyprus  | Wheat and products              | 1998           | 663                                                            |
| 50               | Cyprus  | Wine                            | 1998           | 18                                                             |
| 50               | Cyprus  | Alcoholic Beverages             | 1999           | 93                                                             |
| 50               | Cyprus  | Animal fats                     | 1999           | 50                                                             |



Dietary calcium and zinc deficiency risks are decreasing but remain prevalent

| FAO Country code | Country | Food item                       | Reference year | Net energy supply (kcal capita <sup>-1</sup> d <sup>-1</sup> ) |
|------------------|---------|---------------------------------|----------------|----------------------------------------------------------------|
| 50               | Cyprus  | Animal Products                 | 1999           | 769                                                            |
| 50               | Cyprus  | Apples and products             | 1999           | 14                                                             |
| 50               | Cyprus  | Bananas                         | 1999           | 21                                                             |
| 50               | Cyprus  | Beans                           | 1999           | 21                                                             |
| 50               | Cyprus  | Beer                            | 1999           | 51                                                             |
| 50               | Cyprus  | Beverages, Alcoholic            | 1999           | 24                                                             |
| 50               | Cyprus  | Beverages, Fermented            | 1999           | 1                                                              |
| 50               | Cyprus  | Bovine Meat                     | 1999           | 28                                                             |
| 50               | Cyprus  | Butter, Ghee                    | 1999           | 17                                                             |
| 50               | Cyprus  | Cephalopods                     | 1999           | 6                                                              |
| 50               | Cyprus  | Cereals - Excluding Beer        | 1999           | 737                                                            |
| 50               | Cyprus  | Cereals, Other                  | 1999           | 1                                                              |
| 50               | Cyprus  | Cocoa Beans and products        | 1999           | 24                                                             |
| 50               | Cyprus  | Coconuts - Incl Copra           | 1999           | 3                                                              |
| 50               | Cyprus  | Coffee and products             | 1999           | 4                                                              |
| 50               | Cyprus  | Cream                           | 1999           | 1                                                              |
| 50               | Cyprus  | Crustaceans                     | 1999           | 1                                                              |
| 50               | Cyprus  | Dates                           | 1999           | 1                                                              |
| 50               | Cyprus  | Demersal Fish                   | 1999           | 9                                                              |
| 50               | Cyprus  | Eggs                            | 1999           | 37                                                             |
| 50               | Cyprus  | Fats, Animals, Raw              | 1999           | 32                                                             |
| 50               | Cyprus  | Fish, Seafood                   | 1999           | 37                                                             |
| 50               | Cyprus  | Freshwater Fish                 | 1999           | 1                                                              |
| 50               | Cyprus  | Fruits - Excluding Wine         | 1999           | 148                                                            |
| 50               | Cyprus  | Fruits, Other                   | 1999           | 32                                                             |
| 50               | Cyprus  | Grand Total                     | 1999           | 2,709                                                          |
| 50               | Cyprus  | Grapefruit and products         | 1999           | 9                                                              |
| 50               | Cyprus  | Grapes and products (excl wine) | 1999           | 34                                                             |
| 50               | Cyprus  | Groundnut Oil                   | 1999           | 1                                                              |
| 50               | Cyprus  | Groundnuts (Shelled Eq)         | 1999           | 24                                                             |
| 50               | Cyprus  | Honey                           | 1999           | 6                                                              |
| 50               | Cyprus  | Lemons, Limes and products      | 1999           | 7                                                              |
| 50               | Cyprus  | Maize and products              | 1999           | 16                                                             |
| 50               | Cyprus  | Maize Germ Oil                  | 1999           | 35                                                             |
| 50               | Cyprus  | Marine Fish, Other              | 1999           | 4                                                              |
| 50               | Cyprus  | Meat                            | 1999           | 367                                                            |
| 50               | Cyprus  | Meat, Other                     | 1999           | 6                                                              |
| 50               | Cyprus  | Milk - Excluding Butter         | 1999           | 269                                                            |
| 50               | Cyprus  | Miscellaneous                   | 1999           | 16                                                             |
| 50               | Cyprus  | Mutton & Goat Meat              | 1999           | 65                                                             |
| 50               | Cyprus  | Oats                            | 1999           | 1                                                              |
| 50               | Cyprus  | Offals                          | 1999           | 10                                                             |
| 50               | Cyprus  | Oilcrops                        | 1999           | 75                                                             |
| 50               | Cyprus  | Oilcrops Oil, Other             | 1999           | 20                                                             |
| 50               | Cyprus  | Oilcrops, Other                 | 1999           | 2                                                              |
| 50               | Cyprus  | Olive Oil                       | 1999           | 35                                                             |
| 50               | Cyprus  | Olives (including preserved)    | 1999           | 15                                                             |
| 50               | Cyprus  | Onions                          | 1999           | 15                                                             |
| 50               | Cyprus  | Oranges, Mandarines             | 1999           | 28                                                             |
| 50               | Cyprus  | Pelagic Fish                    | 1999           | 15                                                             |
| 50               | Cyprus  | Pigmeat                         | 1999           | 161                                                            |
| 50               | Cyprus  | Pineapples and products         | 1999           | 1                                                              |
| 50               | Cyprus  | Potatoes and products           | 1999           | 56                                                             |
| 50               | Cyprus  | Poultry Meat                    | 1999           | 107                                                            |
| 50               | Cyprus  | Pulses                          | 1999           | 39                                                             |
| 50               | Cyprus  | Pulses, Other and products      | 1999           | 18                                                             |
| 50               | Cyprus  | Rape and Mustard Oil            | 1999           | 46                                                             |
| 50               | Cyprus  | Rape and Mustardseed            | 1999           | 1                                                              |
| 50               | Cyprus  | Rice (Milled Equivalent)        | 1999           | 39                                                             |
| 50               | Cyprus  | Roots, Other                    | 1999           | 5                                                              |
| 50               | Cyprus  | Sesame seed                     | 1999           | 27                                                             |
| 50               | Cyprus  | Soyabean Oil                    | 1999           | 83                                                             |
| 50               | Cyprus  | Spices                          | 1999           | 2                                                              |
| 50               | Cyprus  | Spices, Other                   | 1999           | 2                                                              |
| 50               | Cyprus  | Starchy Roots                   | 1999           | 61                                                             |
| 50               | Cyprus  | Stimulants                      | 1999           | 28                                                             |
| 50               | Cyprus  | Sugar & Sweeteners              | 1999           | 333                                                            |
| 50               | Cyprus  | Sugar (Raw Equivalent)          | 1999           | 307                                                            |
| 50               | Cyprus  | Sunflower seed                  | 1999           | 4                                                              |
| 50               | Cyprus  | Sunflowerseed Oil               | 1999           | 58                                                             |
| 50               | Cyprus  | Sweeteners, Other               | 1999           | 20                                                             |
| 50               | Cyprus  | Tomatoes and products           | 1999           | 21                                                             |
| 50               | Cyprus  | Treenuts                        | 1999           | 33                                                             |
| 50               | Cyprus  | Vegetable Oils                  | 1999           | 278                                                            |
| 50               | Cyprus  | Vegetables                      | 1999           | 96                                                             |
| 50               | Cyprus  | Vegetables, Other               | 1999           | 60                                                             |
| 50               | Cyprus  | Vegetal Products                | 1999           | 1,940                                                          |
| 50               | Cyprus  | Wheat and products              | 1999           | 680                                                            |
| 50               | Cyprus  | Wine                            | 1999           | 18                                                             |
| 50               | Cyprus  | Alcoholic Beverages             | 2000           | 93                                                             |
| 50               | Cyprus  | Animal fats                     | 2000           | 54                                                             |
| 50               | Cyprus  | Animal Products                 | 2000           | 788                                                            |
| 50               | Cyprus  | Apples and products             | 2000           | 13                                                             |
| 50               | Cyprus  | Bananas                         | 2000           | 14                                                             |
| 50               | Cyprus  | Beans                           | 2000           | 16                                                             |
| 50               | Cyprus  | Beer                            | 2000           | 50                                                             |
| 50               | Cyprus  | Beverages, Alcoholic            | 2000           | 23                                                             |
| 50               | Cyprus  | Beverages, Fermented            | 2000           | 1                                                              |
| 50               | Cyprus  | Bovine Meat                     | 2000           | 31                                                             |
| 50               | Cyprus  | Butter, Ghee                    | 2000           | 22                                                             |
| 50               | Cyprus  | Cephalopods                     | 2000           | 5                                                              |
| 50               | Cyprus  | Cereals - Excluding Beer        | 2000           | 669                                                            |
| 50               | Cyprus  | Cereals, Other                  | 2000           | 1                                                              |
| 50               | Cyprus  | Cocoa Beans and products        | 2000           | 28                                                             |
| 50               | Cyprus  | Coconuts - Incl Copra           | 2000           | 3                                                              |
| 50               | Cyprus  | Coffee and products             | 2000           | 6                                                              |
| 50               | Cyprus  | Cream                           | 2000           | 2                                                              |

Dietary calcium and zinc deficiency risks are decreasing but remain prevalent

| FAO Country code | Country | Food item                       | Reference year | Net energy supply (kcal <i>capita</i> <sup>-1</sup> d <sup>-1</sup> ) |
|------------------|---------|---------------------------------|----------------|-----------------------------------------------------------------------|
| 50               | Cyprus  | Crustaceans                     | 2000           | 1                                                                     |
| 50               | Cyprus  | Dates                           | 2000           | 1                                                                     |
| 50               | Cyprus  | Demersal Fish                   | 2000           | 9                                                                     |
| 50               | Cyprus  | Eggs                            | 2000           | 36                                                                    |
| 50               | Cyprus  | Fats, Animals, Raw              | 2000           | 31                                                                    |
| 50               | Cyprus  | Fish, Seafood                   | 2000           | 35                                                                    |
| 50               | Cyprus  | Freshwater Fish                 | 2000           | 1                                                                     |
| 50               | Cyprus  | Fruits - Excluding Wine         | 2000           | 124                                                                   |
| 50               | Cyprus  | Fruits, Other                   | 2000           | 32                                                                    |
| 50               | Cyprus  | Grand Total                     | 2000           | 2,676                                                                 |
| 50               | Cyprus  | Grapefruit and products         | 2000           | 6                                                                     |
| 50               | Cyprus  | Grapes and products (excl wine) | 2000           | 23                                                                    |
| 50               | Cyprus  | Groundnut Oil                   | 2000           | 1                                                                     |
| 50               | Cyprus  | Groundnuts (Shelled Eq)         | 2000           | 14                                                                    |
| 50               | Cyprus  | Honey                           | 2000           | 8                                                                     |
| 50               | Cyprus  | Lemons, Limes and products      | 2000           | 8                                                                     |
| 50               | Cyprus  | Maize and products              | 2000           | 15                                                                    |
| 50               | Cyprus  | Maize Germ Oil                  | 2000           | 38                                                                    |
| 50               | Cyprus  | Marine Fish, Other              | 2000           | 4                                                                     |
| 50               | Cyprus  | Meat                            | 2000           | 367                                                                   |
| 50               | Cyprus  | Meat, Other                     | 2000           | 6                                                                     |
| 50               | Cyprus  | Milk - Excluding Butter         | 2000           | 285                                                                   |
| 50               | Cyprus  | Miscellaneous                   | 2000           | 25                                                                    |
| 50               | Cyprus  | Mutton & Goat Meat              | 2000           | 65                                                                    |
| 50               | Cyprus  | Oats                            | 2000           | 2                                                                     |
| 50               | Cyprus  | Offals                          | 2000           | 11                                                                    |
| 50               | Cyprus  | Oilcrops                        | 2000           | 71                                                                    |
| 50               | Cyprus  | Oilcrops Oil, Other             | 2000           | 27                                                                    |
| 50               | Cyprus  | Olive Oil                       | 2000           | 45                                                                    |
| 50               | Cyprus  | Olives (including preserved)    | 2000           | 15                                                                    |
| 50               | Cyprus  | Onions                          | 2000           | 17                                                                    |
| 50               | Cyprus  | Oranges, Mandarines             | 2000           | 27                                                                    |
| 50               | Cyprus  | Pelagic Fish                    | 2000           | 14                                                                    |
| 50               | Cyprus  | Pigmeat                         | 2000           | 162                                                                   |
| 50               | Cyprus  | Pineapples and products         | 2000           | 1                                                                     |
| 50               | Cyprus  | Potatoes and products           | 2000           | 63                                                                    |
| 50               | Cyprus  | Poultry Meat                    | 2000           | 103                                                                   |
| 50               | Cyprus  | Pulses                          | 2000           | 32                                                                    |
| 50               | Cyprus  | Pulses, Other and products      | 2000           | 16                                                                    |
| 50               | Cyprus  | Rape and Mustard Oil            | 2000           | 49                                                                    |
| 50               | Cyprus  | Rape and Mustardseed            | 2000           | 1                                                                     |
| 50               | Cyprus  | Rice (Milled Equivalent)        | 2000           | 41                                                                    |
| 50               | Cyprus  | Roots, Other                    | 2000           | 4                                                                     |
| 50               | Cyprus  | Sesame seed                     | 2000           | 28                                                                    |
| 50               | Cyprus  | Soyabean Oil                    | 2000           | 86                                                                    |
| 50               | Cyprus  | Spices                          | 2000           | 2                                                                     |
| 50               | Cyprus  | Spices, Other                   | 2000           | 2                                                                     |
| 50               | Cyprus  | Starchy Roots                   | 2000           | 67                                                                    |
| 50               | Cyprus  | Stimulants                      | 2000           | 34                                                                    |
| 50               | Cyprus  | Sugar & Sweeteners              | 2000           | 340                                                                   |
| 50               | Cyprus  | Sugar (Raw Equivalent)          | 2000           | 304                                                                   |
| 50               | Cyprus  | Sunflower seed                  | 2000           | 9                                                                     |
| 50               | Cyprus  | Sunflowerseed Oil               | 2000           | 58                                                                    |
| 50               | Cyprus  | Sweeteners, Other               | 2000           | 29                                                                    |
| 50               | Cyprus  | Tomatoes and products           | 2000           | 19                                                                    |
| 50               | Cyprus  | Treenuts                        | 2000           | 36                                                                    |
| 50               | Cyprus  | Vegetable Oils                  | 2000           | 304                                                                   |
| 50               | Cyprus  | Vegetables                      | 2000           | 90                                                                    |
| 50               | Cyprus  | Vegetables, Other               | 2000           | 54                                                                    |
| 50               | Cyprus  | Vegetal Products                | 2000           | 1,888                                                                 |
| 50               | Cyprus  | Wheat and products              | 2000           | 609                                                                   |
| 50               | Cyprus  | Wine                            | 2000           | 19                                                                    |
| 50               | Cyprus  | Alcoholic Beverages             | 2001           | 96                                                                    |
| 50               | Cyprus  | Animal fats                     | 2001           | 50                                                                    |
| 50               | Cyprus  | Animal Products                 | 2001           | 785                                                                   |
| 50               | Cyprus  | Apples and products             | 2001           | 9                                                                     |
| 50               | Cyprus  | Bananas                         | 2001           | 16                                                                    |
| 50               | Cyprus  | Beans                           | 2001           | 17                                                                    |
| 50               | Cyprus  | Beer                            | 2001           | 50                                                                    |
| 50               | Cyprus  | Beverages, Alcoholic            | 2001           | 23                                                                    |
| 50               | Cyprus  | Beverages, Fermented            | 2001           | 1                                                                     |
| 50               | Cyprus  | Bovine Meat                     | 2001           | 26                                                                    |
| 50               | Cyprus  | Butter, Ghee                    | 2001           | 20                                                                    |
| 50               | Cyprus  | Cephalopods                     | 2001           | 5                                                                     |
| 50               | Cyprus  | Cereals - Excluding Beer        | 2001           | 661                                                                   |
| 50               | Cyprus  | Cereals, Other                  | 2001           | 1                                                                     |
| 50               | Cyprus  | Cocoa Beans and products        | 2001           | 25                                                                    |
| 50               | Cyprus  | Coconuts - Incl Copra           | 2001           | 3                                                                     |
| 50               | Cyprus  | Coffee and products             | 2001           | 5                                                                     |
| 50               | Cyprus  | Cream                           | 2001           | 1                                                                     |
| 50               | Cyprus  | Crustaceans                     | 2001           | 2                                                                     |
| 50               | Cyprus  | Dates                           | 2001           | 1                                                                     |
| 50               | Cyprus  | Demersal Fish                   | 2001           | 10                                                                    |
| 50               | Cyprus  | Eggs                            | 2001           | 38                                                                    |
| 50               | Cyprus  | Fats, Animals, Raw              | 2001           | 29                                                                    |
| 50               | Cyprus  | Fish, Seafood                   | 2001           | 38                                                                    |
| 50               | Cyprus  | Freshwater Fish                 | 2001           | 1                                                                     |
| 50               | Cyprus  | Fruits - Excluding Wine         | 2001           | 110                                                                   |
| 50               | Cyprus  | Fruits, Other                   | 2001           | 31                                                                    |
| 50               | Cyprus  | Grand Total                     | 2001           | 2,648                                                                 |
| 50               | Cyprus  | Grapefruit and products         | 2001           | 4                                                                     |
| 50               | Cyprus  | Grapes and products (excl wine) | 2001           | 19                                                                    |
| 50               | Cyprus  | Groundnut Oil                   | 2001           | 1                                                                     |
| 50               | Cyprus  | Groundnuts (Shelled Eq)         | 2001           | 25                                                                    |
| 50               | Cyprus  | Honey                           | 2001           | 9                                                                     |
| 50               | Cyprus  | Lemons, Limes and products      | 2001           | 8                                                                     |
| 50               | Cyprus  | Maize and products              | 2001           | 10                                                                    |

Dietary calcium and zinc deficiency risks are decreasing but remain prevalent

| FAO Country code | Country | Food item                       | Reference year | Net energy supply (kcal capita <sup>-1</sup> d <sup>-1</sup> ) |
|------------------|---------|---------------------------------|----------------|----------------------------------------------------------------|
| 50               | Cyprus  | Maize Germ Oil                  | 2001           | 35                                                             |
| 50               | Cyprus  | Marine Fish, Other              | 2001           | 4                                                              |
| 50               | Cyprus  | Meat                            | 2001           | 358                                                            |
| 50               | Cyprus  | Meat, Other                     | 2001           | 6                                                              |
| 50               | Cyprus  | Milk - Excluding Butter         | 2001           | 289                                                            |
| 50               | Cyprus  | Miscellaneous                   | 2001           | 27                                                             |
| 50               | Cyprus  | Mutton & Goat Meat              | 2001           | 64                                                             |
| 50               | Cyprus  | Oats                            | 2001           | 5                                                              |
| 50               | Cyprus  | Offals                          | 2001           | 13                                                             |
| 50               | Cyprus  | Oilcrops                        | 2001           | 82                                                             |
| 50               | Cyprus  | Oilcrops Oil, Other             | 2001           | 16                                                             |
| 50               | Cyprus  | Olive Oil                       | 2001           | 50                                                             |
| 50               | Cyprus  | Olives (including preserved)    | 2001           | 9                                                              |
| 50               | Cyprus  | Onions                          | 2001           | 15                                                             |
| 50               | Cyprus  | Oranges, Mandarines             | 2001           | 23                                                             |
| 50               | Cyprus  | Pelagic Fish                    | 2001           | 15                                                             |
| 50               | Cyprus  | Pigmeat                         | 2001           | 157                                                            |
| 50               | Cyprus  | Pineapples and products         | 2001           | 1                                                              |
| 50               | Cyprus  | Potatoes and products           | 2001           | 70                                                             |
| 50               | Cyprus  | Poultry Meat                    | 2001           | 104                                                            |
| 50               | Cyprus  | Pulses                          | 2001           | 34                                                             |
| 50               | Cyprus  | Pulses, Other and products      | 2001           | 17                                                             |
| 50               | Cyprus  | Rape and Mustard Oil            | 2001           | 47                                                             |
| 50               | Cyprus  | Rape and Mustardseed            | 2001           | 1                                                              |
| 50               | Cyprus  | Rice (Milled Equivalent)        | 2001           | 41                                                             |
| 50               | Cyprus  | Roots, Other                    | 2001           | 4                                                              |
| 50               | Cyprus  | Sesame seed                     | 2001           | 30                                                             |
| 50               | Cyprus  | Soyabean Oil                    | 2001           | 95                                                             |
| 50               | Cyprus  | Spices                          | 2001           | 2                                                              |
| 50               | Cyprus  | Spices, Other                   | 2001           | 2                                                              |
| 50               | Cyprus  | Starchy Roots                   | 2001           | 74                                                             |
| 50               | Cyprus  | Stimulants                      | 2001           | 30                                                             |
| 50               | Cyprus  | Sugar & Sweeteners              | 2001           | 309                                                            |
| 50               | Cyprus  | Sugar (Raw Equivalent)          | 2001           | 279                                                            |
| 50               | Cyprus  | Sunflower seed                  | 2001           | 14                                                             |
| 50               | Cyprus  | Sunflowerseed Oil               | 2001           | 79                                                             |
| 50               | Cyprus  | Sweeteners, Other               | 2001           | 21                                                             |
| 50               | Cyprus  | Tomatoes and products           | 2001           | 19                                                             |
| 50               | Cyprus  | Treenuts                        | 2001           | 24                                                             |
| 50               | Cyprus  | Vegetable Oils                  | 2001           | 322                                                            |
| 50               | Cyprus  | Vegetables                      | 2001           | 90                                                             |
| 50               | Cyprus  | Vegetables, Other               | 2001           | 56                                                             |
| 50               | Cyprus  | Vegetal Products                | 2001           | 1,863                                                          |
| 50               | Cyprus  | Wheat and products              | 2001           | 603                                                            |
| 50               | Cyprus  | Wine                            | 2001           | 23                                                             |
| 50               | Cyprus  | Alcoholic Beverages             | 2002           | 97                                                             |
| 50               | Cyprus  | Animal fats                     | 2002           | 54                                                             |
| 50               | Cyprus  | Animal Products                 | 2002           | 791                                                            |
| 50               | Cyprus  | Apples and products             | 2002           | 12                                                             |
| 50               | Cyprus  | Bananas                         | 2002           | 17                                                             |
| 50               | Cyprus  | Barley and products             | 2002           | 1                                                              |
| 50               | Cyprus  | Beans                           | 2002           | 17                                                             |
| 50               | Cyprus  | Beer                            | 2002           | 49                                                             |
| 50               | Cyprus  | Beverages, Alcoholic            | 2002           | 23                                                             |
| 50               | Cyprus  | Beverages, Fermented            | 2002           | 1                                                              |
| 50               | Cyprus  | Bovine Meat                     | 2002           | 26                                                             |
| 50               | Cyprus  | Butter, Ghee                    | 2002           | 22                                                             |
| 50               | Cyprus  | Cephalopods                     | 2002           | 6                                                              |
| 50               | Cyprus  | Cereals - Excluding Beer        | 2002           | 631                                                            |
| 50               | Cyprus  | Cereals, Other                  | 2002           | 1                                                              |
| 50               | Cyprus  | Cocoa Beans and products        | 2002           | 30                                                             |
| 50               | Cyprus  | Coconuts - Incl Copra           | 2002           | 2                                                              |
| 50               | Cyprus  | Coffee and products             | 2002           | 5                                                              |
| 50               | Cyprus  | Cream                           | 2002           | 2                                                              |
| 50               | Cyprus  | Crustaceans                     | 2002           | 1                                                              |
| 50               | Cyprus  | Dates                           | 2002           | 1                                                              |
| 50               | Cyprus  | Demersal Fish                   | 2002           | 8                                                              |
| 50               | Cyprus  | Eggs                            | 2002           | 42                                                             |
| 50               | Cyprus  | Fats, Animals, Raw              | 2002           | 31                                                             |
| 50               | Cyprus  | Fish, Seafood                   | 2002           | 36                                                             |
| 50               | Cyprus  | Freshwater Fish                 | 2002           | 1                                                              |
| 50               | Cyprus  | Fruits - Excluding Wine         | 2002           | 108                                                            |
| 50               | Cyprus  | Fruits, Other                   | 2002           | 30                                                             |
| 50               | Cyprus  | Grand Total                     | 2002           | 2,638                                                          |
| 50               | Cyprus  | Grapefruit and products         | 2002           | 3                                                              |
| 50               | Cyprus  | Grapes and products (excl wine) | 2002           | 18                                                             |
| 50               | Cyprus  | Groundnut Oil                   | 2002           | 1                                                              |
| 50               | Cyprus  | Groundnuts (Shelled Eq)         | 2002           | 17                                                             |
| 50               | Cyprus  | Honey                           | 2002           | 9                                                              |
| 50               | Cyprus  | Lemons, Limes and products      | 2002           | 4                                                              |
| 50               | Cyprus  | Maize and products              | 2002           | 13                                                             |
| 50               | Cyprus  | Maize Germ Oil                  | 2002           | 34                                                             |
| 50               | Cyprus  | Marine Fish, Other              | 2002           | 4                                                              |
| 50               | Cyprus  | Meat                            | 2002           | 365                                                            |
| 50               | Cyprus  | Meat, Other                     | 2002           | 6                                                              |
| 50               | Cyprus  | Milk - Excluding Butter         | 2002           | 281                                                            |
| 50               | Cyprus  | Miscellaneous                   | 2002           | 24                                                             |
| 50               | Cyprus  | Mutton & Goat Meat              | 2002           | 71                                                             |
| 50               | Cyprus  | Oats                            | 2002           | 4                                                              |
| 50               | Cyprus  | Offals                          | 2002           | 13                                                             |
| 50               | Cyprus  | Oilcrops                        | 2002           | 77                                                             |
| 50               | Cyprus  | Oilcrops Oil, Other             | 2002           | 11                                                             |
| 50               | Cyprus  | Olive Oil                       | 2002           | 43                                                             |
| 50               | Cyprus  | Olives (including preserved)    | 2002           | 14                                                             |
| 50               | Cyprus  | Onions                          | 2002           | 14                                                             |
| 50               | Cyprus  | Oranges, Mandarines             | 2002           | 22                                                             |
| 50               | Cyprus  | Pelagic Fish                    | 2002           | 15                                                             |

Dietary calcium and zinc deficiency risks are decreasing but remain prevalent

| FAO Country code | Country | Food item                       | Reference year | Net energy supply (kcal <i>capita</i> <sup>-1</sup> d <sup>-1</sup> ) |
|------------------|---------|---------------------------------|----------------|-----------------------------------------------------------------------|
| 50               | Cyprus  | Pepper                          | 2002           | 1                                                                     |
| 50               | Cyprus  | Pigmeat                         | 2002           | 156                                                                   |
| 50               | Cyprus  | Pineapples and products         | 2002           | 1                                                                     |
| 50               | Cyprus  | Potatoes and products           | 2002           | 68                                                                    |
| 50               | Cyprus  | Poultry Meat                    | 2002           | 107                                                                   |
| 50               | Cyprus  | Pulses                          | 2002           | 36                                                                    |
| 50               | Cyprus  | Pulses, Other and products      | 2002           | 18                                                                    |
| 50               | Cyprus  | Rape and Mustard Oil            | 2002           | 42                                                                    |
| 50               | Cyprus  | Rape and Mustardseed            | 2002           | 1                                                                     |
| 50               | Cyprus  | Rice (Milled Equivalent)        | 2002           | 45                                                                    |
| 50               | Cyprus  | Roots, Other                    | 2002           | 4                                                                     |
| 50               | Cyprus  | Sesame seed                     | 2002           | 32                                                                    |
| 50               | Cyprus  | Soyabean Oil                    | 2002           | 81                                                                    |
| 50               | Cyprus  | Spices                          | 2002           | 3                                                                     |
| 50               | Cyprus  | Spices, Other                   | 2002           | 2                                                                     |
| 50               | Cyprus  | Starchy Roots                   | 2002           | 72                                                                    |
| 50               | Cyprus  | Stimulants                      | 2002           | 35                                                                    |
| 50               | Cyprus  | Sugar & Sweeteners              | 2002           | 365                                                                   |
| 50               | Cyprus  | Sugar (Raw Equivalent)          | 2002           | 335                                                                   |
| 50               | Cyprus  | Sunflower seed                  | 2002           | 12                                                                    |
| 50               | Cyprus  | Sunflowerseed Oil               | 2002           | 58                                                                    |
| 50               | Cyprus  | Sweeteners, Other               | 2002           | 22                                                                    |
| 50               | Cyprus  | Tomatoes and products           | 2002           | 19                                                                    |
| 50               | Cyprus  | Treenuts                        | 2002           | 40                                                                    |
| 50               | Cyprus  | Vegetable Oils                  | 2002           | 271                                                                   |
| 50               | Cyprus  | Vegetables                      | 2002           | 88                                                                    |
| 50               | Cyprus  | Vegetables, Other               | 2002           | 55                                                                    |
| 50               | Cyprus  | Vegetal Products                | 2002           | 1,847                                                                 |
| 50               | Cyprus  | Wheat and products              | 2002           | 567                                                                   |
| 50               | Cyprus  | Wine                            | 2002           | 24                                                                    |
| 50               | Cyprus  | Alcoholic Beverages             | 2003           | 104                                                                   |
| 50               | Cyprus  | Animal fats                     | 2003           | 42                                                                    |
| 50               | Cyprus  | Animal Products                 | 2003           | 746                                                                   |
| 50               | Cyprus  | Apples and products             | 2003           | 11                                                                    |
| 50               | Cyprus  | Bananas                         | 2003           | 16                                                                    |
| 50               | Cyprus  | Beans                           | 2003           | 16                                                                    |
| 50               | Cyprus  | Beer                            | 2003           | 49                                                                    |
| 50               | Cyprus  | Beverages, Alcoholic            | 2003           | 23                                                                    |
| 50               | Cyprus  | Bovine Meat                     | 2003           | 27                                                                    |
| 50               | Cyprus  | Butter, Ghee                    | 2003           | 16                                                                    |
| 50               | Cyprus  | Cephalopods                     | 2003           | 6                                                                     |
| 50               | Cyprus  | Cereals - Excluding Beer        | 2003           | 627                                                                   |
| 50               | Cyprus  | Cocoa Beans and products        | 2003           | 28                                                                    |
| 50               | Cyprus  | Coconuts - Incl Copra           | 2003           | 3                                                                     |
| 50               | Cyprus  | Coffee and products             | 2003           | 5                                                                     |
| 50               | Cyprus  | Cottonseed Oil                  | 2003           | 1                                                                     |
| 50               | Cyprus  | Cream                           | 2003           | 1                                                                     |
| 50               | Cyprus  | Crustaceans                     | 2003           | 1                                                                     |
| 50               | Cyprus  | Dates                           | 2003           | 1                                                                     |
| 50               | Cyprus  | Demersal Fish                   | 2003           | 10                                                                    |
| 50               | Cyprus  | Eggs                            | 2003           | 46                                                                    |
| 50               | Cyprus  | Fats, Animals, Raw              | 2003           | 25                                                                    |
| 50               | Cyprus  | Fish, Seafood                   | 2003           | 35                                                                    |
| 50               | Cyprus  | Freshwater Fish                 | 2003           | 1                                                                     |
| 50               | Cyprus  | Fruits - Excluding Wine         | 2003           | 99                                                                    |
| 50               | Cyprus  | Fruits, Other                   | 2003           | 26                                                                    |
| 50               | Cyprus  | Grand Total                     | 2003           | 2,611                                                                 |
| 50               | Cyprus  | Grapefruit and products         | 2003           | 3                                                                     |
| 50               | Cyprus  | Grapes and products (excl wine) | 2003           | 19                                                                    |
| 50               | Cyprus  | Groundnut Oil                   | 2003           | 1                                                                     |
| 50               | Cyprus  | Groundnuts (Shelled Eq)         | 2003           | 15                                                                    |
| 50               | Cyprus  | Honey                           | 2003           | 7                                                                     |
| 50               | Cyprus  | Lemons, Limes and products      | 2003           | 4                                                                     |
| 50               | Cyprus  | Maize and products              | 2003           | 10                                                                    |
| 50               | Cyprus  | Maize Germ Oil                  | 2003           | 37                                                                    |
| 50               | Cyprus  | Marine Fish, Other              | 2003           | 3                                                                     |
| 50               | Cyprus  | Meat                            | 2003           | 331                                                                   |
| 50               | Cyprus  | Meat, Other                     | 2003           | 6                                                                     |
| 50               | Cyprus  | Milk - Excluding Butter         | 2003           | 279                                                                   |
| 50               | Cyprus  | Miscellaneous                   | 2003           | 26                                                                    |
| 50               | Cyprus  | Mutton & Goat Meat              | 2003           | 45                                                                    |
| 50               | Cyprus  | Oats                            | 2003           | 1                                                                     |
| 50               | Cyprus  | Offals                          | 2003           | 13                                                                    |
| 50               | Cyprus  | Oilcrops                        | 2003           | 75                                                                    |
| 50               | Cyprus  | Oilcrops Oil, Other             | 2003           | 15                                                                    |
| 50               | Cyprus  | Olive Oil                       | 2003           | 49                                                                    |
| 50               | Cyprus  | Olives (including preserved)    | 2003           | 33                                                                    |
| 50               | Cyprus  | Onions                          | 2003           | 16                                                                    |
| 50               | Cyprus  | Oranges, Mandarines             | 2003           | 18                                                                    |
| 50               | Cyprus  | Pelagic Fish                    | 2003           | 14                                                                    |
| 50               | Cyprus  | Pigmeat                         | 2003           | 152                                                                   |
| 50               | Cyprus  | Pineapples and products         | 2003           | 1                                                                     |
| 50               | Cyprus  | Potatoes and products           | 2003           | 58                                                                    |
| 50               | Cyprus  | Poultry Meat                    | 2003           | 101                                                                   |
| 50               | Cyprus  | Pulses                          | 2003           | 32                                                                    |
| 50               | Cyprus  | Pulses, Other and products      | 2003           | 17                                                                    |
| 50               | Cyprus  | Rape and Mustard Oil            | 2003           | 37                                                                    |
| 50               | Cyprus  | Rape and Mustardseed            | 2003           | 1                                                                     |
| 50               | Cyprus  | Rice (Milled Equivalent)        | 2003           | 66                                                                    |
| 50               | Cyprus  | Roots, Other                    | 2003           | 3                                                                     |
| 50               | Cyprus  | Sesame seed                     | 2003           | 22                                                                    |
| 50               | Cyprus  | Soyabean Oil                    | 2003           | 100                                                                   |
| 50               | Cyprus  | Spices                          | 2003           | 2                                                                     |
| 50               | Cyprus  | Spices, Other                   | 2003           | 2                                                                     |
| 50               | Cyprus  | Starchy Roots                   | 2003           | 60                                                                    |
| 50               | Cyprus  | Stimulants                      | 2003           | 33                                                                    |
| 50               | Cyprus  | Sugar & Sweeteners              | 2003           | 384                                                                   |

Dietary calcium and zinc deficiency risks are decreasing but remain prevalent

| FAO Country code | Country | Food item                       | Reference year | Net energy supply (kcal <i>capita</i> <sup>-1</sup> d <sup>-1</sup> ) |
|------------------|---------|---------------------------------|----------------|-----------------------------------------------------------------------|
| 50               | Cyprus  | Sugar (Raw Equivalent)          | 2003           | 357                                                                   |
| 50               | Cyprus  | Sunflower seed                  | 2003           | 1                                                                     |
| 50               | Cyprus  | Sunflowerseed Oil               | 2003           | 74                                                                    |
| 50               | Cyprus  | Sweeteners, Other               | 2003           | 20                                                                    |
| 50               | Cyprus  | Tomatoes and products           | 2003           | 18                                                                    |
| 50               | Cyprus  | Treenuts                        | 2003           | 22                                                                    |
| 50               | Cyprus  | Vegetable Oils                  | 2003           | 313                                                                   |
| 50               | Cyprus  | Vegetables                      | 2003           | 86                                                                    |
| 50               | Cyprus  | Vegetables, Other               | 2003           | 52                                                                    |
| 50               | Cyprus  | Vegetal Products                | 2003           | 1,865                                                                 |
| 50               | Cyprus  | Wheat and products              | 2003           | 549                                                                   |
| 50               | Cyprus  | Wine                            | 2003           | 33                                                                    |
| 50               | Cyprus  | Alcoholic Beverages             | 2004           | 102                                                                   |
| 50               | Cyprus  | Animal fats                     | 2004           | 39                                                                    |
| 50               | Cyprus  | Animal Products                 | 2004           | 752                                                                   |
| 50               | Cyprus  | Apples and products             | 2004           | 12                                                                    |
| 50               | Cyprus  | Bananas                         | 2004           | 13                                                                    |
| 50               | Cyprus  | Barley and products             | 2004           | 1                                                                     |
| 50               | Cyprus  | Beans                           | 2004           | 17                                                                    |
| 50               | Cyprus  | Beer                            | 2004           | 48                                                                    |
| 50               | Cyprus  | Beverages, Alcoholic            | 2004           | 22                                                                    |
| 50               | Cyprus  | Beverages, Fermented            | 2004           | 1                                                                     |
| 50               | Cyprus  | Bovine Meat                     | 2004           | 24                                                                    |
| 50               | Cyprus  | Butter, Ghee                    | 2004           | 17                                                                    |
| 50               | Cyprus  | Cephalopods                     | 2004           | 6                                                                     |
| 50               | Cyprus  | Cereals - Excluding Beer        | 2004           | 592                                                                   |
| 50               | Cyprus  | Cereals, Other                  | 2004           | 1                                                                     |
| 50               | Cyprus  | Cocoa Beans and products        | 2004           | 37                                                                    |
| 50               | Cyprus  | Coconuts - Incl Copra           | 2004           | 3                                                                     |
| 50               | Cyprus  | Coffee and products             | 2004           | 5                                                                     |
| 50               | Cyprus  | Cottonseed Oil                  | 2004           | 1                                                                     |
| 50               | Cyprus  | Cream                           | 2004           | 2                                                                     |
| 50               | Cyprus  | Crustaceans                     | 2004           | 2                                                                     |
| 50               | Cyprus  | Dates                           | 2004           | 1                                                                     |
| 50               | Cyprus  | Demersal Fish                   | 2004           | 11                                                                    |
| 50               | Cyprus  | Eggs                            | 2004           | 36                                                                    |
| 50               | Cyprus  | Fats, Animals, Raw              | 2004           | 20                                                                    |
| 50               | Cyprus  | Fish, Seafood                   | 2004           | 36                                                                    |
| 50               | Cyprus  | Freshwater Fish                 | 2004           | 2                                                                     |
| 50               | Cyprus  | Fruits - Excluding Wine         | 2004           | 104                                                                   |
| 50               | Cyprus  | Fruits, Other                   | 2004           | 29                                                                    |
| 50               | Cyprus  | Grand Total                     | 2004           | 2,601                                                                 |
| 50               | Cyprus  | Grapefruit and products         | 2004           | 6                                                                     |
| 50               | Cyprus  | Grapes and products (excl wine) | 2004           | 10                                                                    |
| 50               | Cyprus  | Groundnut Oil                   | 2004           | 1                                                                     |
| 50               | Cyprus  | Groundnuts (Shelled Eq)         | 2004           | 24                                                                    |
| 50               | Cyprus  | Honey                           | 2004           | 5                                                                     |
| 50               | Cyprus  | Lemons, Limes and products      | 2004           | 3                                                                     |
| 50               | Cyprus  | Maize and products              | 2004           | 9                                                                     |
| 50               | Cyprus  | Maize Germ Oil                  | 2004           | 36                                                                    |
| 50               | Cyprus  | Marine Fish, Other              | 2004           | 2                                                                     |
| 50               | Cyprus  | Meat                            | 2004           | 326                                                                   |
| 50               | Cyprus  | Meat, Other                     | 2004           | 7                                                                     |
| 50               | Cyprus  | Milk - Excluding Butter         | 2004           | 303                                                                   |
| 50               | Cyprus  | Miscellaneous                   | 2004           | 30                                                                    |
| 50               | Cyprus  | Mutton & Goat Meat              | 2004           | 43                                                                    |
| 50               | Cyprus  | Oats                            | 2004           | 1                                                                     |
| 50               | Cyprus  | Offals                          | 2004           | 12                                                                    |
| 50               | Cyprus  | Oilcrops                        | 2004           | 83                                                                    |
| 50               | Cyprus  | Oilcrops Oil, Other             | 2004           | 21                                                                    |
| 50               | Cyprus  | Olive Oil                       | 2004           | 54                                                                    |
| 50               | Cyprus  | Olives (including preserved)    | 2004           | 29                                                                    |
| 50               | Cyprus  | Onions                          | 2004           | 9                                                                     |
| 50               | Cyprus  | Oranges, Mandarines             | 2004           | 29                                                                    |
| 50               | Cyprus  | Pelagic Fish                    | 2004           | 13                                                                    |
| 50               | Cyprus  | Pepper                          | 2004           | 1                                                                     |
| 50               | Cyprus  | Pigmeat                         | 2004           | 153                                                                   |
| 50               | Cyprus  | Pineapples and products         | 2004           | 1                                                                     |
| 50               | Cyprus  | Potatoes and products           | 2004           | 68                                                                    |
| 50               | Cyprus  | Poultry Meat                    | 2004           | 99                                                                    |
| 50               | Cyprus  | Pulses                          | 2004           | 35                                                                    |
| 50               | Cyprus  | Pulses, Other and products      | 2004           | 17                                                                    |
| 50               | Cyprus  | Rape and Mustard Oil            | 2004           | 35                                                                    |
| 50               | Cyprus  | Rape and Mustardseed            | 2004           | 1                                                                     |
| 50               | Cyprus  | Rice (Milled Equivalent)        | 2004           | 38                                                                    |
| 50               | Cyprus  | Roots, Other                    | 2004           | 3                                                                     |
| 50               | Cyprus  | Sesame seed                     | 2004           | 25                                                                    |
| 50               | Cyprus  | Soyabean Oil                    | 2004           | 82                                                                    |
| 50               | Cyprus  | Spices                          | 2004           | 3                                                                     |
| 50               | Cyprus  | Spices, Other                   | 2004           | 2                                                                     |
| 50               | Cyprus  | Starchy Roots                   | 2004           | 71                                                                    |
| 50               | Cyprus  | Stimulants                      | 2004           | 42                                                                    |
| 50               | Cyprus  | Sugar & Sweeteners              | 2004           | 389                                                                   |
| 50               | Cyprus  | Sugar (Raw Equivalent)          | 2004           | 357                                                                   |
| 50               | Cyprus  | Sunflower seed                  | 2004           | 1                                                                     |
| 50               | Cyprus  | Sunflowerseed Oil               | 2004           | 57                                                                    |
| 50               | Cyprus  | Sweeteners, Other               | 2004           | 27                                                                    |
| 50               | Cyprus  | Tomatoes and products           | 2004           | 19                                                                    |
| 50               | Cyprus  | Treenuts                        | 2004           | 30                                                                    |
| 50               | Cyprus  | Vegetable Oils                  | 2004           | 287                                                                   |
| 50               | Cyprus  | Vegetables                      | 2004           | 81                                                                    |
| 50               | Cyprus  | Vegetables, Other               | 2004           | 53                                                                    |
| 50               | Cyprus  | Vegetal Products                | 2004           | 1,849                                                                 |
| 50               | Cyprus  | Wheat and products              | 2004           | 542                                                                   |
| 50               | Cyprus  | Wine                            | 2004           | 30                                                                    |
| 50               | Cyprus  | Alcoholic Beverages             | 2005           | 99                                                                    |
| 50               | Cyprus  | Animal fats                     | 2005           | 33                                                                    |

Dietary calcium and zinc deficiency risks are decreasing but remain prevalent

| FAO Country code | Country | Food item                       | Reference year | Net energy supply (kcal capita <sup>-1</sup> d <sup>-1</sup> ) |
|------------------|---------|---------------------------------|----------------|----------------------------------------------------------------|
| 50               | Cyprus  | Animal Products                 | 2005           | 725                                                            |
| 50               | Cyprus  | Apples and products             | 2005           | 15                                                             |
| 50               | Cyprus  | Bananas                         | 2005           | 13                                                             |
| 50               | Cyprus  | Barley and products             | 2005           | 1                                                              |
| 50               | Cyprus  | Beans                           | 2005           | 18                                                             |
| 50               | Cyprus  | Beer                            | 2005           | 48                                                             |
| 50               | Cyprus  | Beverages, Alcoholic            | 2005           | 22                                                             |
| 50               | Cyprus  | Bovine Meat                     | 2005           | 28                                                             |
| 50               | Cyprus  | Butter, Ghee                    | 2005           | 14                                                             |
| 50               | Cyprus  | Cephalopods                     | 2005           | 5                                                              |
| 50               | Cyprus  | Cereals - Excluding Beer        | 2005           | 565                                                            |
| 50               | Cyprus  | Cereals, Other                  | 2005           | 1                                                              |
| 50               | Cyprus  | Cocoa Beans and products        | 2005           | 42                                                             |
| 50               | Cyprus  | Coconuts - Incl Copra           | 2005           | 2                                                              |
| 50               | Cyprus  | Coffee and products             | 2005           | 6                                                              |
| 50               | Cyprus  | Cream                           | 2005           | 2                                                              |
| 50               | Cyprus  | Crustaceans                     | 2005           | 2                                                              |
| 50               | Cyprus  | Dates                           | 2005           | 1                                                              |
| 50               | Cyprus  | Demersal Fish                   | 2005           | 11                                                             |
| 50               | Cyprus  | Eggs                            | 2005           | 31                                                             |
| 50               | Cyprus  | Fats, Animals, Raw              | 2005           | 18                                                             |
| 50               | Cyprus  | Fish, Seafood                   | 2005           | 38                                                             |
| 50               | Cyprus  | Freshwater Fish                 | 2005           | 2                                                              |
| 50               | Cyprus  | Fruits - Excluding Wine         | 2005           | 108                                                            |
| 50               | Cyprus  | Fruits, Other                   | 2005           | 30                                                             |
| 50               | Cyprus  | Grand Total                     | 2005           | 2,565                                                          |
| 50               | Cyprus  | Grapefruit and products         | 2005           | 6                                                              |
| 50               | Cyprus  | Grapes and products (excl wine) | 2005           | 11                                                             |
| 50               | Cyprus  | Groundnuts (Shelled Eq)         | 2005           | 22                                                             |
| 50               | Cyprus  | Honey                           | 2005           | 7                                                              |
| 50               | Cyprus  | Lemons, Limes and products      | 2005           | 4                                                              |
| 50               | Cyprus  | Maize and products              | 2005           | 10                                                             |
| 50               | Cyprus  | Maize Germ Oil                  | 2005           | 33                                                             |
| 50               | Cyprus  | Marine Fish, Other              | 2005           | 2                                                              |
| 50               | Cyprus  | Meat                            | 2005           | 345                                                            |
| 50               | Cyprus  | Meat, Other                     | 2005           | 5                                                              |
| 50               | Cyprus  | Milk - Excluding Butter         | 2005           | 267                                                            |
| 50               | Cyprus  | Miscellaneous                   | 2005           | 29                                                             |
| 50               | Cyprus  | Mutton & Goat Meat              | 2005           | 40                                                             |
| 50               | Cyprus  | Oats                            | 2005           | 2                                                              |
| 50               | Cyprus  | Offals                          | 2005           | 11                                                             |
| 50               | Cyprus  | Oilcrops                        | 2005           | 82                                                             |
| 50               | Cyprus  | Oilcrops Oil, Other             | 2005           | 27                                                             |
| 50               | Cyprus  | Olive Oil                       | 2005           | 35                                                             |
| 50               | Cyprus  | Olives (including preserved)    | 2005           | 27                                                             |
| 50               | Cyprus  | Onions                          | 2005           | 15                                                             |
| 50               | Cyprus  | Oranges, Mandarines             | 2005           | 26                                                             |
| 50               | Cyprus  | Pelagic Fish                    | 2005           | 15                                                             |
| 50               | Cyprus  | Pigmeat                         | 2005           | 169                                                            |
| 50               | Cyprus  | Pineapples and products         | 2005           | 1                                                              |
| 50               | Cyprus  | Potatoes and products           | 2005           | 64                                                             |
| 50               | Cyprus  | Poultry Meat                    | 2005           | 103                                                            |
| 50               | Cyprus  | Pulses                          | 2005           | 38                                                             |
| 50               | Cyprus  | Pulses, Other and products      | 2005           | 20                                                             |
| 50               | Cyprus  | Rape and Mustard Oil            | 2005           | 28                                                             |
| 50               | Cyprus  | Rape and Mustardseed            | 2005           | 1                                                              |
| 50               | Cyprus  | Rice (Milled Equivalent)        | 2005           | 47                                                             |
| 50               | Cyprus  | Roots, Other                    | 2005           | 3                                                              |
| 50               | Cyprus  | Sesame seed                     | 2005           | 29                                                             |
| 50               | Cyprus  | Soyabean Oil                    | 2005           | 104                                                            |
| 50               | Cyprus  | Spices                          | 2005           | 5                                                              |
| 50               | Cyprus  | Spices, Other                   | 2005           | 5                                                              |
| 50               | Cyprus  | Starchy Roots                   | 2005           | 66                                                             |
| 50               | Cyprus  | Stimulants                      | 2005           | 48                                                             |
| 50               | Cyprus  | Sugar & Sweeteners              | 2005           | 343                                                            |
| 50               | Cyprus  | Sugar (Raw Equivalent)          | 2005           | 301                                                            |
| 50               | Cyprus  | Sunflower seed                  | 2005           | 1                                                              |
| 50               | Cyprus  | Sunflowerseed Oil               | 2005           | 108                                                            |
| 50               | Cyprus  | Sweeteners, Other               | 2005           | 35                                                             |
| 50               | Cyprus  | Tomatoes and products           | 2005           | 19                                                             |
| 50               | Cyprus  | Treenuts                        | 2005           | 30                                                             |
| 50               | Cyprus  | Vegetable Oils                  | 2005           | 337                                                            |
| 50               | Cyprus  | Vegetables                      | 2005           | 89                                                             |
| 50               | Cyprus  | Vegetables, Other               | 2005           | 55                                                             |
| 50               | Cyprus  | Vegetal Products                | 2005           | 1,840                                                          |
| 50               | Cyprus  | Wheat and products              | 2005           | 505                                                            |
| 50               | Cyprus  | Wine                            | 2005           | 29                                                             |
| 50               | Cyprus  | Alcoholic Beverages             | 2006           | 90                                                             |
| 50               | Cyprus  | Animal fats                     | 2006           | 33                                                             |
| 50               | Cyprus  | Animal Products                 | 2006           | 705                                                            |
| 50               | Cyprus  | Apples and products             | 2006           | 15                                                             |
| 50               | Cyprus  | Bananas                         | 2006           | 13                                                             |
| 50               | Cyprus  | Barley and products             | 2006           | 1                                                              |
| 50               | Cyprus  | Beans                           | 2006           | 14                                                             |
| 50               | Cyprus  | Beer                            | 2006           | 44                                                             |
| 50               | Cyprus  | Beverages, Alcoholic            | 2006           | 22                                                             |
| 50               | Cyprus  | Beverages, Fermented            | 2006           | 1                                                              |
| 50               | Cyprus  | Bovine Meat                     | 2006           | 25                                                             |
| 50               | Cyprus  | Butter, Ghee                    | 2006           | 14                                                             |
| 50               | Cyprus  | Cephalopods                     | 2006           | 6                                                              |
| 50               | Cyprus  | Cereals - Excluding Beer        | 2006           | 560                                                            |
| 50               | Cyprus  | Cereals, Other                  | 2006           | 1                                                              |
| 50               | Cyprus  | Cocoa Beans and products        | 2006           | 42                                                             |
| 50               | Cyprus  | Coconuts - Incl Copra           | 2006           | 2                                                              |
| 50               | Cyprus  | Coffee and products             | 2006           | 4                                                              |
| 50               | Cyprus  | Cream                           | 2006           | 2                                                              |
| 50               | Cyprus  | Crustaceans                     | 2006           | 3                                                              |

Dietary calcium and zinc deficiency risks are decreasing but remain prevalent

| FAO Country code | Country | Food item                       | Reference year | Net energy supply (kcal capita <sup>-1</sup> d <sup>-1</sup> ) |
|------------------|---------|---------------------------------|----------------|----------------------------------------------------------------|
| 50               | Cyprus  | Dates                           | 2006           | 2                                                              |
| 50               | Cyprus  | Demersal Fish                   | 2006           | 11                                                             |
| 50               | Cyprus  | Eggs                            | 2006           | 31                                                             |
| 50               | Cyprus  | Fats, Animals, Raw              | 2006           | 17                                                             |
| 50               | Cyprus  | Fish, Seafood                   | 2006           | 39                                                             |
| 50               | Cyprus  | Freshwater Fish                 | 2006           | 3                                                              |
| 50               | Cyprus  | Fruits - Excluding Wine         | 2006           | 127                                                            |
| 50               | Cyprus  | Fruits, Other                   | 2006           | 32                                                             |
| 50               | Cyprus  | Grand Total                     | 2006           | 2,559                                                          |
| 50               | Cyprus  | Grapefruit and products         | 2006           | 4                                                              |
| 50               | Cyprus  | Grapes and products (excl wine) | 2006           | 32                                                             |
| 50               | Cyprus  | Groundnut Oil                   | 2006           | 1                                                              |
| 50               | Cyprus  | Groundnuts (Shelled Eq)         | 2006           | 22                                                             |
| 50               | Cyprus  | Honey                           | 2006           | 6                                                              |
| 50               | Cyprus  | Lemons, Limes and products      | 2006           | 6                                                              |
| 50               | Cyprus  | Maize and products              | 2006           | 14                                                             |
| 50               | Cyprus  | Maize Germ Oil                  | 2006           | 31                                                             |
| 50               | Cyprus  | Marine Fish, Other              | 2006           | 2                                                              |
| 50               | Cyprus  | Meat                            | 2006           | 338                                                            |
| 50               | Cyprus  | Meat, Other                     | 2006           | 6                                                              |
| 50               | Cyprus  | Milk - Excluding Butter         | 2006           | 254                                                            |
| 50               | Cyprus  | Miscellaneous                   | 2006           | 28                                                             |
| 50               | Cyprus  | Mutton & Goat Meat              | 2006           | 47                                                             |
| 50               | Cyprus  | Oats                            | 2006           | 1                                                              |
| 50               | Cyprus  | Offals                          | 2006           | 10                                                             |
| 50               | Cyprus  | Oilcrops                        | 2006           | 102                                                            |
| 50               | Cyprus  | Oilcrops Oil, Other             | 2006           | 26                                                             |
| 50               | Cyprus  | Olive Oil                       | 2006           | 46                                                             |
| 50               | Cyprus  | Olives (including preserved)    | 2006           | 47                                                             |
| 50               | Cyprus  | Onions                          | 2006           | 15                                                             |
| 50               | Cyprus  | Oranges, Mandarines             | 2006           | 21                                                             |
| 50               | Cyprus  | Pelagic Fish                    | 2006           | 13                                                             |
| 50               | Cyprus  | Pepper                          | 2006           | 1                                                              |
| 50               | Cyprus  | Pigmeat                         | 2006           | 176                                                            |
| 50               | Cyprus  | Pineapples and products         | 2006           | 1                                                              |
| 50               | Cyprus  | Plantains                       | 2006           | 1                                                              |
| 50               | Cyprus  | Potatoes and products           | 2006           | 60                                                             |
| 50               | Cyprus  | Poultry Meat                    | 2006           | 84                                                             |
| 50               | Cyprus  | Pulses                          | 2006           | 33                                                             |
| 50               | Cyprus  | Pulses, Other and products      | 2006           | 18                                                             |
| 50               | Cyprus  | Rape and Mustard Oil            | 2006           | 35                                                             |
| 50               | Cyprus  | Rape and Mustardseed            | 2006           | 1                                                              |
| 50               | Cyprus  | Rice (Milled Equivalent)        | 2006           | 52                                                             |
| 50               | Cyprus  | Roots, Other                    | 2006           | 3                                                              |
| 50               | Cyprus  | Rye and products                | 2006           | 1                                                              |
| 50               | Cyprus  | Sesame seed                     | 2006           | 28                                                             |
| 50               | Cyprus  | Soyabean Oil                    | 2006           | 101                                                            |
| 50               | Cyprus  | Spices                          | 2006           | 3                                                              |
| 50               | Cyprus  | Spices, Other                   | 2006           | 2                                                              |
| 50               | Cyprus  | Starchy Roots                   | 2006           | 63                                                             |
| 50               | Cyprus  | Stimulants                      | 2006           | 47                                                             |
| 50               | Cyprus  | Sugar & Sweeteners              | 2006           | 300                                                            |
| 50               | Cyprus  | Sugar (Raw Equivalent)          | 2006           | 263                                                            |
| 50               | Cyprus  | Sunflower seed                  | 2006           | 2                                                              |
| 50               | Cyprus  | Sunflowerseed Oil               | 2006           | 135                                                            |
| 50               | Cyprus  | Sweeteners, Other               | 2006           | 31                                                             |
| 50               | Cyprus  | Tomatoes and products           | 2006           | 17                                                             |
| 50               | Cyprus  | Treenuts                        | 2006           | 38                                                             |
| 50               | Cyprus  | Vegetable Oils                  | 2006           | 376                                                            |
| 50               | Cyprus  | Vegetables                      | 2006           | 87                                                             |
| 50               | Cyprus  | Vegetables, Other               | 2006           | 55                                                             |
| 50               | Cyprus  | Vegetal Products                | 2006           | 1,854                                                          |
| 50               | Cyprus  | Wheat and products              | 2006           | 489                                                            |
| 50               | Cyprus  | Wine                            | 2006           | 24                                                             |
| 50               | Cyprus  | Alcoholic Beverages             | 2007           | 95                                                             |
| 50               | Cyprus  | Animal fats                     | 2007           | 38                                                             |
| 50               | Cyprus  | Animal Products                 | 2007           | 718                                                            |
| 50               | Cyprus  | Apples and products             | 2007           | 15                                                             |
| 50               | Cyprus  | Bananas                         | 2007           | 14                                                             |
| 50               | Cyprus  | Barley and products             | 2007           | 1                                                              |
| 50               | Cyprus  | Beans                           | 2007           | 17                                                             |
| 50               | Cyprus  | Beer                            | 2007           | 44                                                             |
| 50               | Cyprus  | Beverages, Alcoholic            | 2007           | 21                                                             |
| 50               | Cyprus  | Beverages, Fermented            | 2007           | 1                                                              |
| 50               | Cyprus  | Bovine Meat                     | 2007           | 27                                                             |
| 50               | Cyprus  | Butter, Ghee                    | 2007           | 12                                                             |
| 50               | Cyprus  | Cephalopods                     | 2007           | 7                                                              |
| 50               | Cyprus  | Cereals - Excluding Beer        | 2007           | 640                                                            |
| 50               | Cyprus  | Cereals, Other                  | 2007           | 3                                                              |
| 50               | Cyprus  | Cocoa Beans and products        | 2007           | 42                                                             |
| 50               | Cyprus  | Coconuts - Incl Copra           | 2007           | 2                                                              |
| 50               | Cyprus  | Coffee and products             | 2007           | 5                                                              |
| 50               | Cyprus  | Cottonseed Oil                  | 2007           | 1                                                              |
| 50               | Cyprus  | Cream                           | 2007           | 8                                                              |
| 50               | Cyprus  | Crustaceans                     | 2007           | 3                                                              |
| 50               | Cyprus  | Dates                           | 2007           | 3                                                              |
| 50               | Cyprus  | Demersal Fish                   | 2007           | 11                                                             |
| 50               | Cyprus  | Eggs                            | 2007           | 32                                                             |
| 50               | Cyprus  | Fats, Animals, Raw              | 2007           | 18                                                             |
| 50               | Cyprus  | Fish, Seafood                   | 2007           | 43                                                             |
| 50               | Cyprus  | Freshwater Fish                 | 2007           | 4                                                              |
| 50               | Cyprus  | Fruits - Excluding Wine         | 2007           | 134                                                            |
| 50               | Cyprus  | Fruits, Other                   | 2007           | 33                                                             |
| 50               | Cyprus  | Grand Total                     | 2007           | 2,639                                                          |
| 50               | Cyprus  | Grapefruit and products         | 2007           | 6                                                              |
| 50               | Cyprus  | Grapes and products (excl wine) | 2007           | 36                                                             |
| 50               | Cyprus  | Groundnut Oil                   | 2007           | 1                                                              |

Dietary calcium and zinc deficiency risks are decreasing but remain prevalent

| FAO Country code | Country | Food item                       | Reference year | Net energy supply (kcal capita <sup>-1</sup> d <sup>-1</sup> ) |
|------------------|---------|---------------------------------|----------------|----------------------------------------------------------------|
| 50               | Cyprus  | Groundnuts (Shelled Eq)         | 2007           | 22                                                             |
| 50               | Cyprus  | Honey                           | 2007           | 8                                                              |
| 50               | Cyprus  | Lemons, Limes and products      | 2007           | 4                                                              |
| 50               | Cyprus  | Maize and products              | 2007           | 10                                                             |
| 50               | Cyprus  | Maize Germ Oil                  | 2007           | 38                                                             |
| 50               | Cyprus  | Marine Fish, Other              | 2007           | 2                                                              |
| 50               | Cyprus  | Meat                            | 2007           | 341                                                            |
| 50               | Cyprus  | Meat, Other                     | 2007           | 9                                                              |
| 50               | Cyprus  | Milk - Excluding Butter         | 2007           | 252                                                            |
| 50               | Cyprus  | Miscellaneous                   | 2007           | 30                                                             |
| 50               | Cyprus  | Mutton & Goat Meat              | 2007           | 44                                                             |
| 50               | Cyprus  | Oats                            | 2007           | 2                                                              |
| 50               | Cyprus  | Offals                          | 2007           | 12                                                             |
| 50               | Cyprus  | Oilcrops                        | 2007           | 76                                                             |
| 50               | Cyprus  | Oilcrops Oil, Other             | 2007           | 26                                                             |
| 50               | Cyprus  | Olive Oil                       | 2007           | 34                                                             |
| 50               | Cyprus  | Olives (including preserved)    | 2007           | 23                                                             |
| 50               | Cyprus  | Onions                          | 2007           | 14                                                             |
| 50               | Cyprus  | Oranges, Mandarines             | 2007           | 21                                                             |
| 50               | Cyprus  | Peas                            | 2007           | 1                                                              |
| 50               | Cyprus  | Pelagic Fish                    | 2007           | 16                                                             |
| 50               | Cyprus  | Pigmeat                         | 2007           | 170                                                            |
| 50               | Cyprus  | Pineapples and products         | 2007           | 1                                                              |
| 50               | Cyprus  | Plantains                       | 2007           | 1                                                              |
| 50               | Cyprus  | Potatoes and products           | 2007           | 63                                                             |
| 50               | Cyprus  | Poultry Meat                    | 2007           | 91                                                             |
| 50               | Cyprus  | Pulses                          | 2007           | 38                                                             |
| 50               | Cyprus  | Pulses, Other and products      | 2007           | 19                                                             |
| 50               | Cyprus  | Rape and Mustard Oil            | 2007           | 16                                                             |
| 50               | Cyprus  | Rape and Mustardseed            | 2007           | 1                                                              |
| 50               | Cyprus  | Rice (Milled Equivalent)        | 2007           | 57                                                             |
| 50               | Cyprus  | Roots, Other                    | 2007           | 3                                                              |
| 50               | Cyprus  | Rye and products                | 2007           | 2                                                              |
| 50               | Cyprus  | Sesame seed                     | 2007           | 26                                                             |
| 50               | Cyprus  | Sesameseed Oil                  | 2007           | 1                                                              |
| 50               | Cyprus  | Soyabean Oil                    | 2007           | 84                                                             |
| 50               | Cyprus  | Spices                          | 2007           | 3                                                              |
| 50               | Cyprus  | Spices, Other                   | 2007           | 2                                                              |
| 50               | Cyprus  | Starchy Roots                   | 2007           | 66                                                             |
| 50               | Cyprus  | Stimulants                      | 2007           | 48                                                             |
| 50               | Cyprus  | Sugar & Sweeteners              | 2007           | 322                                                            |
| 50               | Cyprus  | Sugar (Raw Equivalent)          | 2007           | 273                                                            |
| 50               | Cyprus  | Sunflower seed                  | 2007           | 1                                                              |
| 50               | Cyprus  | Sunflowerseed Oil               | 2007           | 146                                                            |
| 50               | Cyprus  | Sweeteners, Other               | 2007           | 41                                                             |
| 50               | Cyprus  | Tomatoes and products           | 2007           | 17                                                             |
| 50               | Cyprus  | Treenuts                        | 2007           | 39                                                             |
| 50               | Cyprus  | Vegetable Oils                  | 2007           | 344                                                            |
| 50               | Cyprus  | Vegetables                      | 2007           | 86                                                             |
| 50               | Cyprus  | Vegetables, Other               | 2007           | 54                                                             |
| 50               | Cyprus  | Vegetal Products                | 2007           | 1,921                                                          |
| 50               | Cyprus  | Wheat and products              | 2007           | 567                                                            |
| 50               | Cyprus  | Wine                            | 2007           | 29                                                             |
| 50               | Cyprus  | Alcoholic Beverages             | 2008           | 101                                                            |
| 50               | Cyprus  | Animal fats                     | 2008           | 30                                                             |
| 50               | Cyprus  | Animal Products                 | 2008           | 717                                                            |
| 50               | Cyprus  | Apples and products             | 2008           | 13                                                             |
| 50               | Cyprus  | Bananas                         | 2008           | 13                                                             |
| 50               | Cyprus  | Barley and products             | 2008           | 2                                                              |
| 50               | Cyprus  | Beans                           | 2008           | 21                                                             |
| 50               | Cyprus  | Beer                            | 2008           | 44                                                             |
| 50               | Cyprus  | Beverages, Alcoholic            | 2008           | 21                                                             |
| 50               | Cyprus  | Beverages, Fermented            | 2008           | 1                                                              |
| 50               | Cyprus  | Bovine Meat                     | 2008           | 28                                                             |
| 50               | Cyprus  | Butter, Ghee                    | 2008           | 17                                                             |
| 50               | Cyprus  | Cephalopods                     | 2008           | 7                                                              |
| 50               | Cyprus  | Cereals - Excluding Beer        | 2008           | 671                                                            |
| 50               | Cyprus  | Cereals, Other                  | 2008           | 3                                                              |
| 50               | Cyprus  | Cocoa Beans and products        | 2008           | 47                                                             |
| 50               | Cyprus  | Coconuts - Incl Copra           | 2008           | 3                                                              |
| 50               | Cyprus  | Coffee and products             | 2008           | 6                                                              |
| 50               | Cyprus  | Cottonseed Oil                  | 2008           | 1                                                              |
| 50               | Cyprus  | Cream                           | 2008           | 1                                                              |
| 50               | Cyprus  | Crustaceans                     | 2008           | 4                                                              |
| 50               | Cyprus  | Dates                           | 2008           | 3                                                              |
| 50               | Cyprus  | Demersal Fish                   | 2008           | 12                                                             |
| 50               | Cyprus  | Eggs                            | 2008           | 35                                                             |
| 50               | Cyprus  | Fats, Animals, Raw              | 2008           | 12                                                             |
| 50               | Cyprus  | Fish, Seafood                   | 2008           | 43                                                             |
| 50               | Cyprus  | Freshwater Fish                 | 2008           | 5                                                              |
| 50               | Cyprus  | Fruits - Excluding Wine         | 2008           | 106                                                            |
| 50               | Cyprus  | Fruits, Other                   | 2008           | 34                                                             |
| 50               | Cyprus  | Grand Total                     | 2008           | 2,656                                                          |
| 50               | Cyprus  | Grapefruit and products         | 2008           | 8                                                              |
| 50               | Cyprus  | Grapes and products (excl wine) | 2008           | 15                                                             |
| 50               | Cyprus  | Groundnut Oil                   | 2008           | 1                                                              |
| 50               | Cyprus  | Groundnuts (Shelled Eq)         | 2008           | 19                                                             |
| 50               | Cyprus  | Honey                           | 2008           | 7                                                              |
| 50               | Cyprus  | Lemons, Limes and products      | 2008           | 5                                                              |
| 50               | Cyprus  | Maize and products              | 2008           | 11                                                             |
| 50               | Cyprus  | Maize Germ Oil                  | 2008           | 19                                                             |
| 50               | Cyprus  | Marine Fish, Other              | 2008           | 2                                                              |
| 50               | Cyprus  | Meat                            | 2008           | 331                                                            |
| 50               | Cyprus  | Meat, Other                     | 2008           | 8                                                              |
| 50               | Cyprus  | Milk - Excluding Butter         | 2008           | 269                                                            |
| 50               | Cyprus  | Miscellaneous                   | 2008           | 35                                                             |
| 50               | Cyprus  | Mutton & Goat Meat              | 2008           | 43                                                             |



## Dietary calcium and zinc deficiency risks are decreasing but remain prevalent

| FAO Country code | Country | Food item                       | Reference year | Net energy supply (kcal capita <sup>-1</sup> d <sup>-1</sup> ) |
|------------------|---------|---------------------------------|----------------|----------------------------------------------------------------|
| 50               | Cyprus  | Oats                            | 2008           | 3                                                              |
| 50               | Cyprus  | Offals                          | 2008           | 10                                                             |
| 50               | Cyprus  | Oilcrops                        | 2008           | 75                                                             |
| 50               | Cyprus  | Oilcrops Oil, Other             | 2008           | 29                                                             |
| 50               | Cyprus  | Olive Oil                       | 2008           | 49                                                             |
| 50               | Cyprus  | Olives (including preserved)    | 2008           | 25                                                             |
| 50               | Cyprus  | Onions                          | 2008           | 17                                                             |
| 50               | Cyprus  | Oranges, Mandarines             | 2008           | 14                                                             |
| 50               | Cyprus  | Peas                            | 2008           | 2                                                              |
| 50               | Cyprus  | Pelagic Fish                    | 2008           | 13                                                             |
| 50               | Cyprus  | Pigmeat                         | 2008           | 157                                                            |
| 50               | Cyprus  | Pineapples and products         | 2008           | 1                                                              |
| 50               | Cyprus  | Potatoes and products           | 2008           | 53                                                             |
| 50               | Cyprus  | Poultry Meat                    | 2008           | 96                                                             |
| 50               | Cyprus  | Pulses                          | 2008           | 45                                                             |
| 50               | Cyprus  | Pulses, Other and products      | 2008           | 21                                                             |
| 50               | Cyprus  | Rape and Mustard Oil            | 2008           | 20                                                             |
| 50               | Cyprus  | Rape and Mustardseed            | 2008           | 1                                                              |
| 50               | Cyprus  | Rice (Milled Equivalent)        | 2008           | 69                                                             |
| 50               | Cyprus  | Roots, Other                    | 2008           | 3                                                              |
| 50               | Cyprus  | Sesame seed                     | 2008           | 26                                                             |
| 50               | Cyprus  | Sesameseed Oil                  | 2008           | 1                                                              |
| 50               | Cyprus  | Soyabean Oil                    | 2008           | 109                                                            |
| 50               | Cyprus  | Spices                          | 2008           | 4                                                              |
| 50               | Cyprus  | Spices, Other                   | 2008           | 3                                                              |
| 50               | Cyprus  | Starchy Roots                   | 2008           | 56                                                             |
| 50               | Cyprus  | Stimulants                      | 2008           | 54                                                             |
| 50               | Cyprus  | Sugar & Sweeteners              | 2008           | 307                                                            |
| 50               | Cyprus  | Sugar (Raw Equivalent)          | 2008           | 264                                                            |
| 50               | Cyprus  | Sunflower seed                  | 2008           | 1                                                              |
| 50               | Cyprus  | Sunflowerseed Oil               | 2008           | 137                                                            |
| 50               | Cyprus  | Sweeteners, Other               | 2008           | 37                                                             |
| 50               | Cyprus  | Tomatoes and products           | 2008           | 15                                                             |
| 50               | Cyprus  | Treenuts                        | 2008           | 37                                                             |
| 50               | Cyprus  | Vegetable Oils                  | 2008           | 366                                                            |
| 50               | Cyprus  | Vegetables                      | 2008           | 82                                                             |
| 50               | Cyprus  | Vegetables, Other               | 2008           | 50                                                             |
| 50               | Cyprus  | Vegetal Products                | 2008           | 1,939                                                          |
| 50               | Cyprus  | Wheat and products              | 2008           | 583                                                            |
| 50               | Cyprus  | Wine                            | 2008           | 35                                                             |
| 50               | Cyprus  | Alcoholic Beverages             | 2009           | 94                                                             |
| 50               | Cyprus  | Animal fats                     | 2009           | 36                                                             |
| 50               | Cyprus  | Animal Products                 | 2009           | 697                                                            |
| 50               | Cyprus  | Apples and products             | 2009           | 15                                                             |
| 50               | Cyprus  | Bananas                         | 2009           | 14                                                             |
| 50               | Cyprus  | Barley and products             | 2009           | 1                                                              |
| 50               | Cyprus  | Beans                           | 2009           | 15                                                             |
| 50               | Cyprus  | Beer                            | 2009           | 44                                                             |
| 50               | Cyprus  | Beverages, Alcoholic            | 2009           | 21                                                             |
| 50               | Cyprus  | Bovine Meat                     | 2009           | 31                                                             |
| 50               | Cyprus  | Butter, Ghee                    | 2009           | 19                                                             |
| 50               | Cyprus  | Cephalopods                     | 2009           | 7                                                              |
| 50               | Cyprus  | Cereals - Excluding Beer        | 2009           | 665                                                            |
| 50               | Cyprus  | Cereals, Other                  | 2009           | 2                                                              |
| 50               | Cyprus  | Cocoa Beans and products        | 2009           | 49                                                             |
| 50               | Cyprus  | Coconuts - Incl Copra           | 2009           | 2                                                              |
| 50               | Cyprus  | Coffee and products             | 2009           | 8                                                              |
| 50               | Cyprus  | Crustaceans                     | 2009           | 3                                                              |
| 50               | Cyprus  | Dates                           | 2009           | 2                                                              |
| 50               | Cyprus  | Demersal Fish                   | 2009           | 11                                                             |
| 50               | Cyprus  | Eggs                            | 2009           | 33                                                             |
| 50               | Cyprus  | Fats, Animals, Raw              | 2009           | 17                                                             |
| 50               | Cyprus  | Fish, Seafood                   | 2009           | 42                                                             |
| 50               | Cyprus  | Freshwater Fish                 | 2009           | 6                                                              |
| 50               | Cyprus  | Fruits - Excluding Wine         | 2009           | 109                                                            |
| 50               | Cyprus  | Fruits, Other                   | 2009           | 34                                                             |
| 50               | Cyprus  | Grand Total                     | 2009           | 2,631                                                          |
| 50               | Cyprus  | Grapefruit and products         | 2009           | 7                                                              |
| 50               | Cyprus  | Grapes and products (excl wine) | 2009           | 14                                                             |
| 50               | Cyprus  | Groundnut Oil                   | 2009           | 1                                                              |
| 50               | Cyprus  | Groundnuts (Shelled Eq)         | 2009           | 18                                                             |
| 50               | Cyprus  | Honey                           | 2009           | 6                                                              |
| 50               | Cyprus  | Lemons, Limes and products      | 2009           | 5                                                              |
| 50               | Cyprus  | Maize and products              | 2009           | 15                                                             |
| 50               | Cyprus  | Maize Germ Oil                  | 2009           | 24                                                             |
| 50               | Cyprus  | Marine Fish, Other              | 2009           | 2                                                              |
| 50               | Cyprus  | Meat                            | 2009           | 327                                                            |
| 50               | Cyprus  | Meat, Other                     | 2009           | 6                                                              |
| 50               | Cyprus  | Milk - Excluding Butter         | 2009           | 249                                                            |
| 50               | Cyprus  | Miscellaneous                   | 2009           | 34                                                             |
| 50               | Cyprus  | Mutton & Goat Meat              | 2009           | 36                                                             |
| 50               | Cyprus  | Oats                            | 2009           | 1                                                              |
| 50               | Cyprus  | Offals                          | 2009           | 10                                                             |
| 50               | Cyprus  | Oilcrops                        | 2009           | 65                                                             |
| 50               | Cyprus  | Oilcrops Oil, Other             | 2009           | 30                                                             |
| 50               | Cyprus  | Olive Oil                       | 2009           | 61                                                             |
| 50               | Cyprus  | Olives (including preserved)    | 2009           | 15                                                             |
| 50               | Cyprus  | Onions                          | 2009           | 18                                                             |
| 50               | Cyprus  | Oranges, Mandarines             | 2009           | 16                                                             |
| 50               | Cyprus  | Peas                            | 2009           | 3                                                              |
| 50               | Cyprus  | Pelagic Fish                    | 2009           | 13                                                             |
| 50               | Cyprus  | Pigmeat                         | 2009           | 162                                                            |
| 50               | Cyprus  | Pineapples and products         | 2009           | 1                                                              |
| 50               | Cyprus  | Plantains                       | 2009           | 1                                                              |
| 50               | Cyprus  | Potatoes and products           | 2009           | 50                                                             |
| 50               | Cyprus  | Poultry Meat                    | 2009           | 92                                                             |
| 50               | Cyprus  | Pulses                          | 2009           | 36                                                             |

Dietary calcium and zinc deficiency risks are decreasing but remain prevalent

| FAO Country code | Country | Food item                       | Reference year | Net energy supply (kcal capita <sup>-1</sup> d <sup>-1</sup> ) |
|------------------|---------|---------------------------------|----------------|----------------------------------------------------------------|
| 50               | Cyprus  | Pulses, Other and products      | 2009           | 18                                                             |
| 50               | Cyprus  | Rape and Mustard Oil            | 2009           | 39                                                             |
| 50               | Cyprus  | Rape and Mustardseed            | 2009           | 2                                                              |
| 50               | Cyprus  | Rice (Milled Equivalent)        | 2009           | 46                                                             |
| 50               | Cyprus  | Roots, Other                    | 2009           | 3                                                              |
| 50               | Cyprus  | Sesame seed                     | 2009           | 27                                                             |
| 50               | Cyprus  | Sesameseed Oil                  | 2009           | 1                                                              |
| 50               | Cyprus  | Soyabean Oil                    | 2009           | 102                                                            |
| 50               | Cyprus  | Spices                          | 2009           | 3                                                              |
| 50               | Cyprus  | Spices, Other                   | 2009           | 3                                                              |
| 50               | Cyprus  | Starchy Roots                   | 2009           | 53                                                             |
| 50               | Cyprus  | Stimulants                      | 2009           | 57                                                             |
| 50               | Cyprus  | Sugar & Sweeteners              | 2009           | 292                                                            |
| 50               | Cyprus  | Sugar (Raw Equivalent)          | 2009           | 252                                                            |
| 50               | Cyprus  | Sunflower seed                  | 2009           | 1                                                              |
| 50               | Cyprus  | Sunflowerseed Oil               | 2009           | 153                                                            |
| 50               | Cyprus  | Sweeteners, Other               | 2009           | 34                                                             |
| 50               | Cyprus  | Tomatoes and products           | 2009           | 13                                                             |
| 50               | Cyprus  | Treenuts                        | 2009           | 35                                                             |
| 50               | Cyprus  | Vegetable Oils                  | 2009           | 411                                                            |
| 50               | Cyprus  | Vegetables                      | 2009           | 82                                                             |
| 50               | Cyprus  | Vegetables, Other               | 2009           | 51                                                             |
| 50               | Cyprus  | Vegetal Products                | 2009           | 1,934                                                          |
| 50               | Cyprus  | Wheat and products              | 2009           | 599                                                            |
| 50               | Cyprus  | Wine                            | 2009           | 29                                                             |
| 50               | Cyprus  | Alcoholic Beverages             | 2010           | 94                                                             |
| 50               | Cyprus  | Animal fats                     | 2010           | 33                                                             |
| 50               | Cyprus  | Animal Products                 | 2010           | 696                                                            |
| 50               | Cyprus  | Apples and products             | 2010           | 12                                                             |
| 50               | Cyprus  | Bananas                         | 2010           | 17                                                             |
| 50               | Cyprus  | Barley and products             | 2010           | 2                                                              |
| 50               | Cyprus  | Beans                           | 2010           | 13                                                             |
| 50               | Cyprus  | Beer                            | 2010           | 44                                                             |
| 50               | Cyprus  | Beverages, Alcoholic            | 2010           | 20                                                             |
| 50               | Cyprus  | Beverages, Fermented            | 2010           | 1                                                              |
| 50               | Cyprus  | Bovine Meat                     | 2010           | 31                                                             |
| 50               | Cyprus  | Butter, Ghee                    | 2010           | 20                                                             |
| 50               | Cyprus  | Cephalopods                     | 2010           | 6                                                              |
| 50               | Cyprus  | Cereals - Excluding Beer        | 2010           | 695                                                            |
| 50               | Cyprus  | Cereals, Other                  | 2010           | 1                                                              |
| 50               | Cyprus  | Cocoa Beans and products        | 2010           | 56                                                             |
| 50               | Cyprus  | Coconuts - Incl Copra           | 2010           | 1                                                              |
| 50               | Cyprus  | Coffee and products             | 2010           | 7                                                              |
| 50               | Cyprus  | Crustaceans                     | 2010           | 4                                                              |
| 50               | Cyprus  | Dates                           | 2010           | 2                                                              |
| 50               | Cyprus  | Demersal Fish                   | 2010           | 11                                                             |
| 50               | Cyprus  | Eggs                            | 2010           | 30                                                             |
| 50               | Cyprus  | Fats, Animals, Raw              | 2010           | 13                                                             |
| 50               | Cyprus  | Fish, Seafood                   | 2010           | 41                                                             |
| 50               | Cyprus  | Freshwater Fish                 | 2010           | 8                                                              |
| 50               | Cyprus  | Fruits - Excluding Wine         | 2010           | 99                                                             |
| 50               | Cyprus  | Fruits, Other                   | 2010           | 30                                                             |
| 50               | Cyprus  | Grand Total                     | 2010           | 2,658                                                          |
| 50               | Cyprus  | Grapefruit and products         | 2010           | 4                                                              |
| 50               | Cyprus  | Grapes and products (excl wine) | 2010           | 13                                                             |
| 50               | Cyprus  | Groundnut Oil                   | 2010           | 1                                                              |
| 50               | Cyprus  | Groundnuts (Shelled Eq)         | 2010           | 17                                                             |
| 50               | Cyprus  | Honey                           | 2010           | 7                                                              |
| 50               | Cyprus  | Lemons, Limes and products      | 2010           | 5                                                              |
| 50               | Cyprus  | Maize and products              | 2010           | 13                                                             |
| 50               | Cyprus  | Maize Germ Oil                  | 2010           | 18                                                             |
| 50               | Cyprus  | Marine Fish, Other              | 2010           | 2                                                              |
| 50               | Cyprus  | Meat                            | 2010           | 326                                                            |
| 50               | Cyprus  | Meat, Other                     | 2010           | 8                                                              |
| 50               | Cyprus  | Milk - Excluding Butter         | 2010           | 255                                                            |
| 50               | Cyprus  | Miscellaneous                   | 2010           | 38                                                             |
| 50               | Cyprus  | Mutton & Goat Meat              | 2010           | 35                                                             |
| 50               | Cyprus  | Oats                            | 2010           | 3                                                              |
| 50               | Cyprus  | Offals                          | 2010           | 11                                                             |
| 50               | Cyprus  | Oilcrops                        | 2010           | 59                                                             |
| 50               | Cyprus  | Oilcrops Oil, Other             | 2010           | 33                                                             |
| 50               | Cyprus  | Olive Oil                       | 2010           | 67                                                             |
| 50               | Cyprus  | Olives (including preserved)    | 2010           | 14                                                             |
| 50               | Cyprus  | Onions                          | 2010           | 20                                                             |
| 50               | Cyprus  | Oranges, Mandarines             | 2010           | 15                                                             |
| 50               | Cyprus  | Peas                            | 2010           | 3                                                              |
| 50               | Cyprus  | Pelagic Fish                    | 2010           | 11                                                             |
| 50               | Cyprus  | Pigmeat                         | 2010           | 159                                                            |
| 50               | Cyprus  | Pineapples and products         | 2010           | 1                                                              |
| 50               | Cyprus  | Potatoes and products           | 2010           | 50                                                             |
| 50               | Cyprus  | Poultry Meat                    | 2010           | 93                                                             |
| 50               | Cyprus  | Pulses                          | 2010           | 36                                                             |
| 50               | Cyprus  | Pulses, Other and products      | 2010           | 20                                                             |
| 50               | Cyprus  | Rape and Mustard Oil            | 2010           | 78                                                             |
| 50               | Cyprus  | Rape and Mustardseed            | 2010           | 2                                                              |
| 50               | Cyprus  | Rice (Milled Equivalent)        | 2010           | 61                                                             |
| 50               | Cyprus  | Roots, Other                    | 2010           | 3                                                              |
| 50               | Cyprus  | Sesame seed                     | 2010           | 22                                                             |
| 50               | Cyprus  | Sesameseed Oil                  | 2010           | 1                                                              |
| 50               | Cyprus  | Soyabean Oil                    | 2010           | 83                                                             |
| 50               | Cyprus  | Spices                          | 2010           | 4                                                              |
| 50               | Cyprus  | Spices, Other                   | 2010           | 3                                                              |
| 50               | Cyprus  | Starchy Roots                   | 2010           | 53                                                             |
| 50               | Cyprus  | Stimulants                      | 2010           | 63                                                             |
| 50               | Cyprus  | Sugar & Sweeteners              | 2010           | 283                                                            |
| 50               | Cyprus  | Sugar (Raw Equivalent)          | 2010           | 241                                                            |
| 50               | Cyprus  | Sunflower seed                  | 2010           | 2                                                              |

## Dietary calcium and zinc deficiency risks are decreasing but remain prevalent

| FAO Country code | Country        | Food item                       | Reference year | Net energy supply (kcal capita <sup>-1</sup> d <sup>-1</sup> ) |
|------------------|----------------|---------------------------------|----------------|----------------------------------------------------------------|
| 50               | Cyprus         | Sunflowerseed Oil               | 2010           | 137                                                            |
| 50               | Cyprus         | Sweeteners, Other               | 2010           | 36                                                             |
| 50               | Cyprus         | Tomatoes and products           | 2010           | 13                                                             |
| 50               | Cyprus         | Treenuts                        | 2010           | 36                                                             |
| 50               | Cyprus         | Vegetable Oils                  | 2010           | 417                                                            |
| 50               | Cyprus         | Vegetables                      | 2010           | 84                                                             |
| 50               | Cyprus         | Vegetables, Other               | 2010           | 51                                                             |
| 50               | Cyprus         | Vegetal Products                | 2010           | 1,962                                                          |
| 50               | Cyprus         | Wheat and products              | 2010           | 615                                                            |
| 50               | Cyprus         | Wine                            | 2010           | 28                                                             |
| 50               | Cyprus         | Alcoholic Beverages             | 2011           | 94                                                             |
| 50               | Cyprus         | Animal fats                     | 2011           | 37                                                             |
| 50               | Cyprus         | Animal Products                 | 2011           | 704                                                            |
| 50               | Cyprus         | Apples and products             | 2011           | 13                                                             |
| 50               | Cyprus         | Bananas                         | 2011           | 14                                                             |
| 50               | Cyprus         | Barley and products             | 2011           | 2                                                              |
| 50               | Cyprus         | Beans                           | 2011           | 10                                                             |
| 50               | Cyprus         | Beer                            | 2011           | 44                                                             |
| 50               | Cyprus         | Beverages, Alcoholic            | 2011           | 20                                                             |
| 50               | Cyprus         | Beverages, Fermented            | 2011           | 1                                                              |
| 50               | Cyprus         | Bovine Meat                     | 2011           | 35                                                             |
| 50               | Cyprus         | Butter, Ghee                    | 2011           | 21                                                             |
| 50               | Cyprus         | Cephalopods                     | 2011           | 6                                                              |
| 50               | Cyprus         | Cereals - Excluding Beer        | 2011           | 699                                                            |
| 50               | Cyprus         | Cereals, Other                  | 2011           | 7                                                              |
| 50               | Cyprus         | Cocoa Beans and products        | 2011           | 52                                                             |
| 50               | Cyprus         | Coconuts - Incl Copra           | 2011           | 2                                                              |
| 50               | Cyprus         | Coffee and products             | 2011           | 7                                                              |
| 50               | Cyprus         | Cottonseed Oil                  | 2011           | 1                                                              |
| 50               | Cyprus         | Crustaceans                     | 2011           | 4                                                              |
| 50               | Cyprus         | Dates                           | 2011           | 2                                                              |
| 50               | Cyprus         | Demersal Fish                   | 2011           | 10                                                             |
| 50               | Cyprus         | Eggs                            | 2011           | 29                                                             |
| 50               | Cyprus         | Fats, Animals, Raw              | 2011           | 15                                                             |
| 50               | Cyprus         | Fish, Seafood                   | 2011           | 41                                                             |
| 50               | Cyprus         | Freshwater Fish                 | 2011           | 9                                                              |
| 50               | Cyprus         | Fruits - Excluding Wine         | 2011           | 93                                                             |
| 50               | Cyprus         | Fruits, Other                   | 2011           | 30                                                             |
| 50               | Cyprus         | Grand Total                     | 2011           | 2,661                                                          |
| 50               | Cyprus         | Grapefruit and products         | 2011           | 5                                                              |
| 50               | Cyprus         | Grapes and products (excl wine) | 2011           | 7                                                              |
| 50               | Cyprus         | Groundnut Oil                   | 2011           | 1                                                              |
| 50               | Cyprus         | Groundnuts (Shelled Eq)         | 2011           | 20                                                             |
| 50               | Cyprus         | Honey                           | 2011           | 5                                                              |
| 50               | Cyprus         | Lemons, Limes and products      | 2011           | 5                                                              |
| 50               | Cyprus         | Maize and products              | 2011           | 15                                                             |
| 50               | Cyprus         | Maize Germ Oil                  | 2011           | 21                                                             |
| 50               | Cyprus         | Marine Fish, Other              | 2011           | 1                                                              |
| 50               | Cyprus         | Meat                            | 2011           | 332                                                            |
| 50               | Cyprus         | Meat, Other                     | 2011           | 7                                                              |
| 50               | Cyprus         | Milk - Excluding Butter         | 2011           | 255                                                            |
| 50               | Cyprus         | Miscellaneous                   | 2011           | 39                                                             |
| 50               | Cyprus         | Mutton & Goat Meat              | 2011           | 33                                                             |
| 50               | Cyprus         | Oats                            | 2011           | 3                                                              |
| 50               | Cyprus         | Offals                          | 2011           | 9                                                              |
| 50               | Cyprus         | Oilcrops                        | 2011           | 59                                                             |
| 50               | Cyprus         | Oilcrops Oil, Other             | 2011           | 30                                                             |
| 50               | Cyprus         | Olive Oil                       | 2011           | 72                                                             |
| 50               | Cyprus         | Olives (including preserved)    | 2011           | 14                                                             |
| 50               | Cyprus         | Onions                          | 2011           | 17                                                             |
| 50               | Cyprus         | Oranges, Mandarines             | 2011           | 14                                                             |
| 50               | Cyprus         | Peas                            | 2011           | 2                                                              |
| 50               | Cyprus         | Pelagic Fish                    | 2011           | 11                                                             |
| 50               | Cyprus         | Pepper                          | 2011           | 1                                                              |
| 50               | Cyprus         | Pigmeat                         | 2011           | 165                                                            |
| 50               | Cyprus         | Pineapples and products         | 2011           | 1                                                              |
| 50               | Cyprus         | Potatoes and products           | 2011           | 37                                                             |
| 50               | Cyprus         | Poultry Meat                    | 2011           | 93                                                             |
| 50               | Cyprus         | Pulses                          | 2011           | 29                                                             |
| 50               | Cyprus         | Pulses, Other and products      | 2011           | 16                                                             |
| 50               | Cyprus         | Rape and Mustard Oil            | 2011           | 95                                                             |
| 50               | Cyprus         | Rape and Mustardseed            | 2011           | 1                                                              |
| 50               | Cyprus         | Rice (Milled Equivalent)        | 2011           | 52                                                             |
| 50               | Cyprus         | Roots, Other                    | 2011           | 3                                                              |
| 50               | Cyprus         | Sesame seed                     | 2011           | 21                                                             |
| 50               | Cyprus         | Sesameseed Oil                  | 2011           | 1                                                              |
| 50               | Cyprus         | Soyabean Oil                    | 2011           | 81                                                             |
| 50               | Cyprus         | Spices                          | 2011           | 4                                                              |
| 50               | Cyprus         | Spices, Other                   | 2011           | 3                                                              |
| 50               | Cyprus         | Starchy Roots                   | 2011           | 40                                                             |
| 50               | Cyprus         | Stimulants                      | 2011           | 59                                                             |
| 50               | Cyprus         | Sugar & Sweeteners              | 2011           | 284                                                            |
| 50               | Cyprus         | Sugar (Raw Equivalent)          | 2011           | 230                                                            |
| 50               | Cyprus         | Sunflower seed                  | 2011           | 1                                                              |
| 50               | Cyprus         | Sunflowerseed Oil               | 2011           | 146                                                            |
| 50               | Cyprus         | Sweeteners, Other               | 2011           | 49                                                             |
| 50               | Cyprus         | Tomatoes and products           | 2011           | 11                                                             |
| 50               | Cyprus         | Treenuts                        | 2011           | 31                                                             |
| 50               | Cyprus         | Vegetable Oils                  | 2011           | 447                                                            |
| 50               | Cyprus         | Vegetables                      | 2011           | 81                                                             |
| 50               | Cyprus         | Vegetables, Other               | 2011           | 52                                                             |
| 50               | Cyprus         | Vegetal Products                | 2011           | 1,958                                                          |
| 50               | Cyprus         | Wheat and products              | 2011           | 620                                                            |
| 50               | Cyprus         | Wine                            | 2011           | 28                                                             |
| 51               | Czechoslovakia | Alcoholic Beverages             | 1992           | 254                                                            |
| 51               | Czechoslovakia | Animal fats                     | 1992           | 297                                                            |
| 51               | Czechoslovakia | Animal Products                 | 1992           | 953                                                            |

Dietary calcium and zinc deficiency risks are decreasing but remain prevalent

| FAO Country code | Country        | Food item                       | Reference year | Net energy supply (kcal capita <sup>-1</sup> d <sup>-1</sup> ) |
|------------------|----------------|---------------------------------|----------------|----------------------------------------------------------------|
| 51               | Czechoslovakia | Apples and products             | 1992           | 22                                                             |
| 51               | Czechoslovakia | Bananas                         | 1992           | 12                                                             |
| 51               | Czechoslovakia | Beans                           | 1992           | 1                                                              |
| 51               | Czechoslovakia | Beer                            | 1992           | 170                                                            |
| 51               | Czechoslovakia | Beverages, Alcoholic            | 1992           | 66                                                             |
| 51               | Czechoslovakia | Beverages, Fermented            | 1992           | 1                                                              |
| 51               | Czechoslovakia | Bovine Meat                     | 1992           | 111                                                            |
| 51               | Czechoslovakia | Butter, Ghee                    | 1992           | 128                                                            |
| 51               | Czechoslovakia | Cereals - Excluding Beer        | 1992           | 929                                                            |
| 51               | Czechoslovakia | Cereals, Other                  | 1992           | 1                                                              |
| 51               | Czechoslovakia | Cocoa Beans and products        | 1992           | 5                                                              |
| 51               | Czechoslovakia | Coffee and products             | 1992           | 3                                                              |
| 51               | Czechoslovakia | Cream                           | 1992           | 13                                                             |
| 51               | Czechoslovakia | Eggs                            | 1992           | 61                                                             |
| 51               | Czechoslovakia | Fats, Animals, Raw              | 1992           | 155                                                            |
| 51               | Czechoslovakia | Fish, Seafood                   | 1992           | 13                                                             |
| 51               | Czechoslovakia | Freshwater Fish                 | 1992           | 4                                                              |
| 51               | Czechoslovakia | Fruits - Excluding Wine         | 1992           | 76                                                             |
| 51               | Czechoslovakia | Fruits, Other                   | 1992           | 26                                                             |
| 51               | Czechoslovakia | Grand Total                     | 1992           | 3,161                                                          |
| 51               | Czechoslovakia | Grapefruit and products         | 1992           | 1                                                              |
| 51               | Czechoslovakia | Grapes and products (excl wine) | 1992           | 9                                                              |
| 51               | Czechoslovakia | Groundnut Oil                   | 1992           | 2                                                              |
| 51               | Czechoslovakia | Groundnuts (Shelled Eq)         | 1992           | 1                                                              |
| 51               | Czechoslovakia | Honey                           | 1992           | 4                                                              |
| 51               | Czechoslovakia | Lemons, Limes and products      | 1992           | 1                                                              |
| 51               | Czechoslovakia | Maize Germ Oil                  | 1992           | 5                                                              |
| 51               | Czechoslovakia | Marine Fish, Other              | 1992           | 9                                                              |
| 51               | Czechoslovakia | Meat                            | 1992           | 388                                                            |
| 51               | Czechoslovakia | Meat, Other                     | 1992           | 7                                                              |
| 51               | Czechoslovakia | Milk - Excluding Butter         | 1992           | 181                                                            |
| 51               | Czechoslovakia | Mutton & Goat Meat              | 1992           | 2                                                              |
| 51               | Czechoslovakia | Oats                            | 1992           | 10                                                             |
| 51               | Czechoslovakia | Offals                          | 1992           | 14                                                             |
| 51               | Czechoslovakia | Oilcrops                        | 1992           | 3                                                              |
| 51               | Czechoslovakia | Oilcrops Oil, Other             | 1992           | 23                                                             |
| 51               | Czechoslovakia | Oilcrops, Other                 | 1992           | 1                                                              |
| 51               | Czechoslovakia | Onions                          | 1992           | 9                                                              |
| 51               | Czechoslovakia | Oranges, Mandarines             | 1992           | 4                                                              |
| 51               | Czechoslovakia | Peas                            | 1992           | 7                                                              |
| 51               | Czechoslovakia | Pepper                          | 1992           | 1                                                              |
| 51               | Czechoslovakia | Pigmeat                         | 1992           | 227                                                            |
| 51               | Czechoslovakia | Pimento                         | 1992           | 2                                                              |
| 51               | Czechoslovakia | Potatoes and products           | 1992           | 146                                                            |
| 51               | Czechoslovakia | Poultry Meat                    | 1992           | 41                                                             |
| 51               | Czechoslovakia | Pulses                          | 1992           | 17                                                             |
| 51               | Czechoslovakia | Pulses, Other and products      | 1992           | 9                                                              |
| 51               | Czechoslovakia | Rape and Mustard Oil            | 1992           | 169                                                            |
| 51               | Czechoslovakia | Rape and Mustardseed            | 1992           | 1                                                              |
| 51               | Czechoslovakia | Rice (Milled Equivalent)        | 1992           | 28                                                             |
| 51               | Czechoslovakia | Rye and products                | 1992           | 143                                                            |
| 51               | Czechoslovakia | Soyabean Oil                    | 1992           | 8                                                              |
| 51               | Czechoslovakia | Spices                          | 1992           | 3                                                              |
| 51               | Czechoslovakia | Starchy Roots                   | 1992           | 146                                                            |
| 51               | Czechoslovakia | Stimulants                      | 1992           | 8                                                              |
| 51               | Czechoslovakia | Sugar & Sweeteners              | 1992           | 453                                                            |
| 51               | Czechoslovakia | Sugar (Raw Equivalent)          | 1992           | 442                                                            |
| 51               | Czechoslovakia | Sunflowerseed Oil               | 1992           | 62                                                             |
| 51               | Czechoslovakia | Sweeteners, Other               | 1992           | 6                                                              |
| 51               | Czechoslovakia | Tomatoes and products           | 1992           | 4                                                              |
| 51               | Czechoslovakia | Treenuts                        | 1992           | 10                                                             |
| 51               | Czechoslovakia | Vegetable Oils                  | 1992           | 270                                                            |
| 51               | Czechoslovakia | Vegetables                      | 1992           | 40                                                             |
| 51               | Czechoslovakia | Vegetables, Other               | 1992           | 27                                                             |
| 51               | Czechoslovakia | Vegetal Products                | 1992           | 2,208                                                          |
| 51               | Czechoslovakia | Wheat and products              | 1992           | 748                                                            |
| 51               | Czechoslovakia | Wine                            | 1992           | 17                                                             |
| 54               | Denmark        | Alcoholic Beverages             | 1992           | 234                                                            |
| 54               | Denmark        | Animal fats                     | 1992           | 478                                                            |
| 54               | Denmark        | Animal Products                 | 1992           | 1,275                                                          |
| 54               | Denmark        | Apples and products             | 1992           | 30                                                             |
| 54               | Denmark        | Bananas                         | 1992           | 18                                                             |
| 54               | Denmark        | Barley and products             | 1992           | 1                                                              |
| 54               | Denmark        | Beans                           | 1992           | 1                                                              |
| 54               | Denmark        | Beer                            | 1992           | 162                                                            |
| 54               | Denmark        | Beverages, Alcoholic            | 1992           | 23                                                             |
| 54               | Denmark        | Bovine Meat                     | 1992           | 61                                                             |
| 54               | Denmark        | Butter, Ghee                    | 1992           | 59                                                             |
| 54               | Denmark        | Cereals - Excluding Beer        | 1992           | 760                                                            |
| 54               | Denmark        | Cocoa Beans and products        | 1992           | 38                                                             |
| 54               | Denmark        | Coffee and products             | 1992           | 14                                                             |
| 54               | Denmark        | Cream                           | 1992           | 51                                                             |
| 54               | Denmark        | Crustaceans                     | 1992           | 6                                                              |
| 54               | Denmark        | Dates                           | 1992           | 1                                                              |
| 54               | Denmark        | Demersal Fish                   | 1992           | 19                                                             |
| 54               | Denmark        | Eggs                            | 1992           | 61                                                             |
| 54               | Denmark        | Fats, Animals, Raw              | 1992           | 244                                                            |
| 54               | Denmark        | Fish, Body Oil                  | 1992           | 124                                                            |
| 54               | Denmark        | Fish, Seafood                   | 1992           | 68                                                             |
| 54               | Denmark        | Freshwater Fish                 | 1992           | 4                                                              |
| 54               | Denmark        | Fruits - Excluding Wine         | 1992           | 101                                                            |
| 54               | Denmark        | Fruits, Other                   | 1992           | 26                                                             |
| 54               | Denmark        | Grand Total                     | 1992           | 3,338                                                          |
| 54               | Denmark        | Grapefruit and products         | 1992           | 1                                                              |
| 54               | Denmark        | Grapes and products (excl wine) | 1992           | 14                                                             |
| 54               | Denmark        | Groundnut Oil                   | 1992           | 3                                                              |
| 54               | Denmark        | Groundnuts (Shelled Eq)         | 1992           | 1                                                              |

Dietary calcium and zinc deficiency risks are decreasing but remain prevalent

| FAO Country code | Country | Food item                       | Reference year | Net energy supply (kcal capita <sup>-1</sup> d <sup>-1</sup> ) |
|------------------|---------|---------------------------------|----------------|----------------------------------------------------------------|
| 54               | Denmark | Honey                           | 1992           | 4                                                              |
| 54               | Denmark | Lemons, Limes and products      | 1992           | 1                                                              |
| 54               | Denmark | Maize and products              | 1992           | 83                                                             |
| 54               | Denmark | Maize Germ Oil                  | 1992           | 6                                                              |
| 54               | Denmark | Meat                            | 1992           | 401                                                            |
| 54               | Denmark | Meat, Other                     | 1992           | 3                                                              |
| 54               | Denmark | Milk - Excluding Butter         | 1992           | 231                                                            |
| 54               | Denmark | Molluscs, Other                 | 1992           | 2                                                              |
| 54               | Denmark | Mutton & Goat Meat              | 1992           | 6                                                              |
| 54               | Denmark | Oats                            | 1992           | 17                                                             |
| 54               | Denmark | Offals                          | 1992           | 36                                                             |
| 54               | Denmark | Oilcrops                        | 1992           | 6                                                              |
| 54               | Denmark | Oilcrops Oil, Other             | 1992           | 9                                                              |
| 54               | Denmark | Olive Oil                       | 1992           | 6                                                              |
| 54               | Denmark | Olives (including preserved)    | 1992           | 1                                                              |
| 54               | Denmark | Onions                          | 1992           | 9                                                              |
| 54               | Denmark | Oranges, Mandarines             | 1992           | 9                                                              |
| 54               | Denmark | Palmkernel Oil                  | 1992           | 46                                                             |
| 54               | Denmark | Peas                            | 1992           | 7                                                              |
| 54               | Denmark | Pelagic Fish                    | 1992           | 38                                                             |
| 54               | Denmark | Pepper                          | 1992           | 1                                                              |
| 54               | Denmark | Pigmeat                         | 1992           | 276                                                            |
| 54               | Denmark | Pimento                         | 1992           | 1                                                              |
| 54               | Denmark | Pineapples and products         | 1992           | 2                                                              |
| 54               | Denmark | Potatoes and products           | 1992           | 128                                                            |
| 54               | Denmark | Poultry Meat                    | 1992           | 55                                                             |
| 54               | Denmark | Pulses                          | 1992           | 9                                                              |
| 54               | Denmark | Pulses, Other and products      | 1992           | 1                                                              |
| 54               | Denmark | Rape and Mustard Oil            | 1992           | 10                                                             |
| 54               | Denmark | Rape and Mustardseed            | 1992           | 4                                                              |
| 54               | Denmark | Rice (Milled Equivalent)        | 1992           | 12                                                             |
| 54               | Denmark | Rye and products                | 1992           | 149                                                            |
| 54               | Denmark | Sesameseed Oil                  | 1992           | 3                                                              |
| 54               | Denmark | Soyabean Oil                    | 1992           | 112                                                            |
| 54               | Denmark | Spices                          | 1992           | 5                                                              |
| 54               | Denmark | Spices, Other                   | 1992           | 3                                                              |
| 54               | Denmark | Starchy Roots                   | 1992           | 135                                                            |
| 54               | Denmark | Stimulants                      | 1992           | 52                                                             |
| 54               | Denmark | Sugar & Sweeteners              | 1992           | 457                                                            |
| 54               | Denmark | Sugar (Raw Equivalent)          | 1992           | 426                                                            |
| 54               | Denmark | Sunflowerseed Oil               | 1992           | 19                                                             |
| 54               | Denmark | Sweet potatoes                  | 1992           | 8                                                              |
| 54               | Denmark | Sweeteners, Other               | 1992           | 27                                                             |
| 54               | Denmark | Tomatoes and products           | 1992           | 7                                                              |
| 54               | Denmark | Treenuts                        | 1992           | 29                                                             |
| 54               | Denmark | Vegetable Oils                  | 1992           | 214                                                            |
| 54               | Denmark | Vegetables                      | 1992           | 60                                                             |
| 54               | Denmark | Vegetables, Other               | 1992           | 44                                                             |
| 54               | Denmark | Vegetal Products                | 1992           | 2,062                                                          |
| 54               | Denmark | Wheat and products              | 1992           | 499                                                            |
| 54               | Denmark | Wine                            | 1992           | 48                                                             |
| 54               | Denmark | Alcoholic Beverages             | 1993           | 227                                                            |
| 54               | Denmark | Animal fats                     | 1993           | 453                                                            |
| 54               | Denmark | Animal Products                 | 1993           | 1,260                                                          |
| 54               | Denmark | Apples and products             | 1993           | 30                                                             |
| 54               | Denmark | Bananas                         | 1993           | 14                                                             |
| 54               | Denmark | Barley and products             | 1993           | 1                                                              |
| 54               | Denmark | Beans                           | 1993           | 1                                                              |
| 54               | Denmark | Beer                            | 1993           | 161                                                            |
| 54               | Denmark | Beverages, Alcoholic            | 1993           | 22                                                             |
| 54               | Denmark | Bovine Meat                     | 1993           | 59                                                             |
| 54               | Denmark | Butter, Ghee                    | 1993           | 51                                                             |
| 54               | Denmark | Cereals - Excluding Beer        | 1993           | 789                                                            |
| 54               | Denmark | Cocoa Beans and products        | 1993           | 39                                                             |
| 54               | Denmark | Coffee and products             | 1993           | 13                                                             |
| 54               | Denmark | Cream                           | 1993           | 39                                                             |
| 54               | Denmark | Crustaceans                     | 1993           | 5                                                              |
| 54               | Denmark | Dates                           | 1993           | 1                                                              |
| 54               | Denmark | Demersal Fish                   | 1993           | 25                                                             |
| 54               | Denmark | Eggs                            | 1993           | 61                                                             |
| 54               | Denmark | Fats, Animals, Raw              | 1993           | 240                                                            |
| 54               | Denmark | Fish, Body Oil                  | 1993           | 123                                                            |
| 54               | Denmark | Fish, Seafood                   | 1993           | 69                                                             |
| 54               | Denmark | Freshwater Fish                 | 1993           | 4                                                              |
| 54               | Denmark | Fruits - Excluding Wine         | 1993           | 91                                                             |
| 54               | Denmark | Fruits, Other                   | 1993           | 20                                                             |
| 54               | Denmark | Grand Total                     | 1993           | 3,339                                                          |
| 54               | Denmark | Grapefruit and products         | 1993           | 1                                                              |
| 54               | Denmark | Grapes and products (excl wine) | 1993           | 14                                                             |
| 54               | Denmark | Groundnuts (Shelled Eq)         | 1993           | 1                                                              |
| 54               | Denmark | Honey                           | 1993           | 3                                                              |
| 54               | Denmark | Lemons, Limes and products      | 1993           | 1                                                              |
| 54               | Denmark | Maize and products              | 1993           | 89                                                             |
| 54               | Denmark | Maize Germ Oil                  | 1993           | 5                                                              |
| 54               | Denmark | Meat                            | 1993           | 393                                                            |
| 54               | Denmark | Meat, Other                     | 1993           | 3                                                              |
| 54               | Denmark | Milk - Excluding Butter         | 1993           | 245                                                            |
| 54               | Denmark | Molluscs, Other                 | 1993           | 1                                                              |
| 54               | Denmark | Mutton & Goat Meat              | 1993           | 7                                                              |
| 54               | Denmark | Oats                            | 1993           | 22                                                             |
| 54               | Denmark | Offals                          | 1993           | 40                                                             |
| 54               | Denmark | Oilcrops                        | 1993           | 5                                                              |
| 54               | Denmark | Oilcrops Oil, Other             | 1993           | 10                                                             |
| 54               | Denmark | Olive Oil                       | 1993           | 6                                                              |
| 54               | Denmark | Onions                          | 1993           | 10                                                             |
| 54               | Denmark | Oranges, Mandarines             | 1993           | 8                                                              |
| 54               | Denmark | Palmkernel Oil                  | 1993           | 17                                                             |

Dietary calcium and zinc deficiency risks are decreasing but remain prevalent

| FAO Country code | Country | Food item                       | Reference year | Net energy supply (kcal capita <sup>-1</sup> d <sup>-1</sup> ) |
|------------------|---------|---------------------------------|----------------|----------------------------------------------------------------|
| 54               | Denmark | Peas                            | 1993           | 7                                                              |
| 54               | Denmark | Pelagic Fish                    | 1993           | 34                                                             |
| 54               | Denmark | Pepper                          | 1993           | 2                                                              |
| 54               | Denmark | Pigmeat                         | 1993           | 275                                                            |
| 54               | Denmark | Pimento                         | 1993           | 1                                                              |
| 54               | Denmark | Pineapples and products         | 1993           | 3                                                              |
| 54               | Denmark | Potatoes and products           | 1993           | 134                                                            |
| 54               | Denmark | Poultry Meat                    | 1993           | 49                                                             |
| 54               | Denmark | Pulses                          | 1993           | 9                                                              |
| 54               | Denmark | Rape and Mustard Oil            | 1993           | 15                                                             |
| 54               | Denmark | Rape and Mustardseed            | 1993           | 3                                                              |
| 54               | Denmark | Rice (Milled Equivalent)        | 1993           | 13                                                             |
| 54               | Denmark | Rye and products                | 1993           | 145                                                            |
| 54               | Denmark | Sesameseed Oil                  | 1993           | 2                                                              |
| 54               | Denmark | Soyabean Oil                    | 1993           | 127                                                            |
| 54               | Denmark | Spices                          | 1993           | 5                                                              |
| 54               | Denmark | Spices, Other                   | 1993           | 3                                                              |
| 54               | Denmark | Starchy Roots                   | 1993           | 140                                                            |
| 54               | Denmark | Stimulants                      | 1993           | 52                                                             |
| 54               | Denmark | Sugar & Sweeteners              | 1993           | 477                                                            |
| 54               | Denmark | Sugar (Raw Equivalent)          | 1993           | 442                                                            |
| 54               | Denmark | Sunflowerseed Oil               | 1993           | 16                                                             |
| 54               | Denmark | Sweet potatoes                  | 1993           | 6                                                              |
| 54               | Denmark | Sweeteners, Other               | 1993           | 31                                                             |
| 54               | Denmark | Tomatoes and products           | 1993           | 7                                                              |
| 54               | Denmark | Treenuts                        | 1993           | 30                                                             |
| 54               | Denmark | Vegetable Oils                  | 1993           | 198                                                            |
| 54               | Denmark | Vegetables                      | 1993           | 56                                                             |
| 54               | Denmark | Vegetables, Other               | 1993           | 40                                                             |
| 54               | Denmark | Vegetal Products                | 1993           | 2,080                                                          |
| 54               | Denmark | Wheat and products              | 1993           | 519                                                            |
| 54               | Denmark | Wine                            | 1993           | 44                                                             |
| 54               | Denmark | Alcoholic Beverages             | 1994           | 230                                                            |
| 54               | Denmark | Animal fats                     | 1994           | 447                                                            |
| 54               | Denmark | Animal Products                 | 1994           | 1,249                                                          |
| 54               | Denmark | Apples and products             | 1994           | 19                                                             |
| 54               | Denmark | Bananas                         | 1994           | 12                                                             |
| 54               | Denmark | Beans                           | 1994           | 1                                                              |
| 54               | Denmark | Beer                            | 1994           | 163                                                            |
| 54               | Denmark | Beverages, Alcoholic            | 1994           | 21                                                             |
| 54               | Denmark | Bovine Meat                     | 1994           | 55                                                             |
| 54               | Denmark | Butter, Ghee                    | 1994           | 46                                                             |
| 54               | Denmark | Cereals - Excluding Beer        | 1994           | 797                                                            |
| 54               | Denmark | Cocoa Beans and products        | 1994           | 39                                                             |
| 54               | Denmark | Coffee and products             | 1994           | 13                                                             |
| 54               | Denmark | Cream                           | 1994           | 40                                                             |
| 54               | Denmark | Crustaceans                     | 1994           | 9                                                              |
| 54               | Denmark | Dates                           | 1994           | 2                                                              |
| 54               | Denmark | Demersal Fish                   | 1994           | 17                                                             |
| 54               | Denmark | Eggs                            | 1994           | 63                                                             |
| 54               | Denmark | Fats, Animals, Raw              | 1994           | 239                                                            |
| 54               | Denmark | Fish, Body Oil                  | 1994           | 123                                                            |
| 54               | Denmark | Fish, Seafood                   | 1994           | 71                                                             |
| 54               | Denmark | Freshwater Fish                 | 1994           | 5                                                              |
| 54               | Denmark | Fruits - Excluding Wine         | 1994           | 83                                                             |
| 54               | Denmark | Fruits, Other                   | 1994           | 22                                                             |
| 54               | Denmark | Grand Total                     | 1994           | 3,315                                                          |
| 54               | Denmark | Grapefruit and products         | 1994           | 1                                                              |
| 54               | Denmark | Grapes and products (excl wine) | 1994           | 14                                                             |
| 54               | Denmark | Groundnut Oil                   | 1994           | 6                                                              |
| 54               | Denmark | Groundnuts (Shelled Eq)         | 1994           | 1                                                              |
| 54               | Denmark | Honey                           | 1994           | 4                                                              |
| 54               | Denmark | Lemons, Limes and products      | 1994           | 1                                                              |
| 54               | Denmark | Maize and products              | 1994           | 82                                                             |
| 54               | Denmark | Maize Germ Oil                  | 1994           | 5                                                              |
| 54               | Denmark | Meat                            | 1994           | 393                                                            |
| 54               | Denmark | Meat, Other                     | 1994           | 3                                                              |
| 54               | Denmark | Milk - Excluding Butter         | 1994           | 241                                                            |
| 54               | Denmark | Molluscs, Other                 | 1994           | 2                                                              |
| 54               | Denmark | Mutton & Goat Meat              | 1994           | 8                                                              |
| 54               | Denmark | Oats                            | 1994           | 28                                                             |
| 54               | Denmark | Offals                          | 1994           | 34                                                             |
| 54               | Denmark | Oilcrops                        | 1994           | 5                                                              |
| 54               | Denmark | Oilcrops Oil, Other             | 1994           | 9                                                              |
| 54               | Denmark | Olive Oil                       | 1994           | 6                                                              |
| 54               | Denmark | Onions                          | 1994           | 11                                                             |
| 54               | Denmark | Oranges, Mandarines             | 1994           | 10                                                             |
| 54               | Denmark | Palmkernel Oil                  | 1994           | 27                                                             |
| 54               | Denmark | Peas                            | 1994           | 7                                                              |
| 54               | Denmark | Pelagic Fish                    | 1994           | 38                                                             |
| 54               | Denmark | Pepper                          | 1994           | 2                                                              |
| 54               | Denmark | Pigmeat                         | 1994           | 269                                                            |
| 54               | Denmark | Pimento                         | 1994           | 1                                                              |
| 54               | Denmark | Pineapples and products         | 1994           | 3                                                              |
| 54               | Denmark | Potatoes and products           | 1994           | 136                                                            |
| 54               | Denmark | Poultry Meat                    | 1994           | 57                                                             |
| 54               | Denmark | Pulses                          | 1994           | 9                                                              |
| 54               | Denmark | Rape and Mustard Oil            | 1994           | 10                                                             |
| 54               | Denmark | Rape and Mustardseed            | 1994           | 3                                                              |
| 54               | Denmark | Rice (Milled Equivalent)        | 1994           | 13                                                             |
| 54               | Denmark | Rye and products                | 1994           | 139                                                            |
| 54               | Denmark | Sesameseed Oil                  | 1994           | 4                                                              |
| 54               | Denmark | Soyabean Oil                    | 1994           | 96                                                             |
| 54               | Denmark | Spices                          | 1994           | 6                                                              |
| 54               | Denmark | Spices, Other                   | 1994           | 3                                                              |
| 54               | Denmark | Starchy Roots                   | 1994           | 138                                                            |
| 54               | Denmark | Stimulants                      | 1994           | 52                                                             |

Dietary calcium and zinc deficiency risks are decreasing but remain prevalent

| FAO Country code | Country | Food item                       | Reference year | Net energy supply (kcal <i>capita</i> <sup>-1</sup> d <sup>-1</sup> ) |
|------------------|---------|---------------------------------|----------------|-----------------------------------------------------------------------|
| 54               | Denmark | Sugar & Sweeteners              | 1994           | 481                                                                   |
| 54               | Denmark | Sugar (Raw Equivalent)          | 1994           | 446                                                                   |
| 54               | Denmark | Sunflowerseed Oil               | 1994           | 20                                                                    |
| 54               | Denmark | Sweet potatoes                  | 1994           | 3                                                                     |
| 54               | Denmark | Sweeteners, Other               | 1994           | 31                                                                    |
| 54               | Denmark | Tomatoes and products           | 1994           | 8                                                                     |
| 54               | Denmark | Treenuts                        | 1994           | 27                                                                    |
| 54               | Denmark | Vegetable Oils                  | 1994           | 183                                                                   |
| 54               | Denmark | Vegetables                      | 1994           | 57                                                                    |
| 54               | Denmark | Vegetables, Other               | 1994           | 38                                                                    |
| 54               | Denmark | Vegetal Products                | 1994           | 2,066                                                                 |
| 54               | Denmark | Wheat and products              | 1994           | 535                                                                   |
| 54               | Denmark | Wine                            | 1994           | 46                                                                    |
| 54               | Denmark | Alcoholic Beverages             | 1995           | 231                                                                   |
| 54               | Denmark | Animal fats                     | 1995           | 437                                                                   |
| 54               | Denmark | Animal Products                 | 1995           | 1,317                                                                 |
| 54               | Denmark | Apples and products             | 1995           | 16                                                                    |
| 54               | Denmark | Bananas                         | 1995           | 12                                                                    |
| 54               | Denmark | Beer                            | 1995           | 161                                                                   |
| 54               | Denmark | Beverages, Alcoholic            | 1995           | 22                                                                    |
| 54               | Denmark | Bovine Meat                     | 1995           | 52                                                                    |
| 54               | Denmark | Butter, Ghee                    | 1995           | 41                                                                    |
| 54               | Denmark | Cereals - Excluding Beer        | 1995           | 827                                                                   |
| 54               | Denmark | Cocoa Beans and products        | 1995           | 45                                                                    |
| 54               | Denmark | Coffee and products             | 1995           | 11                                                                    |
| 54               | Denmark | Cream                           | 1995           | 40                                                                    |
| 54               | Denmark | Crustaceans                     | 1995           | 9                                                                     |
| 54               | Denmark | Dates                           | 1995           | 2                                                                     |
| 54               | Denmark | Demersal Fish                   | 1995           | 9                                                                     |
| 54               | Denmark | Eggs                            | 1995           | 65                                                                    |
| 54               | Denmark | Fats, Animals, Raw              | 1995           | 238                                                                   |
| 54               | Denmark | Fish, Body Oil                  | 1995           | 119                                                                   |
| 54               | Denmark | Fish, Seafood                   | 1995           | 64                                                                    |
| 54               | Denmark | Freshwater Fish                 | 1995           | 6                                                                     |
| 54               | Denmark | Fruits - Excluding Wine         | 1995           | 77                                                                    |
| 54               | Denmark | Fruits, Other                   | 1995           | 22                                                                    |
| 54               | Denmark | Grand Total                     | 1995           | 3,395                                                                 |
| 54               | Denmark | Grapes and products (excl wine) | 1995           | 13                                                                    |
| 54               | Denmark | Honey                           | 1995           | 3                                                                     |
| 54               | Denmark | Lemons, Limes and products      | 1995           | 1                                                                     |
| 54               | Denmark | Maize and products              | 1995           | 93                                                                    |
| 54               | Denmark | Maize Germ Oil                  | 1995           | 5                                                                     |
| 54               | Denmark | Meat                            | 1995           | 400                                                                   |
| 54               | Denmark | Meat, Other                     | 1995           | 4                                                                     |
| 54               | Denmark | Milk - Excluding Butter         | 1995           | 325                                                                   |
| 54               | Denmark | Molluscs, Other                 | 1995           | 2                                                                     |
| 54               | Denmark | Mutton & Goat Meat              | 1995           | 8                                                                     |
| 54               | Denmark | Oats                            | 1995           | 29                                                                    |
| 54               | Denmark | Offals                          | 1995           | 26                                                                    |
| 54               | Denmark | Oilcrops                        | 1995           | 3                                                                     |
| 54               | Denmark | Oilcrops Oil, Other             | 1995           | 9                                                                     |
| 54               | Denmark | Olive Oil                       | 1995           | 4                                                                     |
| 54               | Denmark | Olives (including preserved)    | 1995           | 1                                                                     |
| 54               | Denmark | Onions                          | 1995           | 10                                                                    |
| 54               | Denmark | Oranges, Mandarines             | 1995           | 9                                                                     |
| 54               | Denmark | Palmkernel Oil                  | 1995           | 56                                                                    |
| 54               | Denmark | Peas                            | 1995           | 7                                                                     |
| 54               | Denmark | Pelagic Fish                    | 1995           | 38                                                                    |
| 54               | Denmark | Pepper                          | 1995           | 2                                                                     |
| 54               | Denmark | Pigmeat                         | 1995           | 273                                                                   |
| 54               | Denmark | Pimento                         | 1995           | 1                                                                     |
| 54               | Denmark | Pineapples and products         | 1995           | 3                                                                     |
| 54               | Denmark | Potatoes and products           | 1995           | 129                                                                   |
| 54               | Denmark | Poultry Meat                    | 1995           | 63                                                                    |
| 54               | Denmark | Pulses                          | 1995           | 8                                                                     |
| 54               | Denmark | Pulses, Other and products      | 1995           | 1                                                                     |
| 54               | Denmark | Rape and Mustard Oil            | 1995           | 6                                                                     |
| 54               | Denmark | Rape and Mustardseed            | 1995           | 2                                                                     |
| 54               | Denmark | Rice (Milled Equivalent)        | 1995           | 12                                                                    |
| 54               | Denmark | Rye and products                | 1995           | 138                                                                   |
| 54               | Denmark | Sesameseed Oil                  | 1995           | 3                                                                     |
| 54               | Denmark | Soyabean Oil                    | 1995           | 106                                                                   |
| 54               | Denmark | Spices                          | 1995           | 7                                                                     |
| 54               | Denmark | Spices, Other                   | 1995           | 4                                                                     |
| 54               | Denmark | Starchy Roots                   | 1995           | 129                                                                   |
| 54               | Denmark | Stimulants                      | 1995           | 56                                                                    |
| 54               | Denmark | Sugar & Sweeteners              | 1995           | 464                                                                   |
| 54               | Denmark | Sugar (Raw Equivalent)          | 1995           | 429                                                                   |
| 54               | Denmark | Sunflowerseed Oil               | 1995           | 7                                                                     |
| 54               | Denmark | Sweeteners, Other               | 1995           | 32                                                                    |
| 54               | Denmark | Tomatoes and products           | 1995           | 7                                                                     |
| 54               | Denmark | Treenuts                        | 1995           | 27                                                                    |
| 54               | Denmark | Vegetable Oils                  | 1995           | 197                                                                   |
| 54               | Denmark | Vegetables                      | 1995           | 53                                                                    |
| 54               | Denmark | Vegetables, Other               | 1995           | 36                                                                    |
| 54               | Denmark | Vegetal Products                | 1995           | 2,078                                                                 |
| 54               | Denmark | Wheat and products              | 1995           | 555                                                                   |
| 54               | Denmark | Wine                            | 1995           | 48                                                                    |
| 54               | Denmark | Alcoholic Beverages             | 1996           | 236                                                                   |
| 54               | Denmark | Animal fats                     | 1996           | 435                                                                   |
| 54               | Denmark | Animal Products                 | 1996           | 1,283                                                                 |
| 54               | Denmark | Apples and products             | 1996           | 13                                                                    |
| 54               | Denmark | Bananas                         | 1996           | 16                                                                    |
| 54               | Denmark | Beans                           | 1996           | 1                                                                     |
| 54               | Denmark | Beer                            | 1996           | 158                                                                   |
| 54               | Denmark | Beverages, Alcoholic            | 1996           | 23                                                                    |
| 54               | Denmark | Beverages, Fermented            | 1996           | 1                                                                     |

## Dietary calcium and zinc deficiency risks are decreasing but remain prevalent

| FAO Country code | Country | Food item                       | Reference year | Net energy supply (kcal capita <sup>-1</sup> d <sup>-1</sup> ) |
|------------------|---------|---------------------------------|----------------|----------------------------------------------------------------|
| 54               | Denmark | Bovine Meat                     | 1996           | 55                                                             |
| 54               | Denmark | Butter, Ghee                    | 1996           | 40                                                             |
| 54               | Denmark | Cereals - Excluding Beer        | 1996           | 793                                                            |
| 54               | Denmark | Cocoa Beans and products        | 1996           | 40                                                             |
| 54               | Denmark | Coconuts - Incl Copra           | 1996           | 2                                                              |
| 54               | Denmark | Coffee and products             | 1996           | 12                                                             |
| 54               | Denmark | Cream                           | 1996           | 42                                                             |
| 54               | Denmark | Crustaceans                     | 1996           | 9                                                              |
| 54               | Denmark | Dates                           | 1996           | 2                                                              |
| 54               | Denmark | Demersal Fish                   | 1996           | 9                                                              |
| 54               | Denmark | Eggs                            | 1996           | 54                                                             |
| 54               | Denmark | Fats, Animals, Raw              | 1996           | 226                                                            |
| 54               | Denmark | Fish, Body Oil                  | 1996           | 127                                                            |
| 54               | Denmark | Fish, Seafood                   | 1996           | 51                                                             |
| 54               | Denmark | Freshwater Fish                 | 1996           | 7                                                              |
| 54               | Denmark | Fruits - Excluding Wine         | 1996           | 85                                                             |
| 54               | Denmark | Fruits, Other                   | 1996           | 24                                                             |
| 54               | Denmark | Grand Total                     | 1996           | 3,294                                                          |
| 54               | Denmark | Grapefruit and products         | 1996           | 1                                                              |
| 54               | Denmark | Grapes and products (excl wine) | 1996           | 14                                                             |
| 54               | Denmark | Groundnut Oil                   | 1996           | 5                                                              |
| 54               | Denmark | Honey                           | 1996           | 3                                                              |
| 54               | Denmark | Maize and products              | 1996           | 66                                                             |
| 54               | Denmark | Maize Germ Oil                  | 1996           | 6                                                              |
| 54               | Denmark | Meat                            | 1996           | 400                                                            |
| 54               | Denmark | Meat, Other                     | 1996           | 3                                                              |
| 54               | Denmark | Milk - Excluding Butter         | 1996           | 318                                                            |
| 54               | Denmark | Molluscs, Other                 | 1996           | 2                                                              |
| 54               | Denmark | Mutton & Goat Meat              | 1996           | 6                                                              |
| 54               | Denmark | Oats                            | 1996           | 28                                                             |
| 54               | Denmark | Offals                          | 1996           | 25                                                             |
| 54               | Denmark | Oilcrops                        | 1996           | 5                                                              |
| 54               | Denmark | Oilcrops Oil, Other             | 1996           | 10                                                             |
| 54               | Denmark | Olive Oil                       | 1996           | 6                                                              |
| 54               | Denmark | Olives (including preserved)    | 1996           | 1                                                              |
| 54               | Denmark | Onions                          | 1996           | 10                                                             |
| 54               | Denmark | Oranges, Mandarines             | 1996           | 11                                                             |
| 54               | Denmark | Peas                            | 1996           | 7                                                              |
| 54               | Denmark | Pelagic Fish                    | 1996           | 23                                                             |
| 54               | Denmark | Pepper                          | 1996           | 2                                                              |
| 54               | Denmark | Pigmeat                         | 1996           | 276                                                            |
| 54               | Denmark | Pimento                         | 1996           | 1                                                              |
| 54               | Denmark | Pineapples and products         | 1996           | 3                                                              |
| 54               | Denmark | Potatoes and products           | 1996           | 130                                                            |
| 54               | Denmark | Poultry Meat                    | 1996           | 60                                                             |
| 54               | Denmark | Pulses                          | 1996           | 9                                                              |
| 54               | Denmark | Pulses, Other and products      | 1996           | 1                                                              |
| 54               | Denmark | Rape and Mustard Oil            | 1996           | 37                                                             |
| 54               | Denmark | Rape and Mustardseed            | 1996           | 2                                                              |
| 54               | Denmark | Rice (Milled Equivalent)        | 1996           | 11                                                             |
| 54               | Denmark | Rye and products                | 1996           | 141                                                            |
| 54               | Denmark | Sesameseed Oil                  | 1996           | 3                                                              |
| 54               | Denmark | Soyabean Oil                    | 1996           | 95                                                             |
| 54               | Denmark | Spices                          | 1996           | 4                                                              |
| 54               | Denmark | Spices, Other                   | 1996           | 2                                                              |
| 54               | Denmark | Starchy Roots                   | 1996           | 130                                                            |
| 54               | Denmark | Stimulants                      | 1996           | 52                                                             |
| 54               | Denmark | Sugar & Sweeteners              | 1996           | 444                                                            |
| 54               | Denmark | Sugar (Raw Equivalent)          | 1996           | 408                                                            |
| 54               | Denmark | Sunflowerseed Oil               | 1996           | 4                                                              |
| 54               | Denmark | Sweeteners, Other               | 1996           | 32                                                             |
| 54               | Denmark | Tomatoes and products           | 1996           | 7                                                              |
| 54               | Denmark | Treenuts                        | 1996           | 30                                                             |
| 54               | Denmark | Vegetable Oils                  | 1996           | 165                                                            |
| 54               | Denmark | Vegetables                      | 1996           | 57                                                             |
| 54               | Denmark | Vegetables, Other               | 1996           | 40                                                             |
| 54               | Denmark | Vegetal Products                | 1996           | 2,010                                                          |
| 54               | Denmark | Wheat and products              | 1996           | 546                                                            |
| 54               | Denmark | Wine                            | 1996           | 54                                                             |
| 54               | Denmark | Alcoholic Beverages             | 1997           | 236                                                            |
| 54               | Denmark | Animal fats                     | 1997           | 432                                                            |
| 54               | Denmark | Animal Products                 | 1997           | 1,217                                                          |
| 54               | Denmark | Apples and products             | 1997           | 20                                                             |
| 54               | Denmark | Bananas                         | 1997           | 16                                                             |
| 54               | Denmark | Beer                            | 1997           | 153                                                            |
| 54               | Denmark | Beverages, Alcoholic            | 1997           | 22                                                             |
| 54               | Denmark | Bovine Meat                     | 1997           | 56                                                             |
| 54               | Denmark | Butter, Ghee                    | 1997           | 36                                                             |
| 54               | Denmark | Cereals - Excluding Beer        | 1997           | 847                                                            |
| 54               | Denmark | Cocoa Beans and products        | 1997           | 51                                                             |
| 54               | Denmark | Coconuts - Incl Copra           | 1997           | 3                                                              |
| 54               | Denmark | Coffee and products             | 1997           | 11                                                             |
| 54               | Denmark | Cream                           | 1997           | 43                                                             |
| 54               | Denmark | Crustaceans                     | 1997           | 6                                                              |
| 54               | Denmark | Dates                           | 1997           | 2                                                              |
| 54               | Denmark | Demersal Fish                   | 1997           | 11                                                             |
| 54               | Denmark | Eggs                            | 1997           | 64                                                             |
| 54               | Denmark | Fats, Animals, Raw              | 1997           | 225                                                            |
| 54               | Denmark | Fish, Body Oil                  | 1997           | 128                                                            |
| 54               | Denmark | Fish, Seafood                   | 1997           | 52                                                             |
| 54               | Denmark | Freshwater Fish                 | 1997           | 2                                                              |
| 54               | Denmark | Fruits - Excluding Wine         | 1997           | 98                                                             |
| 54               | Denmark | Fruits, Other                   | 1997           | 27                                                             |
| 54               | Denmark | Grand Total                     | 1997           | 3,365                                                          |
| 54               | Denmark | Grapefruit and products         | 1997           | 1                                                              |
| 54               | Denmark | Grapes and products (excl wine) | 1997           | 16                                                             |
| 54               | Denmark | Groundnut Oil                   | 1997           | 1                                                              |



Dietary calcium and zinc deficiency risks are decreasing but remain prevalent

| FAO Country code | Country | Food item                       | Reference year | Net energy supply (kcal capita <sup>-1</sup> d <sup>-1</sup> ) |
|------------------|---------|---------------------------------|----------------|----------------------------------------------------------------|
| 54               | Denmark | Honey                           | 1997           | 3                                                              |
| 54               | Denmark | Lemons, Limes and products      | 1997           | 1                                                              |
| 54               | Denmark | Maize and products              | 1997           | 66                                                             |
| 54               | Denmark | Maize Germ Oil                  | 1997           | 9                                                              |
| 54               | Denmark | Meat                            | 1997           | 377                                                            |
| 54               | Denmark | Meat, Other                     | 1997           | 3                                                              |
| 54               | Denmark | Milk - Excluding Butter         | 1997           | 278                                                            |
| 54               | Denmark | Molluscs, Other                 | 1997           | 3                                                              |
| 54               | Denmark | Mutton & Goat Meat              | 1997           | 5                                                              |
| 54               | Denmark | Oats                            | 1997           | 25                                                             |
| 54               | Denmark | Offals                          | 1997           | 14                                                             |
| 54               | Denmark | Oilcrops                        | 1997           | 7                                                              |
| 54               | Denmark | Oilcrops Oil, Other             | 1997           | 14                                                             |
| 54               | Denmark | Olive Oil                       | 1997           | 11                                                             |
| 54               | Denmark | Olives (including preserved)    | 1997           | 1                                                              |
| 54               | Denmark | Onions                          | 1997           | 10                                                             |
| 54               | Denmark | Oranges, Mandarines             | 1997           | 14                                                             |
| 54               | Denmark | Palmkernel Oil                  | 1997           | 44                                                             |
| 54               | Denmark | Peas                            | 1997           | 7                                                              |
| 54               | Denmark | Pelagic Fish                    | 1997           | 30                                                             |
| 54               | Denmark | Pepper                          | 1997           | 2                                                              |
| 54               | Denmark | Pigmeat                         | 1997           | 245                                                            |
| 54               | Denmark | Pimento                         | 1997           | 1                                                              |
| 54               | Denmark | Pineapples and products         | 1997           | 3                                                              |
| 54               | Denmark | Potatoes and products           | 1997           | 143                                                            |
| 54               | Denmark | Poultry Meat                    | 1997           | 67                                                             |
| 54               | Denmark | Pulses                          | 1997           | 9                                                              |
| 54               | Denmark | Pulses, Other and products      | 1997           | 1                                                              |
| 54               | Denmark | Rape and Mustardseed            | 1997           | 3                                                              |
| 54               | Denmark | Rice (Milled Equivalent)        | 1997           | 11                                                             |
| 54               | Denmark | Rye and products                | 1997           | 154                                                            |
| 54               | Denmark | Sesameseed Oil                  | 1997           | 5                                                              |
| 54               | Denmark | Soyabean Oil                    | 1997           | 59                                                             |
| 54               | Denmark | Spices                          | 1997           | 5                                                              |
| 54               | Denmark | Spices, Other                   | 1997           | 2                                                              |
| 54               | Denmark | Starchy Roots                   | 1997           | 143                                                            |
| 54               | Denmark | Stimulants                      | 1997           | 62                                                             |
| 54               | Denmark | Sugar & Sweeteners              | 1997           | 488                                                            |
| 54               | Denmark | Sugar (Raw Equivalent)          | 1997           | 445                                                            |
| 54               | Denmark | Sunflowerseed Oil               | 1997           | 16                                                             |
| 54               | Denmark | Sweeteners, Other               | 1997           | 40                                                             |
| 54               | Denmark | Tomatoes and products           | 1997           | 9                                                              |
| 54               | Denmark | Treenuts                        | 1997           | 31                                                             |
| 54               | Denmark | Vegetable Oils                  | 1997           | 158                                                            |
| 54               | Denmark | Vegetables                      | 1997           | 63                                                             |
| 54               | Denmark | Vegetables, Other               | 1997           | 44                                                             |
| 54               | Denmark | Vegetal Products                | 1997           | 2,147                                                          |
| 54               | Denmark | Wheat and products              | 1997           | 591                                                            |
| 54               | Denmark | Wine                            | 1997           | 60                                                             |
| 54               | Denmark | Alcoholic Beverages             | 1998           | 224                                                            |
| 54               | Denmark | Animal fats                     | 1998           | 442                                                            |
| 54               | Denmark | Animal Products                 | 1998           | 1,279                                                          |
| 54               | Denmark | Apples and products             | 1998           | 14                                                             |
| 54               | Denmark | Bananas                         | 1998           | 13                                                             |
| 54               | Denmark | Beans                           | 1998           | 1                                                              |
| 54               | Denmark | Beer                            | 1998           | 141                                                            |
| 54               | Denmark | Beverages, Alcoholic            | 1998           | 23                                                             |
| 54               | Denmark | Beverages, Fermented            | 1998           | 1                                                              |
| 54               | Denmark | Bovine Meat                     | 1998           | 61                                                             |
| 54               | Denmark | Butter, Ghee                    | 1998           | 36                                                             |
| 54               | Denmark | Cereals - Excluding Beer        | 1998           | 887                                                            |
| 54               | Denmark | Cocoa Beans and products        | 1998           | 52                                                             |
| 54               | Denmark | Coconuts - Incl Copra           | 1998           | 2                                                              |
| 54               | Denmark | Coffee and products             | 1998           | 12                                                             |
| 54               | Denmark | Cream                           | 1998           | 47                                                             |
| 54               | Denmark | Crustaceans                     | 1998           | 3                                                              |
| 54               | Denmark | Dates                           | 1998           | 2                                                              |
| 54               | Denmark | Demersal Fish                   | 1998           | 10                                                             |
| 54               | Denmark | Eggs                            | 1998           | 63                                                             |
| 54               | Denmark | Fats, Animals, Raw              | 1998           | 229                                                            |
| 54               | Denmark | Fish, Body Oil                  | 1998           | 130                                                            |
| 54               | Denmark | Fish, Seafood                   | 1998           | 44                                                             |
| 54               | Denmark | Freshwater Fish                 | 1998           | 4                                                              |
| 54               | Denmark | Fruits - Excluding Wine         | 1998           | 81                                                             |
| 54               | Denmark | Fruits, Other                   | 1998           | 20                                                             |
| 54               | Denmark | Grand Total                     | 1998           | 3,395                                                          |
| 54               | Denmark | Grapefruit and products         | 1998           | 1                                                              |
| 54               | Denmark | Grapes and products (excl wine) | 1998           | 14                                                             |
| 54               | Denmark | Honey                           | 1998           | 8                                                              |
| 54               | Denmark | Lemons, Limes and products      | 1998           | 1                                                              |
| 54               | Denmark | Maize and products              | 1998           | 56                                                             |
| 54               | Denmark | Maize Germ Oil                  | 1998           | 8                                                              |
| 54               | Denmark | Meat                            | 1998           | 422                                                            |
| 54               | Denmark | Meat, Other                     | 1998           | 2                                                              |
| 54               | Denmark | Milk - Excluding Butter         | 1998           | 290                                                            |
| 54               | Denmark | Molluscs, Other                 | 1998           | 4                                                              |
| 54               | Denmark | Mutton & Goat Meat              | 1998           | 7                                                              |
| 54               | Denmark | Oats                            | 1998           | 39                                                             |
| 54               | Denmark | Offals                          | 1998           | 18                                                             |
| 54               | Denmark | Oilcrops                        | 1998           | 8                                                              |
| 54               | Denmark | Oilcrops Oil, Other             | 1998           | 15                                                             |
| 54               | Denmark | Olive Oil                       | 1998           | 12                                                             |
| 54               | Denmark | Olives (including preserved)    | 1998           | 1                                                              |
| 54               | Denmark | Onions                          | 1998           | 10                                                             |
| 54               | Denmark | Oranges, Mandarines             | 1998           | 13                                                             |
| 54               | Denmark | Palmkernel Oil                  | 1998           | 22                                                             |
| 54               | Denmark | Peas                            | 1998           | 7                                                              |

## Dietary calcium and zinc deficiency risks are decreasing but remain prevalent

| FAO Country code | Country | Food item                       | Reference year | Net energy supply (kcal capita <sup>-1</sup> d <sup>-1</sup> ) |
|------------------|---------|---------------------------------|----------------|----------------------------------------------------------------|
| 54               | Denmark | Pelagic Fish                    | 1998           | 24                                                             |
| 54               | Denmark | Pepper                          | 1998           | 1                                                              |
| 54               | Denmark | Pigmeat                         | 1998           | 291                                                            |
| 54               | Denmark | Pimento                         | 1998           | 1                                                              |
| 54               | Denmark | Pineapples and products         | 1998           | 3                                                              |
| 54               | Denmark | Potatoes and products           | 1998           | 141                                                            |
| 54               | Denmark | Poultry Meat                    | 1998           | 61                                                             |
| 54               | Denmark | Pulses                          | 1998           | 9                                                              |
| 54               | Denmark | Pulses, Other and products      | 1998           | 1                                                              |
| 54               | Denmark | Rape and Mustard Oil            | 1998           | 16                                                             |
| 54               | Denmark | Rape and Mustardseed            | 1998           | 4                                                              |
| 54               | Denmark | Rice (Milled Equivalent)        | 1998           | 17                                                             |
| 54               | Denmark | Rye and products                | 1998           | 133                                                            |
| 54               | Denmark | Sesameseed Oil                  | 1998           | 5                                                              |
| 54               | Denmark | Soyabean Oil                    | 1998           | 57                                                             |
| 54               | Denmark | Spices                          | 1998           | 7                                                              |
| 54               | Denmark | Spices, Other                   | 1998           | 5                                                              |
| 54               | Denmark | Starchy Roots                   | 1998           | 141                                                            |
| 54               | Denmark | Stimulants                      | 1998           | 64                                                             |
| 54               | Denmark | Sugar & Sweeteners              | 1998           | 450                                                            |
| 54               | Denmark | Sugar (Raw Equivalent)          | 1998           | 391                                                            |
| 54               | Denmark | Sunflowerseed Oil               | 1998           | 21                                                             |
| 54               | Denmark | Sweeteners, Other               | 1998           | 51                                                             |
| 54               | Denmark | Tomatoes and products           | 1998           | 8                                                              |
| 54               | Denmark | Treenuts                        | 1998           | 31                                                             |
| 54               | Denmark | Vegetable Oils                  | 1998           | 155                                                            |
| 54               | Denmark | Vegetables                      | 1998           | 60                                                             |
| 54               | Denmark | Vegetables, Other               | 1998           | 43                                                             |
| 54               | Denmark | Vegetal Products                | 1998           | 2,116                                                          |
| 54               | Denmark | Wheat and products              | 1998           | 642                                                            |
| 54               | Denmark | Wine                            | 1998           | 59                                                             |
| 54               | Denmark | Alcoholic Beverages             | 1999           | 218                                                            |
| 54               | Denmark | Animal fats                     | 1999           | 483                                                            |
| 54               | Denmark | Animal Products                 | 1999           | 1,202                                                          |
| 54               | Denmark | Apples and products             | 1999           | 23                                                             |
| 54               | Denmark | Bananas                         | 1999           | 19                                                             |
| 54               | Denmark | Beans                           | 1999           | 1                                                              |
| 54               | Denmark | Beer                            | 1999           | 137                                                            |
| 54               | Denmark | Beverages, Alcoholic            | 1999           | 22                                                             |
| 54               | Denmark | Beverages, Fermented            | 1999           | 1                                                              |
| 54               | Denmark | Bovine Meat                     | 1999           | 71                                                             |
| 54               | Denmark | Butter, Ghee                    | 1999           | 32                                                             |
| 54               | Denmark | Cereals - Excluding Beer        | 1999           | 853                                                            |
| 54               | Denmark | Cocoa Beans and products        | 1999           | 42                                                             |
| 54               | Denmark | Coconuts - Incl Copra           | 1999           | 3                                                              |
| 54               | Denmark | Coffee and products             | 1999           | 12                                                             |
| 54               | Denmark | Cream                           | 1999           | 51                                                             |
| 54               | Denmark | Crustaceans                     | 1999           | 6                                                              |
| 54               | Denmark | Dates                           | 1999           | 2                                                              |
| 54               | Denmark | Demersal Fish                   | 1999           | 9                                                              |
| 54               | Denmark | Eggs                            | 1999           | 59                                                             |
| 54               | Denmark | Fats, Animals, Raw              | 1999           | 272                                                            |
| 54               | Denmark | Fish, Body Oil                  | 1999           | 128                                                            |
| 54               | Denmark | Fish, Seafood                   | 1999           | 45                                                             |
| 54               | Denmark | Freshwater Fish                 | 1999           | 4                                                              |
| 54               | Denmark | Fruits - Excluding Wine         | 1999           | 104                                                            |
| 54               | Denmark | Fruits, Other                   | 1999           | 28                                                             |
| 54               | Denmark | Grand Total                     | 1999           | 3,332                                                          |
| 54               | Denmark | Grapefruit and products         | 1999           | 1                                                              |
| 54               | Denmark | Grapes and products (excl wine) | 1999           | 14                                                             |
| 54               | Denmark | Groundnut Oil                   | 1999           | 3                                                              |
| 54               | Denmark | Honey                           | 1999           | 4                                                              |
| 54               | Denmark | Lemons, Limes and products      | 1999           | 1                                                              |
| 54               | Denmark | Maize and products              | 1999           | 34                                                             |
| 54               | Denmark | Maize Germ Oil                  | 1999           | 7                                                              |
| 54               | Denmark | Meat                            | 1999           | 257                                                            |
| 54               | Denmark | Meat, Other                     | 1999           | 3                                                              |
| 54               | Denmark | Milk - Excluding Butter         | 1999           | 310                                                            |
| 54               | Denmark | Molluscs, Other                 | 1999           | 3                                                              |
| 54               | Denmark | Mutton & Goat Meat              | 1999           | 6                                                              |
| 54               | Denmark | Oats                            | 1999           | 33                                                             |
| 54               | Denmark | Offals                          | 1999           | 48                                                             |
| 54               | Denmark | Oilcrops                        | 1999           | 7                                                              |
| 54               | Denmark | Oilcrops Oil, Other             | 1999           | 22                                                             |
| 54               | Denmark | Olive Oil                       | 1999           | 9                                                              |
| 54               | Denmark | Olives (including preserved)    | 1999           | 1                                                              |
| 54               | Denmark | Onions                          | 1999           | 11                                                             |
| 54               | Denmark | Oranges, Mandarines             | 1999           | 13                                                             |
| 54               | Denmark | Palmkernel Oil                  | 1999           | 16                                                             |
| 54               | Denmark | Peas                            | 1999           | 14                                                             |
| 54               | Denmark | Pelagic Fish                    | 1999           | 23                                                             |
| 54               | Denmark | Pepper                          | 1999           | 2                                                              |
| 54               | Denmark | Pigmeat                         | 1999           | 112                                                            |
| 54               | Denmark | Pimento                         | 1999           | 1                                                              |
| 54               | Denmark | Pineapples and products         | 1999           | 3                                                              |
| 54               | Denmark | Potatoes and products           | 1999           | 140                                                            |
| 54               | Denmark | Poultry Meat                    | 1999           | 65                                                             |
| 54               | Denmark | Pulses                          | 1999           | 16                                                             |
| 54               | Denmark | Pulses, Other and products      | 1999           | 1                                                              |
| 54               | Denmark | Rape and Mustard Oil            | 1999           | 22                                                             |
| 54               | Denmark | Rape and Mustardseed            | 1999           | 2                                                              |
| 54               | Denmark | Rice (Milled Equivalent)        | 1999           | 40                                                             |
| 54               | Denmark | Rye and products                | 1999           | 123                                                            |
| 54               | Denmark | Sesameseed Oil                  | 1999           | 5                                                              |
| 54               | Denmark | Soyabean Oil                    | 1999           | 102                                                            |
| 54               | Denmark | Spices                          | 1999           | 7                                                              |
| 54               | Denmark | Spices, Other                   | 1999           | 4                                                              |

Dietary calcium and zinc deficiency risks are decreasing but remain prevalent

| FAO Country code | Country | Food item                       | Reference year | Net energy supply (kcal capita <sup>-1</sup> d <sup>-1</sup> ) |
|------------------|---------|---------------------------------|----------------|----------------------------------------------------------------|
| 54               | Denmark | Starchy Roots                   | 1999           | 140                                                            |
| 54               | Denmark | Stimulants                      | 1999           | 54                                                             |
| 54               | Denmark | Sugar & Sweeteners              | 1999           | 428                                                            |
| 54               | Denmark | Sugar (Raw Equivalent)          | 1999           | 358                                                            |
| 54               | Denmark | Sunflowerseed Oil               | 1999           | 19                                                             |
| 54               | Denmark | Sweeteners, Other               | 1999           | 66                                                             |
| 54               | Denmark | Tomatoes and products           | 1999           | 9                                                              |
| 54               | Denmark | Treenuts                        | 1999           | 29                                                             |
| 54               | Denmark | Vegetable Oils                  | 1999           | 206                                                            |
| 54               | Denmark | Vegetables                      | 1999           | 68                                                             |
| 54               | Denmark | Vegetables, Other               | 1999           | 48                                                             |
| 54               | Denmark | Vegetal Products                | 1999           | 2,130                                                          |
| 54               | Denmark | Wheat and products              | 1999           | 623                                                            |
| 54               | Denmark | Wine                            | 1999           | 58                                                             |
| 54               | Denmark | Alcoholic Beverages             | 2000           | 217                                                            |
| 54               | Denmark | Animal fats                     | 2000           | 381                                                            |
| 54               | Denmark | Animal Products                 | 2000           | 1,113                                                          |
| 54               | Denmark | Apples and products             | 2000           | 24                                                             |
| 54               | Denmark | Bananas                         | 2000           | 19                                                             |
| 54               | Denmark | Beans                           | 2000           | 2                                                              |
| 54               | Denmark | Beer                            | 2000           | 134                                                            |
| 54               | Denmark | Beverages, Alcoholic            | 2000           | 22                                                             |
| 54               | Denmark | Beverages, Fermented            | 2000           | 1                                                              |
| 54               | Denmark | Bovine Meat                     | 2000           | 67                                                             |
| 54               | Denmark | Butter, Ghee                    | 2000           | 32                                                             |
| 54               | Denmark | Cereals - Excluding Beer        | 2000           | 791                                                            |
| 54               | Denmark | Cocoa Beans and products        | 2000           | 49                                                             |
| 54               | Denmark | Coconuts - Incl Copra           | 2000           | 3                                                              |
| 54               | Denmark | Coffee and products             | 2000           | 10                                                             |
| 54               | Denmark | Cream                           | 2000           | 50                                                             |
| 54               | Denmark | Crustaceans                     | 2000           | 5                                                              |
| 54               | Denmark | Dates                           | 2000           | 3                                                              |
| 54               | Denmark | Demersal Fish                   | 2000           | 3                                                              |
| 54               | Denmark | Eggs                            | 2000           | 56                                                             |
| 54               | Denmark | Fats, Animals, Raw              | 2000           | 232                                                            |
| 54               | Denmark | Fish, Body Oil                  | 2000           | 68                                                             |
| 54               | Denmark | Fish, Seafood                   | 2000           | 42                                                             |
| 54               | Denmark | Freshwater Fish                 | 2000           | 7                                                              |
| 54               | Denmark | Fruits - Excluding Wine         | 2000           | 110                                                            |
| 54               | Denmark | Fruits, Other                   | 2000           | 29                                                             |
| 54               | Denmark | Grand Total                     | 2000           | 3,313                                                          |
| 54               | Denmark | Grapefruit and products         | 2000           | 1                                                              |
| 54               | Denmark | Grapes and products (excl wine) | 2000           | 15                                                             |
| 54               | Denmark | Groundnut Oil                   | 2000           | 3                                                              |
| 54               | Denmark | Honey                           | 2000           | 5                                                              |
| 54               | Denmark | Lemons, Limes and products      | 2000           | 1                                                              |
| 54               | Denmark | Maize and products              | 2000           | 19                                                             |
| 54               | Denmark | Maize Germ Oil                  | 2000           | 12                                                             |
| 54               | Denmark | Meat                            | 2000           | 275                                                            |
| 54               | Denmark | Meat, Other                     | 2000           | 3                                                              |
| 54               | Denmark | Milk - Excluding Butter         | 2000           | 319                                                            |
| 54               | Denmark | Molluscs, Other                 | 2000           | 3                                                              |
| 54               | Denmark | Mutton & Goat Meat              | 2000           | 8                                                              |
| 54               | Denmark | Oats                            | 2000           | 33                                                             |
| 54               | Denmark | Offals                          | 2000           | 39                                                             |
| 54               | Denmark | Oilcrops                        | 2000           | 8                                                              |
| 54               | Denmark | Oilcrops Oil, Other             | 2000           | 16                                                             |
| 54               | Denmark | Olive Oil                       | 2000           | 10                                                             |
| 54               | Denmark | Olives (including preserved)    | 2000           | 2                                                              |
| 54               | Denmark | Onions                          | 2000           | 8                                                              |
| 54               | Denmark | Oranges, Mandarines             | 2000           | 15                                                             |
| 54               | Denmark | Palm Oil                        | 2000           | 36                                                             |
| 54               | Denmark | Palmkernel Oil                  | 2000           | 30                                                             |
| 54               | Denmark | Peas                            | 2000           | 7                                                              |
| 54               | Denmark | Pelagic Fish                    | 2000           | 24                                                             |
| 54               | Denmark | Pepper                          | 2000           | 2                                                              |
| 54               | Denmark | Pigmeat                         | 2000           | 134                                                            |
| 54               | Denmark | Pimento                         | 2000           | 1                                                              |
| 54               | Denmark | Pineapples and products         | 2000           | 4                                                              |
| 54               | Denmark | Potatoes and products           | 2000           | 140                                                            |
| 54               | Denmark | Poultry Meat                    | 2000           | 64                                                             |
| 54               | Denmark | Pulses                          | 2000           | 10                                                             |
| 54               | Denmark | Pulses, Other and products      | 2000           | 1                                                              |
| 54               | Denmark | Rape and Mustard Oil            | 2000           | 46                                                             |
| 54               | Denmark | Rape and Mustardseed            | 2000           | 3                                                              |
| 54               | Denmark | Rice (Milled Equivalent)        | 2000           | 31                                                             |
| 54               | Denmark | Rye and products                | 2000           | 119                                                            |
| 54               | Denmark | Sesameseed Oil                  | 2000           | 3                                                              |
| 54               | Denmark | Soyabean Oil                    | 2000           | 107                                                            |
| 54               | Denmark | Spices                          | 2000           | 5                                                              |
| 54               | Denmark | Spices, Other                   | 2000           | 2                                                              |
| 54               | Denmark | Starchy Roots                   | 2000           | 140                                                            |
| 54               | Denmark | Stimulants                      | 2000           | 60                                                             |
| 54               | Denmark | Sugar & Sweeteners              | 2000           | 466                                                            |
| 54               | Denmark | Sugar (Raw Equivalent)          | 2000           | 392                                                            |
| 54               | Denmark | Sunflowerseed Oil               | 2000           | 32                                                             |
| 54               | Denmark | Sweeteners, Other               | 2000           | 69                                                             |
| 54               | Denmark | Tomatoes and products           | 2000           | 9                                                              |
| 54               | Denmark | Treenuts                        | 2000           | 35                                                             |
| 54               | Denmark | Vegetable Oils                  | 2000           | 295                                                            |
| 54               | Denmark | Vegetables                      | 2000           | 64                                                             |
| 54               | Denmark | Vegetables, Other               | 2000           | 47                                                             |
| 54               | Denmark | Vegetal Products                | 2000           | 2,200                                                          |
| 54               | Denmark | Wheat and products              | 2000           | 588                                                            |
| 54               | Denmark | Wine                            | 2000           | 60                                                             |
| 54               | Denmark | Alcoholic Beverages             | 2001           | 219                                                            |
| 54               | Denmark | Animal fats                     | 2001           | 414                                                            |

Dietary calcium and zinc deficiency risks are decreasing but remain prevalent

| FAO Country code | Country | Food item                       | Reference year | Net energy supply (kcal capita <sup>-1</sup> d <sup>-1</sup> ) |
|------------------|---------|---------------------------------|----------------|----------------------------------------------------------------|
| 54               | Denmark | Animal Products                 | 2001           | 1,198                                                          |
| 54               | Denmark | Apples and products             | 2001           | 22                                                             |
| 54               | Denmark | Bananas                         | 2001           | 18                                                             |
| 54               | Denmark | Beans                           | 2001           | 1                                                              |
| 54               | Denmark | Beer                            | 2001           | 129                                                            |
| 54               | Denmark | Beverages, Alcoholic            | 2001           | 24                                                             |
| 54               | Denmark | Beverages, Fermented            | 2001           | 1                                                              |
| 54               | Denmark | Bovine Meat                     | 2001           | 69                                                             |
| 54               | Denmark | Butter, Ghee                    | 2001           | 32                                                             |
| 54               | Denmark | Cereals - Excluding Beer        | 2001           | 794                                                            |
| 54               | Denmark | Cocoa Beans and products        | 2001           | 38                                                             |
| 54               | Denmark | Coconuts - Incl Copra           | 2001           | 3                                                              |
| 54               | Denmark | Coffee and products             | 2001           | 12                                                             |
| 54               | Denmark | Cream                           | 2001           | 55                                                             |
| 54               | Denmark | Crustaceans                     | 2001           | 4                                                              |
| 54               | Denmark | Dates                           | 2001           | 2                                                              |
| 54               | Denmark | Demersal Fish                   | 2001           | 8                                                              |
| 54               | Denmark | Eggs                            | 2001           | 66                                                             |
| 54               | Denmark | Fats, Animals, Raw              | 2001           | 231                                                            |
| 54               | Denmark | Fish, Body Oil                  | 2001           | 96                                                             |
| 54               | Denmark | Fish, Seafood                   | 2001           | 50                                                             |
| 54               | Denmark | Freshwater Fish                 | 2001           | 4                                                              |
| 54               | Denmark | Fruits - Excluding Wine         | 2001           | 102                                                            |
| 54               | Denmark | Fruits, Other                   | 2001           | 27                                                             |
| 54               | Denmark | Grand Total                     | 2001           | 3,335                                                          |
| 54               | Denmark | Grapefruit and products         | 2001           | 1                                                              |
| 54               | Denmark | Grapes and products (excl wine) | 2001           | 15                                                             |
| 54               | Denmark | Honey                           | 2001           | 7                                                              |
| 54               | Denmark | Lemons, Limes and products      | 2001           | 1                                                              |
| 54               | Denmark | Maize and products              | 2001           | 19                                                             |
| 54               | Denmark | Maize Germ Oil                  | 2001           | 11                                                             |
| 54               | Denmark | Meat                            | 2001           | 286                                                            |
| 54               | Denmark | Meat, Other                     | 2001           | 3                                                              |
| 54               | Denmark | Milk - Excluding Butter         | 2001           | 322                                                            |
| 54               | Denmark | Molluscs, Other                 | 2001           | 4                                                              |
| 54               | Denmark | Mutton & Goat Meat              | 2001           | 7                                                              |
| 54               | Denmark | Oats                            | 2001           | 32                                                             |
| 54               | Denmark | Offals                          | 2001           | 59                                                             |
| 54               | Denmark | Oilcrops                        | 2001           | 9                                                              |
| 54               | Denmark | Oilcrops Oil, Other             | 2001           | 13                                                             |
| 54               | Denmark | Olive Oil                       | 2001           | 13                                                             |
| 54               | Denmark | Olives (including preserved)    | 2001           | 2                                                              |
| 54               | Denmark | Onions                          | 2001           | 7                                                              |
| 54               | Denmark | Oranges, Mandarines             | 2001           | 13                                                             |
| 54               | Denmark | Palm Oil                        | 2001           | 23                                                             |
| 54               | Denmark | Peas                            | 2001           | 7                                                              |
| 54               | Denmark | Pelagic Fish                    | 2001           | 29                                                             |
| 54               | Denmark | Pepper                          | 2001           | 1                                                              |
| 54               | Denmark | Pigmeat                         | 2001           | 132                                                            |
| 54               | Denmark | Pimento                         | 2001           | 1                                                              |
| 54               | Denmark | Pineapples and products         | 2001           | 4                                                              |
| 54               | Denmark | Potatoes and products           | 2001           | 142                                                            |
| 54               | Denmark | Poultry Meat                    | 2001           | 75                                                             |
| 54               | Denmark | Pulses                          | 2001           | 10                                                             |
| 54               | Denmark | Pulses, Other and products      | 2001           | 2                                                              |
| 54               | Denmark | Rape and Mustard Oil            | 2001           | 57                                                             |
| 54               | Denmark | Rape and Mustardseed            | 2001           | 3                                                              |
| 54               | Denmark | Rice (Milled Equivalent)        | 2001           | 33                                                             |
| 54               | Denmark | Rye and products                | 2001           | 117                                                            |
| 54               | Denmark | Sesameseed Oil                  | 2001           | 3                                                              |
| 54               | Denmark | Soyabean Oil                    | 2001           | 111                                                            |
| 54               | Denmark | Spices                          | 2001           | 6                                                              |
| 54               | Denmark | Spices, Other                   | 2001           | 4                                                              |
| 54               | Denmark | Starchy Roots                   | 2001           | 142                                                            |
| 54               | Denmark | Stimulants                      | 2001           | 50                                                             |
| 54               | Denmark | Sugar & Sweeteners              | 2001           | 449                                                            |
| 54               | Denmark | Sugar (Raw Equivalent)          | 2001           | 372                                                            |
| 54               | Denmark | Sunflowerseed Oil               | 2001           | 23                                                             |
| 54               | Denmark | Sweeteners, Other               | 2001           | 70                                                             |
| 54               | Denmark | Tomatoes and products           | 2001           | 9                                                              |
| 54               | Denmark | Treenuts                        | 2001           | 38                                                             |
| 54               | Denmark | Vegetable Oils                  | 2001           | 254                                                            |
| 54               | Denmark | Vegetables                      | 2001           | 65                                                             |
| 54               | Denmark | Vegetables, Other               | 2001           | 48                                                             |
| 54               | Denmark | Vegetal Products                | 2001           | 2,137                                                          |
| 54               | Denmark | Wheat and products              | 2001           | 593                                                            |
| 54               | Denmark | Wine                            | 2001           | 65                                                             |
| 54               | Denmark | Alcoholic Beverages             | 2002           | 220                                                            |
| 54               | Denmark | Animal fats                     | 2002           | 390                                                            |
| 54               | Denmark | Animal Products                 | 2002           | 1,168                                                          |
| 54               | Denmark | Apples and products             | 2002           | 33                                                             |
| 54               | Denmark | Bananas                         | 2002           | 24                                                             |
| 54               | Denmark | Beans                           | 2002           | 1                                                              |
| 54               | Denmark | Beer                            | 2002           | 127                                                            |
| 54               | Denmark | Beverages, Alcoholic            | 2002           | 30                                                             |
| 54               | Denmark | Bovine Meat                     | 2002           | 78                                                             |
| 54               | Denmark | Butter, Ghee                    | 2002           | 33                                                             |
| 54               | Denmark | Cereals - Excluding Beer        | 2002           | 801                                                            |
| 54               | Denmark | Cocoa Beans and products        | 2002           | 42                                                             |
| 54               | Denmark | Coconuts - Incl Copra           | 2002           | 5                                                              |
| 54               | Denmark | Coffee and products             | 2002           | 11                                                             |
| 54               | Denmark | Cream                           | 2002           | 59                                                             |
| 54               | Denmark | Crustaceans                     | 2002           | 4                                                              |
| 54               | Denmark | Dates                           | 2002           | 2                                                              |
| 54               | Denmark | Demersal Fish                   | 2002           | 8                                                              |
| 54               | Denmark | Eggs                            | 2002           | 66                                                             |
| 54               | Denmark | Fats, Animals, Raw              | 2002           | 199                                                            |

## Dietary calcium and zinc deficiency risks are decreasing but remain prevalent

| FAO Country code | Country | Food item                       | Reference year | Net energy supply (kcal capita <sup>-1</sup> d <sup>-1</sup> ) |
|------------------|---------|---------------------------------|----------------|----------------------------------------------------------------|
| 54               | Denmark | Fish, Body Oil                  | 2002           | 99                                                             |
| 54               | Denmark | Fish, Seafood                   | 2002           | 54                                                             |
| 54               | Denmark | Freshwater Fish                 | 2002           | 3                                                              |
| 54               | Denmark | Fruits - Excluding Wine         | 2002           | 142                                                            |
| 54               | Denmark | Fruits, Other                   | 2002           | 27                                                             |
| 54               | Denmark | Grand Total                     | 2002           | 3,368                                                          |
| 54               | Denmark | Grapefruit and products         | 2002           | 1                                                              |
| 54               | Denmark | Grapes and products (excl wine) | 2002           | 16                                                             |
| 54               | Denmark | Groundnut Oil                   | 2002           | 1                                                              |
| 54               | Denmark | Honey                           | 2002           | 3                                                              |
| 54               | Denmark | Lemons, Limes and products      | 2002           | 1                                                              |
| 54               | Denmark | Maize and products              | 2002           | 19                                                             |
| 54               | Denmark | Maize Germ Oil                  | 2002           | 13                                                             |
| 54               | Denmark | Meat                            | 2002           | 326                                                            |
| 54               | Denmark | Meat, Other                     | 2002           | 3                                                              |
| 54               | Denmark | Milk - Excluding Butter         | 2002           | 276                                                            |
| 54               | Denmark | Molluscs, Other                 | 2002           | 3                                                              |
| 54               | Denmark | Mutton & Goat Meat              | 2002           | 6                                                              |
| 54               | Denmark | Oats                            | 2002           | 38                                                             |
| 54               | Denmark | Offals                          | 2002           | 54                                                             |
| 54               | Denmark | Oilcrops                        | 2002           | 11                                                             |
| 54               | Denmark | Oilcrops Oil, Other             | 2002           | 12                                                             |
| 54               | Denmark | Olive Oil                       | 2002           | 12                                                             |
| 54               | Denmark | Olives (including preserved)    | 2002           | 2                                                              |
| 54               | Denmark | Onions                          | 2002           | 7                                                              |
| 54               | Denmark | Oranges, Mandarines             | 2002           | 30                                                             |
| 54               | Denmark | Palmkernel Oil                  | 2002           | 21                                                             |
| 54               | Denmark | Peas                            | 2002           | 7                                                              |
| 54               | Denmark | Pelagic Fish                    | 2002           | 35                                                             |
| 54               | Denmark | Pepper                          | 2002           | 1                                                              |
| 54               | Denmark | Pigmeat                         | 2002           | 165                                                            |
| 54               | Denmark | Pimento                         | 2002           | 1                                                              |
| 54               | Denmark | Pineapples and products         | 2002           | 7                                                              |
| 54               | Denmark | Potatoes and products           | 2002           | 137                                                            |
| 54               | Denmark | Poultry Meat                    | 2002           | 75                                                             |
| 54               | Denmark | Pulses                          | 2002           | 10                                                             |
| 54               | Denmark | Pulses, Other and products      | 2002           | 1                                                              |
| 54               | Denmark | Rape and Mustard Oil            | 2002           | 70                                                             |
| 54               | Denmark | Rape and Mustardseed            | 2002           | 4                                                              |
| 54               | Denmark | Rice (Milled Equivalent)        | 2002           | 36                                                             |
| 54               | Denmark | Rye and products                | 2002           | 102                                                            |
| 54               | Denmark | Sesameseed Oil                  | 2002           | 3                                                              |
| 54               | Denmark | Soyabean Oil                    | 2002           | 72                                                             |
| 54               | Denmark | Spices                          | 2002           | 6                                                              |
| 54               | Denmark | Spices, Other                   | 2002           | 3                                                              |
| 54               | Denmark | Starchy Roots                   | 2002           | 137                                                            |
| 54               | Denmark | Stimulants                      | 2002           | 53                                                             |
| 54               | Denmark | Sugar & Sweeteners              | 2002           | 502                                                            |
| 54               | Denmark | Sugar (Raw Equivalent)          | 2002           | 425                                                            |
| 54               | Denmark | Sunflowerseed Oil               | 2002           | 16                                                             |
| 54               | Denmark | Sweeteners, Other               | 2002           | 74                                                             |
| 54               | Denmark | Tomatoes and products           | 2002           | 10                                                             |
| 54               | Denmark | Treenuts                        | 2002           | 32                                                             |
| 54               | Denmark | Vegetable Oils                  | 2002           | 220                                                            |
| 54               | Denmark | Vegetables                      | 2002           | 68                                                             |
| 54               | Denmark | Vegetables, Other               | 2002           | 51                                                             |
| 54               | Denmark | Vegetal Products                | 2002           | 2,201                                                          |
| 54               | Denmark | Wheat and products              | 2002           | 606                                                            |
| 54               | Denmark | Wine                            | 2002           | 62                                                             |
| 54               | Denmark | Alcoholic Beverages             | 2003           | 227                                                            |
| 54               | Denmark | Animal fats                     | 2003           | 392                                                            |
| 54               | Denmark | Animal Products                 | 2003           | 1,111                                                          |
| 54               | Denmark | Apples and products             | 2003           | 37                                                             |
| 54               | Denmark | Bananas                         | 2003           | 24                                                             |
| 54               | Denmark | Beans                           | 2003           | 1                                                              |
| 54               | Denmark | Beer                            | 2003           | 126                                                            |
| 54               | Denmark | Beverages, Alcoholic            | 2003           | 38                                                             |
| 54               | Denmark | Bovine Meat                     | 2003           | 81                                                             |
| 54               | Denmark | Butter, Ghee                    | 2003           | 33                                                             |
| 54               | Denmark | Cereals - Excluding Beer        | 2003           | 802                                                            |
| 54               | Denmark | Cocoa Beans and products        | 2003           | 39                                                             |
| 54               | Denmark | Coconuts - Incl Copra           | 2003           | 4                                                              |
| 54               | Denmark | Coffee and products             | 2003           | 10                                                             |
| 54               | Denmark | Cream                           | 2003           | 60                                                             |
| 54               | Denmark | Crustaceans                     | 2003           | 5                                                              |
| 54               | Denmark | Dates                           | 2003           | 2                                                              |
| 54               | Denmark | Demersal Fish                   | 2003           | 11                                                             |
| 54               | Denmark | Eggs                            | 2003           | 71                                                             |
| 54               | Denmark | Fats, Animals, Raw              | 2003           | 194                                                            |
| 54               | Denmark | Fish, Body Oil                  | 2003           | 105                                                            |
| 54               | Denmark | Fish, Seafood                   | 2003           | 59                                                             |
| 54               | Denmark | Freshwater Fish                 | 2003           | 5                                                              |
| 54               | Denmark | Fruits - Excluding Wine         | 2003           | 134                                                            |
| 54               | Denmark | Fruits, Other                   | 2003           | 29                                                             |
| 54               | Denmark | Grand Total                     | 2003           | 3,343                                                          |
| 54               | Denmark | Grapefruit and products         | 2003           | 1                                                              |
| 54               | Denmark | Grapes and products (excl wine) | 2003           | 17                                                             |
| 54               | Denmark | Groundnut Oil                   | 2003           | 3                                                              |
| 54               | Denmark | Groundnuts (Shelled Eq)         | 2003           | 1                                                              |
| 54               | Denmark | Honey                           | 2003           | 3                                                              |
| 54               | Denmark | Lemons, Limes and products      | 2003           | 1                                                              |
| 54               | Denmark | Maize and products              | 2003           | 18                                                             |
| 54               | Denmark | Maize Germ Oil                  | 2003           | 12                                                             |
| 54               | Denmark | Meat                            | 2003           | 304                                                            |
| 54               | Denmark | Meat, Other                     | 2003           | 3                                                              |
| 54               | Denmark | Milk - Excluding Butter         | 2003           | 235                                                            |
| 54               | Denmark | Molluscs, Other                 | 2003           | 3                                                              |

Dietary calcium and zinc deficiency risks are decreasing but remain prevalent

| FAO Country code | Country | Food item                       | Reference year | Net energy supply (kcal capita <sup>-1</sup> d <sup>-1</sup> ) |
|------------------|---------|---------------------------------|----------------|----------------------------------------------------------------|
| 54               | Denmark | Mutton & Goat Meat              | 2003           | 7                                                              |
| 54               | Denmark | Oats                            | 2003           | 38                                                             |
| 54               | Denmark | Offals                          | 2003           | 50                                                             |
| 54               | Denmark | Oilcrops                        | 2003           | 10                                                             |
| 54               | Denmark | Oilcrops Oil, Other             | 2003           | 10                                                             |
| 54               | Denmark | Olive Oil                       | 2003           | 14                                                             |
| 54               | Denmark | Olives (including preserved)    | 2003           | 2                                                              |
| 54               | Denmark | Onions                          | 2003           | 9                                                              |
| 54               | Denmark | Oranges, Mandarines             | 2003           | 17                                                             |
| 54               | Denmark | Palm Oil                        | 2003           | 18                                                             |
| 54               | Denmark | Palmkernel Oil                  | 2003           | 27                                                             |
| 54               | Denmark | Peas                            | 2003           | 7                                                              |
| 54               | Denmark | Pelagic Fish                    | 2003           | 34                                                             |
| 54               | Denmark | Pepper                          | 2003           | 1                                                              |
| 54               | Denmark | Pigmeat                         | 2003           | 144                                                            |
| 54               | Denmark | Pimento                         | 2003           | 1                                                              |
| 54               | Denmark | Pineapples and products         | 2003           | 5                                                              |
| 54               | Denmark | Plantains                       | 2003           | 1                                                              |
| 54               | Denmark | Potatoes and products           | 2003           | 136                                                            |
| 54               | Denmark | Poultry Meat                    | 2003           | 69                                                             |
| 54               | Denmark | Pulses                          | 2003           | 10                                                             |
| 54               | Denmark | Pulses, Other and products      | 2003           | 2                                                              |
| 54               | Denmark | Rape and Mustard Oil            | 2003           | 29                                                             |
| 54               | Denmark | Rape and Mustardseed            | 2003           | 3                                                              |
| 54               | Denmark | Rice (Milled Equivalent)        | 2003           | 44                                                             |
| 54               | Denmark | Rye and products                | 2003           | 86                                                             |
| 54               | Denmark | Sesameseed Oil                  | 2003           | 3                                                              |
| 54               | Denmark | Soyabean Oil                    | 2003           | 111                                                            |
| 54               | Denmark | Spices                          | 2003           | 9                                                              |
| 54               | Denmark | Spices, Other                   | 2003           | 6                                                              |
| 54               | Denmark | Starchy Roots                   | 2003           | 136                                                            |
| 54               | Denmark | Stimulants                      | 2003           | 49                                                             |
| 54               | Denmark | Sugar & Sweeteners              | 2003           | 503                                                            |
| 54               | Denmark | Sugar (Raw Equivalent)          | 2003           | 429                                                            |
| 54               | Denmark | Sunflowerseed Oil               | 2003           | 18                                                             |
| 54               | Denmark | Sweeteners, Other               | 2003           | 71                                                             |
| 54               | Denmark | Tomatoes and products           | 2003           | 10                                                             |
| 54               | Denmark | Treenuts                        | 2003           | 35                                                             |
| 54               | Denmark | Vegetable Oils                  | 2003           | 244                                                            |
| 54               | Denmark | Vegetables                      | 2003           | 72                                                             |
| 54               | Denmark | Vegetables, Other               | 2003           | 53                                                             |
| 54               | Denmark | Vegetal Products                | 2003           | 2,232                                                          |
| 54               | Denmark | Wheat and products              | 2003           | 616                                                            |
| 54               | Denmark | Wine                            | 2003           | 62                                                             |
| 54               | Denmark | Alcoholic Beverages             | 2004           | 214                                                            |
| 54               | Denmark | Animal fats                     | 2004           | 400                                                            |
| 54               | Denmark | Animal Products                 | 2004           | 1,129                                                          |
| 54               | Denmark | Apples and products             | 2004           | 34                                                             |
| 54               | Denmark | Bananas                         | 2004           | 22                                                             |
| 54               | Denmark | Beans                           | 2004           | 1                                                              |
| 54               | Denmark | Beer                            | 2004           | 119                                                            |
| 54               | Denmark | Beverages, Alcoholic            | 2004           | 37                                                             |
| 54               | Denmark | Bovine Meat                     | 2004           | 83                                                             |
| 54               | Denmark | Butter, Ghee                    | 2004           | 35                                                             |
| 54               | Denmark | Cereals - Excluding Beer        | 2004           | 805                                                            |
| 54               | Denmark | Cocoa Beans and products        | 2004           | 42                                                             |
| 54               | Denmark | Coconuts - Incl Copra           | 2004           | 3                                                              |
| 54               | Denmark | Coffee and products             | 2004           | 11                                                             |
| 54               | Denmark | Cream                           | 2004           | 62                                                             |
| 54               | Denmark | Crustaceans                     | 2004           | 5                                                              |
| 54               | Denmark | Dates                           | 2004           | 2                                                              |
| 54               | Denmark | Demersal Fish                   | 2004           | 11                                                             |
| 54               | Denmark | Eggs                            | 2004           | 82                                                             |
| 54               | Denmark | Fats, Animals, Raw              | 2004           | 196                                                            |
| 54               | Denmark | Fish, Body Oil                  | 2004           | 106                                                            |
| 54               | Denmark | Fish, Seafood                   | 2004           | 65                                                             |
| 54               | Denmark | Freshwater Fish                 | 2004           | 6                                                              |
| 54               | Denmark | Fruits - Excluding Wine         | 2004           | 135                                                            |
| 54               | Denmark | Fruits, Other                   | 2004           | 34                                                             |
| 54               | Denmark | Grand Total                     | 2004           | 3,382                                                          |
| 54               | Denmark | Grapefruit and products         | 2004           | 1                                                              |
| 54               | Denmark | Grapes and products (excl wine) | 2004           | 15                                                             |
| 54               | Denmark | Groundnuts (Shelled Eq)         | 2004           | 1                                                              |
| 54               | Denmark | Honey                           | 2004           | 5                                                              |
| 54               | Denmark | Lemons, Limes and products      | 2004           | 1                                                              |
| 54               | Denmark | Maize and products              | 2004           | 18                                                             |
| 54               | Denmark | Maize Germ Oil                  | 2004           | 13                                                             |
| 54               | Denmark | Meat                            | 2004           | 276                                                            |
| 54               | Denmark | Meat, Other                     | 2004           | 3                                                              |
| 54               | Denmark | Milk - Excluding Butter         | 2004           | 254                                                            |
| 54               | Denmark | Molluscs, Other                 | 2004           | 2                                                              |
| 54               | Denmark | Mutton & Goat Meat              | 2004           | 7                                                              |
| 54               | Denmark | Oats                            | 2004           | 40                                                             |
| 54               | Denmark | Offals                          | 2004           | 51                                                             |
| 54               | Denmark | Oilcrops                        | 2004           | 10                                                             |
| 54               | Denmark | Oilcrops Oil, Other             | 2004           | 19                                                             |
| 54               | Denmark | Olive Oil                       | 2004           | 14                                                             |
| 54               | Denmark | Olives (including preserved)    | 2004           | 2                                                              |
| 54               | Denmark | Onions                          | 2004           | 9                                                              |
| 54               | Denmark | Oranges, Mandarines             | 2004           | 17                                                             |
| 54               | Denmark | Palm Oil                        | 2004           | 98                                                             |
| 54               | Denmark | Peas                            | 2004           | 7                                                              |
| 54               | Denmark | Pelagic Fish                    | 2004           | 40                                                             |
| 54               | Denmark | Pepper                          | 2004           | 2                                                              |
| 54               | Denmark | Pigmeat                         | 2004           | 120                                                            |
| 54               | Denmark | Pimento                         | 2004           | 1                                                              |
| 54               | Denmark | Pineapples and products         | 2004           | 6                                                              |

Dietary calcium and zinc deficiency risks are decreasing but remain prevalent

| FAO Country code | Country | Food item                       | Reference year | Net energy supply (kcal capita <sup>-1</sup> d <sup>-1</sup> ) |
|------------------|---------|---------------------------------|----------------|----------------------------------------------------------------|
| 54               | Denmark | Plantains                       | 2004           | 2                                                              |
| 54               | Denmark | Potatoes and products           | 2004           | 135                                                            |
| 54               | Denmark | Poultry Meat                    | 2004           | 64                                                             |
| 54               | Denmark | Pulses                          | 2004           | 10                                                             |
| 54               | Denmark | Pulses, Other and products      | 2004           | 2                                                              |
| 54               | Denmark | Rape and Mustard Oil            | 2004           | 43                                                             |
| 54               | Denmark | Rape and Mustardseed            | 2004           | 4                                                              |
| 54               | Denmark | Rice (Milled Equivalent)        | 2004           | 43                                                             |
| 54               | Denmark | Rye and products                | 2004           | 89                                                             |
| 54               | Denmark | Sesameseed Oil                  | 2004           | 4                                                              |
| 54               | Denmark | Soyabean Oil                    | 2004           | 54                                                             |
| 54               | Denmark | Spices                          | 2004           | 10                                                             |
| 54               | Denmark | Spices, Other                   | 2004           | 6                                                              |
| 54               | Denmark | Starchy Roots                   | 2004           | 135                                                            |
| 54               | Denmark | Stimulants                      | 2004           | 53                                                             |
| 54               | Denmark | Sugar & Sweeteners              | 2004           | 507                                                            |
| 54               | Denmark | Sugar (Raw Equivalent)          | 2004           | 434                                                            |
| 54               | Denmark | Sunflowerseed Oil               | 2004           | 18                                                             |
| 54               | Denmark | Sweeteners, Other               | 2004           | 69                                                             |
| 54               | Denmark | Tomatoes and products           | 2004           | 11                                                             |
| 54               | Denmark | Treenuts                        | 2004           | 39                                                             |
| 54               | Denmark | Vegetable Oils                  | 2004           | 262                                                            |
| 54               | Denmark | Vegetables                      | 2004           | 73                                                             |
| 54               | Denmark | Vegetables, Other               | 2004           | 54                                                             |
| 54               | Denmark | Vegetal Products                | 2004           | 2,253                                                          |
| 54               | Denmark | Wheat and products              | 2004           | 614                                                            |
| 54               | Denmark | Wine                            | 2004           | 58                                                             |
| 54               | Denmark | Alcoholic Beverages             | 2005           | 212                                                            |
| 54               | Denmark | Animal fats                     | 2005           | 421                                                            |
| 54               | Denmark | Animal Products                 | 2005           | 1,294                                                          |
| 54               | Denmark | Apples and products             | 2005           | 36                                                             |
| 54               | Denmark | Bananas                         | 2005           | 20                                                             |
| 54               | Denmark | Beans                           | 2005           | 1                                                              |
| 54               | Denmark | Beer                            | 2005           | 117                                                            |
| 54               | Denmark | Beverages, Alcoholic            | 2005           | 41                                                             |
| 54               | Denmark | Bovine Meat                     | 2005           | 77                                                             |
| 54               | Denmark | Butter, Ghee                    | 2005           | 38                                                             |
| 54               | Denmark | Cereals - Excluding Beer        | 2005           | 843                                                            |
| 54               | Denmark | Cocoa Beans and products        | 2005           | 43                                                             |
| 54               | Denmark | Coconuts - Incl Copra           | 2005           | 3                                                              |
| 54               | Denmark | Coffee and products             | 2005           | 11                                                             |
| 54               | Denmark | Cream                           | 2005           | 54                                                             |
| 54               | Denmark | Crustaceans                     | 2005           | 7                                                              |
| 54               | Denmark | Dates                           | 2005           | 2                                                              |
| 54               | Denmark | Demersal Fish                   | 2005           | 7                                                              |
| 54               | Denmark | Eggs                            | 2005           | 79                                                             |
| 54               | Denmark | Fats, Animals, Raw              | 2005           | 219                                                            |
| 54               | Denmark | Fish, Body Oil                  | 2005           | 109                                                            |
| 54               | Denmark | Fish, Seafood                   | 2005           | 58                                                             |
| 54               | Denmark | Freshwater Fish                 | 2005           | 8                                                              |
| 54               | Denmark | Fruits - Excluding Wine         | 2005           | 131                                                            |
| 54               | Denmark | Fruits, Other                   | 2005           | 33                                                             |
| 54               | Denmark | Grand Total                     | 2005           | 3,408                                                          |
| 54               | Denmark | Grapefruit and products         | 2005           | 1                                                              |
| 54               | Denmark | Grapes and products (excl wine) | 2005           | 16                                                             |
| 54               | Denmark | Groundnuts (Shelled Eq)         | 2005           | 1                                                              |
| 54               | Denmark | Honey                           | 2005           | 7                                                              |
| 54               | Denmark | Lemons, Limes and products      | 2005           | 1                                                              |
| 54               | Denmark | Maize and products              | 2005           | 18                                                             |
| 54               | Denmark | Maize Germ Oil                  | 2005           | 13                                                             |
| 54               | Denmark | Meat                            | 2005           | 370                                                            |
| 54               | Denmark | Meat, Other                     | 2005           | 3                                                              |
| 54               | Denmark | Milk - Excluding Butter         | 2005           | 326                                                            |
| 54               | Denmark | Molluscs, Other                 | 2005           | 1                                                              |
| 54               | Denmark | Mutton & Goat Meat              | 2005           | 6                                                              |
| 54               | Denmark | Oats                            | 2005           | 45                                                             |
| 54               | Denmark | Offals                          | 2005           | 40                                                             |
| 54               | Denmark | Oilcrops                        | 2005           | 10                                                             |
| 54               | Denmark | Oilcrops Oil, Other             | 2005           | 32                                                             |
| 54               | Denmark | Olive Oil                       | 2005           | 13                                                             |
| 54               | Denmark | Olives (including preserved)    | 2005           | 2                                                              |
| 54               | Denmark | Onions                          | 2005           | 10                                                             |
| 54               | Denmark | Oranges, Mandarines             | 2005           | 16                                                             |
| 54               | Denmark | Palm Oil                        | 2005           | 26                                                             |
| 54               | Denmark | Palmkernel Oil                  | 2005           | 16                                                             |
| 54               | Denmark | Peas                            | 2005           | 7                                                              |
| 54               | Denmark | Pelagic Fish                    | 2005           | 35                                                             |
| 54               | Denmark | Pepper                          | 2005           | 1                                                              |
| 54               | Denmark | Pigmeat                         | 2005           | 211                                                            |
| 54               | Denmark | Pimento                         | 2005           | 1                                                              |
| 54               | Denmark | Pineapples and products         | 2005           | 6                                                              |
| 54               | Denmark | Plantains                       | 2005           | 1                                                              |
| 54               | Denmark | Potatoes and products           | 2005           | 134                                                            |
| 54               | Denmark | Poultry Meat                    | 2005           | 73                                                             |
| 54               | Denmark | Pulses                          | 2005           | 9                                                              |
| 54               | Denmark | Pulses, Other and products      | 2005           | 1                                                              |
| 54               | Denmark | Rape and Mustard Oil            | 2005           | 14                                                             |
| 54               | Denmark | Rape and Mustardseed            | 2005           | 3                                                              |
| 54               | Denmark | Rice (Milled Equivalent)        | 2005           | 52                                                             |
| 54               | Denmark | Rye and products                | 2005           | 86                                                             |
| 54               | Denmark | Sesameseed Oil                  | 2005           | 3                                                              |
| 54               | Denmark | Soyabean Oil                    | 2005           | 53                                                             |
| 54               | Denmark | Spices                          | 2005           | 7                                                              |
| 54               | Denmark | Spices, Other                   | 2005           | 4                                                              |
| 54               | Denmark | Starchy Roots                   | 2005           | 134                                                            |
| 54               | Denmark | Stimulants                      | 2005           | 55                                                             |
| 54               | Denmark | Sugar & Sweeteners              | 2005           | 438                                                            |

## Dietary calcium and zinc deficiency risks are decreasing but remain prevalent

| FAO Country code | Country | Food item                       | Reference year | Net energy supply (kcal capita <sup>-1</sup> d <sup>-1</sup> ) |
|------------------|---------|---------------------------------|----------------|----------------------------------------------------------------|
| 54               | Denmark | Sugar (Raw Equivalent)          | 2005           | 364                                                            |
| 54               | Denmark | Sweeteners, Other               | 2005           | 68                                                             |
| 54               | Denmark | Tomatoes and products           | 2005           | 9                                                              |
| 54               | Denmark | Treenuts                        | 2005           | 34                                                             |
| 54               | Denmark | Vegetable Oils                  | 2005           | 171                                                            |
| 54               | Denmark | Vegetables                      | 2005           | 70                                                             |
| 54               | Denmark | Vegetables, Other               | 2005           | 51                                                             |
| 54               | Denmark | Vegetal Products                | 2005           | 2,114                                                          |
| 54               | Denmark | Wheat and products              | 2005           | 643                                                            |
| 54               | Denmark | Wine                            | 2005           | 53                                                             |
| 54               | Denmark | Alcoholic Beverages             | 2006           | 204                                                            |
| 54               | Denmark | Animal fats                     | 2006           | 367                                                            |
| 54               | Denmark | Animal Products                 | 2006           | 1,206                                                          |
| 54               | Denmark | Apples and products             | 2006           | 30                                                             |
| 54               | Denmark | Bananas                         | 2006           | 22                                                             |
| 54               | Denmark | Beans                           | 2006           | 1                                                              |
| 54               | Denmark | Beer                            | 2006           | 115                                                            |
| 54               | Denmark | Beverages, Alcoholic            | 2006           | 34                                                             |
| 54               | Denmark | Beverages, Fermented            | 2006           | 1                                                              |
| 54               | Denmark | Bovine Meat                     | 2006           | 80                                                             |
| 54               | Denmark | Butter, Ghee                    | 2006           | 34                                                             |
| 54               | Denmark | Cereals - Excluding Beer        | 2006           | 869                                                            |
| 54               | Denmark | Cocoa Beans and products        | 2006           | 44                                                             |
| 54               | Denmark | Coconuts - Incl Copra           | 2006           | 4                                                              |
| 54               | Denmark | Coffee and products             | 2006           | 10                                                             |
| 54               | Denmark | Cream                           | 2006           | 39                                                             |
| 54               | Denmark | Crustaceans                     | 2006           | 4                                                              |
| 54               | Denmark | Dates                           | 2006           | 3                                                              |
| 54               | Denmark | Demersal Fish                   | 2006           | 10                                                             |
| 54               | Denmark | Eggs                            | 2006           | 84                                                             |
| 54               | Denmark | Fats, Animals, Raw              | 2006           | 188                                                            |
| 54               | Denmark | Fish, Body Oil                  | 2006           | 106                                                            |
| 54               | Denmark | Fish, Seafood                   | 2006           | 59                                                             |
| 54               | Denmark | Freshwater Fish                 | 2006           | 6                                                              |
| 54               | Denmark | Fruits - Excluding Wine         | 2006           | 132                                                            |
| 54               | Denmark | Fruits, Other                   | 2006           | 35                                                             |
| 54               | Denmark | Grand Total                     | 2006           | 3,410                                                          |
| 54               | Denmark | Grapefruit and products         | 2006           | 1                                                              |
| 54               | Denmark | Grapes and products (excl wine) | 2006           | 16                                                             |
| 54               | Denmark | Groundnut Oil                   | 2006           | 1                                                              |
| 54               | Denmark | Groundnuts (Shelled Eq)         | 2006           | 1                                                              |
| 54               | Denmark | Honey                           | 2006           | 6                                                              |
| 54               | Denmark | Lemons, Limes and products      | 2006           | 1                                                              |
| 54               | Denmark | Maize and products              | 2006           | 15                                                             |
| 54               | Denmark | Maize Germ Oil                  | 2006           | 8                                                              |
| 54               | Denmark | Meat                            | 2006           | 330                                                            |
| 54               | Denmark | Meat, Other                     | 2006           | 3                                                              |
| 54               | Denmark | Milk - Excluding Butter         | 2006           | 325                                                            |
| 54               | Denmark | Molluscs, Other                 | 2006           | 1                                                              |
| 54               | Denmark | Mutton & Goat Meat              | 2006           | 6                                                              |
| 54               | Denmark | Oats                            | 2006           | 50                                                             |
| 54               | Denmark | Offals                          | 2006           | 42                                                             |
| 54               | Denmark | Oilcrops                        | 2006           | 11                                                             |
| 54               | Denmark | Oilcrops Oil, Other             | 2006           | 28                                                             |
| 54               | Denmark | Olive Oil                       | 2006           | 13                                                             |
| 54               | Denmark | Olives (including preserved)    | 2006           | 2                                                              |
| 54               | Denmark | Onions                          | 2006           | 11                                                             |
| 54               | Denmark | Oranges, Mandarines             | 2006           | 18                                                             |
| 54               | Denmark | Palm Oil                        | 2006           | 37                                                             |
| 54               | Denmark | Peas                            | 2006           | 7                                                              |
| 54               | Denmark | Pelagic Fish                    | 2006           | 38                                                             |
| 54               | Denmark | Pepper                          | 2006           | 1                                                              |
| 54               | Denmark | Pigmeat                         | 2006           | 168                                                            |
| 54               | Denmark | Pimento                         | 2006           | 2                                                              |
| 54               | Denmark | Pineapples and products         | 2006           | 6                                                              |
| 54               | Denmark | Plantains                       | 2006           | 1                                                              |
| 54               | Denmark | Potatoes and products           | 2006           | 143                                                            |
| 54               | Denmark | Poultry Meat                    | 2006           | 72                                                             |
| 54               | Denmark | Pulses                          | 2006           | 9                                                              |
| 54               | Denmark | Pulses, Other and products      | 2006           | 1                                                              |
| 54               | Denmark | Rape and Mustard Oil            | 2006           | 11                                                             |
| 54               | Denmark | Rape and Mustardseed            | 2006           | 4                                                              |
| 54               | Denmark | Rice (Milled Equivalent)        | 2006           | 61                                                             |
| 54               | Denmark | Rye and products                | 2006           | 87                                                             |
| 54               | Denmark | Sesameseed Oil                  | 2006           | 3                                                              |
| 54               | Denmark | Soyabean Oil                    | 2006           | 82                                                             |
| 54               | Denmark | Spices                          | 2006           | 9                                                              |
| 54               | Denmark | Spices, Other                   | 2006           | 5                                                              |
| 54               | Denmark | Starchy Roots                   | 2006           | 143                                                            |
| 54               | Denmark | Stimulants                      | 2006           | 55                                                             |
| 54               | Denmark | Sugar & Sweeteners              | 2006           | 472                                                            |
| 54               | Denmark | Sugar (Raw Equivalent)          | 2006           | 402                                                            |
| 54               | Denmark | Sunflowerseed Oil               | 2006           | 7                                                              |
| 54               | Denmark | Sweeteners, Other               | 2006           | 64                                                             |
| 54               | Denmark | Tomatoes and products           | 2006           | 9                                                              |
| 54               | Denmark | Treenuts                        | 2006           | 37                                                             |
| 54               | Denmark | Vegetable Oils                  | 2006           | 191                                                            |
| 54               | Denmark | Vegetables                      | 2006           | 71                                                             |
| 54               | Denmark | Vegetables, Other               | 2006           | 52                                                             |
| 54               | Denmark | Vegetal Products                | 2006           | 2,203                                                          |
| 54               | Denmark | Wheat and products              | 2006           | 656                                                            |
| 54               | Denmark | Wine                            | 2006           | 54                                                             |
| 54               | Denmark | Alcoholic Beverages             | 2007           | 203                                                            |
| 54               | Denmark | Animal fats                     | 2007           | 359                                                            |
| 54               | Denmark | Animal Products                 | 2007           | 1,181                                                          |
| 54               | Denmark | Apples and products             | 2007           | 23                                                             |
| 54               | Denmark | Bananas                         | 2007           | 23                                                             |



Dietary calcium and zinc deficiency risks are decreasing but remain prevalent

| FAO Country code | Country | Food item                       | Reference year | Net energy supply (kcal capita <sup>-1</sup> d <sup>-1</sup> ) |
|------------------|---------|---------------------------------|----------------|----------------------------------------------------------------|
| 54               | Denmark | Beans                           | 2007           | 1                                                              |
| 54               | Denmark | Beer                            | 2007           | 111                                                            |
| 54               | Denmark | Beverages, Alcoholic            | 2007           | 36                                                             |
| 54               | Denmark | Beverages, Fermented            | 2007           | 2                                                              |
| 54               | Denmark | Bovine Meat                     | 2007           | 81                                                             |
| 54               | Denmark | Butter, Ghee                    | 2007           | 36                                                             |
| 54               | Denmark | Cereals - Excluding Beer        | 2007           | 853                                                            |
| 54               | Denmark | Citrus, Other                   | 2007           | 1                                                              |
| 54               | Denmark | Cocoa Beans and products        | 2007           | 50                                                             |
| 54               | Denmark | Coconuts - Incl Copra           | 2007           | 6                                                              |
| 54               | Denmark | Coffee and products             | 2007           | 9                                                              |
| 54               | Denmark | Cream                           | 2007           | 59                                                             |
| 54               | Denmark | Crustaceans                     | 2007           | 4                                                              |
| 54               | Denmark | Dates                           | 2007           | 3                                                              |
| 54               | Denmark | Demersal Fish                   | 2007           | 12                                                             |
| 54               | Denmark | Eggs                            | 2007           | 79                                                             |
| 54               | Denmark | Fats, Animals, Raw              | 2007           | 158                                                            |
| 54               | Denmark | Fish, Body Oil                  | 2007           | 107                                                            |
| 54               | Denmark | Fish, Seafood                   | 2007           | 66                                                             |
| 54               | Denmark | Freshwater Fish                 | 2007           | 5                                                              |
| 54               | Denmark | Fruits - Excluding Wine         | 2007           | 125                                                            |
| 54               | Denmark | Fruits, Other                   | 2007           | 33                                                             |
| 54               | Denmark | Grand Total                     | 2007           | 3,435                                                          |
| 54               | Denmark | Grapefruit and products         | 2007           | 1                                                              |
| 54               | Denmark | Grapes and products (excl wine) | 2007           | 17                                                             |
| 54               | Denmark | Groundnut Oil                   | 2007           | 2                                                              |
| 54               | Denmark | Groundnuts (Shelled Eq)         | 2007           | 3                                                              |
| 54               | Denmark | Honey                           | 2007           | 5                                                              |
| 54               | Denmark | Lemons, Limes and products      | 2007           | 1                                                              |
| 54               | Denmark | Maize and products              | 2007           | 42                                                             |
| 54               | Denmark | Maize Germ Oil                  | 2007           | 5                                                              |
| 54               | Denmark | Meat                            | 2007           | 380                                                            |
| 54               | Denmark | Meat, Other                     | 2007           | 8                                                              |
| 54               | Denmark | Milk - Excluding Butter         | 2007           | 276                                                            |
| 54               | Denmark | Molluscs, Other                 | 2007           | 1                                                              |
| 54               | Denmark | Mutton & Goat Meat              | 2007           | 8                                                              |
| 54               | Denmark | Oats                            | 2007           | 49                                                             |
| 54               | Denmark | Offals                          | 2007           | 22                                                             |
| 54               | Denmark | Oilcrops                        | 2007           | 17                                                             |
| 54               | Denmark | Oilcrops Oil, Other             | 2007           | 22                                                             |
| 54               | Denmark | Olive Oil                       | 2007           | 16                                                             |
| 54               | Denmark | Olives (including preserved)    | 2007           | 2                                                              |
| 54               | Denmark | Onions                          | 2007           | 11                                                             |
| 54               | Denmark | Oranges, Mandarines             | 2007           | 18                                                             |
| 54               | Denmark | Palm Oil                        | 2007           | 36                                                             |
| 54               | Denmark | Peas                            | 2007           | 7                                                              |
| 54               | Denmark | Pelagic Fish                    | 2007           | 44                                                             |
| 54               | Denmark | Pepper                          | 2007           | 2                                                              |
| 54               | Denmark | Pigmeat                         | 2007           | 208                                                            |
| 54               | Denmark | Pimento                         | 2007           | 1                                                              |
| 54               | Denmark | Pineapples and products         | 2007           | 6                                                              |
| 54               | Denmark | Potatoes and products           | 2007           | 141                                                            |
| 54               | Denmark | Poultry Meat                    | 2007           | 75                                                             |
| 54               | Denmark | Pulses                          | 2007           | 9                                                              |
| 54               | Denmark | Pulses, Other and products      | 2007           | 1                                                              |
| 54               | Denmark | Rape and Mustard Oil            | 2007           | 15                                                             |
| 54               | Denmark | Rape and Mustardseed            | 2007           | 7                                                              |
| 54               | Denmark | Rice (Milled Equivalent)        | 2007           | 49                                                             |
| 54               | Denmark | Rye and products                | 2007           | 115                                                            |
| 54               | Denmark | Sesameseed Oil                  | 2007           | 4                                                              |
| 54               | Denmark | Soyabean Oil                    | 2007           | 75                                                             |
| 54               | Denmark | Spices                          | 2007           | 6                                                              |
| 54               | Denmark | Spices, Other                   | 2007           | 3                                                              |
| 54               | Denmark | Starchy Roots                   | 2007           | 141                                                            |
| 54               | Denmark | Stimulants                      | 2007           | 60                                                             |
| 54               | Denmark | Sugar & Sweeteners              | 2007           | 553                                                            |
| 54               | Denmark | Sugar (Raw Equivalent)          | 2007           | 479                                                            |
| 54               | Denmark | Sunflowerseed Oil               | 2007           | 7                                                              |
| 54               | Denmark | Sweeteners, Other               | 2007           | 70                                                             |
| 54               | Denmark | Tomatoes and products           | 2007           | 9                                                              |
| 54               | Denmark | Treenuts                        | 2007           | 33                                                             |
| 54               | Denmark | Vegetable Oils                  | 2007           | 183                                                            |
| 54               | Denmark | Vegetables                      | 2007           | 70                                                             |
| 54               | Denmark | Vegetables, Other               | 2007           | 50                                                             |
| 54               | Denmark | Vegetal Products                | 2007           | 2,253                                                          |
| 54               | Denmark | Wheat and products              | 2007           | 598                                                            |
| 54               | Denmark | Wine                            | 2007           | 54                                                             |
| 54               | Denmark | Alcoholic Beverages             | 2008           | 195                                                            |
| 54               | Denmark | Animal fats                     | 2008           | 384                                                            |
| 54               | Denmark | Animal Products                 | 2008           | 1,203                                                          |
| 54               | Denmark | Apples and products             | 2008           | 22                                                             |
| 54               | Denmark | Bananas                         | 2008           | 26                                                             |
| 54               | Denmark | Beans                           | 2008           | 1                                                              |
| 54               | Denmark | Beer                            | 2008           | 105                                                            |
| 54               | Denmark | Beverages, Alcoholic            | 2008           | 34                                                             |
| 54               | Denmark | Beverages, Fermented            | 2008           | 4                                                              |
| 54               | Denmark | Bovine Meat                     | 2008           | 78                                                             |
| 54               | Denmark | Butter, Ghee                    | 2008           | 36                                                             |
| 54               | Denmark | Cereals - Excluding Beer        | 2008           | 859                                                            |
| 54               | Denmark | Citrus, Other                   | 2008           | 2                                                              |
| 54               | Denmark | Cocoa Beans and products        | 2008           | 36                                                             |
| 54               | Denmark | Coconuts - Incl Copra           | 2008           | 5                                                              |
| 54               | Denmark | Coffee and products             | 2008           | 10                                                             |
| 54               | Denmark | Cream                           | 2008           | 55                                                             |
| 54               | Denmark | Crustaceans                     | 2008           | 7                                                              |
| 54               | Denmark | Dates                           | 2008           | 3                                                              |
| 54               | Denmark | Demersal Fish                   | 2008           | 8                                                              |

Dietary calcium and zinc deficiency risks are decreasing but remain prevalent

| FAO Country code | Country | Food item                       | Reference year | Net energy supply (kcal <i>capita</i> <sup>-1</sup> d <sup>-1</sup> ) |
|------------------|---------|---------------------------------|----------------|-----------------------------------------------------------------------|
| 54               | Denmark | Eggs                            | 2008           | 78                                                                    |
| 54               | Denmark | Fats, Animals, Raw              | 2008           | 202                                                                   |
| 54               | Denmark | Fish, Body Oil                  | 2008           | 90                                                                    |
| 54               | Denmark | Fish, Seafood                   | 2008           | 51                                                                    |
| 54               | Denmark | Freshwater Fish                 | 2008           | 8                                                                     |
| 54               | Denmark | Fruits - Excluding Wine         | 2008           | 126                                                                   |
| 54               | Denmark | Fruits, Other                   | 2008           | 29                                                                    |
| 54               | Denmark | Grand Total                     | 2008           | 3,329                                                                 |
| 54               | Denmark | Grapes and products (excl wine) | 2008           | 19                                                                    |
| 54               | Denmark | Groundnut Oil                   | 2008           | 5                                                                     |
| 54               | Denmark | Groundnuts (Shelled Eq)         | 2008           | 4                                                                     |
| 54               | Denmark | Honey                           | 2008           | 6                                                                     |
| 54               | Denmark | Lemons, Limes and products      | 2008           | 1                                                                     |
| 54               | Denmark | Maize and products              | 2008           | 18                                                                    |
| 54               | Denmark | Maize Germ Oil                  | 2008           | 2                                                                     |
| 54               | Denmark | Meat                            | 2008           | 331                                                                   |
| 54               | Denmark | Meat, Other                     | 2008           | 4                                                                     |
| 54               | Denmark | Milk - Excluding Butter         | 2008           | 328                                                                   |
| 54               | Denmark | Molluscs, Other                 | 2008           | 1                                                                     |
| 54               | Denmark | Mutton & Goat Meat              | 2008           | 7                                                                     |
| 54               | Denmark | Oats                            | 2008           | 65                                                                    |
| 54               | Denmark | Offals                          | 2008           | 31                                                                    |
| 54               | Denmark | Oilcrops                        | 2008           | 15                                                                    |
| 54               | Denmark | Oilcrops Oil, Other             | 2008           | 13                                                                    |
| 54               | Denmark | Olive Oil                       | 2008           | 16                                                                    |
| 54               | Denmark | Olives (including preserved)    | 2008           | 2                                                                     |
| 54               | Denmark | Onions                          | 2008           | 11                                                                    |
| 54               | Denmark | Oranges, Mandarines             | 2008           | 18                                                                    |
| 54               | Denmark | Palm Oil                        | 2008           | 32                                                                    |
| 54               | Denmark | Peas                            | 2008           | 7                                                                     |
| 54               | Denmark | Pelagic Fish                    | 2008           | 28                                                                    |
| 54               | Denmark | Pepper                          | 2008           | 1                                                                     |
| 54               | Denmark | Pigmeat                         | 2008           | 158                                                                   |
| 54               | Denmark | Pimento                         | 2008           | 2                                                                     |
| 54               | Denmark | Pineapples and products         | 2008           | 6                                                                     |
| 54               | Denmark | Potatoes and products           | 2008           | 134                                                                   |
| 54               | Denmark | Poultry Meat                    | 2008           | 85                                                                    |
| 54               | Denmark | Pulses                          | 2008           | 9                                                                     |
| 54               | Denmark | Pulses, Other and products      | 2008           | 1                                                                     |
| 54               | Denmark | Rape and Mustard Oil            | 2008           | 27                                                                    |
| 54               | Denmark | Rape and Mustardseed            | 2008           | 4                                                                     |
| 54               | Denmark | Rice (Milled Equivalent)        | 2008           | 45                                                                    |
| 54               | Denmark | Rye and products                | 2008           | 89                                                                    |
| 54               | Denmark | Sesameseed Oil                  | 2008           | 4                                                                     |
| 54               | Denmark | Soyabean Oil                    | 2008           | 45                                                                    |
| 54               | Denmark | Spices                          | 2008           | 7                                                                     |
| 54               | Denmark | Spices, Other                   | 2008           | 5                                                                     |
| 54               | Denmark | Starchy Roots                   | 2008           | 134                                                                   |
| 54               | Denmark | Stimulants                      | 2008           | 46                                                                    |
| 54               | Denmark | Sugar & Sweeteners              | 2008           | 472                                                                   |
| 54               | Denmark | Sugar (Raw Equivalent)          | 2008           | 408                                                                   |
| 54               | Denmark | Sunflowerseed Oil               | 2008           | 16                                                                    |
| 54               | Denmark | Sweeteners, Other               | 2008           | 59                                                                    |
| 54               | Denmark | Tomatoes and products           | 2008           | 9                                                                     |
| 54               | Denmark | Treenuts                        | 2008           | 32                                                                    |
| 54               | Denmark | Vegetable Oils                  | 2008           | 159                                                                   |
| 54               | Denmark | Vegetables                      | 2008           | 72                                                                    |
| 54               | Denmark | Vegetables, Other               | 2008           | 52                                                                    |
| 54               | Denmark | Vegetal Products                | 2008           | 2,126                                                                 |
| 54               | Denmark | Wheat and products              | 2008           | 641                                                                   |
| 54               | Denmark | Wine                            | 2008           | 51                                                                    |
| 54               | Denmark | Alcoholic Beverages             | 2009           | 178                                                                   |
| 54               | Denmark | Animal fats                     | 2009           | 396                                                                   |
| 54               | Denmark | Animal Products                 | 2009           | 1,187                                                                 |
| 54               | Denmark | Apples and products             | 2009           | 20                                                                    |
| 54               | Denmark | Bananas                         | 2009           | 27                                                                    |
| 54               | Denmark | Beans                           | 2009           | 1                                                                     |
| 54               | Denmark | Beer                            | 2009           | 97                                                                    |
| 54               | Denmark | Beverages, Alcoholic            | 2009           | 27                                                                    |
| 54               | Denmark | Beverages, Fermented            | 2009           | 2                                                                     |
| 54               | Denmark | Bovine Meat                     | 2009           | 74                                                                    |
| 54               | Denmark | Butter, Ghee                    | 2009           | 37                                                                    |
| 54               | Denmark | Cereals - Excluding Beer        | 2009           | 852                                                                   |
| 54               | Denmark | Citrus, Other                   | 2009           | 1                                                                     |
| 54               | Denmark | Cocoa Beans and products        | 2009           | 35                                                                    |
| 54               | Denmark | Coconuts - Incl Copra           | 2009           | 6                                                                     |
| 54               | Denmark | Coffee and products             | 2009           | 10                                                                    |
| 54               | Denmark | Cream                           | 2009           | 58                                                                    |
| 54               | Denmark | Crustaceans                     | 2009           | 5                                                                     |
| 54               | Denmark | Dates                           | 2009           | 3                                                                     |
| 54               | Denmark | Demersal Fish                   | 2009           | 8                                                                     |
| 54               | Denmark | Eggs                            | 2009           | 69                                                                    |
| 54               | Denmark | Fats, Animals, Raw              | 2009           | 206                                                                   |
| 54               | Denmark | Fish, Body Oil                  | 2009           | 95                                                                    |
| 54               | Denmark | Fish, Seafood                   | 2009           | 67                                                                    |
| 54               | Denmark | Freshwater Fish                 | 2009           | 4                                                                     |
| 54               | Denmark | Fruits - Excluding Wine         | 2009           | 140                                                                   |
| 54               | Denmark | Fruits, Other                   | 2009           | 38                                                                    |
| 54               | Denmark | Grand Total                     | 2009           | 3,346                                                                 |
| 54               | Denmark | Grapes and products (excl wine) | 2009           | 21                                                                    |
| 54               | Denmark | Groundnut Oil                   | 2009           | 2                                                                     |
| 54               | Denmark | Groundnuts (Shelled Eq)         | 2009           | 3                                                                     |
| 54               | Denmark | Honey                           | 2009           | 5                                                                     |
| 54               | Denmark | Lemons, Limes and products      | 2009           | 1                                                                     |
| 54               | Denmark | Maize and products              | 2009           | 32                                                                    |
| 54               | Denmark | Maize Germ Oil                  | 2009           | 2                                                                     |
| 54               | Denmark | Meat                            | 2009           | 315                                                                   |

Dietary calcium and zinc deficiency risks are decreasing but remain prevalent

| FAO Country code | Country | Food item                       | Reference year | Net energy supply (kcal capita <sup>-1</sup> d <sup>-1</sup> ) |
|------------------|---------|---------------------------------|----------------|----------------------------------------------------------------|
| 54               | Denmark | Meat, Other                     | 2009           | 4                                                              |
| 54               | Denmark | Milk - Excluding Butter         | 2009           | 329                                                            |
| 54               | Denmark | Molluscs, Other                 | 2009           | 1                                                              |
| 54               | Denmark | Mutton & Goat Meat              | 2009           | 7                                                              |
| 54               | Denmark | Oats                            | 2009           | 62                                                             |
| 54               | Denmark | Offals                          | 2009           | 11                                                             |
| 54               | Denmark | Oilcrops                        | 2009           | 16                                                             |
| 54               | Denmark | Oilcrops Oil, Other             | 2009           | 9                                                              |
| 54               | Denmark | Olive Oil                       | 2009           | 20                                                             |
| 54               | Denmark | Olives (including preserved)    | 2009           | 2                                                              |
| 54               | Denmark | Onions                          | 2009           | 10                                                             |
| 54               | Denmark | Oranges, Mandarines             | 2009           | 22                                                             |
| 54               | Denmark | Palm Oil                        | 2009           | 72                                                             |
| 54               | Denmark | Peas                            | 2009           | 7                                                              |
| 54               | Denmark | Pelagic Fish                    | 2009           | 50                                                             |
| 54               | Denmark | Pepper                          | 2009           | 1                                                              |
| 54               | Denmark | Pigmeat                         | 2009           | 158                                                            |
| 54               | Denmark | Pimento                         | 2009           | 2                                                              |
| 54               | Denmark | Pineapples and products         | 2009           | 6                                                              |
| 54               | Denmark | Plantains                       | 2009           | 1                                                              |
| 54               | Denmark | Potatoes and products           | 2009           | 134                                                            |
| 54               | Denmark | Poultry Meat                    | 2009           | 72                                                             |
| 54               | Denmark | Pulses                          | 2009           | 10                                                             |
| 54               | Denmark | Pulses, Other and products      | 2009           | 2                                                              |
| 54               | Denmark | Rape and Mustard Oil            | 2009           | 22                                                             |
| 54               | Denmark | Rape and Mustardseed            | 2009           | 5                                                              |
| 54               | Denmark | Rice (Milled Equivalent)        | 2009           | 49                                                             |
| 54               | Denmark | Rye and products                | 2009           | 106                                                            |
| 54               | Denmark | Sesameseed Oil                  | 2009           | 3                                                              |
| 54               | Denmark | Soyabean Oil                    | 2009           | 37                                                             |
| 54               | Denmark | Spices                          | 2009           | 9                                                              |
| 54               | Denmark | Spices, Other                   | 2009           | 6                                                              |
| 54               | Denmark | Starchy Roots                   | 2009           | 134                                                            |
| 54               | Denmark | Stimulants                      | 2009           | 45                                                             |
| 54               | Denmark | Sugar & Sweeteners              | 2009           | 465                                                            |
| 54               | Denmark | Sugar (Raw Equivalent)          | 2009           | 406                                                            |
| 54               | Denmark | Sunflowerseed Oil               | 2009           | 25                                                             |
| 54               | Denmark | Sweeteners, Other               | 2009           | 55                                                             |
| 54               | Denmark | Tomatoes and products           | 2009           | 11                                                             |
| 54               | Denmark | Treenuts                        | 2009           | 36                                                             |
| 54               | Denmark | Vegetable Oils                  | 2009           | 193                                                            |
| 54               | Denmark | Vegetables                      | 2009           | 84                                                             |
| 54               | Denmark | Vegetables, Other               | 2009           | 64                                                             |
| 54               | Denmark | Vegetal Products                | 2009           | 2,160                                                          |
| 54               | Denmark | Wheat and products              | 2009           | 603                                                            |
| 54               | Denmark | Wine                            | 2009           | 52                                                             |
| 54               | Denmark | Alcoholic Beverages             | 2010           | 172                                                            |
| 54               | Denmark | Animal fats                     | 2010           | 394                                                            |
| 54               | Denmark | Animal Products                 | 2010           | 1,221                                                          |
| 54               | Denmark | Apples and products             | 2010           | 21                                                             |
| 54               | Denmark | Bananas                         | 2010           | 23                                                             |
| 54               | Denmark | Beans                           | 2010           | 2                                                              |
| 54               | Denmark | Beer                            | 2010           | 91                                                             |
| 54               | Denmark | Beverages, Alcoholic            | 2010           | 24                                                             |
| 54               | Denmark | Beverages, Fermented            | 2010           | 2                                                              |
| 54               | Denmark | Bovine Meat                     | 2010           | 83                                                             |
| 54               | Denmark | Butter, Ghee                    | 2010           | 39                                                             |
| 54               | Denmark | Cereals - Excluding Beer        | 2010           | 928                                                            |
| 54               | Denmark | Cocoa Beans and products        | 2010           | 43                                                             |
| 54               | Denmark | Coconuts - Incl Copra           | 2010           | 5                                                              |
| 54               | Denmark | Coffee and products             | 2010           | 12                                                             |
| 54               | Denmark | Cream                           | 2010           | 55                                                             |
| 54               | Denmark | Crustaceans                     | 2010           | 4                                                              |
| 54               | Denmark | Dates                           | 2010           | 3                                                              |
| 54               | Denmark | Demersal Fish                   | 2010           | 9                                                              |
| 54               | Denmark | Eggs                            | 2010           | 70                                                             |
| 54               | Denmark | Fats, Animals, Raw              | 2010           | 207                                                            |
| 54               | Denmark | Fish, Body Oil                  | 2010           | 94                                                             |
| 54               | Denmark | Fish, Seafood                   | 2010           | 73                                                             |
| 54               | Denmark | Freshwater Fish                 | 2010           | 4                                                              |
| 54               | Denmark | Fruits - Excluding Wine         | 2010           | 132                                                            |
| 54               | Denmark | Fruits, Other                   | 2010           | 41                                                             |
| 54               | Denmark | Grand Total                     | 2010           | 3,396                                                          |
| 54               | Denmark | Grapefruit and products         | 2010           | 1                                                              |
| 54               | Denmark | Grapes and products (excl wine) | 2010           | 21                                                             |
| 54               | Denmark | Groundnut Oil                   | 2010           | 2                                                              |
| 54               | Denmark | Groundnuts (Shelled Eq)         | 2010           | 7                                                              |
| 54               | Denmark | Honey                           | 2010           | 6                                                              |
| 54               | Denmark | Lemons, Limes and products      | 2010           | 1                                                              |
| 54               | Denmark | Maize and products              | 2010           | 32                                                             |
| 54               | Denmark | Maize Germ Oil                  | 2010           | 5                                                              |
| 54               | Denmark | Meat                            | 2010           | 350                                                            |
| 54               | Denmark | Meat, Other                     | 2010           | 4                                                              |
| 54               | Denmark | Milk - Excluding Butter         | 2010           | 306                                                            |
| 54               | Denmark | Mutton & Goat Meat              | 2010           | 6                                                              |
| 54               | Denmark | Oats                            | 2010           | 64                                                             |
| 54               | Denmark | Offals                          | 2010           | 28                                                             |
| 54               | Denmark | Oilcrops                        | 2010           | 14                                                             |
| 54               | Denmark | Oilcrops Oil, Other             | 2010           | 14                                                             |
| 54               | Denmark | Olive Oil                       | 2010           | 22                                                             |
| 54               | Denmark | Olives (including preserved)    | 2010           | 2                                                              |
| 54               | Denmark | Onions                          | 2010           | 9                                                              |
| 54               | Denmark | Oranges, Mandarines             | 2010           | 16                                                             |
| 54               | Denmark | Palm Oil                        | 2010           | 76                                                             |
| 54               | Denmark | Peas                            | 2010           | 7                                                              |
| 54               | Denmark | Pelagic Fish                    | 2010           | 56                                                             |
| 54               | Denmark | Pepper                          | 2010           | 1                                                              |

Dietary calcium and zinc deficiency risks are decreasing but remain prevalent

| FAO Country code | Country | Food item                       | Reference year | Net energy supply (kcal capita <sup>-1</sup> d <sup>-1</sup> ) |
|------------------|---------|---------------------------------|----------------|----------------------------------------------------------------|
| 54               | Denmark | Pigmeat                         | 2010           | 176                                                            |
| 54               | Denmark | Pimento                         | 2010           | 1                                                              |
| 54               | Denmark | Pineapples and products         | 2010           | 6                                                              |
| 54               | Denmark | Plantains                       | 2010           | 1                                                              |
| 54               | Denmark | Potatoes and products           | 2010           | 103                                                            |
| 54               | Denmark | Poultry Meat                    | 2010           | 82                                                             |
| 54               | Denmark | Pulses                          | 2010           | 10                                                             |
| 54               | Denmark | Pulses, Other and products      | 2010           | 2                                                              |
| 54               | Denmark | Rice (Milled Equivalent)        | 2010           | 48                                                             |
| 54               | Denmark | Rye and products                | 2010           | 106                                                            |
| 54               | Denmark | Sesameseed Oil                  | 2010           | 3                                                              |
| 54               | Denmark | Soyabean Oil                    | 2010           | 26                                                             |
| 54               | Denmark | Spices                          | 2010           | 9                                                              |
| 54               | Denmark | Spices, Other                   | 2010           | 6                                                              |
| 54               | Denmark | Starchy Roots                   | 2010           | 103                                                            |
| 54               | Denmark | Stimulants                      | 2010           | 56                                                             |
| 54               | Denmark | Sugar & Sweeteners              | 2010           | 471                                                            |
| 54               | Denmark | Sugar (Raw Equivalent)          | 2010           | 403                                                            |
| 54               | Denmark | Sunflowerseed Oil               | 2010           | 11                                                             |
| 54               | Denmark | Sweeteners, Other               | 2010           | 62                                                             |
| 54               | Denmark | Tomatoes and products           | 2010           | 11                                                             |
| 54               | Denmark | Treenuts                        | 2010           | 35                                                             |
| 54               | Denmark | Vegetable Oils                  | 2010           | 158                                                            |
| 54               | Denmark | Vegetables                      | 2010           | 87                                                             |
| 54               | Denmark | Vegetables, Other               | 2010           | 67                                                             |
| 54               | Denmark | Vegetal Products                | 2010           | 2,175                                                          |
| 54               | Denmark | Wheat and products              | 2010           | 678                                                            |
| 54               | Denmark | Wine                            | 2010           | 54                                                             |
| 54               | Denmark | Alcoholic Beverages             | 2011           | 174                                                            |
| 54               | Denmark | Animal fats                     | 2011           | 396                                                            |
| 54               | Denmark | Animal Products                 | 2011           | 1,228                                                          |
| 54               | Denmark | Apples and products             | 2011           | 20                                                             |
| 54               | Denmark | Bananas                         | 2011           | 21                                                             |
| 54               | Denmark | Beans                           | 2011           | 1                                                              |
| 54               | Denmark | Beer                            | 2011           | 90                                                             |
| 54               | Denmark | Beverages, Alcoholic            | 2011           | 25                                                             |
| 54               | Denmark | Bovine Meat                     | 2011           | 84                                                             |
| 54               | Denmark | Butter, Ghee                    | 2011           | 39                                                             |
| 54               | Denmark | Cereals - Excluding Beer        | 2011           | 853                                                            |
| 54               | Denmark | Cocoa Beans and products        | 2011           | 51                                                             |
| 54               | Denmark | Coconuts - Incl Copra           | 2011           | 6                                                              |
| 54               | Denmark | Coffee and products             | 2011           | 12                                                             |
| 54               | Denmark | Cream                           | 2011           | 54                                                             |
| 54               | Denmark | Crustaceans                     | 2011           | 4                                                              |
| 54               | Denmark | Dates                           | 2011           | 4                                                              |
| 54               | Denmark | Demersal Fish                   | 2011           | 9                                                              |
| 54               | Denmark | Eggs                            | 2011           | 63                                                             |
| 54               | Denmark | Fats, Animals, Raw              | 2011           | 210                                                            |
| 54               | Denmark | Fish, Body Oil                  | 2011           | 93                                                             |
| 54               | Denmark | Fish, Seafood                   | 2011           | 73                                                             |
| 54               | Denmark | Freshwater Fish                 | 2011           | 4                                                              |
| 54               | Denmark | Fruits - Excluding Wine         | 2011           | 128                                                            |
| 54               | Denmark | Fruits, Other                   | 2011           | 42                                                             |
| 54               | Denmark | Grand Total                     | 2011           | 3,363                                                          |
| 54               | Denmark | Grapes and products (excl wine) | 2011           | 18                                                             |
| 54               | Denmark | Groundnut Oil                   | 2011           | 1                                                              |
| 54               | Denmark | Groundnuts (Shelled Eq)         | 2011           | 6                                                              |
| 54               | Denmark | Honey                           | 2011           | 6                                                              |
| 54               | Denmark | Lemons, Limes and products      | 2011           | 1                                                              |
| 54               | Denmark | Maize and products              | 2011           | 32                                                             |
| 54               | Denmark | Maize Germ Oil                  | 2011           | 5                                                              |
| 54               | Denmark | Meat                            | 2011           | 342                                                            |
| 54               | Denmark | Meat, Other                     | 2011           | 3                                                              |
| 54               | Denmark | Milk - Excluding Butter         | 2011           | 335                                                            |
| 54               | Denmark | Mutton & Goat Meat              | 2011           | 6                                                              |
| 54               | Denmark | Oats                            | 2011           | 65                                                             |
| 54               | Denmark | Offals                          | 2011           | 18                                                             |
| 54               | Denmark | Oilcrops                        | 2011           | 16                                                             |
| 54               | Denmark | Oilcrops Oil, Other             | 2011           | 12                                                             |
| 54               | Denmark | Olive Oil                       | 2011           | 23                                                             |
| 54               | Denmark | Olives (including preserved)    | 2011           | 2                                                              |
| 54               | Denmark | Onions                          | 2011           | 11                                                             |
| 54               | Denmark | Oranges, Mandarines             | 2011           | 16                                                             |
| 54               | Denmark | Palm Oil                        | 2011           | 75                                                             |
| 54               | Denmark | Peas                            | 2011           | 7                                                              |
| 54               | Denmark | Pelagic Fish                    | 2011           | 55                                                             |
| 54               | Denmark | Pepper                          | 2011           | 1                                                              |
| 54               | Denmark | Pigmeat                         | 2011           | 155                                                            |
| 54               | Denmark | Pimento                         | 2011           | 1                                                              |
| 54               | Denmark | Pineapples and products         | 2011           | 5                                                              |
| 54               | Denmark | Potatoes and products           | 2011           | 106                                                            |
| 54               | Denmark | Poultry Meat                    | 2011           | 94                                                             |
| 54               | Denmark | Pulses                          | 2011           | 10                                                             |
| 54               | Denmark | Pulses, Other and products      | 2011           | 2                                                              |
| 54               | Denmark | Rape and Mustardseed            | 2011           | 2                                                              |
| 54               | Denmark | Rice (Milled Equivalent)        | 2011           | 54                                                             |
| 54               | Denmark | Rye and products                | 2011           | 105                                                            |
| 54               | Denmark | Sesameseed Oil                  | 2011           | 4                                                              |
| 54               | Denmark | Soyabean Oil                    | 2011           | 47                                                             |
| 54               | Denmark | Spices                          | 2011           | 9                                                              |
| 54               | Denmark | Spices, Other                   | 2011           | 7                                                              |
| 54               | Denmark | Starchy Roots                   | 2011           | 106                                                            |
| 54               | Denmark | Stimulants                      | 2011           | 63                                                             |
| 54               | Denmark | Sugar & Sweeteners              | 2011           | 468                                                            |
| 54               | Denmark | Sugar (Raw Equivalent)          | 2011           | 402                                                            |
| 54               | Denmark | Sunflowerseed Oil               | 2011           | 13                                                             |
| 54               | Denmark | Sweeteners, Other               | 2011           | 60                                                             |

## Dietary calcium and zinc deficiency risks are decreasing but remain prevalent

| FAO Country code | Country  | Food item                  | Reference year | Net energy supply (kcal capita <sup>-1</sup> d <sup>-1</sup> ) |
|------------------|----------|----------------------------|----------------|----------------------------------------------------------------|
| 54               | Denmark  | Tomatoes and products      | 2011           | 11                                                             |
| 54               | Denmark  | Treenuts                   | 2011           | 40                                                             |
| 54               | Denmark  | Vegetable Oils             | 2011           | 180                                                            |
| 54               | Denmark  | Vegetables                 | 2011           | 89                                                             |
| 54               | Denmark  | Vegetables, Other          | 2011           | 67                                                             |
| 54               | Denmark  | Vegetal Products           | 2011           | 2,136                                                          |
| 54               | Denmark  | Wheat and products         | 2011           | 597                                                            |
| 54               | Denmark  | Wine                       | 2011           | 58                                                             |
| 55               | Dominica | Alcoholic Beverages        | 1992           | 135                                                            |
| 55               | Dominica | Animal fats                | 1992           | 31                                                             |
| 55               | Dominica | Animal Products            | 1992           | 658                                                            |
| 55               | Dominica | Bananas                    | 1992           | 43                                                             |
| 55               | Dominica | Beer                       | 1992           | 25                                                             |
| 55               | Dominica | Beverages, Alcoholic       | 1992           | 109                                                            |
| 55               | Dominica | Beverages, Fermented       | 1992           | 1                                                              |
| 55               | Dominica | Bovine Meat                | 1992           | 57                                                             |
| 55               | Dominica | Butter, Ghee               | 1992           | 1                                                              |
| 55               | Dominica | Cassava and products       | 1992           | 12                                                             |
| 55               | Dominica | Cereals - Excluding Beer   | 1992           | 762                                                            |
| 55               | Dominica | Cocoa Beans and products   | 1992           | 27                                                             |
| 55               | Dominica | Coconut Oil                | 1992           | 51                                                             |
| 55               | Dominica | Coconuts - Incl Copra      | 1992           | 73                                                             |
| 55               | Dominica | Coffee and products        | 1992           | 4                                                              |
| 55               | Dominica | Eggs                       | 1992           | 7                                                              |
| 55               | Dominica | Fats, Animals, Raw         | 1992           | 29                                                             |
| 55               | Dominica | Fish, Seafood              | 1992           | 48                                                             |
| 55               | Dominica | Fruits - Excluding Wine    | 1992           | 277                                                            |
| 55               | Dominica | Fruits, Other              | 1992           | 48                                                             |
| 55               | Dominica | Grand Total                | 1992           | 2,872                                                          |
| 55               | Dominica | Grapefruit and products    | 1992           | 101                                                            |
| 55               | Dominica | Groundnuts (Shelled Eq)    | 1992           | 1                                                              |
| 55               | Dominica | Lemons, Limes and products | 1992           | 5                                                              |
| 55               | Dominica | Maize and products         | 1992           | 40                                                             |
| 55               | Dominica | Maize Germ Oil             | 1992           | 34                                                             |
| 55               | Dominica | Marine Fish, Other         | 1992           | 15                                                             |
| 55               | Dominica | Meat                       | 1992           | 320                                                            |
| 55               | Dominica | Meat, Other                | 1992           | 24                                                             |
| 55               | Dominica | Milk - Excluding Butter    | 1992           | 246                                                            |
| 55               | Dominica | Miscellaneous              | 1992           | 17                                                             |
| 55               | Dominica | Mutton & Goat Meat         | 1992           | 6                                                              |
| 55               | Dominica | Offals                     | 1992           | 6                                                              |
| 55               | Dominica | Oilcrops                   | 1992           | 75                                                             |
| 55               | Dominica | Oilcrops Oil, Other        | 1992           | 89                                                             |
| 55               | Dominica | Onions                     | 1992           | 4                                                              |
| 55               | Dominica | Oranges, Mandarines        | 1992           | 27                                                             |
| 55               | Dominica | Pelagic Fish               | 1992           | 32                                                             |
| 55               | Dominica | Pigmeat                    | 1992           | 64                                                             |
| 55               | Dominica | Plantains                  | 1992           | 54                                                             |
| 55               | Dominica | Potatoes and products      | 1992           | 6                                                              |
| 55               | Dominica | Poultry Meat               | 1992           | 170                                                            |
| 55               | Dominica | Pulses                     | 1992           | 36                                                             |
| 55               | Dominica | Pulses, Other and products | 1992           | 36                                                             |
| 55               | Dominica | Rice (Milled Equivalent)   | 1992           | 123                                                            |
| 55               | Dominica | Roots, Other               | 1992           | 95                                                             |
| 55               | Dominica | Soyabean Oil               | 1992           | 23                                                             |
| 55               | Dominica | Spices                     | 1992           | 8                                                              |
| 55               | Dominica | Spices, Other              | 1992           | 8                                                              |
| 55               | Dominica | Starchy Roots              | 1992           | 180                                                            |
| 55               | Dominica | Stimulants                 | 1992           | 31                                                             |
| 55               | Dominica | Sugar & Sweeteners         | 1992           | 439                                                            |
| 55               | Dominica | Sugar (Raw Equivalent)     | 1992           | 423                                                            |
| 55               | Dominica | Sugar cane                 | 1992           | 5                                                              |
| 55               | Dominica | Sugar Crops                | 1992           | 5                                                              |
| 55               | Dominica | Sweet potatoes             | 1992           | 5                                                              |
| 55               | Dominica | Sweeteners, Other          | 1992           | 16                                                             |
| 55               | Dominica | Tomatoes and products      | 1992           | 1                                                              |
| 55               | Dominica | Vegetable Oils             | 1992           | 197                                                            |
| 55               | Dominica | Vegetables                 | 1992           | 52                                                             |
| 55               | Dominica | Vegetables, Other          | 1992           | 47                                                             |
| 55               | Dominica | Vegetal Products           | 1992           | 2,215                                                          |
| 55               | Dominica | Wheat and products         | 1992           | 598                                                            |
| 55               | Dominica | Wine                       | 1992           | 1                                                              |
| 55               | Dominica | Yams                       | 1992           | 63                                                             |
| 55               | Dominica | Alcoholic Beverages        | 1993           | 134                                                            |
| 55               | Dominica | Animal fats                | 1993           | 32                                                             |
| 55               | Dominica | Animal Products            | 1993           | 639                                                            |
| 55               | Dominica | Bananas                    | 1993           | 53                                                             |
| 55               | Dominica | Beer                       | 1993           | 28                                                             |
| 55               | Dominica | Beverages, Alcoholic       | 1993           | 99                                                             |
| 55               | Dominica | Bovine Meat                | 1993           | 55                                                             |
| 55               | Dominica | Butter, Ghee               | 1993           | 3                                                              |
| 55               | Dominica | Cassava and products       | 1993           | 12                                                             |
| 55               | Dominica | Cereals - Excluding Beer   | 1993           | 724                                                            |
| 55               | Dominica | Cocoa Beans and products   | 1993           | 21                                                             |
| 55               | Dominica | Coconut Oil                | 1993           | 68                                                             |
| 55               | Dominica | Coconuts - Incl Copra      | 1993           | 73                                                             |
| 55               | Dominica | Coffee and products        | 1993           | 5                                                              |
| 55               | Dominica | Eggs                       | 1993           | 8                                                              |
| 55               | Dominica | Fats, Animals, Raw         | 1993           | 29                                                             |
| 55               | Dominica | Fish, Seafood              | 1993           | 51                                                             |
| 55               | Dominica | Fruits - Excluding Wine    | 1993           | 263                                                            |
| 55               | Dominica | Fruits, Other              | 1993           | 59                                                             |
| 55               | Dominica | Grand Total                | 1993           | 2,856                                                          |
| 55               | Dominica | Grapefruit and products    | 1993           | 67                                                             |
| 55               | Dominica | Groundnuts (Shelled Eq)    | 1993           | 1                                                              |
| 55               | Dominica | Lemons, Limes and products | 1993           | 4                                                              |
| 55               | Dominica | Maize and products         | 1993           | 52                                                             |

Dietary calcium and zinc deficiency risks are decreasing but remain prevalent

| FAO Country code | Country  | Food item                  | Reference year | Net energy supply (kcal <i>capita</i> <sup>-1</sup> d <sup>-1</sup> ) |
|------------------|----------|----------------------------|----------------|-----------------------------------------------------------------------|
| 55               | Dominica | Maize Germ Oil             | 1993           | 10                                                                    |
| 55               | Dominica | Marine Fish, Other         | 1993           | 18                                                                    |
| 55               | Dominica | Meat                       | 1993           | 314                                                                   |
| 55               | Dominica | Meat, Other                | 1993           | 21                                                                    |
| 55               | Dominica | Milk - Excluding Butter    | 1993           | 226                                                                   |
| 55               | Dominica | Miscellaneous              | 1993           | 21                                                                    |
| 55               | Dominica | Mutton & Goat Meat         | 1993           | 7                                                                     |
| 55               | Dominica | Offals                     | 1993           | 7                                                                     |
| 55               | Dominica | Oilcrops                   | 1993           | 74                                                                    |
| 55               | Dominica | Oilcrops Oil, Other        | 1993           | 121                                                                   |
| 55               | Dominica | Onions                     | 1993           | 4                                                                     |
| 55               | Dominica | Oranges, Mandarines        | 1993           | 23                                                                    |
| 55               | Dominica | Pelagic Fish               | 1993           | 33                                                                    |
| 55               | Dominica | Pigmeat                    | 1993           | 53                                                                    |
| 55               | Dominica | Plantains                  | 1993           | 58                                                                    |
| 55               | Dominica | Potatoes and products      | 1993           | 5                                                                     |
| 55               | Dominica | Poultry Meat               | 1993           | 179                                                                   |
| 55               | Dominica | Pulses                     | 1993           | 39                                                                    |
| 55               | Dominica | Pulses, Other and products | 1993           | 39                                                                    |
| 55               | Dominica | Rice (Milled Equivalent)   | 1993           | 119                                                                   |
| 55               | Dominica | Roots, Other               | 1993           | 95                                                                    |
| 55               | Dominica | Soyabean Oil               | 1993           | 32                                                                    |
| 55               | Dominica | Spices                     | 1993           | 8                                                                     |
| 55               | Dominica | Spices, Other              | 1993           | 8                                                                     |
| 55               | Dominica | Starchy Roots              | 1993           | 187                                                                   |
| 55               | Dominica | Stimulants                 | 1993           | 26                                                                    |
| 55               | Dominica | Sugar & Sweeteners         | 1993           | 456                                                                   |
| 55               | Dominica | Sugar (Raw Equivalent)     | 1993           | 442                                                                   |
| 55               | Dominica | Sugar cane                 | 1993           | 5                                                                     |
| 55               | Dominica | Sugar Crops                | 1993           | 5                                                                     |
| 55               | Dominica | Sweet potatoes             | 1993           | 12                                                                    |
| 55               | Dominica | Sweeteners, Other          | 1993           | 14                                                                    |
| 55               | Dominica | Tomatoes and products      | 1993           | 1                                                                     |
| 55               | Dominica | Vegetable Oils             | 1993           | 231                                                                   |
| 55               | Dominica | Vegetables                 | 1993           | 49                                                                    |
| 55               | Dominica | Vegetables, Other          | 1993           | 44                                                                    |
| 55               | Dominica | Vegetal Products           | 1993           | 2,218                                                                 |
| 55               | Dominica | Wheat and products         | 1993           | 552                                                                   |
| 55               | Dominica | Wine                       | 1993           | 8                                                                     |
| 55               | Dominica | Yams                       | 1993           | 62                                                                    |
| 55               | Dominica | Alcoholic Beverages        | 1994           | 110                                                                   |
| 55               | Dominica | Animal fats                | 1994           | 33                                                                    |
| 55               | Dominica | Animal Products            | 1994           | 632                                                                   |
| 55               | Dominica | Apples and products        | 1994           | 1                                                                     |
| 55               | Dominica | Bananas                    | 1994           | 53                                                                    |
| 55               | Dominica | Beer                       | 1994           | 24                                                                    |
| 55               | Dominica | Beverages, Alcoholic       | 1994           | 77                                                                    |
| 55               | Dominica | Beverages, Fermented       | 1994           | 1                                                                     |
| 55               | Dominica | Bovine Meat                | 1994           | 52                                                                    |
| 55               | Dominica | Butter, Ghee               | 1994           | 5                                                                     |
| 55               | Dominica | Cassava and products       | 1994           | 12                                                                    |
| 55               | Dominica | Cereals - Excluding Beer   | 1994           | 783                                                                   |
| 55               | Dominica | Cocoa Beans and products   | 1994           | 29                                                                    |
| 55               | Dominica | Coconut Oil                | 1994           | 68                                                                    |
| 55               | Dominica | Coconuts - Incl Copra      | 1994           | 73                                                                    |
| 55               | Dominica | Coffee and products        | 1994           | 6                                                                     |
| 55               | Dominica | Demersal Fish              | 1994           | 12                                                                    |
| 55               | Dominica | Eggs                       | 1994           | 9                                                                     |
| 55               | Dominica | Fats, Animals, Raw         | 1994           | 28                                                                    |
| 55               | Dominica | Fish, Seafood              | 1994           | 53                                                                    |
| 55               | Dominica | Fruits - Excluding Wine    | 1994           | 216                                                                   |
| 55               | Dominica | Fruits, Other              | 1994           | 31                                                                    |
| 55               | Dominica | Grand Total                | 1994           | 2,872                                                                 |
| 55               | Dominica | Grapefruit and products    | 1994           | 67                                                                    |
| 55               | Dominica | Lemons, Limes and products | 1994           | 3                                                                     |
| 55               | Dominica | Maize and products         | 1994           | 40                                                                    |
| 55               | Dominica | Maize Germ Oil             | 1994           | 9                                                                     |
| 55               | Dominica | Marine Fish, Other         | 1994           | 19                                                                    |
| 55               | Dominica | Meat                       | 1994           | 305                                                                   |
| 55               | Dominica | Meat, Other                | 1994           | 24                                                                    |
| 55               | Dominica | Milk - Excluding Butter    | 1994           | 220                                                                   |
| 55               | Dominica | Miscellaneous              | 1994           | 22                                                                    |
| 55               | Dominica | Mutton & Goat Meat         | 1994           | 6                                                                     |
| 55               | Dominica | Offals                     | 1994           | 11                                                                    |
| 55               | Dominica | Oilcrops                   | 1994           | 74                                                                    |
| 55               | Dominica | Oilcrops Oil, Other        | 1994           | 98                                                                    |
| 55               | Dominica | Onions                     | 1994           | 4                                                                     |
| 55               | Dominica | Oranges, Mandarines        | 1994           | 29                                                                    |
| 55               | Dominica | Pelagic Fish               | 1994           | 22                                                                    |
| 55               | Dominica | Pigmeat                    | 1994           | 53                                                                    |
| 55               | Dominica | Plantains                  | 1994           | 32                                                                    |
| 55               | Dominica | Potatoes and products      | 1994           | 6                                                                     |
| 55               | Dominica | Poultry Meat               | 1994           | 170                                                                   |
| 55               | Dominica | Pulses                     | 1994           | 42                                                                    |
| 55               | Dominica | Pulses, Other and products | 1994           | 42                                                                    |
| 55               | Dominica | Rice (Milled Equivalent)   | 1994           | 117                                                                   |
| 55               | Dominica | Roots, Other               | 1994           | 119                                                                   |
| 55               | Dominica | Soyabean Oil               | 1994           | 36                                                                    |
| 55               | Dominica | Spices                     | 1994           | 21                                                                    |
| 55               | Dominica | Spices, Other              | 1994           | 21                                                                    |
| 55               | Dominica | Starchy Roots              | 1994           | 202                                                                   |
| 55               | Dominica | Stimulants                 | 1994           | 35                                                                    |
| 55               | Dominica | Sugar & Sweeteners         | 1994           | 469                                                                   |
| 55               | Dominica | Sugar (Raw Equivalent)     | 1994           | 458                                                                   |
| 55               | Dominica | Sugar cane                 | 1994           | 5                                                                     |
| 55               | Dominica | Sugar Crops                | 1994           | 5                                                                     |
| 55               | Dominica | Sweet potatoes             | 1994           | 9                                                                     |

Dietary calcium and zinc deficiency risks are decreasing but remain prevalent

| FAO Country code | Country  | Food item                       | Reference year | Net energy supply (kcal capita <sup>-1</sup> d <sup>-1</sup> ) |
|------------------|----------|---------------------------------|----------------|----------------------------------------------------------------|
| 55               | Dominica | Sweeteners, Other               | 1994           | 11                                                             |
| 55               | Dominica | Tomatoes and products           | 1994           | 1                                                              |
| 55               | Dominica | Vegetable Oils                  | 1994           | 211                                                            |
| 55               | Dominica | Vegetables                      | 1994           | 49                                                             |
| 55               | Dominica | Vegetables, Other               | 1994           | 44                                                             |
| 55               | Dominica | Vegetal Products                | 1994           | 2,240                                                          |
| 55               | Dominica | Wheat and products              | 1994           | 626                                                            |
| 55               | Dominica | Wine                            | 1994           | 8                                                              |
| 55               | Dominica | Yams                            | 1994           | 57                                                             |
| 55               | Dominica | Alcoholic Beverages             | 1995           | 136                                                            |
| 55               | Dominica | Animal fats                     | 1995           | 30                                                             |
| 55               | Dominica | Animal Products                 | 1995           | 661                                                            |
| 55               | Dominica | Apples and products             | 1995           | 1                                                              |
| 55               | Dominica | Bananas                         | 1995           | 53                                                             |
| 55               | Dominica | Barley and products             | 1995           | 5                                                              |
| 55               | Dominica | Beer                            | 1995           | 32                                                             |
| 55               | Dominica | Beverages, Alcoholic            | 1995           | 95                                                             |
| 55               | Dominica | Beverages, Fermented            | 1995           | 1                                                              |
| 55               | Dominica | Bovine Meat                     | 1995           | 57                                                             |
| 55               | Dominica | Butter, Chee                    | 1995           | 7                                                              |
| 55               | Dominica | Cassava and products            | 1995           | 16                                                             |
| 55               | Dominica | Cereals - Excluding Beer        | 1995           | 797                                                            |
| 55               | Dominica | Cereals, Other                  | 1995           | 28                                                             |
| 55               | Dominica | Cocoa Beans and products        | 1995           | 29                                                             |
| 55               | Dominica | Coconut Oil                     | 1995           | 51                                                             |
| 55               | Dominica | Coconuts - Incl Copra           | 1995           | 73                                                             |
| 55               | Dominica | Coffee and products             | 1995           | 5                                                              |
| 55               | Dominica | Demersal Fish                   | 1995           | 8                                                              |
| 55               | Dominica | Eggs                            | 1995           | 8                                                              |
| 55               | Dominica | Fats, Animals, Raw              | 1995           | 22                                                             |
| 55               | Dominica | Fish, Seafood                   | 1995           | 65                                                             |
| 55               | Dominica | Fruits - Excluding Wine         | 1995           | 227                                                            |
| 55               | Dominica | Fruits, Other                   | 1995           | 25                                                             |
| 55               | Dominica | Grand Total                     | 1995           | 2,942                                                          |
| 55               | Dominica | Grapefruit and products         | 1995           | 56                                                             |
| 55               | Dominica | Grapes and products (excl wine) | 1995           | 3                                                              |
| 55               | Dominica | Lemons, Limes and products      | 1995           | 4                                                              |
| 55               | Dominica | Maize and products              | 1995           | 28                                                             |
| 55               | Dominica | Marine Fish, Other              | 1995           | 21                                                             |
| 55               | Dominica | Meat                            | 1995           | 303                                                            |
| 55               | Dominica | Meat, Other                     | 1995           | 8                                                              |
| 55               | Dominica | Milk - Excluding Butter         | 1995           | 244                                                            |
| 55               | Dominica | Miscellaneous                   | 1995           | 8                                                              |
| 55               | Dominica | Mutton & Goat Meat              | 1995           | 5                                                              |
| 55               | Dominica | Offals                          | 1995           | 11                                                             |
| 55               | Dominica | Oilcrops                        | 1995           | 77                                                             |
| 55               | Dominica | Oilcrops Oil, Other             | 1995           | 78                                                             |
| 55               | Dominica | Olive Oil                       | 1995           | 1                                                              |
| 55               | Dominica | Onions                          | 1995           | 5                                                              |
| 55               | Dominica | Oranges, Mandarines             | 1995           | 33                                                             |
| 55               | Dominica | Pelagic Fish                    | 1995           | 37                                                             |
| 55               | Dominica | Pepper                          | 1995           | 3                                                              |
| 55               | Dominica | Pigmeat                         | 1995           | 81                                                             |
| 55               | Dominica | Plantains                       | 1995           | 52                                                             |
| 55               | Dominica | Potatoes and products           | 1995           | 9                                                              |
| 55               | Dominica | Poultry Meat                    | 1995           | 152                                                            |
| 55               | Dominica | Pulses                          | 1995           | 70                                                             |
| 55               | Dominica | Pulses, Other and products      | 1995           | 70                                                             |
| 55               | Dominica | Rape and Mustardseed            | 1995           | 3                                                              |
| 55               | Dominica | Rice (Milled Equivalent)        | 1995           | 91                                                             |
| 55               | Dominica | Roots, Other                    | 1995           | 191                                                            |
| 55               | Dominica | Soyabean Oil                    | 1995           | 53                                                             |
| 55               | Dominica | Spices                          | 1995           | 13                                                             |
| 55               | Dominica | Spices, Other                   | 1995           | 10                                                             |
| 55               | Dominica | Starchy Roots                   | 1995           | 258                                                            |
| 55               | Dominica | Stimulants                      | 1995           | 33                                                             |
| 55               | Dominica | Sugar & Sweeteners              | 1995           | 424                                                            |
| 55               | Dominica | Sugar (Raw Equivalent)          | 1995           | 404                                                            |
| 55               | Dominica | Sugar cane                      | 1995           | 5                                                              |
| 55               | Dominica | Sugar Crops                     | 1995           | 5                                                              |
| 55               | Dominica | Sweet potatoes                  | 1995           | 11                                                             |
| 55               | Dominica | Sweeteners, Other               | 1995           | 20                                                             |
| 55               | Dominica | Tomatoes and products           | 1995           | 2                                                              |
| 55               | Dominica | Treenuts                        | 1995           | 1                                                              |
| 55               | Dominica | Vegetable Oils                  | 1995           | 183                                                            |
| 55               | Dominica | Vegetables                      | 1995           | 49                                                             |
| 55               | Dominica | Vegetables, Other               | 1995           | 42                                                             |
| 55               | Dominica | Vegetal Products                | 1995           | 2,281                                                          |
| 55               | Dominica | Wheat and products              | 1995           | 644                                                            |
| 55               | Dominica | Wine                            | 1995           | 9                                                              |
| 55               | Dominica | Yams                            | 1995           | 31                                                             |
| 55               | Dominica | Alcoholic Beverages             | 1996           | 98                                                             |
| 55               | Dominica | Animal fats                     | 1996           | 24                                                             |
| 55               | Dominica | Animal Products                 | 1996           | 671                                                            |
| 55               | Dominica | Apples and products             | 1996           | 1                                                              |
| 55               | Dominica | Bananas                         | 1996           | 53                                                             |
| 55               | Dominica | Barley and products             | 1996           | 16                                                             |
| 55               | Dominica | Beer                            | 1996           | 6                                                              |
| 55               | Dominica | Beverages, Alcoholic            | 1996           | 86                                                             |
| 55               | Dominica | Beverages, Fermented            | 1996           | 1                                                              |
| 55               | Dominica | Bovine Meat                     | 1996           | 56                                                             |
| 55               | Dominica | Butter, Chee                    | 1996           | 2                                                              |
| 55               | Dominica | Cassava and products            | 1996           | 14                                                             |
| 55               | Dominica | Cereals - Excluding Beer        | 1996           | 706                                                            |
| 55               | Dominica | Cereals, Other                  | 1996           | 9                                                              |
| 55               | Dominica | Cocoa Beans and products        | 1996           | 25                                                             |
| 55               | Dominica | Coconut Oil                     | 1996           | 51                                                             |

Dietary calcium and zinc deficiency risks are decreasing but remain prevalent

| FAO Country code | Country  | Food item                       | Reference year | Net energy supply (kcal capita <sup>-1</sup> d <sup>-1</sup> ) |
|------------------|----------|---------------------------------|----------------|----------------------------------------------------------------|
| 55               | Dominica | Coconuts - Incl Copra           | 1996           | 73                                                             |
| 55               | Dominica | Coffee and products             | 1996           | 9                                                              |
| 55               | Dominica | Demersal Fish                   | 1996           | 10                                                             |
| 55               | Dominica | Eggs                            | 1996           | 8                                                              |
| 55               | Dominica | Fats, Animals, Raw              | 1996           | 23                                                             |
| 55               | Dominica | Fish, Seafood                   | 1996           | 63                                                             |
| 55               | Dominica | Fruits - Excluding Wine         | 1996           | 316                                                            |
| 55               | Dominica | Fruits, Other                   | 1996           | 29                                                             |
| 55               | Dominica | Grand Total                     | 1996           | 2,897                                                          |
| 55               | Dominica | Grapefruit and products         | 1996           | 116                                                            |
| 55               | Dominica | Grapes and products (excl wine) | 1996           | 3                                                              |
| 55               | Dominica | Groundnuts (Shelled Eq)         | 1996           | 11                                                             |
| 55               | Dominica | Lemons, Limes and products      | 1996           | 4                                                              |
| 55               | Dominica | Maize and products              | 1996           | 43                                                             |
| 55               | Dominica | Maize Germ Oil                  | 1996           | 1                                                              |
| 55               | Dominica | Marine Fish, Other              | 1996           | 25                                                             |
| 55               | Dominica | Meat                            | 1996           | 317                                                            |
| 55               | Dominica | Meat, Other                     | 1996           | 27                                                             |
| 55               | Dominica | Milk - Excluding Butter         | 1996           | 247                                                            |
| 55               | Dominica | Miscellaneous                   | 1996           | 10                                                             |
| 55               | Dominica | Mutton & Goat Meat              | 1996           | 7                                                              |
| 55               | Dominica | Offals                          | 1996           | 11                                                             |
| 55               | Dominica | Oilcrops                        | 1996           | 87                                                             |
| 55               | Dominica | Oilcrops Oil, Other             | 1996           | 78                                                             |
| 55               | Dominica | Olive Oil                       | 1996           | 6                                                              |
| 55               | Dominica | Onions                          | 1996           | 5                                                              |
| 55               | Dominica | Oranges, Mandarines             | 1996           | 59                                                             |
| 55               | Dominica | Pelagic Fish                    | 1996           | 28                                                             |
| 55               | Dominica | Pigmeat                         | 1996           | 76                                                             |
| 55               | Dominica | Plantains                       | 1996           | 52                                                             |
| 55               | Dominica | Potatoes and products           | 1996           | 8                                                              |
| 55               | Dominica | Poultry Meat                    | 1996           | 151                                                            |
| 55               | Dominica | Pulses                          | 1996           | 37                                                             |
| 55               | Dominica | Pulses, Other and products      | 1996           | 37                                                             |
| 55               | Dominica | Rape and Mustardseed            | 1996           | 2                                                              |
| 55               | Dominica | Rice (Milled Equivalent)        | 1996           | 78                                                             |
| 55               | Dominica | Roots, Other                    | 1996           | 142                                                            |
| 55               | Dominica | Soyabean Oil                    | 1996           | 63                                                             |
| 55               | Dominica | Spices                          | 1996           | 18                                                             |
| 55               | Dominica | Spices, Other                   | 1996           | 18                                                             |
| 55               | Dominica | Starchy Roots                   | 1996           | 250                                                            |
| 55               | Dominica | Stimulants                      | 1996           | 34                                                             |
| 55               | Dominica | Sugar & Sweeteners              | 1996           | 405                                                            |
| 55               | Dominica | Sugar (Raw Equivalent)          | 1996           | 389                                                            |
| 55               | Dominica | Sugar cane                      | 1996           | 5                                                              |
| 55               | Dominica | Sugar Crops                     | 1996           | 5                                                              |
| 55               | Dominica | Sweet potatoes                  | 1996           | 8                                                              |
| 55               | Dominica | Sweeteners, Other               | 1996           | 15                                                             |
| 55               | Dominica | Tomatoes and products           | 1996           | 2                                                              |
| 55               | Dominica | Treenuts                        | 1996           | 1                                                              |
| 55               | Dominica | Vegetable Oils                  | 1996           | 199                                                            |
| 55               | Dominica | Vegetables                      | 1996           | 59                                                             |
| 55               | Dominica | Vegetables, Other               | 1996           | 52                                                             |
| 55               | Dominica | Vegetal Products                | 1996           | 2,226                                                          |
| 55               | Dominica | Wheat and products              | 1996           | 559                                                            |
| 55               | Dominica | Wine                            | 1996           | 6                                                              |
| 55               | Dominica | Yams                            | 1996           | 77                                                             |
| 55               | Dominica | Alcoholic Beverages             | 1997           | 111                                                            |
| 55               | Dominica | Animal fats                     | 1997           | 21                                                             |
| 55               | Dominica | Animal Products                 | 1997           | 666                                                            |
| 55               | Dominica | Apples and products             | 1997           | 2                                                              |
| 55               | Dominica | Bananas                         | 1997           | 53                                                             |
| 55               | Dominica | Barley and products             | 1997           | 17                                                             |
| 55               | Dominica | Beer                            | 1997           | 12                                                             |
| 55               | Dominica | Beverages, Alcoholic            | 1997           | 89                                                             |
| 55               | Dominica | Beverages, Fermented            | 1997           | 2                                                              |
| 55               | Dominica | Bovine Meat                     | 1997           | 54                                                             |
| 55               | Dominica | Butter, Ghee                    | 1997           | 2                                                              |
| 55               | Dominica | Cassava and products            | 1997           | 14                                                             |
| 55               | Dominica | Cereals - Excluding Beer        | 1997           | 670                                                            |
| 55               | Dominica | Cereals, Other                  | 1997           | 10                                                             |
| 55               | Dominica | Cocoa Beans and products        | 1997           | 46                                                             |
| 55               | Dominica | Coconut Oil                     | 1997           | 51                                                             |
| 55               | Dominica | Coconuts - Incl Copra           | 1997           | 73                                                             |
| 55               | Dominica | Coffee and products             | 1997           | 7                                                              |
| 55               | Dominica | Demersal Fish                   | 1997           | 11                                                             |
| 55               | Dominica | Eggs                            | 1997           | 7                                                              |
| 55               | Dominica | Fats, Animals, Raw              | 1997           | 19                                                             |
| 55               | Dominica | Fish, Seafood                   | 1997           | 56                                                             |
| 55               | Dominica | Fruits - Excluding Wine         | 1997           | 331                                                            |
| 55               | Dominica | Fruits, Other                   | 1997           | 32                                                             |
| 55               | Dominica | Grand Total                     | 1997           | 2,929                                                          |
| 55               | Dominica | Grapefruit and products         | 1997           | 129                                                            |
| 55               | Dominica | Grapes and products (excl wine) | 1997           | 2                                                              |
| 55               | Dominica | Groundnuts (Shelled Eq)         | 1997           | 4                                                              |
| 55               | Dominica | Lemons, Limes and products      | 1997           | 8                                                              |
| 55               | Dominica | Maize and products              | 1997           | 35                                                             |
| 55               | Dominica | Marine Fish, Other              | 1997           | 25                                                             |
| 55               | Dominica | Meat                            | 1997           | 288                                                            |
| 55               | Dominica | Meat, Other                     | 1997           | 3                                                              |
| 55               | Dominica | Milk - Excluding Butter         | 1997           | 283                                                            |
| 55               | Dominica | Miscellaneous                   | 1997           | 9                                                              |
| 55               | Dominica | Mutton & Goat Meat              | 1997           | 5                                                              |
| 55               | Dominica | Offals                          | 1997           | 11                                                             |
| 55               | Dominica | Oilcrops                        | 1997           | 80                                                             |
| 55               | Dominica | Oilcrops Oil, Other             | 1997           | 84                                                             |
| 55               | Dominica | Olive Oil                       | 1997           | 4                                                              |



Dietary calcium and zinc deficiency risks are decreasing but remain prevalent

| FAO Country code | Country  | Food item                       | Reference year | Net energy supply (kcal <i>capita</i> <sup>-1</sup> d <sup>-1</sup> ) |
|------------------|----------|---------------------------------|----------------|-----------------------------------------------------------------------|
| 55               | Dominica | Onions                          | 1997           | 7                                                                     |
| 55               | Dominica | Oranges, Mandarines             | 1997           | 66                                                                    |
| 55               | Dominica | Pelagic Fish                    | 1997           | 20                                                                    |
| 55               | Dominica | Pigmeat                         | 1997           | 84                                                                    |
| 55               | Dominica | Plantains                       | 1997           | 41                                                                    |
| 55               | Dominica | Potatoes and products           | 1997           | 10                                                                    |
| 55               | Dominica | Poultry Meat                    | 1997           | 141                                                                   |
| 55               | Dominica | Pulses                          | 1997           | 46                                                                    |
| 55               | Dominica | Pulses, Other and products      | 1997           | 46                                                                    |
| 55               | Dominica | Rape and Mustardseed            | 1997           | 3                                                                     |
| 55               | Dominica | Rice (Milled Equivalent)        | 1997           | 77                                                                    |
| 55               | Dominica | Roots, Other                    | 1997           | 156                                                                   |
| 55               | Dominica | Soyabean Oil                    | 1997           | 65                                                                    |
| 55               | Dominica | Spices                          | 1997           | 12                                                                    |
| 55               | Dominica | Spices, Other                   | 1997           | 12                                                                    |
| 55               | Dominica | Starchy Roots                   | 1997           | 271                                                                   |
| 55               | Dominica | Stimulants                      | 1997           | 53                                                                    |
| 55               | Dominica | Sugar & Sweeteners              | 1997           | 412                                                                   |
| 55               | Dominica | Sugar (Raw Equivalent)          | 1997           | 390                                                                   |
| 55               | Dominica | Sugar cane                      | 1997           | 5                                                                     |
| 55               | Dominica | Sugar Crops                     | 1997           | 5                                                                     |
| 55               | Dominica | Sweet potatoes                  | 1997           | 10                                                                    |
| 55               | Dominica | Sweeteners, Other               | 1997           | 22                                                                    |
| 55               | Dominica | Tomatoes and products           | 1997           | 2                                                                     |
| 55               | Dominica | Treenuts                        | 1997           | 5                                                                     |
| 55               | Dominica | Vegetable Oils                  | 1997           | 205                                                                   |
| 55               | Dominica | Vegetables                      | 1997           | 53                                                                    |
| 55               | Dominica | Vegetables, Other               | 1997           | 44                                                                    |
| 55               | Dominica | Vegetal Products                | 1997           | 2,264                                                                 |
| 55               | Dominica | Wheat and products              | 1997           | 532                                                                   |
| 55               | Dominica | Wine                            | 1997           | 9                                                                     |
| 55               | Dominica | Yams                            | 1997           | 82                                                                    |
| 55               | Dominica | Alcoholic Beverages             | 1998           | 101                                                                   |
| 55               | Dominica | Animal fats                     | 1998           | 23                                                                    |
| 55               | Dominica | Animal Products                 | 1998           | 661                                                                   |
| 55               | Dominica | Apples and products             | 1998           | 2                                                                     |
| 55               | Dominica | Bananas                         | 1998           | 37                                                                    |
| 55               | Dominica | Barley and products             | 1998           | 68                                                                    |
| 55               | Dominica | Beer                            | 1998           | 5                                                                     |
| 55               | Dominica | Beverages, Alcoholic            | 1998           | 87                                                                    |
| 55               | Dominica | Beverages, Fermented            | 1998           | 1                                                                     |
| 55               | Dominica | Bovine Meat                     | 1998           | 60                                                                    |
| 55               | Dominica | Butter, Ghee                    | 1998           | 3                                                                     |
| 55               | Dominica | Cassava and products            | 1998           | 18                                                                    |
| 55               | Dominica | Cereals - Excluding Beer        | 1998           | 657                                                                   |
| 55               | Dominica | Cereals, Other                  | 1998           | 7                                                                     |
| 55               | Dominica | Cocoa Beans and products        | 1998           | 27                                                                    |
| 55               | Dominica | Coconut Oil                     | 1998           | 52                                                                    |
| 55               | Dominica | Coconuts - Incl Copra           | 1998           | 69                                                                    |
| 55               | Dominica | Coffee and products             | 1998           | 8                                                                     |
| 55               | Dominica | Demersal Fish                   | 1998           | 14                                                                    |
| 55               | Dominica | Eggs                            | 1998           | 7                                                                     |
| 55               | Dominica | Fats, Animals, Raw              | 1998           | 20                                                                    |
| 55               | Dominica | Fish, Seafood                   | 1998           | 69                                                                    |
| 55               | Dominica | Freshwater Fish                 | 1998           | 4                                                                     |
| 55               | Dominica | Fruits - Excluding Wine         | 1998           | 306                                                                   |
| 55               | Dominica | Fruits, Other                   | 1998           | 32                                                                    |
| 55               | Dominica | Grand Total                     | 1998           | 2,913                                                                 |
| 55               | Dominica | Grapefruit and products         | 1998           | 125                                                                   |
| 55               | Dominica | Grapes and products (excl wine) | 1998           | 3                                                                     |
| 55               | Dominica | Groundnuts (Shelled Eq)         | 1998           | 5                                                                     |
| 55               | Dominica | Lemons, Limes and products      | 1998           | 6                                                                     |
| 55               | Dominica | Maize and products              | 1998           | 32                                                                    |
| 55               | Dominica | Marine Fish, Other              | 1998           | 31                                                                    |
| 55               | Dominica | Meat                            | 1998           | 267                                                                   |
| 55               | Dominica | Meat, Other                     | 1998           | 3                                                                     |
| 55               | Dominica | Milk - Excluding Butter         | 1998           | 283                                                                   |
| 55               | Dominica | Miscellaneous                   | 1998           | 5                                                                     |
| 55               | Dominica | Mutton & Goat Meat              | 1998           | 5                                                                     |
| 55               | Dominica | Offals                          | 1998           | 11                                                                    |
| 55               | Dominica | Oilcrops                        | 1998           | 77                                                                    |
| 55               | Dominica | Oilcrops Oil, Other             | 1998           | 82                                                                    |
| 55               | Dominica | Olive Oil                       | 1998           | 4                                                                     |
| 55               | Dominica | Onions                          | 1998           | 7                                                                     |
| 55               | Dominica | Oranges, Mandarines             | 1998           | 65                                                                    |
| 55               | Dominica | Pelagic Fish                    | 1998           | 20                                                                    |
| 55               | Dominica | Pigmeat                         | 1998           | 73                                                                    |
| 55               | Dominica | Plantains                       | 1998           | 35                                                                    |
| 55               | Dominica | Potatoes and products           | 1998           | 7                                                                     |
| 55               | Dominica | Poultry Meat                    | 1998           | 126                                                                   |
| 55               | Dominica | Pulses                          | 1998           | 47                                                                    |
| 55               | Dominica | Pulses, Other and products      | 1998           | 47                                                                    |
| 55               | Dominica | Rape and Mustardseed            | 1998           | 3                                                                     |
| 55               | Dominica | Rice (Milled Equivalent)        | 1998           | 44                                                                    |
| 55               | Dominica | Roots, Other                    | 1998           | 190                                                                   |
| 55               | Dominica | Soyabean Oil                    | 1998           | 69                                                                    |
| 55               | Dominica | Spices                          | 1998           | 10                                                                    |
| 55               | Dominica | Spices, Other                   | 1998           | 10                                                                    |
| 55               | Dominica | Starchy Roots                   | 1998           | 314                                                                   |
| 55               | Dominica | Stimulants                      | 1998           | 34                                                                    |
| 55               | Dominica | Sugar & Sweeteners              | 1998           | 420                                                                   |
| 55               | Dominica | Sugar (Raw Equivalent)          | 1998           | 408                                                                   |
| 55               | Dominica | Sugar cane                      | 1998           | 5                                                                     |
| 55               | Dominica | Sugar Crops                     | 1998           | 5                                                                     |
| 55               | Dominica | Sweet potatoes                  | 1998           | 19                                                                    |
| 55               | Dominica | Sweeteners, Other               | 1998           | 12                                                                    |
| 55               | Dominica | Tomatoes and products           | 1998           | 3                                                                     |

Dietary calcium and zinc deficiency risks are decreasing but remain prevalent

| FAO Country code | Country  | Food item                       | Reference year | Net energy supply (kcal capita <sup>-1</sup> d <sup>-1</sup> ) |
|------------------|----------|---------------------------------|----------------|----------------------------------------------------------------|
| 55               | Dominica | Treenuts                        | 1998           | 2                                                              |
| 55               | Dominica | Vegetable Oils                  | 1998           | 207                                                            |
| 55               | Dominica | Vegetables                      | 1998           | 67                                                             |
| 55               | Dominica | Vegetables, Other               | 1998           | 58                                                             |
| 55               | Dominica | Vegetal Products                | 1998           | 2,253                                                          |
| 55               | Dominica | Wheat and products              | 1998           | 505                                                            |
| 55               | Dominica | Wine                            | 1998           | 10                                                             |
| 55               | Dominica | Yams                            | 1998           | 79                                                             |
| 55               | Dominica | Alcoholic Beverages             | 1999           | 103                                                            |
| 55               | Dominica | Animal fats                     | 1999           | 25                                                             |
| 55               | Dominica | Animal Products                 | 1999           | 670                                                            |
| 55               | Dominica | Apples and products             | 1999           | 1                                                              |
| 55               | Dominica | Bananas                         | 1999           | 37                                                             |
| 55               | Dominica | Barley and products             | 1999           | 83                                                             |
| 55               | Dominica | Beer                            | 1999           | 6                                                              |
| 55               | Dominica | Beverages, Alcoholic            | 1999           | 91                                                             |
| 55               | Dominica | Beverages, Fermented            | 1999           | 2                                                              |
| 55               | Dominica | Bovine Meat                     | 1999           | 54                                                             |
| 55               | Dominica | Butter, Ghee                    | 1999           | 4                                                              |
| 55               | Dominica | Cassava and products            | 1999           | 15                                                             |
| 55               | Dominica | Cereals - Excluding Beer        | 1999           | 745                                                            |
| 55               | Dominica | Cereals, Other                  | 1999           | 7                                                              |
| 55               | Dominica | Cocoa Beans and products        | 1999           | 31                                                             |
| 55               | Dominica | Coconut Oil                     | 1999           | 52                                                             |
| 55               | Dominica | Coconuts - Incl Copra           | 1999           | 69                                                             |
| 55               | Dominica | Coffee and products             | 1999           | 7                                                              |
| 55               | Dominica | Demersal Fish                   | 1999           | 10                                                             |
| 55               | Dominica | Eggs                            | 1999           | 7                                                              |
| 55               | Dominica | Fats, Animals, Raw              | 1999           | 20                                                             |
| 55               | Dominica | Fish, Seafood                   | 1999           | 80                                                             |
| 55               | Dominica | Fruits - Excluding Wine         | 1999           | 293                                                            |
| 55               | Dominica | Fruits, Other                   | 1999           | 32                                                             |
| 55               | Dominica | Grand Total                     | 1999           | 2,928                                                          |
| 55               | Dominica | Grapefruit and products         | 1999           | 114                                                            |
| 55               | Dominica | Grapes and products (excl wine) | 1999           | 3                                                              |
| 55               | Dominica | Groundnuts (Shelled Eq)         | 1999           | 6                                                              |
| 55               | Dominica | Lemons, Limes and products      | 1999           | 9                                                              |
| 55               | Dominica | Maize and products              | 1999           | 39                                                             |
| 55               | Dominica | Marine Fish, Other              | 1999           | 22                                                             |
| 55               | Dominica | Meat                            | 1999           | 231                                                            |
| 55               | Dominica | Milk - Excluding Butter         | 1999           | 316                                                            |
| 55               | Dominica | Miscellaneous                   | 1999           | 5                                                              |
| 55               | Dominica | Mutton & Goat Meat              | 1999           | 6                                                              |
| 55               | Dominica | Offals                          | 1999           | 11                                                             |
| 55               | Dominica | Oilcrops                        | 1999           | 78                                                             |
| 55               | Dominica | Oilcrops Oil, Other             | 1999           | 82                                                             |
| 55               | Dominica | Olive Oil                       | 1999           | 4                                                              |
| 55               | Dominica | Onions                          | 1999           | 7                                                              |
| 55               | Dominica | Oranges, Mandarines             | 1999           | 63                                                             |
| 55               | Dominica | Pelagic Fish                    | 1999           | 47                                                             |
| 55               | Dominica | Pigmeat                         | 1999           | 45                                                             |
| 55               | Dominica | Plantains                       | 1999           | 35                                                             |
| 55               | Dominica | Potatoes and products           | 1999           | 6                                                              |
| 55               | Dominica | Poultry Meat                    | 1999           | 127                                                            |
| 55               | Dominica | Pulses                          | 1999           | 48                                                             |
| 55               | Dominica | Pulses, Other and products      | 1999           | 48                                                             |
| 55               | Dominica | Rape and Mustardseed            | 1999           | 3                                                              |
| 55               | Dominica | Rice (Milled Equivalent)        | 1999           | 64                                                             |
| 55               | Dominica | Roots, Other                    | 1999           | 136                                                            |
| 55               | Dominica | Soyabean Oil                    | 1999           | 69                                                             |
| 55               | Dominica | Spices                          | 1999           | 13                                                             |
| 55               | Dominica | Spices, Other                   | 1999           | 13                                                             |
| 55               | Dominica | Starchy Roots                   | 1999           | 262                                                            |
| 55               | Dominica | Stimulants                      | 1999           | 38                                                             |
| 55               | Dominica | Sugar & Sweeteners              | 1999           | 396                                                            |
| 55               | Dominica | Sugar (Raw Equivalent)          | 1999           | 379                                                            |
| 55               | Dominica | Sugar cane                      | 1999           | 5                                                              |
| 55               | Dominica | Sugar Crops                     | 1999           | 5                                                              |
| 55               | Dominica | Sweet potatoes                  | 1999           | 19                                                             |
| 55               | Dominica | Sweeteners, Other               | 1999           | 17                                                             |
| 55               | Dominica | Tomatoes and products           | 1999           | 3                                                              |
| 55               | Dominica | Treenuts                        | 1999           | 1                                                              |
| 55               | Dominica | Vegetable Oils                  | 1999           | 207                                                            |
| 55               | Dominica | Vegetables                      | 1999           | 64                                                             |
| 55               | Dominica | Vegetables, Other               | 1999           | 55                                                             |
| 55               | Dominica | Vegetal Products                | 1999           | 2,259                                                          |
| 55               | Dominica | Wheat and products              | 1999           | 552                                                            |
| 55               | Dominica | Wine                            | 1999           | 4                                                              |
| 55               | Dominica | Yams                            | 1999           | 86                                                             |
| 55               | Dominica | Alcoholic Beverages             | 2000           | 120                                                            |
| 55               | Dominica | Animal fats                     | 2000           | 33                                                             |
| 55               | Dominica | Animal Products                 | 2000           | 736                                                            |
| 55               | Dominica | Apples and products             | 2000           | 2                                                              |
| 55               | Dominica | Bananas                         | 2000           | 41                                                             |
| 55               | Dominica | Barley and products             | 2000           | 30                                                             |
| 55               | Dominica | Beans                           | 2000           | 21                                                             |
| 55               | Dominica | Beer                            | 2000           | 11                                                             |
| 55               | Dominica | Beverages, Alcoholic            | 2000           | 96                                                             |
| 55               | Dominica | Beverages, Fermented            | 2000           | 1                                                              |
| 55               | Dominica | Bovine Meat                     | 2000           | 67                                                             |
| 55               | Dominica | Butter, Ghee                    | 2000           | 3                                                              |
| 55               | Dominica | Cassava and products            | 2000           | 17                                                             |
| 55               | Dominica | Cereals - Excluding Beer        | 2000           | 742                                                            |
| 55               | Dominica | Cereals, Other                  | 2000           | 9                                                              |
| 55               | Dominica | Cocoa Beans and products        | 2000           | 41                                                             |
| 55               | Dominica | Coconut Oil                     | 2000           | 35                                                             |
| 55               | Dominica | Coconuts - Incl Copra           | 2000           | 64                                                             |

Dietary calcium and zinc deficiency risks are decreasing but remain prevalent

| FAO Country code | Country  | Food item                       | Reference year | Net energy supply (kcal capita <sup>-1</sup> d <sup>-1</sup> ) |
|------------------|----------|---------------------------------|----------------|----------------------------------------------------------------|
| 55               | Dominica | Coffee and products             | 2000           | 8                                                              |
| 55               | Dominica | Demersal Fish                   | 2000           | 14                                                             |
| 55               | Dominica | Eggs                            | 2000           | 7                                                              |
| 55               | Dominica | Fats, Animals, Raw              | 2000           | 30                                                             |
| 55               | Dominica | Fish, Seafood                   | 2000           | 76                                                             |
| 55               | Dominica | Fruits - Excluding Wine         | 2000           | 311                                                            |
| 55               | Dominica | Fruits, Other                   | 2000           | 48                                                             |
| 55               | Dominica | Grand Total                     | 2000           | 3,063                                                          |
| 55               | Dominica | Grapefruit and products         | 2000           | 110                                                            |
| 55               | Dominica | Grapes and products (excl wine) | 2000           | 3                                                              |
| 55               | Dominica | Groundnuts (Shelled Eq)         | 2000           | 11                                                             |
| 55               | Dominica | Lemons, Limes and products      | 2000           | 7                                                              |
| 55               | Dominica | Maize and products              | 2000           | 44                                                             |
| 55               | Dominica | Maize Germ Oil                  | 2000           | 14                                                             |
| 55               | Dominica | Marine Fish, Other              | 2000           | 23                                                             |
| 55               | Dominica | Meat                            | 2000           | 325                                                            |
| 55               | Dominica | Milk - Excluding Butter         | 2000           | 283                                                            |
| 55               | Dominica | Miscellaneous                   | 2000           | 12                                                             |
| 55               | Dominica | Mutton & Goat Meat              | 2000           | 7                                                              |
| 55               | Dominica | Offals                          | 2000           | 11                                                             |
| 55               | Dominica | Oilcrops                        | 2000           | 80                                                             |
| 55               | Dominica | Oilcrops Oil, Other             | 2000           | 90                                                             |
| 55               | Dominica | Olive Oil                       | 2000           | 1                                                              |
| 55               | Dominica | Onions                          | 2000           | 6                                                              |
| 55               | Dominica | Oranges, Mandarines             | 2000           | 58                                                             |
| 55               | Dominica | Peas                            | 2000           | 2                                                              |
| 55               | Dominica | Pelagic Fish                    | 2000           | 39                                                             |
| 55               | Dominica | Pepper                          | 2000           | 22                                                             |
| 55               | Dominica | Pigmeat                         | 2000           | 97                                                             |
| 55               | Dominica | Pineapples and products         | 2000           | 1                                                              |
| 55               | Dominica | Plantains                       | 2000           | 43                                                             |
| 55               | Dominica | Potatoes and products           | 2000           | 13                                                             |
| 55               | Dominica | Poultry Meat                    | 2000           | 154                                                            |
| 55               | Dominica | Pulses                          | 2000           | 49                                                             |
| 55               | Dominica | Pulses, Other and products      | 2000           | 26                                                             |
| 55               | Dominica | Rape and Mustardseed            | 2000           | 4                                                              |
| 55               | Dominica | Rice (Milled Equivalent)        | 2000           | 98                                                             |
| 55               | Dominica | Roots, Other                    | 2000           | 133                                                            |
| 55               | Dominica | Soyabean Oil                    | 2000           | 53                                                             |
| 55               | Dominica | Spices                          | 2000           | 31                                                             |
| 55               | Dominica | Spices, Other                   | 2000           | 9                                                              |
| 55               | Dominica | Starchy Roots                   | 2000           | 257                                                            |
| 55               | Dominica | Stimulants                      | 2000           | 49                                                             |
| 55               | Dominica | Sugar & Sweeteners              | 2000           | 395                                                            |
| 55               | Dominica | Sugar (Raw Equivalent)          | 2000           | 369                                                            |
| 55               | Dominica | Sugar cane                      | 2000           | 5                                                              |
| 55               | Dominica | Sugar Crops                     | 2000           | 5                                                              |
| 55               | Dominica | Sweet potatoes                  | 2000           | 10                                                             |
| 55               | Dominica | Sweeteners, Other               | 2000           | 26                                                             |
| 55               | Dominica | Tomatoes and products           | 2000           | 3                                                              |
| 55               | Dominica | Treenuts                        | 2000           | 19                                                             |
| 55               | Dominica | Vegetable Oils                  | 2000           | 192                                                            |
| 55               | Dominica | Vegetables                      | 2000           | 64                                                             |
| 55               | Dominica | Vegetables, Other               | 2000           | 55                                                             |
| 55               | Dominica | Vegetal Products                | 2000           | 2,327                                                          |
| 55               | Dominica | Wheat and products              | 2000           | 561                                                            |
| 55               | Dominica | Wine                            | 2000           | 12                                                             |
| 55               | Dominica | Yams                            | 2000           | 85                                                             |
| 55               | Dominica | Alcoholic Beverages             | 2001           | 120                                                            |
| 55               | Dominica | Animal fats                     | 2001           | 51                                                             |
| 55               | Dominica | Animal Products                 | 2001           | 727                                                            |
| 55               | Dominica | Apples and products             | 2001           | 2                                                              |
| 55               | Dominica | Bananas                         | 2001           | 41                                                             |
| 55               | Dominica | Barley and products             | 2001           | 34                                                             |
| 55               | Dominica | Beans                           | 2001           | 15                                                             |
| 55               | Dominica | Beer                            | 2001           | 14                                                             |
| 55               | Dominica | Beverages, Alcoholic            | 2001           | 95                                                             |
| 55               | Dominica | Bovine Meat                     | 2001           | 54                                                             |
| 55               | Dominica | Butter, Ghee                    | 2001           | 5                                                              |
| 55               | Dominica | Cassava and products            | 2001           | 19                                                             |
| 55               | Dominica | Cereals - Excluding Beer        | 2001           | 760                                                            |
| 55               | Dominica | Cereals, Other                  | 2001           | 9                                                              |
| 55               | Dominica | Cocoa Beans and products        | 2001           | 45                                                             |
| 55               | Dominica | Coconut Oil                     | 2001           | 35                                                             |
| 55               | Dominica | Coconuts - Incl Copra           | 2001           | 64                                                             |
| 55               | Dominica | Coffee and products             | 2001           | 7                                                              |
| 55               | Dominica | Cream                           | 2001           | 1                                                              |
| 55               | Dominica | Demersal Fish                   | 2001           | 14                                                             |
| 55               | Dominica | Eggs                            | 2001           | 5                                                              |
| 55               | Dominica | Fats, Animals, Raw              | 2001           | 45                                                             |
| 55               | Dominica | Fish, Seafood                   | 2001           | 71                                                             |
| 55               | Dominica | Fruits - Excluding Wine         | 2001           | 288                                                            |
| 55               | Dominica | Fruits, Other                   | 2001           | 38                                                             |
| 55               | Dominica | Grand Total                     | 2001           | 3,040                                                          |
| 55               | Dominica | Grapefruit and products         | 2001           | 101                                                            |
| 55               | Dominica | Grapes and products (excl wine) | 2001           | 4                                                              |
| 55               | Dominica | Groundnuts (Shelled Eq)         | 2001           | 10                                                             |
| 55               | Dominica | Lemons, Limes and products      | 2001           | 6                                                              |
| 55               | Dominica | Maize and products              | 2001           | 47                                                             |
| 55               | Dominica | Maize Germ Oil                  | 2001           | 12                                                             |
| 55               | Dominica | Marine Fish, Other              | 2001           | 22                                                             |
| 55               | Dominica | Meat                            | 2001           | 315                                                            |
| 55               | Dominica | Milk - Excluding Butter         | 2001           | 273                                                            |
| 55               | Dominica | Miscellaneous                   | 2001           | 8                                                              |
| 55               | Dominica | Mutton & Goat Meat              | 2001           | 8                                                              |
| 55               | Dominica | Offals                          | 2001           | 11                                                             |
| 55               | Dominica | Oilcrops                        | 2001           | 76                                                             |

Dietary calcium and zinc deficiency risks are decreasing but remain prevalent

| FAO Country code | Country  | Food item                       | Reference year | Net energy supply (kcal capita <sup>-1</sup> d <sup>-1</sup> ) |
|------------------|----------|---------------------------------|----------------|----------------------------------------------------------------|
| 55               | Dominica | Oilcrops Oil, Other             | 2001           | 75                                                             |
| 55               | Dominica | Olive Oil                       | 2001           | 1                                                              |
| 55               | Dominica | Onions                          | 2001           | 12                                                             |
| 55               | Dominica | Oranges, Mandarines             | 2001           | 55                                                             |
| 55               | Dominica | Peas                            | 2001           | 6                                                              |
| 55               | Dominica | Pelagic Fish                    | 2001           | 35                                                             |
| 55               | Dominica | Pepper                          | 2001           | 6                                                              |
| 55               | Dominica | Pigmeat                         | 2001           | 93                                                             |
| 55               | Dominica | Plantains                       | 2001           | 41                                                             |
| 55               | Dominica | Potatoes and products           | 2001           | 13                                                             |
| 55               | Dominica | Poultry Meat                    | 2001           | 159                                                            |
| 55               | Dominica | Pulses                          | 2001           | 61                                                             |
| 55               | Dominica | Pulses, Other and products      | 2001           | 39                                                             |
| 55               | Dominica | Rape and Mustardseed            | 2001           | 3                                                              |
| 55               | Dominica | Rice (Milled Equivalent)        | 2001           | 90                                                             |
| 55               | Dominica | Roots, Other                    | 2001           | 130                                                            |
| 55               | Dominica | Soyabean Oil                    | 2001           | 58                                                             |
| 55               | Dominica | Spices                          | 2001           | 14                                                             |
| 55               | Dominica | Spices, Other                   | 2001           | 8                                                              |
| 55               | Dominica | Starchy Roots                   | 2001           | 255                                                            |
| 55               | Dominica | Stimulants                      | 2001           | 52                                                             |
| 55               | Dominica | Sugar & Sweeteners              | 2001           | 399                                                            |
| 55               | Dominica | Sugar (Raw Equivalent)          | 2001           | 384                                                            |
| 55               | Dominica | Sugar cane                      | 2001           | 5                                                              |
| 55               | Dominica | Sugar Crops                     | 2001           | 5                                                              |
| 55               | Dominica | Sweet potatoes                  | 2001           | 11                                                             |
| 55               | Dominica | Sweeteners, Other               | 2001           | 15                                                             |
| 55               | Dominica | Tomatoes and products           | 2001           | 4                                                              |
| 55               | Dominica | Treenuts                        | 2001           | 16                                                             |
| 55               | Dominica | Vegetable Oils                  | 2001           | 180                                                            |
| 55               | Dominica | Vegetables                      | 2001           | 78                                                             |
| 55               | Dominica | Vegetables, Other               | 2001           | 62                                                             |
| 55               | Dominica | Vegetal Products                | 2001           | 2,313                                                          |
| 55               | Dominica | Wheat and products              | 2001           | 581                                                            |
| 55               | Dominica | Wine                            | 2001           | 11                                                             |
| 55               | Dominica | Yams                            | 2001           | 81                                                             |
| 55               | Dominica | Alcoholic Beverages             | 2002           | 115                                                            |
| 55               | Dominica | Animal fats                     | 2002           | 36                                                             |
| 55               | Dominica | Animal Products                 | 2002           | 741                                                            |
| 55               | Dominica | Apples and products             | 2002           | 1                                                              |
| 55               | Dominica | Bananas                         | 2002           | 41                                                             |
| 55               | Dominica | Barley and products             | 2002           | 33                                                             |
| 55               | Dominica | Beans                           | 2002           | 14                                                             |
| 55               | Dominica | Beer                            | 2002           | 11                                                             |
| 55               | Dominica | Beverages, Alcoholic            | 2002           | 92                                                             |
| 55               | Dominica | Beverages, Fermented            | 2002           | 1                                                              |
| 55               | Dominica | Bovine Meat                     | 2002           | 61                                                             |
| 55               | Dominica | Butter, Ghee                    | 2002           | 2                                                              |
| 55               | Dominica | Cassava and products            | 2002           | 15                                                             |
| 55               | Dominica | Cereals - Excluding Beer        | 2002           | 731                                                            |
| 55               | Dominica | Cereals, Other                  | 2002           | 8                                                              |
| 55               | Dominica | Cocoa Beans and products        | 2002           | 45                                                             |
| 55               | Dominica | Coconut Oil                     | 2002           | 52                                                             |
| 55               | Dominica | Coconuts - Incl Copra           | 2002           | 64                                                             |
| 55               | Dominica | Coffee and products             | 2002           | 6                                                              |
| 55               | Dominica | Demersal Fish                   | 2002           | 12                                                             |
| 55               | Dominica | Eggs                            | 2002           | 9                                                              |
| 55               | Dominica | Fats, Animals, Raw              | 2002           | 34                                                             |
| 55               | Dominica | Fish, Seafood                   | 2002           | 75                                                             |
| 55               | Dominica | Fruits - Excluding Wine         | 2002           | 255                                                            |
| 55               | Dominica | Fruits, Other                   | 2002           | 44                                                             |
| 55               | Dominica | Grand Total                     | 2002           | 2,984                                                          |
| 55               | Dominica | Grapefruit and products         | 2002           | 87                                                             |
| 55               | Dominica | Grapes and products (excl wine) | 2002           | 3                                                              |
| 55               | Dominica | Groundnuts (Shelled Eq)         | 2002           | 6                                                              |
| 55               | Dominica | Lemons, Limes and products      | 2002           | 6                                                              |
| 55               | Dominica | Maize and products              | 2002           | 50                                                             |
| 55               | Dominica | Maize Germ Oil                  | 2002           | 12                                                             |
| 55               | Dominica | Marine Fish, Other              | 2002           | 15                                                             |
| 55               | Dominica | Meat                            | 2002           | 321                                                            |
| 55               | Dominica | Meat, Other                     | 2002           | 1                                                              |
| 55               | Dominica | Milk - Excluding Butter         | 2002           | 290                                                            |
| 55               | Dominica | Miscellaneous                   | 2002           | 6                                                              |
| 55               | Dominica | Mutton & Goat Meat              | 2002           | 7                                                              |
| 55               | Dominica | Offals                          | 2002           | 11                                                             |
| 55               | Dominica | Oilcrops                        | 2002           | 74                                                             |
| 55               | Dominica | Oilcrops Oil, Other             | 2002           | 59                                                             |
| 55               | Dominica | Olive Oil                       | 2002           | 1                                                              |
| 55               | Dominica | Onions                          | 2002           | 6                                                              |
| 55               | Dominica | Oranges, Mandarines             | 2002           | 32                                                             |
| 55               | Dominica | Peas                            | 2002           | 4                                                              |
| 55               | Dominica | Pelagic Fish                    | 2002           | 47                                                             |
| 55               | Dominica | Pepper                          | 2002           | 21                                                             |
| 55               | Dominica | Pigmeat                         | 2002           | 92                                                             |
| 55               | Dominica | Pineapples and products         | 2002           | 1                                                              |
| 55               | Dominica | Plantains                       | 2002           | 41                                                             |
| 55               | Dominica | Potatoes and products           | 2002           | 14                                                             |
| 55               | Dominica | Poultry Meat                    | 2002           | 161                                                            |
| 55               | Dominica | Pulses                          | 2002           | 49                                                             |
| 55               | Dominica | Pulses, Other and products      | 2002           | 31                                                             |
| 55               | Dominica | Rape and Mustardseed            | 2002           | 3                                                              |
| 55               | Dominica | Rice (Milled Equivalent)        | 2002           | 84                                                             |
| 55               | Dominica | Roots, Other                    | 2002           | 123                                                            |
| 55               | Dominica | Soyabean Oil                    | 2002           | 53                                                             |
| 55               | Dominica | Spices                          | 2002           | 27                                                             |
| 55               | Dominica | Spices, Other                   | 2002           | 7                                                              |
| 55               | Dominica | Starchy Roots                   | 2002           | 251                                                            |

Dietary calcium and zinc deficiency risks are decreasing but remain prevalent

| FAO Country code | Country  | Food item                       | Reference year | Net energy supply (kcal capita <sup>-1</sup> d <sup>-1</sup> ) |
|------------------|----------|---------------------------------|----------------|----------------------------------------------------------------|
| 55               | Dominica | Stimulants                      | 2002           | 52                                                             |
| 55               | Dominica | Sugar & Sweeteners              | 2002           | 400                                                            |
| 55               | Dominica | Sugar (Raw Equivalent)          | 2002           | 385                                                            |
| 55               | Dominica | Sugar cane                      | 2002           | 5                                                              |
| 55               | Dominica | Sugar Crops                     | 2002           | 5                                                              |
| 55               | Dominica | Sweet potatoes                  | 2002           | 12                                                             |
| 55               | Dominica | Sweeteners, Other               | 2002           | 15                                                             |
| 55               | Dominica | Tomatoes and products           | 2002           | 3                                                              |
| 55               | Dominica | Treenuts                        | 2002           | 20                                                             |
| 55               | Dominica | Vegetable Oils                  | 2002           | 177                                                            |
| 55               | Dominica | Vegetables                      | 2002           | 80                                                             |
| 55               | Dominica | Vegetables, Other               | 2002           | 70                                                             |
| 55               | Dominica | Vegetal Products                | 2002           | 2,242                                                          |
| 55               | Dominica | Wheat and products              | 2002           | 554                                                            |
| 55               | Dominica | Wine                            | 2002           | 11                                                             |
| 55               | Dominica | Yams                            | 2002           | 88                                                             |
| 55               | Dominica | Alcoholic Beverages             | 2003           | 100                                                            |
| 55               | Dominica | Animal fats                     | 2003           | 41                                                             |
| 55               | Dominica | Animal Products                 | 2003           | 700                                                            |
| 55               | Dominica | Apples and products             | 2003           | 1                                                              |
| 55               | Dominica | Bananas                         | 2003           | 41                                                             |
| 55               | Dominica | Barley and products             | 2003           | 39                                                             |
| 55               | Dominica | Beans                           | 2003           | 14                                                             |
| 55               | Dominica | Beer                            | 2003           | 4                                                              |
| 55               | Dominica | Beverages, Alcoholic            | 2003           | 86                                                             |
| 55               | Dominica | Bovine Meat                     | 2003           | 56                                                             |
| 55               | Dominica | Butter, Ghee                    | 2003           | 3                                                              |
| 55               | Dominica | Cassava and products            | 2003           | 15                                                             |
| 55               | Dominica | Cereals - Excluding Beer        | 2003           | 732                                                            |
| 55               | Dominica | Cereals, Other                  | 2003           | 3                                                              |
| 55               | Dominica | Cocoa Beans and products        | 2003           | 48                                                             |
| 55               | Dominica | Coconut Oil                     | 2003           | 52                                                             |
| 55               | Dominica | Coconuts - Incl Copra           | 2003           | 69                                                             |
| 55               | Dominica | Coffee and products             | 2003           | 8                                                              |
| 55               | Dominica | Demersal Fish                   | 2003           | 13                                                             |
| 55               | Dominica | Eggs                            | 2003           | 9                                                              |
| 55               | Dominica | Fats, Animals, Raw              | 2003           | 38                                                             |
| 55               | Dominica | Fish, Seafood                   | 2003           | 63                                                             |
| 55               | Dominica | Fruits - Excluding Wine         | 2003           | 282                                                            |
| 55               | Dominica | Fruits, Other                   | 2003           | 32                                                             |
| 55               | Dominica | Grand Total                     | 2003           | 3,006                                                          |
| 55               | Dominica | Grapefruit and products         | 2003           | 117                                                            |
| 55               | Dominica | Grapes and products (excl wine) | 2003           | 3                                                              |
| 55               | Dominica | Groundnuts (Shelled Eq)         | 2003           | 10                                                             |
| 55               | Dominica | Lemons, Limes and products      | 2003           | 5                                                              |
| 55               | Dominica | Maize and products              | 2003           | 29                                                             |
| 55               | Dominica | Maize Germ Oil                  | 2003           | 12                                                             |
| 55               | Dominica | Marine Fish, Other              | 2003           | 13                                                             |
| 55               | Dominica | Meat                            | 2003           | 304                                                            |
| 55               | Dominica | Meat, Other                     | 2003           | 1                                                              |
| 55               | Dominica | Milk - Excluding Butter         | 2003           | 273                                                            |
| 55               | Dominica | Miscellaneous                   | 2003           | 15                                                             |
| 55               | Dominica | Mutton & Goat Meat              | 2003           | 6                                                              |
| 55               | Dominica | Offals                          | 2003           | 11                                                             |
| 55               | Dominica | Oilcrops                        | 2003           | 82                                                             |
| 55               | Dominica | Oilcrops Oil, Other             | 2003           | 49                                                             |
| 55               | Dominica | Olive Oil                       | 2003           | 1                                                              |
| 55               | Dominica | Onions                          | 2003           | 6                                                              |
| 55               | Dominica | Oranges, Mandarines             | 2003           | 42                                                             |
| 55               | Dominica | Peas                            | 2003           | 2                                                              |
| 55               | Dominica | Pelagic Fish                    | 2003           | 37                                                             |
| 55               | Dominica | Pepper                          | 2003           | 17                                                             |
| 55               | Dominica | Pigmeat                         | 2003           | 92                                                             |
| 55               | Dominica | Plantains                       | 2003           | 41                                                             |
| 55               | Dominica | Potatoes and products           | 2003           | 14                                                             |
| 55               | Dominica | Poultry Meat                    | 2003           | 149                                                            |
| 55               | Dominica | Pulses                          | 2003           | 48                                                             |
| 55               | Dominica | Pulses, Other and products      | 2003           | 32                                                             |
| 55               | Dominica | Rape and Mustardseed            | 2003           | 3                                                              |
| 55               | Dominica | Rice (Milled Equivalent)        | 2003           | 87                                                             |
| 55               | Dominica | Roots, Other                    | 2003           | 136                                                            |
| 55               | Dominica | Soyabean Oil                    | 2003           | 48                                                             |
| 55               | Dominica | Spices                          | 2003           | 35                                                             |
| 55               | Dominica | Spices, Other                   | 2003           | 17                                                             |
| 55               | Dominica | Starchy Roots                   | 2003           | 273                                                            |
| 55               | Dominica | Stimulants                      | 2003           | 55                                                             |
| 55               | Dominica | Sugar & Sweeteners              | 2003           | 409                                                            |
| 55               | Dominica | Sugar (Raw Equivalent)          | 2003           | 394                                                            |
| 55               | Dominica | Sugar cane                      | 2003           | 5                                                              |
| 55               | Dominica | Sugar Crops                     | 2003           | 5                                                              |
| 55               | Dominica | Sweet potatoes                  | 2003           | 18                                                             |
| 55               | Dominica | Sweeteners, Other               | 2003           | 15                                                             |
| 55               | Dominica | Tomatoes and products           | 2003           | 2                                                              |
| 55               | Dominica | Treenuts                        | 2003           | 26                                                             |
| 55               | Dominica | Vegetable Oils                  | 2003           | 163                                                            |
| 55               | Dominica | Vegetables                      | 2003           | 82                                                             |
| 55               | Dominica | Vegetables, Other               | 2003           | 74                                                             |
| 55               | Dominica | Vegetal Products                | 2003           | 2,306                                                          |
| 55               | Dominica | Wheat and products              | 2003           | 573                                                            |
| 55               | Dominica | Wine                            | 2003           | 9                                                              |
| 55               | Dominica | Yams                            | 2003           | 90                                                             |
| 55               | Dominica | Alcoholic Beverages             | 2004           | 119                                                            |
| 55               | Dominica | Animal fats                     | 2004           | 35                                                             |
| 55               | Dominica | Animal Products                 | 2004           | 685                                                            |
| 55               | Dominica | Apples and products             | 2004           | 1                                                              |
| 55               | Dominica | Bananas                         | 2004           | 41                                                             |
| 55               | Dominica | Barley and products             | 2004           | 40                                                             |

Dietary calcium and zinc deficiency risks are decreasing but remain prevalent

| FAO Country code | Country  | Food item                       | Reference year | Net energy supply (kcal capita <sup>-1</sup> d <sup>-1</sup> ) |
|------------------|----------|---------------------------------|----------------|----------------------------------------------------------------|
| 55               | Dominica | Beans                           | 2004           | 11                                                             |
| 55               | Dominica | Beer                            | 2004           | 12                                                             |
| 55               | Dominica | Beverages, Alcoholic            | 2004           | 98                                                             |
| 55               | Dominica | Bovine Meat                     | 2004           | 60                                                             |
| 55               | Dominica | Butter, Ghee                    | 2004           | 3                                                              |
| 55               | Dominica | Cassava and products            | 2004           | 15                                                             |
| 55               | Dominica | Cereals - Excluding Beer        | 2004           | 745                                                            |
| 55               | Dominica | Cereals, Other                  | 2004           | 2                                                              |
| 55               | Dominica | Cocoa Beans and products        | 2004           | 49                                                             |
| 55               | Dominica | Coconut Oil                     | 2004           | 52                                                             |
| 55               | Dominica | Coconuts - Incl Copra           | 2004           | 69                                                             |
| 55               | Dominica | Coffee and products             | 2004           | 8                                                              |
| 55               | Dominica | Demersal Fish                   | 2004           | 10                                                             |
| 55               | Dominica | Eggs                            | 2004           | 9                                                              |
| 55               | Dominica | Fats, Animals, Raw              | 2004           | 32                                                             |
| 55               | Dominica | Fish, Seafood                   | 2004           | 61                                                             |
| 55               | Dominica | Freshwater Fish                 | 2004           | 1                                                              |
| 55               | Dominica | Fruits - Excluding Wine         | 2004           | 282                                                            |
| 55               | Dominica | Fruits, Other                   | 2004           | 32                                                             |
| 55               | Dominica | Grand Total                     | 2004           | 2,997                                                          |
| 55               | Dominica | Grapefruit and products         | 2004           | 116                                                            |
| 55               | Dominica | Grapes and products (excl wine) | 2004           | 3                                                              |
| 55               | Dominica | Groundnuts (Shelled Eq)         | 2004           | 10                                                             |
| 55               | Dominica | Lemons, Limes and products      | 2004           | 4                                                              |
| 55               | Dominica | Maize and products              | 2004           | 29                                                             |
| 55               | Dominica | Maize Germ Oil                  | 2004           | 1                                                              |
| 55               | Dominica | Marine Fish, Other              | 2004           | 10                                                             |
| 55               | Dominica | Meat                            | 2004           | 340                                                            |
| 55               | Dominica | Milk - Excluding Butter         | 2004           | 229                                                            |
| 55               | Dominica | Miscellaneous                   | 2004           | 19                                                             |
| 55               | Dominica | Mutton & Goat Meat              | 2004           | 8                                                              |
| 55               | Dominica | Oats                            | 2004           | 5                                                              |
| 55               | Dominica | Offals                          | 2004           | 11                                                             |
| 55               | Dominica | Oilcrops                        | 2004           | 82                                                             |
| 55               | Dominica | Oilcrops Oil, Other             | 2004           | 39                                                             |
| 55               | Dominica | Olive Oil                       | 2004           | 1                                                              |
| 55               | Dominica | Onions                          | 2004           | 5                                                              |
| 55               | Dominica | Oranges, Mandarines             | 2004           | 43                                                             |
| 55               | Dominica | Peas                            | 2004           | 3                                                              |
| 55               | Dominica | Pelagic Fish                    | 2004           | 39                                                             |
| 55               | Dominica | Pigmeat                         | 2004           | 106                                                            |
| 55               | Dominica | Plantains                       | 2004           | 41                                                             |
| 55               | Dominica | Potatoes and products           | 2004           | 14                                                             |
| 55               | Dominica | Poultry Meat                    | 2004           | 165                                                            |
| 55               | Dominica | Pulses                          | 2004           | 46                                                             |
| 55               | Dominica | Pulses, Other and products      | 2004           | 32                                                             |
| 55               | Dominica | Rape and Mustardseed            | 2004           | 3                                                              |
| 55               | Dominica | Rice (Milled Equivalent)        | 2004           | 94                                                             |
| 55               | Dominica | Roots, Other                    | 2004           | 134                                                            |
| 55               | Dominica | Soyabean Oil                    | 2004           | 59                                                             |
| 55               | Dominica | Spices                          | 2004           | 16                                                             |
| 55               | Dominica | Spices, Other                   | 2004           | 16                                                             |
| 55               | Dominica | Starchy Roots                   | 2004           | 266                                                            |
| 55               | Dominica | Stimulants                      | 2004           | 57                                                             |
| 55               | Dominica | Sugar & Sweeteners              | 2004           | 419                                                            |
| 55               | Dominica | Sugar (Raw Equivalent)          | 2004           | 395                                                            |
| 55               | Dominica | Sugar cane                      | 2004           | 5                                                              |
| 55               | Dominica | Sugar Crops                     | 2004           | 5                                                              |
| 55               | Dominica | Sweet potatoes                  | 2004           | 16                                                             |
| 55               | Dominica | Sweeteners, Other               | 2004           | 24                                                             |
| 55               | Dominica | Tomatoes and products           | 2004           | 2                                                              |
| 55               | Dominica | Treenuts                        | 2004           | 20                                                             |
| 55               | Dominica | Vegetable Oils                  | 2004           | 153                                                            |
| 55               | Dominica | Vegetables                      | 2004           | 82                                                             |
| 55               | Dominica | Vegetables, Other               | 2004           | 75                                                             |
| 55               | Dominica | Vegetal Products                | 2004           | 2,312                                                          |
| 55               | Dominica | Wheat and products              | 2004           | 575                                                            |
| 55               | Dominica | Wine                            | 2004           | 9                                                              |
| 55               | Dominica | Yams                            | 2004           | 87                                                             |
| 55               | Dominica | Alcoholic Beverages             | 2005           | 109                                                            |
| 55               | Dominica | Animal fats                     | 2005           | 33                                                             |
| 55               | Dominica | Animal Products                 | 2005           | 643                                                            |
| 55               | Dominica | Apples and products             | 2005           | 1                                                              |
| 55               | Dominica | Bananas                         | 2005           | 41                                                             |
| 55               | Dominica | Barley and products             | 2005           | 44                                                             |
| 55               | Dominica | Beans                           | 2005           | 17                                                             |
| 55               | Dominica | Beer                            | 2005           | 7                                                              |
| 55               | Dominica | Beverages, Alcoholic            | 2005           | 92                                                             |
| 55               | Dominica | Beverages, Fermented            | 2005           | 1                                                              |
| 55               | Dominica | Bovine Meat                     | 2005           | 62                                                             |
| 55               | Dominica | Butter, Ghee                    | 2005           | 3                                                              |
| 55               | Dominica | Cassava and products            | 2005           | 16                                                             |
| 55               | Dominica | Cereals - Excluding Beer        | 2005           | 752                                                            |
| 55               | Dominica | Cereals, Other                  | 2005           | 7                                                              |
| 55               | Dominica | Cocoa Beans and products        | 2005           | 46                                                             |
| 55               | Dominica | Coconut Oil                     | 2005           | 51                                                             |
| 55               | Dominica | Coconuts - Incl Copra           | 2005           | 52                                                             |
| 55               | Dominica | Coffee and products             | 2005           | 7                                                              |
| 55               | Dominica | Demersal Fish                   | 2005           | 9                                                              |
| 55               | Dominica | Eggs                            | 2005           | 9                                                              |
| 55               | Dominica | Fats, Animals, Raw              | 2005           | 30                                                             |
| 55               | Dominica | Fish, Seafood                   | 2005           | 52                                                             |
| 55               | Dominica | Freshwater Fish                 | 2005           | 1                                                              |
| 55               | Dominica | Fruits - Excluding Wine         | 2005           | 253                                                            |
| 55               | Dominica | Fruits, Other                   | 2005           | 31                                                             |
| 55               | Dominica | Grand Total                     | 2005           | 2,921                                                          |
| 55               | Dominica | Grapefruit and products         | 2005           | 95                                                             |

Dietary calcium and zinc deficiency risks are decreasing but remain prevalent

| FAO Country code | Country  | Food item                       | Reference year | Net energy supply (kcal capita <sup>-1</sup> d <sup>-1</sup> ) |
|------------------|----------|---------------------------------|----------------|----------------------------------------------------------------|
| 55               | Dominica | Grapes and products (excl wine) | 2005           | 4                                                              |
| 55               | Dominica | Groundnuts (Shelled Eq)         | 2005           | 17                                                             |
| 55               | Dominica | Lemons, Limes and products      | 2005           | 3                                                              |
| 55               | Dominica | Maize and products              | 2005           | 28                                                             |
| 55               | Dominica | Maize Germ Oil                  | 2005           | 1                                                              |
| 55               | Dominica | Marine Fish, Other              | 2005           | 6                                                              |
| 55               | Dominica | Meat                            | 2005           | 325                                                            |
| 55               | Dominica | Milk - Excluding Butter         | 2005           | 212                                                            |
| 55               | Dominica | Miscellaneous                   | 2005           | 17                                                             |
| 55               | Dominica | Mutton & Goat Meat              | 2005           | 7                                                              |
| 55               | Dominica | Offals                          | 2005           | 11                                                             |
| 55               | Dominica | Oilcrops                        | 2005           | 73                                                             |
| 55               | Dominica | Oilcrops Oil, Other             | 2005           | 41                                                             |
| 55               | Dominica | Olive Oil                       | 2005           | 1                                                              |
| 55               | Dominica | Onions                          | 2005           | 6                                                              |
| 55               | Dominica | Oranges, Mandarines             | 2005           | 37                                                             |
| 55               | Dominica | Peas                            | 2005           | 2                                                              |
| 55               | Dominica | Pelagic Fish                    | 2005           | 35                                                             |
| 55               | Dominica | Pepper                          | 2005           | 6                                                              |
| 55               | Dominica | Pigmeat                         | 2005           | 102                                                            |
| 55               | Dominica | Pineapples and products         | 2005           | 1                                                              |
| 55               | Dominica | Plantains                       | 2005           | 41                                                             |
| 55               | Dominica | Potatoes and products           | 2005           | 14                                                             |
| 55               | Dominica | Poultry Meat                    | 2005           | 154                                                            |
| 55               | Dominica | Pulses                          | 2005           | 54                                                             |
| 55               | Dominica | Pulses, Other and products      | 2005           | 35                                                             |
| 55               | Dominica | Rape and Mustardseed            | 2005           | 3                                                              |
| 55               | Dominica | Rice (Milled Equivalent)        | 2005           | 93                                                             |
| 55               | Dominica | Roots, Other                    | 2005           | 142                                                            |
| 55               | Dominica | Soyabean Oil                    | 2005           | 55                                                             |
| 55               | Dominica | Spices                          | 2005           | 30                                                             |
| 55               | Dominica | Spices, Other                   | 2005           | 24                                                             |
| 55               | Dominica | Starchy Roots                   | 2005           | 271                                                            |
| 55               | Dominica | Stimulants                      | 2005           | 54                                                             |
| 55               | Dominica | Sugar & Sweeteners              | 2005           | 407                                                            |
| 55               | Dominica | Sugar (Raw Equivalent)          | 2005           | 381                                                            |
| 55               | Dominica | Sugar cane                      | 2005           | 5                                                              |
| 55               | Dominica | Sugar Crops                     | 2005           | 5                                                              |
| 55               | Dominica | Sweet potatoes                  | 2005           | 22                                                             |
| 55               | Dominica | Sweeteners, Other               | 2005           | 25                                                             |
| 55               | Dominica | Tomatoes and products           | 2005           | 2                                                              |
| 55               | Dominica | Treenuts                        | 2005           | 20                                                             |
| 55               | Dominica | Vegetable Oils                  | 2005           | 149                                                            |
| 55               | Dominica | Vegetables                      | 2005           | 85                                                             |
| 55               | Dominica | Vegetables, Other               | 2005           | 77                                                             |
| 55               | Dominica | Vegetal Products                | 2005           | 2,279                                                          |
| 55               | Dominica | Wheat and products              | 2005           | 581                                                            |
| 55               | Dominica | Wine                            | 2005           | 9                                                              |
| 55               | Dominica | Yams                            | 2005           | 76                                                             |
| 55               | Dominica | Alcoholic Beverages             | 2006           | 104                                                            |
| 55               | Dominica | Animal fats                     | 2006           | 35                                                             |
| 55               | Dominica | Animal Products                 | 2006           | 687                                                            |
| 55               | Dominica | Apples and products             | 2006           | 2                                                              |
| 55               | Dominica | Bananas                         | 2006           | 41                                                             |
| 55               | Dominica | Barley and products             | 2006           | 42                                                             |
| 55               | Dominica | Beans                           | 2006           | 15                                                             |
| 55               | Dominica | Beer                            | 2006           | 10                                                             |
| 55               | Dominica | Beverages, Alcoholic            | 2006           | 86                                                             |
| 55               | Dominica | Beverages, Fermented            | 2006           | 1                                                              |
| 55               | Dominica | Bovine Meat                     | 2006           | 59                                                             |
| 55               | Dominica | Butter, Ghee                    | 2006           | 3                                                              |
| 55               | Dominica | Cassava and products            | 2006           | 13                                                             |
| 55               | Dominica | Cereals - Excluding Beer        | 2006           | 744                                                            |
| 55               | Dominica | Cocoa Beans and products        | 2006           | 47                                                             |
| 55               | Dominica | Coconut Oil                     | 2006           | 51                                                             |
| 55               | Dominica | Coconuts - Incl Copra           | 2006           | 68                                                             |
| 55               | Dominica | Coffee and products             | 2006           | 7                                                              |
| 55               | Dominica | Demersal Fish                   | 2006           | 7                                                              |
| 55               | Dominica | Eggs                            | 2006           | 9                                                              |
| 55               | Dominica | Fats, Animals, Raw              | 2006           | 32                                                             |
| 55               | Dominica | Fish, Seafood                   | 2006           | 50                                                             |
| 55               | Dominica | Freshwater Fish                 | 2006           | 1                                                              |
| 55               | Dominica | Fruits - Excluding Wine         | 2006           | 278                                                            |
| 55               | Dominica | Fruits, Other                   | 2006           | 29                                                             |
| 55               | Dominica | Grand Total                     | 2006           | 2,914                                                          |
| 55               | Dominica | Grapefruit and products         | 2006           | 97                                                             |
| 55               | Dominica | Grapes and products (excl wine) | 2006           | 5                                                              |
| 55               | Dominica | Groundnuts (Shelled Eq)         | 2006           | 10                                                             |
| 55               | Dominica | Lemons, Limes and products      | 2006           | 3                                                              |
| 55               | Dominica | Maize and products              | 2006           | 29                                                             |
| 55               | Dominica | Maize Germ Oil                  | 2006           | 2                                                              |
| 55               | Dominica | Marine Fish, Other              | 2006           | 7                                                              |
| 55               | Dominica | Meat                            | 2006           | 304                                                            |
| 55               | Dominica | Milk - Excluding Butter         | 2006           | 277                                                            |
| 55               | Dominica | Miscellaneous                   | 2006           | 13                                                             |
| 55               | Dominica | Mutton & Goat Meat              | 2006           | 7                                                              |
| 55               | Dominica | Oats                            | 2006           | 5                                                              |
| 55               | Dominica | Offals                          | 2006           | 12                                                             |
| 55               | Dominica | Oilcrops                        | 2006           | 80                                                             |
| 55               | Dominica | Oilcrops Oil, Other             | 2006           | 31                                                             |
| 55               | Dominica | Olive Oil                       | 2006           | 2                                                              |
| 55               | Dominica | Onions                          | 2006           | 6                                                              |
| 55               | Dominica | Oranges, Mandarines             | 2006           | 61                                                             |
| 55               | Dominica | Peas                            | 2006           | 2                                                              |
| 55               | Dominica | Pelagic Fish                    | 2006           | 35                                                             |
| 55               | Dominica | Pepper                          | 2006           | 7                                                              |
| 55               | Dominica | Pigmeat                         | 2006           | 100                                                            |

Dietary calcium and zinc deficiency risks are decreasing but remain prevalent

| FAO Country code | Country  | Food item                       | Reference year | Net energy supply (kcal capita <sup>-1</sup> d <sup>-1</sup> ) |
|------------------|----------|---------------------------------|----------------|----------------------------------------------------------------|
| 55               | Dominica | Plantains                       | 2006           | 41                                                             |
| 55               | Dominica | Potatoes and products           | 2006           | 15                                                             |
| 55               | Dominica | Poultry Meat                    | 2006           | 138                                                            |
| 55               | Dominica | Pulses                          | 2006           | 44                                                             |
| 55               | Dominica | Pulses, Other and products      | 2006           | 28                                                             |
| 55               | Dominica | Rape and Mustardseed            | 2006           | 2                                                              |
| 55               | Dominica | Rice (Milled Equivalent)        | 2006           | 85                                                             |
| 55               | Dominica | Roots, Other                    | 2006           | 127                                                            |
| 55               | Dominica | Soybean Oil                     | 2006           | 48                                                             |
| 55               | Dominica | Spices                          | 2006           | 33                                                             |
| 55               | Dominica | Spices, Other                   | 2006           | 27                                                             |
| 55               | Dominica | Starchy Roots                   | 2006           | 238                                                            |
| 55               | Dominica | Stimulants                      | 2006           | 54                                                             |
| 55               | Dominica | Sugar & Sweeteners              | 2006           | 412                                                            |
| 55               | Dominica | Sugar (Raw Equivalent)          | 2006           | 378                                                            |
| 55               | Dominica | Sugar cane                      | 2006           | 5                                                              |
| 55               | Dominica | Sugar Crops                     | 2006           | 5                                                              |
| 55               | Dominica | Sweet potatoes                  | 2006           | 10                                                             |
| 55               | Dominica | Sweeteners, Other               | 2006           | 33                                                             |
| 55               | Dominica | Tomatoes and products           | 2006           | 2                                                              |
| 55               | Dominica | Treenuts                        | 2006           | 17                                                             |
| 55               | Dominica | Vegetable Oils                  | 2006           | 134                                                            |
| 55               | Dominica | Vegetables                      | 2006           | 70                                                             |
| 55               | Dominica | Vegetables, Other               | 2006           | 63                                                             |
| 55               | Dominica | Vegetal Products                | 2006           | 2,227                                                          |
| 55               | Dominica | Wheat and products              | 2006           | 583                                                            |
| 55               | Dominica | Wine                            | 2006           | 7                                                              |
| 55               | Dominica | Yams                            | 2006           | 73                                                             |
| 55               | Dominica | Alcoholic Beverages             | 2007           | 101                                                            |
| 55               | Dominica | Animal fats                     | 2007           | 36                                                             |
| 55               | Dominica | Animal Products                 | 2007           | 711                                                            |
| 55               | Dominica | Apples and products             | 2007           | 2                                                              |
| 55               | Dominica | Bananas                         | 2007           | 41                                                             |
| 55               | Dominica | Barley and products             | 2007           | 60                                                             |
| 55               | Dominica | Beans                           | 2007           | 18                                                             |
| 55               | Dominica | Beer                            | 2007           | 11                                                             |
| 55               | Dominica | Beverages, Alcoholic            | 2007           | 78                                                             |
| 55               | Dominica | Bovine Meat                     | 2007           | 62                                                             |
| 55               | Dominica | Butter, Ghee                    | 2007           | 3                                                              |
| 55               | Dominica | Cassava and products            | 2007           | 13                                                             |
| 55               | Dominica | Cereals - Excluding Beer        | 2007           | 788                                                            |
| 55               | Dominica | Cocoa Beans and products        | 2007           | 51                                                             |
| 55               | Dominica | Coconut Oil                     | 2007           | 51                                                             |
| 55               | Dominica | Coconuts - Incl Copra           | 2007           | 68                                                             |
| 55               | Dominica | Coffee and products             | 2007           | 7                                                              |
| 55               | Dominica | Demersal Fish                   | 2007           | 6                                                              |
| 55               | Dominica | Eggs                            | 2007           | 9                                                              |
| 55               | Dominica | Fats, Animals, Raw              | 2007           | 33                                                             |
| 55               | Dominica | Fish, Seafood                   | 2007           | 58                                                             |
| 55               | Dominica | Freshwater Fish                 | 2007           | 1                                                              |
| 55               | Dominica | Fruits - Excluding Wine         | 2007           | 279                                                            |
| 55               | Dominica | Fruits, Other                   | 2007           | 27                                                             |
| 55               | Dominica | Grand Total                     | 2007           | 3,044                                                          |
| 55               | Dominica | Grapefruit and products         | 2007           | 97                                                             |
| 55               | Dominica | Grapes and products (excl wine) | 2007           | 3                                                              |
| 55               | Dominica | Groundnuts (Shelled Eq)         | 2007           | 9                                                              |
| 55               | Dominica | Lemons, Limes and products      | 2007           | 5                                                              |
| 55               | Dominica | Maize and products              | 2007           | 30                                                             |
| 55               | Dominica | Marine Fish, Other              | 2007           | 6                                                              |
| 55               | Dominica | Meat                            | 2007           | 308                                                            |
| 55               | Dominica | Milk - Excluding Butter         | 2007           | 286                                                            |
| 55               | Dominica | Miscellaneous                   | 2007           | 19                                                             |
| 55               | Dominica | Mutton & Goat Meat              | 2007           | 6                                                              |
| 55               | Dominica | Oats                            | 2007           | 6                                                              |
| 55               | Dominica | Offals                          | 2007           | 13                                                             |
| 55               | Dominica | Oilcrops                        | 2007           | 80                                                             |
| 55               | Dominica | Oilcrops Oil, Other             | 2007           | 35                                                             |
| 55               | Dominica | Olive Oil                       | 2007           | 2                                                              |
| 55               | Dominica | Onions                          | 2007           | 6                                                              |
| 55               | Dominica | Oranges, Mandarines             | 2007           | 64                                                             |
| 55               | Dominica | Peas                            | 2007           | 3                                                              |
| 55               | Dominica | Pelagic Fish                    | 2007           | 45                                                             |
| 55               | Dominica | Pepper                          | 2007           | 6                                                              |
| 55               | Dominica | Pigmeat                         | 2007           | 105                                                            |
| 55               | Dominica | Plantains                       | 2007           | 41                                                             |
| 55               | Dominica | Potatoes and products           | 2007           | 16                                                             |
| 55               | Dominica | Poultry Meat                    | 2007           | 134                                                            |
| 55               | Dominica | Pulses                          | 2007           | 53                                                             |
| 55               | Dominica | Pulses, Other and products      | 2007           | 32                                                             |
| 55               | Dominica | Rape and Mustardseed            | 2007           | 2                                                              |
| 55               | Dominica | Rice (Milled Equivalent)        | 2007           | 85                                                             |
| 55               | Dominica | Roots, Other                    | 2007           | 131                                                            |
| 55               | Dominica | Soybean Oil                     | 2007           | 44                                                             |
| 55               | Dominica | Spices                          | 2007           | 31                                                             |
| 55               | Dominica | Spices, Other                   | 2007           | 25                                                             |
| 55               | Dominica | Starchy Roots                   | 2007           | 279                                                            |
| 55               | Dominica | Stimulants                      | 2007           | 59                                                             |
| 55               | Dominica | Sugar & Sweeteners              | 2007           | 417                                                            |
| 55               | Dominica | Sugar (Raw Equivalent)          | 2007           | 383                                                            |
| 55               | Dominica | Sugar cane                      | 2007           | 5                                                              |
| 55               | Dominica | Sugar Crops                     | 2007           | 5                                                              |
| 55               | Dominica | Sweet potatoes                  | 2007           | 18                                                             |
| 55               | Dominica | Sweeteners, Other               | 2007           | 34                                                             |
| 55               | Dominica | Tomatoes and products           | 2007           | 2                                                              |
| 55               | Dominica | Treenuts                        | 2007           | 24                                                             |
| 55               | Dominica | Vegetable Oils                  | 2007           | 132                                                            |
| 55               | Dominica | Vegetables                      | 2007           | 66                                                             |



Dietary calcium and zinc deficiency risks are decreasing but remain prevalent

| FAO Country code | Country  | Food item                       | Reference year | Net energy supply (kcal capita <sup>-1</sup> d <sup>-1</sup> ) |
|------------------|----------|---------------------------------|----------------|----------------------------------------------------------------|
| 55               | Dominica | Vegetables, Other               | 2007           | 58                                                             |
| 55               | Dominica | Vegetal Products                | 2007           | 2,333                                                          |
| 55               | Dominica | Wheat and products              | 2007           | 606                                                            |
| 55               | Dominica | Wine                            | 2007           | 11                                                             |
| 55               | Dominica | Yams                            | 2007           | 102                                                            |
| 55               | Dominica | Alcoholic Beverages             | 2008           | 118                                                            |
| 55               | Dominica | Animal fats                     | 2008           | 34                                                             |
| 55               | Dominica | Animal Products                 | 2008           | 740                                                            |
| 55               | Dominica | Apples and products             | 2008           | 2                                                              |
| 55               | Dominica | Bananas                         | 2008           | 41                                                             |
| 55               | Dominica | Barley and products             | 2008           | 32                                                             |
| 55               | Dominica | Beans                           | 2008           | 16                                                             |
| 55               | Dominica | Beer                            | 2008           | 13                                                             |
| 55               | Dominica | Beverages, Alcoholic            | 2008           | 91                                                             |
| 55               | Dominica | Beverages, Fermented            | 2008           | 1                                                              |
| 55               | Dominica | Bovine Meat                     | 2008           | 58                                                             |
| 55               | Dominica | Butter, Ghee                    | 2008           | 3                                                              |
| 55               | Dominica | Cassava and products            | 2008           | 11                                                             |
| 55               | Dominica | Cereals - Excluding Beer        | 2008           | 787                                                            |
| 55               | Dominica | Cereals, Other                  | 2008           | 1                                                              |
| 55               | Dominica | Cocoa Beans and products        | 2008           | 29                                                             |
| 55               | Dominica | Coconut Oil                     | 2008           | 51                                                             |
| 55               | Dominica | Coconuts - Incl Copra           | 2008           | 68                                                             |
| 55               | Dominica | Coffee and products             | 2008           | 6                                                              |
| 55               | Dominica | Cream                           | 2008           | 1                                                              |
| 55               | Dominica | Demersal Fish                   | 2008           | 5                                                              |
| 55               | Dominica | Eggs                            | 2008           | 10                                                             |
| 55               | Dominica | Fats, Animals, Raw              | 2008           | 29                                                             |
| 55               | Dominica | Fish, Seafood                   | 2008           | 57                                                             |
| 55               | Dominica | Freshwater Fish                 | 2008           | 1                                                              |
| 55               | Dominica | Fruits - Excluding Wine         | 2008           | 265                                                            |
| 55               | Dominica | Fruits, Other                   | 2008           | 27                                                             |
| 55               | Dominica | Grand Total                     | 2008           | 3,042                                                          |
| 55               | Dominica | Grapefruit and products         | 2008           | 86                                                             |
| 55               | Dominica | Grapes and products (excl wine) | 2008           | 4                                                              |
| 55               | Dominica | Groundnuts (Shelled Eq)         | 2008           | 8                                                              |
| 55               | Dominica | Lemons, Limes and products      | 2008           | 5                                                              |
| 55               | Dominica | Maize and products              | 2008           | 29                                                             |
| 55               | Dominica | Maize Germ Oil                  | 2008           | 2                                                              |
| 55               | Dominica | Marine Fish, Other              | 2008           | 6                                                              |
| 55               | Dominica | Meat                            | 2008           | 319                                                            |
| 55               | Dominica | Meat, Other                     | 2008           | 1                                                              |
| 55               | Dominica | Milk - Excluding Butter         | 2008           | 311                                                            |
| 55               | Dominica | Miscellaneous                   | 2008           | 19                                                             |
| 55               | Dominica | Mutton & Goat Meat              | 2008           | 6                                                              |
| 55               | Dominica | Oats                            | 2008           | 7                                                              |
| 55               | Dominica | Offals                          | 2008           | 10                                                             |
| 55               | Dominica | Oilcrops                        | 2008           | 80                                                             |
| 55               | Dominica | Oilcrops Oil, Other             | 2008           | 70                                                             |
| 55               | Dominica | Olive Oil                       | 2008           | 3                                                              |
| 55               | Dominica | Onions                          | 2008           | 7                                                              |
| 55               | Dominica | Oranges, Mandarines             | 2008           | 59                                                             |
| 55               | Dominica | Peas                            | 2008           | 3                                                              |
| 55               | Dominica | Pelagic Fish                    | 2008           | 45                                                             |
| 55               | Dominica | Pepper                          | 2008           | 8                                                              |
| 55               | Dominica | Pigmeat                         | 2008           | 114                                                            |
| 55               | Dominica | Plantains                       | 2008           | 41                                                             |
| 55               | Dominica | Potatoes and products           | 2008           | 17                                                             |
| 55               | Dominica | Poultry Meat                    | 2008           | 139                                                            |
| 55               | Dominica | Pulses                          | 2008           | 50                                                             |
| 55               | Dominica | Pulses, Other and products      | 2008           | 31                                                             |
| 55               | Dominica | Rape and Mustardseed            | 2008           | 3                                                              |
| 55               | Dominica | Rice (Milled Equivalent)        | 2008           | 96                                                             |
| 55               | Dominica | Roots, Other                    | 2008           | 116                                                            |
| 55               | Dominica | Soyabean Oil                    | 2008           | 44                                                             |
| 55               | Dominica | Spices                          | 2008           | 25                                                             |
| 55               | Dominica | Spices, Other                   | 2008           | 17                                                             |
| 55               | Dominica | Starchy Roots                   | 2008           | 243                                                            |
| 55               | Dominica | Stimulants                      | 2008           | 35                                                             |
| 55               | Dominica | Sugar & Sweeteners              | 2008           | 413                                                            |
| 55               | Dominica | Sugar (Raw Equivalent)          | 2008           | 380                                                            |
| 55               | Dominica | Sugar cane                      | 2008           | 5                                                              |
| 55               | Dominica | Sugar Crops                     | 2008           | 5                                                              |
| 55               | Dominica | Sweet potatoes                  | 2008           | 11                                                             |
| 55               | Dominica | Sweeteners, Other               | 2008           | 33                                                             |
| 55               | Dominica | Tomatoes and products           | 2008           | 2                                                              |
| 55               | Dominica | Treenuts                        | 2008           | 26                                                             |
| 55               | Dominica | Vegetable Oils                  | 2008           | 171                                                            |
| 55               | Dominica | Vegetables                      | 2008           | 65                                                             |
| 55               | Dominica | Vegetables, Other               | 2008           | 56                                                             |
| 55               | Dominica | Vegetal Products                | 2008           | 2,302                                                          |
| 55               | Dominica | Wheat and products              | 2008           | 621                                                            |
| 55               | Dominica | Wine                            | 2008           | 14                                                             |
| 55               | Dominica | Yams                            | 2008           | 89                                                             |
| 55               | Dominica | Alcoholic Beverages             | 2009           | 90                                                             |
| 55               | Dominica | Animal fats                     | 2009           | 32                                                             |
| 55               | Dominica | Animal Products                 | 2009           | 722                                                            |
| 55               | Dominica | Apples and products             | 2009           | 8                                                              |
| 55               | Dominica | Bananas                         | 2009           | 48                                                             |
| 55               | Dominica | Barley and products             | 2009           | 28                                                             |
| 55               | Dominica | Beans                           | 2009           | 14                                                             |
| 55               | Dominica | Beer                            | 2009           | 6                                                              |
| 55               | Dominica | Beverages, Alcoholic            | 2009           | 77                                                             |
| 55               | Dominica | Beverages, Fermented            | 2009           | 1                                                              |
| 55               | Dominica | Bovine Meat                     | 2009           | 58                                                             |
| 55               | Dominica | Butter, Ghee                    | 2009           | 1                                                              |
| 55               | Dominica | Cassava and products            | 2009           | 11                                                             |

Dietary calcium and zinc deficiency risks are decreasing but remain prevalent

| FAO Country code | Country  | Food item                       | Reference year | Net energy supply (kcal <i>capita</i> <sup>-1</sup> d <sup>-1</sup> ) |
|------------------|----------|---------------------------------|----------------|-----------------------------------------------------------------------|
| 55               | Dominica | Cereals - Excluding Beer        | 2009           | 867                                                                   |
| 55               | Dominica | Cereals, Other                  | 2009           | 3                                                                     |
| 55               | Dominica | Cocoa Beans and products        | 2009           | 24                                                                    |
| 55               | Dominica | Coconut Oil                     | 2009           | 51                                                                    |
| 55               | Dominica | Coconuts - Incl Copra           | 2009           | 68                                                                    |
| 55               | Dominica | Coffee and products             | 2009           | 5                                                                     |
| 55               | Dominica | Cream                           | 2009           | 1                                                                     |
| 55               | Dominica | Crustaceans                     | 2009           | 1                                                                     |
| 55               | Dominica | Demersal Fish                   | 2009           | 5                                                                     |
| 55               | Dominica | Eggs                            | 2009           | 10                                                                    |
| 55               | Dominica | Fats, Animals, Raw              | 2009           | 30                                                                    |
| 55               | Dominica | Fish, Seafood                   | 2009           | 57                                                                    |
| 55               | Dominica | Freshwater Fish                 | 2009           | 1                                                                     |
| 55               | Dominica | Fruits - Excluding Wine         | 2009           | 311                                                                   |
| 55               | Dominica | Fruits, Other                   | 2009           | 47                                                                    |
| 55               | Dominica | Grand Total                     | 2009           | 3,140                                                                 |
| 55               | Dominica | Grapefruit and products         | 2009           | 78                                                                    |
| 55               | Dominica | Grapes and products (excl wine) | 2009           | 2                                                                     |
| 55               | Dominica | Groundnuts (Shelled Eq)         | 2009           | 4                                                                     |
| 55               | Dominica | Lemons, Limes and products      | 2009           | 6                                                                     |
| 55               | Dominica | Maize and products              | 2009           | 51                                                                    |
| 55               | Dominica | Maize Germ Oil                  | 2009           | 2                                                                     |
| 55               | Dominica | Marine Fish, Other              | 2009           | 8                                                                     |
| 55               | Dominica | Meat                            | 2009           | 298                                                                   |
| 55               | Dominica | Meat, Other                     | 2009           | 1                                                                     |
| 55               | Dominica | Milk - Excluding Butter         | 2009           | 316                                                                   |
| 55               | Dominica | Miscellaneous                   | 2009           | 7                                                                     |
| 55               | Dominica | Mutton & Goat Meat              | 2009           | 5                                                                     |
| 55               | Dominica | Oats                            | 2009           | 5                                                                     |
| 55               | Dominica | Offals                          | 2009           | 9                                                                     |
| 55               | Dominica | Oilcrops                        | 2009           | 73                                                                    |
| 55               | Dominica | Oilcrops Oil, Other             | 2009           | 34                                                                    |
| 55               | Dominica | Olive Oil                       | 2009           | 3                                                                     |
| 55               | Dominica | Onions                          | 2009           | 6                                                                     |
| 55               | Dominica | Oranges, Mandarines             | 2009           | 80                                                                    |
| 55               | Dominica | Peas                            | 2009           | 9                                                                     |
| 55               | Dominica | Pelagic Fish                    | 2009           | 41                                                                    |
| 55               | Dominica | Pepper                          | 2009           | 9                                                                     |
| 55               | Dominica | Pigmeat                         | 2009           | 107                                                                   |
| 55               | Dominica | Pineapples and products         | 2009           | 1                                                                     |
| 55               | Dominica | Plantains                       | 2009           | 41                                                                    |
| 55               | Dominica | Potatoes and products           | 2009           | 21                                                                    |
| 55               | Dominica | Poultry Meat                    | 2009           | 127                                                                   |
| 55               | Dominica | Pulses                          | 2009           | 61                                                                    |
| 55               | Dominica | Pulses, Other and products      | 2009           | 38                                                                    |
| 55               | Dominica | Rice (Milled Equivalent)        | 2009           | 98                                                                    |
| 55               | Dominica | Roots, Other                    | 2009           | 128                                                                   |
| 55               | Dominica | Soyabean Oil                    | 2009           | 49                                                                    |
| 55               | Dominica | Spices                          | 2009           | 38                                                                    |
| 55               | Dominica | Spices, Other                   | 2009           | 28                                                                    |
| 55               | Dominica | Starchy Roots                   | 2009           | 303                                                                   |
| 55               | Dominica | Stimulants                      | 2009           | 28                                                                    |
| 55               | Dominica | Sugar & Sweeteners              | 2009           | 416                                                                   |
| 55               | Dominica | Sugar (Raw Equivalent)          | 2009           | 389                                                                   |
| 55               | Dominica | Sugar cane                      | 2009           | 5                                                                     |
| 55               | Dominica | Sugar Crops                     | 2009           | 5                                                                     |
| 55               | Dominica | Sweet potatoes                  | 2009           | 19                                                                    |
| 55               | Dominica | Sweeteners, Other               | 2009           | 27                                                                    |
| 55               | Dominica | Tomatoes and products           | 2009           | 2                                                                     |
| 55               | Dominica | Treenuts                        | 2009           | 24                                                                    |
| 55               | Dominica | Vegetable Oils                  | 2009           | 139                                                                   |
| 55               | Dominica | Vegetables                      | 2009           | 57                                                                    |
| 55               | Dominica | Vegetables, Other               | 2009           | 49                                                                    |
| 55               | Dominica | Vegetal Products                | 2009           | 2,418                                                                 |
| 55               | Dominica | Wheat and products              | 2009           | 683                                                                   |
| 55               | Dominica | Wine                            | 2009           | 6                                                                     |
| 55               | Dominica | Yams                            | 2009           | 124                                                                   |
| 55               | Dominica | Alcoholic Beverages             | 2010           | 89                                                                    |
| 55               | Dominica | Animal fats                     | 2010           | 61                                                                    |
| 55               | Dominica | Animal Products                 | 2010           | 722                                                                   |
| 55               | Dominica | Apples and products             | 2010           | 8                                                                     |
| 55               | Dominica | Bananas                         | 2010           | 48                                                                    |
| 55               | Dominica | Barley and products             | 2010           | 28                                                                    |
| 55               | Dominica | Beans                           | 2010           | 7                                                                     |
| 55               | Dominica | Beer                            | 2010           | 7                                                                     |
| 55               | Dominica | Beverages, Alcoholic            | 2010           | 74                                                                    |
| 55               | Dominica | Beverages, Fermented            | 2010           | 1                                                                     |
| 55               | Dominica | Bovine Meat                     | 2010           | 55                                                                    |
| 55               | Dominica | Butter, Ghee                    | 2010           | 2                                                                     |
| 55               | Dominica | Cassava and products            | 2010           | 15                                                                    |
| 55               | Dominica | Cereals - Excluding Beer        | 2010           | 764                                                                   |
| 55               | Dominica | Cereals, Other                  | 2010           | 1                                                                     |
| 55               | Dominica | Cocoa Beans and products        | 2010           | 75                                                                    |
| 55               | Dominica | Coconut Oil                     | 2010           | 51                                                                    |
| 55               | Dominica | Coconuts - Incl Copra           | 2010           | 68                                                                    |
| 55               | Dominica | Coffee and products             | 2010           | 3                                                                     |
| 55               | Dominica | Cream                           | 2010           | 1                                                                     |
| 55               | Dominica | Crustaceans                     | 2010           | 1                                                                     |
| 55               | Dominica | Demersal Fish                   | 2010           | 7                                                                     |
| 55               | Dominica | Eggs                            | 2010           | 9                                                                     |
| 55               | Dominica | Fats, Animals, Raw              | 2010           | 58                                                                    |
| 55               | Dominica | Fish, Seafood                   | 2010           | 54                                                                    |
| 55               | Dominica | Freshwater Fish                 | 2010           | 1                                                                     |
| 55               | Dominica | Fruits - Excluding Wine         | 2010           | 287                                                                   |
| 55               | Dominica | Fruits, Other                   | 2010           | 37                                                                    |
| 55               | Dominica | Grand Total                     | 2010           | 3,069                                                                 |
| 55               | Dominica | Grapefruit and products         | 2010           | 79                                                                    |

Dietary calcium and zinc deficiency risks are decreasing but remain prevalent

| FAO Country code | Country  | Food item                       | Reference year | Net energy supply (kcal capita <sup>-1</sup> d <sup>-1</sup> ) |
|------------------|----------|---------------------------------|----------------|----------------------------------------------------------------|
| 55               | Dominica | Grapes and products (excl wine) | 2010           | 2                                                              |
| 55               | Dominica | Groundnuts (Shelled Eq)         | 2010           | 4                                                              |
| 55               | Dominica | Lemons, Limes and products      | 2010           | 6                                                              |
| 55               | Dominica | Maize and products              | 2010           | 42                                                             |
| 55               | Dominica | Maize Germ Oil                  | 2010           | 1                                                              |
| 55               | Dominica | Marine Fish, Other              | 2010           | 7                                                              |
| 55               | Dominica | Meat                            | 2010           | 293                                                            |
| 55               | Dominica | Milk - Excluding Butter         | 2010           | 295                                                            |
| 55               | Dominica | Miscellaneous                   | 2010           | 5                                                              |
| 55               | Dominica | Mutton & Goat Meat              | 2010           | 8                                                              |
| 55               | Dominica | Oats                            | 2010           | 7                                                              |
| 55               | Dominica | Offals                          | 2010           | 10                                                             |
| 55               | Dominica | Oilcrops                        | 2010           | 72                                                             |
| 55               | Dominica | Oilcrops Oil, Other             | 2010           | 50                                                             |
| 55               | Dominica | Olive Oil                       | 2010           | 1                                                              |
| 55               | Dominica | Onions                          | 2010           | 6                                                              |
| 55               | Dominica | Oranges, Mandarines             | 2010           | 66                                                             |
| 55               | Dominica | Peas                            | 2010           | 6                                                              |
| 55               | Dominica | Pelagic Fish                    | 2010           | 38                                                             |
| 55               | Dominica | Pepper                          | 2010           | 9                                                              |
| 55               | Dominica | Pigmeat                         | 2010           | 105                                                            |
| 55               | Dominica | Pineapples and products         | 2010           | 1                                                              |
| 55               | Dominica | Plantains                       | 2010           | 41                                                             |
| 55               | Dominica | Potatoes and products           | 2010           | 18                                                             |
| 55               | Dominica | Poultry Meat                    | 2010           | 125                                                            |
| 55               | Dominica | Pulses                          | 2010           | 41                                                             |
| 55               | Dominica | Pulses, Other and products      | 2010           | 28                                                             |
| 55               | Dominica | Rice (Milled Equivalent)        | 2010           | 94                                                             |
| 55               | Dominica | Roots, Other                    | 2010           | 143                                                            |
| 55               | Dominica | Soyabean Oil                    | 2010           | 47                                                             |
| 55               | Dominica | Spices                          | 2010           | 31                                                             |
| 55               | Dominica | Spices, Other                   | 2010           | 22                                                             |
| 55               | Dominica | Starchy Roots                   | 2010           | 345                                                            |
| 55               | Dominica | Stimulants                      | 2010           | 78                                                             |
| 55               | Dominica | Sugar & Sweeteners              | 2010           | 415                                                            |
| 55               | Dominica | Sugar (Raw Equivalent)          | 2010           | 391                                                            |
| 55               | Dominica | Sugar cane                      | 2010           | 5                                                              |
| 55               | Dominica | Sugar Crops                     | 2010           | 5                                                              |
| 55               | Dominica | Sweet potatoes                  | 2010           | 24                                                             |
| 55               | Dominica | Sweeteners, Other               | 2010           | 24                                                             |
| 55               | Dominica | Tomatoes and products           | 2010           | 2                                                              |
| 55               | Dominica | Treenuts                        | 2010           | 17                                                             |
| 55               | Dominica | Vegetable Oils                  | 2010           | 151                                                            |
| 55               | Dominica | Vegetables                      | 2010           | 47                                                             |
| 55               | Dominica | Vegetables, Other               | 2010           | 40                                                             |
| 55               | Dominica | Vegetal Products                | 2010           | 2,347                                                          |
| 55               | Dominica | Wheat and products              | 2010           | 592                                                            |
| 55               | Dominica | Wine                            | 2010           | 7                                                              |
| 55               | Dominica | Yams                            | 2010           | 146                                                            |
| 55               | Dominica | Alcoholic Beverages             | 2011           | 61                                                             |
| 55               | Dominica | Animal fats                     | 2011           | 49                                                             |
| 55               | Dominica | Animal Products                 | 2011           | 697                                                            |
| 55               | Dominica | Apples and products             | 2011           | 8                                                              |
| 55               | Dominica | Bananas                         | 2011           | 48                                                             |
| 55               | Dominica | Barley and products             | 2011           | 23                                                             |
| 55               | Dominica | Beans                           | 2011           | 10                                                             |
| 55               | Dominica | Beer                            | 2011           | 1                                                              |
| 55               | Dominica | Beverages, Alcoholic            | 2011           | 55                                                             |
| 55               | Dominica | Beverages, Fermented            | 2011           | 1                                                              |
| 55               | Dominica | Bovine Meat                     | 2011           | 56                                                             |
| 55               | Dominica | Butter, Ghee                    | 2011           | 6                                                              |
| 55               | Dominica | Cassava and products            | 2011           | 16                                                             |
| 55               | Dominica | Cereals - Excluding Beer        | 2011           | 828                                                            |
| 55               | Dominica | Cereals, Other                  | 2011           | 1                                                              |
| 55               | Dominica | Cocoa Beans and products        | 2011           | 79                                                             |
| 55               | Dominica | Coconut Oil                     | 2011           | 51                                                             |
| 55               | Dominica | Coconuts - Incl Copra           | 2011           | 68                                                             |
| 55               | Dominica | Coffee and products             | 2011           | 4                                                              |
| 55               | Dominica | Cream                           | 2011           | 1                                                              |
| 55               | Dominica | Crustaceans                     | 2011           | 1                                                              |
| 55               | Dominica | Demersal Fish                   | 2011           | 7                                                              |
| 55               | Dominica | Eggs                            | 2011           | 9                                                              |
| 55               | Dominica | Fats, Animals, Raw              | 2011           | 42                                                             |
| 55               | Dominica | Fish, Seafood                   | 2011           | 54                                                             |
| 55               | Dominica | Freshwater Fish                 | 2011           | 1                                                              |
| 55               | Dominica | Fruits - Excluding Wine         | 2011           | 282                                                            |
| 55               | Dominica | Fruits, Other                   | 2011           | 37                                                             |
| 55               | Dominica | Grand Total                     | 2011           | 3,047                                                          |
| 55               | Dominica | Grapefruit and products         | 2011           | 83                                                             |
| 55               | Dominica | Grapes and products (excl wine) | 2011           | 2                                                              |
| 55               | Dominica | Groundnuts (Shelled Eq)         | 2011           | 6                                                              |
| 55               | Dominica | Lemons, Limes and products      | 2011           | 7                                                              |
| 55               | Dominica | Maize and products              | 2011           | 127                                                            |
| 55               | Dominica | Maize Germ Oil                  | 2011           | 1                                                              |
| 55               | Dominica | Marine Fish, Other              | 2011           | 7                                                              |
| 55               | Dominica | Meat                            | 2011           | 271                                                            |
| 55               | Dominica | Milk - Excluding Butter         | 2011           | 304                                                            |
| 55               | Dominica | Miscellaneous                   | 2011           | 3                                                              |
| 55               | Dominica | Mutton & Goat Meat              | 2011           | 6                                                              |
| 55               | Dominica | Oats                            | 2011           | 6                                                              |
| 55               | Dominica | Offals                          | 2011           | 10                                                             |
| 55               | Dominica | Oilcrops                        | 2011           | 75                                                             |
| 55               | Dominica | Oilcrops Oil, Other             | 2011           | 32                                                             |
| 55               | Dominica | Olive Oil                       | 2011           | 2                                                              |
| 55               | Dominica | Onions                          | 2011           | 5                                                              |
| 55               | Dominica | Oranges, Mandarines             | 2011           | 56                                                             |
| 55               | Dominica | Peas                            | 2011           | 2                                                              |

Dietary calcium and zinc deficiency risks are decreasing but remain prevalent

| FAO Country code | Country            | Food item                       | Reference year | Net energy supply (kcal <i>capita</i> <sup>-1</sup> d <sup>-1</sup> ) |
|------------------|--------------------|---------------------------------|----------------|-----------------------------------------------------------------------|
| 55               | Dominica           | Pelagic Fish                    | 2011           | 38                                                                    |
| 55               | Dominica           | Pepper                          | 2011           | 3                                                                     |
| 55               | Dominica           | Pigmeat                         | 2011           | 79                                                                    |
| 55               | Dominica           | Pineapples and products         | 2011           | 1                                                                     |
| 55               | Dominica           | Plantains                       | 2011           | 41                                                                    |
| 55               | Dominica           | Potatoes and products           | 2011           | 15                                                                    |
| 55               | Dominica           | Poultry Meat                    | 2011           | 130                                                                   |
| 55               | Dominica           | Pulses                          | 2011           | 38                                                                    |
| 55               | Dominica           | Pulses, Other and products      | 2011           | 26                                                                    |
| 55               | Dominica           | Rice (Milled Equivalent)        | 2011           | 86                                                                    |
| 55               | Dominica           | Roots, Other                    | 2011           | 135                                                                   |
| 55               | Dominica           | Soyabean Oil                    | 2011           | 50                                                                    |
| 55               | Dominica           | Spices                          | 2011           | 33                                                                    |
| 55               | Dominica           | Spices, Other                   | 2011           | 29                                                                    |
| 55               | Dominica           | Starchy Roots                   | 2011           | 326                                                                   |
| 55               | Dominica           | Stimulants                      | 2011           | 84                                                                    |
| 55               | Dominica           | Sugar & Sweeteners              | 2011           | 407                                                                   |
| 55               | Dominica           | Sugar (Raw Equivalent)          | 2011           | 391                                                                   |
| 55               | Dominica           | Sugar cane                      | 2011           | 5                                                                     |
| 55               | Dominica           | Sugar Crops                     | 2011           | 5                                                                     |
| 55               | Dominica           | Sweet potatoes                  | 2011           | 17                                                                    |
| 55               | Dominica           | Sweeteners, Other               | 2011           | 16                                                                    |
| 55               | Dominica           | Tomatoes and products           | 2011           | 2                                                                     |
| 55               | Dominica           | Treenuts                        | 2011           | 24                                                                    |
| 55               | Dominica           | Vegetable Oils                  | 2011           | 136                                                                   |
| 55               | Dominica           | Vegetables                      | 2011           | 49                                                                    |
| 55               | Dominica           | Vegetables, Other               | 2011           | 41                                                                    |
| 55               | Dominica           | Vegetal Products                | 2011           | 2,351                                                                 |
| 55               | Dominica           | Wheat and products              | 2011           | 585                                                                   |
| 55               | Dominica           | Wine                            | 2011           | 5                                                                     |
| 55               | Dominica           | Yams                            | 2011           | 143                                                                   |
| 56               | Dominican Republic | Alcoholic Beverages             | 1992           | 86                                                                    |
| 56               | Dominican Republic | Animal fats                     | 1992           | 31                                                                    |
| 56               | Dominican Republic | Animal Products                 | 1992           | 306                                                                   |
| 56               | Dominican Republic | Bananas                         | 1992           | 76                                                                    |
| 56               | Dominican Republic | Beans                           | 1992           | 56                                                                    |
| 56               | Dominican Republic | Beer                            | 1992           | 37                                                                    |
| 56               | Dominican Republic | Beverages, Alcoholic            | 1992           | 49                                                                    |
| 56               | Dominican Republic | Bovine Meat                     | 1992           | 58                                                                    |
| 56               | Dominican Republic | Butter, Ghee                    | 1992           | 8                                                                     |
| 56               | Dominican Republic | Cassava and products            | 1992           | 46                                                                    |
| 56               | Dominican Republic | Cereals - Excluding Beer        | 1992           | 660                                                                   |
| 56               | Dominican Republic | Cocoa Beans and products        | 1992           | 3                                                                     |
| 56               | Dominican Republic | Coconut Oil                     | 1992           | 54                                                                    |
| 56               | Dominican Republic | Coconuts - Incl Copra           | 1992           | 13                                                                    |
| 56               | Dominican Republic | Coffee and products             | 1992           | 3                                                                     |
| 56               | Dominican Republic | Cottonseed Oil                  | 1992           | 11                                                                    |
| 56               | Dominican Republic | Demersal Fish                   | 1992           | 5                                                                     |
| 56               | Dominican Republic | Eggs                            | 1992           | 16                                                                    |
| 56               | Dominican Republic | Fats, Animals, Raw              | 1992           | 22                                                                    |
| 56               | Dominican Republic | Fish, Seafood                   | 1992           | 10                                                                    |
| 56               | Dominican Republic | Fruits - Excluding Wine         | 1992           | 186                                                                   |
| 56               | Dominican Republic | Fruits, Other                   | 1992           | 23                                                                    |
| 56               | Dominican Republic | Grand Total                     | 1992           | 2,140                                                                 |
| 56               | Dominican Republic | Grapes and products (excl wine) | 1992           | 1                                                                     |
| 56               | Dominican Republic | Groundnut Oil                   | 1992           | 6                                                                     |
| 56               | Dominican Republic | Lemons, Limes and products      | 1992           | 1                                                                     |
| 56               | Dominican Republic | Maize and products              | 1992           | 30                                                                    |
| 56               | Dominican Republic | Maize Germ Oil                  | 1992           | 4                                                                     |
| 56               | Dominican Republic | Meat                            | 1992           | 136                                                                   |
| 56               | Dominican Republic | Milk - Excluding Butter         | 1992           | 109                                                                   |
| 56               | Dominican Republic | Miscellaneous                   | 1992           | 1                                                                     |
| 56               | Dominican Republic | Mutton & Goat Meat              | 1992           | 1                                                                     |
| 56               | Dominican Republic | Oats                            | 1992           | 2                                                                     |
| 56               | Dominican Republic | Offals                          | 1992           | 5                                                                     |
| 56               | Dominican Republic | Oilcrops                        | 1992           | 13                                                                    |
| 56               | Dominican Republic | Oilcrops Oil, Other             | 1992           | 3                                                                     |
| 56               | Dominican Republic | Olive Oil                       | 1992           | 2                                                                     |
| 56               | Dominican Republic | Onions                          | 1992           | 3                                                                     |
| 56               | Dominican Republic | Oranges, Mandarines             | 1992           | 5                                                                     |
| 56               | Dominican Republic | Palm Oil                        | 1992           | 52                                                                    |
| 56               | Dominican Republic | Pelagic Fish                    | 1992           | 4                                                                     |
| 56               | Dominican Republic | Pigmeat                         | 1992           | 20                                                                    |
| 56               | Dominican Republic | Pineapples and products         | 1992           | 1                                                                     |
| 56               | Dominican Republic | Plantains                       | 1992           | 79                                                                    |
| 56               | Dominican Republic | Potatoes and products           | 1992           | 7                                                                     |
| 56               | Dominican Republic | Poultry Meat                    | 1992           | 56                                                                    |
| 56               | Dominican Republic | Pulses                          | 1992           | 89                                                                    |
| 56               | Dominican Republic | Pulses, Other and products      | 1992           | 33                                                                    |
| 56               | Dominican Republic | Rice (Milled Equivalent)        | 1992           | 435                                                                   |
| 56               | Dominican Republic | Roots, Other                    | 1992           | 5                                                                     |
| 56               | Dominican Republic | Soyabean Oil                    | 1992           | 177                                                                   |
| 56               | Dominican Republic | Spices                          | 1992           | 3                                                                     |
| 56               | Dominican Republic | Spices, Other                   | 1992           | 3                                                                     |
| 56               | Dominican Republic | Starchy Roots                   | 1992           | 72                                                                    |
| 56               | Dominican Republic | Stimulants                      | 1992           | 6                                                                     |
| 56               | Dominican Republic | Sugar & Sweeteners              | 1992           | 361                                                                   |
| 56               | Dominican Republic | Sugar (Raw Equivalent)          | 1992           | 360                                                                   |
| 56               | Dominican Republic | Sunflowerseed Oil               | 1992           | 25                                                                    |
| 56               | Dominican Republic | Sweet potatoes                  | 1992           | 12                                                                    |
| 56               | Dominican Republic | Tomatoes and products           | 1992           | 8                                                                     |
| 56               | Dominican Republic | Treenuts                        | 1992           | 1                                                                     |
| 56               | Dominican Republic | Vegetable Oils                  | 1992           | 334                                                                   |
| 56               | Dominican Republic | Vegetables                      | 1992           | 20                                                                    |
| 56               | Dominican Republic | Vegetables, Other               | 1992           | 9                                                                     |
| 56               | Dominican Republic | Vegetal Products                | 1992           | 1,834                                                                 |
| 56               | Dominican Republic | Wheat and products              | 1992           | 193                                                                   |

Dietary calcium and zinc deficiency risks are decreasing but remain prevalent

| FAO Country code | Country            | Food item                       | Reference year | Net energy supply (kcal capita <sup>-1</sup> d <sup>-1</sup> ) |
|------------------|--------------------|---------------------------------|----------------|----------------------------------------------------------------|
| 56               | Dominican Republic | Yams                            | 1992           | 2                                                              |
| 56               | Dominican Republic | Alcoholic Beverages             | 1993           | 81                                                             |
| 56               | Dominican Republic | Animal fats                     | 1993           | 32                                                             |
| 56               | Dominican Republic | Animal Products                 | 1993           | 318                                                            |
| 56               | Dominican Republic | Apples and products             | 1993           | 1                                                              |
| 56               | Dominican Republic | Bananas                         | 1993           | 79                                                             |
| 56               | Dominican Republic | Beans                           | 1993           | 57                                                             |
| 56               | Dominican Republic | Beer                            | 1993           | 33                                                             |
| 56               | Dominican Republic | Beverages, Alcoholic            | 1993           | 47                                                             |
| 56               | Dominican Republic | Bovine Meat                     | 1993           | 61                                                             |
| 56               | Dominican Republic | Butter, Ghee                    | 1993           | 7                                                              |
| 56               | Dominican Republic | Cassava and products            | 1993           | 30                                                             |
| 56               | Dominican Republic | Cereals - Excluding Beer        | 1993           | 685                                                            |
| 56               | Dominican Republic | Cocoa Beans and products        | 1993           | 4                                                              |
| 56               | Dominican Republic | Coconut Oil                     | 1993           | 17                                                             |
| 56               | Dominican Republic | Coconuts - Incl Copra           | 1993           | 29                                                             |
| 56               | Dominican Republic | Coffee and products             | 1993           | 3                                                              |
| 56               | Dominican Republic | Cottonseed Oil                  | 1993           | 1                                                              |
| 56               | Dominican Republic | Demersal Fish                   | 1993           | 5                                                              |
| 56               | Dominican Republic | Eggs                            | 1993           | 15                                                             |
| 56               | Dominican Republic | Fats, Animals, Raw              | 1993           | 25                                                             |
| 56               | Dominican Republic | Fish, Seafood                   | 1993           | 12                                                             |
| 56               | Dominican Republic | Freshwater Fish                 | 1993           | 1                                                              |
| 56               | Dominican Republic | Fruits - Excluding Wine         | 1993           | 214                                                            |
| 56               | Dominican Republic | Fruits, Other                   | 1993           | 25                                                             |
| 56               | Dominican Republic | Grand Total                     | 1993           | 2,219                                                          |
| 56               | Dominican Republic | Grapes and products (excl wine) | 1993           | 1                                                              |
| 56               | Dominican Republic | Lemons, Limes and products      | 1993           | 1                                                              |
| 56               | Dominican Republic | Maize and products              | 1993           | 94                                                             |
| 56               | Dominican Republic | Maize Germ Oil                  | 1993           | 6                                                              |
| 56               | Dominican Republic | Meat                            | 1993           | 144                                                            |
| 56               | Dominican Republic | Milk - Excluding Butter         | 1993           | 109                                                            |
| 56               | Dominican Republic | Miscellaneous                   | 1993           | 2                                                              |
| 56               | Dominican Republic | Mutton & Goat Meat              | 1993           | 1                                                              |
| 56               | Dominican Republic | Oats                            | 1993           | 4                                                              |
| 56               | Dominican Republic | Offals                          | 1993           | 5                                                              |
| 56               | Dominican Republic | Oilcrops                        | 1993           | 29                                                             |
| 56               | Dominican Republic | Oilcrops Oil, Other             | 1993           | 2                                                              |
| 56               | Dominican Republic | Olive Oil                       | 1993           | 2                                                              |
| 56               | Dominican Republic | Onions                          | 1993           | 3                                                              |
| 56               | Dominican Republic | Oranges, Mandarines             | 1993           | 6                                                              |
| 56               | Dominican Republic | Palm Oil                        | 1993           | 63                                                             |
| 56               | Dominican Republic | Pelagic Fish                    | 1993           | 6                                                              |
| 56               | Dominican Republic | Pigmeat                         | 1993           | 25                                                             |
| 56               | Dominican Republic | Pineapples and products         | 1993           | 3                                                              |
| 56               | Dominican Republic | Plantains                       | 1993           | 99                                                             |
| 56               | Dominican Republic | Potatoes and products           | 1993           | 4                                                              |
| 56               | Dominican Republic | Poultry Meat                    | 1993           | 57                                                             |
| 56               | Dominican Republic | Pulses                          | 1993           | 91                                                             |
| 56               | Dominican Republic | Pulses, Other and products      | 1993           | 34                                                             |
| 56               | Dominican Republic | Rice (Milled Equivalent)        | 1993           | 419                                                            |
| 56               | Dominican Republic | Roots, Other                    | 1993           | 5                                                              |
| 56               | Dominican Republic | Soyabean Oil                    | 1993           | 216                                                            |
| 56               | Dominican Republic | Spices                          | 1993           | 3                                                              |
| 56               | Dominican Republic | Spices, Other                   | 1993           | 3                                                              |
| 56               | Dominican Republic | Starchy Roots                   | 1993           | 47                                                             |
| 56               | Dominican Republic | Stimulants                      | 1993           | 7                                                              |
| 56               | Dominican Republic | Sugar & Sweeteners              | 1993           | 388                                                            |
| 56               | Dominican Republic | Sugar (Raw Equivalent)          | 1993           | 387                                                            |
| 56               | Dominican Republic | Sunflowerseed Oil               | 1993           | 30                                                             |
| 56               | Dominican Republic | Sweet potatoes                  | 1993           | 6                                                              |
| 56               | Dominican Republic | Sweeteners, Other               | 1993           | 1                                                              |
| 56               | Dominican Republic | Tomatoes and products           | 1993           | 6                                                              |
| 56               | Dominican Republic | Treenuts                        | 1993           | 1                                                              |
| 56               | Dominican Republic | Vegetable Oils                  | 1993           | 337                                                            |
| 56               | Dominican Republic | Vegetables                      | 1993           | 18                                                             |
| 56               | Dominican Republic | Vegetables, Other               | 1993           | 9                                                              |
| 56               | Dominican Republic | Vegetal Products                | 1993           | 1,901                                                          |
| 56               | Dominican Republic | Wheat and products              | 1993           | 168                                                            |
| 56               | Dominican Republic | Yams                            | 1993           | 2                                                              |
| 56               | Dominican Republic | Alcoholic Beverages             | 1994           | 85                                                             |
| 56               | Dominican Republic | Animal fats                     | 1994           | 34                                                             |
| 56               | Dominican Republic | Animal Products                 | 1994           | 317                                                            |
| 56               | Dominican Republic | Apples and products             | 1994           | 1                                                              |
| 56               | Dominican Republic | Bananas                         | 1994           | 69                                                             |
| 56               | Dominican Republic | Beans                           | 1994           | 49                                                             |
| 56               | Dominican Republic | Beer                            | 1994           | 38                                                             |
| 56               | Dominican Republic | Beverages, Alcoholic            | 1994           | 47                                                             |
| 56               | Dominican Republic | Bovine Meat                     | 1994           | 57                                                             |
| 56               | Dominican Republic | Butter, Ghee                    | 1994           | 9                                                              |
| 56               | Dominican Republic | Cassava and products            | 1994           | 31                                                             |
| 56               | Dominican Republic | Cereals - Excluding Beer        | 1994           | 724                                                            |
| 56               | Dominican Republic | Cocoa Beans and products        | 1994           | 4                                                              |
| 56               | Dominican Republic | Coconut Oil                     | 1994           | 15                                                             |
| 56               | Dominican Republic | Coconuts - Incl Copra           | 1994           | 30                                                             |
| 56               | Dominican Republic | Coffee and products             | 1994           | 2                                                              |
| 56               | Dominican Republic | Cottonseed Oil                  | 1994           | 1                                                              |
| 56               | Dominican Republic | Demersal Fish                   | 1994           | 6                                                              |
| 56               | Dominican Republic | Eggs                            | 1994           | 15                                                             |
| 56               | Dominican Republic | Fats, Animals, Raw              | 1994           | 26                                                             |
| 56               | Dominican Republic | Fish, Seafood                   | 1994           | 14                                                             |
| 56               | Dominican Republic | Freshwater Fish                 | 1994           | 2                                                              |
| 56               | Dominican Republic | Fruits - Excluding Wine         | 1994           | 184                                                            |
| 56               | Dominican Republic | Fruits, Other                   | 1994           | 29                                                             |
| 56               | Dominican Republic | Grand Total                     | 1994           | 2,250                                                          |
| 56               | Dominican Republic | Grapes and products (excl wine) | 1994           | 1                                                              |
| 56               | Dominican Republic | Groundnut Oil                   | 1994           | 1                                                              |

Dietary calcium and zinc deficiency risks are decreasing but remain prevalent

| FAO Country code | Country            | Food item                       | Reference year | Net energy supply (kcal <i>capita</i> <sup>-1</sup> d <sup>-1</sup> ) |
|------------------|--------------------|---------------------------------|----------------|-----------------------------------------------------------------------|
| 56               | Dominican Republic | Lemons, Limes and products      | 1994           | 1                                                                     |
| 56               | Dominican Republic | Maize and products              | 1994           | 103                                                                   |
| 56               | Dominican Republic | Maize Germ Oil                  | 1994           | 7                                                                     |
| 56               | Dominican Republic | Meat                            | 1994           | 142                                                                   |
| 56               | Dominican Republic | Milk - Excluding Butter         | 1994           | 106                                                                   |
| 56               | Dominican Republic | Miscellaneous                   | 1994           | 2                                                                     |
| 56               | Dominican Republic | Mutton & Goat Meat              | 1994           | 1                                                                     |
| 56               | Dominican Republic | Oats                            | 1994           | 2                                                                     |
| 56               | Dominican Republic | Offals                          | 1994           | 5                                                                     |
| 56               | Dominican Republic | Oilcrops                        | 1994           | 31                                                                    |
| 56               | Dominican Republic | Oilcrops Oil, Other             | 1994           | 3                                                                     |
| 56               | Dominican Republic | Olive Oil                       | 1994           | 3                                                                     |
| 56               | Dominican Republic | Onions                          | 1994           | 3                                                                     |
| 56               | Dominican Republic | Oranges, Mandarines             | 1994           | 6                                                                     |
| 56               | Dominican Republic | Palm Oil                        | 1994           | 79                                                                    |
| 56               | Dominican Republic | Pelagic Fish                    | 1994           | 6                                                                     |
| 56               | Dominican Republic | Pigmeat                         | 1994           | 26                                                                    |
| 56               | Dominican Republic | Pineapples and products         | 1994           | 11                                                                    |
| 56               | Dominican Republic | Plantains                       | 1994           | 67                                                                    |
| 56               | Dominican Republic | Potatoes and products           | 1994           | 4                                                                     |
| 56               | Dominican Republic | Poultry Meat                    | 1994           | 58                                                                    |
| 56               | Dominican Republic | Pulses                          | 1994           | 81                                                                    |
| 56               | Dominican Republic | Pulses, Other and products      | 1994           | 31                                                                    |
| 56               | Dominican Republic | Rice (Milled Equivalent)        | 1994           | 415                                                                   |
| 56               | Dominican Republic | Roots, Other                    | 1994           | 7                                                                     |
| 56               | Dominican Republic | Soyabean Oil                    | 1994           | 218                                                                   |
| 56               | Dominican Republic | Spices                          | 1994           | 3                                                                     |
| 56               | Dominican Republic | Spices, Other                   | 1994           | 2                                                                     |
| 56               | Dominican Republic | Starchy Roots                   | 1994           | 51                                                                    |
| 56               | Dominican Republic | Stimulants                      | 1994           | 7                                                                     |
| 56               | Dominican Republic | Sugar & Sweeteners              | 1994           | 389                                                                   |
| 56               | Dominican Republic | Sugar (Raw Equivalent)          | 1994           | 387                                                                   |
| 56               | Dominican Republic | Sunflowerseed Oil               | 1994           | 32                                                                    |
| 56               | Dominican Republic | Sweet potatoes                  | 1994           | 8                                                                     |
| 56               | Dominican Republic | Sweeteners, Other               | 1994           | 1                                                                     |
| 56               | Dominican Republic | Tomatoes and products           | 1994           | 6                                                                     |
| 56               | Dominican Republic | Treenuts                        | 1994           | 1                                                                     |
| 56               | Dominican Republic | Vegetable Oils                  | 1994           | 357                                                                   |
| 56               | Dominican Republic | Vegetables                      | 1994           | 19                                                                    |
| 56               | Dominican Republic | Vegetables, Other               | 1994           | 11                                                                    |
| 56               | Dominican Republic | Vegetal Products                | 1994           | 1,933                                                                 |
| 56               | Dominican Republic | Wheat and products              | 1994           | 204                                                                   |
| 56               | Dominican Republic | Yams                            | 1994           | 2                                                                     |
| 56               | Dominican Republic | Alcoholic Beverages             | 1995           | 80                                                                    |
| 56               | Dominican Republic | Animal fats                     | 1995           | 36                                                                    |
| 56               | Dominican Republic | Animal Products                 | 1995           | 322                                                                   |
| 56               | Dominican Republic | Apples and products             | 1995           | 1                                                                     |
| 56               | Dominican Republic | Bananas                         | 1995           | 56                                                                    |
| 56               | Dominican Republic | Barley and products             | 1995           | 1                                                                     |
| 56               | Dominican Republic | Beans                           | 1995           | 49                                                                    |
| 56               | Dominican Republic | Beer                            | 1995           | 35                                                                    |
| 56               | Dominican Republic | Beverages, Alcoholic            | 1995           | 45                                                                    |
| 56               | Dominican Republic | Bovine Meat                     | 1995           | 58                                                                    |
| 56               | Dominican Republic | Butter, Ghee                    | 1995           | 9                                                                     |
| 56               | Dominican Republic | Cassava and products            | 1995           | 42                                                                    |
| 56               | Dominican Republic | Cereals - Excluding Beer        | 1995           | 730                                                                   |
| 56               | Dominican Republic | Cocoa Beans and products        | 1995           | 5                                                                     |
| 56               | Dominican Republic | Coconut Oil                     | 1995           | 21                                                                    |
| 56               | Dominican Republic | Coconuts - Incl Copra           | 1995           | 29                                                                    |
| 56               | Dominican Republic | Coffee and products             | 1995           | 2                                                                     |
| 56               | Dominican Republic | Demersal Fish                   | 1995           | 6                                                                     |
| 56               | Dominican Republic | Eggs                            | 1995           | 16                                                                    |
| 56               | Dominican Republic | Fats, Animals, Raw              | 1995           | 27                                                                    |
| 56               | Dominican Republic | Fish, Seafood                   | 1995           | 13                                                                    |
| 56               | Dominican Republic | Freshwater Fish                 | 1995           | 1                                                                     |
| 56               | Dominican Republic | Fruits - Excluding Wine         | 1995           | 175                                                                   |
| 56               | Dominican Republic | Fruits, Other                   | 1995           | 29                                                                    |
| 56               | Dominican Republic | Grand Total                     | 1995           | 2,276                                                                 |
| 56               | Dominican Republic | Grapes and products (excl wine) | 1995           | 1                                                                     |
| 56               | Dominican Republic | Groundnut Oil                   | 1995           | 1                                                                     |
| 56               | Dominican Republic | Maize and products              | 1995           | 63                                                                    |
| 56               | Dominican Republic | Maize Germ Oil                  | 1995           | 7                                                                     |
| 56               | Dominican Republic | Meat                            | 1995           | 147                                                                   |
| 56               | Dominican Republic | Milk - Excluding Butter         | 1995           | 105                                                                   |
| 56               | Dominican Republic | Miscellaneous                   | 1995           | 2                                                                     |
| 56               | Dominican Republic | Mutton & Goat Meat              | 1995           | 1                                                                     |
| 56               | Dominican Republic | Oats                            | 1995           | 1                                                                     |
| 56               | Dominican Republic | Offals                          | 1995           | 5                                                                     |
| 56               | Dominican Republic | Oilcrops                        | 1995           | 29                                                                    |
| 56               | Dominican Republic | Oilcrops Oil, Other             | 1995           | 4                                                                     |
| 56               | Dominican Republic | Olive Oil                       | 1995           | 2                                                                     |
| 56               | Dominican Republic | Onions                          | 1995           | 4                                                                     |
| 56               | Dominican Republic | Oranges, Mandarines             | 1995           | 6                                                                     |
| 56               | Dominican Republic | Palm Oil                        | 1995           | 73                                                                    |
| 56               | Dominican Republic | Pelagic Fish                    | 1995           | 6                                                                     |
| 56               | Dominican Republic | Pigmeat                         | 1995           | 28                                                                    |
| 56               | Dominican Republic | Pineapples and products         | 1995           | 9                                                                     |
| 56               | Dominican Republic | Plantains                       | 1995           | 73                                                                    |
| 56               | Dominican Republic | Potatoes and products           | 1995           | 6                                                                     |
| 56               | Dominican Republic | Poultry Meat                    | 1995           | 60                                                                    |
| 56               | Dominican Republic | Pulses                          | 1995           | 81                                                                    |
| 56               | Dominican Republic | Pulses, Other and products      | 1995           | 32                                                                    |
| 56               | Dominican Republic | Rice (Milled Equivalent)        | 1995           | 420                                                                   |
| 56               | Dominican Republic | Roots, Other                    | 1995           | 10                                                                    |
| 56               | Dominican Republic | Soyabean Oil                    | 1995           | 232                                                                   |
| 56               | Dominican Republic | Spices                          | 1995           | 3                                                                     |
| 56               | Dominican Republic | Spices, Other                   | 1995           | 3                                                                     |

Dietary calcium and zinc deficiency risks are decreasing but remain prevalent

| FAO Country code | Country            | Food item                       | Reference year | Net energy supply (kcal capita <sup>-1</sup> d <sup>-1</sup> ) |
|------------------|--------------------|---------------------------------|----------------|----------------------------------------------------------------|
| 56               | Dominican Republic | Starchy Roots                   | 1995           | 70                                                             |
| 56               | Dominican Republic | Stimulants                      | 1995           | 7                                                              |
| 56               | Dominican Republic | Sugar & Sweeteners              | 1995           | 385                                                            |
| 56               | Dominican Republic | Sugar (Raw Equivalent)          | 1995           | 380                                                            |
| 56               | Dominican Republic | Sunflowerseed Oil               | 1995           | 32                                                             |
| 56               | Dominican Republic | Sweet potatoes                  | 1995           | 9                                                              |
| 56               | Dominican Republic | Sweeteners, Other               | 1995           | 4                                                              |
| 56               | Dominican Republic | Tomatoes and products           | 1995           | 6                                                              |
| 56               | Dominican Republic | Treenuts                        | 1995           | 1                                                              |
| 56               | Dominican Republic | Vegetable Oils                  | 1995           | 372                                                            |
| 56               | Dominican Republic | Vegetables                      | 1995           | 19                                                             |
| 56               | Dominican Republic | Vegetables, Other               | 1995           | 9                                                              |
| 56               | Dominican Republic | Vegetal Products                | 1995           | 1,954                                                          |
| 56               | Dominican Republic | Wheat and products              | 1995           | 244                                                            |
| 56               | Dominican Republic | Wine                            | 1995           | 1                                                              |
| 56               | Dominican Republic | Yams                            | 1995           | 3                                                              |
| 56               | Dominican Republic | Alcoholic Beverages             | 1996           | 82                                                             |
| 56               | Dominican Republic | Animal fats                     | 1996           | 38                                                             |
| 56               | Dominican Republic | Animal Products                 | 1996           | 329                                                            |
| 56               | Dominican Republic | Apples and products             | 1996           | 1                                                              |
| 56               | Dominican Republic | Bananas                         | 1996           | 59                                                             |
| 56               | Dominican Republic | Beans                           | 1996           | 40                                                             |
| 56               | Dominican Republic | Beer                            | 1996           | 34                                                             |
| 56               | Dominican Republic | Beverages, Alcoholic            | 1996           | 47                                                             |
| 56               | Dominican Republic | Bovine Meat                     | 1996           | 59                                                             |
| 56               | Dominican Republic | Butter, Ghee                    | 1996           | 9                                                              |
| 56               | Dominican Republic | Cassava and products            | 1996           | 39                                                             |
| 56               | Dominican Republic | Cereals - Excluding Beer        | 1996           | 657                                                            |
| 56               | Dominican Republic | Cocoa Beans and products        | 1996           | 5                                                              |
| 56               | Dominican Republic | Coconut Oil                     | 1996           | 21                                                             |
| 56               | Dominican Republic | Coconuts - Incl Copra           | 1996           | 35                                                             |
| 56               | Dominican Republic | Coffee and products             | 1996           | 2                                                              |
| 56               | Dominican Republic | Demersal Fish                   | 1996           | 5                                                              |
| 56               | Dominican Republic | Eggs                            | 1996           | 16                                                             |
| 56               | Dominican Republic | Fats, Animals, Raw              | 1996           | 29                                                             |
| 56               | Dominican Republic | Fish, Seafood                   | 1996           | 13                                                             |
| 56               | Dominican Republic | Fruits - Excluding Wine         | 1996           | 166                                                            |
| 56               | Dominican Republic | Fruits, Other                   | 1996           | 23                                                             |
| 56               | Dominican Republic | Grand Total                     | 1996           | 2,171                                                          |
| 56               | Dominican Republic | Grapes and products (excl wine) | 1996           | 1                                                              |
| 56               | Dominican Republic | Groundnut Oil                   | 1996           | 1                                                              |
| 56               | Dominican Republic | Honey                           | 1996           | 1                                                              |
| 56               | Dominican Republic | Lemons, Limes and products      | 1996           | 1                                                              |
| 56               | Dominican Republic | Maize and products              | 1996           | 76                                                             |
| 56               | Dominican Republic | Maize Germ Oil                  | 1996           | 8                                                              |
| 56               | Dominican Republic | Marine Fish, Other              | 1996           | 1                                                              |
| 56               | Dominican Republic | Meat                            | 1996           | 151                                                            |
| 56               | Dominican Republic | Milk - Excluding Butter         | 1996           | 107                                                            |
| 56               | Dominican Republic | Miscellaneous                   | 1996           | 2                                                              |
| 56               | Dominican Republic | Mutton & Goat Meat              | 1996           | 1                                                              |
| 56               | Dominican Republic | Oats                            | 1996           | 6                                                              |
| 56               | Dominican Republic | Offals                          | 1996           | 6                                                              |
| 56               | Dominican Republic | Oilcrops                        | 1996           | 35                                                             |
| 56               | Dominican Republic | Oilcrops Oil, Other             | 1996           | 4                                                              |
| 56               | Dominican Republic | Olive Oil                       | 1996           | 2                                                              |
| 56               | Dominican Republic | Onions                          | 1996           | 3                                                              |
| 56               | Dominican Republic | Oranges, Mandarines             | 1996           | 8                                                              |
| 56               | Dominican Republic | Palm Oil                        | 1996           | 76                                                             |
| 56               | Dominican Republic | Pelagic Fish                    | 1996           | 6                                                              |
| 56               | Dominican Republic | Pigmeat                         | 1996           | 28                                                             |
| 56               | Dominican Republic | Pineapples and products         | 1996           | 3                                                              |
| 56               | Dominican Republic | Plantains                       | 1996           | 70                                                             |
| 56               | Dominican Republic | Potatoes and products           | 1996           | 4                                                              |
| 56               | Dominican Republic | Poultry Meat                    | 1996           | 63                                                             |
| 56               | Dominican Republic | Pulses                          | 1996           | 70                                                             |
| 56               | Dominican Republic | Pulses, Other and products      | 1996           | 30                                                             |
| 56               | Dominican Republic | Rice (Milled Equivalent)        | 1996           | 405                                                            |
| 56               | Dominican Republic | Roots, Other                    | 1996           | 7                                                              |
| 56               | Dominican Republic | Soyabean Oil                    | 1996           | 211                                                            |
| 56               | Dominican Republic | Spices                          | 1996           | 3                                                              |
| 56               | Dominican Republic | Spices, Other                   | 1996           | 2                                                              |
| 56               | Dominican Republic | Starchy Roots                   | 1996           | 62                                                             |
| 56               | Dominican Republic | Stimulants                      | 1996           | 7                                                              |
| 56               | Dominican Republic | Sugar & Sweeteners              | 1996           | 382                                                            |
| 56               | Dominican Republic | Sugar (Raw Equivalent)          | 1996           | 379                                                            |
| 56               | Dominican Republic | Sunflowerseed Oil               | 1996           | 29                                                             |
| 56               | Dominican Republic | Sweet potatoes                  | 1996           | 9                                                              |
| 56               | Dominican Republic | Sweeteners, Other               | 1996           | 3                                                              |
| 56               | Dominican Republic | Tomatoes and products           | 1996           | 13                                                             |
| 56               | Dominican Republic | Treenuts                        | 1996           | 1                                                              |
| 56               | Dominican Republic | Vegetable Oils                  | 1996           | 351                                                            |
| 56               | Dominican Republic | Vegetables                      | 1996           | 25                                                             |
| 56               | Dominican Republic | Vegetables, Other               | 1996           | 9                                                              |
| 56               | Dominican Republic | Vegetal Products                | 1996           | 1,841                                                          |
| 56               | Dominican Republic | Wheat and products              | 1996           | 169                                                            |
| 56               | Dominican Republic | Wine                            | 1996           | 1                                                              |
| 56               | Dominican Republic | Yams                            | 1996           | 2                                                              |
| 56               | Dominican Republic | Alcoholic Beverages             | 1997           | 85                                                             |
| 56               | Dominican Republic | Animal fats                     | 1997           | 37                                                             |
| 56               | Dominican Republic | Animal Products                 | 1997           | 332                                                            |
| 56               | Dominican Republic | Apples and products             | 1997           | 1                                                              |
| 56               | Dominican Republic | Bananas                         | 1997           | 61                                                             |
| 56               | Dominican Republic | Beans                           | 1997           | 33                                                             |
| 56               | Dominican Republic | Beer                            | 1997           | 38                                                             |
| 56               | Dominican Republic | Beverages, Alcoholic            | 1997           | 46                                                             |
| 56               | Dominican Republic | Bovine Meat                     | 1997           | 57                                                             |
| 56               | Dominican Republic | Butter, Ghee                    | 1997           | 9                                                              |

Dietary calcium and zinc deficiency risks are decreasing but remain prevalent

| FAO Country code | Country            | Food item                       | Reference year | Net energy supply (kcal capita <sup>-1</sup> d <sup>-1</sup> ) |
|------------------|--------------------|---------------------------------|----------------|----------------------------------------------------------------|
| 56               | Dominican Republic | Cassava and products            | 1997           | 29                                                             |
| 56               | Dominican Republic | Cereals - Excluding Beer        | 1997           | 637                                                            |
| 56               | Dominican Republic | Cocoa Beans and products        | 1997           | 4                                                              |
| 56               | Dominican Republic | Coconut Oil                     | 1997           | 19                                                             |
| 56               | Dominican Republic | Coconuts - Incl Copra           | 1997           | 24                                                             |
| 56               | Dominican Republic | Coffee and products             | 1997           | 3                                                              |
| 56               | Dominican Republic | Demersal Fish                   | 1997           | 5                                                              |
| 56               | Dominican Republic | Eggs                            | 1997           | 16                                                             |
| 56               | Dominican Republic | Fats, Animals, Raw              | 1997           | 28                                                             |
| 56               | Dominican Republic | Fish, Seafood                   | 1997           | 14                                                             |
| 56               | Dominican Republic | Fruits - Excluding Wine         | 1997           | 172                                                            |
| 56               | Dominican Republic | Fruits, Other                   | 1997           | 29                                                             |
| 56               | Dominican Republic | Grand Total                     | 1997           | 2,151                                                          |
| 56               | Dominican Republic | Grapes and products (excl wine) | 1997           | 1                                                              |
| 56               | Dominican Republic | Groundnut Oil                   | 1997           | 1                                                              |
| 56               | Dominican Republic | Honey                           | 1997           | 4                                                              |
| 56               | Dominican Republic | Lemons, Limes and products      | 1997           | 1                                                              |
| 56               | Dominican Republic | Maize and products              | 1997           | 73                                                             |
| 56               | Dominican Republic | Maize Germ Oil                  | 1997           | 9                                                              |
| 56               | Dominican Republic | Marine Fish, Other              | 1997           | 1                                                              |
| 56               | Dominican Republic | Meat                            | 1997           | 154                                                            |
| 56               | Dominican Republic | Milk - Excluding Butter         | 1997           | 105                                                            |
| 56               | Dominican Republic | Miscellaneous                   | 1997           | 3                                                              |
| 56               | Dominican Republic | Mutton & Goat Meat              | 1997           | 1                                                              |
| 56               | Dominican Republic | Oats                            | 1997           | 5                                                              |
| 56               | Dominican Republic | Offals                          | 1997           | 6                                                              |
| 56               | Dominican Republic | Oilcrops                        | 1997           | 24                                                             |
| 56               | Dominican Republic | Oilcrops Oil, Other             | 1997           | 7                                                              |
| 56               | Dominican Republic | Olive Oil                       | 1997           | 2                                                              |
| 56               | Dominican Republic | Onions                          | 1997           | 3                                                              |
| 56               | Dominican Republic | Oranges, Mandarines             | 1997           | 8                                                              |
| 56               | Dominican Republic | Palm Oil                        | 1997           | 82                                                             |
| 56               | Dominican Republic | Pelagic Fish                    | 1997           | 7                                                              |
| 56               | Dominican Republic | Pigmeat                         | 1997           | 28                                                             |
| 56               | Dominican Republic | Pineapples and products         | 1997           | 8                                                              |
| 56               | Dominican Republic | Plantains                       | 1997           | 63                                                             |
| 56               | Dominican Republic | Potatoes and products           | 1997           | 4                                                              |
| 56               | Dominican Republic | Poultry Meat                    | 1997           | 68                                                             |
| 56               | Dominican Republic | Pulses                          | 1997           | 57                                                             |
| 56               | Dominican Republic | Pulses, Other and products      | 1997           | 24                                                             |
| 56               | Dominican Republic | Rice (Milled Equivalent)        | 1997           | 412                                                            |
| 56               | Dominican Republic | Roots, Other                    | 1997           | 9                                                              |
| 56               | Dominican Republic | Soyabean Oil                    | 1997           | 233                                                            |
| 56               | Dominican Republic | Spices                          | 1997           | 2                                                              |
| 56               | Dominican Republic | Spices, Other                   | 1997           | 2                                                              |
| 56               | Dominican Republic | Starchy Roots                   | 1997           | 50                                                             |
| 56               | Dominican Republic | Stimulants                      | 1997           | 7                                                              |
| 56               | Dominican Republic | Sugar & Sweeteners              | 1997           | 372                                                            |
| 56               | Dominican Republic | Sugar (Raw Equivalent)          | 1997           | 366                                                            |
| 56               | Dominican Republic | Sunflowerseed Oil               | 1997           | 28                                                             |
| 56               | Dominican Republic | Sweet potatoes                  | 1997           | 5                                                              |
| 56               | Dominican Republic | Sweeteners, Other               | 1997           | 2                                                              |
| 56               | Dominican Republic | Tomatoes and products           | 1997           | 16                                                             |
| 56               | Dominican Republic | Treenuts                        | 1997           | 1                                                              |
| 56               | Dominican Republic | Vegetable Oils                  | 1997           | 381                                                            |
| 56               | Dominican Republic | Vegetables                      | 1997           | 30                                                             |
| 56               | Dominican Republic | Vegetables, Other               | 1997           | 10                                                             |
| 56               | Dominican Republic | Vegetal Products                | 1997           | 1,820                                                          |
| 56               | Dominican Republic | Wheat and products              | 1997           | 146                                                            |
| 56               | Dominican Republic | Wine                            | 1997           | 1                                                              |
| 56               | Dominican Republic | Yams                            | 1997           | 3                                                              |
| 56               | Dominican Republic | Alcoholic Beverages             | 1998           | 90                                                             |
| 56               | Dominican Republic | Animal fats                     | 1998           | 40                                                             |
| 56               | Dominican Republic | Animal Products                 | 1998           | 346                                                            |
| 56               | Dominican Republic | Apples and products             | 1998           | 1                                                              |
| 56               | Dominican Republic | Bananas                         | 1998           | 47                                                             |
| 56               | Dominican Republic | Beans                           | 1998           | 40                                                             |
| 56               | Dominican Republic | Beer                            | 1998           | 45                                                             |
| 56               | Dominican Republic | Beverages, Alcoholic            | 1998           | 44                                                             |
| 56               | Dominican Republic | Bovine Meat                     | 1998           | 57                                                             |
| 56               | Dominican Republic | Butter, Ghee                    | 1998           | 10                                                             |
| 56               | Dominican Republic | Cassava and products            | 1998           | 37                                                             |
| 56               | Dominican Republic | Cereals - Excluding Beer        | 1998           | 639                                                            |
| 56               | Dominican Republic | Cocoa Beans and products        | 1998           | 5                                                              |
| 56               | Dominican Republic | Coconut Oil                     | 1998           | 16                                                             |
| 56               | Dominican Republic | Coconuts - Incl Copra           | 1998           | 34                                                             |
| 56               | Dominican Republic | Coffee and products             | 1998           | 5                                                              |
| 56               | Dominican Republic | Demersal Fish                   | 1998           | 6                                                              |
| 56               | Dominican Republic | Eggs                            | 1998           | 17                                                             |
| 56               | Dominican Republic | Fats, Animals, Raw              | 1998           | 31                                                             |
| 56               | Dominican Republic | Fish, Seafood                   | 1998           | 12                                                             |
| 56               | Dominican Republic | Fruits - Excluding Wine         | 1998           | 152                                                            |
| 56               | Dominican Republic | Fruits, Other                   | 1998           | 31                                                             |
| 56               | Dominican Republic | Grand Total                     | 1998           | 2,139                                                          |
| 56               | Dominican Republic | Grapes and products (excl wine) | 1998           | 1                                                              |
| 56               | Dominican Republic | Groundnut Oil                   | 1998           | 5                                                              |
| 56               | Dominican Republic | Honey                           | 1998           | 1                                                              |
| 56               | Dominican Republic | Lemons, Limes and products      | 1998           | 1                                                              |
| 56               | Dominican Republic | Maize and products              | 1998           | 68                                                             |
| 56               | Dominican Republic | Maize Germ Oil                  | 1998           | 8                                                              |
| 56               | Dominican Republic | Meat                            | 1998           | 165                                                            |
| 56               | Dominican Republic | Milk - Excluding Butter         | 1998           | 105                                                            |
| 56               | Dominican Republic | Miscellaneous                   | 1998           | 3                                                              |
| 56               | Dominican Republic | Mutton & Goat Meat              | 1998           | 1                                                              |
| 56               | Dominican Republic | Oats                            | 1998           | 7                                                              |
| 56               | Dominican Republic | Offals                          | 1998           | 6                                                              |
| 56               | Dominican Republic | Oilcrops                        | 1998           | 35                                                             |



Dietary calcium and zinc deficiency risks are decreasing but remain prevalent

| FAO Country code | Country            | Food item                       | Reference year | Net energy supply (kcal <i>capita</i> <sup>-1</sup> d <sup>-1</sup> ) |
|------------------|--------------------|---------------------------------|----------------|-----------------------------------------------------------------------|
| 56               | Dominican Republic | Oilcrops Oil, Other             | 1998           | 6                                                                     |
| 56               | Dominican Republic | Olive Oil                       | 1998           | 3                                                                     |
| 56               | Dominican Republic | Onions                          | 1998           | 3                                                                     |
| 56               | Dominican Republic | Oranges, Mandarines             | 1998           | 6                                                                     |
| 56               | Dominican Republic | Palm Oil                        | 1998           | 76                                                                    |
| 56               | Dominican Republic | Pelagic Fish                    | 1998           | 6                                                                     |
| 56               | Dominican Republic | Pigmeat                         | 1998           | 29                                                                    |
| 56               | Dominican Republic | Pineapples and products         | 1998           | 6                                                                     |
| 56               | Dominican Republic | Plantains                       | 1998           | 59                                                                    |
| 56               | Dominican Republic | Potatoes and products           | 1998           | 3                                                                     |
| 56               | Dominican Republic | Poultry Meat                    | 1998           | 79                                                                    |
| 56               | Dominican Republic | Pulses                          | 1998           | 54                                                                    |
| 56               | Dominican Republic | Pulses, Other and products      | 1998           | 14                                                                    |
| 56               | Dominican Republic | Rice (Milled Equivalent)        | 1998           | 409                                                                   |
| 56               | Dominican Republic | Roots, Other                    | 1998           | 5                                                                     |
| 56               | Dominican Republic | Soyabean Oil                    | 1998           | 234                                                                   |
| 56               | Dominican Republic | Spices                          | 1998           | 2                                                                     |
| 56               | Dominican Republic | Spices, Other                   | 1998           | 2                                                                     |
| 56               | Dominican Republic | Starchy Roots                   | 1998           | 57                                                                    |
| 56               | Dominican Republic | Stimulants                      | 1998           | 9                                                                     |
| 56               | Dominican Republic | Sugar & Sweeteners              | 1998           | 346                                                                   |
| 56               | Dominican Republic | Sugar (Raw Equivalent)          | 1998           | 342                                                                   |
| 56               | Dominican Republic | Sunflowerseed Oil               | 1998           | 29                                                                    |
| 56               | Dominican Republic | Sweet potatoes                  | 1998           | 9                                                                     |
| 56               | Dominican Republic | Sweeteners, Other               | 1998           | 3                                                                     |
| 56               | Dominican Republic | Tomatoes and products           | 1998           | 17                                                                    |
| 56               | Dominican Republic | Treenuts                        | 1998           | 1                                                                     |
| 56               | Dominican Republic | Vegetable Oils                  | 1998           | 377                                                                   |
| 56               | Dominican Republic | Vegetables                      | 1998           | 28                                                                    |
| 56               | Dominican Republic | Vegetables, Other               | 1998           | 8                                                                     |
| 56               | Dominican Republic | Vegetal Products                | 1998           | 1,793                                                                 |
| 56               | Dominican Republic | Wheat and products              | 1998           | 156                                                                   |
| 56               | Dominican Republic | Wine                            | 1998           | 1                                                                     |
| 56               | Dominican Republic | Yams                            | 1998           | 3                                                                     |
| 56               | Dominican Republic | Alcoholic Beverages             | 1999           | 95                                                                    |
| 56               | Dominican Republic | Animal fats                     | 1999           | 43                                                                    |
| 56               | Dominican Republic | Animal Products                 | 1999           | 325                                                                   |
| 56               | Dominican Republic | Apples and products             | 1999           | 1                                                                     |
| 56               | Dominican Republic | Bananas                         | 1999           | 68                                                                    |
| 56               | Dominican Republic | Beans                           | 1999           | 36                                                                    |
| 56               | Dominican Republic | Beer                            | 1999           | 49                                                                    |
| 56               | Dominican Republic | Beverages, Alcoholic            | 1999           | 45                                                                    |
| 56               | Dominican Republic | Bovine Meat                     | 1999           | 46                                                                    |
| 56               | Dominican Republic | Butter, Ghee                    | 1999           | 9                                                                     |
| 56               | Dominican Republic | Cassava and products            | 1999           | 37                                                                    |
| 56               | Dominican Republic | Cereals - Excluding Beer        | 1999           | 605                                                                   |
| 56               | Dominican Republic | Cocoa Beans and products        | 1999           | 1                                                                     |
| 56               | Dominican Republic | Coconut Oil                     | 1999           | 13                                                                    |
| 56               | Dominican Republic | Coconuts - Incl Copra           | 1999           | 32                                                                    |
| 56               | Dominican Republic | Coffee and products             | 1999           | 3                                                                     |
| 56               | Dominican Republic | Demersal Fish                   | 1999           | 6                                                                     |
| 56               | Dominican Republic | Eggs                            | 1999           | 17                                                                    |
| 56               | Dominican Republic | Fats, Animals, Raw              | 1999           | 34                                                                    |
| 56               | Dominican Republic | Fish, Seafood                   | 1999           | 14                                                                    |
| 56               | Dominican Republic | Fruits - Excluding Wine         | 1999           | 157                                                                   |
| 56               | Dominican Republic | Fruits, Other                   | 1999           | 31                                                                    |
| 56               | Dominican Republic | Grand Total                     | 1999           | 2,147                                                                 |
| 56               | Dominican Republic | Grapes and products (excl wine) | 1999           | 1                                                                     |
| 56               | Dominican Republic | Groundnut Oil                   | 1999           | 4                                                                     |
| 56               | Dominican Republic | Honey                           | 1999           | 1                                                                     |
| 56               | Dominican Republic | Lemons, Limes and products      | 1999           | 1                                                                     |
| 56               | Dominican Republic | Maize and products              | 1999           | 101                                                                   |
| 56               | Dominican Republic | Maize Germ Oil                  | 1999           | 9                                                                     |
| 56               | Dominican Republic | Meat                            | 1999           | 149                                                                   |
| 56               | Dominican Republic | Milk - Excluding Butter         | 1999           | 95                                                                    |
| 56               | Dominican Republic | Miscellaneous                   | 1999           | 2                                                                     |
| 56               | Dominican Republic | Mutton & Goat Meat              | 1999           | 1                                                                     |
| 56               | Dominican Republic | Oats                            | 1999           | 2                                                                     |
| 56               | Dominican Republic | Offals                          | 1999           | 6                                                                     |
| 56               | Dominican Republic | Oilcrops                        | 1999           | 32                                                                    |
| 56               | Dominican Republic | Oilcrops Oil, Other             | 1999           | 9                                                                     |
| 56               | Dominican Republic | Olive Oil                       | 1999           | 3                                                                     |
| 56               | Dominican Republic | Onions                          | 1999           | 5                                                                     |
| 56               | Dominican Republic | Oranges, Mandarines             | 1999           | 6                                                                     |
| 56               | Dominican Republic | Palm Oil                        | 1999           | 85                                                                    |
| 56               | Dominican Republic | Pelagic Fish                    | 1999           | 7                                                                     |
| 56               | Dominican Republic | Pigmeat                         | 1999           | 26                                                                    |
| 56               | Dominican Republic | Pineapples and products         | 1999           | 6                                                                     |
| 56               | Dominican Republic | Plantains                       | 1999           | 42                                                                    |
| 56               | Dominican Republic | Potatoes and products           | 1999           | 5                                                                     |
| 56               | Dominican Republic | Poultry Meat                    | 1999           | 76                                                                    |
| 56               | Dominican Republic | Pulses                          | 1999           | 64                                                                    |
| 56               | Dominican Republic | Pulses, Other and products      | 1999           | 28                                                                    |
| 56               | Dominican Republic | Rice (Milled Equivalent)        | 1999           | 414                                                                   |
| 56               | Dominican Republic | Roots, Other                    | 1999           | 12                                                                    |
| 56               | Dominican Republic | Soyabean Oil                    | 1999           | 256                                                                   |
| 56               | Dominican Republic | Spices                          | 1999           | 3                                                                     |
| 56               | Dominican Republic | Spices, Other                   | 1999           | 2                                                                     |
| 56               | Dominican Republic | Starchy Roots                   | 1999           | 68                                                                    |
| 56               | Dominican Republic | Stimulants                      | 1999           | 5                                                                     |
| 56               | Dominican Republic | Sugar & Sweeteners              | 1999           | 353                                                                   |
| 56               | Dominican Republic | Sugar (Raw Equivalent)          | 1999           | 349                                                                   |
| 56               | Dominican Republic | Sunflowerseed Oil               | 1999           | 29                                                                    |
| 56               | Dominican Republic | Sweet potatoes                  | 1999           | 11                                                                    |
| 56               | Dominican Republic | Sweeteners, Other               | 1999           | 2                                                                     |
| 56               | Dominican Republic | Tomatoes and products           | 1999           | 17                                                                    |
| 56               | Dominican Republic | Treenuts                        | 1999           | 1                                                                     |

Dietary calcium and zinc deficiency risks are decreasing but remain prevalent

| FAO Country code | Country            | Food item                       | Reference year | Net energy supply (kcal <i>capita</i> <sup>-1</sup> d <sup>-1</sup> ) |
|------------------|--------------------|---------------------------------|----------------|-----------------------------------------------------------------------|
| 56               | Dominican Republic | Vegetable Oils                  | 1999           | 407                                                                   |
| 56               | Dominican Republic | Vegetables                      | 1999           | 32                                                                    |
| 56               | Dominican Republic | Vegetables, Other               | 1999           | 9                                                                     |
| 56               | Dominican Republic | Vegetal Products                | 1999           | 1,823                                                                 |
| 56               | Dominican Republic | Wheat and products              | 1999           | 88                                                                    |
| 56               | Dominican Republic | Wine                            | 1999           | 1                                                                     |
| 56               | Dominican Republic | Yams                            | 1999           | 3                                                                     |
| 56               | Dominican Republic | Alcoholic Beverages             | 2000           | 109                                                                   |
| 56               | Dominican Republic | Animal fats                     | 2000           | 41                                                                    |
| 56               | Dominican Republic | Animal Products                 | 2000           | 334                                                                   |
| 56               | Dominican Republic | Apples and products             | 2000           | 1                                                                     |
| 56               | Dominican Republic | Bananas                         | 2000           | 62                                                                    |
| 56               | Dominican Republic | Beans                           | 2000           | 32                                                                    |
| 56               | Dominican Republic | Beer                            | 2000           | 53                                                                    |
| 56               | Dominican Republic | Beverages, Alcoholic            | 2000           | 54                                                                    |
| 56               | Dominican Republic | Bovine Meat                     | 2000           | 47                                                                    |
| 56               | Dominican Republic | Butter, Ghee                    | 2000           | 10                                                                    |
| 56               | Dominican Republic | Cassava and products            | 2000           | 36                                                                    |
| 56               | Dominican Republic | Cereals - Excluding Beer        | 2000           | 681                                                                   |
| 56               | Dominican Republic | Cocoa Beans and products        | 2000           | 2                                                                     |
| 56               | Dominican Republic | Coconut Oil                     | 2000           | 11                                                                    |
| 56               | Dominican Republic | Coconuts - Incl Copra           | 2000           | 49                                                                    |
| 56               | Dominican Republic | Coffee and products             | 2000           | 4                                                                     |
| 56               | Dominican Republic | Demersal Fish                   | 2000           | 7                                                                     |
| 56               | Dominican Republic | Eggs                            | 2000           | 18                                                                    |
| 56               | Dominican Republic | Fats, Animals, Raw              | 2000           | 31                                                                    |
| 56               | Dominican Republic | Fish, Seafood                   | 2000           | 17                                                                    |
| 56               | Dominican Republic | Fruits - Excluding Wine         | 2000           | 156                                                                   |
| 56               | Dominican Republic | Fruits, Other                   | 2000           | 38                                                                    |
| 56               | Dominican Republic | Grand Total                     | 2000           | 2,222                                                                 |
| 56               | Dominican Republic | Grapes and products (excl wine) | 2000           | 1                                                                     |
| 56               | Dominican Republic | Groundnut Oil                   | 2000           | 2                                                                     |
| 56               | Dominican Republic | Honey                           | 2000           | 1                                                                     |
| 56               | Dominican Republic | Maize and products              | 2000           | 77                                                                    |
| 56               | Dominican Republic | Maize Germ Oil                  | 2000           | 6                                                                     |
| 56               | Dominican Republic | Marine Fish, Other              | 2000           | 1                                                                     |
| 56               | Dominican Republic | Meat                            | 2000           | 159                                                                   |
| 56               | Dominican Republic | Milk - Excluding Butter         | 2000           | 93                                                                    |
| 56               | Dominican Republic | Miscellaneous                   | 2000           | 3                                                                     |
| 56               | Dominican Republic | Mutton & Goat Meat              | 2000           | 1                                                                     |
| 56               | Dominican Republic | Oats                            | 2000           | 3                                                                     |
| 56               | Dominican Republic | Offals                          | 2000           | 6                                                                     |
| 56               | Dominican Republic | Oilcrops                        | 2000           | 49                                                                    |
| 56               | Dominican Republic | Oilcrops Oil, Other             | 2000           | 5                                                                     |
| 56               | Dominican Republic | Olive Oil                       | 2000           | 4                                                                     |
| 56               | Dominican Republic | Onions                          | 2000           | 4                                                                     |
| 56               | Dominican Republic | Oranges, Mandarines             | 2000           | 10                                                                    |
| 56               | Dominican Republic | Palm Oil                        | 2000           | 102                                                                   |
| 56               | Dominican Republic | Pelagic Fish                    | 2000           | 8                                                                     |
| 56               | Dominican Republic | Pigmeat                         | 2000           | 26                                                                    |
| 56               | Dominican Republic | Pineapples and products         | 2000           | 5                                                                     |
| 56               | Dominican Republic | Plantains                       | 2000           | 37                                                                    |
| 56               | Dominican Republic | Potatoes and products           | 2000           | 4                                                                     |
| 56               | Dominican Republic | Poultry Meat                    | 2000           | 85                                                                    |
| 56               | Dominican Republic | Pulses                          | 2000           | 49                                                                    |
| 56               | Dominican Republic | Pulses, Other and products      | 2000           | 16                                                                    |
| 56               | Dominican Republic | Rice (Milled Equivalent)        | 2000           | 434                                                                   |
| 56               | Dominican Republic | Roots, Other                    | 2000           | 7                                                                     |
| 56               | Dominican Republic | Soyabean Oil                    | 2000           | 246                                                                   |
| 56               | Dominican Republic | Spices                          | 2000           | 2                                                                     |
| 56               | Dominican Republic | Spices, Other                   | 2000           | 2                                                                     |
| 56               | Dominican Republic | Starchy Roots                   | 2000           | 57                                                                    |
| 56               | Dominican Republic | Stimulants                      | 2000           | 6                                                                     |
| 56               | Dominican Republic | Sugar & Sweeteners              | 2000           | 339                                                                   |
| 56               | Dominican Republic | Sugar (Raw Equivalent)          | 2000           | 336                                                                   |
| 56               | Dominican Republic | Sunflowerseed Oil               | 2000           | 29                                                                    |
| 56               | Dominican Republic | Sweet potatoes                  | 2000           | 6                                                                     |
| 56               | Dominican Republic | Sweeteners, Other               | 2000           | 3                                                                     |
| 56               | Dominican Republic | Tomatoes and products           | 2000           | 17                                                                    |
| 56               | Dominican Republic | Treenuts                        | 2000           | 1                                                                     |
| 56               | Dominican Republic | Vegetable Oils                  | 2000           | 405                                                                   |
| 56               | Dominican Republic | Vegetables                      | 2000           | 29                                                                    |
| 56               | Dominican Republic | Vegetables, Other               | 2000           | 8                                                                     |
| 56               | Dominican Republic | Vegetal Products                | 2000           | 1,888                                                                 |
| 56               | Dominican Republic | Wheat and products              | 2000           | 167                                                                   |
| 56               | Dominican Republic | Wine                            | 2000           | 2                                                                     |
| 56               | Dominican Republic | Yams                            | 2000           | 3                                                                     |
| 56               | Dominican Republic | Alcoholic Beverages             | 2001           | 92                                                                    |
| 56               | Dominican Republic | Animal fats                     | 2001           | 40                                                                    |
| 56               | Dominican Republic | Animal Products                 | 2001           | 330                                                                   |
| 56               | Dominican Republic | Apples and products             | 2001           | 1                                                                     |
| 56               | Dominican Republic | Bananas                         | 2001           | 54                                                                    |
| 56               | Dominican Republic | Beans                           | 2001           | 44                                                                    |
| 56               | Dominican Republic | Beer                            | 2001           | 44                                                                    |
| 56               | Dominican Republic | Beverages, Alcoholic            | 2001           | 45                                                                    |
| 56               | Dominican Republic | Bovine Meat                     | 2001           | 48                                                                    |
| 56               | Dominican Republic | Butter, Ghee                    | 2001           | 9                                                                     |
| 56               | Dominican Republic | Cassava and products            | 2001           | 35                                                                    |
| 56               | Dominican Republic | Cereals - Excluding Beer        | 2001           | 635                                                                   |
| 56               | Dominican Republic | Cocoa Beans and products        | 2001           | 2                                                                     |
| 56               | Dominican Republic | Coconut Oil                     | 2001           | 11                                                                    |
| 56               | Dominican Republic | Coconuts - Incl Copra           | 2001           | 39                                                                    |
| 56               | Dominican Republic | Coffee and products             | 2001           | 4                                                                     |
| 56               | Dominican Republic | Demersal Fish                   | 2001           | 7                                                                     |
| 56               | Dominican Republic | Eggs                            | 2001           | 21                                                                    |
| 56               | Dominican Republic | Fats, Animals, Raw              | 2001           | 31                                                                    |
| 56               | Dominican Republic | Fish, Seafood                   | 2001           | 17                                                                    |

Dietary calcium and zinc deficiency risks are decreasing but remain prevalent

| FAO Country code | Country            | Food item                       | Reference year | Net energy supply (kcal <i>capita</i> <sup>-1</sup> d <sup>-1</sup> ) |
|------------------|--------------------|---------------------------------|----------------|-----------------------------------------------------------------------|
| 56               | Dominican Republic | Freshwater Fish                 | 2001           | 1                                                                     |
| 56               | Dominican Republic | Fruits - Excluding Wine         | 2001           | 192                                                                   |
| 56               | Dominican Republic | Fruits, Other                   | 2001           | 49                                                                    |
| 56               | Dominican Republic | Grand Total                     | 2001           | 2,254                                                                 |
| 56               | Dominican Republic | Grapefruit and products         | 2001           | 1                                                                     |
| 56               | Dominican Republic | Grapes and products (excl wine) | 2001           | 1                                                                     |
| 56               | Dominican Republic | Groundnut Oil                   | 2001           | 2                                                                     |
| 56               | Dominican Republic | Honey                           | 2001           | 1                                                                     |
| 56               | Dominican Republic | Maize and products              | 2001           | 65                                                                    |
| 56               | Dominican Republic | Maize Germ Oil                  | 2001           | 11                                                                    |
| 56               | Dominican Republic | Marine Fish, Other              | 2001           | 1                                                                     |
| 56               | Dominican Republic | Meat                            | 2001           | 156                                                                   |
| 56               | Dominican Republic | Milk - Excluding Butter         | 2001           | 90                                                                    |
| 56               | Dominican Republic | Miscellaneous                   | 2001           | 3                                                                     |
| 56               | Dominican Republic | Mutton & Goat Meat              | 2001           | 1                                                                     |
| 56               | Dominican Republic | Oats                            | 2001           | 3                                                                     |
| 56               | Dominican Republic | Offals                          | 2001           | 6                                                                     |
| 56               | Dominican Republic | Oilcrops                        | 2001           | 39                                                                    |
| 56               | Dominican Republic | Oilcrops Oil, Other             | 2001           | 5                                                                     |
| 56               | Dominican Republic | Olive Oil                       | 2001           | 4                                                                     |
| 56               | Dominican Republic | Onions                          | 2001           | 5                                                                     |
| 56               | Dominican Republic | Oranges, Mandarines             | 2001           | 5                                                                     |
| 56               | Dominican Republic | Palm Oil                        | 2001           | 100                                                                   |
| 56               | Dominican Republic | Pelagic Fish                    | 2001           | 7                                                                     |
| 56               | Dominican Republic | Pigmeat                         | 2001           | 27                                                                    |
| 56               | Dominican Republic | Pineapples and products         | 2001           | 12                                                                    |
| 56               | Dominican Republic | Plantains                       | 2001           | 69                                                                    |
| 56               | Dominican Republic | Potatoes and products           | 2001           | 12                                                                    |
| 56               | Dominican Republic | Poultry Meat                    | 2001           | 81                                                                    |
| 56               | Dominican Republic | Pulses                          | 2001           | 73                                                                    |
| 56               | Dominican Republic | Pulses, Other and products      | 2001           | 29                                                                    |
| 56               | Dominican Republic | Rice (Milled Equivalent)        | 2001           | 457                                                                   |
| 56               | Dominican Republic | Roots, Other                    | 2001           | 4                                                                     |
| 56               | Dominican Republic | Soyabean Oil                    | 2001           | 230                                                                   |
| 56               | Dominican Republic | Spices                          | 2001           | 2                                                                     |
| 56               | Dominican Republic | Spices, Other                   | 2001           | 2                                                                     |
| 56               | Dominican Republic | Starchy Roots                   | 2001           | 60                                                                    |
| 56               | Dominican Republic | Stimulants                      | 2001           | 6                                                                     |
| 56               | Dominican Republic | Sugar & Sweeteners              | 2001           | 394                                                                   |
| 56               | Dominican Republic | Sugar (Raw Equivalent)          | 2001           | 390                                                                   |
| 56               | Dominican Republic | Sunflowerseed Oil               | 2001           | 28                                                                    |
| 56               | Dominican Republic | Sweet potatoes                  | 2001           | 5                                                                     |
| 56               | Dominican Republic | Sweeteners, Other               | 2001           | 3                                                                     |
| 56               | Dominican Republic | Tomatoes and products           | 2001           | 19                                                                    |
| 56               | Dominican Republic | Treenuts                        | 2001           | 1                                                                     |
| 56               | Dominican Republic | Vegetable Oils                  | 2001           | 392                                                                   |
| 56               | Dominican Republic | Vegetables                      | 2001           | 35                                                                    |
| 56               | Dominican Republic | Vegetables, Other               | 2001           | 11                                                                    |
| 56               | Dominican Republic | Vegetal Products                | 2001           | 1,924                                                                 |
| 56               | Dominican Republic | Wheat and products              | 2001           | 109                                                                   |
| 56               | Dominican Republic | Wine                            | 2001           | 2                                                                     |
| 56               | Dominican Republic | Yams                            | 2001           | 4                                                                     |
| 56               | Dominican Republic | Alcoholic Beverages             | 2002           | 97                                                                    |
| 56               | Dominican Republic | Animal fats                     | 2002           | 34                                                                    |
| 56               | Dominican Republic | Animal Products                 | 2002           | 340                                                                   |
| 56               | Dominican Republic | Apples and products             | 2002           | 1                                                                     |
| 56               | Dominican Republic | Bananas                         | 2002           | 68                                                                    |
| 56               | Dominican Republic | Beans                           | 2002           | 39                                                                    |
| 56               | Dominican Republic | Beer                            | 2002           | 50                                                                    |
| 56               | Dominican Republic | Beverages, Alcoholic            | 2002           | 46                                                                    |
| 56               | Dominican Republic | Bovine Meat                     | 2002           | 48                                                                    |
| 56               | Dominican Republic | Butter, Ghee                    | 2002           | 10                                                                    |
| 56               | Dominican Republic | Cassava and products            | 2002           | 33                                                                    |
| 56               | Dominican Republic | Cereals - Excluding Beer        | 2002           | 637                                                                   |
| 56               | Dominican Republic | Cocoa Beans and products        | 2002           | 4                                                                     |
| 56               | Dominican Republic | Coconut Oil                     | 2002           | 33                                                                    |
| 56               | Dominican Republic | Coconuts - Incl Copra           | 2002           | 44                                                                    |
| 56               | Dominican Republic | Coffee and products             | 2002           | 4                                                                     |
| 56               | Dominican Republic | Crustaceans                     | 2002           | 1                                                                     |
| 56               | Dominican Republic | Demersal Fish                   | 2002           | 4                                                                     |
| 56               | Dominican Republic | Eggs                            | 2002           | 25                                                                    |
| 56               | Dominican Republic | Fats, Animals, Raw              | 2002           | 24                                                                    |
| 56               | Dominican Republic | Fish, Seafood                   | 2002           | 17                                                                    |
| 56               | Dominican Republic | Freshwater Fish                 | 2002           | 1                                                                     |
| 56               | Dominican Republic | Fruits - Excluding Wine         | 2002           | 210                                                                   |
| 56               | Dominican Republic | Fruits, Other                   | 2002           | 56                                                                    |
| 56               | Dominican Republic | Grand Total                     | 2002           | 2,279                                                                 |
| 56               | Dominican Republic | Grapefruit and products         | 2002           | 1                                                                     |
| 56               | Dominican Republic | Grapes and products (excl wine) | 2002           | 2                                                                     |
| 56               | Dominican Republic | Groundnut Oil                   | 2002           | 3                                                                     |
| 56               | Dominican Republic | Honey                           | 2002           | 1                                                                     |
| 56               | Dominican Republic | Maize and products              | 2002           | 65                                                                    |
| 56               | Dominican Republic | Maize Germ Oil                  | 2002           | 11                                                                    |
| 56               | Dominican Republic | Meat                            | 2002           | 148                                                                   |
| 56               | Dominican Republic | Milk - Excluding Butter         | 2002           | 110                                                                   |
| 56               | Dominican Republic | Miscellaneous                   | 2002           | 4                                                                     |
| 56               | Dominican Republic | Mutton & Goat Meat              | 2002           | 1                                                                     |
| 56               | Dominican Republic | Oats                            | 2002           | 1                                                                     |
| 56               | Dominican Republic | Offals                          | 2002           | 6                                                                     |
| 56               | Dominican Republic | Oilcrops                        | 2002           | 45                                                                    |
| 56               | Dominican Republic | Oilcrops Oil, Other             | 2002           | 7                                                                     |
| 56               | Dominican Republic | Olive Oil                       | 2002           | 3                                                                     |
| 56               | Dominican Republic | Olives (including preserved)    | 2002           | 1                                                                     |
| 56               | Dominican Republic | Onions                          | 2002           | 5                                                                     |
| 56               | Dominican Republic | Oranges, Mandarines             | 2002           | 7                                                                     |
| 56               | Dominican Republic | Palm Oil                        | 2002           | 97                                                                    |
| 56               | Dominican Republic | Peas                            | 2002           | 1                                                                     |

Dietary calcium and zinc deficiency risks are decreasing but remain prevalent

| FAO Country code | Country            | Food item                       | Reference year | Net energy supply (kcal capita <sup>-1</sup> d <sup>-1</sup> ) |
|------------------|--------------------|---------------------------------|----------------|----------------------------------------------------------------|
| 56               | Dominican Republic | Pelagic Fish                    | 2002           | 11                                                             |
| 56               | Dominican Republic | Pigmeat                         | 2002           | 27                                                             |
| 56               | Dominican Republic | Pineapples and products         | 2002           | 9                                                              |
| 56               | Dominican Republic | Plantains                       | 2002           | 67                                                             |
| 56               | Dominican Republic | Potatoes and products           | 2002           | 10                                                             |
| 56               | Dominican Republic | Poultry Meat                    | 2002           | 71                                                             |
| 56               | Dominican Republic | Pulses                          | 2002           | 73                                                             |
| 56               | Dominican Republic | Pulses, Other and products      | 2002           | 34                                                             |
| 56               | Dominican Republic | Rice (Milled Equivalent)        | 2002           | 407                                                            |
| 56               | Dominican Republic | Roots, Other                    | 2002           | 12                                                             |
| 56               | Dominican Republic | Soyabean Oil                    | 2002           | 190                                                            |
| 56               | Dominican Republic | Spices                          | 2002           | 3                                                              |
| 56               | Dominican Republic | Spices, Other                   | 2002           | 3                                                              |
| 56               | Dominican Republic | Starchy Roots                   | 2002           | 66                                                             |
| 56               | Dominican Republic | Stimulants                      | 2002           | 8                                                              |
| 56               | Dominican Republic | Sugar & Sweeteners              | 2002           | 391                                                            |
| 56               | Dominican Republic | Sugar (Raw Equivalent)          | 2002           | 387                                                            |
| 56               | Dominican Republic | Sunflowerseed Oil               | 2002           | 27                                                             |
| 56               | Dominican Republic | Sweet potatoes                  | 2002           | 6                                                              |
| 56               | Dominican Republic | Sweeteners, Other               | 2002           | 2                                                              |
| 56               | Dominican Republic | Tomatoes and products           | 2002           | 15                                                             |
| 56               | Dominican Republic | Treenuts                        | 2002           | 1                                                              |
| 56               | Dominican Republic | Vegetable Oils                  | 2002           | 371                                                            |
| 56               | Dominican Republic | Vegetables                      | 2002           | 33                                                             |
| 56               | Dominican Republic | Vegetables, Other               | 2002           | 13                                                             |
| 56               | Dominican Republic | Vegetal Products                | 2002           | 1,939                                                          |
| 56               | Dominican Republic | Wheat and products              | 2002           | 163                                                            |
| 56               | Dominican Republic | Wine                            | 2002           | 1                                                              |
| 56               | Dominican Republic | Yams                            | 2002           | 5                                                              |
| 56               | Dominican Republic | Alcoholic Beverages             | 2003           | 98                                                             |
| 56               | Dominican Republic | Animal fats                     | 2003           | 35                                                             |
| 56               | Dominican Republic | Animal Products                 | 2003           | 278                                                            |
| 56               | Dominican Republic | Apples and products             | 2003           | 1                                                              |
| 56               | Dominican Republic | Bananas                         | 2003           | 66                                                             |
| 56               | Dominican Republic | Beans                           | 2003           | 50                                                             |
| 56               | Dominican Republic | Beer                            | 2003           | 50                                                             |
| 56               | Dominican Republic | Beverages, Alcoholic            | 2003           | 47                                                             |
| 56               | Dominican Republic | Bovine Meat                     | 2003           | 46                                                             |
| 56               | Dominican Republic | Butter, Ghee                    | 2003           | 8                                                              |
| 56               | Dominican Republic | Cassava and products            | 2003           | 33                                                             |
| 56               | Dominican Republic | Cereals - Excluding Beer        | 2003           | 524                                                            |
| 56               | Dominican Republic | Cereals, Other                  | 2003           | 2                                                              |
| 56               | Dominican Republic | Cocoa Beans and products        | 2003           | 5                                                              |
| 56               | Dominican Republic | Coconut Oil                     | 2003           | 29                                                             |
| 56               | Dominican Republic | Coconuts - Incl Copra           | 2003           | 37                                                             |
| 56               | Dominican Republic | Coffee and products             | 2003           | 3                                                              |
| 56               | Dominican Republic | Demersal Fish                   | 2003           | 3                                                              |
| 56               | Dominican Republic | Eggs                            | 2003           | 21                                                             |
| 56               | Dominican Republic | Fats, Animals, Raw              | 2003           | 27                                                             |
| 56               | Dominican Republic | Fish, Seafood                   | 2003           | 13                                                             |
| 56               | Dominican Republic | Freshwater Fish                 | 2003           | 1                                                              |
| 56               | Dominican Republic | Fruits - Excluding Wine         | 2003           | 227                                                            |
| 56               | Dominican Republic | Fruits, Other                   | 2003           | 68                                                             |
| 56               | Dominican Republic | Grand Total                     | 2003           | 2,135                                                          |
| 56               | Dominican Republic | Grapefruit and products         | 2003           | 1                                                              |
| 56               | Dominican Republic | Grapes and products (excl wine) | 2003           | 1                                                              |
| 56               | Dominican Republic | Groundnut Oil                   | 2003           | 2                                                              |
| 56               | Dominican Republic | Honey                           | 2003           | 3                                                              |
| 56               | Dominican Republic | Maize and products              | 2003           | 54                                                             |
| 56               | Dominican Republic | Maize Germ Oil                  | 2003           | 11                                                             |
| 56               | Dominican Republic | Marine Fish, Other              | 2003           | 1                                                              |
| 56               | Dominican Republic | Meat                            | 2003           | 132                                                            |
| 56               | Dominican Republic | Milk - Excluding Butter         | 2003           | 72                                                             |
| 56               | Dominican Republic | Miscellaneous                   | 2003           | 5                                                              |
| 56               | Dominican Republic | Mutton & Goat Meat              | 2003           | 1                                                              |
| 56               | Dominican Republic | Oats                            | 2003           | 2                                                              |
| 56               | Dominican Republic | Offals                          | 2003           | 5                                                              |
| 56               | Dominican Republic | Oilcrops                        | 2003           | 37                                                             |
| 56               | Dominican Republic | Oilcrops Oil, Other             | 2003           | 4                                                              |
| 56               | Dominican Republic | Olive Oil                       | 2003           | 3                                                              |
| 56               | Dominican Republic | Onions                          | 2003           | 5                                                              |
| 56               | Dominican Republic | Oranges, Mandarines             | 2003           | 12                                                             |
| 56               | Dominican Republic | Palm Oil                        | 2003           | 91                                                             |
| 56               | Dominican Republic | Peas                            | 2003           | 1                                                              |
| 56               | Dominican Republic | Pelagic Fish                    | 2003           | 8                                                              |
| 56               | Dominican Republic | Pigmeat                         | 2003           | 26                                                             |
| 56               | Dominican Republic | Pineapples and products         | 2003           | 8                                                              |
| 56               | Dominican Republic | Plantains                       | 2003           | 70                                                             |
| 56               | Dominican Republic | Potatoes and products           | 2003           | 10                                                             |
| 56               | Dominican Republic | Poultry Meat                    | 2003           | 60                                                             |
| 56               | Dominican Republic | Pulses                          | 2003           | 86                                                             |
| 56               | Dominican Republic | Pulses, Other and products      | 2003           | 35                                                             |
| 56               | Dominican Republic | Rice (Milled Equivalent)        | 2003           | 331                                                            |
| 56               | Dominican Republic | Roots, Other                    | 2003           | 16                                                             |
| 56               | Dominican Republic | Soyabean Oil                    | 2003           | 222                                                            |
| 56               | Dominican Republic | Spices                          | 2003           | 3                                                              |
| 56               | Dominican Republic | Spices, Other                   | 2003           | 3                                                              |
| 56               | Dominican Republic | Starchy Roots                   | 2003           | 71                                                             |
| 56               | Dominican Republic | Stimulants                      | 2003           | 8                                                              |
| 56               | Dominican Republic | Sugar & Sweeteners              | 2003           | 374                                                            |
| 56               | Dominican Republic | Sugar (Raw Equivalent)          | 2003           | 370                                                            |
| 56               | Dominican Republic | Sunflowerseed Oil               | 2003           | 25                                                             |
| 56               | Dominican Republic | Sweet potatoes                  | 2003           | 6                                                              |
| 56               | Dominican Republic | Sweeteners, Other               | 2003           | 1                                                              |
| 56               | Dominican Republic | Tomatoes and products           | 2003           | 17                                                             |
| 56               | Dominican Republic | Treenuts                        | 2003           | 1                                                              |
| 56               | Dominican Republic | Vegetable Oils                  | 2003           | 387                                                            |

Dietary calcium and zinc deficiency risks are decreasing but remain prevalent

| FAO Country code | Country            | Food item                       | Reference year | Net energy supply (kcal capita <sup>-1</sup> d <sup>-1</sup> ) |
|------------------|--------------------|---------------------------------|----------------|----------------------------------------------------------------|
| 56               | Dominican Republic | Vegetables                      | 2003           | 35                                                             |
| 56               | Dominican Republic | Vegetables, Other               | 2003           | 13                                                             |
| 56               | Dominican Republic | Vegetal Products                | 2003           | 1,857                                                          |
| 56               | Dominican Republic | Wheat and products              | 2003           | 135                                                            |
| 56               | Dominican Republic | Wine                            | 2003           | 1                                                              |
| 56               | Dominican Republic | Yams                            | 2003           | 6                                                              |
| 56               | Dominican Republic | Alcoholic Beverages             | 2004           | 100                                                            |
| 56               | Dominican Republic | Animal fats                     | 2004           | 33                                                             |
| 56               | Dominican Republic | Animal Products                 | 2004           | 302                                                            |
| 56               | Dominican Republic | Apples and products             | 2004           | 1                                                              |
| 56               | Dominican Republic | Bananas                         | 2004           | 62                                                             |
| 56               | Dominican Republic | Beans                           | 2004           | 44                                                             |
| 56               | Dominican Republic | Beer                            | 2004           | 50                                                             |
| 56               | Dominican Republic | Beverages, Alcoholic            | 2004           | 48                                                             |
| 56               | Dominican Republic | Bovine Meat                     | 2004           | 45                                                             |
| 56               | Dominican Republic | Butter, Ghee                    | 2004           | 6                                                              |
| 56               | Dominican Republic | Cassava and products            | 2004           | 24                                                             |
| 56               | Dominican Republic | Cereals - Excluding Beer        | 2004           | 601                                                            |
| 56               | Dominican Republic | Cereals, Other                  | 2004           | 3                                                              |
| 56               | Dominican Republic | Cocoa Beans and products        | 2004           | 2                                                              |
| 56               | Dominican Republic | Coconut Oil                     | 2004           | 19                                                             |
| 56               | Dominican Republic | Coconuts - Incl Copra           | 2004           | 37                                                             |
| 56               | Dominican Republic | Coffee and products             | 2004           | 4                                                              |
| 56               | Dominican Republic | Demersal Fish                   | 2004           | 3                                                              |
| 56               | Dominican Republic | Eggs                            | 2004           | 18                                                             |
| 56               | Dominican Republic | Fats, Animals, Raw              | 2004           | 27                                                             |
| 56               | Dominican Republic | Fish, Seafood                   | 2004           | 15                                                             |
| 56               | Dominican Republic | Freshwater Fish                 | 2004           | 1                                                              |
| 56               | Dominican Republic | Fruits - Excluding Wine         | 2004           | 198                                                            |
| 56               | Dominican Republic | Fruits, Other                   | 2004           | 54                                                             |
| 56               | Dominican Republic | Grand Total                     | 2004           | 2,211                                                          |
| 56               | Dominican Republic | Grapefruit and products         | 2004           | 1                                                              |
| 56               | Dominican Republic | Grapes and products (excl wine) | 2004           | 1                                                              |
| 56               | Dominican Republic | Groundnut Oil                   | 2004           | 2                                                              |
| 56               | Dominican Republic | Honey                           | 2004           | 3                                                              |
| 56               | Dominican Republic | Maize and products              | 2004           | 52                                                             |
| 56               | Dominican Republic | Maize Germ Oil                  | 2004           | 8                                                              |
| 56               | Dominican Republic | Marine Fish, Other              | 2004           | 1                                                              |
| 56               | Dominican Republic | Meat                            | 2004           | 157                                                            |
| 56               | Dominican Republic | Milk - Excluding Butter         | 2004           | 74                                                             |
| 56               | Dominican Republic | Miscellaneous                   | 2004           | 6                                                              |
| 56               | Dominican Republic | Mutton & Goat Meat              | 2004           | 1                                                              |
| 56               | Dominican Republic | Oats                            | 2004           | 2                                                              |
| 56               | Dominican Republic | Offals                          | 2004           | 5                                                              |
| 56               | Dominican Republic | Oilcrops                        | 2004           | 37                                                             |
| 56               | Dominican Republic | Oilcrops Oil, Other             | 2004           | 3                                                              |
| 56               | Dominican Republic | Olive Oil                       | 2004           | 4                                                              |
| 56               | Dominican Republic | Onions                          | 2004           | 5                                                              |
| 56               | Dominican Republic | Oranges, Mandarines             | 2004           | 10                                                             |
| 56               | Dominican Republic | Palm Oil                        | 2004           | 105                                                            |
| 56               | Dominican Republic | Peas                            | 2004           | 1                                                              |
| 56               | Dominican Republic | Pelagic Fish                    | 2004           | 10                                                             |
| 56               | Dominican Republic | Pigmeat                         | 2004           | 21                                                             |
| 56               | Dominican Republic | Pineapples and products         | 2004           | 8                                                              |
| 56               | Dominican Republic | Plantains                       | 2004           | 62                                                             |
| 56               | Dominican Republic | Potatoes and products           | 2004           | 8                                                              |
| 56               | Dominican Republic | Poultry Meat                    | 2004           | 90                                                             |
| 56               | Dominican Republic | Pulses                          | 2004           | 75                                                             |
| 56               | Dominican Republic | Pulses, Other and products      | 2004           | 29                                                             |
| 56               | Dominican Republic | Rice (Milled Equivalent)        | 2004           | 402                                                            |
| 56               | Dominican Republic | Roots, Other                    | 2004           | 14                                                             |
| 56               | Dominican Republic | Soyabean Oil                    | 2004           | 253                                                            |
| 56               | Dominican Republic | Spices                          | 2004           | 3                                                              |
| 56               | Dominican Republic | Spices, Other                   | 2004           | 3                                                              |
| 56               | Dominican Republic | Starchy Roots                   | 2004           | 55                                                             |
| 56               | Dominican Republic | Stimulants                      | 2004           | 6                                                              |
| 56               | Dominican Republic | Sugar & Sweeteners              | 2004           | 374                                                            |
| 56               | Dominican Republic | Sugar (Raw Equivalent)          | 2004           | 369                                                            |
| 56               | Dominican Republic | Sunflowerseed Oil               | 2004           | 24                                                             |
| 56               | Dominican Republic | Sweet potatoes                  | 2004           | 5                                                              |
| 56               | Dominican Republic | Sweeteners, Other               | 2004           | 1                                                              |
| 56               | Dominican Republic | Tomatoes and products           | 2004           | 16                                                             |
| 56               | Dominican Republic | Treenuts                        | 2004           | 1                                                              |
| 56               | Dominican Republic | Vegetable Oils                  | 2004           | 420                                                            |
| 56               | Dominican Republic | Vegetables                      | 2004           | 33                                                             |
| 56               | Dominican Republic | Vegetables, Other               | 2004           | 12                                                             |
| 56               | Dominican Republic | Vegetal Products                | 2004           | 1,909                                                          |
| 56               | Dominican Republic | Wheat and products              | 2004           | 143                                                            |
| 56               | Dominican Republic | Wine                            | 2004           | 1                                                              |
| 56               | Dominican Republic | Yams                            | 2004           | 4                                                              |
| 56               | Dominican Republic | Alcoholic Beverages             | 2005           | 105                                                            |
| 56               | Dominican Republic | Animal fats                     | 2005           | 35                                                             |
| 56               | Dominican Republic | Animal Products                 | 2005           | 350                                                            |
| 56               | Dominican Republic | Apples and products             | 2005           | 2                                                              |
| 56               | Dominican Republic | Bananas                         | 2005           | 62                                                             |
| 56               | Dominican Republic | Beans                           | 2005           | 54                                                             |
| 56               | Dominican Republic | Beer                            | 2005           | 62                                                             |
| 56               | Dominican Republic | Beverages, Alcoholic            | 2005           | 42                                                             |
| 56               | Dominican Republic | Bovine Meat                     | 2005           | 47                                                             |
| 56               | Dominican Republic | Butter, Ghee                    | 2005           | 6                                                              |
| 56               | Dominican Republic | Cassava and products            | 2005           | 26                                                             |
| 56               | Dominican Republic | Cereals - Excluding Beer        | 2005           | 666                                                            |
| 56               | Dominican Republic | Cereals, Other                  | 2005           | 3                                                              |
| 56               | Dominican Republic | Cocoa Beans and products        | 2005           | 3                                                              |
| 56               | Dominican Republic | Coconut Oil                     | 2005           | 18                                                             |
| 56               | Dominican Republic | Coconuts - Incl Copra           | 2005           | 32                                                             |
| 56               | Dominican Republic | Coffee and products             | 2005           | 5                                                              |

Dietary calcium and zinc deficiency risks are decreasing but remain prevalent

| FAO Country code | Country            | Food item                       | Reference year | Net energy supply (kcal capita <sup>-1</sup> d <sup>-1</sup> ) |
|------------------|--------------------|---------------------------------|----------------|----------------------------------------------------------------|
| 56               | Dominican Republic | Demersal Fish                   | 2005           | 4                                                              |
| 56               | Dominican Republic | Eggs                            | 2005           | 22                                                             |
| 56               | Dominican Republic | Fats, Animals, Raw              | 2005           | 28                                                             |
| 56               | Dominican Republic | Fish, Seafood                   | 2005           | 13                                                             |
| 56               | Dominican Republic | Fruits - Excluding Wine         | 2005           | 203                                                            |
| 56               | Dominican Republic | Fruits, Other                   | 2005           | 42                                                             |
| 56               | Dominican Republic | Grand Total                     | 2005           | 2,321                                                          |
| 56               | Dominican Republic | Grapefruit and products         | 2005           | 1                                                              |
| 56               | Dominican Republic | Grapes and products (excl wine) | 2005           | 1                                                              |
| 56               | Dominican Republic | Groundnut Oil                   | 2005           | 2                                                              |
| 56               | Dominican Republic | Honey                           | 2005           | 4                                                              |
| 56               | Dominican Republic | Maize and products              | 2005           | 54                                                             |
| 56               | Dominican Republic | Maize Germ Oil                  | 2005           | 8                                                              |
| 56               | Dominican Republic | Marine Fish, Other              | 2005           | 1                                                              |
| 56               | Dominican Republic | Meat                            | 2005           | 191                                                            |
| 56               | Dominican Republic | Milk - Excluding Butter         | 2005           | 84                                                             |
| 56               | Dominican Republic | Miscellaneous                   | 2005           | 6                                                              |
| 56               | Dominican Republic | Mutton & Goat Meat              | 2005           | 1                                                              |
| 56               | Dominican Republic | Oats                            | 2005           | 2                                                              |
| 56               | Dominican Republic | Offals                          | 2005           | 5                                                              |
| 56               | Dominican Republic | Oilcrops                        | 2005           | 33                                                             |
| 56               | Dominican Republic | Oilcrops Oil, Other             | 2005           | 3                                                              |
| 56               | Dominican Republic | Olive Oil                       | 2005           | 3                                                              |
| 56               | Dominican Republic | Onions                          | 2005           | 6                                                              |
| 56               | Dominican Republic | Oranges, Mandarines             | 2005           | 8                                                              |
| 56               | Dominican Republic | Palm Oil                        | 2005           | 105                                                            |
| 56               | Dominican Republic | Peas                            | 2005           | 1                                                              |
| 56               | Dominican Republic | Pelagic Fish                    | 2005           | 7                                                              |
| 56               | Dominican Republic | Pigmeat                         | 2005           | 33                                                             |
| 56               | Dominican Republic | Pineapples and products         | 2005           | 5                                                              |
| 56               | Dominican Republic | Plantains                       | 2005           | 81                                                             |
| 56               | Dominican Republic | Potatoes and products           | 2005           | 11                                                             |
| 56               | Dominican Republic | Poultry Meat                    | 2005           | 110                                                            |
| 56               | Dominican Republic | Pulses                          | 2005           | 80                                                             |
| 56               | Dominican Republic | Pulses, Other and products      | 2005           | 25                                                             |
| 56               | Dominican Republic | Rice (Milled Equivalent)        | 2005           | 457                                                            |
| 56               | Dominican Republic | Roots, Other                    | 2005           | 6                                                              |
| 56               | Dominican Republic | Soyabean Oil                    | 2005           | 233                                                            |
| 56               | Dominican Republic | Spices                          | 2005           | 4                                                              |
| 56               | Dominican Republic | Spices, Other                   | 2005           | 3                                                              |
| 56               | Dominican Republic | Starchy Roots                   | 2005           | 52                                                             |
| 56               | Dominican Republic | Stimulants                      | 2005           | 8                                                              |
| 56               | Dominican Republic | Sugar & Sweeteners              | 2005           | 379                                                            |
| 56               | Dominican Republic | Sugar (Raw Equivalent)          | 2005           | 373                                                            |
| 56               | Dominican Republic | Sunflowerseed Oil               | 2005           | 24                                                             |
| 56               | Dominican Republic | Sweet potatoes                  | 2005           | 6                                                              |
| 56               | Dominican Republic | Sweeteners, Other               | 2005           | 2                                                              |
| 56               | Dominican Republic | Tomatoes and products           | 2005           | 17                                                             |
| 56               | Dominican Republic | Treenuts                        | 2005           | 1                                                              |
| 56               | Dominican Republic | Vegetable Oils                  | 2005           | 397                                                            |
| 56               | Dominican Republic | Vegetables                      | 2005           | 38                                                             |
| 56               | Dominican Republic | Vegetables, Other               | 2005           | 15                                                             |
| 56               | Dominican Republic | Vegetal Products                | 2005           | 1,970                                                          |
| 56               | Dominican Republic | Wheat and products              | 2005           | 150                                                            |
| 56               | Dominican Republic | Wine                            | 2005           | 1                                                              |
| 56               | Dominican Republic | Yams                            | 2005           | 4                                                              |
| 56               | Dominican Republic | Alcoholic Beverages             | 2006           | 104                                                            |
| 56               | Dominican Republic | Animal fats                     | 2006           | 39                                                             |
| 56               | Dominican Republic | Animal Products                 | 2006           | 393                                                            |
| 56               | Dominican Republic | Apples and products             | 2006           | 2                                                              |
| 56               | Dominican Republic | Bananas                         | 2006           | 46                                                             |
| 56               | Dominican Republic | Beans                           | 2006           | 49                                                             |
| 56               | Dominican Republic | Beer                            | 2006           | 64                                                             |
| 56               | Dominican Republic | Beverages, Alcoholic            | 2006           | 38                                                             |
| 56               | Dominican Republic | Bovine Meat                     | 2006           | 61                                                             |
| 56               | Dominican Republic | Butter, Ghee                    | 2006           | 6                                                              |
| 56               | Dominican Republic | Cassava and products            | 2006           | 33                                                             |
| 56               | Dominican Republic | Cereals - Excluding Beer        | 2006           | 681                                                            |
| 56               | Dominican Republic | Cereals, Other                  | 2006           | 1                                                              |
| 56               | Dominican Republic | Cocoa Beans and products        | 2006           | 4                                                              |
| 56               | Dominican Republic | Coconut Oil                     | 2006           | 18                                                             |
| 56               | Dominican Republic | Coconuts - Incl Copra           | 2006           | 9                                                              |
| 56               | Dominican Republic | Coffee and products             | 2006           | 6                                                              |
| 56               | Dominican Republic | Demersal Fish                   | 2006           | 4                                                              |
| 56               | Dominican Republic | Eggs                            | 2006           | 24                                                             |
| 56               | Dominican Republic | Fats, Animals, Raw              | 2006           | 33                                                             |
| 56               | Dominican Republic | Fish, Seafood                   | 2006           | 15                                                             |
| 56               | Dominican Republic | Freshwater Fish                 | 2006           | 1                                                              |
| 56               | Dominican Republic | Fruits - Excluding Wine         | 2006           | 224                                                            |
| 56               | Dominican Republic | Fruits, Other                   | 2006           | 54                                                             |
| 56               | Dominican Republic | Grand Total                     | 2006           | 2,363                                                          |
| 56               | Dominican Republic | Grapefruit and products         | 2006           | 1                                                              |
| 56               | Dominican Republic | Grapes and products (excl wine) | 2006           | 2                                                              |
| 56               | Dominican Republic | Groundnut Oil                   | 2006           | 2                                                              |
| 56               | Dominican Republic | Honey                           | 2006           | 4                                                              |
| 56               | Dominican Republic | Maize and products              | 2006           | 32                                                             |
| 56               | Dominican Republic | Maize Germ Oil                  | 2006           | 18                                                             |
| 56               | Dominican Republic | Marine Fish, Other              | 2006           | 2                                                              |
| 56               | Dominican Republic | Meat                            | 2006           | 217                                                            |
| 56               | Dominican Republic | Milk - Excluding Butter         | 2006           | 93                                                             |
| 56               | Dominican Republic | Miscellaneous                   | 2006           | 9                                                              |
| 56               | Dominican Republic | Mutton & Goat Meat              | 2006           | 1                                                              |
| 56               | Dominican Republic | Oats                            | 2006           | 2                                                              |
| 56               | Dominican Republic | Offals                          | 2006           | 6                                                              |
| 56               | Dominican Republic | Oilcrops                        | 2006           | 10                                                             |
| 56               | Dominican Republic | Oilcrops Oil, Other             | 2006           | 3                                                              |
| 56               | Dominican Republic | Olive Oil                       | 2006           | 5                                                              |

Dietary calcium and zinc deficiency risks are decreasing but remain prevalent

| FAO Country code | Country            | Food item                       | Reference year | Net energy supply (kcal capita <sup>-1</sup> d <sup>-1</sup> ) |
|------------------|--------------------|---------------------------------|----------------|----------------------------------------------------------------|
| 56               | Dominican Republic | Onions                          | 2006           | 5                                                              |
| 56               | Dominican Republic | Oranges, Mandarines             | 2006           | 9                                                              |
| 56               | Dominican Republic | Palm Oil                        | 2006           | 107                                                            |
| 56               | Dominican Republic | Peas                            | 2006           | 1                                                              |
| 56               | Dominican Republic | Pelagic Fish                    | 2006           | 8                                                              |
| 56               | Dominican Republic | Pigmeat                         | 2006           | 40                                                             |
| 56               | Dominican Republic | Pineapples and products         | 2006           | 6                                                              |
| 56               | Dominican Republic | Plantains                       | 2006           | 105                                                            |
| 56               | Dominican Republic | Potatoes and products           | 2006           | 8                                                              |
| 56               | Dominican Republic | Poultry Meat                    | 2006           | 115                                                            |
| 56               | Dominican Republic | Pulses                          | 2006           | 82                                                             |
| 56               | Dominican Republic | Pulses, Other and products      | 2006           | 33                                                             |
| 56               | Dominican Republic | Rice (Milled Equivalent)        | 2006           | 470                                                            |
| 56               | Dominican Republic | Roots, Other                    | 2006           | 6                                                              |
| 56               | Dominican Republic | Soyabean Oil                    | 2006           | 220                                                            |
| 56               | Dominican Republic | Spices                          | 2006           | 4                                                              |
| 56               | Dominican Republic | Spices, Other                   | 2006           | 4                                                              |
| 56               | Dominican Republic | Starchy Roots                   | 2006           | 58                                                             |
| 56               | Dominican Republic | Stimulants                      | 2006           | 10                                                             |
| 56               | Dominican Republic | Sugar & Sweeteners              | 2006           | 360                                                            |
| 56               | Dominican Republic | Sugar (Raw Equivalent)          | 2006           | 355                                                            |
| 56               | Dominican Republic | Sunflowerseed Oil               | 2006           | 22                                                             |
| 56               | Dominican Republic | Sweet potatoes                  | 2006           | 5                                                              |
| 56               | Dominican Republic | Sweeteners, Other               | 2006           | 2                                                              |
| 56               | Dominican Republic | Tomatoes and products           | 2006           | 14                                                             |
| 56               | Dominican Republic | Treenuts                        | 2006           | 1                                                              |
| 56               | Dominican Republic | Vegetable Oils                  | 2006           | 394                                                            |
| 56               | Dominican Republic | Vegetables                      | 2006           | 32                                                             |
| 56               | Dominican Republic | Vegetables, Other               | 2006           | 13                                                             |
| 56               | Dominican Republic | Vegetal Products                | 2006           | 1,970                                                          |
| 56               | Dominican Republic | Wheat and products              | 2006           | 176                                                            |
| 56               | Dominican Republic | Wine                            | 2006           | 1                                                              |
| 56               | Dominican Republic | Yams                            | 2006           | 6                                                              |
| 56               | Dominican Republic | Alcoholic Beverages             | 2007           | 96                                                             |
| 56               | Dominican Republic | Animal fats                     | 2007           | 37                                                             |
| 56               | Dominican Republic | Animal Products                 | 2007           | 402                                                            |
| 56               | Dominican Republic | Apples and products             | 2007           | 2                                                              |
| 56               | Dominican Republic | Bananas                         | 2007           | 48                                                             |
| 56               | Dominican Republic | Beans                           | 2007           | 51                                                             |
| 56               | Dominican Republic | Beer                            | 2007           | 54                                                             |
| 56               | Dominican Republic | Beverages, Alcoholic            | 2007           | 40                                                             |
| 56               | Dominican Republic | Bovine Meat                     | 2007           | 64                                                             |
| 56               | Dominican Republic | Butter, Ghee                    | 2007           | 6                                                              |
| 56               | Dominican Republic | Cassava and products            | 2007           | 33                                                             |
| 56               | Dominican Republic | Cereals - Excluding Beer        | 2007           | 690                                                            |
| 56               | Dominican Republic | Cereals, Other                  | 2007           | 7                                                              |
| 56               | Dominican Republic | Cocoa Beans and products        | 2007           | 5                                                              |
| 56               | Dominican Republic | Coconut Oil                     | 2007           | 19                                                             |
| 56               | Dominican Republic | Coconuts - Incl Copra           | 2007           | 9                                                              |
| 56               | Dominican Republic | Coffee and products             | 2007           | 5                                                              |
| 56               | Dominican Republic | Crustaceans                     | 2007           | 1                                                              |
| 56               | Dominican Republic | Demersal Fish                   | 2007           | 3                                                              |
| 56               | Dominican Republic | Eggs                            | 2007           | 23                                                             |
| 56               | Dominican Republic | Fats, Animals, Raw              | 2007           | 31                                                             |
| 56               | Dominican Republic | Fish, Seafood                   | 2007           | 15                                                             |
| 56               | Dominican Republic | Fruits - Excluding Wine         | 2007           | 221                                                            |
| 56               | Dominican Republic | Fruits, Other                   | 2007           | 56                                                             |
| 56               | Dominican Republic | Grand Total                     | 2007           | 2,397                                                          |
| 56               | Dominican Republic | Grapefruit and products         | 2007           | 1                                                              |
| 56               | Dominican Republic | Grapes and products (excl wine) | 2007           | 2                                                              |
| 56               | Dominican Republic | Groundnut Oil                   | 2007           | 2                                                              |
| 56               | Dominican Republic | Honey                           | 2007           | 4                                                              |
| 56               | Dominican Republic | Maize and products              | 2007           | 42                                                             |
| 56               | Dominican Republic | Maize Germ Oil                  | 2007           | 16                                                             |
| 56               | Dominican Republic | Marine Fish, Other              | 2007           | 2                                                              |
| 56               | Dominican Republic | Meat                            | 2007           | 222                                                            |
| 56               | Dominican Republic | Milk - Excluding Butter         | 2007           | 100                                                            |
| 56               | Dominican Republic | Miscellaneous                   | 2007           | 10                                                             |
| 56               | Dominican Republic | Mutton & Goat Meat              | 2007           | 1                                                              |
| 56               | Dominican Republic | Oats                            | 2007           | 2                                                              |
| 56               | Dominican Republic | Offals                          | 2007           | 7                                                              |
| 56               | Dominican Republic | Oilcrops                        | 2007           | 9                                                              |
| 56               | Dominican Republic | Oilcrops Oil, Other             | 2007           | 4                                                              |
| 56               | Dominican Republic | Olive Oil                       | 2007           | 3                                                              |
| 56               | Dominican Republic | Onions                          | 2007           | 6                                                              |
| 56               | Dominican Republic | Oranges, Mandarines             | 2007           | 9                                                              |
| 56               | Dominican Republic | Palm Oil                        | 2007           | 107                                                            |
| 56               | Dominican Republic | Peas                            | 2007           | 1                                                              |
| 56               | Dominican Republic | Pelagic Fish                    | 2007           | 8                                                              |
| 56               | Dominican Republic | Pigmeat                         | 2007           | 37                                                             |
| 56               | Dominican Republic | Pineapples and products         | 2007           | 8                                                              |
| 56               | Dominican Republic | Plantains                       | 2007           | 96                                                             |
| 56               | Dominican Republic | Potatoes and products           | 2007           | 9                                                              |
| 56               | Dominican Republic | Poultry Meat                    | 2007           | 120                                                            |
| 56               | Dominican Republic | Pulses                          | 2007           | 80                                                             |
| 56               | Dominican Republic | Pulses, Other and products      | 2007           | 28                                                             |
| 56               | Dominican Republic | Rice (Milled Equivalent)        | 2007           | 449                                                            |
| 56               | Dominican Republic | Roots, Other                    | 2007           | 7                                                              |
| 56               | Dominican Republic | Soyabean Oil                    | 2007           | 245                                                            |
| 56               | Dominican Republic | Spices                          | 2007           | 4                                                              |
| 56               | Dominican Republic | Spices, Other                   | 2007           | 3                                                              |
| 56               | Dominican Republic | Starchy Roots                   | 2007           | 62                                                             |
| 56               | Dominican Republic | Stimulants                      | 2007           | 10                                                             |
| 56               | Dominican Republic | Sugar & Sweeteners              | 2007           | 365                                                            |
| 56               | Dominican Republic | Sugar (Raw Equivalent)          | 2007           | 359                                                            |
| 56               | Dominican Republic | Sunflowerseed Oil               | 2007           | 21                                                             |
| 56               | Dominican Republic | Sweet potatoes                  | 2007           | 6                                                              |

Dietary calcium and zinc deficiency risks are decreasing but remain prevalent

| FAO Country code | Country            | Food item                       | Reference year | Net energy supply (kcal <i>capita</i> <sup>-1</sup> d <sup>-1</sup> ) |
|------------------|--------------------|---------------------------------|----------------|-----------------------------------------------------------------------|
| 56               | Dominican Republic | Sweeteners, Other               | 2007           | 3                                                                     |
| 56               | Dominican Republic | Tomatoes and products           | 2007           | 12                                                                    |
| 56               | Dominican Republic | Treenuts                        | 2007           | 1                                                                     |
| 56               | Dominican Republic | Vegetable Oils                  | 2007           | 417                                                                   |
| 56               | Dominican Republic | Vegetables                      | 2007           | 30                                                                    |
| 56               | Dominican Republic | Vegetables, Other               | 2007           | 13                                                                    |
| 56               | Dominican Republic | Vegetal Products                | 2007           | 1,995                                                                 |
| 56               | Dominican Republic | Wheat and products              | 2007           | 190                                                                   |
| 56               | Dominican Republic | Wine                            | 2007           | 2                                                                     |
| 56               | Dominican Republic | Yams                            | 2007           | 7                                                                     |
| 56               | Dominican Republic | Alcoholic Beverages             | 2008           | 99                                                                    |
| 56               | Dominican Republic | Animal fats                     | 2008           | 36                                                                    |
| 56               | Dominican Republic | Animal Products                 | 2008           | 402                                                                   |
| 56               | Dominican Republic | Apples and products             | 2008           | 2                                                                     |
| 56               | Dominican Republic | Bananas                         | 2008           | 37                                                                    |
| 56               | Dominican Republic | Beans                           | 2008           | 48                                                                    |
| 56               | Dominican Republic | Beer                            | 2008           | 60                                                                    |
| 56               | Dominican Republic | Beverages, Alcoholic            | 2008           | 37                                                                    |
| 56               | Dominican Republic | Bovine Meat                     | 2008           | 62                                                                    |
| 56               | Dominican Republic | Butter, Ghee                    | 2008           | 6                                                                     |
| 56               | Dominican Republic | Cassava and products            | 2008           | 27                                                                    |
| 56               | Dominican Republic | Cereals - Excluding Beer        | 2008           | 689                                                                   |
| 56               | Dominican Republic | Cereals, Other                  | 2008           | 1                                                                     |
| 56               | Dominican Republic | Cocoa Beans and products        | 2008           | 5                                                                     |
| 56               | Dominican Republic | Coconut Oil                     | 2008           | 17                                                                    |
| 56               | Dominican Republic | Coconuts - Incl Copra           | 2008           | 11                                                                    |
| 56               | Dominican Republic | Coffee and products             | 2008           | 5                                                                     |
| 56               | Dominican Republic | Crustaceans                     | 2008           | 1                                                                     |
| 56               | Dominican Republic | Demersal Fish                   | 2008           | 4                                                                     |
| 56               | Dominican Republic | Eggs                            | 2008           | 23                                                                    |
| 56               | Dominican Republic | Fats, Animals, Raw              | 2008           | 30                                                                    |
| 56               | Dominican Republic | Fish, Seafood                   | 2008           | 16                                                                    |
| 56               | Dominican Republic | Freshwater Fish                 | 2008           | 1                                                                     |
| 56               | Dominican Republic | Fruits - Excluding Wine         | 2008           | 169                                                                   |
| 56               | Dominican Republic | Fruits, Other                   | 2008           | 45                                                                    |
| 56               | Dominican Republic | Grand Total                     | 2008           | 2,345                                                                 |
| 56               | Dominican Republic | Grapefruit and products         | 2008           | 1                                                                     |
| 56               | Dominican Republic | Grapes and products (excl wine) | 2008           | 2                                                                     |
| 56               | Dominican Republic | Groundnut Oil                   | 2008           | 2                                                                     |
| 56               | Dominican Republic | Honey                           | 2008           | 4                                                                     |
| 56               | Dominican Republic | Maize and products              | 2008           | 64                                                                    |
| 56               | Dominican Republic | Maize Germ Oil                  | 2008           | 25                                                                    |
| 56               | Dominican Republic | Marine Fish, Other              | 2008           | 2                                                                     |
| 56               | Dominican Republic | Meat                            | 2008           | 210                                                                   |
| 56               | Dominican Republic | Milk - Excluding Butter         | 2008           | 110                                                                   |
| 56               | Dominican Republic | Miscellaneous                   | 2008           | 8                                                                     |
| 56               | Dominican Republic | Mutton & Goat Meat              | 2008           | 1                                                                     |
| 56               | Dominican Republic | Oats                            | 2008           | 2                                                                     |
| 56               | Dominican Republic | Offals                          | 2008           | 7                                                                     |
| 56               | Dominican Republic | Oilcrops                        | 2008           | 11                                                                    |
| 56               | Dominican Republic | Oilcrops Oil, Other             | 2008           | 4                                                                     |
| 56               | Dominican Republic | Olive Oil                       | 2008           | 4                                                                     |
| 56               | Dominican Republic | Onions                          | 2008           | 6                                                                     |
| 56               | Dominican Republic | Oranges, Mandarines             | 2008           | 8                                                                     |
| 56               | Dominican Republic | Palm Oil                        | 2008           | 116                                                                   |
| 56               | Dominican Republic | Peas                            | 2008           | 1                                                                     |
| 56               | Dominican Republic | Pelagic Fish                    | 2008           | 9                                                                     |
| 56               | Dominican Republic | Pigmeat                         | 2008           | 38                                                                    |
| 56               | Dominican Republic | Pineapples and products         | 2008           | 8                                                                     |
| 56               | Dominican Republic | Plantains                       | 2008           | 66                                                                    |
| 56               | Dominican Republic | Potatoes and products           | 2008           | 8                                                                     |
| 56               | Dominican Republic | Poultry Meat                    | 2008           | 109                                                                   |
| 56               | Dominican Republic | Pulses                          | 2008           | 74                                                                    |
| 56               | Dominican Republic | Pulses, Other and products      | 2008           | 24                                                                    |
| 56               | Dominican Republic | Rice (Milled Equivalent)        | 2008           | 437                                                                   |
| 56               | Dominican Republic | Roots, Other                    | 2008           | 6                                                                     |
| 56               | Dominican Republic | Soyabean Oil                    | 2008           | 246                                                                   |
| 56               | Dominican Republic | Spices                          | 2008           | 3                                                                     |
| 56               | Dominican Republic | Spices, Other                   | 2008           | 3                                                                     |
| 56               | Dominican Republic | Starchy Roots                   | 2008           | 51                                                                    |
| 56               | Dominican Republic | Stimulants                      | 2008           | 10                                                                    |
| 56               | Dominican Republic | Sugar & Sweeteners              | 2008           | 361                                                                   |
| 56               | Dominican Republic | Sugar (Raw Equivalent)          | 2008           | 353                                                                   |
| 56               | Dominican Republic | Sunflowerseed Oil               | 2008           | 21                                                                    |
| 56               | Dominican Republic | Sweet potatoes                  | 2008           | 3                                                                     |
| 56               | Dominican Republic | Sweeteners, Other               | 2008           | 4                                                                     |
| 56               | Dominican Republic | Tomatoes and products           | 2008           | 13                                                                    |
| 56               | Dominican Republic | Treenuts                        | 2008           | 1                                                                     |
| 56               | Dominican Republic | Vegetable Oils                  | 2008           | 436                                                                   |
| 56               | Dominican Republic | Vegetables                      | 2008           | 32                                                                    |
| 56               | Dominican Republic | Vegetables, Other               | 2008           | 13                                                                    |
| 56               | Dominican Republic | Vegetal Products                | 2008           | 1,944                                                                 |
| 56               | Dominican Republic | Wheat and products              | 2008           | 185                                                                   |
| 56               | Dominican Republic | Wine                            | 2008           | 2                                                                     |
| 56               | Dominican Republic | Yams                            | 2008           | 7                                                                     |
| 56               | Dominican Republic | Alcoholic Beverages             | 2009           | 84                                                                    |
| 56               | Dominican Republic | Animal fats                     | 2009           | 35                                                                    |
| 56               | Dominican Republic | Animal Products                 | 2009           | 408                                                                   |
| 56               | Dominican Republic | Apples and products             | 2009           | 2                                                                     |
| 56               | Dominican Republic | Bananas                         | 2009           | 45                                                                    |
| 56               | Dominican Republic | Beans                           | 2009           | 48                                                                    |
| 56               | Dominican Republic | Beer                            | 2009           | 52                                                                    |
| 56               | Dominican Republic | Beverages, Alcoholic            | 2009           | 30                                                                    |
| 56               | Dominican Republic | Bovine Meat                     | 2009           | 62                                                                    |
| 56               | Dominican Republic | Butter, Ghee                    | 2009           | 6                                                                     |
| 56               | Dominican Republic | Cassava and products            | 2009           | 42                                                                    |
| 56               | Dominican Republic | Cereals - Excluding Beer        | 2009           | 680                                                                   |



Dietary calcium and zinc deficiency risks are decreasing but remain prevalent

| FAO Country code | Country            | Food item                       | Reference year | Net energy supply (kcal capita <sup>-1</sup> d <sup>-1</sup> ) |
|------------------|--------------------|---------------------------------|----------------|----------------------------------------------------------------|
| 56               | Dominican Republic | Cocoa Beans and products        | 2009           | 4                                                              |
| 56               | Dominican Republic | Coconut Oil                     | 2009           | 16                                                             |
| 56               | Dominican Republic | Coconuts - Incl Copra           | 2009           | 11                                                             |
| 56               | Dominican Republic | Coffee and products             | 2009           | 4                                                              |
| 56               | Dominican Republic | Crustaceans                     | 2009           | 1                                                              |
| 56               | Dominican Republic | Demersal Fish                   | 2009           | 4                                                              |
| 56               | Dominican Republic | Eggs                            | 2009           | 25                                                             |
| 56               | Dominican Republic | Fats, Animals, Raw              | 2009           | 29                                                             |
| 56               | Dominican Republic | Fish, Seafood                   | 2009           | 18                                                             |
| 56               | Dominican Republic | Fruits - Excluding Wine         | 2009           | 232                                                            |
| 56               | Dominican Republic | Fruits, Other                   | 2009           | 68                                                             |
| 56               | Dominican Republic | Grand Total                     | 2009           | 2,387                                                          |
| 56               | Dominican Republic | Grapefruit and products         | 2009           | 1                                                              |
| 56               | Dominican Republic | Grapes and products (excl wine) | 2009           | 2                                                              |
| 56               | Dominican Republic | Groundnut Oil                   | 2009           | 3                                                              |
| 56               | Dominican Republic | Honey                           | 2009           | 4                                                              |
| 56               | Dominican Republic | Maize and products              | 2009           | 61                                                             |
| 56               | Dominican Republic | Maize Germ Oil                  | 2009           | 10                                                             |
| 56               | Dominican Republic | Marine Fish, Other              | 2009           | 1                                                              |
| 56               | Dominican Republic | Meat                            | 2009           | 218                                                            |
| 56               | Dominican Republic | Milk - Excluding Butter         | 2009           | 106                                                            |
| 56               | Dominican Republic | Miscellaneous                   | 2009           | 10                                                             |
| 56               | Dominican Republic | Mutton & Goat Meat              | 2009           | 1                                                              |
| 56               | Dominican Republic | Oats                            | 2009           | 5                                                              |
| 56               | Dominican Republic | Offals                          | 2009           | 7                                                              |
| 56               | Dominican Republic | Oilcrops                        | 2009           | 11                                                             |
| 56               | Dominican Republic | Oilcrops Oil, Other             | 2009           | 4                                                              |
| 56               | Dominican Republic | Olive Oil                       | 2009           | 3                                                              |
| 56               | Dominican Republic | Onions                          | 2009           | 6                                                              |
| 56               | Dominican Republic | Oranges, Mandarines             | 2009           | 9                                                              |
| 56               | Dominican Republic | Palm Oil                        | 2009           | 128                                                            |
| 56               | Dominican Republic | Peas                            | 2009           | 1                                                              |
| 56               | Dominican Republic | Pelagic Fish                    | 2009           | 11                                                             |
| 56               | Dominican Republic | Pigmeat                         | 2009           | 37                                                             |
| 56               | Dominican Republic | Pineapples and products         | 2009           | 10                                                             |
| 56               | Dominican Republic | Plantains                       | 2009           | 96                                                             |
| 56               | Dominican Republic | Potatoes and products           | 2009           | 7                                                              |
| 56               | Dominican Republic | Poultry Meat                    | 2009           | 117                                                            |
| 56               | Dominican Republic | Pulses                          | 2009           | 83                                                             |
| 56               | Dominican Republic | Pulses, Other and products      | 2009           | 35                                                             |
| 56               | Dominican Republic | Rice (Milled Equivalent)        | 2009           | 473                                                            |
| 56               | Dominican Republic | Roots, Other                    | 2009           | 7                                                              |
| 56               | Dominican Republic | Soyabean Oil                    | 2009           | 245                                                            |
| 56               | Dominican Republic | Spices                          | 2009           | 4                                                              |
| 56               | Dominican Republic | Spices, Other                   | 2009           | 3                                                              |
| 56               | Dominican Republic | Starchy Roots                   | 2009           | 69                                                             |
| 56               | Dominican Republic | Stimulants                      | 2009           | 8                                                              |
| 56               | Dominican Republic | Sugar & Sweeteners              | 2009           | 334                                                            |
| 56               | Dominican Republic | Sugar (Raw Equivalent)          | 2009           | 326                                                            |
| 56               | Dominican Republic | Sunflowerseed Oil               | 2009           | 21                                                             |
| 56               | Dominican Republic | Sweet potatoes                  | 2009           | 7                                                              |
| 56               | Dominican Republic | Sweeteners, Other               | 2009           | 3                                                              |
| 56               | Dominican Republic | Tomatoes and products           | 2009           | 12                                                             |
| 56               | Dominican Republic | Treenuts                        | 2009           | 1                                                              |
| 56               | Dominican Republic | Vegetable Oils                  | 2009           | 431                                                            |
| 56               | Dominican Republic | Vegetables                      | 2009           | 32                                                             |
| 56               | Dominican Republic | Vegetables, Other               | 2009           | 14                                                             |
| 56               | Dominican Republic | Vegetal Products                | 2009           | 1,978                                                          |
| 56               | Dominican Republic | Wheat and products              | 2009           | 141                                                            |
| 56               | Dominican Republic | Wine                            | 2009           | 1                                                              |
| 56               | Dominican Republic | Yams                            | 2009           | 6                                                              |
| 56               | Dominican Republic | Alcoholic Beverages             | 2010           | 97                                                             |
| 56               | Dominican Republic | Animal fats                     | 2010           | 36                                                             |
| 56               | Dominican Republic | Animal Products                 | 2010           | 416                                                            |
| 56               | Dominican Republic | Apples and products             | 2010           | 2                                                              |
| 56               | Dominican Republic | Bananas                         | 2010           | 57                                                             |
| 56               | Dominican Republic | Beans                           | 2010           | 55                                                             |
| 56               | Dominican Republic | Beer                            | 2010           | 64                                                             |
| 56               | Dominican Republic | Beverages, Alcoholic            | 2010           | 31                                                             |
| 56               | Dominican Republic | Bovine Meat                     | 2010           | 68                                                             |
| 56               | Dominican Republic | Butter, Ghee                    | 2010           | 6                                                              |
| 56               | Dominican Republic | Cassava and products            | 2010           | 52                                                             |
| 56               | Dominican Republic | Cereals - Excluding Beer        | 2010           | 751                                                            |
| 56               | Dominican Republic | Cereals, Other                  | 2010           | 1                                                              |
| 56               | Dominican Republic | Cocoa Beans and products        | 2010           | 4                                                              |
| 56               | Dominican Republic | Coconut Oil                     | 2010           | 18                                                             |
| 56               | Dominican Republic | Coconuts - Incl Copra           | 2010           | 25                                                             |
| 56               | Dominican Republic | Coffee and products             | 2010           | 2                                                              |
| 56               | Dominican Republic | Crustaceans                     | 2010           | 1                                                              |
| 56               | Dominican Republic | Demersal Fish                   | 2010           | 4                                                              |
| 56               | Dominican Republic | Eggs                            | 2010           | 28                                                             |
| 56               | Dominican Republic | Fats, Animals, Raw              | 2010           | 31                                                             |
| 56               | Dominican Republic | Fish, Seafood                   | 2010           | 17                                                             |
| 56               | Dominican Republic | Fruits - Excluding Wine         | 2010           | 269                                                            |
| 56               | Dominican Republic | Fruits, Other                   | 2010           | 96                                                             |
| 56               | Dominican Republic | Grand Total                     | 2010           | 2,527                                                          |
| 56               | Dominican Republic | Grapefruit and products         | 2010           | 1                                                              |
| 56               | Dominican Republic | Grapes and products (excl wine) | 2010           | 2                                                              |
| 56               | Dominican Republic | Groundnut Oil                   | 2010           | 3                                                              |
| 56               | Dominican Republic | Honey                           | 2010           | 4                                                              |
| 56               | Dominican Republic | Maize and products              | 2010           | 60                                                             |
| 56               | Dominican Republic | Maize Germ Oil                  | 2010           | 13                                                             |
| 56               | Dominican Republic | Marine Fish, Other              | 2010           | 1                                                              |
| 56               | Dominican Republic | Meat                            | 2010           | 230                                                            |
| 56               | Dominican Republic | Milk - Excluding Butter         | 2010           | 97                                                             |
| 56               | Dominican Republic | Miscellaneous                   | 2010           | 11                                                             |
| 56               | Dominican Republic | Mutton & Goat Meat              | 2010           | 1                                                              |

Dietary calcium and zinc deficiency risks are decreasing but remain prevalent

| FAO Country code | Country            | Food item                       | Reference year | Net energy supply (kcal capita <sup>-1</sup> d <sup>-1</sup> ) |
|------------------|--------------------|---------------------------------|----------------|----------------------------------------------------------------|
| 56               | Dominican Republic | Oats                            | 2010           | 2                                                              |
| 56               | Dominican Republic | Offals                          | 2010           | 7                                                              |
| 56               | Dominican Republic | Oilcrops                        | 2010           | 25                                                             |
| 56               | Dominican Republic | Oilcrops Oil, Other             | 2010           | 3                                                              |
| 56               | Dominican Republic | Olive Oil                       | 2010           | 4                                                              |
| 56               | Dominican Republic | Onions                          | 2010           | 7                                                              |
| 56               | Dominican Republic | Oranges, Mandarines             | 2010           | 10                                                             |
| 56               | Dominican Republic | Palm Oil                        | 2010           | 146                                                            |
| 56               | Dominican Republic | Peas                            | 2010           | 1                                                              |
| 56               | Dominican Republic | Pelagic Fish                    | 2010           | 11                                                             |
| 56               | Dominican Republic | Pigmeat                         | 2010           | 39                                                             |
| 56               | Dominican Republic | Pineapples and products         | 2010           | 12                                                             |
| 56               | Dominican Republic | Plantains                       | 2010           | 89                                                             |
| 56               | Dominican Republic | Potatoes and products           | 2010           | 9                                                              |
| 56               | Dominican Republic | Poultry Meat                    | 2010           | 121                                                            |
| 56               | Dominican Republic | Pulses                          | 2010           | 89                                                             |
| 56               | Dominican Republic | Pulses, Other and products      | 2010           | 34                                                             |
| 56               | Dominican Republic | Rice (Milled Equivalent)        | 2010           | 478                                                            |
| 56               | Dominican Republic | Roots, Other                    | 2010           | 7                                                              |
| 56               | Dominican Republic | Soyabean Oil                    | 2010           | 231                                                            |
| 56               | Dominican Republic | Spices                          | 2010           | 3                                                              |
| 56               | Dominican Republic | Spices, Other                   | 2010           | 3                                                              |
| 56               | Dominican Republic | Starchy Roots                   | 2010           | 84                                                             |
| 56               | Dominican Republic | Stimulants                      | 2010           | 6                                                              |
| 56               | Dominican Republic | Sugar & Sweeteners              | 2010           | 312                                                            |
| 56               | Dominican Republic | Sugar (Raw Equivalent)          | 2010           | 303                                                            |
| 56               | Dominican Republic | Sunflowerseed Oil               | 2010           | 12                                                             |
| 56               | Dominican Republic | Sweet potatoes                  | 2010           | 10                                                             |
| 56               | Dominican Republic | Sweeteners, Other               | 2010           | 5                                                              |
| 56               | Dominican Republic | Tomatoes and products           | 2010           | 13                                                             |
| 56               | Dominican Republic | Vegetable Oils                  | 2010           | 430                                                            |
| 56               | Dominican Republic | Vegetables                      | 2010           | 34                                                             |
| 56               | Dominican Republic | Vegetables, Other               | 2010           | 15                                                             |
| 56               | Dominican Republic | Vegetal Products                | 2010           | 2,111                                                          |
| 56               | Dominican Republic | Wheat and products              | 2010           | 211                                                            |
| 56               | Dominican Republic | Wine                            | 2010           | 2                                                              |
| 56               | Dominican Republic | Yams                            | 2010           | 6                                                              |
| 56               | Dominican Republic | Alcoholic Beverages             | 2011           | 94                                                             |
| 56               | Dominican Republic | Animal fats                     | 2011           | 39                                                             |
| 56               | Dominican Republic | Animal Products                 | 2011           | 399                                                            |
| 56               | Dominican Republic | Apples and products             | 2011           | 2                                                              |
| 56               | Dominican Republic | Bananas                         | 2011           | 78                                                             |
| 56               | Dominican Republic | Beans                           | 2011           | 72                                                             |
| 56               | Dominican Republic | Beer                            | 2011           | 64                                                             |
| 56               | Dominican Republic | Beverages, Alcoholic            | 2011           | 28                                                             |
| 56               | Dominican Republic | Bovine Meat                     | 2011           | 61                                                             |
| 56               | Dominican Republic | Butter, Ghee                    | 2011           | 5                                                              |
| 56               | Dominican Republic | Cassava and products            | 2011           | 45                                                             |
| 56               | Dominican Republic | Cereals - Excluding Beer        | 2011           | 762                                                            |
| 56               | Dominican Republic | Cocoa Beans and products        | 2011           | 6                                                              |
| 56               | Dominican Republic | Coconut Oil                     | 2011           | 17                                                             |
| 56               | Dominican Republic | Coconuts - Incl Copra           | 2011           | 29                                                             |
| 56               | Dominican Republic | Coffee and products             | 2011           | 3                                                              |
| 56               | Dominican Republic | Crustaceans                     | 2011           | 1                                                              |
| 56               | Dominican Republic | Demersal Fish                   | 2011           | 4                                                              |
| 56               | Dominican Republic | Eggs                            | 2011           | 25                                                             |
| 56               | Dominican Republic | Fats, Animals, Raw              | 2011           | 34                                                             |
| 56               | Dominican Republic | Fish, Seafood                   | 2011           | 17                                                             |
| 56               | Dominican Republic | Fruits - Excluding Wine         | 2011           | 293                                                            |
| 56               | Dominican Republic | Fruits, Other                   | 2011           | 95                                                             |
| 56               | Dominican Republic | Grand Total                     | 2011           | 2,597                                                          |
| 56               | Dominican Republic | Grapefruit and products         | 2011           | 1                                                              |
| 56               | Dominican Republic | Grapes and products (excl wine) | 2011           | 2                                                              |
| 56               | Dominican Republic | Groundnut Oil                   | 2011           | 3                                                              |
| 56               | Dominican Republic | Honey                           | 2011           | 4                                                              |
| 56               | Dominican Republic | Lemons, Limes and products      | 2011           | 1                                                              |
| 56               | Dominican Republic | Maize and products              | 2011           | 58                                                             |
| 56               | Dominican Republic | Maize Germ Oil                  | 2011           | 12                                                             |
| 56               | Dominican Republic | Marine Fish, Other              | 2011           | 1                                                              |
| 56               | Dominican Republic | Meat                            | 2011           | 220                                                            |
| 56               | Dominican Republic | Milk - Excluding Butter         | 2011           | 91                                                             |
| 56               | Dominican Republic | Miscellaneous                   | 2011           | 10                                                             |
| 56               | Dominican Republic | Mutton & Goat Meat              | 2011           | 1                                                              |
| 56               | Dominican Republic | Oats                            | 2011           | 1                                                              |
| 56               | Dominican Republic | Offals                          | 2011           | 7                                                              |
| 56               | Dominican Republic | Oilcrops                        | 2011           | 29                                                             |
| 56               | Dominican Republic | Oilcrops Oil, Other             | 2011           | 3                                                              |
| 56               | Dominican Republic | Olive Oil                       | 2011           | 4                                                              |
| 56               | Dominican Republic | Onions                          | 2011           | 8                                                              |
| 56               | Dominican Republic | Oranges, Mandarines             | 2011           | 10                                                             |
| 56               | Dominican Republic | Palm Oil                        | 2011           | 188                                                            |
| 56               | Dominican Republic | Peas                            | 2011           | 1                                                              |
| 56               | Dominican Republic | Pelagic Fish                    | 2011           | 11                                                             |
| 56               | Dominican Republic | Pigmeat                         | 2011           | 43                                                             |
| 56               | Dominican Republic | Pineapples and products         | 2011           | 16                                                             |
| 56               | Dominican Republic | Plantains                       | 2011           | 90                                                             |
| 56               | Dominican Republic | Potatoes and products           | 2011           | 9                                                              |
| 56               | Dominican Republic | Poultry Meat                    | 2011           | 115                                                            |
| 56               | Dominican Republic | Pulses                          | 2011           | 106                                                            |
| 56               | Dominican Republic | Pulses, Other and products      | 2011           | 33                                                             |
| 56               | Dominican Republic | Rice (Milled Equivalent)        | 2011           | 479                                                            |
| 56               | Dominican Republic | Roots, Other                    | 2011           | 8                                                              |
| 56               | Dominican Republic | Soyabean Oil                    | 2011           | 230                                                            |
| 56               | Dominican Republic | Spices                          | 2011           | 3                                                              |
| 56               | Dominican Republic | Spices, Other                   | 2011           | 3                                                              |
| 56               | Dominican Republic | Starchy Roots                   | 2011           | 76                                                             |
| 56               | Dominican Republic | Stimulants                      | 2011           | 9                                                              |

Dietary calcium and zinc deficiency risks are decreasing but remain prevalent

| FAO Country code | Country            | Food item                  | Reference year | Net energy supply (kcal capita <sup>-1</sup> d <sup>-1</sup> ) |
|------------------|--------------------|----------------------------|----------------|----------------------------------------------------------------|
| 56               | Dominican Republic | Sugar & Sweeteners         | 2011           | 307                                                            |
| 56               | Dominican Republic | Sugar (Raw Equivalent)     | 2011           | 302                                                            |
| 56               | Dominican Republic | Sunflowerseed Oil          | 2011           | 12                                                             |
| 56               | Dominican Republic | Sweet potatoes             | 2011           | 7                                                              |
| 56               | Dominican Republic | Sweeteners, Other          | 2011           | 2                                                              |
| 56               | Dominican Republic | Tomatoes and products      | 2011           | 15                                                             |
| 56               | Dominican Republic | Vegetable Oils             | 2011           | 469                                                            |
| 56               | Dominican Republic | Vegetables                 | 2011           | 40                                                             |
| 56               | Dominican Republic | Vegetables, Other          | 2011           | 17                                                             |
| 56               | Dominican Republic | Vegetal Products           | 2011           | 2,198                                                          |
| 56               | Dominican Republic | Wheat and products         | 2011           | 223                                                            |
| 56               | Dominican Republic | Wine                       | 2011           | 2                                                              |
| 56               | Dominican Republic | Yams                       | 2011           | 6                                                              |
| 58               | Ecuador            | Alcoholic Beverages        | 1992           | 33                                                             |
| 58               | Ecuador            | Animal fats                | 1992           | 72                                                             |
| 58               | Ecuador            | Animal Products            | 1992           | 387                                                            |
| 58               | Ecuador            | Apples and products        | 1992           | 3                                                              |
| 58               | Ecuador            | Bananas                    | 1992           | 78                                                             |
| 58               | Ecuador            | Barley and products        | 1992           | 14                                                             |
| 58               | Ecuador            | Beans                      | 1992           | 27                                                             |
| 58               | Ecuador            | Beer                       | 1992           | 20                                                             |
| 58               | Ecuador            | Beverages, Alcoholic       | 1992           | 13                                                             |
| 58               | Ecuador            | Bovine Meat                | 1992           | 63                                                             |
| 58               | Ecuador            | Butter, Ghee               | 1992           | 17                                                             |
| 58               | Ecuador            | Cassava and products       | 1992           | 13                                                             |
| 58               | Ecuador            | Cereals - Excluding Beer   | 1992           | 787                                                            |
| 58               | Ecuador            | Cereals, Other             | 1992           | 1                                                              |
| 58               | Ecuador            | Citrus, Other              | 1992           | 3                                                              |
| 58               | Ecuador            | Cocoa Beans and products   | 1992           | 5                                                              |
| 58               | Ecuador            | Coconut Oil                | 1992           | 7                                                              |
| 58               | Ecuador            | Coconuts - Incl Copra      | 1992           | 3                                                              |
| 58               | Ecuador            | Coffee and products        | 1992           | 5                                                              |
| 58               | Ecuador            | Cottonseed Oil             | 1992           | 6                                                              |
| 58               | Ecuador            | Crustaceans                | 1992           | 3                                                              |
| 58               | Ecuador            | Eggs                       | 1992           | 15                                                             |
| 58               | Ecuador            | Fats, Animals, Raw         | 1992           | 55                                                             |
| 58               | Ecuador            | Fish, Seafood              | 1992           | 14                                                             |
| 58               | Ecuador            | Freshwater Fish            | 1992           | 1                                                              |
| 58               | Ecuador            | Fruits - Excluding Wine    | 1992           | 241                                                            |
| 58               | Ecuador            | Fruits, Other              | 1992           | 16                                                             |
| 58               | Ecuador            | Grand Total                | 1992           | 2,292                                                          |
| 58               | Ecuador            | Groundnut Oil              | 1992           | 2                                                              |
| 58               | Ecuador            | Groundnuts (Shelled Eq)    | 1992           | 5                                                              |
| 58               | Ecuador            | Honey                      | 1992           | 1                                                              |
| 58               | Ecuador            | Maize and products         | 1992           | 43                                                             |
| 58               | Ecuador            | Maize Germ Oil             | 1992           | 1                                                              |
| 58               | Ecuador            | Marine Fish, Other         | 1992           | 1                                                              |
| 58               | Ecuador            | Meat                       | 1992           | 127                                                            |
| 58               | Ecuador            | Meat, Other                | 1992           | 3                                                              |
| 58               | Ecuador            | Milk - Excluding Butter    | 1992           | 151                                                            |
| 58               | Ecuador            | Miscellaneous              | 1992           | 1                                                              |
| 58               | Ecuador            | Mutton & Goat Meat         | 1992           | 2                                                              |
| 58               | Ecuador            | Oats                       | 1992           | 13                                                             |
| 58               | Ecuador            | Offals                     | 1992           | 8                                                              |
| 58               | Ecuador            | Oilcrops                   | 1992           | 18                                                             |
| 58               | Ecuador            | Olive Oil                  | 1992           | 1                                                              |
| 58               | Ecuador            | Oranges, Mandarines        | 1992           | 6                                                              |
| 58               | Ecuador            | Palm Oil                   | 1992           | 229                                                            |
| 58               | Ecuador            | Palmkernel Oil             | 1992           | 5                                                              |
| 58               | Ecuador            | Peas                       | 1992           | 6                                                              |
| 58               | Ecuador            | Pelagic Fish               | 1992           | 10                                                             |
| 58               | Ecuador            | Pigmeat                    | 1992           | 26                                                             |
| 58               | Ecuador            | Pineapples and products    | 1992           | 3                                                              |
| 58               | Ecuador            | Plantains                  | 1992           | 131                                                            |
| 58               | Ecuador            | Potatoes and products      | 1992           | 71                                                             |
| 58               | Ecuador            | Poultry Meat               | 1992           | 33                                                             |
| 58               | Ecuador            | Pulses                     | 1992           | 47                                                             |
| 58               | Ecuador            | Pulses, Other and products | 1992           | 14                                                             |
| 58               | Ecuador            | Rape and Mustardseed       | 1992           | 10                                                             |
| 58               | Ecuador            | Rice (Milled Equivalent)   | 1992           | 452                                                            |
| 58               | Ecuador            | Soyabean Oil               | 1992           | 113                                                            |
| 58               | Ecuador            | Spices                     | 1992           | 1                                                              |
| 58               | Ecuador            | Spices, Other              | 1992           | 1                                                              |
| 58               | Ecuador            | Starchy Roots              | 1992           | 84                                                             |
| 58               | Ecuador            | Stimulants                 | 1992           | 10                                                             |
| 58               | Ecuador            | Sugar & Sweeteners         | 1992           | 275                                                            |
| 58               | Ecuador            | Sugar (Raw Equivalent)     | 1992           | 254                                                            |
| 58               | Ecuador            | Sunflower seed             | 1992           | 1                                                              |
| 58               | Ecuador            | Sunflowerseed Oil          | 1992           | 25                                                             |
| 58               | Ecuador            | Sweeteners, Other          | 1992           | 21                                                             |
| 58               | Ecuador            | Tomatoes and products      | 1992           | 5                                                              |
| 58               | Ecuador            | Vegetable Oils             | 1992           | 388                                                            |
| 58               | Ecuador            | Vegetables                 | 1992           | 21                                                             |
| 58               | Ecuador            | Vegetables, Other          | 1992           | 16                                                             |
| 58               | Ecuador            | Vegetal Products           | 1992           | 1,906                                                          |
| 58               | Ecuador            | Wheat and products         | 1992           | 264                                                            |
| 58               | Ecuador            | Wine                       | 1992           | 1                                                              |
| 58               | Ecuador            | Alcoholic Beverages        | 1993           | 32                                                             |
| 58               | Ecuador            | Animal fats                | 1993           | 71                                                             |
| 58               | Ecuador            | Animal Products            | 1993           | 398                                                            |
| 58               | Ecuador            | Apples and products        | 1993           | 4                                                              |
| 58               | Ecuador            | Bananas                    | 1993           | 121                                                            |
| 58               | Ecuador            | Barley and products        | 1993           | 13                                                             |
| 58               | Ecuador            | Beans                      | 1993           | 26                                                             |
| 58               | Ecuador            | Beer                       | 1993           | 18                                                             |
| 58               | Ecuador            | Beverages, Alcoholic       | 1993           | 13                                                             |
| 58               | Ecuador            | Bovine Meat                | 1993           | 69                                                             |

Dietary calcium and zinc deficiency risks are decreasing but remain prevalent

| FAO Country code | Country | Food item                       | Reference year | Net energy supply (kcal <i>capita</i> <sup>-1</sup> d <sup>-1</sup> ) |
|------------------|---------|---------------------------------|----------------|-----------------------------------------------------------------------|
| 58               | Ecuador | Butter, Ghee                    | 1993           | 17                                                                    |
| 58               | Ecuador | Cassava and products            | 1993           | 13                                                                    |
| 58               | Ecuador | Cereals - Excluding Beer        | 1993           | 851                                                                   |
| 58               | Ecuador | Citrus, Other                   | 1993           | 2                                                                     |
| 58               | Ecuador | Cocoa Beans and products        | 1993           | 4                                                                     |
| 58               | Ecuador | Coconut Oil                     | 1993           | 6                                                                     |
| 58               | Ecuador | Coconuts - Incl Copra           | 1993           | 3                                                                     |
| 58               | Ecuador | Coffee and products             | 1993           | 4                                                                     |
| 58               | Ecuador | Cottonseed Oil                  | 1993           | 4                                                                     |
| 58               | Ecuador | Crustaceans                     | 1993           | 4                                                                     |
| 58               | Ecuador | Eggs                            | 1993           | 15                                                                    |
| 58               | Ecuador | Fats, Animals, Raw              | 1993           | 54                                                                    |
| 58               | Ecuador | Fish, Seafood                   | 1993           | 15                                                                    |
| 58               | Ecuador | Freshwater Fish                 | 1993           | 1                                                                     |
| 58               | Ecuador | Fruits - Excluding Wine         | 1993           | 255                                                                   |
| 58               | Ecuador | Fruits, Other                   | 1993           | 9                                                                     |
| 58               | Ecuador | Grand Total                     | 1993           | 2,292                                                                 |
| 58               | Ecuador | Groundnuts (Shelled Eq)         | 1993           | 3                                                                     |
| 58               | Ecuador | Honey                           | 1993           | 1                                                                     |
| 58               | Ecuador | Maize and products              | 1993           | 37                                                                    |
| 58               | Ecuador | Maize Germ Oil                  | 1993           | 3                                                                     |
| 58               | Ecuador | Meat                            | 1993           | 131                                                                   |
| 58               | Ecuador | Meat, Other                     | 1993           | 3                                                                     |
| 58               | Ecuador | Milk - Excluding Butter         | 1993           | 157                                                                   |
| 58               | Ecuador | Mutton & Goat Meat              | 1993           | 3                                                                     |
| 58               | Ecuador | Oats                            | 1993           | 10                                                                    |
| 58               | Ecuador | Offals                          | 1993           | 8                                                                     |
| 58               | Ecuador | Oilcrops                        | 1993           | 7                                                                     |
| 58               | Ecuador | Oranges, Mandarines             | 1993           | 7                                                                     |
| 58               | Ecuador | Palm Oil                        | 1993           | 243                                                                   |
| 58               | Ecuador | Palmkernel Oil                  | 1993           | 6                                                                     |
| 58               | Ecuador | Peas                            | 1993           | 6                                                                     |
| 58               | Ecuador | Pelagic Fish                    | 1993           | 10                                                                    |
| 58               | Ecuador | Pigmeat                         | 1993           | 25                                                                    |
| 58               | Ecuador | Pineapples and products         | 1993           | 3                                                                     |
| 58               | Ecuador | Plantains                       | 1993           | 107                                                                   |
| 58               | Ecuador | Potatoes and products           | 1993           | 58                                                                    |
| 58               | Ecuador | Poultry Meat                    | 1993           | 32                                                                    |
| 58               | Ecuador | Pulses                          | 1993           | 44                                                                    |
| 58               | Ecuador | Pulses, Other and products      | 1993           | 11                                                                    |
| 58               | Ecuador | Rice (Milled Equivalent)        | 1993           | 547                                                                   |
| 58               | Ecuador | Soyabean Oil                    | 1993           | 79                                                                    |
| 58               | Ecuador | Spices                          | 1993           | 1                                                                     |
| 58               | Ecuador | Spices, Other                   | 1993           | 1                                                                     |
| 58               | Ecuador | Starchy Roots                   | 1993           | 71                                                                    |
| 58               | Ecuador | Stimulants                      | 1993           | 9                                                                     |
| 58               | Ecuador | Sugar & Sweeteners              | 1993           | 260                                                                   |
| 58               | Ecuador | Sugar (Raw Equivalent)          | 1993           | 256                                                                   |
| 58               | Ecuador | Sweeteners, Other               | 1993           | 3                                                                     |
| 58               | Ecuador | Tomatoes and products           | 1993           | 4                                                                     |
| 58               | Ecuador | Vegetable Oils                  | 1993           | 342                                                                   |
| 58               | Ecuador | Vegetables                      | 1993           | 20                                                                    |
| 58               | Ecuador | Vegetables, Other               | 1993           | 16                                                                    |
| 58               | Ecuador | Vegetal Products                | 1993           | 1,894                                                                 |
| 58               | Ecuador | Wheat and products              | 1993           | 244                                                                   |
| 58               | Ecuador | Wine                            | 1993           | 1                                                                     |
| 58               | Ecuador | Alcoholic Beverages             | 1994           | 28                                                                    |
| 58               | Ecuador | Animal fats                     | 1994           | 71                                                                    |
| 58               | Ecuador | Animal Products                 | 1994           | 420                                                                   |
| 58               | Ecuador | Apples and products             | 1994           | 5                                                                     |
| 58               | Ecuador | Bananas                         | 1994           | 164                                                                   |
| 58               | Ecuador | Barley and products             | 1994           | 8                                                                     |
| 58               | Ecuador | Beans                           | 1994           | 20                                                                    |
| 58               | Ecuador | Beer                            | 1994           | 11                                                                    |
| 58               | Ecuador | Beverages, Alcoholic            | 1994           | 14                                                                    |
| 58               | Ecuador | Bovine Meat                     | 1994           | 68                                                                    |
| 58               | Ecuador | Butter, Ghee                    | 1994           | 17                                                                    |
| 58               | Ecuador | Cassava and products            | 1994           | 13                                                                    |
| 58               | Ecuador | Cereals - Excluding Beer        | 1994           | 882                                                                   |
| 58               | Ecuador | Citrus, Other                   | 1994           | 1                                                                     |
| 58               | Ecuador | Cocoa Beans and products        | 1994           | 3                                                                     |
| 58               | Ecuador | Coconut Oil                     | 1994           | 8                                                                     |
| 58               | Ecuador | Coconuts - Incl Copra           | 1994           | 3                                                                     |
| 58               | Ecuador | Coffee and products             | 1994           | 4                                                                     |
| 58               | Ecuador | Cottonseed Oil                  | 1994           | 2                                                                     |
| 58               | Ecuador | Crustaceans                     | 1994           | 3                                                                     |
| 58               | Ecuador | Demersal Fish                   | 1994           | 1                                                                     |
| 58               | Ecuador | Eggs                            | 1994           | 15                                                                    |
| 58               | Ecuador | Fats, Animals, Raw              | 1994           | 54                                                                    |
| 58               | Ecuador | Fish, Seafood                   | 1994           | 14                                                                    |
| 58               | Ecuador | Fruits - Excluding Wine         | 1994           | 315                                                                   |
| 58               | Ecuador | Fruits, Other                   | 1994           | 13                                                                    |
| 58               | Ecuador | Grand Total                     | 1994           | 2,398                                                                 |
| 58               | Ecuador | Grapes and products (excl wine) | 1994           | 1                                                                     |
| 58               | Ecuador | Groundnuts (Shelled Eq)         | 1994           | 5                                                                     |
| 58               | Ecuador | Honey                           | 1994           | 1                                                                     |
| 58               | Ecuador | Maize and products              | 1994           | 31                                                                    |
| 58               | Ecuador | Maize Germ Oil                  | 1994           | 1                                                                     |
| 58               | Ecuador | Meat                            | 1994           | 139                                                                   |
| 58               | Ecuador | Meat, Other                     | 1994           | 3                                                                     |
| 58               | Ecuador | Milk - Excluding Butter         | 1994           | 172                                                                   |
| 58               | Ecuador | Miscellaneous                   | 1994           | 1                                                                     |
| 58               | Ecuador | Mutton & Goat Meat              | 1994           | 3                                                                     |
| 58               | Ecuador | Oats                            | 1994           | 13                                                                    |
| 58               | Ecuador | Offals                          | 1994           | 8                                                                     |
| 58               | Ecuador | Oilcrops                        | 1994           | 8                                                                     |
| 58               | Ecuador | Olive Oil                       | 1994           | 1                                                                     |

Dietary calcium and zinc deficiency risks are decreasing but remain prevalent

| FAO Country code | Country | Food item                       | Reference year | Net energy supply (kcal <i>capita</i> <sup>-1</sup> d <sup>-1</sup> ) |
|------------------|---------|---------------------------------|----------------|-----------------------------------------------------------------------|
| 58               | Ecuador | Oranges, Mandarines             | 1994           | 7                                                                     |
| 58               | Ecuador | Palm Oil                        | 1994           | 230                                                                   |
| 58               | Ecuador | Palmkernel Oil                  | 1994           | 6                                                                     |
| 58               | Ecuador | Peas                            | 1994           | 7                                                                     |
| 58               | Ecuador | Pelagic Fish                    | 1994           | 9                                                                     |
| 58               | Ecuador | Pigmeat                         | 1994           | 25                                                                    |
| 58               | Ecuador | Pineapples and products         | 1994           | 4                                                                     |
| 58               | Ecuador | Plantains                       | 1994           | 118                                                                   |
| 58               | Ecuador | Potatoes and products           | 1994           | 73                                                                    |
| 58               | Ecuador | Poultry Meat                    | 1994           | 40                                                                    |
| 58               | Ecuador | Pulses                          | 1994           | 42                                                                    |
| 58               | Ecuador | Pulses, Other and products      | 1994           | 14                                                                    |
| 58               | Ecuador | Rice (Milled Equivalent)        | 1994           | 586                                                                   |
| 58               | Ecuador | Roots, Other                    | 1994           | 1                                                                     |
| 58               | Ecuador | Soyabean Oil                    | 1994           | 75                                                                    |
| 58               | Ecuador | Spices                          | 1994           | 1                                                                     |
| 58               | Ecuador | Spices, Other                   | 1994           | 1                                                                     |
| 58               | Ecuador | Starchy Roots                   | 1994           | 87                                                                    |
| 58               | Ecuador | Stimulants                      | 1994           | 7                                                                     |
| 58               | Ecuador | Sugar & Sweeteners              | 1994           | 266                                                                   |
| 58               | Ecuador | Sugar (Raw Equivalent)          | 1994           | 257                                                                   |
| 58               | Ecuador | Sweeteners, Other               | 1994           | 8                                                                     |
| 58               | Ecuador | Tomatoes and products           | 1994           | 4                                                                     |
| 58               | Ecuador | Vegetable Oils                  | 1994           | 323                                                                   |
| 58               | Ecuador | Vegetables                      | 1994           | 18                                                                    |
| 58               | Ecuador | Vegetables, Other               | 1994           | 15                                                                    |
| 58               | Ecuador | Vegetal Products                | 1994           | 1,978                                                                 |
| 58               | Ecuador | Wheat and products              | 1994           | 243                                                                   |
| 58               | Ecuador | Wine                            | 1994           | 3                                                                     |
| 58               | Ecuador | Alcoholic Beverages             | 1995           | 30                                                                    |
| 58               | Ecuador | Animal fats                     | 1995           | 75                                                                    |
| 58               | Ecuador | Animal Products                 | 1995           | 448                                                                   |
| 58               | Ecuador | Apples and products             | 1995           | 4                                                                     |
| 58               | Ecuador | Bananas                         | 1995           | 115                                                                   |
| 58               | Ecuador | Barley and products             | 1995           | 19                                                                    |
| 58               | Ecuador | Beans                           | 1995           | 21                                                                    |
| 58               | Ecuador | Beer                            | 1995           | 9                                                                     |
| 58               | Ecuador | Beverages, Alcoholic            | 1995           | 20                                                                    |
| 58               | Ecuador | Bovine Meat                     | 1995           | 78                                                                    |
| 58               | Ecuador | Butter, Ghee                    | 1995           | 16                                                                    |
| 58               | Ecuador | Cassava and products            | 1995           | 12                                                                    |
| 58               | Ecuador | Cereals - Excluding Beer        | 1995           | 818                                                                   |
| 58               | Ecuador | Citrus, Other                   | 1995           | 1                                                                     |
| 58               | Ecuador | Cocoa Beans and products        | 1995           | 4                                                                     |
| 58               | Ecuador | Coconut Oil                     | 1995           | 8                                                                     |
| 58               | Ecuador | Coconuts - Incl Copra           | 1995           | 3                                                                     |
| 58               | Ecuador | Coffee and products             | 1995           | 4                                                                     |
| 58               | Ecuador | Cottonseed Oil                  | 1995           | 3                                                                     |
| 58               | Ecuador | Crustaceans                     | 1995           | 3                                                                     |
| 58               | Ecuador | Eggs                            | 1995           | 16                                                                    |
| 58               | Ecuador | Fats, Animals, Raw              | 1995           | 58                                                                    |
| 58               | Ecuador | Fish, Seafood                   | 1995           | 16                                                                    |
| 58               | Ecuador | Fruits - Excluding Wine         | 1995           | 223                                                                   |
| 58               | Ecuador | Fruits, Other                   | 1995           | 11                                                                    |
| 58               | Ecuador | Grand Total                     | 1995           | 2,304                                                                 |
| 58               | Ecuador | Grapes and products (excl wine) | 1995           | 1                                                                     |
| 58               | Ecuador | Groundnuts (Shelled Eq)         | 1995           | 3                                                                     |
| 58               | Ecuador | Honey                           | 1995           | 1                                                                     |
| 58               | Ecuador | Maize and products              | 1995           | 28                                                                    |
| 58               | Ecuador | Maize Germ Oil                  | 1995           | 2                                                                     |
| 58               | Ecuador | Marine Fish, Other              | 1995           | 3                                                                     |
| 58               | Ecuador | Meat                            | 1995           | 150                                                                   |
| 58               | Ecuador | Meat, Other                     | 1995           | 2                                                                     |
| 58               | Ecuador | Milk - Excluding Butter         | 1995           | 182                                                                   |
| 58               | Ecuador | Miscellaneous                   | 1995           | 1                                                                     |
| 58               | Ecuador | Mutton & Goat Meat              | 1995           | 3                                                                     |
| 58               | Ecuador | Oats                            | 1995           | 7                                                                     |
| 58               | Ecuador | Offals                          | 1995           | 9                                                                     |
| 58               | Ecuador | Oilcrops                        | 1995           | 6                                                                     |
| 58               | Ecuador | Olive Oil                       | 1995           | 1                                                                     |
| 58               | Ecuador | Oranges, Mandarines             | 1995           | 7                                                                     |
| 58               | Ecuador | Palm Oil                        | 1995           | 240                                                                   |
| 58               | Ecuador | Palmkernel Oil                  | 1995           | 4                                                                     |
| 58               | Ecuador | Peas                            | 1995           | 5                                                                     |
| 58               | Ecuador | Pelagic Fish                    | 1995           | 10                                                                    |
| 58               | Ecuador | Pigmeat                         | 1995           | 26                                                                    |
| 58               | Ecuador | Pineapples and products         | 1995           | 3                                                                     |
| 58               | Ecuador | Plantains                       | 1995           | 79                                                                    |
| 58               | Ecuador | Potatoes and products           | 1995           | 62                                                                    |
| 58               | Ecuador | Poultry Meat                    | 1995           | 41                                                                    |
| 58               | Ecuador | Pulses                          | 1995           | 41                                                                    |
| 58               | Ecuador | Pulses, Other and products      | 1995           | 15                                                                    |
| 58               | Ecuador | Rice (Milled Equivalent)        | 1995           | 523                                                                   |
| 58               | Ecuador | Soyabean Oil                    | 1995           | 131                                                                   |
| 58               | Ecuador | Spices                          | 1995           | 1                                                                     |
| 58               | Ecuador | Spices, Other                   | 1995           | 1                                                                     |
| 58               | Ecuador | Starchy Roots                   | 1995           | 74                                                                    |
| 58               | Ecuador | Stimulants                      | 1995           | 8                                                                     |
| 58               | Ecuador | Sugar & Sweeteners              | 1995           | 246                                                                   |
| 58               | Ecuador | Sugar (Raw Equivalent)          | 1995           | 241                                                                   |
| 58               | Ecuador | Sweeteners, Other               | 1995           | 5                                                                     |
| 58               | Ecuador | Tomatoes and products           | 1995           | 3                                                                     |
| 58               | Ecuador | Vegetable Oils                  | 1995           | 388                                                                   |
| 58               | Ecuador | Vegetables                      | 1995           | 18                                                                    |
| 58               | Ecuador | Vegetables, Other               | 1995           | 15                                                                    |
| 58               | Ecuador | Vegetal Products                | 1995           | 1,856                                                                 |
| 58               | Ecuador | Wheat and products              | 1995           | 241                                                                   |

## Dietary calcium and zinc deficiency risks are decreasing but remain prevalent

| FAO Country code | Country | Food item                       | Reference year | Net energy supply (kcal capita <sup>-1</sup> d <sup>-1</sup> ) |
|------------------|---------|---------------------------------|----------------|----------------------------------------------------------------|
| 58               | Ecuador | Wine                            | 1995           | 1                                                              |
| 58               | Ecuador | Alcoholic Beverages             | 1996           | 22                                                             |
| 58               | Ecuador | Animal fats                     | 1996           | 81                                                             |
| 58               | Ecuador | Animal Products                 | 1996           | 500                                                            |
| 58               | Ecuador | Apples and products             | 1996           | 7                                                              |
| 58               | Ecuador | Bananas                         | 1996           | 78                                                             |
| 58               | Ecuador | Barley and products             | 1996           | 22                                                             |
| 58               | Ecuador | Beans                           | 1996           | 17                                                             |
| 58               | Ecuador | Beer                            | 1996           | 9                                                              |
| 58               | Ecuador | Beverages, Alcoholic            | 1996           | 12                                                             |
| 58               | Ecuador | Bovine Meat                     | 1996           | 79                                                             |
| 58               | Ecuador | Butter, Ghee                    | 1996           | 16                                                             |
| 58               | Ecuador | Cassava and products            | 1996           | 12                                                             |
| 58               | Ecuador | Cereals - Excluding Beer        | 1996           | 843                                                            |
| 58               | Ecuador | Citrus, Other                   | 1996           | 2                                                              |
| 58               | Ecuador | Cocoa Beans and products        | 1996           | 7                                                              |
| 58               | Ecuador | Coconut Oil                     | 1996           | 9                                                              |
| 58               | Ecuador | Coconuts - Incl Copra           | 1996           | 2                                                              |
| 58               | Ecuador | Coffee and products             | 1996           | 5                                                              |
| 58               | Ecuador | Cottonseed Oil                  | 1996           | 3                                                              |
| 58               | Ecuador | Crustaceans                     | 1996           | 3                                                              |
| 58               | Ecuador | Eggs                            | 1996           | 13                                                             |
| 58               | Ecuador | Fats, Animals, Raw              | 1996           | 65                                                             |
| 58               | Ecuador | Fish, Seafood                   | 1996           | 18                                                             |
| 58               | Ecuador | Fruits - Excluding Wine         | 1996           | 221                                                            |
| 58               | Ecuador | Fruits, Other                   | 1996           | 17                                                             |
| 58               | Ecuador | Grand Total                     | 1996           | 2,303                                                          |
| 58               | Ecuador | Grapes and products (excl wine) | 1996           | 1                                                              |
| 58               | Ecuador | Groundnuts (Shelled Eq)         | 1996           | 6                                                              |
| 58               | Ecuador | Honey                           | 1996           | 1                                                              |
| 58               | Ecuador | Lemons, Limes and products      | 1996           | 1                                                              |
| 58               | Ecuador | Maize and products              | 1996           | 30                                                             |
| 58               | Ecuador | Maize Germ Oil                  | 1996           | 2                                                              |
| 58               | Ecuador | Marine Fish, Other              | 1996           | 1                                                              |
| 58               | Ecuador | Meat                            | 1996           | 170                                                            |
| 58               | Ecuador | Meat, Other                     | 1996           | 2                                                              |
| 58               | Ecuador | Milk - Excluding Butter         | 1996           | 209                                                            |
| 58               | Ecuador | Miscellaneous                   | 1996           | 1                                                              |
| 58               | Ecuador | Mutton & Goat Meat              | 1996           | 3                                                              |
| 58               | Ecuador | Oats                            | 1996           | 18                                                             |
| 58               | Ecuador | Offals                          | 1996           | 10                                                             |
| 58               | Ecuador | Oilcrops                        | 1996           | 8                                                              |
| 58               | Ecuador | Oranges, Mandarines             | 1996           | 7                                                              |
| 58               | Ecuador | Palm Oil                        | 1996           | 224                                                            |
| 58               | Ecuador | Palmkernel Oil                  | 1996           | 2                                                              |
| 58               | Ecuador | Peas                            | 1996           | 7                                                              |
| 58               | Ecuador | Pelagic Fish                    | 1996           | 14                                                             |
| 58               | Ecuador | Pigmeat                         | 1996           | 30                                                             |
| 58               | Ecuador | Pineapples and products         | 1996           | 3                                                              |
| 58               | Ecuador | Plantains                       | 1996           | 105                                                            |
| 58               | Ecuador | Potatoes and products           | 1996           | 58                                                             |
| 58               | Ecuador | Poultry Meat                    | 1996           | 56                                                             |
| 58               | Ecuador | Pulses                          | 1996           | 40                                                             |
| 58               | Ecuador | Pulses, Other and products      | 1996           | 16                                                             |
| 58               | Ecuador | Rice (Milled Equivalent)        | 1996           | 520                                                            |
| 58               | Ecuador | Roots, Other                    | 1996           | 1                                                              |
| 58               | Ecuador | Soyabean Oil                    | 1996           | 115                                                            |
| 58               | Ecuador | Spices                          | 1996           | 1                                                              |
| 58               | Ecuador | Spices, Other                   | 1996           | 1                                                              |
| 58               | Ecuador | Starchy Roots                   | 1996           | 71                                                             |
| 58               | Ecuador | Stimulants                      | 1996           | 11                                                             |
| 58               | Ecuador | Sugar & Sweeteners              | 1996           | 205                                                            |
| 58               | Ecuador | Sugar (Raw Equivalent)          | 1996           | 201                                                            |
| 58               | Ecuador | Sunflowerseed Oil               | 1996           | 2                                                              |
| 58               | Ecuador | Sweeteners, Other               | 1996           | 4                                                              |
| 58               | Ecuador | Tomatoes and products           | 1996           | 3                                                              |
| 58               | Ecuador | Vegetable Oils                  | 1996           | 358                                                            |
| 58               | Ecuador | Vegetables                      | 1996           | 19                                                             |
| 58               | Ecuador | Vegetables, Other               | 1996           | 15                                                             |
| 58               | Ecuador | Vegetal Products                | 1996           | 1,803                                                          |
| 58               | Ecuador | Wheat and products              | 1996           | 252                                                            |
| 58               | Ecuador | Wine                            | 1996           | 1                                                              |
| 58               | Ecuador | Alcoholic Beverages             | 1997           | 22                                                             |
| 58               | Ecuador | Animal fats                     | 1997           | 83                                                             |
| 58               | Ecuador | Animal Products                 | 1997           | 505                                                            |
| 58               | Ecuador | Apples and products             | 1997           | 6                                                              |
| 58               | Ecuador | Bananas                         | 1997           | 99                                                             |
| 58               | Ecuador | Barley and products             | 1997           | 10                                                             |
| 58               | Ecuador | Beans                           | 1997           | 12                                                             |
| 58               | Ecuador | Beer                            | 1997           | 17                                                             |
| 58               | Ecuador | Beverages, Alcoholic            | 1997           | 4                                                              |
| 58               | Ecuador | Bovine Meat                     | 1997           | 78                                                             |
| 58               | Ecuador | Butter, Ghee                    | 1997           | 16                                                             |
| 58               | Ecuador | Cassava and products            | 1997           | 17                                                             |
| 58               | Ecuador | Cereals - Excluding Beer        | 1997           | 827                                                            |
| 58               | Ecuador | Citrus, Other                   | 1997           | 4                                                              |
| 58               | Ecuador | Cocoa Beans and products        | 1997           | 5                                                              |
| 58               | Ecuador | Coconut Oil                     | 1997           | 6                                                              |
| 58               | Ecuador | Coconuts - Incl Copra           | 1997           | 2                                                              |
| 58               | Ecuador | Coffee and products             | 1997           | 4                                                              |
| 58               | Ecuador | Cottonseed Oil                  | 1997           | 3                                                              |
| 58               | Ecuador | Crustaceans                     | 1997           | 3                                                              |
| 58               | Ecuador | Eggs                            | 1997           | 13                                                             |
| 58               | Ecuador | Fats, Animals, Raw              | 1997           | 67                                                             |
| 58               | Ecuador | Fish, Seafood                   | 1997           | 19                                                             |
| 58               | Ecuador | Fruits - Excluding Wine         | 1997           | 247                                                            |
| 58               | Ecuador | Fruits, Other                   | 1997           | 22                                                             |

Dietary calcium and zinc deficiency risks are decreasing but remain prevalent

| FAO Country code | Country | Food item                       | Reference year | Net energy supply (kcal capita <sup>-1</sup> d <sup>-1</sup> ) |
|------------------|---------|---------------------------------|----------------|----------------------------------------------------------------|
| 58               | Ecuador | Grand Total                     | 1997           | 2,335                                                          |
| 58               | Ecuador | Grapes and products (excl wine) | 1997           | 2                                                              |
| 58               | Ecuador | Groundnuts (Shelled Eq)         | 1997           | 10                                                             |
| 58               | Ecuador | Honey                           | 1997           | 1                                                              |
| 58               | Ecuador | Lemons, Limes and products      | 1997           | 1                                                              |
| 58               | Ecuador | Maize and products              | 1997           | 42                                                             |
| 58               | Ecuador | Maize Germ Oil                  | 1997           | 2                                                              |
| 58               | Ecuador | Meat                            | 1997           | 179                                                            |
| 58               | Ecuador | Meat, Other                     | 1997           | 2                                                              |
| 58               | Ecuador | Milk - Excluding Butter         | 1997           | 202                                                            |
| 58               | Ecuador | Miscellaneous                   | 1997           | 2                                                              |
| 58               | Ecuador | Mutton & Goat Meat              | 1997           | 3                                                              |
| 58               | Ecuador | Oats                            | 1997           | 10                                                             |
| 58               | Ecuador | Offals                          | 1997           | 10                                                             |
| 58               | Ecuador | Oilcrops                        | 1997           | 13                                                             |
| 58               | Ecuador | Olive Oil                       | 1997           | 1                                                              |
| 58               | Ecuador | Oranges, Mandarines             | 1997           | 13                                                             |
| 58               | Ecuador | Palm Oil                        | 1997           | 227                                                            |
| 58               | Ecuador | Palmkernel Oil                  | 1997           | 11                                                             |
| 58               | Ecuador | Peas                            | 1997           | 10                                                             |
| 58               | Ecuador | Pelagic Fish                    | 1997           | 15                                                             |
| 58               | Ecuador | Pigmeat                         | 1997           | 30                                                             |
| 58               | Ecuador | Pineapples and products         | 1997           | 1                                                              |
| 58               | Ecuador | Plantains                       | 1997           | 99                                                             |
| 58               | Ecuador | Potatoes and products           | 1997           | 81                                                             |
| 58               | Ecuador | Poultry Meat                    | 1997           | 65                                                             |
| 58               | Ecuador | Pulses                          | 1997           | 39                                                             |
| 58               | Ecuador | Pulses, Other and products      | 1997           | 17                                                             |
| 58               | Ecuador | Rice (Milled Equivalent)        | 1997           | 434                                                            |
| 58               | Ecuador | Soyabean Oil                    | 1997           | 101                                                            |
| 58               | Ecuador | Spices                          | 1997           | 1                                                              |
| 58               | Ecuador | Spices, Other                   | 1997           | 1                                                              |
| 58               | Ecuador | Starchy Roots                   | 1997           | 98                                                             |
| 58               | Ecuador | Stimulants                      | 1997           | 9                                                              |
| 58               | Ecuador | Sugar & Sweeteners              | 1997           | 199                                                            |
| 58               | Ecuador | Sugar (Raw Equivalent)          | 1997           | 194                                                            |
| 58               | Ecuador | Sunflowerseed Oil               | 1997           | 2                                                              |
| 58               | Ecuador | Sweeteners, Other               | 1997           | 5                                                              |
| 58               | Ecuador | Tomatoes and products           | 1997           | 2                                                              |
| 58               | Ecuador | Vegetable Oils                  | 1997           | 353                                                            |
| 58               | Ecuador | Vegetables                      | 1997           | 21                                                             |
| 58               | Ecuador | Vegetables, Other               | 1997           | 18                                                             |
| 58               | Ecuador | Vegetal Products                | 1997           | 1,830                                                          |
| 58               | Ecuador | Wheat and products              | 1997           | 330                                                            |
| 58               | Ecuador | Wine                            | 1997           | 1                                                              |
| 58               | Ecuador | Alcoholic Beverages             | 1998           | 26                                                             |
| 58               | Ecuador | Animal fats                     | 1998           | 76                                                             |
| 58               | Ecuador | Animal Products                 | 1998           | 482                                                            |
| 58               | Ecuador | Apples and products             | 1998           | 7                                                              |
| 58               | Ecuador | Bananas                         | 1998           | 102                                                            |
| 58               | Ecuador | Barley and products             | 1998           | 11                                                             |
| 58               | Ecuador | Beans                           | 1998           | 15                                                             |
| 58               | Ecuador | Beer                            | 1998           | 21                                                             |
| 58               | Ecuador | Beverages, Alcoholic            | 1998           | 5                                                              |
| 58               | Ecuador | Bovine Meat                     | 1998           | 78                                                             |
| 58               | Ecuador | Butter, Ghee                    | 1998           | 16                                                             |
| 58               | Ecuador | Cassava and products            | 1998           | 13                                                             |
| 58               | Ecuador | Cereals - Excluding Beer        | 1998           | 830                                                            |
| 58               | Ecuador | Cereals, Other                  | 1998           | 1                                                              |
| 58               | Ecuador | Citrus, Other                   | 1998           | 1                                                              |
| 58               | Ecuador | Cocoa Beans and products        | 1998           | 3                                                              |
| 58               | Ecuador | Coconut Oil                     | 1998           | 4                                                              |
| 58               | Ecuador | Coconuts - Incl Copra           | 1998           | 2                                                              |
| 58               | Ecuador | Coffee and products             | 1998           | 4                                                              |
| 58               | Ecuador | Cottonseed Oil                  | 1998           | 2                                                              |
| 58               | Ecuador | Crustaceans                     | 1998           | 4                                                              |
| 58               | Ecuador | Eggs                            | 1998           | 15                                                             |
| 58               | Ecuador | Fats, Animals, Raw              | 1998           | 60                                                             |
| 58               | Ecuador | Fish, Seafood                   | 1998           | 16                                                             |
| 58               | Ecuador | Fruits - Excluding Wine         | 1998           | 199                                                            |
| 58               | Ecuador | Fruits, Other                   | 1998           | 23                                                             |
| 58               | Ecuador | Grand Total                     | 1998           | 2,252                                                          |
| 58               | Ecuador | Grapes and products (excl wine) | 1998           | 2                                                              |
| 58               | Ecuador | Groundnuts (Shelled Eq)         | 1998           | 2                                                              |
| 58               | Ecuador | Honey                           | 1998           | 1                                                              |
| 58               | Ecuador | Lemons, Limes and products      | 1998           | 1                                                              |
| 58               | Ecuador | Maize and products              | 1998           | 39                                                             |
| 58               | Ecuador | Maize Germ Oil                  | 1998           | 2                                                              |
| 58               | Ecuador | Marine Fish, Other              | 1998           | 1                                                              |
| 58               | Ecuador | Meat                            | 1998           | 153                                                            |
| 58               | Ecuador | Meat, Other                     | 1998           | 2                                                              |
| 58               | Ecuador | Milk - Excluding Butter         | 1998           | 213                                                            |
| 58               | Ecuador | Miscellaneous                   | 1998           | 2                                                              |
| 58               | Ecuador | Mutton & Goat Meat              | 1998           | 5                                                              |
| 58               | Ecuador | Oats                            | 1998           | 9                                                              |
| 58               | Ecuador | Offals                          | 1998           | 10                                                             |
| 58               | Ecuador | Oilcrops                        | 1998           | 4                                                              |
| 58               | Ecuador | Olive Oil                       | 1998           | 1                                                              |
| 58               | Ecuador | Oranges, Mandarines             | 1998           | 7                                                              |
| 58               | Ecuador | Palm Oil                        | 1998           | 234                                                            |
| 58               | Ecuador | Palmkernel Oil                  | 1998           | 17                                                             |
| 58               | Ecuador | Peas                            | 1998           | 12                                                             |
| 58               | Ecuador | Pelagic Fish                    | 1998           | 11                                                             |
| 58               | Ecuador | Pigmeat                         | 1998           | 28                                                             |
| 58               | Ecuador | Pineapples and products         | 1998           | 5                                                              |
| 58               | Ecuador | Plantains                       | 1998           | 51                                                             |
| 58               | Ecuador | Potatoes and products           | 1998           | 61                                                             |

Dietary calcium and zinc deficiency risks are decreasing but remain prevalent

| FAO Country code | Country | Food item                       | Reference year | Net energy supply (kcal capita <sup>-1</sup> d <sup>-1</sup> ) |
|------------------|---------|---------------------------------|----------------|----------------------------------------------------------------|
| 58               | Ecuador | Poultry Meat                    | 1998           | 39                                                             |
| 58               | Ecuador | Pulses                          | 1998           | 45                                                             |
| 58               | Ecuador | Pulses, Other and products      | 1998           | 18                                                             |
| 58               | Ecuador | Rice (Milled Equivalent)        | 1998           | 442                                                            |
| 58               | Ecuador | Soyabean Oil                    | 1998           | 93                                                             |
| 58               | Ecuador | Spices                          | 1998           | 1                                                              |
| 58               | Ecuador | Spices, Other                   | 1998           | 1                                                              |
| 58               | Ecuador | Starchy Roots                   | 1998           | 74                                                             |
| 58               | Ecuador | Stimulants                      | 1998           | 7                                                              |
| 58               | Ecuador | Sugar & Sweeteners              | 1998           | 203                                                            |
| 58               | Ecuador | Sugar (Raw Equivalent)          | 1998           | 197                                                            |
| 58               | Ecuador | Sunflowerseed Oil               | 1998           | 4                                                              |
| 58               | Ecuador | Sweeteners, Other               | 1998           | 5                                                              |
| 58               | Ecuador | Tomatoes and products           | 1998           | 3                                                              |
| 58               | Ecuador | Vegetable Oils                  | 1998           | 357                                                            |
| 58               | Ecuador | Vegetables                      | 1998           | 22                                                             |
| 58               | Ecuador | Vegetables, Other               | 1998           | 18                                                             |
| 58               | Ecuador | Vegetal Products                | 1998           | 1,770                                                          |
| 58               | Ecuador | Wheat and products              | 1998           | 330                                                            |
| 58               | Ecuador | Wine                            | 1998           | 1                                                              |
| 58               | Ecuador | Alcoholic Beverages             | 1999           | 23                                                             |
| 58               | Ecuador | Animal fats                     | 1999           | 74                                                             |
| 58               | Ecuador | Animal Products                 | 1999           | 472                                                            |
| 58               | Ecuador | Apples and products             | 1999           | 4                                                              |
| 58               | Ecuador | Bananas                         | 1999           | 132                                                            |
| 58               | Ecuador | Barley and products             | 1999           | 8                                                              |
| 58               | Ecuador | Beans                           | 1999           | 14                                                             |
| 58               | Ecuador | Beer                            | 1999           | 19                                                             |
| 58               | Ecuador | Beverages, Alcoholic            | 1999           | 3                                                              |
| 58               | Ecuador | Bovine Meat                     | 1999           | 79                                                             |
| 58               | Ecuador | Butter, Ghee                    | 1999           | 16                                                             |
| 58               | Ecuador | Cassava and products            | 1999           | 14                                                             |
| 58               | Ecuador | Cereals - Excluding Beer        | 1999           | 834                                                            |
| 58               | Ecuador | Cereals, Other                  | 1999           | 1                                                              |
| 58               | Ecuador | Citrus, Other                   | 1999           | 1                                                              |
| 58               | Ecuador | Cocoa Beans and products        | 1999           | 4                                                              |
| 58               | Ecuador | Coconut Oil                     | 1999           | 4                                                              |
| 58               | Ecuador | Coconuts - Incl Copra           | 1999           | 2                                                              |
| 58               | Ecuador | Coffee and products             | 1999           | 5                                                              |
| 58               | Ecuador | Cottonseed Oil                  | 1999           | 2                                                              |
| 58               | Ecuador | Crustaceans                     | 1999           | 3                                                              |
| 58               | Ecuador | Demersal Fish                   | 1999           | 3                                                              |
| 58               | Ecuador | Eggs                            | 1999           | 13                                                             |
| 58               | Ecuador | Fats, Animals, Raw              | 1999           | 57                                                             |
| 58               | Ecuador | Fish, Seafood                   | 1999           | 13                                                             |
| 58               | Ecuador | Freshwater Fish                 | 1999           | 1                                                              |
| 58               | Ecuador | Fruits - Excluding Wine         | 1999           | 265                                                            |
| 58               | Ecuador | Fruits, Other                   | 1999           | 48                                                             |
| 58               | Ecuador | Grand Total                     | 1999           | 2,314                                                          |
| 58               | Ecuador | Grapes and products (excl wine) | 1999           | 1                                                              |
| 58               | Ecuador | Groundnuts (Shelled Eq)         | 1999           | 11                                                             |
| 58               | Ecuador | Honey                           | 1999           | 1                                                              |
| 58               | Ecuador | Lemons, Limes and products      | 1999           | 1                                                              |
| 58               | Ecuador | Maize and products              | 1999           | 33                                                             |
| 58               | Ecuador | Maize Germ Oil                  | 1999           | 2                                                              |
| 58               | Ecuador | Meat                            | 1999           | 167                                                            |
| 58               | Ecuador | Meat, Other                     | 1999           | 3                                                              |
| 58               | Ecuador | Milk - Excluding Butter         | 1999           | 196                                                            |
| 58               | Ecuador | Miscellaneous                   | 1999           | 1                                                              |
| 58               | Ecuador | Mutton & Goat Meat              | 1999           | 4                                                              |
| 58               | Ecuador | Oats                            | 1999           | 17                                                             |
| 58               | Ecuador | Offals                          | 1999           | 9                                                              |
| 58               | Ecuador | Oilcrops                        | 1999           | 13                                                             |
| 58               | Ecuador | Oranges, Mandarines             | 1999           | 7                                                              |
| 58               | Ecuador | Palm Oil                        | 1999           | 237                                                            |
| 58               | Ecuador | Palmkernel Oil                  | 1999           | 12                                                             |
| 58               | Ecuador | Peas                            | 1999           | 10                                                             |
| 58               | Ecuador | Pelagic Fish                    | 1999           | 6                                                              |
| 58               | Ecuador | Pepper                          | 1999           | 2                                                              |
| 58               | Ecuador | Pigmeat                         | 1999           | 30                                                             |
| 58               | Ecuador | Pineapples and products         | 1999           | 4                                                              |
| 58               | Ecuador | Plantains                       | 1999           | 68                                                             |
| 58               | Ecuador | Potatoes and products           | 1999           | 72                                                             |
| 58               | Ecuador | Poultry Meat                    | 1999           | 51                                                             |
| 58               | Ecuador | Pulses                          | 1999           | 37                                                             |
| 58               | Ecuador | Pulses, Other and products      | 1999           | 14                                                             |
| 58               | Ecuador | Rice (Milled Equivalent)        | 1999           | 481                                                            |
| 58               | Ecuador | Soyabean Oil                    | 1999           | 105                                                            |
| 58               | Ecuador | Spices                          | 1999           | 3                                                              |
| 58               | Ecuador | Spices, Other                   | 1999           | 1                                                              |
| 58               | Ecuador | Starchy Roots                   | 1999           | 87                                                             |
| 58               | Ecuador | Stimulants                      | 1999           | 8                                                              |
| 58               | Ecuador | Sugar & Sweeteners              | 1999           | 190                                                            |
| 58               | Ecuador | Sugar (Raw Equivalent)          | 1999           | 184                                                            |
| 58               | Ecuador | Sunflowerseed Oil               | 1999           | 2                                                              |
| 58               | Ecuador | Sweeteners, Other               | 1999           | 5                                                              |
| 58               | Ecuador | Tomatoes and products           | 1999           | 3                                                              |
| 58               | Ecuador | Vegetable Oils                  | 1999           | 364                                                            |
| 58               | Ecuador | Vegetables                      | 1999           | 16                                                             |
| 58               | Ecuador | Vegetables, Other               | 1999           | 13                                                             |
| 58               | Ecuador | Vegetal Products                | 1999           | 1,842                                                          |
| 58               | Ecuador | Wheat and products              | 1999           | 295                                                            |
| 58               | Ecuador | Alcoholic Beverages             | 2000           | 17                                                             |
| 58               | Ecuador | Animal fats                     | 2000           | 82                                                             |
| 58               | Ecuador | Animal Products                 | 2000           | 526                                                            |
| 58               | Ecuador | Apples and products             | 2000           | 3                                                              |
| 58               | Ecuador | Bananas                         | 2000           | 146                                                            |



Dietary calcium and zinc deficiency risks are decreasing but remain prevalent

| FAO Country code | Country | Food item                       | Reference year | Net energy supply (kcal capita <sup>-1</sup> d <sup>-1</sup> ) |
|------------------|---------|---------------------------------|----------------|----------------------------------------------------------------|
| 58               | Ecuador | Barley and products             | 2000           | 8                                                              |
| 58               | Ecuador | Beans                           | 2000           | 13                                                             |
| 58               | Ecuador | Beer                            | 2000           | 15                                                             |
| 58               | Ecuador | Beverages, Alcoholic            | 2000           | 2                                                              |
| 58               | Ecuador | Bovine Meat                     | 2000           | 81                                                             |
| 58               | Ecuador | Butter, Ghee                    | 2000           | 17                                                             |
| 58               | Ecuador | Cassava and products            | 2000           | 14                                                             |
| 58               | Ecuador | Cereals - Excluding Beer        | 2000           | 841                                                            |
| 58               | Ecuador | Citrus, Other                   | 2000           | 1                                                              |
| 58               | Ecuador | Cocoa Beans and products        | 2000           | 5                                                              |
| 58               | Ecuador | Coconut Oil                     | 2000           | 4                                                              |
| 58               | Ecuador | Coconuts - Incl Copra           | 2000           | 2                                                              |
| 58               | Ecuador | Cottonseed Oil                  | 2000           | 1                                                              |
| 58               | Ecuador | Crustaceans                     | 2000           | 1                                                              |
| 58               | Ecuador | Demersal Fish                   | 2000           | 4                                                              |
| 58               | Ecuador | Eggs                            | 2000           | 16                                                             |
| 58               | Ecuador | Fats, Animals, Raw              | 2000           | 66                                                             |
| 58               | Ecuador | Fish, Seafood                   | 2000           | 11                                                             |
| 58               | Ecuador | Freshwater Fish                 | 2000           | 1                                                              |
| 58               | Ecuador | Fruits - Excluding Wine         | 2000           | 246                                                            |
| 58               | Ecuador | Fruits, Other                   | 2000           | 27                                                             |
| 58               | Ecuador | Grand Total                     | 2000           | 2,254                                                          |
| 58               | Ecuador | Grapes and products (excl wine) | 2000           | 1                                                              |
| 58               | Ecuador | Groundnuts (Shelled Eq)         | 2000           | 3                                                              |
| 58               | Ecuador | Honey                           | 2000           | 1                                                              |
| 58               | Ecuador | Lemons, Limes and products      | 2000           | 1                                                              |
| 58               | Ecuador | Maize and products              | 2000           | 33                                                             |
| 58               | Ecuador | Maize Germ Oil                  | 2000           | 1                                                              |
| 58               | Ecuador | Meat                            | 2000           | 183                                                            |
| 58               | Ecuador | Meat, Other                     | 2000           | 2                                                              |
| 58               | Ecuador | Milk - Excluding Butter         | 2000           | 224                                                            |
| 58               | Ecuador | Miscellaneous                   | 2000           | 1                                                              |
| 58               | Ecuador | Mutton & Goat Meat              | 2000           | 4                                                              |
| 58               | Ecuador | Oats                            | 2000           | 19                                                             |
| 58               | Ecuador | Offals                          | 2000           | 10                                                             |
| 58               | Ecuador | Oilcrops                        | 2000           | 5                                                              |
| 58               | Ecuador | Oranges, Mandarines             | 2000           | 9                                                              |
| 58               | Ecuador | Palm Oil                        | 2000           | 245                                                            |
| 58               | Ecuador | Palmkernel Oil                  | 2000           | 8                                                              |
| 58               | Ecuador | Peas                            | 2000           | 10                                                             |
| 58               | Ecuador | Pelagic Fish                    | 2000           | 4                                                              |
| 58               | Ecuador | Pepper                          | 2000           | 2                                                              |
| 58               | Ecuador | Pigmeat                         | 2000           | 30                                                             |
| 58               | Ecuador | Pineapples and products         | 2000           | 3                                                              |
| 58               | Ecuador | Plantains                       | 2000           | 56                                                             |
| 58               | Ecuador | Potatoes and products           | 2000           | 21                                                             |
| 58               | Ecuador | Poultry Meat                    | 2000           | 65                                                             |
| 58               | Ecuador | Pulses                          | 2000           | 38                                                             |
| 58               | Ecuador | Pulses, Other and products      | 2000           | 15                                                             |
| 58               | Ecuador | Rice (Milled Equivalent)        | 2000           | 523                                                            |
| 58               | Ecuador | Soyabean Oil                    | 2000           | 71                                                             |
| 58               | Ecuador | Spices                          | 2000           | 3                                                              |
| 58               | Ecuador | Spices, Other                   | 2000           | 1                                                              |
| 58               | Ecuador | Starchy Roots                   | 2000           | 35                                                             |
| 58               | Ecuador | Stimulants                      | 2000           | 5                                                              |
| 58               | Ecuador | Sugar & Sweeteners              | 2000           | 185                                                            |
| 58               | Ecuador | Sugar (Raw Equivalent)          | 2000           | 178                                                            |
| 58               | Ecuador | Sunflowerseed Oil               | 2000           | 1                                                              |
| 58               | Ecuador | Sweeteners, Other               | 2000           | 7                                                              |
| 58               | Ecuador | Tomatoes and products           | 2000           | 3                                                              |
| 58               | Ecuador | Vegetable Oils                  | 2000           | 332                                                            |
| 58               | Ecuador | Vegetables                      | 2000           | 18                                                             |
| 58               | Ecuador | Vegetables, Other               | 2000           | 15                                                             |
| 58               | Ecuador | Vegetal Products                | 2000           | 1,728                                                          |
| 58               | Ecuador | Wheat and products              | 2000           | 259                                                            |
| 58               | Ecuador | Alcoholic Beverages             | 2001           | 20                                                             |
| 58               | Ecuador | Animal fats                     | 2001           | 92                                                             |
| 58               | Ecuador | Animal Products                 | 2001           | 564                                                            |
| 58               | Ecuador | Apples and products             | 2001           | 5                                                              |
| 58               | Ecuador | Bananas                         | 2001           | 128                                                            |
| 58               | Ecuador | Barley and products             | 2001           | 7                                                              |
| 58               | Ecuador | Beans                           | 2001           | 5                                                              |
| 58               | Ecuador | Beer                            | 2001           | 16                                                             |
| 58               | Ecuador | Beverages, Alcoholic            | 2001           | 4                                                              |
| 58               | Ecuador | Bovine Meat                     | 2001           | 87                                                             |
| 58               | Ecuador | Butter, Ghee                    | 2001           | 20                                                             |
| 58               | Ecuador | Cassava and products            | 2001           | 13                                                             |
| 58               | Ecuador | Cereals - Excluding Beer        | 2001           | 791                                                            |
| 58               | Ecuador | Citrus, Other                   | 2001           | 1                                                              |
| 58               | Ecuador | Cocoa Beans and products        | 2001           | 3                                                              |
| 58               | Ecuador | Coconut Oil                     | 2001           | 4                                                              |
| 58               | Ecuador | Coconuts - Incl Copra           | 2001           | 2                                                              |
| 58               | Ecuador | Cottonseed Oil                  | 2001           | 1                                                              |
| 58               | Ecuador | Demersal Fish                   | 2001           | 1                                                              |
| 58               | Ecuador | Eggs                            | 2001           | 15                                                             |
| 58               | Ecuador | Fats, Animals, Raw              | 2001           | 71                                                             |
| 58               | Ecuador | Fish, Seafood                   | 2001           | 8                                                              |
| 58               | Ecuador | Freshwater Fish                 | 2001           | 2                                                              |
| 58               | Ecuador | Fruits - Excluding Wine         | 2001           | 251                                                            |
| 58               | Ecuador | Fruits, Other                   | 2001           | 28                                                             |
| 58               | Ecuador | Grand Total                     | 2001           | 2,259                                                          |
| 58               | Ecuador | Grapes and products (excl wine) | 2001           | 2                                                              |
| 58               | Ecuador | Groundnuts (Shelled Eq)         | 2001           | 5                                                              |
| 58               | Ecuador | Honey                           | 2001           | 1                                                              |
| 58               | Ecuador | Maize and products              | 2001           | 34                                                             |
| 58               | Ecuador | Maize Germ Oil                  | 2001           | 1                                                              |
| 58               | Ecuador | Marine Fish, Other              | 2001           | 3                                                              |

Dietary calcium and zinc deficiency risks are decreasing but remain prevalent

| FAO Country code | Country | Food item                       | Reference year | Net energy supply (kcal capita <sup>-1</sup> d <sup>-1</sup> ) |
|------------------|---------|---------------------------------|----------------|----------------------------------------------------------------|
| 58               | Ecuador | Meat                            | 2001           | 199                                                            |
| 58               | Ecuador | Meat, Other                     | 2001           | 2                                                              |
| 58               | Ecuador | Milk - Excluding Butter         | 2001           | 239                                                            |
| 58               | Ecuador | Miscellaneous                   | 2001           | 1                                                              |
| 58               | Ecuador | Mutton & Goat Meat              | 2001           | 5                                                              |
| 58               | Ecuador | Oats                            | 2001           | 12                                                             |
| 58               | Ecuador | Offals                          | 2001           | 9                                                              |
| 58               | Ecuador | Oilcrops                        | 2001           | 7                                                              |
| 58               | Ecuador | Olive Oil                       | 2001           | 1                                                              |
| 58               | Ecuador | Oranges, Mandarines             | 2001           | 9                                                              |
| 58               | Ecuador | Palm Oil                        | 2001           | 242                                                            |
| 58               | Ecuador | Palmkernel Oil                  | 2001           | 17                                                             |
| 58               | Ecuador | Peas                            | 2001           | 7                                                              |
| 58               | Ecuador | Pelagic Fish                    | 2001           | 2                                                              |
| 58               | Ecuador | Pepper                          | 2001           | 2                                                              |
| 58               | Ecuador | Pigmeat                         | 2001           | 37                                                             |
| 58               | Ecuador | Pineapples and products         | 2001           | 2                                                              |
| 58               | Ecuador | Plantains                       | 2001           | 76                                                             |
| 58               | Ecuador | Potatoes and products           | 2001           | 52                                                             |
| 58               | Ecuador | Poultry Meat                    | 2001           | 69                                                             |
| 58               | Ecuador | Pulses                          | 2001           | 29                                                             |
| 58               | Ecuador | Pulses, Other and products      | 2001           | 17                                                             |
| 58               | Ecuador | Rice (Milled Equivalent)        | 2001           | 408                                                            |
| 58               | Ecuador | Soyabean Oil                    | 2001           | 60                                                             |
| 58               | Ecuador | Spices                          | 2001           | 3                                                              |
| 58               | Ecuador | Spices, Other                   | 2001           | 1                                                              |
| 58               | Ecuador | Starchy Roots                   | 2001           | 66                                                             |
| 58               | Ecuador | Stimulants                      | 2001           | 3                                                              |
| 58               | Ecuador | Sugar & Sweeteners              | 2001           | 178                                                            |
| 58               | Ecuador | Sugar (Raw Equivalent)          | 2001           | 171                                                            |
| 58               | Ecuador | Sunflowerseed Oil               | 2001           | 3                                                              |
| 58               | Ecuador | Sweeteners, Other               | 2001           | 6                                                              |
| 58               | Ecuador | Tomatoes and products           | 2001           | 2                                                              |
| 58               | Ecuador | Treenuts                        | 2001           | 1                                                              |
| 58               | Ecuador | Vegetable Oils                  | 2001           | 330                                                            |
| 58               | Ecuador | Vegetables                      | 2001           | 16                                                             |
| 58               | Ecuador | Vegetables, Other               | 2001           | 14                                                             |
| 58               | Ecuador | Vegetal Products                | 2001           | 1,695                                                          |
| 58               | Ecuador | Wheat and products              | 2001           | 330                                                            |
| 58               | Ecuador | Alcoholic Beverages             | 2002           | 22                                                             |
| 58               | Ecuador | Animal fats                     | 2002           | 95                                                             |
| 58               | Ecuador | Animal Products                 | 2002           | 589                                                            |
| 58               | Ecuador | Apples and products             | 2002           | 5                                                              |
| 58               | Ecuador | Bananas                         | 2002           | 133                                                            |
| 58               | Ecuador | Barley and products             | 2002           | 9                                                              |
| 58               | Ecuador | Beans                           | 2002           | 2                                                              |
| 58               | Ecuador | Beer                            | 2002           | 17                                                             |
| 58               | Ecuador | Beverages, Alcoholic            | 2002           | 5                                                              |
| 58               | Ecuador | Bovine Meat                     | 2002           | 92                                                             |
| 58               | Ecuador | Butter, Ghee                    | 2002           | 23                                                             |
| 58               | Ecuador | Cassava and products            | 2002           | 12                                                             |
| 58               | Ecuador | Cereals - Excluding Beer        | 2002           | 730                                                            |
| 58               | Ecuador | Citrus, Other                   | 2002           | 1                                                              |
| 58               | Ecuador | Cocoa Beans and products        | 2002           | 3                                                              |
| 58               | Ecuador | Coconut Oil                     | 2002           | 4                                                              |
| 58               | Ecuador | Coconuts - Incl Copra           | 2002           | 2                                                              |
| 58               | Ecuador | Coffee and products             | 2002           | 1                                                              |
| 58               | Ecuador | Cottonseed Oil                  | 2002           | 1                                                              |
| 58               | Ecuador | Crustaceans                     | 2002           | 1                                                              |
| 58               | Ecuador | Demersal Fish                   | 2002           | 1                                                              |
| 58               | Ecuador | Eggs                            | 2002           | 15                                                             |
| 58               | Ecuador | Fats, Animals, Raw              | 2002           | 72                                                             |
| 58               | Ecuador | Fish, Seafood                   | 2002           | 8                                                              |
| 58               | Ecuador | Freshwater Fish                 | 2002           | 2                                                              |
| 58               | Ecuador | Fruits - Excluding Wine         | 2002           | 267                                                            |
| 58               | Ecuador | Fruits, Other                   | 2002           | 28                                                             |
| 58               | Ecuador | Grand Total                     | 2002           | 2,304                                                          |
| 58               | Ecuador | Grapes and products (excl wine) | 2002           | 3                                                              |
| 58               | Ecuador | Groundnuts (Shelled Eq)         | 2002           | 5                                                              |
| 58               | Ecuador | Honey                           | 2002           | 1                                                              |
| 58               | Ecuador | Maize and products              | 2002           | 30                                                             |
| 58               | Ecuador | Maize Germ Oil                  | 2002           | 1                                                              |
| 58               | Ecuador | Meat                            | 2002           | 205                                                            |
| 58               | Ecuador | Meat, Other                     | 2002           | 2                                                              |
| 58               | Ecuador | Milk - Excluding Butter         | 2002           | 256                                                            |
| 58               | Ecuador | Miscellaneous                   | 2002           | 2                                                              |
| 58               | Ecuador | Mutton & Goat Meat              | 2002           | 5                                                              |
| 58               | Ecuador | Oats                            | 2002           | 19                                                             |
| 58               | Ecuador | Offals                          | 2002           | 10                                                             |
| 58               | Ecuador | Oilcrops                        | 2002           | 7                                                              |
| 58               | Ecuador | Olive Oil                       | 2002           | 1                                                              |
| 58               | Ecuador | Oranges, Mandarines             | 2002           | 8                                                              |
| 58               | Ecuador | Palm Oil                        | 2002           | 248                                                            |
| 58               | Ecuador | Palmkernel Oil                  | 2002           | 14                                                             |
| 58               | Ecuador | Peas                            | 2002           | 5                                                              |
| 58               | Ecuador | Pelagic Fish                    | 2002           | 3                                                              |
| 58               | Ecuador | Pepper                          | 2002           | 1                                                              |
| 58               | Ecuador | Pigmeat                         | 2002           | 38                                                             |
| 58               | Ecuador | Pineapples and products         | 2002           | 3                                                              |
| 58               | Ecuador | Plantains                       | 2002           | 86                                                             |
| 58               | Ecuador | Potatoes and products           | 2002           | 61                                                             |
| 58               | Ecuador | Poultry Meat                    | 2002           | 68                                                             |
| 58               | Ecuador | Pulses                          | 2002           | 23                                                             |
| 58               | Ecuador | Pulses, Other and products      | 2002           | 16                                                             |
| 58               | Ecuador | Rice (Milled Equivalent)        | 2002           | 438                                                            |
| 58               | Ecuador | Soyabean Oil                    | 2002           | 122                                                            |
| 58               | Ecuador | Spices                          | 2002           | 3                                                              |

Dietary calcium and zinc deficiency risks are decreasing but remain prevalent

| FAO Country code | Country | Food item                       | Reference year | Net energy supply (kcal capita <sup>-1</sup> d <sup>-1</sup> ) |
|------------------|---------|---------------------------------|----------------|----------------------------------------------------------------|
| 58               | Ecuador | Spices, Other                   | 2002           | 1                                                              |
| 58               | Ecuador | Starchy Roots                   | 2002           | 74                                                             |
| 58               | Ecuador | Stimulants                      | 2002           | 3                                                              |
| 58               | Ecuador | Sugar & Sweeteners              | 2002           | 173                                                            |
| 58               | Ecuador | Sugar (Raw Equivalent)          | 2002           | 165                                                            |
| 58               | Ecuador | Sunflowerseed Oil               | 2002           | 2                                                              |
| 58               | Ecuador | Sweet potatoes                  | 2002           | 1                                                              |
| 58               | Ecuador | Sweeteners, Other               | 2002           | 7                                                              |
| 58               | Ecuador | Tomatoes and products           | 2002           | 3                                                              |
| 58               | Ecuador | Treenuts                        | 2002           | 1                                                              |
| 58               | Ecuador | Vegetable Oils                  | 2002           | 391                                                            |
| 58               | Ecuador | Vegetables                      | 2002           | 18                                                             |
| 58               | Ecuador | Vegetables, Other               | 2002           | 15                                                             |
| 58               | Ecuador | Vegetal Products                | 2002           | 1,715                                                          |
| 58               | Ecuador | Wheat and products              | 2002           | 233                                                            |
| 58               | Ecuador | Wine                            | 2002           | 1                                                              |
| 58               | Ecuador | Alcoholic Beverages             | 2003           | 26                                                             |
| 58               | Ecuador | Animal fats                     | 2003           | 100                                                            |
| 58               | Ecuador | Animal Products                 | 2003           | 613                                                            |
| 58               | Ecuador | Apples and products             | 2003           | 5                                                              |
| 58               | Ecuador | Bananas                         | 2003           | 123                                                            |
| 58               | Ecuador | Barley and products             | 2003           | 8                                                              |
| 58               | Ecuador | Beans                           | 2003           | 2                                                              |
| 58               | Ecuador | Beer                            | 2003           | 19                                                             |
| 58               | Ecuador | Beverages, Alcoholic            | 2003           | 7                                                              |
| 58               | Ecuador | Bovine Meat                     | 2003           | 92                                                             |
| 58               | Ecuador | Butter, Ghee                    | 2003           | 25                                                             |
| 58               | Ecuador | Cassava and products            | 2003           | 15                                                             |
| 58               | Ecuador | Cereals - Excluding Beer        | 2003           | 734                                                            |
| 58               | Ecuador | Citrus, Other                   | 2003           | 1                                                              |
| 58               | Ecuador | Cocoa Beans and products        | 2003           | 5                                                              |
| 58               | Ecuador | Coconut Oil                     | 2003           | 3                                                              |
| 58               | Ecuador | Coconuts - Incl Copra           | 2003           | 2                                                              |
| 58               | Ecuador | Crustaceans                     | 2003           | 2                                                              |
| 58               | Ecuador | Demersal Fish                   | 2003           | 1                                                              |
| 58               | Ecuador | Eggs                            | 2003           | 17                                                             |
| 58               | Ecuador | Fats, Animals, Raw              | 2003           | 75                                                             |
| 58               | Ecuador | Fish, Seafood                   | 2003           | 12                                                             |
| 58               | Ecuador | Freshwater Fish                 | 2003           | 3                                                              |
| 58               | Ecuador | Fruits - Excluding Wine         | 2003           | 247                                                            |
| 58               | Ecuador | Fruits, Other                   | 2003           | 20                                                             |
| 58               | Ecuador | Grand Total                     | 2003           | 2,261                                                          |
| 58               | Ecuador | Grapes and products (excl wine) | 2003           | 3                                                              |
| 58               | Ecuador | Groundnuts (Shelled Eq)         | 2003           | 6                                                              |
| 58               | Ecuador | Honey                           | 2003           | 1                                                              |
| 58               | Ecuador | Maize and products              | 2003           | 33                                                             |
| 58               | Ecuador | Maize Germ Oil                  | 2003           | 2                                                              |
| 58               | Ecuador | Marine Fish, Other              | 2003           | 2                                                              |
| 58               | Ecuador | Meat                            | 2003           | 209                                                            |
| 58               | Ecuador | Meat, Other                     | 2003           | 2                                                              |
| 58               | Ecuador | Milk - Excluding Butter         | 2003           | 266                                                            |
| 58               | Ecuador | Miscellaneous                   | 2003           | 3                                                              |
| 58               | Ecuador | Mutton & Goat Meat              | 2003           | 6                                                              |
| 58               | Ecuador | Oats                            | 2003           | 9                                                              |
| 58               | Ecuador | Offals                          | 2003           | 10                                                             |
| 58               | Ecuador | Oilcrops                        | 2003           | 9                                                              |
| 58               | Ecuador | Olive Oil                       | 2003           | 1                                                              |
| 58               | Ecuador | Oranges, Mandarines             | 2003           | 6                                                              |
| 58               | Ecuador | Palm Oil                        | 2003           | 214                                                            |
| 58               | Ecuador | Palmkernel Oil                  | 2003           | 7                                                              |
| 58               | Ecuador | Peas                            | 2003           | 6                                                              |
| 58               | Ecuador | Pelagic Fish                    | 2003           | 4                                                              |
| 58               | Ecuador | Pepper                          | 2003           | 1                                                              |
| 58               | Ecuador | Pigmeat                         | 2003           | 39                                                             |
| 58               | Ecuador | Pineapples and products         | 2003           | 1                                                              |
| 58               | Ecuador | Plantains                       | 2003           | 89                                                             |
| 58               | Ecuador | Potatoes and products           | 2003           | 47                                                             |
| 58               | Ecuador | Poultry Meat                    | 2003           | 69                                                             |
| 58               | Ecuador | Pulses                          | 2003           | 22                                                             |
| 58               | Ecuador | Pulses, Other and products      | 2003           | 15                                                             |
| 58               | Ecuador | Rice (Milled Equivalent)        | 2003           | 430                                                            |
| 58               | Ecuador | Soyabean Oil                    | 2003           | 114                                                            |
| 58               | Ecuador | Spices                          | 2003           | 2                                                              |
| 58               | Ecuador | Spices, Other                   | 2003           | 1                                                              |
| 58               | Ecuador | Starchy Roots                   | 2003           | 62                                                             |
| 58               | Ecuador | Stimulants                      | 2003           | 5                                                              |
| 58               | Ecuador | Sugar & Sweeteners              | 2003           | 178                                                            |
| 58               | Ecuador | Sugar (Raw Equivalent)          | 2003           | 168                                                            |
| 58               | Ecuador | Sunflowerseed Oil               | 2003           | 2                                                              |
| 58               | Ecuador | Sweeteners, Other               | 2003           | 10                                                             |
| 58               | Ecuador | Tomatoes and products           | 2003           | 2                                                              |
| 58               | Ecuador | Treenuts                        | 2003           | 1                                                              |
| 58               | Ecuador | Vegetable Oils                  | 2003           | 344                                                            |
| 58               | Ecuador | Vegetables                      | 2003           | 15                                                             |
| 58               | Ecuador | Vegetables, Other               | 2003           | 13                                                             |
| 58               | Ecuador | Vegetal Products                | 2003           | 1,648                                                          |
| 58               | Ecuador | Wheat and products              | 2003           | 254                                                            |
| 58               | Ecuador | Wine                            | 2003           | 1                                                              |
| 58               | Ecuador | Alcoholic Beverages             | 2004           | 30                                                             |
| 58               | Ecuador | Animal fats                     | 2004           | 108                                                            |
| 58               | Ecuador | Animal Products                 | 2004           | 628                                                            |
| 58               | Ecuador | Apples and products             | 2004           | 5                                                              |
| 58               | Ecuador | Bananas                         | 2004           | 137                                                            |
| 58               | Ecuador | Barley and products             | 2004           | 3                                                              |
| 58               | Ecuador | Beans                           | 2004           | 2                                                              |
| 58               | Ecuador | Beer                            | 2004           | 20                                                             |
| 58               | Ecuador | Beverages, Alcoholic            | 2004           | 9                                                              |

Dietary calcium and zinc deficiency risks are decreasing but remain prevalent

| FAO Country code | Country | Food item                       | Reference year | Net energy supply (kcal capita <sup>-1</sup> d <sup>-1</sup> ) |
|------------------|---------|---------------------------------|----------------|----------------------------------------------------------------|
| 58               | Ecuador | Bovine Meat                     | 2004           | 91                                                             |
| 58               | Ecuador | Butter, Ghee                    | 2004           | 28                                                             |
| 58               | Ecuador | Cassava and products            | 2004           | 12                                                             |
| 58               | Ecuador | Cereals - Excluding Beer        | 2004           | 714                                                            |
| 58               | Ecuador | Citrus, Other                   | 2004           | 1                                                              |
| 58               | Ecuador | Cocoa Beans and products        | 2004           | 5                                                              |
| 58               | Ecuador | Coconut Oil                     | 2004           | 4                                                              |
| 58               | Ecuador | Coconuts - Incl Copra           | 2004           | 2                                                              |
| 58               | Ecuador | Crustaceans                     | 2004           | 2                                                              |
| 58               | Ecuador | Eggs                            | 2004           | 17                                                             |
| 58               | Ecuador | Fats, Animals, Raw              | 2004           | 80                                                             |
| 58               | Ecuador | Fish, Seafood                   | 2004           | 11                                                             |
| 58               | Ecuador | Freshwater Fish                 | 2004           | 2                                                              |
| 58               | Ecuador | Fruits - Excluding Wine         | 2004           | 262                                                            |
| 58               | Ecuador | Fruits, Other                   | 2004           | 21                                                             |
| 58               | Ecuador | Grand Total                     | 2004           | 2,301                                                          |
| 58               | Ecuador | Grapes and products (excl wine) | 2004           | 3                                                              |
| 58               | Ecuador | Groundnuts (Shelled Eq)         | 2004           | 13                                                             |
| 58               | Ecuador | Honey                           | 2004           | 1                                                              |
| 58               | Ecuador | Maize and products              | 2004           | 33                                                             |
| 58               | Ecuador | Maize Germ Oil                  | 2004           | 2                                                              |
| 58               | Ecuador | Marine Fish, Other              | 2004           | 2                                                              |
| 58               | Ecuador | Meat                            | 2004           | 205                                                            |
| 58               | Ecuador | Meat, Other                     | 2004           | 2                                                              |
| 58               | Ecuador | Milk - Excluding Butter         | 2004           | 277                                                            |
| 58               | Ecuador | Miscellaneous                   | 2004           | 4                                                              |
| 58               | Ecuador | Mutton & Goat Meat              | 2004           | 5                                                              |
| 58               | Ecuador | Oats                            | 2004           | 20                                                             |
| 58               | Ecuador | Offals                          | 2004           | 10                                                             |
| 58               | Ecuador | Oilcrops                        | 2004           | 15                                                             |
| 58               | Ecuador | Olive Oil                       | 2004           | 1                                                              |
| 58               | Ecuador | Oranges, Mandarines             | 2004           | 8                                                              |
| 58               | Ecuador | Palm Oil                        | 2004           | 217                                                            |
| 58               | Ecuador | Palmkernel Oil                  | 2004           | 10                                                             |
| 58               | Ecuador | Peas                            | 2004           | 5                                                              |
| 58               | Ecuador | Pelagic Fish                    | 2004           | 4                                                              |
| 58               | Ecuador | Pepper                          | 2004           | 1                                                              |
| 58               | Ecuador | Pigmeat                         | 2004           | 41                                                             |
| 58               | Ecuador | Plantains                       | 2004           | 87                                                             |
| 58               | Ecuador | Potatoes and products           | 2004           | 57                                                             |
| 58               | Ecuador | Poultry Meat                    | 2004           | 67                                                             |
| 58               | Ecuador | Pulses                          | 2004           | 22                                                             |
| 58               | Ecuador | Pulses, Other and products      | 2004           | 15                                                             |
| 58               | Ecuador | Rice (Milled Equivalent)        | 2004           | 397                                                            |
| 58               | Ecuador | Soyabean Oil                    | 2004           | 113                                                            |
| 58               | Ecuador | Spices                          | 2004           | 3                                                              |
| 58               | Ecuador | Spices, Other                   | 2004           | 2                                                              |
| 58               | Ecuador | Starchy Roots                   | 2004           | 70                                                             |
| 58               | Ecuador | Stimulants                      | 2004           | 5                                                              |
| 58               | Ecuador | Sugar & Sweeteners              | 2004           | 174                                                            |
| 58               | Ecuador | Sugar (Raw Equivalent)          | 2004           | 161                                                            |
| 58               | Ecuador | Sunflowerseed Oil               | 2004           | 5                                                              |
| 58               | Ecuador | Sweeteners, Other               | 2004           | 12                                                             |
| 58               | Ecuador | Tomatoes and products           | 2004           | 4                                                              |
| 58               | Ecuador | Treenuts                        | 2004           | 1                                                              |
| 58               | Ecuador | Vegetable Oils                  | 2004           | 353                                                            |
| 58               | Ecuador | Vegetables                      | 2004           | 21                                                             |
| 58               | Ecuador | Vegetables, Other               | 2004           | 16                                                             |
| 58               | Ecuador | Vegetal Products                | 2004           | 1,673                                                          |
| 58               | Ecuador | Wheat and products              | 2004           | 261                                                            |
| 58               | Ecuador | Wine                            | 2004           | 1                                                              |
| 58               | Ecuador | Alcoholic Beverages             | 2005           | 30                                                             |
| 58               | Ecuador | Animal fats                     | 2005           | 102                                                            |
| 58               | Ecuador | Animal Products                 | 2005           | 630                                                            |
| 58               | Ecuador | Apples and products             | 2005           | 6                                                              |
| 58               | Ecuador | Bananas                         | 2005           | 122                                                            |
| 58               | Ecuador | Barley and products             | 2005           | 3                                                              |
| 58               | Ecuador | Beans                           | 2005           | 3                                                              |
| 58               | Ecuador | Beer                            | 2005           | 21                                                             |
| 58               | Ecuador | Beverages, Alcoholic            | 2005           | 8                                                              |
| 58               | Ecuador | Bovine Meat                     | 2005           | 90                                                             |
| 58               | Ecuador | Butter, Ghee                    | 2005           | 28                                                             |
| 58               | Ecuador | Cassava and products            | 2005           | 25                                                             |
| 58               | Ecuador | Cereals - Excluding Beer        | 2005           | 751                                                            |
| 58               | Ecuador | Citrus, Other                   | 2005           | 1                                                              |
| 58               | Ecuador | Cocoa Beans and products        | 2005           | 4                                                              |
| 58               | Ecuador | Coconut Oil                     | 2005           | 3                                                              |
| 58               | Ecuador | Coconuts - Incl Copra           | 2005           | 2                                                              |
| 58               | Ecuador | Crustaceans                     | 2005           | 2                                                              |
| 58               | Ecuador | Eggs                            | 2005           | 17                                                             |
| 58               | Ecuador | Fats, Animals, Raw              | 2005           | 74                                                             |
| 58               | Ecuador | Fish, Seafood                   | 2005           | 12                                                             |
| 58               | Ecuador | Freshwater Fish                 | 2005           | 2                                                              |
| 58               | Ecuador | Fruits - Excluding Wine         | 2005           | 234                                                            |
| 58               | Ecuador | Fruits, Other                   | 2005           | 25                                                             |
| 58               | Ecuador | Grand Total                     | 2005           | 2,342                                                          |
| 58               | Ecuador | Grapes and products (excl wine) | 2005           | 2                                                              |
| 58               | Ecuador | Groundnuts (Shelled Eq)         | 2005           | 11                                                             |
| 58               | Ecuador | Honey                           | 2005           | 1                                                              |
| 58               | Ecuador | Maize and products              | 2005           | 34                                                             |
| 58               | Ecuador | Maize Germ Oil                  | 2005           | 2                                                              |
| 58               | Ecuador | Marine Fish, Other              | 2005           | 1                                                              |
| 58               | Ecuador | Meat                            | 2005           | 203                                                            |
| 58               | Ecuador | Meat, Other                     | 2005           | 2                                                              |
| 58               | Ecuador | Milk - Excluding Butter         | 2005           | 286                                                            |
| 58               | Ecuador | Miscellaneous                   | 2005           | 4                                                              |
| 58               | Ecuador | Mutton & Goat Meat              | 2005           | 4                                                              |

Dietary calcium and zinc deficiency risks are decreasing but remain prevalent

| FAO Country code | Country | Food item                       | Reference year | Net energy supply (kcal capita <sup>-1</sup> d <sup>-1</sup> ) |
|------------------|---------|---------------------------------|----------------|----------------------------------------------------------------|
| 58               | Ecuador | Oats                            | 2005           | 8                                                              |
| 58               | Ecuador | Offals                          | 2005           | 9                                                              |
| 58               | Ecuador | Oilcrops                        | 2005           | 13                                                             |
| 58               | Ecuador | Olive Oil                       | 2005           | 1                                                              |
| 58               | Ecuador | Oranges, Mandarines             | 2005           | 5                                                              |
| 58               | Ecuador | Palm Oil                        | 2005           | 230                                                            |
| 58               | Ecuador | Palmkernel Oil                  | 2005           | 8                                                              |
| 58               | Ecuador | Peas                            | 2005           | 5                                                              |
| 58               | Ecuador | Pelagic Fish                    | 2005           | 6                                                              |
| 58               | Ecuador | Pigmeat                         | 2005           | 40                                                             |
| 58               | Ecuador | Pineapples and products         | 2005           | 1                                                              |
| 58               | Ecuador | Plantains                       | 2005           | 71                                                             |
| 58               | Ecuador | Potatoes and products           | 2005           | 53                                                             |
| 58               | Ecuador | Poultry Meat                    | 2005           | 66                                                             |
| 58               | Ecuador | Pulses                          | 2005           | 25                                                             |
| 58               | Ecuador | Pulses, Other and products      | 2005           | 18                                                             |
| 58               | Ecuador | Rice (Milled Equivalent)        | 2005           | 428                                                            |
| 58               | Ecuador | Soyabean Oil                    | 2005           | 120                                                            |
| 58               | Ecuador | Spices                          | 2005           | 2                                                              |
| 58               | Ecuador | Spices, Other                   | 2005           | 2                                                              |
| 58               | Ecuador | Starchy Roots                   | 2005           | 78                                                             |
| 58               | Ecuador | Stimulants                      | 2005           | 5                                                              |
| 58               | Ecuador | Sugar & Sweeteners              | 2005           | 175                                                            |
| 58               | Ecuador | Sugar (Raw Equivalent)          | 2005           | 164                                                            |
| 58               | Ecuador | Sunflowerseed Oil               | 2005           | 10                                                             |
| 58               | Ecuador | Sweet potatoes                  | 2005           | 1                                                              |
| 58               | Ecuador | Sweeteners, Other               | 2005           | 11                                                             |
| 58               | Ecuador | Tomatoes and products           | 2005           | 3                                                              |
| 58               | Ecuador | Treenuts                        | 2005           | 1                                                              |
| 58               | Ecuador | Vegetable Oils                  | 2005           | 374                                                            |
| 58               | Ecuador | Vegetables                      | 2005           | 21                                                             |
| 58               | Ecuador | Vegetables, Other               | 2005           | 17                                                             |
| 58               | Ecuador | Vegetal Products                | 2005           | 1,712                                                          |
| 58               | Ecuador | Wheat and products              | 2005           | 277                                                            |
| 58               | Ecuador | Wine                            | 2005           | 1                                                              |
| 58               | Ecuador | Alcoholic Beverages             | 2006           | 31                                                             |
| 58               | Ecuador | Animal fats                     | 2006           | 103                                                            |
| 58               | Ecuador | Animal Products                 | 2006           | 665                                                            |
| 58               | Ecuador | Apples and products             | 2006           | 6                                                              |
| 58               | Ecuador | Bananas                         | 2006           | 107                                                            |
| 58               | Ecuador | Barley and products             | 2006           | 2                                                              |
| 58               | Ecuador | Beans                           | 2006           | 2                                                              |
| 58               | Ecuador | Beer                            | 2006           | 22                                                             |
| 58               | Ecuador | Beverages, Alcoholic            | 2006           | 8                                                              |
| 58               | Ecuador | Bovine Meat                     | 2006           | 89                                                             |
| 58               | Ecuador | Butter, Ghee                    | 2006           | 29                                                             |
| 58               | Ecuador | Cassava and products            | 2006           | 10                                                             |
| 58               | Ecuador | Cereals - Excluding Beer        | 2006           | 754                                                            |
| 58               | Ecuador | Citrus, Other                   | 2006           | 1                                                              |
| 58               | Ecuador | Cocoa Beans and products        | 2006           | 4                                                              |
| 58               | Ecuador | Coconut Oil                     | 2006           | 3                                                              |
| 58               | Ecuador | Coconuts - Incl Copra           | 2006           | 2                                                              |
| 58               | Ecuador | Cottonseed Oil                  | 2006           | 1                                                              |
| 58               | Ecuador | Crustaceans                     | 2006           | 3                                                              |
| 58               | Ecuador | Demersal Fish                   | 2006           | 1                                                              |
| 58               | Ecuador | Eggs                            | 2006           | 18                                                             |
| 58               | Ecuador | Fats, Animals, Raw              | 2006           | 74                                                             |
| 58               | Ecuador | Fish, Seafood                   | 2006           | 12                                                             |
| 58               | Ecuador | Freshwater Fish                 | 2006           | 2                                                              |
| 58               | Ecuador | Fruits - Excluding Wine         | 2006           | 215                                                            |
| 58               | Ecuador | Fruits, Other                   | 2006           | 24                                                             |
| 58               | Ecuador | Grand Total                     | 2006           | 2,314                                                          |
| 58               | Ecuador | Grapes and products (excl wine) | 2006           | 2                                                              |
| 58               | Ecuador | Groundnuts (Shelled Eq)         | 2006           | 11                                                             |
| 58               | Ecuador | Honey                           | 2006           | 1                                                              |
| 58               | Ecuador | Maize and products              | 2006           | 35                                                             |
| 58               | Ecuador | Maize Germ Oil                  | 2006           | 2                                                              |
| 58               | Ecuador | Marine Fish, Other              | 2006           | 1                                                              |
| 58               | Ecuador | Meat                            | 2006           | 228                                                            |
| 58               | Ecuador | Meat, Other                     | 2006           | 2                                                              |
| 58               | Ecuador | Milk - Excluding Butter         | 2006           | 295                                                            |
| 58               | Ecuador | Miscellaneous                   | 2006           | 4                                                              |
| 58               | Ecuador | Mutton & Goat Meat              | 2006           | 4                                                              |
| 58               | Ecuador | Oats                            | 2006           | 15                                                             |
| 58               | Ecuador | Offals                          | 2006           | 9                                                              |
| 58               | Ecuador | Oilcrops                        | 2006           | 13                                                             |
| 58               | Ecuador | Olive Oil                       | 2006           | 1                                                              |
| 58               | Ecuador | Oranges, Mandarines             | 2006           | 4                                                              |
| 58               | Ecuador | Palm Oil                        | 2006           | 216                                                            |
| 58               | Ecuador | Palmkernel Oil                  | 2006           | 10                                                             |
| 58               | Ecuador | Peas                            | 2006           | 4                                                              |
| 58               | Ecuador | Pelagic Fish                    | 2006           | 6                                                              |
| 58               | Ecuador | Pepper                          | 2006           | 1                                                              |
| 58               | Ecuador | Pigmeat                         | 2006           | 40                                                             |
| 58               | Ecuador | Plantains                       | 2006           | 70                                                             |
| 58               | Ecuador | Potatoes and products           | 2006           | 44                                                             |
| 58               | Ecuador | Poultry Meat                    | 2006           | 93                                                             |
| 58               | Ecuador | Pulses                          | 2006           | 22                                                             |
| 58               | Ecuador | Pulses, Other and products      | 2006           | 15                                                             |
| 58               | Ecuador | Rice (Milled Equivalent)        | 2006           | 421                                                            |
| 58               | Ecuador | Soyabean Oil                    | 2006           | 110                                                            |
| 58               | Ecuador | Spices                          | 2006           | 3                                                              |
| 58               | Ecuador | Spices, Other                   | 2006           | 2                                                              |
| 58               | Ecuador | Starchy Roots                   | 2006           | 55                                                             |
| 58               | Ecuador | Stimulants                      | 2006           | 4                                                              |
| 58               | Ecuador | Sugar & Sweeteners              | 2006           | 176                                                            |
| 58               | Ecuador | Sugar (Raw Equivalent)          | 2006           | 166                                                            |

Dietary calcium and zinc deficiency risks are decreasing but remain prevalent

| FAO Country code | Country | Food item                       | Reference year | Net energy supply (kcal capita <sup>-1</sup> d <sup>-1</sup> ) |
|------------------|---------|---------------------------------|----------------|----------------------------------------------------------------|
| 58               | Ecuador | Sunflowerseed Oil               | 2006           | 10                                                             |
| 58               | Ecuador | Sweeteners, Other               | 2006           | 9                                                              |
| 58               | Ecuador | Tomatoes and products           | 2006           | 3                                                              |
| 58               | Ecuador | Treenuts                        | 2006           | 1                                                              |
| 58               | Ecuador | Vegetable Oils                  | 2006           | 353                                                            |
| 58               | Ecuador | Vegetables                      | 2006           | 19                                                             |
| 58               | Ecuador | Vegetables, Other               | 2006           | 16                                                             |
| 58               | Ecuador | Vegetal Products                | 2006           | 1,649                                                          |
| 58               | Ecuador | Wheat and products              | 2006           | 279                                                            |
| 58               | Ecuador | Wine                            | 2006           | 1                                                              |
| 58               | Ecuador | Alcoholic Beverages             | 2007           | 39                                                             |
| 58               | Ecuador | Animal fats                     | 2007           | 110                                                            |
| 58               | Ecuador | Animal Products                 | 2007           | 702                                                            |
| 58               | Ecuador | Apples and products             | 2007           | 6                                                              |
| 58               | Ecuador | Bananas                         | 2007           | 96                                                             |
| 58               | Ecuador | Barley and products             | 2007           | 2                                                              |
| 58               | Ecuador | Beans                           | 2007           | 2                                                              |
| 58               | Ecuador | Beer                            | 2007           | 28                                                             |
| 58               | Ecuador | Beverages, Alcoholic            | 2007           | 10                                                             |
| 58               | Ecuador | Bovine Meat                     | 2007           | 97                                                             |
| 58               | Ecuador | Butter, Ghee                    | 2007           | 29                                                             |
| 58               | Ecuador | Cassava and products            | 2007           | 2                                                              |
| 58               | Ecuador | Cereals - Excluding Beer        | 2007           | 741                                                            |
| 58               | Ecuador | Citrus, Other                   | 2007           | 1                                                              |
| 58               | Ecuador | Cocoa Beans and products        | 2007           | 4                                                              |
| 58               | Ecuador | Coconut Oil                     | 2007           | 3                                                              |
| 58               | Ecuador | Coconuts - Incl Copra           | 2007           | 2                                                              |
| 58               | Ecuador | Cottonseed Oil                  | 2007           | 1                                                              |
| 58               | Ecuador | Crustaceans                     | 2007           | 2                                                              |
| 58               | Ecuador | Eggs                            | 2007           | 19                                                             |
| 58               | Ecuador | Fats, Animals, Raw              | 2007           | 81                                                             |
| 58               | Ecuador | Fish, Seafood                   | 2007           | 13                                                             |
| 58               | Ecuador | Freshwater Fish                 | 2007           | 1                                                              |
| 58               | Ecuador | Fruits - Excluding Wine         | 2007           | 200                                                            |
| 58               | Ecuador | Fruits, Other                   | 2007           | 24                                                             |
| 58               | Ecuador | Grand Total                     | 2007           | 2,331                                                          |
| 58               | Ecuador | Grapes and products (excl wine) | 2007           | 2                                                              |
| 58               | Ecuador | Groundnuts (Shelled Eq)         | 2007           | 11                                                             |
| 58               | Ecuador | Honey                           | 2007           | 1                                                              |
| 58               | Ecuador | Maize and products              | 2007           | 33                                                             |
| 58               | Ecuador | Maize Germ Oil                  | 2007           | 2                                                              |
| 58               | Ecuador | Marine Fish, Other              | 2007           | 1                                                              |
| 58               | Ecuador | Meat                            | 2007           | 250                                                            |
| 58               | Ecuador | Meat, Other                     | 2007           | 2                                                              |
| 58               | Ecuador | Milk - Excluding Butter         | 2007           | 301                                                            |
| 58               | Ecuador | Miscellaneous                   | 2007           | 4                                                              |
| 58               | Ecuador | Mutton & Goat Meat              | 2007           | 3                                                              |
| 58               | Ecuador | Oats                            | 2007           | 21                                                             |
| 58               | Ecuador | Offals                          | 2007           | 10                                                             |
| 58               | Ecuador | Oilcrops                        | 2007           | 13                                                             |
| 58               | Ecuador | Olive Oil                       | 2007           | 2                                                              |
| 58               | Ecuador | Oranges, Mandarines             | 2007           | 4                                                              |
| 58               | Ecuador | Palm Oil                        | 2007           | 218                                                            |
| 58               | Ecuador | Palmkernel Oil                  | 2007           | 17                                                             |
| 58               | Ecuador | Peas                            | 2007           | 3                                                              |
| 58               | Ecuador | Pelagic Fish                    | 2007           | 8                                                              |
| 58               | Ecuador | Pepper                          | 2007           | 1                                                              |
| 58               | Ecuador | Pigmeat                         | 2007           | 45                                                             |
| 58               | Ecuador | Plantains                       | 2007           | 65                                                             |
| 58               | Ecuador | Potatoes and products           | 2007           | 38                                                             |
| 58               | Ecuador | Poultry Meat                    | 2007           | 102                                                            |
| 58               | Ecuador | Pulses                          | 2007           | 23                                                             |
| 58               | Ecuador | Pulses, Other and products      | 2007           | 18                                                             |
| 58               | Ecuador | Rice (Milled Equivalent)        | 2007           | 412                                                            |
| 58               | Ecuador | Soyabean Oil                    | 2007           | 105                                                            |
| 58               | Ecuador | Spices                          | 2007           | 3                                                              |
| 58               | Ecuador | Spices, Other                   | 2007           | 2                                                              |
| 58               | Ecuador | Starchy Roots                   | 2007           | 40                                                             |
| 58               | Ecuador | Stimulants                      | 2007           | 4                                                              |
| 58               | Ecuador | Sugar & Sweeteners              | 2007           | 179                                                            |
| 58               | Ecuador | Sugar (Raw Equivalent)          | 2007           | 167                                                            |
| 58               | Ecuador | Sunflowerseed Oil               | 2007           | 16                                                             |
| 58               | Ecuador | Sweeteners, Other               | 2007           | 11                                                             |
| 58               | Ecuador | Tomatoes and products           | 2007           | 3                                                              |
| 58               | Ecuador | Treenuts                        | 2007           | 1                                                              |
| 58               | Ecuador | Vegetable Oils                  | 2007           | 363                                                            |
| 58               | Ecuador | Vegetables                      | 2007           | 18                                                             |
| 58               | Ecuador | Vegetables, Other               | 2007           | 15                                                             |
| 58               | Ecuador | Vegetal Products                | 2007           | 1,629                                                          |
| 58               | Ecuador | Wheat and products              | 2007           | 272                                                            |
| 58               | Ecuador | Wine                            | 2007           | 1                                                              |
| 58               | Ecuador | Alcoholic Beverages             | 2008           | 40                                                             |
| 58               | Ecuador | Animal fats                     | 2008           | 117                                                            |
| 58               | Ecuador | Animal Products                 | 2008           | 721                                                            |
| 58               | Ecuador | Apples and products             | 2008           | 5                                                              |
| 58               | Ecuador | Bananas                         | 2008           | 106                                                            |
| 58               | Ecuador | Barley and products             | 2008           | 2                                                              |
| 58               | Ecuador | Beans                           | 2008           | 4                                                              |
| 58               | Ecuador | Beer                            | 2008           | 29                                                             |
| 58               | Ecuador | Beverages, Alcoholic            | 2008           | 10                                                             |
| 58               | Ecuador | Bovine Meat                     | 2008           | 101                                                            |
| 58               | Ecuador | Butter, Ghee                    | 2008           | 29                                                             |
| 58               | Ecuador | Cassava and products            | 2008           | 13                                                             |
| 58               | Ecuador | Cereals - Excluding Beer        | 2008           | 736                                                            |
| 58               | Ecuador | Citrus, Other                   | 2008           | 1                                                              |
| 58               | Ecuador | Cocoa Beans and products        | 2008           | 5                                                              |
| 58               | Ecuador | Coconut Oil                     | 2008           | 3                                                              |

## Dietary calcium and zinc deficiency risks are decreasing but remain prevalent

| FAO Country code | Country | Food item                       | Reference year | Net energy supply (kcal capita <sup>-1</sup> d <sup>-1</sup> ) |
|------------------|---------|---------------------------------|----------------|----------------------------------------------------------------|
| 58               | Ecuador | Coconuts - Incl Copra           | 2008           | 2                                                              |
| 58               | Ecuador | Cottonseed Oil                  | 2008           | 1                                                              |
| 58               | Ecuador | Crustaceans                     | 2008           | 3                                                              |
| 58               | Ecuador | Demersal Fish                   | 2008           | 1                                                              |
| 58               | Ecuador | Eggs                            | 2008           | 19                                                             |
| 58               | Ecuador | Fats, Animals, Raw              | 2008           | 87                                                             |
| 58               | Ecuador | Fish, Seafood                   | 2008           | 14                                                             |
| 58               | Ecuador | Freshwater Fish                 | 2008           | 2                                                              |
| 58               | Ecuador | Fruits - Excluding Wine         | 2008           | 205                                                            |
| 58               | Ecuador | Fruits, Other                   | 2008           | 29                                                             |
| 58               | Ecuador | Grand Total                     | 2008           | 2,381                                                          |
| 58               | Ecuador | Grapes and products (excl wine) | 2008           | 3                                                              |
| 58               | Ecuador | Groundnuts (Shelled Eq)         | 2008           | 11                                                             |
| 58               | Ecuador | Honey                           | 2008           | 1                                                              |
| 58               | Ecuador | Maize and products              | 2008           | 31                                                             |
| 58               | Ecuador | Maize Germ Oil                  | 2008           | 2                                                              |
| 58               | Ecuador | Meat                            | 2008           | 256                                                            |
| 58               | Ecuador | Meat, Other                     | 2008           | 2                                                              |
| 58               | Ecuador | Milk - Excluding Butter         | 2008           | 304                                                            |
| 58               | Ecuador | Miscellaneous                   | 2008           | 5                                                              |
| 58               | Ecuador | Mutton & Goat Meat              | 2008           | 3                                                              |
| 58               | Ecuador | Oats                            | 2008           | 10                                                             |
| 58               | Ecuador | Offals                          | 2008           | 10                                                             |
| 58               | Ecuador | Oilcrops                        | 2008           | 14                                                             |
| 58               | Ecuador | Olive Oil                       | 2008           | 2                                                              |
| 58               | Ecuador | Oranges, Mandarines             | 2008           | 4                                                              |
| 58               | Ecuador | Palm Oil                        | 2008           | 218                                                            |
| 58               | Ecuador | Palmkernel Oil                  | 2008           | 18                                                             |
| 58               | Ecuador | Peas                            | 2008           | 4                                                              |
| 58               | Ecuador | Pelagic Fish                    | 2008           | 8                                                              |
| 58               | Ecuador | Pepper                          | 2008           | 1                                                              |
| 58               | Ecuador | Pigmeat                         | 2008           | 50                                                             |
| 58               | Ecuador | Pineapples and products         | 2008           | 1                                                              |
| 58               | Ecuador | Plantains                       | 2008           | 56                                                             |
| 58               | Ecuador | Potatoes and products           | 2008           | 31                                                             |
| 58               | Ecuador | Poultry Meat                    | 2008           | 99                                                             |
| 58               | Ecuador | Pulses                          | 2008           | 25                                                             |
| 58               | Ecuador | Pulses, Other and products      | 2008           | 17                                                             |
| 58               | Ecuador | Rice (Milled Equivalent)        | 2008           | 412                                                            |
| 58               | Ecuador | Soyabean Oil                    | 2008           | 121                                                            |
| 58               | Ecuador | Spices                          | 2008           | 3                                                              |
| 58               | Ecuador | Spices, Other                   | 2008           | 2                                                              |
| 58               | Ecuador | Starchy Roots                   | 2008           | 44                                                             |
| 58               | Ecuador | Stimulants                      | 2008           | 5                                                              |
| 58               | Ecuador | Sugar & Sweeteners              | 2008           | 179                                                            |
| 58               | Ecuador | Sugar (Raw Equivalent)          | 2008           | 168                                                            |
| 58               | Ecuador | Sunflowerseed Oil               | 2008           | 19                                                             |
| 58               | Ecuador | Sweet potatoes                  | 2008           | 1                                                              |
| 58               | Ecuador | Sweeteners, Other               | 2008           | 10                                                             |
| 58               | Ecuador | Tomatoes and products           | 2008           | 2                                                              |
| 58               | Ecuador | Treenuts                        | 2008           | 1                                                              |
| 58               | Ecuador | Vegetable Oils                  | 2008           | 383                                                            |
| 58               | Ecuador | Vegetables                      | 2008           | 20                                                             |
| 58               | Ecuador | Vegetables, Other               | 2008           | 18                                                             |
| 58               | Ecuador | Vegetal Products                | 2008           | 1,661                                                          |
| 58               | Ecuador | Wheat and products              | 2008           | 281                                                            |
| 58               | Ecuador | Wine                            | 2008           | 1                                                              |
| 58               | Ecuador | Alcoholic Beverages             | 2009           | 33                                                             |
| 58               | Ecuador | Animal fats                     | 2009           | 108                                                            |
| 58               | Ecuador | Animal Products                 | 2009           | 706                                                            |
| 58               | Ecuador | Apples and products             | 2009           | 5                                                              |
| 58               | Ecuador | Bananas                         | 2009           | 121                                                            |
| 58               | Ecuador | Barley and products             | 2009           | 2                                                              |
| 58               | Ecuador | Beans                           | 2009           | 3                                                              |
| 58               | Ecuador | Beer                            | 2009           | 24                                                             |
| 58               | Ecuador | Beverages, Alcoholic            | 2009           | 8                                                              |
| 58               | Ecuador | Bovine Meat                     | 2009           | 107                                                            |
| 58               | Ecuador | Butter, Ghee                    | 2009           | 30                                                             |
| 58               | Ecuador | Cassava and products            | 2009           | 8                                                              |
| 58               | Ecuador | Cereals - Excluding Beer        | 2009           | 749                                                            |
| 58               | Ecuador | Citrus, Other                   | 2009           | 1                                                              |
| 58               | Ecuador | Cocoa Beans and products        | 2009           | 4                                                              |
| 58               | Ecuador | Coconut Oil                     | 2009           | 2                                                              |
| 58               | Ecuador | Coconuts - Incl Copra           | 2009           | 1                                                              |
| 58               | Ecuador | Cottonseed Oil                  | 2009           | 1                                                              |
| 58               | Ecuador | Crustaceans                     | 2009           | 4                                                              |
| 58               | Ecuador | Demersal Fish                   | 2009           | 1                                                              |
| 58               | Ecuador | Eggs                            | 2009           | 20                                                             |
| 58               | Ecuador | Fats, Animals, Raw              | 2009           | 77                                                             |
| 58               | Ecuador | Fish, Seafood                   | 2009           | 13                                                             |
| 58               | Ecuador | Freshwater Fish                 | 2009           | 1                                                              |
| 58               | Ecuador | Fruits - Excluding Wine         | 2009           | 227                                                            |
| 58               | Ecuador | Fruits, Other                   | 2009           | 29                                                             |
| 58               | Ecuador | Grand Total                     | 2009           | 2,375                                                          |
| 58               | Ecuador | Grapes and products (excl wine) | 2009           | 2                                                              |
| 58               | Ecuador | Groundnuts (Shelled Eq)         | 2009           | 12                                                             |
| 58               | Ecuador | Honey                           | 2009           | 1                                                              |
| 58               | Ecuador | Maize and products              | 2009           | 33                                                             |
| 58               | Ecuador | Maize Germ Oil                  | 2009           | 1                                                              |
| 58               | Ecuador | Meat                            | 2009           | 245                                                            |
| 58               | Ecuador | Meat, Other                     | 2009           | 2                                                              |
| 58               | Ecuador | Milk - Excluding Butter         | 2009           | 309                                                            |
| 58               | Ecuador | Miscellaneous                   | 2009           | 4                                                              |
| 58               | Ecuador | Mutton & Goat Meat              | 2009           | 3                                                              |
| 58               | Ecuador | Oats                            | 2009           | 13                                                             |
| 58               | Ecuador | Offals                          | 2009           | 11                                                             |
| 58               | Ecuador | Oilcrops                        | 2009           | 14                                                             |

Dietary calcium and zinc deficiency risks are decreasing but remain prevalent

| FAO Country code | Country | Food item                       | Reference year | Net energy supply (kcal capita <sup>-1</sup> d <sup>-1</sup> ) |
|------------------|---------|---------------------------------|----------------|----------------------------------------------------------------|
| 58               | Ecuador | Olive Oil                       | 2009           | 2                                                              |
| 58               | Ecuador | Onions                          | 2009           | 2                                                              |
| 58               | Ecuador | Oranges, Mandarines             | 2009           | 4                                                              |
| 58               | Ecuador | Palm Oil                        | 2009           | 217                                                            |
| 58               | Ecuador | Palmkernel Oil                  | 2009           | 12                                                             |
| 58               | Ecuador | Peas                            | 2009           | 3                                                              |
| 58               | Ecuador | Pelagic Fish                    | 2009           | 7                                                              |
| 58               | Ecuador | Pepper                          | 2009           | 1                                                              |
| 58               | Ecuador | Pigmeat                         | 2009           | 42                                                             |
| 58               | Ecuador | Pineapples and products         | 2009           | 1                                                              |
| 58               | Ecuador | Plantains                       | 2009           | 65                                                             |
| 58               | Ecuador | Potatoes and products           | 2009           | 32                                                             |
| 58               | Ecuador | Poultry Meat                    | 2009           | 91                                                             |
| 58               | Ecuador | Pulses                          | 2009           | 23                                                             |
| 58               | Ecuador | Pulses, Other and products      | 2009           | 16                                                             |
| 58               | Ecuador | Rice (Milled Equivalent)        | 2009           | 416                                                            |
| 58               | Ecuador | Soyabean Oil                    | 2009           | 122                                                            |
| 58               | Ecuador | Spices                          | 2009           | 3                                                              |
| 58               | Ecuador | Spices, Other                   | 2009           | 2                                                              |
| 58               | Ecuador | Starchy Roots                   | 2009           | 41                                                             |
| 58               | Ecuador | Stimulants                      | 2009           | 4                                                              |
| 58               | Ecuador | Sugar & Sweeteners              | 2009           | 179                                                            |
| 58               | Ecuador | Sugar (Raw Equivalent)          | 2009           | 168                                                            |
| 58               | Ecuador | Sunflowerseed Oil               | 2009           | 11                                                             |
| 58               | Ecuador | Sweeteners, Other               | 2009           | 11                                                             |
| 58               | Ecuador | Tomatoes and products           | 2009           | 2                                                              |
| 58               | Ecuador | Treenuts                        | 2009           | 1                                                              |
| 58               | Ecuador | Vegetable Oils                  | 2009           | 368                                                            |
| 58               | Ecuador | Vegetables                      | 2009           | 22                                                             |
| 58               | Ecuador | Vegetables, Other               | 2009           | 18                                                             |
| 58               | Ecuador | Vegetal Products                | 2009           | 1,669                                                          |
| 58               | Ecuador | Wheat and products              | 2009           | 285                                                            |
| 58               | Ecuador | Wine                            | 2009           | 1                                                              |
| 58               | Ecuador | Alcoholic Beverages             | 2010           | 36                                                             |
| 58               | Ecuador | Animal fats                     | 2010           | 108                                                            |
| 58               | Ecuador | Animal Products                 | 2010           | 717                                                            |
| 58               | Ecuador | Apples and products             | 2010           | 6                                                              |
| 58               | Ecuador | Bananas                         | 2010           | 123                                                            |
| 58               | Ecuador | Barley and products             | 2010           | 2                                                              |
| 58               | Ecuador | Beans                           | 2010           | 4                                                              |
| 58               | Ecuador | Beer                            | 2010           | 26                                                             |
| 58               | Ecuador | Beverages, Alcoholic            | 2010           | 9                                                              |
| 58               | Ecuador | Bovine Meat                     | 2010           | 103                                                            |
| 58               | Ecuador | Butter, Ghee                    | 2010           | 30                                                             |
| 58               | Ecuador | Cassava and products            | 2010           | 8                                                              |
| 58               | Ecuador | Cereals - Excluding Beer        | 2010           | 778                                                            |
| 58               | Ecuador | Citrus, Other                   | 2010           | 1                                                              |
| 58               | Ecuador | Cocoa Beans and products        | 2010           | 4                                                              |
| 58               | Ecuador | Coconut Oil                     | 2010           | 4                                                              |
| 58               | Ecuador | Coconuts - Incl Copra           | 2010           | 1                                                              |
| 58               | Ecuador | Cottonseed Oil                  | 2010           | 1                                                              |
| 58               | Ecuador | Crustaceans                     | 2010           | 4                                                              |
| 58               | Ecuador | Demersal Fish                   | 2010           | 1                                                              |
| 58               | Ecuador | Eggs                            | 2010           | 23                                                             |
| 58               | Ecuador | Fats, Animals, Raw              | 2010           | 78                                                             |
| 58               | Ecuador | Fish, Seafood                   | 2010           | 13                                                             |
| 58               | Ecuador | Freshwater Fish                 | 2010           | 1                                                              |
| 58               | Ecuador | Fruits - Excluding Wine         | 2010           | 236                                                            |
| 58               | Ecuador | Fruits, Other                   | 2010           | 33                                                             |
| 58               | Ecuador | Grand Total                     | 2010           | 2,450                                                          |
| 58               | Ecuador | Grapes and products (excl wine) | 2010           | 3                                                              |
| 58               | Ecuador | Groundnuts (Shelled Eq)         | 2010           | 12                                                             |
| 58               | Ecuador | Honey                           | 2010           | 1                                                              |
| 58               | Ecuador | Maize and products              | 2010           | 42                                                             |
| 58               | Ecuador | Maize Germ Oil                  | 2010           | 1                                                              |
| 58               | Ecuador | Meat                            | 2010           | 249                                                            |
| 58               | Ecuador | Meat, Other                     | 2010           | 2                                                              |
| 58               | Ecuador | Milk - Excluding Butter         | 2010           | 314                                                            |
| 58               | Ecuador | Miscellaneous                   | 2010           | 5                                                              |
| 58               | Ecuador | Mutton & Goat Meat              | 2010           | 2                                                              |
| 58               | Ecuador | Oats                            | 2010           | 12                                                             |
| 58               | Ecuador | Offals                          | 2010           | 10                                                             |
| 58               | Ecuador | Oilcrops                        | 2010           | 15                                                             |
| 58               | Ecuador | Olive Oil                       | 2010           | 2                                                              |
| 58               | Ecuador | Onions                          | 2010           | 2                                                              |
| 58               | Ecuador | Oranges, Mandarines             | 2010           | 4                                                              |
| 58               | Ecuador | Palm Oil                        | 2010           | 218                                                            |
| 58               | Ecuador | Palmkernel Oil                  | 2010           | 9                                                              |
| 58               | Ecuador | Peas                            | 2010           | 3                                                              |
| 58               | Ecuador | Pelagic Fish                    | 2010           | 6                                                              |
| 58               | Ecuador | Pigmeat                         | 2010           | 43                                                             |
| 58               | Ecuador | Pineapples and products         | 2010           | 1                                                              |
| 58               | Ecuador | Plantains                       | 2010           | 65                                                             |
| 58               | Ecuador | Potatoes and products           | 2010           | 44                                                             |
| 58               | Ecuador | Poultry Meat                    | 2010           | 99                                                             |
| 58               | Ecuador | Pulses                          | 2010           | 23                                                             |
| 58               | Ecuador | Pulses, Other and products      | 2010           | 16                                                             |
| 58               | Ecuador | Rice (Milled Equivalent)        | 2010           | 419                                                            |
| 58               | Ecuador | Soyabean Oil                    | 2010           | 123                                                            |
| 58               | Ecuador | Spices                          | 2010           | 2                                                              |
| 58               | Ecuador | Spices, Other                   | 2010           | 2                                                              |
| 58               | Ecuador | Starchy Roots                   | 2010           | 52                                                             |
| 58               | Ecuador | Stimulants                      | 2010           | 5                                                              |
| 58               | Ecuador | Sugar & Sweeteners              | 2010           | 183                                                            |
| 58               | Ecuador | Sugar (Raw Equivalent)          | 2010           | 172                                                            |
| 58               | Ecuador | Sunflowerseed Oil               | 2010           | 18                                                             |
| 58               | Ecuador | Sweet potatoes                  | 2010           | 1                                                              |



## Dietary calcium and zinc deficiency risks are decreasing but remain prevalent

| FAO Country code | Country | Food item                       | Reference year | Net energy supply (kcal capita <sup>-1</sup> d <sup>-1</sup> ) |
|------------------|---------|---------------------------------|----------------|----------------------------------------------------------------|
| 58               | Ecuador | Sweeteners, Other               | 2010           | 11                                                             |
| 58               | Ecuador | Tomatoes and products           | 2010           | 2                                                              |
| 58               | Ecuador | Treenuts                        | 2010           | 1                                                              |
| 58               | Ecuador | Vegetable Oils                  | 2010           | 374                                                            |
| 58               | Ecuador | Vegetables                      | 2010           | 23                                                             |
| 58               | Ecuador | Vegetables, Other               | 2010           | 19                                                             |
| 58               | Ecuador | Vegetal Products                | 2010           | 1,732                                                          |
| 58               | Ecuador | Wheat and products              | 2010           | 302                                                            |
| 58               | Ecuador | Wine                            | 2010           | 1                                                              |
| 58               | Ecuador | Alcoholic Beverages             | 2011           | 34                                                             |
| 58               | Ecuador | Animal fats                     | 2011           | 113                                                            |
| 58               | Ecuador | Animal Products                 | 2011           | 733                                                            |
| 58               | Ecuador | Apples and products             | 2011           | 6                                                              |
| 58               | Ecuador | Bananas                         | 2011           | 125                                                            |
| 58               | Ecuador | Barley and products             | 2011           | 2                                                              |
| 58               | Ecuador | Beans                           | 2011           | 4                                                              |
| 58               | Ecuador | Beer                            | 2011           | 25                                                             |
| 58               | Ecuador | Beverages, Alcoholic            | 2011           | 8                                                              |
| 58               | Ecuador | Bovine Meat                     | 2011           | 104                                                            |
| 58               | Ecuador | Butter, Ghee                    | 2011           | 30                                                             |
| 58               | Ecuador | Cassava and products            | 2011           | 7                                                              |
| 58               | Ecuador | Cereals - Excluding Beer        | 2011           | 787                                                            |
| 58               | Ecuador | Cereals, Other                  | 2011           | 1                                                              |
| 58               | Ecuador | Citrus, Other                   | 2011           | 1                                                              |
| 58               | Ecuador | Cocoa Beans and products        | 2011           | 4                                                              |
| 58               | Ecuador | Coconut Oil                     | 2011           | 1                                                              |
| 58               | Ecuador | Coconuts - Incl Copra           | 2011           | 1                                                              |
| 58               | Ecuador | Crustaceans                     | 2011           | 4                                                              |
| 58               | Ecuador | Demersal Fish                   | 2011           | 1                                                              |
| 58               | Ecuador | Eggs                            | 2011           | 27                                                             |
| 58               | Ecuador | Fats, Animals, Raw              | 2011           | 82                                                             |
| 58               | Ecuador | Fish, Seafood                   | 2011           | 13                                                             |
| 58               | Ecuador | Freshwater Fish                 | 2011           | 1                                                              |
| 58               | Ecuador | Fruits - Excluding Wine         | 2011           | 233                                                            |
| 58               | Ecuador | Fruits, Other                   | 2011           | 27                                                             |
| 58               | Ecuador | Grand Total                     | 2011           | 2,477                                                          |
| 58               | Ecuador | Grapes and products (excl wine) | 2011           | 4                                                              |
| 58               | Ecuador | Groundnuts (Shelled Eq)         | 2011           | 13                                                             |
| 58               | Ecuador | Honey                           | 2011           | 1                                                              |
| 58               | Ecuador | Maize and products              | 2011           | 46                                                             |
| 58               | Ecuador | Maize Germ Oil                  | 2011           | 1                                                              |
| 58               | Ecuador | Meat                            | 2011           | 249                                                            |
| 58               | Ecuador | Meat, Other                     | 2011           | 2                                                              |
| 58               | Ecuador | Milk - Excluding Butter         | 2011           | 321                                                            |
| 58               | Ecuador | Miscellaneous                   | 2011           | 5                                                              |
| 58               | Ecuador | Mutton & Goat Meat              | 2011           | 2                                                              |
| 58               | Ecuador | Oats                            | 2011           | 17                                                             |
| 58               | Ecuador | Offals                          | 2011           | 10                                                             |
| 58               | Ecuador | Oilcrops                        | 2011           | 16                                                             |
| 58               | Ecuador | Olive Oil                       | 2011           | 2                                                              |
| 58               | Ecuador | Onions                          | 2011           | 1                                                              |
| 58               | Ecuador | Oranges, Mandarines             | 2011           | 2                                                              |
| 58               | Ecuador | Palm Oil                        | 2011           | 218                                                            |
| 58               | Ecuador | Palmkernel Oil                  | 2011           | 16                                                             |
| 58               | Ecuador | Peas                            | 2011           | 2                                                              |
| 58               | Ecuador | Pelagic Fish                    | 2011           | 6                                                              |
| 58               | Ecuador | Pepper                          | 2011           | 1                                                              |
| 58               | Ecuador | Pigmeat                         | 2011           | 46                                                             |
| 58               | Ecuador | Pineapples and products         | 2011           | 1                                                              |
| 58               | Ecuador | Plantains                       | 2011           | 66                                                             |
| 58               | Ecuador | Potatoes and products           | 2011           | 37                                                             |
| 58               | Ecuador | Poultry Meat                    | 2011           | 94                                                             |
| 58               | Ecuador | Pulses                          | 2011           | 25                                                             |
| 58               | Ecuador | Pulses, Other and products      | 2011           | 19                                                             |
| 58               | Ecuador | Rape and Mustardseed            | 2011           | 1                                                              |
| 58               | Ecuador | Rice (Milled Equivalent)        | 2011           | 419                                                            |
| 58               | Ecuador | Soyabean Oil                    | 2011           | 126                                                            |
| 58               | Ecuador | Spices                          | 2011           | 3                                                              |
| 58               | Ecuador | Spices, Other                   | 2011           | 2                                                              |
| 58               | Ecuador | Starchy Roots                   | 2011           | 45                                                             |
| 58               | Ecuador | Stimulants                      | 2011           | 4                                                              |
| 58               | Ecuador | Sugar & Sweeteners              | 2011           | 184                                                            |
| 58               | Ecuador | Sugar (Raw Equivalent)          | 2011           | 174                                                            |
| 58               | Ecuador | Sunflowerseed Oil               | 2011           | 24                                                             |
| 58               | Ecuador | Sweet potatoes                  | 2011           | 1                                                              |
| 58               | Ecuador | Sweeteners, Other               | 2011           | 10                                                             |
| 58               | Ecuador | Tomatoes and products           | 2011           | 2                                                              |
| 58               | Ecuador | Treenuts                        | 2011           | 1                                                              |
| 58               | Ecuador | Vegetable Oils                  | 2011           | 389                                                            |
| 58               | Ecuador | Vegetables                      | 2011           | 21                                                             |
| 58               | Ecuador | Vegetables, Other               | 2011           | 18                                                             |
| 58               | Ecuador | Vegetal Products                | 2011           | 1,744                                                          |
| 58               | Ecuador | Wheat and products              | 2011           | 303                                                            |
| 58               | Ecuador | Wine                            | 2011           | 1                                                              |
| 59               | Egypt   | Alcoholic Beverages             | 1992           | 1                                                              |
| 59               | Egypt   | Animal fats                     | 1992           | 58                                                             |
| 59               | Egypt   | Animal Products                 | 1992           | 205                                                            |
| 59               | Egypt   | Apples and products             | 1992           | 5                                                              |
| 59               | Egypt   | Bananas                         | 1992           | 10                                                             |
| 59               | Egypt   | Barley and products             | 1992           | 1                                                              |
| 59               | Egypt   | Beans                           | 1992           | 5                                                              |
| 59               | Egypt   | Beer                            | 1992           | 1                                                              |
| 59               | Egypt   | Bovine Meat                     | 1992           | 35                                                             |
| 59               | Egypt   | Butter, Ghee                    | 1992           | 45                                                             |
| 59               | Egypt   | Cereals - Excluding Beer        | 1992           | 2,105                                                          |
| 59               | Egypt   | Cereals, Other                  | 1992           | 2                                                              |
| 59               | Egypt   | Coconut Oil                     | 1992           | 3                                                              |

Dietary calcium and zinc deficiency risks are decreasing but remain prevalent

| FAO Country code | Country | Food item                       | Reference year | Net energy supply (kcal capita <sup>-1</sup> d <sup>-1</sup> ) |
|------------------|---------|---------------------------------|----------------|----------------------------------------------------------------|
| 59               | Egypt   | Coconuts - Incl Copra           | 1992           | 1                                                              |
| 59               | Egypt   | Cottonseed Oil                  | 1992           | 79                                                             |
| 59               | Egypt   | Dates                           | 1992           | 40                                                             |
| 59               | Egypt   | Demersal Fish                   | 1992           | 1                                                              |
| 59               | Egypt   | Eggs                            | 1992           | 7                                                              |
| 59               | Egypt   | Fats, Animals, Raw              | 1992           | 13                                                             |
| 59               | Egypt   | Fish, Seafood                   | 1992           | 15                                                             |
| 59               | Egypt   | Freshwater Fish                 | 1992           | 8                                                              |
| 59               | Egypt   | Fruits - Excluding Wine         | 1992           | 121                                                            |
| 59               | Egypt   | Fruits, Other                   | 1992           | 19                                                             |
| 59               | Egypt   | Grand Total                     | 1992           | 3,175                                                          |
| 59               | Egypt   | Grapes and products (excl wine) | 1992           | 19                                                             |
| 59               | Egypt   | Groundnuts (Shelled Eq)         | 1992           | 5                                                              |
| 59               | Egypt   | Honey                           | 1992           | 1                                                              |
| 59               | Egypt   | Lemons, Limes and products      | 1992           | 2                                                              |
| 59               | Egypt   | Maize and products              | 1992           | 541                                                            |
| 59               | Egypt   | Maize Germ Oil                  | 1992           | 1                                                              |
| 59               | Egypt   | Marine Fish, Other              | 1992           | 5                                                              |
| 59               | Egypt   | Meat                            | 1992           | 72                                                             |
| 59               | Egypt   | Meat, Other                     | 1992           | 6                                                              |
| 59               | Egypt   | Milk - Excluding Butter         | 1992           | 48                                                             |
| 59               | Egypt   | Miscellaneous                   | 1992           | 1                                                              |
| 59               | Egypt   | Mutton & Goat Meat              | 1992           | 8                                                              |
| 59               | Egypt   | Offals                          | 1992           | 5                                                              |
| 59               | Egypt   | Oilcrops                        | 1992           | 27                                                             |
| 59               | Egypt   | Oilcrops Oil, Other             | 1992           | 3                                                              |
| 59               | Egypt   | Oilcrops, Other                 | 1992           | 1                                                              |
| 59               | Egypt   | Olive Oil                       | 1992           | 2                                                              |
| 59               | Egypt   | Olives (including preserved)    | 1992           | 6                                                              |
| 59               | Egypt   | Onions                          | 1992           | 10                                                             |
| 59               | Egypt   | Oranges, Mandarines             | 1992           | 25                                                             |
| 59               | Egypt   | Palmkernel Oil                  | 1992           | 4                                                              |
| 59               | Egypt   | Pelagic Fish                    | 1992           | 1                                                              |
| 59               | Egypt   | Pepper                          | 1992           | 1                                                              |
| 59               | Egypt   | Pimento                         | 1992           | 5                                                              |
| 59               | Egypt   | Potatoes and products           | 1992           | 39                                                             |
| 59               | Egypt   | Poultry Meat                    | 1992           | 22                                                             |
| 59               | Egypt   | Pulses                          | 1992           | 75                                                             |
| 59               | Egypt   | Pulses, Other and products      | 1992           | 69                                                             |
| 59               | Egypt   | Rice (Milled Equivalent)        | 1992           | 360                                                            |
| 59               | Egypt   | Roots, Other                    | 1992           | 4                                                              |
| 59               | Egypt   | Sesame seed                     | 1992           | 13                                                             |
| 59               | Egypt   | Sorghum and products            | 1992           | 37                                                             |
| 59               | Egypt   | Soyabean Oil                    | 1992           | 7                                                              |
| 59               | Egypt   | Soyabeans                       | 1992           | 2                                                              |
| 59               | Egypt   | Spices                          | 1992           | 7                                                              |
| 59               | Egypt   | Spices, Other                   | 1992           | 1                                                              |
| 59               | Egypt   | Starchy Roots                   | 1992           | 46                                                             |
| 59               | Egypt   | Stimulants                      | 1992           | 2                                                              |
| 59               | Egypt   | Sugar & Sweeteners              | 1992           | 308                                                            |
| 59               | Egypt   | Sugar (Raw Equivalent)          | 1992           | 298                                                            |
| 59               | Egypt   | Sugar cane                      | 1992           | 19                                                             |
| 59               | Egypt   | Sugar Crops                     | 1992           | 19                                                             |
| 59               | Egypt   | Sunflowerseed Oil               | 1992           | 71                                                             |
| 59               | Egypt   | Sweet potatoes                  | 1992           | 3                                                              |
| 59               | Egypt   | Sweeteners, Other               | 1992           | 8                                                              |
| 59               | Egypt   | Tea (including mate)            | 1992           | 2                                                              |
| 59               | Egypt   | Tomatoes and products           | 1992           | 36                                                             |
| 59               | Egypt   | Treenuts                        | 1992           | 1                                                              |
| 59               | Egypt   | Vegetable Oils                  | 1992           | 170                                                            |
| 59               | Egypt   | Vegetables                      | 1992           | 89                                                             |
| 59               | Egypt   | Vegetables, Other               | 1992           | 43                                                             |
| 59               | Egypt   | Vegetal Products                | 1992           | 2,970                                                          |
| 59               | Egypt   | Wheat and products              | 1992           | 1,165                                                          |
| 59               | Egypt   | Alcoholic Beverages             | 1993           | 1                                                              |
| 59               | Egypt   | Animal fats                     | 1993           | 56                                                             |
| 59               | Egypt   | Animal Products                 | 1993           | 205                                                            |
| 59               | Egypt   | Apples and products             | 1993           | 7                                                              |
| 59               | Egypt   | Bananas                         | 1993           | 10                                                             |
| 59               | Egypt   | Barley and products             | 1993           | 1                                                              |
| 59               | Egypt   | Beans                           | 1993           | 5                                                              |
| 59               | Egypt   | Beer                            | 1993           | 1                                                              |
| 59               | Egypt   | Bovine Meat                     | 1993           | 35                                                             |
| 59               | Egypt   | Butter, Ghee                    | 1993           | 46                                                             |
| 59               | Egypt   | Cereals - Excluding Beer        | 1993           | 2,137                                                          |
| 59               | Egypt   | Cereals, Other                  | 1993           | 2                                                              |
| 59               | Egypt   | Coconut Oil                     | 1993           | 3                                                              |
| 59               | Egypt   | Coconuts - Incl Copra           | 1993           | 2                                                              |
| 59               | Egypt   | Cottonseed Oil                  | 1993           | 76                                                             |
| 59               | Egypt   | Dates                           | 1993           | 41                                                             |
| 59               | Egypt   | Demersal Fish                   | 1993           | 1                                                              |
| 59               | Egypt   | Eggs                            | 1993           | 8                                                              |
| 59               | Egypt   | Fats, Animals, Raw              | 1993           | 10                                                             |
| 59               | Egypt   | Fish, Seafood                   | 1993           | 14                                                             |
| 59               | Egypt   | Freshwater Fish                 | 1993           | 7                                                              |
| 59               | Egypt   | Fruits - Excluding Wine         | 1993           | 119                                                            |
| 59               | Egypt   | Fruits, Other                   | 1993           | 21                                                             |
| 59               | Egypt   | Grand Total                     | 1993           | 3,197                                                          |
| 59               | Egypt   | Grapes and products (excl wine) | 1993           | 20                                                             |
| 59               | Egypt   | Groundnut Oil                   | 1993           | 4                                                              |
| 59               | Egypt   | Groundnuts (Shelled Eq)         | 1993           | 6                                                              |
| 59               | Egypt   | Honey                           | 1993           | 1                                                              |
| 59               | Egypt   | Lemons, Limes and products      | 1993           | 2                                                              |
| 59               | Egypt   | Maize and products              | 1993           | 562                                                            |
| 59               | Egypt   | Maize Germ Oil                  | 1993           | 2                                                              |
| 59               | Egypt   | Marine Fish, Other              | 1993           | 3                                                              |
| 59               | Egypt   | Meat                            | 1993           | 72                                                             |

Dietary calcium and zinc deficiency risks are decreasing but remain prevalent

| FAO Country code | Country | Food item                       | Reference year | Net energy supply (kcal capita <sup>-1</sup> d <sup>-1</sup> ) |
|------------------|---------|---------------------------------|----------------|----------------------------------------------------------------|
| 59               | Egypt   | Meat, Other                     | 1993           | 6                                                              |
| 59               | Egypt   | Milk - Excluding Butter         | 1993           | 50                                                             |
| 59               | Egypt   | Miscellaneous                   | 1993           | 1                                                              |
| 59               | Egypt   | Mutton & Goat Meat              | 1993           | 8                                                              |
| 59               | Egypt   | Offals                          | 1993           | 5                                                              |
| 59               | Egypt   | Oilcrops                        | 1993           | 30                                                             |
| 59               | Egypt   | Oilcrops Oil, Other             | 1993           | 3                                                              |
| 59               | Egypt   | Oilcrops, Other                 | 1993           | 1                                                              |
| 59               | Egypt   | Olive Oil                       | 1993           | 1                                                              |
| 59               | Egypt   | Olives (including preserved)    | 1993           | 7                                                              |
| 59               | Egypt   | Onions                          | 1993           | 10                                                             |
| 59               | Egypt   | Oranges, Mandarines             | 1993           | 18                                                             |
| 59               | Egypt   | Palmkernel Oil                  | 1993           | 5                                                              |
| 59               | Egypt   | Peas                            | 1993           | 1                                                              |
| 59               | Egypt   | Pelagic Fish                    | 1993           | 2                                                              |
| 59               | Egypt   | Pimento                         | 1993           | 5                                                              |
| 59               | Egypt   | Potatoes and products           | 1993           | 39                                                             |
| 59               | Egypt   | Poultry Meat                    | 1993           | 22                                                             |
| 59               | Egypt   | Pulses                          | 1993           | 77                                                             |
| 59               | Egypt   | Pulses, Other and products      | 1993           | 71                                                             |
| 59               | Egypt   | Rice (Milled Equivalent)        | 1993           | 383                                                            |
| 59               | Egypt   | Roots, Other                    | 1993           | 4                                                              |
| 59               | Egypt   | Sesame seed                     | 1993           | 13                                                             |
| 59               | Egypt   | Sorghum and products            | 1993           | 39                                                             |
| 59               | Egypt   | Soybean Oil                     | 1993           | 13                                                             |
| 59               | Egypt   | Soybeans                        | 1993           | 2                                                              |
| 59               | Egypt   | Spices                          | 1993           | 7                                                              |
| 59               | Egypt   | Spices, Other                   | 1993           | 1                                                              |
| 59               | Egypt   | Starchy Roots                   | 1993           | 48                                                             |
| 59               | Egypt   | Stimulants                      | 1993           | 2                                                              |
| 59               | Egypt   | Sugar & Sweeteners              | 1993           | 290                                                            |
| 59               | Egypt   | Sugar (Raw Equivalent)          | 1993           | 281                                                            |
| 59               | Egypt   | Sugar cane                      | 1993           | 19                                                             |
| 59               | Egypt   | Sugar Crops                     | 1993           | 19                                                             |
| 59               | Egypt   | Sunflowerseed Oil               | 1993           | 63                                                             |
| 59               | Egypt   | Sweet potatoes                  | 1993           | 5                                                              |
| 59               | Egypt   | Sweeteners, Other               | 1993           | 8                                                              |
| 59               | Egypt   | Tea (including mate)            | 1993           | 1                                                              |
| 59               | Egypt   | Tomatoes and products           | 1993           | 36                                                             |
| 59               | Egypt   | Treenuts                        | 1993           | 1                                                              |
| 59               | Egypt   | Vegetable Oils                  | 1993           | 170                                                            |
| 59               | Egypt   | Vegetables                      | 1993           | 90                                                             |
| 59               | Egypt   | Vegetables, Other               | 1993           | 44                                                             |
| 59               | Egypt   | Vegetal Products                | 1993           | 2,992                                                          |
| 59               | Egypt   | Wheat and products              | 1993           | 1,150                                                          |
| 59               | Egypt   | Alcoholic Beverages             | 1994           | 1                                                              |
| 59               | Egypt   | Animal fats                     | 1994           | 55                                                             |
| 59               | Egypt   | Animal Products                 | 1994           | 217                                                            |
| 59               | Egypt   | Apples and products             | 1994           | 7                                                              |
| 59               | Egypt   | Bananas                         | 1994           | 11                                                             |
| 59               | Egypt   | Barley and products             | 1994           | 2                                                              |
| 59               | Egypt   | Beans                           | 1994           | 5                                                              |
| 59               | Egypt   | Beer                            | 1994           | 1                                                              |
| 59               | Egypt   | Bovine Meat                     | 1994           | 40                                                             |
| 59               | Egypt   | Butter, Ghee                    | 1994           | 45                                                             |
| 59               | Egypt   | Cereals - Excluding Beer        | 1994           | 2,203                                                          |
| 59               | Egypt   | Cereals, Other                  | 1994           | 1                                                              |
| 59               | Egypt   | Cocoa Beans and products        | 1994           | 1                                                              |
| 59               | Egypt   | Coconut Oil                     | 1994           | 2                                                              |
| 59               | Egypt   | Coconuts - Incl Copra           | 1994           | 2                                                              |
| 59               | Egypt   | Cottonseed Oil                  | 1994           | 65                                                             |
| 59               | Egypt   | Dates                           | 1994           | 42                                                             |
| 59               | Egypt   | Demersal Fish                   | 1994           | 1                                                              |
| 59               | Egypt   | Eggs                            | 1994           | 8                                                              |
| 59               | Egypt   | Fats, Animals, Raw              | 1994           | 9                                                              |
| 59               | Egypt   | Fish, Seafood                   | 1994           | 17                                                             |
| 59               | Egypt   | Freshwater Fish                 | 1994           | 8                                                              |
| 59               | Egypt   | Fruits - Excluding Wine         | 1994           | 125                                                            |
| 59               | Egypt   | Fruits, Other                   | 1994           | 22                                                             |
| 59               | Egypt   | Grand Total                     | 1994           | 3,259                                                          |
| 59               | Egypt   | Grapes and products (excl wine) | 1994           | 20                                                             |
| 59               | Egypt   | Groundnut Oil                   | 1994           | 4                                                              |
| 59               | Egypt   | Groundnuts (Shelled Eq)         | 1994           | 9                                                              |
| 59               | Egypt   | Honey                           | 1994           | 1                                                              |
| 59               | Egypt   | Lemons, Limes and products      | 1994           | 2                                                              |
| 59               | Egypt   | Maize and products              | 1994           | 547                                                            |
| 59               | Egypt   | Maize Germ Oil                  | 1994           | 1                                                              |
| 59               | Egypt   | Marine Fish, Other              | 1994           | 2                                                              |
| 59               | Egypt   | Meat                            | 1994           | 79                                                             |
| 59               | Egypt   | Meat, Other                     | 1994           | 6                                                              |
| 59               | Egypt   | Milk - Excluding Butter         | 1994           | 54                                                             |
| 59               | Egypt   | Miscellaneous                   | 1994           | 1                                                              |
| 59               | Egypt   | Mutton & Goat Meat              | 1994           | 9                                                              |
| 59               | Egypt   | Offals                          | 1994           | 5                                                              |
| 59               | Egypt   | Oilcrops                        | 1994           | 36                                                             |
| 59               | Egypt   | Oilcrops Oil, Other             | 1994           | 3                                                              |
| 59               | Egypt   | Oilcrops, Other                 | 1994           | 1                                                              |
| 59               | Egypt   | Olive Oil                       | 1994           | 1                                                              |
| 59               | Egypt   | Olives (including preserved)    | 1994           | 8                                                              |
| 59               | Egypt   | Onions                          | 1994           | 6                                                              |
| 59               | Egypt   | Oranges, Mandarines             | 1994           | 21                                                             |
| 59               | Egypt   | Palmkernel Oil                  | 1994           | 5                                                              |
| 59               | Egypt   | Peas                            | 1994           | 1                                                              |
| 59               | Egypt   | Pelagic Fish                    | 1994           | 5                                                              |
| 59               | Egypt   | Pimento                         | 1994           | 5                                                              |
| 59               | Egypt   | Potatoes and products           | 1994           | 33                                                             |
| 59               | Egypt   | Poultry Meat                    | 1994           | 24                                                             |

Dietary calcium and zinc deficiency risks are decreasing but remain prevalent

| FAO Country code | Country | Food item                       | Reference year | Net energy supply (kcal capita <sup>-1</sup> d <sup>-1</sup> ) |
|------------------|---------|---------------------------------|----------------|----------------------------------------------------------------|
| 59               | Egypt   | Pulses                          | 1994           | 75                                                             |
| 59               | Egypt   | Pulses, Other and products      | 1994           | 69                                                             |
| 59               | Egypt   | Rice (Milled Equivalent)        | 1994           | 406                                                            |
| 59               | Egypt   | Roots, Other                    | 1994           | 3                                                              |
| 59               | Egypt   | Sesame seed                     | 1994           | 15                                                             |
| 59               | Egypt   | Sorghum and products            | 1994           | 39                                                             |
| 59               | Egypt   | Soyabean Oil                    | 1994           | 21                                                             |
| 59               | Egypt   | Soyabeans                       | 1994           | 2                                                              |
| 59               | Egypt   | Spices                          | 1994           | 7                                                              |
| 59               | Egypt   | Spices, Other                   | 1994           | 2                                                              |
| 59               | Egypt   | Starchy Roots                   | 1994           | 42                                                             |
| 59               | Egypt   | Stimulants                      | 1994           | 2                                                              |
| 59               | Egypt   | Sugar & Sweeteners              | 1994           | 287                                                            |
| 59               | Egypt   | Sugar (Raw Equivalent)          | 1994           | 277                                                            |
| 59               | Egypt   | Sugar cane                      | 1994           | 20                                                             |
| 59               | Egypt   | Sugar Crops                     | 1994           | 20                                                             |
| 59               | Egypt   | Sunflowerseed Oil               | 1994           | 58                                                             |
| 59               | Egypt   | Sweet potatoes                  | 1994           | 5                                                              |
| 59               | Egypt   | Sweeteners, Other               | 1994           | 9                                                              |
| 59               | Egypt   | Tea (including mate)            | 1994           | 1                                                              |
| 59               | Egypt   | Tomatoes and products           | 1994           | 37                                                             |
| 59               | Egypt   | Treenuts                        | 1994           | 1                                                              |
| 59               | Egypt   | Vegetable Oils                  | 1994           | 161                                                            |
| 59               | Egypt   | Vegetables                      | 1994           | 82                                                             |
| 59               | Egypt   | Vegetables, Other               | 1994           | 40                                                             |
| 59               | Egypt   | Vegetal Products                | 1994           | 3,042                                                          |
| 59               | Egypt   | Wheat and products              | 1994           | 1,208                                                          |
| 59               | Egypt   | Alcoholic Beverages             | 1995           | 1                                                              |
| 59               | Egypt   | Animal fats                     | 1995           | 52                                                             |
| 59               | Egypt   | Animal Products                 | 1995           | 220                                                            |
| 59               | Egypt   | Apples and products             | 1995           | 9                                                              |
| 59               | Egypt   | Bananas                         | 1995           | 12                                                             |
| 59               | Egypt   | Barley and products             | 1995           | 2                                                              |
| 59               | Egypt   | Beans                           | 1995           | 5                                                              |
| 59               | Egypt   | Beer                            | 1995           | 1                                                              |
| 59               | Egypt   | Bovine Meat                     | 1995           | 40                                                             |
| 59               | Egypt   | Butter, Ghee                    | 1995           | 43                                                             |
| 59               | Egypt   | Cereals - Excluding Beer        | 1995           | 2,212                                                          |
| 59               | Egypt   | Cereals, Other                  | 1995           | 1                                                              |
| 59               | Egypt   | Coconut Oil                     | 1995           | 2                                                              |
| 59               | Egypt   | Coconuts - Incl Copra           | 1995           | 2                                                              |
| 59               | Egypt   | Cottonseed Oil                  | 1995           | 64                                                             |
| 59               | Egypt   | Dates                           | 1995           | 43                                                             |
| 59               | Egypt   | Demersal Fish                   | 1995           | 1                                                              |
| 59               | Egypt   | Eggs                            | 1995           | 9                                                              |
| 59               | Egypt   | Fats, Animals, Raw              | 1995           | 9                                                              |
| 59               | Egypt   | Fish, Seafood                   | 1995           | 17                                                             |
| 59               | Egypt   | Freshwater Fish                 | 1995           | 9                                                              |
| 59               | Egypt   | Fruits - Excluding Wine         | 1995           | 134                                                            |
| 59               | Egypt   | Fruits, Other                   | 1995           | 25                                                             |
| 59               | Egypt   | Grand Total                     | 1995           | 3,315                                                          |
| 59               | Egypt   | Grapes and products (excl wine) | 1995           | 20                                                             |
| 59               | Egypt   | Groundnut Oil                   | 1995           | 4                                                              |
| 59               | Egypt   | Groundnuts (Shelled Eq)         | 1995           | 11                                                             |
| 59               | Egypt   | Honey                           | 1995           | 1                                                              |
| 59               | Egypt   | Lemons, Limes and products      | 1995           | 2                                                              |
| 59               | Egypt   | Maize and products              | 1995           | 536                                                            |
| 59               | Egypt   | Maize Germ Oil                  | 1995           | 5                                                              |
| 59               | Egypt   | Marine Fish, Other              | 1995           | 1                                                              |
| 59               | Egypt   | Meat                            | 1995           | 81                                                             |
| 59               | Egypt   | Meat, Other                     | 1995           | 6                                                              |
| 59               | Egypt   | Milk - Excluding Butter         | 1995           | 56                                                             |
| 59               | Egypt   | Miscellaneous                   | 1995           | 1                                                              |
| 59               | Egypt   | Mutton & Goat Meat              | 1995           | 9                                                              |
| 59               | Egypt   | Offals                          | 1995           | 5                                                              |
| 59               | Egypt   | Oilcrops                        | 1995           | 44                                                             |
| 59               | Egypt   | Oilcrops Oil, Other             | 1995           | 2                                                              |
| 59               | Egypt   | Oilcrops, Other                 | 1995           | 1                                                              |
| 59               | Egypt   | Olives (including preserved)    | 1995           | 12                                                             |
| 59               | Egypt   | Onions                          | 1995           | 4                                                              |
| 59               | Egypt   | Oranges, Mandarines             | 1995           | 23                                                             |
| 59               | Egypt   | Palmkernel Oil                  | 1995           | 6                                                              |
| 59               | Egypt   | Peas                            | 1995           | 1                                                              |
| 59               | Egypt   | Pelagic Fish                    | 1995           | 5                                                              |
| 59               | Egypt   | Pimento                         | 1995           | 5                                                              |
| 59               | Egypt   | Potatoes and products           | 1995           | 43                                                             |
| 59               | Egypt   | Poultry Meat                    | 1995           | 26                                                             |
| 59               | Egypt   | Pulses                          | 1995           | 77                                                             |
| 59               | Egypt   | Pulses, Other and products      | 1995           | 71                                                             |
| 59               | Egypt   | Rice (Milled Equivalent)        | 1995           | 432                                                            |
| 59               | Egypt   | Roots, Other                    | 1995           | 3                                                              |
| 59               | Egypt   | Sesame seed                     | 1995           | 17                                                             |
| 59               | Egypt   | Sorghum and products            | 1995           | 37                                                             |
| 59               | Egypt   | Soyabean Oil                    | 1995           | 29                                                             |
| 59               | Egypt   | Soyabeans                       | 1995           | 1                                                              |
| 59               | Egypt   | Spices                          | 1995           | 7                                                              |
| 59               | Egypt   | Spices, Other                   | 1995           | 2                                                              |
| 59               | Egypt   | Starchy Roots                   | 1995           | 52                                                             |
| 59               | Egypt   | Stimulants                      | 1995           | 2                                                              |
| 59               | Egypt   | Sugar & Sweeteners              | 1995           | 291                                                            |
| 59               | Egypt   | Sugar (Raw Equivalent)          | 1995           | 280                                                            |
| 59               | Egypt   | Sugar cane                      | 1995           | 21                                                             |
| 59               | Egypt   | Sugar Crops                     | 1995           | 21                                                             |
| 59               | Egypt   | Sunflowerseed Oil               | 1995           | 53                                                             |
| 59               | Egypt   | Sweet potatoes                  | 1995           | 6                                                              |
| 59               | Egypt   | Sweeteners, Other               | 1995           | 9                                                              |
| 59               | Egypt   | Tea (including mate)            | 1995           | 1                                                              |

Dietary calcium and zinc deficiency risks are decreasing but remain prevalent

| FAO Country code | Country | Food item                       | Reference year | Net energy supply (kcal capita <sup>-1</sup> d <sup>-1</sup> ) |
|------------------|---------|---------------------------------|----------------|----------------------------------------------------------------|
| 59               | Egypt   | Tomatoes and products           | 1995           | 37                                                             |
| 59               | Egypt   | Treenuts                        | 1995           | 1                                                              |
| 59               | Egypt   | Vegetable Oils                  | 1995           | 165                                                            |
| 59               | Egypt   | Vegetables                      | 1995           | 87                                                             |
| 59               | Egypt   | Vegetables, Other               | 1995           | 46                                                             |
| 59               | Egypt   | Vegetal Products                | 1995           | 3,095                                                          |
| 59               | Egypt   | Wheat and products              | 1995           | 1,204                                                          |
| 59               | Egypt   | Alcoholic Beverages             | 1996           | 1                                                              |
| 59               | Egypt   | Animal fats                     | 1996           | 53                                                             |
| 59               | Egypt   | Animal Products                 | 1996           | 226                                                            |
| 59               | Egypt   | Apples and products             | 1996           | 8                                                              |
| 59               | Egypt   | Bananas                         | 1996           | 14                                                             |
| 59               | Egypt   | Barley and products             | 1996           | 2                                                              |
| 59               | Egypt   | Beans                           | 1996           | 5                                                              |
| 59               | Egypt   | Beer                            | 1996           | 1                                                              |
| 59               | Egypt   | Bovine Meat                     | 1996           | 37                                                             |
| 59               | Egypt   | Butter, Ghee                    | 1996           | 46                                                             |
| 59               | Egypt   | Cereals - Excluding Beer        | 1996           | 2,210                                                          |
| 59               | Egypt   | Cereals, Other                  | 1996           | 1                                                              |
| 59               | Egypt   | Coconut Oil                     | 1996           | 2                                                              |
| 59               | Egypt   | Coconuts - Incl Copra           | 1996           | 2                                                              |
| 59               | Egypt   | Cottonseed Oil                  | 1996           | 46                                                             |
| 59               | Egypt   | Dates                           | 1996           | 46                                                             |
| 59               | Egypt   | Demersal Fish                   | 1996           | 1                                                              |
| 59               | Egypt   | Eggs                            | 1996           | 8                                                              |
| 59               | Egypt   | Fats, Animals, Raw              | 1996           | 8                                                              |
| 59               | Egypt   | Fish, Seafood                   | 1996           | 20                                                             |
| 59               | Egypt   | Freshwater Fish                 | 1996           | 9                                                              |
| 59               | Egypt   | Fruits - Excluding Wine         | 1996           | 143                                                            |
| 59               | Egypt   | Fruits, Other                   | 1996           | 24                                                             |
| 59               | Egypt   | Grand Total                     | 1996           | 3,332                                                          |
| 59               | Egypt   | Grapes and products (excl wine) | 1996           | 25                                                             |
| 59               | Egypt   | Groundnut Oil                   | 1996           | 4                                                              |
| 59               | Egypt   | Groundnuts (Shelled Eq)         | 1996           | 12                                                             |
| 59               | Egypt   | Honey                           | 1996           | 1                                                              |
| 59               | Egypt   | Lemons, Limes and products      | 1996           | 2                                                              |
| 59               | Egypt   | Maize and products              | 1996           | 526                                                            |
| 59               | Egypt   | Maize Germ Oil                  | 1996           | 4                                                              |
| 59               | Egypt   | Marine Fish, Other              | 1996           | 1                                                              |
| 59               | Egypt   | Meat                            | 1996           | 78                                                             |
| 59               | Egypt   | Meat, Other                     | 1996           | 6                                                              |
| 59               | Egypt   | Milk - Excluding Butter         | 1996           | 61                                                             |
| 59               | Egypt   | Miscellaneous                   | 1996           | 1                                                              |
| 59               | Egypt   | Mutton & Goat Meat              | 1996           | 9                                                              |
| 59               | Egypt   | Offals                          | 1996           | 5                                                              |
| 59               | Egypt   | Oilcrops                        | 1996           | 48                                                             |
| 59               | Egypt   | Oilcrops Oil, Other             | 1996           | 3                                                              |
| 59               | Egypt   | Oilcrops, Other                 | 1996           | 1                                                              |
| 59               | Egypt   | Olives (including preserved)    | 1996           | 12                                                             |
| 59               | Egypt   | Onions                          | 1996           | 6                                                              |
| 59               | Egypt   | Oranges, Mandarines             | 1996           | 24                                                             |
| 59               | Egypt   | Palmkernel Oil                  | 1996           | 6                                                              |
| 59               | Egypt   | Peas                            | 1996           | 1                                                              |
| 59               | Egypt   | Pelagic Fish                    | 1996           | 9                                                              |
| 59               | Egypt   | Pimento                         | 1996           | 5                                                              |
| 59               | Egypt   | Potatoes and products           | 1996           | 44                                                             |
| 59               | Egypt   | Poultry Meat                    | 1996           | 26                                                             |
| 59               | Egypt   | Pulses                          | 1996           | 77                                                             |
| 59               | Egypt   | Pulses, Other and products      | 1996           | 71                                                             |
| 59               | Egypt   | Rice (Milled Equivalent)        | 1996           | 433                                                            |
| 59               | Egypt   | Roots, Other                    | 1996           | 4                                                              |
| 59               | Egypt   | Sesame seed                     | 1996           | 19                                                             |
| 59               | Egypt   | Sorghum and products            | 1996           | 39                                                             |
| 59               | Egypt   | Soyabean Oil                    | 1996           | 31                                                             |
| 59               | Egypt   | Soyabeans                       | 1996           | 1                                                              |
| 59               | Egypt   | Spices                          | 1996           | 7                                                              |
| 59               | Egypt   | Spices, Other                   | 1996           | 1                                                              |
| 59               | Egypt   | Starchy Roots                   | 1996           | 53                                                             |
| 59               | Egypt   | Stimulants                      | 1996           | 2                                                              |
| 59               | Egypt   | Sugar & Sweeteners              | 1996           | 293                                                            |
| 59               | Egypt   | Sugar (Raw Equivalent)          | 1996           | 282                                                            |
| 59               | Egypt   | Sugar cane                      | 1996           | 20                                                             |
| 59               | Egypt   | Sugar Crops                     | 1996           | 20                                                             |
| 59               | Egypt   | Sunflowerseed Oil               | 1996           | 52                                                             |
| 59               | Egypt   | Sweet potatoes                  | 1996           | 5                                                              |
| 59               | Egypt   | Sweeteners, Other               | 1996           | 10                                                             |
| 59               | Egypt   | Tea (including mate)            | 1996           | 1                                                              |
| 59               | Egypt   | Tomatoes and products           | 1996           | 43                                                             |
| 59               | Egypt   | Treenuts                        | 1996           | 1                                                              |
| 59               | Egypt   | Vegetable Oils                  | 1996           | 147                                                            |
| 59               | Egypt   | Vegetables                      | 1996           | 103                                                            |
| 59               | Egypt   | Vegetables, Other               | 1996           | 54                                                             |
| 59               | Egypt   | Vegetal Products                | 1996           | 3,106                                                          |
| 59               | Egypt   | Wheat and products              | 1996           | 1,208                                                          |
| 59               | Egypt   | Alcoholic Beverages             | 1997           | 1                                                              |
| 59               | Egypt   | Animal fats                     | 1997           | 50                                                             |
| 59               | Egypt   | Animal Products                 | 1997           | 235                                                            |
| 59               | Egypt   | Apples and products             | 1997           | 8                                                              |
| 59               | Egypt   | Bananas                         | 1997           | 15                                                             |
| 59               | Egypt   | Barley and products             | 1997           | 2                                                              |
| 59               | Egypt   | Beans                           | 1997           | 5                                                              |
| 59               | Egypt   | Beer                            | 1997           | 1                                                              |
| 59               | Egypt   | Bovine Meat                     | 1997           | 39                                                             |
| 59               | Egypt   | Butter, Ghee                    | 1997           | 42                                                             |
| 59               | Egypt   | Cereals - Excluding Beer        | 1997           | 2,231                                                          |
| 59               | Egypt   | Cereals, Other                  | 1997           | 1                                                              |
| 59               | Egypt   | Coconut Oil                     | 1997           | 2                                                              |

Dietary calcium and zinc deficiency risks are decreasing but remain prevalent

| FAO Country code | Country | Food item                       | Reference year | Net energy supply (kcal capita <sup>-1</sup> d <sup>-1</sup> ) |
|------------------|---------|---------------------------------|----------------|----------------------------------------------------------------|
| 59               | Egypt   | Coconuts - Incl Copra           | 1997           | 2                                                              |
| 59               | Egypt   | Cottonseed Oil                  | 1997           | 33                                                             |
| 59               | Egypt   | Dates                           | 1997           | 45                                                             |
| 59               | Egypt   | Demersal Fish                   | 1997           | 1                                                              |
| 59               | Egypt   | Eggs                            | 1997           | 8                                                              |
| 59               | Egypt   | Fats, Animals, Raw              | 1997           | 8                                                              |
| 59               | Egypt   | Fish, Seafood                   | 1997           | 19                                                             |
| 59               | Egypt   | Freshwater Fish                 | 1997           | 9                                                              |
| 59               | Egypt   | Fruits - Excluding Wine         | 1997           | 141                                                            |
| 59               | Egypt   | Fruits, Other                   | 1997           | 25                                                             |
| 59               | Egypt   | Grand Total                     | 1997           | 3,361                                                          |
| 59               | Egypt   | Grapes and products (excl wine) | 1997           | 23                                                             |
| 59               | Egypt   | Groundnut Oil                   | 1997           | 5                                                              |
| 59               | Egypt   | Groundnuts (Shelled Eq)         | 1997           | 17                                                             |
| 59               | Egypt   | Honey                           | 1997           | 1                                                              |
| 59               | Egypt   | Lemons, Limes and products      | 1997           | 2                                                              |
| 59               | Egypt   | Maize and products              | 1997           | 554                                                            |
| 59               | Egypt   | Maize Germ Oil                  | 1997           | 4                                                              |
| 59               | Egypt   | Marine Fish, Other              | 1997           | 1                                                              |
| 59               | Egypt   | Meat                            | 1997           | 86                                                             |
| 59               | Egypt   | Meat, Other                     | 1997           | 6                                                              |
| 59               | Egypt   | Milk - Excluding Butter         | 1997           | 65                                                             |
| 59               | Egypt   | Miscellaneous                   | 1997           | 2                                                              |
| 59               | Egypt   | Mutton & Goat Meat              | 1997           | 9                                                              |
| 59               | Egypt   | Offals                          | 1997           | 5                                                              |
| 59               | Egypt   | Oilcrops                        | 1997           | 53                                                             |
| 59               | Egypt   | Oilcrops Oil, Other             | 1997           | 2                                                              |
| 59               | Egypt   | Oilcrops, Other                 | 1997           | 2                                                              |
| 59               | Egypt   | Olives (including preserved)    | 1997           | 11                                                             |
| 59               | Egypt   | Onions                          | 1997           | 5                                                              |
| 59               | Egypt   | Oranges, Mandarines             | 1997           | 22                                                             |
| 59               | Egypt   | Palmkernel Oil                  | 1997           | 6                                                              |
| 59               | Egypt   | Pelagic Fish                    | 1997           | 7                                                              |
| 59               | Egypt   | Pimento                         | 1997           | 5                                                              |
| 59               | Egypt   | Potatoes and products           | 1997           | 39                                                             |
| 59               | Egypt   | Poultry Meat                    | 1997           | 32                                                             |
| 59               | Egypt   | Pulses                          | 1997           | 75                                                             |
| 59               | Egypt   | Pulses, Other and products      | 1997           | 69                                                             |
| 59               | Egypt   | Rice (Milled Equivalent)        | 1997           | 427                                                            |
| 59               | Egypt   | Roots, Other                    | 1997           | 3                                                              |
| 59               | Egypt   | Sesame seed                     | 1997           | 19                                                             |
| 59               | Egypt   | Sorghum and products            | 1997           | 38                                                             |
| 59               | Egypt   | Soyabean Oil                    | 1997           | 24                                                             |
| 59               | Egypt   | Soyabeans                       | 1997           | 1                                                              |
| 59               | Egypt   | Spices                          | 1997           | 8                                                              |
| 59               | Egypt   | Spices, Other                   | 1997           | 2                                                              |
| 59               | Egypt   | Starchy Roots                   | 1997           | 48                                                             |
| 59               | Egypt   | Stimulants                      | 1997           | 2                                                              |
| 59               | Egypt   | Sugar & Sweeteners              | 1997           | 306                                                            |
| 59               | Egypt   | Sugar (Raw Equivalent)          | 1997           | 294                                                            |
| 59               | Egypt   | Sugar cane                      | 1997           | 26                                                             |
| 59               | Egypt   | Sugar Crops                     | 1997           | 26                                                             |
| 59               | Egypt   | Sunflowerseed Oil               | 1997           | 55                                                             |
| 59               | Egypt   | Sweet potatoes                  | 1997           | 6                                                              |
| 59               | Egypt   | Sweeteners, Other               | 1997           | 11                                                             |
| 59               | Egypt   | Tea (including mate)            | 1997           | 1                                                              |
| 59               | Egypt   | Tomatoes and products           | 1997           | 41                                                             |
| 59               | Egypt   | Treenuts                        | 1997           | 1                                                              |
| 59               | Egypt   | Vegetable Oils                  | 1997           | 131                                                            |
| 59               | Egypt   | Vegetables                      | 1997           | 102                                                            |
| 59               | Egypt   | Vegetables, Other               | 1997           | 56                                                             |
| 59               | Egypt   | Vegetal Products                | 1997           | 3,126                                                          |
| 59               | Egypt   | Wheat and products              | 1997           | 1,209                                                          |
| 59               | Egypt   | Alcoholic Beverages             | 1998           | 1                                                              |
| 59               | Egypt   | Animal fats                     | 1998           | 51                                                             |
| 59               | Egypt   | Animal Products                 | 1998           | 245                                                            |
| 59               | Egypt   | Apples and products             | 1998           | 8                                                              |
| 59               | Egypt   | Bananas                         | 1998           | 15                                                             |
| 59               | Egypt   | Barley and products             | 1998           | 2                                                              |
| 59               | Egypt   | Beans                           | 1998           | 5                                                              |
| 59               | Egypt   | Beer                            | 1998           | 1                                                              |
| 59               | Egypt   | Bovine Meat                     | 1998           | 41                                                             |
| 59               | Egypt   | Butter, Ghee                    | 1998           | 43                                                             |
| 59               | Egypt   | Cereals - Excluding Beer        | 1998           | 2,202                                                          |
| 59               | Egypt   | Cereals, Other                  | 1998           | 1                                                              |
| 59               | Egypt   | Cocoa Beans and products        | 1998           | 1                                                              |
| 59               | Egypt   | Coconut Oil                     | 1998           | 2                                                              |
| 59               | Egypt   | Coconuts - Incl Copra           | 1998           | 2                                                              |
| 59               | Egypt   | Cottonseed Oil                  | 1998           | 25                                                             |
| 59               | Egypt   | Dates                           | 1998           | 50                                                             |
| 59               | Egypt   | Demersal Fish                   | 1998           | 2                                                              |
| 59               | Egypt   | Eggs                            | 1998           | 8                                                              |
| 59               | Egypt   | Fats, Animals, Raw              | 1998           | 8                                                              |
| 59               | Egypt   | Fish, Seafood                   | 1998           | 24                                                             |
| 59               | Egypt   | Freshwater Fish                 | 1998           | 11                                                             |
| 59               | Egypt   | Fruits - Excluding Wine         | 1998           | 145                                                            |
| 59               | Egypt   | Fruits, Other                   | 1998           | 26                                                             |
| 59               | Egypt   | Grand Total                     | 1998           | 3,339                                                          |
| 59               | Egypt   | Grapes and products (excl wine) | 1998           | 25                                                             |
| 59               | Egypt   | Groundnut Oil                   | 1998           | 8                                                              |
| 59               | Egypt   | Groundnuts (Shelled Eq)         | 1998           | 15                                                             |
| 59               | Egypt   | Honey                           | 1998           | 1                                                              |
| 59               | Egypt   | Lemons, Limes and products      | 1998           | 2                                                              |
| 59               | Egypt   | Maize and products              | 1998           | 572                                                            |
| 59               | Egypt   | Maize Germ Oil                  | 1998           | 5                                                              |
| 59               | Egypt   | Marine Fish, Other              | 1998           | 1                                                              |
| 59               | Egypt   | Meat                            | 1998           | 89                                                             |

Dietary calcium and zinc deficiency risks are decreasing but remain prevalent

| FAO Country code | Country | Food item                       | Reference year | Net energy supply (kcal capita <sup>-1</sup> d <sup>-1</sup> ) |
|------------------|---------|---------------------------------|----------------|----------------------------------------------------------------|
| 59               | Egypt   | Meat, Other                     | 1998           | 6                                                              |
| 59               | Egypt   | Milk - Excluding Butter         | 1998           | 68                                                             |
| 59               | Egypt   | Miscellaneous                   | 1998           | 1                                                              |
| 59               | Egypt   | Mutton & Goat Meat              | 1998           | 9                                                              |
| 59               | Egypt   | Offals                          | 1998           | 5                                                              |
| 59               | Egypt   | Oilcrops                        | 1998           | 47                                                             |
| 59               | Egypt   | Oilcrops Oil, Other             | 1998           | 2                                                              |
| 59               | Egypt   | Oilcrops, Other                 | 1998           | 2                                                              |
| 59               | Egypt   | Olives (including preserved)    | 1998           | 11                                                             |
| 59               | Egypt   | Onions                          | 1998           | 9                                                              |
| 59               | Egypt   | Oranges, Mandarines             | 1998           | 19                                                             |
| 59               | Egypt   | Palmkernel Oil                  | 1998           | 6                                                              |
| 59               | Egypt   | Peas                            | 1998           | 1                                                              |
| 59               | Egypt   | Pelagic Fish                    | 1998           | 10                                                             |
| 59               | Egypt   | Pigmeat                         | 1998           | 1                                                              |
| 59               | Egypt   | Pimento                         | 1998           | 5                                                              |
| 59               | Egypt   | Potatoes and products           | 1998           | 42                                                             |
| 59               | Egypt   | Poultry Meat                    | 1998           | 31                                                             |
| 59               | Egypt   | Pulses                          | 1998           | 74                                                             |
| 59               | Egypt   | Pulses, Other and products      | 1998           | 69                                                             |
| 59               | Egypt   | Rice (Milled Equivalent)        | 1998           | 415                                                            |
| 59               | Egypt   | Roots, Other                    | 1998           | 2                                                              |
| 59               | Egypt   | Sesame seed                     | 1998           | 16                                                             |
| 59               | Egypt   | Sorghum and products            | 1998           | 42                                                             |
| 59               | Egypt   | Soybean Oil                     | 1998           | 31                                                             |
| 59               | Egypt   | Soybeans                        | 1998           | 2                                                              |
| 59               | Egypt   | Spices                          | 1998           | 8                                                              |
| 59               | Egypt   | Spices, Other                   | 1998           | 2                                                              |
| 59               | Egypt   | Starchy Roots                   | 1998           | 52                                                             |
| 59               | Egypt   | Stimulants                      | 1998           | 2                                                              |
| 59               | Egypt   | Sugar & Sweeteners              | 1998           | 289                                                            |
| 59               | Egypt   | Sugar (Raw Equivalent)          | 1998           | 277                                                            |
| 59               | Egypt   | Sugar cane                      | 1998           | 32                                                             |
| 59               | Egypt   | Sugar Crops                     | 1998           | 32                                                             |
| 59               | Egypt   | Sunflowerseed Oil               | 1998           | 56                                                             |
| 59               | Egypt   | Sweet potatoes                  | 1998           | 7                                                              |
| 59               | Egypt   | Sweeteners, Other               | 1998           | 11                                                             |
| 59               | Egypt   | Tea (including mate)            | 1998           | 1                                                              |
| 59               | Egypt   | Tomatoes and products           | 1998           | 40                                                             |
| 59               | Egypt   | Treenuts                        | 1998           | 1                                                              |
| 59               | Egypt   | Vegetable Oils                  | 1998           | 137                                                            |
| 59               | Egypt   | Vegetables                      | 1998           | 103                                                            |
| 59               | Egypt   | Vegetables, Other               | 1998           | 54                                                             |
| 59               | Egypt   | Vegetal Products                | 1998           | 3,094                                                          |
| 59               | Egypt   | Wheat and products              | 1998           | 1,169                                                          |
| 59               | Egypt   | Alcoholic Beverages             | 1999           | 1                                                              |
| 59               | Egypt   | Animal fats                     | 1999           | 56                                                             |
| 59               | Egypt   | Animal Products                 | 1999           | 253                                                            |
| 59               | Egypt   | Apples and products             | 1999           | 9                                                              |
| 59               | Egypt   | Bananas                         | 1999           | 17                                                             |
| 59               | Egypt   | Barley and products             | 1999           | 2                                                              |
| 59               | Egypt   | Beans                           | 1999           | 5                                                              |
| 59               | Egypt   | Beer                            | 1999           | 1                                                              |
| 59               | Egypt   | Bovine Meat                     | 1999           | 39                                                             |
| 59               | Egypt   | Butter, Ghee                    | 1999           | 47                                                             |
| 59               | Egypt   | Cereals - Excluding Beer        | 1999           | 2,181                                                          |
| 59               | Egypt   | Cereals, Other                  | 1999           | 1                                                              |
| 59               | Egypt   | Cocoa Beans and products        | 1999           | 1                                                              |
| 59               | Egypt   | Coconut Oil                     | 1999           | 3                                                              |
| 59               | Egypt   | Coconuts - Incl Copra           | 1999           | 2                                                              |
| 59               | Egypt   | Cottonseed Oil                  | 1999           | 23                                                             |
| 59               | Egypt   | Dates                           | 1999           | 53                                                             |
| 59               | Egypt   | Demersal Fish                   | 1999           | 2                                                              |
| 59               | Egypt   | Eggs                            | 1999           | 8                                                              |
| 59               | Egypt   | Fats, Animals, Raw              | 1999           | 8                                                              |
| 59               | Egypt   | Fish, Seafood                   | 1999           | 26                                                             |
| 59               | Egypt   | Freshwater Fish                 | 1999           | 12                                                             |
| 59               | Egypt   | Fruits - Excluding Wine         | 1999           | 153                                                            |
| 59               | Egypt   | Fruits, Other                   | 1999           | 23                                                             |
| 59               | Egypt   | Grand Total                     | 1999           | 3,356                                                          |
| 59               | Egypt   | Grapes and products (excl wine) | 1999           | 26                                                             |
| 59               | Egypt   | Groundnut Oil                   | 1999           | 9                                                              |
| 59               | Egypt   | Groundnuts (Shelled Eq)         | 1999           | 15                                                             |
| 59               | Egypt   | Honey                           | 1999           | 1                                                              |
| 59               | Egypt   | Lemons, Limes and products      | 1999           | 2                                                              |
| 59               | Egypt   | Maize and products              | 1999           | 597                                                            |
| 59               | Egypt   | Maize Germ Oil                  | 1999           | 3                                                              |
| 59               | Egypt   | Marine Fish, Other              | 1999           | 3                                                              |
| 59               | Egypt   | Meat                            | 1999           | 87                                                             |
| 59               | Egypt   | Meat, Other                     | 1999           | 7                                                              |
| 59               | Egypt   | Milk - Excluding Butter         | 1999           | 71                                                             |
| 59               | Egypt   | Millet and products             | 1999           | 1                                                              |
| 59               | Egypt   | Miscellaneous                   | 1999           | 2                                                              |
| 59               | Egypt   | Mutton & Goat Meat              | 1999           | 8                                                              |
| 59               | Egypt   | Offals                          | 1999           | 6                                                              |
| 59               | Egypt   | Oilcrops                        | 1999           | 55                                                             |
| 59               | Egypt   | Oilcrops Oil, Other             | 1999           | 2                                                              |
| 59               | Egypt   | Oilcrops, Other                 | 1999           | 2                                                              |
| 59               | Egypt   | Olives (including preserved)    | 1999           | 15                                                             |
| 59               | Egypt   | Onions                          | 1999           | 12                                                             |
| 59               | Egypt   | Oranges, Mandarines             | 1999           | 24                                                             |
| 59               | Egypt   | Palmkernel Oil                  | 1999           | 7                                                              |
| 59               | Egypt   | Peas                            | 1999           | 1                                                              |
| 59               | Egypt   | Pelagic Fish                    | 1999           | 9                                                              |
| 59               | Egypt   | Pimento                         | 1999           | 5                                                              |
| 59               | Egypt   | Potatoes and products           | 1999           | 38                                                             |
| 59               | Egypt   | Poultry Meat                    | 1999           | 34                                                             |

Dietary calcium and zinc deficiency risks are decreasing but remain prevalent

| FAO Country code | Country | Food item                       | Reference year | Net energy supply (kcal capita <sup>-1</sup> d <sup>-1</sup> ) |
|------------------|---------|---------------------------------|----------------|----------------------------------------------------------------|
| 59               | Egypt   | Pulses                          | 1999           | 72                                                             |
| 59               | Egypt   | Pulses, Other and products      | 1999           | 67                                                             |
| 59               | Egypt   | Rice (Milled Equivalent)        | 1999           | 424                                                            |
| 59               | Egypt   | Roots, Other                    | 1999           | 1                                                              |
| 59               | Egypt   | Sesame seed                     | 1999           | 19                                                             |
| 59               | Egypt   | Sorghum and products            | 1999           | 56                                                             |
| 59               | Egypt   | Soyabean Oil                    | 1999           | 32                                                             |
| 59               | Egypt   | Soyabeans                       | 1999           | 1                                                              |
| 59               | Egypt   | Spices                          | 1999           | 8                                                              |
| 59               | Egypt   | Spices, Other                   | 1999           | 2                                                              |
| 59               | Egypt   | Starchy Roots                   | 1999           | 48                                                             |
| 59               | Egypt   | Stimulants                      | 1999           | 2                                                              |
| 59               | Egypt   | Sugar & Sweeteners              | 1999           | 296                                                            |
| 59               | Egypt   | Sugar (Raw Equivalent)          | 1999           | 283                                                            |
| 59               | Egypt   | Sugar cane                      | 1999           | 35                                                             |
| 59               | Egypt   | Sugar Crops                     | 1999           | 35                                                             |
| 59               | Egypt   | Sunflowerseed Oil               | 1999           | 54                                                             |
| 59               | Egypt   | Sweet potatoes                  | 1999           | 8                                                              |
| 59               | Egypt   | Sweeteners, Other               | 1999           | 11                                                             |
| 59               | Egypt   | Tea (including mate)            | 1999           | 1                                                              |
| 59               | Egypt   | Tomatoes and products           | 1999           | 43                                                             |
| 59               | Egypt   | Treenuts                        | 1999           | 2                                                              |
| 59               | Egypt   | Vegetable Oils                  | 1999           | 131                                                            |
| 59               | Egypt   | Vegetables                      | 1999           | 116                                                            |
| 59               | Egypt   | Vegetables, Other               | 1999           | 61                                                             |
| 59               | Egypt   | Vegetal Products                | 1999           | 3,102                                                          |
| 59               | Egypt   | Wheat and products              | 1999           | 1,100                                                          |
| 59               | Egypt   | Alcoholic Beverages             | 2000           | 1                                                              |
| 59               | Egypt   | Animal fats                     | 2000           | 56                                                             |
| 59               | Egypt   | Animal Products                 | 2000           | 261                                                            |
| 59               | Egypt   | Apples and products             | 2000           | 9                                                              |
| 59               | Egypt   | Bananas                         | 2000           | 17                                                             |
| 59               | Egypt   | Barley and products             | 2000           | 3                                                              |
| 59               | Egypt   | Beans                           | 2000           | 4                                                              |
| 59               | Egypt   | Beer                            | 2000           | 1                                                              |
| 59               | Egypt   | Bovine Meat                     | 2000           | 42                                                             |
| 59               | Egypt   | Butter, Ghee                    | 2000           | 48                                                             |
| 59               | Egypt   | Cereals - Excluding Beer        | 2000           | 2,150                                                          |
| 59               | Egypt   | Cereals, Other                  | 2000           | 1                                                              |
| 59               | Egypt   | Cocoa Beans and products        | 2000           | 1                                                              |
| 59               | Egypt   | Coconut Oil                     | 2000           | 2                                                              |
| 59               | Egypt   | Coconuts - Incl Copra           | 2000           | 3                                                              |
| 59               | Egypt   | Cottonseed Oil                  | 2000           | 23                                                             |
| 59               | Egypt   | Dates                           | 2000           | 58                                                             |
| 59               | Egypt   | Demersal Fish                   | 2000           | 3                                                              |
| 59               | Egypt   | Eggs                            | 2000           | 9                                                              |
| 59               | Egypt   | Fats, Animals, Raw              | 2000           | 8                                                              |
| 59               | Egypt   | Fish, Seafood                   | 2000           | 27                                                             |
| 59               | Egypt   | Freshwater Fish                 | 2000           | 13                                                             |
| 59               | Egypt   | Fruits - Excluding Wine         | 2000           | 159                                                            |
| 59               | Egypt   | Fruits, Other                   | 2000           | 23                                                             |
| 59               | Egypt   | Grand Total                     | 2000           | 3,368                                                          |
| 59               | Egypt   | Grapes and products (excl wine) | 2000           | 27                                                             |
| 59               | Egypt   | Groundnut Oil                   | 2000           | 9                                                              |
| 59               | Egypt   | Groundnuts (Shelled Eq)         | 2000           | 16                                                             |
| 59               | Egypt   | Honey                           | 2000           | 1                                                              |
| 59               | Egypt   | Lemons, Limes and products      | 2000           | 2                                                              |
| 59               | Egypt   | Maize and products              | 2000           | 581                                                            |
| 59               | Egypt   | Maize Germ Oil                  | 2000           | 4                                                              |
| 59               | Egypt   | Marine Fish, Other              | 2000           | 2                                                              |
| 59               | Egypt   | Meat                            | 2000           | 91                                                             |
| 59               | Egypt   | Meat, Other                     | 2000           | 7                                                              |
| 59               | Egypt   | Milk - Excluding Butter         | 2000           | 71                                                             |
| 59               | Egypt   | Miscellaneous                   | 2000           | 2                                                              |
| 59               | Egypt   | Mutton & Goat Meat              | 2000           | 7                                                              |
| 59               | Egypt   | Offals                          | 2000           | 6                                                              |
| 59               | Egypt   | Oilcrops                        | 2000           | 61                                                             |
| 59               | Egypt   | Oilcrops Oil, Other             | 2000           | 1                                                              |
| 59               | Egypt   | Oilcrops, Other                 | 2000           | 2                                                              |
| 59               | Egypt   | Olives (including preserved)    | 2000           | 15                                                             |
| 59               | Egypt   | Onions                          | 2000           | 9                                                              |
| 59               | Egypt   | Oranges, Mandarines             | 2000           | 22                                                             |
| 59               | Egypt   | Palmkernel Oil                  | 2000           | 6                                                              |
| 59               | Egypt   | Peas                            | 2000           | 1                                                              |
| 59               | Egypt   | Pelagic Fish                    | 2000           | 8                                                              |
| 59               | Egypt   | Pepper                          | 2000           | 1                                                              |
| 59               | Egypt   | Pimento                         | 2000           | 5                                                              |
| 59               | Egypt   | Potatoes and products           | 2000           | 39                                                             |
| 59               | Egypt   | Poultry Meat                    | 2000           | 35                                                             |
| 59               | Egypt   | Pulses                          | 2000           | 79                                                             |
| 59               | Egypt   | Pulses, Other and products      | 2000           | 75                                                             |
| 59               | Egypt   | Rice (Milled Equivalent)        | 2000           | 426                                                            |
| 59               | Egypt   | Roots, Other                    | 2000           | 1                                                              |
| 59               | Egypt   | Sesame seed                     | 2000           | 24                                                             |
| 59               | Egypt   | Sorghum and products            | 2000           | 50                                                             |
| 59               | Egypt   | Soyabean Oil                    | 2000           | 33                                                             |
| 59               | Egypt   | Soyabeans                       | 2000           | 1                                                              |
| 59               | Egypt   | Spices                          | 2000           | 7                                                              |
| 59               | Egypt   | Spices, Other                   | 2000           | 1                                                              |
| 59               | Egypt   | Starchy Roots                   | 2000           | 49                                                             |
| 59               | Egypt   | Stimulants                      | 2000           | 2                                                              |
| 59               | Egypt   | Sugar & Sweeteners              | 2000           | 300                                                            |
| 59               | Egypt   | Sugar (Raw Equivalent)          | 2000           | 290                                                            |
| 59               | Egypt   | Sugar cane                      | 2000           | 41                                                             |
| 59               | Egypt   | Sugar Crops                     | 2000           | 41                                                             |
| 59               | Egypt   | Sunflowerseed Oil               | 2000           | 51                                                             |
| 59               | Egypt   | Sweet potatoes                  | 2000           | 8                                                              |



Dietary calcium and zinc deficiency risks are decreasing but remain prevalent

| FAO Country code | Country | Food item                       | Reference year | Net energy supply (kcal capita <sup>-1</sup> d <sup>-1</sup> ) |
|------------------|---------|---------------------------------|----------------|----------------------------------------------------------------|
| 59               | Egypt   | Sweeteners, Other               | 2000           | 9                                                              |
| 59               | Egypt   | Tea (including mate)            | 2000           | 1                                                              |
| 59               | Egypt   | Tomatoes and products           | 2000           | 46                                                             |
| 59               | Egypt   | Treenuts                        | 2000           | 4                                                              |
| 59               | Egypt   | Vegetable Oils                  | 2000           | 129                                                            |
| 59               | Egypt   | Vegetables                      | 2000           | 123                                                            |
| 59               | Egypt   | Vegetables, Other               | 2000           | 68                                                             |
| 59               | Egypt   | Vegetal Products                | 2000           | 3,107                                                          |
| 59               | Egypt   | Wheat and products              | 2000           | 1,090                                                          |
| 59               | Egypt   | Alcoholic Beverages             | 2001           | 3                                                              |
| 59               | Egypt   | Animal fats                     | 2001           | 50                                                             |
| 59               | Egypt   | Animal Products                 | 2001           | 251                                                            |
| 59               | Egypt   | Apples and products             | 2001           | 9                                                              |
| 59               | Egypt   | Bananas                         | 2001           | 19                                                             |
| 59               | Egypt   | Barley and products             | 2001           | 2                                                              |
| 59               | Egypt   | Beans                           | 2001           | 3                                                              |
| 59               | Egypt   | Beer                            | 2001           | 2                                                              |
| 59               | Egypt   | Bovine Meat                     | 2001           | 32                                                             |
| 59               | Egypt   | Butter, Ghee                    | 2001           | 43                                                             |
| 59               | Egypt   | Cereals - Excluding Beer        | 2001           | 2,174                                                          |
| 59               | Egypt   | Cereals, Other                  | 2001           | 1                                                              |
| 59               | Egypt   | Cocoa Beans and products        | 2001           | 1                                                              |
| 59               | Egypt   | Coconut Oil                     | 2001           | 2                                                              |
| 59               | Egypt   | Coconuts - Incl Copra           | 2001           | 2                                                              |
| 59               | Egypt   | Cottonseed Oil                  | 2001           | 19                                                             |
| 59               | Egypt   | Dates                           | 2001           | 64                                                             |
| 59               | Egypt   | Demersal Fish                   | 2001           | 3                                                              |
| 59               | Egypt   | Eggs                            | 2001           | 9                                                              |
| 59               | Egypt   | Fats, Animals, Raw              | 2001           | 7                                                              |
| 59               | Egypt   | Fish, Seafood                   | 2001           | 28                                                             |
| 59               | Egypt   | Freshwater Fish                 | 2001           | 14                                                             |
| 59               | Egypt   | Fruits - Excluding Wine         | 2001           | 165                                                            |
| 59               | Egypt   | Fruits, Other                   | 2001           | 22                                                             |
| 59               | Egypt   | Grand Total                     | 2001           | 3,409                                                          |
| 59               | Egypt   | Grapes and products (excl wine) | 2001           | 27                                                             |
| 59               | Egypt   | Groundnut Oil                   | 2001           | 9                                                              |
| 59               | Egypt   | Groundnuts (Shelled Eq)         | 2001           | 17                                                             |
| 59               | Egypt   | Honey                           | 2001           | 1                                                              |
| 59               | Egypt   | Lemons, Limes and products      | 2001           | 2                                                              |
| 59               | Egypt   | Maize and products              | 2001           | 563                                                            |
| 59               | Egypt   | Maize Germ Oil                  | 2001           | 4                                                              |
| 59               | Egypt   | Marine Fish, Other              | 2001           | 2                                                              |
| 59               | Egypt   | Meat                            | 2001           | 83                                                             |
| 59               | Egypt   | Meat, Other                     | 2001           | 8                                                              |
| 59               | Egypt   | Milk - Excluding Butter         | 2001           | 76                                                             |
| 59               | Egypt   | Miscellaneous                   | 2001           | 2                                                              |
| 59               | Egypt   | Mutton & Goat Meat              | 2001           | 7                                                              |
| 59               | Egypt   | Offals                          | 2001           | 5                                                              |
| 59               | Egypt   | Oilcrops                        | 2001           | 57                                                             |
| 59               | Egypt   | Oilcrops Oil, Other             | 2001           | 1                                                              |
| 59               | Egypt   | Oilcrops, Other                 | 2001           | 2                                                              |
| 59               | Egypt   | Olive Oil                       | 2001           | 4                                                              |
| 59               | Egypt   | Olives (including preserved)    | 2001           | 15                                                             |
| 59               | Egypt   | Onions                          | 2001           | 7                                                              |
| 59               | Egypt   | Oranges, Mandarines             | 2001           | 22                                                             |
| 59               | Egypt   | Palmkernel Oil                  | 2001           | 6                                                              |
| 59               | Egypt   | Pelagic Fish                    | 2001           | 8                                                              |
| 59               | Egypt   | Pepper                          | 2001           | 1                                                              |
| 59               | Egypt   | Pimento                         | 2001           | 5                                                              |
| 59               | Egypt   | Potatoes and products           | 2001           | 40                                                             |
| 59               | Egypt   | Poultry Meat                    | 2001           | 36                                                             |
| 59               | Egypt   | Pulses                          | 2001           | 90                                                             |
| 59               | Egypt   | Pulses, Other and products      | 2001           | 86                                                             |
| 59               | Egypt   | Rice (Milled Equivalent)        | 2001           | 418                                                            |
| 59               | Egypt   | Roots, Other                    | 2001           | 1                                                              |
| 59               | Egypt   | Sesame seed                     | 2001           | 20                                                             |
| 59               | Egypt   | Sorghum and products            | 2001           | 37                                                             |
| 59               | Egypt   | Soyabean Oil                    | 2001           | 36                                                             |
| 59               | Egypt   | Spices                          | 2001           | 8                                                              |
| 59               | Egypt   | Spices, Other                   | 2001           | 2                                                              |
| 59               | Egypt   | Starchy Roots                   | 2001           | 51                                                             |
| 59               | Egypt   | Stimulants                      | 2001           | 2                                                              |
| 59               | Egypt   | Sugar & Sweeteners              | 2001           | 322                                                            |
| 59               | Egypt   | Sugar (Raw Equivalent)          | 2001           | 309                                                            |
| 59               | Egypt   | Sugar cane                      | 2001           | 40                                                             |
| 59               | Egypt   | Sugar Crops                     | 2001           | 40                                                             |
| 59               | Egypt   | Sunflowerseed Oil               | 2001           | 47                                                             |
| 59               | Egypt   | Sweet potatoes                  | 2001           | 10                                                             |
| 59               | Egypt   | Sweeteners, Other               | 2001           | 12                                                             |
| 59               | Egypt   | Tea (including mate)            | 2001           | 1                                                              |
| 59               | Egypt   | Tomatoes and products           | 2001           | 42                                                             |
| 59               | Egypt   | Treenuts                        | 2001           | 5                                                              |
| 59               | Egypt   | Vegetable Oils                  | 2001           | 129                                                            |
| 59               | Egypt   | Vegetables                      | 2001           | 110                                                            |
| 59               | Egypt   | Vegetables, Other               | 2001           | 62                                                             |
| 59               | Egypt   | Vegetal Products                | 2001           | 3,158                                                          |
| 59               | Egypt   | Wheat and products              | 2001           | 1,152                                                          |
| 59               | Egypt   | Alcoholic Beverages             | 2002           | 3                                                              |
| 59               | Egypt   | Animal fats                     | 2002           | 51                                                             |
| 59               | Egypt   | Animal Products                 | 2002           | 259                                                            |
| 59               | Egypt   | Apples and products             | 2002           | 10                                                             |
| 59               | Egypt   | Bananas                         | 2002           | 19                                                             |
| 59               | Egypt   | Barley and products             | 2002           | 2                                                              |
| 59               | Egypt   | Beans                           | 2002           | 4                                                              |
| 59               | Egypt   | Beer                            | 2002           | 2                                                              |
| 59               | Egypt   | Bovine Meat                     | 2002           | 35                                                             |
| 59               | Egypt   | Butter, Ghee                    | 2002           | 43                                                             |

Dietary calcium and zinc deficiency risks are decreasing but remain prevalent

| FAO Country code | Country | Food item                       | Reference year | Net energy supply (kcal capita <sup>-1</sup> d <sup>-1</sup> ) |
|------------------|---------|---------------------------------|----------------|----------------------------------------------------------------|
| 59               | Egypt   | Cereals - Excluding Beer        | 2002           | 2,197                                                          |
| 59               | Egypt   | Cereals, Other                  | 2002           | 1                                                              |
| 59               | Egypt   | Cocoa Beans and products        | 2002           | 1                                                              |
| 59               | Egypt   | Coconut Oil                     | 2002           | 3                                                              |
| 59               | Egypt   | Coconuts - Incl Copra           | 2002           | 3                                                              |
| 59               | Egypt   | Cottonseed Oil                  | 2002           | 23                                                             |
| 59               | Egypt   | Dates                           | 2002           | 61                                                             |
| 59               | Egypt   | Demersal Fish                   | 2002           | 4                                                              |
| 59               | Egypt   | Eggs                            | 2002           | 14                                                             |
| 59               | Egypt   | Fats, Animals, Raw              | 2002           | 7                                                              |
| 59               | Egypt   | Fish, Seafood                   | 2002           | 26                                                             |
| 59               | Egypt   | Freshwater Fish                 | 2002           | 14                                                             |
| 59               | Egypt   | Fruits - Excluding Wine         | 2002           | 167                                                            |
| 59               | Egypt   | Fruits, Other                   | 2002           | 24                                                             |
| 59               | Egypt   | Grand Total                     | 2002           | 3,434                                                          |
| 59               | Egypt   | Grapes and products (excl wine) | 2002           | 26                                                             |
| 59               | Egypt   | Groundnut Oil                   | 2002           | 9                                                              |
| 59               | Egypt   | Groundnuts (Shelled Eq)         | 2002           | 16                                                             |
| 59               | Egypt   | Honey                           | 2002           | 1                                                              |
| 59               | Egypt   | Lemons, Limes and products      | 2002           | 2                                                              |
| 59               | Egypt   | Maize and products              | 2002           | 581                                                            |
| 59               | Egypt   | Maize Germ Oil                  | 2002           | 5                                                              |
| 59               | Egypt   | Marine Fish, Other              | 2002           | 2                                                              |
| 59               | Egypt   | Meat                            | 2002           | 85                                                             |
| 59               | Egypt   | Meat, Other                     | 2002           | 7                                                              |
| 59               | Egypt   | Milk - Excluding Butter         | 2002           | 78                                                             |
| 59               | Egypt   | Miscellaneous                   | 2002           | 2                                                              |
| 59               | Egypt   | Mutton & Goat Meat              | 2002           | 7                                                              |
| 59               | Egypt   | Offals                          | 2002           | 5                                                              |
| 59               | Egypt   | Oilcrops                        | 2002           | 59                                                             |
| 59               | Egypt   | Oilcrops Oil, Other             | 2002           | 1                                                              |
| 59               | Egypt   | Oilcrops, Other                 | 2002           | 3                                                              |
| 59               | Egypt   | Olive Oil                       | 2002           | 5                                                              |
| 59               | Egypt   | Olives (including preserved)    | 2002           | 17                                                             |
| 59               | Egypt   | Onions                          | 2002           | 7                                                              |
| 59               | Egypt   | Oranges, Mandarines             | 2002           | 25                                                             |
| 59               | Egypt   | Palmkernel Oil                  | 2002           | 6                                                              |
| 59               | Egypt   | Peas                            | 2002           | 1                                                              |
| 59               | Egypt   | Pelagic Fish                    | 2002           | 6                                                              |
| 59               | Egypt   | Pepper                          | 2002           | 1                                                              |
| 59               | Egypt   | Pimento                         | 2002           | 5                                                              |
| 59               | Egypt   | Potatoes and products           | 2002           | 41                                                             |
| 59               | Egypt   | Poultry Meat                    | 2002           | 35                                                             |
| 59               | Egypt   | Pulses                          | 2002           | 90                                                             |
| 59               | Egypt   | Pulses, Other and products      | 2002           | 85                                                             |
| 59               | Egypt   | Rice (Milled Equivalent)        | 2002           | 472                                                            |
| 59               | Egypt   | Roots, Other                    | 2002           | 2                                                              |
| 59               | Egypt   | Sesame seed                     | 2002           | 20                                                             |
| 59               | Egypt   | Sorghum and products            | 2002           | 40                                                             |
| 59               | Egypt   | Soyabean Oil                    | 2002           | 40                                                             |
| 59               | Egypt   | Spices                          | 2002           | 8                                                              |
| 59               | Egypt   | Spices, Other                   | 2002           | 2                                                              |
| 59               | Egypt   | Starchy Roots                   | 2002           | 50                                                             |
| 59               | Egypt   | Stimulants                      | 2002           | 2                                                              |
| 59               | Egypt   | Sugar & Sweeteners              | 2002           | 305                                                            |
| 59               | Egypt   | Sugar (Raw Equivalent)          | 2002           | 293                                                            |
| 59               | Egypt   | Sugar cane                      | 2002           | 42                                                             |
| 59               | Egypt   | Sugar Crops                     | 2002           | 42                                                             |
| 59               | Egypt   | Sunflowerseed Oil               | 2002           | 46                                                             |
| 59               | Egypt   | Sweet potatoes                  | 2002           | 7                                                              |
| 59               | Egypt   | Sweeteners, Other               | 2002           | 11                                                             |
| 59               | Egypt   | Tea (including mate)            | 2002           | 1                                                              |
| 59               | Egypt   | Tomatoes and products           | 2002           | 44                                                             |
| 59               | Egypt   | Treenuts                        | 2002           | 5                                                              |
| 59               | Egypt   | Vegetable Oils                  | 2002           | 136                                                            |
| 59               | Egypt   | Vegetables                      | 2002           | 110                                                            |
| 59               | Egypt   | Vegetables, Other               | 2002           | 60                                                             |
| 59               | Egypt   | Vegetal Products                | 2002           | 3,175                                                          |
| 59               | Egypt   | Wheat and products              | 2002           | 1,101                                                          |
| 59               | Egypt   | Alcoholic Beverages             | 2003           | 3                                                              |
| 59               | Egypt   | Animal fats                     | 2003           | 55                                                             |
| 59               | Egypt   | Animal Products                 | 2003           | 283                                                            |
| 59               | Egypt   | Apples and products             | 2003           | 10                                                             |
| 59               | Egypt   | Bananas                         | 2003           | 19                                                             |
| 59               | Egypt   | Barley and products             | 2003           | 2                                                              |
| 59               | Egypt   | Beans                           | 2003           | 7                                                              |
| 59               | Egypt   | Beer                            | 2003           | 3                                                              |
| 59               | Egypt   | Bovine Meat                     | 2003           | 37                                                             |
| 59               | Egypt   | Butter, Ghee                    | 2003           | 48                                                             |
| 59               | Egypt   | Cereals - Excluding Beer        | 2003           | 2,153                                                          |
| 59               | Egypt   | Cereals, Other                  | 2003           | 1                                                              |
| 59               | Egypt   | Cocoa Beans and products        | 2003           | 1                                                              |
| 59               | Egypt   | Coconut Oil                     | 2003           | 3                                                              |
| 59               | Egypt   | Coconuts - Incl Copra           | 2003           | 2                                                              |
| 59               | Egypt   | Cottonseed Oil                  | 2003           | 20                                                             |
| 59               | Egypt   | Dates                           | 2003           | 62                                                             |
| 59               | Egypt   | Demersal Fish                   | 2003           | 4                                                              |
| 59               | Egypt   | Eggs                            | 2003           | 13                                                             |
| 59               | Egypt   | Fats, Animals, Raw              | 2003           | 7                                                              |
| 59               | Egypt   | Fish, Seafood                   | 2003           | 28                                                             |
| 59               | Egypt   | Freshwater Fish                 | 2003           | 16                                                             |
| 59               | Egypt   | Fruits - Excluding Wine         | 2003           | 165                                                            |
| 59               | Egypt   | Fruits, Other                   | 2003           | 21                                                             |
| 59               | Egypt   | Grand Total                     | 2003           | 3,379                                                          |
| 59               | Egypt   | Grapes and products (excl wine) | 2003           | 28                                                             |
| 59               | Egypt   | Groundnut Oil                   | 2003           | 8                                                              |
| 59               | Egypt   | Groundnuts (Shelled Eq)         | 2003           | 17                                                             |

Dietary calcium and zinc deficiency risks are decreasing but remain prevalent

| FAO Country code | Country | Food item                       | Reference year | Net energy supply (kcal capita <sup>-1</sup> d <sup>-1</sup> ) |
|------------------|---------|---------------------------------|----------------|----------------------------------------------------------------|
| 59               | Egypt   | Honey                           | 2003           | 1                                                              |
| 59               | Egypt   | Lemons, Limes and products      | 2003           | 2                                                              |
| 59               | Egypt   | Maize and products              | 2003           | 593                                                            |
| 59               | Egypt   | Maize Germ Oil                  | 2003           | 4                                                              |
| 59               | Egypt   | Marine Fish, Other              | 2003           | 2                                                              |
| 59               | Egypt   | Meat                            | 2003           | 86                                                             |
| 59               | Egypt   | Meat, Other                     | 2003           | 7                                                              |
| 59               | Egypt   | Milk - Excluding Butter         | 2003           | 96                                                             |
| 59               | Egypt   | Miscellaneous                   | 2003           | 2                                                              |
| 59               | Egypt   | Mutton & Goat Meat              | 2003           | 6                                                              |
| 59               | Egypt   | Offals                          | 2003           | 5                                                              |
| 59               | Egypt   | Oilcrops                        | 2003           | 55                                                             |
| 59               | Egypt   | Oilcrops Oil, Other             | 2003           | 1                                                              |
| 59               | Egypt   | Oilcrops, Other                 | 2003           | 6                                                              |
| 59               | Egypt   | Olive Oil                       | 2003           | 4                                                              |
| 59               | Egypt   | Olives (including preserved)    | 2003           | 10                                                             |
| 59               | Egypt   | Onions                          | 2003           | 5                                                              |
| 59               | Egypt   | Oranges, Mandarines             | 2003           | 23                                                             |
| 59               | Egypt   | Palmkernel Oil                  | 2003           | 6                                                              |
| 59               | Egypt   | Pelagic Fish                    | 2003           | 6                                                              |
| 59               | Egypt   | Pimento                         | 2003           | 5                                                              |
| 59               | Egypt   | Potatoes and products           | 2003           | 40                                                             |
| 59               | Egypt   | Poultry Meat                    | 2003           | 36                                                             |
| 59               | Egypt   | Pulses                          | 2003           | 85                                                             |
| 59               | Egypt   | Pulses, Other and products      | 2003           | 78                                                             |
| 59               | Egypt   | Rice (Milled Equivalent)        | 2003           | 454                                                            |
| 59               | Egypt   | Roots, Other                    | 2003           | 3                                                              |
| 59               | Egypt   | Sesame seed                     | 2003           | 19                                                             |
| 59               | Egypt   | Sorghum and products            | 2003           | 39                                                             |
| 59               | Egypt   | Soyabean Oil                    | 2003           | 44                                                             |
| 59               | Egypt   | Spices                          | 2003           | 8                                                              |
| 59               | Egypt   | Spices, Other                   | 2003           | 2                                                              |
| 59               | Egypt   | Starchy Roots                   | 2003           | 52                                                             |
| 59               | Egypt   | Stimulants                      | 2003           | 2                                                              |
| 59               | Egypt   | Sugar & Sweeteners              | 2003           | 278                                                            |
| 59               | Egypt   | Sugar (Raw Equivalent)          | 2003           | 267                                                            |
| 59               | Egypt   | Sugar cane                      | 2003           | 38                                                             |
| 59               | Egypt   | Sugar Crops                     | 2003           | 38                                                             |
| 59               | Egypt   | Sunflowerseed Oil               | 2003           | 43                                                             |
| 59               | Egypt   | Sweet potatoes                  | 2003           | 10                                                             |
| 59               | Egypt   | Sweeteners, Other               | 2003           | 10                                                             |
| 59               | Egypt   | Tea (including mate)            | 2003           | 1                                                              |
| 59               | Egypt   | Tomatoes and products           | 2003           | 46                                                             |
| 59               | Egypt   | Treenuts                        | 2003           | 5                                                              |
| 59               | Egypt   | Vegetable Oils                  | 2003           | 133                                                            |
| 59               | Egypt   | Vegetables                      | 2003           | 117                                                            |
| 59               | Egypt   | Vegetables, Other               | 2003           | 66                                                             |
| 59               | Egypt   | Vegetal Products                | 2003           | 3,096                                                          |
| 59               | Egypt   | Wheat and products              | 2003           | 1,064                                                          |
| 59               | Egypt   | Alcoholic Beverages             | 2004           | 5                                                              |
| 59               | Egypt   | Animal fats                     | 2004           | 47                                                             |
| 59               | Egypt   | Animal Products                 | 2004           | 252                                                            |
| 59               | Egypt   | Apples and products             | 2004           | 10                                                             |
| 59               | Egypt   | Bananas                         | 2004           | 18                                                             |
| 59               | Egypt   | Barley and products             | 2004           | 2                                                              |
| 59               | Egypt   | Beans                           | 2004           | 4                                                              |
| 59               | Egypt   | Beer                            | 2004           | 4                                                              |
| 59               | Egypt   | Bovine Meat                     | 2004           | 41                                                             |
| 59               | Egypt   | Butter, Ghee                    | 2004           | 41                                                             |
| 59               | Egypt   | Cereals - Excluding Beer        | 2004           | 2,111                                                          |
| 59               | Egypt   | Cocoa Beans and products        | 2004           | 1                                                              |
| 59               | Egypt   | Coconut Oil                     | 2004           | 2                                                              |
| 59               | Egypt   | Coconuts - Incl Copra           | 2004           | 2                                                              |
| 59               | Egypt   | Cottonseed Oil                  | 2004           | 21                                                             |
| 59               | Egypt   | Dates                           | 2004           | 63                                                             |
| 59               | Egypt   | Demersal Fish                   | 2004           | 4                                                              |
| 59               | Egypt   | Eggs                            | 2004           | 11                                                             |
| 59               | Egypt   | Fats, Animals, Raw              | 2004           | 6                                                              |
| 59               | Egypt   | Fish, Seafood                   | 2004           | 28                                                             |
| 59               | Egypt   | Freshwater Fish                 | 2004           | 15                                                             |
| 59               | Egypt   | Fruits - Excluding Wine         | 2004           | 170                                                            |
| 59               | Egypt   | Fruits, Other                   | 2004           | 23                                                             |
| 59               | Egypt   | Grand Total                     | 2004           | 3,309                                                          |
| 59               | Egypt   | Grapes and products (excl wine) | 2004           | 29                                                             |
| 59               | Egypt   | Groundnut Oil                   | 2004           | 8                                                              |
| 59               | Egypt   | Groundnuts (Shelled Eq)         | 2004           | 14                                                             |
| 59               | Egypt   | Honey                           | 2004           | 1                                                              |
| 59               | Egypt   | Lemons, Limes and products      | 2004           | 2                                                              |
| 59               | Egypt   | Maize and products              | 2004           | 566                                                            |
| 59               | Egypt   | Maize Germ Oil                  | 2004           | 4                                                              |
| 59               | Egypt   | Marine Fish, Other              | 2004           | 2                                                              |
| 59               | Egypt   | Meat                            | 2004           | 89                                                             |
| 59               | Egypt   | Meat, Other                     | 2004           | 6                                                              |
| 59               | Egypt   | Milk - Excluding Butter         | 2004           | 72                                                             |
| 59               | Egypt   | Miscellaneous                   | 2004           | 3                                                              |
| 59               | Egypt   | Mutton & Goat Meat              | 2004           | 5                                                              |
| 59               | Egypt   | Offals                          | 2004           | 4                                                              |
| 59               | Egypt   | Oilcrops                        | 2004           | 54                                                             |
| 59               | Egypt   | Oilcrops Oil, Other             | 2004           | 1                                                              |
| 59               | Egypt   | Oilcrops, Other                 | 2004           | 3                                                              |
| 59               | Egypt   | Olive Oil                       | 2004           | 3                                                              |
| 59               | Egypt   | Olives (including preserved)    | 2004           | 15                                                             |
| 59               | Egypt   | Onions                          | 2004           | 7                                                              |
| 59               | Egypt   | Oranges, Mandarines             | 2004           | 23                                                             |
| 59               | Egypt   | Palmkernel Oil                  | 2004           | 9                                                              |
| 59               | Egypt   | Pelagic Fish                    | 2004           | 7                                                              |
| 59               | Egypt   | Pepper                          | 2004           | 1                                                              |

Dietary calcium and zinc deficiency risks are decreasing but remain prevalent

| FAO Country code | Country | Food item                       | Reference year | Net energy supply (kcal capita <sup>-1</sup> d <sup>-1</sup> ) |
|------------------|---------|---------------------------------|----------------|----------------------------------------------------------------|
| 59               | Egypt   | Pimento                         | 2004           | 5                                                              |
| 59               | Egypt   | Potatoes and products           | 2004           | 49                                                             |
| 59               | Egypt   | Poultry Meat                    | 2004           | 36                                                             |
| 59               | Egypt   | Pulses                          | 2004           | 83                                                             |
| 59               | Egypt   | Pulses, Other and products      | 2004           | 78                                                             |
| 59               | Egypt   | Rice (Milled Equivalent)        | 2004           | 432                                                            |
| 59               | Egypt   | Roots, Other                    | 2004           | 3                                                              |
| 59               | Egypt   | Sesame seed                     | 2004           | 19                                                             |
| 59               | Egypt   | Sorghum and products            | 2004           | 27                                                             |
| 59               | Egypt   | Soyabean Oil                    | 2004           | 36                                                             |
| 59               | Egypt   | Spices                          | 2004           | 8                                                              |
| 59               | Egypt   | Spices, Other                   | 2004           | 2                                                              |
| 59               | Egypt   | Starchy Roots                   | 2004           | 59                                                             |
| 59               | Egypt   | Stimulants                      | 2004           | 1                                                              |
| 59               | Egypt   | Sugar & Sweeteners              | 2004           | 277                                                            |
| 59               | Egypt   | Sugar (Raw Equivalent)          | 2004           | 268                                                            |
| 59               | Egypt   | Sugar cane                      | 2004           | 37                                                             |
| 59               | Egypt   | Sugar Crops                     | 2004           | 37                                                             |
| 59               | Egypt   | Sunflowerseed Oil               | 2004           | 42                                                             |
| 59               | Egypt   | Sweet potatoes                  | 2004           | 8                                                              |
| 59               | Egypt   | Sweeteners, Other               | 2004           | 8                                                              |
| 59               | Egypt   | Tomatoes and products           | 2004           | 48                                                             |
| 59               | Egypt   | Treenuts                        | 2004           | 4                                                              |
| 59               | Egypt   | Vegetable Oils                  | 2004           | 127                                                            |
| 59               | Egypt   | Vegetables                      | 2004           | 119                                                            |
| 59               | Egypt   | Vegetables, Other               | 2004           | 63                                                             |
| 59               | Egypt   | Vegetal Products                | 2004           | 3,057                                                          |
| 59               | Egypt   | Wheat and products              | 2004           | 1,084                                                          |
| 59               | Egypt   | Alcoholic Beverages             | 2005           | 5                                                              |
| 59               | Egypt   | Animal fats                     | 2005           | 49                                                             |
| 59               | Egypt   | Animal Products                 | 2005           | 268                                                            |
| 59               | Egypt   | Apples and products             | 2005           | 11                                                             |
| 59               | Egypt   | Bananas                         | 2005           | 19                                                             |
| 59               | Egypt   | Barley and products             | 2005           | 2                                                              |
| 59               | Egypt   | Beans                           | 2005           | 5                                                              |
| 59               | Egypt   | Beer                            | 2005           | 4                                                              |
| 59               | Egypt   | Bovine Meat                     | 2005           | 45                                                             |
| 59               | Egypt   | Butter, Ghee                    | 2005           | 44                                                             |
| 59               | Egypt   | Cereals - Excluding Beer        | 2005           | 2,129                                                          |
| 59               | Egypt   | Cocoa Beans and products        | 2005           | 1                                                              |
| 59               | Egypt   | Coconut Oil                     | 2005           | 2                                                              |
| 59               | Egypt   | Coconuts - Incl Copra           | 2005           | 3                                                              |
| 59               | Egypt   | Cottonseed Oil                  | 2005           | 21                                                             |
| 59               | Egypt   | Dates                           | 2005           | 62                                                             |
| 59               | Egypt   | Demersal Fish                   | 2005           | 4                                                              |
| 59               | Egypt   | Eggs                            | 2005           | 10                                                             |
| 59               | Egypt   | Fats, Animals, Raw              | 2005           | 6                                                              |
| 59               | Egypt   | Fish, Seafood                   | 2005           | 29                                                             |
| 59               | Egypt   | Freshwater Fish                 | 2005           | 15                                                             |
| 59               | Egypt   | Fruits - Excluding Wine         | 2005           | 172                                                            |
| 59               | Egypt   | Fruits, Other                   | 2005           | 22                                                             |
| 59               | Egypt   | Grand Total                     | 2005           | 3,367                                                          |
| 59               | Egypt   | Grapes and products (excl wine) | 2005           | 31                                                             |
| 59               | Egypt   | Groundnut Oil                   | 2005           | 8                                                              |
| 59               | Egypt   | Groundnuts (Shelled Eq)         | 2005           | 14                                                             |
| 59               | Egypt   | Honey                           | 2005           | 1                                                              |
| 59               | Egypt   | Lemons, Limes and products      | 2005           | 2                                                              |
| 59               | Egypt   | Maize and products              | 2005           | 560                                                            |
| 59               | Egypt   | Maize Germ Oil                  | 2005           | 13                                                             |
| 59               | Egypt   | Marine Fish, Other              | 2005           | 3                                                              |
| 59               | Egypt   | Meat                            | 2005           | 95                                                             |
| 59               | Egypt   | Meat, Other                     | 2005           | 6                                                              |
| 59               | Egypt   | Milk - Excluding Butter         | 2005           | 80                                                             |
| 59               | Egypt   | Miscellaneous                   | 2005           | 4                                                              |
| 59               | Egypt   | Mutton & Goat Meat              | 2005           | 8                                                              |
| 59               | Egypt   | Offals                          | 2005           | 5                                                              |
| 59               | Egypt   | Oilcrops                        | 2005           | 44                                                             |
| 59               | Egypt   | Oilcrops Oil, Other             | 2005           | 2                                                              |
| 59               | Egypt   | Oilcrops, Other                 | 2005           | 1                                                              |
| 59               | Egypt   | Olive Oil                       | 2005           | 2                                                              |
| 59               | Egypt   | Olives (including preserved)    | 2005           | 15                                                             |
| 59               | Egypt   | Onions                          | 2005           | 14                                                             |
| 59               | Egypt   | Oranges, Mandarines             | 2005           | 25                                                             |
| 59               | Egypt   | Palmkernel Oil                  | 2005           | 14                                                             |
| 59               | Egypt   | Peas                            | 2005           | 1                                                              |
| 59               | Egypt   | Pelagic Fish                    | 2005           | 6                                                              |
| 59               | Egypt   | Pepper                          | 2005           | 1                                                              |
| 59               | Egypt   | Pimento                         | 2005           | 5                                                              |
| 59               | Egypt   | Potatoes and products           | 2005           | 64                                                             |
| 59               | Egypt   | Poultry Meat                    | 2005           | 36                                                             |
| 59               | Egypt   | Pulses                          | 2005           | 88                                                             |
| 59               | Egypt   | Pulses, Other and products      | 2005           | 82                                                             |
| 59               | Egypt   | Rice (Milled Equivalent)        | 2005           | 386                                                            |
| 59               | Egypt   | Roots, Other                    | 2005           | 2                                                              |
| 59               | Egypt   | Sesame seed                     | 2005           | 10                                                             |
| 59               | Egypt   | Sorghum and products            | 2005           | 25                                                             |
| 59               | Egypt   | Soyabean Oil                    | 2005           | 38                                                             |
| 59               | Egypt   | Soyabeans                       | 2005           | 1                                                              |
| 59               | Egypt   | Spices                          | 2005           | 8                                                              |
| 59               | Egypt   | Spices, Other                   | 2005           | 3                                                              |
| 59               | Egypt   | Starchy Roots                   | 2005           | 76                                                             |
| 59               | Egypt   | Stimulants                      | 2005           | 1                                                              |
| 59               | Egypt   | Sugar & Sweeteners              | 2005           | 272                                                            |
| 59               | Egypt   | Sugar (Raw Equivalent)          | 2005           | 262                                                            |
| 59               | Egypt   | Sugar cane                      | 2005           | 34                                                             |
| 59               | Egypt   | Sugar Crops                     | 2005           | 34                                                             |
| 59               | Egypt   | Sunflowerseed Oil               | 2005           | 39                                                             |

Dietary calcium and zinc deficiency risks are decreasing but remain prevalent

| FAO Country code | Country | Food item                       | Reference year | Net energy supply (kcal capita <sup>-1</sup> d <sup>-1</sup> ) |
|------------------|---------|---------------------------------|----------------|----------------------------------------------------------------|
| 59               | Egypt   | Sweet potatoes                  | 2005           | 10                                                             |
| 59               | Egypt   | Sweeteners, Other               | 2005           | 10                                                             |
| 59               | Egypt   | Tomatoes and products           | 2005           | 47                                                             |
| 59               | Egypt   | Treenuts                        | 2005           | 4                                                              |
| 59               | Egypt   | Vegetable Oils                  | 2005           | 138                                                            |
| 59               | Egypt   | Vegetables                      | 2005           | 123                                                            |
| 59               | Egypt   | Vegetables, Other               | 2005           | 63                                                             |
| 59               | Egypt   | Vegetal Products                | 2005           | 3,099                                                          |
| 59               | Egypt   | Wheat and products              | 2005           | 1,155                                                          |
| 59               | Egypt   | Alcoholic Beverages             | 2006           | 4                                                              |
| 59               | Egypt   | Animal fats                     | 2006           | 44                                                             |
| 59               | Egypt   | Animal Products                 | 2006           | 286                                                            |
| 59               | Egypt   | Apples and products             | 2006           | 10                                                             |
| 59               | Egypt   | Bananas                         | 2006           | 17                                                             |
| 59               | Egypt   | Barley and products             | 2006           | 2                                                              |
| 59               | Egypt   | Beans                           | 2006           | 3                                                              |
| 59               | Egypt   | Beer                            | 2006           | 3                                                              |
| 59               | Egypt   | Bovine Meat                     | 2006           | 53                                                             |
| 59               | Egypt   | Butter, Ghee                    | 2006           | 38                                                             |
| 59               | Egypt   | Cereals - Excluding Beer        | 2006           | 2,149                                                          |
| 59               | Egypt   | Cocoa Beans and products        | 2006           | 1                                                              |
| 59               | Egypt   | Coconut Oil                     | 2006           | 1                                                              |
| 59               | Egypt   | Coconuts - Incl Copra           | 2006           | 2                                                              |
| 59               | Egypt   | Cottonseed Oil                  | 2006           | 19                                                             |
| 59               | Egypt   | Dates                           | 2006           | 70                                                             |
| 59               | Egypt   | Demersal Fish                   | 2006           | 5                                                              |
| 59               | Egypt   | Eggs                            | 2006           | 10                                                             |
| 59               | Egypt   | Fats, Animals, Raw              | 2006           | 6                                                              |
| 59               | Egypt   | Fish, Seafood                   | 2006           | 30                                                             |
| 59               | Egypt   | Freshwater Fish                 | 2006           | 15                                                             |
| 59               | Egypt   | Fruits - Excluding Wine         | 2006           | 184                                                            |
| 59               | Egypt   | Fruits, Other                   | 2006           | 27                                                             |
| 59               | Egypt   | Grand Total                     | 2006           | 3,388                                                          |
| 59               | Egypt   | Grapes and products (excl wine) | 2006           | 32                                                             |
| 59               | Egypt   | Groundnut Oil                   | 2006           | 8                                                              |
| 59               | Egypt   | Groundnuts (Shelled Eq)         | 2006           | 13                                                             |
| 59               | Egypt   | Honey                           | 2006           | 1                                                              |
| 59               | Egypt   | Lemons, Limes and products      | 2006           | 2                                                              |
| 59               | Egypt   | Maize and products              | 2006           | 564                                                            |
| 59               | Egypt   | Maize Germ Oil                  | 2006           | 5                                                              |
| 59               | Egypt   | Marine Fish, Other              | 2006           | 4                                                              |
| 59               | Egypt   | Meat                            | 2006           | 107                                                            |
| 59               | Egypt   | Meat, Other                     | 2006           | 7                                                              |
| 59               | Egypt   | Milk - Excluding Butter         | 2006           | 88                                                             |
| 59               | Egypt   | Miscellaneous                   | 2006           | 5                                                              |
| 59               | Egypt   | Mutton & Goat Meat              | 2006           | 9                                                              |
| 59               | Egypt   | Offals                          | 2006           | 7                                                              |
| 59               | Egypt   | Oilcrops                        | 2006           | 52                                                             |
| 59               | Egypt   | Oilcrops Oil, Other             | 2006           | 2                                                              |
| 59               | Egypt   | Oilcrops, Other                 | 2006           | 1                                                              |
| 59               | Egypt   | Olive Oil                       | 2006           | 2                                                              |
| 59               | Egypt   | Olives (including preserved)    | 2006           | 24                                                             |
| 59               | Egypt   | Onions                          | 2006           | 13                                                             |
| 59               | Egypt   | Oranges, Mandarines             | 2006           | 26                                                             |
| 59               | Egypt   | Palmkernel Oil                  | 2006           | 13                                                             |
| 59               | Egypt   | Peas                            | 2006           | 1                                                              |
| 59               | Egypt   | Pelagic Fish                    | 2006           | 6                                                              |
| 59               | Egypt   | Pepper                          | 2006           | 1                                                              |
| 59               | Egypt   | Pimento                         | 2006           | 5                                                              |
| 59               | Egypt   | Potatoes and products           | 2006           | 43                                                             |
| 59               | Egypt   | Poultry Meat                    | 2006           | 39                                                             |
| 59               | Egypt   | Pulses                          | 2006           | 85                                                             |
| 59               | Egypt   | Pulses, Other and products      | 2006           | 80                                                             |
| 59               | Egypt   | Rice (Milled Equivalent)        | 2006           | 411                                                            |
| 59               | Egypt   | Roots, Other                    | 2006           | 3                                                              |
| 59               | Egypt   | Sesame seed                     | 2006           | 11                                                             |
| 59               | Egypt   | Sorghum and products            | 2006           | 29                                                             |
| 59               | Egypt   | Soyabean Oil                    | 2006           | 39                                                             |
| 59               | Egypt   | Soyabeans                       | 2006           | 2                                                              |
| 59               | Egypt   | Spices                          | 2006           | 9                                                              |
| 59               | Egypt   | Spices, Other                   | 2006           | 3                                                              |
| 59               | Egypt   | Starchy Roots                   | 2006           | 56                                                             |
| 59               | Egypt   | Stimulants                      | 2006           | 1                                                              |
| 59               | Egypt   | Sugar & Sweeteners              | 2006           | 266                                                            |
| 59               | Egypt   | Sugar (Raw Equivalent)          | 2006           | 253                                                            |
| 59               | Egypt   | Sugar cane                      | 2006           | 34                                                             |
| 59               | Egypt   | Sugar Crops                     | 2006           | 34                                                             |
| 59               | Egypt   | Sunflowerseed Oil               | 2006           | 37                                                             |
| 59               | Egypt   | Sweet potatoes                  | 2006           | 10                                                             |
| 59               | Egypt   | Sweeteners, Other               | 2006           | 12                                                             |
| 59               | Egypt   | Tomatoes and products           | 2006           | 52                                                             |
| 59               | Egypt   | Treenuts                        | 2006           | 4                                                              |
| 59               | Egypt   | Vegetable Oils                  | 2006           | 125                                                            |
| 59               | Egypt   | Vegetables                      | 2006           | 130                                                            |
| 59               | Egypt   | Vegetables, Other               | 2006           | 65                                                             |
| 59               | Egypt   | Vegetal Products                | 2006           | 3,102                                                          |
| 59               | Egypt   | Wheat and products              | 2006           | 1,143                                                          |
| 59               | Egypt   | Alcoholic Beverages             | 2007           | 5                                                              |
| 59               | Egypt   | Animal fats                     | 2007           | 47                                                             |
| 59               | Egypt   | Animal Products                 | 2007           | 315                                                            |
| 59               | Egypt   | Apples and products             | 2007           | 10                                                             |
| 59               | Egypt   | Bananas                         | 2007           | 19                                                             |
| 59               | Egypt   | Barley and products             | 2007           | 3                                                              |
| 59               | Egypt   | Beans                           | 2007           | 2                                                              |
| 59               | Egypt   | Beer                            | 2007           | 5                                                              |
| 59               | Egypt   | Bovine Meat                     | 2007           | 55                                                             |
| 59               | Egypt   | Butter, Ghee                    | 2007           | 41                                                             |

Dietary calcium and zinc deficiency risks are decreasing but remain prevalent

| FAO Country code | Country | Food item                       | Reference year | Net energy supply (kcal capita <sup>-1</sup> d <sup>-1</sup> ) |
|------------------|---------|---------------------------------|----------------|----------------------------------------------------------------|
| 59               | Egypt   | Cereals - Excluding Beer        | 2007           | 2,150                                                          |
| 59               | Egypt   | Cocoa Beans and products        | 2007           | 1                                                              |
| 59               | Egypt   | Coconut Oil                     | 2007           | 2                                                              |
| 59               | Egypt   | Coconuts - Incl Copra           | 2007           | 2                                                              |
| 59               | Egypt   | Cottonseed Oil                  | 2007           | 17                                                             |
| 59               | Egypt   | Crustaceans                     | 2007           | 1                                                              |
| 59               | Egypt   | Dates                           | 2007           | 68                                                             |
| 59               | Egypt   | Demersal Fish                   | 2007           | 5                                                              |
| 59               | Egypt   | Eggs                            | 2007           | 11                                                             |
| 59               | Egypt   | Fats, Animals, Raw              | 2007           | 5                                                              |
| 59               | Egypt   | Fish, Seafood                   | 2007           | 31                                                             |
| 59               | Egypt   | Freshwater Fish                 | 2007           | 15                                                             |
| 59               | Egypt   | Fruits - Excluding Wine         | 2007           | 182                                                            |
| 59               | Egypt   | Fruits, Other                   | 2007           | 26                                                             |
| 59               | Egypt   | Grand Total                     | 2007           | 3,446                                                          |
| 59               | Egypt   | Grapes and products (excl wine) | 2007           | 32                                                             |
| 59               | Egypt   | Groundnut Oil                   | 2007           | 7                                                              |
| 59               | Egypt   | Groundnuts (Shelled Eq)         | 2007           | 20                                                             |
| 59               | Egypt   | Honey                           | 2007           | 1                                                              |
| 59               | Egypt   | Lemons, Limes and products      | 2007           | 2                                                              |
| 59               | Egypt   | Maize and products              | 2007           | 568                                                            |
| 59               | Egypt   | Maize Germ Oil                  | 2007           | 5                                                              |
| 59               | Egypt   | Marine Fish, Other              | 2007           | 3                                                              |
| 59               | Egypt   | Meat                            | 2007           | 116                                                            |
| 59               | Egypt   | Meat, Other                     | 2007           | 6                                                              |
| 59               | Egypt   | Milk - Excluding Butter         | 2007           | 104                                                            |
| 59               | Egypt   | Miscellaneous                   | 2007           | 5                                                              |
| 59               | Egypt   | Mutton & Goat Meat              | 2007           | 11                                                             |
| 59               | Egypt   | Offals                          | 2007           | 7                                                              |
| 59               | Egypt   | Oilcrops                        | 2007           | 64                                                             |
| 59               | Egypt   | Oilcrops Oil, Other             | 2007           | 2                                                              |
| 59               | Egypt   | Oilcrops, Other                 | 2007           | 1                                                              |
| 59               | Egypt   | Olive Oil                       | 2007           | 3                                                              |
| 59               | Egypt   | Olives (including preserved)    | 2007           | 23                                                             |
| 59               | Egypt   | Onions                          | 2007           | 18                                                             |
| 59               | Egypt   | Oranges, Mandarines             | 2007           | 25                                                             |
| 59               | Egypt   | Palmkernel Oil                  | 2007           | 4                                                              |
| 59               | Egypt   | Peas                            | 2007           | 1                                                              |
| 59               | Egypt   | Pelagic Fish                    | 2007           | 7                                                              |
| 59               | Egypt   | Pepper                          | 2007           | 1                                                              |
| 59               | Egypt   | Pimento                         | 2007           | 5                                                              |
| 59               | Egypt   | Potatoes and products           | 2007           | 53                                                             |
| 59               | Egypt   | Poultry Meat                    | 2007           | 43                                                             |
| 59               | Egypt   | Pulses                          | 2007           | 70                                                             |
| 59               | Egypt   | Pulses, Other and products      | 2007           | 68                                                             |
| 59               | Egypt   | Rice (Milled Equivalent)        | 2007           | 419                                                            |
| 59               | Egypt   | Roots, Other                    | 2007           | 3                                                              |
| 59               | Egypt   | Sesame seed                     | 2007           | 10                                                             |
| 59               | Egypt   | Sorghum and products            | 2007           | 24                                                             |
| 59               | Egypt   | Soyabean Oil                    | 2007           | 56                                                             |
| 59               | Egypt   | Soyabeans                       | 2007           | 8                                                              |
| 59               | Egypt   | Spices                          | 2007           | 7                                                              |
| 59               | Egypt   | Spices, Other                   | 2007           | 2                                                              |
| 59               | Egypt   | Starchy Roots                   | 2007           | 67                                                             |
| 59               | Egypt   | Stimulants                      | 2007           | 1                                                              |
| 59               | Egypt   | Sugar & Sweeteners              | 2007           | 267                                                            |
| 59               | Egypt   | Sugar (Raw Equivalent)          | 2007           | 254                                                            |
| 59               | Egypt   | Sugar cane                      | 2007           | 35                                                             |
| 59               | Egypt   | Sugar Crops                     | 2007           | 35                                                             |
| 59               | Egypt   | Sunflowerseed Oil               | 2007           | 40                                                             |
| 59               | Egypt   | Sweet potatoes                  | 2007           | 11                                                             |
| 59               | Egypt   | Sweeteners, Other               | 2007           | 12                                                             |
| 59               | Egypt   | Tomatoes and products           | 2007           | 52                                                             |
| 59               | Egypt   | Treenuts                        | 2007           | 5                                                              |
| 59               | Egypt   | Vegetable Oils                  | 2007           | 136                                                            |
| 59               | Egypt   | Vegetables                      | 2007           | 139                                                            |
| 59               | Egypt   | Vegetables, Other               | 2007           | 69                                                             |
| 59               | Egypt   | Vegetal Products                | 2007           | 3,132                                                          |
| 59               | Egypt   | Wheat and products              | 2007           | 1,137                                                          |
| 59               | Egypt   | Alcoholic Beverages             | 2008           | 4                                                              |
| 59               | Egypt   | Animal fats                     | 2008           | 51                                                             |
| 59               | Egypt   | Animal Products                 | 2008           | 315                                                            |
| 59               | Egypt   | Apples and products             | 2008           | 10                                                             |
| 59               | Egypt   | Bananas                         | 2008           | 21                                                             |
| 59               | Egypt   | Barley and products             | 2008           | 2                                                              |
| 59               | Egypt   | Beans                           | 2008           | 4                                                              |
| 59               | Egypt   | Beer                            | 2008           | 3                                                              |
| 59               | Egypt   | Bovine Meat                     | 2008           | 48                                                             |
| 59               | Egypt   | Butter, Ghee                    | 2008           | 45                                                             |
| 59               | Egypt   | Cereals - Excluding Beer        | 2008           | 2,188                                                          |
| 59               | Egypt   | Cocoa Beans and products        | 2008           | 1                                                              |
| 59               | Egypt   | Coconut Oil                     | 2008           | 2                                                              |
| 59               | Egypt   | Coconuts - Incl Copra           | 2008           | 1                                                              |
| 59               | Egypt   | Cottonseed Oil                  | 2008           | 10                                                             |
| 59               | Egypt   | Crustaceans                     | 2008           | 1                                                              |
| 59               | Egypt   | Dates                           | 2008           | 67                                                             |
| 59               | Egypt   | Demersal Fish                   | 2008           | 5                                                              |
| 59               | Egypt   | Eggs                            | 2008           | 15                                                             |
| 59               | Egypt   | Fats, Animals, Raw              | 2008           | 6                                                              |
| 59               | Egypt   | Fish, Seafood                   | 2008           | 31                                                             |
| 59               | Egypt   | Freshwater Fish                 | 2008           | 17                                                             |
| 59               | Egypt   | Fruits - Excluding Wine         | 2008           | 182                                                            |
| 59               | Egypt   | Fruits, Other                   | 2008           | 26                                                             |
| 59               | Egypt   | Grand Total                     | 2008           | 3,491                                                          |
| 59               | Egypt   | Grapes and products (excl wine) | 2008           | 32                                                             |
| 59               | Egypt   | Groundnut Oil                   | 2008           | 6                                                              |
| 59               | Egypt   | Groundnuts (Shelled Eq)         | 2008           | 17                                                             |

Dietary calcium and zinc deficiency risks are decreasing but remain prevalent

| FAO Country code | Country | Food item                       | Reference year | Net energy supply (kcal capita <sup>-1</sup> d <sup>-1</sup> ) |
|------------------|---------|---------------------------------|----------------|----------------------------------------------------------------|
| 59               | Egypt   | Honey                           | 2008           | 1                                                              |
| 59               | Egypt   | Lemons, Limes and products      | 2008           | 2                                                              |
| 59               | Egypt   | Maize and products              | 2008           | 570                                                            |
| 59               | Egypt   | Maize Germ Oil                  | 2008           | 7                                                              |
| 59               | Egypt   | Marine Fish, Other              | 2008           | 1                                                              |
| 59               | Egypt   | Meat                            | 2008           | 107                                                            |
| 59               | Egypt   | Meat, Other                     | 2008           | 6                                                              |
| 59               | Egypt   | Milk - Excluding Butter         | 2008           | 105                                                            |
| 59               | Egypt   | Miscellaneous                   | 2008           | 4                                                              |
| 59               | Egypt   | Mutton & Goat Meat              | 2008           | 12                                                             |
| 59               | Egypt   | Offals                          | 2008           | 6                                                              |
| 59               | Egypt   | Oilcrops                        | 2008           | 57                                                             |
| 59               | Egypt   | Oilcrops Oil, Other             | 2008           | 8                                                              |
| 59               | Egypt   | Olive Oil                       | 2008           | 2                                                              |
| 59               | Egypt   | Olives (including preserved)    | 2008           | 21                                                             |
| 59               | Egypt   | Onions                          | 2008           | 25                                                             |
| 59               | Egypt   | Oranges, Mandarines             | 2008           | 24                                                             |
| 59               | Egypt   | Palmkernel Oil                  | 2008           | 5                                                              |
| 59               | Egypt   | Peas                            | 2008           | 1                                                              |
| 59               | Egypt   | Pelagic Fish                    | 2008           | 7                                                              |
| 59               | Egypt   | Pimento                         | 2008           | 4                                                              |
| 59               | Egypt   | Potatoes and products           | 2008           | 67                                                             |
| 59               | Egypt   | Poultry Meat                    | 2008           | 40                                                             |
| 59               | Egypt   | Pulses                          | 2008           | 54                                                             |
| 59               | Egypt   | Pulses, Other and products      | 2008           | 49                                                             |
| 59               | Egypt   | Rice (Milled Equivalent)        | 2008           | 424                                                            |
| 59               | Egypt   | Roots, Other                    | 2008           | 3                                                              |
| 59               | Egypt   | Sesame seed                     | 2008           | 10                                                             |
| 59               | Egypt   | Sorghum and products            | 2008           | 28                                                             |
| 59               | Egypt   | Soyabean Oil                    | 2008           | 59                                                             |
| 59               | Egypt   | Soyabeans                       | 2008           | 8                                                              |
| 59               | Egypt   | Spices                          | 2008           | 8                                                              |
| 59               | Egypt   | Spices, Other                   | 2008           | 3                                                              |
| 59               | Egypt   | Starchy Roots                   | 2008           | 77                                                             |
| 59               | Egypt   | Stimulants                      | 2008           | 3                                                              |
| 59               | Egypt   | Sugar & Sweeteners              | 2008           | 274                                                            |
| 59               | Egypt   | Sugar (Raw Equivalent)          | 2008           | 260                                                            |
| 59               | Egypt   | Sugar cane                      | 2008           | 33                                                             |
| 59               | Egypt   | Sugar Crops                     | 2008           | 33                                                             |
| 59               | Egypt   | Sunflowerseed Oil               | 2008           | 39                                                             |
| 59               | Egypt   | Sweet potatoes                  | 2008           | 7                                                              |
| 59               | Egypt   | Sweeteners, Other               | 2008           | 13                                                             |
| 59               | Egypt   | Tea (including mate)            | 2008           | 2                                                              |
| 59               | Egypt   | Tomatoes and products           | 2008           | 54                                                             |
| 59               | Egypt   | Treenuts                        | 2008           | 6                                                              |
| 59               | Egypt   | Vegetable Oils                  | 2008           | 137                                                            |
| 59               | Egypt   | Vegetables                      | 2008           | 149                                                            |
| 59               | Egypt   | Vegetables, Other               | 2008           | 70                                                             |
| 59               | Egypt   | Vegetal Products                | 2008           | 3,176                                                          |
| 59               | Egypt   | Wheat and products              | 2008           | 1,165                                                          |
| 59               | Egypt   | Alcoholic Beverages             | 2009           | 3                                                              |
| 59               | Egypt   | Animal fats                     | 2009           | 48                                                             |
| 59               | Egypt   | Animal Products                 | 2009           | 290                                                            |
| 59               | Egypt   | Apples and products             | 2009           | 9                                                              |
| 59               | Egypt   | Bananas                         | 2009           | 21                                                             |
| 59               | Egypt   | Barley and products             | 2009           | 2                                                              |
| 59               | Egypt   | Beans                           | 2009           | 4                                                              |
| 59               | Egypt   | Beer                            | 2009           | 3                                                              |
| 59               | Egypt   | Bovine Meat                     | 2009           | 51                                                             |
| 59               | Egypt   | Butter, Ghee                    | 2009           | 41                                                             |
| 59               | Egypt   | Cereals - Excluding Beer        | 2009           | 2,198                                                          |
| 59               | Egypt   | Cocoa Beans and products        | 2009           | 1                                                              |
| 59               | Egypt   | Coconut Oil                     | 2009           | 1                                                              |
| 59               | Egypt   | Cottonseed Oil                  | 2009           | 10                                                             |
| 59               | Egypt   | Crustaceans                     | 2009           | 1                                                              |
| 59               | Egypt   | Dates                           | 2009           | 63                                                             |
| 59               | Egypt   | Demersal Fish                   | 2009           | 5                                                              |
| 59               | Egypt   | Eggs                            | 2009           | 9                                                              |
| 59               | Egypt   | Fats, Animals, Raw              | 2009           | 6                                                              |
| 59               | Egypt   | Fish, Seafood                   | 2009           | 31                                                             |
| 59               | Egypt   | Freshwater Fish                 | 2009           | 17                                                             |
| 59               | Egypt   | Fruits - Excluding Wine         | 2009           | 171                                                            |
| 59               | Egypt   | Fruits, Other                   | 2009           | 25                                                             |
| 59               | Egypt   | Grand Total                     | 2009           | 3,443                                                          |
| 59               | Egypt   | Grapes and products (excl wine) | 2009           | 26                                                             |
| 59               | Egypt   | Groundnut Oil                   | 2009           | 5                                                              |
| 59               | Egypt   | Groundnuts (Shelled Eq)         | 2009           | 14                                                             |
| 59               | Egypt   | Honey                           | 2009           | 1                                                              |
| 59               | Egypt   | Lemons, Limes and products      | 2009           | 4                                                              |
| 59               | Egypt   | Maize and products              | 2009           | 598                                                            |
| 59               | Egypt   | Maize Germ Oil                  | 2009           | 7                                                              |
| 59               | Egypt   | Marine Fish, Other              | 2009           | 2                                                              |
| 59               | Egypt   | Meat                            | 2009           | 111                                                            |
| 59               | Egypt   | Meat, Other                     | 2009           | 6                                                              |
| 59               | Egypt   | Milk - Excluding Butter         | 2009           | 85                                                             |
| 59               | Egypt   | Miscellaneous                   | 2009           | 5                                                              |
| 59               | Egypt   | Mutton & Goat Meat              | 2009           | 11                                                             |
| 59               | Egypt   | Offals                          | 2009           | 5                                                              |
| 59               | Egypt   | Oilcrops                        | 2009           | 52                                                             |
| 59               | Egypt   | Oilcrops Oil, Other             | 2009           | 7                                                              |
| 59               | Egypt   | Olives (including preserved)    | 2009           | 17                                                             |
| 59               | Egypt   | Onions                          | 2009           | 25                                                             |
| 59               | Egypt   | Oranges, Mandarines             | 2009           | 22                                                             |
| 59               | Egypt   | Palmkernel Oil                  | 2009           | 5                                                              |
| 59               | Egypt   | Pelagic Fish                    | 2009           | 6                                                              |
| 59               | Egypt   | Pepper                          | 2009           | 1                                                              |
| 59               | Egypt   | Pimento                         | 2009           | 4                                                              |

Dietary calcium and zinc deficiency risks are decreasing but remain prevalent

| FAO Country code | Country | Food item                       | Reference year | Net energy supply (kcal capita <sup>-1</sup> d <sup>-1</sup> ) |
|------------------|---------|---------------------------------|----------------|----------------------------------------------------------------|
| 59               | Egypt   | Potatoes and products           | 2009           | 70                                                             |
| 59               | Egypt   | Poultry Meat                    | 2009           | 43                                                             |
| 59               | Egypt   | Pulses                          | 2009           | 56                                                             |
| 59               | Egypt   | Pulses, Other and products      | 2009           | 52                                                             |
| 59               | Egypt   | Rice (Milled Equivalent)        | 2009           | 410                                                            |
| 59               | Egypt   | Roots, Other                    | 2009           | 2                                                              |
| 59               | Egypt   | Rye and products                | 2009           | 1                                                              |
| 59               | Egypt   | Sesame seed                     | 2009           | 12                                                             |
| 59               | Egypt   | Sorghum and products            | 2009           | 26                                                             |
| 59               | Egypt   | Soyabean Oil                    | 2009           | 62                                                             |
| 59               | Egypt   | Soyabeans                       | 2009           | 9                                                              |
| 59               | Egypt   | Spices                          | 2009           | 7                                                              |
| 59               | Egypt   | Spices, Other                   | 2009           | 2                                                              |
| 59               | Egypt   | Starchy Roots                   | 2009           | 82                                                             |
| 59               | Egypt   | Stimulants                      | 2009           | 2                                                              |
| 59               | Egypt   | Sugar & Sweeteners              | 2009           | 252                                                            |
| 59               | Egypt   | Sugar (Raw Equivalent)          | 2009           | 239                                                            |
| 59               | Egypt   | Sugar cane                      | 2009           | 31                                                             |
| 59               | Egypt   | Sugar Crops                     | 2009           | 31                                                             |
| 59               | Egypt   | Sunflowerseed Oil               | 2009           | 38                                                             |
| 59               | Egypt   | Sweet potatoes                  | 2009           | 10                                                             |
| 59               | Egypt   | Sweeteners, Other               | 2009           | 13                                                             |
| 59               | Egypt   | Tea (including mate)            | 2009           | 1                                                              |
| 59               | Egypt   | Tomatoes and products           | 2009           | 60                                                             |
| 59               | Egypt   | Treenuts                        | 2009           | 6                                                              |
| 59               | Egypt   | Vegetable Oils                  | 2009           | 136                                                            |
| 59               | Egypt   | Vegetables                      | 2009           | 153                                                            |
| 59               | Egypt   | Vegetables, Other               | 2009           | 68                                                             |
| 59               | Egypt   | Vegetal Products                | 2009           | 3,154                                                          |
| 59               | Egypt   | Wheat and products              | 2009           | 1,161                                                          |
| 59               | Egypt   | Alcoholic Beverages             | 2010           | 3                                                              |
| 59               | Egypt   | Animal fats                     | 2010           | 50                                                             |
| 59               | Egypt   | Animal Products                 | 2010           | 329                                                            |
| 59               | Egypt   | Apples and products             | 2010           | 9                                                              |
| 59               | Egypt   | Bananas                         | 2010           | 20                                                             |
| 59               | Egypt   | Barley and products             | 2010           | 1                                                              |
| 59               | Egypt   | Beans                           | 2010           | 3                                                              |
| 59               | Egypt   | Beer                            | 2010           | 3                                                              |
| 59               | Egypt   | Bovine Meat                     | 2010           | 54                                                             |
| 59               | Egypt   | Butter, Ghee                    | 2010           | 44                                                             |
| 59               | Egypt   | Cereals - Excluding Beer        | 2010           | 2,170                                                          |
| 59               | Egypt   | Cocoa Beans and products        | 2010           | 1                                                              |
| 59               | Egypt   | Coconut Oil                     | 2010           | 2                                                              |
| 59               | Egypt   | Coconuts - Incl Copra           | 2010           | 1                                                              |
| 59               | Egypt   | Cottonseed Oil                  | 2010           | 7                                                              |
| 59               | Egypt   | Crustaceans                     | 2010           | 1                                                              |
| 59               | Egypt   | Dates                           | 2010           | 66                                                             |
| 59               | Egypt   | Demersal Fish                   | 2010           | 4                                                              |
| 59               | Egypt   | Eggs                            | 2010           | 11                                                             |
| 59               | Egypt   | Fats, Animals, Raw              | 2010           | 6                                                              |
| 59               | Egypt   | Fish, Seafood                   | 2010           | 41                                                             |
| 59               | Egypt   | Freshwater Fish                 | 2010           | 24                                                             |
| 59               | Egypt   | Fruits - Excluding Wine         | 2010           | 170                                                            |
| 59               | Egypt   | Fruits, Other                   | 2010           | 23                                                             |
| 59               | Egypt   | Grand Total                     | 2010           | 3,517                                                          |
| 59               | Egypt   | Grapes and products (excl wine) | 2010           | 28                                                             |
| 59               | Egypt   | Groundnut Oil                   | 2010           | 6                                                              |
| 59               | Egypt   | Groundnuts (Shelled Eq)         | 2010           | 19                                                             |
| 59               | Egypt   | Honey                           | 2010           | 1                                                              |
| 59               | Egypt   | Lemons, Limes and products      | 2010           | 2                                                              |
| 59               | Egypt   | Maize and products              | 2010           | 597                                                            |
| 59               | Egypt   | Maize Germ Oil                  | 2010           | 9                                                              |
| 59               | Egypt   | Marine Fish, Other              | 2010           | 1                                                              |
| 59               | Egypt   | Meat                            | 2010           | 119                                                            |
| 59               | Egypt   | Meat, Other                     | 2010           | 7                                                              |
| 59               | Egypt   | Milk - Excluding Butter         | 2010           | 101                                                            |
| 59               | Egypt   | Miscellaneous                   | 2010           | 4                                                              |
| 59               | Egypt   | Mutton & Goat Meat              | 2010           | 10                                                             |
| 59               | Egypt   | Offals                          | 2010           | 7                                                              |
| 59               | Egypt   | Oilcrops                        | 2010           | 58                                                             |
| 59               | Egypt   | Oilcrops Oil, Other             | 2010           | 3                                                              |
| 59               | Egypt   | Olive Oil                       | 2010           | 2                                                              |
| 59               | Egypt   | Olives (including preserved)    | 2010           | 17                                                             |
| 59               | Egypt   | Onions                          | 2010           | 23                                                             |
| 59               | Egypt   | Oranges, Mandarines             | 2010           | 24                                                             |
| 59               | Egypt   | Palmkernel Oil                  | 2010           | 4                                                              |
| 59               | Egypt   | Peas                            | 2010           | 1                                                              |
| 59               | Egypt   | Pelagic Fish                    | 2010           | 10                                                             |
| 59               | Egypt   | Pimento                         | 2010           | 5                                                              |
| 59               | Egypt   | Potatoes and products           | 2010           | 69                                                             |
| 59               | Egypt   | Poultry Meat                    | 2010           | 48                                                             |
| 59               | Egypt   | Pulses                          | 2010           | 81                                                             |
| 59               | Egypt   | Pulses, Other and products      | 2010           | 77                                                             |
| 59               | Egypt   | Rice (Milled Equivalent)        | 2010           | 383                                                            |
| 59               | Egypt   | Roots, Other                    | 2010           | 2                                                              |
| 59               | Egypt   | Sesame seed                     | 2010           | 9                                                              |
| 59               | Egypt   | Sorghum and products            | 2010           | 23                                                             |
| 59               | Egypt   | Soyabean Oil                    | 2010           | 65                                                             |
| 59               | Egypt   | Soyabeans                       | 2010           | 11                                                             |
| 59               | Egypt   | Spices                          | 2010           | 7                                                              |
| 59               | Egypt   | Spices, Other                   | 2010           | 2                                                              |
| 59               | Egypt   | Starchy Roots                   | 2010           | 81                                                             |
| 59               | Egypt   | Stimulants                      | 2010           | 3                                                              |
| 59               | Egypt   | Sugar & Sweeteners              | 2010           | 298                                                            |
| 59               | Egypt   | Sugar (Raw Equivalent)          | 2010           | 282                                                            |
| 59               | Egypt   | Sugar cane                      | 2010           | 30                                                             |
| 59               | Egypt   | Sugar Crops                     | 2010           | 30                                                             |



Dietary calcium and zinc deficiency risks are decreasing but remain prevalent

| FAO Country code | Country     | Food item                       | Reference year | Net energy supply (kcal capita <sup>-1</sup> d <sup>-1</sup> ) |
|------------------|-------------|---------------------------------|----------------|----------------------------------------------------------------|
| 59               | Egypt       | Sunflowerseed Oil               | 2010           | 41                                                             |
| 59               | Egypt       | Sweet potatoes                  | 2010           | 10                                                             |
| 59               | Egypt       | Sweeteners, Other               | 2010           | 15                                                             |
| 59               | Egypt       | Tea (including mate)            | 2010           | 1                                                              |
| 59               | Egypt       | Tomatoes and products           | 2010           | 49                                                             |
| 59               | Egypt       | Treenuts                        | 2010           | 7                                                              |
| 59               | Egypt       | Vegetable Oils                  | 2010           | 139                                                            |
| 59               | Egypt       | Vegetables                      | 2010           | 138                                                            |
| 59               | Egypt       | Vegetables, Other               | 2010           | 65                                                             |
| 59               | Egypt       | Vegetal Products                | 2010           | 3,189                                                          |
| 59               | Egypt       | Wheat and products              | 2010           | 1,166                                                          |
| 59               | Egypt       | Alcoholic Beverages             | 2011           | 2                                                              |
| 59               | Egypt       | Animal fats                     | 2011           | 63                                                             |
| 59               | Egypt       | Animal Products                 | 2011           | 336                                                            |
| 59               | Egypt       | Apples and products             | 2011           | 10                                                             |
| 59               | Egypt       | Bananas                         | 2011           | 20                                                             |
| 59               | Egypt       | Barley and products             | 2011           | 2                                                              |
| 59               | Egypt       | Beans                           | 2011           | 8                                                              |
| 59               | Egypt       | Beer                            | 2011           | 2                                                              |
| 59               | Egypt       | Bovine Meat                     | 2011           | 53                                                             |
| 59               | Egypt       | Butter, Ghee                    | 2011           | 57                                                             |
| 59               | Egypt       | Cereals - Excluding Beer        | 2011           | 2,217                                                          |
| 59               | Egypt       | Cocoa Beans and products        | 2011           | 1                                                              |
| 59               | Egypt       | Coconut Oil                     | 2011           | 2                                                              |
| 59               | Egypt       | Cottonseed Oil                  | 2011           | 9                                                              |
| 59               | Egypt       | Crustaceans                     | 2011           | 1                                                              |
| 59               | Egypt       | Dates                           | 2011           | 66                                                             |
| 59               | Egypt       | Demersal Fish                   | 2011           | 4                                                              |
| 59               | Egypt       | Eggs                            | 2011           | 11                                                             |
| 59               | Egypt       | Fats, Animals, Raw              | 2011           | 5                                                              |
| 59               | Egypt       | Fish, Seafood                   | 2011           | 39                                                             |
| 59               | Egypt       | Freshwater Fish                 | 2011           | 25                                                             |
| 59               | Egypt       | Fruits - Excluding Wine         | 2011           | 166                                                            |
| 59               | Egypt       | Fruits, Other                   | 2011           | 22                                                             |
| 59               | Egypt       | Grand Total                     | 2011           | 3,557                                                          |
| 59               | Egypt       | Grapes and products (excl wine) | 2011           | 26                                                             |
| 59               | Egypt       | Groundnut Oil                   | 2011           | 6                                                              |
| 59               | Egypt       | Groundnuts (Shelled Eq)         | 2011           | 15                                                             |
| 59               | Egypt       | Lemons, Limes and products      | 2011           | 2                                                              |
| 59               | Egypt       | Maize and products              | 2011           | 604                                                            |
| 59               | Egypt       | Maize Germ Oil                  | 2011           | 10                                                             |
| 59               | Egypt       | Marine Fish, Other              | 2011           | 1                                                              |
| 59               | Egypt       | Meat                            | 2011           | 114                                                            |
| 59               | Egypt       | Meat, Other                     | 2011           | 6                                                              |
| 59               | Egypt       | Milk - Excluding Butter         | 2011           | 104                                                            |
| 59               | Egypt       | Miscellaneous                   | 2011           | 7                                                              |
| 59               | Egypt       | Mutton & Goat Meat              | 2011           | 10                                                             |
| 59               | Egypt       | Offals                          | 2011           | 6                                                              |
| 59               | Egypt       | Oilcrops                        | 2011           | 56                                                             |
| 59               | Egypt       | Oilcrops Oil, Other             | 2011           | 5                                                              |
| 59               | Egypt       | Olive Oil                       | 2011           | 2                                                              |
| 59               | Egypt       | Olives (including preserved)    | 2011           | 18                                                             |
| 59               | Egypt       | Onions                          | 2011           | 23                                                             |
| 59               | Egypt       | Oranges, Mandarines             | 2011           | 21                                                             |
| 59               | Egypt       | Palmkernel Oil                  | 2011           | 4                                                              |
| 59               | Egypt       | Peas                            | 2011           | 1                                                              |
| 59               | Egypt       | Pelagic Fish                    | 2011           | 7                                                              |
| 59               | Egypt       | Pepper                          | 2011           | 1                                                              |
| 59               | Egypt       | Pimento                         | 2011           | 6                                                              |
| 59               | Egypt       | Potatoes and products           | 2011           | 71                                                             |
| 59               | Egypt       | Poultry Meat                    | 2011           | 45                                                             |
| 59               | Egypt       | Pulses                          | 2011           | 59                                                             |
| 59               | Egypt       | Pulses, Other and products      | 2011           | 50                                                             |
| 59               | Egypt       | Rice (Milled Equivalent)        | 2011           | 414                                                            |
| 59               | Egypt       | Roots, Other                    | 2011           | 2                                                              |
| 59               | Egypt       | Sesame seed                     | 2011           | 13                                                             |
| 59               | Egypt       | Sorghum and products            | 2011           | 28                                                             |
| 59               | Egypt       | Soyabean Oil                    | 2011           | 68                                                             |
| 59               | Egypt       | Soyabeans                       | 2011           | 11                                                             |
| 59               | Egypt       | Spices                          | 2011           | 10                                                             |
| 59               | Egypt       | Spices, Other                   | 2011           | 4                                                              |
| 59               | Egypt       | Starchy Roots                   | 2011           | 80                                                             |
| 59               | Egypt       | Stimulants                      | 2011           | 2                                                              |
| 59               | Egypt       | Sugar & Sweeteners              | 2011           | 304                                                            |
| 59               | Egypt       | Sugar (Raw Equivalent)          | 2011           | 288                                                            |
| 59               | Egypt       | Sugar cane                      | 2011           | 30                                                             |
| 59               | Egypt       | Sugar Crops                     | 2011           | 30                                                             |
| 59               | Egypt       | Sunflowerseed Oil               | 2011           | 40                                                             |
| 59               | Egypt       | Sweet potatoes                  | 2011           | 7                                                              |
| 59               | Egypt       | Sweeteners, Other               | 2011           | 15                                                             |
| 59               | Egypt       | Tea (including mate)            | 2011           | 1                                                              |
| 59               | Egypt       | Tomatoes and products           | 2011           | 45                                                             |
| 59               | Egypt       | Treenuts                        | 2011           | 6                                                              |
| 59               | Egypt       | Vegetable Oils                  | 2011           | 147                                                            |
| 59               | Egypt       | Vegetables                      | 2011           | 133                                                            |
| 59               | Egypt       | Vegetables, Other               | 2011           | 65                                                             |
| 59               | Egypt       | Vegetal Products                | 2011           | 3,220                                                          |
| 59               | Egypt       | Wheat and products              | 2011           | 1,169                                                          |
| 60               | El Salvador | Alcoholic Beverages             | 1992           | 25                                                             |
| 60               | El Salvador | Animal fats                     | 1992           | 57                                                             |
| 60               | El Salvador | Animal Products                 | 1992           | 279                                                            |
| 60               | El Salvador | Apples and products             | 1992           | 2                                                              |
| 60               | El Salvador | Bananas                         | 1992           | 8                                                              |
| 60               | El Salvador | Beans                           | 1992           | 100                                                            |
| 60               | El Salvador | Beer                            | 1992           | 14                                                             |
| 60               | El Salvador | Beverages, Alcoholic            | 1992           | 11                                                             |
| 60               | El Salvador | Bovine Meat                     | 1992           | 17                                                             |

Dietary calcium and zinc deficiency risks are decreasing but remain prevalent

| FAO Country code | Country     | Food item                       | Reference year | Net energy supply (kcal <i>capita</i> <sup>-1</sup> d <sup>-1</sup> ) |
|------------------|-------------|---------------------------------|----------------|-----------------------------------------------------------------------|
| 60               | El Salvador | Butter, Ghee                    | 1992           | 1                                                                     |
| 60               | El Salvador | Cassava and products            | 1992           | 18                                                                    |
| 60               | El Salvador | Cereals - Excluding Beer        | 1992           | 1,357                                                                 |
| 60               | El Salvador | Cereals, Other                  | 1992           | 2                                                                     |
| 60               | El Salvador | Cocoa Beans and products        | 1992           | 1                                                                     |
| 60               | El Salvador | Coconut Oil                     | 1992           | 11                                                                    |
| 60               | El Salvador | Coconuts - Incl Copra           | 1992           | 29                                                                    |
| 60               | El Salvador | Coffee and products             | 1992           | 2                                                                     |
| 60               | El Salvador | Cottonseed Oil                  | 1992           | 82                                                                    |
| 60               | El Salvador | Eggs                            | 1992           | 28                                                                    |
| 60               | El Salvador | Fats, Animals, Raw              | 1992           | 56                                                                    |
| 60               | El Salvador | Fish, Seafood                   | 1992           | 6                                                                     |
| 60               | El Salvador | Freshwater Fish                 | 1992           | 2                                                                     |
| 60               | El Salvador | Fruits - Excluding Wine         | 1992           | 88                                                                    |
| 60               | El Salvador | Fruits, Other                   | 1992           | 24                                                                    |
| 60               | El Salvador | Grand Total                     | 1992           | 2,410                                                                 |
| 60               | El Salvador | Grapes and products (excl wine) | 1992           | 1                                                                     |
| 60               | El Salvador | Groundnuts (Shelled Eq)         | 1992           | 1                                                                     |
| 60               | El Salvador | Honey                           | 1992           | 2                                                                     |
| 60               | El Salvador | Lemons, Limes and products      | 1992           | 3                                                                     |
| 60               | El Salvador | Maize and products              | 1992           | 808                                                                   |
| 60               | El Salvador | Marine Fish, Other              | 1992           | 3                                                                     |
| 60               | El Salvador | Meat                            | 1992           | 50                                                                    |
| 60               | El Salvador | Milk - Excluding Butter         | 1992           | 136                                                                   |
| 60               | El Salvador | Offals                          | 1992           | 2                                                                     |
| 60               | El Salvador | Oilcrops                        | 1992           | 39                                                                    |
| 60               | El Salvador | Oilcrops Oil, Other             | 1992           | 7                                                                     |
| 60               | El Salvador | Olive Oil                       | 1992           | 3                                                                     |
| 60               | El Salvador | Onions                          | 1992           | 2                                                                     |
| 60               | El Salvador | Oranges, Mandarines             | 1992           | 17                                                                    |
| 60               | El Salvador | Pigmeat                         | 1992           | 7                                                                     |
| 60               | El Salvador | Pineapples and products         | 1992           | 2                                                                     |
| 60               | El Salvador | Plantains                       | 1992           | 32                                                                    |
| 60               | El Salvador | Potatoes and products           | 1992           | 9                                                                     |
| 60               | El Salvador | Poultry Meat                    | 1992           | 25                                                                    |
| 60               | El Salvador | Pulses                          | 1992           | 101                                                                   |
| 60               | El Salvador | Rice (Milled Equivalent)        | 1992           | 82                                                                    |
| 60               | El Salvador | Sesame seed                     | 1992           | 6                                                                     |
| 60               | El Salvador | Sorghum and products            | 1992           | 198                                                                   |
| 60               | El Salvador | Soyabean Oil                    | 1992           | 11                                                                    |
| 60               | El Salvador | Soyabeans                       | 1992           | 3                                                                     |
| 60               | El Salvador | Spices                          | 1992           | 1                                                                     |
| 60               | El Salvador | Spices, Other                   | 1992           | 1                                                                     |
| 60               | El Salvador | Starchy Roots                   | 1992           | 27                                                                    |
| 60               | El Salvador | Stimulants                      | 1992           | 3                                                                     |
| 60               | El Salvador | Sugar & Sweeteners              | 1992           | 357                                                                   |
| 60               | El Salvador | Sugar (Raw Equivalent)          | 1992           | 327                                                                   |
| 60               | El Salvador | Sugar non-centrifugal           | 1992           | 25                                                                    |
| 60               | El Salvador | Sweeteners, Other               | 1992           | 4                                                                     |
| 60               | El Salvador | Tomatoes and products           | 1992           | 3                                                                     |
| 60               | El Salvador | Treenuts                        | 1992           | 2                                                                     |
| 60               | El Salvador | Vegetable Oils                  | 1992           | 114                                                                   |
| 60               | El Salvador | Vegetables                      | 1992           | 17                                                                    |
| 60               | El Salvador | Vegetables, Other               | 1992           | 13                                                                    |
| 60               | El Salvador | Vegetal Products                | 1992           | 2,132                                                                 |
| 60               | El Salvador | Wheat and products              | 1992           | 267                                                                   |
| 60               | El Salvador | Alcoholic Beverages             | 1993           | 29                                                                    |
| 60               | El Salvador | Animal fats                     | 1993           | 52                                                                    |
| 60               | El Salvador | Animal Products                 | 1993           | 265                                                                   |
| 60               | El Salvador | Apples and products             | 1993           | 1                                                                     |
| 60               | El Salvador | Bananas                         | 1993           | 7                                                                     |
| 60               | El Salvador | Beans                           | 1993           | 96                                                                    |
| 60               | El Salvador | Beer                            | 1993           | 16                                                                    |
| 60               | El Salvador | Beverages, Alcoholic            | 1993           | 13                                                                    |
| 60               | El Salvador | Bovine Meat                     | 1993           | 19                                                                    |
| 60               | El Salvador | Butter, Ghee                    | 1993           | 1                                                                     |
| 60               | El Salvador | Cassava and products            | 1993           | 17                                                                    |
| 60               | El Salvador | Cereals - Excluding Beer        | 1993           | 1,342                                                                 |
| 60               | El Salvador | Cereals, Other                  | 1993           | 1                                                                     |
| 60               | El Salvador | Cocoa Beans and products        | 1993           | 1                                                                     |
| 60               | El Salvador | Coconut Oil                     | 1993           | 9                                                                     |
| 60               | El Salvador | Coconuts - Incl Copra           | 1993           | 27                                                                    |
| 60               | El Salvador | Coffee and products             | 1993           | 2                                                                     |
| 60               | El Salvador | Cottonseed Oil                  | 1993           | 94                                                                    |
| 60               | El Salvador | Eggs                            | 1993           | 23                                                                    |
| 60               | El Salvador | Fats, Animals, Raw              | 1993           | 51                                                                    |
| 60               | El Salvador | Fish, Seafood                   | 1993           | 4                                                                     |
| 60               | El Salvador | Freshwater Fish                 | 1993           | 1                                                                     |
| 60               | El Salvador | Fruits - Excluding Wine         | 1993           | 83                                                                    |
| 60               | El Salvador | Fruits, Other                   | 1993           | 22                                                                    |
| 60               | El Salvador | Grand Total                     | 1993           | 2,384                                                                 |
| 60               | El Salvador | Grapes and products (excl wine) | 1993           | 1                                                                     |
| 60               | El Salvador | Groundnuts (Shelled Eq)         | 1993           | 1                                                                     |
| 60               | El Salvador | Honey                           | 1993           | 3                                                                     |
| 60               | El Salvador | Lemons, Limes and products      | 1993           | 2                                                                     |
| 60               | El Salvador | Maize and products              | 1993           | 792                                                                   |
| 60               | El Salvador | Meat                            | 1993           | 54                                                                    |
| 60               | El Salvador | Milk - Excluding Butter         | 1993           | 129                                                                   |
| 60               | El Salvador | Miscellaneous                   | 1993           | 1                                                                     |
| 60               | El Salvador | Offals                          | 1993           | 3                                                                     |
| 60               | El Salvador | Oilcrops                        | 1993           | 36                                                                    |
| 60               | El Salvador | Oilcrops Oil, Other             | 1993           | 9                                                                     |
| 60               | El Salvador | Olive Oil                       | 1993           | 3                                                                     |
| 60               | El Salvador | Onions                          | 1993           | 1                                                                     |
| 60               | El Salvador | Oranges, Mandarines             | 1993           | 17                                                                    |
| 60               | El Salvador | Pelagic Fish                    | 1993           | 2                                                                     |
| 60               | El Salvador | Pigmeat                         | 1993           | 7                                                                     |

Dietary calcium and zinc deficiency risks are decreasing but remain prevalent

| FAO Country code | Country     | Food item                       | Reference year | Net energy supply (kcal capita <sup>-1</sup> d <sup>-1</sup> ) |
|------------------|-------------|---------------------------------|----------------|----------------------------------------------------------------|
| 60               | El Salvador | Pineapples and products         | 1993           | 2                                                              |
| 60               | El Salvador | Plantains                       | 1993           | 31                                                             |
| 60               | El Salvador | Potatoes and products           | 1993           | 4                                                              |
| 60               | El Salvador | Poultry Meat                    | 1993           | 27                                                             |
| 60               | El Salvador | Pulses                          | 1993           | 96                                                             |
| 60               | El Salvador | Rice (Milled Equivalent)        | 1993           | 92                                                             |
| 60               | El Salvador | Sesame seed                     | 1993           | 5                                                              |
| 60               | El Salvador | Sorghum and products            | 1993           | 196                                                            |
| 60               | El Salvador | Soybean Oil                     | 1993           | 11                                                             |
| 60               | El Salvador | Soybeans                        | 1993           | 3                                                              |
| 60               | El Salvador | Spices                          | 1993           | 1                                                              |
| 60               | El Salvador | Spices, Other                   | 1993           | 1                                                              |
| 60               | El Salvador | Starchy Roots                   | 1993           | 21                                                             |
| 60               | El Salvador | Stimulants                      | 1993           | 3                                                              |
| 60               | El Salvador | Sugar & Sweeteners              | 1993           | 363                                                            |
| 60               | El Salvador | Sugar (Raw Equivalent)          | 1993           | 335                                                            |
| 60               | El Salvador | Sugar non-centrifugal           | 1993           | 23                                                             |
| 60               | El Salvador | Sunflowerseed Oil               | 1993           | 2                                                              |
| 60               | El Salvador | Sweeteners, Other               | 1993           | 3                                                              |
| 60               | El Salvador | Tomatoes and products           | 1993           | 3                                                              |
| 60               | El Salvador | Treenuts                        | 1993           | 2                                                              |
| 60               | El Salvador | Vegetable Oils                  | 1993           | 128                                                            |
| 60               | El Salvador | Vegetables                      | 1993           | 13                                                             |
| 60               | El Salvador | Vegetables, Other               | 1993           | 8                                                              |
| 60               | El Salvador | Vegetal Products                | 1993           | 2,119                                                          |
| 60               | El Salvador | Wheat and products              | 1993           | 261                                                            |
| 60               | El Salvador | Alcoholic Beverages             | 1994           | 32                                                             |
| 60               | El Salvador | Animal fats                     | 1994           | 60                                                             |
| 60               | El Salvador | Animal Products                 | 1994           | 271                                                            |
| 60               | El Salvador | Apples and products             | 1994           | 2                                                              |
| 60               | El Salvador | Bananas                         | 1994           | 6                                                              |
| 60               | El Salvador | Beans                           | 1994           | 95                                                             |
| 60               | El Salvador | Beer                            | 1994           | 15                                                             |
| 60               | El Salvador | Beverages, Alcoholic            | 1994           | 16                                                             |
| 60               | El Salvador | Bovine Meat                     | 1994           | 22                                                             |
| 60               | El Salvador | Butter, Chee                    | 1994           | 2                                                              |
| 60               | El Salvador | Cassava and products            | 1994           | 19                                                             |
| 60               | El Salvador | Cereals - Excluding Beer        | 1994           | 1,338                                                          |
| 60               | El Salvador | Cereals, Other                  | 1994           | 1                                                              |
| 60               | El Salvador | Cocoa Beans and products        | 1994           | 1                                                              |
| 60               | El Salvador | Coconut Oil                     | 1994           | 11                                                             |
| 60               | El Salvador | Coconuts - Incl Copra           | 1994           | 23                                                             |
| 60               | El Salvador | Coffee and products             | 1994           | 2                                                              |
| 60               | El Salvador | Cottonseed Oil                  | 1994           | 87                                                             |
| 60               | El Salvador | Eggs                            | 1994           | 24                                                             |
| 60               | El Salvador | Fats, Animals, Raw              | 1994           | 59                                                             |
| 60               | El Salvador | Fish, Seafood                   | 1994           | 5                                                              |
| 60               | El Salvador | Freshwater Fish                 | 1994           | 1                                                              |
| 60               | El Salvador | Fruits - Excluding Wine         | 1994           | 81                                                             |
| 60               | El Salvador | Fruits, Other                   | 1994           | 24                                                             |
| 60               | El Salvador | Grand Total                     | 1994           | 2,379                                                          |
| 60               | El Salvador | Grapes and products (excl wine) | 1994           | 1                                                              |
| 60               | El Salvador | Groundnuts (Shelled Eq)         | 1994           | 2                                                              |
| 60               | El Salvador | Honey                           | 1994           | 2                                                              |
| 60               | El Salvador | Lemons, Limes and products      | 1994           | 3                                                              |
| 60               | El Salvador | Maize and products              | 1994           | 792                                                            |
| 60               | El Salvador | Marine Fish, Other              | 1994           | 1                                                              |
| 60               | El Salvador | Meat                            | 1994           | 53                                                             |
| 60               | El Salvador | Milk - Excluding Butter         | 1994           | 126                                                            |
| 60               | El Salvador | Miscellaneous                   | 1994           | 2                                                              |
| 60               | El Salvador | Offals                          | 1994           | 3                                                              |
| 60               | El Salvador | Oilcrops                        | 1994           | 37                                                             |
| 60               | El Salvador | Oilcrops Oil, Other             | 1994           | 9                                                              |
| 60               | El Salvador | Olive Oil                       | 1994           | 3                                                              |
| 60               | El Salvador | Onions                          | 1994           | 1                                                              |
| 60               | El Salvador | Oranges, Mandarines             | 1994           | 16                                                             |
| 60               | El Salvador | Pelagic Fish                    | 1994           | 2                                                              |
| 60               | El Salvador | Pigmeat                         | 1994           | 8                                                              |
| 60               | El Salvador | Pineapples and products         | 1994           | 3                                                              |
| 60               | El Salvador | Plantains                       | 1994           | 27                                                             |
| 60               | El Salvador | Potatoes and products           | 1994           | 5                                                              |
| 60               | El Salvador | Poultry Meat                    | 1994           | 23                                                             |
| 60               | El Salvador | Pulses                          | 1994           | 95                                                             |
| 60               | El Salvador | Rice (Milled Equivalent)        | 1994           | 93                                                             |
| 60               | El Salvador | Roots, Other                    | 1994           | 28                                                             |
| 60               | El Salvador | Sesame seed                     | 1994           | 8                                                              |
| 60               | El Salvador | Sesameseed Oil                  | 1994           | 1                                                              |
| 60               | El Salvador | Sorghum and products            | 1994           | 188                                                            |
| 60               | El Salvador | Soybean Oil                     | 1994           | 7                                                              |
| 60               | El Salvador | Soybeans                        | 1994           | 3                                                              |
| 60               | El Salvador | Spices                          | 1994           | 1                                                              |
| 60               | El Salvador | Spices, Other                   | 1994           | 1                                                              |
| 60               | El Salvador | Starchy Roots                   | 1994           | 52                                                             |
| 60               | El Salvador | Stimulants                      | 1994           | 3                                                              |
| 60               | El Salvador | Sugar & Sweeteners              | 1994           | 330                                                            |
| 60               | El Salvador | Sugar (Raw Equivalent)          | 1994           | 301                                                            |
| 60               | El Salvador | Sugar non-centrifugal           | 1994           | 22                                                             |
| 60               | El Salvador | Sunflowerseed Oil               | 1994           | 6                                                              |
| 60               | El Salvador | Sweeteners, Other               | 1994           | 4                                                              |
| 60               | El Salvador | Tomatoes and products           | 1994           | 2                                                              |
| 60               | El Salvador | Treenuts                        | 1994           | 2                                                              |
| 60               | El Salvador | Vegetable Oils                  | 1994           | 124                                                            |
| 60               | El Salvador | Vegetables                      | 1994           | 13                                                             |
| 60               | El Salvador | Vegetables, Other               | 1994           | 9                                                              |
| 60               | El Salvador | Vegetal Products                | 1994           | 2,108                                                          |
| 60               | El Salvador | Wheat and products              | 1994           | 262                                                            |
| 60               | El Salvador | Alcoholic Beverages             | 1995           | 34                                                             |

Dietary calcium and zinc deficiency risks are decreasing but remain prevalent

| FAO Country code | Country     | Food item                       | Reference year | Net energy supply (kcal capita <sup>-1</sup> d <sup>-1</sup> ) |
|------------------|-------------|---------------------------------|----------------|----------------------------------------------------------------|
| 60               | El Salvador | Animal fats                     | 1995           | 63                                                             |
| 60               | El Salvador | Animal Products                 | 1995           | 269                                                            |
| 60               | El Salvador | Apples and products             | 1995           | 1                                                              |
| 60               | El Salvador | Bananas                         | 1995           | 4                                                              |
| 60               | El Salvador | Beans                           | 1995           | 87                                                             |
| 60               | El Salvador | Beer                            | 1995           | 17                                                             |
| 60               | El Salvador | Beverages, Alcoholic            | 1995           | 16                                                             |
| 60               | El Salvador | Bovine Meat                     | 1995           | 25                                                             |
| 60               | El Salvador | Butter, Ghee                    | 1995           | 2                                                              |
| 60               | El Salvador | Cassava and products            | 1995           | 13                                                             |
| 60               | El Salvador | Cereals - Excluding Beer        | 1995           | 1,368                                                          |
| 60               | El Salvador | Cereals, Other                  | 1995           | 1                                                              |
| 60               | El Salvador | Cocoa Beans and products        | 1995           | 2                                                              |
| 60               | El Salvador | Coconut Oil                     | 1995           | 17                                                             |
| 60               | El Salvador | Coconuts - Incl Copra           | 1995           | 23                                                             |
| 60               | El Salvador | Coffee and products             | 1995           | 2                                                              |
| 60               | El Salvador | Cottonseed Oil                  | 1995           | 57                                                             |
| 60               | El Salvador | Eggs                            | 1995           | 23                                                             |
| 60               | El Salvador | Fats, Animals, Raw              | 1995           | 60                                                             |
| 60               | El Salvador | Fish, Seafood                   | 1995           | 6                                                              |
| 60               | El Salvador | Freshwater Fish                 | 1995           | 1                                                              |
| 60               | El Salvador | Fruits - Excluding Wine         | 1995           | 80                                                             |
| 60               | El Salvador | Fruits, Other                   | 1995           | 25                                                             |
| 60               | El Salvador | Grand Total                     | 1995           | 2,392                                                          |
| 60               | El Salvador | Grapes and products (excl wine) | 1995           | 1                                                              |
| 60               | El Salvador | Groundnuts (Shelled Eq)         | 1995           | 4                                                              |
| 60               | El Salvador | Honey                           | 1995           | 2                                                              |
| 60               | El Salvador | Lemons, Limes and products      | 1995           | 2                                                              |
| 60               | El Salvador | Maize and products              | 1995           | 852                                                            |
| 60               | El Salvador | Maize Germ Oil                  | 1995           | 1                                                              |
| 60               | El Salvador | Marine Fish, Other              | 1995           | 1                                                              |
| 60               | El Salvador | Meat                            | 1995           | 57                                                             |
| 60               | El Salvador | Milk - Excluding Butter         | 1995           | 118                                                            |
| 60               | El Salvador | Miscellaneous                   | 1995           | 2                                                              |
| 60               | El Salvador | Offals                          | 1995           | 3                                                              |
| 60               | El Salvador | Oilcrops                        | 1995           | 39                                                             |
| 60               | El Salvador | Oilcrops Oil, Other             | 1995           | 8                                                              |
| 60               | El Salvador | Olive Oil                       | 1995           | 3                                                              |
| 60               | El Salvador | Onions                          | 1995           | 1                                                              |
| 60               | El Salvador | Oranges, Mandarines             | 1995           | 13                                                             |
| 60               | El Salvador | Pelagic Fish                    | 1995           | 3                                                              |
| 60               | El Salvador | Pigmeat                         | 1995           | 7                                                              |
| 60               | El Salvador | Pineapples and products         | 1995           | 2                                                              |
| 60               | El Salvador | Plantains                       | 1995           | 31                                                             |
| 60               | El Salvador | Potatoes and products           | 1995           | 4                                                              |
| 60               | El Salvador | Poultry Meat                    | 1995           | 24                                                             |
| 60               | El Salvador | Pulses                          | 1995           | 87                                                             |
| 60               | El Salvador | Rice (Milled Equivalent)        | 1995           | 75                                                             |
| 60               | El Salvador | Roots, Other                    | 1995           | 26                                                             |
| 60               | El Salvador | Sesame seed                     | 1995           | 8                                                              |
| 60               | El Salvador | Sorghum and products            | 1995           | 197                                                            |
| 60               | El Salvador | Soyabean Oil                    | 1995           | 10                                                             |
| 60               | El Salvador | Soyabeans                       | 1995           | 3                                                              |
| 60               | El Salvador | Spices                          | 1995           | 1                                                              |
| 60               | El Salvador | Spices, Other                   | 1995           | 1                                                              |
| 60               | El Salvador | Starchy Roots                   | 1995           | 42                                                             |
| 60               | El Salvador | Stimulants                      | 1995           | 4                                                              |
| 60               | El Salvador | Sugar & Sweeteners              | 1995           | 348                                                            |
| 60               | El Salvador | Sugar (Raw Equivalent)          | 1995           | 321                                                            |
| 60               | El Salvador | Sugar non-centrifugal           | 1995           | 22                                                             |
| 60               | El Salvador | Sunflowerseed Oil               | 1995           | 6                                                              |
| 60               | El Salvador | Sweeteners, Other               | 1995           | 3                                                              |
| 60               | El Salvador | Tomatoes and products           | 1995           | 5                                                              |
| 60               | El Salvador | Vegetable Oils                  | 1995           | 103                                                            |
| 60               | El Salvador | Vegetables                      | 1995           | 16                                                             |
| 60               | El Salvador | Vegetables, Other               | 1995           | 9                                                              |
| 60               | El Salvador | Vegetal Products                | 1995           | 2,123                                                          |
| 60               | El Salvador | Wheat and products              | 1995           | 242                                                            |
| 60               | El Salvador | Alcoholic Beverages             | 1996           | 32                                                             |
| 60               | El Salvador | Animal fats                     | 1996           | 62                                                             |
| 60               | El Salvador | Animal Products                 | 1996           | 284                                                            |
| 60               | El Salvador | Apples and products             | 1996           | 2                                                              |
| 60               | El Salvador | Bananas                         | 1996           | 5                                                              |
| 60               | El Salvador | Beans                           | 1996           | 87                                                             |
| 60               | El Salvador | Beer                            | 1996           | 16                                                             |
| 60               | El Salvador | Beverages, Alcoholic            | 1996           | 15                                                             |
| 60               | El Salvador | Bovine Meat                     | 1996           | 26                                                             |
| 60               | El Salvador | Butter, Ghee                    | 1996           | 2                                                              |
| 60               | El Salvador | Cassava and products            | 1996           | 12                                                             |
| 60               | El Salvador | Cereals - Excluding Beer        | 1996           | 1,360                                                          |
| 60               | El Salvador | Cocoa Beans and products        | 1996           | 3                                                              |
| 60               | El Salvador | Coconut Oil                     | 1996           | 19                                                             |
| 60               | El Salvador | Coconuts - Incl Copra           | 1996           | 22                                                             |
| 60               | El Salvador | Coffee and products             | 1996           | 2                                                              |
| 60               | El Salvador | Cottonseed Oil                  | 1996           | 53                                                             |
| 60               | El Salvador | Eggs                            | 1996           | 21                                                             |
| 60               | El Salvador | Fats, Animals, Raw              | 1996           | 61                                                             |
| 60               | El Salvador | Fish, Seafood                   | 1996           | 5                                                              |
| 60               | El Salvador | Freshwater Fish                 | 1996           | 1                                                              |
| 60               | El Salvador | Fruits - Excluding Wine         | 1996           | 60                                                             |
| 60               | El Salvador | Fruits, Other                   | 1996           | 25                                                             |
| 60               | El Salvador | Grand Total                     | 1996           | 2,404                                                          |
| 60               | El Salvador | Grapes and products (excl wine) | 1996           | 1                                                              |
| 60               | El Salvador | Groundnuts (Shelled Eq)         | 1996           | 5                                                              |
| 60               | El Salvador | Honey                           | 1996           | 2                                                              |
| 60               | El Salvador | Lemons, Limes and products      | 1996           | 2                                                              |
| 60               | El Salvador | Maize and products              | 1996           | 822                                                            |

Dietary calcium and zinc deficiency risks are decreasing but remain prevalent

| FAO Country code | Country     | Food item                       | Reference year | Net energy supply (kcal <i>capita</i> <sup>-1</sup> d <sup>-1</sup> ) |
|------------------|-------------|---------------------------------|----------------|-----------------------------------------------------------------------|
| 60               | El Salvador | Maize Germ Oil                  | 1996           | 3                                                                     |
| 60               | El Salvador | Marine Fish, Other              | 1996           | 1                                                                     |
| 60               | El Salvador | Meat                            | 1996           | 59                                                                    |
| 60               | El Salvador | Milk - Excluding Butter         | 1996           | 134                                                                   |
| 60               | El Salvador | Miscellaneous                   | 1996           | 3                                                                     |
| 60               | El Salvador | Oats                            | 1996           | 1                                                                     |
| 60               | El Salvador | Offals                          | 1996           | 3                                                                     |
| 60               | El Salvador | Oilcrops                        | 1996           | 39                                                                    |
| 60               | El Salvador | Oilcrops Oil, Other             | 1996           | 6                                                                     |
| 60               | El Salvador | Olive Oil                       | 1996           | 3                                                                     |
| 60               | El Salvador | Onions                          | 1996           | 1                                                                     |
| 60               | El Salvador | Oranges, Mandarines             | 1996           | 6                                                                     |
| 60               | El Salvador | Pelagic Fish                    | 1996           | 3                                                                     |
| 60               | El Salvador | Pigmeat                         | 1996           | 8                                                                     |
| 60               | El Salvador | Pineapples and products         | 1996           | 1                                                                     |
| 60               | El Salvador | Plantains                       | 1996           | 18                                                                    |
| 60               | El Salvador | Potatoes and products           | 1996           | 6                                                                     |
| 60               | El Salvador | Poultry Meat                    | 1996           | 24                                                                    |
| 60               | El Salvador | Pulses                          | 1996           | 87                                                                    |
| 60               | El Salvador | Rice (Milled Equivalent)        | 1996           | 83                                                                    |
| 60               | El Salvador | Roots, Other                    | 1996           | 24                                                                    |
| 60               | El Salvador | Sesame seed                     | 1996           | 8                                                                     |
| 60               | El Salvador | Sorghum and products            | 1996           | 192                                                                   |
| 60               | El Salvador | Soyabean Oil                    | 1996           | 8                                                                     |
| 60               | El Salvador | Soyabeans                       | 1996           | 3                                                                     |
| 60               | El Salvador | Spices                          | 1996           | 1                                                                     |
| 60               | El Salvador | Spices, Other                   | 1996           | 1                                                                     |
| 60               | El Salvador | Starchy Roots                   | 1996           | 41                                                                    |
| 60               | El Salvador | Stimulants                      | 1996           | 5                                                                     |
| 60               | El Salvador | Sugar & Sweeteners              | 1996           | 377                                                                   |
| 60               | El Salvador | Sugar (Raw Equivalent)          | 1996           | 352                                                                   |
| 60               | El Salvador | Sugar non-centrifugal           | 1996           | 22                                                                    |
| 60               | El Salvador | Sunflowerseed Oil               | 1996           | 9                                                                     |
| 60               | El Salvador | Tomatoes and products           | 1996           | 4                                                                     |
| 60               | El Salvador | Treenuts                        | 1996           | 1                                                                     |
| 60               | El Salvador | Vegetable Oils                  | 1996           | 100                                                                   |
| 60               | El Salvador | Vegetables                      | 1996           | 15                                                                    |
| 60               | El Salvador | Vegetables, Other               | 1996           | 9                                                                     |
| 60               | El Salvador | Vegetal Products                | 1996           | 2,121                                                                 |
| 60               | El Salvador | Wheat and products              | 1996           | 263                                                                   |
| 60               | El Salvador | Alcoholic Beverages             | 1997           | 36                                                                    |
| 60               | El Salvador | Animal fats                     | 1997           | 61                                                                    |
| 60               | El Salvador | Animal Products                 | 1997           | 297                                                                   |
| 60               | El Salvador | Apples and products             | 1997           | 2                                                                     |
| 60               | El Salvador | Bananas                         | 1997           | 8                                                                     |
| 60               | El Salvador | Beans                           | 1997           | 88                                                                    |
| 60               | El Salvador | Beer                            | 1997           | 15                                                                    |
| 60               | El Salvador | Beverages, Alcoholic            | 1997           | 20                                                                    |
| 60               | El Salvador | Bovine Meat                     | 1997           | 30                                                                    |
| 60               | El Salvador | Butter, Ghee                    | 1997           | 2                                                                     |
| 60               | El Salvador | Cassava and products            | 1997           | 8                                                                     |
| 60               | El Salvador | Cereals - Excluding Beer        | 1997           | 1,336                                                                 |
| 60               | El Salvador | Cocoa Beans and products        | 1997           | 2                                                                     |
| 60               | El Salvador | Coconut Oil                     | 1997           | 15                                                                    |
| 60               | El Salvador | Coconuts - Incl Copra           | 1997           | 23                                                                    |
| 60               | El Salvador | Coffee and products             | 1997           | 2                                                                     |
| 60               | El Salvador | Cottonseed Oil                  | 1997           | 42                                                                    |
| 60               | El Salvador | Eggs                            | 1997           | 24                                                                    |
| 60               | El Salvador | Fats, Animals, Raw              | 1997           | 59                                                                    |
| 60               | El Salvador | Fish, Seafood                   | 1997           | 5                                                                     |
| 60               | El Salvador | Freshwater Fish                 | 1997           | 1                                                                     |
| 60               | El Salvador | Fruits - Excluding Wine         | 1997           | 62                                                                    |
| 60               | El Salvador | Fruits, Other                   | 1997           | 27                                                                    |
| 60               | El Salvador | Grand Total                     | 1997           | 2,428                                                                 |
| 60               | El Salvador | Grapes and products (excl wine) | 1997           | 1                                                                     |
| 60               | El Salvador | Groundnuts (Shelled Eq)         | 1997           | 3                                                                     |
| 60               | El Salvador | Honey                           | 1997           | 2                                                                     |
| 60               | El Salvador | Lemons, Limes and products      | 1997           | 3                                                                     |
| 60               | El Salvador | Maize and products              | 1997           | 781                                                                   |
| 60               | El Salvador | Maize Germ Oil                  | 1997           | 1                                                                     |
| 60               | El Salvador | Meat                            | 1997           | 63                                                                    |
| 60               | El Salvador | Milk - Excluding Butter         | 1997           | 142                                                                   |
| 60               | El Salvador | Miscellaneous                   | 1997           | 3                                                                     |
| 60               | El Salvador | Oats                            | 1997           | 1                                                                     |
| 60               | El Salvador | Offals                          | 1997           | 3                                                                     |
| 60               | El Salvador | Oilcrops                        | 1997           | 39                                                                    |
| 60               | El Salvador | Oilcrops Oil, Other             | 1997           | 9                                                                     |
| 60               | El Salvador | Olive Oil                       | 1997           | 4                                                                     |
| 60               | El Salvador | Onions                          | 1997           | 2                                                                     |
| 60               | El Salvador | Oranges, Mandarines             | 1997           | 6                                                                     |
| 60               | El Salvador | Pelagic Fish                    | 1997           | 3                                                                     |
| 60               | El Salvador | Pigmeat                         | 1997           | 8                                                                     |
| 60               | El Salvador | Pineapples and products         | 1997           | 1                                                                     |
| 60               | El Salvador | Plantains                       | 1997           | 13                                                                    |
| 60               | El Salvador | Potatoes and products           | 1997           | 7                                                                     |
| 60               | El Salvador | Poultry Meat                    | 1997           | 25                                                                    |
| 60               | El Salvador | Pulses                          | 1997           | 88                                                                    |
| 60               | El Salvador | Rape and Mustardseed            | 1997           | 1                                                                     |
| 60               | El Salvador | Rice (Milled Equivalent)        | 1997           | 89                                                                    |
| 60               | El Salvador | Roots, Other                    | 1997           | 25                                                                    |
| 60               | El Salvador | Sesame seed                     | 1997           | 8                                                                     |
| 60               | El Salvador | Sorghum and products            | 1997           | 203                                                                   |
| 60               | El Salvador | Soyabean Oil                    | 1997           | 10                                                                    |
| 60               | El Salvador | Soyabeans                       | 1997           | 3                                                                     |
| 60               | El Salvador | Spices                          | 1997           | 1                                                                     |
| 60               | El Salvador | Spices, Other                   | 1997           | 1                                                                     |
| 60               | El Salvador | Starchy Roots                   | 1997           | 40                                                                    |

Dietary calcium and zinc deficiency risks are decreasing but remain prevalent

| FAO Country code | Country     | Food item                       | Reference year | Net energy supply (kcal capita <sup>-1</sup> d <sup>-1</sup> ) |
|------------------|-------------|---------------------------------|----------------|----------------------------------------------------------------|
| 60               | El Salvador | Stimulants                      | 1997           | 4                                                              |
| 60               | El Salvador | Sugar & Sweeteners              | 1997           | 410                                                            |
| 60               | El Salvador | Sugar (Raw Equivalent)          | 1997           | 386                                                            |
| 60               | El Salvador | Sugar non-centrifugal           | 1997           | 22                                                             |
| 60               | El Salvador | Sunflowerseed Oil               | 1997           | 13                                                             |
| 60               | El Salvador | Sweeteners, Other               | 1997           | 1                                                              |
| 60               | El Salvador | Tomatoes and products           | 1997           | 4                                                              |
| 60               | El Salvador | Treenuts                        | 1997           | 1                                                              |
| 60               | El Salvador | Vegetable Oils                  | 1997           | 94                                                             |
| 60               | El Salvador | Vegetables                      | 1997           | 16                                                             |
| 60               | El Salvador | Vegetables, Other               | 1997           | 11                                                             |
| 60               | El Salvador | Vegetal Products                | 1997           | 2,131                                                          |
| 60               | El Salvador | Wheat and products              | 1997           | 262                                                            |
| 60               | El Salvador | Alcoholic Beverages             | 1998           | 36                                                             |
| 60               | El Salvador | Animal fats                     | 1998           | 63                                                             |
| 60               | El Salvador | Animal Products                 | 1998           | 293                                                            |
| 60               | El Salvador | Apples and products             | 1998           | 2                                                              |
| 60               | El Salvador | Bananas                         | 1998           | 10                                                             |
| 60               | El Salvador | Beans                           | 1998           | 88                                                             |
| 60               | El Salvador | Beer                            | 1998           | 14                                                             |
| 60               | El Salvador | Beverages, Alcoholic            | 1998           | 21                                                             |
| 60               | El Salvador | Bovine Meat                     | 1998           | 25                                                             |
| 60               | El Salvador | Butter, Ghee                    | 1998           | 2                                                              |
| 60               | El Salvador | Cassava and products            | 1998           | 3                                                              |
| 60               | El Salvador | Cereals - Excluding Beer        | 1998           | 1,303                                                          |
| 60               | El Salvador | Cereals, Other                  | 1998           | 1                                                              |
| 60               | El Salvador | Cocoa Beans and products        | 1998           | 1                                                              |
| 60               | El Salvador | Coconut Oil                     | 1998           | 16                                                             |
| 60               | El Salvador | Coconuts - Incl Copra           | 1998           | 23                                                             |
| 60               | El Salvador | Coffee and products             | 1998           | 2                                                              |
| 60               | El Salvador | Cottonseed Oil                  | 1998           | 32                                                             |
| 60               | El Salvador | Eggs                            | 1998           | 22                                                             |
| 60               | El Salvador | Fats, Animals, Raw              | 1998           | 61                                                             |
| 60               | El Salvador | Fish, Seafood                   | 1998           | 4                                                              |
| 60               | El Salvador | Freshwater Fish                 | 1998           | 1                                                              |
| 60               | El Salvador | Fruits - Excluding Wine         | 1998           | 57                                                             |
| 60               | El Salvador | Fruits, Other                   | 1998           | 25                                                             |
| 60               | El Salvador | Grand Total                     | 1998           | 2,432                                                          |
| 60               | El Salvador | Grapes and products (excl wine) | 1998           | 1                                                              |
| 60               | El Salvador | Groundnuts (Shelled Eq)         | 1998           | 8                                                              |
| 60               | El Salvador | Honey                           | 1998           | 2                                                              |
| 60               | El Salvador | Lemons, Limes and products      | 1998           | 2                                                              |
| 60               | El Salvador | Maize and products              | 1998           | 750                                                            |
| 60               | El Salvador | Maize Germ Oil                  | 1998           | 1                                                              |
| 60               | El Salvador | Meat                            | 1998           | 64                                                             |
| 60               | El Salvador | Milk - Excluding Butter         | 1998           | 138                                                            |
| 60               | El Salvador | Miscellaneous                   | 1998           | 3                                                              |
| 60               | El Salvador | Offals                          | 1998           | 3                                                              |
| 60               | El Salvador | Oilcrops                        | 1998           | 47                                                             |
| 60               | El Salvador | Oilcrops Oil, Other             | 1998           | 12                                                             |
| 60               | El Salvador | Olive Oil                       | 1998           | 4                                                              |
| 60               | El Salvador | Onions                          | 1998           | 1                                                              |
| 60               | El Salvador | Oranges, Mandarines             | 1998           | 4                                                              |
| 60               | El Salvador | Pelagic Fish                    | 1998           | 2                                                              |
| 60               | El Salvador | Pigmeat                         | 1998           | 10                                                             |
| 60               | El Salvador | Pineapples and products         | 1998           | 1                                                              |
| 60               | El Salvador | Plantains                       | 1998           | 12                                                             |
| 60               | El Salvador | Potatoes and products           | 1998           | 5                                                              |
| 60               | El Salvador | Poultry Meat                    | 1998           | 28                                                             |
| 60               | El Salvador | Pulses                          | 1998           | 88                                                             |
| 60               | El Salvador | Rape and Mustardseed            | 1998           | 1                                                              |
| 60               | El Salvador | Rice (Milled Equivalent)        | 1998           | 94                                                             |
| 60               | El Salvador | Roots, Other                    | 1998           | 24                                                             |
| 60               | El Salvador | Sesame seed                     | 1998           | 11                                                             |
| 60               | El Salvador | Sorghum and products            | 1998           | 195                                                            |
| 60               | El Salvador | Soyabean Oil                    | 1998           | 46                                                             |
| 60               | El Salvador | Soybeans                        | 1998           | 4                                                              |
| 60               | El Salvador | Spices                          | 1998           | 1                                                              |
| 60               | El Salvador | Starchy Roots                   | 1998           | 32                                                             |
| 60               | El Salvador | Stimulants                      | 1998           | 3                                                              |
| 60               | El Salvador | Sugar & Sweeteners              | 1998           | 420                                                            |
| 60               | El Salvador | Sugar (Raw Equivalent)          | 1998           | 393                                                            |
| 60               | El Salvador | Sugar non-centrifugal           | 1998           | 22                                                             |
| 60               | El Salvador | Sunflowerseed Oil               | 1998           | 23                                                             |
| 60               | El Salvador | Sweeteners, Other               | 1998           | 3                                                              |
| 60               | El Salvador | Tomatoes and products           | 1998           | 5                                                              |
| 60               | El Salvador | Vegetable Oils                  | 1998           | 135                                                            |
| 60               | El Salvador | Vegetables                      | 1998           | 16                                                             |
| 60               | El Salvador | Vegetables, Other               | 1998           | 10                                                             |
| 60               | El Salvador | Vegetal Products                | 1998           | 2,139                                                          |
| 60               | El Salvador | Wheat and products              | 1998           | 262                                                            |
| 60               | El Salvador | Alcoholic Beverages             | 1999           | 42                                                             |
| 60               | El Salvador | Animal fats                     | 1999           | 68                                                             |
| 60               | El Salvador | Animal Products                 | 1999           | 317                                                            |
| 60               | El Salvador | Apples and products             | 1999           | 3                                                              |
| 60               | El Salvador | Bananas                         | 1999           | 8                                                              |
| 60               | El Salvador | Beans                           | 1999           | 100                                                            |
| 60               | El Salvador | Beer                            | 1999           | 17                                                             |
| 60               | El Salvador | Beverages, Alcoholic            | 1999           | 25                                                             |
| 60               | El Salvador | Bovine Meat                     | 1999           | 26                                                             |
| 60               | El Salvador | Butter, Ghee                    | 1999           | 2                                                              |
| 60               | El Salvador | Cassava and products            | 1999           | 8                                                              |
| 60               | El Salvador | Cereals - Excluding Beer        | 1999           | 1,215                                                          |
| 60               | El Salvador | Cocoa Beans and products        | 1999           | 1                                                              |
| 60               | El Salvador | Coconut Oil                     | 1999           | 15                                                             |
| 60               | El Salvador | Coconuts - Incl Copra           | 1999           | 28                                                             |
| 60               | El Salvador | Coffee and products             | 1999           | 2                                                              |

Dietary calcium and zinc deficiency risks are decreasing but remain prevalent

| FAO Country code | Country     | Food item                       | Reference year | Net energy supply (kcal capita <sup>-1</sup> d <sup>-1</sup> ) |
|------------------|-------------|---------------------------------|----------------|----------------------------------------------------------------|
| 60               | El Salvador | Cottonseed Oil                  | 1999           | 25                                                             |
| 60               | El Salvador | Eggs                            | 1999           | 25                                                             |
| 60               | El Salvador | Fats, Animals, Raw              | 1999           | 66                                                             |
| 60               | El Salvador | Fish, Seafood                   | 1999           | 4                                                              |
| 60               | El Salvador | Freshwater Fish                 | 1999           | 1                                                              |
| 60               | El Salvador | Fruits - Excluding Wine         | 1999           | 66                                                             |
| 60               | El Salvador | Fruits, Other                   | 1999           | 27                                                             |
| 60               | El Salvador | Grand Total                     | 1999           | 2,411                                                          |
| 60               | El Salvador | Grapes and products (excl wine) | 1999           | 2                                                              |
| 60               | El Salvador | Groundnuts (Shelled Eq)         | 1999           | 8                                                              |
| 60               | El Salvador | Honey                           | 1999           | 3                                                              |
| 60               | El Salvador | Lemons, Limes and products      | 1999           | 2                                                              |
| 60               | El Salvador | Maize and products              | 1999           | 718                                                            |
| 60               | El Salvador | Maize Germ Oil                  | 1999           | 1                                                              |
| 60               | El Salvador | Meat                            | 1999           | 65                                                             |
| 60               | El Salvador | Milk - Excluding Butter         | 1999           | 151                                                            |
| 60               | El Salvador | Miscellaneous                   | 1999           | 3                                                              |
| 60               | El Salvador | Oats                            | 1999           | 1                                                              |
| 60               | El Salvador | Offals                          | 1999           | 4                                                              |
| 60               | El Salvador | Oilcrops                        | 1999           | 52                                                             |
| 60               | El Salvador | Oilcrops Oil, Other             | 1999           | 5                                                              |
| 60               | El Salvador | Olive Oil                       | 1999           | 10                                                             |
| 60               | El Salvador | Onions                          | 1999           | 2                                                              |
| 60               | El Salvador | Oranges, Mandarines             | 1999           | 6                                                              |
| 60               | El Salvador | Pelagic Fish                    | 1999           | 2                                                              |
| 60               | El Salvador | Pigmeat                         | 1999           | 12                                                             |
| 60               | El Salvador | Pineapples and products         | 1999           | 1                                                              |
| 60               | El Salvador | Plantains                       | 1999           | 19                                                             |
| 60               | El Salvador | Potatoes and products           | 1999           | 10                                                             |
| 60               | El Salvador | Poultry Meat                    | 1999           | 27                                                             |
| 60               | El Salvador | Pulses                          | 1999           | 100                                                            |
| 60               | El Salvador | Rape and Mustardseed            | 1999           | 1                                                              |
| 60               | El Salvador | Rice (Milled Equivalent)        | 1999           | 86                                                             |
| 60               | El Salvador | Roots, Other                    | 1999           | 26                                                             |
| 60               | El Salvador | Sesame seed                     | 1999           | 11                                                             |
| 60               | El Salvador | Sorghum and products            | 1999           | 153                                                            |
| 60               | El Salvador | Soyabean Oil                    | 1999           | 57                                                             |
| 60               | El Salvador | Soybeans                        | 1999           | 4                                                              |
| 60               | El Salvador | Spices                          | 1999           | 1                                                              |
| 60               | El Salvador | Starchy Roots                   | 1999           | 44                                                             |
| 60               | El Salvador | Stimulants                      | 1999           | 3                                                              |
| 60               | El Salvador | Sugar & Sweeteners              | 1999           | 411                                                            |
| 60               | El Salvador | Sugar (Raw Equivalent)          | 1999           | 386                                                            |
| 60               | El Salvador | Sugar non-centrifugal           | 1999           | 21                                                             |
| 60               | El Salvador | Sunflowerseed Oil               | 1999           | 25                                                             |
| 60               | El Salvador | Tomatoes and products           | 1999           | 5                                                              |
| 60               | El Salvador | Vegetable Oils                  | 1999           | 138                                                            |
| 60               | El Salvador | Vegetables                      | 1999           | 19                                                             |
| 60               | El Salvador | Vegetables, Other               | 1999           | 13                                                             |
| 60               | El Salvador | Vegetal Products                | 1999           | 2,095                                                          |
| 60               | El Salvador | Wheat and products              | 1999           | 257                                                            |
| 60               | El Salvador | Alcoholic Beverages             | 2000           | 49                                                             |
| 60               | El Salvador | Animal fats                     | 2000           | 67                                                             |
| 60               | El Salvador | Animal Products                 | 2000           | 335                                                            |
| 60               | El Salvador | Apples and products             | 2000           | 3                                                              |
| 60               | El Salvador | Bananas                         | 2000           | 13                                                             |
| 60               | El Salvador | Beans                           | 2000           | 120                                                            |
| 60               | El Salvador | Beer                            | 2000           | 16                                                             |
| 60               | El Salvador | Beverages, Alcoholic            | 2000           | 32                                                             |
| 60               | El Salvador | Bovine Meat                     | 2000           | 30                                                             |
| 60               | El Salvador | Butter, Ghee                    | 2000           | 5                                                              |
| 60               | El Salvador | Cassava and products            | 2000           | 7                                                              |
| 60               | El Salvador | Cereals - Excluding Beer        | 2000           | 1,261                                                          |
| 60               | El Salvador | Cocoa Beans and products        | 2000           | 1                                                              |
| 60               | El Salvador | Coconut Oil                     | 2000           | 17                                                             |
| 60               | El Salvador | Coconuts - Incl Copra           | 2000           | 29                                                             |
| 60               | El Salvador | Coffee and products             | 2000           | 2                                                              |
| 60               | El Salvador | Cottonseed Oil                  | 2000           | 23                                                             |
| 60               | El Salvador | Eggs                            | 2000           | 28                                                             |
| 60               | El Salvador | Fats, Animals, Raw              | 2000           | 60                                                             |
| 60               | El Salvador | Fish, Liver Oil                 | 2000           | 2                                                              |
| 60               | El Salvador | Fish, Seafood                   | 2000           | 5                                                              |
| 60               | El Salvador | Freshwater Fish                 | 2000           | 1                                                              |
| 60               | El Salvador | Fruits - Excluding Wine         | 2000           | 87                                                             |
| 60               | El Salvador | Fruits, Other                   | 2000           | 28                                                             |
| 60               | El Salvador | Grand Total                     | 2000           | 2,541                                                          |
| 60               | El Salvador | Grapes and products (excl wine) | 2000           | 2                                                              |
| 60               | El Salvador | Groundnuts (Shelled Eq)         | 2000           | 8                                                              |
| 60               | El Salvador | Honey                           | 2000           | 1                                                              |
| 60               | El Salvador | Lemons, Limes and products      | 2000           | 1                                                              |
| 60               | El Salvador | Maize and products              | 2000           | 733                                                            |
| 60               | El Salvador | Maize Germ Oil                  | 2000           | 3                                                              |
| 60               | El Salvador | Meat                            | 2000           | 78                                                             |
| 60               | El Salvador | Milk - Excluding Butter         | 2000           | 154                                                            |
| 60               | El Salvador | Miscellaneous                   | 2000           | 6                                                              |
| 60               | El Salvador | Oats                            | 2000           | 1                                                              |
| 60               | El Salvador | Offals                          | 2000           | 3                                                              |
| 60               | El Salvador | Oilcrops                        | 2000           | 52                                                             |
| 60               | El Salvador | Oilcrops Oil, Other             | 2000           | 6                                                              |
| 60               | El Salvador | Olive Oil                       | 2000           | 4                                                              |
| 60               | El Salvador | Onions                          | 2000           | 2                                                              |
| 60               | El Salvador | Oranges, Mandarines             | 2000           | 5                                                              |
| 60               | El Salvador | Pelagic Fish                    | 2000           | 3                                                              |
| 60               | El Salvador | Pigmeat                         | 2000           | 11                                                             |
| 60               | El Salvador | Plantains                       | 2000           | 34                                                             |
| 60               | El Salvador | Potatoes and products           | 2000           | 21                                                             |
| 60               | El Salvador | Poultry Meat                    | 2000           | 36                                                             |

Dietary calcium and zinc deficiency risks are decreasing but remain prevalent

| FAO Country code | Country     | Food item                       | Reference year | Net energy supply (kcal capita <sup>-1</sup> d <sup>-1</sup> ) |
|------------------|-------------|---------------------------------|----------------|----------------------------------------------------------------|
| 60               | El Salvador | Pulses                          | 2000           | 120                                                            |
| 60               | El Salvador | Rape and Mustardseed            | 2000           | 1                                                              |
| 60               | El Salvador | Rice (Milled Equivalent)        | 2000           | 105                                                            |
| 60               | El Salvador | Roots, Other                    | 2000           | 23                                                             |
| 60               | El Salvador | Sesame seed                     | 2000           | 9                                                              |
| 60               | El Salvador | Sorghum and products            | 2000           | 152                                                            |
| 60               | El Salvador | Soyabean Oil                    | 2000           | 71                                                             |
| 60               | El Salvador | Soyabeans                       | 2000           | 5                                                              |
| 60               | El Salvador | Spices                          | 2000           | 1                                                              |
| 60               | El Salvador | Starchy Roots                   | 2000           | 51                                                             |
| 60               | El Salvador | Stimulants                      | 2000           | 3                                                              |
| 60               | El Salvador | Sugar & Sweeteners              | 2000           | 409                                                            |
| 60               | El Salvador | Sugar (Raw Equivalent)          | 2000           | 386                                                            |
| 60               | El Salvador | Sugar non-centrifugal           | 2000           | 21                                                             |
| 60               | El Salvador | Sunflowerseed Oil               | 2000           | 16                                                             |
| 60               | El Salvador | Sweeteners, Other               | 2000           | 1                                                              |
| 60               | El Salvador | Tomatoes and products           | 2000           | 5                                                              |
| 60               | El Salvador | Vegetable Oils                  | 2000           | 140                                                            |
| 60               | El Salvador | Vegetables                      | 2000           | 28                                                             |
| 60               | El Salvador | Vegetables, Other               | 2000           | 21                                                             |
| 60               | El Salvador | Vegetal Products                | 2000           | 2,206                                                          |
| 60               | El Salvador | Wheat and products              | 2000           | 271                                                            |
| 60               | El Salvador | Alcoholic Beverages             | 2001           | 48                                                             |
| 60               | El Salvador | Animal fats                     | 2001           | 72                                                             |
| 60               | El Salvador | Animal Products                 | 2001           | 354                                                            |
| 60               | El Salvador | Apples and products             | 2001           | 2                                                              |
| 60               | El Salvador | Bananas                         | 2001           | 14                                                             |
| 60               | El Salvador | Beans                           | 2001           | 129                                                            |
| 60               | El Salvador | Beer                            | 2001           | 15                                                             |
| 60               | El Salvador | Beverages, Alcoholic            | 2001           | 32                                                             |
| 60               | El Salvador | Bovine Meat                     | 2001           | 29                                                             |
| 60               | El Salvador | Butter, Chee                    | 2001           | 7                                                              |
| 60               | El Salvador | Cassava and products            | 2001           | 7                                                              |
| 60               | El Salvador | Cereals - Excluding Beer        | 2001           | 1,293                                                          |
| 60               | El Salvador | Cereals, Other                  | 2001           | 6                                                              |
| 60               | El Salvador | Cocoa Beans and products        | 2001           | 2                                                              |
| 60               | El Salvador | Coconut Oil                     | 2001           | 16                                                             |
| 60               | El Salvador | Coconuts - Incl Copra           | 2001           | 30                                                             |
| 60               | El Salvador | Coffee and products             | 2001           | 2                                                              |
| 60               | El Salvador | Cottonseed Oil                  | 2001           | 23                                                             |
| 60               | El Salvador | Eggs                            | 2001           | 29                                                             |
| 60               | El Salvador | Fats, Animals, Raw              | 2001           | 66                                                             |
| 60               | El Salvador | Fish, Seafood                   | 2001           | 9                                                              |
| 60               | El Salvador | Freshwater Fish                 | 2001           | 1                                                              |
| 60               | El Salvador | Fruits - Excluding Wine         | 2001           | 88                                                             |
| 60               | El Salvador | Fruits, Other                   | 2001           | 22                                                             |
| 60               | El Salvador | Grand Total                     | 2001           | 2,628                                                          |
| 60               | El Salvador | Grapes and products (excl wine) | 2001           | 1                                                              |
| 60               | El Salvador | Groundnuts (Shelled Eq)         | 2001           | 8                                                              |
| 60               | El Salvador | Honey                           | 2001           | 1                                                              |
| 60               | El Salvador | Lemons, Limes and products      | 2001           | 2                                                              |
| 60               | El Salvador | Maize and products              | 2001           | 754                                                            |
| 60               | El Salvador | Maize Germ Oil                  | 2001           | 22                                                             |
| 60               | El Salvador | Meat                            | 2001           | 84                                                             |
| 60               | El Salvador | Milk - Excluding Butter         | 2001           | 156                                                            |
| 60               | El Salvador | Miscellaneous                   | 2001           | 5                                                              |
| 60               | El Salvador | Offals                          | 2001           | 4                                                              |
| 60               | El Salvador | Oilcrops                        | 2001           | 55                                                             |
| 60               | El Salvador | Oilcrops Oil, Other             | 2001           | 12                                                             |
| 60               | El Salvador | Olive Oil                       | 2001           | 7                                                              |
| 60               | El Salvador | Onions                          | 2001           | 2                                                              |
| 60               | El Salvador | Oranges, Mandarines             | 2001           | 6                                                              |
| 60               | El Salvador | Pelagic Fish                    | 2001           | 8                                                              |
| 60               | El Salvador | Pigmeat                         | 2001           | 9                                                              |
| 60               | El Salvador | Pineapples and products         | 2001           | 1                                                              |
| 60               | El Salvador | Plantains                       | 2001           | 38                                                             |
| 60               | El Salvador | Potatoes and products           | 2001           | 28                                                             |
| 60               | El Salvador | Poultry Meat                    | 2001           | 46                                                             |
| 60               | El Salvador | Pulses                          | 2001           | 129                                                            |
| 60               | El Salvador | Rape and Mustardseed            | 2001           | 1                                                              |
| 60               | El Salvador | Rice (Milled Equivalent)        | 2001           | 103                                                            |
| 60               | El Salvador | Roots, Other                    | 2001           | 26                                                             |
| 60               | El Salvador | Sesame seed                     | 2001           | 10                                                             |
| 60               | El Salvador | Sorghum and products            | 2001           | 153                                                            |
| 60               | El Salvador | Soyabean Oil                    | 2001           | 69                                                             |
| 60               | El Salvador | Soyabeans                       | 2001           | 5                                                              |
| 60               | El Salvador | Spices                          | 2001           | 2                                                              |
| 60               | El Salvador | Spices, Other                   | 2001           | 1                                                              |
| 60               | El Salvador | Starchy Roots                   | 2001           | 61                                                             |
| 60               | El Salvador | Stimulants                      | 2001           | 4                                                              |
| 60               | El Salvador | Sugar & Sweeteners              | 2001           | 398                                                            |
| 60               | El Salvador | Sugar (Raw Equivalent)          | 2001           | 376                                                            |
| 60               | El Salvador | Sugar non-centrifugal           | 2001           | 20                                                             |
| 60               | El Salvador | Sunflowerseed Oil               | 2001           | 14                                                             |
| 60               | El Salvador | Tomatoes and products           | 2001           | 6                                                              |
| 60               | El Salvador | Treenuts                        | 2001           | 1                                                              |
| 60               | El Salvador | Vegetable Oils                  | 2001           | 163                                                            |
| 60               | El Salvador | Vegetables                      | 2001           | 29                                                             |
| 60               | El Salvador | Vegetables, Other               | 2001           | 21                                                             |
| 60               | El Salvador | Vegetal Products                | 2001           | 2,273                                                          |
| 60               | El Salvador | Wheat and products              | 2001           | 276                                                            |
| 60               | El Salvador | Alcoholic Beverages             | 2002           | 49                                                             |
| 60               | El Salvador | Animal fats                     | 2002           | 66                                                             |
| 60               | El Salvador | Animal Products                 | 2002           | 373                                                            |
| 60               | El Salvador | Apples and products             | 2002           | 5                                                              |
| 60               | El Salvador | Bananas                         | 2002           | 14                                                             |
| 60               | El Salvador | Beans                           | 2002           | 152                                                            |



Dietary calcium and zinc deficiency risks are decreasing but remain prevalent

| FAO Country code | Country     | Food item                       | Reference year | Net energy supply (kcal capita <sup>-1</sup> d <sup>-1</sup> ) |
|------------------|-------------|---------------------------------|----------------|----------------------------------------------------------------|
| 60               | El Salvador | Beer                            | 2002           | 15                                                             |
| 60               | El Salvador | Beverages, Alcoholic            | 2002           | 33                                                             |
| 60               | El Salvador | Bovine Meat                     | 2002           | 35                                                             |
| 60               | El Salvador | Butter, Ghee                    | 2002           | 7                                                              |
| 60               | El Salvador | Cassava and products            | 2002           | 7                                                              |
| 60               | El Salvador | Cereals - Excluding Beer        | 2002           | 1,282                                                          |
| 60               | El Salvador | Cereals, Other                  | 2002           | 7                                                              |
| 60               | El Salvador | Citrus, Other                   | 2002           | 1                                                              |
| 60               | El Salvador | Cocoa Beans and products        | 2002           | 3                                                              |
| 60               | El Salvador | Coconut Oil                     | 2002           | 15                                                             |
| 60               | El Salvador | Coconuts - Incl Copra           | 2002           | 30                                                             |
| 60               | El Salvador | Coffee and products             | 2002           | 2                                                              |
| 60               | El Salvador | Cottonseed Oil                  | 2002           | 23                                                             |
| 60               | El Salvador | Crustaceans                     | 2002           | 3                                                              |
| 60               | El Salvador | Demersal Fish                   | 2002           | 1                                                              |
| 60               | El Salvador | Eggs                            | 2002           | 34                                                             |
| 60               | El Salvador | Fats, Animals, Raw              | 2002           | 59                                                             |
| 60               | El Salvador | Fish, Seafood                   | 2002           | 11                                                             |
| 60               | El Salvador | Freshwater Fish                 | 2002           | 1                                                              |
| 60               | El Salvador | Fruits - Excluding Wine         | 2002           | 87                                                             |
| 60               | El Salvador | Fruits, Other                   | 2002           | 19                                                             |
| 60               | El Salvador | Grand Total                     | 2002           | 2,643                                                          |
| 60               | El Salvador | Grapes and products (excl wine) | 2002           | 1                                                              |
| 60               | El Salvador | Groundnuts (Shelled Eq)         | 2002           | 9                                                              |
| 60               | El Salvador | Lemons, Limes and products      | 2002           | 2                                                              |
| 60               | El Salvador | Maize and products              | 2002           | 736                                                            |
| 60               | El Salvador | Maize Germ Oil                  | 2002           | 5                                                              |
| 60               | El Salvador | Marine Fish, Other              | 2002           | 1                                                              |
| 60               | El Salvador | Meat                            | 2002           | 94                                                             |
| 60               | El Salvador | Milk - Excluding Butter         | 2002           | 164                                                            |
| 60               | El Salvador | Miscellaneous                   | 2002           | 6                                                              |
| 60               | El Salvador | Oats                            | 2002           | 1                                                              |
| 60               | El Salvador | Offals                          | 2002           | 4                                                              |
| 60               | El Salvador | Oilcrops                        | 2002           | 57                                                             |
| 60               | El Salvador | Oilcrops Oil, Other             | 2002           | 6                                                              |
| 60               | El Salvador | Olive Oil                       | 2002           | 4                                                              |
| 60               | El Salvador | Onions                          | 2002           | 3                                                              |
| 60               | El Salvador | Oranges, Mandarines             | 2002           | 7                                                              |
| 60               | El Salvador | Pelagic Fish                    | 2002           | 6                                                              |
| 60               | El Salvador | Pigmeat                         | 2002           | 10                                                             |
| 60               | El Salvador | Pineapples and products         | 2002           | 1                                                              |
| 60               | El Salvador | Plantains                       | 2002           | 38                                                             |
| 60               | El Salvador | Potatoes and products           | 2002           | 26                                                             |
| 60               | El Salvador | Poultry Meat                    | 2002           | 49                                                             |
| 60               | El Salvador | Pulses                          | 2002           | 152                                                            |
| 60               | El Salvador | Rape and Mustardseed            | 2002           | 1                                                              |
| 60               | El Salvador | Rice (Milled Equivalent)        | 2002           | 110                                                            |
| 60               | El Salvador | Roots, Other                    | 2002           | 26                                                             |
| 60               | El Salvador | Sesame seed                     | 2002           | 10                                                             |
| 60               | El Salvador | Sorghum and products            | 2002           | 153                                                            |
| 60               | El Salvador | Soyabean Oil                    | 2002           | 84                                                             |
| 60               | El Salvador | Soyabeans                       | 2002           | 6                                                              |
| 60               | El Salvador | Spices                          | 2002           | 1                                                              |
| 60               | El Salvador | Spices, Other                   | 2002           | 1                                                              |
| 60               | El Salvador | Starchy Roots                   | 2002           | 59                                                             |
| 60               | El Salvador | Stimulants                      | 2002           | 5                                                              |
| 60               | El Salvador | Sugar & Sweeteners              | 2002           | 383                                                            |
| 60               | El Salvador | Sugar (Raw Equivalent)          | 2002           | 351                                                            |
| 60               | El Salvador | Sugar non-centrifugal           | 2002           | 20                                                             |
| 60               | El Salvador | Sunflowerseed Oil               | 2002           | 17                                                             |
| 60               | El Salvador | Sweeteners, Other               | 2002           | 11                                                             |
| 60               | El Salvador | Tomatoes and products           | 2002           | 7                                                              |
| 60               | El Salvador | Treenuts                        | 2002           | 2                                                              |
| 60               | El Salvador | Vegetable Oils                  | 2002           | 154                                                            |
| 60               | El Salvador | Vegetables                      | 2002           | 33                                                             |
| 60               | El Salvador | Vegetables, Other               | 2002           | 23                                                             |
| 60               | El Salvador | Vegetal Products                | 2002           | 2,270                                                          |
| 60               | El Salvador | Wheat and products              | 2002           | 276                                                            |
| 60               | El Salvador | Alcoholic Beverages             | 2003           | 50                                                             |
| 60               | El Salvador | Animal fats                     | 2003           | 68                                                             |
| 60               | El Salvador | Animal Products                 | 2003           | 364                                                            |
| 60               | El Salvador | Apples and products             | 2003           | 5                                                              |
| 60               | El Salvador | Bananas                         | 2003           | 13                                                             |
| 60               | El Salvador | Beans                           | 2003           | 145                                                            |
| 60               | El Salvador | Beer                            | 2003           | 17                                                             |
| 60               | El Salvador | Beverages, Alcoholic            | 2003           | 33                                                             |
| 60               | El Salvador | Bovine Meat                     | 2003           | 29                                                             |
| 60               | El Salvador | Butter, Ghee                    | 2003           | 7                                                              |
| 60               | El Salvador | Cassava and products            | 2003           | 7                                                              |
| 60               | El Salvador | Cereals - Excluding Beer        | 2003           | 1,269                                                          |
| 60               | El Salvador | Cereals, Other                  | 2003           | 6                                                              |
| 60               | El Salvador | Cocoa Beans and products        | 2003           | 5                                                              |
| 60               | El Salvador | Coconut Oil                     | 2003           | 8                                                              |
| 60               | El Salvador | Coconuts - Incl Copra           | 2003           | 30                                                             |
| 60               | El Salvador | Coffee and products             | 2003           | 3                                                              |
| 60               | El Salvador | Cottonseed Oil                  | 2003           | 10                                                             |
| 60               | El Salvador | Crustaceans                     | 2003           | 3                                                              |
| 60               | El Salvador | Eggs                            | 2003           | 34                                                             |
| 60               | El Salvador | Fats, Animals, Raw              | 2003           | 61                                                             |
| 60               | El Salvador | Fish, Seafood                   | 2003           | 11                                                             |
| 60               | El Salvador | Freshwater Fish                 | 2003           | 1                                                              |
| 60               | El Salvador | Fruits - Excluding Wine         | 2003           | 88                                                             |
| 60               | El Salvador | Fruits, Other                   | 2003           | 19                                                             |
| 60               | El Salvador | Grand Total                     | 2003           | 2,597                                                          |
| 60               | El Salvador | Grapes and products (excl wine) | 2003           | 2                                                              |
| 60               | El Salvador | Groundnuts (Shelled Eq)         | 2003           | 7                                                              |
| 60               | El Salvador | Lemons, Limes and products      | 2003           | 1                                                              |

Dietary calcium and zinc deficiency risks are decreasing but remain prevalent

| FAO Country code | Country     | Food item                       | Reference year | Net energy supply (kcal capita <sup>-1</sup> d <sup>-1</sup> ) |
|------------------|-------------|---------------------------------|----------------|----------------------------------------------------------------|
| 60               | El Salvador | Maize and products              | 2003           | 757                                                            |
| 60               | El Salvador | Maize Germ Oil                  | 2003           | 4                                                              |
| 60               | El Salvador | Marine Fish, Other              | 2003           | 2                                                              |
| 60               | El Salvador | Meat                            | 2003           | 85                                                             |
| 60               | El Salvador | Milk - Excluding Butter         | 2003           | 161                                                            |
| 60               | El Salvador | Miscellaneous                   | 2003           | 7                                                              |
| 60               | El Salvador | Oats                            | 2003           | 1                                                              |
| 60               | El Salvador | Offals                          | 2003           | 5                                                              |
| 60               | El Salvador | Oilcrops                        | 2003           | 49                                                             |
| 60               | El Salvador | Oilcrops Oil, Other             | 2003           | 11                                                             |
| 60               | El Salvador | Olive Oil                       | 2003           | 6                                                              |
| 60               | El Salvador | Onions                          | 2003           | 3                                                              |
| 60               | El Salvador | Oranges, Mandarines             | 2003           | 8                                                              |
| 60               | El Salvador | Pelagic Fish                    | 2003           | 4                                                              |
| 60               | El Salvador | Pigmeat                         | 2003           | 10                                                             |
| 60               | El Salvador | Pineapples and products         | 2003           | 1                                                              |
| 60               | El Salvador | Plantains                       | 2003           | 39                                                             |
| 60               | El Salvador | Potatoes and products           | 2003           | 29                                                             |
| 60               | El Salvador | Poultry Meat                    | 2003           | 46                                                             |
| 60               | El Salvador | Pulses                          | 2003           | 145                                                            |
| 60               | El Salvador | Rape and Mustardseed            | 2003           | 1                                                              |
| 60               | El Salvador | Rice (Milled Equivalent)        | 2003           | 110                                                            |
| 60               | El Salvador | Roots, Other                    | 2003           | 21                                                             |
| 60               | El Salvador | Sesame seed                     | 2003           | 4                                                              |
| 60               | El Salvador | Sorghum and products            | 2003           | 153                                                            |
| 60               | El Salvador | Soyabean Oil                    | 2003           | 83                                                             |
| 60               | El Salvador | Soyabeans                       | 2003           | 6                                                              |
| 60               | El Salvador | Spices                          | 2003           | 1                                                              |
| 60               | El Salvador | Spices, Other                   | 2003           | 1                                                              |
| 60               | El Salvador | Starchy Roots                   | 2003           | 58                                                             |
| 60               | El Salvador | Stimulants                      | 2003           | 8                                                              |
| 60               | El Salvador | Sugar & Sweeteners              | 2003           | 371                                                            |
| 60               | El Salvador | Sugar (Raw Equivalent)          | 2003           | 338                                                            |
| 60               | El Salvador | Sugar non-centrifugal           | 2003           | 20                                                             |
| 60               | El Salvador | Sunflowerseed Oil               | 2003           | 30                                                             |
| 60               | El Salvador | Sweeteners, Other               | 2003           | 12                                                             |
| 60               | El Salvador | Tomatoes and products           | 2003           | 8                                                              |
| 60               | El Salvador | Treenuts                        | 2003           | 2                                                              |
| 60               | El Salvador | Vegetable Oils                  | 2003           | 152                                                            |
| 60               | El Salvador | Vegetables                      | 2003           | 33                                                             |
| 60               | El Salvador | Vegetables, Other               | 2003           | 22                                                             |
| 60               | El Salvador | Vegetal Products                | 2003           | 2,233                                                          |
| 60               | El Salvador | Wheat and products              | 2003           | 243                                                            |
| 60               | El Salvador | Alcoholic Beverages             | 2004           | 55                                                             |
| 60               | El Salvador | Animal fats                     | 2004           | 65                                                             |
| 60               | El Salvador | Animal Products                 | 2004           | 371                                                            |
| 60               | El Salvador | Apples and products             | 2004           | 4                                                              |
| 60               | El Salvador | Bananas                         | 2004           | 12                                                             |
| 60               | El Salvador | Beans                           | 2004           | 135                                                            |
| 60               | El Salvador | Beer                            | 2004           | 19                                                             |
| 60               | El Salvador | Beverages, Alcoholic            | 2004           | 35                                                             |
| 60               | El Salvador | Bovine Meat                     | 2004           | 28                                                             |
| 60               | El Salvador | Butter, Ghee                    | 2004           | 5                                                              |
| 60               | El Salvador | Cassava and products            | 2004           | 8                                                              |
| 60               | El Salvador | Cereals - Excluding Beer        | 2004           | 1,284                                                          |
| 60               | El Salvador | Cereals, Other                  | 2004           | 4                                                              |
| 60               | El Salvador | Cocoa Beans and products        | 2004           | 5                                                              |
| 60               | El Salvador | Coconut Oil                     | 2004           | 6                                                              |
| 60               | El Salvador | Coconuts - Incl Copra           | 2004           | 31                                                             |
| 60               | El Salvador | Coffee and products             | 2004           | 3                                                              |
| 60               | El Salvador | Cottonseed Oil                  | 2004           | 7                                                              |
| 60               | El Salvador | Crustaceans                     | 2004           | 3                                                              |
| 60               | El Salvador | Demersal Fish                   | 2004           | 1                                                              |
| 60               | El Salvador | Eggs                            | 2004           | 35                                                             |
| 60               | El Salvador | Fats, Animals, Raw              | 2004           | 60                                                             |
| 60               | El Salvador | Fish, Seafood                   | 2004           | 11                                                             |
| 60               | El Salvador | Freshwater Fish                 | 2004           | 1                                                              |
| 60               | El Salvador | Fruits - Excluding Wine         | 2004           | 89                                                             |
| 60               | El Salvador | Fruits, Other                   | 2004           | 21                                                             |
| 60               | El Salvador | Grand Total                     | 2004           | 2,568                                                          |
| 60               | El Salvador | Grapes and products (excl wine) | 2004           | 2                                                              |
| 60               | El Salvador | Groundnuts (Shelled Eq)         | 2004           | 4                                                              |
| 60               | El Salvador | Honey                           | 2004           | 1                                                              |
| 60               | El Salvador | Lemons, Limes and products      | 2004           | 1                                                              |
| 60               | El Salvador | Maize and products              | 2004           | 806                                                            |
| 60               | El Salvador | Maize Germ Oil                  | 2004           | 6                                                              |
| 60               | El Salvador | Marine Fish, Other              | 2004           | 1                                                              |
| 60               | El Salvador | Meat                            | 2004           | 93                                                             |
| 60               | El Salvador | Milk - Excluding Butter         | 2004           | 165                                                            |
| 60               | El Salvador | Miscellaneous                   | 2004           | 9                                                              |
| 60               | El Salvador | Oats                            | 2004           | 1                                                              |
| 60               | El Salvador | Offals                          | 2004           | 3                                                              |
| 60               | El Salvador | Oilcrops                        | 2004           | 46                                                             |
| 60               | El Salvador | Oilcrops Oil, Other             | 2004           | 17                                                             |
| 60               | El Salvador | Olive Oil                       | 2004           | 6                                                              |
| 60               | El Salvador | Onions                          | 2004           | 4                                                              |
| 60               | El Salvador | Oranges, Mandarines             | 2004           | 9                                                              |
| 60               | El Salvador | Pelagic Fish                    | 2004           | 5                                                              |
| 60               | El Salvador | Pigmeat                         | 2004           | 11                                                             |
| 60               | El Salvador | Pineapples and products         | 2004           | 1                                                              |
| 60               | El Salvador | Plantains                       | 2004           | 39                                                             |
| 60               | El Salvador | Potatoes and products           | 2004           | 23                                                             |
| 60               | El Salvador | Poultry Meat                    | 2004           | 54                                                             |
| 60               | El Salvador | Pulses                          | 2004           | 135                                                            |
| 60               | El Salvador | Rape and Mustardseed            | 2004           | 1                                                              |
| 60               | El Salvador | Rice (Milled Equivalent)        | 2004           | 91                                                             |
| 60               | El Salvador | Roots, Other                    | 2004           | 14                                                             |

Dietary calcium and zinc deficiency risks are decreasing but remain prevalent

| FAO Country code | Country     | Food item                       | Reference year | Net energy supply (kcal capita <sup>-1</sup> d <sup>-1</sup> ) |
|------------------|-------------|---------------------------------|----------------|----------------------------------------------------------------|
| 60               | El Salvador | Sesame seed                     | 2004           | 3                                                              |
| 60               | El Salvador | Sorghum and products            | 2004           | 147                                                            |
| 60               | El Salvador | Soybean Oil                     | 2004           | 55                                                             |
| 60               | El Salvador | Soyabeans                       | 2004           | 6                                                              |
| 60               | El Salvador | Spices                          | 2004           | 1                                                              |
| 60               | El Salvador | Spices, Other                   | 2004           | 1                                                              |
| 60               | El Salvador | Starchy Roots                   | 2004           | 46                                                             |
| 60               | El Salvador | Stimulants                      | 2004           | 8                                                              |
| 60               | El Salvador | Sugar & Sweeteners              | 2004           | 362                                                            |
| 60               | El Salvador | Sugar (Raw Equivalent)          | 2004           | 347                                                            |
| 60               | El Salvador | Sunflowerseed Oil               | 2004           | 28                                                             |
| 60               | El Salvador | Sweeteners, Other               | 2004           | 14                                                             |
| 60               | El Salvador | Tomatoes and products           | 2004           | 9                                                              |
| 60               | El Salvador | Treenuts                        | 2004           | 2                                                              |
| 60               | El Salvador | Vegetable Oils                  | 2004           | 124                                                            |
| 60               | El Salvador | Vegetables                      | 2004           | 35                                                             |
| 60               | El Salvador | Vegetables, Other               | 2004           | 22                                                             |
| 60               | El Salvador | Vegetal Products                | 2004           | 2,197                                                          |
| 60               | El Salvador | Wheat and products              | 2004           | 235                                                            |
| 60               | El Salvador | Alcoholic Beverages             | 2005           | 51                                                             |
| 60               | El Salvador | Animal fats                     | 2005           | 67                                                             |
| 60               | El Salvador | Animal Products                 | 2005           | 401                                                            |
| 60               | El Salvador | Apples and products             | 2005           | 4                                                              |
| 60               | El Salvador | Bananas                         | 2005           | 12                                                             |
| 60               | El Salvador | Beans                           | 2005           | 121                                                            |
| 60               | El Salvador | Beer                            | 2005           | 21                                                             |
| 60               | El Salvador | Beverages, Alcoholic            | 2005           | 29                                                             |
| 60               | El Salvador | Bovine Meat                     | 2005           | 29                                                             |
| 60               | El Salvador | Butter, Ghee                    | 2005           | 2                                                              |
| 60               | El Salvador | Cassava and products            | 2005           | 9                                                              |
| 60               | El Salvador | Cereals - Excluding Beer        | 2005           | 1,217                                                          |
| 60               | El Salvador | Cereals, Other                  | 2005           | 4                                                              |
| 60               | El Salvador | Cocoa Beans and products        | 2005           | 2                                                              |
| 60               | El Salvador | Coconut Oil                     | 2005           | 7                                                              |
| 60               | El Salvador | Coconuts - Incl Copra           | 2005           | 31                                                             |
| 60               | El Salvador | Coffee and products             | 2005           | 3                                                              |
| 60               | El Salvador | Cottonseed Oil                  | 2005           | 3                                                              |
| 60               | El Salvador | Crustaceans                     | 2005           | 5                                                              |
| 60               | El Salvador | Demersal Fish                   | 2005           | 1                                                              |
| 60               | El Salvador | Eggs                            | 2005           | 34                                                             |
| 60               | El Salvador | Fats, Animals, Raw              | 2005           | 66                                                             |
| 60               | El Salvador | Fish, Seafood                   | 2005           | 15                                                             |
| 60               | El Salvador | Freshwater Fish                 | 2005           | 1                                                              |
| 60               | El Salvador | Fruits - Excluding Wine         | 2005           | 95                                                             |
| 60               | El Salvador | Fruits, Other                   | 2005           | 22                                                             |
| 60               | El Salvador | Grand Total                     | 2005           | 2,571                                                          |
| 60               | El Salvador | Grapes and products (excl wine) | 2005           | 2                                                              |
| 60               | El Salvador | Groundnuts (Shelled Eq)         | 2005           | 7                                                              |
| 60               | El Salvador | Honey                           | 2005           | 2                                                              |
| 60               | El Salvador | Lemons, Limes and products      | 2005           | 1                                                              |
| 60               | El Salvador | Maize and products              | 2005           | 758                                                            |
| 60               | El Salvador | Maize Germ Oil                  | 2005           | 4                                                              |
| 60               | El Salvador | Marine Fish, Other              | 2005           | 2                                                              |
| 60               | El Salvador | Meat                            | 2005           | 100                                                            |
| 60               | El Salvador | Milk - Excluding Butter         | 2005           | 181                                                            |
| 60               | El Salvador | Miscellaneous                   | 2005           | 12                                                             |
| 60               | El Salvador | Oats                            | 2005           | 1                                                              |
| 60               | El Salvador | Offals                          | 2005           | 4                                                              |
| 60               | El Salvador | Oilcrops                        | 2005           | 50                                                             |
| 60               | El Salvador | Oilcrops Oil, Other             | 2005           | 34                                                             |
| 60               | El Salvador | Olive Oil                       | 2005           | 7                                                              |
| 60               | El Salvador | Onions                          | 2005           | 4                                                              |
| 60               | El Salvador | Oranges, Mandarines             | 2005           | 12                                                             |
| 60               | El Salvador | Pelagic Fish                    | 2005           | 6                                                              |
| 60               | El Salvador | Pigmeat                         | 2005           | 13                                                             |
| 60               | El Salvador | Pineapples and products         | 2005           | 1                                                              |
| 60               | El Salvador | Plantains                       | 2005           | 41                                                             |
| 60               | El Salvador | Potatoes and products           | 2005           | 20                                                             |
| 60               | El Salvador | Poultry Meat                    | 2005           | 58                                                             |
| 60               | El Salvador | Pulses                          | 2005           | 121                                                            |
| 60               | El Salvador | Rape and Mustardseed            | 2005           | 2                                                              |
| 60               | El Salvador | Rice (Milled Equivalent)        | 2005           | 98                                                             |
| 60               | El Salvador | Roots, Other                    | 2005           | 17                                                             |
| 60               | El Salvador | Sesame seed                     | 2005           | 3                                                              |
| 60               | El Salvador | Sorghum and products            | 2005           | 138                                                            |
| 60               | El Salvador | Soybean Oil                     | 2005           | 59                                                             |
| 60               | El Salvador | Soyabeans                       | 2005           | 6                                                              |
| 60               | El Salvador | Spices                          | 2005           | 1                                                              |
| 60               | El Salvador | Spices, Other                   | 2005           | 1                                                              |
| 60               | El Salvador | Starchy Roots                   | 2005           | 46                                                             |
| 60               | El Salvador | Stimulants                      | 2005           | 5                                                              |
| 60               | El Salvador | Sugar & Sweeteners              | 2005           | 381                                                            |
| 60               | El Salvador | Sugar (Raw Equivalent)          | 2005           | 363                                                            |
| 60               | El Salvador | Sunflowerseed Oil               | 2005           | 30                                                             |
| 60               | El Salvador | Sweeteners, Other               | 2005           | 17                                                             |
| 60               | El Salvador | Tomatoes and products           | 2005           | 10                                                             |
| 60               | El Salvador | Treenuts                        | 2005           | 1                                                              |
| 60               | El Salvador | Vegetable Oils                  | 2005           | 144                                                            |
| 60               | El Salvador | Vegetables                      | 2005           | 46                                                             |
| 60               | El Salvador | Vegetables, Other               | 2005           | 32                                                             |
| 60               | El Salvador | Vegetal Products                | 2005           | 2,170                                                          |
| 60               | El Salvador | Wheat and products              | 2005           | 218                                                            |
| 60               | El Salvador | Alcoholic Beverages             | 2006           | 52                                                             |
| 60               | El Salvador | Animal fats                     | 2006           | 70                                                             |
| 60               | El Salvador | Animal Products                 | 2006           | 403                                                            |
| 60               | El Salvador | Apples and products             | 2006           | 4                                                              |
| 60               | El Salvador | Bananas                         | 2006           | 11                                                             |

Dietary calcium and zinc deficiency risks are decreasing but remain prevalent

| FAO Country code | Country     | Food item                       | Reference year | Net energy supply (kcal capita <sup>-1</sup> d <sup>-1</sup> ) |
|------------------|-------------|---------------------------------|----------------|----------------------------------------------------------------|
| 60               | El Salvador | Beans                           | 2006           | 163                                                            |
| 60               | El Salvador | Beer                            | 2006           | 24                                                             |
| 60               | El Salvador | Beverages, Alcoholic            | 2006           | 28                                                             |
| 60               | El Salvador | Bovine Meat                     | 2006           | 33                                                             |
| 60               | El Salvador | Butter, Ghee                    | 2006           | 2                                                              |
| 60               | El Salvador | Cassava and products            | 2006           | 9                                                              |
| 60               | El Salvador | Cereals - Excluding Beer        | 2006           | 1,135                                                          |
| 60               | El Salvador | Cereals, Other                  | 2006           | 3                                                              |
| 60               | El Salvador | Cocoa Beans and products        | 2006           | 2                                                              |
| 60               | El Salvador | Coconut Oil                     | 2006           | 9                                                              |
| 60               | El Salvador | Coconuts - Incl Copra           | 2006           | 31                                                             |
| 60               | El Salvador | Coffee and products             | 2006           | 3                                                              |
| 60               | El Salvador | Cottonseed Oil                  | 2006           | 3                                                              |
| 60               | El Salvador | Crustaceans                     | 2006           | 4                                                              |
| 60               | El Salvador | Demersal Fish                   | 2006           | 1                                                              |
| 60               | El Salvador | Eggs                            | 2006           | 35                                                             |
| 60               | El Salvador | Fats, Animals, Raw              | 2006           | 68                                                             |
| 60               | El Salvador | Fish, Seafood                   | 2006           | 11                                                             |
| 60               | El Salvador | Freshwater Fish                 | 2006           | 1                                                              |
| 60               | El Salvador | Fruits - Excluding Wine         | 2006           | 93                                                             |
| 60               | El Salvador | Fruits, Other                   | 2006           | 19                                                             |
| 60               | El Salvador | Grand Total                     | 2006           | 2,578                                                          |
| 60               | El Salvador | Grapes and products (excl wine) | 2006           | 2                                                              |
| 60               | El Salvador | Groundnuts (Shelled Eq)         | 2006           | 7                                                              |
| 60               | El Salvador | Honey                           | 2006           | 1                                                              |
| 60               | El Salvador | Lemons, Limes and products      | 2006           | 1                                                              |
| 60               | El Salvador | Maize and products              | 2006           | 653                                                            |
| 60               | El Salvador | Maize Germ Oil                  | 2006           | 7                                                              |
| 60               | El Salvador | Marine Fish, Other              | 2006           | 2                                                              |
| 60               | El Salvador | Meat                            | 2006           | 108                                                            |
| 60               | El Salvador | Milk - Excluding Butter         | 2006           | 174                                                            |
| 60               | El Salvador | Miscellaneous                   | 2006           | 9                                                              |
| 60               | El Salvador | Oats                            | 2006           | 1                                                              |
| 60               | El Salvador | Offals                          | 2006           | 4                                                              |
| 60               | El Salvador | Oilcrops                        | 2006           | 51                                                             |
| 60               | El Salvador | Oilcrops Oil, Other             | 2006           | 33                                                             |
| 60               | El Salvador | Olive Oil                       | 2006           | 7                                                              |
| 60               | El Salvador | Onions                          | 2006           | 6                                                              |
| 60               | El Salvador | Oranges, Mandarines             | 2006           | 12                                                             |
| 60               | El Salvador | Pelagic Fish                    | 2006           | 3                                                              |
| 60               | El Salvador | Pigmeat                         | 2006           | 16                                                             |
| 60               | El Salvador | Pineapples and products         | 2006           | 1                                                              |
| 60               | El Salvador | Plantains                       | 2006           | 42                                                             |
| 60               | El Salvador | Potatoes and products           | 2006           | 24                                                             |
| 60               | El Salvador | Poultry Meat                    | 2006           | 59                                                             |
| 60               | El Salvador | Pulses                          | 2006           | 163                                                            |
| 60               | El Salvador | Rape and Mustardseed            | 2006           | 2                                                              |
| 60               | El Salvador | Rice (Milled Equivalent)        | 2006           | 104                                                            |
| 60               | El Salvador | Roots, Other                    | 2006           | 15                                                             |
| 60               | El Salvador | Sesame seed                     | 2006           | 3                                                              |
| 60               | El Salvador | Sorghum and products            | 2006           | 148                                                            |
| 60               | El Salvador | Soyabean Oil                    | 2006           | 67                                                             |
| 60               | El Salvador | Soyabeans                       | 2006           | 6                                                              |
| 60               | El Salvador | Spices                          | 2006           | 1                                                              |
| 60               | El Salvador | Spices, Other                   | 2006           | 1                                                              |
| 60               | El Salvador | Starchy Roots                   | 2006           | 48                                                             |
| 60               | El Salvador | Stimulants                      | 2006           | 6                                                              |
| 60               | El Salvador | Sugar & Sweeteners              | 2006           | 406                                                            |
| 60               | El Salvador | Sugar (Raw Equivalent)          | 2006           | 386                                                            |
| 60               | El Salvador | Sunflowerseed Oil               | 2006           | 33                                                             |
| 60               | El Salvador | Sweeteners, Other               | 2006           | 19                                                             |
| 60               | El Salvador | Tomatoes and products           | 2006           | 11                                                             |
| 60               | El Salvador | Treenuts                        | 2006           | 2                                                              |
| 60               | El Salvador | Vegetable Oils                  | 2006           | 158                                                            |
| 60               | El Salvador | Vegetables                      | 2006           | 52                                                             |
| 60               | El Salvador | Vegetables, Other               | 2006           | 36                                                             |
| 60               | El Salvador | Vegetal Products                | 2006           | 2,176                                                          |
| 60               | El Salvador | Wheat and products              | 2006           | 225                                                            |
| 60               | El Salvador | Wine                            | 2006           | 1                                                              |
| 60               | El Salvador | Alcoholic Beverages             | 2007           | 51                                                             |
| 60               | El Salvador | Animal fats                     | 2007           | 64                                                             |
| 60               | El Salvador | Animal Products                 | 2007           | 403                                                            |
| 60               | El Salvador | Apples and products             | 2007           | 4                                                              |
| 60               | El Salvador | Bananas                         | 2007           | 12                                                             |
| 60               | El Salvador | Beans                           | 2007           | 120                                                            |
| 60               | El Salvador | Beer                            | 2007           | 23                                                             |
| 60               | El Salvador | Beverages, Alcoholic            | 2007           | 27                                                             |
| 60               | El Salvador | Bovine Meat                     | 2007           | 34                                                             |
| 60               | El Salvador | Butter, Ghee                    | 2007           | 1                                                              |
| 60               | El Salvador | Cassava and products            | 2007           | 11                                                             |
| 60               | El Salvador | Cereals - Excluding Beer        | 2007           | 1,147                                                          |
| 60               | El Salvador | Cereals, Other                  | 2007           | 6                                                              |
| 60               | El Salvador | Cocoa Beans and products        | 2007           | 3                                                              |
| 60               | El Salvador | Coconut Oil                     | 2007           | 9                                                              |
| 60               | El Salvador | Coconuts - Incl Copra           | 2007           | 35                                                             |
| 60               | El Salvador | Coffee and products             | 2007           | 4                                                              |
| 60               | El Salvador | Cottonseed Oil                  | 2007           | 2                                                              |
| 60               | El Salvador | Crustaceans                     | 2007           | 4                                                              |
| 60               | El Salvador | Demersal Fish                   | 2007           | 1                                                              |
| 60               | El Salvador | Eggs                            | 2007           | 34                                                             |
| 60               | El Salvador | Fats, Animals, Raw              | 2007           | 62                                                             |
| 60               | El Salvador | Fish, Seafood                   | 2007           | 12                                                             |
| 60               | El Salvador | Freshwater Fish                 | 2007           | 2                                                              |
| 60               | El Salvador | Fruits - Excluding Wine         | 2007           | 100                                                            |
| 60               | El Salvador | Fruits, Other                   | 2007           | 20                                                             |
| 60               | El Salvador | Grand Total                     | 2007           | 2,565                                                          |
| 60               | El Salvador | Grapes and products (excl wine) | 2007           | 2                                                              |

Dietary calcium and zinc deficiency risks are decreasing but remain prevalent

| FAO Country code | Country     | Food item                       | Reference year | Net energy supply (kcal capita <sup>-1</sup> d <sup>-1</sup> ) |
|------------------|-------------|---------------------------------|----------------|----------------------------------------------------------------|
| 60               | El Salvador | Groundnuts (Shelled Eq)         | 2007           | 4                                                              |
| 60               | El Salvador | Honey                           | 2007           | 1                                                              |
| 60               | El Salvador | Lemons, Limes and products      | 2007           | 1                                                              |
| 60               | El Salvador | Maize and products              | 2007           | 662                                                            |
| 60               | El Salvador | Maize Germ Oil                  | 2007           | 4                                                              |
| 60               | El Salvador | Marine Fish, Other              | 2007           | 2                                                              |
| 60               | El Salvador | Meat                            | 2007           | 109                                                            |
| 60               | El Salvador | Milk - Excluding Butter         | 2007           | 181                                                            |
| 60               | El Salvador | Miscellaneous                   | 2007           | 10                                                             |
| 60               | El Salvador | Oats                            | 2007           | 1                                                              |
| 60               | El Salvador | Offals                          | 2007           | 4                                                              |
| 60               | El Salvador | Oilcrops                        | 2007           | 54                                                             |
| 60               | El Salvador | Oilcrops Oil, Other             | 2007           | 23                                                             |
| 60               | El Salvador | Olive Oil                       | 2007           | 9                                                              |
| 60               | El Salvador | Onions                          | 2007           | 5                                                              |
| 60               | El Salvador | Oranges, Mandarines             | 2007           | 13                                                             |
| 60               | El Salvador | Pelagic Fish                    | 2007           | 3                                                              |
| 60               | El Salvador | Pigmeat                         | 2007           | 13                                                             |
| 60               | El Salvador | Pineapples and products         | 2007           | 2                                                              |
| 60               | El Salvador | Plantains                       | 2007           | 46                                                             |
| 60               | El Salvador | Potatoes and products           | 2007           | 28                                                             |
| 60               | El Salvador | Poultry Meat                    | 2007           | 62                                                             |
| 60               | El Salvador | Pulses                          | 2007           | 121                                                            |
| 60               | El Salvador | Rape and Mustardseed            | 2007           | 2                                                              |
| 60               | El Salvador | Rice (Milled Equivalent)        | 2007           | 99                                                             |
| 60               | El Salvador | Roots, Other                    | 2007           | 17                                                             |
| 60               | El Salvador | Sesame seed                     | 2007           | 4                                                              |
| 60               | El Salvador | Sorghum and products            | 2007           | 147                                                            |
| 60               | El Salvador | Soyabean Oil                    | 2007           | 79                                                             |
| 60               | El Salvador | Soyabeans                       | 2007           | 8                                                              |
| 60               | El Salvador | Spices                          | 2007           | 1                                                              |
| 60               | El Salvador | Spices, Other                   | 2007           | 1                                                              |
| 60               | El Salvador | Starchy Roots                   | 2007           | 56                                                             |
| 60               | El Salvador | Stimulants                      | 2007           | 7                                                              |
| 60               | El Salvador | Sugar & Sweeteners              | 2007           | 398                                                            |
| 60               | El Salvador | Sugar (Raw Equivalent)          | 2007           | 380                                                            |
| 60               | El Salvador | Sunflowerseed Oil               | 2007           | 35                                                             |
| 60               | El Salvador | Sweeteners, Other               | 2007           | 17                                                             |
| 60               | El Salvador | Tomatoes and products           | 2007           | 11                                                             |
| 60               | El Salvador | Treenuts                        | 2007           | 2                                                              |
| 60               | El Salvador | Vegetable Oils                  | 2007           | 162                                                            |
| 60               | El Salvador | Vegetables                      | 2007           | 53                                                             |
| 60               | El Salvador | Vegetables, Other               | 2007           | 37                                                             |
| 60               | El Salvador | Vegetal Products                | 2007           | 2,161                                                          |
| 60               | El Salvador | Wheat and products              | 2007           | 232                                                            |
| 60               | El Salvador | Wine                            | 2007           | 1                                                              |
| 60               | El Salvador | Alcoholic Beverages             | 2008           | 47                                                             |
| 60               | El Salvador | Animal fats                     | 2008           | 46                                                             |
| 60               | El Salvador | Animal Products                 | 2008           | 377                                                            |
| 60               | El Salvador | Apples and products             | 2008           | 4                                                              |
| 60               | El Salvador | Bananas                         | 2008           | 12                                                             |
| 60               | El Salvador | Beans                           | 2008           | 160                                                            |
| 60               | El Salvador | Beer                            | 2008           | 21                                                             |
| 60               | El Salvador | Beverages, Alcoholic            | 2008           | 25                                                             |
| 60               | El Salvador | Bovine Meat                     | 2008           | 34                                                             |
| 60               | El Salvador | Butter, Ghee                    | 2008           | 2                                                              |
| 60               | El Salvador | Cassava and products            | 2008           | 11                                                             |
| 60               | El Salvador | Cereals - Excluding Beer        | 2008           | 1,171                                                          |
| 60               | El Salvador | Cereals, Other                  | 2008           | 8                                                              |
| 60               | El Salvador | Cocoa Beans and products        | 2008           | 3                                                              |
| 60               | El Salvador | Coconut Oil                     | 2008           | 10                                                             |
| 60               | El Salvador | Coconuts - Incl Copra           | 2008           | 31                                                             |
| 60               | El Salvador | Coffee and products             | 2008           | 4                                                              |
| 60               | El Salvador | Crustaceans                     | 2008           | 2                                                              |
| 60               | El Salvador | Eggs                            | 2008           | 32                                                             |
| 60               | El Salvador | Fats, Animals, Raw              | 2008           | 45                                                             |
| 60               | El Salvador | Fish, Seafood                   | 2008           | 8                                                              |
| 60               | El Salvador | Freshwater Fish                 | 2008           | 2                                                              |
| 60               | El Salvador | Fruits - Excluding Wine         | 2008           | 107                                                            |
| 60               | El Salvador | Fruits, Other                   | 2008           | 27                                                             |
| 60               | El Salvador | Grand Total                     | 2008           | 2,570                                                          |
| 60               | El Salvador | Grapes and products (excl wine) | 2008           | 2                                                              |
| 60               | El Salvador | Groundnuts (Shelled Eq)         | 2008           | 4                                                              |
| 60               | El Salvador | Honey                           | 2008           | 2                                                              |
| 60               | El Salvador | Lemons, Limes and products      | 2008           | 1                                                              |
| 60               | El Salvador | Maize and products              | 2008           | 670                                                            |
| 60               | El Salvador | Marine Fish, Other              | 2008           | 1                                                              |
| 60               | El Salvador | Meat                            | 2008           | 104                                                            |
| 60               | El Salvador | Milk - Excluding Butter         | 2008           | 183                                                            |
| 60               | El Salvador | Miscellaneous                   | 2008           | 7                                                              |
| 60               | El Salvador | Oats                            | 2008           | 1                                                              |
| 60               | El Salvador | Offals                          | 2008           | 4                                                              |
| 60               | El Salvador | Oilcrops                        | 2008           | 50                                                             |
| 60               | El Salvador | Oilcrops Oil, Other             | 2008           | 23                                                             |
| 60               | El Salvador | Olive Oil                       | 2008           | 8                                                              |
| 60               | El Salvador | Onions                          | 2008           | 5                                                              |
| 60               | El Salvador | Oranges, Mandarines             | 2008           | 12                                                             |
| 60               | El Salvador | Pelagic Fish                    | 2008           | 3                                                              |
| 60               | El Salvador | Pigmeat                         | 2008           | 14                                                             |
| 60               | El Salvador | Pineapples and products         | 2008           | 2                                                              |
| 60               | El Salvador | Plantains                       | 2008           | 47                                                             |
| 60               | El Salvador | Potatoes and products           | 2008           | 20                                                             |
| 60               | El Salvador | Poultry Meat                    | 2008           | 56                                                             |
| 60               | El Salvador | Pulses                          | 2008           | 160                                                            |
| 60               | El Salvador | Rape and Mustardseed            | 2008           | 2                                                              |
| 60               | El Salvador | Rice (Milled Equivalent)        | 2008           | 105                                                            |
| 60               | El Salvador | Roots, Other                    | 2008           | 19                                                             |

Dietary calcium and zinc deficiency risks are decreasing but remain prevalent

| FAO Country code | Country     | Food item                       | Reference year | Net energy supply (kcal <i>capita</i> <sup>-1</sup> d <sup>-1</sup> ) |
|------------------|-------------|---------------------------------|----------------|-----------------------------------------------------------------------|
| 60               | El Salvador | Sesame seed                     | 2008           | 4                                                                     |
| 60               | El Salvador | Sorghum and products            | 2008           | 147                                                                   |
| 60               | El Salvador | Soyabean Oil                    | 2008           | 71                                                                    |
| 60               | El Salvador | Soyabeans                       | 2008           | 8                                                                     |
| 60               | El Salvador | Spices                          | 2008           | 1                                                                     |
| 60               | El Salvador | Spices, Other                   | 2008           | 1                                                                     |
| 60               | El Salvador | Starchy Roots                   | 2008           | 50                                                                    |
| 60               | El Salvador | Stimulants                      | 2008           | 7                                                                     |
| 60               | El Salvador | Sugar & Sweeteners              | 2008           | 396                                                                   |
| 60               | El Salvador | Sugar (Raw Equivalent)          | 2008           | 381                                                                   |
| 60               | El Salvador | Sunflowerseed Oil               | 2008           | 28                                                                    |
| 60               | El Salvador | Sweeteners, Other               | 2008           | 14                                                                    |
| 60               | El Salvador | Tomatoes and products           | 2008           | 11                                                                    |
| 60               | El Salvador | Treenuts                        | 2008           | 3                                                                     |
| 60               | El Salvador | Vegetable Oils                  | 2008           | 141                                                                   |
| 60               | El Salvador | Vegetables                      | 2008           | 55                                                                    |
| 60               | El Salvador | Vegetables, Other               | 2008           | 39                                                                    |
| 60               | El Salvador | Vegetal Products                | 2008           | 2,194                                                                 |
| 60               | El Salvador | Wheat and products              | 2008           | 239                                                                   |
| 60               | El Salvador | Wine                            | 2008           | 1                                                                     |
| 60               | El Salvador | Alcoholic Beverages             | 2009           | 47                                                                    |
| 60               | El Salvador | Animal fats                     | 2009           | 63                                                                    |
| 60               | El Salvador | Animal Products                 | 2009           | 414                                                                   |
| 60               | El Salvador | Apples and products             | 2009           | 1                                                                     |
| 60               | El Salvador | Bananas                         | 2009           | 10                                                                    |
| 60               | El Salvador | Beans                           | 2009           | 140                                                                   |
| 60               | El Salvador | Beer                            | 2009           | 20                                                                    |
| 60               | El Salvador | Beverages, Alcoholic            | 2009           | 26                                                                    |
| 60               | El Salvador | Bovine Meat                     | 2009           | 33                                                                    |
| 60               | El Salvador | Butter, Ghee                    | 2009           | 2                                                                     |
| 60               | El Salvador | Cassava and products            | 2009           | 9                                                                     |
| 60               | El Salvador | Cereals - Excluding Beer        | 2009           | 1,172                                                                 |
| 60               | El Salvador | Cereals, Other                  | 2009           | 6                                                                     |
| 60               | El Salvador | Cocoa Beans and products        | 2009           | 3                                                                     |
| 60               | El Salvador | Coconut Oil                     | 2009           | 10                                                                    |
| 60               | El Salvador | Coconuts - Incl Copra           | 2009           | 30                                                                    |
| 60               | El Salvador | Coffee and products             | 2009           | 3                                                                     |
| 60               | El Salvador | Crustaceans                     | 2009           | 3                                                                     |
| 60               | El Salvador | Eggs                            | 2009           | 31                                                                    |
| 60               | El Salvador | Fats, Animals, Raw              | 2009           | 61                                                                    |
| 60               | El Salvador | Fish, Seafood                   | 2009           | 15                                                                    |
| 60               | El Salvador | Freshwater Fish                 | 2009           | 2                                                                     |
| 60               | El Salvador | Fruits - Excluding Wine         | 2009           | 100                                                                   |
| 60               | El Salvador | Fruits, Other                   | 2009           | 29                                                                    |
| 60               | El Salvador | Grand Total                     | 2009           | 2,575                                                                 |
| 60               | El Salvador | Grapes and products (excl wine) | 2009           | 2                                                                     |
| 60               | El Salvador | Groundnuts (Shelled Eq)         | 2009           | 4                                                                     |
| 60               | El Salvador | Lemons, Limes and products      | 2009           | 2                                                                     |
| 60               | El Salvador | Maize and products              | 2009           | 681                                                                   |
| 60               | El Salvador | Maize Germ Oil                  | 2009           | 1                                                                     |
| 60               | El Salvador | Meat                            | 2009           | 104                                                                   |
| 60               | El Salvador | Milk - Excluding Butter         | 2009           | 196                                                                   |
| 60               | El Salvador | Miscellaneous                   | 2009           | 13                                                                    |
| 60               | El Salvador | Oats                            | 2009           | 1                                                                     |
| 60               | El Salvador | Offals                          | 2009           | 3                                                                     |
| 60               | El Salvador | Oilcrops                        | 2009           | 46                                                                    |
| 60               | El Salvador | Oilcrops Oil, Other             | 2009           | 26                                                                    |
| 60               | El Salvador | Olive Oil                       | 2009           | 8                                                                     |
| 60               | El Salvador | Onions                          | 2009           | 5                                                                     |
| 60               | El Salvador | Oranges, Mandarines             | 2009           | 11                                                                    |
| 60               | El Salvador | Pelagic Fish                    | 2009           | 9                                                                     |
| 60               | El Salvador | Pigmeat                         | 2009           | 14                                                                    |
| 60               | El Salvador | Pineapples and products         | 2009           | 1                                                                     |
| 60               | El Salvador | Plantains                       | 2009           | 44                                                                    |
| 60               | El Salvador | Potatoes and products           | 2009           | 21                                                                    |
| 60               | El Salvador | Poultry Meat                    | 2009           | 57                                                                    |
| 60               | El Salvador | Pulses                          | 2009           | 141                                                                   |
| 60               | El Salvador | Rape and Mustardseed            | 2009           | 3                                                                     |
| 60               | El Salvador | Rice (Milled Equivalent)        | 2009           | 97                                                                    |
| 60               | El Salvador | Roots, Other                    | 2009           | 17                                                                    |
| 60               | El Salvador | Sesame seed                     | 2009           | 2                                                                     |
| 60               | El Salvador | Sorghum and products            | 2009           | 148                                                                   |
| 60               | El Salvador | Soyabean Oil                    | 2009           | 71                                                                    |
| 60               | El Salvador | Soyabeans                       | 2009           | 8                                                                     |
| 60               | El Salvador | Spices                          | 2009           | 1                                                                     |
| 60               | El Salvador | Spices, Other                   | 2009           | 1                                                                     |
| 60               | El Salvador | Starchy Roots                   | 2009           | 48                                                                    |
| 60               | El Salvador | Stimulants                      | 2009           | 6                                                                     |
| 60               | El Salvador | Sugar & Sweeteners              | 2009           | 396                                                                   |
| 60               | El Salvador | Sugar (Raw Equivalent)          | 2009           | 382                                                                   |
| 60               | El Salvador | Sunflowerseed Oil               | 2009           | 27                                                                    |
| 60               | El Salvador | Sweeteners, Other               | 2009           | 14                                                                    |
| 60               | El Salvador | Tomatoes and products           | 2009           | 10                                                                    |
| 60               | El Salvador | Treenuts                        | 2009           | 3                                                                     |
| 60               | El Salvador | Vegetable Oils                  | 2009           | 143                                                                   |
| 60               | El Salvador | Vegetables                      | 2009           | 45                                                                    |
| 60               | El Salvador | Vegetables, Other               | 2009           | 31                                                                    |
| 60               | El Salvador | Vegetal Products                | 2009           | 2,161                                                                 |
| 60               | El Salvador | Wheat and products              | 2009           | 238                                                                   |
| 60               | El Salvador | Wine                            | 2009           | 1                                                                     |
| 60               | El Salvador | Alcoholic Beverages             | 2010           | 42                                                                    |
| 60               | El Salvador | Animal fats                     | 2010           | 62                                                                    |
| 60               | El Salvador | Animal Products                 | 2010           | 393                                                                   |
| 60               | El Salvador | Apples and products             | 2010           | 1                                                                     |
| 60               | El Salvador | Bananas                         | 2010           | 11                                                                    |
| 60               | El Salvador | Beans                           | 2010           | 124                                                                   |
| 60               | El Salvador | Beer                            | 2010           | 20                                                                    |

Dietary calcium and zinc deficiency risks are decreasing but remain prevalent

| FAO Country code | Country     | Food item                       | Reference year | Net energy supply (kcal capita <sup>-1</sup> d <sup>-1</sup> ) |
|------------------|-------------|---------------------------------|----------------|----------------------------------------------------------------|
| 60               | El Salvador | Beverages, Alcoholic            | 2010           | 21                                                             |
| 60               | El Salvador | Bovine Meat                     | 2010           | 35                                                             |
| 60               | El Salvador | Butter, Ghee                    | 2010           | 2                                                              |
| 60               | El Salvador | Cassava and products            | 2010           | 9                                                              |
| 60               | El Salvador | Cereals - Excluding Beer        | 2010           | 1,220                                                          |
| 60               | El Salvador | Cereals, Other                  | 2010           | 1                                                              |
| 60               | El Salvador | Cocoa Beans and products        | 2010           | 4                                                              |
| 60               | El Salvador | Coconut Oil                     | 2010           | 8                                                              |
| 60               | El Salvador | Coconuts - Incl Copra           | 2010           | 27                                                             |
| 60               | El Salvador | Coffee and products             | 2010           | 4                                                              |
| 60               | El Salvador | Crustaceans                     | 2010           | 1                                                              |
| 60               | El Salvador | Eggs                            | 2010           | 31                                                             |
| 60               | El Salvador | Fats, Animals, Raw              | 2010           | 60                                                             |
| 60               | El Salvador | Fish, Seafood                   | 2010           | 12                                                             |
| 60               | El Salvador | Freshwater Fish                 | 2010           | 2                                                              |
| 60               | El Salvador | Fruits - Excluding Wine         | 2010           | 75                                                             |
| 60               | El Salvador | Fruits, Other                   | 2010           | 26                                                             |
| 60               | El Salvador | Grand Total                     | 2010           | 2,524                                                          |
| 60               | El Salvador | Grapes and products (excl wine) | 2010           | 2                                                              |
| 60               | El Salvador | Groundnuts (Shelled Eq)         | 2010           | 4                                                              |
| 60               | El Salvador | Lemons, Limes and products      | 2010           | 2                                                              |
| 60               | El Salvador | Maize and products              | 2010           | 720                                                            |
| 60               | El Salvador | Maize Germ Oil                  | 2010           | 1                                                              |
| 60               | El Salvador | Marine Fish, Other              | 2010           | 4                                                              |
| 60               | El Salvador | Meat                            | 2010           | 108                                                            |
| 60               | El Salvador | Milk - Excluding Butter         | 2010           | 176                                                            |
| 60               | El Salvador | Miscellaneous                   | 2010           | 11                                                             |
| 60               | El Salvador | Oats                            | 2010           | 2                                                              |
| 60               | El Salvador | Offals                          | 2010           | 4                                                              |
| 60               | El Salvador | Oilcrops                        | 2010           | 44                                                             |
| 60               | El Salvador | Oilcrops Oil, Other             | 2010           | 17                                                             |
| 60               | El Salvador | Olive Oil                       | 2010           | 9                                                              |
| 60               | El Salvador | Onions                          | 2010           | 4                                                              |
| 60               | El Salvador | Oranges, Mandarines             | 2010           | 10                                                             |
| 60               | El Salvador | Pelagic Fish                    | 2010           | 5                                                              |
| 60               | El Salvador | Pigmeat                         | 2010           | 13                                                             |
| 60               | El Salvador | Pineapples and products         | 2010           | 1                                                              |
| 60               | El Salvador | Plantains                       | 2010           | 25                                                             |
| 60               | El Salvador | Potatoes and products           | 2010           | 20                                                             |
| 60               | El Salvador | Poultry Meat                    | 2010           | 60                                                             |
| 60               | El Salvador | Pulses                          | 2010           | 125                                                            |
| 60               | El Salvador | Rape and Mustardseed            | 2010           | 3                                                              |
| 60               | El Salvador | Rice (Milled Equivalent)        | 2010           | 101                                                            |
| 60               | El Salvador | Roots, Other                    | 2010           | 17                                                             |
| 60               | El Salvador | Sesame seed                     | 2010           | 3                                                              |
| 60               | El Salvador | Sorghum and products            | 2010           | 149                                                            |
| 60               | El Salvador | Soyabean Oil                    | 2010           | 64                                                             |
| 60               | El Salvador | Soyabeans                       | 2010           | 7                                                              |
| 60               | El Salvador | Spices                          | 2010           | 1                                                              |
| 60               | El Salvador | Spices, Other                   | 2010           | 1                                                              |
| 60               | El Salvador | Starchy Roots                   | 2010           | 47                                                             |
| 60               | El Salvador | Stimulants                      | 2010           | 8                                                              |
| 60               | El Salvador | Sugar & Sweeteners              | 2010           | 384                                                            |
| 60               | El Salvador | Sugar (Raw Equivalent)          | 2010           | 375                                                            |
| 60               | El Salvador | Sunflowerseed Oil               | 2010           | 28                                                             |
| 60               | El Salvador | Sweeteners, Other               | 2010           | 8                                                              |
| 60               | El Salvador | Tomatoes and products           | 2010           | 8                                                              |
| 60               | El Salvador | Treenuts                        | 2010           | 3                                                              |
| 60               | El Salvador | Vegetable Oils                  | 2010           | 127                                                            |
| 60               | El Salvador | Vegetables                      | 2010           | 42                                                             |
| 60               | El Salvador | Vegetables, Other               | 2010           | 30                                                             |
| 60               | El Salvador | Vegetal Products                | 2010           | 2,131                                                          |
| 60               | El Salvador | Wheat and products              | 2010           | 246                                                            |
| 60               | El Salvador | Wine                            | 2010           | 1                                                              |
| 60               | El Salvador | Alcoholic Beverages             | 2011           | 43                                                             |
| 60               | El Salvador | Animal fats                     | 2011           | 56                                                             |
| 60               | El Salvador | Animal Products                 | 2011           | 362                                                            |
| 60               | El Salvador | Apples and products             | 2011           | 1                                                              |
| 60               | El Salvador | Bananas                         | 2011           | 10                                                             |
| 60               | El Salvador | Beans                           | 2011           | 142                                                            |
| 60               | El Salvador | Beer                            | 2011           | 19                                                             |
| 60               | El Salvador | Beverages, Alcoholic            | 2011           | 23                                                             |
| 60               | El Salvador | Bovine Meat                     | 2011           | 28                                                             |
| 60               | El Salvador | Butter, Ghee                    | 2011           | 2                                                              |
| 60               | El Salvador | Cassava and products            | 2011           | 13                                                             |
| 60               | El Salvador | Cereals - Excluding Beer        | 2011           | 1,179                                                          |
| 60               | El Salvador | Cereals, Other                  | 2011           | 2                                                              |
| 60               | El Salvador | Cocoa Beans and products        | 2011           | 5                                                              |
| 60               | El Salvador | Coconut Oil                     | 2011           | 8                                                              |
| 60               | El Salvador | Coconuts - Incl Copra           | 2011           | 26                                                             |
| 60               | El Salvador | Coffee and products             | 2011           | 4                                                              |
| 60               | El Salvador | Crustaceans                     | 2011           | 1                                                              |
| 60               | El Salvador | Eggs                            | 2011           | 28                                                             |
| 60               | El Salvador | Fats, Animals, Raw              | 2011           | 54                                                             |
| 60               | El Salvador | Fish, Seafood                   | 2011           | 12                                                             |
| 60               | El Salvador | Freshwater Fish                 | 2011           | 2                                                              |
| 60               | El Salvador | Fruits - Excluding Wine         | 2011           | 74                                                             |
| 60               | El Salvador | Fruits, Other                   | 2011           | 27                                                             |
| 60               | El Salvador | Grand Total                     | 2011           | 2,513                                                          |
| 60               | El Salvador | Grapes and products (excl wine) | 2011           | 2                                                              |
| 60               | El Salvador | Groundnut Oil                   | 2011           | 1                                                              |
| 60               | El Salvador | Groundnuts (Shelled Eq)         | 2011           | 4                                                              |
| 60               | El Salvador | Honey                           | 2011           | 1                                                              |
| 60               | El Salvador | Lemons, Limes and products      | 2011           | 1                                                              |
| 60               | El Salvador | Maize and products              | 2011           | 684                                                            |
| 60               | El Salvador | Maize Germ Oil                  | 2011           | 1                                                              |
| 60               | El Salvador | Marine Fish, Other              | 2011           | 4                                                              |

Dietary calcium and zinc deficiency risks are decreasing but remain prevalent

| FAO Country code | Country     | Food item                       | Reference year | Net energy supply (kcal <i>capita</i> <sup>-1</sup> d <sup>-1</sup> ) |
|------------------|-------------|---------------------------------|----------------|-----------------------------------------------------------------------|
| 60               | El Salvador | Meat                            | 2011           | 103                                                                   |
| 60               | El Salvador | Milk - Excluding Butter         | 2011           | 161                                                                   |
| 60               | El Salvador | Miscellaneous                   | 2011           | 14                                                                    |
| 60               | El Salvador | Oats                            | 2011           | 2                                                                     |
| 60               | El Salvador | Offals                          | 2011           | 3                                                                     |
| 60               | El Salvador | Oilcrops                        | 2011           | 44                                                                    |
| 60               | El Salvador | Oilcrops Oil, Other             | 2011           | 26                                                                    |
| 60               | El Salvador | Olive Oil                       | 2011           | 9                                                                     |
| 60               | El Salvador | Onions                          | 2011           | 5                                                                     |
| 60               | El Salvador | Oranges, Mandarines             | 2011           | 11                                                                    |
| 60               | El Salvador | Pelagic Fish                    | 2011           | 5                                                                     |
| 60               | El Salvador | Pigmeat                         | 2011           | 12                                                                    |
| 60               | El Salvador | Pineapples and products         | 2011           | 1                                                                     |
| 60               | El Salvador | Plantains                       | 2011           | 22                                                                    |
| 60               | El Salvador | Potatoes and products           | 2011           | 24                                                                    |
| 60               | El Salvador | Poultry Meat                    | 2011           | 63                                                                    |
| 60               | El Salvador | Pulses                          | 2011           | 142                                                                   |
| 60               | El Salvador | Rape and Mustardseed            | 2011           | 3                                                                     |
| 60               | El Salvador | Rice (Milled Equivalent)        | 2011           | 98                                                                    |
| 60               | El Salvador | Roots, Other                    | 2011           | 18                                                                    |
| 60               | El Salvador | Sesame seed                     | 2011           | 3                                                                     |
| 60               | El Salvador | Sorghum and products            | 2011           | 147                                                                   |
| 60               | El Salvador | Soyabean Oil                    | 2011           | 68                                                                    |
| 60               | El Salvador | Soyabeans                       | 2011           | 7                                                                     |
| 60               | El Salvador | Spices                          | 2011           | 1                                                                     |
| 60               | El Salvador | Spices, Other                   | 2011           | 1                                                                     |
| 60               | El Salvador | Starchy Roots                   | 2011           | 57                                                                    |
| 60               | El Salvador | Stimulants                      | 2011           | 9                                                                     |
| 60               | El Salvador | Sugar & Sweeteners              | 2011           | 398                                                                   |
| 60               | El Salvador | Sugar (Raw Equivalent)          | 2011           | 386                                                                   |
| 60               | El Salvador | Sunflowerseed Oil               | 2011           | 30                                                                    |
| 60               | El Salvador | Sweeteners, Other               | 2011           | 12                                                                    |
| 60               | El Salvador | Tomatoes and products           | 2011           | 9                                                                     |
| 60               | El Salvador | Treenuts                        | 2011           | 3                                                                     |
| 60               | El Salvador | Vegetable Oils                  | 2011           | 142                                                                   |
| 60               | El Salvador | Vegetables                      | 2011           | 45                                                                    |
| 60               | El Salvador | Vegetables, Other               | 2011           | 30                                                                    |
| 60               | El Salvador | Vegetal Products                | 2011           | 2,151                                                                 |
| 60               | El Salvador | Wheat and products              | 2011           | 247                                                                   |
| 60               | El Salvador | Wine                            | 2011           | 1                                                                     |
| 63               | Estonia     | Alcoholic Beverages             | 1992           | 130                                                                   |
| 63               | Estonia     | Animal fats                     | 1992           | 147                                                                   |
| 63               | Estonia     | Animal Products                 | 1992           | 1,067                                                                 |
| 63               | Estonia     | Apples and products             | 1992           | 18                                                                    |
| 63               | Estonia     | Bananas                         | 1992           | 2                                                                     |
| 63               | Estonia     | Barley and products             | 1992           | 45                                                                    |
| 63               | Estonia     | Beer                            | 1992           | 39                                                                    |
| 63               | Estonia     | Beverages, Alcoholic            | 1992           | 90                                                                    |
| 63               | Estonia     | Bovine Meat                     | 1992           | 148                                                                   |
| 63               | Estonia     | Butter, Chee                    | 1992           | 103                                                                   |
| 63               | Estonia     | Cephalopods                     | 1992           | 7                                                                     |
| 63               | Estonia     | Cereals - Excluding Beer        | 1992           | 832                                                                   |
| 63               | Estonia     | Cereals, Other                  | 1992           | 3                                                                     |
| 63               | Estonia     | Cocoa Beans and products        | 1992           | 1                                                                     |
| 63               | Estonia     | Coffee and products             | 1992           | 1                                                                     |
| 63               | Estonia     | Cottonseed Oil                  | 1992           | 1                                                                     |
| 63               | Estonia     | Cream                           | 1992           | 12                                                                    |
| 63               | Estonia     | Demersal Fish                   | 1992           | 7                                                                     |
| 63               | Estonia     | Eggs                            | 1992           | 58                                                                    |
| 63               | Estonia     | Fats, Animals, Raw              | 1992           | 33                                                                    |
| 63               | Estonia     | Fish, Seafood                   | 1992           | 51                                                                    |
| 63               | Estonia     | Freshwater Fish                 | 1992           | 7                                                                     |
| 63               | Estonia     | Fruits - Excluding Wine         | 1992           | 32                                                                    |
| 63               | Estonia     | Fruits, Other                   | 1992           | 8                                                                     |
| 63               | Estonia     | Grand Total                     | 1992           | 2,538                                                                 |
| 63               | Estonia     | Grapes and products (excl wine) | 1992           | 1                                                                     |
| 63               | Estonia     | Groundnuts (Shelled Eq)         | 1992           | 1                                                                     |
| 63               | Estonia     | Honey                           | 1992           | 3                                                                     |
| 63               | Estonia     | Marine Fish, Other              | 1992           | 3                                                                     |
| 63               | Estonia     | Meat                            | 1992           | 303                                                                   |
| 63               | Estonia     | Meat, Other                     | 1992           | 2                                                                     |
| 63               | Estonia     | Milk - Excluding Butter         | 1992           | 489                                                                   |
| 63               | Estonia     | Mutton & Goat Meat              | 1992           | 8                                                                     |
| 63               | Estonia     | Oats                            | 1992           | 13                                                                    |
| 63               | Estonia     | Offals                          | 1992           | 19                                                                    |
| 63               | Estonia     | Oilcrops                        | 1992           | 1                                                                     |
| 63               | Estonia     | Oilcrops Oil, Other             | 1992           | 6                                                                     |
| 63               | Estonia     | Onions                          | 1992           | 1                                                                     |
| 63               | Estonia     | Oranges, Mandarines             | 1992           | 3                                                                     |
| 63               | Estonia     | Peas                            | 1992           | 2                                                                     |
| 63               | Estonia     | Pelagic Fish                    | 1992           | 27                                                                    |
| 63               | Estonia     | Pigmeat                         | 1992           | 121                                                                   |
| 63               | Estonia     | Potatoes and products           | 1992           | 198                                                                   |
| 63               | Estonia     | Poultry Meat                    | 1992           | 24                                                                    |
| 63               | Estonia     | Pulses                          | 1992           | 2                                                                     |
| 63               | Estonia     | Rice (Milled Equivalent)        | 1992           | 1                                                                     |
| 63               | Estonia     | Rye and products                | 1992           | 221                                                                   |
| 63               | Estonia     | Starchy Roots                   | 1992           | 198                                                                   |
| 63               | Estonia     | Stimulants                      | 1992           | 2                                                                     |
| 63               | Estonia     | Sugar & Sweeteners              | 1992           | 188                                                                   |
| 63               | Estonia     | Sugar (Raw Equivalent)          | 1992           | 181                                                                   |
| 63               | Estonia     | Sunflowerseed Oil               | 1992           | 41                                                                    |
| 63               | Estonia     | Sweeteners, Other               | 1992           | 4                                                                     |
| 63               | Estonia     | Tomatoes and products           | 1992           | 2                                                                     |
| 63               | Estonia     | Vegetable Oils                  | 1992           | 49                                                                    |
| 63               | Estonia     | Vegetables                      | 1992           | 36                                                                    |
| 63               | Estonia     | Vegetables, Other               | 1992           | 32                                                                    |



Dietary calcium and zinc deficiency risks are decreasing but remain prevalent

| FAO Country code | Country | Food item                       | Reference year | Net energy supply (kcal capita <sup>-1</sup> d <sup>-1</sup> ) |
|------------------|---------|---------------------------------|----------------|----------------------------------------------------------------|
| 63               | Estonia | Vegetal Products                | 1992           | 1,471                                                          |
| 63               | Estonia | Wheat and products              | 1992           | 549                                                            |
| 63               | Estonia | Wine                            | 1992           | 1                                                              |
| 63               | Estonia | Alcoholic Beverages             | 1993           | 135                                                            |
| 63               | Estonia | Animal fats                     | 1993           | 160                                                            |
| 63               | Estonia | Animal Products                 | 1993           | 978                                                            |
| 63               | Estonia | Apples and products             | 1993           | 36                                                             |
| 63               | Estonia | Bananas                         | 1993           | 3                                                              |
| 63               | Estonia | Barley and products             | 1993           | 44                                                             |
| 63               | Estonia | Beer                            | 1993           | 39                                                             |
| 63               | Estonia | Beverages, Alcoholic            | 1993           | 94                                                             |
| 63               | Estonia | Bovine Meat                     | 1993           | 155                                                            |
| 63               | Estonia | Butter, Ghee                    | 1993           | 111                                                            |
| 63               | Estonia | Cephalopods                     | 1993           | 1                                                              |
| 63               | Estonia | Cereals - Excluding Beer        | 1993           | 859                                                            |
| 63               | Estonia | Cereals, Other                  | 1993           | 10                                                             |
| 63               | Estonia | Citrus, Other                   | 1993           | 1                                                              |
| 63               | Estonia | Cocoa Beans and products        | 1993           | 5                                                              |
| 63               | Estonia | Coconut Oil                     | 1993           | 1                                                              |
| 63               | Estonia | Coffee and products             | 1993           | 2                                                              |
| 63               | Estonia | Cottonseed Oil                  | 1993           | 1                                                              |
| 63               | Estonia | Cream                           | 1993           | 14                                                             |
| 63               | Estonia | Crustaceans                     | 1993           | 1                                                              |
| 63               | Estonia | Demersal Fish                   | 1993           | 6                                                              |
| 63               | Estonia | Eggs                            | 1993           | 51                                                             |
| 63               | Estonia | Fats, Animals, Raw              | 1993           | 35                                                             |
| 63               | Estonia | Fish, Seafood                   | 1993           | 57                                                             |
| 63               | Estonia | Freshwater Fish                 | 1993           | 4                                                              |
| 63               | Estonia | Fruits - Excluding Wine         | 1993           | 55                                                             |
| 63               | Estonia | Fruits, Other                   | 1993           | 9                                                              |
| 63               | Estonia | Grand Total                     | 1993           | 2,594                                                          |
| 63               | Estonia | Grapes and products (excl wine) | 1993           | 3                                                              |
| 63               | Estonia | Groundnuts (Shelled Eq)         | 1993           | 2                                                              |
| 63               | Estonia | Honey                           | 1993           | 4                                                              |
| 63               | Estonia | Maize and products              | 1993           | 1                                                              |
| 63               | Estonia | Maize Germ Oil                  | 1993           | 1                                                              |
| 63               | Estonia | Marine Fish, Other              | 1993           | 3                                                              |
| 63               | Estonia | Meat                            | 1993           | 261                                                            |
| 63               | Estonia | Meat, Other                     | 1993           | 2                                                              |
| 63               | Estonia | Milk - Excluding Butter         | 1993           | 436                                                            |
| 63               | Estonia | Miscellaneous                   | 1993           | 8                                                              |
| 63               | Estonia | Mutton & Goat Meat              | 1993           | 6                                                              |
| 63               | Estonia | Oats                            | 1993           | 39                                                             |
| 63               | Estonia | Offals                          | 1993           | 14                                                             |
| 63               | Estonia | Oilcrops                        | 1993           | 2                                                              |
| 63               | Estonia | Oilcrops Oil, Other             | 1993           | 11                                                             |
| 63               | Estonia | Onions                          | 1993           | 2                                                              |
| 63               | Estonia | Oranges, Mandarines             | 1993           | 4                                                              |
| 63               | Estonia | Peas                            | 1993           | 6                                                              |
| 63               | Estonia | Pelagic Fish                    | 1993           | 42                                                             |
| 63               | Estonia | Pigmeat                         | 1993           | 83                                                             |
| 63               | Estonia | Potatoes and products           | 1993           | 211                                                            |
| 63               | Estonia | Poultry Meat                    | 1993           | 15                                                             |
| 63               | Estonia | Pulses                          | 1993           | 6                                                              |
| 63               | Estonia | Rape and Mustardseed            | 1993           | 1                                                              |
| 63               | Estonia | Rice (Milled Equivalent)        | 1993           | 14                                                             |
| 63               | Estonia | Rye and products                | 1993           | 182                                                            |
| 63               | Estonia | Soyabean Oil                    | 1993           | 7                                                              |
| 63               | Estonia | Spices                          | 1993           | 1                                                              |
| 63               | Estonia | Spices, Other                   | 1993           | 1                                                              |
| 63               | Estonia | Starchy Roots                   | 1993           | 211                                                            |
| 63               | Estonia | Stimulants                      | 1993           | 7                                                              |
| 63               | Estonia | Sugar & Sweeteners              | 1993           | 207                                                            |
| 63               | Estonia | Sugar (Raw Equivalent)          | 1993           | 202                                                            |
| 63               | Estonia | Sunflowerseed Oil               | 1993           | 69                                                             |
| 63               | Estonia | Sweeteners, Other               | 1993           | 1                                                              |
| 63               | Estonia | Tomatoes and products           | 1993           | 3                                                              |
| 63               | Estonia | Treenuts                        | 1993           | 2                                                              |
| 63               | Estonia | Vegetable Oils                  | 1993           | 91                                                             |
| 63               | Estonia | Vegetables                      | 1993           | 31                                                             |
| 63               | Estonia | Vegetables, Other               | 1993           | 26                                                             |
| 63               | Estonia | Vegetal Products                | 1993           | 1,616                                                          |
| 63               | Estonia | Wheat and products              | 1993           | 570                                                            |
| 63               | Estonia | Wine                            | 1993           | 2                                                              |
| 63               | Estonia | Alcoholic Beverages             | 1994           | 140                                                            |
| 63               | Estonia | Animal fats                     | 1994           | 148                                                            |
| 63               | Estonia | Animal Products                 | 1994           | 969                                                            |
| 63               | Estonia | Apples and products             | 1994           | 15                                                             |
| 63               | Estonia | Bananas                         | 1994           | 5                                                              |
| 63               | Estonia | Barley and products             | 1994           | 45                                                             |
| 63               | Estonia | Beer                            | 1994           | 46                                                             |
| 63               | Estonia | Beverages, Alcoholic            | 1994           | 90                                                             |
| 63               | Estonia | Bovine Meat                     | 1994           | 122                                                            |
| 63               | Estonia | Butter, Ghee                    | 1994           | 104                                                            |
| 63               | Estonia | Cereals - Excluding Beer        | 1994           | 890                                                            |
| 63               | Estonia | Cereals, Other                  | 1994           | 8                                                              |
| 63               | Estonia | Citrus, Other                   | 1994           | 1                                                              |
| 63               | Estonia | Cocoa Beans and products        | 1994           | 7                                                              |
| 63               | Estonia | Coconut Oil                     | 1994           | 2                                                              |
| 63               | Estonia | Coffee and products             | 1994           | 3                                                              |
| 63               | Estonia | Cottonseed Oil                  | 1994           | 1                                                              |
| 63               | Estonia | Cream                           | 1994           | 13                                                             |
| 63               | Estonia | Crustaceans                     | 1994           | 1                                                              |
| 63               | Estonia | Demersal Fish                   | 1994           | 15                                                             |
| 63               | Estonia | Eggs                            | 1994           | 55                                                             |
| 63               | Estonia | Fats, Animals, Raw              | 1994           | 31                                                             |
| 63               | Estonia | Fish, Seafood                   | 1994           | 37                                                             |

Dietary calcium and zinc deficiency risks are decreasing but remain prevalent

| FAO Country code | Country | Food item                       | Reference year | Net energy supply (kcal <i>capita</i> <sup>-1</sup> d <sup>-1</sup> ) |
|------------------|---------|---------------------------------|----------------|-----------------------------------------------------------------------|
| 63               | Estonia | Freshwater Fish                 | 1994           | 3                                                                     |
| 63               | Estonia | Fruits - Excluding Wine         | 1994           | 36                                                                    |
| 63               | Estonia | Fruits, Other                   | 1994           | 8                                                                     |
| 63               | Estonia | Grand Total                     | 1994           | 2,773                                                                 |
| 63               | Estonia | Grapes and products (excl wine) | 1994           | 4                                                                     |
| 63               | Estonia | Groundnuts (Shelled Eq)         | 1994           | 4                                                                     |
| 63               | Estonia | Honey                           | 1994           | 4                                                                     |
| 63               | Estonia | Maize Germ Oil                  | 1994           | 1                                                                     |
| 63               | Estonia | Marine Fish, Other              | 1994           | 3                                                                     |
| 63               | Estonia | Meat                            | 1994           | 254                                                                   |
| 63               | Estonia | Meat, Other                     | 1994           | 3                                                                     |
| 63               | Estonia | Milk - Excluding Butter         | 1994           | 462                                                                   |
| 63               | Estonia | Miscellaneous                   | 1994           | 7                                                                     |
| 63               | Estonia | Mutton & Goat Meat              | 1994           | 6                                                                     |
| 63               | Estonia | Oats                            | 1994           | 73                                                                    |
| 63               | Estonia | Offals                          | 1994           | 13                                                                    |
| 63               | Estonia | Oilcrops                        | 1994           | 5                                                                     |
| 63               | Estonia | Oilcrops Oil, Other             | 1994           | 25                                                                    |
| 63               | Estonia | Onions                          | 1994           | 3                                                                     |
| 63               | Estonia | Oranges, Mandarines             | 1994           | 3                                                                     |
| 63               | Estonia | Peas                            | 1994           | 7                                                                     |
| 63               | Estonia | Pelagic Fish                    | 1994           | 15                                                                    |
| 63               | Estonia | Pigmeat                         | 1994           | 99                                                                    |
| 63               | Estonia | Potatoes and products           | 1994           | 219                                                                   |
| 63               | Estonia | Poultry Meat                    | 1994           | 24                                                                    |
| 63               | Estonia | Pulses                          | 1994           | 7                                                                     |
| 63               | Estonia | Rape and Mustardseed            | 1994           | 1                                                                     |
| 63               | Estonia | Rice (Milled Equivalent)        | 1994           | 6                                                                     |
| 63               | Estonia | Rye and products                | 1994           | 237                                                                   |
| 63               | Estonia | Soyabean Oil                    | 1994           | 10                                                                    |
| 63               | Estonia | Spices                          | 1994           | 2                                                                     |
| 63               | Estonia | Spices, Other                   | 1994           | 1                                                                     |
| 63               | Estonia | Starchy Roots                   | 1994           | 219                                                                   |
| 63               | Estonia | Stimulants                      | 1994           | 10                                                                    |
| 63               | Estonia | Sugar & Sweeteners              | 1994           | 278                                                                   |
| 63               | Estonia | Sugar (Raw Equivalent)          | 1994           | 267                                                                   |
| 63               | Estonia | Sunflowerseed Oil               | 1994           | 126                                                                   |
| 63               | Estonia | Sweeteners, Other               | 1994           | 7                                                                     |
| 63               | Estonia | Tomatoes and products           | 1994           | 3                                                                     |
| 63               | Estonia | Treenuts                        | 1994           | 5                                                                     |
| 63               | Estonia | Vegetable Oils                  | 1994           | 165                                                                   |
| 63               | Estonia | Vegetables                      | 1994           | 40                                                                    |
| 63               | Estonia | Vegetables, Other               | 1994           | 34                                                                    |
| 63               | Estonia | Vegetal Products                | 1994           | 1,805                                                                 |
| 63               | Estonia | Wheat and products              | 1994           | 520                                                                   |
| 63               | Estonia | Wine                            | 1994           | 3                                                                     |
| 63               | Estonia | Alcoholic Beverages             | 1995           | 142                                                                   |
| 63               | Estonia | Animal fats                     | 1995           | 149                                                                   |
| 63               | Estonia | Animal Products                 | 1995           | 907                                                                   |
| 63               | Estonia | Apples and products             | 1995           | 27                                                                    |
| 63               | Estonia | Bananas                         | 1995           | 7                                                                     |
| 63               | Estonia | Barley and products             | 1995           | 103                                                                   |
| 63               | Estonia | Beer                            | 1995           | 49                                                                    |
| 63               | Estonia | Beverages, Alcoholic            | 1995           | 86                                                                    |
| 63               | Estonia | Bovine Meat                     | 1995           | 97                                                                    |
| 63               | Estonia | Butter, Ghee                    | 1995           | 107                                                                   |
| 63               | Estonia | Cereals - Excluding Beer        | 1995           | 1,051                                                                 |
| 63               | Estonia | Cereals, Other                  | 1995           | 25                                                                    |
| 63               | Estonia | Citrus, Other                   | 1995           | 2                                                                     |
| 63               | Estonia | Cocoa Beans and products        | 1995           | 20                                                                    |
| 63               | Estonia | Coffee and products             | 1995           | 5                                                                     |
| 63               | Estonia | Cottonseed Oil                  | 1995           | 1                                                                     |
| 63               | Estonia | Cream                           | 1995           | 11                                                                    |
| 63               | Estonia | Crustaceans                     | 1995           | 3                                                                     |
| 63               | Estonia | Demersal Fish                   | 1995           | 15                                                                    |
| 63               | Estonia | Eggs                            | 1995           | 51                                                                    |
| 63               | Estonia | Fats, Animals, Raw              | 1995           | 31                                                                    |
| 63               | Estonia | Fish, Seafood                   | 1995           | 33                                                                    |
| 63               | Estonia | Freshwater Fish                 | 1995           | 5                                                                     |
| 63               | Estonia | Fruits - Excluding Wine         | 1995           | 65                                                                    |
| 63               | Estonia | Fruits, Other                   | 1995           | 16                                                                    |
| 63               | Estonia | Grand Total                     | 1995           | 2,944                                                                 |
| 63               | Estonia | Grapes and products (excl wine) | 1995           | 7                                                                     |
| 63               | Estonia | Groundnuts (Shelled Eq)         | 1995           | 3                                                                     |
| 63               | Estonia | Honey                           | 1995           | 4                                                                     |
| 63               | Estonia | Maize and products              | 1995           | 53                                                                    |
| 63               | Estonia | Maize Germ Oil                  | 1995           | 4                                                                     |
| 63               | Estonia | Meat                            | 1995           | 232                                                                   |
| 63               | Estonia | Meat, Other                     | 1995           | 1                                                                     |
| 63               | Estonia | Milk - Excluding Butter         | 1995           | 428                                                                   |
| 63               | Estonia | Miscellaneous                   | 1995           | 1                                                                     |
| 63               | Estonia | Mutton & Goat Meat              | 1995           | 4                                                                     |
| 63               | Estonia | Oats                            | 1995           | 97                                                                    |
| 63               | Estonia | Offals                          | 1995           | 14                                                                    |
| 63               | Estonia | Oilcrops                        | 1995           | 4                                                                     |
| 63               | Estonia | Oilcrops Oil, Other             | 1995           | 19                                                                    |
| 63               | Estonia | Olive Oil                       | 1995           | 1                                                                     |
| 63               | Estonia | Onions                          | 1995           | 3                                                                     |
| 63               | Estonia | Oranges, Mandarines             | 1995           | 6                                                                     |
| 63               | Estonia | Peas                            | 1995           | 26                                                                    |
| 63               | Estonia | Pelagic Fish                    | 1995           | 10                                                                    |
| 63               | Estonia | Pigmeat                         | 1995           | 101                                                                   |
| 63               | Estonia | Potatoes and products           | 1995           | 256                                                                   |
| 63               | Estonia | Poultry Meat                    | 1995           | 28                                                                    |
| 63               | Estonia | Pulses                          | 1995           | 29                                                                    |
| 63               | Estonia | Pulses, Other and products      | 1995           | 3                                                                     |
| 63               | Estonia | Rape and Mustardseed            | 1995           | 1                                                                     |

Dietary calcium and zinc deficiency risks are decreasing but remain prevalent

| FAO Country code | Country | Food item                       | Reference year | Net energy supply (kcal capita <sup>-1</sup> d <sup>-1</sup> ) |
|------------------|---------|---------------------------------|----------------|----------------------------------------------------------------|
| 63               | Estonia | Rice (Milled Equivalent)        | 1995           | 15                                                             |
| 63               | Estonia | Rye and products                | 1995           | 156                                                            |
| 63               | Estonia | Soyabean Oil                    | 1995           | 15                                                             |
| 63               | Estonia | Spices                          | 1995           | 2                                                              |
| 63               | Estonia | Spices, Other                   | 1995           | 2                                                              |
| 63               | Estonia | Starchy Roots                   | 1995           | 256                                                            |
| 63               | Estonia | Stimulants                      | 1995           | 25                                                             |
| 63               | Estonia | Sugar & Sweeteners              | 1995           | 238                                                            |
| 63               | Estonia | Sugar (Raw Equivalent)          | 1995           | 229                                                            |
| 63               | Estonia | Sunflowerseed Oil               | 1995           | 139                                                            |
| 63               | Estonia | Sweeteners, Other               | 1995           | 6                                                              |
| 63               | Estonia | Tomatoes and products           | 1995           | 5                                                              |
| 63               | Estonia | Treenuts                        | 1995           | 8                                                              |
| 63               | Estonia | Vegetable Oils                  | 1995           | 179                                                            |
| 63               | Estonia | Vegetables                      | 1995           | 37                                                             |
| 63               | Estonia | Vegetables, Other               | 1995           | 29                                                             |
| 63               | Estonia | Vegetal Products                | 1995           | 2,037                                                          |
| 63               | Estonia | Wheat and products              | 1995           | 601                                                            |
| 63               | Estonia | Wine                            | 1995           | 7                                                              |
| 63               | Estonia | Alcoholic Beverages             | 1996           | 136                                                            |
| 63               | Estonia | Animal fats                     | 1996           | 142                                                            |
| 63               | Estonia | Animal Products                 | 1996           | 852                                                            |
| 63               | Estonia | Apples and products             | 1996           | 24                                                             |
| 63               | Estonia | Bananas                         | 1996           | 6                                                              |
| 63               | Estonia | Barley and products             | 1996           | 144                                                            |
| 63               | Estonia | Beer                            | 1996           | 48                                                             |
| 63               | Estonia | Beverages, Alcoholic            | 1996           | 78                                                             |
| 63               | Estonia | Beverages, Fermented            | 1996           | 1                                                              |
| 63               | Estonia | Bovine Meat                     | 1996           | 105                                                            |
| 63               | Estonia | Butter, Ghee                    | 1996           | 99                                                             |
| 63               | Estonia | Cephalopods                     | 1996           | 3                                                              |
| 63               | Estonia | Cereals - Excluding Beer        | 1996           | 1,093                                                          |
| 63               | Estonia | Cereals, Other                  | 1996           | 49                                                             |
| 63               | Estonia | Citrus, Other                   | 1996           | 1                                                              |
| 63               | Estonia | Cocoa Beans and products        | 1996           | 42                                                             |
| 63               | Estonia | Coconut Oil                     | 1996           | 1                                                              |
| 63               | Estonia | Coffee and products             | 1996           | 5                                                              |
| 63               | Estonia | Cottonseed Oil                  | 1996           | 2                                                              |
| 63               | Estonia | Cream                           | 1996           | 9                                                              |
| 63               | Estonia | Crustaceans                     | 1996           | 3                                                              |
| 63               | Estonia | Demersal Fish                   | 1996           | 8                                                              |
| 63               | Estonia | Eggs                            | 1996           | 45                                                             |
| 63               | Estonia | Fats, Animals, Raw              | 1996           | 35                                                             |
| 63               | Estonia | Fish, Seafood                   | 1996           | 28                                                             |
| 63               | Estonia | Freshwater Fish                 | 1996           | 6                                                              |
| 63               | Estonia | Fruits - Excluding Wine         | 1996           | 64                                                             |
| 63               | Estonia | Fruits, Other                   | 1996           | 19                                                             |
| 63               | Estonia | Grand Total                     | 1996           | 3,082                                                          |
| 63               | Estonia | Grapes and products (excl wine) | 1996           | 8                                                              |
| 63               | Estonia | Groundnuts (Shelled Eq)         | 1996           | 4                                                              |
| 63               | Estonia | Honey                           | 1996           | 2                                                              |
| 63               | Estonia | Maize and products              | 1996           | 22                                                             |
| 63               | Estonia | Maize Germ Oil                  | 1996           | 2                                                              |
| 63               | Estonia | Meat                            | 1996           | 264                                                            |
| 63               | Estonia | Meat, Other                     | 1996           | 2                                                              |
| 63               | Estonia | Milk - Excluding Butter         | 1996           | 359                                                            |
| 63               | Estonia | Miscellaneous                   | 1996           | 6                                                              |
| 63               | Estonia | Mutton & Goat Meat              | 1996           | 3                                                              |
| 63               | Estonia | Oats                            | 1996           | 48                                                             |
| 63               | Estonia | Offals                          | 1996           | 14                                                             |
| 63               | Estonia | Oilcrops                        | 1996           | 5                                                              |
| 63               | Estonia | Oilcrops Oil, Other             | 1996           | 44                                                             |
| 63               | Estonia | Olive Oil                       | 1996           | 1                                                              |
| 63               | Estonia | Onions                          | 1996           | 3                                                              |
| 63               | Estonia | Oranges, Mandarines             | 1996           | 4                                                              |
| 63               | Estonia | Peas                            | 1996           | 21                                                             |
| 63               | Estonia | Pelagic Fish                    | 1996           | 7                                                              |
| 63               | Estonia | Pigmeat                         | 1996           | 109                                                            |
| 63               | Estonia | Potatoes and products           | 1996           | 277                                                            |
| 63               | Estonia | Poultry Meat                    | 1996           | 46                                                             |
| 63               | Estonia | Pulses                          | 1996           | 21                                                             |
| 63               | Estonia | Rape and Mustardseed            | 1996           | 1                                                              |
| 63               | Estonia | Rice (Milled Equivalent)        | 1996           | 30                                                             |
| 63               | Estonia | Rye and products                | 1996           | 159                                                            |
| 63               | Estonia | Soyabean Oil                    | 1996           | 17                                                             |
| 63               | Estonia | Spices                          | 1996           | 3                                                              |
| 63               | Estonia | Spices, Other                   | 1996           | 2                                                              |
| 63               | Estonia | Starchy Roots                   | 1996           | 277                                                            |
| 63               | Estonia | Stimulants                      | 1996           | 47                                                             |
| 63               | Estonia | Sugar & Sweeteners              | 1996           | 327                                                            |
| 63               | Estonia | Sugar (Raw Equivalent)          | 1996           | 314                                                            |
| 63               | Estonia | Sunflowerseed Oil               | 1996           | 128                                                            |
| 63               | Estonia | Sweeteners, Other               | 1996           | 11                                                             |
| 63               | Estonia | Tomatoes and products           | 1996           | 4                                                              |
| 63               | Estonia | Treenuts                        | 1996           | 14                                                             |
| 63               | Estonia | Vegetable Oils                  | 1996           | 194                                                            |
| 63               | Estonia | Vegetables                      | 1996           | 42                                                             |
| 63               | Estonia | Vegetables, Other               | 1996           | 35                                                             |
| 63               | Estonia | Vegetal Products                | 1996           | 2,230                                                          |
| 63               | Estonia | Wheat and products              | 1996           | 642                                                            |
| 63               | Estonia | Wine                            | 1996           | 9                                                              |
| 63               | Estonia | Alcoholic Beverages             | 1997           | 145                                                            |
| 63               | Estonia | Animal fats                     | 1997           | 121                                                            |
| 63               | Estonia | Animal Products                 | 1997           | 773                                                            |
| 63               | Estonia | Apples and products             | 1997           | 27                                                             |
| 63               | Estonia | Bananas                         | 1997           | 13                                                             |
| 63               | Estonia | Barley and products             | 1997           | 124                                                            |

## Dietary calcium and zinc deficiency risks are decreasing but remain prevalent

| FAO Country code | Country | Food item                       | Reference year | Net energy supply (kcal capita <sup>-1</sup> d <sup>-1</sup> ) |
|------------------|---------|---------------------------------|----------------|----------------------------------------------------------------|
| 63               | Estonia | Beer                            | 1997           | 59                                                             |
| 63               | Estonia | Beverages, Alcoholic            | 1997           | 73                                                             |
| 63               | Estonia | Beverages, Fermented            | 1997           | 1                                                              |
| 63               | Estonia | Bovine Meat                     | 1997           | 81                                                             |
| 63               | Estonia | Butter, Ghee                    | 1997           | 83                                                             |
| 63               | Estonia | Cereals - Excluding Beer        | 1997           | 1,051                                                          |
| 63               | Estonia | Cereals, Other                  | 1997           | 73                                                             |
| 63               | Estonia | Citrus, Other                   | 1997           | 1                                                              |
| 63               | Estonia | Cocoa Beans and products        | 1997           | 43                                                             |
| 63               | Estonia | Coconut Oil                     | 1997           | 1                                                              |
| 63               | Estonia | Coconuts - Incl Copra           | 1997           | 1                                                              |
| 63               | Estonia | Coffee and products             | 1997           | 4                                                              |
| 63               | Estonia | Cottonseed Oil                  | 1997           | 22                                                             |
| 63               | Estonia | Cream                           | 1997           | 10                                                             |
| 63               | Estonia | Crustaceans                     | 1997           | 5                                                              |
| 63               | Estonia | Demersal Fish                   | 1997           | 14                                                             |
| 63               | Estonia | Eggs                            | 1997           | 43                                                             |
| 63               | Estonia | Fats, Animals, Raw              | 1997           | 28                                                             |
| 63               | Estonia | Fish, Seafood                   | 1997           | 30                                                             |
| 63               | Estonia | Freshwater Fish                 | 1997           | 6                                                              |
| 63               | Estonia | Fruits - Excluding Wine         | 1997           | 78                                                             |
| 63               | Estonia | Fruits, Other                   | 1997           | 21                                                             |
| 63               | Estonia | Grand Total                     | 1997           | 3,027                                                          |
| 63               | Estonia | Grapes and products (excl wine) | 1997           | 9                                                              |
| 63               | Estonia | Groundnuts (Shelled Eq)         | 1997           | 2                                                              |
| 63               | Estonia | Honey                           | 1997           | 2                                                              |
| 63               | Estonia | Maize and products              | 1997           | 4                                                              |
| 63               | Estonia | Maize Germ Oil                  | 1997           | 1                                                              |
| 63               | Estonia | Meat                            | 1997           | 241                                                            |
| 63               | Estonia | Meat, Other                     | 1997           | 2                                                              |
| 63               | Estonia | Milk - Excluding Butter         | 1997           | 326                                                            |
| 63               | Estonia | Miscellaneous                   | 1997           | 4                                                              |
| 63               | Estonia | Mutton & Goat Meat              | 1997           | 2                                                              |
| 63               | Estonia | Oats                            | 1997           | 44                                                             |
| 63               | Estonia | Offals                          | 1997           | 12                                                             |
| 63               | Estonia | Oilcrops                        | 1997           | 4                                                              |
| 63               | Estonia | Oilcrops Oil, Other             | 1997           | 114                                                            |
| 63               | Estonia | Onions                          | 1997           | 4                                                              |
| 63               | Estonia | Oranges, Mandarines             | 1997           | 6                                                              |
| 63               | Estonia | Peas                            | 1997           | 29                                                             |
| 63               | Estonia | Pelagic Fish                    | 1997           | 6                                                              |
| 63               | Estonia | Pepper                          | 1997           | 1                                                              |
| 63               | Estonia | Pigmeat                         | 1997           | 95                                                             |
| 63               | Estonia | Pimento                         | 1997           | 1                                                              |
| 63               | Estonia | Pineapples and products         | 1997           | 1                                                              |
| 63               | Estonia | Potatoes and products           | 1997           | 228                                                            |
| 63               | Estonia | Poultry Meat                    | 1997           | 61                                                             |
| 63               | Estonia | Pulses                          | 1997           | 29                                                             |
| 63               | Estonia | Rape and Mustardseed            | 1997           | 1                                                              |
| 63               | Estonia | Rice (Milled Equivalent)        | 1997           | 24                                                             |
| 63               | Estonia | Rye and products                | 1997           | 164                                                            |
| 63               | Estonia | Soyabean Oil                    | 1997           | 35                                                             |
| 63               | Estonia | Spices                          | 1997           | 2                                                              |
| 63               | Estonia | Starchy Roots                   | 1997           | 228                                                            |
| 63               | Estonia | Stimulants                      | 1997           | 48                                                             |
| 63               | Estonia | Sugar & Sweeteners              | 1997           | 365                                                            |
| 63               | Estonia | Sugar (Raw Equivalent)          | 1997           | 340                                                            |
| 63               | Estonia | Sunflowerseed Oil               | 1997           | 67                                                             |
| 63               | Estonia | Sweeteners, Other               | 1997           | 23                                                             |
| 63               | Estonia | Tomatoes and products           | 1997           | 5                                                              |
| 63               | Estonia | Treenuts                        | 1997           | 13                                                             |
| 63               | Estonia | Vegetable Oils                  | 1997           | 241                                                            |
| 63               | Estonia | Vegetables                      | 1997           | 46                                                             |
| 63               | Estonia | Vegetables, Other               | 1997           | 37                                                             |
| 63               | Estonia | Vegetal Products                | 1997           | 2,254                                                          |
| 63               | Estonia | Wheat and products              | 1997           | 618                                                            |
| 63               | Estonia | Wine                            | 1997           | 12                                                             |
| 63               | Estonia | Alcoholic Beverages             | 1998           | 141                                                            |
| 63               | Estonia | Animal fats                     | 1998           | 149                                                            |
| 63               | Estonia | Animal Products                 | 1998           | 838                                                            |
| 63               | Estonia | Apples and products             | 1998           | 19                                                             |
| 63               | Estonia | Bananas                         | 1998           | 14                                                             |
| 63               | Estonia | Barley and products             | 1998           | 114                                                            |
| 63               | Estonia | Beer                            | 1998           | 69                                                             |
| 63               | Estonia | Beverages, Alcoholic            | 1998           | 57                                                             |
| 63               | Estonia | Beverages, Fermented            | 1998           | 3                                                              |
| 63               | Estonia | Bovine Meat                     | 1998           | 87                                                             |
| 63               | Estonia | Butter, Ghee                    | 1998           | 114                                                            |
| 63               | Estonia | Cereals - Excluding Beer        | 1998           | 1,032                                                          |
| 63               | Estonia | Cereals, Other                  | 1998           | 70                                                             |
| 63               | Estonia | Citrus, Other                   | 1998           | 1                                                              |
| 63               | Estonia | Cocoa Beans and products        | 1998           | 59                                                             |
| 63               | Estonia | Coconut Oil                     | 1998           | 1                                                              |
| 63               | Estonia | Coffee and products             | 1998           | 4                                                              |
| 63               | Estonia | Cottonseed Oil                  | 1998           | 19                                                             |
| 63               | Estonia | Cream                           | 1998           | 10                                                             |
| 63               | Estonia | Crustaceans                     | 1998           | 5                                                              |
| 63               | Estonia | Demersal Fish                   | 1998           | 14                                                             |
| 63               | Estonia | Eggs                            | 1998           | 48                                                             |
| 63               | Estonia | Fats, Animals, Raw              | 1998           | 25                                                             |
| 63               | Estonia | Fish, Seafood                   | 1998           | 29                                                             |
| 63               | Estonia | Freshwater Fish                 | 1998           | 8                                                              |
| 63               | Estonia | Fruits - Excluding Wine         | 1998           | 77                                                             |
| 63               | Estonia | Fruits, Other                   | 1998           | 20                                                             |
| 63               | Estonia | Grand Total                     | 1998           | 2,975                                                          |
| 63               | Estonia | Grapes and products (excl wine) | 1998           | 11                                                             |
| 63               | Estonia | Groundnut Oil                   | 1998           | 2                                                              |

Dietary calcium and zinc deficiency risks are decreasing but remain prevalent

| FAO Country code | Country | Food item                       | Reference year | Net energy supply (kcal capita <sup>-1</sup> d <sup>-1</sup> ) |
|------------------|---------|---------------------------------|----------------|----------------------------------------------------------------|
| 63               | Estonia | Groundnuts (Shelled Eq)         | 1998           | 2                                                              |
| 63               | Estonia | Honey                           | 1998           | 2                                                              |
| 63               | Estonia | Maize and products              | 1998           | 37                                                             |
| 63               | Estonia | Maize Germ Oil                  | 1998           | 2                                                              |
| 63               | Estonia | Marine Fish, Other              | 1998           | 1                                                              |
| 63               | Estonia | Meat                            | 1998           | 271                                                            |
| 63               | Estonia | Meat, Other                     | 1998           | 1                                                              |
| 63               | Estonia | Milk - Excluding Butter         | 1998           | 329                                                            |
| 63               | Estonia | Miscellaneous                   | 1998           | 7                                                              |
| 63               | Estonia | Mutton & Goat Meat              | 1998           | 2                                                              |
| 63               | Estonia | Oats                            | 1998           | 44                                                             |
| 63               | Estonia | Offals                          | 1998           | 13                                                             |
| 63               | Estonia | Oilcrops                        | 1998           | 3                                                              |
| 63               | Estonia | Oilcrops Oil, Other             | 1998           | 126                                                            |
| 63               | Estonia | Onions                          | 1998           | 4                                                              |
| 63               | Estonia | Oranges, Mandarines             | 1998           | 10                                                             |
| 63               | Estonia | Peas                            | 1998           | 20                                                             |
| 63               | Estonia | Pelagic Fish                    | 1998           | 3                                                              |
| 63               | Estonia | Pigmeat                         | 1998           | 101                                                            |
| 63               | Estonia | Pineapples and products         | 1998           | 1                                                              |
| 63               | Estonia | Potatoes and products           | 1998           | 167                                                            |
| 63               | Estonia | Poultry Meat                    | 1998           | 80                                                             |
| 63               | Estonia | Pulses                          | 1998           | 20                                                             |
| 63               | Estonia | Rape and Mustardseed            | 1998           | 1                                                              |
| 63               | Estonia | Rice (Milled Equivalent)        | 1998           | 22                                                             |
| 63               | Estonia | Rye and products                | 1998           | 202                                                            |
| 63               | Estonia | Sesameseed Oil                  | 1998           | 1                                                              |
| 63               | Estonia | Soyabean Oil                    | 1998           | 44                                                             |
| 63               | Estonia | Spices                          | 1998           | 2                                                              |
| 63               | Estonia | Spices, Other                   | 1998           | 1                                                              |
| 63               | Estonia | Starchy Roots                   | 1998           | 167                                                            |
| 63               | Estonia | Stimulants                      | 1998           | 64                                                             |
| 63               | Estonia | Sugar & Sweeteners              | 1998           | 357                                                            |
| 63               | Estonia | Sugar (Raw Equivalent)          | 1998           | 329                                                            |
| 63               | Estonia | Sunflowerseed Oil               | 1998           | 9                                                              |
| 63               | Estonia | Sweeteners, Other               | 1998           | 26                                                             |
| 63               | Estonia | Tomatoes and products           | 1998           | 6                                                              |
| 63               | Estonia | Treenuts                        | 1998           | 11                                                             |
| 63               | Estonia | Vegetable Oils                  | 1998           | 206                                                            |
| 63               | Estonia | Vegetables                      | 1998           | 48                                                             |
| 63               | Estonia | Vegetables, Other               | 1998           | 38                                                             |
| 63               | Estonia | Vegetal Products                | 1998           | 2,137                                                          |
| 63               | Estonia | Wheat and products              | 1998           | 543                                                            |
| 63               | Estonia | Wine                            | 1998           | 13                                                             |
| 63               | Estonia | Alcoholic Beverages             | 1999           | 159                                                            |
| 63               | Estonia | Animal fats                     | 1999           | 156                                                            |
| 63               | Estonia | Animal Products                 | 1999           | 952                                                            |
| 63               | Estonia | Apples and products             | 1999           | 28                                                             |
| 63               | Estonia | Bananas                         | 1999           | 16                                                             |
| 63               | Estonia | Barley and products             | 1999           | 52                                                             |
| 63               | Estonia | Beans                           | 1999           | 2                                                              |
| 63               | Estonia | Beer                            | 1999           | 86                                                             |
| 63               | Estonia | Beverages, Alcoholic            | 1999           | 55                                                             |
| 63               | Estonia | Beverages, Fermented            | 1999           | 7                                                              |
| 63               | Estonia | Bovine Meat                     | 1999           | 86                                                             |
| 63               | Estonia | Butter, Ghee                    | 1999           | 118                                                            |
| 63               | Estonia | Cereals - Excluding Beer        | 1999           | 848                                                            |
| 63               | Estonia | Cereals, Other                  | 1999           | 53                                                             |
| 63               | Estonia | Cocoa Beans and products        | 1999           | 77                                                             |
| 63               | Estonia | Coconut Oil                     | 1999           | 1                                                              |
| 63               | Estonia | Coconuts - Incl Copra           | 1999           | 1                                                              |
| 63               | Estonia | Coffee and products             | 1999           | 6                                                              |
| 63               | Estonia | Cottonseed Oil                  | 1999           | 18                                                             |
| 63               | Estonia | Cream                           | 1999           | 8                                                              |
| 63               | Estonia | Crustaceans                     | 1999           | 12                                                             |
| 63               | Estonia | Demersal Fish                   | 1999           | 7                                                              |
| 63               | Estonia | Eggs                            | 1999           | 43                                                             |
| 63               | Estonia | Fats, Animals, Raw              | 1999           | 30                                                             |
| 63               | Estonia | Fish, Seafood                   | 1999           | 31                                                             |
| 63               | Estonia | Freshwater Fish                 | 1999           | 6                                                              |
| 63               | Estonia | Fruits - Excluding Wine         | 1999           | 85                                                             |
| 63               | Estonia | Fruits, Other                   | 1999           | 19                                                             |
| 63               | Estonia | Grand Total                     | 1999           | 3,124                                                          |
| 63               | Estonia | Grapes and products (excl wine) | 1999           | 11                                                             |
| 63               | Estonia | Groundnut Oil                   | 1999           | 1                                                              |
| 63               | Estonia | Groundnuts (Shelled Eq)         | 1999           | 3                                                              |
| 63               | Estonia | Honey                           | 1999           | 3                                                              |
| 63               | Estonia | Maize and products              | 1999           | 14                                                             |
| 63               | Estonia | Maize Germ Oil                  | 1999           | 2                                                              |
| 63               | Estonia | Meat                            | 1999           | 272                                                            |
| 63               | Estonia | Milk - Excluding Butter         | 1999           | 438                                                            |
| 63               | Estonia | Miscellaneous                   | 1999           | 7                                                              |
| 63               | Estonia | Mutton & Goat Meat              | 1999           | 2                                                              |
| 63               | Estonia | Oats                            | 1999           | 19                                                             |
| 63               | Estonia | Offals                          | 1999           | 12                                                             |
| 63               | Estonia | Oilcrops                        | 1999           | 5                                                              |
| 63               | Estonia | Oilcrops Oil, Other             | 1999           | 109                                                            |
| 63               | Estonia | Onions                          | 1999           | 5                                                              |
| 63               | Estonia | Oranges, Mandarines             | 1999           | 7                                                              |
| 63               | Estonia | Peas                            | 1999           | 4                                                              |
| 63               | Estonia | Pelagic Fish                    | 1999           | 5                                                              |
| 63               | Estonia | Pepper                          | 1999           | 1                                                              |
| 63               | Estonia | Pigmeat                         | 1999           | 136                                                            |
| 63               | Estonia | Pimento                         | 1999           | 1                                                              |
| 63               | Estonia | Pineapples and products         | 1999           | 1                                                              |
| 63               | Estonia | Potatoes and products           | 1999           | 249                                                            |
| 63               | Estonia | Poultry Meat                    | 1999           | 48                                                             |

Dietary calcium and zinc deficiency risks are decreasing but remain prevalent

| FAO Country code | Country | Food item                       | Reference year | Net energy supply (kcal capita <sup>-1</sup> d <sup>-1</sup> ) |
|------------------|---------|---------------------------------|----------------|----------------------------------------------------------------|
| 63               | Estonia | Pulses                          | 1999           | 7                                                              |
| 63               | Estonia | Pulses, Other and products      | 1999           | 1                                                              |
| 63               | Estonia | Rape and Mustardseed            | 1999           | 1                                                              |
| 63               | Estonia | Rice (Milled Equivalent)        | 1999           | 27                                                             |
| 63               | Estonia | Rye and products                | 1999           | 215                                                            |
| 63               | Estonia | Sesameseed Oil                  | 1999           | 4                                                              |
| 63               | Estonia | Soyabean Oil                    | 1999           | 29                                                             |
| 63               | Estonia | Spices                          | 1999           | 3                                                              |
| 63               | Estonia | Spices, Other                   | 1999           | 2                                                              |
| 63               | Estonia | Starchy Roots                   | 1999           | 249                                                            |
| 63               | Estonia | Stimulants                      | 1999           | 83                                                             |
| 63               | Estonia | Sugar & Sweeteners              | 1999           | 492                                                            |
| 63               | Estonia | Sugar (Raw Equivalent)          | 1999           | 451                                                            |
| 63               | Estonia | Sunflowerseed Oil               | 1999           | 13                                                             |
| 63               | Estonia | Sweeteners, Other               | 1999           | 38                                                             |
| 63               | Estonia | Tomatoes and products           | 1999           | 8                                                              |
| 63               | Estonia | Treenuts                        | 1999           | 7                                                              |
| 63               | Estonia | Vegetable Oils                  | 1999           | 177                                                            |
| 63               | Estonia | Vegetables                      | 1999           | 50                                                             |
| 63               | Estonia | Vegetables, Other               | 1999           | 37                                                             |
| 63               | Estonia | Vegetal Products                | 1999           | 2,172                                                          |
| 63               | Estonia | Wheat and products              | 1999           | 468                                                            |
| 63               | Estonia | Wine                            | 1999           | 11                                                             |
| 63               | Estonia | Alcoholic Beverages             | 2000           | 162                                                            |
| 63               | Estonia | Animal fats                     | 2000           | 111                                                            |
| 63               | Estonia | Animal Products                 | 2000           | 826                                                            |
| 63               | Estonia | Apples and products             | 2000           | 33                                                             |
| 63               | Estonia | Bananas                         | 2000           | 13                                                             |
| 63               | Estonia | Barley and products             | 2000           | 60                                                             |
| 63               | Estonia | Beer                            | 2000           | 87                                                             |
| 63               | Estonia | Beverages, Alcoholic            | 2000           | 55                                                             |
| 63               | Estonia | Beverages, Fermented            | 2000           | 8                                                              |
| 63               | Estonia | Bovine Meat                     | 2000           | 74                                                             |
| 63               | Estonia | Butter, Ghee                    | 2000           | 70                                                             |
| 63               | Estonia | Cereals - Excluding Beer        | 2000           | 888                                                            |
| 63               | Estonia | Cereals, Other                  | 2000           | 39                                                             |
| 63               | Estonia | Citrus, Other                   | 2000           | 1                                                              |
| 63               | Estonia | Cocoa Beans and products        | 2000           | 47                                                             |
| 63               | Estonia | Coconut Oil                     | 2000           | 1                                                              |
| 63               | Estonia | Coffee and products             | 2000           | 6                                                              |
| 63               | Estonia | Cottonseed Oil                  | 2000           | 4                                                              |
| 63               | Estonia | Cream                           | 2000           | 6                                                              |
| 63               | Estonia | Crustaceans                     | 2000           | 3                                                              |
| 63               | Estonia | Demersal Fish                   | 2000           | 15                                                             |
| 63               | Estonia | Eggs                            | 2000           | 45                                                             |
| 63               | Estonia | Fats, Animals, Raw              | 2000           | 35                                                             |
| 63               | Estonia | Fish, Seafood                   | 2000           | 41                                                             |
| 63               | Estonia | Freshwater Fish                 | 2000           | 7                                                              |
| 63               | Estonia | Fruits - Excluding Wine         | 2000           | 94                                                             |
| 63               | Estonia | Fruits, Other                   | 2000           | 22                                                             |
| 63               | Estonia | Grand Total                     | 2000           | 3,067                                                          |
| 63               | Estonia | Grapes and products (excl wine) | 2000           | 12                                                             |
| 63               | Estonia | Groundnuts (Shelled Eq)         | 2000           | 1                                                              |
| 63               | Estonia | Honey                           | 2000           | 3                                                              |
| 63               | Estonia | Maize and products              | 2000           | 49                                                             |
| 63               | Estonia | Maize Germ Oil                  | 2000           | 3                                                              |
| 63               | Estonia | Meat                            | 2000           | 267                                                            |
| 63               | Estonia | Milk - Excluding Butter         | 2000           | 353                                                            |
| 63               | Estonia | Miscellaneous                   | 2000           | 7                                                              |
| 63               | Estonia | Mutton & Goat Meat              | 2000           | 2                                                              |
| 63               | Estonia | Oats                            | 2000           | 16                                                             |
| 63               | Estonia | Offals                          | 2000           | 9                                                              |
| 63               | Estonia | Oilcrops                        | 2000           | 3                                                              |
| 63               | Estonia | Oilcrops Oil, Other             | 2000           | 110                                                            |
| 63               | Estonia | Olive Oil                       | 2000           | 1                                                              |
| 63               | Estonia | Onions                          | 2000           | 5                                                              |
| 63               | Estonia | Oranges, Mandarines             | 2000           | 9                                                              |
| 63               | Estonia | Peas                            | 2000           | 13                                                             |
| 63               | Estonia | Pelagic Fish                    | 2000           | 15                                                             |
| 63               | Estonia | Pepper                          | 2000           | 1                                                              |
| 63               | Estonia | Pigmeat                         | 2000           | 128                                                            |
| 63               | Estonia | Pimento                         | 2000           | 1                                                              |
| 63               | Estonia | Pineapples and products         | 2000           | 2                                                              |
| 63               | Estonia | Potatoes and products           | 2000           | 256                                                            |
| 63               | Estonia | Poultry Meat                    | 2000           | 62                                                             |
| 63               | Estonia | Pulses                          | 2000           | 13                                                             |
| 63               | Estonia | Rape and Mustardseed            | 2000           | 1                                                              |
| 63               | Estonia | Rice (Milled Equivalent)        | 2000           | 23                                                             |
| 63               | Estonia | Rye and products                | 2000           | 225                                                            |
| 63               | Estonia | Soyabean Oil                    | 2000           | 45                                                             |
| 63               | Estonia | Spices                          | 2000           | 3                                                              |
| 63               | Estonia | Spices, Other                   | 2000           | 1                                                              |
| 63               | Estonia | Starchy Roots                   | 2000           | 256                                                            |
| 63               | Estonia | Stimulants                      | 2000           | 54                                                             |
| 63               | Estonia | Sugar & Sweeteners              | 2000           | 532                                                            |
| 63               | Estonia | Sugar (Raw Equivalent)          | 2000           | 513                                                            |
| 63               | Estonia | Sunflowerseed Oil               | 2000           | 9                                                              |
| 63               | Estonia | Sweeteners, Other               | 2000           | 17                                                             |
| 63               | Estonia | Tomatoes and products           | 2000           | 6                                                              |
| 63               | Estonia | Treenuts                        | 2000           | 7                                                              |
| 63               | Estonia | Vegetable Oils                  | 2000           | 173                                                            |
| 63               | Estonia | Vegetables                      | 2000           | 49                                                             |
| 63               | Estonia | Vegetables, Other               | 2000           | 38                                                             |
| 63               | Estonia | Vegetal Products                | 2000           | 2,241                                                          |
| 63               | Estonia | Wheat and products              | 2000           | 476                                                            |
| 63               | Estonia | Wine                            | 2000           | 12                                                             |
| 63               | Estonia | Alcoholic Beverages             | 2001           | 182                                                            |

Dietary calcium and zinc deficiency risks are decreasing but remain prevalent

| FAO Country code | Country | Food item                       | Reference year | Net energy supply (kcal capita <sup>-1</sup> d <sup>-1</sup> ) |
|------------------|---------|---------------------------------|----------------|----------------------------------------------------------------|
| 63               | Estonia | Animal fats                     | 2001           | 82                                                             |
| 63               | Estonia | Animal Products                 | 2001           | 796                                                            |
| 63               | Estonia | Apples and products             | 2001           | 29                                                             |
| 63               | Estonia | Bananas                         | 2001           | 12                                                             |
| 63               | Estonia | Barley and products             | 2001           | 53                                                             |
| 63               | Estonia | Beans                           | 2001           | 5                                                              |
| 63               | Estonia | Beer                            | 2001           | 93                                                             |
| 63               | Estonia | Beverages, Alcoholic            | 2001           | 71                                                             |
| 63               | Estonia | Beverages, Fermented            | 2001           | 8                                                              |
| 63               | Estonia | Bovine Meat                     | 2001           | 66                                                             |
| 63               | Estonia | Butter, Ghee                    | 2001           | 50                                                             |
| 63               | Estonia | Cephalopods                     | 2001           | 2                                                              |
| 63               | Estonia | Cereals - Excluding Beer        | 2001           | 851                                                            |
| 63               | Estonia | Cereals, Other                  | 2001           | 25                                                             |
| 63               | Estonia | Cocoa Beans and products        | 2001           | 66                                                             |
| 63               | Estonia | Coffee and products             | 2001           | 6                                                              |
| 63               | Estonia | Cream                           | 2001           | 6                                                              |
| 63               | Estonia | Crustaceans                     | 2001           | 10                                                             |
| 63               | Estonia | Demersal Fish                   | 2001           | 8                                                              |
| 63               | Estonia | Eggs                            | 2001           | 48                                                             |
| 63               | Estonia | Fats, Animals, Raw              | 2001           | 26                                                             |
| 63               | Estonia | Fish, Seafood                   | 2001           | 29                                                             |
| 63               | Estonia | Freshwater Fish                 | 2001           | 7                                                              |
| 63               | Estonia | Fruits - Excluding Wine         | 2001           | 91                                                             |
| 63               | Estonia | Fruits, Other                   | 2001           | 27                                                             |
| 63               | Estonia | Grand Total                     | 2001           | 3,060                                                          |
| 63               | Estonia | Grapes and products (excl wine) | 2001           | 11                                                             |
| 63               | Estonia | Groundnuts (Shelled Eq)         | 2001           | 1                                                              |
| 63               | Estonia | Honey                           | 2001           | 2                                                              |
| 63               | Estonia | Maize and products              | 2001           | 20                                                             |
| 63               | Estonia | Maize Germ Oil                  | 2001           | 2                                                              |
| 63               | Estonia | Meat                            | 2001           | 274                                                            |
| 63               | Estonia | Milk - Excluding Butter         | 2001           | 354                                                            |
| 63               | Estonia | Miscellaneous                   | 2001           | 8                                                              |
| 63               | Estonia | Mutton & Goat Meat              | 2001           | 2                                                              |
| 63               | Estonia | Oats                            | 2001           | 12                                                             |
| 63               | Estonia | Offals                          | 2001           | 9                                                              |
| 63               | Estonia | Oilcrops                        | 2001           | 3                                                              |
| 63               | Estonia | Oilcrops Oil, Other             | 2001           | 114                                                            |
| 63               | Estonia | Olive Oil                       | 2001           | 1                                                              |
| 63               | Estonia | Onions                          | 2001           | 6                                                              |
| 63               | Estonia | Oranges, Mandarines             | 2001           | 8                                                              |
| 63               | Estonia | Peas                            | 2001           | 6                                                              |
| 63               | Estonia | Pelagic Fish                    | 2001           | 2                                                              |
| 63               | Estonia | Pepper                          | 2001           | 1                                                              |
| 63               | Estonia | Pigmeat                         | 2001           | 130                                                            |
| 63               | Estonia | Pimento                         | 2001           | 1                                                              |
| 63               | Estonia | Pineapples and products         | 2001           | 3                                                              |
| 63               | Estonia | Potatoes and products           | 2001           | 237                                                            |
| 63               | Estonia | Poultry Meat                    | 2001           | 77                                                             |
| 63               | Estonia | Pulses                          | 2001           | 12                                                             |
| 63               | Estonia | Rape and Mustardseed            | 2001           | 1                                                              |
| 63               | Estonia | Rice (Milled Equivalent)        | 2001           | 26                                                             |
| 63               | Estonia | Rye and products                | 2001           | 231                                                            |
| 63               | Estonia | Soyabean Oil                    | 2001           | 74                                                             |
| 63               | Estonia | Spices                          | 2001           | 3                                                              |
| 63               | Estonia | Spices, Other                   | 2001           | 2                                                              |
| 63               | Estonia | Starchy Roots                   | 2001           | 237                                                            |
| 63               | Estonia | Stimulants                      | 2001           | 73                                                             |
| 63               | Estonia | Sugar & Sweeteners              | 2001           | 539                                                            |
| 63               | Estonia | Sugar (Raw Equivalent)          | 2001           | 485                                                            |
| 63               | Estonia | Sunflowerseed Oil               | 2001           | 10                                                             |
| 63               | Estonia | Sweeteners, Other               | 2001           | 52                                                             |
| 63               | Estonia | Tomatoes and products           | 2001           | 9                                                              |
| 63               | Estonia | Treenuts                        | 2001           | 8                                                              |
| 63               | Estonia | Vegetable Oils                  | 2001           | 200                                                            |
| 63               | Estonia | Vegetables                      | 2001           | 55                                                             |
| 63               | Estonia | Vegetables, Other               | 2001           | 41                                                             |
| 63               | Estonia | Vegetal Products                | 2001           | 2,263                                                          |
| 63               | Estonia | Wheat and products              | 2001           | 485                                                            |
| 63               | Estonia | Wine                            | 2001           | 10                                                             |
| 63               | Estonia | Alcoholic Beverages             | 2002           | 208                                                            |
| 63               | Estonia | Animal fats                     | 2002           | 101                                                            |
| 63               | Estonia | Animal Products                 | 2002           | 900                                                            |
| 63               | Estonia | Apples and products             | 2002           | 32                                                             |
| 63               | Estonia | Bananas                         | 2002           | 11                                                             |
| 63               | Estonia | Barley and products             | 2002           | 76                                                             |
| 63               | Estonia | Beans                           | 2002           | 1                                                              |
| 63               | Estonia | Beer                            | 2002           | 102                                                            |
| 63               | Estonia | Beverages, Alcoholic            | 2002           | 86                                                             |
| 63               | Estonia | Beverages, Fermented            | 2002           | 8                                                              |
| 63               | Estonia | Bovine Meat                     | 2002           | 74                                                             |
| 63               | Estonia | Butter, Ghee                    | 2002           | 69                                                             |
| 63               | Estonia | Cephalopods                     | 2002           | 1                                                              |
| 63               | Estonia | Cereals - Excluding Beer        | 2002           | 865                                                            |
| 63               | Estonia | Cereals, Other                  | 2002           | 31                                                             |
| 63               | Estonia | Cocoa Beans and products        | 2002           | 71                                                             |
| 63               | Estonia | Coffee and products             | 2002           | 7                                                              |
| 63               | Estonia | Cottonseed Oil                  | 2002           | 2                                                              |
| 63               | Estonia | Cream                           | 2002           | 7                                                              |
| 63               | Estonia | Crustaceans                     | 2002           | 13                                                             |
| 63               | Estonia | Demersal Fish                   | 2002           | 8                                                              |
| 63               | Estonia | Eggs                            | 2002           | 43                                                             |
| 63               | Estonia | Fats, Animals, Raw              | 2002           | 25                                                             |
| 63               | Estonia | Fish, Seafood                   | 2002           | 34                                                             |
| 63               | Estonia | Freshwater Fish                 | 2002           | 11                                                             |
| 63               | Estonia | Fruits - Excluding Wine         | 2002           | 89                                                             |

## Dietary calcium and zinc deficiency risks are decreasing but remain prevalent

| FAO Country code | Country | Food item                       | Reference year | Net energy supply (kcal <i>capita</i> <sup>-1</sup> d <sup>-1</sup> ) |
|------------------|---------|---------------------------------|----------------|-----------------------------------------------------------------------|
| 63               | Estonia | Fruits, Other                   | 2002           | 24                                                                    |
| 63               | Estonia | Grand Total                     | 2002           | 3,055                                                                 |
| 63               | Estonia | Grapes and products (excl wine) | 2002           | 10                                                                    |
| 63               | Estonia | Groundnuts (Shelled Eq)         | 2002           | 1                                                                     |
| 63               | Estonia | Honey                           | 2002           | 5                                                                     |
| 63               | Estonia | Maize and products              | 2002           | 27                                                                    |
| 63               | Estonia | Maize Germ Oil                  | 2002           | 4                                                                     |
| 63               | Estonia | Meat                            | 2002           | 284                                                                   |
| 63               | Estonia | Milk - Excluding Butter         | 2002           | 426                                                                   |
| 63               | Estonia | Miscellaneous                   | 2002           | 9                                                                     |
| 63               | Estonia | Mutton & Goat Meat              | 2002           | 2                                                                     |
| 63               | Estonia | Oats                            | 2002           | 14                                                                    |
| 63               | Estonia | Offals                          | 2002           | 11                                                                    |
| 63               | Estonia | Oilcrops                        | 2002           | 3                                                                     |
| 63               | Estonia | Oilcrops Oil, Other             | 2002           | 102                                                                   |
| 63               | Estonia | Olive Oil                       | 2002           | 2                                                                     |
| 63               | Estonia | Onions                          | 2002           | 5                                                                     |
| 63               | Estonia | Oranges, Mandarines             | 2002           | 8                                                                     |
| 63               | Estonia | Peas                            | 2002           | 11                                                                    |
| 63               | Estonia | Pelagic Fish                    | 2002           | 1                                                                     |
| 63               | Estonia | Pepper                          | 2002           | 1                                                                     |
| 63               | Estonia | Pigmeat                         | 2002           | 126                                                                   |
| 63               | Estonia | Pimento                         | 2002           | 1                                                                     |
| 63               | Estonia | Pineapples and products         | 2002           | 3                                                                     |
| 63               | Estonia | Potatoes and products           | 2002           | 201                                                                   |
| 63               | Estonia | Poultry Meat                    | 2002           | 82                                                                    |
| 63               | Estonia | Pulses                          | 2002           | 13                                                                    |
| 63               | Estonia | Rape and Mustardseed            | 2002           | 1                                                                     |
| 63               | Estonia | Rice (Milled Equivalent)        | 2002           | 27                                                                    |
| 63               | Estonia | Rye and products                | 2002           | 228                                                                   |
| 63               | Estonia | Soyabean Oil                    | 2002           | 79                                                                    |
| 63               | Estonia | Spices                          | 2002           | 3                                                                     |
| 63               | Estonia | Spices, Other                   | 2002           | 2                                                                     |
| 63               | Estonia | Starchy Roots                   | 2002           | 201                                                                   |
| 63               | Estonia | Stimulants                      | 2002           | 79                                                                    |
| 63               | Estonia | Sugar & Sweeteners              | 2002           | 425                                                                   |
| 63               | Estonia | Sugar (Raw Equivalent)          | 2002           | 389                                                                   |
| 63               | Estonia | Sunflowerseed Oil               | 2002           | 10                                                                    |
| 63               | Estonia | Sweeteners, Other               | 2002           | 31                                                                    |
| 63               | Estonia | Tomatoes and products           | 2002           | 8                                                                     |
| 63               | Estonia | Treenuts                        | 2002           | 9                                                                     |
| 63               | Estonia | Vegetable Oils                  | 2002           | 198                                                                   |
| 63               | Estonia | Vegetables                      | 2002           | 53                                                                    |
| 63               | Estonia | Vegetables, Other               | 2002           | 40                                                                    |
| 63               | Estonia | Vegetal Products                | 2002           | 2,155                                                                 |
| 63               | Estonia | Wheat and products              | 2002           | 463                                                                   |
| 63               | Estonia | Wine                            | 2002           | 12                                                                    |
| 63               | Estonia | Alcoholic Beverages             | 2003           | 218                                                                   |
| 63               | Estonia | Animal fats                     | 2003           | 143                                                                   |
| 63               | Estonia | Animal Products                 | 2003           | 904                                                                   |
| 63               | Estonia | Apples and products             | 2003           | 27                                                                    |
| 63               | Estonia | Bananas                         | 2003           | 15                                                                    |
| 63               | Estonia | Barley and products             | 2003           | 74                                                                    |
| 63               | Estonia | Beans                           | 2003           | 2                                                                     |
| 63               | Estonia | Beer                            | 2003           | 99                                                                    |
| 63               | Estonia | Beverages, Alcoholic            | 2003           | 101                                                                   |
| 63               | Estonia | Beverages, Fermented            | 2003           | 5                                                                     |
| 63               | Estonia | Bovine Meat                     | 2003           | 57                                                                    |
| 63               | Estonia | Butter, Ghee                    | 2003           | 107                                                                   |
| 63               | Estonia | Cereals - Excluding Beer        | 2003           | 845                                                                   |
| 63               | Estonia | Cereals, Other                  | 2003           | 39                                                                    |
| 63               | Estonia | Cocoa Beans and products        | 2003           | 75                                                                    |
| 63               | Estonia | Coconuts - Incl Copra           | 2003           | 1                                                                     |
| 63               | Estonia | Coffee and products             | 2003           | 7                                                                     |
| 63               | Estonia | Cottonseed Oil                  | 2003           | 1                                                                     |
| 63               | Estonia | Cream                           | 2003           | 10                                                                    |
| 63               | Estonia | Crustaceans                     | 2003           | 13                                                                    |
| 63               | Estonia | Demersal Fish                   | 2003           | 6                                                                     |
| 63               | Estonia | Eggs                            | 2003           | 40                                                                    |
| 63               | Estonia | Fats, Animals, Raw              | 2003           | 26                                                                    |
| 63               | Estonia | Fish, Seafood                   | 2003           | 33                                                                    |
| 63               | Estonia | Freshwater Fish                 | 2003           | 8                                                                     |
| 63               | Estonia | Fruits - Excluding Wine         | 2003           | 86                                                                    |
| 63               | Estonia | Fruits, Other                   | 2003           | 19                                                                    |
| 63               | Estonia | Grand Total                     | 2003           | 3,086                                                                 |
| 63               | Estonia | Grapes and products (excl wine) | 2003           | 14                                                                    |
| 63               | Estonia | Groundnuts (Shelled Eq)         | 2003           | 1                                                                     |
| 63               | Estonia | Honey                           | 2003           | 4                                                                     |
| 63               | Estonia | Maize and products              | 2003           | 27                                                                    |
| 63               | Estonia | Maize Germ Oil                  | 2003           | 4                                                                     |
| 63               | Estonia | Meat                            | 2003           | 267                                                                   |
| 63               | Estonia | Milk - Excluding Butter         | 2003           | 412                                                                   |
| 63               | Estonia | Miscellaneous                   | 2003           | 10                                                                    |
| 63               | Estonia | Mutton & Goat Meat              | 2003           | 2                                                                     |
| 63               | Estonia | Oats                            | 2003           | 14                                                                    |
| 63               | Estonia | Offals                          | 2003           | 11                                                                    |
| 63               | Estonia | Oilcrops                        | 2003           | 4                                                                     |
| 63               | Estonia | Oilcrops Oil, Other             | 2003           | 100                                                                   |
| 63               | Estonia | Olive Oil                       | 2003           | 2                                                                     |
| 63               | Estonia | Olives (including preserved)    | 2003           | 1                                                                     |
| 63               | Estonia | Onions                          | 2003           | 6                                                                     |
| 63               | Estonia | Oranges, Mandarines             | 2003           | 9                                                                     |
| 63               | Estonia | Peas                            | 2003           | 7                                                                     |
| 63               | Estonia | Pelagic Fish                    | 2003           | 6                                                                     |
| 63               | Estonia | Pepper                          | 2003           | 1                                                                     |
| 63               | Estonia | Pigmeat                         | 2003           | 126                                                                   |
| 63               | Estonia | Pimento                         | 2003           | 1                                                                     |



Dietary calcium and zinc deficiency risks are decreasing but remain prevalent

| FAO Country code | Country | Food item                       | Reference year | Net energy supply (kcal capita <sup>-1</sup> d <sup>-1</sup> ) |
|------------------|---------|---------------------------------|----------------|----------------------------------------------------------------|
| 63               | Estonia | Pineapples and products         | 2003           | 2                                                              |
| 63               | Estonia | Potatoes and products           | 2003           | 213                                                            |
| 63               | Estonia | Poultry Meat                    | 2003           | 81                                                             |
| 63               | Estonia | Pulses                          | 2003           | 9                                                              |
| 63               | Estonia | Rape and Mustardseed            | 2003           | 1                                                              |
| 63               | Estonia | Rice (Milled Equivalent)        | 2003           | 28                                                             |
| 63               | Estonia | Rye and products                | 2003           | 191                                                            |
| 63               | Estonia | Soyabean Oil                    | 2003           | 80                                                             |
| 63               | Estonia | Spices                          | 2003           | 4                                                              |
| 63               | Estonia | Spices, Other                   | 2003           | 2                                                              |
| 63               | Estonia | Starchy Roots                   | 2003           | 213                                                            |
| 63               | Estonia | Stimulants                      | 2003           | 83                                                             |
| 63               | Estonia | Sugar & Sweeteners              | 2003           | 427                                                            |
| 63               | Estonia | Sugar (Raw Equivalent)          | 2003           | 391                                                            |
| 63               | Estonia | Sunflowerseed Oil               | 2003           | 14                                                             |
| 63               | Estonia | Sweeteners, Other               | 2003           | 32                                                             |
| 63               | Estonia | Tomatoes and products           | 2003           | 9                                                              |
| 63               | Estonia | Treenuts                        | 2003           | 12                                                             |
| 63               | Estonia | Vegetable Oils                  | 2003           | 201                                                            |
| 63               | Estonia | Vegetables                      | 2003           | 70                                                             |
| 63               | Estonia | Vegetables, Other               | 2003           | 55                                                             |
| 63               | Estonia | Vegetal Products                | 2003           | 2,181                                                          |
| 63               | Estonia | Wheat and products              | 2003           | 472                                                            |
| 63               | Estonia | Wine                            | 2003           | 13                                                             |
| 63               | Estonia | Alcoholic Beverages             | 2004           | 272                                                            |
| 63               | Estonia | Animal fats                     | 2004           | 147                                                            |
| 63               | Estonia | Animal Products                 | 2004           | 825                                                            |
| 63               | Estonia | Apples and products             | 2004           | 27                                                             |
| 63               | Estonia | Bananas                         | 2004           | 17                                                             |
| 63               | Estonia | Barley and products             | 2004           | 59                                                             |
| 63               | Estonia | Beans                           | 2004           | 1                                                              |
| 63               | Estonia | Beer                            | 2004           | 125                                                            |
| 63               | Estonia | Beverages, Alcoholic            | 2004           | 124                                                            |
| 63               | Estonia | Beverages, Fermented            | 2004           | 7                                                              |
| 63               | Estonia | Bovine Meat                     | 2004           | 66                                                             |
| 63               | Estonia | Butter, Chee                    | 2004           | 113                                                            |
| 63               | Estonia | Cephalopods                     | 2004           | 1                                                              |
| 63               | Estonia | Cereals - Excluding Beer        | 2004           | 826                                                            |
| 63               | Estonia | Cereals, Other                  | 2004           | 23                                                             |
| 63               | Estonia | Cocoa Beans and products        | 2004           | 87                                                             |
| 63               | Estonia | Coconut Oil                     | 2004           | 3                                                              |
| 63               | Estonia | Coconuts - Incl Copra           | 2004           | 1                                                              |
| 63               | Estonia | Coffee and products             | 2004           | 8                                                              |
| 63               | Estonia | Cream                           | 2004           | 7                                                              |
| 63               | Estonia | Crustaceans                     | 2004           | 12                                                             |
| 63               | Estonia | Demersal Fish                   | 2004           | 2                                                              |
| 63               | Estonia | Eggs                            | 2004           | 39                                                             |
| 63               | Estonia | Fats, Animals, Raw              | 2004           | 27                                                             |
| 63               | Estonia | Fish, Seafood                   | 2004           | 22                                                             |
| 63               | Estonia | Freshwater Fish                 | 2004           | 3                                                              |
| 63               | Estonia | Fruits - Excluding Wine         | 2004           | 94                                                             |
| 63               | Estonia | Fruits, Other                   | 2004           | 23                                                             |
| 63               | Estonia | Grand Total                     | 2004           | 3,075                                                          |
| 63               | Estonia | Grapes and products (excl wine) | 2004           | 15                                                             |
| 63               | Estonia | Groundnuts (Shelled Eq)         | 2004           | 3                                                              |
| 63               | Estonia | Honey                           | 2004           | 5                                                              |
| 63               | Estonia | Maize and products              | 2004           | 43                                                             |
| 63               | Estonia | Maize Germ Oil                  | 2004           | 8                                                              |
| 63               | Estonia | Meat                            | 2004           | 246                                                            |
| 63               | Estonia | Milk - Excluding Butter         | 2004           | 354                                                            |
| 63               | Estonia | Miscellaneous                   | 2004           | 11                                                             |
| 63               | Estonia | Mutton & Goat Meat              | 2004           | 2                                                              |
| 63               | Estonia | Oats                            | 2004           | 14                                                             |
| 63               | Estonia | Offals                          | 2004           | 17                                                             |
| 63               | Estonia | Oilcrops                        | 2004           | 6                                                              |
| 63               | Estonia | Oilcrops Oil, Other             | 2004           | 102                                                            |
| 63               | Estonia | Olive Oil                       | 2004           | 2                                                              |
| 63               | Estonia | Onions                          | 2004           | 5                                                              |
| 63               | Estonia | Oranges, Mandarines             | 2004           | 8                                                              |
| 63               | Estonia | Peas                            | 2004           | 5                                                              |
| 63               | Estonia | Pelagic Fish                    | 2004           | 4                                                              |
| 63               | Estonia | Pepper                          | 2004           | 1                                                              |
| 63               | Estonia | Pigmeat                         | 2004           | 116                                                            |
| 63               | Estonia | Pimento                         | 2004           | 1                                                              |
| 63               | Estonia | Pineapples and products         | 2004           | 2                                                              |
| 63               | Estonia | Potatoes and products           | 2004           | 129                                                            |
| 63               | Estonia | Poultry Meat                    | 2004           | 63                                                             |
| 63               | Estonia | Pulses                          | 2004           | 19                                                             |
| 63               | Estonia | Pulses, Other and products      | 2004           | 13                                                             |
| 63               | Estonia | Rape and Mustardseed            | 2004           | 1                                                              |
| 63               | Estonia | Rice (Milled Equivalent)        | 2004           | 28                                                             |
| 63               | Estonia | Rye and products                | 2004           | 105                                                            |
| 63               | Estonia | Soyabean Oil                    | 2004           | 82                                                             |
| 63               | Estonia | Spices                          | 2004           | 4                                                              |
| 63               | Estonia | Spices, Other                   | 2004           | 2                                                              |
| 63               | Estonia | Starchy Roots                   | 2004           | 129                                                            |
| 63               | Estonia | Stimulants                      | 2004           | 95                                                             |
| 63               | Estonia | Sugar & Sweeteners              | 2004           | 515                                                            |
| 63               | Estonia | Sugar (Raw Equivalent)          | 2004           | 480                                                            |
| 63               | Estonia | Sunflowerseed Oil               | 2004           | 9                                                              |
| 63               | Estonia | Sweeteners, Other               | 2004           | 31                                                             |
| 63               | Estonia | Tomatoes and products           | 2004           | 10                                                             |
| 63               | Estonia | Treenuts                        | 2004           | 15                                                             |
| 63               | Estonia | Vegetable Oils                  | 2004           | 207                                                            |
| 63               | Estonia | Vegetables                      | 2004           | 59                                                             |
| 63               | Estonia | Vegetables, Other               | 2004           | 44                                                             |
| 63               | Estonia | Vegetal Products                | 2004           | 2,250                                                          |

Dietary calcium and zinc deficiency risks are decreasing but remain prevalent

| FAO Country code | Country | Food item                       | Reference year | Net energy supply (kcal capita <sup>-1</sup> d <sup>-1</sup> ) |
|------------------|---------|---------------------------------|----------------|----------------------------------------------------------------|
| 63               | Estonia | Wheat and products              | 2004           | 554                                                            |
| 63               | Estonia | Wine                            | 2004           | 16                                                             |
| 63               | Estonia | Alcoholic Beverages             | 2005           | 254                                                            |
| 63               | Estonia | Animal fats                     | 2005           | 104                                                            |
| 63               | Estonia | Animal Products                 | 2005           | 820                                                            |
| 63               | Estonia | Apples and products             | 2005           | 28                                                             |
| 63               | Estonia | Bananas                         | 2005           | 12                                                             |
| 63               | Estonia | Barley and products             | 2005           | 73                                                             |
| 63               | Estonia | Beer                            | 2005           | 126                                                            |
| 63               | Estonia | Beverages, Alcoholic            | 2005           | 110                                                            |
| 63               | Estonia | Beverages, Fermented            | 2005           | 1                                                              |
| 63               | Estonia | Bovine Meat                     | 2005           | 63                                                             |
| 63               | Estonia | Butter, Ghee                    | 2005           | 70                                                             |
| 63               | Estonia | Cephalopods                     | 2005           | 1                                                              |
| 63               | Estonia | Cereals - Excluding Beer        | 2005           | 879                                                            |
| 63               | Estonia | Cereals, Other                  | 2005           | 16                                                             |
| 63               | Estonia | Cocoa Beans and products        | 2005           | 79                                                             |
| 63               | Estonia | Coconut Oil                     | 2005           | 4                                                              |
| 63               | Estonia | Coconuts - Incl Copra           | 2005           | 1                                                              |
| 63               | Estonia | Coffee and products             | 2005           | 7                                                              |
| 63               | Estonia | Cream                           | 2005           | 6                                                              |
| 63               | Estonia | Crustaceans                     | 2005           | 12                                                             |
| 63               | Estonia | Demersal Fish                   | 2005           | 2                                                              |
| 63               | Estonia | Eggs                            | 2005           | 40                                                             |
| 63               | Estonia | Fats, Animals, Raw              | 2005           | 28                                                             |
| 63               | Estonia | Fish, Seafood                   | 2005           | 23                                                             |
| 63               | Estonia | Freshwater Fish                 | 2005           | 5                                                              |
| 63               | Estonia | Fruits - Excluding Wine         | 2005           | 84                                                             |
| 63               | Estonia | Fruits, Other                   | 2005           | 22                                                             |
| 63               | Estonia | Grand Total                     | 2005           | 3,171                                                          |
| 63               | Estonia | Grapes and products (excl wine) | 2005           | 9                                                              |
| 63               | Estonia | Groundnuts (Shelled Eq)         | 2005           | 3                                                              |
| 63               | Estonia | Honey                           | 2005           | 5                                                              |
| 63               | Estonia | Maize and products              | 2005           | 42                                                             |
| 63               | Estonia | Maize Germ Oil                  | 2005           | 7                                                              |
| 63               | Estonia | Meat                            | 2005           | 260                                                            |
| 63               | Estonia | Meat, Other                     | 2005           | 15                                                             |
| 63               | Estonia | Milk - Excluding Butter         | 2005           | 379                                                            |
| 63               | Estonia | Miscellaneous                   | 2005           | 12                                                             |
| 63               | Estonia | Mutton & Goat Meat              | 2005           | 2                                                              |
| 63               | Estonia | Oats                            | 2005           | 14                                                             |
| 63               | Estonia | Offals                          | 2005           | 13                                                             |
| 63               | Estonia | Oilcrops                        | 2005           | 6                                                              |
| 63               | Estonia | Oilcrops Oil, Other             | 2005           | 101                                                            |
| 63               | Estonia | Olive Oil                       | 2005           | 2                                                              |
| 63               | Estonia | Onions                          | 2005           | 4                                                              |
| 63               | Estonia | Oranges, Mandarines             | 2005           | 9                                                              |
| 63               | Estonia | Peas                            | 2005           | 4                                                              |
| 63               | Estonia | Pelagic Fish                    | 2005           | 3                                                              |
| 63               | Estonia | Pepper                          | 2005           | 1                                                              |
| 63               | Estonia | Pigmeat                         | 2005           | 117                                                            |
| 63               | Estonia | Pimento                         | 2005           | 1                                                              |
| 63               | Estonia | Pineapples and products         | 2005           | 3                                                              |
| 63               | Estonia | Potatoes and products           | 2005           | 214                                                            |
| 63               | Estonia | Poultry Meat                    | 2005           | 62                                                             |
| 63               | Estonia | Pulses                          | 2005           | 17                                                             |
| 63               | Estonia | Pulses, Other and products      | 2005           | 13                                                             |
| 63               | Estonia | Rape and Mustardseed            | 2005           | 1                                                              |
| 63               | Estonia | Rice (Milled Equivalent)        | 2005           | 19                                                             |
| 63               | Estonia | Rye and products                | 2005           | 123                                                            |
| 63               | Estonia | Soyabean Oil                    | 2005           | 83                                                             |
| 63               | Estonia | Spices                          | 2005           | 5                                                              |
| 63               | Estonia | Spices, Other                   | 2005           | 3                                                              |
| 63               | Estonia | Starchy Roots                   | 2005           | 214                                                            |
| 63               | Estonia | Stimulants                      | 2005           | 86                                                             |
| 63               | Estonia | Sugar & Sweeteners              | 2005           | 513                                                            |
| 63               | Estonia | Sugar (Raw Equivalent)          | 2005           | 472                                                            |
| 63               | Estonia | Sunflowerseed Oil               | 2005           | 10                                                             |
| 63               | Estonia | Sweeteners, Other               | 2005           | 36                                                             |
| 63               | Estonia | Tea (including mate)            | 2005           | 1                                                              |
| 63               | Estonia | Tomatoes and products           | 2005           | 9                                                              |
| 63               | Estonia | Treenuts                        | 2005           | 13                                                             |
| 63               | Estonia | Vegetable Oils                  | 2005           | 208                                                            |
| 63               | Estonia | Vegetables                      | 2005           | 59                                                             |
| 63               | Estonia | Vegetables, Other               | 2005           | 47                                                             |
| 63               | Estonia | Vegetal Products                | 2005           | 2,351                                                          |
| 63               | Estonia | Wheat and products              | 2005           | 592                                                            |
| 63               | Estonia | Wine                            | 2005           | 17                                                             |
| 63               | Estonia | Alcoholic Beverages             | 2006           | 287                                                            |
| 63               | Estonia | Animal fats                     | 2006           | 100                                                            |
| 63               | Estonia | Animal Products                 | 2006           | 813                                                            |
| 63               | Estonia | Apples and products             | 2006           | 11                                                             |
| 63               | Estonia | Bananas                         | 2006           | 13                                                             |
| 63               | Estonia | Barley and products             | 2006           | 18                                                             |
| 63               | Estonia | Beer                            | 2006           | 138                                                            |
| 63               | Estonia | Beverages, Alcoholic            | 2006           | 134                                                            |
| 63               | Estonia | Bovine Meat                     | 2006           | 66                                                             |
| 63               | Estonia | Butter, Ghee                    | 2006           | 70                                                             |
| 63               | Estonia | Cephalopods                     | 2006           | 1                                                              |
| 63               | Estonia | Cereals - Excluding Beer        | 2006           | 889                                                            |
| 63               | Estonia | Cereals, Other                  | 2006           | 6                                                              |
| 63               | Estonia | Cocoa Beans and products        | 2006           | 72                                                             |
| 63               | Estonia | Coconut Oil                     | 2006           | 2                                                              |
| 63               | Estonia | Coconuts - Incl Copra           | 2006           | 1                                                              |
| 63               | Estonia | Coffee and products             | 2006           | 7                                                              |
| 63               | Estonia | Cream                           | 2006           | 5                                                              |
| 63               | Estonia | Crustaceans                     | 2006           | 6                                                              |

Dietary calcium and zinc deficiency risks are decreasing but remain prevalent

| FAO Country code | Country | Food item                       | Reference year | Net energy supply (kcal capita <sup>-1</sup> d <sup>-1</sup> ) |
|------------------|---------|---------------------------------|----------------|----------------------------------------------------------------|
| 63               | Estonia | Demersal Fish                   | 2006           | 3                                                              |
| 63               | Estonia | Eggs                            | 2006           | 39                                                             |
| 63               | Estonia | Fats, Animals, Raw              | 2006           | 25                                                             |
| 63               | Estonia | Fish, Seafood                   | 2006           | 21                                                             |
| 63               | Estonia | Freshwater Fish                 | 2006           | 6                                                              |
| 63               | Estonia | Fruits - Excluding Wine         | 2006           | 75                                                             |
| 63               | Estonia | Fruits, Other                   | 2006           | 21                                                             |
| 63               | Estonia | Grand Total                     | 2006           | 3,183                                                          |
| 63               | Estonia | Grapes and products (excl wine) | 2006           | 13                                                             |
| 63               | Estonia | Groundnuts (Shelled Eq)         | 2006           | 3                                                              |
| 63               | Estonia | Honey                           | 2006           | 8                                                              |
| 63               | Estonia | Maize and products              | 2006           | 43                                                             |
| 63               | Estonia | Maize Germ Oil                  | 2006           | 11                                                             |
| 63               | Estonia | Meat                            | 2006           | 252                                                            |
| 63               | Estonia | Meat, Other                     | 2006           | 2                                                              |
| 63               | Estonia | Milk - Excluding Butter         | 2006           | 385                                                            |
| 63               | Estonia | Miscellaneous                   | 2006           | 9                                                              |
| 63               | Estonia | Mutton & Goat Meat              | 2006           | 3                                                              |
| 63               | Estonia | Oats                            | 2006           | 9                                                              |
| 63               | Estonia | Offals                          | 2006           | 14                                                             |
| 63               | Estonia | Oilcrops                        | 2006           | 6                                                              |
| 63               | Estonia | Oilcrops Oil, Other             | 2006           | 116                                                            |
| 63               | Estonia | Olive Oil                       | 2006           | 2                                                              |
| 63               | Estonia | Onions                          | 2006           | 4                                                              |
| 63               | Estonia | Oranges, Mandarines             | 2006           | 11                                                             |
| 63               | Estonia | Peas                            | 2006           | 9                                                              |
| 63               | Estonia | Pelagic Fish                    | 2006           | 5                                                              |
| 63               | Estonia | Pepper                          | 2006           | 1                                                              |
| 63               | Estonia | Pigmeat                         | 2006           | 118                                                            |
| 63               | Estonia | Pimento                         | 2006           | 1                                                              |
| 63               | Estonia | Pineapples and products         | 2006           | 3                                                              |
| 63               | Estonia | Potatoes and products           | 2006           | 224                                                            |
| 63               | Estonia | Poultry Meat                    | 2006           | 63                                                             |
| 63               | Estonia | Pulses                          | 2006           | 43                                                             |
| 63               | Estonia | Pulses, Other and products      | 2006           | 34                                                             |
| 63               | Estonia | Rape and Mustardseed            | 2006           | 2                                                              |
| 63               | Estonia | Rice (Milled Equivalent)        | 2006           | 24                                                             |
| 63               | Estonia | Rye and products                | 2006           | 99                                                             |
| 63               | Estonia | Soyabean Oil                    | 2006           | 72                                                             |
| 63               | Estonia | Spices                          | 2006           | 5                                                              |
| 63               | Estonia | Spices, Other                   | 2006           | 3                                                              |
| 63               | Estonia | Starchy Roots                   | 2006           | 224                                                            |
| 63               | Estonia | Stimulants                      | 2006           | 79                                                             |
| 63               | Estonia | Sugar & Sweeteners              | 2006           | 470                                                            |
| 63               | Estonia | Sugar (Raw Equivalent)          | 2006           | 422                                                            |
| 63               | Estonia | Sunflowerseed Oil               | 2006           | 9                                                              |
| 63               | Estonia | Sweeteners, Other               | 2006           | 40                                                             |
| 63               | Estonia | Tea (including mate)            | 2006           | 1                                                              |
| 63               | Estonia | Tomatoes and products           | 2006           | 9                                                              |
| 63               | Estonia | Treenuts                        | 2006           | 12                                                             |
| 63               | Estonia | Vegetable Oils                  | 2006           | 212                                                            |
| 63               | Estonia | Vegetables                      | 2006           | 58                                                             |
| 63               | Estonia | Vegetables, Other               | 2006           | 45                                                             |
| 63               | Estonia | Vegetal Products                | 2006           | 2,370                                                          |
| 63               | Estonia | Wheat and products              | 2006           | 691                                                            |
| 63               | Estonia | Wine                            | 2006           | 15                                                             |
| 63               | Estonia | Alcoholic Beverages             | 2007           | 279                                                            |
| 63               | Estonia | Animal fats                     | 2007           | 70                                                             |
| 63               | Estonia | Animal Products                 | 2007           | 782                                                            |
| 63               | Estonia | Apples and products             | 2007           | 19                                                             |
| 63               | Estonia | Bananas                         | 2007           | 14                                                             |
| 63               | Estonia | Barley and products             | 2007           | 16                                                             |
| 63               | Estonia | Beer                            | 2007           | 137                                                            |
| 63               | Estonia | Beverages, Alcoholic            | 2007           | 124                                                            |
| 63               | Estonia | Beverages, Fermented            | 2007           | 1                                                              |
| 63               | Estonia | Bovine Meat                     | 2007           | 67                                                             |
| 63               | Estonia | Butter, Ghee                    | 2007           | 36                                                             |
| 63               | Estonia | Cephalopods                     | 2007           | 1                                                              |
| 63               | Estonia | Cereals - Excluding Beer        | 2007           | 892                                                            |
| 63               | Estonia | Cereals, Other                  | 2007           | 8                                                              |
| 63               | Estonia | Cocoa Beans and products        | 2007           | 85                                                             |
| 63               | Estonia | Coconut Oil                     | 2007           | 4                                                              |
| 63               | Estonia | Coffee and products             | 2007           | 8                                                              |
| 63               | Estonia | Cream                           | 2007           | 4                                                              |
| 63               | Estonia | Crustaceans                     | 2007           | 6                                                              |
| 63               | Estonia | Demersal Fish                   | 2007           | 9                                                              |
| 63               | Estonia | Eggs                            | 2007           | 41                                                             |
| 63               | Estonia | Fats, Animals, Raw              | 2007           | 31                                                             |
| 63               | Estonia | Fish, Seafood                   | 2007           | 28                                                             |
| 63               | Estonia | Freshwater Fish                 | 2007           | 7                                                              |
| 63               | Estonia | Fruits - Excluding Wine         | 2007           | 92                                                             |
| 63               | Estonia | Fruits, Other                   | 2007           | 28                                                             |
| 63               | Estonia | Grand Total                     | 2007           | 3,189                                                          |
| 63               | Estonia | Grapefruit and products         | 2007           | 1                                                              |
| 63               | Estonia | Grapes and products (excl wine) | 2007           | 13                                                             |
| 63               | Estonia | Groundnuts (Shelled Eq)         | 2007           | 5                                                              |
| 63               | Estonia | Honey                           | 2007           | 5                                                              |
| 63               | Estonia | Maize and products              | 2007           | 43                                                             |
| 63               | Estonia | Maize Germ Oil                  | 2007           | 12                                                             |
| 63               | Estonia | Meat                            | 2007           | 268                                                            |
| 63               | Estonia | Meat, Other                     | 2007           | 2                                                              |
| 63               | Estonia | Milk - Excluding Butter         | 2007           | 358                                                            |
| 63               | Estonia | Miscellaneous                   | 2007           | 11                                                             |
| 63               | Estonia | Mutton & Goat Meat              | 2007           | 4                                                              |
| 63               | Estonia | Oats                            | 2007           | 14                                                             |
| 63               | Estonia | Offals                          | 2007           | 16                                                             |
| 63               | Estonia | Oilcrops                        | 2007           | 8                                                              |

Dietary calcium and zinc deficiency risks are decreasing but remain prevalent

| FAO Country code | Country | Food item                       | Reference year | Net energy supply (kcal <i>capita</i> <sup>-1</sup> d <sup>-1</sup> ) |
|------------------|---------|---------------------------------|----------------|-----------------------------------------------------------------------|
| 63               | Estonia | Oilcrops Oil, Other             | 2007           | 104                                                                   |
| 63               | Estonia | Olive Oil                       | 2007           | 5                                                                     |
| 63               | Estonia | Onions                          | 2007           | 5                                                                     |
| 63               | Estonia | Oranges, Mandarines             | 2007           | 12                                                                    |
| 63               | Estonia | Peas                            | 2007           | 14                                                                    |
| 63               | Estonia | Pelagic Fish                    | 2007           | 5                                                                     |
| 63               | Estonia | Pepper                          | 2007           | 2                                                                     |
| 63               | Estonia | Pigmeat                         | 2007           | 127                                                                   |
| 63               | Estonia | Pimento                         | 2007           | 2                                                                     |
| 63               | Estonia | Pineapples and products         | 2007           | 3                                                                     |
| 63               | Estonia | Plantains                       | 2007           | 1                                                                     |
| 63               | Estonia | Potatoes and products           | 2007           | 205                                                                   |
| 63               | Estonia | Poultry Meat                    | 2007           | 69                                                                    |
| 63               | Estonia | Pulses                          | 2007           | 59                                                                    |
| 63               | Estonia | Pulses, Other and products      | 2007           | 44                                                                    |
| 63               | Estonia | Rape and Mustardseed            | 2007           | 3                                                                     |
| 63               | Estonia | Rice (Milled Equivalent)        | 2007           | 23                                                                    |
| 63               | Estonia | Rye and products                | 2007           | 125                                                                   |
| 63               | Estonia | Soyabean Oil                    | 2007           | 73                                                                    |
| 63               | Estonia | Spices                          | 2007           | 6                                                                     |
| 63               | Estonia | Spices, Other                   | 2007           | 2                                                                     |
| 63               | Estonia | Starchy Roots                   | 2007           | 205                                                                   |
| 63               | Estonia | Stimulants                      | 2007           | 94                                                                    |
| 63               | Estonia | Sugar & Sweeteners              | 2007           | 466                                                                   |
| 63               | Estonia | Sugar (Raw Equivalent)          | 2007           | 427                                                                   |
| 63               | Estonia | Sunflowerseed Oil               | 2007           | 4                                                                     |
| 63               | Estonia | Sweeteners, Other               | 2007           | 33                                                                    |
| 63               | Estonia | Tea (including mate)            | 2007           | 1                                                                     |
| 63               | Estonia | Tomatoes and products           | 2007           | 11                                                                    |
| 63               | Estonia | Treenuts                        | 2007           | 20                                                                    |
| 63               | Estonia | Vegetable Oils                  | 2007           | 203                                                                   |
| 63               | Estonia | Vegetables                      | 2007           | 74                                                                    |
| 63               | Estonia | Vegetables, Other               | 2007           | 59                                                                    |
| 63               | Estonia | Vegetal Products                | 2007           | 2,408                                                                 |
| 63               | Estonia | Wheat and products              | 2007           | 663                                                                   |
| 63               | Estonia | Wine                            | 2007           | 17                                                                    |
| 63               | Estonia | Alcoholic Beverages             | 2008           | 309                                                                   |
| 63               | Estonia | Animal fats                     | 2008           | 89                                                                    |
| 63               | Estonia | Animal Products                 | 2008           | 796                                                                   |
| 63               | Estonia | Apples and products             | 2008           | 23                                                                    |
| 63               | Estonia | Bananas                         | 2008           | 17                                                                    |
| 63               | Estonia | Barley and products             | 2008           | 22                                                                    |
| 63               | Estonia | Beer                            | 2008           | 126                                                                   |
| 63               | Estonia | Beverages, Alcoholic            | 2008           | 160                                                                   |
| 63               | Estonia | Beverages, Fermented            | 2008           | 1                                                                     |
| 63               | Estonia | Bovine Meat                     | 2008           | 63                                                                    |
| 63               | Estonia | Butter, Ghee                    | 2008           | 41                                                                    |
| 63               | Estonia | Cephalopods                     | 2008           | 1                                                                     |
| 63               | Estonia | Cereals - Excluding Beer        | 2008           | 993                                                                   |
| 63               | Estonia | Cereals, Other                  | 2008           | 1                                                                     |
| 63               | Estonia | Cocoa Beans and products        | 2008           | 78                                                                    |
| 63               | Estonia | Coconut Oil                     | 2008           | 9                                                                     |
| 63               | Estonia | Coconuts - Incl Copra           | 2008           | 1                                                                     |
| 63               | Estonia | Coffee and products             | 2008           | 9                                                                     |
| 63               | Estonia | Cream                           | 2008           | 20                                                                    |
| 63               | Estonia | Crustaceans                     | 2008           | 5                                                                     |
| 63               | Estonia | Demersal Fish                   | 2008           | 11                                                                    |
| 63               | Estonia | Eggs                            | 2008           | 40                                                                    |
| 63               | Estonia | Fats, Animals, Raw              | 2008           | 27                                                                    |
| 63               | Estonia | Fish, Seafood                   | 2008           | 31                                                                    |
| 63               | Estonia | Freshwater Fish                 | 2008           | 6                                                                     |
| 63               | Estonia | Fruits - Excluding Wine         | 2008           | 94                                                                    |
| 63               | Estonia | Fruits, Other                   | 2008           | 24                                                                    |
| 63               | Estonia | Grand Total                     | 2008           | 3,227                                                                 |
| 63               | Estonia | Grapefruit and products         | 2008           | 2                                                                     |
| 63               | Estonia | Grapes and products (excl wine) | 2008           | 14                                                                    |
| 63               | Estonia | Groundnuts (Shelled Eq)         | 2008           | 4                                                                     |
| 63               | Estonia | Honey                           | 2008           | 4                                                                     |
| 63               | Estonia | Maize and products              | 2008           | 43                                                                    |
| 63               | Estonia | Maize Germ Oil                  | 2008           | 14                                                                    |
| 63               | Estonia | Meat                            | 2008           | 255                                                                   |
| 63               | Estonia | Milk - Excluding Butter         | 2008           | 364                                                                   |
| 63               | Estonia | Miscellaneous                   | 2008           | 6                                                                     |
| 63               | Estonia | Mutton & Goat Meat              | 2008           | 5                                                                     |
| 63               | Estonia | Oats                            | 2008           | 11                                                                    |
| 63               | Estonia | Offals                          | 2008           | 17                                                                    |
| 63               | Estonia | Oilcrops                        | 2008           | 8                                                                     |
| 63               | Estonia | Oilcrops Oil, Other             | 2008           | 106                                                                   |
| 63               | Estonia | Olive Oil                       | 2008           | 4                                                                     |
| 63               | Estonia | Onions                          | 2008           | 5                                                                     |
| 63               | Estonia | Oranges, Mandarines             | 2008           | 11                                                                    |
| 63               | Estonia | Peas                            | 2008           | 4                                                                     |
| 63               | Estonia | Pelagic Fish                    | 2008           | 8                                                                     |
| 63               | Estonia | Pepper                          | 2008           | 2                                                                     |
| 63               | Estonia | Pigmeat                         | 2008           | 117                                                                   |
| 63               | Estonia | Pimento                         | 2008           | 2                                                                     |
| 63               | Estonia | Pineapples and products         | 2008           | 3                                                                     |
| 63               | Estonia | Potatoes and products           | 2008           | 150                                                                   |
| 63               | Estonia | Poultry Meat                    | 2008           | 69                                                                    |
| 63               | Estonia | Pulses                          | 2008           | 51                                                                    |
| 63               | Estonia | Pulses, Other and products      | 2008           | 47                                                                    |
| 63               | Estonia | Rape and Mustardseed            | 2008           | 3                                                                     |
| 63               | Estonia | Rice (Milled Equivalent)        | 2008           | 28                                                                    |
| 63               | Estonia | Rye and products                | 2008           | 125                                                                   |
| 63               | Estonia | Soyabean Oil                    | 2008           | 66                                                                    |
| 63               | Estonia | Spices                          | 2008           | 8                                                                     |
| 63               | Estonia | Spices, Other                   | 2008           | 4                                                                     |

Dietary calcium and zinc deficiency risks are decreasing but remain prevalent

| FAO Country code | Country | Food item                       | Reference year | Net energy supply (kcal capita <sup>-1</sup> d <sup>-1</sup> ) |
|------------------|---------|---------------------------------|----------------|----------------------------------------------------------------|
| 63               | Estonia | Starchy Roots                   | 2008           | 150                                                            |
| 63               | Estonia | Stimulants                      | 2008           | 88                                                             |
| 63               | Estonia | Sugar & Sweeteners              | 2008           | 431                                                            |
| 63               | Estonia | Sugar (Raw Equivalent)          | 2008           | 397                                                            |
| 63               | Estonia | Sunflowerseed Oil               | 2008           | 4                                                              |
| 63               | Estonia | Sweeteners, Other               | 2008           | 30                                                             |
| 63               | Estonia | Tea (including mate)            | 2008           | 1                                                              |
| 63               | Estonia | Tomatoes and products           | 2008           | 11                                                             |
| 63               | Estonia | Treenuts                        | 2008           | 19                                                             |
| 63               | Estonia | Vegetable Oils                  | 2008           | 202                                                            |
| 63               | Estonia | Vegetables                      | 2008           | 71                                                             |
| 63               | Estonia | Vegetables, Other               | 2008           | 56                                                             |
| 63               | Estonia | Vegetal Products                | 2008           | 2,431                                                          |
| 63               | Estonia | Wheat and products              | 2008           | 763                                                            |
| 63               | Estonia | Wine                            | 2008           | 21                                                             |
| 63               | Estonia | Alcoholic Beverages             | 2009           | 303                                                            |
| 63               | Estonia | Animal fats                     | 2009           | 105                                                            |
| 63               | Estonia | Animal Products                 | 2009           | 823                                                            |
| 63               | Estonia | Apples and products             | 2009           | 28                                                             |
| 63               | Estonia | Bananas                         | 2009           | 14                                                             |
| 63               | Estonia | Barley and products             | 2009           | 41                                                             |
| 63               | Estonia | Beer                            | 2009           | 119                                                            |
| 63               | Estonia | Beverages, Alcoholic            | 2009           | 161                                                            |
| 63               | Estonia | Beverages, Fermented            | 2009           | 4                                                              |
| 63               | Estonia | Bovine Meat                     | 2009           | 60                                                             |
| 63               | Estonia | Butter, Ghee                    | 2009           | 52                                                             |
| 63               | Estonia | Cephalopods                     | 2009           | 2                                                              |
| 63               | Estonia | Cereals - Excluding Beer        | 2009           | 1,018                                                          |
| 63               | Estonia | Cereals, Other                  | 2009           | 1                                                              |
| 63               | Estonia | Cocoa Beans and products        | 2009           | 71                                                             |
| 63               | Estonia | Coconut Oil                     | 2009           | 9                                                              |
| 63               | Estonia | Coffee and products             | 2009           | 8                                                              |
| 63               | Estonia | Cream                           | 2009           | 25                                                             |
| 63               | Estonia | Crustaceans                     | 2009           | 4                                                              |
| 63               | Estonia | Demersal Fish                   | 2009           | 10                                                             |
| 63               | Estonia | Eggs                            | 2009           | 43                                                             |
| 63               | Estonia | Fats, Animals, Raw              | 2009           | 28                                                             |
| 63               | Estonia | Fish, Seafood                   | 2009           | 29                                                             |
| 63               | Estonia | Freshwater Fish                 | 2009           | 5                                                              |
| 63               | Estonia | Fruits - Excluding Wine         | 2009           | 97                                                             |
| 63               | Estonia | Fruits, Other                   | 2009           | 27                                                             |
| 63               | Estonia | Grand Total                     | 2009           | 3,263                                                          |
| 63               | Estonia | Grapefruit and products         | 2009           | 1                                                              |
| 63               | Estonia | Grapes and products (excl wine) | 2009           | 11                                                             |
| 63               | Estonia | Groundnuts (Shelled Eq)         | 2009           | 3                                                              |
| 63               | Estonia | Honey                           | 2009           | 5                                                              |
| 63               | Estonia | Lemons, Limes and products      | 2009           | 1                                                              |
| 63               | Estonia | Maize and products              | 2009           | 44                                                             |
| 63               | Estonia | Maize Germ Oil                  | 2009           | 11                                                             |
| 63               | Estonia | Meat                            | 2009           | 255                                                            |
| 63               | Estonia | Milk - Excluding Butter         | 2009           | 373                                                            |
| 63               | Estonia | Mutton & Goat Meat              | 2009           | 5                                                              |
| 63               | Estonia | Oats                            | 2009           | 15                                                             |
| 63               | Estonia | Offals                          | 2009           | 17                                                             |
| 63               | Estonia | Oilcrops                        | 2009           | 7                                                              |
| 63               | Estonia | Oilcrops Oil, Other             | 2009           | 110                                                            |
| 63               | Estonia | Olive Oil                       | 2009           | 5                                                              |
| 63               | Estonia | Onions                          | 2009           | 6                                                              |
| 63               | Estonia | Oranges, Mandarines             | 2009           | 11                                                             |
| 63               | Estonia | Peas                            | 2009           | 2                                                              |
| 63               | Estonia | Pelagic Fish                    | 2009           | 9                                                              |
| 63               | Estonia | Pepper                          | 2009           | 2                                                              |
| 63               | Estonia | Pigmeat                         | 2009           | 115                                                            |
| 63               | Estonia | Pimento                         | 2009           | 3                                                              |
| 63               | Estonia | Pineapples and products         | 2009           | 3                                                              |
| 63               | Estonia | Potatoes and products           | 2009           | 177                                                            |
| 63               | Estonia | Poultry Meat                    | 2009           | 75                                                             |
| 63               | Estonia | Pulses                          | 2009           | 2                                                              |
| 63               | Estonia | Rape and Mustardseed            | 2009           | 3                                                              |
| 63               | Estonia | Rice (Milled Equivalent)        | 2009           | 19                                                             |
| 63               | Estonia | Rye and products                | 2009           | 125                                                            |
| 63               | Estonia | Soyabean Oil                    | 2009           | 64                                                             |
| 63               | Estonia | Spices                          | 2009           | 7                                                              |
| 63               | Estonia | Spices, Other                   | 2009           | 2                                                              |
| 63               | Estonia | Starchy Roots                   | 2009           | 177                                                            |
| 63               | Estonia | Stimulants                      | 2009           | 80                                                             |
| 63               | Estonia | Sugar & Sweeteners              | 2009           | 450                                                            |
| 63               | Estonia | Sugar (Raw Equivalent)          | 2009           | 410                                                            |
| 63               | Estonia | Sunflowerseed Oil               | 2009           | 4                                                              |
| 63               | Estonia | Sweeteners, Other               | 2009           | 35                                                             |
| 63               | Estonia | Tomatoes and products           | 2009           | 10                                                             |
| 63               | Estonia | Treenuts                        | 2009           | 19                                                             |
| 63               | Estonia | Vegetable Oils                  | 2009           | 202                                                            |
| 63               | Estonia | Vegetables                      | 2009           | 78                                                             |
| 63               | Estonia | Vegetables, Other               | 2009           | 62                                                             |
| 63               | Estonia | Vegetal Products                | 2009           | 2,440                                                          |
| 63               | Estonia | Wheat and products              | 2009           | 772                                                            |
| 63               | Estonia | Wine                            | 2009           | 19                                                             |
| 63               | Estonia | Alcoholic Beverages             | 2010           | 318                                                            |
| 63               | Estonia | Animal fats                     | 2010           | 93                                                             |
| 63               | Estonia | Animal Products                 | 2010           | 809                                                            |
| 63               | Estonia | Apples and products             | 2010           | 21                                                             |
| 63               | Estonia | Bananas                         | 2010           | 14                                                             |
| 63               | Estonia | Barley and products             | 2010           | 94                                                             |
| 63               | Estonia | Beer                            | 2010           | 130                                                            |
| 63               | Estonia | Beverages, Alcoholic            | 2010           | 161                                                            |
| 63               | Estonia | Beverages, Fermented            | 2010           | 5                                                              |

## Dietary calcium and zinc deficiency risks are decreasing but remain prevalent

| FAO Country code | Country | Food item                       | Reference year | Net energy supply (kcal capita <sup>-1</sup> d <sup>-1</sup> ) |
|------------------|---------|---------------------------------|----------------|----------------------------------------------------------------|
| 63               | Estonia | Bovine Meat                     | 2010           | 58                                                             |
| 63               | Estonia | Butter, Ghee                    | 2010           | 46                                                             |
| 63               | Estonia | Cephalopods                     | 2010           | 1                                                              |
| 63               | Estonia | Cereals - Excluding Beer        | 2010           | 981                                                            |
| 63               | Estonia | Cereals, Other                  | 2010           | 1                                                              |
| 63               | Estonia | Cocoa Beans and products        | 2010           | 74                                                             |
| 63               | Estonia | Coconut Oil                     | 2010           | 8                                                              |
| 63               | Estonia | Coffee and products             | 2010           | 7                                                              |
| 63               | Estonia | Cream                           | 2010           | 18                                                             |
| 63               | Estonia | Crustaceans                     | 2010           | 3                                                              |
| 63               | Estonia | Demersal Fish                   | 2010           | 9                                                              |
| 63               | Estonia | Eggs                            | 2010           | 43                                                             |
| 63               | Estonia | Fats, Animals, Raw              | 2010           | 29                                                             |
| 63               | Estonia | Fish, Seafood                   | 2010           | 24                                                             |
| 63               | Estonia | Freshwater Fish                 | 2010           | 4                                                              |
| 63               | Estonia | Fruits - Excluding Wine         | 2010           | 89                                                             |
| 63               | Estonia | Fruits, Other                   | 2010           | 26                                                             |
| 63               | Estonia | Grand Total                     | 2010           | 3,210                                                          |
| 63               | Estonia | Grapefruit and products         | 2010           | 2                                                              |
| 63               | Estonia | Grapes and products (excl wine) | 2010           | 11                                                             |
| 63               | Estonia | Groundnuts (Shelled Eq)         | 2010           | 3                                                              |
| 63               | Estonia | Honey                           | 2010           | 6                                                              |
| 63               | Estonia | Lemons, Limes and products      | 2010           | 1                                                              |
| 63               | Estonia | Maize and products              | 2010           | 50                                                             |
| 63               | Estonia | Maize Germ Oil                  | 2010           | 12                                                             |
| 63               | Estonia | Meat                            | 2010           | 258                                                            |
| 63               | Estonia | Meat, Other                     | 2010           | 1                                                              |
| 63               | Estonia | Milk - Excluding Butter         | 2010           | 372                                                            |
| 63               | Estonia | Miscellaneous                   | 2010           | 1                                                              |
| 63               | Estonia | Mutton & Goat Meat              | 2010           | 4                                                              |
| 63               | Estonia | Oats                            | 2010           | 12                                                             |
| 63               | Estonia | Offals                          | 2010           | 18                                                             |
| 63               | Estonia | Oilcrops                        | 2010           | 7                                                              |
| 63               | Estonia | Oilcrops Oil, Other             | 2010           | 102                                                            |
| 63               | Estonia | Olive Oil                       | 2010           | 7                                                              |
| 63               | Estonia | Olives (including preserved)    | 2010           | 1                                                              |
| 63               | Estonia | Onions                          | 2010           | 6                                                              |
| 63               | Estonia | Oranges, Mandarines             | 2010           | 11                                                             |
| 63               | Estonia | Peas                            | 2010           | 50                                                             |
| 63               | Estonia | Pelagic Fish                    | 2010           | 7                                                              |
| 63               | Estonia | Pepper                          | 2010           | 1                                                              |
| 63               | Estonia | Pigmeat                         | 2010           | 116                                                            |
| 63               | Estonia | Pimento                         | 2010           | 3                                                              |
| 63               | Estonia | Pineapples and products         | 2010           | 3                                                              |
| 63               | Estonia | Potatoes and products           | 2010           | 195                                                            |
| 63               | Estonia | Poultry Meat                    | 2010           | 80                                                             |
| 63               | Estonia | Pulses                          | 2010           | 50                                                             |
| 63               | Estonia | Rape and Mustardseed            | 2010           | 3                                                              |
| 63               | Estonia | Rice (Milled Equivalent)        | 2010           | 26                                                             |
| 63               | Estonia | Rye and products                | 2010           | 101                                                            |
| 63               | Estonia | Soyabean Oil                    | 2010           | 38                                                             |
| 63               | Estonia | Spices                          | 2010           | 7                                                              |
| 63               | Estonia | Spices, Other                   | 2010           | 3                                                              |
| 63               | Estonia | Starchy Roots                   | 2010           | 195                                                            |
| 63               | Estonia | Stimulants                      | 2010           | 82                                                             |
| 63               | Estonia | Sugar & Sweeteners              | 2010           | 397                                                            |
| 63               | Estonia | Sugar (Raw Equivalent)          | 2010           | 349                                                            |
| 63               | Estonia | Sunflowerseed Oil               | 2010           | 2                                                              |
| 63               | Estonia | Sweeteners, Other               | 2010           | 42                                                             |
| 63               | Estonia | Tea (including mate)            | 2010           | 1                                                              |
| 63               | Estonia | Tomatoes and products           | 2010           | 10                                                             |
| 63               | Estonia | Treenuts                        | 2010           | 25                                                             |
| 63               | Estonia | Vegetable Oils                  | 2010           | 169                                                            |
| 63               | Estonia | Vegetables                      | 2010           | 81                                                             |
| 63               | Estonia | Vegetables, Other               | 2010           | 64                                                             |
| 63               | Estonia | Vegetal Products                | 2010           | 2,401                                                          |
| 63               | Estonia | Wheat and products              | 2010           | 697                                                            |
| 63               | Estonia | Wine                            | 2010           | 23                                                             |
| 63               | Estonia | Alcoholic Beverages             | 2011           | 329                                                            |
| 63               | Estonia | Animal fats                     | 2011           | 96                                                             |
| 63               | Estonia | Animal Products                 | 2011           | 806                                                            |
| 63               | Estonia | Apples and products             | 2011           | 20                                                             |
| 63               | Estonia | Bananas                         | 2011           | 14                                                             |
| 63               | Estonia | Barley and products             | 2011           | 21                                                             |
| 63               | Estonia | Beer                            | 2011           | 132                                                            |
| 63               | Estonia | Beverages, Alcoholic            | 2011           | 163                                                            |
| 63               | Estonia | Beverages, Fermented            | 2011           | 9                                                              |
| 63               | Estonia | Bovine Meat                     | 2011           | 59                                                             |
| 63               | Estonia | Butter, Ghee                    | 2011           | 45                                                             |
| 63               | Estonia | Cephalopods                     | 2011           | 1                                                              |
| 63               | Estonia | Cereals - Excluding Beer        | 2011           | 999                                                            |
| 63               | Estonia | Cocoa Beans and products        | 2011           | 85                                                             |
| 63               | Estonia | Coconut Oil                     | 2011           | 8                                                              |
| 63               | Estonia | Coffee and products             | 2011           | 7                                                              |
| 63               | Estonia | Cream                           | 2011           | 22                                                             |
| 63               | Estonia | Crustaceans                     | 2011           | 3                                                              |
| 63               | Estonia | Demersal Fish                   | 2011           | 9                                                              |
| 63               | Estonia | Eggs                            | 2011           | 42                                                             |
| 63               | Estonia | Fats, Animals, Raw              | 2011           | 29                                                             |
| 63               | Estonia | Fish, Seafood                   | 2011           | 24                                                             |
| 63               | Estonia | Freshwater Fish                 | 2011           | 4                                                              |
| 63               | Estonia | Fruits - Excluding Wine         | 2011           | 88                                                             |
| 63               | Estonia | Fruits, Other                   | 2011           | 28                                                             |
| 63               | Estonia | Grand Total                     | 2011           | 3,214                                                          |
| 63               | Estonia | Grapefruit and products         | 2011           | 1                                                              |
| 63               | Estonia | Grapes and products (excl wine) | 2011           | 10                                                             |
| 63               | Estonia | Groundnuts (Shelled Eq)         | 2011           | 3                                                              |

Dietary calcium and zinc deficiency risks are decreasing but remain prevalent

| FAO Country code | Country  | Food item                    | Reference year | Net energy supply (kcal <i>capita</i> <sup>-1</sup> d <sup>-1</sup> ) |
|------------------|----------|------------------------------|----------------|-----------------------------------------------------------------------|
| 63               | Estonia  | Honey                        | 2011           | 6                                                                     |
| 63               | Estonia  | Lemons, Limes and products   | 2011           | 1                                                                     |
| 63               | Estonia  | Maize and products           | 2011           | 60                                                                    |
| 63               | Estonia  | Maize Germ Oil               | 2011           | 6                                                                     |
| 63               | Estonia  | Meat                         | 2011           | 252                                                                   |
| 63               | Estonia  | Meat, Other                  | 2011           | 1                                                                     |
| 63               | Estonia  | Milk - Excluding Butter      | 2011           | 376                                                                   |
| 63               | Estonia  | Miscellaneous                | 2011           | 3                                                                     |
| 63               | Estonia  | Mutton & Goat Meat           | 2011           | 3                                                                     |
| 63               | Estonia  | Oats                         | 2011           | 16                                                                    |
| 63               | Estonia  | Offals                       | 2011           | 16                                                                    |
| 63               | Estonia  | Oilcrops                     | 2011           | 8                                                                     |
| 63               | Estonia  | Oilcrops Oil, Other          | 2011           | 84                                                                    |
| 63               | Estonia  | Olive Oil                    | 2011           | 9                                                                     |
| 63               | Estonia  | Olives (including preserved) | 2011           | 1                                                                     |
| 63               | Estonia  | Onions                       | 2011           | 5                                                                     |
| 63               | Estonia  | Oranges, Mandarines          | 2011           | 10                                                                    |
| 63               | Estonia  | Peas                         | 2011           | 41                                                                    |
| 63               | Estonia  | Pelagic Fish                 | 2011           | 7                                                                     |
| 63               | Estonia  | Pepper                       | 2011           | 2                                                                     |
| 63               | Estonia  | Pigmeat                      | 2011           | 111                                                                   |
| 63               | Estonia  | Pimento                      | 2011           | 3                                                                     |
| 63               | Estonia  | Pineapples and products      | 2011           | 3                                                                     |
| 63               | Estonia  | Potatoes and products        | 2011           | 200                                                                   |
| 63               | Estonia  | Poultry Meat                 | 2011           | 78                                                                    |
| 63               | Estonia  | Pulses                       | 2011           | 42                                                                    |
| 63               | Estonia  | Rape and Mustardseed         | 2011           | 4                                                                     |
| 63               | Estonia  | Rice (Milled Equivalent)     | 2011           | 25                                                                    |
| 63               | Estonia  | Rye and products             | 2011           | 112                                                                   |
| 63               | Estonia  | Soyabean Oil                 | 2011           | 39                                                                    |
| 63               | Estonia  | Spices                       | 2011           | 10                                                                    |
| 63               | Estonia  | Spices, Other                | 2011           | 4                                                                     |
| 63               | Estonia  | Starchy Roots                | 2011           | 200                                                                   |
| 63               | Estonia  | Stimulants                   | 2011           | 92                                                                    |
| 63               | Estonia  | Sugar & Sweeteners           | 2011           | 378                                                                   |
| 63               | Estonia  | Sugar (Raw Equivalent)       | 2011           | 331                                                                   |
| 63               | Estonia  | Sunflowerseed Oil            | 2011           | 3                                                                     |
| 63               | Estonia  | Sweeteners, Other            | 2011           | 41                                                                    |
| 63               | Estonia  | Tomatoes and products        | 2011           | 11                                                                    |
| 63               | Estonia  | Treenuts                     | 2011           | 18                                                                    |
| 63               | Estonia  | Vegetable Oils               | 2011           | 150                                                                   |
| 63               | Estonia  | Vegetables                   | 2011           | 89                                                                    |
| 63               | Estonia  | Vegetables, Other            | 2011           | 73                                                                    |
| 63               | Estonia  | Vegetal Products             | 2011           | 2,408                                                                 |
| 63               | Estonia  | Wheat and products           | 2011           | 765                                                                   |
| 63               | Estonia  | Wine                         | 2011           | 25                                                                    |
| 238              | Ethiopia | Alcoholic Beverages          | 1992           | 11                                                                    |
| 238              | Ethiopia | Animal fats                  | 1992           | 11                                                                    |
| 238              | Ethiopia | Animal Products              | 1992           | 95                                                                    |
| 238              | Ethiopia | Bananas                      | 1992           | 2                                                                     |
| 238              | Ethiopia | Barley and products          | 1992           | 101                                                                   |
| 238              | Ethiopia | Beans                        | 1992           | 13                                                                    |
| 238              | Ethiopia | Beer                         | 1992           | 8                                                                     |
| 238              | Ethiopia | Beverages, Alcoholic         | 1992           | 1                                                                     |
| 238              | Ethiopia | Beverages, Fermented         | 1992           | 2                                                                     |
| 238              | Ethiopia | Bovine Meat                  | 1992           | 25                                                                    |
| 238              | Ethiopia | Butter, Ghee                 | 1992           | 4                                                                     |
| 238              | Ethiopia | Cereals - Excluding Beer     | 1992           | 981                                                                   |
| 238              | Ethiopia | Cereals, Other               | 1992           | 210                                                                   |
| 238              | Ethiopia | Coffee and products          | 1992           | 2                                                                     |
| 238              | Ethiopia | Cottonseed Oil               | 1992           | 1                                                                     |
| 238              | Ethiopia | Eggs                         | 1992           | 4                                                                     |
| 238              | Ethiopia | Fats, Animals, Raw           | 1992           | 7                                                                     |
| 238              | Ethiopia | Fruits - Excluding Wine      | 1992           | 5                                                                     |
| 238              | Ethiopia | Fruits, Other                | 1992           | 2                                                                     |
| 238              | Ethiopia | Grand Total                  | 1992           | 1,557                                                                 |
| 238              | Ethiopia | Groundnut Oil                | 1992           | 6                                                                     |
| 238              | Ethiopia | Groundnuts (Shelled Eq)      | 1992           | 1                                                                     |
| 238              | Ethiopia | Honey                        | 1992           | 3                                                                     |
| 238              | Ethiopia | Maize and products           | 1992           | 251                                                                   |
| 238              | Ethiopia | Meat                         | 1992           | 46                                                                    |
| 238              | Ethiopia | Meat, Other                  | 1992           | 7                                                                     |
| 238              | Ethiopia | Milk - Excluding Butter      | 1992           | 28                                                                    |
| 238              | Ethiopia | Millet and products          | 1992           | 21                                                                    |
| 238              | Ethiopia | Miscellaneous                | 1992           | 2                                                                     |
| 238              | Ethiopia | Mutton & Goat Meat           | 1992           | 10                                                                    |
| 238              | Ethiopia | Oats                         | 1992           | 5                                                                     |
| 238              | Ethiopia | Offals                       | 1992           | 5                                                                     |
| 238              | Ethiopia | Oilcrops                     | 1992           | 31                                                                    |
| 238              | Ethiopia | Oilcrops Oil, Other          | 1992           | 9                                                                     |
| 238              | Ethiopia | Oilcrops, Other              | 1992           | 19                                                                    |
| 238              | Ethiopia | Onions                       | 1992           | 1                                                                     |
| 238              | Ethiopia | Palm Oil                     | 1992           | 4                                                                     |
| 238              | Ethiopia | Peas                         | 1992           | 24                                                                    |
| 238              | Ethiopia | Pimento                      | 1992           | 14                                                                    |
| 238              | Ethiopia | Potatoes and products        | 1992           | 11                                                                    |
| 238              | Ethiopia | Poultry Meat                 | 1992           | 3                                                                     |
| 238              | Ethiopia | Pulses                       | 1992           | 127                                                                   |
| 238              | Ethiopia | Pulses, Other and products   | 1992           | 90                                                                    |
| 238              | Ethiopia | Rape and Mustard Oil         | 1992           | 23                                                                    |
| 238              | Ethiopia | Rice (Milled Equivalent)     | 1992           | 2                                                                     |
| 238              | Ethiopia | Roots, Other                 | 1992           | 166                                                                   |
| 238              | Ethiopia | Sesame seed                  | 1992           | 8                                                                     |
| 238              | Ethiopia | Sesameseed Oil               | 1992           | 1                                                                     |
| 238              | Ethiopia | Sorghum and products         | 1992           | 148                                                                   |
| 238              | Ethiopia | Soyabean Oil                 | 1992           | 8                                                                     |
| 238              | Ethiopia | Soyabeans                    | 1992           | 3                                                                     |

Dietary calcium and zinc deficiency risks are decreasing but remain prevalent

| FAO Country code | Country  | Food item                       | Reference year | Net energy supply (kcal <i>capita</i> <sup>-1</sup> d <sup>-1</sup> ) |
|------------------|----------|---------------------------------|----------------|-----------------------------------------------------------------------|
| 238              | Ethiopia | Spices                          | 1992           | 14                                                                    |
| 238              | Ethiopia | Starchy Roots                   | 1992           | 194                                                                   |
| 238              | Ethiopia | Stimulants                      | 1992           | 2                                                                     |
| 238              | Ethiopia | Sugar & Sweeteners              | 1992           | 30                                                                    |
| 238              | Ethiopia | Sugar (Raw Equivalent)          | 1992           | 27                                                                    |
| 238              | Ethiopia | Sweet potatoes                  | 1992           | 7                                                                     |
| 238              | Ethiopia | Treenuts                        | 1992           | 8                                                                     |
| 238              | Ethiopia | Vegetable Oils                  | 1992           | 52                                                                    |
| 238              | Ethiopia | Vegetables                      | 1992           | 6                                                                     |
| 238              | Ethiopia | Vegetables, Other               | 1992           | 5                                                                     |
| 238              | Ethiopia | Vegetal Products                | 1992           | 1,462                                                                 |
| 238              | Ethiopia | Wheat and products              | 1992           | 242                                                                   |
| 238              | Ethiopia | Yams                            | 1992           | 10                                                                    |
| 66               | Fiji     | Alcoholic Beverages             | 1992           | 31                                                                    |
| 66               | Fiji     | Animal fats                     | 1992           | 139                                                                   |
| 66               | Fiji     | Animal Products                 | 1992           | 565                                                                   |
| 66               | Fiji     | Apples and products             | 1992           | 1                                                                     |
| 66               | Fiji     | Bananas                         | 1992           | 12                                                                    |
| 66               | Fiji     | Barley and products             | 1992           | 2                                                                     |
| 66               | Fiji     | Beer                            | 1992           | 28                                                                    |
| 66               | Fiji     | Beverages, Alcoholic            | 1992           | 2                                                                     |
| 66               | Fiji     | Bovine Meat                     | 1992           | 76                                                                    |
| 66               | Fiji     | Butter, Ghee                    | 1992           | 107                                                                   |
| 66               | Fiji     | Cassava and products            | 1992           | 22                                                                    |
| 66               | Fiji     | Cereals - Excluding Beer        | 1992           | 1,192                                                                 |
| 66               | Fiji     | Cereals, Other                  | 1992           | 5                                                                     |
| 66               | Fiji     | Cocoa Beans and products        | 1992           | 4                                                                     |
| 66               | Fiji     | Coconut Oil                     | 1992           | 23                                                                    |
| 66               | Fiji     | Coconuts - Incl Copra           | 1992           | 192                                                                   |
| 66               | Fiji     | Coffee and products             | 1992           | 1                                                                     |
| 66               | Fiji     | Crustaceans                     | 1992           | 3                                                                     |
| 66               | Fiji     | Demersal Fish                   | 1992           | 11                                                                    |
| 66               | Fiji     | Eggs                            | 1992           | 11                                                                    |
| 66               | Fiji     | Fats, Animals, Raw              | 1992           | 32                                                                    |
| 66               | Fiji     | Fish, Seafood                   | 1992           | 40                                                                    |
| 66               | Fiji     | Fruits - Excluding Wine         | 1992           | 24                                                                    |
| 66               | Fiji     | Fruits, Other                   | 1992           | 6                                                                     |
| 66               | Fiji     | Grand Total                     | 1992           | 2,739                                                                 |
| 66               | Fiji     | Grapes and products (excl wine) | 1992           | 1                                                                     |
| 66               | Fiji     | Groundnuts (Shelled Eq)         | 1992           | 5                                                                     |
| 66               | Fiji     | Honey                           | 1992           | 1                                                                     |
| 66               | Fiji     | Maize and products              | 1992           | 11                                                                    |
| 66               | Fiji     | Maize Germ Oil                  | 1992           | 15                                                                    |
| 66               | Fiji     | Marine Fish, Other              | 1992           | 3                                                                     |
| 66               | Fiji     | Meat                            | 1992           | 258                                                                   |
| 66               | Fiji     | Milk - Excluding Butter         | 1992           | 108                                                                   |
| 66               | Fiji     | Molluscs, Other                 | 1992           | 3                                                                     |
| 66               | Fiji     | Mutton & Goat Meat              | 1992           | 114                                                                   |
| 66               | Fiji     | Oats                            | 1992           | 1                                                                     |
| 66               | Fiji     | Offals                          | 1992           | 8                                                                     |
| 66               | Fiji     | Oilcrops                        | 1992           | 199                                                                   |
| 66               | Fiji     | Oilcrops Oil, Other             | 1992           | 17                                                                    |
| 66               | Fiji     | Olive Oil                       | 1992           | 1                                                                     |
| 66               | Fiji     | Onions                          | 1992           | 8                                                                     |
| 66               | Fiji     | Oranges, Mandarines             | 1992           | 1                                                                     |
| 66               | Fiji     | Palmkernel Oil                  | 1992           | 4                                                                     |
| 66               | Fiji     | Pelagic Fish                    | 1992           | 21                                                                    |
| 66               | Fiji     | Pepper                          | 1992           | 2                                                                     |
| 66               | Fiji     | Pigmeat                         | 1992           | 38                                                                    |
| 66               | Fiji     | Pineapples and products         | 1992           | 1                                                                     |
| 66               | Fiji     | Potatoes and products           | 1992           | 34                                                                    |
| 66               | Fiji     | Poultry Meat                    | 1992           | 30                                                                    |
| 66               | Fiji     | Pulses                          | 1992           | 51                                                                    |
| 66               | Fiji     | Pulses, Other and products      | 1992           | 51                                                                    |
| 66               | Fiji     | Rape and Mustard Oil            | 1992           | 8                                                                     |
| 66               | Fiji     | Rape and Mustardseed            | 1992           | 1                                                                     |
| 66               | Fiji     | Rice (Milled Equivalent)        | 1992           | 559                                                                   |
| 66               | Fiji     | Roots, Other                    | 1992           | 12                                                                    |
| 66               | Fiji     | Soyabean Oil                    | 1992           | 231                                                                   |
| 66               | Fiji     | Spices                          | 1992           | 8                                                                     |
| 66               | Fiji     | Spices, Other                   | 1992           | 6                                                                     |
| 66               | Fiji     | Starchy Roots                   | 1992           | 85                                                                    |
| 66               | Fiji     | Stimulants                      | 1992           | 5                                                                     |
| 66               | Fiji     | Sugar & Sweeteners              | 1992           | 257                                                                   |
| 66               | Fiji     | Sugar (Raw Equivalent)          | 1992           | 250                                                                   |
| 66               | Fiji     | Sweet potatoes                  | 1992           | 6                                                                     |
| 66               | Fiji     | Sweeteners, Other               | 1992           | 7                                                                     |
| 66               | Fiji     | Tea (including mate)            | 1992           | 1                                                                     |
| 66               | Fiji     | Treenuts                        | 1992           | 3                                                                     |
| 66               | Fiji     | Vegetable Oils                  | 1992           | 299                                                                   |
| 66               | Fiji     | Vegetables                      | 1992           | 20                                                                    |
| 66               | Fiji     | Vegetables, Other               | 1992           | 12                                                                    |
| 66               | Fiji     | Vegetal Products                | 1992           | 2,175                                                                 |
| 66               | Fiji     | Wheat and products              | 1992           | 615                                                                   |
| 66               | Fiji     | Wine                            | 1992           | 1                                                                     |
| 66               | Fiji     | Yams                            | 1992           | 12                                                                    |
| 66               | Fiji     | Alcoholic Beverages             | 1993           | 30                                                                    |
| 66               | Fiji     | Animal fats                     | 1993           | 135                                                                   |
| 66               | Fiji     | Animal Products                 | 1993           | 577                                                                   |
| 66               | Fiji     | Apples and products             | 1993           | 2                                                                     |
| 66               | Fiji     | Bananas                         | 1993           | 15                                                                    |
| 66               | Fiji     | Barley and products             | 1993           | 3                                                                     |
| 66               | Fiji     | Beer                            | 1993           | 27                                                                    |
| 66               | Fiji     | Beverages, Alcoholic            | 1993           | 2                                                                     |
| 66               | Fiji     | Bovine Meat                     | 1993           | 75                                                                    |
| 66               | Fiji     | Butter, Ghee                    | 1993           | 98                                                                    |
| 66               | Fiji     | Cassava and products            | 1993           | 25                                                                    |



Dietary calcium and zinc deficiency risks are decreasing but remain prevalent

| FAO Country code | Country | Food item                       | Reference year | Net energy supply (kcal capita <sup>-1</sup> d <sup>-1</sup> ) |
|------------------|---------|---------------------------------|----------------|----------------------------------------------------------------|
| 66               | Fiji    | Cereals - Excluding Beer        | 1993           | 1,204                                                          |
| 66               | Fiji    | Cereals, Other                  | 1993           | 1                                                              |
| 66               | Fiji    | Cocoa Beans and products        | 1993           | 5                                                              |
| 66               | Fiji    | Coconut Oil                     | 1993           | 23                                                             |
| 66               | Fiji    | Coconuts - Incl Copra           | 1993           | 184                                                            |
| 66               | Fiji    | Coffee and products             | 1993           | 1                                                              |
| 66               | Fiji    | Crustaceans                     | 1993           | 1                                                              |
| 66               | Fiji    | Demersal Fish                   | 1993           | 8                                                              |
| 66               | Fiji    | Eggs                            | 1993           | 12                                                             |
| 66               | Fiji    | Fats, Animals, Raw              | 1993           | 37                                                             |
| 66               | Fiji    | Fish, Seafood                   | 1993           | 55                                                             |
| 66               | Fiji    | Fruits - Excluding Wine         | 1993           | 30                                                             |
| 66               | Fiji    | Fruits, Other                   | 1993           | 8                                                              |
| 66               | Fiji    | Grand Total                     | 1993           | 2,854                                                          |
| 66               | Fiji    | Grapes and products (excl wine) | 1993           | 1                                                              |
| 66               | Fiji    | Groundnuts (Shelled Eq)         | 1993           | 8                                                              |
| 66               | Fiji    | Honey                           | 1993           | 1                                                              |
| 66               | Fiji    | Maize and products              | 1993           | 6                                                              |
| 66               | Fiji    | Maize Germ Oil                  | 1993           | 22                                                             |
| 66               | Fiji    | Marine Fish, Other              | 1993           | 1                                                              |
| 66               | Fiji    | Meat                            | 1993           | 253                                                            |
| 66               | Fiji    | Milk - Excluding Butter         | 1993           | 112                                                            |
| 66               | Fiji    | Miscellaneous                   | 1993           | 3                                                              |
| 66               | Fiji    | Molluscs, Other                 | 1993           | 2                                                              |
| 66               | Fiji    | Mutton & Goat Meat              | 1993           | 102                                                            |
| 66               | Fiji    | Oats                            | 1993           | 1                                                              |
| 66               | Fiji    | Offals                          | 1993           | 10                                                             |
| 66               | Fiji    | Oilcrops                        | 1993           | 193                                                            |
| 66               | Fiji    | Oilcrops Oil, Other             | 1993           | 24                                                             |
| 66               | Fiji    | Olive Oil                       | 1993           | 2                                                              |
| 66               | Fiji    | Onions                          | 1993           | 7                                                              |
| 66               | Fiji    | Oranges, Mandarines             | 1993           | 2                                                              |
| 66               | Fiji    | Palmkernel Oil                  | 1993           | 9                                                              |
| 66               | Fiji    | Pelagic Fish                    | 1993           | 42                                                             |
| 66               | Fiji    | Pepper                          | 1993           | 1                                                              |
| 66               | Fiji    | Pigmeat                         | 1993           | 40                                                             |
| 66               | Fiji    | Pineapples and products         | 1993           | 1                                                              |
| 66               | Fiji    | Potatoes and products           | 1993           | 43                                                             |
| 66               | Fiji    | Poultry Meat                    | 1993           | 35                                                             |
| 66               | Fiji    | Pulses                          | 1993           | 85                                                             |
| 66               | Fiji    | Pulses, Other and products      | 1993           | 85                                                             |
| 66               | Fiji    | Rape and Mustard Oil            | 1993           | 5                                                              |
| 66               | Fiji    | Rape and Mustardseed            | 1993           | 1                                                              |
| 66               | Fiji    | Rice (Milled Equivalent)        | 1993           | 581                                                            |
| 66               | Fiji    | Roots, Other                    | 1993           | 17                                                             |
| 66               | Fiji    | Rye and products                | 1993           | 4                                                              |
| 66               | Fiji    | Sesameseed Oil                  | 1993           | 1                                                              |
| 66               | Fiji    | Soyabean Oil                    | 1993           | 248                                                            |
| 66               | Fiji    | Soyabeans                       | 1993           | 1                                                              |
| 66               | Fiji    | Spices                          | 1993           | 11                                                             |
| 66               | Fiji    | Spices, Other                   | 1993           | 9                                                              |
| 66               | Fiji    | Starchy Roots                   | 1993           | 105                                                            |
| 66               | Fiji    | Stimulants                      | 1993           | 6                                                              |
| 66               | Fiji    | Sugar & Sweeteners              | 1993           | 247                                                            |
| 66               | Fiji    | Sugar (Raw Equivalent)          | 1993           | 241                                                            |
| 66               | Fiji    | Sweet potatoes                  | 1993           | 15                                                             |
| 66               | Fiji    | Sweeteners, Other               | 1993           | 5                                                              |
| 66               | Fiji    | Tea (including mate)            | 1993           | 1                                                              |
| 66               | Fiji    | Tomatoes and products           | 1993           | 2                                                              |
| 66               | Fiji    | Treenuts                        | 1993           | 1                                                              |
| 66               | Fiji    | Vegetable Oils                  | 1993           | 334                                                            |
| 66               | Fiji    | Vegetables                      | 1993           | 28                                                             |
| 66               | Fiji    | Vegetables, Other               | 1993           | 19                                                             |
| 66               | Fiji    | Vegetal Products                | 1993           | 2,277                                                          |
| 66               | Fiji    | Wheat and products              | 1993           | 608                                                            |
| 66               | Fiji    | Wine                            | 1993           | 1                                                              |
| 66               | Fiji    | Yams                            | 1993           | 5                                                              |
| 66               | Fiji    | Alcoholic Beverages             | 1994           | 28                                                             |
| 66               | Fiji    | Animal fats                     | 1994           | 138                                                            |
| 66               | Fiji    | Animal Products                 | 1994           | 550                                                            |
| 66               | Fiji    | Apples and products             | 1994           | 2                                                              |
| 66               | Fiji    | Bananas                         | 1994           | 15                                                             |
| 66               | Fiji    | Barley and products             | 1994           | 5                                                              |
| 66               | Fiji    | Beer                            | 1994           | 26                                                             |
| 66               | Fiji    | Beverages, Alcoholic            | 1994           | 1                                                              |
| 66               | Fiji    | Bovine Meat                     | 1994           | 66                                                             |
| 66               | Fiji    | Butter, Ghee                    | 1994           | 103                                                            |
| 66               | Fiji    | Cassava and products            | 1994           | 43                                                             |
| 66               | Fiji    | Cephalopods                     | 1994           | 1                                                              |
| 66               | Fiji    | Cereals - Excluding Beer        | 1994           | 1,228                                                          |
| 66               | Fiji    | Cereals, Other                  | 1994           | 2                                                              |
| 66               | Fiji    | Cocoa Beans and products        | 1994           | 7                                                              |
| 66               | Fiji    | Coconut Oil                     | 1994           | 22                                                             |
| 66               | Fiji    | Coconuts - Incl Copra           | 1994           | 180                                                            |
| 66               | Fiji    | Demersal Fish                   | 1994           | 12                                                             |
| 66               | Fiji    | Eggs                            | 1994           | 12                                                             |
| 66               | Fiji    | Fats, Animals, Raw              | 1994           | 35                                                             |
| 66               | Fiji    | Fish, Seafood                   | 1994           | 49                                                             |
| 66               | Fiji    | Fruits - Excluding Wine         | 1994           | 30                                                             |
| 66               | Fiji    | Fruits, Other                   | 1994           | 8                                                              |
| 66               | Fiji    | Grand Total                     | 1994           | 2,796                                                          |
| 66               | Fiji    | Grapes and products (excl wine) | 1994           | 2                                                              |
| 66               | Fiji    | Groundnuts (Shelled Eq)         | 1994           | 10                                                             |
| 66               | Fiji    | Honey                           | 1994           | 1                                                              |
| 66               | Fiji    | Maize and products              | 1994           | 8                                                              |
| 66               | Fiji    | Maize Germ Oil                  | 1994           | 7                                                              |
| 66               | Fiji    | Marine Fish, Other              | 1994           | 2                                                              |

Dietary calcium and zinc deficiency risks are decreasing but remain prevalent

| FAO Country code | Country | Food item                       | Reference year | Net energy supply (kcal <i>capita</i> <sup>-1</sup> d <sup>-1</sup> ) |
|------------------|---------|---------------------------------|----------------|-----------------------------------------------------------------------|
| 66               | Fiji    | Meat                            | 1994           | 245                                                                   |
| 66               | Fiji    | Milk - Excluding Butter         | 1994           | 97                                                                    |
| 66               | Fiji    | Miscellaneous                   | 1994           | 3                                                                     |
| 66               | Fiji    | Molluscs, Other                 | 1994           | 2                                                                     |
| 66               | Fiji    | Mutton & Goat Meat              | 1994           | 100                                                                   |
| 66               | Fiji    | Oats                            | 1994           | 1                                                                     |
| 66               | Fiji    | Offals                          | 1994           | 9                                                                     |
| 66               | Fiji    | Oilcrops                        | 1994           | 192                                                                   |
| 66               | Fiji    | Oilcrops Oil, Other             | 1994           | 19                                                                    |
| 66               | Fiji    | Olive Oil                       | 1994           | 1                                                                     |
| 66               | Fiji    | Onions                          | 1994           | 7                                                                     |
| 66               | Fiji    | Oranges, Mandarines             | 1994           | 1                                                                     |
| 66               | Fiji    | Palmkernel Oil                  | 1994           | 7                                                                     |
| 66               | Fiji    | Pelagic Fish                    | 1994           | 31                                                                    |
| 66               | Fiji    | Pepper                          | 1994           | 2                                                                     |
| 66               | Fiji    | Pigmeat                         | 1994           | 42                                                                    |
| 66               | Fiji    | Pineapples and products         | 1994           | 1                                                                     |
| 66               | Fiji    | Potatoes and products           | 1994           | 40                                                                    |
| 66               | Fiji    | Poultry Meat                    | 1994           | 37                                                                    |
| 66               | Fiji    | Pulses                          | 1994           | 87                                                                    |
| 66               | Fiji    | Pulses, Other and products      | 1994           | 87                                                                    |
| 66               | Fiji    | Rape and Mustard Oil            | 1994           | 5                                                                     |
| 66               | Fiji    | Rape and Mustardseed            | 1994           | 1                                                                     |
| 66               | Fiji    | Rice (Milled Equivalent)        | 1994           | 557                                                                   |
| 66               | Fiji    | Roots, Other                    | 1994           | 17                                                                    |
| 66               | Fiji    | Soyabean Oil                    | 1994           | 209                                                                   |
| 66               | Fiji    | Spices                          | 1994           | 11                                                                    |
| 66               | Fiji    | Spices, Other                   | 1994           | 9                                                                     |
| 66               | Fiji    | Starchy Roots                   | 1994           | 120                                                                   |
| 66               | Fiji    | Stimulants                      | 1994           | 8                                                                     |
| 66               | Fiji    | Sugar & Sweeteners              | 1994           | 242                                                                   |
| 66               | Fiji    | Sugar (Raw Equivalent)          | 1994           | 230                                                                   |
| 66               | Fiji    | Sweet potatoes                  | 1994           | 14                                                                    |
| 66               | Fiji    | Sweeteners, Other               | 1994           | 11                                                                    |
| 66               | Fiji    | Tea (including mate)            | 1994           | 1                                                                     |
| 66               | Fiji    | Tomatoes and products           | 1994           | 2                                                                     |
| 66               | Fiji    | Vegetable Oils                  | 1994           | 272                                                                   |
| 66               | Fiji    | Vegetables                      | 1994           | 26                                                                    |
| 66               | Fiji    | Vegetables, Other               | 1994           | 17                                                                    |
| 66               | Fiji    | Vegetal Products                | 1994           | 2,246                                                                 |
| 66               | Fiji    | Wheat and products              | 1994           | 654                                                                   |
| 66               | Fiji    | Wine                            | 1994           | 1                                                                     |
| 66               | Fiji    | Yams                            | 1994           | 6                                                                     |
| 66               | Fiji    | Alcoholic Beverages             | 1995           | 26                                                                    |
| 66               | Fiji    | Animal fats                     | 1995           | 145                                                                   |
| 66               | Fiji    | Animal Products                 | 1995           | 566                                                                   |
| 66               | Fiji    | Apples and products             | 1995           | 2                                                                     |
| 66               | Fiji    | Bananas                         | 1995           | 12                                                                    |
| 66               | Fiji    | Barley and products             | 1995           | 4                                                                     |
| 66               | Fiji    | Beer                            | 1995           | 25                                                                    |
| 66               | Fiji    | Beverages, Alcoholic            | 1995           | 1                                                                     |
| 66               | Fiji    | Bovine Meat                     | 1995           | 68                                                                    |
| 66               | Fiji    | Butter, Ghee                    | 1995           | 108                                                                   |
| 66               | Fiji    | Cassava and products            | 1995           | 69                                                                    |
| 66               | Fiji    | Cephalopods                     | 1995           | 3                                                                     |
| 66               | Fiji    | Cereals - Excluding Beer        | 1995           | 1,135                                                                 |
| 66               | Fiji    | Cereals, Other                  | 1995           | 1                                                                     |
| 66               | Fiji    | Cocoa Beans and products        | 1995           | 8                                                                     |
| 66               | Fiji    | Coconut Oil                     | 1995           | 31                                                                    |
| 66               | Fiji    | Coconuts - Incl Copra           | 1995           | 182                                                                   |
| 66               | Fiji    | Cream                           | 1995           | 1                                                                     |
| 66               | Fiji    | Crustaceans                     | 1995           | 3                                                                     |
| 66               | Fiji    | Demersal Fish                   | 1995           | 6                                                                     |
| 66               | Fiji    | Eggs                            | 1995           | 12                                                                    |
| 66               | Fiji    | Fats, Animals, Raw              | 1995           | 36                                                                    |
| 66               | Fiji    | Fish, Seafood                   | 1995           | 51                                                                    |
| 66               | Fiji    | Fruits - Excluding Wine         | 1995           | 27                                                                    |
| 66               | Fiji    | Fruits, Other                   | 1995           | 8                                                                     |
| 66               | Fiji    | Grand Total                     | 1995           | 2,742                                                                 |
| 66               | Fiji    | Grapes and products (excl wine) | 1995           | 1                                                                     |
| 66               | Fiji    | Groundnuts (Shelled Eq)         | 1995           | 6                                                                     |
| 66               | Fiji    | Honey                           | 1995           | 1                                                                     |
| 66               | Fiji    | Maize and products              | 1995           | 8                                                                     |
| 66               | Fiji    | Maize Germ Oil                  | 1995           | 17                                                                    |
| 66               | Fiji    | Marine Fish, Other              | 1995           | 3                                                                     |
| 66               | Fiji    | Meat                            | 1995           | 243                                                                   |
| 66               | Fiji    | Milk - Excluding Butter         | 1995           | 106                                                                   |
| 66               | Fiji    | Miscellaneous                   | 1995           | 4                                                                     |
| 66               | Fiji    | Molluscs, Other                 | 1995           | 4                                                                     |
| 66               | Fiji    | Mutton & Goat Meat              | 1995           | 100                                                                   |
| 66               | Fiji    | Oats                            | 1995           | 1                                                                     |
| 66               | Fiji    | Offals                          | 1995           | 9                                                                     |
| 66               | Fiji    | Oilcrops                        | 1995           | 189                                                                   |
| 66               | Fiji    | Oilcrops Oil, Other             | 1995           | 23                                                                    |
| 66               | Fiji    | Olive Oil                       | 1995           | 1                                                                     |
| 66               | Fiji    | Onions                          | 1995           | 8                                                                     |
| 66               | Fiji    | Oranges, Mandarines             | 1995           | 1                                                                     |
| 66               | Fiji    | Palmkernel Oil                  | 1995           | 6                                                                     |
| 66               | Fiji    | Pelagic Fish                    | 1995           | 32                                                                    |
| 66               | Fiji    | Pepper                          | 1995           | 2                                                                     |
| 66               | Fiji    | Pigmeat                         | 1995           | 38                                                                    |
| 66               | Fiji    | Pineapples and products         | 1995           | 2                                                                     |
| 66               | Fiji    | Potatoes and products           | 1995           | 34                                                                    |
| 66               | Fiji    | Poultry Meat                    | 1995           | 38                                                                    |
| 66               | Fiji    | Pulses                          | 1995           | 73                                                                    |
| 66               | Fiji    | Pulses, Other and products      | 1995           | 73                                                                    |
| 66               | Fiji    | Rape and Mustard Oil            | 1995           | 3                                                                     |

Dietary calcium and zinc deficiency risks are decreasing but remain prevalent

| FAO Country code | Country | Food item                       | Reference year | Net energy supply (kcal <i>capita</i> <sup>-1</sup> d <sup>-1</sup> ) |
|------------------|---------|---------------------------------|----------------|-----------------------------------------------------------------------|
| 66               | Fiji    | Rape and Mustardseed            | 1995           | 1                                                                     |
| 66               | Fiji    | Rice (Milled Equivalent)        | 1995           | 452                                                                   |
| 66               | Fiji    | Roots, Other                    | 1995           | 27                                                                    |
| 66               | Fiji    | Soyabean Oil                    | 1995           | 203                                                                   |
| 66               | Fiji    | Spices                          | 1995           | 11                                                                    |
| 66               | Fiji    | Spices, Other                   | 1995           | 9                                                                     |
| 66               | Fiji    | Starchy Roots                   | 1995           | 152                                                                   |
| 66               | Fiji    | Stimulants                      | 1995           | 9                                                                     |
| 66               | Fiji    | Sugar & Sweeteners              | 1995           | 238                                                                   |
| 66               | Fiji    | Sugar (Raw Equivalent)          | 1995           | 237                                                                   |
| 66               | Fiji    | Sweet potatoes                  | 1995           | 13                                                                    |
| 66               | Fiji    | Tea (including mate)            | 1995           | 1                                                                     |
| 66               | Fiji    | Tomatoes and products           | 1995           | 2                                                                     |
| 66               | Fiji    | Treenuts                        | 1995           | 1                                                                     |
| 66               | Fiji    | Vegetable Oils                  | 1995           | 285                                                                   |
| 66               | Fiji    | Vegetables                      | 1995           | 27                                                                    |
| 66               | Fiji    | Vegetables, Other               | 1995           | 17                                                                    |
| 66               | Fiji    | Vegetal Products                | 1995           | 2,175                                                                 |
| 66               | Fiji    | Wheat and products              | 1995           | 669                                                                   |
| 66               | Fiji    | Wine                            | 1995           | 1                                                                     |
| 66               | Fiji    | Yams                            | 1995           | 9                                                                     |
| 66               | Fiji    | Alcoholic Beverages             | 1996           | 30                                                                    |
| 66               | Fiji    | Animal fats                     | 1996           | 151                                                                   |
| 66               | Fiji    | Animal Products                 | 1996           | 538                                                                   |
| 66               | Fiji    | Apples and products             | 1996           | 1                                                                     |
| 66               | Fiji    | Bananas                         | 1996           | 12                                                                    |
| 66               | Fiji    | Barley and products             | 1996           | 10                                                                    |
| 66               | Fiji    | Beer                            | 1996           | 26                                                                    |
| 66               | Fiji    | Beverages, Alcoholic            | 1996           | 3                                                                     |
| 66               | Fiji    | Bovine Meat                     | 1996           | 72                                                                    |
| 66               | Fiji    | Butter, Ghee                    | 1996           | 115                                                                   |
| 66               | Fiji    | Cassava and products            | 1996           | 106                                                                   |
| 66               | Fiji    | Cephalopods                     | 1996           | 1                                                                     |
| 66               | Fiji    | Cereals - Excluding Beer        | 1996           | 1,189                                                                 |
| 66               | Fiji    | Cereals, Other                  | 1996           | 1                                                                     |
| 66               | Fiji    | Cocoa Beans and products        | 1996           | 5                                                                     |
| 66               | Fiji    | Coconut Oil                     | 1996           | 26                                                                    |
| 66               | Fiji    | Coconuts - Incl Copra           | 1996           | 186                                                                   |
| 66               | Fiji    | Cream                           | 1996           | 1                                                                     |
| 66               | Fiji    | Crustaceans                     | 1996           | 1                                                                     |
| 66               | Fiji    | Demersal Fish                   | 1996           | 3                                                                     |
| 66               | Fiji    | Eggs                            | 1996           | 14                                                                    |
| 66               | Fiji    | Fats, Animals, Raw              | 1996           | 36                                                                    |
| 66               | Fiji    | Fish, Seafood                   | 1996           | 34                                                                    |
| 66               | Fiji    | Freshwater Fish                 | 1996           | 1                                                                     |
| 66               | Fiji    | Fruits - Excluding Wine         | 1996           | 29                                                                    |
| 66               | Fiji    | Fruits, Other                   | 1996           | 8                                                                     |
| 66               | Fiji    | Grand Total                     | 1996           | 2,823                                                                 |
| 66               | Fiji    | Grapes and products (excl wine) | 1996           | 2                                                                     |
| 66               | Fiji    | Groundnuts (Shelled Eq)         | 1996           | 13                                                                    |
| 66               | Fiji    | Honey                           | 1996           | 1                                                                     |
| 66               | Fiji    | Maize and products              | 1996           | 7                                                                     |
| 66               | Fiji    | Maize Germ Oil                  | 1996           | 19                                                                    |
| 66               | Fiji    | Marine Fish, Other              | 1996           | 4                                                                     |
| 66               | Fiji    | Meat                            | 1996           | 239                                                                   |
| 66               | Fiji    | Milk - Excluding Butter         | 1996           | 91                                                                    |
| 66               | Fiji    | Miscellaneous                   | 1996           | 4                                                                     |
| 66               | Fiji    | Molluscs, Other                 | 1996           | 3                                                                     |
| 66               | Fiji    | Mutton & Goat Meat              | 1996           | 88                                                                    |
| 66               | Fiji    | Oats                            | 1996           | 1                                                                     |
| 66               | Fiji    | Offals                          | 1996           | 8                                                                     |
| 66               | Fiji    | Oilcrops                        | 1996           | 201                                                                   |
| 66               | Fiji    | Oilcrops Oil, Other             | 1996           | 21                                                                    |
| 66               | Fiji    | Onions                          | 1996           | 8                                                                     |
| 66               | Fiji    | Oranges, Mandarines             | 1996           | 1                                                                     |
| 66               | Fiji    | Palmkernel Oil                  | 1996           | 6                                                                     |
| 66               | Fiji    | Pelagic Fish                    | 1996           | 21                                                                    |
| 66               | Fiji    | Pepper                          | 1996           | 2                                                                     |
| 66               | Fiji    | Pigmeat                         | 1996           | 39                                                                    |
| 66               | Fiji    | Pineapples and products         | 1996           | 3                                                                     |
| 66               | Fiji    | Potatoes and products           | 1996           | 47                                                                    |
| 66               | Fiji    | Poultry Meat                    | 1996           | 41                                                                    |
| 66               | Fiji    | Pulses                          | 1996           | 44                                                                    |
| 66               | Fiji    | Pulses, Other and products      | 1996           | 44                                                                    |
| 66               | Fiji    | Rape and Mustard Oil            | 1996           | 6                                                                     |
| 66               | Fiji    | Rice (Milled Equivalent)        | 1996           | 492                                                                   |
| 66               | Fiji    | Roots, Other                    | 1996           | 46                                                                    |
| 66               | Fiji    | Soyabean Oil                    | 1996           | 197                                                                   |
| 66               | Fiji    | Soyabeans                       | 1996           | 1                                                                     |
| 66               | Fiji    | Spices                          | 1996           | 9                                                                     |
| 66               | Fiji    | Spices, Other                   | 1996           | 7                                                                     |
| 66               | Fiji    | Starchy Roots                   | 1996           | 238                                                                   |
| 66               | Fiji    | Stimulants                      | 1996           | 6                                                                     |
| 66               | Fiji    | Sugar & Sweeteners              | 1996           | 229                                                                   |
| 66               | Fiji    | Sugar (Raw Equivalent)          | 1996           | 228                                                                   |
| 66               | Fiji    | Sweet potatoes                  | 1996           | 26                                                                    |
| 66               | Fiji    | Tea (including mate)            | 1996           | 1                                                                     |
| 66               | Fiji    | Tomatoes and products           | 1996           | 3                                                                     |
| 66               | Fiji    | Treenuts                        | 1996           | 2                                                                     |
| 66               | Fiji    | Vegetable Oils                  | 1996           | 276                                                                   |
| 66               | Fiji    | Vegetables                      | 1996           | 27                                                                    |
| 66               | Fiji    | Vegetables, Other               | 1996           | 17                                                                    |
| 66               | Fiji    | Vegetal Products                | 1996           | 2,285                                                                 |
| 66               | Fiji    | Wheat and products              | 1996           | 677                                                                   |
| 66               | Fiji    | Wine                            | 1996           | 2                                                                     |
| 66               | Fiji    | Yams                            | 1996           | 14                                                                    |
| 66               | Fiji    | Alcoholic Beverages             | 1997           | 29                                                                    |

Dietary calcium and zinc deficiency risks are decreasing but remain prevalent

| FAO Country code | Country | Food item                       | Reference year | Net energy supply (kcal capita <sup>-1</sup> d <sup>-1</sup> ) |
|------------------|---------|---------------------------------|----------------|----------------------------------------------------------------|
| 66               | Fiji    | Animal fats                     | 1997           | 159                                                            |
| 66               | Fiji    | Animal Products                 | 1997           | 551                                                            |
| 66               | Fiji    | Apples and products             | 1997           | 2                                                              |
| 66               | Fiji    | Bananas                         | 1997           | 12                                                             |
| 66               | Fiji    | Barley and products             | 1997           | 9                                                              |
| 66               | Fiji    | Beer                            | 1997           | 26                                                             |
| 66               | Fiji    | Beverages, Alcoholic            | 1997           | 1                                                              |
| 66               | Fiji    | Bovine Meat                     | 1997           | 72                                                             |
| 66               | Fiji    | Butter, Ghee                    | 1997           | 122                                                            |
| 66               | Fiji    | Cassava and products            | 1997           | 84                                                             |
| 66               | Fiji    | Cereals - Excluding Beer        | 1997           | 1,214                                                          |
| 66               | Fiji    | Cereals, Other                  | 1997           | 6                                                              |
| 66               | Fiji    | Cocoa Beans and products        | 1997           | 7                                                              |
| 66               | Fiji    | Coconut Oil                     | 1997           | 23                                                             |
| 66               | Fiji    | Coconuts - Incl Copra           | 1997           | 184                                                            |
| 66               | Fiji    | Cream                           | 1997           | 1                                                              |
| 66               | Fiji    | Crustaceans                     | 1997           | 2                                                              |
| 66               | Fiji    | Demersal Fish                   | 1997           | 8                                                              |
| 66               | Fiji    | Eggs                            | 1997           | 14                                                             |
| 66               | Fiji    | Fats, Animals, Raw              | 1997           | 37                                                             |
| 66               | Fiji    | Fish, Seafood                   | 1997           | 39                                                             |
| 66               | Fiji    | Freshwater Fish                 | 1997           | 1                                                              |
| 66               | Fiji    | Fruits - Excluding Wine         | 1997           | 31                                                             |
| 66               | Fiji    | Fruits, Other                   | 1997           | 11                                                             |
| 66               | Fiji    | Grand Total                     | 1997           | 2,844                                                          |
| 66               | Fiji    | Grapes and products (excl wine) | 1997           | 1                                                              |
| 66               | Fiji    | Groundnuts (Shelled Eq)         | 1997           | 9                                                              |
| 66               | Fiji    | Honey                           | 1997           | 1                                                              |
| 66               | Fiji    | Maize and products              | 1997           | 10                                                             |
| 66               | Fiji    | Maize Germ Oil                  | 1997           | 9                                                              |
| 66               | Fiji    | Marine Fish, Other              | 1997           | 2                                                              |
| 66               | Fiji    | Meat                            | 1997           | 244                                                            |
| 66               | Fiji    | Milk - Excluding Butter         | 1997           | 86                                                             |
| 66               | Fiji    | Miscellaneous                   | 1997           | 3                                                              |
| 66               | Fiji    | Molluscs, Other                 | 1997           | 3                                                              |
| 66               | Fiji    | Mutton & Goat Meat              | 1997           | 86                                                             |
| 66               | Fiji    | Oats                            | 1997           | 2                                                              |
| 66               | Fiji    | Offals                          | 1997           | 9                                                              |
| 66               | Fiji    | Oilcrops                        | 1997           | 194                                                            |
| 66               | Fiji    | Oilcrops Oil, Other             | 1997           | 30                                                             |
| 66               | Fiji    | Onions                          | 1997           | 8                                                              |
| 66               | Fiji    | Oranges, Mandarines             | 1997           | 1                                                              |
| 66               | Fiji    | Palmkernel Oil                  | 1997           | 6                                                              |
| 66               | Fiji    | Pelagic Fish                    | 1997           | 23                                                             |
| 66               | Fiji    | Pepper                          | 1997           | 2                                                              |
| 66               | Fiji    | Pigmeat                         | 1997           | 45                                                             |
| 66               | Fiji    | Pineapples and products         | 1997           | 3                                                              |
| 66               | Fiji    | Potatoes and products           | 1997           | 37                                                             |
| 66               | Fiji    | Poultry Meat                    | 1997           | 41                                                             |
| 66               | Fiji    | Pulses                          | 1997           | 69                                                             |
| 66               | Fiji    | Pulses, Other and products      | 1997           | 69                                                             |
| 66               | Fiji    | Rape and Mustard Oil            | 1997           | 8                                                              |
| 66               | Fiji    | Rice (Milled Equivalent)        | 1997           | 512                                                            |
| 66               | Fiji    | Roots, Other                    | 1997           | 49                                                             |
| 66               | Fiji    | Rye and products                | 1997           | 2                                                              |
| 66               | Fiji    | Soyabean Oil                    | 1997           | 195                                                            |
| 66               | Fiji    | Soyabeans                       | 1997           | 1                                                              |
| 66               | Fiji    | Spices                          | 1997           | 13                                                             |
| 66               | Fiji    | Spices, Other                   | 1997           | 11                                                             |
| 66               | Fiji    | Starchy Roots                   | 1997           | 200                                                            |
| 66               | Fiji    | Stimulants                      | 1997           | 8                                                              |
| 66               | Fiji    | Sugar & Sweeteners              | 1997           | 234                                                            |
| 66               | Fiji    | Sugar (Raw Equivalent)          | 1997           | 233                                                            |
| 66               | Fiji    | Sweet potatoes                  | 1997           | 18                                                             |
| 66               | Fiji    | Tea (including mate)            | 1997           | 1                                                              |
| 66               | Fiji    | Tomatoes and products           | 1997           | 2                                                              |
| 66               | Fiji    | Treenuts                        | 1997           | 1                                                              |
| 66               | Fiji    | Vegetable Oils                  | 1997           | 271                                                            |
| 66               | Fiji    | Vegetables                      | 1997           | 26                                                             |
| 66               | Fiji    | Vegetables, Other               | 1997           | 16                                                             |
| 66               | Fiji    | Vegetal Products                | 1997           | 2,294                                                          |
| 66               | Fiji    | Wheat and products              | 1997           | 672                                                            |
| 66               | Fiji    | Wine                            | 1997           | 2                                                              |
| 66               | Fiji    | Yams                            | 1997           | 12                                                             |
| 66               | Fiji    | Alcoholic Beverages             | 1998           | 28                                                             |
| 66               | Fiji    | Animal fats                     | 1998           | 151                                                            |
| 66               | Fiji    | Animal Products                 | 1998           | 535                                                            |
| 66               | Fiji    | Apples and products             | 1998           | 2                                                              |
| 66               | Fiji    | Bananas                         | 1998           | 4                                                              |
| 66               | Fiji    | Barley and products             | 1998           | 11                                                             |
| 66               | Fiji    | Beer                            | 1998           | 26                                                             |
| 66               | Fiji    | Beverages, Alcoholic            | 1998           | 1                                                              |
| 66               | Fiji    | Bovine Meat                     | 1998           | 70                                                             |
| 66               | Fiji    | Butter, Ghee                    | 1998           | 115                                                            |
| 66               | Fiji    | Cassava and products            | 1998           | 68                                                             |
| 66               | Fiji    | Cereals - Excluding Beer        | 1998           | 1,176                                                          |
| 66               | Fiji    | Cereals, Other                  | 1998           | 3                                                              |
| 66               | Fiji    | Cocoa Beans and products        | 1998           | 4                                                              |
| 66               | Fiji    | Coconut Oil                     | 1998           | 26                                                             |
| 66               | Fiji    | Coconuts - Incl Copra           | 1998           | 184                                                            |
| 66               | Fiji    | Cream                           | 1998           | 1                                                              |
| 66               | Fiji    | Crustaceans                     | 1998           | 2                                                              |
| 66               | Fiji    | Demersal Fish                   | 1998           | 7                                                              |
| 66               | Fiji    | Eggs                            | 1998           | 20                                                             |
| 66               | Fiji    | Fats, Animals, Raw              | 1998           | 36                                                             |
| 66               | Fiji    | Fish, Seafood                   | 1998           | 41                                                             |
| 66               | Fiji    | Freshwater Fish                 | 1998           | 1                                                              |

Dietary calcium and zinc deficiency risks are decreasing but remain prevalent

| FAO Country code | Country | Food item                       | Reference year | Net energy supply (kcal <i>capita</i> <sup>-1</sup> d <sup>-1</sup> ) |
|------------------|---------|---------------------------------|----------------|-----------------------------------------------------------------------|
| 66               | Fiji    | Fruits - Excluding Wine         | 1998           | 25                                                                    |
| 66               | Fiji    | Fruits, Other                   | 1998           | 13                                                                    |
| 66               | Fiji    | Grand Total                     | 1998           | 2,828                                                                 |
| 66               | Fiji    | Grapes and products (excl wine) | 1998           | 2                                                                     |
| 66               | Fiji    | Groundnuts (Shelled Eq)         | 1998           | 5                                                                     |
| 66               | Fiji    | Honey                           | 1998           | 1                                                                     |
| 66               | Fiji    | Maize and products              | 1998           | 6                                                                     |
| 66               | Fiji    | Maize Germ Oil                  | 1998           | 9                                                                     |
| 66               | Fiji    | Marine Fish, Other              | 1998           | 3                                                                     |
| 66               | Fiji    | Meat                            | 1998           | 235                                                                   |
| 66               | Fiji    | Milk - Excluding Butter         | 1998           | 78                                                                    |
| 66               | Fiji    | Miscellaneous                   | 1998           | 4                                                                     |
| 66               | Fiji    | Molluscs, Other                 | 1998           | 3                                                                     |
| 66               | Fiji    | Mutton & Goat Meat              | 1998           | 89                                                                    |
| 66               | Fiji    | Oats                            | 1998           | 2                                                                     |
| 66               | Fiji    | Offals                          | 1998           | 10                                                                    |
| 66               | Fiji    | Oilcrops                        | 1998           | 191                                                                   |
| 66               | Fiji    | Oilcrops Oil, Other             | 1998           | 29                                                                    |
| 66               | Fiji    | Onions                          | 1998           | 6                                                                     |
| 66               | Fiji    | Oranges, Mandarines             | 1998           | 1                                                                     |
| 66               | Fiji    | Palmkernel Oil                  | 1998           | 6                                                                     |
| 66               | Fiji    | Pelagic Fish                    | 1998           | 24                                                                    |
| 66               | Fiji    | Pepper                          | 1998           | 1                                                                     |
| 66               | Fiji    | Pigmeat                         | 1998           | 40                                                                    |
| 66               | Fiji    | Pineapples and products         | 1998           | 2                                                                     |
| 66               | Fiji    | Potatoes and products           | 1998           | 37                                                                    |
| 66               | Fiji    | Poultry Meat                    | 1998           | 36                                                                    |
| 66               | Fiji    | Pulses                          | 1998           | 110                                                                   |
| 66               | Fiji    | Pulses, Other and products      | 1998           | 110                                                                   |
| 66               | Fiji    | Rape and Mustard Oil            | 1998           | 10                                                                    |
| 66               | Fiji    | Rape and Mustardseed            | 1998           | 1                                                                     |
| 66               | Fiji    | Rice (Milled Equivalent)        | 1998           | 475                                                                   |
| 66               | Fiji    | Roots, Other                    | 1998           | 57                                                                    |
| 66               | Fiji    | Soyabean Oil                    | 1998           | 197                                                                   |
| 66               | Fiji    | Soyabeans                       | 1998           | 1                                                                     |
| 66               | Fiji    | Spices                          | 1998           | 10                                                                    |
| 66               | Fiji    | Spices, Other                   | 1998           | 8                                                                     |
| 66               | Fiji    | Starchy Roots                   | 1998           | 203                                                                   |
| 66               | Fiji    | Stimulants                      | 1998           | 6                                                                     |
| 66               | Fiji    | Sugar & Sweeteners              | 1998           | 236                                                                   |
| 66               | Fiji    | Sugar (Raw Equivalent)          | 1998           | 236                                                                   |
| 66               | Fiji    | Sweet potatoes                  | 1998           | 24                                                                    |
| 66               | Fiji    | Tea (including mate)            | 1998           | 2                                                                     |
| 66               | Fiji    | Tomatoes and products           | 1998           | 2                                                                     |
| 66               | Fiji    | Treenuts                        | 1998           | 1                                                                     |
| 66               | Fiji    | Vegetable Oils                  | 1998           | 278                                                                   |
| 66               | Fiji    | Vegetables                      | 1998           | 24                                                                    |
| 66               | Fiji    | Vegetables, Other               | 1998           | 16                                                                    |
| 66               | Fiji    | Vegetal Products                | 1998           | 2,294                                                                 |
| 66               | Fiji    | Wheat and products              | 1998           | 678                                                                   |
| 66               | Fiji    | Wine                            | 1998           | 2                                                                     |
| 66               | Fiji    | Yams                            | 1998           | 17                                                                    |
| 66               | Fiji    | Alcoholic Beverages             | 1999           | 33                                                                    |
| 66               | Fiji    | Animal fats                     | 1999           | 164                                                                   |
| 66               | Fiji    | Animal Products                 | 1999           | 561                                                                   |
| 66               | Fiji    | Apples and products             | 1999           | 2                                                                     |
| 66               | Fiji    | Aquatic Animals, Others         | 1999           | 1                                                                     |
| 66               | Fiji    | Aquatic Products, Other         | 1999           | 1                                                                     |
| 66               | Fiji    | Bananas                         | 1999           | 5                                                                     |
| 66               | Fiji    | Barley and products             | 1999           | 20                                                                    |
| 66               | Fiji    | Beer                            | 1999           | 27                                                                    |
| 66               | Fiji    | Beverages, Alcoholic            | 1999           | 3                                                                     |
| 66               | Fiji    | Bovine Meat                     | 1999           | 66                                                                    |
| 66               | Fiji    | Butter, Ghee                    | 1999           | 128                                                                   |
| 66               | Fiji    | Cassava and products            | 1999           | 65                                                                    |
| 66               | Fiji    | Cereals - Excluding Beer        | 1999           | 1,189                                                                 |
| 66               | Fiji    | Cereals, Other                  | 1999           | 1                                                                     |
| 66               | Fiji    | Cocoa Beans and products        | 1999           | 6                                                                     |
| 66               | Fiji    | Coconut Oil                     | 1999           | 29                                                                    |
| 66               | Fiji    | Coconuts - Incl Copra           | 1999           | 184                                                                   |
| 66               | Fiji    | Coffee and products             | 1999           | 1                                                                     |
| 66               | Fiji    | Cream                           | 1999           | 1                                                                     |
| 66               | Fiji    | Crustaceans                     | 1999           | 2                                                                     |
| 66               | Fiji    | Demersal Fish                   | 1999           | 15                                                                    |
| 66               | Fiji    | Eggs                            | 1999           | 15                                                                    |
| 66               | Fiji    | Fats, Animals, Raw              | 1999           | 35                                                                    |
| 66               | Fiji    | Fish, Seafood                   | 1999           | 38                                                                    |
| 66               | Fiji    | Freshwater Fish                 | 1999           | 2                                                                     |
| 66               | Fiji    | Fruits - Excluding Wine         | 1999           | 22                                                                    |
| 66               | Fiji    | Fruits, Other                   | 1999           | 11                                                                    |
| 66               | Fiji    | Grand Total                     | 1999           | 2,841                                                                 |
| 66               | Fiji    | Grapes and products (excl wine) | 1999           | 1                                                                     |
| 66               | Fiji    | Groundnuts (Shelled Eq)         | 1999           | 8                                                                     |
| 66               | Fiji    | Honey                           | 1999           | 1                                                                     |
| 66               | Fiji    | Maize and products              | 1999           | 5                                                                     |
| 66               | Fiji    | Maize Germ Oil                  | 1999           | 12                                                                    |
| 66               | Fiji    | Marine Fish, Other              | 1999           | 3                                                                     |
| 66               | Fiji    | Meat                            | 1999           | 250                                                                   |
| 66               | Fiji    | Milk - Excluding Butter         | 1999           | 83                                                                    |
| 66               | Fiji    | Miscellaneous                   | 1999           | 4                                                                     |
| 66               | Fiji    | Molluscs, Other                 | 1999           | 3                                                                     |
| 66               | Fiji    | Mutton & Goat Meat              | 1999           | 98                                                                    |
| 66               | Fiji    | Oats                            | 1999           | 3                                                                     |
| 66               | Fiji    | Offals                          | 1999           | 10                                                                    |
| 66               | Fiji    | Oilcrops                        | 1999           | 194                                                                   |
| 66               | Fiji    | Oilcrops Oil, Other             | 1999           | 23                                                                    |
| 66               | Fiji    | Onions                          | 1999           | 9                                                                     |

Dietary calcium and zinc deficiency risks are decreasing but remain prevalent

| FAO Country code | Country | Food item                       | Reference year | Net energy supply (kcal capita <sup>-1</sup> d <sup>-1</sup> ) |
|------------------|---------|---------------------------------|----------------|----------------------------------------------------------------|
| 66               | Fiji    | Oranges, Mandarines             | 1999           | 1                                                              |
| 66               | Fiji    | Palmkernel Oil                  | 1999           | 6                                                              |
| 66               | Fiji    | Pelagic Fish                    | 1999           | 13                                                             |
| 66               | Fiji    | Pepper                          | 1999           | 2                                                              |
| 66               | Fiji    | Pigmeat                         | 1999           | 47                                                             |
| 66               | Fiji    | Pineapples and products         | 1999           | 2                                                              |
| 66               | Fiji    | Potatoes and products           | 1999           | 43                                                             |
| 66               | Fiji    | Poultry Meat                    | 1999           | 40                                                             |
| 66               | Fiji    | Pulses                          | 1999           | 85                                                             |
| 66               | Fiji    | Pulses, Other and products      | 1999           | 85                                                             |
| 66               | Fiji    | Rape and Mustard Oil            | 1999           | 10                                                             |
| 66               | Fiji    | Rape and Mustardseed            | 1999           | 1                                                              |
| 66               | Fiji    | Rice (Milled Equivalent)        | 1999           | 466                                                            |
| 66               | Fiji    | Roots, Other                    | 1999           | 44                                                             |
| 66               | Fiji    | Soyabean Oil                    | 1999           | 186                                                            |
| 66               | Fiji    | Soyabeans                       | 1999           | 1                                                              |
| 66               | Fiji    | Spices                          | 1999           | 7                                                              |
| 66               | Fiji    | Spices, Other                   | 1999           | 5                                                              |
| 66               | Fiji    | Starchy Roots                   | 1999           | 181                                                            |
| 66               | Fiji    | Stimulants                      | 1999           | 7                                                              |
| 66               | Fiji    | Sugar & Sweeteners              | 1999           | 258                                                            |
| 66               | Fiji    | Sugar (Raw Equivalent)          | 1999           | 257                                                            |
| 66               | Fiji    | Sweet potatoes                  | 1999           | 17                                                             |
| 66               | Fiji    | Tea (including mate)            | 1999           | 1                                                              |
| 66               | Fiji    | Tomatoes and products           | 1999           | 2                                                              |
| 66               | Fiji    | Treenuts                        | 1999           | 1                                                              |
| 66               | Fiji    | Vegetable Oils                  | 1999           | 266                                                            |
| 66               | Fiji    | Vegetables                      | 1999           | 33                                                             |
| 66               | Fiji    | Vegetables, Other               | 1999           | 22                                                             |
| 66               | Fiji    | Vegetal Products                | 1999           | 2,280                                                          |
| 66               | Fiji    | Wheat and products              | 1999           | 694                                                            |
| 66               | Fiji    | Wine                            | 1999           | 2                                                              |
| 66               | Fiji    | Yams                            | 1999           | 13                                                             |
| 66               | Fiji    | Alcoholic Beverages             | 2000           | 29                                                             |
| 66               | Fiji    | Animal fats                     | 2000           | 126                                                            |
| 66               | Fiji    | Animal Products                 | 2000           | 522                                                            |
| 66               | Fiji    | Apples and products             | 2000           | 1                                                              |
| 66               | Fiji    | Aquatic Animals, Others         | 2000           | 1                                                              |
| 66               | Fiji    | Aquatic Products, Other         | 2000           | 1                                                              |
| 66               | Fiji    | Bananas                         | 2000           | 5                                                              |
| 66               | Fiji    | Barley and products             | 2000           | 5                                                              |
| 66               | Fiji    | Beans                           | 2000           | 5                                                              |
| 66               | Fiji    | Beer                            | 2000           | 26                                                             |
| 66               | Fiji    | Beverages, Alcoholic            | 2000           | 3                                                              |
| 66               | Fiji    | Bovine Meat                     | 2000           | 68                                                             |
| 66               | Fiji    | Butter, Ghee                    | 2000           | 96                                                             |
| 66               | Fiji    | Cassava and products            | 2000           | 64                                                             |
| 66               | Fiji    | Cereals - Excluding Beer        | 2000           | 1,174                                                          |
| 66               | Fiji    | Cocoa Beans and products        | 2000           | 6                                                              |
| 66               | Fiji    | Coconut Oil                     | 2000           | 48                                                             |
| 66               | Fiji    | Coconuts - Incl Copra           | 2000           | 180                                                            |
| 66               | Fiji    | Cream                           | 2000           | 1                                                              |
| 66               | Fiji    | Crustaceans                     | 2000           | 2                                                              |
| 66               | Fiji    | Demersal Fish                   | 2000           | 12                                                             |
| 66               | Fiji    | Eggs                            | 2000           | 16                                                             |
| 66               | Fiji    | Fats, Animals, Raw              | 2000           | 29                                                             |
| 66               | Fiji    | Fish, Seafood                   | 2000           | 54                                                             |
| 66               | Fiji    | Freshwater Fish                 | 2000           | 5                                                              |
| 66               | Fiji    | Fruits - Excluding Wine         | 2000           | 27                                                             |
| 66               | Fiji    | Fruits, Other                   | 2000           | 14                                                             |
| 66               | Fiji    | Grand Total                     | 2000           | 2,842                                                          |
| 66               | Fiji    | Grapes and products (excl wine) | 2000           | 2                                                              |
| 66               | Fiji    | Groundnuts (Shelled Eq)         | 2000           | 14                                                             |
| 66               | Fiji    | Honey                           | 2000           | 1                                                              |
| 66               | Fiji    | Maize and products              | 2000           | 5                                                              |
| 66               | Fiji    | Maize Germ Oil                  | 2000           | 5                                                              |
| 66               | Fiji    | Maine Fish, Other               | 2000           | 3                                                              |
| 66               | Fiji    | Meat                            | 2000           | 261                                                            |
| 66               | Fiji    | Milk - Excluding Butter         | 2000           | 51                                                             |
| 66               | Fiji    | Miscellaneous                   | 2000           | 1                                                              |
| 66               | Fiji    | Molluscs, Other                 | 2000           | 3                                                              |
| 66               | Fiji    | Mutton & Goat Meat              | 2000           | 99                                                             |
| 66               | Fiji    | Oats                            | 2000           | 4                                                              |
| 66               | Fiji    | Offals                          | 2000           | 13                                                             |
| 66               | Fiji    | Oilcrops                        | 2000           | 196                                                            |
| 66               | Fiji    | Oilcrops Oil, Other             | 2000           | 12                                                             |
| 66               | Fiji    | Olive Oil                       | 2000           | 1                                                              |
| 66               | Fiji    | Onions                          | 2000           | 5                                                              |
| 66               | Fiji    | Oranges, Mandarines             | 2000           | 2                                                              |
| 66               | Fiji    | Palmkernel Oil                  | 2000           | 7                                                              |
| 66               | Fiji    | Peas                            | 2000           | 65                                                             |
| 66               | Fiji    | Pelagic Fish                    | 2000           | 29                                                             |
| 66               | Fiji    | Pepper                          | 2000           | 2                                                              |
| 66               | Fiji    | Pigmeat                         | 2000           | 43                                                             |
| 66               | Fiji    | Pineapples and products         | 2000           | 2                                                              |
| 66               | Fiji    | Potatoes and products           | 2000           | 45                                                             |
| 66               | Fiji    | Poultry Meat                    | 2000           | 50                                                             |
| 66               | Fiji    | Pulses                          | 2000           | 81                                                             |
| 66               | Fiji    | Pulses, Other and products      | 2000           | 11                                                             |
| 66               | Fiji    | Rape and Mustard Oil            | 2000           | 2                                                              |
| 66               | Fiji    | Rape and Mustardseed            | 2000           | 1                                                              |
| 66               | Fiji    | Rice (Milled Equivalent)        | 2000           | 460                                                            |
| 66               | Fiji    | Roots, Other                    | 2000           | 80                                                             |
| 66               | Fiji    | Sesameseed Oil                  | 2000           | 3                                                              |
| 66               | Fiji    | Soyabean Oil                    | 2000           | 203                                                            |
| 66               | Fiji    | Soyabeans                       | 2000           | 1                                                              |
| 66               | Fiji    | Spices                          | 2000           | 9                                                              |

Dietary calcium and zinc deficiency risks are decreasing but remain prevalent

| FAO Country code | Country | Food item                       | Reference year | Net energy supply (kcal <i>capita</i> <sup>-1</sup> d <sup>-1</sup> ) |
|------------------|---------|---------------------------------|----------------|-----------------------------------------------------------------------|
| 66               | Fiji    | Spices, Other                   | 2000           | 6                                                                     |
| 66               | Fiji    | Starchy Roots                   | 2000           | 224                                                                   |
| 66               | Fiji    | Stimulants                      | 2000           | 7                                                                     |
| 66               | Fiji    | Sugar & Sweeteners              | 2000           | 262                                                                   |
| 66               | Fiji    | Sugar (Raw Equivalent)          | 2000           | 256                                                                   |
| 66               | Fiji    | Sweet potatoes                  | 2000           | 21                                                                    |
| 66               | Fiji    | Sweeteners, Other               | 2000           | 5                                                                     |
| 66               | Fiji    | Tea (including mate)            | 2000           | 1                                                                     |
| 66               | Fiji    | Tomatoes and products           | 2000           | 3                                                                     |
| 66               | Fiji    | Vegetable Oils                  | 2000           | 281                                                                   |
| 66               | Fiji    | Vegetables                      | 2000           | 29                                                                    |
| 66               | Fiji    | Vegetables, Other               | 2000           | 21                                                                    |
| 66               | Fiji    | Vegetal Products                | 2000           | 2,320                                                                 |
| 66               | Fiji    | Wheat and products              | 2000           | 700                                                                   |
| 66               | Fiji    | Wine                            | 2000           | 1                                                                     |
| 66               | Fiji    | Yams                            | 2000           | 15                                                                    |
| 66               | Fiji    | Alcoholic Beverages             | 2001           | 29                                                                    |
| 66               | Fiji    | Animal fats                     | 2001           | 127                                                                   |
| 66               | Fiji    | Animal Products                 | 2001           | 538                                                                   |
| 66               | Fiji    | Apples and products             | 2001           | 2                                                                     |
| 66               | Fiji    | Aquatic Animals, Others         | 2001           | 1                                                                     |
| 66               | Fiji    | Aquatic Products, Other         | 2001           | 1                                                                     |
| 66               | Fiji    | Bananas                         | 2001           | 5                                                                     |
| 66               | Fiji    | Barley and products             | 2001           | 4                                                                     |
| 66               | Fiji    | Beans                           | 2001           | 5                                                                     |
| 66               | Fiji    | Beer                            | 2001           | 26                                                                    |
| 66               | Fiji    | Beverages, Alcoholic            | 2001           | 2                                                                     |
| 66               | Fiji    | Bovine Meat                     | 2001           | 62                                                                    |
| 66               | Fiji    | Butter, Ghee                    | 2001           | 105                                                                   |
| 66               | Fiji    | Cassava and products            | 2001           | 53                                                                    |
| 66               | Fiji    | Cereals - Excluding Beer        | 2001           | 1,205                                                                 |
| 66               | Fiji    | Cereals, Other                  | 2001           | 6                                                                     |
| 66               | Fiji    | Cocoa Beans and products        | 2001           | 7                                                                     |
| 66               | Fiji    | Coconut Oil                     | 2001           | 42                                                                    |
| 66               | Fiji    | Coconuts - Incl Copra           | 2001           | 184                                                                   |
| 66               | Fiji    | Coffee and products             | 2001           | 1                                                                     |
| 66               | Fiji    | Crustaceans                     | 2001           | 3                                                                     |
| 66               | Fiji    | Demersal Fish                   | 2001           | 9                                                                     |
| 66               | Fiji    | Eggs                            | 2001           | 30                                                                    |
| 66               | Fiji    | Fats, Animals, Raw              | 2001           | 22                                                                    |
| 66               | Fiji    | Fish, Seafood                   | 2001           | 58                                                                    |
| 66               | Fiji    | Freshwater Fish                 | 2001           | 7                                                                     |
| 66               | Fiji    | Fruits - Excluding Wine         | 2001           | 26                                                                    |
| 66               | Fiji    | Fruits, Other                   | 2001           | 14                                                                    |
| 66               | Fiji    | Grand Total                     | 2001           | 2,893                                                                 |
| 66               | Fiji    | Grapes and products (excl wine) | 2001           | 1                                                                     |
| 66               | Fiji    | Groundnuts (Shelled Eq)         | 2001           | 15                                                                    |
| 66               | Fiji    | Honey                           | 2001           | 1                                                                     |
| 66               | Fiji    | Maize and products              | 2001           | 7                                                                     |
| 66               | Fiji    | Maize Germ Oil                  | 2001           | 2                                                                     |
| 66               | Fiji    | Marine Fish, Other              | 2001           | 4                                                                     |
| 66               | Fiji    | Meat                            | 2001           | 244                                                                   |
| 66               | Fiji    | Milk - Excluding Butter         | 2001           | 65                                                                    |
| 66               | Fiji    | Miscellaneous                   | 2001           | 1                                                                     |
| 66               | Fiji    | Molluscs, Other                 | 2001           | 4                                                                     |
| 66               | Fiji    | Mutton & Goat Meat              | 2001           | 85                                                                    |
| 66               | Fiji    | Oats                            | 2001           | 4                                                                     |
| 66               | Fiji    | Offals                          | 2001           | 12                                                                    |
| 66               | Fiji    | Oilcrops                        | 2001           | 200                                                                   |
| 66               | Fiji    | Oilcrops Oil, Other             | 2001           | 34                                                                    |
| 66               | Fiji    | Olive Oil                       | 2001           | 1                                                                     |
| 66               | Fiji    | Onions                          | 2001           | 8                                                                     |
| 66               | Fiji    | Oranges, Mandarines             | 2001           | 2                                                                     |
| 66               | Fiji    | Palmkernel Oil                  | 2001           | 9                                                                     |
| 66               | Fiji    | Peas                            | 2001           | 63                                                                    |
| 66               | Fiji    | Pelagic Fish                    | 2001           | 32                                                                    |
| 66               | Fiji    | Pepper                          | 2001           | 2                                                                     |
| 66               | Fiji    | Pigmeat                         | 2001           | 43                                                                    |
| 66               | Fiji    | Pineapples and products         | 2001           | 2                                                                     |
| 66               | Fiji    | Potatoes and products           | 2001           | 41                                                                    |
| 66               | Fiji    | Poultry Meat                    | 2001           | 53                                                                    |
| 66               | Fiji    | Pulses                          | 2001           | 81                                                                    |
| 66               | Fiji    | Pulses, Other and products      | 2001           | 13                                                                    |
| 66               | Fiji    | Rape and Mustard Oil            | 2001           | 4                                                                     |
| 66               | Fiji    | Rice (Milled Equivalent)        | 2001           | 475                                                                   |
| 66               | Fiji    | Roots, Other                    | 2001           | 65                                                                    |
| 66               | Fiji    | Sesameseed Oil                  | 2001           | 2                                                                     |
| 66               | Fiji    | Soyabean Oil                    | 2001           | 188                                                                   |
| 66               | Fiji    | Soyabeans                       | 2001           | 1                                                                     |
| 66               | Fiji    | Spices                          | 2001           | 8                                                                     |
| 66               | Fiji    | Spices, Other                   | 2001           | 6                                                                     |
| 66               | Fiji    | Starchy Roots                   | 2001           | 186                                                                   |
| 66               | Fiji    | Stimulants                      | 2001           | 9                                                                     |
| 66               | Fiji    | Sugar & Sweeteners              | 2001           | 291                                                                   |
| 66               | Fiji    | Sugar (Raw Equivalent)          | 2001           | 286                                                                   |
| 66               | Fiji    | Sweet potatoes                  | 2001           | 17                                                                    |
| 66               | Fiji    | Sweeteners, Other               | 2001           | 4                                                                     |
| 66               | Fiji    | Tea (including mate)            | 2001           | 1                                                                     |
| 66               | Fiji    | Tomatoes and products           | 2001           | 3                                                                     |
| 66               | Fiji    | Vegetable Oils                  | 2001           | 282                                                                   |
| 66               | Fiji    | Vegetables                      | 2001           | 36                                                                    |
| 66               | Fiji    | Vegetables, Other               | 2001           | 25                                                                    |
| 66               | Fiji    | Vegetal Products                | 2001           | 2,355                                                                 |
| 66               | Fiji    | Wheat and products              | 2001           | 710                                                                   |
| 66               | Fiji    | Wine                            | 2001           | 1                                                                     |
| 66               | Fiji    | Yams                            | 2001           | 10                                                                    |
| 66               | Fiji    | Alcoholic Beverages             | 2002           | 33                                                                    |

Dietary calcium and zinc deficiency risks are decreasing but remain prevalent

| FAO Country code | Country | Food item                       | Reference year | Net energy supply (kcal <i>capita</i> <sup>-1</sup> d <sup>-1</sup> ) |
|------------------|---------|---------------------------------|----------------|-----------------------------------------------------------------------|
| 66               | Fiji    | Animal fats                     | 2002           | 122                                                                   |
| 66               | Fiji    | Animal Products                 | 2002           | 498                                                                   |
| 66               | Fiji    | Apples and products             | 2002           | 2                                                                     |
| 66               | Fiji    | Aquatic Animals, Others         | 2002           | 1                                                                     |
| 66               | Fiji    | Aquatic Products, Other         | 2002           | 1                                                                     |
| 66               | Fiji    | Bananas                         | 2002           | 4                                                                     |
| 66               | Fiji    | Barley and products             | 2002           | 5                                                                     |
| 66               | Fiji    | Beans                           | 2002           | 5                                                                     |
| 66               | Fiji    | Beer                            | 2002           | 29                                                                    |
| 66               | Fiji    | Beverages, Alcoholic            | 2002           | 2                                                                     |
| 66               | Fiji    | Bovine Meat                     | 2002           | 57                                                                    |
| 66               | Fiji    | Butter, Ghee                    | 2002           | 91                                                                    |
| 66               | Fiji    | Cassava and products            | 2002           | 72                                                                    |
| 66               | Fiji    | Cereals - Excluding Beer        | 2002           | 1,227                                                                 |
| 66               | Fiji    | Cereals, Other                  | 2002           | 5                                                                     |
| 66               | Fiji    | Cocoa Beans and products        | 2002           | 6                                                                     |
| 66               | Fiji    | Coconut Oil                     | 2002           | 47                                                                    |
| 66               | Fiji    | Coconuts - Incl Copra           | 2002           | 197                                                                   |
| 66               | Fiji    | Coffee and products             | 2002           | 1                                                                     |
| 66               | Fiji    | Cream                           | 2002           | 1                                                                     |
| 66               | Fiji    | Crustaceans                     | 2002           | 2                                                                     |
| 66               | Fiji    | Demersal Fish                   | 2002           | 11                                                                    |
| 66               | Fiji    | Eggs                            | 2002           | 21                                                                    |
| 66               | Fiji    | Fats, Animals, Raw              | 2002           | 30                                                                    |
| 66               | Fiji    | Fish, Seafood                   | 2002           | 60                                                                    |
| 66               | Fiji    | Freshwater Fish                 | 2002           | 2                                                                     |
| 66               | Fiji    | Fruits - Excluding Wine         | 2002           | 23                                                                    |
| 66               | Fiji    | Fruits, Other                   | 2002           | 13                                                                    |
| 66               | Fiji    | Grand Total                     | 2002           | 2,915                                                                 |
| 66               | Fiji    | Grapes and products (excl wine) | 2002           | 1                                                                     |
| 66               | Fiji    | Groundnuts (Shelled Eq)         | 2002           | 13                                                                    |
| 66               | Fiji    | Honey                           | 2002           | 1                                                                     |
| 66               | Fiji    | Maize and products              | 2002           | 6                                                                     |
| 66               | Fiji    | Maize Germ Oil                  | 2002           | 5                                                                     |
| 66               | Fiji    | Marine Fish, Other              | 2002           | 5                                                                     |
| 66               | Fiji    | Meat                            | 2002           | 229                                                                   |
| 66               | Fiji    | Milk - Excluding Butter         | 2002           | 53                                                                    |
| 66               | Fiji    | Miscellaneous                   | 2002           | 1                                                                     |
| 66               | Fiji    | Molluscs, Other                 | 2002           | 3                                                                     |
| 66               | Fiji    | Mutton & Goat Meat              | 2002           | 79                                                                    |
| 66               | Fiji    | Oats                            | 2002           | 3                                                                     |
| 66               | Fiji    | Offals                          | 2002           | 11                                                                    |
| 66               | Fiji    | Oilcrops                        | 2002           | 211                                                                   |
| 66               | Fiji    | Oilcrops Oil, Other             | 2002           | 22                                                                    |
| 66               | Fiji    | Olive Oil                       | 2002           | 2                                                                     |
| 66               | Fiji    | Onions                          | 2002           | 9                                                                     |
| 66               | Fiji    | Oranges, Mandarines             | 2002           | 1                                                                     |
| 66               | Fiji    | Palmkernel Oil                  | 2002           | 2                                                                     |
| 66               | Fiji    | Peas                            | 2002           | 67                                                                    |
| 66               | Fiji    | Pelagic Fish                    | 2002           | 39                                                                    |
| 66               | Fiji    | Pepper                          | 2002           | 2                                                                     |
| 66               | Fiji    | Pigmeat                         | 2002           | 46                                                                    |
| 66               | Fiji    | Pineapples and products         | 2002           | 2                                                                     |
| 66               | Fiji    | Potatoes and products           | 2002           | 38                                                                    |
| 66               | Fiji    | Poultry Meat                    | 2002           | 47                                                                    |
| 66               | Fiji    | Pulses                          | 2002           | 84                                                                    |
| 66               | Fiji    | Pulses, Other and products      | 2002           | 12                                                                    |
| 66               | Fiji    | Rape and Mustard Oil            | 2002           | 5                                                                     |
| 66               | Fiji    | Rice (Milled Equivalent)        | 2002           | 497                                                                   |
| 66               | Fiji    | Roots, Other                    | 2002           | 81                                                                    |
| 66               | Fiji    | Soyabean Oil                    | 2002           | 187                                                                   |
| 66               | Fiji    | Soyabeans                       | 2002           | 1                                                                     |
| 66               | Fiji    | Spices                          | 2002           | 10                                                                    |
| 66               | Fiji    | Spices, Other                   | 2002           | 8                                                                     |
| 66               | Fiji    | Starchy Roots                   | 2002           | 226                                                                   |
| 66               | Fiji    | Stimulants                      | 2002           | 7                                                                     |
| 66               | Fiji    | Sugar & Sweeteners              | 2002           | 288                                                                   |
| 66               | Fiji    | Sugar (Raw Equivalent)          | 2002           | 286                                                                   |
| 66               | Fiji    | Sweet potatoes                  | 2002           | 23                                                                    |
| 66               | Fiji    | Sweeteners, Other               | 2002           | 1                                                                     |
| 66               | Fiji    | Tea (including mate)            | 2002           | 1                                                                     |
| 66               | Fiji    | Tomatoes and products           | 2002           | 3                                                                     |
| 66               | Fiji    | Vegetable Oils                  | 2002           | 271                                                                   |
| 66               | Fiji    | Vegetables                      | 2002           | 36                                                                    |
| 66               | Fiji    | Vegetables, Other               | 2002           | 24                                                                    |
| 66               | Fiji    | Vegetal Products                | 2002           | 2,417                                                                 |
| 66               | Fiji    | Wheat and products              | 2002           | 711                                                                   |
| 66               | Fiji    | Wine                            | 2002           | 2                                                                     |
| 66               | Fiji    | Yams                            | 2002           | 12                                                                    |
| 66               | Fiji    | Alcoholic Beverages             | 2003           | 28                                                                    |
| 66               | Fiji    | Animal fats                     | 2003           | 129                                                                   |
| 66               | Fiji    | Animal Products                 | 2003           | 519                                                                   |
| 66               | Fiji    | Apples and products             | 2003           | 3                                                                     |
| 66               | Fiji    | Bananas                         | 2003           | 6                                                                     |
| 66               | Fiji    | Barley and products             | 2003           | 5                                                                     |
| 66               | Fiji    | Beans                           | 2003           | 5                                                                     |
| 66               | Fiji    | Beer                            | 2003           | 22                                                                    |
| 66               | Fiji    | Beverages, Alcoholic            | 2003           | 4                                                                     |
| 66               | Fiji    | Bovine Meat                     | 2003           | 53                                                                    |
| 66               | Fiji    | Butter, Ghee                    | 2003           | 97                                                                    |
| 66               | Fiji    | Cassava and products            | 2003           | 70                                                                    |
| 66               | Fiji    | Cereals - Excluding Beer        | 2003           | 1,200                                                                 |
| 66               | Fiji    | Cereals, Other                  | 2003           | 2                                                                     |
| 66               | Fiji    | Cocoa Beans and products        | 2003           | 7                                                                     |
| 66               | Fiji    | Coconut Oil                     | 2003           | 49                                                                    |
| 66               | Fiji    | Coconuts - Incl Copra           | 2003           | 175                                                                   |
| 66               | Fiji    | Cream                           | 2003           | 1                                                                     |



Dietary calcium and zinc deficiency risks are decreasing but remain prevalent

| FAO Country code | Country | Food item                       | Reference year | Net energy supply (kcal capita <sup>-1</sup> d <sup>-1</sup> ) |
|------------------|---------|---------------------------------|----------------|----------------------------------------------------------------|
| 66               | Fiji    | Crustaceans                     | 2003           | 1                                                              |
| 66               | Fiji    | Demersal Fish                   | 2003           | 4                                                              |
| 66               | Fiji    | Eggs                            | 2003           | 11                                                             |
| 66               | Fiji    | Fats, Animals, Raw              | 2003           | 31                                                             |
| 66               | Fiji    | Fish, Seafood                   | 2003           | 84                                                             |
| 66               | Fiji    | Fruits - Excluding Wine         | 2003           | 30                                                             |
| 66               | Fiji    | Fruits, Other                   | 2003           | 13                                                             |
| 66               | Fiji    | Grand Total                     | 2003           | 2,907                                                          |
| 66               | Fiji    | Grapes and products (excl wine) | 2003           | 1                                                              |
| 66               | Fiji    | Groundnuts (Shelled Eq)         | 2003           | 14                                                             |
| 66               | Fiji    | Honey                           | 2003           | 1                                                              |
| 66               | Fiji    | Maize and products              | 2003           | 9                                                              |
| 66               | Fiji    | Maize Germ Oil                  | 2003           | 5                                                              |
| 66               | Fiji    | Marine Fish, Other              | 2003           | 4                                                              |
| 66               | Fiji    | Meat                            | 2003           | 226                                                            |
| 66               | Fiji    | Milk - Excluding Butter         | 2003           | 57                                                             |
| 66               | Fiji    | Miscellaneous                   | 2003           | 1                                                              |
| 66               | Fiji    | Mutton & Goat Meat              | 2003           | 74                                                             |
| 66               | Fiji    | Oats                            | 2003           | 3                                                              |
| 66               | Fiji    | Offals                          | 2003           | 12                                                             |
| 66               | Fiji    | Oilcrops                        | 2003           | 192                                                            |
| 66               | Fiji    | Oilcrops Oil, Other             | 2003           | 23                                                             |
| 66               | Fiji    | Olive Oil                       | 2003           | 1                                                              |
| 66               | Fiji    | Onions                          | 2003           | 9                                                              |
| 66               | Fiji    | Oranges, Mandarines             | 2003           | 3                                                              |
| 66               | Fiji    | Palm kernels                    | 2003           | 1                                                              |
| 66               | Fiji    | Palmkernel Oil                  | 2003           | 12                                                             |
| 66               | Fiji    | Peas                            | 2003           | 66                                                             |
| 66               | Fiji    | Pelagic Fish                    | 2003           | 74                                                             |
| 66               | Fiji    | Pepper                          | 2003           | 2                                                              |
| 66               | Fiji    | Pigmeat                         | 2003           | 46                                                             |
| 66               | Fiji    | Pineapples and products         | 2003           | 3                                                              |
| 66               | Fiji    | Potatoes and products           | 2003           | 43                                                             |
| 66               | Fiji    | Poultry Meat                    | 2003           | 52                                                             |
| 66               | Fiji    | Pulses                          | 2003           | 81                                                             |
| 66               | Fiji    | Pulses, Other and products      | 2003           | 10                                                             |
| 66               | Fiji    | Rape and Mustard Oil            | 2003           | 5                                                              |
| 66               | Fiji    | Rape and Mustardseed            | 2003           | 1                                                              |
| 66               | Fiji    | Rice (Milled Equivalent)        | 2003           | 497                                                            |
| 66               | Fiji    | Roots, Other                    | 2003           | 81                                                             |
| 66               | Fiji    | Soyabean Oil                    | 2003           | 181                                                            |
| 66               | Fiji    | Soyabeans                       | 2003           | 1                                                              |
| 66               | Fiji    | Spices                          | 2003           | 8                                                              |
| 66               | Fiji    | Spices, Other                   | 2003           | 6                                                              |
| 66               | Fiji    | Starchy Roots                   | 2003           | 228                                                            |
| 66               | Fiji    | Stimulants                      | 2003           | 8                                                              |
| 66               | Fiji    | Sugar & Sweeteners              | 2003           | 297                                                            |
| 66               | Fiji    | Sugar (Raw Equivalent)          | 2003           | 295                                                            |
| 66               | Fiji    | Sunflowerseed Oil               | 2003           | 1                                                              |
| 66               | Fiji    | Sweet potatoes                  | 2003           | 23                                                             |
| 66               | Fiji    | Sweeteners, Other               | 2003           | 1                                                              |
| 66               | Fiji    | Tea (including mate)            | 2003           | 1                                                              |
| 66               | Fiji    | Tomatoes and products           | 2003           | 3                                                              |
| 66               | Fiji    | Treenuts                        | 2003           | 2                                                              |
| 66               | Fiji    | Vegetable Oils                  | 2003           | 276                                                            |
| 66               | Fiji    | Vegetables                      | 2003           | 37                                                             |
| 66               | Fiji    | Vegetables, Other               | 2003           | 25                                                             |
| 66               | Fiji    | Vegetal Products                | 2003           | 2,388                                                          |
| 66               | Fiji    | Wheat and products              | 2003           | 684                                                            |
| 66               | Fiji    | Wine                            | 2003           | 2                                                              |
| 66               | Fiji    | Yams                            | 2003           | 11                                                             |
| 66               | Fiji    | Alcoholic Beverages             | 2004           | 39                                                             |
| 66               | Fiji    | Animal fats                     | 2004           | 121                                                            |
| 66               | Fiji    | Animal Products                 | 2004           | 529                                                            |
| 66               | Fiji    | Apples and products             | 2004           | 3                                                              |
| 66               | Fiji    | Bananas                         | 2004           | 6                                                              |
| 66               | Fiji    | Bailey and products             | 2004           | 4                                                              |
| 66               | Fiji    | Beans                           | 2004           | 4                                                              |
| 66               | Fiji    | Beer                            | 2004           | 29                                                             |
| 66               | Fiji    | Beverages, Alcoholic            | 2004           | 7                                                              |
| 66               | Fiji    | Bovine Meat                     | 2004           | 54                                                             |
| 66               | Fiji    | Butter, Ghee                    | 2004           | 86                                                             |
| 66               | Fiji    | Cassava and products            | 2004           | 83                                                             |
| 66               | Fiji    | Cereals - Excluding Beer        | 2004           | 1,140                                                          |
| 66               | Fiji    | Cereals, Other                  | 2004           | 1                                                              |
| 66               | Fiji    | Cocoa Beans and products        | 2004           | 8                                                              |
| 66               | Fiji    | Coconut Oil                     | 2004           | 75                                                             |
| 66               | Fiji    | Coconuts - Incl Copra           | 2004           | 188                                                            |
| 66               | Fiji    | Cream                           | 2004           | 5                                                              |
| 66               | Fiji    | Crustaceans                     | 2004           | 3                                                              |
| 66               | Fiji    | Dates                           | 2004           | 1                                                              |
| 66               | Fiji    | Demersal Fish                   | 2004           | 5                                                              |
| 66               | Fiji    | Eggs                            | 2004           | 10                                                             |
| 66               | Fiji    | Fats, Animals, Raw              | 2004           | 31                                                             |
| 66               | Fiji    | Fish, Seafood                   | 2004           | 79                                                             |
| 66               | Fiji    | Fruits - Excluding Wine         | 2004           | 31                                                             |
| 66               | Fiji    | Fruits, Other                   | 2004           | 14                                                             |
| 66               | Fiji    | Grand Total                     | 2004           | 2,905                                                          |
| 66               | Fiji    | Grapes and products (excl wine) | 2004           | 2                                                              |
| 66               | Fiji    | Groundnuts (Shelled Eq)         | 2004           | 23                                                             |
| 66               | Fiji    | Honey                           | 2004           | 1                                                              |
| 66               | Fiji    | Maize and products              | 2004           | 3                                                              |
| 66               | Fiji    | Maize Germ Oil                  | 2004           | 5                                                              |
| 66               | Fiji    | Marine Fish, Other              | 2004           | 4                                                              |
| 66               | Fiji    | Meat                            | 2004           | 235                                                            |
| 66               | Fiji    | Milk - Excluding Butter         | 2004           | 71                                                             |
| 66               | Fiji    | Molluscs, Other                 | 2004           | 1                                                              |

Dietary calcium and zinc deficiency risks are decreasing but remain prevalent

| FAO Country code | Country | Food item                       | Reference year | Net energy supply (kcal <i>capita</i> <sup>-1</sup> d <sup>-1</sup> ) |
|------------------|---------|---------------------------------|----------------|-----------------------------------------------------------------------|
| 66               | Fiji    | Mutton & Goat Meat              | 2004           | 75                                                                    |
| 66               | Fiji    | Oats                            | 2004           | 3                                                                     |
| 66               | Fiji    | Offals                          | 2004           | 12                                                                    |
| 66               | Fiji    | Oilcrops                        | 2004           | 215                                                                   |
| 66               | Fiji    | Oilcrops Oil, Other             | 2004           | 32                                                                    |
| 66               | Fiji    | Olive Oil                       | 2004           | 2                                                                     |
| 66               | Fiji    | Onions                          | 2004           | 9                                                                     |
| 66               | Fiji    | Oranges, Mandarines             | 2004           | 2                                                                     |
| 66               | Fiji    | Palm kernels                    | 2004           | 1                                                                     |
| 66               | Fiji    | Palmkernel Oil                  | 2004           | 7                                                                     |
| 66               | Fiji    | Peas                            | 2004           | 67                                                                    |
| 66               | Fiji    | Pelagic Fish                    | 2004           | 66                                                                    |
| 66               | Fiji    | Pepper                          | 2004           | 2                                                                     |
| 66               | Fiji    | Pigmeat                         | 2004           | 45                                                                    |
| 66               | Fiji    | Pineapples and products         | 2004           | 4                                                                     |
| 66               | Fiji    | Potatoes and products           | 2004           | 45                                                                    |
| 66               | Fiji    | Poultry Meat                    | 2004           | 61                                                                    |
| 66               | Fiji    | Pulses                          | 2004           | 82                                                                    |
| 66               | Fiji    | Pulses, Other and products      | 2004           | 11                                                                    |
| 66               | Fiji    | Rape and Mustard Oil            | 2004           | 5                                                                     |
| 66               | Fiji    | Rape and Mustardseed            | 2004           | 1                                                                     |
| 66               | Fiji    | Rice (Milled Equivalent)        | 2004           | 492                                                                   |
| 66               | Fiji    | Roots, Other                    | 2004           | 96                                                                    |
| 66               | Fiji    | Soyabean Oil                    | 2004           | 153                                                                   |
| 66               | Fiji    | Soyabeans                       | 2004           | 1                                                                     |
| 66               | Fiji    | Spices                          | 2004           | 7                                                                     |
| 66               | Fiji    | Spices, Other                   | 2004           | 5                                                                     |
| 66               | Fiji    | Starchy Roots                   | 2004           | 236                                                                   |
| 66               | Fiji    | Stimulants                      | 2004           | 9                                                                     |
| 66               | Fiji    | Sugar & Sweeteners              | 2004           | 295                                                                   |
| 66               | Fiji    | Sugar (Raw Equivalent)          | 2004           | 291                                                                   |
| 66               | Fiji    | Sweet potatoes                  | 2004           | 10                                                                    |
| 66               | Fiji    | Sweeteners, Other               | 2004           | 3                                                                     |
| 66               | Fiji    | Tea (including mate)            | 2004           | 1                                                                     |
| 66               | Fiji    | Tomatoes and products           | 2004           | 3                                                                     |
| 66               | Fiji    | Treenuts                        | 2004           | 2                                                                     |
| 66               | Fiji    | Vegetable Oils                  | 2004           | 280                                                                   |
| 66               | Fiji    | Vegetables                      | 2004           | 39                                                                    |
| 66               | Fiji    | Vegetables, Other               | 2004           | 26                                                                    |
| 66               | Fiji    | Vegetal Products                | 2004           | 2,376                                                                 |
| 66               | Fiji    | Wheat and products              | 2004           | 637                                                                   |
| 66               | Fiji    | Wine                            | 2004           | 2                                                                     |
| 66               | Fiji    | Yams                            | 2004           | 3                                                                     |
| 66               | Fiji    | Alcoholic Beverages             | 2005           | 42                                                                    |
| 66               | Fiji    | Animal fats                     | 2005           | 125                                                                   |
| 66               | Fiji    | Animal Products                 | 2005           | 548                                                                   |
| 66               | Fiji    | Apples and products             | 2005           | 3                                                                     |
| 66               | Fiji    | Bananas                         | 2005           | 7                                                                     |
| 66               | Fiji    | Barley and products             | 2005           | 4                                                                     |
| 66               | Fiji    | Beans                           | 2005           | 4                                                                     |
| 66               | Fiji    | Beer                            | 2005           | 32                                                                    |
| 66               | Fiji    | Beverages, Alcoholic            | 2005           | 8                                                                     |
| 66               | Fiji    | Bovine Meat                     | 2005           | 53                                                                    |
| 66               | Fiji    | Butter, Ghee                    | 2005           | 89                                                                    |
| 66               | Fiji    | Cassava and products            | 2005           | 71                                                                    |
| 66               | Fiji    | Cereals - Excluding Beer        | 2005           | 1,176                                                                 |
| 66               | Fiji    | Cereals, Other                  | 2005           | 1                                                                     |
| 66               | Fiji    | Cocoa Beans and products        | 2005           | 9                                                                     |
| 66               | Fiji    | Coconut Oil                     | 2005           | 73                                                                    |
| 66               | Fiji    | Coconuts - Incl Copra           | 2005           | 190                                                                   |
| 66               | Fiji    | Coffee and products             | 2005           | 1                                                                     |
| 66               | Fiji    | Cream                           | 2005           | 4                                                                     |
| 66               | Fiji    | Crustaceans                     | 2005           | 3                                                                     |
| 66               | Fiji    | Demersal Fish                   | 2005           | 5                                                                     |
| 66               | Fiji    | Eggs                            | 2005           | 15                                                                    |
| 66               | Fiji    | Fats, Animals, Raw              | 2005           | 32                                                                    |
| 66               | Fiji    | Fish, Seafood                   | 2005           | 78                                                                    |
| 66               | Fiji    | Fruits - Excluding Wine         | 2005           | 32                                                                    |
| 66               | Fiji    | Fruits, Other                   | 2005           | 14                                                                    |
| 66               | Fiji    | Grand Total                     | 2005           | 2,945                                                                 |
| 66               | Fiji    | Grapes and products (excl wine) | 2005           | 2                                                                     |
| 66               | Fiji    | Groundnuts (Shelled Eq)         | 2005           | 16                                                                    |
| 66               | Fiji    | Honey                           | 2005           | 1                                                                     |
| 66               | Fiji    | Maize and products              | 2005           | 2                                                                     |
| 66               | Fiji    | Maize Germ Oil                  | 2005           | 3                                                                     |
| 66               | Fiji    | Marine Fish, Other              | 2005           | 4                                                                     |
| 66               | Fiji    | Meat                            | 2005           | 242                                                                   |
| 66               | Fiji    | Milk - Excluding Butter         | 2005           | 76                                                                    |
| 66               | Fiji    | Miscellaneous                   | 2005           | 2                                                                     |
| 66               | Fiji    | Molluscs, Other                 | 2005           | 1                                                                     |
| 66               | Fiji    | Mutton & Goat Meat              | 2005           | 82                                                                    |
| 66               | Fiji    | Oats                            | 2005           | 3                                                                     |
| 66               | Fiji    | Offals                          | 2005           | 12                                                                    |
| 66               | Fiji    | Oilcrops                        | 2005           | 209                                                                   |
| 66               | Fiji    | Oilcrops Oil, Other             | 2005           | 27                                                                    |
| 66               | Fiji    | Oilcrops, Other                 | 2005           | 1                                                                     |
| 66               | Fiji    | Olive Oil                       | 2005           | 1                                                                     |
| 66               | Fiji    | Onions                          | 2005           | 9                                                                     |
| 66               | Fiji    | Oranges, Mandarines             | 2005           | 3                                                                     |
| 66               | Fiji    | Palm kernels                    | 2005           | 1                                                                     |
| 66               | Fiji    | Palmkernel Oil                  | 2005           | 9                                                                     |
| 66               | Fiji    | Peas                            | 2005           | 70                                                                    |
| 66               | Fiji    | Pelagic Fish                    | 2005           | 64                                                                    |
| 66               | Fiji    | Pepper                          | 2005           | 2                                                                     |
| 66               | Fiji    | Pigmeat                         | 2005           | 45                                                                    |
| 66               | Fiji    | Pineapples and products         | 2005           | 3                                                                     |
| 66               | Fiji    | Potatoes and products           | 2005           | 46                                                                    |

Dietary calcium and zinc deficiency risks are decreasing but remain prevalent

| FAO Country code | Country | Food item                       | Reference year | Net energy supply (kcal capita <sup>-1</sup> d <sup>-1</sup> ) |
|------------------|---------|---------------------------------|----------------|----------------------------------------------------------------|
| 66               | Fiji    | Poultry Meat                    | 2005           | 62                                                             |
| 66               | Fiji    | Pulses                          | 2005           | 82                                                             |
| 66               | Fiji    | Pulses, Other and products      | 2005           | 8                                                              |
| 66               | Fiji    | Rape and Mustard Oil            | 2005           | 4                                                              |
| 66               | Fiji    | Rape and Mustardseed            | 2005           | 1                                                              |
| 66               | Fiji    | Rice (Milled Equivalent)        | 2005           | 494                                                            |
| 66               | Fiji    | Roots, Other                    | 2005           | 82                                                             |
| 66               | Fiji    | Soyabean Oil                    | 2005           | 141                                                            |
| 66               | Fiji    | Soyabeans                       | 2005           | 1                                                              |
| 66               | Fiji    | Spices                          | 2005           | 9                                                              |
| 66               | Fiji    | Spices, Other                   | 2005           | 7                                                              |
| 66               | Fiji    | Starchy Roots                   | 2005           | 222                                                            |
| 66               | Fiji    | Stimulants                      | 2005           | 11                                                             |
| 66               | Fiji    | Sugar & Sweeteners              | 2005           | 309                                                            |
| 66               | Fiji    | Sugar (Raw Equivalent)          | 2005           | 307                                                            |
| 66               | Fiji    | Sunflowerseed Oil               | 2005           | 1                                                              |
| 66               | Fiji    | Sweet potatoes                  | 2005           | 14                                                             |
| 66               | Fiji    | Sweeteners, Other               | 2005           | 1                                                              |
| 66               | Fiji    | Tea (including mate)            | 2005           | 1                                                              |
| 66               | Fiji    | Tomatoes and products           | 2005           | 3                                                              |
| 66               | Fiji    | Treenuts                        | 2005           | 3                                                              |
| 66               | Fiji    | Vegetable Oils                  | 2005           | 259                                                            |
| 66               | Fiji    | Vegetables                      | 2005           | 39                                                             |
| 66               | Fiji    | Vegetables, Other               | 2005           | 27                                                             |
| 66               | Fiji    | Vegetal Products                | 2005           | 2,396                                                          |
| 66               | Fiji    | Wheat and products              | 2005           | 672                                                            |
| 66               | Fiji    | Wine                            | 2005           | 3                                                              |
| 66               | Fiji    | Yams                            | 2005           | 9                                                              |
| 66               | Fiji    | Alcoholic Beverages             | 2006           | 44                                                             |
| 66               | Fiji    | Animal fats                     | 2006           | 124                                                            |
| 66               | Fiji    | Animal Products                 | 2006           | 552                                                            |
| 66               | Fiji    | Apples and products             | 2006           | 3                                                              |
| 66               | Fiji    | Bananas                         | 2006           | 8                                                              |
| 66               | Fiji    | Barley and products             | 2006           | 4                                                              |
| 66               | Fiji    | Beans                           | 2006           | 4                                                              |
| 66               | Fiji    | Beer                            | 2006           | 32                                                             |
| 66               | Fiji    | Beverages, Alcoholic            | 2006           | 9                                                              |
| 66               | Fiji    | Bovine Meat                     | 2006           | 54                                                             |
| 66               | Fiji    | Butter, Ghee                    | 2006           | 89                                                             |
| 66               | Fiji    | Cassava and products            | 2006           | 63                                                             |
| 66               | Fiji    | Cereals - Excluding Beer        | 2006           | 1,153                                                          |
| 66               | Fiji    | Cereals, Other                  | 2006           | 3                                                              |
| 66               | Fiji    | Cocoa Beans and products        | 2006           | 13                                                             |
| 66               | Fiji    | Coconut Oil                     | 2006           | 67                                                             |
| 66               | Fiji    | Coconuts - Incl Copra           | 2006           | 188                                                            |
| 66               | Fiji    | Cream                           | 2006           | 2                                                              |
| 66               | Fiji    | Crustaceans                     | 2006           | 3                                                              |
| 66               | Fiji    | Dates                           | 2006           | 1                                                              |
| 66               | Fiji    | Demersal Fish                   | 2006           | 5                                                              |
| 66               | Fiji    | Eggs                            | 2006           | 15                                                             |
| 66               | Fiji    | Fats, Animals, Raw              | 2006           | 33                                                             |
| 66               | Fiji    | Fish, Seafood                   | 2006           | 77                                                             |
| 66               | Fiji    | Freshwater Fish                 | 2006           | 1                                                              |
| 66               | Fiji    | Fruits - Excluding Wine         | 2006           | 37                                                             |
| 66               | Fiji    | Fruits, Other                   | 2006           | 16                                                             |
| 66               | Fiji    | Grand Total                     | 2006           | 2,952                                                          |
| 66               | Fiji    | Grapes and products (excl wine) | 2006           | 2                                                              |
| 66               | Fiji    | Groundnuts (Shelled Eq)         | 2006           | 19                                                             |
| 66               | Fiji    | Honey                           | 2006           | 1                                                              |
| 66               | Fiji    | Maize and products              | 2006           | 4                                                              |
| 66               | Fiji    | Maize Germ Oil                  | 2006           | 4                                                              |
| 66               | Fiji    | Marine Fish, Other              | 2006           | 5                                                              |
| 66               | Fiji    | Meat                            | 2006           | 252                                                            |
| 66               | Fiji    | Milk - Excluding Butter         | 2006           | 70                                                             |
| 66               | Fiji    | Miscellaneous                   | 2006           | 4                                                              |
| 66               | Fiji    | Molluscs, Other                 | 2006           | 1                                                              |
| 66               | Fiji    | Mutton & Goat Meat              | 2006           | 87                                                             |
| 66               | Fiji    | Oats                            | 2006           | 3                                                              |
| 66               | Fiji    | Offals                          | 2006           | 13                                                             |
| 66               | Fiji    | Oilcrops                        | 2006           | 221                                                            |
| 66               | Fiji    | Oilcrops Oil, Other             | 2006           | 28                                                             |
| 66               | Fiji    | Oilcrops, Other                 | 2006           | 11                                                             |
| 66               | Fiji    | Olive Oil                       | 2006           | 2                                                              |
| 66               | Fiji    | Onions                          | 2006           | 10                                                             |
| 66               | Fiji    | Oranges, Mandarines             | 2006           | 3                                                              |
| 66               | Fiji    | Palm kernels                    | 2006           | 1                                                              |
| 66               | Fiji    | Palmkernel Oil                  | 2006           | 1                                                              |
| 66               | Fiji    | Peas                            | 2006           | 60                                                             |
| 66               | Fiji    | Pelagic Fish                    | 2006           | 62                                                             |
| 66               | Fiji    | Pepper                          | 2006           | 2                                                              |
| 66               | Fiji    | Pigmeat                         | 2006           | 44                                                             |
| 66               | Fiji    | Pineapples and products         | 2006           | 4                                                              |
| 66               | Fiji    | Potatoes and products           | 2006           | 51                                                             |
| 66               | Fiji    | Poultry Meat                    | 2006           | 67                                                             |
| 66               | Fiji    | Pulses                          | 2006           | 75                                                             |
| 66               | Fiji    | Pulses, Other and products      | 2006           | 10                                                             |
| 66               | Fiji    | Rape and Mustard Oil            | 2006           | 6                                                              |
| 66               | Fiji    | Rice (Milled Equivalent)        | 2006           | 490                                                            |
| 66               | Fiji    | Roots, Other                    | 2006           | 94                                                             |
| 66               | Fiji    | Soyabean Oil                    | 2006           | 141                                                            |
| 66               | Fiji    | Soyabeans                       | 2006           | 1                                                              |
| 66               | Fiji    | Spices                          | 2006           | 9                                                              |
| 66               | Fiji    | Spices, Other                   | 2006           | 7                                                              |
| 66               | Fiji    | Starchy Roots                   | 2006           | 230                                                            |
| 66               | Fiji    | Stimulants                      | 2006           | 14                                                             |
| 66               | Fiji    | Sugar & Sweeteners              | 2006           | 320                                                            |
| 66               | Fiji    | Sugar (Raw Equivalent)          | 2006           | 317                                                            |

Dietary calcium and zinc deficiency risks are decreasing but remain prevalent

| FAO Country code | Country | Food item                       | Reference year | Net energy supply (kcal capita <sup>-1</sup> d <sup>-1</sup> ) |
|------------------|---------|---------------------------------|----------------|----------------------------------------------------------------|
| 66               | Fiji    | Sunflowerseed Oil               | 2006           | 1                                                              |
| 66               | Fiji    | Sweet potatoes                  | 2006           | 15                                                             |
| 66               | Fiji    | Sweeteners, Other               | 2006           | 2                                                              |
| 66               | Fiji    | Tea (including mate)            | 2006           | 1                                                              |
| 66               | Fiji    | Tomatoes and products           | 2006           | 3                                                              |
| 66               | Fiji    | Treenuts                        | 2006           | 1                                                              |
| 66               | Fiji    | Vegetable Oils                  | 2006           | 251                                                            |
| 66               | Fiji    | Vegetables                      | 2006           | 41                                                             |
| 66               | Fiji    | Vegetables, Other               | 2006           | 28                                                             |
| 66               | Fiji    | Vegetal Products                | 2006           | 2,401                                                          |
| 66               | Fiji    | Wheat and products              | 2006           | 649                                                            |
| 66               | Fiji    | Wine                            | 2006           | 3                                                              |
| 66               | Fiji    | Yams                            | 2006           | 8                                                              |
| 66               | Fiji    | Alcoholic Beverages             | 2007           | 45                                                             |
| 66               | Fiji    | Animal fats                     | 2007           | 121                                                            |
| 66               | Fiji    | Animal Products                 | 2007           | 520                                                            |
| 66               | Fiji    | Apples and products             | 2007           | 3                                                              |
| 66               | Fiji    | Bananas                         | 2007           | 5                                                              |
| 66               | Fiji    | Barley and products             | 2007           | 4                                                              |
| 66               | Fiji    | Beans                           | 2007           | 3                                                              |
| 66               | Fiji    | Beer                            | 2007           | 27                                                             |
| 66               | Fiji    | Beverages, Alcoholic            | 2007           | 15                                                             |
| 66               | Fiji    | Bovine Meat                     | 2007           | 55                                                             |
| 66               | Fiji    | Butter, Chee                    | 2007           | 86                                                             |
| 66               | Fiji    | Cassava and products            | 2007           | 74                                                             |
| 66               | Fiji    | Cereals - Excluding Beer        | 2007           | 1,145                                                          |
| 66               | Fiji    | Cereals, Other                  | 2007           | 5                                                              |
| 66               | Fiji    | Cocoa Beans and products        | 2007           | 9                                                              |
| 66               | Fiji    | Coconut Oil                     | 2007           | 77                                                             |
| 66               | Fiji    | Coconuts - Incl Copra           | 2007           | 190                                                            |
| 66               | Fiji    | Cream                           | 2007           | 2                                                              |
| 66               | Fiji    | Crustaceans                     | 2007           | 3                                                              |
| 66               | Fiji    | Demersal Fish                   | 2007           | 4                                                              |
| 66               | Fiji    | Eggs                            | 2007           | 14                                                             |
| 66               | Fiji    | Fats, Animals, Raw              | 2007           | 33                                                             |
| 66               | Fiji    | Fish, Seafood                   | 2007           | 75                                                             |
| 66               | Fiji    | Freshwater Fish                 | 2007           | 1                                                              |
| 66               | Fiji    | Fruits - Excluding Wine         | 2007           | 38                                                             |
| 66               | Fiji    | Fruits, Other                   | 2007           | 22                                                             |
| 66               | Fiji    | Grand Total                     | 2007           | 2,927                                                          |
| 66               | Fiji    | Grapes and products (excl wine) | 2007           | 1                                                              |
| 66               | Fiji    | Groundnut Oil                   | 2007           | 1                                                              |
| 66               | Fiji    | Groundnuts (Shelled Eq)         | 2007           | 15                                                             |
| 66               | Fiji    | Honey                           | 2007           | 5                                                              |
| 66               | Fiji    | Maize and products              | 2007           | 4                                                              |
| 66               | Fiji    | Maize Germ Oil                  | 2007           | 8                                                              |
| 66               | Fiji    | Marine Fish, Other              | 2007           | 12                                                             |
| 66               | Fiji    | Meat                            | 2007           | 232                                                            |
| 66               | Fiji    | Milk - Excluding Butter         | 2007           | 64                                                             |
| 66               | Fiji    | Miscellaneous                   | 2007           | 3                                                              |
| 66               | Fiji    | Mutton & Goat Meat              | 2007           | 68                                                             |
| 66               | Fiji    | Oats                            | 2007           | 3                                                              |
| 66               | Fiji    | Offals                          | 2007           | 12                                                             |
| 66               | Fiji    | Oilcrops                        | 2007           | 208                                                            |
| 66               | Fiji    | Oilcrops Oil, Other             | 2007           | 35                                                             |
| 66               | Fiji    | Olive Oil                       | 2007           | 2                                                              |
| 66               | Fiji    | Onions                          | 2007           | 9                                                              |
| 66               | Fiji    | Oranges, Mandarines             | 2007           | 3                                                              |
| 66               | Fiji    | Palmkernel Oil                  | 2007           | 2                                                              |
| 66               | Fiji    | Peas                            | 2007           | 50                                                             |
| 66               | Fiji    | Pelagic Fish                    | 2007           | 55                                                             |
| 66               | Fiji    | Pepper                          | 2007           | 2                                                              |
| 66               | Fiji    | Pigmeat                         | 2007           | 43                                                             |
| 66               | Fiji    | Pineapples and products         | 2007           | 3                                                              |
| 66               | Fiji    | Potatoes and products           | 2007           | 48                                                             |
| 66               | Fiji    | Poultry Meat                    | 2007           | 65                                                             |
| 66               | Fiji    | Pulses                          | 2007           | 61                                                             |
| 66               | Fiji    | Pulses, Other and products      | 2007           | 8                                                              |
| 66               | Fiji    | Rape and Mustard Oil            | 2007           | 6                                                              |
| 66               | Fiji    | Rape and Mustardseed            | 2007           | 1                                                              |
| 66               | Fiji    | Rice (Milled Equivalent)        | 2007           | 484                                                            |
| 66               | Fiji    | Roots, Other                    | 2007           | 105                                                            |
| 66               | Fiji    | Soyabean Oil                    | 2007           | 143                                                            |
| 66               | Fiji    | Soyabeans                       | 2007           | 1                                                              |
| 66               | Fiji    | Spices                          | 2007           | 8                                                              |
| 66               | Fiji    | Spices, Other                   | 2007           | 6                                                              |
| 66               | Fiji    | Starchy Roots                   | 2007           | 241                                                            |
| 66               | Fiji    | Stimulants                      | 2007           | 10                                                             |
| 66               | Fiji    | Sugar & Sweeteners              | 2007           | 332                                                            |
| 66               | Fiji    | Sugar (Raw Equivalent)          | 2007           | 325                                                            |
| 66               | Fiji    | Sunflowerseed Oil               | 2007           | 1                                                              |
| 66               | Fiji    | Sweet potatoes                  | 2007           | 7                                                              |
| 66               | Fiji    | Sweeteners, Other               | 2007           | 3                                                              |
| 66               | Fiji    | Tea (including mate)            | 2007           | 1                                                              |
| 66               | Fiji    | Tomatoes and products           | 2007           | 3                                                              |
| 66               | Fiji    | Treenuts                        | 2007           | 3                                                              |
| 66               | Fiji    | Vegetable Oils                  | 2007           | 275                                                            |
| 66               | Fiji    | Vegetables                      | 2007           | 38                                                             |
| 66               | Fiji    | Vegetables, Other               | 2007           | 25                                                             |
| 66               | Fiji    | Vegetal Products                | 2007           | 2,407                                                          |
| 66               | Fiji    | Wheat and products              | 2007           | 646                                                            |
| 66               | Fiji    | Wine                            | 2007           | 3                                                              |
| 66               | Fiji    | Yams                            | 2007           | 7                                                              |
| 66               | Fiji    | Alcoholic Beverages             | 2008           | 42                                                             |
| 66               | Fiji    | Animal fats                     | 2008           | 124                                                            |
| 66               | Fiji    | Animal Products                 | 2008           | 514                                                            |
| 66               | Fiji    | Apples and products             | 2008           | 3                                                              |

Dietary calcium and zinc deficiency risks are decreasing but remain prevalent

| FAO Country code | Country | Food item                       | Reference year | Net energy supply (kcal capita <sup>-1</sup> d <sup>-1</sup> ) |
|------------------|---------|---------------------------------|----------------|----------------------------------------------------------------|
| 66               | Fiji    | Bananas                         | 2008           | 15                                                             |
| 66               | Fiji    | Barley and products             | 2008           | 2                                                              |
| 66               | Fiji    | Beans                           | 2008           | 3                                                              |
| 66               | Fiji    | Beer                            | 2008           | 26                                                             |
| 66               | Fiji    | Beverages, Alcoholic            | 2008           | 8                                                              |
| 66               | Fiji    | Bovine Meat                     | 2008           | 53                                                             |
| 66               | Fiji    | Butter, Ghee                    | 2008           | 81                                                             |
| 66               | Fiji    | Cassava and products            | 2008           | 71                                                             |
| 66               | Fiji    | Cereals - Excluding Beer        | 2008           | 1,187                                                          |
| 66               | Fiji    | Cereals, Other                  | 2008           | 6                                                              |
| 66               | Fiji    | Cocoa Beans and products        | 2008           | 10                                                             |
| 66               | Fiji    | Coconut Oil                     | 2008           | 71                                                             |
| 66               | Fiji    | Coconuts - Incl Copra           | 2008           | 190                                                            |
| 66               | Fiji    | Cream                           | 2008           | 3                                                              |
| 66               | Fiji    | Crustaceans                     | 2008           | 2                                                              |
| 66               | Fiji    | Demersal Fish                   | 2008           | 4                                                              |
| 66               | Fiji    | Eggs                            | 2008           | 9                                                              |
| 66               | Fiji    | Fats, Animals, Raw              | 2008           | 39                                                             |
| 66               | Fiji    | Fish, Seafood                   | 2008           | 73                                                             |
| 66               | Fiji    | Freshwater Fish                 | 2008           | 1                                                              |
| 66               | Fiji    | Fruits - Excluding Wine         | 2008           | 50                                                             |
| 66               | Fiji    | Fruits, Other                   | 2008           | 22                                                             |
| 66               | Fiji    | Grand Total                     | 2008           | 2,947                                                          |
| 66               | Fiji    | Grapes and products (excl wine) | 2008           | 2                                                              |
| 66               | Fiji    | Groundnuts (Shelled Eq)         | 2008           | 16                                                             |
| 66               | Fiji    | Honey                           | 2008           | 6                                                              |
| 66               | Fiji    | Maize and products              | 2008           | 4                                                              |
| 66               | Fiji    | Maize Germ Oil                  | 2008           | 2                                                              |
| 66               | Fiji    | Marine Fish, Other              | 2008           | 16                                                             |
| 66               | Fiji    | Meat                            | 2008           | 231                                                            |
| 66               | Fiji    | Milk - Excluding Butter         | 2008           | 64                                                             |
| 66               | Fiji    | Miscellaneous                   | 2008           | 3                                                              |
| 66               | Fiji    | Mutton & Goat Meat              | 2008           | 70                                                             |
| 66               | Fiji    | Oats                            | 2008           | 3                                                              |
| 66               | Fiji    | Offals                          | 2008           | 11                                                             |
| 66               | Fiji    | Oilcrops                        | 2008           | 209                                                            |
| 66               | Fiji    | Oilcrops Oil, Other             | 2008           | 39                                                             |
| 66               | Fiji    | Olive Oil                       | 2008           | 2                                                              |
| 66               | Fiji    | Onions                          | 2008           | 9                                                              |
| 66               | Fiji    | Oranges, Mandarines             | 2008           | 4                                                              |
| 66               | Fiji    | Palmkernel Oil                  | 2008           | 1                                                              |
| 66               | Fiji    | Peas                            | 2008           | 58                                                             |
| 66               | Fiji    | Pelagic Fish                    | 2008           | 49                                                             |
| 66               | Fiji    | Pepper                          | 2008           | 2                                                              |
| 66               | Fiji    | Pigmeat                         | 2008           | 44                                                             |
| 66               | Fiji    | Pimento                         | 2008           | 1                                                              |
| 66               | Fiji    | Pineapples and products         | 2008           | 4                                                              |
| 66               | Fiji    | Potatoes and products           | 2008           | 44                                                             |
| 66               | Fiji    | Poultry Meat                    | 2008           | 64                                                             |
| 66               | Fiji    | Pulses                          | 2008           | 70                                                             |
| 66               | Fiji    | Pulses, Other and products      | 2008           | 9                                                              |
| 66               | Fiji    | Rape and Mustardseed            | 2008           | 1                                                              |
| 66               | Fiji    | Rice (Milled Equivalent)        | 2008           | 530                                                            |
| 66               | Fiji    | Roots, Other                    | 2008           | 94                                                             |
| 66               | Fiji    | Soyabean Oil                    | 2008           | 143                                                            |
| 66               | Fiji    | Soyabeans                       | 2008           | 1                                                              |
| 66               | Fiji    | Spices                          | 2008           | 10                                                             |
| 66               | Fiji    | Spices, Other                   | 2008           | 7                                                              |
| 66               | Fiji    | Starchy Roots                   | 2008           | 234                                                            |
| 66               | Fiji    | Stimulants                      | 2008           | 11                                                             |
| 66               | Fiji    | Sugar & Sweeteners              | 2008           | 314                                                            |
| 66               | Fiji    | Sugar (Raw Equivalent)          | 2008           | 306                                                            |
| 66               | Fiji    | Sunflowerseed Oil               | 2008           | 1                                                              |
| 66               | Fiji    | Sweet potatoes                  | 2008           | 14                                                             |
| 66               | Fiji    | Sweeteners, Other               | 2008           | 2                                                              |
| 66               | Fiji    | Tea (including mate)            | 2008           | 1                                                              |
| 66               | Fiji    | Tomatoes and products           | 2008           | 4                                                              |
| 66               | Fiji    | Treenuts                        | 2008           | 4                                                              |
| 66               | Fiji    | Vegetable Oils                  | 2008           | 258                                                            |
| 66               | Fiji    | Vegetables                      | 2008           | 41                                                             |
| 66               | Fiji    | Vegetables, Other               | 2008           | 28                                                             |
| 66               | Fiji    | Vegetal Products                | 2008           | 2,433                                                          |
| 66               | Fiji    | Wheat and products              | 2008           | 643                                                            |
| 66               | Fiji    | Wine                            | 2008           | 7                                                              |
| 66               | Fiji    | Yams                            | 2008           | 12                                                             |
| 66               | Fiji    | Alcoholic Beverages             | 2009           | 45                                                             |
| 66               | Fiji    | Animal fats                     | 2009           | 127                                                            |
| 66               | Fiji    | Animal Products                 | 2009           | 491                                                            |
| 66               | Fiji    | Apples and products             | 2009           | 3                                                              |
| 66               | Fiji    | Bananas                         | 2009           | 6                                                              |
| 66               | Fiji    | Barley and products             | 2009           | 1                                                              |
| 66               | Fiji    | Beans                           | 2009           | 1                                                              |
| 66               | Fiji    | Beer                            | 2009           | 28                                                             |
| 66               | Fiji    | Beverages, Alcoholic            | 2009           | 14                                                             |
| 66               | Fiji    | Bovine Meat                     | 2009           | 48                                                             |
| 66               | Fiji    | Butter, Ghee                    | 2009           | 80                                                             |
| 66               | Fiji    | Cassava and products            | 2009           | 50                                                             |
| 66               | Fiji    | Cereals - Excluding Beer        | 2009           | 1,161                                                          |
| 66               | Fiji    | Cereals, Other                  | 2009           | 6                                                              |
| 66               | Fiji    | Cocoa Beans and products        | 2009           | 8                                                              |
| 66               | Fiji    | Coconut Oil                     | 2009           | 99                                                             |
| 66               | Fiji    | Coconuts - Incl Copra           | 2009           | 198                                                            |
| 66               | Fiji    | Cream                           | 2009           | 4                                                              |
| 66               | Fiji    | Demersal Fish                   | 2009           | 3                                                              |
| 66               | Fiji    | Eggs                            | 2009           | 11                                                             |
| 66               | Fiji    | Fats, Animals, Raw              | 2009           | 43                                                             |
| 66               | Fiji    | Fish, Seafood                   | 2009           | 75                                                             |

## Dietary calcium and zinc deficiency risks are decreasing but remain prevalent

| FAO Country code | Country | Food item                       | Reference year | Net energy supply (kcal <i>capita</i> <sup>-1</sup> d <sup>-1</sup> ) |
|------------------|---------|---------------------------------|----------------|-----------------------------------------------------------------------|
| 66               | Fiji    | Freshwater Fish                 | 2009           | 1                                                                     |
| 66               | Fiji    | Fruits - Excluding Wine         | 2009           | 30                                                                    |
| 66               | Fiji    | Fruits, Other                   | 2009           | 12                                                                    |
| 66               | Fiji    | Grand Total                     | 2009           | 2,908                                                                 |
| 66               | Fiji    | Grapes and products (excl wine) | 2009           | 1                                                                     |
| 66               | Fiji    | Groundnuts (Shelled Eq)         | 2009           | 14                                                                    |
| 66               | Fiji    | Honey                           | 2009           | 4                                                                     |
| 66               | Fiji    | Maize and products              | 2009           | 1                                                                     |
| 66               | Fiji    | Maize Germ Oil                  | 2009           | 2                                                                     |
| 66               | Fiji    | Marine Fish, Other              | 2009           | 14                                                                    |
| 66               | Fiji    | Meat                            | 2009           | 200                                                                   |
| 66               | Fiji    | Milk - Excluding Butter         | 2009           | 69                                                                    |
| 66               | Fiji    | Miscellaneous                   | 2009           | 3                                                                     |
| 66               | Fiji    | Mutton & Goat Meat              | 2009           | 57                                                                    |
| 66               | Fiji    | Oats                            | 2009           | 3                                                                     |
| 66               | Fiji    | Offals                          | 2009           | 9                                                                     |
| 66               | Fiji    | Oilcrops                        | 2009           | 216                                                                   |
| 66               | Fiji    | Oilcrops Oil, Other             | 2009           | 32                                                                    |
| 66               | Fiji    | Olive Oil                       | 2009           | 2                                                                     |
| 66               | Fiji    | Onions                          | 2009           | 9                                                                     |
| 66               | Fiji    | Oranges, Mandarines             | 2009           | 4                                                                     |
| 66               | Fiji    | Palmkernel Oil                  | 2009           | 5                                                                     |
| 66               | Fiji    | Peas                            | 2009           | 57                                                                    |
| 66               | Fiji    | Pelagic Fish                    | 2009           | 56                                                                    |
| 66               | Fiji    | Pepper                          | 2009           | 2                                                                     |
| 66               | Fiji    | Pigmeat                         | 2009           | 42                                                                    |
| 66               | Fiji    | Pineapples and products         | 2009           | 4                                                                     |
| 66               | Fiji    | Potatoes and products           | 2009           | 45                                                                    |
| 66               | Fiji    | Poultry Meat                    | 2009           | 52                                                                    |
| 66               | Fiji    | Pulses                          | 2009           | 65                                                                    |
| 66               | Fiji    | Pulses, Other and products      | 2009           | 7                                                                     |
| 66               | Fiji    | Rape and Mustard Oil            | 2009           | 2                                                                     |
| 66               | Fiji    | Rape and Mustardseed            | 2009           | 1                                                                     |
| 66               | Fiji    | Rice (Milled Equivalent)        | 2009           | 528                                                                   |
| 66               | Fiji    | Roots, Other                    | 2009           | 114                                                                   |
| 66               | Fiji    | Soyabean Oil                    | 2009           | 141                                                                   |
| 66               | Fiji    | Soyabeans                       | 2009           | 3                                                                     |
| 66               | Fiji    | Spices                          | 2009           | 8                                                                     |
| 66               | Fiji    | Spices, Other                   | 2009           | 6                                                                     |
| 66               | Fiji    | Starchy Roots                   | 2009           | 228                                                                   |
| 66               | Fiji    | Stimulants                      | 2009           | 9                                                                     |
| 66               | Fiji    | Sugar & Sweeteners              | 2009           | 329                                                                   |
| 66               | Fiji    | Sugar (Raw Equivalent)          | 2009           | 322                                                                   |
| 66               | Fiji    | Sweet potatoes                  | 2009           | 15                                                                    |
| 66               | Fiji    | Sweeteners, Other               | 2009           | 3                                                                     |
| 66               | Fiji    | Tea (including mate)            | 2009           | 1                                                                     |
| 66               | Fiji    | Tomatoes and products           | 2009           | 3                                                                     |
| 66               | Fiji    | Treenuts                        | 2009           | 2                                                                     |
| 66               | Fiji    | Vegetable Oils                  | 2009           | 284                                                                   |
| 66               | Fiji    | Vegetables                      | 2009           | 36                                                                    |
| 66               | Fiji    | Vegetables, Other               | 2009           | 24                                                                    |
| 66               | Fiji    | Vegetal Products                | 2009           | 2,417                                                                 |
| 66               | Fiji    | Wheat and products              | 2009           | 621                                                                   |
| 66               | Fiji    | Wine                            | 2009           | 3                                                                     |
| 66               | Fiji    | Yams                            | 2009           | 4                                                                     |
| 66               | Fiji    | Alcoholic Beverages             | 2010           | 46                                                                    |
| 66               | Fiji    | Animal fats                     | 2010           | 144                                                                   |
| 66               | Fiji    | Animal Products                 | 2010           | 515                                                                   |
| 66               | Fiji    | Apples and products             | 2010           | 3                                                                     |
| 66               | Fiji    | Bananas                         | 2010           | 5                                                                     |
| 66               | Fiji    | Barley and products             | 2010           | 1                                                                     |
| 66               | Fiji    | Beans                           | 2010           | 2                                                                     |
| 66               | Fiji    | Beer                            | 2010           | 32                                                                    |
| 66               | Fiji    | Beverages, Alcoholic            | 2010           | 13                                                                    |
| 66               | Fiji    | Bovine Meat                     | 2010           | 51                                                                    |
| 66               | Fiji    | Butter, Ghee                    | 2010           | 92                                                                    |
| 66               | Fiji    | Cassava and products            | 2010           | 66                                                                    |
| 66               | Fiji    | Cereals - Excluding Beer        | 2010           | 1,195                                                                 |
| 66               | Fiji    | Cereals, Other                  | 2010           | 5                                                                     |
| 66               | Fiji    | Cocoa Beans and products        | 2010           | 8                                                                     |
| 66               | Fiji    | Coconut Oil                     | 2010           | 80                                                                    |
| 66               | Fiji    | Coconuts - Incl Copra           | 2010           | 193                                                                   |
| 66               | Fiji    | Cream                           | 2010           | 5                                                                     |
| 66               | Fiji    | Crustaceans                     | 2010           | 1                                                                     |
| 66               | Fiji    | Demersal Fish                   | 2010           | 3                                                                     |
| 66               | Fiji    | Eggs                            | 2010           | 18                                                                    |
| 66               | Fiji    | Fats, Animals, Raw              | 2010           | 47                                                                    |
| 66               | Fiji    | Fish, Seafood                   | 2010           | 77                                                                    |
| 66               | Fiji    | Fruits - Excluding Wine         | 2010           | 32                                                                    |
| 66               | Fiji    | Fruits, Other                   | 2010           | 12                                                                    |
| 66               | Fiji    | Grand Total                     | 2010           | 2,917                                                                 |
| 66               | Fiji    | Grapes and products (excl wine) | 2010           | 1                                                                     |
| 66               | Fiji    | Groundnuts (Shelled Eq)         | 2010           | 15                                                                    |
| 66               | Fiji    | Honey                           | 2010           | 3                                                                     |
| 66               | Fiji    | Maize and products              | 2010           | 3                                                                     |
| 66               | Fiji    | Maize Germ Oil                  | 2010           | 4                                                                     |
| 66               | Fiji    | Marine Fish, Other              | 2010           | 3                                                                     |
| 66               | Fiji    | Meat                            | 2010           | 194                                                                   |
| 66               | Fiji    | Meat, Other                     | 2010           | 1                                                                     |
| 66               | Fiji    | Milk - Excluding Butter         | 2010           | 71                                                                    |
| 66               | Fiji    | Miscellaneous                   | 2010           | 3                                                                     |
| 66               | Fiji    | Mutton & Goat Meat              | 2010           | 34                                                                    |
| 66               | Fiji    | Oats                            | 2010           | 3                                                                     |
| 66               | Fiji    | Offals                          | 2010           | 10                                                                    |
| 66               | Fiji    | Oilcrops                        | 2010           | 220                                                                   |
| 66               | Fiji    | Oilcrops Oil, Other             | 2010           | 24                                                                    |
| 66               | Fiji    | Oilcrops, Other                 | 2010           | 8                                                                     |

Dietary calcium and zinc deficiency risks are decreasing but remain prevalent

| FAO Country code | Country | Food item                       | Reference year | Net energy supply (kcal capita <sup>-1</sup> d <sup>-1</sup> ) |
|------------------|---------|---------------------------------|----------------|----------------------------------------------------------------|
| 66               | Fiji    | Olive Oil                       | 2010           | 3                                                              |
| 66               | Fiji    | Onions                          | 2010           | 9                                                              |
| 66               | Fiji    | Oranges, Mandarines             | 2010           | 5                                                              |
| 66               | Fiji    | Palmkernel Oil                  | 2010           | 4                                                              |
| 66               | Fiji    | Peas                            | 2010           | 63                                                             |
| 66               | Fiji    | Pelagic Fish                    | 2010           | 68                                                             |
| 66               | Fiji    | Pepper                          | 2010           | 1                                                              |
| 66               | Fiji    | Pigmeat                         | 2010           | 42                                                             |
| 66               | Fiji    | Pineapples and products         | 2010           | 5                                                              |
| 66               | Fiji    | Potatoes and products           | 2010           | 48                                                             |
| 66               | Fiji    | Poultry Meat                    | 2010           | 67                                                             |
| 66               | Fiji    | Pulses                          | 2010           | 84                                                             |
| 66               | Fiji    | Pulses, Other and products      | 2010           | 19                                                             |
| 66               | Fiji    | Rape and Mustard Oil            | 2010           | 1                                                              |
| 66               | Fiji    | Rape and Mustardseed            | 2010           | 1                                                              |
| 66               | Fiji    | Rice (Milled Equivalent)        | 2010           | 561                                                            |
| 66               | Fiji    | Roots, Other                    | 2010           | 80                                                             |
| 66               | Fiji    | Soyabean Oil                    | 2010           | 113                                                            |
| 66               | Fiji    | Soyabeans                       | 2010           | 1                                                              |
| 66               | Fiji    | Spices                          | 2010           | 9                                                              |
| 66               | Fiji    | Spices, Other                   | 2010           | 7                                                              |
| 66               | Fiji    | Starchy Roots                   | 2010           | 222                                                            |
| 66               | Fiji    | Stimulants                      | 2010           | 9                                                              |
| 66               | Fiji    | Sugar & Sweeteners              | 2010           | 317                                                            |
| 66               | Fiji    | Sugar (Raw Equivalent)          | 2010           | 311                                                            |
| 66               | Fiji    | Sweet potatoes                  | 2010           | 23                                                             |
| 66               | Fiji    | Sweeteners, Other               | 2010           | 3                                                              |
| 66               | Fiji    | Tea (including mate)            | 2010           | 1                                                              |
| 66               | Fiji    | Tomatoes and products           | 2010           | 3                                                              |
| 66               | Fiji    | Treenuts                        | 2010           | 2                                                              |
| 66               | Fiji    | Vegetable Oils                  | 2010           | 230                                                            |
| 66               | Fiji    | Vegetables                      | 2010           | 34                                                             |
| 66               | Fiji    | Vegetables, Other               | 2010           | 22                                                             |
| 66               | Fiji    | Vegetal Products                | 2010           | 2,402                                                          |
| 66               | Fiji    | Wheat and products              | 2010           | 621                                                            |
| 66               | Fiji    | Wine                            | 2010           | 2                                                              |
| 66               | Fiji    | Yams                            | 2010           | 5                                                              |
| 66               | Fiji    | Alcoholic Beverages             | 2011           | 36                                                             |
| 66               | Fiji    | Animal fats                     | 2011           | 142                                                            |
| 66               | Fiji    | Animal Products                 | 2011           | 542                                                            |
| 66               | Fiji    | Apples and products             | 2011           | 4                                                              |
| 66               | Fiji    | Bananas                         | 2011           | 4                                                              |
| 66               | Fiji    | Barley and products             | 2011           | 1                                                              |
| 66               | Fiji    | Beans                           | 2011           | 2                                                              |
| 66               | Fiji    | Beer                            | 2011           | 25                                                             |
| 66               | Fiji    | Beverages, Alcoholic            | 2011           | 9                                                              |
| 66               | Fiji    | Bovine Meat                     | 2011           | 53                                                             |
| 66               | Fiji    | Butter, Ghee                    | 2011           | 80                                                             |
| 66               | Fiji    | Cassava and products            | 2011           | 85                                                             |
| 66               | Fiji    | Cereals - Excluding Beer        | 2011           | 1,112                                                          |
| 66               | Fiji    | Cereals, Other                  | 2011           | 9                                                              |
| 66               | Fiji    | Cocoa Beans and products        | 2011           | 8                                                              |
| 66               | Fiji    | Coconut Oil                     | 2011           | 77                                                             |
| 66               | Fiji    | Coconuts - Incl Copra           | 2011           | 190                                                            |
| 66               | Fiji    | Cream                           | 2011           | 10                                                             |
| 66               | Fiji    | Crustaceans                     | 2011           | 1                                                              |
| 66               | Fiji    | Demersal Fish                   | 2011           | 3                                                              |
| 66               | Fiji    | Eggs                            | 2011           | 16                                                             |
| 66               | Fiji    | Fats, Animals, Raw              | 2011           | 53                                                             |
| 66               | Fiji    | Fish, Seafood                   | 2011           | 76                                                             |
| 66               | Fiji    | Fruits - Excluding Wine         | 2011           | 29                                                             |
| 66               | Fiji    | Fruits, Other                   | 2011           | 11                                                             |
| 66               | Fiji    | Grand Total                     | 2011           | 2,930                                                          |
| 66               | Fiji    | Grapes and products (excl wine) | 2011           | 1                                                              |
| 66               | Fiji    | Groundnuts (Shelled Eq)         | 2011           | 14                                                             |
| 66               | Fiji    | Honey                           | 2011           | 3                                                              |
| 66               | Fiji    | Maize and products              | 2011           | 2                                                              |
| 66               | Fiji    | Maize Germ Oil                  | 2011           | 4                                                              |
| 66               | Fiji    | Marine Fish, Other              | 2011           | 3                                                              |
| 66               | Fiji    | Meat                            | 2011           | 216                                                            |
| 66               | Fiji    | Meat, Other                     | 2011           | 1                                                              |
| 66               | Fiji    | Milk - Excluding Butter         | 2011           | 83                                                             |
| 66               | Fiji    | Miscellaneous                   | 2011           | 3                                                              |
| 66               | Fiji    | Mutton & Goat Meat              | 2011           | 35                                                             |
| 66               | Fiji    | Oats                            | 2011           | 4                                                              |
| 66               | Fiji    | Offals                          | 2011           | 9                                                              |
| 66               | Fiji    | Oilcrops                        | 2011           | 213                                                            |
| 66               | Fiji    | Oilcrops Oil, Other             | 2011           | 35                                                             |
| 66               | Fiji    | Oilcrops, Other                 | 2011           | 6                                                              |
| 66               | Fiji    | Olive Oil                       | 2011           | 2                                                              |
| 66               | Fiji    | Onions                          | 2011           | 11                                                             |
| 66               | Fiji    | Oranges, Mandarines             | 2011           | 5                                                              |
| 66               | Fiji    | Palmkernel Oil                  | 2011           | 2                                                              |
| 66               | Fiji    | Peas                            | 2011           | 76                                                             |
| 66               | Fiji    | Pelagic Fish                    | 2011           | 68                                                             |
| 66               | Fiji    | Pepper                          | 2011           | 1                                                              |
| 66               | Fiji    | Pigmeat                         | 2011           | 43                                                             |
| 66               | Fiji    | Pineapples and products         | 2011           | 5                                                              |
| 66               | Fiji    | Potatoes and products           | 2011           | 51                                                             |
| 66               | Fiji    | Poultry Meat                    | 2011           | 85                                                             |
| 66               | Fiji    | Pulses                          | 2011           | 98                                                             |
| 66               | Fiji    | Pulses, Other and products      | 2011           | 20                                                             |
| 66               | Fiji    | Rape and Mustard Oil            | 2011           | 7                                                              |
| 66               | Fiji    | Rape and Mustardseed            | 2011           | 1                                                              |
| 66               | Fiji    | Rice (Milled Equivalent)        | 2011           | 473                                                            |
| 66               | Fiji    | Roots, Other                    | 2011           | 89                                                             |
| 66               | Fiji    | Sesameseed Oil                  | 2011           | 1                                                              |

Dietary calcium and zinc deficiency risks are decreasing but remain prevalent

| FAO Country code | Country | Food item                       | Reference year | Net energy supply (kcal capita <sup>-1</sup> d <sup>-1</sup> ) |
|------------------|---------|---------------------------------|----------------|----------------------------------------------------------------|
| 66               | Fiji    | Soyabean Oil                    | 2011           | 123                                                            |
| 66               | Fiji    | Soyabeans                       | 2011           | 1                                                              |
| 66               | Fiji    | Spices                          | 2011           | 6                                                              |
| 66               | Fiji    | Spices, Other                   | 2011           | 4                                                              |
| 66               | Fiji    | Starchy Roots                   | 2011           | 268                                                            |
| 66               | Fiji    | Stimulants                      | 2011           | 9                                                              |
| 66               | Fiji    | Sugar & Sweeteners              | 2011           | 324                                                            |
| 66               | Fiji    | Sugar (Raw Equivalent)          | 2011           | 317                                                            |
| 66               | Fiji    | Sweet potatoes                  | 2011           | 26                                                             |
| 66               | Fiji    | Sweeteners, Other               | 2011           | 4                                                              |
| 66               | Fiji    | Tea (including mate)            | 2011           | 1                                                              |
| 66               | Fiji    | Tomatoes and products           | 2011           | 3                                                              |
| 66               | Fiji    | Treenuts                        | 2011           | 3                                                              |
| 66               | Fiji    | Vegetable Oils                  | 2011           | 252                                                            |
| 66               | Fiji    | Vegetables                      | 2011           | 35                                                             |
| 66               | Fiji    | Vegetables, Other               | 2011           | 21                                                             |
| 66               | Fiji    | Vegetal Products                | 2011           | 2,388                                                          |
| 66               | Fiji    | Wheat and products              | 2011           | 622                                                            |
| 66               | Fiji    | Wine                            | 2011           | 2                                                              |
| 66               | Fiji    | Yams                            | 2011           | 17                                                             |
| 67               | Finland | Apples and products             | 1992           | 16                                                             |
| 67               | Finland | Bananas                         | 1992           | 25                                                             |
| 67               | Finland | Barley and products             | 1992           | 17                                                             |
| 67               | Finland | Beer                            | 1992           | 125                                                            |
| 67               | Finland | Beverages, Alcoholic            | 1992           | 60                                                             |
| 67               | Finland | Bovine Meat                     | 1992           | 99                                                             |
| 67               | Finland | Butter, Ghee                    | 1992           | 157                                                            |
| 67               | Finland | Cereals, Other                  | 1992           | 4                                                              |
| 67               | Finland | Cocoa Beans and products        | 1992           | 1                                                              |
| 67               | Finland | Coconuts - Incl Copra           | 1992           | 1                                                              |
| 67               | Finland | Coffee and products             | 1992           | 15                                                             |
| 67               | Finland | Cream                           | 1992           | 35                                                             |
| 67               | Finland | Dates                           | 1992           | 1                                                              |
| 67               | Finland | Fats, Animals, Raw              | 1992           | 15                                                             |
| 67               | Finland | Fruits, Other                   | 1992           | 19                                                             |
| 67               | Finland | Grapefruit and products         | 1992           | 1                                                              |
| 67               | Finland | Grapes and products (excl wine) | 1992           | 10                                                             |
| 67               | Finland | Groundnuts (Shelled Eq)         | 1992           | 7                                                              |
| 67               | Finland | Honey                           | 1992           | 4                                                              |
| 67               | Finland | Meat, Other                     | 1992           | 3                                                              |
| 67               | Finland | Mutton & Goat Meat              | 1992           | 2                                                              |
| 67               | Finland | Oats                            | 1992           | 33                                                             |
| 67               | Finland | Oilcrops Oil, Other             | 1992           | 12                                                             |
| 67               | Finland | Olive Oil                       | 1992           | 1                                                              |
| 67               | Finland | Onions                          | 1992           | 5                                                              |
| 67               | Finland | Oranges, Mandarines             | 1992           | 16                                                             |
| 67               | Finland | Peas                            | 1992           | 14                                                             |
| 67               | Finland | Pepper                          | 1992           | 1                                                              |
| 67               | Finland | Pigmeat                         | 1992           | 343                                                            |
| 67               | Finland | Pimento                         | 1992           | 1                                                              |
| 67               | Finland | Pineapples and products         | 1992           | 7                                                              |
| 67               | Finland | Potatoes and products           | 1992           | 134                                                            |
| 67               | Finland | Poultry Meat                    | 1992           | 27                                                             |
| 67               | Finland | Rape and Mustard Oil            | 1992           | 163                                                            |
| 67               | Finland | Rape and Mustardseed            | 1992           | 2                                                              |
| 67               | Finland | Rye and products                | 1992           | 159                                                            |
| 67               | Finland | Soyabean Oil                    | 1992           | 28                                                             |
| 67               | Finland | Spices, Other                   | 1992           | 1                                                              |
| 67               | Finland | Sugar (Raw Equivalent)          | 1992           | 392                                                            |
| 67               | Finland | Sunflowerseed Oil               | 1992           | 35                                                             |
| 67               | Finland | Sweeteners, Other               | 1992           | 23                                                             |
| 67               | Finland | Tomatoes and products           | 1992           | 7                                                              |
| 67               | Finland | Vegetables, Other               | 1992           | 27                                                             |
| 67               | Finland | Wheat and products              | 1992           | 536                                                            |
| 67               | Finland | Wine                            | 1992           | 10                                                             |
| 67               | Finland | Apples and products             | 1993           | 18                                                             |
| 67               | Finland | Bananas                         | 1993           | 22                                                             |
| 67               | Finland | Barley and products             | 1993           | 21                                                             |
| 67               | Finland | Beer                            | 1993           | 120                                                            |
| 67               | Finland | Beverages, Alcoholic            | 1993           | 46                                                             |
| 67               | Finland | Bovine Meat                     | 1993           | 95                                                             |
| 67               | Finland | Butter, Ghee                    | 1993           | 150                                                            |
| 67               | Finland | Cereals, Other                  | 1993           | 4                                                              |
| 67               | Finland | Cocoa Beans and products        | 1993           | 1                                                              |
| 67               | Finland | Coconut Oil                     | 1993           | 30                                                             |
| 67               | Finland | Coconuts - Incl Copra           | 1993           | 1                                                              |
| 67               | Finland | Coffee and products             | 1993           | 16                                                             |
| 67               | Finland | Cream                           | 1993           | 31                                                             |
| 67               | Finland | Fats, Animals, Raw              | 1993           | 16                                                             |
| 67               | Finland | Fruits, Other                   | 1993           | 16                                                             |
| 67               | Finland | Grapes and products (excl wine) | 1993           | 10                                                             |
| 67               | Finland | Groundnut Oil                   | 1993           | 1                                                              |
| 67               | Finland | Groundnuts (Shelled Eq)         | 1993           | 7                                                              |
| 67               | Finland | Honey                           | 1993           | 4                                                              |
| 67               | Finland | Meat, Other                     | 1993           | 3                                                              |
| 67               | Finland | Mutton & Goat Meat              | 1993           | 2                                                              |
| 67               | Finland | Oats                            | 1993           | 32                                                             |
| 67               | Finland | Oilcrops Oil, Other             | 1993           | 25                                                             |
| 67               | Finland | Olive Oil                       | 1993           | 1                                                              |
| 67               | Finland | Onions                          | 1993           | 4                                                              |
| 67               | Finland | Oranges, Mandarines             | 1993           | 14                                                             |
| 67               | Finland | Peas                            | 1993           | 14                                                             |
| 67               | Finland | Pigmeat                         | 1993           | 317                                                            |
| 67               | Finland | Pimento                         | 1993           | 1                                                              |
| 67               | Finland | Pineapples and products         | 1993           | 6                                                              |
| 67               | Finland | Potatoes and products           | 1993           | 134                                                            |
| 67               | Finland | Poultry Meat                    | 1993           | 26                                                             |



Dietary calcium and zinc deficiency risks are decreasing but remain prevalent

| FAO Country code | Country | Food item                       | Reference year | Net energy supply (kcal capita <sup>-1</sup> d <sup>-1</sup> ) |
|------------------|---------|---------------------------------|----------------|----------------------------------------------------------------|
| 67               | Finland | Rape and Mustard Oil            | 1993           | 165                                                            |
| 67               | Finland | Rape and Mustardseed            | 1993           | 1                                                              |
| 67               | Finland | Rye and products                | 1993           | 165                                                            |
| 67               | Finland | Sesame seed                     | 1993           | 1                                                              |
| 67               | Finland | Soyabean Oil                    | 1993           | 1                                                              |
| 67               | Finland | Spices, Other                   | 1993           | 1                                                              |
| 67               | Finland | Sugar (Raw Equivalent)          | 1993           | 400                                                            |
| 67               | Finland | Sunflowerseed Oil               | 1993           | 22                                                             |
| 67               | Finland | Sweeteners, Other               | 1993           | 21                                                             |
| 67               | Finland | Tomatoes and products           | 1993           | 8                                                              |
| 67               | Finland | Vegetables, Other               | 1993           | 28                                                             |
| 67               | Finland | Wheat and products              | 1993           | 446                                                            |
| 67               | Finland | Wine                            | 1993           | 10                                                             |
| 67               | Finland | Apples and products             | 1994           | 17                                                             |
| 67               | Finland | Bananas                         | 1994           | 23                                                             |
| 67               | Finland | Barley and products             | 1994           | 22                                                             |
| 67               | Finland | Beer                            | 1994           | 116                                                            |
| 67               | Finland | Beverages, Alcoholic            | 1994           | 34                                                             |
| 67               | Finland | Bovine Meat                     | 1994           | 98                                                             |
| 67               | Finland | Butter, Ghee                    | 1994           | 117                                                            |
| 67               | Finland | Cereals, Other                  | 1994           | 5                                                              |
| 67               | Finland | Cocoa Beans and products        | 1994           | 1                                                              |
| 67               | Finland | Coconut Oil                     | 1994           | 20                                                             |
| 67               | Finland | Coconuts - Incl Copra           | 1994           | 1                                                              |
| 67               | Finland | Coffee and products             | 1994           | 17                                                             |
| 67               | Finland | Cream                           | 1994           | 37                                                             |
| 67               | Finland | Dates                           | 1994           | 1                                                              |
| 67               | Finland | Fats, Animals, Raw              | 1994           | 16                                                             |
| 67               | Finland | Fruits, Other                   | 1994           | 19                                                             |
| 67               | Finland | Grapes and products (excl wine) | 1994           | 11                                                             |
| 67               | Finland | Groundnuts (Shelled Eq)         | 1994           | 10                                                             |
| 67               | Finland | Honey                           | 1994           | 5                                                              |
| 67               | Finland | Meat, Other                     | 1994           | 3                                                              |
| 67               | Finland | Mutton & Goat Meat              | 1994           | 2                                                              |
| 67               | Finland | Oats                            | 1994           | 29                                                             |
| 67               | Finland | Oilcrops Oil, Other             | 1994           | 16                                                             |
| 67               | Finland | Olive Oil                       | 1994           | 1                                                              |
| 67               | Finland | Onions                          | 1994           | 4                                                              |
| 67               | Finland | Oranges, Mandarines             | 1994           | 14                                                             |
| 67               | Finland | Peas                            | 1994           | 14                                                             |
| 67               | Finland | Pepper                          | 1994           | 1                                                              |
| 67               | Finland | Pigmeat                         | 1994           | 316                                                            |
| 67               | Finland | Pimento                         | 1994           | 1                                                              |
| 67               | Finland | Pineapples and products         | 1994           | 8                                                              |
| 67               | Finland | Potatoes and products           | 1994           | 131                                                            |
| 67               | Finland | Poultry Meat                    | 1994           | 30                                                             |
| 67               | Finland | Rape and Mustard Oil            | 1994           | 163                                                            |
| 67               | Finland | Rye and products                | 1994           | 157                                                            |
| 67               | Finland | Sesame seed                     | 1994           | 1                                                              |
| 67               | Finland | Spices, Other                   | 1994           | 1                                                              |
| 67               | Finland | Sugar (Raw Equivalent)          | 1994           | 370                                                            |
| 67               | Finland | Sunflowerseed Oil               | 1994           | 24                                                             |
| 67               | Finland | Sweeteners, Other               | 1994           | 17                                                             |
| 67               | Finland | Tomatoes and products           | 1994           | 10                                                             |
| 67               | Finland | Vegetables, Other               | 1994           | 34                                                             |
| 67               | Finland | Wheat and products              | 1994           | 433                                                            |
| 67               | Finland | Wine                            | 1994           | 11                                                             |
| 67               | Finland | Apples and products             | 1995           | 12                                                             |
| 67               | Finland | Bananas                         | 1995           | 20                                                             |
| 67               | Finland | Barley and products             | 1995           | 53                                                             |
| 67               | Finland | Beer                            | 1995           | 119                                                            |
| 67               | Finland | Beverages, Alcoholic            | 1995           | 32                                                             |
| 67               | Finland | Bovine Meat                     | 1995           | 95                                                             |
| 67               | Finland | Butter, Ghee                    | 1995           | 132                                                            |
| 67               | Finland | Cereals, Other                  | 1995           | 5                                                              |
| 67               | Finland | Cocoa Beans and products        | 1995           | 1                                                              |
| 67               | Finland | Coconut Oil                     | 1995           | 15                                                             |
| 67               | Finland | Coconuts - Incl Copra           | 1995           | 1                                                              |
| 67               | Finland | Coffee and products             | 1995           | 10                                                             |
| 67               | Finland | Cream                           | 1995           | 34                                                             |
| 67               | Finland | Fats, Animals, Raw              | 1995           | 21                                                             |
| 67               | Finland | Fruits, Other                   | 1995           | 14                                                             |
| 67               | Finland | Grapes and products (excl wine) | 1995           | 7                                                              |
| 67               | Finland | Groundnuts (Shelled Eq)         | 1995           | 8                                                              |
| 67               | Finland | Honey                           | 1995           | 4                                                              |
| 67               | Finland | Meat, Other                     | 1995           | 3                                                              |
| 67               | Finland | Mutton & Goat Meat              | 1995           | 3                                                              |
| 67               | Finland | Oats                            | 1995           | 35                                                             |
| 67               | Finland | Oilcrops Oil, Other             | 1995           | 28                                                             |
| 67               | Finland | Olive Oil                       | 1995           | 1                                                              |
| 67               | Finland | Olives (including preserved)    | 1995           | 1                                                              |
| 67               | Finland | Onions                          | 1995           | 4                                                              |
| 67               | Finland | Oranges, Mandarines             | 1995           | 9                                                              |
| 67               | Finland | Peas                            | 1995           | 14                                                             |
| 67               | Finland | Pepper                          | 1995           | 1                                                              |
| 67               | Finland | Pigmeat                         | 1995           | 343                                                            |
| 67               | Finland | Pimento                         | 1995           | 1                                                              |
| 67               | Finland | Pineapples and products         | 1995           | 4                                                              |
| 67               | Finland | Potatoes and products           | 1995           | 131                                                            |
| 67               | Finland | Poultry Meat                    | 1995           | 33                                                             |
| 67               | Finland | Rape and Mustard Oil            | 1995           | 103                                                            |
| 67               | Finland | Rape and Mustardseed            | 1995           | 1                                                              |
| 67               | Finland | Rye and products                | 1995           | 143                                                            |
| 67               | Finland | Sesame seed                     | 1995           | 1                                                              |
| 67               | Finland | Soyabean Oil                    | 1995           | 81                                                             |
| 67               | Finland | Spices, Other                   | 1995           | 1                                                              |
| 67               | Finland | Sugar (Raw Equivalent)          | 1995           | 366                                                            |

Dietary calcium and zinc deficiency risks are decreasing but remain prevalent

| FAO Country code | Country | Food item                       | Reference year | Net energy supply (kcal capita <sup>-1</sup> d <sup>-1</sup> ) |
|------------------|---------|---------------------------------|----------------|----------------------------------------------------------------|
| 67               | Finland | Sunflowerseed Oil               | 1995           | 14                                                             |
| 67               | Finland | Sweeteners, Other               | 1995           | 18                                                             |
| 67               | Finland | Tomatoes and products           | 1995           | 7                                                              |
| 67               | Finland | Vegetables, Other               | 1995           | 32                                                             |
| 67               | Finland | Wheat and products              | 1995           | 476                                                            |
| 67               | Finland | Wine                            | 1995           | 11                                                             |
| 67               | Finland | Apples and products             | 1996           | 17                                                             |
| 67               | Finland | Bananas                         | 1996           | 18                                                             |
| 67               | Finland | Barley and products             | 1996           | 75                                                             |
| 67               | Finland | Beer                            | 1996           | 110                                                            |
| 67               | Finland | Beverages, Alcoholic            | 1996           | 38                                                             |
| 67               | Finland | Beverages, Fermented            | 1996           | 2                                                              |
| 67               | Finland | Bovine Meat                     | 1996           | 93                                                             |
| 67               | Finland | Butter, Ghee                    | 1996           | 131                                                            |
| 67               | Finland | Cereals, Other                  | 1996           | 3                                                              |
| 67               | Finland | Cocoa Beans and products        | 1996           | 2                                                              |
| 67               | Finland | Coconuts - Incl Copra           | 1996           | 1                                                              |
| 67               | Finland | Coffee and products             | 1996           | 14                                                             |
| 67               | Finland | Cream                           | 1996           | 35                                                             |
| 67               | Finland | Fats, Animals, Raw              | 1996           | 17                                                             |
| 67               | Finland | Fruits, Other                   | 1996           | 18                                                             |
| 67               | Finland | Grapefruit and products         | 1996           | 1                                                              |
| 67               | Finland | Grapes and products (excl wine) | 1996           | 9                                                              |
| 67               | Finland | Groundnuts (Shelled Eq)         | 1996           | 9                                                              |
| 67               | Finland | Honey                           | 1996           | 3                                                              |
| 67               | Finland | Meat, Other                     | 1996           | 3                                                              |
| 67               | Finland | Mutton & Goat Meat              | 1996           | 3                                                              |
| 67               | Finland | Oats                            | 1996           | 33                                                             |
| 67               | Finland | Oilcrops Oil, Other             | 1996           | 26                                                             |
| 67               | Finland | Olive Oil                       | 1996           | 1                                                              |
| 67               | Finland | Olives (including preserved)    | 1996           | 1                                                              |
| 67               | Finland | Onions                          | 1996           | 5                                                              |
| 67               | Finland | Oranges, Mandarines             | 1996           | 14                                                             |
| 67               | Finland | Palm Oil                        | 1996           | 6                                                              |
| 67               | Finland | Peas                            | 1996           | 14                                                             |
| 67               | Finland | Pepper                          | 1996           | 1                                                              |
| 67               | Finland | Pigmeat                         | 1996           | 347                                                            |
| 67               | Finland | Pimento                         | 1996           | 1                                                              |
| 67               | Finland | Pineapples and products         | 1996           | 6                                                              |
| 67               | Finland | Potatoes and products           | 1996           | 133                                                            |
| 67               | Finland | Poultry Meat                    | 1996           | 39                                                             |
| 67               | Finland | Rape and Mustard Oil            | 1996           | 96                                                             |
| 67               | Finland | Rape and Mustardseed            | 1996           | 1                                                              |
| 67               | Finland | Rye and products                | 1996           | 142                                                            |
| 67               | Finland | Sesame seed                     | 1996           | 1                                                              |
| 67               | Finland | Soyabean Oil                    | 1996           | 65                                                             |
| 67               | Finland | Spices, Other                   | 1996           | 1                                                              |
| 67               | Finland | Sugar (Raw Equivalent)          | 1996           | 350                                                            |
| 67               | Finland | Sunflowerseed Oil               | 1996           | 13                                                             |
| 67               | Finland | Sweeteners, Other               | 1996           | 17                                                             |
| 67               | Finland | Tomatoes and products           | 1996           | 9                                                              |
| 67               | Finland | Vegetables, Other               | 1996           | 34                                                             |
| 67               | Finland | Wheat and products              | 1996           | 457                                                            |
| 67               | Finland | Wine                            | 1996           | 10                                                             |
| 67               | Finland | Apples and products             | 1997           | 16                                                             |
| 67               | Finland | Bananas                         | 1997           | 18                                                             |
| 67               | Finland | Barley and products             | 1997           | 60                                                             |
| 67               | Finland | Beer                            | 1997           | 112                                                            |
| 67               | Finland | Beverages, Alcoholic            | 1997           | 27                                                             |
| 67               | Finland | Beverages, Fermented            | 1997           | 3                                                              |
| 67               | Finland | Bovine Meat                     | 1997           | 94                                                             |
| 67               | Finland | Butter, Ghee                    | 1997           | 111                                                            |
| 67               | Finland | Cereals, Other                  | 1997           | 1                                                              |
| 67               | Finland | Cocoa Beans and products        | 1997           | 2                                                              |
| 67               | Finland | Coconut Oil                     | 1997           | 7                                                              |
| 67               | Finland | Coconuts - Incl Copra           | 1997           | 1                                                              |
| 67               | Finland | Coffee and products             | 1997           | 13                                                             |
| 67               | Finland | Cream                           | 1997           | 35                                                             |
| 67               | Finland | Fats, Animals, Raw              | 1997           | 34                                                             |
| 67               | Finland | Fruits, Other                   | 1997           | 17                                                             |
| 67               | Finland | Grapefruit and products         | 1997           | 1                                                              |
| 67               | Finland | Grapes and products (excl wine) | 1997           | 8                                                              |
| 67               | Finland | Groundnuts (Shelled Eq)         | 1997           | 8                                                              |
| 67               | Finland | Honey                           | 1997           | 4                                                              |
| 67               | Finland | Meat, Other                     | 1997           | 2                                                              |
| 67               | Finland | Mutton & Goat Meat              | 1997           | 3                                                              |
| 67               | Finland | Oats                            | 1997           | 30                                                             |
| 67               | Finland | Oilcrops Oil, Other             | 1997           | 33                                                             |
| 67               | Finland | Olive Oil                       | 1997           | 2                                                              |
| 67               | Finland | Olives (including preserved)    | 1997           | 1                                                              |
| 67               | Finland | Onions                          | 1997           | 4                                                              |
| 67               | Finland | Oranges, Mandarines             | 1997           | 14                                                             |
| 67               | Finland | Peas                            | 1997           | 14                                                             |
| 67               | Finland | Pepper                          | 1997           | 1                                                              |
| 67               | Finland | Pigmeat                         | 1997           | 351                                                            |
| 67               | Finland | Pimento                         | 1997           | 1                                                              |
| 67               | Finland | Pineapples and products         | 1997           | 6                                                              |
| 67               | Finland | Potatoes and products           | 1997           | 133                                                            |
| 67               | Finland | Poultry Meat                    | 1997           | 38                                                             |
| 67               | Finland | Rape and Mustard Oil            | 1997           | 191                                                            |
| 67               | Finland | Rape and Mustardseed            | 1997           | 1                                                              |
| 67               | Finland | Rye and products                | 1997           | 143                                                            |
| 67               | Finland | Sesame seed                     | 1997           | 1                                                              |
| 67               | Finland | Soyabean Oil                    | 1997           | 2                                                              |
| 67               | Finland | Spices, Other                   | 1997           | 1                                                              |
| 67               | Finland | Sugar (Raw Equivalent)          | 1997           | 351                                                            |
| 67               | Finland | Sunflowerseed Oil               | 1997           | 16                                                             |

Dietary calcium and zinc deficiency risks are decreasing but remain prevalent

| FAO Country code | Country | Food item                       | Reference year | Net energy supply (kcal capita <sup>-1</sup> d <sup>-1</sup> ) |
|------------------|---------|---------------------------------|----------------|----------------------------------------------------------------|
| 67               | Finland | Sweeteners, Other               | 1997           | 18                                                             |
| 67               | Finland | Tomatoes and products           | 1997           | 9                                                              |
| 67               | Finland | Vegetables, Other               | 1997           | 38                                                             |
| 67               | Finland | Wheat and products              | 1997           | 550                                                            |
| 67               | Finland | Wine                            | 1997           | 11                                                             |
| 67               | Finland | Apples and products             | 1998           | 16                                                             |
| 67               | Finland | Bananas                         | 1998           | 18                                                             |
| 67               | Finland | Barley and products             | 1998           | 88                                                             |
| 67               | Finland | Beer                            | 1998           | 110                                                            |
| 67               | Finland | Beverages, Alcoholic            | 1998           | 40                                                             |
| 67               | Finland | Beverages, Fermented            | 1998           | 3                                                              |
| 67               | Finland | Bovine Meat                     | 1998           | 95                                                             |
| 67               | Finland | Butter, Ghee                    | 1998           | 117                                                            |
| 67               | Finland | Cereals, Other                  | 1998           | 1                                                              |
| 67               | Finland | Cocoa Beans and products        | 1998           | 4                                                              |
| 67               | Finland | Coconuts - Incl Copra           | 1998           | 1                                                              |
| 67               | Finland | Coffee and products             | 1998           | 14                                                             |
| 67               | Finland | Cream                           | 1998           | 34                                                             |
| 67               | Finland | Fats, Animals, Raw              | 1998           | 37                                                             |
| 67               | Finland | Fruits, Other                   | 1998           | 16                                                             |
| 67               | Finland | Grapefruit and products         | 1998           | 1                                                              |
| 67               | Finland | Grapes and products (excl wine) | 1998           | 8                                                              |
| 67               | Finland | Groundnuts (Shelled Eq)         | 1998           | 10                                                             |
| 67               | Finland | Honey                           | 1998           | 3                                                              |
| 67               | Finland | Meat, Other                     | 1998           | 3                                                              |
| 67               | Finland | Mutton & Goat Meat              | 1998           | 2                                                              |
| 67               | Finland | Oats                            | 1998           | 23                                                             |
| 67               | Finland | Oilcrops Oil, Other             | 1998           | 33                                                             |
| 67               | Finland | Olive Oil                       | 1998           | 3                                                              |
| 67               | Finland | Olives (including preserved)    | 1998           | 1                                                              |
| 67               | Finland | Onions                          | 1998           | 5                                                              |
| 67               | Finland | Oranges, Mandarines             | 1998           | 14                                                             |
| 67               | Finland | Palm Oil                        | 1998           | 3                                                              |
| 67               | Finland | Peas                            | 1998           | 11                                                             |
| 67               | Finland | Pepper                          | 1998           | 1                                                              |
| 67               | Finland | Pigmeat                         | 1998           | 365                                                            |
| 67               | Finland | Pimento                         | 1998           | 1                                                              |
| 67               | Finland | Pineapples and products         | 1998           | 5                                                              |
| 67               | Finland | Potatoes and products           | 1998           | 133                                                            |
| 67               | Finland | Poultry Meat                    | 1998           | 42                                                             |
| 67               | Finland | Rape and Mustard Oil            | 1998           | 199                                                            |
| 67               | Finland | Rape and Mustardseed            | 1998           | 1                                                              |
| 67               | Finland | Rye and products                | 1998           | 146                                                            |
| 67               | Finland | Sesame seed                     | 1998           | 1                                                              |
| 67               | Finland | Spices, Other                   | 1998           | 1                                                              |
| 67               | Finland | Sugar (Raw Equivalent)          | 1998           | 338                                                            |
| 67               | Finland | Sunflowerseed Oil               | 1998           | 12                                                             |
| 67               | Finland | Sweeteners, Other               | 1998           | 16                                                             |
| 67               | Finland | Tomatoes and products           | 1998           | 8                                                              |
| 67               | Finland | Vegetables, Other               | 1998           | 31                                                             |
| 67               | Finland | Wheat and products              | 1998           | 522                                                            |
| 67               | Finland | Wine                            | 1998           | 13                                                             |
| 67               | Finland | Apples and products             | 1999           | 20                                                             |
| 67               | Finland | Bananas                         | 1999           | 20                                                             |
| 67               | Finland | Barley and products             | 1999           | 26                                                             |
| 67               | Finland | Beer                            | 1999           | 117                                                            |
| 67               | Finland | Beverages, Alcoholic            | 1999           | 44                                                             |
| 67               | Finland | Beverages, Fermented            | 1999           | 3                                                              |
| 67               | Finland | Bovine Meat                     | 1999           | 92                                                             |
| 67               | Finland | Butter, Ghee                    | 1999           | 112                                                            |
| 67               | Finland | Cocoa Beans and products        | 1999           | 4                                                              |
| 67               | Finland | Coconut Oil                     | 1999           | 8                                                              |
| 67               | Finland | Coconuts - Incl Copra           | 1999           | 1                                                              |
| 67               | Finland | Coffee and products             | 1999           | 15                                                             |
| 67               | Finland | Cream                           | 1999           | 34                                                             |
| 67               | Finland | Fats, Animals, Raw              | 1999           | 19                                                             |
| 67               | Finland | Fruits, Other                   | 1999           | 18                                                             |
| 67               | Finland | Grapefruit and products         | 1999           | 1                                                              |
| 67               | Finland | Grapes and products (excl wine) | 1999           | 9                                                              |
| 67               | Finland | Groundnuts (Shelled Eq)         | 1999           | 9                                                              |
| 67               | Finland | Honey                           | 1999           | 5                                                              |
| 67               | Finland | Meat, Other                     | 1999           | 2                                                              |
| 67               | Finland | Mutton & Goat Meat              | 1999           | 2                                                              |
| 67               | Finland | Oats                            | 1999           | 30                                                             |
| 67               | Finland | Oilcrops Oil, Other             | 1999           | 40                                                             |
| 67               | Finland | Olive Oil                       | 1999           | 3                                                              |
| 67               | Finland | Olives (including preserved)    | 1999           | 1                                                              |
| 67               | Finland | Onions                          | 1999           | 4                                                              |
| 67               | Finland | Oranges, Mandarines             | 1999           | 13                                                             |
| 67               | Finland | Peas                            | 1999           | 11                                                             |
| 67               | Finland | Pepper                          | 1999           | 1                                                              |
| 67               | Finland | Pigmeat                         | 1999           | 349                                                            |
| 67               | Finland | Pimento                         | 1999           | 1                                                              |
| 67               | Finland | Pineapples and products         | 1999           | 6                                                              |
| 67               | Finland | Potatoes and products           | 1999           | 136                                                            |
| 67               | Finland | Poultry Meat                    | 1999           | 45                                                             |
| 67               | Finland | Rape and Mustard Oil            | 1999           | 174                                                            |
| 67               | Finland | Rape and Mustardseed            | 1999           | 2                                                              |
| 67               | Finland | Rye and products                | 1999           | 145                                                            |
| 67               | Finland | Sesame seed                     | 1999           | 1                                                              |
| 67               | Finland | Spices, Other                   | 1999           | 1                                                              |
| 67               | Finland | Sugar (Raw Equivalent)          | 1999           | 336                                                            |
| 67               | Finland | Sunflowerseed Oil               | 1999           | 23                                                             |
| 67               | Finland | Sweeteners, Other               | 1999           | 16                                                             |
| 67               | Finland | Tomatoes and products           | 1999           | 9                                                              |
| 67               | Finland | Vegetables, Other               | 1999           | 36                                                             |
| 67               | Finland | Wheat and products              | 1999           | 630                                                            |

Dietary calcium and zinc deficiency risks are decreasing but remain prevalent

| FAO Country code | Country | Food item                       | Reference year | Net energy supply (kcal capita <sup>-1</sup> d <sup>-1</sup> ) |
|------------------|---------|---------------------------------|----------------|----------------------------------------------------------------|
| 67               | Finland | Wine                            | 1999           | 13                                                             |
| 67               | Finland | Apples and products             | 2000           | 19                                                             |
| 67               | Finland | Bananas                         | 2000           | 18                                                             |
| 67               | Finland | Barley and products             | 2000           | 39                                                             |
| 67               | Finland | Beer                            | 2000           | 113                                                            |
| 67               | Finland | Beverages, Alcoholic            | 2000           | 54                                                             |
| 67               | Finland | Beverages, Fermented            | 2000           | 2                                                              |
| 67               | Finland | Bovine Meat                     | 2000           | 89                                                             |
| 67               | Finland | Butter, Ghee                    | 2000           | 103                                                            |
| 67               | Finland | Cereals, Other                  | 2000           | 1                                                              |
| 67               | Finland | Cocoa Beans and products        | 2000           | 6                                                              |
| 67               | Finland | Coconuts - Incl Copra           | 2000           | 1                                                              |
| 67               | Finland | Coffee and products             | 2000           | 13                                                             |
| 67               | Finland | Cream                           | 2000           | 34                                                             |
| 67               | Finland | Fats, Animals, Raw              | 2000           | 19                                                             |
| 67               | Finland | Fruits, Other                   | 2000           | 17                                                             |
| 67               | Finland | Grapefruit and products         | 2000           | 1                                                              |
| 67               | Finland | Grapes and products (excl wine) | 2000           | 8                                                              |
| 67               | Finland | Groundnuts (Shelled Eq)         | 2000           | 10                                                             |
| 67               | Finland | Honey                           | 2000           | 4                                                              |
| 67               | Finland | Meat, Other                     | 2000           | 3                                                              |
| 67               | Finland | Mutton & Goat Meat              | 2000           | 2                                                              |
| 67               | Finland | Oats                            | 2000           | 20                                                             |
| 67               | Finland | Oilcrops Oil, Other             | 2000           | 18                                                             |
| 67               | Finland | Olive Oil                       | 2000           | 3                                                              |
| 67               | Finland | Olives (including preserved)    | 2000           | 1                                                              |
| 67               | Finland | Onions                          | 2000           | 6                                                              |
| 67               | Finland | Oranges, Mandarines             | 2000           | 14                                                             |
| 67               | Finland | Peas                            | 2000           | 11                                                             |
| 67               | Finland | Pepper                          | 2000           | 1                                                              |
| 67               | Finland | Pigmeat                         | 2000           | 329                                                            |
| 67               | Finland | Pimento                         | 2000           | 1                                                              |
| 67               | Finland | Pineapples and products         | 2000           | 5                                                              |
| 67               | Finland | Potatoes and products           | 2000           | 135                                                            |
| 67               | Finland | Poultry Meat                    | 2000           | 48                                                             |
| 67               | Finland | Rape and Mustard Oil            | 2000           | 141                                                            |
| 67               | Finland | Rape and Mustardseed            | 2000           | 2                                                              |
| 67               | Finland | Rye and products                | 2000           | 143                                                            |
| 67               | Finland | Sesame seed                     | 2000           | 1                                                              |
| 67               | Finland | Soyabean Oil                    | 2000           | 41                                                             |
| 67               | Finland | Spices, Other                   | 2000           | 2                                                              |
| 67               | Finland | Sugar (Raw Equivalent)          | 2000           | 356                                                            |
| 67               | Finland | Sunflowerseed Oil               | 2000           | 23                                                             |
| 67               | Finland | Sweeteners, Other               | 2000           | 16                                                             |
| 67               | Finland | Tomatoes and products           | 2000           | 9                                                              |
| 67               | Finland | Vegetables, Other               | 2000           | 34                                                             |
| 67               | Finland | Wheat and products              | 2000           | 621                                                            |
| 67               | Finland | Wine                            | 2000           | 15                                                             |
| 67               | Finland | Apples and products             | 2001           | 22                                                             |
| 67               | Finland | Bananas                         | 2001           | 19                                                             |
| 67               | Finland | Barley and products             | 2001           | 37                                                             |
| 67               | Finland | Beer                            | 2001           | 119                                                            |
| 67               | Finland | Beverages, Alcoholic            | 2001           | 55                                                             |
| 67               | Finland | Beverages, Fermented            | 2001           | 2                                                              |
| 67               | Finland | Bovine Meat                     | 2001           | 89                                                             |
| 67               | Finland | Butter, Ghee                    | 2001           | 96                                                             |
| 67               | Finland | Cereals, Other                  | 2001           | 4                                                              |
| 67               | Finland | Cocoa Beans and products        | 2001           | 5                                                              |
| 67               | Finland | Coconuts - Incl Copra           | 2001           | 1                                                              |
| 67               | Finland | Coffee and products             | 2001           | 14                                                             |
| 67               | Finland | Cream                           | 2001           | 34                                                             |
| 67               | Finland | Fats, Animals, Raw              | 2001           | 29                                                             |
| 67               | Finland | Fruits, Other                   | 2001           | 18                                                             |
| 67               | Finland | Grapefruit and products         | 2001           | 1                                                              |
| 67               | Finland | Grapes and products (excl wine) | 2001           | 8                                                              |
| 67               | Finland | Groundnuts (Shelled Eq)         | 2001           | 9                                                              |
| 67               | Finland | Honey                           | 2001           | 4                                                              |
| 67               | Finland | Meat, Other                     | 2001           | 3                                                              |
| 67               | Finland | Mutton & Goat Meat              | 2001           | 2                                                              |
| 67               | Finland | Oats                            | 2001           | 16                                                             |
| 67               | Finland | Oilcrops Oil, Other             | 2001           | 19                                                             |
| 67               | Finland | Olive Oil                       | 2001           | 4                                                              |
| 67               | Finland | Olives (including preserved)    | 2001           | 1                                                              |
| 67               | Finland | Onions                          | 2001           | 4                                                              |
| 67               | Finland | Oranges, Mandarines             | 2001           | 14                                                             |
| 67               | Finland | Peas                            | 2001           | 11                                                             |
| 67               | Finland | Pepper                          | 2001           | 1                                                              |
| 67               | Finland | Pigmeat                         | 2001           | 326                                                            |
| 67               | Finland | Pimento                         | 2001           | 1                                                              |
| 67               | Finland | Pineapples and products         | 2001           | 6                                                              |
| 67               | Finland | Potatoes and products           | 2001           | 137                                                            |
| 67               | Finland | Poultry Meat                    | 2001           | 55                                                             |
| 67               | Finland | Rape and Mustard Oil            | 2001           | 95                                                             |
| 67               | Finland | Rape and Mustardseed            | 2001           | 2                                                              |
| 67               | Finland | Rye and products                | 2001           | 141                                                            |
| 67               | Finland | Sesame seed                     | 2001           | 1                                                              |
| 67               | Finland | Soyabean Oil                    | 2001           | 111                                                            |
| 67               | Finland | Spices, Other                   | 2001           | 2                                                              |
| 67               | Finland | Sugar (Raw Equivalent)          | 2001           | 322                                                            |
| 67               | Finland | Sunflowerseed Oil               | 2001           | 28                                                             |
| 67               | Finland | Sweeteners, Other               | 2001           | 14                                                             |
| 67               | Finland | Tomatoes and products           | 2001           | 9                                                              |
| 67               | Finland | Vegetables, Other               | 2001           | 33                                                             |
| 67               | Finland | Wheat and products              | 2001           | 634                                                            |
| 67               | Finland | Wine                            | 2001           | 16                                                             |
| 67               | Finland | Apples and products             | 2002           | 18                                                             |
| 67               | Finland | Bananas                         | 2002           | 19                                                             |

Dietary calcium and zinc deficiency risks are decreasing but remain prevalent

| FAO Country code | Country | Food item                       | Reference year | Net energy supply (kcal <i>capita</i> <sup>-1</sup> d <sup>-1</sup> ) |
|------------------|---------|---------------------------------|----------------|-----------------------------------------------------------------------|
| 67               | Finland | Barley and products             | 2002           | 30                                                                    |
| 67               | Finland | Beer                            | 2002           | 119                                                                   |
| 67               | Finland | Beverages, Alcoholic            | 2002           | 55                                                                    |
| 67               | Finland | Beverages, Fermented            | 2002           | 1                                                                     |
| 67               | Finland | Bovine Meat                     | 2002           | 89                                                                    |
| 67               | Finland | Butter, Ghee                    | 2002           | 90                                                                    |
| 67               | Finland | Cereals, Other                  | 2002           | 1                                                                     |
| 67               | Finland | Cocoa Beans and products        | 2002           | 5                                                                     |
| 67               | Finland | Coconut Oil                     | 2002           | 12                                                                    |
| 67               | Finland | Coconuts - Incl Copra           | 2002           | 1                                                                     |
| 67               | Finland | Coffee and products             | 2002           | 14                                                                    |
| 67               | Finland | Cream                           | 2002           | 35                                                                    |
| 67               | Finland | Fats, Animals, Raw              | 2002           | 24                                                                    |
| 67               | Finland | Fruits, Other                   | 2002           | 18                                                                    |
| 67               | Finland | Grapefruit and products         | 2002           | 1                                                                     |
| 67               | Finland | Grapes and products (excl wine) | 2002           | 8                                                                     |
| 67               | Finland | Groundnuts (Shelled Eq)         | 2002           | 10                                                                    |
| 67               | Finland | Honey                           | 2002           | 4                                                                     |
| 67               | Finland | Meat, Other                     | 2002           | 4                                                                     |
| 67               | Finland | Mutton & Goat Meat              | 2002           | 2                                                                     |
| 67               | Finland | Oats                            | 2002           | 22                                                                    |
| 67               | Finland | Oilcrops Oil, Other             | 2002           | 14                                                                    |
| 67               | Finland | Olive Oil                       | 2002           | 4                                                                     |
| 67               | Finland | Olives (including preserved)    | 2002           | 2                                                                     |
| 67               | Finland | Onions                          | 2002           | 5                                                                     |
| 67               | Finland | Oranges, Mandarines             | 2002           | 14                                                                    |
| 67               | Finland | Peas                            | 2002           | 11                                                                    |
| 67               | Finland | Pepper                          | 2002           | 1                                                                     |
| 67               | Finland | Pigmeat                         | 2002           | 336                                                                   |
| 67               | Finland | Pimento                         | 2002           | 1                                                                     |
| 67               | Finland | Pineapples and products         | 2002           | 6                                                                     |
| 67               | Finland | Potatoes and products           | 2002           | 135                                                                   |
| 67               | Finland | Poultry Meat                    | 2002           | 60                                                                    |
| 67               | Finland | Rape and Mustard Oil            | 2002           | 169                                                                   |
| 67               | Finland | Rape and Mustardseed            | 2002           | 2                                                                     |
| 67               | Finland | Rye and products                | 2002           | 136                                                                   |
| 67               | Finland | Sesame seed                     | 2002           | 1                                                                     |
| 67               | Finland | Soyabean Oil                    | 2002           | 28                                                                    |
| 67               | Finland | Spices, Other                   | 2002           | 1                                                                     |
| 67               | Finland | Sugar (Raw Equivalent)          | 2002           | 308                                                                   |
| 67               | Finland | Sunflowerseed Oil               | 2002           | 31                                                                    |
| 67               | Finland | Sweeteners, Other               | 2002           | 22                                                                    |
| 67               | Finland | Tomatoes and products           | 2002           | 9                                                                     |
| 67               | Finland | Vegetables, Other               | 2002           | 34                                                                    |
| 67               | Finland | Wheat and products              | 2002           | 618                                                                   |
| 67               | Finland | Wine                            | 2002           | 17                                                                    |
| 67               | Finland | Apples and products             | 2003           | 21                                                                    |
| 67               | Finland | Bananas                         | 2003           | 19                                                                    |
| 67               | Finland | Barley and products             | 2003           | 30                                                                    |
| 67               | Finland | Beer                            | 2003           | 118                                                                   |
| 67               | Finland | Beverages, Alcoholic            | 2003           | 55                                                                    |
| 67               | Finland | Beverages, Fermented            | 2003           | 1                                                                     |
| 67               | Finland | Bovine Meat                     | 2003           | 90                                                                    |
| 67               | Finland | Butter, Ghee                    | 2003           | 79                                                                    |
| 67               | Finland | Cereals, Other                  | 2003           | 2                                                                     |
| 67               | Finland | Cocoa Beans and products        | 2003           | 9                                                                     |
| 67               | Finland | Coconut Oil                     | 2003           | 16                                                                    |
| 67               | Finland | Coconuts - Incl Copra           | 2003           | 1                                                                     |
| 67               | Finland | Coffee and products             | 2003           | 14                                                                    |
| 67               | Finland | Cream                           | 2003           | 35                                                                    |
| 67               | Finland | Fats, Animals, Raw              | 2003           | 15                                                                    |
| 67               | Finland | Fruits, Other                   | 2003           | 18                                                                    |
| 67               | Finland | Grapefruit and products         | 2003           | 1                                                                     |
| 67               | Finland | Grapes and products (excl wine) | 2003           | 8                                                                     |
| 67               | Finland | Groundnuts (Shelled Eq)         | 2003           | 11                                                                    |
| 67               | Finland | Honey                           | 2003           | 4                                                                     |
| 67               | Finland | Meat, Other                     | 2003           | 4                                                                     |
| 67               | Finland | Mutton & Goat Meat              | 2003           | 2                                                                     |
| 67               | Finland | Oats                            | 2003           | 23                                                                    |
| 67               | Finland | Oilcrops Oil, Other             | 2003           | 20                                                                    |
| 67               | Finland | Olive Oil                       | 2003           | 6                                                                     |
| 67               | Finland | Olives (including preserved)    | 2003           | 2                                                                     |
| 67               | Finland | Onions                          | 2003           | 4                                                                     |
| 67               | Finland | Oranges, Mandarines             | 2003           | 15                                                                    |
| 67               | Finland | Peas                            | 2003           | 11                                                                    |
| 67               | Finland | Pepper                          | 2003           | 1                                                                     |
| 67               | Finland | Pigmeat                         | 2003           | 339                                                                   |
| 67               | Finland | Pimento                         | 2003           | 1                                                                     |
| 67               | Finland | Pineapples and products         | 2003           | 8                                                                     |
| 67               | Finland | Potatoes and products           | 2003           | 134                                                                   |
| 67               | Finland | Poultry Meat                    | 2003           | 63                                                                    |
| 67               | Finland | Rape and Mustard Oil            | 2003           | 182                                                                   |
| 67               | Finland | Rape and Mustardseed            | 2003           | 3                                                                     |
| 67               | Finland | Rye and products                | 2003           | 134                                                                   |
| 67               | Finland | Sesame seed                     | 2003           | 1                                                                     |
| 67               | Finland | Spices, Other                   | 2003           | 1                                                                     |
| 67               | Finland | Sugar (Raw Equivalent)          | 2003           | 308                                                                   |
| 67               | Finland | Sunflowerseed Oil               | 2003           | 30                                                                    |
| 67               | Finland | Sweeteners, Other               | 2003           | 18                                                                    |
| 67               | Finland | Tomatoes and products           | 2003           | 9                                                                     |
| 67               | Finland | Vegetables, Other               | 2003           | 35                                                                    |
| 67               | Finland | Wheat and products              | 2003           | 630                                                                   |
| 67               | Finland | Wine                            | 2003           | 18                                                                    |
| 67               | Finland | Apples and products             | 2004           | 21                                                                    |
| 67               | Finland | Bananas                         | 2004           | 20                                                                    |
| 67               | Finland | Barley and products             | 2004           | 29                                                                    |
| 67               | Finland | Beer                            | 2004           | 129                                                                   |

Dietary calcium and zinc deficiency risks are decreasing but remain prevalent

| FAO Country code | Country | Food item                       | Reference year | Net energy supply (kcal <i>capita</i> <sup>-1</sup> d <sup>-1</sup> ) |
|------------------|---------|---------------------------------|----------------|-----------------------------------------------------------------------|
| 67               | Finland | Beverages, Alcoholic            | 2004           | 54                                                                    |
| 67               | Finland | Beverages, Fermented            | 2004           | 1                                                                     |
| 67               | Finland | Bovine Meat                     | 2004           | 92                                                                    |
| 67               | Finland | Butter, Ghee                    | 2004           | 82                                                                    |
| 67               | Finland | Cereals, Other                  | 2004           | 2                                                                     |
| 67               | Finland | Cocoa Beans and products        | 2004           | 8                                                                     |
| 67               | Finland | Coconut Oil                     | 2004           | 3                                                                     |
| 67               | Finland | Coconuts - Incl Copra           | 2004           | 1                                                                     |
| 67               | Finland | Coffee and products             | 2004           | 15                                                                    |
| 67               | Finland | Cream                           | 2004           | 36                                                                    |
| 67               | Finland | Fats, Animals, Raw              | 2004           | 13                                                                    |
| 67               | Finland | Fruits, Other                   | 2004           | 19                                                                    |
| 67               | Finland | Grapefruit and products         | 2004           | 1                                                                     |
| 67               | Finland | Grapes and products (excl wine) | 2004           | 9                                                                     |
| 67               | Finland | Groundnut Oil                   | 2004           | 1                                                                     |
| 67               | Finland | Groundnuts (Shelled Eq)         | 2004           | 11                                                                    |
| 67               | Finland | Honey                           | 2004           | 4                                                                     |
| 67               | Finland | Meat, Other                     | 2004           | 4                                                                     |
| 67               | Finland | Mutton & Goat Meat              | 2004           | 2                                                                     |
| 67               | Finland | Oats                            | 2004           | 21                                                                    |
| 67               | Finland | Oilcrops Oil, Other             | 2004           | 15                                                                    |
| 67               | Finland | Olive Oil                       | 2004           | 6                                                                     |
| 67               | Finland | Olives (including preserved)    | 2004           | 1                                                                     |
| 67               | Finland | Onions                          | 2004           | 6                                                                     |
| 67               | Finland | Oranges, Mandarines             | 2004           | 15                                                                    |
| 67               | Finland | Palm Oil                        | 2004           | 2                                                                     |
| 67               | Finland | Peas                            | 2004           | 11                                                                    |
| 67               | Finland | Pepper                          | 2004           | 1                                                                     |
| 67               | Finland | Pigmeat                         | 2004           | 349                                                                   |
| 67               | Finland | Pimento                         | 2004           | 1                                                                     |
| 67               | Finland | Pineapples and products         | 2004           | 9                                                                     |
| 67               | Finland | Potatoes and products           | 2004           | 137                                                                   |
| 67               | Finland | Poultry Meat                    | 2004           | 63                                                                    |
| 67               | Finland | Rape and Mustard Oil            | 2004           | 180                                                                   |
| 67               | Finland | Rape and Mustardseed            | 2004           | 4                                                                     |
| 67               | Finland | Rye and products                | 2004           | 139                                                                   |
| 67               | Finland | Sesame seed                     | 2004           | 2                                                                     |
| 67               | Finland | Soyabean Oil                    | 2004           | 29                                                                    |
| 67               | Finland | Spices, Other                   | 2004           | 1                                                                     |
| 67               | Finland | Sugar (Raw Equivalent)          | 2004           | 307                                                                   |
| 67               | Finland | Sunflowerseed Oil               | 2004           | 18                                                                    |
| 67               | Finland | Sweeteners, Other               | 2004           | 22                                                                    |
| 67               | Finland | Tomatoes and products           | 2004           | 9                                                                     |
| 67               | Finland | Vegetables, Other               | 2004           | 36                                                                    |
| 67               | Finland | Wheat and products              | 2004           | 645                                                                   |
| 67               | Finland | Wine                            | 2004           | 18                                                                    |
| 67               | Finland | Apples and products             | 2005           | 20                                                                    |
| 67               | Finland | Bananas                         | 2005           | 20                                                                    |
| 67               | Finland | Barley and products             | 2005           | 28                                                                    |
| 67               | Finland | Beer                            | 2005           | 119                                                                   |
| 67               | Finland | Beverages, Alcoholic            | 2005           | 54                                                                    |
| 67               | Finland | Beverages, Fermented            | 2005           | 2                                                                     |
| 67               | Finland | Bovine Meat                     | 2005           | 91                                                                    |
| 67               | Finland | Butter, Ghee                    | 2005           | 77                                                                    |
| 67               | Finland | Cereals, Other                  | 2005           | 2                                                                     |
| 67               | Finland | Cocoa Beans and products        | 2005           | 14                                                                    |
| 67               | Finland | Coconut Oil                     | 2005           | 9                                                                     |
| 67               | Finland | Coconuts - Incl Copra           | 2005           | 1                                                                     |
| 67               | Finland | Coffee and products             | 2005           | 15                                                                    |
| 67               | Finland | Cream                           | 2005           | 35                                                                    |
| 67               | Finland | Fats, Animals, Raw              | 2005           | 13                                                                    |
| 67               | Finland | Fruits, Other                   | 2005           | 20                                                                    |
| 67               | Finland | Grapefruit and products         | 2005           | 1                                                                     |
| 67               | Finland | Grapes and products (excl wine) | 2005           | 9                                                                     |
| 67               | Finland | Groundnut Oil                   | 2005           | 2                                                                     |
| 67               | Finland | Groundnuts (Shelled Eq)         | 2005           | 12                                                                    |
| 67               | Finland | Honey                           | 2005           | 5                                                                     |
| 67               | Finland | Meat, Other                     | 2005           | 4                                                                     |
| 67               | Finland | Mutton & Goat Meat              | 2005           | 2                                                                     |
| 67               | Finland | Oats                            | 2005           | 41                                                                    |
| 67               | Finland | Oilcrops Oil, Other             | 2005           | 15                                                                    |
| 67               | Finland | Olive Oil                       | 2005           | 6                                                                     |
| 67               | Finland | Olives (including preserved)    | 2005           | 2                                                                     |
| 67               | Finland | Onions                          | 2005           | 5                                                                     |
| 67               | Finland | Oranges, Mandarines             | 2005           | 15                                                                    |
| 67               | Finland | Peas                            | 2005           | 11                                                                    |
| 67               | Finland | Pepper                          | 2005           | 1                                                                     |
| 67               | Finland | Pigmeat                         | 2005           | 354                                                                   |
| 67               | Finland | Pimento                         | 2005           | 1                                                                     |
| 67               | Finland | Pineapples and products         | 2005           | 7                                                                     |
| 67               | Finland | Potatoes and products           | 2005           | 136                                                                   |
| 67               | Finland | Poultry Meat                    | 2005           | 63                                                                    |
| 67               | Finland | Rape and Mustard Oil            | 2005           | 206                                                                   |
| 67               | Finland | Rape and Mustardseed            | 2005           | 4                                                                     |
| 67               | Finland | Rye and products                | 2005           | 140                                                                   |
| 67               | Finland | Sesame seed                     | 2005           | 2                                                                     |
| 67               | Finland | Spices, Other                   | 2005           | 2                                                                     |
| 67               | Finland | Sugar (Raw Equivalent)          | 2005           | 295                                                                   |
| 67               | Finland | Sunflowerseed Oil               | 2005           | 20                                                                    |
| 67               | Finland | Sweeteners, Other               | 2005           | 21                                                                    |
| 67               | Finland | Tomatoes and products           | 2005           | 9                                                                     |
| 67               | Finland | Vegetables, Other               | 2005           | 39                                                                    |
| 67               | Finland | Wheat and products              | 2005           | 632                                                                   |
| 67               | Finland | Wine                            | 2005           | 20                                                                    |
| 67               | Finland | Apples and products             | 2006           | 19                                                                    |
| 67               | Finland | Bananas                         | 2006           | 19                                                                    |
| 67               | Finland | Barley and products             | 2006           | 28                                                                    |

## Dietary calcium and zinc deficiency risks are decreasing but remain prevalent

| FAO Country code | Country | Food item                       | Reference year | Net energy supply (kcal <i>capita</i> <sup>-1</sup> d <sup>-1</sup> ) |
|------------------|---------|---------------------------------|----------------|-----------------------------------------------------------------------|
| 67               | Finland | Beer                            | 2006           | 112                                                                   |
| 67               | Finland | Beverages, Alcoholic            | 2006           | 49                                                                    |
| 67               | Finland | Beverages, Fermented            | 2006           | 2                                                                     |
| 67               | Finland | Bovine Meat                     | 2006           | 91                                                                    |
| 67               | Finland | Butter, Ghee                    | 2006           | 83                                                                    |
| 67               | Finland | Cereals, Other                  | 2006           | 3                                                                     |
| 67               | Finland | Cocoa Beans and products        | 2006           | 17                                                                    |
| 67               | Finland | Coffee and products             | 2006           | 15                                                                    |
| 67               | Finland | Cream                           | 2006           | 35                                                                    |
| 67               | Finland | Fats, Animals, Raw              | 2006           | 17                                                                    |
| 67               | Finland | Fruits, Other                   | 2006           | 20                                                                    |
| 67               | Finland | Grapefruit and products         | 2006           | 1                                                                     |
| 67               | Finland | Grapes and products (excl wine) | 2006           | 9                                                                     |
| 67               | Finland | Groundnuts (Shelled Eq)         | 2006           | 14                                                                    |
| 67               | Finland | Honey                           | 2006           | 6                                                                     |
| 67               | Finland | Meat, Other                     | 2006           | 5                                                                     |
| 67               | Finland | Mutton & Goat Meat              | 2006           | 3                                                                     |
| 67               | Finland | Oats                            | 2006           | 43                                                                    |
| 67               | Finland | Oilcrops Oil, Other             | 2006           | 19                                                                    |
| 67               | Finland | Olive Oil                       | 2006           | 6                                                                     |
| 67               | Finland | Olives (including preserved)    | 2006           | 2                                                                     |
| 67               | Finland | Onions                          | 2006           | 5                                                                     |
| 67               | Finland | Oranges, Mandarines             | 2006           | 14                                                                    |
| 67               | Finland | Palm Oil                        | 2006           | 46                                                                    |
| 67               | Finland | Peas                            | 2006           | 11                                                                    |
| 67               | Finland | Pepper                          | 2006           | 1                                                                     |
| 67               | Finland | Pigmeat                         | 2006           | 351                                                                   |
| 67               | Finland | Pimento                         | 2006           | 1                                                                     |
| 67               | Finland | Pineapples and products         | 2006           | 8                                                                     |
| 67               | Finland | Potatoes and products           | 2006           | 134                                                                   |
| 67               | Finland | Poultry Meat                    | 2006           | 61                                                                    |
| 67               | Finland | Rape and Mustard Oil            | 2006           | 163                                                                   |
| 67               | Finland | Rape and Mustardseed            | 2006           | 4                                                                     |
| 67               | Finland | Rye and products                | 2006           | 150                                                                   |
| 67               | Finland | Sesame seed                     | 2006           | 1                                                                     |
| 67               | Finland | Spices, Other                   | 2006           | 2                                                                     |
| 67               | Finland | Sugar (Raw Equivalent)          | 2006           | 283                                                                   |
| 67               | Finland | Sunflowerseed Oil               | 2006           | 22                                                                    |
| 67               | Finland | Sweeteners, Other               | 2006           | 24                                                                    |
| 67               | Finland | Tomatoes and products           | 2006           | 8                                                                     |
| 67               | Finland | Vegetables, Other               | 2006           | 37                                                                    |
| 67               | Finland | Wheat and products              | 2006           | 666                                                                   |
| 67               | Finland | Wine                            | 2006           | 20                                                                    |
| 67               | Finland | Apples and products             | 2007           | 21                                                                    |
| 67               | Finland | Bananas                         | 2007           | 21                                                                    |
| 67               | Finland | Barley and products             | 2007           | 30                                                                    |
| 67               | Finland | Beer                            | 2007           | 116                                                                   |
| 67               | Finland | Beverages, Alcoholic            | 2007           | 42                                                                    |
| 67               | Finland | Beverages, Fermented            | 2007           | 3                                                                     |
| 67               | Finland | Bovine Meat                     | 2007           | 90                                                                    |
| 67               | Finland | Butter, Ghee                    | 2007           | 75                                                                    |
| 67               | Finland | Cereals, Other                  | 2007           | 5                                                                     |
| 67               | Finland | Cocoa Beans and products        | 2007           | 22                                                                    |
| 67               | Finland | Coconut Oil                     | 2007           | 12                                                                    |
| 67               | Finland | Coffee and products             | 2007           | 15                                                                    |
| 67               | Finland | Cream                           | 2007           | 37                                                                    |
| 67               | Finland | Fats, Animals, Raw              | 2007           | 17                                                                    |
| 67               | Finland | Fruits, Other                   | 2007           | 21                                                                    |
| 67               | Finland | Grapefruit and products         | 2007           | 1                                                                     |
| 67               | Finland | Grapes and products (excl wine) | 2007           | 10                                                                    |
| 67               | Finland | Groundnut Oil                   | 2007           | 1                                                                     |
| 67               | Finland | Groundnuts (Shelled Eq)         | 2007           | 11                                                                    |
| 67               | Finland | Honey                           | 2007           | 4                                                                     |
| 67               | Finland | Meat, Other                     | 2007           | 6                                                                     |
| 67               | Finland | Mutton & Goat Meat              | 2007           | 4                                                                     |
| 67               | Finland | Oats                            | 2007           | 29                                                                    |
| 67               | Finland | Oilcrops Oil, Other             | 2007           | 20                                                                    |
| 67               | Finland | Olive Oil                       | 2007           | 8                                                                     |
| 67               | Finland | Olives (including preserved)    | 2007           | 2                                                                     |
| 67               | Finland | Onions                          | 2007           | 6                                                                     |
| 67               | Finland | Oranges, Mandarines             | 2007           | 14                                                                    |
| 67               | Finland | Peas                            | 2007           | 11                                                                    |
| 67               | Finland | Pepper                          | 2007           | 1                                                                     |
| 67               | Finland | Pigmeat                         | 2007           | 367                                                                   |
| 67               | Finland | Pimento                         | 2007           | 1                                                                     |
| 67               | Finland | Pineapples and products         | 2007           | 9                                                                     |
| 67               | Finland | Plantains                       | 2007           | 1                                                                     |
| 67               | Finland | Potatoes and products           | 2007           | 130                                                                   |
| 67               | Finland | Poultry Meat                    | 2007           | 66                                                                    |
| 67               | Finland | Rape and Mustard Oil            | 2007           | 179                                                                   |
| 67               | Finland | Rape and Mustardseed            | 2007           | 4                                                                     |
| 67               | Finland | Rye and products                | 2007           | 154                                                                   |
| 67               | Finland | Sesame seed                     | 2007           | 2                                                                     |
| 67               | Finland | Soyabean Oil                    | 2007           | 18                                                                    |
| 67               | Finland | Spices, Other                   | 2007           | 2                                                                     |
| 67               | Finland | Sugar (Raw Equivalent)          | 2007           | 297                                                                   |
| 67               | Finland | Sunflowerseed Oil               | 2007           | 15                                                                    |
| 67               | Finland | Sweeteners, Other               | 2007           | 25                                                                    |
| 67               | Finland | Tomatoes and products           | 2007           | 9                                                                     |
| 67               | Finland | Vegetables, Other               | 2007           | 39                                                                    |
| 67               | Finland | Wheat and products              | 2007           | 653                                                                   |
| 67               | Finland | Wine                            | 2007           | 22                                                                    |
| 67               | Finland | Apples and products             | 2008           | 19                                                                    |
| 67               | Finland | Bananas                         | 2008           | 17                                                                    |
| 67               | Finland | Barley and products             | 2008           | 31                                                                    |
| 67               | Finland | Beer                            | 2008           | 114                                                                   |
| 67               | Finland | Beverages, Alcoholic            | 2008           | 32                                                                    |

Dietary calcium and zinc deficiency risks are decreasing but remain prevalent

| FAO Country code | Country | Food item                       | Reference year | Net energy supply (kcal capita <sup>-1</sup> d <sup>-1</sup> ) |
|------------------|---------|---------------------------------|----------------|----------------------------------------------------------------|
| 67               | Finland | Beverages, Fermented            | 2008           | 1                                                              |
| 67               | Finland | Bovine Meat                     | 2008           | 87                                                             |
| 67               | Finland | Butter, Ghee                    | 2008           | 85                                                             |
| 67               | Finland | Cereals, Other                  | 2008           | 9                                                              |
| 67               | Finland | Cocoa Beans and products        | 2008           | 24                                                             |
| 67               | Finland | Coconut Oil                     | 2008           | 12                                                             |
| 67               | Finland | Coffee and products             | 2008           | 16                                                             |
| 67               | Finland | Cream                           | 2008           | 37                                                             |
| 67               | Finland | Fats, Animals, Raw              | 2008           | 16                                                             |
| 67               | Finland | Fruits, Other                   | 2008           | 21                                                             |
| 67               | Finland | Grapefruit and products         | 2008           | 1                                                              |
| 67               | Finland | Grapes and products (excl wine) | 2008           | 11                                                             |
| 67               | Finland | Groundnut Oil                   | 2008           | 1                                                              |
| 67               | Finland | Groundnuts (Shelled Eq)         | 2008           | 13                                                             |
| 67               | Finland | Honey                           | 2008           | 4                                                              |
| 67               | Finland | Meat, Other                     | 2008           | 6                                                              |
| 67               | Finland | Mutton & Goat Meat              | 2008           | 3                                                              |
| 67               | Finland | Oats                            | 2008           | 37                                                             |
| 67               | Finland | Oilcrops Oil, Other             | 2008           | 13                                                             |
| 67               | Finland | Olive Oil                       | 2008           | 7                                                              |
| 67               | Finland | Olives (including preserved)    | 2008           | 2                                                              |
| 67               | Finland | Onions                          | 2008           | 5                                                              |
| 67               | Finland | Oranges, Mandarines             | 2008           | 13                                                             |
| 67               | Finland | Peas                            | 2008           | 11                                                             |
| 67               | Finland | Pepper                          | 2008           | 1                                                              |
| 67               | Finland | Pigmeat                         | 2008           | 355                                                            |
| 67               | Finland | Pimento                         | 2008           | 1                                                              |
| 67               | Finland | Pineapples and products         | 2008           | 9                                                              |
| 67               | Finland | Potatoes and products           | 2008           | 128                                                            |
| 67               | Finland | Poultry Meat                    | 2008           | 69                                                             |
| 67               | Finland | Rape and Mustard Oil            | 2008           | 164                                                            |
| 67               | Finland | Rape and Mustardseed            | 2008           | 4                                                              |
| 67               | Finland | Rye and products                | 2008           | 145                                                            |
| 67               | Finland | Sesame seed                     | 2008           | 2                                                              |
| 67               | Finland | Soyabean Oil                    | 2008           | 26                                                             |
| 67               | Finland | Spices, Other                   | 2008           | 2                                                              |
| 67               | Finland | Sugar (Raw Equivalent)          | 2008           | 255                                                            |
| 67               | Finland | Sunflowerseed Oil               | 2008           | 13                                                             |
| 67               | Finland | Sweet potatoes                  | 2008           | 1                                                              |
| 67               | Finland | Sweeteners, Other               | 2008           | 24                                                             |
| 67               | Finland | Tomatoes and products           | 2008           | 9                                                              |
| 67               | Finland | Vegetables, Other               | 2008           | 38                                                             |
| 67               | Finland | Wheat and products              | 2008           | 661                                                            |
| 67               | Finland | Wine                            | 2008           | 22                                                             |
| 67               | Finland | Apples and products             | 2009           | 18                                                             |
| 67               | Finland | Bananas                         | 2009           | 16                                                             |
| 67               | Finland | Barley and products             | 2009           | 32                                                             |
| 67               | Finland | Beer                            | 2009           | 112                                                            |
| 67               | Finland | Beverages, Alcoholic            | 2009           | 31                                                             |
| 67               | Finland | Beverages, Fermented            | 2009           | 1                                                              |
| 67               | Finland | Bovine Meat                     | 2009           | 87                                                             |
| 67               | Finland | Butter, Ghee                    | 2009           | 75                                                             |
| 67               | Finland | Cereals, Other                  | 2009           | 17                                                             |
| 67               | Finland | Cocoa Beans and products        | 2009           | 27                                                             |
| 67               | Finland | Coconut Oil                     | 2009           | 9                                                              |
| 67               | Finland | Coffee and products             | 2009           | 15                                                             |
| 67               | Finland | Cream                           | 2009           | 37                                                             |
| 67               | Finland | Dates                           | 2009           | 1                                                              |
| 67               | Finland | Fats, Animals, Raw              | 2009           | 20                                                             |
| 67               | Finland | Fruits, Other                   | 2009           | 23                                                             |
| 67               | Finland | Grapefruit and products         | 2009           | 1                                                              |
| 67               | Finland | Grapes and products (excl wine) | 2009           | 11                                                             |
| 67               | Finland | Groundnut Oil                   | 2009           | 2                                                              |
| 67               | Finland | Groundnuts (Shelled Eq)         | 2009           | 15                                                             |
| 67               | Finland | Honey                           | 2009           | 4                                                              |
| 67               | Finland | Meat, Other                     | 2009           | 6                                                              |
| 67               | Finland | Mutton & Goat Meat              | 2009           | 3                                                              |
| 67               | Finland | Oats                            | 2009           | 34                                                             |
| 67               | Finland | Oilcrops Oil, Other             | 2009           | 13                                                             |
| 67               | Finland | Olive Oil                       | 2009           | 8                                                              |
| 67               | Finland | Olives (including preserved)    | 2009           | 2                                                              |
| 67               | Finland | Onions                          | 2009           | 6                                                              |
| 67               | Finland | Oranges, Mandarines             | 2009           | 14                                                             |
| 67               | Finland | Peas                            | 2009           | 11                                                             |
| 67               | Finland | Pepper                          | 2009           | 1                                                              |
| 67               | Finland | Pigmeat                         | 2009           | 354                                                            |
| 67               | Finland | Pimento                         | 2009           | 1                                                              |
| 67               | Finland | Pineapples and products         | 2009           | 7                                                              |
| 67               | Finland | Potatoes and products           | 2009           | 122                                                            |
| 67               | Finland | Poultry Meat                    | 2009           | 65                                                             |
| 67               | Finland | Rape and Mustard Oil            | 2009           | 189                                                            |
| 67               | Finland | Rape and Mustardseed            | 2009           | 4                                                              |
| 67               | Finland | Rye and products                | 2009           | 144                                                            |
| 67               | Finland | Sesame seed                     | 2009           | 1                                                              |
| 67               | Finland | Spices, Other                   | 2009           | 2                                                              |
| 67               | Finland | Sugar (Raw Equivalent)          | 2009           | 297                                                            |
| 67               | Finland | Sunflowerseed Oil               | 2009           | 22                                                             |
| 67               | Finland | Sweet potatoes                  | 2009           | 1                                                              |
| 67               | Finland | Sweeteners, Other               | 2009           | 22                                                             |
| 67               | Finland | Tomatoes and products           | 2009           | 10                                                             |
| 67               | Finland | Vegetables, Other               | 2009           | 42                                                             |
| 67               | Finland | Wheat and products              | 2009           | 630                                                            |
| 67               | Finland | Wine                            | 2009           | 22                                                             |
| 67               | Finland | Apples and products             | 2010           | 18                                                             |
| 67               | Finland | Bananas                         | 2010           | 17                                                             |
| 67               | Finland | Barley and products             | 2010           | 32                                                             |
| 67               | Finland | Beer                            | 2010           | 111                                                            |



Dietary calcium and zinc deficiency risks are decreasing but remain prevalent

| FAO Country code | Country | Food item                       | Reference year | Net energy supply (kcal <i>capita</i> <sup>-1</sup> d <sup>-1</sup> ) |
|------------------|---------|---------------------------------|----------------|-----------------------------------------------------------------------|
| 67               | Finland | Beverages, Alcoholic            | 2010           | 32                                                                    |
| 67               | Finland | Beverages, Fermented            | 2010           | 1                                                                     |
| 67               | Finland | Bovine Meat                     | 2010           | 89                                                                    |
| 67               | Finland | Butter, Ghee                    | 2010           | 92                                                                    |
| 67               | Finland | Cereals, Other                  | 2010           | 24                                                                    |
| 67               | Finland | Cocoa Beans and products        | 2010           | 31                                                                    |
| 67               | Finland | Coffee and products             | 2010           | 15                                                                    |
| 67               | Finland | Cream                           | 2010           | 34                                                                    |
| 67               | Finland | Dates                           | 2010           | 1                                                                     |
| 67               | Finland | Fats, Animals, Raw              | 2010           | 16                                                                    |
| 67               | Finland | Fruits, Other                   | 2010           | 21                                                                    |
| 67               | Finland | Grapes and products (excl wine) | 2010           | 10                                                                    |
| 67               | Finland | Groundnuts (Shelled Eq)         | 2010           | 15                                                                    |
| 67               | Finland | Meat, Other                     | 2010           | 6                                                                     |
| 67               | Finland | Mutton & Goat Meat              | 2010           | 3                                                                     |
| 67               | Finland | Oats                            | 2010           | 36                                                                    |
| 67               | Finland | Oilcrops Oil, Other             | 2010           | 12                                                                    |
| 67               | Finland | Olive Oil                       | 2010           | 8                                                                     |
| 67               | Finland | Olives (including preserved)    | 2010           | 2                                                                     |
| 67               | Finland | Onions                          | 2010           | 5                                                                     |
| 67               | Finland | Oranges, Mandarines             | 2010           | 14                                                                    |
| 67               | Finland | Palm Oil                        | 2010           | 25                                                                    |
| 67               | Finland | Peas                            | 2010           | 11                                                                    |
| 67               | Finland | Pepper                          | 2010           | 1                                                                     |
| 67               | Finland | Pigmeat                         | 2010           | 373                                                                   |
| 67               | Finland | Pimento                         | 2010           | 1                                                                     |
| 67               | Finland | Pineapples and products         | 2010           | 8                                                                     |
| 67               | Finland | Potatoes and products           | 2010           | 121                                                                   |
| 67               | Finland | Poultry Meat                    | 2010           | 62                                                                    |
| 67               | Finland | Rape and Mustard Oil            | 2010           | 176                                                                   |
| 67               | Finland | Rape and Mustardseed            | 2010           | 4                                                                     |
| 67               | Finland | Rye and products                | 2010           | 150                                                                   |
| 67               | Finland | Sesame seed                     | 2010           | 1                                                                     |
| 67               | Finland | Spices, Other                   | 2010           | 1                                                                     |
| 67               | Finland | Sugar (Raw Equivalent)          | 2010           | 266                                                                   |
| 67               | Finland | Sunflowerseed Oil               | 2010           | 15                                                                    |
| 67               | Finland | Sweet potatoes                  | 2010           | 1                                                                     |
| 67               | Finland | Sweeteners, Other               | 2010           | 22                                                                    |
| 67               | Finland | Tomatoes and products           | 2010           | 8                                                                     |
| 67               | Finland | Vegetables, Other               | 2010           | 41                                                                    |
| 67               | Finland | Wheat and products              | 2010           | 660                                                                   |
| 67               | Finland | Wine                            | 2010           | 23                                                                    |
| 67               | Finland | Apples and products             | 2011           | 19                                                                    |
| 67               | Finland | Bananas                         | 2011           | 21                                                                    |
| 67               | Finland | Barley and products             | 2011           | 31                                                                    |
| 67               | Finland | Beer                            | 2011           | 115                                                                   |
| 67               | Finland | Beverages, Alcoholic            | 2011           | 34                                                                    |
| 67               | Finland | Beverages, Fermented            | 2011           | 1                                                                     |
| 67               | Finland | Bovine Meat                     | 2011           | 90                                                                    |
| 67               | Finland | Butter, Ghee                    | 2011           | 111                                                                   |
| 67               | Finland | Cereals, Other                  | 2011           | 12                                                                    |
| 67               | Finland | Cocoa Beans and products        | 2011           | 22                                                                    |
| 67               | Finland | Coffee and products             | 2011           | 15                                                                    |
| 67               | Finland | Cream                           | 2011           | 36                                                                    |
| 67               | Finland | Dates                           | 2011           | 1                                                                     |
| 67               | Finland | Fats, Animals, Raw              | 2011           | 16                                                                    |
| 67               | Finland | Fruits, Other                   | 2011           | 23                                                                    |
| 67               | Finland | Grapes and products (excl wine) | 2011           | 9                                                                     |
| 67               | Finland | Groundnuts (Shelled Eq)         | 2011           | 16                                                                    |
| 67               | Finland | Lemons, Limes and products      | 2011           | 1                                                                     |
| 67               | Finland | Meat, Other                     | 2011           | 7                                                                     |
| 67               | Finland | Mutton & Goat Meat              | 2011           | 4                                                                     |
| 67               | Finland | Oats                            | 2011           | 38                                                                    |
| 67               | Finland | Oilcrops Oil, Other             | 2011           | 13                                                                    |
| 67               | Finland | Olive Oil                       | 2011           | 11                                                                    |
| 67               | Finland | Olives (including preserved)    | 2011           | 2                                                                     |
| 67               | Finland | Onions                          | 2011           | 6                                                                     |
| 67               | Finland | Oranges, Mandarines             | 2011           | 14                                                                    |
| 67               | Finland | Palm Oil                        | 2011           | 23                                                                    |
| 67               | Finland | Peas                            | 2011           | 10                                                                    |
| 67               | Finland | Pepper                          | 2011           | 1                                                                     |
| 67               | Finland | Pigmeat                         | 2011           | 364                                                                   |
| 67               | Finland | Pimento                         | 2011           | 1                                                                     |
| 67               | Finland | Pineapples and products         | 2011           | 9                                                                     |
| 67               | Finland | Plantains                       | 2011           | 2                                                                     |
| 67               | Finland | Potatoes and products           | 2011           | 120                                                                   |
| 67               | Finland | Poultry Meat                    | 2011           | 64                                                                    |
| 67               | Finland | Rape and Mustard Oil            | 2011           | 158                                                                   |
| 67               | Finland | Rape and Mustardseed            | 2011           | 4                                                                     |
| 67               | Finland | Rye and products                | 2011           | 148                                                                   |
| 67               | Finland | Sesame seed                     | 2011           | 1                                                                     |
| 67               | Finland | Spices, Other                   | 2011           | 2                                                                     |
| 67               | Finland | Sugar (Raw Equivalent)          | 2011           | 268                                                                   |
| 67               | Finland | Sunflowerseed Oil               | 2011           | 27                                                                    |
| 67               | Finland | Sweet potatoes                  | 2011           | 1                                                                     |
| 67               | Finland | Sweeteners, Other               | 2011           | 23                                                                    |
| 67               | Finland | Tomatoes and products           | 2011           | 9                                                                     |
| 67               | Finland | Vegetables, Other               | 2011           | 43                                                                    |
| 67               | Finland | Wheat and products              | 2011           | 641                                                                   |
| 67               | Finland | Wine                            | 2011           | 23                                                                    |
| 28               | Myanmar | Alcoholic Beverages             | 1992           | 3                                                                     |
| 28               | Myanmar | Animal fats                     | 1992           | 8                                                                     |
| 28               | Myanmar | Animal Products                 | 1992           | 89                                                                    |
| 28               | Myanmar | Beans                           | 1992           | 31                                                                    |
| 28               | Myanmar | Beverages, Alcoholic            | 1992           | 3                                                                     |
| 28               | Myanmar | Bovine Meat                     | 1992           | 7                                                                     |
| 28               | Myanmar | Butter, Ghee                    | 1992           | 4                                                                     |

Dietary calcium and zinc deficiency risks are decreasing but remain prevalent

| FAO Country code | Country | Food item                  | Reference year | Net energy supply (kcal capita <sup>-1</sup> d <sup>-1</sup> ) |
|------------------|---------|----------------------------|----------------|----------------------------------------------------------------|
| 28               | Myanmar | Cassava and products       | 1992           | 2                                                              |
| 28               | Myanmar | Cereals - Excluding Beer   | 1992           | 1,170                                                          |
| 28               | Myanmar | Cereals, Other             | 1992           | 3                                                              |
| 28               | Myanmar | Coconuts - Incl Copra      | 1992           | 20                                                             |
| 28               | Myanmar | Cottonseed Oil             | 1992           | 3                                                              |
| 28               | Myanmar | Eggs                       | 1992           | 3                                                              |
| 28               | Myanmar | Fats, Animals, Raw         | 1992           | 3                                                              |
| 28               | Myanmar | Fish, Seafood              | 1992           | 24                                                             |
| 28               | Myanmar | Freshwater Fish            | 1992           | 3                                                              |
| 28               | Myanmar | Fruits - Excluding Wine    | 1992           | 29                                                             |
| 28               | Myanmar | Fruits, Other              | 1992           | 20                                                             |
| 28               | Myanmar | Grand Total                | 1992           | 1,693                                                          |
| 28               | Myanmar | Groundnut Oil              | 1992           | 55                                                             |
| 28               | Myanmar | Groundnuts (Shelled Eq)    | 1992           | 12                                                             |
| 28               | Myanmar | Maize and products         | 1992           | 15                                                             |
| 28               | Myanmar | Marine Fish, Other         | 1992           | 21                                                             |
| 28               | Myanmar | Meat                       | 1992           | 31                                                             |
| 28               | Myanmar | Milk - Excluding Butter    | 1992           | 21                                                             |
| 28               | Myanmar | Millet and products        | 1992           | 3                                                              |
| 28               | Myanmar | Mutton & Goat Meat         | 1992           | 1                                                              |
| 28               | Myanmar | Offals                     | 1992           | 1                                                              |
| 28               | Myanmar | Oilcrops                   | 1992           | 40                                                             |
| 28               | Myanmar | Oilcrops Oil, Other        | 1992           | 1                                                              |
| 28               | Myanmar | Onions                     | 1992           | 4                                                              |
| 28               | Myanmar | Palm Oil                   | 1992           | 78                                                             |
| 28               | Myanmar | Peas                       | 1992           | 3                                                              |
| 28               | Myanmar | Pigmeat                    | 1992           | 14                                                             |
| 28               | Myanmar | Pimento                    | 1992           | 5                                                              |
| 28               | Myanmar | Plantains                  | 1992           | 9                                                              |
| 28               | Myanmar | Potatoes and products      | 1992           | 6                                                              |
| 28               | Myanmar | Poultry Meat               | 1992           | 9                                                              |
| 28               | Myanmar | Pulses                     | 1992           | 58                                                             |
| 28               | Myanmar | Pulses, Other and products | 1992           | 25                                                             |
| 28               | Myanmar | Rice (Milled Equivalent)   | 1992           | 1,129                                                          |
| 28               | Myanmar | Sesame seed                | 1992           | 6                                                              |
| 28               | Myanmar | Sesameseed Oil             | 1992           | 23                                                             |
| 28               | Myanmar | Soyabean Oil               | 1992           | 2                                                              |
| 28               | Myanmar | Soyabeans                  | 1992           | 1                                                              |
| 28               | Myanmar | Spices                     | 1992           | 5                                                              |
| 28               | Myanmar | Starchy Roots              | 1992           | 9                                                              |
| 28               | Myanmar | Sugar & Sweeteners         | 1992           | 73                                                             |
| 28               | Myanmar | Sugar (Raw Equivalent)     | 1992           | 10                                                             |
| 28               | Myanmar | Sugar non-centrifugal      | 1992           | 59                                                             |
| 28               | Myanmar | Sunflower seed             | 1992           | 1                                                              |
| 28               | Myanmar | Sunflowerseed Oil          | 1992           | 17                                                             |
| 28               | Myanmar | Sweet potatoes             | 1992           | 1                                                              |
| 28               | Myanmar | Sweeteners, Other          | 1992           | 5                                                              |
| 28               | Myanmar | Treenuts                   | 1992           | 5                                                              |
| 28               | Myanmar | Vegetable Oils             | 1992           | 180                                                            |
| 28               | Myanmar | Vegetables                 | 1992           | 33                                                             |
| 28               | Myanmar | Vegetables, Other          | 1992           | 29                                                             |
| 28               | Myanmar | Vegetal Products           | 1992           | 1,605                                                          |
| 28               | Myanmar | Wheat and products         | 1992           | 21                                                             |
| 28               | Myanmar | Alcoholic Beverages        | 1993           | 3                                                              |
| 28               | Myanmar | Animal fats                | 1993           | 8                                                              |
| 28               | Myanmar | Animal Products            | 1993           | 89                                                             |
| 28               | Myanmar | Beans                      | 1993           | 27                                                             |
| 28               | Myanmar | Beverages, Alcoholic       | 1993           | 2                                                              |
| 28               | Myanmar | Bovine Meat                | 1993           | 8                                                              |
| 28               | Myanmar | Butter, Ghee               | 1993           | 4                                                              |
| 28               | Myanmar | Cassava and products       | 1993           | 4                                                              |
| 28               | Myanmar | Cereals - Excluding Beer   | 1993           | 1,179                                                          |
| 28               | Myanmar | Cereals, Other             | 1993           | 2                                                              |
| 28               | Myanmar | Coconuts - Incl Copra      | 1993           | 18                                                             |
| 28               | Myanmar | Cottonseed Oil             | 1993           | 4                                                              |
| 28               | Myanmar | Eggs                       | 1993           | 3                                                              |
| 28               | Myanmar | Fats, Animals, Raw         | 1993           | 4                                                              |
| 28               | Myanmar | Fish, Seafood              | 1993           | 24                                                             |
| 28               | Myanmar | Freshwater Fish            | 1993           | 4                                                              |
| 28               | Myanmar | Fruits - Excluding Wine    | 1993           | 30                                                             |
| 28               | Myanmar | Fruits, Other              | 1993           | 20                                                             |
| 28               | Myanmar | Grand Total                | 1993           | 1,737                                                          |
| 28               | Myanmar | Groundnut Oil              | 1993           | 43                                                             |
| 28               | Myanmar | Groundnuts (Shelled Eq)    | 1993           | 14                                                             |
| 28               | Myanmar | Maize and products         | 1993           | 15                                                             |
| 28               | Myanmar | Marine Fish, Other         | 1993           | 20                                                             |
| 28               | Myanmar | Meat                       | 1993           | 32                                                             |
| 28               | Myanmar | Milk - Excluding Butter    | 1993           | 21                                                             |
| 28               | Myanmar | Millet and products        | 1993           | 3                                                              |
| 28               | Myanmar | Mutton & Goat Meat         | 1993           | 1                                                              |
| 28               | Myanmar | Offals                     | 1993           | 1                                                              |
| 28               | Myanmar | Oilcrops                   | 1993           | 42                                                             |
| 28               | Myanmar | Onions                     | 1993           | 4                                                              |
| 28               | Myanmar | Palm Oil                   | 1993           | 98                                                             |
| 28               | Myanmar | Palmkernel Oil             | 1993           | 1                                                              |
| 28               | Myanmar | Peas                       | 1993           | 4                                                              |
| 28               | Myanmar | Pigmeat                    | 1993           | 15                                                             |
| 28               | Myanmar | Pimento                    | 1993           | 4                                                              |
| 28               | Myanmar | Plantains                  | 1993           | 10                                                             |
| 28               | Myanmar | Potatoes and products      | 1993           | 5                                                              |
| 28               | Myanmar | Poultry Meat               | 1993           | 9                                                              |
| 28               | Myanmar | Pulses                     | 1993           | 68                                                             |
| 28               | Myanmar | Pulses, Other and products | 1993           | 38                                                             |
| 28               | Myanmar | Rice (Milled Equivalent)   | 1993           | 1,139                                                          |
| 28               | Myanmar | Sesame seed                | 1993           | 9                                                              |
| 28               | Myanmar | Sesameseed Oil             | 1993           | 34                                                             |
| 28               | Myanmar | Soyabean Oil               | 1993           | 2                                                              |

Dietary calcium and zinc deficiency risks are decreasing but remain prevalent

| FAO Country code | Country | Food item                  | Reference year | Net energy supply (kcal capita <sup>-1</sup> d <sup>-1</sup> ) |
|------------------|---------|----------------------------|----------------|----------------------------------------------------------------|
| 28               | Myanmar | Soyabeans                  | 1993           | 1                                                              |
| 28               | Myanmar | Spices                     | 1993           | 4                                                              |
| 28               | Myanmar | Starchy Roots              | 1993           | 10                                                             |
| 28               | Myanmar | Sugar & Sweeteners         | 1993           | 71                                                             |
| 28               | Myanmar | Sugar (Raw Equivalent)     | 1993           | 11                                                             |
| 28               | Myanmar | Sugar non-centrifugal      | 1993           | 56                                                             |
| 28               | Myanmar | Sunflower seed             | 1993           | 1                                                              |
| 28               | Myanmar | Sunflowerseed Oil          | 1993           | 19                                                             |
| 28               | Myanmar | Sweet potatoes             | 1993           | 1                                                              |
| 28               | Myanmar | Sweeteners, Other          | 1993           | 4                                                              |
| 28               | Myanmar | Treenuts                   | 1993           | 5                                                              |
| 28               | Myanmar | Vegetable Oils             | 1993           | 201                                                            |
| 28               | Myanmar | Vegetables                 | 1993           | 34                                                             |
| 28               | Myanmar | Vegetables, Other          | 1993           | 30                                                             |
| 28               | Myanmar | Vegetal Products           | 1993           | 1,648                                                          |
| 28               | Myanmar | Wheat and products         | 1993           | 19                                                             |
| 28               | Myanmar | Alcoholic Beverages        | 1994           | 3                                                              |
| 28               | Myanmar | Animal fats                | 1994           | 8                                                              |
| 28               | Myanmar | Animal Products            | 1994           | 99                                                             |
| 28               | Myanmar | Beans                      | 1994           | 21                                                             |
| 28               | Myanmar | Beer                       | 1994           | 1                                                              |
| 28               | Myanmar | Beverages, Alcoholic       | 1994           | 3                                                              |
| 28               | Myanmar | Bovine Meat                | 1994           | 8                                                              |
| 28               | Myanmar | Butter, Ghee               | 1994           | 4                                                              |
| 28               | Myanmar | Cassava and products       | 1994           | 4                                                              |
| 28               | Myanmar | Cereals - Excluding Beer   | 1994           | 1,193                                                          |
| 28               | Myanmar | Cereals, Other             | 1994           | 2                                                              |
| 28               | Myanmar | Coconuts - Incl Copra      | 1994           | 18                                                             |
| 28               | Myanmar | Cottonseed Oil             | 1994           | 2                                                              |
| 28               | Myanmar | Eggs                       | 1994           | 3                                                              |
| 28               | Myanmar | Fats, Animals, Raw         | 1994           | 4                                                              |
| 28               | Myanmar | Fish, Seafood              | 1994           | 24                                                             |
| 28               | Myanmar | Freshwater Fish            | 1994           | 4                                                              |
| 28               | Myanmar | Fruits - Excluding Wine    | 1994           | 32                                                             |
| 28               | Myanmar | Fruits, Other              | 1994           | 20                                                             |
| 28               | Myanmar | Grand Total                | 1994           | 1,715                                                          |
| 28               | Myanmar | Groundnut Oil              | 1994           | 42                                                             |
| 28               | Myanmar | Groundnuts (Shelled Eq)    | 1994           | 14                                                             |
| 28               | Myanmar | Maize and products         | 1994           | 16                                                             |
| 28               | Myanmar | Marine Fish, Other         | 1994           | 20                                                             |
| 28               | Myanmar | Meat                       | 1994           | 40                                                             |
| 28               | Myanmar | Milk - Excluding Butter    | 1994           | 22                                                             |
| 28               | Myanmar | Millet and products        | 1994           | 3                                                              |
| 28               | Myanmar | Mutton & Goat Meat         | 1994           | 1                                                              |
| 28               | Myanmar | Offals                     | 1994           | 1                                                              |
| 28               | Myanmar | Oilcrops                   | 1994           | 41                                                             |
| 28               | Myanmar | Onions                     | 1994           | 4                                                              |
| 28               | Myanmar | Palm Oil                   | 1994           | 84                                                             |
| 28               | Myanmar | Peas                       | 1994           | 4                                                              |
| 28               | Myanmar | Pigmeat                    | 1994           | 23                                                             |
| 28               | Myanmar | Pimento                    | 1994           | 5                                                              |
| 28               | Myanmar | Plantains                  | 1994           | 12                                                             |
| 28               | Myanmar | Potatoes and products      | 1994           | 6                                                              |
| 28               | Myanmar | Poultry Meat               | 1994           | 9                                                              |
| 28               | Myanmar | Pulses                     | 1994           | 54                                                             |
| 28               | Myanmar | Pulses, Other and products | 1994           | 29                                                             |
| 28               | Myanmar | Rice (Milled Equivalent)   | 1994           | 1,158                                                          |
| 28               | Myanmar | Sesame seed                | 1994           | 8                                                              |
| 28               | Myanmar | Sesameseed Oil             | 1994           | 24                                                             |
| 28               | Myanmar | Soyabean Oil               | 1994           | 2                                                              |
| 28               | Myanmar | Soyabeans                  | 1994           | 1                                                              |
| 28               | Myanmar | Spices                     | 1994           | 5                                                              |
| 28               | Myanmar | Starchy Roots              | 1994           | 11                                                             |
| 28               | Myanmar | Sugar & Sweeteners         | 1994           | 69                                                             |
| 28               | Myanmar | Sugar (Raw Equivalent)     | 1994           | 11                                                             |
| 28               | Myanmar | Sugar non-centrifugal      | 1994           | 53                                                             |
| 28               | Myanmar | Sunflower seed             | 1994           | 1                                                              |
| 28               | Myanmar | Sunflowerseed Oil          | 1994           | 15                                                             |
| 28               | Myanmar | Sweet potatoes             | 1994           | 1                                                              |
| 28               | Myanmar | Sweeteners, Other          | 1994           | 4                                                              |
| 28               | Myanmar | Treenuts                   | 1994           | 4                                                              |
| 28               | Myanmar | Vegetable Oils             | 1994           | 170                                                            |
| 28               | Myanmar | Vegetables                 | 1994           | 32                                                             |
| 28               | Myanmar | Vegetables, Other          | 1994           | 29                                                             |
| 28               | Myanmar | Vegetal Products           | 1994           | 1,617                                                          |
| 28               | Myanmar | Wheat and products         | 1994           | 15                                                             |
| 28               | Myanmar | Alcoholic Beverages        | 1995           | 3                                                              |
| 28               | Myanmar | Animal fats                | 1995           | 8                                                              |
| 28               | Myanmar | Animal Products            | 1995           | 100                                                            |
| 28               | Myanmar | Beans                      | 1995           | 14                                                             |
| 28               | Myanmar | Beer                       | 1995           | 1                                                              |
| 28               | Myanmar | Beverages, Alcoholic       | 1995           | 2                                                              |
| 28               | Myanmar | Bovine Meat                | 1995           | 7                                                              |
| 28               | Myanmar | Butter, Ghee               | 1995           | 4                                                              |
| 28               | Myanmar | Cassava and products       | 1995           | 4                                                              |
| 28               | Myanmar | Cereals - Excluding Beer   | 1995           | 1,238                                                          |
| 28               | Myanmar | Cereals, Other             | 1995           | 2                                                              |
| 28               | Myanmar | Coconuts - Incl Copra      | 1995           | 18                                                             |
| 28               | Myanmar | Cottonseed Oil             | 1995           | 4                                                              |
| 28               | Myanmar | Eggs                       | 1995           | 4                                                              |
| 28               | Myanmar | Fats, Animals, Raw         | 1995           | 4                                                              |
| 28               | Myanmar | Fish, Seafood              | 1995           | 22                                                             |
| 28               | Myanmar | Freshwater Fish            | 1995           | 5                                                              |
| 28               | Myanmar | Fruits - Excluding Wine    | 1995           | 33                                                             |
| 28               | Myanmar | Fruits, Other              | 1995           | 21                                                             |
| 28               | Myanmar | Grand Total                | 1995           | 1,770                                                          |
| 28               | Myanmar | Groundnut Oil              | 1995           | 39                                                             |

Dietary calcium and zinc deficiency risks are decreasing but remain prevalent

| FAO Country code | Country | Food item                  | Reference year | Net energy supply (kcal <i>capita</i> <sup>-1</sup> d <sup>-1</sup> ) |
|------------------|---------|----------------------------|----------------|-----------------------------------------------------------------------|
| 28               | Myanmar | Groundnuts (Shelled Eq)    | 1995           | 16                                                                    |
| 28               | Myanmar | Maize and products         | 1995           | 29                                                                    |
| 28               | Myanmar | Marine Fish, Other         | 1995           | 17                                                                    |
| 28               | Myanmar | Meat                       | 1995           | 43                                                                    |
| 28               | Myanmar | Milk - Excluding Butter    | 1995           | 22                                                                    |
| 28               | Myanmar | Millet and products        | 1995           | 3                                                                     |
| 28               | Myanmar | Mutton & Goat Meat         | 1995           | 1                                                                     |
| 28               | Myanmar | Offals                     | 1995           | 1                                                                     |
| 28               | Myanmar | Oilcrops                   | 1995           | 46                                                                    |
| 28               | Myanmar | Oilcrops Oil, Other        | 1995           | 1                                                                     |
| 28               | Myanmar | Onions                     | 1995           | 4                                                                     |
| 28               | Myanmar | Palm Oil                   | 1995           | 55                                                                    |
| 28               | Myanmar | Peas                       | 1995           | 5                                                                     |
| 28               | Myanmar | Pigmeat                    | 1995           | 24                                                                    |
| 28               | Myanmar | Pimento                    | 1995           | 4                                                                     |
| 28               | Myanmar | Plantains                  | 1995           | 12                                                                    |
| 28               | Myanmar | Potatoes and products      | 1995           | 5                                                                     |
| 28               | Myanmar | Poultry Meat               | 1995           | 10                                                                    |
| 28               | Myanmar | Pulses                     | 1995           | 53                                                                    |
| 28               | Myanmar | Pulses, Other and products | 1995           | 34                                                                    |
| 28               | Myanmar | Rice (Milled Equivalent)   | 1995           | 1,179                                                                 |
| 28               | Myanmar | Sesame seed                | 1995           | 11                                                                    |
| 28               | Myanmar | Sesameseed Oil             | 1995           | 51                                                                    |
| 28               | Myanmar | Soyabean Oil               | 1995           | 4                                                                     |
| 28               | Myanmar | Soyabeans                  | 1995           | 1                                                                     |
| 28               | Myanmar | Spices                     | 1995           | 4                                                                     |
| 28               | Myanmar | Starchy Roots              | 1995           | 10                                                                    |
| 28               | Myanmar | Sugar & Sweeteners         | 1995           | 69                                                                    |
| 28               | Myanmar | Sugar (Raw Equivalent)     | 1995           | 11                                                                    |
| 28               | Myanmar | Sugar cane                 | 1995           | 1                                                                     |
| 28               | Myanmar | Sugar Crops                | 1995           | 1                                                                     |
| 28               | Myanmar | Sugar non-centrifugal      | 1995           | 52                                                                    |
| 28               | Myanmar | Sunflower seed             | 1995           | 1                                                                     |
| 28               | Myanmar | Sunflowerseed Oil          | 1995           | 22                                                                    |
| 28               | Myanmar | Sweet potatoes             | 1995           | 1                                                                     |
| 28               | Myanmar | Sweeteners, Other          | 1995           | 5                                                                     |
| 28               | Myanmar | Treenuts                   | 1995           | 5                                                                     |
| 28               | Myanmar | Vegetable Oils             | 1995           | 175                                                                   |
| 28               | Myanmar | Vegetables                 | 1995           | 33                                                                    |
| 28               | Myanmar | Vegetables, Other          | 1995           | 30                                                                    |
| 28               | Myanmar | Vegetal Products           | 1995           | 1,669                                                                 |
| 28               | Myanmar | Wheat and products         | 1995           | 24                                                                    |
| 28               | Myanmar | Alcoholic Beverages        | 1996           | 4                                                                     |
| 28               | Myanmar | Animal fats                | 1996           | 9                                                                     |
| 28               | Myanmar | Animal Products            | 1996           | 103                                                                   |
| 28               | Myanmar | Beans                      | 1996           | 14                                                                    |
| 28               | Myanmar | Beer                       | 1996           | 1                                                                     |
| 28               | Myanmar | Beverages, Alcoholic       | 1996           | 3                                                                     |
| 28               | Myanmar | Bovine Meat                | 1996           | 8                                                                     |
| 28               | Myanmar | Butter, Ghee               | 1996           | 4                                                                     |
| 28               | Myanmar | Cassava and products       | 1996           | 4                                                                     |
| 28               | Myanmar | Cereals - Excluding Beer   | 1996           | 1,230                                                                 |
| 28               | Myanmar | Cereals, Other             | 1996           | 2                                                                     |
| 28               | Myanmar | Coconuts - Incl Copra      | 1996           | 17                                                                    |
| 28               | Myanmar | Cottonseed Oil             | 1996           | 8                                                                     |
| 28               | Myanmar | Eggs                       | 1996           | 4                                                                     |
| 28               | Myanmar | Fats, Animals, Raw         | 1996           | 4                                                                     |
| 28               | Myanmar | Fish, Seafood              | 1996           | 18                                                                    |
| 28               | Myanmar | Freshwater Fish            | 1996           | 4                                                                     |
| 28               | Myanmar | Fruits - Excluding Wine    | 1996           | 32                                                                    |
| 28               | Myanmar | Fruits, Other              | 1996           | 22                                                                    |
| 28               | Myanmar | Grand Total                | 1996           | 1,788                                                                 |
| 28               | Myanmar | Groundnut Oil              | 1996           | 51                                                                    |
| 28               | Myanmar | Groundnuts (Shelled Eq)    | 1996           | 19                                                                    |
| 28               | Myanmar | Maize and products         | 1996           | 13                                                                    |
| 28               | Myanmar | Marine Fish, Other         | 1996           | 14                                                                    |
| 28               | Myanmar | Meat                       | 1996           | 46                                                                    |
| 28               | Myanmar | Milk - Excluding Butter    | 1996           | 24                                                                    |
| 28               | Myanmar | Millet and products        | 1996           | 3                                                                     |
| 28               | Myanmar | Mutton & Goat Meat         | 1996           | 1                                                                     |
| 28               | Myanmar | Offals                     | 1996           | 1                                                                     |
| 28               | Myanmar | Oilcrops                   | 1996           | 49                                                                    |
| 28               | Myanmar | Oilcrops Oil, Other        | 1996           | 1                                                                     |
| 28               | Myanmar | Onions                     | 1996           | 4                                                                     |
| 28               | Myanmar | Palm Oil                   | 1996           | 25                                                                    |
| 28               | Myanmar | Peas                       | 1996           | 4                                                                     |
| 28               | Myanmar | Pigmeat                    | 1996           | 26                                                                    |
| 28               | Myanmar | Pimento                    | 1996           | 5                                                                     |
| 28               | Myanmar | Plantains                  | 1996           | 10                                                                    |
| 28               | Myanmar | Potatoes and products      | 1996           | 6                                                                     |
| 28               | Myanmar | Poultry Meat               | 1996           | 11                                                                    |
| 28               | Myanmar | Pulses                     | 1996           | 58                                                                    |
| 28               | Myanmar | Pulses, Other and products | 1996           | 39                                                                    |
| 28               | Myanmar | Rice (Milled Equivalent)   | 1996           | 1,189                                                                 |
| 28               | Myanmar | Sesame seed                | 1996           | 11                                                                    |
| 28               | Myanmar | Sesameseed Oil             | 1996           | 50                                                                    |
| 28               | Myanmar | Soyabean Oil               | 1996           | 5                                                                     |
| 28               | Myanmar | Soyabeans                  | 1996           | 1                                                                     |
| 28               | Myanmar | Spices                     | 1996           | 6                                                                     |
| 28               | Myanmar | Starchy Roots              | 1996           | 12                                                                    |
| 28               | Myanmar | Stimulants                 | 1996           | 1                                                                     |
| 28               | Myanmar | Sugar & Sweeteners         | 1996           | 85                                                                    |
| 28               | Myanmar | Sugar (Raw Equivalent)     | 1996           | 12                                                                    |
| 28               | Myanmar | Sugar cane                 | 1996           | 1                                                                     |
| 28               | Myanmar | Sugar Crops                | 1996           | 1                                                                     |
| 28               | Myanmar | Sugar non-centrifugal      | 1996           | 67                                                                    |
| 28               | Myanmar | Sunflower seed             | 1996           | 1                                                                     |

Dietary calcium and zinc deficiency risks are decreasing but remain prevalent

| FAO Country code | Country | Food item                  | Reference year | Net energy supply (kcal <i>capita</i> <sup>-1</sup> d <sup>-1</sup> ) |
|------------------|---------|----------------------------|----------------|-----------------------------------------------------------------------|
| 28               | Myanmar | Sunflowerseed Oil          | 1996           | 30                                                                    |
| 28               | Myanmar | Sweet potatoes             | 1996           | 1                                                                     |
| 28               | Myanmar | Sweeteners, Other          | 1996           | 5                                                                     |
| 28               | Myanmar | Treenuts                   | 1996           | 5                                                                     |
| 28               | Myanmar | Vegetable Oils             | 1996           | 169                                                                   |
| 28               | Myanmar | Vegetables                 | 1996           | 35                                                                    |
| 28               | Myanmar | Vegetables, Other          | 1996           | 31                                                                    |
| 28               | Myanmar | Vegetal Products           | 1996           | 1,685                                                                 |
| 28               | Myanmar | Wheat and products         | 1996           | 22                                                                    |
| 28               | Myanmar | Alcoholic Beverages        | 1997           | 4                                                                     |
| 28               | Myanmar | Animal fats                | 1997           | 9                                                                     |
| 28               | Myanmar | Animal Products            | 1997           | 108                                                                   |
| 28               | Myanmar | Beans                      | 1997           | 13                                                                    |
| 28               | Myanmar | Beverages, Alcoholic       | 1997           | 4                                                                     |
| 28               | Myanmar | Bovine Meat                | 1997           | 9                                                                     |
| 28               | Myanmar | Butter, Ghee               | 1997           | 4                                                                     |
| 28               | Myanmar | Cassava and products       | 1997           | 4                                                                     |
| 28               | Myanmar | Cereals - Excluding Beer   | 1997           | 1,242                                                                 |
| 28               | Myanmar | Cereals, Other             | 1997           | 2                                                                     |
| 28               | Myanmar | Coconuts - Incl Copra      | 1997           | 20                                                                    |
| 28               | Myanmar | Cottonseed Oil             | 1997           | 8                                                                     |
| 28               | Myanmar | Eggs                       | 1997           | 5                                                                     |
| 28               | Myanmar | Fats, Animals, Raw         | 1997           | 4                                                                     |
| 28               | Myanmar | Fish, Seafood              | 1997           | 23                                                                    |
| 28               | Myanmar | Freshwater Fish            | 1997           | 4                                                                     |
| 28               | Myanmar | Fruits - Excluding Wine    | 1997           | 34                                                                    |
| 28               | Myanmar | Fruits, Other              | 1997           | 23                                                                    |
| 28               | Myanmar | Grand Total                | 1997           | 1,840                                                                 |
| 28               | Myanmar | Groundnut Oil              | 1997           | 44                                                                    |
| 28               | Myanmar | Groundnuts (Shelled Eq)    | 1997           | 17                                                                    |
| 28               | Myanmar | Maize and products         | 1997           | 28                                                                    |
| 28               | Myanmar | Marine Fish, Other         | 1997           | 18                                                                    |
| 28               | Myanmar | Meat                       | 1997           | 47                                                                    |
| 28               | Myanmar | Milk - Excluding Butter    | 1997           | 23                                                                    |
| 28               | Myanmar | Millet and products        | 1997           | 3                                                                     |
| 28               | Myanmar | Mutton & Goat Meat         | 1997           | 1                                                                     |
| 28               | Myanmar | Offals                     | 1997           | 1                                                                     |
| 28               | Myanmar | Oilcrops                   | 1997           | 51                                                                    |
| 28               | Myanmar | Onions                     | 1997           | 4                                                                     |
| 28               | Myanmar | Palm Oil                   | 1997           | 37                                                                    |
| 28               | Myanmar | Peas                       | 1997           | 4                                                                     |
| 28               | Myanmar | Pigmeat                    | 1997           | 25                                                                    |
| 28               | Myanmar | Pimento                    | 1997           | 6                                                                     |
| 28               | Myanmar | Plantains                  | 1997           | 12                                                                    |
| 28               | Myanmar | Potatoes and products      | 1997           | 7                                                                     |
| 28               | Myanmar | Poultry Meat               | 1997           | 12                                                                    |
| 28               | Myanmar | Pulses                     | 1997           | 67                                                                    |
| 28               | Myanmar | Pulses, Other and products | 1997           | 49                                                                    |
| 28               | Myanmar | Rape and Mustard Oil       | 1997           | 1                                                                     |
| 28               | Myanmar | Rice (Milled Equivalent)   | 1997           | 1,178                                                                 |
| 28               | Myanmar | Sesame seed                | 1997           | 12                                                                    |
| 28               | Myanmar | Sesameseed Oil             | 1997           | 58                                                                    |
| 28               | Myanmar | Sorghum and products       | 1997           | 12                                                                    |
| 28               | Myanmar | Soyabean Oil               | 1997           | 6                                                                     |
| 28               | Myanmar | Soyabeans                  | 1997           | 1                                                                     |
| 28               | Myanmar | Spices                     | 1997           | 7                                                                     |
| 28               | Myanmar | Starchy Roots              | 1997           | 13                                                                    |
| 28               | Myanmar | Stimulants                 | 1997           | 1                                                                     |
| 28               | Myanmar | Sugar & Sweeteners         | 1997           | 101                                                                   |
| 28               | Myanmar | Sugar (Raw Equivalent)     | 1997           | 11                                                                    |
| 28               | Myanmar | Sugar cane                 | 1997           | 1                                                                     |
| 28               | Myanmar | Sugar Crops                | 1997           | 1                                                                     |
| 28               | Myanmar | Sugar non-centrifugal      | 1997           | 84                                                                    |
| 28               | Myanmar | Sunflower seed             | 1997           | 1                                                                     |
| 28               | Myanmar | Sunflowerseed Oil          | 1997           | 17                                                                    |
| 28               | Myanmar | Sweet potatoes             | 1997           | 1                                                                     |
| 28               | Myanmar | Sweeteners, Other          | 1997           | 6                                                                     |
| 28               | Myanmar | Treenuts                   | 1997           | 4                                                                     |
| 28               | Myanmar | Vegetable Oils             | 1997           | 170                                                                   |
| 28               | Myanmar | Vegetables                 | 1997           | 36                                                                    |
| 28               | Myanmar | Vegetables, Other          | 1997           | 32                                                                    |
| 28               | Myanmar | Vegetal Products           | 1997           | 1,732                                                                 |
| 28               | Myanmar | Wheat and products         | 1997           | 19                                                                    |
| 28               | Myanmar | Alcoholic Beverages        | 1998           | 3                                                                     |
| 28               | Myanmar | Animal fats                | 1998           | 9                                                                     |
| 28               | Myanmar | Animal Products            | 1998           | 108                                                                   |
| 28               | Myanmar | Beans                      | 1998           | 17                                                                    |
| 28               | Myanmar | Beverages, Alcoholic       | 1998           | 3                                                                     |
| 28               | Myanmar | Bovine Meat                | 1998           | 10                                                                    |
| 28               | Myanmar | Butter, Ghee               | 1998           | 5                                                                     |
| 28               | Myanmar | Cassava and products       | 1998           | 4                                                                     |
| 28               | Myanmar | Cereals - Excluding Beer   | 1998           | 1,237                                                                 |
| 28               | Myanmar | Cereals, Other             | 1998           | 2                                                                     |
| 28               | Myanmar | Coconuts - Incl Copra      | 1998           | 21                                                                    |
| 28               | Myanmar | Cottonseed Oil             | 1998           | 8                                                                     |
| 28               | Myanmar | Eggs                       | 1998           | 5                                                                     |
| 28               | Myanmar | Fats, Animals, Raw         | 1998           | 4                                                                     |
| 28               | Myanmar | Fish, Seafood              | 1998           | 24                                                                    |
| 28               | Myanmar | Freshwater Fish            | 1998           | 4                                                                     |
| 28               | Myanmar | Fruits - Excluding Wine    | 1998           | 38                                                                    |
| 28               | Myanmar | Fruits, Other              | 1998           | 23                                                                    |
| 28               | Myanmar | Grand Total                | 1998           | 1,837                                                                 |
| 28               | Myanmar | Groundnut Oil              | 1998           | 43                                                                    |
| 28               | Myanmar | Groundnuts (Shelled Eq)    | 1998           | 16                                                                    |
| 28               | Myanmar | Maize and products         | 1998           | 21                                                                    |
| 28               | Myanmar | Marine Fish, Other         | 1998           | 20                                                                    |
| 28               | Myanmar | Meat                       | 1998           | 47                                                                    |

Dietary calcium and zinc deficiency risks are decreasing but remain prevalent

| FAO Country code | Country | Food item                  | Reference year | Net energy supply (kcal capita <sup>-1</sup> d <sup>-1</sup> ) |
|------------------|---------|----------------------------|----------------|----------------------------------------------------------------|
| 28               | Myanmar | Milk - Excluding Butter    | 1998           | 22                                                             |
| 28               | Myanmar | Millet and products        | 1998           | 3                                                              |
| 28               | Myanmar | Mutton & Goat Meat         | 1998           | 1                                                              |
| 28               | Myanmar | Offals                     | 1998           | 1                                                              |
| 28               | Myanmar | Oilcrops                   | 1998           | 49                                                             |
| 28               | Myanmar | Onions                     | 1998           | 4                                                              |
| 28               | Myanmar | Palm Oil                   | 1998           | 50                                                             |
| 28               | Myanmar | Peas                       | 1998           | 5                                                              |
| 28               | Myanmar | Pigmeat                    | 1998           | 23                                                             |
| 28               | Myanmar | Pimento                    | 1998           | 6                                                              |
| 28               | Myanmar | Plantains                  | 1998           | 15                                                             |
| 28               | Myanmar | Potatoes and products      | 1998           | 8                                                              |
| 28               | Myanmar | Poultry Meat               | 1998           | 13                                                             |
| 28               | Myanmar | Pulses                     | 1998           | 68                                                             |
| 28               | Myanmar | Pulses, Other and products | 1998           | 47                                                             |
| 28               | Myanmar | Rice (Milled Equivalent)   | 1998           | 1,182                                                          |
| 28               | Myanmar | Sesame seed                | 1998           | 10                                                             |
| 28               | Myanmar | Sesameseed Oil             | 1998           | 49                                                             |
| 28               | Myanmar | Sorghum and products       | 1998           | 10                                                             |
| 28               | Myanmar | Soyabean Oil               | 1998           | 6                                                              |
| 28               | Myanmar | Soyabeans                  | 1998           | 1                                                              |
| 28               | Myanmar | Spices                     | 1998           | 7                                                              |
| 28               | Myanmar | Starchy Roots              | 1998           | 13                                                             |
| 28               | Myanmar | Stimulants                 | 1998           | 1                                                              |
| 28               | Myanmar | Sugar & Sweeteners         | 1998           | 99                                                             |
| 28               | Myanmar | Sugar (Raw Equivalent)     | 1998           | 7                                                              |
| 28               | Myanmar | Sugar cane                 | 1998           | 1                                                              |
| 28               | Myanmar | Sugar Crops                | 1998           | 1                                                              |
| 28               | Myanmar | Sugar non-centrifugal      | 1998           | 87                                                             |
| 28               | Myanmar | Sunflower seed             | 1998           | 1                                                              |
| 28               | Myanmar | Sunflowerseed Oil          | 1998           | 15                                                             |
| 28               | Myanmar | Sweet potatoes             | 1998           | 1                                                              |
| 28               | Myanmar | Sweeteners, Other          | 1998           | 5                                                              |
| 28               | Myanmar | Treenuts                   | 1998           | 5                                                              |
| 28               | Myanmar | Vegetable Oils             | 1998           | 171                                                            |
| 28               | Myanmar | Vegetables                 | 1998           | 38                                                             |
| 28               | Myanmar | Vegetables, Other          | 1998           | 34                                                             |
| 28               | Myanmar | Vegetal Products           | 1998           | 1,729                                                          |
| 28               | Myanmar | Wheat and products         | 1998           | 18                                                             |
| 28               | Myanmar | Alcoholic Beverages        | 1999           | 3                                                              |
| 28               | Myanmar | Animal fats                | 1999           | 10                                                             |
| 28               | Myanmar | Animal Products            | 1999           | 112                                                            |
| 28               | Myanmar | Apples and products        | 1999           | 1                                                              |
| 28               | Myanmar | Beans                      | 1999           | 18                                                             |
| 28               | Myanmar | Beverages, Alcoholic       | 1999           | 3                                                              |
| 28               | Myanmar | Bovine Meat                | 1999           | 9                                                              |
| 28               | Myanmar | Butter, Ghee               | 1999           | 5                                                              |
| 28               | Myanmar | Cassava and products       | 1999           | 5                                                              |
| 28               | Myanmar | Cereals - Excluding Beer   | 1999           | 1,250                                                          |
| 28               | Myanmar | Cereals, Other             | 1999           | 3                                                              |
| 28               | Myanmar | Coconuts - Incl Copra      | 1999           | 21                                                             |
| 28               | Myanmar | Cottonseed Oil             | 1999           | 8                                                              |
| 28               | Myanmar | Eggs                       | 1999           | 6                                                              |
| 28               | Myanmar | Fats, Animals, Raw         | 1999           | 5                                                              |
| 28               | Myanmar | Fish, Seafood              | 1999           | 23                                                             |
| 28               | Myanmar | Freshwater Fish            | 1999           | 3                                                              |
| 28               | Myanmar | Fruits - Excluding Wine    | 1999           | 39                                                             |
| 28               | Myanmar | Fruits, Other              | 1999           | 24                                                             |
| 28               | Myanmar | Grand Total                | 1999           | 1,836                                                          |
| 28               | Myanmar | Groundnut Oil              | 1999           | 44                                                             |
| 28               | Myanmar | Groundnuts (Shelled Eq)    | 1999           | 16                                                             |
| 28               | Myanmar | Maize and products         | 1999           | 24                                                             |
| 28               | Myanmar | Maine Fish, Other          | 1999           | 19                                                             |
| 28               | Myanmar | Meat                       | 1999           | 49                                                             |
| 28               | Myanmar | Milk - Excluding Butter    | 1999           | 23                                                             |
| 28               | Myanmar | Millet and products        | 1999           | 4                                                              |
| 28               | Myanmar | Mutton & Goat Meat         | 1999           | 1                                                              |
| 28               | Myanmar | Offals                     | 1999           | 1                                                              |
| 28               | Myanmar | Oilcrops                   | 1999           | 47                                                             |
| 28               | Myanmar | Oilcrops Oil, Other        | 1999           | 2                                                              |
| 28               | Myanmar | Onions                     | 1999           | 9                                                              |
| 28               | Myanmar | Palm Oil                   | 1999           | 33                                                             |
| 28               | Myanmar | Palmkernel Oil             | 1999           | 1                                                              |
| 28               | Myanmar | Peas                       | 1999           | 5                                                              |
| 28               | Myanmar | Pigmeat                    | 1999           | 25                                                             |
| 28               | Myanmar | Pimento                    | 1999           | 6                                                              |
| 28               | Myanmar | Plantains                  | 1999           | 14                                                             |
| 28               | Myanmar | Potatoes and products      | 1999           | 8                                                              |
| 28               | Myanmar | Poultry Meat               | 1999           | 15                                                             |
| 28               | Myanmar | Pulses                     | 1999           | 60                                                             |
| 28               | Myanmar | Pulses, Other and products | 1999           | 38                                                             |
| 28               | Myanmar | Rice (Milled Equivalent)   | 1999           | 1,178                                                          |
| 28               | Myanmar | Sesame seed                | 1999           | 7                                                              |
| 28               | Myanmar | Sesameseed Oil             | 1999           | 35                                                             |
| 28               | Myanmar | Sorghum and products       | 1999           | 12                                                             |
| 28               | Myanmar | Soyabean Oil               | 1999           | 6                                                              |
| 28               | Myanmar | Soyabeans                  | 1999           | 2                                                              |
| 28               | Myanmar | Spices                     | 1999           | 7                                                              |
| 28               | Myanmar | Spices, Other              | 1999           | 1                                                              |
| 28               | Myanmar | Starchy Roots              | 1999           | 14                                                             |
| 28               | Myanmar | Stimulants                 | 1999           | 1                                                              |
| 28               | Myanmar | Sugar & Sweeteners         | 1999           | 107                                                            |
| 28               | Myanmar | Sugar (Raw Equivalent)     | 1999           | 15                                                             |
| 28               | Myanmar | Sugar cane                 | 1999           | 1                                                              |
| 28               | Myanmar | Sugar Crops                | 1999           | 1                                                              |
| 28               | Myanmar | Sugar non-centrifugal      | 1999           | 86                                                             |
| 28               | Myanmar | Sunflower seed             | 1999           | 1                                                              |

Dietary calcium and zinc deficiency risks are decreasing but remain prevalent

| FAO Country code | Country | Food item                  | Reference year | Net energy supply (kcal capita <sup>-1</sup> d <sup>-1</sup> ) |
|------------------|---------|----------------------------|----------------|----------------------------------------------------------------|
| 28               | Myanmar | Sunflowerseed Oil          | 1999           | 16                                                             |
| 28               | Myanmar | Sweet potatoes             | 1999           | 1                                                              |
| 28               | Myanmar | Sweeteners, Other          | 1999           | 6                                                              |
| 28               | Myanmar | Treenuts                   | 1999           | 5                                                              |
| 28               | Myanmar | Vegetable Oils             | 1999           | 145                                                            |
| 28               | Myanmar | Vegetables                 | 1999           | 44                                                             |
| 28               | Myanmar | Vegetables, Other          | 1999           | 35                                                             |
| 28               | Myanmar | Vegetal Products           | 1999           | 1,724                                                          |
| 28               | Myanmar | Wheat and products         | 1999           | 30                                                             |
| 28               | Myanmar | Alcoholic Beverages        | 2000           | 5                                                              |
| 28               | Myanmar | Animal fats                | 2000           | 11                                                             |
| 28               | Myanmar | Animal Products            | 2000           | 127                                                            |
| 28               | Myanmar | Apples and products        | 2000           | 1                                                              |
| 28               | Myanmar | Beans                      | 2000           | 22                                                             |
| 28               | Myanmar | Beverages, Alcoholic       | 2000           | 4                                                              |
| 28               | Myanmar | Bovine Meat                | 2000           | 10                                                             |
| 28               | Myanmar | Butter, Ghee               | 2000           | 5                                                              |
| 28               | Myanmar | Cassava and products       | 2000           | 5                                                              |
| 28               | Myanmar | Cereals - Excluding Beer   | 2000           | 1,278                                                          |
| 28               | Myanmar | Cereals, Other             | 2000           | 3                                                              |
| 28               | Myanmar | Coconuts - Incl Copra      | 2000           | 19                                                             |
| 28               | Myanmar | Cottonseed Oil             | 2000           | 8                                                              |
| 28               | Myanmar | Eggs                       | 2000           | 8                                                              |
| 28               | Myanmar | Fats, Animals, Raw         | 2000           | 7                                                              |
| 28               | Myanmar | Fish, Seafood              | 2000           | 29                                                             |
| 28               | Myanmar | Freshwater Fish            | 2000           | 5                                                              |
| 28               | Myanmar | Fruits - Excluding Wine    | 2000           | 39                                                             |
| 28               | Myanmar | Fruits, Other              | 2000           | 25                                                             |
| 28               | Myanmar | Grand Total                | 2000           | 1,910                                                          |
| 28               | Myanmar | Groundnut Oil              | 2000           | 52                                                             |
| 28               | Myanmar | Groundnuts (Shelled Eq)    | 2000           | 18                                                             |
| 28               | Myanmar | Maize and products         | 2000           | 21                                                             |
| 28               | Myanmar | Marine Fish, Other         | 2000           | 24                                                             |
| 28               | Myanmar | Meat                       | 2000           | 55                                                             |
| 28               | Myanmar | Milk - Excluding Butter    | 2000           | 23                                                             |
| 28               | Myanmar | Millet and products        | 2000           | 4                                                              |
| 28               | Myanmar | Mutton & Goat Meat         | 2000           | 1                                                              |
| 28               | Myanmar | Offals                     | 2000           | 1                                                              |
| 28               | Myanmar | Oilcrops                   | 2000           | 49                                                             |
| 28               | Myanmar | Oilcrops Oil, Other        | 2000           | 5                                                              |
| 28               | Myanmar | Onions                     | 2000           | 9                                                              |
| 28               | Myanmar | Palm Oil                   | 2000           | 21                                                             |
| 28               | Myanmar | Peas                       | 2000           | 5                                                              |
| 28               | Myanmar | Pigmeat                    | 2000           | 24                                                             |
| 28               | Myanmar | Pimento                    | 2000           | 7                                                              |
| 28               | Myanmar | Plantains                  | 2000           | 13                                                             |
| 28               | Myanmar | Potatoes and products      | 2000           | 8                                                              |
| 28               | Myanmar | Poultry Meat               | 2000           | 20                                                             |
| 28               | Myanmar | Pulses                     | 2000           | 73                                                             |
| 28               | Myanmar | Pulses, Other and products | 2000           | 47                                                             |
| 28               | Myanmar | Rice (Milled Equivalent)   | 2000           | 1,211                                                          |
| 28               | Myanmar | Sesame seed                | 2000           | 10                                                             |
| 28               | Myanmar | Sesameseed Oil             | 2000           | 49                                                             |
| 28               | Myanmar | Sorghum and products       | 2000           | 12                                                             |
| 28               | Myanmar | Soyabean Oil               | 2000           | 7                                                              |
| 28               | Myanmar | Soyabeans                  | 2000           | 2                                                              |
| 28               | Myanmar | Spices                     | 2000           | 8                                                              |
| 28               | Myanmar | Starchy Roots              | 2000           | 15                                                             |
| 28               | Myanmar | Stimulants                 | 2000           | 1                                                              |
| 28               | Myanmar | Sugar & Sweeteners         | 2000           | 109                                                            |
| 28               | Myanmar | Sugar (Raw Equivalent)     | 2000           | 18                                                             |
| 28               | Myanmar | Sugar cane                 | 2000           | 1                                                              |
| 28               | Myanmar | Sugar Crops                | 2000           | 1                                                              |
| 28               | Myanmar | Sugar non-centrifugal      | 2000           | 85                                                             |
| 28               | Myanmar | Sunflower seed             | 2000           | 1                                                              |
| 28               | Myanmar | Sunflowerseed Oil          | 2000           | 13                                                             |
| 28               | Myanmar | Sweet potatoes             | 2000           | 2                                                              |
| 28               | Myanmar | Sweeteners, Other          | 2000           | 6                                                              |
| 28               | Myanmar | Treenuts                   | 2000           | 5                                                              |
| 28               | Myanmar | Vegetable Oils             | 2000           | 156                                                            |
| 28               | Myanmar | Vegetables                 | 2000           | 44                                                             |
| 28               | Myanmar | Vegetables, Other          | 2000           | 36                                                             |
| 28               | Myanmar | Vegetal Products           | 2000           | 1,783                                                          |
| 28               | Myanmar | Wheat and products         | 2000           | 29                                                             |
| 28               | Myanmar | Alcoholic Beverages        | 2001           | 5                                                              |
| 28               | Myanmar | Animal fats                | 2001           | 10                                                             |
| 28               | Myanmar | Animal Products            | 2001           | 132                                                            |
| 28               | Myanmar | Apples and products        | 2001           | 1                                                              |
| 28               | Myanmar | Beans                      | 2001           | 19                                                             |
| 28               | Myanmar | Beverages, Alcoholic       | 2001           | 5                                                              |
| 28               | Myanmar | Bovine Meat                | 2001           | 10                                                             |
| 28               | Myanmar | Butter, Ghee               | 2001           | 5                                                              |
| 28               | Myanmar | Cassava and products       | 2001           | 5                                                              |
| 28               | Myanmar | Cereals - Excluding Beer   | 2001           | 1,286                                                          |
| 28               | Myanmar | Cereals, Other             | 2001           | 2                                                              |
| 28               | Myanmar | Coconuts - Incl Copra      | 2001           | 24                                                             |
| 28               | Myanmar | Cottonseed Oil             | 2001           | 7                                                              |
| 28               | Myanmar | Eggs                       | 2001           | 8                                                              |
| 28               | Myanmar | Fats, Animals, Raw         | 2001           | 5                                                              |
| 28               | Myanmar | Fish, Seafood              | 2001           | 31                                                             |
| 28               | Myanmar | Freshwater Fish            | 2001           | 6                                                              |
| 28               | Myanmar | Fruits - Excluding Wine    | 2001           | 40                                                             |
| 28               | Myanmar | Fruits, Other              | 2001           | 24                                                             |
| 28               | Myanmar | Grand Total                | 2001           | 1,957                                                          |
| 28               | Myanmar | Groundnut Oil              | 2001           | 54                                                             |
| 28               | Myanmar | Groundnuts (Shelled Eq)    | 2001           | 20                                                             |
| 28               | Myanmar | Maize and products         | 2001           | 17                                                             |

Dietary calcium and zinc deficiency risks are decreasing but remain prevalent

| FAO Country code | Country | Food item                  | Reference year | Net energy supply (kcal capita <sup>-1</sup> d <sup>-1</sup> ) |
|------------------|---------|----------------------------|----------------|----------------------------------------------------------------|
| 28               | Myanmar | Marine Fish, Other         | 2001           | 24                                                             |
| 28               | Myanmar | Meat                       | 2001           | 60                                                             |
| 28               | Myanmar | Milk - Excluding Butter    | 2001           | 22                                                             |
| 28               | Myanmar | Millet and products        | 2001           | 3                                                              |
| 28               | Myanmar | Miscellaneous              | 2001           | 1                                                              |
| 28               | Myanmar | Mutton & Goat Meat         | 2001           | 1                                                              |
| 28               | Myanmar | Offals                     | 2001           | 1                                                              |
| 28               | Myanmar | Oilcrops                   | 2001           | 60                                                             |
| 28               | Myanmar | Oilcrops Oil, Other        | 2001           | 19                                                             |
| 28               | Myanmar | Onions                     | 2001           | 11                                                             |
| 28               | Myanmar | Palm Oil                   | 2001           | 10                                                             |
| 28               | Myanmar | Peas                       | 2001           | 5                                                              |
| 28               | Myanmar | Pigmeat                    | 2001           | 26                                                             |
| 28               | Myanmar | Pimento                    | 2001           | 8                                                              |
| 28               | Myanmar | Plantains                  | 2001           | 15                                                             |
| 28               | Myanmar | Potatoes and products      | 2001           | 10                                                             |
| 28               | Myanmar | Poultry Meat               | 2001           | 23                                                             |
| 28               | Myanmar | Pulses                     | 2001           | 75                                                             |
| 28               | Myanmar | Pulses, Other and products | 2001           | 51                                                             |
| 28               | Myanmar | Rice (Milled Equivalent)   | 2001           | 1,224                                                          |
| 28               | Myanmar | Sesame seed                | 2001           | 12                                                             |
| 28               | Myanmar | Sesameseed Oil             | 2001           | 30                                                             |
| 28               | Myanmar | Sorghum and products       | 2001           | 11                                                             |
| 28               | Myanmar | Soyabean Oil               | 2001           | 8                                                              |
| 28               | Myanmar | Soyabeans                  | 2001           | 2                                                              |
| 28               | Myanmar | Spices                     | 2001           | 9                                                              |
| 28               | Myanmar | Starchy Roots              | 2001           | 17                                                             |
| 28               | Myanmar | Stimulants                 | 2001           | 1                                                              |
| 28               | Myanmar | Sugar & Sweeteners         | 2001           | 129                                                            |
| 28               | Myanmar | Sugar (Raw Equivalent)     | 2001           | 18                                                             |
| 28               | Myanmar | Sugar cane                 | 2001           | 1                                                              |
| 28               | Myanmar | Sugar Crops                | 2001           | 1                                                              |
| 28               | Myanmar | Sugar non-centrifugal      | 2001           | 104                                                            |
| 28               | Myanmar | Sunflower seed             | 2001           | 2                                                              |
| 28               | Myanmar | Sunflowerseed Oil          | 2001           | 18                                                             |
| 28               | Myanmar | Sweet potatoes             | 2001           | 3                                                              |
| 28               | Myanmar | Sweeteners, Other          | 2001           | 6                                                              |
| 28               | Myanmar | Treenuts                   | 2001           | 7                                                              |
| 28               | Myanmar | Vegetable Oils             | 2001           | 147                                                            |
| 28               | Myanmar | Vegetables                 | 2001           | 47                                                             |
| 28               | Myanmar | Vegetables, Other          | 2001           | 36                                                             |
| 28               | Myanmar | Vegetal Products           | 2001           | 1,826                                                          |
| 28               | Myanmar | Wheat and products         | 2001           | 29                                                             |
| 28               | Myanmar | Alcoholic Beverages        | 2002           | 3                                                              |
| 28               | Myanmar | Animal fats                | 2002           | 11                                                             |
| 28               | Myanmar | Animal Products            | 2002           | 153                                                            |
| 28               | Myanmar | Apples and products        | 2002           | 1                                                              |
| 28               | Myanmar | Beans                      | 2002           | 17                                                             |
| 28               | Myanmar | Beverages, Alcoholic       | 2002           | 3                                                              |
| 28               | Myanmar | Bovine Meat                | 2002           | 11                                                             |
| 28               | Myanmar | Butter, Ghee               | 2002           | 5                                                              |
| 28               | Myanmar | Cassava and products       | 2002           | 6                                                              |
| 28               | Myanmar | Cereals - Excluding Beer   | 2002           | 1,297                                                          |
| 28               | Myanmar | Cereals, Other             | 2002           | 2                                                              |
| 28               | Myanmar | Coconuts - Incl Copra      | 2002           | 26                                                             |
| 28               | Myanmar | Cottonseed Oil             | 2002           | 7                                                              |
| 28               | Myanmar | Eggs                       | 2002           | 8                                                              |
| 28               | Myanmar | Fats, Animals, Raw         | 2002           | 6                                                              |
| 28               | Myanmar | Fish, Seafood              | 2002           | 33                                                             |
| 28               | Myanmar | Freshwater Fish            | 2002           | 8                                                              |
| 28               | Myanmar | Fruits - Excluding Wine    | 2002           | 42                                                             |
| 28               | Myanmar | Fruits, Other              | 2002           | 25                                                             |
| 28               | Myanmar | Grand Total                | 2002           | 2,003                                                          |
| 28               | Myanmar | Groundnut Oil              | 2002           | 56                                                             |
| 28               | Myanmar | Groundnuts (Shelled Eq)    | 2002           | 21                                                             |
| 28               | Myanmar | Maize and products         | 2002           | 19                                                             |
| 28               | Myanmar | Marine Fish, Other         | 2002           | 24                                                             |
| 28               | Myanmar | Meat                       | 2002           | 75                                                             |
| 28               | Myanmar | Milk - Excluding Butter    | 2002           | 23                                                             |
| 28               | Myanmar | Millet and products        | 2002           | 3                                                              |
| 28               | Myanmar | Mutton & Goat Meat         | 2002           | 1                                                              |
| 28               | Myanmar | Offals                     | 2002           | 2                                                              |
| 28               | Myanmar | Oilcrops                   | 2002           | 64                                                             |
| 28               | Myanmar | Oilcrops Oil, Other        | 2002           | 19                                                             |
| 28               | Myanmar | Onions                     | 2002           | 12                                                             |
| 28               | Myanmar | Palm Oil                   | 2002           | 7                                                              |
| 28               | Myanmar | Peas                       | 2002           | 6                                                              |
| 28               | Myanmar | Pigmeat                    | 2002           | 37                                                             |
| 28               | Myanmar | Pimento                    | 2002           | 10                                                             |
| 28               | Myanmar | Plantains                  | 2002           | 17                                                             |
| 28               | Myanmar | Potatoes and products      | 2002           | 10                                                             |
| 28               | Myanmar | Poultry Meat               | 2002           | 26                                                             |
| 28               | Myanmar | Pulses                     | 2002           | 78                                                             |
| 28               | Myanmar | Pulses, Other and products | 2002           | 55                                                             |
| 28               | Myanmar | Rice (Milled Equivalent)   | 2002           | 1,233                                                          |
| 28               | Myanmar | Sesame seed                | 2002           | 13                                                             |
| 28               | Myanmar | Sesameseed Oil             | 2002           | 36                                                             |
| 28               | Myanmar | Sorghum and products       | 2002           | 11                                                             |
| 28               | Myanmar | Soyabean Oil               | 2002           | 9                                                              |
| 28               | Myanmar | Soyabeans                  | 2002           | 2                                                              |
| 28               | Myanmar | Spices                     | 2002           | 11                                                             |
| 28               | Myanmar | Starchy Roots              | 2002           | 19                                                             |
| 28               | Myanmar | Stimulants                 | 2002           | 1                                                              |
| 28               | Myanmar | Sugar & Sweeteners         | 2002           | 125                                                            |
| 28               | Myanmar | Sugar (Raw Equivalent)     | 2002           | 20                                                             |
| 28               | Myanmar | Sugar cane                 | 2002           | 1                                                              |
| 28               | Myanmar | Sugar Crops                | 2002           | 1                                                              |



Dietary calcium and zinc deficiency risks are decreasing but remain prevalent

| FAO Country code | Country | Food item                  | Reference year | Net energy supply (kcal capita <sup>-1</sup> d <sup>-1</sup> ) |
|------------------|---------|----------------------------|----------------|----------------------------------------------------------------|
| 28               | Myanmar | Sugar non-centrifugal      | 2002           | 97                                                             |
| 28               | Myanmar | Sunflower seed             | 2002           | 2                                                              |
| 28               | Myanmar | Sunflowerseed Oil          | 2002           | 19                                                             |
| 28               | Myanmar | Sweet potatoes             | 2002           | 3                                                              |
| 28               | Myanmar | Sweeteners, Other          | 2002           | 7                                                              |
| 28               | Myanmar | Tea (including mate)       | 2002           | 1                                                              |
| 28               | Myanmar | Treenuts                   | 2002           | 7                                                              |
| 28               | Myanmar | Vegetable Oils             | 2002           | 152                                                            |
| 28               | Myanmar | Vegetables                 | 2002           | 50                                                             |
| 28               | Myanmar | Vegetables, Other          | 2002           | 38                                                             |
| 28               | Myanmar | Vegetal Products           | 2002           | 1,850                                                          |
| 28               | Myanmar | Wheat and products         | 2002           | 29                                                             |
| 28               | Myanmar | Alcoholic Beverages        | 2003           | 3                                                              |
| 28               | Myanmar | Animal fats                | 2003           | 14                                                             |
| 28               | Myanmar | Animal Products            | 2003           | 178                                                            |
| 28               | Myanmar | Beans                      | 2003           | 18                                                             |
| 28               | Myanmar | Beverages, Alcoholic       | 2003           | 3                                                              |
| 28               | Myanmar | Bovine Meat                | 2003           | 13                                                             |
| 28               | Myanmar | Butter, Ghee               | 2003           | 6                                                              |
| 28               | Myanmar | Cassava and products       | 2003           | 7                                                              |
| 28               | Myanmar | Cereals - Excluding Beer   | 2003           | 1,304                                                          |
| 28               | Myanmar | Cereals, Other             | 2003           | 2                                                              |
| 28               | Myanmar | Coconuts - Incl Copra      | 2003           | 29                                                             |
| 28               | Myanmar | Cottonseed Oil             | 2003           | 7                                                              |
| 28               | Myanmar | Eggs                       | 2003           | 10                                                             |
| 28               | Myanmar | Fats, Animals, Raw         | 2003           | 8                                                              |
| 28               | Myanmar | Fish, Seafood              | 2003           | 34                                                             |
| 28               | Myanmar | Freshwater Fish            | 2003           | 10                                                             |
| 28               | Myanmar | Fruits - Excluding Wine    | 2003           | 43                                                             |
| 28               | Myanmar | Fruits, Other              | 2003           | 24                                                             |
| 28               | Myanmar | Grand Total                | 2003           | 2,056                                                          |
| 28               | Myanmar | Groundnut Oil              | 2003           | 60                                                             |
| 28               | Myanmar | Groundnuts (Shelled Eq)    | 2003           | 23                                                             |
| 28               | Myanmar | Maize and products         | 2003           | 20                                                             |
| 28               | Myanmar | Marine Fish, Other         | 2003           | 24                                                             |
| 28               | Myanmar | Meat                       | 2003           | 89                                                             |
| 28               | Myanmar | Milk - Excluding Butter    | 2003           | 29                                                             |
| 28               | Myanmar | Millet and products        | 2003           | 4                                                              |
| 28               | Myanmar | Miscellaneous              | 2003           | 1                                                              |
| 28               | Myanmar | Mutton & Goat Meat         | 2003           | 1                                                              |
| 28               | Myanmar | Offals                     | 2003           | 2                                                              |
| 28               | Myanmar | Oilcrops                   | 2003           | 73                                                             |
| 28               | Myanmar | Oilcrops Oil, Other        | 2003           | 2                                                              |
| 28               | Myanmar | Onions                     | 2003           | 14                                                             |
| 28               | Myanmar | Palm Oil                   | 2003           | 8                                                              |
| 28               | Myanmar | Palmkernel Oil             | 2003           | 1                                                              |
| 28               | Myanmar | Peas                       | 2003           | 6                                                              |
| 28               | Myanmar | Pigmeat                    | 2003           | 43                                                             |
| 28               | Myanmar | Pimento                    | 2003           | 11                                                             |
| 28               | Myanmar | Plantains                  | 2003           | 18                                                             |
| 28               | Myanmar | Potatoes and products      | 2003           | 11                                                             |
| 28               | Myanmar | Poultry Meat               | 2003           | 32                                                             |
| 28               | Myanmar | Pulses                     | 2003           | 84                                                             |
| 28               | Myanmar | Pulses, Other and products | 2003           | 60                                                             |
| 28               | Myanmar | Rice (Milled Equivalent)   | 2003           | 1,241                                                          |
| 28               | Myanmar | Sesame seed                | 2003           | 16                                                             |
| 28               | Myanmar | Sesameseed Oil             | 2003           | 38                                                             |
| 28               | Myanmar | Sorghum and products       | 2003           | 12                                                             |
| 28               | Myanmar | Soyabean Oil               | 2003           | 9                                                              |
| 28               | Myanmar | Soyabeans                  | 2003           | 2                                                              |
| 28               | Myanmar | Spices                     | 2003           | 11                                                             |
| 28               | Myanmar | Starchy Roots              | 2003           | 21                                                             |
| 28               | Myanmar | Stimulants                 | 2003           | 1                                                              |
| 28               | Myanmar | Sugar & Sweeteners         | 2003           | 132                                                            |
| 28               | Myanmar | Sugar (Raw Equivalent)     | 2003           | 13                                                             |
| 28               | Myanmar | Sugar cane                 | 2003           | 1                                                              |
| 28               | Myanmar | Sugar Crops                | 2003           | 1                                                              |
| 28               | Myanmar | Sugar non-centrifugal      | 2003           | 110                                                            |
| 28               | Myanmar | Sunflower seed             | 2003           | 2                                                              |
| 28               | Myanmar | Sunflowerseed Oil          | 2003           | 18                                                             |
| 28               | Myanmar | Sweet potatoes             | 2003           | 3                                                              |
| 28               | Myanmar | Sweeteners, Other          | 2003           | 9                                                              |
| 28               | Myanmar | Tea (including mate)       | 2003           | 1                                                              |
| 28               | Myanmar | Treenuts                   | 2003           | 8                                                              |
| 28               | Myanmar | Vegetable Oils             | 2003           | 143                                                            |
| 28               | Myanmar | Vegetables                 | 2003           | 55                                                             |
| 28               | Myanmar | Vegetables, Other          | 2003           | 40                                                             |
| 28               | Myanmar | Vegetal Products           | 2003           | 1,878                                                          |
| 28               | Myanmar | Wheat and products         | 2003           | 25                                                             |
| 28               | Myanmar | Alcoholic Beverages        | 2004           | 4                                                              |
| 28               | Myanmar | Animal fats                | 2004           | 15                                                             |
| 28               | Myanmar | Animal Products            | 2004           | 212                                                            |
| 28               | Myanmar | Apples and products        | 2004           | 1                                                              |
| 28               | Myanmar | Beans                      | 2004           | 20                                                             |
| 28               | Myanmar | Beverages, Alcoholic       | 2004           | 3                                                              |
| 28               | Myanmar | Bovine Meat                | 2004           | 12                                                             |
| 28               | Myanmar | Butter, Ghee               | 2004           | 7                                                              |
| 28               | Myanmar | Cassava and products       | 2004           | 9                                                              |
| 28               | Myanmar | Cereals - Excluding Beer   | 2004           | 1,263                                                          |
| 28               | Myanmar | Cereals, Other             | 2004           | 2                                                              |
| 28               | Myanmar | Coconuts - Incl Copra      | 2004           | 32                                                             |
| 28               | Myanmar | Cottonseed Oil             | 2004           | 10                                                             |
| 28               | Myanmar | Eggs                       | 2004           | 11                                                             |
| 28               | Myanmar | Fats, Animals, Raw         | 2004           | 9                                                              |
| 28               | Myanmar | Fish, Seafood              | 2004           | 47                                                             |
| 28               | Myanmar | Freshwater Fish            | 2004           | 20                                                             |
| 28               | Myanmar | Fruits - Excluding Wine    | 2004           | 47                                                             |

Dietary calcium and zinc deficiency risks are decreasing but remain prevalent

| FAO Country code | Country | Food item                  | Reference year | Net energy supply (kcal capita <sup>-1</sup> d <sup>-1</sup> ) |
|------------------|---------|----------------------------|----------------|----------------------------------------------------------------|
| 28               | Myanmar | Fruits, Other              | 2004           | 27                                                             |
| 28               | Myanmar | Grand Total                | 2004           | 2,093                                                          |
| 28               | Myanmar | Groundnut Oil              | 2004           | 64                                                             |
| 28               | Myanmar | Groundnuts (Shelled Eq)    | 2004           | 25                                                             |
| 28               | Myanmar | Maize and products         | 2004           | 17                                                             |
| 28               | Myanmar | Marine Fish, Other         | 2004           | 27                                                             |
| 28               | Myanmar | Meat                       | 2004           | 104                                                            |
| 28               | Myanmar | Milk - Excluding Butter    | 2004           | 32                                                             |
| 28               | Myanmar | Millet and products        | 2004           | 4                                                              |
| 28               | Myanmar | Miscellaneous              | 2004           | 1                                                              |
| 28               | Myanmar | Mutton & Goat Meat         | 2004           | 2                                                              |
| 28               | Myanmar | Offals                     | 2004           | 2                                                              |
| 28               | Myanmar | Oilcrops                   | 2004           | 79                                                             |
| 28               | Myanmar | Oilcrops Oil, Other        | 2004           | 1                                                              |
| 28               | Myanmar | Onions                     | 2004           | 15                                                             |
| 28               | Myanmar | Palm Oil                   | 2004           | 9                                                              |
| 28               | Myanmar | Palmkernel Oil             | 2004           | 3                                                              |
| 28               | Myanmar | Peas                       | 2004           | 8                                                              |
| 28               | Myanmar | Pigmeat                    | 2004           | 50                                                             |
| 28               | Myanmar | Pimento                    | 2004           | 10                                                             |
| 28               | Myanmar | Plantains                  | 2004           | 20                                                             |
| 28               | Myanmar | Potatoes and products      | 2004           | 12                                                             |
| 28               | Myanmar | Poultry Meat               | 2004           | 40                                                             |
| 28               | Myanmar | Pulses                     | 2004           | 95                                                             |
| 28               | Myanmar | Pulses, Other and products | 2004           | 67                                                             |
| 28               | Myanmar | Rice (Milled Equivalent)   | 2004           | 1,197                                                          |
| 28               | Myanmar | Sesame seed                | 2004           | 17                                                             |
| 28               | Myanmar | Sesameseed Oil             | 2004           | 39                                                             |
| 28               | Myanmar | Sorghum and products       | 2004           | 12                                                             |
| 28               | Myanmar | Soyabean Oil               | 2004           | 11                                                             |
| 28               | Myanmar | Soyabeans                  | 2004           | 3                                                              |
| 28               | Myanmar | Spices                     | 2004           | 10                                                             |
| 28               | Myanmar | Starchy Roots              | 2004           | 24                                                             |
| 28               | Myanmar | Stimulants                 | 2004           | 1                                                              |
| 28               | Myanmar | Sugar & Sweeteners         | 2004           | 135                                                            |
| 28               | Myanmar | Sugar (Raw Equivalent)     | 2004           | 10                                                             |
| 28               | Myanmar | Sugar cane                 | 2004           | 1                                                              |
| 28               | Myanmar | Sugar Crops                | 2004           | 1                                                              |
| 28               | Myanmar | Sugar non-centrifugal      | 2004           | 117                                                            |
| 28               | Myanmar | Sunflower seed             | 2004           | 2                                                              |
| 28               | Myanmar | Sunflowerseed Oil          | 2004           | 20                                                             |
| 28               | Myanmar | Sweet potatoes             | 2004           | 2                                                              |
| 28               | Myanmar | Sweeteners, Other          | 2004           | 8                                                              |
| 28               | Myanmar | Tea (including mate)       | 2004           | 1                                                              |
| 28               | Myanmar | Treenuts                   | 2004           | 8                                                              |
| 28               | Myanmar | Vegetable Oils             | 2004           | 157                                                            |
| 28               | Myanmar | Vegetables                 | 2004           | 57                                                             |
| 28               | Myanmar | Vegetables, Other          | 2004           | 42                                                             |
| 28               | Myanmar | Vegetal Products           | 2004           | 1,882                                                          |
| 28               | Myanmar | Wheat and products         | 2004           | 31                                                             |
| 28               | Myanmar | Alcoholic Beverages        | 2005           | 3                                                              |
| 28               | Myanmar | Animal fats                | 2005           | 16                                                             |
| 28               | Myanmar | Animal Products            | 2005           | 238                                                            |
| 28               | Myanmar | Beans                      | 2005           | 26                                                             |
| 28               | Myanmar | Beverages, Alcoholic       | 2005           | 2                                                              |
| 28               | Myanmar | Bovine Meat                | 2005           | 14                                                             |
| 28               | Myanmar | Butter, Ghee               | 2005           | 7                                                              |
| 28               | Myanmar | Cassava and products       | 2005           | 10                                                             |
| 28               | Myanmar | Cereals - Excluding Beer   | 2005           | 1,267                                                          |
| 28               | Myanmar | Cereals, Other             | 2005           | 2                                                              |
| 28               | Myanmar | Coconuts - Incl Copra      | 2005           | 34                                                             |
| 28               | Myanmar | Cottonseed Oil             | 2005           | 8                                                              |
| 28               | Myanmar | Eggs                       | 2005           | 13                                                             |
| 28               | Myanmar | Fats, Animals, Raw         | 2005           | 9                                                              |
| 28               | Myanmar | Fish, Seafood              | 2005           | 48                                                             |
| 28               | Myanmar | Freshwater Fish            | 2005           | 25                                                             |
| 28               | Myanmar | Fruits - Excluding Wine    | 2005           | 48                                                             |
| 28               | Myanmar | Fruits, Other              | 2005           | 30                                                             |
| 28               | Myanmar | Grand Total                | 2005           | 2,136                                                          |
| 28               | Myanmar | Groundnut Oil              | 2005           | 66                                                             |
| 28               | Myanmar | Groundnuts (Shelled Eq)    | 2005           | 27                                                             |
| 28               | Myanmar | Maize and products         | 2005           | 21                                                             |
| 28               | Myanmar | Marine Fish, Other         | 2005           | 22                                                             |
| 28               | Myanmar | Meat                       | 2005           | 124                                                            |
| 28               | Myanmar | Milk - Excluding Butter    | 2005           | 34                                                             |
| 28               | Myanmar | Millet and products        | 2005           | 5                                                              |
| 28               | Myanmar | Miscellaneous              | 2005           | 1                                                              |
| 28               | Myanmar | Mutton & Goat Meat         | 2005           | 2                                                              |
| 28               | Myanmar | Offals                     | 2005           | 2                                                              |
| 28               | Myanmar | Oilcrops                   | 2005           | 83                                                             |
| 28               | Myanmar | Oilcrops Oil, Other        | 2005           | 6                                                              |
| 28               | Myanmar | Onions                     | 2005           | 15                                                             |
| 28               | Myanmar | Palm Oil                   | 2005           | 10                                                             |
| 28               | Myanmar | Peas                       | 2005           | 7                                                              |
| 28               | Myanmar | Pigmeat                    | 2005           | 62                                                             |
| 28               | Myanmar | Pimento                    | 2005           | 13                                                             |
| 28               | Myanmar | Plantains                  | 2005           | 18                                                             |
| 28               | Myanmar | Potatoes and products      | 2005           | 14                                                             |
| 28               | Myanmar | Poultry Meat               | 2005           | 46                                                             |
| 28               | Myanmar | Pulses                     | 2005           | 99                                                             |
| 28               | Myanmar | Pulses, Other and products | 2005           | 66                                                             |
| 28               | Myanmar | Rice (Milled Equivalent)   | 2005           | 1,188                                                          |
| 28               | Myanmar | Sesame seed                | 2005           | 16                                                             |
| 28               | Myanmar | Sesameseed Oil             | 2005           | 39                                                             |
| 28               | Myanmar | Sorghum and products       | 2005           | 14                                                             |
| 28               | Myanmar | Soyabean Oil               | 2005           | 12                                                             |
| 28               | Myanmar | Soyabeans                  | 2005           | 3                                                              |

Dietary calcium and zinc deficiency risks are decreasing but remain prevalent

| FAO Country code | Country | Food item                  | Reference year | Net energy supply (kcal capita <sup>-1</sup> d <sup>-1</sup> ) |
|------------------|---------|----------------------------|----------------|----------------------------------------------------------------|
| 28               | Myanmar | Spices                     | 2005           | 14                                                             |
| 28               | Myanmar | Starchy Roots              | 2005           | 26                                                             |
| 28               | Myanmar | Stimulants                 | 2005           | 1                                                              |
| 28               | Myanmar | Sugar & Sweeteners         | 2005           | 132                                                            |
| 28               | Myanmar | Sugar (Raw Equivalent)     | 2005           | 7                                                              |
| 28               | Myanmar | Sugar cane                 | 2005           | 1                                                              |
| 28               | Myanmar | Sugar Crops                | 2005           | 1                                                              |
| 28               | Myanmar | Sugar non-centrifugal      | 2005           | 116                                                            |
| 28               | Myanmar | Sunflower seed             | 2005           | 3                                                              |
| 28               | Myanmar | Sunflowerseed Oil          | 2005           | 19                                                             |
| 28               | Myanmar | Sweet potatoes             | 2005           | 2                                                              |
| 28               | Myanmar | Sweeteners, Other          | 2005           | 9                                                              |
| 28               | Myanmar | Tea (including mate)       | 2005           | 1                                                              |
| 28               | Myanmar | Treenuts                   | 2005           | 9                                                              |
| 28               | Myanmar | Vegetable Oils             | 2005           | 160                                                            |
| 28               | Myanmar | Vegetables                 | 2005           | 55                                                             |
| 28               | Myanmar | Vegetables, Other          | 2005           | 40                                                             |
| 28               | Myanmar | Vegetal Products           | 2005           | 1,899                                                          |
| 28               | Myanmar | Wheat and products         | 2005           | 38                                                             |
| 28               | Myanmar | Alcoholic Beverages        | 2006           | 3                                                              |
| 28               | Myanmar | Animal fats                | 2006           | 18                                                             |
| 28               | Myanmar | Animal Products            | 2006           | 269                                                            |
| 28               | Myanmar | Beans                      | 2006           | 23                                                             |
| 28               | Myanmar | Beer                       | 2006           | 1                                                              |
| 28               | Myanmar | Beverages, Alcoholic       | 2006           | 2                                                              |
| 28               | Myanmar | Bovine Meat                | 2006           | 15                                                             |
| 28               | Myanmar | Butter, Ghee               | 2006           | 8                                                              |
| 28               | Myanmar | Cassava and products       | 2006           | 11                                                             |
| 28               | Myanmar | Cereals - Excluding Beer   | 2006           | 1,284                                                          |
| 28               | Myanmar | Cereals, Other             | 2006           | 2                                                              |
| 28               | Myanmar | Coconuts - Incl Copra      | 2006           | 36                                                             |
| 28               | Myanmar | Cottonseed Oil             | 2006           | 9                                                              |
| 28               | Myanmar | Eggs                       | 2006           | 15                                                             |
| 28               | Myanmar | Fats, Animals, Raw         | 2006           | 10                                                             |
| 28               | Myanmar | Fish, Seafood              | 2006           | 58                                                             |
| 28               | Myanmar | Freshwater Fish            | 2006           | 31                                                             |
| 28               | Myanmar | Fruits - Excluding Wine    | 2006           | 53                                                             |
| 28               | Myanmar | Fruits, Other              | 2006           | 31                                                             |
| 28               | Myanmar | Grand Total                | 2006           | 2,206                                                          |
| 28               | Myanmar | Groundnut Oil              | 2006           | 57                                                             |
| 28               | Myanmar | Groundnuts (Shelled Eq)    | 2006           | 26                                                             |
| 28               | Myanmar | Maize and products         | 2006           | 24                                                             |
| 28               | Myanmar | Marine Fish, Other         | 2006           | 28                                                             |
| 28               | Myanmar | Meat                       | 2006           | 140                                                            |
| 28               | Myanmar | Milk - Excluding Butter    | 2006           | 35                                                             |
| 28               | Myanmar | Millet and products        | 2006           | 4                                                              |
| 28               | Myanmar | Miscellaneous              | 2006           | 1                                                              |
| 28               | Myanmar | Mutton & Goat Meat         | 2006           | 2                                                              |
| 28               | Myanmar | Offals                     | 2006           | 2                                                              |
| 28               | Myanmar | Oilcrops                   | 2006           | 91                                                             |
| 28               | Myanmar | Oilcrops Oil, Other        | 2006           | 4                                                              |
| 28               | Myanmar | Onions                     | 2006           | 19                                                             |
| 28               | Myanmar | Palm Oil                   | 2006           | 1                                                              |
| 28               | Myanmar | Peas                       | 2006           | 8                                                              |
| 28               | Myanmar | Pigmeat                    | 2006           | 70                                                             |
| 28               | Myanmar | Pimento                    | 2006           | 15                                                             |
| 28               | Myanmar | Plantains                  | 2006           | 22                                                             |
| 28               | Myanmar | Potatoes and products      | 2006           | 14                                                             |
| 28               | Myanmar | Poultry Meat               | 2006           | 53                                                             |
| 28               | Myanmar | Pulses                     | 2006           | 102                                                            |
| 28               | Myanmar | Pulses, Other and products | 2006           | 72                                                             |
| 28               | Myanmar | Rice (Milled Equivalent)   | 2006           | 1,209                                                          |
| 28               | Myanmar | Sesame seed                | 2006           | 22                                                             |
| 28               | Myanmar | Sesameseed Oil             | 2006           | 40                                                             |
| 28               | Myanmar | Sorghum and products       | 2006           | 14                                                             |
| 28               | Myanmar | Soyabean Oil               | 2006           | 14                                                             |
| 28               | Myanmar | Soyabeans                  | 2006           | 3                                                              |
| 28               | Myanmar | Spices                     | 2006           | 15                                                             |
| 28               | Myanmar | Starchy Roots              | 2006           | 28                                                             |
| 28               | Myanmar | Stimulants                 | 2006           | 1                                                              |
| 28               | Myanmar | Sugar & Sweeteners         | 2006           | 138                                                            |
| 28               | Myanmar | Sugar (Raw Equivalent)     | 2006           | 7                                                              |
| 28               | Myanmar | Sugar cane                 | 2006           | 1                                                              |
| 28               | Myanmar | Sugar Crops                | 2006           | 1                                                              |
| 28               | Myanmar | Sugar non-centrifugal      | 2006           | 123                                                            |
| 28               | Myanmar | Sunflower seed             | 2006           | 4                                                              |
| 28               | Myanmar | Sunflowerseed Oil          | 2006           | 23                                                             |
| 28               | Myanmar | Sweet potatoes             | 2006           | 3                                                              |
| 28               | Myanmar | Sweeteners, Other          | 2006           | 9                                                              |
| 28               | Myanmar | Tea (including mate)       | 2006           | 1                                                              |
| 28               | Myanmar | Treenuts                   | 2006           | 11                                                             |
| 28               | Myanmar | Vegetable Oils             | 2006           | 147                                                            |
| 28               | Myanmar | Vegetables                 | 2006           | 61                                                             |
| 28               | Myanmar | Vegetables, Other          | 2006           | 42                                                             |
| 28               | Myanmar | Vegetal Products           | 2006           | 1,937                                                          |
| 28               | Myanmar | Wheat and products         | 2006           | 31                                                             |
| 28               | Myanmar | Alcoholic Beverages        | 2007           | 3                                                              |
| 28               | Myanmar | Animal fats                | 2007           | 22                                                             |
| 28               | Myanmar | Animal Products            | 2007           | 301                                                            |
| 28               | Myanmar | Beans                      | 2007           | 26                                                             |
| 28               | Myanmar | Beer                       | 2007           | 1                                                              |
| 28               | Myanmar | Beverages, Alcoholic       | 2007           | 2                                                              |
| 28               | Myanmar | Bovine Meat                | 2007           | 16                                                             |
| 28               | Myanmar | Butter, Ghee               | 2007           | 9                                                              |
| 28               | Myanmar | Cassava and products       | 2007           | 14                                                             |
| 28               | Myanmar | Cereals - Excluding Beer   | 2007           | 1,256                                                          |
| 28               | Myanmar | Cereals, Other             | 2007           | 2                                                              |

## Dietary calcium and zinc deficiency risks are decreasing but remain prevalent

| FAO Country code | Country | Food item                  | Reference year | Net energy supply (kcal capita <sup>-1</sup> d <sup>-1</sup> ) |
|------------------|---------|----------------------------|----------------|----------------------------------------------------------------|
| 28               | Myanmar | Coconuts - Incl Copra      | 2007           | 38                                                             |
| 28               | Myanmar | Cottonseed Oil             | 2007           | 9                                                              |
| 28               | Myanmar | Eggs                       | 2007           | 15                                                             |
| 28               | Myanmar | Fats, Animals, Raw         | 2007           | 13                                                             |
| 28               | Myanmar | Fish, Seafood              | 2007           | 66                                                             |
| 28               | Myanmar | Freshwater Fish            | 2007           | 33                                                             |
| 28               | Myanmar | Fruits - Excluding Wine    | 2007           | 54                                                             |
| 28               | Myanmar | Fruits, Other              | 2007           | 28                                                             |
| 28               | Myanmar | Grand Total                | 2007           | 2,283                                                          |
| 28               | Myanmar | Groundnut Oil              | 2007           | 79                                                             |
| 28               | Myanmar | Groundnuts (Shelled Eq)    | 2007           | 28                                                             |
| 28               | Myanmar | Maize and products         | 2007           | 25                                                             |
| 28               | Myanmar | Marine Fish, Other         | 2007           | 33                                                             |
| 28               | Myanmar | Meat                       | 2007           | 154                                                            |
| 28               | Myanmar | Milk - Excluding Butter    | 2007           | 39                                                             |
| 28               | Myanmar | Millet and products        | 2007           | 4                                                              |
| 28               | Myanmar | Miscellaneous              | 2007           | 1                                                              |
| 28               | Myanmar | Mutton & Goat Meat         | 2007           | 2                                                              |
| 28               | Myanmar | Offals                     | 2007           | 3                                                              |
| 28               | Myanmar | Oilcrops                   | 2007           | 97                                                             |
| 28               | Myanmar | Oilcrops Oil, Other        | 2007           | 3                                                              |
| 28               | Myanmar | Onions                     | 2007           | 18                                                             |
| 28               | Myanmar | Palm Oil                   | 2007           | 6                                                              |
| 28               | Myanmar | Peas                       | 2007           | 9                                                              |
| 28               | Myanmar | Pigmeat                    | 2007           | 77                                                             |
| 28               | Myanmar | Pimento                    | 2007           | 16                                                             |
| 28               | Myanmar | Plantains                  | 2007           | 25                                                             |
| 28               | Myanmar | Potatoes and products      | 2007           | 16                                                             |
| 28               | Myanmar | Poultry Meat               | 2007           | 59                                                             |
| 28               | Myanmar | Pulses                     | 2007           | 107                                                            |
| 28               | Myanmar | Pulses, Other and products | 2007           | 72                                                             |
| 28               | Myanmar | Rice (Milled Equivalent)   | 2007           | 1,176                                                          |
| 28               | Myanmar | Sesame seed                | 2007           | 24                                                             |
| 28               | Myanmar | Sesameseed Oil             | 2007           | 41                                                             |
| 28               | Myanmar | Sorghum and products       | 2007           | 13                                                             |
| 28               | Myanmar | Soyabean Oil               | 2007           | 14                                                             |
| 28               | Myanmar | Soyabeans                  | 2007           | 4                                                              |
| 28               | Myanmar | Spices                     | 2007           | 16                                                             |
| 28               | Myanmar | Starchy Roots              | 2007           | 32                                                             |
| 28               | Myanmar | Stimulants                 | 2007           | 1                                                              |
| 28               | Myanmar | Sugar & Sweeteners         | 2007           | 167                                                            |
| 28               | Myanmar | Sugar (Raw Equivalent)     | 2007           | 5                                                              |
| 28               | Myanmar | Sugar cane                 | 2007           | 2                                                              |
| 28               | Myanmar | Sugar Crops                | 2007           | 2                                                              |
| 28               | Myanmar | Sugar non-centrifugal      | 2007           | 153                                                            |
| 28               | Myanmar | Sunflower seed             | 2007           | 3                                                              |
| 28               | Myanmar | Sunflowerseed Oil          | 2007           | 20                                                             |
| 28               | Myanmar | Sweet potatoes             | 2007           | 3                                                              |
| 28               | Myanmar | Sweeteners, Other          | 2007           | 9                                                              |
| 28               | Myanmar | Tea (including mate)       | 2007           | 1                                                              |
| 28               | Myanmar | Treenuts                   | 2007           | 13                                                             |
| 28               | Myanmar | Vegetable Oils             | 2007           | 173                                                            |
| 28               | Myanmar | Vegetables                 | 2007           | 61                                                             |
| 28               | Myanmar | Vegetables, Other          | 2007           | 43                                                             |
| 28               | Myanmar | Vegetal Products           | 2007           | 1,982                                                          |
| 28               | Myanmar | Wheat and products         | 2007           | 36                                                             |
| 28               | Myanmar | Alcoholic Beverages        | 2008           | 3                                                              |
| 28               | Myanmar | Animal fats                | 2008           | 25                                                             |
| 28               | Myanmar | Animal Products            | 2008           | 330                                                            |
| 28               | Myanmar | Beans                      | 2008           | 23                                                             |
| 28               | Myanmar | Beer                       | 2008           | 1                                                              |
| 28               | Myanmar | Beverages, Alcoholic       | 2008           | 3                                                              |
| 28               | Myanmar | Bovine Meat                | 2008           | 18                                                             |
| 28               | Myanmar | Butter, Ghee               | 2008           | 9                                                              |
| 28               | Myanmar | Cassava and products       | 2008           | 16                                                             |
| 28               | Myanmar | Cereals - Excluding Beer   | 2008           | 1,276                                                          |
| 28               | Myanmar | Cereals, Other             | 2008           | 2                                                              |
| 28               | Myanmar | Coconuts - Incl Copra      | 2008           | 39                                                             |
| 28               | Myanmar | Coffee and products        | 2008           | 1                                                              |
| 28               | Myanmar | Cottonseed Oil             | 2008           | 9                                                              |
| 28               | Myanmar | Eggs                       | 2008           | 18                                                             |
| 28               | Myanmar | Fats, Animals, Raw         | 2008           | 16                                                             |
| 28               | Myanmar | Fish, Seafood              | 2008           | 74                                                             |
| 28               | Myanmar | Freshwater Fish            | 2008           | 37                                                             |
| 28               | Myanmar | Fruits - Excluding Wine    | 2008           | 52                                                             |
| 28               | Myanmar | Fruits, Other              | 2008           | 27                                                             |
| 28               | Myanmar | Grand Total                | 2008           | 2,372                                                          |
| 28               | Myanmar | Groundnut Oil              | 2008           | 92                                                             |
| 28               | Myanmar | Groundnuts (Shelled Eq)    | 2008           | 30                                                             |
| 28               | Myanmar | Maize and products         | 2008           | 23                                                             |
| 28               | Myanmar | Marine Fish, Other         | 2008           | 36                                                             |
| 28               | Myanmar | Meat                       | 2008           | 170                                                            |
| 28               | Myanmar | Milk - Excluding Butter    | 2008           | 40                                                             |
| 28               | Myanmar | Millet and products        | 2008           | 4                                                              |
| 28               | Myanmar | Miscellaneous              | 2008           | 1                                                              |
| 28               | Myanmar | Mutton & Goat Meat         | 2008           | 3                                                              |
| 28               | Myanmar | Offals                     | 2008           | 4                                                              |
| 28               | Myanmar | Oilcrops                   | 2008           | 104                                                            |
| 28               | Myanmar | Oilcrops Oil, Other        | 2008           | 1                                                              |
| 28               | Myanmar | Onions                     | 2008           | 19                                                             |
| 28               | Myanmar | Palm Oil                   | 2008           | 4                                                              |
| 28               | Myanmar | Palmkernel Oil             | 2008           | 1                                                              |
| 28               | Myanmar | Peas                       | 2008           | 10                                                             |
| 28               | Myanmar | Pigmeat                    | 2008           | 86                                                             |
| 28               | Myanmar | Pimento                    | 2008           | 16                                                             |
| 28               | Myanmar | Plantains                  | 2008           | 25                                                             |
| 28               | Myanmar | Potatoes and products      | 2008           | 17                                                             |

Dietary calcium and zinc deficiency risks are decreasing but remain prevalent

| FAO Country code | Country | Food item                  | Reference year | Net energy supply (kcal capita <sup>-1</sup> d <sup>-1</sup> ) |
|------------------|---------|----------------------------|----------------|----------------------------------------------------------------|
| 28               | Myanmar | Poultry Meat               | 2008           | 64                                                             |
| 28               | Myanmar | Pulses                     | 2008           | 112                                                            |
| 28               | Myanmar | Pulses, Other and products | 2008           | 79                                                             |
| 28               | Myanmar | Rice (Milled Equivalent)   | 2008           | 1,207                                                          |
| 28               | Myanmar | Sesame seed                | 2008           | 26                                                             |
| 28               | Myanmar | Sesameseed Oil             | 2008           | 43                                                             |
| 28               | Myanmar | Sorghum and products       | 2008           | 13                                                             |
| 28               | Myanmar | Soyabean Oil               | 2008           | 15                                                             |
| 28               | Myanmar | Soyabeans                  | 2008           | 4                                                              |
| 28               | Myanmar | Spices                     | 2008           | 16                                                             |
| 28               | Myanmar | Starchy Roots              | 2008           | 36                                                             |
| 28               | Myanmar | Stimulants                 | 2008           | 1                                                              |
| 28               | Myanmar | Sugar & Sweeteners         | 2008           | 170                                                            |
| 28               | Myanmar | Sugar (Raw Equivalent)     | 2008           | 4                                                              |
| 28               | Myanmar | Sugar cane                 | 2008           | 2                                                              |
| 28               | Myanmar | Sugar Crops                | 2008           | 2                                                              |
| 28               | Myanmar | Sugar non-centrifugal      | 2008           | 156                                                            |
| 28               | Myanmar | Sunflower seed             | 2008           | 5                                                              |
| 28               | Myanmar | Sunflowerseed Oil          | 2008           | 23                                                             |
| 28               | Myanmar | Sweet potatoes             | 2008           | 3                                                              |
| 28               | Myanmar | Sweeteners, Other          | 2008           | 10                                                             |
| 28               | Myanmar | Tea (including mate)       | 2008           | 1                                                              |
| 28               | Myanmar | Treenuts                   | 2008           | 15                                                             |
| 28               | Myanmar | Vegetable Oils             | 2008           | 188                                                            |
| 28               | Myanmar | Vegetables                 | 2008           | 64                                                             |
| 28               | Myanmar | Vegetables, Other          | 2008           | 45                                                             |
| 28               | Myanmar | Vegetal Products           | 2008           | 2,042                                                          |
| 28               | Myanmar | Wheat and products         | 2008           | 27                                                             |
| 28               | Myanmar | Alcoholic Beverages        | 2009           | 3                                                              |
| 28               | Myanmar | Animal fats                | 2009           | 26                                                             |
| 28               | Myanmar | Animal Products            | 2009           | 371                                                            |
| 28               | Myanmar | Beans                      | 2009           | 29                                                             |
| 28               | Myanmar | Beer                       | 2009           | 1                                                              |
| 28               | Myanmar | Beverages, Alcoholic       | 2009           | 2                                                              |
| 28               | Myanmar | Bovine Meat                | 2009           | 18                                                             |
| 28               | Myanmar | Butter, Chee               | 2009           | 10                                                             |
| 28               | Myanmar | Cassava and products       | 2009           | 23                                                             |
| 28               | Myanmar | Cereals - Excluding Beer   | 2009           | 1,218                                                          |
| 28               | Myanmar | Cereals, Other             | 2009           | 2                                                              |
| 28               | Myanmar | Coconuts - Incl Copra      | 2009           | 32                                                             |
| 28               | Myanmar | Coffee and products        | 2009           | 1                                                              |
| 28               | Myanmar | Cottonseed Oil             | 2009           | 12                                                             |
| 28               | Myanmar | Eggs                       | 2009           | 22                                                             |
| 28               | Myanmar | Fats, Animals, Raw         | 2009           | 16                                                             |
| 28               | Myanmar | Fish, Seafood              | 2009           | 81                                                             |
| 28               | Myanmar | Freshwater Fish            | 2009           | 41                                                             |
| 28               | Myanmar | Fruits - Excluding Wine    | 2009           | 52                                                             |
| 28               | Myanmar | Fruits, Other              | 2009           | 27                                                             |
| 28               | Myanmar | Grand Total                | 2009           | 2,404                                                          |
| 28               | Myanmar | Groundnut Oil              | 2009           | 104                                                            |
| 28               | Myanmar | Groundnuts (Shelled Eq)    | 2009           | 33                                                             |
| 28               | Myanmar | Maize and products         | 2009           | 24                                                             |
| 28               | Myanmar | Marine Fish, Other         | 2009           | 39                                                             |
| 28               | Myanmar | Meat                       | 2009           | 192                                                            |
| 28               | Myanmar | Milk - Excluding Butter    | 2009           | 45                                                             |
| 28               | Myanmar | Millet and products        | 2009           | 4                                                              |
| 28               | Myanmar | Miscellaneous              | 2009           | 1                                                              |
| 28               | Myanmar | Mutton & Goat Meat         | 2009           | 3                                                              |
| 28               | Myanmar | Offals                     | 2009           | 4                                                              |
| 28               | Myanmar | Oilcrops                   | 2009           | 101                                                            |
| 28               | Myanmar | Oilcrops Oil, Other        | 2009           | 1                                                              |
| 28               | Myanmar | Onions                     | 2009           | 19                                                             |
| 28               | Myanmar | Palm Oil                   | 2009           | 4                                                              |
| 28               | Myanmar | Palmkernel Oil             | 2009           | 1                                                              |
| 28               | Myanmar | Peas                       | 2009           | 9                                                              |
| 28               | Myanmar | Pelagic Fish               | 2009           | 1                                                              |
| 28               | Myanmar | Pigmeat                    | 2009           | 99                                                             |
| 28               | Myanmar | Pimento                    | 2009           | 18                                                             |
| 28               | Myanmar | Plantains                  | 2009           | 24                                                             |
| 28               | Myanmar | Potatoes and products      | 2009           | 17                                                             |
| 28               | Myanmar | Poultry Meat               | 2009           | 73                                                             |
| 28               | Myanmar | Pulses                     | 2009           | 138                                                            |
| 28               | Myanmar | Pulses, Other and products | 2009           | 100                                                            |
| 28               | Myanmar | Rice (Milled Equivalent)   | 2009           | 1,134                                                          |
| 28               | Myanmar | Sesame seed                | 2009           | 26                                                             |
| 28               | Myanmar | Sesameseed Oil             | 2009           | 46                                                             |
| 28               | Myanmar | Sorghum and products       | 2009           | 14                                                             |
| 28               | Myanmar | Soyabean Oil               | 2009           | 17                                                             |
| 28               | Myanmar | Soyabeans                  | 2009           | 4                                                              |
| 28               | Myanmar | Spices                     | 2009           | 18                                                             |
| 28               | Myanmar | Starchy Roots              | 2009           | 43                                                             |
| 28               | Myanmar | Stimulants                 | 2009           | 1                                                              |
| 28               | Myanmar | Sugar & Sweeteners         | 2009           | 166                                                            |
| 28               | Myanmar | Sugar (Raw Equivalent)     | 2009           | 4                                                              |
| 28               | Myanmar | Sugar cane                 | 2009           | 1                                                              |
| 28               | Myanmar | Sugar Crops                | 2009           | 1                                                              |
| 28               | Myanmar | Sugar non-centrifugal      | 2009           | 153                                                            |
| 28               | Myanmar | Sunflower seed             | 2009           | 5                                                              |
| 28               | Myanmar | Sunflowerseed Oil          | 2009           | 25                                                             |
| 28               | Myanmar | Sweet potatoes             | 2009           | 3                                                              |
| 28               | Myanmar | Sweeteners, Other          | 2009           | 9                                                              |
| 28               | Myanmar | Tea (including mate)       | 2009           | 1                                                              |
| 28               | Myanmar | Treenuts                   | 2009           | 16                                                             |
| 28               | Myanmar | Vegetable Oils             | 2009           | 210                                                            |
| 28               | Myanmar | Vegetables                 | 2009           | 64                                                             |
| 28               | Myanmar | Vegetables, Other          | 2009           | 44                                                             |
| 28               | Myanmar | Vegetal Products           | 2009           | 2,033                                                          |

Dietary calcium and zinc deficiency risks are decreasing but remain prevalent

| FAO Country code | Country | Food item                  | Reference year | Net energy supply (kcal capita <sup>-1</sup> d <sup>-1</sup> ) |
|------------------|---------|----------------------------|----------------|----------------------------------------------------------------|
| 28               | Myanmar | Wheat and products         | 2009           | 39                                                             |
| 28               | Myanmar | Alcoholic Beverages        | 2010           | 4                                                              |
| 28               | Myanmar | Animal fats                | 2010           | 29                                                             |
| 28               | Myanmar | Animal Products            | 2010           | 407                                                            |
| 28               | Myanmar | Beans                      | 2010           | 31                                                             |
| 28               | Myanmar | Beer                       | 2010           | 2                                                              |
| 28               | Myanmar | Beverages, Alcoholic       | 2010           | 2                                                              |
| 28               | Myanmar | Bovine Meat                | 2010           | 25                                                             |
| 28               | Myanmar | Butter, Ghee               | 2010           | 11                                                             |
| 28               | Myanmar | Cassava and products       | 2010           | 29                                                             |
| 28               | Myanmar | Cereals - Excluding Beer   | 2010           | 1,259                                                          |
| 28               | Myanmar | Cereals, Other             | 2010           | 3                                                              |
| 28               | Myanmar | Coconuts - Incl Copra      | 2010           | 33                                                             |
| 28               | Myanmar | Coffee and products        | 2010           | 1                                                              |
| 28               | Myanmar | Cottonseed Oil             | 2010           | 18                                                             |
| 28               | Myanmar | Eggs                       | 2010           | 23                                                             |
| 28               | Myanmar | Fats, Animals, Raw         | 2010           | 18                                                             |
| 28               | Myanmar | Fish, Seafood              | 2010           | 87                                                             |
| 28               | Myanmar | Freshwater Fish            | 2010           | 46                                                             |
| 28               | Myanmar | Fruits - Excluding Wine    | 2010           | 53                                                             |
| 28               | Myanmar | Fruits, Other              | 2010           | 26                                                             |
| 28               | Myanmar | Grand Total                | 2010           | 2,499                                                          |
| 28               | Myanmar | Groundnut Oil              | 2010           | 110                                                            |
| 28               | Myanmar | Groundnuts (Shelled Eq)    | 2010           | 34                                                             |
| 28               | Myanmar | Maize and products         | 2010           | 26                                                             |
| 28               | Myanmar | Marine Fish, Other         | 2010           | 41                                                             |
| 28               | Myanmar | Meat                       | 2010           | 215                                                            |
| 28               | Myanmar | Milk - Excluding Butter    | 2010           | 48                                                             |
| 28               | Myanmar | Millet and products        | 2010           | 4                                                              |
| 28               | Myanmar | Miscellaneous              | 2010           | 2                                                              |
| 28               | Myanmar | Mutton & Goat Meat         | 2010           | 4                                                              |
| 28               | Myanmar | Offals                     | 2010           | 4                                                              |
| 28               | Myanmar | Oilcrops                   | 2010           | 103                                                            |
| 28               | Myanmar | Onions                     | 2010           | 21                                                             |
| 28               | Myanmar | Palm Oil                   | 2010           | 4                                                              |
| 28               | Myanmar | Peas                       | 2010           | 10                                                             |
| 28               | Myanmar | Pelagic Fish               | 2010           | 1                                                              |
| 28               | Myanmar | Pigmeat                    | 2010           | 107                                                            |
| 28               | Myanmar | Pimento                    | 2010           | 19                                                             |
| 28               | Myanmar | Plantains                  | 2010           | 26                                                             |
| 28               | Myanmar | Potatoes and products      | 2010           | 17                                                             |
| 28               | Myanmar | Poultry Meat               | 2010           | 79                                                             |
| 28               | Myanmar | Pulses                     | 2010           | 148                                                            |
| 28               | Myanmar | Pulses, Other and products | 2010           | 107                                                            |
| 28               | Myanmar | Rice (Milled Equivalent)   | 2010           | 1,164                                                          |
| 28               | Myanmar | Sesame seed                | 2010           | 26                                                             |
| 28               | Myanmar | Sesameseed Oil             | 2010           | 33                                                             |
| 28               | Myanmar | Sorghum and products       | 2010           | 15                                                             |
| 28               | Myanmar | Soyabean Oil               | 2010           | 18                                                             |
| 28               | Myanmar | Soyabeans                  | 2010           | 5                                                              |
| 28               | Myanmar | Spices                     | 2010           | 20                                                             |
| 28               | Myanmar | Starchy Roots              | 2010           | 49                                                             |
| 28               | Myanmar | Stimulants                 | 2010           | 2                                                              |
| 28               | Myanmar | Sugar & Sweeteners         | 2010           | 160                                                            |
| 28               | Myanmar | Sugar (Raw Equivalent)     | 2010           | 4                                                              |
| 28               | Myanmar | Sugar cane                 | 2010           | 1                                                              |
| 28               | Myanmar | Sugar Crops                | 2010           | 1                                                              |
| 28               | Myanmar | Sugar non-centrifugal      | 2010           | 146                                                            |
| 28               | Myanmar | Sunflower seed             | 2010           | 5                                                              |
| 28               | Myanmar | Sunflowerseed Oil          | 2010           | 26                                                             |
| 28               | Myanmar | Sweet potatoes             | 2010           | 2                                                              |
| 28               | Myanmar | Sweeteners, Other          | 2010           | 10                                                             |
| 28               | Myanmar | Tea (including mate)       | 2010           | 1                                                              |
| 28               | Myanmar | Treenuts                   | 2010           | 15                                                             |
| 28               | Myanmar | Vegetable Oils             | 2010           | 210                                                            |
| 28               | Myanmar | Vegetables                 | 2010           | 67                                                             |
| 28               | Myanmar | Vegetables, Other          | 2010           | 46                                                             |
| 28               | Myanmar | Vegetal Products           | 2010           | 2,092                                                          |
| 28               | Myanmar | Wheat and products         | 2010           | 49                                                             |
| 28               | Myanmar | Alcoholic Beverages        | 2011           | 5                                                              |
| 28               | Myanmar | Animal fats                | 2011           | 30                                                             |
| 28               | Myanmar | Animal Products            | 2011           | 430                                                            |
| 28               | Myanmar | Beans                      | 2011           | 30                                                             |
| 28               | Myanmar | Beer                       | 2011           | 3                                                              |
| 28               | Myanmar | Beverages, Alcoholic       | 2011           | 3                                                              |
| 28               | Myanmar | Bovine Meat                | 2011           | 26                                                             |
| 28               | Myanmar | Butter, Ghee               | 2011           | 12                                                             |
| 28               | Myanmar | Cassava and products       | 2011           | 35                                                             |
| 28               | Myanmar | Cereals - Excluding Beer   | 2011           | 1,261                                                          |
| 28               | Myanmar | Cereals, Other             | 2011           | 2                                                              |
| 28               | Myanmar | Coconuts - Incl Copra      | 2011           | 32                                                             |
| 28               | Myanmar | Coffee and products        | 2011           | 2                                                              |
| 28               | Myanmar | Cottonseed Oil             | 2011           | 24                                                             |
| 28               | Myanmar | Eggs                       | 2011           | 25                                                             |
| 28               | Myanmar | Fats, Animals, Raw         | 2011           | 18                                                             |
| 28               | Myanmar | Fish, Seafood              | 2011           | 96                                                             |
| 28               | Myanmar | Freshwater Fish            | 2011           | 49                                                             |
| 28               | Myanmar | Fruits - Excluding Wine    | 2011           | 57                                                             |
| 28               | Myanmar | Fruits, Other              | 2011           | 27                                                             |
| 28               | Myanmar | Grand Total                | 2011           | 2,528                                                          |
| 28               | Myanmar | Groundnut Oil              | 2011           | 112                                                            |
| 28               | Myanmar | Groundnuts (Shelled Eq)    | 2011           | 35                                                             |
| 28               | Myanmar | Maize and products         | 2011           | 25                                                             |
| 28               | Myanmar | Marine Fish, Other         | 2011           | 45                                                             |
| 28               | Myanmar | Meat                       | 2011           | 226                                                            |
| 28               | Myanmar | Milk - Excluding Butter    | 2011           | 50                                                             |
| 28               | Myanmar | Millet and products        | 2011           | 4                                                              |

Dietary calcium and zinc deficiency risks are decreasing but remain prevalent

| FAO Country code | Country                                 | Food item                  | Reference year | Net energy supply (kcal <i>capita</i> <sup>-1</sup> d <sup>-1</sup> ) |
|------------------|-----------------------------------------|----------------------------|----------------|-----------------------------------------------------------------------|
| 28               | Myanmar                                 | Miscellaneous              | 2011           | 2                                                                     |
| 28               | Myanmar                                 | Mutton & Goat Meat         | 2011           | 4                                                                     |
| 28               | Myanmar                                 | Offals                     | 2011           | 5                                                                     |
| 28               | Myanmar                                 | Oilcrops                   | 2011           | 93                                                                    |
| 28               | Myanmar                                 | Onions                     | 2011           | 21                                                                    |
| 28               | Myanmar                                 | Palm Oil                   | 2011           | 4                                                                     |
| 28               | Myanmar                                 | Peas                       | 2011           | 11                                                                    |
| 28               | Myanmar                                 | Pelagic Fish               | 2011           | 1                                                                     |
| 28               | Myanmar                                 | Pigmeat                    | 2011           | 112                                                                   |
| 28               | Myanmar                                 | Pimento                    | 2011           | 18                                                                    |
| 28               | Myanmar                                 | Plantains                  | 2011           | 30                                                                    |
| 28               | Myanmar                                 | Potatoes and products      | 2011           | 17                                                                    |
| 28               | Myanmar                                 | Poultry Meat               | 2011           | 83                                                                    |
| 28               | Myanmar                                 | Pulses                     | 2011           | 145                                                                   |
| 28               | Myanmar                                 | Pulses, Other and products | 2011           | 105                                                                   |
| 28               | Myanmar                                 | Rice (Milled Equivalent)   | 2011           | 1,170                                                                 |
| 28               | Myanmar                                 | Sesame seed                | 2011           | 19                                                                    |
| 28               | Myanmar                                 | Sesameseed Oil             | 2011           | 29                                                                    |
| 28               | Myanmar                                 | Sorghum and products       | 2011           | 15                                                                    |
| 28               | Myanmar                                 | Soyabean Oil               | 2011           | 17                                                                    |
| 28               | Myanmar                                 | Soyabeans                  | 2011           | 4                                                                     |
| 28               | Myanmar                                 | Spices                     | 2011           | 18                                                                    |
| 28               | Myanmar                                 | Starchy Roots              | 2011           | 54                                                                    |
| 28               | Myanmar                                 | Stimulants                 | 2011           | 3                                                                     |
| 28               | Myanmar                                 | Sugar & Sweeteners         | 2011           | 164                                                                   |
| 28               | Myanmar                                 | Sugar (Raw Equivalent)     | 2011           | 4                                                                     |
| 28               | Myanmar                                 | Sugar cane                 | 2011           | 1                                                                     |
| 28               | Myanmar                                 | Sugar Crops                | 2011           | 1                                                                     |
| 28               | Myanmar                                 | Sugar non-centrifugal      | 2011           | 149                                                                   |
| 28               | Myanmar                                 | Sunflower seed             | 2011           | 3                                                                     |
| 28               | Myanmar                                 | Sunflowerseed Oil          | 2011           | 24                                                                    |
| 28               | Myanmar                                 | Sweet potatoes             | 2011           | 2                                                                     |
| 28               | Myanmar                                 | Sweeteners, Other          | 2011           | 11                                                                    |
| 28               | Myanmar                                 | Tea (including mate)       | 2011           | 1                                                                     |
| 28               | Myanmar                                 | Treenuts                   | 2011           | 15                                                                    |
| 28               | Myanmar                                 | Vegetable Oils             | 2011           | 211                                                                   |
| 28               | Myanmar                                 | Vegetables                 | 2011           | 69                                                                    |
| 28               | Myanmar                                 | Vegetables, Other          | 2011           | 47                                                                    |
| 28               | Myanmar                                 | Vegetal Products           | 2011           | 2,098                                                                 |
| 28               | Myanmar                                 | Wheat and products         | 2011           | 46                                                                    |
| 5817             | Net Food Importing Developing Countries | Butter, Ghee               | 1992           | 18                                                                    |
| 5817             | Net Food Importing Developing Countries | Fats, Animals, Raw         | 1992           | 12                                                                    |
| 5817             | Net Food Importing Developing Countries | Meat, Other                | 1992           | 4                                                                     |
| 5817             | Net Food Importing Developing Countries | Mutton & Goat Meat         | 1992           | 13                                                                    |
| 5817             | Net Food Importing Developing Countries | Pigmeat                    | 1992           | 8                                                                     |
| 5817             | Net Food Importing Developing Countries | Poultry Meat               | 1992           | 11                                                                    |
| 5817             | Net Food Importing Developing Countries | Butter, Ghee               | 1993           | 19                                                                    |
| 5817             | Net Food Importing Developing Countries | Fats, Animals, Raw         | 1993           | 12                                                                    |
| 5817             | Net Food Importing Developing Countries | Meat, Other                | 1993           | 4                                                                     |
| 5817             | Net Food Importing Developing Countries | Mutton & Goat Meat         | 1993           | 13                                                                    |
| 5817             | Net Food Importing Developing Countries | Pigmeat                    | 1993           | 8                                                                     |
| 5817             | Net Food Importing Developing Countries | Poultry Meat               | 1993           | 12                                                                    |
| 5817             | Net Food Importing Developing Countries | Butter, Ghee               | 1994           | 19                                                                    |
| 5817             | Net Food Importing Developing Countries | Fats, Animals, Raw         | 1994           | 12                                                                    |
| 5817             | Net Food Importing Developing Countries | Meat, Other                | 1994           | 4                                                                     |
| 5817             | Net Food Importing Developing Countries | Mutton & Goat Meat         | 1994           | 13                                                                    |
| 5817             | Net Food Importing Developing Countries | Pigmeat                    | 1994           | 8                                                                     |
| 5817             | Net Food Importing Developing Countries | Poultry Meat               | 1994           | 12                                                                    |
| 5817             | Net Food Importing Developing Countries | Butter, Ghee               | 1995           | 18                                                                    |
| 5817             | Net Food Importing Developing Countries | Fats, Animals, Raw         | 1995           | 12                                                                    |
| 5817             | Net Food Importing Developing Countries | Meat, Other                | 1995           | 4                                                                     |
| 5817             | Net Food Importing Developing Countries | Mutton & Goat Meat         | 1995           | 13                                                                    |
| 5817             | Net Food Importing Developing Countries | Pigmeat                    | 1995           | 10                                                                    |
| 5817             | Net Food Importing Developing Countries | Poultry Meat               | 1995           | 13                                                                    |
| 5817             | Net Food Importing Developing Countries | Butter, Ghee               | 1996           | 19                                                                    |
| 5817             | Net Food Importing Developing Countries | Fats, Animals, Raw         | 1996           | 11                                                                    |
| 5817             | Net Food Importing Developing Countries | Meat, Other                | 1996           | 4                                                                     |
| 5817             | Net Food Importing Developing Countries | Mutton & Goat Meat         | 1996           | 12                                                                    |
| 5817             | Net Food Importing Developing Countries | Pigmeat                    | 1996           | 10                                                                    |
| 5817             | Net Food Importing Developing Countries | Poultry Meat               | 1996           | 13                                                                    |
| 5817             | Net Food Importing Developing Countries | Butter, Ghee               | 1997           | 19                                                                    |
| 5817             | Net Food Importing Developing Countries | Fats, Animals, Raw         | 1997           | 10                                                                    |
| 5817             | Net Food Importing Developing Countries | Meat, Other                | 1997           | 4                                                                     |
| 5817             | Net Food Importing Developing Countries | Mutton & Goat Meat         | 1997           | 12                                                                    |
| 5817             | Net Food Importing Developing Countries | Pigmeat                    | 1997           | 10                                                                    |
| 5817             | Net Food Importing Developing Countries | Poultry Meat               | 1997           | 14                                                                    |
| 5817             | Net Food Importing Developing Countries | Butter, Ghee               | 1998           | 19                                                                    |
| 5817             | Net Food Importing Developing Countries | Fats, Animals, Raw         | 1998           | 11                                                                    |
| 5817             | Net Food Importing Developing Countries | Meat, Other                | 1998           | 4                                                                     |
| 5817             | Net Food Importing Developing Countries | Mutton & Goat Meat         | 1998           | 13                                                                    |
| 5817             | Net Food Importing Developing Countries | Pigmeat                    | 1998           | 10                                                                    |
| 5817             | Net Food Importing Developing Countries | Poultry Meat               | 1998           | 14                                                                    |
| 5817             | Net Food Importing Developing Countries | Bovine Meat                | 1999           | 27                                                                    |
| 5817             | Net Food Importing Developing Countries | Butter, Ghee               | 1999           | 19                                                                    |
| 5817             | Net Food Importing Developing Countries | Fats, Animals, Raw         | 1999           | 11                                                                    |
| 5817             | Net Food Importing Developing Countries | Meat, Other                | 1999           | 4                                                                     |
| 5817             | Net Food Importing Developing Countries | Mutton & Goat Meat         | 1999           | 13                                                                    |
| 5817             | Net Food Importing Developing Countries | Pigmeat                    | 1999           | 10                                                                    |
| 5817             | Net Food Importing Developing Countries | Poultry Meat               | 1999           | 15                                                                    |
| 5817             | Net Food Importing Developing Countries | Bovine Meat                | 2000           | 27                                                                    |
| 5817             | Net Food Importing Developing Countries | Butter, Ghee               | 2000           | 20                                                                    |
| 5817             | Net Food Importing Developing Countries | Fats, Animals, Raw         | 2000           | 12                                                                    |
| 5817             | Net Food Importing Developing Countries | Meat, Other                | 2000           | 4                                                                     |
| 5817             | Net Food Importing Developing Countries | Mutton & Goat Meat         | 2000           | 13                                                                    |
| 5817             | Net Food Importing Developing Countries | Pigmeat                    | 2000           | 9                                                                     |
| 5817             | Net Food Importing Developing Countries | Poultry Meat               | 2000           | 16                                                                    |
| 5817             | Net Food Importing Developing Countries | Bovine Meat                | 2001           | 26                                                                    |

Dietary calcium and zinc deficiency risks are decreasing but remain prevalent

| FAO Country code | Country                                 | Food item                | Reference year | Net energy supply (kcal capita <sup>-1</sup> d <sup>-1</sup> ) |
|------------------|-----------------------------------------|--------------------------|----------------|----------------------------------------------------------------|
| 5817             | Net Food Importing Developing Countries | Butter, Ghee             | 2001           | 19                                                             |
| 5817             | Net Food Importing Developing Countries | Fats, Animals, Raw       | 2001           | 11                                                             |
| 5817             | Net Food Importing Developing Countries | Meat, Other              | 2001           | 4                                                              |
| 5817             | Net Food Importing Developing Countries | Mutton & Goat Meat       | 2001           | 13                                                             |
| 5817             | Net Food Importing Developing Countries | Pigmeat                  | 2001           | 9                                                              |
| 5817             | Net Food Importing Developing Countries | Poultry Meat             | 2001           | 17                                                             |
| 5817             | Net Food Importing Developing Countries | Bovine Meat              | 2002           | 27                                                             |
| 5817             | Net Food Importing Developing Countries | Butter, Ghee             | 2002           | 20                                                             |
| 5817             | Net Food Importing Developing Countries | Fats, Animals, Raw       | 2002           | 12                                                             |
| 5817             | Net Food Importing Developing Countries | Meat, Other              | 2002           | 4                                                              |
| 5817             | Net Food Importing Developing Countries | Mutton & Goat Meat       | 2002           | 12                                                             |
| 5817             | Net Food Importing Developing Countries | Pigmeat                  | 2002           | 10                                                             |
| 5817             | Net Food Importing Developing Countries | Poultry Meat             | 2002           | 17                                                             |
| 5817             | Net Food Importing Developing Countries | Bovine Meat              | 2003           | 27                                                             |
| 5817             | Net Food Importing Developing Countries | Butter, Ghee             | 2003           | 20                                                             |
| 5817             | Net Food Importing Developing Countries | Fats, Animals, Raw       | 2003           | 14                                                             |
| 5817             | Net Food Importing Developing Countries | Meat, Other              | 2003           | 4                                                              |
| 5817             | Net Food Importing Developing Countries | Mutton & Goat Meat       | 2003           | 12                                                             |
| 5817             | Net Food Importing Developing Countries | Pigmeat                  | 2003           | 10                                                             |
| 5817             | Net Food Importing Developing Countries | Poultry Meat             | 2003           | 17                                                             |
| 5817             | Net Food Importing Developing Countries | Bovine Meat              | 2004           | 27                                                             |
| 5817             | Net Food Importing Developing Countries | Butter, Ghee             | 2004           | 20                                                             |
| 5817             | Net Food Importing Developing Countries | Fats, Animals, Raw       | 2004           | 13                                                             |
| 5817             | Net Food Importing Developing Countries | Meat, Other              | 2004           | 4                                                              |
| 5817             | Net Food Importing Developing Countries | Mutton & Goat Meat       | 2004           | 12                                                             |
| 5817             | Net Food Importing Developing Countries | Pigmeat                  | 2004           | 11                                                             |
| 5817             | Net Food Importing Developing Countries | Poultry Meat             | 2004           | 18                                                             |
| 5817             | Net Food Importing Developing Countries | Bovine Meat              | 2005           | 28                                                             |
| 5817             | Net Food Importing Developing Countries | Butter, Ghee             | 2005           | 20                                                             |
| 5817             | Net Food Importing Developing Countries | Fats, Animals, Raw       | 2005           | 13                                                             |
| 5817             | Net Food Importing Developing Countries | Meat, Other              | 2005           | 4                                                              |
| 5817             | Net Food Importing Developing Countries | Mutton & Goat Meat       | 2005           | 13                                                             |
| 5817             | Net Food Importing Developing Countries | Pigmeat                  | 2005           | 12                                                             |
| 5817             | Net Food Importing Developing Countries | Poultry Meat             | 2005           | 19                                                             |
| 5817             | Net Food Importing Developing Countries | Bovine Meat              | 2006           | 31                                                             |
| 5817             | Net Food Importing Developing Countries | Butter, Ghee             | 2006           | 20                                                             |
| 5817             | Net Food Importing Developing Countries | Fats, Animals, Raw       | 2006           | 13                                                             |
| 5817             | Net Food Importing Developing Countries | Meat, Other              | 2006           | 5                                                              |
| 5817             | Net Food Importing Developing Countries | Mutton & Goat Meat       | 2006           | 12                                                             |
| 5817             | Net Food Importing Developing Countries | Pigmeat                  | 2006           | 12                                                             |
| 5817             | Net Food Importing Developing Countries | Poultry Meat             | 2006           | 20                                                             |
| 5817             | Net Food Importing Developing Countries | Bovine Meat              | 2007           | 31                                                             |
| 5817             | Net Food Importing Developing Countries | Butter, Ghee             | 2007           | 20                                                             |
| 5817             | Net Food Importing Developing Countries | Fats, Animals, Raw       | 2007           | 14                                                             |
| 5817             | Net Food Importing Developing Countries | Meat, Other              | 2007           | 5                                                              |
| 5817             | Net Food Importing Developing Countries | Mutton & Goat Meat       | 2007           | 12                                                             |
| 5817             | Net Food Importing Developing Countries | Pigmeat                  | 2007           | 14                                                             |
| 5817             | Net Food Importing Developing Countries | Poultry Meat             | 2007           | 21                                                             |
| 5817             | Net Food Importing Developing Countries | Bovine Meat              | 2008           | 31                                                             |
| 5817             | Net Food Importing Developing Countries | Fats, Animals, Raw       | 2008           | 13                                                             |
| 5817             | Net Food Importing Developing Countries | Meat, Other              | 2008           | 5                                                              |
| 5817             | Net Food Importing Developing Countries | Mutton & Goat Meat       | 2008           | 13                                                             |
| 5817             | Net Food Importing Developing Countries | Pigmeat                  | 2008           | 14                                                             |
| 5817             | Net Food Importing Developing Countries | Poultry Meat             | 2008           | 22                                                             |
| 5817             | Net Food Importing Developing Countries | Bovine Meat              | 2009           | 31                                                             |
| 5817             | Net Food Importing Developing Countries | Fats, Animals, Raw       | 2009           | 13                                                             |
| 5817             | Net Food Importing Developing Countries | Meat, Other              | 2009           | 5                                                              |
| 5817             | Net Food Importing Developing Countries | Mutton & Goat Meat       | 2009           | 13                                                             |
| 5817             | Net Food Importing Developing Countries | Pigmeat                  | 2009           | 15                                                             |
| 5817             | Net Food Importing Developing Countries | Poultry Meat             | 2009           | 23                                                             |
| 5817             | Net Food Importing Developing Countries | Bovine Meat              | 2010           | 31                                                             |
| 5817             | Net Food Importing Developing Countries | Fats, Animals, Raw       | 2010           | 13                                                             |
| 5817             | Net Food Importing Developing Countries | Meat, Other              | 2010           | 5                                                              |
| 5817             | Net Food Importing Developing Countries | Mutton & Goat Meat       | 2010           | 13                                                             |
| 5817             | Net Food Importing Developing Countries | Pigmeat                  | 2010           | 15                                                             |
| 5817             | Net Food Importing Developing Countries | Poultry Meat             | 2010           | 25                                                             |
| 5817             | Net Food Importing Developing Countries | Bovine Meat              | 2011           | 31                                                             |
| 5817             | Net Food Importing Developing Countries | Fats, Animals, Raw       | 2011           | 13                                                             |
| 5817             | Net Food Importing Developing Countries | Meat, Other              | 2011           | 5                                                              |
| 5817             | Net Food Importing Developing Countries | Mutton & Goat Meat       | 2011           | 13                                                             |
| 5817             | Net Food Importing Developing Countries | Pigmeat                  | 2011           | 15                                                             |
| 5817             | Net Food Importing Developing Countries | Poultry Meat             | 2011           | 25                                                             |
| 25               | Solomon Islands                         | Alcoholic Beverages      | 1992           | 12                                                             |
| 25               | Solomon Islands                         | Animal fats              | 1992           | 23                                                             |
| 25               | Solomon Islands                         | Animal Products          | 1992           | 211                                                            |
| 25               | Solomon Islands                         | Bananas                  | 1992           | 1                                                              |
| 25               | Solomon Islands                         | Beer                     | 1992           | 11                                                             |
| 25               | Solomon Islands                         | Beverages, Alcoholic     | 1992           | 1                                                              |
| 25               | Solomon Islands                         | Bovine Meat              | 1992           | 16                                                             |
| 25               | Solomon Islands                         | Butter, Ghee             | 1992           | 3                                                              |
| 25               | Solomon Islands                         | Cassava and products     | 1992           | 13                                                             |
| 25               | Solomon Islands                         | Cereals - Excluding Beer | 1992           | 597                                                            |
| 25               | Solomon Islands                         | Cereals, Other           | 1992           | 3                                                              |
| 25               | Solomon Islands                         | Cocoa Beans and products | 1992           | 8                                                              |
| 25               | Solomon Islands                         | Coconut Oil              | 1992           | 32                                                             |
| 25               | Solomon Islands                         | Coconuts - Incl Copra    | 1992           | 240                                                            |
| 25               | Solomon Islands                         | Eggs                     | 1992           | 3                                                              |
| 25               | Solomon Islands                         | Fats, Animals, Raw       | 1992           | 20                                                             |
| 25               | Solomon Islands                         | Fish, Seafood            | 1992           | 88                                                             |
| 25               | Solomon Islands                         | Fruits - Excluding Wine  | 1992           | 56                                                             |
| 25               | Solomon Islands                         | Fruits, Other            | 1992           | 55                                                             |
| 25               | Solomon Islands                         | Grand Total              | 1992           | 2,177                                                          |
| 25               | Solomon Islands                         | Marine Fish, Other       | 1992           | 75                                                             |
| 25               | Solomon Islands                         | Meat                     | 1992           | 78                                                             |
| 25               | Solomon Islands                         | Milk - Excluding Butter  | 1992           | 16                                                             |
| 25               | Solomon Islands                         | Offals                   | 1992           | 3                                                              |
| 25               | Solomon Islands                         | Oilcrops                 | 1992           | 240                                                            |



## Dietary calcium and zinc deficiency risks are decreasing but remain prevalent

| FAO Country code | Country         | Food item                  | Reference year | Net energy supply (kcal capita <sup>-1</sup> d <sup>-1</sup> ) |
|------------------|-----------------|----------------------------|----------------|----------------------------------------------------------------|
| 25               | Solomon Islands | Oilcrops Oil, Other        | 1992           | 3                                                              |
| 25               | Solomon Islands | Onions                     | 1992           | 1                                                              |
| 25               | Solomon Islands | Palm Oil                   | 1992           | 18                                                             |
| 25               | Solomon Islands | Pelagic Fish               | 1992           | 12                                                             |
| 25               | Solomon Islands | Pigmeat                    | 1992           | 60                                                             |
| 25               | Solomon Islands | Poultry Meat               | 1992           | 2                                                              |
| 25               | Solomon Islands | Pulses                     | 1992           | 64                                                             |
| 25               | Solomon Islands | Pulses, Other and products | 1992           | 64                                                             |
| 25               | Solomon Islands | Rice (Milled Equivalent)   | 1992           | 475                                                            |
| 25               | Solomon Islands | Roots, Other               | 1992           | 183                                                            |
| 25               | Solomon Islands | Spices                     | 1992           | 4                                                              |
| 25               | Solomon Islands | Spices, Other              | 1992           | 4                                                              |
| 25               | Solomon Islands | Starchy Roots              | 1992           | 843                                                            |
| 25               | Solomon Islands | Stimulants                 | 1992           | 8                                                              |
| 25               | Solomon Islands | Sugar & Sweeteners         | 1992           | 76                                                             |
| 25               | Solomon Islands | Sugar (Raw Equivalent)     | 1992           | 73                                                             |
| 25               | Solomon Islands | Sweet potatoes             | 1992           | 478                                                            |
| 25               | Solomon Islands | Sweeteners, Other          | 1992           | 3                                                              |
| 25               | Solomon Islands | Treenuts                   | 1992           | 4                                                              |
| 25               | Solomon Islands | Vegetable Oils             | 1992           | 53                                                             |
| 25               | Solomon Islands | Vegetables                 | 1992           | 10                                                             |
| 25               | Solomon Islands | Vegetables, Other          | 1992           | 9                                                              |
| 25               | Solomon Islands | Vegetal Products           | 1992           | 1,966                                                          |
| 25               | Solomon Islands | Wheat and products         | 1992           | 119                                                            |
| 25               | Solomon Islands | Yams                       | 1992           | 169                                                            |
| 25               | Solomon Islands | Alcoholic Beverages        | 1993           | 5                                                              |
| 25               | Solomon Islands | Animal fats                | 1993           | 24                                                             |
| 25               | Solomon Islands | Animal Products            | 1993           | 214                                                            |
| 25               | Solomon Islands | Bananas                    | 1993           | 1                                                              |
| 25               | Solomon Islands | Beer                       | 1993           | 3                                                              |
| 25               | Solomon Islands | Beverages, Alcoholic       | 1993           | 1                                                              |
| 25               | Solomon Islands | Bovine Meat                | 1993           | 19                                                             |
| 25               | Solomon Islands | Butter, Ghee               | 1993           | 3                                                              |
| 25               | Solomon Islands | Cassava and products       | 1993           | 13                                                             |
| 25               | Solomon Islands | Cereals - Excluding Beer   | 1993           | 615                                                            |
| 25               | Solomon Islands | Cereals, Other             | 1993           | 2                                                              |
| 25               | Solomon Islands | Cocoa Beans and products   | 1993           | 6                                                              |
| 25               | Solomon Islands | Coconut Oil                | 1993           | 32                                                             |
| 25               | Solomon Islands | Coconuts - Incl Copra      | 1993           | 242                                                            |
| 25               | Solomon Islands | Eggs                       | 1993           | 4                                                              |
| 25               | Solomon Islands | Fats, Animals, Raw         | 1993           | 21                                                             |
| 25               | Solomon Islands | Fish, Seafood              | 1993           | 87                                                             |
| 25               | Solomon Islands | Fruits - Excluding Wine    | 1993           | 50                                                             |
| 25               | Solomon Islands | Fruits, Other              | 1993           | 49                                                             |
| 25               | Solomon Islands | Grand Total                | 1993           | 2,161                                                          |
| 25               | Solomon Islands | Marine Fish, Other         | 1993           | 30                                                             |
| 25               | Solomon Islands | Meat                       | 1993           | 81                                                             |
| 25               | Solomon Islands | Milk - Excluding Butter    | 1993           | 15                                                             |
| 25               | Solomon Islands | Offals                     | 1993           | 3                                                              |
| 25               | Solomon Islands | Oilcrops                   | 1993           | 242                                                            |
| 25               | Solomon Islands | Oilcrops Oil, Other        | 1993           | 4                                                              |
| 25               | Solomon Islands | Palm Oil                   | 1993           | 18                                                             |
| 25               | Solomon Islands | Pelagic Fish               | 1993           | 58                                                             |
| 25               | Solomon Islands | Pigmeat                    | 1993           | 61                                                             |
| 25               | Solomon Islands | Poultry Meat               | 1993           | 2                                                              |
| 25               | Solomon Islands | Pulses                     | 1993           | 65                                                             |
| 25               | Solomon Islands | Pulses, Other and products | 1993           | 65                                                             |
| 25               | Solomon Islands | Rice (Milled Equivalent)   | 1993           | 531                                                            |
| 25               | Solomon Islands | Roots, Other               | 1993           | 167                                                            |
| 25               | Solomon Islands | Spices                     | 1993           | 3                                                              |
| 25               | Solomon Islands | Spices, Other              | 1993           | 3                                                              |
| 25               | Solomon Islands | Starchy Roots              | 1993           | 809                                                            |
| 25               | Solomon Islands | Stimulants                 | 1993           | 6                                                              |
| 25               | Solomon Islands | Sugar & Sweeteners         | 1993           | 86                                                             |
| 25               | Solomon Islands | Sugar (Raw Equivalent)     | 1993           | 85                                                             |
| 25               | Solomon Islands | Sweet potatoes             | 1993           | 481                                                            |
| 25               | Solomon Islands | Sweeteners, Other          | 1993           | 1                                                              |
| 25               | Solomon Islands | Treenuts                   | 1993           | 4                                                              |
| 25               | Solomon Islands | Vegetable Oils             | 1993           | 54                                                             |
| 25               | Solomon Islands | Vegetables                 | 1993           | 10                                                             |
| 25               | Solomon Islands | Vegetables, Other          | 1993           | 9                                                              |
| 25               | Solomon Islands | Vegetal Products           | 1993           | 1,947                                                          |
| 25               | Solomon Islands | Wheat and products         | 1993           | 82                                                             |
| 25               | Solomon Islands | Yams                       | 1993           | 147                                                            |
| 25               | Solomon Islands | Alcoholic Beverages        | 1994           | 4                                                              |
| 25               | Solomon Islands | Animal fats                | 1994           | 23                                                             |
| 25               | Solomon Islands | Animal Products            | 1994           | 199                                                            |
| 25               | Solomon Islands | Bananas                    | 1994           | 1                                                              |
| 25               | Solomon Islands | Beer                       | 1994           | 3                                                              |
| 25               | Solomon Islands | Beverages, Alcoholic       | 1994           | 1                                                              |
| 25               | Solomon Islands | Bovine Meat                | 1994           | 18                                                             |
| 25               | Solomon Islands | Butter, Ghee               | 1994           | 3                                                              |
| 25               | Solomon Islands | Cassava and products       | 1994           | 14                                                             |
| 25               | Solomon Islands | Cereals - Excluding Beer   | 1994           | 691                                                            |
| 25               | Solomon Islands | Cereals, Other             | 1994           | 2                                                              |
| 25               | Solomon Islands | Cocoa Beans and products   | 1994           | 6                                                              |
| 25               | Solomon Islands | Coconut Oil                | 1994           | 35                                                             |
| 25               | Solomon Islands | Coconuts - Incl Copra      | 1994           | 244                                                            |
| 25               | Solomon Islands | Eggs                       | 1994           | 4                                                              |
| 25               | Solomon Islands | Fats, Animals, Raw         | 1994           | 20                                                             |
| 25               | Solomon Islands | Fish, Seafood              | 1994           | 74                                                             |
| 25               | Solomon Islands | Fruits - Excluding Wine    | 1994           | 48                                                             |
| 25               | Solomon Islands | Fruits, Other              | 1994           | 47                                                             |
| 25               | Solomon Islands | Grand Total                | 1994           | 2,288                                                          |
| 25               | Solomon Islands | Marine Fish, Other         | 1994           | 14                                                             |
| 25               | Solomon Islands | Meat                       | 1994           | 80                                                             |
| 25               | Solomon Islands | Milk - Excluding Butter    | 1994           | 17                                                             |

## Dietary calcium and zinc deficiency risks are decreasing but remain prevalent

| FAO Country code | Country         | Food item                  | Reference year | Net energy supply (kcal capita <sup>-1</sup> d <sup>-1</sup> ) |
|------------------|-----------------|----------------------------|----------------|----------------------------------------------------------------|
| 25               | Solomon Islands | Offals                     | 1994           | 2                                                              |
| 25               | Solomon Islands | Oilcrops                   | 1994           | 244                                                            |
| 25               | Solomon Islands | Oilcrops Oil, Other        | 1994           | 11                                                             |
| 25               | Solomon Islands | Onions                     | 1994           | 1                                                              |
| 25               | Solomon Islands | Palm Oil                   | 1994           | 21                                                             |
| 25               | Solomon Islands | Pelagic Fish               | 1994           | 59                                                             |
| 25               | Solomon Islands | Pigmeat                    | 1994           | 59                                                             |
| 25               | Solomon Islands | Potatoes and products      | 1994           | 1                                                              |
| 25               | Solomon Islands | Poultry Meat               | 1994           | 2                                                              |
| 25               | Solomon Islands | Pulses                     | 1994           | 68                                                             |
| 25               | Solomon Islands | Pulses, Other and products | 1994           | 68                                                             |
| 25               | Solomon Islands | Rice (Milled Equivalent)   | 1994           | 597                                                            |
| 25               | Solomon Islands | Roots, Other               | 1994           | 166                                                            |
| 25               | Solomon Islands | Spices                     | 1994           | 3                                                              |
| 25               | Solomon Islands | Spices, Other              | 1994           | 3                                                              |
| 25               | Solomon Islands | Starchy Roots              | 1994           | 852                                                            |
| 25               | Solomon Islands | Stimulants                 | 1994           | 6                                                              |
| 25               | Solomon Islands | Sugar & Sweeteners         | 1994           | 93                                                             |
| 25               | Solomon Islands | Sugar (Raw Equivalent)     | 1994           | 91                                                             |
| 25               | Solomon Islands | Sweet potatoes             | 1994           | 490                                                            |
| 25               | Solomon Islands | Sweeteners, Other          | 1994           | 1                                                              |
| 25               | Solomon Islands | Treenuts                   | 1994           | 4                                                              |
| 25               | Solomon Islands | Vegetable Oils             | 1994           | 66                                                             |
| 25               | Solomon Islands | Vegetables                 | 1994           | 10                                                             |
| 25               | Solomon Islands | Vegetables, Other          | 1994           | 9                                                              |
| 25               | Solomon Islands | Vegetal Products           | 1994           | 2,088                                                          |
| 25               | Solomon Islands | Wheat and products         | 1994           | 92                                                             |
| 25               | Solomon Islands | Yams                       | 1994           | 182                                                            |
| 25               | Solomon Islands | Alcoholic Beverages        | 1995           | 4                                                              |
| 25               | Solomon Islands | Animal fats                | 1995           | 22                                                             |
| 25               | Solomon Islands | Animal Products            | 1995           | 204                                                            |
| 25               | Solomon Islands | Bananas                    | 1995           | 1                                                              |
| 25               | Solomon Islands | Beer                       | 1995           | 2                                                              |
| 25               | Solomon Islands | Beverages, Alcoholic       | 1995           | 1                                                              |
| 25               | Solomon Islands | Bovine Meat                | 1995           | 18                                                             |
| 25               | Solomon Islands | Butter, Ghee               | 1995           | 3                                                              |
| 25               | Solomon Islands | Cassava and products       | 1995           | 14                                                             |
| 25               | Solomon Islands | Cereals - Excluding Beer   | 1995           | 739                                                            |
| 25               | Solomon Islands | Cereals, Other             | 1995           | 1                                                              |
| 25               | Solomon Islands | Cocoa Beans and products   | 1995           | 5                                                              |
| 25               | Solomon Islands | Coconut Oil                | 1995           | 144                                                            |
| 25               | Solomon Islands | Coconuts - Incl Copra      | 1995           | 246                                                            |
| 25               | Solomon Islands | Demersal Fish              | 1995           | 4                                                              |
| 25               | Solomon Islands | Eggs                       | 1995           | 4                                                              |
| 25               | Solomon Islands | Fats, Animals, Raw         | 1995           | 19                                                             |
| 25               | Solomon Islands | Fish, Seafood              | 1995           | 78                                                             |
| 25               | Solomon Islands | Fruits - Excluding Wine    | 1995           | 49                                                             |
| 25               | Solomon Islands | Fruits, Other              | 1995           | 47                                                             |
| 25               | Solomon Islands | Grand Total                | 1995           | 2,382                                                          |
| 25               | Solomon Islands | Marine Fish, Other         | 1995           | 7                                                              |
| 25               | Solomon Islands | Meat                       | 1995           | 79                                                             |
| 25               | Solomon Islands | Milk - Excluding Butter    | 1995           | 19                                                             |
| 25               | Solomon Islands | Offals                     | 1995           | 2                                                              |
| 25               | Solomon Islands | Oilcrops                   | 1995           | 246                                                            |
| 25               | Solomon Islands | Oilcrops Oil, Other        | 1995           | 4                                                              |
| 25               | Solomon Islands | Palm Oil                   | 1995           | 20                                                             |
| 25               | Solomon Islands | Pelagic Fish               | 1995           | 67                                                             |
| 25               | Solomon Islands | Pigmeat                    | 1995           | 59                                                             |
| 25               | Solomon Islands | Poultry Meat               | 1995           | 2                                                              |
| 25               | Solomon Islands | Pulses                     | 1995           | 71                                                             |
| 25               | Solomon Islands | Pulses, Other and products | 1995           | 71                                                             |
| 25               | Solomon Islands | Rice (Milled Equivalent)   | 1995           | 636                                                            |
| 25               | Solomon Islands | Roots, Other               | 1995           | 163                                                            |
| 25               | Solomon Islands | Spices                     | 1995           | 2                                                              |
| 25               | Solomon Islands | Spices, Other              | 1995           | 2                                                              |
| 25               | Solomon Islands | Starchy Roots              | 1995           | 818                                                            |
| 25               | Solomon Islands | Stimulants                 | 1995           | 5                                                              |
| 25               | Solomon Islands | Sugar & Sweeteners         | 1995           | 62                                                             |
| 25               | Solomon Islands | Sugar (Raw Equivalent)     | 1995           | 60                                                             |
| 25               | Solomon Islands | Sweet potatoes             | 1995           | 498                                                            |
| 25               | Solomon Islands | Sweeteners, Other          | 1995           | 1                                                              |
| 25               | Solomon Islands | Treenuts                   | 1995           | 4                                                              |
| 25               | Solomon Islands | Vegetable Oils             | 1995           | 168                                                            |
| 25               | Solomon Islands | Vegetables                 | 1995           | 10                                                             |
| 25               | Solomon Islands | Vegetables, Other          | 1995           | 9                                                              |
| 25               | Solomon Islands | Vegetal Products           | 1995           | 2,177                                                          |
| 25               | Solomon Islands | Wheat and products         | 1995           | 102                                                            |
| 25               | Solomon Islands | Yams                       | 1995           | 143                                                            |
| 25               | Solomon Islands | Alcoholic Beverages        | 1996           | 4                                                              |
| 25               | Solomon Islands | Animal fats                | 1996           | 22                                                             |
| 25               | Solomon Islands | Animal Products            | 1996           | 224                                                            |
| 25               | Solomon Islands | Bananas                    | 1996           | 1                                                              |
| 25               | Solomon Islands | Beer                       | 1996           | 3                                                              |
| 25               | Solomon Islands | Beverages, Alcoholic       | 1996           | 1                                                              |
| 25               | Solomon Islands | Bovine Meat                | 1996           | 24                                                             |
| 25               | Solomon Islands | Butter, Ghee               | 1996           | 3                                                              |
| 25               | Solomon Islands | Cassava and products       | 1996           | 14                                                             |
| 25               | Solomon Islands | Cereals - Excluding Beer   | 1996           | 738                                                            |
| 25               | Solomon Islands | Cereals, Other             | 1996           | 6                                                              |
| 25               | Solomon Islands | Cocoa Beans and products   | 1996           | 5                                                              |
| 25               | Solomon Islands | Coconut Oil                | 1996           | 30                                                             |
| 25               | Solomon Islands | Coconuts - Incl Copra      | 1996           | 239                                                            |
| 25               | Solomon Islands | Demersal Fish              | 1996           | 3                                                              |
| 25               | Solomon Islands | Eggs                       | 1996           | 4                                                              |
| 25               | Solomon Islands | Fats, Animals, Raw         | 1996           | 19                                                             |
| 25               | Solomon Islands | Fish, Seafood              | 1996           | 99                                                             |
| 25               | Solomon Islands | Fruits - Excluding Wine    | 1996           | 49                                                             |

Dietary calcium and zinc deficiency risks are decreasing but remain prevalent

| FAO Country code | Country         | Food item                  | Reference year | Net energy supply (kcal <i>capita</i> <sup>-1</sup> d <sup>-1</sup> ) |
|------------------|-----------------|----------------------------|----------------|-----------------------------------------------------------------------|
| 25               | Solomon Islands | Fruits, Other              | 1996           | 48                                                                    |
| 25               | Solomon Islands | Grand Total                | 1996           | 2,307                                                                 |
| 25               | Solomon Islands | Marine Fish, Other         | 1996           | 6                                                                     |
| 25               | Solomon Islands | Meat                       | 1996           | 83                                                                    |
| 25               | Solomon Islands | Milk - Excluding Butter    | 1996           | 13                                                                    |
| 25               | Solomon Islands | Offals                     | 1996           | 2                                                                     |
| 25               | Solomon Islands | Oilcrops                   | 1996           | 239                                                                   |
| 25               | Solomon Islands | Oilcrops Oil, Other        | 1996           | 5                                                                     |
| 25               | Solomon Islands | Palm Oil                   | 1996           | 20                                                                    |
| 25               | Solomon Islands | Pelagic Fish               | 1996           | 90                                                                    |
| 25               | Solomon Islands | Pigmeat                    | 1996           | 57                                                                    |
| 25               | Solomon Islands | Poultry Meat               | 1996           | 3                                                                     |
| 25               | Solomon Islands | Pulses                     | 1996           | 71                                                                    |
| 25               | Solomon Islands | Pulses, Other and products | 1996           | 71                                                                    |
| 25               | Solomon Islands | Rice (Milled Equivalent)   | 1996           | 634                                                                   |
| 25               | Solomon Islands | Roots, Other               | 1996           | 162                                                                   |
| 25               | Solomon Islands | Spices                     | 1996           | 2                                                                     |
| 25               | Solomon Islands | Spices, Other              | 1996           | 2                                                                     |
| 25               | Solomon Islands | Starchy Roots              | 1996           | 824                                                                   |
| 25               | Solomon Islands | Stimulants                 | 1996           | 5                                                                     |
| 25               | Solomon Islands | Sugar & Sweeteners         | 1996           | 83                                                                    |
| 25               | Solomon Islands | Sugar (Raw Equivalent)     | 1996           | 82                                                                    |
| 25               | Solomon Islands | Sweet potatoes             | 1996           | 499                                                                   |
| 25               | Solomon Islands | Sweeteners, Other          | 1996           | 1                                                                     |
| 25               | Solomon Islands | Treenuts                   | 1996           | 5                                                                     |
| 25               | Solomon Islands | Vegetable Oils             | 1996           | 54                                                                    |
| 25               | Solomon Islands | Vegetables                 | 1996           | 10                                                                    |
| 25               | Solomon Islands | Vegetables, Other          | 1996           | 9                                                                     |
| 25               | Solomon Islands | Vegetal Products           | 1996           | 2,083                                                                 |
| 25               | Solomon Islands | Wheat and products         | 1996           | 98                                                                    |
| 25               | Solomon Islands | Yams                       | 1996           | 149                                                                   |
| 25               | Solomon Islands | Alcoholic Beverages        | 1997           | 5                                                                     |
| 25               | Solomon Islands | Animal fats                | 1997           | 22                                                                    |
| 25               | Solomon Islands | Animal Products            | 1997           | 233                                                                   |
| 25               | Solomon Islands | Bananas                    | 1997           | 1                                                                     |
| 25               | Solomon Islands | Beer                       | 1997           | 5                                                                     |
| 25               | Solomon Islands | Bovine Meat                | 1997           | 18                                                                    |
| 25               | Solomon Islands | Butter, Ghee               | 1997           | 3                                                                     |
| 25               | Solomon Islands | Cassava and products       | 1997           | 15                                                                    |
| 25               | Solomon Islands | Cereals - Excluding Beer   | 1997           | 811                                                                   |
| 25               | Solomon Islands | Cereals, Other             | 1997           | 4                                                                     |
| 25               | Solomon Islands | Cocoa Beans and products   | 1997           | 6                                                                     |
| 25               | Solomon Islands | Coconut Oil                | 1997           | 35                                                                    |
| 25               | Solomon Islands | Coconuts - Incl Copra      | 1997           | 240                                                                   |
| 25               | Solomon Islands | Demersal Fish              | 1997           | 2                                                                     |
| 25               | Solomon Islands | Eggs                       | 1997           | 4                                                                     |
| 25               | Solomon Islands | Fats, Animals, Raw         | 1997           | 19                                                                    |
| 25               | Solomon Islands | Fish, Seafood              | 1997           | 111                                                                   |
| 25               | Solomon Islands | Fruits - Excluding Wine    | 1997           | 50                                                                    |
| 25               | Solomon Islands | Fruits, Other              | 1997           | 49                                                                    |
| 25               | Solomon Islands | Grand Total                | 1997           | 2,406                                                                 |
| 25               | Solomon Islands | Marine Fish, Other         | 1997           | 11                                                                    |
| 25               | Solomon Islands | Meat                       | 1997           | 78                                                                    |
| 25               | Solomon Islands | Milk - Excluding Butter    | 1997           | 15                                                                    |
| 25               | Solomon Islands | Offals                     | 1997           | 2                                                                     |
| 25               | Solomon Islands | Oilcrops                   | 1997           | 240                                                                   |
| 25               | Solomon Islands | Oilcrops Oil, Other        | 1997           | 4                                                                     |
| 25               | Solomon Islands | Palm Oil                   | 1997           | 19                                                                    |
| 25               | Solomon Islands | Pelagic Fish               | 1997           | 98                                                                    |
| 25               | Solomon Islands | Pigmeat                    | 1997           | 57                                                                    |
| 25               | Solomon Islands | Poultry Meat               | 1997           | 3                                                                     |
| 25               | Solomon Islands | Pulses                     | 1997           | 72                                                                    |
| 25               | Solomon Islands | Pulses, Other and products | 1997           | 72                                                                    |
| 25               | Solomon Islands | Rice (Milled Equivalent)   | 1997           | 643                                                                   |
| 25               | Solomon Islands | Roots, Other               | 1997           | 165                                                                   |
| 25               | Solomon Islands | Spices                     | 1997           | 3                                                                     |
| 25               | Solomon Islands | Spices, Other              | 1997           | 3                                                                     |
| 25               | Solomon Islands | Starchy Roots              | 1997           | 830                                                                   |
| 25               | Solomon Islands | Stimulants                 | 1997           | 7                                                                     |
| 25               | Solomon Islands | Sugar & Sweeteners         | 1997           | 82                                                                    |
| 25               | Solomon Islands | Sugar (Raw Equivalent)     | 1997           | 82                                                                    |
| 25               | Solomon Islands | Sweet potatoes             | 1997           | 499                                                                   |
| 25               | Solomon Islands | Sweeteners, Other          | 1997           | 1                                                                     |
| 25               | Solomon Islands | Treenuts                   | 1997           | 5                                                                     |
| 25               | Solomon Islands | Vegetable Oils             | 1997           | 58                                                                    |
| 25               | Solomon Islands | Vegetables                 | 1997           | 10                                                                    |
| 25               | Solomon Islands | Vegetables, Other          | 1997           | 9                                                                     |
| 25               | Solomon Islands | Vegetal Products           | 1997           | 2,173                                                                 |
| 25               | Solomon Islands | Wheat and products         | 1997           | 165                                                                   |
| 25               | Solomon Islands | Yams                       | 1997           | 151                                                                   |
| 25               | Solomon Islands | Alcoholic Beverages        | 1998           | 3                                                                     |
| 25               | Solomon Islands | Animal fats                | 1998           | 21                                                                    |
| 25               | Solomon Islands | Animal Products            | 1998           | 220                                                                   |
| 25               | Solomon Islands | Bananas                    | 1998           | 1                                                                     |
| 25               | Solomon Islands | Barley and products        | 1998           | 4                                                                     |
| 25               | Solomon Islands | Beer                       | 1998           | 2                                                                     |
| 25               | Solomon Islands | Bovine Meat                | 1998           | 10                                                                    |
| 25               | Solomon Islands | Butter, Ghee               | 1998           | 3                                                                     |
| 25               | Solomon Islands | Cassava and products       | 1998           | 14                                                                    |
| 25               | Solomon Islands | Cereals - Excluding Beer   | 1998           | 800                                                                   |
| 25               | Solomon Islands | Cereals, Other             | 1998           | 4                                                                     |
| 25               | Solomon Islands | Cocoa Beans and products   | 1998           | 6                                                                     |
| 25               | Solomon Islands | Coconut Oil                | 1998           | 34                                                                    |
| 25               | Solomon Islands | Coconuts - Incl Copra      | 1998           | 250                                                                   |
| 25               | Solomon Islands | Demersal Fish              | 1998           | 1                                                                     |
| 25               | Solomon Islands | Eggs                       | 1998           | 4                                                                     |
| 25               | Solomon Islands | Fats, Animals, Raw         | 1998           | 18                                                                    |

Dietary calcium and zinc deficiency risks are decreasing but remain prevalent

| FAO Country code | Country         | Food item                  | Reference year | Net energy supply (kcal <i>capita</i> <sup>-1</sup> d <sup>-1</sup> ) |
|------------------|-----------------|----------------------------|----------------|-----------------------------------------------------------------------|
| 25               | Solomon Islands | Fish, Seafood              | 1998           | 108                                                                   |
| 25               | Solomon Islands | Fruits - Excluding Wine    | 1998           | 49                                                                    |
| 25               | Solomon Islands | Fruits, Other              | 1998           | 48                                                                    |
| 25               | Solomon Islands | Grand Total                | 1998           | 2,388                                                                 |
| 25               | Solomon Islands | Marine Fish, Other         | 1998           | 20                                                                    |
| 25               | Solomon Islands | Meat                       | 1998           | 67                                                                    |
| 25               | Solomon Islands | Milk - Excluding Butter    | 1998           | 17                                                                    |
| 25               | Solomon Islands | Offals                     | 1998           | 2                                                                     |
| 25               | Solomon Islands | Oilcrops                   | 1998           | 250                                                                   |
| 25               | Solomon Islands | Oilcrops Oil, Other        | 1998           | 4                                                                     |
| 25               | Solomon Islands | Onions                     | 1998           | 1                                                                     |
| 25               | Solomon Islands | Palm Oil                   | 1998           | 22                                                                    |
| 25               | Solomon Islands | Pelagic Fish               | 1998           | 86                                                                    |
| 25               | Solomon Islands | Pigmeat                    | 1998           | 55                                                                    |
| 25               | Solomon Islands | Poultry Meat               | 1998           | 2                                                                     |
| 25               | Solomon Islands | Pulses                     | 1998           | 72                                                                    |
| 25               | Solomon Islands | Pulses, Other and products | 1998           | 72                                                                    |
| 25               | Solomon Islands | Rice (Milled Equivalent)   | 1998           | 624                                                                   |
| 25               | Solomon Islands | Roots, Other               | 1998           | 166                                                                   |
| 25               | Solomon Islands | Spices                     | 1998           | 4                                                                     |
| 25               | Solomon Islands | Spices, Other              | 1998           | 4                                                                     |
| 25               | Solomon Islands | Starchy Roots              | 1998           | 827                                                                   |
| 25               | Solomon Islands | Stimulants                 | 1998           | 6                                                                     |
| 25               | Solomon Islands | Sugar & Sweeteners         | 1998           | 80                                                                    |
| 25               | Solomon Islands | Sugar (Raw Equivalent)     | 1998           | 80                                                                    |
| 25               | Solomon Islands | Sweet potatoes             | 1998           | 493                                                                   |
| 25               | Solomon Islands | Treenuts                   | 1998           | 6                                                                     |
| 25               | Solomon Islands | Vegetable Oils             | 1998           | 60                                                                    |
| 25               | Solomon Islands | Vegetables                 | 1998           | 10                                                                    |
| 25               | Solomon Islands | Vegetables, Other          | 1998           | 10                                                                    |
| 25               | Solomon Islands | Vegetal Products           | 1998           | 2,168                                                                 |
| 25               | Solomon Islands | Wheat and products         | 1998           | 169                                                                   |
| 25               | Solomon Islands | Yams                       | 1998           | 154                                                                   |
| 25               | Solomon Islands | Alcoholic Beverages        | 1999           | 3                                                                     |
| 25               | Solomon Islands | Animal fats                | 1999           | 20                                                                    |
| 25               | Solomon Islands | Animal Products            | 1999           | 195                                                                   |
| 25               | Solomon Islands | Bananas                    | 1999           | 1                                                                     |
| 25               | Solomon Islands | Barley and products        | 1999           | 2                                                                     |
| 25               | Solomon Islands | Beer                       | 1999           | 2                                                                     |
| 25               | Solomon Islands | Bovine Meat                | 1999           | 9                                                                     |
| 25               | Solomon Islands | Butter, Ghee               | 1999           | 3                                                                     |
| 25               | Solomon Islands | Cassava and products       | 1999           | 15                                                                    |
| 25               | Solomon Islands | Cereals - Excluding Beer   | 1999           | 794                                                                   |
| 25               | Solomon Islands | Cereals, Other             | 1999           | 4                                                                     |
| 25               | Solomon Islands | Cocoa Beans and products   | 1999           | 4                                                                     |
| 25               | Solomon Islands | Coconut Oil                | 1999           | 35                                                                    |
| 25               | Solomon Islands | Coconuts - Incl Copra      | 1999           | 228                                                                   |
| 25               | Solomon Islands | Demersal Fish              | 1999           | 1                                                                     |
| 25               | Solomon Islands | Eggs                       | 1999           | 4                                                                     |
| 25               | Solomon Islands | Fats, Animals, Raw         | 1999           | 17                                                                    |
| 25               | Solomon Islands | Fish, Seafood              | 1999           | 90                                                                    |
| 25               | Solomon Islands | Fruits - Excluding Wine    | 1999           | 38                                                                    |
| 25               | Solomon Islands | Fruits, Other              | 1999           | 37                                                                    |
| 25               | Solomon Islands | Grand Total                | 1999           | 2,311                                                                 |
| 25               | Solomon Islands | Marine Fish, Other         | 1999           | 7                                                                     |
| 25               | Solomon Islands | Meat                       | 1999           | 64                                                                    |
| 25               | Solomon Islands | Milk - Excluding Butter    | 1999           | 14                                                                    |
| 25               | Solomon Islands | Offals                     | 1999           | 2                                                                     |
| 25               | Solomon Islands | Oilcrops                   | 1999           | 228                                                                   |
| 25               | Solomon Islands | Oilcrops Oil, Other        | 1999           | 6                                                                     |
| 25               | Solomon Islands | Onions                     | 1999           | 2                                                                     |
| 25               | Solomon Islands | Palm Oil                   | 1999           | 24                                                                    |
| 25               | Solomon Islands | Pelagic Fish               | 1999           | 82                                                                    |
| 25               | Solomon Islands | Pigmeat                    | 1999           | 52                                                                    |
| 25               | Solomon Islands | Poultry Meat               | 1999           | 3                                                                     |
| 25               | Solomon Islands | Pulses                     | 1999           | 74                                                                    |
| 25               | Solomon Islands | Pulses, Other and products | 1999           | 74                                                                    |
| 25               | Solomon Islands | Rice (Milled Equivalent)   | 1999           | 629                                                                   |
| 25               | Solomon Islands | Roots, Other               | 1999           | 157                                                                   |
| 25               | Solomon Islands | Spices                     | 1999           | 4                                                                     |
| 25               | Solomon Islands | Spices, Other              | 1999           | 4                                                                     |
| 25               | Solomon Islands | Starchy Roots              | 1999           | 810                                                                   |
| 25               | Solomon Islands | Stimulants                 | 1999           | 4                                                                     |
| 25               | Solomon Islands | Sugar & Sweeteners         | 1999           | 83                                                                    |
| 25               | Solomon Islands | Sugar (Raw Equivalent)     | 1999           | 82                                                                    |
| 25               | Solomon Islands | Sweet potatoes             | 1999           | 486                                                                   |
| 25               | Solomon Islands | Sweeteners, Other          | 1999           | 1                                                                     |
| 25               | Solomon Islands | Treenuts                   | 1999           | 4                                                                     |
| 25               | Solomon Islands | Vegetable Oils             | 1999           | 64                                                                    |
| 25               | Solomon Islands | Vegetables                 | 1999           | 11                                                                    |
| 25               | Solomon Islands | Vegetables, Other          | 1999           | 10                                                                    |
| 25               | Solomon Islands | Vegetal Products           | 1999           | 2,117                                                                 |
| 25               | Solomon Islands | Wheat and products         | 1999           | 159                                                                   |
| 25               | Solomon Islands | Yams                       | 1999           | 153                                                                   |
| 25               | Solomon Islands | Alcoholic Beverages        | 2000           | 4                                                                     |
| 25               | Solomon Islands | Animal fats                | 2000           | 19                                                                    |
| 25               | Solomon Islands | Animal Products            | 2000           | 175                                                                   |
| 25               | Solomon Islands | Bananas                    | 2000           | 1                                                                     |
| 25               | Solomon Islands | Barley and products        | 2000           | 2                                                                     |
| 25               | Solomon Islands | Beer                       | 2000           | 3                                                                     |
| 25               | Solomon Islands | Beverages, Alcoholic       | 2000           | 1                                                                     |
| 25               | Solomon Islands | Bovine Meat                | 2000           | 9                                                                     |
| 25               | Solomon Islands | Butter, Ghee               | 2000           | 2                                                                     |
| 25               | Solomon Islands | Cassava and products       | 2000           | 16                                                                    |
| 25               | Solomon Islands | Cereals - Excluding Beer   | 2000           | 828                                                                   |
| 25               | Solomon Islands | Cereals, Other             | 2000           | 3                                                                     |
| 25               | Solomon Islands | Cocoa Beans and products   | 2000           | 3                                                                     |

Dietary calcium and zinc deficiency risks are decreasing but remain prevalent

| FAO Country code | Country         | Food item                  | Reference year | Net energy supply (kcal <i>capita</i> <sup>-1</sup> d <sup>-1</sup> ) |
|------------------|-----------------|----------------------------|----------------|-----------------------------------------------------------------------|
| 25               | Solomon Islands | Coconut Oil                | 2000           | 27                                                                    |
| 25               | Solomon Islands | Coconuts - Incl Copra      | 2000           | 229                                                                   |
| 25               | Solomon Islands | Eggs                       | 2000           | 4                                                                     |
| 25               | Solomon Islands | Fats, Animals, Raw         | 2000           | 17                                                                    |
| 25               | Solomon Islands | Fish, Seafood              | 2000           | 73                                                                    |
| 25               | Solomon Islands | Fruits - Excluding Wine    | 2000           | 49                                                                    |
| 25               | Solomon Islands | Fruits, Other              | 2000           | 48                                                                    |
| 25               | Solomon Islands | Grand Total                | 2000           | 2,353                                                                 |
| 25               | Solomon Islands | Marine Fish, Other         | 2000           | 18                                                                    |
| 25               | Solomon Islands | Meat                       | 2000           | 63                                                                    |
| 25               | Solomon Islands | Milk - Excluding Butter    | 2000           | 14                                                                    |
| 25               | Solomon Islands | Offals                     | 2000           | 2                                                                     |
| 25               | Solomon Islands | Oilcrops                   | 2000           | 229                                                                   |
| 25               | Solomon Islands | Oilcrops Oil, Other        | 2000           | 6                                                                     |
| 25               | Solomon Islands | Onions                     | 2000           | 1                                                                     |
| 25               | Solomon Islands | Palm Oil                   | 2000           | 35                                                                    |
| 25               | Solomon Islands | Pelagic Fish               | 2000           | 55                                                                    |
| 25               | Solomon Islands | Pigmeat                    | 2000           | 51                                                                    |
| 25               | Solomon Islands | Poultry Meat               | 2000           | 3                                                                     |
| 25               | Solomon Islands | Pulses                     | 2000           | 84                                                                    |
| 25               | Solomon Islands | Pulses, Other and products | 2000           | 84                                                                    |
| 25               | Solomon Islands | Rice (Milled Equivalent)   | 2000           | 658                                                                   |
| 25               | Solomon Islands | Roots, Other               | 2000           | 173                                                                   |
| 25               | Solomon Islands | Spices                     | 2000           | 4                                                                     |
| 25               | Solomon Islands | Spices, Other              | 2000           | 4                                                                     |
| 25               | Solomon Islands | Starchy Roots              | 2000           | 831                                                                   |
| 25               | Solomon Islands | Stimulants                 | 2000           | 4                                                                     |
| 25               | Solomon Islands | Sugar & Sweeteners         | 2000           | 63                                                                    |
| 25               | Solomon Islands | Sugar (Raw Equivalent)     | 2000           | 63                                                                    |
| 25               | Solomon Islands | Sweet potatoes             | 2000           | 485                                                                   |
| 25               | Solomon Islands | Sweeteners, Other          | 2000           | 1                                                                     |
| 25               | Solomon Islands | Treenuts                   | 2000           | 4                                                                     |
| 25               | Solomon Islands | Vegetable Oils             | 2000           | 68                                                                    |
| 25               | Solomon Islands | Vegetables                 | 2000           | 10                                                                    |
| 25               | Solomon Islands | Vegetables, Other          | 2000           | 9                                                                     |
| 25               | Solomon Islands | Vegetal Products           | 2000           | 2,178                                                                 |
| 25               | Solomon Islands | Wheat and products         | 2000           | 164                                                                   |
| 25               | Solomon Islands | Yams                       | 2000           | 158                                                                   |
| 25               | Solomon Islands | Alcoholic Beverages        | 2001           | 5                                                                     |
| 25               | Solomon Islands | Animal fats                | 2001           | 19                                                                    |
| 25               | Solomon Islands | Animal Products            | 2001           | 167                                                                   |
| 25               | Solomon Islands | Bananas                    | 2001           | 1                                                                     |
| 25               | Solomon Islands | Beer                       | 2001           | 4                                                                     |
| 25               | Solomon Islands | Bovine Meat                | 2001           | 8                                                                     |
| 25               | Solomon Islands | Butter, Ghee               | 2001           | 2                                                                     |
| 25               | Solomon Islands | Cassava and products       | 2001           | 16                                                                    |
| 25               | Solomon Islands | Cereals - Excluding Beer   | 2001           | 773                                                                   |
| 25               | Solomon Islands | Cereals, Other             | 2001           | 3                                                                     |
| 25               | Solomon Islands | Cocoa Beans and products   | 2001           | 3                                                                     |
| 25               | Solomon Islands | Coconut Oil                | 2001           | 34                                                                    |
| 25               | Solomon Islands | Coconuts - Incl Copra      | 2001           | 230                                                                   |
| 25               | Solomon Islands | Eggs                       | 2001           | 4                                                                     |
| 25               | Solomon Islands | Fats, Animals, Raw         | 2001           | 17                                                                    |
| 25               | Solomon Islands | Fish, Seafood              | 2001           | 68                                                                    |
| 25               | Solomon Islands | Fruits - Excluding Wine    | 2001           | 51                                                                    |
| 25               | Solomon Islands | Fruits, Other              | 2001           | 50                                                                    |
| 25               | Solomon Islands | Grand Total                | 2001           | 2,315                                                                 |
| 25               | Solomon Islands | Marine Fish, Other         | 2001           | 39                                                                    |
| 25               | Solomon Islands | Meat                       | 2001           | 64                                                                    |
| 25               | Solomon Islands | Milk - Excluding Butter    | 2001           | 10                                                                    |
| 25               | Solomon Islands | Miscellaneous              | 2001           | 3                                                                     |
| 25               | Solomon Islands | Offals                     | 2001           | 2                                                                     |
| 25               | Solomon Islands | Oilcrops                   | 2001           | 230                                                                   |
| 25               | Solomon Islands | Oilcrops Oil, Other        | 2001           | 5                                                                     |
| 25               | Solomon Islands | Palm Oil                   | 2001           | 37                                                                    |
| 25               | Solomon Islands | Pelagic Fish               | 2001           | 29                                                                    |
| 25               | Solomon Islands | Pigmeat                    | 2001           | 53                                                                    |
| 25               | Solomon Islands | Poultry Meat               | 2001           | 2                                                                     |
| 25               | Solomon Islands | Pulses                     | 2001           | 76                                                                    |
| 25               | Solomon Islands | Pulses, Other and products | 2001           | 76                                                                    |
| 25               | Solomon Islands | Rice (Milled Equivalent)   | 2001           | 617                                                                   |
| 25               | Solomon Islands | Roots, Other               | 2001           | 178                                                                   |
| 25               | Solomon Islands | Spices                     | 2001           | 4                                                                     |
| 25               | Solomon Islands | Spices, Other              | 2001           | 4                                                                     |
| 25               | Solomon Islands | Starchy Roots              | 2001           | 849                                                                   |
| 25               | Solomon Islands | Stimulants                 | 2001           | 3                                                                     |
| 25               | Solomon Islands | Sugar & Sweeteners         | 2001           | 64                                                                    |
| 25               | Solomon Islands | Sugar (Raw Equivalent)     | 2001           | 64                                                                    |
| 25               | Solomon Islands | Sweet potatoes             | 2001           | 496                                                                   |
| 25               | Solomon Islands | Treenuts                   | 2001           | 4                                                                     |
| 25               | Solomon Islands | Vegetable Oils             | 2001           | 77                                                                    |
| 25               | Solomon Islands | Vegetables                 | 2001           | 10                                                                    |
| 25               | Solomon Islands | Vegetables, Other          | 2001           | 10                                                                    |
| 25               | Solomon Islands | Vegetal Products           | 2001           | 2,148                                                                 |
| 25               | Solomon Islands | Wheat and products         | 2001           | 151                                                                   |
| 25               | Solomon Islands | Yams                       | 2001           | 159                                                                   |
| 25               | Solomon Islands | Alcoholic Beverages        | 2002           | 10                                                                    |
| 25               | Solomon Islands | Animal fats                | 2002           | 19                                                                    |
| 25               | Solomon Islands | Animal Products            | 2002           | 183                                                                   |
| 25               | Solomon Islands | Bananas                    | 2002           | 1                                                                     |
| 25               | Solomon Islands | Beer                       | 2002           | 8                                                                     |
| 25               | Solomon Islands | Beverages, Alcoholic       | 2002           | 2                                                                     |
| 25               | Solomon Islands | Bovine Meat                | 2002           | 17                                                                    |
| 25               | Solomon Islands | Butter, Ghee               | 2002           | 1                                                                     |
| 25               | Solomon Islands | Cassava and products       | 2002           | 16                                                                    |
| 25               | Solomon Islands | Cereals - Excluding Beer   | 2002           | 792                                                                   |
| 25               | Solomon Islands | Cocoa Beans and products   | 2002           | 4                                                                     |

Dietary calcium and zinc deficiency risks are decreasing but remain prevalent

| FAO Country code | Country         | Food item                  | Reference year | Net energy supply (kcal capita <sup>-1</sup> d <sup>-1</sup> ) |
|------------------|-----------------|----------------------------|----------------|----------------------------------------------------------------|
| 25               | Solomon Islands | Coconut Oil                | 2002           | 31                                                             |
| 25               | Solomon Islands | Coconuts - Incl Copra      | 2002           | 231                                                            |
| 25               | Solomon Islands | Eggs                       | 2002           | 5                                                              |
| 25               | Solomon Islands | Fats, Animals, Raw         | 2002           | 17                                                             |
| 25               | Solomon Islands | Fish, Seafood              | 2002           | 72                                                             |
| 25               | Solomon Islands | Fruits - Excluding Wine    | 2002           | 53                                                             |
| 25               | Solomon Islands | Fruits, Other              | 2002           | 52                                                             |
| 25               | Solomon Islands | Grand Total                | 2002           | 2,392                                                          |
| 25               | Solomon Islands | Maize and products         | 2002           | 3                                                              |
| 25               | Solomon Islands | Marine Fish, Other         | 2002           | 36                                                             |
| 25               | Solomon Islands | Meat                       | 2002           | 72                                                             |
| 25               | Solomon Islands | Milk - Excluding Butter    | 2002           | 11                                                             |
| 25               | Solomon Islands | Miscellaneous              | 2002           | 4                                                              |
| 25               | Solomon Islands | Mutton & Goat Meat         | 2002           | 1                                                              |
| 25               | Solomon Islands | Offals                     | 2002           | 3                                                              |
| 25               | Solomon Islands | Oilcrops                   | 2002           | 231                                                            |
| 25               | Solomon Islands | Oilcrops Oil, Other        | 2002           | 25                                                             |
| 25               | Solomon Islands | Onions                     | 2002           | 1                                                              |
| 25               | Solomon Islands | Palm Oil                   | 2002           | 33                                                             |
| 25               | Solomon Islands | Pelagic Fish               | 2002           | 36                                                             |
| 25               | Solomon Islands | Pigmeat                    | 2002           | 52                                                             |
| 25               | Solomon Islands | Potatoes and products      | 2002           | 1                                                              |
| 25               | Solomon Islands | Poultry Meat               | 2002           | 3                                                              |
| 25               | Solomon Islands | Pulses                     | 2002           | 75                                                             |
| 25               | Solomon Islands | Pulses, Other and products | 2002           | 75                                                             |
| 25               | Solomon Islands | Rice (Milled Equivalent)   | 2002           | 606                                                            |
| 25               | Solomon Islands | Roots, Other               | 2002           | 183                                                            |
| 25               | Solomon Islands | Soyabean Oil               | 2002           | 1                                                              |
| 25               | Solomon Islands | Spices                     | 2002           | 5                                                              |
| 25               | Solomon Islands | Spices, Other              | 2002           | 5                                                              |
| 25               | Solomon Islands | Starchy Roots              | 2002           | 859                                                            |
| 25               | Solomon Islands | Stimulants                 | 2002           | 5                                                              |
| 25               | Solomon Islands | Sugar & Sweeteners         | 2002           | 70                                                             |
| 25               | Solomon Islands | Sugar (Raw Equivalent)     | 2002           | 68                                                             |
| 25               | Solomon Islands | Sweet potatoes             | 2002           | 496                                                            |
| 25               | Solomon Islands | Sweeteners, Other          | 2002           | 2                                                              |
| 25               | Solomon Islands | Treenuts                   | 2002           | 4                                                              |
| 25               | Solomon Islands | Vegetable Oils             | 2002           | 91                                                             |
| 25               | Solomon Islands | Vegetables                 | 2002           | 11                                                             |
| 25               | Solomon Islands | Vegetables, Other          | 2002           | 10                                                             |
| 25               | Solomon Islands | Vegetal Products           | 2002           | 2,209                                                          |
| 25               | Solomon Islands | Wheat and products         | 2002           | 183                                                            |
| 25               | Solomon Islands | Yams                       | 2002           | 164                                                            |
| 25               | Solomon Islands | Alcoholic Beverages        | 2003           | 8                                                              |
| 25               | Solomon Islands | Animal fats                | 2003           | 19                                                             |
| 25               | Solomon Islands | Animal Products            | 2003           | 172                                                            |
| 25               | Solomon Islands | Aquatic Animals, Others    | 2003           | 1                                                              |
| 25               | Solomon Islands | Aquatic Products, Other    | 2003           | 1                                                              |
| 25               | Solomon Islands | Bananas                    | 2003           | 1                                                              |
| 25               | Solomon Islands | Beer                       | 2003           | 8                                                              |
| 25               | Solomon Islands | Bovine Meat                | 2003           | 14                                                             |
| 25               | Solomon Islands | Butter, Ghee               | 2003           | 1                                                              |
| 25               | Solomon Islands | Cassava and products       | 2003           | 15                                                             |
| 25               | Solomon Islands | Cereals - Excluding Beer   | 2003           | 788                                                            |
| 25               | Solomon Islands | Cocoa Beans and products   | 2003           | 6                                                              |
| 25               | Solomon Islands | Coconut Oil                | 2003           | 31                                                             |
| 25               | Solomon Islands | Coconuts - Incl Copra      | 2003           | 232                                                            |
| 25               | Solomon Islands | Eggs                       | 2003           | 4                                                              |
| 25               | Solomon Islands | Fats, Animals, Raw         | 2003           | 18                                                             |
| 25               | Solomon Islands | Fish, Seafood              | 2003           | 69                                                             |
| 25               | Solomon Islands | Fruits - Excluding Wine    | 2003           | 54                                                             |
| 25               | Solomon Islands | Fruits, Other              | 2003           | 53                                                             |
| 25               | Solomon Islands | Grand Total                | 2003           | 2,409                                                          |
| 25               | Solomon Islands | Maize and products         | 2003           | 1                                                              |
| 25               | Solomon Islands | Marine Fish, Other         | 2003           | 39                                                             |
| 25               | Solomon Islands | Meat                       | 2003           | 68                                                             |
| 25               | Solomon Islands | Milk - Excluding Butter    | 2003           | 8                                                              |
| 25               | Solomon Islands | Miscellaneous              | 2003           | 1                                                              |
| 25               | Solomon Islands | Offals                     | 2003           | 3                                                              |
| 25               | Solomon Islands | Oilcrops                   | 2003           | 232                                                            |
| 25               | Solomon Islands | Oilcrops Oil, Other        | 2003           | 15                                                             |
| 25               | Solomon Islands | Palm Oil                   | 2003           | 43                                                             |
| 25               | Solomon Islands | Pelagic Fish               | 2003           | 30                                                             |
| 25               | Solomon Islands | Pigmeat                    | 2003           | 51                                                             |
| 25               | Solomon Islands | Poultry Meat               | 2003           | 3                                                              |
| 25               | Solomon Islands | Pulses                     | 2003           | 75                                                             |
| 25               | Solomon Islands | Pulses, Other and products | 2003           | 74                                                             |
| 25               | Solomon Islands | Rice (Milled Equivalent)   | 2003           | 610                                                            |
| 25               | Solomon Islands | Roots, Other               | 2003           | 188                                                            |
| 25               | Solomon Islands | Spices                     | 2003           | 5                                                              |
| 25               | Solomon Islands | Spices, Other              | 2003           | 5                                                              |
| 25               | Solomon Islands | Starchy Roots              | 2003           | 881                                                            |
| 25               | Solomon Islands | Stimulants                 | 2003           | 6                                                              |
| 25               | Solomon Islands | Sugar & Sweeteners         | 2003           | 80                                                             |
| 25               | Solomon Islands | Sugar (Raw Equivalent)     | 2003           | 79                                                             |
| 25               | Solomon Islands | Sweet potatoes             | 2003           | 507                                                            |
| 25               | Solomon Islands | Sweeteners, Other          | 2003           | 2                                                              |
| 25               | Solomon Islands | Treenuts                   | 2003           | 4                                                              |
| 25               | Solomon Islands | Vegetable Oils             | 2003           | 90                                                             |
| 25               | Solomon Islands | Vegetables                 | 2003           | 11                                                             |
| 25               | Solomon Islands | Vegetables, Other          | 2003           | 10                                                             |
| 25               | Solomon Islands | Vegetal Products           | 2003           | 2,236                                                          |
| 25               | Solomon Islands | Wheat and products         | 2003           | 177                                                            |
| 25               | Solomon Islands | Yams                       | 2003           | 171                                                            |
| 25               | Solomon Islands | Alcoholic Beverages        | 2004           | 11                                                             |
| 25               | Solomon Islands | Animal fats                | 2004           | 18                                                             |
| 25               | Solomon Islands | Animal Products            | 2004           | 178                                                            |

Dietary calcium and zinc deficiency risks are decreasing but remain prevalent

| FAO Country code | Country         | Food item                  | Reference year | Net energy supply (kcal capita <sup>-1</sup> d <sup>-1</sup> ) |
|------------------|-----------------|----------------------------|----------------|----------------------------------------------------------------|
| 25               | Solomon Islands | Bananas                    | 2004           | 1                                                              |
| 25               | Solomon Islands | Beer                       | 2004           | 7                                                              |
| 25               | Solomon Islands | Beverages, Alcoholic       | 2004           | 3                                                              |
| 25               | Solomon Islands | Bovine Meat                | 2004           | 15                                                             |
| 25               | Solomon Islands | Butter, Ghee               | 2004           | 1                                                              |
| 25               | Solomon Islands | Cassava and products       | 2004           | 15                                                             |
| 25               | Solomon Islands | Cereals - Excluding Beer   | 2004           | 780                                                            |
| 25               | Solomon Islands | Cocoa Beans and products   | 2004           | 5                                                              |
| 25               | Solomon Islands | Coconut Oil                | 2004           | 16                                                             |
| 25               | Solomon Islands | Coconuts - Incl Copra      | 2004           | 226                                                            |
| 25               | Solomon Islands | Eggs                       | 2004           | 4                                                              |
| 25               | Solomon Islands | Fats, Animals, Raw         | 2004           | 17                                                             |
| 25               | Solomon Islands | Fish, Seafood              | 2004           | 72                                                             |
| 25               | Solomon Islands | Fruits - Excluding Wine    | 2004           | 54                                                             |
| 25               | Solomon Islands | Fruits, Other              | 2004           | 53                                                             |
| 25               | Solomon Islands | Grand Total                | 2004           | 2,402                                                          |
| 25               | Solomon Islands | Maize and products         | 2004           | 1                                                              |
| 25               | Solomon Islands | Marine Fish, Other         | 2004           | 39                                                             |
| 25               | Solomon Islands | Meat                       | 2004           | 70                                                             |
| 25               | Solomon Islands | Milk - Excluding Butter    | 2004           | 11                                                             |
| 25               | Solomon Islands | Miscellaneous              | 2004           | 2                                                              |
| 25               | Solomon Islands | Mutton & Goat Meat         | 2004           | 1                                                              |
| 25               | Solomon Islands | Offals                     | 2004           | 4                                                              |
| 25               | Solomon Islands | Oilcrops                   | 2004           | 227                                                            |
| 25               | Solomon Islands | Oilcrops Oil, Other        | 2004           | 15                                                             |
| 25               | Solomon Islands | Olive Oil                  | 2004           | 1                                                              |
| 25               | Solomon Islands | Palm Oil                   | 2004           | 53                                                             |
| 25               | Solomon Islands | Peas                       | 2004           | 1                                                              |
| 25               | Solomon Islands | Pelagic Fish               | 2004           | 33                                                             |
| 25               | Solomon Islands | Pigmeat                    | 2004           | 51                                                             |
| 25               | Solomon Islands | Poultry Meat               | 2004           | 3                                                              |
| 25               | Solomon Islands | Pulses                     | 2004           | 77                                                             |
| 25               | Solomon Islands | Pulses, Other and products | 2004           | 76                                                             |
| 25               | Solomon Islands | Rice (Milled Equivalent)   | 2004           | 587                                                            |
| 25               | Solomon Islands | Roots, Other               | 2004           | 194                                                            |
| 25               | Solomon Islands | Spices                     | 2004           | 5                                                              |
| 25               | Solomon Islands | Spices, Other              | 2004           | 5                                                              |
| 25               | Solomon Islands | Starchy Roots              | 2004           | 878                                                            |
| 25               | Solomon Islands | Stimulants                 | 2004           | 6                                                              |
| 25               | Solomon Islands | Sugar & Sweeteners         | 2004           | 83                                                             |
| 25               | Solomon Islands | Sugar (Raw Equivalent)     | 2004           | 82                                                             |
| 25               | Solomon Islands | Sweet potatoes             | 2004           | 500                                                            |
| 25               | Solomon Islands | Sweeteners, Other          | 2004           | 2                                                              |
| 25               | Solomon Islands | Treenuts                   | 2004           | 4                                                              |
| 25               | Solomon Islands | Vegetable Oils             | 2004           | 85                                                             |
| 25               | Solomon Islands | Vegetables                 | 2004           | 11                                                             |
| 25               | Solomon Islands | Vegetables, Other          | 2004           | 11                                                             |
| 25               | Solomon Islands | Vegetal Products           | 2004           | 2,224                                                          |
| 25               | Solomon Islands | Wheat and products         | 2004           | 192                                                            |
| 25               | Solomon Islands | Yams                       | 2004           | 169                                                            |
| 25               | Solomon Islands | Alcoholic Beverages        | 2005           | 15                                                             |
| 25               | Solomon Islands | Animal fats                | 2005           | 19                                                             |
| 25               | Solomon Islands | Animal Products            | 2005           | 180                                                            |
| 25               | Solomon Islands | Bananas                    | 2005           | 1                                                              |
| 25               | Solomon Islands | Beer                       | 2005           | 12                                                             |
| 25               | Solomon Islands | Beverages, Alcoholic       | 2005           | 3                                                              |
| 25               | Solomon Islands | Bovine Meat                | 2005           | 17                                                             |
| 25               | Solomon Islands | Butter, Ghee               | 2005           | 1                                                              |
| 25               | Solomon Islands | Cassava and products       | 2005           | 15                                                             |
| 25               | Solomon Islands | Cereals - Excluding Beer   | 2005           | 785                                                            |
| 25               | Solomon Islands | Cocoa Beans and products   | 2005           | 7                                                              |
| 25               | Solomon Islands | Coconut Oil                | 2005           | 24                                                             |
| 25               | Solomon Islands | Coconuts - Incl Copra      | 2005           | 227                                                            |
| 25               | Solomon Islands | Coffee and products        | 2005           | 1                                                              |
| 25               | Solomon Islands | Cream                      | 2005           | 1                                                              |
| 25               | Solomon Islands | Eggs                       | 2005           | 4                                                              |
| 25               | Solomon Islands | Fats, Animals, Raw         | 2005           | 17                                                             |
| 25               | Solomon Islands | Fish, Seafood              | 2005           | 70                                                             |
| 25               | Solomon Islands | Fruits - Excluding Wine    | 2005           | 56                                                             |
| 25               | Solomon Islands | Fruits, Other              | 2005           | 53                                                             |
| 25               | Solomon Islands | Grand Total                | 2005           | 2,427                                                          |
| 25               | Solomon Islands | Maize and products         | 2005           | 1                                                              |
| 25               | Solomon Islands | Marine Fish, Other         | 2005           | 41                                                             |
| 25               | Solomon Islands | Meat                       | 2005           | 71                                                             |
| 25               | Solomon Islands | Milk - Excluding Butter    | 2005           | 12                                                             |
| 25               | Solomon Islands | Miscellaneous              | 2005           | 5                                                              |
| 25               | Solomon Islands | Mutton & Goat Meat         | 2005           | 1                                                              |
| 25               | Solomon Islands | Offals                     | 2005           | 4                                                              |
| 25               | Solomon Islands | Oilcrops                   | 2005           | 228                                                            |
| 25               | Solomon Islands | Oilcrops Oil, Other        | 2005           | 18                                                             |
| 25               | Solomon Islands | Onions                     | 2005           | 1                                                              |
| 25               | Solomon Islands | Oranges, Mandarines        | 2005           | 1                                                              |
| 25               | Solomon Islands | Palm Oil                   | 2005           | 31                                                             |
| 25               | Solomon Islands | Pelagic Fish               | 2005           | 28                                                             |
| 25               | Solomon Islands | Pigmeat                    | 2005           | 51                                                             |
| 25               | Solomon Islands | Poultry Meat               | 2005           | 3                                                              |
| 25               | Solomon Islands | Pulses                     | 2005           | 77                                                             |
| 25               | Solomon Islands | Pulses, Other and products | 2005           | 76                                                             |
| 25               | Solomon Islands | Rice (Milled Equivalent)   | 2005           | 594                                                            |
| 25               | Solomon Islands | Roots, Other               | 2005           | 197                                                            |
| 25               | Solomon Islands | Soyabean Oil               | 2005           | 2                                                              |
| 25               | Solomon Islands | Soyabeans                  | 2005           | 1                                                              |
| 25               | Solomon Islands | Spices                     | 2005           | 5                                                              |
| 25               | Solomon Islands | Spices, Other              | 2005           | 5                                                              |
| 25               | Solomon Islands | Starchy Roots              | 2005           | 876                                                            |
| 25               | Solomon Islands | Stimulants                 | 2005           | 7                                                              |
| 25               | Solomon Islands | Sugar & Sweeteners         | 2005           | 103                                                            |

Dietary calcium and zinc deficiency risks are decreasing but remain prevalent

| FAO Country code | Country         | Food item                  | Reference year | Net energy supply (kcal capita <sup>-1</sup> d <sup>-1</sup> ) |
|------------------|-----------------|----------------------------|----------------|----------------------------------------------------------------|
| 25               | Solomon Islands | Sugar (Raw Equivalent)     | 2005           | 102                                                            |
| 25               | Solomon Islands | Sweet potatoes             | 2005           | 494                                                            |
| 25               | Solomon Islands | Sweeteners, Other          | 2005           | 1                                                              |
| 25               | Solomon Islands | Treenuts                   | 2005           | 4                                                              |
| 25               | Solomon Islands | Vegetable Oils             | 2005           | 76                                                             |
| 25               | Solomon Islands | Vegetables                 | 2005           | 11                                                             |
| 25               | Solomon Islands | Vegetables, Other          | 2005           | 10                                                             |
| 25               | Solomon Islands | Vegetal Products           | 2005           | 2,247                                                          |
| 25               | Solomon Islands | Wheat and products         | 2005           | 190                                                            |
| 25               | Solomon Islands | Yams                       | 2005           | 170                                                            |
| 25               | Solomon Islands | Alcoholic Beverages        | 2006           | 12                                                             |
| 25               | Solomon Islands | Animal fats                | 2006           | 19                                                             |
| 25               | Solomon Islands | Animal Products            | 2006           | 192                                                            |
| 25               | Solomon Islands | Bananas                    | 2006           | 1                                                              |
| 25               | Solomon Islands | Beer                       | 2006           | 12                                                             |
| 25               | Solomon Islands | Bovine Meat                | 2006           | 19                                                             |
| 25               | Solomon Islands | Butter, Ghee               | 2006           | 2                                                              |
| 25               | Solomon Islands | Cassava and products       | 2006           | 14                                                             |
| 25               | Solomon Islands | Cereals - Excluding Beer   | 2006           | 801                                                            |
| 25               | Solomon Islands | Cocoa Beans and products   | 2006           | 5                                                              |
| 25               | Solomon Islands | Coconut Oil                | 2006           | 5                                                              |
| 25               | Solomon Islands | Coconuts - Incl Copra      | 2006           | 228                                                            |
| 25               | Solomon Islands | Coffee and products        | 2006           | 1                                                              |
| 25               | Solomon Islands | Cream                      | 2006           | 1                                                              |
| 25               | Solomon Islands | Eggs                       | 2006           | 5                                                              |
| 25               | Solomon Islands | Fats, Animals, Raw         | 2006           | 17                                                             |
| 25               | Solomon Islands | Fish, Seafood              | 2006           | 73                                                             |
| 25               | Solomon Islands | Fruits - Excluding Wine    | 2006           | 65                                                             |
| 25               | Solomon Islands | Fruits, Other              | 2006           | 62                                                             |
| 25               | Solomon Islands | Grand Total                | 2006           | 2,458                                                          |
| 25               | Solomon Islands | Maize and products         | 2006           | 1                                                              |
| 25               | Solomon Islands | Maize Germ Oil             | 2006           | 1                                                              |
| 25               | Solomon Islands | Marine Fish, Other         | 2006           | 48                                                             |
| 25               | Solomon Islands | Meat                       | 2006           | 73                                                             |
| 25               | Solomon Islands | Milk - Excluding Butter    | 2006           | 17                                                             |
| 25               | Solomon Islands | Miscellaneous              | 2006           | 4                                                              |
| 25               | Solomon Islands | Mutton & Goat Meat         | 2006           | 1                                                              |
| 25               | Solomon Islands | Offals                     | 2006           | 5                                                              |
| 25               | Solomon Islands | Oilcrops                   | 2006           | 229                                                            |
| 25               | Solomon Islands | Oilcrops Oil, Other        | 2006           | 33                                                             |
| 25               | Solomon Islands | Onions                     | 2006           | 1                                                              |
| 25               | Solomon Islands | Oranges, Mandarines        | 2006           | 1                                                              |
| 25               | Solomon Islands | Palm Oil                   | 2006           | 50                                                             |
| 25               | Solomon Islands | Peas                       | 2006           | 1                                                              |
| 25               | Solomon Islands | Pelagic Fish               | 2006           | 25                                                             |
| 25               | Solomon Islands | Pigmeat                    | 2006           | 50                                                             |
| 25               | Solomon Islands | Poultry Meat               | 2006           | 4                                                              |
| 25               | Solomon Islands | Pulses                     | 2006           | 77                                                             |
| 25               | Solomon Islands | Pulses, Other and products | 2006           | 76                                                             |
| 25               | Solomon Islands | Rice (Milled Equivalent)   | 2006           | 596                                                            |
| 25               | Solomon Islands | Roots, Other               | 2006           | 174                                                            |
| 25               | Solomon Islands | Soyabean Oil               | 2006           | 14                                                             |
| 25               | Solomon Islands | Spices                     | 2006           | 5                                                              |
| 25               | Solomon Islands | Spices, Other              | 2006           | 5                                                              |
| 25               | Solomon Islands | Starchy Roots              | 2006           | 814                                                            |
| 25               | Solomon Islands | Stimulants                 | 2006           | 7                                                              |
| 25               | Solomon Islands | Sugar & Sweeteners         | 2006           | 133                                                            |
| 25               | Solomon Islands | Sugar (Raw Equivalent)     | 2006           | 130                                                            |
| 25               | Solomon Islands | Sweet potatoes             | 2006           | 470                                                            |
| 25               | Solomon Islands | Sweeteners, Other          | 2006           | 3                                                              |
| 25               | Solomon Islands | Treenuts                   | 2006           | 4                                                              |
| 25               | Solomon Islands | Vegetable Oils             | 2006           | 104                                                            |
| 25               | Solomon Islands | Vegetables                 | 2006           | 11                                                             |
| 25               | Solomon Islands | Vegetables, Other          | 2006           | 11                                                             |
| 25               | Solomon Islands | Vegetal Products           | 2006           | 2,265                                                          |
| 25               | Solomon Islands | Wheat and products         | 2006           | 204                                                            |
| 25               | Solomon Islands | Wine                       | 2006           | 1                                                              |
| 25               | Solomon Islands | Yams                       | 2006           | 156                                                            |
| 25               | Solomon Islands | Alcoholic Beverages        | 2007           | 14                                                             |
| 25               | Solomon Islands | Animal fats                | 2007           | 19                                                             |
| 25               | Solomon Islands | Animal Products            | 2007           | 193                                                            |
| 25               | Solomon Islands | Bananas                    | 2007           | 1                                                              |
| 25               | Solomon Islands | Beer                       | 2007           | 13                                                             |
| 25               | Solomon Islands | Beverages, Alcoholic       | 2007           | 1                                                              |
| 25               | Solomon Islands | Bovine Meat                | 2007           | 21                                                             |
| 25               | Solomon Islands | Butter, Ghee               | 2007           | 2                                                              |
| 25               | Solomon Islands | Cassava and products       | 2007           | 14                                                             |
| 25               | Solomon Islands | Cereals - Excluding Beer   | 2007           | 808                                                            |
| 25               | Solomon Islands | Cocoa Beans and products   | 2007           | 6                                                              |
| 25               | Solomon Islands | Coconut Oil                | 2007           | 3                                                              |
| 25               | Solomon Islands | Coconuts - Incl Copra      | 2007           | 235                                                            |
| 25               | Solomon Islands | Coffee and products        | 2007           | 2                                                              |
| 25               | Solomon Islands | Eggs                       | 2007           | 5                                                              |
| 25               | Solomon Islands | Fats, Animals, Raw         | 2007           | 17                                                             |
| 25               | Solomon Islands | Fish, Seafood              | 2007           | 76                                                             |
| 25               | Solomon Islands | Fruits - Excluding Wine    | 2007           | 70                                                             |
| 25               | Solomon Islands | Fruits, Other              | 2007           | 68                                                             |
| 25               | Solomon Islands | Grand Total                | 2007           | 2,420                                                          |
| 25               | Solomon Islands | Groundnuts (Shelled Eq)    | 2007           | 1                                                              |
| 25               | Solomon Islands | Maize and products         | 2007           | 1                                                              |
| 25               | Solomon Islands | Marine Fish, Other         | 2007           | 49                                                             |
| 25               | Solomon Islands | Meat                       | 2007           | 74                                                             |
| 25               | Solomon Islands | Milk - Excluding Butter    | 2007           | 15                                                             |
| 25               | Solomon Islands | Miscellaneous              | 2007           | 4                                                              |
| 25               | Solomon Islands | Offals                     | 2007           | 3                                                              |
| 25               | Solomon Islands | Oilcrops                   | 2007           | 236                                                            |
| 25               | Solomon Islands | Oilcrops Oil, Other        | 2007           | 6                                                              |



Dietary calcium and zinc deficiency risks are decreasing but remain prevalent

| FAO Country code | Country         | Food item                  | Reference year | Net energy supply (kcal capita <sup>-1</sup> d <sup>-1</sup> ) |
|------------------|-----------------|----------------------------|----------------|----------------------------------------------------------------|
| 25               | Solomon Islands | Olive Oil                  | 2007           | 1                                                              |
| 25               | Solomon Islands | Onions                     | 2007           | 1                                                              |
| 25               | Solomon Islands | Oranges, Mandarines        | 2007           | 1                                                              |
| 25               | Solomon Islands | Palm Oil                   | 2007           | 54                                                             |
| 25               | Solomon Islands | Pelagic Fish               | 2007           | 27                                                             |
| 25               | Solomon Islands | Pigmeat                    | 2007           | 48                                                             |
| 25               | Solomon Islands | Poultry Meat               | 2007           | 5                                                              |
| 25               | Solomon Islands | Pulses                     | 2007           | 76                                                             |
| 25               | Solomon Islands | Pulses, Other and products | 2007           | 76                                                             |
| 25               | Solomon Islands | Rice (Milled Equivalent)   | 2007           | 624                                                            |
| 25               | Solomon Islands | Roots, Other               | 2007           | 187                                                            |
| 25               | Solomon Islands | Sesameseed Oil             | 2007           | 5                                                              |
| 25               | Solomon Islands | Soyabean Oil               | 2007           | 1                                                              |
| 25               | Solomon Islands | Spices                     | 2007           | 5                                                              |
| 25               | Solomon Islands | Spices, Other              | 2007           | 4                                                              |
| 25               | Solomon Islands | Starchy Roots              | 2007           | 845                                                            |
| 25               | Solomon Islands | Stimulants                 | 2007           | 8                                                              |
| 25               | Solomon Islands | Sugar & Sweeteners         | 2007           | 77                                                             |
| 25               | Solomon Islands | Sugar (Raw Equivalent)     | 2007           | 72                                                             |
| 25               | Solomon Islands | Sweet potatoes             | 2007           | 481                                                            |
| 25               | Solomon Islands | Sweeteners, Other          | 2007           | 4                                                              |
| 25               | Solomon Islands | Treenuts                   | 2007           | 4                                                              |
| 25               | Solomon Islands | Vegetable Oils             | 2007           | 69                                                             |
| 25               | Solomon Islands | Vegetables                 | 2007           | 11                                                             |
| 25               | Solomon Islands | Vegetables, Other          | 2007           | 10                                                             |
| 25               | Solomon Islands | Vegetal Products           | 2007           | 2,227                                                          |
| 25               | Solomon Islands | Wheat and products         | 2007           | 182                                                            |
| 25               | Solomon Islands | Yams                       | 2007           | 162                                                            |
| 25               | Solomon Islands | Alcoholic Beverages        | 2008           | 20                                                             |
| 25               | Solomon Islands | Animal fats                | 2008           | 18                                                             |
| 25               | Solomon Islands | Animal Products            | 2008           | 187                                                            |
| 25               | Solomon Islands | Bananas                    | 2008           | 1                                                              |
| 25               | Solomon Islands | Beer                       | 2008           | 19                                                             |
| 25               | Solomon Islands | Bovine Meat                | 2008           | 20                                                             |
| 25               | Solomon Islands | Butter, Ghee               | 2008           | 2                                                              |
| 25               | Solomon Islands | Cassava and products       | 2008           | 15                                                             |
| 25               | Solomon Islands | Cereals - Excluding Beer   | 2008           | 786                                                            |
| 25               | Solomon Islands | Cocoa Beans and products   | 2008           | 4                                                              |
| 25               | Solomon Islands | Coconut Oil                | 2008           | 5                                                              |
| 25               | Solomon Islands | Coconuts - Incl Copra      | 2008           | 235                                                            |
| 25               | Solomon Islands | Coffee and products        | 2008           | 2                                                              |
| 25               | Solomon Islands | Cream                      | 2008           | 1                                                              |
| 25               | Solomon Islands | Eggs                       | 2008           | 5                                                              |
| 25               | Solomon Islands | Fats, Animals, Raw         | 2008           | 16                                                             |
| 25               | Solomon Islands | Fish, Seafood              | 2008           | 76                                                             |
| 25               | Solomon Islands | Fruits - Excluding Wine    | 2008           | 71                                                             |
| 25               | Solomon Islands | Fruits, Other              | 2008           | 68                                                             |
| 25               | Solomon Islands | Grand Total                | 2008           | 2,480                                                          |
| 25               | Solomon Islands | Marine Fish, Other         | 2008           | 40                                                             |
| 25               | Solomon Islands | Meat                       | 2008           | 77                                                             |
| 25               | Solomon Islands | Milk - Excluding Butter    | 2008           | 9                                                              |
| 25               | Solomon Islands | Miscellaneous              | 2008           | 7                                                              |
| 25               | Solomon Islands | Offals                     | 2008           | 2                                                              |
| 25               | Solomon Islands | Oilcrops                   | 2008           | 236                                                            |
| 25               | Solomon Islands | Oilcrops Oil, Other        | 2008           | 8                                                              |
| 25               | Solomon Islands | Onions                     | 2008           | 1                                                              |
| 25               | Solomon Islands | Oranges, Mandarines        | 2008           | 1                                                              |
| 25               | Solomon Islands | Palm Oil                   | 2008           | 58                                                             |
| 25               | Solomon Islands | Pelagic Fish               | 2008           | 35                                                             |
| 25               | Solomon Islands | Pigmeat                    | 2008           | 50                                                             |
| 25               | Solomon Islands | Poultry Meat               | 2008           | 7                                                              |
| 25               | Solomon Islands | Pulses                     | 2008           | 77                                                             |
| 25               | Solomon Islands | Pulses, Other and products | 2008           | 77                                                             |
| 25               | Solomon Islands | Rice (Milled Equivalent)   | 2008           | 623                                                            |
| 25               | Solomon Islands | Roots, Other               | 2008           | 191                                                            |
| 25               | Solomon Islands | Soyabean Oil               | 2008           | 8                                                              |
| 25               | Solomon Islands | Spices                     | 2008           | 4                                                              |
| 25               | Solomon Islands | Spices, Other              | 2008           | 4                                                              |
| 25               | Solomon Islands | Starchy Roots              | 2008           | 865                                                            |
| 25               | Solomon Islands | Stimulants                 | 2008           | 6                                                              |
| 25               | Solomon Islands | Sugar & Sweeteners         | 2008           | 131                                                            |
| 25               | Solomon Islands | Sugar (Raw Equivalent)     | 2008           | 128                                                            |
| 25               | Solomon Islands | Sweet potatoes             | 2008           | 491                                                            |
| 25               | Solomon Islands | Sweeteners, Other          | 2008           | 2                                                              |
| 25               | Solomon Islands | Treenuts                   | 2008           | 4                                                              |
| 25               | Solomon Islands | Vegetable Oils             | 2008           | 79                                                             |
| 25               | Solomon Islands | Vegetables                 | 2008           | 10                                                             |
| 25               | Solomon Islands | Vegetables, Other          | 2008           | 9                                                              |
| 25               | Solomon Islands | Vegetal Products           | 2008           | 2,294                                                          |
| 25               | Solomon Islands | Wheat and products         | 2008           | 162                                                            |
| 25               | Solomon Islands | Yams                       | 2008           | 168                                                            |
| 25               | Solomon Islands | Alcoholic Beverages        | 2009           | 15                                                             |
| 25               | Solomon Islands | Animal fats                | 2009           | 27                                                             |
| 25               | Solomon Islands | Animal Products            | 2009           | 198                                                            |
| 25               | Solomon Islands | Bananas                    | 2009           | 1                                                              |
| 25               | Solomon Islands | Beer                       | 2009           | 12                                                             |
| 25               | Solomon Islands | Beverages, Alcoholic       | 2009           | 3                                                              |
| 25               | Solomon Islands | Bovine Meat                | 2009           | 23                                                             |
| 25               | Solomon Islands | Butter, Ghee               | 2009           | 1                                                              |
| 25               | Solomon Islands | Cassava and products       | 2009           | 16                                                             |
| 25               | Solomon Islands | Cereals - Excluding Beer   | 2009           | 779                                                            |
| 25               | Solomon Islands | Cocoa Beans and products   | 2009           | 4                                                              |
| 25               | Solomon Islands | Coconut Oil                | 2009           | 6                                                              |
| 25               | Solomon Islands | Coconuts - Incl Copra      | 2009           | 236                                                            |
| 25               | Solomon Islands | Coffee and products        | 2009           | 2                                                              |
| 25               | Solomon Islands | Cream                      | 2009           | 1                                                              |
| 25               | Solomon Islands | Eggs                       | 2009           | 5                                                              |

Dietary calcium and zinc deficiency risks are decreasing but remain prevalent

| FAO Country code | Country         | Food item                  | Reference year | Net energy supply (kcal capita <sup>-1</sup> d <sup>-1</sup> ) |
|------------------|-----------------|----------------------------|----------------|----------------------------------------------------------------|
| 25               | Solomon Islands | Fats, Animals, Raw         | 2009           | 25                                                             |
| 25               | Solomon Islands | Fish, Seafood              | 2009           | 75                                                             |
| 25               | Solomon Islands | Fruits - Excluding Wine    | 2009           | 72                                                             |
| 25               | Solomon Islands | Fruits, Other              | 2009           | 69                                                             |
| 25               | Solomon Islands | Grand Total                | 2009           | 2,453                                                          |
| 25               | Solomon Islands | Maize and products         | 2009           | 1                                                              |
| 25               | Solomon Islands | Marine Fish, Other         | 2009           | 42                                                             |
| 25               | Solomon Islands | Meat                       | 2009           | 79                                                             |
| 25               | Solomon Islands | Milk - Excluding Butter    | 2009           | 9                                                              |
| 25               | Solomon Islands | Miscellaneous              | 2009           | 7                                                              |
| 25               | Solomon Islands | Mutton & Goat Meat         | 2009           | 1                                                              |
| 25               | Solomon Islands | Offals                     | 2009           | 2                                                              |
| 25               | Solomon Islands | Oilcrops                   | 2009           | 237                                                            |
| 25               | Solomon Islands | Oilcrops Oil, Other        | 2009           | 7                                                              |
| 25               | Solomon Islands | Onions                     | 2009           | 1                                                              |
| 25               | Solomon Islands | Oranges, Mandarines        | 2009           | 1                                                              |
| 25               | Solomon Islands | Palm Oil                   | 2009           | 56                                                             |
| 25               | Solomon Islands | Pelagic Fish               | 2009           | 33                                                             |
| 25               | Solomon Islands | Pigmeat                    | 2009           | 48                                                             |
| 25               | Solomon Islands | Poultry Meat               | 2009           | 8                                                              |
| 25               | Solomon Islands | Pulses                     | 2009           | 77                                                             |
| 25               | Solomon Islands | Pulses, Other and products | 2009           | 77                                                             |
| 25               | Solomon Islands | Rice (Milled Equivalent)   | 2009           | 607                                                            |
| 25               | Solomon Islands | Roots, Other               | 2009           | 195                                                            |
| 25               | Solomon Islands | Soyabean Oil               | 2009           | 4                                                              |
| 25               | Solomon Islands | Spices                     | 2009           | 4                                                              |
| 25               | Solomon Islands | Spices, Other              | 2009           | 4                                                              |
| 25               | Solomon Islands | Starchy Roots              | 2009           | 871                                                            |
| 25               | Solomon Islands | Stimulants                 | 2009           | 5                                                              |
| 25               | Solomon Islands | Sugar & Sweeteners         | 2009           | 101                                                            |
| 25               | Solomon Islands | Sugar (Raw Equivalent)     | 2009           | 97                                                             |
| 25               | Solomon Islands | Sweet potatoes             | 2009           | 490                                                            |
| 25               | Solomon Islands | Sweeteners, Other          | 2009           | 4                                                              |
| 25               | Solomon Islands | Treenuts                   | 2009           | 4                                                              |
| 25               | Solomon Islands | Vegetable Oils             | 2009           | 73                                                             |
| 25               | Solomon Islands | Vegetables                 | 2009           | 10                                                             |
| 25               | Solomon Islands | Vegetables, Other          | 2009           | 9                                                              |
| 25               | Solomon Islands | Vegetal Products           | 2009           | 2,255                                                          |
| 25               | Solomon Islands | Wheat and products         | 2009           | 171                                                            |
| 25               | Solomon Islands | Yams                       | 2009           | 170                                                            |
| 25               | Solomon Islands | Alcoholic Beverages        | 2010           | 14                                                             |
| 25               | Solomon Islands | Animal fats                | 2010           | 34                                                             |
| 25               | Solomon Islands | Animal Products            | 2010           | 202                                                            |
| 25               | Solomon Islands | Bananas                    | 2010           | 1                                                              |
| 25               | Solomon Islands | Beer                       | 2010           | 13                                                             |
| 25               | Solomon Islands | Beverages, Alcoholic       | 2010           | 1                                                              |
| 25               | Solomon Islands | Bovine Meat                | 2010           | 21                                                             |
| 25               | Solomon Islands | Butter, Ghee               | 2010           | 2                                                              |
| 25               | Solomon Islands | Cassava and products       | 2010           | 16                                                             |
| 25               | Solomon Islands | Cereals - Excluding Beer   | 2010           | 811                                                            |
| 25               | Solomon Islands | Cocoa Beans and products   | 2010           | 5                                                              |
| 25               | Solomon Islands | Coconut Oil                | 2010           | 12                                                             |
| 25               | Solomon Islands | Coconuts - Incl Copra      | 2010           | 231                                                            |
| 25               | Solomon Islands | Coffee and products        | 2010           | 2                                                              |
| 25               | Solomon Islands | Cream                      | 2010           | 1                                                              |
| 25               | Solomon Islands | Eggs                       | 2010           | 5                                                              |
| 25               | Solomon Islands | Fats, Animals, Raw         | 2010           | 31                                                             |
| 25               | Solomon Islands | Fish, Seafood              | 2010           | 73                                                             |
| 25               | Solomon Islands | Fruits - Excluding Wine    | 2010           | 69                                                             |
| 25               | Solomon Islands | Fruits, Other              | 2010           | 66                                                             |
| 25               | Solomon Islands | Grand Total                | 2010           | 2,482                                                          |
| 25               | Solomon Islands | Groundnuts (Shelled Eq)    | 2010           | 3                                                              |
| 25               | Solomon Islands | Marine Fish, Other         | 2010           | 39                                                             |
| 25               | Solomon Islands | Meat                       | 2010           | 77                                                             |
| 25               | Solomon Islands | Milk - Excluding Butter    | 2010           | 12                                                             |
| 25               | Solomon Islands | Miscellaneous              | 2010           | 10                                                             |
| 25               | Solomon Islands | Mutton & Goat Meat         | 2010           | 2                                                              |
| 25               | Solomon Islands | Offals                     | 2010           | 2                                                              |
| 25               | Solomon Islands | Oilcrops                   | 2010           | 235                                                            |
| 25               | Solomon Islands | Oilcrops Oil, Other        | 2010           | 5                                                              |
| 25               | Solomon Islands | Onions                     | 2010           | 1                                                              |
| 25               | Solomon Islands | Oranges, Mandarines        | 2010           | 1                                                              |
| 25               | Solomon Islands | Palm Oil                   | 2010           | 55                                                             |
| 25               | Solomon Islands | Pelagic Fish               | 2010           | 34                                                             |
| 25               | Solomon Islands | Pigmeat                    | 2010           | 46                                                             |
| 25               | Solomon Islands | Poultry Meat               | 2010           | 8                                                              |
| 25               | Solomon Islands | Pulses                     | 2010           | 77                                                             |
| 25               | Solomon Islands | Pulses, Other and products | 2010           | 77                                                             |
| 25               | Solomon Islands | Rice (Milled Equivalent)   | 2010           | 602                                                            |
| 25               | Solomon Islands | Roots, Other               | 2010           | 183                                                            |
| 25               | Solomon Islands | Spices                     | 2010           | 4                                                              |
| 25               | Solomon Islands | Spices, Other              | 2010           | 4                                                              |
| 25               | Solomon Islands | Starchy Roots              | 2010           | 845                                                            |
| 25               | Solomon Islands | Stimulants                 | 2010           | 7                                                              |
| 25               | Solomon Islands | Sugar & Sweeteners         | 2010           | 125                                                            |
| 25               | Solomon Islands | Sugar (Raw Equivalent)     | 2010           | 120                                                            |
| 25               | Solomon Islands | Sweet potatoes             | 2010           | 480                                                            |
| 25               | Solomon Islands | Sweeteners, Other          | 2010           | 4                                                              |
| 25               | Solomon Islands | Treenuts                   | 2010           | 4                                                              |
| 25               | Solomon Islands | Vegetable Oils             | 2010           | 72                                                             |
| 25               | Solomon Islands | Vegetables                 | 2010           | 10                                                             |
| 25               | Solomon Islands | Vegetables, Other          | 2010           | 9                                                              |
| 25               | Solomon Islands | Vegetal Products           | 2010           | 2,280                                                          |
| 25               | Solomon Islands | Wheat and products         | 2010           | 209                                                            |
| 25               | Solomon Islands | Yams                       | 2010           | 166                                                            |
| 25               | Solomon Islands | Alcoholic Beverages        | 2011           | 18                                                             |
| 25               | Solomon Islands | Animal fats                | 2011           | 22                                                             |

Dietary calcium and zinc deficiency risks are decreasing but remain prevalent

| FAO Country code | Country         | Food item                       | Reference year | Net energy supply (kcal capita <sup>-1</sup> d <sup>-1</sup> ) |
|------------------|-----------------|---------------------------------|----------------|----------------------------------------------------------------|
| 25               | Solomon Islands | Animal Products                 | 2011           | 212                                                            |
| 25               | Solomon Islands | Bananas                         | 2011           | 1                                                              |
| 25               | Solomon Islands | Barley and products             | 2011           | 1                                                              |
| 25               | Solomon Islands | Beer                            | 2011           | 18                                                             |
| 25               | Solomon Islands | Bovine Meat                     | 2011           | 28                                                             |
| 25               | Solomon Islands | Butter, Ghee                    | 2011           | 3                                                              |
| 25               | Solomon Islands | Cassava and products            | 2011           | 15                                                             |
| 25               | Solomon Islands | Cereals - Excluding Beer        | 2011           | 828                                                            |
| 25               | Solomon Islands | Cocoa Beans and products        | 2011           | 5                                                              |
| 25               | Solomon Islands | Coconut Oil                     | 2011           | 20                                                             |
| 25               | Solomon Islands | Coconuts - Incl Copra           | 2011           | 226                                                            |
| 25               | Solomon Islands | Coffee and products             | 2011           | 1                                                              |
| 25               | Solomon Islands | Eggs                            | 2011           | 6                                                              |
| 25               | Solomon Islands | Fats, Animals, Raw              | 2011           | 19                                                             |
| 25               | Solomon Islands | Fish, Seafood                   | 2011           | 72                                                             |
| 25               | Solomon Islands | Fruits - Excluding Wine         | 2011           | 66                                                             |
| 25               | Solomon Islands | Fruits, Other                   | 2011           | 65                                                             |
| 25               | Solomon Islands | Grand Total                     | 2011           | 2,473                                                          |
| 25               | Solomon Islands | Groundnuts (Shelled Eq)         | 2011           | 1                                                              |
| 25               | Solomon Islands | Maize and products              | 2011           | 1                                                              |
| 25               | Solomon Islands | Marine Fish, Other              | 2011           | 38                                                             |
| 25               | Solomon Islands | Meat                            | 2011           | 94                                                             |
| 25               | Solomon Islands | Milk - Excluding Butter         | 2011           | 16                                                             |
| 25               | Solomon Islands | Miscellaneous                   | 2011           | 6                                                              |
| 25               | Solomon Islands | Offals                          | 2011           | 2                                                              |
| 25               | Solomon Islands | Oilcrops                        | 2011           | 227                                                            |
| 25               | Solomon Islands | Oilcrops Oil, Other             | 2011           | 19                                                             |
| 25               | Solomon Islands | Palm Oil                        | 2011           | 54                                                             |
| 25               | Solomon Islands | Pelagic Fish                    | 2011           | 33                                                             |
| 25               | Solomon Islands | Pigmeat                         | 2011           | 45                                                             |
| 25               | Solomon Islands | Potatoes and products           | 2011           | 1                                                              |
| 25               | Solomon Islands | Poultry Meat                    | 2011           | 20                                                             |
| 25               | Solomon Islands | Pulses                          | 2011           | 77                                                             |
| 25               | Solomon Islands | Pulses, Other and products      | 2011           | 77                                                             |
| 25               | Solomon Islands | Rice (Milled Equivalent)        | 2011           | 546                                                            |
| 25               | Solomon Islands | Roots, Other                    | 2011           | 187                                                            |
| 25               | Solomon Islands | Sesameseed Oil                  | 2011           | 2                                                              |
| 25               | Solomon Islands | Spices                          | 2011           | 5                                                              |
| 25               | Solomon Islands | Spices, Other                   | 2011           | 5                                                              |
| 25               | Solomon Islands | Starchy Roots                   | 2011           | 835                                                            |
| 25               | Solomon Islands | Stimulants                      | 2011           | 6                                                              |
| 25               | Solomon Islands | Sugar & Sweeteners              | 2011           | 83                                                             |
| 25               | Solomon Islands | Sugar (Raw Equivalent)          | 2011           | 78                                                             |
| 25               | Solomon Islands | Sweet potatoes                  | 2011           | 470                                                            |
| 25               | Solomon Islands | Sweeteners, Other               | 2011           | 5                                                              |
| 25               | Solomon Islands | Treenuts                        | 2011           | 4                                                              |
| 25               | Solomon Islands | Vegetable Oils                  | 2011           | 96                                                             |
| 25               | Solomon Islands | Vegetables                      | 2011           | 9                                                              |
| 25               | Solomon Islands | Vegetables, Other               | 2011           | 9                                                              |
| 25               | Solomon Islands | Vegetal Products                | 2011           | 2,261                                                          |
| 25               | Solomon Islands | Wheat and products              | 2011           | 280                                                            |
| 25               | Solomon Islands | Yams                            | 2011           | 162                                                            |
| 38               | Sri Lanka       | Alcoholic Beverages             | 1992           | 3                                                              |
| 38               | Sri Lanka       | Animal fats                     | 1992           | 8                                                              |
| 38               | Sri Lanka       | Animal Products                 | 1992           | 125                                                            |
| 38               | Sri Lanka       | Beans                           | 1992           | 13                                                             |
| 38               | Sri Lanka       | Beer                            | 1992           | 1                                                              |
| 38               | Sri Lanka       | Beverages, Alcoholic            | 1992           | 2                                                              |
| 38               | Sri Lanka       | Bovine Meat                     | 1992           | 8                                                              |
| 38               | Sri Lanka       | Butter, Ghee                    | 1992           | 3                                                              |
| 38               | Sri Lanka       | Cassava and products            | 1992           | 51                                                             |
| 38               | Sri Lanka       | Cereals - Excluding Beer        | 1992           | 1,211                                                          |
| 38               | Sri Lanka       | Cocoa Beans and products        | 1992           | 1                                                              |
| 38               | Sri Lanka       | Coconut Oil                     | 1992           | 32                                                             |
| 38               | Sri Lanka       | Coconuts - Incl Copra           | 1992           | 255                                                            |
| 38               | Sri Lanka       | Coffee and products             | 1992           | 1                                                              |
| 38               | Sri Lanka       | Crustaceans                     | 1992           | 1                                                              |
| 38               | Sri Lanka       | Dates                           | 1992           | 2                                                              |
| 38               | Sri Lanka       | Demersal Fish                   | 1992           | 2                                                              |
| 38               | Sri Lanka       | Eggs                            | 1992           | 9                                                              |
| 38               | Sri Lanka       | Fats, Animals, Raw              | 1992           | 5                                                              |
| 38               | Sri Lanka       | Fish, Seafood                   | 1992           | 38                                                             |
| 38               | Sri Lanka       | Freshwater Fish                 | 1992           | 2                                                              |
| 38               | Sri Lanka       | Fruits - Excluding Wine         | 1992           | 67                                                             |
| 38               | Sri Lanka       | Fruits, Other                   | 1992           | 9                                                              |
| 38               | Sri Lanka       | Grand Total                     | 1992           | 2,153                                                          |
| 38               | Sri Lanka       | Grapes and products (excl wine) | 1992           | 1                                                              |
| 38               | Sri Lanka       | Groundnuts (Shelled Eq)         | 1992           | 1                                                              |
| 38               | Sri Lanka       | Lemons, Limes and products      | 1992           | 1                                                              |
| 38               | Sri Lanka       | Maize and products              | 1992           | 31                                                             |
| 38               | Sri Lanka       | Marine Fish, Other              | 1992           | 4                                                              |
| 38               | Sri Lanka       | Meat                            | 1992           | 15                                                             |
| 38               | Sri Lanka       | Milk - Excluding Butter         | 1992           | 53                                                             |
| 38               | Sri Lanka       | Millet and products             | 1992           | 2                                                              |
| 38               | Sri Lanka       | Miscellaneous                   | 1992           | 1                                                              |
| 38               | Sri Lanka       | Mutton & Goat Meat              | 1992           | 1                                                              |
| 38               | Sri Lanka       | Offals                          | 1992           | 2                                                              |
| 38               | Sri Lanka       | Oilcrops                        | 1992           | 259                                                            |
| 38               | Sri Lanka       | Onions                          | 1992           | 8                                                              |
| 38               | Sri Lanka       | Palmkernel Oil                  | 1992           | 3                                                              |
| 38               | Sri Lanka       | Peas                            | 1992           | 1                                                              |
| 38               | Sri Lanka       | Pelagic Fish                    | 1992           | 29                                                             |
| 38               | Sri Lanka       | Pepper                          | 1992           | 4                                                              |
| 38               | Sri Lanka       | Pigmeat                         | 1992           | 1                                                              |
| 38               | Sri Lanka       | Pimento                         | 1992           | 3                                                              |
| 38               | Sri Lanka       | Pineapples and products         | 1992           | 2                                                              |
| 38               | Sri Lanka       | Plantains                       | 1992           | 53                                                             |

Dietary calcium and zinc deficiency risks are decreasing but remain prevalent

| FAO Country code | Country   | Food item                  | Reference year | Net energy supply (kcal capita <sup>-1</sup> d <sup>-1</sup> ) |
|------------------|-----------|----------------------------|----------------|----------------------------------------------------------------|
| 38               | Sri Lanka | Potatoes and products      | 1992           | 8                                                              |
| 38               | Sri Lanka | Poultry Meat               | 1992           | 6                                                              |
| 38               | Sri Lanka | Pulses                     | 1992           | 60                                                             |
| 38               | Sri Lanka | Pulses, Other and products | 1992           | 47                                                             |
| 38               | Sri Lanka | Rape and Mustardseed       | 1992           | 1                                                              |
| 38               | Sri Lanka | Rice (Milled Equivalent)   | 1992           | 879                                                            |
| 38               | Sri Lanka | Ricebran Oil               | 1992           | 6                                                              |
| 38               | Sri Lanka | Sesame seed                | 1992           | 2                                                              |
| 38               | Sri Lanka | Soyabean Oil               | 1992           | 1                                                              |
| 38               | Sri Lanka | Spices                     | 1992           | 32                                                             |
| 38               | Sri Lanka | Spices, Other              | 1992           | 25                                                             |
| 38               | Sri Lanka | Starchy Roots              | 1992           | 67                                                             |
| 38               | Sri Lanka | Stimulants                 | 1992           | 3                                                              |
| 38               | Sri Lanka | Sugar & Sweeteners         | 1992           | 245                                                            |
| 38               | Sri Lanka | Sugar (Raw Equivalent)     | 1992           | 242                                                            |
| 38               | Sri Lanka | Sugar cane                 | 1992           | 8                                                              |
| 38               | Sri Lanka | Sugar Crops                | 1992           | 8                                                              |
| 38               | Sri Lanka | Sugar non-centrifugal      | 1992           | 1                                                              |
| 38               | Sri Lanka | Sweet potatoes             | 1992           | 8                                                              |
| 38               | Sri Lanka | Sweeteners, Other          | 1992           | 2                                                              |
| 38               | Sri Lanka | Tea (including mate)       | 1992           | 1                                                              |
| 38               | Sri Lanka | Tomatoes and products      | 1992           | 1                                                              |
| 38               | Sri Lanka | Treenuts                   | 1992           | 2                                                              |
| 38               | Sri Lanka | Vegetable Oils             | 1992           | 44                                                             |
| 38               | Sri Lanka | Vegetables                 | 1992           | 26                                                             |
| 38               | Sri Lanka | Vegetables, Other          | 1992           | 18                                                             |
| 38               | Sri Lanka | Vegetal Products           | 1992           | 2,028                                                          |
| 38               | Sri Lanka | Wheat and products         | 1992           | 299                                                            |
| 38               | Sri Lanka | Alcoholic Beverages        | 1993           | 3                                                              |
| 38               | Sri Lanka | Animal fats                | 1993           | 5                                                              |
| 38               | Sri Lanka | Animal Products            | 1993           | 116                                                            |
| 38               | Sri Lanka | Beans                      | 1993           | 13                                                             |
| 38               | Sri Lanka | Beer                       | 1993           | 1                                                              |
| 38               | Sri Lanka | Beverages, Alcoholic       | 1993           | 2                                                              |
| 38               | Sri Lanka | Bovine Meat                | 1993           | 8                                                              |
| 38               | Sri Lanka | Butter, Chee               | 1993           | 1                                                              |
| 38               | Sri Lanka | Cassava and products       | 1993           | 53                                                             |
| 38               | Sri Lanka | Cereals - Excluding Beer   | 1993           | 1,188                                                          |
| 38               | Sri Lanka | Cocoa Beans and products   | 1993           | 1                                                              |
| 38               | Sri Lanka | Coconut Oil                | 1993           | 39                                                             |
| 38               | Sri Lanka | Coconuts - Incl Copra      | 1993           | 285                                                            |
| 38               | Sri Lanka | Coffee and products        | 1993           | 1                                                              |
| 38               | Sri Lanka | Crustaceans                | 1993           | 1                                                              |
| 38               | Sri Lanka | Dates                      | 1993           | 1                                                              |
| 38               | Sri Lanka | Demersal Fish              | 1993           | 3                                                              |
| 38               | Sri Lanka | Eggs                       | 1993           | 9                                                              |
| 38               | Sri Lanka | Fats, Animals, Raw         | 1993           | 4                                                              |
| 38               | Sri Lanka | Fish, Seafood              | 1993           | 34                                                             |
| 38               | Sri Lanka | Freshwater Fish            | 1993           | 1                                                              |
| 38               | Sri Lanka | Fruits - Excluding Wine    | 1993           | 72                                                             |
| 38               | Sri Lanka | Fruits, Other              | 1993           | 11                                                             |
| 38               | Sri Lanka | Grand Total                | 1993           | 2,095                                                          |
| 38               | Sri Lanka | Groundnuts (Shelled Eq)    | 1993           | 3                                                              |
| 38               | Sri Lanka | Lemons, Limes and products | 1993           | 1                                                              |
| 38               | Sri Lanka | Maize and products         | 1993           | 32                                                             |
| 38               | Sri Lanka | Marine Fish, Other         | 1993           | 4                                                              |
| 38               | Sri Lanka | Meat                       | 1993           | 16                                                             |
| 38               | Sri Lanka | Milk - Excluding Butter    | 1993           | 49                                                             |
| 38               | Sri Lanka | Millet and products        | 1993           | 3                                                              |
| 38               | Sri Lanka | Mutton & Goat Meat         | 1993           | 1                                                              |
| 38               | Sri Lanka | Oats                       | 1993           | 3                                                              |
| 38               | Sri Lanka | Offals                     | 1993           | 2                                                              |
| 38               | Sri Lanka | Oilcrops                   | 1993           | 292                                                            |
| 38               | Sri Lanka | Onions                     | 1993           | 6                                                              |
| 38               | Sri Lanka | Palmkernel Oil             | 1993           | 10                                                             |
| 38               | Sri Lanka | Peas                       | 1993           | 1                                                              |
| 38               | Sri Lanka | Pelagic Fish               | 1993           | 25                                                             |
| 38               | Sri Lanka | Pepper                     | 1993           | 4                                                              |
| 38               | Sri Lanka | Pigmeat                    | 1993           | 1                                                              |
| 38               | Sri Lanka | Pineapples and products    | 1993           | 2                                                              |
| 38               | Sri Lanka | Plantains                  | 1993           | 58                                                             |
| 38               | Sri Lanka | Potatoes and products      | 1993           | 8                                                              |
| 38               | Sri Lanka | Poultry Meat               | 1993           | 7                                                              |
| 38               | Sri Lanka | Pulses                     | 1993           | 52                                                             |
| 38               | Sri Lanka | Pulses, Other and products | 1993           | 37                                                             |
| 38               | Sri Lanka | Rape and Mustardseed       | 1993           | 1                                                              |
| 38               | Sri Lanka | Rice (Milled Equivalent)   | 1993           | 807                                                            |
| 38               | Sri Lanka | Ricebran Oil               | 1993           | 7                                                              |
| 38               | Sri Lanka | Sesame seed                | 1993           | 4                                                              |
| 38               | Sri Lanka | Sorghum and products       | 1993           | 7                                                              |
| 38               | Sri Lanka | Soyabean Oil               | 1993           | 1                                                              |
| 38               | Sri Lanka | Spices                     | 1993           | 19                                                             |
| 38               | Sri Lanka | Spices, Other              | 1993           | 14                                                             |
| 38               | Sri Lanka | Starchy Roots              | 1993           | 68                                                             |
| 38               | Sri Lanka | Stimulants                 | 1993           | 2                                                              |
| 38               | Sri Lanka | Sugar & Sweeteners         | 1993           | 191                                                            |
| 38               | Sri Lanka | Sugar (Raw Equivalent)     | 1993           | 189                                                            |
| 38               | Sri Lanka | Sugar cane                 | 1993           | 8                                                              |
| 38               | Sri Lanka | Sugar Crops                | 1993           | 8                                                              |
| 38               | Sri Lanka | Sugar non-centrifugal      | 1993           | 1                                                              |
| 38               | Sri Lanka | Sweet potatoes             | 1993           | 7                                                              |
| 38               | Sri Lanka | Sweeteners, Other          | 1993           | 2                                                              |
| 38               | Sri Lanka | Tea (including mate)       | 1993           | 1                                                              |
| 38               | Sri Lanka | Tomatoes and products      | 1993           | 1                                                              |
| 38               | Sri Lanka | Treenuts                   | 1993           | 2                                                              |
| 38               | Sri Lanka | Vegetable Oils             | 1993           | 58                                                             |
| 38               | Sri Lanka | Vegetables                 | 1993           | 24                                                             |

Dietary calcium and zinc deficiency risks are decreasing but remain prevalent

| FAO Country code | Country   | Food item                  | Reference year | Net energy supply (kcal capita <sup>-1</sup> d <sup>-1</sup> ) |
|------------------|-----------|----------------------------|----------------|----------------------------------------------------------------|
| 38               | Sri Lanka | Vegetables, Other          | 1993           | 17                                                             |
| 38               | Sri Lanka | Vegetal Products           | 1993           | 1,980                                                          |
| 38               | Sri Lanka | Wheat and products         | 1993           | 335                                                            |
| 38               | Sri Lanka | Alcoholic Beverages        | 1994           | 3                                                              |
| 38               | Sri Lanka | Animal fats                | 1994           | 4                                                              |
| 38               | Sri Lanka | Animal Products            | 1994           | 117                                                            |
| 38               | Sri Lanka | Beans                      | 1994           | 12                                                             |
| 38               | Sri Lanka | Beer                       | 1994           | 1                                                              |
| 38               | Sri Lanka | Beverages, Alcoholic       | 1994           | 2                                                              |
| 38               | Sri Lanka | Bovine Meat                | 1994           | 8                                                              |
| 38               | Sri Lanka | Butter, Ghee               | 1994           | 1                                                              |
| 38               | Sri Lanka | Cassava and products       | 1994           | 49                                                             |
| 38               | Sri Lanka | Cereals - Excluding Beer   | 1994           | 1,264                                                          |
| 38               | Sri Lanka | Cocoa Beans and products   | 1994           | 1                                                              |
| 38               | Sri Lanka | Coconut Oil                | 1994           | 56                                                             |
| 38               | Sri Lanka | Coconuts - Incl Copra      | 1994           | 292                                                            |
| 38               | Sri Lanka | Coffee and products        | 1994           | 1                                                              |
| 38               | Sri Lanka | Dates                      | 1994           | 1                                                              |
| 38               | Sri Lanka | Demersal Fish              | 1994           | 3                                                              |
| 38               | Sri Lanka | Eggs                       | 1994           | 9                                                              |
| 38               | Sri Lanka | Fats, Animals, Raw         | 1994           | 3                                                              |
| 38               | Sri Lanka | Fish, Seafood              | 1994           | 35                                                             |
| 38               | Sri Lanka | Freshwater Fish            | 1994           | 1                                                              |
| 38               | Sri Lanka | Fruits - Excluding Wine    | 1994           | 75                                                             |
| 38               | Sri Lanka | Fruits, Other              | 1994           | 11                                                             |
| 38               | Sri Lanka | Grand Total                | 1994           | 2,291                                                          |
| 38               | Sri Lanka | Groundnuts (Shelled Eq)    | 1994           | 3                                                              |
| 38               | Sri Lanka | Lemons, Limes and products | 1994           | 1                                                              |
| 38               | Sri Lanka | Maize and products         | 1994           | 27                                                             |
| 38               | Sri Lanka | Marine Fish, Other         | 1994           | 4                                                              |
| 38               | Sri Lanka | Meat                       | 1994           | 19                                                             |
| 38               | Sri Lanka | Milk - Excluding Butter    | 1994           | 47                                                             |
| 38               | Sri Lanka | Millet and products        | 1994           | 3                                                              |
| 38               | Sri Lanka | Mutton & Goat Meat         | 1994           | 1                                                              |
| 38               | Sri Lanka | Offals                     | 1994           | 2                                                              |
| 38               | Sri Lanka | Oilcrops                   | 1994           | 299                                                            |
| 38               | Sri Lanka | Onions                     | 1994           | 7                                                              |
| 38               | Sri Lanka | Palmkernel Oil             | 1994           | 2                                                              |
| 38               | Sri Lanka | Peas                       | 1994           | 4                                                              |
| 38               | Sri Lanka | Pelagic Fish               | 1994           | 27                                                             |
| 38               | Sri Lanka | Pepper                     | 1994           | 5                                                              |
| 38               | Sri Lanka | Pigmeat                    | 1994           | 1                                                              |
| 38               | Sri Lanka | Pimento                    | 1994           | 2                                                              |
| 38               | Sri Lanka | Pineapples and products    | 1994           | 2                                                              |
| 38               | Sri Lanka | Plantains                  | 1994           | 60                                                             |
| 38               | Sri Lanka | Potatoes and products      | 1994           | 10                                                             |
| 38               | Sri Lanka | Poultry Meat               | 1994           | 9                                                              |
| 38               | Sri Lanka | Pulses                     | 1994           | 49                                                             |
| 38               | Sri Lanka | Pulses, Other and products | 1994           | 34                                                             |
| 38               | Sri Lanka | Rape and Mustardseed       | 1994           | 1                                                              |
| 38               | Sri Lanka | Rice (Milled Equivalent)   | 1994           | 903                                                            |
| 38               | Sri Lanka | Ricebran Oil               | 1994           | 7                                                              |
| 38               | Sri Lanka | Sesame seed                | 1994           | 3                                                              |
| 38               | Sri Lanka | Soyabean Oil               | 1994           | 3                                                              |
| 38               | Sri Lanka | Spices                     | 1994           | 21                                                             |
| 38               | Sri Lanka | Spices, Other              | 1994           | 13                                                             |
| 38               | Sri Lanka | Starchy Roots              | 1994           | 66                                                             |
| 38               | Sri Lanka | Stimulants                 | 1994           | 2                                                              |
| 38               | Sri Lanka | Sugar & Sweeteners         | 1994           | 259                                                            |
| 38               | Sri Lanka | Sugar (Raw Equivalent)     | 1994           | 257                                                            |
| 38               | Sri Lanka | Sugar cane                 | 1994           | 38                                                             |
| 38               | Sri Lanka | Sugar Crops                | 1994           | 38                                                             |
| 38               | Sri Lanka | Sugar non-centrifugal      | 1994           | 1                                                              |
| 38               | Sri Lanka | Sweet potatoes             | 1994           | 8                                                              |
| 38               | Sri Lanka | Sweeteners, Other          | 1994           | 2                                                              |
| 38               | Sri Lanka | Tea (including mate)       | 1994           | 1                                                              |
| 38               | Sri Lanka | Tomatoes and products      | 1994           | 1                                                              |
| 38               | Sri Lanka | Treenuts                   | 1994           | 3                                                              |
| 38               | Sri Lanka | Vegetable Oils             | 1994           | 69                                                             |
| 38               | Sri Lanka | Vegetables                 | 1994           | 25                                                             |
| 38               | Sri Lanka | Vegetables, Other          | 1994           | 17                                                             |
| 38               | Sri Lanka | Vegetal Products           | 1994           | 2,173                                                          |
| 38               | Sri Lanka | Wheat and products         | 1994           | 330                                                            |
| 38               | Sri Lanka | Alcoholic Beverages        | 1995           | 3                                                              |
| 38               | Sri Lanka | Animal fats                | 1995           | 17                                                             |
| 38               | Sri Lanka | Animal Products            | 1995           | 145                                                            |
| 38               | Sri Lanka | Beans                      | 1995           | 12                                                             |
| 38               | Sri Lanka | Beer                       | 1995           | 1                                                              |
| 38               | Sri Lanka | Beverages, Alcoholic       | 1995           | 2                                                              |
| 38               | Sri Lanka | Bovine Meat                | 1995           | 8                                                              |
| 38               | Sri Lanka | Butter, Ghee               | 1995           | 1                                                              |
| 38               | Sri Lanka | Cassava and products       | 1995           | 47                                                             |
| 38               | Sri Lanka | Cereals - Excluding Beer   | 1995           | 1,271                                                          |
| 38               | Sri Lanka | Cereals, Other             | 1995           | 1                                                              |
| 38               | Sri Lanka | Cocoa Beans and products   | 1995           | 1                                                              |
| 38               | Sri Lanka | Coconut Oil                | 1995           | 44                                                             |
| 38               | Sri Lanka | Coconuts - Incl Copra      | 1995           | 272                                                            |
| 38               | Sri Lanka | Coffee and products        | 1995           | 1                                                              |
| 38               | Sri Lanka | Dates                      | 1995           | 1                                                              |
| 38               | Sri Lanka | Demersal Fish              | 1995           | 2                                                              |
| 38               | Sri Lanka | Eggs                       | 1995           | 9                                                              |
| 38               | Sri Lanka | Fats, Animals, Raw         | 1995           | 16                                                             |
| 38               | Sri Lanka | Fish, Seafood              | 1995           | 40                                                             |
| 38               | Sri Lanka | Freshwater Fish            | 1995           | 2                                                              |
| 38               | Sri Lanka | Fruits - Excluding Wine    | 1995           | 76                                                             |
| 38               | Sri Lanka | Fruits, Other              | 1995           | 11                                                             |
| 38               | Sri Lanka | Grand Total                | 1995           | 2,221                                                          |

Dietary calcium and zinc deficiency risks are decreasing but remain prevalent

| FAO Country code | Country   | Food item                       | Reference year | Net energy supply (kcal capita <sup>-1</sup> d <sup>-1</sup> ) |
|------------------|-----------|---------------------------------|----------------|----------------------------------------------------------------|
| 38               | Sri Lanka | Grapes and products (excl wine) | 1995           | 1                                                              |
| 38               | Sri Lanka | Groundnuts (Shelled Eq)         | 1995           | 2                                                              |
| 38               | Sri Lanka | Lemons, Limes and products      | 1995           | 1                                                              |
| 38               | Sri Lanka | Maize and products              | 1995           | 22                                                             |
| 38               | Sri Lanka | Marine Fish, Other              | 1995           | 3                                                              |
| 38               | Sri Lanka | Meat                            | 1995           | 20                                                             |
| 38               | Sri Lanka | Milk - Excluding Butter         | 1995           | 56                                                             |
| 38               | Sri Lanka | Millet and products             | 1995           | 2                                                              |
| 38               | Sri Lanka | Mutton & Goat Meat              | 1995           | 1                                                              |
| 38               | Sri Lanka | Offals                          | 1995           | 2                                                              |
| 38               | Sri Lanka | Oilcrops                        | 1995           | 278                                                            |
| 38               | Sri Lanka | Onions                          | 1995           | 9                                                              |
| 38               | Sri Lanka | Peas                            | 1995           | 5                                                              |
| 38               | Sri Lanka | Pelagic Fish                    | 1995           | 33                                                             |
| 38               | Sri Lanka | Pepper                          | 1995           | 6                                                              |
| 38               | Sri Lanka | Pigmeat                         | 1995           | 1                                                              |
| 38               | Sri Lanka | Pimento                         | 1995           | 3                                                              |
| 38               | Sri Lanka | Pineapples and products         | 1995           | 2                                                              |
| 38               | Sri Lanka | Plantains                       | 1995           | 60                                                             |
| 38               | Sri Lanka | Potatoes and products           | 1995           | 11                                                             |
| 38               | Sri Lanka | Poultry Meat                    | 1995           | 10                                                             |
| 38               | Sri Lanka | Pulses                          | 1995           | 58                                                             |
| 38               | Sri Lanka | Pulses, Other and products      | 1995           | 41                                                             |
| 38               | Sri Lanka | Rape and Mustardseed            | 1995           | 1                                                              |
| 38               | Sri Lanka | Rice (Milled Equivalent)        | 1995           | 857                                                            |
| 38               | Sri Lanka | Ricebran Oil                    | 1995           | 8                                                              |
| 38               | Sri Lanka | Sesame seed                     | 1995           | 3                                                              |
| 38               | Sri Lanka | Sorghum and products            | 1995           | 8                                                              |
| 38               | Sri Lanka | Soyabean Oil                    | 1995           | 1                                                              |
| 38               | Sri Lanka | Spices                          | 1995           | 22                                                             |
| 38               | Sri Lanka | Spices, Other                   | 1995           | 14                                                             |
| 38               | Sri Lanka | Starchy Roots                   | 1995           | 65                                                             |
| 38               | Sri Lanka | Stimulants                      | 1995           | 2                                                              |
| 38               | Sri Lanka | Sugar & Sweeteners              | 1995           | 190                                                            |
| 38               | Sri Lanka | Sugar (Raw Equivalent)          | 1995           | 187                                                            |
| 38               | Sri Lanka | Sugar cane                      | 1995           | 27                                                             |
| 38               | Sri Lanka | Sugar Crops                     | 1995           | 27                                                             |
| 38               | Sri Lanka | Sugar non-centrifugal           | 1995           | 1                                                              |
| 38               | Sri Lanka | Sunflowerseed Oil               | 1995           | 1                                                              |
| 38               | Sri Lanka | Sweet potatoes                  | 1995           | 8                                                              |
| 38               | Sri Lanka | Sweeteners, Other               | 1995           | 2                                                              |
| 38               | Sri Lanka | Tea (including mate)            | 1995           | 1                                                              |
| 38               | Sri Lanka | Tomatoes and products           | 1995           | 1                                                              |
| 38               | Sri Lanka | Treenuts                        | 1995           | 2                                                              |
| 38               | Sri Lanka | Vegetable Oils                  | 1995           | 54                                                             |
| 38               | Sri Lanka | Vegetables                      | 1995           | 26                                                             |
| 38               | Sri Lanka | Vegetables, Other               | 1995           | 17                                                             |
| 38               | Sri Lanka | Vegetal Products                | 1995           | 2,076                                                          |
| 38               | Sri Lanka | Wheat and products              | 1995           | 381                                                            |
| 38               | Sri Lanka | Alcoholic Beverages             | 1996           | 3                                                              |
| 38               | Sri Lanka | Animal fats                     | 1996           | 7                                                              |
| 38               | Sri Lanka | Animal Products                 | 1996           | 140                                                            |
| 38               | Sri Lanka | Beans                           | 1996           | 10                                                             |
| 38               | Sri Lanka | Beer                            | 1996           | 1                                                              |
| 38               | Sri Lanka | Beverages, Alcoholic            | 1996           | 2                                                              |
| 38               | Sri Lanka | Bovine Meat                     | 1996           | 7                                                              |
| 38               | Sri Lanka | Butter, Ghee                    | 1996           | 2                                                              |
| 38               | Sri Lanka | Cassava and products            | 1996           | 45                                                             |
| 38               | Sri Lanka | Cereals - Excluding Beer        | 1996           | 1,231                                                          |
| 38               | Sri Lanka | Cocoa Beans and products        | 1996           | 1                                                              |
| 38               | Sri Lanka | Coconut Oil                     | 1996           | 44                                                             |
| 38               | Sri Lanka | Coconuts - Incl Copra           | 1996           | 269                                                            |
| 38               | Sri Lanka | Coffee and products             | 1996           | 1                                                              |
| 38               | Sri Lanka | Dates                           | 1996           | 2                                                              |
| 38               | Sri Lanka | Demersal Fish                   | 1996           | 2                                                              |
| 38               | Sri Lanka | Eggs                            | 1996           | 9                                                              |
| 38               | Sri Lanka | Fats, Animals, Raw              | 1996           | 6                                                              |
| 38               | Sri Lanka | Fish, Seafood                   | 1996           | 44                                                             |
| 38               | Sri Lanka | Freshwater Fish                 | 1996           | 2                                                              |
| 38               | Sri Lanka | Fruits - Excluding Wine         | 1996           | 77                                                             |
| 38               | Sri Lanka | Fruits, Other                   | 1996           | 9                                                              |
| 38               | Sri Lanka | Grand Total                     | 1996           | 2,240                                                          |
| 38               | Sri Lanka | Grapes and products (excl wine) | 1996           | 1                                                              |
| 38               | Sri Lanka | Groundnuts (Shelled Eq)         | 1996           | 6                                                              |
| 38               | Sri Lanka | Lemons, Limes and products      | 1996           | 1                                                              |
| 38               | Sri Lanka | Maize and products              | 1996           | 20                                                             |
| 38               | Sri Lanka | Marine Fish, Other              | 1996           | 3                                                              |
| 38               | Sri Lanka | Meat                            | 1996           | 19                                                             |
| 38               | Sri Lanka | Milk - Excluding Butter         | 1996           | 59                                                             |
| 38               | Sri Lanka | Millet and products             | 1996           | 2                                                              |
| 38               | Sri Lanka | Mutton & Goat Meat              | 1996           | 1                                                              |
| 38               | Sri Lanka | Offals                          | 1996           | 2                                                              |
| 38               | Sri Lanka | Oilcrops                        | 1996           | 279                                                            |
| 38               | Sri Lanka | Onions                          | 1996           | 11                                                             |
| 38               | Sri Lanka | Palmkernel Oil                  | 1996           | 2                                                              |
| 38               | Sri Lanka | Peas                            | 1996           | 6                                                              |
| 38               | Sri Lanka | Pelagic Fish                    | 1996           | 36                                                             |
| 38               | Sri Lanka | Pepper                          | 1996           | 6                                                              |
| 38               | Sri Lanka | Pigmeat                         | 1996           | 1                                                              |
| 38               | Sri Lanka | Pimento                         | 1996           | 4                                                              |
| 38               | Sri Lanka | Pineapples and products         | 1996           | 2                                                              |
| 38               | Sri Lanka | Plantains                       | 1996           | 62                                                             |
| 38               | Sri Lanka | Potatoes and products           | 1996           | 14                                                             |
| 38               | Sri Lanka | Poultry Meat                    | 1996           | 10                                                             |
| 38               | Sri Lanka | Pulses                          | 1996           | 55                                                             |
| 38               | Sri Lanka | Pulses, Other and products      | 1996           | 39                                                             |
| 38               | Sri Lanka | Rape and Mustardseed            | 1996           | 1                                                              |

Dietary calcium and zinc deficiency risks are decreasing but remain prevalent

| FAO Country code | Country   | Food item                       | Reference year | Net energy supply (kcal capita <sup>-1</sup> d <sup>-1</sup> ) |
|------------------|-----------|---------------------------------|----------------|----------------------------------------------------------------|
| 38               | Sri Lanka | Rice (Milled Equivalent)        | 1996           | 859                                                            |
| 38               | Sri Lanka | Ricebran Oil                    | 1996           | 5                                                              |
| 38               | Sri Lanka | Sesame seed                     | 1996           | 3                                                              |
| 38               | Sri Lanka | Sesameseed Oil                  | 1996           | 1                                                              |
| 38               | Sri Lanka | Sorghum and products            | 1996           | 1                                                              |
| 38               | Sri Lanka | Soyabean Oil                    | 1996           | 1                                                              |
| 38               | Sri Lanka | Spices                          | 1996           | 24                                                             |
| 38               | Sri Lanka | Spices, Other                   | 1996           | 15                                                             |
| 38               | Sri Lanka | Starchy Roots                   | 1996           | 67                                                             |
| 38               | Sri Lanka | Stimulants                      | 1996           | 3                                                              |
| 38               | Sri Lanka | Sugar & Sweeteners              | 1996           | 244                                                            |
| 38               | Sri Lanka | Sugar (Raw Equivalent)          | 1996           | 241                                                            |
| 38               | Sri Lanka | Sugar cane                      | 1996           | 33                                                             |
| 38               | Sri Lanka | Sugar Crops                     | 1996           | 33                                                             |
| 38               | Sri Lanka | Sugar non-centrifugal           | 1996           | 1                                                              |
| 38               | Sri Lanka | Sweet potatoes                  | 1996           | 7                                                              |
| 38               | Sri Lanka | Sweeteners, Other               | 1996           | 3                                                              |
| 38               | Sri Lanka | Tea (including mate)            | 1996           | 1                                                              |
| 38               | Sri Lanka | Tomatoes and products           | 1996           | 1                                                              |
| 38               | Sri Lanka | Treenuts                        | 1996           | 2                                                              |
| 38               | Sri Lanka | Vegetable Oils                  | 1996           | 54                                                             |
| 38               | Sri Lanka | Vegetables                      | 1996           | 27                                                             |
| 38               | Sri Lanka | Vegetables, Other               | 1996           | 15                                                             |
| 38               | Sri Lanka | Vegetal Products                | 1996           | 2,100                                                          |
| 38               | Sri Lanka | Wheat and products              | 1996           | 348                                                            |
| 38               | Sri Lanka | Alcoholic Beverages             | 1997           | 4                                                              |
| 38               | Sri Lanka | Animal fats                     | 1997           | 6                                                              |
| 38               | Sri Lanka | Animal Products                 | 1997           | 147                                                            |
| 38               | Sri Lanka | Beans                           | 1997           | 9                                                              |
| 38               | Sri Lanka | Beer                            | 1997           | 1                                                              |
| 38               | Sri Lanka | Beverages, Alcoholic            | 1997           | 2                                                              |
| 38               | Sri Lanka | Bovine Meat                     | 1997           | 7                                                              |
| 38               | Sri Lanka | Butter, Ghee                    | 1997           | 1                                                              |
| 38               | Sri Lanka | Cassava and products            | 1997           | 40                                                             |
| 38               | Sri Lanka | Cereals - Excluding Beer        | 1997           | 1,215                                                          |
| 38               | Sri Lanka | Cocoa Beans and products        | 1997           | 1                                                              |
| 38               | Sri Lanka | Coconut Oil                     | 1997           | 38                                                             |
| 38               | Sri Lanka | Coconuts - Incl Copra           | 1997           | 258                                                            |
| 38               | Sri Lanka | Coffee and products             | 1997           | 1                                                              |
| 38               | Sri Lanka | Dates                           | 1997           | 2                                                              |
| 38               | Sri Lanka | Demersal Fish                   | 1997           | 2                                                              |
| 38               | Sri Lanka | Eggs                            | 1997           | 9                                                              |
| 38               | Sri Lanka | Fats, Animals, Raw              | 1997           | 5                                                              |
| 38               | Sri Lanka | Fish, Seafood                   | 1997           | 49                                                             |
| 38               | Sri Lanka | Freshwater Fish                 | 1997           | 3                                                              |
| 38               | Sri Lanka | Fruits - Excluding Wine         | 1997           | 69                                                             |
| 38               | Sri Lanka | Fruits, Other                   | 1997           | 7                                                              |
| 38               | Sri Lanka | Grand Total                     | 1997           | 2,270                                                          |
| 38               | Sri Lanka | Grapes and products (excl wine) | 1997           | 1                                                              |
| 38               | Sri Lanka | Groundnuts (Shelled Eq)         | 1997           | 2                                                              |
| 38               | Sri Lanka | Lemons, Limes and products      | 1997           | 1                                                              |
| 38               | Sri Lanka | Maize and products              | 1997           | 15                                                             |
| 38               | Sri Lanka | Marine Fish, Other              | 1997           | 2                                                              |
| 38               | Sri Lanka | Meat                            | 1997           | 20                                                             |
| 38               | Sri Lanka | Milk - Excluding Butter         | 1997           | 60                                                             |
| 38               | Sri Lanka | Millet and products             | 1997           | 2                                                              |
| 38               | Sri Lanka | Miscellaneous                   | 1997           | 1                                                              |
| 38               | Sri Lanka | Mutton & Goat Meat              | 1997           | 1                                                              |
| 38               | Sri Lanka | Offals                          | 1997           | 2                                                              |
| 38               | Sri Lanka | Oilcrops                        | 1997           | 264                                                            |
| 38               | Sri Lanka | Onions                          | 1997           | 14                                                             |
| 38               | Sri Lanka | Palmkernel Oil                  | 1997           | 3                                                              |
| 38               | Sri Lanka | Peas                            | 1997           | 8                                                              |
| 38               | Sri Lanka | Pelagic Fish                    | 1997           | 42                                                             |
| 38               | Sri Lanka | Pepper                          | 1997           | 6                                                              |
| 38               | Sri Lanka | Pigmeat                         | 1997           | 1                                                              |
| 38               | Sri Lanka | Pimento                         | 1997           | 5                                                              |
| 38               | Sri Lanka | Pineapples and products         | 1997           | 2                                                              |
| 38               | Sri Lanka | Plantains                       | 1997           | 56                                                             |
| 38               | Sri Lanka | Potatoes and products           | 1997           | 21                                                             |
| 38               | Sri Lanka | Poultry Meat                    | 1997           | 11                                                             |
| 38               | Sri Lanka | Pulses                          | 1997           | 71                                                             |
| 38               | Sri Lanka | Pulses, Other and products      | 1997           | 55                                                             |
| 38               | Sri Lanka | Rape and Mustardseed            | 1997           | 1                                                              |
| 38               | Sri Lanka | Rice (Milled Equivalent)        | 1997           | 870                                                            |
| 38               | Sri Lanka | Ricebran Oil                    | 1997           | 6                                                              |
| 38               | Sri Lanka | Sesame seed                     | 1997           | 4                                                              |
| 38               | Sri Lanka | Soyabean Oil                    | 1997           | 1                                                              |
| 38               | Sri Lanka | Spices                          | 1997           | 26                                                             |
| 38               | Sri Lanka | Spices, Other                   | 1997           | 15                                                             |
| 38               | Sri Lanka | Starchy Roots                   | 1997           | 68                                                             |
| 38               | Sri Lanka | Stimulants                      | 1997           | 3                                                              |
| 38               | Sri Lanka | Sugar & Sweeteners              | 1997           | 287                                                            |
| 38               | Sri Lanka | Sugar (Raw Equivalent)          | 1997           | 284                                                            |
| 38               | Sri Lanka | Sugar cane                      | 1997           | 35                                                             |
| 38               | Sri Lanka | Sugar Crops                     | 1997           | 35                                                             |
| 38               | Sri Lanka | Sugar non-centrifugal           | 1997           | 1                                                              |
| 38               | Sri Lanka | Sweet potatoes                  | 1997           | 7                                                              |
| 38               | Sri Lanka | Sweeteners, Other               | 1997           | 3                                                              |
| 38               | Sri Lanka | Tea (including mate)            | 1997           | 1                                                              |
| 38               | Sri Lanka | Tomatoes and products           | 1997           | 1                                                              |
| 38               | Sri Lanka | Treenuts                        | 1997           | 2                                                              |
| 38               | Sri Lanka | Vegetable Oils                  | 1997           | 49                                                             |
| 38               | Sri Lanka | Vegetables                      | 1997           | 30                                                             |
| 38               | Sri Lanka | Vegetables, Other               | 1997           | 15                                                             |
| 38               | Sri Lanka | Vegetal Products                | 1997           | 2,124                                                          |
| 38               | Sri Lanka | Wheat and products              | 1997           | 328                                                            |

Dietary calcium and zinc deficiency risks are decreasing but remain prevalent

| FAO Country code | Country   | Food item                       | Reference year | Net energy supply (kcal capita <sup>-1</sup> d <sup>-1</sup> ) |
|------------------|-----------|---------------------------------|----------------|----------------------------------------------------------------|
| 38               | Sri Lanka | Alcoholic Beverages             | 1998           | 4                                                              |
| 38               | Sri Lanka | Animal fats                     | 1998           | 9                                                              |
| 38               | Sri Lanka | Animal Products                 | 1998           | 144                                                            |
| 38               | Sri Lanka | Apples and products             | 1998           | 1                                                              |
| 38               | Sri Lanka | Beans                           | 1998           | 11                                                             |
| 38               | Sri Lanka | Beer                            | 1998           | 2                                                              |
| 38               | Sri Lanka | Beverages, Alcoholic            | 1998           | 2                                                              |
| 38               | Sri Lanka | Bovine Meat                     | 1998           | 7                                                              |
| 38               | Sri Lanka | Butter, Ghee                    | 1998           | 2                                                              |
| 38               | Sri Lanka | Cassava and products            | 1998           | 41                                                             |
| 38               | Sri Lanka | Cereals - Excluding Beer        | 1998           | 1,204                                                          |
| 38               | Sri Lanka | Cocoa Beans and products        | 1998           | 1                                                              |
| 38               | Sri Lanka | Coconut Oil                     | 1998           | 52                                                             |
| 38               | Sri Lanka | Coconuts - Incl Copra           | 1998           | 268                                                            |
| 38               | Sri Lanka | Coffee and products             | 1998           | 1                                                              |
| 38               | Sri Lanka | Dates                           | 1998           | 2                                                              |
| 38               | Sri Lanka | Demersal Fish                   | 1998           | 2                                                              |
| 38               | Sri Lanka | Eggs                            | 1998           | 9                                                              |
| 38               | Sri Lanka | Fats, Animals, Raw              | 1998           | 8                                                              |
| 38               | Sri Lanka | Fish, Seafood                   | 1998           | 50                                                             |
| 38               | Sri Lanka | Freshwater Fish                 | 1998           | 3                                                              |
| 38               | Sri Lanka | Fruits - Excluding Wine         | 1998           | 78                                                             |
| 38               | Sri Lanka | Fruits, Other                   | 1998           | 9                                                              |
| 38               | Sri Lanka | Grand Total                     | 1998           | 2,298                                                          |
| 38               | Sri Lanka | Grapes and products (excl wine) | 1998           | 1                                                              |
| 38               | Sri Lanka | Groundnuts (Shelled Eq)         | 1998           | 2                                                              |
| 38               | Sri Lanka | Lemons, Limes and products      | 1998           | 1                                                              |
| 38               | Sri Lanka | Maize and products              | 1998           | 30                                                             |
| 38               | Sri Lanka | Marine Fish, Other              | 1998           | 3                                                              |
| 38               | Sri Lanka | Meat                            | 1998           | 19                                                             |
| 38               | Sri Lanka | Milk - Excluding Butter         | 1998           | 54                                                             |
| 38               | Sri Lanka | Millet and products             | 1998           | 2                                                              |
| 38               | Sri Lanka | Miscellaneous                   | 1998           | 1                                                              |
| 38               | Sri Lanka | Mutton & Goat Meat              | 1998           | 1                                                              |
| 38               | Sri Lanka | Offals                          | 1998           | 2                                                              |
| 38               | Sri Lanka | Oilcrops                        | 1998           | 275                                                            |
| 38               | Sri Lanka | Onions                          | 1998           | 12                                                             |
| 38               | Sri Lanka | Palmkernel Oil                  | 1998           | 1                                                              |
| 38               | Sri Lanka | Peas                            | 1998           | 10                                                             |
| 38               | Sri Lanka | Pelagic Fish                    | 1998           | 41                                                             |
| 38               | Sri Lanka | Pepper                          | 1998           | 5                                                              |
| 38               | Sri Lanka | Pigmeat                         | 1998           | 1                                                              |
| 38               | Sri Lanka | Pimento                         | 1998           | 8                                                              |
| 38               | Sri Lanka | Pineapples and products         | 1998           | 1                                                              |
| 38               | Sri Lanka | Plantains                       | 1998           | 62                                                             |
| 38               | Sri Lanka | Potatoes and products           | 1998           | 19                                                             |
| 38               | Sri Lanka | Poultry Meat                    | 1998           | 11                                                             |
| 38               | Sri Lanka | Pulses                          | 1998           | 72                                                             |
| 38               | Sri Lanka | Pulses, Other and products      | 1998           | 51                                                             |
| 38               | Sri Lanka | Rape and Mustardseed            | 1998           | 1                                                              |
| 38               | Sri Lanka | Rice (Milled Equivalent)        | 1998           | 888                                                            |
| 38               | Sri Lanka | Ricebran Oil                    | 1998           | 7                                                              |
| 38               | Sri Lanka | Sesame seed                     | 1998           | 3                                                              |
| 38               | Sri Lanka | Soyabean Oil                    | 1998           | 1                                                              |
| 38               | Sri Lanka | Spices                          | 1998           | 28                                                             |
| 38               | Sri Lanka | Spices, Other                   | 1998           | 15                                                             |
| 38               | Sri Lanka | Starchy Roots                   | 1998           | 66                                                             |
| 38               | Sri Lanka | Stimulants                      | 1998           | 3                                                              |
| 38               | Sri Lanka | Sugar & Sweeteners              | 1998           | 316                                                            |
| 38               | Sri Lanka | Sugar (Raw Equivalent)          | 1998           | 312                                                            |
| 38               | Sri Lanka | Sugar cane                      | 1998           | 16                                                             |
| 38               | Sri Lanka | Sugar Crops                     | 1998           | 16                                                             |
| 38               | Sri Lanka | Sugar non-centrifugal           | 1998           | 1                                                              |
| 38               | Sri Lanka | Sunflowerseed Oil               | 1998           | 1                                                              |
| 38               | Sri Lanka | Sweet potatoes                  | 1998           | 7                                                              |
| 38               | Sri Lanka | Sweeteners, Other               | 1998           | 3                                                              |
| 38               | Sri Lanka | Tea (including mate)            | 1998           | 1                                                              |
| 38               | Sri Lanka | Tomatoes and products           | 1998           | 1                                                              |
| 38               | Sri Lanka | Treenuts                        | 1998           | 2                                                              |
| 38               | Sri Lanka | Vegetable Oils                  | 1998           | 62                                                             |
| 38               | Sri Lanka | Vegetables                      | 1998           | 27                                                             |
| 38               | Sri Lanka | Vegetables, Other               | 1998           | 15                                                             |
| 38               | Sri Lanka | Vegetal Products                | 1998           | 2,154                                                          |
| 38               | Sri Lanka | Wheat and products              | 1998           | 284                                                            |
| 38               | Sri Lanka | Alcoholic Beverages             | 1999           | 4                                                              |
| 38               | Sri Lanka | Animal fats                     | 1999           | 9                                                              |
| 38               | Sri Lanka | Animal Products                 | 1999           | 144                                                            |
| 38               | Sri Lanka | Apples and products             | 1999           | 1                                                              |
| 38               | Sri Lanka | Beans                           | 1999           | 14                                                             |
| 38               | Sri Lanka | Beer                            | 1999           | 2                                                              |
| 38               | Sri Lanka | Beverages, Alcoholic            | 1999           | 2                                                              |
| 38               | Sri Lanka | Bovine Meat                     | 1999           | 6                                                              |
| 38               | Sri Lanka | Butter, Ghee                    | 1999           | 2                                                              |
| 38               | Sri Lanka | Cassava and products            | 1999           | 40                                                             |
| 38               | Sri Lanka | Cereals - Excluding Beer        | 1999           | 1,320                                                          |
| 38               | Sri Lanka | Cocoa Beans and products        | 1999           | 1                                                              |
| 38               | Sri Lanka | Coconut Oil                     | 1999           | 63                                                             |
| 38               | Sri Lanka | Coconuts - Incl Copra           | 1999           | 260                                                            |
| 38               | Sri Lanka | Coffee and products             | 1999           | 1                                                              |
| 38               | Sri Lanka | Dates                           | 1999           | 4                                                              |
| 38               | Sri Lanka | Demersal Fish                   | 1999           | 3                                                              |
| 38               | Sri Lanka | Eggs                            | 1999           | 9                                                              |
| 38               | Sri Lanka | Fats, Animals, Raw              | 1999           | 7                                                              |
| 38               | Sri Lanka | Fish, Seafood                   | 1999           | 51                                                             |
| 38               | Sri Lanka | Freshwater Fish                 | 1999           | 3                                                              |
| 38               | Sri Lanka | Fruits - Excluding Wine         | 1999           | 77                                                             |
| 38               | Sri Lanka | Fruits, Other                   | 1999           | 7                                                              |



Dietary calcium and zinc deficiency risks are decreasing but remain prevalent

| FAO Country code | Country   | Food item                       | Reference year | Net energy supply (kcal <i>capita</i> <sup>-1</sup> d <sup>-1</sup> ) |
|------------------|-----------|---------------------------------|----------------|-----------------------------------------------------------------------|
| 38               | Sri Lanka | Grand Total                     | 1999           | 2,388                                                                 |
| 38               | Sri Lanka | Grapes and products (excl wine) | 1999           | 1                                                                     |
| 38               | Sri Lanka | Groundnut Oil                   | 1999           | 1                                                                     |
| 38               | Sri Lanka | Groundnuts (Shelled Eq)         | 1999           | 3                                                                     |
| 38               | Sri Lanka | Lemons, Limes and products      | 1999           | 1                                                                     |
| 38               | Sri Lanka | Maize and products              | 1999           | 30                                                                    |
| 38               | Sri Lanka | Marine Fish, Other              | 1999           | 3                                                                     |
| 38               | Sri Lanka | Meat                            | 1999           | 18                                                                    |
| 38               | Sri Lanka | Milk - Excluding Butter         | 1999           | 55                                                                    |
| 38               | Sri Lanka | Millet and products             | 1999           | 3                                                                     |
| 38               | Sri Lanka | Miscellaneous                   | 1999           | 1                                                                     |
| 38               | Sri Lanka | Mutton & Goat Meat              | 1999           | 1                                                                     |
| 38               | Sri Lanka | Offals                          | 1999           | 2                                                                     |
| 38               | Sri Lanka | Oilcrops                        | 1999           | 268                                                                   |
| 38               | Sri Lanka | Onions                          | 1999           | 14                                                                    |
| 38               | Sri Lanka | Palmkernel Oil                  | 1999           | 2                                                                     |
| 38               | Sri Lanka | Peas                            | 1999           | 9                                                                     |
| 38               | Sri Lanka | Pelagic Fish                    | 1999           | 42                                                                    |
| 38               | Sri Lanka | Pepper                          | 1999           | 5                                                                     |
| 38               | Sri Lanka | Pigmeat                         | 1999           | 1                                                                     |
| 38               | Sri Lanka | Pimento                         | 1999           | 8                                                                     |
| 38               | Sri Lanka | Pineapples and products         | 1999           | 1                                                                     |
| 38               | Sri Lanka | Plantains                       | 1999           | 62                                                                    |
| 38               | Sri Lanka | Potatoes and products           | 1999           | 20                                                                    |
| 38               | Sri Lanka | Poultry Meat                    | 1999           | 11                                                                    |
| 38               | Sri Lanka | Pulses                          | 1999           | 72                                                                    |
| 38               | Sri Lanka | Pulses, Other and products      | 1999           | 48                                                                    |
| 38               | Sri Lanka | Rape and Mustardseed            | 1999           | 1                                                                     |
| 38               | Sri Lanka | Rice (Milled Equivalent)        | 1999           | 933                                                                   |
| 38               | Sri Lanka | Ricebran Oil                    | 1999           | 7                                                                     |
| 38               | Sri Lanka | Sesame seed                     | 1999           | 4                                                                     |
| 38               | Sri Lanka | Soyabean Oil                    | 1999           | 1                                                                     |
| 38               | Sri Lanka | Spices                          | 1999           | 29                                                                    |
| 38               | Sri Lanka | Spices, Other                   | 1999           | 15                                                                    |
| 38               | Sri Lanka | Starchy Roots                   | 1999           | 66                                                                    |
| 38               | Sri Lanka | Stimulants                      | 1999           | 3                                                                     |
| 38               | Sri Lanka | Sugar & Sweeteners              | 1999           | 274                                                                   |
| 38               | Sri Lanka | Sugar (Raw Equivalent)          | 1999           | 270                                                                   |
| 38               | Sri Lanka | Sugar cane                      | 1999           | 18                                                                    |
| 38               | Sri Lanka | Sugar Crops                     | 1999           | 18                                                                    |
| 38               | Sri Lanka | Sugar non-centrifugal           | 1999           | 1                                                                     |
| 38               | Sri Lanka | Sunflowerseed Oil               | 1999           | 4                                                                     |
| 38               | Sri Lanka | Sweet potatoes                  | 1999           | 6                                                                     |
| 38               | Sri Lanka | Sweeteners, Other               | 1999           | 3                                                                     |
| 38               | Sri Lanka | Tea (including mate)            | 1999           | 1                                                                     |
| 38               | Sri Lanka | Tomatoes and products           | 1999           | 1                                                                     |
| 38               | Sri Lanka | Treenuts                        | 1999           | 3                                                                     |
| 38               | Sri Lanka | Vegetable Oils                  | 1999           | 79                                                                    |
| 38               | Sri Lanka | Vegetables                      | 1999           | 31                                                                    |
| 38               | Sri Lanka | Vegetables, Other               | 1999           | 16                                                                    |
| 38               | Sri Lanka | Vegetal Products                | 1999           | 2,244                                                                 |
| 38               | Sri Lanka | Wheat and products              | 1999           | 354                                                                   |
| 38               | Sri Lanka | Alcoholic Beverages             | 2000           | 4                                                                     |
| 38               | Sri Lanka | Animal fats                     | 2000           | 7                                                                     |
| 38               | Sri Lanka | Animal Products                 | 2000           | 149                                                                   |
| 38               | Sri Lanka | Apples and products             | 2000           | 1                                                                     |
| 38               | Sri Lanka | Beans                           | 2000           | 13                                                                    |
| 38               | Sri Lanka | Beer                            | 2000           | 2                                                                     |
| 38               | Sri Lanka | Beverages, Alcoholic            | 2000           | 2                                                                     |
| 38               | Sri Lanka | Bovine Meat                     | 2000           | 8                                                                     |
| 38               | Sri Lanka | Butter, Ghee                    | 2000           | 2                                                                     |
| 38               | Sri Lanka | Cassava and products            | 2000           | 39                                                                    |
| 38               | Sri Lanka | Cereals - Excluding Beer        | 2000           | 1,213                                                                 |
| 38               | Sri Lanka | Cocoa Beans and products        | 2000           | 1                                                                     |
| 38               | Sri Lanka | Coconut Oil                     | 2000           | 52                                                                    |
| 38               | Sri Lanka | Coconuts - Incl Copra           | 2000           | 272                                                                   |
| 38               | Sri Lanka | Coffee and products             | 2000           | 1                                                                     |
| 38               | Sri Lanka | Dates                           | 2000           | 3                                                                     |
| 38               | Sri Lanka | Demersal Fish                   | 2000           | 3                                                                     |
| 38               | Sri Lanka | Eggs                            | 2000           | 9                                                                     |
| 38               | Sri Lanka | Fats, Animals, Raw              | 2000           | 5                                                                     |
| 38               | Sri Lanka | Fish, Seafood                   | 2000           | 53                                                                    |
| 38               | Sri Lanka | Freshwater Fish                 | 2000           | 3                                                                     |
| 38               | Sri Lanka | Fruits - Excluding Wine         | 2000           | 75                                                                    |
| 38               | Sri Lanka | Fruits, Other                   | 2000           | 8                                                                     |
| 38               | Sri Lanka | Grand Total                     | 2000           | 2,319                                                                 |
| 38               | Sri Lanka | Grapes and products (excl wine) | 2000           | 1                                                                     |
| 38               | Sri Lanka | Groundnut Oil                   | 2000           | 1                                                                     |
| 38               | Sri Lanka | Groundnuts (Shelled Eq)         | 2000           | 4                                                                     |
| 38               | Sri Lanka | Lemons, Limes and products      | 2000           | 1                                                                     |
| 38               | Sri Lanka | Maize and products              | 2000           | 28                                                                    |
| 38               | Sri Lanka | Marine Fish, Other              | 2000           | 1                                                                     |
| 38               | Sri Lanka | Meat                            | 2000           | 21                                                                    |
| 38               | Sri Lanka | Milk - Excluding Butter         | 2000           | 56                                                                    |
| 38               | Sri Lanka | Millet and products             | 2000           | 3                                                                     |
| 38               | Sri Lanka | Miscellaneous                   | 2000           | 1                                                                     |
| 38               | Sri Lanka | Mutton & Goat Meat              | 2000           | 1                                                                     |
| 38               | Sri Lanka | Offals                          | 2000           | 2                                                                     |
| 38               | Sri Lanka | Oilcrops                        | 2000           | 281                                                                   |
| 38               | Sri Lanka | Onions                          | 2000           | 15                                                                    |
| 38               | Sri Lanka | Oranges, Mandarines             | 2000           | 1                                                                     |
| 38               | Sri Lanka | Palmkernel Oil                  | 2000           | 2                                                                     |
| 38               | Sri Lanka | Peas                            | 2000           | 10                                                                    |
| 38               | Sri Lanka | Pelagic Fish                    | 2000           | 46                                                                    |
| 38               | Sri Lanka | Pepper                          | 2000           | 5                                                                     |
| 38               | Sri Lanka | Pigmeat                         | 2000           | 1                                                                     |
| 38               | Sri Lanka | Pimento                         | 2000           | 9                                                                     |

Dietary calcium and zinc deficiency risks are decreasing but remain prevalent

| FAO Country code | Country   | Food item                       | Reference year | Net energy supply (kcal capita <sup>-1</sup> d <sup>-1</sup> ) |
|------------------|-----------|---------------------------------|----------------|----------------------------------------------------------------|
| 38               | Sri Lanka | Pineapples and products         | 2000           | 1                                                              |
| 38               | Sri Lanka | Plantains                       | 2000           | 60                                                             |
| 38               | Sri Lanka | Potatoes and products           | 2000           | 20                                                             |
| 38               | Sri Lanka | Poultry Meat                    | 2000           | 12                                                             |
| 38               | Sri Lanka | Pulses                          | 2000           | 65                                                             |
| 38               | Sri Lanka | Pulses, Other and products      | 2000           | 42                                                             |
| 38               | Sri Lanka | Rape and Mustardseed            | 2000           | 1                                                              |
| 38               | Sri Lanka | Rice (Milled Equivalent)        | 2000           | 892                                                            |
| 38               | Sri Lanka | Ricebran Oil                    | 2000           | 7                                                              |
| 38               | Sri Lanka | Sesame seed                     | 2000           | 4                                                              |
| 38               | Sri Lanka | Soyabean Oil                    | 2000           | 2                                                              |
| 38               | Sri Lanka | Spices                          | 2000           | 31                                                             |
| 38               | Sri Lanka | Spices, Other                   | 2000           | 17                                                             |
| 38               | Sri Lanka | Starchy Roots                   | 2000           | 66                                                             |
| 38               | Sri Lanka | Stimulants                      | 2000           | 3                                                              |
| 38               | Sri Lanka | Sugar & Sweeteners              | 2000           | 313                                                            |
| 38               | Sri Lanka | Sugar (Raw Equivalent)          | 2000           | 309                                                            |
| 38               | Sri Lanka | Sugar cane                      | 2000           | 20                                                             |
| 38               | Sri Lanka | Sugar Crops                     | 2000           | 20                                                             |
| 38               | Sri Lanka | Sugar non-centrifugal           | 2000           | 1                                                              |
| 38               | Sri Lanka | Sweet potatoes                  | 2000           | 6                                                              |
| 38               | Sri Lanka | Sweeteners, Other               | 2000           | 3                                                              |
| 38               | Sri Lanka | Tea (including mate)            | 2000           | 1                                                              |
| 38               | Sri Lanka | Tomatoes and products           | 2000           | 1                                                              |
| 38               | Sri Lanka | Treenuts                        | 2000           | 3                                                              |
| 38               | Sri Lanka | Vegetable Oils                  | 2000           | 65                                                             |
| 38               | Sri Lanka | Vegetables                      | 2000           | 31                                                             |
| 38               | Sri Lanka | Vegetables, Other               | 2000           | 15                                                             |
| 38               | Sri Lanka | Vegetal Products                | 2000           | 2,171                                                          |
| 38               | Sri Lanka | Wheat and products              | 2000           | 290                                                            |
| 38               | Sri Lanka | Alcoholic Beverages             | 2001           | 4                                                              |
| 38               | Sri Lanka | Animal fats                     | 2001           | 15                                                             |
| 38               | Sri Lanka | Animal Products                 | 2001           | 151                                                            |
| 38               | Sri Lanka | Apples and products             | 2001           | 1                                                              |
| 38               | Sri Lanka | Beans                           | 2001           | 13                                                             |
| 38               | Sri Lanka | Beer                            | 2001           | 2                                                              |
| 38               | Sri Lanka | Beverages, Alcoholic            | 2001           | 2                                                              |
| 38               | Sri Lanka | Bovine Meat                     | 2001           | 7                                                              |
| 38               | Sri Lanka | Butter, Ghee                    | 2001           | 1                                                              |
| 38               | Sri Lanka | Cassava and products            | 2001           | 37                                                             |
| 38               | Sri Lanka | Cereals - Excluding Beer        | 2001           | 1,264                                                          |
| 38               | Sri Lanka | Cocoa Beans and products        | 2001           | 1                                                              |
| 38               | Sri Lanka | Coconut Oil                     | 2001           | 66                                                             |
| 38               | Sri Lanka | Coconuts - Incl Copra           | 2001           | 238                                                            |
| 38               | Sri Lanka | Coffee and products             | 2001           | 1                                                              |
| 38               | Sri Lanka | Dates                           | 2001           | 3                                                              |
| 38               | Sri Lanka | Demersal Fish                   | 2001           | 3                                                              |
| 38               | Sri Lanka | Eggs                            | 2001           | 9                                                              |
| 38               | Sri Lanka | Fats, Animals, Raw              | 2001           | 13                                                             |
| 38               | Sri Lanka | Fish, Seafood                   | 2001           | 49                                                             |
| 38               | Sri Lanka | Freshwater Fish                 | 2001           | 3                                                              |
| 38               | Sri Lanka | Fruits - Excluding Wine         | 2001           | 82                                                             |
| 38               | Sri Lanka | Fruits, Other                   | 2001           | 9                                                              |
| 38               | Sri Lanka | Grand Total                     | 2001           | 2,361                                                          |
| 38               | Sri Lanka | Grapes and products (excl wine) | 2001           | 1                                                              |
| 38               | Sri Lanka | Groundnut Oil                   | 2001           | 1                                                              |
| 38               | Sri Lanka | Groundnuts (Shelled Eq)         | 2001           | 3                                                              |
| 38               | Sri Lanka | Lemons, Limes and products      | 2001           | 1                                                              |
| 38               | Sri Lanka | Maize and products              | 2001           | 37                                                             |
| 38               | Sri Lanka | Marine Fish, Other              | 2001           | 1                                                              |
| 38               | Sri Lanka | Meat                            | 2001           | 23                                                             |
| 38               | Sri Lanka | Milk - Excluding Butter         | 2001           | 53                                                             |
| 38               | Sri Lanka | Millet and products             | 2001           | 3                                                              |
| 38               | Sri Lanka | Miscellaneous                   | 2001           | 1                                                              |
| 38               | Sri Lanka | Mutton & Goat Meat              | 2001           | 1                                                              |
| 38               | Sri Lanka | Offals                          | 2001           | 2                                                              |
| 38               | Sri Lanka | Oilcrops                        | 2001           | 246                                                            |
| 38               | Sri Lanka | Onions                          | 2001           | 13                                                             |
| 38               | Sri Lanka | Oranges, Mandarines             | 2001           | 1                                                              |
| 38               | Sri Lanka | Palmkernel Oil                  | 2001           | 2                                                              |
| 38               | Sri Lanka | Peas                            | 2001           | 10                                                             |
| 38               | Sri Lanka | Pelagic Fish                    | 2001           | 42                                                             |
| 38               | Sri Lanka | Pepper                          | 2001           | 6                                                              |
| 38               | Sri Lanka | Pigmeat                         | 2001           | 1                                                              |
| 38               | Sri Lanka | Pimento                         | 2001           | 10                                                             |
| 38               | Sri Lanka | Pineapples and products         | 2001           | 2                                                              |
| 38               | Sri Lanka | Plantains                       | 2001           | 66                                                             |
| 38               | Sri Lanka | Potatoes and products           | 2001           | 14                                                             |
| 38               | Sri Lanka | Poultry Meat                    | 2001           | 15                                                             |
| 38               | Sri Lanka | Pulses                          | 2001           | 80                                                             |
| 38               | Sri Lanka | Pulses, Other and products      | 2001           | 57                                                             |
| 38               | Sri Lanka | Rape and Mustardseed            | 2001           | 1                                                              |
| 38               | Sri Lanka | Rice (Milled Equivalent)        | 2001           | 902                                                            |
| 38               | Sri Lanka | Ricebran Oil                    | 2001           | 7                                                              |
| 38               | Sri Lanka | Sesame seed                     | 2001           | 3                                                              |
| 38               | Sri Lanka | Soyabean Oil                    | 2001           | 1                                                              |
| 38               | Sri Lanka | Spices                          | 2001           | 30                                                             |
| 38               | Sri Lanka | Spices, Other                   | 2001           | 14                                                             |
| 38               | Sri Lanka | Starchy Roots                   | 2001           | 57                                                             |
| 38               | Sri Lanka | Stimulants                      | 2001           | 3                                                              |
| 38               | Sri Lanka | Sugar & Sweeteners              | 2001           | 308                                                            |
| 38               | Sri Lanka | Sugar (Raw Equivalent)          | 2001           | 305                                                            |
| 38               | Sri Lanka | Sugar cane                      | 2001           | 24                                                             |
| 38               | Sri Lanka | Sugar Crops                     | 2001           | 24                                                             |
| 38               | Sri Lanka | Sugar non-centrifugal           | 2001           | 1                                                              |
| 38               | Sri Lanka | Sweet potatoes                  | 2001           | 6                                                              |
| 38               | Sri Lanka | Sweeteners, Other               | 2001           | 3                                                              |

Dietary calcium and zinc deficiency risks are decreasing but remain prevalent

| FAO Country code | Country   | Food item                       | Reference year | Net energy supply (kcal capita <sup>-1</sup> d <sup>-1</sup> ) |
|------------------|-----------|---------------------------------|----------------|----------------------------------------------------------------|
| 38               | Sri Lanka | Tea (including mate)            | 2001           | 1                                                              |
| 38               | Sri Lanka | Tomatoes and products           | 2001           | 1                                                              |
| 38               | Sri Lanka | Treenuts                        | 2001           | 4                                                              |
| 38               | Sri Lanka | Vegetable Oils                  | 2001           | 78                                                             |
| 38               | Sri Lanka | Vegetables                      | 2001           | 28                                                             |
| 38               | Sri Lanka | Vegetables, Other               | 2001           | 14                                                             |
| 38               | Sri Lanka | Vegetal Products                | 2001           | 2,209                                                          |
| 38               | Sri Lanka | Wheat and products              | 2001           | 322                                                            |
| 38               | Sri Lanka | Alcoholic Beverages             | 2002           | 5                                                              |
| 38               | Sri Lanka | Animal fats                     | 2002           | 5                                                              |
| 38               | Sri Lanka | Animal Products                 | 2002           | 146                                                            |
| 38               | Sri Lanka | Apples and products             | 2002           | 1                                                              |
| 38               | Sri Lanka | Beans                           | 2002           | 12                                                             |
| 38               | Sri Lanka | Beer                            | 2002           | 3                                                              |
| 38               | Sri Lanka | Beverages, Alcoholic            | 2002           | 2                                                              |
| 38               | Sri Lanka | Bovine Meat                     | 2002           | 7                                                              |
| 38               | Sri Lanka | Butter, Ghee                    | 2002           | 2                                                              |
| 38               | Sri Lanka | Cassava and products            | 2002           | 35                                                             |
| 38               | Sri Lanka | Cereals - Excluding Beer        | 2002           | 1,262                                                          |
| 38               | Sri Lanka | Cocoa Beans and products        | 2002           | 1                                                              |
| 38               | Sri Lanka | Coconut Oil                     | 2002           | 58                                                             |
| 38               | Sri Lanka | Coconuts - Incl Copra           | 2002           | 243                                                            |
| 38               | Sri Lanka | Coffee and products             | 2002           | 1                                                              |
| 38               | Sri Lanka | Dates                           | 2002           | 3                                                              |
| 38               | Sri Lanka | Demersal Fish                   | 2002           | 3                                                              |
| 38               | Sri Lanka | Eggs                            | 2002           | 9                                                              |
| 38               | Sri Lanka | Fats, Animals, Raw              | 2002           | 3                                                              |
| 38               | Sri Lanka | Fish, Seafood                   | 2002           | 49                                                             |
| 38               | Sri Lanka | Freshwater Fish                 | 2002           | 2                                                              |
| 38               | Sri Lanka | Fruits - Excluding Wine         | 2002           | 65                                                             |
| 38               | Sri Lanka | Fruits, Other                   | 2002           | 9                                                              |
| 38               | Sri Lanka | Grand Total                     | 2002           | 2,336                                                          |
| 38               | Sri Lanka | Grapes and products (excl wine) | 2002           | 1                                                              |
| 38               | Sri Lanka | Groundnut Oil                   | 2002           | 1                                                              |
| 38               | Sri Lanka | Groundnuts (Shelled Eq)         | 2002           | 3                                                              |
| 38               | Sri Lanka | Lemons, Limes and products      | 2002           | 1                                                              |
| 38               | Sri Lanka | Maize and products              | 2002           | 44                                                             |
| 38               | Sri Lanka | Marine Fish, Other              | 2002           | 1                                                              |
| 38               | Sri Lanka | Meat                            | 2002           | 24                                                             |
| 38               | Sri Lanka | Milk - Excluding Butter         | 2002           | 58                                                             |
| 38               | Sri Lanka | Millet and products             | 2002           | 3                                                              |
| 38               | Sri Lanka | Miscellaneous                   | 2002           | 1                                                              |
| 38               | Sri Lanka | Mutton & Goat Meat              | 2002           | 1                                                              |
| 38               | Sri Lanka | Offals                          | 2002           | 2                                                              |
| 38               | Sri Lanka | Oilcrops                        | 2002           | 250                                                            |
| 38               | Sri Lanka | Onions                          | 2002           | 14                                                             |
| 38               | Sri Lanka | Oranges, Mandarines             | 2002           | 1                                                              |
| 38               | Sri Lanka | Palmkernel Oil                  | 2002           | 2                                                              |
| 38               | Sri Lanka | Peas                            | 2002           | 8                                                              |
| 38               | Sri Lanka | Pelagic Fish                    | 2002           | 42                                                             |
| 38               | Sri Lanka | Pepper                          | 2002           | 4                                                              |
| 38               | Sri Lanka | Pigmeat                         | 2002           | 1                                                              |
| 38               | Sri Lanka | Pimento                         | 2002           | 10                                                             |
| 38               | Sri Lanka | Pineapples and products         | 2002           | 2                                                              |
| 38               | Sri Lanka | Plantains                       | 2002           | 47                                                             |
| 38               | Sri Lanka | Potatoes and products           | 2002           | 14                                                             |
| 38               | Sri Lanka | Poultry Meat                    | 2002           | 15                                                             |
| 38               | Sri Lanka | Pulses                          | 2002           | 74                                                             |
| 38               | Sri Lanka | Pulses, Other and products      | 2002           | 54                                                             |
| 38               | Sri Lanka | Rape and Mustardseed            | 2002           | 1                                                              |
| 38               | Sri Lanka | Rice (Milled Equivalent)        | 2002           | 887                                                            |
| 38               | Sri Lanka | Ricebran Oil                    | 2002           | 7                                                              |
| 38               | Sri Lanka | Sesame seed                     | 2002           | 3                                                              |
| 38               | Sri Lanka | Soyabean Oil                    | 2002           | 1                                                              |
| 38               | Sri Lanka | Spices                          | 2002           | 30                                                             |
| 38               | Sri Lanka | Spices, Other                   | 2002           | 16                                                             |
| 38               | Sri Lanka | Starchy Roots                   | 2002           | 55                                                             |
| 38               | Sri Lanka | Stimulants                      | 2002           | 3                                                              |
| 38               | Sri Lanka | Sugar & Sweeteners              | 2002           | 316                                                            |
| 38               | Sri Lanka | Sugar (Raw Equivalent)          | 2002           | 313                                                            |
| 38               | Sri Lanka | Sugar cane                      | 2002           | 25                                                             |
| 38               | Sri Lanka | Sugar Crops                     | 2002           | 25                                                             |
| 38               | Sri Lanka | Sugar non-centrifugal           | 2002           | 1                                                              |
| 38               | Sri Lanka | Sweet potatoes                  | 2002           | 6                                                              |
| 38               | Sri Lanka | Sweeteners, Other               | 2002           | 3                                                              |
| 38               | Sri Lanka | Tea (including mate)            | 2002           | 1                                                              |
| 38               | Sri Lanka | Tomatoes and products           | 2002           | 1                                                              |
| 38               | Sri Lanka | Treenuts                        | 2002           | 3                                                              |
| 38               | Sri Lanka | Vegetable Oils                  | 2002           | 71                                                             |
| 38               | Sri Lanka | Vegetables                      | 2002           | 30                                                             |
| 38               | Sri Lanka | Vegetables, Other               | 2002           | 15                                                             |
| 38               | Sri Lanka | Vegetal Products                | 2002           | 2,190                                                          |
| 38               | Sri Lanka | Wheat and products              | 2002           | 329                                                            |
| 38               | Sri Lanka | Alcoholic Beverages             | 2003           | 5                                                              |
| 38               | Sri Lanka | Animal fats                     | 2003           | 17                                                             |
| 38               | Sri Lanka | Animal Products                 | 2003           | 161                                                            |
| 38               | Sri Lanka | Apples and products             | 2003           | 2                                                              |
| 38               | Sri Lanka | Beans                           | 2003           | 13                                                             |
| 38               | Sri Lanka | Beer                            | 2003           | 3                                                              |
| 38               | Sri Lanka | Beverages, Alcoholic            | 2003           | 2                                                              |
| 38               | Sri Lanka | Bovine Meat                     | 2003           | 7                                                              |
| 38               | Sri Lanka | Butter, Ghee                    | 2003           | 2                                                              |
| 38               | Sri Lanka | Cassava and products            | 2003           | 35                                                             |
| 38               | Sri Lanka | Cereals - Excluding Beer        | 2003           | 1,274                                                          |
| 38               | Sri Lanka | Cocoa Beans and products        | 2003           | 1                                                              |
| 38               | Sri Lanka | Coconut Oil                     | 2003           | 49                                                             |
| 38               | Sri Lanka | Coconuts - Incl Copra           | 2003           | 257                                                            |

Dietary calcium and zinc deficiency risks are decreasing but remain prevalent

| FAO Country code | Country   | Food item                       | Reference year | Net energy supply (kcal capita <sup>-1</sup> d <sup>-1</sup> ) |
|------------------|-----------|---------------------------------|----------------|----------------------------------------------------------------|
| 38               | Sri Lanka | Coffee and products             | 2003           | 1                                                              |
| 38               | Sri Lanka | Crustaceans                     | 2003           | 1                                                              |
| 38               | Sri Lanka | Dates                           | 2003           | 3                                                              |
| 38               | Sri Lanka | Demersal Fish                   | 2003           | 3                                                              |
| 38               | Sri Lanka | Eggs                            | 2003           | 8                                                              |
| 38               | Sri Lanka | Fats, Animals, Raw              | 2003           | 15                                                             |
| 38               | Sri Lanka | Fish, Seafood                   | 2003           | 51                                                             |
| 38               | Sri Lanka | Freshwater Fish                 | 2003           | 3                                                              |
| 38               | Sri Lanka | Fruits - Excluding Wine         | 2003           | 63                                                             |
| 38               | Sri Lanka | Fruits, Other                   | 2003           | 9                                                              |
| 38               | Sri Lanka | Grand Total                     | 2003           | 2,332                                                          |
| 38               | Sri Lanka | Grapes and products (excl wine) | 2003           | 1                                                              |
| 38               | Sri Lanka | Groundnuts (Shelled Eq)         | 2003           | 2                                                              |
| 38               | Sri Lanka | Maize and products              | 2003           | 52                                                             |
| 38               | Sri Lanka | Meat                            | 2003           | 24                                                             |
| 38               | Sri Lanka | Milk - Excluding Butter         | 2003           | 58                                                             |
| 38               | Sri Lanka | Millet and products             | 2003           | 3                                                              |
| 38               | Sri Lanka | Miscellaneous                   | 2003           | 1                                                              |
| 38               | Sri Lanka | Offals                          | 2003           | 2                                                              |
| 38               | Sri Lanka | Oilcrops                        | 2003           | 264                                                            |
| 38               | Sri Lanka | Onions                          | 2003           | 14                                                             |
| 38               | Sri Lanka | Oranges, Mandarines             | 2003           | 1                                                              |
| 38               | Sri Lanka | Palmkernel Oil                  | 2003           | 2                                                              |
| 38               | Sri Lanka | Peas                            | 2003           | 8                                                              |
| 38               | Sri Lanka | Pelagic Fish                    | 2003           | 44                                                             |
| 38               | Sri Lanka | Pepper                          | 2003           | 4                                                              |
| 38               | Sri Lanka | Pigmeat                         | 2003           | 1                                                              |
| 38               | Sri Lanka | Pimento                         | 2003           | 11                                                             |
| 38               | Sri Lanka | Pineapples and products         | 2003           | 1                                                              |
| 38               | Sri Lanka | Plantains                       | 2003           | 47                                                             |
| 38               | Sri Lanka | Potatoes and products           | 2003           | 12                                                             |
| 38               | Sri Lanka | Poultry Meat                    | 2003           | 16                                                             |
| 38               | Sri Lanka | Pulses                          | 2003           | 73                                                             |
| 38               | Sri Lanka | Pulses, Other and products      | 2003           | 52                                                             |
| 38               | Sri Lanka | Rape and Mustardseed            | 2003           | 1                                                              |
| 38               | Sri Lanka | Rice (Milled Equivalent)        | 2003           | 882                                                            |
| 38               | Sri Lanka | Ricebran Oil                    | 2003           | 8                                                              |
| 38               | Sri Lanka | Sesame seed                     | 2003           | 3                                                              |
| 38               | Sri Lanka | Soyabean Oil                    | 2003           | 1                                                              |
| 38               | Sri Lanka | Spices                          | 2003           | 31                                                             |
| 38               | Sri Lanka | Spices, Other                   | 2003           | 16                                                             |
| 38               | Sri Lanka | Starchy Roots                   | 2003           | 52                                                             |
| 38               | Sri Lanka | Stimulants                      | 2003           | 3                                                              |
| 38               | Sri Lanka | Sugar & Sweeteners              | 2003           | 289                                                            |
| 38               | Sri Lanka | Sugar (Raw Equivalent)          | 2003           | 285                                                            |
| 38               | Sri Lanka | Sugar cane                      | 2003           | 21                                                             |
| 38               | Sri Lanka | Sugar Crops                     | 2003           | 21                                                             |
| 38               | Sri Lanka | Sugar non-centrifugal           | 2003           | 1                                                              |
| 38               | Sri Lanka | Sunflowerseed Oil               | 2003           | 1                                                              |
| 38               | Sri Lanka | Sweet potatoes                  | 2003           | 5                                                              |
| 38               | Sri Lanka | Sweeteners, Other               | 2003           | 3                                                              |
| 38               | Sri Lanka | Tea (including mate)            | 2003           | 1                                                              |
| 38               | Sri Lanka | Tomatoes and products           | 2003           | 1                                                              |
| 38               | Sri Lanka | Treenuts                        | 2003           | 4                                                              |
| 38               | Sri Lanka | Vegetable Oils                  | 2003           | 62                                                             |
| 38               | Sri Lanka | Vegetables                      | 2003           | 30                                                             |
| 38               | Sri Lanka | Vegetables, Other               | 2003           | 15                                                             |
| 38               | Sri Lanka | Vegetal Products                | 2003           | 2,170                                                          |
| 38               | Sri Lanka | Wheat and products              | 2003           | 337                                                            |
| 38               | Sri Lanka | Alcoholic Beverages             | 2004           | 5                                                              |
| 38               | Sri Lanka | Animal fats                     | 2004           | 4                                                              |
| 38               | Sri Lanka | Animal Products                 | 2004           | 141                                                            |
| 38               | Sri Lanka | Apples and products             | 2004           | 1                                                              |
| 38               | Sri Lanka | Beans                           | 2004           | 15                                                             |
| 38               | Sri Lanka | Beer                            | 2004           | 3                                                              |
| 38               | Sri Lanka | Beverages, Alcoholic            | 2004           | 2                                                              |
| 38               | Sri Lanka | Bovine Meat                     | 2004           | 7                                                              |
| 38               | Sri Lanka | Butter, Ghee                    | 2004           | 2                                                              |
| 38               | Sri Lanka | Cassava and products            | 2004           | 33                                                             |
| 38               | Sri Lanka | Cereals - Excluding Beer        | 2004           | 1,330                                                          |
| 38               | Sri Lanka | Cocoa Beans and products        | 2004           | 1                                                              |
| 38               | Sri Lanka | Coconut Oil                     | 2004           | 40                                                             |
| 38               | Sri Lanka | Coconuts - Incl Copra           | 2004           | 265                                                            |
| 38               | Sri Lanka | Coffee and products             | 2004           | 1                                                              |
| 38               | Sri Lanka | Crustaceans                     | 2004           | 1                                                              |
| 38               | Sri Lanka | Dates                           | 2004           | 2                                                              |
| 38               | Sri Lanka | Demersal Fish                   | 2004           | 3                                                              |
| 38               | Sri Lanka | Eggs                            | 2004           | 8                                                              |
| 38               | Sri Lanka | Fats, Animals, Raw              | 2004           | 3                                                              |
| 38               | Sri Lanka | Fish, Seafood                   | 2004           | 49                                                             |
| 38               | Sri Lanka | Freshwater Fish                 | 2004           | 3                                                              |
| 38               | Sri Lanka | Fruits - Excluding Wine         | 2004           | 63                                                             |
| 38               | Sri Lanka | Fruits, Other                   | 2004           | 6                                                              |
| 38               | Sri Lanka | Grand Total                     | 2004           | 2,349                                                          |
| 38               | Sri Lanka | Grapes and products (excl wine) | 2004           | 1                                                              |
| 38               | Sri Lanka | Groundnut Oil                   | 2004           | 1                                                              |
| 38               | Sri Lanka | Groundnuts (Shelled Eq)         | 2004           | 3                                                              |
| 38               | Sri Lanka | Maize and products              | 2004           | 51                                                             |
| 38               | Sri Lanka | Marine Fish, Other              | 2004           | 1                                                              |
| 38               | Sri Lanka | Meat                            | 2004           | 25                                                             |
| 38               | Sri Lanka | Milk - Excluding Butter         | 2004           | 52                                                             |
| 38               | Sri Lanka | Millet and products             | 2004           | 3                                                              |
| 38               | Sri Lanka | Miscellaneous                   | 2004           | 1                                                              |
| 38               | Sri Lanka | Offals                          | 2004           | 2                                                              |
| 38               | Sri Lanka | Oilcrops                        | 2004           | 270                                                            |
| 38               | Sri Lanka | Onions                          | 2004           | 14                                                             |
| 38               | Sri Lanka | Oranges, Mandarines             | 2004           | 1                                                              |

Dietary calcium and zinc deficiency risks are decreasing but remain prevalent

| FAO Country code | Country   | Food item                       | Reference year | Net energy supply (kcal capita <sup>-1</sup> d <sup>-1</sup> ) |
|------------------|-----------|---------------------------------|----------------|----------------------------------------------------------------|
| 38               | Sri Lanka | Palmkernel Oil                  | 2004           | 2                                                              |
| 38               | Sri Lanka | Peas                            | 2004           | 9                                                              |
| 38               | Sri Lanka | Pelagic Fish                    | 2004           | 42                                                             |
| 38               | Sri Lanka | Pepper                          | 2004           | 5                                                              |
| 38               | Sri Lanka | Pigmeat                         | 2004           | 1                                                              |
| 38               | Sri Lanka | Pimento                         | 2004           | 9                                                              |
| 38               | Sri Lanka | Pineapples and products         | 2004           | 2                                                              |
| 38               | Sri Lanka | Plantains                       | 2004           | 50                                                             |
| 38               | Sri Lanka | Potatoes and products           | 2004           | 12                                                             |
| 38               | Sri Lanka | Poultry Meat                    | 2004           | 16                                                             |
| 38               | Sri Lanka | Pulses                          | 2004           | 72                                                             |
| 38               | Sri Lanka | Pulses, Other and products      | 2004           | 48                                                             |
| 38               | Sri Lanka | Rape and Mustardseed            | 2004           | 1                                                              |
| 38               | Sri Lanka | Rice (Milled Equivalent)        | 2004           | 941                                                            |
| 38               | Sri Lanka | Ricebran Oil                    | 2004           | 7                                                              |
| 38               | Sri Lanka | Sesame seed                     | 2004           | 1                                                              |
| 38               | Sri Lanka | Sesameseed Oil                  | 2004           | 1                                                              |
| 38               | Sri Lanka | Soyabean Oil                    | 2004           | 1                                                              |
| 38               | Sri Lanka | Spices                          | 2004           | 30                                                             |
| 38               | Sri Lanka | Spices, Other                   | 2004           | 15                                                             |
| 38               | Sri Lanka | Starchy Roots                   | 2004           | 50                                                             |
| 38               | Sri Lanka | Stimulants                      | 2004           | 3                                                              |
| 38               | Sri Lanka | Sugar & Sweeteners              | 2004           | 280                                                            |
| 38               | Sri Lanka | Sugar (Raw Equivalent)          | 2004           | 276                                                            |
| 38               | Sri Lanka | Sugar cane                      | 2004           | 17                                                             |
| 38               | Sri Lanka | Sugar Crops                     | 2004           | 17                                                             |
| 38               | Sri Lanka | Sugar non-centrifugal           | 2004           | 1                                                              |
| 38               | Sri Lanka | Sunflowerseed Oil               | 2004           | 1                                                              |
| 38               | Sri Lanka | Sweet potatoes                  | 2004           | 5                                                              |
| 38               | Sri Lanka | Sweeteners, Other               | 2004           | 3                                                              |
| 38               | Sri Lanka | Tea (including mate)            | 2004           | 1                                                              |
| 38               | Sri Lanka | Tomatoes and products           | 2004           | 1                                                              |
| 38               | Sri Lanka | Treenuts                        | 2004           | 6                                                              |
| 38               | Sri Lanka | Vegetable Oils                  | 2004           | 53                                                             |
| 38               | Sri Lanka | Vegetables                      | 2004           | 30                                                             |
| 38               | Sri Lanka | Vegetables, Other               | 2004           | 15                                                             |
| 38               | Sri Lanka | Vegetal Products                | 2004           | 2,208                                                          |
| 38               | Sri Lanka | Wheat and products              | 2004           | 334                                                            |
| 38               | Sri Lanka | Alcoholic Beverages             | 2005           | 5                                                              |
| 38               | Sri Lanka | Animal fats                     | 2005           | 4                                                              |
| 38               | Sri Lanka | Animal Products                 | 2005           | 125                                                            |
| 38               | Sri Lanka | Apples and products             | 2005           | 1                                                              |
| 38               | Sri Lanka | Beans                           | 2005           | 13                                                             |
| 38               | Sri Lanka | Beer                            | 2005           | 3                                                              |
| 38               | Sri Lanka | Beverages, Alcoholic            | 2005           | 2                                                              |
| 38               | Sri Lanka | Bovine Meat                     | 2005           | 7                                                              |
| 38               | Sri Lanka | Butter, Ghee                    | 2005           | 2                                                              |
| 38               | Sri Lanka | Cassava and products            | 2005           | 33                                                             |
| 38               | Sri Lanka | Cereals - Excluding Beer        | 2005           | 1,337                                                          |
| 38               | Sri Lanka | Cocoa Beans and products        | 2005           | 1                                                              |
| 38               | Sri Lanka | Coconut Oil                     | 2005           | 47                                                             |
| 38               | Sri Lanka | Coconuts - Incl Copra           | 2005           | 269                                                            |
| 38               | Sri Lanka | Dates                           | 2005           | 2                                                              |
| 38               | Sri Lanka | Demersal Fish                   | 2005           | 1                                                              |
| 38               | Sri Lanka | Eggs                            | 2005           | 8                                                              |
| 38               | Sri Lanka | Fats, Animals, Raw              | 2005           | 3                                                              |
| 38               | Sri Lanka | Fish, Seafood                   | 2005           | 35                                                             |
| 38               | Sri Lanka | Freshwater Fish                 | 2005           | 3                                                              |
| 38               | Sri Lanka | Fruits - Excluding Wine         | 2005           | 64                                                             |
| 38               | Sri Lanka | Fruits, Other                   | 2005           | 8                                                              |
| 38               | Sri Lanka | Grand Total                     | 2005           | 2,348                                                          |
| 38               | Sri Lanka | Grapes and products (excl wine) | 2005           | 1                                                              |
| 38               | Sri Lanka | Groundnut Oil                   | 2005           | 1                                                              |
| 38               | Sri Lanka | Groundnuts (Shelled Eq)         | 2005           | 4                                                              |
| 38               | Sri Lanka | Maize and products              | 2005           | 29                                                             |
| 38               | Sri Lanka | Meat                            | 2005           | 25                                                             |
| 38               | Sri Lanka | Milk - Excluding Butter         | 2005           | 50                                                             |
| 38               | Sri Lanka | Millet and products             | 2005           | 4                                                              |
| 38               | Sri Lanka | Miscellaneous                   | 2005           | 1                                                              |
| 38               | Sri Lanka | Offals                          | 2005           | 2                                                              |
| 38               | Sri Lanka | Oilcrops                        | 2005           | 278                                                            |
| 38               | Sri Lanka | Onions                          | 2005           | 17                                                             |
| 38               | Sri Lanka | Oranges, Mandarines             | 2005           | 1                                                              |
| 38               | Sri Lanka | Palmkernel Oil                  | 2005           | 4                                                              |
| 38               | Sri Lanka | Peas                            | 2005           | 9                                                              |
| 38               | Sri Lanka | Pelagic Fish                    | 2005           | 30                                                             |
| 38               | Sri Lanka | Pepper                          | 2005           | 4                                                              |
| 38               | Sri Lanka | Pigmeat                         | 2005           | 1                                                              |
| 38               | Sri Lanka | Pimento                         | 2005           | 10                                                             |
| 38               | Sri Lanka | Pineapples and products         | 2005           | 2                                                              |
| 38               | Sri Lanka | Plantains                       | 2005           | 50                                                             |
| 38               | Sri Lanka | Potatoes and products           | 2005           | 13                                                             |
| 38               | Sri Lanka | Poultry Meat                    | 2005           | 17                                                             |
| 38               | Sri Lanka | Pulses                          | 2005           | 67                                                             |
| 38               | Sri Lanka | Pulses, Other and products      | 2005           | 45                                                             |
| 38               | Sri Lanka | Rape and Mustardseed            | 2005           | 1                                                              |
| 38               | Sri Lanka | Rice (Milled Equivalent)        | 2005           | 970                                                            |
| 38               | Sri Lanka | Ricebran Oil                    | 2005           | 8                                                              |
| 38               | Sri Lanka | Sesame seed                     | 2005           | 3                                                              |
| 38               | Sri Lanka | Sesameseed Oil                  | 2005           | 3                                                              |
| 38               | Sri Lanka | Soyabean Oil                    | 2005           | 1                                                              |
| 38               | Sri Lanka | Spices                          | 2005           | 28                                                             |
| 38               | Sri Lanka | Spices, Other                   | 2005           | 14                                                             |
| 38               | Sri Lanka | Starchy Roots                   | 2005           | 51                                                             |
| 38               | Sri Lanka | Stimulants                      | 2005           | 2                                                              |
| 38               | Sri Lanka | Sugar & Sweeteners              | 2005           | 267                                                            |
| 38               | Sri Lanka | Sugar (Raw Equivalent)          | 2005           | 262                                                            |

Dietary calcium and zinc deficiency risks are decreasing but remain prevalent

| FAO Country code | Country   | Food item                  | Reference year | Net energy supply (kcal capita <sup>-1</sup> d <sup>-1</sup> ) |
|------------------|-----------|----------------------------|----------------|----------------------------------------------------------------|
| 38               | Sri Lanka | Sugar cane                 | 2005           | 19                                                             |
| 38               | Sri Lanka | Sugar Crops                | 2005           | 19                                                             |
| 38               | Sri Lanka | Sugar non-centrifugal      | 2005           | 2                                                              |
| 38               | Sri Lanka | Sunflowerseed Oil          | 2005           | 1                                                              |
| 38               | Sri Lanka | Sweet potatoes             | 2005           | 5                                                              |
| 38               | Sri Lanka | Sweeteners, Other          | 2005           | 3                                                              |
| 38               | Sri Lanka | Tea (including mate)       | 2005           | 1                                                              |
| 38               | Sri Lanka | Tomatoes and products      | 2005           | 1                                                              |
| 38               | Sri Lanka | Treenuts                   | 2005           | 6                                                              |
| 38               | Sri Lanka | Vegetable Oils             | 2005           | 65                                                             |
| 38               | Sri Lanka | Vegetables                 | 2005           | 34                                                             |
| 38               | Sri Lanka | Vegetables, Other          | 2005           | 16                                                             |
| 38               | Sri Lanka | Vegetal Products           | 2005           | 2,224                                                          |
| 38               | Sri Lanka | Wheat and products         | 2005           | 333                                                            |
| 38               | Sri Lanka | Alcoholic Beverages        | 2006           | 5                                                              |
| 38               | Sri Lanka | Animal fats                | 2006           | 5                                                              |
| 38               | Sri Lanka | Animal Products            | 2006           | 147                                                            |
| 38               | Sri Lanka | Apples and products        | 2006           | 1                                                              |
| 38               | Sri Lanka | Beans                      | 2006           | 9                                                              |
| 38               | Sri Lanka | Beer                       | 2006           | 3                                                              |
| 38               | Sri Lanka | Beverages, Alcoholic       | 2006           | 2                                                              |
| 38               | Sri Lanka | Bovine Meat                | 2006           | 7                                                              |
| 38               | Sri Lanka | Butter, Ghee               | 2006           | 2                                                              |
| 38               | Sri Lanka | Cassava and products       | 2006           | 34                                                             |
| 38               | Sri Lanka | Cereals - Excluding Beer   | 2006           | 1,289                                                          |
| 38               | Sri Lanka | Cocoa Beans and products   | 2006           | 1                                                              |
| 38               | Sri Lanka | Coconut Oil                | 2006           | 54                                                             |
| 38               | Sri Lanka | Coconuts - Incl Copra      | 2006           | 273                                                            |
| 38               | Sri Lanka | Demersal Fish              | 2006           | 1                                                              |
| 38               | Sri Lanka | Eggs                       | 2006           | 8                                                              |
| 38               | Sri Lanka | Fats, Animals, Raw         | 2006           | 3                                                              |
| 38               | Sri Lanka | Fish, Seafood              | 2006           | 44                                                             |
| 38               | Sri Lanka | Freshwater Fish            | 2006           | 4                                                              |
| 38               | Sri Lanka | Fruits - Excluding Wine    | 2006           | 57                                                             |
| 38               | Sri Lanka | Fruits, Other              | 2006           | 8                                                              |
| 38               | Sri Lanka | Grand Total                | 2006           | 2,377                                                          |
| 38               | Sri Lanka | Groundnut Oil              | 2006           | 1                                                              |
| 38               | Sri Lanka | Groundnuts (Shelled Eq)    | 2006           | 7                                                              |
| 38               | Sri Lanka | Maize and products         | 2006           | 10                                                             |
| 38               | Sri Lanka | Maize Germ Oil             | 2006           | 1                                                              |
| 38               | Sri Lanka | Marine Fish, Other         | 2006           | 1                                                              |
| 38               | Sri Lanka | Meat                       | 2006           | 21                                                             |
| 38               | Sri Lanka | Milk - Excluding Butter    | 2006           | 65                                                             |
| 38               | Sri Lanka | Millet and products        | 2006           | 4                                                              |
| 38               | Sri Lanka | Miscellaneous              | 2006           | 1                                                              |
| 38               | Sri Lanka | Offals                     | 2006           | 2                                                              |
| 38               | Sri Lanka | Oilcrops                   | 2006           | 284                                                            |
| 38               | Sri Lanka | Onions                     | 2006           | 19                                                             |
| 38               | Sri Lanka | Oranges, Mandarines        | 2006           | 1                                                              |
| 38               | Sri Lanka | Palmkernel Oil             | 2006           | 4                                                              |
| 38               | Sri Lanka | Peas                       | 2006           | 11                                                             |
| 38               | Sri Lanka | Pelagic Fish               | 2006           | 38                                                             |
| 38               | Sri Lanka | Pepper                     | 2006           | 4                                                              |
| 38               | Sri Lanka | Pigmeat                    | 2006           | 1                                                              |
| 38               | Sri Lanka | Pimento                    | 2006           | 10                                                             |
| 38               | Sri Lanka | Pineapples and products    | 2006           | 2                                                              |
| 38               | Sri Lanka | Plantains                  | 2006           | 45                                                             |
| 38               | Sri Lanka | Potatoes and products      | 2006           | 15                                                             |
| 38               | Sri Lanka | Poultry Meat               | 2006           | 13                                                             |
| 38               | Sri Lanka | Pulses                     | 2006           | 60                                                             |
| 38               | Sri Lanka | Pulses, Other and products | 2006           | 40                                                             |
| 38               | Sri Lanka | Rape and Mustardseed       | 2006           | 2                                                              |
| 38               | Sri Lanka | Rice (Milled Equivalent)   | 2006           | 975                                                            |
| 38               | Sri Lanka | Ricebran Oil               | 2006           | 8                                                              |
| 38               | Sri Lanka | Sesame seed                | 2006           | 2                                                              |
| 38               | Sri Lanka | Sesameseed Oil             | 2006           | 2                                                              |
| 38               | Sri Lanka | Soyabean Oil               | 2006           | 1                                                              |
| 38               | Sri Lanka | Spices                     | 2006           | 28                                                             |
| 38               | Sri Lanka | Spices, Other              | 2006           | 13                                                             |
| 38               | Sri Lanka | Starchy Roots              | 2006           | 53                                                             |
| 38               | Sri Lanka | Stimulants                 | 2006           | 8                                                              |
| 38               | Sri Lanka | Sugar & Sweeteners         | 2006           | 306                                                            |
| 38               | Sri Lanka | Sugar (Raw Equivalent)     | 2006           | 301                                                            |
| 38               | Sri Lanka | Sugar cane                 | 2006           | 24                                                             |
| 38               | Sri Lanka | Sugar Crops                | 2006           | 24                                                             |
| 38               | Sri Lanka | Sugar non-centrifugal      | 2006           | 2                                                              |
| 38               | Sri Lanka | Sunflowerseed Oil          | 2006           | 1                                                              |
| 38               | Sri Lanka | Sweet potatoes             | 2006           | 5                                                              |
| 38               | Sri Lanka | Sweeteners, Other          | 2006           | 3                                                              |
| 38               | Sri Lanka | Tea (including mate)       | 2006           | 6                                                              |
| 38               | Sri Lanka | Tomatoes and products      | 2006           | 1                                                              |
| 38               | Sri Lanka | Treenuts                   | 2006           | 6                                                              |
| 38               | Sri Lanka | Vegetable Oils             | 2006           | 72                                                             |
| 38               | Sri Lanka | Vegetables                 | 2006           | 37                                                             |
| 38               | Sri Lanka | Vegetables, Other          | 2006           | 17                                                             |
| 38               | Sri Lanka | Vegetal Products           | 2006           | 2,230                                                          |
| 38               | Sri Lanka | Wheat and products         | 2006           | 300                                                            |
| 38               | Sri Lanka | Alcoholic Beverages        | 2007           | 5                                                              |
| 38               | Sri Lanka | Animal fats                | 2007           | 4                                                              |
| 38               | Sri Lanka | Animal Products            | 2007           | 148                                                            |
| 38               | Sri Lanka | Apples and products        | 2007           | 1                                                              |
| 38               | Sri Lanka | Beans                      | 2007           | 7                                                              |
| 38               | Sri Lanka | Beer                       | 2007           | 3                                                              |
| 38               | Sri Lanka | Beverages, Alcoholic       | 2007           | 2                                                              |
| 38               | Sri Lanka | Bovine Meat                | 2007           | 6                                                              |
| 38               | Sri Lanka | Butter, Ghee               | 2007           | 2                                                              |
| 38               | Sri Lanka | Cassava and products       | 2007           | 32                                                             |

Dietary calcium and zinc deficiency risks are decreasing but remain prevalent

| FAO Country code | Country   | Food item                       | Reference year | Net energy supply (kcal capita <sup>-1</sup> d <sup>-1</sup> ) |
|------------------|-----------|---------------------------------|----------------|----------------------------------------------------------------|
| 38               | Sri Lanka | Cereals - Excluding Beer        | 2007           | 1,296                                                          |
| 38               | Sri Lanka | Cocoa Beans and products        | 2007           | 1                                                              |
| 38               | Sri Lanka | Coconut Oil                     | 2007           | 56                                                             |
| 38               | Sri Lanka | Coconuts - Incl Copra           | 2007           | 278                                                            |
| 38               | Sri Lanka | Crustaceans                     | 2007           | 1                                                              |
| 38               | Sri Lanka | Demersal Fish                   | 2007           | 1                                                              |
| 38               | Sri Lanka | Eggs                            | 2007           | 8                                                              |
| 38               | Sri Lanka | Fats, Animals, Raw              | 2007           | 3                                                              |
| 38               | Sri Lanka | Fish, Seafood                   | 2007           | 49                                                             |
| 38               | Sri Lanka | Freshwater Fish                 | 2007           | 4                                                              |
| 38               | Sri Lanka | Fruits - Excluding Wine         | 2007           | 59                                                             |
| 38               | Sri Lanka | Fruits, Other                   | 2007           | 8                                                              |
| 38               | Sri Lanka | Grand Total                     | 2007           | 2,371                                                          |
| 38               | Sri Lanka | Groundnut Oil                   | 2007           | 1                                                              |
| 38               | Sri Lanka | Groundnuts (Shelled Eq)         | 2007           | 4                                                              |
| 38               | Sri Lanka | Maize and products              | 2007           | 14                                                             |
| 38               | Sri Lanka | Marine Fish, Other              | 2007           | 1                                                              |
| 38               | Sri Lanka | Meat                            | 2007           | 24                                                             |
| 38               | Sri Lanka | Milk - Excluding Butter         | 2007           | 60                                                             |
| 38               | Sri Lanka | Millet and products             | 2007           | 4                                                              |
| 38               | Sri Lanka | Miscellaneous                   | 2007           | 1                                                              |
| 38               | Sri Lanka | Offals                          | 2007           | 2                                                              |
| 38               | Sri Lanka | Oilcrops                        | 2007           | 289                                                            |
| 38               | Sri Lanka | Oilcrops, Other                 | 2007           | 2                                                              |
| 38               | Sri Lanka | Onions                          | 2007           | 22                                                             |
| 38               | Sri Lanka | Palmkernel Oil                  | 2007           | 2                                                              |
| 38               | Sri Lanka | Peas                            | 2007           | 11                                                             |
| 38               | Sri Lanka | Pelagic Fish                    | 2007           | 42                                                             |
| 38               | Sri Lanka | Pepper                          | 2007           | 5                                                              |
| 38               | Sri Lanka | Pigmeat                         | 2007           | 1                                                              |
| 38               | Sri Lanka | Pimento                         | 2007           | 12                                                             |
| 38               | Sri Lanka | Pineapples and products         | 2007           | 2                                                              |
| 38               | Sri Lanka | Plantains                       | 2007           | 47                                                             |
| 38               | Sri Lanka | Potatoes and products           | 2007           | 19                                                             |
| 38               | Sri Lanka | Poultry Meat                    | 2007           | 17                                                             |
| 38               | Sri Lanka | Pulses                          | 2007           | 71                                                             |
| 38               | Sri Lanka | Pulses, Other and products      | 2007           | 53                                                             |
| 38               | Sri Lanka | Rape and Mustardseed            | 2007           | 1                                                              |
| 38               | Sri Lanka | Rice (Milled Equivalent)        | 2007           | 983                                                            |
| 38               | Sri Lanka | Ricebran Oil                    | 2007           | 8                                                              |
| 38               | Sri Lanka | Sesame seed                     | 2007           | 4                                                              |
| 38               | Sri Lanka | Sesameseed Oil                  | 2007           | 1                                                              |
| 38               | Sri Lanka | Soyabean Oil                    | 2007           | 3                                                              |
| 38               | Sri Lanka | Spices                          | 2007           | 32                                                             |
| 38               | Sri Lanka | Spices, Other                   | 2007           | 15                                                             |
| 38               | Sri Lanka | Starchy Roots                   | 2007           | 56                                                             |
| 38               | Sri Lanka | Stimulants                      | 2007           | 8                                                              |
| 38               | Sri Lanka | Sugar & Sweeteners              | 2007           | 266                                                            |
| 38               | Sri Lanka | Sugar (Raw Equivalent)          | 2007           | 262                                                            |
| 38               | Sri Lanka | Sugar cane                      | 2007           | 19                                                             |
| 38               | Sri Lanka | Sugar Crops                     | 2007           | 19                                                             |
| 38               | Sri Lanka | Sugar non-centrifugal           | 2007           | 1                                                              |
| 38               | Sri Lanka | Sunflowerseed Oil               | 2007           | 1                                                              |
| 38               | Sri Lanka | Sweet potatoes                  | 2007           | 6                                                              |
| 38               | Sri Lanka | Sweeteners, Other               | 2007           | 3                                                              |
| 38               | Sri Lanka | Tea (including mate)            | 2007           | 7                                                              |
| 38               | Sri Lanka | Tomatoes and products           | 2007           | 2                                                              |
| 38               | Sri Lanka | Treenuts                        | 2007           | 6                                                              |
| 38               | Sri Lanka | Vegetable Oils                  | 2007           | 72                                                             |
| 38               | Sri Lanka | Vegetables                      | 2007           | 43                                                             |
| 38               | Sri Lanka | Vegetables, Other               | 2007           | 19                                                             |
| 38               | Sri Lanka | Vegetal Products                | 2007           | 2,223                                                          |
| 38               | Sri Lanka | Wheat and products              | 2007           | 295                                                            |
| 38               | Sri Lanka | Alcoholic Beverages             | 2008           | 5                                                              |
| 38               | Sri Lanka | Animal fats                     | 2008           | 4                                                              |
| 38               | Sri Lanka | Animal Products                 | 2008           | 144                                                            |
| 38               | Sri Lanka | Apples and products             | 2008           | 1                                                              |
| 38               | Sri Lanka | Beans                           | 2008           | 13                                                             |
| 38               | Sri Lanka | Beer                            | 2008           | 4                                                              |
| 38               | Sri Lanka | Beverages, Alcoholic            | 2008           | 2                                                              |
| 38               | Sri Lanka | Bovine Meat                     | 2008           | 5                                                              |
| 38               | Sri Lanka | Butter, Ghee                    | 2008           | 2                                                              |
| 38               | Sri Lanka | Cassava and products            | 2008           | 34                                                             |
| 38               | Sri Lanka | Cereals - Excluding Beer        | 2008           | 1,326                                                          |
| 38               | Sri Lanka | Cocoa Beans and products        | 2008           | 1                                                              |
| 38               | Sri Lanka | Coconut Oil                     | 2008           | 52                                                             |
| 38               | Sri Lanka | Coconuts - Incl Copra           | 2008           | 271                                                            |
| 38               | Sri Lanka | Crustaceans                     | 2008           | 1                                                              |
| 38               | Sri Lanka | Dates                           | 2008           | 1                                                              |
| 38               | Sri Lanka | Demersal Fish                   | 2008           | 1                                                              |
| 38               | Sri Lanka | Eggs                            | 2008           | 10                                                             |
| 38               | Sri Lanka | Fats, Animals, Raw              | 2008           | 3                                                              |
| 38               | Sri Lanka | Fish, Seafood                   | 2008           | 48                                                             |
| 38               | Sri Lanka | Freshwater Fish                 | 2008           | 5                                                              |
| 38               | Sri Lanka | Fruits - Excluding Wine         | 2008           | 61                                                             |
| 38               | Sri Lanka | Fruits, Other                   | 2008           | 8                                                              |
| 38               | Sri Lanka | Grand Total                     | 2008           | 2,446                                                          |
| 38               | Sri Lanka | Grapes and products (excl wine) | 2008           | 1                                                              |
| 38               | Sri Lanka | Groundnut Oil                   | 2008           | 1                                                              |
| 38               | Sri Lanka | Groundnuts (Shelled Eq)         | 2008           | 2                                                              |
| 38               | Sri Lanka | Maize and products              | 2008           | 29                                                             |
| 38               | Sri Lanka | Marine Fish, Other              | 2008           | 1                                                              |
| 38               | Sri Lanka | Meat                            | 2008           | 23                                                             |
| 38               | Sri Lanka | Milk - Excluding Butter         | 2008           | 56                                                             |
| 38               | Sri Lanka | Millet and products             | 2008           | 4                                                              |
| 38               | Sri Lanka | Miscellaneous                   | 2008           | 1                                                              |
| 38               | Sri Lanka | Offals                          | 2008           | 2                                                              |

Dietary calcium and zinc deficiency risks are decreasing but remain prevalent

| FAO Country code | Country   | Food item                       | Reference year | Net energy supply (kcal capita <sup>-1</sup> d <sup>-1</sup> ) |
|------------------|-----------|---------------------------------|----------------|----------------------------------------------------------------|
| 38               | Sri Lanka | Oilcrops                        | 2008           | 279                                                            |
| 38               | Sri Lanka | Onions                          | 2008           | 20                                                             |
| 38               | Sri Lanka | Oranges, Mandarines             | 2008           | 1                                                              |
| 38               | Sri Lanka | Palmkernel Oil                  | 2008           | 5                                                              |
| 38               | Sri Lanka | Peas                            | 2008           | 12                                                             |
| 38               | Sri Lanka | Pelagic Fish                    | 2008           | 40                                                             |
| 38               | Sri Lanka | Pepper                          | 2008           | 6                                                              |
| 38               | Sri Lanka | Pimento                         | 2008           | 13                                                             |
| 38               | Sri Lanka | Pineapples and products         | 2008           | 1                                                              |
| 38               | Sri Lanka | Plantains                       | 2008           | 48                                                             |
| 38               | Sri Lanka | Potatoes and products           | 2008           | 19                                                             |
| 38               | Sri Lanka | Poultry Meat                    | 2008           | 17                                                             |
| 38               | Sri Lanka | Pulses                          | 2008           | 76                                                             |
| 38               | Sri Lanka | Pulses, Other and products      | 2008           | 51                                                             |
| 38               | Sri Lanka | Rape and Mustardseed            | 2008           | 1                                                              |
| 38               | Sri Lanka | Rice (Milled Equivalent)        | 2008           | 1,014                                                          |
| 38               | Sri Lanka | Ricebran Oil                    | 2008           | 9                                                              |
| 38               | Sri Lanka | Sesame seed                     | 2008           | 4                                                              |
| 38               | Sri Lanka | Sesameseed Oil                  | 2008           | 1                                                              |
| 38               | Sri Lanka | Sorghum and products            | 2008           | 6                                                              |
| 38               | Sri Lanka | Soyabean Oil                    | 2008           | 1                                                              |
| 38               | Sri Lanka | Spices                          | 2008           | 36                                                             |
| 38               | Sri Lanka | Spices, Other                   | 2008           | 17                                                             |
| 38               | Sri Lanka | Starchy Roots                   | 2008           | 59                                                             |
| 38               | Sri Lanka | Stimulants                      | 2008           | 2                                                              |
| 38               | Sri Lanka | Sugar & Sweeteners              | 2008           | 325                                                            |
| 38               | Sri Lanka | Sugar (Raw Equivalent)          | 2008           | 320                                                            |
| 38               | Sri Lanka | Sugar cane                      | 2008           | 17                                                             |
| 38               | Sri Lanka | Sugar Crops                     | 2008           | 17                                                             |
| 38               | Sri Lanka | Sugar non-centrifugal           | 2008           | 1                                                              |
| 38               | Sri Lanka | Sweet potatoes                  | 2008           | 6                                                              |
| 38               | Sri Lanka | Sweeteners, Other               | 2008           | 4                                                              |
| 38               | Sri Lanka | Tea (including mate)            | 2008           | 1                                                              |
| 38               | Sri Lanka | Tomatoes and products           | 2008           | 2                                                              |
| 38               | Sri Lanka | Treenuts                        | 2008           | 6                                                              |
| 38               | Sri Lanka | Vegetable Oils                  | 2008           | 69                                                             |
| 38               | Sri Lanka | Vegetables                      | 2008           | 40                                                             |
| 38               | Sri Lanka | Vegetables, Other               | 2008           | 18                                                             |
| 38               | Sri Lanka | Vegetal Products                | 2008           | 2,301                                                          |
| 38               | Sri Lanka | Wheat and products              | 2008           | 272                                                            |
| 38               | Sri Lanka | Alcoholic Beverages             | 2009           | 5                                                              |
| 38               | Sri Lanka | Animal fats                     | 2009           | 4                                                              |
| 38               | Sri Lanka | Animal Products                 | 2009           | 147                                                            |
| 38               | Sri Lanka | Apples and products             | 2009           | 1                                                              |
| 38               | Sri Lanka | Beans                           | 2009           | 12                                                             |
| 38               | Sri Lanka | Beer                            | 2009           | 4                                                              |
| 38               | Sri Lanka | Beverages, Alcoholic            | 2009           | 2                                                              |
| 38               | Sri Lanka | Bovine Meat                     | 2009           | 6                                                              |
| 38               | Sri Lanka | Butter, Ghee                    | 2009           | 1                                                              |
| 38               | Sri Lanka | Cassava and products            | 2009           | 38                                                             |
| 38               | Sri Lanka | Cereals - Excluding Beer        | 2009           | 1,394                                                          |
| 38               | Sri Lanka | Cocoa Beans and products        | 2009           | 1                                                              |
| 38               | Sri Lanka | Coconut Oil                     | 2009           | 61                                                             |
| 38               | Sri Lanka | Coconuts - Incl Copra           | 2009           | 270                                                            |
| 38               | Sri Lanka | Crustaceans                     | 2009           | 1                                                              |
| 38               | Sri Lanka | Dates                           | 2009           | 1                                                              |
| 38               | Sri Lanka | Demersal Fish                   | 2009           | 2                                                              |
| 38               | Sri Lanka | Eggs                            | 2009           | 10                                                             |
| 38               | Sri Lanka | Fats, Animals, Raw              | 2009           | 3                                                              |
| 38               | Sri Lanka | Fish, Seafood                   | 2009           | 50                                                             |
| 38               | Sri Lanka | Freshwater Fish                 | 2009           | 5                                                              |
| 38               | Sri Lanka | Fruits - Excluding Wine         | 2009           | 60                                                             |
| 38               | Sri Lanka | Fruits, Other                   | 2009           | 8                                                              |
| 38               | Sri Lanka | Grand Total                     | 2009           | 2,460                                                          |
| 38               | Sri Lanka | Grapes and products (excl wine) | 2009           | 1                                                              |
| 38               | Sri Lanka | Groundnut Oil                   | 2009           | 1                                                              |
| 38               | Sri Lanka | Groundnuts (Shelled Eq)         | 2009           | 1                                                              |
| 38               | Sri Lanka | Maize and products              | 2009           | 34                                                             |
| 38               | Sri Lanka | Marine Fish, Other              | 2009           | 1                                                              |
| 38               | Sri Lanka | Meat                            | 2009           | 22                                                             |
| 38               | Sri Lanka | Milk - Excluding Butter         | 2009           | 57                                                             |
| 38               | Sri Lanka | Millet and products             | 2009           | 4                                                              |
| 38               | Sri Lanka | Miscellaneous                   | 2009           | 1                                                              |
| 38               | Sri Lanka | Offals                          | 2009           | 2                                                              |
| 38               | Sri Lanka | Oilcrops                        | 2009           | 276                                                            |
| 38               | Sri Lanka | Onions                          | 2009           | 20                                                             |
| 38               | Sri Lanka | Oranges, Mandarines             | 2009           | 1                                                              |
| 38               | Sri Lanka | Palmkernel Oil                  | 2009           | 4                                                              |
| 38               | Sri Lanka | Peas                            | 2009           | 11                                                             |
| 38               | Sri Lanka | Pelagic Fish                    | 2009           | 42                                                             |
| 38               | Sri Lanka | Pepper                          | 2009           | 7                                                              |
| 38               | Sri Lanka | Pimento                         | 2009           | 13                                                             |
| 38               | Sri Lanka | Pineapples and products         | 2009           | 1                                                              |
| 38               | Sri Lanka | Plantains                       | 2009           | 46                                                             |
| 38               | Sri Lanka | Potatoes and products           | 2009           | 18                                                             |
| 38               | Sri Lanka | Poultry Meat                    | 2009           | 16                                                             |
| 38               | Sri Lanka | Pulses                          | 2009           | 73                                                             |
| 38               | Sri Lanka | Pulses, Other and products      | 2009           | 49                                                             |
| 38               | Sri Lanka | Rape and Mustardseed            | 2009           | 1                                                              |
| 38               | Sri Lanka | Rice (Milled Equivalent)        | 2009           | 1,052                                                          |
| 38               | Sri Lanka | Ricebran Oil                    | 2009           | 9                                                              |
| 38               | Sri Lanka | Sesame seed                     | 2009           | 4                                                              |
| 38               | Sri Lanka | Sesameseed Oil                  | 2009           | 1                                                              |
| 38               | Sri Lanka | Sorghum and products            | 2009           | 9                                                              |
| 38               | Sri Lanka | Soyabean Oil                    | 2009           | 1                                                              |
| 38               | Sri Lanka | Spices                          | 2009           | 39                                                             |
| 38               | Sri Lanka | Spices, Other                   | 2009           | 18                                                             |



Dietary calcium and zinc deficiency risks are decreasing but remain prevalent

| FAO Country code | Country   | Food item                       | Reference year | Net energy supply (kcal capita <sup>-1</sup> d <sup>-1</sup> ) |
|------------------|-----------|---------------------------------|----------------|----------------------------------------------------------------|
| 38               | Sri Lanka | Starchy Roots                   | 2009           | 61                                                             |
| 38               | Sri Lanka | Stimulants                      | 2009           | 2                                                              |
| 38               | Sri Lanka | Sugar & Sweeteners              | 2009           | 257                                                            |
| 38               | Sri Lanka | Sugar (Raw Equivalent)          | 2009           | 253                                                            |
| 38               | Sri Lanka | Sugar cane                      | 2009           | 24                                                             |
| 38               | Sri Lanka | Sugar Crops                     | 2009           | 24                                                             |
| 38               | Sri Lanka | Sugar non-centrifugal           | 2009           | 1                                                              |
| 38               | Sri Lanka | Sweet potatoes                  | 2009           | 5                                                              |
| 38               | Sri Lanka | Sweeteners, Other               | 2009           | 3                                                              |
| 38               | Sri Lanka | Tea (including mate)            | 2009           | 1                                                              |
| 38               | Sri Lanka | Tomatoes and products           | 2009           | 2                                                              |
| 38               | Sri Lanka | Treenuts                        | 2009           | 6                                                              |
| 38               | Sri Lanka | Vegetable Oils                  | 2009           | 77                                                             |
| 38               | Sri Lanka | Vegetables                      | 2009           | 39                                                             |
| 38               | Sri Lanka | Vegetables, Other               | 2009           | 17                                                             |
| 38               | Sri Lanka | Vegetal Products                | 2009           | 2,313                                                          |
| 38               | Sri Lanka | Wheat and products              | 2009           | 294                                                            |
| 38               | Sri Lanka | Alcoholic Beverages             | 2010           | 6                                                              |
| 38               | Sri Lanka | Animal fats                     | 2010           | 4                                                              |
| 38               | Sri Lanka | Animal Products                 | 2010           | 164                                                            |
| 38               | Sri Lanka | Apples and products             | 2010           | 1                                                              |
| 38               | Sri Lanka | Beans                           | 2010           | 11                                                             |
| 38               | Sri Lanka | Beer                            | 2010           | 5                                                              |
| 38               | Sri Lanka | Beverages, Alcoholic            | 2010           | 1                                                              |
| 38               | Sri Lanka | Bovine Meat                     | 2010           | 7                                                              |
| 38               | Sri Lanka | Butter, Ghee                    | 2010           | 1                                                              |
| 38               | Sri Lanka | Cassava and products            | 2010           | 37                                                             |
| 38               | Sri Lanka | Cereals - Excluding Beer        | 2010           | 1,333                                                          |
| 38               | Sri Lanka | Cocoa Beans and products        | 2010           | 2                                                              |
| 38               | Sri Lanka | Coconut Oil                     | 2010           | 55                                                             |
| 38               | Sri Lanka | Coconuts - Incl Copra           | 2010           | 259                                                            |
| 38               | Sri Lanka | Crustaceans                     | 2010           | 1                                                              |
| 38               | Sri Lanka | Dates                           | 2010           | 2                                                              |
| 38               | Sri Lanka | Demersal Fish                   | 2010           | 2                                                              |
| 38               | Sri Lanka | Eggs                            | 2010           | 10                                                             |
| 38               | Sri Lanka | Fats, Animals, Raw              | 2010           | 3                                                              |
| 38               | Sri Lanka | Fish, Seafood                   | 2010           | 59                                                             |
| 38               | Sri Lanka | Freshwater Fish                 | 2010           | 5                                                              |
| 38               | Sri Lanka | Fruits - Excluding Wine         | 2010           | 66                                                             |
| 38               | Sri Lanka | Fruits, Other                   | 2010           | 9                                                              |
| 38               | Sri Lanka | Grand Total                     | 2010           | 2,458                                                          |
| 38               | Sri Lanka | Grapes and products (excl wine) | 2010           | 1                                                              |
| 38               | Sri Lanka | Groundnut Oil                   | 2010           | 1                                                              |
| 38               | Sri Lanka | Groundnuts (Shelled Eq)         | 2010           | 1                                                              |
| 38               | Sri Lanka | Maize and products              | 2010           | 34                                                             |
| 38               | Sri Lanka | Marine Fish, Other              | 2010           | 2                                                              |
| 38               | Sri Lanka | Meat                            | 2010           | 24                                                             |
| 38               | Sri Lanka | Milk - Excluding Butter         | 2010           | 65                                                             |
| 38               | Sri Lanka | Millet and products             | 2010           | 4                                                              |
| 38               | Sri Lanka | Offals                          | 2010           | 2                                                              |
| 38               | Sri Lanka | Oilcrops                        | 2010           | 266                                                            |
| 38               | Sri Lanka | Onions                          | 2010           | 20                                                             |
| 38               | Sri Lanka | Oranges, Mandarines             | 2010           | 1                                                              |
| 38               | Sri Lanka | Palmkernel Oil                  | 2010           | 3                                                              |
| 38               | Sri Lanka | Peas                            | 2010           | 14                                                             |
| 38               | Sri Lanka | Pelagic Fish                    | 2010           | 49                                                             |
| 38               | Sri Lanka | Pepper                          | 2010           | 5                                                              |
| 38               | Sri Lanka | Pimento                         | 2010           | 14                                                             |
| 38               | Sri Lanka | Pineapples and products         | 2010           | 2                                                              |
| 38               | Sri Lanka | Plantains                       | 2010           | 51                                                             |
| 38               | Sri Lanka | Potatoes and products           | 2010           | 20                                                             |
| 38               | Sri Lanka | Poultry Meat                    | 2010           | 16                                                             |
| 38               | Sri Lanka | Pulses                          | 2010           | 84                                                             |
| 38               | Sri Lanka | Pulses, Other and products      | 2010           | 59                                                             |
| 38               | Sri Lanka | Rape and Mustardseed            | 2010           | 1                                                              |
| 38               | Sri Lanka | Rice (Milled Equivalent)        | 2010           | 1,082                                                          |
| 38               | Sri Lanka | Ricebran Oil                    | 2010           | 10                                                             |
| 38               | Sri Lanka | Sesame seed                     | 2010           | 4                                                              |
| 38               | Sri Lanka | Sesameseed Oil                  | 2010           | 1                                                              |
| 38               | Sri Lanka | Sorghum and products            | 2010           | 1                                                              |
| 38               | Sri Lanka | Soyabean Oil                    | 2010           | 2                                                              |
| 38               | Sri Lanka | Spices                          | 2010           | 39                                                             |
| 38               | Sri Lanka | Spices, Other                   | 2010           | 20                                                             |
| 38               | Sri Lanka | Starchy Roots                   | 2010           | 62                                                             |
| 38               | Sri Lanka | Stimulants                      | 2010           | 3                                                              |
| 38               | Sri Lanka | Sugar & Sweeteners              | 2010           | 292                                                            |
| 38               | Sri Lanka | Sugar (Raw Equivalent)          | 2010           | 287                                                            |
| 38               | Sri Lanka | Sugar cane                      | 2010           | 23                                                             |
| 38               | Sri Lanka | Sugar Crops                     | 2010           | 23                                                             |
| 38               | Sri Lanka | Sugar non-centrifugal           | 2010           | 1                                                              |
| 38               | Sri Lanka | Sunflowerseed Oil               | 2010           | 1                                                              |
| 38               | Sri Lanka | Sweet potatoes                  | 2010           | 5                                                              |
| 38               | Sri Lanka | Sweeteners, Other               | 2010           | 4                                                              |
| 38               | Sri Lanka | Tea (including mate)            | 2010           | 2                                                              |
| 38               | Sri Lanka | Tomatoes and products           | 2010           | 2                                                              |
| 38               | Sri Lanka | Treenuts                        | 2010           | 6                                                              |
| 38               | Sri Lanka | Vegetable Oils                  | 2010           | 74                                                             |
| 38               | Sri Lanka | Vegetables                      | 2010           | 39                                                             |
| 38               | Sri Lanka | Vegetables, Other               | 2010           | 17                                                             |
| 38               | Sri Lanka | Vegetal Products                | 2010           | 2,294                                                          |
| 38               | Sri Lanka | Wheat and products              | 2010           | 212                                                            |
| 38               | Sri Lanka | Alcoholic Beverages             | 2011           | 9                                                              |
| 38               | Sri Lanka | Animal fats                     | 2011           | 3                                                              |
| 38               | Sri Lanka | Animal Products                 | 2011           | 169                                                            |
| 38               | Sri Lanka | Apples and products             | 2011           | 1                                                              |
| 38               | Sri Lanka | Beans                           | 2011           | 13                                                             |
| 38               | Sri Lanka | Beer                            | 2011           | 7                                                              |

Dietary calcium and zinc deficiency risks are decreasing but remain prevalent

| FAO Country code | Country   | Food item                       | Reference year | Net energy supply (kcal <i>capita</i> <sup>-1</sup> d <sup>-1</sup> ) |
|------------------|-----------|---------------------------------|----------------|-----------------------------------------------------------------------|
| 38               | Sri Lanka | Beverages, Alcoholic            | 2011           | 2                                                                     |
| 38               | Sri Lanka | Bovine Meat                     | 2011           | 6                                                                     |
| 38               | Sri Lanka | Butter, Ghee                    | 2011           | 1                                                                     |
| 38               | Sri Lanka | Cassava and products            | 2011           | 40                                                                    |
| 38               | Sri Lanka | Cereals - Excluding Beer        | 2011           | 1,343                                                                 |
| 38               | Sri Lanka | Cocoa Beans and products        | 2011           | 2                                                                     |
| 38               | Sri Lanka | Coconut Oil                     | 2011           | 55                                                                    |
| 38               | Sri Lanka | Coconuts - Incl Copra           | 2011           | 272                                                                   |
| 38               | Sri Lanka | Crustaceans                     | 2011           | 1                                                                     |
| 38               | Sri Lanka | Dates                           | 2011           | 2                                                                     |
| 38               | Sri Lanka | Demersal Fish                   | 2011           | 2                                                                     |
| 38               | Sri Lanka | Eggs                            | 2011           | 11                                                                    |
| 38               | Sri Lanka | Fats, Animals, Raw              | 2011           | 2                                                                     |
| 38               | Sri Lanka | Fish, Seafood                   | 2011           | 59                                                                    |
| 38               | Sri Lanka | Freshwater Fish                 | 2011           | 5                                                                     |
| 38               | Sri Lanka | Fruits - Excluding Wine         | 2011           | 69                                                                    |
| 38               | Sri Lanka | Fruits, Other                   | 2011           | 9                                                                     |
| 38               | Sri Lanka | Grand Total                     | 2011           | 2,488                                                                 |
| 38               | Sri Lanka | Grapes and products (excl wine) | 2011           | 1                                                                     |
| 38               | Sri Lanka | Groundnut Oil                   | 2011           | 1                                                                     |
| 38               | Sri Lanka | Groundnuts (Shelled Eq)         | 2011           | 2                                                                     |
| 38               | Sri Lanka | Maize and products              | 2011           | 23                                                                    |
| 38               | Sri Lanka | Marine Fish, Other              | 2011           | 2                                                                     |
| 38               | Sri Lanka | Meat                            | 2011           | 23                                                                    |
| 38               | Sri Lanka | Milk - Excluding Butter         | 2011           | 71                                                                    |
| 38               | Sri Lanka | Millet and products             | 2011           | 4                                                                     |
| 38               | Sri Lanka | Miscellaneous                   | 2011           | 1                                                                     |
| 38               | Sri Lanka | Offals                          | 2011           | 2                                                                     |
| 38               | Sri Lanka | Oilcrops                        | 2011           | 282                                                                   |
| 38               | Sri Lanka | Onions                          | 2011           | 20                                                                    |
| 38               | Sri Lanka | Oranges, Mandarines             | 2011           | 1                                                                     |
| 38               | Sri Lanka | Palmkernel Oil                  | 2011           | 2                                                                     |
| 38               | Sri Lanka | Peas                            | 2011           | 15                                                                    |
| 38               | Sri Lanka | Pelagic Fish                    | 2011           | 48                                                                    |
| 38               | Sri Lanka | Pepper                          | 2011           | 7                                                                     |
| 38               | Sri Lanka | Pimento                         | 2011           | 15                                                                    |
| 38               | Sri Lanka | Pineapples and products         | 2011           | 2                                                                     |
| 38               | Sri Lanka | Plantains                       | 2011           | 53                                                                    |
| 38               | Sri Lanka | Potatoes and products           | 2011           | 21                                                                    |
| 38               | Sri Lanka | Poultry Meat                    | 2011           | 17                                                                    |
| 38               | Sri Lanka | Pulses                          | 2011           | 94                                                                    |
| 38               | Sri Lanka | Pulses, Other and products      | 2011           | 66                                                                    |
| 38               | Sri Lanka | Rape and Mustardseed            | 2011           | 1                                                                     |
| 38               | Sri Lanka | Rice (Milled Equivalent)        | 2011           | 1,042                                                                 |
| 38               | Sri Lanka | Ricebran Oil                    | 2011           | 9                                                                     |
| 38               | Sri Lanka | Sesame seed                     | 2011           | 7                                                                     |
| 38               | Sri Lanka | Sesameseed Oil                  | 2011           | 1                                                                     |
| 38               | Sri Lanka | Soyabean Oil                    | 2011           | 1                                                                     |
| 38               | Sri Lanka | Spices                          | 2011           | 43                                                                    |
| 38               | Sri Lanka | Spices, Other                   | 2011           | 21                                                                    |
| 38               | Sri Lanka | Starchy Roots                   | 2011           | 66                                                                    |
| 38               | Sri Lanka | Stimulants                      | 2011           | 3                                                                     |
| 38               | Sri Lanka | Sugar & Sweeteners              | 2011           | 278                                                                   |
| 38               | Sri Lanka | Sugar (Raw Equivalent)          | 2011           | 273                                                                   |
| 38               | Sri Lanka | Sugar cane                      | 2011           | 15                                                                    |
| 38               | Sri Lanka | Sugar Crops                     | 2011           | 15                                                                    |
| 38               | Sri Lanka | Sugar non-centrifugal           | 2011           | 1                                                                     |
| 38               | Sri Lanka | Sunflowerseed Oil               | 2011           | 1                                                                     |
| 38               | Sri Lanka | Sweet potatoes                  | 2011           | 5                                                                     |
| 38               | Sri Lanka | Sweeteners, Other               | 2011           | 4                                                                     |
| 38               | Sri Lanka | Tea (including mate)            | 2011           | 1                                                                     |
| 38               | Sri Lanka | Tomatoes and products           | 2011           | 2                                                                     |
| 38               | Sri Lanka | Treenuts                        | 2011           | 6                                                                     |
| 38               | Sri Lanka | Vegetable Oils                  | 2011           | 70                                                                    |
| 38               | Sri Lanka | Vegetables                      | 2011           | 40                                                                    |
| 38               | Sri Lanka | Vegetables, Other               | 2011           | 18                                                                    |
| 38               | Sri Lanka | Vegetal Products                | 2011           | 2,320                                                                 |
| 38               | Sri Lanka | Wheat and products              | 2011           | 274                                                                   |

**Dietary calcium and zinc deficiency risks are decreasing but remain prevalent**

Diriba B. Kumssa<sup>1,2,3</sup>, Edward J. M. Joy<sup>1,2</sup>, E. Louise Ander<sup>2</sup>, Michael J. Watts<sup>2</sup>, Scott D. Young<sup>1</sup>, Sue Walker<sup>3</sup> & Martin R. Broadley<sup>1</sup>

<sup>1</sup>School of Biosciences, University of Nottingham, Sutton Bonington Campus, Loughborough, LE12 5RD, UK, <sup>2</sup>Centre for Environmental Geochemistry, British Geological Survey, Keyworth, Nottingham, NG12 5GG, UK, <sup>3</sup>Crops For the Future, The University of Nottingham Malaysia Campus, Jalan Broga, 43500 Semenyih, Selangor Darul Ehsan, Malaysia.

Correspondence and requests for materials should be addressed to M.R.B. (martin.broadley@nottingham.ac.uk)

Data from UN. World population prospects: The 2012 revision, <<http://esa.un.org/unpd/wpp/Excel-Data/population.htm>> (2013). Estimates of pregnant and lactating females was based on quoted fertility rates.

**Supplementary Table S5 : Population size by age/gender group, reference year, and country.**

| Country     | Reference year | Age/gender group    | Population |
|-------------|----------------|---------------------|------------|
| Afghanistan | 1992           | FemaleAge0to4       | 1324272    |
| Afghanistan | 1992           | FemaleAge10to14     | 871345     |
| Afghanistan | 1992           | FemaleAge15to19     | 490693     |
| Afghanistan | 1992           | FemaleAge20to24     | 238610     |
| Afghanistan | 1992           | FemaleAge25to29     | 182131     |
| Afghanistan | 1992           | FemaleAge30to34     | 165518     |
| Afghanistan | 1992           | FemaleAge35to39     | 174156     |
| Afghanistan | 1992           | FemaleAge40to44     | 213043     |
| Afghanistan | 1992           | FemaleAge45to49     | 203229     |
| Afghanistan | 1992           | FemaleAge50to54     | 159429     |
| Afghanistan | 1992           | FemaleAge55to59     | 121905     |
| Afghanistan | 1992           | FemaleAge5to9       | 1055585    |
| Afghanistan | 1992           | FemaleAge60to64     | 92507      |
| Afghanistan | 1992           | FemaleAge65to69     | 70604      |
| Afghanistan | 1992           | FemaleAge70to74     | 46192      |
| Afghanistan | 1992           | FemaleAge75to79     | 23543      |
| Afghanistan | 1992           | FemaleAge80to84     | 8784       |
| Afghanistan | 1992           | FemaleAge85to89     | 1948       |
| Afghanistan | 1992           | FemaleAge90to94     | 384        |
| Afghanistan | 1992           | FemaleAge95to99     | 122        |
| Afghanistan | 1992           | FemaleAgeAbove100   | 7          |
| Afghanistan | 1992           | FemaleLactAge15to19 | 127262     |
| Afghanistan | 1992           | FemaleLactAge20to24 | 192702     |
| Afghanistan | 1992           | FemaleLactAge25to29 | 161517     |
| Afghanistan | 1992           | FemaleLactAge30to34 | 124031     |
| Afghanistan | 1992           | FemaleLactAge35to39 | 81786      |
| Afghanistan | 1992           | FemaleLactAge40to44 | 40793      |
| Afghanistan | 1992           | FemaleLactAge45to49 | 10714      |
| Afghanistan | 1992           | FemalePregAge15to19 | 95447      |
| Afghanistan | 1992           | FemalePregAge20to24 | 144526     |
| Afghanistan | 1992           | FemalePregAge25to29 | 121138     |
| Afghanistan | 1992           | FemalePregAge30to34 | 93024      |
| Afghanistan | 1992           | FemalePregAge35to39 | 61339      |
| Afghanistan | 1992           | FemalePregAge40to44 | 30595      |
| Afghanistan | 1992           | FemalePregAge45to49 | 8036       |
| Afghanistan | 1992           | MaleAge0to4         | 1386992    |
| Afghanistan | 1992           | MaleAge10to14       | 933727     |
| Afghanistan | 1992           | MaleAge15to19       | 771674     |
| Afghanistan | 1992           | MaleAge20to24       | 624277     |
| Afghanistan | 1992           | MaleAge25to29       | 504485     |
| Afghanistan | 1992           | MaleAge30to34       | 416981     |
| Afghanistan | 1992           | MaleAge35to39       | 350584     |
| Afghanistan | 1992           | MaleAge40to44       | 296652     |
| Afghanistan | 1992           | MaleAge45to49       | 224759     |
| Afghanistan | 1992           | MaleAge50to54       | 153811     |
| Afghanistan | 1992           | MaleAge55to59       | 105059     |
| Afghanistan | 1992           | MaleAge5to9         | 1114386    |
| Afghanistan | 1992           | MaleAge60to64       | 76024      |
| Afghanistan | 1992           | MaleAge65to69       | 56475      |
| Afghanistan | 1992           | MaleAge70to74       | 34551      |
| Afghanistan | 1992           | MaleAge75to79       | 16556      |
| Afghanistan | 1992           | MaleAge80to84       | 6200       |
| Afghanistan | 1992           | MaleAge85to89       | 1439       |
| Afghanistan | 1992           | MaleAge90to94       | 262        |
| Afghanistan | 1992           | MaleAge95to99       | 64         |
| Afghanistan | 1992           | MaleAgeAbove100     | 2          |
| Afghanistan | 1993           | FemaleAge0to4       | 1467407    |
| Afghanistan | 1993           | FemaleAge10to14     | 952350     |
| Afghanistan | 1993           | FemaleAge15to19     | 561517     |
| Afghanistan | 1993           | FemaleAge20to24     | 297123     |
| Afghanistan | 1993           | FemaleAge25to29     | 230285     |
| Afghanistan | 1993           | FemaleAge30to34     | 201712     |
| Afghanistan | 1993           | FemaleAge35to39     | 203491     |
| Afghanistan | 1993           | FemaleAge40to44     | 229290     |
| Afghanistan | 1993           | FemaleAge45to49     | 233316     |
| Afghanistan | 1993           | FemaleAge50to54     | 177315     |
| Afghanistan | 1993           | FemaleAge55to59     | 137335     |
| Afghanistan | 1993           | FemaleAge5to9       | 1155343    |
| Afghanistan | 1993           | FemaleAge60to64     | 102971     |
| Afghanistan | 1993           | FemaleAge65to69     | 77200      |
| Afghanistan | 1993           | FemaleAge70to74     | 51634      |
| Afghanistan | 1993           | FemaleAge75to79     | 26795      |

Dietary calcium and zinc deficiency risks are decreasing but remain prevalent

| Country     | Reference year | Age/gender group    | Population |
|-------------|----------------|---------------------|------------|
| Afghanistan | 1993           | FemaleAge80to84     | 10540      |
| Afghanistan | 1993           | FemaleAge85to89     | 2307       |
| Afghanistan | 1993           | FemaleAge90to94     | 389        |
| Afghanistan | 1993           | FemaleAge95to99     | 130        |
| Afghanistan | 1993           | FemaleAgeAbove100   | 8          |
| Afghanistan | 1993           | FemaleLactAge15to19 | 127262     |
| Afghanistan | 1993           | FemaleLactAge20to24 | 192702     |
| Afghanistan | 1993           | FemaleLactAge25to29 | 161517     |
| Afghanistan | 1993           | FemaleLactAge30to34 | 124031     |
| Afghanistan | 1993           | FemaleLactAge35to39 | 81786      |
| Afghanistan | 1993           | FemaleLactAge40to44 | 40793      |
| Afghanistan | 1993           | FemaleLactAge45to49 | 10714      |
| Afghanistan | 1993           | FemalePregAge15to19 | 95447      |
| Afghanistan | 1993           | FemalePregAge20to24 | 144526     |
| Afghanistan | 1993           | FemalePregAge25to29 | 121138     |
| Afghanistan | 1993           | FemalePregAge30to34 | 93024      |
| Afghanistan | 1993           | FemalePregAge35to39 | 61339      |
| Afghanistan | 1993           | FemalePregAge40to44 | 30595      |
| Afghanistan | 1993           | FemalePregAge45to49 | 8036       |
| Afghanistan | 1993           | MaleAge0to4         | 1535082    |
| Afghanistan | 1993           | MaleAge10to14       | 1015781    |
| Afghanistan | 1993           | MaleAge15to19       | 844950     |
| Afghanistan | 1993           | MaleAge20to24       | 683846     |
| Afghanistan | 1993           | MaleAge25to29       | 553078     |
| Afghanistan | 1993           | MaleAge30to34       | 453224     |
| Afghanistan | 1993           | MaleAge35to39       | 378939     |
| Afghanistan | 1993           | MaleAge40to44       | 318461     |
| Afghanistan | 1993           | MaleAge45to49       | 252427     |
| Afghanistan | 1993           | MaleAge50to54       | 175207     |
| Afghanistan | 1993           | MaleAge55to59       | 121534     |
| Afghanistan | 1993           | MaleAge5to9         | 1214495    |
| Afghanistan | 1993           | MaleAge60to64       | 86020      |
| Afghanistan | 1993           | MaleAge65to69       | 62946      |
| Afghanistan | 1993           | MaleAge70to74       | 39553      |
| Afghanistan | 1993           | MaleAge75to79       | 19026      |
| Afghanistan | 1993           | MaleAge80to84       | 7385       |
| Afghanistan | 1993           | MaleAge85to89       | 1658       |
| Afghanistan | 1993           | MaleAge90to94       | 273        |
| Afghanistan | 1993           | MaleAge95to99       | 70         |
| Afghanistan | 1993           | MaleAgeAbove100     | 3          |
| Afghanistan | 1994           | FemaleAge0to4       | 1605836    |
| Afghanistan | 1994           | FemaleAge10to14     | 1029592    |
| Afghanistan | 1994           | FemaleAge15to19     | 628146     |
| Afghanistan | 1994           | FemaleAge20to24     | 353301     |
| Afghanistan | 1994           | FemaleAge25to29     | 276907     |
| Afghanistan | 1994           | FemaleAge30to34     | 237375     |
| Afghanistan | 1994           | FemaleAge35to39     | 232258     |
| Afghanistan | 1994           | FemaleAge40to44     | 244447     |
| Afghanistan | 1994           | FemaleAge45to49     | 259407     |
| Afghanistan | 1994           | FemaleAge50to54     | 196177     |
| Afghanistan | 1994           | FemaleAge55to59     | 152473     |
| Afghanistan | 1994           | FemaleAge5to9       | 1250500    |
| Afghanistan | 1994           | FemaleAge60to64     | 113983     |
| Afghanistan | 1994           | FemaleAge65to69     | 84330      |
| Afghanistan | 1994           | FemaleAge70to74     | 57035      |
| Afghanistan | 1994           | FemaleAge75to79     | 30145      |
| Afghanistan | 1994           | FemaleAge80to84     | 12486      |
| Afghanistan | 1994           | FemaleAge85to89     | 2760       |
| Afghanistan | 1994           | FemaleAge90to94     | 389        |
| Afghanistan | 1994           | FemaleAge95to99     | 102        |
| Afghanistan | 1994           | FemaleAgeAbove100   | 8          |
| Afghanistan | 1994           | FemaleLactAge15to19 | 127262     |
| Afghanistan | 1994           | FemaleLactAge20to24 | 192702     |
| Afghanistan | 1994           | FemaleLactAge25to29 | 161517     |
| Afghanistan | 1994           | FemaleLactAge30to34 | 124031     |
| Afghanistan | 1994           | FemaleLactAge35to39 | 81786      |
| Afghanistan | 1994           | FemaleLactAge40to44 | 40793      |
| Afghanistan | 1994           | FemaleLactAge45to49 | 10714      |
| Afghanistan | 1994           | FemalePregAge15to19 | 95447      |
| Afghanistan | 1994           | FemalePregAge20to24 | 144526     |
| Afghanistan | 1994           | FemalePregAge25to29 | 121138     |
| Afghanistan | 1994           | FemalePregAge30to34 | 93024      |
| Afghanistan | 1994           | FemalePregAge35to39 | 61339      |
| Afghanistan | 1994           | FemalePregAge40to44 | 30595      |
| Afghanistan | 1994           | FemalePregAge45to49 | 8036       |
| Afghanistan | 1994           | MaleAge0to4         | 1678109    |
| Afghanistan | 1994           | MaleAge10to14       | 1093131    |
| Afghanistan | 1994           | MaleAge15to19       | 913680     |
| Afghanistan | 1994           | MaleAge20to24       | 740995     |
| Afghanistan | 1994           | MaleAge25to29       | 599611     |
| Afghanistan | 1994           | MaleAge30to34       | 488747     |
| Afghanistan | 1994           | MaleAge35to39       | 406226     |
| Afghanistan | 1994           | MaleAge40to44       | 338296     |
| Afghanistan | 1994           | MaleAge45to49       | 276992     |
| Afghanistan | 1994           | MaleAge50to54       | 196562     |
| Afghanistan | 1994           | MaleAge55to59       | 138277     |
| Afghanistan | 1994           | MaleAge5to9         | 1309409    |
| Afghanistan | 1994           | MaleAge60to64       | 96990      |

Dietary calcium and zinc deficiency risks are decreasing but remain prevalent

| Country     | Reference year | Age/gender group    | Population |
|-------------|----------------|---------------------|------------|
| Afghanistan | 1994           | MaleAge65to69       | 70023      |
| Afghanistan | 1994           | MaleAge70to74       | 44639      |
| Afghanistan | 1994           | MaleAge75to79       | 21775      |
| Afghanistan | 1994           | MaleAge80to84       | 8745       |
| Afghanistan | 1994           | MaleAge85to89       | 1916       |
| Afghanistan | 1994           | MaleAge90to94       | 271        |
| Afghanistan | 1994           | MaleAge95to99       | 55         |
| Afghanistan | 1994           | MaleAgeAbove100     | 3          |
| Afghanistan | 1995           | FemaleAge0to4       | 1708114    |
| Afghanistan | 1995           | FemaleAge10to14     | 1095520    |
| Afghanistan | 1995           | FemaleAge15to19     | 684529     |
| Afghanistan | 1995           | FemaleAge20to24     | 402199     |
| Afghanistan | 1995           | FemaleAge25to29     | 317745     |
| Afghanistan | 1995           | FemaleAge30to34     | 269487     |
| Afghanistan | 1995           | FemaleAge35to39     | 257142     |
| Afghanistan | 1995           | FemaleAge40to44     | 258650     |
| Afghanistan | 1995           | FemaleAge45to49     | 277766     |
| Afghanistan | 1995           | FemaleAge50to54     | 214974     |
| Afghanistan | 1995           | FemaleAge55to59     | 165956     |
| Afghanistan | 1995           | FemaleAge5to9       | 1333122    |
| Afghanistan | 1995           | FemaleAge60to64     | 124630     |
| Afghanistan | 1995           | FemaleAge65to69     | 91498      |
| Afghanistan | 1995           | FemaleAge70to74     | 62022      |
| Afghanistan | 1995           | FemaleAge75to79     | 33490      |
| Afghanistan | 1995           | FemaleAge80to84     | 14453      |
| Afghanistan | 1995           | FemaleAge85to89     | 3390       |
| Afghanistan | 1995           | FemaleAge90to94     | 334        |
| Afghanistan | 1995           | FemaleAge95to99     | 62         |
| Afghanistan | 1995           | FemaleAgeAbove100   | 8          |
| Afghanistan | 1995           | FemaleLactAge15to19 | 127262     |
| Afghanistan | 1995           | FemaleLactAge20to24 | 192702     |
| Afghanistan | 1995           | FemaleLactAge25to29 | 161517     |
| Afghanistan | 1995           | FemaleLactAge30to34 | 124031     |
| Afghanistan | 1995           | FemaleLactAge35to39 | 81786      |
| Afghanistan | 1995           | FemaleLactAge40to44 | 40793      |
| Afghanistan | 1995           | FemaleLactAge45to49 | 10714      |
| Afghanistan | 1995           | FemalePregAge15to19 | 95447      |
| Afghanistan | 1995           | FemalePregAge20to24 | 144526     |
| Afghanistan | 1995           | FemalePregAge25to29 | 121138     |
| Afghanistan | 1995           | FemalePregAge30to34 | 93024      |
| Afghanistan | 1995           | FemalePregAge35to39 | 61339      |
| Afghanistan | 1995           | FemalePregAge40to44 | 30595      |
| Afghanistan | 1995           | FemalePregAge45to49 | 8036       |
| Afghanistan | 1995           | MaleAge0to4         | 1783286    |
| Afghanistan | 1995           | MaleAge10to14       | 1158054    |
| Afghanistan | 1995           | MaleAge15to19       | 971191     |
| Afghanistan | 1995           | MaleAge20to24       | 790732     |
| Afghanistan | 1995           | MaleAge25to29       | 639910     |
| Afghanistan | 1995           | MaleAge30to34       | 520237     |
| Afghanistan | 1995           | MaleAge35to39       | 429692     |
| Afghanistan | 1995           | MaleAge40to44       | 355063     |
| Afghanistan | 1995           | MaleAge45to49       | 295799     |
| Afghanistan | 1995           | MaleAge50to54       | 216249     |
| Afghanistan | 1995           | MaleAge55to59       | 153977     |
| Afghanistan | 1995           | MaleAge5to9         | 1391460    |
| Afghanistan | 1995           | MaleAge60to64       | 108186     |
| Afghanistan | 1995           | MaleAge65to69       | 77244      |
| Afghanistan | 1995           | MaleAge70to74       | 49532      |
| Afghanistan | 1995           | MaleAge75to79       | 24749      |
| Afghanistan | 1995           | MaleAge80to84       | 10179      |
| Afghanistan | 1995           | MaleAge85to89       | 2285       |
| Afghanistan | 1995           | MaleAge90to94       | 215        |
| Afghanistan | 1995           | MaleAge95to99       | 30         |
| Afghanistan | 1995           | MaleAgeAbove100     | 3          |
| Afghanistan | 1996           | FemaleAge0to4       | 1815788    |
| Afghanistan | 1996           | FemaleAge10to14     | 1142785    |
| Afghanistan | 1996           | FemaleAge15to19     | 652833     |
| Afghanistan | 1996           | FemaleAge20to24     | 314924     |
| Afghanistan | 1996           | FemaleAge25to29     | 238460     |
| Afghanistan | 1996           | FemaleAge30to34     | 225572     |
| Afghanistan | 1996           | FemaleAge35to39     | 237530     |
| Afghanistan | 1996           | FemaleAge40to44     | 257924     |
| Afghanistan | 1996           | FemaleAge45to49     | 279132     |
| Afghanistan | 1996           | FemaleAge50to54     | 228987     |
| Afghanistan | 1996           | FemaleAge55to59     | 172619     |
| Afghanistan | 1996           | FemaleAge5to9       | 1404703    |
| Afghanistan | 1996           | FemaleAge60to64     | 129646     |
| Afghanistan | 1996           | FemaleAge65to69     | 94577      |
| Afghanistan | 1996           | FemaleAge70to74     | 64475      |
| Afghanistan | 1996           | FemaleAge75to79     | 35651      |
| Afghanistan | 1996           | FemaleAge80to84     | 15716      |
| Afghanistan | 1996           | FemaleAge85to89     | 4252       |
| Afghanistan | 1996           | FemaleAge90to94     | 467        |
| Afghanistan | 1996           | FemaleAge95to99     | 57         |
| Afghanistan | 1996           | FemaleAgeAbove100   | 8          |
| Afghanistan | 1996           | FemaleLactAge15to19 | 165573     |
| Afghanistan | 1996           | FemaleLactAge20to24 | 260385     |
| Afghanistan | 1996           | FemaleLactAge25to29 | 222242     |

Dietary calcium and zinc deficiency risks are decreasing but remain prevalent

| Country     | Reference year | Age/gender group    | Population |
|-------------|----------------|---------------------|------------|
| Afghanistan | 1996           | FemaleLactAge30to34 | 161653     |
| Afghanistan | 1996           | FemaleLactAge35to39 | 102738     |
| Afghanistan | 1996           | FemaleLactAge40to44 | 47414      |
| Afghanistan | 1996           | FemaleLactAge45to49 | 15318      |
| Afghanistan | 1996           | FemalePregAge15to19 | 124179     |
| Afghanistan | 1996           | FemalePregAge20to24 | 195288     |
| Afghanistan | 1996           | FemalePregAge25to29 | 166681     |
| Afghanistan | 1996           | FemalePregAge30to34 | 121240     |
| Afghanistan | 1996           | FemalePregAge35to39 | 77053      |
| Afghanistan | 1996           | FemalePregAge40to44 | 35560      |
| Afghanistan | 1996           | FemalePregAge45to49 | 11488      |
| Afghanistan | 1996           | MaleAge0to4         | 1894931    |
| Afghanistan | 1996           | MaleAge10to14       | 1204129    |
| Afghanistan | 1996           | MaleAge15to19       | 1007031    |
| Afghanistan | 1996           | MaleAge20to24       | 822175     |
| Afghanistan | 1996           | MaleAge25to29       | 665938     |
| Afghanistan | 1996           | MaleAge30to34       | 541054     |
| Afghanistan | 1996           | MaleAge35to39       | 445795     |
| Afghanistan | 1996           | MaleAge40to44       | 367244     |
| Afghanistan | 1996           | MaleAge45to49       | 306820     |
| Afghanistan | 1996           | MaleAge50to54       | 228660     |
| Afghanistan | 1996           | MaleAge55to59       | 161818     |
| Afghanistan | 1996           | MaleAge5to9         | 1462603    |
| Afghanistan | 1996           | MaleAge60to64       | 112492     |
| Afghanistan | 1996           | MaleAge65to69       | 79359      |
| Afghanistan | 1996           | MaleAge70to74       | 51611      |
| Afghanistan | 1996           | MaleAge75to79       | 26500      |
| Afghanistan | 1996           | MaleAge80to84       | 11031      |
| Afghanistan | 1996           | MaleAge85to89       | 2867       |
| Afghanistan | 1996           | MaleAge90to94       | 297        |
| Afghanistan | 1996           | MaleAge95to99       | 31         |
| Afghanistan | 1996           | MaleAgeAbove100     | 3          |
| Afghanistan | 1997           | FemaleAge0to4       | 1902228    |
| Afghanistan | 1997           | FemaleAge10to14     | 1178276    |
| Afghanistan | 1997           | FemaleAge15to19     | 676890     |
| Afghanistan | 1997           | FemaleAge20to24     | 335229     |
| Afghanistan | 1997           | FemaleAge25to29     | 256638     |
| Afghanistan | 1997           | FemaleAge30to34     | 241366     |
| Afghanistan | 1997           | FemaleAge35to39     | 248933     |
| Afghanistan | 1997           | FemaleAge40to44     | 266692     |
| Afghanistan | 1997           | FemaleAge45to49     | 280816     |
| Afghanistan | 1997           | FemaleAge50to54     | 242434     |
| Afghanistan | 1997           | FemaleAge55to59     | 176662     |
| Afghanistan | 1997           | FemaleAge5to9       | 1460743    |
| Afghanistan | 1997           | FemaleAge60to64     | 133443     |
| Afghanistan | 1997           | FemaleAge65to69     | 96494      |
| Afghanistan | 1997           | FemaleAge70to74     | 65861      |
| Afghanistan | 1997           | FemaleAge75to79     | 37336      |
| Afghanistan | 1997           | FemaleAge80to84     | 16459      |
| Afghanistan | 1997           | FemaleAge85to89     | 4971       |
| Afghanistan | 1997           | FemaleAge90to94     | 596        |
| Afghanistan | 1997           | FemaleAge95to99     | 65         |
| Afghanistan | 1997           | FemaleAgeAbove100   | 8          |
| Afghanistan | 1997           | FemaleLactAge15to19 | 165573     |
| Afghanistan | 1997           | FemaleLactAge20to24 | 260385     |
| Afghanistan | 1997           | FemaleLactAge25to29 | 222242     |
| Afghanistan | 1997           | FemaleLactAge30to34 | 161653     |
| Afghanistan | 1997           | FemaleLactAge35to39 | 102738     |
| Afghanistan | 1997           | FemaleLactAge40to44 | 47414      |
| Afghanistan | 1997           | FemaleLactAge45to49 | 15318      |
| Afghanistan | 1997           | FemalePregAge15to19 | 124179     |
| Afghanistan | 1997           | FemalePregAge20to24 | 195288     |
| Afghanistan | 1997           | FemalePregAge25to29 | 166681     |
| Afghanistan | 1997           | FemalePregAge30to34 | 121240     |
| Afghanistan | 1997           | FemalePregAge35to39 | 77053      |
| Afghanistan | 1997           | FemalePregAge40to44 | 35560      |
| Afghanistan | 1997           | FemalePregAge45to49 | 11488      |
| Afghanistan | 1997           | MaleAge0to4         | 1983686    |
| Afghanistan | 1997           | MaleAge10to14       | 1237209    |
| Afghanistan | 1997           | MaleAge15to19       | 1030544    |
| Afghanistan | 1997           | MaleAge20to24       | 843070     |
| Afghanistan | 1997           | MaleAge25to29       | 682594     |
| Afghanistan | 1997           | MaleAge30to34       | 554962     |
| Afghanistan | 1997           | MaleAge35to39       | 455985     |
| Afghanistan | 1997           | MaleAge40to44       | 375438     |
| Afghanistan | 1997           | MaleAge45to49       | 312258     |
| Afghanistan | 1997           | MaleAge50to54       | 238942     |
| Afghanistan | 1997           | MaleAge55to59       | 167722     |
| Afghanistan | 1997           | MaleAge5to9         | 1517874    |
| Afghanistan | 1997           | MaleAge60to64       | 115879     |
| Afghanistan | 1997           | MaleAge65to69       | 80255      |
| Afghanistan | 1997           | MaleAge70to74       | 52758      |
| Afghanistan | 1997           | MaleAge75to79       | 27869      |
| Afghanistan | 1997           | MaleAge80to84       | 11462      |
| Afghanistan | 1997           | MaleAge85to89       | 3345       |
| Afghanistan | 1997           | MaleAge90to94       | 380        |
| Afghanistan | 1997           | MaleAge95to99       | 39         |
| Afghanistan | 1997           | MaleAgeAbove100     | 3          |

Dietary calcium and zinc deficiency risks are decreasing but remain prevalent

| Country     | Reference year | Age/gender group    | Population |
|-------------|----------------|---------------------|------------|
| Afghanistan | 1998           | FemaleAge0to4       | 1967075    |
| Afghanistan | 1998           | FemaleAge10to14     | 1209564    |
| Afghanistan | 1998           | FemaleAge15to19     | 696419     |
| Afghanistan | 1998           | FemaleAge20to24     | 349422     |
| Afghanistan | 1998           | FemaleAge25to29     | 269854     |
| Afghanistan | 1998           | FemaleAge30to34     | 253962     |
| Afghanistan | 1998           | FemaleAge35to39     | 257515     |
| Afghanistan | 1998           | FemaleAge40to44     | 274790     |
| Afghanistan | 1998           | FemaleAge45to49     | 278641     |
| Afghanistan | 1998           | FemaleAge50to54     | 254765     |
| Afghanistan | 1998           | FemaleAge55to59     | 179955     |
| Afghanistan | 1998           | FemaleAge5to9       | 1508408    |
| Afghanistan | 1998           | FemaleAge60to64     | 136693     |
| Afghanistan | 1998           | FemaleAge65to69     | 97941      |
| Afghanistan | 1998           | FemaleAge70to74     | 66743      |
| Afghanistan | 1998           | FemaleAge75to79     | 38662      |
| Afghanistan | 1998           | FemaleAge80to84     | 16849      |
| Afghanistan | 1998           | FemaleAge85to89     | 5435       |
| Afghanistan | 1998           | FemaleAge90to94     | 731        |
| Afghanistan | 1998           | FemaleAge95to99     | 76         |
| Afghanistan | 1998           | FemaleAgeAbove100   | 7          |
| Afghanistan | 1998           | FemaleLactAge15to19 | 165573     |
| Afghanistan | 1998           | FemaleLactAge20to24 | 260385     |
| Afghanistan | 1998           | FemaleLactAge25to29 | 222242     |
| Afghanistan | 1998           | FemaleLactAge30to34 | 161653     |
| Afghanistan | 1998           | FemaleLactAge35to39 | 102738     |
| Afghanistan | 1998           | FemaleLactAge40to44 | 47414      |
| Afghanistan | 1998           | FemaleLactAge45to49 | 15318      |
| Afghanistan | 1998           | FemalePregAge15to19 | 124179     |
| Afghanistan | 1998           | FemalePregAge20to24 | 195288     |
| Afghanistan | 1998           | FemalePregAge25to29 | 166681     |
| Afghanistan | 1998           | FemalePregAge30to34 | 121240     |
| Afghanistan | 1998           | FemalePregAge35to39 | 77053      |
| Afghanistan | 1998           | FemalePregAge40to44 | 35560      |
| Afghanistan | 1998           | FemalePregAge45to49 | 11488      |
| Afghanistan | 1998           | MaleAge0to4         | 2049900    |
| Afghanistan | 1998           | MaleAge10to14       | 1265625    |
| Afghanistan | 1998           | MaleAge15to19       | 1049047    |
| Afghanistan | 1998           | MaleAge20to24       | 858668     |
| Afghanistan | 1998           | MaleAge25to29       | 694291     |
| Afghanistan | 1998           | MaleAge30to34       | 565355     |
| Afghanistan | 1998           | MaleAge35to39       | 463299     |
| Afghanistan | 1998           | MaleAge40to44       | 381812     |
| Afghanistan | 1998           | MaleAge45to49       | 314949     |
| Afghanistan | 1998           | MaleAge50to54       | 247744     |
| Afghanistan | 1998           | MaleAge55to59       | 172863     |
| Afghanistan | 1998           | MaleAge5to9         | 1565211    |
| Afghanistan | 1998           | MaleAge60to64       | 119051     |
| Afghanistan | 1998           | MaleAge65to69       | 80688      |
| Afghanistan | 1998           | MaleAge70to74       | 53361      |
| Afghanistan | 1998           | MaleAge75to79       | 28900      |
| Afghanistan | 1998           | MaleAge80to84       | 11616      |
| Afghanistan | 1998           | MaleAge85to89       | 3626       |
| Afghanistan | 1998           | MaleAge90to94       | 463        |
| Afghanistan | 1998           | MaleAge95to99       | 46         |
| Afghanistan | 1998           | MaleAgeAbove100     | 2          |
| Afghanistan | 1999           | FemaleAge0to4       | 2023144    |
| Afghanistan | 1999           | FemaleAge10to14     | 1245457    |
| Afghanistan | 1999           | FemaleAge15to19     | 719285     |
| Afghanistan | 1999           | FemaleAge20to24     | 364031     |
| Afghanistan | 1999           | FemaleAge25to29     | 283074     |
| Afghanistan | 1999           | FemaleAge30to34     | 266962     |
| Afghanistan | 1999           | FemaleAge35to39     | 266976     |
| Afghanistan | 1999           | FemaleAge40to44     | 283582     |
| Afghanistan | 1999           | FemaleAge45to49     | 277814     |
| Afghanistan | 1999           | FemaleAge50to54     | 265105     |
| Afghanistan | 1999           | FemaleAge55to59     | 185036     |
| Afghanistan | 1999           | FemaleAge5to9       | 1557856    |
| Afghanistan | 1999           | FemaleAge60to64     | 140165     |
| Afghanistan | 1999           | FemaleAge65to69     | 99774      |
| Afghanistan | 1999           | FemaleAge70to74     | 67759      |
| Afghanistan | 1999           | FemaleAge75to79     | 39789      |
| Afghanistan | 1999           | FemaleAge80to84     | 17145      |
| Afghanistan | 1999           | FemaleAge85to89     | 5605       |
| Afghanistan | 1999           | FemaleAge90to94     | 844        |
| Afghanistan | 1999           | FemaleAge95to99     | 75         |
| Afghanistan | 1999           | FemaleAgeAbove100   | 7          |
| Afghanistan | 1999           | FemaleLactAge15to19 | 165573     |
| Afghanistan | 1999           | FemaleLactAge20to24 | 260385     |
| Afghanistan | 1999           | FemaleLactAge25to29 | 222242     |
| Afghanistan | 1999           | FemaleLactAge30to34 | 161653     |
| Afghanistan | 1999           | FemaleLactAge35to39 | 102738     |
| Afghanistan | 1999           | FemaleLactAge40to44 | 47414      |
| Afghanistan | 1999           | FemaleLactAge45to49 | 15318      |
| Afghanistan | 1999           | FemalePregAge15to19 | 124179     |
| Afghanistan | 1999           | FemalePregAge20to24 | 195288     |
| Afghanistan | 1999           | FemalePregAge25to29 | 166681     |
| Afghanistan | 1999           | FemalePregAge30to34 | 121240     |

Dietary calcium and zinc deficiency risks are decreasing but remain prevalent

| Country     | Reference year | Age/gender group    | Population |
|-------------|----------------|---------------------|------------|
| Afghanistan | 1999           | FemalePregAge35to39 | 77053      |
| Afghanistan | 1999           | FemalePregAge40to44 | 35560      |
| Afghanistan | 1999           | FemalePregAge45to49 | 11488      |
| Afghanistan | 1999           | MaleAge0to4         | 2108430    |
| Afghanistan | 1999           | MaleAge10to14       | 1299290    |
| Afghanistan | 1999           | MaleAge15to19       | 1071170    |
| Afghanistan | 1999           | MaleAge20to24       | 875585     |
| Afghanistan | 1999           | MaleAge25to29       | 706834     |
| Afghanistan | 1999           | MaleAge30to34       | 576398     |
| Afghanistan | 1999           | MaleAge35to39       | 471534     |
| Afghanistan | 1999           | MaleAge40to44       | 388903     |
| Afghanistan | 1999           | MaleAge45to49       | 318499     |
| Afghanistan | 1999           | MaleAge50to54       | 255904     |
| Afghanistan | 1999           | MaleAge55to59       | 178882     |
| Afghanistan | 1999           | MaleAge5to9         | 1615468    |
| Afghanistan | 1999           | MaleAge60to64       | 122815     |
| Afghanistan | 1999           | MaleAge65to69       | 81586      |
| Afghanistan | 1999           | MaleAge70to74       | 53861      |
| Afghanistan | 1999           | MaleAge75to79       | 29683      |
| Afghanistan | 1999           | MaleAge80to84       | 11697      |
| Afghanistan | 1999           | MaleAge85to89       | 3668       |
| Afghanistan | 1999           | MaleAge90to94       | 521        |
| Afghanistan | 1999           | MaleAge95to99       | 44         |
| Afghanistan | 1999           | MaleAgeAbove100     | 2          |
| Albania     | 1992           | FemaleAge0to4       | 197894     |
| Albania     | 1992           | FemaleAge10to14     | 178325     |
| Albania     | 1992           | FemaleAge15to19     | 156112     |
| Albania     | 1992           | FemaleAge20to24     | 103456     |
| Albania     | 1992           | FemaleAge25to29     | 100291     |
| Albania     | 1992           | FemaleAge30to34     | 113688     |
| Albania     | 1992           | FemaleAge35to39     | 103624     |
| Albania     | 1992           | FemaleAge40to44     | 82982      |
| Albania     | 1992           | FemaleAge45to49     | 66883      |
| Albania     | 1992           | FemaleAge50to54     | 61076      |
| Albania     | 1992           | FemaleAge55to59     | 51835      |
| Albania     | 1992           | FemaleAge5to9       | 187754     |
| Albania     | 1992           | FemaleAge60to64     | 42825      |
| Albania     | 1992           | FemaleAge65to69     | 34558      |
| Albania     | 1992           | FemaleAge70to74     | 26984      |
| Albania     | 1992           | FemaleAge75to79     | 19674      |
| Albania     | 1992           | FemaleAge80to84     | 12000      |
| Albania     | 1992           | FemaleAge85to89     | 4968       |
| Albania     | 1992           | FemaleAge90to94     | 1343       |
| Albania     | 1992           | FemaleAge95to99     | 251        |
| Albania     | 1992           | FemaleAgeAbove100   | 11         |
| Albania     | 1992           | FemaleLactAge15to19 | 6715       |
| Albania     | 1992           | FemaleLactAge20to24 | 28150      |
| Albania     | 1992           | FemaleLactAge25to29 | 26716      |
| Albania     | 1992           | FemaleLactAge30to34 | 13005      |
| Albania     | 1992           | FemaleLactAge35to39 | 5753       |
| Albania     | 1992           | FemaleLactAge40to44 | 465        |
| Albania     | 1992           | FemalePregAge15to19 | 5036       |
| Albania     | 1992           | FemalePregAge20to24 | 21112      |
| Albania     | 1992           | FemalePregAge25to29 | 20037      |
| Albania     | 1992           | FemalePregAge30to34 | 9754       |
| Albania     | 1992           | FemalePregAge35to39 | 4315       |
| Albania     | 1992           | FemalePregAge40to44 | 348        |
| Albania     | 1992           | MaleAge0to4         | 208214     |
| Albania     | 1992           | MaleAge10to14       | 184602     |
| Albania     | 1992           | MaleAge15to19       | 174423     |
| Albania     | 1992           | MaleAge20to24       | 158624     |
| Albania     | 1992           | MaleAge25to29       | 153223     |
| Albania     | 1992           | MaleAge30to34       | 143408     |
| Albania     | 1992           | MaleAge35to39       | 117696     |
| Albania     | 1992           | MaleAge40to44       | 88349      |
| Albania     | 1992           | MaleAge45to49       | 74827      |
| Albania     | 1992           | MaleAge50to54       | 70039      |
| Albania     | 1992           | MaleAge55to59       | 58236      |
| Albania     | 1992           | MaleAge5to9         | 196789     |
| Albania     | 1992           | MaleAge60to64       | 47416      |
| Albania     | 1992           | MaleAge65to69       | 32860      |
| Albania     | 1992           | MaleAge70to74       | 22395      |
| Albania     | 1992           | MaleAge75to79       | 15835      |
| Albania     | 1992           | MaleAge80to84       | 8179       |
| Albania     | 1992           | MaleAge85to89       | 2931       |
| Albania     | 1992           | MaleAge90to94       | 745        |
| Albania     | 1992           | MaleAge95to99       | 119        |
| Albania     | 1992           | MaleAgeAbove100     | 7          |
| Albania     | 1993           | FemaleAge0to4       | 189613     |
| Albania     | 1993           | FemaleAge10to14     | 175805     |
| Albania     | 1993           | FemaleAge15to19     | 154568     |
| Albania     | 1993           | FemaleAge20to24     | 101103     |
| Albania     | 1993           | FemaleAge25to29     | 95725      |
| Albania     | 1993           | FemaleAge30to34     | 113356     |
| Albania     | 1993           | FemaleAge35to39     | 105055     |
| Albania     | 1993           | FemaleAge40to44     | 87092      |
| Albania     | 1993           | FemaleAge45to49     | 67171      |
| Albania     | 1993           | FemaleAge50to54     | 61667      |



Dietary calcium and zinc deficiency risks are decreasing but remain prevalent

| Country | Reference year | Age/gender group    | Population |
|---------|----------------|---------------------|------------|
| Albania | 1993           | FemaleAge55to59     | 53169      |
| Albania | 1993           | FemaleAge5to9       | 187578     |
| Albania | 1993           | FemaleAge60to64     | 43524      |
| Albania | 1993           | FemaleAge65to69     | 35224      |
| Albania | 1993           | FemaleAge70to74     | 27359      |
| Albania | 1993           | FemaleAge75to79     | 20112      |
| Albania | 1993           | FemaleAge80to84     | 12108      |
| Albania | 1993           | FemaleAge85to89     | 5264       |
| Albania | 1993           | FemaleAge90to94     | 1278       |
| Albania | 1993           | FemaleAge95to99     | 304        |
| Albania | 1993           | FemaleAgeAbove100   | 10         |
| Albania | 1993           | FemaleLactAge15to19 | 6715       |
| Albania | 1993           | FemaleLactAge20to24 | 28150      |
| Albania | 1993           | FemaleLactAge25to29 | 26716      |
| Albania | 1993           | FemaleLactAge30to34 | 13005      |
| Albania | 1993           | FemaleLactAge35to39 | 5753       |
| Albania | 1993           | FemaleLactAge40to44 | 465        |
| Albania | 1993           | FemalePregAge15to19 | 5036       |
| Albania | 1993           | FemalePregAge20to24 | 21112      |
| Albania | 1993           | FemalePregAge25to29 | 20037      |
| Albania | 1993           | FemalePregAge30to34 | 9754       |
| Albania | 1993           | FemalePregAge35to39 | 4315       |
| Albania | 1993           | FemalePregAge40to44 | 348        |
| Albania | 1993           | MaleAge0to4         | 199605     |
| Albania | 1993           | MaleAge10to14       | 181027     |
| Albania | 1993           | MaleAge15to19       | 170131     |
| Albania | 1993           | MaleAge20to24       | 154731     |
| Albania | 1993           | MaleAge25to29       | 146395     |
| Albania | 1993           | MaleAge30to34       | 141802     |
| Albania | 1993           | MaleAge35to39       | 119788     |
| Albania | 1993           | MaleAge40to44       | 91636      |
| Albania | 1993           | MaleAge45to49       | 74119      |
| Albania | 1993           | MaleAge50to54       | 70018      |
| Albania | 1993           | MaleAge55to59       | 59773      |
| Albania | 1993           | MaleAge5to9         | 196780     |
| Albania | 1993           | MaleAge60to64       | 47641      |
| Albania | 1993           | MaleAge65to69       | 35125      |
| Albania | 1993           | MaleAge70to74       | 21997      |
| Albania | 1993           | MaleAge75to79       | 15970      |
| Albania | 1993           | MaleAge80to84       | 8352       |
| Albania | 1993           | MaleAge85to89       | 3009       |
| Albania | 1993           | MaleAge90to94       | 738        |
| Albania | 1993           | MaleAge95to99       | 144        |
| Albania | 1993           | MaleAgeAbove100     | 7          |
| Albania | 1994           | FemaleAge0to4       | 181051     |
| Albania | 1994           | FemaleAge10to14     | 173405     |
| Albania | 1994           | FemaleAge15to19     | 153522     |
| Albania | 1994           | FemaleAge20to24     | 98797      |
| Albania | 1994           | FemaleAge25to29     | 91106      |
| Albania | 1994           | FemaleAge30to34     | 112300     |
| Albania | 1994           | FemaleAge35to39     | 105788     |
| Albania | 1994           | FemaleAge40to44     | 90838      |
| Albania | 1994           | FemaleAge45to49     | 67771      |
| Albania | 1994           | FemaleAge50to54     | 62404      |
| Albania | 1994           | FemaleAge55to59     | 54151      |
| Albania | 1994           | FemaleAge5to9       | 187330     |
| Albania | 1994           | FemaleAge60to64     | 44539      |
| Albania | 1994           | FemaleAge65to69     | 35849      |
| Albania | 1994           | FemaleAge70to74     | 27743      |
| Albania | 1994           | FemaleAge75to79     | 20684      |
| Albania | 1994           | FemaleAge80to84     | 12254      |
| Albania | 1994           | FemaleAge85to89     | 5385       |
| Albania | 1994           | FemaleAge90to94     | 1211       |
| Albania | 1994           | FemaleAge95to99     | 288        |
| Albania | 1994           | FemaleAgeAbove100   | 10         |
| Albania | 1994           | FemaleLactAge15to19 | 6715       |
| Albania | 1994           | FemaleLactAge20to24 | 28150      |
| Albania | 1994           | FemaleLactAge25to29 | 26716      |
| Albania | 1994           | FemaleLactAge30to34 | 13005      |
| Albania | 1994           | FemaleLactAge35to39 | 5753       |
| Albania | 1994           | FemaleLactAge40to44 | 465        |
| Albania | 1994           | FemalePregAge15to19 | 5036       |
| Albania | 1994           | FemalePregAge20to24 | 21112      |
| Albania | 1994           | FemalePregAge25to29 | 20037      |
| Albania | 1994           | FemalePregAge30to34 | 9754       |
| Albania | 1994           | FemalePregAge35to39 | 4315       |
| Albania | 1994           | FemalePregAge40to44 | 348        |
| Albania | 1994           | MaleAge0to4         | 190744     |
| Albania | 1994           | MaleAge10to14       | 178055     |
| Albania | 1994           | MaleAge15to19       | 166389     |
| Albania | 1994           | MaleAge20to24       | 150501     |
| Albania | 1994           | MaleAge25to29       | 139594     |
| Albania | 1994           | MaleAge30to34       | 138775     |
| Albania | 1994           | MaleAge35to39       | 120740     |
| Albania | 1994           | MaleAge40to44       | 94865      |
| Albania | 1994           | MaleAge45to49       | 73741      |
| Albania | 1994           | MaleAge50to54       | 69945      |
| Albania | 1994           | MaleAge55to59       | 60839      |

Dietary calcium and zinc deficiency risks are decreasing but remain prevalent

| Country | Reference year | Age/gender group    | Population |
|---------|----------------|---------------------|------------|
| Albania | 1994           | MaleAge5to9         | 196847     |
| Albania | 1994           | MaleAge60to64       | 48146      |
| Albania | 1994           | MaleAge65to69       | 37032      |
| Albania | 1994           | MaleAge70to74       | 22097      |
| Albania | 1994           | MaleAge75to79       | 15981      |
| Albania | 1994           | MaleAge80to84       | 8416       |
| Albania | 1994           | MaleAge85to89       | 2989       |
| Albania | 1994           | MaleAge90to94       | 695        |
| Albania | 1994           | MaleAge95to99       | 137        |
| Albania | 1994           | MaleAgeAbov e100    | 6          |
| Albania | 1995           | FemaleAge0to4       | 174596     |
| Albania | 1995           | FemaleAge10to14     | 172051     |
| Albania | 1995           | FemaleAge15to19     | 152811     |
| Albania | 1995           | FemaleAge20to24     | 96938      |
| Albania | 1995           | FemaleAge25to29     | 87167      |
| Albania | 1995           | FemaleAge30to34     | 110438     |
| Albania | 1995           | FemaleAge35to39     | 106299     |
| Albania | 1995           | FemaleAge40to44     | 93879      |
| Albania | 1995           | FemaleAge45to49     | 69183      |
| Albania | 1995           | FemaleAge50to54     | 63158      |
| Albania | 1995           | FemaleAge55to59     | 55000      |
| Albania | 1995           | FemaleAge5to9       | 186229     |
| Albania | 1995           | FemaleAge60to64     | 45827      |
| Albania | 1995           | FemaleAge65to69     | 36562      |
| Albania | 1995           | FemaleAge70to74     | 28229      |
| Albania | 1995           | FemaleAge75to79     | 21329      |
| Albania | 1995           | FemaleAge80to84     | 12534      |
| Albania | 1995           | FemaleAge85to89     | 5373       |
| Albania | 1995           | FemaleAge90to94     | 1135       |
| Albania | 1995           | FemaleAge95to99     | 179        |
| Albania | 1995           | FemaleAgeAbov e100  | 10         |
| Albania | 1995           | FemaleLactAge15to19 | 6715       |
| Albania | 1995           | FemaleLactAge20to24 | 28150      |
| Albania | 1995           | FemaleLactAge25to29 | 26716      |
| Albania | 1995           | FemaleLactAge30to34 | 13005      |
| Albania | 1995           | FemaleLactAge35to39 | 5753       |
| Albania | 1995           | FemaleLactAge40to44 | 465        |
| Albania | 1995           | FemalePregAge15to19 | 5036       |
| Albania | 1995           | FemalePregAge20to24 | 21112      |
| Albania | 1995           | FemalePregAge25to29 | 20037      |
| Albania | 1995           | FemalePregAge30to34 | 9754       |
| Albania | 1995           | FemalePregAge35to39 | 4315       |
| Albania | 1995           | FemalePregAge40to44 | 348        |
| Albania | 1995           | MaleAge0to4         | 184145     |
| Albania | 1995           | MaleAge10to14       | 176612     |
| Albania | 1995           | MaleAge15to19       | 163460     |
| Albania | 1995           | MaleAge20to24       | 146334     |
| Albania | 1995           | MaleAge25to29       | 133613     |
| Albania | 1995           | MaleAge30to34       | 134590     |
| Albania | 1995           | MaleAge35to39       | 120820     |
| Albania | 1995           | MaleAge40to44       | 97728      |
| Albania | 1995           | MaleAge45to49       | 74276      |
| Albania | 1995           | MaleAge50to54       | 69825      |
| Albania | 1995           | MaleAge55to59       | 61560      |
| Albania | 1995           | MaleAge5to9         | 196190     |
| Albania | 1995           | MaleAge60to64       | 49134      |
| Albania | 1995           | MaleAge65to69       | 38462      |
| Albania | 1995           | MaleAge70to74       | 22887      |
| Albania | 1995           | MaleAge75to79       | 15898      |
| Albania | 1995           | MaleAge80to84       | 8414       |
| Albania | 1995           | MaleAge85to89       | 2892       |
| Albania | 1995           | MaleAge90to94       | 593        |
| Albania | 1995           | MaleAge95to99       | 85         |
| Albania | 1995           | MaleAgeAbov e100    | 6          |
| Albania | 1996           | FemaleAge0to4       | 166489     |
| Albania | 1996           | FemaleAge10to14     | 172934     |
| Albania | 1996           | FemaleAge15to19     | 151965     |
| Albania | 1996           | FemaleAge20to24     | 102398     |
| Albania | 1996           | FemaleAge25to29     | 93631      |
| Albania | 1996           | FemaleAge30to34     | 110913     |
| Albania | 1996           | FemaleAge35to39     | 109388     |
| Albania | 1996           | FemaleAge40to44     | 96804      |
| Albania | 1996           | FemaleAge45to49     | 72293      |
| Albania | 1996           | FemaleAge50to54     | 63082      |
| Albania | 1996           | FemaleAge55to59     | 56655      |
| Albania | 1996           | FemaleAge5to9       | 183427     |
| Albania | 1996           | FemaleAge60to64     | 46937      |
| Albania | 1996           | FemaleAge65to69     | 37626      |
| Albania | 1996           | FemaleAge70to74     | 28439      |
| Albania | 1996           | FemaleAge75to79     | 21913      |
| Albania | 1996           | FemaleAge80to84     | 13012      |
| Albania | 1996           | FemaleAge85to89     | 5704       |
| Albania | 1996           | FemaleAge90to94     | 1411       |
| Albania | 1996           | FemaleAge95to99     | 185        |
| Albania | 1996           | FemaleAgeAbov e100  | 10         |
| Albania | 1996           | FemaleLactAge15to19 | 6005       |
| Albania | 1996           | FemaleLactAge20to24 | 24481      |
| Albania | 1996           | FemaleLactAge25to29 | 22147      |

Dietary calcium and zinc deficiency risks are decreasing but remain prevalent

| Country | Reference year | Age/gender group    | Population |
|---------|----------------|---------------------|------------|
| Albania | 1996           | FemaleLactAge30to34 | 11306      |
| Albania | 1996           | FemaleLactAge35to39 | 5490       |
| Albania | 1996           | FemaleLactAge40to44 | 512        |
| Albania | 1996           | FemalePregAge15to19 | 4504       |
| Albania | 1996           | FemalePregAge20to24 | 18361      |
| Albania | 1996           | FemalePregAge25to29 | 16611      |
| Albania | 1996           | FemalePregAge30to34 | 8480       |
| Albania | 1996           | FemalePregAge35to39 | 4117       |
| Albania | 1996           | FemalePregAge40to44 | 384        |
| Albania | 1996           | MaleAge0to4         | 175089     |
| Albania | 1996           | MaleAge10to14       | 176531     |
| Albania | 1996           | MaleAge15to19       | 159721     |
| Albania | 1996           | MaleAge20to24       | 143229     |
| Albania | 1996           | MaleAge25to29       | 130574     |
| Albania | 1996           | MaleAge30to34       | 130742     |
| Albania | 1996           | MaleAge35to39       | 122648     |
| Albania | 1996           | MaleAge40to44       | 100955     |
| Albania | 1996           | MaleAge45to49       | 76786      |
| Albania | 1996           | MaleAge50to54       | 68830      |
| Albania | 1996           | MaleAge55to59       | 62524      |
| Albania | 1996           | MaleAge5to9         | 193377     |
| Albania | 1996           | MaleAge60to64       | 50504      |
| Albania | 1996           | MaleAge65to69       | 39392      |
| Albania | 1996           | MaleAge70to74       | 23943      |
| Albania | 1996           | MaleAge75to79       | 15867      |
| Albania | 1996           | MaleAge80to84       | 8725       |
| Albania | 1996           | MaleAge85to89       | 3183       |
| Albania | 1996           | MaleAge90to94       | 710        |
| Albania | 1996           | MaleAge95to99       | 92         |
| Albania | 1996           | MaleAgeAbove100     | 6          |
| Albania | 1997           | FemaleAge0to4       | 162659     |
| Albania | 1997           | FemaleAge10to14     | 174141     |
| Albania | 1997           | FemaleAge15to19     | 150495     |
| Albania | 1997           | FemaleAge20to24     | 101507     |
| Albania | 1997           | FemaleAge25to29     | 92321      |
| Albania | 1997           | FemaleAge30to34     | 107937     |
| Albania | 1997           | FemaleAge35to39     | 111068     |
| Albania | 1997           | FemaleAge40to44     | 99979      |
| Albania | 1997           | FemaleAge45to49     | 75915      |
| Albania | 1997           | FemaleAge50to54     | 63043      |
| Albania | 1997           | FemaleAge55to59     | 57952      |
| Albania | 1997           | FemaleAge5to9       | 179064     |
| Albania | 1997           | FemaleAge60to64     | 48543      |
| Albania | 1997           | FemaleAge65to69     | 38636      |
| Albania | 1997           | FemaleAge70to74     | 29048      |
| Albania | 1997           | FemaleAge75to79     | 22124      |
| Albania | 1997           | FemaleAge80to84     | 13814      |
| Albania | 1997           | FemaleAge85to89     | 5860       |
| Albania | 1997           | FemaleAge90to94     | 1635       |
| Albania | 1997           | FemaleAge95to99     | 189        |
| Albania | 1997           | FemaleAgeAbove100   | 11         |
| Albania | 1997           | FemaleLactAge15to19 | 6005       |
| Albania | 1997           | FemaleLactAge20to24 | 24481      |
| Albania | 1997           | FemaleLactAge25to29 | 22147      |
| Albania | 1997           | FemaleLactAge30to34 | 11306      |
| Albania | 1997           | FemaleLactAge35to39 | 5490       |
| Albania | 1997           | FemaleLactAge40to44 | 512        |
| Albania | 1997           | FemalePregAge15to19 | 4504       |
| Albania | 1997           | FemalePregAge20to24 | 18361      |
| Albania | 1997           | FemalePregAge25to29 | 16611      |
| Albania | 1997           | FemalePregAge30to34 | 8480       |
| Albania | 1997           | FemalePregAge35to39 | 4117       |
| Albania | 1997           | FemalePregAge40to44 | 384        |
| Albania | 1997           | MaleAge0to4         | 171241     |
| Albania | 1997           | MaleAge10to14       | 177453     |
| Albania | 1997           | MaleAge15to19       | 156647     |
| Albania | 1997           | MaleAge20to24       | 139848     |
| Albania | 1997           | MaleAge25to29       | 127698     |
| Albania | 1997           | MaleAge30to34       | 126193     |
| Albania | 1997           | MaleAge35to39       | 123108     |
| Albania | 1997           | MaleAge40to44       | 104348     |
| Albania | 1997           | MaleAge45to49       | 79943      |
| Albania | 1997           | MaleAge50to54       | 68031      |
| Albania | 1997           | MaleAge55to59       | 62929      |
| Albania | 1997           | MaleAge5to9         | 188734     |
| Albania | 1997           | MaleAge60to64       | 52262      |
| Albania | 1997           | MaleAge65to69       | 40154      |
| Albania | 1997           | MaleAge70to74       | 25461      |
| Albania | 1997           | MaleAge75to79       | 15583      |
| Albania | 1997           | MaleAge80to84       | 9081       |
| Albania | 1997           | MaleAge85to89       | 3364       |
| Albania | 1997           | MaleAge90to94       | 791        |
| Albania | 1997           | MaleAge95to99       | 102        |
| Albania | 1997           | MaleAgeAbove100     | 6          |
| Albania | 1998           | FemaleAge0to4       | 161534     |
| Albania | 1998           | FemaleAge10to14     | 174650     |
| Albania | 1998           | FemaleAge15to19     | 150319     |
| Albania | 1998           | FemaleAge20to24     | 100583     |

Dietary calcium and zinc deficiency risks are decreasing but remain prevalent

| Country | Reference year | Age/gender group    | Population |
|---------|----------------|---------------------|------------|
| Albania | 1998           | FemaleAge25to29     | 90750      |
| Albania | 1998           | FemaleAge30to34     | 105319     |
| Albania | 1998           | FemaleAge35to39     | 111091     |
| Albania | 1998           | FemaleAge40to44     | 103660     |
| Albania | 1998           | FemaleAge45to49     | 79366      |
| Albania | 1998           | FemaleAge50to54     | 63653      |
| Albania | 1998           | FemaleAge55to59     | 58553      |
| Albania | 1998           | FemaleAge5to9       | 173419     |
| Albania | 1998           | FemaleAge60to64     | 50715      |
| Albania | 1998           | FemaleAge65to69     | 39479      |
| Albania | 1998           | FemaleAge70to74     | 30165      |
| Albania | 1998           | FemaleAge75to79     | 21919      |
| Albania | 1998           | FemaleAge80to84     | 14958      |
| Albania | 1998           | FemaleAge85to89     | 5873       |
| Albania | 1998           | FemaleAge90to94     | 1760       |
| Albania | 1998           | FemaleAge95to99     | 206        |
| Albania | 1998           | FemaleAgeAbove100   | 11         |
| Albania | 1998           | FemaleLactAge15to19 | 6005       |
| Albania | 1998           | FemaleLactAge20to24 | 24481      |
| Albania | 1998           | FemaleLactAge25to29 | 22147      |
| Albania | 1998           | FemaleLactAge30to34 | 11306      |
| Albania | 1998           | FemaleLactAge35to39 | 5490       |
| Albania | 1998           | FemaleLactAge40to44 | 512        |
| Albania | 1998           | FemalePregAge15to19 | 4504       |
| Albania | 1998           | FemalePregAge20to24 | 18361      |
| Albania | 1998           | FemalePregAge25to29 | 16611      |
| Albania | 1998           | FemalePregAge30to34 | 8480       |
| Albania | 1998           | FemalePregAge35to39 | 4117       |
| Albania | 1998           | FemalePregAge40to44 | 384        |
| Albania | 1998           | MaleAge0to4         | 170708     |
| Albania | 1998           | MaleAge10to14       | 178709     |
| Albania | 1998           | MaleAge15to19       | 154983     |
| Albania | 1998           | MaleAge20to24       | 136409     |
| Albania | 1998           | MaleAge25to29       | 124565     |
| Albania | 1998           | MaleAge30to34       | 121849     |
| Albania | 1998           | MaleAge35to39       | 121776     |
| Albania | 1998           | MaleAge40to44       | 108067     |
| Albania | 1998           | MaleAge45to49       | 83179      |
| Albania | 1998           | MaleAge50to54       | 68122      |
| Albania | 1998           | MaleAge55to59       | 62671      |
| Albania | 1998           | MaleAge5to9         | 182495     |
| Albania | 1998           | MaleAge60to64       | 54222      |
| Albania | 1998           | MaleAge65to69       | 41037      |
| Albania | 1998           | MaleAge70to74       | 27206      |
| Albania | 1998           | MaleAge75to79       | 15259      |
| Albania | 1998           | MaleAge80to84       | 9461       |
| Albania | 1998           | MaleAge85to89       | 3412       |
| Albania | 1998           | MaleAge90to94       | 826        |
| Albania | 1998           | MaleAge95to99       | 112        |
| Albania | 1998           | MaleAgeAbove100     | 6          |
| Albania | 1999           | FemaleAge0to4       | 159844     |
| Albania | 1999           | FemaleAge10to14     | 173695     |
| Albania | 1999           | FemaleAge15to19     | 151490     |
| Albania | 1999           | FemaleAge20to24     | 99670      |
| Albania | 1999           | FemaleAge25to29     | 88799      |
| Albania | 1999           | FemaleAge30to34     | 103353     |
| Albania | 1999           | FemaleAge35to39     | 109522     |
| Albania | 1999           | FemaleAge40to44     | 107461     |
| Albania | 1999           | FemaleAge45to49     | 82389      |
| Albania | 1999           | FemaleAge50to54     | 65193      |
| Albania | 1999           | FemaleAge55to59     | 58565      |
| Albania | 1999           | FemaleAge5to9       | 167257     |
| Albania | 1999           | FemaleAge60to64     | 53097      |
| Albania | 1999           | FemaleAge65to69     | 40355      |
| Albania | 1999           | FemaleAge70to74     | 31594      |
| Albania | 1999           | FemaleAge75to79     | 21602      |
| Albania | 1999           | FemaleAge80to84     | 16167      |
| Albania | 1999           | FemaleAge85to89     | 5910       |
| Albania | 1999           | FemaleAge90to94     | 1749       |
| Albania | 1999           | FemaleAge95to99     | 237        |
| Albania | 1999           | FemaleAgeAbove100   | 12         |
| Albania | 1999           | FemaleLactAge15to19 | 6005       |
| Albania | 1999           | FemaleLactAge20to24 | 24481      |
| Albania | 1999           | FemaleLactAge25to29 | 22147      |
| Albania | 1999           | FemaleLactAge30to34 | 11306      |
| Albania | 1999           | FemaleLactAge35to39 | 5490       |
| Albania | 1999           | FemaleLactAge40to44 | 512        |
| Albania | 1999           | FemalePregAge15to19 | 4504       |
| Albania | 1999           | FemalePregAge20to24 | 18361      |
| Albania | 1999           | FemalePregAge25to29 | 16611      |
| Albania | 1999           | FemalePregAge30to34 | 8480       |
| Albania | 1999           | FemalePregAge35to39 | 4117       |
| Albania | 1999           | FemalePregAge40to44 | 384        |
| Albania | 1999           | MaleAge0to4         | 169838     |
| Albania | 1999           | MaleAge10to14       | 179361     |
| Albania | 1999           | MaleAge15to19       | 155129     |
| Albania | 1999           | MaleAge20to24       | 133311     |
| Albania | 1999           | MaleAge25to29       | 121030     |

Dietary calcium and zinc deficiency risks are decreasing but remain prevalent

| Country | Reference year | Age/gender group    | Population |
|---------|----------------|---------------------|------------|
| Albania | 1999           | MaleAge30to34       | 118170     |
| Albania | 1999           | MaleAge35to39       | 118954     |
| Albania | 1999           | MaleAge40to44       | 111661     |
| Albania | 1999           | MaleAge45to49       | 86333      |
| Albania | 1999           | MaleAge50to54       | 69445      |
| Albania | 1999           | MaleAge55to59       | 62042      |
| Albania | 1999           | MaleAge5to9         | 175764     |
| Albania | 1999           | MaleAge60to64       | 56043      |
| Albania | 1999           | MaleAge65to69       | 42344      |
| Albania | 1999           | MaleAge70to74       | 28892      |
| Albania | 1999           | MaleAge75to79       | 15236      |
| Albania | 1999           | MaleAge80to84       | 9745       |
| Albania | 1999           | MaleAge85to89       | 3363       |
| Albania | 1999           | MaleAge90to94       | 801        |
| Albania | 1999           | MaleAge95to99       | 113        |
| Albania | 1999           | MaleAgeAbov e100    | 6          |
| Albania | 2000           | FemaleAge0to4       | 155193     |
| Albania | 2000           | FemaleAge10to14     | 171026     |
| Albania | 2000           | FemaleAge15to19     | 153200     |
| Albania | 2000           | FemaleAge20to24     | 99113      |
| Albania | 2000           | FemaleAge25to29     | 86661      |
| Albania | 2000           | FemaleAge30to34     | 101604     |
| Albania | 2000           | FemaleAge35to39     | 107118     |
| Albania | 2000           | FemaleAge40to44     | 110428     |
| Albania | 2000           | FemaleAge45to49     | 85320      |
| Albania | 2000           | FemaleAge50to54     | 67350      |
| Albania | 2000           | FemaleAge55to59     | 58469      |
| Albania | 2000           | FemaleAge5to9       | 161731     |
| Albania | 2000           | FemaleAge60to64     | 55109      |
| Albania | 2000           | FemaleAge65to69     | 41609      |
| Albania | 2000           | FemaleAge70to74     | 32991      |
| Albania | 2000           | FemaleAge75to79     | 21598      |
| Albania | 2000           | FemaleAge80to84     | 17060      |
| Albania | 2000           | FemaleAge85to89     | 6186       |
| Albania | 2000           | FemaleAge90to94     | 1608       |
| Albania | 2000           | FemaleAge95to99     | 171        |
| Albania | 2000           | FemaleAgeAbov e100  | 12         |
| Albania | 2000           | FemaleLactAge15to19 | 6005       |
| Albania | 2000           | FemaleLactAge20to24 | 24481      |
| Albania | 2000           | FemaleLactAge25to29 | 22147      |
| Albania | 2000           | FemaleLactAge30to34 | 11306      |
| Albania | 2000           | FemaleLactAge35to39 | 5490       |
| Albania | 2000           | FemaleLactAge40to44 | 512        |
| Albania | 2000           | FemalePregAge15to19 | 4504       |
| Albania | 2000           | FemalePregAge20to24 | 18361      |
| Albania | 2000           | FemalePregAge25to29 | 16611      |
| Albania | 2000           | FemalePregAge30to34 | 8480       |
| Albania | 2000           | FemalePregAge35to39 | 4117       |
| Albania | 2000           | FemalePregAge40to44 | 384        |
| Albania | 2000           | MaleAge0to4         | 166013     |
| Albania | 2000           | MaleAge10to14       | 178614     |
| Albania | 2000           | MaleAge15to19       | 156771     |
| Albania | 2000           | MaleAge20to24       | 131044     |
| Albania | 2000           | MaleAge25to29       | 117242     |
| Albania | 2000           | MaleAge30to34       | 114870     |
| Albania | 2000           | MaleAge35to39       | 115416     |
| Albania | 2000           | MaleAge40to44       | 114255     |
| Albania | 2000           | MaleAge45to49       | 89687      |
| Albania | 2000           | MaleAge50to54       | 71733      |
| Albania | 2000           | MaleAge55to59       | 61588      |
| Albania | 2000           | MaleAge5to9         | 170176     |
| Albania | 2000           | MaleAge60to64       | 57382      |
| Albania | 2000           | MaleAge65to69       | 44161      |
| Albania | 2000           | MaleAge70to74       | 30434      |
| Albania | 2000           | MaleAge75to79       | 15710      |
| Albania | 2000           | MaleAge80to84       | 9825       |
| Albania | 2000           | MaleAge85to89       | 3302       |
| Albania | 2000           | MaleAge90to94       | 688        |
| Albania | 2000           | MaleAge95to99       | 75         |
| Albania | 2000           | MaleAgeAbov e100    | 6          |
| Algeria | 1992           | FemaleAge0to4       | 1942032    |
| Algeria | 1992           | FemaleAge10to14     | 1795862    |
| Algeria | 1992           | FemaleAge15to19     | 1452844    |
| Algeria | 1992           | FemaleAge20to24     | 950022     |
| Algeria | 1992           | FemaleAge25to29     | 686287     |
| Algeria | 1992           | FemaleAge30to34     | 566141     |
| Algeria | 1992           | FemaleAge35to39     | 558001     |
| Algeria | 1992           | FemaleAge40to44     | 454643     |
| Algeria | 1992           | FemaleAge45to49     | 363050     |
| Algeria | 1992           | FemaleAge50to54     | 366459     |
| Algeria | 1992           | FemaleAge55to59     | 328213     |
| Algeria | 1992           | FemaleAge5to9       | 2000247    |
| Algeria | 1992           | FemaleAge60to64     | 264082     |
| Algeria | 1992           | FemaleAge65to69     | 190802     |
| Algeria | 1992           | FemaleAge70to74     | 141530     |
| Algeria | 1992           | FemaleAge75to79     | 94058      |
| Algeria | 1992           | FemaleAge80to84     | 50008      |
| Algeria | 1992           | FemaleAge85to89     | 18886      |

Dietary calcium and zinc deficiency risks are decreasing but remain prevalent

| Country | Reference year | Age/gender group    | Population |
|---------|----------------|---------------------|------------|
| Algeria | 1992           | FemaleAge90to94     | 3690       |
| Algeria | 1992           | FemaleAge95to99     | 580        |
| Algeria | 1992           | FemaleAgeAbove100   | 13         |
| Algeria | 1992           | FemaleLactAge15to19 | 37667      |
| Algeria | 1992           | FemaleLactAge20to24 | 184905     |
| Algeria | 1992           | FemaleLactAge25to29 | 215501     |
| Algeria | 1992           | FemaleLactAge30to34 | 183387     |
| Algeria | 1992           | FemaleLactAge35to39 | 126715     |
| Algeria | 1992           | FemaleLactAge40to44 | 44176      |
| Algeria | 1992           | FemaleLactAge45to49 | 6688       |
| Algeria | 1992           | FemalePregAge15to19 | 28250      |
| Algeria | 1992           | FemalePregAge20to24 | 138678     |
| Algeria | 1992           | FemalePregAge25to29 | 161626     |
| Algeria | 1992           | FemalePregAge30to34 | 137541     |
| Algeria | 1992           | FemalePregAge35to39 | 95036      |
| Algeria | 1992           | FemalePregAge40to44 | 33132      |
| Algeria | 1992           | FemalePregAge45to49 | 5016       |
| Algeria | 1992           | MaleAge0to4         | 2028705    |
| Algeria | 1992           | MaleAge10to14       | 1868349    |
| Algeria | 1992           | MaleAge15to19       | 1577465    |
| Algeria | 1992           | MaleAge20to24       | 1327284    |
| Algeria | 1992           | MaleAge25to29       | 1105034    |
| Algeria | 1992           | MaleAge30to34       | 923827     |
| Algeria | 1992           | MaleAge35to39       | 810310     |
| Algeria | 1992           | MaleAge40to44       | 540492     |
| Algeria | 1992           | MaleAge45to49       | 360831     |
| Algeria | 1992           | MaleAge50to54       | 338990     |
| Algeria | 1992           | MaleAge55to59       | 310826     |
| Algeria | 1992           | MaleAge5to9         | 2083230    |
| Algeria | 1992           | MaleAge60to64       | 237666     |
| Algeria | 1992           | MaleAge65to69       | 161683     |
| Algeria | 1992           | MaleAge70to74       | 113659     |
| Algeria | 1992           | MaleAge75to79       | 70122      |
| Algeria | 1992           | MaleAge80to84       | 35376      |
| Algeria | 1992           | MaleAge85to89       | 12804      |
| Algeria | 1992           | MaleAge90to94       | 2427       |
| Algeria | 1992           | MaleAge95to99       | 298        |
| Algeria | 1992           | MaleAgeAbove100     | 6          |
| Algeria | 1993           | FemaleAge0to4       | 1918558    |
| Algeria | 1993           | FemaleAge10to14     | 1852338    |
| Algeria | 1993           | FemaleAge15to19     | 1498214    |
| Algeria | 1993           | FemaleAge20to24     | 992834     |
| Algeria | 1993           | FemaleAge25to29     | 720396     |
| Algeria | 1993           | FemaleAge30to34     | 596109     |
| Algeria | 1993           | FemaleAge35to39     | 570507     |
| Algeria | 1993           | FemaleAge40to44     | 523955     |
| Algeria | 1993           | FemaleAge45to49     | 365363     |
| Algeria | 1993           | FemaleAge50to54     | 367859     |
| Algeria | 1993           | FemaleAge55to59     | 337726     |
| Algeria | 1993           | FemaleAge5to9       | 2002062    |
| Algeria | 1993           | FemaleAge60to64     | 274275     |
| Algeria | 1993           | FemaleAge65to69     | 201355     |
| Algeria | 1993           | FemaleAge70to74     | 142001     |
| Algeria | 1993           | FemaleAge75to79     | 98225      |
| Algeria | 1993           | FemaleAge80to84     | 50054      |
| Algeria | 1993           | FemaleAge85to89     | 20525      |
| Algeria | 1993           | FemaleAge90to94     | 3706       |
| Algeria | 1993           | FemaleAge95to99     | 728        |
| Algeria | 1993           | FemaleAgeAbove100   | 14         |
| Algeria | 1993           | FemaleLactAge15to19 | 37667      |
| Algeria | 1993           | FemaleLactAge20to24 | 184905     |
| Algeria | 1993           | FemaleLactAge25to29 | 215501     |
| Algeria | 1993           | FemaleLactAge30to34 | 183387     |
| Algeria | 1993           | FemaleLactAge35to39 | 126715     |
| Algeria | 1993           | FemaleLactAge40to44 | 44176      |
| Algeria | 1993           | FemaleLactAge45to49 | 6688       |
| Algeria | 1993           | FemalePregAge15to19 | 28250      |
| Algeria | 1993           | FemalePregAge20to24 | 138678     |
| Algeria | 1993           | FemalePregAge25to29 | 161626     |
| Algeria | 1993           | FemalePregAge30to34 | 137541     |
| Algeria | 1993           | FemalePregAge35to39 | 95036      |
| Algeria | 1993           | FemalePregAge40to44 | 33132      |
| Algeria | 1993           | FemalePregAge45to49 | 5016       |
| Algeria | 1993           | MaleAge0to4         | 2001464    |
| Algeria | 1993           | MaleAge10to14       | 1925792    |
| Algeria | 1993           | MaleAge15to19       | 1623592    |
| Algeria | 1993           | MaleAge20to24       | 1368285    |
| Algeria | 1993           | MaleAge25to29       | 1141183    |
| Algeria | 1993           | MaleAge30to34       | 950491     |
| Algeria | 1993           | MaleAge35to39       | 824187     |
| Algeria | 1993           | MaleAge40to44       | 615067     |
| Algeria | 1993           | MaleAge45to49       | 366225     |
| Algeria | 1993           | MaleAge50to54       | 341994     |
| Algeria | 1993           | MaleAge55to59       | 315476     |
| Algeria | 1993           | MaleAge5to9         | 2086384    |
| Algeria | 1993           | MaleAge60to64       | 252515     |
| Algeria | 1993           | MaleAge65to69       | 169154     |
| Algeria | 1993           | MaleAge70to74       | 116152     |

Dietary calcium and zinc deficiency risks are decreasing but remain prevalent

| Country | Reference year | Age/gender group    | Population |
|---------|----------------|---------------------|------------|
| Algeria | 1993           | MaleAge75to79       | 72506      |
| Algeria | 1993           | MaleAge80to84       | 35483      |
| Algeria | 1993           | MaleAge85to89       | 13598      |
| Algeria | 1993           | MaleAge90to94       | 2492       |
| Algeria | 1993           | MaleAge95to99       | 393        |
| Algeria | 1993           | MaleAgeAbov e100    | 6          |
| Algeria | 1994           | FemaleAge0to4       | 1887262    |
| Algeria | 1994           | FemaleAge10to14     | 1903367    |
| Algeria | 1994           | FemaleAge15to19     | 1546409    |
| Algeria | 1994           | FemaleAge20to24     | 1036841    |
| Algeria | 1994           | FemaleAge25to29     | 756022     |
| Algeria | 1994           | FemaleAge30to34     | 627522     |
| Algeria | 1994           | FemaleAge35to39     | 582422     |
| Algeria | 1994           | FemaleAge40to44     | 587323     |
| Algeria | 1994           | FemaleAge45to49     | 379370     |
| Algeria | 1994           | FemaleAge50to54     | 368556     |
| Algeria | 1994           | FemaleAge55to59     | 345569     |
| Algeria | 1994           | FemaleAge5to9       | 1991941    |
| Algeria | 1994           | FemaleAge60to64     | 284901     |
| Algeria | 1994           | FemaleAge65to69     | 212439     |
| Algeria | 1994           | FemaleAge70to74     | 144660     |
| Algeria | 1994           | FemaleAge75to79     | 101762     |
| Algeria | 1994           | FemaleAge80to84     | 50581      |
| Algeria | 1994           | FemaleAge85to89     | 21041      |
| Algeria | 1994           | FemaleAge90to94     | 3762       |
| Algeria | 1994           | FemaleAge95to99     | 721        |
| Algeria | 1994           | FemaleAgeAbov e100  | 15         |
| Algeria | 1994           | FemaleLactAge15to19 | 37667      |
| Algeria | 1994           | FemaleLactAge20to24 | 184905     |
| Algeria | 1994           | FemaleLactAge25to29 | 215501     |
| Algeria | 1994           | FemaleLactAge30to34 | 183387     |
| Algeria | 1994           | FemaleLactAge35to39 | 126715     |
| Algeria | 1994           | FemaleLactAge40to44 | 44176      |
| Algeria | 1994           | FemaleLactAge45to49 | 6688       |
| Algeria | 1994           | FemalePregAge15to19 | 28250      |
| Algeria | 1994           | FemalePregAge20to24 | 138678     |
| Algeria | 1994           | FemalePregAge25to29 | 161626     |
| Algeria | 1994           | FemalePregAge30to34 | 137541     |
| Algeria | 1994           | FemalePregAge35to39 | 95036      |
| Algeria | 1994           | FemalePregAge40to44 | 33132      |
| Algeria | 1994           | FemalePregAge45to49 | 5016       |
| Algeria | 1994           | MaleAge0to4         | 1966430    |
| Algeria | 1994           | MaleAge10to14       | 1978540    |
| Algeria | 1994           | MaleAge15to19       | 1672266    |
| Algeria | 1994           | MaleAge20to24       | 1411123    |
| Algeria | 1994           | MaleAge25to29       | 1178185    |
| Algeria | 1994           | MaleAge30to34       | 979841     |
| Algeria | 1994           | MaleAge35to39       | 835433     |
| Algeria | 1994           | MaleAge40to44       | 683688     |
| Algeria | 1994           | MaleAge45to49       | 383764     |
| Algeria | 1994           | MaleAge50to54       | 344607     |
| Algeria | 1994           | MaleAge55to59       | 319567     |
| Algeria | 1994           | MaleAge5to9         | 2077252    |
| Algeria | 1994           | MaleAge60to64       | 266064     |
| Algeria | 1994           | MaleAge65to69       | 178281     |
| Algeria | 1994           | MaleAge70to74       | 120084     |
| Algeria | 1994           | MaleAge75to79       | 74650      |
| Algeria | 1994           | MaleAge80to84       | 35687      |
| Algeria | 1994           | MaleAge85to89       | 13620      |
| Algeria | 1994           | MaleAge90to94       | 2472       |
| Algeria | 1994           | MaleAge95to99       | 385        |
| Algeria | 1994           | MaleAgeAbov e100    | 7          |
| Algeria | 1995           | FemaleAge0to4       | 1841216    |
| Algeria | 1995           | FemaleAge10to14     | 1943022    |
| Algeria | 1995           | FemaleAge15to19     | 1599010    |
| Algeria | 1995           | FemaleAge20to24     | 1082013    |
| Algeria | 1995           | FemaleAge25to29     | 793766     |
| Algeria | 1995           | FemaleAge30to34     | 659107     |
| Algeria | 1995           | FemaleAge35to39     | 599919     |
| Algeria | 1995           | FemaleAge40to44     | 636158     |
| Algeria | 1995           | FemaleAge45to49     | 409375     |
| Algeria | 1995           | FemaleAge50to54     | 369239     |
| Algeria | 1995           | FemaleAge55to59     | 351282     |
| Algeria | 1995           | FemaleAge5to9       | 1976285    |
| Algeria | 1995           | FemaleAge60to64     | 295871     |
| Algeria | 1995           | FemaleAge65to69     | 223600     |
| Algeria | 1995           | FemaleAge70to74     | 150207     |
| Algeria | 1995           | FemaleAge75to79     | 104454     |
| Algeria | 1995           | FemaleAge80to84     | 51932      |
| Algeria | 1995           | FemaleAge85to89     | 20545      |
| Algeria | 1995           | FemaleAge90to94     | 3703       |
| Algeria | 1995           | FemaleAge95to99     | 466        |
| Algeria | 1995           | FemaleAgeAbov e100  | 17         |
| Algeria | 1995           | FemaleLactAge15to19 | 37667      |
| Algeria | 1995           | FemaleLactAge20to24 | 184905     |
| Algeria | 1995           | FemaleLactAge25to29 | 215501     |
| Algeria | 1995           | FemaleLactAge30to34 | 183387     |
| Algeria | 1995           | FemaleLactAge35to39 | 126715     |

Dietary calcium and zinc deficiency risks are decreasing but remain prevalent

| Country | Reference year | Age/gender group    | Population |
|---------|----------------|---------------------|------------|
| Algeria | 1995           | FemaleLactAge40to44 | 44176      |
| Algeria | 1995           | FemaleLactAge45to49 | 6688       |
| Algeria | 1995           | FemalePregAge15to19 | 28250      |
| Algeria | 1995           | FemalePregAge20to24 | 138678     |
| Algeria | 1995           | FemalePregAge25to29 | 161626     |
| Algeria | 1995           | FemalePregAge30to34 | 137541     |
| Algeria | 1995           | FemalePregAge35to39 | 95036      |
| Algeria | 1995           | FemalePregAge40to44 | 33132      |
| Algeria | 1995           | FemalePregAge45to49 | 5016       |
| Algeria | 1995           | MaleAge0to4         | 1917812    |
| Algeria | 1995           | MaleAge10to14       | 2020506    |
| Algeria | 1995           | MaleAge15to19       | 1725461    |
| Algeria | 1995           | MaleAge20to24       | 1455964    |
| Algeria | 1995           | MaleAge25to29       | 1216342    |
| Algeria | 1995           | MaleAge30to34       | 1010851    |
| Algeria | 1995           | MaleAge35to39       | 850973     |
| Algeria | 1995           | MaleAge40to44       | 736848     |
| Algeria | 1995           | MaleAge45to49       | 417968     |
| Algeria | 1995           | MaleAge50to54       | 347290     |
| Algeria | 1995           | MaleAge55to59       | 323405     |
| Algeria | 1995           | MaleAge5to9         | 2061907    |
| Algeria | 1995           | MaleAge60to64       | 277428     |
| Algeria | 1995           | MaleAge65to69       | 189346     |
| Algeria | 1995           | MaleAge70to74       | 125539     |
| Algeria | 1995           | MaleAge75to79       | 76751      |
| Algeria | 1995           | MaleAge80to84       | 36145      |
| Algeria | 1995           | MaleAge85to89       | 12949      |
| Algeria | 1995           | MaleAge90to94       | 2236       |
| Algeria | 1995           | MaleAge95to99       | 230        |
| Algeria | 1995           | MaleAgeAbove100     | 8          |
| Algeria | 1996           | FemaleAge0to4       | 1789313    |
| Algeria | 1996           | FemaleAge10to14     | 1969809    |
| Algeria | 1996           | FemaleAge15to19     | 1672909    |
| Algeria | 1996           | FemaleAge20to24     | 1197531    |
| Algeria | 1996           | FemaleAge25to29     | 889602     |
| Algeria | 1996           | FemaleAge30to34     | 740922     |
| Algeria | 1996           | FemaleAge35to39     | 663893     |
| Algeria | 1996           | FemaleAge40to44     | 677449     |
| Algeria | 1996           | FemaleAge45to49     | 453992     |
| Algeria | 1996           | FemaleAge50to54     | 368852     |
| Algeria | 1996           | FemaleAge55to59     | 353876     |
| Algeria | 1996           | FemaleAge5to9       | 1959275    |
| Algeria | 1996           | FemaleAge60to64     | 305172     |
| Algeria | 1996           | FemaleAge65to69     | 232290     |
| Algeria | 1996           | FemaleAge70to74     | 155597     |
| Algeria | 1996           | FemaleAge75to79     | 105582     |
| Algeria | 1996           | FemaleAge80to84     | 54811      |
| Algeria | 1996           | FemaleAge85to89     | 21884      |
| Algeria | 1996           | FemaleAge90to94     | 4859       |
| Algeria | 1996           | FemaleAge95to99     | 504        |
| Algeria | 1996           | FemaleAgeAbove100   | 20         |
| Algeria | 1996           | FemaleLactAge15to19 | 26791      |
| Algeria | 1996           | FemaleLactAge20to24 | 144577     |
| Algeria | 1996           | FemaleLactAge25to29 | 183608     |
| Algeria | 1996           | FemaleLactAge30to34 | 155005     |
| Algeria | 1996           | FemaleLactAge35to39 | 101980     |
| Algeria | 1996           | FemaleLactAge40to44 | 40185      |
| Algeria | 1996           | FemaleLactAge45to49 | 6452       |
| Algeria | 1996           | FemalePregAge15to19 | 20093      |
| Algeria | 1996           | FemalePregAge20to24 | 108433     |
| Algeria | 1996           | FemalePregAge25to29 | 137706     |
| Algeria | 1996           | FemalePregAge30to34 | 116254     |
| Algeria | 1996           | FemalePregAge35to39 | 76485      |
| Algeria | 1996           | FemalePregAge40to44 | 30138      |
| Algeria | 1996           | FemalePregAge45to49 | 4839       |
| Algeria | 1996           | MaleAge0to4         | 1861878    |
| Algeria | 1996           | MaleAge10to14       | 2049734    |
| Algeria | 1996           | MaleAge15to19       | 1780949    |
| Algeria | 1996           | MaleAge20to24       | 1500152    |
| Algeria | 1996           | MaleAge25to29       | 1256851    |
| Algeria | 1996           | MaleAge30to34       | 1043601    |
| Algeria | 1996           | MaleAge35to39       | 870183     |
| Algeria | 1996           | MaleAge40to44       | 774402     |
| Algeria | 1996           | MaleAge45to49       | 466903     |
| Algeria | 1996           | MaleAge50to54       | 350779     |
| Algeria | 1996           | MaleAge55to59       | 326097     |
| Algeria | 1996           | MaleAge5to9         | 2043380    |
| Algeria | 1996           | MaleAge60to64       | 285519     |
| Algeria | 1996           | MaleAge65to69       | 199793     |
| Algeria | 1996           | MaleAge70to74       | 129770     |
| Algeria | 1996           | MaleAge75to79       | 79239      |
| Algeria | 1996           | MaleAge80to84       | 38123      |
| Algeria | 1996           | MaleAge85to89       | 13986      |
| Algeria | 1996           | MaleAge90to94       | 2912       |
| Algeria | 1996           | MaleAge95to99       | 260        |
| Algeria | 1996           | MaleAgeAbove100     | 9          |
| Algeria | 1997           | FemaleAge0to4       | 1723113    |
| Algeria | 1997           | FemaleAge10to14     | 1985742    |



Dietary calcium and zinc deficiency risks are decreasing but remain prevalent

| Country | Reference year | Age/gender group    | Population |
|---------|----------------|---------------------|------------|
| Algeria | 1997           | FemaleAge15to19     | 1733160    |
| Algeria | 1997           | FemaleAge20to24     | 1242213    |
| Algeria | 1997           | FemaleAge25to29     | 931908     |
| Algeria | 1997           | FemaleAge30to34     | 774663     |
| Algeria | 1997           | FemaleAge35to39     | 690157     |
| Algeria | 1997           | FemaleAge40to44     | 697064     |
| Algeria | 1997           | FemaleAge45to49     | 514873     |
| Algeria | 1997           | FemaleAge50to54     | 367501     |
| Algeria | 1997           | FemaleAge55to59     | 355715     |
| Algeria | 1997           | FemaleAge5to9       | 1935436    |
| Algeria | 1997           | FemaleAge60to64     | 314732     |
| Algeria | 1997           | FemaleAge65to69     | 241919     |
| Algeria | 1997           | FemaleAge70to74     | 162715     |
| Algeria | 1997           | FemaleAge75to79     | 106097     |
| Algeria | 1997           | FemaleAge80to84     | 57912      |
| Algeria | 1997           | FemaleAge85to89     | 22476      |
| Algeria | 1997           | FemaleAge90to94     | 5839       |
| Algeria | 1997           | FemaleAge95to99     | 529        |
| Algeria | 1997           | FemaleAgeAbov e100  | 24         |
| Algeria | 1997           | FemaleLactAge15to19 | 26791      |
| Algeria | 1997           | FemaleLactAge20to24 | 144577     |
| Algeria | 1997           | FemaleLactAge25to29 | 183608     |
| Algeria | 1997           | FemaleLactAge30to34 | 155005     |
| Algeria | 1997           | FemaleLactAge35to39 | 101980     |
| Algeria | 1997           | FemaleLactAge40to44 | 40185      |
| Algeria | 1997           | FemaleLactAge45to49 | 6452       |
| Algeria | 1997           | FemalePregAge15to19 | 20093      |
| Algeria | 1997           | FemalePregAge20to24 | 108433     |
| Algeria | 1997           | FemalePregAge25to29 | 137706     |
| Algeria | 1997           | FemalePregAge30to34 | 116254     |
| Algeria | 1997           | FemalePregAge35to39 | 76485      |
| Algeria | 1997           | FemalePregAge40to44 | 30138      |
| Algeria | 1997           | FemalePregAge45to49 | 4839       |
| Algeria | 1997           | MaleAge0to4         | 1794408    |
| Algeria | 1997           | MaleAge10to14       | 2067475    |
| Algeria | 1997           | MaleAge15to19       | 1843343    |
| Algeria | 1997           | MaleAge20to24       | 1543718    |
| Algeria | 1997           | MaleAge25to29       | 1298745    |
| Algeria | 1997           | MaleAge30to34       | 1079140    |
| Algeria | 1997           | MaleAge35to39       | 894496     |
| Algeria | 1997           | MaleAge40to44       | 795359     |
| Algeria | 1997           | MaleAge45to49       | 533673     |
| Algeria | 1997           | MaleAge50to54       | 352710     |
| Algeria | 1997           | MaleAge55to59       | 329772     |
| Algeria | 1997           | MaleAge5to9         | 2016918    |
| Algeria | 1997           | MaleAge60to64       | 292450     |
| Algeria | 1997           | MaleAge65to69       | 212445     |
| Algeria | 1997           | MaleAge70to74       | 134394     |
| Algeria | 1997           | MaleAge75to79       | 81694      |
| Algeria | 1997           | MaleAge80to84       | 40099      |
| Algeria | 1997           | MaleAge85to89       | 14520      |
| Algeria | 1997           | MaleAge90to94       | 3463       |
| Algeria | 1997           | MaleAge95to99       | 300        |
| Algeria | 1997           | MaleAgeAbov e100    | 10         |
| Algeria | 1998           | FemaleAge0to4       | 1648366    |
| Algeria | 1998           | FemaleAge10to14     | 1991763    |
| Algeria | 1998           | FemaleAge15to19     | 1794506    |
| Algeria | 1998           | FemaleAge20to24     | 1287903    |
| Algeria | 1998           | FemaleAge25to29     | 975967     |
| Algeria | 1998           | FemaleAge30to34     | 810048     |
| Algeria | 1998           | FemaleAge35to39     | 721200     |
| Algeria | 1998           | FemaleAge40to44     | 707015     |
| Algeria | 1998           | FemaleAge45to49     | 583683     |
| Algeria | 1998           | FemaleAge50to54     | 370200     |
| Algeria | 1998           | FemaleAge55to59     | 357010     |
| Algeria | 1998           | FemaleAge5to9       | 1904042    |
| Algeria | 1998           | FemaleAge60to64     | 323629     |
| Algeria | 1998           | FemaleAge65to69     | 252656     |
| Algeria | 1998           | FemaleAge70to74     | 170983     |
| Algeria | 1998           | FemaleAge75to79     | 107098     |
| Algeria | 1998           | FemaleAge80to84     | 60771      |
| Algeria | 1998           | FemaleAge85to89     | 22554      |
| Algeria | 1998           | FemaleAge90to94     | 6384       |
| Algeria | 1998           | FemaleAge95to99     | 659        |
| Algeria | 1998           | FemaleAgeAbov e100  | 28         |
| Algeria | 1998           | FemaleLactAge15to19 | 26791      |
| Algeria | 1998           | FemaleLactAge20to24 | 144577     |
| Algeria | 1998           | FemaleLactAge25to29 | 183608     |
| Algeria | 1998           | FemaleLactAge30to34 | 155005     |
| Algeria | 1998           | FemaleLactAge35to39 | 101980     |
| Algeria | 1998           | FemaleLactAge40to44 | 40185      |
| Algeria | 1998           | FemaleLactAge45to49 | 6452       |
| Algeria | 1998           | FemalePregAge15to19 | 20093      |
| Algeria | 1998           | FemalePregAge20to24 | 108433     |
| Algeria | 1998           | FemalePregAge25to29 | 137706     |
| Algeria | 1998           | FemalePregAge30to34 | 116254     |
| Algeria | 1998           | FemalePregAge35to39 | 76485      |
| Algeria | 1998           | FemalePregAge40to44 | 30138      |

Dietary calcium and zinc deficiency risks are decreasing but remain prevalent

| Country | Reference year | Age/gender group    | Population |
|---------|----------------|---------------------|------------|
| Algeria | 1998           | FemalePregAge45to49 | 4839       |
| Algeria | 1998           | MaleAge0to4         | 1720145    |
| Algeria | 1998           | MaleAge10to14       | 2074190    |
| Algeria | 1998           | MaleAge15to19       | 1908499    |
| Algeria | 1998           | MaleAge20to24       | 1588059    |
| Algeria | 1998           | MaleAge25to29       | 1341664    |
| Algeria | 1998           | MaleAge30to34       | 1117060    |
| Algeria | 1998           | MaleAge35to39       | 923724     |
| Algeria | 1998           | MaleAge40to44       | 804620     |
| Algeria | 1998           | MaleAge45to49       | 609413     |
| Algeria | 1998           | MaleAge50to54       | 357896     |
| Algeria | 1998           | MaleAge55to59       | 334302     |
| Algeria | 1998           | MaleAge5to9         | 1982067    |
| Algeria | 1998           | MaleAge60to64       | 298499     |
| Algeria | 1998           | MaleAge65to69       | 226240     |
| Algeria | 1998           | MaleAge70to74       | 139932     |
| Algeria | 1998           | MaleAge75to79       | 84382      |
| Algeria | 1998           | MaleAge80to84       | 41985      |
| Algeria | 1998           | MaleAge85to89       | 14603      |
| Algeria | 1998           | MaleAge90to94       | 3752       |
| Algeria | 1998           | MaleAge95to99       | 380        |
| Algeria | 1998           | MaleAgeAbove100     | 12         |
| Algeria | 1999           | FemaleAge0to4       | 1576854    |
| Algeria | 1999           | FemaleAge10to14     | 1989467    |
| Algeria | 1999           | FemaleAge15to19     | 1849189    |
| Algeria | 1999           | FemaleAge20to24     | 1336738    |
| Algeria | 1999           | FemaleAge25to29     | 1020662    |
| Algeria | 1999           | FemaleAge30to34     | 847038     |
| Algeria | 1999           | FemaleAge35to39     | 754136     |
| Algeria | 1999           | FemaleAge40to44     | 716593     |
| Algeria | 1999           | FemaleAge45to49     | 646164     |
| Algeria | 1999           | FemaleAge50to54     | 384446     |
| Algeria | 1999           | FemaleAge55to59     | 357817     |
| Algeria | 1999           | FemaleAge5to9       | 1863941    |
| Algeria | 1999           | FemaleAge60to64     | 330822     |
| Algeria | 1999           | FemaleAge65to69     | 264122     |
| Algeria | 1999           | FemaleAge70to74     | 179932     |
| Algeria | 1999           | FemaleAge75to79     | 109657     |
| Algeria | 1999           | FemaleAge80to84     | 62834      |
| Algeria | 1999           | FemaleAge85to89     | 22480      |
| Algeria | 1999           | FemaleAge90to94     | 6305       |
| Algeria | 1999           | FemaleAge95to99     | 747        |
| Algeria | 1999           | FemaleAgeAbove100   | 32         |
| Algeria | 1999           | FemaleLactAge15to19 | 26791      |
| Algeria | 1999           | FemaleLactAge20to24 | 144577     |
| Algeria | 1999           | FemaleLactAge25to29 | 183608     |
| Algeria | 1999           | FemaleLactAge30to34 | 155005     |
| Algeria | 1999           | FemaleLactAge35to39 | 101980     |
| Algeria | 1999           | FemaleLactAge40to44 | 40185      |
| Algeria | 1999           | FemaleLactAge45to49 | 6452       |
| Algeria | 1999           | FemalePregAge15to19 | 20093      |
| Algeria | 1999           | FemalePregAge20to24 | 108433     |
| Algeria | 1999           | FemalePregAge25to29 | 137706     |
| Algeria | 1999           | FemalePregAge30to34 | 116254     |
| Algeria | 1999           | FemalePregAge35to39 | 76485      |
| Algeria | 1999           | FemalePregAge40to44 | 30138      |
| Algeria | 1999           | FemalePregAge45to49 | 4839       |
| Algeria | 1999           | MaleAge0to4         | 1648996    |
| Algeria | 1999           | MaleAge10to14       | 2071405    |
| Algeria | 1999           | MaleAge15to19       | 1967820    |
| Algeria | 1999           | MaleAge20to24       | 1635992    |
| Algeria | 1999           | MaleAge25to29       | 1384879    |
| Algeria | 1999           | MaleAge30to34       | 1156389    |
| Algeria | 1999           | MaleAge35to39       | 955570     |
| Algeria | 1999           | MaleAge40to44       | 812208     |
| Algeria | 1999           | MaleAge45to49       | 678561     |
| Algeria | 1999           | MaleAge50to54       | 374563     |
| Algeria | 1999           | MaleAge55to59       | 338900     |
| Algeria | 1999           | MaleAge5to9         | 1938222    |
| Algeria | 1999           | MaleAge60to64       | 304032     |
| Algeria | 1999           | MaleAge65to69       | 239454     |
| Algeria | 1999           | MaleAge70to74       | 147148     |
| Algeria | 1999           | MaleAge75to79       | 87517      |
| Algeria | 1999           | MaleAge80to84       | 43628      |
| Algeria | 1999           | MaleAge85to89       | 14416      |
| Algeria | 1999           | MaleAge90to94       | 3639       |
| Algeria | 1999           | MaleAge95to99       | 421        |
| Algeria | 1999           | MaleAgeAbove100     | 13         |
| Angola  | 1992           | FemaleAge0to4       | 1101316    |
| Angola  | 1992           | FemaleAge10to14     | 688076     |
| Angola  | 1992           | FemaleAge15to19     | 335676     |
| Angola  | 1992           | FemaleAge20to24     | 179697     |
| Angola  | 1992           | FemaleAge25to29     | 177026     |
| Angola  | 1992           | FemaleAge30to34     | 184096     |
| Angola  | 1992           | FemaleAge35to39     | 189285     |
| Angola  | 1992           | FemaleAge40to44     | 175047     |
| Angola  | 1992           | FemaleAge45to49     | 164699     |
| Angola  | 1992           | FemaleAge50to54     | 145852     |

Dietary calcium and zinc deficiency risks are decreasing but remain prevalent

| Country | Reference year | Age/gender group    | Population |
|---------|----------------|---------------------|------------|
| Angola  | 1992           | FemaleAge55to59     | 119760     |
| Angola  | 1992           | FemaleAge5to9       | 850008     |
| Angola  | 1992           | FemaleAge60to64     | 94524      |
| Angola  | 1992           | FemaleAge65to69     | 69962      |
| Angola  | 1992           | FemaleAge70to74     | 46445      |
| Angola  | 1992           | FemaleAge75to79     | 26206      |
| Angola  | 1992           | FemaleAge80to84     | 11745      |
| Angola  | 1992           | FemaleAge85to89     | 3839       |
| Angola  | 1992           | FemaleAge90to94     | 822        |
| Angola  | 1992           | FemaleAge95to99     | 101        |
| Angola  | 1992           | FemaleAgeAbove100   | 4          |
| Angola  | 1992           | FemaleLactAge15to19 | 131361     |
| Angola  | 1992           | FemaleLactAge20to24 | 168203     |
| Angola  | 1992           | FemaleLactAge25to29 | 128632     |
| Angola  | 1992           | FemaleLactAge30to34 | 85115      |
| Angola  | 1992           | FemaleLactAge35to39 | 47770      |
| Angola  | 1992           | FemaleLactAge40to44 | 20503      |
| Angola  | 1992           | FemaleLactAge45to49 | 3230       |
| Angola  | 1992           | FemalePregAge15to19 | 98520      |
| Angola  | 1992           | FemalePregAge20to24 | 126152     |
| Angola  | 1992           | FemalePregAge25to29 | 96474      |
| Angola  | 1992           | FemalePregAge30to34 | 63836      |
| Angola  | 1992           | FemalePregAge35to39 | 35827      |
| Angola  | 1992           | FemalePregAge40to44 | 15378      |
| Angola  | 1992           | FemalePregAge45to49 | 2423       |
| Angola  | 1992           | MaleAge0to4         | 1091386    |
| Angola  | 1992           | MaleAge10to14       | 681850     |
| Angola  | 1992           | MaleAge15to19       | 558756     |
| Angola  | 1992           | MaleAge20to24       | 465399     |
| Angola  | 1992           | MaleAge25to29       | 391339     |
| Angola  | 1992           | MaleAge30to34       | 319973     |
| Angola  | 1992           | MaleAge35to39       | 258805     |
| Angola  | 1992           | MaleAge40to44       | 199755     |
| Angola  | 1992           | MaleAge45to49       | 159710     |
| Angola  | 1992           | MaleAge50to54       | 133903     |
| Angola  | 1992           | MaleAge55to59       | 107265     |
| Angola  | 1992           | MaleAge5to9         | 840532     |
| Angola  | 1992           | MaleAge60to64       | 81819      |
| Angola  | 1992           | MaleAge65to69       | 58126      |
| Angola  | 1992           | MaleAge70to74       | 36698      |
| Angola  | 1992           | MaleAge75to79       | 19312      |
| Angola  | 1992           | MaleAge80to84       | 7831       |
| Angola  | 1992           | MaleAge85to89       | 2239       |
| Angola  | 1992           | MaleAge90to94       | 403        |
| Angola  | 1992           | MaleAge95to99       | 45         |
| Angola  | 1992           | MaleAgeAbove100     | 1          |
| Angola  | 1993           | FemaleAge0to4       | 1133739    |
| Angola  | 1993           | FemaleAge10to14     | 713711     |
| Angola  | 1993           | FemaleAge15to19     | 358274     |
| Angola  | 1993           | FemaleAge20to24     | 193607     |
| Angola  | 1993           | FemaleAge25to29     | 189456     |
| Angola  | 1993           | FemaleAge30to34     | 195894     |
| Angola  | 1993           | FemaleAge35to39     | 198469     |
| Angola  | 1993           | FemaleAge40to44     | 186520     |
| Angola  | 1993           | FemaleAge45to49     | 167975     |
| Angola  | 1993           | FemaleAge50to54     | 149463     |
| Angola  | 1993           | FemaleAge55to59     | 122899     |
| Angola  | 1993           | FemaleAge5to9       | 881901     |
| Angola  | 1993           | FemaleAge60to64     | 96871      |
| Angola  | 1993           | FemaleAge65to69     | 71762      |
| Angola  | 1993           | FemaleAge70to74     | 47685      |
| Angola  | 1993           | FemaleAge75to79     | 26942      |
| Angola  | 1993           | FemaleAge80to84     | 12105      |
| Angola  | 1993           | FemaleAge85to89     | 3990       |
| Angola  | 1993           | FemaleAge90to94     | 879        |
| Angola  | 1993           | FemaleAge95to99     | 121        |
| Angola  | 1993           | FemaleAgeAbove100   | 5          |
| Angola  | 1993           | FemaleLactAge15to19 | 131361     |
| Angola  | 1993           | FemaleLactAge20to24 | 168203     |
| Angola  | 1993           | FemaleLactAge25to29 | 128632     |
| Angola  | 1993           | FemaleLactAge30to34 | 85115      |
| Angola  | 1993           | FemaleLactAge35to39 | 47770      |
| Angola  | 1993           | FemaleLactAge40to44 | 20503      |
| Angola  | 1993           | FemaleLactAge45to49 | 3230       |
| Angola  | 1993           | FemalePregAge15to19 | 98520      |
| Angola  | 1993           | FemalePregAge20to24 | 126152     |
| Angola  | 1993           | FemalePregAge25to29 | 96474      |
| Angola  | 1993           | FemalePregAge30to34 | 63836      |
| Angola  | 1993           | FemalePregAge35to39 | 35827      |
| Angola  | 1993           | FemalePregAge40to44 | 15378      |
| Angola  | 1993           | FemalePregAge45to49 | 2423       |
| Angola  | 1993           | MaleAge0to4         | 1123459    |
| Angola  | 1993           | MaleAge10to14       | 707157     |
| Angola  | 1993           | MaleAge15to19       | 581368     |
| Angola  | 1993           | MaleAge20to24       | 478912     |
| Angola  | 1993           | MaleAge25to29       | 403644     |
| Angola  | 1993           | MaleAge30to34       | 331814     |
| Angola  | 1993           | MaleAge35to39       | 267754     |

Dietary calcium and zinc deficiency risks are decreasing but remain prevalent

| Country | Reference year | Age/gender group    | Population |
|---------|----------------|---------------------|------------|
| Angola  | 1993           | MaleAge40to44       | 209880     |
| Angola  | 1993           | MaleAge45to49       | 162899     |
| Angola  | 1993           | MaleAge50to54       | 137000     |
| Angola  | 1993           | MaleAge55to59       | 110042     |
| Angola  | 1993           | MaleAge5to9         | 870579     |
| Angola  | 1993           | MaleAge60to64       | 83878      |
| Angola  | 1993           | MaleAge65to69       | 59648      |
| Angola  | 1993           | MaleAge70to74       | 37662      |
| Angola  | 1993           | MaleAge75to79       | 19856      |
| Angola  | 1993           | MaleAge80to84       | 8077       |
| Angola  | 1993           | MaleAge85to89       | 2336       |
| Angola  | 1993           | MaleAge90to94       | 440        |
| Angola  | 1993           | MaleAge95to99       | 56         |
| Angola  | 1993           | MaleAgeAbov e100    | 2          |
| Angola  | 1994           | FemaleAge0to4       | 1165412    |
| Angola  | 1994           | FemaleAge10to14     | 739651     |
| Angola  | 1994           | FemaleAge15to19     | 381471     |
| Angola  | 1994           | FemaleAge20to24     | 208839     |
| Angola  | 1994           | FemaleAge25to29     | 201951     |
| Angola  | 1994           | FemaleAge30to34     | 207748     |
| Angola  | 1994           | FemaleAge35to39     | 207865     |
| Angola  | 1994           | FemaleAge40to44     | 197867     |
| Angola  | 1994           | FemaleAge45to49     | 172554     |
| Angola  | 1994           | FemaleAge50to54     | 152963     |
| Angola  | 1994           | FemaleAge55to59     | 126158     |
| Angola  | 1994           | FemaleAge5to9       | 911245     |
| Angola  | 1994           | FemaleAge60to64     | 99445      |
| Angola  | 1994           | FemaleAge65to69     | 73731      |
| Angola  | 1994           | FemaleAge70to74     | 49011      |
| Angola  | 1994           | FemaleAge75to79     | 27613      |
| Angola  | 1994           | FemaleAge80to84     | 12290      |
| Angola  | 1994           | FemaleAge85to89     | 3985       |
| Angola  | 1994           | FemaleAge90to94     | 866        |
| Angola  | 1994           | FemaleAge95to99     | 125        |
| Angola  | 1994           | FemaleAgeAbov e100  | 5          |
| Angola  | 1994           | FemaleLactAge15to19 | 131361     |
| Angola  | 1994           | FemaleLactAge20to24 | 168203     |
| Angola  | 1994           | FemaleLactAge25to29 | 128632     |
| Angola  | 1994           | FemaleLactAge30to34 | 85115      |
| Angola  | 1994           | FemaleLactAge35to39 | 47770      |
| Angola  | 1994           | FemaleLactAge40to44 | 20503      |
| Angola  | 1994           | FemaleLactAge45to49 | 3230       |
| Angola  | 1994           | FemalePregAge15to19 | 98520      |
| Angola  | 1994           | FemalePregAge20to24 | 126152     |
| Angola  | 1994           | FemalePregAge25to29 | 96474      |
| Angola  | 1994           | FemalePregAge30to34 | 63836      |
| Angola  | 1994           | FemalePregAge35to39 | 35827      |
| Angola  | 1994           | FemalePregAge40to44 | 15378      |
| Angola  | 1994           | FemalePregAge45to49 | 2423       |
| Angola  | 1994           | MaleAge0to4         | 1155489    |
| Angola  | 1994           | MaleAge10to14       | 732744     |
| Angola  | 1994           | MaleAge15to19       | 604753     |
| Angola  | 1994           | MaleAge20to24       | 493942     |
| Angola  | 1994           | MaleAge25to29       | 415988     |
| Angola  | 1994           | MaleAge30to34       | 343740     |
| Angola  | 1994           | MaleAge35to39       | 277103     |
| Angola  | 1994           | MaleAge40to44       | 220078     |
| Angola  | 1994           | MaleAge45to49       | 167251     |
| Angola  | 1994           | MaleAge50to54       | 140080     |
| Angola  | 1994           | MaleAge55to59       | 112906     |
| Angola  | 1994           | MaleAge5to9         | 897786     |
| Angola  | 1994           | MaleAge60to64       | 86121      |
| Angola  | 1994           | MaleAge65to69       | 61308      |
| Angola  | 1994           | MaleAge70to74       | 38679      |
| Angola  | 1994           | MaleAge75to79       | 20290      |
| Angola  | 1994           | MaleAge80to84       | 8148       |
| Angola  | 1994           | MaleAge85to89       | 2313       |
| Angola  | 1994           | MaleAge90to94       | 434        |
| Angola  | 1994           | MaleAge95to99       | 57         |
| Angola  | 1994           | MaleAgeAbov e100    | 2          |
| Angola  | 1995           | FemaleAge0to4       | 1196752    |
| Angola  | 1995           | FemaleAge10to14     | 764440     |
| Angola  | 1995           | FemaleAge15to19     | 404073     |
| Angola  | 1995           | FemaleAge20to24     | 225390     |
| Angola  | 1995           | FemaleAge25to29     | 214180     |
| Angola  | 1995           | FemaleAge30to34     | 219167     |
| Angola  | 1995           | FemaleAge35to39     | 217580     |
| Angola  | 1995           | FemaleAge40to44     | 208141     |
| Angola  | 1995           | FemaleAge45to49     | 178788     |
| Angola  | 1995           | FemaleAge50to54     | 156128     |
| Angola  | 1995           | FemaleAge55to59     | 129376     |
| Angola  | 1995           | FemaleAge5to9       | 936068     |
| Angola  | 1995           | FemaleAge60to64     | 102164     |
| Angola  | 1995           | FemaleAge65to69     | 75809      |
| Angola  | 1995           | FemaleAge70to74     | 50413      |
| Angola  | 1995           | FemaleAge75to79     | 28248      |
| Angola  | 1995           | FemaleAge80to84     | 12324      |
| Angola  | 1995           | FemaleAge85to89     | 3804       |

Dietary calcium and zinc deficiency risks are decreasing but remain prevalent

| Country | Reference year | Age/gender group    | Population |
|---------|----------------|---------------------|------------|
| Angola  | 1995           | FemaleAge90to94     | 744        |
| Angola  | 1995           | FemaleAge95to99     | 85         |
| Angola  | 1995           | FemaleAgeAbove100   | 5          |
| Angola  | 1995           | FemaleLactAge15to19 | 131361     |
| Angola  | 1995           | FemaleLactAge20to24 | 168203     |
| Angola  | 1995           | FemaleLactAge25to29 | 128632     |
| Angola  | 1995           | FemaleLactAge30to34 | 85115      |
| Angola  | 1995           | FemaleLactAge35to39 | 47770      |
| Angola  | 1995           | FemaleLactAge40to44 | 20503      |
| Angola  | 1995           | FemaleLactAge45to49 | 3230       |
| Angola  | 1995           | FemalePregAge15to19 | 98520      |
| Angola  | 1995           | FemalePregAge20to24 | 126152     |
| Angola  | 1995           | FemalePregAge25to29 | 96474      |
| Angola  | 1995           | FemalePregAge30to34 | 63836      |
| Angola  | 1995           | FemalePregAge35to39 | 35827      |
| Angola  | 1995           | FemalePregAge40to44 | 15378      |
| Angola  | 1995           | FemalePregAge45to49 | 2423       |
| Angola  | 1995           | MaleAge0to4         | 1188177    |
| Angola  | 1995           | MaleAge10to14       | 756847     |
| Angola  | 1995           | MaleAge15to19       | 627677     |
| Angola  | 1995           | MaleAge20to24       | 510576     |
| Angola  | 1995           | MaleAge25to29       | 428093     |
| Angola  | 1995           | MaleAge30to34       | 355249     |
| Angola  | 1995           | MaleAge35to39       | 286880     |
| Angola  | 1995           | MaleAge40to44       | 229581     |
| Angola  | 1995           | MaleAge45to49       | 173018     |
| Angola  | 1995           | MaleAge50to54       | 142990     |
| Angola  | 1995           | MaleAge55to59       | 115716     |
| Angola  | 1995           | MaleAge5to9         | 920539     |
| Angola  | 1995           | MaleAge60to64       | 88481      |
| Angola  | 1995           | MaleAge65to69       | 63054      |
| Angola  | 1995           | MaleAge70to74       | 39748      |
| Angola  | 1995           | MaleAge75to79       | 20645      |
| Angola  | 1995           | MaleAge80to84       | 8058       |
| Angola  | 1995           | MaleAge85to89       | 2138       |
| Angola  | 1995           | MaleAge90to94       | 347        |
| Angola  | 1995           | MaleAge95to99       | 32         |
| Angola  | 1995           | MaleAgeAbove100     | 2          |
| Angola  | 1996           | FemaleAge0to4       | 1231942    |
| Angola  | 1996           | FemaleAge10to14     | 787872     |
| Angola  | 1996           | FemaleAge15to19     | 394597     |
| Angola  | 1996           | FemaleAge20to24     | 195948     |
| Angola  | 1996           | FemaleAge25to29     | 187556     |
| Angola  | 1996           | FemaleAge30to34     | 209221     |
| Angola  | 1996           | FemaleAge35to39     | 217902     |
| Angola  | 1996           | FemaleAge40to44     | 213114     |
| Angola  | 1996           | FemaleAge45to49     | 185291     |
| Angola  | 1996           | FemaleAge50to54     | 157961     |
| Angola  | 1996           | FemaleAge55to59     | 131479     |
| Angola  | 1996           | FemaleAge5to9       | 967219     |
| Angola  | 1996           | FemaleAge60to64     | 103891     |
| Angola  | 1996           | FemaleAge65to69     | 77071      |
| Angola  | 1996           | FemaleAge70to74     | 51481      |
| Angola  | 1996           | FemaleAge75to79     | 29199      |
| Angola  | 1996           | FemaleAge80to84     | 13087      |
| Angola  | 1996           | FemaleAge85to89     | 4249       |
| Angola  | 1996           | FemaleAge90to94     | 896        |
| Angola  | 1996           | FemaleAge95to99     | 100        |
| Angola  | 1996           | FemaleAgeAbove100   | 5          |
| Angola  | 1996           | FemaleLactAge15to19 | 147588     |
| Angola  | 1996           | FemaleLactAge20to24 | 193342     |
| Angola  | 1996           | FemaleLactAge25to29 | 149084     |
| Angola  | 1996           | FemaleLactAge30to34 | 95836      |
| Angola  | 1996           | FemaleLactAge35to39 | 52305      |
| Angola  | 1996           | FemaleLactAge40to44 | 22333      |
| Angola  | 1996           | FemaleLactAge45to49 | 3370       |
| Angola  | 1996           | FemalePregAge15to19 | 110691     |
| Angola  | 1996           | FemalePregAge20to24 | 145007     |
| Angola  | 1996           | FemalePregAge25to29 | 111813     |
| Angola  | 1996           | FemalePregAge30to34 | 71877      |
| Angola  | 1996           | FemalePregAge35to39 | 39228      |
| Angola  | 1996           | FemalePregAge40to44 | 16750      |
| Angola  | 1996           | FemalePregAge45to49 | 2528       |
| Angola  | 1996           | MaleAge0to4         | 1226141    |
| Angola  | 1996           | MaleAge10to14       | 778557     |
| Angola  | 1996           | MaleAge15to19       | 646174     |
| Angola  | 1996           | MaleAge20to24       | 525153     |
| Angola  | 1996           | MaleAge25to29       | 437344     |
| Angola  | 1996           | MaleAge30to34       | 364203     |
| Angola  | 1996           | MaleAge35to39       | 295024     |
| Angola  | 1996           | MaleAge40to44       | 236947     |
| Angola  | 1996           | MaleAge45to49       | 178895     |
| Angola  | 1996           | MaleAge50to54       | 144744     |
| Angola  | 1996           | MaleAge55to59       | 117581     |
| Angola  | 1996           | MaleAge5to9         | 951081     |
| Angola  | 1996           | MaleAge60to64       | 90119      |
| Angola  | 1996           | MaleAge65to69       | 64266      |
| Angola  | 1996           | MaleAge70to74       | 40753      |

Dietary calcium and zinc deficiency risks are decreasing but remain prevalent

| Country | Reference year | Age/gender group    | Population |
|---------|----------------|---------------------|------------|
| Angola  | 1996           | MaleAge75to79       | 21510      |
| Angola  | 1996           | MaleAge80to84       | 8698       |
| Angola  | 1996           | MaleAge85to89       | 2451       |
| Angola  | 1996           | MaleAge90to94       | 428        |
| Angola  | 1996           | MaleAge95to99       | 40         |
| Angola  | 1996           | MaleAgeAbove100     | 2          |
| Angola  | 1997           | FemaleAge0to4       | 1261890    |
| Angola  | 1997           | FemaleAge10to14     | 812068     |
| Angola  | 1997           | FemaleAge15to19     | 413711     |
| Angola  | 1997           | FemaleAge20to24     | 212177     |
| Angola  | 1997           | FemaleAge25to29     | 196623     |
| Angola  | 1997           | FemaleAge30to34     | 217831     |
| Angola  | 1997           | FemaleAge35to39     | 226328     |
| Angola  | 1997           | FemaleAge40to44     | 220347     |
| Angola  | 1997           | FemaleAge45to49     | 193690     |
| Angola  | 1997           | FemaleAge50to54     | 159523     |
| Angola  | 1997           | FemaleAge55to59     | 133769     |
| Angola  | 1997           | FemaleAge5to9       | 996251     |
| Angola  | 1997           | FemaleAge60to64     | 105787     |
| Angola  | 1997           | FemaleAge65to69     | 78393      |
| Angola  | 1997           | FemaleAge70to74     | 52509      |
| Angola  | 1997           | FemaleAge75to79     | 29984      |
| Angola  | 1997           | FemaleAge80to84     | 13649      |
| Angola  | 1997           | FemaleAge85to89     | 4565       |
| Angola  | 1997           | FemaleAge90to94     | 1011       |
| Angola  | 1997           | FemaleAge95to99     | 124        |
| Angola  | 1997           | FemaleAgeAbove100   | 6          |
| Angola  | 1997           | FemaleLactAge15to19 | 147588     |
| Angola  | 1997           | FemaleLactAge20to24 | 193342     |
| Angola  | 1997           | FemaleLactAge25to29 | 149084     |
| Angola  | 1997           | FemaleLactAge30to34 | 95836      |
| Angola  | 1997           | FemaleLactAge35to39 | 52305      |
| Angola  | 1997           | FemaleLactAge40to44 | 22333      |
| Angola  | 1997           | FemaleLactAge45to49 | 3370       |
| Angola  | 1997           | FemalePregAge15to19 | 110691     |
| Angola  | 1997           | FemalePregAge20to24 | 145007     |
| Angola  | 1997           | FemalePregAge25to29 | 111813     |
| Angola  | 1997           | FemalePregAge30to34 | 71877      |
| Angola  | 1997           | FemalePregAge35to39 | 39228      |
| Angola  | 1997           | FemalePregAge40to44 | 16750      |
| Angola  | 1997           | FemalePregAge45to49 | 2528       |
| Angola  | 1997           | MaleAge0to4         | 1258652    |
| Angola  | 1997           | MaleAge10to14       | 801067     |
| Angola  | 1997           | MaleAge15to19       | 665058     |
| Angola  | 1997           | MaleAge20to24       | 541547     |
| Angola  | 1997           | MaleAge25to29       | 446505     |
| Angola  | 1997           | MaleAge30to34       | 373084     |
| Angola  | 1997           | MaleAge35to39       | 303554     |
| Angola  | 1997           | MaleAge40to44       | 243734     |
| Angola  | 1997           | MaleAge45to49       | 186146     |
| Angola  | 1997           | MaleAge50to54       | 146361     |
| Angola  | 1997           | MaleAge55to59       | 119581     |
| Angola  | 1997           | MaleAge5to9         | 980390     |
| Angola  | 1997           | MaleAge60to64       | 91892      |
| Angola  | 1997           | MaleAge65to69       | 65514      |
| Angola  | 1997           | MaleAge70to74       | 41702      |
| Angola  | 1997           | MaleAge75to79       | 22210      |
| Angola  | 1997           | MaleAge80to84       | 9171       |
| Angola  | 1997           | MaleAge85to89       | 2678       |
| Angola  | 1997           | MaleAge90to94       | 496        |
| Angola  | 1997           | MaleAge95to99       | 55         |
| Angola  | 1997           | MaleAgeAbove100     | 2          |
| Angola  | 1998           | FemaleAge0to4       | 1290000    |
| Angola  | 1998           | FemaleAge10to14     | 837595     |
| Angola  | 1998           | FemaleAge15to19     | 433776     |
| Angola  | 1998           | FemaleAge20to24     | 230162     |
| Angola  | 1998           | FemaleAge25to29     | 206556     |
| Angola  | 1998           | FemaleAge30to34     | 226639     |
| Angola  | 1998           | FemaleAge35to39     | 235088     |
| Angola  | 1998           | FemaleAge40to44     | 227223     |
| Angola  | 1998           | FemaleAge45to49     | 203175     |
| Angola  | 1998           | FemaleAge50to54     | 161561     |
| Angola  | 1998           | FemaleAge55to59     | 136263     |
| Angola  | 1998           | FemaleAge5to9       | 1023061    |
| Angola  | 1998           | FemaleAge60to64     | 107931     |
| Angola  | 1998           | FemaleAge65to69     | 79908      |
| Angola  | 1998           | FemaleAge70to74     | 53604      |
| Angola  | 1998           | FemaleAge75to79     | 30669      |
| Angola  | 1998           | FemaleAge80to84     | 14005      |
| Angola  | 1998           | FemaleAge85to89     | 4718       |
| Angola  | 1998           | FemaleAge90to94     | 1073       |
| Angola  | 1998           | FemaleAge95to99     | 150        |
| Angola  | 1998           | FemaleAgeAbove100   | 6          |
| Angola  | 1998           | FemaleLactAge15to19 | 147588     |
| Angola  | 1998           | FemaleLactAge20to24 | 193342     |
| Angola  | 1998           | FemaleLactAge25to29 | 149084     |
| Angola  | 1998           | FemaleLactAge30to34 | 95836      |
| Angola  | 1998           | FemaleLactAge35to39 | 52305      |

Dietary calcium and zinc deficiency risks are decreasing but remain prevalent

| Country   | Reference year | Age/gender group    | Population |
|-----------|----------------|---------------------|------------|
| Angola    | 1998           | FemaleLactAge40to44 | 22333      |
| Angola    | 1998           | FemaleLactAge45to49 | 3370       |
| Angola    | 1998           | FemalePregAge15to19 | 110691     |
| Angola    | 1998           | FemalePregAge20to24 | 145007     |
| Angola    | 1998           | FemalePregAge25to29 | 111813     |
| Angola    | 1998           | FemalePregAge30to34 | 71877      |
| Angola    | 1998           | FemalePregAge35to39 | 39228      |
| Angola    | 1998           | FemalePregAge40to44 | 16750      |
| Angola    | 1998           | FemalePregAge45to49 | 2528       |
| Angola    | 1998           | MaleAge0to4         | 1289289    |
| Angola    | 1998           | MaleAge10to14       | 825071     |
| Angola    | 1998           | MaleAge15to19       | 684949     |
| Angola    | 1998           | MaleAge20to24       | 559747     |
| Angola    | 1998           | MaleAge25to29       | 456501     |
| Angola    | 1998           | MaleAge30to34       | 382226     |
| Angola    | 1998           | MaleAge35to39       | 312578     |
| Angola    | 1998           | MaleAge40to44       | 250457     |
| Angola    | 1998           | MaleAge45to49       | 194350     |
| Angola    | 1998           | MaleAge50to54       | 148440     |
| Angola    | 1998           | MaleAge55to59       | 121755     |
| Angola    | 1998           | MaleAge5to9         | 1008178    |
| Angola    | 1998           | MaleAge60to64       | 93854      |
| Angola    | 1998           | MaleAge65to69       | 66907      |
| Angola    | 1998           | MaleAge70to74       | 42684      |
| Angola    | 1998           | MaleAge75to79       | 22779      |
| Angola    | 1998           | MaleAge80to84       | 9458       |
| Angola    | 1998           | MaleAge85to89       | 2793       |
| Angola    | 1998           | MaleAge90to94       | 539        |
| Angola    | 1998           | MaleAge95to99       | 69         |
| Angola    | 1998           | MaleAgeAbov e100    | 2          |
| Angola    | 1999           | FemaleAge0to4       | 1321807    |
| Angola    | 1999           | FemaleAge10to14     | 864387     |
| Angola    | 1999           | FemaleAge15to19     | 455813     |
| Angola    | 1999           | FemaleAge20to24     | 249816     |
| Angola    | 1999           | FemaleAge25to29     | 218622     |
| Angola    | 1999           | FemaleAge30to34     | 236129     |
| Angola    | 1999           | FemaleAge35to39     | 244311     |
| Angola    | 1999           | FemaleAge40to44     | 234637     |
| Angola    | 1999           | FemaleAge45to49     | 212843     |
| Angola    | 1999           | FemaleAge50to54     | 165137     |
| Angola    | 1999           | FemaleAge55to59     | 138926     |
| Angola    | 1999           | FemaleAge5to9       | 1048422    |
| Angola    | 1999           | FemaleAge60to64     | 110404     |
| Angola    | 1999           | FemaleAge65to69     | 81756      |
| Angola    | 1999           | FemaleAge70to74     | 54867      |
| Angola    | 1999           | FemaleAge75to79     | 31321      |
| Angola    | 1999           | FemaleAge80to84     | 14183      |
| Angola    | 1999           | FemaleAge85to89     | 4702       |
| Angola    | 1999           | FemaleAge90to94     | 1055       |
| Angola    | 1999           | FemaleAge95to99     | 152        |
| Angola    | 1999           | FemaleAgeAbov e100  | 7          |
| Angola    | 1999           | FemaleLactAge15to19 | 147588     |
| Angola    | 1999           | FemaleLactAge20to24 | 193342     |
| Angola    | 1999           | FemaleLactAge25to29 | 149084     |
| Angola    | 1999           | FemaleLactAge30to34 | 95836      |
| Angola    | 1999           | FemaleLactAge35to39 | 52305      |
| Angola    | 1999           | FemaleLactAge40to44 | 22333      |
| Angola    | 1999           | FemaleLactAge45to49 | 3370       |
| Angola    | 1999           | FemalePregAge15to19 | 110691     |
| Angola    | 1999           | FemalePregAge20to24 | 145007     |
| Angola    | 1999           | FemalePregAge25to29 | 111813     |
| Angola    | 1999           | FemalePregAge30to34 | 71877      |
| Angola    | 1999           | FemalePregAge35to39 | 39228      |
| Angola    | 1999           | FemalePregAge40to44 | 16750      |
| Angola    | 1999           | FemalePregAge45to49 | 2528       |
| Angola    | 1999           | MaleAge0to4         | 1323686    |
| Angola    | 1999           | MaleAge10to14       | 850721     |
| Angola    | 1999           | MaleAge15to19       | 706653     |
| Angola    | 1999           | MaleAge20to24       | 579569     |
| Angola    | 1999           | MaleAge25to29       | 468610     |
| Angola    | 1999           | MaleAge30to34       | 392029     |
| Angola    | 1999           | MaleAge35to39       | 322154     |
| Angola    | 1999           | MaleAge40to44       | 257880     |
| Angola    | 1999           | MaleAge45to49       | 202842     |
| Angola    | 1999           | MaleAge50to54       | 151818     |
| Angola    | 1999           | MaleAge55to59       | 124114     |
| Angola    | 1999           | MaleAge5to9         | 1034878    |
| Angola    | 1999           | MaleAge60to64       | 96054      |
| Angola    | 1999           | MaleAge65to69       | 68558      |
| Angola    | 1999           | MaleAge70to74       | 43774      |
| Angola    | 1999           | MaleAge75to79       | 23274      |
| Angola    | 1999           | MaleAge80to84       | 9568       |
| Angola    | 1999           | MaleAge85to89       | 2779       |
| Angola    | 1999           | MaleAge90to94       | 534        |
| Angola    | 1999           | MaleAge95to99       | 69         |
| Angola    | 1999           | MaleAgeAbov e100    | 2          |
| Argentina | 1992           | FemaleAge0to4       | 1721370    |
| Argentina | 1992           | FemaleAge10to14     | 1657184    |

Dietary calcium and zinc deficiency risks are decreasing but remain prevalent

| Country   | Reference year | Age/gender group    | Population |
|-----------|----------------|---------------------|------------|
| Argentina | 1992           | FemaleAge15to19     | 1306616    |
| Argentina | 1992           | FemaleAge20to24     | 932804     |
| Argentina | 1992           | FemaleAge25to29     | 857632     |
| Argentina | 1992           | FemaleAge30to34     | 905931     |
| Argentina | 1992           | FemaleAge35to39     | 967848     |
| Argentina | 1992           | FemaleAge40to44     | 962689     |
| Argentina | 1992           | FemaleAge45to49     | 873091     |
| Argentina | 1992           | FemaleAge50to54     | 783301     |
| Argentina | 1992           | FemaleAge55to59     | 734142     |
| Argentina | 1992           | FemaleAge5to9       | 1609985    |
| Argentina | 1992           | FemaleAge60to64     | 696314     |
| Argentina | 1992           | FemaleAge65to69     | 611917     |
| Argentina | 1992           | FemaleAge70to74     | 485071     |
| Argentina | 1992           | FemaleAge75to79     | 357968     |
| Argentina | 1992           | FemaleAge80to84     | 224149     |
| Argentina | 1992           | FemaleAge85to89     | 102437     |
| Argentina | 1992           | FemaleAge90to94     | 31644      |
| Argentina | 1992           | FemaleAge95to99     | 5655       |
| Argentina | 1992           | FemaleAgeAbov e100  | 584        |
| Argentina | 1992           | FemaleLactAge15to19 | 111039     |
| Argentina | 1992           | FemaleLactAge20to24 | 192871     |
| Argentina | 1992           | FemaleLactAge25to29 | 185135     |
| Argentina | 1992           | FemaleLactAge30to34 | 134401     |
| Argentina | 1992           | FemaleLactAge35to39 | 69990      |
| Argentina | 1992           | FemaleLactAge40to44 | 20004      |
| Argentina | 1992           | FemaleLactAge45to49 | 2229       |
| Argentina | 1992           | FemalePregAge15to19 | 83279      |
| Argentina | 1992           | FemalePregAge20to24 | 144653     |
| Argentina | 1992           | FemalePregAge25to29 | 138851     |
| Argentina | 1992           | FemalePregAge30to34 | 100801     |
| Argentina | 1992           | FemalePregAge35to39 | 52493      |
| Argentina | 1992           | FemalePregAge40to44 | 15003      |
| Argentina | 1992           | FemalePregAge45to49 | 1672       |
| Argentina | 1992           | MaleAge0to4         | 1777662    |
| Argentina | 1992           | MaleAge10to14       | 1700531    |
| Argentina | 1992           | MaleAge15to19       | 1530986    |
| Argentina | 1992           | MaleAge20to24       | 1290609    |
| Argentina | 1992           | MaleAge25to29       | 1189082    |
| Argentina | 1992           | MaleAge30to34       | 1110039    |
| Argentina | 1992           | MaleAge35to39       | 1049265    |
| Argentina | 1992           | MaleAge40to44       | 964497     |
| Argentina | 1992           | MaleAge45to49       | 848353     |
| Argentina | 1992           | MaleAge50to54       | 743743     |
| Argentina | 1992           | MaleAge55to59       | 670682     |
| Argentina | 1992           | MaleAge5to9         | 1663261    |
| Argentina | 1992           | MaleAge60to64       | 609453     |
| Argentina | 1992           | MaleAge65to69       | 501738     |
| Argentina | 1992           | MaleAge70to74       | 358893     |
| Argentina | 1992           | MaleAge75to79       | 233354     |
| Argentina | 1992           | MaleAge80to84       | 129169     |
| Argentina | 1992           | MaleAge85to89       | 52382      |
| Argentina | 1992           | MaleAge90to94       | 14058      |
| Argentina | 1992           | MaleAge95to99       | 2108       |
| Argentina | 1992           | MaleAgeAbov e100    | 185        |
| Argentina | 1993           | FemaleAge0to4       | 1720574    |
| Argentina | 1993           | FemaleAge10to14     | 1639936    |
| Argentina | 1993           | FemaleAge15to19     | 1369693    |
| Argentina | 1993           | FemaleAge20to24     | 963485     |
| Argentina | 1993           | FemaleAge25to29     | 866679     |
| Argentina | 1993           | FemaleAge30to34     | 914022     |
| Argentina | 1993           | FemaleAge35to39     | 978654     |
| Argentina | 1993           | FemaleAge40to44     | 983735     |
| Argentina | 1993           | FemaleAge45to49     | 894727     |
| Argentina | 1993           | FemaleAge50to54     | 794679     |
| Argentina | 1993           | FemaleAge55to59     | 736646     |
| Argentina | 1993           | FemaleAge5to9       | 1625753    |
| Argentina | 1993           | FemaleAge60to64     | 698328     |
| Argentina | 1993           | FemaleAge65to69     | 624466     |
| Argentina | 1993           | FemaleAge70to74     | 498449     |
| Argentina | 1993           | FemaleAge75to79     | 364854     |
| Argentina | 1993           | FemaleAge80to84     | 232113     |
| Argentina | 1993           | FemaleAge85to89     | 107667     |
| Argentina | 1993           | FemaleAge90to94     | 33663      |
| Argentina | 1993           | FemaleAge95to99     | 6490       |
| Argentina | 1993           | FemaleAgeAbov e100  | 642        |
| Argentina | 1993           | FemaleLactAge15to19 | 111039     |
| Argentina | 1993           | FemaleLactAge20to24 | 192871     |
| Argentina | 1993           | FemaleLactAge25to29 | 185135     |
| Argentina | 1993           | FemaleLactAge30to34 | 134401     |
| Argentina | 1993           | FemaleLactAge35to39 | 69990      |
| Argentina | 1993           | FemaleLactAge40to44 | 20004      |
| Argentina | 1993           | FemaleLactAge45to49 | 2229       |
| Argentina | 1993           | FemalePregAge15to19 | 83279      |
| Argentina | 1993           | FemalePregAge20to24 | 144653     |
| Argentina | 1993           | FemalePregAge25to29 | 138851     |
| Argentina | 1993           | FemalePregAge30to34 | 100801     |
| Argentina | 1993           | FemalePregAge35to39 | 52493      |
| Argentina | 1993           | FemalePregAge40to44 | 15003      |



Dietary calcium and zinc deficiency risks are decreasing but remain prevalent

| Country   | Reference year | Age/gender group    | Population |
|-----------|----------------|---------------------|------------|
| Argentina | 1993           | FemalePregAge45to49 | 1672       |
| Argentina | 1993           | MaleAge0to4         | 1777803    |
| Argentina | 1993           | MaleAge10to14       | 1685764    |
| Argentina | 1993           | MaleAge15to19       | 1596067    |
| Argentina | 1993           | MaleAge20to24       | 1322041    |
| Argentina | 1993           | MaleAge25to29       | 1200567    |
| Argentina | 1993           | MaleAge30to34       | 1127331    |
| Argentina | 1993           | MaleAge35to39       | 1055549    |
| Argentina | 1993           | MaleAge40to44       | 984244     |
| Argentina | 1993           | MaleAge45to49       | 866136     |
| Argentina | 1993           | MaleAge50to54       | 756003     |
| Argentina | 1993           | MaleAge55to59       | 672577     |
| Argentina | 1993           | MaleAge5to9         | 1679767    |
| Argentina | 1993           | MaleAge60to64       | 609304     |
| Argentina | 1993           | MaleAge65to69       | 511543     |
| Argentina | 1993           | MaleAge70to74       | 368820     |
| Argentina | 1993           | MaleAge75to79       | 236603     |
| Argentina | 1993           | MaleAge80to84       | 132119     |
| Argentina | 1993           | MaleAge85to89       | 54346      |
| Argentina | 1993           | MaleAge90to94       | 15030      |
| Argentina | 1993           | MaleAge95to99       | 2451       |
| Argentina | 1993           | MaleAgeAbove100     | 206        |
| Argentina | 1994           | FemaleAge0to4       | 1715244    |
| Argentina | 1994           | FemaleAge10to14     | 1621571    |
| Argentina | 1994           | FemaleAge15to19     | 1420769    |
| Argentina | 1994           | FemaleAge20to24     | 1001143    |
| Argentina | 1994           | FemaleAge25to29     | 879151     |
| Argentina | 1994           | FemaleAge30to34     | 921510     |
| Argentina | 1994           | FemaleAge35to39     | 988177     |
| Argentina | 1994           | FemaleAge40to44     | 1003037    |
| Argentina | 1994           | FemaleAge45to49     | 916937     |
| Argentina | 1994           | FemaleAge50to54     | 808313     |
| Argentina | 1994           | FemaleAge55to59     | 740640     |
| Argentina | 1994           | FemaleAge5to9       | 1647313    |
| Argentina | 1994           | FemaleAge60to64     | 700058     |
| Argentina | 1994           | FemaleAge65to69     | 635715     |
| Argentina | 1994           | FemaleAge70to74     | 512687     |
| Argentina | 1994           | FemaleAge75to79     | 373803     |
| Argentina | 1994           | FemaleAge80to84     | 240083     |
| Argentina | 1994           | FemaleAge85to89     | 111558     |
| Argentina | 1994           | FemaleAge90to94     | 34796      |
| Argentina | 1994           | FemaleAge95to99     | 7025       |
| Argentina | 1994           | FemaleAgeAbove100   | 711        |
| Argentina | 1994           | FemaleLactAge15to19 | 111039     |
| Argentina | 1994           | FemaleLactAge20to24 | 192871     |
| Argentina | 1994           | FemaleLactAge25to29 | 185135     |
| Argentina | 1994           | FemaleLactAge30to34 | 134401     |
| Argentina | 1994           | FemaleLactAge35to39 | 69990      |
| Argentina | 1994           | FemaleLactAge40to44 | 20004      |
| Argentina | 1994           | FemaleLactAge45to49 | 2229       |
| Argentina | 1994           | FemalePregAge15to19 | 83279      |
| Argentina | 1994           | FemalePregAge20to24 | 144653     |
| Argentina | 1994           | FemalePregAge25to29 | 138851     |
| Argentina | 1994           | FemalePregAge30to34 | 100801     |
| Argentina | 1994           | FemalePregAge35to39 | 52493      |
| Argentina | 1994           | FemalePregAge40to44 | 15003      |
| Argentina | 1994           | FemalePregAge45to49 | 1672       |
| Argentina | 1994           | MaleAge0to4         | 1773330    |
| Argentina | 1994           | MaleAge10to14       | 1669776    |
| Argentina | 1994           | MaleAge15to19       | 1649434    |
| Argentina | 1994           | MaleAge20to24       | 1360567    |
| Argentina | 1994           | MaleAge25to29       | 1214863    |
| Argentina | 1994           | MaleAge30to34       | 1143670    |
| Argentina | 1994           | MaleAge35to39       | 1062812    |
| Argentina | 1994           | MaleAge40to44       | 1001866    |
| Argentina | 1994           | MaleAge45to49       | 884867     |
| Argentina | 1994           | MaleAge50to54       | 770103     |
| Argentina | 1994           | MaleAge55to59       | 676667     |
| Argentina | 1994           | MaleAge5to9         | 1701773    |
| Argentina | 1994           | MaleAge60to64       | 609500     |
| Argentina | 1994           | MaleAge65to69       | 520122     |
| Argentina | 1994           | MaleAge70to74       | 379130     |
| Argentina | 1994           | MaleAge75to79       | 241170     |
| Argentina | 1994           | MaleAge80to84       | 134030     |
| Argentina | 1994           | MaleAge85to89       | 54844      |
| Argentina | 1994           | MaleAge90to94       | 15276      |
| Argentina | 1994           | MaleAge95to99       | 2651       |
| Argentina | 1994           | MaleAgeAbove100     | 230        |
| Argentina | 1995           | FemaleAge0to4       | 1713939    |
| Argentina | 1995           | FemaleAge10to14     | 1612324    |
| Argentina | 1995           | FemaleAge15to19     | 1452001    |
| Argentina | 1995           | FemaleAge20to24     | 1046198    |
| Argentina | 1995           | FemaleAge25to29     | 896180     |
| Argentina | 1995           | FemaleAge30to34     | 928245     |
| Argentina | 1995           | FemaleAge35to39     | 996720     |
| Argentina | 1995           | FemaleAge40to44     | 1019858    |
| Argentina | 1995           | FemaleAge45to49     | 938849     |
| Argentina | 1995           | FemaleAge50to54     | 824045     |

Dietary calcium and zinc deficiency risks are decreasing but remain prevalent

| Country   | Reference year | Age/gender group    | Population |
|-----------|----------------|---------------------|------------|
| Argentina | 1995           | FemaleAge55to59     | 746372     |
| Argentina | 1995           | FemaleAge5to9       | 1664444    |
| Argentina | 1995           | FemaleAge60to64     | 702056     |
| Argentina | 1995           | FemaleAge65to69     | 644895     |
| Argentina | 1995           | FemaleAge70to74     | 527281     |
| Argentina | 1995           | FemaleAge75to79     | 385181     |
| Argentina | 1995           | FemaleAge80to84     | 247974     |
| Argentina | 1995           | FemaleAge85to89     | 114845     |
| Argentina | 1995           | FemaleAge90to94     | 35009      |
| Argentina | 1995           | FemaleAge95to99     | 6700       |
| Argentina | 1995           | FemaleAgeAbove100   | 792        |
| Argentina | 1995           | FemaleLactAge15to19 | 111039     |
| Argentina | 1995           | FemaleLactAge20to24 | 192871     |
| Argentina | 1995           | FemaleLactAge25to29 | 185135     |
| Argentina | 1995           | FemaleLactAge30to34 | 134401     |
| Argentina | 1995           | FemaleLactAge35to39 | 69990      |
| Argentina | 1995           | FemaleLactAge40to44 | 20004      |
| Argentina | 1995           | FemaleLactAge45to49 | 2229       |
| Argentina | 1995           | FemalePregAge15to19 | 83279      |
| Argentina | 1995           | FemalePregAge20to24 | 144653     |
| Argentina | 1995           | FemalePregAge25to29 | 138851     |
| Argentina | 1995           | FemalePregAge30to34 | 100801     |
| Argentina | 1995           | FemalePregAge35to39 | 52493      |
| Argentina | 1995           | FemalePregAge40to44 | 15003      |
| Argentina | 1995           | FemalePregAge45to49 | 1672       |
| Argentina | 1995           | MaleAge0to4         | 1772572    |
| Argentina | 1995           | MaleAge10to14       | 1662423    |
| Argentina | 1995           | MaleAge15to19       | 1683018    |
| Argentina | 1995           | MaleAge20to24       | 1406725    |
| Argentina | 1995           | MaleAge25to29       | 1233497    |
| Argentina | 1995           | MaleAge30to34       | 1157363    |
| Argentina | 1995           | MaleAge35to39       | 1072409    |
| Argentina | 1995           | MaleAge40to44       | 1016093    |
| Argentina | 1995           | MaleAge45to49       | 904086     |
| Argentina | 1995           | MaleAge50to54       | 785419     |
| Argentina | 1995           | MaleAge55to59       | 683184     |
| Argentina | 1995           | MaleAge5to9         | 1719227    |
| Argentina | 1995           | MaleAge60to64       | 610653     |
| Argentina | 1995           | MaleAge65to69       | 526809     |
| Argentina | 1995           | MaleAge70to74       | 389562     |
| Argentina | 1995           | MaleAge75to79       | 247322     |
| Argentina | 1995           | MaleAge80to84       | 135204     |
| Argentina | 1995           | MaleAge85to89       | 54104      |
| Argentina | 1995           | MaleAge90to94       | 14523      |
| Argentina | 1995           | MaleAge95to99       | 2391       |
| Argentina | 1995           | MaleAgeAbove100     | 255        |
| Argentina | 1996           | FemaleAge0to4       | 1714162    |
| Argentina | 1996           | FemaleAge10to14     | 1612363    |
| Argentina | 1996           | FemaleAge15to19     | 1460776    |
| Argentina | 1996           | FemaleAge20to24     | 1101763    |
| Argentina | 1996           | FemaleAge25to29     | 933896     |
| Argentina | 1996           | FemaleAge30to34     | 939933     |
| Argentina | 1996           | FemaleAge35to39     | 1002944    |
| Argentina | 1996           | FemaleAge40to44     | 1033443    |
| Argentina | 1996           | FemaleAge45to49     | 960918     |
| Argentina | 1996           | FemaleAge50to54     | 841317     |
| Argentina | 1996           | FemaleAge55to59     | 752934     |
| Argentina | 1996           | FemaleAge5to9       | 1677527    |
| Argentina | 1996           | FemaleAge60to64     | 702502     |
| Argentina | 1996           | FemaleAge65to69     | 649231     |
| Argentina | 1996           | FemaleAge70to74     | 538474     |
| Argentina | 1996           | FemaleAge75to79     | 394533     |
| Argentina | 1996           | FemaleAge80to84     | 254847     |
| Argentina | 1996           | FemaleAge85to89     | 123662     |
| Argentina | 1996           | FemaleAge90to94     | 40225      |
| Argentina | 1996           | FemaleAge95to99     | 7547       |
| Argentina | 1996           | FemaleAgeAbove100   | 888        |
| Argentina | 1996           | FemaleLactAge15to19 | 113539     |
| Argentina | 1996           | FemaleLactAge20to24 | 191195     |
| Argentina | 1996           | FemaleLactAge25to29 | 175917     |
| Argentina | 1996           | FemaleLactAge30to34 | 131671     |
| Argentina | 1996           | FemaleLactAge35to39 | 71089      |
| Argentina | 1996           | FemaleLactAge40to44 | 20558      |
| Argentina | 1996           | FemaleLactAge45to49 | 1884       |
| Argentina | 1996           | FemalePregAge15to19 | 85154      |
| Argentina | 1996           | FemalePregAge20to24 | 143396     |
| Argentina | 1996           | FemalePregAge25to29 | 131938     |
| Argentina | 1996           | FemalePregAge30to34 | 98753      |
| Argentina | 1996           | FemalePregAge35to39 | 53317      |
| Argentina | 1996           | FemalePregAge40to44 | 15419      |
| Argentina | 1996           | FemalePregAge45to49 | 1413       |
| Argentina | 1996           | MaleAge0to4         | 1773633    |
| Argentina | 1996           | MaleAge10to14       | 1663170    |
| Argentina | 1996           | MaleAge15to19       | 1697364    |
| Argentina | 1996           | MaleAge20to24       | 1459813    |
| Argentina | 1996           | MaleAge25to29       | 1255515    |
| Argentina | 1996           | MaleAge30to34       | 1168725    |
| Argentina | 1996           | MaleAge35to39       | 1083617    |

Dietary calcium and zinc deficiency risks are decreasing but remain prevalent

| Country   | Reference year | Age/gender group    | Population |
|-----------|----------------|---------------------|------------|
| Argentina | 1996           | MaleAge40to44       | 1026249    |
| Argentina | 1996           | MaleAge45to49       | 922566     |
| Argentina | 1996           | MaleAge50to54       | 800469     |
| Argentina | 1996           | MaleAge55to59       | 690378     |
| Argentina | 1996           | MaleAge5to9         | 1732874    |
| Argentina | 1996           | MaleAge60to64       | 610406     |
| Argentina | 1996           | MaleAge65to69       | 529234     |
| Argentina | 1996           | MaleAge70to74       | 398476     |
| Argentina | 1996           | MaleAge75to79       | 254324     |
| Argentina | 1996           | MaleAge80to84       | 139714     |
| Argentina | 1996           | MaleAge85to89       | 58614      |
| Argentina | 1996           | MaleAge90to94       | 16805      |
| Argentina | 1996           | MaleAge95to99       | 2712       |
| Argentina | 1996           | MaleAgeAbov e100    | 283        |
| Argentina | 1997           | FemaleAge0to4       | 1712415    |
| Argentina | 1997           | FemaleAge10to14     | 1620678    |
| Argentina | 1997           | FemaleAge15to19     | 1454072    |
| Argentina | 1997           | FemaleAge20to24     | 1163160    |
| Argentina | 1997           | FemaleAge25to29     | 958844     |
| Argentina | 1997           | FemaleAge30to34     | 946897     |
| Argentina | 1997           | FemaleAge35to39     | 1010877    |
| Argentina | 1997           | FemaleAge40to44     | 1045777    |
| Argentina | 1997           | FemaleAge45to49     | 982310     |
| Argentina | 1997           | FemaleAge50to54     | 860866     |
| Argentina | 1997           | FemaleAge55to59     | 761681     |
| Argentina | 1997           | FemaleAge5to9       | 1689247    |
| Argentina | 1997           | FemaleAge60to64     | 703711     |
| Argentina | 1997           | FemaleAge65to69     | 652095     |
| Argentina | 1997           | FemaleAge70to74     | 550415     |
| Argentina | 1997           | FemaleAge75to79     | 405403     |
| Argentina | 1997           | FemaleAge80to84     | 260927     |
| Argentina | 1997           | FemaleAge85to89     | 131462     |
| Argentina | 1997           | FemaleAge90to94     | 44545      |
| Argentina | 1997           | FemaleAge95to99     | 8636       |
| Argentina | 1997           | FemaleAgeAbov e100  | 999        |
| Argentina | 1997           | FemaleLactAge15to19 | 113539     |
| Argentina | 1997           | FemaleLactAge20to24 | 191195     |
| Argentina | 1997           | FemaleLactAge25to29 | 175917     |
| Argentina | 1997           | FemaleLactAge30to34 | 131671     |
| Argentina | 1997           | FemaleLactAge35to39 | 71089      |
| Argentina | 1997           | FemaleLactAge40to44 | 20558      |
| Argentina | 1997           | FemaleLactAge45to49 | 1884       |
| Argentina | 1997           | FemalePregAge15to19 | 85154      |
| Argentina | 1997           | FemalePregAge20to24 | 143396     |
| Argentina | 1997           | FemalePregAge25to29 | 131938     |
| Argentina | 1997           | FemalePregAge30to34 | 98753      |
| Argentina | 1997           | FemalePregAge35to39 | 53317      |
| Argentina | 1997           | FemalePregAge40to44 | 15419      |
| Argentina | 1997           | FemalePregAge45to49 | 1413       |
| Argentina | 1997           | MaleAge0to4         | 1772205    |
| Argentina | 1997           | MaleAge10to14       | 1672116    |
| Argentina | 1997           | MaleAge15to19       | 1692113    |
| Argentina | 1997           | MaleAge20to24       | 1521895    |
| Argentina | 1997           | MaleAge25to29       | 1280480    |
| Argentina | 1997           | MaleAge30to34       | 1178450    |
| Argentina | 1997           | MaleAge35to39       | 1097870    |
| Argentina | 1997           | MaleAge40to44       | 1033138    |
| Argentina | 1997           | MaleAge45to49       | 941896     |
| Argentina | 1997           | MaleAge50to54       | 816775     |
| Argentina | 1997           | MaleAge55to59       | 700320     |
| Argentina | 1997           | MaleAge5to9         | 1745256    |
| Argentina | 1997           | MaleAge60to64       | 611315     |
| Argentina | 1997           | MaleAge65to69       | 530307     |
| Argentina | 1997           | MaleAge70to74       | 407657     |
| Argentina | 1997           | MaleAge75to79       | 261718     |
| Argentina | 1997           | MaleAge80to84       | 142935     |
| Argentina | 1997           | MaleAge85to89       | 62047      |
| Argentina | 1997           | MaleAge90to94       | 18533      |
| Argentina | 1997           | MaleAge95to99       | 3179       |
| Argentina | 1997           | MaleAgeAbov e100    | 312        |
| Argentina | 1998           | FemaleAge0to4       | 1709949    |
| Argentina | 1998           | FemaleAge10to14     | 1634789    |
| Argentina | 1998           | FemaleAge15to19     | 1435092    |
| Argentina | 1998           | FemaleAge20to24     | 1224936    |
| Argentina | 1998           | FemaleAge25to29     | 988387     |
| Argentina | 1998           | FemaleAge30to34     | 955134     |
| Argentina | 1998           | FemaleAge35to39     | 1018343    |
| Argentina | 1998           | FemaleAge40to44     | 1056110    |
| Argentina | 1998           | FemaleAge45to49     | 1002801    |
| Argentina | 1998           | FemaleAge50to54     | 881908     |
| Argentina | 1998           | FemaleAge55to59     | 772579     |
| Argentina | 1998           | FemaleAge5to9       | 1698613    |
| Argentina | 1998           | FemaleAge60to64     | 705963     |
| Argentina | 1998           | FemaleAge65to69     | 653962     |
| Argentina | 1998           | FemaleAge70to74     | 562291     |
| Argentina | 1998           | FemaleAge75to79     | 417599     |
| Argentina | 1998           | FemaleAge80to84     | 267496     |
| Argentina | 1998           | FemaleAge85to89     | 137771     |

Dietary calcium and zinc deficiency risks are decreasing but remain prevalent

| Country   | Reference year | Age/gender group    | Population |
|-----------|----------------|---------------------|------------|
| Argentina | 1998           | FemaleAge90to94     | 47700      |
| Argentina | 1998           | FemaleAge95to99     | 9828       |
| Argentina | 1998           | FemaleAgeAbove100   | 1128       |
| Argentina | 1998           | FemaleLactAge15to19 | 113539     |
| Argentina | 1998           | FemaleLactAge20to24 | 191195     |
| Argentina | 1998           | FemaleLactAge25to29 | 175917     |
| Argentina | 1998           | FemaleLactAge30to34 | 131671     |
| Argentina | 1998           | FemaleLactAge35to39 | 71089      |
| Argentina | 1998           | FemaleLactAge40to44 | 20558      |
| Argentina | 1998           | FemaleLactAge45to49 | 1884       |
| Argentina | 1998           | FemalePregAge15to19 | 85154      |
| Argentina | 1998           | FemalePregAge20to24 | 143396     |
| Argentina | 1998           | FemalePregAge25to29 | 131938     |
| Argentina | 1998           | FemalePregAge30to34 | 98753      |
| Argentina | 1998           | FemalePregAge35to39 | 53317      |
| Argentina | 1998           | FemalePregAge40to44 | 15419      |
| Argentina | 1998           | FemalePregAge45to49 | 1413       |
| Argentina | 1998           | MaleAge0to4         | 1769654    |
| Argentina | 1998           | MaleAge10to14       | 1686876    |
| Argentina | 1998           | MaleAge15to19       | 1674785    |
| Argentina | 1998           | MaleAge20to24       | 1584521    |
| Argentina | 1998           | MaleAge25to29       | 1309840    |
| Argentina | 1998           | MaleAge30to34       | 1188084    |
| Argentina | 1998           | MaleAge35to39       | 1113545    |
| Argentina | 1998           | MaleAge40to44       | 1038217    |
| Argentina | 1998           | MaleAge45to49       | 960737     |
| Argentina | 1998           | MaleAge50to54       | 834042     |
| Argentina | 1998           | MaleAge55to59       | 712524     |
| Argentina | 1998           | MaleAge5to9         | 1755270    |
| Argentina | 1998           | MaleAge60to64       | 613759     |
| Argentina | 1998           | MaleAge65to69       | 530809     |
| Argentina | 1998           | MaleAge70to74       | 416492     |
| Argentina | 1998           | MaleAge75to79       | 269559     |
| Argentina | 1998           | MaleAge80to84       | 145449     |
| Argentina | 1998           | MaleAge85to89       | 64029      |
| Argentina | 1998           | MaleAge90to94       | 19529      |
| Argentina | 1998           | MaleAge95to99       | 3653       |
| Argentina | 1998           | MaleAgeAbove100     | 345        |
| Argentina | 1999           | FemaleAge0to4       | 1704687    |
| Argentina | 1999           | FemaleAge10to14     | 1649834    |
| Argentina | 1999           | FemaleAge15to19     | 1416992    |
| Argentina | 1999           | FemaleAge20to24     | 1274563    |
| Argentina | 1999           | FemaleAge25to29     | 1024726    |
| Argentina | 1999           | FemaleAge30to34     | 966656     |
| Argentina | 1999           | FemaleAge35to39     | 1025106    |
| Argentina | 1999           | FemaleAge40to44     | 1065120    |
| Argentina | 1999           | FemaleAge45to49     | 1021532    |
| Argentina | 1999           | FemaleAge50to54     | 903515     |
| Argentina | 1999           | FemaleAge55to59     | 785730     |
| Argentina | 1999           | FemaleAge5to9       | 1705390    |
| Argentina | 1999           | FemaleAge60to64     | 709788     |
| Argentina | 1999           | FemaleAge65to69     | 655758     |
| Argentina | 1999           | FemaleAge70to74     | 573093     |
| Argentina | 1999           | FemaleAge75to79     | 430822     |
| Argentina | 1999           | FemaleAge80to84     | 275573     |
| Argentina | 1999           | FemaleAge85to89     | 142456     |
| Argentina | 1999           | FemaleAge90to94     | 49718      |
| Argentina | 1999           | FemaleAge95to99     | 10802      |
| Argentina | 1999           | FemaleAgeAbove100   | 1280       |
| Argentina | 1999           | FemaleLactAge15to19 | 113539     |
| Argentina | 1999           | FemaleLactAge20to24 | 191195     |
| Argentina | 1999           | FemaleLactAge25to29 | 175917     |
| Argentina | 1999           | FemaleLactAge30to34 | 131671     |
| Argentina | 1999           | FemaleLactAge35to39 | 71089      |
| Argentina | 1999           | FemaleLactAge40to44 | 20558      |
| Argentina | 1999           | FemaleLactAge45to49 | 1884       |
| Argentina | 1999           | FemalePregAge15to19 | 85154      |
| Argentina | 1999           | FemalePregAge20to24 | 143396     |
| Argentina | 1999           | FemalePregAge25to29 | 131938     |
| Argentina | 1999           | FemalePregAge30to34 | 98753      |
| Argentina | 1999           | FemalePregAge35to39 | 53317      |
| Argentina | 1999           | FemalePregAge40to44 | 15419      |
| Argentina | 1999           | FemalePregAge45to49 | 1413       |
| Argentina | 1999           | MaleAge0to4         | 1764115    |
| Argentina | 1999           | MaleAge10to14       | 1702724    |
| Argentina | 1999           | MaleAge15to19       | 1658389    |
| Argentina | 1999           | MaleAge20to24       | 1635158    |
| Argentina | 1999           | MaleAge25to29       | 1346061    |
| Argentina | 1999           | MaleAge30to34       | 1200392    |
| Argentina | 1999           | MaleAge35to39       | 1128165    |
| Argentina | 1999           | MaleAge40to44       | 1044143    |
| Argentina | 1999           | MaleAge45to49       | 977363     |
| Argentina | 1999           | MaleAge50to54       | 852140     |
| Argentina | 1999           | MaleAge55to59       | 726447     |
| Argentina | 1999           | MaleAge5to9         | 1762592    |
| Argentina | 1999           | MaleAge60to64       | 618386     |
| Argentina | 1999           | MaleAge65to69       | 531829     |
| Argentina | 1999           | MaleAge70to74       | 424159     |

Dietary calcium and zinc deficiency risks are decreasing but remain prevalent

| Country   | Reference year | Age/gender group    | Population |
|-----------|----------------|---------------------|------------|
| Argentina | 1999           | MaleAge75to79       | 277736     |
| Argentina | 1999           | MaleAge80to84       | 148000     |
| Argentina | 1999           | MaleAge85to89       | 64440      |
| Argentina | 1999           | MaleAge90to94       | 19652      |
| Argentina | 1999           | MaleAge95to99       | 3900       |
| Argentina | 1999           | MaleAgeAbove100     | 382        |
| Armenia   | 1992           | FemaleAge0to4       | 176532     |
| Armenia   | 1992           | FemaleAge10to14     | 159455     |
| Armenia   | 1992           | FemaleAge15to19     | 113347     |
| Armenia   | 1992           | FemaleAge20to24     | 79468      |
| Armenia   | 1992           | FemaleAge25to29     | 125239     |
| Armenia   | 1992           | FemaleAge30to34     | 152361     |
| Armenia   | 1992           | FemaleAge35to39     | 135918     |
| Armenia   | 1992           | FemaleAge40to44     | 98702      |
| Armenia   | 1992           | FemaleAge45to49     | 59654      |
| Armenia   | 1992           | FemaleAge50to54     | 84482      |
| Armenia   | 1992           | FemaleAge55to59     | 88545      |
| Armenia   | 1992           | FemaleAge5to9       | 180593     |
| Armenia   | 1992           | FemaleAge60to64     | 81002      |
| Armenia   | 1992           | FemaleAge65to69     | 60517      |
| Armenia   | 1992           | FemaleAge70to74     | 29027      |
| Armenia   | 1992           | FemaleAge75to79     | 22830      |
| Armenia   | 1992           | FemaleAge80to84     | 16909      |
| Armenia   | 1992           | FemaleAge85to89     | 8094       |
| Armenia   | 1992           | FemaleAge90to94     | 3058       |
| Armenia   | 1992           | FemaleAge95to99     | 612        |
| Armenia   | 1992           | FemaleAgeAbove100   | 175        |
| Armenia   | 1992           | FemaleLactAge15to19 | 10769      |
| Armenia   | 1992           | FemaleLactAge20to24 | 25821      |
| Armenia   | 1992           | FemaleLactAge25to29 | 15628      |
| Armenia   | 1992           | FemaleLactAge30to34 | 8599       |
| Armenia   | 1992           | FemaleLactAge35to39 | 3076       |
| Armenia   | 1992           | FemaleLactAge40to44 | 690        |
| Armenia   | 1992           | FemaleLactAge45to49 | 11         |
| Armenia   | 1992           | FemalePregAge15to19 | 8077       |
| Armenia   | 1992           | FemalePregAge20to24 | 19366      |
| Armenia   | 1992           | FemalePregAge25to29 | 11721      |
| Armenia   | 1992           | FemalePregAge30to34 | 6449       |
| Armenia   | 1992           | FemalePregAge35to39 | 2307       |
| Armenia   | 1992           | FemalePregAge40to44 | 518        |
| Armenia   | 1992           | FemalePregAge45to49 | 8          |
| Armenia   | 1992           | MaleAge0to4         | 182618     |
| Armenia   | 1992           | MaleAge10to14       | 159349     |
| Armenia   | 1992           | MaleAge15to19       | 135268     |
| Armenia   | 1992           | MaleAge20to24       | 124044     |
| Armenia   | 1992           | MaleAge25to29       | 139656     |
| Armenia   | 1992           | MaleAge30to34       | 152689     |
| Armenia   | 1992           | MaleAge35to39       | 128482     |
| Armenia   | 1992           | MaleAge40to44       | 89378      |
| Armenia   | 1992           | MaleAge45to49       | 52578      |
| Armenia   | 1992           | MaleAge50to54       | 74350      |
| Armenia   | 1992           | MaleAge55to59       | 79697      |
| Armenia   | 1992           | MaleAge5to9         | 184544     |
| Armenia   | 1992           | MaleAge60to64       | 70561      |
| Armenia   | 1992           | MaleAge65to69       | 44560      |
| Armenia   | 1992           | MaleAge70to74       | 15438      |
| Armenia   | 1992           | MaleAge75to79       | 11494      |
| Armenia   | 1992           | MaleAge80to84       | 8975       |
| Armenia   | 1992           | MaleAge85to89       | 4290       |
| Armenia   | 1992           | MaleAge90to94       | 1593       |
| Armenia   | 1992           | MaleAge95to99       | 305        |
| Armenia   | 1992           | MaleAgeAbove100     | 65         |
| Armenia   | 1993           | FemaleAge0to4       | 164748     |
| Armenia   | 1993           | FemaleAge10to14     | 159349     |
| Armenia   | 1993           | FemaleAge15to19     | 113449     |
| Armenia   | 1993           | FemaleAge20to24     | 72757      |
| Armenia   | 1993           | FemaleAge25to29     | 111451     |
| Armenia   | 1993           | FemaleAge30to34     | 147840     |
| Armenia   | 1993           | FemaleAge35to39     | 139131     |
| Armenia   | 1993           | FemaleAge40to44     | 103077     |
| Armenia   | 1993           | FemaleAge45to49     | 64346      |
| Armenia   | 1993           | FemaleAge50to54     | 70085      |
| Armenia   | 1993           | FemaleAge55to59     | 93877      |
| Armenia   | 1993           | FemaleAge5to9       | 177766     |
| Armenia   | 1993           | FemaleAge60to64     | 75969      |
| Armenia   | 1993           | FemaleAge65to69     | 66991      |
| Armenia   | 1993           | FemaleAge70to74     | 31739      |
| Armenia   | 1993           | FemaleAge75to79     | 20752      |
| Armenia   | 1993           | FemaleAge80to84     | 17680      |
| Armenia   | 1993           | FemaleAge85to89     | 7985       |
| Armenia   | 1993           | FemaleAge90to94     | 3267       |
| Armenia   | 1993           | FemaleAge95to99     | 628        |
| Armenia   | 1993           | FemaleAgeAbove100   | 161        |
| Armenia   | 1993           | FemaleLactAge15to19 | 10769      |
| Armenia   | 1993           | FemaleLactAge20to24 | 25821      |
| Armenia   | 1993           | FemaleLactAge25to29 | 15628      |
| Armenia   | 1993           | FemaleLactAge30to34 | 8599       |
| Armenia   | 1993           | FemaleLactAge35to39 | 3076       |

Dietary calcium and zinc deficiency risks are decreasing but remain prevalent

| Country | Reference year | Age/gender group    | Population |
|---------|----------------|---------------------|------------|
| Armenia | 1993           | FemaleLactAge40to44 | 690        |
| Armenia | 1993           | FemaleLactAge45to49 | 11         |
| Armenia | 1993           | FemalePregAge15to19 | 8077       |
| Armenia | 1993           | FemalePregAge20to24 | 19366      |
| Armenia | 1993           | FemalePregAge25to29 | 11721      |
| Armenia | 1993           | FemalePregAge30to34 | 6449       |
| Armenia | 1993           | FemalePregAge35to39 | 2307       |
| Armenia | 1993           | FemalePregAge40to44 | 518        |
| Armenia | 1993           | FemalePregAge45to49 | 8          |
| Armenia | 1993           | MaleAge0to4         | 171287     |
| Armenia | 1993           | MaleAge10to14       | 158254     |
| Armenia | 1993           | MaleAge15to19       | 131012     |
| Armenia | 1993           | MaleAge20to24       | 116977     |
| Armenia | 1993           | MaleAge25to29       | 126125     |
| Armenia | 1993           | MaleAge30to34       | 145396     |
| Armenia | 1993           | MaleAge35to39       | 130381     |
| Armenia | 1993           | MaleAge40to44       | 92237      |
| Armenia | 1993           | MaleAge45to49       | 56441      |
| Armenia | 1993           | MaleAge50to54       | 60711      |
| Armenia | 1993           | MaleAge55to59       | 83132      |
| Armenia | 1993           | MaleAge5to9         | 181190     |
| Armenia | 1993           | MaleAge60to64       | 66464      |
| Armenia | 1993           | MaleAge65to69       | 51405      |
| Armenia | 1993           | MaleAge70to74       | 17164      |
| Armenia | 1993           | MaleAge75to79       | 10065      |
| Armenia | 1993           | MaleAge80to84       | 9160       |
| Armenia | 1993           | MaleAge85to89       | 4147       |
| Armenia | 1993           | MaleAge90to94       | 1658       |
| Armenia | 1993           | MaleAge95to99       | 315        |
| Armenia | 1993           | MaleAgeAbove100     | 61         |
| Armenia | 1994           | FemaleAge0to4       | 152264     |
| Armenia | 1994           | FemaleAge10to14     | 159152     |
| Armenia | 1994           | FemaleAge15to19     | 114264     |
| Armenia | 1994           | FemaleAge20to24     | 67973      |
| Armenia | 1994           | FemaleAge25to29     | 98361      |
| Armenia | 1994           | FemaleAge30to34     | 141450     |
| Armenia | 1994           | FemaleAge35to39     | 141068     |
| Armenia | 1994           | FemaleAge40to44     | 107579     |
| Armenia | 1994           | FemaleAge45to49     | 69822      |
| Armenia | 1994           | FemaleAge50to54     | 57909      |
| Armenia | 1994           | FemaleAge55to59     | 96531      |
| Armenia | 1994           | FemaleAge5to9       | 174230     |
| Armenia | 1994           | FemaleAge60to64     | 72245      |
| Armenia | 1994           | FemaleAge65to69     | 71838      |
| Armenia | 1994           | FemaleAge70to74     | 35280      |
| Armenia | 1994           | FemaleAge75to79     | 19594      |
| Armenia | 1994           | FemaleAge80to84     | 17853      |
| Armenia | 1994           | FemaleAge85to89     | 7964       |
| Armenia | 1994           | FemaleAge90to94     | 3299       |
| Armenia | 1994           | FemaleAge95to99     | 663        |
| Armenia | 1994           | FemaleAgeAbove100   | 148        |
| Armenia | 1994           | FemaleLactAge15to19 | 10769      |
| Armenia | 1994           | FemaleLactAge20to24 | 25821      |
| Armenia | 1994           | FemaleLactAge25to29 | 15628      |
| Armenia | 1994           | FemaleLactAge30to34 | 8599       |
| Armenia | 1994           | FemaleLactAge35to39 | 3076       |
| Armenia | 1994           | FemaleLactAge40to44 | 690        |
| Armenia | 1994           | FemaleLactAge45to49 | 11         |
| Armenia | 1994           | FemalePregAge15to19 | 8077       |
| Armenia | 1994           | FemalePregAge20to24 | 19366      |
| Armenia | 1994           | FemalePregAge25to29 | 11721      |
| Armenia | 1994           | FemalePregAge30to34 | 6449       |
| Armenia | 1994           | FemalePregAge35to39 | 2307       |
| Armenia | 1994           | FemalePregAge40to44 | 518        |
| Armenia | 1994           | FemalePregAge45to49 | 8          |
| Armenia | 1994           | MaleAge0to4         | 159500     |
| Armenia | 1994           | MaleAge10to14       | 157665     |
| Armenia | 1994           | MaleAge15to19       | 127923     |
| Armenia | 1994           | MaleAge20to24       | 110984     |
| Armenia | 1994           | MaleAge25to29       | 113375     |
| Armenia | 1994           | MaleAge30to34       | 136672     |
| Armenia | 1994           | MaleAge35to39       | 130623     |
| Armenia | 1994           | MaleAge40to44       | 95068      |
| Armenia | 1994           | MaleAge45to49       | 60889      |
| Armenia | 1994           | MaleAge50to54       | 49328      |
| Armenia | 1994           | MaleAge55to59       | 84028      |
| Armenia | 1994           | MaleAge5to9         | 177378     |
| Armenia | 1994           | MaleAge60to64       | 63391      |
| Armenia | 1994           | MaleAge65to69       | 56571      |
| Armenia | 1994           | MaleAge70to74       | 19824      |
| Armenia | 1994           | MaleAge75to79       | 9238       |
| Armenia | 1994           | MaleAge80to84       | 8952       |
| Armenia | 1994           | MaleAge85to89       | 4006       |
| Armenia | 1994           | MaleAge90to94       | 1615       |
| Armenia | 1994           | MaleAge95to99       | 325        |
| Armenia | 1994           | MaleAgeAbove100     | 58         |
| Armenia | 1995           | FemaleAge0to4       | 140599     |
| Armenia | 1995           | FemaleAge10to14     | 159432     |

Dietary calcium and zinc deficiency risks are decreasing but remain prevalent

| Country | Reference year | Age/gender group    | Population |
|---------|----------------|---------------------|------------|
| Armenia | 1995           | FemaleAge15to19     | 115762     |
| Armenia | 1995           | FemaleAge20to24     | 65205      |
| Armenia | 1995           | FemaleAge25to29     | 87461      |
| Armenia | 1995           | FemaleAge30to34     | 133549     |
| Armenia | 1995           | FemaleAge35to39     | 141921     |
| Armenia | 1995           | FemaleAge40to44     | 112577     |
| Armenia | 1995           | FemaleAge45to49     | 74940      |
| Armenia | 1995           | FemaleAge50to54     | 50704      |
| Armenia | 1995           | FemaleAge55to59     | 94597      |
| Armenia | 1995           | FemaleAge5to9       | 170194     |
| Armenia | 1995           | FemaleAge60to64     | 71658      |
| Armenia | 1995           | FemaleAge65to69     | 74335      |
| Armenia | 1995           | FemaleAge70to74     | 39773      |
| Armenia | 1995           | FemaleAge75to79     | 19766      |
| Armenia | 1995           | FemaleAge80to84     | 17358      |
| Armenia | 1995           | FemaleAge85to89     | 8114       |
| Armenia | 1995           | FemaleAge90to94     | 3164       |
| Armenia | 1995           | FemaleAge95to99     | 649        |
| Armenia | 1995           | FemaleAgeAbove100   | 138        |
| Armenia | 1995           | FemaleLactAge15to19 | 10769      |
| Armenia | 1995           | FemaleLactAge20to24 | 25821      |
| Armenia | 1995           | FemaleLactAge25to29 | 15628      |
| Armenia | 1995           | FemaleLactAge30to34 | 8599       |
| Armenia | 1995           | FemaleLactAge35to39 | 3076       |
| Armenia | 1995           | FemaleLactAge40to44 | 690        |
| Armenia | 1995           | FemaleLactAge45to49 | 11         |
| Armenia | 1995           | FemalePregAge15to19 | 8077       |
| Armenia | 1995           | FemalePregAge20to24 | 19366      |
| Armenia | 1995           | FemalePregAge25to29 | 11721      |
| Armenia | 1995           | FemalePregAge30to34 | 6449       |
| Armenia | 1995           | FemalePregAge35to39 | 2307       |
| Armenia | 1995           | FemalePregAge40to44 | 518        |
| Armenia | 1995           | FemalePregAge45to49 | 8          |
| Armenia | 1995           | MaleAge0to4         | 148711     |
| Armenia | 1995           | MaleAge10to14       | 157940     |
| Armenia | 1995           | MaleAge15to19       | 126616     |
| Armenia | 1995           | MaleAge20to24       | 106150     |
| Armenia | 1995           | MaleAge25to29       | 102637     |
| Armenia | 1995           | MaleAge30to34       | 127202     |
| Armenia | 1995           | MaleAge35to39       | 129367     |
| Armenia | 1995           | MaleAge40to44       | 98348      |
| Armenia | 1995           | MaleAge45to49       | 64863      |
| Armenia | 1995           | MaleAge50to54       | 42546      |
| Armenia | 1995           | MaleAge55to59       | 81047      |
| Armenia | 1995           | MaleAge5to9         | 173613     |
| Armenia | 1995           | MaleAge60to64       | 62837      |
| Armenia | 1995           | MaleAge65to69       | 59427      |
| Armenia | 1995           | MaleAge70to74       | 23658      |
| Armenia | 1995           | MaleAge75to79       | 9214       |
| Armenia | 1995           | MaleAge80to84       | 8336       |
| Armenia | 1995           | MaleAge85to89       | 3908       |
| Armenia | 1995           | MaleAge90to94       | 1463       |
| Armenia | 1995           | MaleAge95to99       | 296        |
| Armenia | 1995           | MaleAgeAbove100     | 55         |
| Armenia | 1996           | FemaleAge0to4       | 127046     |
| Armenia | 1996           | FemaleAge10to14     | 160764     |
| Armenia | 1996           | FemaleAge15to19     | 125324     |
| Armenia | 1996           | FemaleAge20to24     | 78411      |
| Armenia | 1996           | FemaleAge25to29     | 92173      |
| Armenia | 1996           | FemaleAge30to34     | 132072     |
| Armenia | 1996           | FemaleAge35to39     | 143690     |
| Armenia | 1996           | FemaleAge40to44     | 118406     |
| Armenia | 1996           | FemaleAge45to49     | 80590      |
| Armenia | 1996           | FemaleAge50to54     | 48096      |
| Armenia | 1996           | FemaleAge55to59     | 87763      |
| Armenia | 1996           | FemaleAge5to9       | 165524     |
| Armenia | 1996           | FemaleAge60to64     | 73338      |
| Armenia | 1996           | FemaleAge65to69     | 73301      |
| Armenia | 1996           | FemaleAge70to74     | 44602      |
| Armenia | 1996           | FemaleAge75to79     | 20549      |
| Armenia | 1996           | FemaleAge80to84     | 16391      |
| Armenia | 1996           | FemaleAge85to89     | 8761       |
| Armenia | 1996           | FemaleAge90to94     | 3349       |
| Armenia | 1996           | FemaleAge95to99     | 728        |
| Armenia | 1996           | FemaleAgeAbove100   | 131        |
| Armenia | 1996           | FemaleLactAge15to19 | 7109       |
| Armenia | 1996           | FemaleLactAge20to24 | 18780      |
| Armenia | 1996           | FemaleLactAge25to29 | 8981       |
| Armenia | 1996           | FemaleLactAge30to34 | 4737       |
| Armenia | 1996           | FemaleLactAge35to39 | 2308       |
| Armenia | 1996           | FemaleLactAge40to44 | 574        |
| Armenia | 1996           | FemaleLactAge45to49 | 10         |
| Armenia | 1996           | FemalePregAge15to19 | 5332       |
| Armenia | 1996           | FemalePregAge20to24 | 14085      |
| Armenia | 1996           | FemalePregAge25to29 | 6736       |
| Armenia | 1996           | FemalePregAge30to34 | 3553       |
| Armenia | 1996           | FemalePregAge35to39 | 1731       |
| Armenia | 1996           | FemalePregAge40to44 | 431        |

Dietary calcium and zinc deficiency risks are decreasing but remain prevalent

| Country | Reference year | Age/gender group    | Population |
|---------|----------------|---------------------|------------|
| Armenia | 1996           | FemalePregAge45to49 | 7          |
| Armenia | 1996           | MaleAge0to4         | 135395     |
| Armenia | 1996           | MaleAge10to14       | 159521     |
| Armenia | 1996           | MaleAge15to19       | 128710     |
| Armenia | 1996           | MaleAge20to24       | 105055     |
| Armenia | 1996           | MaleAge25to29       | 96397      |
| Armenia | 1996           | MaleAge30to34       | 118493     |
| Armenia | 1996           | MaleAge35to39       | 127442     |
| Armenia | 1996           | MaleAge40to44       | 102070     |
| Armenia | 1996           | MaleAge45to49       | 68864      |
| Armenia | 1996           | MaleAge50to54       | 39834      |
| Armenia | 1996           | MaleAge55to59       | 73459      |
| Armenia | 1996           | MaleAge5to9         | 169007     |
| Armenia | 1996           | MaleAge60to64       | 63389      |
| Armenia | 1996           | MaleAge65to69       | 58927      |
| Armenia | 1996           | MaleAge70to74       | 28233      |
| Armenia | 1996           | MaleAge75to79       | 9598       |
| Armenia | 1996           | MaleAge80to84       | 7580       |
| Armenia | 1996           | MaleAge85to89       | 4151       |
| Armenia | 1996           | MaleAge90to94       | 1542       |
| Armenia | 1996           | MaleAge95to99       | 322        |
| Armenia | 1996           | MaleAgeAbove100     | 53         |
| Armenia | 1997           | FemaleAge0to4       | 115553     |
| Armenia | 1997           | FemaleAge10to14     | 162300     |
| Armenia | 1997           | FemaleAge15to19     | 128679     |
| Armenia | 1997           | FemaleAge20to24     | 81127      |
| Armenia | 1997           | FemaleAge25to29     | 87777      |
| Armenia | 1997           | FemaleAge30to34     | 122434     |
| Armenia | 1997           | FemaleAge35to39     | 143455     |
| Armenia | 1997           | FemaleAge40to44     | 124078     |
| Armenia | 1997           | FemaleAge45to49     | 86552      |
| Armenia | 1997           | FemaleAge50to54     | 50042      |
| Armenia | 1997           | FemaleAge55to59     | 76512      |
| Armenia | 1997           | FemaleAge5to9       | 159300     |
| Armenia | 1997           | FemaleAge60to64     | 78670      |
| Armenia | 1997           | FemaleAge65to69     | 69695      |
| Armenia | 1997           | FemaleAge70to74     | 50581      |
| Armenia | 1997           | FemaleAge75to79     | 22030      |
| Armenia | 1997           | FemaleAge80to84     | 14993      |
| Armenia | 1997           | FemaleAge85to89     | 9535       |
| Armenia | 1997           | FemaleAge90to94     | 3412       |
| Armenia | 1997           | FemaleAge95to99     | 872        |
| Armenia | 1997           | FemaleAgeAbove100   | 128        |
| Armenia | 1997           | FemaleLactAge15to19 | 7109       |
| Armenia | 1997           | FemaleLactAge20to24 | 18780      |
| Armenia | 1997           | FemaleLactAge25to29 | 8981       |
| Armenia | 1997           | FemaleLactAge30to34 | 4737       |
| Armenia | 1997           | FemaleLactAge35to39 | 2308       |
| Armenia | 1997           | FemaleLactAge40to44 | 574        |
| Armenia | 1997           | FemaleLactAge45to49 | 10         |
| Armenia | 1997           | FemalePregAge15to19 | 5332       |
| Armenia | 1997           | FemalePregAge20to24 | 14085      |
| Armenia | 1997           | FemalePregAge25to29 | 6736       |
| Armenia | 1997           | FemalePregAge30to34 | 3553       |
| Armenia | 1997           | FemalePregAge35to39 | 1731       |
| Armenia | 1997           | FemalePregAge40to44 | 431        |
| Armenia | 1997           | FemalePregAge45to49 | 7          |
| Armenia | 1997           | MaleAge0to4         | 124309     |
| Armenia | 1997           | MaleAge10to14       | 161439     |
| Armenia | 1997           | MaleAge15to19       | 132171     |
| Armenia | 1997           | MaleAge20to24       | 105155     |
| Armenia | 1997           | MaleAge25to29       | 92587      |
| Armenia | 1997           | MaleAge30to34       | 109267     |
| Armenia | 1997           | MaleAge35to39       | 124705     |
| Armenia | 1997           | MaleAge40to44       | 106038     |
| Armenia | 1997           | MaleAge45to49       | 72882      |
| Armenia | 1997           | MaleAge50to54       | 41255      |
| Armenia | 1997           | MaleAge55to59       | 62584      |
| Armenia | 1997           | MaleAge5to9         | 163145     |
| Armenia | 1997           | MaleAge60to64       | 66529      |
| Armenia | 1997           | MaleAge65to69       | 56287      |
| Armenia | 1997           | MaleAge70to74       | 33865      |
| Armenia | 1997           | MaleAge75to79       | 10277      |
| Armenia | 1997           | MaleAge80to84       | 6629       |
| Armenia | 1997           | MaleAge85to89       | 4446       |
| Armenia | 1997           | MaleAge90to94       | 1553       |
| Armenia | 1997           | MaleAge95to99       | 378        |
| Armenia | 1997           | MaleAgeAbove100     | 52         |
| Armenia | 1998           | FemaleAge0to4       | 106013     |
| Armenia | 1998           | FemaleAge10to14     | 163633     |
| Armenia | 1998           | FemaleAge15to19     | 132056     |
| Armenia | 1998           | FemaleAge20to24     | 85092      |
| Armenia | 1998           | FemaleAge25to29     | 85705      |
| Armenia | 1998           | FemaleAge30to34     | 112162     |
| Armenia | 1998           | FemaleAge35to39     | 142154     |
| Armenia | 1998           | FemaleAge40to44     | 129296     |
| Armenia | 1998           | FemaleAge45to49     | 92827      |
| Armenia | 1998           | FemaleAge50to54     | 55224      |



Dietary calcium and zinc deficiency risks are decreasing but remain prevalent

| Country | Reference year | Age/gender group    | Population |
|---------|----------------|---------------------|------------|
| Armenia | 1998           | FemaleAge55to59     | 63270      |
| Armenia | 1998           | FemaleAge5to9       | 151302     |
| Armenia | 1998           | FemaleAge60to64     | 85277      |
| Armenia | 1998           | FemaleAge65to69     | 65123      |
| Armenia | 1998           | FemaleAge70to74     | 56614      |
| Armenia | 1998           | FemaleAge75to79     | 24221      |
| Armenia | 1998           | FemaleAge80to84     | 13651      |
| Armenia | 1998           | FemaleAge85to89     | 10143      |
| Armenia | 1998           | FemaleAge90to94     | 3414       |
| Armenia | 1998           | FemaleAge95to99     | 997        |
| Armenia | 1998           | FemaleAgeAbove100   | 128        |
| Armenia | 1998           | FemaleLactAge15to19 | 7109       |
| Armenia | 1998           | FemaleLactAge20to24 | 18780      |
| Armenia | 1998           | FemaleLactAge25to29 | 8981       |
| Armenia | 1998           | FemaleLactAge30to34 | 4737       |
| Armenia | 1998           | FemaleLactAge35to39 | 2308       |
| Armenia | 1998           | FemaleLactAge40to44 | 574        |
| Armenia | 1998           | FemaleLactAge45to49 | 10         |
| Armenia | 1998           | FemalePregAge15to19 | 5332       |
| Armenia | 1998           | FemalePregAge20to24 | 14085      |
| Armenia | 1998           | FemalePregAge25to29 | 6736       |
| Armenia | 1998           | FemalePregAge30to34 | 3553       |
| Armenia | 1998           | FemalePregAge35to39 | 1731       |
| Armenia | 1998           | FemalePregAge40to44 | 431        |
| Armenia | 1998           | FemalePregAge45to49 | 7          |
| Armenia | 1998           | MaleAge0to4         | 115507     |
| Armenia | 1998           | MaleAge10to14       | 163487     |
| Armenia | 1998           | MaleAge15to19       | 136772     |
| Armenia | 1998           | MaleAge20to24       | 106501     |
| Armenia | 1998           | MaleAge25to29       | 90862      |
| Armenia | 1998           | MaleAge30to34       | 100172     |
| Armenia | 1998           | MaleAge35to39       | 121227     |
| Armenia | 1998           | MaleAge40to44       | 109804     |
| Armenia | 1998           | MaleAge45to49       | 77088      |
| Armenia | 1998           | MaleAge50to54       | 45529      |
| Armenia | 1998           | MaleAge55to59       | 50644      |
| Armenia | 1998           | MaleAge5to9         | 155974     |
| Armenia | 1998           | MaleAge60to64       | 70396      |
| Armenia | 1998           | MaleAge65to69       | 52945      |
| Armenia | 1998           | MaleAge70to74       | 39515      |
| Armenia | 1998           | MaleAge75to79       | 11476      |
| Armenia | 1998           | MaleAge80to84       | 5755       |
| Armenia | 1998           | MaleAge85to89       | 4627       |
| Armenia | 1998           | MaleAge90to94       | 1524       |
| Armenia | 1998           | MaleAge95to99       | 425        |
| Armenia | 1998           | MaleAgeAbove100     | 52         |
| Armenia | 1999           | FemaleAge0to4       | 98228      |
| Armenia | 1999           | FemaleAge10to14     | 163696     |
| Armenia | 1999           | FemaleAge15to19     | 135229     |
| Armenia | 1999           | FemaleAge20to24     | 89454      |
| Armenia | 1999           | FemaleAge25to29     | 85315      |
| Armenia | 1999           | FemaleAge30to34     | 102596     |
| Armenia | 1999           | FemaleAge35to39     | 139005     |
| Armenia | 1999           | FemaleAge40to44     | 133368     |
| Armenia | 1999           | FemaleAge45to49     | 99310      |
| Armenia | 1999           | FemaleAge50to54     | 61422      |
| Armenia | 1999           | FemaleAge55to59     | 52061      |
| Armenia | 1999           | FemaleAge5to9       | 141870     |
| Armenia | 1999           | FemaleAge60to64     | 89178      |
| Armenia | 1999           | FemaleAge65to69     | 62085      |
| Armenia | 1999           | FemaleAge70to74     | 61009      |
| Armenia | 1999           | FemaleAge75to79     | 27189      |
| Armenia | 1999           | FemaleAge80to84     | 12924      |
| Armenia | 1999           | FemaleAge85to89     | 10226      |
| Armenia | 1999           | FemaleAge90to94     | 3435       |
| Armenia | 1999           | FemaleAge95to99     | 1031       |
| Armenia | 1999           | FemaleAgeAbove100   | 131        |
| Armenia | 1999           | FemaleLactAge15to19 | 7109       |
| Armenia | 1999           | FemaleLactAge20to24 | 18780      |
| Armenia | 1999           | FemaleLactAge25to29 | 8981       |
| Armenia | 1999           | FemaleLactAge30to34 | 4737       |
| Armenia | 1999           | FemaleLactAge35to39 | 2308       |
| Armenia | 1999           | FemaleLactAge40to44 | 574        |
| Armenia | 1999           | FemaleLactAge45to49 | 10         |
| Armenia | 1999           | FemalePregAge15to19 | 5332       |
| Armenia | 1999           | FemalePregAge20to24 | 14085      |
| Armenia | 1999           | FemalePregAge25to29 | 6736       |
| Armenia | 1999           | FemalePregAge30to34 | 3553       |
| Armenia | 1999           | FemalePregAge35to39 | 1731       |
| Armenia | 1999           | FemalePregAge40to44 | 431        |
| Armenia | 1999           | FemalePregAge45to49 | 7          |
| Armenia | 1999           | MaleAge0to4         | 109074     |
| Armenia | 1999           | MaleAge10to14       | 164919     |
| Armenia | 1999           | MaleAge15to19       | 142011     |
| Armenia | 1999           | MaleAge20to24       | 109185     |
| Armenia | 1999           | MaleAge25to29       | 90474      |
| Armenia | 1999           | MaleAge30to34       | 92222      |
| Armenia | 1999           | MaleAge35to39       | 116877     |

Dietary calcium and zinc deficiency risks are decreasing but remain prevalent

| Country   | Reference year | Age/gender group    | Population |
|-----------|----------------|---------------------|------------|
| Armenia   | 1999           | MaleAge40to44       | 112679     |
| Armenia   | 1999           | MaleAge45to49       | 81704      |
| Armenia   | 1999           | MaleAge50to54       | 50684      |
| Armenia   | 1999           | MaleAge55to59       | 40961      |
| Armenia   | 1999           | MaleAge5to9         | 147950     |
| Armenia   | 1999           | MaleAge60to64       | 72104      |
| Armenia   | 1999           | MaleAge65to69       | 50839      |
| Armenia   | 1999           | MaleAge70to74       | 43756      |
| Armenia   | 1999           | MaleAge75to79       | 13533      |
| Armenia   | 1999           | MaleAge80to84       | 5242       |
| Armenia   | 1999           | MaleAge85to89       | 4504       |
| Armenia   | 1999           | MaleAge90to94       | 1484       |
| Armenia   | 1999           | MaleAge95to99       | 430        |
| Armenia   | 1999           | MaleAgeAbov e100    | 52         |
| Armenia   | 2000           | FemaleAge0to4       | 92079      |
| Armenia   | 2000           | FemaleAge10to14     | 161396     |
| Armenia   | 2000           | FemaleAge15to19     | 137927     |
| Armenia   | 2000           | FemaleAge20to24     | 93552      |
| Armenia   | 2000           | FemaleAge25to29     | 86008      |
| Armenia   | 2000           | FemaleAge30to34     | 94755      |
| Armenia   | 2000           | FemaleAge35to39     | 133498     |
| Armenia   | 2000           | FemaleAge40to44     | 135797     |
| Armenia   | 2000           | FemaleAge45to49     | 105661     |
| Armenia   | 2000           | FemaleAge50to54     | 67230      |
| Armenia   | 2000           | FemaleAge55to59     | 45418      |
| Armenia   | 2000           | FemaleAge5to9       | 132020     |
| Armenia   | 2000           | FemaleAge60to64     | 87922      |
| Armenia   | 2000           | FemaleAge65to69     | 61993      |
| Armenia   | 2000           | FemaleAge70to74     | 62790      |
| Armenia   | 2000           | FemaleAge75to79     | 30892      |
| Armenia   | 2000           | FemaleAge80to84     | 13048      |
| Armenia   | 2000           | FemaleAge85to89     | 9694       |
| Armenia   | 2000           | FemaleAge90to94     | 3476       |
| Armenia   | 2000           | FemaleAge95to99     | 943        |
| Armenia   | 2000           | FemaleAgeAbov e100  | 137        |
| Armenia   | 2000           | FemaleLactAge15to19 | 7109       |
| Armenia   | 2000           | FemaleLactAge20to24 | 18780      |
| Armenia   | 2000           | FemaleLactAge25to29 | 8981       |
| Armenia   | 2000           | FemaleLactAge30to34 | 4737       |
| Armenia   | 2000           | FemaleLactAge35to39 | 2308       |
| Armenia   | 2000           | FemaleLactAge40to44 | 574        |
| Armenia   | 2000           | FemaleLactAge45to49 | 10         |
| Armenia   | 2000           | FemalePregAge15to19 | 5332       |
| Armenia   | 2000           | FemalePregAge20to24 | 14085      |
| Armenia   | 2000           | FemalePregAge25to29 | 6736       |
| Armenia   | 2000           | FemalePregAge30to34 | 3553       |
| Armenia   | 2000           | FemalePregAge35to39 | 1731       |
| Armenia   | 2000           | FemalePregAge40to44 | 431        |
| Armenia   | 2000           | FemalePregAge45to49 | 7          |
| Armenia   | 2000           | MaleAge0to4         | 105097     |
| Armenia   | 2000           | MaleAge10to14       | 164831     |
| Armenia   | 2000           | MaleAge15to19       | 147397     |
| Armenia   | 2000           | MaleAge20to24       | 113202     |
| Armenia   | 2000           | MaleAge25to29       | 90896      |
| Armenia   | 2000           | MaleAge30to34       | 86107      |
| Armenia   | 2000           | MaleAge35to39       | 111502     |
| Armenia   | 2000           | MaleAge40to44       | 114214     |
| Armenia   | 2000           | MaleAge45to49       | 86694      |
| Armenia   | 2000           | MaleAge50to54       | 55528      |
| Armenia   | 2000           | MaleAge55to59       | 35459      |
| Armenia   | 2000           | MaleAge5to9         | 140072     |
| Armenia   | 2000           | MaleAge60to64       | 70024      |
| Armenia   | 2000           | MaleAge65to69       | 50933      |
| Armenia   | 2000           | MaleAge70to74       | 45899      |
| Armenia   | 2000           | MaleAge75to79       | 16538      |
| Armenia   | 2000           | MaleAge80to84       | 5202       |
| Armenia   | 2000           | MaleAge85to89       | 4039       |
| Armenia   | 2000           | MaleAge90to94       | 1428       |
| Armenia   | 2000           | MaleAge95to99       | 372        |
| Armenia   | 2000           | MaleAgeAbov e100    | 54         |
| Australia | 1992           | FemaleAge0to4       | 617466     |
| Australia | 1992           | FemaleAge10to14     | 607959     |
| Australia | 1992           | FemaleAge15to19     | 638934     |
| Australia | 1992           | FemaleAge20to24     | 600470     |
| Australia | 1992           | FemaleAge25to29     | 545938     |
| Australia | 1992           | FemaleAge30to34     | 587098     |
| Australia | 1992           | FemaleAge35to39     | 634509     |
| Australia | 1992           | FemaleAge40to44     | 639765     |
| Australia | 1992           | FemaleAge45to49     | 536536     |
| Australia | 1992           | FemaleAge50to54     | 425228     |
| Australia | 1992           | FemaleAge55to59     | 369852     |
| Australia | 1992           | FemaleAge5to9       | 628703     |
| Australia | 1992           | FemaleAge60to64     | 362616     |
| Australia | 1992           | FemaleAge65to69     | 356718     |
| Australia | 1992           | FemaleAge70to74     | 291058     |
| Australia | 1992           | FemaleAge75to79     | 225929     |
| Australia | 1992           | FemaleAge80to84     | 154654     |
| Australia | 1992           | FemaleAge85to89     | 78447      |

Dietary calcium and zinc deficiency risks are decreasing but remain prevalent

| Country   | Reference year | Age/gender group    | Population |
|-----------|----------------|---------------------|------------|
| Australia | 1992           | FemaleAge90to94     | 30184      |
| Australia | 1992           | FemaleAge95to99     | 7540       |
| Australia | 1992           | FemaleAgeAbove100   | 889        |
| Australia | 1992           | FemaleLactAge15to19 | 13920      |
| Australia | 1992           | FemaleLactAge20to24 | 49995      |
| Australia | 1992           | FemaleLactAge25to29 | 90639      |
| Australia | 1992           | FemaleLactAge30to34 | 74037      |
| Australia | 1992           | FemaleLactAge35to39 | 26426      |
| Australia | 1992           | FemaleLactAge40to44 | 3983       |
| Australia | 1992           | FemaleLactAge45to49 | 137        |
| Australia | 1992           | FemalePregAge15to19 | 10440      |
| Australia | 1992           | FemalePregAge20to24 | 37496      |
| Australia | 1992           | FemalePregAge25to29 | 67979      |
| Australia | 1992           | FemalePregAge30to34 | 55528      |
| Australia | 1992           | FemalePregAge35to39 | 19820      |
| Australia | 1992           | FemalePregAge40to44 | 2987       |
| Australia | 1992           | FemalePregAge45to49 | 103        |
| Australia | 1992           | MaleAge0to4         | 650556     |
| Australia | 1992           | MaleAge10to14       | 641664     |
| Australia | 1992           | MaleAge15to19       | 694811     |
| Australia | 1992           | MaleAge20to24       | 706416     |
| Australia | 1992           | MaleAge25to29       | 711248     |
| Australia | 1992           | MaleAge30to34       | 719103     |
| Australia | 1992           | MaleAge35to39       | 679236     |
| Australia | 1992           | MaleAge40to44       | 658791     |
| Australia | 1992           | MaleAge45to49       | 561030     |
| Australia | 1992           | MaleAge50to54       | 445121     |
| Australia | 1992           | MaleAge55to59       | 378821     |
| Australia | 1992           | MaleAge5to9         | 661339     |
| Australia | 1992           | MaleAge60to64       | 360111     |
| Australia | 1992           | MaleAge65to69       | 327807     |
| Australia | 1992           | MaleAge70to74       | 239203     |
| Australia | 1992           | MaleAge75to79       | 159612     |
| Australia | 1992           | MaleAge80to84       | 91630      |
| Australia | 1992           | MaleAge85to89       | 36327      |
| Australia | 1992           | MaleAge90to94       | 9912       |
| Australia | 1992           | MaleAge95to99       | 1684       |
| Australia | 1992           | MaleAgeAbove100     | 162        |
| Australia | 1993           | FemaleAge0to4       | 624760     |
| Australia | 1993           | FemaleAge10to14     | 616467     |
| Australia | 1993           | FemaleAge15to19     | 620898     |
| Australia | 1993           | FemaleAge20to24     | 610081     |
| Australia | 1993           | FemaleAge25to29     | 539461     |
| Australia | 1993           | FemaleAge30to34     | 594547     |
| Australia | 1993           | FemaleAge35to39     | 646567     |
| Australia | 1993           | FemaleAge40to44     | 646011     |
| Australia | 1993           | FemaleAge45to49     | 567653     |
| Australia | 1993           | FemaleAge50to54     | 438210     |
| Australia | 1993           | FemaleAge55to59     | 377800     |
| Australia | 1993           | FemaleAge5to9       | 630406     |
| Australia | 1993           | FemaleAge60to64     | 358165     |
| Australia | 1993           | FemaleAge65to69     | 357165     |
| Australia | 1993           | FemaleAge70to74     | 302989     |
| Australia | 1993           | FemaleAge75to79     | 226675     |
| Australia | 1993           | FemaleAge80to84     | 162315     |
| Australia | 1993           | FemaleAge85to89     | 82030      |
| Australia | 1993           | FemaleAge90to94     | 31427      |
| Australia | 1993           | FemaleAge95to99     | 8022       |
| Australia | 1993           | FemaleAgeAbove100   | 975        |
| Australia | 1993           | FemaleLactAge15to19 | 13920      |
| Australia | 1993           | FemaleLactAge20to24 | 49995      |
| Australia | 1993           | FemaleLactAge25to29 | 90639      |
| Australia | 1993           | FemaleLactAge30to34 | 74037      |
| Australia | 1993           | FemaleLactAge35to39 | 26426      |
| Australia | 1993           | FemaleLactAge40to44 | 3983       |
| Australia | 1993           | FemaleLactAge45to49 | 137        |
| Australia | 1993           | FemalePregAge15to19 | 10440      |
| Australia | 1993           | FemalePregAge20to24 | 37496      |
| Australia | 1993           | FemalePregAge25to29 | 67979      |
| Australia | 1993           | FemalePregAge30to34 | 55528      |
| Australia | 1993           | FemalePregAge35to39 | 19820      |
| Australia | 1993           | FemalePregAge40to44 | 2987       |
| Australia | 1993           | FemalePregAge45to49 | 103        |
| Australia | 1993           | MaleAge0to4         | 658437     |
| Australia | 1993           | MaleAge10to14       | 650020     |
| Australia | 1993           | MaleAge15to19       | 676674     |
| Australia | 1993           | MaleAge20to24       | 716801     |
| Australia | 1993           | MaleAge25to29       | 703469     |
| Australia | 1993           | MaleAge30to34       | 725474     |
| Australia | 1993           | MaleAge35to39       | 691336     |
| Australia | 1993           | MaleAge40to44       | 659794     |
| Australia | 1993           | MaleAge45to49       | 591032     |
| Australia | 1993           | MaleAge50to54       | 458608     |
| Australia | 1993           | MaleAge55to59       | 387286     |
| Australia | 1993           | MaleAge5to9         | 662928     |
| Australia | 1993           | MaleAge60to64       | 355385     |
| Australia | 1993           | MaleAge65to69       | 331895     |
| Australia | 1993           | MaleAge70to74       | 250694     |

Dietary calcium and zinc deficiency risks are decreasing but remain prevalent

| Country   | Reference year | Age/gender group    | Population |
|-----------|----------------|---------------------|------------|
| Australia | 1993           | MaleAge75to79       | 161390     |
| Australia | 1993           | MaleAge80to84       | 96278      |
| Australia | 1993           | MaleAge85to89       | 38461      |
| Australia | 1993           | MaleAge90to94       | 10560      |
| Australia | 1993           | MaleAge95to99       | 1865       |
| Australia | 1993           | MaleAgeAbov e100    | 171        |
| Australia | 1994           | FemaleAge0to4       | 631173     |
| Australia | 1994           | FemaleAge10to14     | 625694     |
| Australia | 1994           | FemaleAge15to19     | 605783     |
| Australia | 1994           | FemaleAge20to24     | 616068     |
| Australia | 1994           | FemaleAge25to29     | 534420     |
| Australia | 1994           | FemaleAge30to34     | 600058     |
| Australia | 1994           | FemaleAge35to39     | 658245     |
| Australia | 1994           | FemaleAge40to44     | 652857     |
| Australia | 1994           | FemaleAge45to49     | 595613     |
| Australia | 1994           | FemaleAge50to54     | 454982     |
| Australia | 1994           | FemaleAge55to59     | 386777     |
| Australia | 1994           | FemaleAge5to9       | 630783     |
| Australia | 1994           | FemaleAge60to64     | 356107     |
| Australia | 1994           | FemaleAge65to69     | 356239     |
| Australia | 1994           | FemaleAge70to74     | 314249     |
| Australia | 1994           | FemaleAge75to79     | 229310     |
| Australia | 1994           | FemaleAge80to84     | 169504     |
| Australia | 1994           | FemaleAge85to89     | 85859      |
| Australia | 1994           | FemaleAge90to94     | 32270      |
| Australia | 1994           | FemaleAge95to99     | 8232       |
| Australia | 1994           | FemaleAgeAbov e100  | 1055       |
| Australia | 1994           | FemaleLactAge15to19 | 13920      |
| Australia | 1994           | FemaleLactAge20to24 | 49995      |
| Australia | 1994           | FemaleLactAge25to29 | 90639      |
| Australia | 1994           | FemaleLactAge30to34 | 74037      |
| Australia | 1994           | FemaleLactAge35to39 | 26426      |
| Australia | 1994           | FemaleLactAge40to44 | 3983       |
| Australia | 1994           | FemaleLactAge45to49 | 137        |
| Australia | 1994           | FemalePregAge15to19 | 10440      |
| Australia | 1994           | FemalePregAge20to24 | 37496      |
| Australia | 1994           | FemalePregAge25to29 | 67979      |
| Australia | 1994           | FemalePregAge30to34 | 55528      |
| Australia | 1994           | FemalePregAge35to39 | 19820      |
| Australia | 1994           | FemalePregAge40to44 | 2987       |
| Australia | 1994           | FemalePregAge45to49 | 103        |
| Australia | 1994           | MaleAge0to4         | 665191     |
| Australia | 1994           | MaleAge10to14       | 658927     |
| Australia | 1994           | MaleAge15to19       | 661920     |
| Australia | 1994           | MaleAge20to24       | 723625     |
| Australia | 1994           | MaleAge25to29       | 697122     |
| Australia | 1994           | MaleAge30to34       | 729658     |
| Australia | 1994           | MaleAge35to39       | 702847     |
| Australia | 1994           | MaleAge40to44       | 662043     |
| Australia | 1994           | MaleAge45to49       | 617030     |
| Australia | 1994           | MaleAge50to54       | 475797     |
| Australia | 1994           | MaleAge55to59       | 396883     |
| Australia | 1994           | MaleAge5to9         | 663213     |
| Australia | 1994           | MaleAge60to64       | 353151     |
| Australia | 1994           | MaleAge65to69       | 334387     |
| Australia | 1994           | MaleAge70to74       | 261663     |
| Australia | 1994           | MaleAge75to79       | 165146     |
| Australia | 1994           | MaleAge80to84       | 100006     |
| Australia | 1994           | MaleAge85to89       | 40206      |
| Australia | 1994           | MaleAge90to94       | 10890      |
| Australia | 1994           | MaleAge95to99       | 1942       |
| Australia | 1994           | MaleAgeAbov e100    | 180        |
| Australia | 1995           | FemaleAge0to4       | 634224     |
| Australia | 1995           | FemaleAge10to14     | 632952     |
| Australia | 1995           | FemaleAge15to19     | 597901     |
| Australia | 1995           | FemaleAge20to24     | 615487     |
| Australia | 1995           | FemaleAge25to29     | 533736     |
| Australia | 1995           | FemaleAge30to34     | 603024     |
| Australia | 1995           | FemaleAge35to39     | 669376     |
| Australia | 1995           | FemaleAge40to44     | 662790     |
| Australia | 1995           | FemaleAge45to49     | 618302     |
| Australia | 1995           | FemaleAge50to54     | 476640     |
| Australia | 1995           | FemaleAge55to59     | 396716     |
| Australia | 1995           | FemaleAge5to9       | 632583     |
| Australia | 1995           | FemaleAge60to64     | 357219     |
| Australia | 1995           | FemaleAge65to69     | 354952     |
| Australia | 1995           | FemaleAge70to74     | 323286     |
| Australia | 1995           | FemaleAge75to79     | 235485     |
| Australia | 1995           | FemaleAge80to84     | 175484     |
| Australia | 1995           | FemaleAge85to89     | 90469      |
| Australia | 1995           | FemaleAge90to94     | 32945      |
| Australia | 1995           | FemaleAge95to99     | 7810       |
| Australia | 1995           | FemaleAgeAbov e100  | 1121       |
| Australia | 1995           | FemaleLactAge15to19 | 13920      |
| Australia | 1995           | FemaleLactAge20to24 | 49995      |
| Australia | 1995           | FemaleLactAge25to29 | 90639      |
| Australia | 1995           | FemaleLactAge30to34 | 74037      |
| Australia | 1995           | FemaleLactAge35to39 | 26426      |

Dietary calcium and zinc deficiency risks are decreasing but remain prevalent

| Country   | Reference year | Age/gender group    | Population |
|-----------|----------------|---------------------|------------|
| Australia | 1995           | FemaleLactAge40to44 | 3983       |
| Australia | 1995           | FemaleLactAge45to49 | 137        |
| Australia | 1995           | FemalePregAge15to19 | 10440      |
| Australia | 1995           | FemalePregAge20to24 | 37496      |
| Australia | 1995           | FemalePregAge25to29 | 67979      |
| Australia | 1995           | FemalePregAge30to34 | 55528      |
| Australia | 1995           | FemalePregAge35to39 | 19820      |
| Australia | 1995           | FemalePregAge40to44 | 2987       |
| Australia | 1995           | FemalePregAge45to49 | 103        |
| Australia | 1995           | MaleAge0to4         | 668272     |
| Australia | 1995           | MaleAge10to14       | 665814     |
| Australia | 1995           | MaleAge15to19       | 654690     |
| Australia | 1995           | MaleAge20to24       | 723849     |
| Australia | 1995           | MaleAge25to29       | 695489     |
| Australia | 1995           | MaleAge30to34       | 731039     |
| Australia | 1995           | MaleAge35to39       | 713143     |
| Australia | 1995           | MaleAge40to44       | 668528     |
| Australia | 1995           | MaleAge45to49       | 636764     |
| Australia | 1995           | MaleAge50to54       | 497603     |
| Australia | 1995           | MaleAge55to59       | 407539     |
| Australia | 1995           | MaleAge5to9         | 664923     |
| Australia | 1995           | MaleAge60to64       | 354536     |
| Australia | 1995           | MaleAge65to69       | 335651     |
| Australia | 1995           | MaleAge70to74       | 271282     |
| Australia | 1995           | MaleAge75to79       | 171750     |
| Australia | 1995           | MaleAge80to84       | 102830     |
| Australia | 1995           | MaleAge85to89       | 41790      |
| Australia | 1995           | MaleAge90to94       | 10852      |
| Australia | 1995           | MaleAge95to99       | 1714       |
| Australia | 1995           | MaleAgeAbove100     | 187        |
| Australia | 1996           | FemaleAge0to4       | 638572     |
| Australia | 1996           | FemaleAge10to14     | 638558     |
| Australia | 1996           | FemaleAge15to19     | 598953     |
| Australia | 1996           | FemaleAge20to24     | 622358     |
| Australia | 1996           | FemaleAge25to29     | 558249     |
| Australia | 1996           | FemaleAge30to34     | 595969     |
| Australia | 1996           | FemaleAge35to39     | 667559     |
| Australia | 1996           | FemaleAge40to44     | 670343     |
| Australia | 1996           | FemaleAge45to49     | 636982     |
| Australia | 1996           | FemaleAge50to54     | 502731     |
| Australia | 1996           | FemaleAge55to59     | 408888     |
| Australia | 1996           | FemaleAge5to9       | 637197     |
| Australia | 1996           | FemaleAge60to64     | 359401     |
| Australia | 1996           | FemaleAge65to69     | 352248     |
| Australia | 1996           | FemaleAge70to74     | 328022     |
| Australia | 1996           | FemaleAge75to79     | 243898     |
| Australia | 1996           | FemaleAge80to84     | 177284     |
| Australia | 1996           | FemaleAge85to89     | 96199      |
| Australia | 1996           | FemaleAge90to94     | 36125      |
| Australia | 1996           | FemaleAge95to99     | 8313       |
| Australia | 1996           | FemaleAgeAbove100   | 1171       |
| Australia | 1996           | FemaleLactAge15to19 | 12274      |
| Australia | 1996           | FemaleLactAge20to24 | 42105      |
| Australia | 1996           | FemaleLactAge25to29 | 80193      |
| Australia | 1996           | FemaleLactAge30to34 | 78048      |
| Australia | 1996           | FemaleLactAge35to39 | 33400      |
| Australia | 1996           | FemaleLactAge40to44 | 5537       |
| Australia | 1996           | FemaleLactAge45to49 | 200        |
| Australia | 1996           | FemalePregAge15to19 | 9206       |
| Australia | 1996           | FemalePregAge20to24 | 31579      |
| Australia | 1996           | FemalePregAge25to29 | 60145      |
| Australia | 1996           | FemalePregAge30to34 | 58536      |
| Australia | 1996           | FemalePregAge35to39 | 25050      |
| Australia | 1996           | FemalePregAge40to44 | 4153       |
| Australia | 1996           | FemalePregAge45to49 | 150        |
| Australia | 1996           | MaleAge0to4         | 673129     |
| Australia | 1996           | MaleAge10to14       | 670459     |
| Australia | 1996           | MaleAge15to19       | 651254     |
| Australia | 1996           | MaleAge20to24       | 714582     |
| Australia | 1996           | MaleAge25to29       | 700735     |
| Australia | 1996           | MaleAge30to34       | 729572     |
| Australia | 1996           | MaleAge35to39       | 722046     |
| Australia | 1996           | MaleAge40to44       | 675763     |
| Australia | 1996           | MaleAge45to49       | 650633     |
| Australia | 1996           | MaleAge50to54       | 523522     |
| Australia | 1996           | MaleAge55to59       | 420862     |
| Australia | 1996           | MaleAge5to9         | 669537     |
| Australia | 1996           | MaleAge60to64       | 357690     |
| Australia | 1996           | MaleAge65to69       | 334915     |
| Australia | 1996           | MaleAge70to74       | 278466     |
| Australia | 1996           | MaleAge75to79       | 180062     |
| Australia | 1996           | MaleAge80to84       | 105700     |
| Australia | 1996           | MaleAge85to89       | 45757      |
| Australia | 1996           | MaleAge90to94       | 12660      |
| Australia | 1996           | MaleAge95to99       | 1904       |
| Australia | 1996           | MaleAgeAbove100     | 194        |
| Australia | 1997           | FemaleAge0to4       | 638433     |
| Australia | 1997           | FemaleAge10to14     | 643284     |

Dietary calcium and zinc deficiency risks are decreasing but remain prevalent

| Country   | Reference year | Age/gender group    | Population |
|-----------|----------------|---------------------|------------|
| Australia | 1997           | FemaleAge15to19     | 604119     |
| Australia | 1997           | FemaleAge20to24     | 608353     |
| Australia | 1997           | FemaleAge25to29     | 569426     |
| Australia | 1997           | FemaleAge30to34     | 593180     |
| Australia | 1997           | FemaleAge35to39     | 678641     |
| Australia | 1997           | FemaleAge40to44     | 682741     |
| Australia | 1997           | FemaleAge45to49     | 650053     |
| Australia | 1997           | FemaleAge50to54     | 534295     |
| Australia | 1997           | FemaleAge55to59     | 421795     |
| Australia | 1997           | FemaleAge5to9       | 643148     |
| Australia | 1997           | FemaleAge60to64     | 365399     |
| Australia | 1997           | FemaleAge65to69     | 349130     |
| Australia | 1997           | FemaleAge70to74     | 331157     |
| Australia | 1997           | FemaleAge75to79     | 255499     |
| Australia | 1997           | FemaleAge80to84     | 178249     |
| Australia | 1997           | FemaleAge85to89     | 102227     |
| Australia | 1997           | FemaleAge90to94     | 38591      |
| Australia | 1997           | FemaleAge95to99     | 9056       |
| Australia | 1997           | FemaleAgeAbove100   | 1208       |
| Australia | 1997           | FemaleLactAge15to19 | 12274      |
| Australia | 1997           | FemaleLactAge20to24 | 42105      |
| Australia | 1997           | FemaleLactAge25to29 | 80193      |
| Australia | 1997           | FemaleLactAge30to34 | 78048      |
| Australia | 1997           | FemaleLactAge35to39 | 33400      |
| Australia | 1997           | FemaleLactAge40to44 | 5537       |
| Australia | 1997           | FemaleLactAge45to49 | 200        |
| Australia | 1997           | FemalePregAge15to19 | 9206       |
| Australia | 1997           | FemalePregAge20to24 | 31579      |
| Australia | 1997           | FemalePregAge25to29 | 60145      |
| Australia | 1997           | FemalePregAge30to34 | 58536      |
| Australia | 1997           | FemalePregAge35to39 | 25050      |
| Australia | 1997           | FemalePregAge40to44 | 4153       |
| Australia | 1997           | FemalePregAge45to49 | 150        |
| Australia | 1997           | MaleAge0to4         | 672707     |
| Australia | 1997           | MaleAge10to14       | 674664     |
| Australia | 1997           | MaleAge15to19       | 655187     |
| Australia | 1997           | MaleAge20to24       | 698868     |
| Australia | 1997           | MaleAge25to29       | 710349     |
| Australia | 1997           | MaleAge30to34       | 724907     |
| Australia | 1997           | MaleAge35to39       | 731668     |
| Australia | 1997           | MaleAge40to44       | 686161     |
| Australia | 1997           | MaleAge45to49       | 657945     |
| Australia | 1997           | MaleAge50to54       | 554108     |
| Australia | 1997           | MaleAge55to59       | 435235     |
| Australia | 1997           | MaleAge5to9         | 675882     |
| Australia | 1997           | MaleAge60to64       | 364811     |
| Australia | 1997           | MaleAge65to69       | 333036     |
| Australia | 1997           | MaleAge70to74       | 285265     |
| Australia | 1997           | MaleAge75to79       | 190345     |
| Australia | 1997           | MaleAge80to84       | 107900     |
| Australia | 1997           | MaleAge85to89       | 49404      |
| Australia | 1997           | MaleAge90to94       | 14044      |
| Australia | 1997           | MaleAge95to99       | 2197       |
| Australia | 1997           | MaleAgeAbove100     | 200        |
| Australia | 1998           | FemaleAge0to4       | 635106     |
| Australia | 1998           | FemaleAge10to14     | 647438     |
| Australia | 1998           | FemaleAge15to19     | 613845     |
| Australia | 1998           | FemaleAge20to24     | 591118     |
| Australia | 1998           | FemaleAge25to29     | 581415     |
| Australia | 1998           | FemaleAge30to34     | 589688     |
| Australia | 1998           | FemaleAge35to39     | 689167     |
| Australia | 1998           | FemaleAge40to44     | 696788     |
| Australia | 1998           | FemaleAge45to49     | 658936     |
| Australia | 1998           | FemaleAge50to54     | 568569     |
| Australia | 1998           | FemaleAge55to59     | 436033     |
| Australia | 1998           | FemaleAge5to9       | 649966     |
| Australia | 1998           | FemaleAge60to64     | 374840     |
| Australia | 1998           | FemaleAge65to69     | 346267     |
| Australia | 1998           | FemaleAge70to74     | 333159     |
| Australia | 1998           | FemaleAge75to79     | 268201     |
| Australia | 1998           | FemaleAge80to84     | 180339     |
| Australia | 1998           | FemaleAge85to89     | 107908     |
| Australia | 1998           | FemaleAge90to94     | 40389      |
| Australia | 1998           | FemaleAge95to99     | 9790       |
| Australia | 1998           | FemaleAgeAbove100   | 1239       |
| Australia | 1998           | FemaleLactAge15to19 | 12274      |
| Australia | 1998           | FemaleLactAge20to24 | 42105      |
| Australia | 1998           | FemaleLactAge25to29 | 80193      |
| Australia | 1998           | FemaleLactAge30to34 | 78048      |
| Australia | 1998           | FemaleLactAge35to39 | 33400      |
| Australia | 1998           | FemaleLactAge40to44 | 5537       |
| Australia | 1998           | FemaleLactAge45to49 | 200        |
| Australia | 1998           | FemalePregAge15to19 | 9206       |
| Australia | 1998           | FemalePregAge20to24 | 31579      |
| Australia | 1998           | FemalePregAge25to29 | 60145      |
| Australia | 1998           | FemalePregAge30to34 | 58536      |
| Australia | 1998           | FemalePregAge35to39 | 25050      |
| Australia | 1998           | FemalePregAge40to44 | 4153       |

Dietary calcium and zinc deficiency risks are decreasing but remain prevalent

| Country   | Reference year | Age/gender group    | Population |
|-----------|----------------|---------------------|------------|
| Australia | 1998           | FemalePregAge45to49 | 150        |
| Australia | 1998           | MaleAge0to4         | 668724     |
| Australia | 1998           | MaleAge10to14       | 678649     |
| Australia | 1998           | MaleAge15to19       | 664026     |
| Australia | 1998           | MaleAge20to24       | 681151     |
| Australia | 1998           | MaleAge25to29       | 719999     |
| Australia | 1998           | MaleAge30to34       | 719179     |
| Australia | 1998           | MaleAge35to39       | 740896     |
| Australia | 1998           | MaleAge40to44       | 698803     |
| Australia | 1998           | MaleAge45to49       | 661099     |
| Australia | 1998           | MaleAge50to54       | 586282     |
| Australia | 1998           | MaleAge55to59       | 451165     |
| Australia | 1998           | MaleAge5to9         | 683482     |
| Australia | 1998           | MaleAge60to64       | 375464     |
| Australia | 1998           | MaleAge65to69       | 331149     |
| Australia | 1998           | MaleAge70to74       | 291574     |
| Australia | 1998           | MaleAge75to79       | 201545     |
| Australia | 1998           | MaleAge80to84       | 110633     |
| Australia | 1998           | MaleAge85to89       | 52297      |
| Australia | 1998           | MaleAge90to94       | 14941      |
| Australia | 1998           | MaleAge95to99       | 2512       |
| Australia | 1998           | MaleAgeAbove100     | 206        |
| Australia | 1999           | FemaleAge0to4       | 631226     |
| Australia | 1999           | FemaleAge10to14     | 651893     |
| Australia | 1999           | FemaleAge15to19     | 623874     |
| Australia | 1999           | FemaleAge20to24     | 576629     |
| Australia | 1999           | FemaleAge25to29     | 588229     |
| Australia | 1999           | FemaleAge30to34     | 588419     |
| Australia | 1999           | FemaleAge35to39     | 697350     |
| Australia | 1999           | FemaleAge40to44     | 710994     |
| Australia | 1999           | FemaleAge45to49     | 667035     |
| Australia | 1999           | FemaleAge50to54     | 600334     |
| Australia | 1999           | FemaleAge55to59     | 453475     |
| Australia | 1999           | FemaleAge5to9       | 656439     |
| Australia | 1999           | FemaleAge60to64     | 386318     |
| Australia | 1999           | FemaleAge65to69     | 345011     |
| Australia | 1999           | FemaleAge70to74     | 334383     |
| Australia | 1999           | FemaleAge75to79     | 279538     |
| Australia | 1999           | FemaleAge80to84     | 185393     |
| Australia | 1999           | FemaleAge85to89     | 112481     |
| Australia | 1999           | FemaleAge90to94     | 41845      |
| Australia | 1999           | FemaleAge95to99     | 10198      |
| Australia | 1999           | FemaleAgeAbove100   | 1270       |
| Australia | 1999           | FemaleLactAge15to19 | 12274      |
| Australia | 1999           | FemaleLactAge20to24 | 42105      |
| Australia | 1999           | FemaleLactAge25to29 | 80193      |
| Australia | 1999           | FemaleLactAge30to34 | 78048      |
| Australia | 1999           | FemaleLactAge35to39 | 33400      |
| Australia | 1999           | FemaleLactAge40to44 | 5537       |
| Australia | 1999           | FemaleLactAge45to49 | 200        |
| Australia | 1999           | FemalePregAge15to19 | 9206       |
| Australia | 1999           | FemalePregAge20to24 | 31579      |
| Australia | 1999           | FemalePregAge25to29 | 60145      |
| Australia | 1999           | FemalePregAge30to34 | 58536      |
| Australia | 1999           | FemalePregAge35to39 | 25050      |
| Australia | 1999           | FemalePregAge40to44 | 4153       |
| Australia | 1999           | FemalePregAge45to49 | 150        |
| Australia | 1999           | MaleAge0to4         | 664375     |
| Australia | 1999           | MaleAge10to14       | 683323     |
| Australia | 1999           | MaleAge15to19       | 673711     |
| Australia | 1999           | MaleAge20to24       | 667310     |
| Australia | 1999           | MaleAge25to29       | 724086     |
| Australia | 1999           | MaleAge30to34       | 715473     |
| Australia | 1999           | MaleAge35to39       | 747910     |
| Australia | 1999           | MaleAge40to44       | 711750     |
| Australia | 1999           | MaleAge45to49       | 664386     |
| Australia | 1999           | MaleAge50to54       | 614842     |
| Australia | 1999           | MaleAge55to59       | 470098     |
| Australia | 1999           | MaleAge5to9         | 690996     |
| Australia | 1999           | MaleAge60to64       | 388348     |
| Australia | 1999           | MaleAge65to69       | 331169     |
| Australia | 1999           | MaleAge70to74       | 296884     |
| Australia | 1999           | MaleAge75to79       | 212323     |
| Australia | 1999           | MaleAge80to84       | 115079     |
| Australia | 1999           | MaleAge85to89       | 54161      |
| Australia | 1999           | MaleAge90to94       | 15401      |
| Australia | 1999           | MaleAge95to99       | 2691       |
| Australia | 1999           | MaleAgeAbove100     | 213        |
| Austria   | 1992           | FemaleAge0to4       | 212416     |
| Austria   | 1992           | FemaleAge10to14     | 217028     |
| Austria   | 1992           | FemaleAge15to19     | 227133     |
| Austria   | 1992           | FemaleAge20to24     | 259572     |
| Austria   | 1992           | FemaleAge25to29     | 279864     |
| Austria   | 1992           | FemaleAge30to34     | 283936     |
| Austria   | 1992           | FemaleAge35to39     | 259752     |
| Austria   | 1992           | FemaleAge40to44     | 237775     |
| Austria   | 1992           | FemaleAge45to49     | 267113     |
| Austria   | 1992           | FemaleAge50to54     | 239897     |

Dietary calcium and zinc deficiency risks are decreasing but remain prevalent

| Country | Reference year | Age/gender group    | Population |
|---------|----------------|---------------------|------------|
| Austria | 1992           | FemaleAge55to59     | 198188     |
| Austria | 1992           | FemaleAge5to9       | 233940     |
| Austria | 1992           | FemaleAge60to64     | 200226     |
| Austria | 1992           | FemaleAge65to69     | 250142     |
| Austria | 1992           | FemaleAge70to74     | 168288     |
| Austria | 1992           | FemaleAge75to79     | 140031     |
| Austria | 1992           | FemaleAge80to84     | 129664     |
| Austria | 1992           | FemaleAge85to89     | 63520      |
| Austria | 1992           | FemaleAge90to94     | 20831      |
| Austria | 1992           | FemaleAge95to99     | 3077       |
| Austria | 1992           | FemaleAgeAbove100   | 196        |
| Austria | 1992           | FemaleLactAge15to19 | 4811       |
| Austria | 1992           | FemaleLactAge20to24 | 25068      |
| Austria | 1992           | FemaleLactAge25to29 | 35257      |
| Austria | 1992           | FemaleLactAge30to34 | 19415      |
| Austria | 1992           | FemaleLactAge35to39 | 6087       |
| Austria | 1992           | FemaleLactAge40to44 | 954        |
| Austria | 1992           | FemaleLactAge45to49 | 44         |
| Austria | 1992           | FemalePregAge15to19 | 3608       |
| Austria | 1992           | FemalePregAge20to24 | 18801      |
| Austria | 1992           | FemalePregAge25to29 | 26442      |
| Austria | 1992           | FemalePregAge30to34 | 14562      |
| Austria | 1992           | FemalePregAge35to39 | 4565       |
| Austria | 1992           | FemalePregAge40to44 | 715        |
| Austria | 1992           | FemalePregAge45to49 | 33         |
| Austria | 1992           | MaleAge0to4         | 225685     |
| Austria | 1992           | MaleAge10to14       | 229119     |
| Austria | 1992           | MaleAge15to19       | 243489     |
| Austria | 1992           | MaleAge20to24       | 313362     |
| Austria | 1992           | MaleAge25to29       | 357419     |
| Austria | 1992           | MaleAge30to34       | 328716     |
| Austria | 1992           | MaleAge35to39       | 273757     |
| Austria | 1992           | MaleAge40to44       | 242058     |
| Austria | 1992           | MaleAge45to49       | 266532     |
| Austria | 1992           | MaleAge50to54       | 235427     |
| Austria | 1992           | MaleAge55to59       | 189324     |
| Austria | 1992           | MaleAge5to9         | 245288     |
| Austria | 1992           | MaleAge60to64       | 177613     |
| Austria | 1992           | MaleAge65to69       | 163606     |
| Austria | 1992           | MaleAge70to74       | 92938      |
| Austria | 1992           | MaleAge75to79       | 71065      |
| Austria | 1992           | MaleAge80to84       | 58465      |
| Austria | 1992           | MaleAge85to89       | 23539      |
| Austria | 1992           | MaleAge90to94       | 6146       |
| Austria | 1992           | MaleAge95to99       | 655        |
| Austria | 1992           | MaleAgeAbove100     | 42         |
| Austria | 1993           | FemaleAge0to4       | 222164     |
| Austria | 1993           | FemaleAge10to14     | 225156     |
| Austria | 1993           | FemaleAge15to19     | 219870     |
| Austria | 1993           | FemaleAge20to24     | 250044     |
| Austria | 1993           | FemaleAge25to29     | 281465     |
| Austria | 1993           | FemaleAge30to34     | 295198     |
| Austria | 1993           | FemaleAge35to39     | 270247     |
| Austria | 1993           | FemaleAge40to44     | 242499     |
| Austria | 1993           | FemaleAge45to49     | 256407     |
| Austria | 1993           | FemaleAge50to54     | 255662     |
| Austria | 1993           | FemaleAge55to59     | 199398     |
| Austria | 1993           | FemaleAge5to9       | 231700     |
| Austria | 1993           | FemaleAge60to64     | 197267     |
| Austria | 1993           | FemaleAge65to69     | 233243     |
| Austria | 1993           | FemaleAge70to74     | 199364     |
| Austria | 1993           | FemaleAge75to79     | 119553     |
| Austria | 1993           | FemaleAge80to84     | 134111     |
| Austria | 1993           | FemaleAge85to89     | 65240      |
| Austria | 1993           | FemaleAge90to94     | 21878      |
| Austria | 1993           | FemaleAge95to99     | 3550       |
| Austria | 1993           | FemaleAgeAbove100   | 212        |
| Austria | 1993           | FemaleLactAge15to19 | 4811       |
| Austria | 1993           | FemaleLactAge20to24 | 25068      |
| Austria | 1993           | FemaleLactAge25to29 | 35257      |
| Austria | 1993           | FemaleLactAge30to34 | 19415      |
| Austria | 1993           | FemaleLactAge35to39 | 6087       |
| Austria | 1993           | FemaleLactAge40to44 | 954        |
| Austria | 1993           | FemaleLactAge45to49 | 44         |
| Austria | 1993           | FemalePregAge15to19 | 3608       |
| Austria | 1993           | FemalePregAge20to24 | 18801      |
| Austria | 1993           | FemalePregAge25to29 | 26442      |
| Austria | 1993           | FemalePregAge30to34 | 14562      |
| Austria | 1993           | FemalePregAge35to39 | 4565       |
| Austria | 1993           | FemalePregAge40to44 | 715        |
| Austria | 1993           | FemalePregAge45to49 | 33         |
| Austria | 1993           | MaleAge0to4         | 235355     |
| Austria | 1993           | MaleAge10to14       | 237079     |
| Austria | 1993           | MaleAge15to19       | 237165     |
| Austria | 1993           | MaleAge20to24       | 301426     |
| Austria | 1993           | MaleAge25to29       | 359350     |
| Austria | 1993           | MaleAge30to34       | 343254     |
| Austria | 1993           | MaleAge35to39       | 286007     |



Dietary calcium and zinc deficiency risks are decreasing but remain prevalent

| Country | Reference year | Age/gender group    | Population |
|---------|----------------|---------------------|------------|
| Austria | 1993           | MaleAge40to44       | 246692     |
| Austria | 1993           | MaleAge45to49       | 256665     |
| Austria | 1993           | MaleAge50to54       | 250511     |
| Austria | 1993           | MaleAge55to59       | 190629     |
| Austria | 1993           | MaleAge5to9         | 243451     |
| Austria | 1993           | MaleAge60to64       | 176586     |
| Austria | 1993           | MaleAge65to69       | 162753     |
| Austria | 1993           | MaleAge70to74       | 108467     |
| Austria | 1993           | MaleAge75to79       | 60169      |
| Austria | 1993           | MaleAge80to84       | 60720      |
| Austria | 1993           | MaleAge85to89       | 24099      |
| Austria | 1993           | MaleAge90to94       | 6580       |
| Austria | 1993           | MaleAge95to99       | 768        |
| Austria | 1993           | MaleAgeAbove100     | 44         |
| Austria | 1994           | FemaleAge0to4       | 231054     |
| Austria | 1994           | FemaleAge10to14     | 232753     |
| Austria | 1994           | FemaleAge15to19     | 214577     |
| Austria | 1994           | FemaleAge20to24     | 239925     |
| Austria | 1994           | FemaleAge25to29     | 280817     |
| Austria | 1994           | FemaleAge30to34     | 304915     |
| Austria | 1994           | FemaleAge35to39     | 281412     |
| Austria | 1994           | FemaleAge40to44     | 248908     |
| Austria | 1994           | FemaleAge45to49     | 246823     |
| Austria | 1994           | FemaleAge50to54     | 267406     |
| Austria | 1994           | FemaleAge55to59     | 203556     |
| Austria | 1994           | FemaleAge5to9       | 227930     |
| Austria | 1994           | FemaleAge60to64     | 195409     |
| Austria | 1994           | FemaleAge65to69     | 216808     |
| Austria | 1994           | FemaleAge70to74     | 224176     |
| Austria | 1994           | FemaleAge75to79     | 108141     |
| Austria | 1994           | FemaleAge80to84     | 134531     |
| Austria | 1994           | FemaleAge85to89     | 66752      |
| Austria | 1994           | FemaleAge90to94     | 22103      |
| Austria | 1994           | FemaleAge95to99     | 3832       |
| Austria | 1994           | FemaleAgeAbove100   | 229        |
| Austria | 1994           | FemaleLactAge15to19 | 4811       |
| Austria | 1994           | FemaleLactAge20to24 | 25068      |
| Austria | 1994           | FemaleLactAge25to29 | 35257      |
| Austria | 1994           | FemaleLactAge30to34 | 19415      |
| Austria | 1994           | FemaleLactAge35to39 | 6087       |
| Austria | 1994           | FemaleLactAge40to44 | 954        |
| Austria | 1994           | FemaleLactAge45to49 | 44         |
| Austria | 1994           | FemalePregAge15to19 | 3608       |
| Austria | 1994           | FemalePregAge20to24 | 18801      |
| Austria | 1994           | FemalePregAge25to29 | 26442      |
| Austria | 1994           | FemalePregAge30to34 | 14562      |
| Austria | 1994           | FemalePregAge35to39 | 4565       |
| Austria | 1994           | FemalePregAge40to44 | 715        |
| Austria | 1994           | FemalePregAge45to49 | 33         |
| Austria | 1994           | MaleAge0to4         | 243882     |
| Austria | 1994           | MaleAge10to14       | 244306     |
| Austria | 1994           | MaleAge15to19       | 233252     |
| Austria | 1994           | MaleAge20to24       | 288564     |
| Austria | 1994           | MaleAge25to29       | 358152     |
| Austria | 1994           | MaleAge30to34       | 355746     |
| Austria | 1994           | MaleAge35to39       | 299279     |
| Austria | 1994           | MaleAge40to44       | 253253     |
| Austria | 1994           | MaleAge45to49       | 247928     |
| Austria | 1994           | MaleAge50to54       | 261661     |
| Austria | 1994           | MaleAge55to59       | 194617     |
| Austria | 1994           | MaleAge5to9         | 240029     |
| Austria | 1994           | MaleAge60to64       | 175783     |
| Austria | 1994           | MaleAge65to69       | 161356     |
| Austria | 1994           | MaleAge70to74       | 121656     |
| Austria | 1994           | MaleAge75to79       | 54245      |
| Austria | 1994           | MaleAge80to84       | 60203      |
| Austria | 1994           | MaleAge85to89       | 24382      |
| Austria | 1994           | MaleAge90to94       | 6612       |
| Austria | 1994           | MaleAge95to99       | 853        |
| Austria | 1994           | MaleAgeAbove100     | 46         |
| Austria | 1995           | FemaleAge0to4       | 233874     |
| Austria | 1995           | FemaleAge10to14     | 237218     |
| Austria | 1995           | FemaleAge15to19     | 212196     |
| Austria | 1995           | FemaleAge20to24     | 229856     |
| Austria | 1995           | FemaleAge25to29     | 277594     |
| Austria | 1995           | FemaleAge30to34     | 312557     |
| Austria | 1995           | FemaleAge35to39     | 292876     |
| Austria | 1995           | FemaleAge40to44     | 256085     |
| Austria | 1995           | FemaleAge45to49     | 241291     |
| Austria | 1995           | FemaleAge50to54     | 272436     |
| Austria | 1995           | FemaleAge55to59     | 211139     |
| Austria | 1995           | FemaleAge5to9       | 225862     |
| Austria | 1995           | FemaleAge60to64     | 193798     |
| Austria | 1995           | FemaleAge65to69     | 205000     |
| Austria | 1995           | FemaleAge70to74     | 236385     |
| Austria | 1995           | FemaleAge75to79     | 110169     |
| Austria | 1995           | FemaleAge80to84     | 129421     |
| Austria | 1995           | FemaleAge85to89     | 68554      |

Dietary calcium and zinc deficiency risks are decreasing but remain prevalent

| Country | Reference year | Age/gender group    | Population |
|---------|----------------|---------------------|------------|
| Austria | 1995           | FemaleAge90to94     | 21698      |
| Austria | 1995           | FemaleAge95to99     | 3476       |
| Austria | 1995           | FemaleAgeAbove100   | 249        |
| Austria | 1995           | FemaleLactAge15to19 | 4811       |
| Austria | 1995           | FemaleLactAge20to24 | 25068      |
| Austria | 1995           | FemaleLactAge25to29 | 35257      |
| Austria | 1995           | FemaleLactAge30to34 | 19415      |
| Austria | 1995           | FemaleLactAge35to39 | 6087       |
| Austria | 1995           | FemaleLactAge40to44 | 954        |
| Austria | 1995           | FemaleLactAge45to49 | 44         |
| Austria | 1995           | FemalePregAge15to19 | 3608       |
| Austria | 1995           | FemalePregAge20to24 | 18801      |
| Austria | 1995           | FemalePregAge25to29 | 26442      |
| Austria | 1995           | FemalePregAge30to34 | 14562      |
| Austria | 1995           | FemalePregAge35to39 | 4565       |
| Austria | 1995           | FemalePregAge40to44 | 715        |
| Austria | 1995           | FemalePregAge45to49 | 33         |
| Austria | 1995           | MaleAge0to4         | 246131     |
| Austria | 1995           | MaleAge10to14       | 248432     |
| Austria | 1995           | MaleAge15to19       | 231948     |
| Austria | 1995           | MaleAge20to24       | 276235     |
| Austria | 1995           | MaleAge25to29       | 353314     |
| Austria | 1995           | MaleAge30to34       | 365190     |
| Austria | 1995           | MaleAge35to39       | 313067     |
| Austria | 1995           | MaleAge40to44       | 260975     |
| Austria | 1995           | MaleAge45to49       | 242955     |
| Austria | 1995           | MaleAge50to54       | 266322     |
| Austria | 1995           | MaleAge55to59       | 201748     |
| Austria | 1995           | MaleAge5to9         | 238017     |
| Austria | 1995           | MaleAge60to64       | 175355     |
| Austria | 1995           | MaleAge65to69       | 160372     |
| Austria | 1995           | MaleAge70to74       | 130085     |
| Austria | 1995           | MaleAge75to79       | 55127      |
| Austria | 1995           | MaleAge80to84       | 56451      |
| Austria | 1995           | MaleAge85to89       | 24574      |
| Austria | 1995           | MaleAge90to94       | 6202       |
| Austria | 1995           | MaleAge95to99       | 727        |
| Austria | 1995           | MaleAgeAbove100     | 48         |
| Austria | 1996           | FemaleAge0to4       | 237563     |
| Austria | 1996           | FemaleAge10to14     | 237908     |
| Austria | 1996           | FemaleAge15to19     | 215080     |
| Austria | 1996           | FemaleAge20to24     | 230293     |
| Austria | 1996           | FemaleAge25to29     | 276342     |
| Austria | 1996           | FemaleAge30to34     | 310747     |
| Austria | 1996           | FemaleAge35to39     | 299920     |
| Austria | 1996           | FemaleAge40to44     | 262967     |
| Austria | 1996           | FemaleAge45to49     | 238802     |
| Austria | 1996           | FemaleAge50to54     | 271368     |
| Austria | 1996           | FemaleAge55to59     | 221656     |
| Austria | 1996           | FemaleAge5to9       | 225158     |
| Austria | 1996           | FemaleAge60to64     | 192736     |
| Austria | 1996           | FemaleAge65to69     | 196068     |
| Austria | 1996           | FemaleAge70to74     | 237071     |
| Austria | 1996           | FemaleAge75to79     | 122638     |
| Austria | 1996           | FemaleAge80to84     | 118290     |
| Austria | 1996           | FemaleAge85to89     | 73064      |
| Austria | 1996           | FemaleAge90to94     | 24504      |
| Austria | 1996           | FemaleAge95to99     | 3903       |
| Austria | 1996           | FemaleAgeAbove100   | 272        |
| Austria | 1996           | FemaleLactAge15to19 | 3404       |
| Austria | 1996           | FemaleLactAge20to24 | 17686      |
| Austria | 1996           | FemaleLactAge25to29 | 30643      |
| Austria | 1996           | FemaleLactAge30to34 | 22295      |
| Austria | 1996           | FemaleLactAge35to39 | 7730       |
| Austria | 1996           | FemaleLactAge40to44 | 1217       |
| Austria | 1996           | FemaleLactAge45to49 | 44         |
| Austria | 1996           | FemalePregAge15to19 | 2553       |
| Austria | 1996           | FemalePregAge20to24 | 13265      |
| Austria | 1996           | FemalePregAge25to29 | 22982      |
| Austria | 1996           | FemalePregAge30to34 | 16721      |
| Austria | 1996           | FemalePregAge35to39 | 5797       |
| Austria | 1996           | FemalePregAge40to44 | 913        |
| Austria | 1996           | FemalePregAge45to49 | 33         |
| Austria | 1996           | MaleAge0to4         | 249552     |
| Austria | 1996           | MaleAge10to14       | 249149     |
| Austria | 1996           | MaleAge15to19       | 232314     |
| Austria | 1996           | MaleAge20to24       | 263001     |
| Austria | 1996           | MaleAge25to29       | 340564     |
| Austria | 1996           | MaleAge30to34       | 367772     |
| Austria | 1996           | MaleAge35to39       | 324066     |
| Austria | 1996           | MaleAge40to44       | 268327     |
| Austria | 1996           | MaleAge45to49       | 240445     |
| Austria | 1996           | MaleAge50to54       | 265534     |
| Austria | 1996           | MaleAge55to59       | 211877     |
| Austria | 1996           | MaleAge5to9         | 237548     |
| Austria | 1996           | MaleAge60to64       | 175433     |
| Austria | 1996           | MaleAge65to69       | 159242     |
| Austria | 1996           | MaleAge70to74       | 134841     |

Dietary calcium and zinc deficiency risks are decreasing but remain prevalent

| Country | Reference year | Age/gender group    | Population |
|---------|----------------|---------------------|------------|
| Austria | 1996           | MaleAge75to79       | 61329      |
| Austria | 1996           | MaleAge80to84       | 51472      |
| Austria | 1996           | MaleAge85to89       | 27081      |
| Austria | 1996           | MaleAge90to94       | 7269       |
| Austria | 1996           | MaleAge95to99       | 846        |
| Austria | 1996           | MaleAgeAbov e100    | 51         |
| Austria | 1997           | FemaleAge0to4       | 233049     |
| Austria | 1997           | FemaleAge10to14     | 235796     |
| Austria | 1997           | FemaleAge15to19     | 219430     |
| Austria | 1997           | FemaleAge20to24     | 218248     |
| Austria | 1997           | FemaleAge25to29     | 264607     |
| Austria | 1997           | FemaleAge30to34     | 311806     |
| Austria | 1997           | FemaleAge35to39     | 309533     |
| Austria | 1997           | FemaleAge40to44     | 271210     |
| Austria | 1997           | FemaleAge45to49     | 239794     |
| Austria | 1997           | FemaleAge50to54     | 263955     |
| Austria | 1997           | FemaleAge55to59     | 235731     |
| Austria | 1997           | FemaleAge5to9       | 226336     |
| Austria | 1997           | FemaleAge60to64     | 192372     |
| Austria | 1997           | FemaleAge65to69     | 190478     |
| Austria | 1997           | FemaleAge70to74     | 227758     |
| Austria | 1997           | FemaleAge75to79     | 146139     |
| Austria | 1997           | FemaleAge80to84     | 102037     |
| Austria | 1997           | FemaleAge85to89     | 78198      |
| Austria | 1997           | FemaleAge90to94     | 26278      |
| Austria | 1997           | FemaleAge95to99     | 4489       |
| Austria | 1997           | FemaleAgeAbov e100  | 297        |
| Austria | 1997           | FemaleLactAge15to19 | 3404       |
| Austria | 1997           | FemaleLactAge20to24 | 17686      |
| Austria | 1997           | FemaleLactAge25to29 | 30643      |
| Austria | 1997           | FemaleLactAge30to34 | 22295      |
| Austria | 1997           | FemaleLactAge35to39 | 7730       |
| Austria | 1997           | FemaleLactAge40to44 | 1217       |
| Austria | 1997           | FemaleLactAge45to49 | 44         |
| Austria | 1997           | FemalePregAge15to19 | 2553       |
| Austria | 1997           | FemalePregAge20to24 | 13265      |
| Austria | 1997           | FemalePregAge25to29 | 22982      |
| Austria | 1997           | FemalePregAge30to34 | 16721      |
| Austria | 1997           | FemalePregAge35to39 | 5797       |
| Austria | 1997           | FemalePregAge40to44 | 913        |
| Austria | 1997           | FemalePregAge45to49 | 33         |
| Austria | 1997           | MaleAge0to4         | 244444     |
| Austria | 1997           | MaleAge10to14       | 247203     |
| Austria | 1997           | MaleAge15to19       | 236116     |
| Austria | 1997           | MaleAge20to24       | 251412     |
| Austria | 1997           | MaleAge25to29       | 324588     |
| Austria | 1997           | MaleAge30to34       | 367326     |
| Austria | 1997           | MaleAge35to39       | 334792     |
| Austria | 1997           | MaleAge40to44       | 276611     |
| Austria | 1997           | MaleAge45to49       | 240862     |
| Austria | 1997           | MaleAge50to54       | 258815     |
| Austria | 1997           | MaleAge55to59       | 225255     |
| Austria | 1997           | MaleAge5to9         | 238754     |
| Austria | 1997           | MaleAge60to64       | 175812     |
| Austria | 1997           | MaleAge65to69       | 158095     |
| Austria | 1997           | MaleAge70to74       | 136508     |
| Austria | 1997           | MaleAge75to79       | 71912      |
| Austria | 1997           | MaleAge80to84       | 44136      |
| Austria | 1997           | MaleAge85to89       | 29707      |
| Austria | 1997           | MaleAge90to94       | 7867       |
| Austria | 1997           | MaleAge95to99       | 1032       |
| Austria | 1997           | MaleAgeAbov e100    | 54         |
| Austria | 1998           | FemaleAge0to4       | 222647     |
| Austria | 1998           | FemaleAge10to14     | 231969     |
| Austria | 1998           | FemaleAge15to19     | 225747     |
| Austria | 1998           | FemaleAge20to24     | 207781     |
| Austria | 1998           | FemaleAge25to29     | 251554     |
| Austria | 1998           | FemaleAge30to34     | 310624     |
| Austria | 1998           | FemaleAge35to39     | 318387     |
| Austria | 1998           | FemaleAge40to44     | 280226     |
| Austria | 1998           | FemaleAge45to49     | 243752     |
| Austria | 1998           | FemaleAge50to54     | 253177     |
| Austria | 1998           | FemaleAge55to59     | 250511     |
| Austria | 1998           | FemaleAge5to9       | 229349     |
| Austria | 1998           | FemaleAge60to64     | 193618     |
| Austria | 1998           | FemaleAge65to69     | 187505     |
| Austria | 1998           | FemaleAge70to74     | 212939     |
| Austria | 1998           | FemaleAge75to79     | 173451     |
| Austria | 1998           | FemaleAge80to84     | 86777      |
| Austria | 1998           | FemaleAge85to89     | 82000      |
| Austria | 1998           | FemaleAge90to94     | 27068      |
| Austria | 1998           | FemaleAge95to99     | 5050       |
| Austria | 1998           | FemaleAgeAbov e100  | 324        |
| Austria | 1998           | FemaleLactAge15to19 | 3404       |
| Austria | 1998           | FemaleLactAge20to24 | 17686      |
| Austria | 1998           | FemaleLactAge25to29 | 30643      |
| Austria | 1998           | FemaleLactAge30to34 | 22295      |
| Austria | 1998           | FemaleLactAge35to39 | 7730       |

Dietary calcium and zinc deficiency risks are decreasing but remain prevalent

| Country    | Reference year | Age/gender group    | Population |
|------------|----------------|---------------------|------------|
| Austria    | 1998           | FemaleLactAge40to44 | 1217       |
| Austria    | 1998           | FemaleLactAge45to49 | 44         |
| Austria    | 1998           | FemalePregAge15to19 | 2553       |
| Austria    | 1998           | FemalePregAge20to24 | 13265      |
| Austria    | 1998           | FemalePregAge25to29 | 22982      |
| Austria    | 1998           | FemalePregAge30to34 | 16721      |
| Austria    | 1998           | FemalePregAge35to39 | 5797       |
| Austria    | 1998           | FemalePregAge40to44 | 913        |
| Austria    | 1998           | FemalePregAge45to49 | 33         |
| Austria    | 1998           | MaleAge0to4         | 233340     |
| Austria    | 1998           | MaleAge10to14       | 243588     |
| Austria    | 1998           | MaleAge15to19       | 241807     |
| Austria    | 1998           | MaleAge20to24       | 242162     |
| Austria    | 1998           | MaleAge25to29       | 307135     |
| Austria    | 1998           | MaleAge30to34       | 363943     |
| Austria    | 1998           | MaleAge35to39       | 344610     |
| Austria    | 1998           | MaleAge40to44       | 285771     |
| Austria    | 1998           | MaleAge45to49       | 243943     |
| Austria    | 1998           | MaleAge50to54       | 248993     |
| Austria    | 1998           | MaleAge55to59       | 239204     |
| Austria    | 1998           | MaleAge5to9         | 241644     |
| Austria    | 1998           | MaleAge60to64       | 177530     |
| Austria    | 1998           | MaleAge65to69       | 157217     |
| Austria    | 1998           | MaleAge70to74       | 136402     |
| Austria    | 1998           | MaleAge75to79       | 83967      |
| Austria    | 1998           | MaleAge80to84       | 37396      |
| Austria    | 1998           | MaleAge85to89       | 31330      |
| Austria    | 1998           | MaleAge90to94       | 8055       |
| Austria    | 1998           | MaleAge95to99       | 1219       |
| Austria    | 1998           | MaleAgeAbov e100    | 57         |
| Austria    | 1999           | FemaleAge0to4       | 211791     |
| Austria    | 1999           | FemaleAge10to14     | 228665     |
| Austria    | 1999           | FemaleAge15to19     | 231057     |
| Austria    | 1999           | FemaleAge20to24     | 200371     |
| Austria    | 1999           | FemaleAge25to29     | 238484     |
| Austria    | 1999           | FemaleAge30to34     | 307048     |
| Austria    | 1999           | FemaleAge35to39     | 325831     |
| Austria    | 1999           | FemaleAge40to44     | 289845     |
| Austria    | 1999           | FemaleAge45to49     | 249430     |
| Austria    | 1999           | FemaleAge50to54     | 243658     |
| Austria    | 1999           | FemaleAge55to59     | 261666     |
| Austria    | 1999           | FemaleAge5to9       | 232834     |
| Austria    | 1999           | FemaleAge60to64     | 197802     |
| Austria    | 1999           | FemaleAge65to69     | 185828     |
| Austria    | 1999           | FemaleAge70to74     | 198984     |
| Austria    | 1999           | FemaleAge75to79     | 194924     |
| Austria    | 1999           | FemaleAge80to84     | 79987      |
| Austria    | 1999           | FemaleAge85to89     | 81863      |
| Austria    | 1999           | FemaleAge90to94     | 27337      |
| Austria    | 1999           | FemaleAge95to99     | 5337       |
| Austria    | 1999           | FemaleAgeAbov e100  | 354        |
| Austria    | 1999           | FemaleLactAge15to19 | 3404       |
| Austria    | 1999           | FemaleLactAge20to24 | 17686      |
| Austria    | 1999           | FemaleLactAge25to29 | 30643      |
| Austria    | 1999           | FemaleLactAge30to34 | 22295      |
| Austria    | 1999           | FemaleLactAge35to39 | 7730       |
| Austria    | 1999           | FemaleLactAge40to44 | 1217       |
| Austria    | 1999           | FemaleLactAge45to49 | 44         |
| Austria    | 1999           | FemalePregAge15to19 | 2553       |
| Austria    | 1999           | FemalePregAge20to24 | 13265      |
| Austria    | 1999           | FemalePregAge25to29 | 22982      |
| Austria    | 1999           | FemalePregAge30to34 | 16721      |
| Austria    | 1999           | FemalePregAge35to39 | 5797       |
| Austria    | 1999           | FemalePregAge40to44 | 913        |
| Austria    | 1999           | FemalePregAge45to49 | 33         |
| Austria    | 1999           | MaleAge0to4         | 221944     |
| Austria    | 1999           | MaleAge10to14       | 240508     |
| Austria    | 1999           | MaleAge15to19       | 246892     |
| Austria    | 1999           | MaleAge20to24       | 235981     |
| Austria    | 1999           | MaleAge25to29       | 290487     |
| Austria    | 1999           | MaleAge30to34       | 357671     |
| Austria    | 1999           | MaleAge35to39       | 352595     |
| Austria    | 1999           | MaleAge40to44       | 295763     |
| Austria    | 1999           | MaleAge45to49       | 248864     |
| Austria    | 1999           | MaleAge50to54       | 240347     |
| Austria    | 1999           | MaleAge55to59       | 249763     |
| Austria    | 1999           | MaleAge5to9         | 244949     |
| Austria    | 1999           | MaleAge60to64       | 181976     |
| Austria    | 1999           | MaleAge65to69       | 156949     |
| Austria    | 1999           | MaleAge70to74       | 136069     |
| Austria    | 1999           | MaleAge75to79       | 94078      |
| Austria    | 1999           | MaleAge80to84       | 34491      |
| Austria    | 1999           | MaleAge85to89       | 30751      |
| Austria    | 1999           | MaleAge90to94       | 8025       |
| Austria    | 1999           | MaleAge95to99       | 1300       |
| Austria    | 1999           | MaleAgeAbov e100    | 62         |
| Azerbaijan | 1992           | FemaleAge0to4       | 462212     |
| Azerbaijan | 1992           | FemaleAge10to14     | 362090     |

Dietary calcium and zinc deficiency risks are decreasing but remain prevalent

| Country    | Reference year | Age/gender group    | Population |
|------------|----------------|---------------------|------------|
| Azerbaijan | 1992           | FemaleAge15to19     | 310214     |
| Azerbaijan | 1992           | FemaleAge20to24     | 207322     |
| Azerbaijan | 1992           | FemaleAge25to29     | 254280     |
| Azerbaijan | 1992           | FemaleAge30to34     | 277419     |
| Azerbaijan | 1992           | FemaleAge35to39     | 235364     |
| Azerbaijan | 1992           | FemaleAge40to44     | 156201     |
| Azerbaijan | 1992           | FemaleAge45to49     | 123905     |
| Azerbaijan | 1992           | FemaleAge50to54     | 157538     |
| Azerbaijan | 1992           | FemaleAge55to59     | 152639     |
| Azerbaijan | 1992           | FemaleAge5to9       | 422638     |
| Azerbaijan | 1992           | FemaleAge60to64     | 127877     |
| Azerbaijan | 1992           | FemaleAge65to69     | 85300      |
| Azerbaijan | 1992           | FemaleAge70to74     | 50261      |
| Azerbaijan | 1992           | FemaleAge75to79     | 42717      |
| Azerbaijan | 1992           | FemaleAge80to84     | 11123      |
| Azerbaijan | 1992           | FemaleAge85to89     | 7299       |
| Azerbaijan | 1992           | FemaleAge90to94     | 8871       |
| Azerbaijan | 1992           | FemaleAge95to99     | 1306       |
| Azerbaijan | 1992           | FemaleAgeAbov e100  | 427        |
| Azerbaijan | 1992           | FemaleLactAge15to19 | 12722      |
| Azerbaijan | 1992           | FemaleLactAge20to24 | 77193      |
| Azerbaijan | 1992           | FemaleLactAge25to29 | 64484      |
| Azerbaijan | 1992           | FemaleLactAge30to34 | 30879      |
| Azerbaijan | 1992           | FemaleLactAge35to39 | 9146       |
| Azerbaijan | 1992           | FemaleLactAge40to44 | 1425       |
| Azerbaijan | 1992           | FemaleLactAge45to49 | 103        |
| Azerbaijan | 1992           | FemalePregAge15to19 | 9541       |
| Azerbaijan | 1992           | FemalePregAge20to24 | 57895      |
| Azerbaijan | 1992           | FemalePregAge25to29 | 48363      |
| Azerbaijan | 1992           | FemalePregAge30to34 | 23159      |
| Azerbaijan | 1992           | FemalePregAge35to39 | 6859       |
| Azerbaijan | 1992           | FemalePregAge40to44 | 1069       |
| Azerbaijan | 1992           | FemalePregAge45to49 | 77         |
| Azerbaijan | 1992           | MaleAge0to4         | 489174     |
| Azerbaijan | 1992           | MaleAge10to14       | 373143     |
| Azerbaijan | 1992           | MaleAge15to19       | 355529     |
| Azerbaijan | 1992           | MaleAge20to24       | 333347     |
| Azerbaijan | 1992           | MaleAge25to29       | 330846     |
| Azerbaijan | 1992           | MaleAge30to34       | 310560     |
| Azerbaijan | 1992           | MaleAge35to39       | 243057     |
| Azerbaijan | 1992           | MaleAge40to44       | 152622     |
| Azerbaijan | 1992           | MaleAge45to49       | 115591     |
| Azerbaijan | 1992           | MaleAge50to54       | 141957     |
| Azerbaijan | 1992           | MaleAge55to59       | 136955     |
| Azerbaijan | 1992           | MaleAge5to9         | 445715     |
| Azerbaijan | 1992           | MaleAge60to64       | 107027     |
| Azerbaijan | 1992           | MaleAge65to69       | 58528      |
| Azerbaijan | 1992           | MaleAge70to74       | 25287      |
| Azerbaijan | 1992           | MaleAge75to79       | 19324      |
| Azerbaijan | 1992           | MaleAge80to84       | 6543       |
| Azerbaijan | 1992           | MaleAge85to89       | 2814       |
| Azerbaijan | 1992           | MaleAge90to94       | 2644       |
| Azerbaijan | 1992           | MaleAge95to99       | 289        |
| Azerbaijan | 1992           | MaleAgeAbov e100    | 50         |
| Azerbaijan | 1993           | FemaleAge0to4       | 457901     |
| Azerbaijan | 1993           | FemaleAge10to14     | 373140     |
| Azerbaijan | 1993           | FemaleAge15to19     | 311755     |
| Azerbaijan | 1993           | FemaleAge20to24     | 202832     |
| Azerbaijan | 1993           | FemaleAge25to29     | 250366     |
| Azerbaijan | 1993           | FemaleAge30to34     | 293478     |
| Azerbaijan | 1993           | FemaleAge35to39     | 251564     |
| Azerbaijan | 1993           | FemaleAge40to44     | 174270     |
| Azerbaijan | 1993           | FemaleAge45to49     | 120145     |
| Azerbaijan | 1993           | FemaleAge50to54     | 146355     |
| Azerbaijan | 1993           | FemaleAge55to59     | 158678     |
| Azerbaijan | 1993           | FemaleAge5to9       | 434966     |
| Azerbaijan | 1993           | FemaleAge60to64     | 128054     |
| Azerbaijan | 1993           | FemaleAge65to69     | 93598      |
| Azerbaijan | 1993           | FemaleAge70to74     | 49706      |
| Azerbaijan | 1993           | FemaleAge75to79     | 39063      |
| Azerbaijan | 1993           | FemaleAge80to84     | 16987      |
| Azerbaijan | 1993           | FemaleAge85to89     | 3308       |
| Azerbaijan | 1993           | FemaleAge90to94     | 9379       |
| Azerbaijan | 1993           | FemaleAge95to99     | 1262       |
| Azerbaijan | 1993           | FemaleAgeAbov e100  | 353        |
| Azerbaijan | 1993           | FemaleLactAge15to19 | 12722      |
| Azerbaijan | 1993           | FemaleLactAge20to24 | 77193      |
| Azerbaijan | 1993           | FemaleLactAge25to29 | 64484      |
| Azerbaijan | 1993           | FemaleLactAge30to34 | 30879      |
| Azerbaijan | 1993           | FemaleLactAge35to39 | 9146       |
| Azerbaijan | 1993           | FemaleLactAge40to44 | 1425       |
| Azerbaijan | 1993           | FemaleLactAge45to49 | 103        |
| Azerbaijan | 1993           | FemalePregAge15to19 | 9541       |
| Azerbaijan | 1993           | FemalePregAge20to24 | 57895      |
| Azerbaijan | 1993           | FemalePregAge25to29 | 48363      |
| Azerbaijan | 1993           | FemalePregAge30to34 | 23159      |
| Azerbaijan | 1993           | FemalePregAge35to39 | 6859       |
| Azerbaijan | 1993           | FemalePregAge40to44 | 1069       |

Dietary calcium and zinc deficiency risks are decreasing but remain prevalent

| Country    | Reference year | Age/gender group    | Population |
|------------|----------------|---------------------|------------|
| Azerbaijan | 1993           | FemalePregAge45to49 | 77         |
| Azerbaijan | 1993           | MaleAge0to4         | 483400     |
| Azerbaijan | 1993           | MaleAge10to14       | 385236     |
| Azerbaijan | 1993           | MaleAge15to19       | 348341     |
| Azerbaijan | 1993           | MaleAge20to24       | 338613     |
| Azerbaijan | 1993           | MaleAge25to29       | 324004     |
| Azerbaijan | 1993           | MaleAge30to34       | 322418     |
| Azerbaijan | 1993           | MaleAge35to39       | 258095     |
| Azerbaijan | 1993           | MaleAge40to44       | 170722     |
| Azerbaijan | 1993           | MaleAge45to49       | 112411     |
| Azerbaijan | 1993           | MaleAge50to54       | 131903     |
| Azerbaijan | 1993           | MaleAge55to59       | 140834     |
| Azerbaijan | 1993           | MaleAge5to9         | 458479     |
| Azerbaijan | 1993           | MaleAge60to64       | 108986     |
| Azerbaijan | 1993           | MaleAge65to69       | 67551      |
| Azerbaijan | 1993           | MaleAge70to74       | 25588      |
| Azerbaijan | 1993           | MaleAge75to79       | 17411      |
| Azerbaijan | 1993           | MaleAge80to84       | 8291       |
| Azerbaijan | 1993           | MaleAge85to89       | 1700       |
| Azerbaijan | 1993           | MaleAge90to94       | 2773       |
| Azerbaijan | 1993           | MaleAge95to99       | 280        |
| Azerbaijan | 1993           | MaleAgeAbov e100    | 45         |
| Azerbaijan | 1994           | FemaleAge0to4       | 449079     |
| Azerbaijan | 1994           | FemaleAge10to14     | 385243     |
| Azerbaijan | 1994           | FemaleAge15to19     | 315223     |
| Azerbaijan | 1994           | FemaleAge20to24     | 199028     |
| Azerbaijan | 1994           | FemaleAge25to29     | 244787     |
| Azerbaijan | 1994           | FemaleAge30to34     | 306192     |
| Azerbaijan | 1994           | FemaleAge35to39     | 268195     |
| Azerbaijan | 1994           | FemaleAge40to44     | 193566     |
| Azerbaijan | 1994           | FemaleAge45to49     | 120590     |
| Azerbaijan | 1994           | FemaleAge50to54     | 134967     |
| Azerbaijan | 1994           | FemaleAge55to59     | 161881     |
| Azerbaijan | 1994           | FemaleAge5to9       | 445770     |
| Azerbaijan | 1994           | FemaleAge60to64     | 129367     |
| Azerbaijan | 1994           | FemaleAge65to69     | 101031     |
| Azerbaijan | 1994           | FemaleAge70to74     | 50818      |
| Azerbaijan | 1994           | FemaleAge75to79     | 35765      |
| Azerbaijan | 1994           | FemaleAge80to84     | 21358      |
| Azerbaijan | 1994           | FemaleAge85to89     | 954        |
| Azerbaijan | 1994           | FemaleAge90to94     | 8288       |
| Azerbaijan | 1994           | FemaleAge95to99     | 1359       |
| Azerbaijan | 1994           | FemaleAgeAbov e100  | 283        |
| Azerbaijan | 1994           | FemaleLactAge15to19 | 12722      |
| Azerbaijan | 1994           | FemaleLactAge20to24 | 77193      |
| Azerbaijan | 1994           | FemaleLactAge25to29 | 64484      |
| Azerbaijan | 1994           | FemaleLactAge30to34 | 30879      |
| Azerbaijan | 1994           | FemaleLactAge35to39 | 9146       |
| Azerbaijan | 1994           | FemaleLactAge40to44 | 1425       |
| Azerbaijan | 1994           | FemaleLactAge45to49 | 103        |
| Azerbaijan | 1994           | FemalePregAge15to19 | 9541       |
| Azerbaijan | 1994           | FemalePregAge20to24 | 57895      |
| Azerbaijan | 1994           | FemalePregAge25to29 | 48363      |
| Azerbaijan | 1994           | FemalePregAge30to34 | 23159      |
| Azerbaijan | 1994           | FemalePregAge35to39 | 6859       |
| Azerbaijan | 1994           | FemalePregAge40to44 | 1069       |
| Azerbaijan | 1994           | FemalePregAge45to49 | 77         |
| Azerbaijan | 1994           | MaleAge0to4         | 473484     |
| Azerbaijan | 1994           | MaleAge10to14       | 398987     |
| Azerbaijan | 1994           | MaleAge15to19       | 344165     |
| Azerbaijan | 1994           | MaleAge20to24       | 341649     |
| Azerbaijan | 1994           | MaleAge25to29       | 317179     |
| Azerbaijan | 1994           | MaleAge30to34       | 330727     |
| Azerbaijan | 1994           | MaleAge35to39       | 272826     |
| Azerbaijan | 1994           | MaleAge40to44       | 189773     |
| Azerbaijan | 1994           | MaleAge45to49       | 113360     |
| Azerbaijan | 1994           | MaleAge50to54       | 121885     |
| Azerbaijan | 1994           | MaleAge55to59       | 142168     |
| Azerbaijan | 1994           | MaleAge5to9         | 469225     |
| Azerbaijan | 1994           | MaleAge60to64       | 111268     |
| Azerbaijan | 1994           | MaleAge65to69       | 75546      |
| Azerbaijan | 1994           | MaleAge70to74       | 27476      |
| Azerbaijan | 1994           | MaleAge75to79       | 15848      |
| Azerbaijan | 1994           | MaleAge80to84       | 9092       |
| Azerbaijan | 1994           | MaleAge85to89       | 1105       |
| Azerbaijan | 1994           | MaleAge90to94       | 2358       |
| Azerbaijan | 1994           | MaleAge95to99       | 309        |
| Azerbaijan | 1994           | MaleAgeAbov e100    | 39         |
| Azerbaijan | 1995           | FemaleAge0to4       | 436000     |
| Azerbaijan | 1995           | FemaleAge10to14     | 397875     |
| Azerbaijan | 1995           | FemaleAge15to19     | 320719     |
| Azerbaijan | 1995           | FemaleAge20to24     | 196049     |
| Azerbaijan | 1995           | FemaleAge25to29     | 238900     |
| Azerbaijan | 1995           | FemaleAge30to34     | 314061     |
| Azerbaijan | 1995           | FemaleAge35to39     | 285399     |
| Azerbaijan | 1995           | FemaleAge40to44     | 212416     |
| Azerbaijan | 1995           | FemaleAge45to49     | 125920     |
| Azerbaijan | 1995           | FemaleAge50to54     | 125237     |

Dietary calcium and zinc deficiency risks are decreasing but remain prevalent

| Country    | Reference year | Age/gender group    | Population |
|------------|----------------|---------------------|------------|
| Azerbaijan | 1995           | FemaleAge55to59     | 160543     |
| Azerbaijan | 1995           | FemaleAge5to9       | 453484     |
| Azerbaijan | 1995           | FemaleAge60to64     | 132583     |
| Azerbaijan | 1995           | FemaleAge65to69     | 106604     |
| Azerbaijan | 1995           | FemaleAge70to74     | 53966      |
| Azerbaijan | 1995           | FemaleAge75to79     | 33471      |
| Azerbaijan | 1995           | FemaleAge80to84     | 23741      |
| Azerbaijan | 1995           | FemaleAge85to89     | 166        |
| Azerbaijan | 1995           | FemaleAge90to94     | 5799       |
| Azerbaijan | 1995           | FemaleAge95to99     | 1283       |
| Azerbaijan | 1995           | FemaleAgeAbove100   | 228        |
| Azerbaijan | 1995           | FemaleLactAge15to19 | 12722      |
| Azerbaijan | 1995           | FemaleLactAge20to24 | 77193      |
| Azerbaijan | 1995           | FemaleLactAge25to29 | 64484      |
| Azerbaijan | 1995           | FemaleLactAge30to34 | 30879      |
| Azerbaijan | 1995           | FemaleLactAge35to39 | 9146       |
| Azerbaijan | 1995           | FemaleLactAge40to44 | 1425       |
| Azerbaijan | 1995           | FemaleLactAge45to49 | 103        |
| Azerbaijan | 1995           | FemalePregAge15to19 | 9541       |
| Azerbaijan | 1995           | FemalePregAge20to24 | 57895      |
| Azerbaijan | 1995           | FemalePregAge25to29 | 48363      |
| Azerbaijan | 1995           | FemalePregAge30to34 | 23159      |
| Azerbaijan | 1995           | FemalePregAge35to39 | 6859       |
| Azerbaijan | 1995           | FemalePregAge40to44 | 1069       |
| Azerbaijan | 1995           | FemalePregAge45to49 | 77         |
| Azerbaijan | 1995           | MaleAge0to4         | 460351     |
| Azerbaijan | 1995           | MaleAge10to14       | 412835     |
| Azerbaijan | 1995           | MaleAge15to19       | 345008     |
| Azerbaijan | 1995           | MaleAge20to24       | 340750     |
| Azerbaijan | 1995           | MaleAge25to29       | 312563     |
| Azerbaijan | 1995           | MaleAge30to34       | 334086     |
| Azerbaijan | 1995           | MaleAge35to39       | 287163     |
| Azerbaijan | 1995           | MaleAge40to44       | 208042     |
| Azerbaijan | 1995           | MaleAge45to49       | 119144     |
| Azerbaijan | 1995           | MaleAge50to54       | 113413     |
| Azerbaijan | 1995           | MaleAge55to59       | 139828     |
| Azerbaijan | 1995           | MaleAge5to9         | 476530     |
| Azerbaijan | 1995           | MaleAge60to64       | 114338     |
| Azerbaijan | 1995           | MaleAge65to69       | 81681      |
| Azerbaijan | 1995           | MaleAge70to74       | 31267      |
| Azerbaijan | 1995           | MaleAge75to79       | 14844      |
| Azerbaijan | 1995           | MaleAge80to84       | 8865       |
| Azerbaijan | 1995           | MaleAge85to89       | 920        |
| Azerbaijan | 1995           | MaleAge90to94       | 1516       |
| Azerbaijan | 1995           | MaleAge95to99       | 268        |
| Azerbaijan | 1995           | MaleAgeAbove100     | 35         |
| Azerbaijan | 1996           | FemaleAge0to4       | 417606     |
| Azerbaijan | 1996           | FemaleAge10to14     | 410984     |
| Azerbaijan | 1996           | FemaleAge15to19     | 323399     |
| Azerbaijan | 1996           | FemaleAge20to24     | 229503     |
| Azerbaijan | 1996           | FemaleAge25to29     | 269449     |
| Azerbaijan | 1996           | FemaleAge30to34     | 330957     |
| Azerbaijan | 1996           | FemaleAge35to39     | 302431     |
| Azerbaijan | 1996           | FemaleAge40to44     | 230233     |
| Azerbaijan | 1996           | FemaleAge45to49     | 135250     |
| Azerbaijan | 1996           | FemaleAge50to54     | 115944     |
| Azerbaijan | 1996           | FemaleAge55to59     | 154019     |
| Azerbaijan | 1996           | FemaleAge5to9       | 458540     |
| Azerbaijan | 1996           | FemaleAge60to64     | 136278     |
| Azerbaijan | 1996           | FemaleAge65to69     | 109820     |
| Azerbaijan | 1996           | FemaleAge70to74     | 59161      |
| Azerbaijan | 1996           | FemaleAge75to79     | 32256      |
| Azerbaijan | 1996           | FemaleAge80to84     | 24061      |
| Azerbaijan | 1996           | FemaleAge85to89     | 2652       |
| Azerbaijan | 1996           | FemaleAge90to94     | 4029       |
| Azerbaijan | 1996           | FemaleAge95to99     | 1545       |
| Azerbaijan | 1996           | FemaleAgeAbove100   | 193        |
| Azerbaijan | 1996           | FemaleLactAge15to19 | 15323      |
| Azerbaijan | 1996           | FemaleLactAge20to24 | 56826      |
| Azerbaijan | 1996           | FemaleLactAge25to29 | 43486      |
| Azerbaijan | 1996           | FemaleLactAge30to34 | 23258      |
| Azerbaijan | 1996           | FemaleLactAge35to39 | 9551       |
| Azerbaijan | 1996           | FemaleLactAge40to44 | 1703       |
| Azerbaijan | 1996           | FemaleLactAge45to49 | 139        |
| Azerbaijan | 1996           | FemalePregAge15to19 | 11492      |
| Azerbaijan | 1996           | FemalePregAge20to24 | 42620      |
| Azerbaijan | 1996           | FemalePregAge25to29 | 32614      |
| Azerbaijan | 1996           | FemalePregAge30to34 | 17443      |
| Azerbaijan | 1996           | FemalePregAge35to39 | 7163       |
| Azerbaijan | 1996           | FemalePregAge40to44 | 1277       |
| Azerbaijan | 1996           | FemalePregAge45to49 | 104        |
| Azerbaijan | 1996           | MaleAge0to4         | 442196     |
| Azerbaijan | 1996           | MaleAge10to14       | 427275     |
| Azerbaijan | 1996           | MaleAge15to19       | 348846     |
| Azerbaijan | 1996           | MaleAge20to24       | 333783     |
| Azerbaijan | 1996           | MaleAge25to29       | 309032     |
| Azerbaijan | 1996           | MaleAge30to34       | 334851     |
| Azerbaijan | 1996           | MaleAge35to39       | 302922     |

Dietary calcium and zinc deficiency risks are decreasing but remain prevalent

| Country    | Reference year | Age/gender group    | Population |
|------------|----------------|---------------------|------------|
| Azerbaijan | 1996           | MaleAge40to44       | 225854     |
| Azerbaijan | 1996           | MaleAge45to49       | 129006     |
| Azerbaijan | 1996           | MaleAge50to54       | 105491     |
| Azerbaijan | 1996           | MaleAge55to59       | 133306     |
| Azerbaijan | 1996           | MaleAge5to9         | 481860     |
| Azerbaijan | 1996           | MaleAge60to64       | 117203     |
| Azerbaijan | 1996           | MaleAge65to69       | 85919      |
| Azerbaijan | 1996           | MaleAge70to74       | 36744      |
| Azerbaijan | 1996           | MaleAge75to79       | 14645      |
| Azerbaijan | 1996           | MaleAge80to84       | 8877       |
| Azerbaijan | 1996           | MaleAge85to89       | 1685       |
| Azerbaijan | 1996           | MaleAge90to94       | 1109       |
| Azerbaijan | 1996           | MaleAge95to99       | 327        |
| Azerbaijan | 1996           | MaleAgeAbov e100    | 32         |
| Azerbaijan | 1997           | FemaleAge0to4       | 395774     |
| Azerbaijan | 1997           | FemaleAge10to14     | 424501     |
| Azerbaijan | 1997           | FemaleAge15to19     | 332680     |
| Azerbaijan | 1997           | FemaleAge20to24     | 228632     |
| Azerbaijan | 1997           | FemaleAge25to29     | 263273     |
| Azerbaijan | 1997           | FemaleAge30to34     | 329307     |
| Azerbaijan | 1997           | FemaleAge35to39     | 320278     |
| Azerbaijan | 1997           | FemaleAge40to44     | 248098     |
| Azerbaijan | 1997           | FemaleAge45to49     | 150049     |
| Azerbaijan | 1997           | FemaleAge50to54     | 108753     |
| Azerbaijan | 1997           | FemaleAge55to59     | 143131     |
| Azerbaijan | 1997           | FemaleAge5to9       | 458864     |
| Azerbaijan | 1997           | FemaleAge60to64     | 141409     |
| Azerbaijan | 1997           | FemaleAge65to69     | 111304     |
| Azerbaijan | 1997           | FemaleAge70to74     | 66067      |
| Azerbaijan | 1997           | FemaleAge75to79     | 31298      |
| Azerbaijan | 1997           | FemaleAge80to84     | 22678      |
| Azerbaijan | 1997           | FemaleAge85to89     | 5737       |
| Azerbaijan | 1997           | FemaleAge90to94     | 2272       |
| Azerbaijan | 1997           | FemaleAge95to99     | 2230       |
| Azerbaijan | 1997           | FemaleAgeAbov e100  | 174        |
| Azerbaijan | 1997           | FemaleLactAge15to19 | 15323      |
| Azerbaijan | 1997           | FemaleLactAge20to24 | 56826      |
| Azerbaijan | 1997           | FemaleLactAge25to29 | 43486      |
| Azerbaijan | 1997           | FemaleLactAge30to34 | 23258      |
| Azerbaijan | 1997           | FemaleLactAge35to39 | 9551       |
| Azerbaijan | 1997           | FemaleLactAge40to44 | 1703       |
| Azerbaijan | 1997           | FemaleLactAge45to49 | 139        |
| Azerbaijan | 1997           | FemalePregAge15to19 | 11492      |
| Azerbaijan | 1997           | FemalePregAge20to24 | 42620      |
| Azerbaijan | 1997           | FemalePregAge25to29 | 32614      |
| Azerbaijan | 1997           | FemalePregAge30to34 | 17443      |
| Azerbaijan | 1997           | FemalePregAge35to39 | 7163       |
| Azerbaijan | 1997           | FemalePregAge40to44 | 1277       |
| Azerbaijan | 1997           | FemalePregAge45to49 | 104        |
| Azerbaijan | 1997           | MaleAge0to4         | 422853     |
| Azerbaijan | 1997           | MaleAge10to14       | 441894     |
| Azerbaijan | 1997           | MaleAge15to19       | 357861     |
| Azerbaijan | 1997           | MaleAge20to24       | 324679     |
| Azerbaijan | 1997           | MaleAge25to29       | 307045     |
| Azerbaijan | 1997           | MaleAge30to34       | 328416     |
| Azerbaijan | 1997           | MaleAge35to39       | 318507     |
| Azerbaijan | 1997           | MaleAge40to44       | 243337     |
| Azerbaijan | 1997           | MaleAge45to49       | 143912     |
| Azerbaijan | 1997           | MaleAge50to54       | 99426      |
| Azerbaijan | 1997           | MaleAge55to59       | 123470     |
| Azerbaijan | 1997           | MaleAge5to9         | 481726     |
| Azerbaijan | 1997           | MaleAge60to64       | 120404     |
| Azerbaijan | 1997           | MaleAge65to69       | 88618      |
| Azerbaijan | 1997           | MaleAge70to74       | 43509      |
| Azerbaijan | 1997           | MaleAge75to79       | 14421      |
| Azerbaijan | 1997           | MaleAge80to84       | 8367       |
| Azerbaijan | 1997           | MaleAge85to89       | 2545       |
| Azerbaijan | 1997           | MaleAge90to94       | 727        |
| Azerbaijan | 1997           | MaleAge95to99       | 490        |
| Azerbaijan | 1997           | MaleAgeAbov e100    | 29         |
| Azerbaijan | 1998           | FemaleAge0to4       | 372194     |
| Azerbaijan | 1998           | FemaleAge10to14     | 437836     |
| Azerbaijan | 1998           | FemaleAge15to19     | 343873     |
| Azerbaijan | 1998           | FemaleAge20to24     | 229573     |
| Azerbaijan | 1998           | FemaleAge25to29     | 257711     |
| Azerbaijan | 1998           | FemaleAge30to34     | 323736     |
| Azerbaijan | 1998           | FemaleAge35to39     | 336780     |
| Azerbaijan | 1998           | FemaleAge40to44     | 265892     |
| Azerbaijan | 1998           | FemaleAge45to49     | 168804     |
| Azerbaijan | 1998           | FemaleAge50to54     | 104957     |
| Azerbaijan | 1998           | FemaleAge55to59     | 129485     |
| Azerbaijan | 1998           | FemaleAge5to9       | 454107     |
| Azerbaijan | 1998           | FemaleAge60to64     | 146179     |
| Azerbaijan | 1998           | FemaleAge65to69     | 112280     |
| Azerbaijan | 1998           | FemaleAge70to74     | 73514      |
| Azerbaijan | 1998           | FemaleAge75to79     | 31232      |
| Azerbaijan | 1998           | FemaleAge80to84     | 20290      |
| Azerbaijan | 1998           | FemaleAge85to89     | 8723       |



Dietary calcium and zinc deficiency risks are decreasing but remain prevalent

| Country    | Reference year | Age/gender group    | Population |
|------------|----------------|---------------------|------------|
| Azerbaijan | 1998           | FemaleAge90to94     | 897        |
| Azerbaijan | 1998           | FemaleAge95to99     | 2589       |
| Azerbaijan | 1998           | FemaleAgeAbove100   | 167        |
| Azerbaijan | 1998           | FemaleLactAge15to19 | 15323      |
| Azerbaijan | 1998           | FemaleLactAge20to24 | 56826      |
| Azerbaijan | 1998           | FemaleLactAge25to29 | 43486      |
| Azerbaijan | 1998           | FemaleLactAge30to34 | 23258      |
| Azerbaijan | 1998           | FemaleLactAge35to39 | 9551       |
| Azerbaijan | 1998           | FemaleLactAge40to44 | 1703       |
| Azerbaijan | 1998           | FemaleLactAge45to49 | 139        |
| Azerbaijan | 1998           | FemalePregAge15to19 | 11492      |
| Azerbaijan | 1998           | FemalePregAge20to24 | 42620      |
| Azerbaijan | 1998           | FemalePregAge25to29 | 32614      |
| Azerbaijan | 1998           | FemalePregAge30to34 | 17443      |
| Azerbaijan | 1998           | FemalePregAge35to39 | 7163       |
| Azerbaijan | 1998           | FemalePregAge40to44 | 1277       |
| Azerbaijan | 1998           | FemalePregAge45to49 | 104        |
| Azerbaijan | 1998           | MaleAge0to4         | 403358     |
| Azerbaijan | 1998           | MaleAge10to14       | 456090     |
| Azerbaijan | 1998           | MaleAge15to19       | 371269     |
| Azerbaijan | 1998           | MaleAge20to24       | 316655     |
| Azerbaijan | 1998           | MaleAge25to29       | 305501     |
| Azerbaijan | 1998           | MaleAge30to34       | 316752     |
| Azerbaijan | 1998           | MaleAge35to39       | 332621     |
| Azerbaijan | 1998           | MaleAge40to44       | 260890     |
| Azerbaijan | 1998           | MaleAge45to49       | 162461     |
| Azerbaijan | 1998           | MaleAge50to54       | 96522      |
| Azerbaijan | 1998           | MaleAge55to59       | 111798     |
| Azerbaijan | 1998           | MaleAge5to9         | 476137     |
| Azerbaijan | 1998           | MaleAge60to64       | 122771     |
| Azerbaijan | 1998           | MaleAge65to69       | 90649      |
| Azerbaijan | 1998           | MaleAge70to74       | 50556      |
| Azerbaijan | 1998           | MaleAge75to79       | 14766      |
| Azerbaijan | 1998           | MaleAge80to84       | 7516       |
| Azerbaijan | 1998           | MaleAge85to89       | 3284       |
| Azerbaijan | 1998           | MaleAge90to94       | 441        |
| Azerbaijan | 1998           | MaleAge95to99       | 577        |
| Azerbaijan | 1998           | MaleAgeAbove100     | 27         |
| Azerbaijan | 1999           | FemaleAge0to4       | 349563     |
| Azerbaijan | 1999           | FemaleAge10to14     | 449462     |
| Azerbaijan | 1999           | FemaleAge15to19     | 356645     |
| Azerbaijan | 1999           | FemaleAge20to24     | 232818     |
| Azerbaijan | 1999           | FemaleAge25to29     | 253085     |
| Azerbaijan | 1999           | FemaleAge30to34     | 316526     |
| Azerbaijan | 1999           | FemaleAge35to39     | 349735     |
| Azerbaijan | 1999           | FemaleAge40to44     | 284304     |
| Azerbaijan | 1999           | FemaleAge45to49     | 189214     |
| Azerbaijan | 1999           | FemaleAge50to54     | 105807     |
| Azerbaijan | 1999           | FemaleAge55to59     | 115911     |
| Azerbaijan | 1999           | FemaleAge5to9       | 444940     |
| Azerbaijan | 1999           | FemaleAge60to64     | 147867     |
| Azerbaijan | 1999           | FemaleAge65to69     | 114237     |
| Azerbaijan | 1999           | FemaleAge70to74     | 80076      |
| Azerbaijan | 1999           | FemaleAge75to79     | 32702      |
| Azerbaijan | 1999           | FemaleAge80to84     | 17803      |
| Azerbaijan | 1999           | FemaleAge85to89     | 10828      |
| Azerbaijan | 1999           | FemaleAge90to94     | 182        |
| Azerbaijan | 1999           | FemaleAge95to99     | 2155       |
| Azerbaijan | 1999           | FemaleAgeAbove100   | 164        |
| Azerbaijan | 1999           | FemaleLactAge15to19 | 15323      |
| Azerbaijan | 1999           | FemaleLactAge20to24 | 56826      |
| Azerbaijan | 1999           | FemaleLactAge25to29 | 43486      |
| Azerbaijan | 1999           | FemaleLactAge30to34 | 23258      |
| Azerbaijan | 1999           | FemaleLactAge35to39 | 9551       |
| Azerbaijan | 1999           | FemaleLactAge40to44 | 1703       |
| Azerbaijan | 1999           | FemaleLactAge45to49 | 139        |
| Azerbaijan | 1999           | FemalePregAge15to19 | 11492      |
| Azerbaijan | 1999           | FemalePregAge20to24 | 42620      |
| Azerbaijan | 1999           | FemalePregAge25to29 | 32614      |
| Azerbaijan | 1999           | FemalePregAge30to34 | 17443      |
| Azerbaijan | 1999           | FemalePregAge35to39 | 7163       |
| Azerbaijan | 1999           | FemalePregAge40to44 | 1277       |
| Azerbaijan | 1999           | FemalePregAge45to49 | 104        |
| Azerbaijan | 1999           | MaleAge0to4         | 385031     |
| Azerbaijan | 1999           | MaleAge10to14       | 468676     |
| Azerbaijan | 1999           | MaleAge15to19       | 387567     |
| Azerbaijan | 1999           | MaleAge20to24       | 313458     |
| Azerbaijan | 1999           | MaleAge25to29       | 302419     |
| Azerbaijan | 1999           | MaleAge30to34       | 303958     |
| Azerbaijan | 1999           | MaleAge35to39       | 342924     |
| Azerbaijan | 1999           | MaleAge40to44       | 279138     |
| Azerbaijan | 1999           | MaleAge45to49       | 182677     |
| Azerbaijan | 1999           | MaleAge50to54       | 98175      |
| Azerbaijan | 1999           | MaleAge55to59       | 100604     |
| Azerbaijan | 1999           | MaleAge5to9         | 466538     |
| Azerbaijan | 1999           | MaleAge60to64       | 122622     |
| Azerbaijan | 1999           | MaleAge65to69       | 92990      |
| Azerbaijan | 1999           | MaleAge70to74       | 56765      |

Dietary calcium and zinc deficiency risks are decreasing but remain prevalent

| Country    | Reference year | Age/gender group    | Population |
|------------|----------------|---------------------|------------|
| Azerbaijan | 1999           | MaleAge75to79       | 16352      |
| Azerbaijan | 1999           | MaleAge80to84       | 6576       |
| Azerbaijan | 1999           | MaleAge85to89       | 3651       |
| Azerbaijan | 1999           | MaleAge90to94       | 291        |
| Azerbaijan | 1999           | MaleAge95to99       | 474        |
| Azerbaijan | 1999           | MaleAgeAbov e100    | 26         |
| Bangladesh | 1992           | FemaleAge0to4       | 8202784    |
| Bangladesh | 1992           | FemaleAge10to14     | 6900276    |
| Bangladesh | 1992           | FemaleAge15to19     | 4307762    |
| Bangladesh | 1992           | FemaleAge20to24     | 3085566    |
| Bangladesh | 1992           | FemaleAge25to29     | 2960010    |
| Bangladesh | 1992           | FemaleAge30to34     | 2640199    |
| Bangladesh | 1992           | FemaleAge35to39     | 2087133    |
| Bangladesh | 1992           | FemaleAge40to44     | 1962574    |
| Bangladesh | 1992           | FemaleAge45to49     | 1951585    |
| Bangladesh | 1992           | FemaleAge50to54     | 1653580    |
| Bangladesh | 1992           | FemaleAge55to59     | 1286123    |
| Bangladesh | 1992           | FemaleAge5to9       | 7635262    |
| Bangladesh | 1992           | FemaleAge60to64     | 1024462    |
| Bangladesh | 1992           | FemaleAge65to69     | 791246     |
| Bangladesh | 1992           | FemaleAge70to74     | 553523     |
| Bangladesh | 1992           | FemaleAge75to79     | 344455     |
| Bangladesh | 1992           | FemaleAge80to84     | 177831     |
| Bangladesh | 1992           | FemaleAge85to89     | 70283      |
| Bangladesh | 1992           | FemaleAge90to94     | 20089      |
| Bangladesh | 1992           | FemaleAge95to99     | 3044       |
| Bangladesh | 1992           | FemaleAgeAbov e100  | 239        |
| Bangladesh | 1992           | FemaleLactAge15to19 | 938037     |
| Bangladesh | 1992           | FemaleLactAge20to24 | 1187426    |
| Bangladesh | 1992           | FemaleLactAge25to29 | 861253     |
| Bangladesh | 1992           | FemaleLactAge30to34 | 459273     |
| Bangladesh | 1992           | FemaleLactAge35to39 | 208351     |
| Bangladesh | 1992           | FemaleLactAge40to44 | 66887      |
| Bangladesh | 1992           | FemaleLactAge45to49 | 14574      |
| Bangladesh | 1992           | FemalePregAge15to19 | 703528     |
| Bangladesh | 1992           | FemalePregAge20to24 | 890569     |
| Bangladesh | 1992           | FemalePregAge25to29 | 645940     |
| Bangladesh | 1992           | FemalePregAge30to34 | 344455     |
| Bangladesh | 1992           | FemalePregAge35to39 | 156263     |
| Bangladesh | 1992           | FemalePregAge40to44 | 50166      |
| Bangladesh | 1992           | FemalePregAge45to49 | 10930      |
| Bangladesh | 1992           | MaleAge0to4         | 8536884    |
| Bangladesh | 1992           | MaleAge10to14       | 7176683    |
| Bangladesh | 1992           | MaleAge15to19       | 6180408    |
| Bangladesh | 1992           | MaleAge20to24       | 5454657    |
| Bangladesh | 1992           | MaleAge25to29       | 4819465    |
| Bangladesh | 1992           | MaleAge30to34       | 3859463    |
| Bangladesh | 1992           | MaleAge35to39       | 2918885    |
| Bangladesh | 1992           | MaleAge40to44       | 2364266    |
| Bangladesh | 1992           | MaleAge45to49       | 2117448    |
| Bangladesh | 1992           | MaleAge50to54       | 1848130    |
| Bangladesh | 1992           | MaleAge55to59       | 1502809    |
| Bangladesh | 1992           | MaleAge5to9         | 7962460    |
| Bangladesh | 1992           | MaleAge60to64       | 1182831    |
| Bangladesh | 1992           | MaleAge65to69       | 905202     |
| Bangladesh | 1992           | MaleAge70to74       | 646738     |
| Bangladesh | 1992           | MaleAge75to79       | 412877     |
| Bangladesh | 1992           | MaleAge80to84       | 223962     |
| Bangladesh | 1992           | MaleAge85to89       | 92652      |
| Bangladesh | 1992           | MaleAge90to94       | 25442      |
| Bangladesh | 1992           | MaleAge95to99       | 3740       |
| Bangladesh | 1992           | MaleAgeAbov e100    | 287        |
| Bangladesh | 1993           | FemaleAge0to4       | 8209943    |
| Bangladesh | 1993           | FemaleAge10to14     | 7039159    |
| Bangladesh | 1993           | FemaleAge15to19     | 4484457    |
| Bangladesh | 1993           | FemaleAge20to24     | 3182981    |
| Bangladesh | 1993           | FemaleAge25to29     | 3089697    |
| Bangladesh | 1993           | FemaleAge30to34     | 2854288    |
| Bangladesh | 1993           | FemaleAge35to39     | 2239878    |
| Bangladesh | 1993           | FemaleAge40to44     | 1965542    |
| Bangladesh | 1993           | FemaleAge45to49     | 1964446    |
| Bangladesh | 1993           | FemaleAge50to54     | 1723026    |
| Bangladesh | 1993           | FemaleAge55to59     | 1331518    |
| Bangladesh | 1993           | FemaleAge5to9       | 7722533    |
| Bangladesh | 1993           | FemaleAge60to64     | 1050626    |
| Bangladesh | 1993           | FemaleAge65to69     | 814131     |
| Bangladesh | 1993           | FemaleAge70to74     | 572844     |
| Bangladesh | 1993           | FemaleAge75to79     | 354730     |
| Bangladesh | 1993           | FemaleAge80to84     | 184915     |
| Bangladesh | 1993           | FemaleAge85to89     | 72302      |
| Bangladesh | 1993           | FemaleAge90to94     | 21448      |
| Bangladesh | 1993           | FemaleAge95to99     | 3523       |
| Bangladesh | 1993           | FemaleAgeAbov e100  | 261        |
| Bangladesh | 1993           | FemaleLactAge15to19 | 938037     |
| Bangladesh | 1993           | FemaleLactAge20to24 | 1187426    |
| Bangladesh | 1993           | FemaleLactAge25to29 | 861253     |
| Bangladesh | 1993           | FemaleLactAge30to34 | 459273     |
| Bangladesh | 1993           | FemaleLactAge35to39 | 208351     |

Dietary calcium and zinc deficiency risks are decreasing but remain prevalent

| Country    | Reference year | Age/gender group    | Population |
|------------|----------------|---------------------|------------|
| Bangladesh | 1993           | FemaleLactAge40to44 | 66887      |
| Bangladesh | 1993           | FemaleLactAge45to49 | 14574      |
| Bangladesh | 1993           | FemalePregAge15to19 | 703528     |
| Bangladesh | 1993           | FemalePregAge20to24 | 890569     |
| Bangladesh | 1993           | FemalePregAge25to29 | 645940     |
| Bangladesh | 1993           | FemalePregAge30to34 | 344455     |
| Bangladesh | 1993           | FemalePregAge35to39 | 156263     |
| Bangladesh | 1993           | FemalePregAge40to44 | 50166      |
| Bangladesh | 1993           | FemalePregAge45to49 | 10930      |
| Bangladesh | 1993           | MaleAge0to4         | 8548108    |
| Bangladesh | 1993           | MaleAge10to14       | 7324671    |
| Bangladesh | 1993           | MaleAge15to19       | 6348997    |
| Bangladesh | 1993           | MaleAge20to24       | 5520651    |
| Bangladesh | 1993           | MaleAge25to29       | 4946498    |
| Bangladesh | 1993           | MaleAge30to34       | 4061214    |
| Bangladesh | 1993           | MaleAge35to39       | 3071096    |
| Bangladesh | 1993           | MaleAge40to44       | 2430693    |
| Bangladesh | 1993           | MaleAge45to49       | 2138964    |
| Bangladesh | 1993           | MaleAge50to54       | 1896291    |
| Bangladesh | 1993           | MaleAge55to59       | 1547998    |
| Bangladesh | 1993           | MaleAge5to9         | 8056571    |
| Bangladesh | 1993           | MaleAge60to64       | 1215567    |
| Bangladesh | 1993           | MaleAge65to69       | 925929     |
| Bangladesh | 1993           | MaleAge70to74       | 663538     |
| Bangladesh | 1993           | MaleAge75to79       | 423108     |
| Bangladesh | 1993           | MaleAge80to84       | 229744     |
| Bangladesh | 1993           | MaleAge85to89       | 96171      |
| Bangladesh | 1993           | MaleAge90to94       | 27214      |
| Bangladesh | 1993           | MaleAge95to99       | 4304       |
| Bangladesh | 1993           | MaleAgeAbove100     | 315        |
| Bangladesh | 1994           | FemaleAge0to4       | 8209777    |
| Bangladesh | 1994           | FemaleAge10to14     | 7172972    |
| Bangladesh | 1994           | FemaleAge15to19     | 4661580    |
| Bangladesh | 1994           | FemaleAge20to24     | 3292532    |
| Bangladesh | 1994           | FemaleAge25to29     | 3209963    |
| Bangladesh | 1994           | FemaleAge30to34     | 3057423    |
| Bangladesh | 1994           | FemaleAge35to39     | 2411450    |
| Bangladesh | 1994           | FemaleAge40to44     | 1994587    |
| Bangladesh | 1994           | FemaleAge45to49     | 1970842    |
| Bangladesh | 1994           | FemaleAge50to54     | 1783361    |
| Bangladesh | 1994           | FemaleAge55to59     | 1383789    |
| Bangladesh | 1994           | FemaleAge5to9       | 7790451    |
| Bangladesh | 1994           | FemaleAge60to64     | 1081055    |
| Bangladesh | 1994           | FemaleAge65to69     | 838763     |
| Bangladesh | 1994           | FemaleAge70to74     | 593326     |
| Bangladesh | 1994           | FemaleAge75to79     | 366609     |
| Bangladesh | 1994           | FemaleAge80to84     | 191124     |
| Bangladesh | 1994           | FemaleAge85to89     | 73022      |
| Bangladesh | 1994           | FemaleAge90to94     | 21689      |
| Bangladesh | 1994           | FemaleAge95to99     | 3773       |
| Bangladesh | 1994           | FemaleAgeAbove100   | 285        |
| Bangladesh | 1994           | FemaleLactAge15to19 | 938037     |
| Bangladesh | 1994           | FemaleLactAge20to24 | 1187426    |
| Bangladesh | 1994           | FemaleLactAge25to29 | 861253     |
| Bangladesh | 1994           | FemaleLactAge30to34 | 459273     |
| Bangladesh | 1994           | FemaleLactAge35to39 | 208351     |
| Bangladesh | 1994           | FemaleLactAge40to44 | 66887      |
| Bangladesh | 1994           | FemaleLactAge45to49 | 14574      |
| Bangladesh | 1994           | FemalePregAge15to19 | 703528     |
| Bangladesh | 1994           | FemalePregAge20to24 | 890569     |
| Bangladesh | 1994           | FemalePregAge25to29 | 645940     |
| Bangladesh | 1994           | FemalePregAge30to34 | 344455     |
| Bangladesh | 1994           | FemalePregAge35to39 | 156263     |
| Bangladesh | 1994           | FemalePregAge40to44 | 50166      |
| Bangladesh | 1994           | FemalePregAge45to49 | 10930      |
| Bangladesh | 1994           | MaleAge0to4         | 8551462    |
| Bangladesh | 1994           | MaleAge10to14       | 7471651    |
| Bangladesh | 1994           | MaleAge15to19       | 6522785    |
| Bangladesh | 1994           | MaleAge20to24       | 5598039    |
| Bangladesh | 1994           | MaleAge25to29       | 5058450    |
| Bangladesh | 1994           | MaleAge30to34       | 4253140    |
| Bangladesh | 1994           | MaleAge35to39       | 3237874    |
| Bangladesh | 1994           | MaleAge40to44       | 2514280    |
| Bangladesh | 1994           | MaleAge45to49       | 2167001    |
| Bangladesh | 1994           | MaleAge50to54       | 1940103    |
| Bangladesh | 1994           | MaleAge55to59       | 1595705    |
| Bangladesh | 1994           | MaleAge5to9         | 8130262    |
| Bangladesh | 1994           | MaleAge60to64       | 1252253    |
| Bangladesh | 1994           | MaleAge65to69       | 949819     |
| Bangladesh | 1994           | MaleAge70to74       | 681473     |
| Bangladesh | 1994           | MaleAge75to79       | 434146     |
| Bangladesh | 1994           | MaleAge80to84       | 234932     |
| Bangladesh | 1994           | MaleAge85to89       | 97384      |
| Bangladesh | 1994           | MaleAge90to94       | 27726      |
| Bangladesh | 1994           | MaleAge95to99       | 4636       |
| Bangladesh | 1994           | MaleAgeAbove100     | 345        |
| Bangladesh | 1995           | FemaleAge0to4       | 8214660    |
| Bangladesh | 1995           | FemaleAge10to14     | 7298182    |

Dietary calcium and zinc deficiency risks are decreasing but remain prevalent

| Country    | Reference year | Age/gender group    | Population |
|------------|----------------|---------------------|------------|
| Bangladesh | 1995           | FemaleAge15to19     | 4832049    |
| Bangladesh | 1995           | FemaleAge20to24     | 3422647    |
| Bangladesh | 1995           | FemaleAge25to29     | 3325627    |
| Bangladesh | 1995           | FemaleAge30to34     | 3241729    |
| Bangladesh | 1995           | FemaleAge35to39     | 2595441    |
| Bangladesh | 1995           | FemaleAge40to44     | 2058654    |
| Bangladesh | 1995           | FemaleAge45to49     | 1974883    |
| Bangladesh | 1995           | FemaleAge50to54     | 1829689    |
| Bangladesh | 1995           | FemaleAge55to59     | 1442683    |
| Bangladesh | 1995           | FemaleAge5to9       | 7838412    |
| Bangladesh | 1995           | FemaleAge60to64     | 1117103    |
| Bangladesh | 1995           | FemaleAge65to69     | 865020     |
| Bangladesh | 1995           | FemaleAge70to74     | 615072     |
| Bangladesh | 1995           | FemaleAge75to79     | 380557     |
| Bangladesh | 1995           | FemaleAge80to84     | 196792     |
| Bangladesh | 1995           | FemaleAge85to89     | 72931      |
| Bangladesh | 1995           | FemaleAge90to94     | 20411      |
| Bangladesh | 1995           | FemaleAge95to99     | 3361       |
| Bangladesh | 1995           | FemaleAgeAbov e100  | 312        |
| Bangladesh | 1995           | FemaleLactAge15to19 | 938037     |
| Bangladesh | 1995           | FemaleLactAge20to24 | 1187426    |
| Bangladesh | 1995           | FemaleLactAge25to29 | 861253     |
| Bangladesh | 1995           | FemaleLactAge30to34 | 459273     |
| Bangladesh | 1995           | FemaleLactAge35to39 | 208351     |
| Bangladesh | 1995           | FemaleLactAge40to44 | 66887      |
| Bangladesh | 1995           | FemaleLactAge45to49 | 14574      |
| Bangladesh | 1995           | FemalePregAge15to19 | 703528     |
| Bangladesh | 1995           | FemalePregAge20to24 | 890569     |
| Bangladesh | 1995           | FemalePregAge25to29 | 645940     |
| Bangladesh | 1995           | FemalePregAge30to34 | 344455     |
| Bangladesh | 1995           | FemalePregAge35to39 | 156263     |
| Bangladesh | 1995           | FemalePregAge40to44 | 50166      |
| Bangladesh | 1995           | FemalePregAge45to49 | 10930      |
| Bangladesh | 1995           | MaleAge0to4         | 8559452    |
| Bangladesh | 1995           | MaleAge10to14       | 7611784    |
| Bangladesh | 1995           | MaleAge15to19       | 6694854    |
| Bangladesh | 1995           | MaleAge20to24       | 5700665    |
| Bangladesh | 1995           | MaleAge25to29       | 5156890    |
| Bangladesh | 1995           | MaleAge30to34       | 4428154    |
| Bangladesh | 1995           | MaleAge35to39       | 3416821    |
| Bangladesh | 1995           | MaleAge40to44       | 2617457    |
| Bangladesh | 1995           | MaleAge45to49       | 2206032    |
| Bangladesh | 1995           | MaleAge50to54       | 1978144    |
| Bangladesh | 1995           | MaleAge55to59       | 1645380    |
| Bangladesh | 1995           | MaleAge5to9         | 8184387    |
| Bangladesh | 1995           | MaleAge60to64       | 1293155    |
| Bangladesh | 1995           | MaleAge65to69       | 977554     |
| Bangladesh | 1995           | MaleAge70to74       | 700727     |
| Bangladesh | 1995           | MaleAge75to79       | 446431     |
| Bangladesh | 1995           | MaleAge80to84       | 239892     |
| Bangladesh | 1995           | MaleAge85to89       | 96817      |
| Bangladesh | 1995           | MaleAge90to94       | 26576      |
| Bangladesh | 1995           | MaleAge95to99       | 4167       |
| Bangladesh | 1995           | MaleAgeAbov e100    | 378        |
| Bangladesh | 1996           | FemaleAge0to4       | 8228444    |
| Bangladesh | 1996           | FemaleAge10to14     | 7405068    |
| Bangladesh | 1996           | FemaleAge15to19     | 5078768    |
| Bangladesh | 1996           | FemaleAge20to24     | 3581972    |
| Bangladesh | 1996           | FemaleAge25to29     | 3466485    |
| Bangladesh | 1996           | FemaleAge30to34     | 3405882    |
| Bangladesh | 1996           | FemaleAge35to39     | 2800806    |
| Bangladesh | 1996           | FemaleAge40to44     | 2176654    |
| Bangladesh | 1996           | FemaleAge45to49     | 1988115    |
| Bangladesh | 1996           | FemaleAge50to54     | 1862626    |
| Bangladesh | 1996           | FemaleAge55to59     | 1500274    |
| Bangladesh | 1996           | FemaleAge5to9       | 7897921    |
| Bangladesh | 1996           | FemaleAge60to64     | 1150690    |
| Bangladesh | 1996           | FemaleAge65to69     | 883863     |
| Bangladesh | 1996           | FemaleAge70to74     | 632092     |
| Bangladesh | 1996           | FemaleAge75to79     | 393987     |
| Bangladesh | 1996           | FemaleAge80to84     | 205900     |
| Bangladesh | 1996           | FemaleAge85to89     | 80165      |
| Bangladesh | 1996           | FemaleAge90to94     | 22994      |
| Bangladesh | 1996           | FemaleAge95to99     | 3835       |
| Bangladesh | 1996           | FemaleAgeAbov e100  | 342        |
| Bangladesh | 1996           | FemaleLactAge15to19 | 890133     |
| Bangladesh | 1996           | FemaleLactAge20to24 | 1183416    |
| Bangladesh | 1996           | FemaleLactAge25to29 | 843702     |
| Bangladesh | 1996           | FemaleLactAge30to34 | 459812     |
| Bangladesh | 1996           | FemaleLactAge35to39 | 201251     |
| Bangladesh | 1996           | FemaleLactAge40to44 | 51989      |
| Bangladesh | 1996           | FemaleLactAge45to49 | 8297       |
| Bangladesh | 1996           | FemalePregAge15to19 | 667599     |
| Bangladesh | 1996           | FemalePregAge20to24 | 887562     |
| Bangladesh | 1996           | FemalePregAge25to29 | 632776     |
| Bangladesh | 1996           | FemalePregAge30to34 | 344859     |
| Bangladesh | 1996           | FemalePregAge35to39 | 150938     |
| Bangladesh | 1996           | FemalePregAge40to44 | 38991      |

Dietary calcium and zinc deficiency risks are decreasing but remain prevalent

| Country    | Reference year | Age/gender group    | Population |
|------------|----------------|---------------------|------------|
| Bangladesh | 1996           | FemalePregAge45to49 | 6223       |
| Bangladesh | 1996           | MaleAge0to4         | 8576913    |
| Bangladesh | 1996           | MaleAge10to14       | 7734893    |
| Bangladesh | 1996           | MaleAge15to19       | 6871958    |
| Bangladesh | 1996           | MaleAge20to24       | 5839353    |
| Bangladesh | 1996           | MaleAge25to29       | 5244387    |
| Bangladesh | 1996           | MaleAge30to34       | 4582843    |
| Bangladesh | 1996           | MaleAge35to39       | 3598673    |
| Bangladesh | 1996           | MaleAge40to44       | 2732897    |
| Bangladesh | 1996           | MaleAge45to49       | 2247667    |
| Bangladesh | 1996           | MaleAge50to54       | 2005438    |
| Bangladesh | 1996           | MaleAge55to59       | 1688635    |
| Bangladesh | 1996           | MaleAge5to9         | 8249432    |
| Bangladesh | 1996           | MaleAge60to64       | 1329018    |
| Bangladesh | 1996           | MaleAge65to69       | 1000507    |
| Bangladesh | 1996           | MaleAge70to74       | 715723     |
| Bangladesh | 1996           | MaleAge75to79       | 458930     |
| Bangladesh | 1996           | MaleAge80to84       | 249106     |
| Bangladesh | 1996           | MaleAge85to89       | 104432     |
| Bangladesh | 1996           | MaleAge90to94       | 30514      |
| Bangladesh | 1996           | MaleAge95to99       | 4734       |
| Bangladesh | 1996           | MaleAgeAbove100     | 413        |
| Bangladesh | 1997           | FemaleAge0to4       | 8229732    |
| Bangladesh | 1997           | FemaleAge10to14     | 7502989    |
| Bangladesh | 1997           | FemaleAge15to19     | 5233684    |
| Bangladesh | 1997           | FemaleAge20to24     | 3756003    |
| Bangladesh | 1997           | FemaleAge25to29     | 3569893    |
| Bangladesh | 1997           | FemaleAge30to34     | 3554084    |
| Bangladesh | 1997           | FemaleAge35to39     | 3007146    |
| Bangladesh | 1997           | FemaleAge40to44     | 2299760    |
| Bangladesh | 1997           | FemaleAge45to49     | 1988961    |
| Bangladesh | 1997           | FemaleAge50to54     | 1886123    |
| Bangladesh | 1997           | FemaleAge55to59     | 1565364    |
| Bangladesh | 1997           | FemaleAge5to9       | 7947902    |
| Bangladesh | 1997           | FemaleAge60to64     | 1188746    |
| Bangladesh | 1997           | FemaleAge65to69     | 904595     |
| Bangladesh | 1997           | FemaleAge70to74     | 650221     |
| Bangladesh | 1997           | FemaleAge75to79     | 407997     |
| Bangladesh | 1997           | FemaleAge80to84     | 213659     |
| Bangladesh | 1997           | FemaleAge85to89     | 86051      |
| Bangladesh | 1997           | FemaleAge90to94     | 24851      |
| Bangladesh | 1997           | FemaleAge95to99     | 4594       |
| Bangladesh | 1997           | FemaleAgeAbove100   | 375        |
| Bangladesh | 1997           | FemaleLactAge15to19 | 890133     |
| Bangladesh | 1997           | FemaleLactAge20to24 | 1183416    |
| Bangladesh | 1997           | FemaleLactAge25to29 | 843702     |
| Bangladesh | 1997           | FemaleLactAge30to34 | 459812     |
| Bangladesh | 1997           | FemaleLactAge35to39 | 201251     |
| Bangladesh | 1997           | FemaleLactAge40to44 | 51989      |
| Bangladesh | 1997           | FemaleLactAge45to49 | 8297       |
| Bangladesh | 1997           | FemalePregAge15to19 | 667599     |
| Bangladesh | 1997           | FemalePregAge20to24 | 887562     |
| Bangladesh | 1997           | FemalePregAge25to29 | 632776     |
| Bangladesh | 1997           | FemalePregAge30to34 | 344859     |
| Bangladesh | 1997           | FemalePregAge35to39 | 150938     |
| Bangladesh | 1997           | FemalePregAge40to44 | 38991      |
| Bangladesh | 1997           | FemalePregAge45to49 | 6223       |
| Bangladesh | 1997           | MaleAge0to4         | 8582310    |
| Bangladesh | 1997           | MaleAge10to14       | 7845437    |
| Bangladesh | 1997           | MaleAge15to19       | 7047202    |
| Bangladesh | 1997           | MaleAge20to24       | 6007599    |
| Bangladesh | 1997           | MaleAge25to29       | 5317047    |
| Bangladesh | 1997           | MaleAge30to34       | 4724493    |
| Bangladesh | 1997           | MaleAge35to39       | 3791237    |
| Bangladesh | 1997           | MaleAge40to44       | 2865797    |
| Bangladesh | 1997           | MaleAge45to49       | 2300569    |
| Bangladesh | 1997           | MaleAge50to54       | 2028549    |
| Bangladesh | 1997           | MaleAge55to59       | 1735590    |
| Bangladesh | 1997           | MaleAge5to9         | 8304326    |
| Bangladesh | 1997           | MaleAge60to64       | 1368558    |
| Bangladesh | 1997           | MaleAge65to69       | 1026729    |
| Bangladesh | 1997           | MaleAge70to74       | 731508     |
| Bangladesh | 1997           | MaleAge75to79       | 471450     |
| Bangladesh | 1997           | MaleAge80to84       | 256973     |
| Bangladesh | 1997           | MaleAge85to89       | 110120     |
| Bangladesh | 1997           | MaleAge90to94       | 33496      |
| Bangladesh | 1997           | MaleAge95to99       | 5597       |
| Bangladesh | 1997           | MaleAgeAbove100     | 451        |
| Bangladesh | 1998           | FemaleAge0to4       | 8222125    |
| Bangladesh | 1998           | FemaleAge10to14     | 7592214    |
| Bangladesh | 1998           | FemaleAge15to19     | 5378203    |
| Bangladesh | 1998           | FemaleAge20to24     | 3942810    |
| Bangladesh | 1998           | FemaleAge25to29     | 3674056    |
| Bangladesh | 1998           | FemaleAge30to34     | 3687963    |
| Bangladesh | 1998           | FemaleAge35to39     | 3216891    |
| Bangladesh | 1998           | FemaleAge40to44     | 2449038    |
| Bangladesh | 1998           | FemaleAge45to49     | 1998580    |
| Bangladesh | 1998           | FemaleAge50to54     | 1901251    |

Dietary calcium and zinc deficiency risks are decreasing but remain prevalent

| Country    | Reference year | Age/gender group    | Population |
|------------|----------------|---------------------|------------|
| Bangladesh | 1998           | FemaleAge55to59     | 1632196    |
| Bangladesh | 1998           | FemaleAge5to9       | 7985020    |
| Bangladesh | 1998           | FemaleAge60to64     | 1231661    |
| Bangladesh | 1998           | FemaleAge65to69     | 928628     |
| Bangladesh | 1998           | FemaleAge70to74     | 669474     |
| Bangladesh | 1998           | FemaleAge75to79     | 422659     |
| Bangladesh | 1998           | FemaleAge80to84     | 220757     |
| Bangladesh | 1998           | FemaleAge85to89     | 89881      |
| Bangladesh | 1998           | FemaleAge90to94     | 25998      |
| Bangladesh | 1998           | FemaleAge95to99     | 5278       |
| Bangladesh | 1998           | FemaleAgeAbove100   | 412        |
| Bangladesh | 1998           | FemaleLactAge15to19 | 890133     |
| Bangladesh | 1998           | FemaleLactAge20to24 | 1183416    |
| Bangladesh | 1998           | FemaleLactAge25to29 | 843702     |
| Bangladesh | 1998           | FemaleLactAge30to34 | 459812     |
| Bangladesh | 1998           | FemaleLactAge35to39 | 201251     |
| Bangladesh | 1998           | FemaleLactAge40to44 | 51989      |
| Bangladesh | 1998           | FemaleLactAge45to49 | 8297       |
| Bangladesh | 1998           | FemalePregAge15to19 | 667599     |
| Bangladesh | 1998           | FemalePregAge20to24 | 887562     |
| Bangladesh | 1998           | FemalePregAge25to29 | 632776     |
| Bangladesh | 1998           | FemalePregAge30to34 | 344859     |
| Bangladesh | 1998           | FemalePregAge35to39 | 150938     |
| Bangladesh | 1998           | FemalePregAge40to44 | 38991      |
| Bangladesh | 1998           | FemalePregAge45to49 | 6223       |
| Bangladesh | 1998           | MaleAge0to4         | 8577971    |
| Bangladesh | 1998           | MaleAge10to14       | 7942836    |
| Bangladesh | 1998           | MaleAge15to19       | 7215897    |
| Bangladesh | 1998           | MaleAge20to24       | 6195720    |
| Bangladesh | 1998           | MaleAge25to29       | 5385367    |
| Bangladesh | 1998           | MaleAge30to34       | 4852197    |
| Bangladesh | 1998           | MaleAge35to39       | 3985833    |
| Bangladesh | 1998           | MaleAge40to44       | 3013552    |
| Bangladesh | 1998           | MaleAge45to49       | 2367327    |
| Bangladesh | 1998           | MaleAge50to54       | 2050637    |
| Bangladesh | 1998           | MaleAge55to59       | 1783336    |
| Bangladesh | 1998           | MaleAge5to9         | 8345368    |
| Bangladesh | 1998           | MaleAge60to64       | 1411015    |
| Bangladesh | 1998           | MaleAge65to69       | 1056387    |
| Bangladesh | 1998           | MaleAge70to74       | 748841     |
| Bangladesh | 1998           | MaleAge75to79       | 484017     |
| Bangladesh | 1998           | MaleAge80to84       | 263991     |
| Bangladesh | 1998           | MaleAge85to89       | 113430     |
| Bangladesh | 1998           | MaleAge90to94       | 35216      |
| Bangladesh | 1998           | MaleAge95to99       | 6452       |
| Bangladesh | 1998           | MaleAgeAbove100     | 492        |
| Bangladesh | 1999           | FemaleAge0to4       | 8207432    |
| Bangladesh | 1999           | FemaleAge10to14     | 7671415    |
| Bangladesh | 1999           | FemaleAge15to19     | 5511449    |
| Bangladesh | 1999           | FemaleAge20to24     | 4127914    |
| Bangladesh | 1999           | FemaleAge25to29     | 3790389    |
| Bangladesh | 1999           | FemaleAge30to34     | 3812350    |
| Bangladesh | 1999           | FemaleAge35to39     | 3416603    |
| Bangladesh | 1999           | FemaleAge40to44     | 2616161    |
| Bangladesh | 1999           | FemaleAge45to49     | 2031102    |
| Bangladesh | 1999           | FemaleAge50to54     | 1910723    |
| Bangladesh | 1999           | FemaleAge55to59     | 1691854    |
| Bangladesh | 1999           | FemaleAge5to9       | 8007176    |
| Bangladesh | 1999           | FemaleAge60to64     | 1280576    |
| Bangladesh | 1999           | FemaleAge65to69     | 957446     |
| Bangladesh | 1999           | FemaleAge70to74     | 689788     |
| Bangladesh | 1999           | FemaleAge75to79     | 437822     |
| Bangladesh | 1999           | FemaleAge80to84     | 227810     |
| Bangladesh | 1999           | FemaleAge85to89     | 91538      |
| Bangladesh | 1999           | FemaleAge90to94     | 26337      |
| Bangladesh | 1999           | FemaleAge95to99     | 5476       |
| Bangladesh | 1999           | FemaleAgeAbove100   | 453        |
| Bangladesh | 1999           | FemaleLactAge15to19 | 890133     |
| Bangladesh | 1999           | FemaleLactAge20to24 | 1183416    |
| Bangladesh | 1999           | FemaleLactAge25to29 | 843702     |
| Bangladesh | 1999           | FemaleLactAge30to34 | 459812     |
| Bangladesh | 1999           | FemaleLactAge35to39 | 201251     |
| Bangladesh | 1999           | FemaleLactAge40to44 | 51989      |
| Bangladesh | 1999           | FemaleLactAge45to49 | 8297       |
| Bangladesh | 1999           | FemalePregAge15to19 | 667599     |
| Bangladesh | 1999           | FemalePregAge20to24 | 887562     |
| Bangladesh | 1999           | FemalePregAge25to29 | 632776     |
| Bangladesh | 1999           | FemalePregAge30to34 | 344859     |
| Bangladesh | 1999           | FemalePregAge35to39 | 150938     |
| Bangladesh | 1999           | FemalePregAge40to44 | 38991      |
| Bangladesh | 1999           | FemalePregAge45to49 | 6223       |
| Bangladesh | 1999           | MaleAge0to4         | 8564270    |
| Bangladesh | 1999           | MaleAge10to14       | 8026428    |
| Bangladesh | 1999           | MaleAge15to19       | 7372519    |
| Bangladesh | 1999           | MaleAge20to24       | 6386938    |
| Bangladesh | 1999           | MaleAge25to29       | 5467207    |
| Bangladesh | 1999           | MaleAge30to34       | 4964625    |
| Bangladesh | 1999           | MaleAge35to39       | 4170393    |

Dietary calcium and zinc deficiency risks are decreasing but remain prevalent

| Country    | Reference year | Age/gender group    | Population |
|------------|----------------|---------------------|------------|
| Bangladesh | 1999           | MaleAge40to44       | 3173058    |
| Bangladesh | 1999           | MaleAge45to49       | 2450244    |
| Bangladesh | 1999           | MaleAge50to54       | 2077378    |
| Bangladesh | 1999           | MaleAge55to59       | 1827115    |
| Bangladesh | 1999           | MaleAge5to9         | 8369492    |
| Bangladesh | 1999           | MaleAge60to64       | 1455560    |
| Bangladesh | 1999           | MaleAge65to69       | 1089518    |
| Bangladesh | 1999           | MaleAge70to74       | 768506     |
| Bangladesh | 1999           | MaleAge75to79       | 496566     |
| Bangladesh | 1999           | MaleAge80to84       | 270428     |
| Bangladesh | 1999           | MaleAge85to89       | 114450     |
| Bangladesh | 1999           | MaleAge90to94       | 35386      |
| Bangladesh | 1999           | MaleAge95to99       | 6841       |
| Bangladesh | 1999           | MaleAgeAbove100     | 540        |
| Belarus    | 1992           | FemaleAge0to4       | 360801     |
| Belarus    | 1992           | FemaleAge10to14     | 380008     |
| Belarus    | 1992           | FemaleAge15to19     | 334029     |
| Belarus    | 1992           | FemaleAge20to24     | 249430     |
| Belarus    | 1992           | FemaleAge25to29     | 327129     |
| Belarus    | 1992           | FemaleAge30to34     | 406541     |
| Belarus    | 1992           | FemaleAge35to39     | 392122     |
| Belarus    | 1992           | FemaleAge40to44     | 336945     |
| Belarus    | 1992           | FemaleAge45to49     | 250101     |
| Belarus    | 1992           | FemaleAge50to54     | 311002     |
| Belarus    | 1992           | FemaleAge55to59     | 339666     |
| Belarus    | 1992           | FemaleAge5to9       | 407220     |
| Belarus    | 1992           | FemaleAge60to64     | 339493     |
| Belarus    | 1992           | FemaleAge65to69     | 302361     |
| Belarus    | 1992           | FemaleAge70to74     | 174249     |
| Belarus    | 1992           | FemaleAge75to79     | 136734     |
| Belarus    | 1992           | FemaleAge80to84     | 108315     |
| Belarus    | 1992           | FemaleAge85to89     | 55228      |
| Belarus    | 1992           | FemaleAge90to94     | 21333      |
| Belarus    | 1992           | FemaleAge95to99     | 4192       |
| Belarus    | 1992           | FemaleAgeAbove100   | 584        |
| Belarus    | 1992           | FemaleLactAge15to19 | 16175      |
| Belarus    | 1992           | FemaleLactAge20to24 | 54118      |
| Belarus    | 1992           | FemaleLactAge25to29 | 31547      |
| Belarus    | 1992           | FemaleLactAge30to34 | 15343      |
| Belarus    | 1992           | FemaleLactAge35to39 | 5279       |
| Belarus    | 1992           | FemaleLactAge40to44 | 974        |
| Belarus    | 1992           | FemaleLactAge45to49 | 55         |
| Belarus    | 1992           | FemalePregAge15to19 | 12131      |
| Belarus    | 1992           | FemalePregAge20to24 | 40589      |
| Belarus    | 1992           | FemalePregAge25to29 | 23660      |
| Belarus    | 1992           | FemalePregAge30to34 | 11507      |
| Belarus    | 1992           | FemalePregAge35to39 | 3959       |
| Belarus    | 1992           | FemalePregAge40to44 | 730        |
| Belarus    | 1992           | FemalePregAge45to49 | 41         |
| Belarus    | 1992           | MaleAge0to4         | 380868     |
| Belarus    | 1992           | MaleAge10to14       | 391089     |
| Belarus    | 1992           | MaleAge15to19       | 368721     |
| Belarus    | 1992           | MaleAge20to24       | 339089     |
| Belarus    | 1992           | MaleAge25to29       | 379162     |
| Belarus    | 1992           | MaleAge30to34       | 433586     |
| Belarus    | 1992           | MaleAge35to39       | 395548     |
| Belarus    | 1992           | MaleAge40to44       | 325839     |
| Belarus    | 1992           | MaleAge45to49       | 233287     |
| Belarus    | 1992           | MaleAge50to54       | 264955     |
| Belarus    | 1992           | MaleAge55to59       | 271989     |
| Belarus    | 1992           | MaleAge5to9         | 421808     |
| Belarus    | 1992           | MaleAge60to64       | 242018     |
| Belarus    | 1992           | MaleAge65to69       | 169520     |
| Belarus    | 1992           | MaleAge70to74       | 76915      |
| Belarus    | 1992           | MaleAge75to79       | 53556      |
| Belarus    | 1992           | MaleAge80to84       | 40934      |
| Belarus    | 1992           | MaleAge85to89       | 17183      |
| Belarus    | 1992           | MaleAge90to94       | 4557       |
| Belarus    | 1992           | MaleAge95to99       | 852        |
| Belarus    | 1992           | MaleAgeAbove100     | 78         |
| Belarus    | 1993           | FemaleAge0to4       | 337553     |
| Belarus    | 1993           | FemaleAge10to14     | 388347     |
| Belarus    | 1993           | FemaleAge15to19     | 333284     |
| Belarus    | 1993           | FemaleAge20to24     | 253201     |
| Belarus    | 1993           | FemaleAge25to29     | 310816     |
| Belarus    | 1993           | FemaleAge30to34     | 401656     |
| Belarus    | 1993           | FemaleAge35to39     | 405156     |
| Belarus    | 1993           | FemaleAge40to44     | 346622     |
| Belarus    | 1993           | FemaleAge45to49     | 269337     |
| Belarus    | 1993           | FemaleAge50to54     | 276410     |
| Belarus    | 1993           | FemaleAge55to59     | 350021     |
| Belarus    | 1993           | FemaleAge5to9       | 406765     |
| Belarus    | 1993           | FemaleAge60to64     | 325597     |
| Belarus    | 1993           | FemaleAge65to69     | 314236     |
| Belarus    | 1993           | FemaleAge70to74     | 195263     |
| Belarus    | 1993           | FemaleAge75to79     | 122063     |
| Belarus    | 1993           | FemaleAge80to84     | 110941     |
| Belarus    | 1993           | FemaleAge85to89     | 53978      |

Dietary calcium and zinc deficiency risks are decreasing but remain prevalent

| Country | Reference year | Age/gender group    | Population |
|---------|----------------|---------------------|------------|
| Belarus | 1993           | FemaleAge90to94     | 22482      |
| Belarus | 1993           | FemaleAge95to99     | 4361       |
| Belarus | 1993           | FemaleAgeAbove100   | 625        |
| Belarus | 1993           | FemaleLactAge15to19 | 16175      |
| Belarus | 1993           | FemaleLactAge20to24 | 54118      |
| Belarus | 1993           | FemaleLactAge25to29 | 31547      |
| Belarus | 1993           | FemaleLactAge30to34 | 15343      |
| Belarus | 1993           | FemaleLactAge35to39 | 5279       |
| Belarus | 1993           | FemaleLactAge40to44 | 974        |
| Belarus | 1993           | FemaleLactAge45to49 | 55         |
| Belarus | 1993           | FemalePregAge15to19 | 12131      |
| Belarus | 1993           | FemalePregAge20to24 | 40589      |
| Belarus | 1993           | FemalePregAge25to29 | 23660      |
| Belarus | 1993           | FemalePregAge30to34 | 11507      |
| Belarus | 1993           | FemalePregAge35to39 | 3959       |
| Belarus | 1993           | FemalePregAge40to44 | 730        |
| Belarus | 1993           | FemalePregAge45to49 | 41         |
| Belarus | 1993           | MaleAge0to4         | 356165     |
| Belarus | 1993           | MaleAge10to14       | 398955     |
| Belarus | 1993           | MaleAge15to19       | 368474     |
| Belarus | 1993           | MaleAge20to24       | 345470     |
| Belarus | 1993           | MaleAge25to29       | 359443     |
| Belarus | 1993           | MaleAge30to34       | 427573     |
| Belarus | 1993           | MaleAge35to39       | 407734     |
| Belarus | 1993           | MaleAge40to44       | 334447     |
| Belarus | 1993           | MaleAge45to49       | 250936     |
| Belarus | 1993           | MaleAge50to54       | 236470     |
| Belarus | 1993           | MaleAge55to59       | 279582     |
| Belarus | 1993           | MaleAge5to9         | 421814     |
| Belarus | 1993           | MaleAge60to64       | 233501     |
| Belarus | 1993           | MaleAge65to69       | 184580     |
| Belarus | 1993           | MaleAge70to74       | 84832      |
| Belarus | 1993           | MaleAge75to79       | 48215      |
| Belarus | 1993           | MaleAge80to84       | 40913      |
| Belarus | 1993           | MaleAge85to89       | 16957      |
| Belarus | 1993           | MaleAge90to94       | 4504       |
| Belarus | 1993           | MaleAge95to99       | 886        |
| Belarus | 1993           | MaleAgeAbove100     | 74         |
| Belarus | 1994           | FemaleAge0to4       | 314213     |
| Belarus | 1994           | FemaleAge10to14     | 395782     |
| Belarus | 1994           | FemaleAge15to19     | 334680     |
| Belarus | 1994           | FemaleAge20to24     | 256637     |
| Belarus | 1994           | FemaleAge25to29     | 296757     |
| Belarus | 1994           | FemaleAge30to34     | 393643     |
| Belarus | 1994           | FemaleAge35to39     | 415244     |
| Belarus | 1994           | FemaleAge40to44     | 356747     |
| Belarus | 1994           | FemaleAge45to49     | 289558     |
| Belarus | 1994           | FemaleAge50to54     | 248722     |
| Belarus | 1994           | FemaleAge55to59     | 353485     |
| Belarus | 1994           | FemaleAge5to9       | 403160     |
| Belarus | 1994           | FemaleAge60to64     | 314884     |
| Belarus | 1994           | FemaleAge65to69     | 321763     |
| Belarus | 1994           | FemaleAge70to74     | 215843     |
| Belarus | 1994           | FemaleAge75to79     | 114508     |
| Belarus | 1994           | FemaleAge80to84     | 109607     |
| Belarus | 1994           | FemaleAge85to89     | 52898      |
| Belarus | 1994           | FemaleAge90to94     | 22209      |
| Belarus | 1994           | FemaleAge95to99     | 4567       |
| Belarus | 1994           | FemaleAgeAbove100   | 653        |
| Belarus | 1994           | FemaleLactAge15to19 | 16175      |
| Belarus | 1994           | FemaleLactAge20to24 | 54118      |
| Belarus | 1994           | FemaleLactAge25to29 | 31547      |
| Belarus | 1994           | FemaleLactAge30to34 | 15343      |
| Belarus | 1994           | FemaleLactAge35to39 | 5279       |
| Belarus | 1994           | FemaleLactAge40to44 | 974        |
| Belarus | 1994           | FemaleLactAge45to49 | 55         |
| Belarus | 1994           | FemalePregAge15to19 | 12131      |
| Belarus | 1994           | FemalePregAge20to24 | 40589      |
| Belarus | 1994           | FemalePregAge25to29 | 23660      |
| Belarus | 1994           | FemalePregAge30to34 | 11507      |
| Belarus | 1994           | FemalePregAge35to39 | 3959       |
| Belarus | 1994           | FemalePregAge40to44 | 730        |
| Belarus | 1994           | FemalePregAge45to49 | 41         |
| Belarus | 1994           | MaleAge0to4         | 331228     |
| Belarus | 1994           | MaleAge10to14       | 406249     |
| Belarus | 1994           | MaleAge15to19       | 369811     |
| Belarus | 1994           | MaleAge20to24       | 351746     |
| Belarus | 1994           | MaleAge25to29       | 343134     |
| Belarus | 1994           | MaleAge30to34       | 418207     |
| Belarus | 1994           | MaleAge35to39       | 417098     |
| Belarus | 1994           | MaleAge40to44       | 343660     |
| Belarus | 1994           | MaleAge45to49       | 269206     |
| Belarus | 1994           | MaleAge50to54       | 214632     |
| Belarus | 1994           | MaleAge55to59       | 281287     |
| Belarus | 1994           | MaleAge5to9         | 418768     |
| Belarus | 1994           | MaleAge60to64       | 227318     |
| Belarus | 1994           | MaleAge65to69       | 195415     |
| Belarus | 1994           | MaleAge70to74       | 94218      |



Dietary calcium and zinc deficiency risks are decreasing but remain prevalent

| Country | Reference year | Age/gender group    | Population |
|---------|----------------|---------------------|------------|
| Belarus | 1994           | MaleAge75to79       | 45006      |
| Belarus | 1994           | MaleAge80to84       | 40072      |
| Belarus | 1994           | MaleAge85to89       | 15894      |
| Belarus | 1994           | MaleAge90to94       | 4171       |
| Belarus | 1994           | MaleAge95to99       | 820        |
| Belarus | 1994           | MaleAgeAbov e100    | 69         |
| Belarus | 1995           | FemaleAge0to4       | 293036     |
| Belarus | 1995           | FemaleAge10to14     | 401374     |
| Belarus | 1995           | FemaleAge15to19     | 338854     |
| Belarus | 1995           | FemaleAge20to24     | 258292     |
| Belarus | 1995           | FemaleAge25to29     | 286922     |
| Belarus | 1995           | FemaleAge30to34     | 382881     |
| Belarus | 1995           | FemaleAge35to39     | 421036     |
| Belarus | 1995           | FemaleAge40to44     | 368523     |
| Belarus | 1995           | FemaleAge45to49     | 306108     |
| Belarus | 1995           | FemaleAge50to54     | 234578     |
| Belarus | 1995           | FemaleAge55to59     | 345273     |
| Belarus | 1995           | FemaleAge5to9       | 396161     |
| Belarus | 1995           | FemaleAge60to64     | 310624     |
| Belarus | 1995           | FemaleAge65to69     | 324043     |
| Belarus | 1995           | FemaleAge70to74     | 233507     |
| Belarus | 1995           | FemaleAge75to79     | 116456     |
| Belarus | 1995           | FemaleAge80to84     | 103946     |
| Belarus | 1995           | FemaleAge85to89     | 52204      |
| Belarus | 1995           | FemaleAge90to94     | 20582      |
| Belarus | 1995           | FemaleAge95to99     | 4336       |
| Belarus | 1995           | FemaleAgeAbov e100  | 662        |
| Belarus | 1995           | FemaleLactAge15to19 | 16175      |
| Belarus | 1995           | FemaleLactAge20to24 | 54118      |
| Belarus | 1995           | FemaleLactAge25to29 | 31547      |
| Belarus | 1995           | FemaleLactAge30to34 | 15343      |
| Belarus | 1995           | FemaleLactAge35to39 | 5279       |
| Belarus | 1995           | FemaleLactAge40to44 | 974        |
| Belarus | 1995           | FemaleLactAge45to49 | 55         |
| Belarus | 1995           | FemalePregAge15to19 | 12131      |
| Belarus | 1995           | FemalePregAge20to24 | 40589      |
| Belarus | 1995           | FemalePregAge25to29 | 23660      |
| Belarus | 1995           | FemalePregAge30to34 | 11507      |
| Belarus | 1995           | FemalePregAge35to39 | 3959       |
| Belarus | 1995           | FemalePregAge40to44 | 730        |
| Belarus | 1995           | FemalePregAge45to49 | 41         |
| Belarus | 1995           | MaleAge0to4         | 308926     |
| Belarus | 1995           | MaleAge10to14       | 412160     |
| Belarus | 1995           | MaleAge15to19       | 373811     |
| Belarus | 1995           | MaleAge20to24       | 355740     |
| Belarus | 1995           | MaleAge25to29       | 332787     |
| Belarus | 1995           | MaleAge30to34       | 405817     |
| Belarus | 1995           | MaleAge35to39       | 422335     |
| Belarus | 1995           | MaleAge40to44       | 354670     |
| Belarus | 1995           | MaleAge45to49       | 284254     |
| Belarus | 1995           | MaleAge50to54       | 204624     |
| Belarus | 1995           | MaleAge55to59       | 273918     |
| Belarus | 1995           | MaleAge5to9         | 412130     |
| Belarus | 1995           | MaleAge60to64       | 225878     |
| Belarus | 1995           | MaleAge65to69       | 200666     |
| Belarus | 1995           | MaleAge70to74       | 104622     |
| Belarus | 1995           | MaleAge75to79       | 44906      |
| Belarus | 1995           | MaleAge80to84       | 37900      |
| Belarus | 1995           | MaleAge85to89       | 14472      |
| Belarus | 1995           | MaleAge90to94       | 3371       |
| Belarus | 1995           | MaleAge95to99       | 520        |
| Belarus | 1995           | MaleAgeAbov e100    | 63         |
| Belarus | 1996           | FemaleAge0to4       | 264430     |
| Belarus | 1996           | FemaleAge10to14     | 404640     |
| Belarus | 1996           | FemaleAge15to19     | 349227     |
| Belarus | 1996           | FemaleAge20to24     | 285323     |
| Belarus | 1996           | FemaleAge25to29     | 295937     |
| Belarus | 1996           | FemaleAge30to34     | 376300     |
| Belarus | 1996           | FemaleAge35to39     | 425369     |
| Belarus | 1996           | FemaleAge40to44     | 382145     |
| Belarus | 1996           | FemaleAge45to49     | 320944     |
| Belarus | 1996           | FemaleAge50to54     | 233053     |
| Belarus | 1996           | FemaleAge55to59     | 328255     |
| Belarus | 1996           | FemaleAge5to9       | 384338     |
| Belarus | 1996           | FemaleAge60to64     | 312128     |
| Belarus | 1996           | FemaleAge65to69     | 319875     |
| Belarus | 1996           | FemaleAge70to74     | 247416     |
| Belarus | 1996           | FemaleAge75to79     | 125349     |
| Belarus | 1996           | FemaleAge80to84     | 96406      |
| Belarus | 1996           | FemaleAge85to89     | 54153      |
| Belarus | 1996           | FemaleAge90to94     | 21434      |
| Belarus | 1996           | FemaleAge95to99     | 4577       |
| Belarus | 1996           | FemaleAgeAbov e100  | 649        |
| Belarus | 1996           | FemaleLactAge15to19 | 12631      |
| Belarus | 1996           | FemaleLactAge20to24 | 39814      |
| Belarus | 1996           | FemaleLactAge25to29 | 24702      |
| Belarus | 1996           | FemaleLactAge30to34 | 11811      |
| Belarus | 1996           | FemaleLactAge35to39 | 4387       |

Dietary calcium and zinc deficiency risks are decreasing but remain prevalent

| Country | Reference year | Age/gender group    | Population |
|---------|----------------|---------------------|------------|
| Belarus | 1996           | FemaleLactAge40to44 | 844        |
| Belarus | 1996           | FemaleLactAge45to49 | 61         |
| Belarus | 1996           | FemalePregAge15to19 | 9473       |
| Belarus | 1996           | FemalePregAge20to24 | 29861      |
| Belarus | 1996           | FemalePregAge25to29 | 18526      |
| Belarus | 1996           | FemalePregAge30to34 | 8858       |
| Belarus | 1996           | FemalePregAge35to39 | 3290       |
| Belarus | 1996           | FemalePregAge40to44 | 633        |
| Belarus | 1996           | FemalePregAge45to49 | 46         |
| Belarus | 1996           | MaleAge0to4         | 279394     |
| Belarus | 1996           | MaleAge10to14       | 417628     |
| Belarus | 1996           | MaleAge15to19       | 379939     |
| Belarus | 1996           | MaleAge20to24       | 358668     |
| Belarus | 1996           | MaleAge25to29       | 331699     |
| Belarus | 1996           | MaleAge30to34       | 391474     |
| Belarus | 1996           | MaleAge35to39       | 424208     |
| Belarus | 1996           | MaleAge40to44       | 366640     |
| Belarus | 1996           | MaleAge45to49       | 297452     |
| Belarus | 1996           | MaleAge50to54       | 204871     |
| Belarus | 1996           | MaleAge55to59       | 259051     |
| Belarus | 1996           | MaleAge5to9         | 401320     |
| Belarus | 1996           | MaleAge60to64       | 227511     |
| Belarus | 1996           | MaleAge65to69       | 200676     |
| Belarus | 1996           | MaleAge70to74       | 115550     |
| Belarus | 1996           | MaleAge75to79       | 48416      |
| Belarus | 1996           | MaleAge80to84       | 34527      |
| Belarus | 1996           | MaleAge85to89       | 15871      |
| Belarus | 1996           | MaleAge90to94       | 3896       |
| Belarus | 1996           | MaleAge95to99       | 524        |
| Belarus | 1996           | MaleAgeAbove100     | 57         |
| Belarus | 1997           | FemaleAge0to4       | 246985     |
| Belarus | 1997           | FemaleAge10to14     | 406068     |
| Belarus | 1997           | FemaleAge15to19     | 354375     |
| Belarus | 1997           | FemaleAge20to24     | 284900     |
| Belarus | 1997           | FemaleAge25to29     | 296976     |
| Belarus | 1997           | FemaleAge30to34     | 360850     |
| Belarus | 1997           | FemaleAge35to39     | 423598     |
| Belarus | 1997           | FemaleAge40to44     | 395873     |
| Belarus | 1997           | FemaleAge45to49     | 332496     |
| Belarus | 1997           | FemaleAge50to54     | 243802     |
| Belarus | 1997           | FemaleAge55to59     | 299782     |
| Belarus | 1997           | FemaleAge5to9       | 365982     |
| Belarus | 1997           | FemaleAge60to64     | 321030     |
| Belarus | 1997           | FemaleAge65to69     | 309300     |
| Belarus | 1997           | FemaleAge70to74     | 260210     |
| Belarus | 1997           | FemaleAge75to79     | 139209     |
| Belarus | 1997           | FemaleAge80to84     | 86773      |
| Belarus | 1997           | FemaleAge85to89     | 55741      |
| Belarus | 1997           | FemaleAge90to94     | 21157      |
| Belarus | 1997           | FemaleAge95to99     | 5141       |
| Belarus | 1997           | FemaleAgeAbove100   | 618        |
| Belarus | 1997           | FemaleLactAge15to19 | 12631      |
| Belarus | 1997           | FemaleLactAge20to24 | 39814      |
| Belarus | 1997           | FemaleLactAge25to29 | 24702      |
| Belarus | 1997           | FemaleLactAge30to34 | 11811      |
| Belarus | 1997           | FemaleLactAge35to39 | 4387       |
| Belarus | 1997           | FemaleLactAge40to44 | 844        |
| Belarus | 1997           | FemaleLactAge45to49 | 61         |
| Belarus | 1997           | FemalePregAge15to19 | 9473       |
| Belarus | 1997           | FemalePregAge20to24 | 29861      |
| Belarus | 1997           | FemalePregAge25to29 | 18526      |
| Belarus | 1997           | FemalePregAge30to34 | 8858       |
| Belarus | 1997           | FemalePregAge35to39 | 3290       |
| Belarus | 1997           | FemalePregAge40to44 | 633        |
| Belarus | 1997           | FemalePregAge45to49 | 46         |
| Belarus | 1997           | MaleAge0to4         | 261279     |
| Belarus | 1997           | MaleAge10to14       | 421209     |
| Belarus | 1997           | MaleAge15to19       | 387399     |
| Belarus | 1997           | MaleAge20to24       | 359346     |
| Belarus | 1997           | MaleAge25to29       | 335180     |
| Belarus | 1997           | MaleAge30to34       | 374837     |
| Belarus | 1997           | MaleAge35to39       | 422044     |
| Belarus | 1997           | MaleAge40to44       | 379308     |
| Belarus | 1997           | MaleAge45to49       | 307525     |
| Belarus | 1997           | MaleAge50to54       | 215482     |
| Belarus | 1997           | MaleAge55to59       | 236032     |
| Belarus | 1997           | MaleAge5to9         | 383502     |
| Belarus | 1997           | MaleAge60to64       | 233744     |
| Belarus | 1997           | MaleAge65to69       | 195358     |
| Belarus | 1997           | MaleAge70to74       | 127462     |
| Belarus | 1997           | MaleAge75to79       | 52883      |
| Belarus | 1997           | MaleAge80to84       | 30599      |
| Belarus | 1997           | MaleAge85to89       | 16815      |
| Belarus | 1997           | MaleAge90to94       | 4111       |
| Belarus | 1997           | MaleAge95to99       | 587        |
| Belarus | 1997           | MaleAgeAbove100     | 50         |
| Belarus | 1998           | FemaleAge0to4       | 237464     |
| Belarus | 1998           | FemaleAge10to14     | 405401     |

Dietary calcium and zinc deficiency risks are decreasing but remain prevalent

| Country | Reference year | Age/gender group    | Population |
|---------|----------------|---------------------|------------|
| Belarus | 1998           | FemaleAge15to19     | 360303     |
| Belarus | 1998           | FemaleAge20to24     | 283331     |
| Belarus | 1998           | FemaleAge25to29     | 300144     |
| Belarus | 1998           | FemaleAge30to34     | 345427     |
| Belarus | 1998           | FemaleAge35to39     | 417758     |
| Belarus | 1998           | FemaleAge40to44     | 408821     |
| Belarus | 1998           | FemaleAge45to49     | 342012     |
| Belarus | 1998           | FemaleAge50to54     | 262772     |
| Belarus | 1998           | FemaleAge55to59     | 266790     |
| Belarus | 1998           | FemaleAge5to9       | 341841     |
| Belarus | 1998           | FemaleAge60to64     | 332246     |
| Belarus | 1998           | FemaleAge65to69     | 296243     |
| Belarus | 1998           | FemaleAge70to74     | 271267     |
| Belarus | 1998           | FemaleAge75to79     | 154941     |
| Belarus | 1998           | FemaleAge80to84     | 79093      |
| Belarus | 1998           | FemaleAge85to89     | 55563      |
| Belarus | 1998           | FemaleAge90to94     | 20003      |
| Belarus | 1998           | FemaleAge95to99     | 5531       |
| Belarus | 1998           | FemaleAgeAbov e100  | 575        |
| Belarus | 1998           | FemaleLactAge15to19 | 12631      |
| Belarus | 1998           | FemaleLactAge20to24 | 39814      |
| Belarus | 1998           | FemaleLactAge25to29 | 24702      |
| Belarus | 1998           | FemaleLactAge30to34 | 11811      |
| Belarus | 1998           | FemaleLactAge35to39 | 4387       |
| Belarus | 1998           | FemaleLactAge40to44 | 844        |
| Belarus | 1998           | FemaleLactAge45to49 | 61         |
| Belarus | 1998           | FemalePregAge15to19 | 9473       |
| Belarus | 1998           | FemalePregAge20to24 | 29861      |
| Belarus | 1998           | FemalePregAge25to29 | 18526      |
| Belarus | 1998           | FemalePregAge30to34 | 8858       |
| Belarus | 1998           | FemalePregAge35to39 | 3290       |
| Belarus | 1998           | FemalePregAge40to44 | 633        |
| Belarus | 1998           | FemalePregAge45to49 | 46         |
| Belarus | 1998           | MaleAge0to4         | 251365     |
| Belarus | 1998           | MaleAge10to14       | 422401     |
| Belarus | 1998           | MaleAge15to19       | 395612     |
| Belarus | 1998           | MaleAge20to24       | 359616     |
| Belarus | 1998           | MaleAge25to29       | 340358     |
| Belarus | 1998           | MaleAge30to34       | 359071     |
| Belarus | 1998           | MaleAge35to39       | 416069     |
| Belarus | 1998           | MaleAge40to44       | 391540     |
| Belarus | 1998           | MaleAge45to49       | 315578     |
| Belarus | 1998           | MaleAge50to54       | 232761     |
| Belarus | 1998           | MaleAge55to59       | 210621     |
| Belarus | 1998           | MaleAge5to9         | 359362     |
| Belarus | 1998           | MaleAge60to64       | 240828     |
| Belarus | 1998           | MaleAge65to69       | 187805     |
| Belarus | 1998           | MaleAge70to74       | 138658     |
| Belarus | 1998           | MaleAge75to79       | 57534      |
| Belarus | 1998           | MaleAge80to84       | 27886      |
| Belarus | 1998           | MaleAge85to89       | 16513      |
| Belarus | 1998           | MaleAge90to94       | 4036       |
| Belarus | 1998           | MaleAge95to99       | 650        |
| Belarus | 1998           | MaleAgeAbov e100    | 44         |
| Belarus | 1999           | FemaleAge0to4       | 230897     |
| Belarus | 1999           | FemaleAge10to14     | 401265     |
| Belarus | 1999           | FemaleAge15to19     | 366190     |
| Belarus | 1999           | FemaleAge20to24     | 282728     |
| Belarus | 1999           | FemaleAge25to29     | 302833     |
| Belarus | 1999           | FemaleAge30to34     | 333142     |
| Belarus | 1999           | FemaleAge35to39     | 408977     |
| Belarus | 1999           | FemaleAge40to44     | 419048     |
| Belarus | 1999           | FemaleAge45to49     | 352058     |
| Belarus | 1999           | FemaleAge50to54     | 282902     |
| Belarus | 1999           | FemaleAge55to59     | 240339     |
| Belarus | 1999           | FemaleAge5to9       | 315121     |
| Belarus | 1999           | FemaleAge60to64     | 337406     |
| Belarus | 1999           | FemaleAge65to69     | 286766     |
| Belarus | 1999           | FemaleAge70to74     | 278917     |
| Belarus | 1999           | FemaleAge75to79     | 169772     |
| Belarus | 1999           | FemaleAge80to84     | 77078      |
| Belarus | 1999           | FemaleAge85to89     | 52549      |
| Belarus | 1999           | FemaleAge90to94     | 18261      |
| Belarus | 1999           | FemaleAge95to99     | 5227       |
| Belarus | 1999           | FemaleAgeAbov e100  | 533        |
| Belarus | 1999           | FemaleLactAge15to19 | 12631      |
| Belarus | 1999           | FemaleLactAge20to24 | 39814      |
| Belarus | 1999           | FemaleLactAge25to29 | 24702      |
| Belarus | 1999           | FemaleLactAge30to34 | 11811      |
| Belarus | 1999           | FemaleLactAge35to39 | 4387       |
| Belarus | 1999           | FemaleLactAge40to44 | 844        |
| Belarus | 1999           | FemaleLactAge45to49 | 61         |
| Belarus | 1999           | FemalePregAge15to19 | 9473       |
| Belarus | 1999           | FemalePregAge20to24 | 29861      |
| Belarus | 1999           | FemalePregAge25to29 | 18526      |
| Belarus | 1999           | FemalePregAge30to34 | 8858       |
| Belarus | 1999           | FemalePregAge35to39 | 3290       |
| Belarus | 1999           | FemalePregAge40to44 | 633        |

Dietary calcium and zinc deficiency risks are decreasing but remain prevalent

| Country | Reference year | Age/gender group    | Population |
|---------|----------------|---------------------|------------|
| Belarus | 1999           | FemalePregAge45to49 | 46         |
| Belarus | 1999           | MaleAge0to4         | 244457     |
| Belarus | 1999           | MaleAge10to14       | 419527     |
| Belarus | 1999           | MaleAge15to19       | 403522     |
| Belarus | 1999           | MaleAge20to24       | 361579     |
| Belarus | 1999           | MaleAge25to29       | 344197     |
| Belarus | 1999           | MaleAge30to34       | 347403     |
| Belarus | 1999           | MaleAge35to39       | 407153     |
| Belarus | 1999           | MaleAge40to44       | 401218     |
| Belarus | 1999           | MaleAge45to49       | 323993     |
| Belarus | 1999           | MaleAge50to54       | 250662     |
| Belarus | 1999           | MaleAge55to59       | 191375     |
| Belarus | 1999           | MaleAge5to9         | 332131     |
| Belarus | 1999           | MaleAge60to64       | 242952     |
| Belarus | 1999           | MaleAge65to69       | 182333     |
| Belarus | 1999           | MaleAge70to74       | 146540     |
| Belarus | 1999           | MaleAge75to79       | 62440      |
| Belarus | 1999           | MaleAge80to84       | 27419      |
| Belarus | 1999           | MaleAge85to89       | 14629      |
| Belarus | 1999           | MaleAge90to94       | 3635       |
| Belarus | 1999           | MaleAge95to99       | 625        |
| Belarus | 1999           | MaleAgeAbove100     | 38         |
| Belgium | 1992           | FemaleAge0to4       | 290732     |
| Belgium | 1992           | FemaleAge10to14     | 294397     |
| Belgium | 1992           | FemaleAge15to19     | 303286     |
| Belgium | 1992           | FemaleAge20to24     | 300270     |
| Belgium | 1992           | FemaleAge25to29     | 296590     |
| Belgium | 1992           | FemaleAge30to34     | 344734     |
| Belgium | 1992           | FemaleAge35to39     | 353881     |
| Belgium | 1992           | FemaleAge40to44     | 361145     |
| Belgium | 1992           | FemaleAge45to49     | 300908     |
| Belgium | 1992           | FemaleAge50to54     | 268108     |
| Belgium | 1992           | FemaleAge55to59     | 290210     |
| Belgium | 1992           | FemaleAge5to9       | 295465     |
| Belgium | 1992           | FemaleAge60to64     | 287882     |
| Belgium | 1992           | FemaleAge65to69     | 300594     |
| Belgium | 1992           | FemaleAge70to74     | 207004     |
| Belgium | 1992           | FemaleAge75to79     | 165710     |
| Belgium | 1992           | FemaleAge80to84     | 148028     |
| Belgium | 1992           | FemaleAge85to89     | 80770      |
| Belgium | 1992           | FemaleAge90to94     | 29502      |
| Belgium | 1992           | FemaleAge95to99     | 5004       |
| Belgium | 1992           | FemaleAgeAbove100   | 342        |
| Belgium | 1992           | FemaleLactAge15to19 | 3334       |
| Belgium | 1992           | FemaleLactAge20to24 | 24393      |
| Belgium | 1992           | FemaleLactAge25to29 | 51997      |
| Belgium | 1992           | FemaleLactAge30to34 | 30377      |
| Belgium | 1992           | FemaleLactAge35to39 | 8606       |
| Belgium | 1992           | FemaleLactAge40to44 | 1321       |
| Belgium | 1992           | FemaleLactAge45to49 | 62         |
| Belgium | 1992           | FemalePregAge15to19 | 2500       |
| Belgium | 1992           | FemalePregAge20to24 | 18295      |
| Belgium | 1992           | FemalePregAge25to29 | 38998      |
| Belgium | 1992           | FemalePregAge30to34 | 22783      |
| Belgium | 1992           | FemalePregAge35to39 | 6455       |
| Belgium | 1992           | FemalePregAge40to44 | 990        |
| Belgium | 1992           | FemalePregAge45to49 | 47         |
| Belgium | 1992           | MaleAge0to4         | 306034     |
| Belgium | 1992           | MaleAge10to14       | 308142     |
| Belgium | 1992           | MaleAge15to19       | 322385     |
| Belgium | 1992           | MaleAge20to24       | 356648     |
| Belgium | 1992           | MaleAge25to29       | 401783     |
| Belgium | 1992           | MaleAge30to34       | 411711     |
| Belgium | 1992           | MaleAge35to39       | 381407     |
| Belgium | 1992           | MaleAge40to44       | 375600     |
| Belgium | 1992           | MaleAge45to49       | 308986     |
| Belgium | 1992           | MaleAge50to54       | 266957     |
| Belgium | 1992           | MaleAge55to59       | 278576     |
| Belgium | 1992           | MaleAge5to9         | 310731     |
| Belgium | 1992           | MaleAge60to64       | 261641     |
| Belgium | 1992           | MaleAge65to69       | 250478     |
| Belgium | 1992           | MaleAge70to74       | 157629     |
| Belgium | 1992           | MaleAge75to79       | 100916     |
| Belgium | 1992           | MaleAge80to84       | 73561      |
| Belgium | 1992           | MaleAge85to89       | 31135      |
| Belgium | 1992           | MaleAge90to94       | 9402       |
| Belgium | 1992           | MaleAge95to99       | 1403       |
| Belgium | 1992           | MaleAgeAbove100     | 98         |
| Belgium | 1993           | FemaleAge0to4       | 293874     |
| Belgium | 1993           | FemaleAge10to14     | 295197     |
| Belgium | 1993           | FemaleAge15to19     | 299091     |
| Belgium | 1993           | FemaleAge20to24     | 294858     |
| Belgium | 1993           | FemaleAge25to29     | 289251     |
| Belgium | 1993           | FemaleAge30to34     | 348379     |
| Belgium | 1993           | FemaleAge35to39     | 361305     |
| Belgium | 1993           | FemaleAge40to44     | 358523     |
| Belgium | 1993           | FemaleAge45to49     | 322091     |
| Belgium | 1993           | FemaleAge50to54     | 262884     |

Dietary calcium and zinc deficiency risks are decreasing but remain prevalent

| Country | Reference year | Age/gender group    | Population |
|---------|----------------|---------------------|------------|
| Belgium | 1993           | FemaleAge55to59     | 285463     |
| Belgium | 1993           | FemaleAge5to9       | 296045     |
| Belgium | 1993           | FemaleAge60to64     | 289279     |
| Belgium | 1993           | FemaleAge65to69     | 291392     |
| Belgium | 1993           | FemaleAge70to74     | 236091     |
| Belgium | 1993           | FemaleAge75to79     | 150467     |
| Belgium | 1993           | FemaleAge80to84     | 151240     |
| Belgium | 1993           | FemaleAge85to89     | 82846      |
| Belgium | 1993           | FemaleAge90to94     | 30809      |
| Belgium | 1993           | FemaleAge95to99     | 5738       |
| Belgium | 1993           | FemaleAgeAbove100   | 366        |
| Belgium | 1993           | FemaleLactAge15to19 | 3334       |
| Belgium | 1993           | FemaleLactAge20to24 | 24393      |
| Belgium | 1993           | FemaleLactAge25to29 | 51997      |
| Belgium | 1993           | FemaleLactAge30to34 | 30377      |
| Belgium | 1993           | FemaleLactAge35to39 | 8606       |
| Belgium | 1993           | FemaleLactAge40to44 | 1321       |
| Belgium | 1993           | FemaleLactAge45to49 | 62         |
| Belgium | 1993           | FemalePregAge15to19 | 2500       |
| Belgium | 1993           | FemalePregAge20to24 | 18295      |
| Belgium | 1993           | FemalePregAge25to29 | 38998      |
| Belgium | 1993           | FemalePregAge30to34 | 22783      |
| Belgium | 1993           | FemalePregAge35to39 | 6455       |
| Belgium | 1993           | FemalePregAge40to44 | 990        |
| Belgium | 1993           | FemalePregAge45to49 | 47         |
| Belgium | 1993           | MaleAge0to4         | 308823     |
| Belgium | 1993           | MaleAge10to14       | 309177     |
| Belgium | 1993           | MaleAge15to19       | 317647     |
| Belgium | 1993           | MaleAge20to24       | 350506     |
| Belgium | 1993           | MaleAge25to29       | 394115     |
| Belgium | 1993           | MaleAge30to34       | 415406     |
| Belgium | 1993           | MaleAge35to39       | 388564     |
| Belgium | 1993           | MaleAge40to44       | 372254     |
| Belgium | 1993           | MaleAge45to49       | 331030     |
| Belgium | 1993           | MaleAge50to54       | 262977     |
| Belgium | 1993           | MaleAge55to59       | 274518     |
| Belgium | 1993           | MaleAge5to9         | 311450     |
| Belgium | 1993           | MaleAge60to64       | 264251     |
| Belgium | 1993           | MaleAge65to69       | 243646     |
| Belgium | 1993           | MaleAge70to74       | 180216     |
| Belgium | 1993           | MaleAge75to79       | 92002      |
| Belgium | 1993           | MaleAge80to84       | 76174      |
| Belgium | 1993           | MaleAge85to89       | 31630      |
| Belgium | 1993           | MaleAge90to94       | 9709       |
| Belgium | 1993           | MaleAge95to99       | 1616       |
| Belgium | 1993           | MaleAgeAbove100     | 102        |
| Belgium | 1994           | FemaleAge0to4       | 296342     |
| Belgium | 1994           | FemaleAge10to14     | 296354     |
| Belgium | 1994           | FemaleAge15to19     | 295396     |
| Belgium | 1994           | FemaleAge20to24     | 289467     |
| Belgium | 1994           | FemaleAge25to29     | 281752     |
| Belgium | 1994           | FemaleAge30to34     | 350062     |
| Belgium | 1994           | FemaleAge35to39     | 368622     |
| Belgium | 1994           | FemaleAge40to44     | 356495     |
| Belgium | 1994           | FemaleAge45to49     | 340690     |
| Belgium | 1994           | FemaleAge50to54     | 262143     |
| Belgium | 1994           | FemaleAge55to59     | 280219     |
| Belgium | 1994           | FemaleAge5to9       | 296707     |
| Belgium | 1994           | FemaleAge60to64     | 289993     |
| Belgium | 1994           | FemaleAge65to69     | 282678     |
| Belgium | 1994           | FemaleAge70to74     | 260567     |
| Belgium | 1994           | FemaleAge75to79     | 143022     |
| Belgium | 1994           | FemaleAge80to84     | 151725     |
| Belgium | 1994           | FemaleAge85to89     | 84730      |
| Belgium | 1994           | FemaleAge90to94     | 31141      |
| Belgium | 1994           | FemaleAge95to99     | 6173       |
| Belgium | 1994           | FemaleAgeAbove100   | 394        |
| Belgium | 1994           | FemaleLactAge15to19 | 3334       |
| Belgium | 1994           | FemaleLactAge20to24 | 24393      |
| Belgium | 1994           | FemaleLactAge25to29 | 51997      |
| Belgium | 1994           | FemaleLactAge30to34 | 30377      |
| Belgium | 1994           | FemaleLactAge35to39 | 8606       |
| Belgium | 1994           | FemaleLactAge40to44 | 1321       |
| Belgium | 1994           | FemaleLactAge45to49 | 62         |
| Belgium | 1994           | FemalePregAge15to19 | 2500       |
| Belgium | 1994           | FemalePregAge20to24 | 18295      |
| Belgium | 1994           | FemalePregAge25to29 | 38998      |
| Belgium | 1994           | FemalePregAge30to34 | 22783      |
| Belgium | 1994           | FemalePregAge35to39 | 6455       |
| Belgium | 1994           | FemalePregAge40to44 | 990        |
| Belgium | 1994           | FemalePregAge45to49 | 47         |
| Belgium | 1994           | MaleAge0to4         | 310852     |
| Belgium | 1994           | MaleAge10to14       | 310614     |
| Belgium | 1994           | MaleAge15to19       | 313674     |
| Belgium | 1994           | MaleAge20to24       | 344283     |
| Belgium | 1994           | MaleAge25to29       | 386054     |
| Belgium | 1994           | MaleAge30to34       | 417201     |
| Belgium | 1994           | MaleAge35to39       | 395715     |

Dietary calcium and zinc deficiency risks are decreasing but remain prevalent

| Country | Reference year | Age/gender group    | Population |
|---------|----------------|---------------------|------------|
| Belgium | 1994           | MaleAge40to44       | 369452     |
| Belgium | 1994           | MaleAge45to49       | 350158     |
| Belgium | 1994           | MaleAge50to54       | 263559     |
| Belgium | 1994           | MaleAge55to59       | 270182     |
| Belgium | 1994           | MaleAge5to9         | 312156     |
| Belgium | 1994           | MaleAge60to64       | 266119     |
| Belgium | 1994           | MaleAge65to69       | 237909     |
| Belgium | 1994           | MaleAge70to74       | 198519     |
| Belgium | 1994           | MaleAge75to79       | 88966      |
| Belgium | 1994           | MaleAge80to84       | 76312      |
| Belgium | 1994           | MaleAge85to89       | 31789      |
| Belgium | 1994           | MaleAge90to94       | 9499       |
| Belgium | 1994           | MaleAge95to99       | 1680       |
| Belgium | 1994           | MaleAgeAbov e100    | 106        |
| Belgium | 1995           | FemaleAge0to4       | 296621     |
| Belgium | 1995           | FemaleAge10to14     | 297384     |
| Belgium | 1995           | FemaleAge15to19     | 292555     |
| Belgium | 1995           | FemaleAge20to24     | 283845     |
| Belgium | 1995           | FemaleAge25to29     | 274791     |
| Belgium | 1995           | FemaleAge30to34     | 349347     |
| Belgium | 1995           | FemaleAge35to39     | 374775     |
| Belgium | 1995           | FemaleAge40to44     | 357595     |
| Belgium | 1995           | FemaleAge45to49     | 353190     |
| Belgium | 1995           | FemaleAge50to54     | 267617     |
| Belgium | 1995           | FemaleAge55to59     | 274800     |
| Belgium | 1995           | FemaleAge5to9       | 297911     |
| Belgium | 1995           | FemaleAge60to64     | 288657     |
| Belgium | 1995           | FemaleAge65to69     | 277834     |
| Belgium | 1995           | FemaleAge70to74     | 275137     |
| Belgium | 1995           | FemaleAge75to79     | 147058     |
| Belgium | 1995           | FemaleAge80to84     | 148319     |
| Belgium | 1995           | FemaleAge85to89     | 86750      |
| Belgium | 1995           | FemaleAge90to94     | 30863      |
| Belgium | 1995           | FemaleAge95to99     | 5777       |
| Belgium | 1995           | FemaleAgeAbov e100  | 429        |
| Belgium | 1995           | FemaleLactAge15to19 | 3334       |
| Belgium | 1995           | FemaleLactAge20to24 | 24393      |
| Belgium | 1995           | FemaleLactAge25to29 | 51997      |
| Belgium | 1995           | FemaleLactAge30to34 | 30377      |
| Belgium | 1995           | FemaleLactAge35to39 | 8606       |
| Belgium | 1995           | FemaleLactAge40to44 | 1321       |
| Belgium | 1995           | FemaleLactAge45to49 | 62         |
| Belgium | 1995           | FemalePregAge15to19 | 2500       |
| Belgium | 1995           | FemalePregAge20to24 | 18295      |
| Belgium | 1995           | FemalePregAge25to29 | 38998      |
| Belgium | 1995           | FemalePregAge30to34 | 22783      |
| Belgium | 1995           | FemalePregAge35to39 | 6455       |
| Belgium | 1995           | FemalePregAge40to44 | 990        |
| Belgium | 1995           | FemalePregAge45to49 | 47         |
| Belgium | 1995           | MaleAge0to4         | 310636     |
| Belgium | 1995           | MaleAge10to14       | 311906     |
| Belgium | 1995           | MaleAge15to19       | 310795     |
| Belgium | 1995           | MaleAge20to24       | 337837     |
| Belgium | 1995           | MaleAge25to29       | 378334     |
| Belgium | 1995           | MaleAge30to34       | 416510     |
| Belgium | 1995           | MaleAge35to39       | 401792     |
| Belgium | 1995           | MaleAge40to44       | 369887     |
| Belgium | 1995           | MaleAge45to49       | 362785     |
| Belgium | 1995           | MaleAge50to54       | 270315     |
| Belgium | 1995           | MaleAge55to59       | 265949     |
| Belgium | 1995           | MaleAge5to9         | 313296     |
| Belgium | 1995           | MaleAge60to64       | 266060     |
| Belgium | 1995           | MaleAge65to69       | 235697     |
| Belgium | 1995           | MaleAge70to74       | 209181     |
| Belgium | 1995           | MaleAge75to79       | 93929      |
| Belgium | 1995           | MaleAge80to84       | 73545      |
| Belgium | 1995           | MaleAge85to89       | 31831      |
| Belgium | 1995           | MaleAge90to94       | 8745       |
| Belgium | 1995           | MaleAge95to99       | 1362       |
| Belgium | 1995           | MaleAgeAbov e100    | 111        |
| Belgium | 1996           | FemaleAge0to4       | 295939     |
| Belgium | 1996           | FemaleAge10to14     | 297769     |
| Belgium | 1996           | FemaleAge15to19     | 293301     |
| Belgium | 1996           | FemaleAge20to24     | 288292     |
| Belgium | 1996           | FemaleAge25to29     | 277504     |
| Belgium | 1996           | FemaleAge30to34     | 339476     |
| Belgium | 1996           | FemaleAge35to39     | 376156     |
| Belgium | 1996           | FemaleAge40to44     | 360338     |
| Belgium | 1996           | FemaleAge45to49     | 359694     |
| Belgium | 1996           | FemaleAge50to54     | 278874     |
| Belgium | 1996           | FemaleAge55to59     | 269029     |
| Belgium | 1996           | FemaleAge5to9       | 298327     |
| Belgium | 1996           | FemaleAge60to64     | 285456     |
| Belgium | 1996           | FemaleAge65to69     | 274719     |
| Belgium | 1996           | FemaleAge70to74     | 279609     |
| Belgium | 1996           | FemaleAge75to79     | 159223     |
| Belgium | 1996           | FemaleAge80to84     | 139074     |
| Belgium | 1996           | FemaleAge85to89     | 90085      |

Dietary calcium and zinc deficiency risks are decreasing but remain prevalent

| Country | Reference year | Age/gender group    | Population |
|---------|----------------|---------------------|------------|
| Belgium | 1996           | FemaleAge90to94     | 34203      |
| Belgium | 1996           | FemaleAge95to99     | 6412       |
| Belgium | 1996           | FemaleAgeAbove100   | 471        |
| Belgium | 1996           | FemaleLactAge15to19 | 3037       |
| Belgium | 1996           | FemaleLactAge20to24 | 19442      |
| Belgium | 1996           | FemaleLactAge25to29 | 45959      |
| Belgium | 1996           | FemaleLactAge30to34 | 33671      |
| Belgium | 1996           | FemaleLactAge35to39 | 10846      |
| Belgium | 1996           | FemaleLactAge40to44 | 1564       |
| Belgium | 1996           | FemaleLactAge45to49 | 75         |
| Belgium | 1996           | FemalePregAge15to19 | 2277       |
| Belgium | 1996           | FemalePregAge20to24 | 14582      |
| Belgium | 1996           | FemalePregAge25to29 | 34469      |
| Belgium | 1996           | FemalePregAge30to34 | 25253      |
| Belgium | 1996           | FemalePregAge35to39 | 8134       |
| Belgium | 1996           | FemalePregAge40to44 | 1173       |
| Belgium | 1996           | FemalePregAge45to49 | 56         |
| Belgium | 1996           | MaleAge0to4         | 309368     |
| Belgium | 1996           | MaleAge10to14       | 312393     |
| Belgium | 1996           | MaleAge15to19       | 310207     |
| Belgium | 1996           | MaleAge20to24       | 332516     |
| Belgium | 1996           | MaleAge25to29       | 369972     |
| Belgium | 1996           | MaleAge30to34       | 411784     |
| Belgium | 1996           | MaleAge35to39       | 406466     |
| Belgium | 1996           | MaleAge40to44       | 372460     |
| Belgium | 1996           | MaleAge45to49       | 369006     |
| Belgium | 1996           | MaleAge50to54       | 282185     |
| Belgium | 1996           | MaleAge55to59       | 261089     |
| Belgium | 1996           | MaleAge5to9         | 313576     |
| Belgium | 1996           | MaleAge60to64       | 263881     |
| Belgium | 1996           | MaleAge65to69       | 234473     |
| Belgium | 1996           | MaleAge70to74       | 212211     |
| Belgium | 1996           | MaleAge75to79       | 104870     |
| Belgium | 1996           | MaleAge80to84       | 69620      |
| Belgium | 1996           | MaleAge85to89       | 34603      |
| Belgium | 1996           | MaleAge90to94       | 9975       |
| Belgium | 1996           | MaleAge95to99       | 1504       |
| Belgium | 1996           | MaleAgeAbove100     | 117        |
| Belgium | 1997           | FemaleAge0to4       | 292883     |
| Belgium | 1997           | FemaleAge10to14     | 297709     |
| Belgium | 1997           | FemaleAge15to19     | 293834     |
| Belgium | 1997           | FemaleAge20to24     | 284647     |
| Belgium | 1997           | FemaleAge25to29     | 270966     |
| Belgium | 1997           | FemaleAge30to34     | 332616     |
| Belgium | 1997           | FemaleAge35to39     | 380595     |
| Belgium | 1997           | FemaleAge40to44     | 366032     |
| Belgium | 1997           | FemaleAge45to49     | 360225     |
| Belgium | 1997           | FemaleAge50to54     | 296528     |
| Belgium | 1997           | FemaleAge55to59     | 262515     |
| Belgium | 1997           | FemaleAge5to9       | 298976     |
| Belgium | 1997           | FemaleAge60to64     | 281486     |
| Belgium | 1997           | FemaleAge65to69     | 274446     |
| Belgium | 1997           | FemaleAge70to74     | 275988     |
| Belgium | 1997           | FemaleAge75to79     | 181123     |
| Belgium | 1997           | FemaleAge80to84     | 125898     |
| Belgium | 1997           | FemaleAge85to89     | 93693      |
| Belgium | 1997           | FemaleAge90to94     | 36488      |
| Belgium | 1997           | FemaleAge95to99     | 7227       |
| Belgium | 1997           | FemaleAgeAbove100   | 520        |
| Belgium | 1997           | FemaleLactAge15to19 | 3037       |
| Belgium | 1997           | FemaleLactAge20to24 | 19442      |
| Belgium | 1997           | FemaleLactAge25to29 | 45959      |
| Belgium | 1997           | FemaleLactAge30to34 | 33671      |
| Belgium | 1997           | FemaleLactAge35to39 | 10846      |
| Belgium | 1997           | FemaleLactAge40to44 | 1564       |
| Belgium | 1997           | FemaleLactAge45to49 | 75         |
| Belgium | 1997           | FemalePregAge15to19 | 2277       |
| Belgium | 1997           | FemalePregAge20to24 | 14582      |
| Belgium | 1997           | FemalePregAge25to29 | 34469      |
| Belgium | 1997           | FemalePregAge30to34 | 25253      |
| Belgium | 1997           | FemalePregAge35to39 | 8134       |
| Belgium | 1997           | FemalePregAge40to44 | 1173       |
| Belgium | 1997           | FemalePregAge45to49 | 56         |
| Belgium | 1997           | MaleAge0to4         | 305747     |
| Belgium | 1997           | MaleAge10to14       | 312514     |
| Belgium | 1997           | MaleAge15to19       | 310381     |
| Belgium | 1997           | MaleAge20to24       | 327616     |
| Belgium | 1997           | MaleAge25to29       | 362618     |
| Belgium | 1997           | MaleAge30to34       | 404486     |
| Belgium | 1997           | MaleAge35to39       | 410413     |
| Belgium | 1997           | MaleAge40to44       | 377499     |
| Belgium | 1997           | MaleAge45to49       | 368993     |
| Belgium | 1997           | MaleAge50to54       | 300492     |
| Belgium | 1997           | MaleAge55to59       | 255599     |
| Belgium | 1997           | MaleAge5to9         | 313999     |
| Belgium | 1997           | MaleAge60to64       | 260922     |
| Belgium | 1997           | MaleAge65to69       | 235812     |
| Belgium | 1997           | MaleAge70to74       | 209598     |

Dietary calcium and zinc deficiency risks are decreasing but remain prevalent

| Country | Reference year | Age/gender group    | Population |
|---------|----------------|---------------------|------------|
| Belgium | 1997           | MaleAge75to79       | 121200     |
| Belgium | 1997           | MaleAge80to84       | 63202      |
| Belgium | 1997           | MaleAge85to89       | 37414      |
| Belgium | 1997           | MaleAge90to94       | 10677      |
| Belgium | 1997           | MaleAge95to99       | 1730       |
| Belgium | 1997           | MaleAgeAbov e100    | 123        |
| Belgium | 1998           | FemaleAge0to4       | 288300     |
| Belgium | 1998           | FemaleAge10to14     | 297663     |
| Belgium | 1998           | FemaleAge15to19     | 294092     |
| Belgium | 1998           | FemaleAge20to24     | 281589     |
| Belgium | 1998           | FemaleAge25to29     | 265953     |
| Belgium | 1998           | FemaleAge30to34     | 324012     |
| Belgium | 1998           | FemaleAge35to39     | 383524     |
| Belgium | 1998           | FemaleAge40to44     | 373459     |
| Belgium | 1998           | FemaleAge45to49     | 357305     |
| Belgium | 1998           | FemaleAge50to54     | 317072     |
| Belgium | 1998           | FemaleAge55to59     | 257322     |
| Belgium | 1998           | FemaleAge5to9       | 299826     |
| Belgium | 1998           | FemaleAge60to64     | 276944     |
| Belgium | 1998           | FemaleAge65to69     | 275735     |
| Belgium | 1998           | FemaleAge70to74     | 267899     |
| Belgium | 1998           | FemaleAge75to79     | 206761     |
| Belgium | 1998           | FemaleAge80to84     | 113839     |
| Belgium | 1998           | FemaleAge85to89     | 96313      |
| Belgium | 1998           | FemaleAge90to94     | 37566      |
| Belgium | 1998           | FemaleAge95to99     | 7991       |
| Belgium | 1998           | FemaleAgeAbov e100  | 574        |
| Belgium | 1998           | FemaleLactAge15to19 | 3037       |
| Belgium | 1998           | FemaleLactAge20to24 | 19442      |
| Belgium | 1998           | FemaleLactAge25to29 | 45959      |
| Belgium | 1998           | FemaleLactAge30to34 | 33671      |
| Belgium | 1998           | FemaleLactAge35to39 | 10846      |
| Belgium | 1998           | FemaleLactAge40to44 | 1564       |
| Belgium | 1998           | FemaleLactAge45to49 | 75         |
| Belgium | 1998           | FemalePregAge15to19 | 2277       |
| Belgium | 1998           | FemalePregAge20to24 | 14582      |
| Belgium | 1998           | FemalePregAge25to29 | 34469      |
| Belgium | 1998           | FemalePregAge30to34 | 25253      |
| Belgium | 1998           | FemalePregAge35to39 | 8134       |
| Belgium | 1998           | FemalePregAge40to44 | 1173       |
| Belgium | 1998           | FemalePregAge45to49 | 56         |
| Belgium | 1998           | MaleAge0to4         | 300682     |
| Belgium | 1998           | MaleAge10to14       | 312620     |
| Belgium | 1998           | MaleAge15to19       | 310857     |
| Belgium | 1998           | MaleAge20to24       | 323282     |
| Belgium | 1998           | MaleAge25to29       | 356353     |
| Belgium | 1998           | MaleAge30to34       | 395680     |
| Belgium | 1998           | MaleAge35to39       | 413052     |
| Belgium | 1998           | MaleAge40to44       | 384174     |
| Belgium | 1998           | MaleAge45to49       | 365380     |
| Belgium | 1998           | MaleAge50to54       | 321703     |
| Belgium | 1998           | MaleAge55to59       | 251488     |
| Belgium | 1998           | MaleAge5to9         | 314544     |
| Belgium | 1998           | MaleAge60to64       | 257421     |
| Belgium | 1998           | MaleAge65to69       | 238551     |
| Belgium | 1998           | MaleAge70to74       | 204422     |
| Belgium | 1998           | MaleAge75to79       | 138731     |
| Belgium | 1998           | MaleAge80to84       | 57571      |
| Belgium | 1998           | MaleAge85to89       | 39170      |
| Belgium | 1998           | MaleAge90to94       | 10871      |
| Belgium | 1998           | MaleAge95to99       | 1935       |
| Belgium | 1998           | MaleAgeAbov e100    | 130        |
| Belgium | 1999           | FemaleAge0to4       | 283960     |
| Belgium | 1999           | FemaleAge10to14     | 298002     |
| Belgium | 1999           | FemaleAge15to19     | 293751     |
| Belgium | 1999           | FemaleAge20to24     | 279219     |
| Belgium | 1999           | FemaleAge25to29     | 262074     |
| Belgium | 1999           | FemaleAge30to34     | 315337     |
| Belgium | 1999           | FemaleAge35to39     | 384236     |
| Belgium | 1999           | FemaleAge40to44     | 380976     |
| Belgium | 1999           | FemaleAge45to49     | 355183     |
| Belgium | 1999           | FemaleAge50to54     | 335022     |
| Belgium | 1999           | FemaleAge55to59     | 256582     |
| Belgium | 1999           | FemaleAge5to9       | 300629     |
| Belgium | 1999           | FemaleAge60to64     | 272103     |
| Belgium | 1999           | FemaleAge65to69     | 276507     |
| Belgium | 1999           | FemaleAge70to74     | 260656     |
| Belgium | 1999           | FemaleAge75to79     | 228046     |
| Belgium | 1999           | FemaleAge80to84     | 109226     |
| Belgium | 1999           | FemaleAge85to89     | 96011      |
| Belgium | 1999           | FemaleAge90to94     | 37702      |
| Belgium | 1999           | FemaleAge95to99     | 8384       |
| Belgium | 1999           | FemaleAgeAbov e100  | 629        |
| Belgium | 1999           | FemaleLactAge15to19 | 3037       |
| Belgium | 1999           | FemaleLactAge20to24 | 19442      |
| Belgium | 1999           | FemaleLactAge25to29 | 45959      |
| Belgium | 1999           | FemaleLactAge30to34 | 33671      |
| Belgium | 1999           | FemaleLactAge35to39 | 10846      |



Dietary calcium and zinc deficiency risks are decreasing but remain prevalent

| Country | Reference year | Age/gender group    | Population |
|---------|----------------|---------------------|------------|
| Belgium | 1999           | FemaleLactAge40to44 | 1564       |
| Belgium | 1999           | FemaleLactAge45to49 | 75         |
| Belgium | 1999           | FemalePregAge15to19 | 2277       |
| Belgium | 1999           | FemalePregAge20to24 | 14582      |
| Belgium | 1999           | FemalePregAge25to29 | 34469      |
| Belgium | 1999           | FemalePregAge30to34 | 25253      |
| Belgium | 1999           | FemalePregAge35to39 | 8134       |
| Belgium | 1999           | FemalePregAge40to44 | 1173       |
| Belgium | 1999           | FemalePregAge45to49 | 56         |
| Belgium | 1999           | MaleAge0to4         | 296035     |
| Belgium | 1999           | MaleAge10to14       | 313067     |
| Belgium | 1999           | MaleAge15to19       | 311181     |
| Belgium | 1999           | MaleAge20to24       | 319818     |
| Belgium | 1999           | MaleAge25to29       | 350877     |
| Belgium | 1999           | MaleAge30to34       | 386915     |
| Belgium | 1999           | MaleAge35to39       | 413671     |
| Belgium | 1999           | MaleAge40to44       | 390903     |
| Belgium | 1999           | MaleAge45to49       | 362553     |
| Belgium | 1999           | MaleAge50to54       | 340226     |
| Belgium | 1999           | MaleAge55to59       | 251850     |
| Belgium | 1999           | MaleAge5to9         | 315004     |
| Belgium | 1999           | MaleAge60to64       | 253743     |
| Belgium | 1999           | MaleAge65to69       | 240881     |
| Belgium | 1999           | MaleAge70to74       | 200571     |
| Belgium | 1999           | MaleAge75to79       | 152390     |
| Belgium | 1999           | MaleAge80to84       | 56459      |
| Belgium | 1999           | MaleAge85to89       | 38712      |
| Belgium | 1999           | MaleAge90to94       | 10705      |
| Belgium | 1999           | MaleAge95to99       | 1977       |
| Belgium | 1999           | MaleAgeAbove100     | 136        |
| Benin   | 1992           | FemaleAge0to4       | 496964     |
| Benin   | 1992           | FemaleAge10to14     | 337745     |
| Benin   | 1992           | FemaleAge15to19     | 220207     |
| Benin   | 1992           | FemaleAge20to24     | 120932     |
| Benin   | 1992           | FemaleAge25to29     | 92223      |
| Benin   | 1992           | FemaleAge30to34     | 82870      |
| Benin   | 1992           | FemaleAge35to39     | 81696      |
| Benin   | 1992           | FemaleAge40to44     | 88452      |
| Benin   | 1992           | FemaleAge45to49     | 94151      |
| Benin   | 1992           | FemaleAge50to54     | 84163      |
| Benin   | 1992           | FemaleAge55to59     | 66914      |
| Benin   | 1992           | FemaleAge5to9       | 404133     |
| Benin   | 1992           | FemaleAge60to64     | 53589      |
| Benin   | 1992           | FemaleAge65to69     | 42082      |
| Benin   | 1992           | FemaleAge70to74     | 30790      |
| Benin   | 1992           | FemaleAge75to79     | 18751      |
| Benin   | 1992           | FemaleAge80to84     | 8647       |
| Benin   | 1992           | FemaleAge85to89     | 2691       |
| Benin   | 1992           | FemaleAge90to94     | 467        |
| Benin   | 1992           | FemaleAge95to99     | 41         |
| Benin   | 1992           | FemaleAgeAbove100   | 1          |
| Benin   | 1992           | FemaleLactAge15to19 | 36762      |
| Benin   | 1992           | FemaleLactAge20to24 | 66896      |
| Benin   | 1992           | FemaleLactAge25to29 | 59630      |
| Benin   | 1992           | FemaleLactAge30to34 | 43919      |
| Benin   | 1992           | FemaleLactAge35to39 | 27026      |
| Benin   | 1992           | FemaleLactAge40to44 | 12480      |
| Benin   | 1992           | FemaleLactAge45to49 | 3557       |
| Benin   | 1992           | FemalePregAge15to19 | 27571      |
| Benin   | 1992           | FemalePregAge20to24 | 50172      |
| Benin   | 1992           | FemalePregAge25to29 | 44722      |
| Benin   | 1992           | FemalePregAge30to34 | 32939      |
| Benin   | 1992           | FemalePregAge35to39 | 20269      |
| Benin   | 1992           | FemalePregAge40to44 | 9360       |
| Benin   | 1992           | FemalePregAge45to49 | 2668       |
| Benin   | 1992           | MaleAge0to4         | 498295     |
| Benin   | 1992           | MaleAge10to14       | 329558     |
| Benin   | 1992           | MaleAge15to19       | 275271     |
| Benin   | 1992           | MaleAge20to24       | 231583     |
| Benin   | 1992           | MaleAge25to29       | 192735     |
| Benin   | 1992           | MaleAge30to34       | 155702     |
| Benin   | 1992           | MaleAge35to39       | 125705     |
| Benin   | 1992           | MaleAge40to44       | 96309      |
| Benin   | 1992           | MaleAge45to49       | 81179      |
| Benin   | 1992           | MaleAge50to54       | 66921      |
| Benin   | 1992           | MaleAge55to59       | 50272      |
| Benin   | 1992           | MaleAge5to9         | 399176     |
| Benin   | 1992           | MaleAge60to64       | 39081      |
| Benin   | 1992           | MaleAge65to69       | 30046      |
| Benin   | 1992           | MaleAge70to74       | 21167      |
| Benin   | 1992           | MaleAge75to79       | 12466      |
| Benin   | 1992           | MaleAge80to84       | 5498       |
| Benin   | 1992           | MaleAge85to89       | 1545       |
| Benin   | 1992           | MaleAge90to94       | 222        |
| Benin   | 1992           | MaleAge95to99       | 14         |
| Benin   | 1993           | FemaleAge0to4       | 513245     |
| Benin   | 1993           | FemaleAge10to14     | 349484     |
| Benin   | 1993           | FemaleAge15to19     | 230531     |

Dietary calcium and zinc deficiency risks are decreasing but remain prevalent

| Country | Reference year | Age/gender group    | Population |
|---------|----------------|---------------------|------------|
| Benin   | 1993           | FemaleAge20to24     | 130465     |
| Benin   | 1993           | FemaleAge25to29     | 100855     |
| Benin   | 1993           | FemaleAge30to34     | 90297      |
| Benin   | 1993           | FemaleAge35to39     | 87396      |
| Benin   | 1993           | FemaleAge40to44     | 91006      |
| Benin   | 1993           | FemaleAge45to49     | 95652      |
| Benin   | 1993           | FemaleAge50to54     | 87880      |
| Benin   | 1993           | FemaleAge55to59     | 69039      |
| Benin   | 1993           | FemaleAge5to9       | 418274     |
| Benin   | 1993           | FemaleAge60to64     | 55166      |
| Benin   | 1993           | FemaleAge65to69     | 42863      |
| Benin   | 1993           | FemaleAge70to74     | 31347      |
| Benin   | 1993           | FemaleAge75to79     | 19244      |
| Benin   | 1993           | FemaleAge80to84     | 8872       |
| Benin   | 1993           | FemaleAge85to89     | 2804       |
| Benin   | 1993           | FemaleAge90to94     | 507        |
| Benin   | 1993           | FemaleAge95to99     | 55         |
| Benin   | 1993           | FemaleAgeAbove100   | 1          |
| Benin   | 1993           | FemaleLactAge15to19 | 36762      |
| Benin   | 1993           | FemaleLactAge20to24 | 66896      |
| Benin   | 1993           | FemaleLactAge25to29 | 59630      |
| Benin   | 1993           | FemaleLactAge30to34 | 43919      |
| Benin   | 1993           | FemaleLactAge35to39 | 27026      |
| Benin   | 1993           | FemaleLactAge40to44 | 12480      |
| Benin   | 1993           | FemaleLactAge45to49 | 3557       |
| Benin   | 1993           | FemalePregAge15to19 | 27571      |
| Benin   | 1993           | FemalePregAge20to24 | 50172      |
| Benin   | 1993           | FemalePregAge25to29 | 44722      |
| Benin   | 1993           | FemalePregAge30to34 | 32939      |
| Benin   | 1993           | FemalePregAge35to39 | 20269      |
| Benin   | 1993           | FemalePregAge40to44 | 9360       |
| Benin   | 1993           | FemalePregAge45to49 | 2668       |
| Benin   | 1993           | MaleAge0to4         | 514901     |
| Benin   | 1993           | MaleAge10to14       | 342284     |
| Benin   | 1993           | MaleAge15to19       | 286485     |
| Benin   | 1993           | MaleAge20to24       | 241463     |
| Benin   | 1993           | MaleAge25to29       | 202567     |
| Benin   | 1993           | MaleAge30to34       | 164454     |
| Benin   | 1993           | MaleAge35to39       | 131916     |
| Benin   | 1993           | MaleAge40to44       | 102984     |
| Benin   | 1993           | MaleAge45to49       | 82230      |
| Benin   | 1993           | MaleAge50to54       | 70816      |
| Benin   | 1993           | MaleAge55to59       | 52330      |
| Benin   | 1993           | MaleAge5to9         | 414199     |
| Benin   | 1993           | MaleAge60to64       | 40245      |
| Benin   | 1993           | MaleAge65to69       | 30659      |
| Benin   | 1993           | MaleAge70to74       | 21622      |
| Benin   | 1993           | MaleAge75to79       | 12744      |
| Benin   | 1993           | MaleAge80to84       | 5675       |
| Benin   | 1993           | MaleAge85to89       | 1620       |
| Benin   | 1993           | MaleAge90to94       | 248        |
| Benin   | 1993           | MaleAge95to99       | 23         |
| Benin   | 1994           | FemaleAge0to4       | 529100     |
| Benin   | 1994           | FemaleAge10to14     | 361436     |
| Benin   | 1994           | FemaleAge15to19     | 240776     |
| Benin   | 1994           | FemaleAge20to24     | 139971     |
| Benin   | 1994           | FemaleAge25to29     | 109630     |
| Benin   | 1994           | FemaleAge30to34     | 97982      |
| Benin   | 1994           | FemaleAge35to39     | 93520      |
| Benin   | 1994           | FemaleAge40to44     | 94081      |
| Benin   | 1994           | FemaleAge45to49     | 97170      |
| Benin   | 1994           | FemaleAge50to54     | 91279      |
| Benin   | 1994           | FemaleAge55to59     | 71492      |
| Benin   | 1994           | FemaleAge5to9       | 431980     |
| Benin   | 1994           | FemaleAge60to64     | 56904      |
| Benin   | 1994           | FemaleAge65to69     | 43837      |
| Benin   | 1994           | FemaleAge70to74     | 31998      |
| Benin   | 1994           | FemaleAge75to79     | 19718      |
| Benin   | 1994           | FemaleAge80to84     | 8995       |
| Benin   | 1994           | FemaleAge85to89     | 2776       |
| Benin   | 1994           | FemaleAge90to94     | 500        |
| Benin   | 1994           | FemaleAge95to99     | 58         |
| Benin   | 1994           | FemaleAgeAbove100   | 1          |
| Benin   | 1994           | FemaleLactAge15to19 | 36762      |
| Benin   | 1994           | FemaleLactAge20to24 | 66896      |
| Benin   | 1994           | FemaleLactAge25to29 | 59630      |
| Benin   | 1994           | FemaleLactAge30to34 | 43919      |
| Benin   | 1994           | FemaleLactAge35to39 | 27026      |
| Benin   | 1994           | FemaleLactAge40to44 | 12480      |
| Benin   | 1994           | FemaleLactAge45to49 | 3557       |
| Benin   | 1994           | FemalePregAge15to19 | 27571      |
| Benin   | 1994           | FemalePregAge20to24 | 50172      |
| Benin   | 1994           | FemalePregAge25to29 | 44722      |
| Benin   | 1994           | FemalePregAge30to34 | 32939      |
| Benin   | 1994           | FemalePregAge35to39 | 20269      |
| Benin   | 1994           | FemalePregAge40to44 | 9360       |
| Benin   | 1994           | FemalePregAge45to49 | 2668       |
| Benin   | 1994           | MaleAge0to4         | 530856     |

Dietary calcium and zinc deficiency risks are decreasing but remain prevalent

| Country | Reference year | Age/gender group    | Population |
|---------|----------------|---------------------|------------|
| Benin   | 1994           | MaleAge10to14       | 355031     |
| Benin   | 1994           | MaleAge15to19       | 297386     |
| Benin   | 1994           | MaleAge20to24       | 251176     |
| Benin   | 1994           | MaleAge25to29       | 212319     |
| Benin   | 1994           | MaleAge30to34       | 173467     |
| Benin   | 1994           | MaleAge35to39       | 138508     |
| Benin   | 1994           | MaleAge40to44       | 109810     |
| Benin   | 1994           | MaleAge45to49       | 84063      |
| Benin   | 1994           | MaleAge50to54       | 74259      |
| Benin   | 1994           | MaleAge55to59       | 54739      |
| Benin   | 1994           | MaleAge5to9         | 428296     |
| Benin   | 1994           | MaleAge60to64       | 41585      |
| Benin   | 1994           | MaleAge65to69       | 31377      |
| Benin   | 1994           | MaleAge70to74       | 22122      |
| Benin   | 1994           | MaleAge75to79       | 13002      |
| Benin   | 1994           | MaleAge80to84       | 5747       |
| Benin   | 1994           | MaleAge85to89       | 1602       |
| Benin   | 1994           | MaleAge90to94       | 249        |
| Benin   | 1994           | MaleAge95to99       | 24         |
| Benin   | 1995           | FemaleAge0to4       | 544376     |
| Benin   | 1995           | FemaleAge10to14     | 373147     |
| Benin   | 1995           | FemaleAge15to19     | 250834     |
| Benin   | 1995           | FemaleAge20to24     | 149265     |
| Benin   | 1995           | FemaleAge25to29     | 118359     |
| Benin   | 1995           | FemaleAge30to34     | 105783     |
| Benin   | 1995           | FemaleAge35to39     | 99862      |
| Benin   | 1995           | FemaleAge40to44     | 97724      |
| Benin   | 1995           | FemaleAge45to49     | 98864      |
| Benin   | 1995           | FemaleAge50to54     | 94049      |
| Benin   | 1995           | FemaleAge55to59     | 74293      |
| Benin   | 1995           | FemaleAge5to9       | 444777     |
| Benin   | 1995           | FemaleAge60to64     | 58748      |
| Benin   | 1995           | FemaleAge65to69     | 45007      |
| Benin   | 1995           | FemaleAge70to74     | 32734      |
| Benin   | 1995           | FemaleAge75to79     | 20182      |
| Benin   | 1995           | FemaleAge80to84     | 9061       |
| Benin   | 1995           | FemaleAge85to89     | 2616       |
| Benin   | 1995           | FemaleAge90to94     | 404        |
| Benin   | 1995           | FemaleAge95to99     | 33         |
| Benin   | 1995           | FemaleAgeAbove100   | 1          |
| Benin   | 1995           | FemaleLactAge15to19 | 36762      |
| Benin   | 1995           | FemaleLactAge20to24 | 66896      |
| Benin   | 1995           | FemaleLactAge25to29 | 59630      |
| Benin   | 1995           | FemaleLactAge30to34 | 43919      |
| Benin   | 1995           | FemaleLactAge35to39 | 27026      |
| Benin   | 1995           | FemaleLactAge40to44 | 12480      |
| Benin   | 1995           | FemaleLactAge45to49 | 3557       |
| Benin   | 1995           | FemalePregAge15to19 | 27571      |
| Benin   | 1995           | FemalePregAge20to24 | 50172      |
| Benin   | 1995           | FemalePregAge25to29 | 44722      |
| Benin   | 1995           | FemalePregAge30to34 | 32939      |
| Benin   | 1995           | FemalePregAge35to39 | 20269      |
| Benin   | 1995           | FemalePregAge40to44 | 9360       |
| Benin   | 1995           | FemalePregAge45to49 | 2668       |
| Benin   | 1995           | MaleAge0to4         | 545963     |
| Benin   | 1995           | MaleAge10to14       | 367008     |
| Benin   | 1995           | MaleAge15to19       | 307688     |
| Benin   | 1995           | MaleAge20to24       | 260457     |
| Benin   | 1995           | MaleAge25to29       | 221575     |
| Benin   | 1995           | MaleAge30to34       | 182380     |
| Benin   | 1995           | MaleAge35to39       | 145537     |
| Benin   | 1995           | MaleAge40to44       | 116202     |
| Benin   | 1995           | MaleAge45to49       | 87141      |
| Benin   | 1995           | MaleAge50to54       | 76852      |
| Benin   | 1995           | MaleAge55to59       | 57481      |
| Benin   | 1995           | MaleAge5to9         | 440706     |
| Benin   | 1995           | MaleAge60to64       | 43073      |
| Benin   | 1995           | MaleAge65to69       | 32186      |
| Benin   | 1995           | MaleAge70to74       | 22637      |
| Benin   | 1995           | MaleAge75to79       | 13254      |
| Benin   | 1995           | MaleAge80to84       | 5734       |
| Benin   | 1995           | MaleAge85to89       | 1491       |
| Benin   | 1995           | MaleAge90to94       | 190        |
| Benin   | 1995           | MaleAge95to99       | 12         |
| Benin   | 1996           | FemaleAge0to4       | 562197     |
| Benin   | 1996           | FemaleAge10to14     | 385061     |
| Benin   | 1996           | FemaleAge15to19     | 251171     |
| Benin   | 1996           | FemaleAge20to24     | 139765     |
| Benin   | 1996           | FemaleAge25to29     | 110782     |
| Benin   | 1996           | FemaleAge30to34     | 101812     |
| Benin   | 1996           | FemaleAge35to39     | 101003     |
| Benin   | 1996           | FemaleAge40to44     | 101609     |
| Benin   | 1996           | FemaleAge45to49     | 100381     |
| Benin   | 1996           | FemaleAge50to54     | 95830      |
| Benin   | 1996           | FemaleAge55to59     | 76928      |
| Benin   | 1996           | FemaleAge5to9       | 460385     |
| Benin   | 1996           | FemaleAge60to64     | 60101      |
| Benin   | 1996           | FemaleAge65to69     | 45719      |

Dietary calcium and zinc deficiency risks are decreasing but remain prevalent

| Country | Reference year | Age/gender group    | Population |
|---------|----------------|---------------------|------------|
| Benin   | 1996           | FemaleAge70to74     | 32978      |
| Benin   | 1996           | FemaleAge75to79     | 20516      |
| Benin   | 1996           | FemaleAge80to84     | 9561       |
| Benin   | 1996           | FemaleAge85to89     | 2964       |
| Benin   | 1996           | FemaleAge90to94     | 517        |
| Benin   | 1996           | FemaleAge95to99     | 36         |
| Benin   | 1996           | FemaleAgeAbove100   | 1          |
| Benin   | 1996           | FemaleLactAge15to19 | 41934      |
| Benin   | 1996           | FemaleLactAge20to24 | 76747      |
| Benin   | 1996           | FemaleLactAge25to29 | 67988      |
| Benin   | 1996           | FemaleLactAge30to34 | 49932      |
| Benin   | 1996           | FemaleLactAge35to39 | 29577      |
| Benin   | 1996           | FemaleLactAge40to44 | 12307      |
| Benin   | 1996           | FemaleLactAge45to49 | 3474       |
| Benin   | 1996           | FemalePregAge15to19 | 31450      |
| Benin   | 1996           | FemalePregAge20to24 | 57560      |
| Benin   | 1996           | FemalePregAge25to29 | 50991      |
| Benin   | 1996           | FemalePregAge30to34 | 37449      |
| Benin   | 1996           | FemalePregAge35to39 | 22183      |
| Benin   | 1996           | FemalePregAge40to44 | 9230       |
| Benin   | 1996           | FemalePregAge45to49 | 2605       |
| Benin   | 1996           | MaleAge0to4         | 564818     |
| Benin   | 1996           | MaleAge10to14       | 379451     |
| Benin   | 1996           | MaleAge15to19       | 317030     |
| Benin   | 1996           | MaleAge20to24       | 267219     |
| Benin   | 1996           | MaleAge25to29       | 227580     |
| Benin   | 1996           | MaleAge30to34       | 188752     |
| Benin   | 1996           | MaleAge35to39       | 151077     |
| Benin   | 1996           | MaleAge40to44       | 120966     |
| Benin   | 1996           | MaleAge45to49       | 90410      |
| Benin   | 1996           | MaleAge50to54       | 77972      |
| Benin   | 1996           | MaleAge55to59       | 59947      |
| Benin   | 1996           | MaleAge5to9         | 457225     |
| Benin   | 1996           | MaleAge60to64       | 44159      |
| Benin   | 1996           | MaleAge65to69       | 32603      |
| Benin   | 1996           | MaleAge70to74       | 22806      |
| Benin   | 1996           | MaleAge75to79       | 13508      |
| Benin   | 1996           | MaleAge80to84       | 6055       |
| Benin   | 1996           | MaleAge85to89       | 1733       |
| Benin   | 1996           | MaleAge90to94       | 252        |
| Benin   | 1996           | MaleAge95to99       | 11         |
| Benin   | 1997           | FemaleAge0to4       | 577280     |
| Benin   | 1997           | FemaleAge10to14     | 397365     |
| Benin   | 1997           | FemaleAge15to19     | 260960     |
| Benin   | 1997           | FemaleAge20to24     | 147560     |
| Benin   | 1997           | FemaleAge25to29     | 117749     |
| Benin   | 1997           | FemaleAge30to34     | 108332     |
| Benin   | 1997           | FemaleAge35to39     | 106736     |
| Benin   | 1997           | FemaleAge40to44     | 105742     |
| Benin   | 1997           | FemaleAge45to49     | 101896     |
| Benin   | 1997           | FemaleAge50to54     | 97091      |
| Benin   | 1997           | FemaleAge55to59     | 79954      |
| Benin   | 1997           | FemaleAge5to9       | 476007     |
| Benin   | 1997           | FemaleAge60to64     | 61554      |
| Benin   | 1997           | FemaleAge65to69     | 46636      |
| Benin   | 1997           | FemaleAge70to74     | 33255      |
| Benin   | 1997           | FemaleAge75to79     | 20752      |
| Benin   | 1997           | FemaleAge80to84     | 9898       |
| Benin   | 1997           | FemaleAge85to89     | 3185       |
| Benin   | 1997           | FemaleAge90to94     | 600        |
| Benin   | 1997           | FemaleAge95to99     | 50         |
| Benin   | 1997           | FemaleAgeAbove100   | 1          |
| Benin   | 1997           | FemaleLactAge15to19 | 41934      |
| Benin   | 1997           | FemaleLactAge20to24 | 76747      |
| Benin   | 1997           | FemaleLactAge25to29 | 67988      |
| Benin   | 1997           | FemaleLactAge30to34 | 49932      |
| Benin   | 1997           | FemaleLactAge35to39 | 29577      |
| Benin   | 1997           | FemaleLactAge40to44 | 12307      |
| Benin   | 1997           | FemaleLactAge45to49 | 3474       |
| Benin   | 1997           | FemalePregAge15to19 | 31450      |
| Benin   | 1997           | FemalePregAge20to24 | 57560      |
| Benin   | 1997           | FemalePregAge25to29 | 50991      |
| Benin   | 1997           | FemalePregAge30to34 | 37449      |
| Benin   | 1997           | FemalePregAge35to39 | 22183      |
| Benin   | 1997           | FemalePregAge40to44 | 9230       |
| Benin   | 1997           | FemalePregAge45to49 | 2605       |
| Benin   | 1997           | MaleAge0to4         | 580394     |
| Benin   | 1997           | MaleAge10to14       | 392026     |
| Benin   | 1997           | MaleAge15to19       | 326719     |
| Benin   | 1997           | MaleAge20to24       | 273994     |
| Benin   | 1997           | MaleAge25to29       | 233002     |
| Benin   | 1997           | MaleAge30to34       | 194831     |
| Benin   | 1997           | MaleAge35to39       | 156723     |
| Benin   | 1997           | MaleAge40to44       | 125229     |
| Benin   | 1997           | MaleAge45to49       | 94759      |
| Benin   | 1997           | MaleAge50to54       | 78220      |
| Benin   | 1997           | MaleAge55to59       | 62794      |
| Benin   | 1997           | MaleAge5to9         | 473118     |

Dietary calcium and zinc deficiency risks are decreasing but remain prevalent

| Country | Reference year | Age/gender group    | Population |
|---------|----------------|---------------------|------------|
| Benin   | 1997           | MaleAge60to64       | 45311      |
| Benin   | 1997           | MaleAge65to69       | 33092      |
| Benin   | 1997           | MaleAge70to74       | 22948      |
| Benin   | 1997           | MaleAge75to79       | 13668      |
| Benin   | 1997           | MaleAge80to84       | 6233       |
| Benin   | 1997           | MaleAge85to89       | 1891       |
| Benin   | 1997           | MaleAge90to94       | 301        |
| Benin   | 1997           | MaleAge95to99       | 18         |
| Benin   | 1998           | FemaleAge0to4       | 590785     |
| Benin   | 1998           | FemaleAge10to14     | 410224     |
| Benin   | 1998           | FemaleAge15to19     | 271298     |
| Benin   | 1998           | FemaleAge20to24     | 155606     |
| Benin   | 1998           | FemaleAge25to29     | 124758     |
| Benin   | 1998           | FemaleAge30to34     | 114890     |
| Benin   | 1998           | FemaleAge35to39     | 112635     |
| Benin   | 1998           | FemaleAge40to44     | 110359     |
| Benin   | 1998           | FemaleAge45to49     | 103727     |
| Benin   | 1998           | FemaleAge50to54     | 98065      |
| Benin   | 1998           | FemaleAge55to59     | 83118      |
| Benin   | 1998           | FemaleAge5to9       | 491491     |
| Benin   | 1998           | FemaleAge60to64     | 63221      |
| Benin   | 1998           | FemaleAge65to69     | 47764      |
| Benin   | 1998           | FemaleAge70to74     | 33658      |
| Benin   | 1998           | FemaleAge75to79     | 20959      |
| Benin   | 1998           | FemaleAge80to84     | 10057      |
| Benin   | 1998           | FemaleAge85to89     | 3250       |
| Benin   | 1998           | FemaleAge90to94     | 643        |
| Benin   | 1998           | FemaleAge95to99     | 67         |
| Benin   | 1998           | FemaleAgeAbove100   | 2          |
| Benin   | 1998           | FemaleLactAge15to19 | 41934      |
| Benin   | 1998           | FemaleLactAge20to24 | 76747      |
| Benin   | 1998           | FemaleLactAge25to29 | 67988      |
| Benin   | 1998           | FemaleLactAge30to34 | 49932      |
| Benin   | 1998           | FemaleLactAge35to39 | 29577      |
| Benin   | 1998           | FemaleLactAge40to44 | 12307      |
| Benin   | 1998           | FemaleLactAge45to49 | 3474       |
| Benin   | 1998           | FemalePregAge15to19 | 31450      |
| Benin   | 1998           | FemalePregAge20to24 | 57560      |
| Benin   | 1998           | FemalePregAge25to29 | 50991      |
| Benin   | 1998           | FemalePregAge30to34 | 37449      |
| Benin   | 1998           | FemalePregAge35to39 | 22183      |
| Benin   | 1998           | FemalePregAge40to44 | 9230       |
| Benin   | 1998           | FemalePregAge45to49 | 2605       |
| Benin   | 1998           | MaleAge0to4         | 594240     |
| Benin   | 1998           | MaleAge10to14       | 405115     |
| Benin   | 1998           | MaleAge15to19       | 337064     |
| Benin   | 1998           | MaleAge20to24       | 281156     |
| Benin   | 1998           | MaleAge25to29       | 238237     |
| Benin   | 1998           | MaleAge30to34       | 200747     |
| Benin   | 1998           | MaleAge35to39       | 162528     |
| Benin   | 1998           | MaleAge40to44       | 129323     |
| Benin   | 1998           | MaleAge45to49       | 99824      |
| Benin   | 1998           | MaleAge50to54       | 78277      |
| Benin   | 1998           | MaleAge55to59       | 65718      |
| Benin   | 1998           | MaleAge5to9         | 488421     |
| Benin   | 1998           | MaleAge60to64       | 46654      |
| Benin   | 1998           | MaleAge65to69       | 33708      |
| Benin   | 1998           | MaleAge70to74       | 23143      |
| Benin   | 1998           | MaleAge75to79       | 13772      |
| Benin   | 1998           | MaleAge80to84       | 6267       |
| Benin   | 1998           | MaleAge85to89       | 1939       |
| Benin   | 1998           | MaleAge90to94       | 328        |
| Benin   | 1998           | MaleAge95to99       | 28         |
| Benin   | 1999           | FemaleAge0to4       | 604486     |
| Benin   | 1999           | FemaleAge10to14     | 423800     |
| Benin   | 1999           | FemaleAge15to19     | 282362     |
| Benin   | 1999           | FemaleAge20to24     | 164188     |
| Benin   | 1999           | FemaleAge25to29     | 132002     |
| Benin   | 1999           | FemaleAge30to34     | 121594     |
| Benin   | 1999           | FemaleAge35to39     | 118755     |
| Benin   | 1999           | FemaleAge40to44     | 115362     |
| Benin   | 1999           | FemaleAge45to49     | 106095     |
| Benin   | 1999           | FemaleAge50to54     | 99113      |
| Benin   | 1999           | FemaleAge55to59     | 86047      |
| Benin   | 1999           | FemaleAge5to9       | 506697     |
| Benin   | 1999           | FemaleAge60to64     | 65281      |
| Benin   | 1999           | FemaleAge65to69     | 49107      |
| Benin   | 1999           | FemaleAge70to74     | 34275      |
| Benin   | 1999           | FemaleAge75to79     | 21186      |
| Benin   | 1999           | FemaleAge80to84     | 10052      |
| Benin   | 1999           | FemaleAge85to89     | 3155       |
| Benin   | 1999           | FemaleAge90to94     | 620        |
| Benin   | 1999           | FemaleAge95to99     | 71         |
| Benin   | 1999           | FemaleAgeAbove100   | 2          |
| Benin   | 1999           | FemaleLactAge15to19 | 41934      |
| Benin   | 1999           | FemaleLactAge20to24 | 76747      |
| Benin   | 1999           | FemaleLactAge25to29 | 67988      |
| Benin   | 1999           | FemaleLactAge30to34 | 49932      |

Dietary calcium and zinc deficiency risks are decreasing but remain prevalent

| Country | Reference year | Age/gender group    | Population |
|---------|----------------|---------------------|------------|
| Benin   | 1999           | FemaleLactAge35to39 | 29577      |
| Benin   | 1999           | FemaleLactAge40to44 | 12307      |
| Benin   | 1999           | FemaleLactAge45to49 | 3474       |
| Benin   | 1999           | FemalePregAge15to19 | 31450      |
| Benin   | 1999           | FemalePregAge20to24 | 57560      |
| Benin   | 1999           | FemalePregAge25to29 | 50991      |
| Benin   | 1999           | FemalePregAge30to34 | 37449      |
| Benin   | 1999           | FemalePregAge35to39 | 22183      |
| Benin   | 1999           | FemalePregAge40to44 | 9230       |
| Benin   | 1999           | FemalePregAge45to49 | 2605       |
| Benin   | 1999           | MaleAge0to4         | 608619     |
| Benin   | 1999           | MaleAge10to14       | 419124     |
| Benin   | 1999           | MaleAge15to19       | 348453     |
| Benin   | 1999           | MaleAge20to24       | 289213     |
| Benin   | 1999           | MaleAge25to29       | 243883     |
| Benin   | 1999           | MaleAge30to34       | 206686     |
| Benin   | 1999           | MaleAge35to39       | 168562     |
| Benin   | 1999           | MaleAge40to44       | 133787     |
| Benin   | 1999           | MaleAge45to49       | 105033     |
| Benin   | 1999           | MaleAge50to54       | 79143      |
| Benin   | 1999           | MaleAge55to59       | 68271      |
| Benin   | 1999           | MaleAge5to9         | 503433     |
| Benin   | 1999           | MaleAge60to64       | 48371      |
| Benin   | 1999           | MaleAge65to69       | 34531      |
| Benin   | 1999           | MaleAge70to74       | 23460      |
| Benin   | 1999           | MaleAge75to79       | 13853      |
| Benin   | 1999           | MaleAge80to84       | 6184       |
| Benin   | 1999           | MaleAge85to89       | 1860       |
| Benin   | 1999           | MaleAge90to94       | 317        |
| Benin   | 1999           | MaleAge95to99       | 31         |
| Bolivia | 1992           | FemaleAge0to4       | 548022     |
| Bolivia | 1992           | FemaleAge10to14     | 414497     |
| Bolivia | 1992           | FemaleAge15to19     | 317537     |
| Bolivia | 1992           | FemaleAge20to24     | 195373     |
| Bolivia | 1992           | FemaleAge25to29     | 161552     |
| Bolivia | 1992           | FemaleAge30to34     | 156247     |
| Bolivia | 1992           | FemaleAge35to39     | 149743     |
| Bolivia | 1992           | FemaleAge40to44     | 148188     |
| Bolivia | 1992           | FemaleAge45to49     | 131583     |
| Bolivia | 1992           | FemaleAge50to54     | 113293     |
| Bolivia | 1992           | FemaleAge55to59     | 96197      |
| Bolivia | 1992           | FemaleAge5to9       | 473206     |
| Bolivia | 1992           | FemaleAge60to64     | 81140      |
| Bolivia | 1992           | FemaleAge65to69     | 61136      |
| Bolivia | 1992           | FemaleAge70to74     | 41152      |
| Bolivia | 1992           | FemaleAge75to79     | 26725      |
| Bolivia | 1992           | FemaleAge80to84     | 13640      |
| Bolivia | 1992           | FemaleAge85to89     | 4667       |
| Bolivia | 1992           | FemaleAge90to94     | 1092       |
| Bolivia | 1992           | FemaleAge95to99     | 155        |
| Bolivia | 1992           | FemaleAgeAbove100   | 11         |
| Bolivia | 1992           | FemaleLactAge15to19 | 33787      |
| Bolivia | 1992           | FemaleLactAge20to24 | 74908      |
| Bolivia | 1992           | FemaleLactAge25to29 | 63645      |
| Bolivia | 1992           | FemaleLactAge30to34 | 44544      |
| Bolivia | 1992           | FemaleLactAge35to39 | 28548      |
| Bolivia | 1992           | FemaleLactAge40to44 | 11456      |
| Bolivia | 1992           | FemaleLactAge45to49 | 2540       |
| Bolivia | 1992           | FemalePregAge15to19 | 25341      |
| Bolivia | 1992           | FemalePregAge20to24 | 56181      |
| Bolivia | 1992           | FemalePregAge25to29 | 47734      |
| Bolivia | 1992           | FemalePregAge30to34 | 33408      |
| Bolivia | 1992           | FemalePregAge35to39 | 21411      |
| Bolivia | 1992           | FemalePregAge40to44 | 8592       |
| Bolivia | 1992           | FemalePregAge45to49 | 1905       |
| Bolivia | 1992           | MaleAge0to4         | 568857     |
| Bolivia | 1992           | MaleAge10to14       | 421857     |
| Bolivia | 1992           | MaleAge15to19       | 377683     |
| Bolivia | 1992           | MaleAge20to24       | 323107     |
| Bolivia | 1992           | MaleAge25to29       | 267192     |
| Bolivia | 1992           | MaleAge30to34       | 226629     |
| Bolivia | 1992           | MaleAge35to39       | 189928     |
| Bolivia | 1992           | MaleAge40to44       | 158508     |
| Bolivia | 1992           | MaleAge45to49       | 127656     |
| Bolivia | 1992           | MaleAge50to54       | 104851     |
| Bolivia | 1992           | MaleAge55to59       | 87153      |
| Bolivia | 1992           | MaleAge5to9         | 487560     |
| Bolivia | 1992           | MaleAge60to64       | 71851      |
| Bolivia | 1992           | MaleAge65to69       | 52765      |
| Bolivia | 1992           | MaleAge70to74       | 34051      |
| Bolivia | 1992           | MaleAge75to79       | 20844      |
| Bolivia | 1992           | MaleAge80to84       | 9857       |
| Bolivia | 1992           | MaleAge85to89       | 3052       |
| Bolivia | 1992           | MaleAge90to94       | 645        |
| Bolivia | 1992           | MaleAge95to99       | 86         |
| Bolivia | 1992           | MaleAgeAbove100     | 5          |
| Bolivia | 1993           | FemaleAge0to4       | 560996     |
| Bolivia | 1993           | FemaleAge10to14     | 422833     |

Dietary calcium and zinc deficiency risks are decreasing but remain prevalent

| Country | Reference year | Age/gender group    | Population |
|---------|----------------|---------------------|------------|
| Bolivia | 1993           | FemaleAge15to19     | 321150     |
| Bolivia | 1993           | FemaleAge20to24     | 205275     |
| Bolivia | 1993           | FemaleAge25to29     | 167877     |
| Bolivia | 1993           | FemaleAge30to34     | 161148     |
| Bolivia | 1993           | FemaleAge35to39     | 155099     |
| Bolivia | 1993           | FemaleAge40to44     | 152656     |
| Bolivia | 1993           | FemaleAge45to49     | 136902     |
| Bolivia | 1993           | FemaleAge50to54     | 115009     |
| Bolivia | 1993           | FemaleAge55to59     | 98574      |
| Bolivia | 1993           | FemaleAge5to9       | 484175     |
| Bolivia | 1993           | FemaleAge60to64     | 82317      |
| Bolivia | 1993           | FemaleAge65to69     | 64367      |
| Bolivia | 1993           | FemaleAge70to74     | 42494      |
| Bolivia | 1993           | FemaleAge75to79     | 27172      |
| Bolivia | 1993           | FemaleAge80to84     | 14294      |
| Bolivia | 1993           | FemaleAge85to89     | 4883       |
| Bolivia | 1993           | FemaleAge90to94     | 1167       |
| Bolivia | 1993           | FemaleAge95to99     | 182        |
| Bolivia | 1993           | FemaleAgeAbove100   | 12         |
| Bolivia | 1993           | FemaleLactAge15to19 | 33787      |
| Bolivia | 1993           | FemaleLactAge20to24 | 74908      |
| Bolivia | 1993           | FemaleLactAge25to29 | 63645      |
| Bolivia | 1993           | FemaleLactAge30to34 | 44544      |
| Bolivia | 1993           | FemaleLactAge35to39 | 28548      |
| Bolivia | 1993           | FemaleLactAge40to44 | 11456      |
| Bolivia | 1993           | FemaleLactAge45to49 | 2540       |
| Bolivia | 1993           | FemalePregAge15to19 | 25341      |
| Bolivia | 1993           | FemalePregAge20to24 | 56181      |
| Bolivia | 1993           | FemalePregAge25to29 | 47734      |
| Bolivia | 1993           | FemalePregAge30to34 | 33408      |
| Bolivia | 1993           | FemalePregAge35to39 | 21411      |
| Bolivia | 1993           | FemalePregAge40to44 | 8592       |
| Bolivia | 1993           | FemalePregAge45to49 | 1905       |
| Bolivia | 1993           | MaleAge0to4         | 582935     |
| Bolivia | 1993           | MaleAge10to14       | 431454     |
| Bolivia | 1993           | MaleAge15to19       | 382251     |
| Bolivia | 1993           | MaleAge20to24       | 333431     |
| Bolivia | 1993           | MaleAge25to29       | 273640     |
| Bolivia | 1993           | MaleAge30to34       | 231671     |
| Bolivia | 1993           | MaleAge35to39       | 195435     |
| Bolivia | 1993           | MaleAge40to44       | 162439     |
| Bolivia | 1993           | MaleAge45to49       | 132610     |
| Bolivia | 1993           | MaleAge50to54       | 106576     |
| Bolivia | 1993           | MaleAge55to59       | 89386      |
| Bolivia | 1993           | MaleAge5to9         | 499551     |
| Bolivia | 1993           | MaleAge60to64       | 72768      |
| Bolivia | 1993           | MaleAge65to69       | 55448      |
| Bolivia | 1993           | MaleAge70to74       | 35120      |
| Bolivia | 1993           | MaleAge75to79       | 21155      |
| Bolivia | 1993           | MaleAge80to84       | 10308      |
| Bolivia | 1993           | MaleAge85to89       | 3183       |
| Bolivia | 1993           | MaleAge90to94       | 694        |
| Bolivia | 1993           | MaleAge95to99       | 102        |
| Bolivia | 1993           | MaleAgeAbove100     | 5          |
| Bolivia | 1994           | FemaleAge0to4       | 572420     |
| Bolivia | 1994           | FemaleAge10to14     | 431818     |
| Bolivia | 1994           | FemaleAge15to19     | 325391     |
| Bolivia | 1994           | FemaleAge20to24     | 214368     |
| Bolivia | 1994           | FemaleAge25to29     | 174845     |
| Bolivia | 1994           | FemaleAge30to34     | 166178     |
| Bolivia | 1994           | FemaleAge35to39     | 160363     |
| Bolivia | 1994           | FemaleAge40to44     | 157266     |
| Bolivia | 1994           | FemaleAge45to49     | 142272     |
| Bolivia | 1994           | FemaleAge50to54     | 117323     |
| Bolivia | 1994           | FemaleAge55to59     | 100856     |
| Bolivia | 1994           | FemaleAge5to9       | 495422     |
| Bolivia | 1994           | FemaleAge60to64     | 83636      |
| Bolivia | 1994           | FemaleAge65to69     | 67410      |
| Bolivia | 1994           | FemaleAge70to74     | 44283      |
| Bolivia | 1994           | FemaleAge75to79     | 27809      |
| Bolivia | 1994           | FemaleAge80to84     | 14745      |
| Bolivia | 1994           | FemaleAge85to89     | 4996       |
| Bolivia | 1994           | FemaleAge90to94     | 1181       |
| Bolivia | 1994           | FemaleAge95to99     | 190        |
| Bolivia | 1994           | FemaleAgeAbove100   | 13         |
| Bolivia | 1994           | FemaleLactAge15to19 | 33787      |
| Bolivia | 1994           | FemaleLactAge20to24 | 74908      |
| Bolivia | 1994           | FemaleLactAge25to29 | 63645      |
| Bolivia | 1994           | FemaleLactAge30to34 | 44544      |
| Bolivia | 1994           | FemaleLactAge35to39 | 28548      |
| Bolivia | 1994           | FemaleLactAge40to44 | 11456      |
| Bolivia | 1994           | FemaleLactAge45to49 | 2540       |
| Bolivia | 1994           | FemalePregAge15to19 | 25341      |
| Bolivia | 1994           | FemalePregAge20to24 | 56181      |
| Bolivia | 1994           | FemalePregAge25to29 | 47734      |
| Bolivia | 1994           | FemalePregAge30to34 | 33408      |
| Bolivia | 1994           | FemalePregAge35to39 | 21411      |
| Bolivia | 1994           | FemalePregAge40to44 | 8592       |

Dietary calcium and zinc deficiency risks are decreasing but remain prevalent

| Country | Reference year | Age/gender group    | Population |
|---------|----------------|---------------------|------------|
| Bolivia | 1994           | FemalePregAge45to49 | 1905       |
| Bolivia | 1994           | MaleAge0to4         | 595351     |
| Bolivia | 1994           | MaleAge10to14       | 441672     |
| Bolivia | 1994           | MaleAge15to19       | 387578     |
| Bolivia | 1994           | MaleAge20to24       | 343043     |
| Bolivia | 1994           | MaleAge25to29       | 280756     |
| Bolivia | 1994           | MaleAge30to34       | 236870     |
| Bolivia | 1994           | MaleAge35to39       | 200868     |
| Bolivia | 1994           | MaleAge40to44       | 166603     |
| Bolivia | 1994           | MaleAge45to49       | 137539     |
| Bolivia | 1994           | MaleAge50to54       | 108858     |
| Bolivia | 1994           | MaleAge55to59       | 91578      |
| Bolivia | 1994           | MaleAge5to9         | 511752     |
| Bolivia | 1994           | MaleAge60to64       | 73869      |
| Bolivia | 1994           | MaleAge65to69       | 57946      |
| Bolivia | 1994           | MaleAge70to74       | 36539      |
| Bolivia | 1994           | MaleAge75to79       | 21597      |
| Bolivia | 1994           | MaleAge80to84       | 10537      |
| Bolivia | 1994           | MaleAge85to89       | 3223       |
| Bolivia | 1994           | MaleAge90to94       | 697        |
| Bolivia | 1994           | MaleAge95to99       | 105        |
| Bolivia | 1994           | MaleAgeAbove100     | 6          |
| Bolivia | 1995           | FemaleAge0to4       | 581409     |
| Bolivia | 1995           | FemaleAge10to14     | 441308     |
| Bolivia | 1995           | FemaleAge15to19     | 331034     |
| Bolivia | 1995           | FemaleAge20to24     | 222079     |
| Bolivia | 1995           | FemaleAge25to29     | 182703     |
| Bolivia | 1995           | FemaleAge30to34     | 171516     |
| Bolivia | 1995           | FemaleAge35to39     | 165450     |
| Bolivia | 1995           | FemaleAge40to44     | 162159     |
| Bolivia | 1995           | FemaleAge45to49     | 147412     |
| Bolivia | 1995           | FemaleAge50to54     | 120529     |
| Bolivia | 1995           | FemaleAge55to59     | 102930     |
| Bolivia | 1995           | FemaleAge5to9       | 506784     |
| Bolivia | 1995           | FemaleAge60to64     | 85324      |
| Bolivia | 1995           | FemaleAge65to69     | 70013      |
| Bolivia | 1995           | FemaleAge70to74     | 46595      |
| Bolivia | 1995           | FemaleAge75to79     | 28707      |
| Bolivia | 1995           | FemaleAge80to84     | 15034      |
| Bolivia | 1995           | FemaleAge85to89     | 5033       |
| Bolivia | 1995           | FemaleAge90to94     | 1096       |
| Bolivia | 1995           | FemaleAge95to99     | 151        |
| Bolivia | 1995           | FemaleAgeAbove100   | 14         |
| Bolivia | 1995           | FemaleLactAge15to19 | 33787      |
| Bolivia | 1995           | FemaleLactAge20to24 | 74908      |
| Bolivia | 1995           | FemaleLactAge25to29 | 63645      |
| Bolivia | 1995           | FemaleLactAge30to34 | 44544      |
| Bolivia | 1995           | FemaleLactAge35to39 | 28548      |
| Bolivia | 1995           | FemaleLactAge40to44 | 11456      |
| Bolivia | 1995           | FemaleLactAge45to49 | 2540       |
| Bolivia | 1995           | FemalePregAge15to19 | 25341      |
| Bolivia | 1995           | FemalePregAge20to24 | 56181      |
| Bolivia | 1995           | FemalePregAge25to29 | 47734      |
| Bolivia | 1995           | FemalePregAge30to34 | 33408      |
| Bolivia | 1995           | FemalePregAge35to39 | 21411      |
| Bolivia | 1995           | FemalePregAge40to44 | 8592       |
| Bolivia | 1995           | FemalePregAge45to49 | 1905       |
| Bolivia | 1995           | MaleAge0to4         | 605120     |
| Bolivia | 1995           | MaleAge10to14       | 452339     |
| Bolivia | 1995           | MaleAge15to19       | 394397     |
| Bolivia | 1995           | MaleAge20to24       | 351403     |
| Bolivia | 1995           | MaleAge25to29       | 288825     |
| Bolivia | 1995           | MaleAge30to34       | 242386     |
| Bolivia | 1995           | MaleAge35to39       | 206108     |
| Bolivia | 1995           | MaleAge40to44       | 171196     |
| Bolivia | 1995           | MaleAge45to49       | 142188     |
| Bolivia | 1995           | MaleAge50to54       | 111943     |
| Bolivia | 1995           | MaleAge55to59       | 93618      |
| Bolivia | 1995           | MaleAge5to9         | 524065     |
| Bolivia | 1995           | MaleAge60to64       | 75367      |
| Bolivia | 1995           | MaleAge65to69       | 60058      |
| Bolivia | 1995           | MaleAge70to74       | 38381      |
| Bolivia | 1995           | MaleAge75to79       | 22220      |
| Bolivia | 1995           | MaleAge80to84       | 10595      |
| Bolivia | 1995           | MaleAge85to89       | 3173       |
| Bolivia | 1995           | MaleAge90to94       | 617        |
| Bolivia | 1995           | MaleAge95to99       | 76         |
| Bolivia | 1995           | MaleAgeAbove100     | 6          |
| Bolivia | 1996           | FemaleAge0to4       | 590572     |
| Bolivia | 1996           | FemaleAge10to14     | 450933     |
| Bolivia | 1996           | FemaleAge15to19     | 333568     |
| Bolivia | 1996           | FemaleAge20to24     | 226731     |
| Bolivia | 1996           | FemaleAge25to29     | 189311     |
| Bolivia | 1996           | FemaleAge30to34     | 176306     |
| Bolivia | 1996           | FemaleAge35to39     | 170898     |
| Bolivia | 1996           | FemaleAge40to44     | 167137     |
| Bolivia | 1996           | FemaleAge45to49     | 152281     |
| Bolivia | 1996           | FemaleAge50to54     | 124301     |



Dietary calcium and zinc deficiency risks are decreasing but remain prevalent

| Country | Reference year | Age/gender group    | Population |
|---------|----------------|---------------------|------------|
| Bolivia | 1996           | FemaleAge55to59     | 104681     |
| Bolivia | 1996           | FemaleAge5to9       | 518558     |
| Bolivia | 1996           | FemaleAge60to64     | 86998      |
| Bolivia | 1996           | FemaleAge65to69     | 71579      |
| Bolivia | 1996           | FemaleAge70to74     | 48720      |
| Bolivia | 1996           | FemaleAge75to79     | 29501      |
| Bolivia | 1996           | FemaleAge80to84     | 15616      |
| Bolivia | 1996           | FemaleAge85to89     | 5668       |
| Bolivia | 1996           | FemaleAge90to94     | 1300       |
| Bolivia | 1996           | FemaleAge95to99     | 172        |
| Bolivia | 1996           | FemaleAgeAbove100   | 15         |
| Bolivia | 1996           | FemaleLactAge15to19 | 35686      |
| Bolivia | 1996           | FemaleLactAge20to24 | 75601      |
| Bolivia | 1996           | FemaleLactAge25to29 | 64939      |
| Bolivia | 1996           | FemaleLactAge30to34 | 45147      |
| Bolivia | 1996           | FemaleLactAge35to39 | 28238      |
| Bolivia | 1996           | FemaleLactAge40to44 | 11360      |
| Bolivia | 1996           | FemaleLactAge45to49 | 2402       |
| Bolivia | 1996           | FemalePregAge15to19 | 26765      |
| Bolivia | 1996           | FemalePregAge20to24 | 56701      |
| Bolivia | 1996           | FemalePregAge25to29 | 48704      |
| Bolivia | 1996           | FemalePregAge30to34 | 33860      |
| Bolivia | 1996           | FemalePregAge35to39 | 21179      |
| Bolivia | 1996           | FemalePregAge40to44 | 8520       |
| Bolivia | 1996           | FemalePregAge45to49 | 1802       |
| Bolivia | 1996           | MaleAge0to4         | 615124     |
| Bolivia | 1996           | MaleAge10to14       | 463064     |
| Bolivia | 1996           | MaleAge15to19       | 401257     |
| Bolivia | 1996           | MaleAge20to24       | 357903     |
| Bolivia | 1996           | MaleAge25to29       | 297885     |
| Bolivia | 1996           | MaleAge30to34       | 248244     |
| Bolivia | 1996           | MaleAge35to39       | 211187     |
| Bolivia | 1996           | MaleAge40to44       | 175911     |
| Bolivia | 1996           | MaleAge45to49       | 146324     |
| Bolivia | 1996           | MaleAge50to54       | 115438     |
| Bolivia | 1996           | MaleAge55to59       | 95270      |
| Bolivia | 1996           | MaleAge5to9         | 536883     |
| Bolivia | 1996           | MaleAge60to64       | 76852      |
| Bolivia | 1996           | MaleAge65to69       | 61275      |
| Bolivia | 1996           | MaleAge70to74       | 40132      |
| Bolivia | 1996           | MaleAge75to79       | 22885      |
| Bolivia | 1996           | MaleAge80to84       | 11104      |
| Bolivia | 1996           | MaleAge85to89       | 3633       |
| Bolivia | 1996           | MaleAge90to94       | 739        |
| Bolivia | 1996           | MaleAge95to99       | 89         |
| Bolivia | 1996           | MaleAgeAbove100     | 6          |
| Bolivia | 1997           | FemaleAge0to4       | 594360     |
| Bolivia | 1997           | FemaleAge10to14     | 461439     |
| Bolivia | 1997           | FemaleAge15to19     | 340962     |
| Bolivia | 1997           | FemaleAge20to24     | 231369     |
| Bolivia | 1997           | FemaleAge25to29     | 199304     |
| Bolivia | 1997           | FemaleAge30to34     | 182523     |
| Bolivia | 1997           | FemaleAge35to39     | 175904     |
| Bolivia | 1997           | FemaleAge40to44     | 172352     |
| Bolivia | 1997           | FemaleAge45to49     | 156818     |
| Bolivia | 1997           | FemaleAge50to54     | 128987     |
| Bolivia | 1997           | FemaleAge55to59     | 106334     |
| Bolivia | 1997           | FemaleAge5to9       | 531297     |
| Bolivia | 1997           | FemaleAge60to64     | 89142      |
| Bolivia | 1997           | FemaleAge65to69     | 72874      |
| Bolivia | 1997           | FemaleAge70to74     | 51350      |
| Bolivia | 1997           | FemaleAge75to79     | 30361      |
| Bolivia | 1997           | FemaleAge80to84     | 16045      |
| Bolivia | 1997           | FemaleAge85to89     | 6200       |
| Bolivia | 1997           | FemaleAge90to94     | 1448       |
| Bolivia | 1997           | FemaleAge95to99     | 210        |
| Bolivia | 1997           | FemaleAgeAbove100   | 16         |
| Bolivia | 1997           | FemaleLactAge15to19 | 35686      |
| Bolivia | 1997           | FemaleLactAge20to24 | 75601      |
| Bolivia | 1997           | FemaleLactAge25to29 | 64939      |
| Bolivia | 1997           | FemaleLactAge30to34 | 45147      |
| Bolivia | 1997           | FemaleLactAge35to39 | 28238      |
| Bolivia | 1997           | FemaleLactAge40to44 | 11360      |
| Bolivia | 1997           | FemaleLactAge45to49 | 2402       |
| Bolivia | 1997           | FemalePregAge15to19 | 26765      |
| Bolivia | 1997           | FemalePregAge20to24 | 56701      |
| Bolivia | 1997           | FemalePregAge25to29 | 48704      |
| Bolivia | 1997           | FemalePregAge30to34 | 33860      |
| Bolivia | 1997           | FemalePregAge35to39 | 21179      |
| Bolivia | 1997           | FemalePregAge40to44 | 8520       |
| Bolivia | 1997           | FemalePregAge45to49 | 1802       |
| Bolivia | 1997           | MaleAge0to4         | 619383     |
| Bolivia | 1997           | MaleAge10to14       | 474687     |
| Bolivia | 1997           | MaleAge15to19       | 409788     |
| Bolivia | 1997           | MaleAge20to24       | 363314     |
| Bolivia | 1997           | MaleAge25to29       | 308139     |
| Bolivia | 1997           | MaleAge30to34       | 254467     |
| Bolivia | 1997           | MaleAge35to39       | 216340     |

Dietary calcium and zinc deficiency risks are decreasing but remain prevalent

| Country | Reference year | Age/gender group    | Population |
|---------|----------------|---------------------|------------|
| Bolivia | 1997           | MaleAge40to44       | 181185     |
| Bolivia | 1997           | MaleAge45to49       | 150330     |
| Bolivia | 1997           | MaleAge50to54       | 119794     |
| Bolivia | 1997           | MaleAge55to59       | 96871      |
| Bolivia | 1997           | MaleAge5to9         | 550745     |
| Bolivia | 1997           | MaleAge60to64       | 78796      |
| Bolivia | 1997           | MaleAge65to69       | 62262      |
| Bolivia | 1997           | MaleAge70to74       | 42259      |
| Bolivia | 1997           | MaleAge75to79       | 23551      |
| Bolivia | 1997           | MaleAge80to84       | 11457      |
| Bolivia | 1997           | MaleAge85to89       | 4008       |
| Bolivia | 1997           | MaleAge90to94       | 828        |
| Bolivia | 1997           | MaleAge95to99       | 113        |
| Bolivia | 1997           | MaleAgeAbove100     | 7          |
| Bolivia | 1998           | FemaleAge0to4       | 594670     |
| Bolivia | 1998           | FemaleAge10to14     | 472486     |
| Bolivia | 1998           | FemaleAge15to19     | 349638     |
| Bolivia | 1998           | FemaleAge20to24     | 235411     |
| Bolivia | 1998           | FemaleAge25to29     | 209548     |
| Bolivia | 1998           | FemaleAge30to34     | 189186     |
| Bolivia | 1998           | FemaleAge35to39     | 181027     |
| Bolivia | 1998           | FemaleAge40to44     | 177795     |
| Bolivia | 1998           | FemaleAge45to49     | 161331     |
| Bolivia | 1998           | FemaleAge50to54     | 134240     |
| Bolivia | 1998           | FemaleAge55to59     | 108127     |
| Bolivia | 1998           | FemaleAge5to9       | 544480     |
| Bolivia | 1998           | FemaleAge60to64     | 91528      |
| Bolivia | 1998           | FemaleAge65to69     | 74106      |
| Bolivia | 1998           | FemaleAge70to74     | 54232      |
| Bolivia | 1998           | FemaleAge75to79     | 31419      |
| Bolivia | 1998           | FemaleAge80to84     | 16398      |
| Bolivia | 1998           | FemaleAge85to89     | 6539       |
| Bolivia | 1998           | FemaleAge90to94     | 1539       |
| Bolivia | 1998           | FemaleAge95to99     | 245        |
| Bolivia | 1998           | FemaleAgeAbove100   | 17         |
| Bolivia | 1998           | FemaleLactAge15to19 | 35686      |
| Bolivia | 1998           | FemaleLactAge20to24 | 75601      |
| Bolivia | 1998           | FemaleLactAge25to29 | 64939      |
| Bolivia | 1998           | FemaleLactAge30to34 | 45147      |
| Bolivia | 1998           | FemaleLactAge35to39 | 28238      |
| Bolivia | 1998           | FemaleLactAge40to44 | 11360      |
| Bolivia | 1998           | FemaleLactAge45to49 | 2402       |
| Bolivia | 1998           | FemalePregAge15to19 | 26765      |
| Bolivia | 1998           | FemalePregAge20to24 | 56701      |
| Bolivia | 1998           | FemalePregAge25to29 | 48704      |
| Bolivia | 1998           | FemalePregAge30to34 | 33860      |
| Bolivia | 1998           | FemalePregAge35to39 | 21179      |
| Bolivia | 1998           | FemalePregAge40to44 | 8520       |
| Bolivia | 1998           | FemalePregAge45to49 | 1802       |
| Bolivia | 1998           | MaleAge0to4         | 619836     |
| Bolivia | 1998           | MaleAge10to14       | 486796     |
| Bolivia | 1998           | MaleAge15to19       | 419686     |
| Bolivia | 1998           | MaleAge20to24       | 368213     |
| Bolivia | 1998           | MaleAge25to29       | 318693     |
| Bolivia | 1998           | MaleAge30to34       | 261143     |
| Bolivia | 1998           | MaleAge35to39       | 221554     |
| Bolivia | 1998           | MaleAge40to44       | 186769     |
| Bolivia | 1998           | MaleAge45to49       | 154314     |
| Bolivia | 1998           | MaleAge50to54       | 124659     |
| Bolivia | 1998           | MaleAge55to59       | 98625      |
| Bolivia | 1998           | MaleAge5to9         | 565041     |
| Bolivia | 1998           | MaleAge60to64       | 80982      |
| Bolivia | 1998           | MaleAge65to69       | 63224      |
| Bolivia | 1998           | MaleAge70to74       | 44541      |
| Bolivia | 1998           | MaleAge75to79       | 24336      |
| Bolivia | 1998           | MaleAge80to84       | 11686      |
| Bolivia | 1998           | MaleAge85to89       | 4227       |
| Bolivia | 1998           | MaleAge90to94       | 884        |
| Bolivia | 1998           | MaleAge95to99       | 133        |
| Bolivia | 1998           | MaleAgeAbove100     | 8          |
| Bolivia | 1999           | FemaleAge0to4       | 594717     |
| Bolivia | 1999           | FemaleAge10to14     | 483907     |
| Bolivia | 1999           | FemaleAge15to19     | 359012     |
| Bolivia | 1999           | FemaleAge20to24     | 239835     |
| Bolivia | 1999           | FemaleAge25to29     | 218729     |
| Bolivia | 1999           | FemaleAge30to34     | 196409     |
| Bolivia | 1999           | FemaleAge35to39     | 186293     |
| Bolivia | 1999           | FemaleAge40to44     | 183161     |
| Bolivia | 1999           | FemaleAge45to49     | 165944     |
| Bolivia | 1999           | FemaleAge50to54     | 139498     |
| Bolivia | 1999           | FemaleAge55to59     | 110437     |
| Bolivia | 1999           | FemaleAge5to9       | 556893     |
| Bolivia | 1999           | FemaleAge60to64     | 93830      |
| Bolivia | 1999           | FemaleAge65to69     | 75557      |
| Bolivia | 1999           | FemaleAge70to74     | 56966      |
| Bolivia | 1999           | FemaleAge75to79     | 32833      |
| Bolivia | 1999           | FemaleAge80to84     | 16747      |
| Bolivia | 1999           | FemaleAge85to89     | 6638       |

Dietary calcium and zinc deficiency risks are decreasing but remain prevalent

| Country                | Reference year | Age/gender group    | Population |
|------------------------|----------------|---------------------|------------|
| Bolivia                | 1999           | FemaleAge90to94     | 1567       |
| Bolivia                | 1999           | FemaleAge95to99     | 257        |
| Bolivia                | 1999           | FemaleAgeAbove100   | 19         |
| Bolivia                | 1999           | FemaleLactAge15to19 | 35686      |
| Bolivia                | 1999           | FemaleLactAge20to24 | 75601      |
| Bolivia                | 1999           | FemaleLactAge25to29 | 64939      |
| Bolivia                | 1999           | FemaleLactAge30to34 | 45147      |
| Bolivia                | 1999           | FemaleLactAge35to39 | 28238      |
| Bolivia                | 1999           | FemaleLactAge40to44 | 11360      |
| Bolivia                | 1999           | FemaleLactAge45to49 | 2402       |
| Bolivia                | 1999           | FemalePregAge15to19 | 26765      |
| Bolivia                | 1999           | FemalePregAge20to24 | 56701      |
| Bolivia                | 1999           | FemalePregAge25to29 | 48704      |
| Bolivia                | 1999           | FemalePregAge30to34 | 33860      |
| Bolivia                | 1999           | FemalePregAge35to39 | 21179      |
| Bolivia                | 1999           | FemalePregAge40to44 | 8520       |
| Bolivia                | 1999           | FemalePregAge45to49 | 1802       |
| Bolivia                | 1999           | MaleAge0to4         | 619812     |
| Bolivia                | 1999           | MaleAge10to14       | 499175     |
| Bolivia                | 1999           | MaleAge15to19       | 430251     |
| Bolivia                | 1999           | MaleAge20to24       | 373516     |
| Bolivia                | 1999           | MaleAge25to29       | 328207     |
| Bolivia                | 1999           | MaleAge30to34       | 268386     |
| Bolivia                | 1999           | MaleAge35to39       | 226827     |
| Bolivia                | 1999           | MaleAge40to44       | 192258     |
| Bolivia                | 1999           | MaleAge45to49       | 158455     |
| Bolivia                | 1999           | MaleAge50to54       | 129471     |
| Bolivia                | 1999           | MaleAge55to59       | 100852     |
| Bolivia                | 1999           | MaleAge5to9         | 578390     |
| Bolivia                | 1999           | MaleAge60to64       | 83102      |
| Bolivia                | 1999           | MaleAge65to69       | 64411      |
| Bolivia                | 1999           | MaleAge70to74       | 46649      |
| Bolivia                | 1999           | MaleAge75to79       | 25366      |
| Bolivia                | 1999           | MaleAge80to84       | 11843      |
| Bolivia                | 1999           | MaleAge85to89       | 4245       |
| Bolivia                | 1999           | MaleAge90to94       | 895        |
| Bolivia                | 1999           | MaleAge95to99       | 138        |
| Bolivia                | 1999           | MaleAgeAbove100     | 8          |
| Bosnia and Herzegovina | 1992           | FemaleAge0to4       | 146877     |
| Bosnia and Herzegovina | 1992           | FemaleAge10to14     | 160523     |
| Bosnia and Herzegovina | 1992           | FemaleAge15to19     | 142651     |
| Bosnia and Herzegovina | 1992           | FemaleAge20to24     | 136321     |
| Bosnia and Herzegovina | 1992           | FemaleAge25to29     | 154685     |
| Bosnia and Herzegovina | 1992           | FemaleAge30to34     | 177508     |
| Bosnia and Herzegovina | 1992           | FemaleAge35to39     | 179921     |
| Bosnia and Herzegovina | 1992           | FemaleAge40to44     | 132108     |
| Bosnia and Herzegovina | 1992           | FemaleAge45to49     | 105381     |
| Bosnia and Herzegovina | 1992           | FemaleAge50to54     | 117258     |
| Bosnia and Herzegovina | 1992           | FemaleAge55to59     | 119669     |
| Bosnia and Herzegovina | 1992           | FemaleAge5to9       | 163264     |
| Bosnia and Herzegovina | 1992           | FemaleAge60to64     | 103044     |
| Bosnia and Herzegovina | 1992           | FemaleAge65to69     | 69376      |
| Bosnia and Herzegovina | 1992           | FemaleAge70to74     | 42277      |
| Bosnia and Herzegovina | 1992           | FemaleAge75to79     | 31592      |
| Bosnia and Herzegovina | 1992           | FemaleAge80to84     | 21858      |
| Bosnia and Herzegovina | 1992           | FemaleAge85to89     | 8328       |
| Bosnia and Herzegovina | 1992           | FemaleAge90to94     | 2564       |
| Bosnia and Herzegovina | 1992           | FemaleAge95to99     | 860        |
| Bosnia and Herzegovina | 1992           | FemaleAgeAbove100   | 38         |
| Bosnia and Herzegovina | 1992           | FemaleLactAge15to19 | 4950       |
| Bosnia and Herzegovina | 1992           | FemaleLactAge20to24 | 17528      |
| Bosnia and Herzegovina | 1992           | FemaleLactAge25to29 | 17186      |
| Bosnia and Herzegovina | 1992           | FemaleLactAge30to34 | 8864       |
| Bosnia and Herzegovina | 1992           | FemaleLactAge35to39 | 2963       |
| Bosnia and Herzegovina | 1992           | FemaleLactAge40to44 | 457        |
| Bosnia and Herzegovina | 1992           | FemaleLactAge45to49 | 90         |
| Bosnia and Herzegovina | 1992           | FemalePregAge15to19 | 3712       |
| Bosnia and Herzegovina | 1992           | FemalePregAge20to24 | 13146      |
| Bosnia and Herzegovina | 1992           | FemalePregAge25to29 | 12889      |
| Bosnia and Herzegovina | 1992           | FemalePregAge30to34 | 6648       |
| Bosnia and Herzegovina | 1992           | FemalePregAge35to39 | 2222       |
| Bosnia and Herzegovina | 1992           | FemalePregAge40to44 | 343        |
| Bosnia and Herzegovina | 1992           | FemalePregAge45to49 | 67         |
| Bosnia and Herzegovina | 1992           | MaleAge0to4         | 157702     |
| Bosnia and Herzegovina | 1992           | MaleAge10to14       | 170500     |
| Bosnia and Herzegovina | 1992           | MaleAge15to19       | 158643     |
| Bosnia and Herzegovina | 1992           | MaleAge20to24       | 167001     |
| Bosnia and Herzegovina | 1992           | MaleAge25to29       | 187739     |
| Bosnia and Herzegovina | 1992           | MaleAge30to34       | 186846     |
| Bosnia and Herzegovina | 1992           | MaleAge35to39       | 185526     |
| Bosnia and Herzegovina | 1992           | MaleAge40to44       | 145620     |
| Bosnia and Herzegovina | 1992           | MaleAge45to49       | 87895      |
| Bosnia and Herzegovina | 1992           | MaleAge50to54       | 104929     |
| Bosnia and Herzegovina | 1992           | MaleAge55to59       | 115019     |
| Bosnia and Herzegovina | 1992           | MaleAge5to9         | 173708     |
| Bosnia and Herzegovina | 1992           | MaleAge60to64       | 87518      |
| Bosnia and Herzegovina | 1992           | MaleAge65to69       | 47744      |
| Bosnia and Herzegovina | 1992           | MaleAge70to74       | 21592      |

Dietary calcium and zinc deficiency risks are decreasing but remain prevalent

| Country                | Reference year | Age/gender group    | Population |
|------------------------|----------------|---------------------|------------|
| Bosnia and Herzegovina | 1992           | MaleAge75to79       | 17472      |
| Bosnia and Herzegovina | 1992           | MaleAge80to84       | 13261      |
| Bosnia and Herzegovina | 1992           | MaleAge85to89       | 5518       |
| Bosnia and Herzegovina | 1992           | MaleAge90to94       | 1386       |
| Bosnia and Herzegovina | 1992           | MaleAge95to99       | 265        |
| Bosnia and Herzegovina | 1992           | MaleAgeAbove100     | 17         |
| Bosnia and Herzegovina | 1993           | FemaleAge0to4       | 121383     |
| Bosnia and Herzegovina | 1993           | FemaleAge10to14     | 150998     |
| Bosnia and Herzegovina | 1993           | FemaleAge15to19     | 134747     |
| Bosnia and Herzegovina | 1993           | FemaleAge20to24     | 118936     |
| Bosnia and Herzegovina | 1993           | FemaleAge25to29     | 142512     |
| Bosnia and Herzegovina | 1993           | FemaleAge30to34     | 164835     |
| Bosnia and Herzegovina | 1993           | FemaleAge35to39     | 173914     |
| Bosnia and Herzegovina | 1993           | FemaleAge40to44     | 137697     |
| Bosnia and Herzegovina | 1993           | FemaleAge45to49     | 97851      |
| Bosnia and Herzegovina | 1993           | FemaleAge50to54     | 106937     |
| Bosnia and Herzegovina | 1993           | FemaleAge55to59     | 113251     |
| Bosnia and Herzegovina | 1993           | FemaleAge5to9       | 154157     |
| Bosnia and Herzegovina | 1993           | FemaleAge60to64     | 100278     |
| Bosnia and Herzegovina | 1993           | FemaleAge65to69     | 71347      |
| Bosnia and Herzegovina | 1993           | FemaleAge70to74     | 41709      |
| Bosnia and Herzegovina | 1993           | FemaleAge75to79     | 29049      |
| Bosnia and Herzegovina | 1993           | FemaleAge80to84     | 20706      |
| Bosnia and Herzegovina | 1993           | FemaleAge85to89     | 9464       |
| Bosnia and Herzegovina | 1993           | FemaleAge90to94     | 1984       |
| Bosnia and Herzegovina | 1993           | FemaleAge95to99     | 1108       |
| Bosnia and Herzegovina | 1993           | FemaleAgeAbove100   | 34         |
| Bosnia and Herzegovina | 1993           | FemaleLactAge15to19 | 4950       |
| Bosnia and Herzegovina | 1993           | FemaleLactAge20to24 | 17528      |
| Bosnia and Herzegovina | 1993           | FemaleLactAge25to29 | 17186      |
| Bosnia and Herzegovina | 1993           | FemaleLactAge30to34 | 8864       |
| Bosnia and Herzegovina | 1993           | FemaleLactAge35to39 | 2963       |
| Bosnia and Herzegovina | 1993           | FemaleLactAge40to44 | 457        |
| Bosnia and Herzegovina | 1993           | FemaleLactAge45to49 | 90         |
| Bosnia and Herzegovina | 1993           | FemalePregAge15to19 | 3712       |
| Bosnia and Herzegovina | 1993           | FemalePregAge20to24 | 13146      |
| Bosnia and Herzegovina | 1993           | FemalePregAge25to29 | 12889      |
| Bosnia and Herzegovina | 1993           | FemalePregAge30to34 | 6648       |
| Bosnia and Herzegovina | 1993           | FemalePregAge35to39 | 2222       |
| Bosnia and Herzegovina | 1993           | FemalePregAge40to44 | 343        |
| Bosnia and Herzegovina | 1993           | FemalePregAge45to49 | 67         |
| Bosnia and Herzegovina | 1993           | MaleAge0to4         | 130454     |
| Bosnia and Herzegovina | 1993           | MaleAge10to14       | 159922     |
| Bosnia and Herzegovina | 1993           | MaleAge15to19       | 149476     |
| Bosnia and Herzegovina | 1993           | MaleAge20to24       | 147194     |
| Bosnia and Herzegovina | 1993           | MaleAge25to29       | 169033     |
| Bosnia and Herzegovina | 1993           | MaleAge30to34       | 175759     |
| Bosnia and Herzegovina | 1993           | MaleAge35to39       | 172978     |
| Bosnia and Herzegovina | 1993           | MaleAge40to44       | 149385     |
| Bosnia and Herzegovina | 1993           | MaleAge45to49       | 89334      |
| Bosnia and Herzegovina | 1993           | MaleAge50to54       | 86148      |
| Bosnia and Herzegovina | 1993           | MaleAge55to59       | 111191     |
| Bosnia and Herzegovina | 1993           | MaleAge5to9         | 164128     |
| Bosnia and Herzegovina | 1993           | MaleAge60to64       | 85634      |
| Bosnia and Herzegovina | 1993           | MaleAge65to69       | 51797      |
| Bosnia and Herzegovina | 1993           | MaleAge70to74       | 21324      |
| Bosnia and Herzegovina | 1993           | MaleAge75to79       | 14944      |
| Bosnia and Herzegovina | 1993           | MaleAge80to84       | 12319      |
| Bosnia and Herzegovina | 1993           | MaleAge85to89       | 5887       |
| Bosnia and Herzegovina | 1993           | MaleAge90to94       | 1337       |
| Bosnia and Herzegovina | 1993           | MaleAge95to99       | 326        |
| Bosnia and Herzegovina | 1993           | MaleAgeAbove100     | 17         |
| Bosnia and Herzegovina | 1994           | FemaleAge0to4       | 99387      |
| Bosnia and Herzegovina | 1994           | FemaleAge10to14     | 143136     |
| Bosnia and Herzegovina | 1994           | FemaleAge15to19     | 128661     |
| Bosnia and Herzegovina | 1994           | FemaleAge20to24     | 104474     |
| Bosnia and Herzegovina | 1994           | FemaleAge25to29     | 131102     |
| Bosnia and Herzegovina | 1994           | FemaleAge30to34     | 153588     |
| Bosnia and Herzegovina | 1994           | FemaleAge35to39     | 167837     |
| Bosnia and Herzegovina | 1994           | FemaleAge40to44     | 143130     |
| Bosnia and Herzegovina | 1994           | FemaleAge45to49     | 93877      |
| Bosnia and Herzegovina | 1994           | FemaleAge50to54     | 98025      |
| Bosnia and Herzegovina | 1994           | FemaleAge55to59     | 106916     |
| Bosnia and Herzegovina | 1994           | FemaleAge5to9       | 145812     |
| Bosnia and Herzegovina | 1994           | FemaleAge60to64     | 97660      |
| Bosnia and Herzegovina | 1994           | FemaleAge65to69     | 73079      |
| Bosnia and Herzegovina | 1994           | FemaleAge70to74     | 41978      |
| Bosnia and Herzegovina | 1994           | FemaleAge75to79     | 27367      |
| Bosnia and Herzegovina | 1994           | FemaleAge80to84     | 18938      |
| Bosnia and Herzegovina | 1994           | FemaleAge85to89     | 10118      |
| Bosnia and Herzegovina | 1994           | FemaleAge90to94     | 1750       |
| Bosnia and Herzegovina | 1994           | FemaleAge95to99     | 1029       |
| Bosnia and Herzegovina | 1994           | FemaleAgeAbove100   | 33         |
| Bosnia and Herzegovina | 1994           | FemaleLactAge15to19 | 4950       |
| Bosnia and Herzegovina | 1994           | FemaleLactAge20to24 | 17528      |
| Bosnia and Herzegovina | 1994           | FemaleLactAge25to29 | 17186      |
| Bosnia and Herzegovina | 1994           | FemaleLactAge30to34 | 8864       |
| Bosnia and Herzegovina | 1994           | FemaleLactAge35to39 | 2963       |

Dietary calcium and zinc deficiency risks are decreasing but remain prevalent

| Country                | Reference year | Age/gender group    | Population |
|------------------------|----------------|---------------------|------------|
| Bosnia and Herzegovina | 1994           | FemaleLactAge40to44 | 457        |
| Bosnia and Herzegovina | 1994           | FemaleLactAge45to49 | 90         |
| Bosnia and Herzegovina | 1994           | FemalePregAge15to19 | 3712       |
| Bosnia and Herzegovina | 1994           | FemalePregAge20to24 | 13146      |
| Bosnia and Herzegovina | 1994           | FemalePregAge25to29 | 12889      |
| Bosnia and Herzegovina | 1994           | FemalePregAge30to34 | 6648       |
| Bosnia and Herzegovina | 1994           | FemalePregAge35to39 | 2222       |
| Bosnia and Herzegovina | 1994           | FemalePregAge40to44 | 343        |
| Bosnia and Herzegovina | 1994           | FemalePregAge45to49 | 67         |
| Bosnia and Herzegovina | 1994           | MaleAge0to4         | 106944     |
| Bosnia and Herzegovina | 1994           | MaleAge10to14       | 151339     |
| Bosnia and Herzegovina | 1994           | MaleAge15to19       | 142899     |
| Bosnia and Herzegovina | 1994           | MaleAge20to24       | 131307     |
| Bosnia and Herzegovina | 1994           | MaleAge25to29       | 151150     |
| Bosnia and Herzegovina | 1994           | MaleAge30to34       | 164919     |
| Bosnia and Herzegovina | 1994           | MaleAge35to39       | 161646     |
| Bosnia and Herzegovina | 1994           | MaleAge40to44       | 151777     |
| Bosnia and Herzegovina | 1994           | MaleAge45to49       | 93216      |
| Bosnia and Herzegovina | 1994           | MaleAge50to54       | 71332      |
| Bosnia and Herzegovina | 1994           | MaleAge55to59       | 105579     |
| Bosnia and Herzegovina | 1994           | MaleAge5to9         | 155591     |
| Bosnia and Herzegovina | 1994           | MaleAge60to64       | 83934      |
| Bosnia and Herzegovina | 1994           | MaleAge65to69       | 55193      |
| Bosnia and Herzegovina | 1994           | MaleAge70to74       | 22060      |
| Bosnia and Herzegovina | 1994           | MaleAge75to79       | 13119      |
| Bosnia and Herzegovina | 1994           | MaleAge80to84       | 10780      |
| Bosnia and Herzegovina | 1994           | MaleAge85to89       | 5996       |
| Bosnia and Herzegovina | 1994           | MaleAge90to94       | 1321       |
| Bosnia and Herzegovina | 1994           | MaleAge95to99       | 328        |
| Bosnia and Herzegovina | 1994           | MaleAgeAbove100     | 18         |
| Bosnia and Herzegovina | 1995           | FemaleAge0to4       | 87928      |
| Bosnia and Herzegovina | 1995           | FemaleAge10to14     | 138664     |
| Bosnia and Herzegovina | 1995           | FemaleAge15to19     | 124859     |
| Bosnia and Herzegovina | 1995           | FemaleAge20to24     | 94889      |
| Bosnia and Herzegovina | 1995           | FemaleAge25to29     | 121332     |
| Bosnia and Herzegovina | 1995           | FemaleAge30to34     | 145675     |
| Bosnia and Herzegovina | 1995           | FemaleAge35to39     | 163865     |
| Bosnia and Herzegovina | 1995           | FemaleAge40to44     | 148609     |
| Bosnia and Herzegovina | 1995           | FemaleAge45to49     | 94889      |
| Bosnia and Herzegovina | 1995           | FemaleAge50to54     | 91608      |
| Bosnia and Herzegovina | 1995           | FemaleAge55to59     | 101658     |
| Bosnia and Herzegovina | 1995           | FemaleAge5to9       | 138304     |
| Bosnia and Herzegovina | 1995           | FemaleAge60to64     | 96243      |
| Bosnia and Herzegovina | 1995           | FemaleAge65to69     | 75099      |
| Bosnia and Herzegovina | 1995           | FemaleAge70to74     | 43591      |
| Bosnia and Herzegovina | 1995           | FemaleAge75to79     | 26744      |
| Bosnia and Herzegovina | 1995           | FemaleAge80to84     | 17055      |
| Bosnia and Herzegovina | 1995           | FemaleAge85to89     | 10139      |
| Bosnia and Herzegovina | 1995           | FemaleAge90to94     | 1876       |
| Bosnia and Herzegovina | 1995           | FemaleAge95to99     | 671        |
| Bosnia and Herzegovina | 1995           | FemaleAgeAbove100   | 36         |
| Bosnia and Herzegovina | 1995           | FemaleLactAge15to19 | 4950       |
| Bosnia and Herzegovina | 1995           | FemaleLactAge20to24 | 17528      |
| Bosnia and Herzegovina | 1995           | FemaleLactAge25to29 | 17186      |
| Bosnia and Herzegovina | 1995           | FemaleLactAge30to34 | 8864       |
| Bosnia and Herzegovina | 1995           | FemaleLactAge35to39 | 2963       |
| Bosnia and Herzegovina | 1995           | FemaleLactAge40to44 | 457        |
| Bosnia and Herzegovina | 1995           | FemaleLactAge45to49 | 90         |
| Bosnia and Herzegovina | 1995           | FemalePregAge15to19 | 3712       |
| Bosnia and Herzegovina | 1995           | FemalePregAge20to24 | 13146      |
| Bosnia and Herzegovina | 1995           | FemalePregAge25to29 | 12889      |
| Bosnia and Herzegovina | 1995           | FemalePregAge30to34 | 6648       |
| Bosnia and Herzegovina | 1995           | FemalePregAge35to39 | 2222       |
| Bosnia and Herzegovina | 1995           | FemalePregAge40to44 | 343        |
| Bosnia and Herzegovina | 1995           | FemalePregAge45to49 | 67         |
| Bosnia and Herzegovina | 1995           | MaleAge0to4         | 94855      |
| Bosnia and Herzegovina | 1995           | MaleAge10to14       | 146963     |
| Bosnia and Herzegovina | 1995           | MaleAge15to19       | 139506     |
| Bosnia and Herzegovina | 1995           | MaleAge20to24       | 121093     |
| Bosnia and Herzegovina | 1995           | MaleAge25to29       | 136102     |
| Bosnia and Herzegovina | 1995           | MaleAge30to34       | 155330     |
| Bosnia and Herzegovina | 1995           | MaleAge35to39       | 154365     |
| Bosnia and Herzegovina | 1995           | MaleAge40to44       | 153869     |
| Bosnia and Herzegovina | 1995           | MaleAge45to49       | 99513      |
| Bosnia and Herzegovina | 1995           | MaleAge50to54       | 63018      |
| Bosnia and Herzegovina | 1995           | MaleAge55to59       | 98542      |
| Bosnia and Herzegovina | 1995           | MaleAge5to9         | 148347     |
| Bosnia and Herzegovina | 1995           | MaleAge60to64       | 83797      |
| Bosnia and Herzegovina | 1995           | MaleAge65to69       | 58295      |
| Bosnia and Herzegovina | 1995           | MaleAge70to74       | 24157      |
| Bosnia and Herzegovina | 1995           | MaleAge75to79       | 12118      |
| Bosnia and Herzegovina | 1995           | MaleAge80to84       | 8949       |
| Bosnia and Herzegovina | 1995           | MaleAge85to89       | 5752       |
| Bosnia and Herzegovina | 1995           | MaleAge90to94       | 1349       |
| Bosnia and Herzegovina | 1995           | MaleAge95to99       | 259        |
| Bosnia and Herzegovina | 1995           | MaleAgeAbove100     | 19         |
| Bosnia and Herzegovina | 1996           | FemaleAge0to4       | 77682      |
| Bosnia and Herzegovina | 1996           | FemaleAge10to14     | 138623     |

Dietary calcium and zinc deficiency risks are decreasing but remain prevalent

| Country                | Reference year | Age/gender group    | Population |
|------------------------|----------------|---------------------|------------|
| Bosnia and Herzegovina | 1996           | FemaleAge15to19     | 126021     |
| Bosnia and Herzegovina | 1996           | FemaleAge20to24     | 98468      |
| Bosnia and Herzegovina | 1996           | FemaleAge25to29     | 122107     |
| Bosnia and Herzegovina | 1996           | FemaleAge30to34     | 143192     |
| Bosnia and Herzegovina | 1996           | FemaleAge35to39     | 158444     |
| Bosnia and Herzegovina | 1996           | FemaleAge40to44     | 152557     |
| Bosnia and Herzegovina | 1996           | FemaleAge45to49     | 102277     |
| Bosnia and Herzegovina | 1996           | FemaleAge50to54     | 91016      |
| Bosnia and Herzegovina | 1996           | FemaleAge55to59     | 100674     |
| Bosnia and Herzegovina | 1996           | FemaleAge5to9       | 132940     |
| Bosnia and Herzegovina | 1996           | FemaleAge60to64     | 97462      |
| Bosnia and Herzegovina | 1996           | FemaleAge65to69     | 77555      |
| Bosnia and Herzegovina | 1996           | FemaleAge70to74     | 47044      |
| Bosnia and Herzegovina | 1996           | FemaleAge75to79     | 28060      |
| Bosnia and Herzegovina | 1996           | FemaleAge80to84     | 16820      |
| Bosnia and Herzegovina | 1996           | FemaleAge85to89     | 10035      |
| Bosnia and Herzegovina | 1996           | FemaleAge90to94     | 2567       |
| Bosnia and Herzegovina | 1996           | FemaleAge95to99     | 605        |
| Bosnia and Herzegovina | 1996           | FemaleAgeAbove100   | 45         |
| Bosnia and Herzegovina | 1996           | FemaleLactAge15to19 | 3752       |
| Bosnia and Herzegovina | 1996           | FemaleLactAge20to24 | 13946      |
| Bosnia and Herzegovina | 1996           | FemaleLactAge25to29 | 12751      |
| Bosnia and Herzegovina | 1996           | FemaleLactAge30to34 | 8303       |
| Bosnia and Herzegovina | 1996           | FemaleLactAge35to39 | 3893       |
| Bosnia and Herzegovina | 1996           | FemaleLactAge40to44 | 781        |
| Bosnia and Herzegovina | 1996           | FemaleLactAge45to49 | 53         |
| Bosnia and Herzegovina | 1996           | FemalePregAge15to19 | 2814       |
| Bosnia and Herzegovina | 1996           | FemalePregAge20to24 | 10459      |
| Bosnia and Herzegovina | 1996           | FemalePregAge25to29 | 9564       |
| Bosnia and Herzegovina | 1996           | FemalePregAge30to34 | 6227       |
| Bosnia and Herzegovina | 1996           | FemalePregAge35to39 | 2920       |
| Bosnia and Herzegovina | 1996           | FemalePregAge40to44 | 586        |
| Bosnia and Herzegovina | 1996           | FemalePregAge45to49 | 39         |
| Bosnia and Herzegovina | 1996           | MaleAge0to4         | 83439      |
| Bosnia and Herzegovina | 1996           | MaleAge10to14       | 145512     |
| Bosnia and Herzegovina | 1996           | MaleAge15to19       | 137619     |
| Bosnia and Herzegovina | 1996           | MaleAge20to24       | 119420     |
| Bosnia and Herzegovina | 1996           | MaleAge25to29       | 129509     |
| Bosnia and Herzegovina | 1996           | MaleAge30to34       | 150195     |
| Bosnia and Herzegovina | 1996           | MaleAge35to39       | 151211     |
| Bosnia and Herzegovina | 1996           | MaleAge40to44       | 152866     |
| Bosnia and Herzegovina | 1996           | MaleAge45to49       | 108679     |
| Bosnia and Herzegovina | 1996           | MaleAge50to54       | 65957      |
| Bosnia and Herzegovina | 1996           | MaleAge55to59       | 93390      |
| Bosnia and Herzegovina | 1996           | MaleAge5to9         | 142061     |
| Bosnia and Herzegovina | 1996           | MaleAge60to64       | 86853      |
| Bosnia and Herzegovina | 1996           | MaleAge65to69       | 61762      |
| Bosnia and Herzegovina | 1996           | MaleAge70to74       | 28095      |
| Bosnia and Herzegovina | 1996           | MaleAge75to79       | 12852      |
| Bosnia and Herzegovina | 1996           | MaleAge80to84       | 8368       |
| Bosnia and Herzegovina | 1996           | MaleAge85to89       | 5543       |
| Bosnia and Herzegovina | 1996           | MaleAge90to94       | 1687       |
| Bosnia and Herzegovina | 1996           | MaleAge95to99       | 256        |
| Bosnia and Herzegovina | 1996           | MaleAgeAbove100     | 21         |
| Bosnia and Herzegovina | 1997           | FemaleAge0to4       | 80535      |
| Bosnia and Herzegovina | 1997           | FemaleAge10to14     | 141476     |
| Bosnia and Herzegovina | 1997           | FemaleAge15to19     | 127216     |
| Bosnia and Herzegovina | 1997           | FemaleAge20to24     | 99591      |
| Bosnia and Herzegovina | 1997           | FemaleAge25to29     | 116595     |
| Bosnia and Herzegovina | 1997           | FemaleAge30to34     | 142854     |
| Bosnia and Herzegovina | 1997           | FemaleAge35to39     | 157284     |
| Bosnia and Herzegovina | 1997           | FemaleAge40to44     | 156798     |
| Bosnia and Herzegovina | 1997           | FemaleAge45to49     | 113782     |
| Bosnia and Herzegovina | 1997           | FemaleAge50to54     | 91663      |
| Bosnia and Herzegovina | 1997           | FemaleAge55to59     | 101385     |
| Bosnia and Herzegovina | 1997           | FemaleAge5to9       | 127416     |
| Bosnia and Herzegovina | 1997           | FemaleAge60to64     | 100527     |
| Bosnia and Herzegovina | 1997           | FemaleAge65to69     | 81382      |
| Bosnia and Herzegovina | 1997           | FemaleAge70to74     | 51602      |
| Bosnia and Herzegovina | 1997           | FemaleAge75to79     | 29991      |
| Bosnia and Herzegovina | 1997           | FemaleAge80to84     | 17419      |
| Bosnia and Herzegovina | 1997           | FemaleAge85to89     | 9703       |
| Bosnia and Herzegovina | 1997           | FemaleAge90to94     | 3302       |
| Bosnia and Herzegovina | 1997           | FemaleAge95to99     | 441        |
| Bosnia and Herzegovina | 1997           | FemaleAgeAbove100   | 58         |
| Bosnia and Herzegovina | 1997           | FemaleLactAge15to19 | 3752       |
| Bosnia and Herzegovina | 1997           | FemaleLactAge20to24 | 13946      |
| Bosnia and Herzegovina | 1997           | FemaleLactAge25to29 | 12751      |
| Bosnia and Herzegovina | 1997           | FemaleLactAge30to34 | 8303       |
| Bosnia and Herzegovina | 1997           | FemaleLactAge35to39 | 3893       |
| Bosnia and Herzegovina | 1997           | FemaleLactAge40to44 | 781        |
| Bosnia and Herzegovina | 1997           | FemaleLactAge45to49 | 53         |
| Bosnia and Herzegovina | 1997           | FemalePregAge15to19 | 2814       |
| Bosnia and Herzegovina | 1997           | FemalePregAge20to24 | 10459      |
| Bosnia and Herzegovina | 1997           | FemalePregAge25to29 | 9564       |
| Bosnia and Herzegovina | 1997           | FemalePregAge30to34 | 6227       |
| Bosnia and Herzegovina | 1997           | FemalePregAge35to39 | 2920       |
| Bosnia and Herzegovina | 1997           | FemalePregAge40to44 | 586        |

Dietary calcium and zinc deficiency risks are decreasing but remain prevalent

| Country                | Reference year | Age/gender group    | Population |
|------------------------|----------------|---------------------|------------|
| Bosnia and Herzegovina | 1997           | FemalePregAge45to49 | 39         |
| Bosnia and Herzegovina | 1997           | MaleAge0to4         | 85913      |
| Bosnia and Herzegovina | 1997           | MaleAge10to14       | 147959     |
| Bosnia and Herzegovina | 1997           | MaleAge15to19       | 137837     |
| Bosnia and Herzegovina | 1997           | MaleAge20to24       | 121457     |
| Bosnia and Herzegovina | 1997           | MaleAge25to29       | 125380     |
| Bosnia and Herzegovina | 1997           | MaleAge30to34       | 147274     |
| Bosnia and Herzegovina | 1997           | MaleAge35to39       | 152336     |
| Bosnia and Herzegovina | 1997           | MaleAge40to44       | 152267     |
| Bosnia and Herzegovina | 1997           | MaleAge45to49       | 119440     |
| Bosnia and Herzegovina | 1997           | MaleAge50to54       | 73315      |
| Bosnia and Herzegovina | 1997           | MaleAge55to59       | 87793      |
| Bosnia and Herzegovina | 1997           | MaleAge5to9         | 136263     |
| Bosnia and Herzegovina | 1997           | MaleAge60to64       | 92640      |
| Bosnia and Herzegovina | 1997           | MaleAge65to69       | 65945      |
| Bosnia and Herzegovina | 1997           | MaleAge70to74       | 33375      |
| Bosnia and Herzegovina | 1997           | MaleAge75to79       | 13874      |
| Bosnia and Herzegovina | 1997           | MaleAge80to84       | 8322       |
| Bosnia and Herzegovina | 1997           | MaleAge85to89       | 5226       |
| Bosnia and Herzegovina | 1997           | MaleAge90to94       | 2023       |
| Bosnia and Herzegovina | 1997           | MaleAge95to99       | 228        |
| Bosnia and Herzegovina | 1997           | MaleAgeAbove100     | 25         |
| Bosnia and Herzegovina | 1998           | FemaleAge0to4       | 93175      |
| Bosnia and Herzegovina | 1998           | FemaleAge10to14     | 145687     |
| Bosnia and Herzegovina | 1998           | FemaleAge15to19     | 130130     |
| Bosnia and Herzegovina | 1998           | FemaleAge20to24     | 102753     |
| Bosnia and Herzegovina | 1998           | FemaleAge25to29     | 112375     |
| Bosnia and Herzegovina | 1998           | FemaleAge30to34     | 143479     |
| Bosnia and Herzegovina | 1998           | FemaleAge35to39     | 158158     |
| Bosnia and Herzegovina | 1998           | FemaleAge40to44     | 160145     |
| Bosnia and Herzegovina | 1998           | FemaleAge45to49     | 127638     |
| Bosnia and Herzegovina | 1998           | FemaleAge50to54     | 93500      |
| Bosnia and Herzegovina | 1998           | FemaleAge55to59     | 103170     |
| Bosnia and Herzegovina | 1998           | FemaleAge5to9       | 121021     |
| Bosnia and Herzegovina | 1998           | FemaleAge60to64     | 104561     |
| Bosnia and Herzegovina | 1998           | FemaleAge65to69     | 86442      |
| Bosnia and Herzegovina | 1998           | FemaleAge70to74     | 56702      |
| Bosnia and Herzegovina | 1998           | FemaleAge75to79     | 32441      |
| Bosnia and Herzegovina | 1998           | FemaleAge80to84     | 18855      |
| Bosnia and Herzegovina | 1998           | FemaleAge85to89     | 9255       |
| Bosnia and Herzegovina | 1998           | FemaleAge90to94     | 3839       |
| Bosnia and Herzegovina | 1998           | FemaleAge95to99     | 362        |
| Bosnia and Herzegovina | 1998           | FemaleAgeAbove100   | 72         |
| Bosnia and Herzegovina | 1998           | FemaleLactAge15to19 | 3752       |
| Bosnia and Herzegovina | 1998           | FemaleLactAge20to24 | 13946      |
| Bosnia and Herzegovina | 1998           | FemaleLactAge25to29 | 12751      |
| Bosnia and Herzegovina | 1998           | FemaleLactAge30to34 | 8303       |
| Bosnia and Herzegovina | 1998           | FemaleLactAge35to39 | 3893       |
| Bosnia and Herzegovina | 1998           | FemaleLactAge40to44 | 781        |
| Bosnia and Herzegovina | 1998           | FemaleLactAge45to49 | 53         |
| Bosnia and Herzegovina | 1998           | FemalePregAge15to19 | 2814       |
| Bosnia and Herzegovina | 1998           | FemalePregAge20to24 | 10459      |
| Bosnia and Herzegovina | 1998           | FemalePregAge25to29 | 9564       |
| Bosnia and Herzegovina | 1998           | FemalePregAge30to34 | 6227       |
| Bosnia and Herzegovina | 1998           | FemalePregAge35to39 | 2920       |
| Bosnia and Herzegovina | 1998           | FemalePregAge40to44 | 586        |
| Bosnia and Herzegovina | 1998           | FemalePregAge45to49 | 39         |
| Bosnia and Herzegovina | 1998           | MaleAge0to4         | 98864      |
| Bosnia and Herzegovina | 1998           | MaleAge10to14       | 152594     |
| Bosnia and Herzegovina | 1998           | MaleAge15to19       | 139779     |
| Bosnia and Herzegovina | 1998           | MaleAge20to24       | 125470     |
| Bosnia and Herzegovina | 1998           | MaleAge25to29       | 122860     |
| Bosnia and Herzegovina | 1998           | MaleAge30to34       | 145411     |
| Bosnia and Herzegovina | 1998           | MaleAge35to39       | 155575     |
| Bosnia and Herzegovina | 1998           | MaleAge40to44       | 152397     |
| Bosnia and Herzegovina | 1998           | MaleAge45to49       | 130416     |
| Bosnia and Herzegovina | 1998           | MaleAge50to54       | 83298      |
| Bosnia and Herzegovina | 1998           | MaleAge55to59       | 82926      |
| Bosnia and Herzegovina | 1998           | MaleAge5to9         | 129955     |
| Bosnia and Herzegovina | 1998           | MaleAge60to64       | 99477      |
| Bosnia and Herzegovina | 1998           | MaleAge65to69       | 70984      |
| Bosnia and Herzegovina | 1998           | MaleAge70to74       | 39522      |
| Bosnia and Herzegovina | 1998           | MaleAge75to79       | 15271      |
| Bosnia and Herzegovina | 1998           | MaleAge80to84       | 8871       |
| Bosnia and Herzegovina | 1998           | MaleAge85to89       | 4807       |
| Bosnia and Herzegovina | 1998           | MaleAge90to94       | 2240       |
| Bosnia and Herzegovina | 1998           | MaleAge95to99       | 229        |
| Bosnia and Herzegovina | 1998           | MaleAgeAbove100     | 29         |
| Bosnia and Herzegovina | 1999           | FemaleAge0to4       | 107302     |
| Bosnia and Herzegovina | 1999           | FemaleAge10to14     | 148651     |
| Bosnia and Herzegovina | 1999           | FemaleAge15to19     | 133945     |
| Bosnia and Herzegovina | 1999           | FemaleAge20to24     | 105940     |
| Bosnia and Herzegovina | 1999           | FemaleAge25to29     | 109375     |
| Bosnia and Herzegovina | 1999           | FemaleAge30to34     | 142816     |
| Bosnia and Herzegovina | 1999           | FemaleAge35to39     | 159715     |
| Bosnia and Herzegovina | 1999           | FemaleAge40to44     | 162269     |
| Bosnia and Herzegovina | 1999           | FemaleAge45to49     | 140466     |
| Bosnia and Herzegovina | 1999           | FemaleAge50to54     | 97019      |

Dietary calcium and zinc deficiency risks are decreasing but remain prevalent

| Country                | Reference year | Age/gender group    | Population |
|------------------------|----------------|---------------------|------------|
| Bosnia and Herzegovina | 1999           | FemaleAge55to59     | 105099     |
| Bosnia and Herzegovina | 1999           | FemaleAge5to9       | 114516     |
| Bosnia and Herzegovina | 1999           | FemaleAge60to64     | 108448     |
| Bosnia and Herzegovina | 1999           | FemaleAge65to69     | 92039      |
| Bosnia and Herzegovina | 1999           | FemaleAge70to74     | 61699      |
| Bosnia and Herzegovina | 1999           | FemaleAge75to79     | 35353      |
| Bosnia and Herzegovina | 1999           | FemaleAge80to84     | 20843      |
| Bosnia and Herzegovina | 1999           | FemaleAge85to89     | 8924       |
| Bosnia and Herzegovina | 1999           | FemaleAge90to94     | 3980       |
| Bosnia and Herzegovina | 1999           | FemaleAge95to99     | 434        |
| Bosnia and Herzegovina | 1999           | FemaleAgeAbov e100  | 84         |
| Bosnia and Herzegovina | 1999           | FemaleLactAge15to19 | 3752       |
| Bosnia and Herzegovina | 1999           | FemaleLactAge20to24 | 13946      |
| Bosnia and Herzegovina | 1999           | FemaleLactAge25to29 | 12751      |
| Bosnia and Herzegovina | 1999           | FemaleLactAge30to34 | 8303       |
| Bosnia and Herzegovina | 1999           | FemaleLactAge35to39 | 3893       |
| Bosnia and Herzegovina | 1999           | FemaleLactAge40to44 | 781        |
| Bosnia and Herzegovina | 1999           | FemaleLactAge45to49 | 53         |
| Bosnia and Herzegovina | 1999           | FemalePregAge15to19 | 2814       |
| Bosnia and Herzegovina | 1999           | FemalePregAge20to24 | 10459      |
| Bosnia and Herzegovina | 1999           | FemalePregAge25to29 | 9564       |
| Bosnia and Herzegovina | 1999           | FemalePregAge30to34 | 6227       |
| Bosnia and Herzegovina | 1999           | FemalePregAge35to39 | 2920       |
| Bosnia and Herzegovina | 1999           | FemalePregAge40to44 | 586        |
| Bosnia and Herzegovina | 1999           | FemalePregAge45to49 | 39         |
| Bosnia and Herzegovina | 1999           | MaleAge0to4         | 113647     |
| Bosnia and Herzegovina | 1999           | MaleAge10to14       | 156404     |
| Bosnia and Herzegovina | 1999           | MaleAge15to19       | 142826     |
| Bosnia and Herzegovina | 1999           | MaleAge20to24       | 129277     |
| Bosnia and Herzegovina | 1999           | MaleAge25to29       | 121272     |
| Bosnia and Herzegovina | 1999           | MaleAge30to34       | 143314     |
| Bosnia and Herzegovina | 1999           | MaleAge35to39       | 158220     |
| Bosnia and Herzegovina | 1999           | MaleAge40to44       | 153402     |
| Bosnia and Herzegovina | 1999           | MaleAge45to49       | 139374     |
| Bosnia and Herzegovina | 1999           | MaleAge50to54       | 93592      |
| Bosnia and Herzegovina | 1999           | MaleAge55to59       | 80634      |
| Bosnia and Herzegovina | 1999           | MaleAge5to9         | 123676     |
| Bosnia and Herzegovina | 1999           | MaleAge60to64       | 104757     |
| Bosnia and Herzegovina | 1999           | MaleAge65to69       | 76806      |
| Bosnia and Herzegovina | 1999           | MaleAge70to74       | 45698      |
| Bosnia and Herzegovina | 1999           | MaleAge75to79       | 17351      |
| Bosnia and Herzegovina | 1999           | MaleAge80to84       | 9851       |
| Bosnia and Herzegovina | 1999           | MaleAge85to89       | 4383       |
| Bosnia and Herzegovina | 1999           | MaleAge90to94       | 2207       |
| Bosnia and Herzegovina | 1999           | MaleAge95to99       | 278        |
| Bosnia and Herzegovina | 1999           | MaleAgeAbov e100    | 32         |
| Botswana               | 1992           | FemaleAge0to4       | 111669     |
| Botswana               | 1992           | FemaleAge10to14     | 97710      |
| Botswana               | 1992           | FemaleAge15to19     | 68596      |
| Botswana               | 1992           | FemaleAge20to24     | 45347      |
| Botswana               | 1992           | FemaleAge25to29     | 36614      |
| Botswana               | 1992           | FemaleAge30to34     | 33156      |
| Botswana               | 1992           | FemaleAge35to39     | 31692      |
| Botswana               | 1992           | FemaleAge40to44     | 26356      |
| Botswana               | 1992           | FemaleAge45to49     | 22685      |
| Botswana               | 1992           | FemaleAge50to54     | 20687      |
| Botswana               | 1992           | FemaleAge55to59     | 17145      |
| Botswana               | 1992           | FemaleAge5to9       | 109075     |
| Botswana               | 1992           | FemaleAge60to64     | 12799      |
| Botswana               | 1992           | FemaleAge65to69     | 10152      |
| Botswana               | 1992           | FemaleAge70to74     | 7042       |
| Botswana               | 1992           | FemaleAge75to79     | 3638       |
| Botswana               | 1992           | FemaleAge80to84     | 1819       |
| Botswana               | 1992           | FemaleAge85to89     | 855        |
| Botswana               | 1992           | FemaleAge90to94     | 254        |
| Botswana               | 1992           | FemaleAge95to99     | 31         |
| Botswana               | 1992           | FemaleAgeAbov e100  | 2          |
| Botswana               | 1992           | FemaleLactAge15to19 | 7167       |
| Botswana               | 1992           | FemaleLactAge20to24 | 12215      |
| Botswana               | 1992           | FemaleLactAge25to29 | 11108      |
| Botswana               | 1992           | FemaleLactAge30to34 | 8655       |
| Botswana               | 1992           | FemaleLactAge35to39 | 5954       |
| Botswana               | 1992           | FemaleLactAge40to44 | 2441       |
| Botswana               | 1992           | FemaleLactAge45to49 | 301        |
| Botswana               | 1992           | FemalePregAge15to19 | 5375       |
| Botswana               | 1992           | FemalePregAge20to24 | 9161       |
| Botswana               | 1992           | FemalePregAge25to29 | 8331       |
| Botswana               | 1992           | FemalePregAge30to34 | 6491       |
| Botswana               | 1992           | FemalePregAge35to39 | 4466       |
| Botswana               | 1992           | FemalePregAge40to44 | 1831       |
| Botswana               | 1992           | FemalePregAge45to49 | 226        |
| Botswana               | 1992           | MaleAge0to4         | 113460     |
| Botswana               | 1992           | MaleAge10to14       | 98427      |
| Botswana               | 1992           | MaleAge15to19       | 81610      |
| Botswana               | 1992           | MaleAge20to24       | 67056      |
| Botswana               | 1992           | MaleAge25to29       | 56163      |
| Botswana               | 1992           | MaleAge30to34       | 48113      |
| Botswana               | 1992           | MaleAge35to39       | 41499      |



Dietary calcium and zinc deficiency risks are decreasing but remain prevalent

| Country  | Reference year | Age/gender group    | Population |
|----------|----------------|---------------------|------------|
| Botswana | 1992           | MaleAge40to44       | 29935      |
| Botswana | 1992           | MaleAge45to49       | 21754      |
| Botswana | 1992           | MaleAge50to54       | 17779      |
| Botswana | 1992           | MaleAge55to59       | 13335      |
| Botswana | 1992           | MaleAge5to9         | 110253     |
| Botswana | 1992           | MaleAge60to64       | 9072       |
| Botswana | 1992           | MaleAge65to69       | 6945       |
| Botswana | 1992           | MaleAge70to74       | 4694       |
| Botswana | 1992           | MaleAge75to79       | 2302       |
| Botswana | 1992           | MaleAge80to84       | 1065       |
| Botswana | 1992           | MaleAge85to89       | 437        |
| Botswana | 1992           | MaleAge90to94       | 114        |
| Botswana | 1992           | MaleAge95to99       | 11         |
| Botswana | 1992           | MaleAgeAbove100     | 1          |
| Botswana | 1993           | FemaleAge0to4       | 111874     |
| Botswana | 1993           | FemaleAge10to14     | 100645     |
| Botswana | 1993           | FemaleAge15to19     | 72064      |
| Botswana | 1993           | FemaleAge20to24     | 47881      |
| Botswana | 1993           | FemaleAge25to29     | 38529      |
| Botswana | 1993           | FemaleAge30to34     | 34397      |
| Botswana | 1993           | FemaleAge35to39     | 32809      |
| Botswana | 1993           | FemaleAge40to44     | 29151      |
| Botswana | 1993           | FemaleAge45to49     | 23032      |
| Botswana | 1993           | FemaleAge50to54     | 21130      |
| Botswana | 1993           | FemaleAge55to59     | 17724      |
| Botswana | 1993           | FemaleAge5to9       | 109983     |
| Botswana | 1993           | FemaleAge60to64     | 13457      |
| Botswana | 1993           | FemaleAge65to69     | 10159      |
| Botswana | 1993           | FemaleAge70to74     | 7545       |
| Botswana | 1993           | FemaleAge75to79     | 3876       |
| Botswana | 1993           | FemaleAge80to84     | 1834       |
| Botswana | 1993           | FemaleAge85to89     | 855        |
| Botswana | 1993           | FemaleAge90to94     | 271        |
| Botswana | 1993           | FemaleAge95to99     | 33         |
| Botswana | 1993           | FemaleAgeAbove100   | 3          |
| Botswana | 1993           | FemaleLactAge15to19 | 7167       |
| Botswana | 1993           | FemaleLactAge20to24 | 12215      |
| Botswana | 1993           | FemaleLactAge25to29 | 11108      |
| Botswana | 1993           | FemaleLactAge30to34 | 8655       |
| Botswana | 1993           | FemaleLactAge35to39 | 5954       |
| Botswana | 1993           | FemaleLactAge40to44 | 2441       |
| Botswana | 1993           | FemaleLactAge45to49 | 301        |
| Botswana | 1993           | FemalePregAge15to19 | 5375       |
| Botswana | 1993           | FemalePregAge20to24 | 9161       |
| Botswana | 1993           | FemalePregAge25to29 | 8331       |
| Botswana | 1993           | FemalePregAge30to34 | 6491       |
| Botswana | 1993           | FemalePregAge35to39 | 4466       |
| Botswana | 1993           | FemalePregAge40to44 | 1831       |
| Botswana | 1993           | FemalePregAge45to49 | 226        |
| Botswana | 1993           | MaleAge0to4         | 113696     |
| Botswana | 1993           | MaleAge10to14       | 101428     |
| Botswana | 1993           | MaleAge15to19       | 85116      |
| Botswana | 1993           | MaleAge20to24       | 69672      |
| Botswana | 1993           | MaleAge25to29       | 58234      |
| Botswana | 1993           | MaleAge30to34       | 49442      |
| Botswana | 1993           | MaleAge35to39       | 42625      |
| Botswana | 1993           | MaleAge40to44       | 32583      |
| Botswana | 1993           | MaleAge45to49       | 22316      |
| Botswana | 1993           | MaleAge50to54       | 18454      |
| Botswana | 1993           | MaleAge55to59       | 13964      |
| Botswana | 1993           | MaleAge5to9         | 111227     |
| Botswana | 1993           | MaleAge60to64       | 9592       |
| Botswana | 1993           | MaleAge65to69       | 6835       |
| Botswana | 1993           | MaleAge70to74       | 5033       |
| Botswana | 1993           | MaleAge75to79       | 2432       |
| Botswana | 1993           | MaleAge80to84       | 1094       |
| Botswana | 1993           | MaleAge85to89       | 445        |
| Botswana | 1993           | MaleAge90to94       | 125        |
| Botswana | 1993           | MaleAge95to99       | 14         |
| Botswana | 1993           | MaleAgeAbove100     | 1          |
| Botswana | 1994           | FemaleAge0to4       | 112042     |
| Botswana | 1994           | FemaleAge10to14     | 103241     |
| Botswana | 1994           | FemaleAge15to19     | 75463      |
| Botswana | 1994           | FemaleAge20to24     | 50613      |
| Botswana | 1994           | FemaleAge25to29     | 40575      |
| Botswana | 1994           | FemaleAge30to34     | 35722      |
| Botswana | 1994           | FemaleAge35to39     | 33839      |
| Botswana | 1994           | FemaleAge40to44     | 31777      |
| Botswana | 1994           | FemaleAge45to49     | 23796      |
| Botswana | 1994           | FemaleAge50to54     | 21526      |
| Botswana | 1994           | FemaleAge55to59     | 18269      |
| Botswana | 1994           | FemaleAge5to9       | 110449     |
| Botswana | 1994           | FemaleAge60to64     | 14130      |
| Botswana | 1994           | FemaleAge65to69     | 10270      |
| Botswana | 1994           | FemaleAge70to74     | 7969       |
| Botswana | 1994           | FemaleAge75to79     | 4153       |
| Botswana | 1994           | FemaleAge80to84     | 1877       |
| Botswana | 1994           | FemaleAge85to89     | 836        |

Dietary calcium and zinc deficiency risks are decreasing but remain prevalent

| Country  | Reference year | Age/gender group    | Population |
|----------|----------------|---------------------|------------|
| Botswana | 1994           | FemaleAge90to94     | 264        |
| Botswana | 1994           | FemaleAge95to99     | 35         |
| Botswana | 1994           | FemaleAgeAbove100   | 3          |
| Botswana | 1994           | FemaleLactAge15to19 | 7167       |
| Botswana | 1994           | FemaleLactAge20to24 | 12215      |
| Botswana | 1994           | FemaleLactAge25to29 | 11108      |
| Botswana | 1994           | FemaleLactAge30to34 | 8655       |
| Botswana | 1994           | FemaleLactAge35to39 | 5954       |
| Botswana | 1994           | FemaleLactAge40to44 | 2441       |
| Botswana | 1994           | FemaleLactAge45to49 | 301        |
| Botswana | 1994           | FemalePregAge15to19 | 5375       |
| Botswana | 1994           | FemalePregAge20to24 | 9161       |
| Botswana | 1994           | FemalePregAge25to29 | 8331       |
| Botswana | 1994           | FemalePregAge30to34 | 6491       |
| Botswana | 1994           | FemalePregAge35to39 | 4466       |
| Botswana | 1994           | FemalePregAge40to44 | 1831       |
| Botswana | 1994           | FemalePregAge45to49 | 226        |
| Botswana | 1994           | MaleAge0to4         | 113889     |
| Botswana | 1994           | MaleAge10to14       | 104085     |
| Botswana | 1994           | MaleAge15to19       | 88555      |
| Botswana | 1994           | MaleAge20to24       | 72446      |
| Botswana | 1994           | MaleAge25to29       | 60437      |
| Botswana | 1994           | MaleAge30to34       | 50896      |
| Botswana | 1994           | MaleAge35to39       | 43707      |
| Botswana | 1994           | MaleAge40to44       | 35050      |
| Botswana | 1994           | MaleAge45to49       | 23227      |
| Botswana | 1994           | MaleAge50to54       | 19097      |
| Botswana | 1994           | MaleAge55to59       | 14602      |
| Botswana | 1994           | MaleAge5to9         | 111749     |
| Botswana | 1994           | MaleAge60to64       | 10155      |
| Botswana | 1994           | MaleAge65to69       | 6812       |
| Botswana | 1994           | MaleAge70to74       | 5287       |
| Botswana | 1994           | MaleAge75to79       | 2586       |
| Botswana | 1994           | MaleAge80to84       | 1128       |
| Botswana | 1994           | MaleAge85to89       | 441        |
| Botswana | 1994           | MaleAge90to94       | 127        |
| Botswana | 1994           | MaleAge95to99       | 16         |
| Botswana | 1994           | MaleAgeAbove100     | 1          |
| Botswana | 1995           | FemaleAge0to4       | 112068     |
| Botswana | 1995           | FemaleAge10to14     | 105334     |
| Botswana | 1995           | FemaleAge15to19     | 78700      |
| Botswana | 1995           | FemaleAge20to24     | 53540      |
| Botswana | 1995           | FemaleAge25to29     | 42728      |
| Botswana | 1995           | FemaleAge30to34     | 37155      |
| Botswana | 1995           | FemaleAge35to39     | 34920      |
| Botswana | 1995           | FemaleAge40to44     | 33943      |
| Botswana | 1995           | FemaleAge45to49     | 25136      |
| Botswana | 1995           | FemaleAge50to54     | 21875      |
| Botswana | 1995           | FemaleAge55to59     | 18773      |
| Botswana | 1995           | FemaleAge5to9       | 110698     |
| Botswana | 1995           | FemaleAge60to64     | 14768      |
| Botswana | 1995           | FemaleAge65to69     | 10552      |
| Botswana | 1995           | FemaleAge70to74     | 8272       |
| Botswana | 1995           | FemaleAge75to79     | 4477       |
| Botswana | 1995           | FemaleAge80to84     | 1958       |
| Botswana | 1995           | FemaleAge85to89     | 798        |
| Botswana | 1995           | FemaleAge90to94     | 232        |
| Botswana | 1995           | FemaleAge95to99     | 30         |
| Botswana | 1995           | FemaleAgeAbove100   | 3          |
| Botswana | 1995           | FemaleLactAge15to19 | 7167       |
| Botswana | 1995           | FemaleLactAge20to24 | 12215      |
| Botswana | 1995           | FemaleLactAge25to29 | 11108      |
| Botswana | 1995           | FemaleLactAge30to34 | 8655       |
| Botswana | 1995           | FemaleLactAge35to39 | 5954       |
| Botswana | 1995           | FemaleLactAge40to44 | 2441       |
| Botswana | 1995           | FemaleLactAge45to49 | 301        |
| Botswana | 1995           | FemalePregAge15to19 | 5375       |
| Botswana | 1995           | FemalePregAge20to24 | 9161       |
| Botswana | 1995           | FemalePregAge25to29 | 8331       |
| Botswana | 1995           | FemalePregAge30to34 | 6491       |
| Botswana | 1995           | FemalePregAge35to39 | 4466       |
| Botswana | 1995           | FemalePregAge40to44 | 1831       |
| Botswana | 1995           | FemalePregAge45to49 | 226        |
| Botswana | 1995           | MaleAge0to4         | 113944     |
| Botswana | 1995           | MaleAge10to14       | 106233     |
| Botswana | 1995           | MaleAge15to19       | 91834      |
| Botswana | 1995           | MaleAge20to24       | 75395      |
| Botswana | 1995           | MaleAge25to29       | 62721      |
| Botswana | 1995           | MaleAge30to34       | 52495      |
| Botswana | 1995           | MaleAge35to39       | 44870      |
| Botswana | 1995           | MaleAge40to44       | 37100      |
| Botswana | 1995           | MaleAge45to49       | 24623      |
| Botswana | 1995           | MaleAge50to54       | 19692      |
| Botswana | 1995           | MaleAge55to59       | 15242      |
| Botswana | 1995           | MaleAge5to9         | 112037     |
| Botswana | 1995           | MaleAge60to64       | 10723      |
| Botswana | 1995           | MaleAge65to69       | 6944       |
| Botswana | 1995           | MaleAge70to74       | 5417       |

Dietary calcium and zinc deficiency risks are decreasing but remain prevalent

| Country  | Reference year | Age/gender group    | Population |
|----------|----------------|---------------------|------------|
| Botswana | 1995           | MaleAge75to79       | 2775       |
| Botswana | 1995           | MaleAge80to84       | 1169       |
| Botswana | 1995           | MaleAge85to89       | 427        |
| Botswana | 1995           | MaleAge90to94       | 115        |
| Botswana | 1995           | MaleAge95to99       | 13         |
| Botswana | 1995           | MaleAgeAbov e100    | 1          |
| Botswana | 1996           | FemaleAge0to4       | 112357     |
| Botswana | 1996           | FemaleAge10to14     | 107321     |
| Botswana | 1996           | FemaleAge15to19     | 82122      |
| Botswana | 1996           | FemaleAge20to24     | 55410      |
| Botswana | 1996           | FemaleAge25to29     | 44046      |
| Botswana | 1996           | FemaleAge30to34     | 38661      |
| Botswana | 1996           | FemaleAge35to39     | 36210      |
| Botswana | 1996           | FemaleAge40to44     | 35376      |
| Botswana | 1996           | FemaleAge45to49     | 26863      |
| Botswana | 1996           | FemaleAge50to54     | 22099      |
| Botswana | 1996           | FemaleAge55to59     | 19160      |
| Botswana | 1996           | FemaleAge5to9       | 111278     |
| Botswana | 1996           | FemaleAge60to64     | 15306      |
| Botswana | 1996           | FemaleAge65to69     | 10909      |
| Botswana | 1996           | FemaleAge70to74     | 8393       |
| Botswana | 1996           | FemaleAge75to79     | 4835       |
| Botswana | 1996           | FemaleAge80to84     | 2107       |
| Botswana | 1996           | FemaleAge85to89     | 838        |
| Botswana | 1996           | FemaleAge90to94     | 260        |
| Botswana | 1996           | FemaleAge95to99     | 36         |
| Botswana | 1996           | FemaleAgeAbov e100  | 3          |
| Botswana | 1996           | FemaleLactAge15to19 | 7207       |
| Botswana | 1996           | FemaleLactAge20to24 | 12893      |
| Botswana | 1996           | FemaleLactAge25to29 | 11385      |
| Botswana | 1996           | FemaleLactAge30to34 | 8406       |
| Botswana | 1996           | FemaleLactAge35to39 | 5651       |
| Botswana | 1996           | FemaleLactAge40to44 | 2542       |
| Botswana | 1996           | FemaleLactAge45to49 | 303        |
| Botswana | 1996           | FemalePregAge15to19 | 5406       |
| Botswana | 1996           | FemalePregAge20to24 | 9670       |
| Botswana | 1996           | FemalePregAge25to29 | 8539       |
| Botswana | 1996           | FemalePregAge30to34 | 6305       |
| Botswana | 1996           | FemalePregAge35to39 | 4238       |
| Botswana | 1996           | FemalePregAge40to44 | 1907       |
| Botswana | 1996           | FemalePregAge45to49 | 227        |
| Botswana | 1996           | MaleAge0to4         | 114266     |
| Botswana | 1996           | MaleAge10to14       | 108275     |
| Botswana | 1996           | MaleAge15to19       | 95413      |
| Botswana | 1996           | MaleAge20to24       | 78717      |
| Botswana | 1996           | MaleAge25to29       | 64908      |
| Botswana | 1996           | MaleAge30to34       | 53762      |
| Botswana | 1996           | MaleAge35to39       | 45500      |
| Botswana | 1996           | MaleAge40to44       | 38462      |
| Botswana | 1996           | MaleAge45to49       | 26273      |
| Botswana | 1996           | MaleAge50to54       | 20102      |
| Botswana | 1996           | MaleAge55to59       | 15731      |
| Botswana | 1996           | MaleAge5to9         | 112672     |
| Botswana | 1996           | MaleAge60to64       | 11153      |
| Botswana | 1996           | MaleAge65to69       | 7149       |
| Botswana | 1996           | MaleAge70to74       | 5426       |
| Botswana | 1996           | MaleAge75to79       | 3022       |
| Botswana | 1996           | MaleAge80to84       | 1272       |
| Botswana | 1996           | MaleAge85to89       | 467        |
| Botswana | 1996           | MaleAge90to94       | 134        |
| Botswana | 1996           | MaleAge95to99       | 16         |
| Botswana | 1996           | MaleAgeAbov e100    | 1          |
| Botswana | 1997           | FemaleAge0to4       | 112649     |
| Botswana | 1997           | FemaleAge10to14     | 108748     |
| Botswana | 1997           | FemaleAge15to19     | 85458      |
| Botswana | 1997           | FemaleAge20to24     | 58737      |
| Botswana | 1997           | FemaleAge25to29     | 46038      |
| Botswana | 1997           | FemaleAge30to34     | 39828      |
| Botswana | 1997           | FemaleAge35to39     | 36884      |
| Botswana | 1997           | FemaleAge40to44     | 36479      |
| Botswana | 1997           | FemaleAge45to49     | 29150      |
| Botswana | 1997           | FemaleAge50to54     | 22210      |
| Botswana | 1997           | FemaleAge55to59     | 19526      |
| Botswana | 1997           | FemaleAge5to9       | 111584     |
| Botswana | 1997           | FemaleAge60to64     | 15818      |
| Botswana | 1997           | FemaleAge65to69     | 11392      |
| Botswana | 1997           | FemaleAge70to74     | 8411       |
| Botswana | 1997           | FemaleAge75to79     | 5227       |
| Botswana | 1997           | FemaleAge80to84     | 2251       |
| Botswana | 1997           | FemaleAge85to89     | 858        |
| Botswana | 1997           | FemaleAge90to94     | 282        |
| Botswana | 1997           | FemaleAge95to99     | 44         |
| Botswana | 1997           | FemaleAgeAbov e100  | 3          |
| Botswana | 1997           | FemaleLactAge15to19 | 7207       |
| Botswana | 1997           | FemaleLactAge20to24 | 12893      |
| Botswana | 1997           | FemaleLactAge25to29 | 11385      |
| Botswana | 1997           | FemaleLactAge30to34 | 8406       |
| Botswana | 1997           | FemaleLactAge35to39 | 5651       |

Dietary calcium and zinc deficiency risks are decreasing but remain prevalent

| Country  | Reference year | Age/gender group    | Population |
|----------|----------------|---------------------|------------|
| Botswana | 1997           | FemaleLactAge40to44 | 2542       |
| Botswana | 1997           | FemaleLactAge45to49 | 303        |
| Botswana | 1997           | FemalePregAge15to19 | 5406       |
| Botswana | 1997           | FemalePregAge20to24 | 9670       |
| Botswana | 1997           | FemalePregAge25to29 | 8539       |
| Botswana | 1997           | FemalePregAge30to34 | 6305       |
| Botswana | 1997           | FemalePregAge35to39 | 4238       |
| Botswana | 1997           | FemalePregAge40to44 | 1907       |
| Botswana | 1997           | FemalePregAge45to49 | 227        |
| Botswana | 1997           | MaleAge0to4         | 114578     |
| Botswana | 1997           | MaleAge10to14       | 109757     |
| Botswana | 1997           | MaleAge15to19       | 98800      |
| Botswana | 1997           | MaleAge20to24       | 82226      |
| Botswana | 1997           | MaleAge25to29       | 67271      |
| Botswana | 1997           | MaleAge30to34       | 55277      |
| Botswana | 1997           | MaleAge35to39       | 46158      |
| Botswana | 1997           | MaleAge40to44       | 39329      |
| Botswana | 1997           | MaleAge45to49       | 28331      |
| Botswana | 1997           | MaleAge50to54       | 20412      |
| Botswana | 1997           | MaleAge55to59       | 16248      |
| Botswana | 1997           | MaleAge5to9         | 113025     |
| Botswana | 1997           | MaleAge60to64       | 11591      |
| Botswana | 1997           | MaleAge65to69       | 7436       |
| Botswana | 1997           | MaleAge70to74       | 5329       |
| Botswana | 1997           | MaleAge75to79       | 3289       |
| Botswana | 1997           | MaleAge80to84       | 1362       |
| Botswana | 1997           | MaleAge85to89       | 501        |
| Botswana | 1997           | MaleAge90to94       | 150        |
| Botswana | 1997           | MaleAge95to99       | 23         |
| Botswana | 1997           | MaleAgeAbove100     | 1          |
| Botswana | 1998           | FemaleAge0to4       | 112842     |
| Botswana | 1998           | FemaleAge10to14     | 109684     |
| Botswana | 1998           | FemaleAge15to19     | 88463      |
| Botswana | 1998           | FemaleAge20to24     | 62237      |
| Botswana | 1998           | FemaleAge25to29     | 48286      |
| Botswana | 1998           | FemaleAge30to34     | 41104      |
| Botswana | 1998           | FemaleAge35to39     | 37513      |
| Botswana | 1998           | FemaleAge40to44     | 37167      |
| Botswana | 1998           | FemaleAge45to49     | 31700      |
| Botswana | 1998           | FemaleAge50to54     | 22396      |
| Botswana | 1998           | FemaleAge55to59     | 19855      |
| Botswana | 1998           | FemaleAge5to9       | 111641     |
| Botswana | 1998           | FemaleAge60to64     | 16297      |
| Botswana | 1998           | FemaleAge65to69     | 11942      |
| Botswana | 1998           | FemaleAge70to74     | 8416       |
| Botswana | 1998           | FemaleAge75to79     | 5603       |
| Botswana | 1998           | FemaleAge80to84     | 2395       |
| Botswana | 1998           | FemaleAge85to89     | 871        |
| Botswana | 1998           | FemaleAge90to94     | 289        |
| Botswana | 1998           | FemaleAge95to99     | 52         |
| Botswana | 1998           | FemaleAgeAbove100   | 3          |
| Botswana | 1998           | FemaleLactAge15to19 | 7207       |
| Botswana | 1998           | FemaleLactAge20to24 | 12893      |
| Botswana | 1998           | FemaleLactAge25to29 | 11385      |
| Botswana | 1998           | FemaleLactAge30to34 | 8406       |
| Botswana | 1998           | FemaleLactAge35to39 | 5651       |
| Botswana | 1998           | FemaleLactAge40to44 | 2542       |
| Botswana | 1998           | FemaleLactAge45to49 | 303        |
| Botswana | 1998           | FemalePregAge15to19 | 5406       |
| Botswana | 1998           | FemalePregAge20to24 | 9670       |
| Botswana | 1998           | FemalePregAge25to29 | 8539       |
| Botswana | 1998           | FemalePregAge30to34 | 6305       |
| Botswana | 1998           | FemalePregAge35to39 | 4238       |
| Botswana | 1998           | FemalePregAge40to44 | 1907       |
| Botswana | 1998           | FemalePregAge45to49 | 227        |
| Botswana | 1998           | MaleAge0to4         | 114791     |
| Botswana | 1998           | MaleAge10to14       | 110750     |
| Botswana | 1998           | MaleAge15to19       | 101854     |
| Botswana | 1998           | MaleAge20to24       | 85811      |
| Botswana | 1998           | MaleAge25to29       | 69839      |
| Botswana | 1998           | MaleAge30to34       | 57035      |
| Botswana | 1998           | MaleAge35to39       | 46924      |
| Botswana | 1998           | MaleAge40to44       | 39812      |
| Botswana | 1998           | MaleAge45to49       | 30528      |
| Botswana | 1998           | MaleAge50to54       | 20775      |
| Botswana | 1998           | MaleAge55to59       | 16768      |
| Botswana | 1998           | MaleAge5to9         | 113122     |
| Botswana | 1998           | MaleAge60to64       | 12047      |
| Botswana | 1998           | MaleAge65to69       | 7761       |
| Botswana | 1998           | MaleAge70to74       | 5204       |
| Botswana | 1998           | MaleAge75to79       | 3526       |
| Botswana | 1998           | MaleAge80to84       | 1447       |
| Botswana | 1998           | MaleAge85to89       | 528        |
| Botswana | 1998           | MaleAge90to94       | 162        |
| Botswana | 1998           | MaleAge95to99       | 29         |
| Botswana | 1998           | MaleAgeAbove100     | 1          |
| Botswana | 1999           | FemaleAge0to4       | 112810     |
| Botswana | 1999           | FemaleAge10to14     | 110232     |

Dietary calcium and zinc deficiency risks are decreasing but remain prevalent

| Country  | Reference year | Age/gender group    | Population |
|----------|----------------|---------------------|------------|
| Botswana | 1999           | FemaleAge15to19     | 90974      |
| Botswana | 1999           | FemaleAge20to24     | 65740      |
| Botswana | 1999           | FemaleAge25to29     | 50842      |
| Botswana | 1999           | FemaleAge30to34     | 42509      |
| Botswana | 1999           | FemaleAge35to39     | 38141      |
| Botswana | 1999           | FemaleAge40to44     | 37649      |
| Botswana | 1999           | FemaleAge45to49     | 34032      |
| Botswana | 1999           | FemaleAge50to54     | 22949      |
| Botswana | 1999           | FemaleAge55to59     | 20122      |
| Botswana | 1999           | FemaleAge5to9       | 111473     |
| Botswana | 1999           | FemaleAge60to64     | 16724      |
| Botswana | 1999           | FemaleAge65to69     | 12489      |
| Botswana | 1999           | FemaleAge70to74     | 8517       |
| Botswana | 1999           | FemaleAge75to79     | 5894       |
| Botswana | 1999           | FemaleAge80to84     | 2555       |
| Botswana | 1999           | FemaleAge85to89     | 884        |
| Botswana | 1999           | FemaleAge90to94     | 278        |
| Botswana | 1999           | FemaleAge95to99     | 55         |
| Botswana | 1999           | FemaleAgeAbov e100  | 3          |
| Botswana | 1999           | FemaleLactAge15to19 | 7207       |
| Botswana | 1999           | FemaleLactAge20to24 | 12893      |
| Botswana | 1999           | FemaleLactAge25to29 | 11385      |
| Botswana | 1999           | FemaleLactAge30to34 | 8406       |
| Botswana | 1999           | FemaleLactAge35to39 | 5651       |
| Botswana | 1999           | FemaleLactAge40to44 | 2542       |
| Botswana | 1999           | FemaleLactAge45to49 | 303        |
| Botswana | 1999           | FemalePregAge15to19 | 5406       |
| Botswana | 1999           | FemalePregAge20to24 | 9670       |
| Botswana | 1999           | FemalePregAge25to29 | 8539       |
| Botswana | 1999           | FemalePregAge30to34 | 6305       |
| Botswana | 1999           | FemalePregAge35to39 | 4238       |
| Botswana | 1999           | FemalePregAge40to44 | 1907       |
| Botswana | 1999           | FemalePregAge45to49 | 227        |
| Botswana | 1999           | MaleAge0to4         | 114783     |
| Botswana | 1999           | MaleAge10to14       | 111366     |
| Botswana | 1999           | MaleAge15to19       | 104418     |
| Botswana | 1999           | MaleAge20to24       | 89328      |
| Botswana | 1999           | MaleAge25to29       | 72648      |
| Botswana | 1999           | MaleAge30to34       | 59005      |
| Botswana | 1999           | MaleAge35to39       | 47854      |
| Botswana | 1999           | MaleAge40to44       | 40145      |
| Botswana | 1999           | MaleAge45to49       | 32455      |
| Botswana | 1999           | MaleAge50to54       | 21430      |
| Botswana | 1999           | MaleAge55to59       | 17246      |
| Botswana | 1999           | MaleAge5to9         | 112994     |
| Botswana | 1999           | MaleAge60to64       | 12513      |
| Botswana | 1999           | MaleAge65to69       | 8085       |
| Botswana | 1999           | MaleAge70to74       | 5141       |
| Botswana | 1999           | MaleAge75to79       | 3672       |
| Botswana | 1999           | MaleAge80to84       | 1538       |
| Botswana | 1999           | MaleAge85to89       | 553        |
| Botswana | 1999           | MaleAge90to94       | 166        |
| Botswana | 1999           | MaleAge95to99       | 33         |
| Botswana | 1999           | MaleAgeAbov e100    | 1          |
| Brazil   | 1992           | FemaleAge0to4       | 8378513    |
| Brazil   | 1992           | FemaleAge10to14     | 8669431    |
| Brazil   | 1992           | FemaleAge15to19     | 6611988    |
| Brazil   | 1992           | FemaleAge20to24     | 5211983    |
| Brazil   | 1992           | FemaleAge25to29     | 5322931    |
| Brazil   | 1992           | FemaleAge30to34     | 5253179    |
| Brazil   | 1992           | FemaleAge35to39     | 4773525    |
| Brazil   | 1992           | FemaleAge40to44     | 4128116    |
| Brazil   | 1992           | FemaleAge45to49     | 3311724    |
| Brazil   | 1992           | FemaleAge50to54     | 2819365    |
| Brazil   | 1992           | FemaleAge55to59     | 2329842    |
| Brazil   | 1992           | FemaleAge5to9       | 9015834    |
| Brazil   | 1992           | FemaleAge60to64     | 1926099    |
| Brazil   | 1992           | FemaleAge65to69     | 1512188    |
| Brazil   | 1992           | FemaleAge70to74     | 1052563    |
| Brazil   | 1992           | FemaleAge75to79     | 709556     |
| Brazil   | 1992           | FemaleAge80to84     | 414303     |
| Brazil   | 1992           | FemaleAge85to89     | 188038     |
| Brazil   | 1992           | FemaleAge90to94     | 69163      |
| Brazil   | 1992           | FemaleAge95to99     | 17868      |
| Brazil   | 1992           | FemaleAgeAbov e100  | 2581       |
| Brazil   | 1992           | FemaleLactAge15to19 | 660262     |
| Brazil   | 1992           | FemaleLactAge20to24 | 1088544    |
| Brazil   | 1992           | FemaleLactAge25to29 | 898193     |
| Brazil   | 1992           | FemaleLactAge30to34 | 532158     |
| Brazil   | 1992           | FemaleLactAge35to39 | 248843     |
| Brazil   | 1992           | FemaleLactAge40to44 | 81522      |
| Brazil   | 1992           | FemaleLactAge45to49 | 11055      |
| Brazil   | 1992           | FemalePregAge15to19 | 495197     |
| Brazil   | 1992           | FemalePregAge20to24 | 816408     |
| Brazil   | 1992           | FemalePregAge25to29 | 673644     |
| Brazil   | 1992           | FemalePregAge30to34 | 399119     |
| Brazil   | 1992           | FemalePregAge35to39 | 186633     |
| Brazil   | 1992           | FemalePregAge40to44 | 61142      |

Dietary calcium and zinc deficiency risks are decreasing but remain prevalent

| Country | Reference year | Age/gender group    | Population |
|---------|----------------|---------------------|------------|
| Brazil  | 1992           | FemalePregAge45to49 | 8291       |
| Brazil  | 1992           | MaleAge0to4         | 8655774    |
| Brazil  | 1992           | MaleAge10to14       | 8851369    |
| Brazil  | 1992           | MaleAge15to19       | 7780063    |
| Brazil  | 1992           | MaleAge20to24       | 7077284    |
| Brazil  | 1992           | MaleAge25to29       | 6818196    |
| Brazil  | 1992           | MaleAge30to34       | 6057906    |
| Brazil  | 1992           | MaleAge35to39       | 5057769    |
| Brazil  | 1992           | MaleAge40to44       | 4113367    |
| Brazil  | 1992           | MaleAge45to49       | 3173630    |
| Brazil  | 1992           | MaleAge50to54       | 2641973    |
| Brazil  | 1992           | MaleAge55to59       | 2139387    |
| Brazil  | 1992           | MaleAge5to9         | 9343996    |
| Brazil  | 1992           | MaleAge60to64       | 1724376    |
| Brazil  | 1992           | MaleAge65to69       | 1320213    |
| Brazil  | 1992           | MaleAge70to74       | 886770     |
| Brazil  | 1992           | MaleAge75to79       | 569778     |
| Brazil  | 1992           | MaleAge80to84       | 314576     |
| Brazil  | 1992           | MaleAge85to89       | 133691     |
| Brazil  | 1992           | MaleAge90to94       | 45549      |
| Brazil  | 1992           | MaleAge95to99       | 11015      |
| Brazil  | 1992           | MaleAgeAbove100     | 1503       |
| Brazil  | 1993           | FemaleAge0to4       | 8298003    |
| Brazil  | 1993           | FemaleAge10to14     | 8817913    |
| Brazil  | 1993           | FemaleAge15to19     | 6785869    |
| Brazil  | 1993           | FemaleAge20to24     | 5290139    |
| Brazil  | 1993           | FemaleAge25to29     | 5335793    |
| Brazil  | 1993           | FemaleAge30to34     | 5461094    |
| Brazil  | 1993           | FemaleAge35to39     | 4929077    |
| Brazil  | 1993           | FemaleAge40to44     | 4307892    |
| Brazil  | 1993           | FemaleAge45to49     | 3470419    |
| Brazil  | 1993           | FemaleAge50to54     | 2853009    |
| Brazil  | 1993           | FemaleAge55to59     | 2433279    |
| Brazil  | 1993           | FemaleAge5to9       | 8914005    |
| Brazil  | 1993           | FemaleAge60to64     | 1945207    |
| Brazil  | 1993           | FemaleAge65to69     | 1582747    |
| Brazil  | 1993           | FemaleAge70to74     | 1093102    |
| Brazil  | 1993           | FemaleAge75to79     | 729505     |
| Brazil  | 1993           | FemaleAge80to84     | 434352     |
| Brazil  | 1993           | FemaleAge85to89     | 199002     |
| Brazil  | 1993           | FemaleAge90to94     | 72180      |
| Brazil  | 1993           | FemaleAge95to99     | 20525      |
| Brazil  | 1993           | FemaleAgeAbove100   | 2895       |
| Brazil  | 1993           | FemaleLactAge15to19 | 660262     |
| Brazil  | 1993           | FemaleLactAge20to24 | 1088544    |
| Brazil  | 1993           | FemaleLactAge25to29 | 898193     |
| Brazil  | 1993           | FemaleLactAge30to34 | 532158     |
| Brazil  | 1993           | FemaleLactAge35to39 | 248843     |
| Brazil  | 1993           | FemaleLactAge40to44 | 81522      |
| Brazil  | 1993           | FemaleLactAge45to49 | 11055      |
| Brazil  | 1993           | FemalePregAge15to19 | 495197     |
| Brazil  | 1993           | FemalePregAge20to24 | 816408     |
| Brazil  | 1993           | FemalePregAge25to29 | 673644     |
| Brazil  | 1993           | FemalePregAge30to34 | 399119     |
| Brazil  | 1993           | FemalePregAge35to39 | 186633     |
| Brazil  | 1993           | FemalePregAge40to44 | 61142      |
| Brazil  | 1993           | FemalePregAge45to49 | 8291       |
| Brazil  | 1993           | MaleAge0to4         | 8582309    |
| Brazil  | 1993           | MaleAge10to14       | 9041186    |
| Brazil  | 1993           | MaleAge15to19       | 7966550    |
| Brazil  | 1993           | MaleAge20to24       | 7140741    |
| Brazil  | 1993           | MaleAge25to29       | 6822980    |
| Brazil  | 1993           | MaleAge30to34       | 6254863    |
| Brazil  | 1993           | MaleAge35to39       | 5198352    |
| Brazil  | 1993           | MaleAge40to44       | 4278111    |
| Brazil  | 1993           | MaleAge45to49       | 3318185    |
| Brazil  | 1993           | MaleAge50to54       | 2668219    |
| Brazil  | 1993           | MaleAge55to59       | 2228319    |
| Brazil  | 1993           | MaleAge5to9         | 9233000    |
| Brazil  | 1993           | MaleAge60to64       | 1734698    |
| Brazil  | 1993           | MaleAge65to69       | 1374815    |
| Brazil  | 1993           | MaleAge70to74       | 916751     |
| Brazil  | 1993           | MaleAge75to79       | 582954     |
| Brazil  | 1993           | MaleAge80to84       | 328507     |
| Brazil  | 1993           | MaleAge85to89       | 141353     |
| Brazil  | 1993           | MaleAge90to94       | 47814      |
| Brazil  | 1993           | MaleAge95to99       | 12705      |
| Brazil  | 1993           | MaleAgeAbove100     | 1702       |
| Brazil  | 1994           | FemaleAge0to4       | 8254418    |
| Brazil  | 1994           | FemaleAge10to14     | 8933059    |
| Brazil  | 1994           | FemaleAge15to19     | 6965626    |
| Brazil  | 1994           | FemaleAge20to24     | 5389297    |
| Brazil  | 1994           | FemaleAge25to29     | 5349276    |
| Brazil  | 1994           | FemaleAge30to34     | 5639345    |
| Brazil  | 1994           | FemaleAge35to39     | 5094742    |
| Brazil  | 1994           | FemaleAge40to44     | 4486585    |
| Brazil  | 1994           | FemaleAge45to49     | 3639636    |
| Brazil  | 1994           | FemaleAge50to54     | 2904956    |

Dietary calcium and zinc deficiency risks are decreasing but remain prevalent

| Country | Reference year | Age/gender group    | Population |
|---------|----------------|---------------------|------------|
| Brazil  | 1994           | FemaleAge55to59     | 2528483    |
| Brazil  | 1994           | FemaleAge5to9       | 8772778    |
| Brazil  | 1994           | FemaleAge60to64     | 1977438    |
| Brazil  | 1994           | FemaleAge65to69     | 1646728    |
| Brazil  | 1994           | FemaleAge70to74     | 1140637    |
| Brazil  | 1994           | FemaleAge75to79     | 753224     |
| Brazil  | 1994           | FemaleAge80to84     | 452778     |
| Brazil  | 1994           | FemaleAge85to89     | 208773     |
| Brazil  | 1994           | FemaleAge90to94     | 74578      |
| Brazil  | 1994           | FemaleAge95to99     | 21950      |
| Brazil  | 1994           | FemaleAgeAbove100   | 3284       |
| Brazil  | 1994           | FemaleLactAge15to19 | 660262     |
| Brazil  | 1994           | FemaleLactAge20to24 | 1088544    |
| Brazil  | 1994           | FemaleLactAge25to29 | 898193     |
| Brazil  | 1994           | FemaleLactAge30to34 | 532158     |
| Brazil  | 1994           | FemaleLactAge35to39 | 248843     |
| Brazil  | 1994           | FemaleLactAge40to44 | 81522      |
| Brazil  | 1994           | FemaleLactAge45to49 | 11055      |
| Brazil  | 1994           | FemalePregAge15to19 | 495197     |
| Brazil  | 1994           | FemalePregAge20to24 | 816408     |
| Brazil  | 1994           | FemalePregAge25to29 | 673644     |
| Brazil  | 1994           | FemalePregAge30to34 | 399119     |
| Brazil  | 1994           | FemalePregAge35to39 | 186633     |
| Brazil  | 1994           | FemalePregAge40to44 | 61142      |
| Brazil  | 1994           | FemalePregAge45to49 | 8291       |
| Brazil  | 1994           | MaleAge0to4         | 8549271    |
| Brazil  | 1994           | MaleAge10to14       | 9194216    |
| Brazil  | 1994           | MaleAge15to19       | 8167668    |
| Brazil  | 1994           | MaleAge20to24       | 7230213    |
| Brazil  | 1994           | MaleAge25to29       | 6827716    |
| Brazil  | 1994           | MaleAge30to34       | 6422578    |
| Brazil  | 1994           | MaleAge35to39       | 5349684    |
| Brazil  | 1994           | MaleAge40to44       | 4441460    |
| Brazil  | 1994           | MaleAge45to49       | 3472484    |
| Brazil  | 1994           | MaleAge50to54       | 2712679    |
| Brazil  | 1994           | MaleAge55to59       | 2309573    |
| Brazil  | 1994           | MaleAge5to9         | 9074079    |
| Brazil  | 1994           | MaleAge60to64       | 1757449    |
| Brazil  | 1994           | MaleAge65to69       | 1423090    |
| Brazil  | 1994           | MaleAge70to74       | 951666     |
| Brazil  | 1994           | MaleAge75to79       | 598362     |
| Brazil  | 1994           | MaleAge80to84       | 339710     |
| Brazil  | 1994           | MaleAge85to89       | 147460     |
| Brazil  | 1994           | MaleAge90to94       | 49397      |
| Brazil  | 1994           | MaleAge95to99       | 13603      |
| Brazil  | 1994           | MaleAgeAbove100     | 1950       |
| Brazil  | 1995           | FemaleAge0to4       | 8236898    |
| Brazil  | 1995           | FemaleAge10to14     | 8991886    |
| Brazil  | 1995           | FemaleAge15to19     | 7144153    |
| Brazil  | 1995           | FemaleAge20to24     | 5511105    |
| Brazil  | 1995           | FemaleAge25to29     | 5382365    |
| Brazil  | 1995           | FemaleAge30to34     | 5771714    |
| Brazil  | 1995           | FemaleAge35to39     | 5276932    |
| Brazil  | 1995           | FemaleAge40to44     | 4662606    |
| Brazil  | 1995           | FemaleAge45to49     | 3811960    |
| Brazil  | 1995           | FemaleAge50to54     | 2988694    |
| Brazil  | 1995           | FemaleAge55to59     | 2604945    |
| Brazil  | 1995           | FemaleAge5to9       | 8634727    |
| Brazil  | 1995           | FemaleAge60to64     | 2031784    |
| Brazil  | 1995           | FemaleAge65to69     | 1699299    |
| Brazil  | 1995           | FemaleAge70to74     | 1195907    |
| Brazil  | 1995           | FemaleAge75to79     | 782276     |
| Brazil  | 1995           | FemaleAge80to84     | 469677     |
| Brazil  | 1995           | FemaleAge85to89     | 217894     |
| Brazil  | 1995           | FemaleAge90to94     | 76310      |
| Brazil  | 1995           | FemaleAge95to99     | 21550      |
| Brazil  | 1995           | FemaleAgeAbove100   | 3767       |
| Brazil  | 1995           | FemaleLactAge15to19 | 660262     |
| Brazil  | 1995           | FemaleLactAge20to24 | 1088544    |
| Brazil  | 1995           | FemaleLactAge25to29 | 898193     |
| Brazil  | 1995           | FemaleLactAge30to34 | 532158     |
| Brazil  | 1995           | FemaleLactAge35to39 | 248843     |
| Brazil  | 1995           | FemaleLactAge40to44 | 81522      |
| Brazil  | 1995           | FemaleLactAge45to49 | 11055      |
| Brazil  | 1995           | FemalePregAge15to19 | 495197     |
| Brazil  | 1995           | FemalePregAge20to24 | 816408     |
| Brazil  | 1995           | FemalePregAge25to29 | 673644     |
| Brazil  | 1995           | FemalePregAge30to34 | 399119     |
| Brazil  | 1995           | FemalePregAge35to39 | 186633     |
| Brazil  | 1995           | FemalePregAge40to44 | 61142      |
| Brazil  | 1995           | FemalePregAge45to49 | 8291       |
| Brazil  | 1995           | MaleAge0to4         | 8538779    |
| Brazil  | 1995           | MaleAge10to14       | 9279930    |
| Brazil  | 1995           | MaleAge15to19       | 8376551    |
| Brazil  | 1995           | MaleAge20to24       | 7350593    |
| Brazil  | 1995           | MaleAge25to29       | 6851184    |
| Brazil  | 1995           | MaleAge30to34       | 6545423    |
| Brazil  | 1995           | MaleAge35to39       | 5518661    |

Dietary calcium and zinc deficiency risks are decreasing but remain prevalent

| Country | Reference year | Age/gender group    | Population |
|---------|----------------|---------------------|------------|
| Brazil  | 1995           | MaleAge40to44       | 4602118    |
| Brazil  | 1995           | MaleAge45to49       | 3629904    |
| Brazil  | 1995           | MaleAge50to54       | 2787597    |
| Brazil  | 1995           | MaleAge55to59       | 2374138    |
| Brazil  | 1995           | MaleAge5to9         | 8920808    |
| Brazil  | 1995           | MaleAge60to64       | 1800669    |
| Brazil  | 1995           | MaleAge65to69       | 1461271    |
| Brazil  | 1995           | MaleAge70to74       | 992293     |
| Brazil  | 1995           | MaleAge75to79       | 617287     |
| Brazil  | 1995           | MaleAge80to84       | 348483     |
| Brazil  | 1995           | MaleAge85to89       | 152134     |
| Brazil  | 1995           | MaleAge90to94       | 50038      |
| Brazil  | 1995           | MaleAge95to99       | 13238      |
| Brazil  | 1995           | MaleAgeAbove100     | 2258       |
| Brazil  | 1996           | FemaleAge0to4       | 8248239    |
| Brazil  | 1996           | FemaleAge10to14     | 8993546    |
| Brazil  | 1996           | FemaleAge15to19     | 7120100    |
| Brazil  | 1996           | FemaleAge20to24     | 5627088    |
| Brazil  | 1996           | FemaleAge25to29     | 5476137    |
| Brazil  | 1996           | FemaleAge30to34     | 5876306    |
| Brazil  | 1996           | FemaleAge35to39     | 5448015    |
| Brazil  | 1996           | FemaleAge40to44     | 4837223    |
| Brazil  | 1996           | FemaleAge45to49     | 3981729    |
| Brazil  | 1996           | FemaleAge50to54     | 3096251    |
| Brazil  | 1996           | FemaleAge55to59     | 2659754    |
| Brazil  | 1996           | FemaleAge5to9       | 8525165    |
| Brazil  | 1996           | FemaleAge60to64     | 2099056    |
| Brazil  | 1996           | FemaleAge65to69     | 1732510    |
| Brazil  | 1996           | FemaleAge70to74     | 1250939    |
| Brazil  | 1996           | FemaleAge75to79     | 813344     |
| Brazil  | 1996           | FemaleAge80to84     | 490302     |
| Brazil  | 1996           | FemaleAge85to89     | 236618     |
| Brazil  | 1996           | FemaleAge90to94     | 85694      |
| Brazil  | 1996           | FemaleAge95to99     | 23589      |
| Brazil  | 1996           | FemaleAgeAbove100   | 4358       |
| Brazil  | 1996           | FemaleLactAge15to19 | 774240     |
| Brazil  | 1996           | FemaleLactAge20to24 | 1104990    |
| Brazil  | 1996           | FemaleLactAge25to29 | 873088     |
| Brazil  | 1996           | FemaleLactAge30to34 | 523770     |
| Brazil  | 1996           | FemaleLactAge35to39 | 262423     |
| Brazil  | 1996           | FemaleLactAge40to44 | 77783      |
| Brazil  | 1996           | FemaleLactAge45to49 | 12809      |
| Brazil  | 1996           | FemalePregAge15to19 | 580680     |
| Brazil  | 1996           | FemalePregAge20to24 | 828743     |
| Brazil  | 1996           | FemalePregAge25to29 | 654816     |
| Brazil  | 1996           | FemalePregAge30to34 | 392827     |
| Brazil  | 1996           | FemalePregAge35to39 | 196817     |
| Brazil  | 1996           | FemalePregAge40to44 | 58337      |
| Brazil  | 1996           | FemalePregAge45to49 | 9607       |
| Brazil  | 1996           | MaleAge0to4         | 8565249    |
| Brazil  | 1996           | MaleAge10to14       | 9290893    |
| Brazil  | 1996           | MaleAge15to19       | 8580023    |
| Brazil  | 1996           | MaleAge20to24       | 7495224    |
| Brazil  | 1996           | MaleAge25to29       | 6888693    |
| Brazil  | 1996           | MaleAge30to34       | 6626648    |
| Brazil  | 1996           | MaleAge35to39       | 5700809    |
| Brazil  | 1996           | MaleAge40to44       | 4754009    |
| Brazil  | 1996           | MaleAge45to49       | 3786493    |
| Brazil  | 1996           | MaleAge50to54       | 2883387    |
| Brazil  | 1996           | MaleAge55to59       | 2419187    |
| Brazil  | 1996           | MaleAge5to9         | 8804336    |
| Brazil  | 1996           | MaleAge60to64       | 1856646    |
| Brazil  | 1996           | MaleAge65to69       | 1483704    |
| Brazil  | 1996           | MaleAge70to74       | 1034433    |
| Brazil  | 1996           | MaleAge75to79       | 641022     |
| Brazil  | 1996           | MaleAge80to84       | 364637     |
| Brazil  | 1996           | MaleAge85to89       | 166152     |
| Brazil  | 1996           | MaleAge90to94       | 56725      |
| Brazil  | 1996           | MaleAge95to99       | 14627      |
| Brazil  | 1996           | MaleAgeAbove100     | 2633       |
| Brazil  | 1997           | FemaleAge0to4       | 8312889    |
| Brazil  | 1997           | FemaleAge10to14     | 8938675    |
| Brazil  | 1997           | FemaleAge15to19     | 7291147    |
| Brazil  | 1997           | FemaleAge20to24     | 5789733    |
| Brazil  | 1997           | FemaleAge25to29     | 5538931    |
| Brazil  | 1997           | FemaleAge30to34     | 5919855    |
| Brazil  | 1997           | FemaleAge35to39     | 5658283    |
| Brazil  | 1997           | FemaleAge40to44     | 4995137    |
| Brazil  | 1997           | FemaleAge45to49     | 4158320    |
| Brazil  | 1997           | FemaleAge50to54     | 3231286    |
| Brazil  | 1997           | FemaleAge55to59     | 2697346    |
| Brazil  | 1997           | FemaleAge5to9       | 8418874    |
| Brazil  | 1997           | FemaleAge60to64     | 2188051    |
| Brazil  | 1997           | FemaleAge65to69     | 1753612    |
| Brazil  | 1997           | FemaleAge70to74     | 1313363    |
| Brazil  | 1997           | FemaleAge75to79     | 846017     |
| Brazil  | 1997           | FemaleAge80to84     | 508917     |
| Brazil  | 1997           | FemaleAge85to89     | 254519     |



Dietary calcium and zinc deficiency risks are decreasing but remain prevalent

| Country | Reference year | Age/gender group    | Population |
|---------|----------------|---------------------|------------|
| Brazil  | 1997           | FemaleAge90to94     | 94276      |
| Brazil  | 1997           | FemaleAge95to99     | 25795      |
| Brazil  | 1997           | FemaleAgeAbove100   | 5052       |
| Brazil  | 1997           | FemaleLactAge15to19 | 774240     |
| Brazil  | 1997           | FemaleLactAge20to24 | 1104990    |
| Brazil  | 1997           | FemaleLactAge25to29 | 873088     |
| Brazil  | 1997           | FemaleLactAge30to34 | 523770     |
| Brazil  | 1997           | FemaleLactAge35to39 | 262423     |
| Brazil  | 1997           | FemaleLactAge40to44 | 77783      |
| Brazil  | 1997           | FemaleLactAge45to49 | 12809      |
| Brazil  | 1997           | FemalePregAge15to19 | 580680     |
| Brazil  | 1997           | FemalePregAge20to24 | 828743     |
| Brazil  | 1997           | FemalePregAge25to29 | 654816     |
| Brazil  | 1997           | FemalePregAge30to34 | 392827     |
| Brazil  | 1997           | FemalePregAge35to39 | 196817     |
| Brazil  | 1997           | FemalePregAge40to44 | 58337      |
| Brazil  | 1997           | FemalePregAge45to49 | 9607       |
| Brazil  | 1997           | MaleAge0to4         | 8639351    |
| Brazil  | 1997           | MaleAge10to14       | 9236042    |
| Brazil  | 1997           | MaleAge15to19       | 8788936    |
| Brazil  | 1997           | MaleAge20to24       | 7663316    |
| Brazil  | 1997           | MaleAge25to29       | 6937422    |
| Brazil  | 1997           | MaleAge30to34       | 6663633    |
| Brazil  | 1997           | MaleAge35to39       | 5899323    |
| Brazil  | 1997           | MaleAge40to44       | 4896331    |
| Brazil  | 1997           | MaleAge45to49       | 3946915    |
| Brazil  | 1997           | MaleAge50to54       | 3004615    |
| Brazil  | 1997           | MaleAge55to59       | 2449369    |
| Brazil  | 1997           | MaleAge5to9         | 8695764    |
| Brazil  | 1997           | MaleAge60to64       | 1931907    |
| Brazil  | 1997           | MaleAge65to69       | 1495938    |
| Brazil  | 1997           | MaleAge70to74       | 1081520    |
| Brazil  | 1997           | MaleAge75to79       | 664656     |
| Brazil  | 1997           | MaleAge80to84       | 378195     |
| Brazil  | 1997           | MaleAge85to89       | 179153     |
| Brazil  | 1997           | MaleAge90to94       | 62786      |
| Brazil  | 1997           | MaleAge95to99       | 16204      |
| Brazil  | 1997           | MaleAgeAbove100     | 3073       |
| Brazil  | 1998           | FemaleAge0to4       | 8405920    |
| Brazil  | 1998           | FemaleAge10to14     | 8842597    |
| Brazil  | 1998           | FemaleAge15to19     | 7442854    |
| Brazil  | 1998           | FemaleAge20to24     | 5965117    |
| Brazil  | 1998           | FemaleAge25to29     | 5618987    |
| Brazil  | 1998           | FemaleAge30to34     | 5935008    |
| Brazil  | 1998           | FemaleAge35to39     | 5866566    |
| Brazil  | 1998           | FemaleAge40to44     | 5150694    |
| Brazil  | 1998           | FemaleAge45to49     | 4336549    |
| Brazil  | 1998           | FemaleAge50to54     | 3387392    |
| Brazil  | 1998           | FemaleAge55to59     | 2731765    |
| Brazil  | 1998           | FemaleAge5to9       | 8323713    |
| Brazil  | 1998           | FemaleAge60to64     | 2287168    |
| Brazil  | 1998           | FemaleAge65to69     | 1772908    |
| Brazil  | 1998           | FemaleAge70to74     | 1377884    |
| Brazil  | 1998           | FemaleAge75to79     | 881856     |
| Brazil  | 1998           | FemaleAge80to84     | 527421     |
| Brazil  | 1998           | FemaleAge85to89     | 270620     |
| Brazil  | 1998           | FemaleAge90to94     | 101824     |
| Brazil  | 1998           | FemaleAge95to99     | 28191      |
| Brazil  | 1998           | FemaleAgeAbove100   | 5829       |
| Brazil  | 1998           | FemaleLactAge15to19 | 774240     |
| Brazil  | 1998           | FemaleLactAge20to24 | 1104990    |
| Brazil  | 1998           | FemaleLactAge25to29 | 873088     |
| Brazil  | 1998           | FemaleLactAge30to34 | 523770     |
| Brazil  | 1998           | FemaleLactAge35to39 | 262423     |
| Brazil  | 1998           | FemaleLactAge40to44 | 77783      |
| Brazil  | 1998           | FemaleLactAge45to49 | 12809      |
| Brazil  | 1998           | FemalePregAge15to19 | 580680     |
| Brazil  | 1998           | FemalePregAge20to24 | 828743     |
| Brazil  | 1998           | FemalePregAge25to29 | 654816     |
| Brazil  | 1998           | FemalePregAge30to34 | 392827     |
| Brazil  | 1998           | FemalePregAge35to39 | 196817     |
| Brazil  | 1998           | FemalePregAge40to44 | 58337      |
| Brazil  | 1998           | FemalePregAge45to49 | 9607       |
| Brazil  | 1998           | MaleAge0to4         | 8736864    |
| Brazil  | 1998           | MaleAge10to14       | 9133257    |
| Brazil  | 1998           | MaleAge15to19       | 8983179    |
| Brazil  | 1998           | MaleAge20to24       | 7850337    |
| Brazil  | 1998           | MaleAge25to29       | 7003699    |
| Brazil  | 1998           | MaleAge30to34       | 6673191    |
| Brazil  | 1998           | MaleAge35to39       | 6096549    |
| Brazil  | 1998           | MaleAge40to44       | 5037017    |
| Brazil  | 1998           | MaleAge45to49       | 4108954    |
| Brazil  | 1998           | MaleAge50to54       | 3145206    |
| Brazil  | 1998           | MaleAge55to59       | 2477720    |
| Brazil  | 1998           | MaleAge5to9         | 8602731    |
| Brazil  | 1998           | MaleAge60to64       | 2015720    |
| Brazil  | 1998           | MaleAge65to69       | 1507441    |
| Brazil  | 1998           | MaleAge70to74       | 1129167    |

Dietary calcium and zinc deficiency risks are decreasing but remain prevalent

| Country  | Reference year | Age/gender group    | Population |
|----------|----------------|---------------------|------------|
| Brazil   | 1998           | MaleAge75to79       | 689519     |
| Brazil   | 1998           | MaleAge80to84       | 390285     |
| Brazil   | 1998           | MaleAge85to89       | 190240     |
| Brazil   | 1998           | MaleAge90to94       | 67995      |
| Brazil   | 1998           | MaleAge95to99       | 17914      |
| Brazil   | 1998           | MaleAgeAbov e100    | 3569       |
| Brazil   | 1999           | FemaleAge0to4       | 8496328    |
| Brazil   | 1999           | FemaleAge10to14     | 8729805    |
| Brazil   | 1999           | FemaleAge15to19     | 7553165    |
| Brazil   | 1999           | FemaleAge20to24     | 6145423    |
| Brazil   | 1999           | FemaleAge25to29     | 5719781    |
| Brazil   | 1999           | FemaleAge30to34     | 5950535    |
| Brazil   | 1999           | FemaleAge35to39     | 6045460    |
| Brazil   | 1999           | FemaleAge40to44     | 5316464    |
| Brazil   | 1999           | FemaleAge45to49     | 4513897    |
| Brazil   | 1999           | FemaleAge50to54     | 3553750    |
| Brazil   | 1999           | FemaleAge55to59     | 2784473    |
| Brazil   | 1999           | FemaleAge5to9       | 8246136    |
| Brazil   | 1999           | FemaleAge60to64     | 2378544    |
| Brazil   | 1999           | FemaleAge65to69     | 1805385    |
| Brazil   | 1999           | FemaleAge70to74     | 1436359    |
| Brazil   | 1999           | FemaleAge75to79     | 923074     |
| Brazil   | 1999           | FemaleAge80to84     | 547815     |
| Brazil   | 1999           | FemaleAge85to89     | 284120     |
| Brazil   | 1999           | FemaleAge90to94     | 108385     |
| Brazil   | 1999           | FemaleAge95to99     | 30563      |
| Brazil   | 1999           | FemaleAgeAbov e100  | 6661       |
| Brazil   | 1999           | FemaleLactAge15to19 | 774240     |
| Brazil   | 1999           | FemaleLactAge20to24 | 1104990    |
| Brazil   | 1999           | FemaleLactAge25to29 | 873088     |
| Brazil   | 1999           | FemaleLactAge30to34 | 523770     |
| Brazil   | 1999           | FemaleLactAge35to39 | 262423     |
| Brazil   | 1999           | FemaleLactAge40to44 | 77783      |
| Brazil   | 1999           | FemaleLactAge45to49 | 12809      |
| Brazil   | 1999           | FemalePregAge15to19 | 580680     |
| Brazil   | 1999           | FemalePregAge20to24 | 828743     |
| Brazil   | 1999           | FemalePregAge25to29 | 654816     |
| Brazil   | 1999           | FemalePregAge30to34 | 392827     |
| Brazil   | 1999           | FemalePregAge35to39 | 196817     |
| Brazil   | 1999           | FemalePregAge40to44 | 58337      |
| Brazil   | 1999           | FemalePregAge45to49 | 9607       |
| Brazil   | 1999           | MaleAge0to4         | 8830503    |
| Brazil   | 1999           | MaleAge10to14       | 9012621    |
| Brazil   | 1999           | MaleAge15to19       | 9131588    |
| Brazil   | 1999           | MaleAge20to24       | 8049364    |
| Brazil   | 1999           | MaleAge25to29       | 7094203    |
| Brazil   | 1999           | MaleAge30to34       | 6681738    |
| Brazil   | 1999           | MaleAge35to39       | 6264858    |
| Brazil   | 1999           | MaleAge40to44       | 5188440    |
| Brazil   | 1999           | MaleAge45to49       | 4269812    |
| Brazil   | 1999           | MaleAge50to54       | 3295123    |
| Brazil   | 1999           | MaleAge55to59       | 2523435    |
| Brazil   | 1999           | MaleAge5to9         | 8529231    |
| Brazil   | 1999           | MaleAge60to64       | 2092207    |
| Brazil   | 1999           | MaleAge65to69       | 1531140    |
| Brazil   | 1999           | MaleAge70to74       | 1170821    |
| Brazil   | 1999           | MaleAge75to79       | 717415     |
| Brazil   | 1999           | MaleAge80to84       | 402320     |
| Brazil   | 1999           | MaleAge85to89       | 198593     |
| Brazil   | 1999           | MaleAge90to94       | 72249      |
| Brazil   | 1999           | MaleAge95to99       | 19537      |
| Brazil   | 1999           | MaleAgeAbov e100    | 4111       |
| Bulgaria | 1992           | FemaleAge0to4       | 254961     |
| Bulgaria | 1992           | FemaleAge10to14     | 299012     |
| Bulgaria | 1992           | FemaleAge15to19     | 274462     |
| Bulgaria | 1992           | FemaleAge20to24     | 219240     |
| Bulgaria | 1992           | FemaleAge25to29     | 244881     |
| Bulgaria | 1992           | FemaleAge30to34     | 277304     |
| Bulgaria | 1992           | FemaleAge35to39     | 298935     |
| Bulgaria | 1992           | FemaleAge40to44     | 320016     |
| Bulgaria | 1992           | FemaleAge45to49     | 286605     |
| Bulgaria | 1992           | FemaleAge50to54     | 256143     |
| Bulgaria | 1992           | FemaleAge55to59     | 278459     |
| Bulgaria | 1992           | FemaleAge5to9       | 269321     |
| Bulgaria | 1992           | FemaleAge60to64     | 280319     |
| Bulgaria | 1992           | FemaleAge65to69     | 267619     |
| Bulgaria | 1992           | FemaleAge70to74     | 167342     |
| Bulgaria | 1992           | FemaleAge75to79     | 114364     |
| Bulgaria | 1992           | FemaleAge80to84     | 85905      |
| Bulgaria | 1992           | FemaleAge85to89     | 34584      |
| Bulgaria | 1992           | FemaleAge90to94     | 9033       |
| Bulgaria | 1992           | FemaleAge95to99     | 1310       |
| Bulgaria | 1992           | FemaleAgeAbov e100  | 120        |
| Bulgaria | 1992           | FemaleLactAge15to19 | 20407      |
| Bulgaria | 1992           | FemaleLactAge20to24 | 40161      |
| Bulgaria | 1992           | FemaleLactAge25to29 | 19463      |
| Bulgaria | 1992           | FemaleLactAge30to34 | 7373       |
| Bulgaria | 1992           | FemaleLactAge35to39 | 2555       |

Dietary calcium and zinc deficiency risks are decreasing but remain prevalent

| Country  | Reference year | Age/gender group    | Population |
|----------|----------------|---------------------|------------|
| Bulgaria | 1992           | FemaleLactAge40to44 | 547        |
| Bulgaria | 1992           | FemaleLactAge45to49 | 24         |
| Bulgaria | 1992           | FemalePregAge15to19 | 15306      |
| Bulgaria | 1992           | FemalePregAge20to24 | 30121      |
| Bulgaria | 1992           | FemalePregAge25to29 | 14597      |
| Bulgaria | 1992           | FemalePregAge30to34 | 5530       |
| Bulgaria | 1992           | FemalePregAge35to39 | 1916       |
| Bulgaria | 1992           | FemalePregAge40to44 | 410        |
| Bulgaria | 1992           | FemalePregAge45to49 | 18         |
| Bulgaria | 1992           | MaleAge0to4         | 266673     |
| Bulgaria | 1992           | MaleAge10to14       | 315539     |
| Bulgaria | 1992           | MaleAge15to19       | 324705     |
| Bulgaria | 1992           | MaleAge20to24       | 301102     |
| Bulgaria | 1992           | MaleAge25to29       | 286032     |
| Bulgaria | 1992           | MaleAge30to34       | 292441     |
| Bulgaria | 1992           | MaleAge35to39       | 301614     |
| Bulgaria | 1992           | MaleAge40to44       | 315532     |
| Bulgaria | 1992           | MaleAge45to49       | 278835     |
| Bulgaria | 1992           | MaleAge50to54       | 243957     |
| Bulgaria | 1992           | MaleAge55to59       | 259655     |
| Bulgaria | 1992           | MaleAge5to9         | 284422     |
| Bulgaria | 1992           | MaleAge60to64       | 253791     |
| Bulgaria | 1992           | MaleAge65to69       | 224548     |
| Bulgaria | 1992           | MaleAge70to74       | 132776     |
| Bulgaria | 1992           | MaleAge75to79       | 84950      |
| Bulgaria | 1992           | MaleAge80to84       | 59640      |
| Bulgaria | 1992           | MaleAge85to89       | 22325      |
| Bulgaria | 1992           | MaleAge90to94       | 5779       |
| Bulgaria | 1992           | MaleAge95to99       | 795        |
| Bulgaria | 1992           | MaleAgeAbove100     | 56         |
| Bulgaria | 1993           | FemaleAge0to4       | 236953     |
| Bulgaria | 1993           | FemaleAge10to14     | 288234     |
| Bulgaria | 1993           | FemaleAge15to19     | 271967     |
| Bulgaria | 1993           | FemaleAge20to24     | 220565     |
| Bulgaria | 1993           | FemaleAge25to29     | 241430     |
| Bulgaria | 1993           | FemaleAge30to34     | 270782     |
| Bulgaria | 1993           | FemaleAge35to39     | 293725     |
| Bulgaria | 1993           | FemaleAge40to44     | 312880     |
| Bulgaria | 1993           | FemaleAge45to49     | 297487     |
| Bulgaria | 1993           | FemaleAge50to54     | 253921     |
| Bulgaria | 1993           | FemaleAge55to59     | 268654     |
| Bulgaria | 1993           | FemaleAge5to9       | 264709     |
| Bulgaria | 1993           | FemaleAge60to64     | 280600     |
| Bulgaria | 1993           | FemaleAge65to69     | 262702     |
| Bulgaria | 1993           | FemaleAge70to74     | 191109     |
| Bulgaria | 1993           | FemaleAge75to79     | 103171     |
| Bulgaria | 1993           | FemaleAge80to84     | 88691      |
| Bulgaria | 1993           | FemaleAge85to89     | 35697      |
| Bulgaria | 1993           | FemaleAge90to94     | 9417       |
| Bulgaria | 1993           | FemaleAge95to99     | 1500       |
| Bulgaria | 1993           | FemaleAgeAbove100   | 115        |
| Bulgaria | 1993           | FemaleLactAge15to19 | 20407      |
| Bulgaria | 1993           | FemaleLactAge20to24 | 40161      |
| Bulgaria | 1993           | FemaleLactAge25to29 | 19463      |
| Bulgaria | 1993           | FemaleLactAge30to34 | 7373       |
| Bulgaria | 1993           | FemaleLactAge35to39 | 2555       |
| Bulgaria | 1993           | FemaleLactAge40to44 | 547        |
| Bulgaria | 1993           | FemaleLactAge45to49 | 24         |
| Bulgaria | 1993           | FemalePregAge15to19 | 15306      |
| Bulgaria | 1993           | FemalePregAge20to24 | 30121      |
| Bulgaria | 1993           | FemalePregAge25to29 | 14597      |
| Bulgaria | 1993           | FemalePregAge30to34 | 5530       |
| Bulgaria | 1993           | FemalePregAge35to39 | 1916       |
| Bulgaria | 1993           | FemalePregAge40to44 | 410        |
| Bulgaria | 1993           | FemalePregAge45to49 | 18         |
| Bulgaria | 1993           | MaleAge0to4         | 248409     |
| Bulgaria | 1993           | MaleAge10to14       | 304652     |
| Bulgaria | 1993           | MaleAge15to19       | 322490     |
| Bulgaria | 1993           | MaleAge20to24       | 302245     |
| Bulgaria | 1993           | MaleAge25to29       | 283233     |
| Bulgaria | 1993           | MaleAge30to34       | 286180     |
| Bulgaria | 1993           | MaleAge35to39       | 296339     |
| Bulgaria | 1993           | MaleAge40to44       | 308057     |
| Bulgaria | 1993           | MaleAge45to49       | 288713     |
| Bulgaria | 1993           | MaleAge50to54       | 241251     |
| Bulgaria | 1993           | MaleAge55to59       | 248906     |
| Bulgaria | 1993           | MaleAge5to9         | 278907     |
| Bulgaria | 1993           | MaleAge60to64       | 252898     |
| Bulgaria | 1993           | MaleAge65to69       | 221047     |
| Bulgaria | 1993           | MaleAge70to74       | 149530     |
| Bulgaria | 1993           | MaleAge75to79       | 75809      |
| Bulgaria | 1993           | MaleAge80to84       | 61239      |
| Bulgaria | 1993           | MaleAge85to89       | 22830      |
| Bulgaria | 1993           | MaleAge90to94       | 5973       |
| Bulgaria | 1993           | MaleAge95to99       | 937        |
| Bulgaria | 1993           | MaleAgeAbove100     | 54         |
| Bulgaria | 1994           | FemaleAge0to4       | 218612     |
| Bulgaria | 1994           | FemaleAge10to14     | 278026     |

Dietary calcium and zinc deficiency risks are decreasing but remain prevalent

| Country  | Reference year | Age/gender group    | Population |
|----------|----------------|---------------------|------------|
| Bulgaria | 1994           | FemaleAge15to19     | 268275     |
| Bulgaria | 1994           | FemaleAge20to24     | 221360     |
| Bulgaria | 1994           | FemaleAge25to29     | 239212     |
| Bulgaria | 1994           | FemaleAge30to34     | 264824     |
| Bulgaria | 1994           | FemaleAge35to39     | 288402     |
| Bulgaria | 1994           | FemaleAge40to44     | 305199     |
| Bulgaria | 1994           | FemaleAge45to49     | 306165     |
| Bulgaria | 1994           | FemaleAge50to54     | 254584     |
| Bulgaria | 1994           | FemaleAge55to59     | 259810     |
| Bulgaria | 1994           | FemaleAge5to9       | 260512     |
| Bulgaria | 1994           | FemaleAge60to64     | 279627     |
| Bulgaria | 1994           | FemaleAge65to69     | 258258     |
| Bulgaria | 1994           | FemaleAge70to74     | 211199     |
| Bulgaria | 1994           | FemaleAge75to79     | 98636      |
| Bulgaria | 1994           | FemaleAge80to84     | 88751      |
| Bulgaria | 1994           | FemaleAge85to89     | 36103      |
| Bulgaria | 1994           | FemaleAge90to94     | 9386       |
| Bulgaria | 1994           | FemaleAge95to99     | 1554       |
| Bulgaria | 1994           | FemaleAgeAbov e100  | 110        |
| Bulgaria | 1994           | FemaleLactAge15to19 | 20407      |
| Bulgaria | 1994           | FemaleLactAge20to24 | 40161      |
| Bulgaria | 1994           | FemaleLactAge25to29 | 19463      |
| Bulgaria | 1994           | FemaleLactAge30to34 | 7373       |
| Bulgaria | 1994           | FemaleLactAge35to39 | 2555       |
| Bulgaria | 1994           | FemaleLactAge40to44 | 547        |
| Bulgaria | 1994           | FemaleLactAge45to49 | 24         |
| Bulgaria | 1994           | FemalePregAge15to19 | 15306      |
| Bulgaria | 1994           | FemalePregAge20to24 | 30121      |
| Bulgaria | 1994           | FemalePregAge25to29 | 14597      |
| Bulgaria | 1994           | FemalePregAge30to34 | 5530       |
| Bulgaria | 1994           | FemalePregAge35to39 | 1916       |
| Bulgaria | 1994           | FemalePregAge40to44 | 410        |
| Bulgaria | 1994           | FemalePregAge45to49 | 18         |
| Bulgaria | 1994           | MaleAge0to4         | 229885     |
| Bulgaria | 1994           | MaleAge10to14       | 294209     |
| Bulgaria | 1994           | MaleAge15to19       | 319316     |
| Bulgaria | 1994           | MaleAge20to24       | 302870     |
| Bulgaria | 1994           | MaleAge25to29       | 281581     |
| Bulgaria | 1994           | MaleAge30to34       | 280722     |
| Bulgaria | 1994           | MaleAge35to39       | 291063     |
| Bulgaria | 1994           | MaleAge40to44       | 300251     |
| Bulgaria | 1994           | MaleAge45to49       | 296559     |
| Bulgaria | 1994           | MaleAge50to54       | 241489     |
| Bulgaria | 1994           | MaleAge55to59       | 239393     |
| Bulgaria | 1994           | MaleAge5to9         | 273780     |
| Bulgaria | 1994           | MaleAge60to64       | 250737     |
| Bulgaria | 1994           | MaleAge65to69       | 218010     |
| Bulgaria | 1994           | MaleAge70to74       | 163110     |
| Bulgaria | 1994           | MaleAge75to79       | 71817      |
| Bulgaria | 1994           | MaleAge80to84       | 60126      |
| Bulgaria | 1994           | MaleAge85to89       | 22823      |
| Bulgaria | 1994           | MaleAge90to94       | 5847       |
| Bulgaria | 1994           | MaleAge95to99       | 959        |
| Bulgaria | 1994           | MaleAgeAbov e100    | 52         |
| Bulgaria | 1995           | FemaleAge0to4       | 203829     |
| Bulgaria | 1995           | FemaleAge10to14     | 269893     |
| Bulgaria | 1995           | FemaleAge15to19     | 263155     |
| Bulgaria | 1995           | FemaleAge20to24     | 221418     |
| Bulgaria | 1995           | FemaleAge25to29     | 238246     |
| Bulgaria | 1995           | FemaleAge30to34     | 259757     |
| Bulgaria | 1995           | FemaleAge35to39     | 282704     |
| Bulgaria | 1995           | FemaleAge40to44     | 298604     |
| Bulgaria | 1995           | FemaleAge45to49     | 310666     |
| Bulgaria | 1995           | FemaleAge50to54     | 258411     |
| Bulgaria | 1995           | FemaleAge55to59     | 253125     |
| Bulgaria | 1995           | FemaleAge5to9       | 254293     |
| Bulgaria | 1995           | FemaleAge60to64     | 276316     |
| Bulgaria | 1995           | FemaleAge65to69     | 256604     |
| Bulgaria | 1995           | FemaleAge70to74     | 224092     |
| Bulgaria | 1995           | FemaleAge75to79     | 103270     |
| Bulgaria | 1995           | FemaleAge80to84     | 85549      |
| Bulgaria | 1995           | FemaleAge85to89     | 36193      |
| Bulgaria | 1995           | FemaleAge90to94     | 8827       |
| Bulgaria | 1995           | FemaleAge95to99     | 1242       |
| Bulgaria | 1995           | FemaleAgeAbov e100  | 106        |
| Bulgaria | 1995           | FemaleLactAge15to19 | 20407      |
| Bulgaria | 1995           | FemaleLactAge20to24 | 40161      |
| Bulgaria | 1995           | FemaleLactAge25to29 | 19463      |
| Bulgaria | 1995           | FemaleLactAge30to34 | 7373       |
| Bulgaria | 1995           | FemaleLactAge35to39 | 2555       |
| Bulgaria | 1995           | FemaleLactAge40to44 | 547        |
| Bulgaria | 1995           | FemaleLactAge45to49 | 24         |
| Bulgaria | 1995           | FemalePregAge15to19 | 15306      |
| Bulgaria | 1995           | FemalePregAge20to24 | 30121      |
| Bulgaria | 1995           | FemalePregAge25to29 | 14597      |
| Bulgaria | 1995           | FemalePregAge30to34 | 5530       |
| Bulgaria | 1995           | FemalePregAge35to39 | 1916       |
| Bulgaria | 1995           | FemalePregAge40to44 | 410        |

Dietary calcium and zinc deficiency risks are decreasing but remain prevalent

| Country  | Reference year | Age/gender group    | Population |
|----------|----------------|---------------------|------------|
| Bulgaria | 1995           | FemalePregAge45to49 | 18         |
| Bulgaria | 1995           | MaleAge0to4         | 214840     |
| Bulgaria | 1995           | MaleAge10to14       | 285718     |
| Bulgaria | 1995           | MaleAge15to19       | 314785     |
| Bulgaria | 1995           | MaleAge20to24       | 302995     |
| Bulgaria | 1995           | MaleAge25to29       | 281032     |
| Bulgaria | 1995           | MaleAge30to34       | 276353     |
| Bulgaria | 1995           | MaleAge35to39       | 285592     |
| Bulgaria | 1995           | MaleAge40to44       | 293678     |
| Bulgaria | 1995           | MaleAge45to49       | 300508     |
| Bulgaria | 1995           | MaleAge50to54       | 244885     |
| Bulgaria | 1995           | MaleAge55to59       | 232306     |
| Bulgaria | 1995           | MaleAge5to9         | 266761     |
| Bulgaria | 1995           | MaleAge60to64       | 246534     |
| Bulgaria | 1995           | MaleAge65to69       | 216907     |
| Bulgaria | 1995           | MaleAge70to74       | 171405     |
| Bulgaria | 1995           | MaleAge75to79       | 74458      |
| Bulgaria | 1995           | MaleAge80to84       | 56204      |
| Bulgaria | 1995           | MaleAge85to89       | 22374      |
| Bulgaria | 1995           | MaleAge90to94       | 5289       |
| Bulgaria | 1995           | MaleAge95to99       | 711        |
| Bulgaria | 1995           | MaleAgeAbove100     | 51         |
| Bulgaria | 1996           | FemaleAge0to4       | 187553     |
| Bulgaria | 1996           | FemaleAge10to14     | 264942     |
| Bulgaria | 1996           | FemaleAge15to19     | 268857     |
| Bulgaria | 1996           | FemaleAge20to24     | 244905     |
| Bulgaria | 1996           | FemaleAge25to29     | 242594     |
| Bulgaria | 1996           | FemaleAge30to34     | 257948     |
| Bulgaria | 1996           | FemaleAge35to39     | 278785     |
| Bulgaria | 1996           | FemaleAge40to44     | 293683     |
| Bulgaria | 1996           | FemaleAge45to49     | 311523     |
| Bulgaria | 1996           | FemaleAge50to54     | 265383     |
| Bulgaria | 1996           | FemaleAge55to59     | 247871     |
| Bulgaria | 1996           | FemaleAge5to9       | 247462     |
| Bulgaria | 1996           | FemaleAge60to64     | 269776     |
| Bulgaria | 1996           | FemaleAge65to69     | 254775     |
| Bulgaria | 1996           | FemaleAge70to74     | 228149     |
| Bulgaria | 1996           | FemaleAge75to79     | 113749     |
| Bulgaria | 1996           | FemaleAge80to84     | 79677      |
| Bulgaria | 1996           | FemaleAge85to89     | 39303      |
| Bulgaria | 1996           | FemaleAge90to94     | 10336      |
| Bulgaria | 1996           | FemaleAge95to99     | 1347       |
| Bulgaria | 1996           | FemaleAgeAbove100   | 103        |
| Bulgaria | 1996           | FemaleLactAge15to19 | 13592      |
| Bulgaria | 1996           | FemaleLactAge20to24 | 27189      |
| Bulgaria | 1996           | FemaleLactAge25to29 | 17597      |
| Bulgaria | 1996           | FemaleLactAge30to34 | 6674       |
| Bulgaria | 1996           | FemaleLactAge35to39 | 2158       |
| Bulgaria | 1996           | FemaleLactAge40to44 | 463        |
| Bulgaria | 1996           | FemaleLactAge45to49 | 21         |
| Bulgaria | 1996           | FemalePregAge15to19 | 10194      |
| Bulgaria | 1996           | FemalePregAge20to24 | 20392      |
| Bulgaria | 1996           | FemalePregAge25to29 | 13198      |
| Bulgaria | 1996           | FemalePregAge30to34 | 5006       |
| Bulgaria | 1996           | FemalePregAge35to39 | 1618       |
| Bulgaria | 1996           | FemalePregAge40to44 | 347        |
| Bulgaria | 1996           | FemalePregAge45to49 | 16         |
| Bulgaria | 1996           | MaleAge0to4         | 198449     |
| Bulgaria | 1996           | MaleAge10to14       | 279968     |
| Bulgaria | 1996           | MaleAge15to19       | 308591     |
| Bulgaria | 1996           | MaleAge20to24       | 304353     |
| Bulgaria | 1996           | MaleAge25to29       | 282330     |
| Bulgaria | 1996           | MaleAge30to34       | 274036     |
| Bulgaria | 1996           | MaleAge35to39       | 281562     |
| Bulgaria | 1996           | MaleAge40to44       | 288726     |
| Bulgaria | 1996           | MaleAge45to49       | 300588     |
| Bulgaria | 1996           | MaleAge50to54       | 250635     |
| Bulgaria | 1996           | MaleAge55to59       | 226205     |
| Bulgaria | 1996           | MaleAge5to9         | 259175     |
| Bulgaria | 1996           | MaleAge60to64       | 238630     |
| Bulgaria | 1996           | MaleAge65to69       | 214857     |
| Bulgaria | 1996           | MaleAge70to74       | 173886     |
| Bulgaria | 1996           | MaleAge75to79       | 81683      |
| Bulgaria | 1996           | MaleAge80to84       | 52331      |
| Bulgaria | 1996           | MaleAge85to89       | 24411      |
| Bulgaria | 1996           | MaleAge90to94       | 6166       |
| Bulgaria | 1996           | MaleAge95to99       | 772        |
| Bulgaria | 1996           | MaleAgeAbove100     | 50         |
| Bulgaria | 1997           | FemaleAge0to4       | 176508     |
| Bulgaria | 1997           | FemaleAge10to14     | 262016     |
| Bulgaria | 1997           | FemaleAge15to19     | 260983     |
| Bulgaria | 1997           | FemaleAge20to24     | 245195     |
| Bulgaria | 1997           | FemaleAge25to29     | 244469     |
| Bulgaria | 1997           | FemaleAge30to34     | 255594     |
| Bulgaria | 1997           | FemaleAge35to39     | 274206     |
| Bulgaria | 1997           | FemaleAge40to44     | 289653     |
| Bulgaria | 1997           | FemaleAge45to49     | 308259     |
| Bulgaria | 1997           | FemaleAge50to54     | 275705     |

Dietary calcium and zinc deficiency risks are decreasing but remain prevalent

| Country  | Reference year | Age/gender group    | Population |
|----------|----------------|---------------------|------------|
| Bulgaria | 1997           | FemaleAge55to59     | 244472     |
| Bulgaria | 1997           | FemaleAge5to9       | 237853     |
| Bulgaria | 1997           | FemaleAge60to64     | 261656     |
| Bulgaria | 1997           | FemaleAge65to69     | 255086     |
| Bulgaria | 1997           | FemaleAge70to74     | 227094     |
| Bulgaria | 1997           | FemaleAge75to79     | 130346     |
| Bulgaria | 1997           | FemaleAge80to84     | 71096      |
| Bulgaria | 1997           | FemaleAge85to89     | 42201      |
| Bulgaria | 1997           | FemaleAge90to94     | 11185      |
| Bulgaria | 1997           | FemaleAge95to99     | 1528       |
| Bulgaria | 1997           | FemaleAgeAbove100   | 100        |
| Bulgaria | 1997           | FemaleLactAge15to19 | 13592      |
| Bulgaria | 1997           | FemaleLactAge20to24 | 27189      |
| Bulgaria | 1997           | FemaleLactAge25to29 | 17597      |
| Bulgaria | 1997           | FemaleLactAge30to34 | 6674       |
| Bulgaria | 1997           | FemaleLactAge35to39 | 2158       |
| Bulgaria | 1997           | FemaleLactAge40to44 | 463        |
| Bulgaria | 1997           | FemaleLactAge45to49 | 21         |
| Bulgaria | 1997           | FemalePregAge15to19 | 10194      |
| Bulgaria | 1997           | FemalePregAge20to24 | 20392      |
| Bulgaria | 1997           | FemalePregAge25to29 | 13198      |
| Bulgaria | 1997           | FemalePregAge30to34 | 5006       |
| Bulgaria | 1997           | FemalePregAge35to39 | 1618       |
| Bulgaria | 1997           | FemalePregAge40to44 | 347        |
| Bulgaria | 1997           | FemalePregAge45to49 | 16         |
| Bulgaria | 1997           | MaleAge0to4         | 186977     |
| Bulgaria | 1997           | MaleAge10to14       | 276232     |
| Bulgaria | 1997           | MaleAge15to19       | 300614     |
| Bulgaria | 1997           | MaleAge20to24       | 305446     |
| Bulgaria | 1997           | MaleAge25to29       | 284396     |
| Bulgaria | 1997           | MaleAge30to34       | 272441     |
| Bulgaria | 1997           | MaleAge35to39       | 277742     |
| Bulgaria | 1997           | MaleAge40to44       | 285062     |
| Bulgaria | 1997           | MaleAge45to49       | 297082     |
| Bulgaria | 1997           | MaleAge50to54       | 259766     |
| Bulgaria | 1997           | MaleAge55to59       | 222149     |
| Bulgaria | 1997           | MaleAge5to9         | 249059     |
| Bulgaria | 1997           | MaleAge60to64       | 229442     |
| Bulgaria | 1997           | MaleAge65to69       | 214049     |
| Bulgaria | 1997           | MaleAge70to74       | 173005     |
| Bulgaria | 1997           | MaleAge75to79       | 92266      |
| Bulgaria | 1997           | MaleAge80to84       | 46529      |
| Bulgaria | 1997           | MaleAge85to89       | 26231      |
| Bulgaria | 1997           | MaleAge90to94       | 6620       |
| Bulgaria | 1997           | MaleAge95to99       | 886        |
| Bulgaria | 1997           | MaleAgeAbove100     | 49         |
| Bulgaria | 1998           | FemaleAge0to4       | 169800     |
| Bulgaria | 1998           | FemaleAge10to14     | 260259     |
| Bulgaria | 1998           | FemaleAge15to19     | 252701     |
| Bulgaria | 1998           | FemaleAge20to24     | 244599     |
| Bulgaria | 1998           | FemaleAge25to29     | 246665     |
| Bulgaria | 1998           | FemaleAge30to34     | 254053     |
| Bulgaria | 1998           | FemaleAge35to39     | 269845     |
| Bulgaria | 1998           | FemaleAge40to44     | 286386     |
| Bulgaria | 1998           | FemaleAge45to49     | 302288     |
| Bulgaria | 1998           | FemaleAge50to54     | 287166     |
| Bulgaria | 1998           | FemaleAge55to59     | 243398     |
| Bulgaria | 1998           | FemaleAge5to9       | 225390     |
| Bulgaria | 1998           | FemaleAge60to64     | 253002     |
| Bulgaria | 1998           | FemaleAge65to69     | 256214     |
| Bulgaria | 1998           | FemaleAge70to74     | 223730     |
| Bulgaria | 1998           | FemaleAge75to79     | 148631     |
| Bulgaria | 1998           | FemaleAge80to84     | 63690      |
| Bulgaria | 1998           | FemaleAge85to89     | 43534      |
| Bulgaria | 1998           | FemaleAge90to94     | 11340      |
| Bulgaria | 1998           | FemaleAge95to99     | 1717       |
| Bulgaria | 1998           | FemaleAgeAbove100   | 98         |
| Bulgaria | 1998           | FemaleLactAge15to19 | 13592      |
| Bulgaria | 1998           | FemaleLactAge20to24 | 27189      |
| Bulgaria | 1998           | FemaleLactAge25to29 | 17597      |
| Bulgaria | 1998           | FemaleLactAge30to34 | 6674       |
| Bulgaria | 1998           | FemaleLactAge35to39 | 2158       |
| Bulgaria | 1998           | FemaleLactAge40to44 | 463        |
| Bulgaria | 1998           | FemaleLactAge45to49 | 21         |
| Bulgaria | 1998           | FemalePregAge15to19 | 10194      |
| Bulgaria | 1998           | FemalePregAge20to24 | 20392      |
| Bulgaria | 1998           | FemalePregAge25to29 | 13198      |
| Bulgaria | 1998           | FemalePregAge30to34 | 5006       |
| Bulgaria | 1998           | FemalePregAge35to39 | 1618       |
| Bulgaria | 1998           | FemalePregAge40to44 | 347        |
| Bulgaria | 1998           | FemalePregAge45to49 | 16         |
| Bulgaria | 1998           | MaleAge0to4         | 179644     |
| Bulgaria | 1998           | MaleAge10to14       | 273715     |
| Bulgaria | 1998           | MaleAge15to19       | 292162     |
| Bulgaria | 1998           | MaleAge20to24       | 305735     |
| Bulgaria | 1998           | MaleAge25to29       | 286924     |
| Bulgaria | 1998           | MaleAge30to34       | 271664     |
| Bulgaria | 1998           | MaleAge35to39       | 274288     |

Dietary calcium and zinc deficiency risks are decreasing but remain prevalent

| Country      | Reference year | Age/gender group    | Population |
|--------------|----------------|---------------------|------------|
| Bulgaria     | 1998           | MaleAge40to44       | 282391     |
| Bulgaria     | 1998           | MaleAge45to49       | 291390     |
| Bulgaria     | 1998           | MaleAge50to54       | 270216     |
| Bulgaria     | 1998           | MaleAge55to59       | 220496     |
| Bulgaria     | 1998           | MaleAge5to9         | 236336     |
| Bulgaria     | 1998           | MaleAge60to64       | 220135     |
| Bulgaria     | 1998           | MaleAge65to69       | 213505     |
| Bulgaria     | 1998           | MaleAge70to74       | 170751     |
| Bulgaria     | 1998           | MaleAge75to79       | 103180     |
| Bulgaria     | 1998           | MaleAge80to84       | 41360      |
| Bulgaria     | 1998           | MaleAge85to89       | 26876      |
| Bulgaria     | 1998           | MaleAge90to94       | 6639       |
| Bulgaria     | 1998           | MaleAge95to99       | 995        |
| Bulgaria     | 1998           | MaleAgeAbove100     | 49         |
| Bulgaria     | 1999           | FemaleAge0to4       | 164962     |
| Bulgaria     | 1999           | FemaleAge10to14     | 257666     |
| Bulgaria     | 1999           | FemaleAge15to19     | 245702     |
| Bulgaria     | 1999           | FemaleAge20to24     | 242654     |
| Bulgaria     | 1999           | FemaleAge25to29     | 248615     |
| Bulgaria     | 1999           | FemaleAge30to34     | 253467     |
| Bulgaria     | 1999           | FemaleAge35to39     | 266027     |
| Bulgaria     | 1999           | FemaleAge40to44     | 283207     |
| Bulgaria     | 1999           | FemaleAge45to49     | 296024     |
| Bulgaria     | 1999           | FemaleAge50to54     | 296515     |
| Bulgaria     | 1999           | FemaleAge55to59     | 245240     |
| Bulgaria     | 1999           | FemaleAge5to9       | 211385     |
| Bulgaria     | 1999           | FemaleAge60to64     | 245503     |
| Bulgaria     | 1999           | FemaleAge65to69     | 256245     |
| Bulgaria     | 1999           | FemaleAge70to74     | 221456     |
| Bulgaria     | 1999           | FemaleAge75to79     | 163412     |
| Bulgaria     | 1999           | FemaleAge80to84     | 61633      |
| Bulgaria     | 1999           | FemaleAge85to89     | 42034      |
| Bulgaria     | 1999           | FemaleAge90to94     | 10907      |
| Bulgaria     | 1999           | FemaleAge95to99     | 1759       |
| Bulgaria     | 1999           | FemaleAgeAbove100   | 97         |
| Bulgaria     | 1999           | FemaleLactAge15to19 | 13592      |
| Bulgaria     | 1999           | FemaleLactAge20to24 | 27189      |
| Bulgaria     | 1999           | FemaleLactAge25to29 | 17597      |
| Bulgaria     | 1999           | FemaleLactAge30to34 | 6674       |
| Bulgaria     | 1999           | FemaleLactAge35to39 | 2158       |
| Bulgaria     | 1999           | FemaleLactAge40to44 | 463        |
| Bulgaria     | 1999           | FemaleLactAge45to49 | 21         |
| Bulgaria     | 1999           | FemalePregAge15to19 | 10194      |
| Bulgaria     | 1999           | FemalePregAge20to24 | 20392      |
| Bulgaria     | 1999           | FemalePregAge25to29 | 13198      |
| Bulgaria     | 1999           | FemalePregAge30to34 | 5006       |
| Bulgaria     | 1999           | FemalePregAge35to39 | 1618       |
| Bulgaria     | 1999           | FemalePregAge40to44 | 347        |
| Bulgaria     | 1999           | FemalePregAge45to49 | 16         |
| Bulgaria     | 1999           | MaleAge0to4         | 174234     |
| Bulgaria     | 1999           | MaleAge10to14       | 270525     |
| Bulgaria     | 1999           | MaleAge15to19       | 284991     |
| Bulgaria     | 1999           | MaleAge20to24       | 304608     |
| Bulgaria     | 1999           | MaleAge25to29       | 289492     |
| Bulgaria     | 1999           | MaleAge30to34       | 271836     |
| Bulgaria     | 1999           | MaleAge35to39       | 271494     |
| Bulgaria     | 1999           | MaleAge40to44       | 280056     |
| Bulgaria     | 1999           | MaleAge45to49       | 285824     |
| Bulgaria     | 1999           | MaleAge50to54       | 278954     |
| Bulgaria     | 1999           | MaleAge55to59       | 221800     |
| Bulgaria     | 1999           | MaleAge5to9         | 222233     |
| Bulgaria     | 1999           | MaleAge60to64       | 212334     |
| Bulgaria     | 1999           | MaleAge65to69       | 211890     |
| Bulgaria     | 1999           | MaleAge70to74       | 169203     |
| Bulgaria     | 1999           | MaleAge75to79       | 111284     |
| Bulgaria     | 1999           | MaleAge80to84       | 39434      |
| Bulgaria     | 1999           | MaleAge85to89       | 25471      |
| Bulgaria     | 1999           | MaleAge90to94       | 6268       |
| Bulgaria     | 1999           | MaleAge95to99       | 991        |
| Bulgaria     | 1999           | MaleAgeAbove100     | 48         |
| Burkina Faso | 1992           | FemaleAge0to4       | 861521     |
| Burkina Faso | 1992           | FemaleAge10to14     | 597875     |
| Burkina Faso | 1992           | FemaleAge15to19     | 364799     |
| Burkina Faso | 1992           | FemaleAge20to24     | 202840     |
| Burkina Faso | 1992           | FemaleAge25to29     | 161875     |
| Burkina Faso | 1992           | FemaleAge30to34     | 142330     |
| Burkina Faso | 1992           | FemaleAge35to39     | 135634     |
| Burkina Faso | 1992           | FemaleAge40to44     | 137553     |
| Burkina Faso | 1992           | FemaleAge45to49     | 144252     |
| Burkina Faso | 1992           | FemaleAge50to54     | 135028     |
| Burkina Faso | 1992           | FemaleAge55to59     | 112187     |
| Burkina Faso | 1992           | FemaleAge5to9       | 707823     |
| Burkina Faso | 1992           | FemaleAge60to64     | 93455      |
| Burkina Faso | 1992           | FemaleAge65to69     | 74618      |
| Burkina Faso | 1992           | FemaleAge70to74     | 52540      |
| Burkina Faso | 1992           | FemaleAge75to79     | 29971      |
| Burkina Faso | 1992           | FemaleAge80to84     | 12366      |
| Burkina Faso | 1992           | FemaleAge85to89     | 3229       |

Dietary calcium and zinc deficiency risks are decreasing but remain prevalent

| Country      | Reference year | Age/gender group    | Population |
|--------------|----------------|---------------------|------------|
| Burkina Faso | 1992           | FemaleAge90to94     | 459        |
| Burkina Faso | 1992           | FemaleAge95to99     | 30         |
| Burkina Faso | 1992           | FemaleLactAge15to19 | 73314      |
| Burkina Faso | 1992           | FemaleLactAge20to24 | 116652     |
| Burkina Faso | 1992           | FemaleLactAge25to29 | 98531      |
| Burkina Faso | 1992           | FemaleLactAge30to34 | 74259      |
| Burkina Faso | 1992           | FemaleLactAge35to39 | 49411      |
| Burkina Faso | 1992           | FemaleLactAge40to44 | 25713      |
| Burkina Faso | 1992           | FemaleLactAge45to49 | 7619       |
| Burkina Faso | 1992           | FemalePregAge15to19 | 54986      |
| Burkina Faso | 1992           | FemalePregAge20to24 | 87489      |
| Burkina Faso | 1992           | FemalePregAge25to29 | 73898      |
| Burkina Faso | 1992           | FemalePregAge30to34 | 55694      |
| Burkina Faso | 1992           | FemalePregAge35to39 | 37058      |
| Burkina Faso | 1992           | FemalePregAge40to44 | 19285      |
| Burkina Faso | 1992           | FemalePregAge45to49 | 5715       |
| Burkina Faso | 1992           | MaleAge0to4         | 889804     |
| Burkina Faso | 1992           | MaleAge10to14       | 616150     |
| Burkina Faso | 1992           | MaleAge15to19       | 504634     |
| Burkina Faso | 1992           | MaleAge20to24       | 407571     |
| Burkina Faso | 1992           | MaleAge25to29       | 321415     |
| Burkina Faso | 1992           | MaleAge30to34       | 247004     |
| Burkina Faso | 1992           | MaleAge35to39       | 187112     |
| Burkina Faso | 1992           | MaleAge40to44       | 147236     |
| Burkina Faso | 1992           | MaleAge45to49       | 122989     |
| Burkina Faso | 1992           | MaleAge50to54       | 100637     |
| Burkina Faso | 1992           | MaleAge55to59       | 80370      |
| Burkina Faso | 1992           | MaleAge5to9         | 730024     |
| Burkina Faso | 1992           | MaleAge60to64       | 66207      |
| Burkina Faso | 1992           | MaleAge65to69       | 54098      |
| Burkina Faso | 1992           | MaleAge70to74       | 38768      |
| Burkina Faso | 1992           | MaleAge75to79       | 21883      |
| Burkina Faso | 1992           | MaleAge80to84       | 8740       |
| Burkina Faso | 1992           | MaleAge85to89       | 2166       |
| Burkina Faso | 1992           | MaleAge90to94       | 273        |
| Burkina Faso | 1992           | MaleAge95to99       | 26         |
| Burkina Faso | 1993           | FemaleAge0to4       | 882907     |
| Burkina Faso | 1993           | FemaleAge10to14     | 616685     |
| Burkina Faso | 1993           | FemaleAge15to19     | 382895     |
| Burkina Faso | 1993           | FemaleAge20to24     | 213314     |
| Burkina Faso | 1993           | FemaleAge25to29     | 172565     |
| Burkina Faso | 1993           | FemaleAge30to34     | 150037     |
| Burkina Faso | 1993           | FemaleAge35to39     | 142581     |
| Burkina Faso | 1993           | FemaleAge40to44     | 142383     |
| Burkina Faso | 1993           | FemaleAge45to49     | 146395     |
| Burkina Faso | 1993           | FemaleAge50to54     | 138259     |
| Burkina Faso | 1993           | FemaleAge55to59     | 114421     |
| Burkina Faso | 1993           | FemaleAge5to9       | 725257     |
| Burkina Faso | 1993           | FemaleAge60to64     | 94435      |
| Burkina Faso | 1993           | FemaleAge65to69     | 75423      |
| Burkina Faso | 1993           | FemaleAge70to74     | 53387      |
| Burkina Faso | 1993           | FemaleAge75to79     | 30659      |
| Burkina Faso | 1993           | FemaleAge80to84     | 12827      |
| Burkina Faso | 1993           | FemaleAge85to89     | 3391       |
| Burkina Faso | 1993           | FemaleAge90to94     | 525        |
| Burkina Faso | 1993           | FemaleAge95to99     | 47         |
| Burkina Faso | 1993           | FemaleAgeAbove100   | 1          |
| Burkina Faso | 1993           | FemaleLactAge15to19 | 73314      |
| Burkina Faso | 1993           | FemaleLactAge20to24 | 116652     |
| Burkina Faso | 1993           | FemaleLactAge25to29 | 98531      |
| Burkina Faso | 1993           | FemaleLactAge30to34 | 74259      |
| Burkina Faso | 1993           | FemaleLactAge35to39 | 49411      |
| Burkina Faso | 1993           | FemaleLactAge40to44 | 25713      |
| Burkina Faso | 1993           | FemaleLactAge45to49 | 7619       |
| Burkina Faso | 1993           | FemalePregAge15to19 | 54986      |
| Burkina Faso | 1993           | FemalePregAge20to24 | 87489      |
| Burkina Faso | 1993           | FemalePregAge25to29 | 73898      |
| Burkina Faso | 1993           | FemalePregAge30to34 | 55694      |
| Burkina Faso | 1993           | FemalePregAge35to39 | 37058      |
| Burkina Faso | 1993           | FemalePregAge40to44 | 19285      |
| Burkina Faso | 1993           | FemalePregAge45to49 | 5715       |
| Burkina Faso | 1993           | MaleAge0to4         | 911935     |
| Burkina Faso | 1993           | MaleAge10to14       | 635829     |
| Burkina Faso | 1993           | MaleAge15to19       | 523617     |
| Burkina Faso | 1993           | MaleAge20to24       | 418682     |
| Burkina Faso | 1993           | MaleAge25to29       | 332995     |
| Burkina Faso | 1993           | MaleAge30to34       | 255523     |
| Burkina Faso | 1993           | MaleAge35to39       | 194764     |
| Burkina Faso | 1993           | MaleAge40to44       | 150386     |
| Burkina Faso | 1993           | MaleAge45to49       | 124994     |
| Burkina Faso | 1993           | MaleAge50to54       | 103035     |
| Burkina Faso | 1993           | MaleAge55to59       | 81827      |
| Burkina Faso | 1993           | MaleAge5to9         | 748138     |
| Burkina Faso | 1993           | MaleAge60to64       | 66146      |
| Burkina Faso | 1993           | MaleAge65to69       | 53820      |
| Burkina Faso | 1993           | MaleAge70to74       | 38944      |
| Burkina Faso | 1993           | MaleAge75to79       | 22205      |
| Burkina Faso | 1993           | MaleAge80to84       | 8993       |



Dietary calcium and zinc deficiency risks are decreasing but remain prevalent

| Country      | Reference year | Age/gender group    | Population |
|--------------|----------------|---------------------|------------|
| Burkina Faso | 1993           | MaleAge85to89       | 2268       |
| Burkina Faso | 1993           | MaleAge90to94       | 321        |
| Burkina Faso | 1993           | MaleAge95to99       | 33         |
| Burkina Faso | 1994           | FemaleAge0to4       | 905282     |
| Burkina Faso | 1994           | FemaleAge10to14     | 635843     |
| Burkina Faso | 1994           | FemaleAge15to19     | 401960     |
| Burkina Faso | 1994           | FemaleAge20to24     | 225352     |
| Burkina Faso | 1994           | FemaleAge25to29     | 183373     |
| Burkina Faso | 1994           | FemaleAge30to34     | 158284     |
| Burkina Faso | 1994           | FemaleAge35to39     | 149775     |
| Burkina Faso | 1994           | FemaleAge40to44     | 147701     |
| Burkina Faso | 1994           | FemaleAge45to49     | 148981     |
| Burkina Faso | 1994           | FemaleAge50to54     | 141420     |
| Burkina Faso | 1994           | FemaleAge55to59     | 117020     |
| Burkina Faso | 1994           | FemaleAge5to9       | 740865     |
| Burkina Faso | 1994           | FemaleAge60to64     | 95814      |
| Burkina Faso | 1994           | FemaleAge65to69     | 76435      |
| Burkina Faso | 1994           | FemaleAge70to74     | 54350      |
| Burkina Faso | 1994           | FemaleAge75to79     | 31275      |
| Burkina Faso | 1994           | FemaleAge80to84     | 13003      |
| Burkina Faso | 1994           | FemaleAge85to89     | 3375       |
| Burkina Faso | 1994           | FemaleAge90to94     | 534        |
| Burkina Faso | 1994           | FemaleAge95to99     | 51         |
| Burkina Faso | 1994           | FemaleAgeAbove100   | 1          |
| Burkina Faso | 1994           | FemaleLactAge15to19 | 73314      |
| Burkina Faso | 1994           | FemaleLactAge20to24 | 116652     |
| Burkina Faso | 1994           | FemaleLactAge25to29 | 98531      |
| Burkina Faso | 1994           | FemaleLactAge30to34 | 74259      |
| Burkina Faso | 1994           | FemaleLactAge35to39 | 49411      |
| Burkina Faso | 1994           | FemaleLactAge40to44 | 25713      |
| Burkina Faso | 1994           | FemaleLactAge45to49 | 7619       |
| Burkina Faso | 1994           | FemalePregAge15to19 | 54986      |
| Burkina Faso | 1994           | FemalePregAge20to24 | 87489      |
| Burkina Faso | 1994           | FemalePregAge25to29 | 73898      |
| Burkina Faso | 1994           | FemalePregAge30to34 | 55694      |
| Burkina Faso | 1994           | FemalePregAge35to39 | 37058      |
| Burkina Faso | 1994           | FemalePregAge40to44 | 19285      |
| Burkina Faso | 1994           | FemalePregAge45to49 | 5715       |
| Burkina Faso | 1994           | MaleAge0to4         | 935134     |
| Burkina Faso | 1994           | MaleAge10to14       | 655944     |
| Burkina Faso | 1994           | MaleAge15to19       | 543903     |
| Burkina Faso | 1994           | MaleAge20to24       | 431518     |
| Burkina Faso | 1994           | MaleAge25to29       | 344567     |
| Burkina Faso | 1994           | MaleAge30to34       | 264539     |
| Burkina Faso | 1994           | MaleAge35to39       | 202716     |
| Burkina Faso | 1994           | MaleAge40to44       | 154300     |
| Burkina Faso | 1994           | MaleAge45to49       | 127141     |
| Burkina Faso | 1994           | MaleAge50to54       | 105429     |
| Burkina Faso | 1994           | MaleAge55to59       | 83586      |
| Burkina Faso | 1994           | MaleAge5to9         | 764309     |
| Burkina Faso | 1994           | MaleAge60to64       | 66448      |
| Burkina Faso | 1994           | MaleAge65to69       | 53673      |
| Burkina Faso | 1994           | MaleAge70to74       | 39104      |
| Burkina Faso | 1994           | MaleAge75to79       | 22384      |
| Burkina Faso | 1994           | MaleAge80to84       | 8988       |
| Burkina Faso | 1994           | MaleAge85to89       | 2227       |
| Burkina Faso | 1994           | MaleAge90to94       | 328        |
| Burkina Faso | 1994           | MaleAge95to99       | 30         |
| Burkina Faso | 1995           | FemaleAge0to4       | 929970     |
| Burkina Faso | 1995           | FemaleAge10to14     | 654061     |
| Burkina Faso | 1995           | FemaleAge15to19     | 421462     |
| Burkina Faso | 1995           | FemaleAge20to24     | 239570     |
| Burkina Faso | 1995           | FemaleAge25to29     | 194145     |
| Burkina Faso | 1995           | FemaleAge30to34     | 167204     |
| Burkina Faso | 1995           | FemaleAge35to39     | 157091     |
| Burkina Faso | 1995           | FemaleAge40to44     | 153423     |
| Burkina Faso | 1995           | FemaleAge45to49     | 152222     |
| Burkina Faso | 1995           | FemaleAge50to54     | 144352     |
| Burkina Faso | 1995           | FemaleAge55to59     | 119929     |
| Burkina Faso | 1995           | FemaleAge5to9       | 755011     |
| Burkina Faso | 1995           | FemaleAge60to64     | 97638      |
| Burkina Faso | 1995           | FemaleAge65to69     | 77664      |
| Burkina Faso | 1995           | FemaleAge70to74     | 55436      |
| Burkina Faso | 1995           | FemaleAge75to79     | 31881      |
| Burkina Faso | 1995           | FemaleAge80to84     | 12970      |
| Burkina Faso | 1995           | FemaleAge85to89     | 3151       |
| Burkina Faso | 1995           | FemaleAge90to94     | 411        |
| Burkina Faso | 1995           | FemaleAge95to99     | 26         |
| Burkina Faso | 1995           | FemaleAgeAbove100   | 1          |
| Burkina Faso | 1995           | FemaleLactAge15to19 | 73314      |
| Burkina Faso | 1995           | FemaleLactAge20to24 | 116652     |
| Burkina Faso | 1995           | FemaleLactAge25to29 | 98531      |
| Burkina Faso | 1995           | FemaleLactAge30to34 | 74259      |
| Burkina Faso | 1995           | FemaleLactAge35to39 | 49411      |
| Burkina Faso | 1995           | FemaleLactAge40to44 | 25713      |
| Burkina Faso | 1995           | FemaleLactAge45to49 | 7619       |
| Burkina Faso | 1995           | FemalePregAge15to19 | 54986      |
| Burkina Faso | 1995           | FemalePregAge20to24 | 87489      |

Dietary calcium and zinc deficiency risks are decreasing but remain prevalent

| Country      | Reference year | Age/gender group    | Population |
|--------------|----------------|---------------------|------------|
| Burkina Faso | 1995           | FemalePregAge25to29 | 73898      |
| Burkina Faso | 1995           | FemalePregAge30to34 | 55694      |
| Burkina Faso | 1995           | FemalePregAge35to39 | 37058      |
| Burkina Faso | 1995           | FemalePregAge40to44 | 19285      |
| Burkina Faso | 1995           | FemalePregAge45to49 | 5715       |
| Burkina Faso | 1995           | MaleAge0to4         | 960789     |
| Burkina Faso | 1995           | MaleAge10to14       | 675075     |
| Burkina Faso | 1995           | MaleAge15to19       | 564824     |
| Burkina Faso | 1995           | MaleAge20to24       | 446766     |
| Burkina Faso | 1995           | MaleAge25to29       | 356034     |
| Burkina Faso | 1995           | MaleAge30to34       | 274174     |
| Burkina Faso | 1995           | MaleAge35to39       | 210661     |
| Burkina Faso | 1995           | MaleAge40to44       | 159129     |
| Burkina Faso | 1995           | MaleAge45to49       | 129488     |
| Burkina Faso | 1995           | MaleAge50to54       | 107704     |
| Burkina Faso | 1995           | MaleAge55to59       | 85574      |
| Burkina Faso | 1995           | MaleAge5to9         | 778834     |
| Burkina Faso | 1995           | MaleAge60to64       | 67170      |
| Burkina Faso | 1995           | MaleAge65to69       | 53681      |
| Burkina Faso | 1995           | MaleAge70to74       | 39238      |
| Burkina Faso | 1995           | MaleAge75to79       | 22465      |
| Burkina Faso | 1995           | MaleAge80to84       | 8778       |
| Burkina Faso | 1995           | MaleAge85to89       | 2004       |
| Burkina Faso | 1995           | MaleAge90to94       | 233        |
| Burkina Faso | 1995           | MaleAge95to99       | 13         |
| Burkina Faso | 1996           | FemaleAge0to4       | 960417     |
| Burkina Faso | 1996           | FemaleAge10to14     | 669386     |
| Burkina Faso | 1996           | FemaleAge15to19     | 418107     |
| Burkina Faso | 1996           | FemaleAge20to24     | 220437     |
| Burkina Faso | 1996           | FemaleAge25to29     | 181053     |
| Burkina Faso | 1996           | FemaleAge30to34     | 159257     |
| Burkina Faso | 1996           | FemaleAge35to39     | 155356     |
| Burkina Faso | 1996           | FemaleAge40to44     | 155901     |
| Burkina Faso | 1996           | FemaleAge45to49     | 154794     |
| Burkina Faso | 1996           | FemaleAge50to54     | 146371     |
| Burkina Faso | 1996           | FemaleAge55to59     | 122219     |
| Burkina Faso | 1996           | FemaleAge5to9       | 776181     |
| Burkina Faso | 1996           | FemaleAge60to64     | 98742      |
| Burkina Faso | 1996           | FemaleAge65to69     | 77951      |
| Burkina Faso | 1996           | FemaleAge70to74     | 55838      |
| Burkina Faso | 1996           | FemaleAge75to79     | 32674      |
| Burkina Faso | 1996           | FemaleAge80to84     | 13906      |
| Burkina Faso | 1996           | FemaleAge85to89     | 3714       |
| Burkina Faso | 1996           | FemaleAge90to94     | 529        |
| Burkina Faso | 1996           | FemaleAge95to99     | 26         |
| Burkina Faso | 1996           | FemaleAgeAbove100   | 1          |
| Burkina Faso | 1996           | FemaleLactAge15to19 | 84817      |
| Burkina Faso | 1996           | FemaleLactAge20to24 | 135711     |
| Burkina Faso | 1996           | FemaleLactAge25to29 | 111730     |
| Burkina Faso | 1996           | FemaleLactAge30to34 | 84037      |
| Burkina Faso | 1996           | FemaleLactAge35to39 | 54424      |
| Burkina Faso | 1996           | FemaleLactAge40to44 | 27592      |
| Burkina Faso | 1996           | FemaleLactAge45to49 | 8035       |
| Burkina Faso | 1996           | FemalePregAge15to19 | 63613      |
| Burkina Faso | 1996           | FemalePregAge20to24 | 101783     |
| Burkina Faso | 1996           | FemalePregAge25to29 | 83798      |
| Burkina Faso | 1996           | FemalePregAge30to34 | 63028      |
| Burkina Faso | 1996           | FemalePregAge35to39 | 40818      |
| Burkina Faso | 1996           | FemalePregAge40to44 | 20694      |
| Burkina Faso | 1996           | FemalePregAge45to49 | 6026       |
| Burkina Faso | 1996           | MaleAge0to4         | 992245     |
| Burkina Faso | 1996           | MaleAge10to14       | 690456     |
| Burkina Faso | 1996           | MaleAge15to19       | 581616     |
| Burkina Faso | 1996           | MaleAge20to24       | 461430     |
| Burkina Faso | 1996           | MaleAge25to29       | 366900     |
| Burkina Faso | 1996           | MaleAge30to34       | 284332     |
| Burkina Faso | 1996           | MaleAge35to39       | 218544     |
| Burkina Faso | 1996           | MaleAge40to44       | 164650     |
| Burkina Faso | 1996           | MaleAge45to49       | 131694     |
| Burkina Faso | 1996           | MaleAge50to54       | 109396     |
| Burkina Faso | 1996           | MaleAge55to59       | 87172      |
| Burkina Faso | 1996           | MaleAge5to9         | 800384     |
| Burkina Faso | 1996           | MaleAge60to64       | 67612      |
| Burkina Faso | 1996           | MaleAge65to69       | 53183      |
| Burkina Faso | 1996           | MaleAge70to74       | 38972      |
| Burkina Faso | 1996           | MaleAge75to79       | 22875      |
| Burkina Faso | 1996           | MaleAge80to84       | 9438       |
| Burkina Faso | 1996           | MaleAge85to89       | 2381       |
| Burkina Faso | 1996           | MaleAge90to94       | 306        |
| Burkina Faso | 1996           | MaleAge95to99       | 12         |
| Burkina Faso | 1997           | FemaleAge0to4       | 987606     |
| Burkina Faso | 1997           | FemaleAge10to14     | 685379     |
| Burkina Faso | 1997           | FemaleAge15to19     | 435854     |
| Burkina Faso | 1997           | FemaleAge20to24     | 236700     |
| Burkina Faso | 1997           | FemaleAge25to29     | 191043     |
| Burkina Faso | 1997           | FemaleAge30to34     | 169313     |
| Burkina Faso | 1997           | FemaleAge35to39     | 162636     |
| Burkina Faso | 1997           | FemaleAge40to44     | 162279     |

Dietary calcium and zinc deficiency risks are decreasing but remain prevalent

| Country      | Reference year | Age/gender group    | Population |
|--------------|----------------|---------------------|------------|
| Burkina Faso | 1997           | FemaleAge45to49     | 158855     |
| Burkina Faso | 1997           | FemaleAge50to54     | 148335     |
| Burkina Faso | 1997           | FemaleAge55to59     | 125002     |
| Burkina Faso | 1997           | FemaleAge5to9       | 798742     |
| Burkina Faso | 1997           | FemaleAge60to64     | 100332     |
| Burkina Faso | 1997           | FemaleAge65to69     | 78467      |
| Burkina Faso | 1997           | FemaleAge70to74     | 56293      |
| Burkina Faso | 1997           | FemaleAge75to79     | 33298      |
| Burkina Faso | 1997           | FemaleAge80to84     | 14559      |
| Burkina Faso | 1997           | FemaleAge85to89     | 4111       |
| Burkina Faso | 1997           | FemaleAge90to94     | 625        |
| Burkina Faso | 1997           | FemaleAge95to99     | 46         |
| Burkina Faso | 1997           | FemaleAgeAbove100   | 1          |
| Burkina Faso | 1997           | FemaleLactAge15to19 | 84817      |
| Burkina Faso | 1997           | FemaleLactAge20to24 | 135711     |
| Burkina Faso | 1997           | FemaleLactAge25to29 | 111730     |
| Burkina Faso | 1997           | FemaleLactAge30to34 | 84037      |
| Burkina Faso | 1997           | FemaleLactAge35to39 | 54424      |
| Burkina Faso | 1997           | FemaleLactAge40to44 | 27592      |
| Burkina Faso | 1997           | FemaleLactAge45to49 | 8035       |
| Burkina Faso | 1997           | FemalePregAge15to19 | 63613      |
| Burkina Faso | 1997           | FemalePregAge20to24 | 101783     |
| Burkina Faso | 1997           | FemalePregAge25to29 | 83798      |
| Burkina Faso | 1997           | FemalePregAge30to34 | 63028      |
| Burkina Faso | 1997           | FemalePregAge35to39 | 40818      |
| Burkina Faso | 1997           | FemalePregAge40to44 | 20694      |
| Burkina Faso | 1997           | FemalePregAge45to49 | 6026       |
| Burkina Faso | 1997           | MaleAge0to4         | 1020280    |
| Burkina Faso | 1997           | MaleAge10to14       | 706686     |
| Burkina Faso | 1997           | MaleAge15to19       | 599644     |
| Burkina Faso | 1997           | MaleAge20to24       | 478194     |
| Burkina Faso | 1997           | MaleAge25to29       | 377566     |
| Burkina Faso | 1997           | MaleAge30to34       | 295301     |
| Burkina Faso | 1997           | MaleAge35to39       | 226604     |
| Burkina Faso | 1997           | MaleAge40to44       | 171259     |
| Burkina Faso | 1997           | MaleAge45to49       | 134210     |
| Burkina Faso | 1997           | MaleAge50to54       | 111161     |
| Burkina Faso | 1997           | MaleAge55to59       | 89119      |
| Burkina Faso | 1997           | MaleAge5to9         | 823444     |
| Burkina Faso | 1997           | MaleAge60to64       | 68478      |
| Burkina Faso | 1997           | MaleAge65to69       | 52832      |
| Burkina Faso | 1997           | MaleAge70to74       | 38652      |
| Burkina Faso | 1997           | MaleAge75to79       | 23090      |
| Burkina Faso | 1997           | MaleAge80to84       | 9857       |
| Burkina Faso | 1997           | MaleAge85to89       | 2637       |
| Burkina Faso | 1997           | MaleAge90to94       | 364        |
| Burkina Faso | 1997           | MaleAge95to99       | 24         |
| Burkina Faso | 1998           | FemaleAge0to4       | 1013208    |
| Burkina Faso | 1998           | FemaleAge10to14     | 702337     |
| Burkina Faso | 1998           | FemaleAge15to19     | 454239     |
| Burkina Faso | 1998           | FemaleAge20to24     | 254490     |
| Burkina Faso | 1998           | FemaleAge25to29     | 201500     |
| Burkina Faso | 1998           | FemaleAge30to34     | 179934     |
| Burkina Faso | 1998           | FemaleAge35to39     | 170267     |
| Burkina Faso | 1998           | FemaleAge40to44     | 169099     |
| Burkina Faso | 1998           | FemaleAge45to49     | 163583     |
| Burkina Faso | 1998           | FemaleAge50to54     | 150435     |
| Burkina Faso | 1998           | FemaleAge55to59     | 128073     |
| Burkina Faso | 1998           | FemaleAge5to9       | 821706     |
| Burkina Faso | 1998           | FemaleAge60to64     | 102365     |
| Burkina Faso | 1998           | FemaleAge65to69     | 79289      |
| Burkina Faso | 1998           | FemaleAge70to74     | 56883      |
| Burkina Faso | 1998           | FemaleAge75to79     | 33807      |
| Burkina Faso | 1998           | FemaleAge80to84     | 14884      |
| Burkina Faso | 1998           | FemaleAge85to89     | 4282       |
| Burkina Faso | 1998           | FemaleAge90to94     | 693        |
| Burkina Faso | 1998           | FemaleAge95to99     | 70         |
| Burkina Faso | 1998           | FemaleAgeAbove100   | 1          |
| Burkina Faso | 1998           | FemaleLactAge15to19 | 84817      |
| Burkina Faso | 1998           | FemaleLactAge20to24 | 135711     |
| Burkina Faso | 1998           | FemaleLactAge25to29 | 111730     |
| Burkina Faso | 1998           | FemaleLactAge30to34 | 84037      |
| Burkina Faso | 1998           | FemaleLactAge35to39 | 54424      |
| Burkina Faso | 1998           | FemaleLactAge40to44 | 27592      |
| Burkina Faso | 1998           | FemaleLactAge45to49 | 8035       |
| Burkina Faso | 1998           | FemalePregAge15to19 | 63613      |
| Burkina Faso | 1998           | FemalePregAge20to24 | 101783     |
| Burkina Faso | 1998           | FemalePregAge25to29 | 83798      |
| Burkina Faso | 1998           | FemalePregAge30to34 | 63028      |
| Burkina Faso | 1998           | FemalePregAge35to39 | 40818      |
| Burkina Faso | 1998           | FemalePregAge40to44 | 20694      |
| Burkina Faso | 1998           | FemalePregAge45to49 | 6026       |
| Burkina Faso | 1998           | MaleAge0to4         | 1046723    |
| Burkina Faso | 1998           | MaleAge10to14       | 724030     |
| Burkina Faso | 1998           | MaleAge15to19       | 618676     |
| Burkina Faso | 1998           | MaleAge20to24       | 496615     |
| Burkina Faso | 1998           | MaleAge25to29       | 388540     |
| Burkina Faso | 1998           | MaleAge30to34       | 306763     |

Dietary calcium and zinc deficiency risks are decreasing but remain prevalent

| Country      | Reference year | Age/gender group    | Population |
|--------------|----------------|---------------------|------------|
| Burkina Faso | 1998           | MaleAge35to39       | 234968     |
| Burkina Faso | 1998           | MaleAge40to44       | 178659     |
| Burkina Faso | 1998           | MaleAge45to49       | 137224     |
| Burkina Faso | 1998           | MaleAge50to54       | 113042     |
| Burkina Faso | 1998           | MaleAge55to59       | 91289      |
| Burkina Faso | 1998           | MaleAge5to9         | 846983     |
| Burkina Faso | 1998           | MaleAge60to64       | 69706      |
| Burkina Faso | 1998           | MaleAge65to69       | 52713      |
| Burkina Faso | 1998           | MaleAge70to74       | 38373      |
| Burkina Faso | 1998           | MaleAge75to79       | 23131      |
| Burkina Faso | 1998           | MaleAge80to84       | 9980       |
| Burkina Faso | 1998           | MaleAge85to89       | 2726       |
| Burkina Faso | 1998           | MaleAge90to94       | 409        |
| Burkina Faso | 1998           | MaleAge95to99       | 37         |
| Burkina Faso | 1999           | FemaleAge0to4       | 1039313    |
| Burkina Faso | 1999           | FemaleAge10to14     | 720394     |
| Burkina Faso | 1999           | FemaleAge15to19     | 472805     |
| Burkina Faso | 1999           | FemaleAge20to24     | 273024     |
| Burkina Faso | 1999           | FemaleAge25to29     | 213246     |
| Burkina Faso | 1999           | FemaleAge30to34     | 190631     |
| Burkina Faso | 1999           | FemaleAge35to39     | 178433     |
| Burkina Faso | 1999           | FemaleAge40to44     | 176152     |
| Burkina Faso | 1999           | FemaleAge45to49     | 168826     |
| Burkina Faso | 1999           | FemaleAge50to54     | 152997     |
| Burkina Faso | 1999           | FemaleAge55to59     | 131135     |
| Burkina Faso | 1999           | FemaleAge5to9       | 843995     |
| Burkina Faso | 1999           | FemaleAge60to64     | 104799     |
| Burkina Faso | 1999           | FemaleAge65to69     | 80512      |
| Burkina Faso | 1999           | FemaleAge70to74     | 57644      |
| Burkina Faso | 1999           | FemaleAge75to79     | 34235      |
| Burkina Faso | 1999           | FemaleAge80to84     | 14900      |
| Burkina Faso | 1999           | FemaleAge85to89     | 4200       |
| Burkina Faso | 1999           | FemaleAge90to94     | 692        |
| Burkina Faso | 1999           | FemaleAge95to99     | 72         |
| Burkina Faso | 1999           | FemaleAgeAbove100   | 1          |
| Burkina Faso | 1999           | FemaleLactAge15to19 | 84817      |
| Burkina Faso | 1999           | FemaleLactAge20to24 | 135711     |
| Burkina Faso | 1999           | FemaleLactAge25to29 | 111730     |
| Burkina Faso | 1999           | FemaleLactAge30to34 | 84037      |
| Burkina Faso | 1999           | FemaleLactAge35to39 | 54424      |
| Burkina Faso | 1999           | FemaleLactAge40to44 | 27592      |
| Burkina Faso | 1999           | FemaleLactAge45to49 | 8035       |
| Burkina Faso | 1999           | FemalePregAge15to19 | 63613      |
| Burkina Faso | 1999           | FemalePregAge20to24 | 101783     |
| Burkina Faso | 1999           | FemalePregAge25to29 | 83798      |
| Burkina Faso | 1999           | FemalePregAge30to34 | 63028      |
| Burkina Faso | 1999           | FemalePregAge35to39 | 40818      |
| Burkina Faso | 1999           | FemalePregAge40to44 | 20694      |
| Burkina Faso | 1999           | FemalePregAge45to49 | 6026       |
| Burkina Faso | 1999           | MaleAge0to4         | 1073867    |
| Burkina Faso | 1999           | MaleAge10to14       | 742655     |
| Burkina Faso | 1999           | MaleAge15to19       | 638267     |
| Burkina Faso | 1999           | MaleAge20to24       | 515977     |
| Burkina Faso | 1999           | MaleAge25to29       | 400763     |
| Burkina Faso | 1999           | MaleAge30to34       | 318230     |
| Burkina Faso | 1999           | MaleAge35to39       | 243868     |
| Burkina Faso | 1999           | MaleAge40to44       | 186407     |
| Burkina Faso | 1999           | MaleAge45to49       | 141025     |
| Burkina Faso | 1999           | MaleAge50to54       | 115111     |
| Burkina Faso | 1999           | MaleAge55to59       | 93507      |
| Burkina Faso | 1999           | MaleAge5to9         | 869918     |
| Burkina Faso | 1999           | MaleAge60to64       | 71234      |
| Burkina Faso | 1999           | MaleAge65to69       | 52933      |
| Burkina Faso | 1999           | MaleAge70to74       | 38192      |
| Burkina Faso | 1999           | MaleAge75to79       | 23004      |
| Burkina Faso | 1999           | MaleAge80to84       | 9806       |
| Burkina Faso | 1999           | MaleAge85to89       | 2625       |
| Burkina Faso | 1999           | MaleAge90to94       | 404        |
| Burkina Faso | 1999           | MaleAge95to99       | 39         |
| Cambodia     | 1992           | FemaleAge0to4       | 839751     |
| Cambodia     | 1992           | FemaleAge10to14     | 513288     |
| Cambodia     | 1992           | FemaleAge15to19     | 369999     |
| Cambodia     | 1992           | FemaleAge20to24     | 263445     |
| Cambodia     | 1992           | FemaleAge25to29     | 221043     |
| Cambodia     | 1992           | FemaleAge30to34     | 207203     |
| Cambodia     | 1992           | FemaleAge35to39     | 210771     |
| Cambodia     | 1992           | FemaleAge40to44     | 193174     |
| Cambodia     | 1992           | FemaleAge45to49     | 164809     |
| Cambodia     | 1992           | FemaleAge50to54     | 141814     |
| Cambodia     | 1992           | FemaleAge55to59     | 116780     |
| Cambodia     | 1992           | FemaleAge5to9       | 828656     |
| Cambodia     | 1992           | FemaleAge60to64     | 95169      |
| Cambodia     | 1992           | FemaleAge65to69     | 74845      |
| Cambodia     | 1992           | FemaleAge70to74     | 55004      |
| Cambodia     | 1992           | FemaleAge75to79     | 35630      |
| Cambodia     | 1992           | FemaleAge80to84     | 19438      |
| Cambodia     | 1992           | FemaleAge85to89     | 8393       |
| Cambodia     | 1992           | FemaleAge90to94     | 2495       |

Dietary calcium and zinc deficiency risks are decreasing but remain prevalent

| Country  | Reference year | Age/gender group    | Population |
|----------|----------------|---------------------|------------|
| Cambodia | 1992           | FemaleAge95to99     | 422        |
| Cambodia | 1992           | FemaleAgeAbov e100  | 41         |
| Cambodia | 1992           | FemaleLactAge15to19 | 28930      |
| Cambodia | 1992           | FemaleLactAge20to24 | 103459     |
| Cambodia | 1992           | FemaleLactAge25to29 | 97098      |
| Cambodia | 1992           | FemaleLactAge30to34 | 74282      |
| Cambodia | 1992           | FemaleLactAge35to39 | 48290      |
| Cambodia | 1992           | FemaleLactAge40to44 | 19062      |
| Cambodia | 1992           | FemaleLactAge45to49 | 3227       |
| Cambodia | 1992           | FemalePregAge15to19 | 21698      |
| Cambodia | 1992           | FemalePregAge20to24 | 77594      |
| Cambodia | 1992           | FemalePregAge25to29 | 72824      |
| Cambodia | 1992           | FemalePregAge30to34 | 55712      |
| Cambodia | 1992           | FemalePregAge35to39 | 36217      |
| Cambodia | 1992           | FemalePregAge40to44 | 14297      |
| Cambodia | 1992           | FemalePregAge45to49 | 2421       |
| Cambodia | 1992           | MaleAge0to4         | 848839     |
| Cambodia | 1992           | MaleAge10to14       | 510885     |
| Cambodia | 1992           | MaleAge15to19       | 413389     |
| Cambodia | 1992           | MaleAge20to24       | 426081     |
| Cambodia | 1992           | MaleAge25to29       | 330875     |
| Cambodia | 1992           | MaleAge30to34       | 268676     |
| Cambodia | 1992           | MaleAge35to39       | 243031     |
| Cambodia | 1992           | MaleAge40to44       | 188842     |
| Cambodia | 1992           | MaleAge45to49       | 145919     |
| Cambodia | 1992           | MaleAge50to54       | 133576     |
| Cambodia | 1992           | MaleAge55to59       | 116876     |
| Cambodia | 1992           | MaleAge5to9         | 856263     |
| Cambodia | 1992           | MaleAge60to64       | 90970      |
| Cambodia | 1992           | MaleAge65to69       | 62558      |
| Cambodia | 1992           | MaleAge70to74       | 37914      |
| Cambodia | 1992           | MaleAge75to79       | 19289      |
| Cambodia | 1992           | MaleAge80to84       | 7610       |
| Cambodia | 1992           | MaleAge85to89       | 2291       |
| Cambodia | 1992           | MaleAge90to94       | 521        |
| Cambodia | 1992           | MaleAge95to99       | 84         |
| Cambodia | 1992           | MaleAgeAbov e100    | 8          |
| Cambodia | 1993           | FemaleAge0to4       | 860851     |
| Cambodia | 1993           | FemaleAge10to14     | 593854     |
| Cambodia | 1993           | FemaleAge15to19     | 348282     |
| Cambodia | 1993           | FemaleAge20to24     | 274876     |
| Cambodia | 1993           | FemaleAge25to29     | 231386     |
| Cambodia | 1993           | FemaleAge30to34     | 217602     |
| Cambodia | 1993           | FemaleAge35to39     | 217196     |
| Cambodia | 1993           | FemaleAge40to44     | 210249     |
| Cambodia | 1993           | FemaleAge45to49     | 170491     |
| Cambodia | 1993           | FemaleAge50to54     | 146616     |
| Cambodia | 1993           | FemaleAge55to59     | 120451     |
| Cambodia | 1993           | FemaleAge5to9       | 846524     |
| Cambodia | 1993           | FemaleAge60to64     | 97896      |
| Cambodia | 1993           | FemaleAge65to69     | 77147      |
| Cambodia | 1993           | FemaleAge70to74     | 56948      |
| Cambodia | 1993           | FemaleAge75to79     | 37453      |
| Cambodia | 1993           | FemaleAge80to84     | 20407      |
| Cambodia | 1993           | FemaleAge85to89     | 9076       |
| Cambodia | 1993           | FemaleAge90to94     | 2803       |
| Cambodia | 1993           | FemaleAge95to99     | 508        |
| Cambodia | 1993           | FemaleAgeAbov e100  | 51         |
| Cambodia | 1993           | FemaleLactAge15to19 | 28930      |
| Cambodia | 1993           | FemaleLactAge20to24 | 103459     |
| Cambodia | 1993           | FemaleLactAge25to29 | 97098      |
| Cambodia | 1993           | FemaleLactAge30to34 | 74282      |
| Cambodia | 1993           | FemaleLactAge35to39 | 48290      |
| Cambodia | 1993           | FemaleLactAge40to44 | 19062      |
| Cambodia | 1993           | FemaleLactAge45to49 | 3227       |
| Cambodia | 1993           | FemalePregAge15to19 | 21698      |
| Cambodia | 1993           | FemalePregAge20to24 | 77594      |
| Cambodia | 1993           | FemalePregAge25to29 | 72824      |
| Cambodia | 1993           | FemalePregAge30to34 | 55712      |
| Cambodia | 1993           | FemalePregAge35to39 | 36217      |
| Cambodia | 1993           | FemalePregAge40to44 | 14297      |
| Cambodia | 1993           | FemalePregAge45to49 | 2421       |
| Cambodia | 1993           | MaleAge0to4         | 872942     |
| Cambodia | 1993           | MaleAge10to14       | 599950     |
| Cambodia | 1993           | MaleAge15to19       | 386250     |
| Cambodia | 1993           | MaleAge20to24       | 443695     |
| Cambodia | 1993           | MaleAge25to29       | 348742     |
| Cambodia | 1993           | MaleAge30to34       | 275691     |
| Cambodia | 1993           | MaleAge35to39       | 245926     |
| Cambodia | 1993           | MaleAge40to44       | 202849     |
| Cambodia | 1993           | MaleAge45to49       | 148651     |
| Cambodia | 1993           | MaleAge50to54       | 134243     |
| Cambodia | 1993           | MaleAge55to59       | 119410     |
| Cambodia | 1993           | MaleAge5to9         | 870082     |
| Cambodia | 1993           | MaleAge60to64       | 94364      |
| Cambodia | 1993           | MaleAge65to69       | 65877      |
| Cambodia | 1993           | MaleAge70to74       | 40333      |
| Cambodia | 1993           | MaleAge75to79       | 21030      |

Dietary calcium and zinc deficiency risks are decreasing but remain prevalent

| Country  | Reference year | Age/gender group    | Population |
|----------|----------------|---------------------|------------|
| Cambodia | 1993           | MaleAge80to84       | 8337       |
| Cambodia | 1993           | MaleAge85to89       | 2552       |
| Cambodia | 1993           | MaleAge90to94       | 594        |
| Cambodia | 1993           | MaleAge95to99       | 102        |
| Cambodia | 1993           | MaleAgeAbov e100    | 9          |
| Cambodia | 1994           | FemaleAge0to4       | 878318     |
| Cambodia | 1994           | FemaleAge10to14     | 673363     |
| Cambodia | 1994           | FemaleAge15to19     | 343130     |
| Cambodia | 1994           | FemaleAge20to24     | 280741     |
| Cambodia | 1994           | FemaleAge25to29     | 242388     |
| Cambodia | 1994           | FemaleAge30to34     | 228829     |
| Cambodia | 1994           | FemaleAge35to39     | 224252     |
| Cambodia | 1994           | FemaleAge40to44     | 226425     |
| Cambodia | 1994           | FemaleAge45to49     | 178471     |
| Cambodia | 1994           | FemaleAge50to54     | 151780     |
| Cambodia | 1994           | FemaleAge55to59     | 124506     |
| Cambodia | 1994           | FemaleAge5to9       | 852227     |
| Cambodia | 1994           | FemaleAge60to64     | 100991     |
| Cambodia | 1994           | FemaleAge65to69     | 79720      |
| Cambodia | 1994           | FemaleAge70to74     | 59001      |
| Cambodia | 1994           | FemaleAge75to79     | 39477      |
| Cambodia | 1994           | FemaleAge80to84     | 21420      |
| Cambodia | 1994           | FemaleAge85to89     | 9691       |
| Cambodia | 1994           | FemaleAge90to94     | 3078       |
| Cambodia | 1994           | FemaleAge95to99     | 600        |
| Cambodia | 1994           | FemaleAgeAbov e100  | 63         |
| Cambodia | 1994           | FemaleLactAge15to19 | 28930      |
| Cambodia | 1994           | FemaleLactAge20to24 | 103459     |
| Cambodia | 1994           | FemaleLactAge25to29 | 97098      |
| Cambodia | 1994           | FemaleLactAge30to34 | 74282      |
| Cambodia | 1994           | FemaleLactAge35to39 | 48290      |
| Cambodia | 1994           | FemaleLactAge40to44 | 19062      |
| Cambodia | 1994           | FemaleLactAge45to49 | 3227       |
| Cambodia | 1994           | FemalePregAge15to19 | 21698      |
| Cambodia | 1994           | FemalePregAge20to24 | 77594      |
| Cambodia | 1994           | FemalePregAge25to29 | 72824      |
| Cambodia | 1994           | FemalePregAge30to34 | 55712      |
| Cambodia | 1994           | FemalePregAge35to39 | 36217      |
| Cambodia | 1994           | FemalePregAge40to44 | 14297      |
| Cambodia | 1994           | FemalePregAge45to49 | 2421       |
| Cambodia | 1994           | MaleAge0to4         | 894021     |
| Cambodia | 1994           | MaleAge10to14       | 686918     |
| Cambodia | 1994           | MaleAge15to19       | 377628     |
| Cambodia | 1994           | MaleAge20to24       | 453683     |
| Cambodia | 1994           | MaleAge25to29       | 367566     |
| Cambodia | 1994           | MaleAge30to34       | 285340     |
| Cambodia | 1994           | MaleAge35to39       | 249244     |
| Cambodia | 1994           | MaleAge40to44       | 215746     |
| Cambodia | 1994           | MaleAge45to49       | 153711     |
| Cambodia | 1994           | MaleAge50to54       | 135370     |
| Cambodia | 1994           | MaleAge55to59       | 121765     |
| Cambodia | 1994           | MaleAge5to9         | 869983     |
| Cambodia | 1994           | MaleAge60to64       | 97822      |
| Cambodia | 1994           | MaleAge65to69       | 69387      |
| Cambodia | 1994           | MaleAge70to74       | 42893      |
| Cambodia | 1994           | MaleAge75to79       | 22926      |
| Cambodia | 1994           | MaleAge80to84       | 9095       |
| Cambodia | 1994           | MaleAge85to89       | 2815       |
| Cambodia | 1994           | MaleAge90to94       | 654        |
| Cambodia | 1994           | MaleAge95to99       | 112        |
| Cambodia | 1994           | MaleAgeAbov e100    | 10         |
| Cambodia | 1995           | FemaleAge0to4       | 876698     |
| Cambodia | 1995           | FemaleAge10to14     | 737825     |
| Cambodia | 1995           | FemaleAge15to19     | 364037     |
| Cambodia | 1995           | FemaleAge20to24     | 279086     |
| Cambodia | 1995           | FemaleAge25to29     | 254381     |
| Cambodia | 1995           | FemaleAge30to34     | 240928     |
| Cambodia | 1995           | FemaleAge35to39     | 233317     |
| Cambodia | 1995           | FemaleAge40to44     | 240524     |
| Cambodia | 1995           | FemaleAge45to49     | 189610     |
| Cambodia | 1995           | FemaleAge50to54     | 157424     |
| Cambodia | 1995           | FemaleAge55to59     | 129044     |
| Cambodia | 1995           | FemaleAge5to9       | 859905     |
| Cambodia | 1995           | FemaleAge60to64     | 104570     |
| Cambodia | 1995           | FemaleAge65to69     | 82625      |
| Cambodia | 1995           | FemaleAge70to74     | 61305      |
| Cambodia | 1995           | FemaleAge75to79     | 41635      |
| Cambodia | 1995           | FemaleAge80to84     | 22617      |
| Cambodia | 1995           | FemaleAge85to89     | 10249      |
| Cambodia | 1995           | FemaleAge90to94     | 3310       |
| Cambodia | 1995           | FemaleAge95to99     | 668        |
| Cambodia | 1995           | FemaleAgeAbov e100  | 79         |
| Cambodia | 1995           | FemaleLactAge15to19 | 28930      |
| Cambodia | 1995           | FemaleLactAge20to24 | 103459     |
| Cambodia | 1995           | FemaleLactAge25to29 | 97098      |
| Cambodia | 1995           | FemaleLactAge30to34 | 74282      |
| Cambodia | 1995           | FemaleLactAge35to39 | 48290      |
| Cambodia | 1995           | FemaleLactAge40to44 | 19062      |

Dietary calcium and zinc deficiency risks are decreasing but remain prevalent

| Country  | Reference year | Age/gender group    | Population |
|----------|----------------|---------------------|------------|
| Cambodia | 1995           | FemaleLactAge45to49 | 3227       |
| Cambodia | 1995           | FemalePregAge15to19 | 21698      |
| Cambodia | 1995           | FemalePregAge20to24 | 77594      |
| Cambodia | 1995           | FemalePregAge25to29 | 72824      |
| Cambodia | 1995           | FemalePregAge30to34 | 55712      |
| Cambodia | 1995           | FemalePregAge35to39 | 36217      |
| Cambodia | 1995           | FemalePregAge40to44 | 14297      |
| Cambodia | 1995           | FemalePregAge45to49 | 2421       |
| Cambodia | 1995           | MaleAge0to4         | 894037     |
| Cambodia | 1995           | MaleAge10to14       | 755711     |
| Cambodia | 1995           | MaleAge15to19       | 398781     |
| Cambodia | 1995           | MaleAge20to24       | 453747     |
| Cambodia | 1995           | MaleAge25to29       | 387009     |
| Cambodia | 1995           | MaleAge30to34       | 298406     |
| Cambodia | 1995           | MaleAge35to39       | 254438     |
| Cambodia | 1995           | MaleAge40to44       | 226353     |
| Cambodia | 1995           | MaleAge45to49       | 161852     |
| Cambodia | 1995           | MaleAge50to54       | 137355     |
| Cambodia | 1995           | MaleAge55to59       | 124025     |
| Cambodia | 1995           | MaleAge5to9         | 873405     |
| Cambodia | 1995           | MaleAge60to64       | 101439     |
| Cambodia | 1995           | MaleAge65to69       | 73150      |
| Cambodia | 1995           | MaleAge70to74       | 45738      |
| Cambodia | 1995           | MaleAge75to79       | 24948      |
| Cambodia | 1995           | MaleAge80to84       | 9978       |
| Cambodia | 1995           | MaleAge85to89       | 3068       |
| Cambodia | 1995           | MaleAge90to94       | 692        |
| Cambodia | 1995           | MaleAge95to99       | 109        |
| Cambodia | 1995           | MaleAgeAbov e100    | 12         |
| Cambodia | 1996           | FemaleAge0to4       | 865636     |
| Cambodia | 1996           | FemaleAge10to14     | 799533     |
| Cambodia | 1996           | FemaleAge15to19     | 400204     |
| Cambodia | 1996           | FemaleAge20to24     | 303292     |
| Cambodia | 1996           | FemaleAge25to29     | 275051     |
| Cambodia | 1996           | FemaleAge30to34     | 261389     |
| Cambodia | 1996           | FemaleAge35to39     | 248696     |
| Cambodia | 1996           | FemaleAge40to44     | 252339     |
| Cambodia | 1996           | FemaleAge45to49     | 203179     |
| Cambodia | 1996           | FemaleAge50to54     | 162758     |
| Cambodia | 1996           | FemaleAge55to59     | 133321     |
| Cambodia | 1996           | FemaleAge5to9       | 865195     |
| Cambodia | 1996           | FemaleAge60to64     | 108332     |
| Cambodia | 1996           | FemaleAge65to69     | 84788      |
| Cambodia | 1996           | FemaleAge70to74     | 62667      |
| Cambodia | 1996           | FemaleAge75to79     | 42648      |
| Cambodia | 1996           | FemaleAge80to84     | 24166      |
| Cambodia | 1996           | FemaleAge85to89     | 11186      |
| Cambodia | 1996           | FemaleAge90to94     | 3837       |
| Cambodia | 1996           | FemaleAge95to99     | 802        |
| Cambodia | 1996           | FemaleAgeAbov e100  | 99         |
| Cambodia | 1996           | FemaleLactAge15to19 | 31106      |
| Cambodia | 1996           | FemaleLactAge20to24 | 82785      |
| Cambodia | 1996           | FemaleLactAge25to29 | 91917      |
| Cambodia | 1996           | FemaleLactAge30to34 | 70278      |
| Cambodia | 1996           | FemaleLactAge35to39 | 44486      |
| Cambodia | 1996           | FemaleLactAge40to44 | 18643      |
| Cambodia | 1996           | FemaleLactAge45to49 | 2992       |
| Cambodia | 1996           | FemalePregAge15to19 | 23330      |
| Cambodia | 1996           | FemalePregAge20to24 | 62088      |
| Cambodia | 1996           | FemalePregAge25to29 | 68938      |
| Cambodia | 1996           | FemalePregAge30to34 | 52709      |
| Cambodia | 1996           | FemalePregAge35to39 | 33364      |
| Cambodia | 1996           | FemalePregAge40to44 | 13982      |
| Cambodia | 1996           | FemalePregAge45to49 | 2244       |
| Cambodia | 1996           | MaleAge0to4         | 888282     |
| Cambodia | 1996           | MaleAge10to14       | 818113     |
| Cambodia | 1996           | MaleAge15to19       | 440516     |
| Cambodia | 1996           | MaleAge20to24       | 439038     |
| Cambodia | 1996           | MaleAge25to29       | 407435     |
| Cambodia | 1996           | MaleAge30to34       | 319645     |
| Cambodia | 1996           | MaleAge35to39       | 257224     |
| Cambodia | 1996           | MaleAge40to44       | 230981     |
| Cambodia | 1996           | MaleAge45to49       | 169985     |
| Cambodia | 1996           | MaleAge50to54       | 137286     |
| Cambodia | 1996           | MaleAge55to59       | 123181     |
| Cambodia | 1996           | MaleAge5to9         | 881513     |
| Cambodia | 1996           | MaleAge60to64       | 102973     |
| Cambodia | 1996           | MaleAge65to69       | 75676      |
| Cambodia | 1996           | MaleAge70to74       | 48202      |
| Cambodia | 1996           | MaleAge75to79       | 26739      |
| Cambodia | 1996           | MaleAge80to84       | 11300      |
| Cambodia | 1996           | MaleAge85to89       | 3561       |
| Cambodia | 1996           | MaleAge90to94       | 835        |
| Cambodia | 1996           | MaleAge95to99       | 132        |
| Cambodia | 1996           | MaleAgeAbov e100    | 14         |
| Cambodia | 1997           | FemaleAge0to4       | 837327     |
| Cambodia | 1997           | FemaleAge10to14     | 840497     |
| Cambodia | 1997           | FemaleAge15to19     | 476820     |

Dietary calcium and zinc deficiency risks are decreasing but remain prevalent

| Country  | Reference year | Age/gender group    | Population |
|----------|----------------|---------------------|------------|
| Cambodia | 1997           | FemaleAge20to24     | 277294     |
| Cambodia | 1997           | FemaleAge25to29     | 290398     |
| Cambodia | 1997           | FemaleAge30to34     | 274617     |
| Cambodia | 1997           | FemaleAge35to39     | 260711     |
| Cambodia | 1997           | FemaleAge40to44     | 260666     |
| Cambodia | 1997           | FemaleAge45to49     | 219865     |
| Cambodia | 1997           | FemaleAge50to54     | 168264     |
| Cambodia | 1997           | FemaleAge55to59     | 138325     |
| Cambodia | 1997           | FemaleAge5to9       | 868364     |
| Cambodia | 1997           | FemaleAge60to64     | 112455     |
| Cambodia | 1997           | FemaleAge65to69     | 87795      |
| Cambodia | 1997           | FemaleAge70to74     | 64337      |
| Cambodia | 1997           | FemaleAge75to79     | 43653      |
| Cambodia | 1997           | FemaleAge80to84     | 25553      |
| Cambodia | 1997           | FemaleAge85to89     | 12133      |
| Cambodia | 1997           | FemaleAge90to94     | 4349       |
| Cambodia | 1997           | FemaleAge95to99     | 966        |
| Cambodia | 1997           | FemaleAgeAbov e100  | 123        |
| Cambodia | 1997           | FemaleLactAge15to19 | 31106      |
| Cambodia | 1997           | FemaleLactAge20to24 | 82785      |
| Cambodia | 1997           | FemaleLactAge25to29 | 91917      |
| Cambodia | 1997           | FemaleLactAge30to34 | 70278      |
| Cambodia | 1997           | FemaleLactAge35to39 | 44486      |
| Cambodia | 1997           | FemaleLactAge40to44 | 18643      |
| Cambodia | 1997           | FemaleLactAge45to49 | 2992       |
| Cambodia | 1997           | FemalePregAge15to19 | 23330      |
| Cambodia | 1997           | FemalePregAge20to24 | 62088      |
| Cambodia | 1997           | FemalePregAge25to29 | 68938      |
| Cambodia | 1997           | FemalePregAge30to34 | 52709      |
| Cambodia | 1997           | FemalePregAge35to39 | 33364      |
| Cambodia | 1997           | FemalePregAge40to44 | 13982      |
| Cambodia | 1997           | FemalePregAge45to49 | 2244       |
| Cambodia | 1997           | MaleAge0to4         | 861714     |
| Cambodia | 1997           | MaleAge10to14       | 860244     |
| Cambodia | 1997           | MaleAge15to19       | 521909     |
| Cambodia | 1997           | MaleAge20to24       | 407503     |
| Cambodia | 1997           | MaleAge25to29       | 429787     |
| Cambodia | 1997           | MaleAge30to34       | 342853     |
| Cambodia | 1997           | MaleAge35to39       | 266286     |
| Cambodia | 1997           | MaleAge40to44       | 231937     |
| Cambodia | 1997           | MaleAge45to49       | 181454     |
| Cambodia | 1997           | MaleAge50to54       | 137829     |
| Cambodia | 1997           | MaleAge55to59       | 122511     |
| Cambodia | 1997           | MaleAge5to9         | 888765     |
| Cambodia | 1997           | MaleAge60to64       | 104324     |
| Cambodia | 1997           | MaleAge65to69       | 78283      |
| Cambodia | 1997           | MaleAge70to74       | 50769      |
| Cambodia | 1997           | MaleAge75to79       | 28507      |
| Cambodia | 1997           | MaleAge80to84       | 12682      |
| Cambodia | 1997           | MaleAge85to89       | 4056       |
| Cambodia | 1997           | MaleAge90to94       | 986        |
| Cambodia | 1997           | MaleAge95to99       | 168        |
| Cambodia | 1997           | MaleAgeAbov e100    | 17         |
| Cambodia | 1998           | FemaleAge0to4       | 797111     |
| Cambodia | 1998           | FemaleAge10to14     | 857799     |
| Cambodia | 1998           | FemaleAge15to19     | 581426     |
| Cambodia | 1998           | FemaleAge20to24     | 246587     |
| Cambodia | 1998           | FemaleAge25to29     | 306203     |
| Cambodia | 1998           | FemaleAge30to34     | 286601     |
| Cambodia | 1998           | FemaleAge35to39     | 275972     |
| Cambodia | 1998           | FemaleAge40to44     | 266886     |
| Cambodia | 1998           | FemaleAge45to49     | 238411     |
| Cambodia | 1998           | FemaleAge50to54     | 174596     |
| Cambodia | 1998           | FemaleAge55to59     | 143942     |
| Cambodia | 1998           | FemaleAge5to9       | 871521     |
| Cambodia | 1998           | FemaleAge60to64     | 116634     |
| Cambodia | 1998           | FemaleAge65to69     | 91667      |
| Cambodia | 1998           | FemaleAge70to74     | 66272      |
| Cambodia | 1998           | FemaleAge75to79     | 44815      |
| Cambodia | 1998           | FemaleAge80to84     | 26618      |
| Cambodia | 1998           | FemaleAge85to89     | 13107      |
| Cambodia | 1998           | FemaleAge90to94     | 4819       |
| Cambodia | 1998           | FemaleAge95to99     | 1147       |
| Cambodia | 1998           | FemaleAgeAbov e100  | 151        |
| Cambodia | 1998           | FemaleLactAge15to19 | 31106      |
| Cambodia | 1998           | FemaleLactAge20to24 | 82785      |
| Cambodia | 1998           | FemaleLactAge25to29 | 91917      |
| Cambodia | 1998           | FemaleLactAge30to34 | 70278      |
| Cambodia | 1998           | FemaleLactAge35to39 | 44486      |
| Cambodia | 1998           | FemaleLactAge40to44 | 18643      |
| Cambodia | 1998           | FemaleLactAge45to49 | 2992       |
| Cambodia | 1998           | FemalePregAge15to19 | 23330      |
| Cambodia | 1998           | FemalePregAge20to24 | 62088      |
| Cambodia | 1998           | FemalePregAge25to29 | 68938      |
| Cambodia | 1998           | FemalePregAge30to34 | 52709      |
| Cambodia | 1998           | FemalePregAge35to39 | 33364      |
| Cambodia | 1998           | FemalePregAge40to44 | 13982      |
| Cambodia | 1998           | FemalePregAge45to49 | 2244       |



Dietary calcium and zinc deficiency risks are decreasing but remain prevalent

| Country  | Reference year | Age/gender group    | Population |
|----------|----------------|---------------------|------------|
| Cambodia | 1998           | MaleAge0to4         | 820350     |
| Cambodia | 1998           | MaleAge10to14       | 880439     |
| Cambodia | 1998           | MaleAge15to19       | 632523     |
| Cambodia | 1998           | MaleAge20to24       | 370740     |
| Cambodia | 1998           | MaleAge25to29       | 449994     |
| Cambodia | 1998           | MaleAge30to34       | 365064     |
| Cambodia | 1998           | MaleAge35to39       | 283134     |
| Cambodia | 1998           | MaleAge40to44       | 230023     |
| Cambodia | 1998           | MaleAge45to49       | 194431     |
| Cambodia | 1998           | MaleAge50to54       | 139477     |
| Cambodia | 1998           | MaleAge55to59       | 122194     |
| Cambodia | 1998           | MaleAge5to9         | 896113     |
| Cambodia | 1998           | MaleAge60to64       | 105236     |
| Cambodia | 1998           | MaleAge65to69       | 80865      |
| Cambodia | 1998           | MaleAge70to74       | 53320      |
| Cambodia | 1998           | MaleAge75to79       | 30307      |
| Cambodia | 1998           | MaleAge80to84       | 14035      |
| Cambodia | 1998           | MaleAge85to89       | 4575       |
| Cambodia | 1998           | MaleAge90to94       | 1140       |
| Cambodia | 1998           | MaleAge95to99       | 205        |
| Cambodia | 1998           | MaleAgeAbov e100    | 20         |
| Cambodia | 1999           | FemaleAge0to4       | 759141     |
| Cambodia | 1999           | FemaleAge10to14     | 859300     |
| Cambodia | 1999           | FemaleAge15to19     | 687764     |
| Cambodia | 1999           | FemaleAge20to24     | 231686     |
| Cambodia | 1999           | FemaleAge25to29     | 314417     |
| Cambodia | 1999           | FemaleAge30to34     | 297221     |
| Cambodia | 1999           | FemaleAge35to39     | 292311     |
| Cambodia | 1999           | FemaleAge40to44     | 272924     |
| Cambodia | 1999           | FemaleAge45to49     | 255502     |
| Cambodia | 1999           | FemaleAge50to54     | 182761     |
| Cambodia | 1999           | FemaleAge55to59     | 149644     |
| Cambodia | 1999           | FemaleAge5to9       | 871260     |
| Cambodia | 1999           | FemaleAge60to64     | 120671     |
| Cambodia | 1999           | FemaleAge65to69     | 95999      |
| Cambodia | 1999           | FemaleAge70to74     | 68477      |
| Cambodia | 1999           | FemaleAge75to79     | 46132      |
| Cambodia | 1999           | FemaleAge80to84     | 27312      |
| Cambodia | 1999           | FemaleAge85to89     | 14025      |
| Cambodia | 1999           | FemaleAge90to94     | 5238       |
| Cambodia | 1999           | FemaleAge95to99     | 1324       |
| Cambodia | 1999           | FemaleAgeAbov e100  | 185        |
| Cambodia | 1999           | FemaleLactAge15to19 | 31106      |
| Cambodia | 1999           | FemaleLactAge20to24 | 82785      |
| Cambodia | 1999           | FemaleLactAge25to29 | 91917      |
| Cambodia | 1999           | FemaleLactAge30to34 | 70278      |
| Cambodia | 1999           | FemaleLactAge35to39 | 44486      |
| Cambodia | 1999           | FemaleLactAge40to44 | 18643      |
| Cambodia | 1999           | FemaleLactAge45to49 | 2992       |
| Cambodia | 1999           | FemalePregAge15to19 | 23330      |
| Cambodia | 1999           | FemalePregAge20to24 | 62088      |
| Cambodia | 1999           | FemalePregAge25to29 | 68938      |
| Cambodia | 1999           | FemalePregAge30to34 | 52709      |
| Cambodia | 1999           | FemalePregAge35to39 | 33364      |
| Cambodia | 1999           | FemalePregAge40to44 | 13982      |
| Cambodia | 1999           | FemalePregAge45to49 | 2244       |
| Cambodia | 1999           | MaleAge0to4         | 780520     |
| Cambodia | 1999           | MaleAge10to14       | 886588     |
| Cambodia | 1999           | MaleAge15to19       | 744101     |
| Cambodia | 1999           | MaleAge20to24       | 351718     |
| Cambodia | 1999           | MaleAge25to29       | 459285     |
| Cambodia | 1999           | MaleAge30to34       | 384546     |
| Cambodia | 1999           | MaleAge35to39       | 305561     |
| Cambodia | 1999           | MaleAge40to44       | 228555     |
| Cambodia | 1999           | MaleAge45to49       | 205308     |
| Cambodia | 1999           | MaleAge50to54       | 142937     |
| Cambodia | 1999           | MaleAge55to59       | 122122     |
| Cambodia | 1999           | MaleAge5to9         | 898863     |
| Cambodia | 1999           | MaleAge60to64       | 105419     |
| Cambodia | 1999           | MaleAge65to69       | 83048      |
| Cambodia | 1999           | MaleAge70to74       | 55682      |
| Cambodia | 1999           | MaleAge75to79       | 32116      |
| Cambodia | 1999           | MaleAge80to84       | 15267      |
| Cambodia | 1999           | MaleAge85to89       | 5126       |
| Cambodia | 1999           | MaleAge90to94       | 1289       |
| Cambodia | 1999           | MaleAge95to99       | 236        |
| Cambodia | 1999           | MaleAgeAbov e100    | 24         |
| Cambodia | 2000           | FemaleAge0to4       | 732675     |
| Cambodia | 2000           | FemaleAge10to14     | 856446     |
| Cambodia | 2000           | FemaleAge15to19     | 771360     |
| Cambodia | 2000           | FemaleAge20to24     | 249785     |
| Cambodia | 2000           | FemaleAge25to29     | 309260     |
| Cambodia | 2000           | FemaleAge30to34     | 307311     |
| Cambodia | 2000           | FemaleAge35to39     | 307331     |
| Cambodia | 2000           | FemaleAge40to44     | 280863     |
| Cambodia | 2000           | FemaleAge45to49     | 268801     |
| Cambodia | 2000           | FemaleAge50to54     | 193408     |
| Cambodia | 2000           | FemaleAge55to59     | 155089     |

Dietary calcium and zinc deficiency risks are decreasing but remain prevalent

| Country  | Reference year | Age/gender group    | Population |
|----------|----------------|---------------------|------------|
| Cambodia | 2000           | FemaleAge5to9       | 862451     |
| Cambodia | 2000           | FemaleAge60to64     | 124668     |
| Cambodia | 2000           | FemaleAge65to69     | 100300     |
| Cambodia | 2000           | FemaleAge70to74     | 71116      |
| Cambodia | 2000           | FemaleAge75to79     | 47543      |
| Cambodia | 2000           | FemaleAge80to84     | 27785      |
| Cambodia | 2000           | FemaleAge85to89     | 14737      |
| Cambodia | 2000           | FemaleAge90to94     | 5620       |
| Cambodia | 2000           | FemaleAge95to99     | 1462       |
| Cambodia | 2000           | FemaleAgeAbove100   | 224        |
| Cambodia | 2000           | FemaleLactAge15to19 | 31106      |
| Cambodia | 2000           | FemaleLactAge20to24 | 82785      |
| Cambodia | 2000           | FemaleLactAge25to29 | 91917      |
| Cambodia | 2000           | FemaleLactAge30to34 | 70278      |
| Cambodia | 2000           | FemaleLactAge35to39 | 44486      |
| Cambodia | 2000           | FemaleLactAge40to44 | 18643      |
| Cambodia | 2000           | FemaleLactAge45to49 | 2992       |
| Cambodia | 2000           | FemalePregAge15to19 | 23330      |
| Cambodia | 2000           | FemalePregAge20to24 | 62088      |
| Cambodia | 2000           | FemalePregAge25to29 | 68938      |
| Cambodia | 2000           | FemalePregAge30to34 | 52709      |
| Cambodia | 2000           | FemalePregAge35to39 | 33364      |
| Cambodia | 2000           | FemalePregAge40to44 | 13982      |
| Cambodia | 2000           | FemalePregAge45to49 | 2244       |
| Cambodia | 2000           | MaleAge0to4         | 753604     |
| Cambodia | 2000           | MaleAge10to14       | 889081     |
| Cambodia | 2000           | MaleAge15to19       | 831846     |
| Cambodia | 2000           | MaleAge20to24       | 368587     |
| Cambodia | 2000           | MaleAge25to29       | 452079     |
| Cambodia | 2000           | MaleAge30to34       | 401369     |
| Cambodia | 2000           | MaleAge35to39       | 329410     |
| Cambodia | 2000           | MaleAge40to44       | 231685     |
| Cambodia | 2000           | MaleAge45to49       | 211511     |
| Cambodia | 2000           | MaleAge50to54       | 148584     |
| Cambodia | 2000           | MaleAge55to59       | 122231     |
| Cambodia | 2000           | MaleAge5to9         | 890876     |
| Cambodia | 2000           | MaleAge60to64       | 104953     |
| Cambodia | 2000           | MaleAge65to69       | 84539      |
| Cambodia | 2000           | MaleAge70to74       | 57796      |
| Cambodia | 2000           | MaleAge75to79       | 33873      |
| Cambodia | 2000           | MaleAge80to84       | 16362      |
| Cambodia | 2000           | MaleAge85to89       | 5690       |
| Cambodia | 2000           | MaleAge90to94       | 1420       |
| Cambodia | 2000           | MaleAge95to99       | 249        |
| Cambodia | 2000           | MaleAgeAbove100     | 29         |
| Cameroon | 1992           | FemaleAge0to4       | 1174127    |
| Cameroon | 1992           | FemaleAge10to14     | 798496     |
| Cameroon | 1992           | FemaleAge15to19     | 446117     |
| Cameroon | 1992           | FemaleAge20to24     | 257103     |
| Cameroon | 1992           | FemaleAge25to29     | 217990     |
| Cameroon | 1992           | FemaleAge30to34     | 207974     |
| Cameroon | 1992           | FemaleAge35to39     | 215110     |
| Cameroon | 1992           | FemaleAge40to44     | 221439     |
| Cameroon | 1992           | FemaleAge45to49     | 209907     |
| Cameroon | 1992           | FemaleAge50to54     | 187057     |
| Cameroon | 1992           | FemaleAge55to59     | 157121     |
| Cameroon | 1992           | FemaleAge5to9       | 979887     |
| Cameroon | 1992           | FemaleAge60to64     | 128251     |
| Cameroon | 1992           | FemaleAge65to69     | 99200      |
| Cameroon | 1992           | FemaleAge70to74     | 70304      |
| Cameroon | 1992           | FemaleAge75to79     | 43525      |
| Cameroon | 1992           | FemaleAge80to84     | 22029      |
| Cameroon | 1992           | FemaleAge85to89     | 8375       |
| Cameroon | 1992           | FemaleAge90to94     | 2161       |
| Cameroon | 1992           | FemaleAge95to99     | 302        |
| Cameroon | 1992           | FemaleAgeAbove100   | 19         |
| Cameroon | 1992           | FemaleLactAge15to19 | 118969     |
| Cameroon | 1992           | FemaleLactAge20to24 | 161738     |
| Cameroon | 1992           | FemaleLactAge25to29 | 127606     |
| Cameroon | 1992           | FemaleLactAge30to34 | 85559      |
| Cameroon | 1992           | FemaleLactAge35to39 | 47020      |
| Cameroon | 1992           | FemaleLactAge40to44 | 19583      |
| Cameroon | 1992           | FemaleLactAge45to49 | 5703       |
| Cameroon | 1992           | FemalePregAge15to19 | 89227      |
| Cameroon | 1992           | FemalePregAge20to24 | 121303     |
| Cameroon | 1992           | FemalePregAge25to29 | 95705      |
| Cameroon | 1992           | FemalePregAge30to34 | 64169      |
| Cameroon | 1992           | FemalePregAge35to39 | 35265      |
| Cameroon | 1992           | FemalePregAge40to44 | 14688      |
| Cameroon | 1992           | FemalePregAge45to49 | 4277       |
| Cameroon | 1992           | MaleAge0to4         | 1191470    |
| Cameroon | 1992           | MaleAge10to14       | 805384     |
| Cameroon | 1992           | MaleAge15to19       | 656745     |
| Cameroon | 1992           | MaleAge20to24       | 539205     |
| Cameroon | 1992           | MaleAge25to29       | 437932     |
| Cameroon | 1992           | MaleAge30to34       | 352395     |
| Cameroon | 1992           | MaleAge35to39       | 290986     |
| Cameroon | 1992           | MaleAge40to44       | 246943     |

Dietary calcium and zinc deficiency risks are decreasing but remain prevalent

| Country  | Reference year | Age/gender group    | Population |
|----------|----------------|---------------------|------------|
| Cameroon | 1992           | MaleAge45to49       | 209339     |
| Cameroon | 1992           | MaleAge50to54       | 175585     |
| Cameroon | 1992           | MaleAge55to59       | 144622     |
| Cameroon | 1992           | MaleAge5to9         | 990877     |
| Cameroon | 1992           | MaleAge60to64       | 115063     |
| Cameroon | 1992           | MaleAge65to69       | 86216      |
| Cameroon | 1992           | MaleAge70to74       | 58835      |
| Cameroon | 1992           | MaleAge75to79       | 34637      |
| Cameroon | 1992           | MaleAge80to84       | 16333      |
| Cameroon | 1992           | MaleAge85to89       | 5601       |
| Cameroon | 1992           | MaleAge90to94       | 1220       |
| Cameroon | 1992           | MaleAge95to99       | 134        |
| Cameroon | 1992           | MaleAgeAbov e100    | 5          |
| Cameroon | 1993           | FemaleAge0to4       | 1197741    |
| Cameroon | 1993           | FemaleAge10to14     | 830174     |
| Cameroon | 1993           | FemaleAge15to19     | 467809     |
| Cameroon | 1993           | FemaleAge20to24     | 275847     |
| Cameroon | 1993           | FemaleAge25to29     | 233405     |
| Cameroon | 1993           | FemaleAge30to34     | 220648     |
| Cameroon | 1993           | FemaleAge35to39     | 222351     |
| Cameroon | 1993           | FemaleAge40to44     | 226538     |
| Cameroon | 1993           | FemaleAge45to49     | 214543     |
| Cameroon | 1993           | FemaleAge50to54     | 190912     |
| Cameroon | 1993           | FemaleAge55to59     | 160284     |
| Cameroon | 1993           | FemaleAge5to9       | 1009079    |
| Cameroon | 1993           | FemaleAge60to64     | 130953     |
| Cameroon | 1993           | FemaleAge65to69     | 101380     |
| Cameroon | 1993           | FemaleAge70to74     | 71932      |
| Cameroon | 1993           | FemaleAge75to79     | 44602      |
| Cameroon | 1993           | FemaleAge80to84     | 22622      |
| Cameroon | 1993           | FemaleAge85to89     | 8638       |
| Cameroon | 1993           | FemaleAge90to94     | 2265       |
| Cameroon | 1993           | FemaleAge95to99     | 352        |
| Cameroon | 1993           | FemaleAgeAbov e100  | 20         |
| Cameroon | 1993           | FemaleLactAge15to19 | 118969     |
| Cameroon | 1993           | FemaleLactAge20to24 | 161738     |
| Cameroon | 1993           | FemaleLactAge25to29 | 127606     |
| Cameroon | 1993           | FemaleLactAge30to34 | 85559      |
| Cameroon | 1993           | FemaleLactAge35to39 | 47020      |
| Cameroon | 1993           | FemaleLactAge40to44 | 19583      |
| Cameroon | 1993           | FemaleLactAge45to49 | 5703       |
| Cameroon | 1993           | FemalePregAge15to19 | 89227      |
| Cameroon | 1993           | FemalePregAge20to24 | 121303     |
| Cameroon | 1993           | FemalePregAge25to29 | 95705      |
| Cameroon | 1993           | FemalePregAge30to34 | 64169      |
| Cameroon | 1993           | FemalePregAge35to39 | 35265      |
| Cameroon | 1993           | FemalePregAge40to44 | 14688      |
| Cameroon | 1993           | FemalePregAge45to49 | 4277       |
| Cameroon | 1993           | MaleAge0to4         | 1215939    |
| Cameroon | 1993           | MaleAge10to14       | 837784     |
| Cameroon | 1993           | MaleAge15to19       | 679007     |
| Cameroon | 1993           | MaleAge20to24       | 557784     |
| Cameroon | 1993           | MaleAge25to29       | 453377     |
| Cameroon | 1993           | MaleAge30to34       | 365167     |
| Cameroon | 1993           | MaleAge35to39       | 298192     |
| Cameroon | 1993           | MaleAge40to44       | 252451     |
| Cameroon | 1993           | MaleAge45to49       | 213764     |
| Cameroon | 1993           | MaleAge50to54       | 179260     |
| Cameroon | 1993           | MaleAge55to59       | 147603     |
| Cameroon | 1993           | MaleAge5to9         | 1020334    |
| Cameroon | 1993           | MaleAge60to64       | 117596     |
| Cameroon | 1993           | MaleAge65to69       | 88192      |
| Cameroon | 1993           | MaleAge70to74       | 60248      |
| Cameroon | 1993           | MaleAge75to79       | 35561      |
| Cameroon | 1993           | MaleAge80to84       | 16814      |
| Cameroon | 1993           | MaleAge85to89       | 5800       |
| Cameroon | 1993           | MaleAge90to94       | 1295       |
| Cameroon | 1993           | MaleAge95to99       | 169        |
| Cameroon | 1993           | MaleAgeAbov e100    | 5          |
| Cameroon | 1994           | FemaleAge0to4       | 1220652    |
| Cameroon | 1994           | FemaleAge10to14     | 862153     |
| Cameroon | 1994           | FemaleAge15to19     | 491338     |
| Cameroon | 1994           | FemaleAge20to24     | 295208     |
| Cameroon | 1994           | FemaleAge25to29     | 249469     |
| Cameroon | 1994           | FemaleAge30to34     | 233997     |
| Cameroon | 1994           | FemaleAge35to39     | 230575     |
| Cameroon | 1994           | FemaleAge40to44     | 231927     |
| Cameroon | 1994           | FemaleAge45to49     | 219271     |
| Cameroon | 1994           | FemaleAge50to54     | 194960     |
| Cameroon | 1994           | FemaleAge55to59     | 163652     |
| Cameroon | 1994           | FemaleAge5to9       | 1035564    |
| Cameroon | 1994           | FemaleAge60to64     | 133875     |
| Cameroon | 1994           | FemaleAge65to69     | 103801     |
| Cameroon | 1994           | FemaleAge70to74     | 73735      |
| Cameroon | 1994           | FemaleAge75to79     | 45716      |
| Cameroon | 1994           | FemaleAge80to84     | 23062      |
| Cameroon | 1994           | FemaleAge85to89     | 8665       |
| Cameroon | 1994           | FemaleAge90to94     | 2233       |

Dietary calcium and zinc deficiency risks are decreasing but remain prevalent

| Country  | Reference year | Age/gender group    | Population |
|----------|----------------|---------------------|------------|
| Cameroon | 1994           | FemaleAge95to99     | 362        |
| Cameroon | 1994           | FemaleAgeAbov e100  | 21         |
| Cameroon | 1994           | FemaleLactAge15to19 | 118969     |
| Cameroon | 1994           | FemaleLactAge20to24 | 161738     |
| Cameroon | 1994           | FemaleLactAge25to29 | 127606     |
| Cameroon | 1994           | FemaleLactAge30to34 | 85559      |
| Cameroon | 1994           | FemaleLactAge35to39 | 47020      |
| Cameroon | 1994           | FemaleLactAge40to44 | 19583      |
| Cameroon | 1994           | FemaleLactAge45to49 | 5703       |
| Cameroon | 1994           | FemalePregAge15to19 | 89227      |
| Cameroon | 1994           | FemalePregAge20to24 | 121303     |
| Cameroon | 1994           | FemalePregAge25to29 | 95705      |
| Cameroon | 1994           | FemalePregAge30to34 | 64169      |
| Cameroon | 1994           | FemalePregAge35to39 | 35265      |
| Cameroon | 1994           | FemalePregAge40to44 | 14688      |
| Cameroon | 1994           | FemalePregAge45to49 | 4277       |
| Cameroon | 1994           | MaleAge0to4         | 1239729    |
| Cameroon | 1994           | MaleAge10to14       | 870464     |
| Cameroon | 1994           | MaleAge15to19       | 703350     |
| Cameroon | 1994           | MaleAge20to24       | 577103     |
| Cameroon | 1994           | MaleAge25to29       | 469387     |
| Cameroon | 1994           | MaleAge30to34       | 378627     |
| Cameroon | 1994           | MaleAge35to39       | 306396     |
| Cameroon | 1994           | MaleAge40to44       | 258242     |
| Cameroon | 1994           | MaleAge45to49       | 218425     |
| Cameroon | 1994           | MaleAge50to54       | 183124     |
| Cameroon | 1994           | MaleAge55to59       | 150785     |
| Cameroon | 1994           | MaleAge5to9         | 1046947    |
| Cameroon | 1994           | MaleAge60to64       | 120326     |
| Cameroon | 1994           | MaleAge65to69       | 90368      |
| Cameroon | 1994           | MaleAge70to74       | 61793      |
| Cameroon | 1994           | MaleAge75to79       | 36460      |
| Cameroon | 1994           | MaleAge80to84       | 17128      |
| Cameroon | 1994           | MaleAge85to89       | 5796       |
| Cameroon | 1994           | MaleAge90to94       | 1270       |
| Cameroon | 1994           | MaleAge95to99       | 176        |
| Cameroon | 1994           | MaleAgeAbov e100    | 6          |
| Cameroon | 1995           | FemaleAge0to4       | 1243906    |
| Cameroon | 1995           | FemaleAge10to14     | 892746     |
| Cameroon | 1995           | FemaleAge15to19     | 517129     |
| Cameroon | 1995           | FemaleAge20to24     | 315141     |
| Cameroon | 1995           | FemaleAge25to29     | 266211     |
| Cameroon | 1995           | FemaleAge30to34     | 247805     |
| Cameroon | 1995           | FemaleAge35to39     | 239927     |
| Cameroon | 1995           | FemaleAge40to44     | 237696     |
| Cameroon | 1995           | FemaleAge45to49     | 224027     |
| Cameroon | 1995           | FemaleAge50to54     | 199179     |
| Cameroon | 1995           | FemaleAge55to59     | 167217     |
| Cameroon | 1995           | FemaleAge5to9       | 1059423    |
| Cameroon | 1995           | FemaleAge60to64     | 136988     |
| Cameroon | 1995           | FemaleAge65to69     | 106456     |
| Cameroon | 1995           | FemaleAge70to74     | 75738      |
| Cameroon | 1995           | FemaleAge75to79     | 46910      |
| Cameroon | 1995           | FemaleAge80to84     | 23410      |
| Cameroon | 1995           | FemaleAge85to89     | 8483       |
| Cameroon | 1995           | FemaleAge90to94     | 2014       |
| Cameroon | 1995           | FemaleAge95to99     | 281        |
| Cameroon | 1995           | FemaleAgeAbov e100  | 22         |
| Cameroon | 1995           | FemaleLactAge15to19 | 118969     |
| Cameroon | 1995           | FemaleLactAge20to24 | 161738     |
| Cameroon | 1995           | FemaleLactAge25to29 | 127606     |
| Cameroon | 1995           | FemaleLactAge30to34 | 85559      |
| Cameroon | 1995           | FemaleLactAge35to39 | 47020      |
| Cameroon | 1995           | FemaleLactAge40to44 | 19583      |
| Cameroon | 1995           | FemaleLactAge45to49 | 5703       |
| Cameroon | 1995           | FemalePregAge15to19 | 89227      |
| Cameroon | 1995           | FemalePregAge20to24 | 121303     |
| Cameroon | 1995           | FemalePregAge25to29 | 95705      |
| Cameroon | 1995           | FemalePregAge30to34 | 64169      |
| Cameroon | 1995           | FemalePregAge35to39 | 35265      |
| Cameroon | 1995           | FemalePregAge40to44 | 14688      |
| Cameroon | 1995           | FemalePregAge45to49 | 4277       |
| Cameroon | 1995           | MaleAge0to4         | 1263882    |
| Cameroon | 1995           | MaleAge10to14       | 901644     |
| Cameroon | 1995           | MaleAge15to19       | 730097     |
| Cameroon | 1995           | MaleAge20to24       | 597244     |
| Cameroon | 1995           | MaleAge25to29       | 486018     |
| Cameroon | 1995           | MaleAge30to34       | 392520     |
| Cameroon | 1995           | MaleAge35to39       | 315797     |
| Cameroon | 1995           | MaleAge40to44       | 264327     |
| Cameroon | 1995           | MaleAge45to49       | 223301     |
| Cameroon | 1995           | MaleAge50to54       | 187168     |
| Cameroon | 1995           | MaleAge55to59       | 154166     |
| Cameroon | 1995           | MaleAge5to9         | 1070905    |
| Cameroon | 1995           | MaleAge60to64       | 123231     |
| Cameroon | 1995           | MaleAge65to69       | 92748      |
| Cameroon | 1995           | MaleAge70to74       | 63493      |
| Cameroon | 1995           | MaleAge75to79       | 37379      |

Dietary calcium and zinc deficiency risks are decreasing but remain prevalent

| Country  | Reference year | Age/gender group    | Population |
|----------|----------------|---------------------|------------|
| Cameroon | 1995           | MaleAge80to84       | 17324      |
| Cameroon | 1995           | MaleAge85to89       | 5598       |
| Cameroon | 1995           | MaleAge90to94       | 1095       |
| Cameroon | 1995           | MaleAge95to99       | 113        |
| Cameroon | 1995           | MaleAgeAbov e100    | 6          |
| Cameroon | 1996           | FemaleAge0to4       | 1269169    |
| Cameroon | 1996           | FemaleAge10to14     | 922446     |
| Cameroon | 1996           | FemaleAge15to19     | 524716     |
| Cameroon | 1996           | FemaleAge20to24     | 305219     |
| Cameroon | 1996           | FemaleAge25to29     | 257266     |
| Cameroon | 1996           | FemaleAge30to34     | 242880     |
| Cameroon | 1996           | FemaleAge35to39     | 242611     |
| Cameroon | 1996           | FemaleAge40to44     | 244227     |
| Cameroon | 1996           | FemaleAge45to49     | 228990     |
| Cameroon | 1996           | FemaleAge50to54     | 202800     |
| Cameroon | 1996           | FemaleAge55to59     | 170155     |
| Cameroon | 1996           | FemaleAge5to9       | 1087934    |
| Cameroon | 1996           | FemaleAge60to64     | 139283     |
| Cameroon | 1996           | FemaleAge65to69     | 108293     |
| Cameroon | 1996           | FemaleAge70to74     | 77208      |
| Cameroon | 1996           | FemaleAge75to79     | 48145      |
| Cameroon | 1996           | FemaleAge80to84     | 24476      |
| Cameroon | 1996           | FemaleAge85to89     | 9254       |
| Cameroon | 1996           | FemaleAge90to94     | 2354       |
| Cameroon | 1996           | FemaleAge95to99     | 315        |
| Cameroon | 1996           | FemaleAgeAbov e100  | 23         |
| Cameroon | 1996           | FemaleLactAge15to19 | 130118     |
| Cameroon | 1996           | FemaleLactAge20to24 | 178377     |
| Cameroon | 1996           | FemaleLactAge25to29 | 141797     |
| Cameroon | 1996           | FemaleLactAge30to34 | 95740      |
| Cameroon | 1996           | FemaleLactAge35to39 | 50767      |
| Cameroon | 1996           | FemaleLactAge40to44 | 18894      |
| Cameroon | 1996           | FemaleLactAge45to49 | 5150       |
| Cameroon | 1996           | FemalePregAge15to19 | 97588      |
| Cameroon | 1996           | FemalePregAge20to24 | 133783     |
| Cameroon | 1996           | FemalePregAge25to29 | 106348     |
| Cameroon | 1996           | FemalePregAge30to34 | 71805      |
| Cameroon | 1996           | FemalePregAge35to39 | 38075      |
| Cameroon | 1996           | FemalePregAge40to44 | 14171      |
| Cameroon | 1996           | FemalePregAge45to49 | 3863       |
| Cameroon | 1996           | MaleAge0to4         | 1290338    |
| Cameroon | 1996           | MaleAge10to14       | 931493     |
| Cameroon | 1996           | MaleAge15to19       | 757465     |
| Cameroon | 1996           | MaleAge20to24       | 616840     |
| Cameroon | 1996           | MaleAge25to29       | 502148     |
| Cameroon | 1996           | MaleAge30to34       | 405596     |
| Cameroon | 1996           | MaleAge35to39       | 325085     |
| Cameroon | 1996           | MaleAge40to44       | 269722     |
| Cameroon | 1996           | MaleAge45to49       | 227424     |
| Cameroon | 1996           | MaleAge50to54       | 190596     |
| Cameroon | 1996           | MaleAge55to59       | 156942     |
| Cameroon | 1996           | MaleAge5to9         | 1099891    |
| Cameroon | 1996           | MaleAge60to64       | 125387     |
| Cameroon | 1996           | MaleAge65to69       | 94478      |
| Cameroon | 1996           | MaleAge70to74       | 64839      |
| Cameroon | 1996           | MaleAge75to79       | 38511      |
| Cameroon | 1996           | MaleAge80to84       | 18269      |
| Cameroon | 1996           | MaleAge85to89       | 6220       |
| Cameroon | 1996           | MaleAge90to94       | 1328       |
| Cameroon | 1996           | MaleAge95to99       | 133        |
| Cameroon | 1996           | MaleAgeAbov e100    | 6          |
| Cameroon | 1997           | FemaleAge0to4       | 1292571    |
| Cameroon | 1997           | FemaleAge10to14     | 951789     |
| Cameroon | 1997           | FemaleAge15to19     | 554271     |
| Cameroon | 1997           | FemaleAge20to24     | 325145     |
| Cameroon | 1997           | FemaleAge25to29     | 274067     |
| Cameroon | 1997           | FemaleAge30to34     | 256286     |
| Cameroon | 1997           | FemaleAge35to39     | 252946     |
| Cameroon | 1997           | FemaleAge40to44     | 249899     |
| Cameroon | 1997           | FemaleAge45to49     | 233131     |
| Cameroon | 1997           | FemaleAge50to54     | 206626     |
| Cameroon | 1997           | FemaleAge55to59     | 173327     |
| Cameroon | 1997           | FemaleAge5to9       | 1114476    |
| Cameroon | 1997           | FemaleAge60to64     | 141814     |
| Cameroon | 1997           | FemaleAge65to69     | 110351     |
| Cameroon | 1997           | FemaleAge70to74     | 78780      |
| Cameroon | 1997           | FemaleAge75to79     | 49296      |
| Cameroon | 1997           | FemaleAge80to84     | 25323      |
| Cameroon | 1997           | FemaleAge85to89     | 9807       |
| Cameroon | 1997           | FemaleAge90to94     | 2596       |
| Cameroon | 1997           | FemaleAge95to99     | 375        |
| Cameroon | 1997           | FemaleAgeAbov e100  | 24         |
| Cameroon | 1997           | FemaleLactAge15to19 | 130118     |
| Cameroon | 1997           | FemaleLactAge20to24 | 178377     |
| Cameroon | 1997           | FemaleLactAge25to29 | 141797     |
| Cameroon | 1997           | FemaleLactAge30to34 | 95740      |
| Cameroon | 1997           | FemaleLactAge35to39 | 50767      |
| Cameroon | 1997           | FemaleLactAge40to44 | 18894      |

Dietary calcium and zinc deficiency risks are decreasing but remain prevalent

| Country  | Reference year | Age/gender group    | Population |
|----------|----------------|---------------------|------------|
| Cameroon | 1997           | FemaleLactAge45to49 | 5150       |
| Cameroon | 1997           | FemalePregAge15to19 | 97588      |
| Cameroon | 1997           | FemalePregAge20to24 | 133783     |
| Cameroon | 1997           | FemalePregAge25to29 | 106348     |
| Cameroon | 1997           | FemalePregAge30to34 | 71805      |
| Cameroon | 1997           | FemalePregAge35to39 | 38075      |
| Cameroon | 1997           | FemalePregAge40to44 | 14171      |
| Cameroon | 1997           | FemalePregAge45to49 | 3863       |
| Cameroon | 1997           | MaleAge0to4         | 1314375    |
| Cameroon | 1997           | MaleAge10to14       | 961044     |
| Cameroon | 1997           | MaleAge15to19       | 787477     |
| Cameroon | 1997           | MaleAge20to24       | 637248     |
| Cameroon | 1997           | MaleAge25to29       | 519129     |
| Cameroon | 1997           | MaleAge30to34       | 419298     |
| Cameroon | 1997           | MaleAge35to39       | 335587     |
| Cameroon | 1997           | MaleAge40to44       | 275417     |
| Cameroon | 1997           | MaleAge45to49       | 231866     |
| Cameroon | 1997           | MaleAge50to54       | 194221     |
| Cameroon | 1997           | MaleAge55to59       | 159966     |
| Cameroon | 1997           | MaleAge5to9         | 1127172    |
| Cameroon | 1997           | MaleAge60to64       | 127753     |
| Cameroon | 1997           | MaleAge65to69       | 96389      |
| Cameroon | 1997           | MaleAge70to74       | 66239      |
| Cameroon | 1997           | MaleAge75to79       | 39522      |
| Cameroon | 1997           | MaleAge80to84       | 19008      |
| Cameroon | 1997           | MaleAge85to89       | 6664       |
| Cameroon | 1997           | MaleAge90to94       | 1500       |
| Cameroon | 1997           | MaleAge95to99       | 170        |
| Cameroon | 1997           | MaleAgeAbov e100    | 7          |
| Cameroon | 1998           | FemaleAge0to4       | 1315474    |
| Cameroon | 1998           | FemaleAge10to14     | 980784     |
| Cameroon | 1998           | FemaleAge15to19     | 585359     |
| Cameroon | 1998           | FemaleAge20to24     | 346339     |
| Cameroon | 1998           | FemaleAge25to29     | 291761     |
| Cameroon | 1998           | FemaleAge30to34     | 270249     |
| Cameroon | 1998           | FemaleAge35to39     | 264205     |
| Cameroon | 1998           | FemaleAge40to44     | 256084     |
| Cameroon | 1998           | FemaleAge45to49     | 237486     |
| Cameroon | 1998           | FemaleAge50to54     | 210584     |
| Cameroon | 1998           | FemaleAge55to59     | 176700     |
| Cameroon | 1998           | FemaleAge5to9       | 1138435    |
| Cameroon | 1998           | FemaleAge60to64     | 144580     |
| Cameroon | 1998           | FemaleAge65to69     | 112650     |
| Cameroon | 1998           | FemaleAge70to74     | 80509      |
| Cameroon | 1998           | FemaleAge75to79     | 50434      |
| Cameroon | 1998           | FemaleAge80to84     | 25967      |
| Cameroon | 1998           | FemaleAge85to89     | 10094      |
| Cameroon | 1998           | FemaleAge90to94     | 2710       |
| Cameroon | 1998           | FemaleAge95to99     | 432        |
| Cameroon | 1998           | FemaleAgeAbov e100  | 25         |
| Cameroon | 1998           | FemaleLactAge15to19 | 130118     |
| Cameroon | 1998           | FemaleLactAge20to24 | 178377     |
| Cameroon | 1998           | FemaleLactAge25to29 | 141797     |
| Cameroon | 1998           | FemaleLactAge30to34 | 95740      |
| Cameroon | 1998           | FemaleLactAge35to39 | 50767      |
| Cameroon | 1998           | FemaleLactAge40to44 | 18894      |
| Cameroon | 1998           | FemaleLactAge45to49 | 5150       |
| Cameroon | 1998           | FemalePregAge15to19 | 97588      |
| Cameroon | 1998           | FemalePregAge20to24 | 133783     |
| Cameroon | 1998           | FemalePregAge25to29 | 106348     |
| Cameroon | 1998           | FemalePregAge30to34 | 71805      |
| Cameroon | 1998           | FemalePregAge35to39 | 38075      |
| Cameroon | 1998           | FemalePregAge40to44 | 14171      |
| Cameroon | 1998           | FemalePregAge45to49 | 3863       |
| Cameroon | 1998           | MaleAge0to4         | 1337594    |
| Cameroon | 1998           | MaleAge10to14       | 990286     |
| Cameroon | 1998           | MaleAge15to19       | 819256     |
| Cameroon | 1998           | MaleAge20to24       | 658954     |
| Cameroon | 1998           | MaleAge25to29       | 536939     |
| Cameroon | 1998           | MaleAge30to34       | 433649     |
| Cameroon | 1998           | MaleAge35to39       | 347112     |
| Cameroon | 1998           | MaleAge40to44       | 281628     |
| Cameroon | 1998           | MaleAge45to49       | 236627     |
| Cameroon | 1998           | MaleAge50to54       | 198012     |
| Cameroon | 1998           | MaleAge55to59       | 163198     |
| Cameroon | 1998           | MaleAge5to9         | 1152046    |
| Cameroon | 1998           | MaleAge60to64       | 130346     |
| Cameroon | 1998           | MaleAge65to69       | 98495      |
| Cameroon | 1998           | MaleAge70to74       | 67751      |
| Cameroon | 1998           | MaleAge75to79       | 40465      |
| Cameroon | 1998           | MaleAge80to84       | 19536      |
| Cameroon | 1998           | MaleAge85to89       | 6885       |
| Cameroon | 1998           | MaleAge90to94       | 1583       |
| Cameroon | 1998           | MaleAge95to99       | 205        |
| Cameroon | 1998           | MaleAgeAbov e100    | 7          |
| Cameroon | 1999           | FemaleAge0to4       | 1339821    |
| Cameroon | 1999           | FemaleAge10to14     | 1008885    |
| Cameroon | 1999           | FemaleAge15to19     | 616615     |

Dietary calcium and zinc deficiency risks are decreasing but remain prevalent

| Country  | Reference year | Age/gender group    | Population |
|----------|----------------|---------------------|------------|
| Cameroon | 1999           | FemaleAge20to24     | 369544     |
| Cameroon | 1999           | FemaleAge25to29     | 310220     |
| Cameroon | 1999           | FemaleAge30to34     | 284848     |
| Cameroon | 1999           | FemaleAge35to39     | 276054     |
| Cameroon | 1999           | FemaleAge40to44     | 263054     |
| Cameroon | 1999           | FemaleAge45to49     | 242091     |
| Cameroon | 1999           | FemaleAge50to54     | 214574     |
| Cameroon | 1999           | FemaleAge55to59     | 180228     |
| Cameroon | 1999           | FemaleAge5to9       | 1159807    |
| Cameroon | 1999           | FemaleAge60to64     | 147576     |
| Cameroon | 1999           | FemaleAge65to69     | 115179     |
| Cameroon | 1999           | FemaleAge70to74     | 82427      |
| Cameroon | 1999           | FemaleAge75to79     | 51610      |
| Cameroon | 1999           | FemaleAge80to84     | 26439      |
| Cameroon | 1999           | FemaleAge85to89     | 10116      |
| Cameroon | 1999           | FemaleAge90to94     | 2663       |
| Cameroon | 1999           | FemaleAge95to99     | 443        |
| Cameroon | 1999           | FemaleAgeAbov e100  | 27         |
| Cameroon | 1999           | FemaleLactAge15to19 | 130118     |
| Cameroon | 1999           | FemaleLactAge20to24 | 178377     |
| Cameroon | 1999           | FemaleLactAge25to29 | 141797     |
| Cameroon | 1999           | FemaleLactAge30to34 | 95740      |
| Cameroon | 1999           | FemaleLactAge35to39 | 50767      |
| Cameroon | 1999           | FemaleLactAge40to44 | 18894      |
| Cameroon | 1999           | FemaleLactAge45to49 | 5150       |
| Cameroon | 1999           | FemalePregAge15to19 | 97588      |
| Cameroon | 1999           | FemalePregAge20to24 | 133783     |
| Cameroon | 1999           | FemalePregAge25to29 | 106348     |
| Cameroon | 1999           | FemalePregAge30to34 | 71805      |
| Cameroon | 1999           | FemalePregAge35to39 | 38075      |
| Cameroon | 1999           | FemalePregAge40to44 | 14171      |
| Cameroon | 1999           | FemalePregAge45to49 | 3863       |
| Cameroon | 1999           | MaleAge0to4         | 1362288    |
| Cameroon | 1999           | MaleAge10to14       | 1018740    |
| Cameroon | 1999           | MaleAge15to19       | 851346     |
| Cameroon | 1999           | MaleAge20to24       | 682677     |
| Cameroon | 1999           | MaleAge25to29       | 555511     |
| Cameroon | 1999           | MaleAge30to34       | 448656     |
| Cameroon | 1999           | MaleAge35to39       | 359300     |
| Cameroon | 1999           | MaleAge40to44       | 288693     |
| Cameroon | 1999           | MaleAge45to49       | 241638     |
| Cameroon | 1999           | MaleAge50to54       | 201940     |
| Cameroon | 1999           | MaleAge55to59       | 166585     |
| Cameroon | 1999           | MaleAge5to9         | 1174334    |
| Cameroon | 1999           | MaleAge60to64       | 133163     |
| Cameroon | 1999           | MaleAge65to69       | 100787     |
| Cameroon | 1999           | MaleAge70to74       | 69407      |
| Cameroon | 1999           | MaleAge75to79       | 41385      |
| Cameroon | 1999           | MaleAge80to84       | 19869      |
| Cameroon | 1999           | MaleAge85to89       | 6873       |
| Cameroon | 1999           | MaleAge90to94       | 1547       |
| Cameroon | 1999           | MaleAge95to99       | 211        |
| Cameroon | 1999           | MaleAgeAbov e100    | 8          |
| Cameroon | 2000           | FemaleAge0to4       | 1367370    |
| Cameroon | 2000           | FemaleAge10to14     | 1034995    |
| Cameroon | 2000           | FemaleAge15to19     | 647157     |
| Cameroon | 2000           | FemaleAge20to24     | 395105     |
| Cameroon | 2000           | FemaleAge25to29     | 329390     |
| Cameroon | 2000           | FemaleAge30to34     | 300157     |
| Cameroon | 2000           | FemaleAge35to39     | 288271     |
| Cameroon | 2000           | FemaleAge40to44     | 270975     |
| Cameroon | 2000           | FemaleAge45to49     | 246957     |
| Cameroon | 2000           | FemaleAge50to54     | 218554     |
| Cameroon | 2000           | FemaleAge55to59     | 183872     |
| Cameroon | 2000           | FemaleAge5to9       | 1179073    |
| Cameroon | 2000           | FemaleAge60to64     | 150774     |
| Cameroon | 2000           | FemaleAge65to69     | 117921     |
| Cameroon | 2000           | FemaleAge70to74     | 84548      |
| Cameroon | 2000           | FemaleAge75to79     | 52874      |
| Cameroon | 2000           | FemaleAge80to84     | 26805      |
| Cameroon | 2000           | FemaleAge85to89     | 9902       |
| Cameroon | 2000           | FemaleAge90to94     | 2403       |
| Cameroon | 2000           | FemaleAge95to99     | 345        |
| Cameroon | 2000           | FemaleAgeAbov e100  | 28         |
| Cameroon | 2000           | FemaleLactAge15to19 | 130118     |
| Cameroon | 2000           | FemaleLactAge20to24 | 178377     |
| Cameroon | 2000           | FemaleLactAge25to29 | 141797     |
| Cameroon | 2000           | FemaleLactAge30to34 | 95740      |
| Cameroon | 2000           | FemaleLactAge35to39 | 50767      |
| Cameroon | 2000           | FemaleLactAge40to44 | 18894      |
| Cameroon | 2000           | FemaleLactAge45to49 | 5150       |
| Cameroon | 2000           | FemalePregAge15to19 | 97588      |
| Cameroon | 2000           | FemalePregAge20to24 | 133783     |
| Cameroon | 2000           | FemalePregAge25to29 | 106348     |
| Cameroon | 2000           | FemalePregAge30to34 | 71805      |
| Cameroon | 2000           | FemalePregAge35to39 | 38075      |
| Cameroon | 2000           | FemalePregAge40to44 | 14171      |
| Cameroon | 2000           | FemalePregAge45to49 | 3863       |

Dietary calcium and zinc deficiency risks are decreasing but remain prevalent

| Country  | Reference year | Age/gender group    | Population |
|----------|----------------|---------------------|------------|
| Cameroon | 2000           | MaleAge0to4         | 1390515    |
| Cameroon | 2000           | MaleAge10to14       | 1045368    |
| Cameroon | 2000           | MaleAge15to19       | 882733     |
| Cameroon | 2000           | MaleAge20to24       | 708825     |
| Cameroon | 2000           | MaleAge25to29       | 574850     |
| Cameroon | 2000           | MaleAge30to34       | 464312     |
| Cameroon | 2000           | MaleAge35to39       | 371915     |
| Cameroon | 2000           | MaleAge40to44       | 296825     |
| Cameroon | 2000           | MaleAge45to49       | 246844     |
| Cameroon | 2000           | MaleAge50to54       | 206012     |
| Cameroon | 2000           | MaleAge55to59       | 170085     |
| Cameroon | 2000           | MaleAge5to9         | 1194300    |
| Cameroon | 2000           | MaleAge60to64       | 136175     |
| Cameroon | 2000           | MaleAge65to69       | 103261     |
| Cameroon | 2000           | MaleAge70to74       | 71221      |
| Cameroon | 2000           | MaleAge75to79       | 42337      |
| Cameroon | 2000           | MaleAge80to84       | 20057      |
| Cameroon | 2000           | MaleAge85to89       | 6640       |
| Cameroon | 2000           | MaleAge90to94       | 1337       |
| Cameroon | 2000           | MaleAge95to99       | 143        |
| Cameroon | 2000           | MaleAgeAbov e100    | 8          |
| Canada   | 1992           | FemaleAge0to4       | 956134     |
| Canada   | 1992           | FemaleAge10to14     | 939799     |
| Canada   | 1992           | FemaleAge15to19     | 902346     |
| Canada   | 1992           | FemaleAge20to24     | 870486     |
| Canada   | 1992           | FemaleAge25to29     | 961203     |
| Canada   | 1992           | FemaleAge30to34     | 1107927    |
| Canada   | 1992           | FemaleAge35to39     | 1140170    |
| Canada   | 1992           | FemaleAge40to44     | 1076541    |
| Canada   | 1992           | FemaleAge45to49     | 886731     |
| Canada   | 1992           | FemaleAge50to54     | 693643     |
| Canada   | 1992           | FemaleAge55to59     | 624991     |
| Canada   | 1992           | FemaleAge5to9       | 957039     |
| Canada   | 1992           | FemaleAge60to64     | 609797     |
| Canada   | 1992           | FemaleAge65to69     | 589544     |
| Canada   | 1992           | FemaleAge70to74     | 485148     |
| Canada   | 1992           | FemaleAge75to79     | 367233     |
| Canada   | 1992           | FemaleAge80to84     | 248446     |
| Canada   | 1992           | FemaleAge85to89     | 132745     |
| Canada   | 1992           | FemaleAge90to94     | 56288      |
| Canada   | 1992           | FemaleAge95to99     | 15148      |
| Canada   | 1992           | FemaleAgeAbov e100  | 2164       |
| Canada   | 1992           | FemaleLactAge15to19 | 23948      |
| Canada   | 1992           | FemaleLactAge20to24 | 77018      |
| Canada   | 1992           | FemaleLactAge25to29 | 139412     |
| Canada   | 1992           | FemaleLactAge30to34 | 109366     |
| Canada   | 1992           | FemaleLactAge35to39 | 35566      |
| Canada   | 1992           | FemaleLactAge40to44 | 4691       |
| Canada   | 1992           | FemaleLactAge45to49 | 133        |
| Canada   | 1992           | FemalePregAge15to19 | 17961      |
| Canada   | 1992           | FemalePregAge20to24 | 57763      |
| Canada   | 1992           | FemalePregAge25to29 | 104559     |
| Canada   | 1992           | FemalePregAge30to34 | 82025      |
| Canada   | 1992           | FemalePregAge35to39 | 26674      |
| Canada   | 1992           | FemalePregAge40to44 | 3518       |
| Canada   | 1992           | FemalePregAge45to49 | 100        |
| Canada   | 1992           | MaleAge0to4         | 1002330    |
| Canada   | 1992           | MaleAge10to14       | 991633     |
| Canada   | 1992           | MaleAge15to19       | 992992     |
| Canada   | 1992           | MaleAge20to24       | 1040773    |
| Canada   | 1992           | MaleAge25to29       | 1235683    |
| Canada   | 1992           | MaleAge30to34       | 1317245    |
| Canada   | 1992           | MaleAge35to39       | 1201269    |
| Canada   | 1992           | MaleAge40to44       | 1086353    |
| Canada   | 1992           | MaleAge45to49       | 895967     |
| Canada   | 1992           | MaleAge50to54       | 697188     |
| Canada   | 1992           | MaleAge55to59       | 620665     |
| Canada   | 1992           | MaleAge5to9         | 1007102    |
| Canada   | 1992           | MaleAge60to64       | 579390     |
| Canada   | 1992           | MaleAge65to69       | 505593     |
| Canada   | 1992           | MaleAge70to74       | 375270     |
| Canada   | 1992           | MaleAge75to79       | 254540     |
| Canada   | 1992           | MaleAge80to84       | 148197     |
| Canada   | 1992           | MaleAge85to89       | 64443      |
| Canada   | 1992           | MaleAge90to94       | 21489      |
| Canada   | 1992           | MaleAge95to99       | 4295       |
| Canada   | 1992           | MaleAgeAbov e100    | 553        |
| Canada   | 1993           | FemaleAge0to4       | 966220     |
| Canada   | 1993           | FemaleAge10to14     | 952113     |
| Canada   | 1993           | FemaleAge15to19     | 906580     |
| Canada   | 1993           | FemaleAge20to24     | 861597     |
| Canada   | 1993           | FemaleAge25to29     | 915921     |
| Canada   | 1993           | FemaleAge30to34     | 1118474    |
| Canada   | 1993           | FemaleAge35to39     | 1170362    |
| Canada   | 1993           | FemaleAge40to44     | 1099452    |
| Canada   | 1993           | FemaleAge45to49     | 938117     |
| Canada   | 1993           | FemaleAge50to54     | 722314     |
| Canada   | 1993           | FemaleAge55to59     | 629724     |



Dietary calcium and zinc deficiency risks are decreasing but remain prevalent

| Country | Reference year | Age/gender group    | Population |
|---------|----------------|---------------------|------------|
| Canada  | 1993           | FemaleAge5to9       | 963160     |
| Canada  | 1993           | FemaleAge60to64     | 610850     |
| Canada  | 1993           | FemaleAge65to69     | 588505     |
| Canada  | 1993           | FemaleAge70to74     | 505148     |
| Canada  | 1993           | FemaleAge75to79     | 371331     |
| Canada  | 1993           | FemaleAge80to84     | 259473     |
| Canada  | 1993           | FemaleAge85to89     | 138027     |
| Canada  | 1993           | FemaleAge90to94     | 58339      |
| Canada  | 1993           | FemaleAge95to99     | 16231      |
| Canada  | 1993           | FemaleAgeAbove100   | 2278       |
| Canada  | 1993           | FemaleLactAge15to19 | 23948      |
| Canada  | 1993           | FemaleLactAge20to24 | 77018      |
| Canada  | 1993           | FemaleLactAge25to29 | 139412     |
| Canada  | 1993           | FemaleLactAge30to34 | 109366     |
| Canada  | 1993           | FemaleLactAge35to39 | 35566      |
| Canada  | 1993           | FemaleLactAge40to44 | 4691       |
| Canada  | 1993           | FemaleLactAge45to49 | 133        |
| Canada  | 1993           | FemalePregAge15to19 | 17961      |
| Canada  | 1993           | FemalePregAge20to24 | 57763      |
| Canada  | 1993           | FemalePregAge25to29 | 104559     |
| Canada  | 1993           | FemalePregAge30to34 | 82025      |
| Canada  | 1993           | FemalePregAge35to39 | 26674      |
| Canada  | 1993           | FemalePregAge40to44 | 3518       |
| Canada  | 1993           | FemalePregAge45to49 | 100        |
| Canada  | 1993           | MaleAge0to4         | 1013898    |
| Canada  | 1993           | MaleAge10to14       | 1004791    |
| Canada  | 1993           | MaleAge15to19       | 997935     |
| Canada  | 1993           | MaleAge20to24       | 1031346    |
| Canada  | 1993           | MaleAge25to29       | 1187418    |
| Canada  | 1993           | MaleAge30to34       | 1330645    |
| Canada  | 1993           | MaleAge35to39       | 1232554    |
| Canada  | 1993           | MaleAge40to44       | 1104653    |
| Canada  | 1993           | MaleAge45to49       | 943918     |
| Canada  | 1993           | MaleAge50to54       | 724077     |
| Canada  | 1993           | MaleAge55to59       | 623272     |
| Canada  | 1993           | MaleAge5to9         | 1012431    |
| Canada  | 1993           | MaleAge60to64       | 584170     |
| Canada  | 1993           | MaleAge65to69       | 511422     |
| Canada  | 1993           | MaleAge70to74       | 391180     |
| Canada  | 1993           | MaleAge75to79       | 256696     |
| Canada  | 1993           | MaleAge80to84       | 154892     |
| Canada  | 1993           | MaleAge85to89       | 66459      |
| Canada  | 1993           | MaleAge90to94       | 22464      |
| Canada  | 1993           | MaleAge95to99       | 4603       |
| Canada  | 1993           | MaleAgeAbove100     | 550        |
| Canada  | 1994           | FemaleAge0to4       | 971322     |
| Canada  | 1994           | FemaleAge10to14     | 963118     |
| Canada  | 1994           | FemaleAge15to19     | 913025     |
| Canada  | 1994           | FemaleAge20to24     | 856463     |
| Canada  | 1994           | FemaleAge25to29     | 873407     |
| Canada  | 1994           | FemaleAge30to34     | 1118099    |
| Canada  | 1994           | FemaleAge35to39     | 1198108    |
| Canada  | 1994           | FemaleAge40to44     | 1122395    |
| Canada  | 1994           | FemaleAge45to49     | 986359     |
| Canada  | 1994           | FemaleAge50to54     | 755586     |
| Canada  | 1994           | FemaleAge55to59     | 638786     |
| Canada  | 1994           | FemaleAge5to9       | 967474     |
| Canada  | 1994           | FemaleAge60to64     | 612479     |
| Canada  | 1994           | FemaleAge65to69     | 587412     |
| Canada  | 1994           | FemaleAge70to74     | 522700     |
| Canada  | 1994           | FemaleAge75to79     | 378938     |
| Canada  | 1994           | FemaleAge80to84     | 269294     |
| Canada  | 1994           | FemaleAge85to89     | 143975     |
| Canada  | 1994           | FemaleAge90to94     | 59733      |
| Canada  | 1994           | FemaleAge95to99     | 16700      |
| Canada  | 1994           | FemaleAgeAbove100   | 2381       |
| Canada  | 1994           | FemaleLactAge15to19 | 23948      |
| Canada  | 1994           | FemaleLactAge20to24 | 77018      |
| Canada  | 1994           | FemaleLactAge25to29 | 139412     |
| Canada  | 1994           | FemaleLactAge30to34 | 109366     |
| Canada  | 1994           | FemaleLactAge35to39 | 35566      |
| Canada  | 1994           | FemaleLactAge40to44 | 4691       |
| Canada  | 1994           | FemaleLactAge45to49 | 133        |
| Canada  | 1994           | FemalePregAge15to19 | 17961      |
| Canada  | 1994           | FemalePregAge20to24 | 57763      |
| Canada  | 1994           | FemalePregAge25to29 | 104559     |
| Canada  | 1994           | FemalePregAge30to34 | 82025      |
| Canada  | 1994           | FemalePregAge35to39 | 26674      |
| Canada  | 1994           | FemalePregAge40to44 | 3518       |
| Canada  | 1994           | FemalePregAge45to49 | 100        |
| Canada  | 1994           | MaleAge0to4         | 1020419    |
| Canada  | 1994           | MaleAge10to14       | 1015764    |
| Canada  | 1994           | MaleAge15to19       | 1007142    |
| Canada  | 1994           | MaleAge20to24       | 1025711    |
| Canada  | 1994           | MaleAge25to29       | 1141888    |
| Canada  | 1994           | MaleAge30to34       | 1332724    |
| Canada  | 1994           | MaleAge35to39       | 1262012    |
| Canada  | 1994           | MaleAge40to44       | 1124345    |

Dietary calcium and zinc deficiency risks are decreasing but remain prevalent

| Country | Reference year | Age/gender group    | Population |
|---------|----------------|---------------------|------------|
| Canada  | 1994           | MaleAge45to49       | 988827     |
| Canada  | 1994           | MaleAge50to54       | 755411     |
| Canada  | 1994           | MaleAge55to59       | 629925     |
| Canada  | 1994           | MaleAge5to9         | 1016142    |
| Canada  | 1994           | MaleAge60to64       | 589000     |
| Canada  | 1994           | MaleAge65to69       | 517425     |
| Canada  | 1994           | MaleAge70to74       | 406312     |
| Canada  | 1994           | MaleAge75to79       | 261738     |
| Canada  | 1994           | MaleAge80to84       | 159865     |
| Canada  | 1994           | MaleAge85to89       | 68277      |
| Canada  | 1994           | MaleAge90to94       | 22584      |
| Canada  | 1994           | MaleAge95to99       | 4694       |
| Canada  | 1994           | MaleAgeAbov e100    | 546        |
| Canada  | 1995           | FemaleAge0to4       | 967737     |
| Canada  | 1995           | FemaleAge10to14     | 972193     |
| Canada  | 1995           | FemaleAge15to19     | 921227     |
| Canada  | 1995           | FemaleAge20to24     | 853042     |
| Canada  | 1995           | FemaleAge25to29     | 840047     |
| Canada  | 1995           | FemaleAge30to34     | 1104898    |
| Canada  | 1995           | FemaleAge35to39     | 1221644    |
| Canada  | 1995           | FemaleAge40to44     | 1148679    |
| Canada  | 1995           | FemaleAge45to49     | 1028180    |
| Canada  | 1995           | FemaleAge50to54     | 793844     |
| Canada  | 1995           | FemaleAge55to59     | 653196     |
| Canada  | 1995           | FemaleAge5to9       | 971647     |
| Canada  | 1995           | FemaleAge60to64     | 614694     |
| Canada  | 1995           | FemaleAge65to69     | 587861     |
| Canada  | 1995           | FemaleAge70to74     | 535717     |
| Canada  | 1995           | FemaleAge75to79     | 391447     |
| Canada  | 1995           | FemaleAge80to84     | 277676     |
| Canada  | 1995           | FemaleAge85to89     | 150809     |
| Canada  | 1995           | FemaleAge90to94     | 60859      |
| Canada  | 1995           | FemaleAge95to99     | 16032      |
| Canada  | 1995           | FemaleAgeAbov e100  | 2471       |
| Canada  | 1995           | FemaleLactAge15to19 | 23948      |
| Canada  | 1995           | FemaleLactAge20to24 | 77018      |
| Canada  | 1995           | FemaleLactAge25to29 | 139412     |
| Canada  | 1995           | FemaleLactAge30to34 | 109366     |
| Canada  | 1995           | FemaleLactAge35to39 | 35566      |
| Canada  | 1995           | FemaleLactAge40to44 | 4691       |
| Canada  | 1995           | FemaleLactAge45to49 | 133        |
| Canada  | 1995           | FemalePregAge15to19 | 17961      |
| Canada  | 1995           | FemalePregAge20to24 | 57763      |
| Canada  | 1995           | FemalePregAge25to29 | 104559     |
| Canada  | 1995           | FemalePregAge30to34 | 82025      |
| Canada  | 1995           | FemalePregAge35to39 | 26674      |
| Canada  | 1995           | FemalePregAge40to44 | 3518       |
| Canada  | 1995           | FemalePregAge45to49 | 100        |
| Canada  | 1995           | MaleAge0to4         | 1017398    |
| Canada  | 1995           | MaleAge10to14       | 1024528    |
| Canada  | 1995           | MaleAge15to19       | 1019105    |
| Canada  | 1995           | MaleAge20to24       | 1022616    |
| Canada  | 1995           | MaleAge25to29       | 1106312    |
| Canada  | 1995           | MaleAge30to34       | 1320977    |
| Canada  | 1995           | MaleAge35to39       | 1287964    |
| Canada  | 1995           | MaleAge40to44       | 1149184    |
| Canada  | 1995           | MaleAge45to49       | 1027559    |
| Canada  | 1995           | MaleAge50to54       | 791601     |
| Canada  | 1995           | MaleAge55to59       | 642312     |
| Canada  | 1995           | MaleAge5to9         | 1020352    |
| Canada  | 1995           | MaleAge60to64       | 593646     |
| Canada  | 1995           | MaleAge65to69       | 524434     |
| Canada  | 1995           | MaleAge70to74       | 419623     |
| Canada  | 1995           | MaleAge75to79       | 270747     |
| Canada  | 1995           | MaleAge80to84       | 163240     |
| Canada  | 1995           | MaleAge85to89       | 70112      |
| Canada  | 1995           | MaleAge90to94       | 21847      |
| Canada  | 1995           | MaleAge95to99       | 4166       |
| Canada  | 1995           | MaleAgeAbov e100    | 541        |
| Canada  | 1996           | FemaleAge0to4       | 965110     |
| Canada  | 1996           | FemaleAge10to14     | 981786     |
| Canada  | 1996           | FemaleAge15to19     | 938406     |
| Canada  | 1996           | FemaleAge20to24     | 873173     |
| Canada  | 1996           | FemaleAge25to29     | 867509     |
| Canada  | 1996           | FemaleAge30to34     | 1091449    |
| Canada  | 1996           | FemaleAge35to39     | 1228950    |
| Canada  | 1996           | FemaleAge40to44     | 1173731    |
| Canada  | 1996           | FemaleAge45to49     | 1061741    |
| Canada  | 1996           | FemaleAge50to54     | 835863     |
| Canada  | 1996           | FemaleAge55to59     | 669561     |
| Canada  | 1996           | FemaleAge5to9       | 977002     |
| Canada  | 1996           | FemaleAge60to64     | 615099     |
| Canada  | 1996           | FemaleAge65to69     | 586294     |
| Canada  | 1996           | FemaleAge70to74     | 541291     |
| Canada  | 1996           | FemaleAge75to79     | 404897     |
| Canada  | 1996           | FemaleAge80to84     | 282702     |
| Canada  | 1996           | FemaleAge85to89     | 158046     |
| Canada  | 1996           | FemaleAge90to94     | 65331      |

Dietary calcium and zinc deficiency risks are decreasing but remain prevalent

| Country | Reference year | Age/gender group    | Population |
|---------|----------------|---------------------|------------|
| Canada  | 1996           | FemaleAge95to99     | 16945      |
| Canada  | 1996           | FemaleAgeAbov e100  | 2547       |
| Canada  | 1996           | FemaleLactAge15to19 | 19922      |
| Canada  | 1996           | FemaleLactAge20to24 | 64376      |
| Canada  | 1996           | FemaleLactAge25to29 | 109727     |
| Canada  | 1996           | FemaleLactAge30to34 | 103531     |
| Canada  | 1996           | FemaleLactAge35to39 | 42747      |
| Canada  | 1996           | FemaleLactAge40to44 | 6465       |
| Canada  | 1996           | FemaleLactAge45to49 | 229        |
| Canada  | 1996           | FemalePregAge15to19 | 14942      |
| Canada  | 1996           | FemalePregAge20to24 | 48282      |
| Canada  | 1996           | FemalePregAge25to29 | 82295      |
| Canada  | 1996           | FemalePregAge30to34 | 77648      |
| Canada  | 1996           | FemalePregAge35to39 | 32060      |
| Canada  | 1996           | FemalePregAge40to44 | 4849       |
| Canada  | 1996           | FemalePregAge45to49 | 172        |
| Canada  | 1996           | MaleAge0to4         | 1014471    |
| Canada  | 1996           | MaleAge10to14       | 1033878    |
| Canada  | 1996           | MaleAge15to19       | 1028816    |
| Canada  | 1996           | MaleAge20to24       | 1022881    |
| Canada  | 1996           | MaleAge25to29       | 1081444    |
| Canada  | 1996           | MaleAge30to34       | 1296911    |
| Canada  | 1996           | MaleAge35to39       | 1310451    |
| Canada  | 1996           | MaleAge40to44       | 1175996    |
| Canada  | 1996           | MaleAge45to49       | 1058192    |
| Canada  | 1996           | MaleAge50to54       | 832578     |
| Canada  | 1996           | MaleAge55to59       | 657133     |
| Canada  | 1996           | MaleAge5to9         | 1025179    |
| Canada  | 1996           | MaleAge60to64       | 593913     |
| Canada  | 1996           | MaleAge65to69       | 528319     |
| Canada  | 1996           | MaleAge70to74       | 428224     |
| Canada  | 1996           | MaleAge75to79       | 281336     |
| Canada  | 1996           | MaleAge80to84       | 167286     |
| Canada  | 1996           | MaleAge85to89       | 75455      |
| Canada  | 1996           | MaleAge90to94       | 24205      |
| Canada  | 1996           | MaleAge95to99       | 4486       |
| Canada  | 1996           | MaleAgeAbov e100    | 536        |
| Canada  | 1997           | FemaleAge0to4       | 948327     |
| Canada  | 1997           | FemaleAge10to14     | 989130     |
| Canada  | 1997           | FemaleAge15to19     | 950180     |
| Canada  | 1997           | FemaleAge20to24     | 874849     |
| Canada  | 1997           | FemaleAge25to29     | 851491     |
| Canada  | 1997           | FemaleAge30to34     | 1055670    |
| Canada  | 1997           | FemaleAge35to39     | 1246897    |
| Canada  | 1997           | FemaleAge40to44     | 1204409    |
| Canada  | 1997           | FemaleAge45to49     | 1088791    |
| Canada  | 1997           | FemaleAge50to54     | 884060     |
| Canada  | 1997           | FemaleAge55to59     | 690535     |
| Canada  | 1997           | FemaleAge5to9       | 982976     |
| Canada  | 1997           | FemaleAge60to64     | 616736     |
| Canada  | 1997           | FemaleAge65to69     | 586400     |
| Canada  | 1997           | FemaleAge70to74     | 543505     |
| Canada  | 1997           | FemaleAge75to79     | 422222     |
| Canada  | 1997           | FemaleAge80to84     | 286878     |
| Canada  | 1997           | FemaleAge85to89     | 165505     |
| Canada  | 1997           | FemaleAge90to94     | 68673      |
| Canada  | 1997           | FemaleAge95to99     | 18232      |
| Canada  | 1997           | FemaleAgeAbov e100  | 2611       |
| Canada  | 1997           | FemaleLactAge15to19 | 19922      |
| Canada  | 1997           | FemaleLactAge20to24 | 64376      |
| Canada  | 1997           | FemaleLactAge25to29 | 109727     |
| Canada  | 1997           | FemaleLactAge30to34 | 103531     |
| Canada  | 1997           | FemaleLactAge35to39 | 42747      |
| Canada  | 1997           | FemaleLactAge40to44 | 6465       |
| Canada  | 1997           | FemaleLactAge45to49 | 229        |
| Canada  | 1997           | FemalePregAge15to19 | 14942      |
| Canada  | 1997           | FemalePregAge20to24 | 48282      |
| Canada  | 1997           | FemalePregAge25to29 | 82295      |
| Canada  | 1997           | FemalePregAge30to34 | 77648      |
| Canada  | 1997           | FemalePregAge35to39 | 32060      |
| Canada  | 1997           | FemalePregAge40to44 | 4849       |
| Canada  | 1997           | FemalePregAge45to49 | 172        |
| Canada  | 1997           | MaleAge0to4         | 996119     |
| Canada  | 1997           | MaleAge10to14       | 1041348    |
| Canada  | 1997           | MaleAge15to19       | 1040362    |
| Canada  | 1997           | MaleAge20to24       | 1027582    |
| Canada  | 1997           | MaleAge25to29       | 1066093    |
| Canada  | 1997           | MaleAge30to34       | 1259804    |
| Canada  | 1997           | MaleAge35to39       | 1332318    |
| Canada  | 1997           | MaleAge40to44       | 1206900    |
| Canada  | 1997           | MaleAge45to49       | 1081852    |
| Canada  | 1997           | MaleAge50to54       | 880102     |
| Canada  | 1997           | MaleAge55to59       | 677691     |
| Canada  | 1997           | MaleAge5to9         | 1031184    |
| Canada  | 1997           | MaleAge60to64       | 594305     |
| Canada  | 1997           | MaleAge65to69       | 533469     |
| Canada  | 1997           | MaleAge70to74       | 435787     |
| Canada  | 1997           | MaleAge75to79       | 294431     |

Dietary calcium and zinc deficiency risks are decreasing but remain prevalent

| Country | Reference year | Age/gender group    | Population |
|---------|----------------|---------------------|------------|
| Canada  | 1997           | MaleAge80to84       | 170127     |
| Canada  | 1997           | MaleAge85to89       | 80348      |
| Canada  | 1997           | MaleAge90to94       | 25751      |
| Canada  | 1997           | MaleAge95to99       | 5075       |
| Canada  | 1997           | MaleAgeAbov e100    | 532        |
| Canada  | 1998           | FemaleAge0to4       | 922445     |
| Canada  | 1998           | FemaleAge10to14     | 994141     |
| Canada  | 1998           | FemaleAge15to19     | 962455     |
| Canada  | 1998           | FemaleAge20to24     | 880173     |
| Canada  | 1998           | FemaleAge25to29     | 842084     |
| Canada  | 1998           | FemaleAge30to34     | 1013440    |
| Canada  | 1998           | FemaleAge35to39     | 1259822    |
| Canada  | 1998           | FemaleAge40to44     | 1235839    |
| Canada  | 1998           | FemaleAge45to49     | 1112097    |
| Canada  | 1998           | FemaleAge50to54     | 934818     |
| Canada  | 1998           | FemaleAge55to59     | 716476     |
| Canada  | 1998           | FemaleAge5to9       | 989291     |
| Canada  | 1998           | FemaleAge60to64     | 620693     |
| Canada  | 1998           | FemaleAge65to69     | 587843     |
| Canada  | 1998           | FemaleAge70to74     | 543885     |
| Canada  | 1998           | FemaleAge75to79     | 440814     |
| Canada  | 1998           | FemaleAge80to84     | 292257     |
| Canada  | 1998           | FemaleAge85to89     | 172818     |
| Canada  | 1998           | FemaleAge90to94     | 70966      |
| Canada  | 1998           | FemaleAge95to99     | 19390      |
| Canada  | 1998           | FemaleAgeAbov e100  | 2670       |
| Canada  | 1998           | FemaleLactAge15to19 | 19922      |
| Canada  | 1998           | FemaleLactAge20to24 | 64376      |
| Canada  | 1998           | FemaleLactAge25to29 | 109727     |
| Canada  | 1998           | FemaleLactAge30to34 | 103531     |
| Canada  | 1998           | FemaleLactAge35to39 | 42747      |
| Canada  | 1998           | FemaleLactAge40to44 | 6465       |
| Canada  | 1998           | FemaleLactAge45to49 | 229        |
| Canada  | 1998           | FemalePregAge15to19 | 14942      |
| Canada  | 1998           | FemalePregAge20to24 | 48282      |
| Canada  | 1998           | FemalePregAge25to29 | 82295      |
| Canada  | 1998           | FemalePregAge30to34 | 77648      |
| Canada  | 1998           | FemalePregAge35to39 | 32060      |
| Canada  | 1998           | FemalePregAge40to44 | 4849       |
| Canada  | 1998           | FemalePregAge45to49 | 172        |
| Canada  | 1998           | MaleAge0to4         | 967791     |
| Canada  | 1998           | MaleAge10to14       | 1046217    |
| Canada  | 1998           | MaleAge15to19       | 1053222    |
| Canada  | 1998           | MaleAge20to24       | 1036129    |
| Canada  | 1998           | MaleAge25to29       | 1058109    |
| Canada  | 1998           | MaleAge30to34       | 1215848    |
| Canada  | 1998           | MaleAge35to39       | 1349662    |
| Canada  | 1998           | MaleAge40to44       | 1240021    |
| Canada  | 1998           | MaleAge45to49       | 1101815    |
| Canada  | 1998           | MaleAge50to54       | 930269     |
| Canada  | 1998           | MaleAge55to59       | 704079     |
| Canada  | 1998           | MaleAge5to9         | 1038082    |
| Canada  | 1998           | MaleAge60to64       | 596484     |
| Canada  | 1998           | MaleAge65to69       | 539353     |
| Canada  | 1998           | MaleAge70to74       | 443019     |
| Canada  | 1998           | MaleAge75to79       | 308699     |
| Canada  | 1998           | MaleAge80to84       | 173282     |
| Canada  | 1998           | MaleAge85to89       | 84181      |
| Canada  | 1998           | MaleAge90to94       | 26500      |
| Canada  | 1998           | MaleAge95to99       | 5609       |
| Canada  | 1998           | MaleAgeAbov e100    | 529        |
| Canada  | 1999           | FemaleAge0to4       | 896036     |
| Canada  | 1999           | FemaleAge10to14     | 998084     |
| Canada  | 1999           | FemaleAge15to19     | 973828     |
| Canada  | 1999           | FemaleAge20to24     | 888381     |
| Canada  | 1999           | FemaleAge25to29     | 836110     |
| Canada  | 1999           | FemaleAge30to34     | 973564     |
| Canada  | 1999           | FemaleAge35to39     | 1262851    |
| Canada  | 1999           | FemaleAge40to44     | 1265257    |
| Canada  | 1999           | FemaleAge45to49     | 1136377    |
| Canada  | 1999           | FemaleAge50to54     | 982610     |
| Canada  | 1999           | FemaleAge55to59     | 747927     |
| Canada  | 1999           | FemaleAge5to9       | 993852     |
| Canada  | 1999           | FemaleAge60to64     | 628561     |
| Canada  | 1999           | FemaleAge65to69     | 589943     |
| Canada  | 1999           | FemaleAge70to74     | 544482     |
| Canada  | 1999           | FemaleAge75to79     | 457237     |
| Canada  | 1999           | FemaleAge80to84     | 301014     |
| Canada  | 1999           | FemaleAge85to89     | 179380     |
| Canada  | 1999           | FemaleAge90to94     | 72645      |
| Canada  | 1999           | FemaleAge95to99     | 19844      |
| Canada  | 1999           | FemaleAgeAbov e100  | 2731       |
| Canada  | 1999           | FemaleLactAge15to19 | 19922      |
| Canada  | 1999           | FemaleLactAge20to24 | 64376      |
| Canada  | 1999           | FemaleLactAge25to29 | 109727     |
| Canada  | 1999           | FemaleLactAge30to34 | 103531     |
| Canada  | 1999           | FemaleLactAge35to39 | 42747      |
| Canada  | 1999           | FemaleLactAge40to44 | 6465       |

Dietary calcium and zinc deficiency risks are decreasing but remain prevalent

| Country                   | Reference year | Age/gender group    | Population |
|---------------------------|----------------|---------------------|------------|
| Canada                    | 1999           | FemaleLactAge45to49 | 229        |
| Canada                    | 1999           | FemalePregAge15to19 | 14942      |
| Canada                    | 1999           | FemalePregAge20to24 | 48282      |
| Canada                    | 1999           | FemalePregAge25to29 | 82295      |
| Canada                    | 1999           | FemalePregAge30to34 | 77648      |
| Canada                    | 1999           | FemalePregAge35to39 | 32060      |
| Canada                    | 1999           | FemalePregAge40to44 | 4849       |
| Canada                    | 1999           | FemalePregAge45to49 | 172        |
| Canada                    | 1999           | MaleAge0to4         | 939168     |
| Canada                    | 1999           | MaleAge10to14       | 1049626    |
| Canada                    | 1999           | MaleAge15to19       | 1066024    |
| Canada                    | 1999           | MaleAge20to24       | 1047155    |
| Canada                    | 1999           | MaleAge25to29       | 1053942    |
| Canada                    | 1999           | MaleAge30to34       | 1174621    |
| Canada                    | 1999           | MaleAge35to39       | 1356383    |
| Canada                    | 1999           | MaleAge40to44       | 1272164    |
| Canada                    | 1999           | MaleAge45to49       | 1123422    |
| Canada                    | 1999           | MaleAge50to54       | 977103     |
| Canada                    | 1999           | MaleAge55to59       | 736261     |
| Canada                    | 1999           | MaleAge5to9         | 1043317    |
| Canada                    | 1999           | MaleAge60to64       | 602925     |
| Canada                    | 1999           | MaleAge65to69       | 544999     |
| Canada                    | 1999           | MaleAge70to74       | 450612     |
| Canada                    | 1999           | MaleAge75to79       | 322307     |
| Canada                    | 1999           | MaleAge80to84       | 178353     |
| Canada                    | 1999           | MaleAge85to89       | 86484      |
| Canada                    | 1999           | MaleAge90to94       | 26612      |
| Canada                    | 1999           | MaleAge95to99       | 5698       |
| Canada                    | 1999           | MaleAgeAbov e100    | 529        |
| Central Af rican Republic | 1992           | FemaleAge0to4       | 255916     |
| Central Af rican Republic | 1992           | FemaleAge10to14     | 187004     |
| Central Af rican Republic | 1992           | FemaleAge15to19     | 117860     |
| Central Af rican Republic | 1992           | FemaleAge20to24     | 73777      |
| Central Af rican Republic | 1992           | FemaleAge25to29     | 63324      |
| Central Af rican Republic | 1992           | FemaleAge30to34     | 59575      |
| Central Af rican Republic | 1992           | FemaleAge35to39     | 57856      |
| Central Af rican Republic | 1992           | FemaleAge40to44     | 54792      |
| Central Af rican Republic | 1992           | FemaleAge45to49     | 49630      |
| Central Af rican Republic | 1992           | FemaleAge50to54     | 50015      |
| Central Af rican Republic | 1992           | FemaleAge55to59     | 43260      |
| Central Af rican Republic | 1992           | FemaleAge5to9       | 219881     |
| Central Af rican Republic | 1992           | FemaleAge60to64     | 36165      |
| Central Af rican Republic | 1992           | FemaleAge65to69     | 28057      |
| Central Af rican Republic | 1992           | FemaleAge70to74     | 19345      |
| Central Af rican Republic | 1992           | FemaleAge75to79     | 11968      |
| Central Af rican Republic | 1992           | FemaleAge80to84     | 6234       |
| Central Af rican Republic | 1992           | FemaleAge85to89     | 2360       |
| Central Af rican Republic | 1992           | FemaleAge90to94     | 604        |
| Central Af rican Republic | 1992           | FemaleAge95to99     | 82         |
| Central Af rican Republic | 1992           | FemaleAgeAbov e100  | 5          |
| Central Af rican Republic | 1992           | FemaleLactAge15to19 | 23162      |
| Central Af rican Republic | 1992           | FemaleLactAge20to24 | 33644      |
| Central Af rican Republic | 1992           | FemaleLactAge25to29 | 27031      |
| Central Af rican Republic | 1992           | FemaleLactAge30to34 | 19356      |
| Central Af rican Republic | 1992           | FemaleLactAge35to39 | 11603      |
| Central Af rican Republic | 1992           | FemaleLactAge40to44 | 5562       |
| Central Af rican Republic | 1992           | FemaleLactAge45to49 | 3803       |
| Central Af rican Republic | 1992           | FemalePregAge15to19 | 17371      |
| Central Af rican Republic | 1992           | FemalePregAge20to24 | 25233      |
| Central Af rican Republic | 1992           | FemalePregAge25to29 | 20273      |
| Central Af rican Republic | 1992           | FemalePregAge30to34 | 14517      |
| Central Af rican Republic | 1992           | FemalePregAge35to39 | 8702       |
| Central Af rican Republic | 1992           | FemalePregAge40to44 | 4172       |
| Central Af rican Republic | 1992           | FemalePregAge45to49 | 2852       |
| Central Af rican Republic | 1992           | MaleAge0to4         | 255836     |
| Central Af rican Republic | 1992           | MaleAge10to14       | 184138     |
| Central Af rican Republic | 1992           | MaleAge15to19       | 155777     |
| Central Af rican Republic | 1992           | MaleAge20to24       | 130349     |
| Central Af rican Republic | 1992           | MaleAge25to29       | 107852     |
| Central Af rican Republic | 1992           | MaleAge30to34       | 89216      |
| Central Af rican Republic | 1992           | MaleAge35to39       | 72944      |
| Central Af rican Republic | 1992           | MaleAge40to44       | 59834      |
| Central Af rican Republic | 1992           | MaleAge45to49       | 52249      |
| Central Af rican Republic | 1992           | MaleAge50to54       | 46023      |
| Central Af rican Republic | 1992           | MaleAge55to59       | 38442      |
| Central Af rican Republic | 1992           | MaleAge5to9         | 217216     |
| Central Af rican Republic | 1992           | MaleAge60to64       | 30953      |
| Central Af rican Republic | 1992           | MaleAge65to69       | 23519      |
| Central Af rican Republic | 1992           | MaleAge70to74       | 15929      |
| Central Af rican Republic | 1992           | MaleAge75to79       | 9321       |
| Central Af rican Republic | 1992           | MaleAge80to84       | 4392       |
| Central Af rican Republic | 1992           | MaleAge85to89       | 1467       |
| Central Af rican Republic | 1992           | MaleAge90to94       | 306        |
| Central Af rican Republic | 1992           | MaleAge95to99       | 33         |
| Central Af rican Republic | 1992           | MaleAgeAbov e100    | 1          |
| Central Af rican Republic | 1993           | FemaleAge0to4       | 258945     |
| Central Af rican Republic | 1993           | FemaleAge10to14     | 192962     |
| Central Af rican Republic | 1993           | FemaleAge15to19     | 122999     |

Dietary calcium and zinc deficiency risks are decreasing but remain prevalent

| Country                  | Reference year | Age/gender group    | Population |
|--------------------------|----------------|---------------------|------------|
| Central African Republic | 1993           | FemaleAge20to24     | 78450      |
| Central African Republic | 1993           | FemaleAge25to29     | 66553      |
| Central African Republic | 1993           | FemaleAge30to34     | 61835      |
| Central African Republic | 1993           | FemaleAge35to39     | 60165      |
| Central African Republic | 1993           | FemaleAge40to44     | 56654      |
| Central African Republic | 1993           | FemaleAge45to49     | 50145      |
| Central African Republic | 1993           | FemaleAge50to54     | 50780      |
| Central African Republic | 1993           | FemaleAge55to59     | 43954      |
| Central African Republic | 1993           | FemaleAge5to9       | 225081     |
| Central African Republic | 1993           | FemaleAge60to64     | 36847      |
| Central African Republic | 1993           | FemaleAge65to69     | 28732      |
| Central African Republic | 1993           | FemaleAge70to74     | 19936      |
| Central African Republic | 1993           | FemaleAge75to79     | 12137      |
| Central African Republic | 1993           | FemaleAge80to84     | 6378       |
| Central African Republic | 1993           | FemaleAge85to89     | 2432       |
| Central African Republic | 1993           | FemaleAge90to94     | 629        |
| Central African Republic | 1993           | FemaleAge95to99     | 98         |
| Central African Republic | 1993           | FemaleAgeAbov e100  | 6          |
| Central African Republic | 1993           | FemaleLactAge15to19 | 23162      |
| Central African Republic | 1993           | FemaleLactAge20to24 | 33644      |
| Central African Republic | 1993           | FemaleLactAge25to29 | 27031      |
| Central African Republic | 1993           | FemaleLactAge30to34 | 19356      |
| Central African Republic | 1993           | FemaleLactAge35to39 | 11603      |
| Central African Republic | 1993           | FemaleLactAge40to44 | 5562       |
| Central African Republic | 1993           | FemaleLactAge45to49 | 3803       |
| Central African Republic | 1993           | FemalePregAge15to19 | 17371      |
| Central African Republic | 1993           | FemalePregAge20to24 | 25233      |
| Central African Republic | 1993           | FemalePregAge25to29 | 20273      |
| Central African Republic | 1993           | FemalePregAge30to34 | 14517      |
| Central African Republic | 1993           | FemalePregAge35to39 | 8702       |
| Central African Republic | 1993           | FemalePregAge40to44 | 4172       |
| Central African Republic | 1993           | FemalePregAge45to49 | 2852       |
| Central African Republic | 1993           | MaleAge0to4         | 258782     |
| Central African Republic | 1993           | MaleAge10to14       | 189960     |
| Central African Republic | 1993           | MaleAge15to19       | 160832     |
| Central African Republic | 1993           | MaleAge20to24       | 134932     |
| Central African Republic | 1993           | MaleAge25to29       | 111383     |
| Central African Republic | 1993           | MaleAge30to34       | 91682      |
| Central African Republic | 1993           | MaleAge35to39       | 75031      |
| Central African Republic | 1993           | MaleAge40to44       | 61163      |
| Central African Republic | 1993           | MaleAge45to49       | 52560      |
| Central African Republic | 1993           | MaleAge50to54       | 46675      |
| Central African Republic | 1993           | MaleAge55to59       | 39109      |
| Central African Republic | 1993           | MaleAge5to9         | 222434     |
| Central African Republic | 1993           | MaleAge60to64       | 31398      |
| Central African Republic | 1993           | MaleAge65to69       | 23992      |
| Central African Republic | 1993           | MaleAge70to74       | 16326      |
| Central African Republic | 1993           | MaleAge75to79       | 9496       |
| Central African Republic | 1993           | MaleAge80to84       | 4505       |
| Central African Republic | 1993           | MaleAge85to89       | 1515       |
| Central African Republic | 1993           | MaleAge90to94       | 325        |
| Central African Republic | 1993           | MaleAge95to99       | 43         |
| Central African Republic | 1993           | MaleAgeAbov e100    | 1          |
| Central African Republic | 1994           | FemaleAge0to4       | 262283     |
| Central African Republic | 1994           | FemaleAge10to14     | 198802     |
| Central African Republic | 1994           | FemaleAge15to19     | 128244     |
| Central African Republic | 1994           | FemaleAge20to24     | 83376      |
| Central African Republic | 1994           | FemaleAge25to29     | 70109      |
| Central African Republic | 1994           | FemaleAge30to34     | 64201      |
| Central African Republic | 1994           | FemaleAge35to39     | 62456      |
| Central African Republic | 1994           | FemaleAge40to44     | 58628      |
| Central African Republic | 1994           | FemaleAge45to49     | 50888      |
| Central African Republic | 1994           | FemaleAge50to54     | 51462      |
| Central African Republic | 1994           | FemaleAge55to59     | 44677      |
| Central African Republic | 1994           | FemaleAge5to9       | 229543     |
| Central African Republic | 1994           | FemaleAge60to64     | 37572      |
| Central African Republic | 1994           | FemaleAge65to69     | 29455      |
| Central African Republic | 1994           | FemaleAge70to74     | 20563      |
| Central African Republic | 1994           | FemaleAge75to79     | 12365      |
| Central African Republic | 1994           | FemaleAge80to84     | 6454       |
| Central African Republic | 1994           | FemaleAge85to89     | 2427       |
| Central African Republic | 1994           | FemaleAge90to94     | 617        |
| Central African Republic | 1994           | FemaleAge95to99     | 101        |
| Central African Republic | 1994           | FemaleAgeAbov e100  | 6          |
| Central African Republic | 1994           | FemaleLactAge15to19 | 23162      |
| Central African Republic | 1994           | FemaleLactAge20to24 | 33644      |
| Central African Republic | 1994           | FemaleLactAge25to29 | 27031      |
| Central African Republic | 1994           | FemaleLactAge30to34 | 19356      |
| Central African Republic | 1994           | FemaleLactAge35to39 | 11603      |
| Central African Republic | 1994           | FemaleLactAge40to44 | 5562       |
| Central African Republic | 1994           | FemaleLactAge45to49 | 3803       |
| Central African Republic | 1994           | FemalePregAge15to19 | 17371      |
| Central African Republic | 1994           | FemalePregAge20to24 | 25233      |
| Central African Republic | 1994           | FemalePregAge25to29 | 20273      |
| Central African Republic | 1994           | FemalePregAge30to34 | 14517      |
| Central African Republic | 1994           | FemalePregAge35to39 | 8702       |
| Central African Republic | 1994           | FemalePregAge40to44 | 4172       |
| Central African Republic | 1994           | FemalePregAge45to49 | 2852       |

Dietary calcium and zinc deficiency risks are decreasing but remain prevalent

| Country                  | Reference year | Age/gender group    | Population |
|--------------------------|----------------|---------------------|------------|
| Central African Republic | 1994           | MaleAge0to4         | 262047     |
| Central African Republic | 1994           | MaleAge10to14       | 195712     |
| Central African Republic | 1994           | MaleAge15to19       | 166023     |
| Central African Republic | 1994           | MaleAge20to24       | 139711     |
| Central African Republic | 1994           | MaleAge25to29       | 115229     |
| Central African Republic | 1994           | MaleAge30to34       | 94374      |
| Central African Republic | 1994           | MaleAge35to39       | 77218      |
| Central African Republic | 1994           | MaleAge40to44       | 62620      |
| Central African Republic | 1994           | MaleAge45to49       | 52996      |
| Central African Republic | 1994           | MaleAge50to54       | 47283      |
| Central African Republic | 1994           | MaleAge55to59       | 39820      |
| Central African Republic | 1994           | MaleAge5to9         | 226881     |
| Central African Republic | 1994           | MaleAge60to64       | 31878      |
| Central African Republic | 1994           | MaleAge65to69       | 24494      |
| Central African Republic | 1994           | MaleAge70to74       | 16743      |
| Central African Republic | 1994           | MaleAge75to79       | 9678       |
| Central African Republic | 1994           | MaleAge80to84       | 4552       |
| Central African Republic | 1994           | MaleAge85to89       | 1502       |
| Central African Republic | 1994           | MaleAge90to94       | 317        |
| Central African Republic | 1994           | MaleAge95to99       | 43         |
| Central African Republic | 1994           | MaleAgeAbov e100    | 1          |
| Central African Republic | 1995           | FemaleAge0to4       | 266485     |
| Central African Republic | 1995           | FemaleAge10to14     | 204086     |
| Central African Republic | 1995           | FemaleAge15to19     | 133517     |
| Central African Republic | 1995           | FemaleAge20to24     | 88321      |
| Central African Republic | 1995           | FemaleAge25to29     | 73941      |
| Central African Republic | 1995           | FemaleAge30to34     | 66699      |
| Central African Republic | 1995           | FemaleAge35to39     | 64632      |
| Central African Republic | 1995           | FemaleAge40to44     | 60594      |
| Central African Republic | 1995           | FemaleAge45to49     | 51891      |
| Central African Republic | 1995           | FemaleAge50to54     | 52017      |
| Central African Republic | 1995           | FemaleAge55to59     | 45382      |
| Central African Republic | 1995           | FemaleAge5to9       | 233040     |
| Central African Republic | 1995           | FemaleAge60to64     | 38309      |
| Central African Republic | 1995           | FemaleAge65to69     | 30199      |
| Central African Republic | 1995           | FemaleAge70to74     | 21207      |
| Central African Republic | 1995           | FemaleAge75to79     | 12670      |
| Central African Republic | 1995           | FemaleAge80to84     | 6469       |
| Central African Republic | 1995           | FemaleAge85to89     | 2355       |
| Central African Republic | 1995           | FemaleAge90to94     | 551        |
| Central African Republic | 1995           | FemaleAge95to99     | 77         |
| Central African Republic | 1995           | FemaleAgeAbov e100  | 6          |
| Central African Republic | 1995           | FemaleLactAge15to19 | 23162      |
| Central African Republic | 1995           | FemaleLactAge20to24 | 33644      |
| Central African Republic | 1995           | FemaleLactAge25to29 | 27031      |
| Central African Republic | 1995           | FemaleLactAge30to34 | 19356      |
| Central African Republic | 1995           | FemaleLactAge35to39 | 11603      |
| Central African Republic | 1995           | FemaleLactAge40to44 | 5562       |
| Central African Republic | 1995           | FemaleLactAge45to49 | 3803       |
| Central African Republic | 1995           | FemalePregAge15to19 | 17371      |
| Central African Republic | 1995           | FemalePregAge20to24 | 25233      |
| Central African Republic | 1995           | FemalePregAge25to29 | 20273      |
| Central African Republic | 1995           | FemalePregAge30to34 | 14517      |
| Central African Republic | 1995           | FemalePregAge35to39 | 8702       |
| Central African Republic | 1995           | FemalePregAge40to44 | 4172       |
| Central African Republic | 1995           | FemalePregAge45to49 | 2852       |
| Central African Republic | 1995           | MaleAge0to4         | 266279     |
| Central African Republic | 1995           | MaleAge10to14       | 200938     |
| Central African Republic | 1995           | MaleAge15to19       | 171245     |
| Central African Republic | 1995           | MaleAge20to24       | 144516     |
| Central African Republic | 1995           | MaleAge25to29       | 119279     |
| Central African Republic | 1995           | MaleAge30to34       | 97283      |
| Central African Republic | 1995           | MaleAge35to39       | 79424      |
| Central African Republic | 1995           | MaleAge40to44       | 64144      |
| Central African Republic | 1995           | MaleAge45to49       | 53593      |
| Central African Republic | 1995           | MaleAge50to54       | 47772      |
| Central African Republic | 1995           | MaleAge55to59       | 40514      |
| Central African Republic | 1995           | MaleAge5to9         | 230275     |
| Central African Republic | 1995           | MaleAge60to64       | 32406      |
| Central African Republic | 1995           | MaleAge65to69       | 24987      |
| Central African Republic | 1995           | MaleAge70to74       | 17170      |
| Central African Republic | 1995           | MaleAge75to79       | 9876       |
| Central African Republic | 1995           | MaleAge80to84       | 4544       |
| Central African Republic | 1995           | MaleAge85to89       | 1426       |
| Central African Republic | 1995           | MaleAge90to94       | 267        |
| Central African Republic | 1995           | MaleAge95to99       | 26         |
| Central African Republic | 1995           | MaleAgeAbov e100    | 1          |
| Central African Republic | 1996           | FemaleAge0to4       | 271551     |
| Central African Republic | 1996           | FemaleAge10to14     | 209440     |
| Central African Republic | 1996           | FemaleAge15to19     | 135296     |
| Central African Republic | 1996           | FemaleAge20to24     | 85744      |
| Central African Republic | 1996           | FemaleAge25to29     | 71208      |
| Central African Republic | 1996           | FemaleAge30to34     | 65389      |
| Central African Republic | 1996           | FemaleAge35to39     | 63832      |
| Central African Republic | 1996           | FemaleAge40to44     | 61101      |
| Central African Republic | 1996           | FemaleAge45to49     | 51905      |
| Central African Republic | 1996           | FemaleAge50to54     | 52494      |
| Central African Republic | 1996           | FemaleAge55to59     | 45969      |

Dietary calcium and zinc deficiency risks are decreasing but remain prevalent

| Country                  | Reference year | Age/gender group    | Population |
|--------------------------|----------------|---------------------|------------|
| Central African Republic | 1996           | FemaleAge5to9       | 237997     |
| Central African Republic | 1996           | FemaleAge60to64     | 38820      |
| Central African Republic | 1996           | FemaleAge65to69     | 30698      |
| Central African Republic | 1996           | FemaleAge70to74     | 21709      |
| Central African Republic | 1996           | FemaleAge75to79     | 13061      |
| Central African Republic | 1996           | FemaleAge80to84     | 6698       |
| Central African Republic | 1996           | FemaleAge85to89     | 2571       |
| Central African Republic | 1996           | FemaleAge90to94     | 646        |
| Central African Republic | 1996           | FemaleAge95to99     | 86         |
| Central African Republic | 1996           | FemaleAgeAbove100   | 6          |
| Central African Republic | 1996           | FemaleLactAge15to19 | 25152      |
| Central African Republic | 1996           | FemaleLactAge20to24 | 37470      |
| Central African Republic | 1996           | FemaleLactAge25to29 | 30352      |
| Central African Republic | 1996           | FemaleLactAge30to34 | 21240      |
| Central African Republic | 1996           | FemaleLactAge35to39 | 13002      |
| Central African Republic | 1996           | FemaleLactAge40to44 | 6304       |
| Central African Republic | 1996           | FemaleLactAge45to49 | 4431       |
| Central African Republic | 1996           | FemalePregAge15to19 | 18864      |
| Central African Republic | 1996           | FemalePregAge20to24 | 28103      |
| Central African Republic | 1996           | FemalePregAge25to29 | 22764      |
| Central African Republic | 1996           | FemalePregAge30to34 | 15930      |
| Central African Republic | 1996           | FemalePregAge35to39 | 9752       |
| Central African Republic | 1996           | FemalePregAge40to44 | 4728       |
| Central African Republic | 1996           | FemalePregAge45to49 | 3324       |
| Central African Republic | 1996           | MaleAge0to4         | 271421     |
| Central African Republic | 1996           | MaleAge10to14       | 206131     |
| Central African Republic | 1996           | MaleAge15to19       | 176298     |
| Central African Republic | 1996           | MaleAge20to24       | 148678     |
| Central African Republic | 1996           | MaleAge25to29       | 122631     |
| Central African Republic | 1996           | MaleAge30to34       | 99635      |
| Central African Republic | 1996           | MaleAge35to39       | 81117      |
| Central African Republic | 1996           | MaleAge40to44       | 65594      |
| Central African Republic | 1996           | MaleAge45to49       | 54294      |
| Central African Republic | 1996           | MaleAge50to54       | 47993      |
| Central African Republic | 1996           | MaleAge55to59       | 41024      |
| Central African Republic | 1996           | MaleAge5to9         | 235261     |
| Central African Republic | 1996           | MaleAge60to64       | 32888      |
| Central African Republic | 1996           | MaleAge65to69       | 25287      |
| Central African Republic | 1996           | MaleAge70to74       | 17506      |
| Central African Republic | 1996           | MaleAge75to79       | 10183      |
| Central African Republic | 1996           | MaleAge80to84       | 4772       |
| Central African Republic | 1996           | MaleAge85to89       | 1592       |
| Central African Republic | 1996           | MaleAge90to94       | 327        |
| Central African Republic | 1996           | MaleAge95to99       | 30         |
| Central African Republic | 1996           | MaleAgeAbove100     | 1          |
| Central African Republic | 1997           | FemaleAge0to4       | 277638     |
| Central African Republic | 1997           | FemaleAge10to14     | 214505     |
| Central African Republic | 1997           | FemaleAge15to19     | 140681     |
| Central African Republic | 1997           | FemaleAge20to24     | 89958      |
| Central African Republic | 1997           | FemaleAge25to29     | 74579      |
| Central African Republic | 1997           | FemaleAge30to34     | 67355      |
| Central African Republic | 1997           | FemaleAge35to39     | 65237      |
| Central African Republic | 1997           | FemaleAge40to44     | 62817      |
| Central African Republic | 1997           | FemaleAge45to49     | 53202      |
| Central African Republic | 1997           | FemaleAge50to54     | 52841      |
| Central African Republic | 1997           | FemaleAge55to59     | 46569      |
| Central African Republic | 1997           | FemaleAge5to9       | 242015     |
| Central African Republic | 1997           | FemaleAge60to64     | 39341      |
| Central African Republic | 1997           | FemaleAge65to69     | 31199      |
| Central African Republic | 1997           | FemaleAge70to74     | 22196      |
| Central African Republic | 1997           | FemaleAge75to79     | 13444      |
| Central African Republic | 1997           | FemaleAge80to84     | 6838       |
| Central African Republic | 1997           | FemaleAge85to89     | 2722       |
| Central African Republic | 1997           | FemaleAge90to94     | 713        |
| Central African Republic | 1997           | FemaleAge95to99     | 102        |
| Central African Republic | 1997           | FemaleAgeAbove100   | 7          |
| Central African Republic | 1997           | FemaleLactAge15to19 | 25152      |
| Central African Republic | 1997           | FemaleLactAge20to24 | 37470      |
| Central African Republic | 1997           | FemaleLactAge25to29 | 30352      |
| Central African Republic | 1997           | FemaleLactAge30to34 | 21240      |
| Central African Republic | 1997           | FemaleLactAge35to39 | 13002      |
| Central African Republic | 1997           | FemaleLactAge40to44 | 6304       |
| Central African Republic | 1997           | FemaleLactAge45to49 | 4431       |
| Central African Republic | 1997           | FemalePregAge15to19 | 18864      |
| Central African Republic | 1997           | FemalePregAge20to24 | 28103      |
| Central African Republic | 1997           | FemalePregAge25to29 | 22764      |
| Central African Republic | 1997           | FemalePregAge30to34 | 15930      |
| Central African Republic | 1997           | FemalePregAge35to39 | 9752       |
| Central African Republic | 1997           | FemalePregAge40to44 | 4728       |
| Central African Republic | 1997           | FemalePregAge45to49 | 3324       |
| Central African Republic | 1997           | MaleAge0to4         | 277485     |
| Central African Republic | 1997           | MaleAge10to14       | 211113     |
| Central African Republic | 1997           | MaleAge15to19       | 181481     |
| Central African Republic | 1997           | MaleAge20to24       | 152892     |
| Central African Republic | 1997           | MaleAge25to29       | 126184     |
| Central African Republic | 1997           | MaleAge30to34       | 102128     |
| Central African Republic | 1997           | MaleAge35to39       | 82734      |
| Central African Republic | 1997           | MaleAge40to44       | 67019      |



Dietary calcium and zinc deficiency risks are decreasing but remain prevalent

| Country                  | Reference year | Age/gender group    | Population |
|--------------------------|----------------|---------------------|------------|
| Central African Republic | 1997           | MaleAge45to49       | 55110      |
| Central African Republic | 1997           | MaleAge50to54       | 48099      |
| Central African Republic | 1997           | MaleAge55to59       | 41526      |
| Central African Republic | 1997           | MaleAge5to9         | 239308     |
| Central African Republic | 1997           | MaleAge60to64       | 33405      |
| Central African Republic | 1997           | MaleAge65to69       | 25567      |
| Central African Republic | 1997           | MaleAge70to74       | 17822      |
| Central African Republic | 1997           | MaleAge75to79       | 10449      |
| Central African Republic | 1997           | MaleAge80to84       | 4921       |
| Central African Republic | 1997           | MaleAge85to89       | 1706       |
| Central African Republic | 1997           | MaleAge90to94       | 369        |
| Central African Republic | 1997           | MaleAge95to99       | 40         |
| Central African Republic | 1997           | MaleAgeAbove100     | 1          |
| Central African Republic | 1998           | FemaleAge0to4       | 284269     |
| Central African Republic | 1998           | FemaleAge10to14     | 219292     |
| Central African Republic | 1998           | FemaleAge15to19     | 146036     |
| Central African Republic | 1998           | FemaleAge20to24     | 94350      |
| Central African Republic | 1998           | FemaleAge25to29     | 78266      |
| Central African Republic | 1998           | FemaleAge30to34     | 69360      |
| Central African Republic | 1998           | FemaleAge35to39     | 66493      |
| Central African Republic | 1998           | FemaleAge40to44     | 64389      |
| Central African Republic | 1998           | FemaleAge45to49     | 54637      |
| Central African Republic | 1998           | FemaleAge50to54     | 53143      |
| Central African Republic | 1998           | FemaleAge55to59     | 47148      |
| Central African Republic | 1998           | FemaleAge5to9       | 245038     |
| Central African Republic | 1998           | FemaleAge60to64     | 39883      |
| Central African Republic | 1998           | FemaleAge65to69     | 31724      |
| Central African Republic | 1998           | FemaleAge70to74     | 22686      |
| Central African Republic | 1998           | FemaleAge75to79     | 13818      |
| Central African Republic | 1998           | FemaleAge80to84     | 6918       |
| Central African Republic | 1998           | FemaleAge85to89     | 2786       |
| Central African Republic | 1998           | FemaleAge90to94     | 742        |
| Central African Republic | 1998           | FemaleAge95to99     | 115        |
| Central African Republic | 1998           | FemaleAgeAbove100   | 7          |
| Central African Republic | 1998           | FemaleLactAge15to19 | 25152      |
| Central African Republic | 1998           | FemaleLactAge20to24 | 37470      |
| Central African Republic | 1998           | FemaleLactAge25to29 | 30352      |
| Central African Republic | 1998           | FemaleLactAge30to34 | 21240      |
| Central African Republic | 1998           | FemaleLactAge35to39 | 13002      |
| Central African Republic | 1998           | FemaleLactAge40to44 | 6304       |
| Central African Republic | 1998           | FemaleLactAge45to49 | 4431       |
| Central African Republic | 1998           | FemalePregAge15to19 | 18864      |
| Central African Republic | 1998           | FemalePregAge20to24 | 28103      |
| Central African Republic | 1998           | FemalePregAge25to29 | 22764      |
| Central African Republic | 1998           | FemalePregAge30to34 | 15930      |
| Central African Republic | 1998           | FemalePregAge35to39 | 9752       |
| Central African Republic | 1998           | FemalePregAge40to44 | 4728       |
| Central African Republic | 1998           | FemalePregAge45to49 | 3324       |
| Central African Republic | 1998           | MaleAge0to4         | 284054     |
| Central African Republic | 1998           | MaleAge10to14       | 215887     |
| Central African Republic | 1998           | MaleAge15to19       | 186684     |
| Central African Republic | 1998           | MaleAge20to24       | 157203     |
| Central African Republic | 1998           | MaleAge25to29       | 129947     |
| Central African Republic | 1998           | MaleAge30to34       | 104795     |
| Central African Republic | 1998           | MaleAge35to39       | 84375      |
| Central African Republic | 1998           | MaleAge40to44       | 68378      |
| Central African Republic | 1998           | MaleAge45to49       | 56006      |
| Central African Republic | 1998           | MaleAge50to54       | 48178      |
| Central African Republic | 1998           | MaleAge55to59       | 42004      |
| Central African Republic | 1998           | MaleAge5to9         | 242319     |
| Central African Republic | 1998           | MaleAge60to64       | 33927      |
| Central African Republic | 1998           | MaleAge65to69       | 25865      |
| Central African Republic | 1998           | MaleAge70to74       | 18135      |
| Central African Republic | 1998           | MaleAge75to79       | 10677      |
| Central African Republic | 1998           | MaleAge80to84       | 4999       |
| Central African Republic | 1998           | MaleAge85to89       | 1752       |
| Central African Republic | 1998           | MaleAge90to94       | 388        |
| Central African Republic | 1998           | MaleAge95to99       | 50         |
| Central African Republic | 1998           | MaleAgeAbove100     | 2          |
| Central African Republic | 1999           | FemaleAge0to4       | 290504     |
| Central African Republic | 1999           | FemaleAge10to14     | 223640     |
| Central African Republic | 1999           | FemaleAge15to19     | 151240     |
| Central African Republic | 1999           | FemaleAge20to24     | 99036      |
| Central African Republic | 1999           | FemaleAge25to29     | 82228      |
| Central African Republic | 1999           | FemaleAge30to34     | 71550      |
| Central African Republic | 1999           | FemaleAge35to39     | 67735      |
| Central African Republic | 1999           | FemaleAge40to44     | 65783      |
| Central African Republic | 1999           | FemaleAge45to49     | 56108      |
| Central African Republic | 1999           | FemaleAge50to54     | 53566      |
| Central African Republic | 1999           | FemaleAge55to59     | 47662      |
| Central African Republic | 1999           | FemaleAge5to9       | 247391     |
| Central African Republic | 1999           | FemaleAge60to64     | 40456      |
| Central African Republic | 1999           | FemaleAge65to69     | 32290      |
| Central African Republic | 1999           | FemaleAge70to74     | 23197      |
| Central African Republic | 1999           | FemaleAge75to79     | 14183      |
| Central African Republic | 1999           | FemaleAge80to84     | 6977       |
| Central African Republic | 1999           | FemaleAge85to89     | 2756       |
| Central African Republic | 1999           | FemaleAge90to94     | 721        |

Dietary calcium and zinc deficiency risks are decreasing but remain prevalent

| Country                  | Reference year | Age/gender group    | Population |
|--------------------------|----------------|---------------------|------------|
| Central African Republic | 1999           | FemaleAge95to99     | 119        |
| Central African Republic | 1999           | FemaleAgeAbove100   | 8          |
| Central African Republic | 1999           | FemaleLactAge15to19 | 25152      |
| Central African Republic | 1999           | FemaleLactAge20to24 | 37470      |
| Central African Republic | 1999           | FemaleLactAge25to29 | 30352      |
| Central African Republic | 1999           | FemaleLactAge30to34 | 21240      |
| Central African Republic | 1999           | FemaleLactAge35to39 | 13002      |
| Central African Republic | 1999           | FemaleLactAge40to44 | 6304       |
| Central African Republic | 1999           | FemaleLactAge45to49 | 4431       |
| Central African Republic | 1999           | FemalePregAge15to19 | 18864      |
| Central African Republic | 1999           | FemalePregAge20to24 | 28103      |
| Central African Republic | 1999           | FemalePregAge25to29 | 22764      |
| Central African Republic | 1999           | FemalePregAge30to34 | 15930      |
| Central African Republic | 1999           | FemalePregAge35to39 | 9752       |
| Central African Republic | 1999           | FemalePregAge40to44 | 4728       |
| Central African Republic | 1999           | FemalePregAge45to49 | 3324       |
| Central African Republic | 1999           | MaleAge0to4         | 290254     |
| Central African Republic | 1999           | MaleAge10to14       | 220259     |
| Central African Republic | 1999           | MaleAge15to19       | 191806     |
| Central African Republic | 1999           | MaleAge20to24       | 161727     |
| Central African Republic | 1999           | MaleAge25to29       | 133916     |
| Central African Republic | 1999           | MaleAge30to34       | 107692     |
| Central African Republic | 1999           | MaleAge35to39       | 86158      |
| Central African Republic | 1999           | MaleAge40to44       | 69671      |
| Central African Republic | 1999           | MaleAge45to49       | 56933      |
| Central African Republic | 1999           | MaleAge50to54       | 48361      |
| Central African Republic | 1999           | MaleAge55to59       | 42417      |
| Central African Republic | 1999           | MaleAge5to9         | 244599     |
| Central African Republic | 1999           | MaleAge60to64       | 34443      |
| Central African Republic | 1999           | MaleAge65to69       | 26226      |
| Central African Republic | 1999           | MaleAge70to74       | 18449      |
| Central African Republic | 1999           | MaleAge75to79       | 10874      |
| Central African Republic | 1999           | MaleAge80to84       | 5027       |
| Central African Republic | 1999           | MaleAge85to89       | 1719       |
| Central African Republic | 1999           | MaleAge90to94       | 374        |
| Central African Republic | 1999           | MaleAge95to99       | 51         |
| Central African Republic | 1999           | MaleAgeAbove100     | 2          |
| Chad                     | 1992           | FemaleAge0to4       | 628881     |
| Chad                     | 1992           | FemaleAge10to14     | 393842     |
| Chad                     | 1992           | FemaleAge15to19     | 195883     |
| Chad                     | 1992           | FemaleAge20to24     | 99607      |
| Chad                     | 1992           | FemaleAge25to29     | 86873      |
| Chad                     | 1992           | FemaleAge30to34     | 84993      |
| Chad                     | 1992           | FemaleAge35to39     | 104922     |
| Chad                     | 1992           | FemaleAge40to44     | 105456     |
| Chad                     | 1992           | FemaleAge45to49     | 94006      |
| Chad                     | 1992           | FemaleAge50to54     | 85187      |
| Chad                     | 1992           | FemaleAge55to59     | 72050      |
| Chad                     | 1992           | FemaleAge5to9       | 487055     |
| Chad                     | 1992           | FemaleAge60to64     | 59131      |
| Chad                     | 1992           | FemaleAge65to69     | 46058      |
| Chad                     | 1992           | FemaleAge70to74     | 32096      |
| Chad                     | 1992           | FemaleAge75to79     | 19105      |
| Chad                     | 1992           | FemaleAge80to84     | 9392       |
| Chad                     | 1992           | FemaleAge85to89     | 3403       |
| Chad                     | 1992           | FemaleAge90to94     | 818        |
| Chad                     | 1992           | FemaleAge95to99     | 112        |
| Chad                     | 1992           | FemaleAgeAbove100   | 6          |
| Chad                     | 1992           | FemaleLactAge15to19 | 71769      |
| Chad                     | 1992           | FemaleLactAge20to24 | 90597      |
| Chad                     | 1992           | FemaleLactAge25to29 | 71676      |
| Chad                     | 1992           | FemaleLactAge30to34 | 55200      |
| Chad                     | 1992           | FemaleLactAge35to39 | 31012      |
| Chad                     | 1992           | FemaleLactAge40to44 | 9755       |
| Chad                     | 1992           | FemaleLactAge45to49 | 1859       |
| Chad                     | 1992           | FemalePregAge15to19 | 53827      |
| Chad                     | 1992           | FemalePregAge20to24 | 67947      |
| Chad                     | 1992           | FemalePregAge25to29 | 53757      |
| Chad                     | 1992           | FemalePregAge30to34 | 41400      |
| Chad                     | 1992           | FemalePregAge35to39 | 23259      |
| Chad                     | 1992           | FemalePregAge40to44 | 7316       |
| Chad                     | 1992           | FemalePregAge45to49 | 1394       |
| Chad                     | 1992           | MaleAge0to4         | 637760     |
| Chad                     | 1992           | MaleAge10to14       | 398657     |
| Chad                     | 1992           | MaleAge15to19       | 325043     |
| Chad                     | 1992           | MaleAge20to24       | 258796     |
| Chad                     | 1992           | MaleAge25to29       | 208998     |
| Chad                     | 1992           | MaleAge30to34       | 175125     |
| Chad                     | 1992           | MaleAge35to39       | 148673     |
| Chad                     | 1992           | MaleAge40to44       | 116884     |
| Chad                     | 1992           | MaleAge45to49       | 95609      |
| Chad                     | 1992           | MaleAge50to54       | 81908      |
| Chad                     | 1992           | MaleAge55to59       | 65985      |
| Chad                     | 1992           | MaleAge5to9         | 494082     |
| Chad                     | 1992           | MaleAge60to64       | 51750      |
| Chad                     | 1992           | MaleAge65to69       | 38903      |
| Chad                     | 1992           | MaleAge70to74       | 26536      |
| Chad                     | 1992           | MaleAge75to79       | 15164      |

Dietary calcium and zinc deficiency risks are decreasing but remain prevalent

| Country | Reference year | Age/gender group    | Population |
|---------|----------------|---------------------|------------|
| Chad    | 1992           | MaleAge80to84       | 6741       |
| Chad    | 1992           | MaleAge85to89       | 2186       |
| Chad    | 1992           | MaleAge90to94       | 446        |
| Chad    | 1992           | MaleAge95to99       | 44         |
| Chad    | 1992           | MaleAgeAbov e100    | 1          |
| Chad    | 1993           | FemaleAge0to4       | 650815     |
| Chad    | 1993           | FemaleAge10to14     | 408114     |
| Chad    | 1993           | FemaleAge15to19     | 207840     |
| Chad    | 1993           | FemaleAge20to24     | 109814     |
| Chad    | 1993           | FemaleAge25to29     | 92355      |
| Chad    | 1993           | FemaleAge30to34     | 88643      |
| Chad    | 1993           | FemaleAge35to39     | 107053     |
| Chad    | 1993           | FemaleAge40to44     | 113136     |
| Chad    | 1993           | FemaleAge45to49     | 94708      |
| Chad    | 1993           | FemaleAge50to54     | 86726      |
| Chad    | 1993           | FemaleAge55to59     | 73095      |
| Chad    | 1993           | FemaleAge5to9       | 504527     |
| Chad    | 1993           | FemaleAge60to64     | 60114      |
| Chad    | 1993           | FemaleAge65to69     | 46688      |
| Chad    | 1993           | FemaleAge70to74     | 32858      |
| Chad    | 1993           | FemaleAge75to79     | 19492      |
| Chad    | 1993           | FemaleAge80to84     | 9576       |
| Chad    | 1993           | FemaleAge85to89     | 3518       |
| Chad    | 1993           | FemaleAge90to94     | 849        |
| Chad    | 1993           | FemaleAge95to99     | 135        |
| Chad    | 1993           | FemaleAgeAbov e100  | 7          |
| Chad    | 1993           | FemaleLactAge15to19 | 71769      |
| Chad    | 1993           | FemaleLactAge20to24 | 90597      |
| Chad    | 1993           | FemaleLactAge25to29 | 71676      |
| Chad    | 1993           | FemaleLactAge30to34 | 55200      |
| Chad    | 1993           | FemaleLactAge35to39 | 31012      |
| Chad    | 1993           | FemaleLactAge40to44 | 9755       |
| Chad    | 1993           | FemaleLactAge45to49 | 1859       |
| Chad    | 1993           | FemalePregAge15to19 | 53827      |
| Chad    | 1993           | FemalePregAge20to24 | 67947      |
| Chad    | 1993           | FemalePregAge25to29 | 53757      |
| Chad    | 1993           | FemalePregAge30to34 | 41400      |
| Chad    | 1993           | FemalePregAge35to39 | 23259      |
| Chad    | 1993           | FemalePregAge40to44 | 7316       |
| Chad    | 1993           | FemalePregAge45to49 | 1394       |
| Chad    | 1993           | MaleAge0to4         | 659627     |
| Chad    | 1993           | MaleAge10to14       | 413449     |
| Chad    | 1993           | MaleAge15to19       | 337000     |
| Chad    | 1993           | MaleAge20to24       | 269599     |
| Chad    | 1993           | MaleAge25to29       | 215029     |
| Chad    | 1993           | MaleAge30to34       | 179352     |
| Chad    | 1993           | MaleAge35to39       | 151686     |
| Chad    | 1993           | MaleAge40to44       | 122345     |
| Chad    | 1993           | MaleAge45to49       | 96273      |
| Chad    | 1993           | MaleAge50to54       | 83525      |
| Chad    | 1993           | MaleAge55to59       | 67490      |
| Chad    | 1993           | MaleAge5to9         | 511777     |
| Chad    | 1993           | MaleAge60to64       | 52656      |
| Chad    | 1993           | MaleAge65to69       | 39535      |
| Chad    | 1993           | MaleAge70to74       | 26984      |
| Chad    | 1993           | MaleAge75to79       | 15559      |
| Chad    | 1993           | MaleAge80to84       | 6917       |
| Chad    | 1993           | MaleAge85to89       | 2249       |
| Chad    | 1993           | MaleAge90to94       | 479        |
| Chad    | 1993           | MaleAge95to99       | 56         |
| Chad    | 1993           | MaleAgeAbov e100    | 2          |
| Chad    | 1994           | FemaleAge0to4       | 673620     |
| Chad    | 1994           | FemaleAge10to14     | 423134     |
| Chad    | 1994           | FemaleAge15to19     | 220355     |
| Chad    | 1994           | FemaleAge20to24     | 120722     |
| Chad    | 1994           | FemaleAge25to29     | 98874      |
| Chad    | 1994           | FemaleAge30to34     | 92723      |
| Chad    | 1994           | FemaleAge35to39     | 109243     |
| Chad    | 1994           | FemaleAge40to44     | 120225     |
| Chad    | 1994           | FemaleAge45to49     | 96655      |
| Chad    | 1994           | FemaleAge50to54     | 88164      |
| Chad    | 1994           | FemaleAge55to59     | 74286      |
| Chad    | 1994           | FemaleAge5to9       | 521684     |
| Chad    | 1994           | FemaleAge60to64     | 61217      |
| Chad    | 1994           | FemaleAge65to69     | 47475      |
| Chad    | 1994           | FemaleAge70to74     | 33639      |
| Chad    | 1994           | FemaleAge75to79     | 19906      |
| Chad    | 1994           | FemaleAge80to84     | 9674       |
| Chad    | 1994           | FemaleAge85to89     | 3502       |
| Chad    | 1994           | FemaleAge90to94     | 830        |
| Chad    | 1994           | FemaleAge95to99     | 138        |
| Chad    | 1994           | FemaleAgeAbov e100  | 7          |
| Chad    | 1994           | FemaleLactAge15to19 | 71769      |
| Chad    | 1994           | FemaleLactAge20to24 | 90597      |
| Chad    | 1994           | FemaleLactAge25to29 | 71676      |
| Chad    | 1994           | FemaleLactAge30to34 | 55200      |
| Chad    | 1994           | FemaleLactAge35to39 | 31012      |
| Chad    | 1994           | FemaleLactAge40to44 | 9755       |

Dietary calcium and zinc deficiency risks are decreasing but remain prevalent

| Country | Reference year | Age/gender group    | Population |
|---------|----------------|---------------------|------------|
| Chad    | 1994           | FemaleLactAge45to49 | 1859       |
| Chad    | 1994           | FemalePregAge15to19 | 53827      |
| Chad    | 1994           | FemalePregAge20to24 | 67947      |
| Chad    | 1994           | FemalePregAge25to29 | 53757      |
| Chad    | 1994           | FemalePregAge30to34 | 41400      |
| Chad    | 1994           | FemalePregAge35to39 | 23259      |
| Chad    | 1994           | FemalePregAge40to44 | 7316       |
| Chad    | 1994           | FemalePregAge45to49 | 1394       |
| Chad    | 1994           | MaleAge0to4         | 682392     |
| Chad    | 1994           | MaleAge10to14       | 428987     |
| Chad    | 1994           | MaleAge15to19       | 349665     |
| Chad    | 1994           | MaleAge20to24       | 280993     |
| Chad    | 1994           | MaleAge25to29       | 222057     |
| Chad    | 1994           | MaleAge30to34       | 184005     |
| Chad    | 1994           | MaleAge35to39       | 154861     |
| Chad    | 1994           | MaleAge40to44       | 127651     |
| Chad    | 1994           | MaleAge45to49       | 97796      |
| Chad    | 1994           | MaleAge50to54       | 85003      |
| Chad    | 1994           | MaleAge55to59       | 69093      |
| Chad    | 1994           | MaleAge5to9         | 529033     |
| Chad    | 1994           | MaleAge60to64       | 53752      |
| Chad    | 1994           | MaleAge65to69       | 40282      |
| Chad    | 1994           | MaleAge70to74       | 27481      |
| Chad    | 1994           | MaleAge75to79       | 15893      |
| Chad    | 1994           | MaleAge80to84       | 7012       |
| Chad    | 1994           | MaleAge85to89       | 2219       |
| Chad    | 1994           | MaleAge90to94       | 464        |
| Chad    | 1994           | MaleAge95to99       | 59         |
| Chad    | 1994           | MaleAgeAbov e100    | 2          |
| Chad    | 1995           | FemaleAge0to4       | 698531     |
| Chad    | 1995           | FemaleAge10to14     | 438409     |
| Chad    | 1995           | FemaleAge15to19     | 233524     |
| Chad    | 1995           | FemaleAge20to24     | 132154     |
| Chad    | 1995           | FemaleAge25to29     | 106621     |
| Chad    | 1995           | FemaleAge30to34     | 97241      |
| Chad    | 1995           | FemaleAge35to39     | 112022     |
| Chad    | 1995           | FemaleAge40to44     | 125928     |
| Chad    | 1995           | FemaleAge45to49     | 100331     |
| Chad    | 1995           | FemaleAge50to54     | 89417      |
| Chad    | 1995           | FemaleAge55to59     | 75637      |
| Chad    | 1995           | FemaleAge5to9       | 538484     |
| Chad    | 1995           | FemaleAge60to64     | 62423      |
| Chad    | 1995           | FemaleAge65to69     | 48449      |
| Chad    | 1995           | FemaleAge70to74     | 34439      |
| Chad    | 1995           | FemaleAge75to79     | 20380      |
| Chad    | 1995           | FemaleAge80to84     | 9714       |
| Chad    | 1995           | FemaleAge85to89     | 3362       |
| Chad    | 1995           | FemaleAge90to94     | 732        |
| Chad    | 1995           | FemaleAge95to99     | 99         |
| Chad    | 1995           | FemaleAgeAbov e100  | 7          |
| Chad    | 1995           | FemaleLactAge15to19 | 71769      |
| Chad    | 1995           | FemaleLactAge20to24 | 90597      |
| Chad    | 1995           | FemaleLactAge25to29 | 71676      |
| Chad    | 1995           | FemaleLactAge30to34 | 55200      |
| Chad    | 1995           | FemaleLactAge35to39 | 31012      |
| Chad    | 1995           | FemaleLactAge40to44 | 9755       |
| Chad    | 1995           | FemaleLactAge45to49 | 1859       |
| Chad    | 1995           | FemalePregAge15to19 | 53827      |
| Chad    | 1995           | FemalePregAge20to24 | 67947      |
| Chad    | 1995           | FemalePregAge25to29 | 53757      |
| Chad    | 1995           | FemalePregAge30to34 | 41400      |
| Chad    | 1995           | FemalePregAge35to39 | 23259      |
| Chad    | 1995           | FemalePregAge40to44 | 7316       |
| Chad    | 1995           | FemalePregAge45to49 | 1394       |
| Chad    | 1995           | MaleAge0to4         | 707372     |
| Chad    | 1995           | MaleAge10to14       | 444693     |
| Chad    | 1995           | MaleAge15to19       | 363173     |
| Chad    | 1995           | MaleAge20to24       | 292794     |
| Chad    | 1995           | MaleAge25to29       | 230307     |
| Chad    | 1995           | MaleAge30to34       | 189107     |
| Chad    | 1995           | MaleAge35to39       | 158475     |
| Chad    | 1995           | MaleAge40to44       | 132341     |
| Chad    | 1995           | MaleAge45to49       | 100532     |
| Chad    | 1995           | MaleAge50to54       | 86292      |
| Chad    | 1995           | MaleAge55to59       | 70758      |
| Chad    | 1995           | MaleAge5to9         | 545835     |
| Chad    | 1995           | MaleAge60to64       | 55058      |
| Chad    | 1995           | MaleAge65to69       | 41152      |
| Chad    | 1995           | MaleAge70to74       | 28050      |
| Chad    | 1995           | MaleAge75to79       | 16190      |
| Chad    | 1995           | MaleAge80to84       | 7040       |
| Chad    | 1995           | MaleAge85to89       | 2095       |
| Chad    | 1995           | MaleAge90to94       | 379        |
| Chad    | 1995           | MaleAge95to99       | 35         |
| Chad    | 1995           | MaleAgeAbov e100    | 2          |
| Chad    | 1996           | FemaleAge0to4       | 726840     |
| Chad    | 1996           | FemaleAge10to14     | 453770     |
| Chad    | 1996           | FemaleAge15to19     | 221885     |

Dietary calcium and zinc deficiency risks are decreasing but remain prevalent

| Country | Reference year | Age/gender group    | Population |
|---------|----------------|---------------------|------------|
| Chad    | 1996           | FemaleAge20to24     | 108180     |
| Chad    | 1996           | FemaleAge25to29     | 90786      |
| Chad    | 1996           | FemaleAge30to34     | 87947      |
| Chad    | 1996           | FemaleAge35to39     | 109281     |
| Chad    | 1996           | FemaleAge40to44     | 126957     |
| Chad    | 1996           | FemaleAge45to49     | 104399     |
| Chad    | 1996           | FemaleAge50to54     | 90080      |
| Chad    | 1996           | FemaleAge55to59     | 76702      |
| Chad    | 1996           | FemaleAge5to9       | 560418     |
| Chad    | 1996           | FemaleAge60to64     | 63182      |
| Chad    | 1996           | FemaleAge65to69     | 49057      |
| Chad    | 1996           | FemaleAge70to74     | 34961      |
| Chad    | 1996           | FemaleAge75to79     | 20999      |
| Chad    | 1996           | FemaleAge80to84     | 10170      |
| Chad    | 1996           | FemaleAge85to89     | 3680       |
| Chad    | 1996           | FemaleAge90to94     | 870        |
| Chad    | 1996           | FemaleAge95to99     | 110        |
| Chad    | 1996           | FemaleAgeAbove100   | 7          |
| Chad    | 1996           | FemaleLactAge15to19 | 85749      |
| Chad    | 1996           | FemaleLactAge20to24 | 110475     |
| Chad    | 1996           | FemaleLactAge25to29 | 85164      |
| Chad    | 1996           | FemaleLactAge30to34 | 62802      |
| Chad    | 1996           | FemaleLactAge35to39 | 33972      |
| Chad    | 1996           | FemaleLactAge40to44 | 11434      |
| Chad    | 1996           | FemaleLactAge45to49 | 2276       |
| Chad    | 1996           | FemalePregAge15to19 | 64311      |
| Chad    | 1996           | FemalePregAge20to24 | 82856      |
| Chad    | 1996           | FemalePregAge25to29 | 63873      |
| Chad    | 1996           | FemalePregAge30to34 | 47101      |
| Chad    | 1996           | FemalePregAge35to39 | 25479      |
| Chad    | 1996           | FemalePregAge40to44 | 8575       |
| Chad    | 1996           | FemalePregAge45to49 | 1707       |
| Chad    | 1996           | MaleAge0to4         | 735721     |
| Chad    | 1996           | MaleAge10to14       | 460292     |
| Chad    | 1996           | MaleAge15to19       | 376087     |
| Chad    | 1996           | MaleAge20to24       | 303847     |
| Chad    | 1996           | MaleAge25to29       | 238844     |
| Chad    | 1996           | MaleAge30to34       | 193794     |
| Chad    | 1996           | MaleAge35to39       | 161657     |
| Chad    | 1996           | MaleAge40to44       | 135934     |
| Chad    | 1996           | MaleAge45to49       | 103867     |
| Chad    | 1996           | MaleAge50to54       | 87008      |
| Chad    | 1996           | MaleAge55to59       | 72077      |
| Chad    | 1996           | MaleAge5to9         | 567830     |
| Chad    | 1996           | MaleAge60to64       | 56093      |
| Chad    | 1996           | MaleAge65to69       | 41730      |
| Chad    | 1996           | MaleAge70to74       | 28494      |
| Chad    | 1996           | MaleAge75to79       | 16650      |
| Chad    | 1996           | MaleAge80to84       | 7483       |
| Chad    | 1996           | MaleAge85to89       | 2352       |
| Chad    | 1996           | MaleAge90to94       | 462        |
| Chad    | 1996           | MaleAge95to99       | 41         |
| Chad    | 1996           | MaleAgeAbove100     | 2          |
| Chad    | 1997           | FemaleAge0to4       | 753008     |
| Chad    | 1997           | FemaleAge10to14     | 470446     |
| Chad    | 1997           | FemaleAge15to19     | 235733     |
| Chad    | 1997           | FemaleAge20to24     | 119805     |
| Chad    | 1997           | FemaleAge25to29     | 99954      |
| Chad    | 1997           | FemaleAge30to34     | 92580      |
| Chad    | 1997           | FemaleAge35to39     | 112262     |
| Chad    | 1997           | FemaleAge40to44     | 129751     |
| Chad    | 1997           | FemaleAge45to49     | 110890     |
| Chad    | 1997           | FemaleAge50to54     | 90516      |
| Chad    | 1997           | FemaleAge55to59     | 78090      |
| Chad    | 1997           | FemaleAge5to9       | 583547     |
| Chad    | 1997           | FemaleAge60to64     | 64097      |
| Chad    | 1997           | FemaleAge65to69     | 49847      |
| Chad    | 1997           | FemaleAge70to74     | 35491      |
| Chad    | 1997           | FemaleAge75to79     | 21605      |
| Chad    | 1997           | FemaleAge80to84     | 10521      |
| Chad    | 1997           | FemaleAge85to89     | 3902       |
| Chad    | 1997           | FemaleAge90to94     | 973        |
| Chad    | 1997           | FemaleAge95to99     | 130        |
| Chad    | 1997           | FemaleAgeAbove100   | 8          |
| Chad    | 1997           | FemaleLactAge15to19 | 85749      |
| Chad    | 1997           | FemaleLactAge20to24 | 110475     |
| Chad    | 1997           | FemaleLactAge25to29 | 85164      |
| Chad    | 1997           | FemaleLactAge30to34 | 62802      |
| Chad    | 1997           | FemaleLactAge35to39 | 33972      |
| Chad    | 1997           | FemaleLactAge40to44 | 11434      |
| Chad    | 1997           | FemaleLactAge45to49 | 2276       |
| Chad    | 1997           | FemalePregAge15to19 | 64311      |
| Chad    | 1997           | FemalePregAge20to24 | 82856      |
| Chad    | 1997           | FemalePregAge25to29 | 63873      |
| Chad    | 1997           | FemalePregAge30to34 | 47101      |
| Chad    | 1997           | FemalePregAge35to39 | 25479      |
| Chad    | 1997           | FemalePregAge40to44 | 8575       |
| Chad    | 1997           | FemalePregAge45to49 | 1707       |

Dietary calcium and zinc deficiency risks are decreasing but remain prevalent

| Country | Reference year | Age/gender group    | Population |
|---------|----------------|---------------------|------------|
| Chad    | 1997           | MaleAge0to4         | 762063     |
| Chad    | 1997           | MaleAge10to14       | 477194     |
| Chad    | 1997           | MaleAge15to19       | 390216     |
| Chad    | 1997           | MaleAge20to24       | 315502     |
| Chad    | 1997           | MaleAge25to29       | 248744     |
| Chad    | 1997           | MaleAge30to34       | 199094     |
| Chad    | 1997           | MaleAge35to39       | 165324     |
| Chad    | 1997           | MaleAge40to44       | 139086     |
| Chad    | 1997           | MaleAge45to49       | 108381     |
| Chad    | 1997           | MaleAge50to54       | 87538      |
| Chad    | 1997           | MaleAge55to59       | 73601      |
| Chad    | 1997           | MaleAge5to9         | 590933     |
| Chad    | 1997           | MaleAge60to64       | 57354      |
| Chad    | 1997           | MaleAge65to69       | 42425      |
| Chad    | 1997           | MaleAge70to74       | 28977      |
| Chad    | 1997           | MaleAge75to79       | 17037      |
| Chad    | 1997           | MaleAge80to84       | 7832       |
| Chad    | 1997           | MaleAge85to89       | 2533       |
| Chad    | 1997           | MaleAge90to94       | 522        |
| Chad    | 1997           | MaleAge95to99       | 58         |
| Chad    | 1997           | MaleAgeAbov e100    | 2          |
| Chad    | 1998           | FemaleAge0to4       | 778601     |
| Chad    | 1998           | FemaleAge10to14     | 488635     |
| Chad    | 1998           | FemaleAge15to19     | 250552     |
| Chad    | 1998           | FemaleAge20to24     | 132277     |
| Chad    | 1998           | FemaleAge25to29     | 110358     |
| Chad    | 1998           | FemaleAge30to34     | 98062      |
| Chad    | 1998           | FemaleAge35to39     | 115798     |
| Chad    | 1998           | FemaleAge40to44     | 131839     |
| Chad    | 1998           | FemaleAge45to49     | 118212     |
| Chad    | 1998           | FemaleAge50to54     | 91294      |
| Chad    | 1998           | FemaleAge55to59     | 79662      |
| Chad    | 1998           | FemaleAge5to9       | 607350     |
| Chad    | 1998           | FemaleAge60to64     | 65186      |
| Chad    | 1998           | FemaleAge65to69     | 50818      |
| Chad    | 1998           | FemaleAge70to74     | 36095      |
| Chad    | 1998           | FemaleAge75to79     | 22199      |
| Chad    | 1998           | FemaleAge80to84     | 10778      |
| Chad    | 1998           | FemaleAge85to89     | 4008       |
| Chad    | 1998           | FemaleAge90to94     | 1026       |
| Chad    | 1998           | FemaleAge95to99     | 149        |
| Chad    | 1998           | FemaleAgeAbov e100  | 8          |
| Chad    | 1998           | FemaleLactAge15to19 | 85749      |
| Chad    | 1998           | FemaleLactAge20to24 | 110475     |
| Chad    | 1998           | FemaleLactAge25to29 | 85164      |
| Chad    | 1998           | FemaleLactAge30to34 | 62802      |
| Chad    | 1998           | FemaleLactAge35to39 | 33972      |
| Chad    | 1998           | FemaleLactAge40to44 | 11434      |
| Chad    | 1998           | FemaleLactAge45to49 | 2276       |
| Chad    | 1998           | FemalePregAge15to19 | 64311      |
| Chad    | 1998           | FemalePregAge20to24 | 82856      |
| Chad    | 1998           | FemalePregAge25to29 | 63873      |
| Chad    | 1998           | FemalePregAge30to34 | 47101      |
| Chad    | 1998           | FemalePregAge35to39 | 25479      |
| Chad    | 1998           | FemalePregAge40to44 | 8575       |
| Chad    | 1998           | FemalePregAge45to49 | 1707       |
| Chad    | 1998           | MaleAge0to4         | 787990     |
| Chad    | 1998           | MaleAge10to14       | 495586     |
| Chad    | 1998           | MaleAge15to19       | 405526     |
| Chad    | 1998           | MaleAge20to24       | 327893     |
| Chad    | 1998           | MaleAge25to29       | 259771     |
| Chad    | 1998           | MaleAge30to34       | 205255     |
| Chad    | 1998           | MaleAge35to39       | 169516     |
| Chad    | 1998           | MaleAge40to44       | 142041     |
| Chad    | 1998           | MaleAge45to49       | 113585     |
| Chad    | 1998           | MaleAge50to54       | 88286      |
| Chad    | 1998           | MaleAge55to59       | 75223      |
| Chad    | 1998           | MaleAge5to9         | 614632     |
| Chad    | 1998           | MaleAge60to64       | 58812      |
| Chad    | 1998           | MaleAge65to69       | 43283      |
| Chad    | 1998           | MaleAge70to74       | 29533      |
| Chad    | 1998           | MaleAge75to79       | 17382      |
| Chad    | 1998           | MaleAge80to84       | 8072       |
| Chad    | 1998           | MaleAge85to89       | 2619       |
| Chad    | 1998           | MaleAge90to94       | 555        |
| Chad    | 1998           | MaleAge95to99       | 72         |
| Chad    | 1998           | MaleAgeAbov e100    | 2          |
| Chad    | 1999           | FemaleAge0to4       | 805690     |
| Chad    | 1999           | FemaleAge10to14     | 508315     |
| Chad    | 1999           | FemaleAge15to19     | 266352     |
| Chad    | 1999           | FemaleAge20to24     | 145662     |
| Chad    | 1999           | FemaleAge25to29     | 121714     |
| Chad    | 1999           | FemaleAge30to34     | 104707     |
| Chad    | 1999           | FemaleAge35to39     | 119837     |
| Chad    | 1999           | FemaleAge40to44     | 134002     |
| Chad    | 1999           | FemaleAge45to49     | 125055     |
| Chad    | 1999           | FemaleAge50to54     | 93285      |
| Chad    | 1999           | FemaleAge55to59     | 81197      |

Dietary calcium and zinc deficiency risks are decreasing but remain prevalent

| Country | Reference year | Age/gender group    | Population |
|---------|----------------|---------------------|------------|
| Chad    | 1999           | FemaleAge5to9       | 631306     |
| Chad    | 1999           | FemaleAge60to64     | 66479      |
| Chad    | 1999           | FemaleAge65to69     | 51950      |
| Chad    | 1999           | FemaleAge70to74     | 36842      |
| Chad    | 1999           | FemaleAge75to79     | 22765      |
| Chad    | 1999           | FemaleAge80to84     | 10975      |
| Chad    | 1999           | FemaleAge85to89     | 3997       |
| Chad    | 1999           | FemaleAge90to94     | 1006       |
| Chad    | 1999           | FemaleAge95to99     | 154        |
| Chad    | 1999           | FemaleAgeAbove100   | 8          |
| Chad    | 1999           | FemaleLactAge15to19 | 85749      |
| Chad    | 1999           | FemaleLactAge20to24 | 110475     |
| Chad    | 1999           | FemaleLactAge25to29 | 85164      |
| Chad    | 1999           | FemaleLactAge30to34 | 62802      |
| Chad    | 1999           | FemaleLactAge35to39 | 33972      |
| Chad    | 1999           | FemaleLactAge40to44 | 11434      |
| Chad    | 1999           | FemaleLactAge45to49 | 2276       |
| Chad    | 1999           | FemalePregAge15to19 | 64311      |
| Chad    | 1999           | FemalePregAge20to24 | 82856      |
| Chad    | 1999           | FemalePregAge25to29 | 63873      |
| Chad    | 1999           | FemalePregAge30to34 | 47101      |
| Chad    | 1999           | FemalePregAge35to39 | 25479      |
| Chad    | 1999           | FemalePregAge40to44 | 8575       |
| Chad    | 1999           | FemalePregAge45to49 | 1707       |
| Chad    | 1999           | MaleAge0to4         | 815614     |
| Chad    | 1999           | MaleAge10to14       | 515444     |
| Chad    | 1999           | MaleAge15to19       | 421943     |
| Chad    | 1999           | MaleAge20to24       | 341251     |
| Chad    | 1999           | MaleAge25to29       | 271578     |
| Chad    | 1999           | MaleAge30to34       | 212598     |
| Chad    | 1999           | MaleAge35to39       | 174250     |
| Chad    | 1999           | MaleAge40to44       | 145209     |
| Chad    | 1999           | MaleAge45to49       | 118722     |
| Chad    | 1999           | MaleAge50to54       | 89864      |
| Chad    | 1999           | MaleAge55to59       | 76786      |
| Chad    | 1999           | MaleAge5to9         | 638465     |
| Chad    | 1999           | MaleAge60to64       | 60422      |
| Chad    | 1999           | MaleAge65to69       | 44355      |
| Chad    | 1999           | MaleAge70to74       | 30190      |
| Chad    | 1999           | MaleAge75to79       | 17712      |
| Chad    | 1999           | MaleAge80to84       | 8197       |
| Chad    | 1999           | MaleAge85to89       | 2609       |
| Chad    | 1999           | MaleAge90to94       | 541        |
| Chad    | 1999           | MaleAge95to99       | 74         |
| Chad    | 1999           | MaleAgeAbove100     | 2          |
| Chad    | 2000           | FemaleAge0to4       | 836280     |
| Chad    | 2000           | FemaleAge10to14     | 529046     |
| Chad    | 2000           | FemaleAge15to19     | 283200     |
| Chad    | 2000           | FemaleAge20to24     | 159967     |
| Chad    | 2000           | FemaleAge25to29     | 133814     |
| Chad    | 2000           | FemaleAge30to34     | 112694     |
| Chad    | 2000           | FemaleAge35to39     | 124368     |
| Chad    | 2000           | FemaleAge40to44     | 136729     |
| Chad    | 2000           | FemaleAge45to49     | 130618     |
| Chad    | 2000           | FemaleAge50to54     | 96935      |
| Chad    | 2000           | FemaleAge55to59     | 82599      |
| Chad    | 2000           | FemaleAge5to9       | 654746     |
| Chad    | 2000           | FemaleAge60to64     | 67972      |
| Chad    | 2000           | FemaleAge65to69     | 53226      |
| Chad    | 2000           | FemaleAge70to74     | 37761      |
| Chad    | 2000           | FemaleAge75to79     | 23319      |
| Chad    | 2000           | FemaleAge80to84     | 11143      |
| Chad    | 2000           | FemaleAge85to89     | 3875       |
| Chad    | 2000           | FemaleAge90to94     | 889        |
| Chad    | 2000           | FemaleAge95to99     | 117        |
| Chad    | 2000           | FemaleAgeAbove100   | 9          |
| Chad    | 2000           | FemaleLactAge15to19 | 85749      |
| Chad    | 2000           | FemaleLactAge20to24 | 110475     |
| Chad    | 2000           | FemaleLactAge25to29 | 85164      |
| Chad    | 2000           | FemaleLactAge30to34 | 62802      |
| Chad    | 2000           | FemaleLactAge35to39 | 33972      |
| Chad    | 2000           | FemaleLactAge40to44 | 11434      |
| Chad    | 2000           | FemaleLactAge45to49 | 2276       |
| Chad    | 2000           | FemalePregAge15to19 | 64311      |
| Chad    | 2000           | FemalePregAge20to24 | 82856      |
| Chad    | 2000           | FemalePregAge25to29 | 63873      |
| Chad    | 2000           | FemalePregAge30to34 | 47101      |
| Chad    | 2000           | FemalePregAge35to39 | 25479      |
| Chad    | 2000           | FemalePregAge40to44 | 8575       |
| Chad    | 2000           | FemalePregAge45to49 | 1707       |
| Chad    | 2000           | MaleAge0to4         | 847013     |
| Chad    | 2000           | MaleAge10to14       | 536303     |
| Chad    | 2000           | MaleAge15to19       | 439418     |
| Chad    | 2000           | MaleAge20to24       | 355725     |
| Chad    | 2000           | MaleAge25to29       | 283939     |
| Chad    | 2000           | MaleAge30to34       | 221274     |
| Chad    | 2000           | MaleAge35to39       | 179542     |
| Chad    | 2000           | MaleAge40to44       | 148843     |

Dietary calcium and zinc deficiency risks are decreasing but remain prevalent

| Country | Reference year | Age/gender group    | Population |
|---------|----------------|---------------------|------------|
| Chad    | 2000           | MaleAge45to49       | 123329     |
| Chad    | 2000           | MaleAge50to54       | 92594      |
| Chad    | 2000           | MaleAge55to59       | 78211      |
| Chad    | 2000           | MaleAge5to9         | 661830     |
| Chad    | 2000           | MaleAge60to64       | 62145      |
| Chad    | 2000           | MaleAge65to69       | 45656      |
| Chad    | 2000           | MaleAge70to74       | 30961      |
| Chad    | 2000           | MaleAge75to79       | 18058      |
| Chad    | 2000           | MaleAge80to84       | 8232       |
| Chad    | 2000           | MaleAge85to89       | 2497       |
| Chad    | 2000           | MaleAge90to94       | 453        |
| Chad    | 2000           | MaleAge95to99       | 44         |
| Chad    | 2000           | MaleAgeAbov e100    | 2          |
| Chile   | 1992           | FemaleAge0to4       | 730817     |
| Chile   | 1992           | FemaleAge10to14     | 596465     |
| Chile   | 1992           | FemaleAge15to19     | 525458     |
| Chile   | 1992           | FemaleAge20to24     | 472409     |
| Chile   | 1992           | FemaleAge25to29     | 488344     |
| Chile   | 1992           | FemaleAge30to34     | 491918     |
| Chile   | 1992           | FemaleAge35to39     | 438112     |
| Chile   | 1992           | FemaleAge40to44     | 385874     |
| Chile   | 1992           | FemaleAge45to49     | 342652     |
| Chile   | 1992           | FemaleAge50to54     | 281206     |
| Chile   | 1992           | FemaleAge55to59     | 240819     |
| Chile   | 1992           | FemaleAge5to9       | 684366     |
| Chile   | 1992           | FemaleAge60to64     | 214728     |
| Chile   | 1992           | FemaleAge65to69     | 172625     |
| Chile   | 1992           | FemaleAge70to74     | 133398     |
| Chile   | 1992           | FemaleAge75to79     | 96642      |
| Chile   | 1992           | FemaleAge80to84     | 61324      |
| Chile   | 1992           | FemaleAge85to89     | 30549      |
| Chile   | 1992           | FemaleAge90to94     | 11057      |
| Chile   | 1992           | FemaleAge95to99     | 2958       |
| Chile   | 1992           | FemaleAgeAbov e100  | 505        |
| Chile   | 1992           | FemaleLactAge15to19 | 40599      |
| Chile   | 1992           | FemaleLactAge20to24 | 82832      |
| Chile   | 1992           | FemaleLactAge25to29 | 84548      |
| Chile   | 1992           | FemaleLactAge30to34 | 60365      |
| Chile   | 1992           | FemaleLactAge35to39 | 27737      |
| Chile   | 1992           | FemaleLactAge40to44 | 6257       |
| Chile   | 1992           | FemaleLactAge45to49 | 417        |
| Chile   | 1992           | FemalePregAge15to19 | 30449      |
| Chile   | 1992           | FemalePregAge20to24 | 62124      |
| Chile   | 1992           | FemalePregAge25to29 | 63411      |
| Chile   | 1992           | FemalePregAge30to34 | 45273      |
| Chile   | 1992           | FemalePregAge35to39 | 20803      |
| Chile   | 1992           | FemalePregAge40to44 | 4693       |
| Chile   | 1992           | FemalePregAge45to49 | 313        |
| Chile   | 1992           | MaleAge0to4         | 757410     |
| Chile   | 1992           | MaleAge10to14       | 615441     |
| Chile   | 1992           | MaleAge15to19       | 611408     |
| Chile   | 1992           | MaleAge20to24       | 628102     |
| Chile   | 1992           | MaleAge25to29       | 641934     |
| Chile   | 1992           | MaleAge30to34       | 598558     |
| Chile   | 1992           | MaleAge35to39       | 484064     |
| Chile   | 1992           | MaleAge40to44       | 389144     |
| Chile   | 1992           | MaleAge45to49       | 328723     |
| Chile   | 1992           | MaleAge50to54       | 261879     |
| Chile   | 1992           | MaleAge55to59       | 213655     |
| Chile   | 1992           | MaleAge5to9         | 708729     |
| Chile   | 1992           | MaleAge60to64       | 180879     |
| Chile   | 1992           | MaleAge65to69       | 136873     |
| Chile   | 1992           | MaleAge70to74       | 96679      |
| Chile   | 1992           | MaleAge75to79       | 63088      |
| Chile   | 1992           | MaleAge80to84       | 35597      |
| Chile   | 1992           | MaleAge85to89       | 15826      |
| Chile   | 1992           | MaleAge90to94       | 5068       |
| Chile   | 1992           | MaleAge95to99       | 1205       |
| Chile   | 1992           | MaleAgeAbov e100    | 178        |
| Chile   | 1993           | FemaleAge0to4       | 736032     |
| Chile   | 1993           | FemaleAge10to14     | 614500     |
| Chile   | 1993           | FemaleAge15to19     | 514543     |
| Chile   | 1993           | FemaleAge20to24     | 475002     |
| Chile   | 1993           | FemaleAge25to29     | 482618     |
| Chile   | 1993           | FemaleAge30to34     | 510358     |
| Chile   | 1993           | FemaleAge35to39     | 462321     |
| Chile   | 1993           | FemaleAge40to44     | 399397     |
| Chile   | 1993           | FemaleAge45to49     | 351551     |
| Chile   | 1993           | FemaleAge50to54     | 294773     |
| Chile   | 1993           | FemaleAge55to59     | 243279     |
| Chile   | 1993           | FemaleAge5to9       | 698445     |
| Chile   | 1993           | FemaleAge60to64     | 219188     |
| Chile   | 1993           | FemaleAge65to69     | 179198     |
| Chile   | 1993           | FemaleAge70to74     | 136290     |
| Chile   | 1993           | FemaleAge75to79     | 100027     |
| Chile   | 1993           | FemaleAge80to84     | 62905      |
| Chile   | 1993           | FemaleAge85to89     | 32332      |
| Chile   | 1993           | FemaleAge90to94     | 11490      |



Dietary calcium and zinc deficiency risks are decreasing but remain prevalent

| Country | Reference year | Age/gender group    | Population |
|---------|----------------|---------------------|------------|
| Chile   | 1993           | FemaleAge95to99     | 3228       |
| Chile   | 1993           | FemaleAgeAbov e100  | 543        |
| Chile   | 1993           | FemaleLactAge15to19 | 40599      |
| Chile   | 1993           | FemaleLactAge20to24 | 82832      |
| Chile   | 1993           | FemaleLactAge25to29 | 84548      |
| Chile   | 1993           | FemaleLactAge30to34 | 60365      |
| Chile   | 1993           | FemaleLactAge35to39 | 27737      |
| Chile   | 1993           | FemaleLactAge40to44 | 6257       |
| Chile   | 1993           | FemaleLactAge45to49 | 417        |
| Chile   | 1993           | FemalePregAge15to19 | 30449      |
| Chile   | 1993           | FemalePregAge20to24 | 62124      |
| Chile   | 1993           | FemalePregAge25to29 | 63411      |
| Chile   | 1993           | FemalePregAge30to34 | 45273      |
| Chile   | 1993           | FemalePregAge35to39 | 20803      |
| Chile   | 1993           | FemalePregAge40to44 | 4693       |
| Chile   | 1993           | FemalePregAge45to49 | 313        |
| Chile   | 1993           | MaleAge0to4         | 762996     |
| Chile   | 1993           | MaleAge10to14       | 634648     |
| Chile   | 1993           | MaleAge15to19       | 600663     |
| Chile   | 1993           | MaleAge20to24       | 631002     |
| Chile   | 1993           | MaleAge25to29       | 636215     |
| Chile   | 1993           | MaleAge30to34       | 617020     |
| Chile   | 1993           | MaleAge35to39       | 508221     |
| Chile   | 1993           | MaleAge40to44       | 403342     |
| Chile   | 1993           | MaleAge45to49       | 338426     |
| Chile   | 1993           | MaleAge50to54       | 275398     |
| Chile   | 1993           | MaleAge55to59       | 217450     |
| Chile   | 1993           | MaleAge5to9         | 723348     |
| Chile   | 1993           | MaleAge60to64       | 185095     |
| Chile   | 1993           | MaleAge65to69       | 142768     |
| Chile   | 1993           | MaleAge70to74       | 99141      |
| Chile   | 1993           | MaleAge75to79       | 65199      |
| Chile   | 1993           | MaleAge80to84       | 36272      |
| Chile   | 1993           | MaleAge85to89       | 16602      |
| Chile   | 1993           | MaleAge90to94       | 5224       |
| Chile   | 1993           | MaleAge95to99       | 1321       |
| Chile   | 1993           | MaleAgeAbov e100    | 188        |
| Chile   | 1994           | FemaleAge0to4       | 737452     |
| Chile   | 1994           | FemaleAge10to14     | 633913     |
| Chile   | 1994           | FemaleAge15to19     | 507716     |
| Chile   | 1994           | FemaleAge20to24     | 475339     |
| Chile   | 1994           | FemaleAge25to29     | 476893     |
| Chile   | 1994           | FemaleAge30to34     | 524545     |
| Chile   | 1994           | FemaleAge35to39     | 486457     |
| Chile   | 1994           | FemaleAge40to44     | 415144     |
| Chile   | 1994           | FemaleAge45to49     | 360980     |
| Chile   | 1994           | FemaleAge50to54     | 308101     |
| Chile   | 1994           | FemaleAge55to59     | 247580     |
| Chile   | 1994           | FemaleAge5to9       | 710282     |
| Chile   | 1994           | FemaleAge60to64     | 223269     |
| Chile   | 1994           | FemaleAge65to69     | 185699     |
| Chile   | 1994           | FemaleAge70to74     | 139964     |
| Chile   | 1994           | FemaleAge75to79     | 103504     |
| Chile   | 1994           | FemaleAge80to84     | 64858      |
| Chile   | 1994           | FemaleAge85to89     | 33682      |
| Chile   | 1994           | FemaleAge90to94     | 11846      |
| Chile   | 1994           | FemaleAge95to99     | 3355       |
| Chile   | 1994           | FemaleAgeAbov e100  | 585        |
| Chile   | 1994           | FemaleLactAge15to19 | 40599      |
| Chile   | 1994           | FemaleLactAge20to24 | 82832      |
| Chile   | 1994           | FemaleLactAge25to29 | 84548      |
| Chile   | 1994           | FemaleLactAge30to34 | 60365      |
| Chile   | 1994           | FemaleLactAge35to39 | 27737      |
| Chile   | 1994           | FemaleLactAge40to44 | 6257       |
| Chile   | 1994           | FemaleLactAge45to49 | 417        |
| Chile   | 1994           | FemalePregAge15to19 | 30449      |
| Chile   | 1994           | FemalePregAge20to24 | 62124      |
| Chile   | 1994           | FemalePregAge25to29 | 63411      |
| Chile   | 1994           | FemalePregAge30to34 | 45273      |
| Chile   | 1994           | FemalePregAge35to39 | 20803      |
| Chile   | 1994           | FemalePregAge40to44 | 4693       |
| Chile   | 1994           | FemalePregAge45to49 | 313        |
| Chile   | 1994           | MaleAge0to4         | 764631     |
| Chile   | 1994           | MaleAge10to14       | 655210     |
| Chile   | 1994           | MaleAge15to19       | 594262     |
| Chile   | 1994           | MaleAge20to24       | 631699     |
| Chile   | 1994           | MaleAge25to29       | 630540     |
| Chile   | 1994           | MaleAge30to34       | 631182     |
| Chile   | 1994           | MaleAge35to39       | 532243     |
| Chile   | 1994           | MaleAge40to44       | 419639     |
| Chile   | 1994           | MaleAge45to49       | 348689     |
| Chile   | 1994           | MaleAge50to54       | 288760     |
| Chile   | 1994           | MaleAge55to59       | 222988     |
| Chile   | 1994           | MaleAge5to9         | 735560     |
| Chile   | 1994           | MaleAge60to64       | 189226     |
| Chile   | 1994           | MaleAge65to69       | 148599     |
| Chile   | 1994           | MaleAge70to74       | 102337     |
| Chile   | 1994           | MaleAge75to79       | 67368      |

Dietary calcium and zinc deficiency risks are decreasing but remain prevalent

| Country | Reference year | Age/gender group    | Population |
|---------|----------------|---------------------|------------|
| Chile   | 1994           | MaleAge80to84       | 37001      |
| Chile   | 1994           | MaleAge85to89       | 16983      |
| Chile   | 1994           | MaleAge90to94       | 5277       |
| Chile   | 1994           | MaleAge95to99       | 1349       |
| Chile   | 1994           | MaleAgeAbov e100    | 200        |
| Chile   | 1995           | FemaleAge0to4       | 732708     |
| Chile   | 1995           | FemaleAge10to14     | 651986     |
| Chile   | 1995           | FemaleAge15to19     | 507869     |
| Chile   | 1995           | FemaleAge20to24     | 471662     |
| Chile   | 1995           | FemaleAge25to29     | 473357     |
| Chile   | 1995           | FemaleAge30to34     | 533369     |
| Chile   | 1995           | FemaleAge35to39     | 509412     |
| Chile   | 1995           | FemaleAge40to44     | 433507     |
| Chile   | 1995           | FemaleAge45to49     | 371626     |
| Chile   | 1995           | FemaleAge50to54     | 320033     |
| Chile   | 1995           | FemaleAge55to59     | 254548     |
| Chile   | 1995           | FemaleAge5to9       | 720590     |
| Chile   | 1995           | FemaleAge60to64     | 226973     |
| Chile   | 1995           | FemaleAge65to69     | 191729     |
| Chile   | 1995           | FemaleAge70to74     | 144702     |
| Chile   | 1995           | FemaleAge75to79     | 106951     |
| Chile   | 1995           | FemaleAge80to84     | 67287      |
| Chile   | 1995           | FemaleAge85to89     | 34703      |
| Chile   | 1995           | FemaleAge90to94     | 12144      |
| Chile   | 1995           | FemaleAge95to99     | 3224       |
| Chile   | 1995           | FemaleAgeAbov e100  | 630        |
| Chile   | 1995           | FemaleLactAge15to19 | 40599      |
| Chile   | 1995           | FemaleLactAge20to24 | 82832      |
| Chile   | 1995           | FemaleLactAge25to29 | 84548      |
| Chile   | 1995           | FemaleLactAge30to34 | 60365      |
| Chile   | 1995           | FemaleLactAge35to39 | 27737      |
| Chile   | 1995           | FemaleLactAge40to44 | 6257       |
| Chile   | 1995           | FemaleLactAge45to49 | 417        |
| Chile   | 1995           | FemalePregAge15to19 | 30449      |
| Chile   | 1995           | FemalePregAge20to24 | 62124      |
| Chile   | 1995           | FemalePregAge25to29 | 63411      |
| Chile   | 1995           | FemalePregAge30to34 | 45273      |
| Chile   | 1995           | FemalePregAge35to39 | 20803      |
| Chile   | 1995           | FemalePregAge40to44 | 4693       |
| Chile   | 1995           | FemalePregAge45to49 | 313        |
| Chile   | 1995           | MaleAge0to4         | 759792     |
| Chile   | 1995           | MaleAge10to14       | 674275     |
| Chile   | 1995           | MaleAge15to19       | 595140     |
| Chile   | 1995           | MaleAge20to24       | 628409     |
| Chile   | 1995           | MaleAge25to29       | 627141     |
| Chile   | 1995           | MaleAge30to34       | 639936     |
| Chile   | 1995           | MaleAge35to39       | 555076     |
| Chile   | 1995           | MaleAge40to44       | 438376     |
| Chile   | 1995           | MaleAge45to49       | 360120     |
| Chile   | 1995           | MaleAge50to54       | 300983     |
| Chile   | 1995           | MaleAge55to59       | 230880     |
| Chile   | 1995           | MaleAge5to9         | 746169     |
| Chile   | 1995           | MaleAge60to64       | 193366     |
| Chile   | 1995           | MaleAge65to69       | 154045     |
| Chile   | 1995           | MaleAge70to74       | 106457     |
| Chile   | 1995           | MaleAge75to79       | 69577      |
| Chile   | 1995           | MaleAge80to84       | 37908      |
| Chile   | 1995           | MaleAge85to89       | 17008      |
| Chile   | 1995           | MaleAge90to94       | 5188       |
| Chile   | 1995           | MaleAge95to99       | 1215       |
| Chile   | 1995           | MaleAgeAbov e100    | 213        |
| Chile   | 1996           | FemaleAge0to4       | 723594     |
| Chile   | 1996           | FemaleAge10to14     | 668948     |
| Chile   | 1996           | FemaleAge15to19     | 513502     |
| Chile   | 1996           | FemaleAge20to24     | 494945     |
| Chile   | 1996           | FemaleAge25to29     | 500123     |
| Chile   | 1996           | FemaleAge30to34     | 542931     |
| Chile   | 1996           | FemaleAge35to39     | 525894     |
| Chile   | 1996           | FemaleAge40to44     | 452813     |
| Chile   | 1996           | FemaleAge45to49     | 382967     |
| Chile   | 1996           | FemaleAge50to54     | 330348     |
| Chile   | 1996           | FemaleAge55to59     | 263480     |
| Chile   | 1996           | FemaleAge5to9       | 729499     |
| Chile   | 1996           | FemaleAge60to64     | 229578     |
| Chile   | 1996           | FemaleAge65to69     | 196543     |
| Chile   | 1996           | FemaleAge70to74     | 149497     |
| Chile   | 1996           | FemaleAge75to79     | 109533     |
| Chile   | 1996           | FemaleAge80to84     | 69790      |
| Chile   | 1996           | FemaleAge85to89     | 36646      |
| Chile   | 1996           | FemaleAge90to94     | 13668      |
| Chile   | 1996           | FemaleAge95to99     | 3450       |
| Chile   | 1996           | FemaleAgeAbov e100  | 679        |
| Chile   | 1996           | FemaleLactAge15to19 | 41219      |
| Chile   | 1996           | FemaleLactAge20to24 | 65623      |
| Chile   | 1996           | FemaleLactAge25to29 | 68359      |
| Chile   | 1996           | FemaleLactAge30to34 | 56762      |
| Chile   | 1996           | FemaleLactAge35to39 | 30552      |
| Chile   | 1996           | FemaleLactAge40to44 | 6814       |

Dietary calcium and zinc deficiency risks are decreasing but remain prevalent

| Country | Reference year | Age/gender group    | Population |
|---------|----------------|---------------------|------------|
| Chile   | 1996           | FemaleLactAge45to49 | 326        |
| Chile   | 1996           | FemalePregAge15to19 | 30915      |
| Chile   | 1996           | FemalePregAge20to24 | 49218      |
| Chile   | 1996           | FemalePregAge25to29 | 51270      |
| Chile   | 1996           | FemalePregAge30to34 | 42572      |
| Chile   | 1996           | FemalePregAge35to39 | 22914      |
| Chile   | 1996           | FemalePregAge40to44 | 5110       |
| Chile   | 1996           | FemalePregAge45to49 | 244        |
| Chile   | 1996           | MaleAge0to4         | 750570     |
| Chile   | 1996           | MaleAge10to14       | 691951     |
| Chile   | 1996           | MaleAge15to19       | 602499     |
| Chile   | 1996           | MaleAge20to24       | 621722     |
| Chile   | 1996           | MaleAge25to29       | 625829     |
| Chile   | 1996           | MaleAge30to34       | 643154     |
| Chile   | 1996           | MaleAge35to39       | 576291     |
| Chile   | 1996           | MaleAge40to44       | 458696     |
| Chile   | 1996           | MaleAge45to49       | 371844     |
| Chile   | 1996           | MaleAge50to54       | 311463     |
| Chile   | 1996           | MaleAge55to59       | 240055     |
| Chile   | 1996           | MaleAge5to9         | 755411     |
| Chile   | 1996           | MaleAge60to64       | 196578     |
| Chile   | 1996           | MaleAge65to69       | 158239     |
| Chile   | 1996           | MaleAge70to74       | 110626     |
| Chile   | 1996           | MaleAge75to79       | 71731      |
| Chile   | 1996           | MaleAge80to84       | 39740      |
| Chile   | 1996           | MaleAge85to89       | 18141      |
| Chile   | 1996           | MaleAge90to94       | 5931       |
| Chile   | 1996           | MaleAge95to99       | 1299       |
| Chile   | 1996           | MaleAgeAbov e100    | 227        |
| Chile   | 1997           | FemaleAge0to4       | 708586     |
| Chile   | 1997           | FemaleAge10to14     | 684665     |
| Chile   | 1997           | FemaleAge15to19     | 526877     |
| Chile   | 1997           | FemaleAge20to24     | 484519     |
| Chile   | 1997           | FemaleAge25to29     | 501424     |
| Chile   | 1997           | FemaleAge30to34     | 540496     |
| Chile   | 1997           | FemaleAge35to39     | 546392     |
| Chile   | 1997           | FemaleAge40to44     | 475411     |
| Chile   | 1997           | FemaleAge45to49     | 394961     |
| Chile   | 1997           | FemaleAge50to54     | 339626     |
| Chile   | 1997           | FemaleAge55to59     | 275198     |
| Chile   | 1997           | FemaleAge5to9       | 735485     |
| Chile   | 1997           | FemaleAge60to64     | 231683     |
| Chile   | 1997           | FemaleAge65to69     | 201223     |
| Chile   | 1997           | FemaleAge70to74     | 155243     |
| Chile   | 1997           | FemaleAge75to79     | 112036     |
| Chile   | 1997           | FemaleAge80to84     | 72529      |
| Chile   | 1997           | FemaleAge85to89     | 38236      |
| Chile   | 1997           | FemaleAge90to94     | 15053      |
| Chile   | 1997           | FemaleAge95to99     | 3716       |
| Chile   | 1997           | FemaleAgeAbov e100  | 733        |
| Chile   | 1997           | FemaleLactAge15to19 | 41219      |
| Chile   | 1997           | FemaleLactAge20to24 | 65623      |
| Chile   | 1997           | FemaleLactAge25to29 | 68359      |
| Chile   | 1997           | FemaleLactAge30to34 | 56762      |
| Chile   | 1997           | FemaleLactAge35to39 | 30552      |
| Chile   | 1997           | FemaleLactAge40to44 | 6814       |
| Chile   | 1997           | FemaleLactAge45to49 | 326        |
| Chile   | 1997           | FemalePregAge15to19 | 30915      |
| Chile   | 1997           | FemalePregAge20to24 | 49218      |
| Chile   | 1997           | FemalePregAge25to29 | 51270      |
| Chile   | 1997           | FemalePregAge30to34 | 42572      |
| Chile   | 1997           | FemalePregAge35to39 | 22914      |
| Chile   | 1997           | FemalePregAge40to44 | 5110       |
| Chile   | 1997           | FemalePregAge45to49 | 244        |
| Chile   | 1997           | MaleAge0to4         | 735059     |
| Chile   | 1997           | MaleAge10to14       | 708295     |
| Chile   | 1997           | MaleAge15to19       | 616795     |
| Chile   | 1997           | MaleAge20to24       | 611418     |
| Chile   | 1997           | MaleAge25to29       | 627466     |
| Chile   | 1997           | MaleAge30to34       | 640718     |
| Chile   | 1997           | MaleAge35to39       | 596623     |
| Chile   | 1997           | MaleAge40to44       | 481154     |
| Chile   | 1997           | MaleAge45to49       | 384393     |
| Chile   | 1997           | MaleAge50to54       | 321159     |
| Chile   | 1997           | MaleAge55to59       | 251635     |
| Chile   | 1997           | MaleAge5to9         | 761692     |
| Chile   | 1997           | MaleAge60to64       | 199681     |
| Chile   | 1997           | MaleAge65to69       | 162330     |
| Chile   | 1997           | MaleAge70to74       | 115494     |
| Chile   | 1997           | MaleAge75to79       | 73764      |
| Chile   | 1997           | MaleAge80to84       | 41560      |
| Chile   | 1997           | MaleAge85to89       | 18999      |
| Chile   | 1997           | MaleAge90to94       | 6581       |
| Chile   | 1997           | MaleAge95to99       | 1409       |
| Chile   | 1997           | MaleAgeAbov e100    | 243        |
| Chile   | 1998           | FemaleAge0to4       | 689637     |
| Chile   | 1998           | FemaleAge10to14     | 698894     |
| Chile   | 1998           | FemaleAge15to19     | 544831     |

Dietary calcium and zinc deficiency risks are decreasing but remain prevalent

| Country | Reference year | Age/gender group    | Population |
|---------|----------------|---------------------|------------|
| Chile   | 1998           | FemaleAge20to24     | 473449     |
| Chile   | 1998           | FemaleAge25to29     | 503748     |
| Chile   | 1998           | FemaleAge30to34     | 534537     |
| Chile   | 1998           | FemaleAge35to39     | 564586     |
| Chile   | 1998           | FemaleAge40to44     | 499356     |
| Chile   | 1998           | FemaleAge45to49     | 408323     |
| Chile   | 1998           | FemaleAge50to54     | 348450     |
| Chile   | 1998           | FemaleAge55to59     | 288525     |
| Chile   | 1998           | FemaleAge5to9       | 738154     |
| Chile   | 1998           | FemaleAge60to64     | 234205     |
| Chile   | 1998           | FemaleAge65to69     | 205704     |
| Chile   | 1998           | FemaleAge70to74     | 161515     |
| Chile   | 1998           | FemaleAge75to79     | 114839     |
| Chile   | 1998           | FemaleAge80to84     | 75484      |
| Chile   | 1998           | FemaleAge85to89     | 39590      |
| Chile   | 1998           | FemaleAge90to94     | 16148      |
| Chile   | 1998           | FemaleAge95to99     | 4039       |
| Chile   | 1998           | FemaleAgeAbov e100  | 792        |
| Chile   | 1998           | FemaleLactAge15to19 | 41219      |
| Chile   | 1998           | FemaleLactAge20to24 | 65623      |
| Chile   | 1998           | FemaleLactAge25to29 | 68359      |
| Chile   | 1998           | FemaleLactAge30to34 | 56762      |
| Chile   | 1998           | FemaleLactAge35to39 | 30552      |
| Chile   | 1998           | FemaleLactAge40to44 | 6814       |
| Chile   | 1998           | FemaleLactAge45to49 | 326        |
| Chile   | 1998           | FemalePregAge15to19 | 30915      |
| Chile   | 1998           | FemalePregAge20to24 | 49218      |
| Chile   | 1998           | FemalePregAge25to29 | 51270      |
| Chile   | 1998           | FemalePregAge30to34 | 42572      |
| Chile   | 1998           | FemalePregAge35to39 | 22914      |
| Chile   | 1998           | FemalePregAge40to44 | 5110       |
| Chile   | 1998           | FemalePregAge45to49 | 244        |
| Chile   | 1998           | MaleAge0to4         | 715343     |
| Chile   | 1998           | MaleAge10to14       | 723066     |
| Chile   | 1998           | MaleAge15to19       | 635858     |
| Chile   | 1998           | MaleAge20to24       | 600566     |
| Chile   | 1998           | MaleAge25to29       | 630162     |
| Chile   | 1998           | MaleAge30to34       | 634822     |
| Chile   | 1998           | MaleAge35to39       | 614677     |
| Chile   | 1998           | MaleAge40to44       | 504839     |
| Chile   | 1998           | MaleAge45to49       | 398266     |
| Chile   | 1998           | MaleAge50to54       | 330602     |
| Chile   | 1998           | MaleAge55to59       | 264621     |
| Chile   | 1998           | MaleAge5to9         | 764599     |
| Chile   | 1998           | MaleAge60to64       | 203381     |
| Chile   | 1998           | MaleAge65to69       | 166380     |
| Chile   | 1998           | MaleAge70to74       | 120750     |
| Chile   | 1998           | MaleAge75to79       | 75980      |
| Chile   | 1998           | MaleAge80to84       | 43317      |
| Chile   | 1998           | MaleAge85to89       | 19629      |
| Chile   | 1998           | MaleAge90to94       | 7044       |
| Chile   | 1998           | MaleAge95to99       | 1542       |
| Chile   | 1998           | MaleAgeAbov e100    | 261        |
| Chile   | 1999           | FemaleAge0to4       | 670682     |
| Chile   | 1999           | FemaleAge10to14     | 711399     |
| Chile   | 1999           | FemaleAge15to19     | 563736     |
| Chile   | 1999           | FemaleAge20to24     | 466342     |
| Chile   | 1999           | FemaleAge25to29     | 503768     |
| Chile   | 1999           | FemaleAge30to34     | 528465     |
| Chile   | 1999           | FemaleAge35to39     | 578419     |
| Chile   | 1999           | FemaleAge40to44     | 523111     |
| Chile   | 1999           | FemaleAge45to49     | 423787     |
| Chile   | 1999           | FemaleAge50to54     | 357742     |
| Chile   | 1999           | FemaleAge55to59     | 301552     |
| Chile   | 1999           | FemaleAge5to9       | 737245     |
| Chile   | 1999           | FemaleAge60to64     | 238503     |
| Chile   | 1999           | FemaleAge65to69     | 209828     |
| Chile   | 1999           | FemaleAge70to74     | 167699     |
| Chile   | 1999           | FemaleAge75to79     | 118405     |
| Chile   | 1999           | FemaleAge80to84     | 78482      |
| Chile   | 1999           | FemaleAge85to89     | 40899      |
| Chile   | 1999           | FemaleAge90to94     | 16858      |
| Chile   | 1999           | FemaleAge95to99     | 4365       |
| Chile   | 1999           | FemaleAgeAbov e100  | 859        |
| Chile   | 1999           | FemaleLactAge15to19 | 41219      |
| Chile   | 1999           | FemaleLactAge20to24 | 65623      |
| Chile   | 1999           | FemaleLactAge25to29 | 68359      |
| Chile   | 1999           | FemaleLactAge30to34 | 56762      |
| Chile   | 1999           | FemaleLactAge35to39 | 30552      |
| Chile   | 1999           | FemaleLactAge40to44 | 6814       |
| Chile   | 1999           | FemaleLactAge45to49 | 326        |
| Chile   | 1999           | FemalePregAge15to19 | 30915      |
| Chile   | 1999           | FemalePregAge20to24 | 49218      |
| Chile   | 1999           | FemalePregAge25to29 | 51270      |
| Chile   | 1999           | FemalePregAge30to34 | 42572      |
| Chile   | 1999           | FemalePregAge35to39 | 22914      |
| Chile   | 1999           | FemalePregAge40to44 | 5110       |
| Chile   | 1999           | FemalePregAge45to49 | 244        |

Dietary calcium and zinc deficiency risks are decreasing but remain prevalent

| Country | Reference year | Age/gender group    | Population |
|---------|----------------|---------------------|------------|
| Chile   | 1999           | MaleAge0to4         | 695611     |
| Chile   | 1999           | MaleAge10to14       | 736063     |
| Chile   | 1999           | MaleAge15to19       | 655895     |
| Chile   | 1999           | MaleAge20to24       | 593897     |
| Chile   | 1999           | MaleAge25to29       | 630541     |
| Chile   | 1999           | MaleAge30to34       | 628884     |
| Chile   | 1999           | MaleAge35to39       | 628389     |
| Chile   | 1999           | MaleAge40to44       | 528298     |
| Chile   | 1999           | MaleAge45to49       | 414123     |
| Chile   | 1999           | MaleAge50to54       | 340594     |
| Chile   | 1999           | MaleAge55to59       | 277416     |
| Chile   | 1999           | MaleAge5to9         | 763810     |
| Chile   | 1999           | MaleAge60to64       | 208701     |
| Chile   | 1999           | MaleAge65to69       | 170388     |
| Chile   | 1999           | MaleAge70to74       | 125915     |
| Chile   | 1999           | MaleAge75to79       | 78730      |
| Chile   | 1999           | MaleAge80to84       | 44929      |
| Chile   | 1999           | MaleAge85to89       | 20122      |
| Chile   | 1999           | MaleAge90to94       | 7250       |
| Chile   | 1999           | MaleAge95to99       | 1655       |
| Chile   | 1999           | MaleAgeAbov e100    | 281        |
| China   | 1992           | FemaleAge0to4       | 64106629   |
| China   | 1992           | FemaleAge10to14     | 46701811   |
| China   | 1992           | FemaleAge15to19     | 53606946   |
| China   | 1992           | FemaleAge20to24     | 42790633   |
| China   | 1992           | FemaleAge25to29     | 40117731   |
| China   | 1992           | FemaleAge30to34     | 39378858   |
| China   | 1992           | FemaleAge35to39     | 40391764   |
| China   | 1992           | FemaleAge40to44     | 34650316   |
| China   | 1992           | FemaleAge45to49     | 24727581   |
| China   | 1992           | FemaleAge50to54     | 21264195   |
| China   | 1992           | FemaleAge55to59     | 20069134   |
| China   | 1992           | FemaleAge5to9       | 57156246   |
| China   | 1992           | FemaleAge60to64     | 17199182   |
| China   | 1992           | FemaleAge65to69     | 13564857   |
| China   | 1992           | FemaleAge70to74     | 10557394   |
| China   | 1992           | FemaleAge75to79     | 7281223    |
| China   | 1992           | FemaleAge80to84     | 4166884    |
| China   | 1992           | FemaleAge85to89     | 1924781    |
| China   | 1992           | FemaleAge90to94     | 577609     |
| China   | 1992           | FemaleAge95to99     | 73757      |
| China   | 1992           | FemaleAgeAbov e100  | 4526       |
| China   | 1992           | FemaleLactAge15to19 | 292569     |
| China   | 1992           | FemaleLactAge20to24 | 10594184   |
| China   | 1992           | FemaleLactAge25to29 | 8839267    |
| China   | 1992           | FemaleLactAge30to34 | 2371011    |
| China   | 1992           | FemaleLactAge35to39 | 449150     |
| China   | 1992           | FemaleLactAge40to44 | 156580     |
| China   | 1992           | FemaleLactAge45to49 | 29003      |
| China   | 1992           | FemalePregAge15to19 | 219427     |
| China   | 1992           | FemalePregAge20to24 | 7945638    |
| China   | 1992           | FemalePregAge25to29 | 6629451    |
| China   | 1992           | FemalePregAge30to34 | 1778259    |
| China   | 1992           | FemalePregAge35to39 | 336862     |
| China   | 1992           | FemalePregAge40to44 | 117435     |
| China   | 1992           | FemalePregAge45to49 | 21752      |
| China   | 1992           | MaleAge0to4         | 70932697   |
| China   | 1992           | MaleAge10to14       | 49677970   |
| China   | 1992           | MaleAge15to19       | 57043746   |
| China   | 1992           | MaleAge20to24       | 65366310   |
| China   | 1992           | MaleAge25to29       | 59488344   |
| China   | 1992           | MaleAge30to34       | 47322573   |
| China   | 1992           | MaleAge35to39       | 45650711   |
| China   | 1992           | MaleAge40to44       | 38070571   |
| China   | 1992           | MaleAge45to49       | 27061750   |
| China   | 1992           | MaleAge50to54       | 23757495   |
| China   | 1992           | MaleAge55to59       | 22036529   |
| China   | 1992           | MaleAge5to9         | 61495297   |
| China   | 1992           | MaleAge60to64       | 18196520   |
| China   | 1992           | MaleAge65to69       | 13294930   |
| China   | 1992           | MaleAge70to74       | 9529412    |
| China   | 1992           | MaleAge75to79       | 5886463    |
| China   | 1992           | MaleAge80to84       | 2733132    |
| China   | 1992           | MaleAge85to89       | 986175     |
| China   | 1992           | MaleAge90to94       | 227456     |
| China   | 1992           | MaleAge95to99       | 23507      |
| China   | 1992           | MaleAgeAbov e100    | 830        |
| China   | 1993           | FemaleAge0to4       | 60016154   |
| China   | 1993           | FemaleAge10to14     | 47960818   |
| China   | 1993           | FemaleAge15to19     | 50527230   |
| China   | 1993           | FemaleAge20to24     | 42797229   |
| China   | 1993           | FemaleAge25to29     | 41988587   |
| China   | 1993           | FemaleAge30to34     | 41962330   |
| China   | 1993           | FemaleAge35to39     | 39542357   |
| China   | 1993           | FemaleAge40to44     | 37348655   |
| China   | 1993           | FemaleAge45to49     | 26094990   |
| China   | 1993           | FemaleAge50to54     | 21441107   |
| China   | 1993           | FemaleAge55to59     | 20243175   |

Dietary calcium and zinc deficiency risks are decreasing but remain prevalent

| Country | Reference year | Age/gender group    | Population |
|---------|----------------|---------------------|------------|
| China   | 1993           | FemaleAge5to9       | 60317667   |
| China   | 1993           | FemaleAge60to64     | 17740787   |
| China   | 1993           | FemaleAge65to69     | 13944390   |
| China   | 1993           | FemaleAge70to74     | 10698539   |
| China   | 1993           | FemaleAge75to79     | 7521467    |
| China   | 1993           | FemaleAge80to84     | 4257038    |
| China   | 1993           | FemaleAge85to89     | 1978591    |
| China   | 1993           | FemaleAge90to94     | 615598     |
| China   | 1993           | FemaleAge95to99     | 82329      |
| China   | 1993           | FemaleAgeAbove100   | 4942       |
| China   | 1993           | FemaleLactAge15to19 | 292569     |
| China   | 1993           | FemaleLactAge20to24 | 10594184   |
| China   | 1993           | FemaleLactAge25to29 | 8839267    |
| China   | 1993           | FemaleLactAge30to34 | 2371011    |
| China   | 1993           | FemaleLactAge35to39 | 449150     |
| China   | 1993           | FemaleLactAge40to44 | 156580     |
| China   | 1993           | FemaleLactAge45to49 | 29003      |
| China   | 1993           | FemalePregAge15to19 | 219427     |
| China   | 1993           | FemalePregAge20to24 | 7945638    |
| China   | 1993           | FemalePregAge25to29 | 6629451    |
| China   | 1993           | FemalePregAge30to34 | 1778259    |
| China   | 1993           | FemalePregAge35to39 | 336862     |
| China   | 1993           | FemalePregAge40to44 | 117435     |
| China   | 1993           | FemalePregAge45to49 | 21752      |
| China   | 1993           | MaleAge0to4         | 66799541   |
| China   | 1993           | MaleAge10to14       | 51024676   |
| China   | 1993           | MaleAge15to19       | 53919162   |
| China   | 1993           | MaleAge20to24       | 65042560   |
| China   | 1993           | MaleAge25to29       | 61595047   |
| China   | 1993           | MaleAge30to34       | 49743215   |
| China   | 1993           | MaleAge35to39       | 44671661   |
| China   | 1993           | MaleAge40to44       | 41217783   |
| China   | 1993           | MaleAge45to49       | 28325062   |
| China   | 1993           | MaleAge50to54       | 23865859   |
| China   | 1993           | MaleAge55to59       | 22294413   |
| China   | 1993           | MaleAge5to9         | 65233414   |
| China   | 1993           | MaleAge60to64       | 18793314   |
| China   | 1993           | MaleAge65to69       | 13811169   |
| China   | 1993           | MaleAge70to74       | 9608817    |
| China   | 1993           | MaleAge75to79       | 6153034    |
| China   | 1993           | MaleAge80to84       | 2835546    |
| China   | 1993           | MaleAge85to89       | 1028177    |
| China   | 1993           | MaleAge90to94       | 246217     |
| China   | 1993           | MaleAge95to99       | 29522      |
| China   | 1993           | MaleAgeAbove100     | 917        |
| China   | 1994           | FemaleAge0to4       | 55488433   |
| China   | 1994           | FemaleAge10to14     | 49736543   |
| China   | 1994           | FemaleAge15to19     | 47940472   |
| China   | 1994           | FemaleAge20to24     | 42074778   |
| China   | 1994           | FemaleAge25to29     | 43481346   |
| China   | 1994           | FemaleAge30to34     | 44591626   |
| China   | 1994           | FemaleAge35to39     | 39046637   |
| China   | 1994           | FemaleAge40to44     | 39471253   |
| China   | 1994           | FemaleAge45to49     | 27740972   |
| China   | 1994           | FemaleAge50to54     | 21798527   |
| China   | 1994           | FemaleAge55to59     | 20372459   |
| China   | 1994           | FemaleAge5to9       | 63155890   |
| China   | 1994           | FemaleAge60to64     | 18219218   |
| China   | 1994           | FemaleAge65to69     | 14369020   |
| China   | 1994           | FemaleAge70to74     | 10886582   |
| China   | 1994           | FemaleAge75to79     | 7745128    |
| China   | 1994           | FemaleAge80to84     | 4351943    |
| China   | 1994           | FemaleAge85to89     | 2003122    |
| China   | 1994           | FemaleAge90to94     | 618560     |
| China   | 1994           | FemaleAge95to99     | 88250      |
| China   | 1994           | FemaleAgeAbove100   | 5333       |
| China   | 1994           | FemaleLactAge15to19 | 292569     |
| China   | 1994           | FemaleLactAge20to24 | 10594184   |
| China   | 1994           | FemaleLactAge25to29 | 8839267    |
| China   | 1994           | FemaleLactAge30to34 | 2371011    |
| China   | 1994           | FemaleLactAge35to39 | 449150     |
| China   | 1994           | FemaleLactAge40to44 | 156580     |
| China   | 1994           | FemaleLactAge45to49 | 29003      |
| China   | 1994           | FemalePregAge15to19 | 219427     |
| China   | 1994           | FemalePregAge20to24 | 7945638    |
| China   | 1994           | FemalePregAge25to29 | 6629451    |
| China   | 1994           | FemalePregAge30to34 | 1778259    |
| China   | 1994           | FemalePregAge35to39 | 336862     |
| China   | 1994           | FemalePregAge40to44 | 117435     |
| China   | 1994           | FemalePregAge45to49 | 21752      |
| China   | 1994           | MaleAge0to4         | 62131651   |
| China   | 1994           | MaleAge10to14       | 52959025   |
| China   | 1994           | MaleAge15to19       | 51314433   |
| China   | 1994           | MaleAge20to24       | 63994375   |
| China   | 1994           | MaleAge25to29       | 63239268   |
| China   | 1994           | MaleAge30to34       | 52268080   |
| China   | 1994           | MaleAge35to39       | 44006454   |
| China   | 1994           | MaleAge40to44       | 43715214   |

Dietary calcium and zinc deficiency risks are decreasing but remain prevalent

| Country | Reference year | Age/gender group    | Population |
|---------|----------------|---------------------|------------|
| China   | 1994           | MaleAge45to49       | 29957674   |
| China   | 1994           | MaleAge50to54       | 24139317   |
| China   | 1994           | MaleAge55to59       | 22485778   |
| China   | 1994           | MaleAge5to9         | 68671844   |
| China   | 1994           | MaleAge60to64       | 19332924   |
| China   | 1994           | MaleAge65to69       | 14363643   |
| China   | 1994           | MaleAge70to74       | 9762777    |
| China   | 1994           | MaleAge75to79       | 6362893    |
| China   | 1994           | MaleAge80to84       | 2925992    |
| China   | 1994           | MaleAge85to89       | 1044722    |
| China   | 1994           | MaleAge90to94       | 246471     |
| China   | 1994           | MaleAge95to99       | 31365      |
| China   | 1994           | MaleAgeAbov e100    | 1005       |
| China   | 1995           | FemaleAge0to4       | 51596571   |
| China   | 1995           | FemaleAge10to14     | 51916860   |
| China   | 1995           | FemaleAge15to19     | 46314599   |
| China   | 1995           | FemaleAge20to24     | 40504782   |
| China   | 1995           | FemaleAge25to29     | 44492784   |
| China   | 1995           | FemaleAge30to34     | 46911402   |
| China   | 1995           | FemaleAge35to39     | 39373414   |
| China   | 1995           | FemaleAge40to44     | 40656892   |
| China   | 1995           | FemaleAge45to49     | 29639340   |
| China   | 1995           | FemaleAge50to54     | 22394837   |
| China   | 1995           | FemaleAge55to59     | 20461618   |
| China   | 1995           | FemaleAge5to9       | 64855436   |
| China   | 1995           | FemaleAge60to64     | 18583266   |
| China   | 1995           | FemaleAge65to69     | 14820480   |
| China   | 1995           | FemaleAge70to74     | 11134404   |
| China   | 1995           | FemaleAge75to79     | 7935809    |
| China   | 1995           | FemaleAge80to84     | 4462404    |
| China   | 1995           | FemaleAge85to89     | 2002487    |
| China   | 1995           | FemaleAge90to94     | 586773     |
| China   | 1995           | FemaleAge95to99     | 76640      |
| China   | 1995           | FemaleAgeAbov e100  | 5683       |
| China   | 1995           | FemaleLactAge15to19 | 292569     |
| China   | 1995           | FemaleLactAge20to24 | 10594184   |
| China   | 1995           | FemaleLactAge25to29 | 8839267    |
| China   | 1995           | FemaleLactAge30to34 | 2371011    |
| China   | 1995           | FemaleLactAge35to39 | 449150     |
| China   | 1995           | FemaleLactAge40to44 | 156580     |
| China   | 1995           | FemaleLactAge45to49 | 29003      |
| China   | 1995           | FemalePregAge15to19 | 219427     |
| China   | 1995           | FemalePregAge20to24 | 7945638    |
| China   | 1995           | FemalePregAge25to29 | 6629451    |
| China   | 1995           | FemalePregAge30to34 | 1778259    |
| China   | 1995           | FemalePregAge35to39 | 336862     |
| China   | 1995           | FemalePregAge40to44 | 117435     |
| China   | 1995           | FemalePregAge45to49 | 21752      |
| China   | 1995           | MaleAge0to4         | 58111005   |
| China   | 1995           | MaleAge10to14       | 55413074   |
| China   | 1995           | MaleAge15to19       | 49676360   |
| China   | 1995           | MaleAge20to24       | 62161497   |
| China   | 1995           | MaleAge25to29       | 64242743   |
| China   | 1995           | MaleAge30to34       | 54562721   |
| China   | 1995           | MaleAge35to39       | 44161245   |
| China   | 1995           | MaleAge40to44       | 45117885   |
| China   | 1995           | MaleAge45to49       | 31968337   |
| China   | 1995           | MaleAge50to54       | 24640379   |
| China   | 1995           | MaleAge55to59       | 22598909   |
| China   | 1995           | MaleAge5to9         | 70861800   |
| China   | 1995           | MaleAge60to64       | 19772119   |
| China   | 1995           | MaleAge65to69       | 14918770   |
| China   | 1995           | MaleAge70to74       | 10020953   |
| China   | 1995           | MaleAge75to79       | 6501644    |
| China   | 1995           | MaleAge80to84       | 3014456    |
| China   | 1995           | MaleAge85to89       | 1034568    |
| China   | 1995           | MaleAge90to94       | 223956     |
| China   | 1995           | MaleAge95to99       | 20847      |
| China   | 1995           | MaleAgeAbov e100    | 1092       |
| China   | 1996           | FemaleAge0to4       | 45492609   |
| China   | 1996           | FemaleAge10to14     | 54846649   |
| China   | 1996           | FemaleAge15to19     | 45856532   |
| China   | 1996           | FemaleAge20to24     | 44043919   |
| China   | 1996           | FemaleAge25to29     | 48893637   |
| China   | 1996           | FemaleAge30to34     | 49782611   |
| China   | 1996           | FemaleAge35to39     | 40811617   |
| China   | 1996           | FemaleAge40to44     | 41298206   |
| China   | 1996           | FemaleAge45to49     | 31961577   |
| China   | 1996           | FemaleAge50to54     | 23314893   |
| China   | 1996           | FemaleAge55to59     | 20589188   |
| China   | 1996           | FemaleAge5to9       | 65362798   |
| China   | 1996           | FemaleAge60to64     | 18877355   |
| China   | 1996           | FemaleAge65to69     | 15269414   |
| China   | 1996           | FemaleAge70to74     | 11379654   |
| China   | 1996           | FemaleAge75to79     | 8070805    |
| China   | 1996           | FemaleAge80to84     | 4652350    |
| China   | 1996           | FemaleAge85to89     | 2114013    |
| China   | 1996           | FemaleAge90to94     | 665669     |

Dietary calcium and zinc deficiency risks are decreasing but remain prevalent

| Country | Reference year | Age/gender group    | Population |
|---------|----------------|---------------------|------------|
| China   | 1996           | FemaleAge95to99     | 87788      |
| China   | 1996           | FemaleAgeAbov e100  | 5985       |
| China   | 1996           | FemaleLactAge15to19 | 291430     |
| China   | 1996           | FemaleLactAge20to24 | 7438496    |
| China   | 1996           | FemaleLactAge25to29 | 6857257    |
| China   | 1996           | FemaleLactAge30to34 | 2104431    |
| China   | 1996           | FemaleLactAge35to39 | 371583     |
| China   | 1996           | FemaleLactAge40to44 | 105403     |
| China   | 1996           | FemaleLactAge45to49 | 29965      |
| China   | 1996           | FemalePregAge15to19 | 218572     |
| China   | 1996           | FemalePregAge20to24 | 5578872    |
| China   | 1996           | FemalePregAge25to29 | 5142943    |
| China   | 1996           | FemalePregAge30to34 | 1578323    |
| China   | 1996           | FemalePregAge35to39 | 278687     |
| China   | 1996           | FemalePregAge40to44 | 79052      |
| China   | 1996           | FemalePregAge45to49 | 22474      |
| China   | 1996           | MaleAge0to4         | 51705514   |
| China   | 1996           | MaleAge10to14       | 58759107   |
| China   | 1996           | MaleAge15to19       | 49236340   |
| China   | 1996           | MaleAge20to24       | 59997979   |
| China   | 1996           | MaleAge25to29       | 65057164   |
| China   | 1996           | MaleAge30to34       | 57042260   |
| China   | 1996           | MaleAge35to39       | 45292350   |
| China   | 1996           | MaleAge40to44       | 45760328   |
| China   | 1996           | MaleAge45to49       | 34522539   |
| China   | 1996           | MaleAge50to54       | 25440271   |
| China   | 1996           | MaleAge55to59       | 22692452   |
| China   | 1996           | MaleAge5to9         | 71744571   |
| China   | 1996           | MaleAge60to64       | 20114951   |
| China   | 1996           | MaleAge65to69       | 15423610   |
| China   | 1996           | MaleAge70to74       | 10329339   |
| China   | 1996           | MaleAge75to79       | 6628772    |
| China   | 1996           | MaleAge80to84       | 3238186    |
| China   | 1996           | MaleAge85to89       | 1140461    |
| China   | 1996           | MaleAge90to94       | 267102     |
| China   | 1996           | MaleAge95to99       | 27862      |
| China   | 1996           | MaleAgeAbov e100    | 1177       |
| China   | 1997           | FemaleAge0to4       | 42126030   |
| China   | 1997           | FemaleAge10to14     | 58052994   |
| China   | 1997           | FemaleAge15to19     | 46151535   |
| China   | 1997           | FemaleAge20to24     | 41096158   |
| China   | 1997           | FemaleAge25to29     | 49262231   |
| China   | 1997           | FemaleAge30to34     | 51809177   |
| China   | 1997           | FemaleAge35to39     | 42767651   |
| China   | 1997           | FemaleAge40to44     | 40789881   |
| China   | 1997           | FemaleAge45to49     | 34558198   |
| China   | 1997           | FemaleAge50to54     | 24368956   |
| China   | 1997           | FemaleAge55to59     | 20644984   |
| China   | 1997           | FemaleAge5to9       | 63733328   |
| China   | 1997           | FemaleAge60to64     | 19056549   |
| China   | 1997           | FemaleAge65to69     | 15725839   |
| China   | 1997           | FemaleAge70to74     | 11635378   |
| China   | 1997           | FemaleAge75to79     | 8154417    |
| China   | 1997           | FemaleAge80to84     | 4820169    |
| China   | 1997           | FemaleAge85to89     | 2183709    |
| China   | 1997           | FemaleAge90to94     | 718216     |
| China   | 1997           | FemaleAge95to99     | 106297     |
| China   | 1997           | FemaleAgeAbov e100  | 6243       |
| China   | 1997           | FemaleLactAge15to19 | 291430     |
| China   | 1997           | FemaleLactAge20to24 | 7438496    |
| China   | 1997           | FemaleLactAge25to29 | 6857257    |
| China   | 1997           | FemaleLactAge30to34 | 2104431    |
| China   | 1997           | FemaleLactAge35to39 | 371583     |
| China   | 1997           | FemaleLactAge40to44 | 105403     |
| China   | 1997           | FemaleLactAge45to49 | 29965      |
| China   | 1997           | FemalePregAge15to19 | 218572     |
| China   | 1997           | FemalePregAge20to24 | 5578872    |
| China   | 1997           | FemalePregAge25to29 | 5142943    |
| China   | 1997           | FemalePregAge30to34 | 1578323    |
| China   | 1997           | FemalePregAge35to39 | 278687     |
| China   | 1997           | FemalePregAge40to44 | 79052      |
| China   | 1997           | FemalePregAge45to49 | 22474      |
| China   | 1997           | MaleAge0to4         | 48140586   |
| China   | 1997           | MaleAge10to14       | 62475764   |
| China   | 1997           | MaleAge15to19       | 49554003   |
| China   | 1997           | MaleAge20to24       | 56933306   |
| China   | 1997           | MaleAge25to29       | 65155565   |
| China   | 1997           | MaleAge30to34       | 59239781   |
| China   | 1997           | MaleAge35to39       | 47043966   |
| China   | 1997           | MaleAge40to44       | 45199281   |
| China   | 1997           | MaleAge45to49       | 37474750   |
| China   | 1997           | MaleAge50to54       | 26346154   |
| China   | 1997           | MaleAge55to59       | 22687645   |
| China   | 1997           | MaleAge5to9         | 70315066   |
| China   | 1997           | MaleAge60to64       | 20356620   |
| China   | 1997           | MaleAge65to69       | 15910493   |
| China   | 1997           | MaleAge70to74       | 10665972   |
| China   | 1997           | MaleAge75to79       | 6674601    |



Dietary calcium and zinc deficiency risks are decreasing but remain prevalent

| Country | Reference year | Age/gender group    | Population |
|---------|----------------|---------------------|------------|
| China   | 1997           | MaleAge80to84       | 3433374    |
| China   | 1997           | MaleAge85to89       | 1212974    |
| China   | 1997           | MaleAge90to94       | 297865     |
| China   | 1997           | MaleAge95to99       | 37329      |
| China   | 1997           | MaleAgeAbov e100    | 1261       |
| China   | 1998           | FemaleAge0to4       | 40749978   |
| China   | 1998           | FemaleAge10to14     | 61264731   |
| China   | 1998           | FemaleAge15to19     | 47209901   |
| China   | 1998           | FemaleAge20to24     | 37826843   |
| China   | 1998           | FemaleAge25to29     | 49047586   |
| China   | 1998           | FemaleAge30to34     | 53471908   |
| China   | 1998           | FemaleAge35to39     | 45182110   |
| China   | 1998           | FemaleAge40to44     | 39803221   |
| China   | 1998           | FemaleAge45to49     | 37105993   |
| China   | 1998           | FemaleAge50to54     | 25626507   |
| China   | 1998           | FemaleAge55to59     | 20748866   |
| China   | 1998           | FemaleAge5to9       | 60121647   |
| China   | 1998           | FemaleAge60to64     | 19166754   |
| China   | 1998           | FemaleAge65to69     | 16178454   |
| China   | 1998           | FemaleAge70to74     | 11923118   |
| China   | 1998           | FemaleAge75to79     | 8239177    |
| China   | 1998           | FemaleAge80to84     | 4960331    |
| China   | 1998           | FemaleAge85to89     | 2223158    |
| China   | 1998           | FemaleAge90to94     | 737479     |
| China   | 1998           | FemaleAge95to99     | 123203     |
| China   | 1998           | FemaleAgeAbov e100  | 6467       |
| China   | 1998           | FemaleLactAge15to19 | 291430     |
| China   | 1998           | FemaleLactAge20to24 | 7438496    |
| China   | 1998           | FemaleLactAge25to29 | 6857257    |
| China   | 1998           | FemaleLactAge30to34 | 2104431    |
| China   | 1998           | FemaleLactAge35to39 | 371583     |
| China   | 1998           | FemaleLactAge40to44 | 105403     |
| China   | 1998           | FemaleLactAge45to49 | 29965      |
| China   | 1998           | FemalePregAge15to19 | 218572     |
| China   | 1998           | FemalePregAge20to24 | 5578872    |
| China   | 1998           | FemalePregAge25to29 | 5142943    |
| China   | 1998           | FemalePregAge30to34 | 1578323    |
| China   | 1998           | FemalePregAge35to39 | 278687     |
| China   | 1998           | FemalePregAge40to44 | 79052      |
| China   | 1998           | FemalePregAge45to49 | 22474      |
| China   | 1998           | MaleAge0to4         | 46658833   |
| China   | 1998           | MaleAge10to14       | 66249006   |
| China   | 1998           | MaleAge15to19       | 50676785   |
| China   | 1998           | MaleAge20to24       | 53604754   |
| China   | 1998           | MaleAge25to29       | 64585318   |
| China   | 1998           | MaleAge30to34       | 61105496   |
| China   | 1998           | MaleAge35to39       | 49263422   |
| China   | 1998           | MaleAge40to44       | 44062404   |
| China   | 1998           | MaleAge45to49       | 40426224   |
| China   | 1998           | MaleAge50to54       | 27476952   |
| China   | 1998           | MaleAge55to59       | 22713095   |
| China   | 1998           | MaleAge5to9         | 66732075   |
| China   | 1998           | MaleAge60to64       | 20533832   |
| China   | 1998           | MaleAge65to69       | 16384674   |
| China   | 1998           | MaleAge70to74       | 11034639   |
| China   | 1998           | MaleAge75to79       | 6707810    |
| China   | 1998           | MaleAge80to84       | 3577164    |
| China   | 1998           | MaleAge85to89       | 1255672    |
| China   | 1998           | MaleAge90to94       | 312729     |
| China   | 1998           | MaleAge95to99       | 45391      |
| China   | 1998           | MaleAgeAbov e100    | 1341       |
| China   | 1999           | FemaleAge0to4       | 39970987   |
| China   | 1999           | FemaleAge10to14     | 63754481   |
| China   | 1999           | FemaleAge15to19     | 48956063   |
| China   | 1999           | FemaleAge20to24     | 35144695   |
| China   | 1999           | FemaleAge25to29     | 48201108   |
| China   | 1999           | FemaleAge30to34     | 54839213   |
| China   | 1999           | FemaleAge35to39     | 47700574   |
| China   | 1999           | FemaleAge40to44     | 39240374   |
| China   | 1999           | FemaleAge45to49     | 39129718   |
| China   | 1999           | FemaleAge50to54     | 27193802   |
| China   | 1999           | FemaleAge55to59     | 21067041   |
| China   | 1999           | FemaleAge5to9       | 55495657   |
| China   | 1999           | FemaleAge60to64     | 19270369   |
| China   | 1999           | FemaleAge65to69     | 16607065   |
| China   | 1999           | FemaleAge70to74     | 12274739   |
| China   | 1999           | FemaleAge75to79     | 8380494    |
| China   | 1999           | FemaleAge80to84     | 5070980    |
| China   | 1999           | FemaleAge85to89     | 2248975    |
| China   | 1999           | FemaleAge90to94     | 722660     |
| China   | 1999           | FemaleAge95to99     | 126425     |
| China   | 1999           | FemaleAgeAbov e100  | 6672       |
| China   | 1999           | FemaleLactAge15to19 | 291430     |
| China   | 1999           | FemaleLactAge20to24 | 7438496    |
| China   | 1999           | FemaleLactAge25to29 | 6857257    |
| China   | 1999           | FemaleLactAge30to34 | 2104431    |
| China   | 1999           | FemaleLactAge35to39 | 371583     |
| China   | 1999           | FemaleLactAge40to44 | 105403     |

Dietary calcium and zinc deficiency risks are decreasing but remain prevalent

| Country  | Reference year | Age/gender group    | Population |
|----------|----------------|---------------------|------------|
| China    | 1999           | FemaleLactAge45to49 | 29965      |
| China    | 1999           | FemalePregAge15to19 | 218572     |
| China    | 1999           | FemalePregAge20to24 | 5578872    |
| China    | 1999           | FemalePregAge25to29 | 5142943    |
| China    | 1999           | FemalePregAge30to34 | 1578323    |
| China    | 1999           | FemalePregAge35to39 | 278687     |
| China    | 1999           | FemalePregAge40to44 | 79052      |
| China    | 1999           | FemalePregAge45to49 | 22474      |
| China    | 1999           | MaleAge0to4         | 45815882   |
| China    | 1999           | MaleAge10to14       | 69265818   |
| China    | 1999           | MaleAge15to19       | 52589459   |
| China    | 1999           | MaleAge20to24       | 50899378   |
| China    | 1999           | MaleAge25to29       | 63404289   |
| China    | 1999           | MaleAge30to34       | 62605860   |
| China    | 1999           | MaleAge35to39       | 51656266   |
| China    | 1999           | MaleAge40to44       | 43323391   |
| China    | 1999           | MaleAge45to49       | 42788560   |
| China    | 1999           | MaleAge50to54       | 29013095   |
| China    | 1999           | MaleAge55to59       | 22945982   |
| China    | 1999           | MaleAge5to9         | 62033093   |
| China    | 1999           | MaleAge60to64       | 20691863   |
| China    | 1999           | MaleAge65to69       | 16845992   |
| China    | 1999           | MaleAge70to74       | 11446776   |
| China    | 1999           | MaleAge75to79       | 6802475    |
| China    | 1999           | MaleAge80to84       | 3654208    |
| China    | 1999           | MaleAge85to89       | 1277913    |
| China    | 1999           | MaleAge90to94       | 308226     |
| China    | 1999           | MaleAge95to99       | 45749      |
| China    | 1999           | MaleAgeAbov e100    | 1417       |
| Colombia | 1992           | FemaleAge0to4       | 2136564    |
| Colombia | 1992           | FemaleAge10to14     | 1935504    |
| Colombia | 1992           | FemaleAge15to19     | 1482394    |
| Colombia | 1992           | FemaleAge20to24     | 1204493    |
| Colombia | 1992           | FemaleAge25to29     | 1186377    |
| Colombia | 1992           | FemaleAge30to34     | 1109258    |
| Colombia | 1992           | FemaleAge35to39     | 1016249    |
| Colombia | 1992           | FemaleAge40to44     | 883183     |
| Colombia | 1992           | FemaleAge45to49     | 683725     |
| Colombia | 1992           | FemaleAge50to54     | 532460     |
| Colombia | 1992           | FemaleAge55to59     | 443801     |
| Colombia | 1992           | FemaleAge5to9       | 2029328    |
| Colombia | 1992           | FemaleAge60to64     | 371220     |
| Colombia | 1992           | FemaleAge65to69     | 306253     |
| Colombia | 1992           | FemaleAge70to74     | 227842     |
| Colombia | 1992           | FemaleAge75to79     | 155066     |
| Colombia | 1992           | FemaleAge80to84     | 92306      |
| Colombia | 1992           | FemaleAge85to89     | 40892      |
| Colombia | 1992           | FemaleAge90to94     | 13268      |
| Colombia | 1992           | FemaleAge95to99     | 2921       |
| Colombia | 1992           | FemaleAgeAbov e100  | 445        |
| Colombia | 1992           | FemaleLactAge15to19 | 156159     |
| Colombia | 1992           | FemaleLactAge20to24 | 281736     |
| Colombia | 1992           | FemaleLactAge25to29 | 236378     |
| Colombia | 1992           | FemaleLactAge30to34 | 143913     |
| Colombia | 1992           | FemaleLactAge35to39 | 74522      |
| Colombia | 1992           | FemaleLactAge40to44 | 24202      |
| Colombia | 1992           | FemaleLactAge45to49 | 3309       |
| Colombia | 1992           | FemalePregAge15to19 | 117119     |
| Colombia | 1992           | FemalePregAge20to24 | 211302     |
| Colombia | 1992           | FemalePregAge25to29 | 177283     |
| Colombia | 1992           | FemalePregAge30to34 | 107935     |
| Colombia | 1992           | FemalePregAge35to39 | 55891      |
| Colombia | 1992           | FemalePregAge40to44 | 18151      |
| Colombia | 1992           | FemalePregAge45to49 | 2482       |
| Colombia | 1992           | MaleAge0to4         | 2226561    |
| Colombia | 1992           | MaleAge10to14       | 1999391    |
| Colombia | 1992           | MaleAge15to19       | 1795500    |
| Colombia | 1992           | MaleAge20to24       | 1706251    |
| Colombia | 1992           | MaleAge25to29       | 1577672    |
| Colombia | 1992           | MaleAge30to34       | 1312676    |
| Colombia | 1992           | MaleAge35to39       | 1080839    |
| Colombia | 1992           | MaleAge40to44       | 858146     |
| Colombia | 1992           | MaleAge45to49       | 628059     |
| Colombia | 1992           | MaleAge50to54       | 474679     |
| Colombia | 1992           | MaleAge55to59       | 387464     |
| Colombia | 1992           | MaleAge5to9         | 2106931    |
| Colombia | 1992           | MaleAge60to64       | 319580     |
| Colombia | 1992           | MaleAge65to69       | 260553     |
| Colombia | 1992           | MaleAge70to74       | 188501     |
| Colombia | 1992           | MaleAge75to79       | 120722     |
| Colombia | 1992           | MaleAge80to84       | 65498      |
| Colombia | 1992           | MaleAge85to89       | 26054      |
| Colombia | 1992           | MaleAge90to94       | 7524       |
| Colombia | 1992           | MaleAge95to99       | 1433       |
| Colombia | 1992           | MaleAgeAbov e100    | 206        |
| Colombia | 1993           | FemaleAge0to4       | 2155028    |
| Colombia | 1993           | FemaleAge10to14     | 1952475    |
| Colombia | 1993           | FemaleAge15to19     | 1523316    |

Dietary calcium and zinc deficiency risks are decreasing but remain prevalent

| Country  | Reference year | Age/gender group    | Population |
|----------|----------------|---------------------|------------|
| Colombia | 1993           | FemaleAge20to24     | 1188584    |
| Colombia | 1993           | FemaleAge25to29     | 1221169    |
| Colombia | 1993           | FemaleAge30to34     | 1155184    |
| Colombia | 1993           | FemaleAge35to39     | 1050212    |
| Colombia | 1993           | FemaleAge40to44     | 928574     |
| Colombia | 1993           | FemaleAge45to49     | 725468     |
| Colombia | 1993           | FemaleAge50to54     | 551197     |
| Colombia | 1993           | FemaleAge55to59     | 455259     |
| Colombia | 1993           | FemaleAge5to9       | 2046300    |
| Colombia | 1993           | FemaleAge60to64     | 380240     |
| Colombia | 1993           | FemaleAge65to69     | 311748     |
| Colombia | 1993           | FemaleAge70to74     | 237193     |
| Colombia | 1993           | FemaleAge75to79     | 158162     |
| Colombia | 1993           | FemaleAge80to84     | 95931      |
| Colombia | 1993           | FemaleAge85to89     | 42929      |
| Colombia | 1993           | FemaleAge90to94     | 13939      |
| Colombia | 1993           | FemaleAge95to99     | 3236       |
| Colombia | 1993           | FemaleAgeAbov e100  | 467        |
| Colombia | 1993           | FemaleLactAge15to19 | 156159     |
| Colombia | 1993           | FemaleLactAge20to24 | 281736     |
| Colombia | 1993           | FemaleLactAge25to29 | 236378     |
| Colombia | 1993           | FemaleLactAge30to34 | 143913     |
| Colombia | 1993           | FemaleLactAge35to39 | 74522      |
| Colombia | 1993           | FemaleLactAge40to44 | 24202      |
| Colombia | 1993           | FemaleLactAge45to49 | 3309       |
| Colombia | 1993           | FemalePregAge15to19 | 117119     |
| Colombia | 1993           | FemalePregAge20to24 | 211302     |
| Colombia | 1993           | FemalePregAge25to29 | 177283     |
| Colombia | 1993           | FemalePregAge30to34 | 107935     |
| Colombia | 1993           | FemalePregAge35to39 | 55891      |
| Colombia | 1993           | FemalePregAge40to44 | 18151      |
| Colombia | 1993           | FemalePregAge45to49 | 2482       |
| Colombia | 1993           | MaleAge0to4         | 2245790    |
| Colombia | 1993           | MaleAge10to14       | 2018057    |
| Colombia | 1993           | MaleAge15to19       | 1836805    |
| Colombia | 1993           | MaleAge20to24       | 1685617    |
| Colombia | 1993           | MaleAge25to29       | 1606969    |
| Colombia | 1993           | MaleAge30to34       | 1354370    |
| Colombia | 1993           | MaleAge35to39       | 1112000    |
| Colombia | 1993           | MaleAge40to44       | 899087     |
| Colombia | 1993           | MaleAge45to49       | 666583     |
| Colombia | 1993           | MaleAge50to54       | 491373     |
| Colombia | 1993           | MaleAge55to59       | 397275     |
| Colombia | 1993           | MaleAge5to9         | 2125280    |
| Colombia | 1993           | MaleAge60to64       | 325941     |
| Colombia | 1993           | MaleAge65to69       | 264044     |
| Colombia | 1993           | MaleAge70to74       | 195838     |
| Colombia | 1993           | MaleAge75to79       | 123374     |
| Colombia | 1993           | MaleAge80to84       | 68236      |
| Colombia | 1993           | MaleAge85to89       | 27115      |
| Colombia | 1993           | MaleAge90to94       | 7923       |
| Colombia | 1993           | MaleAge95to99       | 1579       |
| Colombia | 1993           | MaleAgeAbov e100    | 207        |
| Colombia | 1994           | FemaleAge0to4       | 2170296    |
| Colombia | 1994           | FemaleAge10to14     | 1968613    |
| Colombia | 1994           | FemaleAge15to19     | 1563759    |
| Colombia | 1994           | FemaleAge20to24     | 1180052    |
| Colombia | 1994           | FemaleAge25to29     | 1246234    |
| Colombia | 1994           | FemaleAge30to34     | 1200000    |
| Colombia | 1994           | FemaleAge35to39     | 1086036    |
| Colombia | 1994           | FemaleAge40to44     | 972240     |
| Colombia | 1994           | FemaleAge45to49     | 769202     |
| Colombia | 1994           | FemaleAge50to54     | 574277     |
| Colombia | 1994           | FemaleAge55to59     | 467909     |
| Colombia | 1994           | FemaleAge5to9       | 2063352    |
| Colombia | 1994           | FemaleAge60to64     | 389910     |
| Colombia | 1994           | FemaleAge65to69     | 318005     |
| Colombia | 1994           | FemaleAge70to74     | 246276     |
| Colombia | 1994           | FemaleAge75to79     | 162604     |
| Colombia | 1994           | FemaleAge80to84     | 99246      |
| Colombia | 1994           | FemaleAge85to89     | 44456      |
| Colombia | 1994           | FemaleAge90to94     | 14308      |
| Colombia | 1994           | FemaleAge95to99     | 3389       |
| Colombia | 1994           | FemaleAgeAbov e100  | 494        |
| Colombia | 1994           | FemaleLactAge15to19 | 156159     |
| Colombia | 1994           | FemaleLactAge20to24 | 281736     |
| Colombia | 1994           | FemaleLactAge25to29 | 236378     |
| Colombia | 1994           | FemaleLactAge30to34 | 143913     |
| Colombia | 1994           | FemaleLactAge35to39 | 74522      |
| Colombia | 1994           | FemaleLactAge40to44 | 24202      |
| Colombia | 1994           | FemaleLactAge45to49 | 3309       |
| Colombia | 1994           | FemalePregAge15to19 | 117119     |
| Colombia | 1994           | FemalePregAge20to24 | 211302     |
| Colombia | 1994           | FemalePregAge25to29 | 177283     |
| Colombia | 1994           | FemalePregAge30to34 | 107935     |
| Colombia | 1994           | FemalePregAge35to39 | 55891      |
| Colombia | 1994           | FemalePregAge40to44 | 18151      |
| Colombia | 1994           | FemalePregAge45to49 | 2482       |

Dietary calcium and zinc deficiency risks are decreasing but remain prevalent

| Country  | Reference year | Age/gender group    | Population |
|----------|----------------|---------------------|------------|
| Colombia | 1994           | MaleAge0to4         | 2261662    |
| Colombia | 1994           | MaleAge10to14       | 2036195    |
| Colombia | 1994           | MaleAge15to19       | 1879897    |
| Colombia | 1994           | MaleAge20to24       | 1673853    |
| Colombia | 1994           | MaleAge25to29       | 1626265    |
| Colombia | 1994           | MaleAge30to34       | 1394101    |
| Colombia | 1994           | MaleAge35to39       | 1144336    |
| Colombia | 1994           | MaleAge40to44       | 938393     |
| Colombia | 1994           | MaleAge45to49       | 706563     |
| Colombia | 1994           | MaleAge50to54       | 512244     |
| Colombia | 1994           | MaleAge55to59       | 408255     |
| Colombia | 1994           | MaleAge5to9         | 2143595    |
| Colombia | 1994           | MaleAge60to64       | 333059     |
| Colombia | 1994           | MaleAge65to69       | 268189     |
| Colombia | 1994           | MaleAge70to74       | 202656     |
| Colombia | 1994           | MaleAge75to79       | 127013     |
| Colombia | 1994           | MaleAge80to84       | 70530      |
| Colombia | 1994           | MaleAge85to89       | 27738      |
| Colombia | 1994           | MaleAge90to94       | 8013       |
| Colombia | 1994           | MaleAge95to99       | 1627       |
| Colombia | 1994           | MaleAgeAbov e100    | 210        |
| Colombia | 1995           | FemaleAge0to4       | 2181582    |
| Colombia | 1995           | FemaleAge10to14     | 1985977    |
| Colombia | 1995           | FemaleAge15to19     | 1597699    |
| Colombia | 1995           | FemaleAge20to24     | 1186247    |
| Colombia | 1995           | FemaleAge25to29     | 1259471    |
| Colombia | 1995           | FemaleAge30to34     | 1242083    |
| Colombia | 1995           | FemaleAge35to39     | 1125402    |
| Colombia | 1995           | FemaleAge40to44     | 1013492    |
| Colombia | 1995           | FemaleAge45to49     | 813576     |
| Colombia | 1995           | FemaleAge50to54     | 602682     |
| Colombia | 1995           | FemaleAge55to59     | 482046     |
| Colombia | 1995           | FemaleAge5to9       | 2079880    |
| Colombia | 1995           | FemaleAge60to64     | 400042     |
| Colombia | 1995           | FemaleAge65to69     | 325484     |
| Colombia | 1995           | FemaleAge70to74     | 254580     |
| Colombia | 1995           | FemaleAge75to79     | 168777     |
| Colombia | 1995           | FemaleAge80to84     | 102274     |
| Colombia | 1995           | FemaleAge85to89     | 45708      |
| Colombia | 1995           | FemaleAge90to94     | 14321      |
| Colombia | 1995           | FemaleAge95to99     | 3180       |
| Colombia | 1995           | FemaleAgeAbov e100  | 524        |
| Colombia | 1995           | FemaleLactAge15to19 | 156159     |
| Colombia | 1995           | FemaleLactAge20to24 | 281736     |
| Colombia | 1995           | FemaleLactAge25to29 | 236378     |
| Colombia | 1995           | FemaleLactAge30to34 | 143913     |
| Colombia | 1995           | FemaleLactAge35to39 | 74522      |
| Colombia | 1995           | FemaleLactAge40to44 | 24202      |
| Colombia | 1995           | FemaleLactAge45to49 | 3309       |
| Colombia | 1995           | FemalePregAge15to19 | 117119     |
| Colombia | 1995           | FemalePregAge20to24 | 211302     |
| Colombia | 1995           | FemalePregAge25to29 | 177283     |
| Colombia | 1995           | FemalePregAge30to34 | 107935     |
| Colombia | 1995           | FemalePregAge35to39 | 55891      |
| Colombia | 1995           | FemalePregAge40to44 | 18151      |
| Colombia | 1995           | FemalePregAge45to49 | 2482       |
| Colombia | 1995           | MaleAge0to4         | 2273787    |
| Colombia | 1995           | MaleAge10to14       | 2056072    |
| Colombia | 1995           | MaleAge15to19       | 1918099    |
| Colombia | 1995           | MaleAge20to24       | 1679149    |
| Colombia | 1995           | MaleAge25to29       | 1634161    |
| Colombia | 1995           | MaleAge30to34       | 1430514    |
| Colombia | 1995           | MaleAge35to39       | 1179433    |
| Colombia | 1995           | MaleAge40to44       | 975479     |
| Colombia | 1995           | MaleAge45to49       | 746792     |
| Colombia | 1995           | MaleAge50to54       | 538188     |
| Colombia | 1995           | MaleAge55to59       | 420666     |
| Colombia | 1995           | MaleAge5to9         | 2161412    |
| Colombia | 1995           | MaleAge60to64       | 340920     |
| Colombia | 1995           | MaleAge65to69       | 273390     |
| Colombia | 1995           | MaleAge70to74       | 208652     |
| Colombia | 1995           | MaleAge75to79       | 131869     |
| Colombia | 1995           | MaleAge80to84       | 72482      |
| Colombia | 1995           | MaleAge85to89       | 28093      |
| Colombia | 1995           | MaleAge90to94       | 7684       |
| Colombia | 1995           | MaleAge95to99       | 1429       |
| Colombia | 1995           | MaleAgeAbov e100    | 215        |
| Colombia | 1996           | FemaleAge0to4       | 2194783    |
| Colombia | 1996           | FemaleAge10to14     | 2002225    |
| Colombia | 1996           | FemaleAge15to19     | 1589583    |
| Colombia | 1996           | FemaleAge20to24     | 1227671    |
| Colombia | 1996           | FemaleAge25to29     | 1288576    |
| Colombia | 1996           | FemaleAge30to34     | 1280693    |
| Colombia | 1996           | FemaleAge35to39     | 1172575    |
| Colombia | 1996           | FemaleAge40to44     | 1043120    |
| Colombia | 1996           | FemaleAge45to49     | 858535     |
| Colombia | 1996           | FemaleAge50to54     | 634757     |
| Colombia | 1996           | FemaleAge55to59     | 496383     |

Dietary calcium and zinc deficiency risks are decreasing but remain prevalent

| Country  | Reference year | Age/gender group    | Population |
|----------|----------------|---------------------|------------|
| Colombia | 1996           | FemaleAge5to9       | 2096707    |
| Colombia | 1996           | FemaleAge60to64     | 408963     |
| Colombia | 1996           | FemaleAge65to69     | 331886     |
| Colombia | 1996           | FemaleAge70to74     | 260381     |
| Colombia | 1996           | FemaleAge75to79     | 174938     |
| Colombia | 1996           | FemaleAge80to84     | 105330     |
| Colombia | 1996           | FemaleAge85to89     | 49260      |
| Colombia | 1996           | FemaleAge90to94     | 16204      |
| Colombia | 1996           | FemaleAge95to99     | 3469       |
| Colombia | 1996           | FemaleAgeAbove100   | 559        |
| Colombia | 1996           | FemaleLactAge15to19 | 176281     |
| Colombia | 1996           | FemaleLactAge20to24 | 269062     |
| Colombia | 1996           | FemaleLactAge25to29 | 222076     |
| Colombia | 1996           | FemaleLactAge30to34 | 145293     |
| Colombia | 1996           | FemaleLactAge35to39 | 71500      |
| Colombia | 1996           | FemaleLactAge40to44 | 29160      |
| Colombia | 1996           | FemaleLactAge45to49 | 2788       |
| Colombia | 1996           | FemalePregAge15to19 | 132211     |
| Colombia | 1996           | FemalePregAge20to24 | 201797     |
| Colombia | 1996           | FemalePregAge25to29 | 166557     |
| Colombia | 1996           | FemalePregAge30to34 | 108970     |
| Colombia | 1996           | FemalePregAge35to39 | 53625      |
| Colombia | 1996           | FemalePregAge40to44 | 21870      |
| Colombia | 1996           | FemalePregAge45to49 | 2091       |
| Colombia | 1996           | MaleAge0to4         | 2287664    |
| Colombia | 1996           | MaleAge10to14       | 2072659    |
| Colombia | 1996           | MaleAge15to19       | 1944463    |
| Colombia | 1996           | MaleAge20to24       | 1698650    |
| Colombia | 1996           | MaleAge25to29       | 1636087    |
| Colombia | 1996           | MaleAge30to34       | 1468633    |
| Colombia | 1996           | MaleAge35to39       | 1218775    |
| Colombia | 1996           | MaleAge40to44       | 1010492    |
| Colombia | 1996           | MaleAge45to49       | 786880     |
| Colombia | 1996           | MaleAge50to54       | 567419     |
| Colombia | 1996           | MaleAge55to59       | 433298     |
| Colombia | 1996           | MaleAge5to9         | 2178997    |
| Colombia | 1996           | MaleAge60to64       | 347999     |
| Colombia | 1996           | MaleAge65to69       | 277606     |
| Colombia | 1996           | MaleAge70to74       | 212884     |
| Colombia | 1996           | MaleAge75to79       | 136923     |
| Colombia | 1996           | MaleAge80to84       | 75346      |
| Colombia | 1996           | MaleAge85to89       | 30863      |
| Colombia | 1996           | MaleAge90to94       | 8808       |
| Colombia | 1996           | MaleAge95to99       | 1578       |
| Colombia | 1996           | MaleAgeAbove100     | 222        |
| Colombia | 1997           | FemaleAge0to4       | 2197016    |
| Colombia | 1997           | FemaleAge10to14     | 2019208    |
| Colombia | 1997           | FemaleAge15to19     | 1611709    |
| Colombia | 1997           | FemaleAge20to24     | 1261625    |
| Colombia | 1997           | FemaleAge25to29     | 1280593    |
| Colombia | 1997           | FemaleAge30to34     | 1321309    |
| Colombia | 1997           | FemaleAge35to39     | 1217647    |
| Colombia | 1997           | FemaleAge40to44     | 1078781    |
| Colombia | 1997           | FemaleAge45to49     | 903869     |
| Colombia | 1997           | FemaleAge50to54     | 672121     |
| Colombia | 1997           | FemaleAge55to59     | 512342     |
| Colombia | 1997           | FemaleAge5to9       | 2115597    |
| Colombia | 1997           | FemaleAge60to64     | 419045     |
| Colombia | 1997           | FemaleAge65to69     | 339602     |
| Colombia | 1997           | FemaleAge70to74     | 265765     |
| Colombia | 1997           | FemaleAge75to79     | 182373     |
| Colombia | 1997           | FemaleAge80to84     | 107860     |
| Colombia | 1997           | FemaleAge85to89     | 52409      |
| Colombia | 1997           | FemaleAge90to94     | 17737      |
| Colombia | 1997           | FemaleAge95to99     | 3856       |
| Colombia | 1997           | FemaleAgeAbove100   | 600        |
| Colombia | 1997           | FemaleLactAge15to19 | 176281     |
| Colombia | 1997           | FemaleLactAge20to24 | 269062     |
| Colombia | 1997           | FemaleLactAge25to29 | 222076     |
| Colombia | 1997           | FemaleLactAge30to34 | 145293     |
| Colombia | 1997           | FemaleLactAge35to39 | 71500      |
| Colombia | 1997           | FemaleLactAge40to44 | 29160      |
| Colombia | 1997           | FemaleLactAge45to49 | 2788       |
| Colombia | 1997           | FemalePregAge15to19 | 132211     |
| Colombia | 1997           | FemalePregAge20to24 | 201797     |
| Colombia | 1997           | FemalePregAge25to29 | 166557     |
| Colombia | 1997           | FemalePregAge30to34 | 108970     |
| Colombia | 1997           | FemalePregAge35to39 | 53625      |
| Colombia | 1997           | FemalePregAge40to44 | 21870      |
| Colombia | 1997           | FemalePregAge45to49 | 2091       |
| Colombia | 1997           | MaleAge0to4         | 2290021    |
| Colombia | 1997           | MaleAge10to14       | 2091149    |
| Colombia | 1997           | MaleAge15to19       | 1967053    |
| Colombia | 1997           | MaleAge20to24       | 1733924    |
| Colombia | 1997           | MaleAge25to29       | 1626386    |
| Colombia | 1997           | MaleAge30to34       | 1506137    |
| Colombia | 1997           | MaleAge35to39       | 1261031    |
| Colombia | 1997           | MaleAge40to44       | 1043318    |

Dietary calcium and zinc deficiency risks are decreasing but remain prevalent

| Country  | Reference year | Age/gender group    | Population |
|----------|----------------|---------------------|------------|
| Colombia | 1997           | MaleAge45to49       | 828023     |
| Colombia | 1997           | MaleAge50to54       | 601704     |
| Colombia | 1997           | MaleAge55to59       | 447487     |
| Colombia | 1997           | MaleAge5to9         | 2199348    |
| Colombia | 1997           | MaleAge60to64       | 356471     |
| Colombia | 1997           | MaleAge65to69       | 282898     |
| Colombia | 1997           | MaleAge70to74       | 216652     |
| Colombia | 1997           | MaleAge75to79       | 142768     |
| Colombia | 1997           | MaleAge80to84       | 77663      |
| Colombia | 1997           | MaleAge85to89       | 33261      |
| Colombia | 1997           | MaleAge90to94       | 9672       |
| Colombia | 1997           | MaleAge95to99       | 1816       |
| Colombia | 1997           | MaleAgeAbov e100    | 232        |
| Colombia | 1998           | FemaleAge0to4       | 2191971    |
| Colombia | 1998           | FemaleAge10to14     | 2036498    |
| Colombia | 1998           | FemaleAge15to19     | 1630063    |
| Colombia | 1998           | FemaleAge20to24     | 1304521    |
| Colombia | 1998           | FemaleAge25to29     | 1267556    |
| Colombia | 1998           | FemaleAge30to34     | 1357871    |
| Colombia | 1998           | FemaleAge35to39     | 1264376    |
| Colombia | 1998           | FemaleAge40to44     | 1113381    |
| Colombia | 1998           | FemaleAge45to49     | 949305     |
| Colombia | 1998           | FemaleAge50to54     | 713503     |
| Colombia | 1998           | FemaleAge55to59     | 530926     |
| Colombia | 1998           | FemaleAge5to9       | 2135502    |
| Colombia | 1998           | FemaleAge60to64     | 430362     |
| Colombia | 1998           | FemaleAge65to69     | 348394     |
| Colombia | 1998           | FemaleAge70to74     | 271201     |
| Colombia | 1998           | FemaleAge75to79     | 190500     |
| Colombia | 1998           | FemaleAge80to84     | 110565     |
| Colombia | 1998           | FemaleAge85to89     | 54891      |
| Colombia | 1998           | FemaleAge90to94     | 18834      |
| Colombia | 1998           | FemaleAge95to99     | 4267       |
| Colombia | 1998           | FemaleAgeAbov e100  | 645        |
| Colombia | 1998           | FemaleLactAge15to19 | 176281     |
| Colombia | 1998           | FemaleLactAge20to24 | 269062     |
| Colombia | 1998           | FemaleLactAge25to29 | 222076     |
| Colombia | 1998           | FemaleLactAge30to34 | 145293     |
| Colombia | 1998           | FemaleLactAge35to39 | 71500      |
| Colombia | 1998           | FemaleLactAge40to44 | 29160      |
| Colombia | 1998           | FemaleLactAge45to49 | 2788       |
| Colombia | 1998           | FemalePregAge15to19 | 132211     |
| Colombia | 1998           | FemalePregAge20to24 | 201797     |
| Colombia | 1998           | FemalePregAge25to29 | 166557     |
| Colombia | 1998           | FemalePregAge30to34 | 108970     |
| Colombia | 1998           | FemalePregAge35to39 | 53625      |
| Colombia | 1998           | FemalePregAge40to44 | 21870      |
| Colombia | 1998           | FemalePregAge45to49 | 2091       |
| Colombia | 1998           | MaleAge0to4         | 2284771    |
| Colombia | 1998           | MaleAge10to14       | 2110526    |
| Colombia | 1998           | MaleAge15to19       | 1987542    |
| Colombia | 1998           | MaleAge20to24       | 1778827    |
| Colombia | 1998           | MaleAge25to29       | 1612220    |
| Colombia | 1998           | MaleAge30to34       | 1539439    |
| Colombia | 1998           | MaleAge35to39       | 1304538    |
| Colombia | 1998           | MaleAge40to44       | 1075368    |
| Colombia | 1998           | MaleAge45to49       | 869125     |
| Colombia | 1998           | MaleAge50to54       | 639780     |
| Colombia | 1998           | MaleAge55to59       | 464154     |
| Colombia | 1998           | MaleAge5to9         | 2221069    |
| Colombia | 1998           | MaleAge60to64       | 366306     |
| Colombia | 1998           | MaleAge65to69       | 289195     |
| Colombia | 1998           | MaleAge70to74       | 220331     |
| Colombia | 1998           | MaleAge75to79       | 148991     |
| Colombia | 1998           | MaleAge80to84       | 79892      |
| Colombia | 1998           | MaleAge85to89       | 35017      |
| Colombia | 1998           | MaleAge90to94       | 10250      |
| Colombia | 1998           | MaleAge95to99       | 2058       |
| Colombia | 1998           | MaleAgeAbov e100    | 245        |
| Colombia | 1999           | FemaleAge0to4       | 2185222    |
| Colombia | 1999           | FemaleAge10to14     | 2053995    |
| Colombia | 1999           | FemaleAge15to19     | 1647306    |
| Colombia | 1999           | FemaleAge20to24     | 1346371    |
| Colombia | 1999           | FemaleAge25to29     | 1260830    |
| Colombia | 1999           | FemaleAge30to34     | 1385035    |
| Colombia | 1999           | FemaleAge35to39     | 1310265    |
| Colombia | 1999           | FemaleAge40to44     | 1149632    |
| Colombia | 1999           | FemaleAge45to49     | 993206     |
| Colombia | 1999           | FemaleAge50to54     | 756874     |
| Colombia | 1999           | FemaleAge55to59     | 553695     |
| Colombia | 1999           | FemaleAge5to9       | 2153909    |
| Colombia | 1999           | FemaleAge60to64     | 442969     |
| Colombia | 1999           | FemaleAge65to69     | 357845     |
| Colombia | 1999           | FemaleAge70to74     | 277334     |
| Colombia | 1999           | FemaleAge75to79     | 198441     |
| Colombia | 1999           | FemaleAge80to84     | 114155     |
| Colombia | 1999           | FemaleAge85to89     | 56569      |
| Colombia | 1999           | FemaleAge90to94     | 19483      |

Dietary calcium and zinc deficiency risks are decreasing but remain prevalent

| Country  | Reference year | Age/gender group    | Population |
|----------|----------------|---------------------|------------|
| Colombia | 1999           | FemaleAge95to99     | 4559       |
| Colombia | 1999           | FemaleAgeAbov e100  | 696        |
| Colombia | 1999           | FemaleLactAge15to19 | 176281     |
| Colombia | 1999           | FemaleLactAge20to24 | 269062     |
| Colombia | 1999           | FemaleLactAge25to29 | 222076     |
| Colombia | 1999           | FemaleLactAge30to34 | 145293     |
| Colombia | 1999           | FemaleLactAge35to39 | 71500      |
| Colombia | 1999           | FemaleLactAge40to44 | 29160      |
| Colombia | 1999           | FemaleLactAge45to49 | 2788       |
| Colombia | 1999           | FemalePregAge15to19 | 132211     |
| Colombia | 1999           | FemalePregAge20to24 | 201797     |
| Colombia | 1999           | FemalePregAge25to29 | 166557     |
| Colombia | 1999           | FemalePregAge30to34 | 108970     |
| Colombia | 1999           | FemalePregAge35to39 | 53625      |
| Colombia | 1999           | FemalePregAge40to44 | 21870      |
| Colombia | 1999           | FemalePregAge45to49 | 2091       |
| Colombia | 1999           | MaleAge0to4         | 2277810    |
| Colombia | 1999           | MaleAge10to14       | 2130339    |
| Colombia | 1999           | MaleAge15to19       | 2008456    |
| Colombia | 1999           | MaleAge20to24       | 1823063    |
| Colombia | 1999           | MaleAge25to29       | 1605039    |
| Colombia | 1999           | MaleAge30to34       | 1563309    |
| Colombia | 1999           | MaleAge35to39       | 1346727    |
| Colombia | 1999           | MaleAge40to44       | 1108937    |
| Colombia | 1999           | MaleAge45to49       | 908758     |
| Colombia | 1999           | MaleAge50to54       | 679579     |
| Colombia | 1999           | MaleAge55to59       | 484742     |
| Colombia | 1999           | MaleAge5to9         | 2241149    |
| Colombia | 1999           | MaleAge60to64       | 377403     |
| Colombia | 1999           | MaleAge65to69       | 296284     |
| Colombia | 1999           | MaleAge70to74       | 224446     |
| Colombia | 1999           | MaleAge75to79       | 154892     |
| Colombia | 1999           | MaleAge80to84       | 82528      |
| Colombia | 1999           | MaleAge85to89       | 36010      |
| Colombia | 1999           | MaleAge90to94       | 10534      |
| Colombia | 1999           | MaleAge95to99       | 2179       |
| Colombia | 1999           | MaleAgeAbov e100    | 260        |
| Congo    | 1992           | FemaleAge0to4       | 203497     |
| Congo    | 1992           | FemaleAge10to14     | 157750     |
| Congo    | 1992           | FemaleAge15to19     | 104422     |
| Congo    | 1992           | FemaleAge20to24     | 67200      |
| Congo    | 1992           | FemaleAge25to29     | 55836      |
| Congo    | 1992           | FemaleAge30to34     | 48066      |
| Congo    | 1992           | FemaleAge35to39     | 45434      |
| Congo    | 1992           | FemaleAge40to44     | 44345      |
| Congo    | 1992           | FemaleAge45to49     | 41471      |
| Congo    | 1992           | FemaleAge50to54     | 36818      |
| Congo    | 1992           | FemaleAge55to59     | 31017      |
| Congo    | 1992           | FemaleAge5to9       | 178192     |
| Congo    | 1992           | FemaleAge60to64     | 25485      |
| Congo    | 1992           | FemaleAge65to69     | 19920      |
| Congo    | 1992           | FemaleAge70to74     | 14346      |
| Congo    | 1992           | FemaleAge75to79     | 9112       |
| Congo    | 1992           | FemaleAge80to84     | 4793       |
| Congo    | 1992           | FemaleAge85to89     | 1917       |
| Congo    | 1992           | FemaleAge90to94     | 527        |
| Congo    | 1992           | FemaleAge95to99     | 79         |
| Congo    | 1992           | FemaleAgeAbov e100  | 5          |
| Congo    | 1992           | FemaleLactAge15to19 | 18013      |
| Congo    | 1992           | FemaleLactAge20to24 | 26668      |
| Congo    | 1992           | FemaleLactAge25to29 | 21697      |
| Congo    | 1992           | FemaleLactAge30to34 | 16060      |
| Congo    | 1992           | FemaleLactAge35to39 | 9519       |
| Congo    | 1992           | FemaleLactAge40to44 | 4008       |
| Congo    | 1992           | FemaleLactAge45to49 | 1050       |
| Congo    | 1992           | FemalePregAge15to19 | 13510      |
| Congo    | 1992           | FemalePregAge20to24 | 20001      |
| Congo    | 1992           | FemalePregAge25to29 | 16272      |
| Congo    | 1992           | FemalePregAge30to34 | 12045      |
| Congo    | 1992           | FemalePregAge35to39 | 7139       |
| Congo    | 1992           | FemalePregAge40to44 | 3006       |
| Congo    | 1992           | FemalePregAge45to49 | 787        |
| Congo    | 1992           | MaleAge0to4         | 206807     |
| Congo    | 1992           | MaleAge10to14       | 160036     |
| Congo    | 1992           | MaleAge15to19       | 137388     |
| Congo    | 1992           | MaleAge20to24       | 114505     |
| Congo    | 1992           | MaleAge25to29       | 93873      |
| Congo    | 1992           | MaleAge30to34       | 75809      |
| Congo    | 1992           | MaleAge35to39       | 61547      |
| Congo    | 1992           | MaleAge40to44       | 50065      |
| Congo    | 1992           | MaleAge45to49       | 41375      |
| Congo    | 1992           | MaleAge50to54       | 34756      |
| Congo    | 1992           | MaleAge55to59       | 28830      |
| Congo    | 1992           | MaleAge5to9         | 180942     |
| Congo    | 1992           | MaleAge60to64       | 23174      |
| Congo    | 1992           | MaleAge65to69       | 17605      |
| Congo    | 1992           | MaleAge70to74       | 12242      |
| Congo    | 1992           | MaleAge75to79       | 7444       |

Dietary calcium and zinc deficiency risks are decreasing but remain prevalent

| Country | Reference year | Age/gender group    | Population |
|---------|----------------|---------------------|------------|
| Congo   | 1992           | MaleAge80to84       | 3693       |
| Congo   | 1992           | MaleAge85to89       | 1355       |
| Congo   | 1992           | MaleAge90to94       | 323        |
| Congo   | 1992           | MaleAge95to99       | 39         |
| Congo   | 1992           | MaleAgeAbov e100    | 2          |
| Congo   | 1993           | FemaleAge0to4       | 207622     |
| Congo   | 1993           | FemaleAge10to14     | 161412     |
| Congo   | 1993           | FemaleAge15to19     | 108827     |
| Congo   | 1993           | FemaleAge20to24     | 71192      |
| Congo   | 1993           | FemaleAge25to29     | 59273      |
| Congo   | 1993           | FemaleAge30to34     | 50818      |
| Congo   | 1993           | FemaleAge35to39     | 47376      |
| Congo   | 1993           | FemaleAge40to44     | 45758      |
| Congo   | 1993           | FemaleAge45to49     | 42415      |
| Congo   | 1993           | FemaleAge50to54     | 37576      |
| Congo   | 1993           | FemaleAge55to59     | 31652      |
| Congo   | 1993           | FemaleAge5to9       | 181667     |
| Congo   | 1993           | FemaleAge60to64     | 26039      |
| Congo   | 1993           | FemaleAge65to69     | 20381      |
| Congo   | 1993           | FemaleAge70to74     | 14697      |
| Congo   | 1993           | FemaleAge75to79     | 9342       |
| Congo   | 1993           | FemaleAge80to84     | 4923       |
| Congo   | 1993           | FemaleAge85to89     | 1976       |
| Congo   | 1993           | FemaleAge90to94     | 550        |
| Congo   | 1993           | FemaleAge95to99     | 91         |
| Congo   | 1993           | FemaleAgeAbov e100  | 6          |
| Congo   | 1993           | FemaleLactAge15to19 | 18013      |
| Congo   | 1993           | FemaleLactAge20to24 | 26668      |
| Congo   | 1993           | FemaleLactAge25to29 | 21697      |
| Congo   | 1993           | FemaleLactAge30to34 | 16060      |
| Congo   | 1993           | FemaleLactAge35to39 | 9519       |
| Congo   | 1993           | FemaleLactAge40to44 | 4008       |
| Congo   | 1993           | FemaleLactAge45to49 | 1050       |
| Congo   | 1993           | FemalePregAge15to19 | 13510      |
| Congo   | 1993           | FemalePregAge20to24 | 20001      |
| Congo   | 1993           | FemalePregAge25to29 | 16272      |
| Congo   | 1993           | FemalePregAge30to34 | 12045      |
| Congo   | 1993           | FemalePregAge35to39 | 7139       |
| Congo   | 1993           | FemalePregAge40to44 | 3006       |
| Congo   | 1993           | FemalePregAge45to49 | 787        |
| Congo   | 1993           | MaleAge0to4         | 210902     |
| Congo   | 1993           | MaleAge10to14       | 163772     |
| Congo   | 1993           | MaleAge15to19       | 141885     |
| Congo   | 1993           | MaleAge20to24       | 118502     |
| Congo   | 1993           | MaleAge25to29       | 97367      |
| Congo   | 1993           | MaleAge30to34       | 78618      |
| Congo   | 1993           | MaleAge35to39       | 63440      |
| Congo   | 1993           | MaleAge40to44       | 51629      |
| Congo   | 1993           | MaleAge45to49       | 42285      |
| Congo   | 1993           | MaleAge50to54       | 35454      |
| Congo   | 1993           | MaleAge55to59       | 29425      |
| Congo   | 1993           | MaleAge5to9         | 184333     |
| Congo   | 1993           | MaleAge60to64       | 23682      |
| Congo   | 1993           | MaleAge65to69       | 18014      |
| Congo   | 1993           | MaleAge70to74       | 12536      |
| Congo   | 1993           | MaleAge75to79       | 7629       |
| Congo   | 1993           | MaleAge80to84       | 3795       |
| Congo   | 1993           | MaleAge85to89       | 1399       |
| Congo   | 1993           | MaleAge90to94       | 340        |
| Congo   | 1993           | MaleAge95to99       | 45         |
| Congo   | 1993           | MaleAgeAbov e100    | 2          |
| Congo   | 1994           | FemaleAge0to4       | 212333     |
| Congo   | 1994           | FemaleAge10to14     | 165016     |
| Congo   | 1994           | FemaleAge15to19     | 113131     |
| Congo   | 1994           | FemaleAge20to24     | 75359      |
| Congo   | 1994           | FemaleAge25to29     | 62909      |
| Congo   | 1994           | FemaleAge30to34     | 53747      |
| Congo   | 1994           | FemaleAge35to39     | 49490      |
| Congo   | 1994           | FemaleAge40to44     | 47269      |
| Congo   | 1994           | FemaleAge45to49     | 43453      |
| Congo   | 1994           | FemaleAge50to54     | 38369      |
| Congo   | 1994           | FemaleAge55to59     | 32322      |
| Congo   | 1994           | FemaleAge5to9       | 185043     |
| Congo   | 1994           | FemaleAge60to64     | 26635      |
| Congo   | 1994           | FemaleAge65to69     | 20892      |
| Congo   | 1994           | FemaleAge70to74     | 15092      |
| Congo   | 1994           | FemaleAge75to79     | 9589       |
| Congo   | 1994           | FemaleAge80to84     | 5033       |
| Congo   | 1994           | FemaleAge85to89     | 1991       |
| Congo   | 1994           | FemaleAge90to94     | 542        |
| Congo   | 1994           | FemaleAge95to99     | 93         |
| Congo   | 1994           | FemaleAgeAbov e100  | 6          |
| Congo   | 1994           | FemaleLactAge15to19 | 18013      |
| Congo   | 1994           | FemaleLactAge20to24 | 26668      |
| Congo   | 1994           | FemaleLactAge25to29 | 21697      |
| Congo   | 1994           | FemaleLactAge30to34 | 16060      |
| Congo   | 1994           | FemaleLactAge35to39 | 9519       |
| Congo   | 1994           | FemaleLactAge40to44 | 4008       |



Dietary calcium and zinc deficiency risks are decreasing but remain prevalent

| Country | Reference year | Age/gender group    | Population |
|---------|----------------|---------------------|------------|
| Congo   | 1994           | FemaleLactAge45to49 | 1050       |
| Congo   | 1994           | FemalePregAge15to19 | 13510      |
| Congo   | 1994           | FemalePregAge20to24 | 20001      |
| Congo   | 1994           | FemalePregAge25to29 | 16272      |
| Congo   | 1994           | FemalePregAge30to34 | 12045      |
| Congo   | 1994           | FemalePregAge35to39 | 7139       |
| Congo   | 1994           | FemalePregAge40to44 | 3006       |
| Congo   | 1994           | FemalePregAge45to49 | 787        |
| Congo   | 1994           | MaleAge0to4         | 215624     |
| Congo   | 1994           | MaleAge10to14       | 167438     |
| Congo   | 1994           | MaleAge15to19       | 146326     |
| Congo   | 1994           | MaleAge20to24       | 122674     |
| Congo   | 1994           | MaleAge25to29       | 101048     |
| Congo   | 1994           | MaleAge30to34       | 81627      |
| Congo   | 1994           | MaleAge35to39       | 65524      |
| Congo   | 1994           | MaleAge40to44       | 53271      |
| Congo   | 1994           | MaleAge45to49       | 43328      |
| Congo   | 1994           | MaleAge50to54       | 36187      |
| Congo   | 1994           | MaleAge55to59       | 30055      |
| Congo   | 1994           | MaleAge5to9         | 187589     |
| Congo   | 1994           | MaleAge60to64       | 24231      |
| Congo   | 1994           | MaleAge65to69       | 18467      |
| Congo   | 1994           | MaleAge70to74       | 12866      |
| Congo   | 1994           | MaleAge75to79       | 7818       |
| Congo   | 1994           | MaleAge80to84       | 3869       |
| Congo   | 1994           | MaleAge85to89       | 1402       |
| Congo   | 1994           | MaleAge90to94       | 333        |
| Congo   | 1994           | MaleAge95to99       | 47         |
| Congo   | 1994           | MaleAgeAbov e100    | 2          |
| Congo   | 1995           | FemaleAge0to4       | 217976     |
| Congo   | 1995           | FemaleAge10to14     | 168501     |
| Congo   | 1995           | FemaleAge15to19     | 117268     |
| Congo   | 1995           | FemaleAge20to24     | 79677      |
| Congo   | 1995           | FemaleAge25to29     | 66737      |
| Congo   | 1995           | FemaleAge30to34     | 56859      |
| Congo   | 1995           | FemaleAge35to39     | 51794      |
| Congo   | 1995           | FemaleAge40to44     | 48883      |
| Congo   | 1995           | FemaleAge45to49     | 44589      |
| Congo   | 1995           | FemaleAge50to54     | 39202      |
| Congo   | 1995           | FemaleAge55to59     | 33026      |
| Congo   | 1995           | FemaleAge5to9       | 188387     |
| Congo   | 1995           | FemaleAge60to64     | 27268      |
| Congo   | 1995           | FemaleAge65to69     | 21450      |
| Congo   | 1995           | FemaleAge70to74     | 15533      |
| Congo   | 1995           | FemaleAge75to79     | 9865       |
| Congo   | 1995           | FemaleAge80to84     | 5132       |
| Congo   | 1995           | FemaleAge85to89     | 1968       |
| Congo   | 1995           | FemaleAge90to94     | 498        |
| Congo   | 1995           | FemaleAge95to99     | 74         |
| Congo   | 1995           | FemaleAgeAbov e100  | 6          |
| Congo   | 1995           | FemaleLactAge15to19 | 18013      |
| Congo   | 1995           | FemaleLactAge20to24 | 26668      |
| Congo   | 1995           | FemaleLactAge25to29 | 21697      |
| Congo   | 1995           | FemaleLactAge30to34 | 16060      |
| Congo   | 1995           | FemaleLactAge35to39 | 9519       |
| Congo   | 1995           | FemaleLactAge40to44 | 4008       |
| Congo   | 1995           | FemaleLactAge45to49 | 1050       |
| Congo   | 1995           | FemalePregAge15to19 | 13510      |
| Congo   | 1995           | FemalePregAge20to24 | 20001      |
| Congo   | 1995           | FemalePregAge25to29 | 16272      |
| Congo   | 1995           | FemalePregAge30to34 | 12045      |
| Congo   | 1995           | FemalePregAge35to39 | 7139       |
| Congo   | 1995           | FemalePregAge40to44 | 3006       |
| Congo   | 1995           | FemalePregAge45to49 | 787        |
| Congo   | 1995           | MaleAge0to4         | 221340     |
| Congo   | 1995           | MaleAge10to14       | 170954     |
| Congo   | 1995           | MaleAge15to19       | 150626     |
| Congo   | 1995           | MaleAge20to24       | 127030     |
| Congo   | 1995           | MaleAge25to29       | 104904     |
| Congo   | 1995           | MaleAge30to34       | 84828      |
| Congo   | 1995           | MaleAge35to39       | 67840      |
| Congo   | 1995           | MaleAge40to44       | 54975      |
| Congo   | 1995           | MaleAge45to49       | 44518      |
| Congo   | 1995           | MaleAge50to54       | 36968      |
| Congo   | 1995           | MaleAge55to59       | 30712      |
| Congo   | 1995           | MaleAge5to9         | 190806     |
| Congo   | 1995           | MaleAge60to64       | 24822      |
| Congo   | 1995           | MaleAge65to69       | 18963      |
| Congo   | 1995           | MaleAge70to74       | 13234      |
| Congo   | 1995           | MaleAge75to79       | 8022       |
| Congo   | 1995           | MaleAge80to84       | 3925       |
| Congo   | 1995           | MaleAge85to89       | 1368       |
| Congo   | 1995           | MaleAge90to94       | 293        |
| Congo   | 1995           | MaleAge95to99       | 33         |
| Congo   | 1995           | MaleAgeAbov e100    | 2          |
| Congo   | 1996           | FemaleAge0to4       | 224390     |
| Congo   | 1996           | FemaleAge10to14     | 172042     |
| Congo   | 1996           | FemaleAge15to19     | 116018     |

Dietary calcium and zinc deficiency risks are decreasing but remain prevalent

| Country | Reference year | Age/gender group    | Population |
|---------|----------------|---------------------|------------|
| Congo   | 1996           | FemaleAge20to24     | 74987      |
| Congo   | 1996           | FemaleAge25to29     | 64342      |
| Congo   | 1996           | FemaleAge30to34     | 55099      |
| Congo   | 1996           | FemaleAge35to39     | 51608      |
| Congo   | 1996           | FemaleAge40to44     | 49636      |
| Congo   | 1996           | FemaleAge45to49     | 45574      |
| Congo   | 1996           | FemaleAge50to54     | 40026      |
| Congo   | 1996           | FemaleAge55to59     | 33667      |
| Congo   | 1996           | FemaleAge5to9       | 192582     |
| Congo   | 1996           | FemaleAge60to64     | 27766      |
| Congo   | 1996           | FemaleAge65to69     | 21842      |
| Congo   | 1996           | FemaleAge70to74     | 15841      |
| Congo   | 1996           | FemaleAge75to79     | 10113      |
| Congo   | 1996           | FemaleAge80to84     | 5338       |
| Congo   | 1996           | FemaleAge85to89     | 2127       |
| Congo   | 1996           | FemaleAge90to94     | 577        |
| Congo   | 1996           | FemaleAge95to99     | 82         |
| Congo   | 1996           | FemaleAgeAbove100   | 6          |
| Congo   | 1996           | FemaleLactAge15to19 | 21152      |
| Congo   | 1996           | FemaleLactAge20to24 | 31952      |
| Congo   | 1996           | FemaleLactAge25to29 | 25269      |
| Congo   | 1996           | FemaleLactAge30to34 | 18828      |
| Congo   | 1996           | FemaleLactAge35to39 | 10947      |
| Congo   | 1996           | FemaleLactAge40to44 | 4527       |
| Congo   | 1996           | FemaleLactAge45to49 | 1147       |
| Congo   | 1996           | FemalePregAge15to19 | 15864      |
| Congo   | 1996           | FemalePregAge20to24 | 23964      |
| Congo   | 1996           | FemalePregAge25to29 | 18952      |
| Congo   | 1996           | FemalePregAge30to34 | 14121      |
| Congo   | 1996           | FemalePregAge35to39 | 8211       |
| Congo   | 1996           | FemalePregAge40to44 | 3395       |
| Congo   | 1996           | FemalePregAge45to49 | 860        |
| Congo   | 1996           | MaleAge0to4         | 227886     |
| Congo   | 1996           | MaleAge10to14       | 174416     |
| Congo   | 1996           | MaleAge15to19       | 154842     |
| Congo   | 1996           | MaleAge20to24       | 131646     |
| Congo   | 1996           | MaleAge25to29       | 108874     |
| Congo   | 1996           | MaleAge30to34       | 88043      |
| Congo   | 1996           | MaleAge35to39       | 70215      |
| Congo   | 1996           | MaleAge40to44       | 56677      |
| Congo   | 1996           | MaleAge45to49       | 45755      |
| Congo   | 1996           | MaleAge50to54       | 37747      |
| Congo   | 1996           | MaleAge55to59       | 31299      |
| Congo   | 1996           | MaleAge5to9         | 194948     |
| Congo   | 1996           | MaleAge60to64       | 25288      |
| Congo   | 1996           | MaleAge65to69       | 19329      |
| Congo   | 1996           | MaleAge70to74       | 13514      |
| Congo   | 1996           | MaleAge75to79       | 8245       |
| Congo   | 1996           | MaleAge80to84       | 4107       |
| Congo   | 1996           | MaleAge85to89       | 1499       |
| Congo   | 1996           | MaleAge90to94       | 351        |
| Congo   | 1996           | MaleAge95to99       | 38         |
| Congo   | 1996           | MaleAgeAbove100     | 2          |
| Congo   | 1997           | FemaleAge0to4       | 231754     |
| Congo   | 1997           | FemaleAge10to14     | 175538     |
| Congo   | 1997           | FemaleAge15to19     | 120056     |
| Congo   | 1997           | FemaleAge20to24     | 79705      |
| Congo   | 1997           | FemaleAge25to29     | 68443      |
| Congo   | 1997           | FemaleAge30to34     | 58395      |
| Congo   | 1997           | FemaleAge35to39     | 54078      |
| Congo   | 1997           | FemaleAge40to44     | 51384      |
| Congo   | 1997           | FemaleAge45to49     | 46827      |
| Congo   | 1997           | FemaleAge50to54     | 40892      |
| Congo   | 1997           | FemaleAge55to59     | 34363      |
| Congo   | 1997           | FemaleAge5to9       | 196861     |
| Congo   | 1997           | FemaleAge60to64     | 28314      |
| Congo   | 1997           | FemaleAge65to69     | 22285      |
| Congo   | 1997           | FemaleAge70to74     | 16174      |
| Congo   | 1997           | FemaleAge75to79     | 10353      |
| Congo   | 1997           | FemaleAge80to84     | 5505       |
| Congo   | 1997           | FemaleAge85to89     | 2240       |
| Congo   | 1997           | FemaleAge90to94     | 631        |
| Congo   | 1997           | FemaleAge95to99     | 96         |
| Congo   | 1997           | FemaleAgeAbove100   | 7          |
| Congo   | 1997           | FemaleLactAge15to19 | 21152      |
| Congo   | 1997           | FemaleLactAge20to24 | 31952      |
| Congo   | 1997           | FemaleLactAge25to29 | 25269      |
| Congo   | 1997           | FemaleLactAge30to34 | 18828      |
| Congo   | 1997           | FemaleLactAge35to39 | 10947      |
| Congo   | 1997           | FemaleLactAge40to44 | 4527       |
| Congo   | 1997           | FemaleLactAge45to49 | 1147       |
| Congo   | 1997           | FemalePregAge15to19 | 15864      |
| Congo   | 1997           | FemalePregAge20to24 | 23964      |
| Congo   | 1997           | FemalePregAge25to29 | 18952      |
| Congo   | 1997           | FemalePregAge30to34 | 14121      |
| Congo   | 1997           | FemalePregAge35to39 | 8211       |
| Congo   | 1997           | FemalePregAge40to44 | 3395       |
| Congo   | 1997           | FemalePregAge45to49 | 860        |

Dietary calcium and zinc deficiency risks are decreasing but remain prevalent

| Country | Reference year | Age/gender group    | Population |
|---------|----------------|---------------------|------------|
| Congo   | 1997           | MaleAge0to4         | 235378     |
| Congo   | 1997           | MaleAge10to14       | 177839     |
| Congo   | 1997           | MaleAge15to19       | 158889     |
| Congo   | 1997           | MaleAge20to24       | 136418     |
| Congo   | 1997           | MaleAge25to29       | 113039     |
| Congo   | 1997           | MaleAge30to34       | 91495      |
| Congo   | 1997           | MaleAge35to39       | 72804      |
| Congo   | 1997           | MaleAge40to44       | 58437      |
| Congo   | 1997           | MaleAge45to49       | 47142      |
| Congo   | 1997           | MaleAge50to54       | 38572      |
| Congo   | 1997           | MaleAge55to59       | 31940      |
| Congo   | 1997           | MaleAge5to9         | 199208     |
| Congo   | 1997           | MaleAge60to64       | 25802      |
| Congo   | 1997           | MaleAge65to69       | 19736      |
| Congo   | 1997           | MaleAge70to74       | 13813      |
| Congo   | 1997           | MaleAge75to79       | 8453       |
| Congo   | 1997           | MaleAge80to84       | 4245       |
| Congo   | 1997           | MaleAge85to89       | 1593       |
| Congo   | 1997           | MaleAge90to94       | 392        |
| Congo   | 1997           | MaleAge95to99       | 47         |
| Congo   | 1997           | MaleAgeAbov e100    | 2          |
| Congo   | 1998           | FemaleAge0to4       | 239725     |
| Congo   | 1998           | FemaleAge10to14     | 179010     |
| Congo   | 1998           | FemaleAge15to19     | 123799     |
| Congo   | 1998           | FemaleAge20to24     | 84428      |
| Congo   | 1998           | FemaleAge25to29     | 72757      |
| Congo   | 1998           | FemaleAge30to34     | 61885      |
| Congo   | 1998           | FemaleAge35to39     | 56689      |
| Congo   | 1998           | FemaleAge40to44     | 53205      |
| Congo   | 1998           | FemaleAge45to49     | 48168      |
| Congo   | 1998           | FemaleAge50to54     | 41792      |
| Congo   | 1998           | FemaleAge55to59     | 35095      |
| Congo   | 1998           | FemaleAge5to9       | 201156     |
| Congo   | 1998           | FemaleAge60to64     | 28903      |
| Congo   | 1998           | FemaleAge65to69     | 22769      |
| Congo   | 1998           | FemaleAge70to74     | 16541      |
| Congo   | 1998           | FemaleAge75to79     | 10596      |
| Congo   | 1998           | FemaleAge80to84     | 5635       |
| Congo   | 1998           | FemaleAge85to89     | 2299       |
| Congo   | 1998           | FemaleAge90to94     | 655        |
| Congo   | 1998           | FemaleAge95to99     | 109        |
| Congo   | 1998           | FemaleAgeAbov e100  | 7          |
| Congo   | 1998           | FemaleLactAge15to19 | 21152      |
| Congo   | 1998           | FemaleLactAge20to24 | 31952      |
| Congo   | 1998           | FemaleLactAge25to29 | 25269      |
| Congo   | 1998           | FemaleLactAge30to34 | 18828      |
| Congo   | 1998           | FemaleLactAge35to39 | 10947      |
| Congo   | 1998           | FemaleLactAge40to44 | 4527       |
| Congo   | 1998           | FemaleLactAge45to49 | 1147       |
| Congo   | 1998           | FemalePregAge15to19 | 15864      |
| Congo   | 1998           | FemalePregAge20to24 | 23964      |
| Congo   | 1998           | FemalePregAge25to29 | 18952      |
| Congo   | 1998           | FemalePregAge30to34 | 14121      |
| Congo   | 1998           | FemalePregAge35to39 | 8211       |
| Congo   | 1998           | FemalePregAge40to44 | 3395       |
| Congo   | 1998           | FemalePregAge45to49 | 860        |
| Congo   | 1998           | MaleAge0to4         | 243481     |
| Congo   | 1998           | MaleAge10to14       | 181238     |
| Congo   | 1998           | MaleAge15to19       | 162694     |
| Congo   | 1998           | MaleAge20to24       | 141174     |
| Congo   | 1998           | MaleAge25to29       | 117365     |
| Congo   | 1998           | MaleAge30to34       | 95158      |
| Congo   | 1998           | MaleAge35to39       | 75583      |
| Congo   | 1998           | MaleAge40to44       | 60270      |
| Congo   | 1998           | MaleAge45to49       | 48640      |
| Congo   | 1998           | MaleAge50to54       | 39447      |
| Congo   | 1998           | MaleAge55to59       | 32618      |
| Congo   | 1998           | MaleAge5to9         | 203502     |
| Congo   | 1998           | MaleAge60to64       | 26357      |
| Congo   | 1998           | MaleAge65to69       | 20180      |
| Congo   | 1998           | MaleAge70to74       | 14137      |
| Congo   | 1998           | MaleAge75to79       | 8651       |
| Congo   | 1998           | MaleAge80to84       | 4347       |
| Congo   | 1998           | MaleAge85to89       | 1637       |
| Congo   | 1998           | MaleAge90to94       | 409        |
| Congo   | 1998           | MaleAge95to99       | 56         |
| Congo   | 1998           | MaleAgeAbov e100    | 2          |
| Congo   | 1999           | FemaleAge0to4       | 247651     |
| Congo   | 1999           | FemaleAge10to14     | 182398     |
| Congo   | 1999           | FemaleAge15to19     | 127225     |
| Congo   | 1999           | FemaleAge20to24     | 88949      |
| Congo   | 1999           | FemaleAge25to29     | 77223      |
| Congo   | 1999           | FemaleAge30to34     | 65551      |
| Congo   | 1999           | FemaleAge35to39     | 59429      |
| Congo   | 1999           | FemaleAge40to44     | 55104      |
| Congo   | 1999           | FemaleAge45to49     | 49564      |
| Congo   | 1999           | FemaleAge50to54     | 42729      |
| Congo   | 1999           | FemaleAge55to59     | 35841      |

Dietary calcium and zinc deficiency risks are decreasing but remain prevalent

| Country | Reference year | Age/gender group    | Population |
|---------|----------------|---------------------|------------|
| Congo   | 1999           | FemaleAge5to9       | 205478     |
| Congo   | 1999           | FemaleAge60to64     | 29522      |
| Congo   | 1999           | FemaleAge65to69     | 23288      |
| Congo   | 1999           | FemaleAge70to74     | 16941      |
| Congo   | 1999           | FemaleAge75to79     | 10848      |
| Congo   | 1999           | FemaleAge80to84     | 5737       |
| Congo   | 1999           | FemaleAge85to89     | 2302       |
| Congo   | 1999           | FemaleAge90to94     | 641        |
| Congo   | 1999           | FemaleAge95to99     | 114        |
| Congo   | 1999           | FemaleAgeAbove100   | 8          |
| Congo   | 1999           | FemaleLactAge15to19 | 21152      |
| Congo   | 1999           | FemaleLactAge20to24 | 31952      |
| Congo   | 1999           | FemaleLactAge25to29 | 25269      |
| Congo   | 1999           | FemaleLactAge30to34 | 18828      |
| Congo   | 1999           | FemaleLactAge35to39 | 10947      |
| Congo   | 1999           | FemaleLactAge40to44 | 4527       |
| Congo   | 1999           | FemaleLactAge45to49 | 1147       |
| Congo   | 1999           | FemalePregAge15to19 | 15864      |
| Congo   | 1999           | FemalePregAge20to24 | 23964      |
| Congo   | 1999           | FemalePregAge25to29 | 18952      |
| Congo   | 1999           | FemalePregAge30to34 | 14121      |
| Congo   | 1999           | FemalePregAge35to39 | 8211       |
| Congo   | 1999           | FemalePregAge40to44 | 3395       |
| Congo   | 1999           | FemalePregAge45to49 | 860        |
| Congo   | 1999           | MaleAge0to4         | 251553     |
| Congo   | 1999           | MaleAge10to14       | 184560     |
| Congo   | 1999           | MaleAge15to19       | 166213     |
| Congo   | 1999           | MaleAge20to24       | 145711     |
| Congo   | 1999           | MaleAge25to29       | 121803     |
| Congo   | 1999           | MaleAge30to34       | 98990      |
| Congo   | 1999           | MaleAge35to39       | 78520      |
| Congo   | 1999           | MaleAge40to44       | 62215      |
| Congo   | 1999           | MaleAge45to49       | 50185      |
| Congo   | 1999           | MaleAge50to54       | 40390      |
| Congo   | 1999           | MaleAge55to59       | 33318      |
| Congo   | 1999           | MaleAge5to9         | 207825     |
| Congo   | 1999           | MaleAge60to64       | 26939      |
| Congo   | 1999           | MaleAge65to69       | 20654      |
| Congo   | 1999           | MaleAge70to74       | 14486      |
| Congo   | 1999           | MaleAge75to79       | 8848       |
| Congo   | 1999           | MaleAge80to84       | 4415       |
| Congo   | 1999           | MaleAge85to89       | 1630       |
| Congo   | 1999           | MaleAge90to94       | 398        |
| Congo   | 1999           | MaleAge95to99       | 58         |
| Congo   | 1999           | MaleAgeAbove100     | 2          |
| Congo   | 2000           | FemaleAge0to4       | 255112     |
| Congo   | 2000           | FemaleAge10to14     | 185596     |
| Congo   | 2000           | FemaleAge15to19     | 130367     |
| Congo   | 2000           | FemaleAge20to24     | 93112      |
| Congo   | 2000           | FemaleAge25to29     | 81757      |
| Congo   | 2000           | FemaleAge30to34     | 69382      |
| Congo   | 2000           | FemaleAge35to39     | 62298      |
| Congo   | 2000           | FemaleAge40to44     | 57093      |
| Congo   | 2000           | FemaleAge45to49     | 50992      |
| Congo   | 2000           | FemaleAge50to54     | 43706      |
| Congo   | 2000           | FemaleAge55to59     | 36588      |
| Congo   | 2000           | FemaleAge5to9       | 209925     |
| Congo   | 2000           | FemaleAge60to64     | 30160      |
| Congo   | 2000           | FemaleAge65to69     | 23835      |
| Congo   | 2000           | FemaleAge70to74     | 17374      |
| Congo   | 2000           | FemaleAge75to79     | 11117      |
| Congo   | 2000           | FemaleAge80to84     | 5822       |
| Congo   | 2000           | FemaleAge85to89     | 2260       |
| Congo   | 2000           | FemaleAge90to94     | 583        |
| Congo   | 2000           | FemaleAge95to99     | 89         |
| Congo   | 2000           | FemaleAgeAbove100   | 8          |
| Congo   | 2000           | FemaleLactAge15to19 | 21152      |
| Congo   | 2000           | FemaleLactAge20to24 | 31952      |
| Congo   | 2000           | FemaleLactAge25to29 | 25269      |
| Congo   | 2000           | FemaleLactAge30to34 | 18828      |
| Congo   | 2000           | FemaleLactAge35to39 | 10947      |
| Congo   | 2000           | FemaleLactAge40to44 | 4527       |
| Congo   | 2000           | FemaleLactAge45to49 | 1147       |
| Congo   | 2000           | FemalePregAge15to19 | 15864      |
| Congo   | 2000           | FemalePregAge20to24 | 23964      |
| Congo   | 2000           | FemalePregAge25to29 | 18952      |
| Congo   | 2000           | FemalePregAge30to34 | 14121      |
| Congo   | 2000           | FemalePregAge35to39 | 8211       |
| Congo   | 2000           | FemalePregAge40to44 | 3395       |
| Congo   | 2000           | FemalePregAge45to49 | 860        |
| Congo   | 2000           | MaleAge0to4         | 259181     |
| Congo   | 2000           | MaleAge10to14       | 187704     |
| Congo   | 2000           | MaleAge15to19       | 169440     |
| Congo   | 2000           | MaleAge20to24       | 149898     |
| Congo   | 2000           | MaleAge25to29       | 126291     |
| Congo   | 2000           | MaleAge30to34       | 102947     |
| Congo   | 2000           | MaleAge35to39       | 81601      |
| Congo   | 2000           | MaleAge40to44       | 64309      |

Dietary calcium and zinc deficiency risks are decreasing but remain prevalent

| Country    | Reference year | Age/gender group    | Population |
|------------|----------------|---------------------|------------|
| Congo      | 2000           | MaleAge45to49       | 51729      |
| Congo      | 2000           | MaleAge50to54       | 41423      |
| Congo      | 2000           | MaleAge55to59       | 34024      |
| Congo      | 2000           | MaleAge5to9         | 212261     |
| Congo      | 2000           | MaleAge60to64       | 27536      |
| Congo      | 2000           | MaleAge65to69       | 21155      |
| Congo      | 2000           | MaleAge70to74       | 14862      |
| Congo      | 2000           | MaleAge75to79       | 9053       |
| Congo      | 2000           | MaleAge80to84       | 4458       |
| Congo      | 2000           | MaleAge85to89       | 1578       |
| Congo      | 2000           | MaleAge90to94       | 347        |
| Congo      | 2000           | MaleAge95to99       | 41         |
| Congo      | 2000           | MaleAgeAbov e100    | 2          |
| Costa Rica | 1992           | FemaleAge0to4       | 201663     |
| Costa Rica | 1992           | FemaleAge10to14     | 167598     |
| Costa Rica | 1992           | FemaleAge15to19     | 120291     |
| Costa Rica | 1992           | FemaleAge20to24     | 100394     |
| Costa Rica | 1992           | FemaleAge25to29     | 111472     |
| Costa Rica | 1992           | FemaleAge30to34     | 107410     |
| Costa Rica | 1992           | FemaleAge35to39     | 95225      |
| Costa Rica | 1992           | FemaleAge40to44     | 78374      |
| Costa Rica | 1992           | FemaleAge45to49     | 61259      |
| Costa Rica | 1992           | FemaleAge50to54     | 50451      |
| Costa Rica | 1992           | FemaleAge55to59     | 41961      |
| Costa Rica | 1992           | FemaleAge5to9       | 190758     |
| Costa Rica | 1992           | FemaleAge60to64     | 35696      |
| Costa Rica | 1992           | FemaleAge65to69     | 27522      |
| Costa Rica | 1992           | FemaleAge70to74     | 22640      |
| Costa Rica | 1992           | FemaleAge75to79     | 17170      |
| Costa Rica | 1992           | FemaleAge80to84     | 10156      |
| Costa Rica | 1992           | FemaleAge85to89     | 5063       |
| Costa Rica | 1992           | FemaleAge90to94     | 1916       |
| Costa Rica | 1992           | FemaleAge95to99     | 464        |
| Costa Rica | 1992           | FemaleAgeAbov e100  | 69         |
| Costa Rica | 1992           | FemaleLactAge15to19 | 13981      |
| Costa Rica | 1992           | FemaleLactAge20to24 | 23395      |
| Costa Rica | 1992           | FemaleLactAge25to29 | 20782      |
| Costa Rica | 1992           | FemaleLactAge30to34 | 13910      |
| Costa Rica | 1992           | FemaleLactAge35to39 | 6854       |
| Costa Rica | 1992           | FemaleLactAge40to44 | 1823       |
| Costa Rica | 1992           | FemaleLactAge45to49 | 129        |
| Costa Rica | 1992           | FemalePregAge15to19 | 10486      |
| Costa Rica | 1992           | FemalePregAge20to24 | 17546      |
| Costa Rica | 1992           | FemalePregAge25to29 | 15587      |
| Costa Rica | 1992           | FemalePregAge30to34 | 10433      |
| Costa Rica | 1992           | FemalePregAge35to39 | 5141       |
| Costa Rica | 1992           | FemalePregAge40to44 | 1368       |
| Costa Rica | 1992           | FemalePregAge45to49 | 97         |
| Costa Rica | 1992           | MaleAge0to4         | 211430     |
| Costa Rica | 1992           | MaleAge10to14       | 175735     |
| Costa Rica | 1992           | MaleAge15to19       | 150913     |
| Costa Rica | 1992           | MaleAge20to24       | 147724     |
| Costa Rica | 1992           | MaleAge25to29       | 155651     |
| Costa Rica | 1992           | MaleAge30to34       | 139547     |
| Costa Rica | 1992           | MaleAge35to39       | 113150     |
| Costa Rica | 1992           | MaleAge40to44       | 84709      |
| Costa Rica | 1992           | MaleAge45to49       | 61476      |
| Costa Rica | 1992           | MaleAge50to54       | 49590      |
| Costa Rica | 1992           | MaleAge55to59       | 40756      |
| Costa Rica | 1992           | MaleAge5to9         | 200593     |
| Costa Rica | 1992           | MaleAge60to64       | 34970      |
| Costa Rica | 1992           | MaleAge65to69       | 26795      |
| Costa Rica | 1992           | MaleAge70to74       | 21733      |
| Costa Rica | 1992           | MaleAge75to79       | 15788      |
| Costa Rica | 1992           | MaleAge80to84       | 8389       |
| Costa Rica | 1992           | MaleAge85to89       | 3814       |
| Costa Rica | 1992           | MaleAge90to94       | 1348       |
| Costa Rica | 1992           | MaleAge95to99       | 323        |
| Costa Rica | 1992           | MaleAgeAbov e100    | 51         |
| Costa Rica | 1993           | FemaleAge0to4       | 199467     |
| Costa Rica | 1993           | FemaleAge10to14     | 172989     |
| Costa Rica | 1993           | FemaleAge15to19     | 125344     |
| Costa Rica | 1993           | FemaleAge20to24     | 99791      |
| Costa Rica | 1993           | FemaleAge25to29     | 111453     |
| Costa Rica | 1993           | FemaleAge30to34     | 113596     |
| Costa Rica | 1993           | FemaleAge35to39     | 99552      |
| Costa Rica | 1993           | FemaleAge40to44     | 84191      |
| Costa Rica | 1993           | FemaleAge45to49     | 64093      |
| Costa Rica | 1993           | FemaleAge50to54     | 52285      |
| Costa Rica | 1993           | FemaleAge55to59     | 43422      |
| Costa Rica | 1993           | FemaleAge5to9       | 195466     |
| Costa Rica | 1993           | FemaleAge60to64     | 36475      |
| Costa Rica | 1993           | FemaleAge65to69     | 29147      |
| Costa Rica | 1993           | FemaleAge70to74     | 22434      |
| Costa Rica | 1993           | FemaleAge75to79     | 18114      |
| Costa Rica | 1993           | FemaleAge80to84     | 10595      |
| Costa Rica | 1993           | FemaleAge85to89     | 5322       |
| Costa Rica | 1993           | FemaleAge90to94     | 2014       |

Dietary calcium and zinc deficiency risks are decreasing but remain prevalent

| Country    | Reference year | Age/gender group    | Population |
|------------|----------------|---------------------|------------|
| Costa Rica | 1993           | FemaleAge95to99     | 526        |
| Costa Rica | 1993           | FemaleAgeAbov e100  | 75         |
| Costa Rica | 1993           | FemaleLactAge15to19 | 13981      |
| Costa Rica | 1993           | FemaleLactAge20to24 | 23395      |
| Costa Rica | 1993           | FemaleLactAge25to29 | 20782      |
| Costa Rica | 1993           | FemaleLactAge30to34 | 13910      |
| Costa Rica | 1993           | FemaleLactAge35to39 | 6854       |
| Costa Rica | 1993           | FemaleLactAge40to44 | 1823       |
| Costa Rica | 1993           | FemaleLactAge45to49 | 129        |
| Costa Rica | 1993           | FemalePregAge15to19 | 10486      |
| Costa Rica | 1993           | FemalePregAge20to24 | 17546      |
| Costa Rica | 1993           | FemalePregAge25to29 | 15587      |
| Costa Rica | 1993           | FemalePregAge30to34 | 10433      |
| Costa Rica | 1993           | FemalePregAge35to39 | 5141       |
| Costa Rica | 1993           | FemalePregAge40to44 | 1368       |
| Costa Rica | 1993           | FemalePregAge45to49 | 97         |
| Costa Rica | 1993           | MaleAge0to4         | 209199     |
| Costa Rica | 1993           | MaleAge10to14       | 181645     |
| Costa Rica | 1993           | MaleAge15to19       | 156369     |
| Costa Rica | 1993           | MaleAge20to24       | 146846     |
| Costa Rica | 1993           | MaleAge25to29       | 155344     |
| Costa Rica | 1993           | MaleAge30to34       | 145794     |
| Costa Rica | 1993           | MaleAge35to39       | 117872     |
| Costa Rica | 1993           | MaleAge40to44       | 91022      |
| Costa Rica | 1993           | MaleAge45to49       | 64866      |
| Costa Rica | 1993           | MaleAge50to54       | 51220      |
| Costa Rica | 1993           | MaleAge55to59       | 42355      |
| Costa Rica | 1993           | MaleAge5to9         | 205659     |
| Costa Rica | 1993           | MaleAge60to64       | 35321      |
| Costa Rica | 1993           | MaleAge65to69       | 28422      |
| Costa Rica | 1993           | MaleAge70to74       | 21195      |
| Costa Rica | 1993           | MaleAge75to79       | 16698      |
| Costa Rica | 1993           | MaleAge80to84       | 8748       |
| Costa Rica | 1993           | MaleAge85to89       | 4012       |
| Costa Rica | 1993           | MaleAge90to94       | 1418       |
| Costa Rica | 1993           | MaleAge95to99       | 364        |
| Costa Rica | 1993           | MaleAgeAbov e100    | 56         |
| Costa Rica | 1994           | FemaleAge0to4       | 197160     |
| Costa Rica | 1994           | FemaleAge10to14     | 178438     |
| Costa Rica | 1994           | FemaleAge15to19     | 130825     |
| Costa Rica | 1994           | FemaleAge20to24     | 100182     |
| Costa Rica | 1994           | FemaleAge25to29     | 111068     |
| Costa Rica | 1994           | FemaleAge30to34     | 118944     |
| Costa Rica | 1994           | FemaleAge35to39     | 104274     |
| Costa Rica | 1994           | FemaleAge40to44     | 90009      |
| Costa Rica | 1994           | FemaleAge45to49     | 67527      |
| Costa Rica | 1994           | FemaleAge50to54     | 54325      |
| Costa Rica | 1994           | FemaleAge55to59     | 44989      |
| Costa Rica | 1994           | FemaleAge5to9       | 199654     |
| Costa Rica | 1994           | FemaleAge60to64     | 37359      |
| Costa Rica | 1994           | FemaleAge65to69     | 30740      |
| Costa Rica | 1994           | FemaleAge70to74     | 22544      |
| Costa Rica | 1994           | FemaleAge75to79     | 18899      |
| Costa Rica | 1994           | FemaleAge80to84     | 11146      |
| Costa Rica | 1994           | FemaleAge85to89     | 5567       |
| Costa Rica | 1994           | FemaleAge90to94     | 2084       |
| Costa Rica | 1994           | FemaleAge95to99     | 565        |
| Costa Rica | 1994           | FemaleAgeAbov e100  | 83         |
| Costa Rica | 1994           | FemaleLactAge15to19 | 13981      |
| Costa Rica | 1994           | FemaleLactAge20to24 | 23395      |
| Costa Rica | 1994           | FemaleLactAge25to29 | 20782      |
| Costa Rica | 1994           | FemaleLactAge30to34 | 13910      |
| Costa Rica | 1994           | FemaleLactAge35to39 | 6854       |
| Costa Rica | 1994           | FemaleLactAge40to44 | 1823       |
| Costa Rica | 1994           | FemaleLactAge45to49 | 129        |
| Costa Rica | 1994           | FemalePregAge15to19 | 10486      |
| Costa Rica | 1994           | FemalePregAge20to24 | 17546      |
| Costa Rica | 1994           | FemalePregAge25to29 | 15587      |
| Costa Rica | 1994           | FemalePregAge30to34 | 10433      |
| Costa Rica | 1994           | FemalePregAge35to39 | 5141       |
| Costa Rica | 1994           | FemalePregAge40to44 | 1368       |
| Costa Rica | 1994           | FemalePregAge45to49 | 97         |
| Costa Rica | 1994           | MaleAge0to4         | 206842     |
| Costa Rica | 1994           | MaleAge10to14       | 187627     |
| Costa Rica | 1994           | MaleAge15to19       | 162308     |
| Costa Rica | 1994           | MaleAge20to24       | 147090     |
| Costa Rica | 1994           | MaleAge25to29       | 154668     |
| Costa Rica | 1994           | MaleAge30to34       | 151122     |
| Costa Rica | 1994           | MaleAge35to39       | 122931     |
| Costa Rica | 1994           | MaleAge40to44       | 97324      |
| Costa Rica | 1994           | MaleAge45to49       | 68888      |
| Costa Rica | 1994           | MaleAge50to54       | 53162      |
| Costa Rica | 1994           | MaleAge55to59       | 44023      |
| Costa Rica | 1994           | MaleAge5to9         | 210166     |
| Costa Rica | 1994           | MaleAge60to64       | 35872      |
| Costa Rica | 1994           | MaleAge65to69       | 29952      |
| Costa Rica | 1994           | MaleAge70to74       | 21045      |
| Costa Rica | 1994           | MaleAge75to79       | 17365      |

Dietary calcium and zinc deficiency risks are decreasing but remain prevalent

| Country    | Reference year | Age/gender group    | Population |
|------------|----------------|---------------------|------------|
| Costa Rica | 1994           | MaleAge80to84       | 9184       |
| Costa Rica | 1994           | MaleAge85to89       | 4182       |
| Costa Rica | 1994           | MaleAge90to94       | 1462       |
| Costa Rica | 1994           | MaleAge95to99       | 388        |
| Costa Rica | 1994           | MaleAgeAbov e100    | 61         |
| Costa Rica | 1995           | FemaleAge0to4       | 195674     |
| Costa Rica | 1995           | FemaleAge10to14     | 183987     |
| Costa Rica | 1995           | FemaleAge15to19     | 136339     |
| Costa Rica | 1995           | FemaleAge20to24     | 101879     |
| Costa Rica | 1995           | FemaleAge25to29     | 110702     |
| Costa Rica | 1995           | FemaleAge30to34     | 122893     |
| Costa Rica | 1995           | FemaleAge35to39     | 109658     |
| Costa Rica | 1995           | FemaleAge40to44     | 95532      |
| Costa Rica | 1995           | FemaleAge45to49     | 71690      |
| Costa Rica | 1995           | FemaleAge50to54     | 56600      |
| Costa Rica | 1995           | FemaleAge55to59     | 46625      |
| Costa Rica | 1995           | FemaleAge5to9       | 202895     |
| Costa Rica | 1995           | FemaleAge60to64     | 38454      |
| Costa Rica | 1995           | FemaleAge65to69     | 32112      |
| Costa Rica | 1995           | FemaleAge70to74     | 23155      |
| Costa Rica | 1995           | FemaleAge75to79     | 19433      |
| Costa Rica | 1995           | FemaleAge80to84     | 11827      |
| Costa Rica | 1995           | FemaleAge85to89     | 5822       |
| Costa Rica | 1995           | FemaleAge90to94     | 2134       |
| Costa Rica | 1995           | FemaleAge95to99     | 559        |
| Costa Rica | 1995           | FemaleAgeAbov e100  | 92         |
| Costa Rica | 1995           | FemaleLactAge15to19 | 13981      |
| Costa Rica | 1995           | FemaleLactAge20to24 | 23395      |
| Costa Rica | 1995           | FemaleLactAge25to29 | 20782      |
| Costa Rica | 1995           | FemaleLactAge30to34 | 13910      |
| Costa Rica | 1995           | FemaleLactAge35to39 | 6854       |
| Costa Rica | 1995           | FemaleLactAge40to44 | 1823       |
| Costa Rica | 1995           | FemaleLactAge45to49 | 129        |
| Costa Rica | 1995           | FemalePregAge15to19 | 10486      |
| Costa Rica | 1995           | FemalePregAge20to24 | 17546      |
| Costa Rica | 1995           | FemalePregAge25to29 | 15587      |
| Costa Rica | 1995           | FemalePregAge30to34 | 10433      |
| Costa Rica | 1995           | FemalePregAge35to39 | 5141       |
| Costa Rica | 1995           | FemalePregAge40to44 | 1368       |
| Costa Rica | 1995           | FemalePregAge45to49 | 97         |
| Costa Rica | 1995           | MaleAge0to4         | 205309     |
| Costa Rica | 1995           | MaleAge10to14       | 193706     |
| Costa Rica | 1995           | MaleAge15to19       | 168306     |
| Costa Rica | 1995           | MaleAge20to24       | 148802     |
| Costa Rica | 1995           | MaleAge25to29       | 154018     |
| Costa Rica | 1995           | MaleAge30to34       | 154978     |
| Costa Rica | 1995           | MaleAge35to39       | 128576     |
| Costa Rica | 1995           | MaleAge40to44       | 103322     |
| Costa Rica | 1995           | MaleAge45to49       | 73610      |
| Costa Rica | 1995           | MaleAge50to54       | 55524      |
| Costa Rica | 1995           | MaleAge55to59       | 45660      |
| Costa Rica | 1995           | MaleAge5to9         | 213681     |
| Costa Rica | 1995           | MaleAge60to64       | 36781      |
| Costa Rica | 1995           | MaleAge65to69       | 31161      |
| Costa Rica | 1995           | MaleAge70to74       | 21490      |
| Costa Rica | 1995           | MaleAge75to79       | 17698      |
| Costa Rica | 1995           | MaleAge80to84       | 9724       |
| Costa Rica | 1995           | MaleAge85to89       | 4336       |
| Costa Rica | 1995           | MaleAge90to94       | 1477       |
| Costa Rica | 1995           | MaleAge95to99       | 378        |
| Costa Rica | 1995           | MaleAgeAbov e100    | 67         |
| Costa Rica | 1996           | FemaleAge0to4       | 192233     |
| Costa Rica | 1996           | FemaleAge10to14     | 190396     |
| Costa Rica | 1996           | FemaleAge15to19     | 140392     |
| Costa Rica | 1996           | FemaleAge20to24     | 107202     |
| Costa Rica | 1996           | FemaleAge25to29     | 113231     |
| Costa Rica | 1996           | FemaleAge30to34     | 125757     |
| Costa Rica | 1996           | FemaleAge35to39     | 116102     |
| Costa Rica | 1996           | FemaleAge40to44     | 101306     |
| Costa Rica | 1996           | FemaleAge45to49     | 76577      |
| Costa Rica | 1996           | FemaleAge50to54     | 59052      |
| Costa Rica | 1996           | FemaleAge55to59     | 48281      |
| Costa Rica | 1996           | FemaleAge5to9       | 205401     |
| Costa Rica | 1996           | FemaleAge60to64     | 39628      |
| Costa Rica | 1996           | FemaleAge65to69     | 33158      |
| Costa Rica | 1996           | FemaleAge70to74     | 24026      |
| Costa Rica | 1996           | FemaleAge75to79     | 19568      |
| Costa Rica | 1996           | FemaleAge80to84     | 12518      |
| Costa Rica | 1996           | FemaleAge85to89     | 6214       |
| Costa Rica | 1996           | FemaleAge90to94     | 2365       |
| Costa Rica | 1996           | FemaleAge95to99     | 615        |
| Costa Rica | 1996           | FemaleAgeAbov e100  | 103        |
| Costa Rica | 1996           | FemaleLactAge15to19 | 15503      |
| Costa Rica | 1996           | FemaleLactAge20to24 | 22443      |
| Costa Rica | 1996           | FemaleLactAge25to29 | 19296      |
| Costa Rica | 1996           | FemaleLactAge30to34 | 13927      |
| Costa Rica | 1996           | FemaleLactAge35to39 | 6625       |
| Costa Rica | 1996           | FemaleLactAge40to44 | 1526       |

Dietary calcium and zinc deficiency risks are decreasing but remain prevalent

| Country    | Reference year | Age/gender group    | Population |
|------------|----------------|---------------------|------------|
| Costa Rica | 1996           | FemaleLactAge45to49 | 117        |
| Costa Rica | 1996           | FemalePregAge15to19 | 11628      |
| Costa Rica | 1996           | FemalePregAge20to24 | 16833      |
| Costa Rica | 1996           | FemalePregAge25to29 | 14472      |
| Costa Rica | 1996           | FemalePregAge30to34 | 10445      |
| Costa Rica | 1996           | FemalePregAge35to39 | 4968       |
| Costa Rica | 1996           | FemalePregAge40to44 | 1145       |
| Costa Rica | 1996           | FemalePregAge45to49 | 88         |
| Costa Rica | 1996           | MaleAge0to4         | 201694     |
| Costa Rica | 1996           | MaleAge10to14       | 200612     |
| Costa Rica | 1996           | MaleAge15to19       | 175596     |
| Costa Rica | 1996           | MaleAge20to24       | 152622     |
| Costa Rica | 1996           | MaleAge25to29       | 153600     |
| Costa Rica | 1996           | MaleAge30to34       | 157681     |
| Costa Rica | 1996           | MaleAge35to39       | 134819     |
| Costa Rica | 1996           | MaleAge40to44       | 109008     |
| Costa Rica | 1996           | MaleAge45to49       | 78977      |
| Costa Rica | 1996           | MaleAge50to54       | 58229      |
| Costa Rica | 1996           | MaleAge55to59       | 47212      |
| Costa Rica | 1996           | MaleAge5to9         | 216442     |
| Costa Rica | 1996           | MaleAge60to64       | 37849      |
| Costa Rica | 1996           | MaleAge65to69       | 31903      |
| Costa Rica | 1996           | MaleAge70to74       | 22281      |
| Costa Rica | 1996           | MaleAge75to79       | 17691      |
| Costa Rica | 1996           | MaleAge80to84       | 10437      |
| Costa Rica | 1996           | MaleAge85to89       | 4674       |
| Costa Rica | 1996           | MaleAge90to94       | 1650       |
| Costa Rica | 1996           | MaleAge95to99       | 414        |
| Costa Rica | 1996           | MaleAgeAbov e100    | 74         |
| Costa Rica | 1997           | FemaleAge0to4       | 191247     |
| Costa Rica | 1997           | FemaleAge10to14     | 196527     |
| Costa Rica | 1997           | FemaleAge15to19     | 146926     |
| Costa Rica | 1997           | FemaleAge20to24     | 112300     |
| Costa Rica | 1997           | FemaleAge25to29     | 113098     |
| Costa Rica | 1997           | FemaleAge30to34     | 127334     |
| Costa Rica | 1997           | FemaleAge35to39     | 122729     |
| Costa Rica | 1997           | FemaleAge40to44     | 106096     |
| Costa Rica | 1997           | FemaleAge45to49     | 82156      |
| Costa Rica | 1997           | FemaleAge50to54     | 61675      |
| Costa Rica | 1997           | FemaleAge55to59     | 50049      |
| Costa Rica | 1997           | FemaleAge5to9       | 205961     |
| Costa Rica | 1997           | FemaleAge60to64     | 40983      |
| Costa Rica | 1997           | FemaleAge65to69     | 34035      |
| Costa Rica | 1997           | FemaleAge70to74     | 25329      |
| Costa Rica | 1997           | FemaleAge75to79     | 19465      |
| Costa Rica | 1997           | FemaleAge80to84     | 13321      |
| Costa Rica | 1997           | FemaleAge85to89     | 6560       |
| Costa Rica | 1997           | FemaleAge90to94     | 2567       |
| Costa Rica | 1997           | FemaleAge95to99     | 680        |
| Costa Rica | 1997           | FemaleAgeAbov e100  | 116        |
| Costa Rica | 1997           | FemaleLactAge15to19 | 15503      |
| Costa Rica | 1997           | FemaleLactAge20to24 | 22443      |
| Costa Rica | 1997           | FemaleLactAge25to29 | 19296      |
| Costa Rica | 1997           | FemaleLactAge30to34 | 13927      |
| Costa Rica | 1997           | FemaleLactAge35to39 | 6625       |
| Costa Rica | 1997           | FemaleLactAge40to44 | 1526       |
| Costa Rica | 1997           | FemaleLactAge45to49 | 117        |
| Costa Rica | 1997           | FemalePregAge15to19 | 11628      |
| Costa Rica | 1997           | FemalePregAge20to24 | 16833      |
| Costa Rica | 1997           | FemalePregAge25to29 | 14472      |
| Costa Rica | 1997           | FemalePregAge30to34 | 10445      |
| Costa Rica | 1997           | FemalePregAge35to39 | 4968       |
| Costa Rica | 1997           | FemalePregAge40to44 | 1145       |
| Costa Rica | 1997           | FemalePregAge45to49 | 88         |
| Costa Rica | 1997           | MaleAge0to4         | 200644     |
| Costa Rica | 1997           | MaleAge10to14       | 207233     |
| Costa Rica | 1997           | MaleAge15to19       | 182701     |
| Costa Rica | 1997           | MaleAge20to24       | 158053     |
| Costa Rica | 1997           | MaleAge25to29       | 153150     |
| Costa Rica | 1997           | MaleAge30to34       | 158991     |
| Costa Rica | 1997           | MaleAge35to39       | 141557     |
| Costa Rica | 1997           | MaleAge40to44       | 114209     |
| Costa Rica | 1997           | MaleAge45to49       | 85026      |
| Costa Rica | 1997           | MaleAge50to54       | 61263      |
| Costa Rica | 1997           | MaleAge55to59       | 48790      |
| Costa Rica | 1997           | MaleAge5to9         | 217138     |
| Costa Rica | 1997           | MaleAge60to64       | 39248      |
| Costa Rica | 1997           | MaleAge65to69       | 32391      |
| Costa Rica | 1997           | MaleAge70to74       | 23543      |
| Costa Rica | 1997           | MaleAge75to79       | 17381      |
| Costa Rica | 1997           | MaleAge80to84       | 11237      |
| Costa Rica | 1997           | MaleAge85to89       | 4956       |
| Costa Rica | 1997           | MaleAge90to94       | 1800       |
| Costa Rica | 1997           | MaleAge95to99       | 458        |
| Costa Rica | 1997           | MaleAgeAbov e100    | 82         |
| Costa Rica | 1998           | FemaleAge0to4       | 191884     |
| Costa Rica | 1998           | FemaleAge10to14     | 202184     |
| Costa Rica | 1998           | FemaleAge15to19     | 153209     |



Dietary calcium and zinc deficiency risks are decreasing but remain prevalent

| Country    | Reference year | Age/gender group    | Population |
|------------|----------------|---------------------|------------|
| Costa Rica | 1998           | FemaleAge20to24     | 118494     |
| Costa Rica | 1998           | FemaleAge25to29     | 113369     |
| Costa Rica | 1998           | FemaleAge30to34     | 127926     |
| Costa Rica | 1998           | FemaleAge35to39     | 129372     |
| Costa Rica | 1998           | FemaleAge40to44     | 110728     |
| Costa Rica | 1998           | FemaleAge45to49     | 88155      |
| Costa Rica | 1998           | FemaleAge50to54     | 64635      |
| Costa Rica | 1998           | FemaleAge55to59     | 51958      |
| Costa Rica | 1998           | FemaleAge5to9       | 204645     |
| Costa Rica | 1998           | FemaleAge60to64     | 42484      |
| Costa Rica | 1998           | FemaleAge65to69     | 34851      |
| Costa Rica | 1998           | FemaleAge70to74     | 26871      |
| Costa Rica | 1998           | FemaleAge75to79     | 19347      |
| Costa Rica | 1998           | FemaleAge80to84     | 14138      |
| Costa Rica | 1998           | FemaleAge85to89     | 6893       |
| Costa Rica | 1998           | FemaleAge90to94     | 2732       |
| Costa Rica | 1998           | FemaleAge95to99     | 745        |
| Costa Rica | 1998           | FemaleAgeAbov e100  | 130        |
| Costa Rica | 1998           | FemaleLactAge15to19 | 15503      |
| Costa Rica | 1998           | FemaleLactAge20to24 | 22443      |
| Costa Rica | 1998           | FemaleLactAge25to29 | 19296      |
| Costa Rica | 1998           | FemaleLactAge30to34 | 13927      |
| Costa Rica | 1998           | FemaleLactAge35to39 | 6625       |
| Costa Rica | 1998           | FemaleLactAge40to44 | 1526       |
| Costa Rica | 1998           | FemaleLactAge45to49 | 117        |
| Costa Rica | 1998           | FemalePregAge15to19 | 11628      |
| Costa Rica | 1998           | FemalePregAge20to24 | 16833      |
| Costa Rica | 1998           | FemalePregAge25to29 | 14472      |
| Costa Rica | 1998           | FemalePregAge30to34 | 10445      |
| Costa Rica | 1998           | FemalePregAge35to39 | 4968       |
| Costa Rica | 1998           | FemalePregAge40to44 | 1145       |
| Costa Rica | 1998           | FemalePregAge45to49 | 88         |
| Costa Rica | 1998           | MaleAge0to4         | 201287     |
| Costa Rica | 1998           | MaleAge10to14       | 213391     |
| Costa Rica | 1998           | MaleAge15to19       | 189530     |
| Costa Rica | 1998           | MaleAge20to24       | 164718     |
| Costa Rica | 1998           | MaleAge25to29       | 153190     |
| Costa Rica | 1998           | MaleAge30to34       | 159268     |
| Costa Rica | 1998           | MaleAge35to39       | 148214     |
| Costa Rica | 1998           | MaleAge40to44       | 119220     |
| Costa Rica | 1998           | MaleAge45to49       | 91472      |
| Costa Rica | 1998           | MaleAge50to54       | 64733      |
| Costa Rica | 1998           | MaleAge55to59       | 50499      |
| Costa Rica | 1998           | MaleAge5to9         | 215821     |
| Costa Rica | 1998           | MaleAge60to64       | 40875      |
| Costa Rica | 1998           | MaleAge65to69       | 32809      |
| Costa Rica | 1998           | MaleAge70to74       | 25031      |
| Costa Rica | 1998           | MaleAge75to79       | 17045      |
| Costa Rica | 1998           | MaleAge80to84       | 11990      |
| Costa Rica | 1998           | MaleAge85to89       | 5212       |
| Costa Rica | 1998           | MaleAge90to94       | 1920       |
| Costa Rica | 1998           | MaleAge95to99       | 504        |
| Costa Rica | 1998           | MaleAgeAbov e100    | 91         |
| Costa Rica | 1999           | FemaleAge0to4       | 192666     |
| Costa Rica | 1999           | FemaleAge10to14     | 206756     |
| Costa Rica | 1999           | FemaleAge15to19     | 159337     |
| Costa Rica | 1999           | FemaleAge20to24     | 125143     |
| Costa Rica | 1999           | FemaleAge25to29     | 114651     |
| Costa Rica | 1999           | FemaleAge30to34     | 128109     |
| Costa Rica | 1999           | FemaleAge35to39     | 135135     |
| Costa Rica | 1999           | FemaleAge40to44     | 115720     |
| Costa Rica | 1999           | FemaleAge45to49     | 94117      |
| Costa Rica | 1999           | FemaleAge50to54     | 68174      |
| Costa Rica | 1999           | FemaleAge55to59     | 54050      |
| Costa Rica | 1999           | FemaleAge5to9       | 202181     |
| Costa Rica | 1999           | FemaleAge60to64     | 44067      |
| Costa Rica | 1999           | FemaleAge65to69     | 35769      |
| Costa Rica | 1999           | FemaleAge70to74     | 28370      |
| Costa Rica | 1999           | FemaleAge75to79     | 19522      |
| Costa Rica | 1999           | FemaleAge80to84     | 14811      |
| Costa Rica | 1999           | FemaleAge85to89     | 7266       |
| Costa Rica | 1999           | FemaleAge90to94     | 2861       |
| Costa Rica | 1999           | FemaleAge95to99     | 797        |
| Costa Rica | 1999           | FemaleAgeAbov e100  | 145        |
| Costa Rica | 1999           | FemaleLactAge15to19 | 15503      |
| Costa Rica | 1999           | FemaleLactAge20to24 | 22443      |
| Costa Rica | 1999           | FemaleLactAge25to29 | 19296      |
| Costa Rica | 1999           | FemaleLactAge30to34 | 13927      |
| Costa Rica | 1999           | FemaleLactAge35to39 | 6625       |
| Costa Rica | 1999           | FemaleLactAge40to44 | 1526       |
| Costa Rica | 1999           | FemaleLactAge45to49 | 117        |
| Costa Rica | 1999           | FemalePregAge15to19 | 11628      |
| Costa Rica | 1999           | FemalePregAge20to24 | 16833      |
| Costa Rica | 1999           | FemalePregAge25to29 | 14472      |
| Costa Rica | 1999           | FemalePregAge30to34 | 10445      |
| Costa Rica | 1999           | FemalePregAge35to39 | 4968       |
| Costa Rica | 1999           | FemalePregAge40to44 | 1145       |
| Costa Rica | 1999           | FemalePregAge45to49 | 88         |

Dietary calcium and zinc deficiency risks are decreasing but remain prevalent

| Country       | Reference year | Age/gender group    | Population |
|---------------|----------------|---------------------|------------|
| Costa Rica    | 1999           | MaleAge0to4         | 202084     |
| Costa Rica    | 1999           | MaleAge10to14       | 218433     |
| Costa Rica    | 1999           | MaleAge15to19       | 196187     |
| Costa Rica    | 1999           | MaleAge20to24       | 171909     |
| Costa Rica    | 1999           | MaleAge25to29       | 154390     |
| Costa Rica    | 1999           | MaleAge30to34       | 159123     |
| Costa Rica    | 1999           | MaleAge35to39       | 153896     |
| Costa Rica    | 1999           | MaleAge40to44       | 124539     |
| Costa Rica    | 1999           | MaleAge45to49       | 97871      |
| Costa Rica    | 1999           | MaleAge50to54       | 68795      |
| Costa Rica    | 1999           | MaleAge55to59       | 52501      |
| Costa Rica    | 1999           | MaleAge5to9         | 213266     |
| Costa Rica    | 1999           | MaleAge60to64       | 42558      |
| Costa Rica    | 1999           | MaleAge65to69       | 33424      |
| Costa Rica    | 1999           | MaleAge70to74       | 26403      |
| Costa Rica    | 1999           | MaleAge75to79       | 17031      |
| Costa Rica    | 1999           | MaleAge80to84       | 12519      |
| Costa Rica    | 1999           | MaleAge85to89       | 5495       |
| Costa Rica    | 1999           | MaleAge90to94       | 2010       |
| Costa Rica    | 1999           | MaleAge95to99       | 537        |
| Costa Rica    | 1999           | MaleAgeAbov e100    | 101        |
| Côte d'Ivoire | 1992           | FemaleAge0to4       | 1097568    |
| Côte d'Ivoire | 1992           | FemaleAge10to14     | 805460     |
| Côte d'Ivoire | 1992           | FemaleAge15to19     | 499033     |
| Côte d'Ivoire | 1992           | FemaleAge20to24     | 300610     |
| Côte d'Ivoire | 1992           | FemaleAge25to29     | 232554     |
| Côte d'Ivoire | 1992           | FemaleAge30to34     | 205739     |
| Côte d'Ivoire | 1992           | FemaleAge35to39     | 202267     |
| Côte d'Ivoire | 1992           | FemaleAge40to44     | 203880     |
| Côte d'Ivoire | 1992           | FemaleAge45to49     | 203063     |
| Côte d'Ivoire | 1992           | FemaleAge50to54     | 180738     |
| Côte d'Ivoire | 1992           | FemaleAge55to59     | 142504     |
| Côte d'Ivoire | 1992           | FemaleAge5to9       | 943693     |
| Côte d'Ivoire | 1992           | FemaleAge60to64     | 106441     |
| Côte d'Ivoire | 1992           | FemaleAge65to69     | 74772      |
| Côte d'Ivoire | 1992           | FemaleAge70to74     | 48475      |
| Côte d'Ivoire | 1992           | FemaleAge75to79     | 27819      |
| Côte d'Ivoire | 1992           | FemaleAge80to84     | 13231      |
| Côte d'Ivoire | 1992           | FemaleAge85to89     | 4787       |
| Côte d'Ivoire | 1992           | FemaleAge90to94     | 1189       |
| Côte d'Ivoire | 1992           | FemaleAge95to99     | 166        |
| Côte d'Ivoire | 1992           | FemaleAgeAbov e100  | 10         |
| Côte d'Ivoire | 1992           | FemaleLactAge15to19 | 94609      |
| Côte d'Ivoire | 1992           | FemaleLactAge20to24 | 135990     |
| Côte d'Ivoire | 1992           | FemaleLactAge25to29 | 119255     |
| Côte d'Ivoire | 1992           | FemaleLactAge30to34 | 90057      |
| Côte d'Ivoire | 1992           | FemaleLactAge35to39 | 54993      |
| Côte d'Ivoire | 1992           | FemaleLactAge40to44 | 27270      |
| Côte d'Ivoire | 1992           | FemaleLactAge45to49 | 7876       |
| Côte d'Ivoire | 1992           | FemalePregAge15to19 | 70957      |
| Côte d'Ivoire | 1992           | FemalePregAge20to24 | 101993     |
| Côte d'Ivoire | 1992           | FemalePregAge25to29 | 89441      |
| Côte d'Ivoire | 1992           | FemalePregAge30to34 | 67542      |
| Côte d'Ivoire | 1992           | FemalePregAge35to39 | 41245      |
| Côte d'Ivoire | 1992           | FemalePregAge40to44 | 20452      |
| Côte d'Ivoire | 1992           | FemalePregAge45to49 | 5907       |
| Côte d'Ivoire | 1992           | MaleAge0to4         | 1104100    |
| Côte d'Ivoire | 1992           | MaleAge10to14       | 805566     |
| Côte d'Ivoire | 1992           | MaleAge15to19       | 671535     |
| Côte d'Ivoire | 1992           | MaleAge20to24       | 562988     |
| Côte d'Ivoire | 1992           | MaleAge25to29       | 486974     |
| Côte d'Ivoire | 1992           | MaleAge30to34       | 427228     |
| Côte d'Ivoire | 1992           | MaleAge35to39       | 371650     |
| Côte d'Ivoire | 1992           | MaleAge40to44       | 329417     |
| Côte d'Ivoire | 1992           | MaleAge45to49       | 287452     |
| Côte d'Ivoire | 1992           | MaleAge50to54       | 235788     |
| Côte d'Ivoire | 1992           | MaleAge55to59       | 181660     |
| Côte d'Ivoire | 1992           | MaleAge5to9         | 944402     |
| Côte d'Ivoire | 1992           | MaleAge60to64       | 130978     |
| Côte d'Ivoire | 1992           | MaleAge65to69       | 88088      |
| Côte d'Ivoire | 1992           | MaleAge70to74       | 54197      |
| Côte d'Ivoire | 1992           | MaleAge75to79       | 29155      |
| Côte d'Ivoire | 1992           | MaleAge80to84       | 12874      |
| Côte d'Ivoire | 1992           | MaleAge85to89       | 4285       |
| Côte d'Ivoire | 1992           | MaleAge90to94       | 954        |
| Côte d'Ivoire | 1992           | MaleAge95to99       | 114        |
| Côte d'Ivoire | 1992           | MaleAgeAbov e100    | 4          |
| Côte d'Ivoire | 1993           | FemaleAge0to4       | 1120874    |
| Côte d'Ivoire | 1993           | FemaleAge10to14     | 830661     |
| Côte d'Ivoire | 1993           | FemaleAge15to19     | 529458     |
| Côte d'Ivoire | 1993           | FemaleAge20to24     | 326151     |
| Côte d'Ivoire | 1993           | FemaleAge25to29     | 252103     |
| Côte d'Ivoire | 1993           | FemaleAge30to34     | 220977     |
| Côte d'Ivoire | 1993           | FemaleAge35to39     | 214087     |
| Côte d'Ivoire | 1993           | FemaleAge40to44     | 210838     |
| Côte d'Ivoire | 1993           | FemaleAge45to49     | 208483     |
| Côte d'Ivoire | 1993           | FemaleAge50to54     | 186749     |
| Côte d'Ivoire | 1993           | FemaleAge55to59     | 147999     |

Dietary calcium and zinc deficiency risks are decreasing but remain prevalent

| Country       | Reference year | Age/gender group    | Population |
|---------------|----------------|---------------------|------------|
| Côte d'Ivoire | 1993           | FemaleAge5to9       | 965735     |
| Côte d'Ivoire | 1993           | FemaleAge60to64     | 110902     |
| Côte d'Ivoire | 1993           | FemaleAge65to69     | 77875      |
| Côte d'Ivoire | 1993           | FemaleAge70to74     | 50350      |
| Côte d'Ivoire | 1993           | FemaleAge75to79     | 28824      |
| Côte d'Ivoire | 1993           | FemaleAge80to84     | 13687      |
| Côte d'Ivoire | 1993           | FemaleAge85to89     | 4962       |
| Côte d'Ivoire | 1993           | FemaleAge90to94     | 1254       |
| Côte d'Ivoire | 1993           | FemaleAge95to99     | 192        |
| Côte d'Ivoire | 1993           | FemaleAgeAbove100   | 11         |
| Côte d'Ivoire | 1993           | FemaleLactAge15to19 | 94609      |
| Côte d'Ivoire | 1993           | FemaleLactAge20to24 | 135990     |
| Côte d'Ivoire | 1993           | FemaleLactAge25to29 | 119255     |
| Côte d'Ivoire | 1993           | FemaleLactAge30to34 | 90057      |
| Côte d'Ivoire | 1993           | FemaleLactAge35to39 | 54993      |
| Côte d'Ivoire | 1993           | FemaleLactAge40to44 | 27270      |
| Côte d'Ivoire | 1993           | FemaleLactAge45to49 | 7876       |
| Côte d'Ivoire | 1993           | FemalePregAge15to19 | 70957      |
| Côte d'Ivoire | 1993           | FemalePregAge20to24 | 101993     |
| Côte d'Ivoire | 1993           | FemalePregAge25to29 | 89441      |
| Côte d'Ivoire | 1993           | FemalePregAge30to34 | 67542      |
| Côte d'Ivoire | 1993           | FemalePregAge35to39 | 41245      |
| Côte d'Ivoire | 1993           | FemalePregAge40to44 | 20452      |
| Côte d'Ivoire | 1993           | FemalePregAge45to49 | 5907       |
| Côte d'Ivoire | 1993           | MaleAge0to4         | 1127674    |
| Côte d'Ivoire | 1993           | MaleAge10to14       | 830873     |
| Côte d'Ivoire | 1993           | MaleAge15to19       | 702639     |
| Côte d'Ivoire | 1993           | MaleAge20to24       | 587643     |
| Côte d'Ivoire | 1993           | MaleAge25to29       | 505526     |
| Côte d'Ivoire | 1993           | MaleAge30to34       | 441370     |
| Côte d'Ivoire | 1993           | MaleAge35to39       | 383804     |
| Côte d'Ivoire | 1993           | MaleAge40to44       | 335768     |
| Côte d'Ivoire | 1993           | MaleAge45to49       | 295368     |
| Côte d'Ivoire | 1993           | MaleAge50to54       | 243895     |
| Côte d'Ivoire | 1993           | MaleAge55to59       | 189247     |
| Côte d'Ivoire | 1993           | MaleAge5to9         | 966701     |
| Côte d'Ivoire | 1993           | MaleAge60to64       | 137028     |
| Côte d'Ivoire | 1993           | MaleAge65to69       | 92158      |
| Côte d'Ivoire | 1993           | MaleAge70to74       | 56581      |
| Côte d'Ivoire | 1993           | MaleAge75to79       | 30369      |
| Côte d'Ivoire | 1993           | MaleAge80to84       | 13361      |
| Côte d'Ivoire | 1993           | MaleAge85to89       | 4447       |
| Côte d'Ivoire | 1993           | MaleAge90to94       | 1010       |
| Côte d'Ivoire | 1993           | MaleAge95to99       | 137        |
| Côte d'Ivoire | 1993           | MaleAgeAbove100     | 5          |
| Côte d'Ivoire | 1994           | FemaleAge0to4       | 1144851    |
| Côte d'Ivoire | 1994           | FemaleAge10to14     | 853618     |
| Côte d'Ivoire | 1994           | FemaleAge15to19     | 558266     |
| Côte d'Ivoire | 1994           | FemaleAge20to24     | 352610     |
| Côte d'Ivoire | 1994           | FemaleAge25to29     | 272769     |
| Côte d'Ivoire | 1994           | FemaleAge30to34     | 236978     |
| Côte d'Ivoire | 1994           | FemaleAge35to39     | 226596     |
| Côte d'Ivoire | 1994           | FemaleAge40to44     | 218531     |
| Côte d'Ivoire | 1994           | FemaleAge45to49     | 213988     |
| Côte d'Ivoire | 1994           | FemaleAge50to54     | 192607     |
| Côte d'Ivoire | 1994           | FemaleAge55to59     | 153610     |
| Côte d'Ivoire | 1994           | FemaleAge5to9       | 985931     |
| Côte d'Ivoire | 1994           | FemaleAge60to64     | 115614     |
| Côte d'Ivoire | 1994           | FemaleAge65to69     | 81260      |
| Côte d'Ivoire | 1994           | FemaleAge70to74     | 52412      |
| Côte d'Ivoire | 1994           | FemaleAge75to79     | 29864      |
| Côte d'Ivoire | 1994           | FemaleAge80to84     | 14041      |
| Côte d'Ivoire | 1994           | FemaleAge85to89     | 4991       |
| Côte d'Ivoire | 1994           | FemaleAge90to94     | 1239       |
| Côte d'Ivoire | 1994           | FemaleAge95to99     | 198        |
| Côte d'Ivoire | 1994           | FemaleAgeAbove100   | 12         |
| Côte d'Ivoire | 1994           | FemaleLactAge15to19 | 94609      |
| Côte d'Ivoire | 1994           | FemaleLactAge20to24 | 135990     |
| Côte d'Ivoire | 1994           | FemaleLactAge25to29 | 119255     |
| Côte d'Ivoire | 1994           | FemaleLactAge30to34 | 90057      |
| Côte d'Ivoire | 1994           | FemaleLactAge35to39 | 54993      |
| Côte d'Ivoire | 1994           | FemaleLactAge40to44 | 27270      |
| Côte d'Ivoire | 1994           | FemaleLactAge45to49 | 7876       |
| Côte d'Ivoire | 1994           | FemalePregAge15to19 | 70957      |
| Côte d'Ivoire | 1994           | FemalePregAge20to24 | 101993     |
| Côte d'Ivoire | 1994           | FemalePregAge25to29 | 89441      |
| Côte d'Ivoire | 1994           | FemalePregAge30to34 | 67542      |
| Côte d'Ivoire | 1994           | FemalePregAge35to39 | 41245      |
| Côte d'Ivoire | 1994           | FemalePregAge40to44 | 20452      |
| Côte d'Ivoire | 1994           | FemalePregAge45to49 | 5907       |
| Côte d'Ivoire | 1994           | MaleAge0to4         | 1151916    |
| Côte d'Ivoire | 1994           | MaleAge10to14       | 853538     |
| Côte d'Ivoire | 1994           | MaleAge15to19       | 731764     |
| Côte d'Ivoire | 1994           | MaleAge20to24       | 613580     |
| Côte d'Ivoire | 1994           | MaleAge25to29       | 525299     |
| Côte d'Ivoire | 1994           | MaleAge30to34       | 456387     |
| Côte d'Ivoire | 1994           | MaleAge35to39       | 396601     |
| Côte d'Ivoire | 1994           | MaleAge40to44       | 343024     |

Dietary calcium and zinc deficiency risks are decreasing but remain prevalent

| Country       | Reference year | Age/gender group    | Population |
|---------------|----------------|---------------------|------------|
| Côte d'Ivoire | 1994           | MaleAge45to49       | 302974     |
| Côte d'Ivoire | 1994           | MaleAge50to54       | 251983     |
| Côte d'Ivoire | 1994           | MaleAge55to59       | 196992     |
| Côte d'Ivoire | 1994           | MaleAge5to9         | 987140     |
| Côte d'Ivoire | 1994           | MaleAge60to64       | 143420     |
| Côte d'Ivoire | 1994           | MaleAge65to69       | 96591      |
| Côte d'Ivoire | 1994           | MaleAge70to74       | 59183      |
| Côte d'Ivoire | 1994           | MaleAge75to79       | 31590      |
| Côte d'Ivoire | 1994           | MaleAge80to84       | 13726      |
| Côte d'Ivoire | 1994           | MaleAge85to89       | 4452       |
| Côte d'Ivoire | 1994           | MaleAge90to94       | 988        |
| Côte d'Ivoire | 1994           | MaleAge95to99       | 136        |
| Côte d'Ivoire | 1994           | MaleAgeAbov e100    | 5          |
| Côte d'Ivoire | 1995           | FemaleAge0to4       | 1169949    |
| Côte d'Ivoire | 1995           | FemaleAge10to14     | 874069     |
| Côte d'Ivoire | 1995           | FemaleAge15to19     | 584444     |
| Côte d'Ivoire | 1995           | FemaleAge20to24     | 379421     |
| Côte d'Ivoire | 1995           | FemaleAge25to29     | 294412     |
| Côte d'Ivoire | 1995           | FemaleAge30to34     | 253662     |
| Côte d'Ivoire | 1995           | FemaleAge35to39     | 239550     |
| Côte d'Ivoire | 1995           | FemaleAge40to44     | 227067     |
| Côte d'Ivoire | 1995           | FemaleAge45to49     | 219628     |
| Côte d'Ivoire | 1995           | FemaleAge50to54     | 198160     |
| Côte d'Ivoire | 1995           | FemaleAge55to59     | 159253     |
| Côte d'Ivoire | 1995           | FemaleAge5to9       | 1004405    |
| Côte d'Ivoire | 1995           | FemaleAge60to64     | 120510     |
| Côte d'Ivoire | 1995           | FemaleAge65to69     | 84911      |
| Côte d'Ivoire | 1995           | FemaleAge70to74     | 54682      |
| Côte d'Ivoire | 1995           | FemaleAge75to79     | 30971      |
| Côte d'Ivoire | 1995           | FemaleAge80to84     | 14328      |
| Côte d'Ivoire | 1995           | FemaleAge85to89     | 4883       |
| Côte d'Ivoire | 1995           | FemaleAge90to94     | 1108       |
| Côte d'Ivoire | 1995           | FemaleAge95to99     | 150        |
| Côte d'Ivoire | 1995           | FemaleAgeAbov e100  | 12         |
| Côte d'Ivoire | 1995           | FemaleLactAge15to19 | 94609      |
| Côte d'Ivoire | 1995           | FemaleLactAge20to24 | 135990     |
| Côte d'Ivoire | 1995           | FemaleLactAge25to29 | 119255     |
| Côte d'Ivoire | 1995           | FemaleLactAge30to34 | 90057      |
| Côte d'Ivoire | 1995           | FemaleLactAge35to39 | 54993      |
| Côte d'Ivoire | 1995           | FemaleLactAge40to44 | 27270      |
| Côte d'Ivoire | 1995           | FemaleLactAge45to49 | 7876       |
| Côte d'Ivoire | 1995           | FemalePregAge15to19 | 70957      |
| Côte d'Ivoire | 1995           | FemalePregAge20to24 | 101993     |
| Côte d'Ivoire | 1995           | FemalePregAge25to29 | 89441      |
| Côte d'Ivoire | 1995           | FemalePregAge30to34 | 67542      |
| Côte d'Ivoire | 1995           | FemalePregAge35to39 | 41245      |
| Côte d'Ivoire | 1995           | FemalePregAge40to44 | 20452      |
| Côte d'Ivoire | 1995           | FemalePregAge45to49 | 5907       |
| Côte d'Ivoire | 1995           | MaleAge0to4         | 1177342    |
| Côte d'Ivoire | 1995           | MaleAge10to14       | 873452     |
| Côte d'Ivoire | 1995           | MaleAge15to19       | 757717     |
| Côte d'Ivoire | 1995           | MaleAge20to24       | 640104     |
| Côte d'Ivoire | 1995           | MaleAge25to29       | 546092     |
| Côte d'Ivoire | 1995           | MaleAge30to34       | 472247     |
| Côte d'Ivoire | 1995           | MaleAge35to39       | 409593     |
| Côte d'Ivoire | 1995           | MaleAge40to44       | 351543     |
| Côte d'Ivoire | 1995           | MaleAge45to49       | 310076     |
| Côte d'Ivoire | 1995           | MaleAge50to54       | 259933     |
| Côte d'Ivoire | 1995           | MaleAge55to59       | 204776     |
| Côte d'Ivoire | 1995           | MaleAge5to9         | 1005820    |
| Côte d'Ivoire | 1995           | MaleAge60to64       | 150073     |
| Côte d'Ivoire | 1995           | MaleAge65to69       | 101376     |
| Côte d'Ivoire | 1995           | MaleAge70to74       | 62029      |
| Côte d'Ivoire | 1995           | MaleAge75to79       | 32862      |
| Côte d'Ivoire | 1995           | MaleAge80to84       | 14001      |
| Côte d'Ivoire | 1995           | MaleAge85to89       | 4293       |
| Côte d'Ivoire | 1995           | MaleAge90to94       | 846        |
| Côte d'Ivoire | 1995           | MaleAge95to99       | 88         |
| Côte d'Ivoire | 1995           | MaleAgeAbov e100    | 5          |
| Côte d'Ivoire | 1996           | FemaleAge0to4       | 1200618    |
| Côte d'Ivoire | 1996           | FemaleAge10to14     | 896952     |
| Côte d'Ivoire | 1996           | FemaleAge15to19     | 595169     |
| Côte d'Ivoire | 1996           | FemaleAge20to24     | 368849     |
| Côte d'Ivoire | 1996           | FemaleAge25to29     | 278774     |
| Côte d'Ivoire | 1996           | FemaleAge30to34     | 248523     |
| Côte d'Ivoire | 1996           | FemaleAge35to39     | 241100     |
| Côte d'Ivoire | 1996           | FemaleAge40to44     | 236799     |
| Côte d'Ivoire | 1996           | FemaleAge45to49     | 225751     |
| Côte d'Ivoire | 1996           | FemaleAge50to54     | 202463     |
| Côte d'Ivoire | 1996           | FemaleAge55to59     | 163638     |
| Côte d'Ivoire | 1996           | FemaleAge5to9       | 1027245    |
| Côte d'Ivoire | 1996           | FemaleAge60to64     | 124002     |
| Côte d'Ivoire | 1996           | FemaleAge65to69     | 87230      |
| Côte d'Ivoire | 1996           | FemaleAge70to74     | 56009      |
| Côte d'Ivoire | 1996           | FemaleAge75to79     | 31759      |
| Côte d'Ivoire | 1996           | FemaleAge80to84     | 14926      |
| Côte d'Ivoire | 1996           | FemaleAge85to89     | 5310       |
| Côte d'Ivoire | 1996           | FemaleAge90to94     | 1291       |

Dietary calcium and zinc deficiency risks are decreasing but remain prevalent

| Country       | Reference year | Age/gender group    | Population |
|---------------|----------------|---------------------|------------|
| Côte d'Ivoire | 1996           | FemaleAge95to99     | 167        |
| Côte d'Ivoire | 1996           | FemaleAgeAbove100   | 12         |
| Côte d'Ivoire | 1996           | FemaleLactAge15to19 | 102832     |
| Côte d'Ivoire | 1996           | FemaleLactAge20to24 | 156331     |
| Côte d'Ivoire | 1996           | FemaleLactAge25to29 | 139434     |
| Côte d'Ivoire | 1996           | FemaleLactAge30to34 | 101527     |
| Côte d'Ivoire | 1996           | FemaleLactAge35to39 | 60788      |
| Côte d'Ivoire | 1996           | FemaleLactAge40to44 | 26436      |
| Côte d'Ivoire | 1996           | FemaleLactAge45to49 | 7198       |
| Côte d'Ivoire | 1996           | FemalePregAge15to19 | 77124      |
| Côte d'Ivoire | 1996           | FemalePregAge20to24 | 117248     |
| Côte d'Ivoire | 1996           | FemalePregAge25to29 | 104575     |
| Côte d'Ivoire | 1996           | FemalePregAge30to34 | 76145      |
| Côte d'Ivoire | 1996           | FemalePregAge35to39 | 45591      |
| Côte d'Ivoire | 1996           | FemalePregAge40to44 | 19827      |
| Côte d'Ivoire | 1996           | FemalePregAge45to49 | 5398       |
| Côte d'Ivoire | 1996           | MaleAge0to4         | 1209594    |
| Côte d'Ivoire | 1996           | MaleAge10to14       | 897855     |
| Côte d'Ivoire | 1996           | MaleAge15to19       | 782621     |
| Côte d'Ivoire | 1996           | MaleAge20to24       | 663383     |
| Côte d'Ivoire | 1996           | MaleAge25to29       | 563394     |
| Côte d'Ivoire | 1996           | MaleAge30to34       | 485238     |
| Côte d'Ivoire | 1996           | MaleAge35to39       | 420127     |
| Côte d'Ivoire | 1996           | MaleAge40to44       | 359236     |
| Côte d'Ivoire | 1996           | MaleAge45to49       | 315164     |
| Côte d'Ivoire | 1996           | MaleAge50to54       | 266377     |
| Côte d'Ivoire | 1996           | MaleAge55to59       | 211144     |
| Côte d'Ivoire | 1996           | MaleAge5to9         | 1031519    |
| Côte d'Ivoire | 1996           | MaleAge60to64       | 155456     |
| Côte d'Ivoire | 1996           | MaleAge65to69       | 105115     |
| Côte d'Ivoire | 1996           | MaleAge70to74       | 64245      |
| Côte d'Ivoire | 1996           | MaleAge75to79       | 34176      |
| Côte d'Ivoire | 1996           | MaleAge80to84       | 14823      |
| Côte d'Ivoire | 1996           | MaleAge85to89       | 4763       |
| Côte d'Ivoire | 1996           | MaleAge90to94       | 1010       |
| Côte d'Ivoire | 1996           | MaleAge95to99       | 103        |
| Côte d'Ivoire | 1996           | MaleAgeAbove100     | 5          |
| Côte d'Ivoire | 1997           | FemaleAge0to4       | 1233377    |
| Côte d'Ivoire | 1997           | FemaleAge10to14     | 917316     |
| Côte d'Ivoire | 1997           | FemaleAge15to19     | 618590     |
| Côte d'Ivoire | 1997           | FemaleAge20to24     | 394178     |
| Côte d'Ivoire | 1997           | FemaleAge25to29     | 298920     |
| Côte d'Ivoire | 1997           | FemaleAge30to34     | 263699     |
| Côte d'Ivoire | 1997           | FemaleAge35to39     | 252929     |
| Côte d'Ivoire | 1997           | FemaleAge40to44     | 245666     |
| Côte d'Ivoire | 1997           | FemaleAge45to49     | 230697     |
| Côte d'Ivoire | 1997           | FemaleAge50to54     | 206518     |
| Côte d'Ivoire | 1997           | FemaleAge55to59     | 168088     |
| Côte d'Ivoire | 1997           | FemaleAge5to9       | 1048696    |
| Côte d'Ivoire | 1997           | FemaleAge60to64     | 127623     |
| Côte d'Ivoire | 1997           | FemaleAge65to69     | 89686      |
| Côte d'Ivoire | 1997           | FemaleAge70to74     | 57306      |
| Côte d'Ivoire | 1997           | FemaleAge75to79     | 32347      |
| Côte d'Ivoire | 1997           | FemaleAge80to84     | 15262      |
| Côte d'Ivoire | 1997           | FemaleAge85to89     | 5550       |
| Côte d'Ivoire | 1997           | FemaleAge90to94     | 1410       |
| Côte d'Ivoire | 1997           | FemaleAge95to99     | 201        |
| Côte d'Ivoire | 1997           | FemaleAgeAbove100   | 12         |
| Côte d'Ivoire | 1997           | FemaleLactAge15to19 | 102832     |
| Côte d'Ivoire | 1997           | FemaleLactAge20to24 | 156331     |
| Côte d'Ivoire | 1997           | FemaleLactAge25to29 | 139434     |
| Côte d'Ivoire | 1997           | FemaleLactAge30to34 | 101527     |
| Côte d'Ivoire | 1997           | FemaleLactAge35to39 | 60788      |
| Côte d'Ivoire | 1997           | FemaleLactAge40to44 | 26436      |
| Côte d'Ivoire | 1997           | FemaleLactAge45to49 | 7198       |
| Côte d'Ivoire | 1997           | FemalePregAge15to19 | 77124      |
| Côte d'Ivoire | 1997           | FemalePregAge20to24 | 117248     |
| Côte d'Ivoire | 1997           | FemalePregAge25to29 | 104575     |
| Côte d'Ivoire | 1997           | FemalePregAge30to34 | 76145      |
| Côte d'Ivoire | 1997           | FemalePregAge35to39 | 45591      |
| Côte d'Ivoire | 1997           | FemalePregAge40to44 | 19827      |
| Côte d'Ivoire | 1997           | FemalePregAge45to49 | 5398       |
| Côte d'Ivoire | 1997           | MaleAge0to4         | 1243229    |
| Côte d'Ivoire | 1997           | MaleAge10to14       | 920349     |
| Côte d'Ivoire | 1997           | MaleAge15to19       | 805977     |
| Côte d'Ivoire | 1997           | MaleAge20to24       | 687470     |
| Côte d'Ivoire | 1997           | MaleAge25to29       | 581047     |
| Côte d'Ivoire | 1997           | MaleAge30to34       | 498497     |
| Côte d'Ivoire | 1997           | MaleAge35to39       | 430571     |
| Côte d'Ivoire | 1997           | MaleAge40to44       | 367865     |
| Côte d'Ivoire | 1997           | MaleAge45to49       | 319545     |
| Côte d'Ivoire | 1997           | MaleAge50to54       | 272635     |
| Côte d'Ivoire | 1997           | MaleAge55to59       | 217426     |
| Côte d'Ivoire | 1997           | MaleAge5to9         | 1055594    |
| Côte d'Ivoire | 1997           | MaleAge60to64       | 160954     |
| Côte d'Ivoire | 1997           | MaleAge65to69       | 109018     |
| Côte d'Ivoire | 1997           | MaleAge70to74       | 66447      |
| Côte d'Ivoire | 1997           | MaleAge75to79       | 35285      |

Dietary calcium and zinc deficiency risks are decreasing but remain prevalent

| Country       | Reference year | Age/gender group    | Population |
|---------------|----------------|---------------------|------------|
| Côte d'Ivoire | 1997           | MaleAge80to84       | 15386      |
| Côte d'Ivoire | 1997           | MaleAge85to89       | 5062       |
| Côte d'Ivoire | 1997           | MaleAge90to94       | 1126       |
| Côte d'Ivoire | 1997           | MaleAge95to99       | 134        |
| Côte d'Ivoire | 1997           | MaleAgeAbov e100    | 5          |
| Côte d'Ivoire | 1998           | FemaleAge0to4       | 1265737    |
| Côte d'Ivoire | 1998           | FemaleAge10to14     | 934784     |
| Côte d'Ivoire | 1998           | FemaleAge15to19     | 640032     |
| Côte d'Ivoire | 1998           | FemaleAge20to24     | 419017     |
| Côte d'Ivoire | 1998           | FemaleAge25to29     | 319389     |
| Côte d'Ivoire | 1998           | FemaleAge30to34     | 279111     |
| Côte d'Ivoire | 1998           | FemaleAge35to39     | 264841     |
| Côte d'Ivoire | 1998           | FemaleAge40to44     | 254882     |
| Côte d'Ivoire | 1998           | FemaleAge45to49     | 235749     |
| Côte d'Ivoire | 1998           | FemaleAge50to54     | 210354     |
| Côte d'Ivoire | 1998           | FemaleAge55to59     | 172456     |
| Côte d'Ivoire | 1998           | FemaleAge5to9       | 1068813    |
| Côte d'Ivoire | 1998           | FemaleAge60to64     | 131333     |
| Côte d'Ivoire | 1998           | FemaleAge65to69     | 92295      |
| Côte d'Ivoire | 1998           | FemaleAge70to74     | 58631      |
| Côte d'Ivoire | 1998           | FemaleAge75to79     | 32781      |
| Côte d'Ivoire | 1998           | FemaleAge80to84     | 15323      |
| Côte d'Ivoire | 1998           | FemaleAge85to89     | 5555       |
| Côte d'Ivoire | 1998           | FemaleAge90to94     | 1437       |
| Côte d'Ivoire | 1998           | FemaleAge95to99     | 228        |
| Côte d'Ivoire | 1998           | FemaleAgeAbov e100  | 12         |
| Côte d'Ivoire | 1998           | FemaleLactAge15to19 | 102832     |
| Côte d'Ivoire | 1998           | FemaleLactAge20to24 | 156331     |
| Côte d'Ivoire | 1998           | FemaleLactAge25to29 | 139434     |
| Côte d'Ivoire | 1998           | FemaleLactAge30to34 | 101527     |
| Côte d'Ivoire | 1998           | FemaleLactAge35to39 | 60788      |
| Côte d'Ivoire | 1998           | FemaleLactAge40to44 | 26436      |
| Côte d'Ivoire | 1998           | FemaleLactAge45to49 | 7198       |
| Côte d'Ivoire | 1998           | FemalePregAge15to19 | 77124      |
| Côte d'Ivoire | 1998           | FemalePregAge20to24 | 117248     |
| Côte d'Ivoire | 1998           | FemalePregAge25to29 | 104575     |
| Côte d'Ivoire | 1998           | FemalePregAge30to34 | 76145      |
| Côte d'Ivoire | 1998           | FemalePregAge35to39 | 45591      |
| Côte d'Ivoire | 1998           | FemalePregAge40to44 | 19827      |
| Côte d'Ivoire | 1998           | FemalePregAge45to49 | 5398       |
| Côte d'Ivoire | 1998           | MaleAge0to4         | 1275882    |
| Côte d'Ivoire | 1998           | MaleAge10to14       | 940301     |
| Côte d'Ivoire | 1998           | MaleAge15to19       | 827354     |
| Côte d'Ivoire | 1998           | MaleAge20to24       | 711442     |
| Côte d'Ivoire | 1998           | MaleAge25to29       | 598874     |
| Côte d'Ivoire | 1998           | MaleAge30to34       | 511867     |
| Côte d'Ivoire | 1998           | MaleAge35to39       | 440838     |
| Côte d'Ivoire | 1998           | MaleAge40to44       | 376943     |
| Côte d'Ivoire | 1998           | MaleAge45to49       | 323565     |
| Côte d'Ivoire | 1998           | MaleAge50to54       | 278428     |
| Côte d'Ivoire | 1998           | MaleAge55to59       | 223485     |
| Côte d'Ivoire | 1998           | MaleAge5to9         | 1077701    |
| Côte d'Ivoire | 1998           | MaleAge60to64       | 166467     |
| Côte d'Ivoire | 1998           | MaleAge65to69       | 113065     |
| Côte d'Ivoire | 1998           | MaleAge70to74       | 68688      |
| Côte d'Ivoire | 1998           | MaleAge75to79       | 36217      |
| Côte d'Ivoire | 1998           | MaleAge80to84       | 15670      |
| Côte d'Ivoire | 1998           | MaleAge85to89       | 5134       |
| Côte d'Ivoire | 1998           | MaleAge90to94       | 1166       |
| Côte d'Ivoire | 1998           | MaleAge95to99       | 162        |
| Côte d'Ivoire | 1998           | MaleAgeAbov e100    | 5          |
| Côte d'Ivoire | 1999           | FemaleAge0to4       | 1293491    |
| Côte d'Ivoire | 1999           | FemaleAge10to14     | 949559     |
| Côte d'Ivoire | 1999           | FemaleAge15to19     | 659116     |
| Côte d'Ivoire | 1999           | FemaleAge20to24     | 442383     |
| Côte d'Ivoire | 1999           | FemaleAge25to29     | 340073     |
| Côte d'Ivoire | 1999           | FemaleAge30to34     | 294833     |
| Côte d'Ivoire | 1999           | FemaleAge35to39     | 276811     |
| Côte d'Ivoire | 1999           | FemaleAge40to44     | 264149     |
| Côte d'Ivoire | 1999           | FemaleAge45to49     | 241102     |
| Côte d'Ivoire | 1999           | FemaleAge50to54     | 214046     |
| Côte d'Ivoire | 1999           | FemaleAge55to59     | 176556     |
| Côte d'Ivoire | 1999           | FemaleAge5to9       | 1087622    |
| Côte d'Ivoire | 1999           | FemaleAge60to64     | 135094     |
| Côte d'Ivoire | 1999           | FemaleAge65to69     | 95055      |
| Côte d'Ivoire | 1999           | FemaleAge70to74     | 60041      |
| Côte d'Ivoire | 1999           | FemaleAge75to79     | 33121      |
| Côte d'Ivoire | 1999           | FemaleAge80to84     | 15126      |
| Côte d'Ivoire | 1999           | FemaleAge85to89     | 5299       |
| Côte d'Ivoire | 1999           | FemaleAge90to94     | 1333       |
| Côte d'Ivoire | 1999           | FemaleAge95to99     | 224        |
| Côte d'Ivoire | 1999           | FemaleAgeAbov e100  | 12         |
| Côte d'Ivoire | 1999           | FemaleLactAge15to19 | 102832     |
| Côte d'Ivoire | 1999           | FemaleLactAge20to24 | 156331     |
| Côte d'Ivoire | 1999           | FemaleLactAge25to29 | 139434     |
| Côte d'Ivoire | 1999           | FemaleLactAge30to34 | 101527     |
| Côte d'Ivoire | 1999           | FemaleLactAge35to39 | 60788      |
| Côte d'Ivoire | 1999           | FemaleLactAge40to44 | 26436      |

Dietary calcium and zinc deficiency risks are decreasing but remain prevalent

| Country       | Reference year | Age/gender group    | Population |
|---------------|----------------|---------------------|------------|
| Côte d'Ivoire | 1999           | FemaleLactAge45to49 | 7198       |
| Côte d'Ivoire | 1999           | FemalePregAge15to19 | 77124      |
| Côte d'Ivoire | 1999           | FemalePregAge20to24 | 117248     |
| Côte d'Ivoire | 1999           | FemalePregAge25to29 | 104575     |
| Côte d'Ivoire | 1999           | FemalePregAge30to34 | 76145      |
| Côte d'Ivoire | 1999           | FemalePregAge35to39 | 45591      |
| Côte d'Ivoire | 1999           | FemalePregAge40to44 | 19827      |
| Côte d'Ivoire | 1999           | FemalePregAge45to49 | 5398       |
| Côte d'Ivoire | 1999           | MaleAge0to4         | 1303409    |
| Côte d'Ivoire | 1999           | MaleAge10to14       | 957350     |
| Côte d'Ivoire | 1999           | MaleAge15to19       | 846371     |
| Côte d'Ivoire | 1999           | MaleAge20to24       | 733973     |
| Côte d'Ivoire | 1999           | MaleAge25to29       | 616823     |
| Côte d'Ivoire | 1999           | MaleAge30to34       | 525206     |
| Côte d'Ivoire | 1999           | MaleAge35to39       | 450901     |
| Côte d'Ivoire | 1999           | MaleAge40to44       | 385776     |
| Côte d'Ivoire | 1999           | MaleAge45to49       | 327805     |
| Côte d'Ivoire | 1999           | MaleAge50to54       | 283414     |
| Côte d'Ivoire | 1999           | MaleAge55to59       | 229172     |
| Côte d'Ivoire | 1999           | MaleAge5to9         | 1097533    |
| Côte d'Ivoire | 1999           | MaleAge60to64       | 171875     |
| Côte d'Ivoire | 1999           | MaleAge65to69       | 117217     |
| Côte d'Ivoire | 1999           | MaleAge70to74       | 71014      |
| Côte d'Ivoire | 1999           | MaleAge75to79       | 37022      |
| Côte d'Ivoire | 1999           | MaleAge80to84       | 15682      |
| Côte d'Ivoire | 1999           | MaleAge85to89       | 4950       |
| Côte d'Ivoire | 1999           | MaleAge90to94       | 1089       |
| Côte d'Ivoire | 1999           | MaleAge95to99       | 159        |
| Côte d'Ivoire | 1999           | MaleAgeAbov e100    | 5          |
| Croatia       | 1992           | FemaleAge0to4       | 136198     |
| Croatia       | 1992           | FemaleAge10to14     | 163161     |
| Croatia       | 1992           | FemaleAge15to19     | 156995     |
| Croatia       | 1992           | FemaleAge20to24     | 133640     |
| Croatia       | 1992           | FemaleAge25to29     | 138933     |
| Croatia       | 1992           | FemaleAge30to34     | 160690     |
| Croatia       | 1992           | FemaleAge35to39     | 177012     |
| Croatia       | 1992           | FemaleAge40to44     | 176370     |
| Croatia       | 1992           | FemaleAge45to49     | 137914     |
| Croatia       | 1992           | FemaleAge50to54     | 145791     |
| Croatia       | 1992           | FemaleAge55to59     | 167173     |
| Croatia       | 1992           | FemaleAge5to9       | 152541     |
| Croatia       | 1992           | FemaleAge60to64     | 156658     |
| Croatia       | 1992           | FemaleAge65to69     | 143677     |
| Croatia       | 1992           | FemaleAge70to74     | 87583      |
| Croatia       | 1992           | FemaleAge75to79     | 63600      |
| Croatia       | 1992           | FemaleAge80to84     | 52587      |
| Croatia       | 1992           | FemaleAge85to89     | 22642      |
| Croatia       | 1992           | FemaleAge90to94     | 5901       |
| Croatia       | 1992           | FemaleAge95to99     | 881        |
| Croatia       | 1992           | FemaleAgeAbov e100  | 52         |
| Croatia       | 1992           | FemaleLactAge15to19 | 2827       |
| Croatia       | 1992           | FemaleLactAge20to24 | 14049      |
| Croatia       | 1992           | FemaleLactAge25to29 | 16529      |
| Croatia       | 1992           | FemaleLactAge30to34 | 11632      |
| Croatia       | 1992           | FemaleLactAge35to39 | 4896       |
| Croatia       | 1992           | FemaleLactAge40to44 | 947        |
| Croatia       | 1992           | FemaleLactAge45to49 | 4          |
| Croatia       | 1992           | FemalePregAge15to19 | 2120       |
| Croatia       | 1992           | FemalePregAge20to24 | 10536      |
| Croatia       | 1992           | FemalePregAge25to29 | 12397      |
| Croatia       | 1992           | FemalePregAge30to34 | 8724       |
| Croatia       | 1992           | FemalePregAge35to39 | 3672       |
| Croatia       | 1992           | FemalePregAge40to44 | 710        |
| Croatia       | 1992           | FemalePregAge45to49 | 3          |
| Croatia       | 1992           | MaleAge0to4         | 142996     |
| Croatia       | 1992           | MaleAge10to14       | 171060     |
| Croatia       | 1992           | MaleAge15to19       | 169020     |
| Croatia       | 1992           | MaleAge20to24       | 163119     |
| Croatia       | 1992           | MaleAge25to29       | 170552     |
| Croatia       | 1992           | MaleAge30to34       | 183936     |
| Croatia       | 1992           | MaleAge35to39       | 193414     |
| Croatia       | 1992           | MaleAge40to44       | 186123     |
| Croatia       | 1992           | MaleAge45to49       | 137366     |
| Croatia       | 1992           | MaleAge50to54       | 139922     |
| Croatia       | 1992           | MaleAge55to59       | 153827     |
| Croatia       | 1992           | MaleAge5to9         | 160590     |
| Croatia       | 1992           | MaleAge60to64       | 132898     |
| Croatia       | 1992           | MaleAge65to69       | 93189      |
| Croatia       | 1992           | MaleAge70to74       | 47566      |
| Croatia       | 1992           | MaleAge75to79       | 34091      |
| Croatia       | 1992           | MaleAge80to84       | 26853      |
| Croatia       | 1992           | MaleAge85to89       | 9976       |
| Croatia       | 1992           | MaleAge90to94       | 1746       |
| Croatia       | 1992           | MaleAge95to99       | 326        |
| Croatia       | 1992           | MaleAgeAbov e100    | 17         |
| Croatia       | 1993           | FemaleAge0to4       | 132321     |
| Croatia       | 1993           | FemaleAge10to14     | 161049     |
| Croatia       | 1993           | FemaleAge15to19     | 156835     |

Dietary calcium and zinc deficiency risks are decreasing but remain prevalent

| Country | Reference year | Age/gender group    | Population |
|---------|----------------|---------------------|------------|
| Croatia | 1993           | FemaleAge20to24     | 132734     |
| Croatia | 1993           | FemaleAge25to29     | 134929     |
| Croatia | 1993           | FemaleAge30to34     | 157923     |
| Croatia | 1993           | FemaleAge35to39     | 175698     |
| Croatia | 1993           | FemaleAge40to44     | 176957     |
| Croatia | 1993           | FemaleAge45to49     | 147184     |
| Croatia | 1993           | FemaleAge50to54     | 135572     |
| Croatia | 1993           | FemaleAge55to59     | 166825     |
| Croatia | 1993           | FemaleAge5to9       | 149002     |
| Croatia | 1993           | FemaleAge60to64     | 158425     |
| Croatia | 1993           | FemaleAge65to69     | 143123     |
| Croatia | 1993           | FemaleAge70to74     | 100264     |
| Croatia | 1993           | FemaleAge75to79     | 56373      |
| Croatia | 1993           | FemaleAge80to84     | 53909      |
| Croatia | 1993           | FemaleAge85to89     | 23827      |
| Croatia | 1993           | FemaleAge90to94     | 6098       |
| Croatia | 1993           | FemaleAge95to99     | 1054       |
| Croatia | 1993           | FemaleAgeAbov e100  | 55         |
| Croatia | 1993           | FemaleLactAge15to19 | 2827       |
| Croatia | 1993           | FemaleLactAge20to24 | 14049      |
| Croatia | 1993           | FemaleLactAge25to29 | 16529      |
| Croatia | 1993           | FemaleLactAge30to34 | 11632      |
| Croatia | 1993           | FemaleLactAge35to39 | 4896       |
| Croatia | 1993           | FemaleLactAge40to44 | 947        |
| Croatia | 1993           | FemaleLactAge45to49 | 4          |
| Croatia | 1993           | FemalePregAge15to19 | 2120       |
| Croatia | 1993           | FemalePregAge20to24 | 10536      |
| Croatia | 1993           | FemalePregAge25to29 | 12397      |
| Croatia | 1993           | FemalePregAge30to34 | 8724       |
| Croatia | 1993           | FemalePregAge35to39 | 3672       |
| Croatia | 1993           | FemalePregAge40to44 | 710        |
| Croatia | 1993           | FemalePregAge45to49 | 3          |
| Croatia | 1993           | MaleAge0to4         | 139017     |
| Croatia | 1993           | MaleAge10to14       | 168947     |
| Croatia | 1993           | MaleAge15to19       | 168545     |
| Croatia | 1993           | MaleAge20to24       | 162012     |
| Croatia | 1993           | MaleAge25to29       | 166113     |
| Croatia | 1993           | MaleAge30to34       | 180252     |
| Croatia | 1993           | MaleAge35to39       | 190011     |
| Croatia | 1993           | MaleAge40to44       | 186670     |
| Croatia | 1993           | MaleAge45to49       | 147562     |
| Croatia | 1993           | MaleAge50to54       | 128527     |
| Croatia | 1993           | MaleAge55to59       | 153559     |
| Croatia | 1993           | MaleAge5to9         | 156498     |
| Croatia | 1993           | MaleAge60to64       | 134201     |
| Croatia | 1993           | MaleAge65to69       | 98462      |
| Croatia | 1993           | MaleAge70to74       | 52593      |
| Croatia | 1993           | MaleAge75to79       | 30169      |
| Croatia | 1993           | MaleAge80to84       | 26865      |
| Croatia | 1993           | MaleAge85to89       | 11010      |
| Croatia | 1993           | MaleAge90to94       | 1787       |
| Croatia | 1993           | MaleAge95to99       | 403        |
| Croatia | 1993           | MaleAgeAbov e100    | 17         |
| Croatia | 1994           | FemaleAge0to4       | 128627     |
| Croatia | 1994           | FemaleAge10to14     | 158569     |
| Croatia | 1994           | FemaleAge15to19     | 156176     |
| Croatia | 1994           | FemaleAge20to24     | 131754     |
| Croatia | 1994           | FemaleAge25to29     | 131128     |
| Croatia | 1994           | FemaleAge30to34     | 154536     |
| Croatia | 1994           | FemaleAge35to39     | 173909     |
| Croatia | 1994           | FemaleAge40to44     | 176673     |
| Croatia | 1994           | FemaleAge45to49     | 155501     |
| Croatia | 1994           | FemaleAge50to54     | 127836     |
| Croatia | 1994           | FemaleAge55to59     | 164462     |
| Croatia | 1994           | FemaleAge5to9       | 144984     |
| Croatia | 1994           | FemaleAge60to64     | 159826     |
| Croatia | 1994           | FemaleAge65to69     | 142567     |
| Croatia | 1994           | FemaleAge70to74     | 111509     |
| Croatia | 1994           | FemaleAge75to79     | 52265      |
| Croatia | 1994           | FemaleAge80to84     | 53851      |
| Croatia | 1994           | FemaleAge85to89     | 24376      |
| Croatia | 1994           | FemaleAge90to94     | 6169       |
| Croatia | 1994           | FemaleAge95to99     | 1101       |
| Croatia | 1994           | FemaleAgeAbov e100  | 58         |
| Croatia | 1994           | FemaleLactAge15to19 | 2827       |
| Croatia | 1994           | FemaleLactAge20to24 | 14049      |
| Croatia | 1994           | FemaleLactAge25to29 | 16529      |
| Croatia | 1994           | FemaleLactAge30to34 | 11632      |
| Croatia | 1994           | FemaleLactAge35to39 | 4896       |
| Croatia | 1994           | FemaleLactAge40to44 | 947        |
| Croatia | 1994           | FemaleLactAge45to49 | 4          |
| Croatia | 1994           | FemalePregAge15to19 | 2120       |
| Croatia | 1994           | FemalePregAge20to24 | 10536      |
| Croatia | 1994           | FemalePregAge25to29 | 12397      |
| Croatia | 1994           | FemalePregAge30to34 | 8724       |
| Croatia | 1994           | FemalePregAge35to39 | 3672       |
| Croatia | 1994           | FemalePregAge40to44 | 710        |
| Croatia | 1994           | FemalePregAge45to49 | 3          |



Dietary calcium and zinc deficiency risks are decreasing but remain prevalent

| Country | Reference year | Age/gender group    | Population |
|---------|----------------|---------------------|------------|
| Croatia | 1994           | MaleAge0to4         | 135246     |
| Croatia | 1994           | MaleAge10to14       | 166383     |
| Croatia | 1994           | MaleAge15to19       | 167756     |
| Croatia | 1994           | MaleAge20to24       | 160829     |
| Croatia | 1994           | MaleAge25to29       | 161883     |
| Croatia | 1994           | MaleAge30to34       | 176169     |
| Croatia | 1994           | MaleAge35to39       | 186130     |
| Croatia | 1994           | MaleAge40to44       | 186135     |
| Croatia | 1994           | MaleAge45to49       | 156663     |
| Croatia | 1994           | MaleAge50to54       | 120205     |
| Croatia | 1994           | MaleAge55to59       | 151113     |
| Croatia | 1994           | MaleAge5to9         | 151837     |
| Croatia | 1994           | MaleAge60to64       | 135041     |
| Croatia | 1994           | MaleAge65to69       | 102968     |
| Croatia | 1994           | MaleAge70to74       | 57814      |
| Croatia | 1994           | MaleAge75to79       | 27716      |
| Croatia | 1994           | MaleAge80to84       | 25987      |
| Croatia | 1994           | MaleAge85to89       | 11392      |
| Croatia | 1994           | MaleAge90to94       | 1940       |
| Croatia | 1994           | MaleAge95to99       | 399        |
| Croatia | 1994           | MaleAgeAbov e100    | 18         |
| Croatia | 1995           | FemaleAge0to4       | 125442     |
| Croatia | 1995           | FemaleAge10to14     | 155727     |
| Croatia | 1995           | FemaleAge15to19     | 154999     |
| Croatia | 1995           | FemaleAge20to24     | 130672     |
| Croatia | 1995           | FemaleAge25to29     | 127815     |
| Croatia | 1995           | FemaleAge30to34     | 150634     |
| Croatia | 1995           | FemaleAge35to39     | 171685     |
| Croatia | 1995           | FemaleAge40to44     | 176232     |
| Croatia | 1995           | FemaleAge45to49     | 161046     |
| Croatia | 1995           | FemaleAge50to54     | 124559     |
| Croatia | 1995           | FemaleAge55to59     | 159537     |
| Croatia | 1995           | FemaleAge5to9       | 140700     |
| Croatia | 1995           | FemaleAge60to64     | 160583     |
| Croatia | 1995           | FemaleAge65to69     | 143193     |
| Croatia | 1995           | FemaleAge70to74     | 119214     |
| Croatia | 1995           | FemaleAge75to79     | 53141      |
| Croatia | 1995           | FemaleAge80to84     | 51784      |
| Croatia | 1995           | FemaleAge85to89     | 24598      |
| Croatia | 1995           | FemaleAge90to94     | 6080       |
| Croatia | 1995           | FemaleAge95to99     | 898        |
| Croatia | 1995           | FemaleAgeAbov e100  | 63         |
| Croatia | 1995           | FemaleLactAge15to19 | 2827       |
| Croatia | 1995           | FemaleLactAge20to24 | 14049      |
| Croatia | 1995           | FemaleLactAge25to29 | 16529      |
| Croatia | 1995           | FemaleLactAge30to34 | 11632      |
| Croatia | 1995           | FemaleLactAge35to39 | 4896       |
| Croatia | 1995           | FemaleLactAge40to44 | 947        |
| Croatia | 1995           | FemaleLactAge45to49 | 4          |
| Croatia | 1995           | FemalePregAge15to19 | 2120       |
| Croatia | 1995           | FemalePregAge20to24 | 10536      |
| Croatia | 1995           | FemalePregAge25to29 | 12397      |
| Croatia | 1995           | FemalePregAge30to34 | 8724       |
| Croatia | 1995           | FemalePregAge35to39 | 3672       |
| Croatia | 1995           | FemalePregAge40to44 | 710        |
| Croatia | 1995           | FemalePregAge45to49 | 3          |
| Croatia | 1995           | MaleAge0to4         | 131994     |
| Croatia | 1995           | MaleAge10to14       | 163402     |
| Croatia | 1995           | MaleAge15to19       | 166704     |
| Croatia | 1995           | MaleAge20to24       | 159666     |
| Croatia | 1995           | MaleAge25to29       | 158281     |
| Croatia | 1995           | MaleAge30to34       | 171748     |
| Croatia | 1995           | MaleAge35to39       | 182232     |
| Croatia | 1995           | MaleAge40to44       | 185166     |
| Croatia | 1995           | MaleAge45to49       | 162870     |
| Croatia | 1995           | MaleAge50to54       | 117081     |
| Croatia | 1995           | MaleAge55to59       | 145990     |
| Croatia | 1995           | MaleAge5to9         | 147042     |
| Croatia | 1995           | MaleAge60to64       | 135735     |
| Croatia | 1995           | MaleAge65to69       | 106691     |
| Croatia | 1995           | MaleAge70to74       | 62766      |
| Croatia | 1995           | MaleAge75to79       | 27420      |
| Croatia | 1995           | MaleAge80to84       | 24107      |
| Croatia | 1995           | MaleAge85to89       | 11212      |
| Croatia | 1995           | MaleAge90to94       | 2116       |
| Croatia | 1995           | MaleAge95to99       | 299        |
| Croatia | 1995           | MaleAgeAbov e100    | 20         |
| Croatia | 1996           | FemaleAge0to4       | 123071     |
| Croatia | 1996           | FemaleAge10to14     | 152221     |
| Croatia | 1996           | FemaleAge15to19     | 153742     |
| Croatia | 1996           | FemaleAge20to24     | 130254     |
| Croatia | 1996           | FemaleAge25to29     | 127031     |
| Croatia | 1996           | FemaleAge30to34     | 147957     |
| Croatia | 1996           | FemaleAge35to39     | 169198     |
| Croatia | 1996           | FemaleAge40to44     | 175621     |
| Croatia | 1996           | FemaleAge45to49     | 165135     |
| Croatia | 1996           | FemaleAge50to54     | 125379     |
| Croatia | 1996           | FemaleAge55to59     | 151052     |

Dietary calcium and zinc deficiency risks are decreasing but remain prevalent

| Country | Reference year | Age/gender group    | Population |
|---------|----------------|---------------------|------------|
| Croatia | 1996           | FemaleAge5to9       | 136276     |
| Croatia | 1996           | FemaleAge60to64     | 159601     |
| Croatia | 1996           | FemaleAge65to69     | 143121     |
| Croatia | 1996           | FemaleAge70to74     | 122870     |
| Croatia | 1996           | FemaleAge75to79     | 58056      |
| Croatia | 1996           | FemaleAge80to84     | 47698      |
| Croatia | 1996           | FemaleAge85to89     | 26655      |
| Croatia | 1996           | FemaleAge90to94     | 7323       |
| Croatia | 1996           | FemaleAge95to99     | 986        |
| Croatia | 1996           | FemaleAgeAbove100   | 69         |
| Croatia | 1996           | FemaleLactAge15to19 | 2753       |
| Croatia | 1996           | FemaleLactAge20to24 | 13820      |
| Croatia | 1996           | FemaleLactAge25to29 | 15316      |
| Croatia | 1996           | FemaleLactAge30to34 | 10584      |
| Croatia | 1996           | FemaleLactAge35to39 | 4630       |
| Croatia | 1996           | FemaleLactAge40to44 | 958        |
| Croatia | 1996           | FemaleLactAge45to49 | 5          |
| Croatia | 1996           | FemalePregAge15to19 | 2065       |
| Croatia | 1996           | FemalePregAge20to24 | 10365      |
| Croatia | 1996           | FemalePregAge25to29 | 11487      |
| Croatia | 1996           | FemalePregAge30to34 | 7938       |
| Croatia | 1996           | FemalePregAge35to39 | 3473       |
| Croatia | 1996           | FemalePregAge40to44 | 718        |
| Croatia | 1996           | FemalePregAge45to49 | 4          |
| Croatia | 1996           | MaleAge0to4         | 129736     |
| Croatia | 1996           | MaleAge10to14       | 159472     |
| Croatia | 1996           | MaleAge15to19       | 165328     |
| Croatia | 1996           | MaleAge20to24       | 158930     |
| Croatia | 1996           | MaleAge25to29       | 155376     |
| Croatia | 1996           | MaleAge30to34       | 166892     |
| Croatia | 1996           | MaleAge35to39       | 178019     |
| Croatia | 1996           | MaleAge40to44       | 183401     |
| Croatia | 1996           | MaleAge45to49       | 167444     |
| Croatia | 1996           | MaleAge50to54       | 118401     |
| Croatia | 1996           | MaleAge55to59       | 137428     |
| Croatia | 1996           | MaleAge5to9         | 142198     |
| Croatia | 1996           | MaleAge60to64       | 135272     |
| Croatia | 1996           | MaleAge65to69       | 108943     |
| Croatia | 1996           | MaleAge70to74       | 67324      |
| Croatia | 1996           | MaleAge75to79       | 28949      |
| Croatia | 1996           | MaleAge80to84       | 22087      |
| Croatia | 1996           | MaleAge85to89       | 12068      |
| Croatia | 1996           | MaleAge90to94       | 2807       |
| Croatia | 1996           | MaleAge95to99       | 315        |
| Croatia | 1996           | MaleAgeAbove100     | 22         |
| Croatia | 1997           | FemaleAge0to4       | 121643     |
| Croatia | 1997           | FemaleAge10to14     | 148033     |
| Croatia | 1997           | FemaleAge15to19     | 151864     |
| Croatia | 1997           | FemaleAge20to24     | 129527     |
| Croatia | 1997           | FemaleAge25to29     | 124544     |
| Croatia | 1997           | FemaleAge30to34     | 143053     |
| Croatia | 1997           | FemaleAge35to39     | 165745     |
| Croatia | 1997           | FemaleAge40to44     | 174340     |
| Croatia | 1997           | FemaleAge45to49     | 167021     |
| Croatia | 1997           | FemaleAge50to54     | 130661     |
| Croatia | 1997           | FemaleAge55to59     | 140062     |
| Croatia | 1997           | FemaleAge5to9       | 132012     |
| Croatia | 1997           | FemaleAge60to64     | 158469     |
| Croatia | 1997           | FemaleAge65to69     | 143459     |
| Croatia | 1997           | FemaleAge70to74     | 123520     |
| Croatia | 1997           | FemaleAge75to79     | 67008      |
| Croatia | 1997           | FemaleAge80to84     | 41262      |
| Croatia | 1997           | FemaleAge85to89     | 28809      |
| Croatia | 1997           | FemaleAge90to94     | 8206       |
| Croatia | 1997           | FemaleAge95to99     | 1077       |
| Croatia | 1997           | FemaleAgeAbove100   | 76         |
| Croatia | 1997           | FemaleLactAge15to19 | 2753       |
| Croatia | 1997           | FemaleLactAge20to24 | 13820      |
| Croatia | 1997           | FemaleLactAge25to29 | 15316      |
| Croatia | 1997           | FemaleLactAge30to34 | 10584      |
| Croatia | 1997           | FemaleLactAge35to39 | 4630       |
| Croatia | 1997           | FemaleLactAge40to44 | 958        |
| Croatia | 1997           | FemaleLactAge45to49 | 5          |
| Croatia | 1997           | FemalePregAge15to19 | 2065       |
| Croatia | 1997           | FemalePregAge20to24 | 10365      |
| Croatia | 1997           | FemalePregAge25to29 | 11487      |
| Croatia | 1997           | FemalePregAge30to34 | 7938       |
| Croatia | 1997           | FemalePregAge35to39 | 3473       |
| Croatia | 1997           | FemalePregAge40to44 | 718        |
| Croatia | 1997           | FemalePregAge45to49 | 4          |
| Croatia | 1997           | MaleAge0to4         | 128243     |
| Croatia | 1997           | MaleAge10to14       | 154854     |
| Croatia | 1997           | MaleAge15to19       | 163557     |
| Croatia | 1997           | MaleAge20to24       | 158408     |
| Croatia | 1997           | MaleAge25to29       | 153060     |
| Croatia | 1997           | MaleAge30to34       | 161792     |
| Croatia | 1997           | MaleAge35to39       | 173886     |
| Croatia | 1997           | MaleAge40to44       | 180529     |

Dietary calcium and zinc deficiency risks are decreasing but remain prevalent

| Country | Reference year | Age/gender group    | Population |
|---------|----------------|---------------------|------------|
| Croatia | 1997           | MaleAge45to49       | 169991     |
| Croatia | 1997           | MaleAge50to54       | 124486     |
| Croatia | 1997           | MaleAge55to59       | 126356     |
| Croatia | 1997           | MaleAge5to9         | 137759     |
| Croatia | 1997           | MaleAge60to64       | 134913     |
| Croatia | 1997           | MaleAge65to69       | 110253     |
| Croatia | 1997           | MaleAge70to74       | 71608      |
| Croatia | 1997           | MaleAge75to79       | 31785      |
| Croatia | 1997           | MaleAge80to84       | 19121      |
| Croatia | 1997           | MaleAge85to89       | 12798      |
| Croatia | 1997           | MaleAge90to94       | 3351       |
| Croatia | 1997           | MaleAge95to99       | 315        |
| Croatia | 1997           | MaleAgeAbov e100    | 25         |
| Croatia | 1998           | FemaleAge0to4       | 120725     |
| Croatia | 1998           | FemaleAge10to14     | 143409     |
| Croatia | 1998           | FemaleAge15to19     | 149635     |
| Croatia | 1998           | FemaleAge20to24     | 128874     |
| Croatia | 1998           | FemaleAge25to29     | 122501     |
| Croatia | 1998           | FemaleAge30to34     | 138195     |
| Croatia | 1998           | FemaleAge35to39     | 161975     |
| Croatia | 1998           | FemaleAge40to44     | 172596     |
| Croatia | 1998           | FemaleAge45to49     | 167289     |
| Croatia | 1998           | FemaleAge50to54     | 138516     |
| Croatia | 1998           | FemaleAge55to59     | 128889     |
| Croatia | 1998           | FemaleAge5to9       | 128186     |
| Croatia | 1998           | FemaleAge60to64     | 156607     |
| Croatia | 1998           | FemaleAge65to69     | 144050     |
| Croatia | 1998           | FemaleAge70to74     | 122541     |
| Croatia | 1998           | FemaleAge75to79     | 77650      |
| Croatia | 1998           | FemaleAge80to84     | 34832      |
| Croatia | 1998           | FemaleAge85to89     | 30265      |
| Croatia | 1998           | FemaleAge90to94     | 8658       |
| Croatia | 1998           | FemaleAge95to99     | 1197       |
| Croatia | 1998           | FemaleAgeAbov e100  | 85         |
| Croatia | 1998           | FemaleLactAge15to19 | 2753       |
| Croatia | 1998           | FemaleLactAge20to24 | 13820      |
| Croatia | 1998           | FemaleLactAge25to29 | 15316      |
| Croatia | 1998           | FemaleLactAge30to34 | 10584      |
| Croatia | 1998           | FemaleLactAge35to39 | 4630       |
| Croatia | 1998           | FemaleLactAge40to44 | 958        |
| Croatia | 1998           | FemaleLactAge45to49 | 5          |
| Croatia | 1998           | FemalePregAge15to19 | 2065       |
| Croatia | 1998           | FemalePregAge20to24 | 10365      |
| Croatia | 1998           | FemalePregAge25to29 | 11487      |
| Croatia | 1998           | FemalePregAge30to34 | 7938       |
| Croatia | 1998           | FemalePregAge35to39 | 3473       |
| Croatia | 1998           | FemalePregAge40to44 | 718        |
| Croatia | 1998           | FemalePregAge45to49 | 4          |
| Croatia | 1998           | MaleAge0to4         | 127148     |
| Croatia | 1998           | MaleAge10to14       | 149812     |
| Croatia | 1998           | MaleAge15to19       | 161465     |
| Croatia | 1998           | MaleAge20to24       | 158088     |
| Croatia | 1998           | MaleAge25to29       | 151307     |
| Croatia | 1998           | MaleAge30to34       | 156833     |
| Croatia | 1998           | MaleAge35to39       | 169904     |
| Croatia | 1998           | MaleAge40to44       | 176988     |
| Croatia | 1998           | MaleAge45to49       | 170980     |
| Croatia | 1998           | MaleAge50to54       | 133262     |
| Croatia | 1998           | MaleAge55to59       | 115250     |
| Croatia | 1998           | MaleAge5to9         | 133985     |
| Croatia | 1998           | MaleAge60to64       | 133962     |
| Croatia | 1998           | MaleAge65to69       | 110976     |
| Croatia | 1998           | MaleAge70to74       | 75495      |
| Croatia | 1998           | MaleAge75to79       | 35385      |
| Croatia | 1998           | MaleAge80to84       | 16140      |
| Croatia | 1998           | MaleAge85to89       | 13070      |
| Croatia | 1998           | MaleAge90to94       | 3643       |
| Croatia | 1998           | MaleAge95to99       | 366        |
| Croatia | 1998           | MaleAgeAbov e100    | 28         |
| Croatia | 1999           | FemaleAge0to4       | 119506     |
| Croatia | 1999           | FemaleAge10to14     | 138834     |
| Croatia | 1999           | FemaleAge15to19     | 147197     |
| Croatia | 1999           | FemaleAge20to24     | 128253     |
| Croatia | 1999           | FemaleAge25to29     | 120958     |
| Croatia | 1999           | FemaleAge30to34     | 133950     |
| Croatia | 1999           | FemaleAge35to39     | 158117     |
| Croatia | 1999           | FemaleAge40to44     | 170617     |
| Croatia | 1999           | FemaleAge45to49     | 167055     |
| Croatia | 1999           | FemaleAge50to54     | 146089     |
| Croatia | 1999           | FemaleAge55to59     | 120852     |
| Croatia | 1999           | FemaleAge5to9       | 125010     |
| Croatia | 1999           | FemaleAge60to64     | 153180     |
| Croatia | 1999           | FemaleAge65to69     | 144625     |
| Croatia | 1999           | FemaleAge70to74     | 121867     |
| Croatia | 1999           | FemaleAge75to79     | 86882      |
| Croatia | 1999           | FemaleAge80to84     | 31407      |
| Croatia | 1999           | FemaleAge85to89     | 29950      |
| Croatia | 1999           | FemaleAge90to94     | 8794       |

Dietary calcium and zinc deficiency risks are decreasing but remain prevalent

| Country | Reference year | Age/gender group    | Population |
|---------|----------------|---------------------|------------|
| Croatia | 1999           | FemaleAge95to99     | 1319       |
| Croatia | 1999           | FemaleAgeAbov e100  | 93         |
| Croatia | 1999           | FemaleLactAge15to19 | 2753       |
| Croatia | 1999           | FemaleLactAge20to24 | 13820      |
| Croatia | 1999           | FemaleLactAge25to29 | 15316      |
| Croatia | 1999           | FemaleLactAge30to34 | 10584      |
| Croatia | 1999           | FemaleLactAge35to39 | 4630       |
| Croatia | 1999           | FemaleLactAge40to44 | 958        |
| Croatia | 1999           | FemaleLactAge45to49 | 5          |
| Croatia | 1999           | FemalePregAge15to19 | 2065       |
| Croatia | 1999           | FemalePregAge20to24 | 10365      |
| Croatia | 1999           | FemalePregAge25to29 | 11487      |
| Croatia | 1999           | FemalePregAge30to34 | 7938       |
| Croatia | 1999           | FemalePregAge35to39 | 3473       |
| Croatia | 1999           | FemalePregAge40to44 | 718        |
| Croatia | 1999           | FemalePregAge45to49 | 4          |
| Croatia | 1999           | MaleAge0to4         | 125760     |
| Croatia | 1999           | MaleAge10to14       | 144895     |
| Croatia | 1999           | MaleAge15to19       | 159111     |
| Croatia | 1999           | MaleAge20to24       | 157883     |
| Croatia | 1999           | MaleAge25to29       | 150106     |
| Croatia | 1999           | MaleAge30to34       | 152577     |
| Croatia | 1999           | MaleAge35to39       | 166030     |
| Croatia | 1999           | MaleAge40to44       | 173398     |
| Croatia | 1999           | MaleAge45to49       | 171221     |
| Croatia | 1999           | MaleAge50to54       | 141748     |
| Croatia | 1999           | MaleAge55to59       | 107567     |
| Croatia | 1999           | MaleAge5to9         | 130982     |
| Croatia | 1999           | MaleAge60to64       | 131361     |
| Croatia | 1999           | MaleAge65to69       | 111552     |
| Croatia | 1999           | MaleAge70to74       | 78885      |
| Croatia | 1999           | MaleAge75to79       | 39119      |
| Croatia | 1999           | MaleAge80to84       | 14240      |
| Croatia | 1999           | MaleAge85to89       | 12461      |
| Croatia | 1999           | MaleAge90to94       | 3685       |
| Croatia | 1999           | MaleAge95to99       | 484        |
| Croatia | 1999           | MaleAgeAbov e100    | 31         |
| Cuba    | 1992           | FemaleAge0to4       | 433062     |
| Cuba    | 1992           | FemaleAge10to14     | 359860     |
| Cuba    | 1992           | FemaleAge15to19     | 416999     |
| Cuba    | 1992           | FemaleAge20to24     | 459459     |
| Cuba    | 1992           | FemaleAge25to29     | 486308     |
| Cuba    | 1992           | FemaleAge30to34     | 396490     |
| Cuba    | 1992           | FemaleAge35to39     | 346261     |
| Cuba    | 1992           | FemaleAge40to44     | 316127     |
| Cuba    | 1992           | FemaleAge45to49     | 271442     |
| Cuba    | 1992           | FemaleAge50to54     | 251502     |
| Cuba    | 1992           | FemaleAge55to59     | 214469     |
| Cuba    | 1992           | FemaleAge5to9       | 401209     |
| Cuba    | 1992           | FemaleAge60to64     | 181097     |
| Cuba    | 1992           | FemaleAge65to69     | 155036     |
| Cuba    | 1992           | FemaleAge70to74     | 128794     |
| Cuba    | 1992           | FemaleAge75to79     | 104539     |
| Cuba    | 1992           | FemaleAge80to84     | 72178      |
| Cuba    | 1992           | FemaleAge85to89     | 37116      |
| Cuba    | 1992           | FemaleAge90to94     | 12701      |
| Cuba    | 1992           | FemaleAge95to99     | 2338       |
| Cuba    | 1992           | FemaleAgeAbov e100  | 390        |
| Cuba    | 1992           | FemaleLactAge15to19 | 31477      |
| Cuba    | 1992           | FemaleLactAge20to24 | 56811      |
| Cuba    | 1992           | FemaleLactAge25to29 | 48439      |
| Cuba    | 1992           | FemaleLactAge30to34 | 22233      |
| Cuba    | 1992           | FemaleLactAge35to39 | 6314       |
| Cuba    | 1992           | FemaleLactAge40to44 | 871        |
| Cuba    | 1992           | FemaleLactAge45to49 | 110        |
| Cuba    | 1992           | FemalePregAge15to19 | 23608      |
| Cuba    | 1992           | FemalePregAge20to24 | 42609      |
| Cuba    | 1992           | FemalePregAge25to29 | 36330      |
| Cuba    | 1992           | FemalePregAge30to34 | 16675      |
| Cuba    | 1992           | FemalePregAge35to39 | 4735       |
| Cuba    | 1992           | FemalePregAge40to44 | 653        |
| Cuba    | 1992           | FemalePregAge45to49 | 83         |
| Cuba    | 1992           | MaleAge0to4         | 457863     |
| Cuba    | 1992           | MaleAge10to14       | 377683     |
| Cuba    | 1992           | MaleAge15to19       | 493127     |
| Cuba    | 1992           | MaleAge20to24       | 580204     |
| Cuba    | 1992           | MaleAge25to29       | 588779     |
| Cuba    | 1992           | MaleAge30to34       | 445656     |
| Cuba    | 1992           | MaleAge35to39       | 361658     |
| Cuba    | 1992           | MaleAge40to44       | 324032     |
| Cuba    | 1992           | MaleAge45to49       | 278526     |
| Cuba    | 1992           | MaleAge50to54       | 253847     |
| Cuba    | 1992           | MaleAge55to59       | 211803     |
| Cuba    | 1992           | MaleAge5to9         | 421738     |
| Cuba    | 1992           | MaleAge60to64       | 173322     |
| Cuba    | 1992           | MaleAge65to69       | 142775     |
| Cuba    | 1992           | MaleAge70to74       | 115386     |
| Cuba    | 1992           | MaleAge75to79       | 89472      |

Dietary calcium and zinc deficiency risks are decreasing but remain prevalent

| Country | Reference year | Age/gender group    | Population |
|---------|----------------|---------------------|------------|
| Cuba    | 1992           | MaleAge80to84       | 59557      |
| Cuba    | 1992           | MaleAge85to89       | 31098      |
| Cuba    | 1992           | MaleAge90to94       | 10871      |
| Cuba    | 1992           | MaleAge95to99       | 1878       |
| Cuba    | 1992           | MaleAgeAbove100     | 292        |
| Cuba    | 1993           | FemaleAge0to4       | 420559     |
| Cuba    | 1993           | FemaleAge10to14     | 362243     |
| Cuba    | 1993           | FemaleAge15to19     | 377821     |
| Cuba    | 1993           | FemaleAge20to24     | 456232     |
| Cuba    | 1993           | FemaleAge25to29     | 481767     |
| Cuba    | 1993           | FemaleAge30to34     | 439714     |
| Cuba    | 1993           | FemaleAge35to39     | 339651     |
| Cuba    | 1993           | FemaleAge40to44     | 332241     |
| Cuba    | 1993           | FemaleAge45to49     | 273315     |
| Cuba    | 1993           | FemaleAge50to54     | 254911     |
| Cuba    | 1993           | FemaleAge55to59     | 221818     |
| Cuba    | 1993           | FemaleAge5to9       | 413499     |
| Cuba    | 1993           | FemaleAge60to64     | 184042     |
| Cuba    | 1993           | FemaleAge65to69     | 157728     |
| Cuba    | 1993           | FemaleAge70to74     | 130418     |
| Cuba    | 1993           | FemaleAge75to79     | 104594     |
| Cuba    | 1993           | FemaleAge80to84     | 73956      |
| Cuba    | 1993           | FemaleAge85to89     | 38487      |
| Cuba    | 1993           | FemaleAge90to94     | 13827      |
| Cuba    | 1993           | FemaleAge95to99     | 2614       |
| Cuba    | 1993           | FemaleAgeAbove100   | 413        |
| Cuba    | 1993           | FemaleLactAge15to19 | 31477      |
| Cuba    | 1993           | FemaleLactAge20to24 | 56811      |
| Cuba    | 1993           | FemaleLactAge25to29 | 48439      |
| Cuba    | 1993           | FemaleLactAge30to34 | 22233      |
| Cuba    | 1993           | FemaleLactAge35to39 | 6314       |
| Cuba    | 1993           | FemaleLactAge40to44 | 871        |
| Cuba    | 1993           | FemaleLactAge45to49 | 110        |
| Cuba    | 1993           | FemalePregAge15to19 | 23608      |
| Cuba    | 1993           | FemalePregAge20to24 | 42609      |
| Cuba    | 1993           | FemalePregAge25to29 | 36330      |
| Cuba    | 1993           | FemalePregAge30to34 | 16675      |
| Cuba    | 1993           | FemalePregAge35to39 | 4735       |
| Cuba    | 1993           | FemalePregAge40to44 | 653        |
| Cuba    | 1993           | FemalePregAge45to49 | 83         |
| Cuba    | 1993           | MaleAge0to4         | 444392     |
| Cuba    | 1993           | MaleAge10to14       | 380072     |
| Cuba    | 1993           | MaleAge15to19       | 452639     |
| Cuba    | 1993           | MaleAge20to24       | 577444     |
| Cuba    | 1993           | MaleAge25to29       | 584735     |
| Cuba    | 1993           | MaleAge30to34       | 490567     |
| Cuba    | 1993           | MaleAge35to39       | 355521     |
| Cuba    | 1993           | MaleAge40to44       | 338987     |
| Cuba    | 1993           | MaleAge45to49       | 280646     |
| Cuba    | 1993           | MaleAge50to54       | 257833     |
| Cuba    | 1993           | MaleAge55to59       | 219357     |
| Cuba    | 1993           | MaleAge5to9         | 435242     |
| Cuba    | 1993           | MaleAge60to64       | 176644     |
| Cuba    | 1993           | MaleAge65to69       | 145430     |
| Cuba    | 1993           | MaleAge70to74       | 116083     |
| Cuba    | 1993           | MaleAge75to79       | 89464      |
| Cuba    | 1993           | MaleAge80to84       | 60067      |
| Cuba    | 1993           | MaleAge85to89       | 31494      |
| Cuba    | 1993           | MaleAge90to94       | 11714      |
| Cuba    | 1993           | MaleAge95to99       | 2114       |
| Cuba    | 1993           | MaleAgeAbove100     | 309        |
| Cuba    | 1994           | FemaleAge0to4       | 406804     |
| Cuba    | 1994           | FemaleAge10to14     | 368582     |
| Cuba    | 1994           | FemaleAge15to19     | 343445     |
| Cuba    | 1994           | FemaleAge20to24     | 446183     |
| Cuba    | 1994           | FemaleAge25to29     | 474895     |
| Cuba    | 1994           | FemaleAge30to34     | 477573     |
| Cuba    | 1994           | FemaleAge35to39     | 340405     |
| Cuba    | 1994           | FemaleAge40to44     | 344823     |
| Cuba    | 1994           | FemaleAge45to49     | 277336     |
| Cuba    | 1994           | FemaleAge50to54     | 257606     |
| Cuba    | 1994           | FemaleAge55to59     | 228630     |
| Cuba    | 1994           | FemaleAge5to9       | 424645     |
| Cuba    | 1994           | FemaleAge60to64     | 187807     |
| Cuba    | 1994           | FemaleAge65to69     | 160524     |
| Cuba    | 1994           | FemaleAge70to74     | 132339     |
| Cuba    | 1994           | FemaleAge75to79     | 105086     |
| Cuba    | 1994           | FemaleAge80to84     | 75519      |
| Cuba    | 1994           | FemaleAge85to89     | 39503      |
| Cuba    | 1994           | FemaleAge90to94     | 14504      |
| Cuba    | 1994           | FemaleAge95to99     | 2925       |
| Cuba    | 1994           | FemaleAgeAbove100   | 439        |
| Cuba    | 1994           | FemaleLactAge15to19 | 31477      |
| Cuba    | 1994           | FemaleLactAge20to24 | 56811      |
| Cuba    | 1994           | FemaleLactAge25to29 | 48439      |
| Cuba    | 1994           | FemaleLactAge30to34 | 22233      |
| Cuba    | 1994           | FemaleLactAge35to39 | 6314       |
| Cuba    | 1994           | FemaleLactAge40to44 | 871        |

Dietary calcium and zinc deficiency risks are decreasing but remain prevalent

| Country | Reference year | Age/gender group    | Population |
|---------|----------------|---------------------|------------|
| Cuba    | 1994           | FemaleLactAge45to49 | 110        |
| Cuba    | 1994           | FemalePregAge15to19 | 23608      |
| Cuba    | 1994           | FemalePregAge20to24 | 42609      |
| Cuba    | 1994           | FemalePregAge25to29 | 36330      |
| Cuba    | 1994           | FemalePregAge30to34 | 16675      |
| Cuba    | 1994           | FemalePregAge35to39 | 4735       |
| Cuba    | 1994           | FemalePregAge40to44 | 653        |
| Cuba    | 1994           | FemalePregAge45to49 | 83         |
| Cuba    | 1994           | MaleAge0to4         | 429414     |
| Cuba    | 1994           | MaleAge10to14       | 386661     |
| Cuba    | 1994           | MaleAge15to19       | 416978     |
| Cuba    | 1994           | MaleAge20to24       | 567439     |
| Cuba    | 1994           | MaleAge25to29       | 578230     |
| Cuba    | 1994           | MaleAge30to34       | 529888     |
| Cuba    | 1994           | MaleAge35to39       | 356972     |
| Cuba    | 1994           | MaleAge40to44       | 350589     |
| Cuba    | 1994           | MaleAge45to49       | 284576     |
| Cuba    | 1994           | MaleAge50to54       | 261144     |
| Cuba    | 1994           | MaleAge55to59       | 226362     |
| Cuba    | 1994           | MaleAge5to9         | 447541     |
| Cuba    | 1994           | MaleAge60to64       | 180794     |
| Cuba    | 1994           | MaleAge65to69       | 148287     |
| Cuba    | 1994           | MaleAge70to74       | 117195     |
| Cuba    | 1994           | MaleAge75to79       | 89693      |
| Cuba    | 1994           | MaleAge80to84       | 60396      |
| Cuba    | 1994           | MaleAge85to89       | 31463      |
| Cuba    | 1994           | MaleAge90to94       | 11988      |
| Cuba    | 1994           | MaleAge95to99       | 2364       |
| Cuba    | 1994           | MaleAgeAbov e100    | 329        |
| Cuba    | 1995           | FemaleAge0to4       | 394931     |
| Cuba    | 1995           | FemaleAge10to14     | 376532     |
| Cuba    | 1995           | FemaleAge15to19     | 319076     |
| Cuba    | 1995           | FemaleAge20to24     | 426561     |
| Cuba    | 1995           | FemaleAge25to29     | 469543     |
| Cuba    | 1995           | FemaleAge30to34     | 503216     |
| Cuba    | 1995           | FemaleAge35to39     | 353557     |
| Cuba    | 1995           | FemaleAge40to44     | 351328     |
| Cuba    | 1995           | FemaleAge45to49     | 284399     |
| Cuba    | 1995           | FemaleAge50to54     | 259834     |
| Cuba    | 1995           | FemaleAge55to59     | 234262     |
| Cuba    | 1995           | FemaleAge5to9       | 432424     |
| Cuba    | 1995           | FemaleAge60to64     | 192616     |
| Cuba    | 1995           | FemaleAge65to69     | 163361     |
| Cuba    | 1995           | FemaleAge70to74     | 134505     |
| Cuba    | 1995           | FemaleAge75to79     | 106168     |
| Cuba    | 1995           | FemaleAge80to84     | 76782      |
| Cuba    | 1995           | FemaleAge85to89     | 40373      |
| Cuba    | 1995           | FemaleAge90to94     | 14746      |
| Cuba    | 1995           | FemaleAge95to99     | 3051       |
| Cuba    | 1995           | FemaleAgeAbov e100  | 471        |
| Cuba    | 1995           | FemaleLactAge15to19 | 31477      |
| Cuba    | 1995           | FemaleLactAge20to24 | 56811      |
| Cuba    | 1995           | FemaleLactAge25to29 | 48439      |
| Cuba    | 1995           | FemaleLactAge30to34 | 22233      |
| Cuba    | 1995           | FemaleLactAge35to39 | 6314       |
| Cuba    | 1995           | FemaleLactAge40to44 | 871        |
| Cuba    | 1995           | FemaleLactAge45to49 | 110        |
| Cuba    | 1995           | FemalePregAge15to19 | 23608      |
| Cuba    | 1995           | FemalePregAge20to24 | 42609      |
| Cuba    | 1995           | FemalePregAge25to29 | 36330      |
| Cuba    | 1995           | FemalePregAge30to34 | 16675      |
| Cuba    | 1995           | FemalePregAge35to39 | 4735       |
| Cuba    | 1995           | FemalePregAge40to44 | 653        |
| Cuba    | 1995           | FemalePregAge45to49 | 83         |
| Cuba    | 1995           | MaleAge0to4         | 416433     |
| Cuba    | 1995           | MaleAge10to14       | 395090     |
| Cuba    | 1995           | MaleAge15to19       | 391584     |
| Cuba    | 1995           | MaleAge20to24       | 547306     |
| Cuba    | 1995           | MaleAge25to29       | 573171     |
| Cuba    | 1995           | MaleAge30to34       | 556590     |
| Cuba    | 1995           | MaleAge35to39       | 370974     |
| Cuba    | 1995           | MaleAge40to44       | 356448     |
| Cuba    | 1995           | MaleAge45to49       | 291162     |
| Cuba    | 1995           | MaleAge50to54       | 263906     |
| Cuba    | 1995           | MaleAge55to59       | 232270     |
| Cuba    | 1995           | MaleAge5to9         | 456048     |
| Cuba    | 1995           | MaleAge60to64       | 185923     |
| Cuba    | 1995           | MaleAge65to69       | 151253     |
| Cuba    | 1995           | MaleAge70to74       | 118778     |
| Cuba    | 1995           | MaleAge75to79       | 90204      |
| Cuba    | 1995           | MaleAge80to84       | 60579      |
| Cuba    | 1995           | MaleAge85to89       | 31171      |
| Cuba    | 1995           | MaleAge90to94       | 11680      |
| Cuba    | 1995           | MaleAge95to99       | 2407       |
| Cuba    | 1995           | MaleAgeAbov e100    | 353        |
| Cuba    | 1996           | FemaleAge0to4       | 373774     |
| Cuba    | 1996           | FemaleAge10to14     | 387043     |
| Cuba    | 1996           | FemaleAge15to19     | 315097     |

Dietary calcium and zinc deficiency risks are decreasing but remain prevalent

| Country | Reference year | Age/gender group    | Population |
|---------|----------------|---------------------|------------|
| Cuba    | 1996           | FemaleAge20to24     | 419465     |
| Cuba    | 1996           | FemaleAge25to29     | 471418     |
| Cuba    | 1996           | FemaleAge30to34     | 513909     |
| Cuba    | 1996           | FemaleAge35to39     | 377015     |
| Cuba    | 1996           | FemaleAge40to44     | 353234     |
| Cuba    | 1996           | FemaleAge45to49     | 295185     |
| Cuba    | 1996           | FemaleAge50to54     | 262416     |
| Cuba    | 1996           | FemaleAge55to59     | 239318     |
| Cuba    | 1996           | FemaleAge5to9       | 436156     |
| Cuba    | 1996           | FemaleAge60to64     | 198399     |
| Cuba    | 1996           | FemaleAge65to69     | 166111     |
| Cuba    | 1996           | FemaleAge70to74     | 136552     |
| Cuba    | 1996           | FemaleAge75to79     | 106950     |
| Cuba    | 1996           | FemaleAge80to84     | 77387      |
| Cuba    | 1996           | FemaleAge85to89     | 42498      |
| Cuba    | 1996           | FemaleAge90to94     | 16359      |
| Cuba    | 1996           | FemaleAge95to99     | 3485       |
| Cuba    | 1996           | FemaleAgeAbove100   | 510        |
| Cuba    | 1996           | FemaleLactAge15to19 | 25248      |
| Cuba    | 1996           | FemaleLactAge20to24 | 45602      |
| Cuba    | 1996           | FemaleLactAge25to29 | 45649      |
| Cuba    | 1996           | FemaleLactAge30to34 | 25357      |
| Cuba    | 1996           | FemaleLactAge35to39 | 7399       |
| Cuba    | 1996           | FemaleLactAge40to44 | 886        |
| Cuba    | 1996           | FemaleLactAge45to49 | 125        |
| Cuba    | 1996           | FemalePregAge15to19 | 18936      |
| Cuba    | 1996           | FemalePregAge20to24 | 34202      |
| Cuba    | 1996           | FemalePregAge25to29 | 34237      |
| Cuba    | 1996           | FemalePregAge30to34 | 19017      |
| Cuba    | 1996           | FemalePregAge35to39 | 5550       |
| Cuba    | 1996           | FemalePregAge40to44 | 665        |
| Cuba    | 1996           | FemalePregAge45to49 | 94         |
| Cuba    | 1996           | MaleAge0to4         | 393566     |
| Cuba    | 1996           | MaleAge10to14       | 406002     |
| Cuba    | 1996           | MaleAge15to19       | 375743     |
| Cuba    | 1996           | MaleAge20to24       | 519533     |
| Cuba    | 1996           | MaleAge25to29       | 570294     |
| Cuba    | 1996           | MaleAge30to34       | 573409     |
| Cuba    | 1996           | MaleAge35to39       | 397331     |
| Cuba    | 1996           | MaleAge40to44       | 357771     |
| Cuba    | 1996           | MaleAge45to49       | 301051     |
| Cuba    | 1996           | MaleAge50to54       | 266537     |
| Cuba    | 1996           | MaleAge55to59       | 237660     |
| Cuba    | 1996           | MaleAge5to9         | 460083     |
| Cuba    | 1996           | MaleAge60to64       | 191815     |
| Cuba    | 1996           | MaleAge65to69       | 154119     |
| Cuba    | 1996           | MaleAge70to74       | 120497     |
| Cuba    | 1996           | MaleAge75to79       | 90613      |
| Cuba    | 1996           | MaleAge80to84       | 61146      |
| Cuba    | 1996           | MaleAge85to89       | 32475      |
| Cuba    | 1996           | MaleAge90to94       | 12750      |
| Cuba    | 1996           | MaleAge95to99       | 2736       |
| Cuba    | 1996           | MaleAgeAbove100     | 382        |
| Cuba    | 1997           | FemaleAge0to4       | 363664     |
| Cuba    | 1997           | FemaleAge10to14     | 399283     |
| Cuba    | 1997           | FemaleAge15to19     | 309191     |
| Cuba    | 1997           | FemaleAge20to24     | 383252     |
| Cuba    | 1997           | FemaleAge25to29     | 469125     |
| Cuba    | 1997           | FemaleAge30to34     | 517311     |
| Cuba    | 1997           | FemaleAge35to39     | 414031     |
| Cuba    | 1997           | FemaleAge40to44     | 347752     |
| Cuba    | 1997           | FemaleAge45to49     | 309625     |
| Cuba    | 1997           | FemaleAge50to54     | 263784     |
| Cuba    | 1997           | FemaleAge55to59     | 243262     |
| Cuba    | 1997           | FemaleAge5to9       | 431996     |
| Cuba    | 1997           | FemaleAge60to64     | 204988     |
| Cuba    | 1997           | FemaleAge65to69     | 168664     |
| Cuba    | 1997           | FemaleAge70to74     | 138833     |
| Cuba    | 1997           | FemaleAge75to79     | 108031     |
| Cuba    | 1997           | FemaleAge80to84     | 77545      |
| Cuba    | 1997           | FemaleAge85to89     | 44242      |
| Cuba    | 1997           | FemaleAge90to94     | 17554      |
| Cuba    | 1997           | FemaleAge95to99     | 4058       |
| Cuba    | 1997           | FemaleAgeAbove100   | 557        |
| Cuba    | 1997           | FemaleLactAge15to19 | 25248      |
| Cuba    | 1997           | FemaleLactAge20to24 | 45602      |
| Cuba    | 1997           | FemaleLactAge25to29 | 45649      |
| Cuba    | 1997           | FemaleLactAge30to34 | 25357      |
| Cuba    | 1997           | FemaleLactAge35to39 | 7399       |
| Cuba    | 1997           | FemaleLactAge40to44 | 886        |
| Cuba    | 1997           | FemaleLactAge45to49 | 125        |
| Cuba    | 1997           | FemalePregAge15to19 | 18936      |
| Cuba    | 1997           | FemalePregAge20to24 | 34202      |
| Cuba    | 1997           | FemalePregAge25to29 | 34237      |
| Cuba    | 1997           | FemalePregAge30to34 | 19017      |
| Cuba    | 1997           | FemalePregAge35to39 | 5550       |
| Cuba    | 1997           | FemalePregAge40to44 | 665        |
| Cuba    | 1997           | FemalePregAge45to49 | 94         |

Dietary calcium and zinc deficiency risks are decreasing but remain prevalent

| Country | Reference year | Age/gender group    | Population |
|---------|----------------|---------------------|------------|
| Cuba    | 1997           | MaleAge0to4         | 382417     |
| Cuba    | 1997           | MaleAge10to14       | 418925     |
| Cuba    | 1997           | MaleAge15to19       | 369020     |
| Cuba    | 1997           | MaleAge20to24       | 481693     |
| Cuba    | 1997           | MaleAge25to29       | 567994     |
| Cuba    | 1997           | MaleAge30to34       | 576991     |
| Cuba    | 1997           | MaleAge35to39       | 435442     |
| Cuba    | 1997           | MaleAge40to44       | 352008     |
| Cuba    | 1997           | MaleAge45to49       | 314136     |
| Cuba    | 1997           | MaleAge50to54       | 267894     |
| Cuba    | 1997           | MaleAge55to59       | 241929     |
| Cuba    | 1997           | MaleAge5to9         | 455546     |
| Cuba    | 1997           | MaleAge60to64       | 198411     |
| Cuba    | 1997           | MaleAge65to69       | 156846     |
| Cuba    | 1997           | MaleAge70to74       | 122536     |
| Cuba    | 1997           | MaleAge75to79       | 91017      |
| Cuba    | 1997           | MaleAge80to84       | 61368      |
| Cuba    | 1997           | MaleAge85to89       | 33336      |
| Cuba    | 1997           | MaleAge90to94       | 13421      |
| Cuba    | 1997           | MaleAge95to99       | 3191       |
| Cuba    | 1997           | MaleAgeAbov e100    | 416        |
| Cuba    | 1998           | FemaleAge0to4       | 360981     |
| Cuba    | 1998           | FemaleAge10to14     | 412203     |
| Cuba    | 1998           | FemaleAge15to19     | 310866     |
| Cuba    | 1998           | FemaleAge20to24     | 343359     |
| Cuba    | 1998           | FemaleAge25to29     | 464998     |
| Cuba    | 1998           | FemaleAge30to34     | 511910     |
| Cuba    | 1998           | FemaleAge35to39     | 456319     |
| Cuba    | 1998           | FemaleAge40to44     | 340636     |
| Cuba    | 1998           | FemaleAge45to49     | 325129     |
| Cuba    | 1998           | FemaleAge50to54     | 265266     |
| Cuba    | 1998           | FemaleAge55to59     | 246392     |
| Cuba    | 1998           | FemaleAge5to9       | 420262     |
| Cuba    | 1998           | FemaleAge60to64     | 211944     |
| Cuba    | 1998           | FemaleAge65to69     | 171476     |
| Cuba    | 1998           | FemaleAge70to74     | 141354     |
| Cuba    | 1998           | FemaleAge75to79     | 109494     |
| Cuba    | 1998           | FemaleAge80to84     | 77761      |
| Cuba    | 1998           | FemaleAge85to89     | 45492      |
| Cuba    | 1998           | FemaleAge90to94     | 18300      |
| Cuba    | 1998           | FemaleAge95to99     | 4612       |
| Cuba    | 1998           | FemaleAgeAbov e100  | 611        |
| Cuba    | 1998           | FemaleLactAge15to19 | 25248      |
| Cuba    | 1998           | FemaleLactAge20to24 | 45602      |
| Cuba    | 1998           | FemaleLactAge25to29 | 45649      |
| Cuba    | 1998           | FemaleLactAge30to34 | 25357      |
| Cuba    | 1998           | FemaleLactAge35to39 | 7399       |
| Cuba    | 1998           | FemaleLactAge40to44 | 886        |
| Cuba    | 1998           | FemaleLactAge45to49 | 125        |
| Cuba    | 1998           | FemalePregAge15to19 | 18936      |
| Cuba    | 1998           | FemalePregAge20to24 | 34202      |
| Cuba    | 1998           | FemalePregAge25to29 | 34237      |
| Cuba    | 1998           | FemalePregAge30to34 | 19017      |
| Cuba    | 1998           | FemalePregAge35to39 | 5550       |
| Cuba    | 1998           | FemalePregAge40to44 | 665        |
| Cuba    | 1998           | FemalePregAge45to49 | 94         |
| Cuba    | 1998           | MaleAge0to4         | 379242     |
| Cuba    | 1998           | MaleAge10to14       | 432814     |
| Cuba    | 1998           | MaleAge15to19       | 370134     |
| Cuba    | 1998           | MaleAge20to24       | 439953     |
| Cuba    | 1998           | MaleAge25to29       | 563728     |
| Cuba    | 1998           | MaleAge30to34       | 571532     |
| Cuba    | 1998           | MaleAge35to39       | 478789     |
| Cuba    | 1998           | MaleAge40to44       | 345041     |
| Cuba    | 1998           | MaleAge45to49       | 328069     |
| Cuba    | 1998           | MaleAge50to54       | 269335     |
| Cuba    | 1998           | MaleAge55to59       | 245340     |
| Cuba    | 1998           | MaleAge5to9         | 442821     |
| Cuba    | 1998           | MaleAge60to64       | 205364     |
| Cuba    | 1998           | MaleAge65to69       | 159880     |
| Cuba    | 1998           | MaleAge70to74       | 124907     |
| Cuba    | 1998           | MaleAge75to79       | 91675      |
| Cuba    | 1998           | MaleAge80to84       | 61517      |
| Cuba    | 1998           | MaleAge85to89       | 33719      |
| Cuba    | 1998           | MaleAge90to94       | 13672      |
| Cuba    | 1998           | MaleAge95to99       | 3602       |
| Cuba    | 1998           | MaleAgeAbov e100    | 454        |
| Cuba    | 1999           | FemaleAge0to4       | 359920     |
| Cuba    | 1999           | FemaleAge10to14     | 423003     |
| Cuba    | 1999           | FemaleAge15to19     | 317029     |
| Cuba    | 1999           | FemaleAge20to24     | 308504     |
| Cuba    | 1999           | FemaleAge25to29     | 454438     |
| Cuba    | 1999           | FemaleAge30to34     | 504605     |
| Cuba    | 1999           | FemaleAge35to39     | 493578     |
| Cuba    | 1999           | FemaleAge40to44     | 341030     |
| Cuba    | 1999           | FemaleAge45to49     | 337453     |
| Cuba    | 1999           | FemaleAge50to54     | 268910     |
| Cuba    | 1999           | FemaleAge55to59     | 249125     |



Dietary calcium and zinc deficiency risks are decreasing but remain prevalent

| Country        | Reference year | Age/gender group    | Population |
|----------------|----------------|---------------------|------------|
| Cuba           | 1999           | FemaleAge5to9       | 404529     |
| Cuba           | 1999           | FemaleAge60to64     | 218566     |
| Cuba           | 1999           | FemaleAge65to69     | 175207     |
| Cuba           | 1999           | FemaleAge70to74     | 144137     |
| Cuba           | 1999           | FemaleAge75to79     | 111422     |
| Cuba           | 1999           | FemaleAge80to84     | 78445      |
| Cuba           | 1999           | FemaleAge85to89     | 46197      |
| Cuba           | 1999           | FemaleAge90to94     | 18657      |
| Cuba           | 1999           | FemaleAge95to99     | 4967       |
| Cuba           | 1999           | FemaleAgeAbove100   | 674        |
| Cuba           | 1999           | FemaleLactAge15to19 | 25248      |
| Cuba           | 1999           | FemaleLactAge20to24 | 45602      |
| Cuba           | 1999           | FemaleLactAge25to29 | 45649      |
| Cuba           | 1999           | FemaleLactAge30to34 | 25357      |
| Cuba           | 1999           | FemaleLactAge35to39 | 7399       |
| Cuba           | 1999           | FemaleLactAge40to44 | 886        |
| Cuba           | 1999           | FemaleLactAge45to49 | 125        |
| Cuba           | 1999           | FemalePregAge15to19 | 18936      |
| Cuba           | 1999           | FemalePregAge20to24 | 34202      |
| Cuba           | 1999           | FemalePregAge25to29 | 34237      |
| Cuba           | 1999           | FemalePregAge30to34 | 19017      |
| Cuba           | 1999           | FemalePregAge35to39 | 5550       |
| Cuba           | 1999           | FemalePregAge40to44 | 665        |
| Cuba           | 1999           | FemalePregAge45to49 | 94         |
| Cuba           | 1999           | MaleAge0to4         | 378014     |
| Cuba           | 1999           | MaleAge10to14       | 444659     |
| Cuba           | 1999           | MaleAge15to19       | 376147     |
| Cuba           | 1999           | MaleAge20to24       | 403476     |
| Cuba           | 1999           | MaleAge25to29       | 552860     |
| Cuba           | 1999           | MaleAge30to34       | 564255     |
| Cuba           | 1999           | MaleAge35to39       | 517018     |
| Cuba           | 1999           | MaleAge40to44       | 346008     |
| Cuba           | 1999           | MaleAge45to49       | 339039     |
| Cuba           | 1999           | MaleAge50to54       | 272833     |
| Cuba           | 1999           | MaleAge55to59       | 248326     |
| Cuba           | 1999           | MaleAge5to9         | 425852     |
| Cuba           | 1999           | MaleAge60to64       | 212110     |
| Cuba           | 1999           | MaleAge65to69       | 163855     |
| Cuba           | 1999           | MaleAge70to74       | 127631     |
| Cuba           | 1999           | MaleAge75to79       | 92849      |
| Cuba           | 1999           | MaleAge80to84       | 61803      |
| Cuba           | 1999           | MaleAge85to89       | 33670      |
| Cuba           | 1999           | MaleAge90to94       | 13540      |
| Cuba           | 1999           | MaleAge95to99       | 3777       |
| Cuba           | 1999           | MaleAgeAbove100     | 498        |
| Czech Republic | 1992           | FemaleAge0to4       | 328497     |
| Czech Republic | 1992           | FemaleAge10to14     | 401391     |
| Czech Republic | 1992           | FemaleAge15to19     | 400850     |
| Czech Republic | 1992           | FemaleAge20to24     | 263884     |
| Czech Republic | 1992           | FemaleAge25to29     | 267774     |
| Czech Republic | 1992           | FemaleAge30to34     | 312408     |
| Czech Republic | 1992           | FemaleAge35to39     | 374615     |
| Czech Republic | 1992           | FemaleAge40to44     | 419153     |
| Czech Republic | 1992           | FemaleAge45to49     | 375141     |
| Czech Republic | 1992           | FemaleAge50to54     | 278602     |
| Czech Republic | 1992           | FemaleAge55to59     | 263653     |
| Czech Republic | 1992           | FemaleAge5to9       | 307120     |
| Czech Republic | 1992           | FemaleAge60to64     | 278568     |
| Czech Republic | 1992           | FemaleAge65to69     | 308296     |
| Czech Republic | 1992           | FemaleAge70to74     | 183572     |
| Czech Republic | 1992           | FemaleAge75to79     | 144877     |
| Czech Republic | 1992           | FemaleAge80to84     | 129477     |
| Czech Republic | 1992           | FemaleAge85to89     | 53332      |
| Czech Republic | 1992           | FemaleAge90to94     | 14674      |
| Czech Republic | 1992           | FemaleAge95to99     | 1824       |
| Czech Republic | 1992           | FemaleAgeAbove100   | 89         |
| Czech Republic | 1992           | FemaleLactAge15to19 | 17468      |
| Czech Republic | 1992           | FemaleLactAge20to24 | 54341      |
| Czech Republic | 1992           | FemaleLactAge25to29 | 31003      |
| Czech Republic | 1992           | FemaleLactAge30to34 | 12251      |
| Czech Republic | 1992           | FemaleLactAge35to39 | 4170       |
| Czech Republic | 1992           | FemaleLactAge40to44 | 727        |
| Czech Republic | 1992           | FemaleLactAge45to49 | 23         |
| Czech Republic | 1992           | FemalePregAge15to19 | 13101      |
| Czech Republic | 1992           | FemalePregAge20to24 | 40756      |
| Czech Republic | 1992           | FemalePregAge25to29 | 23253      |
| Czech Republic | 1992           | FemalePregAge30to34 | 9188       |
| Czech Republic | 1992           | FemalePregAge35to39 | 3128       |
| Czech Republic | 1992           | FemalePregAge40to44 | 545        |
| Czech Republic | 1992           | FemalePregAge45to49 | 17         |
| Czech Republic | 1992           | MaleAge0to4         | 344002     |
| Czech Republic | 1992           | MaleAge10to14       | 419391     |
| Czech Republic | 1992           | MaleAge15to19       | 451432     |
| Czech Republic | 1992           | MaleAge20to24       | 375758     |
| Czech Republic | 1992           | MaleAge25to29       | 335881     |
| Czech Republic | 1992           | MaleAge30to34       | 344537     |
| Czech Republic | 1992           | MaleAge35to39       | 387788     |
| Czech Republic | 1992           | MaleAge40to44       | 421934     |

Dietary calcium and zinc deficiency risks are decreasing but remain prevalent

| Country        | Reference year | Age/gender group    | Population |
|----------------|----------------|---------------------|------------|
| Czech Republic | 1992           | MaleAge45to49       | 370382     |
| Czech Republic | 1992           | MaleAge50to54       | 265010     |
| Czech Republic | 1992           | MaleAge55to59       | 237401     |
| Czech Republic | 1992           | MaleAge5to9         | 322834     |
| Czech Republic | 1992           | MaleAge60to64       | 231491     |
| Czech Republic | 1992           | MaleAge65to69       | 222054     |
| Czech Republic | 1992           | MaleAge70to74       | 120756     |
| Czech Republic | 1992           | MaleAge75to79       | 80202      |
| Czech Republic | 1992           | MaleAge80to84       | 63122      |
| Czech Republic | 1992           | MaleAge85to89       | 19990      |
| Czech Republic | 1992           | MaleAge90to94       | 4074       |
| Czech Republic | 1992           | MaleAge95to99       | 424        |
| Czech Republic | 1992           | MaleAgeAbov e100    | 17         |
| Czech Republic | 1993           | FemaleAge0to4       | 318074     |
| Czech Republic | 1993           | FemaleAge10to14     | 375589     |
| Czech Republic | 1993           | FemaleAge15to19     | 409749     |
| Czech Republic | 1993           | FemaleAge20to24     | 280819     |
| Czech Republic | 1993           | FemaleAge25to29     | 268483     |
| Czech Republic | 1993           | FemaleAge30to34     | 309107     |
| Czech Republic | 1993           | FemaleAge35to39     | 362364     |
| Czech Republic | 1993           | FemaleAge40to44     | 415869     |
| Czech Republic | 1993           | FemaleAge45to49     | 391412     |
| Czech Republic | 1993           | FemaleAge50to54     | 296821     |
| Czech Republic | 1993           | FemaleAge55to59     | 254477     |
| Czech Republic | 1993           | FemaleAge5to9       | 307685     |
| Czech Republic | 1993           | FemaleAge60to64     | 277287     |
| Czech Republic | 1993           | FemaleAge65to69     | 293198     |
| Czech Republic | 1993           | FemaleAge70to74     | 222652     |
| Czech Republic | 1993           | FemaleAge75to79     | 118470     |
| Czech Republic | 1993           | FemaleAge80to84     | 135160     |
| Czech Republic | 1993           | FemaleAge85to89     | 54689      |
| Czech Republic | 1993           | FemaleAge90to94     | 15295      |
| Czech Republic | 1993           | FemaleAge95to99     | 2172       |
| Czech Republic | 1993           | FemaleAgeAbov e100  | 93         |
| Czech Republic | 1993           | FemaleLactAge15to19 | 17468      |
| Czech Republic | 1993           | FemaleLactAge20to24 | 54341      |
| Czech Republic | 1993           | FemaleLactAge25to29 | 31003      |
| Czech Republic | 1993           | FemaleLactAge30to34 | 12251      |
| Czech Republic | 1993           | FemaleLactAge35to39 | 4170       |
| Czech Republic | 1993           | FemaleLactAge40to44 | 727        |
| Czech Republic | 1993           | FemaleLactAge45to49 | 23         |
| Czech Republic | 1993           | FemalePregAge15to19 | 13101      |
| Czech Republic | 1993           | FemalePregAge20to24 | 40756      |
| Czech Republic | 1993           | FemalePregAge25to29 | 23253      |
| Czech Republic | 1993           | FemalePregAge30to34 | 9188       |
| Czech Republic | 1993           | FemalePregAge35to39 | 3128       |
| Czech Republic | 1993           | FemalePregAge40to44 | 545        |
| Czech Republic | 1993           | FemalePregAge45to49 | 17         |
| Czech Republic | 1993           | MaleAge0to4         | 334052     |
| Czech Republic | 1993           | MaleAge10to14       | 393046     |
| Czech Republic | 1993           | MaleAge15to19       | 459939     |
| Czech Republic | 1993           | MaleAge20to24       | 393860     |
| Czech Republic | 1993           | MaleAge25to29       | 336665     |
| Czech Republic | 1993           | MaleAge30to34       | 342057     |
| Czech Republic | 1993           | MaleAge35to39       | 376067     |
| Czech Republic | 1993           | MaleAge40to44       | 418605     |
| Czech Republic | 1993           | MaleAge45to49       | 386721     |
| Czech Republic | 1993           | MaleAge50to54       | 283407     |
| Czech Republic | 1993           | MaleAge55to59       | 229012     |
| Czech Republic | 1993           | MaleAge5to9         | 323054     |
| Czech Republic | 1993           | MaleAge60to64       | 231946     |
| Czech Republic | 1993           | MaleAge65to69       | 212855     |
| Czech Republic | 1993           | MaleAge70to74       | 144785     |
| Czech Republic | 1993           | MaleAge75to79       | 64627      |
| Czech Republic | 1993           | MaleAge80to84       | 66457      |
| Czech Republic | 1993           | MaleAge85to89       | 20593      |
| Czech Republic | 1993           | MaleAge90to94       | 4350       |
| Czech Republic | 1993           | MaleAge95to99       | 542        |
| Czech Republic | 1993           | MaleAgeAbov e100    | 18         |
| Czech Republic | 1994           | FemaleAge0to4       | 303945     |
| Czech Republic | 1994           | FemaleAge10to14     | 350886     |
| Czech Republic | 1994           | FemaleAge15to19     | 412283     |
| Czech Republic | 1994           | FemaleAge20to24     | 297516     |
| Czech Republic | 1994           | FemaleAge25to29     | 272321     |
| Czech Republic | 1994           | FemaleAge30to34     | 306787     |
| Czech Republic | 1994           | FemaleAge35to39     | 350922     |
| Czech Republic | 1994           | FemaleAge40to44     | 409899     |
| Czech Republic | 1994           | FemaleAge45to49     | 404618     |
| Czech Republic | 1994           | FemaleAge50to54     | 316407     |
| Czech Republic | 1994           | FemaleAge55to59     | 249782     |
| Czech Republic | 1994           | FemaleAge5to9       | 312734     |
| Czech Republic | 1994           | FemaleAge60to64     | 275046     |
| Czech Republic | 1994           | FemaleAge65to69     | 278955     |
| Czech Republic | 1994           | FemaleAge70to74     | 254567     |
| Czech Republic | 1994           | FemaleAge75to79     | 104082     |
| Czech Republic | 1994           | FemaleAge80to84     | 135023     |
| Czech Republic | 1994           | FemaleAge85to89     | 55593      |
| Czech Republic | 1994           | FemaleAge90to94     | 15167      |

Dietary calcium and zinc deficiency risks are decreasing but remain prevalent

| Country        | Reference year | Age/gender group    | Population |
|----------------|----------------|---------------------|------------|
| Czech Republic | 1994           | FemaleAge95to99     | 2308       |
| Czech Republic | 1994           | FemaleAgeAbove100   | 99         |
| Czech Republic | 1994           | FemaleLactAge15to19 | 17468      |
| Czech Republic | 1994           | FemaleLactAge20to24 | 54341      |
| Czech Republic | 1994           | FemaleLactAge25to29 | 31003      |
| Czech Republic | 1994           | FemaleLactAge30to34 | 12251      |
| Czech Republic | 1994           | FemaleLactAge35to39 | 4170       |
| Czech Republic | 1994           | FemaleLactAge40to44 | 727        |
| Czech Republic | 1994           | FemaleLactAge45to49 | 23         |
| Czech Republic | 1994           | FemalePregAge15to19 | 13101      |
| Czech Republic | 1994           | FemalePregAge20to24 | 40756      |
| Czech Republic | 1994           | FemalePregAge25to29 | 23253      |
| Czech Republic | 1994           | FemalePregAge30to34 | 9188       |
| Czech Republic | 1994           | FemalePregAge35to39 | 3128       |
| Czech Republic | 1994           | FemalePregAge40to44 | 545        |
| Czech Republic | 1994           | FemalePregAge45to49 | 17         |
| Czech Republic | 1994           | MaleAge0to4         | 320219     |
| Czech Republic | 1994           | MaleAge10to14       | 367865     |
| Czech Republic | 1994           | MaleAge15to19       | 462030     |
| Czech Republic | 1994           | MaleAge20to24       | 411548     |
| Czech Republic | 1994           | MaleAge25to29       | 340810     |
| Czech Republic | 1994           | MaleAge30to34       | 340500     |
| Czech Republic | 1994           | MaleAge35to39       | 365358     |
| Czech Republic | 1994           | MaleAge40to44       | 412863     |
| Czech Republic | 1994           | MaleAge45to49       | 400112     |
| Czech Republic | 1994           | MaleAge50to54       | 303118     |
| Czech Republic | 1994           | MaleAge55to59       | 225205     |
| Czech Republic | 1994           | MaleAge5to9         | 327889     |
| Czech Republic | 1994           | MaleAge60to64       | 231268     |
| Czech Republic | 1994           | MaleAge65to69       | 204914     |
| Czech Republic | 1994           | MaleAge70to74       | 163226     |
| Czech Republic | 1994           | MaleAge75to79       | 56823      |
| Czech Republic | 1994           | MaleAge80to84       | 65456      |
| Czech Republic | 1994           | MaleAge85to89       | 20834      |
| Czech Republic | 1994           | MaleAge90to94       | 4352       |
| Czech Republic | 1994           | MaleAge95to99       | 571        |
| Czech Republic | 1994           | MaleAgeAbove100     | 19         |
| Czech Republic | 1995           | FemaleAge0to4       | 290795     |
| Czech Republic | 1995           | FemaleAge10to14     | 332885     |
| Czech Republic | 1995           | FemaleAge15to19     | 406572     |
| Czech Republic | 1995           | FemaleAge20to24     | 312184     |
| Czech Republic | 1995           | FemaleAge25to29     | 280005     |
| Czech Republic | 1995           | FemaleAge30to34     | 304738     |
| Czech Republic | 1995           | FemaleAge35to39     | 341118     |
| Czech Republic | 1995           | FemaleAge40to44     | 401903     |
| Czech Republic | 1995           | FemaleAge45to49     | 413557     |
| Czech Republic | 1995           | FemaleAge50to54     | 335158     |
| Czech Republic | 1995           | FemaleAge55to59     | 251688     |
| Czech Republic | 1995           | FemaleAge5to9       | 315288     |
| Czech Republic | 1995           | FemaleAge60to64     | 270064     |
| Czech Republic | 1995           | FemaleAge65to69     | 269860     |
| Czech Republic | 1995           | FemaleAge70to74     | 272131     |
| Czech Republic | 1995           | FemaleAge75to79     | 106795     |
| Czech Republic | 1995           | FemaleAge80to84     | 127429     |
| Czech Republic | 1995           | FemaleAge85to89     | 56668      |
| Czech Republic | 1995           | FemaleAge90to94     | 14253      |
| Czech Republic | 1995           | FemaleAge95to99     | 1829       |
| Czech Republic | 1995           | FemaleAgeAbove100   | 106        |
| Czech Republic | 1995           | FemaleLactAge15to19 | 17468      |
| Czech Republic | 1995           | FemaleLactAge20to24 | 54341      |
| Czech Republic | 1995           | FemaleLactAge25to29 | 31003      |
| Czech Republic | 1995           | FemaleLactAge30to34 | 12251      |
| Czech Republic | 1995           | FemaleLactAge35to39 | 4170       |
| Czech Republic | 1995           | FemaleLactAge40to44 | 727        |
| Czech Republic | 1995           | FemaleLactAge45to49 | 23         |
| Czech Republic | 1995           | FemalePregAge15to19 | 13101      |
| Czech Republic | 1995           | FemalePregAge20to24 | 40756      |
| Czech Republic | 1995           | FemalePregAge25to29 | 23253      |
| Czech Republic | 1995           | FemalePregAge30to34 | 9188       |
| Czech Republic | 1995           | FemalePregAge35to39 | 3128       |
| Czech Republic | 1995           | FemalePregAge40to44 | 545        |
| Czech Republic | 1995           | FemalePregAge45to49 | 17         |
| Czech Republic | 1995           | MaleAge0to4         | 306968     |
| Czech Republic | 1995           | MaleAge10to14       | 349445     |
| Czech Republic | 1995           | MaleAge15to19       | 455922     |
| Czech Republic | 1995           | MaleAge20to24       | 426861     |
| Czech Republic | 1995           | MaleAge25to29       | 349137     |
| Czech Republic | 1995           | MaleAge30to34       | 339089     |
| Czech Republic | 1995           | MaleAge35to39       | 356441     |
| Czech Republic | 1995           | MaleAge40to44       | 405391     |
| Czech Republic | 1995           | MaleAge45to49       | 409342     |
| Czech Republic | 1995           | MaleAge50to54       | 322059     |
| Czech Republic | 1995           | MaleAge55to59       | 228063     |
| Czech Republic | 1995           | MaleAge5to9         | 330346     |
| Czech Republic | 1995           | MaleAge60to64       | 228112     |
| Czech Republic | 1995           | MaleAge65to69       | 200623     |
| Czech Republic | 1995           | MaleAge70to74       | 172520     |
| Czech Republic | 1995           | MaleAge75to79       | 59107      |

Dietary calcium and zinc deficiency risks are decreasing but remain prevalent

| Country        | Reference year | Age/gender group    | Population |
|----------------|----------------|---------------------|------------|
| Czech Republic | 1995           | MaleAge80to84       | 59649      |
| Czech Republic | 1995           | MaleAge85to89       | 20876      |
| Czech Republic | 1995           | MaleAge90to94       | 3888       |
| Czech Republic | 1995           | MaleAge95to99       | 366        |
| Czech Republic | 1995           | MaleAgeAbove100     | 20         |
| Czech Republic | 1996           | FemaleAge0to4       | 275975     |
| Czech Republic | 1996           | FemaleAge10to14     | 321642     |
| Czech Republic | 1996           | FemaleAge15to19     | 412184     |
| Czech Republic | 1996           | FemaleAge20to24     | 358842     |
| Czech Republic | 1996           | FemaleAge25to29     | 291066     |
| Czech Republic | 1996           | FemaleAge30to34     | 302789     |
| Czech Republic | 1996           | FemaleAge35to39     | 333120     |
| Czech Republic | 1996           | FemaleAge40to44     | 391846     |
| Czech Republic | 1996           | FemaleAge45to49     | 417870     |
| Czech Republic | 1996           | FemaleAge50to54     | 352937     |
| Czech Republic | 1996           | FemaleAge55to59     | 259009     |
| Czech Republic | 1996           | FemaleAge5to9       | 313898     |
| Czech Republic | 1996           | FemaleAge60to64     | 262342     |
| Czech Republic | 1996           | FemaleAge65to69     | 262821     |
| Czech Republic | 1996           | FemaleAge70to74     | 275947     |
| Czech Republic | 1996           | FemaleAge75to79     | 122315     |
| Czech Republic | 1996           | FemaleAge80to84     | 114059     |
| Czech Republic | 1996           | FemaleAge85to89     | 62596      |
| Czech Republic | 1996           | FemaleAge90to94     | 16743      |
| Czech Republic | 1996           | FemaleAge95to99     | 2071       |
| Czech Republic | 1996           | FemaleAgeAbove100   | 114        |
| Czech Republic | 1996           | FemaleLactAge15to19 | 6442       |
| Czech Republic | 1996           | FemaleLactAge20to24 | 35057      |
| Czech Republic | 1996           | FemaleLactAge25to29 | 31050      |
| Czech Republic | 1996           | FemaleLactAge30to34 | 12442      |
| Czech Republic | 1996           | FemaleLactAge35to39 | 4156       |
| Czech Republic | 1996           | FemaleLactAge40to44 | 702        |
| Czech Republic | 1996           | FemaleLactAge45to49 | 25         |
| Czech Republic | 1996           | FemalePregAge15to19 | 4832       |
| Czech Republic | 1996           | FemalePregAge20to24 | 26293      |
| Czech Republic | 1996           | FemalePregAge25to29 | 23288      |
| Czech Republic | 1996           | FemalePregAge30to34 | 9331       |
| Czech Republic | 1996           | FemalePregAge35to39 | 3117       |
| Czech Republic | 1996           | FemalePregAge40to44 | 526        |
| Czech Republic | 1996           | FemalePregAge45to49 | 19         |
| Czech Republic | 1996           | MaleAge0to4         | 292151     |
| Czech Republic | 1996           | MaleAge10to14       | 337596     |
| Czech Republic | 1996           | MaleAge15to19       | 441448     |
| Czech Republic | 1996           | MaleAge20to24       | 439786     |
| Czech Republic | 1996           | MaleAge25to29       | 361002     |
| Czech Republic | 1996           | MaleAge30to34       | 337820     |
| Czech Republic | 1996           | MaleAge35to39       | 349154     |
| Czech Republic | 1996           | MaleAge40to44       | 395622     |
| Czech Republic | 1996           | MaleAge45to49       | 413492     |
| Czech Republic | 1996           | MaleAge50to54       | 339565     |
| Czech Republic | 1996           | MaleAge55to59       | 235864     |
| Czech Republic | 1996           | MaleAge5to9         | 328862     |
| Czech Republic | 1996           | MaleAge60to64       | 222167     |
| Czech Republic | 1996           | MaleAge65to69       | 198162     |
| Czech Republic | 1996           | MaleAge70to74       | 175225     |
| Czech Republic | 1996           | MaleAge75to79       | 69453      |
| Czech Republic | 1996           | MaleAge80to84       | 53265      |
| Czech Republic | 1996           | MaleAge85to89       | 24437      |
| Czech Republic | 1996           | MaleAge90to94       | 4823       |
| Czech Republic | 1996           | MaleAge95to99       | 444        |
| Czech Republic | 1996           | MaleAgeAbove100     | 22         |
| Czech Republic | 1997           | FemaleAge0to4       | 258175     |
| Czech Republic | 1997           | FemaleAge10to14     | 316870     |
| Czech Republic | 1997           | FemaleAge15to19     | 390118     |
| Czech Republic | 1997           | FemaleAge20to24     | 370744     |
| Czech Republic | 1997           | FemaleAge25to29     | 305617     |
| Czech Republic | 1997           | FemaleAge30to34     | 301716     |
| Czech Republic | 1997           | FemaleAge35to39     | 327620     |
| Czech Republic | 1997           | FemaleAge40to44     | 380159     |
| Czech Republic | 1997           | FemaleAge45to49     | 418002     |
| Czech Republic | 1997           | FemaleAge50to54     | 370501     |
| Czech Republic | 1997           | FemaleAge55to59     | 272441     |
| Czech Republic | 1997           | FemaleAge5to9       | 311046     |
| Czech Republic | 1997           | FemaleAge60to64     | 252991     |
| Czech Republic | 1997           | FemaleAge65to69     | 259749     |
| Czech Republic | 1997           | FemaleAge70to74     | 269267     |
| Czech Republic | 1997           | FemaleAge75to79     | 150317     |
| Czech Republic | 1997           | FemaleAge80to84     | 94588      |
| Czech Republic | 1997           | FemaleAge85to89     | 69175      |
| Czech Republic | 1997           | FemaleAge90to94     | 18152      |
| Czech Republic | 1997           | FemaleAge95to99     | 2429       |
| Czech Republic | 1997           | FemaleAgeAbove100   | 124        |
| Czech Republic | 1997           | FemaleLactAge15to19 | 6442       |
| Czech Republic | 1997           | FemaleLactAge20to24 | 35057      |
| Czech Republic | 1997           | FemaleLactAge25to29 | 31050      |
| Czech Republic | 1997           | FemaleLactAge30to34 | 12442      |
| Czech Republic | 1997           | FemaleLactAge35to39 | 4156       |
| Czech Republic | 1997           | FemaleLactAge40to44 | 702        |

Dietary calcium and zinc deficiency risks are decreasing but remain prevalent

| Country        | Reference year | Age/gender group    | Population |
|----------------|----------------|---------------------|------------|
| Czech Republic | 1997           | FemaleLactAge45to49 | 25         |
| Czech Republic | 1997           | FemalePregAge15to19 | 4832       |
| Czech Republic | 1997           | FemalePregAge20to24 | 26293      |
| Czech Republic | 1997           | FemalePregAge25to29 | 23288      |
| Czech Republic | 1997           | FemalePregAge30to34 | 9331       |
| Czech Republic | 1997           | FemalePregAge35to39 | 3117       |
| Czech Republic | 1997           | FemalePregAge40to44 | 526        |
| Czech Republic | 1997           | FemalePregAge45to49 | 19         |
| Czech Republic | 1997           | MaleAge0to4         | 273413     |
| Czech Republic | 1997           | MaleAge10to14       | 332415     |
| Czech Republic | 1997           | MaleAge15to19       | 418779     |
| Czech Republic | 1997           | MaleAge20to24       | 451450     |
| Czech Republic | 1997           | MaleAge25to29       | 376606     |
| Czech Republic | 1997           | MaleAge30to34       | 337056     |
| Czech Republic | 1997           | MaleAge35to39       | 344618     |
| Czech Republic | 1997           | MaleAge40to44       | 384635     |
| Czech Republic | 1997           | MaleAge45to49       | 413780     |
| Czech Republic | 1997           | MaleAge50to54       | 357107     |
| Czech Republic | 1997           | MaleAge55to59       | 249502     |
| Czech Republic | 1997           | MaleAge5to9         | 326241     |
| Czech Republic | 1997           | MaleAge60to64       | 214497     |
| Czech Republic | 1997           | MaleAge65to69       | 198306     |
| Czech Republic | 1997           | MaleAge70to74       | 172241     |
| Czech Republic | 1997           | MaleAge75to79       | 85651      |
| Czech Republic | 1997           | MaleAge80to84       | 43708      |
| Czech Republic | 1997           | MaleAge85to89       | 28227      |
| Czech Republic | 1997           | MaleAge90to94       | 5313       |
| Czech Republic | 1997           | MaleAge95to99       | 581        |
| Czech Republic | 1997           | MaleAgeAbov e100    | 24         |
| Czech Republic | 1998           | FemaleAge0to4       | 240313     |
| Czech Republic | 1998           | FemaleAge10to14     | 316692     |
| Czech Republic | 1998           | FemaleAge15to19     | 363829     |
| Czech Republic | 1998           | FemaleAge20to24     | 379408     |
| Czech Republic | 1998           | FemaleAge25to29     | 322056     |
| Czech Republic | 1998           | FemaleAge30to34     | 302168     |
| Czech Republic | 1998           | FemaleAge35to39     | 324069     |
| Czech Republic | 1998           | FemaleAge40to44     | 367875     |
| Czech Republic | 1998           | FemaleAge45to49     | 414437     |
| Czech Republic | 1998           | FemaleAge50to54     | 386598     |
| Czech Republic | 1998           | FemaleAge55to59     | 290105     |
| Czech Republic | 1998           | FemaleAge5to9       | 306119     |
| Czech Republic | 1998           | FemaleAge60to64     | 244337     |
| Czech Republic | 1998           | FemaleAge65to69     | 258710     |
| Czech Republic | 1998           | FemaleAge70to74     | 257090     |
| Czech Republic | 1998           | FemaleAge75to79     | 182235     |
| Czech Republic | 1998           | FemaleAge80to84     | 76514      |
| Czech Republic | 1998           | FemaleAge85to89     | 73541      |
| Czech Republic | 1998           | FemaleAge90to94     | 18630      |
| Czech Republic | 1998           | FemaleAge95to99     | 2792       |
| Czech Republic | 1998           | FemaleAgeAbov e100  | 135        |
| Czech Republic | 1998           | FemaleLactAge15to19 | 6442       |
| Czech Republic | 1998           | FemaleLactAge20to24 | 35057      |
| Czech Republic | 1998           | FemaleLactAge25to29 | 31050      |
| Czech Republic | 1998           | FemaleLactAge30to34 | 12442      |
| Czech Republic | 1998           | FemaleLactAge35to39 | 4156       |
| Czech Republic | 1998           | FemaleLactAge40to44 | 702        |
| Czech Republic | 1998           | FemaleLactAge45to49 | 25         |
| Czech Republic | 1998           | FemalePregAge15to19 | 4832       |
| Czech Republic | 1998           | FemalePregAge20to24 | 26293      |
| Czech Republic | 1998           | FemalePregAge25to29 | 23288      |
| Czech Republic | 1998           | FemalePregAge30to34 | 9331       |
| Czech Republic | 1998           | FemalePregAge35to39 | 3117       |
| Czech Republic | 1998           | FemalePregAge40to44 | 526        |
| Czech Republic | 1998           | FemalePregAge45to49 | 19         |
| Czech Republic | 1998           | MaleAge0to4         | 254051     |
| Czech Republic | 1998           | MaleAge10to14       | 331951     |
| Czech Republic | 1998           | MaleAge15to19       | 392005     |
| Czech Republic | 1998           | MaleAge20to24       | 459633     |
| Czech Republic | 1998           | MaleAge25to29       | 394165     |
| Czech Republic | 1998           | MaleAge30to34       | 337829     |
| Czech Republic | 1998           | MaleAge35to39       | 342084     |
| Czech Republic | 1998           | MaleAge40to44       | 373293     |
| Czech Republic | 1998           | MaleAge45to49       | 410671     |
| Czech Republic | 1998           | MaleAge50to54       | 373402     |
| Czech Republic | 1998           | MaleAge55to59       | 267077     |
| Czech Republic | 1998           | MaleAge5to9         | 321751     |
| Czech Republic | 1998           | MaleAge60to64       | 207497     |
| Czech Republic | 1998           | MaleAge65to69       | 199479     |
| Czech Republic | 1998           | MaleAge70to74       | 166671     |
| Czech Republic | 1998           | MaleAge75to79       | 102770     |
| Czech Republic | 1998           | MaleAge80to84       | 35091      |
| Czech Republic | 1998           | MaleAge85to89       | 30508      |
| Czech Republic | 1998           | MaleAge90to94       | 5529       |
| Czech Republic | 1998           | MaleAge95to99       | 740        |
| Czech Republic | 1998           | MaleAgeAbov e100    | 26         |
| Czech Republic | 1999           | FemaleAge0to4       | 225151     |
| Czech Republic | 1999           | FemaleAge10to14     | 317441     |
| Czech Republic | 1999           | FemaleAge15to19     | 339993     |

Dietary calcium and zinc deficiency risks are decreasing but remain prevalent

| Country                               | Reference year | Age/gender group    | Population |
|---------------------------------------|----------------|---------------------|------------|
| Czech Republic                        | 1999           | FemaleAge20to24     | 381683     |
| Czech Republic                        | 1999           | FemaleAge25to29     | 338217     |
| Czech Republic                        | 1999           | FemaleAge30to34     | 305742     |
| Czech Republic                        | 1999           | FemaleAge35to39     | 321455     |
| Czech Republic                        | 1999           | FemaleAge40to44     | 356390     |
| Czech Republic                        | 1999           | FemaleAge45to49     | 408236     |
| Czech Republic                        | 1999           | FemaleAge50to54     | 399615     |
| Czech Republic                        | 1999           | FemaleAge55to59     | 309114     |
| Czech Republic                        | 1999           | FemaleAge5to9       | 299183     |
| Czech Republic                        | 1999           | FemaleAge60to64     | 240051     |
| Czech Republic                        | 1999           | FemaleAge65to69     | 256797     |
| Czech Republic                        | 1999           | FemaleAge70to74     | 246093     |
| Czech Republic                        | 1999           | FemaleAge75to79     | 207360     |
| Czech Republic                        | 1999           | FemaleAge80to84     | 68524      |
| Czech Republic                        | 1999           | FemaleAge85to89     | 72458      |
| Czech Republic                        | 1999           | FemaleAge90to94     | 18694      |
| Czech Republic                        | 1999           | FemaleAge95to99     | 2963       |
| Czech Republic                        | 1999           | FemaleAgeAbov e100  | 147        |
| Czech Republic                        | 1999           | FemaleLactAge15to19 | 6442       |
| Czech Republic                        | 1999           | FemaleLactAge20to24 | 35057      |
| Czech Republic                        | 1999           | FemaleLactAge25to29 | 31050      |
| Czech Republic                        | 1999           | FemaleLactAge30to34 | 12442      |
| Czech Republic                        | 1999           | FemaleLactAge35to39 | 4156       |
| Czech Republic                        | 1999           | FemaleLactAge40to44 | 702        |
| Czech Republic                        | 1999           | FemaleLactAge45to49 | 25         |
| Czech Republic                        | 1999           | FemalePregAge15to19 | 4832       |
| Czech Republic                        | 1999           | FemalePregAge20to24 | 26293      |
| Czech Republic                        | 1999           | FemalePregAge25to29 | 23288      |
| Czech Republic                        | 1999           | FemalePregAge30to34 | 9331       |
| Czech Republic                        | 1999           | FemalePregAge35to39 | 3117       |
| Czech Republic                        | 1999           | FemalePregAge40to44 | 526        |
| Czech Republic                        | 1999           | FemalePregAge45to49 | 19         |
| Czech Republic                        | 1999           | MaleAge0to4         | 237526     |
| Czech Republic                        | 1999           | MaleAge10to14       | 332506     |
| Czech Republic                        | 1999           | MaleAge15to19       | 367691     |
| Czech Republic                        | 1999           | MaleAge20to24       | 461242     |
| Czech Republic                        | 1999           | MaleAge25to29       | 411126     |
| Czech Republic                        | 1999           | MaleAge30to34       | 341816     |
| Czech Republic                        | 1999           | MaleAge35to39       | 340354     |
| Czech Republic                        | 1999           | MaleAge40to44       | 362840     |
| Czech Republic                        | 1999           | MaleAge45to49       | 405143     |
| Czech Republic                        | 1999           | MaleAge50to54       | 386716     |
| Czech Republic                        | 1999           | MaleAge55to59       | 285840     |
| Czech Republic                        | 1999           | MaleAge5to9         | 315199     |
| Czech Republic                        | 1999           | MaleAge60to64       | 204722     |
| Czech Republic                        | 1999           | MaleAge65to69       | 199450     |
| Czech Republic                        | 1999           | MaleAge70to74       | 162125     |
| Czech Republic                        | 1999           | MaleAge75to79       | 115318     |
| Czech Republic                        | 1999           | MaleAge80to84       | 31761      |
| Czech Republic                        | 1999           | MaleAge85to89       | 29605      |
| Czech Republic                        | 1999           | MaleAge90to94       | 5690       |
| Czech Republic                        | 1999           | MaleAge95to99       | 813        |
| Czech Republic                        | 1999           | MaleAgeAbov e100    | 29         |
| Democratic People's Republic of Korea | 1992           | FemaleAge0to4       | 924881     |
| Democratic People's Republic of Korea | 1992           | FemaleAge10to14     | 785930     |
| Democratic People's Republic of Korea | 1992           | FemaleAge15to19     | 985370     |
| Democratic People's Republic of Korea | 1992           | FemaleAge20to24     | 1074882    |
| Democratic People's Republic of Korea | 1992           | FemaleAge25to29     | 462680     |
| Democratic People's Republic of Korea | 1992           | FemaleAge30to34     | 756853     |
| Democratic People's Republic of Korea | 1992           | FemaleAge35to39     | 592234     |
| Democratic People's Republic of Korea | 1992           | FemaleAge40to44     | 539218     |
| Democratic People's Republic of Korea | 1992           | FemaleAge45to49     | 660706     |
| Democratic People's Republic of Korea | 1992           | FemaleAge50to54     | 625255     |
| Democratic People's Republic of Korea | 1992           | FemaleAge55to59     | 502115     |
| Democratic People's Republic of Korea | 1992           | FemaleAge5to9       | 976669     |
| Democratic People's Republic of Korea | 1992           | FemaleAge60to64     | 369101     |
| Democratic People's Republic of Korea | 1992           | FemaleAge65to69     | 275105     |
| Democratic People's Republic of Korea | 1992           | FemaleAge70to74     | 190881     |
| Democratic People's Republic of Korea | 1992           | FemaleAge75to79     | 116864     |
| Democratic People's Republic of Korea | 1992           | FemaleAge80to84     | 63227      |
| Democratic People's Republic of Korea | 1992           | FemaleAge85to89     | 26441      |
| Democratic People's Republic of Korea | 1992           | FemaleAge90to94     | 6513       |
| Democratic People's Republic of Korea | 1992           | FemaleAge95to99     | 756        |
| Democratic People's Republic of Korea | 1992           | FemaleAgeAbov e100  | 35         |
| Democratic People's Republic of Korea | 1992           | FemaleLactAge15to19 | 1672       |
| Democratic People's Republic of Korea | 1992           | FemaleLactAge20to24 | 76814      |
| Democratic People's Republic of Korea | 1992           | FemaleLactAge25to29 | 270185     |
| Democratic People's Republic of Korea | 1992           | FemaleLactAge30to34 | 74239      |
| Democratic People's Republic of Korea | 1992           | FemaleLactAge35to39 | 10880      |
| Democratic People's Republic of Korea | 1992           | FemaleLactAge40to44 | 1703       |
| Democratic People's Republic of Korea | 1992           | FemaleLactAge45to49 | 547        |
| Democratic People's Republic of Korea | 1992           | FemalePregAge15to19 | 1254       |
| Democratic People's Republic of Korea | 1992           | FemalePregAge20to24 | 57611      |
| Democratic People's Republic of Korea | 1992           | FemalePregAge25to29 | 202638     |
| Democratic People's Republic of Korea | 1992           | FemalePregAge30to34 | 55679      |
| Democratic People's Republic of Korea | 1992           | FemalePregAge35to39 | 8160       |
| Democratic People's Republic of Korea | 1992           | FemalePregAge40to44 | 1277       |
| Democratic People's Republic of Korea | 1992           | FemalePregAge45to49 | 410        |

Dietary calcium and zinc deficiency risks are decreasing but remain prevalent

| Country                               | Reference year | Age/gender group    | Population |
|---------------------------------------|----------------|---------------------|------------|
| Democratic People's Republic of Korea | 1992           | MaleAge0to4         | 968898     |
| Democratic People's Republic of Korea | 1992           | MaleAge10to14       | 821190     |
| Democratic People's Republic of Korea | 1992           | MaleAge15to19       | 1028077    |
| Democratic People's Republic of Korea | 1992           | MaleAge20to24       | 1249579    |
| Democratic People's Republic of Korea | 1992           | MaleAge25to29       | 954852     |
| Democratic People's Republic of Korea | 1992           | MaleAge30to34       | 892186     |
| Democratic People's Republic of Korea | 1992           | MaleAge35to39       | 596183     |
| Democratic People's Republic of Korea | 1992           | MaleAge40to44       | 505369     |
| Democratic People's Republic of Korea | 1992           | MaleAge45to49       | 621663     |
| Democratic People's Republic of Korea | 1992           | MaleAge50to54       | 573010     |
| Democratic People's Republic of Korea | 1992           | MaleAge55to59       | 395070     |
| Democratic People's Republic of Korea | 1992           | MaleAge5to9         | 1021998    |
| Democratic People's Republic of Korea | 1992           | MaleAge60to64       | 221151     |
| Democratic People's Republic of Korea | 1992           | MaleAge65to69       | 135489     |
| Democratic People's Republic of Korea | 1992           | MaleAge70to74       | 85206      |
| Democratic People's Republic of Korea | 1992           | MaleAge75to79       | 47164      |
| Democratic People's Republic of Korea | 1992           | MaleAge80to84       | 17697      |
| Democratic People's Republic of Korea | 1992           | MaleAge85to89       | 3783       |
| Democratic People's Republic of Korea | 1992           | MaleAge90to94       | 664        |
| Democratic People's Republic of Korea | 1992           | MaleAge95to99       | 74         |
| Democratic People's Republic of Korea | 1992           | MaleAgeAbov e100    | 2          |
| Democratic People's Republic of Korea | 1993           | FemaleAge0to4       | 962279     |
| Democratic People's Republic of Korea | 1993           | FemaleAge10to14     | 836082     |
| Democratic People's Republic of Korea | 1993           | FemaleAge15to19     | 885339     |
| Democratic People's Republic of Korea | 1993           | FemaleAge20to24     | 1071896    |
| Democratic People's Republic of Korea | 1993           | FemaleAge25to29     | 545713     |
| Democratic People's Republic of Korea | 1993           | FemaleAge30to34     | 713864     |
| Democratic People's Republic of Korea | 1993           | FemaleAge35to39     | 706958     |
| Democratic People's Republic of Korea | 1993           | FemaleAge40to44     | 480454     |
| Democratic People's Republic of Korea | 1993           | FemaleAge45to49     | 662756     |
| Democratic People's Republic of Korea | 1993           | FemaleAge50to54     | 631714     |
| Democratic People's Republic of Korea | 1993           | FemaleAge55to59     | 531465     |
| Democratic People's Republic of Korea | 1993           | FemaleAge5to9       | 969971     |
| Democratic People's Republic of Korea | 1993           | FemaleAge60to64     | 384868     |
| Democratic People's Republic of Korea | 1993           | FemaleAge65to69     | 287345     |
| Democratic People's Republic of Korea | 1993           | FemaleAge70to74     | 201403     |
| Democratic People's Republic of Korea | 1993           | FemaleAge75to79     | 123584     |
| Democratic People's Republic of Korea | 1993           | FemaleAge80to84     | 65127      |
| Democratic People's Republic of Korea | 1993           | FemaleAge85to89     | 27874      |
| Democratic People's Republic of Korea | 1993           | FemaleAge90to94     | 6952       |
| Democratic People's Republic of Korea | 1993           | FemaleAge95to99     | 887        |
| Democratic People's Republic of Korea | 1993           | FemaleAgeAbov e100  | 39         |
| Democratic People's Republic of Korea | 1993           | FemaleLactAge15to19 | 1672       |
| Democratic People's Republic of Korea | 1993           | FemaleLactAge20to24 | 76814      |
| Democratic People's Republic of Korea | 1993           | FemaleLactAge25to29 | 270185     |
| Democratic People's Republic of Korea | 1993           | FemaleLactAge30to34 | 74239      |
| Democratic People's Republic of Korea | 1993           | FemaleLactAge35to39 | 10880      |
| Democratic People's Republic of Korea | 1993           | FemaleLactAge40to44 | 1703       |
| Democratic People's Republic of Korea | 1993           | FemaleLactAge45to49 | 547        |
| Democratic People's Republic of Korea | 1993           | FemalePregAge15to19 | 1254       |
| Democratic People's Republic of Korea | 1993           | FemalePregAge20to24 | 57611      |
| Democratic People's Republic of Korea | 1993           | FemalePregAge25to29 | 202638     |
| Democratic People's Republic of Korea | 1993           | FemalePregAge30to34 | 55679      |
| Democratic People's Republic of Korea | 1993           | FemalePregAge35to39 | 8160       |
| Democratic People's Republic of Korea | 1993           | FemalePregAge40to44 | 1277       |
| Democratic People's Republic of Korea | 1993           | FemalePregAge45to49 | 410        |
| Democratic People's Republic of Korea | 1993           | MaleAge0to4         | 1007194    |
| Democratic People's Republic of Korea | 1993           | MaleAge10to14       | 873792     |
| Democratic People's Republic of Korea | 1993           | MaleAge15to19       | 924511     |
| Democratic People's Republic of Korea | 1993           | MaleAge20to24       | 1247938    |
| Democratic People's Republic of Korea | 1993           | MaleAge25to29       | 1042203    |
| Democratic People's Republic of Korea | 1993           | MaleAge30to34       | 849518     |
| Democratic People's Republic of Korea | 1993           | MaleAge35to39       | 716202     |
| Democratic People's Republic of Korea | 1993           | MaleAge40to44       | 449107     |
| Democratic People's Republic of Korea | 1993           | MaleAge45to49       | 622372     |
| Democratic People's Republic of Korea | 1993           | MaleAge50to54       | 582931     |
| Democratic People's Republic of Korea | 1993           | MaleAge55to59       | 436598     |
| Democratic People's Republic of Korea | 1993           | MaleAge5to9         | 1014950    |
| Democratic People's Republic of Korea | 1993           | MaleAge60to64       | 238150     |
| Democratic People's Republic of Korea | 1993           | MaleAge65to69       | 141330     |
| Democratic People's Republic of Korea | 1993           | MaleAge70to74       | 87446      |
| Democratic People's Republic of Korea | 1993           | MaleAge75to79       | 48332      |
| Democratic People's Republic of Korea | 1993           | MaleAge80to84       | 19182      |
| Democratic People's Republic of Korea | 1993           | MaleAge85to89       | 3980       |
| Democratic People's Republic of Korea | 1993           | MaleAge90to94       | 763        |
| Democratic People's Republic of Korea | 1993           | MaleAge95to99       | 97         |
| Democratic People's Republic of Korea | 1993           | MaleAgeAbov e100    | 3          |
| Democratic People's Republic of Korea | 1994           | FemaleAge0to4       | 999222     |
| Democratic People's Republic of Korea | 1994           | FemaleAge10to14     | 888017     |
| Democratic People's Republic of Korea | 1994           | FemaleAge15to19     | 805167     |
| Democratic People's Republic of Korea | 1994           | FemaleAge20to24     | 1047497    |
| Democratic People's Republic of Korea | 1994           | FemaleAge25to29     | 620943     |
| Democratic People's Republic of Korea | 1994           | FemaleAge30to34     | 685242     |
| Democratic People's Republic of Korea | 1994           | FemaleAge35to39     | 803723     |
| Democratic People's Republic of Korea | 1994           | FemaleAge40to44     | 448195     |
| Democratic People's Republic of Korea | 1994           | FemaleAge45to49     | 653335     |
| Democratic People's Republic of Korea | 1994           | FemaleAge50to54     | 636241     |
| Democratic People's Republic of Korea | 1994           | FemaleAge55to59     | 558408     |

Dietary calcium and zinc deficiency risks are decreasing but remain prevalent

| Country                               | Reference year | Age/gender group    | Population |
|---------------------------------------|----------------|---------------------|------------|
| Democratic People's Republic of Korea | 1994           | FemaleAge5to9       | 952778     |
| Democratic People's Republic of Korea | 1994           | FemaleAge60to64     | 403507     |
| Democratic People's Republic of Korea | 1994           | FemaleAge65to69     | 300202     |
| Democratic People's Republic of Korea | 1994           | FemaleAge70to74     | 212588     |
| Democratic People's Republic of Korea | 1994           | FemaleAge75to79     | 131292     |
| Democratic People's Republic of Korea | 1994           | FemaleAge80to84     | 67721      |
| Democratic People's Republic of Korea | 1994           | FemaleAge85to89     | 28675      |
| Democratic People's Republic of Korea | 1994           | FemaleAge90to94     | 7047       |
| Democratic People's Republic of Korea | 1994           | FemaleAge95to99     | 963        |
| Democratic People's Republic of Korea | 1994           | FemaleAgeAbove100   | 43         |
| Democratic People's Republic of Korea | 1994           | FemaleLactAge15to19 | 1672       |
| Democratic People's Republic of Korea | 1994           | FemaleLactAge20to24 | 76814      |
| Democratic People's Republic of Korea | 1994           | FemaleLactAge25to29 | 270185     |
| Democratic People's Republic of Korea | 1994           | FemaleLactAge30to34 | 74239      |
| Democratic People's Republic of Korea | 1994           | FemaleLactAge35to39 | 10880      |
| Democratic People's Republic of Korea | 1994           | FemaleLactAge40to44 | 1703       |
| Democratic People's Republic of Korea | 1994           | FemaleLactAge45to49 | 547        |
| Democratic People's Republic of Korea | 1994           | FemalePregAge15to19 | 1254       |
| Democratic People's Republic of Korea | 1994           | FemalePregAge20to24 | 57611      |
| Democratic People's Republic of Korea | 1994           | FemalePregAge25to29 | 202638     |
| Democratic People's Republic of Korea | 1994           | FemalePregAge30to34 | 55679      |
| Democratic People's Republic of Korea | 1994           | FemalePregAge35to39 | 8160       |
| Democratic People's Republic of Korea | 1994           | FemalePregAge40to44 | 1277       |
| Democratic People's Republic of Korea | 1994           | FemalePregAge45to49 | 410        |
| Democratic People's Republic of Korea | 1994           | MaleAge0to4         | 1045039    |
| Democratic People's Republic of Korea | 1994           | MaleAge10to14       | 927916     |
| Democratic People's Republic of Korea | 1994           | MaleAge15to19       | 841458     |
| Democratic People's Republic of Korea | 1994           | MaleAge20to24       | 1223688    |
| Democratic People's Republic of Korea | 1994           | MaleAge25to29       | 1121123    |
| Democratic People's Republic of Korea | 1994           | MaleAge30to34       | 821604     |
| Democratic People's Republic of Korea | 1994           | MaleAge35to39       | 817213     |
| Democratic People's Republic of Korea | 1994           | MaleAge40to44       | 420054     |
| Democratic People's Republic of Korea | 1994           | MaleAge45to49       | 611799     |
| Democratic People's Republic of Korea | 1994           | MaleAge50to54       | 589756     |
| Democratic People's Republic of Korea | 1994           | MaleAge55to59       | 474842     |
| Democratic People's Republic of Korea | 1994           | MaleAge5to9         | 996634     |
| Democratic People's Republic of Korea | 1994           | MaleAge60to64       | 260294     |
| Democratic People's Republic of Korea | 1994           | MaleAge65to69       | 148916     |
| Democratic People's Republic of Korea | 1994           | MaleAge70to74       | 90062      |
| Democratic People's Republic of Korea | 1994           | MaleAge75to79       | 49330      |
| Democratic People's Republic of Korea | 1994           | MaleAge80to84       | 19911      |
| Democratic People's Republic of Korea | 1994           | MaleAge85to89       | 4175       |
| Democratic People's Republic of Korea | 1994           | MaleAge90to94       | 767        |
| Democratic People's Republic of Korea | 1994           | MaleAge95to99       | 93         |
| Democratic People's Republic of Korea | 1994           | MaleAgeAbove100     | 3          |
| Democratic People's Republic of Korea | 1995           | FemaleAge0to4       | 1014866    |
| Democratic People's Republic of Korea | 1995           | FemaleAge10to14     | 922571     |
| Democratic People's Republic of Korea | 1995           | FemaleAge15to19     | 761830     |
| Democratic People's Republic of Korea | 1995           | FemaleAge20to24     | 1002695    |
| Democratic People's Republic of Korea | 1995           | FemaleAge25to29     | 673765     |
| Democratic People's Republic of Korea | 1995           | FemaleAge30to34     | 692488     |
| Democratic People's Republic of Korea | 1995           | FemaleAge35to39     | 859972     |
| Democratic People's Republic of Korea | 1995           | FemaleAge40to44     | 458239     |
| Democratic People's Republic of Korea | 1995           | FemaleAge45to49     | 629029     |
| Democratic People's Republic of Korea | 1995           | FemaleAge50to54     | 640550     |
| Democratic People's Republic of Korea | 1995           | FemaleAge55to59     | 580931     |
| Democratic People's Republic of Korea | 1995           | FemaleAge5to9       | 943438     |
| Democratic People's Republic of Korea | 1995           | FemaleAge60to64     | 426077     |
| Democratic People's Republic of Korea | 1995           | FemaleAge65to69     | 314148     |
| Democratic People's Republic of Korea | 1995           | FemaleAge70to74     | 224331     |
| Democratic People's Republic of Korea | 1995           | FemaleAge75to79     | 140026     |
| Democratic People's Republic of Korea | 1995           | FemaleAge80to84     | 71384      |
| Democratic People's Republic of Korea | 1995           | FemaleAge85to89     | 29048      |
| Democratic People's Republic of Korea | 1995           | FemaleAge90to94     | 6785       |
| Democratic People's Republic of Korea | 1995           | FemaleAge95to99     | 799        |
| Democratic People's Republic of Korea | 1995           | FemaleAgeAbove100   | 47         |
| Democratic People's Republic of Korea | 1995           | FemaleLactAge15to19 | 1672       |
| Democratic People's Republic of Korea | 1995           | FemaleLactAge20to24 | 76814      |
| Democratic People's Republic of Korea | 1995           | FemaleLactAge25to29 | 270185     |
| Democratic People's Republic of Korea | 1995           | FemaleLactAge30to34 | 74239      |
| Democratic People's Republic of Korea | 1995           | FemaleLactAge35to39 | 10880      |
| Democratic People's Republic of Korea | 1995           | FemaleLactAge40to44 | 1703       |
| Democratic People's Republic of Korea | 1995           | FemaleLactAge45to49 | 547        |
| Democratic People's Republic of Korea | 1995           | FemalePregAge15to19 | 1254       |
| Democratic People's Republic of Korea | 1995           | FemalePregAge20to24 | 57611      |
| Democratic People's Republic of Korea | 1995           | FemalePregAge25to29 | 202638     |
| Democratic People's Republic of Korea | 1995           | FemalePregAge30to34 | 55679      |
| Democratic People's Republic of Korea | 1995           | FemalePregAge35to39 | 8160       |
| Democratic People's Republic of Korea | 1995           | FemalePregAge40to44 | 1277       |
| Democratic People's Republic of Korea | 1995           | FemalePregAge45to49 | 410        |
| Democratic People's Republic of Korea | 1995           | MaleAge0to4         | 1061042    |
| Democratic People's Republic of Korea | 1995           | MaleAge10to14       | 963593     |
| Democratic People's Republic of Korea | 1995           | MaleAge15to19       | 796640     |
| Democratic People's Republic of Korea | 1995           | MaleAge20to24       | 1177816    |
| Democratic People's Republic of Korea | 1995           | MaleAge25to29       | 1176597    |
| Democratic People's Republic of Korea | 1995           | MaleAge30to34       | 830510     |
| Democratic People's Republic of Korea | 1995           | MaleAge35to39       | 876248     |
| Democratic People's Republic of Korea | 1995           | MaleAge40to44       | 433715     |



Dietary calcium and zinc deficiency risks are decreasing but remain prevalent

| Country                               | Reference year | Age/gender group    | Population |
|---------------------------------------|----------------|---------------------|------------|
| Democratic People's Republic of Korea | 1995           | MaleAge45to49       | 587145     |
| Democratic People's Republic of Korea | 1995           | MaleAge50to54       | 595482     |
| Democratic People's Republic of Korea | 1995           | MaleAge55to59       | 506536     |
| Democratic People's Republic of Korea | 1995           | MaleAge5to9         | 986180     |
| Democratic People's Republic of Korea | 1995           | MaleAge60to64       | 288760     |
| Democratic People's Republic of Korea | 1995           | MaleAge65to69       | 158962     |
| Democratic People's Republic of Korea | 1995           | MaleAge70to74       | 93160      |
| Democratic People's Republic of Korea | 1995           | MaleAge75to79       | 50281      |
| Democratic People's Republic of Korea | 1995           | MaleAge80to84       | 20012      |
| Democratic People's Republic of Korea | 1995           | MaleAge85to89       | 4249       |
| Democratic People's Republic of Korea | 1995           | MaleAge90to94       | 607        |
| Democratic People's Republic of Korea | 1995           | MaleAge95to99       | 52         |
| Democratic People's Republic of Korea | 1995           | MaleAgeAbove100     | 3          |
| Democratic People's Republic of Korea | 1996           | FemaleAge0to4       | 1035083    |
| Democratic People's Republic of Korea | 1996           | FemaleAge10to14     | 941350     |
| Democratic People's Republic of Korea | 1996           | FemaleAge15to19     | 753317     |
| Democratic People's Republic of Korea | 1996           | FemaleAge20to24     | 971302     |
| Democratic People's Republic of Korea | 1996           | FemaleAge25to29     | 715523     |
| Democratic People's Republic of Korea | 1996           | FemaleAge30to34     | 706429     |
| Democratic People's Republic of Korea | 1996           | FemaleAge35to39     | 874136     |
| Democratic People's Republic of Korea | 1996           | FemaleAge40to44     | 506599     |
| Democratic People's Republic of Korea | 1996           | FemaleAge45to49     | 589597     |
| Democratic People's Republic of Korea | 1996           | FemaleAge50to54     | 642539     |
| Democratic People's Republic of Korea | 1996           | FemaleAge55to59     | 594062     |
| Democratic People's Republic of Korea | 1996           | FemaleAge5to9       | 947607     |
| Democratic People's Republic of Korea | 1996           | FemaleAge60to64     | 447548     |
| Democratic People's Republic of Korea | 1996           | FemaleAge65to69     | 325170     |
| Democratic People's Republic of Korea | 1996           | FemaleAge70to74     | 231294     |
| Democratic People's Republic of Korea | 1996           | FemaleAge75to79     | 144756     |
| Democratic People's Republic of Korea | 1996           | FemaleAge80to84     | 74251      |
| Democratic People's Republic of Korea | 1996           | FemaleAge85to89     | 30667      |
| Democratic People's Republic of Korea | 1996           | FemaleAge90to94     | 8102       |
| Democratic People's Republic of Korea | 1996           | FemaleAge95to99     | 908        |
| Democratic People's Republic of Korea | 1996           | FemaleAgeAbove100   | 50         |
| Democratic People's Republic of Korea | 1996           | FemaleLactAge15to19 | 1049       |
| Democratic People's Republic of Korea | 1996           | FemaleLactAge20to24 | 56321      |
| Democratic People's Republic of Korea | 1996           | FemaleLactAge25to29 | 265133     |
| Democratic People's Republic of Korea | 1996           | FemaleLactAge30to34 | 86776      |
| Democratic People's Republic of Korea | 1996           | FemaleLactAge35to39 | 13400      |
| Democratic People's Republic of Korea | 1996           | FemaleLactAge40to44 | 1924       |
| Democratic People's Republic of Korea | 1996           | FemaleLactAge45to49 | 348        |
| Democratic People's Republic of Korea | 1996           | FemalePregAge15to19 | 786        |
| Democratic People's Republic of Korea | 1996           | FemalePregAge20to24 | 42241      |
| Democratic People's Republic of Korea | 1996           | FemalePregAge25to29 | 198850     |
| Democratic People's Republic of Korea | 1996           | FemalePregAge30to34 | 65082      |
| Democratic People's Republic of Korea | 1996           | FemalePregAge35to39 | 10050      |
| Democratic People's Republic of Korea | 1996           | FemalePregAge40to44 | 1443       |
| Democratic People's Republic of Korea | 1996           | FemalePregAge45to49 | 261        |
| Democratic People's Republic of Korea | 1996           | MaleAge0to4         | 1082396    |
| Democratic People's Republic of Korea | 1996           | MaleAge10to14       | 982835     |
| Democratic People's Republic of Korea | 1996           | MaleAge15to19       | 786920     |
| Democratic People's Republic of Korea | 1996           | MaleAge20to24       | 1108126    |
| Democratic People's Republic of Korea | 1996           | MaleAge25to29       | 1211000    |
| Democratic People's Republic of Korea | 1996           | MaleAge30to34       | 868258     |
| Democratic People's Republic of Korea | 1996           | MaleAge35to39       | 895741     |
| Democratic People's Republic of Korea | 1996           | MaleAge40to44       | 486045     |
| Democratic People's Republic of Korea | 1996           | MaleAge45to49       | 547305     |
| Democratic People's Republic of Korea | 1996           | MaleAge50to54       | 595942     |
| Democratic People's Republic of Korea | 1996           | MaleAge55to59       | 522943     |
| Democratic People's Republic of Korea | 1996           | MaleAge5to9         | 989806     |
| Democratic People's Republic of Korea | 1996           | MaleAge60to64       | 315048     |
| Democratic People's Republic of Korea | 1996           | MaleAge65to69       | 167168     |
| Democratic People's Republic of Korea | 1996           | MaleAge70to74       | 94597      |
| Democratic People's Republic of Korea | 1996           | MaleAge75to79       | 51014      |
| Democratic People's Republic of Korea | 1996           | MaleAge80to84       | 21386      |
| Democratic People's Republic of Korea | 1996           | MaleAge85to89       | 5245       |
| Democratic People's Republic of Korea | 1996           | MaleAge90to94       | 713        |
| Democratic People's Republic of Korea | 1996           | MaleAge95to99       | 72         |
| Democratic People's Republic of Korea | 1996           | MaleAgeAbove100     | 3          |
| Democratic People's Republic of Korea | 1997           | FemaleAge0to4       | 1031269    |
| Democratic People's Republic of Korea | 1997           | FemaleAge10to14     | 946679     |
| Democratic People's Republic of Korea | 1997           | FemaleAge15to19     | 781783     |
| Democratic People's Republic of Korea | 1997           | FemaleAge20to24     | 879974     |
| Democratic People's Republic of Korea | 1997           | FemaleAge25to29     | 732401     |
| Democratic People's Republic of Korea | 1997           | FemaleAge30to34     | 772981     |
| Democratic People's Republic of Korea | 1997           | FemaleAge35to39     | 852356     |
| Democratic People's Republic of Korea | 1997           | FemaleAge40to44     | 599692     |
| Democratic People's Republic of Korea | 1997           | FemaleAge45to49     | 532472     |
| Democratic People's Republic of Korea | 1997           | FemaleAge50to54     | 647475     |
| Democratic People's Republic of Korea | 1997           | FemaleAge55to59     | 602968     |
| Democratic People's Republic of Korea | 1997           | FemaleAge5to9       | 957889     |
| Democratic People's Republic of Korea | 1997           | FemaleAge60to64     | 472568     |
| Democratic People's Republic of Korea | 1997           | FemaleAge65to69     | 336766     |
| Democratic People's Republic of Korea | 1997           | FemaleAge70to74     | 239324     |
| Democratic People's Republic of Korea | 1997           | FemaleAge75to79     | 150198     |
| Democratic People's Republic of Korea | 1997           | FemaleAge80to84     | 76932      |
| Democratic People's Republic of Korea | 1997           | FemaleAge85to89     | 31497      |
| Democratic People's Republic of Korea | 1997           | FemaleAge90to94     | 9067       |

Dietary calcium and zinc deficiency risks are decreasing but remain prevalent

| Country                               | Reference year | Age/gender group    | Population |
|---------------------------------------|----------------|---------------------|------------|
| Democratic People's Republic of Korea | 1997           | FemaleAge95to99     | 1087       |
| Democratic People's Republic of Korea | 1997           | FemaleAgeAbov e100  | 54         |
| Democratic People's Republic of Korea | 1997           | FemaleLactAge15to19 | 1049       |
| Democratic People's Republic of Korea | 1997           | FemaleLactAge20to24 | 56321      |
| Democratic People's Republic of Korea | 1997           | FemaleLactAge25to29 | 265133     |
| Democratic People's Republic of Korea | 1997           | FemaleLactAge30to34 | 86776      |
| Democratic People's Republic of Korea | 1997           | FemaleLactAge35to39 | 13400      |
| Democratic People's Republic of Korea | 1997           | FemaleLactAge40to44 | 1924       |
| Democratic People's Republic of Korea | 1997           | FemaleLactAge45to49 | 348        |
| Democratic People's Republic of Korea | 1997           | FemalePregAge15to19 | 786        |
| Democratic People's Republic of Korea | 1997           | FemalePregAge20to24 | 42241      |
| Democratic People's Republic of Korea | 1997           | FemalePregAge25to29 | 198850     |
| Democratic People's Republic of Korea | 1997           | FemalePregAge30to34 | 65082      |
| Democratic People's Republic of Korea | 1997           | FemalePregAge35to39 | 10050      |
| Democratic People's Republic of Korea | 1997           | FemalePregAge40to44 | 1443       |
| Democratic People's Republic of Korea | 1997           | FemalePregAge45to49 | 261        |
| Democratic People's Republic of Korea | 1997           | MaleAge0to4         | 1079694    |
| Democratic People's Republic of Korea | 1997           | MaleAge10to14       | 987636     |
| Democratic People's Republic of Korea | 1997           | MaleAge15to19       | 816564     |
| Democratic People's Republic of Korea | 1997           | MaleAge20to24       | 1013290    |
| Democratic People's Republic of Korea | 1997           | MaleAge25to29       | 1228685    |
| Democratic People's Republic of Korea | 1997           | MaleAge30to34       | 937158     |
| Democratic People's Republic of Korea | 1997           | MaleAge35to39       | 873677     |
| Democratic People's Republic of Korea | 1997           | MaleAge40to44       | 582737     |
| Democratic People's Republic of Korea | 1997           | MaleAge45to49       | 491348     |
| Democratic People's Republic of Korea | 1997           | MaleAge50to54       | 598647     |
| Democratic People's Republic of Korea | 1997           | MaleAge55to59       | 533938     |
| Democratic People's Republic of Korea | 1997           | MaleAge5to9         | 999599     |
| Democratic People's Republic of Korea | 1997           | MaleAge60to64       | 346354     |
| Democratic People's Republic of Korea | 1997           | MaleAge65to69       | 175816     |
| Democratic People's Republic of Korea | 1997           | MaleAge70to74       | 96182      |
| Democratic People's Republic of Korea | 1997           | MaleAge75to79       | 51350      |
| Democratic People's Republic of Korea | 1997           | MaleAge80to84       | 22123      |
| Democratic People's Republic of Korea | 1997           | MaleAge85to89       | 6033       |
| Democratic People's Republic of Korea | 1997           | MaleAge90to94       | 786        |
| Democratic People's Republic of Korea | 1997           | MaleAge95to99       | 116        |
| Democratic People's Republic of Korea | 1997           | MaleAgeAbov e100    | 3          |
| Democratic People's Republic of Korea | 1998           | FemaleAge0to4       | 1008801    |
| Democratic People's Republic of Korea | 1998           | FemaleAge10to14     | 942562     |
| Democratic People's Republic of Korea | 1998           | FemaleAge15to19     | 833723     |
| Democratic People's Republic of Korea | 1998           | FemaleAge20to24     | 781868     |
| Democratic People's Republic of Korea | 1998           | FemaleAge25to29     | 730722     |
| Democratic People's Republic of Korea | 1998           | FemaleAge30to34     | 856015     |
| Democratic People's Republic of Korea | 1998           | FemaleAge35to39     | 810688     |
| Democratic People's Republic of Korea | 1998           | FemaleAge40to44     | 713543     |
| Democratic People's Republic of Korea | 1998           | FemaleAge45to49     | 475009     |
| Democratic People's Republic of Korea | 1998           | FemaleAge50to54     | 649927     |
| Democratic People's Republic of Korea | 1998           | FemaleAge55to59     | 609079     |
| Democratic People's Republic of Korea | 1998           | FemaleAge5to9       | 973696     |
| Democratic People's Republic of Korea | 1998           | FemaleAge60to64     | 498868     |
| Democratic People's Republic of Korea | 1998           | FemaleAge65to69     | 349619     |
| Democratic People's Republic of Korea | 1998           | FemaleAge70to74     | 248649     |
| Democratic People's Republic of Korea | 1998           | FemaleAge75to79     | 156530     |
| Democratic People's Republic of Korea | 1998           | FemaleAge80to84     | 79494      |
| Democratic People's Republic of Korea | 1998           | FemaleAge85to89     | 31658      |
| Democratic People's Republic of Korea | 1998           | FemaleAge90to94     | 9425       |
| Democratic People's Republic of Korea | 1998           | FemaleAge95to99     | 1282       |
| Democratic People's Republic of Korea | 1998           | FemaleAgeAbov e100  | 57         |
| Democratic People's Republic of Korea | 1998           | FemaleLactAge15to19 | 1049       |
| Democratic People's Republic of Korea | 1998           | FemaleLactAge20to24 | 56321      |
| Democratic People's Republic of Korea | 1998           | FemaleLactAge25to29 | 265133     |
| Democratic People's Republic of Korea | 1998           | FemaleLactAge30to34 | 86776      |
| Democratic People's Republic of Korea | 1998           | FemaleLactAge35to39 | 13400      |
| Democratic People's Republic of Korea | 1998           | FemaleLactAge40to44 | 1924       |
| Democratic People's Republic of Korea | 1998           | FemaleLactAge45to49 | 348        |
| Democratic People's Republic of Korea | 1998           | FemalePregAge15to19 | 786        |
| Democratic People's Republic of Korea | 1998           | FemalePregAge20to24 | 42241      |
| Democratic People's Republic of Korea | 1998           | FemalePregAge25to29 | 198850     |
| Democratic People's Republic of Korea | 1998           | FemalePregAge30to34 | 65082      |
| Democratic People's Republic of Korea | 1998           | FemalePregAge35to39 | 10050      |
| Democratic People's Republic of Korea | 1998           | FemalePregAge40to44 | 1443       |
| Democratic People's Republic of Korea | 1998           | FemalePregAge45to49 | 261        |
| Democratic People's Republic of Korea | 1998           | MaleAge0to4         | 1058141    |
| Democratic People's Republic of Korea | 1998           | MaleAge10to14       | 982338     |
| Democratic People's Republic of Korea | 1998           | MaleAge15to19       | 870382     |
| Democratic People's Republic of Korea | 1998           | MaleAge20to24       | 911611     |
| Democratic People's Republic of Korea | 1998           | MaleAge25to29       | 1227216    |
| Democratic People's Republic of Korea | 1998           | MaleAge30to34       | 1022649    |
| Democratic People's Republic of Korea | 1998           | MaleAge35to39       | 831463     |
| Democratic People's Republic of Korea | 1998           | MaleAge40to44       | 699611     |
| Democratic People's Republic of Korea | 1998           | MaleAge45to49       | 436186     |
| Democratic People's Republic of Korea | 1998           | MaleAge50to54       | 598678     |
| Democratic People's Republic of Korea | 1998           | MaleAge55to59       | 541626     |
| Democratic People's Republic of Korea | 1998           | MaleAge5to9         | 1015235    |
| Democratic People's Republic of Korea | 1998           | MaleAge60to64       | 379546     |
| Democratic People's Republic of Korea | 1998           | MaleAge65to69       | 186116     |
| Democratic People's Republic of Korea | 1998           | MaleAge70to74       | 98416      |
| Democratic People's Republic of Korea | 1998           | MaleAge75to79       | 51391      |

Dietary calcium and zinc deficiency risks are decreasing but remain prevalent

| Country                               | Reference year | Age/gender group    | Population |
|---------------------------------------|----------------|---------------------|------------|
| Democratic People's Republic of Korea | 1998           | MaleAge80to84       | 22080      |
| Democratic People's Republic of Korea | 1998           | MaleAge85to89       | 6423       |
| Democratic People's Republic of Korea | 1998           | MaleAge90to94       | 856        |
| Democratic People's Republic of Korea | 1998           | MaleAge95to99       | 146        |
| Democratic People's Republic of Korea | 1998           | MaleAgeAbov e100    | 3          |
| Democratic People's Republic of Korea | 1999           | FemaleAge0to4       | 983578     |
| Democratic People's Republic of Korea | 1999           | FemaleAge10to14     | 938198     |
| Democratic People's Republic of Korea | 1999           | FemaleAge15to19     | 883932     |
| Democratic People's Republic of Korea | 1999           | FemaleAge20to24     | 703140     |
| Democratic People's Republic of Korea | 1999           | FemaleAge25to29     | 707460     |
| Democratic People's Republic of Korea | 1999           | FemaleAge30to34     | 931129     |
| Democratic People's Republic of Korea | 1999           | FemaleAge35to39     | 782960     |
| Democratic People's Republic of Korea | 1999           | FemaleAge40to44     | 809581     |
| Democratic People's Republic of Korea | 1999           | FemaleAge45to49     | 443534     |
| Democratic People's Republic of Korea | 1999           | FemaleAge50to54     | 641083     |
| Democratic People's Republic of Korea | 1999           | FemaleAge55to59     | 614075     |
| Democratic People's Republic of Korea | 1999           | FemaleAge5to9       | 989898     |
| Democratic People's Republic of Korea | 1999           | FemaleAge60to64     | 522794     |
| Democratic People's Republic of Korea | 1999           | FemaleAge65to69     | 364954     |
| Democratic People's Republic of Korea | 1999           | FemaleAge70to74     | 259129     |
| Democratic People's Republic of Korea | 1999           | FemaleAge75to79     | 163599     |
| Democratic People's Republic of Korea | 1999           | FemaleAge80to84     | 82081      |
| Democratic People's Republic of Korea | 1999           | FemaleAge85to89     | 31361      |
| Democratic People's Republic of Korea | 1999           | FemaleAge90to94     | 8988       |
| Democratic People's Republic of Korea | 1999           | FemaleAge95to99     | 1352       |
| Democratic People's Republic of Korea | 1999           | FemaleAgeAbov e100  | 60         |
| Democratic People's Republic of Korea | 1999           | FemaleLactAge15to19 | 1049       |
| Democratic People's Republic of Korea | 1999           | FemaleLactAge20to24 | 56321      |
| Democratic People's Republic of Korea | 1999           | FemaleLactAge25to29 | 265133     |
| Democratic People's Republic of Korea | 1999           | FemaleLactAge30to34 | 86776      |
| Democratic People's Republic of Korea | 1999           | FemaleLactAge35to39 | 13400      |
| Democratic People's Republic of Korea | 1999           | FemaleLactAge40to44 | 1924       |
| Democratic People's Republic of Korea | 1999           | FemaleLactAge45to49 | 348        |
| Democratic People's Republic of Korea | 1999           | FemalePregAge15to19 | 786        |
| Democratic People's Republic of Korea | 1999           | FemalePregAge20to24 | 42241      |
| Democratic People's Republic of Korea | 1999           | FemalePregAge25to29 | 198850     |
| Democratic People's Republic of Korea | 1999           | FemalePregAge30to34 | 65082      |
| Democratic People's Republic of Korea | 1999           | FemalePregAge35to39 | 10050      |
| Democratic People's Republic of Korea | 1999           | FemalePregAge40to44 | 1443       |
| Democratic People's Republic of Korea | 1999           | FemalePregAge45to49 | 261        |
| Democratic People's Republic of Korea | 1999           | MaleAge0to4         | 1033431    |
| Democratic People's Republic of Korea | 1999           | MaleAge10to14       | 976773     |
| Democratic People's Republic of Korea | 1999           | MaleAge15to19       | 922266     |
| Democratic People's Republic of Korea | 1999           | MaleAge20to24       | 830435     |
| Democratic People's Republic of Korea | 1999           | MaleAge25to29       | 1203593    |
| Democratic People's Republic of Korea | 1999           | MaleAge30to34       | 1099949    |
| Democratic People's Republic of Korea | 1999           | MaleAge35to39       | 803906     |
| Democratic People's Republic of Korea | 1999           | MaleAge40to44       | 797754     |
| Democratic People's Republic of Korea | 1999           | MaleAge45to49       | 407706     |
| Democratic People's Republic of Korea | 1999           | MaleAge50to54       | 588270     |
| Democratic People's Republic of Korea | 1999           | MaleAge55to59       | 548192     |
| Democratic People's Republic of Korea | 1999           | MaleAge5to9         | 1031684    |
| Democratic People's Republic of Korea | 1999           | MaleAge60to64       | 409813     |
| Democratic People's Republic of Korea | 1999           | MaleAge65to69       | 200173     |
| Democratic People's Republic of Korea | 1999           | MaleAge70to74       | 101674     |
| Democratic People's Republic of Korea | 1999           | MaleAge75to79       | 51115      |
| Democratic People's Republic of Korea | 1999           | MaleAge80to84       | 21202      |
| Democratic People's Republic of Korea | 1999           | MaleAge85to89       | 6246       |
| Democratic People's Republic of Korea | 1999           | MaleAge90to94       | 885        |
| Democratic People's Republic of Korea | 1999           | MaleAge95to99       | 133        |
| Democratic People's Republic of Korea | 1999           | MaleAgeAbov e100    | 3          |
| Denmark                               | 1992           | FemaleAge0to4       | 154113     |
| Denmark                               | 1992           | FemaleAge10to14     | 143967     |
| Denmark                               | 1992           | FemaleAge15to19     | 169269     |
| Denmark                               | 1992           | FemaleAge20to24     | 168123     |
| Denmark                               | 1992           | FemaleAge25to29     | 149437     |
| Denmark                               | 1992           | FemaleAge30to34     | 154610     |
| Denmark                               | 1992           | FemaleAge35to39     | 167461     |
| Denmark                               | 1992           | FemaleAge40to44     | 192221     |
| Denmark                               | 1992           | FemaleAge45to49     | 190164     |
| Denmark                               | 1992           | FemaleAge50to54     | 154917     |
| Denmark                               | 1992           | FemaleAge55to59     | 130609     |
| Denmark                               | 1992           | FemaleAge5to9       | 131677     |
| Denmark                               | 1992           | FemaleAge60to64     | 124331     |
| Denmark                               | 1992           | FemaleAge65to69     | 126277     |
| Denmark                               | 1992           | FemaleAge70to74     | 114188     |
| Denmark                               | 1992           | FemaleAge75to79     | 96199      |
| Denmark                               | 1992           | FemaleAge80to84     | 73290      |
| Denmark                               | 1992           | FemaleAge85to89     | 41845      |
| Denmark                               | 1992           | FemaleAge90to94     | 16720      |
| Denmark                               | 1992           | FemaleAge95to99     | 3874       |
| Denmark                               | 1992           | FemaleAgeAbov e100  | 427        |
| Denmark                               | 1992           | FemaleLactAge15to19 | 1496       |
| Denmark                               | 1992           | FemaleLactAge20to24 | 12483      |
| Denmark                               | 1992           | FemaleLactAge25to29 | 26979      |
| Denmark                               | 1992           | FemaleLactAge30to34 | 18591      |
| Denmark                               | 1992           | FemaleLactAge35to39 | 5981       |
| Denmark                               | 1992           | FemaleLactAge40to44 | 894        |

Dietary calcium and zinc deficiency risks are decreasing but remain prevalent

| Country | Reference year | Age/gender group    | Population |
|---------|----------------|---------------------|------------|
| Denmark | 1992           | FemaleLactAge45to49 | 28         |
| Denmark | 1992           | FemalePregAge15to19 | 1122       |
| Denmark | 1992           | FemalePregAge20to24 | 9363       |
| Denmark | 1992           | FemalePregAge25to29 | 20234      |
| Denmark | 1992           | FemalePregAge30to34 | 13943      |
| Denmark | 1992           | FemalePregAge35to39 | 4486       |
| Denmark | 1992           | FemalePregAge40to44 | 671        |
| Denmark | 1992           | FemalePregAge45to49 | 21         |
| Denmark | 1992           | MaleAge0to4         | 164147     |
| Denmark | 1992           | MaleAge10to14       | 150515     |
| Denmark | 1992           | MaleAge15to19       | 179167     |
| Denmark | 1992           | MaleAge20to24       | 200021     |
| Denmark | 1992           | MaleAge25to29       | 208455     |
| Denmark | 1992           | MaleAge30to34       | 197412     |
| Denmark | 1992           | MaleAge35to39       | 186641     |
| Denmark | 1992           | MaleAge40to44       | 201076     |
| Denmark | 1992           | MaleAge45to49       | 196276     |
| Denmark | 1992           | MaleAge50to54       | 156680     |
| Denmark | 1992           | MaleAge55to59       | 126659     |
| Denmark | 1992           | MaleAge5to9         | 136955     |
| Denmark | 1992           | MaleAge60to64       | 115068     |
| Denmark | 1992           | MaleAge65to69       | 108498     |
| Denmark | 1992           | MaleAge70to74       | 89852      |
| Denmark | 1992           | MaleAge75to79       | 66278      |
| Denmark | 1992           | MaleAge80to84       | 41386      |
| Denmark | 1992           | MaleAge85to89       | 18761      |
| Denmark | 1992           | MaleAge90to94       | 6121       |
| Denmark | 1992           | MaleAge95to99       | 1207       |
| Denmark | 1992           | MaleAgeAbov e100    | 117        |
| Denmark | 1993           | FemaleAge0to4       | 158558     |
| Denmark | 1993           | FemaleAge10to14     | 139308     |
| Denmark | 1993           | FemaleAge15to19     | 164604     |
| Denmark | 1993           | FemaleAge20to24     | 166939     |
| Denmark | 1993           | FemaleAge25to29     | 149383     |
| Denmark | 1993           | FemaleAge30to34     | 158496     |
| Denmark | 1993           | FemaleAge35to39     | 168291     |
| Denmark | 1993           | FemaleAge40to44     | 187120     |
| Denmark | 1993           | FemaleAge45to49     | 194759     |
| Denmark | 1993           | FemaleAge50to54     | 162239     |
| Denmark | 1993           | FemaleAge55to59     | 132279     |
| Denmark | 1993           | FemaleAge5to9       | 134908     |
| Denmark | 1993           | FemaleAge60to64     | 123622     |
| Denmark | 1993           | FemaleAge65to69     | 123462     |
| Denmark | 1993           | FemaleAge70to74     | 115642     |
| Denmark | 1993           | FemaleAge75to79     | 94908      |
| Denmark | 1993           | FemaleAge80to84     | 73544      |
| Denmark | 1993           | FemaleAge85to89     | 42868      |
| Denmark | 1993           | FemaleAge90to94     | 17160      |
| Denmark | 1993           | FemaleAge95to99     | 4228       |
| Denmark | 1993           | FemaleAgeAbov e100  | 454        |
| Denmark | 1993           | FemaleLactAge15to19 | 1496       |
| Denmark | 1993           | FemaleLactAge20to24 | 12483      |
| Denmark | 1993           | FemaleLactAge25to29 | 26979      |
| Denmark | 1993           | FemaleLactAge30to34 | 18591      |
| Denmark | 1993           | FemaleLactAge35to39 | 5981       |
| Denmark | 1993           | FemaleLactAge40to44 | 894        |
| Denmark | 1993           | FemaleLactAge45to49 | 28         |
| Denmark | 1993           | FemalePregAge15to19 | 1122       |
| Denmark | 1993           | FemalePregAge20to24 | 9363       |
| Denmark | 1993           | FemalePregAge25to29 | 20234      |
| Denmark | 1993           | FemalePregAge30to34 | 13943      |
| Denmark | 1993           | FemalePregAge35to39 | 4486       |
| Denmark | 1993           | FemalePregAge40to44 | 671        |
| Denmark | 1993           | FemalePregAge45to49 | 21         |
| Denmark | 1993           | MaleAge0to4         | 168004     |
| Denmark | 1993           | MaleAge10to14       | 145104     |
| Denmark | 1993           | MaleAge15to19       | 174757     |
| Denmark | 1993           | MaleAge20to24       | 197482     |
| Denmark | 1993           | MaleAge25to29       | 208584     |
| Denmark | 1993           | MaleAge30to34       | 201422     |
| Denmark | 1993           | MaleAge35to39       | 187515     |
| Denmark | 1993           | MaleAge40to44       | 196066     |
| Denmark | 1993           | MaleAge45to49       | 200846     |
| Denmark | 1993           | MaleAge50to54       | 164928     |
| Denmark | 1993           | MaleAge55to59       | 128915     |
| Denmark | 1993           | MaleAge5to9         | 141206     |
| Denmark | 1993           | MaleAge60to64       | 114776     |
| Denmark | 1993           | MaleAge65to69       | 106751     |
| Denmark | 1993           | MaleAge70to74       | 90909      |
| Denmark | 1993           | MaleAge75to79       | 65516      |
| Denmark | 1993           | MaleAge80to84       | 41945      |
| Denmark | 1993           | MaleAge85to89       | 19166      |
| Denmark | 1993           | MaleAge90to94       | 6229       |
| Denmark | 1993           | MaleAge95to99       | 1325       |
| Denmark | 1993           | MaleAgeAbov e100    | 120        |
| Denmark | 1994           | FemaleAge0to4       | 162102     |
| Denmark | 1994           | FemaleAge10to14     | 135709     |
| Denmark | 1994           | FemaleAge15to19     | 159472     |

Dietary calcium and zinc deficiency risks are decreasing but remain prevalent

| Country | Reference year | Age/gender group    | Population |
|---------|----------------|---------------------|------------|
| Denmark | 1994           | FemaleAge20to24     | 165143     |
| Denmark | 1994           | FemaleAge25to29     | 149028     |
| Denmark | 1994           | FemaleAge30to34     | 161964     |
| Denmark | 1994           | FemaleAge35to39     | 170034     |
| Denmark | 1994           | FemaleAge40to44     | 182500     |
| Denmark | 1994           | FemaleAge45to49     | 197607     |
| Denmark | 1994           | FemaleAge50to54     | 169537     |
| Denmark | 1994           | FemaleAge55to59     | 135171     |
| Denmark | 1994           | FemaleAge5to9       | 139511     |
| Denmark | 1994           | FemaleAge60to64     | 123444     |
| Denmark | 1994           | FemaleAge65to69     | 120937     |
| Denmark | 1994           | FemaleAge70to74     | 116623     |
| Denmark | 1994           | FemaleAge75to79     | 94327      |
| Denmark | 1994           | FemaleAge80to84     | 73750      |
| Denmark | 1994           | FemaleAge85to89     | 43519      |
| Denmark | 1994           | FemaleAge90to94     | 17235      |
| Denmark | 1994           | FemaleAge95to99     | 4366       |
| Denmark | 1994           | FemaleAgeAbove100   | 483        |
| Denmark | 1994           | FemaleLactAge15to19 | 1496       |
| Denmark | 1994           | FemaleLactAge20to24 | 12483      |
| Denmark | 1994           | FemaleLactAge25to29 | 26979      |
| Denmark | 1994           | FemaleLactAge30to34 | 18591      |
| Denmark | 1994           | FemaleLactAge35to39 | 5981       |
| Denmark | 1994           | FemaleLactAge40to44 | 894        |
| Denmark | 1994           | FemaleLactAge45to49 | 28         |
| Denmark | 1994           | FemalePregAge15to19 | 1122       |
| Denmark | 1994           | FemalePregAge20to24 | 9363       |
| Denmark | 1994           | FemalePregAge25to29 | 20234      |
| Denmark | 1994           | FemalePregAge30to34 | 13943      |
| Denmark | 1994           | FemalePregAge35to39 | 4486       |
| Denmark | 1994           | FemalePregAge40to44 | 671        |
| Denmark | 1994           | FemalePregAge45to49 | 21         |
| Denmark | 1994           | MaleAge0to4         | 170883     |
| Denmark | 1994           | MaleAge10to14       | 140893     |
| Denmark | 1994           | MaleAge15to19       | 169941     |
| Denmark | 1994           | MaleAge20to24       | 194380     |
| Denmark | 1994           | MaleAge25to29       | 208213     |
| Denmark | 1994           | MaleAge30to34       | 205065     |
| Denmark | 1994           | MaleAge35to39       | 189294     |
| Denmark | 1994           | MaleAge40to44       | 191553     |
| Denmark | 1994           | MaleAge45to49       | 203649     |
| Denmark | 1994           | MaleAge50to54       | 173019     |
| Denmark | 1994           | MaleAge55to59       | 132512     |
| Denmark | 1994           | MaleAge5to9         | 147037     |
| Denmark | 1994           | MaleAge60to64       | 115052     |
| Denmark | 1994           | MaleAge65to69       | 105347     |
| Denmark | 1994           | MaleAge70to74       | 91685      |
| Denmark | 1994           | MaleAge75to79       | 65185      |
| Denmark | 1994           | MaleAge80to84       | 42092      |
| Denmark | 1994           | MaleAge85to89       | 19219      |
| Denmark | 1994           | MaleAge90to94       | 6095       |
| Denmark | 1994           | MaleAge95to99       | 1329       |
| Denmark | 1994           | MaleAgeAbove100     | 123        |
| Denmark | 1995           | FemaleAge0to4       | 164975     |
| Denmark | 1995           | FemaleAge10to14     | 133874     |
| Denmark | 1995           | FemaleAge15to19     | 154162     |
| Denmark | 1995           | FemaleAge20to24     | 162449     |
| Denmark | 1995           | FemaleAge25to29     | 148612     |
| Denmark | 1995           | FemaleAge30to34     | 164582     |
| Denmark | 1995           | FemaleAge35to39     | 172356     |
| Denmark | 1995           | FemaleAge40to44     | 179432     |
| Denmark | 1995           | FemaleAge45to49     | 198291     |
| Denmark | 1995           | FemaleAge50to54     | 176260     |
| Denmark | 1995           | FemaleAge55to59     | 139483     |
| Denmark | 1995           | FemaleAge5to9       | 144299     |
| Denmark | 1995           | FemaleAge60to64     | 123762     |
| Denmark | 1995           | FemaleAge65to69     | 119079     |
| Denmark | 1995           | FemaleAge70to74     | 116681     |
| Denmark | 1995           | FemaleAge75to79     | 94701      |
| Denmark | 1995           | FemaleAge80to84     | 73863      |
| Denmark | 1995           | FemaleAge85to89     | 43899      |
| Denmark | 1995           | FemaleAge90to94     | 17056      |
| Denmark | 1995           | FemaleAge95to99     | 4059       |
| Denmark | 1995           | FemaleAgeAbove100   | 514        |
| Denmark | 1995           | FemaleLactAge15to19 | 1496       |
| Denmark | 1995           | FemaleLactAge20to24 | 12483      |
| Denmark | 1995           | FemaleLactAge25to29 | 26979      |
| Denmark | 1995           | FemaleLactAge30to34 | 18591      |
| Denmark | 1995           | FemaleLactAge35to39 | 5981       |
| Denmark | 1995           | FemaleLactAge40to44 | 894        |
| Denmark | 1995           | FemaleLactAge45to49 | 28         |
| Denmark | 1995           | FemalePregAge15to19 | 1122       |
| Denmark | 1995           | FemalePregAge20to24 | 9363       |
| Denmark | 1995           | FemalePregAge25to29 | 20234      |
| Denmark | 1995           | FemalePregAge30to34 | 13943      |
| Denmark | 1995           | FemalePregAge35to39 | 4486       |
| Denmark | 1995           | FemalePregAge40to44 | 671        |
| Denmark | 1995           | FemalePregAge45to49 | 21         |

Dietary calcium and zinc deficiency risks are decreasing but remain prevalent

| Country | Reference year | Age/gender group    | Population |
|---------|----------------|---------------------|------------|
| Denmark | 1995           | MaleAge0to4         | 173507     |
| Denmark | 1995           | MaleAge10to14       | 138904     |
| Denmark | 1995           | MaleAge15to19       | 164685     |
| Denmark | 1995           | MaleAge20to24       | 190743     |
| Denmark | 1995           | MaleAge25to29       | 207381     |
| Denmark | 1995           | MaleAge30to34       | 207882     |
| Denmark | 1995           | MaleAge35to39       | 191652     |
| Denmark | 1995           | MaleAge40to44       | 188548     |
| Denmark | 1995           | MaleAge45to49       | 204325     |
| Denmark | 1995           | MaleAge50to54       | 180297     |
| Denmark | 1995           | MaleAge55to59       | 137623     |
| Denmark | 1995           | MaleAge5to9         | 152792     |
| Denmark | 1995           | MaleAge60to64       | 115928     |
| Denmark | 1995           | MaleAge65to69       | 104482     |
| Denmark | 1995           | MaleAge70to74       | 91927      |
| Denmark | 1995           | MaleAge75to79       | 65467      |
| Denmark | 1995           | MaleAge80to84       | 41854      |
| Denmark | 1995           | MaleAge85to89       | 18985      |
| Denmark | 1995           | MaleAge90to94       | 5693       |
| Denmark | 1995           | MaleAge95to99       | 1099       |
| Denmark | 1995           | MaleAgeAbov e100    | 126        |
| Denmark | 1996           | FemaleAge0to4       | 167797     |
| Denmark | 1996           | FemaleAge10to14     | 133973     |
| Denmark | 1996           | FemaleAge15to19     | 150180     |
| Denmark | 1996           | FemaleAge20to24     | 163983     |
| Denmark | 1996           | FemaleAge25to29     | 150871     |
| Denmark | 1996           | FemaleAge30to34     | 160860     |
| Denmark | 1996           | FemaleAge35to39     | 172022     |
| Denmark | 1996           | FemaleAge40to44     | 177226     |
| Denmark | 1996           | FemaleAge45to49     | 196614     |
| Denmark | 1996           | FemaleAge50to54     | 182160     |
| Denmark | 1996           | FemaleAge55to59     | 144731     |
| Denmark | 1996           | FemaleAge5to9       | 148974     |
| Denmark | 1996           | FemaleAge60to64     | 124098     |
| Denmark | 1996           | FemaleAge65to69     | 117046     |
| Denmark | 1996           | FemaleAge70to74     | 115034     |
| Denmark | 1996           | FemaleAge75to79     | 95010      |
| Denmark | 1996           | FemaleAge80to84     | 73102      |
| Denmark | 1996           | FemaleAge85to89     | 44900      |
| Denmark | 1996           | FemaleAge90to94     | 18575      |
| Denmark | 1996           | FemaleAge95to99     | 4339       |
| Denmark | 1996           | FemaleAgeAbov e100  | 548        |
| Denmark | 1996           | FemaleLactAge15to19 | 1177       |
| Denmark | 1996           | FemaleLactAge20to24 | 9680       |
| Denmark | 1996           | FemaleLactAge25to29 | 25273      |
| Denmark | 1996           | FemaleLactAge30to34 | 21724      |
| Denmark | 1996           | FemaleLactAge35to39 | 7771       |
| Denmark | 1996           | FemaleLactAge40to44 | 1070       |
| Denmark | 1996           | FemaleLactAge45to49 | 40         |
| Denmark | 1996           | FemalePregAge15to19 | 883        |
| Denmark | 1996           | FemalePregAge20to24 | 7260       |
| Denmark | 1996           | FemalePregAge25to29 | 18955      |
| Denmark | 1996           | FemalePregAge30to34 | 16293      |
| Denmark | 1996           | FemalePregAge35to39 | 5828       |
| Denmark | 1996           | FemalePregAge40to44 | 802        |
| Denmark | 1996           | FemalePregAge45to49 | 30         |
| Denmark | 1996           | MaleAge0to4         | 175680     |
| Denmark | 1996           | MaleAge10to14       | 139274     |
| Denmark | 1996           | MaleAge15to19       | 159303     |
| Denmark | 1996           | MaleAge20to24       | 186784     |
| Denmark | 1996           | MaleAge25to29       | 205666     |
| Denmark | 1996           | MaleAge30to34       | 209692     |
| Denmark | 1996           | MaleAge35to39       | 194528     |
| Denmark | 1996           | MaleAge40to44       | 186611     |
| Denmark | 1996           | MaleAge45to49       | 202601     |
| Denmark | 1996           | MaleAge50to54       | 186416     |
| Denmark | 1996           | MaleAge55to59       | 143605     |
| Denmark | 1996           | MaleAge5to9         | 158069     |
| Denmark | 1996           | MaleAge60to64       | 116814     |
| Denmark | 1996           | MaleAge65to69       | 103333     |
| Denmark | 1996           | MaleAge70to74       | 91101      |
| Denmark | 1996           | MaleAge75to79       | 66152      |
| Denmark | 1996           | MaleAge80to84       | 42110      |
| Denmark | 1996           | MaleAge85to89       | 20101      |
| Denmark | 1996           | MaleAge90to94       | 6414       |
| Denmark | 1996           | MaleAge95to99       | 1171       |
| Denmark | 1996           | MaleAgeAbov e100    | 129        |
| Denmark | 1997           | FemaleAge0to4       | 168360     |
| Denmark | 1997           | FemaleAge10to14     | 135763     |
| Denmark | 1997           | FemaleAge15to19     | 145476     |
| Denmark | 1997           | FemaleAge20to24     | 160166     |
| Denmark | 1997           | FemaleAge25to29     | 150180     |
| Denmark | 1997           | FemaleAge30to34     | 161713     |
| Denmark | 1997           | FemaleAge35to39     | 175715     |
| Denmark | 1997           | FemaleAge40to44     | 176872     |
| Denmark | 1997           | FemaleAge45to49     | 192821     |
| Denmark | 1997           | FemaleAge50to54     | 187744     |
| Denmark | 1997           | FemaleAge55to59     | 151270     |

Dietary calcium and zinc deficiency risks are decreasing but remain prevalent

| Country | Reference year | Age/gender group    | Population |
|---------|----------------|---------------------|------------|
| Denmark | 1997           | FemaleAge5to9       | 154017     |
| Denmark | 1997           | FemaleAge6to64      | 125050     |
| Denmark | 1997           | FemaleAge65to69     | 115735     |
| Denmark | 1997           | FemaleAge70to74     | 112766     |
| Denmark | 1997           | FemaleAge75to79     | 96094      |
| Denmark | 1997           | FemaleAge80to84     | 72127      |
| Denmark | 1997           | FemaleAge85to89     | 45537      |
| Denmark | 1997           | FemaleAge90to94     | 19703      |
| Denmark | 1997           | FemaleAge95to99     | 4718       |
| Denmark | 1997           | FemaleAgeAbove100   | 584        |
| Denmark | 1997           | FemaleLactAge15to19 | 1177       |
| Denmark | 1997           | FemaleLactAge20to24 | 9680       |
| Denmark | 1997           | FemaleLactAge25to29 | 25273      |
| Denmark | 1997           | FemaleLactAge30to34 | 21724      |
| Denmark | 1997           | FemaleLactAge35to39 | 7771       |
| Denmark | 1997           | FemaleLactAge40to44 | 1070       |
| Denmark | 1997           | FemaleLactAge45to49 | 40         |
| Denmark | 1997           | FemalePregAge15to19 | 883        |
| Denmark | 1997           | FemalePregAge20to24 | 7260       |
| Denmark | 1997           | FemalePregAge25to29 | 18955      |
| Denmark | 1997           | FemalePregAge30to34 | 16293      |
| Denmark | 1997           | FemalePregAge35to39 | 5828       |
| Denmark | 1997           | FemalePregAge40to44 | 802        |
| Denmark | 1997           | FemalePregAge45to49 | 30         |
| Denmark | 1997           | MaleAge0to4         | 176301     |
| Denmark | 1997           | MaleAge10to14       | 141813     |
| Denmark | 1997           | MaleAge15to19       | 153546     |
| Denmark | 1997           | MaleAge20to24       | 182764     |
| Denmark | 1997           | MaleAge25to29       | 203481     |
| Denmark | 1997           | MaleAge30to34       | 210676     |
| Denmark | 1997           | MaleAge35to39       | 198251     |
| Denmark | 1997           | MaleAge40to44       | 186206     |
| Denmark | 1997           | MaleAge45to49       | 198778     |
| Denmark | 1997           | MaleAge50to54       | 192009     |
| Denmark | 1997           | MaleAge55to59       | 150940     |
| Denmark | 1997           | MaleAge5to9         | 163372     |
| Denmark | 1997           | MaleAge60to64       | 118333     |
| Denmark | 1997           | MaleAge65to69       | 102692     |
| Denmark | 1997           | MaleAge70to74       | 89978      |
| Denmark | 1997           | MaleAge75to79       | 67139      |
| Denmark | 1997           | MaleAge80to84       | 41974      |
| Denmark | 1997           | MaleAge85to89       | 20906      |
| Denmark | 1997           | MaleAge90to94       | 6903       |
| Denmark | 1997           | MaleAge95to99       | 1291       |
| Denmark | 1997           | MaleAgeAbove100     | 133        |
| Denmark | 1998           | FemaleAge0to4       | 167438     |
| Denmark | 1998           | FemaleAge10to14     | 138941     |
| Denmark | 1998           | FemaleAge15to19     | 140945     |
| Denmark | 1998           | FemaleAge20to24     | 155995     |
| Denmark | 1998           | FemaleAge25to29     | 149282     |
| Denmark | 1998           | FemaleAge30to34     | 161767     |
| Denmark | 1998           | FemaleAge35to39     | 179770     |
| Denmark | 1998           | FemaleAge40to44     | 177829     |
| Denmark | 1998           | FemaleAge45to49     | 187862     |
| Denmark | 1998           | FemaleAge50to54     | 192397     |
| Denmark | 1998           | FemaleAge55to59     | 158523     |
| Denmark | 1998           | FemaleAge5to9       | 159126     |
| Denmark | 1998           | FemaleAge60to64     | 126847     |
| Denmark | 1998           | FemaleAge65to69     | 115068     |
| Denmark | 1998           | FemaleAge70to74     | 110251     |
| Denmark | 1998           | FemaleAge75to79     | 97366      |
| Denmark | 1998           | FemaleAge80to84     | 71411      |
| Denmark | 1998           | FemaleAge85to89     | 45827      |
| Denmark | 1998           | FemaleAge90to94     | 20291      |
| Denmark | 1998           | FemaleAge95to99     | 5083       |
| Denmark | 1998           | FemaleAgeAbove100   | 621        |
| Denmark | 1998           | FemaleLactAge15to19 | 1177       |
| Denmark | 1998           | FemaleLactAge20to24 | 9680       |
| Denmark | 1998           | FemaleLactAge25to29 | 25273      |
| Denmark | 1998           | FemaleLactAge30to34 | 21724      |
| Denmark | 1998           | FemaleLactAge35to39 | 7771       |
| Denmark | 1998           | FemaleLactAge40to44 | 1070       |
| Denmark | 1998           | FemaleLactAge45to49 | 40         |
| Denmark | 1998           | FemalePregAge15to19 | 883        |
| Denmark | 1998           | FemalePregAge20to24 | 7260       |
| Denmark | 1998           | FemalePregAge25to29 | 18955      |
| Denmark | 1998           | FemalePregAge30to34 | 16293      |
| Denmark | 1998           | FemalePregAge35to39 | 5828       |
| Denmark | 1998           | FemalePregAge40to44 | 802        |
| Denmark | 1998           | FemalePregAge45to49 | 30         |
| Denmark | 1998           | MaleAge0to4         | 175926     |
| Denmark | 1998           | MaleAge10to14       | 146004     |
| Denmark | 1998           | MaleAge15to19       | 148088     |
| Denmark | 1998           | MaleAge20to24       | 178532     |
| Denmark | 1998           | MaleAge25to29       | 200816     |
| Denmark | 1998           | MaleAge30to34       | 210845     |
| Denmark | 1998           | MaleAge35to39       | 202271     |
| Denmark | 1998           | MaleAge40to44       | 187125     |

Dietary calcium and zinc deficiency risks are decreasing but remain prevalent

| Country            | Reference year | Age/gender group    | Population |
|--------------------|----------------|---------------------|------------|
| Denmark            | 1998           | MaleAge45to49       | 193816     |
| Denmark            | 1998           | MaleAge50to54       | 196538     |
| Denmark            | 1998           | MaleAge55to59       | 158970     |
| Denmark            | 1998           | MaleAge5to9         | 168392     |
| Denmark            | 1998           | MaleAge60to64       | 120736     |
| Denmark            | 1998           | MaleAge65to69       | 102558     |
| Denmark            | 1998           | MaleAge70to74       | 88841      |
| Denmark            | 1998           | MaleAge75to79       | 68131      |
| Denmark            | 1998           | MaleAge80to84       | 41752      |
| Denmark            | 1998           | MaleAge85to89       | 21267      |
| Denmark            | 1998           | MaleAge90to94       | 7101       |
| Denmark            | 1998           | MaleAge95to99       | 1409       |
| Denmark            | 1998           | MaleAgeAbov e100    | 136        |
| Denmark            | 1999           | FemaleAge0to4       | 165997     |
| Denmark            | 1999           | FemaleAge10to14     | 142912     |
| Denmark            | 1999           | FemaleAge15to19     | 137333     |
| Denmark            | 1999           | FemaleAge20to24     | 151532     |
| Denmark            | 1999           | FemaleAge25to29     | 147760     |
| Denmark            | 1999           | FemaleAge30to34     | 161390     |
| Denmark            | 1999           | FemaleAge35to39     | 183395     |
| Denmark            | 1999           | FemaleAge40to44     | 179621     |
| Denmark            | 1999           | FemaleAge45to49     | 183313     |
| Denmark            | 1999           | FemaleAge50to54     | 195259     |
| Denmark            | 1999           | FemaleAge55to59     | 165686     |
| Denmark            | 1999           | FemaleAge5to9       | 163862     |
| Denmark            | 1999           | FemaleAge60to64     | 129829     |
| Denmark            | 1999           | FemaleAge65to69     | 114934     |
| Denmark            | 1999           | FemaleAge70to74     | 108014     |
| Denmark            | 1999           | FemaleAge75to79     | 98115      |
| Denmark            | 1999           | FemaleAge80to84     | 71363      |
| Denmark            | 1999           | FemaleAge85to89     | 45760      |
| Denmark            | 1999           | FemaleAge90to94     | 20298      |
| Denmark            | 1999           | FemaleAge95to99     | 5269       |
| Denmark            | 1999           | FemaleAgeAbov e100  | 660        |
| Denmark            | 1999           | FemaleLactAge15to19 | 1177       |
| Denmark            | 1999           | FemaleLactAge20to24 | 9680       |
| Denmark            | 1999           | FemaleLactAge25to29 | 25273      |
| Denmark            | 1999           | FemaleLactAge30to34 | 21724      |
| Denmark            | 1999           | FemaleLactAge35to39 | 7771       |
| Denmark            | 1999           | FemaleLactAge40to44 | 1070       |
| Denmark            | 1999           | FemaleLactAge45to49 | 40         |
| Denmark            | 1999           | FemalePregAge15to19 | 883        |
| Denmark            | 1999           | FemalePregAge20to24 | 7260       |
| Denmark            | 1999           | FemalePregAge25to29 | 18955      |
| Denmark            | 1999           | FemalePregAge30to34 | 16293      |
| Denmark            | 1999           | FemalePregAge35to39 | 5828       |
| Denmark            | 1999           | FemalePregAge40to44 | 802        |
| Denmark            | 1999           | FemalePregAge45to49 | 30         |
| Denmark            | 1999           | MaleAge0to4         | 174996     |
| Denmark            | 1999           | MaleAge10to14       | 150936     |
| Denmark            | 1999           | MaleAge15to19       | 144039     |
| Denmark            | 1999           | MaleAge20to24       | 173853     |
| Denmark            | 1999           | MaleAge25to29       | 197669     |
| Denmark            | 1999           | MaleAge30to34       | 210338     |
| Denmark            | 1999           | MaleAge35to39       | 205852     |
| Denmark            | 1999           | MaleAge40to44       | 188912     |
| Denmark            | 1999           | MaleAge45to49       | 189281     |
| Denmark            | 1999           | MaleAge50to54       | 199274     |
| Denmark            | 1999           | MaleAge55to59       | 166785     |
| Denmark            | 1999           | MaleAge5to9         | 172856     |
| Denmark            | 1999           | MaleAge60to64       | 124398     |
| Denmark            | 1999           | MaleAge65to69       | 102968     |
| Denmark            | 1999           | MaleAge70to74       | 87989      |
| Denmark            | 1999           | MaleAge75to79       | 68762      |
| Denmark            | 1999           | MaleAge80to84       | 41720      |
| Denmark            | 1999           | MaleAge85to89       | 21123      |
| Denmark            | 1999           | MaleAge90to94       | 6987       |
| Denmark            | 1999           | MaleAge95to99       | 1444       |
| Denmark            | 1999           | MaleAgeAbov e100    | 140        |
| Dominican Republic | 1992           | FemaleAge0to4       | 497513     |
| Dominican Republic | 1992           | FemaleAge10to14     | 435406     |
| Dominican Republic | 1992           | FemaleAge15to19     | 318978     |
| Dominican Republic | 1992           | FemaleAge20to24     | 239005     |
| Dominican Republic | 1992           | FemaleAge25to29     | 231685     |
| Dominican Republic | 1992           | FemaleAge30to34     | 220960     |
| Dominican Republic | 1992           | FemaleAge35to39     | 201179     |
| Dominican Republic | 1992           | FemaleAge40to44     | 162031     |
| Dominican Republic | 1992           | FemaleAge45to49     | 126075     |
| Dominican Republic | 1992           | FemaleAge50to54     | 112085     |
| Dominican Republic | 1992           | FemaleAge55to59     | 101096     |
| Dominican Republic | 1992           | FemaleAge5to9       | 473749     |
| Dominican Republic | 1992           | FemaleAge60to64     | 81329      |
| Dominican Republic | 1992           | FemaleAge65to69     | 60181      |
| Dominican Republic | 1992           | FemaleAge70to74     | 41619      |
| Dominican Republic | 1992           | FemaleAge75to79     | 26569      |
| Dominican Republic | 1992           | FemaleAge80to84     | 15156      |
| Dominican Republic | 1992           | FemaleAge85to89     | 7047       |
| Dominican Republic | 1992           | FemaleAge90to94     | 2300       |



Dietary calcium and zinc deficiency risks are decreasing but remain prevalent

| Country            | Reference year | Age/gender group    | Population |
|--------------------|----------------|---------------------|------------|
| Dominican Republic | 1992           | FemaleAge95to99     | 435        |
| Dominican Republic | 1992           | FemaleAgeAbov e100  | 53         |
| Dominican Republic | 1992           | FemaleLactAge15to19 | 46060      |
| Dominican Republic | 1992           | FemaleLactAge20to24 | 72196      |
| Dominican Republic | 1992           | FemaleLactAge25to29 | 53397      |
| Dominican Republic | 1992           | FemaleLactAge30to34 | 31554      |
| Dominican Republic | 1992           | FemaleLactAge35to39 | 11419      |
| Dominican Republic | 1992           | FemaleLactAge40to44 | 3148       |
| Dominican Republic | 1992           | FemaleLactAge45to49 | 611        |
| Dominican Republic | 1992           | FemalePregAge15to19 | 34545      |
| Dominican Republic | 1992           | FemalePregAge20to24 | 54147      |
| Dominican Republic | 1992           | FemalePregAge25to29 | 40048      |
| Dominican Republic | 1992           | FemalePregAge30to34 | 23666      |
| Dominican Republic | 1992           | FemalePregAge35to39 | 8564       |
| Dominican Republic | 1992           | FemalePregAge40to44 | 2361       |
| Dominican Republic | 1992           | FemalePregAge45to49 | 458        |
| Dominican Republic | 1992           | MaleAge0to4         | 515324     |
| Dominican Republic | 1992           | MaleAge10to14       | 443435     |
| Dominican Republic | 1992           | MaleAge15to19       | 399312     |
| Dominican Republic | 1992           | MaleAge20to24       | 360441     |
| Dominican Republic | 1992           | MaleAge25to29       | 318831     |
| Dominican Republic | 1992           | MaleAge30to34       | 272791     |
| Dominican Republic | 1992           | MaleAge35to39       | 222747     |
| Dominican Republic | 1992           | MaleAge40to44       | 172406     |
| Dominican Republic | 1992           | MaleAge45to49       | 134000     |
| Dominican Republic | 1992           | MaleAge50to54       | 119387     |
| Dominican Republic | 1992           | MaleAge55to59       | 108307     |
| Dominican Republic | 1992           | MaleAge5to9         | 489727     |
| Dominican Republic | 1992           | MaleAge60to64       | 87993      |
| Dominican Republic | 1992           | MaleAge65to69       | 65009      |
| Dominican Republic | 1992           | MaleAge70to74       | 43903      |
| Dominican Republic | 1992           | MaleAge75to79       | 26807      |
| Dominican Republic | 1992           | MaleAge80to84       | 14481      |
| Dominican Republic | 1992           | MaleAge85to89       | 6429       |
| Dominican Republic | 1992           | MaleAge90to94       | 2033       |
| Dominican Republic | 1992           | MaleAge95to99       | 384        |
| Dominican Republic | 1992           | MaleAgeAbov e100    | 50         |
| Dominican Republic | 1993           | FemaleAge0to4       | 502681     |
| Dominican Republic | 1993           | FemaleAge10to14     | 442712     |
| Dominican Republic | 1993           | FemaleAge15to19     | 322281     |
| Dominican Republic | 1993           | FemaleAge20to24     | 243112     |
| Dominican Republic | 1993           | FemaleAge25to29     | 237044     |
| Dominican Republic | 1993           | FemaleAge30to34     | 229001     |
| Dominican Republic | 1993           | FemaleAge35to39     | 210377     |
| Dominican Republic | 1993           | FemaleAge40to44     | 171118     |
| Dominican Republic | 1993           | FemaleAge45to49     | 131679     |
| Dominican Republic | 1993           | FemaleAge50to54     | 112141     |
| Dominican Republic | 1993           | FemaleAge55to59     | 103272     |
| Dominican Republic | 1993           | FemaleAge5to9       | 478079     |
| Dominican Republic | 1993           | FemaleAge60to64     | 84349      |
| Dominican Republic | 1993           | FemaleAge65to69     | 62867      |
| Dominican Republic | 1993           | FemaleAge70to74     | 43637      |
| Dominican Republic | 1993           | FemaleAge75to79     | 27923      |
| Dominican Republic | 1993           | FemaleAge80to84     | 16004      |
| Dominican Republic | 1993           | FemaleAge85to89     | 7640       |
| Dominican Republic | 1993           | FemaleAge90to94     | 2614       |
| Dominican Republic | 1993           | FemaleAge95to99     | 532        |
| Dominican Republic | 1993           | FemaleAgeAbov e100  | 67         |
| Dominican Republic | 1993           | FemaleLactAge15to19 | 46060      |
| Dominican Republic | 1993           | FemaleLactAge20to24 | 72196      |
| Dominican Republic | 1993           | FemaleLactAge25to29 | 53397      |
| Dominican Republic | 1993           | FemaleLactAge30to34 | 31554      |
| Dominican Republic | 1993           | FemaleLactAge35to39 | 11419      |
| Dominican Republic | 1993           | FemaleLactAge40to44 | 3148       |
| Dominican Republic | 1993           | FemaleLactAge45to49 | 611        |
| Dominican Republic | 1993           | FemalePregAge15to19 | 34545      |
| Dominican Republic | 1993           | FemalePregAge20to24 | 54147      |
| Dominican Republic | 1993           | FemalePregAge25to29 | 40048      |
| Dominican Republic | 1993           | FemalePregAge30to34 | 23666      |
| Dominican Republic | 1993           | FemalePregAge35to39 | 8564       |
| Dominican Republic | 1993           | FemalePregAge40to44 | 2361       |
| Dominican Republic | 1993           | FemalePregAge45to49 | 458        |
| Dominican Republic | 1993           | MaleAge0to4         | 521124     |
| Dominican Republic | 1993           | MaleAge10to14       | 451152     |
| Dominican Republic | 1993           | MaleAge15to19       | 403030     |
| Dominican Republic | 1993           | MaleAge20to24       | 364856     |
| Dominican Republic | 1993           | MaleAge25to29       | 324091     |
| Dominican Republic | 1993           | MaleAge30to34       | 280145     |
| Dominican Republic | 1993           | MaleAge35to39       | 231437     |
| Dominican Republic | 1993           | MaleAge40to44       | 181212     |
| Dominican Republic | 1993           | MaleAge45to49       | 139198     |
| Dominican Republic | 1993           | MaleAge50to54       | 119314     |
| Dominican Republic | 1993           | MaleAge55to59       | 110056     |
| Dominican Republic | 1993           | MaleAge5to9         | 494116     |
| Dominican Republic | 1993           | MaleAge60to64       | 90636      |
| Dominican Republic | 1993           | MaleAge65to69       | 67459      |
| Dominican Republic | 1993           | MaleAge70to74       | 45774      |
| Dominican Republic | 1993           | MaleAge75to79       | 28024      |

Dietary calcium and zinc deficiency risks are decreasing but remain prevalent

| Country            | Reference year | Age/gender group    | Population |
|--------------------|----------------|---------------------|------------|
| Dominican Republic | 1993           | MaleAge80to84       | 15307      |
| Dominican Republic | 1993           | MaleAge85to89       | 7052       |
| Dominican Republic | 1993           | MaleAge90to94       | 2363       |
| Dominican Republic | 1993           | MaleAge95to99       | 481        |
| Dominican Republic | 1993           | MaleAgeAbov e100    | 66         |
| Dominican Republic | 1994           | FemaleAge0to4       | 506874     |
| Dominican Republic | 1994           | FemaleAge10to14     | 450087     |
| Dominican Republic | 1994           | FemaleAge15to19     | 326530     |
| Dominican Republic | 1994           | FemaleAge20to24     | 246912     |
| Dominican Republic | 1994           | FemaleAge25to29     | 241973     |
| Dominican Republic | 1994           | FemaleAge30to34     | 236446     |
| Dominican Republic | 1994           | FemaleAge35to39     | 219240     |
| Dominican Republic | 1994           | FemaleAge40to44     | 180359     |
| Dominican Republic | 1994           | FemaleAge45to49     | 138124     |
| Dominican Republic | 1994           | FemaleAge50to54     | 112976     |
| Dominican Republic | 1994           | FemaleAge55to59     | 105008     |
| Dominican Republic | 1994           | FemaleAge5to9       | 481787     |
| Dominican Republic | 1994           | FemaleAge60to64     | 87258      |
| Dominican Republic | 1994           | FemaleAge65to69     | 65676      |
| Dominican Republic | 1994           | FemaleAge70to74     | 45810      |
| Dominican Republic | 1994           | FemaleAge75to79     | 29376      |
| Dominican Republic | 1994           | FemaleAge80to84     | 16884      |
| Dominican Republic | 1994           | FemaleAge85to89     | 8189       |
| Dominican Republic | 1994           | FemaleAge90to94     | 2904       |
| Dominican Republic | 1994           | FemaleAge95to99     | 640        |
| Dominican Republic | 1994           | FemaleAgeAbov e100  | 84         |
| Dominican Republic | 1994           | FemaleLactAge15to19 | 46060      |
| Dominican Republic | 1994           | FemaleLactAge20to24 | 72196      |
| Dominican Republic | 1994           | FemaleLactAge25to29 | 53397      |
| Dominican Republic | 1994           | FemaleLactAge30to34 | 31554      |
| Dominican Republic | 1994           | FemaleLactAge35to39 | 11419      |
| Dominican Republic | 1994           | FemaleLactAge40to44 | 3148       |
| Dominican Republic | 1994           | FemaleLactAge45to49 | 611        |
| Dominican Republic | 1994           | FemalePregAge15to19 | 34545      |
| Dominican Republic | 1994           | FemalePregAge20to24 | 54147      |
| Dominican Republic | 1994           | FemalePregAge25to29 | 40048      |
| Dominican Republic | 1994           | FemalePregAge30to34 | 23666      |
| Dominican Republic | 1994           | FemalePregAge35to39 | 8564       |
| Dominican Republic | 1994           | FemalePregAge40to44 | 2361       |
| Dominican Republic | 1994           | FemalePregAge45to49 | 458        |
| Dominican Republic | 1994           | MaleAge0to4         | 525941     |
| Dominican Republic | 1994           | MaleAge10to14       | 458922     |
| Dominican Republic | 1994           | MaleAge15to19       | 407379     |
| Dominican Republic | 1994           | MaleAge20to24       | 369056     |
| Dominican Republic | 1994           | MaleAge25to29       | 328875     |
| Dominican Republic | 1994           | MaleAge30to34       | 286858     |
| Dominican Republic | 1994           | MaleAge35to39       | 239785     |
| Dominican Republic | 1994           | MaleAge40to44       | 190158     |
| Dominican Republic | 1994           | MaleAge45to49       | 145272     |
| Dominican Republic | 1994           | MaleAge50to54       | 120010     |
| Dominican Republic | 1994           | MaleAge55to59       | 111453     |
| Dominican Republic | 1994           | MaleAge5to9         | 498069     |
| Dominican Republic | 1994           | MaleAge60to64       | 93173      |
| Dominican Republic | 1994           | MaleAge65to69       | 70010      |
| Dominican Republic | 1994           | MaleAge70to74       | 47768      |
| Dominican Republic | 1994           | MaleAge75to79       | 29267      |
| Dominican Republic | 1994           | MaleAge80to84       | 16068      |
| Dominican Republic | 1994           | MaleAge85to89       | 7618       |
| Dominican Republic | 1994           | MaleAge90to94       | 2683       |
| Dominican Republic | 1994           | MaleAge95to99       | 598        |
| Dominican Republic | 1994           | MaleAgeAbov e100    | 86         |
| Dominican Republic | 1995           | FemaleAge0to4       | 508995     |
| Dominican Republic | 1995           | FemaleAge10to14     | 456879     |
| Dominican Republic | 1995           | FemaleAge15to19     | 332031     |
| Dominican Republic | 1995           | FemaleAge20to24     | 250610     |
| Dominican Republic | 1995           | FemaleAge25to29     | 246619     |
| Dominican Republic | 1995           | FemaleAge30to34     | 243249     |
| Dominican Republic | 1995           | FemaleAge35to39     | 227797     |
| Dominican Republic | 1995           | FemaleAge40to44     | 189544     |
| Dominican Republic | 1995           | FemaleAge45to49     | 145208     |
| Dominican Republic | 1995           | FemaleAge50to54     | 115084     |
| Dominican Republic | 1995           | FemaleAge55to59     | 106223     |
| Dominican Republic | 1995           | FemaleAge5to9       | 485510     |
| Dominican Republic | 1995           | FemaleAge60to64     | 89998      |
| Dominican Republic | 1995           | FemaleAge65to69     | 68608      |
| Dominican Republic | 1995           | FemaleAge70to74     | 48148      |
| Dominican Republic | 1995           | FemaleAge75to79     | 30952      |
| Dominican Republic | 1995           | FemaleAge80to84     | 17820      |
| Dominican Republic | 1995           | FemaleAge85to89     | 8703       |
| Dominican Republic | 1995           | FemaleAge90to94     | 3167       |
| Dominican Republic | 1995           | FemaleAge95to99     | 739        |
| Dominican Republic | 1995           | FemaleAgeAbov e100  | 106        |
| Dominican Republic | 1995           | FemaleLactAge15to19 | 46060      |
| Dominican Republic | 1995           | FemaleLactAge20to24 | 72196      |
| Dominican Republic | 1995           | FemaleLactAge25to29 | 53397      |
| Dominican Republic | 1995           | FemaleLactAge30to34 | 31554      |
| Dominican Republic | 1995           | FemaleLactAge35to39 | 11419      |
| Dominican Republic | 1995           | FemaleLactAge40to44 | 3148       |

Dietary calcium and zinc deficiency risks are decreasing but remain prevalent

| Country            | Reference year | Age/gender group    | Population |
|--------------------|----------------|---------------------|------------|
| Dominican Republic | 1995           | FemaleLactAge45to49 | 611        |
| Dominican Republic | 1995           | FemalePregAge15to19 | 34545      |
| Dominican Republic | 1995           | FemalePregAge20to24 | 54147      |
| Dominican Republic | 1995           | FemalePregAge25to29 | 40048      |
| Dominican Republic | 1995           | FemalePregAge30to34 | 23666      |
| Dominican Republic | 1995           | FemalePregAge35to39 | 8564       |
| Dominican Republic | 1995           | FemalePregAge40to44 | 2361       |
| Dominican Republic | 1995           | FemalePregAge45to49 | 458        |
| Dominican Republic | 1995           | MaleAge0to4         | 528357     |
| Dominican Republic | 1995           | MaleAge10to14       | 466121     |
| Dominican Republic | 1995           | MaleAge15to19       | 412847     |
| Dominican Republic | 1995           | MaleAge20to24       | 373086     |
| Dominican Republic | 1995           | MaleAge25to29       | 333377     |
| Dominican Republic | 1995           | MaleAge30to34       | 292961     |
| Dominican Republic | 1995           | MaleAge35to39       | 247761     |
| Dominican Republic | 1995           | MaleAge40to44       | 199025     |
| Dominican Republic | 1995           | MaleAge45to49       | 152060     |
| Dominican Republic | 1995           | MaleAge50to54       | 121939     |
| Dominican Republic | 1995           | MaleAge55to59       | 112438     |
| Dominican Republic | 1995           | MaleAge5to9         | 502402     |
| Dominican Republic | 1995           | MaleAge60to64       | 95566      |
| Dominican Republic | 1995           | MaleAge65to69       | 72670      |
| Dominican Republic | 1995           | MaleAge70to74       | 49897      |
| Dominican Republic | 1995           | MaleAge75to79       | 30585      |
| Dominican Republic | 1995           | MaleAge80to84       | 16791      |
| Dominican Republic | 1995           | MaleAge85to89       | 8110       |
| Dominican Republic | 1995           | MaleAge90to94       | 2979       |
| Dominican Republic | 1995           | MaleAge95to99       | 719        |
| Dominican Republic | 1995           | MaleAgeAbove100     | 112        |
| Dominican Republic | 1996           | FemaleAge0to4       | 511385     |
| Dominican Republic | 1996           | FemaleAge10to14     | 461937     |
| Dominican Republic | 1996           | FemaleAge15to19     | 334584     |
| Dominican Republic | 1996           | FemaleAge20to24     | 255731     |
| Dominican Republic | 1996           | FemaleAge25to29     | 256621     |
| Dominican Republic | 1996           | FemaleAge30to34     | 251141     |
| Dominican Republic | 1996           | FemaleAge35to39     | 236645     |
| Dominican Republic | 1996           | FemaleAge40to44     | 199499     |
| Dominican Republic | 1996           | FemaleAge45to49     | 152962     |
| Dominican Republic | 1996           | FemaleAge50to54     | 118263     |
| Dominican Republic | 1996           | FemaleAge55to59     | 106766     |
| Dominican Republic | 1996           | FemaleAge5to9       | 489341     |
| Dominican Republic | 1996           | FemaleAge60to64     | 92327      |
| Dominican Republic | 1996           | FemaleAge65to69     | 71273      |
| Dominican Republic | 1996           | FemaleAge70to74     | 50266      |
| Dominican Republic | 1996           | FemaleAge75to79     | 32459      |
| Dominican Republic | 1996           | FemaleAge80to84     | 18825      |
| Dominican Republic | 1996           | FemaleAge85to89     | 9380       |
| Dominican Republic | 1996           | FemaleAge90to94     | 3594       |
| Dominican Republic | 1996           | FemaleAge95to99     | 879        |
| Dominican Republic | 1996           | FemaleAgeAbove100   | 132        |
| Dominican Republic | 1996           | FemaleLactAge15to19 | 47653      |
| Dominican Republic | 1996           | FemaleLactAge20to24 | 71286      |
| Dominican Republic | 1996           | FemaleLactAge25to29 | 50299      |
| Dominican Republic | 1996           | FemaleLactAge30to34 | 30797      |
| Dominican Republic | 1996           | FemaleLactAge35to39 | 11283      |
| Dominican Republic | 1996           | FemaleLactAge40to44 | 2757       |
| Dominican Republic | 1996           | FemaleLactAge45to49 | 570        |
| Dominican Republic | 1996           | FemalePregAge15to19 | 35740      |
| Dominican Republic | 1996           | FemalePregAge20to24 | 53465      |
| Dominican Republic | 1996           | FemalePregAge25to29 | 37725      |
| Dominican Republic | 1996           | FemalePregAge30to34 | 23098      |
| Dominican Republic | 1996           | FemalePregAge35to39 | 8462       |
| Dominican Republic | 1996           | FemalePregAge40to44 | 2067       |
| Dominican Republic | 1996           | FemalePregAge45to49 | 428        |
| Dominican Republic | 1996           | MaleAge0to4         | 530555     |
| Dominican Republic | 1996           | MaleAge10to14       | 471671     |
| Dominican Republic | 1996           | MaleAge15to19       | 419092     |
| Dominican Republic | 1996           | MaleAge20to24       | 376891     |
| Dominican Republic | 1996           | MaleAge25to29       | 338072     |
| Dominican Republic | 1996           | MaleAge30to34       | 299151     |
| Dominican Republic | 1996           | MaleAge35to39       | 255564     |
| Dominican Republic | 1996           | MaleAge40to44       | 207627     |
| Dominican Republic | 1996           | MaleAge45to49       | 159265     |
| Dominican Republic | 1996           | MaleAge50to54       | 124709     |
| Dominican Republic | 1996           | MaleAge55to59       | 112642     |
| Dominican Republic | 1996           | MaleAge5to9         | 506333     |
| Dominican Republic | 1996           | MaleAge60to64       | 97419      |
| Dominican Republic | 1996           | MaleAge65to69       | 75040      |
| Dominican Republic | 1996           | MaleAge70to74       | 51927      |
| Dominican Republic | 1996           | MaleAge75to79       | 32094      |
| Dominican Republic | 1996           | MaleAge80to84       | 17775      |
| Dominican Republic | 1996           | MaleAge85to89       | 8721       |
| Dominican Republic | 1996           | MaleAge90to94       | 3378       |
| Dominican Republic | 1996           | MaleAge95to99       | 862        |
| Dominican Republic | 1996           | MaleAgeAbove100     | 143        |
| Dominican Republic | 1997           | FemaleAge0to4       | 510404     |
| Dominican Republic | 1997           | FemaleAge10to14     | 466651     |
| Dominican Republic | 1997           | FemaleAge15to19     | 341184     |

Dietary calcium and zinc deficiency risks are decreasing but remain prevalent

| Country            | Reference year | Age/gender group    | Population |
|--------------------|----------------|---------------------|------------|
| Dominican Republic | 1997           | FemaleAge20to24     | 259118     |
| Dominican Republic | 1997           | FemaleAge25to29     | 261033     |
| Dominican Republic | 1997           | FemaleAge30to34     | 257121     |
| Dominican Republic | 1997           | FemaleAge35to39     | 245057     |
| Dominican Republic | 1997           | FemaleAge40to44     | 208618     |
| Dominican Republic | 1997           | FemaleAge45to49     | 161412     |
| Dominican Republic | 1997           | FemaleAge50to54     | 122702     |
| Dominican Republic | 1997           | FemaleAge55to59     | 106903     |
| Dominican Republic | 1997           | FemaleAge5to9       | 493680     |
| Dominican Republic | 1997           | FemaleAge60to64     | 94676      |
| Dominican Republic | 1997           | FemaleAge65to69     | 74075      |
| Dominican Republic | 1997           | FemaleAge70to74     | 52514      |
| Dominican Republic | 1997           | FemaleAge75to79     | 34047      |
| Dominican Republic | 1997           | FemaleAge80to84     | 19846      |
| Dominican Republic | 1997           | FemaleAge85to89     | 10019      |
| Dominican Republic | 1997           | FemaleAge90to94     | 4001       |
| Dominican Republic | 1997           | FemaleAge95to99     | 1041       |
| Dominican Republic | 1997           | FemaleAgeAbov e100  | 163        |
| Dominican Republic | 1997           | FemaleLactAge15to19 | 47653      |
| Dominican Republic | 1997           | FemaleLactAge20to24 | 71286      |
| Dominican Republic | 1997           | FemaleLactAge25to29 | 50299      |
| Dominican Republic | 1997           | FemaleLactAge30to34 | 30797      |
| Dominican Republic | 1997           | FemaleLactAge35to39 | 11283      |
| Dominican Republic | 1997           | FemaleLactAge40to44 | 2757       |
| Dominican Republic | 1997           | FemaleLactAge45to49 | 570        |
| Dominican Republic | 1997           | FemalePregAge15to19 | 35740      |
| Dominican Republic | 1997           | FemalePregAge20to24 | 53465      |
| Dominican Republic | 1997           | FemalePregAge25to29 | 37725      |
| Dominican Republic | 1997           | FemalePregAge30to34 | 23098      |
| Dominican Republic | 1997           | FemalePregAge35to39 | 8462       |
| Dominican Republic | 1997           | FemalePregAge40to44 | 2067       |
| Dominican Republic | 1997           | FemalePregAge45to49 | 428        |
| Dominican Republic | 1997           | MaleAge0to4         | 529533     |
| Dominican Republic | 1997           | MaleAge10to14       | 476719     |
| Dominican Republic | 1997           | MaleAge15to19       | 426485     |
| Dominican Republic | 1997           | MaleAge20to24       | 380503     |
| Dominican Republic | 1997           | MaleAge25to29       | 342632     |
| Dominican Republic | 1997           | MaleAge30to34       | 304772     |
| Dominican Republic | 1997           | MaleAge35to39       | 263131     |
| Dominican Republic | 1997           | MaleAge40to44       | 216129     |
| Dominican Republic | 1997           | MaleAge45to49       | 167237     |
| Dominican Republic | 1997           | MaleAge50to54       | 128699     |
| Dominican Republic | 1997           | MaleAge55to59       | 112525     |
| Dominican Republic | 1997           | MaleAge5to9         | 510842     |
| Dominican Republic | 1997           | MaleAge60to64       | 99289      |
| Dominican Republic | 1997           | MaleAge65to69       | 77486      |
| Dominican Republic | 1997           | MaleAge70to74       | 54025      |
| Dominican Republic | 1997           | MaleAge75to79       | 33631      |
| Dominican Republic | 1997           | MaleAge80to84       | 18718      |
| Dominican Republic | 1997           | MaleAge85to89       | 9285       |
| Dominican Republic | 1997           | MaleAge90to94       | 3758       |
| Dominican Republic | 1997           | MaleAge95to99       | 1023       |
| Dominican Republic | 1997           | MaleAgeAbov e100    | 180        |
| Dominican Republic | 1998           | FemaleAge0to4       | 507311     |
| Dominican Republic | 1998           | FemaleAge10to14     | 471066     |
| Dominican Republic | 1998           | FemaleAge15to19     | 348607     |
| Dominican Republic | 1998           | FemaleAge20to24     | 262604     |
| Dominican Republic | 1998           | FemaleAge25to29     | 265223     |
| Dominican Republic | 1998           | FemaleAge30to34     | 262524     |
| Dominican Republic | 1998           | FemaleAge35to39     | 253123     |
| Dominican Republic | 1998           | FemaleAge40to44     | 217471     |
| Dominican Republic | 1998           | FemaleAge45to49     | 170399     |
| Dominican Republic | 1998           | FemaleAge50to54     | 128235     |
| Dominican Republic | 1998           | FemaleAge55to59     | 107109     |
| Dominican Republic | 1998           | FemaleAge5to9       | 498249     |
| Dominican Republic | 1998           | FemaleAge60to64     | 96873      |
| Dominican Republic | 1998           | FemaleAge65to69     | 76933      |
| Dominican Republic | 1998           | FemaleAge70to74     | 54908      |
| Dominican Republic | 1998           | FemaleAge75to79     | 35725      |
| Dominican Republic | 1998           | FemaleAge80to84     | 20899      |
| Dominican Republic | 1998           | FemaleAge85to89     | 10625      |
| Dominican Republic | 1998           | FemaleAge90to94     | 4371       |
| Dominican Republic | 1998           | FemaleAge95to99     | 1214       |
| Dominican Republic | 1998           | FemaleAgeAbov e100  | 200        |
| Dominican Republic | 1998           | FemaleLactAge15to19 | 47653      |
| Dominican Republic | 1998           | FemaleLactAge20to24 | 71286      |
| Dominican Republic | 1998           | FemaleLactAge25to29 | 50299      |
| Dominican Republic | 1998           | FemaleLactAge30to34 | 30797      |
| Dominican Republic | 1998           | FemaleLactAge35to39 | 11283      |
| Dominican Republic | 1998           | FemaleLactAge40to44 | 2757       |
| Dominican Republic | 1998           | FemaleLactAge45to49 | 570        |
| Dominican Republic | 1998           | FemalePregAge15to19 | 35740      |
| Dominican Republic | 1998           | FemalePregAge20to24 | 53465      |
| Dominican Republic | 1998           | FemalePregAge25to29 | 37725      |
| Dominican Republic | 1998           | FemalePregAge30to34 | 23098      |
| Dominican Republic | 1998           | FemalePregAge35to39 | 8462       |
| Dominican Republic | 1998           | FemalePregAge40to44 | 2067       |
| Dominican Republic | 1998           | FemalePregAge45to49 | 428        |

Dietary calcium and zinc deficiency risks are decreasing but remain prevalent

| Country            | Reference year | Age/gender group    | Population |
|--------------------|----------------|---------------------|------------|
| Dominican Republic | 1998           | MaleAge0to4         | 526476     |
| Dominican Republic | 1998           | MaleAge10to14       | 481439     |
| Dominican Republic | 1998           | MaleAge15to19       | 434433     |
| Dominican Republic | 1998           | MaleAge20to24       | 384274     |
| Dominican Republic | 1998           | MaleAge25to29       | 346988     |
| Dominican Republic | 1998           | MaleAge30to34       | 309779     |
| Dominican Republic | 1998           | MaleAge35to39       | 270351     |
| Dominican Republic | 1998           | MaleAge40to44       | 224435     |
| Dominican Republic | 1998           | MaleAge45to49       | 175716     |
| Dominican Republic | 1998           | MaleAge50to54       | 133766     |
| Dominican Republic | 1998           | MaleAge55to59       | 112526     |
| Dominican Republic | 1998           | MaleAge5to9         | 515718     |
| Dominican Republic | 1998           | MaleAge60to64       | 101043     |
| Dominican Republic | 1998           | MaleAge65to69       | 79939      |
| Dominican Republic | 1998           | MaleAge70to74       | 56208      |
| Dominican Republic | 1998           | MaleAge75to79       | 35203      |
| Dominican Republic | 1998           | MaleAge80to84       | 19628      |
| Dominican Republic | 1998           | MaleAge85to89       | 9804       |
| Dominican Republic | 1998           | MaleAge90to94       | 4097       |
| Dominican Republic | 1998           | MaleAge95to99       | 1191       |
| Dominican Republic | 1998           | MaleAgeAbov e100    | 222        |
| Dominican Republic | 1999           | FemaleAge0to4       | 504493     |
| Dominican Republic | 1999           | FemaleAge10to14     | 475440     |
| Dominican Republic | 1999           | FemaleAge15to19     | 355945     |
| Dominican Republic | 1999           | FemaleAge20to24     | 266599     |
| Dominican Republic | 1999           | FemaleAge25to29     | 269040     |
| Dominican Republic | 1999           | FemaleAge30to34     | 267367     |
| Dominican Republic | 1999           | FemaleAge35to39     | 260557     |
| Dominican Republic | 1999           | FemaleAge40to44     | 226003     |
| Dominican Republic | 1999           | FemaleAge45to49     | 179535     |
| Dominican Republic | 1999           | FemaleAge50to54     | 134559     |
| Dominican Republic | 1999           | FemaleAge55to59     | 108069     |
| Dominican Republic | 1999           | FemaleAge5to9       | 502347     |
| Dominican Republic | 1999           | FemaleAge60to64     | 98652      |
| Dominican Republic | 1999           | FemaleAge65to69     | 79718      |
| Dominican Republic | 1999           | FemaleAge70to74     | 57436      |
| Dominican Republic | 1999           | FemaleAge75to79     | 37513      |
| Dominican Republic | 1999           | FemaleAge80to84     | 21995      |
| Dominican Republic | 1999           | FemaleAge85to89     | 11211      |
| Dominican Republic | 1999           | FemaleAge90to94     | 4687       |
| Dominican Republic | 1999           | FemaleAge95to99     | 1378       |
| Dominican Republic | 1999           | FemaleAgeAbov e100  | 244        |
| Dominican Republic | 1999           | FemaleLactAge15to19 | 47653      |
| Dominican Republic | 1999           | FemaleLactAge20to24 | 71286      |
| Dominican Republic | 1999           | FemaleLactAge25to29 | 50299      |
| Dominican Republic | 1999           | FemaleLactAge30to34 | 30797      |
| Dominican Republic | 1999           | FemaleLactAge35to39 | 11283      |
| Dominican Republic | 1999           | FemaleLactAge40to44 | 2757       |
| Dominican Republic | 1999           | FemaleLactAge45to49 | 570        |
| Dominican Republic | 1999           | FemalePregAge15to19 | 35740      |
| Dominican Republic | 1999           | FemalePregAge20to24 | 53465      |
| Dominican Republic | 1999           | FemalePregAge25to29 | 37725      |
| Dominican Republic | 1999           | FemalePregAge30to34 | 23098      |
| Dominican Republic | 1999           | FemalePregAge35to39 | 8462       |
| Dominican Republic | 1999           | FemalePregAge40to44 | 2067       |
| Dominican Republic | 1999           | FemalePregAge45to49 | 428        |
| Dominican Republic | 1999           | MaleAge0to4         | 523756     |
| Dominican Republic | 1999           | MaleAge10to14       | 486177     |
| Dominican Republic | 1999           | MaleAge15to19       | 442002     |
| Dominican Republic | 1999           | MaleAge20to24       | 388636     |
| Dominican Republic | 1999           | MaleAge25to29       | 350947     |
| Dominican Republic | 1999           | MaleAge30to34       | 314180     |
| Dominican Republic | 1999           | MaleAge35to39       | 276997     |
| Dominican Republic | 1999           | MaleAge40to44       | 232444     |
| Dominican Republic | 1999           | MaleAge45to49       | 184311     |
| Dominican Republic | 1999           | MaleAge50to54       | 139635     |
| Dominican Republic | 1999           | MaleAge55to59       | 113276     |
| Dominican Republic | 1999           | MaleAge5to9         | 520287     |
| Dominican Republic | 1999           | MaleAge60to64       | 102449     |
| Dominican Republic | 1999           | MaleAge65to69       | 82292      |
| Dominican Republic | 1999           | MaleAge70to74       | 58467      |
| Dominican Republic | 1999           | MaleAge75to79       | 36814      |
| Dominican Republic | 1999           | MaleAge80to84       | 20520      |
| Dominican Republic | 1999           | MaleAge85to89       | 10287      |
| Dominican Republic | 1999           | MaleAge90to94       | 4374       |
| Dominican Republic | 1999           | MaleAge95to99       | 1345       |
| Dominican Republic | 1999           | MaleAgeAbov e100    | 268        |
| Ecuador            | 1992           | FemaleAge0to4       | 707859     |
| Ecuador            | 1992           | FemaleAge10to14     | 598392     |
| Ecuador            | 1992           | FemaleAge15to19     | 471416     |
| Ecuador            | 1992           | FemaleAge20to24     | 346651     |
| Ecuador            | 1992           | FemaleAge25to29     | 306355     |
| Ecuador            | 1992           | FemaleAge30to34     | 287945     |
| Ecuador            | 1992           | FemaleAge35to39     | 274872     |
| Ecuador            | 1992           | FemaleAge40to44     | 232805     |
| Ecuador            | 1992           | FemaleAge45to49     | 193056     |
| Ecuador            | 1992           | FemaleAge50to54     | 167547     |
| Ecuador            | 1992           | FemaleAge55to59     | 140128     |

Dietary calcium and zinc deficiency risks are decreasing but remain prevalent

| Country | Reference year | Age/gender group    | Population |
|---------|----------------|---------------------|------------|
| Ecuador | 1992           | FemaleAge5to9       | 648001     |
| Ecuador | 1992           | FemaleAge60to64     | 113841     |
| Ecuador | 1992           | FemaleAge65to69     | 88551      |
| Ecuador | 1992           | FemaleAge70to74     | 65753      |
| Ecuador | 1992           | FemaleAge75to79     | 47625      |
| Ecuador | 1992           | FemaleAge80to84     | 29042      |
| Ecuador | 1992           | FemaleAge85to89     | 13688      |
| Ecuador | 1992           | FemaleAge90to94     | 5046       |
| Ecuador | 1992           | FemaleAge95to99     | 1178       |
| Ecuador | 1992           | FemaleAgeAbove100   | 186        |
| Ecuador | 1992           | FemaleLactAge15to19 | 47404      |
| Ecuador | 1992           | FemaleLactAge20to24 | 88721      |
| Ecuador | 1992           | FemaleLactAge25to29 | 75825      |
| Ecuador | 1992           | FemaleLactAge30to34 | 50738      |
| Ecuador | 1992           | FemaleLactAge35to39 | 28730      |
| Ecuador | 1992           | FemaleLactAge40to44 | 11542      |
| Ecuador | 1992           | FemaleLactAge45to49 | 2237       |
| Ecuador | 1992           | FemalePregAge15to19 | 35553      |
| Ecuador | 1992           | FemalePregAge20to24 | 66541      |
| Ecuador | 1992           | FemalePregAge25to29 | 56869      |
| Ecuador | 1992           | FemalePregAge30to34 | 38054      |
| Ecuador | 1992           | FemalePregAge35to39 | 21547      |
| Ecuador | 1992           | FemalePregAge40to44 | 8656       |
| Ecuador | 1992           | FemalePregAge45to49 | 1678       |
| Ecuador | 1992           | MaleAge0to4         | 733977     |
| Ecuador | 1992           | MaleAge10to14       | 615912     |
| Ecuador | 1992           | MaleAge15to19       | 568788     |
| Ecuador | 1992           | MaleAge20to24       | 512695     |
| Ecuador | 1992           | MaleAge25to29       | 445641     |
| Ecuador | 1992           | MaleAge30to34       | 379091     |
| Ecuador | 1992           | MaleAge35to39       | 323995     |
| Ecuador | 1992           | MaleAge40to44       | 250961     |
| Ecuador | 1992           | MaleAge45to49       | 194917     |
| Ecuador | 1992           | MaleAge50to54       | 164800     |
| Ecuador | 1992           | MaleAge55to59       | 136052     |
| Ecuador | 1992           | MaleAge5to9         | 669120     |
| Ecuador | 1992           | MaleAge60to64       | 108640     |
| Ecuador | 1992           | MaleAge65to69       | 82827      |
| Ecuador | 1992           | MaleAge70to74       | 59327      |
| Ecuador | 1992           | MaleAge75to79       | 40538      |
| Ecuador | 1992           | MaleAge80to84       | 22974      |
| Ecuador | 1992           | MaleAge85to89       | 9828       |
| Ecuador | 1992           | MaleAge90to94       | 3276       |
| Ecuador | 1992           | MaleAge95to99       | 684        |
| Ecuador | 1992           | MaleAgeAbove100     | 94         |
| Ecuador | 1993           | FemaleAge0to4       | 709150     |
| Ecuador | 1993           | FemaleAge10to14     | 606288     |
| Ecuador | 1993           | FemaleAge15to19     | 480629     |
| Ecuador | 1993           | FemaleAge20to24     | 357481     |
| Ecuador | 1993           | FemaleAge25to29     | 319168     |
| Ecuador | 1993           | FemaleAge30to34     | 299098     |
| Ecuador | 1993           | FemaleAge35to39     | 283596     |
| Ecuador | 1993           | FemaleAge40to44     | 249167     |
| Ecuador | 1993           | FemaleAge45to49     | 198907     |
| Ecuador | 1993           | FemaleAge50to54     | 172164     |
| Ecuador | 1993           | FemaleAge55to59     | 144483     |
| Ecuador | 1993           | FemaleAge5to9       | 660963     |
| Ecuador | 1993           | FemaleAge60to64     | 117519     |
| Ecuador | 1993           | FemaleAge65to69     | 91899      |
| Ecuador | 1993           | FemaleAge70to74     | 68063      |
| Ecuador | 1993           | FemaleAge75to79     | 48663      |
| Ecuador | 1993           | FemaleAge80to84     | 30709      |
| Ecuador | 1993           | FemaleAge85to89     | 14302      |
| Ecuador | 1993           | FemaleAge90to94     | 5394       |
| Ecuador | 1993           | FemaleAge95to99     | 1309       |
| Ecuador | 1993           | FemaleAgeAbove100   | 207        |
| Ecuador | 1993           | FemaleLactAge15to19 | 47404      |
| Ecuador | 1993           | FemaleLactAge20to24 | 88721      |
| Ecuador | 1993           | FemaleLactAge25to29 | 75825      |
| Ecuador | 1993           | FemaleLactAge30to34 | 50738      |
| Ecuador | 1993           | FemaleLactAge35to39 | 28730      |
| Ecuador | 1993           | FemaleLactAge40to44 | 11542      |
| Ecuador | 1993           | FemaleLactAge45to49 | 2237       |
| Ecuador | 1993           | FemalePregAge15to19 | 35553      |
| Ecuador | 1993           | FemalePregAge20to24 | 66541      |
| Ecuador | 1993           | FemalePregAge25to29 | 56869      |
| Ecuador | 1993           | FemalePregAge30to34 | 38054      |
| Ecuador | 1993           | FemalePregAge35to39 | 21547      |
| Ecuador | 1993           | FemalePregAge40to44 | 8656       |
| Ecuador | 1993           | FemalePregAge45to49 | 1678       |
| Ecuador | 1993           | MaleAge0to4         | 735523     |
| Ecuador | 1993           | MaleAge10to14       | 624284     |
| Ecuador | 1993           | MaleAge15to19       | 578393     |
| Ecuador | 1993           | MaleAge20to24       | 523784     |
| Ecuador | 1993           | MaleAge25to29       | 458521     |
| Ecuador | 1993           | MaleAge30to34       | 390143     |
| Ecuador | 1993           | MaleAge35to39       | 332603     |
| Ecuador | 1993           | MaleAge40to44       | 266817     |

Dietary calcium and zinc deficiency risks are decreasing but remain prevalent

| Country | Reference year | Age/gender group    | Population |
|---------|----------------|---------------------|------------|
| Ecuador | 1993           | MaleAge45to49       | 200561     |
| Ecuador | 1993           | MaleAge50to54       | 169243     |
| Ecuador | 1993           | MaleAge55to59       | 140361     |
| Ecuador | 1993           | MaleAge5to9         | 682841     |
| Ecuador | 1993           | MaleAge60to64       | 112135     |
| Ecuador | 1993           | MaleAge65to69       | 85925      |
| Ecuador | 1993           | MaleAge70to74       | 61489      |
| Ecuador | 1993           | MaleAge75to79       | 41461      |
| Ecuador | 1993           | MaleAge80to84       | 24323      |
| Ecuador | 1993           | MaleAge85to89       | 10283      |
| Ecuador | 1993           | MaleAge90to94       | 3510       |
| Ecuador | 1993           | MaleAge95to99       | 769        |
| Ecuador | 1993           | MaleAgeAbov e100    | 105        |
| Ecuador | 1994           | FemaleAge0to4       | 709740     |
| Ecuador | 1994           | FemaleAge10to14     | 614717     |
| Ecuador | 1994           | FemaleAge15to19     | 489421     |
| Ecuador | 1994           | FemaleAge20to24     | 367851     |
| Ecuador | 1994           | FemaleAge25to29     | 331718     |
| Ecuador | 1994           | FemaleAge30to34     | 310623     |
| Ecuador | 1994           | FemaleAge35to39     | 292312     |
| Ecuador | 1994           | FemaleAge40to44     | 264747     |
| Ecuador | 1994           | FemaleAge45to49     | 206581     |
| Ecuador | 1994           | FemaleAge50to54     | 176909     |
| Ecuador | 1994           | FemaleAge55to59     | 148851     |
| Ecuador | 1994           | FemaleAge5to9       | 673751     |
| Ecuador | 1994           | FemaleAge60to64     | 121343     |
| Ecuador | 1994           | FemaleAge65to69     | 95380      |
| Ecuador | 1994           | FemaleAge70to74     | 70628      |
| Ecuador | 1994           | FemaleAge75to79     | 49952      |
| Ecuador | 1994           | FemaleAge80to84     | 32239      |
| Ecuador | 1994           | FemaleAge85to89     | 14943      |
| Ecuador | 1994           | FemaleAge90to94     | 5624       |
| Ecuador | 1994           | FemaleAge95to99     | 1410       |
| Ecuador | 1994           | FemaleAgeAbov e100  | 228        |
| Ecuador | 1994           | FemaleLactAge15to19 | 47404      |
| Ecuador | 1994           | FemaleLactAge20to24 | 88721      |
| Ecuador | 1994           | FemaleLactAge25to29 | 75825      |
| Ecuador | 1994           | FemaleLactAge30to34 | 50738      |
| Ecuador | 1994           | FemaleLactAge35to39 | 28730      |
| Ecuador | 1994           | FemaleLactAge40to44 | 11542      |
| Ecuador | 1994           | FemaleLactAge45to49 | 2237       |
| Ecuador | 1994           | FemalePregAge15to19 | 35553      |
| Ecuador | 1994           | FemalePregAge20to24 | 66541      |
| Ecuador | 1994           | FemalePregAge25to29 | 56869      |
| Ecuador | 1994           | FemalePregAge30to34 | 38054      |
| Ecuador | 1994           | FemalePregAge35to39 | 21547      |
| Ecuador | 1994           | FemalePregAge40to44 | 8656       |
| Ecuador | 1994           | FemalePregAge45to49 | 1678       |
| Ecuador | 1994           | MaleAge0to4         | 736324     |
| Ecuador | 1994           | MaleAge10to14       | 633214     |
| Ecuador | 1994           | MaleAge15to19       | 587604     |
| Ecuador | 1994           | MaleAge20to24       | 534477     |
| Ecuador | 1994           | MaleAge25to29       | 471209     |
| Ecuador | 1994           | MaleAge30to34       | 401564     |
| Ecuador | 1994           | MaleAge35to39       | 341139     |
| Ecuador | 1994           | MaleAge40to44       | 281876     |
| Ecuador | 1994           | MaleAge45to49       | 207974     |
| Ecuador | 1994           | MaleAge50to54       | 173801     |
| Ecuador | 1994           | MaleAge55to59       | 144664     |
| Ecuador | 1994           | MaleAge5to9         | 696320     |
| Ecuador | 1994           | MaleAge60to64       | 115785     |
| Ecuador | 1994           | MaleAge65to69       | 89170      |
| Ecuador | 1994           | MaleAge70to74       | 63875      |
| Ecuador | 1994           | MaleAge75to79       | 42599      |
| Ecuador | 1994           | MaleAge80to84       | 25491      |
| Ecuador | 1994           | MaleAge85to89       | 10721      |
| Ecuador | 1994           | MaleAge90to94       | 3643       |
| Ecuador | 1994           | MaleAge95to99       | 826        |
| Ecuador | 1994           | MaleAgeAbov e100    | 116        |
| Ecuador | 1995           | FemaleAge0to4       | 712043     |
| Ecuador | 1995           | FemaleAge10to14     | 624272     |
| Ecuador | 1995           | FemaleAge15to19     | 497691     |
| Ecuador | 1995           | FemaleAge20to24     | 377705     |
| Ecuador | 1995           | FemaleAge25to29     | 343656     |
| Ecuador | 1995           | FemaleAge30to34     | 322332     |
| Ecuador | 1995           | FemaleAge35to39     | 301736     |
| Ecuador | 1995           | FemaleAge40to44     | 278245     |
| Ecuador | 1995           | FemaleAge45to49     | 216639     |
| Ecuador | 1995           | FemaleAge50to54     | 181788     |
| Ecuador | 1995           | FemaleAge55to59     | 153149     |
| Ecuador | 1995           | FemaleAge5to9       | 684341     |
| Ecuador | 1995           | FemaleAge60to64     | 125304     |
| Ecuador | 1995           | FemaleAge65to69     | 98928      |
| Ecuador | 1995           | FemaleAge70to74     | 73419      |
| Ecuador | 1995           | FemaleAge75to79     | 51589      |
| Ecuador | 1995           | FemaleAge80to84     | 33563      |
| Ecuador | 1995           | FemaleAge85to89     | 15695      |
| Ecuador | 1995           | FemaleAge90to94     | 5735       |

Dietary calcium and zinc deficiency risks are decreasing but remain prevalent

| Country | Reference year | Age/gender group    | Population |
|---------|----------------|---------------------|------------|
| Ecuador | 1995           | FemaleAge95to99     | 1419       |
| Ecuador | 1995           | FemaleAgeAbov e100  | 249        |
| Ecuador | 1995           | FemaleLactAge15to19 | 47404      |
| Ecuador | 1995           | FemaleLactAge20to24 | 88721      |
| Ecuador | 1995           | FemaleLactAge25to29 | 75825      |
| Ecuador | 1995           | FemaleLactAge30to34 | 50738      |
| Ecuador | 1995           | FemaleLactAge35to39 | 28730      |
| Ecuador | 1995           | FemaleLactAge40to44 | 11542      |
| Ecuador | 1995           | FemaleLactAge45to49 | 2237       |
| Ecuador | 1995           | FemalePregAge15to19 | 35553      |
| Ecuador | 1995           | FemalePregAge20to24 | 66541      |
| Ecuador | 1995           | FemalePregAge25to29 | 56869      |
| Ecuador | 1995           | FemalePregAge30to34 | 38054      |
| Ecuador | 1995           | FemalePregAge35to39 | 21547      |
| Ecuador | 1995           | FemalePregAge40to44 | 8656       |
| Ecuador | 1995           | FemalePregAge45to49 | 1678       |
| Ecuador | 1995           | MaleAge0to4         | 738949     |
| Ecuador | 1995           | MaleAge10to14       | 643284     |
| Ecuador | 1995           | MaleAge15to19       | 596297     |
| Ecuador | 1995           | MaleAge20to24       | 544693     |
| Ecuador | 1995           | MaleAge25to29       | 483349     |
| Ecuador | 1995           | MaleAge30to34       | 413197     |
| Ecuador | 1995           | MaleAge35to39       | 350300     |
| Ecuador | 1995           | MaleAge40to44       | 294876     |
| Ecuador | 1995           | MaleAge45to49       | 217664     |
| Ecuador | 1995           | MaleAge50to54       | 178486     |
| Ecuador | 1995           | MaleAge55to59       | 148864     |
| Ecuador | 1995           | MaleAge5to9         | 707420     |
| Ecuador | 1995           | MaleAge60to64       | 119593     |
| Ecuador | 1995           | MaleAge65to69       | 92497      |
| Ecuador | 1995           | MaleAge70to74       | 66459      |
| Ecuador | 1995           | MaleAge75to79       | 44041      |
| Ecuador | 1995           | MaleAge80to84       | 26445      |
| Ecuador | 1995           | MaleAge85to89       | 11197      |
| Ecuador | 1995           | MaleAge90to94       | 3658       |
| Ecuador | 1995           | MaleAge95to99       | 812        |
| Ecuador | 1995           | MaleAgeAbov e100    | 127        |
| Ecuador | 1996           | FemaleAge0to4       | 712216     |
| Ecuador | 1996           | FemaleAge10to14     | 635627     |
| Ecuador | 1996           | FemaleAge15to19     | 500612     |
| Ecuador | 1996           | FemaleAge20to24     | 384639     |
| Ecuador | 1996           | FemaleAge25to29     | 352924     |
| Ecuador | 1996           | FemaleAge30to34     | 332600     |
| Ecuador | 1996           | FemaleAge35to39     | 312059     |
| Ecuador | 1996           | FemaleAge40to44     | 290167     |
| Ecuador | 1996           | FemaleAge45to49     | 228932     |
| Ecuador | 1996           | FemaleAge50to54     | 186765     |
| Ecuador | 1996           | FemaleAge55to59     | 157384     |
| Ecuador | 1996           | FemaleAge5to9       | 693642     |
| Ecuador | 1996           | FemaleAge60to64     | 129298     |
| Ecuador | 1996           | FemaleAge65to69     | 102416     |
| Ecuador | 1996           | FemaleAge70to74     | 76314      |
| Ecuador | 1996           | FemaleAge75to79     | 53304      |
| Ecuador | 1996           | FemaleAge80to84     | 34583      |
| Ecuador | 1996           | FemaleAge85to89     | 16906      |
| Ecuador | 1996           | FemaleAge90to94     | 6265       |
| Ecuador | 1996           | FemaleAge95to99     | 1555       |
| Ecuador | 1996           | FemaleAgeAbov e100  | 269        |
| Ecuador | 1996           | FemaleLactAge15to19 | 50471      |
| Ecuador | 1996           | FemaleLactAge20to24 | 90416      |
| Ecuador | 1996           | FemaleLactAge25to29 | 77259      |
| Ecuador | 1996           | FemaleLactAge30to34 | 51795      |
| Ecuador | 1996           | FemaleLactAge35to39 | 28516      |
| Ecuador | 1996           | FemaleLactAge40to44 | 11421      |
| Ecuador | 1996           | FemaleLactAge45to49 | 2272       |
| Ecuador | 1996           | FemalePregAge15to19 | 37853      |
| Ecuador | 1996           | FemalePregAge20to24 | 67812      |
| Ecuador | 1996           | FemalePregAge25to29 | 57944      |
| Ecuador | 1996           | FemalePregAge30to34 | 38847      |
| Ecuador | 1996           | FemalePregAge35to39 | 21387      |
| Ecuador | 1996           | FemalePregAge40to44 | 8566       |
| Ecuador | 1996           | FemalePregAge45to49 | 1704       |
| Ecuador | 1996           | MaleAge0to4         | 739661     |
| Ecuador | 1996           | MaleAge10to14       | 655241     |
| Ecuador | 1996           | MaleAge15to19       | 604729     |
| Ecuador | 1996           | MaleAge20to24       | 554416     |
| Ecuador | 1996           | MaleAge25to29       | 494738     |
| Ecuador | 1996           | MaleAge30to34       | 424968     |
| Ecuador | 1996           | MaleAge35to39       | 360117     |
| Ecuador | 1996           | MaleAge40to44       | 306295     |
| Ecuador | 1996           | MaleAge45to49       | 229595     |
| Ecuador | 1996           | MaleAge50to54       | 183326     |
| Ecuador | 1996           | MaleAge55to59       | 152999     |
| Ecuador | 1996           | MaleAge5to9         | 717454     |
| Ecuador | 1996           | MaleAge60to64       | 123437     |
| Ecuador | 1996           | MaleAge65to69       | 95704      |
| Ecuador | 1996           | MaleAge70to74       | 69198      |
| Ecuador | 1996           | MaleAge75to79       | 45760      |



Dietary calcium and zinc deficiency risks are decreasing but remain prevalent

| Country | Reference year | Age/gender group    | Population |
|---------|----------------|---------------------|------------|
| Ecuador | 1996           | MaleAge80to84       | 27448      |
| Ecuador | 1996           | MaleAge85to89       | 12232      |
| Ecuador | 1996           | MaleAge90to94       | 4057       |
| Ecuador | 1996           | MaleAge95to99       | 899        |
| Ecuador | 1996           | MaleAgeAbov e100    | 138        |
| Ecuador | 1997           | FemaleAge0to4       | 716056     |
| Ecuador | 1997           | FemaleAge10to14     | 647910     |
| Ecuador | 1997           | FemaleAge15to19     | 508065     |
| Ecuador | 1997           | FemaleAge20to24     | 393920     |
| Ecuador | 1997           | FemaleAge25to29     | 363982     |
| Ecuador | 1997           | FemaleAge30to34     | 344940     |
| Ecuador | 1997           | FemaleAge35to39     | 322343     |
| Ecuador | 1997           | FemaleAge40to44     | 299776     |
| Ecuador | 1997           | FemaleAge45to49     | 243640     |
| Ecuador | 1997           | FemaleAge50to54     | 191639     |
| Ecuador | 1997           | FemaleAge55to59     | 161670     |
| Ecuador | 1997           | FemaleAge5to9       | 699857     |
| Ecuador | 1997           | FemaleAge60to64     | 133404     |
| Ecuador | 1997           | FemaleAge65to69     | 105940     |
| Ecuador | 1997           | FemaleAge70to74     | 79423      |
| Ecuador | 1997           | FemaleAge75to79     | 55304      |
| Ecuador | 1997           | FemaleAge80to84     | 35499      |
| Ecuador | 1997           | FemaleAge85to89     | 18093      |
| Ecuador | 1997           | FemaleAge90to94     | 6650       |
| Ecuador | 1997           | FemaleAge95to99     | 1734       |
| Ecuador | 1997           | FemaleAgeAbov e100  | 289        |
| Ecuador | 1997           | FemaleLactAge15to19 | 50471      |
| Ecuador | 1997           | FemaleLactAge20to24 | 90416      |
| Ecuador | 1997           | FemaleLactAge25to29 | 77259      |
| Ecuador | 1997           | FemaleLactAge30to34 | 51795      |
| Ecuador | 1997           | FemaleLactAge35to39 | 28516      |
| Ecuador | 1997           | FemaleLactAge40to44 | 11421      |
| Ecuador | 1997           | FemaleLactAge45to49 | 2272       |
| Ecuador | 1997           | FemalePregAge15to19 | 37853      |
| Ecuador | 1997           | FemalePregAge20to24 | 67812      |
| Ecuador | 1997           | FemalePregAge25to29 | 57944      |
| Ecuador | 1997           | FemalePregAge30to34 | 38847      |
| Ecuador | 1997           | FemalePregAge35to39 | 21387      |
| Ecuador | 1997           | FemalePregAge40to44 | 8566       |
| Ecuador | 1997           | FemalePregAge45to49 | 1704       |
| Ecuador | 1997           | MaleAge0to4         | 744133     |
| Ecuador | 1997           | MaleAge10to14       | 668207     |
| Ecuador | 1997           | MaleAge15to19       | 612430     |
| Ecuador | 1997           | MaleAge20to24       | 563630     |
| Ecuador | 1997           | MaleAge25to29       | 505439     |
| Ecuador | 1997           | MaleAge30to34       | 436850     |
| Ecuador | 1997           | MaleAge35to39       | 370088     |
| Ecuador | 1997           | MaleAge40to44       | 315657     |
| Ecuador | 1997           | MaleAge45to49       | 243756     |
| Ecuador | 1997           | MaleAge50to54       | 188053     |
| Ecuador | 1997           | MaleAge55to59       | 157178     |
| Ecuador | 1997           | MaleAge5to9         | 724261     |
| Ecuador | 1997           | MaleAge60to64       | 127440     |
| Ecuador | 1997           | MaleAge65to69       | 98931      |
| Ecuador | 1997           | MaleAge70to74       | 72070      |
| Ecuador | 1997           | MaleAge75to79       | 47707      |
| Ecuador | 1997           | MaleAge80to84       | 28340      |
| Ecuador | 1997           | MaleAge85to89       | 13209      |
| Ecuador | 1997           | MaleAge90to94       | 4347       |
| Ecuador | 1997           | MaleAge95to99       | 1018       |
| Ecuador | 1997           | MaleAgeAbov e100    | 149        |
| Ecuador | 1998           | FemaleAge0to4       | 722641     |
| Ecuador | 1998           | FemaleAge10to14     | 660658     |
| Ecuador | 1998           | FemaleAge15to19     | 515397     |
| Ecuador | 1998           | FemaleAge20to24     | 402703     |
| Ecuador | 1998           | FemaleAge25to29     | 374447     |
| Ecuador | 1998           | FemaleAge30to34     | 357376     |
| Ecuador | 1998           | FemaleAge35to39     | 333052     |
| Ecuador | 1998           | FemaleAge40to44     | 308067     |
| Ecuador | 1998           | FemaleAge45to49     | 259484     |
| Ecuador | 1998           | FemaleAge50to54     | 197183     |
| Ecuador | 1998           | FemaleAge55to59     | 166058     |
| Ecuador | 1998           | FemaleAge5to9       | 703127     |
| Ecuador | 1998           | FemaleAge60to64     | 137586     |
| Ecuador | 1998           | FemaleAge65to69     | 109552     |
| Ecuador | 1998           | FemaleAge70to74     | 82700      |
| Ecuador | 1998           | FemaleAge75to79     | 57593      |
| Ecuador | 1998           | FemaleAge80to84     | 36535      |
| Ecuador | 1998           | FemaleAge85to89     | 19148      |
| Ecuador | 1998           | FemaleAge90to94     | 6920       |
| Ecuador | 1998           | FemaleAge95to99     | 1898       |
| Ecuador | 1998           | FemaleAgeAbov e100  | 308        |
| Ecuador | 1998           | FemaleLactAge15to19 | 50471      |
| Ecuador | 1998           | FemaleLactAge20to24 | 90416      |
| Ecuador | 1998           | FemaleLactAge25to29 | 77259      |
| Ecuador | 1998           | FemaleLactAge30to34 | 51795      |
| Ecuador | 1998           | FemaleLactAge35to39 | 28516      |
| Ecuador | 1998           | FemaleLactAge40to44 | 11421      |

Dietary calcium and zinc deficiency risks are decreasing but remain prevalent

| Country | Reference year | Age/gender group    | Population |
|---------|----------------|---------------------|------------|
| Ecuador | 1998           | FemaleLactAge45to49 | 2272       |
| Ecuador | 1998           | FemalePregAge15to19 | 37853      |
| Ecuador | 1998           | FemalePregAge20to24 | 67812      |
| Ecuador | 1998           | FemalePregAge25to29 | 57944      |
| Ecuador | 1998           | FemalePregAge30to34 | 38847      |
| Ecuador | 1998           | FemalePregAge35to39 | 21387      |
| Ecuador | 1998           | FemalePregAge40to44 | 8566       |
| Ecuador | 1998           | FemalePregAge45to49 | 1704       |
| Ecuador | 1998           | MaleAge0to4         | 751401     |
| Ecuador | 1998           | MaleAge10to14       | 681670     |
| Ecuador | 1998           | MaleAge15to19       | 620129     |
| Ecuador | 1998           | MaleAge20to24       | 572470     |
| Ecuador | 1998           | MaleAge25to29       | 515634     |
| Ecuador | 1998           | MaleAge30to34       | 448764     |
| Ecuador | 1998           | MaleAge35to39       | 380280     |
| Ecuador | 1998           | MaleAge40to44       | 323700     |
| Ecuador | 1998           | MaleAge45to49       | 258981     |
| Ecuador | 1998           | MaleAge50to54       | 193402     |
| Ecuador | 1998           | MaleAge55to59       | 161456     |
| Ecuador | 1998           | MaleAge5to9         | 727973     |
| Ecuador | 1998           | MaleAge60to64       | 131551     |
| Ecuador | 1998           | MaleAge65to69       | 102254     |
| Ecuador | 1998           | MaleAge70to74       | 75044      |
| Ecuador | 1998           | MaleAge75to79       | 49884      |
| Ecuador | 1998           | MaleAge80to84       | 29305      |
| Ecuador | 1998           | MaleAge85to89       | 14026      |
| Ecuador | 1998           | MaleAge90to94       | 4549       |
| Ecuador | 1998           | MaleAge95to99       | 1127       |
| Ecuador | 1998           | MaleAgeAbov e100    | 159        |
| Ecuador | 1999           | FemaleAge0to4       | 729961     |
| Ecuador | 1999           | FemaleAge10to14     | 672532     |
| Ecuador | 1999           | FemaleAge15to19     | 523689     |
| Ecuador | 1999           | FemaleAge20to24     | 411167     |
| Ecuador | 1999           | FemaleAge25to29     | 384570     |
| Ecuador | 1999           | FemaleAge30to34     | 369699     |
| Ecuador | 1999           | FemaleAge35to39     | 344236     |
| Ecuador | 1999           | FemaleAge40to44     | 316398     |
| Ecuador | 1999           | FemaleAge45to49     | 274587     |
| Ecuador | 1999           | FemaleAge50to54     | 204566     |
| Ecuador | 1999           | FemaleAge55to59     | 170598     |
| Ecuador | 1999           | FemaleAge5to9       | 704832     |
| Ecuador | 1999           | FemaleAge60to64     | 141797     |
| Ecuador | 1999           | FemaleAge65to69     | 113323     |
| Ecuador | 1999           | FemaleAge70to74     | 86113      |
| Ecuador | 1999           | FemaleAge75to79     | 60175      |
| Ecuador | 1999           | FemaleAge80to84     | 37874      |
| Ecuador | 1999           | FemaleAge85to89     | 19993      |
| Ecuador | 1999           | FemaleAge90to94     | 7144       |
| Ecuador | 1999           | FemaleAge95to99     | 1978       |
| Ecuador | 1999           | FemaleAgeAbov e100  | 328        |
| Ecuador | 1999           | FemaleLactAge15to19 | 50471      |
| Ecuador | 1999           | FemaleLactAge20to24 | 90416      |
| Ecuador | 1999           | FemaleLactAge25to29 | 77259      |
| Ecuador | 1999           | FemaleLactAge30to34 | 51795      |
| Ecuador | 1999           | FemaleLactAge35to39 | 28516      |
| Ecuador | 1999           | FemaleLactAge40to44 | 11421      |
| Ecuador | 1999           | FemaleLactAge45to49 | 2272       |
| Ecuador | 1999           | FemalePregAge15to19 | 37853      |
| Ecuador | 1999           | FemalePregAge20to24 | 67812      |
| Ecuador | 1999           | FemalePregAge25to29 | 57944      |
| Ecuador | 1999           | FemalePregAge30to34 | 38847      |
| Ecuador | 1999           | FemalePregAge35to39 | 21387      |
| Ecuador | 1999           | FemalePregAge40to44 | 8566       |
| Ecuador | 1999           | FemalePregAge45to49 | 1704       |
| Ecuador | 1999           | MaleAge0to4         | 759339     |
| Ecuador | 1999           | MaleAge10to14       | 694234     |
| Ecuador | 1999           | MaleAge15to19       | 628926     |
| Ecuador | 1999           | MaleAge20to24       | 581131     |
| Ecuador | 1999           | MaleAge25to29       | 525606     |
| Ecuador | 1999           | MaleAge30to34       | 460552     |
| Ecuador | 1999           | MaleAge35to39       | 390776     |
| Ecuador | 1999           | MaleAge40to44       | 331703     |
| Ecuador | 1999           | MaleAge45to49       | 273468     |
| Ecuador | 1999           | MaleAge50to54       | 200499     |
| Ecuador | 1999           | MaleAge55to59       | 165882     |
| Ecuador | 1999           | MaleAge5to9         | 730016     |
| Ecuador | 1999           | MaleAge60to64       | 135702     |
| Ecuador | 1999           | MaleAge65to69       | 105771     |
| Ecuador | 1999           | MaleAge70to74       | 78113      |
| Ecuador | 1999           | MaleAge75to79       | 52278      |
| Ecuador | 1999           | MaleAge80to84       | 30494      |
| Ecuador | 1999           | MaleAge85to89       | 14636      |
| Ecuador | 1999           | MaleAge90to94       | 4701       |
| Ecuador | 1999           | MaleAge95to99       | 1176       |
| Ecuador | 1999           | MaleAgeAbov e100    | 170        |
| Egy pt  | 1992           | FemaleAge0to4       | 4009217    |
| Egy pt  | 1992           | FemaleAge10to14     | 3359522    |
| Egy pt  | 1992           | FemaleAge15to19     | 2416863    |

Dietary calcium and zinc deficiency risks are decreasing but remain prevalent

| Country | Reference year | Age/gender group    | Population |
|---------|----------------|---------------------|------------|
| Egy pt  | 1992           | FemaleAge20to24     | 1510014    |
| Egy pt  | 1992           | FemaleAge25to29     | 1331038    |
| Egy pt  | 1992           | FemaleAge30to34     | 1386265    |
| Egy pt  | 1992           | FemaleAge35to39     | 1306205    |
| Egy pt  | 1992           | FemaleAge40to44     | 1357690    |
| Egy pt  | 1992           | FemaleAge45to49     | 1236207    |
| Egy pt  | 1992           | FemaleAge50to54     | 1043825    |
| Egy pt  | 1992           | FemaleAge55to59     | 931991     |
| Egy pt  | 1992           | FemaleAge5to9       | 3791444    |
| Egy pt  | 1992           | FemaleAge60to64     | 803090     |
| Egy pt  | 1992           | FemaleAge65to69     | 642979     |
| Egy pt  | 1992           | FemaleAge70to74     | 463702     |
| Egy pt  | 1992           | FemaleAge75to79     | 299804     |
| Egy pt  | 1992           | FemaleAge80to84     | 164172     |
| Egy pt  | 1992           | FemaleAge85to89     | 69760      |
| Egy pt  | 1992           | FemaleAge90to94     | 20548      |
| Egy pt  | 1992           | FemaleAge95to99     | 3384       |
| Egy pt  | 1992           | FemaleAgeAbov e100  | 290        |
| Egy pt  | 1992           | FemaleLactAge15to19 | 217802     |
| Egy pt  | 1992           | FemaleLactAge20to24 | 481429     |
| Egy pt  | 1992           | FemaleLactAge25to29 | 450049     |
| Egy pt  | 1992           | FemaleLactAge30to34 | 304359     |
| Egy pt  | 1992           | FemaleLactAge35to39 | 151178     |
| Egy pt  | 1992           | FemaleLactAge40to44 | 45976      |
| Egy pt  | 1992           | FemaleLactAge45to49 | 5578       |
| Egy pt  | 1992           | FemalePregAge15to19 | 163351     |
| Egy pt  | 1992           | FemalePregAge20to24 | 361072     |
| Egy pt  | 1992           | FemalePregAge25to29 | 337537     |
| Egy pt  | 1992           | FemalePregAge30to34 | 228270     |
| Egy pt  | 1992           | FemalePregAge35to39 | 113384     |
| Egy pt  | 1992           | FemalePregAge40to44 | 34482      |
| Egy pt  | 1992           | FemalePregAge45to49 | 4183       |
| Egy pt  | 1992           | MaleAge0to4         | 4193040    |
| Egy pt  | 1992           | MaleAge10to14       | 3512584    |
| Egy pt  | 1992           | MaleAge15to19       | 2927041    |
| Egy pt  | 1992           | MaleAge20to24       | 2476974    |
| Egy pt  | 1992           | MaleAge25to29       | 2228528    |
| Egy pt  | 1992           | MaleAge30to34       | 1969955    |
| Egy pt  | 1992           | MaleAge35to39       | 1644536    |
| Egy pt  | 1992           | MaleAge40to44       | 1481556    |
| Egy pt  | 1992           | MaleAge45to49       | 1201796    |
| Egy pt  | 1992           | MaleAge50to54       | 977300     |
| Egy pt  | 1992           | MaleAge55to59       | 849280     |
| Egy pt  | 1992           | MaleAge5to9         | 3960776    |
| Egy pt  | 1992           | MaleAge60to64       | 699915     |
| Egy pt  | 1992           | MaleAge65to69       | 524690     |
| Egy pt  | 1992           | MaleAge70to74       | 341740     |
| Egy pt  | 1992           | MaleAge75to79       | 197752     |
| Egy pt  | 1992           | MaleAge80to84       | 94639      |
| Egy pt  | 1992           | MaleAge85to89       | 33352      |
| Egy pt  | 1992           | MaleAge90to94       | 7658       |
| Egy pt  | 1992           | MaleAge95to99       | 905        |
| Egy pt  | 1992           | MaleAgeAbov e100    | 38         |
| Egy pt  | 1993           | FemaleAge0to4       | 3911802    |
| Egy pt  | 1993           | FemaleAge10to14     | 3442827    |
| Egy pt  | 1993           | FemaleAge15to19     | 2507695    |
| Egy pt  | 1993           | FemaleAge20to24     | 1531161    |
| Egy pt  | 1993           | FemaleAge25to29     | 1346099    |
| Egy pt  | 1993           | FemaleAge30to34     | 1429345    |
| Egy pt  | 1993           | FemaleAge35to39     | 1394050    |
| Egy pt  | 1993           | FemaleAge40to44     | 1347896    |
| Egy pt  | 1993           | FemaleAge45to49     | 1305902    |
| Egy pt  | 1993           | FemaleAge50to54     | 1053630    |
| Egy pt  | 1993           | FemaleAge55to59     | 949112     |
| Egy pt  | 1993           | FemaleAge5to9       | 3866420    |
| Egy pt  | 1993           | FemaleAge60to64     | 815715     |
| Egy pt  | 1993           | FemaleAge65to69     | 662458     |
| Egy pt  | 1993           | FemaleAge70to74     | 477620     |
| Egy pt  | 1993           | FemaleAge75to79     | 307893     |
| Egy pt  | 1993           | FemaleAge80to84     | 168360     |
| Egy pt  | 1993           | FemaleAge85to89     | 72019      |
| Egy pt  | 1993           | FemaleAge90to94     | 21633      |
| Egy pt  | 1993           | FemaleAge95to99     | 3841       |
| Egy pt  | 1993           | FemaleAgeAbov e100  | 314        |
| Egy pt  | 1993           | FemaleLactAge15to19 | 217802     |
| Egy pt  | 1993           | FemaleLactAge20to24 | 481429     |
| Egy pt  | 1993           | FemaleLactAge25to29 | 450049     |
| Egy pt  | 1993           | FemaleLactAge30to34 | 304359     |
| Egy pt  | 1993           | FemaleLactAge35to39 | 151178     |
| Egy pt  | 1993           | FemaleLactAge40to44 | 45976      |
| Egy pt  | 1993           | FemaleLactAge45to49 | 5578       |
| Egy pt  | 1993           | FemalePregAge15to19 | 163351     |
| Egy pt  | 1993           | FemalePregAge20to24 | 361072     |
| Egy pt  | 1993           | FemalePregAge25to29 | 337537     |
| Egy pt  | 1993           | FemalePregAge30to34 | 228270     |
| Egy pt  | 1993           | FemalePregAge35to39 | 113384     |
| Egy pt  | 1993           | FemalePregAge40to44 | 34482      |
| Egy pt  | 1993           | FemalePregAge45to49 | 4183       |

Dietary calcium and zinc deficiency risks are decreasing but remain prevalent

| Country | Reference year | Age/gender group    | Population |
|---------|----------------|---------------------|------------|
| Egy pt  | 1993           | MaleAge0to4         | 4090157    |
| Egy pt  | 1993           | MaleAge10to14       | 3597047    |
| Egy pt  | 1993           | MaleAge15to19       | 3019593    |
| Egy pt  | 1993           | MaleAge20to24       | 2486585    |
| Egy pt  | 1993           | MaleAge25to29       | 2242949    |
| Egy pt  | 1993           | MaleAge30to34       | 2027638    |
| Egy pt  | 1993           | MaleAge35to39       | 1717506    |
| Egy pt  | 1993           | MaleAge40to44       | 1491554    |
| Egy pt  | 1993           | MaleAge45to49       | 1282421    |
| Egy pt  | 1993           | MaleAge50to54       | 981603     |
| Egy pt  | 1993           | MaleAge55to59       | 867358     |
| Egy pt  | 1993           | MaleAge5to9         | 4038849    |
| Egy pt  | 1993           | MaleAge60to64       | 709423     |
| Egy pt  | 1993           | MaleAge65to69       | 543234     |
| Egy pt  | 1993           | MaleAge70to74       | 353361     |
| Egy pt  | 1993           | MaleAge75to79       | 203076     |
| Egy pt  | 1993           | MaleAge80to84       | 97359      |
| Egy pt  | 1993           | MaleAge85to89       | 34445      |
| Egy pt  | 1993           | MaleAge90to94       | 8049       |
| Egy pt  | 1993           | MaleAge95to99       | 1091       |
| Egy pt  | 1993           | MaleAgeAbov e100    | 41         |
| Egy pt  | 1994           | FemaleAge0to4       | 3815095    |
| Egy pt  | 1994           | FemaleAge10to14     | 3527831    |
| Egy pt  | 1994           | FemaleAge15to19     | 2607181    |
| Egy pt  | 1994           | FemaleAge20to24     | 1560590    |
| Egy pt  | 1994           | FemaleAge25to29     | 1352679    |
| Egy pt  | 1994           | FemaleAge30to34     | 1462536    |
| Egy pt  | 1994           | FemaleAge35to39     | 1479671    |
| Egy pt  | 1994           | FemaleAge40to44     | 1350256    |
| Egy pt  | 1994           | FemaleAge45to49     | 1365387    |
| Egy pt  | 1994           | FemaleAge50to54     | 1073655    |
| Egy pt  | 1994           | FemaleAge55to59     | 964739     |
| Egy pt  | 1994           | FemaleAge5to9       | 3924004    |
| Egy pt  | 1994           | FemaleAge60to64     | 829029     |
| Egy pt  | 1994           | FemaleAge65to69     | 681591     |
| Egy pt  | 1994           | FemaleAge70to74     | 493458     |
| Egy pt  | 1994           | FemaleAge75to79     | 316981     |
| Egy pt  | 1994           | FemaleAge80to84     | 172038     |
| Egy pt  | 1994           | FemaleAge85to89     | 72771      |
| Egy pt  | 1994           | FemaleAge90to94     | 21687      |
| Egy pt  | 1994           | FemaleAge95to99     | 4050       |
| Egy pt  | 1994           | FemaleAgeAbov e100  | 340        |
| Egy pt  | 1994           | FemaleLactAge15to19 | 217802     |
| Egy pt  | 1994           | FemaleLactAge20to24 | 481429     |
| Egy pt  | 1994           | FemaleLactAge25to29 | 450049     |
| Egy pt  | 1994           | FemaleLactAge30to34 | 304359     |
| Egy pt  | 1994           | FemaleLactAge35to39 | 151178     |
| Egy pt  | 1994           | FemaleLactAge40to44 | 45976      |
| Egy pt  | 1994           | FemaleLactAge45to49 | 5578       |
| Egy pt  | 1994           | FemalePregAge15to19 | 163351     |
| Egy pt  | 1994           | FemalePregAge20to24 | 361072     |
| Egy pt  | 1994           | FemalePregAge25to29 | 337537     |
| Egy pt  | 1994           | FemalePregAge30to34 | 228270     |
| Egy pt  | 1994           | FemalePregAge35to39 | 113384     |
| Egy pt  | 1994           | FemalePregAge40to44 | 34482      |
| Egy pt  | 1994           | FemalePregAge45to49 | 4183       |
| Egy pt  | 1994           | MaleAge0to4         | 3988573    |
| Egy pt  | 1994           | MaleAge10to14       | 3683775    |
| Egy pt  | 1994           | MaleAge15to19       | 3122919    |
| Egy pt  | 1994           | MaleAge20to24       | 2507266    |
| Egy pt  | 1994           | MaleAge25to29       | 2244181    |
| Egy pt  | 1994           | MaleAge30to34       | 2073806    |
| Egy pt  | 1994           | MaleAge35to39       | 1792640    |
| Egy pt  | 1994           | MaleAge40to44       | 1508221    |
| Egy pt  | 1994           | MaleAge45to49       | 1355878    |
| Egy pt  | 1994           | MaleAge50to54       | 999315     |
| Egy pt  | 1994           | MaleAge55to59       | 882784     |
| Egy pt  | 1994           | MaleAge5to9         | 4099545    |
| Egy pt  | 1994           | MaleAge60to64       | 720395     |
| Egy pt  | 1994           | MaleAge65to69       | 560772     |
| Egy pt  | 1994           | MaleAge70to74       | 366375     |
| Egy pt  | 1994           | MaleAge75to79       | 208792     |
| Egy pt  | 1994           | MaleAge80to84       | 99053      |
| Egy pt  | 1994           | MaleAge85to89       | 34374      |
| Egy pt  | 1994           | MaleAge90to94       | 7821       |
| Egy pt  | 1994           | MaleAge95to99       | 1120       |
| Egy pt  | 1994           | MaleAgeAbov e100    | 43         |
| Egy pt  | 1995           | FemaleAge0to4       | 3753957    |
| Egy pt  | 1995           | FemaleAge10to14     | 3613874    |
| Egy pt  | 1995           | FemaleAge15to19     | 2707270    |
| Egy pt  | 1995           | FemaleAge20to24     | 1604432    |
| Egy pt  | 1995           | FemaleAge25to29     | 1353893    |
| Egy pt  | 1995           | FemaleAge30to34     | 1485183    |
| Egy pt  | 1995           | FemaleAge35to39     | 1550544    |
| Egy pt  | 1995           | FemaleAge40to44     | 1377107    |
| Egy pt  | 1995           | FemaleAge45to49     | 1404180    |
| Egy pt  | 1995           | FemaleAge50to54     | 1107878    |
| Egy pt  | 1995           | FemaleAge55to59     | 977942     |

Dietary calcium and zinc deficiency risks are decreasing but remain prevalent

| Country | Reference year | Age/gender group    | Population |
|---------|----------------|---------------------|------------|
| Egy pt  | 1995           | FemaleAge5to9       | 3949009    |
| Egy pt  | 1995           | FemaleAge60to64     | 843204     |
| Egy pt  | 1995           | FemaleAge65to69     | 699342     |
| Egy pt  | 1995           | FemaleAge70to74     | 510999     |
| Egy pt  | 1995           | FemaleAge75to79     | 327346     |
| Egy pt  | 1995           | FemaleAge80to84     | 175599     |
| Egy pt  | 1995           | FemaleAge85to89     | 72269      |
| Egy pt  | 1995           | FemaleAge90to94     | 20494      |
| Egy pt  | 1995           | FemaleAge95to99     | 3558       |
| Egy pt  | 1995           | FemaleAgeAbove100   | 366        |
| Egy pt  | 1995           | FemaleLactAge15to19 | 217802     |
| Egy pt  | 1995           | FemaleLactAge20to24 | 481429     |
| Egy pt  | 1995           | FemaleLactAge25to29 | 450049     |
| Egy pt  | 1995           | FemaleLactAge30to34 | 304359     |
| Egy pt  | 1995           | FemaleLactAge35to39 | 151178     |
| Egy pt  | 1995           | FemaleLactAge40to44 | 45976      |
| Egy pt  | 1995           | FemaleLactAge45to49 | 5578       |
| Egy pt  | 1995           | FemalePregAge15to19 | 163351     |
| Egy pt  | 1995           | FemalePregAge20to24 | 361072     |
| Egy pt  | 1995           | FemalePregAge25to29 | 337537     |
| Egy pt  | 1995           | FemalePregAge30to34 | 228270     |
| Egy pt  | 1995           | FemalePregAge35to39 | 113384     |
| Egy pt  | 1995           | FemalePregAge40to44 | 34482      |
| Egy pt  | 1995           | FemalePregAge45to49 | 4183       |
| Egy pt  | 1995           | MaleAge0to4         | 3925347    |
| Egy pt  | 1995           | MaleAge10to14       | 3772848    |
| Egy pt  | 1995           | MaleAge15to19       | 3227634    |
| Egy pt  | 1995           | MaleAge20to24       | 2546664    |
| Egy pt  | 1995           | MaleAge25to29       | 2237273    |
| Egy pt  | 1995           | MaleAge30to34       | 2104190    |
| Egy pt  | 1995           | MaleAge35to39       | 1861171    |
| Egy pt  | 1995           | MaleAge40to44       | 1541618    |
| Egy pt  | 1995           | MaleAge45to49       | 1411066    |
| Egy pt  | 1995           | MaleAge50to54       | 1035929    |
| Egy pt  | 1995           | MaleAge55to59       | 894323     |
| Egy pt  | 1995           | MaleAge5to9         | 4126808    |
| Egy pt  | 1995           | MaleAge60to64       | 733397     |
| Egy pt  | 1995           | MaleAge65to69       | 576289     |
| Egy pt  | 1995           | MaleAge70to74       | 380840     |
| Egy pt  | 1995           | MaleAge75to79       | 215260     |
| Egy pt  | 1995           | MaleAge80to84       | 99956      |
| Egy pt  | 1995           | MaleAge85to89       | 33159      |
| Egy pt  | 1995           | MaleAge90to94       | 6720       |
| Egy pt  | 1995           | MaleAge95to99       | 766        |
| Egy pt  | 1995           | MaleAgeAbove100     | 46         |
| Egy pt  | 1996           | FemaleAge0to4       | 3671769    |
| Egy pt  | 1996           | FemaleAge10to14     | 3706118    |
| Egy pt  | 1996           | FemaleAge15to19     | 2835382    |
| Egy pt  | 1996           | FemaleAge20to24     | 1606185    |
| Egy pt  | 1996           | FemaleAge25to29     | 1380861    |
| Egy pt  | 1996           | FemaleAge30to34     | 1552042    |
| Egy pt  | 1996           | FemaleAge35to39     | 1623293    |
| Egy pt  | 1996           | FemaleAge40to44     | 1437317    |
| Egy pt  | 1996           | FemaleAge45to49     | 1417433    |
| Egy pt  | 1996           | FemaleAge50to54     | 1153797    |
| Egy pt  | 1996           | FemaleAge55to59     | 988658     |
| Egy pt  | 1996           | FemaleAge5to9       | 3959713    |
| Egy pt  | 1996           | FemaleAge60to64     | 855748     |
| Egy pt  | 1996           | FemaleAge65to69     | 711219     |
| Egy pt  | 1996           | FemaleAge70to74     | 524553     |
| Egy pt  | 1996           | FemaleAge75to79     | 336742     |
| Egy pt  | 1996           | FemaleAge80to84     | 182539     |
| Egy pt  | 1996           | FemaleAge85to89     | 77511      |
| Egy pt  | 1996           | FemaleAge90to94     | 23330      |
| Egy pt  | 1996           | FemaleAge95to99     | 3951       |
| Egy pt  | 1996           | FemaleAgeAbove100   | 392        |
| Egy pt  | 1996           | FemaleLactAge15to19 | 196165     |
| Egy pt  | 1996           | FemaleLactAge20to24 | 515799     |
| Egy pt  | 1996           | FemaleLactAge25to29 | 448489     |
| Egy pt  | 1996           | FemaleLactAge30to34 | 281451     |
| Egy pt  | 1996           | FemaleLactAge35to39 | 143967     |
| Egy pt  | 1996           | FemaleLactAge40to44 | 39144      |
| Egy pt  | 1996           | FemaleLactAge45to49 | 7494       |
| Egy pt  | 1996           | FemalePregAge15to19 | 147124     |
| Egy pt  | 1996           | FemalePregAge20to24 | 386849     |
| Egy pt  | 1996           | FemalePregAge25to29 | 336367     |
| Egy pt  | 1996           | FemalePregAge30to34 | 211088     |
| Egy pt  | 1996           | FemalePregAge35to39 | 107975     |
| Egy pt  | 1996           | FemalePregAge40to44 | 29358      |
| Egy pt  | 1996           | FemalePregAge45to49 | 5621       |
| Egy pt  | 1996           | MaleAge0to4         | 3838839    |
| Egy pt  | 1996           | MaleAge10to14       | 3865266    |
| Egy pt  | 1996           | MaleAge15to19       | 3325389    |
| Egy pt  | 1996           | MaleAge20to24       | 2618139    |
| Egy pt  | 1996           | MaleAge25to29       | 2258620    |
| Egy pt  | 1996           | MaleAge30to34       | 2134178    |
| Egy pt  | 1996           | MaleAge35to39       | 1921211    |
| Egy pt  | 1996           | MaleAge40to44       | 1588410    |

Dietary calcium and zinc deficiency risks are decreasing but remain prevalent

| Country | Reference year | Age/gender group    | Population |
|---------|----------------|---------------------|------------|
| Egy pt  | 1996           | MaleAge45to49       | 1443653    |
| Egy pt  | 1996           | MaleAge50to54       | 1085260    |
| Egy pt  | 1996           | MaleAge55to59       | 901446     |
| Egy pt  | 1996           | MaleAge5to9         | 4137921    |
| Egy pt  | 1996           | MaleAge60to64       | 745105     |
| Egy pt  | 1996           | MaleAge65to69       | 586125     |
| Egy pt  | 1996           | MaleAge70to74       | 394188     |
| Egy pt  | 1996           | MaleAge75to79       | 223594     |
| Egy pt  | 1996           | MaleAge80to84       | 105113     |
| Egy pt  | 1996           | MaleAge85to89       | 36630      |
| Egy pt  | 1996           | MaleAge90to94       | 8127       |
| Egy pt  | 1996           | MaleAge95to99       | 885        |
| Egy pt  | 1996           | MaleAgeAbov e100    | 49         |
| Egy pt  | 1997           | FemaleAge0to4       | 3665642    |
| Egy pt  | 1997           | FemaleAge10to14     | 3790182    |
| Egy pt  | 1997           | FemaleAge15to19     | 2924825    |
| Egy pt  | 1997           | FemaleAge20to24     | 1680889    |
| Egy pt  | 1997           | FemaleAge25to29     | 1391670    |
| Egy pt  | 1997           | FemaleAge30to34     | 1569484    |
| Egy pt  | 1997           | FemaleAge35to39     | 1670119    |
| Egy pt  | 1997           | FemaleAge40to44     | 1507272    |
| Egy pt  | 1997           | FemaleAge45to49     | 1411381    |
| Egy pt  | 1997           | FemaleAge50to54     | 1213591    |
| Egy pt  | 1997           | FemaleAge55to59     | 994897     |
| Egy pt  | 1997           | FemaleAge5to9       | 3926595    |
| Egy pt  | 1997           | FemaleAge60to64     | 869378     |
| Egy pt  | 1997           | FemaleAge65to69     | 721457     |
| Egy pt  | 1997           | FemaleAge70to74     | 538977     |
| Egy pt  | 1997           | FemaleAge75to79     | 345694     |
| Egy pt  | 1997           | FemaleAge80to84     | 187963     |
| Egy pt  | 1997           | FemaleAge85to89     | 81219      |
| Egy pt  | 1997           | FemaleAge90to94     | 25361      |
| Egy pt  | 1997           | FemaleAge95to99     | 4544       |
| Egy pt  | 1997           | FemaleAgeAbov e100  | 419        |
| Egy pt  | 1997           | FemaleLactAge15to19 | 196165     |
| Egy pt  | 1997           | FemaleLactAge20to24 | 515799     |
| Egy pt  | 1997           | FemaleLactAge25to29 | 448489     |
| Egy pt  | 1997           | FemaleLactAge30to34 | 281451     |
| Egy pt  | 1997           | FemaleLactAge35to39 | 143967     |
| Egy pt  | 1997           | FemaleLactAge40to44 | 39144      |
| Egy pt  | 1997           | FemaleLactAge45to49 | 7494       |
| Egy pt  | 1997           | FemalePregAge15to19 | 147124     |
| Egy pt  | 1997           | FemalePregAge20to24 | 386849     |
| Egy pt  | 1997           | FemalePregAge25to29 | 336367     |
| Egy pt  | 1997           | FemalePregAge30to34 | 211088     |
| Egy pt  | 1997           | FemalePregAge35to39 | 107975     |
| Egy pt  | 1997           | FemalePregAge40to44 | 29358      |
| Egy pt  | 1997           | FemalePregAge45to49 | 5621       |
| Egy pt  | 1997           | MaleAge0to4         | 3833378    |
| Egy pt  | 1997           | MaleAge10to14       | 3950992    |
| Egy pt  | 1997           | MaleAge15to19       | 3417569    |
| Egy pt  | 1997           | MaleAge20to24       | 2705569    |
| Egy pt  | 1997           | MaleAge25to29       | 2268995    |
| Egy pt  | 1997           | MaleAge30to34       | 2150924    |
| Egy pt  | 1997           | MaleAge35to39       | 1974718    |
| Egy pt  | 1997           | MaleAge40to44       | 1648184    |
| Egy pt  | 1997           | MaleAge45to49       | 1457364    |
| Egy pt  | 1997           | MaleAge50to54       | 1151775    |
| Egy pt  | 1997           | MaleAge55to59       | 902708     |
| Egy pt  | 1997           | MaleAge5to9         | 4103667    |
| Egy pt  | 1997           | MaleAge60to64       | 759102     |
| Egy pt  | 1997           | MaleAge65to69       | 593547     |
| Egy pt  | 1997           | MaleAge70to74       | 407900     |
| Egy pt  | 1997           | MaleAge75to79       | 231092     |
| Egy pt  | 1997           | MaleAge80to84       | 108813     |
| Egy pt  | 1997           | MaleAge85to89       | 39024      |
| Egy pt  | 1997           | MaleAge90to94       | 9144       |
| Egy pt  | 1997           | MaleAge95to99       | 1102       |
| Egy pt  | 1997           | MaleAgeAbov e100    | 52         |
| Egy pt  | 1998           | FemaleAge0to4       | 3714186    |
| Egy pt  | 1998           | FemaleAge10to14     | 3861387    |
| Egy pt  | 1998           | FemaleAge15to19     | 3020122    |
| Egy pt  | 1998           | FemaleAge20to24     | 1769742    |
| Egy pt  | 1998           | FemaleAge25to29     | 1393472    |
| Egy pt  | 1998           | FemaleAge30to34     | 1580917    |
| Egy pt  | 1998           | FemaleAge35to39     | 1706437    |
| Egy pt  | 1998           | FemaleAge40to44     | 1590150    |
| Egy pt  | 1998           | FemaleAge45to49     | 1397419    |
| Egy pt  | 1998           | FemaleAge50to54     | 1278014    |
| Egy pt  | 1998           | FemaleAge55to59     | 1002492    |
| Egy pt  | 1998           | FemaleAge5to9       | 3856744    |
| Egy pt  | 1998           | FemaleAge60to64     | 883793     |
| Egy pt  | 1998           | FemaleAge65to69     | 731491     |
| Egy pt  | 1998           | FemaleAge70to74     | 554417     |
| Egy pt  | 1998           | FemaleAge75to79     | 355131     |
| Egy pt  | 1998           | FemaleAge80to84     | 192378     |
| Egy pt  | 1998           | FemaleAge85to89     | 83274      |
| Egy pt  | 1998           | FemaleAge90to94     | 26352      |

Dietary calcium and zinc deficiency risks are decreasing but remain prevalent

| Country | Reference year | Age/gender group    | Population |
|---------|----------------|---------------------|------------|
| Egy pt  | 1998           | FemaleAge95to99     | 5109       |
| Egy pt  | 1998           | FemaleAgeAbov e100  | 447        |
| Egy pt  | 1998           | FemaleLactAge15to19 | 196165     |
| Egy pt  | 1998           | FemaleLactAge20to24 | 515799     |
| Egy pt  | 1998           | FemaleLactAge25to29 | 448489     |
| Egy pt  | 1998           | FemaleLactAge30to34 | 281451     |
| Egy pt  | 1998           | FemaleLactAge35to39 | 143967     |
| Egy pt  | 1998           | FemaleLactAge40to44 | 39144      |
| Egy pt  | 1998           | FemaleLactAge45to49 | 7494       |
| Egy pt  | 1998           | FemalePregAge15to19 | 147124     |
| Egy pt  | 1998           | FemalePregAge20to24 | 386849     |
| Egy pt  | 1998           | FemalePregAge25to29 | 336367     |
| Egy pt  | 1998           | FemalePregAge30to34 | 211088     |
| Egy pt  | 1998           | FemalePregAge35to39 | 107975     |
| Egy pt  | 1998           | FemalePregAge40to44 | 29358      |
| Egy pt  | 1998           | FemalePregAge45to49 | 5621       |
| Egy pt  | 1998           | MaleAge0to4         | 3885843    |
| Egy pt  | 1998           | MaleAge10to14       | 4026062    |
| Egy pt  | 1998           | MaleAge15to19       | 3510950    |
| Egy pt  | 1998           | MaleAge20to24       | 2807842    |
| Egy pt  | 1998           | MaleAge25to29       | 2274524    |
| Egy pt  | 1998           | MaleAge30to34       | 2158191    |
| Egy pt  | 1998           | MaleAge35to39       | 2021860    |
| Egy pt  | 1998           | MaleAge40to44       | 1716028    |
| Egy pt  | 1998           | MaleAge45to49       | 1463729    |
| Egy pt  | 1998           | MaleAge50to54       | 1226018    |
| Egy pt  | 1998           | MaleAge55to59       | 905293     |
| Egy pt  | 1998           | MaleAge5to9         | 4030588    |
| Egy pt  | 1998           | MaleAge60to64       | 774220     |
| Egy pt  | 1998           | MaleAge65to69       | 600516     |
| Egy pt  | 1998           | MaleAge70to74       | 421641     |
| Egy pt  | 1998           | MaleAge75to79       | 238372     |
| Egy pt  | 1998           | MaleAge80to84       | 111356     |
| Egy pt  | 1998           | MaleAge85to89       | 40073      |
| Egy pt  | 1998           | MaleAge90to94       | 9602       |
| Egy pt  | 1998           | MaleAge95to99       | 1315       |
| Egy pt  | 1998           | MaleAgeAbov e100    | 55         |
| Egy pt  | 1999           | FemaleAge0to4       | 3774078    |
| Egy pt  | 1999           | FemaleAge10to14     | 3912198    |
| Egy pt  | 1999           | FemaleAge15to19     | 3126289    |
| Egy pt  | 1999           | FemaleAge20to24     | 1870085    |
| Egy pt  | 1999           | FemaleAge25to29     | 1400322    |
| Egy pt  | 1999           | FemaleAge30to34     | 1588907    |
| Egy pt  | 1999           | FemaleAge35to39     | 1737615    |
| Egy pt  | 1999           | FemaleAge40to44     | 1671987    |
| Egy pt  | 1999           | FemaleAge45to49     | 1398439    |
| Egy pt  | 1999           | FemaleAge50to54     | 1332923    |
| Egy pt  | 1999           | FemaleAge55to59     | 1020614    |
| Egy pt  | 1999           | FemaleAge5to9       | 3773978    |
| Egy pt  | 1999           | FemaleAge60to64     | 898453     |
| Egy pt  | 1999           | FemaleAge65to69     | 743486     |
| Egy pt  | 1999           | FemaleAge70to74     | 570718     |
| Egy pt  | 1999           | FemaleAge75to79     | 366145     |
| Egy pt  | 1999           | FemaleAge80to84     | 196578     |
| Egy pt  | 1999           | FemaleAge85to89     | 83865      |
| Egy pt  | 1999           | FemaleAge90to94     | 26156      |
| Egy pt  | 1999           | FemaleAge95to99     | 5304       |
| Egy pt  | 1999           | FemaleAgeAbov e100  | 475        |
| Egy pt  | 1999           | FemaleLactAge15to19 | 196165     |
| Egy pt  | 1999           | FemaleLactAge20to24 | 515799     |
| Egy pt  | 1999           | FemaleLactAge25to29 | 448489     |
| Egy pt  | 1999           | FemaleLactAge30to34 | 281451     |
| Egy pt  | 1999           | FemaleLactAge35to39 | 143967     |
| Egy pt  | 1999           | FemaleLactAge40to44 | 39144      |
| Egy pt  | 1999           | FemaleLactAge45to49 | 7494       |
| Egy pt  | 1999           | FemalePregAge15to19 | 147124     |
| Egy pt  | 1999           | FemalePregAge20to24 | 386849     |
| Egy pt  | 1999           | FemalePregAge25to29 | 336367     |
| Egy pt  | 1999           | FemalePregAge30to34 | 211088     |
| Egy pt  | 1999           | FemalePregAge35to39 | 107975     |
| Egy pt  | 1999           | FemalePregAge40to44 | 29358      |
| Egy pt  | 1999           | FemalePregAge45to49 | 5621       |
| Egy pt  | 1999           | MaleAge0to4         | 3949799    |
| Egy pt  | 1999           | MaleAge10to14       | 4081260    |
| Egy pt  | 1999           | MaleAge15to19       | 3612947    |
| Egy pt  | 1999           | MaleAge20to24       | 2919263    |
| Egy pt  | 1999           | MaleAge25to29       | 2289399    |
| Egy pt  | 1999           | MaleAge30to34       | 2161202    |
| Egy pt  | 1999           | MaleAge35to39       | 2062795    |
| Egy pt  | 1999           | MaleAge40to44       | 1784891    |
| Egy pt  | 1999           | MaleAge45to49       | 1480385    |
| Egy pt  | 1999           | MaleAge50to54       | 1293548    |
| Egy pt  | 1999           | MaleAge55to59       | 920505     |
| Egy pt  | 1999           | MaleAge5to9         | 3943346    |
| Egy pt  | 1999           | MaleAge60to64       | 788456     |
| Egy pt  | 1999           | MaleAge65to69       | 609638     |
| Egy pt  | 1999           | MaleAge70to74       | 434821     |
| Egy pt  | 1999           | MaleAge75to79       | 246295     |

Dietary calcium and zinc deficiency risks are decreasing but remain prevalent

| Country     | Reference year | Age/gender group    | Population |
|-------------|----------------|---------------------|------------|
| Egypt       | 1999           | MaleAge80to84       | 113274     |
| Egypt       | 1999           | MaleAge85to89       | 39727      |
| Egypt       | 1999           | MaleAge90to94       | 9306       |
| Egypt       | 1999           | MaleAge95to99       | 1355       |
| Egypt       | 1999           | MaleAgeAbove100     | 59         |
| El Salvador | 1992           | FemaleAge0to4       | 392950     |
| El Salvador | 1992           | FemaleAge10to14     | 342210     |
| El Salvador | 1992           | FemaleAge15to19     | 243171     |
| El Salvador | 1992           | FemaleAge20to24     | 167591     |
| El Salvador | 1992           | FemaleAge25to29     | 155500     |
| El Salvador | 1992           | FemaleAge30to34     | 140613     |
| El Salvador | 1992           | FemaleAge35to39     | 125630     |
| El Salvador | 1992           | FemaleAge40to44     | 113282     |
| El Salvador | 1992           | FemaleAge45to49     | 106052     |
| El Salvador | 1992           | FemaleAge50to54     | 96191      |
| El Salvador | 1992           | FemaleAge55to59     | 80857      |
| El Salvador | 1992           | FemaleAge5to9       | 368779     |
| El Salvador | 1992           | FemaleAge60to64     | 63228      |
| El Salvador | 1992           | FemaleAge65to69     | 49889      |
| El Salvador | 1992           | FemaleAge70to74     | 37632      |
| El Salvador | 1992           | FemaleAge75to79     | 25134      |
| El Salvador | 1992           | FemaleAge80to84     | 15531      |
| El Salvador | 1992           | FemaleAge85to89     | 8615       |
| El Salvador | 1992           | FemaleAge90to94     | 4087       |
| El Salvador | 1992           | FemaleAge95to99     | 1529       |
| El Salvador | 1992           | FemaleAgeAbove100   | 533        |
| El Salvador | 1992           | FemaleLactAge15to19 | 35859      |
| El Salvador | 1992           | FemaleLactAge20to24 | 55311      |
| El Salvador | 1992           | FemaleLactAge25to29 | 38409      |
| El Salvador | 1992           | FemaleLactAge30to34 | 22324      |
| El Salvador | 1992           | FemaleLactAge35to39 | 12263      |
| El Salvador | 1992           | FemaleLactAge40to44 | 4553       |
| El Salvador | 1992           | FemaleLactAge45to49 | 574        |
| El Salvador | 1992           | FemalePregAge15to19 | 26895      |
| El Salvador | 1992           | FemalePregAge20to24 | 41484      |
| El Salvador | 1992           | FemalePregAge25to29 | 28807      |
| El Salvador | 1992           | FemalePregAge30to34 | 16743      |
| El Salvador | 1992           | FemalePregAge35to39 | 9197       |
| El Salvador | 1992           | FemalePregAge40to44 | 3415       |
| El Salvador | 1992           | FemalePregAge45to49 | 431        |
| El Salvador | 1992           | MaleAge0to4         | 408798     |
| El Salvador | 1992           | MaleAge10to14       | 348280     |
| El Salvador | 1992           | MaleAge15to19       | 303027     |
| El Salvador | 1992           | MaleAge20to24       | 246387     |
| El Salvador | 1992           | MaleAge25to29       | 191421     |
| El Salvador | 1992           | MaleAge30to34       | 149902     |
| El Salvador | 1992           | MaleAge35to39       | 125980     |
| El Salvador | 1992           | MaleAge40to44       | 107409     |
| El Salvador | 1992           | MaleAge45to49       | 95458      |
| El Salvador | 1992           | MaleAge50to54       | 82923      |
| El Salvador | 1992           | MaleAge55to59       | 66142      |
| El Salvador | 1992           | MaleAge5to9         | 380785     |
| El Salvador | 1992           | MaleAge60to64       | 51976      |
| El Salvador | 1992           | MaleAge65to69       | 42601      |
| El Salvador | 1992           | MaleAge70to74       | 32286      |
| El Salvador | 1992           | MaleAge75to79       | 20771      |
| El Salvador | 1992           | MaleAge80to84       | 11844      |
| El Salvador | 1992           | MaleAge85to89       | 6034       |
| El Salvador | 1992           | MaleAge90to94       | 2653       |
| El Salvador | 1992           | MaleAge95to99       | 916        |
| El Salvador | 1992           | MaleAgeAbove100     | 276        |
| El Salvador | 1993           | FemaleAge0to4       | 395293     |
| El Salvador | 1993           | FemaleAge10to14     | 342418     |
| El Salvador | 1993           | FemaleAge15to19     | 245545     |
| El Salvador | 1993           | FemaleAge20to24     | 170591     |
| El Salvador | 1993           | FemaleAge25to29     | 161301     |
| El Salvador | 1993           | FemaleAge30to34     | 148351     |
| El Salvador | 1993           | FemaleAge35to39     | 130290     |
| El Salvador | 1993           | FemaleAge40to44     | 118265     |
| El Salvador | 1993           | FemaleAge45to49     | 107116     |
| El Salvador | 1993           | FemaleAge50to54     | 98617      |
| El Salvador | 1993           | FemaleAge55to59     | 83364      |
| El Salvador | 1993           | FemaleAge5to9       | 370997     |
| El Salvador | 1993           | FemaleAge60to64     | 66107      |
| El Salvador | 1993           | FemaleAge65to69     | 50907      |
| El Salvador | 1993           | FemaleAge70to74     | 39229      |
| El Salvador | 1993           | FemaleAge75to79     | 26142      |
| El Salvador | 1993           | FemaleAge80to84     | 16073      |
| El Salvador | 1993           | FemaleAge85to89     | 8914       |
| El Salvador | 1993           | FemaleAge90to94     | 4232       |
| El Salvador | 1993           | FemaleAge95to99     | 1623       |
| El Salvador | 1993           | FemaleAgeAbove100   | 557        |
| El Salvador | 1993           | FemaleLactAge15to19 | 35859      |
| El Salvador | 1993           | FemaleLactAge20to24 | 55311      |
| El Salvador | 1993           | FemaleLactAge25to29 | 38409      |
| El Salvador | 1993           | FemaleLactAge30to34 | 22324      |
| El Salvador | 1993           | FemaleLactAge35to39 | 12263      |
| El Salvador | 1993           | FemaleLactAge40to44 | 4553       |



Dietary calcium and zinc deficiency risks are decreasing but remain prevalent

| Country     | Reference year | Age/gender group    | Population |
|-------------|----------------|---------------------|------------|
| El Salvador | 1993           | FemaleLactAge45to49 | 574        |
| El Salvador | 1993           | FemalePregAge15to19 | 26895      |
| El Salvador | 1993           | FemalePregAge20to24 | 41484      |
| El Salvador | 1993           | FemalePregAge25to29 | 28807      |
| El Salvador | 1993           | FemalePregAge30to34 | 16743      |
| El Salvador | 1993           | FemalePregAge35to39 | 9197       |
| El Salvador | 1993           | FemalePregAge40to44 | 3415       |
| El Salvador | 1993           | FemalePregAge45to49 | 431        |
| El Salvador | 1993           | MaleAge0to4         | 411349     |
| El Salvador | 1993           | MaleAge10to14       | 349190     |
| El Salvador | 1993           | MaleAge15to19       | 305093     |
| El Salvador | 1993           | MaleAge20to24       | 250896     |
| El Salvador | 1993           | MaleAge25to29       | 197408     |
| El Salvador | 1993           | MaleAge30to34       | 154727     |
| El Salvador | 1993           | MaleAge35to39       | 128330     |
| El Salvador | 1993           | MaleAge40to44       | 110398     |
| El Salvador | 1993           | MaleAge45to49       | 96004      |
| El Salvador | 1993           | MaleAge50to54       | 85240      |
| El Salvador | 1993           | MaleAge55to59       | 68398      |
| El Salvador | 1993           | MaleAge5to9         | 384266     |
| El Salvador | 1993           | MaleAge60to64       | 53382      |
| El Salvador | 1993           | MaleAge65to69       | 42920      |
| El Salvador | 1993           | MaleAge70to74       | 33354      |
| El Salvador | 1993           | MaleAge75to79       | 21614      |
| El Salvador | 1993           | MaleAge80to84       | 12289      |
| El Salvador | 1993           | MaleAge85to89       | 6249       |
| El Salvador | 1993           | MaleAge90to94       | 2752       |
| El Salvador | 1993           | MaleAge95to99       | 974        |
| El Salvador | 1993           | MaleAgeAbove100     | 292        |
| El Salvador | 1994           | FemaleAge0to4       | 396865     |
| El Salvador | 1994           | FemaleAge10to14     | 342714     |
| El Salvador | 1994           | FemaleAge15to19     | 247301     |
| El Salvador | 1994           | FemaleAge20to24     | 172625     |
| El Salvador | 1994           | FemaleAge25to29     | 165769     |
| El Salvador | 1994           | FemaleAge30to34     | 155711     |
| El Salvador | 1994           | FemaleAge35to39     | 135225     |
| El Salvador | 1994           | FemaleAge40to44     | 123235     |
| El Salvador | 1994           | FemaleAge45to49     | 108651     |
| El Salvador | 1994           | FemaleAge50to54     | 100708     |
| El Salvador | 1994           | FemaleAge55to59     | 85783      |
| El Salvador | 1994           | FemaleAge5to9       | 373724     |
| El Salvador | 1994           | FemaleAge60to64     | 68984      |
| El Salvador | 1994           | FemaleAge65to69     | 52208      |
| El Salvador | 1994           | FemaleAge70to74     | 40731      |
| El Salvador | 1994           | FemaleAge75to79     | 27234      |
| El Salvador | 1994           | FemaleAge80to84     | 16645      |
| El Salvador | 1994           | FemaleAge85to89     | 9184       |
| El Salvador | 1994           | FemaleAge90to94     | 4333       |
| El Salvador | 1994           | FemaleAge95to99     | 1678       |
| El Salvador | 1994           | FemaleAgeAbove100   | 582        |
| El Salvador | 1994           | FemaleLactAge15to19 | 35859      |
| El Salvador | 1994           | FemaleLactAge20to24 | 55311      |
| El Salvador | 1994           | FemaleLactAge25to29 | 38409      |
| El Salvador | 1994           | FemaleLactAge30to34 | 22324      |
| El Salvador | 1994           | FemaleLactAge35to39 | 12263      |
| El Salvador | 1994           | FemaleLactAge40to44 | 4553       |
| El Salvador | 1994           | FemaleLactAge45to49 | 574        |
| El Salvador | 1994           | FemalePregAge15to19 | 26895      |
| El Salvador | 1994           | FemalePregAge20to24 | 41484      |
| El Salvador | 1994           | FemalePregAge25to29 | 28807      |
| El Salvador | 1994           | FemalePregAge30to34 | 16743      |
| El Salvador | 1994           | FemalePregAge35to39 | 9197       |
| El Salvador | 1994           | FemalePregAge40to44 | 3415       |
| El Salvador | 1994           | FemalePregAge45to49 | 431        |
| El Salvador | 1994           | MaleAge0to4         | 412992     |
| El Salvador | 1994           | MaleAge10to14       | 350866     |
| El Salvador | 1994           | MaleAge15to19       | 306556     |
| El Salvador | 1994           | MaleAge20to24       | 254096     |
| El Salvador | 1994           | MaleAge25to29       | 202503     |
| El Salvador | 1994           | MaleAge30to34       | 159445     |
| El Salvador | 1994           | MaleAge35to39       | 130838     |
| El Salvador | 1994           | MaleAge40to44       | 113211     |
| El Salvador | 1994           | MaleAge45to49       | 96742      |
| El Salvador | 1994           | MaleAge50to54       | 87183      |
| El Salvador | 1994           | MaleAge55to59       | 70635      |
| El Salvador | 1994           | MaleAge5to9         | 388189     |
| El Salvador | 1994           | MaleAge60to64       | 54951      |
| El Salvador | 1994           | MaleAge65to69       | 43372      |
| El Salvador | 1994           | MaleAge70to74       | 34261      |
| El Salvador | 1994           | MaleAge75to79       | 22467      |
| El Salvador | 1994           | MaleAge80to84       | 12729      |
| El Salvador | 1994           | MaleAge85to89       | 6431       |
| El Salvador | 1994           | MaleAge90to94       | 2807       |
| El Salvador | 1994           | MaleAge95to99       | 1006       |
| El Salvador | 1994           | MaleAgeAbove100     | 308        |
| El Salvador | 1995           | FemaleAge0to4       | 396946     |
| El Salvador | 1995           | FemaleAge10to14     | 343372     |
| El Salvador | 1995           | FemaleAge15to19     | 248155     |

Dietary calcium and zinc deficiency risks are decreasing but remain prevalent

| Country     | Reference year | Age/gender group    | Population |
|-------------|----------------|---------------------|------------|
| El Salvador | 1995           | FemaleAge20to24     | 173861     |
| El Salvador | 1995           | FemaleAge25to29     | 168807     |
| El Salvador | 1995           | FemaleAge30to34     | 161997     |
| El Salvador | 1995           | FemaleAge35to39     | 140578     |
| El Salvador | 1995           | FemaleAge40to44     | 127757     |
| El Salvador | 1995           | FemaleAge45to49     | 110914     |
| El Salvador | 1995           | FemaleAge50to54     | 102301     |
| El Salvador | 1995           | FemaleAge55to59     | 88088      |
| El Salvador | 1995           | FemaleAge5to9       | 376338     |
| El Salvador | 1995           | FemaleAge60to64     | 71652      |
| El Salvador | 1995           | FemaleAge65to69     | 53913      |
| El Salvador | 1995           | FemaleAge70to74     | 42041      |
| El Salvador | 1995           | FemaleAge75to79     | 28409      |
| El Salvador | 1995           | FemaleAge80to84     | 17260      |
| El Salvador | 1995           | FemaleAge85to89     | 9426       |
| El Salvador | 1995           | FemaleAge90to94     | 4388       |
| El Salvador | 1995           | FemaleAge95to99     | 1671       |
| El Salvador | 1995           | FemaleAgeAbove100   | 607        |
| El Salvador | 1995           | FemaleLactAge15to19 | 35859      |
| El Salvador | 1995           | FemaleLactAge20to24 | 55311      |
| El Salvador | 1995           | FemaleLactAge25to29 | 38409      |
| El Salvador | 1995           | FemaleLactAge30to34 | 22324      |
| El Salvador | 1995           | FemaleLactAge35to39 | 12263      |
| El Salvador | 1995           | FemaleLactAge40to44 | 4553       |
| El Salvador | 1995           | FemaleLactAge45to49 | 574        |
| El Salvador | 1995           | FemalePregAge15to19 | 26895      |
| El Salvador | 1995           | FemalePregAge20to24 | 41484      |
| El Salvador | 1995           | FemalePregAge25to29 | 28807      |
| El Salvador | 1995           | FemalePregAge30to34 | 16743      |
| El Salvador | 1995           | FemalePregAge35to39 | 9197       |
| El Salvador | 1995           | FemalePregAge40to44 | 3415       |
| El Salvador | 1995           | FemalePregAge45to49 | 431        |
| El Salvador | 1995           | MaleAge0to4         | 413237     |
| El Salvador | 1995           | MaleAge10to14       | 353317     |
| El Salvador | 1995           | MaleAge15to19       | 307598     |
| El Salvador | 1995           | MaleAge20to24       | 256061     |
| El Salvador | 1995           | MaleAge25to29       | 206415     |
| El Salvador | 1995           | MaleAge30to34       | 163745     |
| El Salvador | 1995           | MaleAge35to39       | 133548     |
| El Salvador | 1995           | MaleAge40to44       | 115527     |
| El Salvador | 1995           | MaleAge45to49       | 97898      |
| El Salvador | 1995           | MaleAge50to54       | 88570      |
| El Salvador | 1995           | MaleAge55to59       | 72773      |
| El Salvador | 1995           | MaleAge5to9         | 391777     |
| El Salvador | 1995           | MaleAge60to64       | 56615      |
| El Salvador | 1995           | MaleAge65to69       | 44042      |
| El Salvador | 1995           | MaleAge70to74       | 34939      |
| El Salvador | 1995           | MaleAge75to79       | 23315      |
| El Salvador | 1995           | MaleAge80to84       | 13181      |
| El Salvador | 1995           | MaleAge85to89       | 6578       |
| El Salvador | 1995           | MaleAge90to94       | 2816       |
| El Salvador | 1995           | MaleAge95to99       | 990        |
| El Salvador | 1995           | MaleAgeAbove100     | 325        |
| El Salvador | 1996           | FemaleAge0to4       | 396910     |
| El Salvador | 1996           | FemaleAge10to14     | 344220     |
| El Salvador | 1996           | FemaleAge15to19     | 250983     |
| El Salvador | 1996           | FemaleAge20to24     | 182538     |
| El Salvador | 1996           | FemaleAge25to29     | 172536     |
| El Salvador | 1996           | FemaleAge30to34     | 168469     |
| El Salvador | 1996           | FemaleAge35to39     | 146304     |
| El Salvador | 1996           | FemaleAge40to44     | 131687     |
| El Salvador | 1996           | FemaleAge45to49     | 113335     |
| El Salvador | 1996           | FemaleAge50to54     | 103062     |
| El Salvador | 1996           | FemaleAge55to59     | 90093      |
| El Salvador | 1996           | FemaleAge5to9       | 378151     |
| El Salvador | 1996           | FemaleAge60to64     | 74002      |
| El Salvador | 1996           | FemaleAge65to69     | 55815      |
| El Salvador | 1996           | FemaleAge70to74     | 43004      |
| El Salvador | 1996           | FemaleAge75to79     | 29600      |
| El Salvador | 1996           | FemaleAge80to84     | 17993      |
| El Salvador | 1996           | FemaleAge85to89     | 9849       |
| El Salvador | 1996           | FemaleAge90to94     | 4651       |
| El Salvador | 1996           | FemaleAge95to99     | 1756       |
| El Salvador | 1996           | FemaleAgeAbove100   | 634        |
| El Salvador | 1996           | FemaleLactAge15to19 | 34620      |
| El Salvador | 1996           | FemaleLactAge20to24 | 51425      |
| El Salvador | 1996           | FemaleLactAge25to29 | 37394      |
| El Salvador | 1996           | FemaleLactAge30to34 | 21108      |
| El Salvador | 1996           | FemaleLactAge35to39 | 11739      |
| El Salvador | 1996           | FemaleLactAge40to44 | 4117       |
| El Salvador | 1996           | FemaleLactAge45to49 | 500        |
| El Salvador | 1996           | FemalePregAge15to19 | 25965      |
| El Salvador | 1996           | FemalePregAge20to24 | 38569      |
| El Salvador | 1996           | FemalePregAge25to29 | 28046      |
| El Salvador | 1996           | FemalePregAge30to34 | 15831      |
| El Salvador | 1996           | FemalePregAge35to39 | 8804       |
| El Salvador | 1996           | FemalePregAge40to44 | 3088       |
| El Salvador | 1996           | FemalePregAge45to49 | 375        |

Dietary calcium and zinc deficiency risks are decreasing but remain prevalent

| Country     | Reference year | Age/gender group    | Population |
|-------------|----------------|---------------------|------------|
| El Salvador | 1996           | MaleAge0to4         | 413346     |
| El Salvador | 1996           | MaleAge10to14       | 354946     |
| El Salvador | 1996           | MaleAge15to19       | 308778     |
| El Salvador | 1996           | MaleAge20to24       | 257771     |
| El Salvador | 1996           | MaleAge25to29       | 209687     |
| El Salvador | 1996           | MaleAge30to34       | 167965     |
| El Salvador | 1996           | MaleAge35to39       | 135929     |
| El Salvador | 1996           | MaleAge40to44       | 116783     |
| El Salvador | 1996           | MaleAge45to49       | 98863      |
| El Salvador | 1996           | MaleAge50to54       | 88965      |
| El Salvador | 1996           | MaleAge55to59       | 74602      |
| El Salvador | 1996           | MaleAge5to9         | 394039     |
| El Salvador | 1996           | MaleAge60to64       | 58198      |
| El Salvador | 1996           | MaleAge65to69       | 44835      |
| El Salvador | 1996           | MaleAge70to74       | 35424      |
| El Salvador | 1996           | MaleAge75to79       | 24220      |
| El Salvador | 1996           | MaleAge80to84       | 13871      |
| El Salvador | 1996           | MaleAge85to89       | 6950       |
| El Salvador | 1996           | MaleAge90to94       | 3016       |
| El Salvador | 1996           | MaleAge95to99       | 1046       |
| El Salvador | 1996           | MaleAgeAbove100     | 343        |
| El Salvador | 1997           | FemaleAge0to4       | 395742     |
| El Salvador | 1997           | FemaleAge10to14     | 345323     |
| El Salvador | 1997           | FemaleAge15to19     | 250543     |
| El Salvador | 1997           | FemaleAge20to24     | 184095     |
| El Salvador | 1997           | FemaleAge25to29     | 173476     |
| El Salvador | 1997           | FemaleAge30to34     | 171466     |
| El Salvador | 1997           | FemaleAge35to39     | 151399     |
| El Salvador | 1997           | FemaleAge40to44     | 134298     |
| El Salvador | 1997           | FemaleAge45to49     | 116182     |
| El Salvador | 1997           | FemaleAge50to54     | 103211     |
| El Salvador | 1997           | FemaleAge55to59     | 91958      |
| El Salvador | 1997           | FemaleAge5to9       | 379826     |
| El Salvador | 1997           | FemaleAge60to64     | 76122      |
| El Salvador | 1997           | FemaleAge65to69     | 58040      |
| El Salvador | 1997           | FemaleAge70to74     | 43764      |
| El Salvador | 1997           | FemaleAge75to79     | 30859      |
| El Salvador | 1997           | FemaleAge80to84     | 18708      |
| El Salvador | 1997           | FemaleAge85to89     | 10219      |
| El Salvador | 1997           | FemaleAge90to94     | 4862       |
| El Salvador | 1997           | FemaleAge95to99     | 1857       |
| El Salvador | 1997           | FemaleAgeAbove100   | 661        |
| El Salvador | 1997           | FemaleLactAge15to19 | 34620      |
| El Salvador | 1997           | FemaleLactAge20to24 | 51425      |
| El Salvador | 1997           | FemaleLactAge25to29 | 37394      |
| El Salvador | 1997           | FemaleLactAge30to34 | 21108      |
| El Salvador | 1997           | FemaleLactAge35to39 | 11739      |
| El Salvador | 1997           | FemaleLactAge40to44 | 4117       |
| El Salvador | 1997           | FemaleLactAge45to49 | 500        |
| El Salvador | 1997           | FemalePregAge15to19 | 25965      |
| El Salvador | 1997           | FemalePregAge20to24 | 38569      |
| El Salvador | 1997           | FemalePregAge25to29 | 28046      |
| El Salvador | 1997           | FemalePregAge30to34 | 15831      |
| El Salvador | 1997           | FemalePregAge35to39 | 8804       |
| El Salvador | 1997           | FemalePregAge40to44 | 3088       |
| El Salvador | 1997           | FemalePregAge45to49 | 375        |
| El Salvador | 1997           | MaleAge0to4         | 412424     |
| El Salvador | 1997           | MaleAge10to14       | 356899     |
| El Salvador | 1997           | MaleAge15to19       | 309492     |
| El Salvador | 1997           | MaleAge20to24       | 258865     |
| El Salvador | 1997           | MaleAge25to29       | 211585     |
| El Salvador | 1997           | MaleAge30to34       | 171493     |
| El Salvador | 1997           | MaleAge35to39       | 138595     |
| El Salvador | 1997           | MaleAge40to44       | 117543     |
| El Salvador | 1997           | MaleAge45to49       | 100190     |
| El Salvador | 1997           | MaleAge50to54       | 88692      |
| El Salvador | 1997           | MaleAge55to59       | 76294      |
| El Salvador | 1997           | MaleAge5to9         | 396171     |
| El Salvador | 1997           | MaleAge60to64       | 59795      |
| El Salvador | 1997           | MaleAge65to69       | 45731      |
| El Salvador | 1997           | MaleAge70to74       | 35707      |
| El Salvador | 1997           | MaleAge75to79       | 25115      |
| El Salvador | 1997           | MaleAge80to84       | 14516      |
| El Salvador | 1997           | MaleAge85to89       | 7270       |
| El Salvador | 1997           | MaleAge90to94       | 3178       |
| El Salvador | 1997           | MaleAge95to99       | 1118       |
| El Salvador | 1997           | MaleAgeAbove100     | 361        |
| El Salvador | 1998           | FemaleAge0to4       | 393078     |
| El Salvador | 1998           | FemaleAge10to14     | 346887     |
| El Salvador | 1998           | FemaleAge15to19     | 249556     |
| El Salvador | 1998           | FemaleAge20to24     | 185290     |
| El Salvador | 1998           | FemaleAge25to29     | 173771     |
| El Salvador | 1998           | FemaleAge30to34     | 173213     |
| El Salvador | 1998           | FemaleAge35to39     | 156476     |
| El Salvador | 1998           | FemaleAge40to44     | 136706     |
| El Salvador | 1998           | FemaleAge45to49     | 119312     |
| El Salvador | 1998           | FemaleAge50to54     | 103147     |
| El Salvador | 1998           | FemaleAge55to59     | 93595      |

Dietary calcium and zinc deficiency risks are decreasing but remain prevalent

| Country     | Reference year | Age/gender group    | Population |
|-------------|----------------|---------------------|------------|
| El Salvador | 1998           | FemaleAge5to9       | 381437     |
| El Salvador | 1998           | FemaleAge60to64     | 78059      |
| El Salvador | 1998           | FemaleAge65to69     | 60458      |
| El Salvador | 1998           | FemaleAge70to74     | 44540      |
| El Salvador | 1998           | FemaleAge75to79     | 32119      |
| El Salvador | 1998           | FemaleAge80to84     | 19432      |
| El Salvador | 1998           | FemaleAge85to89     | 10556      |
| El Salvador | 1998           | FemaleAge90to94     | 5023       |
| El Salvador | 1998           | FemaleAge95to99     | 1949       |
| El Salvador | 1998           | FemaleAgeAbove100   | 690        |
| El Salvador | 1998           | FemaleLactAge15to19 | 34620      |
| El Salvador | 1998           | FemaleLactAge20to24 | 51425      |
| El Salvador | 1998           | FemaleLactAge25to29 | 37394      |
| El Salvador | 1998           | FemaleLactAge30to34 | 21108      |
| El Salvador | 1998           | FemaleLactAge35to39 | 11739      |
| El Salvador | 1998           | FemaleLactAge40to44 | 4117       |
| El Salvador | 1998           | FemaleLactAge45to49 | 500        |
| El Salvador | 1998           | FemalePregAge15to19 | 25965      |
| El Salvador | 1998           | FemalePregAge20to24 | 38569      |
| El Salvador | 1998           | FemalePregAge25to29 | 28046      |
| El Salvador | 1998           | FemalePregAge30to34 | 15831      |
| El Salvador | 1998           | FemalePregAge35to39 | 8804       |
| El Salvador | 1998           | FemalePregAge40to44 | 3088       |
| El Salvador | 1998           | FemalePregAge45to49 | 375        |
| El Salvador | 1998           | MaleAge0to4         | 410005     |
| El Salvador | 1998           | MaleAge10to14       | 359370     |
| El Salvador | 1998           | MaleAge15to19       | 310091     |
| El Salvador | 1998           | MaleAge20to24       | 259688     |
| El Salvador | 1998           | MaleAge25to29       | 212244     |
| El Salvador | 1998           | MaleAge30to34       | 174079     |
| El Salvador | 1998           | MaleAge35to39       | 141512     |
| El Salvador | 1998           | MaleAge40to44       | 118050     |
| El Salvador | 1998           | MaleAge45to49       | 101669     |
| El Salvador | 1998           | MaleAge50to54       | 88087      |
| El Salvador | 1998           | MaleAge55to59       | 77708      |
| El Salvador | 1998           | MaleAge5to9         | 398125     |
| El Salvador | 1998           | MaleAge60to64       | 61389      |
| El Salvador | 1998           | MaleAge65to69       | 46715      |
| El Salvador | 1998           | MaleAge70to74       | 35933      |
| El Salvador | 1998           | MaleAge75to79       | 25953      |
| El Salvador | 1998           | MaleAge80to84       | 15112      |
| El Salvador | 1998           | MaleAge85to89       | 7551       |
| El Salvador | 1998           | MaleAge90to94       | 3298       |
| El Salvador | 1998           | MaleAge95to99       | 1185       |
| El Salvador | 1998           | MaleAgeAbove100     | 379        |
| El Salvador | 1999           | FemaleAge0to4       | 388135     |
| El Salvador | 1999           | FemaleAge10to14     | 349125     |
| El Salvador | 1999           | FemaleAge15to19     | 248963     |
| El Salvador | 1999           | FemaleAge20to24     | 186052     |
| El Salvador | 1999           | FemaleAge25to29     | 173926     |
| El Salvador | 1999           | FemaleAge30to34     | 174141     |
| El Salvador | 1999           | FemaleAge35to39     | 161032     |
| El Salvador | 1999           | FemaleAge40to44     | 139493     |
| El Salvador | 1999           | FemaleAge45to49     | 122346     |
| El Salvador | 1999           | FemaleAge50to54     | 103488     |
| El Salvador | 1999           | FemaleAge55to59     | 94883      |
| El Salvador | 1999           | FemaleAge5to9       | 383080     |
| El Salvador | 1999           | FemaleAge60to64     | 79936      |
| El Salvador | 1999           | FemaleAge65to69     | 62896      |
| El Salvador | 1999           | FemaleAge70to74     | 45628      |
| El Salvador | 1999           | FemaleAge75to79     | 33298      |
| El Salvador | 1999           | FemaleAge80to84     | 20215      |
| El Salvador | 1999           | FemaleAge85to89     | 10892      |
| El Salvador | 1999           | FemaleAge90to94     | 5137       |
| El Salvador | 1999           | FemaleAge95to99     | 2002       |
| El Salvador | 1999           | FemaleAgeAbove100   | 718        |
| El Salvador | 1999           | FemaleLactAge15to19 | 34620      |
| El Salvador | 1999           | FemaleLactAge20to24 | 51425      |
| El Salvador | 1999           | FemaleLactAge25to29 | 37394      |
| El Salvador | 1999           | FemaleLactAge30to34 | 21108      |
| El Salvador | 1999           | FemaleLactAge35to39 | 11739      |
| El Salvador | 1999           | FemaleLactAge40to44 | 4117       |
| El Salvador | 1999           | FemaleLactAge45to49 | 500        |
| El Salvador | 1999           | FemalePregAge15to19 | 25965      |
| El Salvador | 1999           | FemalePregAge20to24 | 38569      |
| El Salvador | 1999           | FemalePregAge25to29 | 28046      |
| El Salvador | 1999           | FemalePregAge30to34 | 15831      |
| El Salvador | 1999           | FemalePregAge35to39 | 8804       |
| El Salvador | 1999           | FemalePregAge40to44 | 3088       |
| El Salvador | 1999           | FemalePregAge45to49 | 375        |
| El Salvador | 1999           | MaleAge0to4         | 405093     |
| El Salvador | 1999           | MaleAge10to14       | 362554     |
| El Salvador | 1999           | MaleAge15to19       | 311205     |
| El Salvador | 1999           | MaleAge20to24       | 260491     |
| El Salvador | 1999           | MaleAge25to29       | 212136     |
| El Salvador | 1999           | MaleAge30to34       | 175678     |
| El Salvador | 1999           | MaleAge35to39       | 144441     |
| El Salvador | 1999           | MaleAge40to44       | 118773     |

Dietary calcium and zinc deficiency risks are decreasing but remain prevalent

| Country      | Reference year | Age/gender group    | Population |
|--------------|----------------|---------------------|------------|
| El Salv ador | 1999           | MaleAge45to49       | 102971     |
| El Salv ador | 1999           | MaleAge50to54       | 87674      |
| El Salv ador | 1999           | MaleAge55to59       | 78690      |
| El Salv ador | 1999           | MaleAge5to9         | 399929     |
| El Salv ador | 1999           | MaleAge60to64       | 62962      |
| El Salv ador | 1999           | MaleAge65to69       | 47808      |
| El Salv ador | 1999           | MaleAge70to74       | 36278      |
| El Salv ador | 1999           | MaleAge75to79       | 26667      |
| El Salv ador | 1999           | MaleAge80to84       | 15678      |
| El Salv ador | 1999           | MaleAge85to89       | 7816       |
| El Salv ador | 1999           | MaleAge90to94       | 3378       |
| El Salv ador | 1999           | MaleAge95to99       | 1222       |
| El Salv ador | 1999           | MaleAgeAbov e100    | 398        |
| Estonia      | 1992           | FemaleAge0to4       | 52546      |
| Estonia      | 1992           | FemaleAge10to14     | 53328      |
| Estonia      | 1992           | FemaleAge15to19     | 47565      |
| Estonia      | 1992           | FemaleAge20to24     | 38018      |
| Estonia      | 1992           | FemaleAge25to29     | 44618      |
| Estonia      | 1992           | FemaleAge30to34     | 53236      |
| Estonia      | 1992           | FemaleAge35to39     | 55840      |
| Estonia      | 1992           | FemaleAge40to44     | 54243      |
| Estonia      | 1992           | FemaleAge45to49     | 46597      |
| Estonia      | 1992           | FemaleAge50to54     | 50197      |
| Estonia      | 1992           | FemaleAge55to59     | 50677      |
| Estonia      | 1992           | FemaleAge5to9       | 56617      |
| Estonia      | 1992           | FemaleAge60to64     | 49218      |
| Estonia      | 1992           | FemaleAge65to69     | 45370      |
| Estonia      | 1992           | FemaleAge70to74     | 29079      |
| Estonia      | 1992           | FemaleAge75to79     | 23758      |
| Estonia      | 1992           | FemaleAge80to84     | 19531      |
| Estonia      | 1992           | FemaleAge85to89     | 9502       |
| Estonia      | 1992           | FemaleAge90to94     | 3097       |
| Estonia      | 1992           | FemaleAge95to99     | 539        |
| Estonia      | 1992           | FemaleAgeAbov e100  | 49         |
| Estonia      | 1992           | FemaleLactAge15to19 | 2391       |
| Estonia      | 1992           | FemaleLactAge20to24 | 6609       |
| Estonia      | 1992           | FemaleLactAge25to29 | 4339       |
| Estonia      | 1992           | FemaleLactAge30to34 | 2281       |
| Estonia      | 1992           | FemaleLactAge35to39 | 957        |
| Estonia      | 1992           | FemaleLactAge40to44 | 195        |
| Estonia      | 1992           | FemaleLactAge45to49 | 7          |
| Estonia      | 1992           | FemalePregAge15to19 | 1793       |
| Estonia      | 1992           | FemalePregAge20to24 | 4957       |
| Estonia      | 1992           | FemalePregAge25to29 | 3255       |
| Estonia      | 1992           | FemalePregAge30to34 | 1711       |
| Estonia      | 1992           | FemalePregAge35to39 | 718        |
| Estonia      | 1992           | FemalePregAge40to44 | 146        |
| Estonia      | 1992           | FemalePregAge45to49 | 5          |
| Estonia      | 1992           | MaleAge0to4         | 55372      |
| Estonia      | 1992           | MaleAge10to14       | 55370      |
| Estonia      | 1992           | MaleAge15to19       | 53809      |
| Estonia      | 1992           | MaleAge20to24       | 52169      |
| Estonia      | 1992           | MaleAge25to29       | 53447      |
| Estonia      | 1992           | MaleAge30to34       | 56191      |
| Estonia      | 1992           | MaleAge35to39       | 54946      |
| Estonia      | 1992           | MaleAge40to44       | 50478      |
| Estonia      | 1992           | MaleAge45to49       | 41933      |
| Estonia      | 1992           | MaleAge50to54       | 42903      |
| Estonia      | 1992           | MaleAge55to59       | 40903      |
| Estonia      | 1992           | MaleAge5to9         | 58779      |
| Estonia      | 1992           | MaleAge60to64       | 35412      |
| Estonia      | 1992           | MaleAge65to69       | 24894      |
| Estonia      | 1992           | MaleAge70to74       | 13251      |
| Estonia      | 1992           | MaleAge75to79       | 9964       |
| Estonia      | 1992           | MaleAge80to84       | 6835       |
| Estonia      | 1992           | MaleAge85to89       | 2728       |
| Estonia      | 1992           | MaleAge90to94       | 700        |
| Estonia      | 1992           | MaleAge95to99       | 80         |
| Estonia      | 1992           | MaleAgeAbov e100    | 7          |
| Estonia      | 1993           | FemaleAge0to4       | 47611      |
| Estonia      | 1993           | FemaleAge10to14     | 52843      |
| Estonia      | 1993           | FemaleAge15to19     | 46317      |
| Estonia      | 1993           | FemaleAge20to24     | 37838      |
| Estonia      | 1993           | FemaleAge25to29     | 42346      |
| Estonia      | 1993           | FemaleAge30to34     | 51228      |
| Estonia      | 1993           | FemaleAge35to39     | 54831      |
| Estonia      | 1993           | FemaleAge40to44     | 53771      |
| Estonia      | 1993           | FemaleAge45to49     | 47815      |
| Estonia      | 1993           | FemaleAge50to54     | 47017      |
| Estonia      | 1993           | FemaleAge55to59     | 51405      |
| Estonia      | 1993           | FemaleAge5to9       | 55804      |
| Estonia      | 1993           | FemaleAge60to64     | 47631      |
| Estonia      | 1993           | FemaleAge65to69     | 45762      |
| Estonia      | 1993           | FemaleAge70to74     | 31771      |
| Estonia      | 1993           | FemaleAge75to79     | 21384      |
| Estonia      | 1993           | FemaleAge80to84     | 19658      |
| Estonia      | 1993           | FemaleAge85to89     | 9592       |
| Estonia      | 1993           | FemaleAge90to94     | 3144       |

Dietary calcium and zinc deficiency risks are decreasing but remain prevalent

| Country | Reference year | Age/gender group    | Population |
|---------|----------------|---------------------|------------|
| Estonia | 1993           | FemaleAge95to99     | 587        |
| Estonia | 1993           | FemaleAgeAbov e100  | 48         |
| Estonia | 1993           | FemaleLactAge15to19 | 2391       |
| Estonia | 1993           | FemaleLactAge20to24 | 6609       |
| Estonia | 1993           | FemaleLactAge25to29 | 4339       |
| Estonia | 1993           | FemaleLactAge30to34 | 2281       |
| Estonia | 1993           | FemaleLactAge35to39 | 957        |
| Estonia | 1993           | FemaleLactAge40to44 | 195        |
| Estonia | 1993           | FemaleLactAge45to49 | 7          |
| Estonia | 1993           | FemalePregAge15to19 | 1793       |
| Estonia | 1993           | FemalePregAge20to24 | 4957       |
| Estonia | 1993           | FemalePregAge25to29 | 3255       |
| Estonia | 1993           | FemalePregAge30to34 | 1711       |
| Estonia | 1993           | FemalePregAge35to39 | 718        |
| Estonia | 1993           | FemalePregAge40to44 | 146        |
| Estonia | 1993           | FemalePregAge45to49 | 5          |
| Estonia | 1993           | MaleAge0to4         | 50153      |
| Estonia | 1993           | MaleAge10to14       | 54793      |
| Estonia | 1993           | MaleAge15to19       | 52505      |
| Estonia | 1993           | MaleAge20to24       | 51037      |
| Estonia | 1993           | MaleAge25to29       | 50661      |
| Estonia | 1993           | MaleAge30to34       | 54094      |
| Estonia | 1993           | MaleAge35to39       | 53798      |
| Estonia | 1993           | MaleAge40to44       | 49919      |
| Estonia | 1993           | MaleAge45to49       | 42739      |
| Estonia | 1993           | MaleAge50to54       | 40110      |
| Estonia | 1993           | MaleAge55to59       | 41293      |
| Estonia | 1993           | MaleAge5to9         | 58163      |
| Estonia | 1993           | MaleAge60to64       | 34479      |
| Estonia | 1993           | MaleAge65to69       | 26430      |
| Estonia | 1993           | MaleAge70to74       | 13886      |
| Estonia | 1993           | MaleAge75to79       | 9026       |
| Estonia | 1993           | MaleAge80to84       | 6922       |
| Estonia | 1993           | MaleAge85to89       | 2727       |
| Estonia | 1993           | MaleAge90to94       | 741        |
| Estonia | 1993           | MaleAge95to99       | 88         |
| Estonia | 1993           | MaleAgeAbov e100    | 7          |
| Estonia | 1994           | FemaleAge0to4       | 42702      |
| Estonia | 1994           | FemaleAge10to14     | 52492      |
| Estonia | 1994           | FemaleAge15to19     | 45125      |
| Estonia | 1994           | FemaleAge20to24     | 37568      |
| Estonia | 1994           | FemaleAge25to29     | 40574      |
| Estonia | 1994           | FemaleAge30to34     | 49182      |
| Estonia | 1994           | FemaleAge35to39     | 53643      |
| Estonia | 1994           | FemaleAge40to44     | 53145      |
| Estonia | 1994           | FemaleAge45to49     | 48947      |
| Estonia | 1994           | FemaleAge50to54     | 44491      |
| Estonia | 1994           | FemaleAge55to59     | 51582      |
| Estonia | 1994           | FemaleAge5to9       | 54717      |
| Estonia | 1994           | FemaleAge60to64     | 46467      |
| Estonia | 1994           | FemaleAge65to69     | 45821      |
| Estonia | 1994           | FemaleAge70to74     | 34274      |
| Estonia | 1994           | FemaleAge75to79     | 19992      |
| Estonia | 1994           | FemaleAge80to84     | 19362      |
| Estonia | 1994           | FemaleAge85to89     | 9549       |
| Estonia | 1994           | FemaleAge90to94     | 3050       |
| Estonia | 1994           | FemaleAge95to99     | 592        |
| Estonia | 1994           | FemaleAgeAbov e100  | 48         |
| Estonia | 1994           | FemaleLactAge15to19 | 2391       |
| Estonia | 1994           | FemaleLactAge20to24 | 6609       |
| Estonia | 1994           | FemaleLactAge25to29 | 4339       |
| Estonia | 1994           | FemaleLactAge30to34 | 2281       |
| Estonia | 1994           | FemaleLactAge35to39 | 957        |
| Estonia | 1994           | FemaleLactAge40to44 | 195        |
| Estonia | 1994           | FemaleLactAge45to49 | 7          |
| Estonia | 1994           | FemalePregAge15to19 | 1793       |
| Estonia | 1994           | FemalePregAge20to24 | 4957       |
| Estonia | 1994           | FemalePregAge25to29 | 3255       |
| Estonia | 1994           | FemalePregAge30to34 | 1711       |
| Estonia | 1994           | FemalePregAge35to39 | 718        |
| Estonia | 1994           | FemalePregAge40to44 | 146        |
| Estonia | 1994           | FemalePregAge45to49 | 5          |
| Estonia | 1994           | MaleAge0to4         | 44976      |
| Estonia | 1994           | MaleAge10to14       | 54398      |
| Estonia | 1994           | MaleAge15to19       | 51308      |
| Estonia | 1994           | MaleAge20to24       | 50283      |
| Estonia | 1994           | MaleAge25to29       | 48005      |
| Estonia | 1994           | MaleAge30to34       | 51935      |
| Estonia | 1994           | MaleAge35to39       | 52477      |
| Estonia | 1994           | MaleAge40to44       | 49224      |
| Estonia | 1994           | MaleAge45to49       | 43457      |
| Estonia | 1994           | MaleAge50to54       | 37933      |
| Estonia | 1994           | MaleAge55to59       | 41174      |
| Estonia | 1994           | MaleAge5to9         | 57297      |
| Estonia | 1994           | MaleAge60to64       | 33801      |
| Estonia | 1994           | MaleAge65to69       | 27534      |
| Estonia | 1994           | MaleAge70to74       | 14715      |
| Estonia | 1994           | MaleAge75to79       | 8385       |

Dietary calcium and zinc deficiency risks are decreasing but remain prevalent

| Country | Reference year | Age/gender group    | Population |
|---------|----------------|---------------------|------------|
| Estonia | 1994           | MaleAge80to84       | 6753       |
| Estonia | 1994           | MaleAge85to89       | 2666       |
| Estonia | 1994           | MaleAge90to94       | 719        |
| Estonia | 1994           | MaleAge95to99       | 95         |
| Estonia | 1994           | MaleAgeAbov e100    | 7          |
| Estonia | 1995           | FemaleAge0to4       | 38749      |
| Estonia | 1995           | FemaleAge10to14     | 52312      |
| Estonia | 1995           | FemaleAge15to19     | 44281      |
| Estonia | 1995           | FemaleAge20to24     | 37088      |
| Estonia | 1995           | FemaleAge25to29     | 39453      |
| Estonia | 1995           | FemaleAge30to34     | 47267      |
| Estonia | 1995           | FemaleAge35to39     | 52370      |
| Estonia | 1995           | FemaleAge40to44     | 52582      |
| Estonia | 1995           | FemaleAge45to49     | 49666      |
| Estonia | 1995           | FemaleAge50to54     | 43209      |
| Estonia | 1995           | FemaleAge55to59     | 50904      |
| Estonia | 1995           | FemaleAge5to9       | 53205      |
| Estonia | 1995           | FemaleAge60to64     | 46060      |
| Estonia | 1995           | FemaleAge65to69     | 45692      |
| Estonia | 1995           | FemaleAge70to74     | 36237      |
| Estonia | 1995           | FemaleAge75to79     | 20001      |
| Estonia | 1995           | FemaleAge80to84     | 18571      |
| Estonia | 1995           | FemaleAge85to89     | 9456       |
| Estonia | 1995           | FemaleAge90to94     | 2835       |
| Estonia | 1995           | FemaleAge95to99     | 480        |
| Estonia | 1995           | FemaleAgeAbov e100  | 48         |
| Estonia | 1995           | FemaleLactAge15to19 | 2391       |
| Estonia | 1995           | FemaleLactAge20to24 | 6609       |
| Estonia | 1995           | FemaleLactAge25to29 | 4339       |
| Estonia | 1995           | FemaleLactAge30to34 | 2281       |
| Estonia | 1995           | FemaleLactAge35to39 | 957        |
| Estonia | 1995           | FemaleLactAge40to44 | 195        |
| Estonia | 1995           | FemaleLactAge45to49 | 7          |
| Estonia | 1995           | FemalePregAge15to19 | 1793       |
| Estonia | 1995           | FemalePregAge20to24 | 4957       |
| Estonia | 1995           | FemalePregAge25to29 | 3255       |
| Estonia | 1995           | FemalePregAge30to34 | 1711       |
| Estonia | 1995           | FemalePregAge35to39 | 718        |
| Estonia | 1995           | FemalePregAge40to44 | 146        |
| Estonia | 1995           | FemalePregAge45to49 | 5          |
| Estonia | 1995           | MaleAge0to4         | 40888      |
| Estonia | 1995           | MaleAge10to14       | 54300      |
| Estonia | 1995           | MaleAge15to19       | 50520      |
| Estonia | 1995           | MaleAge20to24       | 49726      |
| Estonia | 1995           | MaleAge25to29       | 45910      |
| Estonia | 1995           | MaleAge30to34       | 49779      |
| Estonia | 1995           | MaleAge35to39       | 51115      |
| Estonia | 1995           | MaleAge40to44       | 48598      |
| Estonia | 1995           | MaleAge45to49       | 43877      |
| Estonia | 1995           | MaleAge50to54       | 36828      |
| Estonia | 1995           | MaleAge55to59       | 40411      |
| Estonia | 1995           | MaleAge5to9         | 55985      |
| Estonia | 1995           | MaleAge60to64       | 33666      |
| Estonia | 1995           | MaleAge65to69       | 28147      |
| Estonia | 1995           | MaleAge70to74       | 15729      |
| Estonia | 1995           | MaleAge75to79       | 8168       |
| Estonia | 1995           | MaleAge80to84       | 6323       |
| Estonia | 1995           | MaleAge85to89       | 2565       |
| Estonia | 1995           | MaleAge90to94       | 628        |
| Estonia | 1995           | MaleAge95to99       | 76         |
| Estonia | 1995           | MaleAgeAbov e100    | 7          |
| Estonia | 1996           | FemaleAge0to4       | 34098      |
| Estonia | 1996           | FemaleAge10to14     | 52586      |
| Estonia | 1996           | FemaleAge15to19     | 45775      |
| Estonia | 1996           | FemaleAge20to24     | 40500      |
| Estonia | 1996           | FemaleAge25to29     | 39923      |
| Estonia | 1996           | FemaleAge30to34     | 46274      |
| Estonia | 1996           | FemaleAge35to39     | 51686      |
| Estonia | 1996           | FemaleAge40to44     | 52362      |
| Estonia | 1996           | FemaleAge45to49     | 50113      |
| Estonia | 1996           | FemaleAge50to54     | 42844      |
| Estonia | 1996           | FemaleAge55to59     | 49275      |
| Estonia | 1996           | FemaleAge5to9       | 51378      |
| Estonia | 1996           | FemaleAge60to64     | 46032      |
| Estonia | 1996           | FemaleAge65to69     | 45003      |
| Estonia | 1996           | FemaleAge70to74     | 37482      |
| Estonia | 1996           | FemaleAge75to79     | 21022      |
| Estonia | 1996           | FemaleAge80to84     | 17388      |
| Estonia | 1996           | FemaleAge85to89     | 9955       |
| Estonia | 1996           | FemaleAge90to94     | 3221       |
| Estonia | 1996           | FemaleAge95to99     | 517        |
| Estonia | 1996           | FemaleAgeAbov e100  | 49         |
| Estonia | 1996           | FemaleLactAge15to19 | 1505       |
| Estonia | 1996           | FemaleLactAge20to24 | 4413       |
| Estonia | 1996           | FemaleLactAge25to29 | 3790       |
| Estonia | 1996           | FemaleLactAge30to34 | 2033       |
| Estonia | 1996           | FemaleLactAge35to39 | 851        |
| Estonia | 1996           | FemaleLactAge40to44 | 199        |

Dietary calcium and zinc deficiency risks are decreasing but remain prevalent

| Country | Reference year | Age/gender group    | Population |
|---------|----------------|---------------------|------------|
| Estonia | 1996           | FemaleLactAge45to49 | 7          |
| Estonia | 1996           | FemalePregAge15to19 | 1129       |
| Estonia | 1996           | FemalePregAge20to24 | 3310       |
| Estonia | 1996           | FemalePregAge25to29 | 2842       |
| Estonia | 1996           | FemalePregAge30to34 | 1525       |
| Estonia | 1996           | FemalePregAge35to39 | 638        |
| Estonia | 1996           | FemalePregAge40to44 | 149        |
| Estonia | 1996           | FemalePregAge45to49 | 5          |
| Estonia | 1996           | MaleAge0to4         | 35840      |
| Estonia | 1996           | MaleAge10to14       | 54599      |
| Estonia | 1996           | MaleAge15to19       | 50366      |
| Estonia | 1996           | MaleAge20to24       | 49392      |
| Estonia | 1996           | MaleAge25to29       | 45563      |
| Estonia | 1996           | MaleAge30to34       | 48123      |
| Estonia | 1996           | MaleAge35to39       | 50176      |
| Estonia | 1996           | MaleAge40to44       | 48244      |
| Estonia | 1996           | MaleAge45to49       | 44065      |
| Estonia | 1996           | MaleAge50to54       | 36394      |
| Estonia | 1996           | MaleAge55to59       | 38899      |
| Estonia | 1996           | MaleAge5to9         | 54113      |
| Estonia | 1996           | MaleAge60to64       | 33679      |
| Estonia | 1996           | MaleAge65to69       | 28259      |
| Estonia | 1996           | MaleAge70to74       | 16914      |
| Estonia | 1996           | MaleAge75to79       | 8395       |
| Estonia | 1996           | MaleAge80to84       | 5988       |
| Estonia | 1996           | MaleAge85to89       | 2806       |
| Estonia | 1996           | MaleAge90to94       | 733        |
| Estonia | 1996           | MaleAge95to99       | 87         |
| Estonia | 1996           | MaleAgeAbov e100    | 7          |
| Estonia | 1997           | FemaleAge0to4       | 31488      |
| Estonia | 1997           | FemaleAge10to14     | 52889      |
| Estonia | 1997           | FemaleAge15to19     | 46062      |
| Estonia | 1997           | FemaleAge20to24     | 39876      |
| Estonia | 1997           | FemaleAge25to29     | 39903      |
| Estonia | 1997           | FemaleAge30to34     | 44864      |
| Estonia | 1997           | FemaleAge35to39     | 50781      |
| Estonia | 1997           | FemaleAge40to44     | 52200      |
| Estonia | 1997           | FemaleAge45to49     | 50313      |
| Estonia | 1997           | FemaleAge50to54     | 43532      |
| Estonia | 1997           | FemaleAge55to59     | 46855      |
| Estonia | 1997           | FemaleAge5to9       | 48690      |
| Estonia | 1997           | FemaleAge60to64     | 46736      |
| Estonia | 1997           | FemaleAge65to69     | 43988      |
| Estonia | 1997           | FemaleAge70to74     | 38440      |
| Estonia | 1997           | FemaleAge75to79     | 22955      |
| Estonia | 1997           | FemaleAge80to84     | 15808      |
| Estonia | 1997           | FemaleAge85to89     | 10440      |
| Estonia | 1997           | FemaleAge90to94     | 3471       |
| Estonia | 1997           | FemaleAge95to99     | 580        |
| Estonia | 1997           | FemaleAgeAbov e100  | 50         |
| Estonia | 1997           | FemaleLactAge15to19 | 1505       |
| Estonia | 1997           | FemaleLactAge20to24 | 4413       |
| Estonia | 1997           | FemaleLactAge25to29 | 3790       |
| Estonia | 1997           | FemaleLactAge30to34 | 2033       |
| Estonia | 1997           | FemaleLactAge35to39 | 851        |
| Estonia | 1997           | FemaleLactAge40to44 | 199        |
| Estonia | 1997           | FemaleLactAge45to49 | 7          |
| Estonia | 1997           | FemalePregAge15to19 | 1129       |
| Estonia | 1997           | FemalePregAge20to24 | 3310       |
| Estonia | 1997           | FemalePregAge25to29 | 2842       |
| Estonia | 1997           | FemalePregAge30to34 | 1525       |
| Estonia | 1997           | FemalePregAge35to39 | 638        |
| Estonia | 1997           | FemalePregAge40to44 | 149        |
| Estonia | 1997           | FemalePregAge45to49 | 5          |
| Estonia | 1997           | MaleAge0to4         | 33117      |
| Estonia | 1997           | MaleAge10to14       | 55044      |
| Estonia | 1997           | MaleAge15to19       | 50545      |
| Estonia | 1997           | MaleAge20to24       | 48863      |
| Estonia | 1997           | MaleAge25to29       | 45815      |
| Estonia | 1997           | MaleAge30to34       | 46506      |
| Estonia | 1997           | MaleAge35to39       | 49252      |
| Estonia | 1997           | MaleAge40to44       | 47969      |
| Estonia | 1997           | MaleAge45to49       | 44116      |
| Estonia | 1997           | MaleAge50to54       | 36793      |
| Estonia | 1997           | MaleAge55to59       | 36876      |
| Estonia | 1997           | MaleAge5to9         | 51294      |
| Estonia | 1997           | MaleAge60to64       | 34111      |
| Estonia | 1997           | MaleAge65to69       | 27942      |
| Estonia | 1997           | MaleAge70to74       | 18273      |
| Estonia | 1997           | MaleAge75to79       | 8775       |
| Estonia | 1997           | MaleAge80to84       | 5528       |
| Estonia | 1997           | MaleAge85to89       | 3025       |
| Estonia | 1997           | MaleAge90to94       | 794        |
| Estonia | 1997           | MaleAge95to99       | 108        |
| Estonia | 1997           | MaleAgeAbov e100    | 7          |
| Estonia | 1998           | FemaleAge0to4       | 30464      |
| Estonia | 1998           | FemaleAge10to14     | 53094      |
| Estonia | 1998           | FemaleAge15to19     | 46630      |



Dietary calcium and zinc deficiency risks are decreasing but remain prevalent

| Country | Reference year | Age/gender group    | Population |
|---------|----------------|---------------------|------------|
| Estonia | 1998           | FemaleAge20to24     | 39212      |
| Estonia | 1998           | FemaleAge25to29     | 40153      |
| Estonia | 1998           | FemaleAge30to34     | 43602      |
| Estonia | 1998           | FemaleAge35to39     | 49850      |
| Estonia | 1998           | FemaleAge40to44     | 52037      |
| Estonia | 1998           | FemaleAge45to49     | 50361      |
| Estonia | 1998           | FemaleAge50to54     | 44868      |
| Estonia | 1998           | FemaleAge55to59     | 44191      |
| Estonia | 1998           | FemaleAge5to9       | 45200      |
| Estonia | 1998           | FemaleAge60to64     | 47703      |
| Estonia | 1998           | FemaleAge65to69     | 42937      |
| Estonia | 1998           | FemaleAge70to74     | 39167      |
| Estonia | 1998           | FemaleAge75to79     | 25284      |
| Estonia | 1998           | FemaleAge80to84     | 14420      |
| Estonia | 1998           | FemaleAge85to89     | 10717      |
| Estonia | 1998           | FemaleAge90to94     | 3566       |
| Estonia | 1998           | FemaleAge95to99     | 646        |
| Estonia | 1998           | FemaleAgeAbove100   | 51         |
| Estonia | 1998           | FemaleLactAge15to19 | 1505       |
| Estonia | 1998           | FemaleLactAge20to24 | 4413       |
| Estonia | 1998           | FemaleLactAge25to29 | 3790       |
| Estonia | 1998           | FemaleLactAge30to34 | 2033       |
| Estonia | 1998           | FemaleLactAge35to39 | 851        |
| Estonia | 1998           | FemaleLactAge40to44 | 199        |
| Estonia | 1998           | FemaleLactAge45to49 | 7          |
| Estonia | 1998           | FemalePregAge15to19 | 1129       |
| Estonia | 1998           | FemalePregAge20to24 | 3310       |
| Estonia | 1998           | FemalePregAge25to29 | 2842       |
| Estonia | 1998           | FemalePregAge30to34 | 1525       |
| Estonia | 1998           | FemalePregAge35to39 | 638        |
| Estonia | 1998           | FemalePregAge40to44 | 149        |
| Estonia | 1998           | FemalePregAge45to49 | 5          |
| Estonia | 1998           | MaleAge0to4         | 32165      |
| Estonia | 1998           | MaleAge10to14       | 55475      |
| Estonia | 1998           | MaleAge15to19       | 51039      |
| Estonia | 1998           | MaleAge20to24       | 48320      |
| Estonia | 1998           | MaleAge25to29       | 46390      |
| Estonia | 1998           | MaleAge30to34       | 45135      |
| Estonia | 1998           | MaleAge35to39       | 48323      |
| Estonia | 1998           | MaleAge40to44       | 47747      |
| Estonia | 1998           | MaleAge45to49       | 44102      |
| Estonia | 1998           | MaleAge50to54       | 37701      |
| Estonia | 1998           | MaleAge55to59       | 34792      |
| Estonia | 1998           | MaleAge5to9         | 47592      |
| Estonia | 1998           | MaleAge60to64       | 34642      |
| Estonia | 1998           | MaleAge65to69       | 27476      |
| Estonia | 1998           | MaleAge70to74       | 19612      |
| Estonia | 1998           | MaleAge75to79       | 9272       |
| Estonia | 1998           | MaleAge80to84       | 5113       |
| Estonia | 1998           | MaleAge85to89       | 3134       |
| Estonia | 1998           | MaleAge90to94       | 815        |
| Estonia | 1998           | MaleAge95to99       | 129        |
| Estonia | 1998           | MaleAgeAbove100     | 7          |
| Estonia | 1999           | FemaleAge0to4       | 30117      |
| Estonia | 1999           | FemaleAge10to14     | 52841      |
| Estonia | 1999           | FemaleAge15to19     | 47338      |
| Estonia | 1999           | FemaleAge20to24     | 38764      |
| Estonia | 1999           | FemaleAge25to29     | 40364      |
| Estonia | 1999           | FemaleAge30to34     | 42653      |
| Estonia | 1999           | FemaleAge35to39     | 48891      |
| Estonia | 1999           | FemaleAge40to44     | 51790      |
| Estonia | 1999           | FemaleAge45to49     | 50413      |
| Estonia | 1999           | FemaleAge50to54     | 46217      |
| Estonia | 1999           | FemaleAge55to59     | 42124      |
| Estonia | 1999           | FemaleAge5to9       | 41361      |
| Estonia | 1999           | FemaleAge60to64     | 48201      |
| Estonia | 1999           | FemaleAge65to69     | 42275      |
| Estonia | 1999           | FemaleAge70to74     | 39674      |
| Estonia | 1999           | FemaleAge75to79     | 27426      |
| Estonia | 1999           | FemaleAge80to84     | 13853      |
| Estonia | 1999           | FemaleAge85to89     | 10558      |
| Estonia | 1999           | FemaleAge90to94     | 3528       |
| Estonia | 1999           | FemaleAge95to99     | 680        |
| Estonia | 1999           | FemaleAgeAbove100   | 53         |
| Estonia | 1999           | FemaleLactAge15to19 | 1505       |
| Estonia | 1999           | FemaleLactAge20to24 | 4413       |
| Estonia | 1999           | FemaleLactAge25to29 | 3790       |
| Estonia | 1999           | FemaleLactAge30to34 | 2033       |
| Estonia | 1999           | FemaleLactAge35to39 | 851        |
| Estonia | 1999           | FemaleLactAge40to44 | 199        |
| Estonia | 1999           | FemaleLactAge45to49 | 7          |
| Estonia | 1999           | FemalePregAge15to19 | 1129       |
| Estonia | 1999           | FemalePregAge20to24 | 3310       |
| Estonia | 1999           | FemalePregAge25to29 | 2842       |
| Estonia | 1999           | FemalePregAge30to34 | 1525       |
| Estonia | 1999           | FemalePregAge35to39 | 638        |
| Estonia | 1999           | FemalePregAge40to44 | 149        |
| Estonia | 1999           | FemalePregAge45to49 | 5          |

Dietary calcium and zinc deficiency risks are decreasing but remain prevalent

| Country  | Reference year | Age/gender group    | Population |
|----------|----------------|---------------------|------------|
| Estonia  | 1999           | MaleAge0to4         | 31928      |
| Estonia  | 1999           | MaleAge10to14       | 55457      |
| Estonia  | 1999           | MaleAge15to19       | 51764      |
| Estonia  | 1999           | MaleAge20to24       | 48027      |
| Estonia  | 1999           | MaleAge25to29       | 46916      |
| Estonia  | 1999           | MaleAge30to34       | 44244      |
| Estonia  | 1999           | MaleAge35to39       | 47367      |
| Estonia  | 1999           | MaleAge40to44       | 47509      |
| Estonia  | 1999           | MaleAge45to49       | 44132      |
| Estonia  | 1999           | MaleAge50to54       | 38651      |
| Estonia  | 1999           | MaleAge55to59       | 33251      |
| Estonia  | 1999           | MaleAge5to9         | 43509      |
| Estonia  | 1999           | MaleAge60to64       | 34817      |
| Estonia  | 1999           | MaleAge65to69       | 27210      |
| Estonia  | 1999           | MaleAge70to74       | 20662      |
| Estonia  | 1999           | MaleAge75to79       | 9891       |
| Estonia  | 1999           | MaleAge80to84       | 4896       |
| Estonia  | 1999           | MaleAge85to89       | 3048       |
| Estonia  | 1999           | MaleAge90to94       | 802        |
| Estonia  | 1999           | MaleAge95to99       | 138        |
| Estonia  | 1999           | MaleAgeAbov e100    | 7          |
| Estonia  | 2000           | FemaleAge0to4       | 29760      |
| Estonia  | 2000           | FemaleAge10to14     | 51730      |
| Estonia  | 2000           | FemaleAge15to19     | 48027      |
| Estonia  | 2000           | FemaleAge20to24     | 38683      |
| Estonia  | 2000           | FemaleAge25to29     | 40335      |
| Estonia  | 2000           | FemaleAge30to34     | 42081      |
| Estonia  | 2000           | FemaleAge35to39     | 47893      |
| Estonia  | 2000           | FemaleAge40to44     | 51399      |
| Estonia  | 2000           | FemaleAge45to49     | 50521      |
| Estonia  | 2000           | FemaleAge50to54     | 47190      |
| Estonia  | 2000           | FemaleAge55to59     | 41112      |
| Estonia  | 2000           | FemaleAge5to9       | 37934      |
| Estonia  | 2000           | FemaleAge60to64     | 47819      |
| Estonia  | 2000           | FemaleAge65to69     | 42208      |
| Estonia  | 2000           | FemaleAge70to74     | 39927      |
| Estonia  | 2000           | FemaleAge75to79     | 29131      |
| Estonia  | 2000           | FemaleAge80to84     | 14286      |
| Estonia  | 2000           | FemaleAge85to89     | 9967       |
| Estonia  | 2000           | FemaleAge90to94     | 3388       |
| Estonia  | 2000           | FemaleAge95to99     | 603        |
| Estonia  | 2000           | FemaleAgeAbov e100  | 56         |
| Estonia  | 2000           | FemaleLactAge15to19 | 1505       |
| Estonia  | 2000           | FemaleLactAge20to24 | 4413       |
| Estonia  | 2000           | FemaleLactAge25to29 | 3790       |
| Estonia  | 2000           | FemaleLactAge30to34 | 2033       |
| Estonia  | 2000           | FemaleLactAge35to39 | 851        |
| Estonia  | 2000           | FemaleLactAge40to44 | 199        |
| Estonia  | 2000           | FemaleLactAge45to49 | 7          |
| Estonia  | 2000           | FemalePregAge15to19 | 1129       |
| Estonia  | 2000           | FemalePregAge20to24 | 3310       |
| Estonia  | 2000           | FemalePregAge25to29 | 2842       |
| Estonia  | 2000           | FemalePregAge30to34 | 1525       |
| Estonia  | 2000           | FemalePregAge35to39 | 638        |
| Estonia  | 2000           | FemalePregAge40to44 | 149        |
| Estonia  | 2000           | FemalePregAge45to49 | 5          |
| Estonia  | 2000           | MaleAge0to4         | 31633      |
| Estonia  | 2000           | MaleAge10to14       | 54496      |
| Estonia  | 2000           | MaleAge15to19       | 52594      |
| Estonia  | 2000           | MaleAge20to24       | 48118      |
| Estonia  | 2000           | MaleAge25to29       | 47176      |
| Estonia  | 2000           | MaleAge30to34       | 43887      |
| Estonia  | 2000           | MaleAge35to39       | 46386      |
| Estonia  | 2000           | MaleAge40to44       | 47180      |
| Estonia  | 2000           | MaleAge45to49       | 44236      |
| Estonia  | 2000           | MaleAge50to54       | 39359      |
| Estonia  | 2000           | MaleAge55to59       | 32545      |
| Estonia  | 2000           | MaleAge5to9         | 39893      |
| Estonia  | 2000           | MaleAge60to64       | 34403      |
| Estonia  | 2000           | MaleAge65to69       | 27294      |
| Estonia  | 2000           | MaleAge70to74       | 21288      |
| Estonia  | 2000           | MaleAge75to79       | 10641      |
| Estonia  | 2000           | MaleAge80to84       | 4888       |
| Estonia  | 2000           | MaleAge85to89       | 2785       |
| Estonia  | 2000           | MaleAge90to94       | 747        |
| Estonia  | 2000           | MaleAge95to99       | 113        |
| Estonia  | 2000           | MaleAgeAbov e100    | 8          |
| Ethiopia | 1992           | FemaleAge0to4       | 4823742    |
| Ethiopia | 1992           | FemaleAge10to14     | 3180827    |
| Ethiopia | 1992           | FemaleAge15to19     | 2045133    |
| Ethiopia | 1992           | FemaleAge20to24     | 1027594    |
| Ethiopia | 1992           | FemaleAge25to29     | 784929     |
| Ethiopia | 1992           | FemaleAge30to34     | 727078     |
| Ethiopia | 1992           | FemaleAge35to39     | 739400     |
| Ethiopia | 1992           | FemaleAge40to44     | 849330     |
| Ethiopia | 1992           | FemaleAge45to49     | 854933     |
| Ethiopia | 1992           | FemaleAge50to54     | 724944     |
| Ethiopia | 1992           | FemaleAge55to59     | 601704     |

Dietary calcium and zinc deficiency risks are decreasing but remain prevalent

| Country  | Reference year | Age/gender group    | Population |
|----------|----------------|---------------------|------------|
| Ethiopia | 1992           | FemaleAge5to9       | 3904747    |
| Ethiopia | 1992           | FemaleAge60to64     | 461847     |
| Ethiopia | 1992           | FemaleAge65to69     | 345856     |
| Ethiopia | 1992           | FemaleAge70to74     | 234534     |
| Ethiopia | 1992           | FemaleAge75to79     | 134965     |
| Ethiopia | 1992           | FemaleAge80to84     | 65313      |
| Ethiopia | 1992           | FemaleAge85to89     | 22586      |
| Ethiopia | 1992           | FemaleAge90to94     | 5878       |
| Ethiopia | 1992           | FemaleAge95to99     | 580        |
| Ethiopia | 1992           | FemaleAgeAbove100   | 37         |
| Ethiopia | 1992           | FemaleLactAge15to19 | 313496     |
| Ethiopia | 1992           | FemaleLactAge20to24 | 638516     |
| Ethiopia | 1992           | FemaleLactAge25to29 | 559118     |
| Ethiopia | 1992           | FemaleLactAge30to34 | 443852     |
| Ethiopia | 1992           | FemaleLactAge35to39 | 303272     |
| Ethiopia | 1992           | FemaleLactAge40to44 | 147320     |
| Ethiopia | 1992           | FemaleLactAge45to49 | 44310      |
| Ethiopia | 1992           | FemalePregAge15to19 | 235122     |
| Ethiopia | 1992           | FemalePregAge20to24 | 478887     |
| Ethiopia | 1992           | FemalePregAge25to29 | 419339     |
| Ethiopia | 1992           | FemalePregAge30to34 | 332889     |
| Ethiopia | 1992           | FemalePregAge35to39 | 227454     |
| Ethiopia | 1992           | FemalePregAge40to44 | 110490     |
| Ethiopia | 1992           | FemalePregAge45to49 | 33232      |
| Ethiopia | 1992           | MaleAge0to4         | 4914751    |
| Ethiopia | 1992           | MaleAge10to14       | 3202054    |
| Ethiopia | 1992           | MaleAge15to19       | 2655810    |
| Ethiopia | 1992           | MaleAge20to24       | 2142127    |
| Ethiopia | 1992           | MaleAge25to29       | 1695939    |
| Ethiopia | 1992           | MaleAge30to34       | 1407310    |
| Ethiopia | 1992           | MaleAge35to39       | 1197638    |
| Ethiopia | 1992           | MaleAge40to44       | 1051556    |
| Ethiopia | 1992           | MaleAge45to49       | 897589     |
| Ethiopia | 1992           | MaleAge50to54       | 717076     |
| Ethiopia | 1992           | MaleAge55to59       | 594956     |
| Ethiopia | 1992           | MaleAge5to9         | 3981146    |
| Ethiopia | 1992           | MaleAge60to64       | 444211     |
| Ethiopia | 1992           | MaleAge65to69       | 321167     |
| Ethiopia | 1992           | MaleAge70to74       | 241533     |
| Ethiopia | 1992           | MaleAge75to79       | 151033     |
| Ethiopia | 1992           | MaleAge80to84       | 65935      |
| Ethiopia | 1992           | MaleAge85to89       | 17413      |
| Ethiopia | 1992           | MaleAge90to94       | 2902       |
| Ethiopia | 1992           | MaleAge95to99       | 251        |
| Ethiopia | 1992           | MaleAgeAbove100     | 8          |
| Ethiopia | 1993           | FemaleAge0to4       | 4955236    |
| Ethiopia | 1993           | FemaleAge10to14     | 3334243    |
| Ethiopia | 1993           | FemaleAge15to19     | 2143654    |
| Ethiopia | 1993           | FemaleAge20to24     | 1108038    |
| Ethiopia | 1993           | FemaleAge25to29     | 860758     |
| Ethiopia | 1993           | FemaleAge30to34     | 767468     |
| Ethiopia | 1993           | FemaleAge35to39     | 792476     |
| Ethiopia | 1993           | FemaleAge40to44     | 863073     |
| Ethiopia | 1993           | FemaleAge45to49     | 894445     |
| Ethiopia | 1993           | FemaleAge50to54     | 755566     |
| Ethiopia | 1993           | FemaleAge55to59     | 610162     |
| Ethiopia | 1993           | FemaleAge5to9       | 4051829    |
| Ethiopia | 1993           | FemaleAge60to64     | 487426     |
| Ethiopia | 1993           | FemaleAge65to69     | 348001     |
| Ethiopia | 1993           | FemaleAge70to74     | 247420     |
| Ethiopia | 1993           | FemaleAge75to79     | 136338     |
| Ethiopia | 1993           | FemaleAge80to84     | 68989      |
| Ethiopia | 1993           | FemaleAge85to89     | 22695      |
| Ethiopia | 1993           | FemaleAge90to94     | 6389       |
| Ethiopia | 1993           | FemaleAge95to99     | 687        |
| Ethiopia | 1993           | FemaleAgeAbove100   | 39         |
| Ethiopia | 1993           | FemaleLactAge15to19 | 313496     |
| Ethiopia | 1993           | FemaleLactAge20to24 | 638516     |
| Ethiopia | 1993           | FemaleLactAge25to29 | 559118     |
| Ethiopia | 1993           | FemaleLactAge30to34 | 443852     |
| Ethiopia | 1993           | FemaleLactAge35to39 | 303272     |
| Ethiopia | 1993           | FemaleLactAge40to44 | 147320     |
| Ethiopia | 1993           | FemaleLactAge45to49 | 44310      |
| Ethiopia | 1993           | FemalePregAge15to19 | 235122     |
| Ethiopia | 1993           | FemalePregAge20to24 | 478887     |
| Ethiopia | 1993           | FemalePregAge25to29 | 419339     |
| Ethiopia | 1993           | FemalePregAge30to34 | 332889     |
| Ethiopia | 1993           | FemalePregAge35to39 | 227454     |
| Ethiopia | 1993           | FemalePregAge40to44 | 110490     |
| Ethiopia | 1993           | FemalePregAge45to49 | 33232      |
| Ethiopia | 1993           | MaleAge0to4         | 5051551    |
| Ethiopia | 1993           | MaleAge10to14       | 3367918    |
| Ethiopia | 1993           | MaleAge15to19       | 2730013    |
| Ethiopia | 1993           | MaleAge20to24       | 2251023    |
| Ethiopia | 1993           | MaleAge25to29       | 1754885    |
| Ethiopia | 1993           | MaleAge30to34       | 1450004    |
| Ethiopia | 1993           | MaleAge35to39       | 1233712    |
| Ethiopia | 1993           | MaleAge40to44       | 1071800    |

Dietary calcium and zinc deficiency risks are decreasing but remain prevalent

| Country  | Reference year | Age/gender group    | Population |
|----------|----------------|---------------------|------------|
| Ethiopia | 1993           | MaleAge45to49       | 923131     |
| Ethiopia | 1993           | MaleAge50to54       | 744337     |
| Ethiopia | 1993           | MaleAge55to59       | 604983     |
| Ethiopia | 1993           | MaleAge5to9         | 4133502    |
| Ethiopia | 1993           | MaleAge60to64       | 474591     |
| Ethiopia | 1993           | MaleAge65to69       | 321856     |
| Ethiopia | 1993           | MaleAge70to74       | 248667     |
| Ethiopia | 1993           | MaleAge75to79       | 160075     |
| Ethiopia | 1993           | MaleAge80to84       | 71787      |
| Ethiopia | 1993           | MaleAge85to89       | 18120      |
| Ethiopia | 1993           | MaleAge90to94       | 3322       |
| Ethiopia | 1993           | MaleAge95to99       | 354        |
| Ethiopia | 1993           | MaleAgeAbov e100    | 8          |
| Ethiopia | 1994           | FemaleAge0to4       | 5086142    |
| Ethiopia | 1994           | FemaleAge10to14     | 3495859    |
| Ethiopia | 1994           | FemaleAge15to19     | 2249089    |
| Ethiopia | 1994           | FemaleAge20to24     | 1187760    |
| Ethiopia | 1994           | FemaleAge25to29     | 939592     |
| Ethiopia | 1994           | FemaleAge30to34     | 810045     |
| Ethiopia | 1994           | FemaleAge35to39     | 847415     |
| Ethiopia | 1994           | FemaleAge40to44     | 880680     |
| Ethiopia | 1994           | FemaleAge45to49     | 929697     |
| Ethiopia | 1994           | FemaleAge50to54     | 788597     |
| Ethiopia | 1994           | FemaleAge55to59     | 621562     |
| Ethiopia | 1994           | FemaleAge5to9       | 4178105    |
| Ethiopia | 1994           | FemaleAge60to64     | 510978     |
| Ethiopia | 1994           | FemaleAge65to69     | 354317     |
| Ethiopia | 1994           | FemaleAge70to74     | 258490     |
| Ethiopia | 1994           | FemaleAge75to79     | 139255     |
| Ethiopia | 1994           | FemaleAge80to84     | 71196      |
| Ethiopia | 1994           | FemaleAge85to89     | 22576      |
| Ethiopia | 1994           | FemaleAge90to94     | 6258       |
| Ethiopia | 1994           | FemaleAge95to99     | 764        |
| Ethiopia | 1994           | FemaleAgeAbov e100  | 41         |
| Ethiopia | 1994           | FemaleLactAge15to19 | 313496     |
| Ethiopia | 1994           | FemaleLactAge20to24 | 638516     |
| Ethiopia | 1994           | FemaleLactAge25to29 | 559118     |
| Ethiopia | 1994           | FemaleLactAge30to34 | 443852     |
| Ethiopia | 1994           | FemaleLactAge35to39 | 303272     |
| Ethiopia | 1994           | FemaleLactAge40to44 | 147320     |
| Ethiopia | 1994           | FemaleLactAge45to49 | 44310      |
| Ethiopia | 1994           | FemalePregAge15to19 | 235122     |
| Ethiopia | 1994           | FemalePregAge20to24 | 478887     |
| Ethiopia | 1994           | FemalePregAge25to29 | 419339     |
| Ethiopia | 1994           | FemalePregAge30to34 | 332889     |
| Ethiopia | 1994           | FemalePregAge35to39 | 227454     |
| Ethiopia | 1994           | FemalePregAge40to44 | 110490     |
| Ethiopia | 1994           | FemalePregAge45to49 | 33232      |
| Ethiopia | 1994           | MaleAge0to4         | 5188749    |
| Ethiopia | 1994           | MaleAge10to14       | 3544600    |
| Ethiopia | 1994           | MaleAge15to19       | 2813415    |
| Ethiopia | 1994           | MaleAge20to24       | 2355309    |
| Ethiopia | 1994           | MaleAge25to29       | 1823450    |
| Ethiopia | 1994           | MaleAge30to34       | 1491437    |
| Ethiopia | 1994           | MaleAge35to39       | 1270809    |
| Ethiopia | 1994           | MaleAge40to44       | 1095572    |
| Ethiopia | 1994           | MaleAge45to49       | 946288     |
| Ethiopia | 1994           | MaleAge50to54       | 772521     |
| Ethiopia | 1994           | MaleAge55to59       | 614553     |
| Ethiopia | 1994           | MaleAge5to9         | 4262651    |
| Ethiopia | 1994           | MaleAge60to64       | 505871     |
| Ethiopia | 1994           | MaleAge65to69       | 326022     |
| Ethiopia | 1994           | MaleAge70to74       | 253371     |
| Ethiopia | 1994           | MaleAge75to79       | 169793     |
| Ethiopia | 1994           | MaleAge80to84       | 77546      |
| Ethiopia | 1994           | MaleAge85to89       | 18454      |
| Ethiopia | 1994           | MaleAge90to94       | 3450       |
| Ethiopia | 1994           | MaleAge95to99       | 370        |
| Ethiopia | 1994           | MaleAgeAbov e100    | 8          |
| Ethiopia | 1995           | FemaleAge0to4       | 5230679    |
| Ethiopia | 1995           | FemaleAge10to14     | 3647207    |
| Ethiopia | 1995           | FemaleAge15to19     | 2364253    |
| Ethiopia | 1995           | FemaleAge20to24     | 1266926    |
| Ethiopia | 1995           | FemaleAge25to29     | 1015059    |
| Ethiopia | 1995           | FemaleAge30to34     | 858435     |
| Ethiopia | 1995           | FemaleAge35to39     | 896855     |
| Ethiopia | 1995           | FemaleAge40to44     | 906853     |
| Ethiopia | 1995           | FemaleAge45to49     | 957267     |
| Ethiopia | 1995           | FemaleAge50to54     | 822149     |
| Ethiopia | 1995           | FemaleAge55to59     | 637993     |
| Ethiopia | 1995           | FemaleAge5to9       | 4280505    |
| Ethiopia | 1995           | FemaleAge60to64     | 529314     |
| Ethiopia | 1995           | FemaleAge65to69     | 366444     |
| Ethiopia | 1995           | FemaleAge70to74     | 266480     |
| Ethiopia | 1995           | FemaleAge75to79     | 144402     |
| Ethiopia | 1995           | FemaleAge80to84     | 71813      |
| Ethiopia | 1995           | FemaleAge85to89     | 22295      |
| Ethiopia | 1995           | FemaleAge90to94     | 5330       |

Dietary calcium and zinc deficiency risks are decreasing but remain prevalent

| Country  | Reference year | Age/gender group    | Population |
|----------|----------------|---------------------|------------|
| Ethiopia | 1995           | FemaleAge95to99     | 622        |
| Ethiopia | 1995           | FemaleAgeAbov e100  | 43         |
| Ethiopia | 1995           | FemaleLactAge15to19 | 313496     |
| Ethiopia | 1995           | FemaleLactAge20to24 | 638516     |
| Ethiopia | 1995           | FemaleLactAge25to29 | 559118     |
| Ethiopia | 1995           | FemaleLactAge30to34 | 443852     |
| Ethiopia | 1995           | FemaleLactAge35to39 | 303272     |
| Ethiopia | 1995           | FemaleLactAge40to44 | 147320     |
| Ethiopia | 1995           | FemaleLactAge45to49 | 44310      |
| Ethiopia | 1995           | FemalePregAge15to19 | 235122     |
| Ethiopia | 1995           | FemalePregAge20to24 | 478887     |
| Ethiopia | 1995           | FemalePregAge25to29 | 419339     |
| Ethiopia | 1995           | FemalePregAge30to34 | 332889     |
| Ethiopia | 1995           | FemalePregAge35to39 | 227454     |
| Ethiopia | 1995           | FemalePregAge40to44 | 110490     |
| Ethiopia | 1995           | FemalePregAge45to49 | 33232      |
| Ethiopia | 1995           | MaleAge0to4         | 5339818    |
| Ethiopia | 1995           | MaleAge10to14       | 3708867    |
| Ethiopia | 1995           | MaleAge15to19       | 2917050    |
| Ethiopia | 1995           | MaleAge20to24       | 2446938    |
| Ethiopia | 1995           | MaleAge25to29       | 1901064    |
| Ethiopia | 1995           | MaleAge30to34       | 1532858    |
| Ethiopia | 1995           | MaleAge35to39       | 1305984    |
| Ethiopia | 1995           | MaleAge40to44       | 1122254    |
| Ethiopia | 1995           | MaleAge45to49       | 967296     |
| Ethiopia | 1995           | MaleAge50to54       | 798691     |
| Ethiopia | 1995           | MaleAge55to59       | 627415     |
| Ethiopia | 1995           | MaleAge5to9         | 4368120    |
| Ethiopia | 1995           | MaleAge60to64       | 531869     |
| Ethiopia | 1995           | MaleAge65to69       | 337159     |
| Ethiopia | 1995           | MaleAge70to74       | 255519     |
| Ethiopia | 1995           | MaleAge75to79       | 178782     |
| Ethiopia | 1995           | MaleAge80to84       | 83580      |
| Ethiopia | 1995           | MaleAge85to89       | 18952      |
| Ethiopia | 1995           | MaleAge90to94       | 2854       |
| Ethiopia | 1995           | MaleAge95to99       | 220        |
| Ethiopia | 1995           | MaleAgeAbov e100    | 9          |
| Ethiopia | 1996           | FemaleAge0to4       | 5426882    |
| Ethiopia | 1996           | FemaleAge10to14     | 3766805    |
| Ethiopia | 1996           | FemaleAge15to19     | 2367467    |
| Ethiopia | 1996           | FemaleAge20to24     | 1156414    |
| Ethiopia | 1996           | FemaleAge25to29     | 896576     |
| Ethiopia | 1996           | FemaleAge30to34     | 800610     |
| Ethiopia | 1996           | FemaleAge35to39     | 895080     |
| Ethiopia | 1996           | FemaleAge40to44     | 929613     |
| Ethiopia | 1996           | FemaleAge45to49     | 978024     |
| Ethiopia | 1996           | FemaleAge50to54     | 852439     |
| Ethiopia | 1996           | FemaleAge55to59     | 655344     |
| Ethiopia | 1996           | FemaleAge5to9       | 4409897    |
| Ethiopia | 1996           | FemaleAge60to64     | 539771     |
| Ethiopia | 1996           | FemaleAge65to69     | 380559     |
| Ethiopia | 1996           | FemaleAge70to74     | 270862     |
| Ethiopia | 1996           | FemaleAge75to79     | 152732     |
| Ethiopia | 1996           | FemaleAge80to84     | 74643      |
| Ethiopia | 1996           | FemaleAge85to89     | 25498      |
| Ethiopia | 1996           | FemaleAge90to94     | 6020       |
| Ethiopia | 1996           | FemaleAge95to99     | 762        |
| Ethiopia | 1996           | FemaleAgeAbov e100  | 46         |
| Ethiopia | 1996           | FemaleLactAge15to19 | 381332     |
| Ethiopia | 1996           | FemaleLactAge20to24 | 747333     |
| Ethiopia | 1996           | FemaleLactAge25to29 | 659560     |
| Ethiopia | 1996           | FemaleLactAge30to34 | 498317     |
| Ethiopia | 1996           | FemaleLactAge35to39 | 317877     |
| Ethiopia | 1996           | FemaleLactAge40to44 | 147847     |
| Ethiopia | 1996           | FemaleLactAge45to49 | 40121      |
| Ethiopia | 1996           | FemalePregAge15to19 | 285999     |
| Ethiopia | 1996           | FemalePregAge20to24 | 560500     |
| Ethiopia | 1996           | FemalePregAge25to29 | 494670     |
| Ethiopia | 1996           | FemalePregAge30to34 | 373737     |
| Ethiopia | 1996           | FemalePregAge35to39 | 238408     |
| Ethiopia | 1996           | FemalePregAge40to44 | 110885     |
| Ethiopia | 1996           | FemalePregAge45to49 | 30091      |
| Ethiopia | 1996           | MaleAge0to4         | 5539538    |
| Ethiopia | 1996           | MaleAge10to14       | 3821640    |
| Ethiopia | 1996           | MaleAge15to19       | 3034162    |
| Ethiopia | 1996           | MaleAge20to24       | 2527506    |
| Ethiopia | 1996           | MaleAge25to29       | 1990660    |
| Ethiopia | 1996           | MaleAge30to34       | 1579954    |
| Ethiopia | 1996           | MaleAge35to39       | 1330337    |
| Ethiopia | 1996           | MaleAge40to44       | 1137663    |
| Ethiopia | 1996           | MaleAge45to49       | 983638     |
| Ethiopia | 1996           | MaleAge50to54       | 819964     |
| Ethiopia | 1996           | MaleAge55to59       | 640965     |
| Ethiopia | 1996           | MaleAge5to9         | 4493847    |
| Ethiopia | 1996           | MaleAge60to64       | 541024     |
| Ethiopia | 1996           | MaleAge65to69       | 354466     |
| Ethiopia | 1996           | MaleAge70to74       | 251644     |
| Ethiopia | 1996           | MaleAge75to79       | 178531     |

Dietary calcium and zinc deficiency risks are decreasing but remain prevalent

| Country  | Reference year | Age/gender group    | Population |
|----------|----------------|---------------------|------------|
| Ethiopia | 1996           | MaleAge80to84       | 89459      |
| Ethiopia | 1996           | MaleAge85to89       | 23756      |
| Ethiopia | 1996           | MaleAge90to94       | 3365       |
| Ethiopia | 1996           | MaleAge95to99       | 268        |
| Ethiopia | 1996           | MaleAgeAbov e100    | 10         |
| Ethiopia | 1997           | FemaleAge0to4       | 5610971    |
| Ethiopia | 1997           | FemaleAge10to14     | 3870637    |
| Ethiopia | 1997           | FemaleAge15to19     | 2501418    |
| Ethiopia | 1997           | FemaleAge20to24     | 1236291    |
| Ethiopia | 1997           | FemaleAge25to29     | 954833     |
| Ethiopia | 1997           | FemaleAge30to34     | 846454     |
| Ethiopia | 1997           | FemaleAge35to39     | 909424     |
| Ethiopia | 1997           | FemaleAge40to44     | 962116     |
| Ethiopia | 1997           | FemaleAge45to49     | 981015     |
| Ethiopia | 1997           | FemaleAge50to54     | 883725     |
| Ethiopia | 1997           | FemaleAge55to59     | 676281     |
| Ethiopia | 1997           | FemaleAge5to9       | 4543100    |
| Ethiopia | 1997           | FemaleAge60to64     | 545708     |
| Ethiopia | 1997           | FemaleAge65to69     | 399323     |
| Ethiopia | 1997           | FemaleAge70to74     | 272354     |
| Ethiopia | 1997           | FemaleAge75to79     | 162280     |
| Ethiopia | 1997           | FemaleAge80to84     | 75945      |
| Ethiopia | 1997           | FemaleAge85to89     | 28340      |
| Ethiopia | 1997           | FemaleAge90to94     | 6393       |
| Ethiopia | 1997           | FemaleAge95to99     | 1029       |
| Ethiopia | 1997           | FemaleAgeAbov e100  | 49         |
| Ethiopia | 1997           | FemaleLactAge15to19 | 381332     |
| Ethiopia | 1997           | FemaleLactAge20to24 | 747333     |
| Ethiopia | 1997           | FemaleLactAge25to29 | 659560     |
| Ethiopia | 1997           | FemaleLactAge30to34 | 498317     |
| Ethiopia | 1997           | FemaleLactAge35to39 | 317877     |
| Ethiopia | 1997           | FemaleLactAge40to44 | 147847     |
| Ethiopia | 1997           | FemaleLactAge45to49 | 40121      |
| Ethiopia | 1997           | FemalePregAge15to19 | 285999     |
| Ethiopia | 1997           | FemalePregAge20to24 | 560500     |
| Ethiopia | 1997           | FemalePregAge25to29 | 494670     |
| Ethiopia | 1997           | FemalePregAge30to34 | 373737     |
| Ethiopia | 1997           | FemalePregAge35to39 | 238408     |
| Ethiopia | 1997           | FemalePregAge40to44 | 110885     |
| Ethiopia | 1997           | FemalePregAge45to49 | 30091      |
| Ethiopia | 1997           | MaleAge0to4         | 5731811    |
| Ethiopia | 1997           | MaleAge10to14       | 3918230    |
| Ethiopia | 1997           | MaleAge15to19       | 3166928    |
| Ethiopia | 1997           | MaleAge20to24       | 2591765    |
| Ethiopia | 1997           | MaleAge25to29       | 2088925    |
| Ethiopia | 1997           | MaleAge30to34       | 1631758    |
| Ethiopia | 1997           | MaleAge35to39       | 1355381    |
| Ethiopia | 1997           | MaleAge40to44       | 1154480    |
| Ethiopia | 1997           | MaleAge45to49       | 995954     |
| Ethiopia | 1997           | MaleAge50to54       | 839785     |
| Ethiopia | 1997           | MaleAge55to59       | 659520     |
| Ethiopia | 1997           | MaleAge5to9         | 4624816    |
| Ethiopia | 1997           | MaleAge60to64       | 542589     |
| Ethiopia | 1997           | MaleAge65to69       | 378801     |
| Ethiopia | 1997           | MaleAge70to74       | 246849     |
| Ethiopia | 1997           | MaleAge75to79       | 176625     |
| Ethiopia | 1997           | MaleAge80to84       | 93727      |
| Ethiopia | 1997           | MaleAge85to89       | 27869      |
| Ethiopia | 1997           | MaleAge90to94       | 3645       |
| Ethiopia | 1997           | MaleAge95to99       | 443        |
| Ethiopia | 1997           | MaleAgeAbov e100    | 11         |
| Ethiopia | 1998           | FemaleAge0to4       | 5785455    |
| Ethiopia | 1998           | FemaleAge10to14     | 3963756    |
| Ethiopia | 1998           | FemaleAge15to19     | 2642312    |
| Ethiopia | 1998           | FemaleAge20to24     | 1318048    |
| Ethiopia | 1998           | FemaleAge25to29     | 1016834    |
| Ethiopia | 1998           | FemaleAge30to34     | 899092     |
| Ethiopia | 1998           | FemaleAge35to39     | 919237     |
| Ethiopia | 1998           | FemaleAge40to44     | 999737     |
| Ethiopia | 1998           | FemaleAge45to49     | 978638     |
| Ethiopia | 1998           | FemaleAge50to54     | 913464     |
| Ethiopia | 1998           | FemaleAge55to59     | 700095     |
| Ethiopia | 1998           | FemaleAge5to9       | 4681184    |
| Ethiopia | 1998           | FemaleAge60to64     | 550187     |
| Ethiopia | 1998           | FemaleAge65to69     | 419951     |
| Ethiopia | 1998           | FemaleAge70to74     | 273785     |
| Ethiopia | 1998           | FemaleAge75to79     | 171602     |
| Ethiopia | 1998           | FemaleAge80to84     | 76742      |
| Ethiopia | 1998           | FemaleAge85to89     | 30202      |
| Ethiopia | 1998           | FemaleAge90to94     | 6554       |
| Ethiopia | 1998           | FemaleAge95to99     | 1247       |
| Ethiopia | 1998           | FemaleAgeAbov e100  | 52         |
| Ethiopia | 1998           | FemaleLactAge15to19 | 381332     |
| Ethiopia | 1998           | FemaleLactAge20to24 | 747333     |
| Ethiopia | 1998           | FemaleLactAge25to29 | 659560     |
| Ethiopia | 1998           | FemaleLactAge30to34 | 498317     |
| Ethiopia | 1998           | FemaleLactAge35to39 | 317877     |
| Ethiopia | 1998           | FemaleLactAge40to44 | 147847     |

Dietary calcium and zinc deficiency risks are decreasing but remain prevalent

| Country  | Reference year | Age/gender group    | Population |
|----------|----------------|---------------------|------------|
| Ethiopia | 1998           | FemaleLactAge45to49 | 40121      |
| Ethiopia | 1998           | FemalePregAge15to19 | 285999     |
| Ethiopia | 1998           | FemalePregAge20to24 | 560500     |
| Ethiopia | 1998           | FemalePregAge25to29 | 494670     |
| Ethiopia | 1998           | FemalePregAge30to34 | 373737     |
| Ethiopia | 1998           | FemalePregAge35to39 | 238408     |
| Ethiopia | 1998           | FemalePregAge40to44 | 110885     |
| Ethiopia | 1998           | FemalePregAge45to49 | 30091      |
| Ethiopia | 1998           | MaleAge0to4         | 5916903    |
| Ethiopia | 1998           | MaleAge10to14       | 4007190    |
| Ethiopia | 1998           | MaleAge15to19       | 3306032    |
| Ethiopia | 1998           | MaleAge20to24       | 2649866    |
| Ethiopia | 1998           | MaleAge25to29       | 2189964    |
| Ethiopia | 1998           | MaleAge30to34       | 1690356    |
| Ethiopia | 1998           | MaleAge35to39       | 1382995    |
| Ethiopia | 1998           | MaleAge40to44       | 1173746    |
| Ethiopia | 1998           | MaleAge45to49       | 1005123    |
| Ethiopia | 1998           | MaleAge50to54       | 858321     |
| Ethiopia | 1998           | MaleAge55to59       | 681195     |
| Ethiopia | 1998           | MaleAge5to9         | 4761695    |
| Ethiopia | 1998           | MaleAge60to64       | 541225     |
| Ethiopia | 1998           | MaleAge65to69       | 405423     |
| Ethiopia | 1998           | MaleAge70to74       | 243962     |
| Ethiopia | 1998           | MaleAge75to79       | 173918     |
| Ethiopia | 1998           | MaleAge80to84       | 95986      |
| Ethiopia | 1998           | MaleAge85to89       | 30582      |
| Ethiopia | 1998           | MaleAge90to94       | 3974       |
| Ethiopia | 1998           | MaleAge95to99       | 625        |
| Ethiopia | 1998           | MaleAgeAbov e100    | 12         |
| Ethiopia | 1999           | FemaleAge0to4       | 5947968    |
| Ethiopia | 1999           | FemaleAge10to14     | 4058539    |
| Ethiopia | 1999           | FemaleAge15to19     | 2780407    |
| Ethiopia | 1999           | FemaleAge20to24     | 1408989    |
| Ethiopia | 1999           | FemaleAge25to29     | 1085461    |
| Ethiopia | 1999           | FemaleAge30to34     | 955818     |
| Ethiopia | 1999           | FemaleAge35to39     | 933961     |
| Ethiopia | 1999           | FemaleAge40to44     | 1035170    |
| Ethiopia | 1999           | FemaleAge45to49     | 980134     |
| Ethiopia | 1999           | FemaleAge50to54     | 937960     |
| Ethiopia | 1999           | FemaleAge55to59     | 725969     |
| Ethiopia | 1999           | FemaleAge5to9       | 4823965    |
| Ethiopia | 1999           | FemaleAge60to64     | 557839     |
| Ethiopia | 1999           | FemaleAge65to69     | 438623     |
| Ethiopia | 1999           | FemaleAge70to74     | 278771     |
| Ethiopia | 1999           | FemaleAge75to79     | 178996     |
| Ethiopia | 1999           | FemaleAge80to84     | 78273      |
| Ethiopia | 1999           | FemaleAge85to89     | 30645      |
| Ethiopia | 1999           | FemaleAge90to94     | 6551       |
| Ethiopia | 1999           | FemaleAge95to99     | 1242       |
| Ethiopia | 1999           | FemaleAgeAbov e100  | 56         |
| Ethiopia | 1999           | FemaleLactAge15to19 | 381332     |
| Ethiopia | 1999           | FemaleLactAge20to24 | 747333     |
| Ethiopia | 1999           | FemaleLactAge25to29 | 659560     |
| Ethiopia | 1999           | FemaleLactAge30to34 | 498317     |
| Ethiopia | 1999           | FemaleLactAge35to39 | 317877     |
| Ethiopia | 1999           | FemaleLactAge40to44 | 147847     |
| Ethiopia | 1999           | FemaleLactAge45to49 | 40121      |
| Ethiopia | 1999           | FemalePregAge15to19 | 285999     |
| Ethiopia | 1999           | FemalePregAge20to24 | 560500     |
| Ethiopia | 1999           | FemalePregAge25to29 | 494670     |
| Ethiopia | 1999           | FemalePregAge30to34 | 373737     |
| Ethiopia | 1999           | FemalePregAge35to39 | 238408     |
| Ethiopia | 1999           | FemalePregAge40to44 | 110885     |
| Ethiopia | 1999           | FemalePregAge45to49 | 30091      |
| Ethiopia | 1999           | MaleAge0to4         | 6089964    |
| Ethiopia | 1999           | MaleAge10to14       | 4101901    |
| Ethiopia | 1999           | MaleAge15to19       | 3438737    |
| Ethiopia | 1999           | MaleAge20to24       | 2719035    |
| Ethiopia | 1999           | MaleAge25to29       | 2285769    |
| Ethiopia | 1999           | MaleAge30to34       | 1758864    |
| Ethiopia | 1999           | MaleAge35to39       | 1416643    |
| Ethiopia | 1999           | MaleAge40to44       | 1195751    |
| Ethiopia | 1999           | MaleAge45to49       | 1014087    |
| Ethiopia | 1999           | MaleAge50to54       | 875653     |
| Ethiopia | 1999           | MaleAge55to59       | 703517     |
| Ethiopia | 1999           | MaleAge5to9         | 4905011    |
| Ethiopia | 1999           | MaleAge60to64       | 543561     |
| Ethiopia | 1999           | MaleAge65to69       | 428112     |
| Ethiopia | 1999           | MaleAge70to74       | 246779     |
| Ethiopia | 1999           | MaleAge75to79       | 171004     |
| Ethiopia | 1999           | MaleAge80to84       | 95917      |
| Ethiopia | 1999           | MaleAge85to89       | 31610      |
| Ethiopia | 1999           | MaleAge90to94       | 4377       |
| Ethiopia | 1999           | MaleAge95to99       | 570        |
| Ethiopia | 1999           | MaleAgeAbov e100    | 13         |
| Ethiopia | 2000           | FemaleAge0to4       | 6099991    |
| Ethiopia | 2000           | FemaleAge10to14     | 4164349    |
| Ethiopia | 2000           | FemaleAge15to19     | 2908573    |

Dietary calcium and zinc deficiency risks are decreasing but remain prevalent

| Country  | Reference year | Age/gender group    | Population |
|----------|----------------|---------------------|------------|
| Ethiopia | 2000           | FemaleAge20to24     | 1515607    |
| Ethiopia | 2000           | FemaleAge25to29     | 1161118    |
| Ethiopia | 2000           | FemaleAge30to34     | 1015601    |
| Ethiopia | 2000           | FemaleAge35to39     | 960271     |
| Ethiopia | 2000           | FemaleAge40to44     | 1063477    |
| Ethiopia | 2000           | FemaleAge45to49     | 991808     |
| Ethiopia | 2000           | FemaleAge50to54     | 954978     |
| Ethiopia | 2000           | FemaleAge55to59     | 753276     |
| Ethiopia | 2000           | FemaleAge5to9       | 4967330    |
| Ethiopia | 2000           | FemaleAge60to64     | 571241     |
| Ethiopia | 2000           | FemaleAge65to69     | 453507     |
| Ethiopia | 2000           | FemaleAge70to74     | 288988     |
| Ethiopia | 2000           | FemaleAge75to79     | 184083     |
| Ethiopia | 2000           | FemaleAge80to84     | 81042      |
| Ethiopia | 2000           | FemaleAge85to89     | 29732      |
| Ethiopia | 2000           | FemaleAge90to94     | 6160       |
| Ethiopia | 2000           | FemaleAge95to99     | 891        |
| Ethiopia | 2000           | FemaleAgeAbov e100  | 61         |
| Ethiopia | 2000           | FemaleLactAge15to19 | 381332     |
| Ethiopia | 2000           | FemaleLactAge20to24 | 747333     |
| Ethiopia | 2000           | FemaleLactAge25to29 | 659560     |
| Ethiopia | 2000           | FemaleLactAge30to34 | 498317     |
| Ethiopia | 2000           | FemaleLactAge35to39 | 317877     |
| Ethiopia | 2000           | FemaleLactAge40to44 | 147847     |
| Ethiopia | 2000           | FemaleLactAge45to49 | 40121      |
| Ethiopia | 2000           | FemalePregAge15to19 | 285999     |
| Ethiopia | 2000           | FemalePregAge20to24 | 560500     |
| Ethiopia | 2000           | FemalePregAge25to29 | 494670     |
| Ethiopia | 2000           | FemalePregAge30to34 | 373737     |
| Ethiopia | 2000           | FemalePregAge35to39 | 238408     |
| Ethiopia | 2000           | FemalePregAge40to44 | 110885     |
| Ethiopia | 2000           | FemalePregAge45to49 | 30091      |
| Ethiopia | 2000           | MaleAge0to4         | 6250797    |
| Ethiopia | 2000           | MaleAge10to14       | 4210183    |
| Ethiopia | 2000           | MaleAge15to19       | 3559217    |
| Ethiopia | 2000           | MaleAge20to24       | 2809546    |
| Ethiopia | 2000           | MaleAge25to29       | 2371957    |
| Ethiopia | 2000           | MaleAge30to34       | 1838499    |
| Ethiopia | 2000           | MaleAge35to39       | 1458923    |
| Ethiopia | 2000           | MaleAge40to44       | 1220401    |
| Ethiopia | 2000           | MaleAge45to49       | 1025774    |
| Ethiopia | 2000           | MaleAge50to54       | 891354     |
| Ethiopia | 2000           | MaleAge55to59       | 725186     |
| Ethiopia | 2000           | MaleAge5to9         | 5051735    |
| Ethiopia | 2000           | MaleAge60to64       | 553059     |
| Ethiopia | 2000           | MaleAge65to69       | 443986     |
| Ethiopia | 2000           | MaleAge70to74       | 256939     |
| Ethiopia | 2000           | MaleAge75to79       | 168304     |
| Ethiopia | 2000           | MaleAge80to84       | 93823      |
| Ethiopia | 2000           | MaleAge85to89       | 31037      |
| Ethiopia | 2000           | MaleAge90to94       | 4349       |
| Ethiopia | 2000           | MaleAge95to99       | 356        |
| Ethiopia | 2000           | MaleAgeAbov e100    | 15         |
| Finland  | 1992           | FemaleAge0to4       | 153764     |
| Finland  | 1992           | FemaleAge10to14     | 161859     |
| Finland  | 1992           | FemaleAge15to19     | 147121     |
| Finland  | 1992           | FemaleAge20to24     | 140798     |
| Finland  | 1992           | FemaleAge25to29     | 139547     |
| Finland  | 1992           | FemaleAge30to34     | 154804     |
| Finland  | 1992           | FemaleAge35to39     | 180332     |
| Finland  | 1992           | FemaleAge40to44     | 212073     |
| Finland  | 1992           | FemaleAge45to49     | 177732     |
| Finland  | 1992           | FemaleAge50to54     | 141025     |
| Finland  | 1992           | FemaleAge55to59     | 131837     |
| Finland  | 1992           | FemaleAge5to9       | 158014     |
| Finland  | 1992           | FemaleAge60to64     | 132545     |
| Finland  | 1992           | FemaleAge65to69     | 132843     |
| Finland  | 1992           | FemaleAge70to74     | 109134     |
| Finland  | 1992           | FemaleAge75to79     | 89800      |
| Finland  | 1992           | FemaleAge80to84     | 66626      |
| Finland  | 1992           | FemaleAge85to89     | 32852      |
| Finland  | 1992           | FemaleAge90to94     | 10355      |
| Finland  | 1992           | FemaleAge95to99     | 1755       |
| Finland  | 1992           | FemaleAgeAbov e100  | 130        |
| Finland  | 1992           | FemaleLactAge15to19 | 1752       |
| Finland  | 1992           | FemaleLactAge20to24 | 11500      |
| Finland  | 1992           | FemaleLactAge25to29 | 24070      |
| Finland  | 1992           | FemaleLactAge30to34 | 18597      |
| Finland  | 1992           | FemaleLactAge35to39 | 7441       |
| Finland  | 1992           | FemaleLactAge40to44 | 1582       |
| Finland  | 1992           | FemaleLactAge45to49 | 77         |
| Finland  | 1992           | FemalePregAge15to19 | 1314       |
| Finland  | 1992           | FemalePregAge20to24 | 8625       |
| Finland  | 1992           | FemalePregAge25to29 | 18053      |
| Finland  | 1992           | FemalePregAge30to34 | 13948      |
| Finland  | 1992           | FemalePregAge35to39 | 5581       |
| Finland  | 1992           | FemalePregAge40to44 | 1186       |
| Finland  | 1992           | FemalePregAge45to49 | 57         |



Dietary calcium and zinc deficiency risks are decreasing but remain prevalent

| Country | Reference year | Age/gender group    | Population |
|---------|----------------|---------------------|------------|
| Finland | 1992           | MaleAge0to4         | 160260     |
| Finland | 1992           | MaleAge10to14       | 169149     |
| Finland | 1992           | MaleAge15to19       | 157067     |
| Finland | 1992           | MaleAge20to24       | 167512     |
| Finland | 1992           | MaleAge25to29       | 189433     |
| Finland | 1992           | MaleAge30to34       | 195818     |
| Finland | 1992           | MaleAge35to39       | 201527     |
| Finland | 1992           | MaleAge40to44       | 224814     |
| Finland | 1992           | MaleAge45to49       | 184009     |
| Finland | 1992           | MaleAge50to54       | 139858     |
| Finland | 1992           | MaleAge55to59       | 125185     |
| Finland | 1992           | MaleAge5to9         | 165456     |
| Finland | 1992           | MaleAge60to64       | 116047     |
| Finland | 1992           | MaleAge65to69       | 96938      |
| Finland | 1992           | MaleAge70to74       | 64710      |
| Finland | 1992           | MaleAge75to79       | 44970      |
| Finland | 1992           | MaleAge80to84       | 28593      |
| Finland | 1992           | MaleAge85to89       | 11466      |
| Finland | 1992           | MaleAge90to94       | 2879       |
| Finland | 1992           | MaleAge95to99       | 449        |
| Finland | 1992           | MaleAgeAbov e100    | 30         |
| Finland | 1993           | FemaleAge0to4       | 156991     |
| Finland | 1993           | FemaleAge10to14     | 162080     |
| Finland | 1993           | FemaleAge15to19     | 150828     |
| Finland | 1993           | FemaleAge20to24     | 135075     |
| Finland | 1993           | FemaleAge25to29     | 137345     |
| Finland | 1993           | FemaleAge30to34     | 154765     |
| Finland | 1993           | FemaleAge35to39     | 178713     |
| Finland | 1993           | FemaleAge40to44     | 206830     |
| Finland | 1993           | FemaleAge45to49     | 192831     |
| Finland | 1993           | FemaleAge50to54     | 141878     |
| Finland | 1993           | FemaleAge55to59     | 133844     |
| Finland | 1993           | FemaleAge5to9       | 156508     |
| Finland | 1993           | FemaleAge60to64     | 130106     |
| Finland | 1993           | FemaleAge65to69     | 132584     |
| Finland | 1993           | FemaleAge70to74     | 113429     |
| Finland | 1993           | FemaleAge75to79     | 87848      |
| Finland | 1993           | FemaleAge80to84     | 67835      |
| Finland | 1993           | FemaleAge85to89     | 34405      |
| Finland | 1993           | FemaleAge90to94     | 10792      |
| Finland | 1993           | FemaleAge95to99     | 2020       |
| Finland | 1993           | FemaleAgeAbov e100  | 139        |
| Finland | 1993           | FemaleLactAge15to19 | 1752       |
| Finland | 1993           | FemaleLactAge20to24 | 11500      |
| Finland | 1993           | FemaleLactAge25to29 | 24070      |
| Finland | 1993           | FemaleLactAge30to34 | 18597      |
| Finland | 1993           | FemaleLactAge35to39 | 7441       |
| Finland | 1993           | FemaleLactAge40to44 | 1582       |
| Finland | 1993           | FemaleLactAge45to49 | 77         |
| Finland | 1993           | FemalePregAge15to19 | 1314       |
| Finland | 1993           | FemalePregAge20to24 | 8625       |
| Finland | 1993           | FemalePregAge25to29 | 18053      |
| Finland | 1993           | FemalePregAge30to34 | 13948      |
| Finland | 1993           | FemalePregAge35to39 | 5581       |
| Finland | 1993           | FemalePregAge40to44 | 1186       |
| Finland | 1993           | FemalePregAge45to49 | 57         |
| Finland | 1993           | MaleAge0to4         | 163361     |
| Finland | 1993           | MaleAge10to14       | 169501     |
| Finland | 1993           | MaleAge15to19       | 160795     |
| Finland | 1993           | MaleAge20to24       | 161885     |
| Finland | 1993           | MaleAge25to29       | 186945     |
| Finland | 1993           | MaleAge30to34       | 195787     |
| Finland | 1993           | MaleAge35to39       | 199653     |
| Finland | 1993           | MaleAge40to44       | 218518     |
| Finland | 1993           | MaleAge45to49       | 200187     |
| Finland | 1993           | MaleAge50to54       | 141374     |
| Finland | 1993           | MaleAge55to59       | 127394     |
| Finland | 1993           | MaleAge5to9         | 163877     |
| Finland | 1993           | MaleAge60to64       | 114991     |
| Finland | 1993           | MaleAge65to69       | 99824      |
| Finland | 1993           | MaleAge70to74       | 68069      |
| Finland | 1993           | MaleAge75to79       | 43792      |
| Finland | 1993           | MaleAge80to84       | 29260      |
| Finland | 1993           | MaleAge85to89       | 12067      |
| Finland | 1993           | MaleAge90to94       | 3005       |
| Finland | 1993           | MaleAge95to99       | 520        |
| Finland | 1993           | MaleAgeAbov e100    | 32         |
| Finland | 1994           | FemaleAge0to4       | 159526     |
| Finland | 1994           | FemaleAge10to14     | 161893     |
| Finland | 1994           | FemaleAge15to19     | 154491     |
| Finland | 1994           | FemaleAge20to24     | 130691     |
| Finland | 1994           | FemaleAge25to29     | 134375     |
| Finland | 1994           | FemaleAge30to34     | 154482     |
| Finland | 1994           | FemaleAge35to39     | 177537     |
| Finland | 1994           | FemaleAge40to44     | 201195     |
| Finland | 1994           | FemaleAge45to49     | 205341     |
| Finland | 1994           | FemaleAge50to54     | 145235     |
| Finland | 1994           | FemaleAge55to59     | 135882     |

Dietary calcium and zinc deficiency risks are decreasing but remain prevalent

| Country | Reference year | Age/gender group    | Population |
|---------|----------------|---------------------|------------|
| Finland | 1994           | FemaleAge5to9       | 155009     |
| Finland | 1994           | FemaleAge60to64     | 128293     |
| Finland | 1994           | FemaleAge65to69     | 131895     |
| Finland | 1994           | FemaleAge70to74     | 117428     |
| Finland | 1994           | FemaleAge75to79     | 87220      |
| Finland | 1994           | FemaleAge80to84     | 68764      |
| Finland | 1994           | FemaleAge85to89     | 35475      |
| Finland | 1994           | FemaleAge90to94     | 10977      |
| Finland | 1994           | FemaleAge95to99     | 2142       |
| Finland | 1994           | FemaleAgeAbove100   | 149        |
| Finland | 1994           | FemaleLactAge15to19 | 1752       |
| Finland | 1994           | FemaleLactAge20to24 | 11500      |
| Finland | 1994           | FemaleLactAge25to29 | 24070      |
| Finland | 1994           | FemaleLactAge30to34 | 18597      |
| Finland | 1994           | FemaleLactAge35to39 | 7441       |
| Finland | 1994           | FemaleLactAge40to44 | 1582       |
| Finland | 1994           | FemaleLactAge45to49 | 77         |
| Finland | 1994           | FemalePregAge15to19 | 1314       |
| Finland | 1994           | FemalePregAge20to24 | 8625       |
| Finland | 1994           | FemalePregAge25to29 | 18053      |
| Finland | 1994           | FemalePregAge30to34 | 13948      |
| Finland | 1994           | FemalePregAge35to39 | 5581       |
| Finland | 1994           | FemalePregAge40to44 | 1186       |
| Finland | 1994           | FemalePregAge45to49 | 57         |
| Finland | 1994           | MaleAge0to4         | 165803     |
| Finland | 1994           | MaleAge10to14       | 169441     |
| Finland | 1994           | MaleAge15to19       | 164501     |
| Finland | 1994           | MaleAge20to24       | 157567     |
| Finland | 1994           | MaleAge25to29       | 183741     |
| Finland | 1994           | MaleAge30to34       | 195543     |
| Finland | 1994           | MaleAge35to39       | 198334     |
| Finland | 1994           | MaleAge40to44       | 211895     |
| Finland | 1994           | MaleAge45to49       | 213412     |
| Finland | 1994           | MaleAge50to54       | 145553     |
| Finland | 1994           | MaleAge55to59       | 129694     |
| Finland | 1994           | MaleAge5to9         | 162271     |
| Finland | 1994           | MaleAge60to64       | 114393     |
| Finland | 1994           | MaleAge65to69       | 102143     |
| Finland | 1994           | MaleAge70to74       | 71568      |
| Finland | 1994           | MaleAge75to79       | 43456      |
| Finland | 1994           | MaleAge80to84       | 29456      |
| Finland | 1994           | MaleAge85to89       | 12334      |
| Finland | 1994           | MaleAge90to94       | 3039       |
| Finland | 1994           | MaleAge95to99       | 539        |
| Finland | 1994           | MaleAgeAbove100     | 34         |
| Finland | 1995           | FemaleAge0to4       | 160044     |
| Finland | 1995           | FemaleAge10to14     | 161397     |
| Finland | 1995           | FemaleAge15to19     | 157168     |
| Finland | 1995           | FemaleAge20to24     | 128558     |
| Finland | 1995           | FemaleAge25to29     | 130551     |
| Finland | 1995           | FemaleAge30to34     | 153668     |
| Finland | 1995           | FemaleAge35to39     | 176544     |
| Finland | 1995           | FemaleAge40to44     | 196973     |
| Finland | 1995           | FemaleAge45to49     | 212927     |
| Finland | 1995           | FemaleAge50to54     | 152193     |
| Finland | 1995           | FemaleAge55to59     | 137525     |
| Finland | 1995           | FemaleAge5to9       | 154075     |
| Finland | 1995           | FemaleAge60to64     | 127500     |
| Finland | 1995           | FemaleAge65to69     | 130940     |
| Finland | 1995           | FemaleAge70to74     | 120427     |
| Finland | 1995           | FemaleAge75to79     | 88496      |
| Finland | 1995           | FemaleAge80to84     | 69232      |
| Finland | 1995           | FemaleAge85to89     | 36267      |
| Finland | 1995           | FemaleAge90to94     | 10983      |
| Finland | 1995           | FemaleAge95to99     | 1932       |
| Finland | 1995           | FemaleAgeAbove100   | 160        |
| Finland | 1995           | FemaleLactAge15to19 | 1752       |
| Finland | 1995           | FemaleLactAge20to24 | 11500      |
| Finland | 1995           | FemaleLactAge25to29 | 24070      |
| Finland | 1995           | FemaleLactAge30to34 | 18597      |
| Finland | 1995           | FemaleLactAge35to39 | 7441       |
| Finland | 1995           | FemaleLactAge40to44 | 1582       |
| Finland | 1995           | FemaleLactAge45to49 | 77         |
| Finland | 1995           | FemalePregAge15to19 | 1314       |
| Finland | 1995           | FemalePregAge20to24 | 8625       |
| Finland | 1995           | FemalePregAge25to29 | 18053      |
| Finland | 1995           | FemalePregAge30to34 | 13948      |
| Finland | 1995           | FemalePregAge35to39 | 5581       |
| Finland | 1995           | FemalePregAge40to44 | 1186       |
| Finland | 1995           | FemalePregAge45to49 | 57         |
| Finland | 1995           | MaleAge0to4         | 166242     |
| Finland | 1995           | MaleAge10to14       | 169027     |
| Finland | 1995           | MaleAge15to19       | 167251     |
| Finland | 1995           | MaleAge20to24       | 155444     |
| Finland | 1995           | MaleAge25to29       | 179768     |
| Finland | 1995           | MaleAge30to34       | 194725     |
| Finland | 1995           | MaleAge35to39       | 197262     |
| Finland | 1995           | MaleAge40to44       | 206940     |

Dietary calcium and zinc deficiency risks are decreasing but remain prevalent

| Country | Reference year | Age/gender group    | Population |
|---------|----------------|---------------------|------------|
| Finland | 1995           | MaleAge45to49       | 221197     |
| Finland | 1995           | MaleAge50to54       | 153440     |
| Finland | 1995           | MaleAge55to59       | 131776     |
| Finland | 1995           | MaleAge5to9         | 161214     |
| Finland | 1995           | MaleAge60to64       | 114694     |
| Finland | 1995           | MaleAge65to69       | 103707     |
| Finland | 1995           | MaleAge70to74       | 74945      |
| Finland | 1995           | MaleAge75to79       | 44311      |
| Finland | 1995           | MaleAge80to84       | 29133      |
| Finland | 1995           | MaleAge85to89       | 12341      |
| Finland | 1995           | MaleAge90to94       | 2944       |
| Finland | 1995           | MaleAge95to99       | 437        |
| Finland | 1995           | MaleAgeAbov e100    | 36         |
| Finland | 1996           | FemaleAge0to4       | 161901     |
| Finland | 1996           | FemaleAge10to14     | 160231     |
| Finland | 1996           | FemaleAge15to19     | 159141     |
| Finland | 1996           | FemaleAge20to24     | 131570     |
| Finland | 1996           | FemaleAge25to29     | 133151     |
| Finland | 1996           | FemaleAge30to34     | 152571     |
| Finland | 1996           | FemaleAge35to39     | 174193     |
| Finland | 1996           | FemaleAge40to44     | 193173     |
| Finland | 1996           | FemaleAge45to49     | 215582     |
| Finland | 1996           | FemaleAge50to54     | 162203     |
| Finland | 1996           | FemaleAge55to59     | 138488     |
| Finland | 1996           | FemaleAge5to9       | 153839     |
| Finland | 1996           | FemaleAge60to64     | 127394     |
| Finland | 1996           | FemaleAge65to69     | 129039     |
| Finland | 1996           | FemaleAge70to74     | 121619     |
| Finland | 1996           | FemaleAge75to79     | 90357      |
| Finland | 1996           | FemaleAge80to84     | 68373      |
| Finland | 1996           | FemaleAge85to89     | 38055      |
| Finland | 1996           | FemaleAge90to94     | 12597      |
| Finland | 1996           | FemaleAge95to99     | 2104       |
| Finland | 1996           | FemaleAgeAbov e100  | 172        |
| Finland | 1996           | FemaleLactAge15to19 | 1526       |
| Finland | 1996           | FemaleLactAge20to24 | 9675       |
| Finland | 1996           | FemaleLactAge25to29 | 19681      |
| Finland | 1996           | FemaleLactAge30to34 | 18246      |
| Finland | 1996           | FemaleLactAge35to39 | 8180       |
| Finland | 1996           | FemaleLactAge40to44 | 1655       |
| Finland | 1996           | FemaleLactAge45to49 | 93         |
| Finland | 1996           | FemalePregAge15to19 | 1144       |
| Finland | 1996           | FemalePregAge20to24 | 7256       |
| Finland | 1996           | FemalePregAge25to29 | 14761      |
| Finland | 1996           | FemalePregAge30to34 | 13685      |
| Finland | 1996           | FemalePregAge35to39 | 6135       |
| Finland | 1996           | FemalePregAge40to44 | 1241       |
| Finland | 1996           | FemalePregAge45to49 | 69         |
| Finland | 1996           | MaleAge0to4         | 167954     |
| Finland | 1996           | MaleAge10to14       | 167842     |
| Finland | 1996           | MaleAge15to19       | 168942     |
| Finland | 1996           | MaleAge20to24       | 155333     |
| Finland | 1996           | MaleAge25to29       | 174496     |
| Finland | 1996           | MaleAge30to34       | 192651     |
| Finland | 1996           | MaleAge35to39       | 196061     |
| Finland | 1996           | MaleAge40to44       | 202646     |
| Finland | 1996           | MaleAge45to49       | 223436     |
| Finland | 1996           | MaleAge50to54       | 164228     |
| Finland | 1996           | MaleAge55to59       | 133097     |
| Finland | 1996           | MaleAge5to9         | 160790     |
| Finland | 1996           | MaleAge60to64       | 115296     |
| Finland | 1996           | MaleAge65to69       | 103946     |
| Finland | 1996           | MaleAge70to74       | 77844      |
| Finland | 1996           | MaleAge75to79       | 46059      |
| Finland | 1996           | MaleAge80to84       | 28904      |
| Finland | 1996           | MaleAge85to89       | 13349      |
| Finland | 1996           | MaleAge90to94       | 3530       |
| Finland | 1996           | MaleAge95to99       | 478        |
| Finland | 1996           | MaleAgeAbov e100    | 38         |
| Finland | 1997           | FemaleAge0to4       | 159305     |
| Finland | 1997           | FemaleAge10to14     | 158690     |
| Finland | 1997           | FemaleAge15to19     | 160067     |
| Finland | 1997           | FemaleAge20to24     | 133786     |
| Finland | 1997           | FemaleAge25to29     | 127244     |
| Finland | 1997           | FemaleAge30to34     | 150627     |
| Finland | 1997           | FemaleAge35to39     | 173765     |
| Finland | 1997           | FemaleAge40to44     | 190621     |
| Finland | 1997           | FemaleAge45to49     | 213608     |
| Finland | 1997           | FemaleAge50to54     | 175997     |
| Finland | 1997           | FemaleAge55to59     | 138808     |
| Finland | 1997           | FemaleAge5to9       | 154938     |
| Finland | 1997           | FemaleAge60to64     | 128671     |
| Finland | 1997           | FemaleAge65to69     | 126885     |
| Finland | 1997           | FemaleAge70to74     | 122294     |
| Finland | 1997           | FemaleAge75to79     | 93782      |
| Finland | 1997           | FemaleAge80to84     | 66971      |
| Finland | 1997           | FemaleAge85to89     | 39656      |
| Finland | 1997           | FemaleAge90to94     | 13841      |

Dietary calcium and zinc deficiency risks are decreasing but remain prevalent

| Country | Reference year | Age/gender group    | Population |
|---------|----------------|---------------------|------------|
| Finland | 1997           | FemaleAge95to99     | 2311       |
| Finland | 1997           | FemaleAgeAbov e100  | 186        |
| Finland | 1997           | FemaleLactAge15to19 | 1526       |
| Finland | 1997           | FemaleLactAge20to24 | 9675       |
| Finland | 1997           | FemaleLactAge25to29 | 19681      |
| Finland | 1997           | FemaleLactAge30to34 | 18246      |
| Finland | 1997           | FemaleLactAge35to39 | 8180       |
| Finland | 1997           | FemaleLactAge40to44 | 1655       |
| Finland | 1997           | FemaleLactAge45to49 | 93         |
| Finland | 1997           | FemalePregAge15to19 | 1144       |
| Finland | 1997           | FemalePregAge20to24 | 7256       |
| Finland | 1997           | FemalePregAge25to29 | 14761      |
| Finland | 1997           | FemalePregAge30to34 | 13685      |
| Finland | 1997           | FemalePregAge35to39 | 6135       |
| Finland | 1997           | FemalePregAge40to44 | 1241       |
| Finland | 1997           | FemalePregAge45to49 | 69         |
| Finland | 1997           | MaleAge0to4         | 165330     |
| Finland | 1997           | MaleAge10to14       | 166229     |
| Finland | 1997           | MaleAge15to19       | 170006     |
| Finland | 1997           | MaleAge20to24       | 157610     |
| Finland | 1997           | MaleAge25to29       | 168541     |
| Finland | 1997           | MaleAge30to34       | 190298     |
| Finland | 1997           | MaleAge35to39       | 195571     |
| Finland | 1997           | MaleAge40to44       | 199711     |
| Finland | 1997           | MaleAge45to49       | 220648     |
| Finland | 1997           | MaleAge50to54       | 178875     |
| Finland | 1997           | MaleAge55to59       | 133917     |
| Finland | 1997           | MaleAge5to9         | 161682     |
| Finland | 1997           | MaleAge60to64       | 116980     |
| Finland | 1997           | MaleAge65to69       | 103585     |
| Finland | 1997           | MaleAge70to74       | 80855      |
| Finland | 1997           | MaleAge75to79       | 48528      |
| Finland | 1997           | MaleAge80to84       | 28237      |
| Finland | 1997           | MaleAge85to89       | 14209      |
| Finland | 1997           | MaleAge90to94       | 3968       |
| Finland | 1997           | MaleAge95to99       | 533        |
| Finland | 1997           | MaleAgeAbov e100    | 41         |
| Finland | 1998           | FemaleAge0to4       | 153807     |
| Finland | 1998           | FemaleAge10to14     | 156919     |
| Finland | 1998           | FemaleAge15to19     | 160364     |
| Finland | 1998           | FemaleAge20to24     | 137427     |
| Finland | 1998           | FemaleAge25to29     | 121387     |
| Finland | 1998           | FemaleAge30to34     | 148195     |
| Finland | 1998           | FemaleAge35to39     | 173582     |
| Finland | 1998           | FemaleAge40to44     | 188968     |
| Finland | 1998           | FemaleAge45to49     | 208502     |
| Finland | 1998           | FemaleAge50to54     | 191085     |
| Finland | 1998           | FemaleAge55to59     | 139676     |
| Finland | 1998           | FemaleAge5to9       | 157190     |
| Finland | 1998           | FemaleAge60to64     | 130795     |
| Finland | 1998           | FemaleAge65to69     | 124793     |
| Finland | 1998           | FemaleAge70to74     | 122538     |
| Finland | 1998           | FemaleAge75to79     | 97953      |
| Finland | 1998           | FemaleAge80to84     | 65923      |
| Finland | 1998           | FemaleAge85to89     | 40877      |
| Finland | 1998           | FemaleAge90to94     | 14552      |
| Finland | 1998           | FemaleAge95to99     | 2543       |
| Finland | 1998           | FemaleAgeAbov e100  | 200        |
| Finland | 1998           | FemaleLactAge15to19 | 1526       |
| Finland | 1998           | FemaleLactAge20to24 | 9675       |
| Finland | 1998           | FemaleLactAge25to29 | 19681      |
| Finland | 1998           | FemaleLactAge30to34 | 18246      |
| Finland | 1998           | FemaleLactAge35to39 | 8180       |
| Finland | 1998           | FemaleLactAge40to44 | 1655       |
| Finland | 1998           | FemaleLactAge45to49 | 93         |
| Finland | 1998           | FemalePregAge15to19 | 1144       |
| Finland | 1998           | FemalePregAge20to24 | 7256       |
| Finland | 1998           | FemalePregAge25to29 | 14761      |
| Finland | 1998           | FemalePregAge30to34 | 13685      |
| Finland | 1998           | FemalePregAge35to39 | 6135       |
| Finland | 1998           | FemalePregAge40to44 | 1241       |
| Finland | 1998           | FemalePregAge45to49 | 69         |
| Finland | 1998           | MaleAge0to4         | 159876     |
| Finland | 1998           | MaleAge10to14       | 164343     |
| Finland | 1998           | MaleAge15to19       | 170453     |
| Finland | 1998           | MaleAge20to24       | 161293     |
| Finland | 1998           | MaleAge25to29       | 162746     |
| Finland | 1998           | MaleAge30to34       | 187478     |
| Finland | 1998           | MaleAge35to39       | 195357     |
| Finland | 1998           | MaleAge40to44       | 197862     |
| Finland | 1998           | MaleAge45to49       | 214573     |
| Finland | 1998           | MaleAge50to54       | 194713     |
| Finland | 1998           | MaleAge55to59       | 135433     |
| Finland | 1998           | MaleAge5to9         | 163720     |
| Finland | 1998           | MaleAge60to64       | 119334     |
| Finland | 1998           | MaleAge65to69       | 103064     |
| Finland | 1998           | MaleAge70to74       | 83740      |
| Finland | 1998           | MaleAge75to79       | 51414      |

Dietary calcium and zinc deficiency risks are decreasing but remain prevalent

| Country | Reference year | Age/gender group    | Population |
|---------|----------------|---------------------|------------|
| Finland | 1998           | MaleAge80to84       | 27641      |
| Finland | 1998           | MaleAge85to89       | 14719      |
| Finland | 1998           | MaleAge90to94       | 4201       |
| Finland | 1998           | MaleAge95to99       | 601        |
| Finland | 1998           | MaleAgeAbov e100    | 44         |
| Finland | 1999           | FemaleAge0to4       | 148105     |
| Finland | 1999           | FemaleAge10to14     | 155494     |
| Finland | 1999           | FemaleAge15to19     | 160147     |
| Finland | 1999           | FemaleAge20to24     | 140940     |
| Finland | 1999           | FemaleAge25to29     | 116916     |
| Finland | 1999           | FemaleAge30to34     | 144923     |
| Finland | 1999           | FemaleAge35to39     | 173068     |
| Finland | 1999           | FemaleAge40to44     | 187673     |
| Finland | 1999           | FemaleAge45to49     | 202897     |
| Finland | 1999           | FemaleAge50to54     | 203530     |
| Finland | 1999           | FemaleAge55to59     | 143004     |
| Finland | 1999           | FemaleAge5to9       | 159645     |
| Finland | 1999           | FemaleAge60to64     | 132885     |
| Finland | 1999           | FemaleAge65to69     | 123284     |
| Finland | 1999           | FemaleAge70to74     | 122427     |
| Finland | 1999           | FemaleAge75to79     | 101811     |
| Finland | 1999           | FemaleAge80to84     | 66166      |
| Finland | 1999           | FemaleAge85to89     | 41440      |
| Finland | 1999           | FemaleAge90to94     | 14743      |
| Finland | 1999           | FemaleAge95to99     | 2712       |
| Finland | 1999           | FemaleAgeAbov e100  | 214        |
| Finland | 1999           | FemaleLactAge15to19 | 1526       |
| Finland | 1999           | FemaleLactAge20to24 | 9675       |
| Finland | 1999           | FemaleLactAge25to29 | 19681      |
| Finland | 1999           | FemaleLactAge30to34 | 18246      |
| Finland | 1999           | FemaleLactAge35to39 | 8180       |
| Finland | 1999           | FemaleLactAge40to44 | 1655       |
| Finland | 1999           | FemaleLactAge45to49 | 93         |
| Finland | 1999           | FemalePregAge15to19 | 1144       |
| Finland | 1999           | FemalePregAge20to24 | 7256       |
| Finland | 1999           | FemalePregAge25to29 | 14761      |
| Finland | 1999           | FemalePregAge30to34 | 13685      |
| Finland | 1999           | FemalePregAge35to39 | 6135       |
| Finland | 1999           | FemalePregAge40to44 | 1241       |
| Finland | 1999           | FemalePregAge45to49 | 69         |
| Finland | 1999           | MaleAge0to4         | 154246     |
| Finland | 1999           | MaleAge10to14       | 162778     |
| Finland | 1999           | MaleAge15to19       | 170357     |
| Finland | 1999           | MaleAge20to24       | 164847     |
| Finland | 1999           | MaleAge25to29       | 158379     |
| Finland | 1999           | MaleAge30to34       | 183931     |
| Finland | 1999           | MaleAge35to39       | 194781     |
| Finland | 1999           | MaleAge40to44       | 196473     |
| Finland | 1999           | MaleAge45to49       | 208122     |
| Finland | 1999           | MaleAge50to54       | 207592     |
| Finland | 1999           | MaleAge55to59       | 139525     |
| Finland | 1999           | MaleAge5to9         | 165972     |
| Finland | 1999           | MaleAge60to64       | 121700     |
| Finland | 1999           | MaleAge65to69       | 102975     |
| Finland | 1999           | MaleAge70to74       | 86113      |
| Finland | 1999           | MaleAge75to79       | 54359      |
| Finland | 1999           | MaleAge80to84       | 27655      |
| Finland | 1999           | MaleAge85to89       | 14688      |
| Finland | 1999           | MaleAge90to94       | 4217       |
| Finland | 1999           | MaleAge95to99       | 652        |
| Finland | 1999           | MaleAgeAbov e100    | 46         |
| France  | 1992           | FemaleAge0to4       | 1760427    |
| France  | 1992           | FemaleAge10to14     | 1766179    |
| France  | 1992           | FemaleAge15to19     | 1946069    |
| France  | 1992           | FemaleAge20to24     | 1893793    |
| France  | 1992           | FemaleAge25to29     | 1676379    |
| France  | 1992           | FemaleAge30to34     | 1853670    |
| France  | 1992           | FemaleAge35to39     | 2020973    |
| France  | 1992           | FemaleAge40to44     | 2166401    |
| France  | 1992           | FemaleAge45to49     | 1696332    |
| France  | 1992           | FemaleAge50to54     | 1398112    |
| France  | 1992           | FemaleAge55to59     | 1515882    |
| France  | 1992           | FemaleAge5to9       | 1962997    |
| France  | 1992           | FemaleAge60to64     | 1514855    |
| France  | 1992           | FemaleAge65to69     | 1575646    |
| France  | 1992           | FemaleAge70to74     | 1030710    |
| France  | 1992           | FemaleAge75to79     | 879074     |
| France  | 1992           | FemaleAge80to84     | 861414     |
| France  | 1992           | FemaleAge85to89     | 497889     |
| France  | 1992           | FemaleAge90to94     | 196706     |
| France  | 1992           | FemaleAge95to99     | 39406      |
| France  | 1992           | FemaleAgeAbov e100  | 3264       |
| France  | 1992           | FemaleLactAge15to19 | 21386      |
| France  | 1992           | FemaleLactAge20to24 | 155666     |
| France  | 1992           | FemaleLactAge25to29 | 289149     |
| France  | 1992           | FemaleLactAge30to34 | 188059     |
| France  | 1992           | FemaleLactAge35to39 | 71161      |
| France  | 1992           | FemaleLactAge40to44 | 13070      |

Dietary calcium and zinc deficiency risks are decreasing but remain prevalent

| Country | Reference year | Age/gender group    | Population |
|---------|----------------|---------------------|------------|
| France  | 1992           | FemaleLactAge45to49 | 518        |
| France  | 1992           | FemalePregAge15to19 | 16040      |
| France  | 1992           | FemalePregAge20to24 | 116749     |
| France  | 1992           | FemalePregAge25to29 | 216862     |
| France  | 1992           | FemalePregAge30to34 | 141044     |
| France  | 1992           | FemalePregAge35to39 | 53370      |
| France  | 1992           | FemalePregAge40to44 | 9802       |
| France  | 1992           | FemalePregAge45to49 | 389        |
| France  | 1992           | MaleAge0to4         | 1841421    |
| France  | 1992           | MaleAge10to14       | 1851736    |
| France  | 1992           | MaleAge15to19       | 2060754    |
| France  | 1992           | MaleAge20to24       | 2231353    |
| France  | 1992           | MaleAge25to29       | 2184779    |
| France  | 1992           | MaleAge30to34       | 2115815    |
| France  | 1992           | MaleAge35to39       | 2106435    |
| France  | 1992           | MaleAge40to44       | 2198880    |
| France  | 1992           | MaleAge45to49       | 1692674    |
| France  | 1992           | MaleAge50to54       | 1364476    |
| France  | 1992           | MaleAge55to59       | 1428592    |
| France  | 1992           | MaleAge5to9         | 2056118    |
| France  | 1992           | MaleAge60to64       | 1346002    |
| France  | 1992           | MaleAge65to69       | 1271218    |
| France  | 1992           | MaleAge70to74       | 769741     |
| France  | 1992           | MaleAge75to79       | 548641     |
| France  | 1992           | MaleAge80to84       | 451442     |
| France  | 1992           | MaleAge85to89       | 201932     |
| France  | 1992           | MaleAge90to94       | 59452      |
| France  | 1992           | MaleAge95to99       | 7620       |
| France  | 1992           | MaleAgeAbov e100    | 571        |
| France  | 1993           | FemaleAge0to4       | 1765293    |
| France  | 1993           | FemaleAge10to14     | 1828825    |
| France  | 1993           | FemaleAge15to19     | 1834765    |
| France  | 1993           | FemaleAge20to24     | 1907654    |
| France  | 1993           | FemaleAge25to29     | 1657617    |
| France  | 1993           | FemaleAge30to34     | 1869429    |
| France  | 1993           | FemaleAge35to39     | 2024177    |
| France  | 1993           | FemaleAge40to44     | 2150786    |
| France  | 1993           | FemaleAge45to49     | 1856621    |
| France  | 1993           | FemaleAge50to54     | 1376207    |
| France  | 1993           | FemaleAge55to59     | 1487862    |
| France  | 1993           | FemaleAge5to9       | 1941587    |
| France  | 1993           | FemaleAge60to64     | 1521773    |
| France  | 1993           | FemaleAge65to69     | 1532860    |
| France  | 1993           | FemaleAge70to74     | 1203860    |
| France  | 1993           | FemaleAge75to79     | 775252     |
| France  | 1993           | FemaleAge80to84     | 880593     |
| France  | 1993           | FemaleAge85to89     | 511685     |
| France  | 1993           | FemaleAge90to94     | 205979     |
| France  | 1993           | FemaleAge95to99     | 44064      |
| France  | 1993           | FemaleAgeAbov e100  | 3543       |
| France  | 1993           | FemaleLactAge15to19 | 21386      |
| France  | 1993           | FemaleLactAge20to24 | 155666     |
| France  | 1993           | FemaleLactAge25to29 | 289149     |
| France  | 1993           | FemaleLactAge30to34 | 188059     |
| France  | 1993           | FemaleLactAge35to39 | 71161      |
| France  | 1993           | FemaleLactAge40to44 | 13070      |
| France  | 1993           | FemaleLactAge45to49 | 518        |
| France  | 1993           | FemalePregAge15to19 | 16040      |
| France  | 1993           | FemalePregAge20to24 | 116749     |
| France  | 1993           | FemalePregAge25to29 | 216862     |
| France  | 1993           | FemalePregAge30to34 | 141044     |
| France  | 1993           | FemalePregAge35to39 | 53370      |
| France  | 1993           | FemalePregAge40to44 | 9802       |
| France  | 1993           | FemalePregAge45to49 | 389        |
| France  | 1993           | MaleAge0to4         | 1847986    |
| France  | 1993           | MaleAge10to14       | 1917868    |
| France  | 1993           | MaleAge15to19       | 1944195    |
| France  | 1993           | MaleAge20to24       | 2236382    |
| France  | 1993           | MaleAge25to29       | 2178114    |
| France  | 1993           | MaleAge30to34       | 2140517    |
| France  | 1993           | MaleAge35to39       | 2091335    |
| France  | 1993           | MaleAge40to44       | 2173593    |
| France  | 1993           | MaleAge45to49       | 1855049    |
| France  | 1993           | MaleAge50to54       | 1341605    |
| France  | 1993           | MaleAge55to59       | 1406802    |
| France  | 1993           | MaleAge5to9         | 2032844    |
| France  | 1993           | MaleAge60to64       | 1356382    |
| France  | 1993           | MaleAge65to69       | 1244868    |
| France  | 1993           | MaleAge70to74       | 896608     |
| France  | 1993           | MaleAge75to79       | 484353     |
| France  | 1993           | MaleAge80to84       | 467160     |
| France  | 1993           | MaleAge85to89       | 207943     |
| France  | 1993           | MaleAge90to94       | 63128      |
| France  | 1993           | MaleAge95to99       | 8973       |
| France  | 1993           | MaleAgeAbov e100    | 588        |
| France  | 1994           | FemaleAge0to4       | 1776848    |
| France  | 1994           | FemaleAge10to14     | 1889988    |
| France  | 1994           | FemaleAge15to19     | 1748423    |

Dietary calcium and zinc deficiency risks are decreasing but remain prevalent

| Country | Reference year | Age/gender group    | Population |
|---------|----------------|---------------------|------------|
| France  | 1994           | FemaleAge20to24     | 1900168    |
| France  | 1994           | FemaleAge25to29     | 1640874    |
| France  | 1994           | FemaleAge30to34     | 1881892    |
| France  | 1994           | FemaleAge35to39     | 2029826    |
| France  | 1994           | FemaleAge40to44     | 2130168    |
| France  | 1994           | FemaleAge45to49     | 1996849    |
| France  | 1994           | FemaleAge50to54     | 1386832    |
| France  | 1994           | FemaleAge55to59     | 1458251    |
| France  | 1994           | FemaleAge5to9       | 1904426    |
| France  | 1994           | FemaleAge60to64     | 1524211    |
| France  | 1994           | FemaleAge65to69     | 1489958    |
| France  | 1994           | FemaleAge70to74     | 1353289    |
| France  | 1994           | FemaleAge75to79     | 717603     |
| France  | 1994           | FemaleAge80to84     | 882792     |
| France  | 1994           | FemaleAge85to89     | 525303     |
| France  | 1994           | FemaleAge90to94     | 210968     |
| France  | 1994           | FemaleAge95to99     | 47061      |
| France  | 1994           | FemaleAgeAbov e100  | 3853       |
| France  | 1994           | FemaleLactAge15to19 | 21386      |
| France  | 1994           | FemaleLactAge20to24 | 155666     |
| France  | 1994           | FemaleLactAge25to29 | 289149     |
| France  | 1994           | FemaleLactAge30to34 | 188059     |
| France  | 1994           | FemaleLactAge35to39 | 71161      |
| France  | 1994           | FemaleLactAge40to44 | 13070      |
| France  | 1994           | FemaleLactAge45to49 | 518        |
| France  | 1994           | FemalePregAge15to19 | 16040      |
| France  | 1994           | FemalePregAge20to24 | 116749     |
| France  | 1994           | FemalePregAge25to29 | 216862     |
| France  | 1994           | FemalePregAge30to34 | 141044     |
| France  | 1994           | FemalePregAge35to39 | 53370      |
| France  | 1994           | FemalePregAge40to44 | 9802       |
| France  | 1994           | FemalePregAge45to49 | 389        |
| France  | 1994           | MaleAge0to4         | 1861733    |
| France  | 1994           | MaleAge10to14       | 1981966    |
| France  | 1994           | MaleAge15to19       | 1858325    |
| France  | 1994           | MaleAge20to24       | 2218220    |
| France  | 1994           | MaleAge25to29       | 2168615    |
| France  | 1994           | MaleAge30to34       | 2164894    |
| France  | 1994           | MaleAge35to39       | 2083298    |
| France  | 1994           | MaleAge40to44       | 2141529    |
| France  | 1994           | MaleAge45to49       | 1995436    |
| France  | 1994           | MaleAge50to54       | 1351993    |
| France  | 1994           | MaleAge55to59       | 1383738    |
| France  | 1994           | MaleAge5to9         | 1993197    |
| France  | 1994           | MaleAge60to64       | 1362908    |
| France  | 1994           | MaleAge65to69       | 1220528    |
| France  | 1994           | MaleAge70to74       | 1003054    |
| France  | 1994           | MaleAge75to79       | 455357     |
| France  | 1994           | MaleAge80to84       | 467897     |
| France  | 1994           | MaleAge85to89       | 212267     |
| France  | 1994           | MaleAge90to94       | 63994      |
| France  | 1994           | MaleAge95to99       | 9889       |
| France  | 1994           | MaleAgeAbov e100    | 611        |
| France  | 1995           | FemaleAge0to4       | 1776445    |
| France  | 1995           | FemaleAge10to14     | 1927224    |
| France  | 1995           | FemaleAge15to19     | 1707114    |
| France  | 1995           | FemaleAge20to24     | 1862001    |
| France  | 1995           | FemaleAge25to29     | 1632437    |
| France  | 1995           | FemaleAge30to34     | 1887118    |
| France  | 1995           | FemaleAge35to39     | 2037904    |
| France  | 1995           | FemaleAge40to44     | 2120310    |
| France  | 1995           | FemaleAge45to49     | 2093791    |
| France  | 1995           | FemaleAge50to54     | 1441582    |
| France  | 1995           | FemaleAge55to59     | 1430347    |
| France  | 1995           | FemaleAge5to9       | 1873838    |
| France  | 1995           | FemaleAge60to64     | 1515681    |
| France  | 1995           | FemaleAge65to69     | 1466926    |
| France  | 1995           | FemaleAge70to74     | 1446802    |
| France  | 1995           | FemaleAge75to79     | 731255     |
| France  | 1995           | FemaleAge80to84     | 859467     |
| France  | 1995           | FemaleAge85to89     | 541050     |
| France  | 1995           | FemaleAge90to94     | 213761     |
| France  | 1995           | FemaleAge95to99     | 45696      |
| France  | 1995           | FemaleAgeAbov e100  | 4191       |
| France  | 1995           | FemaleLactAge15to19 | 21386      |
| France  | 1995           | FemaleLactAge20to24 | 155666     |
| France  | 1995           | FemaleLactAge25to29 | 289149     |
| France  | 1995           | FemaleLactAge30to34 | 188059     |
| France  | 1995           | FemaleLactAge35to39 | 71161      |
| France  | 1995           | FemaleLactAge40to44 | 13070      |
| France  | 1995           | FemaleLactAge45to49 | 518        |
| France  | 1995           | FemalePregAge15to19 | 16040      |
| France  | 1995           | FemalePregAge20to24 | 116749     |
| France  | 1995           | FemalePregAge25to29 | 216862     |
| France  | 1995           | FemalePregAge30to34 | 141044     |
| France  | 1995           | FemalePregAge35to39 | 53370      |
| France  | 1995           | FemalePregAge40to44 | 9802       |
| France  | 1995           | FemalePregAge45to49 | 389        |

Dietary calcium and zinc deficiency risks are decreasing but remain prevalent

| Country | Reference year | Age/gender group    | Population |
|---------|----------------|---------------------|------------|
| France  | 1995           | MaleAge0to4         | 1862849    |
| France  | 1995           | MaleAge10to14       | 2021104    |
| France  | 1995           | MaleAge15to19       | 1821403    |
| France  | 1995           | MaleAge20to24       | 2171306    |
| France  | 1995           | MaleAge25to29       | 2161746    |
| France  | 1995           | MaleAge30to34       | 2182219    |
| France  | 1995           | MaleAge35to39       | 2084676    |
| France  | 1995           | MaleAge40to44       | 2118724    |
| France  | 1995           | MaleAge45to49       | 2089915    |
| France  | 1995           | MaleAge50to54       | 1407909    |
| France  | 1995           | MaleAge55to59       | 1361689    |
| France  | 1995           | MaleAge5to9         | 1960786    |
| France  | 1995           | MaleAge60to64       | 1360959    |
| France  | 1995           | MaleAge65to69       | 1211724    |
| France  | 1995           | MaleAge70to74       | 1069417    |
| France  | 1995           | MaleAge75to79       | 475737     |
| France  | 1995           | MaleAge80to84       | 450226     |
| France  | 1995           | MaleAge85to89       | 216505     |
| France  | 1995           | MaleAge90to94       | 62267      |
| France  | 1995           | MaleAge95to99       | 8946       |
| France  | 1995           | MaleAgeAbov e100    | 645        |
| France  | 1996           | FemaleAge0to4       | 1774403    |
| France  | 1996           | FemaleAge10to14     | 1946855    |
| France  | 1996           | FemaleAge15to19     | 1709768    |
| France  | 1996           | FemaleAge20to24     | 1862400    |
| France  | 1996           | FemaleAge25to29     | 1643504    |
| France  | 1996           | FemaleAge30to34     | 1825374    |
| France  | 1996           | FemaleAge35to39     | 2020754    |
| France  | 1996           | FemaleAge40to44     | 2109372    |
| France  | 1996           | FemaleAge45to49     | 2150579    |
| France  | 1996           | FemaleAge50to54     | 1536552    |
| France  | 1996           | FemaleAge55to59     | 1402794    |
| France  | 1996           | FemaleAge5to9       | 1854869    |
| France  | 1996           | FemaleAge60to64     | 1497453    |
| France  | 1996           | FemaleAge65to69     | 1453268    |
| France  | 1996           | FemaleAge70to74     | 1482523    |
| France  | 1996           | FemaleAge75to79     | 799796     |
| France  | 1996           | FemaleAge80to84     | 794960     |
| France  | 1996           | FemaleAge85to89     | 560051     |
| France  | 1996           | FemaleAge90to94     | 232836     |
| France  | 1996           | FemaleAge95to99     | 50182      |
| France  | 1996           | FemaleAgeAbov e100  | 4560       |
| France  | 1996           | FemaleLactAge15to19 | 18138      |
| France  | 1996           | FemaleLactAge20to24 | 118390     |
| France  | 1996           | FemaleLactAge25to29 | 285456     |
| France  | 1996           | FemaleLactAge30to34 | 219870     |
| France  | 1996           | FemaleLactAge35to39 | 86900      |
| France  | 1996           | FemaleLactAge40to44 | 16035      |
| France  | 1996           | FemaleLactAge45to49 | 640        |
| France  | 1996           | FemalePregAge15to19 | 13603      |
| France  | 1996           | FemalePregAge20to24 | 88793      |
| France  | 1996           | FemalePregAge25to29 | 214092     |
| France  | 1996           | FemalePregAge30to34 | 164902     |
| France  | 1996           | FemalePregAge35to39 | 65175      |
| France  | 1996           | FemalePregAge40to44 | 12026      |
| France  | 1996           | FemalePregAge45to49 | 480        |
| France  | 1996           | MaleAge0to4         | 1863305    |
| France  | 1996           | MaleAge10to14       | 2039564    |
| France  | 1996           | MaleAge15to19       | 1815727    |
| France  | 1996           | MaleAge20to24       | 2106214    |
| France  | 1996           | MaleAge25to29       | 2168912    |
| France  | 1996           | MaleAge30to34       | 2184430    |
| France  | 1996           | MaleAge35to39       | 2090353    |
| France  | 1996           | MaleAge40to44       | 2096152    |
| France  | 1996           | MaleAge45to49       | 2140165    |
| France  | 1996           | MaleAge50to54       | 1503251    |
| France  | 1996           | MaleAge55to59       | 1335420    |
| France  | 1996           | MaleAge5to9         | 1940212    |
| France  | 1996           | MaleAge60to64       | 1347893    |
| France  | 1996           | MaleAge65to69       | 1207341    |
| France  | 1996           | MaleAge70to74       | 1094855    |
| France  | 1996           | MaleAge75to79       | 532288     |
| France  | 1996           | MaleAge80to84       | 417806     |
| France  | 1996           | MaleAge85to89       | 232748     |
| France  | 1996           | MaleAge90to94       | 71365      |
| France  | 1996           | MaleAge95to99       | 10181      |
| France  | 1996           | MaleAgeAbov e100    | 690        |
| France  | 1997           | FemaleAge0to4       | 1774966    |
| France  | 1997           | FemaleAge10to14     | 1946235    |
| France  | 1997           | FemaleAge15to19     | 1749324    |
| France  | 1997           | FemaleAge20to24     | 1765470    |
| France  | 1997           | FemaleAge25to29     | 1658366    |
| France  | 1997           | FemaleAge30to34     | 1809329    |
| France  | 1997           | FemaleAge35to39     | 2035693    |
| France  | 1997           | FemaleAge40to44     | 2107971    |
| France  | 1997           | FemaleAge45to49     | 2165089    |
| France  | 1997           | FemaleAge50to54     | 1674992    |
| France  | 1997           | FemaleAge55to59     | 1372236    |



Dietary calcium and zinc deficiency risks are decreasing but remain prevalent

| Country | Reference year | Age/gender group    | Population |
|---------|----------------|---------------------|------------|
| France  | 1997           | FemaleAge5to9       | 1835185    |
| France  | 1997           | FemaleAge60to64     | 1474371    |
| France  | 1997           | FemaleAge65to69     | 1453725    |
| France  | 1997           | FemaleAge70to74     | 1470741    |
| France  | 1997           | FemaleAge75to79     | 930393     |
| France  | 1997           | FemaleAge80to84     | 703903     |
| France  | 1997           | FemaleAge85to89     | 583214     |
| France  | 1997           | FemaleAge90to94     | 246172     |
| France  | 1997           | FemaleAge95to99     | 55915      |
| France  | 1997           | FemaleAgeAbove100   | 4961       |
| France  | 1997           | FemaleLactAge15to19 | 18138      |
| France  | 1997           | FemaleLactAge20to24 | 118390     |
| France  | 1997           | FemaleLactAge25to29 | 285456     |
| France  | 1997           | FemaleLactAge30to34 | 219870     |
| France  | 1997           | FemaleLactAge35to39 | 86900      |
| France  | 1997           | FemaleLactAge40to44 | 16035      |
| France  | 1997           | FemaleLactAge45to49 | 640        |
| France  | 1997           | FemalePregAge15to19 | 13603      |
| France  | 1997           | FemalePregAge20to24 | 88793      |
| France  | 1997           | FemalePregAge25to29 | 214092     |
| France  | 1997           | FemalePregAge30to34 | 164902     |
| France  | 1997           | FemalePregAge35to39 | 65175      |
| France  | 1997           | FemalePregAge40to44 | 12026      |
| France  | 1997           | FemalePregAge45to49 | 480        |
| France  | 1997           | MaleAge0to4         | 1865051    |
| France  | 1997           | MaleAge10to14       | 2037943    |
| France  | 1997           | MaleAge15to19       | 1854722    |
| France  | 1997           | MaleAge20to24       | 2009210    |
| France  | 1997           | MaleAge25to29       | 2183008    |
| France  | 1997           | MaleAge30to34       | 2178694    |
| France  | 1997           | MaleAge35to39       | 2106968    |
| France  | 1997           | MaleAge40to44       | 2075865    |
| France  | 1997           | MaleAge45to49       | 2147018    |
| France  | 1997           | MaleAge50to54       | 1642721    |
| France  | 1997           | MaleAge55to59       | 1305388    |
| France  | 1997           | MaleAge5to9         | 1920523    |
| France  | 1997           | MaleAge60to64       | 1332000    |
| France  | 1997           | MaleAge65to69       | 1213464    |
| France  | 1997           | MaleAge70to74       | 1089387    |
| France  | 1997           | MaleAge75to79       | 623963     |
| France  | 1997           | MaleAge80to84       | 369896     |
| France  | 1997           | MaleAge85to89       | 250017     |
| France  | 1997           | MaleAge90to94       | 77067      |
| France  | 1997           | MaleAge95to99       | 11923      |
| France  | 1997           | MaleAgeAbove100     | 745        |
| France  | 1998           | FemaleAge0to4       | 1775241    |
| France  | 1998           | FemaleAge10to14     | 1930443    |
| France  | 1998           | FemaleAge15to19     | 1815332    |
| France  | 1998           | FemaleAge20to24     | 1659441    |
| France  | 1998           | FemaleAge25to29     | 1671241    |
| France  | 1998           | FemaleAge30to34     | 1790347    |
| France  | 1998           | FemaleAge35to39     | 2052447    |
| France  | 1998           | FemaleAge40to44     | 2112034    |
| France  | 1998           | FemaleAge45to49     | 2151605    |
| France  | 1998           | FemaleAge50to54     | 1832992    |
| France  | 1998           | FemaleAge55to59     | 1353072    |
| France  | 1998           | FemaleAge5to9       | 1817270    |
| France  | 1998           | FemaleAge60to64     | 1448677    |
| France  | 1998           | FemaleAge65to69     | 1461986    |
| France  | 1998           | FemaleAge70to74     | 1432088    |
| France  | 1998           | FemaleAge75to79     | 1086800    |
| France  | 1998           | FemaleAge80to84     | 618308     |
| France  | 1998           | FemaleAge85to89     | 602102     |
| France  | 1998           | FemaleAge90to94     | 253791     |
| France  | 1998           | FemaleAge95to99     | 61223      |
| France  | 1998           | FemaleAgeAbove100   | 5389       |
| France  | 1998           | FemaleLactAge15to19 | 18138      |
| France  | 1998           | FemaleLactAge20to24 | 118390     |
| France  | 1998           | FemaleLactAge25to29 | 285456     |
| France  | 1998           | FemaleLactAge30to34 | 219870     |
| France  | 1998           | FemaleLactAge35to39 | 86900      |
| France  | 1998           | FemaleLactAge40to44 | 16035      |
| France  | 1998           | FemaleLactAge45to49 | 640        |
| France  | 1998           | FemalePregAge15to19 | 13603      |
| France  | 1998           | FemalePregAge20to24 | 88793      |
| France  | 1998           | FemalePregAge25to29 | 214092     |
| France  | 1998           | FemalePregAge30to34 | 164902     |
| France  | 1998           | FemalePregAge35to39 | 65175      |
| France  | 1998           | FemalePregAge40to44 | 12026      |
| France  | 1998           | FemalePregAge45to49 | 480        |
| France  | 1998           | MaleAge0to4         | 1865448    |
| France  | 1998           | MaleAge10to14       | 2020465    |
| France  | 1998           | MaleAge15to19       | 1923338    |
| France  | 1998           | MaleAge20to24       | 1902180    |
| France  | 1998           | MaleAge25to29       | 2192437    |
| France  | 1998           | MaleAge30to34       | 2170780    |
| France  | 1998           | MaleAge35to39       | 2130134    |
| France  | 1998           | MaleAge40to44       | 2060949    |

Dietary calcium and zinc deficiency risks are decreasing but remain prevalent

| Country | Reference year | Age/gender group    | Population |
|---------|----------------|---------------------|------------|
| France  | 1998           | MaleAge45to49       | 2124757    |
| France  | 1998           | MaleAge50to54       | 1800853    |
| France  | 1998           | MaleAge55to59       | 1286557    |
| France  | 1998           | MaleAge5to9         | 1904064    |
| France  | 1998           | MaleAge60to64       | 1314721    |
| France  | 1998           | MaleAge65to69       | 1224990    |
| France  | 1998           | MaleAge70to74       | 1068234    |
| France  | 1998           | MaleAge75to79       | 726548     |
| France  | 1998           | MaleAge80to84       | 327399     |
| France  | 1998           | MaleAge85to89       | 261546     |
| France  | 1998           | MaleAge90to94       | 79385      |
| France  | 1998           | MaleAge95to99       | 13639      |
| France  | 1998           | MaleAgeAbov e100    | 811        |
| France  | 1999           | FemaleAge0to4       | 1779046    |
| France  | 1999           | FemaleAge10to14     | 1910283    |
| France  | 1999           | FemaleAge15to19     | 1879234    |
| France  | 1999           | FemaleAge20to24     | 1578452    |
| France  | 1999           | FemaleAge25to29     | 1664012    |
| France  | 1999           | FemaleAge30to34     | 1777777    |
| France  | 1999           | FemaleAge35to39     | 2066145    |
| France  | 1999           | FemaleAge40to44     | 2120719    |
| France  | 1999           | FemaleAge45to49     | 2134369    |
| France  | 1999           | FemaleAge50to54     | 1973074    |
| France  | 1999           | FemaleAge55to59     | 1366463    |
| France  | 1999           | FemaleAge5to9       | 1802539    |
| France  | 1999           | FemaleAge60to64     | 1423186    |
| France  | 1999           | FemaleAge65to69     | 1467105    |
| France  | 1999           | FemaleAge70to74     | 1396983    |
| France  | 1999           | FemaleAge75to79     | 1219646    |
| France  | 1999           | FemaleAge80to84     | 579400     |
| France  | 1999           | FemaleAge85to89     | 602960     |
| France  | 1999           | FemaleAge90to94     | 257898     |
| France  | 1999           | FemaleAge95to99     | 64226      |
| France  | 1999           | FemaleAgeAbov e100  | 5836       |
| France  | 1999           | FemaleLactAge15to19 | 18138      |
| France  | 1999           | FemaleLactAge20to24 | 118390     |
| France  | 1999           | FemaleLactAge25to29 | 285456     |
| France  | 1999           | FemaleLactAge30to34 | 219870     |
| France  | 1999           | FemaleLactAge35to39 | 86900      |
| France  | 1999           | FemaleLactAge40to44 | 16035      |
| France  | 1999           | FemaleLactAge45to49 | 640        |
| France  | 1999           | FemalePregAge15to19 | 13603      |
| France  | 1999           | FemalePregAge20to24 | 88793      |
| France  | 1999           | FemalePregAge25to29 | 214092     |
| France  | 1999           | FemalePregAge30to34 | 164902     |
| France  | 1999           | FemalePregAge35to39 | 65175      |
| France  | 1999           | FemalePregAge40to44 | 12026      |
| France  | 1999           | FemalePregAge45to49 | 480        |
| France  | 1999           | MaleAge0to4         | 1869051    |
| France  | 1999           | MaleAge10to14       | 1998299    |
| France  | 1999           | MaleAge15to19       | 1991849    |
| France  | 1999           | MaleAge20to24       | 1819036    |
| France  | 1999           | MaleAge25to29       | 2180589    |
| France  | 1999           | MaleAge30to34       | 2167666    |
| France  | 1999           | MaleAge35to39       | 2152253    |
| France  | 1999           | MaleAge40to44       | 2053845    |
| France  | 1999           | MaleAge45to49       | 2096562    |
| France  | 1999           | MaleAge50to54       | 1938665    |
| France  | 1999           | MaleAge55to59       | 1300759    |
| France  | 1999           | MaleAge5to9         | 1891351    |
| France  | 1999           | MaleAge60to64       | 1297326    |
| France  | 1999           | MaleAge65to69       | 1233764    |
| France  | 1999           | MaleAge70to74       | 1051321    |
| France  | 1999           | MaleAge75to79       | 810024     |
| France  | 1999           | MaleAge80to84       | 314203     |
| France  | 1999           | MaleAge85to89       | 259456     |
| France  | 1999           | MaleAge90to94       | 79449      |
| France  | 1999           | MaleAge95to99       | 14462      |
| France  | 1999           | MaleAgeAbov e100    | 888        |
| Gabon   | 1993           | FemaleAge0to4       | 81561      |
| Gabon   | 1993           | FemaleAge10to14     | 59727      |
| Gabon   | 1993           | FemaleAge15to19     | 36625      |
| Gabon   | 1993           | FemaleAge20to24     | 22629      |
| Gabon   | 1993           | FemaleAge25to29     | 21134      |
| Gabon   | 1993           | FemaleAge30to34     | 19609      |
| Gabon   | 1993           | FemaleAge35to39     | 19078      |
| Gabon   | 1993           | FemaleAge40to44     | 19001      |
| Gabon   | 1993           | FemaleAge45to49     | 19134      |
| Gabon   | 1993           | FemaleAge50to54     | 19026      |
| Gabon   | 1993           | FemaleAge55to59     | 18099      |
| Gabon   | 1993           | FemaleAge5to9       | 70678      |
| Gabon   | 1993           | FemaleAge60to64     | 16660      |
| Gabon   | 1993           | FemaleAge65to69     | 13559      |
| Gabon   | 1993           | FemaleAge70to74     | 9856       |
| Gabon   | 1993           | FemaleAge75to79     | 6383       |
| Gabon   | 1993           | FemaleAge80to84     | 3209       |
| Gabon   | 1993           | FemaleAge85to89     | 1362       |
| Gabon   | 1993           | FemaleAge90to94     | 373        |

Dietary calcium and zinc deficiency risks are decreasing but remain prevalent

| Country | Reference year | Age/gender group    | Population |
|---------|----------------|---------------------|------------|
| Gabon   | 1993           | FemaleAge95to99     | 60         |
| Gabon   | 1993           | FemaleAgeAbov e100  | 4          |
| Gabon   | 1993           | FemaleLactAge15to19 | 7689       |
| Gabon   | 1993           | FemaleLactAge20to24 | 11273      |
| Gabon   | 1993           | FemaleLactAge25to29 | 7989       |
| Gabon   | 1993           | FemaleLactAge30to34 | 5040       |
| Gabon   | 1993           | FemaleLactAge35to39 | 2948       |
| Gabon   | 1993           | FemaleLactAge40to44 | 1433       |
| Gabon   | 1993           | FemaleLactAge45to49 | 374        |
| Gabon   | 1993           | FemalePregAge15to19 | 5767       |
| Gabon   | 1993           | FemalePregAge20to24 | 8455       |
| Gabon   | 1993           | FemalePregAge25to29 | 5991       |
| Gabon   | 1993           | FemalePregAge30to34 | 3780       |
| Gabon   | 1993           | FemalePregAge35to39 | 2211       |
| Gabon   | 1993           | FemalePregAge40to44 | 1075       |
| Gabon   | 1993           | FemalePregAge45to49 | 280        |
| Gabon   | 1993           | MaleAge0to4         | 83079      |
| Gabon   | 1993           | MaleAge10to14       | 60374      |
| Gabon   | 1993           | MaleAge15to19       | 50249      |
| Gabon   | 1993           | MaleAge20to24       | 42150      |
| Gabon   | 1993           | MaleAge25to29       | 34673      |
| Gabon   | 1993           | MaleAge30to34       | 27736      |
| Gabon   | 1993           | MaleAge35to39       | 23384      |
| Gabon   | 1993           | MaleAge40to44       | 20827      |
| Gabon   | 1993           | MaleAge45to49       | 18499      |
| Gabon   | 1993           | MaleAge50to54       | 16361      |
| Gabon   | 1993           | MaleAge55to59       | 15116      |
| Gabon   | 1993           | MaleAge5to9         | 71745      |
| Gabon   | 1993           | MaleAge60to64       | 13122      |
| Gabon   | 1993           | MaleAge65to69       | 10361      |
| Gabon   | 1993           | MaleAge70to74       | 7402       |
| Gabon   | 1993           | MaleAge75to79       | 4776       |
| Gabon   | 1993           | MaleAge80to84       | 2452       |
| Gabon   | 1993           | MaleAge85to89       | 923        |
| Gabon   | 1993           | MaleAge90to94       | 227        |
| Gabon   | 1993           | MaleAge95to99       | 32         |
| Gabon   | 1993           | MaleAgeAbov e100    | 2          |
| Gabon   | 1994           | FemaleAge0to4       | 83079      |
| Gabon   | 1994           | FemaleAge10to14     | 61750      |
| Gabon   | 1994           | FemaleAge15to19     | 38317      |
| Gabon   | 1994           | FemaleAge20to24     | 24009      |
| Gabon   | 1994           | FemaleAge25to29     | 22615      |
| Gabon   | 1994           | FemaleAge30to34     | 20678      |
| Gabon   | 1994           | FemaleAge35to39     | 19673      |
| Gabon   | 1994           | FemaleAge40to44     | 19453      |
| Gabon   | 1994           | FemaleAge45to49     | 19221      |
| Gabon   | 1994           | FemaleAge50to54     | 19090      |
| Gabon   | 1994           | FemaleAge55to59     | 18070      |
| Gabon   | 1994           | FemaleAge5to9       | 72600      |
| Gabon   | 1994           | FemaleAge60to64     | 16817      |
| Gabon   | 1994           | FemaleAge65to69     | 13954      |
| Gabon   | 1994           | FemaleAge70to74     | 10079      |
| Gabon   | 1994           | FemaleAge75to79     | 6635       |
| Gabon   | 1994           | FemaleAge80to84     | 3278       |
| Gabon   | 1994           | FemaleAge85to89     | 1366       |
| Gabon   | 1994           | FemaleAge90to94     | 367        |
| Gabon   | 1994           | FemaleAge95to99     | 61         |
| Gabon   | 1994           | FemaleAgeAbov e100  | 4          |
| Gabon   | 1994           | FemaleLactAge15to19 | 7689       |
| Gabon   | 1994           | FemaleLactAge20to24 | 11273      |
| Gabon   | 1994           | FemaleLactAge25to29 | 7989       |
| Gabon   | 1994           | FemaleLactAge30to34 | 5040       |
| Gabon   | 1994           | FemaleLactAge35to39 | 2948       |
| Gabon   | 1994           | FemaleLactAge40to44 | 1433       |
| Gabon   | 1994           | FemaleLactAge45to49 | 374        |
| Gabon   | 1994           | FemalePregAge15to19 | 5767       |
| Gabon   | 1994           | FemalePregAge20to24 | 8455       |
| Gabon   | 1994           | FemalePregAge25to29 | 5991       |
| Gabon   | 1994           | FemalePregAge30to34 | 3780       |
| Gabon   | 1994           | FemalePregAge35to39 | 2211       |
| Gabon   | 1994           | FemalePregAge40to44 | 1075       |
| Gabon   | 1994           | FemalePregAge45to49 | 280        |
| Gabon   | 1994           | MaleAge0to4         | 84648      |
| Gabon   | 1994           | MaleAge10to14       | 62483      |
| Gabon   | 1994           | MaleAge15to19       | 52025      |
| Gabon   | 1994           | MaleAge20to24       | 43550      |
| Gabon   | 1994           | MaleAge25to29       | 36191      |
| Gabon   | 1994           | MaleAge30to34       | 28833      |
| Gabon   | 1994           | MaleAge35to39       | 24004      |
| Gabon   | 1994           | MaleAge40to44       | 21151      |
| Gabon   | 1994           | MaleAge45to49       | 18946      |
| Gabon   | 1994           | MaleAge50to54       | 16481      |
| Gabon   | 1994           | MaleAge55to59       | 15225      |
| Gabon   | 1994           | MaleAge5to9         | 73730      |
| Gabon   | 1994           | MaleAge60to64       | 13321      |
| Gabon   | 1994           | MaleAge65to69       | 10647      |
| Gabon   | 1994           | MaleAge70to74       | 7562       |
| Gabon   | 1994           | MaleAge75to79       | 4878       |

Dietary calcium and zinc deficiency risks are decreasing but remain prevalent

| Country | Reference year | Age/gender group    | Population |
|---------|----------------|---------------------|------------|
| Gabon   | 1994           | MaleAge80to84       | 2495       |
| Gabon   | 1994           | MaleAge85to89       | 925        |
| Gabon   | 1994           | MaleAge90to94       | 224        |
| Gabon   | 1994           | MaleAge95to99       | 33         |
| Gabon   | 1994           | MaleAgeAbov e100    | 2          |
| Gabon   | 1995           | FemaleAge0to4       | 84507      |
| Gabon   | 1995           | FemaleAge10to14     | 63745      |
| Gabon   | 1995           | FemaleAge15to19     | 40076      |
| Gabon   | 1995           | FemaleAge20to24     | 25449      |
| Gabon   | 1995           | FemaleAge25to29     | 24052      |
| Gabon   | 1995           | FemaleAge30to34     | 21857      |
| Gabon   | 1995           | FemaleAge35to39     | 20364      |
| Gabon   | 1995           | FemaleAge40to44     | 19911      |
| Gabon   | 1995           | FemaleAge45to49     | 19397      |
| Gabon   | 1995           | FemaleAge50to54     | 19140      |
| Gabon   | 1995           | FemaleAge55to59     | 18077      |
| Gabon   | 1995           | FemaleAge5to9       | 74402      |
| Gabon   | 1995           | FemaleAge60to64     | 16939      |
| Gabon   | 1995           | FemaleAge65to69     | 14315      |
| Gabon   | 1995           | FemaleAge70to74     | 10385      |
| Gabon   | 1995           | FemaleAge75to79     | 6859       |
| Gabon   | 1995           | FemaleAge80to84     | 3381       |
| Gabon   | 1995           | FemaleAge85to89     | 1337       |
| Gabon   | 1995           | FemaleAge90to94     | 335        |
| Gabon   | 1995           | FemaleAge95to99     | 49         |
| Gabon   | 1995           | FemaleAgeAbov e100  | 4          |
| Gabon   | 1995           | FemaleLactAge15to19 | 7689       |
| Gabon   | 1995           | FemaleLactAge20to24 | 11273      |
| Gabon   | 1995           | FemaleLactAge25to29 | 7989       |
| Gabon   | 1995           | FemaleLactAge30to34 | 5040       |
| Gabon   | 1995           | FemaleLactAge35to39 | 2948       |
| Gabon   | 1995           | FemaleLactAge40to44 | 1433       |
| Gabon   | 1995           | FemaleLactAge45to49 | 374        |
| Gabon   | 1995           | FemalePregAge15to19 | 5767       |
| Gabon   | 1995           | FemalePregAge20to24 | 8455       |
| Gabon   | 1995           | FemalePregAge25to29 | 5991       |
| Gabon   | 1995           | FemalePregAge30to34 | 3780       |
| Gabon   | 1995           | FemalePregAge35to39 | 2211       |
| Gabon   | 1995           | FemalePregAge40to44 | 1075       |
| Gabon   | 1995           | FemalePregAge45to49 | 280        |
| Gabon   | 1995           | MaleAge0to4         | 86169      |
| Gabon   | 1995           | MaleAge10to14       | 64593      |
| Gabon   | 1995           | MaleAge15to19       | 53899      |
| Gabon   | 1995           | MaleAge20to24       | 45050      |
| Gabon   | 1995           | MaleAge25to29       | 37674      |
| Gabon   | 1995           | MaleAge30to34       | 30059      |
| Gabon   | 1995           | MaleAge35to39       | 24723      |
| Gabon   | 1995           | MaleAge40to44       | 21538      |
| Gabon   | 1995           | MaleAge45to49       | 19355      |
| Gabon   | 1995           | MaleAge50to54       | 16708      |
| Gabon   | 1995           | MaleAge55to59       | 15332      |
| Gabon   | 1995           | MaleAge5to9         | 75619      |
| Gabon   | 1995           | MaleAge60to64       | 13521      |
| Gabon   | 1995           | MaleAge65to69       | 10931      |
| Gabon   | 1995           | MaleAge70to74       | 7778       |
| Gabon   | 1995           | MaleAge75to79       | 4985       |
| Gabon   | 1995           | MaleAge80to84       | 2527       |
| Gabon   | 1995           | MaleAge85to89       | 905        |
| Gabon   | 1995           | MaleAge90to94       | 201        |
| Gabon   | 1995           | MaleAge95to99       | 25         |
| Gabon   | 1995           | MaleAgeAbov e100    | 2          |
| Gabon   | 1996           | FemaleAge0to4       | 85922      |
| Gabon   | 1996           | FemaleAge10to14     | 65712      |
| Gabon   | 1996           | FemaleAge15to19     | 40836      |
| Gabon   | 1996           | FemaleAge20to24     | 25378      |
| Gabon   | 1996           | FemaleAge25to29     | 24125      |
| Gabon   | 1996           | FemaleAge30to34     | 22288      |
| Gabon   | 1996           | FemaleAge35to39     | 20851      |
| Gabon   | 1996           | FemaleAge40to44     | 20342      |
| Gabon   | 1996           | FemaleAge45to49     | 19676      |
| Gabon   | 1996           | FemaleAge50to54     | 19160      |
| Gabon   | 1996           | FemaleAge55to59     | 18070      |
| Gabon   | 1996           | FemaleAge5to9       | 76259      |
| Gabon   | 1996           | FemaleAge60to64     | 16939      |
| Gabon   | 1996           | FemaleAge65to69     | 14526      |
| Gabon   | 1996           | FemaleAge70to74     | 10647      |
| Gabon   | 1996           | FemaleAge75to79     | 7031       |
| Gabon   | 1996           | FemaleAge80to84     | 3590       |
| Gabon   | 1996           | FemaleAge85to89     | 1433       |
| Gabon   | 1996           | FemaleAge90to94     | 393        |
| Gabon   | 1996           | FemaleAge95to99     | 55         |
| Gabon   | 1996           | FemaleAgeAbov e100  | 4          |
| Gabon   | 1996           | FemaleLactAge15to19 | 8266       |
| Gabon   | 1996           | FemaleLactAge20to24 | 12089      |
| Gabon   | 1996           | FemaleLactAge25to29 | 8702       |
| Gabon   | 1996           | FemaleLactAge30to34 | 5554       |
| Gabon   | 1996           | FemaleLactAge35to39 | 3131       |
| Gabon   | 1996           | FemaleLactAge40to44 | 1454       |

Dietary calcium and zinc deficiency risks are decreasing but remain prevalent

| Country | Reference year | Age/gender group    | Population |
|---------|----------------|---------------------|------------|
| Gabon   | 1996           | FemaleLactAge45to49 | 361        |
| Gabon   | 1996           | FemalePregAge15to19 | 6200       |
| Gabon   | 1996           | FemalePregAge20to24 | 9066       |
| Gabon   | 1996           | FemalePregAge25to29 | 6526       |
| Gabon   | 1996           | FemalePregAge30to34 | 4165       |
| Gabon   | 1996           | FemalePregAge35to39 | 2348       |
| Gabon   | 1996           | FemalePregAge40to44 | 1091       |
| Gabon   | 1996           | FemalePregAge45to49 | 271        |
| Gabon   | 1996           | MaleAge0to4         | 87572      |
| Gabon   | 1996           | MaleAge10to14       | 66660      |
| Gabon   | 1996           | MaleAge15to19       | 55865      |
| Gabon   | 1996           | MaleAge20to24       | 46647      |
| Gabon   | 1996           | MaleAge25to29       | 39100      |
| Gabon   | 1996           | MaleAge30to34       | 31441      |
| Gabon   | 1996           | MaleAge35to39       | 25636      |
| Gabon   | 1996           | MaleAge40to44       | 22017      |
| Gabon   | 1996           | MaleAge45to49       | 19714      |
| Gabon   | 1996           | MaleAge50to54       | 17002      |
| Gabon   | 1996           | MaleAge55to59       | 15379      |
| Gabon   | 1996           | MaleAge5to9         | 77494      |
| Gabon   | 1996           | MaleAge60to64       | 13636      |
| Gabon   | 1996           | MaleAge65to69       | 11115      |
| Gabon   | 1996           | MaleAge70to74       | 7956       |
| Gabon   | 1996           | MaleAge75to79       | 5092       |
| Gabon   | 1996           | MaleAge80to84       | 2646       |
| Gabon   | 1996           | MaleAge85to89       | 995        |
| Gabon   | 1996           | MaleAge90to94       | 240        |
| Gabon   | 1996           | MaleAge95to99       | 29         |
| Gabon   | 1996           | MaleAgeAbov e100    | 2          |
| Gabon   | 1997           | FemaleAge0to4       | 87201      |
| Gabon   | 1997           | FemaleAge10to14     | 67680      |
| Gabon   | 1997           | FemaleAge15to19     | 42691      |
| Gabon   | 1997           | FemaleAge20to24     | 26804      |
| Gabon   | 1997           | FemaleAge25to29     | 25361      |
| Gabon   | 1997           | FemaleAge30to34     | 23698      |
| Gabon   | 1997           | FemaleAge35to39     | 21768      |
| Gabon   | 1997           | FemaleAge40to44     | 20835      |
| Gabon   | 1997           | FemaleAge45to49     | 20030      |
| Gabon   | 1997           | FemaleAge50to54     | 19177      |
| Gabon   | 1997           | FemaleAge55to59     | 18117      |
| Gabon   | 1997           | FemaleAge5to9       | 78003      |
| Gabon   | 1997           | FemaleAge60to64     | 16917      |
| Gabon   | 1997           | FemaleAge65to69     | 14721      |
| Gabon   | 1997           | FemaleAge70to74     | 10960      |
| Gabon   | 1997           | FemaleAge75to79     | 7168       |
| Gabon   | 1997           | FemaleAge80to84     | 3798       |
| Gabon   | 1997           | FemaleAge85to89     | 1495       |
| Gabon   | 1997           | FemaleAge90to94     | 439        |
| Gabon   | 1997           | FemaleAge95to99     | 63         |
| Gabon   | 1997           | FemaleAgeAbov e100  | 5          |
| Gabon   | 1997           | FemaleLactAge15to19 | 8266       |
| Gabon   | 1997           | FemaleLactAge20to24 | 12089      |
| Gabon   | 1997           | FemaleLactAge25to29 | 8702       |
| Gabon   | 1997           | FemaleLactAge30to34 | 5554       |
| Gabon   | 1997           | FemaleLactAge35to39 | 3131       |
| Gabon   | 1997           | FemaleLactAge40to44 | 1454       |
| Gabon   | 1997           | FemaleLactAge45to49 | 361        |
| Gabon   | 1997           | FemalePregAge15to19 | 6200       |
| Gabon   | 1997           | FemalePregAge20to24 | 9066       |
| Gabon   | 1997           | FemalePregAge25to29 | 6526       |
| Gabon   | 1997           | FemalePregAge30to34 | 4165       |
| Gabon   | 1997           | FemalePregAge35to39 | 2348       |
| Gabon   | 1997           | FemalePregAge40to44 | 1091       |
| Gabon   | 1997           | FemalePregAge45to49 | 271        |
| Gabon   | 1997           | MaleAge0to4         | 88869      |
| Gabon   | 1997           | MaleAge10to14       | 68725      |
| Gabon   | 1997           | MaleAge15to19       | 57915      |
| Gabon   | 1997           | MaleAge20to24       | 48340      |
| Gabon   | 1997           | MaleAge25to29       | 40513      |
| Gabon   | 1997           | MaleAge30to34       | 32927      |
| Gabon   | 1997           | MaleAge35to39       | 26642      |
| Gabon   | 1997           | MaleAge40to44       | 22600      |
| Gabon   | 1997           | MaleAge45to49       | 20061      |
| Gabon   | 1997           | MaleAge50to54       | 17412      |
| Gabon   | 1997           | MaleAge55to59       | 15434      |
| Gabon   | 1997           | MaleAge5to9         | 79277      |
| Gabon   | 1997           | MaleAge60to64       | 13765      |
| Gabon   | 1997           | MaleAge65to69       | 11308      |
| Gabon   | 1997           | MaleAge70to74       | 8169       |
| Gabon   | 1997           | MaleAge75to79       | 5187       |
| Gabon   | 1997           | MaleAge80to84       | 2746       |
| Gabon   | 1997           | MaleAge85to89       | 1062       |
| Gabon   | 1997           | MaleAge90to94       | 269        |
| Gabon   | 1997           | MaleAge95to99       | 35         |
| Gabon   | 1997           | MaleAgeAbov e100    | 2          |
| Gabon   | 1998           | FemaleAge0to4       | 88410      |
| Gabon   | 1998           | FemaleAge10to14     | 69630      |
| Gabon   | 1998           | FemaleAge15to19     | 44594      |

Dietary calcium and zinc deficiency risks are decreasing but remain prevalent

| Country | Reference year | Age/gender group    | Population |
|---------|----------------|---------------------|------------|
| Gabon   | 1998           | FemaleAge20to24     | 28320      |
| Gabon   | 1998           | FemaleAge25to29     | 26544      |
| Gabon   | 1998           | FemaleAge30to34     | 25121      |
| Gabon   | 1998           | FemaleAge35to39     | 22801      |
| Gabon   | 1998           | FemaleAge40to44     | 21371      |
| Gabon   | 1998           | FemaleAge45to49     | 20457      |
| Gabon   | 1998           | FemaleAge50to54     | 19219      |
| Gabon   | 1998           | FemaleAge55to59     | 18198      |
| Gabon   | 1998           | FemaleAge5to9       | 79608      |
| Gabon   | 1998           | FemaleAge60to64     | 16888      |
| Gabon   | 1998           | FemaleAge65to69     | 14901      |
| Gabon   | 1998           | FemaleAge70to74     | 11304      |
| Gabon   | 1998           | FemaleAge75to79     | 7305       |
| Gabon   | 1998           | FemaleAge80to84     | 3985       |
| Gabon   | 1998           | FemaleAge85to89     | 1534       |
| Gabon   | 1998           | FemaleAge90to94     | 462        |
| Gabon   | 1998           | FemaleAge95to99     | 74         |
| Gabon   | 1998           | FemaleAgeAbove100   | 5          |
| Gabon   | 1998           | FemaleLactAge15to19 | 8266       |
| Gabon   | 1998           | FemaleLactAge20to24 | 12089      |
| Gabon   | 1998           | FemaleLactAge25to29 | 8702       |
| Gabon   | 1998           | FemaleLactAge30to34 | 5554       |
| Gabon   | 1998           | FemaleLactAge35to39 | 3131       |
| Gabon   | 1998           | FemaleLactAge40to44 | 1454       |
| Gabon   | 1998           | FemaleLactAge45to49 | 361        |
| Gabon   | 1998           | FemalePregAge15to19 | 6200       |
| Gabon   | 1998           | FemalePregAge20to24 | 9066       |
| Gabon   | 1998           | FemalePregAge25to29 | 6526       |
| Gabon   | 1998           | FemalePregAge30to34 | 4165       |
| Gabon   | 1998           | FemalePregAge35to39 | 2348       |
| Gabon   | 1998           | FemalePregAge40to44 | 1091       |
| Gabon   | 1998           | FemalePregAge45to49 | 271        |
| Gabon   | 1998           | MaleAge0to4         | 90119      |
| Gabon   | 1998           | MaleAge10to14       | 70764      |
| Gabon   | 1998           | MaleAge15to19       | 60007      |
| Gabon   | 1998           | MaleAge20to24       | 50116      |
| Gabon   | 1998           | MaleAge25to29       | 41949      |
| Gabon   | 1998           | MaleAge30to34       | 34461      |
| Gabon   | 1998           | MaleAge35to39       | 27733      |
| Gabon   | 1998           | MaleAge40to44       | 23292      |
| Gabon   | 1998           | MaleAge45to49       | 20419      |
| Gabon   | 1998           | MaleAge50to54       | 17892      |
| Gabon   | 1998           | MaleAge55to59       | 15522      |
| Gabon   | 1998           | MaleAge5to9         | 80931      |
| Gabon   | 1998           | MaleAge60to64       | 13906      |
| Gabon   | 1998           | MaleAge65to69       | 11508      |
| Gabon   | 1998           | MaleAge70to74       | 8408       |
| Gabon   | 1998           | MaleAge75to79       | 5288       |
| Gabon   | 1998           | MaleAge80to84       | 2824       |
| Gabon   | 1998           | MaleAge85to89       | 1102       |
| Gabon   | 1998           | MaleAge90to94       | 285        |
| Gabon   | 1998           | MaleAge95to99       | 42         |
| Gabon   | 1998           | MaleAgeAbove100     | 3          |
| Gabon   | 1999           | FemaleAge0to4       | 89652      |
| Gabon   | 1999           | FemaleAge10to14     | 71518      |
| Gabon   | 1999           | FemaleAge15to19     | 46506      |
| Gabon   | 1999           | FemaleAge20to24     | 29924      |
| Gabon   | 1999           | FemaleAge25to29     | 27734      |
| Gabon   | 1999           | FemaleAge30to34     | 26483      |
| Gabon   | 1999           | FemaleAge35to39     | 23937      |
| Gabon   | 1999           | FemaleAge40to44     | 21988      |
| Gabon   | 1999           | FemaleAge45to49     | 20911      |
| Gabon   | 1999           | FemaleAge50to54     | 19324      |
| Gabon   | 1999           | FemaleAge55to59     | 18281      |
| Gabon   | 1999           | FemaleAge5to9       | 81068      |
| Gabon   | 1999           | FemaleAge60to64     | 16882      |
| Gabon   | 1999           | FemaleAge65to69     | 15063      |
| Gabon   | 1999           | FemaleAge70to74     | 11643      |
| Gabon   | 1999           | FemaleAge75to79     | 7483       |
| Gabon   | 1999           | FemaleAge80to84     | 4133       |
| Gabon   | 1999           | FemaleAge85to89     | 1561       |
| Gabon   | 1999           | FemaleAge90to94     | 459        |
| Gabon   | 1999           | FemaleAge95to99     | 77         |
| Gabon   | 1999           | FemaleAgeAbove100   | 6          |
| Gabon   | 1999           | FemaleLactAge15to19 | 8266       |
| Gabon   | 1999           | FemaleLactAge20to24 | 12089      |
| Gabon   | 1999           | FemaleLactAge25to29 | 8702       |
| Gabon   | 1999           | FemaleLactAge30to34 | 5554       |
| Gabon   | 1999           | FemaleLactAge35to39 | 3131       |
| Gabon   | 1999           | FemaleLactAge40to44 | 1454       |
| Gabon   | 1999           | FemaleLactAge45to49 | 361        |
| Gabon   | 1999           | FemalePregAge15to19 | 6200       |
| Gabon   | 1999           | FemalePregAge20to24 | 9066       |
| Gabon   | 1999           | FemalePregAge25to29 | 6526       |
| Gabon   | 1999           | FemalePregAge30to34 | 4165       |
| Gabon   | 1999           | FemalePregAge35to39 | 2348       |
| Gabon   | 1999           | FemalePregAge40to44 | 1091       |
| Gabon   | 1999           | FemalePregAge45to49 | 271        |

Dietary calcium and zinc deficiency risks are decreasing but remain prevalent

| Country | Reference year | Age/gender group    | Population |
|---------|----------------|---------------------|------------|
| Gabon   | 1999           | MaleAge0to4         | 91411      |
| Gabon   | 1999           | MaleAge10to14       | 72725      |
| Gabon   | 1999           | MaleAge15to19       | 62083      |
| Gabon   | 1999           | MaleAge20to24       | 51955      |
| Gabon   | 1999           | MaleAge25to29       | 43451      |
| Gabon   | 1999           | MaleAge30to34       | 35973      |
| Gabon   | 1999           | MaleAge35to39       | 28903      |
| Gabon   | 1999           | MaleAge40to44       | 24086      |
| Gabon   | 1999           | MaleAge45to49       | 20829      |
| Gabon   | 1999           | MaleAge50to54       | 18370      |
| Gabon   | 1999           | MaleAge55to59       | 15686      |
| Gabon   | 1999           | MaleAge5to9         | 82436      |
| Gabon   | 1999           | MaleAge60to64       | 14046      |
| Gabon   | 1999           | MaleAge65to69       | 11714      |
| Gabon   | 1999           | MaleAge70to74       | 8657       |
| Gabon   | 1999           | MaleAge75to79       | 5412       |
| Gabon   | 1999           | MaleAge80to84       | 2881       |
| Gabon   | 1999           | MaleAge85to89       | 1114       |
| Gabon   | 1999           | MaleAge90to94       | 284        |
| Gabon   | 1999           | MaleAge95to99       | 44         |
| Gabon   | 1999           | MaleAgeAbove100     | 3          |
| Gambia  | 1993           | FemaleAge0to4       | 94943      |
| Gambia  | 1993           | FemaleAge10to14     | 63602      |
| Gambia  | 1993           | FemaleAge15to19     | 37971      |
| Gambia  | 1993           | FemaleAge20to24     | 23311      |
| Gambia  | 1993           | FemaleAge25to29     | 22538      |
| Gambia  | 1993           | FemaleAge30to34     | 19919      |
| Gambia  | 1993           | FemaleAge35to39     | 18960      |
| Gambia  | 1993           | FemaleAge40to44     | 14526      |
| Gambia  | 1993           | FemaleAge45to49     | 10870      |
| Gambia  | 1993           | FemaleAge50to54     | 10773      |
| Gambia  | 1993           | FemaleAge55to59     | 7495       |
| Gambia  | 1993           | FemaleAge5to9       | 75989      |
| Gambia  | 1993           | FemaleAge60to64     | 6689       |
| Gambia  | 1993           | FemaleAge65to69     | 5369       |
| Gambia  | 1993           | FemaleAge70to74     | 4054       |
| Gambia  | 1993           | FemaleAge75to79     | 2539       |
| Gambia  | 1993           | FemaleAge80to84     | 927        |
| Gambia  | 1993           | FemaleAge85to89     | 244        |
| Gambia  | 1993           | FemaleAge90to94     | 32         |
| Gambia  | 1993           | FemaleAge95to99     | 4          |
| Gambia  | 1993           | FemaleLactAge15to19 | 7898       |
| Gambia  | 1993           | FemaleLactAge20to24 | 12783      |
| Gambia  | 1993           | FemaleLactAge25to29 | 12198      |
| Gambia  | 1993           | FemaleLactAge30to34 | 8121       |
| Gambia  | 1993           | FemaleLactAge35to39 | 3893       |
| Gambia  | 1993           | FemaleLactAge40to44 | 1190       |
| Gambia  | 1993           | FemaleLactAge45to49 | 404        |
| Gambia  | 1993           | FemalePregAge15to19 | 5923       |
| Gambia  | 1993           | FemalePregAge20to24 | 9587       |
| Gambia  | 1993           | FemalePregAge25to29 | 9149       |
| Gambia  | 1993           | FemalePregAge30to34 | 6091       |
| Gambia  | 1993           | FemalePregAge35to39 | 2920       |
| Gambia  | 1993           | FemalePregAge40to44 | 892        |
| Gambia  | 1993           | FemalePregAge45to49 | 303        |
| Gambia  | 1993           | MaleAge0to4         | 96842      |
| Gambia  | 1993           | MaleAge10to14       | 63155      |
| Gambia  | 1993           | MaleAge15to19       | 50583      |
| Gambia  | 1993           | MaleAge20to24       | 43615      |
| Gambia  | 1993           | MaleAge25to29       | 39911      |
| Gambia  | 1993           | MaleAge30to34       | 31346      |
| Gambia  | 1993           | MaleAge35to39       | 25505      |
| Gambia  | 1993           | MaleAge40to44       | 18979      |
| Gambia  | 1993           | MaleAge45to49       | 14951      |
| Gambia  | 1993           | MaleAge50to54       | 12801      |
| Gambia  | 1993           | MaleAge55to59       | 9363       |
| Gambia  | 1993           | MaleAge5to9         | 76856      |
| Gambia  | 1993           | MaleAge60to64       | 7706       |
| Gambia  | 1993           | MaleAge65to69       | 6243       |
| Gambia  | 1993           | MaleAge70to74       | 4689       |
| Gambia  | 1993           | MaleAge75to79       | 2357       |
| Gambia  | 1993           | MaleAge80to84       | 949        |
| Gambia  | 1993           | MaleAge85to89       | 257        |
| Gambia  | 1993           | MaleAge90to94       | 25         |
| Gambia  | 1993           | MaleAge95to99       | 2          |
| Gambia  | 1994           | FemaleAge0to4       | 97304      |
| Gambia  | 1994           | FemaleAge10to14     | 65846      |
| Gambia  | 1994           | FemaleAge15to19     | 41138      |
| Gambia  | 1994           | FemaleAge20to24     | 23062      |
| Gambia  | 1994           | FemaleAge25to29     | 23480      |
| Gambia  | 1994           | FemaleAge30to34     | 20901      |
| Gambia  | 1994           | FemaleAge35to39     | 19966      |
| Gambia  | 1994           | FemaleAge40to44     | 16136      |
| Gambia  | 1994           | FemaleAge45to49     | 10659      |
| Gambia  | 1994           | FemaleAge50to54     | 11420      |
| Gambia  | 1994           | FemaleAge55to59     | 7682       |
| Gambia  | 1994           | FemaleAge5to9       | 77722      |
| Gambia  | 1994           | FemaleAge60to64     | 6834       |

Dietary calcium and zinc deficiency risks are decreasing but remain prevalent

| Country | Reference year | Age/gender group    | Population |
|---------|----------------|---------------------|------------|
| Gambia  | 1994           | FemaleAge65to69     | 5590       |
| Gambia  | 1994           | FemaleAge70to74     | 4159       |
| Gambia  | 1994           | FemaleAge75to79     | 2665       |
| Gambia  | 1994           | FemaleAge80to84     | 951        |
| Gambia  | 1994           | FemaleAge85to89     | 248        |
| Gambia  | 1994           | FemaleAge90to94     | 33         |
| Gambia  | 1994           | FemaleAge95to99     | 4          |
| Gambia  | 1994           | FemaleLactAge15to19 | 7898       |
| Gambia  | 1994           | FemaleLactAge20to24 | 12783      |
| Gambia  | 1994           | FemaleLactAge25to29 | 12198      |
| Gambia  | 1994           | FemaleLactAge30to34 | 8121       |
| Gambia  | 1994           | FemaleLactAge35to39 | 3893       |
| Gambia  | 1994           | FemaleLactAge40to44 | 1190       |
| Gambia  | 1994           | FemaleLactAge45to49 | 404        |
| Gambia  | 1994           | FemalePregAge15to19 | 5923       |
| Gambia  | 1994           | FemalePregAge20to24 | 9587       |
| Gambia  | 1994           | FemalePregAge25to29 | 9149       |
| Gambia  | 1994           | FemalePregAge30to34 | 6091       |
| Gambia  | 1994           | FemalePregAge35to39 | 2920       |
| Gambia  | 1994           | FemalePregAge40to44 | 892        |
| Gambia  | 1994           | FemalePregAge45to49 | 303        |
| Gambia  | 1994           | MaleAge0to4         | 99173      |
| Gambia  | 1994           | MaleAge10to14       | 65486      |
| Gambia  | 1994           | MaleAge15to19       | 53128      |
| Gambia  | 1994           | MaleAge20to24       | 43375      |
| Gambia  | 1994           | MaleAge25to29       | 40836      |
| Gambia  | 1994           | MaleAge30to34       | 31950      |
| Gambia  | 1994           | MaleAge35to39       | 26216      |
| Gambia  | 1994           | MaleAge40to44       | 19966      |
| Gambia  | 1994           | MaleAge45to49       | 14955      |
| Gambia  | 1994           | MaleAge50to54       | 13382      |
| Gambia  | 1994           | MaleAge55to59       | 9598       |
| Gambia  | 1994           | MaleAge5to9         | 78562      |
| Gambia  | 1994           | MaleAge60to64       | 7915       |
| Gambia  | 1994           | MaleAge65to69       | 6266       |
| Gambia  | 1994           | MaleAge70to74       | 4927       |
| Gambia  | 1994           | MaleAge75to79       | 2462       |
| Gambia  | 1994           | MaleAge80to84       | 944        |
| Gambia  | 1994           | MaleAge85to89       | 256        |
| Gambia  | 1994           | MaleAge90to94       | 29         |
| Gambia  | 1994           | MaleAge95to99       | 2          |
| Gambia  | 1995           | FemaleAge0to4       | 99832      |
| Gambia  | 1995           | FemaleAge10to14     | 67849      |
| Gambia  | 1995           | FemaleAge15to19     | 44113      |
| Gambia  | 1995           | FemaleAge20to24     | 23944      |
| Gambia  | 1995           | FemaleAge25to29     | 23943      |
| Gambia  | 1995           | FemaleAge30to34     | 22037      |
| Gambia  | 1995           | FemaleAge35to39     | 20951      |
| Gambia  | 1995           | FemaleAge40to44     | 17535      |
| Gambia  | 1995           | FemaleAge45to49     | 10964      |
| Gambia  | 1995           | FemaleAge50to54     | 11699      |
| Gambia  | 1995           | FemaleAge55to59     | 8069       |
| Gambia  | 1995           | FemaleAge5to9       | 79244      |
| Gambia  | 1995           | FemaleAge60to64     | 6946       |
| Gambia  | 1995           | FemaleAge65to69     | 5801       |
| Gambia  | 1995           | FemaleAge70to74     | 4340       |
| Gambia  | 1995           | FemaleAge75to79     | 2773       |
| Gambia  | 1995           | FemaleAge80to84     | 987        |
| Gambia  | 1995           | FemaleAge85to89     | 234        |
| Gambia  | 1995           | FemaleAge90to94     | 27         |
| Gambia  | 1995           | FemaleAge95to99     | 2          |
| Gambia  | 1995           | FemaleLactAge15to19 | 7898       |
| Gambia  | 1995           | FemaleLactAge20to24 | 12783      |
| Gambia  | 1995           | FemaleLactAge25to29 | 12198      |
| Gambia  | 1995           | FemaleLactAge30to34 | 8121       |
| Gambia  | 1995           | FemaleLactAge35to39 | 3893       |
| Gambia  | 1995           | FemaleLactAge40to44 | 1190       |
| Gambia  | 1995           | FemaleLactAge45to49 | 404        |
| Gambia  | 1995           | FemalePregAge15to19 | 5923       |
| Gambia  | 1995           | FemalePregAge20to24 | 9587       |
| Gambia  | 1995           | FemalePregAge25to29 | 9149       |
| Gambia  | 1995           | FemalePregAge30to34 | 6091       |
| Gambia  | 1995           | FemalePregAge35to39 | 2920       |
| Gambia  | 1995           | FemalePregAge40to44 | 892        |
| Gambia  | 1995           | FemalePregAge45to49 | 303        |
| Gambia  | 1995           | MaleAge0to4         | 101659     |
| Gambia  | 1995           | MaleAge10to14       | 67605      |
| Gambia  | 1995           | MaleAge15to19       | 55686      |
| Gambia  | 1995           | MaleAge20to24       | 44001      |
| Gambia  | 1995           | MaleAge25to29       | 41280      |
| Gambia  | 1995           | MaleAge30to34       | 32767      |
| Gambia  | 1995           | MaleAge35to39       | 26852      |
| Gambia  | 1995           | MaleAge40to44       | 20875      |
| Gambia  | 1995           | MaleAge45to49       | 15240      |
| Gambia  | 1995           | MaleAge50to54       | 13740      |
| Gambia  | 1995           | MaleAge55to59       | 9978       |
| Gambia  | 1995           | MaleAge5to9         | 80045      |
| Gambia  | 1995           | MaleAge60to64       | 8092       |



Dietary calcium and zinc deficiency risks are decreasing but remain prevalent

| Country | Reference year | Age/gender group    | Population |
|---------|----------------|---------------------|------------|
| Gambia  | 1995           | MaleAge65to69       | 6363       |
| Gambia  | 1995           | MaleAge70to74       | 5117       |
| Gambia  | 1995           | MaleAge75to79       | 2614       |
| Gambia  | 1995           | MaleAge80to84       | 937        |
| Gambia  | 1995           | MaleAge85to89       | 230        |
| Gambia  | 1995           | MaleAge90to94       | 22         |
| Gambia  | 1995           | MaleAge95to99       | 1          |
| Gambia  | 1996           | FemaleAge0to4       | 102920     |
| Gambia  | 1996           | FemaleAge10to14     | 69810      |
| Gambia  | 1996           | FemaleAge15to19     | 45922      |
| Gambia  | 1996           | FemaleAge20to24     | 23244      |
| Gambia  | 1996           | FemaleAge25to29     | 21631      |
| Gambia  | 1996           | FemaleAge30to34     | 20846      |
| Gambia  | 1996           | FemaleAge35to39     | 20190      |
| Gambia  | 1996           | FemaleAge40to44     | 17799      |
| Gambia  | 1996           | FemaleAge45to49     | 11366      |
| Gambia  | 1996           | FemaleAge50to54     | 11582      |
| Gambia  | 1996           | FemaleAge55to59     | 8585       |
| Gambia  | 1996           | FemaleAge5to9       | 81341      |
| Gambia  | 1996           | FemaleAge60to64     | 6965       |
| Gambia  | 1996           | FemaleAge65to69     | 5913       |
| Gambia  | 1996           | FemaleAge70to74     | 4393       |
| Gambia  | 1996           | FemaleAge75to79     | 2810       |
| Gambia  | 1996           | FemaleAge80to84     | 1111       |
| Gambia  | 1996           | FemaleAge85to89     | 271        |
| Gambia  | 1996           | FemaleAge90to94     | 37         |
| Gambia  | 1996           | FemaleAge95to99     | 2          |
| Gambia  | 1996           | FemaleLactAge15to19 | 8506       |
| Gambia  | 1996           | FemaleLactAge20to24 | 14312      |
| Gambia  | 1996           | FemaleLactAge25to29 | 13485      |
| Gambia  | 1996           | FemaleLactAge30to34 | 9359       |
| Gambia  | 1996           | FemaleLactAge35to39 | 4691       |
| Gambia  | 1996           | FemaleLactAge40to44 | 1622       |
| Gambia  | 1996           | FemaleLactAge45to49 | 547        |
| Gambia  | 1996           | FemalePregAge15to19 | 6380       |
| Gambia  | 1996           | FemalePregAge20to24 | 10734      |
| Gambia  | 1996           | FemalePregAge25to29 | 10114      |
| Gambia  | 1996           | FemalePregAge30to34 | 7019       |
| Gambia  | 1996           | FemalePregAge35to39 | 3519       |
| Gambia  | 1996           | FemalePregAge40to44 | 1216       |
| Gambia  | 1996           | FemalePregAge45to49 | 410        |
| Gambia  | 1996           | MaleAge0to4         | 104850     |
| Gambia  | 1996           | MaleAge10to14       | 69439      |
| Gambia  | 1996           | MaleAge15to19       | 58168      |
| Gambia  | 1996           | MaleAge20to24       | 45407      |
| Gambia  | 1996           | MaleAge25to29       | 41250      |
| Gambia  | 1996           | MaleAge30to34       | 33522      |
| Gambia  | 1996           | MaleAge35to39       | 27182      |
| Gambia  | 1996           | MaleAge40to44       | 21571      |
| Gambia  | 1996           | MaleAge45to49       | 15674      |
| Gambia  | 1996           | MaleAge50to54       | 13820      |
| Gambia  | 1996           | MaleAge55to59       | 10426      |
| Gambia  | 1996           | MaleAge5to9         | 82110      |
| Gambia  | 1996           | MaleAge60to64       | 8199       |
| Gambia  | 1996           | MaleAge65to69       | 6457       |
| Gambia  | 1996           | MaleAge70to74       | 5108       |
| Gambia  | 1996           | MaleAge75to79       | 2774       |
| Gambia  | 1996           | MaleAge80to84       | 1023       |
| Gambia  | 1996           | MaleAge85to89       | 264        |
| Gambia  | 1996           | MaleAge90to94       | 32         |
| Gambia  | 1996           | MaleAge95to99       | 1          |
| Gambia  | 1997           | FemaleAge0to4       | 105698     |
| Gambia  | 1997           | FemaleAge10to14     | 71564      |
| Gambia  | 1997           | FemaleAge15to19     | 48508      |
| Gambia  | 1997           | FemaleAge20to24     | 26256      |
| Gambia  | 1997           | FemaleAge25to29     | 21463      |
| Gambia  | 1997           | FemaleAge30to34     | 22067      |
| Gambia  | 1997           | FemaleAge35to39     | 20814      |
| Gambia  | 1997           | FemaleAge40to44     | 18598      |
| Gambia  | 1997           | FemaleAge45to49     | 12428      |
| Gambia  | 1997           | FemaleAge50to54     | 11134      |
| Gambia  | 1997           | FemaleAge55to59     | 9298       |
| Gambia  | 1997           | FemaleAge5to9       | 83490      |
| Gambia  | 1997           | FemaleAge60to64     | 6970       |
| Gambia  | 1997           | FemaleAge65to69     | 6029       |
| Gambia  | 1997           | FemaleAge70to74     | 4508       |
| Gambia  | 1997           | FemaleAge75to79     | 2823       |
| Gambia  | 1997           | FemaleAge80to84     | 1222       |
| Gambia  | 1997           | FemaleAge85to89     | 293        |
| Gambia  | 1997           | FemaleAge90to94     | 46         |
| Gambia  | 1997           | FemaleAge95to99     | 3          |
| Gambia  | 1997           | FemaleLactAge15to19 | 8506       |
| Gambia  | 1997           | FemaleLactAge20to24 | 14312      |
| Gambia  | 1997           | FemaleLactAge25to29 | 13485      |
| Gambia  | 1997           | FemaleLactAge30to34 | 9359       |
| Gambia  | 1997           | FemaleLactAge35to39 | 4691       |
| Gambia  | 1997           | FemaleLactAge40to44 | 1622       |
| Gambia  | 1997           | FemaleLactAge45to49 | 547        |

Dietary calcium and zinc deficiency risks are decreasing but remain prevalent

| Country | Reference year | Age/gender group    | Population |
|---------|----------------|---------------------|------------|
| Gambia  | 1997           | FemalePregAge15to19 | 6380       |
| Gambia  | 1997           | FemalePregAge20to24 | 10734      |
| Gambia  | 1997           | FemalePregAge25to29 | 10114      |
| Gambia  | 1997           | FemalePregAge30to34 | 7019       |
| Gambia  | 1997           | FemalePregAge35to39 | 3519       |
| Gambia  | 1997           | FemalePregAge40to44 | 1216       |
| Gambia  | 1997           | FemalePregAge45to49 | 410        |
| Gambia  | 1997           | MaleAge0to4         | 107684     |
| Gambia  | 1997           | MaleAge10to14       | 71093      |
| Gambia  | 1997           | MaleAge15to19       | 60575      |
| Gambia  | 1997           | MaleAge20to24       | 47648      |
| Gambia  | 1997           | MaleAge25to29       | 41019      |
| Gambia  | 1997           | MaleAge30to34       | 34535      |
| Gambia  | 1997           | MaleAge35to39       | 27427      |
| Gambia  | 1997           | MaleAge40to44       | 22170      |
| Gambia  | 1997           | MaleAge45to49       | 16352      |
| Gambia  | 1997           | MaleAge50to54       | 13702      |
| Gambia  | 1997           | MaleAge55to59       | 11008      |
| Gambia  | 1997           | MaleAge5to9         | 84298      |
| Gambia  | 1997           | MaleAge60to64       | 8295       |
| Gambia  | 1997           | MaleAge65to69       | 6609       |
| Gambia  | 1997           | MaleAge70to74       | 5085       |
| Gambia  | 1997           | MaleAge75to79       | 2948       |
| Gambia  | 1997           | MaleAge80to84       | 1081       |
| Gambia  | 1997           | MaleAge85to89       | 286        |
| Gambia  | 1997           | MaleAge90to94       | 41         |
| Gambia  | 1997           | MaleAge95to99       | 3          |
| Gambia  | 1998           | FemaleAge0to4       | 108347     |
| Gambia  | 1998           | FemaleAge10to14     | 73150      |
| Gambia  | 1998           | FemaleAge15to19     | 50763      |
| Gambia  | 1998           | FemaleAge20to24     | 29911      |
| Gambia  | 1998           | FemaleAge25to29     | 21647      |
| Gambia  | 1998           | FemaleAge30to34     | 23351      |
| Gambia  | 1998           | FemaleAge35to39     | 21519      |
| Gambia  | 1998           | FemaleAge40to44     | 19218      |
| Gambia  | 1998           | FemaleAge45to49     | 13701      |
| Gambia  | 1998           | FemaleAge50to54     | 10600      |
| Gambia  | 1998           | FemaleAge55to59     | 10035      |
| Gambia  | 1998           | FemaleAge5to9       | 85696      |
| Gambia  | 1998           | FemaleAge60to64     | 7031       |
| Gambia  | 1998           | FemaleAge65to69     | 6127       |
| Gambia  | 1998           | FemaleAge70to74     | 4682       |
| Gambia  | 1998           | FemaleAge75to79     | 2845       |
| Gambia  | 1998           | FemaleAge80to84     | 1298       |
| Gambia  | 1998           | FemaleAge85to89     | 303        |
| Gambia  | 1998           | FemaleAge90to94     | 54         |
| Gambia  | 1998           | FemaleAge95to99     | 5          |
| Gambia  | 1998           | FemaleLactAge15to19 | 8506       |
| Gambia  | 1998           | FemaleLactAge20to24 | 14312      |
| Gambia  | 1998           | FemaleLactAge25to29 | 13485      |
| Gambia  | 1998           | FemaleLactAge30to34 | 9359       |
| Gambia  | 1998           | FemaleLactAge35to39 | 4691       |
| Gambia  | 1998           | FemaleLactAge40to44 | 1622       |
| Gambia  | 1998           | FemaleLactAge45to49 | 547        |
| Gambia  | 1998           | FemalePregAge15to19 | 6380       |
| Gambia  | 1998           | FemalePregAge20to24 | 10734      |
| Gambia  | 1998           | FemalePregAge25to29 | 10114      |
| Gambia  | 1998           | FemalePregAge30to34 | 7019       |
| Gambia  | 1998           | FemalePregAge35to39 | 3519       |
| Gambia  | 1998           | FemalePregAge40to44 | 1216       |
| Gambia  | 1998           | FemalePregAge45to49 | 410        |
| Gambia  | 1998           | MaleAge0to4         | 110383     |
| Gambia  | 1998           | MaleAge10to14       | 72630      |
| Gambia  | 1998           | MaleAge15to19       | 62829      |
| Gambia  | 1998           | MaleAge20to24       | 50483      |
| Gambia  | 1998           | MaleAge25to29       | 40956      |
| Gambia  | 1998           | MaleAge30to34       | 35626      |
| Gambia  | 1998           | MaleAge35to39       | 27696      |
| Gambia  | 1998           | MaleAge40to44       | 22658      |
| Gambia  | 1998           | MaleAge45to49       | 17183      |
| Gambia  | 1998           | MaleAge50to54       | 13525      |
| Gambia  | 1998           | MaleAge55to59       | 11617      |
| Gambia  | 1998           | MaleAge5to9         | 86600      |
| Gambia  | 1998           | MaleAge60to64       | 8428       |
| Gambia  | 1998           | MaleAge65to69       | 6781       |
| Gambia  | 1998           | MaleAge70to74       | 5104       |
| Gambia  | 1998           | MaleAge75to79       | 3110       |
| Gambia  | 1998           | MaleAge80to84       | 1114       |
| Gambia  | 1998           | MaleAge85to89       | 295        |
| Gambia  | 1998           | MaleAge90to94       | 50         |
| Gambia  | 1998           | MaleAge95to99       | 5          |
| Gambia  | 1999           | FemaleAge0to4       | 111124     |
| Gambia  | 1999           | FemaleAge10to14     | 74637      |
| Gambia  | 1999           | FemaleAge15to19     | 52749      |
| Gambia  | 1999           | FemaleAge20to24     | 33634      |
| Gambia  | 1999           | FemaleAge25to29     | 22708      |
| Gambia  | 1999           | FemaleAge30to34     | 24495      |
| Gambia  | 1999           | FemaleAge35to39     | 22384      |

Dietary calcium and zinc deficiency risks are decreasing but remain prevalent

| Country | Reference year | Age/gender group    | Population |
|---------|----------------|---------------------|------------|
| Gambia  | 1999           | FemaleAge40to44     | 19763      |
| Gambia  | 1999           | FemaleAge45to49     | 14898      |
| Gambia  | 1999           | FemaleAge50to54     | 10321      |
| Gambia  | 1999           | FemaleAge55to59     | 10553      |
| Gambia  | 1999           | FemaleAge5to9       | 87885      |
| Gambia  | 1999           | FemaleAge60to64     | 7233       |
| Gambia  | 1999           | FemaleAge65to69     | 6207       |
| Gambia  | 1999           | FemaleAge70to74     | 4891       |
| Gambia  | 1999           | FemaleAge75to79     | 2905       |
| Gambia  | 1999           | FemaleAge80to84     | 1326       |
| Gambia  | 1999           | FemaleAge85to89     | 309        |
| Gambia  | 1999           | FemaleAge90to94     | 54         |
| Gambia  | 1999           | FemaleAge95to99     | 5          |
| Gambia  | 1999           | FemaleLactAge15to19 | 8506       |
| Gambia  | 1999           | FemaleLactAge20to24 | 14312      |
| Gambia  | 1999           | FemaleLactAge25to29 | 13485      |
| Gambia  | 1999           | FemaleLactAge30to34 | 9359       |
| Gambia  | 1999           | FemaleLactAge35to39 | 4691       |
| Gambia  | 1999           | FemaleLactAge40to44 | 1622       |
| Gambia  | 1999           | FemaleLactAge45to49 | 547        |
| Gambia  | 1999           | FemalePregAge15to19 | 6380       |
| Gambia  | 1999           | FemalePregAge20to24 | 10734      |
| Gambia  | 1999           | FemalePregAge25to29 | 10114      |
| Gambia  | 1999           | FemalePregAge30to34 | 7019       |
| Gambia  | 1999           | FemalePregAge35to39 | 3519       |
| Gambia  | 1999           | FemalePregAge40to44 | 1216       |
| Gambia  | 1999           | FemalePregAge45to49 | 410        |
| Gambia  | 1999           | MaleAge0to4         | 113242     |
| Gambia  | 1999           | MaleAge10to14       | 74157      |
| Gambia  | 1999           | MaleAge15to19       | 64907      |
| Gambia  | 1999           | MaleAge20to24       | 53514      |
| Gambia  | 1999           | MaleAge25to29       | 41530      |
| Gambia  | 1999           | MaleAge30to34       | 36555      |
| Gambia  | 1999           | MaleAge35to39       | 28122      |
| Gambia  | 1999           | MaleAge40to44       | 23055      |
| Gambia  | 1999           | MaleAge45to49       | 18008      |
| Gambia  | 1999           | MaleAge50to54       | 13492      |
| Gambia  | 1999           | MaleAge55to59       | 12101      |
| Gambia  | 1999           | MaleAge5to9         | 88938      |
| Gambia  | 1999           | MaleAge60to64       | 8662       |
| Gambia  | 1999           | MaleAge65to69       | 6942       |
| Gambia  | 1999           | MaleAge70to74       | 5201       |
| Gambia  | 1999           | MaleAge75to79       | 3239       |
| Gambia  | 1999           | MaleAge80to84       | 1139       |
| Gambia  | 1999           | MaleAge85to89       | 289        |
| Gambia  | 1999           | MaleAge90to94       | 50         |
| Gambia  | 1999           | MaleAge95to99       | 4          |
| Georgia | 1992           | FemaleAge0to4       | 212877     |
| Georgia | 1992           | FemaleAge10to14     | 209139     |
| Georgia | 1992           | FemaleAge15to19     | 173349     |
| Georgia | 1992           | FemaleAge20to24     | 133032     |
| Georgia | 1992           | FemaleAge25to29     | 183851     |
| Georgia | 1992           | FemaleAge30to34     | 206343     |
| Georgia | 1992           | FemaleAge35to39     | 189233     |
| Georgia | 1992           | FemaleAge40to44     | 166570     |
| Georgia | 1992           | FemaleAge45to49     | 127936     |
| Georgia | 1992           | FemaleAge50to54     | 163980     |
| Georgia | 1992           | FemaleAge55to59     | 165984     |
| Georgia | 1992           | FemaleAge5to9       | 218141     |
| Georgia | 1992           | FemaleAge60to64     | 157440     |
| Georgia | 1992           | FemaleAge65to69     | 133122     |
| Georgia | 1992           | FemaleAge70to74     | 80506      |
| Georgia | 1992           | FemaleAge75to79     | 65584      |
| Georgia | 1992           | FemaleAge80to84     | 43958      |
| Georgia | 1992           | FemaleAge85to89     | 20823      |
| Georgia | 1992           | FemaleAge90to94     | 7959       |
| Georgia | 1992           | FemaleAge95to99     | 1141       |
| Georgia | 1992           | FemaleAgeAbove100   | 176        |
| Georgia | 1992           | FemaleLactAge15to19 | 13442      |
| Georgia | 1992           | FemaleLactAge20to24 | 30315      |
| Georgia | 1992           | FemaleLactAge25to29 | 19705      |
| Georgia | 1992           | FemaleLactAge30to34 | 12832      |
| Georgia | 1992           | FemaleLactAge35to39 | 4323       |
| Georgia | 1992           | FemaleLactAge40to44 | 953        |
| Georgia | 1992           | FemaleLactAge45to49 | 56         |
| Georgia | 1992           | FemalePregAge15to19 | 10082      |
| Georgia | 1992           | FemalePregAge20to24 | 22736      |
| Georgia | 1992           | FemalePregAge25to29 | 14779      |
| Georgia | 1992           | FemalePregAge30to34 | 9624       |
| Georgia | 1992           | FemalePregAge35to39 | 3243       |
| Georgia | 1992           | FemalePregAge40to44 | 715        |
| Georgia | 1992           | FemalePregAge45to49 | 42         |
| Georgia | 1992           | MaleAge0to4         | 225932     |
| Georgia | 1992           | MaleAge10to14       | 214428     |
| Georgia | 1992           | MaleAge15to19       | 206508     |
| Georgia | 1992           | MaleAge20to24       | 193944     |
| Georgia | 1992           | MaleAge25to29       | 205665     |
| Georgia | 1992           | MaleAge30to34       | 210107     |

Dietary calcium and zinc deficiency risks are decreasing but remain prevalent

| Country | Reference year | Age/gender group    | Population |
|---------|----------------|---------------------|------------|
| Georgia | 1992           | MaleAge35to39       | 184934     |
| Georgia | 1992           | MaleAge40to44       | 153232     |
| Georgia | 1992           | MaleAge45to49       | 112417     |
| Georgia | 1992           | MaleAge50to54       | 143348     |
| Georgia | 1992           | MaleAge55to59       | 144288     |
| Georgia | 1992           | MaleAge5to9         | 226429     |
| Georgia | 1992           | MaleAge60to64       | 130467     |
| Georgia | 1992           | MaleAge65to69       | 91196      |
| Georgia | 1992           | MaleAge70to74       | 38743      |
| Georgia | 1992           | MaleAge75to79       | 28331      |
| Georgia | 1992           | MaleAge80to84       | 20034      |
| Georgia | 1992           | MaleAge85to89       | 8470       |
| Georgia | 1992           | MaleAge90to94       | 2732       |
| Georgia | 1992           | MaleAge95to99       | 379        |
| Georgia | 1992           | MaleAgeAbov e100    | 50         |
| Georgia | 1993           | FemaleAge0to4       | 205537     |
| Georgia | 1993           | FemaleAge10to14     | 205988     |
| Georgia | 1993           | FemaleAge15to19     | 171119     |
| Georgia | 1993           | FemaleAge20to24     | 129939     |
| Georgia | 1993           | FemaleAge25to29     | 167669     |
| Georgia | 1993           | FemaleAge30to34     | 205471     |
| Georgia | 1993           | FemaleAge35to39     | 191229     |
| Georgia | 1993           | FemaleAge40to44     | 166665     |
| Georgia | 1993           | FemaleAge45to49     | 133917     |
| Georgia | 1993           | FemaleAge50to54     | 142325     |
| Georgia | 1993           | FemaleAge55to59     | 172781     |
| Georgia | 1993           | FemaleAge5to9       | 215119     |
| Georgia | 1993           | FemaleAge60to64     | 146976     |
| Georgia | 1993           | FemaleAge65to69     | 139050     |
| Georgia | 1993           | FemaleAge70to74     | 84367      |
| Georgia | 1993           | FemaleAge75to79     | 59423      |
| Georgia | 1993           | FemaleAge80to84     | 46134      |
| Georgia | 1993           | FemaleAge85to89     | 19475      |
| Georgia | 1993           | FemaleAge90to94     | 8810       |
| Georgia | 1993           | FemaleAge95to99     | 1035       |
| Georgia | 1993           | FemaleAgeAbov e100  | 181        |
| Georgia | 1993           | FemaleLactAge15to19 | 13442      |
| Georgia | 1993           | FemaleLactAge20to24 | 30315      |
| Georgia | 1993           | FemaleLactAge25to29 | 19705      |
| Georgia | 1993           | FemaleLactAge30to34 | 12832      |
| Georgia | 1993           | FemaleLactAge35to39 | 4323       |
| Georgia | 1993           | FemaleLactAge40to44 | 953        |
| Georgia | 1993           | FemaleLactAge45to49 | 56         |
| Georgia | 1993           | FemalePregAge15to19 | 10082      |
| Georgia | 1993           | FemalePregAge20to24 | 22736      |
| Georgia | 1993           | FemalePregAge25to29 | 14779      |
| Georgia | 1993           | FemalePregAge30to34 | 9624       |
| Georgia | 1993           | FemalePregAge35to39 | 3243       |
| Georgia | 1993           | FemalePregAge40to44 | 715        |
| Georgia | 1993           | FemalePregAge45to49 | 42         |
| Georgia | 1993           | MaleAge0to4         | 217733     |
| Georgia | 1993           | MaleAge10to14       | 210555     |
| Georgia | 1993           | MaleAge15to19       | 201222     |
| Georgia | 1993           | MaleAge20to24       | 190985     |
| Georgia | 1993           | MaleAge25to29       | 193791     |
| Georgia | 1993           | MaleAge30to34       | 207179     |
| Georgia | 1993           | MaleAge35to39       | 185737     |
| Georgia | 1993           | MaleAge40to44       | 154541     |
| Georgia | 1993           | MaleAge45to49       | 117342     |
| Georgia | 1993           | MaleAge50to54       | 123511     |
| Georgia | 1993           | MaleAge55to59       | 149395     |
| Georgia | 1993           | MaleAge5to9         | 224095     |
| Georgia | 1993           | MaleAge60to64       | 122118     |
| Georgia | 1993           | MaleAge65to69       | 100249     |
| Georgia | 1993           | MaleAge70to74       | 41997      |
| Georgia | 1993           | MaleAge75to79       | 24497      |
| Georgia | 1993           | MaleAge80to84       | 20438      |
| Georgia | 1993           | MaleAge85to89       | 8055       |
| Georgia | 1993           | MaleAge90to94       | 2956       |
| Georgia | 1993           | MaleAge95to99       | 347        |
| Georgia | 1993           | MaleAgeAbov e100    | 51         |
| Georgia | 1994           | FemaleAge0to4       | 197170     |
| Georgia | 1994           | FemaleAge10to14     | 202731     |
| Georgia | 1994           | FemaleAge15to19     | 168894     |
| Georgia | 1994           | FemaleAge20to24     | 127735     |
| Georgia | 1994           | FemaleAge25to29     | 152951     |
| Georgia | 1994           | FemaleAge30to34     | 201814     |
| Georgia | 1994           | FemaleAge35to39     | 192858     |
| Georgia | 1994           | FemaleAge40to44     | 166828     |
| Georgia | 1994           | FemaleAge45to49     | 140253     |
| Georgia | 1994           | FemaleAge50to54     | 124090     |
| Georgia | 1994           | FemaleAge55to59     | 175487     |
| Georgia | 1994           | FemaleAge5to9       | 212305     |
| Georgia | 1994           | FemaleAge60to64     | 138949     |
| Georgia | 1994           | FemaleAge65to69     | 142347     |
| Georgia | 1994           | FemaleAge70to74     | 88890      |
| Georgia | 1994           | FemaleAge75to79     | 55259      |
| Georgia | 1994           | FemaleAge80to84     | 46307      |

Dietary calcium and zinc deficiency risks are decreasing but remain prevalent

| Country | Reference year | Age/gender group    | Population |
|---------|----------------|---------------------|------------|
| Georgia | 1994           | FemaleAge85to89     | 18580      |
| Georgia | 1994           | FemaleAge90to94     | 8814       |
| Georgia | 1994           | FemaleAge95to99     | 1132       |
| Georgia | 1994           | FemaleAgeAbove100   | 184        |
| Georgia | 1994           | FemaleLactAge15to19 | 13442      |
| Georgia | 1994           | FemaleLactAge20to24 | 30315      |
| Georgia | 1994           | FemaleLactAge25to29 | 19705      |
| Georgia | 1994           | FemaleLactAge30to34 | 12832      |
| Georgia | 1994           | FemaleLactAge35to39 | 4323       |
| Georgia | 1994           | FemaleLactAge40to44 | 953        |
| Georgia | 1994           | FemaleLactAge45to49 | 56         |
| Georgia | 1994           | FemalePregAge15to19 | 10082      |
| Georgia | 1994           | FemalePregAge20to24 | 22736      |
| Georgia | 1994           | FemalePregAge25to29 | 14779      |
| Georgia | 1994           | FemalePregAge30to34 | 9624       |
| Georgia | 1994           | FemalePregAge35to39 | 3243       |
| Georgia | 1994           | FemalePregAge40to44 | 715        |
| Georgia | 1994           | FemalePregAge45to49 | 42         |
| Georgia | 1994           | MaleAge0to4         | 208532     |
| Georgia | 1994           | MaleAge10to14       | 207105     |
| Georgia | 1994           | MaleAge15to19       | 196089     |
| Georgia | 1994           | MaleAge20to24       | 188092     |
| Georgia | 1994           | MaleAge25to29       | 182836     |
| Georgia | 1994           | MaleAge30to34       | 202430     |
| Georgia | 1994           | MaleAge35to39       | 185866     |
| Georgia | 1994           | MaleAge40to44       | 155515     |
| Georgia | 1994           | MaleAge45to49       | 122819     |
| Georgia | 1994           | MaleAge50to54       | 106931     |
| Georgia | 1994           | MaleAge55to59       | 150641     |
| Georgia | 1994           | MaleAge5to9         | 222001     |
| Georgia | 1994           | MaleAge60to64       | 115595     |
| Georgia | 1994           | MaleAge65to69       | 106338     |
| Georgia | 1994           | MaleAge70to74       | 46261      |
| Georgia | 1994           | MaleAge75to79       | 22049      |
| Georgia | 1994           | MaleAge80to84       | 19649      |
| Georgia | 1994           | MaleAge85to89       | 7619       |
| Georgia | 1994           | MaleAge90to94       | 2874       |
| Georgia | 1994           | MaleAge95to99       | 362        |
| Georgia | 1994           | MaleAgeAbove100     | 51         |
| Georgia | 1995           | FemaleAge0to4       | 187894     |
| Georgia | 1995           | FemaleAge10to14     | 200347     |
| Georgia | 1995           | FemaleAge15to19     | 167040     |
| Georgia | 1995           | FemaleAge20to24     | 125814     |
| Georgia | 1995           | FemaleAge25to29     | 142026     |
| Georgia | 1995           | FemaleAge30to34     | 195135     |
| Georgia | 1995           | FemaleAge35to39     | 194356     |
| Georgia | 1995           | FemaleAge40to44     | 168219     |
| Georgia | 1995           | FemaleAge45to49     | 144745     |
| Georgia | 1995           | FemaleAge50to54     | 113324     |
| Georgia | 1995           | FemaleAge55to59     | 171407     |
| Georgia | 1995           | FemaleAge5to9       | 209765     |
| Georgia | 1995           | FemaleAge60to64     | 135917     |
| Georgia | 1995           | FemaleAge65to69     | 142300     |
| Georgia | 1995           | FemaleAge70to74     | 93894      |
| Georgia | 1995           | FemaleAge75to79     | 54014      |
| Georgia | 1995           | FemaleAge80to84     | 44334      |
| Georgia | 1995           | FemaleAge85to89     | 18330      |
| Georgia | 1995           | FemaleAge90to94     | 7959       |
| Georgia | 1995           | FemaleAge95to99     | 1188       |
| Georgia | 1995           | FemaleAgeAbove100   | 183        |
| Georgia | 1995           | FemaleLactAge15to19 | 13442      |
| Georgia | 1995           | FemaleLactAge20to24 | 30315      |
| Georgia | 1995           | FemaleLactAge25to29 | 19705      |
| Georgia | 1995           | FemaleLactAge30to34 | 12832      |
| Georgia | 1995           | FemaleLactAge35to39 | 4323       |
| Georgia | 1995           | FemaleLactAge40to44 | 953        |
| Georgia | 1995           | FemaleLactAge45to49 | 56         |
| Georgia | 1995           | FemalePregAge15to19 | 10082      |
| Georgia | 1995           | FemalePregAge20to24 | 22736      |
| Georgia | 1995           | FemalePregAge25to29 | 14779      |
| Georgia | 1995           | FemalePregAge30to34 | 9624       |
| Georgia | 1995           | FemalePregAge35to39 | 3243       |
| Georgia | 1995           | FemalePregAge40to44 | 715        |
| Georgia | 1995           | FemalePregAge45to49 | 42         |
| Georgia | 1995           | MaleAge0to4         | 198709     |
| Georgia | 1995           | MaleAge10to14       | 204936     |
| Georgia | 1995           | MaleAge15to19       | 191971     |
| Georgia | 1995           | MaleAge20to24       | 184853     |
| Georgia | 1995           | MaleAge25to29       | 174483     |
| Georgia | 1995           | MaleAge30to34       | 196041     |
| Georgia | 1995           | MaleAge35to39       | 185621     |
| Georgia | 1995           | MaleAge40to44       | 157004     |
| Georgia | 1995           | MaleAge45to49       | 127023     |
| Georgia | 1995           | MaleAge50to54       | 97063      |
| Georgia | 1995           | MaleAge55to59       | 145944     |
| Georgia | 1995           | MaleAge5to9         | 220001     |
| Georgia | 1995           | MaleAge60to64       | 113159     |
| Georgia | 1995           | MaleAge65to69       | 108521     |

Dietary calcium and zinc deficiency risks are decreasing but remain prevalent

| Country | Reference year | Age/gender group    | Population |
|---------|----------------|---------------------|------------|
| Georgia | 1995           | MaleAge70to74       | 51645      |
| Georgia | 1995           | MaleAge75to79       | 21415      |
| Georgia | 1995           | MaleAge80to84       | 17683      |
| Georgia | 1995           | MaleAge85to89       | 7186       |
| Georgia | 1995           | MaleAge90to94       | 2464       |
| Georgia | 1995           | MaleAge95to99       | 333        |
| Georgia | 1995           | MaleAgeAbov e100    | 50         |
| Georgia | 1996           | FemaleAge0to4       | 175104     |
| Georgia | 1996           | FemaleAge10to14     | 199380     |
| Georgia | 1996           | FemaleAge15to19     | 169239     |
| Georgia | 1996           | FemaleAge20to24     | 138727     |
| Georgia | 1996           | FemaleAge25to29     | 145218     |
| Georgia | 1996           | FemaleAge30to34     | 191963     |
| Georgia | 1996           | FemaleAge35to39     | 196171     |
| Georgia | 1996           | FemaleAge40to44     | 170769     |
| Georgia | 1996           | FemaleAge45to49     | 147983     |
| Georgia | 1996           | FemaleAge50to54     | 109419     |
| Georgia | 1996           | FemaleAge55to59     | 161192     |
| Georgia | 1996           | FemaleAge5to9       | 205939     |
| Georgia | 1996           | FemaleAge60to64     | 137291     |
| Georgia | 1996           | FemaleAge65to69     | 138520     |
| Georgia | 1996           | FemaleAge70to74     | 99222      |
| Georgia | 1996           | FemaleAge75to79     | 54784      |
| Georgia | 1996           | FemaleAge80to84     | 42235      |
| Georgia | 1996           | FemaleAge85to89     | 20054      |
| Georgia | 1996           | FemaleAge90to94     | 8003       |
| Georgia | 1996           | FemaleAge95to99     | 1410       |
| Georgia | 1996           | FemaleAgeAbov e100  | 177        |
| Georgia | 1996           | FemaleLactAge15to19 | 11409      |
| Georgia | 1996           | FemaleLactAge20to24 | 22325      |
| Georgia | 1996           | FemaleLactAge25to29 | 13852      |
| Georgia | 1996           | FemaleLactAge30to34 | 9384       |
| Georgia | 1996           | FemaleLactAge35to39 | 4315       |
| Georgia | 1996           | FemaleLactAge40to44 | 938        |
| Georgia | 1996           | FemaleLactAge45to49 | 150        |
| Georgia | 1996           | FemalePregAge15to19 | 8557       |
| Georgia | 1996           | FemalePregAge20to24 | 16744      |
| Georgia | 1996           | FemalePregAge25to29 | 10389      |
| Georgia | 1996           | FemalePregAge30to34 | 7038       |
| Georgia | 1996           | FemalePregAge35to39 | 3236       |
| Georgia | 1996           | FemalePregAge40to44 | 703        |
| Georgia | 1996           | FemalePregAge45to49 | 113        |
| Georgia | 1996           | MaleAge0to4         | 184489     |
| Georgia | 1996           | MaleAge10to14       | 204544     |
| Georgia | 1996           | MaleAge15to19       | 189195     |
| Georgia | 1996           | MaleAge20to24       | 181877     |
| Georgia | 1996           | MaleAge25to29       | 169053     |
| Georgia | 1996           | MaleAge30to34       | 188417     |
| Georgia | 1996           | MaleAge35to39       | 185579     |
| Georgia | 1996           | MaleAge40to44       | 159314     |
| Georgia | 1996           | MaleAge45to49       | 130627     |
| Georgia | 1996           | MaleAge50to54       | 93364      |
| Georgia | 1996           | MaleAge55to59       | 136260     |
| Georgia | 1996           | MaleAge5to9         | 216312     |
| Georgia | 1996           | MaleAge60to64       | 114253     |
| Georgia | 1996           | MaleAge65to69       | 106946     |
| Georgia | 1996           | MaleAge70to74       | 58376      |
| Georgia | 1996           | MaleAge75to79       | 22425      |
| Georgia | 1996           | MaleAge80to84       | 16248      |
| Georgia | 1996           | MaleAge85to89       | 7840       |
| Georgia | 1996           | MaleAge90to94       | 2595       |
| Georgia | 1996           | MaleAge95to99       | 382        |
| Georgia | 1996           | MaleAgeAbov e100    | 48         |
| Georgia | 1997           | FemaleAge0to4       | 163038     |
| Georgia | 1997           | FemaleAge10to14     | 199575     |
| Georgia | 1997           | FemaleAge15to19     | 167892     |
| Georgia | 1997           | FemaleAge20to24     | 138187     |
| Georgia | 1997           | FemaleAge25to29     | 141812     |
| Georgia | 1997           | FemaleAge30to34     | 179779     |
| Georgia | 1997           | FemaleAge35to39     | 198341     |
| Georgia | 1997           | FemaleAge40to44     | 174004     |
| Georgia | 1997           | FemaleAge45to49     | 150030     |
| Georgia | 1997           | FemaleAge50to54     | 112307     |
| Georgia | 1997           | FemaleAge55to59     | 144752     |
| Georgia | 1997           | FemaleAge5to9       | 200568     |
| Georgia | 1997           | FemaleAge60to64     | 143864     |
| Georgia | 1997           | FemaleAge65to69     | 131334     |
| Georgia | 1997           | FemaleAge70to74     | 105647     |
| Georgia | 1997           | FemaleAge75to79     | 57041      |
| Georgia | 1997           | FemaleAge80to84     | 38848      |
| Georgia | 1997           | FemaleAge85to89     | 22061      |
| Georgia | 1997           | FemaleAge90to94     | 7607       |
| Georgia | 1997           | FemaleAge95to99     | 1908       |
| Georgia | 1997           | FemaleAgeAbov e100  | 168        |
| Georgia | 1997           | FemaleLactAge15to19 | 11409      |
| Georgia | 1997           | FemaleLactAge20to24 | 22325      |
| Georgia | 1997           | FemaleLactAge25to29 | 13852      |
| Georgia | 1997           | FemaleLactAge30to34 | 9384       |

Dietary calcium and zinc deficiency risks are decreasing but remain prevalent

| Country | Reference year | Age/gender group    | Population |
|---------|----------------|---------------------|------------|
| Georgia | 1997           | FemaleLactAge35to39 | 4315       |
| Georgia | 1997           | FemaleLactAge40to44 | 938        |
| Georgia | 1997           | FemaleLactAge45to49 | 150        |
| Georgia | 1997           | FemalePregAge15to19 | 8557       |
| Georgia | 1997           | FemalePregAge20to24 | 16744      |
| Georgia | 1997           | FemalePregAge25to29 | 10389      |
| Georgia | 1997           | FemalePregAge30to34 | 7038       |
| Georgia | 1997           | FemalePregAge35to39 | 3236       |
| Georgia | 1997           | FemalePregAge40to44 | 703        |
| Georgia | 1997           | FemalePregAge45to49 | 113        |
| Georgia | 1997           | MaleAge0to4         | 172228     |
| Georgia | 1997           | MaleAge10to14       | 205579     |
| Georgia | 1997           | MaleAge15to19       | 187237     |
| Georgia | 1997           | MaleAge20to24       | 178731     |
| Georgia | 1997           | MaleAge25to29       | 166348     |
| Georgia | 1997           | MaleAge30to34       | 179014     |
| Georgia | 1997           | MaleAge35to39       | 185306     |
| Georgia | 1997           | MaleAge40to44       | 161924     |
| Georgia | 1997           | MaleAge45to49       | 133408     |
| Georgia | 1997           | MaleAge50to54       | 95474      |
| Georgia | 1997           | MaleAge55to59       | 121440     |
| Georgia | 1997           | MaleAge5to9         | 210360     |
| Georgia | 1997           | MaleAge60to64       | 119337     |
| Georgia | 1997           | MaleAge65to69       | 101912     |
| Georgia | 1997           | MaleAge70to74       | 66357      |
| Georgia | 1997           | MaleAge75to79       | 24023      |
| Georgia | 1997           | MaleAge80to84       | 14250      |
| Georgia | 1997           | MaleAge85to89       | 8532       |
| Georgia | 1997           | MaleAge90to94       | 2565       |
| Georgia | 1997           | MaleAge95to99       | 504        |
| Georgia | 1997           | MaleAgeAbov e100    | 44         |
| Georgia | 1998           | FemaleAge0to4       | 151841     |
| Georgia | 1998           | FemaleAge10to14     | 200596     |
| Georgia | 1998           | FemaleAge15to19     | 166729     |
| Georgia | 1998           | FemaleAge20to24     | 138000     |
| Georgia | 1998           | FemaleAge25to29     | 141126     |
| Georgia | 1998           | FemaleAge30to34     | 166395     |
| Georgia | 1998           | FemaleAge35to39     | 199820     |
| Georgia | 1998           | FemaleAge40to44     | 177730     |
| Georgia | 1998           | FemaleAge45to49     | 151307     |
| Georgia | 1998           | FemaleAge50to54     | 119621     |
| Georgia | 1998           | FemaleAge55to59     | 125820     |
| Georgia | 1998           | FemaleAge5to9       | 193321     |
| Georgia | 1998           | FemaleAge60to64     | 152160     |
| Georgia | 1998           | FemaleAge65to69     | 123190     |
| Georgia | 1998           | FemaleAge70to74     | 111888     |
| Georgia | 1998           | FemaleAge75to79     | 60448      |
| Georgia | 1998           | FemaleAge80to84     | 35366      |
| Georgia | 1998           | FemaleAge85to89     | 23522      |
| Georgia | 1998           | FemaleAge90to94     | 7107       |
| Georgia | 1998           | FemaleAge95to99     | 2295       |
| Georgia | 1998           | FemaleAgeAbov e100  | 158        |
| Georgia | 1998           | FemaleLactAge15to19 | 11409      |
| Georgia | 1998           | FemaleLactAge20to24 | 22325      |
| Georgia | 1998           | FemaleLactAge25to29 | 13852      |
| Georgia | 1998           | FemaleLactAge30to34 | 9384       |
| Georgia | 1998           | FemaleLactAge35to39 | 4315       |
| Georgia | 1998           | FemaleLactAge40to44 | 938        |
| Georgia | 1998           | FemaleLactAge45to49 | 150        |
| Georgia | 1998           | FemalePregAge15to19 | 8557       |
| Georgia | 1998           | FemalePregAge20to24 | 16744      |
| Georgia | 1998           | FemalePregAge25to29 | 10389      |
| Georgia | 1998           | FemalePregAge30to34 | 7038       |
| Georgia | 1998           | FemalePregAge35to39 | 3236       |
| Georgia | 1998           | FemalePregAge40to44 | 703        |
| Georgia | 1998           | FemalePregAge45to49 | 113        |
| Georgia | 1998           | MaleAge0to4         | 161494     |
| Georgia | 1998           | MaleAge10to14       | 207609     |
| Georgia | 1998           | MaleAge15to19       | 186245     |
| Georgia | 1998           | MaleAge20to24       | 175679     |
| Georgia | 1998           | MaleAge25to29       | 165564     |
| Georgia | 1998           | MaleAge30to34       | 169022     |
| Georgia | 1998           | MaleAge35to39       | 184297     |
| Georgia | 1998           | MaleAge40to44       | 164669     |
| Georgia | 1998           | MaleAge45to49       | 135704     |
| Georgia | 1998           | MaleAge50to54       | 101410     |
| Georgia | 1998           | MaleAge55to59       | 104790     |
| Georgia | 1998           | MaleAge5to9         | 201806     |
| Georgia | 1998           | MaleAge60to64       | 125524     |
| Georgia | 1998           | MaleAge65to69       | 95790      |
| Georgia | 1998           | MaleAge70to74       | 74060      |
| Georgia | 1998           | MaleAge75to79       | 26279      |
| Georgia | 1998           | MaleAge80to84       | 12345      |
| Georgia | 1998           | MaleAge85to89       | 8876       |
| Georgia | 1998           | MaleAge90to94       | 2445       |
| Georgia | 1998           | MaleAge95to99       | 607        |
| Georgia | 1998           | MaleAgeAbov e100    | 40         |
| Georgia | 1999           | FemaleAge0to4       | 141758     |

Dietary calcium and zinc deficiency risks are decreasing but remain prevalent

| Country | Reference year | Age/gender group    | Population |
|---------|----------------|---------------------|------------|
| Georgia | 1999           | FemaleAge10to14     | 201208     |
| Georgia | 1999           | FemaleAge15to19     | 166117     |
| Georgia | 1999           | FemaleAge20to24     | 137949     |
| Georgia | 1999           | FemaleAge25to29     | 141418     |
| Georgia | 1999           | FemaleAge30to34     | 154536     |
| Georgia | 1999           | FemaleAge35to39     | 198866     |
| Georgia | 1999           | FemaleAge40to44     | 181470     |
| Georgia | 1999           | FemaleAge45to49     | 152948     |
| Georgia | 1999           | FemaleAge50to54     | 127361     |
| Georgia | 1999           | FemaleAge55to59     | 110230     |
| Georgia | 1999           | FemaleAge5to9       | 184473     |
| Georgia | 1999           | FemaleAge60to64     | 156734     |
| Georgia | 1999           | FemaleAge65to69     | 117674     |
| Georgia | 1999           | FemaleAge70to74     | 115977     |
| Georgia | 1999           | FemaleAge75to79     | 64627      |
| Georgia | 1999           | FemaleAge80to84     | 33115      |
| Georgia | 1999           | FemaleAge85to89     | 23568      |
| Georgia | 1999           | FemaleAge90to94     | 6815       |
| Georgia | 1999           | FemaleAge95to99     | 2265       |
| Georgia | 1999           | FemaleAgeAbove100   | 153        |
| Georgia | 1999           | FemaleLactAge15to19 | 11409      |
| Georgia | 1999           | FemaleLactAge20to24 | 22325      |
| Georgia | 1999           | FemaleLactAge25to29 | 13852      |
| Georgia | 1999           | FemaleLactAge30to34 | 9384       |
| Georgia | 1999           | FemaleLactAge35to39 | 4315       |
| Georgia | 1999           | FemaleLactAge40to44 | 938        |
| Georgia | 1999           | FemaleLactAge45to49 | 150        |
| Georgia | 1999           | FemalePregAge15to19 | 8557       |
| Georgia | 1999           | FemalePregAge20to24 | 16744      |
| Georgia | 1999           | FemalePregAge25to29 | 10389      |
| Georgia | 1999           | FemalePregAge30to34 | 7038       |
| Georgia | 1999           | FemalePregAge35to39 | 3236       |
| Georgia | 1999           | FemalePregAge40to44 | 703        |
| Georgia | 1999           | FemalePregAge45to49 | 113        |
| Georgia | 1999           | MaleAge0to4         | 151953     |
| Georgia | 1999           | MaleAge10to14       | 209090     |
| Georgia | 1999           | MaleAge15to19       | 186360     |
| Georgia | 1999           | MaleAge20to24       | 173162     |
| Georgia | 1999           | MaleAge25to29       | 165130     |
| Georgia | 1999           | MaleAge30to34       | 160212     |
| Georgia | 1999           | MaleAge35to39       | 181695     |
| Georgia | 1999           | MaleAge40to44       | 167110     |
| Georgia | 1999           | MaleAge45to49       | 138174     |
| Georgia | 1999           | MaleAge50to54       | 107947     |
| Georgia | 1999           | MaleAge55to59       | 91238      |
| Georgia | 1999           | MaleAge5to9         | 191237     |
| Georgia | 1999           | MaleAge60to64       | 128436     |
| Georgia | 1999           | MaleAge65to69       | 91722      |
| Georgia | 1999           | MaleAge70to74       | 79391      |
| Georgia | 1999           | MaleAge75to79       | 29441      |
| Georgia | 1999           | MaleAge80to84       | 11177      |
| Georgia | 1999           | MaleAge85to89       | 8479       |
| Georgia | 1999           | MaleAge90to94       | 2305       |
| Georgia | 1999           | MaleAge95to99       | 601        |
| Georgia | 1999           | MaleAgeAbove100     | 37         |
| Germany | 1992           | FemaleAge0to4       | 2114876    |
| Germany | 1992           | FemaleAge10to14     | 2089231    |
| Germany | 1992           | FemaleAge15to19     | 2036036    |
| Germany | 1992           | FemaleAge20to24     | 2582841    |
| Germany | 1992           | FemaleAge25to29     | 2954142    |
| Germany | 1992           | FemaleAge30to34     | 2828258    |
| Germany | 1992           | FemaleAge35to39     | 2859681    |
| Germany | 1992           | FemaleAge40to44     | 2480304    |
| Germany | 1992           | FemaleAge45to49     | 2496481    |
| Germany | 1992           | FemaleAge50to54     | 3037072    |
| Germany | 1992           | FemaleAge55to59     | 2605982    |
| Germany | 1992           | FemaleAge5to9       | 2258805    |
| Germany | 1992           | FemaleAge60to64     | 2209288    |
| Germany | 1992           | FemaleAge65to69     | 2529041    |
| Germany | 1992           | FemaleAge70to74     | 1711011    |
| Germany | 1992           | FemaleAge75to79     | 1529027    |
| Germany | 1992           | FemaleAge80to84     | 1430610    |
| Germany | 1992           | FemaleAge85to89     | 702875     |
| Germany | 1992           | FemaleAge90to94     | 223902     |
| Germany | 1992           | FemaleAge95to99     | 35891      |
| Germany | 1992           | FemaleAgeAbove100   | 2554       |
| Germany | 1992           | FemaleLactAge15to19 | 34397      |
| Germany | 1992           | FemaleLactAge20to24 | 175103     |
| Germany | 1992           | FemaleLactAge25to29 | 315074     |
| Germany | 1992           | FemaleLactAge30to34 | 208236     |
| Germany | 1992           | FemaleLactAge35to39 | 63924      |
| Germany | 1992           | FemaleLactAge40to44 | 8942       |
| Germany | 1992           | FemaleLactAge45to49 | 402        |
| Germany | 1992           | FemalePregAge15to19 | 25798      |
| Germany | 1992           | FemalePregAge20to24 | 131327     |
| Germany | 1992           | FemalePregAge25to29 | 236305     |
| Germany | 1992           | FemalePregAge30to34 | 156177     |
| Germany | 1992           | FemalePregAge35to39 | 47943      |



Dietary calcium and zinc deficiency risks are decreasing but remain prevalent

| Country | Reference year | Age/gender group    | Population |
|---------|----------------|---------------------|------------|
| Germany | 1992           | FemalePregAge40to44 | 6707       |
| Germany | 1992           | FemalePregAge45to49 | 302        |
| Germany | 1992           | MaleAge0to4         | 2236553    |
| Germany | 1992           | MaleAge10to14       | 2197723    |
| Germany | 1992           | MaleAge15to19       | 2213447    |
| Germany | 1992           | MaleAge20to24       | 3085859    |
| Germany | 1992           | MaleAge25to29       | 3751829    |
| Germany | 1992           | MaleAge30to34       | 3397318    |
| Germany | 1992           | MaleAge35to39       | 2993513    |
| Germany | 1992           | MaleAge40to44       | 2535527    |
| Germany | 1992           | MaleAge45to49       | 2631416    |
| Germany | 1992           | MaleAge50to54       | 3130513    |
| Germany | 1992           | MaleAge55to59       | 2630314    |
| Germany | 1992           | MaleAge5to9         | 2371804    |
| Germany | 1992           | MaleAge60to64       | 2050879    |
| Germany | 1992           | MaleAge65to69       | 1694576    |
| Germany | 1992           | MaleAge70to74       | 926818     |
| Germany | 1992           | MaleAge75to79       | 724793     |
| Germany | 1992           | MaleAge80to84       | 597407     |
| Germany | 1992           | MaleAge85to89       | 251348     |
| Germany | 1992           | MaleAge90to94       | 66893      |
| Germany | 1992           | MaleAge95to99       | 7502       |
| Germany | 1992           | MaleAgeAbov e100    | 584        |
| Germany | 1993           | FemaleAge0to4       | 2098456    |
| Germany | 1993           | FemaleAge10to14     | 2159752    |
| Germany | 1993           | FemaleAge15to19     | 2032913    |
| Germany | 1993           | FemaleAge20to24     | 2402343    |
| Germany | 1993           | FemaleAge25to29     | 2946079    |
| Germany | 1993           | FemaleAge30to34     | 2977064    |
| Germany | 1993           | FemaleAge35to39     | 2867686    |
| Germany | 1993           | FemaleAge40to44     | 2651601    |
| Germany | 1993           | FemaleAge45to49     | 2391877    |
| Germany | 1993           | FemaleAge50to54     | 2948772    |
| Germany | 1993           | FemaleAge55to59     | 2798441    |
| Germany | 1993           | FemaleAge5to9       | 2282353    |
| Germany | 1993           | FemaleAge60to64     | 2189895    |
| Germany | 1993           | FemaleAge65to69     | 2418512    |
| Germany | 1993           | FemaleAge70to74     | 1989883    |
| Germany | 1993           | FemaleAge75to79     | 1316715    |
| Germany | 1993           | FemaleAge80to84     | 1471042    |
| Germany | 1993           | FemaleAge85to89     | 730091     |
| Germany | 1993           | FemaleAge90to94     | 235224     |
| Germany | 1993           | FemaleAge95to99     | 40811      |
| Germany | 1993           | FemaleAgeAbov e100  | 2773       |
| Germany | 1993           | FemaleLactAge15to19 | 34397      |
| Germany | 1993           | FemaleLactAge20to24 | 175103     |
| Germany | 1993           | FemaleLactAge25to29 | 315074     |
| Germany | 1993           | FemaleLactAge30to34 | 208236     |
| Germany | 1993           | FemaleLactAge35to39 | 63924      |
| Germany | 1993           | FemaleLactAge40to44 | 8942       |
| Germany | 1993           | FemaleLactAge45to49 | 402        |
| Germany | 1993           | FemalePregAge15to19 | 25798      |
| Germany | 1993           | FemalePregAge20to24 | 131327     |
| Germany | 1993           | FemalePregAge25to29 | 236305     |
| Germany | 1993           | FemalePregAge30to34 | 156177     |
| Germany | 1993           | FemalePregAge35to39 | 47943      |
| Germany | 1993           | FemalePregAge40to44 | 6707       |
| Germany | 1993           | FemalePregAge45to49 | 302        |
| Germany | 1993           | MaleAge0to4         | 2217667    |
| Germany | 1993           | MaleAge10to14       | 2269533    |
| Germany | 1993           | MaleAge15to19       | 2210103    |
| Germany | 1993           | MaleAge20to24       | 2893694    |
| Germany | 1993           | MaleAge25to29       | 3764573    |
| Germany | 1993           | MaleAge30to34       | 3567330    |
| Germany | 1993           | MaleAge35to39       | 3052846    |
| Germany | 1993           | MaleAge40to44       | 2667684    |
| Germany | 1993           | MaleAge45to49       | 2517196    |
| Germany | 1993           | MaleAge50to54       | 3042892    |
| Germany | 1993           | MaleAge55to59       | 2816946    |
| Germany | 1993           | MaleAge5to9         | 2400376    |
| Germany | 1993           | MaleAge60to64       | 2060529    |
| Germany | 1993           | MaleAge65to69       | 1743444    |
| Germany | 1993           | MaleAge70to74       | 1067589    |
| Germany | 1993           | MaleAge75to79       | 621956     |
| Germany | 1993           | MaleAge80to84       | 612169     |
| Germany | 1993           | MaleAge85to89       | 255161     |
| Germany | 1993           | MaleAge90to94       | 71380      |
| Germany | 1993           | MaleAge95to99       | 8593       |
| Germany | 1993           | MaleAgeAbov e100    | 593        |
| Germany | 1994           | FemaleAge0to4       | 2082436    |
| Germany | 1994           | FemaleAge10to14     | 2229724    |
| Germany | 1994           | FemaleAge15to19     | 2043644    |
| Germany | 1994           | FemaleAge20to24     | 2242117    |
| Germany | 1994           | FemaleAge25to29     | 2897645    |
| Germany | 1994           | FemaleAge30to34     | 3105977    |
| Germany | 1994           | FemaleAge35to39     | 2892771    |
| Germany | 1994           | FemaleAge40to44     | 2810292    |
| Germany | 1994           | FemaleAge45to49     | 2330594    |

Dietary calcium and zinc deficiency risks are decreasing but remain prevalent

| Country | Reference year | Age/gender group    | Population |
|---------|----------------|---------------------|------------|
| Germany | 1994           | FemaleAge50to54     | 2838682    |
| Germany | 1994           | FemaleAge55to59     | 2954858    |
| Germany | 1994           | FemaleAge5to9       | 2290420    |
| Germany | 1994           | FemaleAge60to64     | 2210281    |
| Germany | 1994           | FemaleAge65to69     | 2308553    |
| Germany | 1994           | FemaleAge70to74     | 2220470    |
| Germany | 1994           | FemaleAge75to79     | 1189629    |
| Germany | 1994           | FemaleAge80to84     | 1471903    |
| Germany | 1994           | FemaleAge85to89     | 751192     |
| Germany | 1994           | FemaleAge90to94     | 239667     |
| Germany | 1994           | FemaleAge95to99     | 43672      |
| Germany | 1994           | FemaleAgeAbove100   | 3013       |
| Germany | 1994           | FemaleLactAge15to19 | 34397      |
| Germany | 1994           | FemaleLactAge20to24 | 175103     |
| Germany | 1994           | FemaleLactAge25to29 | 315074     |
| Germany | 1994           | FemaleLactAge30to34 | 208236     |
| Germany | 1994           | FemaleLactAge35to39 | 63924      |
| Germany | 1994           | FemaleLactAge40to44 | 8942       |
| Germany | 1994           | FemaleLactAge45to49 | 402        |
| Germany | 1994           | FemalePregAge15to19 | 25798      |
| Germany | 1994           | FemalePregAge20to24 | 131327     |
| Germany | 1994           | FemalePregAge25to29 | 236305     |
| Germany | 1994           | FemalePregAge30to34 | 156177     |
| Germany | 1994           | FemalePregAge35to39 | 47943      |
| Germany | 1994           | FemalePregAge40to44 | 6707       |
| Germany | 1994           | FemalePregAge45to49 | 302        |
| Germany | 1994           | MaleAge0to4         | 2197935    |
| Germany | 1994           | MaleAge10to14       | 2339870    |
| Germany | 1994           | MaleAge15to19       | 2221710    |
| Germany | 1994           | MaleAge20to24       | 2714008    |
| Germany | 1994           | MaleAge25to29       | 3733495    |
| Germany | 1994           | MaleAge30to34       | 3715226    |
| Germany | 1994           | MaleAge35to39       | 3128427    |
| Germany | 1994           | MaleAge40to44       | 2800723    |
| Germany | 1994           | MaleAge45to49       | 2440044    |
| Germany | 1994           | MaleAge50to54       | 2932370    |
| Germany | 1994           | MaleAge55to59       | 2965299    |
| Germany | 1994           | MaleAge5to9         | 2412353    |
| Germany | 1994           | MaleAge60to64       | 2098972    |
| Germany | 1994           | MaleAge65to69       | 1782846    |
| Germany | 1994           | MaleAge70to74       | 1196605    |
| Germany | 1994           | MaleAge75to79       | 565100     |
| Germany | 1994           | MaleAge80to84       | 601721     |
| Germany | 1994           | MaleAge85to89       | 254384     |
| Germany | 1994           | MaleAge90to94       | 71056      |
| Germany | 1994           | MaleAge95to99       | 9505       |
| Germany | 1994           | MaleAgeAbove100     | 605        |
| Germany | 1995           | FemaleAge0to4       | 2059870    |
| Germany | 1995           | FemaleAge10to14     | 2286910    |
| Germany | 1995           | FemaleAge15to19     | 2061148    |
| Germany | 1995           | FemaleAge20to24     | 2120254    |
| Germany | 1995           | FemaleAge25to29     | 2808147    |
| Germany | 1995           | FemaleAge30to34     | 3192516    |
| Germany | 1995           | FemaleAge35to39     | 2956672    |
| Germany | 1995           | FemaleAge40to44     | 2922915    |
| Germany | 1995           | FemaleAge45to49     | 2329487    |
| Germany | 1995           | FemaleAge50to54     | 2726776    |
| Germany | 1995           | FemaleAge55to59     | 3038260    |
| Germany | 1995           | FemaleAge5to9       | 2291357    |
| Germany | 1995           | FemaleAge60to64     | 2276359    |
| Germany | 1995           | FemaleAge65to69     | 2231108    |
| Germany | 1995           | FemaleAge70to74     | 2345040    |
| Germany | 1995           | FemaleAge75to79     | 1190437    |
| Germany | 1995           | FemaleAge80to84     | 1417213    |
| Germany | 1995           | FemaleAge85to89     | 771196     |
| Germany | 1995           | FemaleAge90to94     | 239072     |
| Germany | 1995           | FemaleAge95to99     | 39926      |
| Germany | 1995           | FemaleAgeAbove100   | 3280       |
| Germany | 1995           | FemaleLactAge15to19 | 34397      |
| Germany | 1995           | FemaleLactAge20to24 | 175103     |
| Germany | 1995           | FemaleLactAge25to29 | 315074     |
| Germany | 1995           | FemaleLactAge30to34 | 208236     |
| Germany | 1995           | FemaleLactAge35to39 | 63924      |
| Germany | 1995           | FemaleLactAge40to44 | 8942       |
| Germany | 1995           | FemaleLactAge45to49 | 402        |
| Germany | 1995           | FemalePregAge15to19 | 25798      |
| Germany | 1995           | FemalePregAge20to24 | 131327     |
| Germany | 1995           | FemalePregAge25to29 | 236305     |
| Germany | 1995           | FemalePregAge30to34 | 156177     |
| Germany | 1995           | FemalePregAge35to39 | 47943      |
| Germany | 1995           | FemalePregAge40to44 | 6707       |
| Germany | 1995           | FemalePregAge45to49 | 302        |
| Germany | 1995           | MaleAge0to4         | 2171422    |
| Germany | 1995           | MaleAge10to14       | 2397068    |
| Germany | 1995           | MaleAge15to19       | 2238302    |
| Germany | 1995           | MaleAge20to24       | 2571616    |
| Germany | 1995           | MaleAge25to29       | 3651323    |
| Germany | 1995           | MaleAge30to34       | 3821589    |

Dietary calcium and zinc deficiency risks are decreasing but remain prevalent

| Country | Reference year | Age/gender group    | Population |
|---------|----------------|---------------------|------------|
| Germany | 1995           | MaleAge35to39       | 3233069    |
| Germany | 1995           | MaleAge40to44       | 2908648    |
| Germany | 1995           | MaleAge45to49       | 2415339    |
| Germany | 1995           | MaleAge50to54       | 2816678    |
| Germany | 1995           | MaleAge55to59       | 3041701    |
| Germany | 1995           | MaleAge5to9         | 2414863    |
| Germany | 1995           | MaleAge60to64       | 2179927    |
| Germany | 1995           | MaleAge65to69       | 1815365    |
| Germany | 1995           | MaleAge70to74       | 1294242    |
| Germany | 1995           | MaleAge75to79       | 570575     |
| Germany | 1995           | MaleAge80to84       | 562167     |
| Germany | 1995           | MaleAge85to89       | 251082     |
| Germany | 1995           | MaleAge90to94       | 65412      |
| Germany | 1995           | MaleAge95to99       | 8180       |
| Germany | 1995           | MaleAgeAbov e100    | 622        |
| Germany | 1996           | FemaleAge0to4       | 2010340    |
| Germany | 1996           | FemaleAge10to14     | 2324315    |
| Germany | 1996           | FemaleAge15to19     | 2111371    |
| Germany | 1996           | FemaleAge20to24     | 2082827    |
| Germany | 1996           | FemaleAge25to29     | 2741735    |
| Germany | 1996           | FemaleAge30to34     | 3149029    |
| Germany | 1996           | FemaleAge35to39     | 3003111    |
| Germany | 1996           | FemaleAge40to44     | 2986685    |
| Germany | 1996           | FemaleAge45to49     | 2390258    |
| Germany | 1996           | FemaleAge50to54     | 2612528    |
| Germany | 1996           | FemaleAge55to59     | 3057412    |
| Germany | 1996           | FemaleAge5to9       | 2275268    |
| Germany | 1996           | FemaleAge60to64     | 2388273    |
| Germany | 1996           | FemaleAge65to69     | 2169781    |
| Germany | 1996           | FemaleAge70to74     | 2373140    |
| Germany | 1996           | FemaleAge75to79     | 1288876    |
| Germany | 1996           | FemaleAge80to84     | 1301130    |
| Germany | 1996           | FemaleAge85to89     | 820664     |
| Germany | 1996           | FemaleAge90to94     | 274111     |
| Germany | 1996           | FemaleAge95to99     | 44471      |
| Germany | 1996           | FemaleAgeAbov e100  | 3573       |
| Germany | 1996           | FemaleLactAge15to19 | 29287      |
| Germany | 1996           | FemaleLactAge20to24 | 138368     |
| Germany | 1996           | FemaleLactAge25to29 | 270744     |
| Germany | 1996           | FemaleLactAge30to34 | 256525     |
| Germany | 1996           | FemaleLactAge35to39 | 87833      |
| Germany | 1996           | FemaleLactAge40to44 | 12476      |
| Germany | 1996           | FemaleLactAge45to49 | 411        |
| Germany | 1996           | FemalePregAge15to19 | 21965      |
| Germany | 1996           | FemalePregAge20to24 | 103776     |
| Germany | 1996           | FemalePregAge25to29 | 203058     |
| Germany | 1996           | FemalePregAge30to34 | 192394     |
| Germany | 1996           | FemalePregAge35to39 | 65874      |
| Germany | 1996           | FemalePregAge40to44 | 9357       |
| Germany | 1996           | FemalePregAge45to49 | 308        |
| Germany | 1996           | MaleAge0to4         | 2117939    |
| Germany | 1996           | MaleAge10to14       | 2439810    |
| Germany | 1996           | MaleAge15to19       | 2273930    |
| Germany | 1996           | MaleAge20to24       | 2452155    |
| Germany | 1996           | MaleAge25to29       | 3482914    |
| Germany | 1996           | MaleAge30to34       | 3869151    |
| Germany | 1996           | MaleAge35to39       | 3346354    |
| Germany | 1996           | MaleAge40to44       | 2988902    |
| Germany | 1996           | MaleAge45to49       | 2446275    |
| Germany | 1996           | MaleAge50to54       | 2700874    |
| Germany | 1996           | MaleAge55to59       | 3059478    |
| Germany | 1996           | MaleAge5to9         | 2401990    |
| Germany | 1996           | MaleAge60to64       | 2301196    |
| Germany | 1996           | MaleAge65to69       | 1836415    |
| Germany | 1996           | MaleAge70to74       | 1369468    |
| Germany | 1996           | MaleAge75to79       | 624063     |
| Germany | 1996           | MaleAge80to84       | 515888     |
| Germany | 1996           | MaleAge85to89       | 274382     |
| Germany | 1996           | MaleAge90to94       | 76405      |
| Germany | 1996           | MaleAge95to99       | 9422       |
| Germany | 1996           | MaleAgeAbov e100    | 645        |
| Germany | 1997           | FemaleAge0to4       | 1986045    |
| Germany | 1997           | FemaleAge10to14     | 2342653    |
| Germany | 1997           | FemaleAge15to19     | 2163785    |
| Germany | 1997           | FemaleAge20to24     | 2021868    |
| Germany | 1997           | FemaleAge25to29     | 2554585    |
| Germany | 1997           | FemaleAge30to34     | 3150772    |
| Germany | 1997           | FemaleAge35to39     | 3117709    |
| Germany | 1997           | FemaleAge40to44     | 3004875    |
| Germany | 1997           | FemaleAge45to49     | 2516631    |
| Germany | 1997           | FemaleAge50to54     | 2487486    |
| Germany | 1997           | FemaleAge55to59     | 3006995    |
| Germany | 1997           | FemaleAge5to9       | 2239881    |
| Germany | 1997           | FemaleAge60to64     | 2552361    |
| Germany | 1997           | FemaleAge65to69     | 2119703    |
| Germany | 1997           | FemaleAge70to74     | 2319354    |
| Germany | 1997           | FemaleAge75to79     | 1490155    |
| Germany | 1997           | FemaleAge80to84     | 1130836    |

Dietary calcium and zinc deficiency risks are decreasing but remain prevalent

| Country | Reference year | Age/gender group    | Population |
|---------|----------------|---------------------|------------|
| Germany | 1997           | FemaleAge85to89     | 873662     |
| Germany | 1997           | FemaleAge90to94     | 298544     |
| Germany | 1997           | FemaleAge95to99     | 50213      |
| Germany | 1997           | FemaleAgeAbove100   | 3893       |
| Germany | 1997           | FemaleLactAge15to19 | 29287      |
| Germany | 1997           | FemaleLactAge20to24 | 138368     |
| Germany | 1997           | FemaleLactAge25to29 | 270744     |
| Germany | 1997           | FemaleLactAge30to34 | 256525     |
| Germany | 1997           | FemaleLactAge35to39 | 87833      |
| Germany | 1997           | FemaleLactAge40to44 | 12476      |
| Germany | 1997           | FemaleLactAge45to49 | 411        |
| Germany | 1997           | FemalePregAge15to19 | 21965      |
| Germany | 1997           | FemalePregAge20to24 | 103776     |
| Germany | 1997           | FemalePregAge25to29 | 203058     |
| Germany | 1997           | FemalePregAge30to34 | 192394     |
| Germany | 1997           | FemalePregAge35to39 | 65874      |
| Germany | 1997           | FemalePregAge40to44 | 9357       |
| Germany | 1997           | FemalePregAge45to49 | 308        |
| Germany | 1997           | MaleAge0to4         | 2092646    |
| Germany | 1997           | MaleAge10to14       | 2463133    |
| Germany | 1997           | MaleAge15to19       | 2321684    |
| Germany | 1997           | MaleAge20to24       | 2378345    |
| Germany | 1997           | MaleAge25to29       | 3260458    |
| Germany | 1997           | MaleAge30to34       | 3874586    |
| Germany | 1997           | MaleAge35to39       | 3474214    |
| Germany | 1997           | MaleAge40to44       | 3035798    |
| Germany | 1997           | MaleAge45to49       | 2531362    |
| Germany | 1997           | MaleAge50to54       | 2572378    |
| Germany | 1997           | MaleAge55to59       | 3011619    |
| Germany | 1997           | MaleAge5to9         | 2365770    |
| Germany | 1997           | MaleAge60to64       | 2463936    |
| Germany | 1997           | MaleAge65to69       | 1838300    |
| Germany | 1997           | MaleAge70to74       | 1426724    |
| Germany | 1997           | MaleAge75to79       | 715765     |
| Germany | 1997           | MaleAge80to84       | 447301     |
| Germany | 1997           | MaleAge85to89       | 297639     |
| Germany | 1997           | MaleAge90to94       | 82606      |
| Germany | 1997           | MaleAge95to99       | 11377      |
| Germany | 1997           | MaleAgeAbove100     | 674        |
| Germany | 1998           | FemaleAge0to4       | 1974433    |
| Germany | 1998           | FemaleAge10to14     | 2347123    |
| Germany | 1998           | FemaleAge15to19     | 2216735    |
| Germany | 1998           | FemaleAge20to24     | 1998876    |
| Germany | 1998           | FemaleAge25to29     | 2351817    |
| Germany | 1998           | FemaleAge30to34     | 3112783    |
| Germany | 1998           | FemaleAge35to39     | 3241494    |
| Germany | 1998           | FemaleAge40to44     | 2996816    |
| Germany | 1998           | FemaleAge45to49     | 2678615    |
| Germany | 1998           | FemaleAge50to54     | 2375850    |
| Germany | 1998           | FemaleAge55to59     | 2906232    |
| Germany | 1998           | FemaleAge5to9       | 2188654    |
| Germany | 1998           | FemaleAge60to64     | 2734416    |
| Germany | 1998           | FemaleAge65to69     | 2092804    |
| Germany | 1998           | FemaleAge70to74     | 2220009    |
| Germany | 1998           | FemaleAge75to79     | 1729669    |
| Germany | 1998           | FemaleAge80to84     | 967074     |
| Germany | 1998           | FemaleAge85to89     | 911118     |
| Germany | 1998           | FemaleAge90to94     | 311491     |
| Germany | 1998           | FemaleAge95to99     | 56302      |
| Germany | 1998           | FemaleAgeAbove100   | 4245       |
| Germany | 1998           | FemaleLactAge15to19 | 29287      |
| Germany | 1998           | FemaleLactAge20to24 | 138368     |
| Germany | 1998           | FemaleLactAge25to29 | 270744     |
| Germany | 1998           | FemaleLactAge30to34 | 256525     |
| Germany | 1998           | FemaleLactAge35to39 | 87833      |
| Germany | 1998           | FemaleLactAge40to44 | 12476      |
| Germany | 1998           | FemaleLactAge45to49 | 411        |
| Germany | 1998           | FemalePregAge15to19 | 21965      |
| Germany | 1998           | FemalePregAge20to24 | 103776     |
| Germany | 1998           | FemalePregAge25to29 | 203058     |
| Germany | 1998           | FemalePregAge30to34 | 192394     |
| Germany | 1998           | FemalePregAge35to39 | 65874      |
| Germany | 1998           | FemalePregAge40to44 | 9357       |
| Germany | 1998           | FemalePregAge45to49 | 308        |
| Germany | 1998           | MaleAge0to4         | 2081835    |
| Germany | 1998           | MaleAge10to14       | 2471215    |
| Germany | 1998           | MaleAge15to19       | 2373419    |
| Germany | 1998           | MaleAge20to24       | 2344850    |
| Germany | 1998           | MaleAge25to29       | 3018563    |
| Germany | 1998           | MaleAge30to34       | 3835903    |
| Germany | 1998           | MaleAge35to39       | 3602451    |
| Germany | 1998           | MaleAge40to44       | 3067506    |
| Germany | 1998           | MaleAge45to49       | 2649512    |
| Germany | 1998           | MaleAge50to54       | 2453476    |
| Germany | 1998           | MaleAge55to59       | 2916915    |
| Germany | 1998           | MaleAge5to9         | 2310535    |
| Germany | 1998           | MaleAge60to64       | 2637807    |
| Germany | 1998           | MaleAge65to69       | 1840868    |

Dietary calcium and zinc deficiency risks are decreasing but remain prevalent

| Country | Reference year | Age/gender group    | Population |
|---------|----------------|---------------------|------------|
| Germany | 1998           | MaleAge70to74       | 1471534    |
| Germany | 1998           | MaleAge75to79       | 823037     |
| Germany | 1998           | MaleAge80to84       | 383397     |
| Germany | 1998           | MaleAge85to89       | 310634     |
| Germany | 1998           | MaleAge90to94       | 84277      |
| Germany | 1998           | MaleAge95to99       | 13340      |
| Germany | 1998           | MaleAgeAbov e100    | 710        |
| Germany | 1999           | FemaleAge0to4       | 1962078    |
| Germany | 1999           | FemaleAge10to14     | 2341448    |
| Germany | 1999           | FemaleAge15to19     | 2261119    |
| Germany | 1999           | FemaleAge20to24     | 2002157    |
| Germany | 1999           | FemaleAge25to29     | 2171712    |
| Germany | 1999           | FemaleAge30to34     | 3037150    |
| Germany | 1999           | FemaleAge35to39     | 3346298    |
| Germany | 1999           | FemaleAge40to44     | 3005677    |
| Germany | 1999           | FemaleAge45to49     | 2827647    |
| Germany | 1999           | FemaleAge50to54     | 2310144    |
| Germany | 1999           | FemaleAge55to59     | 2788010    |
| Germany | 1999           | FemaleAge5to9       | 2130977    |
| Germany | 1999           | FemaleAge60to64     | 2881473    |
| Germany | 1999           | FemaleAge65to69     | 2106966    |
| Germany | 1999           | FemaleAge70to74     | 2125626    |
| Germany | 1999           | FemaleAge75to79     | 1922885    |
| Germany | 1999           | FemaleAge80to84     | 883353     |
| Germany | 1999           | FemaleAge85to89     | 907312     |
| Germany | 1999           | FemaleAge90to94     | 317020     |
| Germany | 1999           | FemaleAge95to99     | 60765      |
| Germany | 1999           | FemaleAgeAbov e100  | 4634       |
| Germany | 1999           | FemaleLactAge15to19 | 29287      |
| Germany | 1999           | FemaleLactAge20to24 | 138368     |
| Germany | 1999           | FemaleLactAge25to29 | 270744     |
| Germany | 1999           | FemaleLactAge30to34 | 256525     |
| Germany | 1999           | FemaleLactAge35to39 | 87833      |
| Germany | 1999           | FemaleLactAge40to44 | 12476      |
| Germany | 1999           | FemaleLactAge45to49 | 411        |
| Germany | 1999           | FemalePregAge15to19 | 21965      |
| Germany | 1999           | FemalePregAge20to24 | 103776     |
| Germany | 1999           | FemalePregAge25to29 | 203058     |
| Germany | 1999           | FemalePregAge30to34 | 192394     |
| Germany | 1999           | FemalePregAge35to39 | 65874      |
| Germany | 1999           | FemalePregAge40to44 | 9357       |
| Germany | 1999           | FemalePregAge45to49 | 308        |
| Germany | 1999           | MaleAge0to4         | 2069957    |
| Germany | 1999           | MaleAge10to14       | 2467533    |
| Germany | 1999           | MaleAge15to19       | 2420711    |
| Germany | 1999           | MaleAge20to24       | 2338122    |
| Germany | 1999           | MaleAge25to29       | 2803827    |
| Germany | 1999           | MaleAge30to34       | 3752557    |
| Germany | 1999           | MaleAge35to39       | 3709055    |
| Germany | 1999           | MaleAge40to44       | 3114734    |
| Germany | 1999           | MaleAge45to49       | 2766283    |
| Germany | 1999           | MaleAge50to54       | 2373815    |
| Germany | 1999           | MaleAge55to59       | 2805445    |
| Germany | 1999           | MaleAge5to9         | 2247565    |
| Germany | 1999           | MaleAge60to64       | 2776538    |
| Germany | 1999           | MaleAge65to69       | 1874270    |
| Germany | 1999           | MaleAge70to74       | 1509341    |
| Germany | 1999           | MaleAge75to79       | 920193     |
| Germany | 1999           | MaleAge80to84       | 353555     |
| Germany | 1999           | MaleAge85to89       | 302567     |
| Germany | 1999           | MaleAge90to94       | 83056      |
| Germany | 1999           | MaleAge95to99       | 14174      |
| Germany | 1999           | MaleAgeAbov e100    | 756        |
| Ghana   | 1992           | FemaleAge0to4       | 1253556    |
| Ghana   | 1992           | FemaleAge10to14     | 950896     |
| Ghana   | 1992           | FemaleAge15to19     | 675231     |
| Ghana   | 1992           | FemaleAge20to24     | 439377     |
| Ghana   | 1992           | FemaleAge25to29     | 337994     |
| Ghana   | 1992           | FemaleAge30to34     | 289883     |
| Ghana   | 1992           | FemaleAge35to39     | 257271     |
| Ghana   | 1992           | FemaleAge40to44     | 263314     |
| Ghana   | 1992           | FemaleAge45to49     | 259230     |
| Ghana   | 1992           | FemaleAge50to54     | 220595     |
| Ghana   | 1992           | FemaleAge55to59     | 178453     |
| Ghana   | 1992           | FemaleAge5to9       | 1091306    |
| Ghana   | 1992           | FemaleAge60to64     | 140129     |
| Ghana   | 1992           | FemaleAge65to69     | 103939     |
| Ghana   | 1992           | FemaleAge70to74     | 68937      |
| Ghana   | 1992           | FemaleAge75to79     | 38219      |
| Ghana   | 1992           | FemaleAge80to84     | 16162      |
| Ghana   | 1992           | FemaleAge85to89     | 4571       |
| Ghana   | 1992           | FemaleAge90to94     | 744        |
| Ghana   | 1992           | FemaleAge95to99     | 60         |
| Ghana   | 1992           | FemaleAgeAbov e100  | 1          |
| Ghana   | 1992           | FemaleLactAge15to19 | 87333      |
| Ghana   | 1992           | FemaleLactAge20to24 | 154027     |
| Ghana   | 1992           | FemaleLactAge25to29 | 141980     |
| Ghana   | 1992           | FemaleLactAge30to34 | 103270     |

Dietary calcium and zinc deficiency risks are decreasing but remain prevalent

| Country | Reference year | Age/gender group    | Population |
|---------|----------------|---------------------|------------|
| Ghana   | 1992           | FemaleLactAge35to39 | 63287      |
| Ghana   | 1992           | FemaleLactAge40to44 | 32825      |
| Ghana   | 1992           | FemaleLactAge45to49 | 9116       |
| Ghana   | 1992           | FemalePregAge15to19 | 65499      |
| Ghana   | 1992           | FemalePregAge20to24 | 115520     |
| Ghana   | 1992           | FemalePregAge25to29 | 106485     |
| Ghana   | 1992           | FemalePregAge30to34 | 77453      |
| Ghana   | 1992           | FemalePregAge35to39 | 47465      |
| Ghana   | 1992           | FemalePregAge40to44 | 24618      |
| Ghana   | 1992           | FemalePregAge45to49 | 6837       |
| Ghana   | 1992           | MaleAge0to4         | 1309758    |
| Ghana   | 1992           | MaleAge10to14       | 984632     |
| Ghana   | 1992           | MaleAge15to19       | 851964     |
| Ghana   | 1992           | MaleAge20to24       | 730723     |
| Ghana   | 1992           | MaleAge25to29       | 608020     |
| Ghana   | 1992           | MaleAge30to34       | 489095     |
| Ghana   | 1992           | MaleAge35to39       | 381877     |
| Ghana   | 1992           | MaleAge40to44       | 334418     |
| Ghana   | 1992           | MaleAge45to49       | 284090     |
| Ghana   | 1992           | MaleAge50to54       | 221487     |
| Ghana   | 1992           | MaleAge55to59       | 173592     |
| Ghana   | 1992           | MaleAge5to9         | 1134434    |
| Ghana   | 1992           | MaleAge60to64       | 132297     |
| Ghana   | 1992           | MaleAge65to69       | 96203      |
| Ghana   | 1992           | MaleAge70to74       | 62402      |
| Ghana   | 1992           | MaleAge75to79       | 33711      |
| Ghana   | 1992           | MaleAge80to84       | 13515      |
| Ghana   | 1992           | MaleAge85to89       | 3366       |
| Ghana   | 1992           | MaleAge90to94       | 496        |
| Ghana   | 1992           | MaleAge95to99       | 32         |
| Ghana   | 1992           | MaleAgeAbove100     | 1          |
| Ghana   | 1993           | FemaleAge0to4       | 1278030    |
| Ghana   | 1993           | FemaleAge10to14     | 976353     |
| Ghana   | 1993           | FemaleAge15to19     | 697645     |
| Ghana   | 1993           | FemaleAge20to24     | 462604     |
| Ghana   | 1993           | FemaleAge25to29     | 361586     |
| Ghana   | 1993           | FemaleAge30to34     | 310893     |
| Ghana   | 1993           | FemaleAge35to39     | 275355     |
| Ghana   | 1993           | FemaleAge40to44     | 265628     |
| Ghana   | 1993           | FemaleAge45to49     | 271083     |
| Ghana   | 1993           | FemaleAge50to54     | 227874     |
| Ghana   | 1993           | FemaleAge55to59     | 184325     |
| Ghana   | 1993           | FemaleAge5to9       | 1117619    |
| Ghana   | 1993           | FemaleAge60to64     | 144711     |
| Ghana   | 1993           | FemaleAge65to69     | 107376     |
| Ghana   | 1993           | FemaleAge70to74     | 71560      |
| Ghana   | 1993           | FemaleAge75to79     | 39691      |
| Ghana   | 1993           | FemaleAge80to84     | 16869      |
| Ghana   | 1993           | FemaleAge85to89     | 4804       |
| Ghana   | 1993           | FemaleAge90to94     | 828        |
| Ghana   | 1993           | FemaleAge95to99     | 84         |
| Ghana   | 1993           | FemaleAgeAbove100   | 2          |
| Ghana   | 1993           | FemaleLactAge15to19 | 87333      |
| Ghana   | 1993           | FemaleLactAge20to24 | 154027     |
| Ghana   | 1993           | FemaleLactAge25to29 | 141980     |
| Ghana   | 1993           | FemaleLactAge30to34 | 103270     |
| Ghana   | 1993           | FemaleLactAge35to39 | 63287      |
| Ghana   | 1993           | FemaleLactAge40to44 | 32825      |
| Ghana   | 1993           | FemaleLactAge45to49 | 9116       |
| Ghana   | 1993           | FemalePregAge15to19 | 65499      |
| Ghana   | 1993           | FemalePregAge20to24 | 115520     |
| Ghana   | 1993           | FemalePregAge25to29 | 106485     |
| Ghana   | 1993           | FemalePregAge30to34 | 77453      |
| Ghana   | 1993           | FemalePregAge35to39 | 47465      |
| Ghana   | 1993           | FemalePregAge40to44 | 24618      |
| Ghana   | 1993           | FemalePregAge45to49 | 6837       |
| Ghana   | 1993           | MaleAge0to4         | 1334174    |
| Ghana   | 1993           | MaleAge10to14       | 1011152    |
| Ghana   | 1993           | MaleAge15to19       | 873886     |
| Ghana   | 1993           | MaleAge20to24       | 749455     |
| Ghana   | 1993           | MaleAge25to29       | 628366     |
| Ghana   | 1993           | MaleAge30to34       | 507309     |
| Ghana   | 1993           | MaleAge35to39       | 398045     |
| Ghana   | 1993           | MaleAge40to44       | 333592     |
| Ghana   | 1993           | MaleAge45to49       | 296052     |
| Ghana   | 1993           | MaleAge50to54       | 228164     |
| Ghana   | 1993           | MaleAge55to59       | 178433     |
| Ghana   | 1993           | MaleAge5to9         | 1162209    |
| Ghana   | 1993           | MaleAge60to64       | 135635     |
| Ghana   | 1993           | MaleAge65to69       | 99409      |
| Ghana   | 1993           | MaleAge70to74       | 65722      |
| Ghana   | 1993           | MaleAge75to79       | 35919      |
| Ghana   | 1993           | MaleAge80to84       | 14894      |
| Ghana   | 1993           | MaleAge85to89       | 3597       |
| Ghana   | 1993           | MaleAge90to94       | 568        |
| Ghana   | 1993           | MaleAge95to99       | 49         |
| Ghana   | 1993           | MaleAgeAbove100     | 1          |
| Ghana   | 1994           | FemaleAge0to4       | 1299900    |

Dietary calcium and zinc deficiency risks are decreasing but remain prevalent

| Country | Reference year | Age/gender group    | Population |
|---------|----------------|---------------------|------------|
| Ghana   | 1994           | FemaleAge10to14     | 1001423    |
| Ghana   | 1994           | FemaleAge15to19     | 719955     |
| Ghana   | 1994           | FemaleAge20to24     | 485144     |
| Ghana   | 1994           | FemaleAge25to29     | 384879     |
| Ghana   | 1994           | FemaleAge30to34     | 332260     |
| Ghana   | 1994           | FemaleAge35to39     | 294474     |
| Ghana   | 1994           | FemaleAge40to44     | 269844     |
| Ghana   | 1994           | FemaleAge45to49     | 281275     |
| Ghana   | 1994           | FemaleAge50to54     | 235930     |
| Ghana   | 1994           | FemaleAge55to59     | 190486     |
| Ghana   | 1994           | FemaleAge5to9       | 1141996    |
| Ghana   | 1994           | FemaleAge60to64     | 149592     |
| Ghana   | 1994           | FemaleAge65to69     | 111115     |
| Ghana   | 1994           | FemaleAge70to74     | 74392      |
| Ghana   | 1994           | FemaleAge75to79     | 41223      |
| Ghana   | 1994           | FemaleAge80to84     | 17340      |
| Ghana   | 1994           | FemaleAge85to89     | 4818       |
| Ghana   | 1994           | FemaleAge90to94     | 829        |
| Ghana   | 1994           | FemaleAge95to99     | 88         |
| Ghana   | 1994           | FemaleAgeAbove100   | 2          |
| Ghana   | 1994           | FemaleLactAge15to19 | 87333      |
| Ghana   | 1994           | FemaleLactAge20to24 | 154027     |
| Ghana   | 1994           | FemaleLactAge25to29 | 141980     |
| Ghana   | 1994           | FemaleLactAge30to34 | 103270     |
| Ghana   | 1994           | FemaleLactAge35to39 | 63287      |
| Ghana   | 1994           | FemaleLactAge40to44 | 32825      |
| Ghana   | 1994           | FemaleLactAge45to49 | 9116       |
| Ghana   | 1994           | FemalePregAge15to19 | 65499      |
| Ghana   | 1994           | FemalePregAge20to24 | 115520     |
| Ghana   | 1994           | FemalePregAge25to29 | 106485     |
| Ghana   | 1994           | FemalePregAge30to34 | 77453      |
| Ghana   | 1994           | FemalePregAge35to39 | 47465      |
| Ghana   | 1994           | FemalePregAge40to44 | 24618      |
| Ghana   | 1994           | FemalePregAge45to49 | 6837       |
| Ghana   | 1994           | MaleAge0to4         | 1356131    |
| Ghana   | 1994           | MaleAge10to14       | 1038114    |
| Ghana   | 1994           | MaleAge15to19       | 896908     |
| Ghana   | 1994           | MaleAge20to24       | 768381     |
| Ghana   | 1994           | MaleAge25to29       | 648301     |
| Ghana   | 1994           | MaleAge30to34       | 525837     |
| Ghana   | 1994           | MaleAge35to39       | 415309     |
| Ghana   | 1994           | MaleAge40to44       | 334634     |
| Ghana   | 1994           | MaleAge45to49       | 305869     |
| Ghana   | 1994           | MaleAge50to54       | 235963     |
| Ghana   | 1994           | MaleAge55to59       | 183769     |
| Ghana   | 1994           | MaleAge5to9         | 1188020    |
| Ghana   | 1994           | MaleAge60to64       | 139006     |
| Ghana   | 1994           | MaleAge65to69       | 102440     |
| Ghana   | 1994           | MaleAge70to74       | 69081      |
| Ghana   | 1994           | MaleAge75to79       | 38138      |
| Ghana   | 1994           | MaleAge80to84       | 16298      |
| Ghana   | 1994           | MaleAge85to89       | 3776       |
| Ghana   | 1994           | MaleAge90to94       | 572        |
| Ghana   | 1994           | MaleAge95to99       | 51         |
| Ghana   | 1994           | MaleAgeAbove100     | 1          |
| Ghana   | 1995           | FemaleAge0to4       | 1318238    |
| Ghana   | 1995           | FemaleAge10to14     | 1025091    |
| Ghana   | 1995           | FemaleAge15to19     | 741975     |
| Ghana   | 1995           | FemaleAge20to24     | 506668     |
| Ghana   | 1995           | FemaleAge25to29     | 407396     |
| Ghana   | 1995           | FemaleAge30to34     | 353774     |
| Ghana   | 1995           | FemaleAge35to39     | 313408     |
| Ghana   | 1995           | FemaleAge40to44     | 277524     |
| Ghana   | 1995           | FemaleAge45to49     | 288701     |
| Ghana   | 1995           | FemaleAge50to54     | 244835     |
| Ghana   | 1995           | FemaleAge55to59     | 196846     |
| Ghana   | 1995           | FemaleAge5to9       | 1163478    |
| Ghana   | 1995           | FemaleAge60to64     | 154689     |
| Ghana   | 1995           | FemaleAge65to69     | 115127     |
| Ghana   | 1995           | FemaleAge70to74     | 77401      |
| Ghana   | 1995           | FemaleAge75to79     | 42878      |
| Ghana   | 1995           | FemaleAge80to84     | 17666      |
| Ghana   | 1995           | FemaleAge85to89     | 4603       |
| Ghana   | 1995           | FemaleAge90to94     | 662        |
| Ghana   | 1995           | FemaleAge95to99     | 49         |
| Ghana   | 1995           | FemaleAgeAbove100   | 2          |
| Ghana   | 1995           | FemaleLactAge15to19 | 87333      |
| Ghana   | 1995           | FemaleLactAge20to24 | 154027     |
| Ghana   | 1995           | FemaleLactAge25to29 | 141980     |
| Ghana   | 1995           | FemaleLactAge30to34 | 103270     |
| Ghana   | 1995           | FemaleLactAge35to39 | 63287      |
| Ghana   | 1995           | FemaleLactAge40to44 | 32825      |
| Ghana   | 1995           | FemaleLactAge45to49 | 9116       |
| Ghana   | 1995           | FemalePregAge15to19 | 65499      |
| Ghana   | 1995           | FemalePregAge20to24 | 115520     |
| Ghana   | 1995           | FemalePregAge25to29 | 106485     |
| Ghana   | 1995           | FemalePregAge30to34 | 77453      |
| Ghana   | 1995           | FemalePregAge35to39 | 47465      |

Dietary calcium and zinc deficiency risks are decreasing but remain prevalent

| Country | Reference year | Age/gender group    | Population |
|---------|----------------|---------------------|------------|
| Ghana   | 1995           | FemalePregAge40to44 | 24618      |
| Ghana   | 1995           | FemalePregAge45to49 | 6837       |
| Ghana   | 1995           | MaleAge0to4         | 1375665    |
| Ghana   | 1995           | MaleAge10to14       | 1064589    |
| Ghana   | 1995           | MaleAge15to19       | 920897     |
| Ghana   | 1995           | MaleAge20to24       | 787958     |
| Ghana   | 1995           | MaleAge25to29       | 667572     |
| Ghana   | 1995           | MaleAge30to34       | 544721     |
| Ghana   | 1995           | MaleAge35to39       | 432385     |
| Ghana   | 1995           | MaleAge40to44       | 339620     |
| Ghana   | 1995           | MaleAge45to49       | 312265     |
| Ghana   | 1995           | MaleAge50to54       | 245002     |
| Ghana   | 1995           | MaleAge55to59       | 189581     |
| Ghana   | 1995           | MaleAge5to9         | 1211126    |
| Ghana   | 1995           | MaleAge60to64       | 142589     |
| Ghana   | 1995           | MaleAge65to69       | 105330     |
| Ghana   | 1995           | MaleAge70to74       | 72305      |
| Ghana   | 1995           | MaleAge75to79       | 40473      |
| Ghana   | 1995           | MaleAge80to84       | 17670      |
| Ghana   | 1995           | MaleAge85to89       | 4018       |
| Ghana   | 1995           | MaleAge90to94       | 409        |
| Ghana   | 1995           | MaleAge95to99       | 25         |
| Ghana   | 1995           | MaleAgeAbov e100    | 1          |
| Ghana   | 1996           | FemaleAge0to4       | 1339041    |
| Ghana   | 1996           | FemaleAge10to14     | 1048407    |
| Ghana   | 1996           | FemaleAge15to19     | 769442     |
| Ghana   | 1996           | FemaleAge20to24     | 514094     |
| Ghana   | 1996           | FemaleAge25to29     | 404209     |
| Ghana   | 1996           | FemaleAge30to34     | 353640     |
| Ghana   | 1996           | FemaleAge35to39     | 318984     |
| Ghana   | 1996           | FemaleAge40to44     | 288185     |
| Ghana   | 1996           | FemaleAge45to49     | 293612     |
| Ghana   | 1996           | FemaleAge50to54     | 253666     |
| Ghana   | 1996           | FemaleAge55to59     | 202150     |
| Ghana   | 1996           | FemaleAge5to9       | 1187941    |
| Ghana   | 1996           | FemaleAge60to64     | 158446     |
| Ghana   | 1996           | FemaleAge65to69     | 117678     |
| Ghana   | 1996           | FemaleAge70to74     | 79179      |
| Ghana   | 1996           | FemaleAge75to79     | 44390      |
| Ghana   | 1996           | FemaleAge80to84     | 18887      |
| Ghana   | 1996           | FemaleAge85to89     | 5326       |
| Ghana   | 1996           | FemaleAge90to94     | 844        |
| Ghana   | 1996           | FemaleAge95to99     | 52         |
| Ghana   | 1996           | FemaleAgeAbov e100  | 2          |
| Ghana   | 1996           | FemaleLactAge15to19 | 83199      |
| Ghana   | 1996           | FemaleLactAge20to24 | 160180     |
| Ghana   | 1996           | FemaleLactAge25to29 | 154910     |
| Ghana   | 1996           | FemaleLactAge30to34 | 114584     |
| Ghana   | 1996           | FemaleLactAge35to39 | 70174      |
| Ghana   | 1996           | FemaleLactAge40to44 | 32408      |
| Ghana   | 1996           | FemaleLactAge45to49 | 8663       |
| Ghana   | 1996           | FemalePregAge15to19 | 62399      |
| Ghana   | 1996           | FemalePregAge20to24 | 120135     |
| Ghana   | 1996           | FemalePregAge25to29 | 116183     |
| Ghana   | 1996           | FemalePregAge30to34 | 85938      |
| Ghana   | 1996           | FemalePregAge35to39 | 52631      |
| Ghana   | 1996           | FemalePregAge40to44 | 24306      |
| Ghana   | 1996           | FemalePregAge45to49 | 6497       |
| Ghana   | 1996           | MaleAge0to4         | 1397868    |
| Ghana   | 1996           | MaleAge10to14       | 1089984    |
| Ghana   | 1996           | MaleAge15to19       | 943292     |
| Ghana   | 1996           | MaleAge20to24       | 806546     |
| Ghana   | 1996           | MaleAge25to29       | 685359     |
| Ghana   | 1996           | MaleAge30to34       | 563320     |
| Ghana   | 1996           | MaleAge35to39       | 449121     |
| Ghana   | 1996           | MaleAge40to44       | 348259     |
| Ghana   | 1996           | MaleAge45to49       | 315001     |
| Ghana   | 1996           | MaleAge50to54       | 254166     |
| Ghana   | 1996           | MaleAge55to59       | 194884     |
| Ghana   | 1996           | MaleAge5to9         | 1237657    |
| Ghana   | 1996           | MaleAge60to64       | 146065     |
| Ghana   | 1996           | MaleAge65to69       | 107241     |
| Ghana   | 1996           | MaleAge70to74       | 73751      |
| Ghana   | 1996           | MaleAge75to79       | 42040      |
| Ghana   | 1996           | MaleAge80to84       | 18723      |
| Ghana   | 1996           | MaleAge85to89       | 4910       |
| Ghana   | 1996           | MaleAge90to94       | 543        |
| Ghana   | 1996           | MaleAge95to99       | 40         |
| Ghana   | 1996           | MaleAgeAbov e100    | 1          |
| Ghana   | 1997           | FemaleAge0to4       | 1352939    |
| Ghana   | 1997           | FemaleAge10to14     | 1071454    |
| Ghana   | 1997           | FemaleAge15to19     | 790505     |
| Ghana   | 1997           | FemaleAge20to24     | 531690     |
| Ghana   | 1997           | FemaleAge25to29     | 422903     |
| Ghana   | 1997           | FemaleAge30to34     | 373131     |
| Ghana   | 1997           | FemaleAge35to39     | 336585     |
| Ghana   | 1997           | FemaleAge40to44     | 301363     |
| Ghana   | 1997           | FemaleAge45to49     | 295173     |



Dietary calcium and zinc deficiency risks are decreasing but remain prevalent

| Country | Reference year | Age/gender group    | Population |
|---------|----------------|---------------------|------------|
| Ghana   | 1997           | FemaleAge50to54     | 263737     |
| Ghana   | 1997           | FemaleAge55to59     | 207637     |
| Ghana   | 1997           | FemaleAge5to9       | 1211072    |
| Ghana   | 1997           | FemaleAge60to64     | 162591     |
| Ghana   | 1997           | FemaleAge65to69     | 120532     |
| Ghana   | 1997           | FemaleAge70to74     | 81011      |
| Ghana   | 1997           | FemaleAge75to79     | 45725      |
| Ghana   | 1997           | FemaleAge80to84     | 19748      |
| Ghana   | 1997           | FemaleAge85to89     | 5829       |
| Ghana   | 1997           | FemaleAge90to94     | 986        |
| Ghana   | 1997           | FemaleAge95to99     | 82         |
| Ghana   | 1997           | FemaleAgeAbove100   | 2          |
| Ghana   | 1997           | FemaleLactAge15to19 | 83199      |
| Ghana   | 1997           | FemaleLactAge20to24 | 160180     |
| Ghana   | 1997           | FemaleLactAge25to29 | 154910     |
| Ghana   | 1997           | FemaleLactAge30to34 | 114584     |
| Ghana   | 1997           | FemaleLactAge35to39 | 70174      |
| Ghana   | 1997           | FemaleLactAge40to44 | 32408      |
| Ghana   | 1997           | FemaleLactAge45to49 | 8663       |
| Ghana   | 1997           | FemalePregAge15to19 | 62399      |
| Ghana   | 1997           | FemalePregAge20to24 | 120135     |
| Ghana   | 1997           | FemalePregAge25to29 | 116183     |
| Ghana   | 1997           | FemalePregAge30to34 | 85938      |
| Ghana   | 1997           | FemalePregAge35to39 | 52631      |
| Ghana   | 1997           | FemalePregAge40to44 | 24306      |
| Ghana   | 1997           | FemalePregAge45to49 | 6497       |
| Ghana   | 1997           | MaleAge0to4         | 1413427    |
| Ghana   | 1997           | MaleAge10to14       | 1115940    |
| Ghana   | 1997           | MaleAge15to19       | 967359     |
| Ghana   | 1997           | MaleAge20to24       | 826036     |
| Ghana   | 1997           | MaleAge25to29       | 702538     |
| Ghana   | 1997           | MaleAge30to34       | 582220     |
| Ghana   | 1997           | MaleAge35to39       | 465982     |
| Ghana   | 1997           | MaleAge40to44       | 360861     |
| Ghana   | 1997           | MaleAge45to49       | 314674     |
| Ghana   | 1997           | MaleAge50to54       | 264897     |
| Ghana   | 1997           | MaleAge55to59       | 200446     |
| Ghana   | 1997           | MaleAge5to9         | 1263364    |
| Ghana   | 1997           | MaleAge60to64       | 150039     |
| Ghana   | 1997           | MaleAge65to69       | 109304     |
| Ghana   | 1997           | MaleAge70to74       | 75149      |
| Ghana   | 1997           | MaleAge75to79       | 43543      |
| Ghana   | 1997           | MaleAge80to84       | 19450      |
| Ghana   | 1997           | MaleAge85to89       | 5590       |
| Ghana   | 1997           | MaleAge90to94       | 679        |
| Ghana   | 1997           | MaleAge95to99       | 62         |
| Ghana   | 1997           | MaleAgeAbove100     | 1          |
| Ghana   | 1998           | FemaleAge0to4       | 1363718    |
| Ghana   | 1998           | FemaleAge10to14     | 1094613    |
| Ghana   | 1998           | FemaleAge15to19     | 812870     |
| Ghana   | 1998           | FemaleAge20to24     | 549541     |
| Ghana   | 1998           | FemaleAge25to29     | 441271     |
| Ghana   | 1998           | FemaleAge30to34     | 392620     |
| Ghana   | 1998           | FemaleAge35to39     | 354439     |
| Ghana   | 1998           | FemaleAge40to44     | 317069     |
| Ghana   | 1998           | FemaleAge45to49     | 296090     |
| Ghana   | 1998           | FemaleAge50to54     | 274058     |
| Ghana   | 1998           | FemaleAge55to59     | 213670     |
| Ghana   | 1998           | FemaleAge5to9       | 1233078    |
| Ghana   | 1998           | FemaleAge60to64     | 167228     |
| Ghana   | 1998           | FemaleAge65to69     | 123799     |
| Ghana   | 1998           | FemaleAge70to74     | 83086      |
| Ghana   | 1998           | FemaleAge75to79     | 46982      |
| Ghana   | 1998           | FemaleAge80to84     | 20244      |
| Ghana   | 1998           | FemaleAge85to89     | 6035       |
| Ghana   | 1998           | FemaleAge90to94     | 1076       |
| Ghana   | 1998           | FemaleAge95to99     | 113        |
| Ghana   | 1998           | FemaleAgeAbove100   | 2          |
| Ghana   | 1998           | FemaleLactAge15to19 | 83199      |
| Ghana   | 1998           | FemaleLactAge20to24 | 160180     |
| Ghana   | 1998           | FemaleLactAge25to29 | 154910     |
| Ghana   | 1998           | FemaleLactAge30to34 | 114584     |
| Ghana   | 1998           | FemaleLactAge35to39 | 70174      |
| Ghana   | 1998           | FemaleLactAge40to44 | 32408      |
| Ghana   | 1998           | FemaleLactAge45to49 | 8663       |
| Ghana   | 1998           | FemalePregAge15to19 | 62399      |
| Ghana   | 1998           | FemalePregAge20to24 | 120135     |
| Ghana   | 1998           | FemalePregAge25to29 | 116183     |
| Ghana   | 1998           | FemalePregAge30to34 | 85938      |
| Ghana   | 1998           | FemalePregAge35to39 | 52631      |
| Ghana   | 1998           | FemalePregAge40to44 | 24306      |
| Ghana   | 1998           | FemalePregAge45to49 | 6497       |
| Ghana   | 1998           | MaleAge0to4         | 1425652    |
| Ghana   | 1998           | MaleAge10to14       | 1142182    |
| Ghana   | 1998           | MaleAge15to19       | 992993     |
| Ghana   | 1998           | MaleAge20to24       | 846586     |
| Ghana   | 1998           | MaleAge25to29       | 719444     |
| Ghana   | 1998           | MaleAge30to34       | 601146     |

Dietary calcium and zinc deficiency risks are decreasing but remain prevalent

| Country | Reference year | Age/gender group    | Population |
|---------|----------------|---------------------|------------|
| Ghana   | 1998           | MaleAge35to39       | 483047     |
| Ghana   | 1998           | MaleAge40to44       | 376309     |
| Ghana   | 1998           | MaleAge45to49       | 313324     |
| Ghana   | 1998           | MaleAge50to54       | 275820     |
| Ghana   | 1998           | MaleAge55to59       | 206603     |
| Ghana   | 1998           | MaleAge5to9         | 1287519    |
| Ghana   | 1998           | MaleAge60to64       | 154484     |
| Ghana   | 1998           | MaleAge65to69       | 111576     |
| Ghana   | 1998           | MaleAge70to74       | 76655      |
| Ghana   | 1998           | MaleAge75to79       | 44921      |
| Ghana   | 1998           | MaleAge80to84       | 19955      |
| Ghana   | 1998           | MaleAge85to89       | 5916       |
| Ghana   | 1998           | MaleAge90to94       | 811        |
| Ghana   | 1998           | MaleAge95to99       | 79         |
| Ghana   | 1998           | MaleAgeAbov e100    | 1          |
| Ghana   | 1999           | FemaleAge0to4       | 1377506    |
| Ghana   | 1999           | FemaleAge10to14     | 1118417    |
| Ghana   | 1999           | FemaleAge15to19     | 836771     |
| Ghana   | 1999           | FemaleAge20to24     | 568800     |
| Ghana   | 1999           | FemaleAge25to29     | 459887     |
| Ghana   | 1999           | FemaleAge30to34     | 412323     |
| Ghana   | 1999           | FemaleAge35to39     | 373015     |
| Ghana   | 1999           | FemaleAge40to44     | 334026     |
| Ghana   | 1999           | FemaleAge45to49     | 299219     |
| Ghana   | 1999           | FemaleAge50to54     | 283106     |
| Ghana   | 1999           | FemaleAge55to59     | 220793     |
| Ghana   | 1999           | FemaleAge5to9       | 1254221    |
| Ghana   | 1999           | FemaleAge60to64     | 172469     |
| Ghana   | 1999           | FemaleAge65to69     | 127596     |
| Ghana   | 1999           | FemaleAge70to74     | 85553      |
| Ghana   | 1999           | FemaleAge75to79     | 48250      |
| Ghana   | 1999           | FemaleAge80to84     | 20443      |
| Ghana   | 1999           | FemaleAge85to89     | 5917       |
| Ghana   | 1999           | FemaleAge90to94     | 1056       |
| Ghana   | 1999           | FemaleAge95to99     | 117        |
| Ghana   | 1999           | FemaleAgeAbov e100  | 2          |
| Ghana   | 1999           | FemaleLactAge15to19 | 83199      |
| Ghana   | 1999           | FemaleLactAge20to24 | 160180     |
| Ghana   | 1999           | FemaleLactAge25to29 | 154910     |
| Ghana   | 1999           | FemaleLactAge30to34 | 114584     |
| Ghana   | 1999           | FemaleLactAge35to39 | 70174      |
| Ghana   | 1999           | FemaleLactAge40to44 | 32408      |
| Ghana   | 1999           | FemaleLactAge45to49 | 8663       |
| Ghana   | 1999           | FemalePregAge15to19 | 62399      |
| Ghana   | 1999           | FemalePregAge20to24 | 120135     |
| Ghana   | 1999           | FemalePregAge25to29 | 116183     |
| Ghana   | 1999           | FemalePregAge30to34 | 85938      |
| Ghana   | 1999           | FemalePregAge35to39 | 52631      |
| Ghana   | 1999           | FemalePregAge40to44 | 24306      |
| Ghana   | 1999           | FemalePregAge45to49 | 6497       |
| Ghana   | 1999           | MaleAge0to4         | 1439908    |
| Ghana   | 1999           | MaleAge10to14       | 1168217    |
| Ghana   | 1999           | MaleAge15to19       | 1019624    |
| Ghana   | 1999           | MaleAge20to24       | 868293     |
| Ghana   | 1999           | MaleAge25to29       | 736631     |
| Ghana   | 1999           | MaleAge30to34       | 619642     |
| Ghana   | 1999           | MaleAge35to39       | 500476     |
| Ghana   | 1999           | MaleAge40to44       | 392696     |
| Ghana   | 1999           | MaleAge45to49       | 314110     |
| Ghana   | 1999           | MaleAge50to54       | 284804     |
| Ghana   | 1999           | MaleAge55to59       | 213811     |
| Ghana   | 1999           | MaleAge5to9         | 1309305    |
| Ghana   | 1999           | MaleAge60to64       | 159336     |
| Ghana   | 1999           | MaleAge65to69       | 114177     |
| Ghana   | 1999           | MaleAge70to74       | 78340      |
| Ghana   | 1999           | MaleAge75to79       | 46114      |
| Ghana   | 1999           | MaleAge80to84       | 20332      |
| Ghana   | 1999           | MaleAge85to89       | 5861       |
| Ghana   | 1999           | MaleAge90to94       | 858        |
| Ghana   | 1999           | MaleAge95to99       | 74         |
| Ghana   | 1999           | MaleAgeAbov e100    | 1          |
| Greece  | 1992           | FemaleAge0to4       | 256840     |
| Greece  | 1992           | FemaleAge10to14     | 357823     |
| Greece  | 1992           | FemaleAge15to19     | 365059     |
| Greece  | 1992           | FemaleAge20to24     | 341808     |
| Greece  | 1992           | FemaleAge25to29     | 314278     |
| Greece  | 1992           | FemaleAge30to34     | 332788     |
| Greece  | 1992           | FemaleAge35to39     | 339599     |
| Greece  | 1992           | FemaleAge40to44     | 341474     |
| Greece  | 1992           | FemaleAge45to49     | 296652     |
| Greece  | 1992           | FemaleAge50to54     | 313395     |
| Greece  | 1992           | FemaleAge55to59     | 337086     |
| Greece  | 1992           | FemaleAge5to9       | 302503     |
| Greece  | 1992           | FemaleAge60to64     | 338696     |
| Greece  | 1992           | FemaleAge65to69     | 273209     |
| Greece  | 1992           | FemaleAge70to74     | 194714     |
| Greece  | 1992           | FemaleAge75to79     | 160579     |
| Greece  | 1992           | FemaleAge80to84     | 116516     |

Dietary calcium and zinc deficiency risks are decreasing but remain prevalent

| Country | Reference year | Age/gender group    | Population |
|---------|----------------|---------------------|------------|
| Greece  | 1992           | FemaleAge85to89     | 54997      |
| Greece  | 1992           | FemaleAge90to94     | 19817      |
| Greece  | 1992           | FemaleAge95to99     | 5313       |
| Greece  | 1992           | FemaleAgeAbove100   | 449        |
| Greece  | 1992           | FemaleLactAge15to19 | 6516       |
| Greece  | 1992           | FemaleLactAge20to24 | 29882      |
| Greece  | 1992           | FemaleLactAge25to29 | 37298      |
| Greece  | 1992           | FemaleLactAge30to34 | 21687      |
| Greece  | 1992           | FemaleLactAge35to39 | 7739       |
| Greece  | 1992           | FemaleLactAge40to44 | 1387       |
| Greece  | 1992           | FemaleLactAge45to49 | 107        |
| Greece  | 1992           | FemalePregAge15to19 | 4887       |
| Greece  | 1992           | FemalePregAge20to24 | 22412      |
| Greece  | 1992           | FemalePregAge25to29 | 27974      |
| Greece  | 1992           | FemalePregAge30to34 | 16265      |
| Greece  | 1992           | FemalePregAge35to39 | 5804       |
| Greece  | 1992           | FemalePregAge40to44 | 1040       |
| Greece  | 1992           | FemalePregAge45to49 | 80         |
| Greece  | 1992           | MaleAge0to4         | 271989     |
| Greece  | 1992           | MaleAge10to14       | 381861     |
| Greece  | 1992           | MaleAge15to19       | 403198     |
| Greece  | 1992           | MaleAge20to24       | 410145     |
| Greece  | 1992           | MaleAge25to29       | 381137     |
| Greece  | 1992           | MaleAge30to34       | 364637     |
| Greece  | 1992           | MaleAge35to39       | 352651     |
| Greece  | 1992           | MaleAge40to44       | 344348     |
| Greece  | 1992           | MaleAge45to49       | 294176     |
| Greece  | 1992           | MaleAge50to54       | 295601     |
| Greece  | 1992           | MaleAge55to59       | 318958     |
| Greece  | 1992           | MaleAge5to9         | 322125     |
| Greece  | 1992           | MaleAge60to64       | 312726     |
| Greece  | 1992           | MaleAge65to69       | 237165     |
| Greece  | 1992           | MaleAge70to74       | 152994     |
| Greece  | 1992           | MaleAge75to79       | 119578     |
| Greece  | 1992           | MaleAge80to84       | 90082      |
| Greece  | 1992           | MaleAge85to89       | 38579      |
| Greece  | 1992           | MaleAge90to94       | 8982       |
| Greece  | 1992           | MaleAge95to99       | 2256       |
| Greece  | 1992           | MaleAgeAbove100     | 135        |
| Greece  | 1993           | FemaleAge0to4       | 254854     |
| Greece  | 1993           | FemaleAge10to14     | 351882     |
| Greece  | 1993           | FemaleAge15to19     | 370921     |
| Greece  | 1993           | FemaleAge20to24     | 341412     |
| Greece  | 1993           | FemaleAge25to29     | 328542     |
| Greece  | 1993           | FemaleAge30to34     | 334247     |
| Greece  | 1993           | FemaleAge35to39     | 351516     |
| Greece  | 1993           | FemaleAge40to44     | 342480     |
| Greece  | 1993           | FemaleAge45to49     | 315208     |
| Greece  | 1993           | FemaleAge50to54     | 298822     |
| Greece  | 1993           | FemaleAge55to59     | 343194     |
| Greece  | 1993           | FemaleAge5to9       | 293630     |
| Greece  | 1993           | FemaleAge60to64     | 336705     |
| Greece  | 1993           | FemaleAge65to69     | 293768     |
| Greece  | 1993           | FemaleAge70to74     | 199264     |
| Greece  | 1993           | FemaleAge75to79     | 158833     |
| Greece  | 1993           | FemaleAge80to84     | 118252     |
| Greece  | 1993           | FemaleAge85to89     | 59592      |
| Greece  | 1993           | FemaleAge90to94     | 18929      |
| Greece  | 1993           | FemaleAge95to99     | 6364       |
| Greece  | 1993           | FemaleAgeAbove100   | 451        |
| Greece  | 1993           | FemaleLactAge15to19 | 6516       |
| Greece  | 1993           | FemaleLactAge20to24 | 29882      |
| Greece  | 1993           | FemaleLactAge25to29 | 37298      |
| Greece  | 1993           | FemaleLactAge30to34 | 21687      |
| Greece  | 1993           | FemaleLactAge35to39 | 7739       |
| Greece  | 1993           | FemaleLactAge40to44 | 1387       |
| Greece  | 1993           | FemaleLactAge45to49 | 107        |
| Greece  | 1993           | FemalePregAge15to19 | 4887       |
| Greece  | 1993           | FemalePregAge20to24 | 22412      |
| Greece  | 1993           | FemalePregAge25to29 | 27974      |
| Greece  | 1993           | FemalePregAge30to34 | 16265      |
| Greece  | 1993           | FemalePregAge35to39 | 5804       |
| Greece  | 1993           | FemalePregAge40to44 | 1040       |
| Greece  | 1993           | FemalePregAge45to49 | 80         |
| Greece  | 1993           | MaleAge0to4         | 270451     |
| Greece  | 1993           | MaleAge10to14       | 377328     |
| Greece  | 1993           | MaleAge15to19       | 410694     |
| Greece  | 1993           | MaleAge20to24       | 414348     |
| Greece  | 1993           | MaleAge25to29       | 397899     |
| Greece  | 1993           | MaleAge30to34       | 367588     |
| Greece  | 1993           | MaleAge35to39       | 362262     |
| Greece  | 1993           | MaleAge40to44       | 346391     |
| Greece  | 1993           | MaleAge45to49       | 311787     |
| Greece  | 1993           | MaleAge50to54       | 284042     |
| Greece  | 1993           | MaleAge55to59       | 319397     |
| Greece  | 1993           | MaleAge5to9         | 313008     |
| Greece  | 1993           | MaleAge60to64       | 312324     |
| Greece  | 1993           | MaleAge65to69       | 255151     |

Dietary calcium and zinc deficiency risks are decreasing but remain prevalent

| Country | Reference year | Age/gender group    | Population |
|---------|----------------|---------------------|------------|
| Greece  | 1993           | MaleAge70to74       | 157938     |
| Greece  | 1993           | MaleAge75to79       | 116023     |
| Greece  | 1993           | MaleAge80to84       | 88665      |
| Greece  | 1993           | MaleAge85to89       | 43582      |
| Greece  | 1993           | MaleAge90to94       | 8642       |
| Greece  | 1993           | MaleAge95to99       | 2749       |
| Greece  | 1993           | MaleAgeAbov e100    | 142        |
| Greece  | 1994           | FemaleAge0to4       | 254112     |
| Greece  | 1994           | FemaleAge10to14     | 344328     |
| Greece  | 1994           | FemaleAge15to19     | 375001     |
| Greece  | 1994           | FemaleAge20to24     | 341253     |
| Greece  | 1994           | FemaleAge25to29     | 341239     |
| Greece  | 1994           | FemaleAge30to34     | 337488     |
| Greece  | 1994           | FemaleAge35to39     | 362192     |
| Greece  | 1994           | FemaleAge40to44     | 344629     |
| Greece  | 1994           | FemaleAge45to49     | 332708     |
| Greece  | 1994           | FemaleAge50to54     | 288690     |
| Greece  | 1994           | FemaleAge55to59     | 345684     |
| Greece  | 1994           | FemaleAge5to9       | 284642     |
| Greece  | 1994           | FemaleAge60to64     | 335644     |
| Greece  | 1994           | FemaleAge65to69     | 312106     |
| Greece  | 1994           | FemaleAge70to74     | 207120     |
| Greece  | 1994           | FemaleAge75to79     | 158612     |
| Greece  | 1994           | FemaleAge80to84     | 119332     |
| Greece  | 1994           | FemaleAge85to89     | 62911      |
| Greece  | 1994           | FemaleAge90to94     | 18678      |
| Greece  | 1994           | FemaleAge95to99     | 6374       |
| Greece  | 1994           | FemaleAgeAbov e100  | 461        |
| Greece  | 1994           | FemaleLactAge15to19 | 6516       |
| Greece  | 1994           | FemaleLactAge20to24 | 29882      |
| Greece  | 1994           | FemaleLactAge25to29 | 37298      |
| Greece  | 1994           | FemaleLactAge30to34 | 21687      |
| Greece  | 1994           | FemaleLactAge35to39 | 7739       |
| Greece  | 1994           | FemaleLactAge40to44 | 1387       |
| Greece  | 1994           | FemaleLactAge45to49 | 107        |
| Greece  | 1994           | FemalePregAge15to19 | 4887       |
| Greece  | 1994           | FemalePregAge20to24 | 22412      |
| Greece  | 1994           | FemalePregAge25to29 | 27974      |
| Greece  | 1994           | FemalePregAge30to34 | 16265      |
| Greece  | 1994           | FemalePregAge35to39 | 5804       |
| Greece  | 1994           | FemalePregAge40to44 | 1040       |
| Greece  | 1994           | FemalePregAge45to49 | 80         |
| Greece  | 1994           | MaleAge0to4         | 270193     |
| Greece  | 1994           | MaleAge10to14       | 370659     |
| Greece  | 1994           | MaleAge15to19       | 416437     |
| Greece  | 1994           | MaleAge20to24       | 418598     |
| Greece  | 1994           | MaleAge25to29       | 413435     |
| Greece  | 1994           | MaleAge30to34       | 372730     |
| Greece  | 1994           | MaleAge35to39       | 371070     |
| Greece  | 1994           | MaleAge40to44       | 349182     |
| Greece  | 1994           | MaleAge45to49       | 328559     |
| Greece  | 1994           | MaleAge50to54       | 276905     |
| Greece  | 1994           | MaleAge55to59       | 317438     |
| Greece  | 1994           | MaleAge5to9         | 303349     |
| Greece  | 1994           | MaleAge60to64       | 311777     |
| Greece  | 1994           | MaleAge65to69       | 271262     |
| Greece  | 1994           | MaleAge70to74       | 165556     |
| Greece  | 1994           | MaleAge75to79       | 114230     |
| Greece  | 1994           | MaleAge80to84       | 86557      |
| Greece  | 1994           | MaleAge85to89       | 46363      |
| Greece  | 1994           | MaleAge90to94       | 9038       |
| Greece  | 1994           | MaleAge95to99       | 2705       |
| Greece  | 1994           | MaleAgeAbov e100    | 152        |
| Greece  | 1995           | FemaleAge0to4       | 253527     |
| Greece  | 1995           | FemaleAge10to14     | 335512     |
| Greece  | 1995           | FemaleAge15to19     | 375586     |
| Greece  | 1995           | FemaleAge20to24     | 342667     |
| Greece  | 1995           | FemaleAge25to29     | 350004     |
| Greece  | 1995           | FemaleAge30to34     | 343934     |
| Greece  | 1995           | FemaleAge35to39     | 369867     |
| Greece  | 1995           | FemaleAge40to44     | 349839     |
| Greece  | 1995           | FemaleAge45to49     | 345188     |
| Greece  | 1995           | FemaleAge50to54     | 286514     |
| Greece  | 1995           | FemaleAge55to59     | 342365     |
| Greece  | 1995           | FemaleAge5to9       | 275936     |
| Greece  | 1995           | FemaleAge60to64     | 337177     |
| Greece  | 1995           | FemaleAge65to69     | 325405     |
| Greece  | 1995           | FemaleAge70to74     | 219012     |
| Greece  | 1995           | FemaleAge75to79     | 160259     |
| Greece  | 1995           | FemaleAge80to84     | 119745     |
| Greece  | 1995           | FemaleAge85to89     | 64900      |
| Greece  | 1995           | FemaleAge90to94     | 19169      |
| Greece  | 1995           | FemaleAge95to99     | 5283       |
| Greece  | 1995           | FemaleAgeAbov e100  | 487        |
| Greece  | 1995           | FemaleLactAge15to19 | 6516       |
| Greece  | 1995           | FemaleLactAge20to24 | 29882      |
| Greece  | 1995           | FemaleLactAge25to29 | 37298      |
| Greece  | 1995           | FemaleLactAge30to34 | 21687      |

Dietary calcium and zinc deficiency risks are decreasing but remain prevalent

| Country | Reference year | Age/gender group    | Population |
|---------|----------------|---------------------|------------|
| Greece  | 1995           | FemaleLactAge35to39 | 7739       |
| Greece  | 1995           | FemaleLactAge40to44 | 1387       |
| Greece  | 1995           | FemaleLactAge45to49 | 107        |
| Greece  | 1995           | FemalePregAge15to19 | 4887       |
| Greece  | 1995           | FemalePregAge20to24 | 22412      |
| Greece  | 1995           | FemalePregAge25to29 | 27974      |
| Greece  | 1995           | FemalePregAge30to34 | 16265      |
| Greece  | 1995           | FemalePregAge35to39 | 5804       |
| Greece  | 1995           | FemalePregAge40to44 | 1040       |
| Greece  | 1995           | FemalePregAge45to49 | 80         |
| Greece  | 1995           | MaleAge0to4         | 269898     |
| Greece  | 1995           | MaleAge10to14       | 362057     |
| Greece  | 1995           | MaleAge15to19       | 418741     |
| Greece  | 1995           | MaleAge20to24       | 423876     |
| Greece  | 1995           | MaleAge25to29       | 425597     |
| Greece  | 1995           | MaleAge30to34       | 381197     |
| Greece  | 1995           | MaleAge35to39       | 377829     |
| Greece  | 1995           | MaleAge40to44       | 354214     |
| Greece  | 1995           | MaleAge45to49       | 341023     |
| Greece  | 1995           | MaleAge50to54       | 276747     |
| Greece  | 1995           | MaleAge55to59       | 312063     |
| Greece  | 1995           | MaleAge5to9         | 293761     |
| Greece  | 1995           | MaleAge60to64       | 312027     |
| Greece  | 1995           | MaleAge65to69       | 283291     |
| Greece  | 1995           | MaleAge70to74       | 176274     |
| Greece  | 1995           | MaleAge75to79       | 114579     |
| Greece  | 1995           | MaleAge80to84       | 84022      |
| Greece  | 1995           | MaleAge85to89       | 46775      |
| Greece  | 1995           | MaleAge90to94       | 10105      |
| Greece  | 1995           | MaleAge95to99       | 2110       |
| Greece  | 1995           | MaleAgeAbove100     | 167        |
| Greece  | 1996           | FemaleAge0to4       | 257060     |
| Greece  | 1996           | FemaleAge10to14     | 326667     |
| Greece  | 1996           | FemaleAge15to19     | 376969     |
| Greece  | 1996           | FemaleAge20to24     | 357996     |
| Greece  | 1996           | FemaleAge25to29     | 352848     |
| Greece  | 1996           | FemaleAge30to34     | 341145     |
| Greece  | 1996           | FemaleAge35to39     | 369826     |
| Greece  | 1996           | FemaleAge40to44     | 355857     |
| Greece  | 1996           | FemaleAge45to49     | 352553     |
| Greece  | 1996           | FemaleAge50to54     | 291354     |
| Greece  | 1996           | FemaleAge55to59     | 333647     |
| Greece  | 1996           | FemaleAge5to9       | 270432     |
| Greece  | 1996           | FemaleAge60to64     | 338525     |
| Greece  | 1996           | FemaleAge65to69     | 331043     |
| Greece  | 1996           | FemaleAge70to74     | 232864     |
| Greece  | 1996           | FemaleAge75to79     | 161184     |
| Greece  | 1996           | FemaleAge80to84     | 119295     |
| Greece  | 1996           | FemaleAge85to89     | 68051      |
| Greece  | 1996           | FemaleAge90to94     | 22373      |
| Greece  | 1996           | FemaleAge95to99     | 5333       |
| Greece  | 1996           | FemaleAgeAbove100   | 534        |
| Greece  | 1996           | FemaleLactAge15to19 | 4288       |
| Greece  | 1996           | FemaleLactAge20to24 | 22312      |
| Greece  | 1996           | FemaleLactAge25to29 | 37786      |
| Greece  | 1996           | FemaleLactAge30to34 | 27954      |
| Greece  | 1996           | FemaleLactAge35to39 | 10202      |
| Greece  | 1996           | FemaleLactAge40to44 | 1814       |
| Greece  | 1996           | FemaleLactAge45to49 | 162        |
| Greece  | 1996           | FemalePregAge15to19 | 3216       |
| Greece  | 1996           | FemalePregAge20to24 | 16734      |
| Greece  | 1996           | FemalePregAge25to29 | 28339      |
| Greece  | 1996           | FemalePregAge30to34 | 20965      |
| Greece  | 1996           | FemalePregAge35to39 | 7652       |
| Greece  | 1996           | FemalePregAge40to44 | 1360       |
| Greece  | 1996           | FemalePregAge45to49 | 122        |
| Greece  | 1996           | MaleAge0to4         | 274285     |
| Greece  | 1996           | MaleAge10to14       | 353145     |
| Greece  | 1996           | MaleAge15to19       | 416985     |
| Greece  | 1996           | MaleAge20to24       | 427828     |
| Greece  | 1996           | MaleAge25to29       | 432524     |
| Greece  | 1996           | MaleAge30to34       | 390638     |
| Greece  | 1996           | MaleAge35to39       | 381118     |
| Greece  | 1996           | MaleAge40to44       | 359504     |
| Greece  | 1996           | MaleAge45to49       | 348612     |
| Greece  | 1996           | MaleAge50to54       | 282296     |
| Greece  | 1996           | MaleAge55to59       | 303252     |
| Greece  | 1996           | MaleAge5to9         | 287775     |
| Greece  | 1996           | MaleAge60to64       | 310739     |
| Greece  | 1996           | MaleAge65to69       | 289266     |
| Greece  | 1996           | MaleAge70to74       | 189485     |
| Greece  | 1996           | MaleAge75to79       | 116238     |
| Greece  | 1996           | MaleAge80to84       | 82298      |
| Greece  | 1996           | MaleAge85to89       | 48422      |
| Greece  | 1996           | MaleAge90to94       | 13234      |
| Greece  | 1996           | MaleAge95to99       | 2076       |
| Greece  | 1996           | MaleAgeAbove100     | 188        |
| Greece  | 1997           | FemaleAge0to4       | 258026     |

Dietary calcium and zinc deficiency risks are decreasing but remain prevalent

| Country | Reference year | Age/gender group    | Population |
|---------|----------------|---------------------|------------|
| Greece  | 1997           | FemaleAge10to14     | 317167     |
| Greece  | 1997           | FemaleAge15to19     | 371603     |
| Greece  | 1997           | FemaleAge20to24     | 361727     |
| Greece  | 1997           | FemaleAge25to29     | 352570     |
| Greece  | 1997           | FemaleAge30to34     | 352435     |
| Greece  | 1997           | FemaleAge35to39     | 371083     |
| Greece  | 1997           | FemaleAge40to44     | 365248     |
| Greece  | 1997           | FemaleAge45to49     | 355197     |
| Greece  | 1997           | FemaleAge50to54     | 304402     |
| Greece  | 1997           | FemaleAge55to59     | 319527     |
| Greece  | 1997           | FemaleAge5to9       | 266834     |
| Greece  | 1997           | FemaleAge60to64     | 342493     |
| Greece  | 1997           | FemaleAge65to69     | 331672     |
| Greece  | 1997           | FemaleAge70to74     | 250869     |
| Greece  | 1997           | FemaleAge75to79     | 162859     |
| Greece  | 1997           | FemaleAge80to84     | 117997     |
| Greece  | 1997           | FemaleAge85to89     | 70456      |
| Greece  | 1997           | FemaleAge90to94     | 25295      |
| Greece  | 1997           | FemaleAge95to99     | 5061       |
| Greece  | 1997           | FemaleAgeAbove100   | 597        |
| Greece  | 1997           | FemaleLactAge15to19 | 4288       |
| Greece  | 1997           | FemaleLactAge20to24 | 22312      |
| Greece  | 1997           | FemaleLactAge25to29 | 37786      |
| Greece  | 1997           | FemaleLactAge30to34 | 27954      |
| Greece  | 1997           | FemaleLactAge35to39 | 10202      |
| Greece  | 1997           | FemaleLactAge40to44 | 1814       |
| Greece  | 1997           | FemaleLactAge45to49 | 162        |
| Greece  | 1997           | FemalePregAge15to19 | 3216       |
| Greece  | 1997           | FemalePregAge20to24 | 16734      |
| Greece  | 1997           | FemalePregAge25to29 | 28339      |
| Greece  | 1997           | FemalePregAge30to34 | 20965      |
| Greece  | 1997           | FemalePregAge35to39 | 7652       |
| Greece  | 1997           | FemalePregAge40to44 | 1360       |
| Greece  | 1997           | FemalePregAge45to49 | 122        |
| Greece  | 1997           | MaleAge0to4         | 275290     |
| Greece  | 1997           | MaleAge10to14       | 343104     |
| Greece  | 1997           | MaleAge15to19       | 412550     |
| Greece  | 1997           | MaleAge20to24       | 433055     |
| Greece  | 1997           | MaleAge25to29       | 435946     |
| Greece  | 1997           | MaleAge30to34       | 403356     |
| Greece  | 1997           | MaleAge35to39       | 382370     |
| Greece  | 1997           | MaleAge40to44       | 366452     |
| Greece  | 1997           | MaleAge45to49       | 352145     |
| Greece  | 1997           | MaleAge50to54       | 295012     |
| Greece  | 1997           | MaleAge55to59       | 291298     |
| Greece  | 1997           | MaleAge5to9         | 283877     |
| Greece  | 1997           | MaleAge60to64       | 310267     |
| Greece  | 1997           | MaleAge65to69       | 291311     |
| Greece  | 1997           | MaleAge70to74       | 205498     |
| Greece  | 1997           | MaleAge75to79       | 118955     |
| Greece  | 1997           | MaleAge80to84       | 79974      |
| Greece  | 1997           | MaleAge85to89       | 48956      |
| Greece  | 1997           | MaleAge90to94       | 16209      |
| Greece  | 1997           | MaleAge95to99       | 1771       |
| Greece  | 1997           | MaleAgeAbove100     | 214        |
| Greece  | 1998           | FemaleAge0to4       | 257186     |
| Greece  | 1998           | FemaleAge10to14     | 307321     |
| Greece  | 1998           | FemaleAge15to19     | 363771     |
| Greece  | 1998           | FemaleAge20to24     | 365634     |
| Greece  | 1998           | FemaleAge25to29     | 349795     |
| Greece  | 1998           | FemaleAge30to34     | 364759     |
| Greece  | 1998           | FemaleAge35to39     | 370876     |
| Greece  | 1998           | FemaleAge40to44     | 375644     |
| Greece  | 1998           | FemaleAge45to49     | 354960     |
| Greece  | 1998           | FemaleAge50to54     | 322010     |
| Greece  | 1998           | FemaleAge55to59     | 303602     |
| Greece  | 1998           | FemaleAge5to9       | 265091     |
| Greece  | 1998           | FemaleAge60to64     | 346647     |
| Greece  | 1998           | FemaleAge65to69     | 329519     |
| Greece  | 1998           | FemaleAge70to74     | 270146     |
| Greece  | 1998           | FemaleAge75to79     | 166314     |
| Greece  | 1998           | FemaleAge80to84     | 116603     |
| Greece  | 1998           | FemaleAge85to89     | 72046      |
| Greece  | 1998           | FemaleAge90to94     | 27354      |
| Greece  | 1998           | FemaleAge95to99     | 4919       |
| Greece  | 1998           | FemaleAgeAbove100   | 667        |
| Greece  | 1998           | FemaleLactAge15to19 | 4288       |
| Greece  | 1998           | FemaleLactAge20to24 | 22312      |
| Greece  | 1998           | FemaleLactAge25to29 | 37786      |
| Greece  | 1998           | FemaleLactAge30to34 | 27954      |
| Greece  | 1998           | FemaleLactAge35to39 | 10202      |
| Greece  | 1998           | FemaleLactAge40to44 | 1814       |
| Greece  | 1998           | FemaleLactAge45to49 | 162        |
| Greece  | 1998           | FemalePregAge15to19 | 3216       |
| Greece  | 1998           | FemalePregAge20to24 | 16734      |
| Greece  | 1998           | FemalePregAge25to29 | 28339      |
| Greece  | 1998           | FemalePregAge30to34 | 20965      |
| Greece  | 1998           | FemalePregAge35to39 | 7652       |

Dietary calcium and zinc deficiency risks are decreasing but remain prevalent

| Country | Reference year | Age/gender group    | Population |
|---------|----------------|---------------------|------------|
| Greece  | 1998           | FemalePregAge40to44 | 1360       |
| Greece  | 1998           | FemalePregAge45to49 | 122        |
| Greece  | 1998           | MaleAge0to4         | 273891     |
| Greece  | 1998           | MaleAge10to14       | 332158     |
| Greece  | 1998           | MaleAge15to19       | 405623     |
| Greece  | 1998           | MaleAge20to24       | 438372     |
| Greece  | 1998           | MaleAge25to29       | 436906     |
| Greece  | 1998           | MaleAge30to34       | 417376     |
| Greece  | 1998           | MaleAge35to39       | 382973     |
| Greece  | 1998           | MaleAge40to44       | 373847     |
| Greece  | 1998           | MaleAge45to49       | 353122     |
| Greece  | 1998           | MaleAge50to54       | 311672     |
| Greece  | 1998           | MaleAge55to59       | 278919     |
| Greece  | 1998           | MaleAge5to9         | 282057     |
| Greece  | 1998           | MaleAge60to64       | 309359     |
| Greece  | 1998           | MaleAge65to69       | 290910     |
| Greece  | 1998           | MaleAge70to74       | 221972     |
| Greece  | 1998           | MaleAge75to79       | 123316     |
| Greece  | 1998           | MaleAge80to84       | 77806      |
| Greece  | 1998           | MaleAge85to89       | 48546      |
| Greece  | 1998           | MaleAge90to94       | 18230      |
| Greece  | 1998           | MaleAge95to99       | 1697       |
| Greece  | 1998           | MaleAgeAbove100     | 243        |
| Greece  | 1999           | FemaleAge0to4       | 255706     |
| Greece  | 1999           | FemaleAge10to14     | 297898     |
| Greece  | 1999           | FemaleAge15to19     | 354354     |
| Greece  | 1999           | FemaleAge20to24     | 367411     |
| Greece  | 1999           | FemaleAge25to29     | 347133     |
| Greece  | 1999           | FemaleAge30to34     | 374822     |
| Greece  | 1999           | FemaleAge35to39     | 371928     |
| Greece  | 1999           | FemaleAge40to44     | 384386     |
| Greece  | 1999           | FemaleAge45to49     | 355395     |
| Greece  | 1999           | FemaleAge50to54     | 338060     |
| Greece  | 1999           | FemaleAge55to59     | 291866     |
| Greece  | 1999           | FemaleAge5to9       | 264366     |
| Greece  | 1999           | FemaleAge60to64     | 347291     |
| Greece  | 1999           | FemaleAge65to69     | 327939     |
| Greece  | 1999           | FemaleAge70to74     | 286615     |
| Greece  | 1999           | FemaleAge75to79     | 173032     |
| Greece  | 1999           | FemaleAge80to84     | 115955     |
| Greece  | 1999           | FemaleAge85to89     | 72550      |
| Greece  | 1999           | FemaleAge90to94     | 28267      |
| Greece  | 1999           | FemaleAge95to99     | 5128       |
| Greece  | 1999           | FemaleAgeAbove100   | 727        |
| Greece  | 1999           | FemaleLactAge15to19 | 4288       |
| Greece  | 1999           | FemaleLactAge20to24 | 22312      |
| Greece  | 1999           | FemaleLactAge25to29 | 37786      |
| Greece  | 1999           | FemaleLactAge30to34 | 27954      |
| Greece  | 1999           | FemaleLactAge35to39 | 10202      |
| Greece  | 1999           | FemaleLactAge40to44 | 1814       |
| Greece  | 1999           | FemaleLactAge45to49 | 162        |
| Greece  | 1999           | FemalePregAge15to19 | 3216       |
| Greece  | 1999           | FemalePregAge20to24 | 16734      |
| Greece  | 1999           | FemalePregAge25to29 | 28339      |
| Greece  | 1999           | FemalePregAge30to34 | 20965      |
| Greece  | 1999           | FemalePregAge35to39 | 7652       |
| Greece  | 1999           | FemalePregAge40to44 | 1360       |
| Greece  | 1999           | FemalePregAge45to49 | 122        |
| Greece  | 1999           | MaleAge0to4         | 271692     |
| Greece  | 1999           | MaleAge10to14       | 321292     |
| Greece  | 1999           | MaleAge15to19       | 396787     |
| Greece  | 1999           | MaleAge20to24       | 441683     |
| Greece  | 1999           | MaleAge25to29       | 437557     |
| Greece  | 1999           | MaleAge30to34       | 429573     |
| Greece  | 1999           | MaleAge35to39       | 385222     |
| Greece  | 1999           | MaleAge40to44       | 379865     |
| Greece  | 1999           | MaleAge45to49       | 354260     |
| Greece  | 1999           | MaleAge50to54       | 326999     |
| Greece  | 1999           | MaleAge55to59       | 270576     |
| Greece  | 1999           | MaleAge5to9         | 281285     |
| Greece  | 1999           | MaleAge60to64       | 306156     |
| Greece  | 1999           | MaleAge65to69       | 290063     |
| Greece  | 1999           | MaleAge70to74       | 235842     |
| Greece  | 1999           | MaleAge75to79       | 130151     |
| Greece  | 1999           | MaleAge80to84       | 76638      |
| Greece  | 1999           | MaleAge85to89       | 47230      |
| Greece  | 1999           | MaleAge90to94       | 18770      |
| Greece  | 1999           | MaleAge95to99       | 2083       |
| Greece  | 1999           | MaleAgeAbove100     | 267        |
| Greece  | 2000           | FemaleAge0to4       | 254390     |
| Greece  | 2000           | FemaleAge10to14     | 289798     |
| Greece  | 2000           | FemaleAge15to19     | 344114     |
| Greece  | 2000           | FemaleAge20to24     | 365715     |
| Greece  | 2000           | FemaleAge25to29     | 346177     |
| Greece  | 2000           | FemaleAge30to34     | 380702     |
| Greece  | 2000           | FemaleAge35to39     | 375914     |
| Greece  | 2000           | FemaleAge40to44     | 389954     |
| Greece  | 2000           | FemaleAge45to49     | 358693     |

Dietary calcium and zinc deficiency risks are decreasing but remain prevalent

| Country   | Reference year | Age/gender group    | Population |
|-----------|----------------|---------------------|------------|
| Greece    | 2000           | FemaleAge50to54     | 348787     |
| Greece    | 2000           | FemaleAge55to59     | 288047     |
| Greece    | 2000           | FemaleAge5to9       | 263285     |
| Greece    | 2000           | FemaleAge60to64     | 342494     |
| Greece    | 2000           | FemaleAge65to69     | 328669     |
| Greece    | 2000           | FemaleAge70to74     | 298112     |
| Greece    | 2000           | FemaleAge75to79     | 183668     |
| Greece    | 2000           | FemaleAge80to84     | 116595     |
| Greece    | 2000           | FemaleAge85to89     | 71979      |
| Greece    | 2000           | FemaleAge90to94     | 28204      |
| Greece    | 2000           | FemaleAge95to99     | 5151       |
| Greece    | 2000           | FemaleAgeAbove100   | 767        |
| Greece    | 2000           | FemaleLactAge15to19 | 4288       |
| Greece    | 2000           | FemaleLactAge20to24 | 22312      |
| Greece    | 2000           | FemaleLactAge25to29 | 37786      |
| Greece    | 2000           | FemaleLactAge30to34 | 27954      |
| Greece    | 2000           | FemaleLactAge35to39 | 10202      |
| Greece    | 2000           | FemaleLactAge40to44 | 1814       |
| Greece    | 2000           | FemaleLactAge45to49 | 162        |
| Greece    | 2000           | FemalePregAge15to19 | 3216       |
| Greece    | 2000           | FemalePregAge20to24 | 16734      |
| Greece    | 2000           | FemalePregAge25to29 | 28339      |
| Greece    | 2000           | FemalePregAge30to34 | 20965      |
| Greece    | 2000           | FemalePregAge35to39 | 7652       |
| Greece    | 2000           | FemalePregAge40to44 | 1360       |
| Greece    | 2000           | FemalePregAge45to49 | 122        |
| Greece    | 2000           | MaleAge0to4         | 269918     |
| Greece    | 2000           | MaleAge10to14       | 311738     |
| Greece    | 2000           | MaleAge15to19       | 386548     |
| Greece    | 2000           | MaleAge20to24       | 441628     |
| Greece    | 2000           | MaleAge25to29       | 439389     |
| Greece    | 2000           | MaleAge30to34       | 438048     |
| Greece    | 2000           | MaleAge35to39       | 390472     |
| Greece    | 2000           | MaleAge40to44       | 383603     |
| Greece    | 2000           | MaleAge45to49       | 357180     |
| Greece    | 2000           | MaleAge50to54       | 337761     |
| Greece    | 2000           | MaleAge55to59       | 269010     |
| Greece    | 2000           | MaleAge5to9         | 279850     |
| Greece    | 2000           | MaleAge60to64       | 299825     |
| Greece    | 2000           | MaleAge65to69       | 289728     |
| Greece    | 2000           | MaleAge70to74       | 245642     |
| Greece    | 2000           | MaleAge75to79       | 139701     |
| Greece    | 2000           | MaleAge80to84       | 76951      |
| Greece    | 2000           | MaleAge85to89       | 45145      |
| Greece    | 2000           | MaleAge90to94       | 17918      |
| Greece    | 2000           | MaleAge95to99       | 2424       |
| Greece    | 2000           | MaleAgeAbove100     | 285        |
| Guatemala | 1992           | FemaleAge0to4       | 773695     |
| Guatemala | 1992           | FemaleAge10to14     | 603242     |
| Guatemala | 1992           | FemaleAge15to19     | 391410     |
| Guatemala | 1992           | FemaleAge20to24     | 209994     |
| Guatemala | 1992           | FemaleAge25to29     | 175643     |
| Guatemala | 1992           | FemaleAge30to34     | 161320     |
| Guatemala | 1992           | FemaleAge35to39     | 165327     |
| Guatemala | 1992           | FemaleAge40to44     | 173966     |
| Guatemala | 1992           | FemaleAge45to49     | 151326     |
| Guatemala | 1992           | FemaleAge50to54     | 126294     |
| Guatemala | 1992           | FemaleAge55to59     | 113507     |
| Guatemala | 1992           | FemaleAge5to9       | 689098     |
| Guatemala | 1992           | FemaleAge60to64     | 95113      |
| Guatemala | 1992           | FemaleAge65to69     | 70283      |
| Guatemala | 1992           | FemaleAge70to74     | 45678      |
| Guatemala | 1992           | FemaleAge75to79     | 27404      |
| Guatemala | 1992           | FemaleAge80to84     | 14373      |
| Guatemala | 1992           | FemaleAge85to89     | 6547       |
| Guatemala | 1992           | FemaleAge90to94     | 2662       |
| Guatemala | 1992           | FemaleAge95to99     | 696        |
| Guatemala | 1992           | FemaleAgeAbove100   | 169        |
| Guatemala | 1992           | FemaleLactAge15to19 | 65894      |
| Guatemala | 1992           | FemaleLactAge20to24 | 112631     |
| Guatemala | 1992           | FemaleLactAge25to29 | 84544      |
| Guatemala | 1992           | FemaleLactAge30to34 | 56502      |
| Guatemala | 1992           | FemaleLactAge35to39 | 32838      |
| Guatemala | 1992           | FemaleLactAge40to44 | 12558      |
| Guatemala | 1992           | FemaleLactAge45to49 | 2124       |
| Guatemala | 1992           | FemalePregAge15to19 | 49421      |
| Guatemala | 1992           | FemalePregAge20to24 | 84474      |
| Guatemala | 1992           | FemalePregAge25to29 | 63408      |
| Guatemala | 1992           | FemalePregAge30to34 | 42377      |
| Guatemala | 1992           | FemalePregAge35to39 | 24629      |
| Guatemala | 1992           | FemalePregAge40to44 | 9419       |
| Guatemala | 1992           | FemalePregAge45to49 | 1593       |
| Guatemala | 1992           | MaleAge0to4         | 804864     |
| Guatemala | 1992           | MaleAge10to14       | 621799     |
| Guatemala | 1992           | MaleAge15to19       | 511218     |
| Guatemala | 1992           | MaleAge20to24       | 401594     |
| Guatemala | 1992           | MaleAge25to29       | 314775     |
| Guatemala | 1992           | MaleAge30to34       | 250658     |



Dietary calcium and zinc deficiency risks are decreasing but remain prevalent

| Country   | Reference year | Age/gender group    | Population |
|-----------|----------------|---------------------|------------|
| Guatemala | 1992           | MaleAge35to39       | 216475     |
| Guatemala | 1992           | MaleAge40to44       | 191531     |
| Guatemala | 1992           | MaleAge45to49       | 153827     |
| Guatemala | 1992           | MaleAge50to54       | 127457     |
| Guatemala | 1992           | MaleAge55to59       | 112852     |
| Guatemala | 1992           | MaleAge5to9         | 714441     |
| Guatemala | 1992           | MaleAge60to64       | 92767      |
| Guatemala | 1992           | MaleAge65to69       | 68052      |
| Guatemala | 1992           | MaleAge70to74       | 43907      |
| Guatemala | 1992           | MaleAge75to79       | 25842      |
| Guatemala | 1992           | MaleAge80to84       | 12894      |
| Guatemala | 1992           | MaleAge85to89       | 5315       |
| Guatemala | 1992           | MaleAge90to94       | 1957       |
| Guatemala | 1992           | MaleAge95to99       | 447        |
| Guatemala | 1992           | MaleAgeAbov e100    | 88         |
| Guatemala | 1993           | FemaleAge0to4       | 795263     |
| Guatemala | 1993           | FemaleAge10to14     | 619136     |
| Guatemala | 1993           | FemaleAge15to19     | 406627     |
| Guatemala | 1993           | FemaleAge20to24     | 224261     |
| Guatemala | 1993           | FemaleAge25to29     | 185706     |
| Guatemala | 1993           | FemaleAge30to34     | 170082     |
| Guatemala | 1993           | FemaleAge35to39     | 168145     |
| Guatemala | 1993           | FemaleAge40to44     | 178233     |
| Guatemala | 1993           | FemaleAge45to49     | 159071     |
| Guatemala | 1993           | FemaleAge50to54     | 127831     |
| Guatemala | 1993           | FemaleAge55to59     | 114269     |
| Guatemala | 1993           | FemaleAge5to9       | 699909     |
| Guatemala | 1993           | FemaleAge60to64     | 97772      |
| Guatemala | 1993           | FemaleAge65to69     | 73250      |
| Guatemala | 1993           | FemaleAge70to74     | 48292      |
| Guatemala | 1993           | FemaleAge75to79     | 28537      |
| Guatemala | 1993           | FemaleAge80to84     | 15247      |
| Guatemala | 1993           | FemaleAge85to89     | 6525       |
| Guatemala | 1993           | FemaleAge90to94     | 2721       |
| Guatemala | 1993           | FemaleAge95to99     | 721        |
| Guatemala | 1993           | FemaleAgeAbov e100  | 162        |
| Guatemala | 1993           | FemaleLactAge15to19 | 65894      |
| Guatemala | 1993           | FemaleLactAge20to24 | 112631     |
| Guatemala | 1993           | FemaleLactAge25to29 | 84544      |
| Guatemala | 1993           | FemaleLactAge30to34 | 56502      |
| Guatemala | 1993           | FemaleLactAge35to39 | 32838      |
| Guatemala | 1993           | FemaleLactAge40to44 | 12558      |
| Guatemala | 1993           | FemaleLactAge45to49 | 2124       |
| Guatemala | 1993           | FemalePregAge15to19 | 49421      |
| Guatemala | 1993           | FemalePregAge20to24 | 84474      |
| Guatemala | 1993           | FemalePregAge25to29 | 63408      |
| Guatemala | 1993           | FemalePregAge30to34 | 42377      |
| Guatemala | 1993           | FemalePregAge35to39 | 24629      |
| Guatemala | 1993           | FemalePregAge40to44 | 9419       |
| Guatemala | 1993           | FemalePregAge45to49 | 1593       |
| Guatemala | 1993           | MaleAge0to4         | 826364     |
| Guatemala | 1993           | MaleAge10to14       | 636236     |
| Guatemala | 1993           | MaleAge15to19       | 524342     |
| Guatemala | 1993           | MaleAge20to24       | 409959     |
| Guatemala | 1993           | MaleAge25to29       | 320709     |
| Guatemala | 1993           | MaleAge30to34       | 255415     |
| Guatemala | 1993           | MaleAge35to39       | 216659     |
| Guatemala | 1993           | MaleAge40to44       | 194435     |
| Guatemala | 1993           | MaleAge45to49       | 159757     |
| Guatemala | 1993           | MaleAge50to54       | 128307     |
| Guatemala | 1993           | MaleAge55to59       | 113506     |
| Guatemala | 1993           | MaleAge5to9         | 723409     |
| Guatemala | 1993           | MaleAge60to64       | 94842      |
| Guatemala | 1993           | MaleAge65to69       | 70396      |
| Guatemala | 1993           | MaleAge70to74       | 46065      |
| Guatemala | 1993           | MaleAge75to79       | 26583      |
| Guatemala | 1993           | MaleAge80to84       | 13574      |
| Guatemala | 1993           | MaleAge85to89       | 5274       |
| Guatemala | 1993           | MaleAge90to94       | 1996       |
| Guatemala | 1993           | MaleAge95to99       | 470        |
| Guatemala | 1993           | MaleAgeAbov e100    | 84         |
| Guatemala | 1994           | FemaleAge0to4       | 817044     |
| Guatemala | 1994           | FemaleAge10to14     | 634613     |
| Guatemala | 1994           | FemaleAge15to19     | 422764     |
| Guatemala | 1994           | FemaleAge20to24     | 239048     |
| Guatemala | 1994           | FemaleAge25to29     | 196100     |
| Guatemala | 1994           | FemaleAge30to34     | 179464     |
| Guatemala | 1994           | FemaleAge35to39     | 171613     |
| Guatemala | 1994           | FemaleAge40to44     | 182134     |
| Guatemala | 1994           | FemaleAge45to49     | 166569     |
| Guatemala | 1994           | FemaleAge50to54     | 130533     |
| Guatemala | 1994           | FemaleAge55to59     | 115064     |
| Guatemala | 1994           | FemaleAge5to9       | 710437     |
| Guatemala | 1994           | FemaleAge60to64     | 100159     |
| Guatemala | 1994           | FemaleAge65to69     | 76262      |
| Guatemala | 1994           | FemaleAge70to74     | 51011      |
| Guatemala | 1994           | FemaleAge75to79     | 29919      |
| Guatemala | 1994           | FemaleAge80to84     | 16102      |

Dietary calcium and zinc deficiency risks are decreasing but remain prevalent

| Country   | Reference year | Age/gender group    | Population |
|-----------|----------------|---------------------|------------|
| Guatemala | 1994           | FemaleAge85to89     | 6551       |
| Guatemala | 1994           | FemaleAge90to94     | 2655       |
| Guatemala | 1994           | FemaleAge95to99     | 718        |
| Guatemala | 1994           | FemaleAgeAbove100   | 154        |
| Guatemala | 1994           | FemaleLactAge15to19 | 65894      |
| Guatemala | 1994           | FemaleLactAge20to24 | 112631     |
| Guatemala | 1994           | FemaleLactAge25to29 | 84544      |
| Guatemala | 1994           | FemaleLactAge30to34 | 56502      |
| Guatemala | 1994           | FemaleLactAge35to39 | 32838      |
| Guatemala | 1994           | FemaleLactAge40to44 | 12558      |
| Guatemala | 1994           | FemaleLactAge45to49 | 2124       |
| Guatemala | 1994           | FemalePregAge15to19 | 49421      |
| Guatemala | 1994           | FemalePregAge20to24 | 84474      |
| Guatemala | 1994           | FemalePregAge25to29 | 63408      |
| Guatemala | 1994           | FemalePregAge30to34 | 42377      |
| Guatemala | 1994           | FemalePregAge35to39 | 24629      |
| Guatemala | 1994           | FemalePregAge40to44 | 9419       |
| Guatemala | 1994           | FemalePregAge45to49 | 1593       |
| Guatemala | 1994           | MaleAge0to4         | 847819     |
| Guatemala | 1994           | MaleAge10to14       | 649985     |
| Guatemala | 1994           | MaleAge15to19       | 539969     |
| Guatemala | 1994           | MaleAge20to24       | 418037     |
| Guatemala | 1994           | MaleAge25to29       | 327151     |
| Guatemala | 1994           | MaleAge30to34       | 259656     |
| Guatemala | 1994           | MaleAge35to39       | 217293     |
| Guatemala | 1994           | MaleAge40to44       | 196498     |
| Guatemala | 1994           | MaleAge45to49       | 165409     |
| Guatemala | 1994           | MaleAge50to54       | 130048     |
| Guatemala | 1994           | MaleAge55to59       | 114157     |
| Guatemala | 1994           | MaleAge5to9         | 732022     |
| Guatemala | 1994           | MaleAge60to64       | 96672      |
| Guatemala | 1994           | MaleAge65to69       | 72716      |
| Guatemala | 1994           | MaleAge70to74       | 48289      |
| Guatemala | 1994           | MaleAge75to79       | 27541      |
| Guatemala | 1994           | MaleAge80to84       | 14116      |
| Guatemala | 1994           | MaleAge85to89       | 5240       |
| Guatemala | 1994           | MaleAge90to94       | 1913       |
| Guatemala | 1994           | MaleAge95to99       | 464        |
| Guatemala | 1994           | MaleAgeAbove100     | 81         |
| Guatemala | 1995           | FemaleAge0to4       | 836736     |
| Guatemala | 1995           | FemaleAge10to14     | 648867     |
| Guatemala | 1995           | FemaleAge15to19     | 439661     |
| Guatemala | 1995           | FemaleAge20to24     | 254347     |
| Guatemala | 1995           | FemaleAge25to29     | 207339     |
| Guatemala | 1995           | FemaleAge30to34     | 188841     |
| Guatemala | 1995           | FemaleAge35to39     | 176322     |
| Guatemala | 1995           | FemaleAge40to44     | 185753     |
| Guatemala | 1995           | FemaleAge45to49     | 173183     |
| Guatemala | 1995           | FemaleAge50to54     | 134725     |
| Guatemala | 1995           | FemaleAge55to59     | 116080     |
| Guatemala | 1995           | FemaleAge5to9       | 722304     |
| Guatemala | 1995           | FemaleAge60to64     | 102157     |
| Guatemala | 1995           | FemaleAge65to69     | 79295      |
| Guatemala | 1995           | FemaleAge70to74     | 53813      |
| Guatemala | 1995           | FemaleAge75to79     | 31619      |
| Guatemala | 1995           | FemaleAge80to84     | 16912      |
| Guatemala | 1995           | FemaleAge85to89     | 6679       |
| Guatemala | 1995           | FemaleAge90to94     | 2460       |
| Guatemala | 1995           | FemaleAge95to99     | 636        |
| Guatemala | 1995           | FemaleAgeAbove100   | 148        |
| Guatemala | 1995           | FemaleLactAge15to19 | 65894      |
| Guatemala | 1995           | FemaleLactAge20to24 | 112631     |
| Guatemala | 1995           | FemaleLactAge25to29 | 84544      |
| Guatemala | 1995           | FemaleLactAge30to34 | 56502      |
| Guatemala | 1995           | FemaleLactAge35to39 | 32838      |
| Guatemala | 1995           | FemaleLactAge40to44 | 12558      |
| Guatemala | 1995           | FemaleLactAge45to49 | 2124       |
| Guatemala | 1995           | FemalePregAge15to19 | 49421      |
| Guatemala | 1995           | FemalePregAge20to24 | 84474      |
| Guatemala | 1995           | FemalePregAge25to29 | 63408      |
| Guatemala | 1995           | FemalePregAge30to34 | 42377      |
| Guatemala | 1995           | FemalePregAge35to39 | 24629      |
| Guatemala | 1995           | FemalePregAge40to44 | 9419       |
| Guatemala | 1995           | FemalePregAge45to49 | 1593       |
| Guatemala | 1995           | MaleAge0to4         | 867010     |
| Guatemala | 1995           | MaleAge10to14       | 662694     |
| Guatemala | 1995           | MaleAge15to19       | 557140     |
| Guatemala | 1995           | MaleAge20to24       | 427525     |
| Guatemala | 1995           | MaleAge25to29       | 333881     |
| Guatemala | 1995           | MaleAge30to34       | 263543     |
| Guatemala | 1995           | MaleAge35to39       | 218666     |
| Guatemala | 1995           | MaleAge40to44       | 197883     |
| Guatemala | 1995           | MaleAge45to49       | 170265     |
| Guatemala | 1995           | MaleAge50to54       | 133044     |
| Guatemala | 1995           | MaleAge55to59       | 114937     |
| Guatemala | 1995           | MaleAge5to9         | 742411     |
| Guatemala | 1995           | MaleAge60to64       | 98246      |
| Guatemala | 1995           | MaleAge65to69       | 75053      |

Dietary calcium and zinc deficiency risks are decreasing but remain prevalent

| Country   | Reference year | Age/gender group    | Population |
|-----------|----------------|---------------------|------------|
| Guatemala | 1995           | MaleAge70to74       | 50545      |
| Guatemala | 1995           | MaleAge75to79       | 28796      |
| Guatemala | 1995           | MaleAge80to84       | 14537      |
| Guatemala | 1995           | MaleAge85to89       | 5233       |
| Guatemala | 1995           | MaleAge90to94       | 1701       |
| Guatemala | 1995           | MaleAge95to99       | 389        |
| Guatemala | 1995           | MaleAgeAbov e100    | 77         |
| Guatemala | 1996           | FemaleAge0to4       | 859692     |
| Guatemala | 1996           | FemaleAge10to14     | 659995     |
| Guatemala | 1996           | FemaleAge15to19     | 443407     |
| Guatemala | 1996           | FemaleAge20to24     | 249093     |
| Guatemala | 1996           | FemaleAge25to29     | 207054     |
| Guatemala | 1996           | FemaleAge30to34     | 191588     |
| Guatemala | 1996           | FemaleAge35to39     | 182215     |
| Guatemala | 1996           | FemaleAge40to44     | 189324     |
| Guatemala | 1996           | FemaleAge45to49     | 178574     |
| Guatemala | 1996           | FemaleAge50to54     | 140017     |
| Guatemala | 1996           | FemaleAge55to59     | 116925     |
| Guatemala | 1996           | FemaleAge5to9       | 736563     |
| Guatemala | 1996           | FemaleAge60to64     | 103379     |
| Guatemala | 1996           | FemaleAge65to69     | 82047      |
| Guatemala | 1996           | FemaleAge70to74     | 56597      |
| Guatemala | 1996           | FemaleAge75to79     | 33517      |
| Guatemala | 1996           | FemaleAge80to84     | 17762      |
| Guatemala | 1996           | FemaleAge85to89     | 7275       |
| Guatemala | 1996           | FemaleAge90to94     | 2588       |
| Guatemala | 1996           | FemaleAge95to99     | 668        |
| Guatemala | 1996           | FemaleAgeAbov e100  | 143        |
| Guatemala | 1996           | FemaleLactAge15to19 | 71805      |
| Guatemala | 1996           | FemaleLactAge20to24 | 123980     |
| Guatemala | 1996           | FemaleLactAge25to29 | 92283      |
| Guatemala | 1996           | FemaleLactAge30to34 | 60174      |
| Guatemala | 1996           | FemaleLactAge35to39 | 33072      |
| Guatemala | 1996           | FemaleLactAge40to44 | 12074      |
| Guatemala | 1996           | FemaleLactAge45to49 | 2140       |
| Guatemala | 1996           | FemalePregAge15to19 | 53854      |
| Guatemala | 1996           | FemalePregAge20to24 | 92985      |
| Guatemala | 1996           | FemalePregAge25to29 | 69212      |
| Guatemala | 1996           | FemalePregAge30to34 | 45131      |
| Guatemala | 1996           | FemalePregAge35to39 | 24804      |
| Guatemala | 1996           | FemalePregAge40to44 | 9056       |
| Guatemala | 1996           | FemalePregAge45to49 | 1605       |
| Guatemala | 1996           | MaleAge0to4         | 889904     |
| Guatemala | 1996           | MaleAge10to14       | 671517     |
| Guatemala | 1996           | MaleAge15to19       | 567192     |
| Guatemala | 1996           | MaleAge20to24       | 439711     |
| Guatemala | 1996           | MaleAge25to29       | 340778     |
| Guatemala | 1996           | MaleAge30to34       | 269605     |
| Guatemala | 1996           | MaleAge35to39       | 221358     |
| Guatemala | 1996           | MaleAge40to44       | 198815     |
| Guatemala | 1996           | MaleAge45to49       | 174189     |
| Guatemala | 1996           | MaleAge50to54       | 136934     |
| Guatemala | 1996           | MaleAge55to59       | 115518     |
| Guatemala | 1996           | MaleAge5to9         | 755119     |
| Guatemala | 1996           | MaleAge60to64       | 99448      |
| Guatemala | 1996           | MaleAge65to69       | 77338      |
| Guatemala | 1996           | MaleAge70to74       | 52845      |
| Guatemala | 1996           | MaleAge75to79       | 30434      |
| Guatemala | 1996           | MaleAge80to84       | 15266      |
| Guatemala | 1996           | MaleAge85to89       | 5758       |
| Guatemala | 1996           | MaleAge90to94       | 1812       |
| Guatemala | 1996           | MaleAge95to99       | 409        |
| Guatemala | 1996           | MaleAgeAbov e100    | 74         |
| Guatemala | 1997           | FemaleAge0to4       | 876025     |
| Guatemala | 1997           | FemaleAge10to14     | 670770     |
| Guatemala | 1997           | FemaleAge15to19     | 458651     |
| Guatemala | 1997           | FemaleAge20to24     | 263931     |
| Guatemala | 1997           | FemaleAge25to29     | 221136     |
| Guatemala | 1997           | FemaleAge30to34     | 201141     |
| Guatemala | 1997           | FemaleAge35to39     | 190038     |
| Guatemala | 1997           | FemaleAge40to44     | 191923     |
| Guatemala | 1997           | FemaleAge45to49     | 183355     |
| Guatemala | 1997           | FemaleAge50to54     | 146835     |
| Guatemala | 1997           | FemaleAge55to59     | 118026     |
| Guatemala | 1997           | FemaleAge5to9       | 754457     |
| Guatemala | 1997           | FemaleAge60to64     | 104340     |
| Guatemala | 1997           | FemaleAge65to69     | 84874      |
| Guatemala | 1997           | FemaleAge70to74     | 59494      |
| Guatemala | 1997           | FemaleAge75to79     | 35681      |
| Guatemala | 1997           | FemaleAge80to84     | 18598      |
| Guatemala | 1997           | FemaleAge85to89     | 7865       |
| Guatemala | 1997           | FemaleAge90to94     | 2639       |
| Guatemala | 1997           | FemaleAge95to99     | 742        |
| Guatemala | 1997           | FemaleAgeAbov e100  | 139        |
| Guatemala | 1997           | FemaleLactAge15to19 | 71805      |
| Guatemala | 1997           | FemaleLactAge20to24 | 123980     |
| Guatemala | 1997           | FemaleLactAge25to29 | 92283      |
| Guatemala | 1997           | FemaleLactAge30to34 | 60174      |

Dietary calcium and zinc deficiency risks are decreasing but remain prevalent

| Country   | Reference year | Age/gender group    | Population |
|-----------|----------------|---------------------|------------|
| Guatemala | 1997           | FemaleLactAge35to39 | 33072      |
| Guatemala | 1997           | FemaleLactAge40to44 | 12074      |
| Guatemala | 1997           | FemaleLactAge45to49 | 2140       |
| Guatemala | 1997           | FemalePregAge15to19 | 53854      |
| Guatemala | 1997           | FemalePregAge20to24 | 92985      |
| Guatemala | 1997           | FemalePregAge25to29 | 69212      |
| Guatemala | 1997           | FemalePregAge30to34 | 45131      |
| Guatemala | 1997           | FemalePregAge35to39 | 24804      |
| Guatemala | 1997           | FemalePregAge40to44 | 9056       |
| Guatemala | 1997           | FemalePregAge45to49 | 1605       |
| Guatemala | 1997           | MaleAge0to4         | 905972     |
| Guatemala | 1997           | MaleAge10to14       | 680648     |
| Guatemala | 1997           | MaleAge15to19       | 579105     |
| Guatemala | 1997           | MaleAge20to24       | 452593     |
| Guatemala | 1997           | MaleAge25to29       | 348002     |
| Guatemala | 1997           | MaleAge30to34       | 275571     |
| Guatemala | 1997           | MaleAge35to39       | 225171     |
| Guatemala | 1997           | MaleAge40to44       | 199296     |
| Guatemala | 1997           | MaleAge45to49       | 177652     |
| Guatemala | 1997           | MaleAge50to54       | 142108     |
| Guatemala | 1997           | MaleAge55to59       | 116182     |
| Guatemala | 1997           | MaleAge5to9         | 772163     |
| Guatemala | 1997           | MaleAge60to64       | 100555     |
| Guatemala | 1997           | MaleAge65to69       | 79705      |
| Guatemala | 1997           | MaleAge70to74       | 55215      |
| Guatemala | 1997           | MaleAge75to79       | 32295      |
| Guatemala | 1997           | MaleAge80to84       | 15933      |
| Guatemala | 1997           | MaleAge85to89       | 6241       |
| Guatemala | 1997           | MaleAge90to94       | 1859       |
| Guatemala | 1997           | MaleAge95to99       | 463        |
| Guatemala | 1997           | MaleAgeAbov e100    | 71         |
| Guatemala | 1998           | FemaleAge0to4       | 888021     |
| Guatemala | 1998           | FemaleAge10to14     | 681448     |
| Guatemala | 1998           | FemaleAge15to19     | 474658     |
| Guatemala | 1998           | FemaleAge20to24     | 279021     |
| Guatemala | 1998           | FemaleAge25to29     | 235462     |
| Guatemala | 1998           | FemaleAge30to34     | 211399     |
| Guatemala | 1998           | FemaleAge35to39     | 198789     |
| Guatemala | 1998           | FemaleAge40to44     | 194886     |
| Guatemala | 1998           | FemaleAge45to49     | 187531     |
| Guatemala | 1998           | FemaleAge50to54     | 154444     |
| Guatemala | 1998           | FemaleAge55to59     | 119754     |
| Guatemala | 1998           | FemaleAge5to9       | 775522     |
| Guatemala | 1998           | FemaleAge60to64     | 105153     |
| Guatemala | 1998           | FemaleAge65to69     | 87627      |
| Guatemala | 1998           | FemaleAge70to74     | 62461      |
| Guatemala | 1998           | FemaleAge75to79     | 38061      |
| Guatemala | 1998           | FemaleAge80to84     | 19548      |
| Guatemala | 1998           | FemaleAge85to89     | 8373       |
| Guatemala | 1998           | FemaleAge90to94     | 2651       |
| Guatemala | 1998           | FemaleAge95to99     | 798        |
| Guatemala | 1998           | FemaleAgeAbov e100  | 136        |
| Guatemala | 1998           | FemaleLactAge15to19 | 71805      |
| Guatemala | 1998           | FemaleLactAge20to24 | 123980     |
| Guatemala | 1998           | FemaleLactAge25to29 | 92283      |
| Guatemala | 1998           | FemaleLactAge30to34 | 60174      |
| Guatemala | 1998           | FemaleLactAge35to39 | 33072      |
| Guatemala | 1998           | FemaleLactAge40to44 | 12074      |
| Guatemala | 1998           | FemaleLactAge45to49 | 2140       |
| Guatemala | 1998           | FemalePregAge15to19 | 53854      |
| Guatemala | 1998           | FemalePregAge20to24 | 92985      |
| Guatemala | 1998           | FemalePregAge25to29 | 69212      |
| Guatemala | 1998           | FemalePregAge30to34 | 45131      |
| Guatemala | 1998           | FemalePregAge35to39 | 24804      |
| Guatemala | 1998           | FemalePregAge40to44 | 9056       |
| Guatemala | 1998           | FemalePregAge45to49 | 1605       |
| Guatemala | 1998           | MaleAge0to4         | 917682     |
| Guatemala | 1998           | MaleAge10to14       | 689897     |
| Guatemala | 1998           | MaleAge15to19       | 593557     |
| Guatemala | 1998           | MaleAge20to24       | 465096     |
| Guatemala | 1998           | MaleAge25to29       | 356179     |
| Guatemala | 1998           | MaleAge30to34       | 281078     |
| Guatemala | 1998           | MaleAge35to39       | 229823     |
| Guatemala | 1998           | MaleAge40to44       | 199663     |
| Guatemala | 1998           | MaleAge45to49       | 180587     |
| Guatemala | 1998           | MaleAge50to54       | 147959     |
| Guatemala | 1998           | MaleAge55to59       | 117264     |
| Guatemala | 1998           | MaleAge5to9         | 793070     |
| Guatemala | 1998           | MaleAge60to64       | 101606     |
| Guatemala | 1998           | MaleAge65to69       | 82039      |
| Guatemala | 1998           | MaleAge70to74       | 57646      |
| Guatemala | 1998           | MaleAge75to79       | 34329      |
| Guatemala | 1998           | MaleAge80to84       | 16650      |
| Guatemala | 1998           | MaleAge85to89       | 6608       |
| Guatemala | 1998           | MaleAge90to94       | 1866       |
| Guatemala | 1998           | MaleAge95to99       | 503        |
| Guatemala | 1998           | MaleAgeAbov e100    | 69         |
| Guatemala | 1999           | FemaleAge0to4       | 899798     |

Dietary calcium and zinc deficiency risks are decreasing but remain prevalent

| Country   | Reference year | Age/gender group    | Population |
|-----------|----------------|---------------------|------------|
| Guatemala | 1999           | FemaleAge10to14     | 693317     |
| Guatemala | 1999           | FemaleAge15to19     | 490385     |
| Guatemala | 1999           | FemaleAge20to24     | 294341     |
| Guatemala | 1999           | FemaleAge25to29     | 249582     |
| Guatemala | 1999           | FemaleAge30to34     | 222534     |
| Guatemala | 1999           | FemaleAge35to39     | 207752     |
| Guatemala | 1999           | FemaleAge40to44     | 198790     |
| Guatemala | 1999           | FemaleAge45to49     | 191240     |
| Guatemala | 1999           | FemaleAge50to54     | 161749     |
| Guatemala | 1999           | FemaleAge55to59     | 122609     |
| Guatemala | 1999           | FemaleAge5to9       | 797786     |
| Guatemala | 1999           | FemaleAge60to64     | 106008     |
| Guatemala | 1999           | FemaleAge65to69     | 90061      |
| Guatemala | 1999           | FemaleAge70to74     | 65444      |
| Guatemala | 1999           | FemaleAge75to79     | 40584      |
| Guatemala | 1999           | FemaleAge80to84     | 20727      |
| Guatemala | 1999           | FemaleAge85to89     | 8768       |
| Guatemala | 1999           | FemaleAge90to94     | 2651       |
| Guatemala | 1999           | FemaleAge95to99     | 784        |
| Guatemala | 1999           | FemaleAgeAbove100   | 134        |
| Guatemala | 1999           | FemaleLactAge15to19 | 71805      |
| Guatemala | 1999           | FemaleLactAge20to24 | 123980     |
| Guatemala | 1999           | FemaleLactAge25to29 | 92283      |
| Guatemala | 1999           | FemaleLactAge30to34 | 60174      |
| Guatemala | 1999           | FemaleLactAge35to39 | 33072      |
| Guatemala | 1999           | FemaleLactAge40to44 | 12074      |
| Guatemala | 1999           | FemaleLactAge45to49 | 2140       |
| Guatemala | 1999           | FemalePregAge15to19 | 53854      |
| Guatemala | 1999           | FemalePregAge20to24 | 92985      |
| Guatemala | 1999           | FemalePregAge25to29 | 69212      |
| Guatemala | 1999           | FemalePregAge30to34 | 45131      |
| Guatemala | 1999           | FemalePregAge35to39 | 24804      |
| Guatemala | 1999           | FemalePregAge40to44 | 9056       |
| Guatemala | 1999           | FemalePregAge45to49 | 1605       |
| Guatemala | 1999           | MaleAge0to4         | 929491     |
| Guatemala | 1999           | MaleAge10to14       | 700606     |
| Guatemala | 1999           | MaleAge15to19       | 609487     |
| Guatemala | 1999           | MaleAge20to24       | 476999     |
| Guatemala | 1999           | MaleAge25to29       | 365425     |
| Guatemala | 1999           | MaleAge30to34       | 286127     |
| Guatemala | 1999           | MaleAge35to39       | 234631     |
| Guatemala | 1999           | MaleAge40to44       | 200448     |
| Guatemala | 1999           | MaleAge45to49       | 182909     |
| Guatemala | 1999           | MaleAge50to54       | 153572     |
| Guatemala | 1999           | MaleAge55to59       | 119240     |
| Guatemala | 1999           | MaleAge5to9         | 815631     |
| Guatemala | 1999           | MaleAge60to64       | 102635     |
| Guatemala | 1999           | MaleAge65to69       | 84170      |
| Guatemala | 1999           | MaleAge70to74       | 60112      |
| Guatemala | 1999           | MaleAge75to79       | 36450      |
| Guatemala | 1999           | MaleAge80to84       | 17529      |
| Guatemala | 1999           | MaleAge85to89       | 6832       |
| Guatemala | 1999           | MaleAge90to94       | 1846       |
| Guatemala | 1999           | MaleAge95to99       | 486        |
| Guatemala | 1999           | MaleAgeAbove100     | 67         |
| Guatemala | 2000           | FemaleAge0to4       | 914427     |
| Guatemala | 2000           | FemaleAge15to19     | 505107     |
| Guatemala | 2000           | FemaleAge45to49     | 194690     |
| Guatemala | 2000           | FemaleAge50to54     | 168097     |
| Guatemala | 2000           | FemaleAge55to59     | 126832     |
| Guatemala | 2000           | FemaleAge70to74     | 68410      |
| Guatemala | 2000           | MaleAge20to24       | 489486     |
| Guatemala | 2000           | MaleAge25to29       | 375281     |
| Guatemala | 2000           | MaleAge30to34       | 291154     |
| Guatemala | 2000           | MaleAge35to39       | 238988     |
| Guatemala | 2000           | MaleAge40to44       | 202010     |
| Guatemala | 2000           | MaleAge45to49       | 184617     |
| Guatemala | 2000           | MaleAge50to54       | 158407     |
| Guatemala | 2000           | MaleAge55to59       | 122367     |
| Guatemala | 2000           | MaleAge70to74       | 62589      |
| Guinea    | 1992           | FemaleAge0to4       | 602578     |
| Guinea    | 1992           | FemaleAge10to14     | 399738     |
| Guinea    | 1992           | FemaleAge15to19     | 222668     |
| Guinea    | 1992           | FemaleAge20to24     | 138364     |
| Guinea    | 1992           | FemaleAge25to29     | 119667     |
| Guinea    | 1992           | FemaleAge30to34     | 119302     |
| Guinea    | 1992           | FemaleAge35to39     | 128491     |
| Guinea    | 1992           | FemaleAge40to44     | 120017     |
| Guinea    | 1992           | FemaleAge45to49     | 112664     |
| Guinea    | 1992           | FemaleAge50to54     | 107608     |
| Guinea    | 1992           | FemaleAge55to59     | 91249      |
| Guinea    | 1992           | FemaleAge5to9       | 483140     |
| Guinea    | 1992           | FemaleAge60to64     | 75092      |
| Guinea    | 1992           | FemaleAge65to69     | 57835      |
| Guinea    | 1992           | FemaleAge70to74     | 38908      |
| Guinea    | 1992           | FemaleAge75to79     | 21174      |
| Guinea    | 1992           | FemaleAge80to84     | 8302       |
| Guinea    | 1992           | FemaleAge85to89     | 2046       |

Dietary calcium and zinc deficiency risks are decreasing but remain prevalent

| Country | Reference year | Age/gender group    | Population |
|---------|----------------|---------------------|------------|
| Guinea  | 1992           | FemaleAge90to94     | 283        |
| Guinea  | 1992           | FemaleAge95to99     | 19         |
| Guinea  | 1992           | FemaleLactAge15to19 | 61794      |
| Guinea  | 1992           | FemaleLactAge20to24 | 78010      |
| Guinea  | 1992           | FemaleLactAge25to29 | 67819      |
| Guinea  | 1992           | FemaleLactAge30to34 | 52499      |
| Guinea  | 1992           | FemaleLactAge35to39 | 34210      |
| Guinea  | 1992           | FemaleLactAge40to44 | 16041      |
| Guinea  | 1992           | FemaleLactAge45to49 | 4595       |
| Guinea  | 1992           | FemalePregAge15to19 | 46346      |
| Guinea  | 1992           | FemalePregAge20to24 | 58507      |
| Guinea  | 1992           | FemalePregAge25to29 | 50864      |
| Guinea  | 1992           | FemalePregAge30to34 | 39374      |
| Guinea  | 1992           | FemalePregAge35to39 | 25658      |
| Guinea  | 1992           | FemalePregAge40to44 | 12031      |
| Guinea  | 1992           | FemalePregAge45to49 | 3447       |
| Guinea  | 1992           | MaleAge0to4         | 605553     |
| Guinea  | 1992           | MaleAge10to14       | 399342     |
| Guinea  | 1992           | MaleAge15to19       | 328946     |
| Guinea  | 1992           | MaleAge20to24       | 273073     |
| Guinea  | 1992           | MaleAge25to29       | 236307     |
| Guinea  | 1992           | MaleAge30to34       | 208221     |
| Guinea  | 1992           | MaleAge35to39       | 184246     |
| Guinea  | 1992           | MaleAge40to44       | 144844     |
| Guinea  | 1992           | MaleAge45to49       | 116804     |
| Guinea  | 1992           | MaleAge50to54       | 100208     |
| Guinea  | 1992           | MaleAge55to59       | 81362      |
| Guinea  | 1992           | MaleAge5to9         | 484520     |
| Guinea  | 1992           | MaleAge60to64       | 64909      |
| Guinea  | 1992           | MaleAge65to69       | 48767      |
| Guinea  | 1992           | MaleAge70to74       | 31975      |
| Guinea  | 1992           | MaleAge75to79       | 16821      |
| Guinea  | 1992           | MaleAge80to84       | 6317       |
| Guinea  | 1992           | MaleAge85to89       | 1485       |
| Guinea  | 1992           | MaleAge90to94       | 185        |
| Guinea  | 1992           | MaleAge95to99       | 19         |
| Guinea  | 1993           | FemaleAge0to4       | 637993     |
| Guinea  | 1993           | FemaleAge10to14     | 425671     |
| Guinea  | 1993           | FemaleAge15to19     | 244527     |
| Guinea  | 1993           | FemaleAge20to24     | 155139     |
| Guinea  | 1993           | FemaleAge25to29     | 131276     |
| Guinea  | 1993           | FemaleAge30to34     | 129796     |
| Guinea  | 1993           | FemaleAge35to39     | 137023     |
| Guinea  | 1993           | FemaleAge40to44     | 133836     |
| Guinea  | 1993           | FemaleAge45to49     | 117409     |
| Guinea  | 1993           | FemaleAge50to54     | 112932     |
| Guinea  | 1993           | FemaleAge55to59     | 95919      |
| Guinea  | 1993           | FemaleAge5to9       | 512993     |
| Guinea  | 1993           | FemaleAge60to64     | 78781      |
| Guinea  | 1993           | FemaleAge65to69     | 60973      |
| Guinea  | 1993           | FemaleAge70to74     | 41363      |
| Guinea  | 1993           | FemaleAge75to79     | 22697      |
| Guinea  | 1993           | FemaleAge80to84     | 9038       |
| Guinea  | 1993           | FemaleAge85to89     | 2236       |
| Guinea  | 1993           | FemaleAge90to94     | 337        |
| Guinea  | 1993           | FemaleAge95to99     | 30         |
| Guinea  | 1993           | FemaleAgeAbove100   | 1          |
| Guinea  | 1993           | FemaleLactAge15to19 | 61794      |
| Guinea  | 1993           | FemaleLactAge20to24 | 78010      |
| Guinea  | 1993           | FemaleLactAge25to29 | 67819      |
| Guinea  | 1993           | FemaleLactAge30to34 | 52499      |
| Guinea  | 1993           | FemaleLactAge35to39 | 34210      |
| Guinea  | 1993           | FemaleLactAge40to44 | 16041      |
| Guinea  | 1993           | FemaleLactAge45to49 | 4595       |
| Guinea  | 1993           | FemalePregAge15to19 | 46346      |
| Guinea  | 1993           | FemalePregAge20to24 | 58507      |
| Guinea  | 1993           | FemalePregAge25to29 | 50864      |
| Guinea  | 1993           | FemalePregAge30to34 | 39374      |
| Guinea  | 1993           | FemalePregAge35to39 | 25658      |
| Guinea  | 1993           | FemalePregAge40to44 | 12031      |
| Guinea  | 1993           | FemalePregAge45to49 | 3447       |
| Guinea  | 1993           | MaleAge0to4         | 641320     |
| Guinea  | 1993           | MaleAge10to14       | 425823     |
| Guinea  | 1993           | MaleAge15to19       | 351182     |
| Guinea  | 1993           | MaleAge20to24       | 289694     |
| Guinea  | 1993           | MaleAge25to29       | 248159     |
| Guinea  | 1993           | MaleAge30to34       | 218874     |
| Guinea  | 1993           | MaleAge35to39       | 192969     |
| Guinea  | 1993           | MaleAge40to44       | 158055     |
| Guinea  | 1993           | MaleAge45to49       | 121778     |
| Guinea  | 1993           | MaleAge50to54       | 105859     |
| Guinea  | 1993           | MaleAge55to59       | 85838      |
| Guinea  | 1993           | MaleAge5to9         | 515063     |
| Guinea  | 1993           | MaleAge60to64       | 68112      |
| Guinea  | 1993           | MaleAge65to69       | 51422      |
| Guinea  | 1993           | MaleAge70to74       | 33988      |
| Guinea  | 1993           | MaleAge75to79       | 18063      |
| Guinea  | 1993           | MaleAge80to84       | 6877       |

Dietary calcium and zinc deficiency risks are decreasing but remain prevalent

| Country | Reference year | Age/gender group    | Population |
|---------|----------------|---------------------|------------|
| Guinea  | 1993           | MaleAge85to89       | 1621       |
| Guinea  | 1993           | MaleAge90to94       | 226        |
| Guinea  | 1993           | MaleAge95to99       | 24         |
| Guinea  | 1994           | FemaleAge0to4       | 669067     |
| Guinea  | 1994           | FemaleAge10to14     | 450633     |
| Guinea  | 1994           | FemaleAge15to19     | 265685     |
| Guinea  | 1994           | FemaleAge20to24     | 171681     |
| Guinea  | 1994           | FemaleAge25to29     | 142586     |
| Guinea  | 1994           | FemaleAge30to34     | 139435     |
| Guinea  | 1994           | FemaleAge35to39     | 144717     |
| Guinea  | 1994           | FemaleAge40to44     | 146540     |
| Guinea  | 1994           | FemaleAge45to49     | 123135     |
| Guinea  | 1994           | FemaleAge50to54     | 117645     |
| Guinea  | 1994           | FemaleAge55to59     | 100349     |
| Guinea  | 1994           | FemaleAge5to9       | 539827     |
| Guinea  | 1994           | FemaleAge60to64     | 82417      |
| Guinea  | 1994           | FemaleAge65to69     | 64091      |
| Guinea  | 1994           | FemaleAge70to74     | 43891      |
| Guinea  | 1994           | FemaleAge75to79     | 24263      |
| Guinea  | 1994           | FemaleAge80to84     | 9682       |
| Guinea  | 1994           | FemaleAge85to89     | 2363       |
| Guinea  | 1994           | FemaleAge90to94     | 360        |
| Guinea  | 1994           | FemaleAge95to99     | 32         |
| Guinea  | 1994           | FemaleAgeAbove100   | 1          |
| Guinea  | 1994           | FemaleLactAge15to19 | 61794      |
| Guinea  | 1994           | FemaleLactAge20to24 | 78010      |
| Guinea  | 1994           | FemaleLactAge25to29 | 67819      |
| Guinea  | 1994           | FemaleLactAge30to34 | 52499      |
| Guinea  | 1994           | FemaleLactAge35to39 | 34210      |
| Guinea  | 1994           | FemaleLactAge40to44 | 16041      |
| Guinea  | 1994           | FemaleLactAge45to49 | 4595       |
| Guinea  | 1994           | FemalePregAge15to19 | 46346      |
| Guinea  | 1994           | FemalePregAge20to24 | 58507      |
| Guinea  | 1994           | FemalePregAge25to29 | 50864      |
| Guinea  | 1994           | FemalePregAge30to34 | 39374      |
| Guinea  | 1994           | FemalePregAge35to39 | 25658      |
| Guinea  | 1994           | FemalePregAge40to44 | 12031      |
| Guinea  | 1994           | FemalePregAge45to49 | 3447       |
| Guinea  | 1994           | MaleAge0to4         | 672784     |
| Guinea  | 1994           | MaleAge10to14       | 451425     |
| Guinea  | 1994           | MaleAge15to19       | 372845     |
| Guinea  | 1994           | MaleAge20to24       | 306187     |
| Guinea  | 1994           | MaleAge25to29       | 259664     |
| Guinea  | 1994           | MaleAge30to34       | 228746     |
| Guinea  | 1994           | MaleAge35to39       | 200942     |
| Guinea  | 1994           | MaleAge40to44       | 170297     |
| Guinea  | 1994           | MaleAge45to49       | 127638     |
| Guinea  | 1994           | MaleAge50to54       | 110981     |
| Guinea  | 1994           | MaleAge55to59       | 90239      |
| Guinea  | 1994           | MaleAge5to9         | 542625     |
| Guinea  | 1994           | MaleAge60to64       | 71332      |
| Guinea  | 1994           | MaleAge65to69       | 54054      |
| Guinea  | 1994           | MaleAge70to74       | 36057      |
| Guinea  | 1994           | MaleAge75to79       | 19314      |
| Guinea  | 1994           | MaleAge80to84       | 7360       |
| Guinea  | 1994           | MaleAge85to89       | 1706       |
| Guinea  | 1994           | MaleAge90to94       | 242        |
| Guinea  | 1994           | MaleAge95to99       | 22         |
| Guinea  | 1995           | FemaleAge0to4       | 690245     |
| Guinea  | 1995           | FemaleAge10to14     | 472585     |
| Guinea  | 1995           | FemaleAge15to19     | 284960     |
| Guinea  | 1995           | FemaleAge20to24     | 187032     |
| Guinea  | 1995           | FemaleAge25to29     | 153092     |
| Guinea  | 1995           | FemaleAge30to34     | 147466     |
| Guinea  | 1995           | FemaleAge35to39     | 151540     |
| Guinea  | 1995           | FemaleAge40to44     | 156539     |
| Guinea  | 1995           | FemaleAge45to49     | 130085     |
| Guinea  | 1995           | FemaleAge50to54     | 121335     |
| Guinea  | 1995           | FemaleAge55to59     | 104199     |
| Guinea  | 1995           | FemaleAge5to9       | 561748     |
| Guinea  | 1995           | FemaleAge60to64     | 85776      |
| Guinea  | 1995           | FemaleAge65to69     | 66994      |
| Guinea  | 1995           | FemaleAge70to74     | 46349      |
| Guinea  | 1995           | FemaleAge75to79     | 25849      |
| Guinea  | 1995           | FemaleAge80to84     | 10273      |
| Guinea  | 1995           | FemaleAge85to89     | 2424       |
| Guinea  | 1995           | FemaleAge90to94     | 308        |
| Guinea  | 1995           | FemaleAge95to99     | 19         |
| Guinea  | 1995           | FemaleAgeAbove100   | 1          |
| Guinea  | 1995           | FemaleLactAge15to19 | 61794      |
| Guinea  | 1995           | FemaleLactAge20to24 | 78010      |
| Guinea  | 1995           | FemaleLactAge25to29 | 67819      |
| Guinea  | 1995           | FemaleLactAge30to34 | 52499      |
| Guinea  | 1995           | FemaleLactAge35to39 | 34210      |
| Guinea  | 1995           | FemaleLactAge40to44 | 16041      |
| Guinea  | 1995           | FemaleLactAge45to49 | 4595       |
| Guinea  | 1995           | FemalePregAge15to19 | 46346      |
| Guinea  | 1995           | FemalePregAge20to24 | 58507      |

Dietary calcium and zinc deficiency risks are decreasing but remain prevalent

| Country | Reference year | Age/gender group    | Population |
|---------|----------------|---------------------|------------|
| Guinea  | 1995           | FemalePregAge25to29 | 50864      |
| Guinea  | 1995           | FemalePregAge30to34 | 39374      |
| Guinea  | 1995           | FemalePregAge35to39 | 25658      |
| Guinea  | 1995           | FemalePregAge40to44 | 12031      |
| Guinea  | 1995           | FemalePregAge45to49 | 3447       |
| Guinea  | 1995           | MaleAge0to4         | 694475     |
| Guinea  | 1995           | MaleAge10to14       | 474120     |
| Guinea  | 1995           | MaleAge15to19       | 392729     |
| Guinea  | 1995           | MaleAge20to24       | 321684     |
| Guinea  | 1995           | MaleAge25to29       | 270312     |
| Guinea  | 1995           | MaleAge30to34       | 237089     |
| Guinea  | 1995           | MaleAge35to39       | 208078     |
| Guinea  | 1995           | MaleAge40to44       | 180114     |
| Guinea  | 1995           | MaleAge45to49       | 134598     |
| Guinea  | 1995           | MaleAge50to54       | 115139     |
| Guinea  | 1995           | MaleAge55to59       | 94268      |
| Guinea  | 1995           | MaleAge5to9         | 565276     |
| Guinea  | 1995           | MaleAge60to64       | 74409      |
| Guinea  | 1995           | MaleAge65to69       | 56503      |
| Guinea  | 1995           | MaleAge70to74       | 38070      |
| Guinea  | 1995           | MaleAge75to79       | 20561      |
| Guinea  | 1995           | MaleAge80to84       | 7798       |
| Guinea  | 1995           | MaleAge85to89       | 1730       |
| Guinea  | 1995           | MaleAge90to94       | 197        |
| Guinea  | 1995           | MaleAge95to99       | 11         |
| Guinea  | 1996           | FemaleAge0to4       | 714592     |
| Guinea  | 1996           | FemaleAge10to14     | 488893     |
| Guinea  | 1996           | FemaleAge15to19     | 279345     |
| Guinea  | 1996           | FemaleAge20to24     | 175404     |
| Guinea  | 1996           | FemaleAge25to29     | 145045     |
| Guinea  | 1996           | FemaleAge30to34     | 142952     |
| Guinea  | 1996           | FemaleAge35to39     | 151777     |
| Guinea  | 1996           | FemaleAge40to44     | 160670     |
| Guinea  | 1996           | FemaleAge45to49     | 136565     |
| Guinea  | 1996           | FemaleAge50to54     | 122870     |
| Guinea  | 1996           | FemaleAge55to59     | 106194     |
| Guinea  | 1996           | FemaleAge5to9       | 582058     |
| Guinea  | 1996           | FemaleAge60to64     | 87303      |
| Guinea  | 1996           | FemaleAge65to69     | 68051      |
| Guinea  | 1996           | FemaleAge70to74     | 47351      |
| Guinea  | 1996           | FemaleAge75to79     | 26878      |
| Guinea  | 1996           | FemaleAge80to84     | 11166      |
| Guinea  | 1996           | FemaleAge85to89     | 2904       |
| Guinea  | 1996           | FemaleAge90to94     | 401        |
| Guinea  | 1996           | FemaleAge95to99     | 19         |
| Guinea  | 1996           | FemaleAgeAbove100   | 1          |
| Guinea  | 1996           | FemaleLactAge15to19 | 73341      |
| Guinea  | 1996           | FemaleLactAge20to24 | 91395      |
| Guinea  | 1996           | FemaleLactAge25to29 | 76866      |
| Guinea  | 1996           | FemaleLactAge30to34 | 57908      |
| Guinea  | 1996           | FemaleLactAge35to39 | 36551      |
| Guinea  | 1996           | FemaleLactAge40to44 | 17275      |
| Guinea  | 1996           | FemaleLactAge45to49 | 4710       |
| Guinea  | 1996           | FemalePregAge15to19 | 55006      |
| Guinea  | 1996           | FemalePregAge20to24 | 68546      |
| Guinea  | 1996           | FemalePregAge25to29 | 57650      |
| Guinea  | 1996           | FemalePregAge30to34 | 43431      |
| Guinea  | 1996           | FemalePregAge35to39 | 27413      |
| Guinea  | 1996           | FemalePregAge40to44 | 12957      |
| Guinea  | 1996           | FemalePregAge45to49 | 3532       |
| Guinea  | 1996           | MaleAge0to4         | 719245     |
| Guinea  | 1996           | MaleAge10to14       | 491150     |
| Guinea  | 1996           | MaleAge15to19       | 407873     |
| Guinea  | 1996           | MaleAge20to24       | 333754     |
| Guinea  | 1996           | MaleAge25to29       | 278225     |
| Guinea  | 1996           | MaleAge30to34       | 242370     |
| Guinea  | 1996           | MaleAge35to39       | 212685     |
| Guinea  | 1996           | MaleAge40to44       | 186275     |
| Guinea  | 1996           | MaleAge45to49       | 141034     |
| Guinea  | 1996           | MaleAge50to54       | 117104     |
| Guinea  | 1996           | MaleAge55to59       | 96679      |
| Guinea  | 1996           | MaleAge5to9         | 586314     |
| Guinea  | 1996           | MaleAge60to64       | 76044      |
| Guinea  | 1996           | MaleAge65to69       | 57537      |
| Guinea  | 1996           | MaleAge70to74       | 39024      |
| Guinea  | 1996           | MaleAge75to79       | 21499      |
| Guinea  | 1996           | MaleAge80to84       | 8554       |
| Guinea  | 1996           | MaleAge85to89       | 2097       |
| Guinea  | 1996           | MaleAge90to94       | 261        |
| Guinea  | 1996           | MaleAge95to99       | 9          |
| Guinea  | 1997           | FemaleAge0to4       | 731133     |
| Guinea  | 1997           | FemaleAge10to14     | 502216     |
| Guinea  | 1997           | FemaleAge15to19     | 291616     |
| Guinea  | 1997           | FemaleAge20to24     | 185567     |
| Guinea  | 1997           | FemaleAge25to29     | 151719     |
| Guinea  | 1997           | FemaleAge30to34     | 146261     |
| Guinea  | 1997           | FemaleAge35to39     | 154917     |
| Guinea  | 1997           | FemaleAge40to44     | 164106     |



Dietary calcium and zinc deficiency risks are decreasing but remain prevalent

| Country | Reference year | Age/gender group    | Population |
|---------|----------------|---------------------|------------|
| Guinea  | 1997           | FemaleAge45to49     | 144241     |
| Guinea  | 1997           | FemaleAge50to54     | 123171     |
| Guinea  | 1997           | FemaleAge55to59     | 107701     |
| Guinea  | 1997           | FemaleAge5to9       | 598079     |
| Guinea  | 1997           | FemaleAge60to64     | 88460      |
| Guinea  | 1997           | FemaleAge65to69     | 68715      |
| Guinea  | 1997           | FemaleAge70to74     | 48000      |
| Guinea  | 1997           | FemaleAge75to79     | 27551      |
| Guinea  | 1997           | FemaleAge80to84     | 11747      |
| Guinea  | 1997           | FemaleAge85to89     | 3240       |
| Guinea  | 1997           | FemaleAge90to94     | 475        |
| Guinea  | 1997           | FemaleAge95to99     | 36         |
| Guinea  | 1997           | FemaleAgeAbove100   | 1          |
| Guinea  | 1997           | FemaleLactAge15to19 | 73341      |
| Guinea  | 1997           | FemaleLactAge20to24 | 91395      |
| Guinea  | 1997           | FemaleLactAge25to29 | 76866      |
| Guinea  | 1997           | FemaleLactAge30to34 | 57908      |
| Guinea  | 1997           | FemaleLactAge35to39 | 36551      |
| Guinea  | 1997           | FemaleLactAge40to44 | 17275      |
| Guinea  | 1997           | FemaleLactAge45to49 | 4710       |
| Guinea  | 1997           | FemalePregAge15to19 | 55006      |
| Guinea  | 1997           | FemalePregAge20to24 | 68546      |
| Guinea  | 1997           | FemalePregAge25to29 | 57650      |
| Guinea  | 1997           | FemalePregAge30to34 | 43431      |
| Guinea  | 1997           | FemalePregAge35to39 | 27413      |
| Guinea  | 1997           | FemalePregAge40to44 | 12957      |
| Guinea  | 1997           | FemalePregAge45to49 | 3532       |
| Guinea  | 1997           | MaleAge0to4         | 736213     |
| Guinea  | 1997           | MaleAge10to14       | 505304     |
| Guinea  | 1997           | MaleAge15to19       | 420785     |
| Guinea  | 1997           | MaleAge20to24       | 344368     |
| Guinea  | 1997           | MaleAge25to29       | 284977     |
| Guinea  | 1997           | MaleAge30to34       | 246096     |
| Guinea  | 1997           | MaleAge35to39       | 216164     |
| Guinea  | 1997           | MaleAge40to44       | 189877     |
| Guinea  | 1997           | MaleAge45to49       | 148297     |
| Guinea  | 1997           | MaleAge50to54       | 117857     |
| Guinea  | 1997           | MaleAge55to59       | 98722      |
| Guinea  | 1997           | MaleAge5to9         | 603110     |
| Guinea  | 1997           | MaleAge60to64       | 77373      |
| Guinea  | 1997           | MaleAge65to69       | 58218      |
| Guinea  | 1997           | MaleAge70to74       | 39681      |
| Guinea  | 1997           | MaleAge75to79       | 22141      |
| Guinea  | 1997           | MaleAge80to84       | 9072       |
| Guinea  | 1997           | MaleAge85to89       | 2357       |
| Guinea  | 1997           | MaleAge90to94       | 315        |
| Guinea  | 1997           | MaleAge95to99       | 20         |
| Guinea  | 1998           | FemaleAge0to4       | 740528     |
| Guinea  | 1998           | FemaleAge10to14     | 513713     |
| Guinea  | 1998           | FemaleAge15to19     | 302337     |
| Guinea  | 1998           | FemaleAge20to24     | 194710     |
| Guinea  | 1998           | FemaleAge25to29     | 157868     |
| Guinea  | 1998           | FemaleAge30to34     | 148735     |
| Guinea  | 1998           | FemaleAge35to39     | 157295     |
| Guinea  | 1998           | FemaleAge40to44     | 165621     |
| Guinea  | 1998           | FemaleAge45to49     | 152153     |
| Guinea  | 1998           | FemaleAge50to54     | 123237     |
| Guinea  | 1998           | FemaleAge55to59     | 108831     |
| Guinea  | 1998           | FemaleAge5to9       | 610428     |
| Guinea  | 1998           | FemaleAge60to64     | 89420      |
| Guinea  | 1998           | FemaleAge65to69     | 69217      |
| Guinea  | 1998           | FemaleAge70to74     | 48480      |
| Guinea  | 1998           | FemaleAge75to79     | 27971      |
| Guinea  | 1998           | FemaleAge80to84     | 12000      |
| Guinea  | 1998           | FemaleAge85to89     | 3380       |
| Guinea  | 1998           | FemaleAge90to94     | 529        |
| Guinea  | 1998           | FemaleAge95to99     | 53         |
| Guinea  | 1998           | FemaleAgeAbove100   | 1          |
| Guinea  | 1998           | FemaleLactAge15to19 | 73341      |
| Guinea  | 1998           | FemaleLactAge20to24 | 91395      |
| Guinea  | 1998           | FemaleLactAge25to29 | 76866      |
| Guinea  | 1998           | FemaleLactAge30to34 | 57908      |
| Guinea  | 1998           | FemaleLactAge35to39 | 36551      |
| Guinea  | 1998           | FemaleLactAge40to44 | 17275      |
| Guinea  | 1998           | FemaleLactAge45to49 | 4710       |
| Guinea  | 1998           | FemalePregAge15to19 | 55006      |
| Guinea  | 1998           | FemalePregAge20to24 | 68546      |
| Guinea  | 1998           | FemalePregAge25to29 | 57650      |
| Guinea  | 1998           | FemalePregAge30to34 | 43431      |
| Guinea  | 1998           | FemalePregAge35to39 | 27413      |
| Guinea  | 1998           | FemalePregAge40to44 | 12957      |
| Guinea  | 1998           | FemalePregAge45to49 | 3532       |
| Guinea  | 1998           | MaleAge0to4         | 746087     |
| Guinea  | 1998           | MaleAge10to14       | 517719     |
| Guinea  | 1998           | MaleAge15to19       | 432237     |
| Guinea  | 1998           | MaleAge20to24       | 354113     |
| Guinea  | 1998           | MaleAge25to29       | 291188     |
| Guinea  | 1998           | MaleAge30to34       | 249030     |

Dietary calcium and zinc deficiency risks are decreasing but remain prevalent

| Country | Reference year | Age/gender group    | Population |
|---------|----------------|---------------------|------------|
| Guinea  | 1998           | MaleAge35to39       | 218930     |
| Guinea  | 1998           | MaleAge40to44       | 191793     |
| Guinea  | 1998           | MaleAge45to49       | 155738     |
| Guinea  | 1998           | MaleAge50to54       | 118338     |
| Guinea  | 1998           | MaleAge55to59       | 100448     |
| Guinea  | 1998           | MaleAge5to9         | 616269     |
| Guinea  | 1998           | MaleAge60to64       | 78552      |
| Guinea  | 1998           | MaleAge65to69       | 58750      |
| Guinea  | 1998           | MaleAge70to74       | 40189      |
| Guinea  | 1998           | MaleAge75to79       | 22560      |
| Guinea  | 1998           | MaleAge80to84       | 9331       |
| Guinea  | 1998           | MaleAge85to89       | 2473       |
| Guinea  | 1998           | MaleAge90to94       | 357        |
| Guinea  | 1998           | MaleAge95to99       | 33         |
| Guinea  | 1999           | FemaleAge0to4       | 746167     |
| Guinea  | 1999           | FemaleAge10to14     | 524574     |
| Guinea  | 1999           | FemaleAge15to19     | 312545     |
| Guinea  | 1999           | FemaleAge20to24     | 203667     |
| Guinea  | 1999           | FemaleAge25to29     | 164187     |
| Guinea  | 1999           | FemaleAge30to34     | 151397     |
| Guinea  | 1999           | FemaleAge35to39     | 159321     |
| Guinea  | 1999           | FemaleAge40to44     | 166651     |
| Guinea  | 1999           | FemaleAge45to49     | 159102     |
| Guinea  | 1999           | FemaleAge50to54     | 124476     |
| Guinea  | 1999           | FemaleAge55to59     | 109660     |
| Guinea  | 1999           | FemaleAge5to9       | 620195     |
| Guinea  | 1999           | FemaleAge60to64     | 90381      |
| Guinea  | 1999           | FemaleAge65to69     | 69820      |
| Guinea  | 1999           | FemaleAge70to74     | 48967      |
| Guinea  | 1999           | FemaleAge75to79     | 28245      |
| Guinea  | 1999           | FemaleAge80to84     | 11978      |
| Guinea  | 1999           | FemaleAge85to89     | 3309       |
| Guinea  | 1999           | FemaleAge90to94     | 530        |
| Guinea  | 1999           | FemaleAge95to99     | 54         |
| Guinea  | 1999           | FemaleAgeAbove100   | 1          |
| Guinea  | 1999           | FemaleLactAge15to19 | 73341      |
| Guinea  | 1999           | FemaleLactAge20to24 | 91395      |
| Guinea  | 1999           | FemaleLactAge25to29 | 76866      |
| Guinea  | 1999           | FemaleLactAge30to34 | 57908      |
| Guinea  | 1999           | FemaleLactAge35to39 | 36551      |
| Guinea  | 1999           | FemaleLactAge40to44 | 17275      |
| Guinea  | 1999           | FemaleLactAge45to49 | 4710       |
| Guinea  | 1999           | FemalePregAge15to19 | 55006      |
| Guinea  | 1999           | FemalePregAge20to24 | 68546      |
| Guinea  | 1999           | FemalePregAge25to29 | 57650      |
| Guinea  | 1999           | FemalePregAge30to34 | 43431      |
| Guinea  | 1999           | FemalePregAge35to39 | 27413      |
| Guinea  | 1999           | FemalePregAge40to44 | 12957      |
| Guinea  | 1999           | FemalePregAge45to49 | 3532       |
| Guinea  | 1999           | MaleAge0to4         | 752273     |
| Guinea  | 1999           | MaleAge10to14       | 529555     |
| Guinea  | 1999           | MaleAge15to19       | 443269     |
| Guinea  | 1999           | MaleAge20to24       | 363749     |
| Guinea  | 1999           | MaleAge25to29       | 297643     |
| Guinea  | 1999           | MaleAge30to34       | 252115     |
| Guinea  | 1999           | MaleAge35to39       | 221391     |
| Guinea  | 1999           | MaleAge40to44       | 193329     |
| Guinea  | 1999           | MaleAge45to49       | 162343     |
| Guinea  | 1999           | MaleAge50to54       | 119854     |
| Guinea  | 1999           | MaleAge55to59       | 101859     |
| Guinea  | 1999           | MaleAge5to9         | 626866     |
| Guinea  | 1999           | MaleAge60to64       | 79775      |
| Guinea  | 1999           | MaleAge65to69       | 59380      |
| Guinea  | 1999           | MaleAge70to74       | 40676      |
| Guinea  | 1999           | MaleAge75to79       | 22841      |
| Guinea  | 1999           | MaleAge80to84       | 9360       |
| Guinea  | 1999           | MaleAge85to89       | 2433       |
| Guinea  | 1999           | MaleAge90to94       | 361        |
| Guinea  | 1999           | MaleAge95to99       | 33         |
| Guinea  | 2000           | FemaleAge0to4       | 752008     |
| Guinea  | 2000           | FemaleAge10to14     | 535200     |
| Guinea  | 2000           | FemaleAge15to19     | 323021     |
| Guinea  | 2000           | FemaleAge20to24     | 213055     |
| Guinea  | 2000           | FemaleAge25to29     | 171152     |
| Guinea  | 2000           | FemaleAge30to34     | 154901     |
| Guinea  | 2000           | FemaleAge35to39     | 161303     |
| Guinea  | 2000           | FemaleAge40to44     | 168117     |
| Guinea  | 2000           | FemaleAge45to49     | 164434     |
| Guinea  | 2000           | FemaleAge50to54     | 127660     |
| Guinea  | 2000           | FemaleAge55to59     | 110294     |
| Guinea  | 2000           | FemaleAge5to9       | 627970     |
| Guinea  | 2000           | FemaleAge60to64     | 91474      |
| Guinea  | 2000           | FemaleAge65to69     | 70685      |
| Guinea  | 2000           | FemaleAge70to74     | 49564      |
| Guinea  | 2000           | FemaleAge75to79     | 28484      |
| Guinea  | 2000           | FemaleAge80to84     | 11770      |
| Guinea  | 2000           | FemaleAge85to89     | 3013       |
| Guinea  | 2000           | FemaleAge90to94     | 404        |

Dietary calcium and zinc deficiency risks are decreasing but remain prevalent

| Country       | Reference year | Age/gender group    | Population |
|---------------|----------------|---------------------|------------|
| Guinea        | 2000           | FemaleAge95to99     | 28         |
| Guinea        | 2000           | FemaleAgeAbove100   | 1          |
| Guinea        | 2000           | FemaleLactAge15to19 | 73341      |
| Guinea        | 2000           | FemaleLactAge20to24 | 91395      |
| Guinea        | 2000           | FemaleLactAge25to29 | 76866      |
| Guinea        | 2000           | FemaleLactAge30to34 | 57908      |
| Guinea        | 2000           | FemaleLactAge35to39 | 36551      |
| Guinea        | 2000           | FemaleLactAge40to44 | 17275      |
| Guinea        | 2000           | FemaleLactAge45to49 | 4710       |
| Guinea        | 2000           | FemalePregAge15to19 | 55006      |
| Guinea        | 2000           | FemalePregAge20to24 | 68546      |
| Guinea        | 2000           | FemalePregAge25to29 | 57650      |
| Guinea        | 2000           | FemalePregAge30to34 | 43431      |
| Guinea        | 2000           | FemalePregAge35to39 | 27413      |
| Guinea        | 2000           | FemalePregAge40to44 | 12957      |
| Guinea        | 2000           | FemalePregAge45to49 | 3532       |
| Guinea        | 2000           | MaleAge0to4         | 758719     |
| Guinea        | 2000           | MaleAge10to14       | 541179     |
| Guinea        | 2000           | MaleAge15to19       | 454653     |
| Guinea        | 2000           | MaleAge20to24       | 373848     |
| Guinea        | 2000           | MaleAge25to29       | 304873     |
| Guinea        | 2000           | MaleAge30to34       | 255953     |
| Guinea        | 2000           | MaleAge35to39       | 223853     |
| Guinea        | 2000           | MaleAge40to44       | 195305     |
| Guinea        | 2000           | MaleAge45to49       | 167574     |
| Guinea        | 2000           | MaleAge50to54       | 123122     |
| Guinea        | 2000           | MaleAge55to59       | 103020     |
| Guinea        | 2000           | MaleAge5to9         | 635468     |
| Guinea        | 2000           | MaleAge60to64       | 81172      |
| Guinea        | 2000           | MaleAge65to69       | 60252      |
| Guinea        | 2000           | MaleAge70to74       | 41218      |
| Guinea        | 2000           | MaleAge75to79       | 23073      |
| Guinea        | 2000           | MaleAge80to84       | 9227       |
| Guinea        | 2000           | MaleAge85to89       | 2222       |
| Guinea        | 2000           | MaleAge90to94       | 264        |
| Guinea        | 2000           | MaleAge95to99       | 16         |
| Guinea-Bissau | 1992           | FemaleAge0to4       | 91664      |
| Guinea-Bissau | 1992           | FemaleAge10to14     | 63711      |
| Guinea-Bissau | 1992           | FemaleAge15to19     | 48669      |
| Guinea-Bissau | 1992           | FemaleAge20to24     | 20341      |
| Guinea-Bissau | 1992           | FemaleAge25to29     | 14181      |
| Guinea-Bissau | 1992           | FemaleAge30to34     | 16006      |
| Guinea-Bissau | 1992           | FemaleAge35to39     | 23249      |
| Guinea-Bissau | 1992           | FemaleAge40to44     | 20544      |
| Guinea-Bissau | 1992           | FemaleAge45to49     | 16806      |
| Guinea-Bissau | 1992           | FemaleAge50to54     | 15213      |
| Guinea-Bissau | 1992           | FemaleAge55to59     | 12495      |
| Guinea-Bissau | 1992           | FemaleAge5to9       | 80202      |
| Guinea-Bissau | 1992           | FemaleAge60to64     | 10650      |
| Guinea-Bissau | 1992           | FemaleAge65to69     | 8385       |
| Guinea-Bissau | 1992           | FemaleAge70to74     | 5941       |
| Guinea-Bissau | 1992           | FemaleAge75to79     | 3512       |
| Guinea-Bissau | 1992           | FemaleAge80to84     | 1486       |
| Guinea-Bissau | 1992           | FemaleAge85to89     | 378        |
| Guinea-Bissau | 1992           | FemaleAge90to94     | 58         |
| Guinea-Bissau | 1992           | FemaleAge95to99     | 5          |
| Guinea-Bissau | 1992           | FemaleLactAge15to19 | 8416       |
| Guinea-Bissau | 1992           | FemaleLactAge20to24 | 12573      |
| Guinea-Bissau | 1992           | FemaleLactAge25to29 | 9691       |
| Guinea-Bissau | 1992           | FemaleLactAge30to34 | 8086       |
| Guinea-Bissau | 1992           | FemaleLactAge35to39 | 5615       |
| Guinea-Bissau | 1992           | FemaleLactAge40to44 | 3105       |
| Guinea-Bissau | 1992           | FemaleLactAge45to49 | 643        |
| Guinea-Bissau | 1992           | FemalePregAge15to19 | 6312       |
| Guinea-Bissau | 1992           | FemalePregAge20to24 | 9429       |
| Guinea-Bissau | 1992           | FemalePregAge25to29 | 7268       |
| Guinea-Bissau | 1992           | FemalePregAge30to34 | 6065       |
| Guinea-Bissau | 1992           | FemalePregAge35to39 | 4211       |
| Guinea-Bissau | 1992           | FemalePregAge40to44 | 2329       |
| Guinea-Bissau | 1992           | FemalePregAge45to49 | 482        |
| Guinea-Bissau | 1992           | MaleAge0to4         | 91802      |
| Guinea-Bissau | 1992           | MaleAge10to14       | 63063      |
| Guinea-Bissau | 1992           | MaleAge15to19       | 62809      |
| Guinea-Bissau | 1992           | MaleAge20to24       | 41953      |
| Guinea-Bissau | 1992           | MaleAge25to29       | 30865      |
| Guinea-Bissau | 1992           | MaleAge30to34       | 29918      |
| Guinea-Bissau | 1992           | MaleAge35to39       | 32710      |
| Guinea-Bissau | 1992           | MaleAge40to44       | 25711      |
| Guinea-Bissau | 1992           | MaleAge45to49       | 17429      |
| Guinea-Bissau | 1992           | MaleAge50to54       | 14384      |
| Guinea-Bissau | 1992           | MaleAge55to59       | 11507      |
| Guinea-Bissau | 1992           | MaleAge5to9         | 79505      |
| Guinea-Bissau | 1992           | MaleAge60to64       | 9461       |
| Guinea-Bissau | 1992           | MaleAge65to69       | 7091       |
| Guinea-Bissau | 1992           | MaleAge70to74       | 4765       |
| Guinea-Bissau | 1992           | MaleAge75to79       | 2664       |
| Guinea-Bissau | 1992           | MaleAge80to84       | 1058       |
| Guinea-Bissau | 1992           | MaleAge85to89       | 242        |

Dietary calcium and zinc deficiency risks are decreasing but remain prevalent

| Country       | Reference year | Age/gender group    | Population |
|---------------|----------------|---------------------|------------|
| Guinea-Bissau | 1992           | MaleAge90to94       | 30         |
| Guinea-Bissau | 1992           | MaleAge95to99       | 3          |
| Guinea-Bissau | 1993           | FemaleAge0to4       | 94605      |
| Guinea-Bissau | 1993           | FemaleAge10to14     | 66856      |
| Guinea-Bissau | 1993           | FemaleAge15to19     | 45901      |
| Guinea-Bissau | 1993           | FemaleAge20to24     | 28037      |
| Guinea-Bissau | 1993           | FemaleAge25to29     | 11762      |
| Guinea-Bissau | 1993           | FemaleAge30to34     | 17503      |
| Guinea-Bissau | 1993           | FemaleAge35to39     | 20762      |
| Guinea-Bissau | 1993           | FemaleAge40to44     | 23888      |
| Guinea-Bissau | 1993           | FemaleAge45to49     | 16544      |
| Guinea-Bissau | 1993           | FemaleAge50to54     | 15895      |
| Guinea-Bissau | 1993           | FemaleAge55to59     | 12493      |
| Guinea-Bissau | 1993           | FemaleAge5to9       | 80938      |
| Guinea-Bissau | 1993           | FemaleAge60to64     | 10771      |
| Guinea-Bissau | 1993           | FemaleAge65to69     | 8449       |
| Guinea-Bissau | 1993           | FemaleAge70to74     | 6006       |
| Guinea-Bissau | 1993           | FemaleAge75to79     | 3551       |
| Guinea-Bissau | 1993           | FemaleAge80to84     | 1551       |
| Guinea-Bissau | 1993           | FemaleAge85to89     | 396        |
| Guinea-Bissau | 1993           | FemaleAge90to94     | 64         |
| Guinea-Bissau | 1993           | FemaleAge95to99     | 8          |
| Guinea-Bissau | 1993           | FemaleLactAge15to19 | 8416       |
| Guinea-Bissau | 1993           | FemaleLactAge20to24 | 12573      |
| Guinea-Bissau | 1993           | FemaleLactAge25to29 | 9691       |
| Guinea-Bissau | 1993           | FemaleLactAge30to34 | 8086       |
| Guinea-Bissau | 1993           | FemaleLactAge35to39 | 5615       |
| Guinea-Bissau | 1993           | FemaleLactAge40to44 | 3105       |
| Guinea-Bissau | 1993           | FemaleLactAge45to49 | 643        |
| Guinea-Bissau | 1993           | FemalePregAge15to19 | 6312       |
| Guinea-Bissau | 1993           | FemalePregAge20to24 | 9429       |
| Guinea-Bissau | 1993           | FemalePregAge25to29 | 7268       |
| Guinea-Bissau | 1993           | FemalePregAge30to34 | 6065       |
| Guinea-Bissau | 1993           | FemalePregAge35to39 | 4211       |
| Guinea-Bissau | 1993           | FemalePregAge40to44 | 2329       |
| Guinea-Bissau | 1993           | FemalePregAge45to49 | 482        |
| Guinea-Bissau | 1993           | MaleAge0to4         | 94734      |
| Guinea-Bissau | 1993           | MaleAge10to14       | 66164      |
| Guinea-Bissau | 1993           | MaleAge15to19       | 60035      |
| Guinea-Bissau | 1993           | MaleAge20to24       | 49529      |
| Guinea-Bissau | 1993           | MaleAge25to29       | 28435      |
| Guinea-Bissau | 1993           | MaleAge30to34       | 31368      |
| Guinea-Bissau | 1993           | MaleAge35to39       | 30238      |
| Guinea-Bissau | 1993           | MaleAge40to44       | 28932      |
| Guinea-Bissau | 1993           | MaleAge45to49       | 17231      |
| Guinea-Bissau | 1993           | MaleAge50to54       | 15027      |
| Guinea-Bissau | 1993           | MaleAge55to59       | 11488      |
| Guinea-Bissau | 1993           | MaleAge5to9         | 80230      |
| Guinea-Bissau | 1993           | MaleAge60to64       | 9576       |
| Guinea-Bissau | 1993           | MaleAge65to69       | 7148       |
| Guinea-Bissau | 1993           | MaleAge70to74       | 4814       |
| Guinea-Bissau | 1993           | MaleAge75to79       | 2684       |
| Guinea-Bissau | 1993           | MaleAge80to84       | 1102       |
| Guinea-Bissau | 1993           | MaleAge85to89       | 255        |
| Guinea-Bissau | 1993           | MaleAge90to94       | 35         |
| Guinea-Bissau | 1993           | MaleAge95to99       | 5          |
| Guinea-Bissau | 1994           | FemaleAge0to4       | 97619      |
| Guinea-Bissau | 1994           | FemaleAge10to14     | 70049      |
| Guinea-Bissau | 1994           | FemaleAge15to19     | 43674      |
| Guinea-Bissau | 1994           | FemaleAge20to24     | 34475      |
| Guinea-Bissau | 1994           | FemaleAge25to29     | 10940      |
| Guinea-Bissau | 1994           | FemaleAge30to34     | 18506      |
| Guinea-Bissau | 1994           | FemaleAge35to39     | 18676      |
| Guinea-Bissau | 1994           | FemaleAge40to44     | 26430      |
| Guinea-Bissau | 1994           | FemaleAge45to49     | 16896      |
| Guinea-Bissau | 1994           | FemaleAge50to54     | 16458      |
| Guinea-Bissau | 1994           | FemaleAge55to59     | 12612      |
| Guinea-Bissau | 1994           | FemaleAge5to9       | 81194      |
| Guinea-Bissau | 1994           | FemaleAge60to64     | 10892      |
| Guinea-Bissau | 1994           | FemaleAge65to69     | 8544       |
| Guinea-Bissau | 1994           | FemaleAge70to74     | 6088       |
| Guinea-Bissau | 1994           | FemaleAge75to79     | 3587       |
| Guinea-Bissau | 1994           | FemaleAge80to84     | 1573       |
| Guinea-Bissau | 1994           | FemaleAge85to89     | 398        |
| Guinea-Bissau | 1994           | FemaleAge90to94     | 64         |
| Guinea-Bissau | 1994           | FemaleAge95to99     | 7          |
| Guinea-Bissau | 1994           | FemaleLactAge15to19 | 8416       |
| Guinea-Bissau | 1994           | FemaleLactAge20to24 | 12573      |
| Guinea-Bissau | 1994           | FemaleLactAge25to29 | 9691       |
| Guinea-Bissau | 1994           | FemaleLactAge30to34 | 8086       |
| Guinea-Bissau | 1994           | FemaleLactAge35to39 | 5615       |
| Guinea-Bissau | 1994           | FemaleLactAge40to44 | 3105       |
| Guinea-Bissau | 1994           | FemaleLactAge45to49 | 643        |
| Guinea-Bissau | 1994           | FemalePregAge15to19 | 6312       |
| Guinea-Bissau | 1994           | FemalePregAge20to24 | 9429       |
| Guinea-Bissau | 1994           | FemalePregAge25to29 | 7268       |
| Guinea-Bissau | 1994           | FemalePregAge30to34 | 6065       |
| Guinea-Bissau | 1994           | FemalePregAge35to39 | 4211       |

Dietary calcium and zinc deficiency risks are decreasing but remain prevalent

| Country       | Reference year | Age/gender group    | Population |
|---------------|----------------|---------------------|------------|
| Guinea-Bissau | 1994           | FemalePregAge40to44 | 2329       |
| Guinea-Bissau | 1994           | FemalePregAge45to49 | 482        |
| Guinea-Bissau | 1994           | MaleAge0to4         | 97745      |
| Guinea-Bissau | 1994           | MaleAge10to14       | 69325      |
| Guinea-Bissau | 1994           | MaleAge15to19       | 57823      |
| Guinea-Bissau | 1994           | MaleAge20to24       | 55862      |
| Guinea-Bissau | 1994           | MaleAge25to29       | 27587      |
| Guinea-Bissau | 1994           | MaleAge30to34       | 32333      |
| Guinea-Bissau | 1994           | MaleAge35to39       | 28177      |
| Guinea-Bissau | 1994           | MaleAge40to44       | 31367      |
| Guinea-Bissau | 1994           | MaleAge45to49       | 17626      |
| Guinea-Bissau | 1994           | MaleAge50to54       | 15569      |
| Guinea-Bissau | 1994           | MaleAge55to59       | 11587      |
| Guinea-Bissau | 1994           | MaleAge5to9         | 80458      |
| Guinea-Bissau | 1994           | MaleAge60to64       | 9686       |
| Guinea-Bissau | 1994           | MaleAge65to69       | 7230       |
| Guinea-Bissau | 1994           | MaleAge70to74       | 4871       |
| Guinea-Bissau | 1994           | MaleAge75to79       | 2697       |
| Guinea-Bissau | 1994           | MaleAge80to84       | 1106       |
| Guinea-Bissau | 1994           | MaleAge85to89       | 254        |
| Guinea-Bissau | 1994           | MaleAge90to94       | 35         |
| Guinea-Bissau | 1994           | MaleAge95to99       | 4          |
| Guinea-Bissau | 1995           | FemaleAge0to4       | 100023     |
| Guinea-Bissau | 1995           | FemaleAge10to14     | 72476      |
| Guinea-Bissau | 1995           | FemaleAge15to19     | 43220      |
| Guinea-Bissau | 1995           | FemaleAge20to24     | 38320      |
| Guinea-Bissau | 1995           | FemaleAge25to29     | 12675      |
| Guinea-Bissau | 1995           | FemaleAge30to34     | 18470      |
| Guinea-Bissau | 1995           | FemaleAge35to39     | 17687      |
| Guinea-Bissau | 1995           | FemaleAge40to44     | 27578      |
| Guinea-Bissau | 1995           | FemaleAge45to49     | 18178      |
| Guinea-Bissau | 1995           | FemaleAge50to54     | 16808      |
| Guinea-Bissau | 1995           | FemaleAge55to59     | 12906      |
| Guinea-Bissau | 1995           | FemaleAge5to9       | 81709      |
| Guinea-Bissau | 1995           | FemaleAge60to64     | 11011      |
| Guinea-Bissau | 1995           | FemaleAge65to69     | 8679       |
| Guinea-Bissau | 1995           | FemaleAge70to74     | 6191       |
| Guinea-Bissau | 1995           | FemaleAge75to79     | 3632       |
| Guinea-Bissau | 1995           | FemaleAge80to84     | 1563       |
| Guinea-Bissau | 1995           | FemaleAge85to89     | 378        |
| Guinea-Bissau | 1995           | FemaleAge90to94     | 49         |
| Guinea-Bissau | 1995           | FemaleAge95to99     | 4          |
| Guinea-Bissau | 1995           | FemaleLactAge15to19 | 8416       |
| Guinea-Bissau | 1995           | FemaleLactAge20to24 | 12573      |
| Guinea-Bissau | 1995           | FemaleLactAge25to29 | 9691       |
| Guinea-Bissau | 1995           | FemaleLactAge30to34 | 8086       |
| Guinea-Bissau | 1995           | FemaleLactAge35to39 | 5615       |
| Guinea-Bissau | 1995           | FemaleLactAge40to44 | 3105       |
| Guinea-Bissau | 1995           | FemaleLactAge45to49 | 643        |
| Guinea-Bissau | 1995           | FemalePregAge15to19 | 6312       |
| Guinea-Bissau | 1995           | FemalePregAge20to24 | 9429       |
| Guinea-Bissau | 1995           | FemalePregAge25to29 | 7268       |
| Guinea-Bissau | 1995           | FemalePregAge30to34 | 6065       |
| Guinea-Bissau | 1995           | FemalePregAge35to39 | 4211       |
| Guinea-Bissau | 1995           | FemalePregAge40to44 | 2329       |
| Guinea-Bissau | 1995           | FemalePregAge45to49 | 482        |
| Guinea-Bissau | 1995           | MaleAge0to4         | 100189     |
| Guinea-Bissau | 1995           | MaleAge10to14       | 71727      |
| Guinea-Bissau | 1995           | MaleAge15to19       | 57386      |
| Guinea-Bissau | 1995           | MaleAge20to24       | 59645      |
| Guinea-Bissau | 1995           | MaleAge25to29       | 29274      |
| Guinea-Bissau | 1995           | MaleAge30to34       | 32274      |
| Guinea-Bissau | 1995           | MaleAge35to39       | 27203      |
| Guinea-Bissau | 1995           | MaleAge40to44       | 32454      |
| Guinea-Bissau | 1995           | MaleAge45to49       | 18909      |
| Guinea-Bissau | 1995           | MaleAge50to54       | 15924      |
| Guinea-Bissau | 1995           | MaleAge55to59       | 11859      |
| Guinea-Bissau | 1995           | MaleAge5to9         | 80918      |
| Guinea-Bissau | 1995           | MaleAge60to64       | 9785       |
| Guinea-Bissau | 1995           | MaleAge65to69       | 7346       |
| Guinea-Bissau | 1995           | MaleAge70to74       | 4944       |
| Guinea-Bissau | 1995           | MaleAge75to79       | 2709       |
| Guinea-Bissau | 1995           | MaleAge80to84       | 1078       |
| Guinea-Bissau | 1995           | MaleAge85to89       | 234        |
| Guinea-Bissau | 1995           | MaleAge90to94       | 25         |
| Guinea-Bissau | 1995           | MaleAge95to99       | 2          |
| Guinea-Bissau | 1996           | FemaleAge0to4       | 103023     |
| Guinea-Bissau | 1996           | FemaleAge10to14     | 73988      |
| Guinea-Bissau | 1996           | FemaleAge15to19     | 43634      |
| Guinea-Bissau | 1996           | FemaleAge20to24     | 36489      |
| Guinea-Bissau | 1996           | FemaleAge25to29     | 12743      |
| Guinea-Bissau | 1996           | FemaleAge30to34     | 18708      |
| Guinea-Bissau | 1996           | FemaleAge35to39     | 18643      |
| Guinea-Bissau | 1996           | FemaleAge40to44     | 27171      |
| Guinea-Bissau | 1996           | FemaleAge45to49     | 19802      |
| Guinea-Bissau | 1996           | FemaleAge50to54     | 16829      |
| Guinea-Bissau | 1996           | FemaleAge55to59     | 13260      |
| Guinea-Bissau | 1996           | FemaleAge5to9       | 83237      |

Dietary calcium and zinc deficiency risks are decreasing but remain prevalent

| Country       | Reference year | Age/gender group    | Population |
|---------------|----------------|---------------------|------------|
| Guinea-Bissau | 1996           | FemaleAge60to64     | 10991      |
| Guinea-Bissau | 1996           | FemaleAge65to69     | 8723       |
| Guinea-Bissau | 1996           | FemaleAge70to74     | 6222       |
| Guinea-Bissau | 1996           | FemaleAge75to79     | 3698       |
| Guinea-Bissau | 1996           | FemaleAge80to84     | 1654       |
| Guinea-Bissau | 1996           | FemaleAge85to89     | 450        |
| Guinea-Bissau | 1996           | FemaleAge90to94     | 63         |
| Guinea-Bissau | 1996           | FemaleAge95to99     | 3          |
| Guinea-Bissau | 1996           | FemaleLactAge15to19 | 8580       |
| Guinea-Bissau | 1996           | FemaleLactAge20to24 | 14316      |
| Guinea-Bissau | 1996           | FemaleLactAge25to29 | 11890      |
| Guinea-Bissau | 1996           | FemaleLactAge30to34 | 7321       |
| Guinea-Bissau | 1996           | FemaleLactAge35to39 | 4988       |
| Guinea-Bissau | 1996           | FemaleLactAge40to44 | 3177       |
| Guinea-Bissau | 1996           | FemaleLactAge45to49 | 868        |
| Guinea-Bissau | 1996           | FemalePregAge15to19 | 6435       |
| Guinea-Bissau | 1996           | FemalePregAge20to24 | 10737      |
| Guinea-Bissau | 1996           | FemalePregAge25to29 | 8918       |
| Guinea-Bissau | 1996           | FemalePregAge30to34 | 5491       |
| Guinea-Bissau | 1996           | FemalePregAge35to39 | 3741       |
| Guinea-Bissau | 1996           | FemalePregAge40to44 | 2383       |
| Guinea-Bissau | 1996           | FemalePregAge45to49 | 651        |
| Guinea-Bissau | 1996           | MaleAge0to4         | 103256     |
| Guinea-Bissau | 1996           | MaleAge10to14       | 73180      |
| Guinea-Bissau | 1996           | MaleAge15to19       | 58037      |
| Guinea-Bissau | 1996           | MaleAge20to24       | 60804      |
| Guinea-Bissau | 1996           | MaleAge25to29       | 33116      |
| Guinea-Bissau | 1996           | MaleAge30to34       | 31147      |
| Guinea-Bissau | 1996           | MaleAge35to39       | 27044      |
| Guinea-Bissau | 1996           | MaleAge40to44       | 32115      |
| Guinea-Bissau | 1996           | MaleAge45to49       | 20866      |
| Guinea-Bissau | 1996           | MaleAge50to54       | 15971      |
| Guinea-Bissau | 1996           | MaleAge55to59       | 12189      |
| Guinea-Bissau | 1996           | MaleAge5to9         | 82480      |
| Guinea-Bissau | 1996           | MaleAge60to64       | 9776       |
| Guinea-Bissau | 1996           | MaleAge65to69       | 7414       |
| Guinea-Bissau | 1996           | MaleAge70to74       | 4993       |
| Guinea-Bissau | 1996           | MaleAge75to79       | 2780       |
| Guinea-Bissau | 1996           | MaleAge80to84       | 1153       |
| Guinea-Bissau | 1996           | MaleAge85to89       | 286        |
| Guinea-Bissau | 1996           | MaleAge90to94       | 32         |
| Guinea-Bissau | 1996           | MaleAge95to99       | 2          |
| Guinea-Bissau | 1997           | FemaleAge0to4       | 104712     |
| Guinea-Bissau | 1997           | FemaleAge10to14     | 75119      |
| Guinea-Bissau | 1997           | FemaleAge15to19     | 45935      |
| Guinea-Bissau | 1997           | FemaleAge20to24     | 35274      |
| Guinea-Bissau | 1997           | FemaleAge25to29     | 19211      |
| Guinea-Bissau | 1997           | FemaleAge30to34     | 16512      |
| Guinea-Bissau | 1997           | FemaleAge35to39     | 19664      |
| Guinea-Bissau | 1997           | FemaleAge40to44     | 25554      |
| Guinea-Bissau | 1997           | FemaleAge45to49     | 22787      |
| Guinea-Bissau | 1997           | FemaleAge50to54     | 16561      |
| Guinea-Bissau | 1997           | FemaleAge55to59     | 13844      |
| Guinea-Bissau | 1997           | FemaleAge5to9       | 85276      |
| Guinea-Bissau | 1997           | FemaleAge60to64     | 10971      |
| Guinea-Bissau | 1997           | FemaleAge65to69     | 8820       |
| Guinea-Bissau | 1997           | FemaleAge70to74     | 6264       |
| Guinea-Bissau | 1997           | FemaleAge75to79     | 3753       |
| Guinea-Bissau | 1997           | FemaleAge80to84     | 1711       |
| Guinea-Bissau | 1997           | FemaleAge85to89     | 504        |
| Guinea-Bissau | 1997           | FemaleAge90to94     | 74         |
| Guinea-Bissau | 1997           | FemaleAge95to99     | 5          |
| Guinea-Bissau | 1997           | FemaleLactAge15to19 | 8580       |
| Guinea-Bissau | 1997           | FemaleLactAge20to24 | 14316      |
| Guinea-Bissau | 1997           | FemaleLactAge25to29 | 11890      |
| Guinea-Bissau | 1997           | FemaleLactAge30to34 | 7321       |
| Guinea-Bissau | 1997           | FemaleLactAge35to39 | 4988       |
| Guinea-Bissau | 1997           | FemaleLactAge40to44 | 3177       |
| Guinea-Bissau | 1997           | FemaleLactAge45to49 | 868        |
| Guinea-Bissau | 1997           | FemalePregAge15to19 | 6435       |
| Guinea-Bissau | 1997           | FemalePregAge20to24 | 10737      |
| Guinea-Bissau | 1997           | FemalePregAge25to29 | 8918       |
| Guinea-Bissau | 1997           | FemalePregAge30to34 | 5491       |
| Guinea-Bissau | 1997           | FemalePregAge35to39 | 3741       |
| Guinea-Bissau | 1997           | FemalePregAge40to44 | 2383       |
| Guinea-Bissau | 1997           | FemalePregAge45to49 | 651        |
| Guinea-Bissau | 1997           | MaleAge0to4         | 104955     |
| Guinea-Bissau | 1997           | MaleAge10to14       | 74290      |
| Guinea-Bissau | 1997           | MaleAge15to19       | 60292      |
| Guinea-Bissau | 1997           | MaleAge20to24       | 59584      |
| Guinea-Bissau | 1997           | MaleAge25to29       | 39479      |
| Guinea-Bissau | 1997           | MaleAge30to34       | 28951      |
| Guinea-Bissau | 1997           | MaleAge35to39       | 28036      |
| Guinea-Bissau | 1997           | MaleAge40to44       | 30501      |
| Guinea-Bissau | 1997           | MaleAge45to49       | 23740      |
| Guinea-Bissau | 1997           | MaleAge50to54       | 15762      |
| Guinea-Bissau | 1997           | MaleAge55to59       | 12736      |
| Guinea-Bissau | 1997           | MaleAge5to9         | 84565      |

Dietary calcium and zinc deficiency risks are decreasing but remain prevalent

| Country       | Reference year | Age/gender group    | Population |
|---------------|----------------|---------------------|------------|
| Guinea-Bissau | 1997           | MaleAge60to64       | 9759       |
| Guinea-Bissau | 1997           | MaleAge65to69       | 7524       |
| Guinea-Bissau | 1997           | MaleAge70to74       | 5049       |
| Guinea-Bissau | 1997           | MaleAge75to79       | 2838       |
| Guinea-Bissau | 1997           | MaleAge80to84       | 1202       |
| Guinea-Bissau | 1997           | MaleAge85to89       | 323        |
| Guinea-Bissau | 1997           | MaleAge90to94       | 39         |
| Guinea-Bissau | 1997           | MaleAge95to99       | 3          |
| Guinea-Bissau | 1998           | FemaleAge0to4       | 105488     |
| Guinea-Bissau | 1998           | FemaleAge10to14     | 76014      |
| Guinea-Bissau | 1998           | FemaleAge15to19     | 49206      |
| Guinea-Bissau | 1998           | FemaleAge20to24     | 32722      |
| Guinea-Bissau | 1998           | FemaleAge25to29     | 26775      |
| Guinea-Bissau | 1998           | FemaleAge30to34     | 14232      |
| Guinea-Bissau | 1998           | FemaleAge35to39     | 21220      |
| Guinea-Bissau | 1998           | FemaleAge40to44     | 23251      |
| Guinea-Bissau | 1998           | FemaleAge45to49     | 26064      |
| Guinea-Bissau | 1998           | FemaleAge50to54     | 16341      |
| Guinea-Bissau | 1998           | FemaleAge55to59     | 14524      |
| Guinea-Bissau | 1998           | FemaleAge5to9       | 87688      |
| Guinea-Bissau | 1998           | FemaleAge60to64     | 10997      |
| Guinea-Bissau | 1998           | FemaleAge65to69     | 8948       |
| Guinea-Bissau | 1998           | FemaleAge70to74     | 6324       |
| Guinea-Bissau | 1998           | FemaleAge75to79     | 3800       |
| Guinea-Bissau | 1998           | FemaleAge80to84     | 1735       |
| Guinea-Bissau | 1998           | FemaleAge85to89     | 528        |
| Guinea-Bissau | 1998           | FemaleAge90to94     | 81         |
| Guinea-Bissau | 1998           | FemaleAge95to99     | 10         |
| Guinea-Bissau | 1998           | FemaleLactAge15to19 | 8580       |
| Guinea-Bissau | 1998           | FemaleLactAge20to24 | 14316      |
| Guinea-Bissau | 1998           | FemaleLactAge25to29 | 11890      |
| Guinea-Bissau | 1998           | FemaleLactAge30to34 | 7321       |
| Guinea-Bissau | 1998           | FemaleLactAge35to39 | 4988       |
| Guinea-Bissau | 1998           | FemaleLactAge40to44 | 3177       |
| Guinea-Bissau | 1998           | FemaleLactAge45to49 | 868        |
| Guinea-Bissau | 1998           | FemalePregAge15to19 | 6435       |
| Guinea-Bissau | 1998           | FemalePregAge20to24 | 10737      |
| Guinea-Bissau | 1998           | FemalePregAge25to29 | 8918       |
| Guinea-Bissau | 1998           | FemalePregAge30to34 | 5491       |
| Guinea-Bissau | 1998           | FemalePregAge35to39 | 3741       |
| Guinea-Bissau | 1998           | FemalePregAge40to44 | 2383       |
| Guinea-Bissau | 1998           | FemalePregAge45to49 | 651        |
| Guinea-Bissau | 1998           | MaleAge0to4         | 105724     |
| Guinea-Bissau | 1998           | MaleAge10to14       | 75209      |
| Guinea-Bissau | 1998           | MaleAge15to19       | 63530      |
| Guinea-Bissau | 1998           | MaleAge20to24       | 57067      |
| Guinea-Bissau | 1998           | MaleAge25to29       | 46929      |
| Guinea-Bissau | 1998           | MaleAge30to34       | 26687      |
| Guinea-Bissau | 1998           | MaleAge35to39       | 29561      |
| Guinea-Bissau | 1998           | MaleAge40to44       | 28251      |
| Guinea-Bissau | 1998           | MaleAge45to49       | 26877      |
| Guinea-Bissau | 1998           | MaleAge50to54       | 15618      |
| Guinea-Bissau | 1998           | MaleAge55to59       | 13374      |
| Guinea-Bissau | 1998           | MaleAge5to9         | 87015      |
| Guinea-Bissau | 1998           | MaleAge60to64       | 9782       |
| Guinea-Bissau | 1998           | MaleAge65to69       | 7657       |
| Guinea-Bissau | 1998           | MaleAge70to74       | 5117       |
| Guinea-Bissau | 1998           | MaleAge75to79       | 2884       |
| Guinea-Bissau | 1998           | MaleAge80to84       | 1222       |
| Guinea-Bissau | 1998           | MaleAge85to89       | 342        |
| Guinea-Bissau | 1998           | MaleAge90to94       | 44         |
| Guinea-Bissau | 1998           | MaleAge95to99       | 5          |
| Guinea-Bissau | 1999           | FemaleAge0to4       | 106193     |
| Guinea-Bissau | 1999           | FemaleAge10to14     | 76997      |
| Guinea-Bissau | 1999           | FemaleAge15to19     | 52335      |
| Guinea-Bissau | 1999           | FemaleAge20to24     | 30649      |
| Guinea-Bissau | 1999           | FemaleAge25to29     | 33100      |
| Guinea-Bissau | 1999           | FemaleAge30to34     | 13469      |
| Guinea-Bissau | 1999           | FemaleAge35to39     | 22270      |
| Guinea-Bissau | 1999           | FemaleAge40to44     | 21306      |
| Guinea-Bissau | 1999           | FemaleAge45to49     | 28560      |
| Guinea-Bissau | 1999           | FemaleAge50to54     | 16705      |
| Guinea-Bissau | 1999           | FemaleAge55to59     | 15079      |
| Guinea-Bissau | 1999           | FemaleAge5to9       | 90077      |
| Guinea-Bissau | 1999           | FemaleAge60to64     | 11136      |
| Guinea-Bissau | 1999           | FemaleAge65to69     | 9070       |
| Guinea-Bissau | 1999           | FemaleAge70to74     | 6408       |
| Guinea-Bissau | 1999           | FemaleAge75to79     | 3839       |
| Guinea-Bissau | 1999           | FemaleAge80to84     | 1724       |
| Guinea-Bissau | 1999           | FemaleAge85to89     | 518        |
| Guinea-Bissau | 1999           | FemaleAge90to94     | 82         |
| Guinea-Bissau | 1999           | FemaleAge95to99     | 10         |
| Guinea-Bissau | 1999           | FemaleLactAge15to19 | 8580       |
| Guinea-Bissau | 1999           | FemaleLactAge20to24 | 14316      |
| Guinea-Bissau | 1999           | FemaleLactAge25to29 | 11890      |
| Guinea-Bissau | 1999           | FemaleLactAge30to34 | 7321       |
| Guinea-Bissau | 1999           | FemaleLactAge35to39 | 4988       |
| Guinea-Bissau | 1999           | FemaleLactAge40to44 | 3177       |

Dietary calcium and zinc deficiency risks are decreasing but remain prevalent

| Country       | Reference year | Age/gender group    | Population |
|---------------|----------------|---------------------|------------|
| Guinea-Bissau | 1999           | FemaleLactAge45to49 | 868        |
| Guinea-Bissau | 1999           | FemalePregAge15to19 | 6435       |
| Guinea-Bissau | 1999           | FemalePregAge20to24 | 10737      |
| Guinea-Bissau | 1999           | FemalePregAge25to29 | 8918       |
| Guinea-Bissau | 1999           | FemalePregAge30to34 | 5491       |
| Guinea-Bissau | 1999           | FemalePregAge35to39 | 3741       |
| Guinea-Bissau | 1999           | FemalePregAge40to44 | 2383       |
| Guinea-Bissau | 1999           | FemalePregAge45to49 | 651        |
| Guinea-Bissau | 1999           | MaleAge0to4         | 106440     |
| Guinea-Bissau | 1999           | MaleAge10to14       | 76252      |
| Guinea-Bissau | 1999           | MaleAge15to19       | 66661      |
| Guinea-Bissau | 1999           | MaleAge20to24       | 55048      |
| Guinea-Bissau | 1999           | MaleAge25to29       | 53169      |
| Guinea-Bissau | 1999           | MaleAge30to34       | 25932      |
| Guinea-Bissau | 1999           | MaleAge35to39       | 30594      |
| Guinea-Bissau | 1999           | MaleAge40to44       | 26379      |
| Guinea-Bissau | 1999           | MaleAge45to49       | 29259      |
| Guinea-Bissau | 1999           | MaleAge50to54       | 16034      |
| Guinea-Bissau | 1999           | MaleAge55to59       | 13908      |
| Guinea-Bissau | 1999           | MaleAge5to9         | 89428      |
| Guinea-Bissau | 1999           | MaleAge60to64       | 9908       |
| Guinea-Bissau | 1999           | MaleAge65to69       | 7780       |
| Guinea-Bissau | 1999           | MaleAge70to74       | 5201       |
| Guinea-Bissau | 1999           | MaleAge75to79       | 2918       |
| Guinea-Bissau | 1999           | MaleAge80to84       | 1215       |
| Guinea-Bissau | 1999           | MaleAge85to89       | 334        |
| Guinea-Bissau | 1999           | MaleAge90to94       | 45         |
| Guinea-Bissau | 1999           | MaleAge95to99       | 5          |
| Haiti         | 1992           | FemaleAge0to4       | 568842     |
| Haiti         | 1992           | FemaleAge10to14     | 458755     |
| Haiti         | 1992           | FemaleAge15to19     | 321683     |
| Haiti         | 1992           | FemaleAge20to24     | 216524     |
| Haiti         | 1992           | FemaleAge25to29     | 169675     |
| Haiti         | 1992           | FemaleAge30to34     | 142673     |
| Haiti         | 1992           | FemaleAge35to39     | 138320     |
| Haiti         | 1992           | FemaleAge40to44     | 132161     |
| Haiti         | 1992           | FemaleAge45to49     | 125275     |
| Haiti         | 1992           | FemaleAge50to54     | 123694     |
| Haiti         | 1992           | FemaleAge55to59     | 103467     |
| Haiti         | 1992           | FemaleAge5to9       | 543801     |
| Haiti         | 1992           | FemaleAge60to64     | 81149      |
| Haiti         | 1992           | FemaleAge65to69     | 62003      |
| Haiti         | 1992           | FemaleAge70to74     | 45817      |
| Haiti         | 1992           | FemaleAge75to79     | 29330      |
| Haiti         | 1992           | FemaleAge80to84     | 14370      |
| Haiti         | 1992           | FemaleAge85to89     | 4804       |
| Haiti         | 1992           | FemaleAge90to94     | 942        |
| Haiti         | 1992           | FemaleAge95to99     | 103        |
| Haiti         | 1992           | FemaleAgeAbove100   | 6          |
| Haiti         | 1992           | FemaleLactAge15to19 | 26561      |
| Haiti         | 1992           | FemaleLactAge20to24 | 59934      |
| Haiti         | 1992           | FemaleLactAge25to29 | 67094      |
| Haiti         | 1992           | FemaleLactAge30to34 | 54444      |
| Haiti         | 1992           | FemaleLactAge35to39 | 35194      |
| Haiti         | 1992           | FemaleLactAge40to44 | 15981      |
| Haiti         | 1992           | FemaleLactAge45to49 | 6210       |
| Haiti         | 1992           | FemalePregAge15to19 | 19921      |
| Haiti         | 1992           | FemalePregAge20to24 | 44950      |
| Haiti         | 1992           | FemalePregAge25to29 | 50321      |
| Haiti         | 1992           | FemalePregAge30to34 | 40833      |
| Haiti         | 1992           | FemalePregAge35to39 | 26395      |
| Haiti         | 1992           | FemalePregAge40to44 | 11985      |
| Haiti         | 1992           | FemalePregAge45to49 | 4658       |
| Haiti         | 1992           | MaleAge0to4         | 590211     |
| Haiti         | 1992           | MaleAge10to14       | 465612     |
| Haiti         | 1992           | MaleAge15to19       | 361691     |
| Haiti         | 1992           | MaleAge20to24       | 307470     |
| Haiti         | 1992           | MaleAge25to29       | 270450     |
| Haiti         | 1992           | MaleAge30to34       | 225448     |
| Haiti         | 1992           | MaleAge35to39       | 188020     |
| Haiti         | 1992           | MaleAge40to44       | 145081     |
| Haiti         | 1992           | MaleAge45to49       | 124969     |
| Haiti         | 1992           | MaleAge50to54       | 112820     |
| Haiti         | 1992           | MaleAge55to59       | 91683      |
| Haiti         | 1992           | MaleAge5to9         | 562122     |
| Haiti         | 1992           | MaleAge60to64       | 71542      |
| Haiti         | 1992           | MaleAge65to69       | 54585      |
| Haiti         | 1992           | MaleAge70to74       | 39498      |
| Haiti         | 1992           | MaleAge75to79       | 24662      |
| Haiti         | 1992           | MaleAge80to84       | 11686      |
| Haiti         | 1992           | MaleAge85to89       | 3676       |
| Haiti         | 1992           | MaleAge90to94       | 692        |
| Haiti         | 1992           | MaleAge95to99       | 66         |
| Haiti         | 1992           | MaleAgeAbove100     | 3          |
| Haiti         | 1993           | FemaleAge0to4       | 573691     |
| Haiti         | 1993           | FemaleAge10to14     | 478265     |
| Haiti         | 1993           | FemaleAge15to19     | 333921     |
| Haiti         | 1993           | FemaleAge20to24     | 219160     |



Dietary calcium and zinc deficiency risks are decreasing but remain prevalent

| Country | Reference year | Age/gender group    | Population |
|---------|----------------|---------------------|------------|
| Haiti   | 1993           | FemaleAge25to29     | 173801     |
| Haiti   | 1993           | FemaleAge30to34     | 150160     |
| Haiti   | 1993           | FemaleAge35to39     | 140795     |
| Haiti   | 1993           | FemaleAge40to44     | 139307     |
| Haiti   | 1993           | FemaleAge45to49     | 124880     |
| Haiti   | 1993           | FemaleAge50to54     | 125139     |
| Haiti   | 1993           | FemaleAge55to59     | 105923     |
| Haiti   | 1993           | FemaleAge5to9       | 547333     |
| Haiti   | 1993           | FemaleAge60to64     | 83424      |
| Haiti   | 1993           | FemaleAge65to69     | 63062      |
| Haiti   | 1993           | FemaleAge70to74     | 46300      |
| Haiti   | 1993           | FemaleAge75to79     | 29950      |
| Haiti   | 1993           | FemaleAge80to84     | 14712      |
| Haiti   | 1993           | FemaleAge85to89     | 4979       |
| Haiti   | 1993           | FemaleAge90to94     | 1018       |
| Haiti   | 1993           | FemaleAge95to99     | 125        |
| Haiti   | 1993           | FemaleAgeAbove100   | 6          |
| Haiti   | 1993           | FemaleLactAge15to19 | 26561      |
| Haiti   | 1993           | FemaleLactAge20to24 | 59934      |
| Haiti   | 1993           | FemaleLactAge25to29 | 67094      |
| Haiti   | 1993           | FemaleLactAge30to34 | 54444      |
| Haiti   | 1993           | FemaleLactAge35to39 | 35194      |
| Haiti   | 1993           | FemaleLactAge40to44 | 15981      |
| Haiti   | 1993           | FemaleLactAge45to49 | 6210       |
| Haiti   | 1993           | FemalePregAge15to19 | 19921      |
| Haiti   | 1993           | FemalePregAge20to24 | 44950      |
| Haiti   | 1993           | FemalePregAge25to29 | 50321      |
| Haiti   | 1993           | FemalePregAge30to34 | 40833      |
| Haiti   | 1993           | FemalePregAge35to39 | 26395      |
| Haiti   | 1993           | FemalePregAge40to44 | 11985      |
| Haiti   | 1993           | FemalePregAge45to49 | 4658       |
| Haiti   | 1993           | MaleAge0to4         | 595435     |
| Haiti   | 1993           | MaleAge10to14       | 487077     |
| Haiti   | 1993           | MaleAge15to19       | 374481     |
| Haiti   | 1993           | MaleAge20to24       | 309169     |
| Haiti   | 1993           | MaleAge25to29       | 274357     |
| Haiti   | 1993           | MaleAge30to34       | 231218     |
| Haiti   | 1993           | MaleAge35to39       | 191697     |
| Haiti   | 1993           | MaleAge40to44       | 152947     |
| Haiti   | 1993           | MaleAge45to49       | 123240     |
| Haiti   | 1993           | MaleAge50to54       | 115181     |
| Haiti   | 1993           | MaleAge55to59       | 93732      |
| Haiti   | 1993           | MaleAge5to9         | 565911     |
| Haiti   | 1993           | MaleAge60to64       | 73324      |
| Haiti   | 1993           | MaleAge65to69       | 55243      |
| Haiti   | 1993           | MaleAge70to74       | 39943      |
| Haiti   | 1993           | MaleAge75to79       | 24995      |
| Haiti   | 1993           | MaleAge80to84       | 11973      |
| Haiti   | 1993           | MaleAge85to89       | 3781       |
| Haiti   | 1993           | MaleAge90to94       | 752        |
| Haiti   | 1993           | MaleAge95to99       | 90         |
| Haiti   | 1993           | MaleAgeAbove100     | 4          |
| Haiti   | 1994           | FemaleAge0to4       | 579145     |
| Haiti   | 1994           | FemaleAge10to14     | 496467     |
| Haiti   | 1994           | FemaleAge15to19     | 348197     |
| Haiti   | 1994           | FemaleAge20to24     | 223724     |
| Haiti   | 1994           | FemaleAge25to29     | 177396     |
| Haiti   | 1994           | FemaleAge30to34     | 157313     |
| Haiti   | 1994           | FemaleAge35to39     | 143939     |
| Haiti   | 1994           | FemaleAge40to44     | 145982     |
| Haiti   | 1994           | FemaleAge45to49     | 125675     |
| Haiti   | 1994           | FemaleAge50to54     | 126244     |
| Haiti   | 1994           | FemaleAge55to59     | 108215     |
| Haiti   | 1994           | FemaleAge5to9       | 547748     |
| Haiti   | 1994           | FemaleAge60to64     | 85927      |
| Haiti   | 1994           | FemaleAge65to69     | 64430      |
| Haiti   | 1994           | FemaleAge70to74     | 46932      |
| Haiti   | 1994           | FemaleAge75to79     | 30580      |
| Haiti   | 1994           | FemaleAge80to84     | 14924      |
| Haiti   | 1994           | FemaleAge85to89     | 4936       |
| Haiti   | 1994           | FemaleAge90to94     | 1021       |
| Haiti   | 1994           | FemaleAge95to99     | 133        |
| Haiti   | 1994           | FemaleAgeAbove100   | 6          |
| Haiti   | 1994           | FemaleLactAge15to19 | 26561      |
| Haiti   | 1994           | FemaleLactAge20to24 | 59934      |
| Haiti   | 1994           | FemaleLactAge25to29 | 67094      |
| Haiti   | 1994           | FemaleLactAge30to34 | 54444      |
| Haiti   | 1994           | FemaleLactAge35to39 | 35194      |
| Haiti   | 1994           | FemaleLactAge40to44 | 15981      |
| Haiti   | 1994           | FemaleLactAge45to49 | 6210       |
| Haiti   | 1994           | FemalePregAge15to19 | 19921      |
| Haiti   | 1994           | FemalePregAge20to24 | 44950      |
| Haiti   | 1994           | FemalePregAge25to29 | 50321      |
| Haiti   | 1994           | FemalePregAge30to34 | 40833      |
| Haiti   | 1994           | FemalePregAge35to39 | 26395      |
| Haiti   | 1994           | FemalePregAge40to44 | 11985      |
| Haiti   | 1994           | FemalePregAge45to49 | 4658       |
| Haiti   | 1994           | MaleAge0to4         | 601403     |

Dietary calcium and zinc deficiency risks are decreasing but remain prevalent

| Country | Reference year | Age/gender group    | Population |
|---------|----------------|---------------------|------------|
| Haiti   | 1994           | MaleAge10to14       | 507168     |
| Haiti   | 1994           | MaleAge15to19       | 390095     |
| Haiti   | 1994           | MaleAge20to24       | 312461     |
| Haiti   | 1994           | MaleAge25to29       | 277806     |
| Haiti   | 1994           | MaleAge30to34       | 236492     |
| Haiti   | 1994           | MaleAge35to39       | 195583     |
| Haiti   | 1994           | MaleAge40to44       | 160586     |
| Haiti   | 1994           | MaleAge45to49       | 122974     |
| Haiti   | 1994           | MaleAge50to54       | 116874     |
| Haiti   | 1994           | MaleAge55to59       | 95893      |
| Haiti   | 1994           | MaleAge5to9         | 566327     |
| Haiti   | 1994           | MaleAge60to64       | 75305      |
| Haiti   | 1994           | MaleAge65to69       | 56187      |
| Haiti   | 1994           | MaleAge70to74       | 40447      |
| Haiti   | 1994           | MaleAge75to79       | 25364      |
| Haiti   | 1994           | MaleAge80to84       | 12067      |
| Haiti   | 1994           | MaleAge85to89       | 3711       |
| Haiti   | 1994           | MaleAge90to94       | 746        |
| Haiti   | 1994           | MaleAge95to99       | 93         |
| Haiti   | 1994           | MaleAgeAbove100     | 4          |
| Haiti   | 1995           | FemaleAge0to4       | 583470     |
| Haiti   | 1995           | FemaleAge10to14     | 511062     |
| Haiti   | 1995           | FemaleAge15to19     | 364529     |
| Haiti   | 1995           | FemaleAge20to24     | 230902     |
| Haiti   | 1995           | FemaleAge25to29     | 180827     |
| Haiti   | 1995           | FemaleAge30to34     | 163609     |
| Haiti   | 1995           | FemaleAge35to39     | 148499     |
| Haiti   | 1995           | FemaleAge40to44     | 151400     |
| Haiti   | 1995           | FemaleAge45to49     | 128274     |
| Haiti   | 1995           | FemaleAge50to54     | 126956     |
| Haiti   | 1995           | FemaleAge55to59     | 110332     |
| Haiti   | 1995           | FemaleAge5to9       | 548087     |
| Haiti   | 1995           | FemaleAge60to64     | 88572      |
| Haiti   | 1995           | FemaleAge65to69     | 66177      |
| Haiti   | 1995           | FemaleAge70to74     | 47780      |
| Haiti   | 1995           | FemaleAge75to79     | 31203      |
| Haiti   | 1995           | FemaleAge80to84     | 15089      |
| Haiti   | 1995           | FemaleAge85to89     | 4711       |
| Haiti   | 1995           | FemaleAge90to94     | 888        |
| Haiti   | 1995           | FemaleAge95to99     | 94         |
| Haiti   | 1995           | FemaleAgeAbove100   | 6          |
| Haiti   | 1995           | FemaleLactAge15to19 | 26561      |
| Haiti   | 1995           | FemaleLactAge20to24 | 59934      |
| Haiti   | 1995           | FemaleLactAge25to29 | 67094      |
| Haiti   | 1995           | FemaleLactAge30to34 | 54444      |
| Haiti   | 1995           | FemaleLactAge35to39 | 35194      |
| Haiti   | 1995           | FemaleLactAge40to44 | 15981      |
| Haiti   | 1995           | FemaleLactAge45to49 | 6210       |
| Haiti   | 1995           | FemalePregAge15to19 | 19921      |
| Haiti   | 1995           | FemalePregAge20to24 | 44950      |
| Haiti   | 1995           | FemalePregAge25to29 | 50321      |
| Haiti   | 1995           | FemalePregAge30to34 | 40833      |
| Haiti   | 1995           | FemalePregAge35to39 | 26395      |
| Haiti   | 1995           | FemalePregAge40to44 | 11985      |
| Haiti   | 1995           | FemalePregAge45to49 | 4658       |
| Haiti   | 1995           | MaleAge0to4         | 606184     |
| Haiti   | 1995           | MaleAge10to14       | 523392     |
| Haiti   | 1995           | MaleAge15to19       | 408319     |
| Haiti   | 1995           | MaleAge20to24       | 318622     |
| Haiti   | 1995           | MaleAge25to29       | 280725     |
| Haiti   | 1995           | MaleAge30to34       | 241194     |
| Haiti   | 1995           | MaleAge35to39       | 200136     |
| Haiti   | 1995           | MaleAge40to44       | 167069     |
| Haiti   | 1995           | MaleAge45to49       | 125092     |
| Haiti   | 1995           | MaleAge50to54       | 117630     |
| Haiti   | 1995           | MaleAge55to59       | 98209      |
| Haiti   | 1995           | MaleAge5to9         | 566759     |
| Haiti   | 1995           | MaleAge60to64       | 77442      |
| Haiti   | 1995           | MaleAge65to69       | 57484      |
| Haiti   | 1995           | MaleAge70to74       | 41058      |
| Haiti   | 1995           | MaleAge75to79       | 25768      |
| Haiti   | 1995           | MaleAge80to84       | 12043      |
| Haiti   | 1995           | MaleAge85to89       | 3482       |
| Haiti   | 1995           | MaleAge90to94       | 620        |
| Haiti   | 1995           | MaleAge95to99       | 61         |
| Haiti   | 1995           | MaleAgeAbove100     | 4          |
| Haiti   | 1996           | FemaleAge0to4       | 589404     |
| Haiti   | 1996           | FemaleAge10to14     | 520617     |
| Haiti   | 1996           | FemaleAge15to19     | 378907     |
| Haiti   | 1996           | FemaleAge20to24     | 231797     |
| Haiti   | 1996           | FemaleAge25to29     | 187049     |
| Haiti   | 1996           | FemaleAge30to34     | 169290     |
| Haiti   | 1996           | FemaleAge35to39     | 153702     |
| Haiti   | 1996           | FemaleAge40to44     | 156684     |
| Haiti   | 1996           | FemaleAge45to49     | 133886     |
| Haiti   | 1996           | FemaleAge50to54     | 127082     |
| Haiti   | 1996           | FemaleAge55to59     | 112047     |
| Haiti   | 1996           | FemaleAge5to9       | 550722     |

Dietary calcium and zinc deficiency risks are decreasing but remain prevalent

| Country | Reference year | Age/gender group    | Population |
|---------|----------------|---------------------|------------|
| Haiti   | 1996           | FemaleAge60to64     | 90718      |
| Haiti   | 1996           | FemaleAge65to69     | 67745      |
| Haiti   | 1996           | FemaleAge70to74     | 48427      |
| Haiti   | 1996           | FemaleAge75to79     | 31618      |
| Haiti   | 1996           | FemaleAge80to84     | 15823      |
| Haiti   | 1996           | FemaleAge85to89     | 5298       |
| Haiti   | 1996           | FemaleAge90to94     | 1084       |
| Haiti   | 1996           | FemaleAge95to99     | 112        |
| Haiti   | 1996           | FemaleAgeAbove100   | 6          |
| Haiti   | 1996           | FemaleLactAge15to19 | 28086      |
| Haiti   | 1996           | FemaleLactAge20to24 | 63927      |
| Haiti   | 1996           | FemaleLactAge25to29 | 65239      |
| Haiti   | 1996           | FemaleLactAge30to34 | 54376      |
| Haiti   | 1996           | FemaleLactAge35to39 | 35497      |
| Haiti   | 1996           | FemaleLactAge40to44 | 15476      |
| Haiti   | 1996           | FemaleLactAge45to49 | 5446       |
| Haiti   | 1996           | FemalePregAge15to19 | 21065      |
| Haiti   | 1996           | FemalePregAge20to24 | 47945      |
| Haiti   | 1996           | FemalePregAge25to29 | 48929      |
| Haiti   | 1996           | FemalePregAge30to34 | 40782      |
| Haiti   | 1996           | FemalePregAge35to39 | 26622      |
| Haiti   | 1996           | FemalePregAge40to44 | 11607      |
| Haiti   | 1996           | FemalePregAge45to49 | 4084       |
| Haiti   | 1996           | MaleAge0to4         | 612575     |
| Haiti   | 1996           | MaleAge10to14       | 533876     |
| Haiti   | 1996           | MaleAge15to19       | 426338     |
| Haiti   | 1996           | MaleAge20to24       | 326677     |
| Haiti   | 1996           | MaleAge25to29       | 283290     |
| Haiti   | 1996           | MaleAge30to34       | 246541     |
| Haiti   | 1996           | MaleAge35to39       | 205127     |
| Haiti   | 1996           | MaleAge40to44       | 172401     |
| Haiti   | 1996           | MaleAge45to49       | 129248     |
| Haiti   | 1996           | MaleAge50to54       | 117152     |
| Haiti   | 1996           | MaleAge55to59       | 100252     |
| Haiti   | 1996           | MaleAge5to9         | 569514     |
| Haiti   | 1996           | MaleAge60to64       | 79129      |
| Haiti   | 1996           | MaleAge65to69       | 58579      |
| Haiti   | 1996           | MaleAge70to74       | 41489      |
| Haiti   | 1996           | MaleAge75to79       | 26131      |
| Haiti   | 1996           | MaleAge80to84       | 12631      |
| Haiti   | 1996           | MaleAge85to89       | 3978       |
| Haiti   | 1996           | MaleAge90to94       | 754        |
| Haiti   | 1996           | MaleAge95to99       | 74         |
| Haiti   | 1996           | MaleAgeAbove100     | 4          |
| Haiti   | 1997           | FemaleAge0to4       | 593551     |
| Haiti   | 1997           | FemaleAge10to14     | 526923     |
| Haiti   | 1997           | FemaleAge15to19     | 398119     |
| Haiti   | 1997           | FemaleAge20to24     | 241804     |
| Haiti   | 1997           | FemaleAge25to29     | 189677     |
| Haiti   | 1997           | FemaleAge30to34     | 174261     |
| Haiti   | 1997           | FemaleAge35to39     | 160645     |
| Haiti   | 1997           | FemaleAge40to44     | 159868     |
| Haiti   | 1997           | FemaleAge45to49     | 140021     |
| Haiti   | 1997           | FemaleAge50to54     | 126729     |
| Haiti   | 1997           | FemaleAge55to59     | 113816     |
| Haiti   | 1997           | FemaleAge5to9       | 553869     |
| Haiti   | 1997           | FemaleAge60to64     | 93002      |
| Haiti   | 1997           | FemaleAge65to69     | 69635      |
| Haiti   | 1997           | FemaleAge70to74     | 49210      |
| Haiti   | 1997           | FemaleAge75to79     | 31978      |
| Haiti   | 1997           | FemaleAge80to84     | 16399      |
| Haiti   | 1997           | FemaleAge85to89     | 5701       |
| Haiti   | 1997           | FemaleAge90to94     | 1227       |
| Haiti   | 1997           | FemaleAge95to99     | 143        |
| Haiti   | 1997           | FemaleAgeAbove100   | 7          |
| Haiti   | 1997           | FemaleLactAge15to19 | 28086      |
| Haiti   | 1997           | FemaleLactAge20to24 | 63927      |
| Haiti   | 1997           | FemaleLactAge25to29 | 65239      |
| Haiti   | 1997           | FemaleLactAge30to34 | 54376      |
| Haiti   | 1997           | FemaleLactAge35to39 | 35497      |
| Haiti   | 1997           | FemaleLactAge40to44 | 15476      |
| Haiti   | 1997           | FemaleLactAge45to49 | 5446       |
| Haiti   | 1997           | FemalePregAge15to19 | 21065      |
| Haiti   | 1997           | FemalePregAge20to24 | 47945      |
| Haiti   | 1997           | FemalePregAge25to29 | 48929      |
| Haiti   | 1997           | FemalePregAge30to34 | 40782      |
| Haiti   | 1997           | FemalePregAge35to39 | 26622      |
| Haiti   | 1997           | FemalePregAge40to44 | 11607      |
| Haiti   | 1997           | FemalePregAge45to49 | 4084       |
| Haiti   | 1997           | MaleAge0to4         | 617274     |
| Haiti   | 1997           | MaleAge10to14       | 540914     |
| Haiti   | 1997           | MaleAge15to19       | 446999     |
| Haiti   | 1997           | MaleAge20to24       | 337029     |
| Haiti   | 1997           | MaleAge25to29       | 284743     |
| Haiti   | 1997           | MaleAge30to34       | 251833     |
| Haiti   | 1997           | MaleAge35to39       | 210759     |
| Haiti   | 1997           | MaleAge40to44       | 176630     |
| Haiti   | 1997           | MaleAge45to49       | 135723     |

Dietary calcium and zinc deficiency risks are decreasing but remain prevalent

| Country | Reference year | Age/gender group    | Population |
|---------|----------------|---------------------|------------|
| Haiti   | 1997           | MaleAge50to54       | 115721     |
| Haiti   | 1997           | MaleAge55to59       | 102660     |
| Haiti   | 1997           | MaleAge5to9         | 572843     |
| Haiti   | 1997           | MaleAge60to64       | 80910      |
| Haiti   | 1997           | MaleAge65to69       | 59952      |
| Haiti   | 1997           | MaleAge70to74       | 41967      |
| Haiti   | 1997           | MaleAge75to79       | 26445      |
| Haiti   | 1997           | MaleAge80to84       | 13029      |
| Haiti   | 1997           | MaleAge85to89       | 4322       |
| Haiti   | 1997           | MaleAge90to94       | 850        |
| Haiti   | 1997           | MaleAge95to99       | 100        |
| Haiti   | 1997           | MaleAgeAbov e100    | 4          |
| Haiti   | 1998           | FemaleAge0to4       | 596086     |
| Haiti   | 1998           | FemaleAge10to14     | 530828     |
| Haiti   | 1998           | FemaleAge15to19     | 417712     |
| Haiti   | 1998           | FemaleAge20to24     | 254070     |
| Haiti   | 1998           | FemaleAge25to29     | 192624     |
| Haiti   | 1998           | FemaleAge30to34     | 178641     |
| Haiti   | 1998           | FemaleAge35to39     | 168198     |
| Haiti   | 1998           | FemaleAge40to44     | 162505     |
| Haiti   | 1998           | FemaleAge45to49     | 147110     |
| Haiti   | 1998           | FemaleAge50to54     | 126548     |
| Haiti   | 1998           | FemaleAge55to59     | 115471     |
| Haiti   | 1998           | FemaleAge5to9       | 557424     |
| Haiti   | 1998           | FemaleAge60to64     | 95357      |
| Haiti   | 1998           | FemaleAge65to69     | 71786      |
| Haiti   | 1998           | FemaleAge70to74     | 50172      |
| Haiti   | 1998           | FemaleAge75to79     | 32412      |
| Haiti   | 1998           | FemaleAge80to84     | 16798      |
| Haiti   | 1998           | FemaleAge85to89     | 5862       |
| Haiti   | 1998           | FemaleAge90to94     | 1304       |
| Haiti   | 1998           | FemaleAge95to99     | 175        |
| Haiti   | 1998           | FemaleAgeAbov e100  | 8          |
| Haiti   | 1998           | FemaleLactAge15to19 | 28086      |
| Haiti   | 1998           | FemaleLactAge20to24 | 63927      |
| Haiti   | 1998           | FemaleLactAge25to29 | 65239      |
| Haiti   | 1998           | FemaleLactAge30to34 | 54376      |
| Haiti   | 1998           | FemaleLactAge35to39 | 35497      |
| Haiti   | 1998           | FemaleLactAge40to44 | 15476      |
| Haiti   | 1998           | FemaleLactAge45to49 | 5446       |
| Haiti   | 1998           | FemalePregAge15to19 | 21065      |
| Haiti   | 1998           | FemalePregAge20to24 | 47945      |
| Haiti   | 1998           | FemalePregAge25to29 | 48929      |
| Haiti   | 1998           | FemalePregAge30to34 | 40782      |
| Haiti   | 1998           | FemalePregAge35to39 | 26622      |
| Haiti   | 1998           | FemalePregAge40to44 | 11607      |
| Haiti   | 1998           | FemalePregAge45to49 | 4084       |
| Haiti   | 1998           | MaleAge0to4         | 620334     |
| Haiti   | 1998           | MaleAge10to14       | 545293     |
| Haiti   | 1998           | MaleAge15to19       | 468634     |
| Haiti   | 1998           | MaleAge20to24       | 349706     |
| Haiti   | 1998           | MaleAge25to29       | 285982     |
| Haiti   | 1998           | MaleAge30to34       | 256706     |
| Haiti   | 1998           | MaleAge35to39       | 216800     |
| Haiti   | 1998           | MaleAge40to44       | 180188     |
| Haiti   | 1998           | MaleAge45to49       | 143501     |
| Haiti   | 1998           | MaleAge50to54       | 114294     |
| Haiti   | 1998           | MaleAge55to59       | 105036     |
| Haiti   | 1998           | MaleAge5to9         | 576633     |
| Haiti   | 1998           | MaleAge60to64       | 82797      |
| Haiti   | 1998           | MaleAge65to69       | 61564      |
| Haiti   | 1998           | MaleAge70to74       | 42546      |
| Haiti   | 1998           | MaleAge75to79       | 26792      |
| Haiti   | 1998           | MaleAge80to84       | 13231      |
| Haiti   | 1998           | MaleAge85to89       | 4452       |
| Haiti   | 1998           | MaleAge90to94       | 902        |
| Haiti   | 1998           | MaleAge95to99       | 124        |
| Haiti   | 1998           | MaleAgeAbov e100    | 4          |
| Haiti   | 1999           | FemaleAge0to4       | 597861     |
| Haiti   | 1999           | FemaleAge10to14     | 533818     |
| Haiti   | 1999           | FemaleAge15to19     | 435137     |
| Haiti   | 1999           | FemaleAge20to24     | 268483     |
| Haiti   | 1999           | FemaleAge25to29     | 196938     |
| Haiti   | 1999           | FemaleAge30to34     | 182432     |
| Haiti   | 1999           | FemaleAge35to39     | 175350     |
| Haiti   | 1999           | FemaleAge40to44     | 165701     |
| Haiti   | 1999           | FemaleAge45to49     | 153723     |
| Haiti   | 1999           | FemaleAge50to54     | 127507     |
| Haiti   | 1999           | FemaleAge55to59     | 116759     |
| Haiti   | 1999           | FemaleAge5to9       | 560773     |
| Haiti   | 1999           | FemaleAge60to64     | 97667      |
| Haiti   | 1999           | FemaleAge65to69     | 74099      |
| Haiti   | 1999           | FemaleAge70to74     | 51390      |
| Haiti   | 1999           | FemaleAge75to79     | 32985      |
| Haiti   | 1999           | FemaleAge80to84     | 17009      |
| Haiti   | 1999           | FemaleAge85to89     | 5788       |
| Haiti   | 1999           | FemaleAge90to94     | 1287       |
| Haiti   | 1999           | FemaleAge95to99     | 183        |

Dietary calcium and zinc deficiency risks are decreasing but remain prevalent

| Country | Reference year | Age/gender group    | Population |
|---------|----------------|---------------------|------------|
| Haiti   | 1999           | FemaleAgeAbove100   | 8          |
| Haiti   | 1999           | FemaleLactAge15to19 | 28086      |
| Haiti   | 1999           | FemaleLactAge20to24 | 63927      |
| Haiti   | 1999           | FemaleLactAge25to29 | 65239      |
| Haiti   | 1999           | FemaleLactAge30to34 | 54376      |
| Haiti   | 1999           | FemaleLactAge35to39 | 35497      |
| Haiti   | 1999           | FemaleLactAge40to44 | 15476      |
| Haiti   | 1999           | FemaleLactAge45to49 | 5446       |
| Haiti   | 1999           | FemalePregAge15to19 | 21065      |
| Haiti   | 1999           | FemalePregAge20to24 | 47945      |
| Haiti   | 1999           | FemalePregAge25to29 | 48929      |
| Haiti   | 1999           | FemalePregAge30to34 | 40782      |
| Haiti   | 1999           | FemalePregAge35to39 | 26622      |
| Haiti   | 1999           | FemalePregAge40to44 | 11607      |
| Haiti   | 1999           | FemalePregAge45to49 | 4084       |
| Haiti   | 1999           | MaleAge0to4         | 622494     |
| Haiti   | 1999           | MaleAge10to14       | 548634     |
| Haiti   | 1999           | MaleAge15to19       | 488400     |
| Haiti   | 1999           | MaleAge20to24       | 364598     |
| Haiti   | 1999           | MaleAge25to29       | 288520     |
| Haiti   | 1999           | MaleAge30to34       | 260588     |
| Haiti   | 1999           | MaleAge35to39       | 222727     |
| Haiti   | 1999           | MaleAge40to44       | 183881     |
| Haiti   | 1999           | MaleAge45to49       | 150969     |
| Haiti   | 1999           | MaleAge50to54       | 114292     |
| Haiti   | 1999           | MaleAge55to59       | 106763     |
| Haiti   | 1999           | MaleAge5to9         | 580218     |
| Haiti   | 1999           | MaleAge60to64       | 84818      |
| Haiti   | 1999           | MaleAge65to69       | 63331      |
| Haiti   | 1999           | MaleAge70to74       | 43316      |
| Haiti   | 1999           | MaleAge75to79       | 27186      |
| Haiti   | 1999           | MaleAge80to84       | 13255      |
| Haiti   | 1999           | MaleAge85to89       | 4351       |
| Haiti   | 1999           | MaleAge90to94       | 889        |
| Haiti   | 1999           | MaleAge95to99       | 126        |
| Haiti   | 1999           | MaleAgeAbove100     | 5          |
| Haiti   | 2000           | FemaleAge0to4       | 599615     |
| Haiti   | 2000           | FemaleAge10to14     | 536915     |
| Haiti   | 2000           | FemaleAge15to19     | 448939     |
| Haiti   | 2000           | FemaleAge20to24     | 284699     |
| Haiti   | 2000           | FemaleAge25to29     | 203402     |
| Haiti   | 2000           | FemaleAge30to34     | 185726     |
| Haiti   | 2000           | FemaleAge35to39     | 181475     |
| Haiti   | 2000           | FemaleAge40to44     | 170109     |
| Haiti   | 2000           | FemaleAge45to49     | 159011     |
| Haiti   | 2000           | FemaleAge50to54     | 130136     |
| Haiti   | 2000           | FemaleAge55to59     | 117587     |
| Haiti   | 2000           | FemaleAge5to9       | 563063     |
| Haiti   | 2000           | FemaleAge60to64     | 99848      |
| Haiti   | 2000           | FemaleAge65to69     | 76508      |
| Haiti   | 2000           | FemaleAge70to74     | 52920      |
| Haiti   | 2000           | FemaleAge75to79     | 33697      |
| Haiti   | 2000           | FemaleAge80to84     | 17099      |
| Haiti   | 2000           | FemaleAge85to89     | 5531       |
| Haiti   | 2000           | FemaleAge90to94     | 1110       |
| Haiti   | 2000           | FemaleAge95to99     | 131        |
| Haiti   | 2000           | FemaleAgeAbove100   | 9          |
| Haiti   | 2000           | FemaleLactAge15to19 | 28086      |
| Haiti   | 2000           | FemaleLactAge20to24 | 63927      |
| Haiti   | 2000           | FemaleLactAge25to29 | 65239      |
| Haiti   | 2000           | FemaleLactAge30to34 | 54376      |
| Haiti   | 2000           | FemaleLactAge35to39 | 35497      |
| Haiti   | 2000           | FemaleLactAge40to44 | 15476      |
| Haiti   | 2000           | FemaleLactAge45to49 | 5446       |
| Haiti   | 2000           | FemalePregAge15to19 | 21065      |
| Haiti   | 2000           | FemalePregAge20to24 | 47945      |
| Haiti   | 2000           | FemalePregAge25to29 | 48929      |
| Haiti   | 2000           | FemalePregAge30to34 | 40782      |
| Haiti   | 2000           | FemalePregAge35to39 | 26622      |
| Haiti   | 2000           | FemalePregAge40to44 | 11607      |
| Haiti   | 2000           | FemalePregAge45to49 | 4084       |
| Haiti   | 2000           | MaleAge0to4         | 624432     |
| Haiti   | 2000           | MaleAge10to14       | 552118     |
| Haiti   | 2000           | MaleAge15to19       | 504405     |
| Haiti   | 2000           | MaleAge20to24       | 381585     |
| Haiti   | 2000           | MaleAge25to29       | 293465     |
| Haiti   | 2000           | MaleAge30to34       | 263177     |
| Haiti   | 2000           | MaleAge35to39       | 228136     |
| Haiti   | 2000           | MaleAge40to44       | 188242     |
| Haiti   | 2000           | MaleAge45to49       | 157140     |
| Haiti   | 2000           | MaleAge50to54       | 116506     |
| Haiti   | 2000           | MaleAge55to59       | 107548     |
| Haiti   | 2000           | MaleAge5to9         | 582695     |
| Haiti   | 2000           | MaleAge60to64       | 86976      |
| Haiti   | 2000           | MaleAge65to69       | 65192      |
| Haiti   | 2000           | MaleAge70to74       | 44343      |
| Haiti   | 2000           | MaleAge75to79       | 27615      |
| Haiti   | 2000           | MaleAge80to84       | 13171      |

Dietary calcium and zinc deficiency risks are decreasing but remain prevalent

| Country  | Reference year | Age/gender group    | Population |
|----------|----------------|---------------------|------------|
| Haiti    | 2000           | MaleAge85to89       | 4047       |
| Haiti    | 2000           | MaleAge90to94       | 744        |
| Haiti    | 2000           | MaleAge95to99       | 82         |
| Haiti    | 2000           | MaleAgeAbove100     | 5          |
| Honduras | 1992           | FemaleAge0to4       | 431214     |
| Honduras | 1992           | FemaleAge10to14     | 334703     |
| Honduras | 1992           | FemaleAge15to19     | 217082     |
| Honduras | 1992           | FemaleAge20to24     | 131915     |
| Honduras | 1992           | FemaleAge25to29     | 121849     |
| Honduras | 1992           | FemaleAge30to34     | 109195     |
| Honduras | 1992           | FemaleAge35to39     | 100914     |
| Honduras | 1992           | FemaleAge40to44     | 85710      |
| Honduras | 1992           | FemaleAge45to49     | 70946      |
| Honduras | 1992           | FemaleAge50to54     | 60571      |
| Honduras | 1992           | FemaleAge55to59     | 53229      |
| Honduras | 1992           | FemaleAge5to9       | 384879     |
| Honduras | 1992           | FemaleAge60to64     | 44753      |
| Honduras | 1992           | FemaleAge65to69     | 36482      |
| Honduras | 1992           | FemaleAge70to74     | 25704      |
| Honduras | 1992           | FemaleAge75to79     | 17488      |
| Honduras | 1992           | FemaleAge80to84     | 10754      |
| Honduras | 1992           | FemaleAge85to89     | 4652       |
| Honduras | 1992           | FemaleAge90to94     | 1534       |
| Honduras | 1992           | FemaleAge95to99     | 302        |
| Honduras | 1992           | FemaleAgeAbove100   | 32         |
| Honduras | 1992           | FemaleLactAge15to19 | 36208      |
| Honduras | 1992           | FemaleLactAge20to24 | 60935      |
| Honduras | 1992           | FemaleLactAge25to29 | 44351      |
| Honduras | 1992           | FemaleLactAge30to34 | 29245      |
| Honduras | 1992           | FemaleLactAge35to39 | 16276      |
| Honduras | 1992           | FemaleLactAge40to44 | 6794       |
| Honduras | 1992           | FemaleLactAge45to49 | 1077       |
| Honduras | 1992           | FemalePregAge15to19 | 27156      |
| Honduras | 1992           | FemalePregAge20to24 | 45701      |
| Honduras | 1992           | FemalePregAge25to29 | 33263      |
| Honduras | 1992           | FemalePregAge30to34 | 21934      |
| Honduras | 1992           | FemalePregAge35to39 | 12207      |
| Honduras | 1992           | FemalePregAge40to44 | 5095       |
| Honduras | 1992           | FemalePregAge45to49 | 808        |
| Honduras | 1992           | MaleAge0to4         | 447180     |
| Honduras | 1992           | MaleAge10to14       | 340882     |
| Honduras | 1992           | MaleAge15to19       | 281579     |
| Honduras | 1992           | MaleAge20to24       | 236347     |
| Honduras | 1992           | MaleAge25to29       | 195213     |
| Honduras | 1992           | MaleAge30to34       | 155525     |
| Honduras | 1992           | MaleAge35to39       | 125831     |
| Honduras | 1992           | MaleAge40to44       | 97148      |
| Honduras | 1992           | MaleAge45to49       | 74464      |
| Honduras | 1992           | MaleAge50to54       | 62653      |
| Honduras | 1992           | MaleAge55to59       | 54751      |
| Honduras | 1992           | MaleAge5to9         | 396073     |
| Honduras | 1992           | MaleAge60to64       | 44259      |
| Honduras | 1992           | MaleAge65to69       | 33984      |
| Honduras | 1992           | MaleAge70to74       | 22739      |
| Honduras | 1992           | MaleAge75to79       | 14508      |
| Honduras | 1992           | MaleAge80to84       | 8348       |
| Honduras | 1992           | MaleAge85to89       | 3294       |
| Honduras | 1992           | MaleAge90to94       | 962        |
| Honduras | 1992           | MaleAge95to99       | 170        |
| Honduras | 1992           | MaleAgeAbove100     | 17         |
| Honduras | 1993           | FemaleAge0to4       | 439687     |
| Honduras | 1993           | FemaleAge10to14     | 343770     |
| Honduras | 1993           | FemaleAge15to19     | 226240     |
| Honduras | 1993           | FemaleAge20to24     | 136734     |
| Honduras | 1993           | FemaleAge25to29     | 128411     |
| Honduras | 1993           | FemaleAge30to34     | 114361     |
| Honduras | 1993           | FemaleAge35to39     | 104814     |
| Honduras | 1993           | FemaleAge40to44     | 91308      |
| Honduras | 1993           | FemaleAge45to49     | 73769      |
| Honduras | 1993           | FemaleAge50to54     | 61830      |
| Honduras | 1993           | FemaleAge55to59     | 54059      |
| Honduras | 1993           | FemaleAge5to9       | 392359     |
| Honduras | 1993           | FemaleAge60to64     | 46052      |
| Honduras | 1993           | FemaleAge65to69     | 37206      |
| Honduras | 1993           | FemaleAge70to74     | 27446      |
| Honduras | 1993           | FemaleAge75to79     | 17636      |
| Honduras | 1993           | FemaleAge80to84     | 11394      |
| Honduras | 1993           | FemaleAge85to89     | 4882       |
| Honduras | 1993           | FemaleAge90to94     | 1617       |
| Honduras | 1993           | FemaleAge95to99     | 352        |
| Honduras | 1993           | FemaleAgeAbove100   | 35         |
| Honduras | 1993           | FemaleLactAge15to19 | 36208      |
| Honduras | 1993           | FemaleLactAge20to24 | 60935      |
| Honduras | 1993           | FemaleLactAge25to29 | 44351      |
| Honduras | 1993           | FemaleLactAge30to34 | 29245      |
| Honduras | 1993           | FemaleLactAge35to39 | 16276      |
| Honduras | 1993           | FemaleLactAge40to44 | 6794       |
| Honduras | 1993           | FemaleLactAge45to49 | 1077       |

Dietary calcium and zinc deficiency risks are decreasing but remain prevalent

| Country  | Reference year | Age/gender group    | Population |
|----------|----------------|---------------------|------------|
| Honduras | 1993           | FemalePregAge15to19 | 27156      |
| Honduras | 1993           | FemalePregAge20to24 | 45701      |
| Honduras | 1993           | FemalePregAge25to29 | 33263      |
| Honduras | 1993           | FemalePregAge30to34 | 21934      |
| Honduras | 1993           | FemalePregAge35to39 | 12207      |
| Honduras | 1993           | FemalePregAge40to44 | 5095       |
| Honduras | 1993           | FemalePregAge45to49 | 808        |
| Honduras | 1993           | MaleAge0to4         | 456131     |
| Honduras | 1993           | MaleAge10to14       | 350195     |
| Honduras | 1993           | MaleAge15to19       | 290678     |
| Honduras | 1993           | MaleAge20to24       | 240573     |
| Honduras | 1993           | MaleAge25to29       | 201285     |
| Honduras | 1993           | MaleAge30to34       | 160241     |
| Honduras | 1993           | MaleAge35to39       | 129591     |
| Honduras | 1993           | MaleAge40to44       | 102456     |
| Honduras | 1993           | MaleAge45to49       | 77290      |
| Honduras | 1993           | MaleAge50to54       | 63739      |
| Honduras | 1993           | MaleAge55to59       | 55577      |
| Honduras | 1993           | MaleAge5to9         | 403950     |
| Honduras | 1993           | MaleAge60to64       | 45846      |
| Honduras | 1993           | MaleAge65to69       | 34817      |
| Honduras | 1993           | MaleAge70to74       | 24310      |
| Honduras | 1993           | MaleAge75to79       | 14634      |
| Honduras | 1993           | MaleAge80to84       | 8822       |
| Honduras | 1993           | MaleAge85to89       | 3459       |
| Honduras | 1993           | MaleAge90to94       | 1019       |
| Honduras | 1993           | MaleAge95to99       | 199        |
| Honduras | 1993           | MaleAgeAbov e100    | 18         |
| Honduras | 1994           | FemaleAge0to4       | 447084     |
| Honduras | 1994           | FemaleAge10to14     | 352603     |
| Honduras | 1994           | FemaleAge15to19     | 235593     |
| Honduras | 1994           | FemaleAge20to24     | 142149     |
| Honduras | 1994           | FemaleAge25to29     | 134694     |
| Honduras | 1994           | FemaleAge30to34     | 119730     |
| Honduras | 1994           | FemaleAge35to39     | 108694     |
| Honduras | 1994           | FemaleAge40to44     | 96652      |
| Honduras | 1994           | FemaleAge45to49     | 77031      |
| Honduras | 1994           | FemaleAge50to54     | 63316      |
| Honduras | 1994           | FemaleAge55to59     | 54901      |
| Honduras | 1994           | FemaleAge5to9       | 399352     |
| Honduras | 1994           | FemaleAge60to64     | 47285      |
| Honduras | 1994           | FemaleAge65to69     | 38009      |
| Honduras | 1994           | FemaleAge70to74     | 29062      |
| Honduras | 1994           | FemaleAge75to79     | 18086      |
| Honduras | 1994           | FemaleAge80to84     | 11940      |
| Honduras | 1994           | FemaleAge85to89     | 5099       |
| Honduras | 1994           | FemaleAge90to94     | 1664       |
| Honduras | 1994           | FemaleAge95to99     | 378        |
| Honduras | 1994           | FemaleAgeAbov e100  | 39         |
| Honduras | 1994           | FemaleLactAge15to19 | 36208      |
| Honduras | 1994           | FemaleLactAge20to24 | 60935      |
| Honduras | 1994           | FemaleLactAge25to29 | 44351      |
| Honduras | 1994           | FemaleLactAge30to34 | 29245      |
| Honduras | 1994           | FemaleLactAge35to39 | 16276      |
| Honduras | 1994           | FemaleLactAge40to44 | 6794       |
| Honduras | 1994           | FemaleLactAge45to49 | 1077       |
| Honduras | 1994           | FemalePregAge15to19 | 27156      |
| Honduras | 1994           | FemalePregAge20to24 | 45701      |
| Honduras | 1994           | FemalePregAge25to29 | 33263      |
| Honduras | 1994           | FemalePregAge30to34 | 21934      |
| Honduras | 1994           | FemalePregAge35to39 | 12207      |
| Honduras | 1994           | FemalePregAge40to44 | 5095       |
| Honduras | 1994           | FemalePregAge45to49 | 808        |
| Honduras | 1994           | MaleAge0to4         | 463921     |
| Honduras | 1994           | MaleAge10to14       | 359361     |
| Honduras | 1994           | MaleAge15to19       | 300041     |
| Honduras | 1994           | MaleAge20to24       | 245440     |
| Honduras | 1994           | MaleAge25to29       | 206989     |
| Honduras | 1994           | MaleAge30to34       | 164976     |
| Honduras | 1994           | MaleAge35to39       | 133165     |
| Honduras | 1994           | MaleAge40to44       | 107547     |
| Honduras | 1994           | MaleAge45to49       | 80586      |
| Honduras | 1994           | MaleAge50to54       | 65095      |
| Honduras | 1994           | MaleAge55to59       | 56369      |
| Honduras | 1994           | MaleAge5to9         | 411332     |
| Honduras | 1994           | MaleAge60to64       | 47328      |
| Honduras | 1994           | MaleAge65to69       | 35768      |
| Honduras | 1994           | MaleAge70to74       | 25780      |
| Honduras | 1994           | MaleAge75to79       | 15024      |
| Honduras | 1994           | MaleAge80to84       | 9190       |
| Honduras | 1994           | MaleAge85to89       | 3590       |
| Honduras | 1994           | MaleAge90to94       | 1045       |
| Honduras | 1994           | MaleAge95to99       | 212        |
| Honduras | 1994           | MaleAgeAbov e100    | 20         |
| Honduras | 1995           | FemaleAge0to4       | 452661     |
| Honduras | 1995           | FemaleAge10to14     | 361034     |
| Honduras | 1995           | FemaleAge15to19     | 244847     |
| Honduras | 1995           | FemaleAge20to24     | 148621     |

Dietary calcium and zinc deficiency risks are decreasing but remain prevalent

| Country  | Reference year | Age/gender group    | Population |
|----------|----------------|---------------------|------------|
| Honduras | 1995           | FemaleAge25to29     | 140501     |
| Honduras | 1995           | FemaleAge30to34     | 125328     |
| Honduras | 1995           | FemaleAge35to39     | 112822     |
| Honduras | 1995           | FemaleAge40to44     | 101434     |
| Honduras | 1995           | FemaleAge45to49     | 80814      |
| Honduras | 1995           | FemaleAge50to54     | 65072      |
| Honduras | 1995           | FemaleAge55to59     | 55803      |
| Honduras | 1995           | FemaleAge5to9       | 406176     |
| Honduras | 1995           | FemaleAge60to64     | 48380      |
| Honduras | 1995           | FemaleAge65to69     | 39002      |
| Honduras | 1995           | FemaleAge70to74     | 30406      |
| Honduras | 1995           | FemaleAge75to79     | 18949      |
| Honduras | 1995           | FemaleAge80to84     | 12354      |
| Honduras | 1995           | FemaleAge85to89     | 5348       |
| Honduras | 1995           | FemaleAge90to94     | 1670       |
| Honduras | 1995           | FemaleAge95to99     | 360        |
| Honduras | 1995           | FemaleAgeAbove100   | 44         |
| Honduras | 1995           | FemaleLactAge15to19 | 36208      |
| Honduras | 1995           | FemaleLactAge20to24 | 60935      |
| Honduras | 1995           | FemaleLactAge25to29 | 44351      |
| Honduras | 1995           | FemaleLactAge30to34 | 29245      |
| Honduras | 1995           | FemaleLactAge35to39 | 16276      |
| Honduras | 1995           | FemaleLactAge40to44 | 6794       |
| Honduras | 1995           | FemaleLactAge45to49 | 1077       |
| Honduras | 1995           | FemalePregAge15to19 | 27156      |
| Honduras | 1995           | FemalePregAge20to24 | 45701      |
| Honduras | 1995           | FemalePregAge25to29 | 33263      |
| Honduras | 1995           | FemalePregAge30to34 | 21934      |
| Honduras | 1995           | FemalePregAge35to39 | 12207      |
| Honduras | 1995           | FemalePregAge40to44 | 5095       |
| Honduras | 1995           | FemalePregAge45to49 | 808        |
| Honduras | 1995           | MaleAge0to4         | 469768     |
| Honduras | 1995           | MaleAge10to14       | 368182     |
| Honduras | 1995           | MaleAge15to19       | 309374     |
| Honduras | 1995           | MaleAge20to24       | 251468     |
| Honduras | 1995           | MaleAge25to29       | 212121     |
| Honduras | 1995           | MaleAge30to34       | 169810     |
| Honduras | 1995           | MaleAge35to39       | 136781     |
| Honduras | 1995           | MaleAge40to44       | 112088     |
| Honduras | 1995           | MaleAge45to49       | 84381      |
| Honduras | 1995           | MaleAge50to54       | 66807      |
| Honduras | 1995           | MaleAge55to59       | 57203      |
| Honduras | 1995           | MaleAge5to9         | 418536     |
| Honduras | 1995           | MaleAge60to64       | 48604      |
| Honduras | 1995           | MaleAge65to69       | 36937      |
| Honduras | 1995           | MaleAge70to74       | 27035      |
| Honduras | 1995           | MaleAge75to79       | 15766      |
| Honduras | 1995           | MaleAge80to84       | 9436       |
| Honduras | 1995           | MaleAge85to89       | 3718       |
| Honduras | 1995           | MaleAge90to94       | 1029       |
| Honduras | 1995           | MaleAge95to99       | 194        |
| Honduras | 1995           | MaleAgeAbove100     | 22         |
| Honduras | 1996           | FemaleAge0to4       | 458853     |
| Honduras | 1996           | FemaleAge10to14     | 368388     |
| Honduras | 1996           | FemaleAge15to19     | 250592     |
| Honduras | 1996           | FemaleAge20to24     | 152826     |
| Honduras | 1996           | FemaleAge25to29     | 145146     |
| Honduras | 1996           | FemaleAge30to34     | 130547     |
| Honduras | 1996           | FemaleAge35to39     | 117528     |
| Honduras | 1996           | FemaleAge40to44     | 105729     |
| Honduras | 1996           | FemaleAge45to49     | 85381      |
| Honduras | 1996           | FemaleAge50to54     | 67145      |
| Honduras | 1996           | FemaleAge55to59     | 56743      |
| Honduras | 1996           | FemaleAge5to9       | 413237     |
| Honduras | 1996           | FemaleAge60to64     | 49299      |
| Honduras | 1996           | FemaleAge65to69     | 40012      |
| Honduras | 1996           | FemaleAge70to74     | 31423      |
| Honduras | 1996           | FemaleAge75to79     | 19991      |
| Honduras | 1996           | FemaleAge80to84     | 12599      |
| Honduras | 1996           | FemaleAge85to89     | 5874       |
| Honduras | 1996           | FemaleAge90to94     | 1886       |
| Honduras | 1996           | FemaleAge95to99     | 401        |
| Honduras | 1996           | FemaleAgeAbove100   | 50         |
| Honduras | 1996           | FemaleLactAge15to19 | 37730      |
| Honduras | 1996           | FemaleLactAge20to24 | 62315      |
| Honduras | 1996           | FemaleLactAge25to29 | 44300      |
| Honduras | 1996           | FemaleLactAge30to34 | 29348      |
| Honduras | 1996           | FemaleLactAge35to39 | 16056      |
| Honduras | 1996           | FemaleLactAge40to44 | 6849       |
| Honduras | 1996           | FemaleLactAge45to49 | 1072       |
| Honduras | 1996           | FemalePregAge15to19 | 28297      |
| Honduras | 1996           | FemalePregAge20to24 | 46736      |
| Honduras | 1996           | FemalePregAge25to29 | 33225      |
| Honduras | 1996           | FemalePregAge30to34 | 22011      |
| Honduras | 1996           | FemalePregAge35to39 | 12042      |
| Honduras | 1996           | FemalePregAge40to44 | 5137       |
| Honduras | 1996           | FemalePregAge45to49 | 804        |
| Honduras | 1996           | MaleAge0to4         | 476252     |



Dietary calcium and zinc deficiency risks are decreasing but remain prevalent

| Country  | Reference year | Age/gender group    | Population |
|----------|----------------|---------------------|------------|
| Honduras | 1996           | MaleAge10to14       | 375363     |
| Honduras | 1996           | MaleAge15to19       | 317455     |
| Honduras | 1996           | MaleAge20to24       | 257504     |
| Honduras | 1996           | MaleAge25to29       | 216029     |
| Honduras | 1996           | MaleAge30to34       | 175059     |
| Honduras | 1996           | MaleAge35to39       | 141199     |
| Honduras | 1996           | MaleAge40to44       | 116397     |
| Honduras | 1996           | MaleAge45to49       | 88661      |
| Honduras | 1996           | MaleAge50to54       | 68766      |
| Honduras | 1996           | MaleAge55to59       | 58031      |
| Honduras | 1996           | MaleAge5to9         | 425741     |
| Honduras | 1996           | MaleAge60to64       | 49599      |
| Honduras | 1996           | MaleAge65to69       | 38143      |
| Honduras | 1996           | MaleAge70to74       | 28002      |
| Honduras | 1996           | MaleAge75to79       | 16677      |
| Honduras | 1996           | MaleAge80to84       | 9645       |
| Honduras | 1996           | MaleAge85to89       | 4121       |
| Honduras | 1996           | MaleAge90to94       | 1181       |
| Honduras | 1996           | MaleAge95to99       | 218        |
| Honduras | 1996           | MaleAgeAbove100     | 25         |
| Honduras | 1997           | FemaleAge0to4       | 461799     |
| Honduras | 1997           | FemaleAge10to14     | 375507     |
| Honduras | 1997           | FemaleAge15to19     | 259143     |
| Honduras | 1997           | FemaleAge20to24     | 160555     |
| Honduras | 1997           | FemaleAge25to29     | 149262     |
| Honduras | 1997           | FemaleAge30to34     | 136261     |
| Honduras | 1997           | FemaleAge35to39     | 121956     |
| Honduras | 1997           | FemaleAge40to44     | 109571     |
| Honduras | 1997           | FemaleAge45to49     | 90496      |
| Honduras | 1997           | FemaleAge50to54     | 69508      |
| Honduras | 1997           | FemaleAge55to59     | 57811      |
| Honduras | 1997           | FemaleAge5to9       | 420805     |
| Honduras | 1997           | FemaleAge60to64     | 50172      |
| Honduras | 1997           | FemaleAge65to69     | 41202      |
| Honduras | 1997           | FemaleAge70to74     | 32251      |
| Honduras | 1997           | FemaleAge75to79     | 21368      |
| Honduras | 1997           | FemaleAge80to84     | 12720      |
| Honduras | 1997           | FemaleAge85to89     | 6403       |
| Honduras | 1997           | FemaleAge90to94     | 2056       |
| Honduras | 1997           | FemaleAge95to99     | 453        |
| Honduras | 1997           | FemaleAgeAbove100   | 57         |
| Honduras | 1997           | FemaleLactAge15to19 | 37730      |
| Honduras | 1997           | FemaleLactAge20to24 | 62315      |
| Honduras | 1997           | FemaleLactAge25to29 | 44300      |
| Honduras | 1997           | FemaleLactAge30to34 | 29348      |
| Honduras | 1997           | FemaleLactAge35to39 | 16056      |
| Honduras | 1997           | FemaleLactAge40to44 | 6849       |
| Honduras | 1997           | FemaleLactAge45to49 | 1072       |
| Honduras | 1997           | FemalePregAge15to19 | 28297      |
| Honduras | 1997           | FemalePregAge20to24 | 46736      |
| Honduras | 1997           | FemalePregAge25to29 | 33225      |
| Honduras | 1997           | FemalePregAge30to34 | 22011      |
| Honduras | 1997           | FemalePregAge35to39 | 12042      |
| Honduras | 1997           | FemalePregAge40to44 | 5137       |
| Honduras | 1997           | FemalePregAge45to49 | 804        |
| Honduras | 1997           | MaleAge0to4         | 479427     |
| Honduras | 1997           | MaleAge10to14       | 382428     |
| Honduras | 1997           | MaleAge15to19       | 325725     |
| Honduras | 1997           | MaleAge20to24       | 264664     |
| Honduras | 1997           | MaleAge25to29       | 219288     |
| Honduras | 1997           | MaleAge30to34       | 180370     |
| Honduras | 1997           | MaleAge35to39       | 145553     |
| Honduras | 1997           | MaleAge40to44       | 120315     |
| Honduras | 1997           | MaleAge45to49       | 93545      |
| Honduras | 1997           | MaleAge50to54       | 71089      |
| Honduras | 1997           | MaleAge55to59       | 58944      |
| Honduras | 1997           | MaleAge5to9         | 433565     |
| Honduras | 1997           | MaleAge60to64       | 50494      |
| Honduras | 1997           | MaleAge65to69       | 39552      |
| Honduras | 1997           | MaleAge70to74       | 28823      |
| Honduras | 1997           | MaleAge75to79       | 17843      |
| Honduras | 1997           | MaleAge80to84       | 9739       |
| Honduras | 1997           | MaleAge85to89       | 4505       |
| Honduras | 1997           | MaleAge90to94       | 1295       |
| Honduras | 1997           | MaleAge95to99       | 251        |
| Honduras | 1997           | MaleAgeAbove100     | 27         |
| Honduras | 1998           | FemaleAge0to4       | 462402     |
| Honduras | 1998           | FemaleAge10to14     | 382455     |
| Honduras | 1998           | FemaleAge15to19     | 267695     |
| Honduras | 1998           | FemaleAge20to24     | 169080     |
| Honduras | 1998           | FemaleAge25to29     | 153398     |
| Honduras | 1998           | FemaleAge30to34     | 142054     |
| Honduras | 1998           | FemaleAge35to39     | 126477     |
| Honduras | 1998           | FemaleAge40to44     | 113070     |
| Honduras | 1998           | FemaleAge45to49     | 95798      |
| Honduras | 1998           | FemaleAge50to54     | 72250      |
| Honduras | 1998           | FemaleAge55to59     | 59060      |
| Honduras | 1998           | FemaleAge5to9       | 428663     |

Dietary calcium and zinc deficiency risks are decreasing but remain prevalent

| Country  | Reference year | Age/gender group    | Population |
|----------|----------------|---------------------|------------|
| Honduras | 1998           | FemaleAge60to64     | 51027      |
| Honduras | 1998           | FemaleAge65to69     | 42490      |
| Honduras | 1998           | FemaleAge70to74     | 32997      |
| Honduras | 1998           | FemaleAge75to79     | 22907      |
| Honduras | 1998           | FemaleAge80to84     | 12905      |
| Honduras | 1998           | FemaleAge85to89     | 6854       |
| Honduras | 1998           | FemaleAge90to94     | 2189       |
| Honduras | 1998           | FemaleAge95to99     | 504        |
| Honduras | 1998           | FemaleAgeAbove100   | 65         |
| Honduras | 1998           | FemaleLactAge15to19 | 37730      |
| Honduras | 1998           | FemaleLactAge20to24 | 62315      |
| Honduras | 1998           | FemaleLactAge25to29 | 44300      |
| Honduras | 1998           | FemaleLactAge30to34 | 29348      |
| Honduras | 1998           | FemaleLactAge35to39 | 16056      |
| Honduras | 1998           | FemaleLactAge40to44 | 6849       |
| Honduras | 1998           | FemaleLactAge45to49 | 1072       |
| Honduras | 1998           | FemalePregAge15to19 | 28297      |
| Honduras | 1998           | FemalePregAge20to24 | 46736      |
| Honduras | 1998           | FemalePregAge25to29 | 33225      |
| Honduras | 1998           | FemalePregAge30to34 | 22011      |
| Honduras | 1998           | FemalePregAge35to39 | 12042      |
| Honduras | 1998           | FemalePregAge40to44 | 5137       |
| Honduras | 1998           | FemalePregAge45to49 | 804        |
| Honduras | 1998           | MaleAge0to4         | 480199     |
| Honduras | 1998           | MaleAge10to14       | 389470     |
| Honduras | 1998           | MaleAge15to19       | 334063     |
| Honduras | 1998           | MaleAge20to24       | 272649     |
| Honduras | 1998           | MaleAge25to29       | 222455     |
| Honduras | 1998           | MaleAge30to34       | 185472     |
| Honduras | 1998           | MaleAge35to39       | 149761     |
| Honduras | 1998           | MaleAge40to44       | 123990     |
| Honduras | 1998           | MaleAge45to49       | 98733      |
| Honduras | 1998           | MaleAge50to54       | 73841      |
| Honduras | 1998           | MaleAge55to59       | 60008      |
| Honduras | 1998           | MaleAge5to9         | 441761     |
| Honduras | 1998           | MaleAge60to64       | 51340      |
| Honduras | 1998           | MaleAge65to69       | 41050      |
| Honduras | 1998           | MaleAge70to74       | 29611      |
| Honduras | 1998           | MaleAge75to79       | 19131      |
| Honduras | 1998           | MaleAge80to84       | 9864       |
| Honduras | 1998           | MaleAge85to89       | 4801       |
| Honduras | 1998           | MaleAge90to94       | 1379       |
| Honduras | 1998           | MaleAge95to99       | 282        |
| Honduras | 1998           | MaleAgeAbove100     | 31         |
| Honduras | 1999           | FemaleAge0to4       | 462196     |
| Honduras | 1999           | FemaleAge10to14     | 389509     |
| Honduras | 1999           | FemaleAge15to19     | 276076     |
| Honduras | 1999           | FemaleAge20to24     | 177884     |
| Honduras | 1999           | FemaleAge25to29     | 158221     |
| Honduras | 1999           | FemaleAge30to34     | 147535     |
| Honduras | 1999           | FemaleAge35to39     | 131091     |
| Honduras | 1999           | FemaleAge40to44     | 116537     |
| Honduras | 1999           | FemaleAge45to49     | 100783     |
| Honduras | 1999           | FemaleAge50to54     | 75483      |
| Honduras | 1999           | FemaleAge55to59     | 60548      |
| Honduras | 1999           | FemaleAge5to9       | 436157     |
| Honduras | 1999           | FemaleAge60to64     | 51912      |
| Honduras | 1999           | FemaleAge65to69     | 43743      |
| Honduras | 1999           | FemaleAge70to74     | 33826      |
| Honduras | 1999           | FemaleAge75to79     | 24371      |
| Honduras | 1999           | FemaleAge80to84     | 13354      |
| Honduras | 1999           | FemaleAge85to89     | 7158       |
| Honduras | 1999           | FemaleAge90to94     | 2303       |
| Honduras | 1999           | FemaleAge95to99     | 540        |
| Honduras | 1999           | FemaleAgeAbove100   | 73         |
| Honduras | 1999           | FemaleLactAge15to19 | 37730      |
| Honduras | 1999           | FemaleLactAge20to24 | 62315      |
| Honduras | 1999           | FemaleLactAge25to29 | 44300      |
| Honduras | 1999           | FemaleLactAge30to34 | 29348      |
| Honduras | 1999           | FemaleLactAge35to39 | 16056      |
| Honduras | 1999           | FemaleLactAge40to44 | 6849       |
| Honduras | 1999           | FemaleLactAge45to49 | 1072       |
| Honduras | 1999           | FemalePregAge15to19 | 28297      |
| Honduras | 1999           | FemalePregAge20to24 | 46736      |
| Honduras | 1999           | FemalePregAge25to29 | 33225      |
| Honduras | 1999           | FemalePregAge30to34 | 22011      |
| Honduras | 1999           | FemalePregAge35to39 | 12042      |
| Honduras | 1999           | FemalePregAge40to44 | 5137       |
| Honduras | 1999           | FemalePregAge45to49 | 804        |
| Honduras | 1999           | MaleAge0to4         | 480118     |
| Honduras | 1999           | MaleAge10to14       | 396785     |
| Honduras | 1999           | MaleAge15to19       | 342314     |
| Honduras | 1999           | MaleAge20to24       | 280953     |
| Honduras | 1999           | MaleAge25to29       | 226283     |
| Honduras | 1999           | MaleAge30to34       | 189974     |
| Honduras | 1999           | MaleAge35to39       | 153809     |
| Honduras | 1999           | MaleAge40to44       | 127624     |
| Honduras | 1999           | MaleAge45to49       | 103769     |

Dietary calcium and zinc deficiency risks are decreasing but remain prevalent

| Country  | Reference year | Age/gender group    | Population |
|----------|----------------|---------------------|------------|
| Honduras | 1999           | MaleAge50to54       | 77104      |
| Honduras | 1999           | MaleAge55to59       | 61334      |
| Honduras | 1999           | MaleAge5to9         | 449643     |
| Honduras | 1999           | MaleAge60to64       | 52192      |
| Honduras | 1999           | MaleAge65to69       | 42473      |
| Honduras | 1999           | MaleAge70to74       | 30524      |
| Honduras | 1999           | MaleAge75to79       | 20353      |
| Honduras | 1999           | MaleAge80to84       | 10185      |
| Honduras | 1999           | MaleAge85to89       | 4957       |
| Honduras | 1999           | MaleAge90to94       | 1436       |
| Honduras | 1999           | MaleAge95to99       | 300        |
| Honduras | 1999           | MaleAgeAbov e100    | 34         |
| Honduras | 2000           | FemaleAge0to4       | 462320     |
| Honduras | 2000           | FemaleAge10to14     | 397000     |
| Honduras | 2000           | FemaleAge15to19     | 284224     |
| Honduras | 2000           | FemaleAge20to24     | 186673     |
| Honduras | 2000           | FemaleAge25to29     | 164147     |
| Honduras | 2000           | FemaleAge30to34     | 152535     |
| Honduras | 2000           | FemaleAge35to39     | 135839     |
| Honduras | 2000           | FemaleAge40to44     | 120165     |
| Honduras | 2000           | FemaleAge45to49     | 105175     |
| Honduras | 2000           | FemaleAge50to54     | 79225      |
| Honduras | 2000           | FemaleAge55to59     | 62332      |
| Honduras | 2000           | FemaleAge5to9       | 442408     |
| Honduras | 2000           | FemaleAge60to64     | 52870      |
| Honduras | 2000           | FemaleAge65to69     | 44889      |
| Honduras | 2000           | FemaleAge70to74     | 34836      |
| Honduras | 2000           | FemaleAge75to79     | 25636      |
| Honduras | 2000           | FemaleAge80to84     | 14146      |
| Honduras | 2000           | FemaleAge85to89     | 7334       |
| Honduras | 2000           | FemaleAge90to94     | 2400       |
| Honduras | 2000           | FemaleAge95to99     | 533        |
| Honduras | 2000           | FemaleAgeAbov e100  | 81         |
| Honduras | 2000           | FemaleLactAge15to19 | 37730      |
| Honduras | 2000           | FemaleLactAge20to24 | 62315      |
| Honduras | 2000           | FemaleLactAge25to29 | 44300      |
| Honduras | 2000           | FemaleLactAge30to34 | 29348      |
| Honduras | 2000           | FemaleLactAge35to39 | 16056      |
| Honduras | 2000           | FemaleLactAge40to44 | 6849       |
| Honduras | 2000           | FemaleLactAge45to49 | 1072       |
| Honduras | 2000           | FemalePregAge15to19 | 28297      |
| Honduras | 2000           | FemalePregAge20to24 | 46736      |
| Honduras | 2000           | FemalePregAge25to29 | 33225      |
| Honduras | 2000           | FemalePregAge30to34 | 22011      |
| Honduras | 2000           | FemalePregAge35to39 | 12042      |
| Honduras | 2000           | FemalePregAge40to44 | 5137       |
| Honduras | 2000           | FemalePregAge45to49 | 804        |
| Honduras | 2000           | MaleAge0to4         | 480346     |
| Honduras | 2000           | MaleAge10to14       | 404685     |
| Honduras | 2000           | MaleAge15to19       | 350463     |
| Honduras | 2000           | MaleAge20to24       | 289299     |
| Honduras | 2000           | MaleAge25to29       | 231241     |
| Honduras | 2000           | MaleAge30to34       | 193758     |
| Honduras | 2000           | MaleAge35to39       | 157748     |
| Honduras | 2000           | MaleAge40to44       | 131278     |
| Honduras | 2000           | MaleAge45to49       | 108377     |
| Honduras | 2000           | MaleAge50to54       | 80909      |
| Honduras | 2000           | MaleAge55to59       | 63022      |
| Honduras | 2000           | MaleAge5to9         | 456306     |
| Honduras | 2000           | MaleAge60to64       | 53096      |
| Honduras | 2000           | MaleAge65to69       | 43736      |
| Honduras | 2000           | MaleAge70to74       | 31645      |
| Honduras | 2000           | MaleAge75to79       | 21429      |
| Honduras | 2000           | MaleAge80to84       | 10760      |
| Honduras | 2000           | MaleAge85to89       | 4992       |
| Honduras | 2000           | MaleAge90to94       | 1459       |
| Honduras | 2000           | MaleAge95to99       | 285        |
| Honduras | 2000           | MaleAgeAbov e100    | 38         |
| Hungary  | 1992           | FemaleAge0to4       | 321310     |
| Hungary  | 1992           | FemaleAge10to14     | 386160     |
| Hungary  | 1992           | FemaleAge15to19     | 376622     |
| Hungary  | 1992           | FemaleAge20to24     | 270097     |
| Hungary  | 1992           | FemaleAge25to29     | 240377     |
| Hungary  | 1992           | FemaleAge30to34     | 311728     |
| Hungary  | 1992           | FemaleAge35to39     | 410190     |
| Hungary  | 1992           | FemaleAge40to44     | 386168     |
| Hungary  | 1992           | FemaleAge45to49     | 349091     |
| Hungary  | 1992           | FemaleAge50to54     | 324945     |
| Hungary  | 1992           | FemaleAge55to59     | 316268     |
| Hungary  | 1992           | FemaleAge5to9       | 288075     |
| Hungary  | 1992           | FemaleAge60to64     | 313009     |
| Hungary  | 1992           | FemaleAge65to69     | 327675     |
| Hungary  | 1992           | FemaleAge70to74     | 198807     |
| Hungary  | 1992           | FemaleAge75to79     | 157595     |
| Hungary  | 1992           | FemaleAge80to84     | 133109     |
| Hungary  | 1992           | FemaleAge85to89     | 53967      |
| Hungary  | 1992           | FemaleAge90to94     | 16316      |
| Hungary  | 1992           | FemaleAge95to99     | 2588       |

Dietary calcium and zinc deficiency risks are decreasing but remain prevalent

| Country | Reference year | Age/gender group    | Population |
|---------|----------------|---------------------|------------|
| Hungary | 1992           | FemaleAgeAbove100   | 155        |
| Hungary | 1992           | FemaleLactAge15to19 | 14556      |
| Hungary | 1992           | FemaleLactAge20to24 | 46071      |
| Hungary | 1992           | FemaleLactAge25to29 | 35661      |
| Hungary | 1992           | FemaleLactAge30to34 | 16838      |
| Hungary | 1992           | FemaleLactAge35to39 | 6844       |
| Hungary | 1992           | FemaleLactAge40to44 | 1269       |
| Hungary | 1992           | FemaleLactAge45to49 | 46         |
| Hungary | 1992           | FemalePregAge15to19 | 10917      |
| Hungary | 1992           | FemalePregAge20to24 | 34553      |
| Hungary | 1992           | FemalePregAge25to29 | 26745      |
| Hungary | 1992           | FemalePregAge30to34 | 12628      |
| Hungary | 1992           | FemalePregAge35to39 | 5133       |
| Hungary | 1992           | FemalePregAge40to44 | 952        |
| Hungary | 1992           | FemalePregAge45to49 | 34         |
| Hungary | 1992           | MaleAge0to4         | 337430     |
| Hungary | 1992           | MaleAge10to14       | 404845     |
| Hungary | 1992           | MaleAge15to19       | 421549     |
| Hungary | 1992           | MaleAge20to24       | 366281     |
| Hungary | 1992           | MaleAge25to29       | 311190     |
| Hungary | 1992           | MaleAge30to34       | 343174     |
| Hungary | 1992           | MaleAge35to39       | 418738     |
| Hungary | 1992           | MaleAge40to44       | 380314     |
| Hungary | 1992           | MaleAge45to49       | 332951     |
| Hungary | 1992           | MaleAge50to54       | 284596     |
| Hungary | 1992           | MaleAge55to59       | 262775     |
| Hungary | 1992           | MaleAge5to9         | 300422     |
| Hungary | 1992           | MaleAge60to64       | 250070     |
| Hungary | 1992           | MaleAge65to69       | 233439     |
| Hungary | 1992           | MaleAge70to74       | 131243     |
| Hungary | 1992           | MaleAge75to79       | 90566      |
| Hungary | 1992           | MaleAge80to84       | 68642      |
| Hungary | 1992           | MaleAge85to89       | 23238      |
| Hungary | 1992           | MaleAge90to94       | 5929       |
| Hungary | 1992           | MaleAge95to99       | 735        |
| Hungary | 1992           | MaleAgeAbove100     | 37         |
| Hungary | 1993           | FemaleAge0to4       | 312588     |
| Hungary | 1993           | FemaleAge10to14     | 359708     |
| Hungary | 1993           | FemaleAge15to19     | 390282     |
| Hungary | 1993           | FemaleAge20to24     | 276917     |
| Hungary | 1993           | FemaleAge25to29     | 251955     |
| Hungary | 1993           | FemaleAge30to34     | 293580     |
| Hungary | 1993           | FemaleAge35to39     | 398944     |
| Hungary | 1993           | FemaleAge40to44     | 404815     |
| Hungary | 1993           | FemaleAge45to49     | 348611     |
| Hungary | 1993           | FemaleAge50to54     | 332862     |
| Hungary | 1993           | FemaleAge55to59     | 312401     |
| Hungary | 1993           | FemaleAge5to9       | 291286     |
| Hungary | 1993           | FemaleAge60to64     | 313734     |
| Hungary | 1993           | FemaleAge65to69     | 316035     |
| Hungary | 1993           | FemaleAge70to74     | 236981     |
| Hungary | 1993           | FemaleAge75to79     | 132502     |
| Hungary | 1993           | FemaleAge80to84     | 140652     |
| Hungary | 1993           | FemaleAge85to89     | 55356      |
| Hungary | 1993           | FemaleAge90to94     | 16756      |
| Hungary | 1993           | FemaleAge95to99     | 3040       |
| Hungary | 1993           | FemaleAgeAbove100   | 164        |
| Hungary | 1993           | FemaleLactAge15to19 | 14556      |
| Hungary | 1993           | FemaleLactAge20to24 | 46071      |
| Hungary | 1993           | FemaleLactAge25to29 | 35661      |
| Hungary | 1993           | FemaleLactAge30to34 | 16838      |
| Hungary | 1993           | FemaleLactAge35to39 | 6844       |
| Hungary | 1993           | FemaleLactAge40to44 | 1269       |
| Hungary | 1993           | FemaleLactAge45to49 | 46         |
| Hungary | 1993           | FemalePregAge15to19 | 10917      |
| Hungary | 1993           | FemalePregAge20to24 | 34553      |
| Hungary | 1993           | FemalePregAge25to29 | 26745      |
| Hungary | 1993           | FemalePregAge30to34 | 12628      |
| Hungary | 1993           | FemalePregAge35to39 | 5133       |
| Hungary | 1993           | FemalePregAge40to44 | 952        |
| Hungary | 1993           | FemalePregAge45to49 | 34         |
| Hungary | 1993           | MaleAge0to4         | 328003     |
| Hungary | 1993           | MaleAge10to14       | 376680     |
| Hungary | 1993           | MaleAge15to19       | 436108     |
| Hungary | 1993           | MaleAge20to24       | 373073     |
| Hungary | 1993           | MaleAge25to29       | 324206     |
| Hungary | 1993           | MaleAge30to34       | 324856     |
| Hungary | 1993           | MaleAge35to39       | 407147     |
| Hungary | 1993           | MaleAge40to44       | 397652     |
| Hungary | 1993           | MaleAge45to49       | 332114     |
| Hungary | 1993           | MaleAge50to54       | 295486     |
| Hungary | 1993           | MaleAge55to59       | 255557     |
| Hungary | 1993           | MaleAge5to9         | 304053     |
| Hungary | 1993           | MaleAge60to64       | 249648     |
| Hungary | 1993           | MaleAge65to69       | 225366     |
| Hungary | 1993           | MaleAge70to74       | 153890     |
| Hungary | 1993           | MaleAge75to79       | 75347      |
| Hungary | 1993           | MaleAge80to84       | 72558      |

Dietary calcium and zinc deficiency risks are decreasing but remain prevalent

| Country | Reference year | Age/gender group    | Population |
|---------|----------------|---------------------|------------|
| Hungary | 1993           | MaleAge85to89       | 23527      |
| Hungary | 1993           | MaleAge90to94       | 6175       |
| Hungary | 1993           | MaleAge95to99       | 899        |
| Hungary | 1993           | MaleAgeAbove100     | 38         |
| Hungary | 1994           | FemaleAge0to4       | 300715     |
| Hungary | 1994           | FemaleAge10to14     | 335103     |
| Hungary | 1994           | FemaleAge15to19     | 397178     |
| Hungary | 1994           | FemaleAge20to24     | 284735     |
| Hungary | 1994           | FemaleAge25to29     | 264458     |
| Hungary | 1994           | FemaleAge30to34     | 279795     |
| Hungary | 1994           | FemaleAge35to39     | 384795     |
| Hungary | 1994           | FemaleAge40to44     | 419449     |
| Hungary | 1994           | FemaleAge45to49     | 351217     |
| Hungary | 1994           | FemaleAge50to54     | 339996     |
| Hungary | 1994           | FemaleAge55to59     | 310443     |
| Hungary | 1994           | FemaleAge5to9       | 299314     |
| Hungary | 1994           | FemaleAge60to64     | 314266     |
| Hungary | 1994           | FemaleAge65to69     | 305168     |
| Hungary | 1994           | FemaleAge70to74     | 268675     |
| Hungary | 1994           | FemaleAge75to79     | 118980     |
| Hungary | 1994           | FemaleAge80to84     | 142205     |
| Hungary | 1994           | FemaleAge85to89     | 56675      |
| Hungary | 1994           | FemaleAge90to94     | 16552      |
| Hungary | 1994           | FemaleAge95to99     | 3147       |
| Hungary | 1994           | FemaleAgeAbove100   | 175        |
| Hungary | 1994           | FemaleLactAge15to19 | 14556      |
| Hungary | 1994           | FemaleLactAge20to24 | 46071      |
| Hungary | 1994           | FemaleLactAge25to29 | 35661      |
| Hungary | 1994           | FemaleLactAge30to34 | 16838      |
| Hungary | 1994           | FemaleLactAge35to39 | 6844       |
| Hungary | 1994           | FemaleLactAge40to44 | 1269       |
| Hungary | 1994           | FemaleLactAge45to49 | 46         |
| Hungary | 1994           | FemalePregAge15to19 | 10917      |
| Hungary | 1994           | FemalePregAge20to24 | 34553      |
| Hungary | 1994           | FemalePregAge25to29 | 26745      |
| Hungary | 1994           | FemalePregAge30to34 | 12628      |
| Hungary | 1994           | FemalePregAge35to39 | 5133       |
| Hungary | 1994           | FemalePregAge40to44 | 952        |
| Hungary | 1994           | FemalePregAge45to49 | 34         |
| Hungary | 1994           | MaleAge0to4         | 315266     |
| Hungary | 1994           | MaleAge10to14       | 350492     |
| Hungary | 1994           | MaleAge15to19       | 443693     |
| Hungary | 1994           | MaleAge20to24       | 380930     |
| Hungary | 1994           | MaleAge25to29       | 338041     |
| Hungary | 1994           | MaleAge30to34       | 311370     |
| Hungary | 1994           | MaleAge35to39       | 392858     |
| Hungary | 1994           | MaleAge40to44       | 411089     |
| Hungary | 1994           | MaleAge45to49       | 334329     |
| Hungary | 1994           | MaleAge50to54       | 305305     |
| Hungary | 1994           | MaleAge55to59       | 251426     |
| Hungary | 1994           | MaleAge5to9         | 312823     |
| Hungary | 1994           | MaleAge60to64       | 248559     |
| Hungary | 1994           | MaleAge65to69       | 218053     |
| Hungary | 1994           | MaleAge70to74       | 171332     |
| Hungary | 1994           | MaleAge75to79       | 67551      |
| Hungary | 1994           | MaleAge80to84       | 72078      |
| Hungary | 1994           | MaleAge85to89       | 23669      |
| Hungary | 1994           | MaleAge90to94       | 6009       |
| Hungary | 1994           | MaleAge95to99       | 936        |
| Hungary | 1994           | MaleAgeAbove100     | 39         |
| Hungary | 1995           | FemaleAge0to4       | 291523     |
| Hungary | 1995           | FemaleAge10to14     | 318261     |
| Hungary | 1995           | FemaleAge15to19     | 394017     |
| Hungary | 1995           | FemaleAge20to24     | 294336     |
| Hungary | 1995           | FemaleAge25to29     | 274928     |
| Hungary | 1995           | FemaleAge30to34     | 272363     |
| Hungary | 1995           | FemaleAge35to39     | 369103     |
| Hungary | 1995           | FemaleAge40to44     | 426311     |
| Hungary | 1995           | FemaleAge45to49     | 358579     |
| Hungary | 1995           | FemaleAge50to54     | 344610     |
| Hungary | 1995           | FemaleAge55to59     | 311103     |
| Hungary | 1995           | FemaleAge5to9       | 304405     |
| Hungary | 1995           | FemaleAge60to64     | 312997     |
| Hungary | 1995           | FemaleAge65to69     | 298923     |
| Hungary | 1995           | FemaleAge70to74     | 286944     |
| Hungary | 1995           | FemaleAge75to79     | 121970     |
| Hungary | 1995           | FemaleAge80to84     | 135985     |
| Hungary | 1995           | FemaleAge85to89     | 58551      |
| Hungary | 1995           | FemaleAge90to94     | 15648      |
| Hungary | 1995           | FemaleAge95to99     | 2539       |
| Hungary | 1995           | FemaleAgeAbove100   | 187        |
| Hungary | 1995           | FemaleLactAge15to19 | 14556      |
| Hungary | 1995           | FemaleLactAge20to24 | 46071      |
| Hungary | 1995           | FemaleLactAge25to29 | 35661      |
| Hungary | 1995           | FemaleLactAge30to34 | 16838      |
| Hungary | 1995           | FemaleLactAge35to39 | 6844       |
| Hungary | 1995           | FemaleLactAge40to44 | 1269       |
| Hungary | 1995           | FemaleLactAge45to49 | 46         |

Dietary calcium and zinc deficiency risks are decreasing but remain prevalent

| Country | Reference year | Age/gender group    | Population |
|---------|----------------|---------------------|------------|
| Hungary | 1995           | FemalePregAge15to19 | 10917      |
| Hungary | 1995           | FemalePregAge20to24 | 34553      |
| Hungary | 1995           | FemalePregAge25to29 | 26745      |
| Hungary | 1995           | FemalePregAge30to34 | 12628      |
| Hungary | 1995           | FemalePregAge35to39 | 5133       |
| Hungary | 1995           | FemalePregAge40to44 | 952        |
| Hungary | 1995           | FemalePregAge45to49 | 34         |
| Hungary | 1995           | MaleAge0to4         | 305689     |
| Hungary | 1995           | MaleAge10to14       | 332612     |
| Hungary | 1995           | MaleAge15to19       | 440624     |
| Hungary | 1995           | MaleAge20to24       | 390862     |
| Hungary | 1995           | MaleAge25to29       | 349490     |
| Hungary | 1995           | MaleAge30to34       | 304721     |
| Hungary | 1995           | MaleAge35to39       | 377135     |
| Hungary | 1995           | MaleAge40to44       | 417045     |
| Hungary | 1995           | MaleAge45to49       | 341344     |
| Hungary | 1995           | MaleAge50to54       | 311799     |
| Hungary | 1995           | MaleAge55to59       | 251618     |
| Hungary | 1995           | MaleAge5to9         | 318388     |
| Hungary | 1995           | MaleAge60to64       | 245557     |
| Hungary | 1995           | MaleAge65to69       | 213655     |
| Hungary | 1995           | MaleAge70to74       | 180065     |
| Hungary | 1995           | MaleAge75to79       | 69382      |
| Hungary | 1995           | MaleAge80to84       | 66651      |
| Hungary | 1995           | MaleAge85to89       | 23830      |
| Hungary | 1995           | MaleAge90to94       | 5280       |
| Hungary | 1995           | MaleAge95to99       | 678        |
| Hungary | 1995           | MaleAgeAbov e100    | 41         |
| Hungary | 1996           | FemaleAge0to4       | 281148     |
| Hungary | 1996           | FemaleAge10to14     | 308932     |
| Hungary | 1996           | FemaleAge15to19     | 391130     |
| Hungary | 1996           | FemaleAge20to24     | 328005     |
| Hungary | 1996           | FemaleAge25to29     | 286517     |
| Hungary | 1996           | FemaleAge30to34     | 273311     |
| Hungary | 1996           | FemaleAge35to39     | 353241     |
| Hungary | 1996           | FemaleAge40to44     | 426132     |
| Hungary | 1996           | FemaleAge45to49     | 369901     |
| Hungary | 1996           | FemaleAge50to54     | 346563     |
| Hungary | 1996           | FemaleAge55to59     | 313700     |
| Hungary | 1996           | FemaleAge5to9       | 305052     |
| Hungary | 1996           | FemaleAge60to64     | 309664     |
| Hungary | 1996           | FemaleAge65to69     | 294342     |
| Hungary | 1996           | FemaleAge70to74     | 291892     |
| Hungary | 1996           | FemaleAge75to79     | 137125     |
| Hungary | 1996           | FemaleAge80to84     | 123512     |
| Hungary | 1996           | FemaleAge85to89     | 65221      |
| Hungary | 1996           | FemaleAge90to94     | 18002      |
| Hungary | 1996           | FemaleAge95to99     | 2803       |
| Hungary | 1996           | FemaleAgeAbov e100  | 201        |
| Hungary | 1996           | FemaleLactAge15to19 | 9534       |
| Hungary | 1996           | FemaleLactAge20to24 | 33317      |
| Hungary | 1996           | FemaleLactAge25to29 | 34045      |
| Hungary | 1996           | FemaleLactAge30to34 | 15708      |
| Hungary | 1996           | FemaleLactAge35to39 | 5959       |
| Hungary | 1996           | FemaleLactAge40to44 | 1329       |
| Hungary | 1996           | FemaleLactAge45to49 | 54         |
| Hungary | 1996           | FemalePregAge15to19 | 7151       |
| Hungary | 1996           | FemalePregAge20to24 | 24988      |
| Hungary | 1996           | FemalePregAge25to29 | 25534      |
| Hungary | 1996           | FemalePregAge30to34 | 11781      |
| Hungary | 1996           | FemalePregAge35to39 | 4470       |
| Hungary | 1996           | FemalePregAge40to44 | 997        |
| Hungary | 1996           | FemalePregAge45to49 | 41         |
| Hungary | 1996           | MaleAge0to4         | 294820     |
| Hungary | 1996           | MaleAge10to14       | 322539     |
| Hungary | 1996           | MaleAge15to19       | 428138     |
| Hungary | 1996           | MaleAge20to24       | 402714     |
| Hungary | 1996           | MaleAge25to29       | 358643     |
| Hungary | 1996           | MaleAge30to34       | 304598     |
| Hungary | 1996           | MaleAge35to39       | 359302     |
| Hungary | 1996           | MaleAge40to44       | 415575     |
| Hungary | 1996           | MaleAge45to49       | 351330     |
| Hungary | 1996           | MaleAge50to54       | 314497     |
| Hungary | 1996           | MaleAge55to59       | 254806     |
| Hungary | 1996           | MaleAge5to9         | 318995     |
| Hungary | 1996           | MaleAge60to64       | 240379     |
| Hungary | 1996           | MaleAge65to69       | 210817     |
| Hungary | 1996           | MaleAge70to74       | 182377     |
| Hungary | 1996           | MaleAge75to79       | 78902      |
| Hungary | 1996           | MaleAge80to84       | 60543      |
| Hungary | 1996           | MaleAge85to89       | 27592      |
| Hungary | 1996           | MaleAge90to94       | 6193       |
| Hungary | 1996           | MaleAge95to99       | 774        |
| Hungary | 1996           | MaleAgeAbov e100    | 43         |
| Hungary | 1997           | FemaleAge0to4       | 269503     |
| Hungary | 1997           | FemaleAge10to14     | 305812     |
| Hungary | 1997           | FemaleAge15to19     | 370468     |
| Hungary | 1997           | FemaleAge20to24     | 341679     |

Dietary calcium and zinc deficiency risks are decreasing but remain prevalent

| Country | Reference year | Age/gender group    | Population |
|---------|----------------|---------------------|------------|
| Hungary | 1997           | FemaleAge25to29     | 292874     |
| Hungary | 1997           | FemaleAge30to34     | 279371     |
| Hungary | 1997           | FemaleAge35to39     | 333919     |
| Hungary | 1997           | FemaleAge40to44     | 419647     |
| Hungary | 1997           | FemaleAge45to49     | 386018     |
| Hungary | 1997           | FemaleAge50to54     | 345753     |
| Hungary | 1997           | FemaleAge55to59     | 319305     |
| Hungary | 1997           | FemaleAge5to9       | 304139     |
| Hungary | 1997           | FemaleAge60to64     | 305450     |
| Hungary | 1997           | FemaleAge65to69     | 293118     |
| Hungary | 1997           | FemaleAge70to74     | 287178     |
| Hungary | 1997           | FemaleAge75to79     | 163989     |
| Hungary | 1997           | FemaleAge80to84     | 105033     |
| Hungary | 1997           | FemaleAge85to89     | 72525      |
| Hungary | 1997           | FemaleAge90to94     | 19264      |
| Hungary | 1997           | FemaleAge95to99     | 3191       |
| Hungary | 1997           | FemaleAgeAbove100   | 217        |
| Hungary | 1997           | FemaleLactAge15to19 | 9534       |
| Hungary | 1997           | FemaleLactAge20to24 | 33317      |
| Hungary | 1997           | FemaleLactAge25to29 | 34045      |
| Hungary | 1997           | FemaleLactAge30to34 | 15708      |
| Hungary | 1997           | FemaleLactAge35to39 | 5959       |
| Hungary | 1997           | FemaleLactAge40to44 | 1329       |
| Hungary | 1997           | FemaleLactAge45to49 | 54         |
| Hungary | 1997           | FemalePregAge15to19 | 7151       |
| Hungary | 1997           | FemalePregAge20to24 | 24988      |
| Hungary | 1997           | FemalePregAge25to29 | 25534      |
| Hungary | 1997           | FemalePregAge30to34 | 11781      |
| Hungary | 1997           | FemalePregAge35to39 | 4470       |
| Hungary | 1997           | FemalePregAge40to44 | 997        |
| Hungary | 1997           | FemalePregAge45to49 | 41         |
| Hungary | 1997           | MaleAge0to4         | 283002     |
| Hungary | 1997           | MaleAge10to14       | 319151     |
| Hungary | 1997           | MaleAge15to19       | 406042     |
| Hungary | 1997           | MaleAge20to24       | 417447     |
| Hungary | 1997           | MaleAge25to29       | 364998     |
| Hungary | 1997           | MaleAge30to34       | 311980     |
| Hungary | 1997           | MaleAge35to39       | 339930     |
| Hungary | 1997           | MaleAge40to44       | 408261     |
| Hungary | 1997           | MaleAge45to49       | 365790     |
| Hungary | 1997           | MaleAge50to54       | 313973     |
| Hungary | 1997           | MaleAge55to59       | 262253     |
| Hungary | 1997           | MaleAge5to9         | 317994     |
| Hungary | 1997           | MaleAge60to64       | 233639     |
| Hungary | 1997           | MaleAge65to69       | 210139     |
| Hungary | 1997           | MaleAge70to74       | 179129     |
| Hungary | 1997           | MaleAge75to79       | 93693      |
| Hungary | 1997           | MaleAge80to84       | 51313      |
| Hungary | 1997           | MaleAge85to89       | 31560      |
| Hungary | 1997           | MaleAge90to94       | 6587       |
| Hungary | 1997           | MaleAge95to99       | 942        |
| Hungary | 1997           | MaleAgeAbove100     | 46         |
| Hungary | 1998           | FemaleAge0to4       | 258368     |
| Hungary | 1998           | FemaleAge10to14     | 306784     |
| Hungary | 1998           | FemaleAge15to19     | 345618     |
| Hungary | 1998           | FemaleAge20to24     | 354224     |
| Hungary | 1998           | FemaleAge25to29     | 297919     |
| Hungary | 1998           | FemaleAge30to34     | 290113     |
| Hungary | 1998           | FemaleAge35to39     | 315219     |
| Hungary | 1998           | FemaleAge40to44     | 408029     |
| Hungary | 1998           | FemaleAge45to49     | 403451     |
| Hungary | 1998           | FemaleAge50to54     | 344349     |
| Hungary | 1998           | FemaleAge55to59     | 326397     |
| Hungary | 1998           | FemaleAge5to9       | 301253     |
| Hungary | 1998           | FemaleAge60to64     | 301366     |
| Hungary | 1998           | FemaleAge65to69     | 293788     |
| Hungary | 1998           | FemaleAge70to74     | 277599     |
| Hungary | 1998           | FemaleAge75to79     | 194354     |
| Hungary | 1998           | FemaleAge80to84     | 88015      |
| Hungary | 1998           | FemaleAge85to89     | 77444      |
| Hungary | 1998           | FemaleAge90to94     | 19706      |
| Hungary | 1998           | FemaleAge95to99     | 3546       |
| Hungary | 1998           | FemaleAgeAbove100   | 235        |
| Hungary | 1998           | FemaleLactAge15to19 | 9534       |
| Hungary | 1998           | FemaleLactAge20to24 | 33317      |
| Hungary | 1998           | FemaleLactAge25to29 | 34045      |
| Hungary | 1998           | FemaleLactAge30to34 | 15708      |
| Hungary | 1998           | FemaleLactAge35to39 | 5959       |
| Hungary | 1998           | FemaleLactAge40to44 | 1329       |
| Hungary | 1998           | FemaleLactAge45to49 | 54         |
| Hungary | 1998           | FemalePregAge15to19 | 7151       |
| Hungary | 1998           | FemalePregAge20to24 | 24988      |
| Hungary | 1998           | FemalePregAge25to29 | 25534      |
| Hungary | 1998           | FemalePregAge30to34 | 11781      |
| Hungary | 1998           | FemalePregAge35to39 | 4470       |
| Hungary | 1998           | FemalePregAge40to44 | 997        |
| Hungary | 1998           | FemalePregAge45to49 | 41         |
| Hungary | 1998           | MaleAge0to4         | 272007     |

Dietary calcium and zinc deficiency risks are decreasing but remain prevalent

| Country | Reference year | Age/gender group    | Population |
|---------|----------------|---------------------|------------|
| Hungary | 1998           | MaleAge10to14       | 320154     |
| Hungary | 1998           | MaleAge15to19       | 379438     |
| Hungary | 1998           | MaleAge20to24       | 431324     |
| Hungary | 1998           | MaleAge25to29       | 369833     |
| Hungary | 1998           | MaleAge30to34       | 324191     |
| Hungary | 1998           | MaleAge35to39       | 321635     |
| Hungary | 1998           | MaleAge40to44       | 396341     |
| Hungary | 1998           | MaleAge45to49       | 381409     |
| Hungary | 1998           | MaleAge50to54       | 312555     |
| Hungary | 1998           | MaleAge55to59       | 271805     |
| Hungary | 1998           | MaleAge5to9         | 314973     |
| Hungary | 1998           | MaleAge60to64       | 227005     |
| Hungary | 1998           | MaleAge65to69       | 210484     |
| Hungary | 1998           | MaleAge70to74       | 173279     |
| Hungary | 1998           | MaleAge75to79       | 109045     |
| Hungary | 1998           | MaleAge80to84       | 43003      |
| Hungary | 1998           | MaleAge85to89       | 33968      |
| Hungary | 1998           | MaleAge90to94       | 6667       |
| Hungary | 1998           | MaleAge95to99       | 1090       |
| Hungary | 1998           | MaleAgeAbove100     | 49         |
| Hungary | 1999           | FemaleAge0to4       | 248323     |
| Hungary | 1999           | FemaleAge10to14     | 308357     |
| Hungary | 1999           | FemaleAge15to19     | 323766     |
| Hungary | 1999           | FemaleAge20to24     | 360561     |
| Hungary | 1999           | FemaleAge25to29     | 304017     |
| Hungary | 1999           | FemaleAge30to34     | 301559     |
| Hungary | 1999           | FemaleAge35to39     | 300906     |
| Hungary | 1999           | FemaleAge40to44     | 393609     |
| Hungary | 1999           | FemaleAge45to49     | 416954     |
| Hungary | 1999           | FemaleAge50to54     | 346006     |
| Hungary | 1999           | FemaleAge55to59     | 332671     |
| Hungary | 1999           | FemaleAge5to9       | 296660     |
| Hungary | 1999           | FemaleAge60to64     | 299163     |
| Hungary | 1999           | FemaleAge65to69     | 294270     |
| Hungary | 1999           | FemaleAge70to74     | 269407     |
| Hungary | 1999           | FemaleAge75to79     | 218332     |
| Hungary | 1999           | FemaleAge80to84     | 80809      |
| Hungary | 1999           | FemaleAge85to89     | 76777      |
| Hungary | 1999           | FemaleAge90to94     | 19922      |
| Hungary | 1999           | FemaleAge95to99     | 3671       |
| Hungary | 1999           | FemaleAgeAbove100   | 254        |
| Hungary | 1999           | FemaleLactAge15to19 | 9534       |
| Hungary | 1999           | FemaleLactAge20to24 | 33317      |
| Hungary | 1999           | FemaleLactAge25to29 | 34045      |
| Hungary | 1999           | FemaleLactAge30to34 | 15708      |
| Hungary | 1999           | FemaleLactAge35to39 | 5959       |
| Hungary | 1999           | FemaleLactAge40to44 | 1329       |
| Hungary | 1999           | FemaleLactAge45to49 | 54         |
| Hungary | 1999           | FemalePregAge15to19 | 7151       |
| Hungary | 1999           | FemalePregAge20to24 | 24988      |
| Hungary | 1999           | FemalePregAge25to29 | 25534      |
| Hungary | 1999           | FemalePregAge30to34 | 11781      |
| Hungary | 1999           | FemalePregAge35to39 | 4470       |
| Hungary | 1999           | FemalePregAge40to44 | 997        |
| Hungary | 1999           | FemalePregAge45to49 | 41         |
| Hungary | 1999           | MaleAge0to4         | 262163     |
| Hungary | 1999           | MaleAge10to14       | 321822     |
| Hungary | 1999           | MaleAge15to19       | 356064     |
| Hungary | 1999           | MaleAge20to24       | 438738     |
| Hungary | 1999           | MaleAge25to29       | 375946     |
| Hungary | 1999           | MaleAge30to34       | 336955     |
| Hungary | 1999           | MaleAge35to39       | 308244     |
| Hungary | 1999           | MaleAge40to44       | 382033     |
| Hungary | 1999           | MaleAge45to49       | 393311     |
| Hungary | 1999           | MaleAge50to54       | 314025     |
| Hungary | 1999           | MaleAge55to59       | 280338     |
| Hungary | 1999           | MaleAge5to9         | 310262     |
| Hungary | 1999           | MaleAge60to64       | 223126     |
| Hungary | 1999           | MaleAge65to69       | 210140     |
| Hungary | 1999           | MaleAge70to74       | 168340     |
| Hungary | 1999           | MaleAge75to79       | 119931     |
| Hungary | 1999           | MaleAge80to84       | 39720      |
| Hungary | 1999           | MaleAge85to89       | 33177      |
| Hungary | 1999           | MaleAge90to94       | 6711       |
| Hungary | 1999           | MaleAge95to99       | 1111       |
| Hungary | 1999           | MaleAgeAbove100     | 54         |
| Hungary | 2000           | FemaleAge0to4       | 240036     |
| Hungary | 2000           | FemaleAge10to14     | 308168     |
| Hungary | 2000           | FemaleAge15to19     | 308931     |
| Hungary | 2000           | FemaleAge20to24     | 358016     |
| Hungary | 2000           | FemaleAge25to29     | 312433     |
| Hungary | 2000           | FemaleAge30to34     | 311068     |
| Hungary | 2000           | FemaleAge35to39     | 293240     |
| Hungary | 2000           | FemaleAge40to44     | 378047     |
| Hungary | 2000           | FemaleAge45to49     | 423334     |
| Hungary | 2000           | FemaleAge50to54     | 352706     |
| Hungary | 2000           | FemaleAge55to59     | 336780     |
| Hungary | 2000           | FemaleAge5to9       | 291041     |



Dietary calcium and zinc deficiency risks are decreasing but remain prevalent

| Country | Reference year | Age/gender group    | Population |
|---------|----------------|---------------------|------------|
| Hungary | 2000           | FemaleAge60to64     | 299812     |
| Hungary | 2000           | FemaleAge65to69     | 293511     |
| Hungary | 2000           | FemaleAge70to74     | 265568     |
| Hungary | 2000           | FemaleAge75to79     | 231729     |
| Hungary | 2000           | FemaleAge80to84     | 86054      |
| Hungary | 2000           | FemaleAge85to89     | 70416      |
| Hungary | 2000           | FemaleAge90to94     | 20017      |
| Hungary | 2000           | FemaleAge95to99     | 3154       |
| Hungary | 2000           | FemaleAgeAbove100   | 274        |
| Hungary | 2000           | FemaleLactAge15to19 | 9534       |
| Hungary | 2000           | FemaleLactAge20to24 | 33317      |
| Hungary | 2000           | FemaleLactAge25to29 | 34045      |
| Hungary | 2000           | FemaleLactAge30to34 | 15708      |
| Hungary | 2000           | FemaleLactAge35to39 | 5959       |
| Hungary | 2000           | FemaleLactAge40to44 | 1329       |
| Hungary | 2000           | FemaleLactAge45to49 | 54         |
| Hungary | 2000           | FemalePregAge15to19 | 7151       |
| Hungary | 2000           | FemalePregAge20to24 | 24988      |
| Hungary | 2000           | FemalePregAge25to29 | 25534      |
| Hungary | 2000           | FemalePregAge30to34 | 11781      |
| Hungary | 2000           | FemalePregAge35to39 | 4470       |
| Hungary | 2000           | FemalePregAge40to44 | 997        |
| Hungary | 2000           | FemalePregAge45to49 | 41         |
| Hungary | 2000           | MaleAge0to4         | 253959     |
| Hungary | 2000           | MaleAge10to14       | 321652     |
| Hungary | 2000           | MaleAge15to19       | 340253     |
| Hungary | 2000           | MaleAge20to24       | 436645     |
| Hungary | 2000           | MaleAge25to29       | 384897     |
| Hungary | 2000           | MaleAge30to34       | 347477     |
| Hungary | 2000           | MaleAge35to39       | 301958     |
| Hungary | 2000           | MaleAge40to44       | 366921     |
| Hungary | 2000           | MaleAge45to49       | 398612     |
| Hungary | 2000           | MaleAge50to54       | 320367     |
| Hungary | 2000           | MaleAge55to59       | 286105     |
| Hungary | 2000           | MaleAge5to9         | 304632     |
| Hungary | 2000           | MaleAge60to64       | 223424     |
| Hungary | 2000           | MaleAge65to69       | 208247     |
| Hungary | 2000           | MaleAge70to74       | 165882     |
| Hungary | 2000           | MaleAge75to79       | 124734     |
| Hungary | 2000           | MaleAge80to84       | 42270      |
| Hungary | 2000           | MaleAge85to89       | 29332      |
| Hungary | 2000           | MaleAge90to94       | 6611       |
| Hungary | 2000           | MaleAge95to99       | 836        |
| Hungary | 2000           | MaleAgeAbove100     | 59         |
| India   | 1992           | FemaleAge0to4       | 58248078   |
| India   | 1992           | FemaleAge10to14     | 49096102   |
| India   | 1992           | FemaleAge15to19     | 35691414   |
| India   | 1992           | FemaleAge20to24     | 22250692   |
| India   | 1992           | FemaleAge25to29     | 23445894   |
| India   | 1992           | FemaleAge30to34     | 24912631   |
| India   | 1992           | FemaleAge35to39     | 24452051   |
| India   | 1992           | FemaleAge40to44     | 20853244   |
| India   | 1992           | FemaleAge45to49     | 17592858   |
| India   | 1992           | FemaleAge50to54     | 15997629   |
| India   | 1992           | FemaleAge55to59     | 13607568   |
| India   | 1992           | FemaleAge5to9       | 53726611   |
| India   | 1992           | FemaleAge60to64     | 10527363   |
| India   | 1992           | FemaleAge65to69     | 7574035    |
| India   | 1992           | FemaleAge70to74     | 5057131    |
| India   | 1992           | FemaleAge75to79     | 3007705    |
| India   | 1992           | FemaleAge80to84     | 1535802    |
| India   | 1992           | FemaleAge85to89     | 621833     |
| India   | 1992           | FemaleAge90to94     | 197553     |
| India   | 1992           | FemaleAge95to99     | 47086      |
| India   | 1992           | FemaleAgeAbove100   | 7281       |
| India   | 1992           | FemaleLactAge15to19 | 4626255    |
| India   | 1992           | FemaleLactAge20to24 | 9746437    |
| India   | 1992           | FemaleLactAge25to29 | 6680649    |
| India   | 1992           | FemaleLactAge30to34 | 3442846    |
| India   | 1992           | FemaleLactAge35to39 | 1551150    |
| India   | 1992           | FemaleLactAge40to44 | 513055     |
| India   | 1992           | FemaleLactAge45to49 | 115266     |
| India   | 1992           | FemalePregAge15to19 | 3469691    |
| India   | 1992           | FemalePregAge20to24 | 7309828    |
| India   | 1992           | FemalePregAge25to29 | 5010487    |
| India   | 1992           | FemalePregAge30to34 | 2582135    |
| India   | 1992           | FemalePregAge35to39 | 1163362    |
| India   | 1992           | FemalePregAge40to44 | 384791     |
| India   | 1992           | FemalePregAge45to49 | 86449      |
| India   | 1992           | MaleAge0to4         | 62900609   |
| India   | 1992           | MaleAge10to14       | 52964997   |
| India   | 1992           | MaleAge15to19       | 47430840   |
| India   | 1992           | MaleAge20to24       | 42929893   |
| India   | 1992           | MaleAge25to29       | 38697806   |
| India   | 1992           | MaleAge30to34       | 34334162   |
| India   | 1992           | MaleAge35to39       | 30500902   |
| India   | 1992           | MaleAge40to44       | 23679848   |
| India   | 1992           | MaleAge45to49       | 18615772   |

Dietary calcium and zinc deficiency risks are decreasing but remain prevalent

| Country | Reference year | Age/gender group    | Population |
|---------|----------------|---------------------|------------|
| India   | 1992           | MaleAge50to54       | 16327982   |
| India   | 1992           | MaleAge55to59       | 13659899   |
| India   | 1992           | MaleAge5to9         | 57931839   |
| India   | 1992           | MaleAge60to64       | 10742191   |
| India   | 1992           | MaleAge65to69       | 7772923    |
| India   | 1992           | MaleAge70to74       | 5057285    |
| India   | 1992           | MaleAge75to79       | 2885211    |
| India   | 1992           | MaleAge80to84       | 1408457    |
| India   | 1992           | MaleAge85to89       | 559004     |
| India   | 1992           | MaleAge90to94       | 172633     |
| India   | 1992           | MaleAge95to99       | 38692      |
| India   | 1992           | MaleAgeAbov e100    | 5729       |
| India   | 1993           | FemaleAge0to4       | 58208348   |
| India   | 1993           | FemaleAge10to14     | 49915425   |
| India   | 1993           | FemaleAge15to19     | 36750602   |
| India   | 1993           | FemaleAge20to24     | 22851592   |
| India   | 1993           | FemaleAge25to29     | 24254748   |
| India   | 1993           | FemaleAge30to34     | 25605728   |
| India   | 1993           | FemaleAge35to39     | 25107153   |
| India   | 1993           | FemaleAge40to44     | 22032056   |
| India   | 1993           | FemaleAge45to49     | 17931032   |
| India   | 1993           | FemaleAge50to54     | 16185909   |
| India   | 1993           | FemaleAge55to59     | 13979311   |
| India   | 1993           | FemaleAge5to9       | 54512492   |
| India   | 1993           | FemaleAge60to64     | 10881662   |
| India   | 1993           | FemaleAge65to69     | 7823091    |
| India   | 1993           | FemaleAge70to74     | 5203984    |
| India   | 1993           | FemaleAge75to79     | 3099025    |
| India   | 1993           | FemaleAge80to84     | 1574575    |
| India   | 1993           | FemaleAge85to89     | 653653     |
| India   | 1993           | FemaleAge90to94     | 200773     |
| India   | 1993           | FemaleAge95to99     | 53899      |
| India   | 1993           | FemaleAgeAbov e100  | 7234       |
| India   | 1993           | FemaleLactAge15to19 | 4626255    |
| India   | 1993           | FemaleLactAge20to24 | 9746437    |
| India   | 1993           | FemaleLactAge25to29 | 6680649    |
| India   | 1993           | FemaleLactAge30to34 | 3442846    |
| India   | 1993           | FemaleLactAge35to39 | 1551150    |
| India   | 1993           | FemaleLactAge40to44 | 513055     |
| India   | 1993           | FemaleLactAge45to49 | 115266     |
| India   | 1993           | FemalePregAge15to19 | 3469691    |
| India   | 1993           | FemalePregAge20to24 | 7309828    |
| India   | 1993           | FemalePregAge25to29 | 5010487    |
| India   | 1993           | FemalePregAge30to34 | 2582135    |
| India   | 1993           | FemalePregAge35to39 | 1163362    |
| India   | 1993           | FemalePregAge40to44 | 384791     |
| India   | 1993           | FemalePregAge45to49 | 86449      |
| India   | 1993           | MaleAge0to4         | 63158942   |
| India   | 1993           | MaleAge10to14       | 53861836   |
| India   | 1993           | MaleAge15to19       | 48527212   |
| India   | 1993           | MaleAge20to24       | 43543046   |
| India   | 1993           | MaleAge25to29       | 39533013   |
| India   | 1993           | MaleAge30to34       | 35041849   |
| India   | 1993           | MaleAge35to39       | 31118225   |
| India   | 1993           | MaleAge40to44       | 25247981   |
| India   | 1993           | MaleAge45to49       | 18940026   |
| India   | 1993           | MaleAge50to54       | 16570982   |
| India   | 1993           | MaleAge55to59       | 13951347   |
| India   | 1993           | MaleAge5to9         | 58779104   |
| India   | 1993           | MaleAge60to64       | 10956400   |
| India   | 1993           | MaleAge65to69       | 7974494    |
| India   | 1993           | MaleAge70to74       | 5179188    |
| India   | 1993           | MaleAge75to79       | 2963687    |
| India   | 1993           | MaleAge80to84       | 1436078    |
| India   | 1993           | MaleAge85to89       | 582205     |
| India   | 1993           | MaleAge90to94       | 177468     |
| India   | 1993           | MaleAge95to99       | 43931      |
| India   | 1993           | MaleAgeAbov e100    | 5827       |
| India   | 1994           | FemaleAge0to4       | 58104531   |
| India   | 1994           | FemaleAge10to14     | 50718897   |
| India   | 1994           | FemaleAge15to19     | 37807258   |
| India   | 1994           | FemaleAge20to24     | 23520835   |
| India   | 1994           | FemaleAge25to29     | 25030106   |
| India   | 1994           | FemaleAge30to34     | 26317865   |
| India   | 1994           | FemaleAge35to39     | 25745007   |
| India   | 1994           | FemaleAge40to44     | 23170165   |
| India   | 1994           | FemaleAge45to49     | 18427093   |
| India   | 1994           | FemaleAge50to54     | 16393363   |
| India   | 1994           | FemaleAge55to59     | 14329019   |
| India   | 1994           | FemaleAge5to9       | 55193882   |
| India   | 1994           | FemaleAge60to64     | 11256620   |
| India   | 1994           | FemaleAge65to69     | 8101343    |
| India   | 1994           | FemaleAge70to74     | 5368716    |
| India   | 1994           | FemaleAge75to79     | 3187772    |
| India   | 1994           | FemaleAge80to84     | 1603962    |
| India   | 1994           | FemaleAge85to89     | 668146     |
| India   | 1994           | FemaleAge90to94     | 200636     |
| India   | 1994           | FemaleAge95to99     | 54875      |

Dietary calcium and zinc deficiency risks are decreasing but remain prevalent

| Country | Reference year | Age/gender group    | Population |
|---------|----------------|---------------------|------------|
| India   | 1994           | FemaleAgeAbove100   | 7260       |
| India   | 1994           | FemaleLactAge15to19 | 4626255    |
| India   | 1994           | FemaleLactAge20to24 | 9746437    |
| India   | 1994           | FemaleLactAge25to29 | 6680649    |
| India   | 1994           | FemaleLactAge30to34 | 3442846    |
| India   | 1994           | FemaleLactAge35to39 | 1551150    |
| India   | 1994           | FemaleLactAge40to44 | 513055     |
| India   | 1994           | FemaleLactAge45to49 | 115266     |
| India   | 1994           | FemalePregAge15to19 | 3469691    |
| India   | 1994           | FemalePregAge20to24 | 7309828    |
| India   | 1994           | FemalePregAge25to29 | 5010487    |
| India   | 1994           | FemalePregAge30to34 | 2582135    |
| India   | 1994           | FemalePregAge35to39 | 1163362    |
| India   | 1994           | FemalePregAge40to44 | 384791     |
| India   | 1994           | FemalePregAge45to49 | 86449      |
| India   | 1994           | MaleAge0to4         | 63341580   |
| India   | 1994           | MaleAge10to14       | 54740659   |
| India   | 1994           | MaleAge15to19       | 49621347   |
| India   | 1994           | MaleAge20to24       | 44228814   |
| India   | 1994           | MaleAge25to29       | 40336326   |
| India   | 1994           | MaleAge30to34       | 35773998   |
| India   | 1994           | MaleAge35to39       | 31708687   |
| India   | 1994           | MaleAge40to44       | 26725521   |
| India   | 1994           | MaleAge45to49       | 19492210   |
| India   | 1994           | MaleAge50to54       | 16827121   |
| India   | 1994           | MaleAge55to59       | 14244758   |
| India   | 1994           | MaleAge5to9         | 59535201   |
| India   | 1994           | MaleAge60to64       | 11197417   |
| India   | 1994           | MaleAge65to69       | 8182028    |
| India   | 1994           | MaleAge70to74       | 5309451    |
| India   | 1994           | MaleAge75to79       | 3031788    |
| India   | 1994           | MaleAge80to84       | 1450275    |
| India   | 1994           | MaleAge85to89       | 587778     |
| India   | 1994           | MaleAge90to94       | 176938     |
| India   | 1994           | MaleAge95to99       | 44930      |
| India   | 1994           | MaleAgeAbove100     | 5971       |
| India   | 1995           | FemaleAge0to4       | 58090401   |
| India   | 1995           | FemaleAge10to14     | 51513600   |
| India   | 1995           | FemaleAge15to19     | 38801219   |
| India   | 1995           | FemaleAge20to24     | 24302696   |
| India   | 1995           | FemaleAge25to29     | 25744669   |
| India   | 1995           | FemaleAge30to34     | 27045529   |
| India   | 1995           | FemaleAge35to39     | 26406757   |
| India   | 1995           | FemaleAge40to44     | 24170528   |
| India   | 1995           | FemaleAge45to49     | 19119307   |
| India   | 1995           | FemaleAge50to54     | 16638259   |
| India   | 1995           | FemaleAge55to59     | 14640243   |
| India   | 1995           | FemaleAge5to9       | 55681778   |
| India   | 1995           | FemaleAge60to64     | 11646156   |
| India   | 1995           | FemaleAge65to69     | 8410494    |
| India   | 1995           | FemaleAge70to74     | 5555500    |
| India   | 1995           | FemaleAge75to79     | 3277255    |
| India   | 1995           | FemaleAge80to84     | 1627590    |
| India   | 1995           | FemaleAge85to89     | 664172     |
| India   | 1995           | FemaleAge90to94     | 194207     |
| India   | 1995           | FemaleAge95to99     | 47725      |
| India   | 1995           | FemaleAgeAbove100   | 7443       |
| India   | 1995           | FemaleLactAge15to19 | 4626255    |
| India   | 1995           | FemaleLactAge20to24 | 9746437    |
| India   | 1995           | FemaleLactAge25to29 | 6680649    |
| India   | 1995           | FemaleLactAge30to34 | 3442846    |
| India   | 1995           | FemaleLactAge35to39 | 1551150    |
| India   | 1995           | FemaleLactAge40to44 | 513055     |
| India   | 1995           | FemaleLactAge45to49 | 115266     |
| India   | 1995           | FemalePregAge15to19 | 3469691    |
| India   | 1995           | FemalePregAge20to24 | 7309828    |
| India   | 1995           | FemalePregAge25to29 | 5010487    |
| India   | 1995           | FemalePregAge30to34 | 2582135    |
| India   | 1995           | FemalePregAge35to39 | 1163362    |
| India   | 1995           | FemalePregAge40to44 | 384791     |
| India   | 1995           | FemalePregAge45to49 | 86449      |
| India   | 1995           | MaleAge0to4         | 63551164   |
| India   | 1995           | MaleAge10to14       | 55605300   |
| India   | 1995           | MaleAge15to19       | 50659604   |
| India   | 1995           | MaleAge20to24       | 45034356   |
| India   | 1995           | MaleAge25to29       | 41079636   |
| India   | 1995           | MaleAge30to34       | 36525173   |
| India   | 1995           | MaleAge35to39       | 32352272   |
| India   | 1995           | MaleAge40to44       | 27962135   |
| India   | 1995           | MaleAge45to49       | 20344146   |
| India   | 1995           | MaleAge50to54       | 17102925   |
| India   | 1995           | MaleAge55to59       | 14528679   |
| India   | 1995           | MaleAge5to9         | 60140239   |
| India   | 1995           | MaleAge60to64       | 11468855   |
| India   | 1995           | MaleAge65to69       | 8396212    |
| India   | 1995           | MaleAge70to74       | 5452397    |
| India   | 1995           | MaleAge75to79       | 3092632    |
| India   | 1995           | MaleAge80to84       | 1454096    |

Dietary calcium and zinc deficiency risks are decreasing but remain prevalent

| Country | Reference year | Age/gender group    | Population |
|---------|----------------|---------------------|------------|
| India   | 1995           | MaleAge85to89       | 573344     |
| India   | 1995           | MaleAge90to94       | 167792     |
| India   | 1995           | MaleAge95to99       | 39255      |
| India   | 1995           | MaleAgeAbove100     | 6214       |
| India   | 1996           | FemaleAge0to4       | 58045040   |
| India   | 1996           | FemaleAge10to14     | 52316877   |
| India   | 1996           | FemaleAge15to19     | 40182291   |
| India   | 1996           | FemaleAge20to24     | 24606215   |
| India   | 1996           | FemaleAge25to29     | 26231264   |
| India   | 1996           | FemaleAge30to34     | 27943322   |
| India   | 1996           | FemaleAge35to39     | 27237748   |
| India   | 1996           | FemaleAge40to44     | 25044946   |
| India   | 1996           | FemaleAge45to49     | 19965307   |
| India   | 1996           | FemaleAge50to54     | 16867966   |
| India   | 1996           | FemaleAge55to59     | 14851548   |
| India   | 1996           | FemaleAge5to9       | 56205309   |
| India   | 1996           | FemaleAge60to64     | 11977109   |
| India   | 1996           | FemaleAge65to69     | 8691060    |
| India   | 1996           | FemaleAge70to74     | 5742301    |
| India   | 1996           | FemaleAge75to79     | 3401332    |
| India   | 1996           | FemaleAge80to84     | 1714000    |
| India   | 1996           | FemaleAge85to89     | 714261     |
| India   | 1996           | FemaleAge90to94     | 220637     |
| India   | 1996           | FemaleAge95to99     | 50423      |
| India   | 1996           | FemaleAgeAbove100   | 7819       |
| India   | 1996           | FemaleLactAge15to19 | 4348965    |
| India   | 1996           | FemaleLactAge20to24 | 10074831   |
| India   | 1996           | FemaleLactAge25to29 | 6786509    |
| India   | 1996           | FemaleLactAge30to34 | 3359658    |
| India   | 1996           | FemaleLactAge35to39 | 1454997    |
| India   | 1996           | FemaleLactAge40to44 | 504098     |
| India   | 1996           | FemaleLactAge45to49 | 113802     |
| India   | 1996           | FemalePregAge15to19 | 3261724    |
| India   | 1996           | FemalePregAge20to24 | 7556123    |
| India   | 1996           | FemalePregAge25to29 | 5089882    |
| India   | 1996           | FemalePregAge30to34 | 2519744    |
| India   | 1996           | FemalePregAge35to39 | 1091248    |
| India   | 1996           | FemalePregAge40to44 | 378073     |
| India   | 1996           | FemalePregAge45to49 | 85352      |
| India   | 1996           | MaleAge0to4         | 63773654   |
| India   | 1996           | MaleAge10to14       | 56474431   |
| India   | 1996           | MaleAge15to19       | 51622229   |
| India   | 1996           | MaleAge20to24       | 45923692   |
| India   | 1996           | MaleAge25to29       | 41745905   |
| India   | 1996           | MaleAge30to34       | 37274657   |
| India   | 1996           | MaleAge35to39       | 32983981   |
| India   | 1996           | MaleAge40to44       | 28930658   |
| India   | 1996           | MaleAge45to49       | 21415071   |
| India   | 1996           | MaleAge50to54       | 17332154   |
| India   | 1996           | MaleAge55to59       | 14734681   |
| India   | 1996           | MaleAge5to9         | 60807342   |
| India   | 1996           | MaleAge60to64       | 11691361   |
| India   | 1996           | MaleAge65to69       | 8580581    |
| India   | 1996           | MaleAge70to74       | 5614677    |
| India   | 1996           | MaleAge75to79       | 3209278    |
| India   | 1996           | MaleAge80to84       | 1537229    |
| India   | 1996           | MaleAge85to89       | 616070     |
| India   | 1996           | MaleAge90to94       | 189615     |
| India   | 1996           | MaleAge95to99       | 41957      |
| India   | 1996           | MaleAgeAbove100     | 6577       |
| India   | 1997           | FemaleAge0to4       | 58082892   |
| India   | 1997           | FemaleAge10to14     | 53120428   |
| India   | 1997           | FemaleAge15to19     | 41010261   |
| India   | 1997           | FemaleAge20to24     | 25583821   |
| India   | 1997           | FemaleAge25to29     | 26834947   |
| India   | 1997           | FemaleAge30to34     | 28727443   |
| India   | 1997           | FemaleAge35to39     | 27903676   |
| India   | 1997           | FemaleAge40to44     | 25774967   |
| India   | 1997           | FemaleAge45to49     | 21008755   |
| India   | 1997           | FemaleAge50to54     | 17121671   |
| India   | 1997           | FemaleAge55to59     | 15041906   |
| India   | 1997           | FemaleAge5to9       | 56545079   |
| India   | 1997           | FemaleAge60to64     | 12326571   |
| India   | 1997           | FemaleAge65to69     | 8992935    |
| India   | 1997           | FemaleAge70to74     | 5937699    |
| India   | 1997           | FemaleAge75to79     | 3517921    |
| India   | 1997           | FemaleAge80to84     | 1789364    |
| India   | 1997           | FemaleAge85to89     | 751769     |
| India   | 1997           | FemaleAge90to94     | 243235     |
| India   | 1997           | FemaleAge95to99     | 53436      |
| India   | 1997           | FemaleAgeAbove100   | 8356       |
| India   | 1997           | FemaleLactAge15to19 | 4348965    |
| India   | 1997           | FemaleLactAge20to24 | 10074831   |
| India   | 1997           | FemaleLactAge25to29 | 6786509    |
| India   | 1997           | FemaleLactAge30to34 | 3359658    |
| India   | 1997           | FemaleLactAge35to39 | 1454997    |
| India   | 1997           | FemaleLactAge40to44 | 504098     |
| India   | 1997           | FemaleLactAge45to49 | 113802     |

Dietary calcium and zinc deficiency risks are decreasing but remain prevalent

| Country | Reference year | Age/gender group    | Population |
|---------|----------------|---------------------|------------|
| India   | 1997           | FemalePregAge15to19 | 3261724    |
| India   | 1997           | FemalePregAge20to24 | 7556123    |
| India   | 1997           | FemalePregAge25to29 | 5089882    |
| India   | 1997           | FemalePregAge30to34 | 2519744    |
| India   | 1997           | FemalePregAge35to39 | 1091248    |
| India   | 1997           | FemalePregAge40to44 | 378073     |
| India   | 1997           | FemalePregAge45to49 | 85352      |
| India   | 1997           | MaleAge0to4         | 63957326   |
| India   | 1997           | MaleAge10to14       | 57340116   |
| India   | 1997           | MaleAge15to19       | 52535530   |
| India   | 1997           | MaleAge20to24       | 46929540   |
| India   | 1997           | MaleAge25to29       | 42351561   |
| India   | 1997           | MaleAge30to34       | 38070231   |
| India   | 1997           | MaleAge35to39       | 33640804   |
| India   | 1997           | MaleAge40to44       | 29677264   |
| India   | 1997           | MaleAge45to49       | 22782404   |
| India   | 1997           | MaleAge50to54       | 17558875   |
| India   | 1997           | MaleAge55to59       | 14955814   |
| India   | 1997           | MaleAge5to9         | 61350998   |
| India   | 1997           | MaleAge60to64       | 11943333   |
| India   | 1997           | MaleAge65to69       | 8763822    |
| India   | 1997           | MaleAge70to74       | 5777096    |
| India   | 1997           | MaleAge75to79       | 3310361    |
| India   | 1997           | MaleAge80to84       | 1605805    |
| India   | 1997           | MaleAge85to89       | 646698     |
| India   | 1997           | MaleAge90to94       | 207822     |
| India   | 1997           | MaleAge95to99       | 45555      |
| India   | 1997           | MaleAgeAbov e100    | 7042       |
| India   | 1998           | FemaleAge0to4       | 58196684   |
| India   | 1998           | FemaleAge10to14     | 53903059   |
| India   | 1998           | FemaleAge15to19     | 41800565   |
| India   | 1998           | FemaleAge20to24     | 26618553   |
| India   | 1998           | FemaleAge25to29     | 27422083   |
| India   | 1998           | FemaleAge30to34     | 29520523   |
| India   | 1998           | FemaleAge35to39     | 28581772   |
| India   | 1998           | FemaleAge40to44     | 26417192   |
| India   | 1998           | FemaleAge45to49     | 22159755   |
| India   | 1998           | FemaleAge50to54     | 17452393   |
| India   | 1998           | FemaleAge55to59     | 15230980   |
| India   | 1998           | FemaleAge5to9       | 56694368   |
| India   | 1998           | FemaleAge60to64     | 12680843   |
| India   | 1998           | FemaleAge65to69     | 9316622    |
| India   | 1998           | FemaleAge70to74     | 6148641    |
| India   | 1998           | FemaleAge75to79     | 3632778    |
| India   | 1998           | FemaleAge80to84     | 1852526    |
| India   | 1998           | FemaleAge85to89     | 776309     |
| India   | 1998           | FemaleAge90to94     | 258601     |
| India   | 1998           | FemaleAge95to99     | 56629      |
| India   | 1998           | FemaleAgeAbov e100  | 8991       |
| India   | 1998           | FemaleLactAge15to19 | 4348965    |
| India   | 1998           | FemaleLactAge20to24 | 10074831   |
| India   | 1998           | FemaleLactAge25to29 | 6786509    |
| India   | 1998           | FemaleLactAge30to34 | 3359658    |
| India   | 1998           | FemaleLactAge35to39 | 1454997    |
| India   | 1998           | FemaleLactAge40to44 | 504098     |
| India   | 1998           | FemaleLactAge45to49 | 113802     |
| India   | 1998           | FemalePregAge15to19 | 3261724    |
| India   | 1998           | FemalePregAge20to24 | 7556123    |
| India   | 1998           | FemalePregAge25to29 | 5089882    |
| India   | 1998           | FemalePregAge30to34 | 2519744    |
| India   | 1998           | FemalePregAge35to39 | 1091248    |
| India   | 1998           | FemalePregAge40to44 | 378073     |
| India   | 1998           | FemalePregAge45to49 | 85352      |
| India   | 1998           | MaleAge0to4         | 64127745   |
| India   | 1998           | MaleAge10to14       | 58185232   |
| India   | 1998           | MaleAge15to19       | 53415000   |
| India   | 1998           | MaleAge20to24       | 48006679   |
| India   | 1998           | MaleAge25to29       | 42947557   |
| India   | 1998           | MaleAge30to34       | 38882697   |
| India   | 1998           | MaleAge35to39       | 34325371   |
| India   | 1998           | MaleAge40to44       | 30274843   |
| India   | 1998           | MaleAge45to49       | 24294733   |
| India   | 1998           | MaleAge50to54       | 17871171   |
| India   | 1998           | MaleAge55to59       | 15194204   |
| India   | 1998           | MaleAge5to9         | 61756586   |
| India   | 1998           | MaleAge60to64       | 12217042   |
| India   | 1998           | MaleAge65to69       | 8954795    |
| India   | 1998           | MaleAge70to74       | 5940453    |
| India   | 1998           | MaleAge75to79       | 3400403    |
| India   | 1998           | MaleAge80to84       | 1656396    |
| India   | 1998           | MaleAge85to89       | 664770     |
| India   | 1998           | MaleAge90to94       | 219369     |
| India   | 1998           | MaleAge95to99       | 49069      |
| India   | 1998           | MaleAgeAbov e100    | 7572       |
| India   | 1999           | FemaleAge0to4       | 58336026   |
| India   | 1999           | FemaleAge10to14     | 54603123   |
| India   | 1999           | FemaleAge15to19     | 42601182   |
| India   | 1999           | FemaleAge20to24     | 27643675   |

Dietary calcium and zinc deficiency risks are decreasing but remain prevalent

| Country   | Reference year | Age/gender group    | Population |
|-----------|----------------|---------------------|------------|
| India     | 1999           | FemaleAge25to29     | 28076442   |
| India     | 1999           | FemaleAge30to34     | 30285583   |
| India     | 1999           | FemaleAge35to39     | 29282353   |
| India     | 1999           | FemaleAge40to44     | 27046633   |
| India     | 1999           | FemaleAge45to49     | 23275857   |
| India     | 1999           | FemaleAge50to54     | 17940566   |
| India     | 1999           | FemaleAge55to59     | 15445571   |
| India     | 1999           | FemaleAge5to9       | 56706708   |
| India     | 1999           | FemaleAge60to64     | 13018494   |
| India     | 1999           | FemaleAge65to69     | 9660984    |
| India     | 1999           | FemaleAge70to74     | 6382813    |
| India     | 1999           | FemaleAge75to79     | 3752926    |
| India     | 1999           | FemaleAge80to84     | 1904140    |
| India     | 1999           | FemaleAge85to89     | 788825     |
| India     | 1999           | FemaleAge90to94     | 263343     |
| India     | 1999           | FemaleAge95to99     | 58638      |
| India     | 1999           | FemaleAgeAbove100   | 9626       |
| India     | 1999           | FemaleLactAge15to19 | 4348965    |
| India     | 1999           | FemaleLactAge20to24 | 10074831   |
| India     | 1999           | FemaleLactAge25to29 | 6786509    |
| India     | 1999           | FemaleLactAge30to34 | 3359658    |
| India     | 1999           | FemaleLactAge35to39 | 1454997    |
| India     | 1999           | FemaleLactAge40to44 | 504098     |
| India     | 1999           | FemaleLactAge45to49 | 113802     |
| India     | 1999           | FemalePregAge15to19 | 3261724    |
| India     | 1999           | FemalePregAge20to24 | 7556123    |
| India     | 1999           | FemalePregAge25to29 | 5089882    |
| India     | 1999           | FemalePregAge30to34 | 2519744    |
| India     | 1999           | FemalePregAge35to39 | 1091248    |
| India     | 1999           | FemalePregAge40to44 | 378073     |
| India     | 1999           | FemalePregAge45to49 | 85352      |
| India     | 1999           | MaleAge0to4         | 64299983   |
| India     | 1999           | MaleAge10to14       | 58965854   |
| India     | 1999           | MaleAge15to19       | 54290540   |
| India     | 1999           | MaleAge20to24       | 49081481   |
| India     | 1999           | MaleAge25to29       | 43615708   |
| India     | 1999           | MaleAge30to34       | 39665417   |
| India     | 1999           | MaleAge35to39       | 35035135   |
| India     | 1999           | MaleAge40to44       | 30849975   |
| India     | 1999           | MaleAge45to49       | 25719681   |
| India     | 1999           | MaleAge50to54       | 18403730   |
| India     | 1999           | MaleAge55to59       | 15449573   |
| India     | 1999           | MaleAge5to9         | 62041268   |
| India     | 1999           | MaleAge60to64       | 12496190   |
| India     | 1999           | MaleAge65to69       | 9164661    |
| India     | 1999           | MaleAge70to74       | 6103594    |
| India     | 1999           | MaleAge75to79       | 3485235    |
| India     | 1999           | MaleAge80to84       | 1688418    |
| India     | 1999           | MaleAge85to89       | 670148     |
| India     | 1999           | MaleAge90to94       | 220848     |
| India     | 1999           | MaleAge95to99       | 50652      |
| India     | 1999           | MaleAgeAbove100     | 8110       |
| Indonesia | 1992           | FemaleAge0to4       | 10622796   |
| Indonesia | 1992           | FemaleAge10to14     | 10615881   |
| Indonesia | 1992           | FemaleAge15to19     | 8848036    |
| Indonesia | 1992           | FemaleAge20to24     | 6715298    |
| Indonesia | 1992           | FemaleAge25to29     | 5939776    |
| Indonesia | 1992           | FemaleAge30to34     | 5553380    |
| Indonesia | 1992           | FemaleAge35to39     | 4760320    |
| Indonesia | 1992           | FemaleAge40to44     | 4005230    |
| Indonesia | 1992           | FemaleAge45to49     | 3740740    |
| Indonesia | 1992           | FemaleAge50to54     | 3492706    |
| Indonesia | 1992           | FemaleAge55to59     | 2961597    |
| Indonesia | 1992           | FemaleAge5to9       | 10900491   |
| Indonesia | 1992           | FemaleAge60to64     | 2309047    |
| Indonesia | 1992           | FemaleAge65to69     | 1627441    |
| Indonesia | 1992           | FemaleAge70to74     | 1087197    |
| Indonesia | 1992           | FemaleAge75to79     | 707212     |
| Indonesia | 1992           | FemaleAge80to84     | 374261     |
| Indonesia | 1992           | FemaleAge85to89     | 134873     |
| Indonesia | 1992           | FemaleAge90to94     | 30336      |
| Indonesia | 1992           | FemaleAge95to99     | 3996       |
| Indonesia | 1992           | FemaleAgeAbove100   | 244        |
| Indonesia | 1992           | FemaleLactAge15to19 | 631762     |
| Indonesia | 1992           | FemaleLactAge20to24 | 1389821    |
| Indonesia | 1992           | FemaleLactAge25to29 | 1217646    |
| Indonesia | 1992           | FemaleLactAge30to34 | 768503     |
| Indonesia | 1992           | FemaleLactAge35to39 | 405847     |
| Indonesia | 1992           | FemaleLactAge40to44 | 132625     |
| Indonesia | 1992           | FemaleLactAge45to49 | 15291      |
| Indonesia | 1992           | FemalePregAge15to19 | 473821     |
| Indonesia | 1992           | FemalePregAge20to24 | 1042366    |
| Indonesia | 1992           | FemalePregAge25to29 | 913235     |
| Indonesia | 1992           | FemalePregAge30to34 | 576378     |
| Indonesia | 1992           | FemalePregAge35to39 | 304385     |
| Indonesia | 1992           | FemalePregAge40to44 | 99469      |
| Indonesia | 1992           | FemalePregAge45to49 | 11468      |
| Indonesia | 1992           | MaleAge0to4         | 11009526   |

Dietary calcium and zinc deficiency risks are decreasing but remain prevalent

| Country   | Reference year | Age/gender group    | Population |
|-----------|----------------|---------------------|------------|
| Indonesia | 1992           | MaleAge10to14       | 10924776   |
| Indonesia | 1992           | MaleAge15to19       | 10189226   |
| Indonesia | 1992           | MaleAge20to24       | 9312468    |
| Indonesia | 1992           | MaleAge25to29       | 8219192    |
| Indonesia | 1992           | MaleAge30to34       | 7030923    |
| Indonesia | 1992           | MaleAge35to39       | 5588916    |
| Indonesia | 1992           | MaleAge40to44       | 4134132    |
| Indonesia | 1992           | MaleAge45to49       | 3477878    |
| Indonesia | 1992           | MaleAge50to54       | 3217419    |
| Indonesia | 1992           | MaleAge55to59       | 2712584    |
| Indonesia | 1992           | MaleAge5to9         | 11254311   |
| Indonesia | 1992           | MaleAge60to64       | 2100849    |
| Indonesia | 1992           | MaleAge65to69       | 1472064    |
| Indonesia | 1992           | MaleAge70to74       | 928323     |
| Indonesia | 1992           | MaleAge75to79       | 554791     |
| Indonesia | 1992           | MaleAge80to84       | 270876     |
| Indonesia | 1992           | MaleAge85to89       | 86391      |
| Indonesia | 1992           | MaleAge90to94       | 16627      |
| Indonesia | 1992           | MaleAge95to99       | 2016       |
| Indonesia | 1992           | MaleAgeAbove100     | 86         |
| Indonesia | 1993           | FemaleAge0to4       | 10625347   |
| Indonesia | 1993           | FemaleAge10to14     | 10725889   |
| Indonesia | 1993           | FemaleAge15to19     | 8966407    |
| Indonesia | 1993           | FemaleAge20to24     | 6862310    |
| Indonesia | 1993           | FemaleAge25to29     | 6155360    |
| Indonesia | 1993           | FemaleAge30to34     | 5758467    |
| Indonesia | 1993           | FemaleAge35to39     | 5051364    |
| Indonesia | 1993           | FemaleAge40to44     | 4171654    |
| Indonesia | 1993           | FemaleAge45to49     | 3748416    |
| Indonesia | 1993           | FemaleAge50to54     | 3534340    |
| Indonesia | 1993           | FemaleAge55to59     | 3042928    |
| Indonesia | 1993           | FemaleAge5to9       | 10837873   |
| Indonesia | 1993           | FemaleAge60to64     | 2389238    |
| Indonesia | 1993           | FemaleAge65to69     | 1708986    |
| Indonesia | 1993           | FemaleAge70to74     | 1117214    |
| Indonesia | 1993           | FemaleAge75to79     | 717485     |
| Indonesia | 1993           | FemaleAge80to84     | 387486     |
| Indonesia | 1993           | FemaleAge85to89     | 141146     |
| Indonesia | 1993           | FemaleAge90to94     | 32249      |
| Indonesia | 1993           | FemaleAge95to99     | 4592       |
| Indonesia | 1993           | FemaleAgeAbove100   | 253        |
| Indonesia | 1993           | FemaleLactAge15to19 | 631762     |
| Indonesia | 1993           | FemaleLactAge20to24 | 1389821    |
| Indonesia | 1993           | FemaleLactAge25to29 | 1217646    |
| Indonesia | 1993           | FemaleLactAge30to34 | 768503     |
| Indonesia | 1993           | FemaleLactAge35to39 | 405847     |
| Indonesia | 1993           | FemaleLactAge40to44 | 132625     |
| Indonesia | 1993           | FemaleLactAge45to49 | 15291      |
| Indonesia | 1993           | FemalePregAge15to19 | 473821     |
| Indonesia | 1993           | FemalePregAge20to24 | 1042366    |
| Indonesia | 1993           | FemalePregAge25to29 | 913235     |
| Indonesia | 1993           | FemalePregAge30to34 | 576378     |
| Indonesia | 1993           | FemalePregAge35to39 | 304385     |
| Indonesia | 1993           | FemalePregAge40to44 | 99469      |
| Indonesia | 1993           | FemalePregAge45to49 | 11468      |
| Indonesia | 1993           | MaleAge0to4         | 11013655   |
| Indonesia | 1993           | MaleAge10to14       | 11042487   |
| Indonesia | 1993           | MaleAge15to19       | 10317730   |
| Indonesia | 1993           | MaleAge20to24       | 9461400    |
| Indonesia | 1993           | MaleAge25to29       | 8422898    |
| Indonesia | 1993           | MaleAge30to34       | 7236610    |
| Indonesia | 1993           | MaleAge35to39       | 5876831    |
| Indonesia | 1993           | MaleAge40to44       | 4367475    |
| Indonesia | 1993           | MaleAge45to49       | 3493811    |
| Indonesia | 1993           | MaleAge50to54       | 3242505    |
| Indonesia | 1993           | MaleAge55to59       | 2784458    |
| Indonesia | 1993           | MaleAge5to9         | 11193430   |
| Indonesia | 1993           | MaleAge60to64       | 2157330    |
| Indonesia | 1993           | MaleAge65to69       | 1535424    |
| Indonesia | 1993           | MaleAge70to74       | 959278     |
| Indonesia | 1993           | MaleAge75to79       | 560510     |
| Indonesia | 1993           | MaleAge80to84       | 280578     |
| Indonesia | 1993           | MaleAge85to89       | 90992      |
| Indonesia | 1993           | MaleAge90to94       | 17725      |
| Indonesia | 1993           | MaleAge95to99       | 2442       |
| Indonesia | 1993           | MaleAgeAbove100     | 89         |
| Indonesia | 1994           | FemaleAge0to4       | 10625425   |
| Indonesia | 1994           | FemaleAge10to14     | 10816099   |
| Indonesia | 1994           | FemaleAge15to19     | 9088997    |
| Indonesia | 1994           | FemaleAge20to24     | 7002825    |
| Indonesia | 1994           | FemaleAge25to29     | 6361894    |
| Indonesia | 1994           | FemaleAge30to34     | 5963520    |
| Indonesia | 1994           | FemaleAge35to39     | 5336901    |
| Indonesia | 1994           | FemaleAge40to44     | 4368741    |
| Indonesia | 1994           | FemaleAge45to49     | 3781169    |
| Indonesia | 1994           | FemaleAge50to54     | 3568191    |
| Indonesia | 1994           | FemaleAge55to59     | 3119176    |
| Indonesia | 1994           | FemaleAge5to9       | 10748477   |

Dietary calcium and zinc deficiency risks are decreasing but remain prevalent

| Country   | Reference year | Age/gender group    | Population |
|-----------|----------------|---------------------|------------|
| Indonesia | 1994           | FemaleAge60to64     | 2472189    |
| Indonesia | 1994           | FemaleAge65to69     | 1794047    |
| Indonesia | 1994           | FemaleAge70to74     | 1157817    |
| Indonesia | 1994           | FemaleAge75to79     | 730627     |
| Indonesia | 1994           | FemaleAge80to84     | 396873     |
| Indonesia | 1994           | FemaleAge85to89     | 143381     |
| Indonesia | 1994           | FemaleAge90to94     | 32462      |
| Indonesia | 1994           | FemaleAge95to99     | 4705       |
| Indonesia | 1994           | FemaleAgeAbove100   | 263        |
| Indonesia | 1994           | FemaleLactAge15to19 | 631762     |
| Indonesia | 1994           | FemaleLactAge20to24 | 1389821    |
| Indonesia | 1994           | FemaleLactAge25to29 | 1217646    |
| Indonesia | 1994           | FemaleLactAge30to34 | 768503     |
| Indonesia | 1994           | FemaleLactAge35to39 | 405847     |
| Indonesia | 1994           | FemaleLactAge40to44 | 132625     |
| Indonesia | 1994           | FemaleLactAge45to49 | 15291      |
| Indonesia | 1994           | FemalePregAge15to19 | 473821     |
| Indonesia | 1994           | FemalePregAge20to24 | 1042366    |
| Indonesia | 1994           | FemalePregAge25to29 | 913235     |
| Indonesia | 1994           | FemalePregAge30to34 | 576378     |
| Indonesia | 1994           | FemalePregAge35to39 | 304385     |
| Indonesia | 1994           | FemalePregAge40to44 | 99469      |
| Indonesia | 1994           | FemalePregAge45to49 | 11468      |
| Indonesia | 1994           | MaleAge0to4         | 11014397   |
| Indonesia | 1994           | MaleAge10to14       | 11139031   |
| Indonesia | 1994           | MaleAge15to19       | 10450566   |
| Indonesia | 1994           | MaleAge20to24       | 9605897    |
| Indonesia | 1994           | MaleAge25to29       | 8617814    |
| Indonesia | 1994           | MaleAge30to34       | 7438921    |
| Indonesia | 1994           | MaleAge35to39       | 6155486    |
| Indonesia | 1994           | MaleAge40to44       | 4622655    |
| Indonesia | 1994           | MaleAge45to49       | 3546490    |
| Indonesia | 1994           | MaleAge50to54       | 3263565    |
| Indonesia | 1994           | MaleAge55to59       | 2850438    |
| Indonesia | 1994           | MaleAge5to9         | 11103180   |
| Indonesia | 1994           | MaleAge60to64       | 2218533    |
| Indonesia | 1994           | MaleAge65to69       | 1599685    |
| Indonesia | 1994           | MaleAge70to74       | 996202     |
| Indonesia | 1994           | MaleAge75to79       | 569039     |
| Indonesia | 1994           | MaleAge80to84       | 284898     |
| Indonesia | 1994           | MaleAge85to89       | 92190      |
| Indonesia | 1994           | MaleAge90to94       | 17767      |
| Indonesia | 1994           | MaleAge95to99       | 2433       |
| Indonesia | 1994           | MaleAgeAbove100     | 91         |
| Indonesia | 1995           | FemaleAge0to4       | 10591768   |
| Indonesia | 1995           | FemaleAge10to14     | 10868699   |
| Indonesia | 1995           | FemaleAge15to19     | 9218783    |
| Indonesia | 1995           | FemaleAge20to24     | 7144203    |
| Indonesia | 1995           | FemaleAge25to29     | 6555752    |
| Indonesia | 1995           | FemaleAge30to34     | 6178485    |
| Indonesia | 1995           | FemaleAge35to39     | 5605194    |
| Indonesia | 1995           | FemaleAge40to44     | 4594211    |
| Indonesia | 1995           | FemaleAge45to49     | 3851734    |
| Indonesia | 1995           | FemaleAge50to54     | 3594916    |
| Indonesia | 1995           | FemaleAge55to59     | 3188519    |
| Indonesia | 1995           | FemaleAge5to9       | 10664068   |
| Indonesia | 1995           | FemaleAge60to64     | 2559212    |
| Indonesia | 1995           | FemaleAge65to69     | 1880066    |
| Indonesia | 1995           | FemaleAge70to74     | 1211220    |
| Indonesia | 1995           | FemaleAge75to79     | 748339     |
| Indonesia | 1995           | FemaleAge80to84     | 402851     |
| Indonesia | 1995           | FemaleAge85to89     | 142648     |
| Indonesia | 1995           | FemaleAge90to94     | 30020      |
| Indonesia | 1995           | FemaleAge95to99     | 3514       |
| Indonesia | 1995           | FemaleAgeAbove100   | 271        |
| Indonesia | 1995           | FemaleLactAge15to19 | 631762     |
| Indonesia | 1995           | FemaleLactAge20to24 | 1389821    |
| Indonesia | 1995           | FemaleLactAge25to29 | 1217646    |
| Indonesia | 1995           | FemaleLactAge30to34 | 768503     |
| Indonesia | 1995           | FemaleLactAge35to39 | 405847     |
| Indonesia | 1995           | FemaleLactAge40to44 | 132625     |
| Indonesia | 1995           | FemaleLactAge45to49 | 15291      |
| Indonesia | 1995           | FemalePregAge15to19 | 473821     |
| Indonesia | 1995           | FemalePregAge20to24 | 1042366    |
| Indonesia | 1995           | FemalePregAge25to29 | 913235     |
| Indonesia | 1995           | FemalePregAge30to34 | 576378     |
| Indonesia | 1995           | FemalePregAge35to39 | 304385     |
| Indonesia | 1995           | FemalePregAge40to44 | 99469      |
| Indonesia | 1995           | FemalePregAge45to49 | 11468      |
| Indonesia | 1995           | MaleAge0to4         | 10979967   |
| Indonesia | 1995           | MaleAge10to14       | 11195792   |
| Indonesia | 1995           | MaleAge15to19       | 10589900   |
| Indonesia | 1995           | MaleAge20to24       | 9752641    |
| Indonesia | 1995           | MaleAge25to29       | 8802356    |
| Indonesia | 1995           | MaleAge30to34       | 7646115    |
| Indonesia | 1995           | MaleAge35to39       | 6418741    |
| Indonesia | 1995           | MaleAge40to44       | 4888684    |
| Indonesia | 1995           | MaleAge45to49       | 3650544    |



Dietary calcium and zinc deficiency risks are decreasing but remain prevalent

| Country   | Reference year | Age/gender group    | Population |
|-----------|----------------|---------------------|------------|
| Indonesia | 1995           | MaleAge50to54       | 3283240    |
| Indonesia | 1995           | MaleAge55to59       | 2906978    |
| Indonesia | 1995           | MaleAge5to9         | 11015946   |
| Indonesia | 1995           | MaleAge60to64       | 2286897    |
| Indonesia | 1995           | MaleAge65to69       | 1663417    |
| Indonesia | 1995           | MaleAge70to74       | 1040083    |
| Indonesia | 1995           | MaleAge75to79       | 582151     |
| Indonesia | 1995           | MaleAge80to84       | 284481     |
| Indonesia | 1995           | MaleAge85to89       | 90100      |
| Indonesia | 1995           | MaleAge90to94       | 15801      |
| Indonesia | 1995           | MaleAge95to99       | 1539       |
| Indonesia | 1995           | MaleAgeAbov e100    | 94         |
| Indonesia | 1996           | FemaleAge0to4       | 10596995   |
| Indonesia | 1996           | FemaleAge10to14     | 10866360   |
| Indonesia | 1996           | FemaleAge15to19     | 9558772    |
| Indonesia | 1996           | FemaleAge20to24     | 7564127    |
| Indonesia | 1996           | FemaleAge25to29     | 6754604    |
| Indonesia | 1996           | FemaleAge30to34     | 6281515    |
| Indonesia | 1996           | FemaleAge35to39     | 5827875    |
| Indonesia | 1996           | FemaleAge40to44     | 4800852    |
| Indonesia | 1996           | FemaleAge45to49     | 3879299    |
| Indonesia | 1996           | FemaleAge50to54     | 3606798    |
| Indonesia | 1996           | FemaleAge55to59     | 3241824    |
| Indonesia | 1996           | FemaleAge5to9       | 10604851   |
| Indonesia | 1996           | FemaleAge60to64     | 2636383    |
| Indonesia | 1996           | FemaleAge65to69     | 1952466    |
| Indonesia | 1996           | FemaleAge70to74     | 1264586    |
| Indonesia | 1996           | FemaleAge75to79     | 766621     |
| Indonesia | 1996           | FemaleAge80to84     | 415249     |
| Indonesia | 1996           | FemaleAge85to89     | 158000     |
| Indonesia | 1996           | FemaleAge90to94     | 36280      |
| Indonesia | 1996           | FemaleAge95to99     | 3997       |
| Indonesia | 1996           | FemaleAgeAbov e100  | 278        |
| Indonesia | 1996           | FemaleLactAge15to19 | 506174     |
| Indonesia | 1996           | FemaleLactAge20to24 | 1228987    |
| Indonesia | 1996           | FemaleLactAge25to29 | 1205872    |
| Indonesia | 1996           | FemaleLactAge30to34 | 832757     |
| Indonesia | 1996           | FemaleLactAge35to39 | 418402     |
| Indonesia | 1996           | FemaleLactAge40to44 | 155959     |
| Indonesia | 1996           | FemaleLactAge45to49 | 56017      |
| Indonesia | 1996           | FemalePregAge15to19 | 379630     |
| Indonesia | 1996           | FemalePregAge20to24 | 921740     |
| Indonesia | 1996           | FemalePregAge25to29 | 904404     |
| Indonesia | 1996           | FemalePregAge30to34 | 624567     |
| Indonesia | 1996           | FemalePregAge35to39 | 313801     |
| Indonesia | 1996           | FemalePregAge40to44 | 116969     |
| Indonesia | 1996           | FemalePregAge45to49 | 42012      |
| Indonesia | 1996           | MaleAge0to4         | 10987543   |
| Indonesia | 1996           | MaleAge10to14       | 11195100   |
| Indonesia | 1996           | MaleAge15to19       | 10712597   |
| Indonesia | 1996           | MaleAge20to24       | 9888779    |
| Indonesia | 1996           | MaleAge25to29       | 8970697    |
| Indonesia | 1996           | MaleAge30to34       | 7850393    |
| Indonesia | 1996           | MaleAge35to39       | 6659408    |
| Indonesia | 1996           | MaleAge40to44       | 5158638    |
| Indonesia | 1996           | MaleAge45to49       | 3793554    |
| Indonesia | 1996           | MaleAge50to54       | 3290426    |
| Indonesia | 1996           | MaleAge55to59       | 2942006    |
| Indonesia | 1996           | MaleAge5to9         | 10956694   |
| Indonesia | 1996           | MaleAge60to64       | 2347136    |
| Indonesia | 1996           | MaleAge65to69       | 1714480    |
| Indonesia | 1996           | MaleAge70to74       | 1084308    |
| Indonesia | 1996           | MaleAge75to79       | 602557     |
| Indonesia | 1996           | MaleAge80to84       | 295384     |
| Indonesia | 1996           | MaleAge85to89       | 101526     |
| Indonesia | 1996           | MaleAge90to94       | 19801      |
| Indonesia | 1996           | MaleAge95to99       | 1741       |
| Indonesia | 1996           | MaleAgeAbov e100    | 97         |
| Indonesia | 1997           | FemaleAge0to4       | 10532885   |
| Indonesia | 1997           | FemaleAge10to14     | 10831865   |
| Indonesia | 1997           | FemaleAge15to19     | 9688430    |
| Indonesia | 1997           | FemaleAge20to24     | 7702877    |
| Indonesia | 1997           | FemaleAge25to29     | 6924058    |
| Indonesia | 1997           | FemaleAge30to34     | 6506070    |
| Indonesia | 1997           | FemaleAge35to39     | 6054316    |
| Indonesia | 1997           | FemaleAge40to44     | 5080359    |
| Indonesia | 1997           | FemaleAge45to49     | 4014897    |
| Indonesia | 1997           | FemaleAge50to54     | 3614371    |
| Indonesia | 1997           | FemaleAge55to59     | 3293631    |
| Indonesia | 1997           | FemaleAge5to9       | 10570726   |
| Indonesia | 1997           | FemaleAge60to64     | 2718418    |
| Indonesia | 1997           | FemaleAge65to69     | 2026942    |
| Indonesia | 1997           | FemaleAge70to74     | 1328348    |
| Indonesia | 1997           | FemaleAge75to79     | 786255     |
| Indonesia | 1997           | FemaleAge80to84     | 424177     |
| Indonesia | 1997           | FemaleAge85to89     | 170110     |
| Indonesia | 1997           | FemaleAge90to94     | 40793      |
| Indonesia | 1997           | FemaleAge95to99     | 4860       |

Dietary calcium and zinc deficiency risks are decreasing but remain prevalent

| Country   | Reference year | Age/gender group    | Population |
|-----------|----------------|---------------------|------------|
| Indonesia | 1997           | FemaleAgeAbove100   | 285        |
| Indonesia | 1997           | FemaleLactAge15to19 | 506174     |
| Indonesia | 1997           | FemaleLactAge20to24 | 1228987    |
| Indonesia | 1997           | FemaleLactAge25to29 | 1205872    |
| Indonesia | 1997           | FemaleLactAge30to34 | 832757     |
| Indonesia | 1997           | FemaleLactAge35to39 | 418402     |
| Indonesia | 1997           | FemaleLactAge40to44 | 155959     |
| Indonesia | 1997           | FemaleLactAge45to49 | 56017      |
| Indonesia | 1997           | FemalePregAge15to19 | 379630     |
| Indonesia | 1997           | FemalePregAge20to24 | 921740     |
| Indonesia | 1997           | FemalePregAge25to29 | 904404     |
| Indonesia | 1997           | FemalePregAge30to34 | 624567     |
| Indonesia | 1997           | FemalePregAge35to39 | 313801     |
| Indonesia | 1997           | FemalePregAge40to44 | 116969     |
| Indonesia | 1997           | FemalePregAge45to49 | 42012      |
| Indonesia | 1997           | MaleAge0to4         | 10921954   |
| Indonesia | 1997           | MaleAge10to14       | 11161084   |
| Indonesia | 1997           | MaleAge15to19       | 10846432   |
| Indonesia | 1997           | MaleAge20to24       | 10027225   |
| Indonesia | 1997           | MaleAge25to29       | 9130834    |
| Indonesia | 1997           | MaleAge30to34       | 8059061    |
| Indonesia | 1997           | MaleAge35to39       | 6883054    |
| Indonesia | 1997           | MaleAge40to44       | 5443484    |
| Indonesia | 1997           | MaleAge45to49       | 3986798    |
| Indonesia | 1997           | MaleAge50to54       | 3297351    |
| Indonesia | 1997           | MaleAge55to59       | 2974454    |
| Indonesia | 1997           | MaleAge5to9         | 10922179   |
| Indonesia | 1997           | MaleAge60to64       | 2414872    |
| Indonesia | 1997           | MaleAge65to69       | 1764984    |
| Indonesia | 1997           | MaleAge70to74       | 1133511    |
| Indonesia | 1997           | MaleAge75to79       | 623359     |
| Indonesia | 1997           | MaleAge80to84       | 302256     |
| Indonesia | 1997           | MaleAge85to89       | 110451     |
| Indonesia | 1997           | MaleAge90to94       | 22750      |
| Indonesia | 1997           | MaleAge95to99       | 2288       |
| Indonesia | 1997           | MaleAgeAbove100     | 100        |
| Indonesia | 1998           | FemaleAge0to4       | 10424449   |
| Indonesia | 1998           | FemaleAge10to14     | 10772542   |
| Indonesia | 1998           | FemaleAge15to19     | 9812343    |
| Indonesia | 1998           | FemaleAge20to24     | 7840686    |
| Indonesia | 1998           | FemaleAge25to29     | 7085365    |
| Indonesia | 1998           | FemaleAge30to34     | 6732508    |
| Indonesia | 1998           | FemaleAge35to39     | 6268472    |
| Indonesia | 1998           | FemaleAge40to44     | 5376786    |
| Indonesia | 1998           | FemaleAge45to49     | 4185079    |
| Indonesia | 1998           | FemaleAge50to54     | 3629106    |
| Indonesia | 1998           | FemaleAge55to59     | 3341394    |
| Indonesia | 1998           | FemaleAge5to9       | 10558647   |
| Indonesia | 1998           | FemaleAge60to64     | 2801605    |
| Indonesia | 1998           | FemaleAge65to69     | 2104492    |
| Indonesia | 1998           | FemaleAge70to74     | 1399657    |
| Indonesia | 1998           | FemaleAge75to79     | 810223     |
| Indonesia | 1998           | FemaleAge80to84     | 431580     |
| Indonesia | 1998           | FemaleAge85to89     | 176963     |
| Indonesia | 1998           | FemaleAge90to94     | 43152      |
| Indonesia | 1998           | FemaleAge95to99     | 5780       |
| Indonesia | 1998           | FemaleAgeAbove100   | 292        |
| Indonesia | 1998           | FemaleLactAge15to19 | 506174     |
| Indonesia | 1998           | FemaleLactAge20to24 | 1228987    |
| Indonesia | 1998           | FemaleLactAge25to29 | 1205872    |
| Indonesia | 1998           | FemaleLactAge30to34 | 832757     |
| Indonesia | 1998           | FemaleLactAge35to39 | 418402     |
| Indonesia | 1998           | FemaleLactAge40to44 | 155959     |
| Indonesia | 1998           | FemaleLactAge45to49 | 56017      |
| Indonesia | 1998           | FemalePregAge15to19 | 379630     |
| Indonesia | 1998           | FemalePregAge20to24 | 921740     |
| Indonesia | 1998           | FemalePregAge25to29 | 904404     |
| Indonesia | 1998           | FemalePregAge30to34 | 624567     |
| Indonesia | 1998           | FemalePregAge35to39 | 313801     |
| Indonesia | 1998           | FemalePregAge40to44 | 116969     |
| Indonesia | 1998           | FemalePregAge45to49 | 42012      |
| Indonesia | 1998           | MaleAge0to4         | 10811443   |
| Indonesia | 1998           | MaleAge10to14       | 11102655   |
| Indonesia | 1998           | MaleAge15to19       | 10977960   |
| Indonesia | 1998           | MaleAge20to24       | 10169085   |
| Indonesia | 1998           | MaleAge25to29       | 9284858    |
| Indonesia | 1998           | MaleAge30to34       | 8267734    |
| Indonesia | 1998           | MaleAge35to39       | 7095225    |
| Indonesia | 1998           | MaleAge40to44       | 5734300    |
| Indonesia | 1998           | MaleAge45to49       | 4219960    |
| Indonesia | 1998           | MaleAge50to54       | 3319092    |
| Indonesia | 1998           | MaleAge55to59       | 3004790    |
| Indonesia | 1998           | MaleAge5to9         | 10911072   |
| Indonesia | 1998           | MaleAge60to64       | 2485368    |
| Indonesia | 1998           | MaleAge65to69       | 1817760    |
| Indonesia | 1998           | MaleAge70to74       | 1186077    |
| Indonesia | 1998           | MaleAge75to79       | 645848     |
| Indonesia | 1998           | MaleAge80to84       | 306702     |

Dietary calcium and zinc deficiency risks are decreasing but remain prevalent

| Country   | Reference year | Age/gender group    | Population |
|-----------|----------------|---------------------|------------|
| Indonesia | 1998           | MaleAge85to89       | 115185     |
| Indonesia | 1998           | MaleAge90to94       | 24378      |
| Indonesia | 1998           | MaleAge95to99       | 2916       |
| Indonesia | 1998           | MaleAgeAbove100     | 103        |
| Indonesia | 1999           | FemaleAge0to4       | 10331281   |
| Indonesia | 1999           | FemaleAge10to14     | 10705265   |
| Indonesia | 1999           | FemaleAge15to19     | 9904331    |
| Indonesia | 1999           | FemaleAge20to24     | 7974427    |
| Indonesia | 1999           | FemaleAge25to29     | 7238608    |
| Indonesia | 1999           | FemaleAge30to34     | 6947453    |
| Indonesia | 1999           | FemaleAge35to39     | 6480239    |
| Indonesia | 1999           | FemaleAge40to44     | 5666319    |
| Indonesia | 1999           | FemaleAge45to49     | 4384491    |
| Indonesia | 1999           | FemaleAge50to54     | 3667207    |
| Indonesia | 1999           | FemaleAge55to59     | 3380575    |
| Indonesia | 1999           | FemaleAge5to9       | 10549798   |
| Indonesia | 1999           | FemaleAge60to64     | 2880024    |
| Indonesia | 1999           | FemaleAge65to69     | 2185644    |
| Indonesia | 1999           | FemaleAge70to74     | 1474105    |
| Indonesia | 1999           | FemaleAge75to79     | 841952     |
| Indonesia | 1999           | FemaleAge80to84     | 438816     |
| Indonesia | 1999           | FemaleAge85to89     | 177581     |
| Indonesia | 1999           | FemaleAge90to94     | 43020      |
| Indonesia | 1999           | FemaleAge95to99     | 6128       |
| Indonesia | 1999           | FemaleAgeAbove100   | 301        |
| Indonesia | 1999           | FemaleLactAge15to19 | 506174     |
| Indonesia | 1999           | FemaleLactAge20to24 | 1228987    |
| Indonesia | 1999           | FemaleLactAge25to29 | 1205872    |
| Indonesia | 1999           | FemaleLactAge30to34 | 832757     |
| Indonesia | 1999           | FemaleLactAge35to39 | 418402     |
| Indonesia | 1999           | FemaleLactAge40to44 | 155959     |
| Indonesia | 1999           | FemaleLactAge45to49 | 56017      |
| Indonesia | 1999           | FemalePregAge15to19 | 379630     |
| Indonesia | 1999           | FemalePregAge20to24 | 921740     |
| Indonesia | 1999           | FemalePregAge25to29 | 904404     |
| Indonesia | 1999           | FemalePregAge30to34 | 624567     |
| Indonesia | 1999           | FemalePregAge35to39 | 313801     |
| Indonesia | 1999           | FemalePregAge40to44 | 116969     |
| Indonesia | 1999           | FemalePregAge45to49 | 42012      |
| Indonesia | 1999           | MaleAge0to4         | 10721475   |
| Indonesia | 1999           | MaleAge10to14       | 11039374   |
| Indonesia | 1999           | MaleAge15to19       | 11082392   |
| Indonesia | 1999           | MaleAge20to24       | 10313142   |
| Indonesia | 1999           | MaleAge25to29       | 9435088    |
| Indonesia | 1999           | MaleAge30to34       | 8467365    |
| Indonesia | 1999           | MaleAge35to39       | 7304222    |
| Indonesia | 1999           | MaleAge40to44       | 6017548    |
| Indonesia | 1999           | MaleAge45to49       | 4475476    |
| Indonesia | 1999           | MaleAge50to54       | 3377172    |
| Indonesia | 1999           | MaleAge55to59       | 3032267    |
| Indonesia | 1999           | MaleAge5to9         | 10906287   |
| Indonesia | 1999           | MaleAge60to64       | 2551084    |
| Indonesia | 1999           | MaleAge65to69       | 1875833    |
| Indonesia | 1999           | MaleAge70to74       | 1239234    |
| Indonesia | 1999           | MaleAge75to79       | 671557     |
| Indonesia | 1999           | MaleAge80to84       | 310386     |
| Indonesia | 1999           | MaleAge85to89       | 114652     |
| Indonesia | 1999           | MaleAge90to94       | 24205      |
| Indonesia | 1999           | MaleAge95to99       | 3110       |
| Indonesia | 1999           | MaleAgeAbove100     | 107        |
| Iran      | 1992           | FemaleAge0to4       | 4272889    |
| Iran      | 1992           | FemaleAge10to14     | 3852168    |
| Iran      | 1992           | FemaleAge15to19     | 2599300    |
| Iran      | 1992           | FemaleAge20to24     | 1638763    |
| Iran      | 1992           | FemaleAge25to29     | 1397083    |
| Iran      | 1992           | FemaleAge30to34     | 1310851    |
| Iran      | 1992           | FemaleAge35to39     | 1264180    |
| Iran      | 1992           | FemaleAge40to44     | 1064250    |
| Iran      | 1992           | FemaleAge45to49     | 810487     |
| Iran      | 1992           | FemaleAge50to54     | 733310     |
| Iran      | 1992           | FemaleAge55to59     | 690951     |
| Iran      | 1992           | FemaleAge5to9       | 4502618    |
| Iran      | 1992           | FemaleAge60to64     | 578003     |
| Iran      | 1992           | FemaleAge65to69     | 454580     |
| Iran      | 1992           | FemaleAge70to74     | 285060     |
| Iran      | 1992           | FemaleAge75to79     | 138714     |
| Iran      | 1992           | FemaleAge80to84     | 68807      |
| Iran      | 1992           | FemaleAge85to89     | 28147      |
| Iran      | 1992           | FemaleAge90to94     | 6663       |
| Iran      | 1992           | FemaleAge95to99     | 805        |
| Iran      | 1992           | FemaleAgeAbove100   | 42         |
| Iran      | 1992           | FemaleLactAge15to19 | 234685     |
| Iran      | 1992           | FemaleLactAge20to24 | 456043     |
| Iran      | 1992           | FemaleLactAge25to29 | 400481     |
| Iran      | 1992           | FemaleLactAge30to34 | 288815     |
| Iran      | 1992           | FemaleLactAge35to39 | 174710     |
| Iran      | 1992           | FemaleLactAge40to44 | 69322      |
| Iran      | 1992           | FemaleLactAge45to49 | 13389      |

Dietary calcium and zinc deficiency risks are decreasing but remain prevalent

| Country | Reference year | Age/gender group    | Population |
|---------|----------------|---------------------|------------|
| Iran    | 1992           | FemalePregAge15to19 | 176014     |
| Iran    | 1992           | FemalePregAge20to24 | 342032     |
| Iran    | 1992           | FemalePregAge25to29 | 300361     |
| Iran    | 1992           | FemalePregAge30to34 | 216611     |
| Iran    | 1992           | FemalePregAge35to39 | 131033     |
| Iran    | 1992           | FemalePregAge40to44 | 51991      |
| Iran    | 1992           | FemalePregAge45to49 | 10042      |
| Iran    | 1992           | MaleAge0to4         | 4476923    |
| Iran    | 1992           | MaleAge10to14       | 4052266    |
| Iran    | 1992           | MaleAge15to19       | 3138373    |
| Iran    | 1992           | MaleAge20to24       | 2488856    |
| Iran    | 1992           | MaleAge25to29       | 2110741    |
| Iran    | 1992           | MaleAge30to34       | 1861541    |
| Iran    | 1992           | MaleAge35to39       | 1648645    |
| Iran    | 1992           | MaleAge40to44       | 1232860    |
| Iran    | 1992           | MaleAge45to49       | 862200     |
| Iran    | 1992           | MaleAge50to54       | 758088     |
| Iran    | 1992           | MaleAge55to59       | 721535     |
| Iran    | 1992           | MaleAge5to9         | 4722401    |
| Iran    | 1992           | MaleAge60to64       | 613418     |
| Iran    | 1992           | MaleAge65to69       | 486304     |
| Iran    | 1992           | MaleAge70to74       | 306099     |
| Iran    | 1992           | MaleAge75to79       | 151721     |
| Iran    | 1992           | MaleAge80to84       | 73659      |
| Iran    | 1992           | MaleAge85to89       | 29459      |
| Iran    | 1992           | MaleAge90to94       | 7908       |
| Iran    | 1992           | MaleAge95to99       | 1150       |
| Iran    | 1992           | MaleAgeAbov e100    | 111        |
| Iran    | 1993           | FemaleAge0to4       | 4076558    |
| Iran    | 1993           | FemaleAge10to14     | 4013786    |
| Iran    | 1993           | FemaleAge15to19     | 2698211    |
| Iran    | 1993           | FemaleAge20to24     | 1685271    |
| Iran    | 1993           | FemaleAge25to29     | 1430566    |
| Iran    | 1993           | FemaleAge30to34     | 1351098    |
| Iran    | 1993           | FemaleAge35to39     | 1291213    |
| Iran    | 1993           | FemaleAge40to44     | 1144427    |
| Iran    | 1993           | FemaleAge45to49     | 843721     |
| Iran    | 1993           | FemaleAge50to54     | 721930     |
| Iran    | 1993           | FemaleAge55to59     | 691742     |
| Iran    | 1993           | FemaleAge5to9       | 4502530    |
| Iran    | 1993           | FemaleAge60to64     | 590459     |
| Iran    | 1993           | FemaleAge65to69     | 459913     |
| Iran    | 1993           | FemaleAge70to74     | 307780     |
| Iran    | 1993           | FemaleAge75to79     | 145351     |
| Iran    | 1993           | FemaleAge80to84     | 68664      |
| Iran    | 1993           | FemaleAge85to89     | 29394      |
| Iran    | 1993           | FemaleAge90to94     | 7046       |
| Iran    | 1993           | FemaleAge95to99     | 957        |
| Iran    | 1993           | FemaleAgeAbov e100  | 44         |
| Iran    | 1993           | FemaleLactAge15to19 | 234685     |
| Iran    | 1993           | FemaleLactAge20to24 | 456043     |
| Iran    | 1993           | FemaleLactAge25to29 | 400481     |
| Iran    | 1993           | FemaleLactAge30to34 | 288815     |
| Iran    | 1993           | FemaleLactAge35to39 | 174710     |
| Iran    | 1993           | FemaleLactAge40to44 | 69322      |
| Iran    | 1993           | FemaleLactAge45to49 | 13389      |
| Iran    | 1993           | FemalePregAge15to19 | 176014     |
| Iran    | 1993           | FemalePregAge20to24 | 342032     |
| Iran    | 1993           | FemalePregAge25to29 | 300361     |
| Iran    | 1993           | FemalePregAge30to34 | 216611     |
| Iran    | 1993           | FemalePregAge35to39 | 131033     |
| Iran    | 1993           | FemalePregAge40to44 | 51991      |
| Iran    | 1993           | FemalePregAge45to49 | 10042      |
| Iran    | 1993           | MaleAge0to4         | 4262273    |
| Iran    | 1993           | MaleAge10to14       | 4214296    |
| Iran    | 1993           | MaleAge15to19       | 3227172    |
| Iran    | 1993           | MaleAge20to24       | 2527296    |
| Iran    | 1993           | MaleAge25to29       | 2145068    |
| Iran    | 1993           | MaleAge30to34       | 1890999    |
| Iran    | 1993           | MaleAge35to39       | 1674109    |
| Iran    | 1993           | MaleAge40to44       | 1320501    |
| Iran    | 1993           | MaleAge45to49       | 888973     |
| Iran    | 1993           | MaleAge50to54       | 746067     |
| Iran    | 1993           | MaleAge55to59       | 719477     |
| Iran    | 1993           | MaleAge5to9         | 4718034    |
| Iran    | 1993           | MaleAge60to64       | 628019     |
| Iran    | 1993           | MaleAge65to69       | 492557     |
| Iran    | 1993           | MaleAge70to74       | 330058     |
| Iran    | 1993           | MaleAge75to79       | 156664     |
| Iran    | 1993           | MaleAge80to84       | 74761      |
| Iran    | 1993           | MaleAge85to89       | 30185      |
| Iran    | 1993           | MaleAge90to94       | 8371       |
| Iran    | 1993           | MaleAge95to99       | 1252       |
| Iran    | 1993           | MaleAgeAbov e100    | 109        |
| Iran    | 1994           | FemaleAge0to4       | 3878629    |
| Iran    | 1994           | FemaleAge10to14     | 4171911    |
| Iran    | 1994           | FemaleAge15to19     | 2821389    |
| Iran    | 1994           | FemaleAge20to24     | 1737121    |

Dietary calcium and zinc deficiency risks are decreasing but remain prevalent

| Country | Reference year | Age/gender group    | Population |
|---------|----------------|---------------------|------------|
| Iran    | 1994           | FemaleAge25to29     | 1467746    |
| Iran    | 1994           | FemaleAge30to34     | 1392690    |
| Iran    | 1994           | FemaleAge35to39     | 1318996    |
| Iran    | 1994           | FemaleAge40to44     | 1220804    |
| Iran    | 1994           | FemaleAge45to49     | 888156     |
| Iran    | 1994           | FemaleAge50to54     | 717937     |
| Iran    | 1994           | FemaleAge55to59     | 690198     |
| Iran    | 1994           | FemaleAge5to9       | 4460572    |
| Iran    | 1994           | FemaleAge60to64     | 602220     |
| Iran    | 1994           | FemaleAge65to69     | 467314     |
| Iran    | 1994           | FemaleAge70to74     | 328257     |
| Iran    | 1994           | FemaleAge75to79     | 154696     |
| Iran    | 1994           | FemaleAge80to84     | 68978      |
| Iran    | 1994           | FemaleAge85to89     | 29273      |
| Iran    | 1994           | FemaleAge90to94     | 7051       |
| Iran    | 1994           | FemaleAge95to99     | 1015       |
| Iran    | 1994           | FemaleAgeAbove100   | 47         |
| Iran    | 1994           | FemaleLactAge15to19 | 234685     |
| Iran    | 1994           | FemaleLactAge20to24 | 456043     |
| Iran    | 1994           | FemaleLactAge25to29 | 400481     |
| Iran    | 1994           | FemaleLactAge30to34 | 288815     |
| Iran    | 1994           | FemaleLactAge35to39 | 174710     |
| Iran    | 1994           | FemaleLactAge40to44 | 69322      |
| Iran    | 1994           | FemaleLactAge45to49 | 13389      |
| Iran    | 1994           | FemalePregAge15to19 | 176014     |
| Iran    | 1994           | FemalePregAge20to24 | 342032     |
| Iran    | 1994           | FemalePregAge25to29 | 300361     |
| Iran    | 1994           | FemalePregAge30to34 | 216611     |
| Iran    | 1994           | FemalePregAge35to39 | 131033     |
| Iran    | 1994           | FemalePregAge40to44 | 51991      |
| Iran    | 1994           | FemalePregAge45to49 | 10042      |
| Iran    | 1994           | MaleAge0to4         | 4046282    |
| Iran    | 1994           | MaleAge10to14       | 4379403    |
| Iran    | 1994           | MaleAge15to19       | 3344711    |
| Iran    | 1994           | MaleAge20to24       | 2565297    |
| Iran    | 1994           | MaleAge25to29       | 2181524    |
| Iran    | 1994           | MaleAge30to34       | 1923277    |
| Iran    | 1994           | MaleAge35to39       | 1699403    |
| Iran    | 1994           | MaleAge40to44       | 1404523    |
| Iran    | 1994           | MaleAge45to49       | 929411     |
| Iran    | 1994           | MaleAge50to54       | 739632     |
| Iran    | 1994           | MaleAge55to59       | 715089     |
| Iran    | 1994           | MaleAge5to9         | 4669009    |
| Iran    | 1994           | MaleAge60to64       | 641244     |
| Iran    | 1994           | MaleAge65to69       | 501734     |
| Iran    | 1994           | MaleAge70to74       | 352330     |
| Iran    | 1994           | MaleAge75to79       | 164533     |
| Iran    | 1994           | MaleAge80to84       | 75559      |
| Iran    | 1994           | MaleAge85to89       | 29936      |
| Iran    | 1994           | MaleAge90to94       | 8284       |
| Iran    | 1994           | MaleAge95to99       | 1291       |
| Iran    | 1994           | MaleAgeAbove100     | 107        |
| Iran    | 1995           | FemaleAge0to4       | 3706055    |
| Iran    | 1995           | FemaleAge10to14     | 4309586    |
| Iran    | 1995           | FemaleAge15to19     | 2975106    |
| Iran    | 1995           | FemaleAge20to24     | 1805756    |
| Iran    | 1995           | FemaleAge25to29     | 1509918    |
| Iran    | 1995           | FemaleAge30to34     | 1435700    |
| Iran    | 1995           | FemaleAge35to39     | 1355330    |
| Iran    | 1995           | FemaleAge40to44     | 1288267    |
| Iran    | 1995           | FemaleAge45to49     | 945454     |
| Iran    | 1995           | FemaleAge50to54     | 725698     |
| Iran    | 1995           | FemaleAge55to59     | 686965     |
| Iran    | 1995           | FemaleAge5to9       | 4391982    |
| Iran    | 1995           | FemaleAge60to64     | 612705     |
| Iran    | 1995           | FemaleAge65to69     | 478928     |
| Iran    | 1995           | FemaleAge70to74     | 345406     |
| Iran    | 1995           | FemaleAge75to79     | 167639     |
| Iran    | 1995           | FemaleAge80to84     | 70254      |
| Iran    | 1995           | FemaleAge85to89     | 27806      |
| Iran    | 1995           | FemaleAge90to94     | 6521       |
| Iran    | 1995           | FemaleAge95to99     | 803        |
| Iran    | 1995           | FemaleAgeAbove100   | 51         |
| Iran    | 1995           | FemaleLactAge15to19 | 234685     |
| Iran    | 1995           | FemaleLactAge20to24 | 456043     |
| Iran    | 1995           | FemaleLactAge25to29 | 400481     |
| Iran    | 1995           | FemaleLactAge30to34 | 288815     |
| Iran    | 1995           | FemaleLactAge35to39 | 174710     |
| Iran    | 1995           | FemaleLactAge40to44 | 69322      |
| Iran    | 1995           | FemaleLactAge45to49 | 13389      |
| Iran    | 1995           | FemalePregAge15to19 | 176014     |
| Iran    | 1995           | FemalePregAge20to24 | 342032     |
| Iran    | 1995           | FemalePregAge25to29 | 300361     |
| Iran    | 1995           | FemalePregAge30to34 | 216611     |
| Iran    | 1995           | FemalePregAge35to39 | 131033     |
| Iran    | 1995           | FemalePregAge40to44 | 51991      |
| Iran    | 1995           | FemalePregAge45to49 | 10042      |
| Iran    | 1995           | MaleAge0to4         | 3861968    |

Dietary calcium and zinc deficiency risks are decreasing but remain prevalent

| Country | Reference year | Age/gender group    | Population |
|---------|----------------|---------------------|------------|
| Iran    | 1995           | MaleAge10to14       | 4527408    |
| Iran    | 1995           | MaleAge15to19       | 3499360    |
| Iran    | 1995           | MaleAge20to24       | 2618561    |
| Iran    | 1995           | MaleAge25to29       | 2218538    |
| Iran    | 1995           | MaleAge30to34       | 1959535    |
| Iran    | 1995           | MaleAge35to39       | 1732363    |
| Iran    | 1995           | MaleAge40to44       | 1478605    |
| Iran    | 1995           | MaleAge45to49       | 986804     |
| Iran    | 1995           | MaleAge50to54       | 743134     |
| Iran    | 1995           | MaleAge55to59       | 709303     |
| Iran    | 1995           | MaleAge5to9         | 4590844    |
| Iran    | 1995           | MaleAge60to64       | 652164     |
| Iran    | 1995           | MaleAge65to69       | 516024     |
| Iran    | 1995           | MaleAge70to74       | 371700     |
| Iran    | 1995           | MaleAge75to79       | 176854     |
| Iran    | 1995           | MaleAge80to84       | 76372      |
| Iran    | 1995           | MaleAge85to89       | 28691      |
| Iran    | 1995           | MaleAge90to94       | 7499       |
| Iran    | 1995           | MaleAge95to99       | 1061       |
| Iran    | 1995           | MaleAgeAbove100     | 106        |
| Iran    | 1996           | FemaleAge0to4       | 3509763    |
| Iran    | 1996           | FemaleAge10to14     | 4394314    |
| Iran    | 1996           | FemaleAge15to19     | 3255559    |
| Iran    | 1996           | FemaleAge20to24     | 2019045    |
| Iran    | 1996           | FemaleAge25to29     | 1674449    |
| Iran    | 1996           | FemaleAge30to34     | 1616507    |
| Iran    | 1996           | FemaleAge35to39     | 1516960    |
| Iran    | 1996           | FemaleAge40to44     | 1398779    |
| Iran    | 1996           | FemaleAge45to49     | 1031198    |
| Iran    | 1996           | FemaleAge50to54     | 750391     |
| Iran    | 1996           | FemaleAge55to59     | 685107     |
| Iran    | 1996           | FemaleAge5to9       | 4303869    |
| Iran    | 1996           | FemaleAge60to64     | 621212     |
| Iran    | 1996           | FemaleAge65to69     | 490418     |
| Iran    | 1996           | FemaleAge70to74     | 355791     |
| Iran    | 1996           | FemaleAge75to79     | 183589     |
| Iran    | 1996           | FemaleAge80to84     | 75390      |
| Iran    | 1996           | FemaleAge85to89     | 29300      |
| Iran    | 1996           | FemaleAge90to94     | 7843       |
| Iran    | 1996           | FemaleAge95to99     | 918        |
| Iran    | 1996           | FemaleAgeAbove100   | 56         |
| Iran    | 1996           | FemaleLactAge15to19 | 185269     |
| Iran    | 1996           | FemaleLactAge20to24 | 408335     |
| Iran    | 1996           | FemaleLactAge25to29 | 341288     |
| Iran    | 1996           | FemaleLactAge30to34 | 214059     |
| Iran    | 1996           | FemaleLactAge35to39 | 110293     |
| Iran    | 1996           | FemaleLactAge40to44 | 41451      |
| Iran    | 1996           | FemaleLactAge45to49 | 8548       |
| Iran    | 1996           | FemalePregAge15to19 | 138952     |
| Iran    | 1996           | FemalePregAge20to24 | 306251     |
| Iran    | 1996           | FemalePregAge25to29 | 255966     |
| Iran    | 1996           | FemalePregAge30to34 | 160544     |
| Iran    | 1996           | FemalePregAge35to39 | 82719      |
| Iran    | 1996           | FemalePregAge40to44 | 31088      |
| Iran    | 1996           | FemalePregAge45to49 | 6411       |
| Iran    | 1996           | MaleAge0to4         | 3656418    |
| Iran    | 1996           | MaleAge10to14       | 4611462    |
| Iran    | 1996           | MaleAge15to19       | 3713577    |
| Iran    | 1996           | MaleAge20to24       | 2759525    |
| Iran    | 1996           | MaleAge25to29       | 2274123    |
| Iran    | 1996           | MaleAge30to34       | 1998059    |
| Iran    | 1996           | MaleAge35to39       | 1767585    |
| Iran    | 1996           | MaleAge40to44       | 1541607    |
| Iran    | 1996           | MaleAge45to49       | 1068875    |
| Iran    | 1996           | MaleAge50to54       | 764570     |
| Iran    | 1996           | MaleAge55to59       | 703329     |
| Iran    | 1996           | MaleAge5to9         | 4487827    |
| Iran    | 1996           | MaleAge60to64       | 657029     |
| Iran    | 1996           | MaleAge65to69       | 526916     |
| Iran    | 1996           | MaleAge70to74       | 382586     |
| Iran    | 1996           | MaleAge75to79       | 194130     |
| Iran    | 1996           | MaleAge80to84       | 81092      |
| Iran    | 1996           | MaleAge85to89       | 30655      |
| Iran    | 1996           | MaleAge90to94       | 8591       |
| Iran    | 1996           | MaleAge95to99       | 1191       |
| Iran    | 1996           | MaleAgeAbove100     | 106        |
| Iran    | 1997           | FemaleAge0to4       | 3366948    |
| Iran    | 1997           | FemaleAge10to14     | 4445046    |
| Iran    | 1997           | FemaleAge15to19     | 3462886    |
| Iran    | 1997           | FemaleAge20to24     | 2168118    |
| Iran    | 1997           | FemaleAge25to29     | 1745634    |
| Iran    | 1997           | FemaleAge30to34     | 1669656    |
| Iran    | 1997           | FemaleAge35to39     | 1573531    |
| Iran    | 1997           | FemaleAge40to44     | 1449811    |
| Iran    | 1997           | FemaleAge45to49     | 1122083    |
| Iran    | 1997           | FemaleAge50to54     | 786140     |
| Iran    | 1997           | FemaleAge55to59     | 682973     |
| Iran    | 1997           | FemaleAge5to9       | 4186050    |

Dietary calcium and zinc deficiency risks are decreasing but remain prevalent

| Country | Reference year | Age/gender group    | Population |
|---------|----------------|---------------------|------------|
| Iran    | 1997           | FemaleAge60to64     | 630690     |
| Iran    | 1997           | FemaleAge65to69     | 505581     |
| Iran    | 1997           | FemaleAge70to74     | 364200     |
| Iran    | 1997           | FemaleAge75to79     | 201393     |
| Iran    | 1997           | FemaleAge80to84     | 80164      |
| Iran    | 1997           | FemaleAge85to89     | 30291      |
| Iran    | 1997           | FemaleAge90to94     | 8994       |
| Iran    | 1997           | FemaleAge95to99     | 1095       |
| Iran    | 1997           | FemaleAgeAbove100   | 62         |
| Iran    | 1997           | FemaleLactAge15to19 | 185269     |
| Iran    | 1997           | FemaleLactAge20to24 | 408335     |
| Iran    | 1997           | FemaleLactAge25to29 | 341288     |
| Iran    | 1997           | FemaleLactAge30to34 | 214059     |
| Iran    | 1997           | FemaleLactAge35to39 | 110293     |
| Iran    | 1997           | FemaleLactAge40to44 | 41451      |
| Iran    | 1997           | FemaleLactAge45to49 | 8548       |
| Iran    | 1997           | FemalePregAge15to19 | 138952     |
| Iran    | 1997           | FemalePregAge20to24 | 306251     |
| Iran    | 1997           | FemalePregAge25to29 | 255966     |
| Iran    | 1997           | FemalePregAge30to34 | 160544     |
| Iran    | 1997           | FemalePregAge35to39 | 82719      |
| Iran    | 1997           | FemalePregAge40to44 | 31088      |
| Iran    | 1997           | FemalePregAge45to49 | 6411       |
| Iran    | 1997           | MaleAge0to4         | 3506747    |
| Iran    | 1997           | MaleAge10to14       | 4656490    |
| Iran    | 1997           | MaleAge15to19       | 3941726    |
| Iran    | 1997           | MaleAge20to24       | 2924709    |
| Iran    | 1997           | MaleAge25to29       | 2341171    |
| Iran    | 1997           | MaleAge30to34       | 2043788    |
| Iran    | 1997           | MaleAge35to39       | 1807760    |
| Iran    | 1997           | MaleAge40to44       | 1591352    |
| Iran    | 1997           | MaleAge45to49       | 1167473    |
| Iran    | 1997           | MaleAge50to54       | 796417     |
| Iran    | 1997           | MaleAge55to59       | 698444     |
| Iran    | 1997           | MaleAge5to9         | 4357047    |
| Iran    | 1997           | MaleAge60to64       | 661624     |
| Iran    | 1997           | MaleAge65to69       | 542113     |
| Iran    | 1997           | MaleAge70to74       | 391080     |
| Iran    | 1997           | MaleAge75to79       | 213680     |
| Iran    | 1997           | MaleAge80to84       | 85160      |
| Iran    | 1997           | MaleAge85to89       | 32221      |
| Iran    | 1997           | MaleAge90to94       | 9457       |
| Iran    | 1997           | MaleAge95to99       | 1443       |
| Iran    | 1997           | MaleAgeAbove100     | 107        |
| Iran    | 1998           | FemaleAge0to4       | 3267952    |
| Iran    | 1998           | FemaleAge10to14     | 4462903    |
| Iran    | 1998           | FemaleAge15to19     | 3665630    |
| Iran    | 1998           | FemaleAge20to24     | 2332725    |
| Iran    | 1998           | FemaleAge25to29     | 1830307    |
| Iran    | 1998           | FemaleAge30to34     | 1725517    |
| Iran    | 1998           | FemaleAge35to39     | 1634241    |
| Iran    | 1998           | FemaleAge40to44     | 1493966    |
| Iran    | 1998           | FemaleAge45to49     | 1218579    |
| Iran    | 1998           | FemaleAge50to54     | 833037     |
| Iran    | 1998           | FemaleAge55to59     | 683474     |
| Iran    | 1998           | FemaleAge5to9       | 4037491    |
| Iran    | 1998           | FemaleAge60to64     | 640000     |
| Iran    | 1998           | FemaleAge65to69     | 522625     |
| Iran    | 1998           | FemaleAge70to74     | 372917     |
| Iran    | 1998           | FemaleAge75to79     | 218932     |
| Iran    | 1998           | FemaleAge80to84     | 85155      |
| Iran    | 1998           | FemaleAge85to89     | 31032      |
| Iran    | 1998           | FemaleAge90to94     | 9633       |
| Iran    | 1998           | FemaleAge95to99     | 1307       |
| Iran    | 1998           | FemaleAgeAbove100   | 69         |
| Iran    | 1998           | FemaleLactAge15to19 | 185269     |
| Iran    | 1998           | FemaleLactAge20to24 | 408335     |
| Iran    | 1998           | FemaleLactAge25to29 | 341288     |
| Iran    | 1998           | FemaleLactAge30to34 | 214059     |
| Iran    | 1998           | FemaleLactAge35to39 | 110293     |
| Iran    | 1998           | FemaleLactAge40to44 | 41451      |
| Iran    | 1998           | FemaleLactAge45to49 | 8548       |
| Iran    | 1998           | FemalePregAge15to19 | 138952     |
| Iran    | 1998           | FemalePregAge20to24 | 306251     |
| Iran    | 1998           | FemalePregAge25to29 | 255966     |
| Iran    | 1998           | FemalePregAge30to34 | 160544     |
| Iran    | 1998           | FemalePregAge35to39 | 82719      |
| Iran    | 1998           | FemalePregAge40to44 | 31088      |
| Iran    | 1998           | FemalePregAge45to49 | 6411       |
| Iran    | 1998           | MaleAge0to4         | 3405209    |
| Iran    | 1998           | MaleAge10to14       | 4666838    |
| Iran    | 1998           | MaleAge15to19       | 4165084    |
| Iran    | 1998           | MaleAge20to24       | 3109989    |
| Iran    | 1998           | MaleAge25to29       | 2425478    |
| Iran    | 1998           | MaleAge30to34       | 2096009    |
| Iran    | 1998           | MaleAge35to39       | 1851693    |
| Iran    | 1998           | MaleAge40to44       | 1632023    |
| Iran    | 1998           | MaleAge45to49       | 1273284    |

Dietary calcium and zinc deficiency risks are decreasing but remain prevalent

| Country | Reference year | Age/gender group    | Population |
|---------|----------------|---------------------|------------|
| Iran    | 1998           | MaleAge50to54       | 840128     |
| Iran    | 1998           | MaleAge55to59       | 697435     |
| Iran    | 1998           | MaleAge5to9         | 4198987    |
| Iran    | 1998           | MaleAge60to64       | 665329     |
| Iran    | 1998           | MaleAge65to69       | 559684     |
| Iran    | 1998           | MaleAge70to74       | 399872     |
| Iran    | 1998           | MaleAge75to79       | 232989     |
| Iran    | 1998           | MaleAge80to84       | 89634      |
| Iran    | 1998           | MaleAge85to89       | 33363      |
| Iran    | 1998           | MaleAge90to94       | 9895       |
| Iran    | 1998           | MaleAge95to99       | 1697       |
| Iran    | 1998           | MaleAgeAbov e100    | 109        |
| Iran    | 1999           | FemaleAge0to4       | 3184952    |
| Iran    | 1999           | FemaleAge10to14     | 4446320    |
| Iran    | 1999           | FemaleAge15to19     | 3839227    |
| Iran    | 1999           | FemaleAge20to24     | 2508946    |
| Iran    | 1999           | FemaleAge25to29     | 1931685    |
| Iran    | 1999           | FemaleAge30to34     | 1784289    |
| Iran    | 1999           | FemaleAge35to39     | 1693581    |
| Iran    | 1999           | FemaleAge40to44     | 1538036    |
| Iran    | 1999           | FemaleAge45to49     | 1308752    |
| Iran    | 1999           | FemaleAge50to54     | 891032     |
| Iran    | 1999           | FemaleAge55to59     | 691221     |
| Iran    | 1999           | FemaleAge5to9       | 3867838    |
| Iran    | 1999           | FemaleAge60to64     | 647483     |
| Iran    | 1999           | FemaleAge65to69     | 539209     |
| Iran    | 1999           | FemaleAge70to74     | 384097     |
| Iran    | 1999           | FemaleAge75to79     | 233914     |
| Iran    | 1999           | FemaleAge80to84     | 91303      |
| Iran    | 1999           | FemaleAge85to89     | 31686      |
| Iran    | 1999           | FemaleAge90to94     | 9471       |
| Iran    | 1999           | FemaleAge95to99     | 1431       |
| Iran    | 1999           | FemaleAgeAbov e100  | 77         |
| Iran    | 1999           | FemaleLactAge15to19 | 185269     |
| Iran    | 1999           | FemaleLactAge20to24 | 408335     |
| Iran    | 1999           | FemaleLactAge25to29 | 341288     |
| Iran    | 1999           | FemaleLactAge30to34 | 214059     |
| Iran    | 1999           | FemaleLactAge35to39 | 110293     |
| Iran    | 1999           | FemaleLactAge40to44 | 41451      |
| Iran    | 1999           | FemaleLactAge45to49 | 8548       |
| Iran    | 1999           | FemalePregAge15to19 | 138952     |
| Iran    | 1999           | FemalePregAge20to24 | 306251     |
| Iran    | 1999           | FemalePregAge25to29 | 255966     |
| Iran    | 1999           | FemalePregAge30to34 | 160544     |
| Iran    | 1999           | FemalePregAge35to39 | 82719      |
| Iran    | 1999           | FemalePregAge40to44 | 31088      |
| Iran    | 1999           | FemalePregAge45to49 | 6411       |
| Iran    | 1999           | MaleAge0to4         | 3324052    |
| Iran    | 1999           | MaleAge10to14       | 4645612    |
| Iran    | 1999           | MaleAge15to19       | 4358556    |
| Iran    | 1999           | MaleAge20to24       | 3311372    |
| Iran    | 1999           | MaleAge25to29       | 2533720    |
| Iran    | 1999           | MaleAge30to34       | 2154411    |
| Iran    | 1999           | MaleAge35to39       | 1897452    |
| Iran    | 1999           | MaleAge40to44       | 1671128    |
| Iran    | 1999           | MaleAge45to49       | 1372503    |
| Iran    | 1999           | MaleAge50to54       | 897931     |
| Iran    | 1999           | MaleAge55to59       | 704354     |
| Iran    | 1999           | MaleAge5to9         | 4024696    |
| Iran    | 1999           | MaleAge60to64       | 667818     |
| Iran    | 1999           | MaleAge65to69       | 576744     |
| Iran    | 1999           | MaleAge70to74       | 411663     |
| Iran    | 1999           | MaleAge75to79       | 249498     |
| Iran    | 1999           | MaleAge80to84       | 95880      |
| Iran    | 1999           | MaleAge85to89       | 34052      |
| Iran    | 1999           | MaleAge90to94       | 9710       |
| Iran    | 1999           | MaleAge95to99       | 1763       |
| Iran    | 1999           | MaleAgeAbov e100    | 113        |
| Iran    | 2000           | FemaleAge0to4       | 3086346    |
| Iran    | 2000           | FemaleAge10to14     | 4390659    |
| Iran    | 2000           | FemaleAge15to19     | 3969049    |
| Iran    | 2000           | FemaleAge20to24     | 2692780    |
| Iran    | 2000           | FemaleAge25to29     | 2050287    |
| Iran    | 2000           | FemaleAge30to34     | 1847548    |
| Iran    | 2000           | FemaleAge35to39     | 1748719    |
| Iran    | 2000           | FemaleAge40to44     | 1586262    |
| Iran    | 2000           | FemaleAge45to49     | 1385353    |
| Iran    | 2000           | FemaleAge50to54     | 959410     |
| Iran    | 2000           | FemaleAge55to59     | 709305     |
| Iran    | 2000           | FemaleAge5to9       | 3697556    |
| Iran    | 2000           | FemaleAge60to64     | 652524     |
| Iran    | 2000           | FemaleAge65to69     | 554129     |
| Iran    | 2000           | FemaleAge70to74     | 398368     |
| Iran    | 2000           | FemaleAge75to79     | 246002     |
| Iran    | 2000           | FemaleAge80to84     | 98968      |
| Iran    | 2000           | FemaleAge85to89     | 32183      |
| Iran    | 2000           | FemaleAge90to94     | 8459       |
| Iran    | 2000           | FemaleAge95to99     | 1215       |



Dietary calcium and zinc deficiency risks are decreasing but remain prevalent

| Country | Reference year | Age/gender group    | Population |
|---------|----------------|---------------------|------------|
| Iran    | 2000           | FemaleAgeAbove100   | 85         |
| Iran    | 2000           | FemaleLactAge15to19 | 185269     |
| Iran    | 2000           | FemaleLactAge20to24 | 408335     |
| Iran    | 2000           | FemaleLactAge25to29 | 341288     |
| Iran    | 2000           | FemaleLactAge30to34 | 214059     |
| Iran    | 2000           | FemaleLactAge35to39 | 110293     |
| Iran    | 2000           | FemaleLactAge40to44 | 41451      |
| Iran    | 2000           | FemaleLactAge45to49 | 8548       |
| Iran    | 2000           | FemalePregAge15to19 | 138952     |
| Iran    | 2000           | FemalePregAge20to24 | 306251     |
| Iran    | 2000           | FemalePregAge25to29 | 255966     |
| Iran    | 2000           | FemalePregAge30to34 | 160544     |
| Iran    | 2000           | FemalePregAge35to39 | 82719      |
| Iran    | 2000           | FemalePregAge40to44 | 31088      |
| Iran    | 2000           | FemalePregAge45to49 | 6411       |
| Iran    | 2000           | MaleAge0to4         | 3230628    |
| Iran    | 2000           | MaleAge10to14       | 4590776    |
| Iran    | 2000           | MaleAge15to19       | 4507532    |
| Iran    | 2000           | MaleAge20to24       | 3524861    |
| Iran    | 2000           | MaleAge25to29       | 2668147    |
| Iran    | 2000           | MaleAge30to34       | 2220611    |
| Iran    | 2000           | MaleAge35to39       | 1944553    |
| Iran    | 2000           | MaleAge40to44       | 1713562    |
| Iran    | 2000           | MaleAge45to49       | 1456755    |
| Iran    | 2000           | MaleAge50to54       | 970480     |
| Iran    | 2000           | MaleAge55to59       | 721895     |
| Iran    | 2000           | MaleAge5to9         | 3854534    |
| Iran    | 2000           | MaleAge60to64       | 669557     |
| Iran    | 2000           | MaleAge65to69       | 591518     |
| Iran    | 2000           | MaleAge70to74       | 427438     |
| Iran    | 2000           | MaleAge75to79       | 262929     |
| Iran    | 2000           | MaleAge80to84       | 104290     |
| Iran    | 2000           | MaleAge85to89       | 34291      |
| Iran    | 2000           | MaleAge90to94       | 8777       |
| Iran    | 2000           | MaleAge95to99       | 1417       |
| Iran    | 2000           | MaleAgeAbove100     | 118        |
| Iraq    | 1992           | FemaleAge0to4       | 1530415    |
| Iraq    | 1992           | FemaleAge10to14     | 1200888    |
| Iraq    | 1992           | FemaleAge15to19     | 926168     |
| Iraq    | 1992           | FemaleAge20to24     | 584377     |
| Iraq    | 1992           | FemaleAge25to29     | 347327     |
| Iraq    | 1992           | FemaleAge30to34     | 243675     |
| Iraq    | 1992           | FemaleAge35to39     | 296554     |
| Iraq    | 1992           | FemaleAge40to44     | 268794     |
| Iraq    | 1992           | FemaleAge45to49     | 240559     |
| Iraq    | 1992           | FemaleAge50to54     | 241487     |
| Iraq    | 1992           | FemaleAge55to59     | 202086     |
| Iraq    | 1992           | FemaleAge5to9       | 1342579    |
| Iraq    | 1992           | FemaleAge60to64     | 164937     |
| Iraq    | 1992           | FemaleAge65to69     | 132178     |
| Iraq    | 1992           | FemaleAge70to74     | 107129     |
| Iraq    | 1992           | FemaleAge75to79     | 75670      |
| Iraq    | 1992           | FemaleAge80to84     | 41480      |
| Iraq    | 1992           | FemaleAge85to89     | 16833      |
| Iraq    | 1992           | FemaleAge90to94     | 4285       |
| Iraq    | 1992           | FemaleAge95to99     | 479        |
| Iraq    | 1992           | FemaleAgeAbove100   | 22         |
| Iraq    | 1992           | FemaleLactAge15to19 | 72307      |
| Iraq    | 1992           | FemaleLactAge20to24 | 178269     |
| Iraq    | 1992           | FemaleLactAge25to29 | 185100     |
| Iraq    | 1992           | FemaleLactAge30to34 | 131658     |
| Iraq    | 1992           | FemaleLactAge35to39 | 89023      |
| Iraq    | 1992           | FemaleLactAge40to44 | 38136      |
| Iraq    | 1992           | FemaleLactAge45to49 | 8634       |
| Iraq    | 1992           | FemalePregAge15to19 | 54230      |
| Iraq    | 1992           | FemalePregAge20to24 | 133702     |
| Iraq    | 1992           | FemalePregAge25to29 | 138825     |
| Iraq    | 1992           | FemalePregAge30to34 | 98744      |
| Iraq    | 1992           | FemalePregAge35to39 | 66767      |
| Iraq    | 1992           | FemalePregAge40to44 | 28602      |
| Iraq    | 1992           | FemalePregAge45to49 | 6476       |
| Iraq    | 1992           | MaleAge0to4         | 1621247    |
| Iraq    | 1992           | MaleAge10to14       | 1266804    |
| Iraq    | 1992           | MaleAge15to19       | 1104171    |
| Iraq    | 1992           | MaleAge20to24       | 909989     |
| Iraq    | 1992           | MaleAge25to29       | 642236     |
| Iraq    | 1992           | MaleAge30to34       | 438091     |
| Iraq    | 1992           | MaleAge35to39       | 424490     |
| Iraq    | 1992           | MaleAge40to44       | 335544     |
| Iraq    | 1992           | MaleAge45to49       | 269470     |
| Iraq    | 1992           | MaleAge50to54       | 244167     |
| Iraq    | 1992           | MaleAge55to59       | 196959     |
| Iraq    | 1992           | MaleAge5to9         | 1419370    |
| Iraq    | 1992           | MaleAge60to64       | 155076     |
| Iraq    | 1992           | MaleAge65to69       | 119639     |
| Iraq    | 1992           | MaleAge70to74       | 93252      |
| Iraq    | 1992           | MaleAge75to79       | 62003      |
| Iraq    | 1992           | MaleAge80to84       | 31641      |

Dietary calcium and zinc deficiency risks are decreasing but remain prevalent

| Country | Reference year | Age/gender group    | Population |
|---------|----------------|---------------------|------------|
| Iraq    | 1992           | MaleAge85to89       | 11680      |
| Iraq    | 1992           | MaleAge90to94       | 2534       |
| Iraq    | 1992           | MaleAge95to99       | 277        |
| Iraq    | 1992           | MaleAgeAbove100     | 11         |
| Iraq    | 1993           | FemaleAge0to4       | 1560865    |
| Iraq    | 1993           | FemaleAge10to14     | 1226288    |
| Iraq    | 1993           | FemaleAge15to19     | 958168     |
| Iraq    | 1993           | FemaleAge20to24     | 612191     |
| Iraq    | 1993           | FemaleAge25to29     | 397781     |
| Iraq    | 1993           | FemaleAge30to34     | 269688     |
| Iraq    | 1993           | FemaleAge35to39     | 285722     |
| Iraq    | 1993           | FemaleAge40to44     | 312367     |
| Iraq    | 1993           | FemaleAge45to49     | 234745     |
| Iraq    | 1993           | FemaleAge50to54     | 249317     |
| Iraq    | 1993           | FemaleAge55to59     | 207463     |
| Iraq    | 1993           | FemaleAge5to9       | 1377595    |
| Iraq    | 1993           | FemaleAge60to64     | 170491     |
| Iraq    | 1993           | FemaleAge65to69     | 135233     |
| Iraq    | 1993           | FemaleAge70to74     | 107868     |
| Iraq    | 1993           | FemaleAge75to79     | 78114      |
| Iraq    | 1993           | FemaleAge80to84     | 42979      |
| Iraq    | 1993           | FemaleAge85to89     | 17608      |
| Iraq    | 1993           | FemaleAge90to94     | 4629       |
| Iraq    | 1993           | FemaleAge95to99     | 571        |
| Iraq    | 1993           | FemaleAgeAbove100   | 26         |
| Iraq    | 1993           | FemaleLactAge15to19 | 72307      |
| Iraq    | 1993           | FemaleLactAge20to24 | 178269     |
| Iraq    | 1993           | FemaleLactAge25to29 | 185100     |
| Iraq    | 1993           | FemaleLactAge30to34 | 131658     |
| Iraq    | 1993           | FemaleLactAge35to39 | 89023      |
| Iraq    | 1993           | FemaleLactAge40to44 | 38136      |
| Iraq    | 1993           | FemaleLactAge45to49 | 8634       |
| Iraq    | 1993           | FemalePregAge15to19 | 54230      |
| Iraq    | 1993           | FemalePregAge20to24 | 133702     |
| Iraq    | 1993           | FemalePregAge25to29 | 138825     |
| Iraq    | 1993           | FemalePregAge30to34 | 98744      |
| Iraq    | 1993           | FemalePregAge35to39 | 66767      |
| Iraq    | 1993           | FemalePregAge40to44 | 28602      |
| Iraq    | 1993           | FemalePregAge45to49 | 6476       |
| Iraq    | 1993           | MaleAge0to4         | 1653517    |
| Iraq    | 1993           | MaleAge10to14       | 1294356    |
| Iraq    | 1993           | MaleAge15to19       | 1139782    |
| Iraq    | 1993           | MaleAge20to24       | 947501     |
| Iraq    | 1993           | MaleAge25to29       | 699543     |
| Iraq    | 1993           | MaleAge30to34       | 461715     |
| Iraq    | 1993           | MaleAge35to39       | 412540     |
| Iraq    | 1993           | MaleAge40to44       | 370642     |
| Iraq    | 1993           | MaleAge45to49       | 264387     |
| Iraq    | 1993           | MaleAge50to54       | 253782     |
| Iraq    | 1993           | MaleAge55to59       | 202075     |
| Iraq    | 1993           | MaleAge5to9         | 1457091    |
| Iraq    | 1993           | MaleAge60to64       | 160511     |
| Iraq    | 1993           | MaleAge65to69       | 121686     |
| Iraq    | 1993           | MaleAge70to74       | 93315      |
| Iraq    | 1993           | MaleAge75to79       | 63683      |
| Iraq    | 1993           | MaleAge80to84       | 32381      |
| Iraq    | 1993           | MaleAge85to89       | 12190      |
| Iraq    | 1993           | MaleAge90to94       | 2712       |
| Iraq    | 1993           | MaleAge95to99       | 343        |
| Iraq    | 1993           | MaleAgeAbove100     | 12         |
| Iraq    | 1994           | FemaleAge0to4       | 1594603    |
| Iraq    | 1994           | FemaleAge10to14     | 1253351    |
| Iraq    | 1994           | FemaleAge15to19     | 990016     |
| Iraq    | 1994           | FemaleAge20to24     | 640183     |
| Iraq    | 1994           | FemaleAge25to29     | 446292     |
| Iraq    | 1994           | FemaleAge30to34     | 301845     |
| Iraq    | 1994           | FemaleAge35to39     | 278120     |
| Iraq    | 1994           | FemaleAge40to44     | 349225     |
| Iraq    | 1994           | FemaleAge45to49     | 236835     |
| Iraq    | 1994           | FemaleAge50to54     | 254906     |
| Iraq    | 1994           | FemaleAge55to59     | 213315     |
| Iraq    | 1994           | FemaleAge5to9       | 1414441    |
| Iraq    | 1994           | FemaleAge60to64     | 176366     |
| Iraq    | 1994           | FemaleAge65to69     | 139043     |
| Iraq    | 1994           | FemaleAge70to74     | 109217     |
| Iraq    | 1994           | FemaleAge75to79     | 80448      |
| Iraq    | 1994           | FemaleAge80to84     | 44505      |
| Iraq    | 1994           | FemaleAge85to89     | 18092      |
| Iraq    | 1994           | FemaleAge90to94     | 4727       |
| Iraq    | 1994           | FemaleAge95to99     | 635        |
| Iraq    | 1994           | FemaleAgeAbove100   | 30         |
| Iraq    | 1994           | FemaleLactAge15to19 | 72307      |
| Iraq    | 1994           | FemaleLactAge20to24 | 178269     |
| Iraq    | 1994           | FemaleLactAge25to29 | 185100     |
| Iraq    | 1994           | FemaleLactAge30to34 | 131658     |
| Iraq    | 1994           | FemaleLactAge35to39 | 89023      |
| Iraq    | 1994           | FemaleLactAge40to44 | 38136      |
| Iraq    | 1994           | FemaleLactAge45to49 | 8634       |

Dietary calcium and zinc deficiency risks are decreasing but remain prevalent

| Country | Reference year | Age/gender group    | Population |
|---------|----------------|---------------------|------------|
| Iraq    | 1994           | FemalePregAge15to19 | 54230      |
| Iraq    | 1994           | FemalePregAge20to24 | 133702     |
| Iraq    | 1994           | FemalePregAge25to29 | 138825     |
| Iraq    | 1994           | FemalePregAge30to34 | 98744      |
| Iraq    | 1994           | FemalePregAge35to39 | 66767      |
| Iraq    | 1994           | FemalePregAge40to44 | 28602      |
| Iraq    | 1994           | FemalePregAge45to49 | 6476       |
| Iraq    | 1994           | MaleAge0to4         | 1689382    |
| Iraq    | 1994           | MaleAge10to14       | 1323633    |
| Iraq    | 1994           | MaleAge15to19       | 1174850    |
| Iraq    | 1994           | MaleAge20to24       | 984467     |
| Iraq    | 1994           | MaleAge25to29       | 755975     |
| Iraq    | 1994           | MaleAge30to34       | 492979     |
| Iraq    | 1994           | MaleAge35to39       | 403896     |
| Iraq    | 1994           | MaleAge40to44       | 399719     |
| Iraq    | 1994           | MaleAge45to49       | 265658     |
| Iraq    | 1994           | MaleAge50to54       | 261228     |
| Iraq    | 1994           | MaleAge55to59       | 208141     |
| Iraq    | 1994           | MaleAge5to9         | 1496900    |
| Iraq    | 1994           | MaleAge60to64       | 166279     |
| Iraq    | 1994           | MaleAge65to69       | 124598     |
| Iraq    | 1994           | MaleAge70to74       | 93881      |
| Iraq    | 1994           | MaleAge75to79       | 65070      |
| Iraq    | 1994           | MaleAge80to84       | 33022      |
| Iraq    | 1994           | MaleAge85to89       | 12300      |
| Iraq    | 1994           | MaleAge90to94       | 2709       |
| Iraq    | 1994           | MaleAge95to99       | 364        |
| Iraq    | 1994           | MaleAgeAbov e100    | 13         |
| Iraq    | 1995           | FemaleAge0to4       | 1634572    |
| Iraq    | 1995           | FemaleAge10to14     | 1282600    |
| Iraq    | 1995           | FemaleAge15to19     | 1020120    |
| Iraq    | 1995           | FemaleAge20to24     | 670083     |
| Iraq    | 1995           | FemaleAge25to29     | 489451     |
| Iraq    | 1995           | FemaleAge30to34     | 338572     |
| Iraq    | 1995           | FemaleAge35to39     | 280118     |
| Iraq    | 1995           | FemaleAge40to44     | 371800     |
| Iraq    | 1995           | FemaleAge45to49     | 250921     |
| Iraq    | 1995           | FemaleAge50to54     | 257023     |
| Iraq    | 1995           | FemaleAge55to59     | 219648     |
| Iraq    | 1995           | FemaleAge5to9       | 1450257    |
| Iraq    | 1995           | FemaleAge60to64     | 182280     |
| Iraq    | 1995           | FemaleAge65to69     | 143509     |
| Iraq    | 1995           | FemaleAge70to74     | 111348     |
| Iraq    | 1995           | FemaleAge75to79     | 82509      |
| Iraq    | 1995           | FemaleAge80to84     | 46155      |
| Iraq    | 1995           | FemaleAge85to89     | 18385      |
| Iraq    | 1995           | FemaleAge90to94     | 4538       |
| Iraq    | 1995           | FemaleAge95to99     | 554        |
| Iraq    | 1995           | FemaleAgeAbov e100  | 34         |
| Iraq    | 1995           | FemaleLactAge15to19 | 72307      |
| Iraq    | 1995           | FemaleLactAge20to24 | 178269     |
| Iraq    | 1995           | FemaleLactAge25to29 | 185100     |
| Iraq    | 1995           | FemaleLactAge30to34 | 131658     |
| Iraq    | 1995           | FemaleLactAge35to39 | 89023      |
| Iraq    | 1995           | FemaleLactAge40to44 | 38136      |
| Iraq    | 1995           | FemaleLactAge45to49 | 8634       |
| Iraq    | 1995           | FemalePregAge15to19 | 54230      |
| Iraq    | 1995           | FemalePregAge20to24 | 133702     |
| Iraq    | 1995           | FemalePregAge25to29 | 138825     |
| Iraq    | 1995           | FemalePregAge30to34 | 98744      |
| Iraq    | 1995           | FemalePregAge35to39 | 66767      |
| Iraq    | 1995           | FemalePregAge40to44 | 28602      |
| Iraq    | 1995           | FemalePregAge45to49 | 6476       |
| Iraq    | 1995           | MaleAge0to4         | 1731870    |
| Iraq    | 1995           | MaleAge10to14       | 1355070    |
| Iraq    | 1995           | MaleAge15to19       | 1207919    |
| Iraq    | 1995           | MaleAge20to24       | 1021949    |
| Iraq    | 1995           | MaleAge25to29       | 807564     |
| Iraq    | 1995           | MaleAge30to34       | 530979     |
| Iraq    | 1995           | MaleAge35to39       | 404152     |
| Iraq    | 1995           | MaleAge40to44       | 416280     |
| Iraq    | 1995           | MaleAge45to49       | 276778     |
| Iraq    | 1995           | MaleAge50to54       | 265034     |
| Iraq    | 1995           | MaleAge55to59       | 215288     |
| Iraq    | 1995           | MaleAge5to9         | 1535351    |
| Iraq    | 1995           | MaleAge60to64       | 172038     |
| Iraq    | 1995           | MaleAge65to69       | 128349     |
| Iraq    | 1995           | MaleAge70to74       | 95082      |
| Iraq    | 1995           | MaleAge75to79       | 66055      |
| Iraq    | 1995           | MaleAge80to84       | 33657      |
| Iraq    | 1995           | MaleAge85to89       | 12055      |
| Iraq    | 1995           | MaleAge90to94       | 2455       |
| Iraq    | 1995           | MaleAge95to99       | 248        |
| Iraq    | 1995           | MaleAgeAbov e100    | 14         |
| Iraq    | 1996           | FemaleAge0to4       | 1674498    |
| Iraq    | 1996           | FemaleAge10to14     | 1313432    |
| Iraq    | 1996           | FemaleAge15to19     | 1037414    |
| Iraq    | 1996           | FemaleAge20to24     | 664972     |

Dietary calcium and zinc deficiency risks are decreasing but remain prevalent

| Country | Reference year | Age/gender group    | Population |
|---------|----------------|---------------------|------------|
| Iraq    | 1996           | FemaleAge25to29     | 463909     |
| Iraq    | 1996           | FemaleAge30to34     | 325202     |
| Iraq    | 1996           | FemaleAge35to39     | 288187     |
| Iraq    | 1996           | FemaleAge40to44     | 378099     |
| Iraq    | 1996           | FemaleAge45to49     | 277925     |
| Iraq    | 1996           | FemaleAge50to54     | 255651     |
| Iraq    | 1996           | FemaleAge55to59     | 226223     |
| Iraq    | 1996           | FemaleAge5to9       | 1486193    |
| Iraq    | 1996           | FemaleAge60to64     | 187399     |
| Iraq    | 1996           | FemaleAge65to69     | 147443     |
| Iraq    | 1996           | FemaleAge70to74     | 112799     |
| Iraq    | 1996           | FemaleAge75to79     | 83260      |
| Iraq    | 1996           | FemaleAge80to84     | 48136      |
| Iraq    | 1996           | FemaleAge85to89     | 19929      |
| Iraq    | 1996           | FemaleAge90to94     | 5344       |
| Iraq    | 1996           | FemaleAge95to99     | 650        |
| Iraq    | 1996           | FemaleAgeAbove100   | 38         |
| Iraq    | 1996           | FemaleLactAge15to19 | 78640      |
| Iraq    | 1996           | FemaleLactAge20to24 | 199768     |
| Iraq    | 1996           | FemaleLactAge25to29 | 222634     |
| Iraq    | 1996           | FemaleLactAge30to34 | 164314     |
| Iraq    | 1996           | FemaleLactAge35to39 | 90956      |
| Iraq    | 1996           | FemaleLactAge40to44 | 40513      |
| Iraq    | 1996           | FemaleLactAge45to49 | 7849       |
| Iraq    | 1996           | FemalePregAge15to19 | 58980      |
| Iraq    | 1996           | FemalePregAge20to24 | 149826     |
| Iraq    | 1996           | FemalePregAge25to29 | 166975     |
| Iraq    | 1996           | FemalePregAge30to34 | 123235     |
| Iraq    | 1996           | FemalePregAge35to39 | 68217      |
| Iraq    | 1996           | FemalePregAge40to44 | 30385      |
| Iraq    | 1996           | FemalePregAge45to49 | 5886       |
| Iraq    | 1996           | MaleAge0to4         | 1774032    |
| Iraq    | 1996           | MaleAge10to14       | 1387992    |
| Iraq    | 1996           | MaleAge15to19       | 1238430    |
| Iraq    | 1996           | MaleAge20to24       | 1060407    |
| Iraq    | 1996           | MaleAge25to29       | 856600     |
| Iraq    | 1996           | MaleAge30to34       | 577948     |
| Iraq    | 1996           | MaleAge35to39       | 413409     |
| Iraq    | 1996           | MaleAge40to44       | 422324     |
| Iraq    | 1996           | MaleAge45to49       | 297200     |
| Iraq    | 1996           | MaleAge50to54       | 264866     |
| Iraq    | 1996           | MaleAge55to59       | 222759     |
| Iraq    | 1996           | MaleAge5to9         | 1573585    |
| Iraq    | 1996           | MaleAge60to64       | 176732     |
| Iraq    | 1996           | MaleAge65to69       | 131784     |
| Iraq    | 1996           | MaleAge70to74       | 95872      |
| Iraq    | 1996           | MaleAge75to79       | 66527      |
| Iraq    | 1996           | MaleAge80to84       | 35261      |
| Iraq    | 1996           | MaleAge85to89       | 13178      |
| Iraq    | 1996           | MaleAge90to94       | 3007       |
| Iraq    | 1996           | MaleAge95to99       | 300        |
| Iraq    | 1996           | MaleAgeAbove100     | 15         |
| Iraq    | 1997           | FemaleAge0to4       | 1722085    |
| Iraq    | 1997           | FemaleAge10to14     | 1346232    |
| Iraq    | 1997           | FemaleAge15to19     | 1063593    |
| Iraq    | 1997           | FemaleAge20to24     | 698358     |
| Iraq    | 1997           | FemaleAge25to29     | 497970     |
| Iraq    | 1997           | FemaleAge30to34     | 374787     |
| Iraq    | 1997           | FemaleAge35to39     | 307732     |
| Iraq    | 1997           | FemaleAge40to44     | 375155     |
| Iraq    | 1997           | FemaleAge45to49     | 316327     |
| Iraq    | 1997           | FemaleAge50to54     | 249814     |
| Iraq    | 1997           | FemaleAge55to59     | 234097     |
| Iraq    | 1997           | FemaleAge5to9       | 1520977    |
| Iraq    | 1997           | FemaleAge60to64     | 192490     |
| Iraq    | 1997           | FemaleAge65to69     | 152096     |
| Iraq    | 1997           | FemaleAge70to74     | 114850     |
| Iraq    | 1997           | FemaleAge75to79     | 83740      |
| Iraq    | 1997           | FemaleAge80to84     | 50005      |
| Iraq    | 1997           | FemaleAge85to89     | 21092      |
| Iraq    | 1997           | FemaleAge90to94     | 5931       |
| Iraq    | 1997           | FemaleAge95to99     | 795        |
| Iraq    | 1997           | FemaleAgeAbove100   | 43         |
| Iraq    | 1997           | FemaleLactAge15to19 | 78640      |
| Iraq    | 1997           | FemaleLactAge20to24 | 199768     |
| Iraq    | 1997           | FemaleLactAge25to29 | 222634     |
| Iraq    | 1997           | FemaleLactAge30to34 | 164314     |
| Iraq    | 1997           | FemaleLactAge35to39 | 90956      |
| Iraq    | 1997           | FemaleLactAge40to44 | 40513      |
| Iraq    | 1997           | FemaleLactAge45to49 | 7849       |
| Iraq    | 1997           | FemalePregAge15to19 | 58980      |
| Iraq    | 1997           | FemalePregAge20to24 | 149826     |
| Iraq    | 1997           | FemalePregAge25to29 | 166975     |
| Iraq    | 1997           | FemalePregAge30to34 | 123235     |
| Iraq    | 1997           | FemalePregAge35to39 | 68217      |
| Iraq    | 1997           | FemalePregAge40to44 | 30385      |
| Iraq    | 1997           | FemalePregAge45to49 | 5886       |
| Iraq    | 1997           | MaleAge0to4         | 1824300    |

Dietary calcium and zinc deficiency risks are decreasing but remain prevalent

| Country | Reference year | Age/gender group    | Population |
|---------|----------------|---------------------|------------|
| Iraq    | 1997           | MaleAge10to14       | 1422925    |
| Iraq    | 1997           | MaleAge15to19       | 1266322    |
| Iraq    | 1997           | MaleAge20to24       | 1098057    |
| Iraq    | 1997           | MaleAge25to29       | 899986     |
| Iraq    | 1997           | MaleAge30to34       | 632571     |
| Iraq    | 1997           | MaleAge35to39       | 430240     |
| Iraq    | 1997           | MaleAge40to44       | 416942     |
| Iraq    | 1997           | MaleAge45to49       | 328142     |
| Iraq    | 1997           | MaleAge50to54       | 260315     |
| Iraq    | 1997           | MaleAge55to59       | 231916     |
| Iraq    | 1997           | MaleAge5to9         | 1610268    |
| Iraq    | 1997           | MaleAge60to64       | 181272     |
| Iraq    | 1997           | MaleAge65to69       | 136021     |
| Iraq    | 1997           | MaleAge70to74       | 97009      |
| Iraq    | 1997           | MaleAge75to79       | 66615      |
| Iraq    | 1997           | MaleAge80to84       | 36636      |
| Iraq    | 1997           | MaleAge85to89       | 13910      |
| Iraq    | 1997           | MaleAge90to94       | 3409       |
| Iraq    | 1997           | MaleAge95to99       | 379        |
| Iraq    | 1997           | MaleAgeAbove100     | 16         |
| Iraq    | 1998           | FemaleAge0to4       | 1774723    |
| Iraq    | 1998           | FemaleAge10to14     | 1380492    |
| Iraq    | 1998           | FemaleAge15to19     | 1088644    |
| Iraq    | 1998           | FemaleAge20to24     | 731664     |
| Iraq    | 1998           | FemaleAge25to29     | 527768     |
| Iraq    | 1998           | FemaleAge30to34     | 426854     |
| Iraq    | 1998           | FemaleAge35to39     | 334806     |
| Iraq    | 1998           | FemaleAge40to44     | 365017     |
| Iraq    | 1998           | FemaleAge45to49     | 359880     |
| Iraq    | 1998           | FemaleAge50to54     | 244284     |
| Iraq    | 1998           | FemaleAge55to59     | 241851     |
| Iraq    | 1998           | FemaleAge5to9       | 1554566    |
| Iraq    | 1998           | FemaleAge60to64     | 197700     |
| Iraq    | 1998           | FemaleAge65to69     | 157290     |
| Iraq    | 1998           | FemaleAge70to74     | 117521     |
| Iraq    | 1998           | FemaleAge75to79     | 84362      |
| Iraq    | 1998           | FemaleAge80to84     | 51669      |
| Iraq    | 1998           | FemaleAge85to89     | 21851      |
| Iraq    | 1998           | FemaleAge90to94     | 6237       |
| Iraq    | 1998           | FemaleAge95to99     | 943        |
| Iraq    | 1998           | FemaleAgeAbove100   | 47         |
| Iraq    | 1998           | FemaleLactAge15to19 | 78640      |
| Iraq    | 1998           | FemaleLactAge20to24 | 199768     |
| Iraq    | 1998           | FemaleLactAge25to29 | 222634     |
| Iraq    | 1998           | FemaleLactAge30to34 | 164314     |
| Iraq    | 1998           | FemaleLactAge35to39 | 90956      |
| Iraq    | 1998           | FemaleLactAge40to44 | 40513      |
| Iraq    | 1998           | FemaleLactAge45to49 | 7849       |
| Iraq    | 1998           | FemalePregAge15to19 | 58980      |
| Iraq    | 1998           | FemalePregAge20to24 | 149826     |
| Iraq    | 1998           | FemalePregAge25to29 | 166975     |
| Iraq    | 1998           | FemalePregAge30to34 | 123235     |
| Iraq    | 1998           | FemalePregAge35to39 | 68217      |
| Iraq    | 1998           | FemalePregAge40to44 | 30385      |
| Iraq    | 1998           | FemalePregAge45to49 | 5886       |
| Iraq    | 1998           | MaleAge0to4         | 1879984    |
| Iraq    | 1998           | MaleAge10to14       | 1459369    |
| Iraq    | 1998           | MaleAge15to19       | 1292936    |
| Iraq    | 1998           | MaleAge20to24       | 1134338    |
| Iraq    | 1998           | MaleAge25to29       | 938994     |
| Iraq    | 1998           | MaleAge30to34       | 691207     |
| Iraq    | 1998           | MaleAge35to39       | 454831     |
| Iraq    | 1998           | MaleAge40to44       | 405707     |
| Iraq    | 1998           | MaleAge45to49       | 363101     |
| Iraq    | 1998           | MaleAge50to54       | 255535     |
| Iraq    | 1998           | MaleAge55to59       | 241220     |
| Iraq    | 1998           | MaleAge5to9         | 1645479    |
| Iraq    | 1998           | MaleAge60to64       | 186044     |
| Iraq    | 1998           | MaleAge65to69       | 140832     |
| Iraq    | 1998           | MaleAge70to74       | 98639      |
| Iraq    | 1998           | MaleAge75to79       | 66672      |
| Iraq    | 1998           | MaleAge80to84       | 37641      |
| Iraq    | 1998           | MaleAge85to89       | 14230      |
| Iraq    | 1998           | MaleAge90to94       | 3592       |
| Iraq    | 1998           | MaleAge95to99       | 465        |
| Iraq    | 1998           | MaleAgeAbove100     | 17         |
| Iraq    | 1999           | FemaleAge0to4       | 1827445    |
| Iraq    | 1999           | FemaleAge10to14     | 1414844    |
| Iraq    | 1999           | FemaleAge15to19     | 1114442    |
| Iraq    | 1999           | FemaleAge20to24     | 763357     |
| Iraq    | 1999           | FemaleAge25to29     | 556796     |
| Iraq    | 1999           | FemaleAge30to34     | 476558     |
| Iraq    | 1999           | FemaleAge35to39     | 367835     |
| Iraq    | 1999           | FemaleAge40to44     | 358053     |
| Iraq    | 1999           | FemaleAge45to49     | 396504     |
| Iraq    | 1999           | FemaleAge50to54     | 246533     |
| Iraq    | 1999           | FemaleAge55to59     | 247286     |
| Iraq    | 1999           | FemaleAge5to9       | 1588242    |

Dietary calcium and zinc deficiency risks are decreasing but remain prevalent

| Country | Reference year | Age/gender group    | Population |
|---------|----------------|---------------------|------------|
| Iraq    | 1999           | FemaleAge60to64     | 203333     |
| Iraq    | 1999           | FemaleAge65to69     | 162783     |
| Iraq    | 1999           | FemaleAge70to74     | 120877     |
| Iraq    | 1999           | FemaleAge75to79     | 85519      |
| Iraq    | 1999           | FemaleAge80to84     | 52973      |
| Iraq    | 1999           | FemaleAge85to89     | 22295      |
| Iraq    | 1999           | FemaleAge90to94     | 6245       |
| Iraq    | 1999           | FemaleAge95to99     | 1007       |
| Iraq    | 1999           | FemaleAgeAbove100   | 52         |
| Iraq    | 1999           | FemaleLactAge15to19 | 78640      |
| Iraq    | 1999           | FemaleLactAge20to24 | 199768     |
| Iraq    | 1999           | FemaleLactAge25to29 | 222634     |
| Iraq    | 1999           | FemaleLactAge30to34 | 164314     |
| Iraq    | 1999           | FemaleLactAge35to39 | 90956      |
| Iraq    | 1999           | FemaleLactAge40to44 | 40513      |
| Iraq    | 1999           | FemaleLactAge45to49 | 7849       |
| Iraq    | 1999           | FemalePregAge15to19 | 58980      |
| Iraq    | 1999           | FemalePregAge20to24 | 149826     |
| Iraq    | 1999           | FemalePregAge25to29 | 166975     |
| Iraq    | 1999           | FemalePregAge30to34 | 123235     |
| Iraq    | 1999           | FemalePregAge35to39 | 68217      |
| Iraq    | 1999           | FemalePregAge40to44 | 30385      |
| Iraq    | 1999           | FemalePregAge45to49 | 5886       |
| Iraq    | 1999           | MaleAge0to4         | 1935920    |
| Iraq    | 1999           | MaleAge10to14       | 1495945    |
| Iraq    | 1999           | MaleAge15to19       | 1320470    |
| Iraq    | 1999           | MaleAge20to24       | 1168469    |
| Iraq    | 1999           | MaleAge25to29       | 976413     |
| Iraq    | 1999           | MaleAge30to34       | 748496     |
| Iraq    | 1999           | MaleAge35to39       | 486851     |
| Iraq    | 1999           | MaleAge40to44       | 397767     |
| Iraq    | 1999           | MaleAge45to49       | 391849     |
| Iraq    | 1999           | MaleAge50to54       | 257022     |
| Iraq    | 1999           | MaleAge55to59       | 248318     |
| Iraq    | 1999           | MaleAge5to9         | 1680825    |
| Iraq    | 1999           | MaleAge60to64       | 191674     |
| Iraq    | 1999           | MaleAge65to69       | 145910     |
| Iraq    | 1999           | MaleAge70to74       | 100971     |
| Iraq    | 1999           | MaleAge75to79       | 67021      |
| Iraq    | 1999           | MaleAge80to84       | 38135      |
| Iraq    | 1999           | MaleAge85to89       | 14207      |
| Iraq    | 1999           | MaleAge90to94       | 3505       |
| Iraq    | 1999           | MaleAge95to99       | 466        |
| Iraq    | 1999           | MaleAgeAbove100     | 18         |
| Ireland | 1992           | FemaleAge0to4       | 127288     |
| Ireland | 1992           | FemaleAge10to14     | 166052     |
| Ireland | 1992           | FemaleAge15to19     | 156708     |
| Ireland | 1992           | FemaleAge20to24     | 124799     |
| Ireland | 1992           | FemaleAge25to29     | 102436     |
| Ireland | 1992           | FemaleAge30to34     | 100818     |
| Ireland | 1992           | FemaleAge35to39     | 108682     |
| Ireland | 1992           | FemaleAge40to44     | 111753     |
| Ireland | 1992           | FemaleAge45to49     | 96820      |
| Ireland | 1992           | FemaleAge50to54     | 79633      |
| Ireland | 1992           | FemaleAge55to59     | 71460      |
| Ireland | 1992           | FemaleAge5to9       | 152412     |
| Ireland | 1992           | FemaleAge60to64     | 68480      |
| Ireland | 1992           | FemaleAge65to69     | 68402      |
| Ireland | 1992           | FemaleAge70to74     | 60076      |
| Ireland | 1992           | FemaleAge75to79     | 48102      |
| Ireland | 1992           | FemaleAge80to84     | 32095      |
| Ireland | 1992           | FemaleAge85to89     | 15954      |
| Ireland | 1992           | FemaleAge90to94     | 5831       |
| Ireland | 1992           | FemaleAge95to99     | 1121       |
| Ireland | 1992           | FemaleAgeAbove100   | 102        |
| Ireland | 1992           | FemaleLactAge15to19 | 2612       |
| Ireland | 1992           | FemaleLactAge20to24 | 7416       |
| Ireland | 1992           | FemaleLactAge25to29 | 14982      |
| Ireland | 1992           | FemaleLactAge30to34 | 15602      |
| Ireland | 1992           | FemaleLactAge35to39 | 7124       |
| Ireland | 1992           | FemaleLactAge40to44 | 1606       |
| Ireland | 1992           | FemaleLactAge45to49 | 99         |
| Ireland | 1992           | FemalePregAge15to19 | 1959       |
| Ireland | 1992           | FemalePregAge20to24 | 5562       |
| Ireland | 1992           | FemalePregAge25to29 | 11237      |
| Ireland | 1992           | FemalePregAge30to34 | 11701      |
| Ireland | 1992           | FemalePregAge35to39 | 5343       |
| Ireland | 1992           | FemalePregAge40to44 | 1205       |
| Ireland | 1992           | FemalePregAge45to49 | 74         |
| Ireland | 1992           | MaleAge0to4         | 134139     |
| Ireland | 1992           | MaleAge10to14       | 174831     |
| Ireland | 1992           | MaleAge15to19       | 168985     |
| Ireland | 1992           | MaleAge20to24       | 142751     |
| Ireland | 1992           | MaleAge25to29       | 126151     |
| Ireland | 1992           | MaleAge30to34       | 123916     |
| Ireland | 1992           | MaleAge35to39       | 120379     |
| Ireland | 1992           | MaleAge40to44       | 116184     |
| Ireland | 1992           | MaleAge45to49       | 100151     |

Dietary calcium and zinc deficiency risks are decreasing but remain prevalent

| Country | Reference year | Age/gender group    | Population |
|---------|----------------|---------------------|------------|
| Ireland | 1992           | MaleAge50to54       | 82178      |
| Ireland | 1992           | MaleAge55to59       | 72744      |
| Ireland | 1992           | MaleAge5to9         | 160949     |
| Ireland | 1992           | MaleAge60to64       | 65629      |
| Ireland | 1992           | MaleAge65to69       | 59785      |
| Ireland | 1992           | MaleAge70to74       | 48861      |
| Ireland | 1992           | MaleAge75to79       | 35376      |
| Ireland | 1992           | MaleAge80to84       | 20237      |
| Ireland | 1992           | MaleAge85to89       | 7879       |
| Ireland | 1992           | MaleAge90to94       | 2217       |
| Ireland | 1992           | MaleAge95to99       | 355        |
| Ireland | 1992           | MaleAgeAbov e100    | 21         |
| Ireland | 1993           | FemaleAge0to4       | 125130     |
| Ireland | 1993           | FemaleAge10to14     | 165041     |
| Ireland | 1993           | FemaleAge15to19     | 156820     |
| Ireland | 1993           | FemaleAge20to24     | 127507     |
| Ireland | 1993           | FemaleAge25to29     | 101628     |
| Ireland | 1993           | FemaleAge30to34     | 102742     |
| Ireland | 1993           | FemaleAge35to39     | 110648     |
| Ireland | 1993           | FemaleAge40to44     | 113016     |
| Ireland | 1993           | FemaleAge45to49     | 101678     |
| Ireland | 1993           | FemaleAge50to54     | 81787      |
| Ireland | 1993           | FemaleAge55to59     | 72438      |
| Ireland | 1993           | FemaleAge5to9       | 148072     |
| Ireland | 1993           | FemaleAge60to64     | 68353      |
| Ireland | 1993           | FemaleAge65to69     | 67575      |
| Ireland | 1993           | FemaleAge70to74     | 61061      |
| Ireland | 1993           | FemaleAge75to79     | 47761      |
| Ireland | 1993           | FemaleAge80to84     | 33293      |
| Ireland | 1993           | FemaleAge85to89     | 16238      |
| Ireland | 1993           | FemaleAge90to94     | 6037       |
| Ireland | 1993           | FemaleAge95to99     | 1226       |
| Ireland | 1993           | FemaleAgeAbov e100  | 107        |
| Ireland | 1993           | FemaleLactAge15to19 | 2612       |
| Ireland | 1993           | FemaleLactAge20to24 | 7416       |
| Ireland | 1993           | FemaleLactAge25to29 | 14982      |
| Ireland | 1993           | FemaleLactAge30to34 | 15602      |
| Ireland | 1993           | FemaleLactAge35to39 | 7124       |
| Ireland | 1993           | FemaleLactAge40to44 | 1606       |
| Ireland | 1993           | FemaleLactAge45to49 | 99         |
| Ireland | 1993           | FemalePregAge15to19 | 1959       |
| Ireland | 1993           | FemalePregAge20to24 | 5562       |
| Ireland | 1993           | FemalePregAge25to29 | 11237      |
| Ireland | 1993           | FemalePregAge30to34 | 11701      |
| Ireland | 1993           | FemalePregAge35to39 | 5343       |
| Ireland | 1993           | FemalePregAge40to44 | 1205       |
| Ireland | 1993           | FemalePregAge45to49 | 74         |
| Ireland | 1993           | MaleAge0to4         | 132060     |
| Ireland | 1993           | MaleAge10to14       | 173987     |
| Ireland | 1993           | MaleAge15to19       | 169000     |
| Ireland | 1993           | MaleAge20to24       | 145406     |
| Ireland | 1993           | MaleAge25to29       | 126364     |
| Ireland | 1993           | MaleAge30to34       | 124933     |
| Ireland | 1993           | MaleAge35to39       | 121607     |
| Ireland | 1993           | MaleAge40to44       | 117049     |
| Ireland | 1993           | MaleAge45to49       | 104757     |
| Ireland | 1993           | MaleAge50to54       | 84528      |
| Ireland | 1993           | MaleAge55to59       | 73617      |
| Ireland | 1993           | MaleAge5to9         | 156292     |
| Ireland | 1993           | MaleAge60to64       | 66353      |
| Ireland | 1993           | MaleAge65to69       | 59322      |
| Ireland | 1993           | MaleAge70to74       | 49321      |
| Ireland | 1993           | MaleAge75to79       | 34945      |
| Ireland | 1993           | MaleAge80to84       | 20916      |
| Ireland | 1993           | MaleAge85to89       | 8062       |
| Ireland | 1993           | MaleAge90to94       | 2283       |
| Ireland | 1993           | MaleAge95to99       | 408        |
| Ireland | 1993           | MaleAgeAbov e100    | 23         |
| Ireland | 1994           | FemaleAge0to4       | 123948     |
| Ireland | 1994           | FemaleAge10to14     | 163662     |
| Ireland | 1994           | FemaleAge15to19     | 158004     |
| Ireland | 1994           | FemaleAge20to24     | 129106     |
| Ireland | 1994           | FemaleAge25to29     | 101131     |
| Ireland | 1994           | FemaleAge30to34     | 104464     |
| Ireland | 1994           | FemaleAge35to39     | 112782     |
| Ireland | 1994           | FemaleAge40to44     | 114386     |
| Ireland | 1994           | FemaleAge45to49     | 106198     |
| Ireland | 1994           | FemaleAge50to54     | 84580      |
| Ireland | 1994           | FemaleAge55to59     | 73785      |
| Ireland | 1994           | FemaleAge5to9       | 143575     |
| Ireland | 1994           | FemaleAge60to64     | 68445      |
| Ireland | 1994           | FemaleAge65to69     | 67031      |
| Ireland | 1994           | FemaleAge70to74     | 62024      |
| Ireland | 1994           | FemaleAge75to79     | 47691      |
| Ireland | 1994           | FemaleAge80to84     | 34375      |
| Ireland | 1994           | FemaleAge85to89     | 16535      |
| Ireland | 1994           | FemaleAge90to94     | 6031       |
| Ireland | 1994           | FemaleAge95to99     | 1265       |

Dietary calcium and zinc deficiency risks are decreasing but remain prevalent

| Country | Reference year | Age/gender group    | Population |
|---------|----------------|---------------------|------------|
| Ireland | 1994           | FemaleAgeAbove100   | 111        |
| Ireland | 1994           | FemaleLactAge15to19 | 2612       |
| Ireland | 1994           | FemaleLactAge20to24 | 7416       |
| Ireland | 1994           | FemaleLactAge25to29 | 14982      |
| Ireland | 1994           | FemaleLactAge30to34 | 15602      |
| Ireland | 1994           | FemaleLactAge35to39 | 7124       |
| Ireland | 1994           | FemaleLactAge40to44 | 1606       |
| Ireland | 1994           | FemaleLactAge45to49 | 99         |
| Ireland | 1994           | FemalePregAge15to19 | 1959       |
| Ireland | 1994           | FemalePregAge20to24 | 5562       |
| Ireland | 1994           | FemalePregAge25to29 | 11237      |
| Ireland | 1994           | FemalePregAge30to34 | 11701      |
| Ireland | 1994           | FemalePregAge35to39 | 5343       |
| Ireland | 1994           | FemalePregAge40to44 | 1205       |
| Ireland | 1994           | FemalePregAge45to49 | 74         |
| Ireland | 1994           | MaleAge0to4         | 131070     |
| Ireland | 1994           | MaleAge10to14       | 172880     |
| Ireland | 1994           | MaleAge15to19       | 170167     |
| Ireland | 1994           | MaleAge20to24       | 147198     |
| Ireland | 1994           | MaleAge25to29       | 126542     |
| Ireland | 1994           | MaleAge30to34       | 126177     |
| Ireland | 1994           | MaleAge35to39       | 122895     |
| Ireland | 1994           | MaleAge40to44       | 117976     |
| Ireland | 1994           | MaleAge45to49       | 109021     |
| Ireland | 1994           | MaleAge50to54       | 87553      |
| Ireland | 1994           | MaleAge55to59       | 74852      |
| Ireland | 1994           | MaleAge5to9         | 151433     |
| Ireland | 1994           | MaleAge60to64       | 67252      |
| Ireland | 1994           | MaleAge65to69       | 59349      |
| Ireland | 1994           | MaleAge70to74       | 49822      |
| Ireland | 1994           | MaleAge75to79       | 34719      |
| Ireland | 1994           | MaleAge80to84       | 21306      |
| Ireland | 1994           | MaleAge85to89       | 8107       |
| Ireland | 1994           | MaleAge90to94       | 2236       |
| Ireland | 1994           | MaleAge95to99       | 413        |
| Ireland | 1994           | MaleAgeAbove100     | 25         |
| Ireland | 1995           | FemaleAge0to4       | 123400     |
| Ireland | 1995           | FemaleAge10to14     | 161751     |
| Ireland | 1995           | FemaleAge15to19     | 159777     |
| Ireland | 1995           | FemaleAge20to24     | 130016     |
| Ireland | 1995           | FemaleAge25to29     | 101173     |
| Ireland | 1995           | FemaleAge30to34     | 105549     |
| Ireland | 1995           | FemaleAge35to39     | 115040     |
| Ireland | 1995           | FemaleAge40to44     | 116194     |
| Ireland | 1995           | FemaleAge45to49     | 109979     |
| Ireland | 1995           | FemaleAge50to54     | 88119      |
| Ireland | 1995           | FemaleAge55to59     | 75458      |
| Ireland | 1995           | FemaleAge5to9       | 139457     |
| Ireland | 1995           | FemaleAge60to64     | 68800      |
| Ireland | 1995           | FemaleAge65to69     | 66848      |
| Ireland | 1995           | FemaleAge70to74     | 62746      |
| Ireland | 1995           | FemaleAge75to79     | 48148      |
| Ireland | 1995           | FemaleAge80to84     | 35174      |
| Ireland | 1995           | FemaleAge85to89     | 16977      |
| Ireland | 1995           | FemaleAge90to94     | 5836       |
| Ireland | 1995           | FemaleAge95to99     | 1128       |
| Ireland | 1995           | FemaleAgeAbove100   | 115        |
| Ireland | 1995           | FemaleLactAge15to19 | 2612       |
| Ireland | 1995           | FemaleLactAge20to24 | 7416       |
| Ireland | 1995           | FemaleLactAge25to29 | 14982      |
| Ireland | 1995           | FemaleLactAge30to34 | 15602      |
| Ireland | 1995           | FemaleLactAge35to39 | 7124       |
| Ireland | 1995           | FemaleLactAge40to44 | 1606       |
| Ireland | 1995           | FemaleLactAge45to49 | 99         |
| Ireland | 1995           | FemalePregAge15to19 | 1959       |
| Ireland | 1995           | FemalePregAge20to24 | 5562       |
| Ireland | 1995           | FemalePregAge25to29 | 11237      |
| Ireland | 1995           | FemalePregAge30to34 | 11701      |
| Ireland | 1995           | FemalePregAge35to39 | 5343       |
| Ireland | 1995           | FemalePregAge40to44 | 1205       |
| Ireland | 1995           | FemalePregAge45to49 | 74         |
| Ireland | 1995           | MaleAge0to4         | 130748     |
| Ireland | 1995           | MaleAge10to14       | 171196     |
| Ireland | 1995           | MaleAge15to19       | 172100     |
| Ireland | 1995           | MaleAge20to24       | 148487     |
| Ireland | 1995           | MaleAge25to29       | 126944     |
| Ireland | 1995           | MaleAge30to34       | 127201     |
| Ireland | 1995           | MaleAge35to39       | 124252     |
| Ireland | 1995           | MaleAge40to44       | 119254     |
| Ireland | 1995           | MaleAge45to49       | 112561     |
| Ireland | 1995           | MaleAge50to54       | 91275      |
| Ireland | 1995           | MaleAge55to59       | 76551      |
| Ireland | 1995           | MaleAge5to9         | 147008     |
| Ireland | 1995           | MaleAge60to64       | 68251      |
| Ireland | 1995           | MaleAge65to69       | 59903      |
| Ireland | 1995           | MaleAge70to74       | 50299      |
| Ireland | 1995           | MaleAge75to79       | 34851      |
| Ireland | 1995           | MaleAge80to84       | 21371      |



Dietary calcium and zinc deficiency risks are decreasing but remain prevalent

| Country | Reference year | Age/gender group    | Population |
|---------|----------------|---------------------|------------|
| Ireland | 1995           | MaleAge85to89       | 8076       |
| Ireland | 1995           | MaleAge90to94       | 2035       |
| Ireland | 1995           | MaleAge95to99       | 320        |
| Ireland | 1995           | MaleAgeAbove100     | 26         |
| Ireland | 1996           | FemaleAge0to4       | 123778     |
| Ireland | 1996           | FemaleAge10to14     | 157874     |
| Ireland | 1996           | FemaleAge15to19     | 158470     |
| Ireland | 1996           | FemaleAge20to24     | 133837     |
| Ireland | 1996           | FemaleAge25to29     | 107130     |
| Ireland | 1996           | FemaleAge30to34     | 101742     |
| Ireland | 1996           | FemaleAge35to39     | 113335     |
| Ireland | 1996           | FemaleAge40to44     | 117740     |
| Ireland | 1996           | FemaleAge45to49     | 112730     |
| Ireland | 1996           | FemaleAge50to54     | 91973      |
| Ireland | 1996           | FemaleAge55to59     | 77149      |
| Ireland | 1996           | FemaleAge5to9       | 135633     |
| Ireland | 1996           | FemaleAge60to64     | 69103      |
| Ireland | 1996           | FemaleAge65to69     | 66022      |
| Ireland | 1996           | FemaleAge70to74     | 62292      |
| Ireland | 1996           | FemaleAge75to79     | 48496      |
| Ireland | 1996           | FemaleAge80to84     | 35055      |
| Ireland | 1996           | FemaleAge85to89     | 17972      |
| Ireland | 1996           | FemaleAge90to94     | 6366       |
| Ireland | 1996           | FemaleAge95to99     | 1223       |
| Ireland | 1996           | FemaleAgeAbove100   | 119        |
| Ireland | 1996           | FemaleLactAge15to19 | 3077       |
| Ireland | 1996           | FemaleLactAge20to24 | 7593       |
| Ireland | 1996           | FemaleLactAge25to29 | 13619      |
| Ireland | 1996           | FemaleLactAge30to34 | 18367      |
| Ireland | 1996           | FemaleLactAge35to39 | 9438       |
| Ireland | 1996           | FemaleLactAge40to44 | 1631       |
| Ireland | 1996           | FemaleLactAge45to49 | 115        |
| Ireland | 1996           | FemalePregAge15to19 | 2308       |
| Ireland | 1996           | FemalePregAge20to24 | 5695       |
| Ireland | 1996           | FemalePregAge25to29 | 10214      |
| Ireland | 1996           | FemalePregAge30to34 | 13776      |
| Ireland | 1996           | FemalePregAge35to39 | 7079       |
| Ireland | 1996           | FemalePregAge40to44 | 1223       |
| Ireland | 1996           | FemalePregAge45to49 | 86         |
| Ireland | 1996           | MaleAge0to4         | 131349     |
| Ireland | 1996           | MaleAge10to14       | 166889     |
| Ireland | 1996           | MaleAge15to19       | 171037     |
| Ireland | 1996           | MaleAge20to24       | 152453     |
| Ireland | 1996           | MaleAge25to29       | 131311     |
| Ireland | 1996           | MaleAge30to34       | 128985     |
| Ireland | 1996           | MaleAge35to39       | 126208     |
| Ireland | 1996           | MaleAge40to44       | 120231     |
| Ireland | 1996           | MaleAge45to49       | 115058     |
| Ireland | 1996           | MaleAge50to54       | 94985      |
| Ireland | 1996           | MaleAge55to59       | 78331      |
| Ireland | 1996           | MaleAge5to9         | 142718     |
| Ireland | 1996           | MaleAge60to64       | 68773      |
| Ireland | 1996           | MaleAge65to69       | 59733      |
| Ireland | 1996           | MaleAge70to74       | 49993      |
| Ireland | 1996           | MaleAge75to79       | 35052      |
| Ireland | 1996           | MaleAge80to84       | 21490      |
| Ireland | 1996           | MaleAge85to89       | 8858       |
| Ireland | 1996           | MaleAge90to94       | 2325       |
| Ireland | 1996           | MaleAge95to99       | 346        |
| Ireland | 1996           | MaleAgeAbove100     | 27         |
| Ireland | 1997           | FemaleAge0to4       | 124552     |
| Ireland | 1997           | FemaleAge10to14     | 153818     |
| Ireland | 1997           | FemaleAge15to19     | 157408     |
| Ireland | 1997           | FemaleAge20to24     | 137181     |
| Ireland | 1997           | FemaleAge25to29     | 111144     |
| Ireland | 1997           | FemaleAge30to34     | 102631     |
| Ireland | 1997           | FemaleAge35to39     | 116185     |
| Ireland | 1997           | FemaleAge40to44     | 119774     |
| Ireland | 1997           | FemaleAge45to49     | 114645     |
| Ireland | 1997           | FemaleAge50to54     | 96661      |
| Ireland | 1997           | FemaleAge55to59     | 79003      |
| Ireland | 1997           | FemaleAge5to9       | 132762     |
| Ireland | 1997           | FemaleAge60to64     | 69928      |
| Ireland | 1997           | FemaleAge65to69     | 65496      |
| Ireland | 1997           | FemaleAge70to74     | 61694      |
| Ireland | 1997           | FemaleAge75to79     | 49311      |
| Ireland | 1997           | FemaleAge80to84     | 34640      |
| Ireland | 1997           | FemaleAge85to89     | 18900      |
| Ireland | 1997           | FemaleAge90to94     | 6676       |
| Ireland | 1997           | FemaleAge95to99     | 1383       |
| Ireland | 1997           | FemaleAgeAbove100   | 123        |
| Ireland | 1997           | FemaleLactAge15to19 | 3077       |
| Ireland | 1997           | FemaleLactAge20to24 | 7593       |
| Ireland | 1997           | FemaleLactAge25to29 | 13619      |
| Ireland | 1997           | FemaleLactAge30to34 | 18367      |
| Ireland | 1997           | FemaleLactAge35to39 | 9438       |
| Ireland | 1997           | FemaleLactAge40to44 | 1631       |
| Ireland | 1997           | FemaleLactAge45to49 | 115        |

Dietary calcium and zinc deficiency risks are decreasing but remain prevalent

| Country | Reference year | Age/gender group    | Population |
|---------|----------------|---------------------|------------|
| Ireland | 1997           | FemalePregAge15to19 | 2308       |
| Ireland | 1997           | FemalePregAge20to24 | 5695       |
| Ireland | 1997           | FemalePregAge25to29 | 10214      |
| Ireland | 1997           | FemalePregAge30to34 | 13776      |
| Ireland | 1997           | FemalePregAge35to39 | 7079       |
| Ireland | 1997           | FemalePregAge40to44 | 1223       |
| Ireland | 1997           | FemalePregAge45to49 | 86         |
| Ireland | 1997           | MaleAge0to4         | 132285     |
| Ireland | 1997           | MaleAge10to14       | 162376     |
| Ireland | 1997           | MaleAge15to19       | 169806     |
| Ireland | 1997           | MaleAge20to24       | 155271     |
| Ireland | 1997           | MaleAge25to29       | 135977     |
| Ireland | 1997           | MaleAge30to34       | 130755     |
| Ireland | 1997           | MaleAge35to39       | 128780     |
| Ireland | 1997           | MaleAge40to44       | 121763     |
| Ireland | 1997           | MaleAge45to49       | 116655     |
| Ireland | 1997           | MaleAge50to54       | 99551      |
| Ireland | 1997           | MaleAge55to59       | 80389      |
| Ireland | 1997           | MaleAge5to9         | 139556     |
| Ireland | 1997           | MaleAge60to64       | 69626      |
| Ireland | 1997           | MaleAge65to69       | 60031      |
| Ireland | 1997           | MaleAge70to74       | 49669      |
| Ireland | 1997           | MaleAge75to79       | 35452      |
| Ireland | 1997           | MaleAge80to84       | 21313      |
| Ireland | 1997           | MaleAge85to89       | 9488       |
| Ireland | 1997           | MaleAge90to94       | 2501       |
| Ireland | 1997           | MaleAge95to99       | 393        |
| Ireland | 1997           | MaleAgeAbove100     | 27         |
| Ireland | 1998           | FemaleAge0to4       | 125737     |
| Ireland | 1998           | FemaleAge10to14     | 149753     |
| Ireland | 1998           | FemaleAge15to19     | 156301     |
| Ireland | 1998           | FemaleAge20to24     | 139520     |
| Ireland | 1998           | FemaleAge25to29     | 115048     |
| Ireland | 1998           | FemaleAge30to34     | 103927     |
| Ireland | 1998           | FemaleAge35to39     | 119327     |
| Ireland | 1998           | FemaleAge40to44     | 122341     |
| Ireland | 1998           | FemaleAge45to49     | 116004     |
| Ireland | 1998           | FemaleAge50to54     | 101820     |
| Ireland | 1998           | FemaleAge55to59     | 81165      |
| Ireland | 1998           | FemaleAge5to9       | 130905     |
| Ireland | 1998           | FemaleAge60to64     | 71239      |
| Ireland | 1998           | FemaleAge65to69     | 65308      |
| Ireland | 1998           | FemaleAge70to74     | 61154      |
| Ireland | 1998           | FemaleAge75to79     | 50336      |
| Ireland | 1998           | FemaleAge80to84     | 34312      |
| Ireland | 1998           | FemaleAge85to89     | 19603      |
| Ireland | 1998           | FemaleAge90to94     | 6792       |
| Ireland | 1998           | FemaleAge95to99     | 1523       |
| Ireland | 1998           | FemaleAgeAbove100   | 128        |
| Ireland | 1998           | FemaleLactAge15to19 | 3077       |
| Ireland | 1998           | FemaleLactAge20to24 | 7593       |
| Ireland | 1998           | FemaleLactAge25to29 | 13619      |
| Ireland | 1998           | FemaleLactAge30to34 | 18367      |
| Ireland | 1998           | FemaleLactAge35to39 | 9438       |
| Ireland | 1998           | FemaleLactAge40to44 | 1631       |
| Ireland | 1998           | FemaleLactAge45to49 | 115        |
| Ireland | 1998           | FemalePregAge15to19 | 2308       |
| Ireland | 1998           | FemalePregAge20to24 | 5695       |
| Ireland | 1998           | FemalePregAge25to29 | 10214      |
| Ireland | 1998           | FemalePregAge30to34 | 13776      |
| Ireland | 1998           | FemalePregAge35to39 | 7079       |
| Ireland | 1998           | FemalePregAge40to44 | 1223       |
| Ireland | 1998           | FemalePregAge45to49 | 86         |
| Ireland | 1998           | MaleAge0to4         | 133584     |
| Ireland | 1998           | MaleAge10to14       | 157824     |
| Ireland | 1998           | MaleAge15to19       | 168968     |
| Ireland | 1998           | MaleAge20to24       | 156860     |
| Ireland | 1998           | MaleAge25to29       | 140426     |
| Ireland | 1998           | MaleAge30to34       | 132883     |
| Ireland | 1998           | MaleAge35to39       | 131846     |
| Ireland | 1998           | MaleAge40to44       | 124007     |
| Ireland | 1998           | MaleAge45to49       | 117614     |
| Ireland | 1998           | MaleAge50to54       | 104691     |
| Ireland | 1998           | MaleAge55to59       | 82800      |
| Ireland | 1998           | MaleAge5to9         | 137588     |
| Ireland | 1998           | MaleAge60to64       | 70880      |
| Ireland | 1998           | MaleAge65to69       | 60787      |
| Ireland | 1998           | MaleAge70to74       | 49514      |
| Ireland | 1998           | MaleAge75to79       | 35963      |
| Ireland | 1998           | MaleAge80to84       | 21064      |
| Ireland | 1998           | MaleAge85to89       | 9824       |
| Ireland | 1998           | MaleAge90to94       | 2568       |
| Ireland | 1998           | MaleAge95to99       | 435        |
| Ireland | 1998           | MaleAgeAbove100     | 27         |
| Ireland | 1999           | FemaleAge0to4       | 127461     |
| Ireland | 1999           | FemaleAge10to14     | 146129     |
| Ireland | 1999           | FemaleAge15to19     | 155287     |
| Ireland | 1999           | FemaleAge20to24     | 140843     |

Dietary calcium and zinc deficiency risks are decreasing but remain prevalent

| Country | Reference year | Age/gender group    | Population |
|---------|----------------|---------------------|------------|
| Ireland | 1999           | FemaleAge25to29     | 118435     |
| Ireland | 1999           | FemaleAge30to34     | 106122     |
| Ireland | 1999           | FemaleAge35to39     | 122501     |
| Ireland | 1999           | FemaleAge40to44     | 125417     |
| Ireland | 1999           | FemaleAge45to49     | 117467     |
| Ireland | 1999           | FemaleAge50to54     | 106757     |
| Ireland | 1999           | FemaleAge55to59     | 83969      |
| Ireland | 1999           | FemaleAge5to9       | 129961     |
| Ireland | 1999           | FemaleAge60to64     | 72948      |
| Ireland | 1999           | FemaleAge65to69     | 65542      |
| Ireland | 1999           | FemaleAge70to74     | 60894      |
| Ireland | 1999           | FemaleAge75to79     | 51275      |
| Ireland | 1999           | FemaleAge80to84     | 34419      |
| Ireland | 1999           | FemaleAge85to89     | 19944      |
| Ireland | 1999           | FemaleAge90to94     | 6786       |
| Ireland | 1999           | FemaleAge95to99     | 1551       |
| Ireland | 1999           | FemaleAgeAbove100   | 133        |
| Ireland | 1999           | FemaleLactAge15to19 | 3077       |
| Ireland | 1999           | FemaleLactAge20to24 | 7593       |
| Ireland | 1999           | FemaleLactAge25to29 | 13619      |
| Ireland | 1999           | FemaleLactAge30to34 | 18367      |
| Ireland | 1999           | FemaleLactAge35to39 | 9438       |
| Ireland | 1999           | FemaleLactAge40to44 | 1631       |
| Ireland | 1999           | FemaleLactAge45to49 | 115        |
| Ireland | 1999           | FemalePregAge15to19 | 2308       |
| Ireland | 1999           | FemalePregAge20to24 | 5695       |
| Ireland | 1999           | FemalePregAge25to29 | 10214      |
| Ireland | 1999           | FemalePregAge30to34 | 13776      |
| Ireland | 1999           | FemalePregAge35to39 | 7079       |
| Ireland | 1999           | FemalePregAge40to44 | 1223       |
| Ireland | 1999           | FemalePregAge45to49 | 86         |
| Ireland | 1999           | MaleAge0to4         | 135393     |
| Ireland | 1999           | MaleAge10to14       | 153814     |
| Ireland | 1999           | MaleAge15to19       | 168482     |
| Ireland | 1999           | MaleAge20to24       | 157538     |
| Ireland | 1999           | MaleAge25to29       | 144191     |
| Ireland | 1999           | MaleAge30to34       | 135772     |
| Ireland | 1999           | MaleAge35to39       | 135227     |
| Ireland | 1999           | MaleAge40to44       | 126960     |
| Ireland | 1999           | MaleAge45to49       | 118656     |
| Ireland | 1999           | MaleAge50to54       | 109727     |
| Ireland | 1999           | MaleAge55to59       | 85846      |
| Ireland | 1999           | MaleAge5to9         | 136683     |
| Ireland | 1999           | MaleAge60to64       | 72623      |
| Ireland | 1999           | MaleAge65to69       | 61951      |
| Ireland | 1999           | MaleAge70to74       | 49744      |
| Ireland | 1999           | MaleAge75to79       | 36475      |
| Ireland | 1999           | MaleAge80to84       | 20951      |
| Ireland | 1999           | MaleAge85to89       | 9782       |
| Ireland | 1999           | MaleAge90to94       | 2537       |
| Ireland | 1999           | MaleAge95to99       | 438        |
| Ireland | 1999           | MaleAgeAbove100     | 28         |
| Israel  | 1992           | FemaleAge0to4       | 245229     |
| Israel  | 1992           | FemaleAge10to14     | 232526     |
| Israel  | 1992           | FemaleAge15to19     | 215580     |
| Israel  | 1992           | FemaleAge20to24     | 147063     |
| Israel  | 1992           | FemaleAge25to29     | 111614     |
| Israel  | 1992           | FemaleAge30to34     | 120730     |
| Israel  | 1992           | FemaleAge35to39     | 147223     |
| Israel  | 1992           | FemaleAge40to44     | 152826     |
| Israel  | 1992           | FemaleAge45to49     | 113649     |
| Israel  | 1992           | FemaleAge50to54     | 91307      |
| Israel  | 1992           | FemaleAge55to59     | 89549      |
| Israel  | 1992           | FemaleAge5to9       | 234055     |
| Israel  | 1992           | FemaleAge60to64     | 87971      |
| Israel  | 1992           | FemaleAge65to69     | 81470      |
| Israel  | 1992           | FemaleAge70to74     | 62064      |
| Israel  | 1992           | FemaleAge75to79     | 49209      |
| Israel  | 1992           | FemaleAge80to84     | 32737      |
| Israel  | 1992           | FemaleAge85to89     | 13771      |
| Israel  | 1992           | FemaleAge90to94     | 4291       |
| Israel  | 1992           | FemaleAge95to99     | 761        |
| Israel  | 1992           | FemaleAgeAbove100   | 56         |
| Israel  | 1992           | FemaleLactAge15to19 | 4362       |
| Israel  | 1992           | FemaleLactAge20to24 | 26117      |
| Israel  | 1992           | FemaleLactAge25to29 | 34068      |
| Israel  | 1992           | FemaleLactAge30to34 | 24870      |
| Israel  | 1992           | FemaleLactAge35to39 | 12887      |
| Israel  | 1992           | FemaleLactAge40to44 | 2802       |
| Israel  | 1992           | FemaleLactAge45to49 | 184        |
| Israel  | 1992           | FemalePregAge15to19 | 3272       |
| Israel  | 1992           | FemalePregAge20to24 | 19588      |
| Israel  | 1992           | FemalePregAge25to29 | 25551      |
| Israel  | 1992           | FemalePregAge30to34 | 18653      |
| Israel  | 1992           | FemalePregAge35to39 | 9665       |
| Israel  | 1992           | FemalePregAge40to44 | 2101       |
| Israel  | 1992           | FemalePregAge45to49 | 138        |
| Israel  | 1992           | MaleAge0to4         | 257387     |

Dietary calcium and zinc deficiency risks are decreasing but remain prevalent

| Country | Reference year | Age/gender group    | Population |
|---------|----------------|---------------------|------------|
| Israel  | 1992           | MaleAge10to14       | 245008     |
| Israel  | 1992           | MaleAge15to19       | 233528     |
| Israel  | 1992           | MaleAge20to24       | 198809     |
| Israel  | 1992           | MaleAge25to29       | 174880     |
| Israel  | 1992           | MaleAge30to34       | 164104     |
| Israel  | 1992           | MaleAge35to39       | 166061     |
| Israel  | 1992           | MaleAge40to44       | 154832     |
| Israel  | 1992           | MaleAge45to49       | 111291     |
| Israel  | 1992           | MaleAge50to54       | 86290      |
| Israel  | 1992           | MaleAge55to59       | 81951      |
| Israel  | 1992           | MaleAge5to9         | 246304     |
| Israel  | 1992           | MaleAge60to64       | 73033      |
| Israel  | 1992           | MaleAge65to69       | 66786      |
| Israel  | 1992           | MaleAge70to74       | 50871      |
| Israel  | 1992           | MaleAge75to79       | 37889      |
| Israel  | 1992           | MaleAge80to84       | 25518      |
| Israel  | 1992           | MaleAge85to89       | 10844      |
| Israel  | 1992           | MaleAge90to94       | 3117       |
| Israel  | 1992           | MaleAge95to99       | 508        |
| Israel  | 1992           | MaleAgeAbove100     | 32         |
| Israel  | 1993           | FemaleAge0to4       | 248671     |
| Israel  | 1993           | FemaleAge10to14     | 237684     |
| Israel  | 1993           | FemaleAge15to19     | 222107     |
| Israel  | 1993           | FemaleAge20to24     | 158052     |
| Israel  | 1993           | FemaleAge25to29     | 117847     |
| Israel  | 1993           | FemaleAge30to34     | 126733     |
| Israel  | 1993           | FemaleAge35to39     | 149548     |
| Israel  | 1993           | FemaleAge40to44     | 163007     |
| Israel  | 1993           | FemaleAge45to49     | 127152     |
| Israel  | 1993           | FemaleAge50to54     | 93716      |
| Israel  | 1993           | FemaleAge55to59     | 92717      |
| Israel  | 1993           | FemaleAge5to9       | 240189     |
| Israel  | 1993           | FemaleAge60to64     | 91334      |
| Israel  | 1993           | FemaleAge65to69     | 85809      |
| Israel  | 1993           | FemaleAge70to74     | 68670      |
| Israel  | 1993           | FemaleAge75to79     | 50149      |
| Israel  | 1993           | FemaleAge80to84     | 35864      |
| Israel  | 1993           | FemaleAge85to89     | 14896      |
| Israel  | 1993           | FemaleAge90to94     | 4541       |
| Israel  | 1993           | FemaleAge95to99     | 888        |
| Israel  | 1993           | FemaleAgeAbove100   | 59         |
| Israel  | 1993           | FemaleLactAge15to19 | 4362       |
| Israel  | 1993           | FemaleLactAge20to24 | 26117      |
| Israel  | 1993           | FemaleLactAge25to29 | 34068      |
| Israel  | 1993           | FemaleLactAge30to34 | 24870      |
| Israel  | 1993           | FemaleLactAge35to39 | 12887      |
| Israel  | 1993           | FemaleLactAge40to44 | 2802       |
| Israel  | 1993           | FemaleLactAge45to49 | 184        |
| Israel  | 1993           | FemalePregAge15to19 | 3272       |
| Israel  | 1993           | FemalePregAge20to24 | 19588      |
| Israel  | 1993           | FemalePregAge25to29 | 25551      |
| Israel  | 1993           | FemalePregAge30to34 | 18653      |
| Israel  | 1993           | FemalePregAge35to39 | 9665       |
| Israel  | 1993           | FemalePregAge40to44 | 2101       |
| Israel  | 1993           | FemalePregAge45to49 | 138        |
| Israel  | 1993           | MaleAge0to4         | 261252     |
| Israel  | 1993           | MaleAge10to14       | 250324     |
| Israel  | 1993           | MaleAge15to19       | 240889     |
| Israel  | 1993           | MaleAge20to24       | 209668     |
| Israel  | 1993           | MaleAge25to29       | 179511     |
| Israel  | 1993           | MaleAge30to34       | 169188     |
| Israel  | 1993           | MaleAge35to39       | 166996     |
| Israel  | 1993           | MaleAge40to44       | 163337     |
| Israel  | 1993           | MaleAge45to49       | 124305     |
| Israel  | 1993           | MaleAge50to54       | 88631      |
| Israel  | 1993           | MaleAge55to59       | 84496      |
| Israel  | 1993           | MaleAge5to9         | 252231     |
| Israel  | 1993           | MaleAge60to64       | 77002      |
| Israel  | 1993           | MaleAge65to69       | 68056      |
| Israel  | 1993           | MaleAge70to74       | 55648      |
| Israel  | 1993           | MaleAge75to79       | 37775      |
| Israel  | 1993           | MaleAge80to84       | 26906      |
| Israel  | 1993           | MaleAge85to89       | 11640      |
| Israel  | 1993           | MaleAge90to94       | 3272       |
| Israel  | 1993           | MaleAge95to99       | 599        |
| Israel  | 1993           | MaleAgeAbove100     | 34         |
| Israel  | 1994           | FemaleAge0to4       | 252399     |
| Israel  | 1994           | FemaleAge10to14     | 243001     |
| Israel  | 1994           | FemaleAge15to19     | 228102     |
| Israel  | 1994           | FemaleAge20to24     | 168005     |
| Israel  | 1994           | FemaleAge25to29     | 124654     |
| Israel  | 1994           | FemaleAge30to34     | 132735     |
| Israel  | 1994           | FemaleAge35to39     | 151890     |
| Israel  | 1994           | FemaleAge40to44     | 171352     |
| Israel  | 1994           | FemaleAge45to49     | 141323     |
| Israel  | 1994           | FemaleAge50to54     | 97783      |
| Israel  | 1994           | FemaleAge55to59     | 95218      |
| Israel  | 1994           | FemaleAge5to9       | 245623     |

Dietary calcium and zinc deficiency risks are decreasing but remain prevalent

| Country | Reference year | Age/gender group    | Population |
|---------|----------------|---------------------|------------|
| Israel  | 1994           | FemaleAge60to64     | 94712      |
| Israel  | 1994           | FemaleAge65to69     | 89771      |
| Israel  | 1994           | FemaleAge70to74     | 75341      |
| Israel  | 1994           | FemaleAge75to79     | 52407      |
| Israel  | 1994           | FemaleAge80to84     | 38747      |
| Israel  | 1994           | FemaleAge85to89     | 16239      |
| Israel  | 1994           | FemaleAge90to94     | 4753       |
| Israel  | 1994           | FemaleAge95to99     | 939        |
| Israel  | 1994           | FemaleAgeAbove100   | 63         |
| Israel  | 1994           | FemaleLactAge15to19 | 4362       |
| Israel  | 1994           | FemaleLactAge20to24 | 26117      |
| Israel  | 1994           | FemaleLactAge25to29 | 34068      |
| Israel  | 1994           | FemaleLactAge30to34 | 24870      |
| Israel  | 1994           | FemaleLactAge35to39 | 12887      |
| Israel  | 1994           | FemaleLactAge40to44 | 2802       |
| Israel  | 1994           | FemaleLactAge45to49 | 184        |
| Israel  | 1994           | FemalePregAge15to19 | 3272       |
| Israel  | 1994           | FemalePregAge20to24 | 19588      |
| Israel  | 1994           | FemalePregAge25to29 | 25551      |
| Israel  | 1994           | FemalePregAge30to34 | 18653      |
| Israel  | 1994           | FemalePregAge35to39 | 9665       |
| Israel  | 1994           | FemalePregAge40to44 | 2101       |
| Israel  | 1994           | FemalePregAge45to49 | 138        |
| Israel  | 1994           | MaleAge0to4         | 265549     |
| Israel  | 1994           | MaleAge10to14       | 255562     |
| Israel  | 1994           | MaleAge15to19       | 247938     |
| Israel  | 1994           | MaleAge20to24       | 220019     |
| Israel  | 1994           | MaleAge25to29       | 184982     |
| Israel  | 1994           | MaleAge30to34       | 174273     |
| Israel  | 1994           | MaleAge35to39       | 167888     |
| Israel  | 1994           | MaleAge40to44       | 170006     |
| Israel  | 1994           | MaleAge45to49       | 137630     |
| Israel  | 1994           | MaleAge50to54       | 92738      |
| Israel  | 1994           | MaleAge55to59       | 86522      |
| Israel  | 1994           | MaleAge5to9         | 257532     |
| Israel  | 1994           | MaleAge60to64       | 81003      |
| Israel  | 1994           | MaleAge65to69       | 69658      |
| Israel  | 1994           | MaleAge70to74       | 60133      |
| Israel  | 1994           | MaleAge75to79       | 38750      |
| Israel  | 1994           | MaleAge80to84       | 27988      |
| Israel  | 1994           | MaleAge85to89       | 12362      |
| Israel  | 1994           | MaleAge90to94       | 3384       |
| Israel  | 1994           | MaleAge95to99       | 631        |
| Israel  | 1994           | MaleAgeAbove100     | 37         |
| Israel  | 1995           | FemaleAge0to4       | 257339     |
| Israel  | 1995           | FemaleAge10to14     | 247713     |
| Israel  | 1995           | FemaleAge15to19     | 233284     |
| Israel  | 1995           | FemaleAge20to24     | 175984     |
| Israel  | 1995           | FemaleAge25to29     | 131779     |
| Israel  | 1995           | FemaleAge30to34     | 137900     |
| Israel  | 1995           | FemaleAge35to39     | 154543     |
| Israel  | 1995           | FemaleAge40to44     | 177384     |
| Israel  | 1995           | FemaleAge45to49     | 154368     |
| Israel  | 1995           | FemaleAge50to54     | 104278     |
| Israel  | 1995           | FemaleAge55to59     | 96909      |
| Israel  | 1995           | FemaleAge5to9       | 249220     |
| Israel  | 1995           | FemaleAge60to64     | 97625      |
| Israel  | 1995           | FemaleAge65to69     | 93348      |
| Israel  | 1995           | FemaleAge70to74     | 81268      |
| Israel  | 1995           | FemaleAge75to79     | 56250      |
| Israel  | 1995           | FemaleAge80to84     | 41146      |
| Israel  | 1995           | FemaleAge85to89     | 17918      |
| Israel  | 1995           | FemaleAge90to94     | 4968       |
| Israel  | 1995           | FemaleAge95to99     | 848        |
| Israel  | 1995           | FemaleAgeAbove100   | 68         |
| Israel  | 1995           | FemaleLactAge15to19 | 4362       |
| Israel  | 1995           | FemaleLactAge20to24 | 26117      |
| Israel  | 1995           | FemaleLactAge25to29 | 34068      |
| Israel  | 1995           | FemaleLactAge30to34 | 24870      |
| Israel  | 1995           | FemaleLactAge35to39 | 12887      |
| Israel  | 1995           | FemaleLactAge40to44 | 2802       |
| Israel  | 1995           | FemaleLactAge45to49 | 184        |
| Israel  | 1995           | FemalePregAge15to19 | 3272       |
| Israel  | 1995           | FemalePregAge20to24 | 19588      |
| Israel  | 1995           | FemalePregAge25to29 | 25551      |
| Israel  | 1995           | FemalePregAge30to34 | 18653      |
| Israel  | 1995           | FemalePregAge35to39 | 9665       |
| Israel  | 1995           | FemalePregAge40to44 | 2101       |
| Israel  | 1995           | FemalePregAge45to49 | 138        |
| Israel  | 1995           | MaleAge0to4         | 271192     |
| Israel  | 1995           | MaleAge10to14       | 260192     |
| Israel  | 1995           | MaleAge15to19       | 254240     |
| Israel  | 1995           | MaleAge20to24       | 228951     |
| Israel  | 1995           | MaleAge25to29       | 191394     |
| Israel  | 1995           | MaleAge30to34       | 178512     |
| Israel  | 1995           | MaleAge35to39       | 169247     |
| Israel  | 1995           | MaleAge40to44       | 174498     |
| Israel  | 1995           | MaleAge45to49       | 149589     |

Dietary calcium and zinc deficiency risks are decreasing but remain prevalent

| Country | Reference year | Age/gender group    | Population |
|---------|----------------|---------------------|------------|
| Israel  | 1995           | MaleAge50to54       | 99274      |
| Israel  | 1995           | MaleAge55to59       | 88109      |
| Israel  | 1995           | MaleAge5to9         | 261240     |
| Israel  | 1995           | MaleAge60to64       | 84333      |
| Israel  | 1995           | MaleAge65to69       | 71944      |
| Israel  | 1995           | MaleAge70to74       | 63654      |
| Israel  | 1995           | MaleAge75to79       | 41048      |
| Israel  | 1995           | MaleAge80to84       | 28709      |
| Israel  | 1995           | MaleAge85to89       | 13046      |
| Israel  | 1995           | MaleAge90to94       | 3465       |
| Israel  | 1995           | MaleAge95to99       | 545        |
| Israel  | 1995           | MaleAgeAbov e100    | 41         |
| Israel  | 1996           | FemaleAge0to4       | 264755     |
| Israel  | 1996           | FemaleAge10to14     | 251279     |
| Israel  | 1996           | FemaleAge15to19     | 238526     |
| Israel  | 1996           | FemaleAge20to24     | 180273     |
| Israel  | 1996           | FemaleAge25to29     | 129267     |
| Israel  | 1996           | FemaleAge30to34     | 133269     |
| Israel  | 1996           | FemaleAge35to39     | 153347     |
| Israel  | 1996           | FemaleAge40to44     | 179915     |
| Israel  | 1996           | FemaleAge45to49     | 165293     |
| Israel  | 1996           | FemaleAge50to54     | 114002     |
| Israel  | 1996           | FemaleAge55to59     | 98821      |
| Israel  | 1996           | FemaleAge5to9       | 253047     |
| Israel  | 1996           | FemaleAge60to64     | 99047      |
| Israel  | 1996           | FemaleAge65to69     | 95374      |
| Israel  | 1996           | FemaleAge70to74     | 83971      |
| Israel  | 1996           | FemaleAge75to79     | 58634      |
| Israel  | 1996           | FemaleAge80to84     | 41837      |
| Israel  | 1996           | FemaleAge85to89     | 19992      |
| Israel  | 1996           | FemaleAge90to94     | 5803       |
| Israel  | 1996           | FemaleAge95to99     | 945        |
| Israel  | 1996           | FemaleAgeAbov e100  | 75         |
| Israel  | 1996           | FemaleLactAge15to19 | 4389       |
| Israel  | 1996           | FemaleLactAge20to24 | 28228      |
| Israel  | 1996           | FemaleLactAge25to29 | 39888      |
| Israel  | 1996           | FemaleLactAge30to34 | 29880      |
| Israel  | 1996           | FemaleLactAge35to39 | 15017      |
| Israel  | 1996           | FemaleLactAge40to44 | 3580       |
| Israel  | 1996           | FemaleLactAge45to49 | 233        |
| Israel  | 1996           | FemalePregAge15to19 | 3292       |
| Israel  | 1996           | FemalePregAge20to24 | 21171      |
| Israel  | 1996           | FemalePregAge25to29 | 29916      |
| Israel  | 1996           | FemalePregAge30to34 | 22410      |
| Israel  | 1996           | FemalePregAge35to39 | 11263      |
| Israel  | 1996           | FemalePregAge40to44 | 2685       |
| Israel  | 1996           | FemalePregAge45to49 | 175        |
| Israel  | 1996           | MaleAge0to4         | 279139     |
| Israel  | 1996           | MaleAge10to14       | 263729     |
| Israel  | 1996           | MaleAge15to19       | 260247     |
| Israel  | 1996           | MaleAge20to24       | 237997     |
| Israel  | 1996           | MaleAge25to29       | 198519     |
| Israel  | 1996           | MaleAge30to34       | 181428     |
| Israel  | 1996           | MaleAge35to39       | 170939     |
| Israel  | 1996           | MaleAge40to44       | 176680     |
| Israel  | 1996           | MaleAge45to49       | 159181     |
| Israel  | 1996           | MaleAge50to54       | 108343     |
| Israel  | 1996           | MaleAge55to59       | 89743      |
| Israel  | 1996           | MaleAge5to9         | 265000     |
| Israel  | 1996           | MaleAge60to64       | 85950      |
| Israel  | 1996           | MaleAge65to69       | 73819      |
| Israel  | 1996           | MaleAge70to74       | 64904      |
| Israel  | 1996           | MaleAge75to79       | 43123      |
| Israel  | 1996           | MaleAge80to84       | 28924      |
| Israel  | 1996           | MaleAge85to89       | 14202      |
| Israel  | 1996           | MaleAge90to94       | 4103       |
| Israel  | 1996           | MaleAge95to99       | 604        |
| Israel  | 1996           | MaleAgeAbov e100    | 45         |
| Israel  | 1997           | FemaleAge0to4       | 273528     |
| Israel  | 1997           | FemaleAge10to14     | 253706     |
| Israel  | 1997           | FemaleAge15to19     | 242466     |
| Israel  | 1997           | FemaleAge20to24     | 186720     |
| Israel  | 1997           | FemaleAge25to29     | 137372     |
| Israel  | 1997           | FemaleAge30to34     | 136583     |
| Israel  | 1997           | FemaleAge35to39     | 156185     |
| Israel  | 1997           | FemaleAge40to44     | 181283     |
| Israel  | 1997           | FemaleAge45to49     | 174591     |
| Israel  | 1997           | FemaleAge50to54     | 125934     |
| Israel  | 1997           | FemaleAge55to59     | 100309     |
| Israel  | 1997           | FemaleAge5to9       | 256347     |
| Israel  | 1997           | FemaleAge60to64     | 100348     |
| Israel  | 1997           | FemaleAge65to69     | 97181      |
| Israel  | 1997           | FemaleAge70to74     | 86240      |
| Israel  | 1997           | FemaleAge75to79     | 61904      |
| Israel  | 1997           | FemaleAge80to84     | 41712      |
| Israel  | 1997           | FemaleAge85to89     | 22148      |
| Israel  | 1997           | FemaleAge90to94     | 6453       |
| Israel  | 1997           | FemaleAge95to99     | 1066       |

Dietary calcium and zinc deficiency risks are decreasing but remain prevalent

| Country | Reference year | Age/gender group    | Population |
|---------|----------------|---------------------|------------|
| Israel  | 1997           | FemaleAgeAbove100   | 82         |
| Israel  | 1997           | FemaleLactAge15to19 | 4389       |
| Israel  | 1997           | FemaleLactAge20to24 | 28228      |
| Israel  | 1997           | FemaleLactAge25to29 | 39888      |
| Israel  | 1997           | FemaleLactAge30to34 | 29880      |
| Israel  | 1997           | FemaleLactAge35to39 | 15017      |
| Israel  | 1997           | FemaleLactAge40to44 | 3580       |
| Israel  | 1997           | FemaleLactAge45to49 | 233        |
| Israel  | 1997           | FemalePregAge15to19 | 3292       |
| Israel  | 1997           | FemalePregAge20to24 | 21171      |
| Israel  | 1997           | FemalePregAge25to29 | 29916      |
| Israel  | 1997           | FemalePregAge30to34 | 22410      |
| Israel  | 1997           | FemalePregAge35to39 | 11263      |
| Israel  | 1997           | FemalePregAge40to44 | 2685       |
| Israel  | 1997           | FemalePregAge45to49 | 175        |
| Israel  | 1997           | MaleAge0to4         | 288547     |
| Israel  | 1997           | MaleAge10to14       | 266157     |
| Israel  | 1997           | MaleAge15to19       | 264721     |
| Israel  | 1997           | MaleAge20to24       | 246107     |
| Israel  | 1997           | MaleAge25to29       | 206904     |
| Israel  | 1997           | MaleAge30to34       | 183347     |
| Israel  | 1997           | MaleAge35to39       | 173242     |
| Israel  | 1997           | MaleAge40to44       | 176549     |
| Israel  | 1997           | MaleAge45to49       | 166926     |
| Israel  | 1997           | MaleAge50to54       | 119620     |
| Israel  | 1997           | MaleAge55to59       | 91132      |
| Israel  | 1997           | MaleAge5to9         | 268493     |
| Israel  | 1997           | MaleAge60to64       | 87163      |
| Israel  | 1997           | MaleAge65to69       | 76272      |
| Israel  | 1997           | MaleAge70to74       | 65366      |
| Israel  | 1997           | MaleAge75to79       | 45987      |
| Israel  | 1997           | MaleAge80to84       | 28633      |
| Israel  | 1997           | MaleAge85to89       | 15283      |
| Israel  | 1997           | MaleAge90to94       | 4608       |
| Israel  | 1997           | MaleAge95to99       | 673        |
| Israel  | 1997           | MaleAgeAbove100     | 50         |
| Israel  | 1998           | FemaleAge0to4       | 283017     |
| Israel  | 1998           | FemaleAge10to14     | 255241     |
| Israel  | 1998           | FemaleAge15to19     | 245246     |
| Israel  | 1998           | FemaleAge20to24     | 191805     |
| Israel  | 1998           | FemaleAge25to29     | 145445     |
| Israel  | 1998           | FemaleAge30to34     | 139548     |
| Israel  | 1998           | FemaleAge35to39     | 159193     |
| Israel  | 1998           | FemaleAge40to44     | 180888     |
| Israel  | 1998           | FemaleAge45to49     | 182087     |
| Israel  | 1998           | FemaleAge50to54     | 138943     |
| Israel  | 1998           | FemaleAge55to59     | 102188     |
| Israel  | 1998           | FemaleAge5to9       | 259433     |
| Israel  | 1998           | FemaleAge60to64     | 101615     |
| Israel  | 1998           | FemaleAge65to69     | 98675      |
| Israel  | 1998           | FemaleAge70to74     | 88314      |
| Israel  | 1998           | FemaleAge75to79     | 65651      |
| Israel  | 1998           | FemaleAge80to84     | 41446      |
| Israel  | 1998           | FemaleAge85to89     | 24070      |
| Israel  | 1998           | FemaleAge90to94     | 6947       |
| Israel  | 1998           | FemaleAge95to99     | 1191       |
| Israel  | 1998           | FemaleAgeAbove100   | 92         |
| Israel  | 1998           | FemaleLactAge15to19 | 4389       |
| Israel  | 1998           | FemaleLactAge20to24 | 28228      |
| Israel  | 1998           | FemaleLactAge25to29 | 39888      |
| Israel  | 1998           | FemaleLactAge30to34 | 29880      |
| Israel  | 1998           | FemaleLactAge35to39 | 15017      |
| Israel  | 1998           | FemaleLactAge40to44 | 3580       |
| Israel  | 1998           | FemaleLactAge45to49 | 233        |
| Israel  | 1998           | FemalePregAge15to19 | 3292       |
| Israel  | 1998           | FemalePregAge20to24 | 21171      |
| Israel  | 1998           | FemalePregAge25to29 | 29916      |
| Israel  | 1998           | FemalePregAge30to34 | 22410      |
| Israel  | 1998           | FemalePregAge35to39 | 11263      |
| Israel  | 1998           | FemalePregAge40to44 | 2685       |
| Israel  | 1998           | FemalePregAge45to49 | 175        |
| Israel  | 1998           | MaleAge0to4         | 298728     |
| Israel  | 1998           | MaleAge10to14       | 267665     |
| Israel  | 1998           | MaleAge15to19       | 267805     |
| Israel  | 1998           | MaleAge20to24       | 253248     |
| Israel  | 1998           | MaleAge25to29       | 216099     |
| Israel  | 1998           | MaleAge30to34       | 184953     |
| Israel  | 1998           | MaleAge35to39       | 175821     |
| Israel  | 1998           | MaleAge40to44       | 174925     |
| Israel  | 1998           | MaleAge45to49       | 172741     |
| Israel  | 1998           | MaleAge50to54       | 131968     |
| Israel  | 1998           | MaleAge55to59       | 93019      |
| Israel  | 1998           | MaleAge5to9         | 272054     |
| Israel  | 1998           | MaleAge60to64       | 88167      |
| Israel  | 1998           | MaleAge65to69       | 78907      |
| Israel  | 1998           | MaleAge70to74       | 65584      |
| Israel  | 1998           | MaleAge75to79       | 49128      |
| Israel  | 1998           | MaleAge80to84       | 28339      |

Dietary calcium and zinc deficiency risks are decreasing but remain prevalent

| Country | Reference year | Age/gender group    | Population |
|---------|----------------|---------------------|------------|
| Israel  | 1998           | MaleAge85to89       | 16136      |
| Israel  | 1998           | MaleAge90to94       | 4939       |
| Israel  | 1998           | MaleAge95to99       | 753        |
| Israel  | 1998           | MaleAgeAbove100     | 55         |
| Israel  | 1999           | FemaleAge0to4       | 291702     |
| Israel  | 1999           | FemaleAge10to14     | 256365     |
| Israel  | 1999           | FemaleAge15to19     | 247220     |
| Israel  | 1999           | FemaleAge20to24     | 195973     |
| Israel  | 1999           | FemaleAge25to29     | 152880     |
| Israel  | 1999           | FemaleAge30to34     | 143016     |
| Israel  | 1999           | FemaleAge35to39     | 162005     |
| Israel  | 1999           | FemaleAge40to44     | 180145     |
| Israel  | 1999           | FemaleAge45to49     | 187811     |
| Israel  | 1999           | FemaleAge50to54     | 151403     |
| Israel  | 1999           | FemaleAge55to59     | 105813     |
| Israel  | 1999           | FemaleAge5to9       | 262781     |
| Israel  | 1999           | FemaleAge60to64     | 102877     |
| Israel  | 1999           | FemaleAge65to69     | 99918      |
| Israel  | 1999           | FemaleAge70to74     | 90459      |
| Israel  | 1999           | FemaleAge75to79     | 69338      |
| Israel  | 1999           | FemaleAge80to84     | 41886      |
| Israel  | 1999           | FemaleAge85to89     | 25381      |
| Israel  | 1999           | FemaleAge90to94     | 7417       |
| Israel  | 1999           | FemaleAge95to99     | 1287       |
| Israel  | 1999           | FemaleAgeAbove100   | 101        |
| Israel  | 1999           | FemaleLactAge15to19 | 4389       |
| Israel  | 1999           | FemaleLactAge20to24 | 28228      |
| Israel  | 1999           | FemaleLactAge25to29 | 39888      |
| Israel  | 1999           | FemaleLactAge30to34 | 29880      |
| Israel  | 1999           | FemaleLactAge35to39 | 15017      |
| Israel  | 1999           | FemaleLactAge40to44 | 3580       |
| Israel  | 1999           | FemaleLactAge45to49 | 233        |
| Israel  | 1999           | FemalePregAge15to19 | 3292       |
| Israel  | 1999           | FemalePregAge20to24 | 21171      |
| Israel  | 1999           | FemalePregAge25to29 | 29916      |
| Israel  | 1999           | FemalePregAge30to34 | 22410      |
| Israel  | 1999           | FemalePregAge35to39 | 11263      |
| Israel  | 1999           | FemalePregAge40to44 | 2685       |
| Israel  | 1999           | FemalePregAge45to49 | 175        |
| Israel  | 1999           | MaleAge0to4         | 308088     |
| Israel  | 1999           | MaleAge10to14       | 268737     |
| Israel  | 1999           | MaleAge15to19       | 269943     |
| Israel  | 1999           | MaleAge20to24       | 259524     |
| Israel  | 1999           | MaleAge25to29       | 225321     |
| Israel  | 1999           | MaleAge30to34       | 187481     |
| Israel  | 1999           | MaleAge35to39       | 178053     |
| Israel  | 1999           | MaleAge40to44       | 173190     |
| Israel  | 1999           | MaleAge45to49       | 176754     |
| Israel  | 1999           | MaleAge50to54       | 143681     |
| Israel  | 1999           | MaleAge55to59       | 96634      |
| Israel  | 1999           | MaleAge5to9         | 276085     |
| Israel  | 1999           | MaleAge60to64       | 89204      |
| Israel  | 1999           | MaleAge65to69       | 81252      |
| Israel  | 1999           | MaleAge70to74       | 66283      |
| Israel  | 1999           | MaleAge75to79       | 51874      |
| Israel  | 1999           | MaleAge80to84       | 28659      |
| Israel  | 1999           | MaleAge85to89       | 16588      |
| Israel  | 1999           | MaleAge90to94       | 5124       |
| Israel  | 1999           | MaleAge95to99       | 821        |
| Israel  | 1999           | MaleAgeAbove100     | 61         |
| Italy   | 1992           | FemaleAge0to4       | 1345577    |
| Italy   | 1992           | FemaleAge10to14     | 1624056    |
| Italy   | 1992           | FemaleAge15to19     | 1998214    |
| Italy   | 1992           | FemaleAge20to24     | 2069065    |
| Italy   | 1992           | FemaleAge25to29     | 1923838    |
| Italy   | 1992           | FemaleAge30to34     | 1826364    |
| Italy   | 1992           | FemaleAge35to39     | 1801129    |
| Italy   | 1992           | FemaleAge40to44     | 1938478    |
| Italy   | 1992           | FemaleAge45to49     | 1815637    |
| Italy   | 1992           | FemaleAge50to54     | 1789548    |
| Italy   | 1992           | FemaleAge55to59     | 1797212    |
| Italy   | 1992           | FemaleAge5to9       | 1385197    |
| Italy   | 1992           | FemaleAge60to64     | 1716934    |
| Italy   | 1992           | FemaleAge65to69     | 1704380    |
| Italy   | 1992           | FemaleAge70to74     | 1178819    |
| Italy   | 1992           | FemaleAge75to79     | 1004406    |
| Italy   | 1992           | FemaleAge80to84     | 843481     |
| Italy   | 1992           | FemaleAge85to89     | 408008     |
| Italy   | 1992           | FemaleAge90to94     | 140740     |
| Italy   | 1992           | FemaleAge95to99     | 27941      |
| Italy   | 1992           | FemaleAgeAbove100   | 2205       |
| Italy   | 1992           | FemaleLactAge15to19 | 15757      |
| Italy   | 1992           | FemaleLactAge20to24 | 105142     |
| Italy   | 1992           | FemaleLactAge25to29 | 205329     |
| Italy   | 1992           | FemaleLactAge30to34 | 157263     |
| Italy   | 1992           | FemaleLactAge35to39 | 59142      |
| Italy   | 1992           | FemaleLactAge40to44 | 10806      |
| Italy   | 1992           | FemalePregAge15to19 | 11818      |



Dietary calcium and zinc deficiency risks are decreasing but remain prevalent

| Country | Reference year | Age/gender group    | Population |
|---------|----------------|---------------------|------------|
| Italy   | 1992           | FemalePregAge20to24 | 78856      |
| Italy   | 1992           | FemalePregAge25to29 | 153997     |
| Italy   | 1992           | FemalePregAge30to34 | 117947     |
| Italy   | 1992           | FemalePregAge35to39 | 44357      |
| Italy   | 1992           | FemalePregAge40to44 | 8104       |
| Italy   | 1992           | MaleAge0to4         | 1424336    |
| Italy   | 1992           | MaleAge10to14       | 1699130    |
| Italy   | 1992           | MaleAge15to19       | 2104904    |
| Italy   | 1992           | MaleAge20to24       | 2322880    |
| Italy   | 1992           | MaleAge25to29       | 2325709    |
| Italy   | 1992           | MaleAge30to34       | 2120662    |
| Italy   | 1992           | MaleAge35to39       | 1898514    |
| Italy   | 1992           | MaleAge40to44       | 1934531    |
| Italy   | 1992           | MaleAge45to49       | 1774325    |
| Italy   | 1992           | MaleAge50to54       | 1712314    |
| Italy   | 1992           | MaleAge55to59       | 1670558    |
| Italy   | 1992           | MaleAge5to9         | 1464171    |
| Italy   | 1992           | MaleAge60to64       | 1524273    |
| Italy   | 1992           | MaleAge65to69       | 1373650    |
| Italy   | 1992           | MaleAge70to74       | 865548     |
| Italy   | 1992           | MaleAge75to79       | 653702     |
| Italy   | 1992           | MaleAge80to84       | 476672     |
| Italy   | 1992           | MaleAge85to89       | 181084     |
| Italy   | 1992           | MaleAge90to94       | 48903      |
| Italy   | 1992           | MaleAge95to99       | 8223       |
| Italy   | 1992           | MaleAgeAbove100     | 609        |
| Italy   | 1993           | FemaleAge0to4       | 1340160    |
| Italy   | 1993           | FemaleAge10to14     | 1564675    |
| Italy   | 1993           | FemaleAge15to19     | 1914303    |
| Italy   | 1993           | FemaleAge20to24     | 2056307    |
| Italy   | 1993           | FemaleAge25to29     | 1925232    |
| Italy   | 1993           | FemaleAge30to34     | 1884497    |
| Italy   | 1993           | FemaleAge35to39     | 1824342    |
| Italy   | 1993           | FemaleAge40to44     | 1907834    |
| Italy   | 1993           | FemaleAge45to49     | 1879490    |
| Italy   | 1993           | FemaleAge50to54     | 1749849    |
| Italy   | 1993           | FemaleAge55to59     | 1815258    |
| Italy   | 1993           | FemaleAge5to9       | 1368087    |
| Italy   | 1993           | FemaleAge60to64     | 1717347    |
| Italy   | 1993           | FemaleAge65to69     | 1687269    |
| Italy   | 1993           | FemaleAge70to74     | 1321664    |
| Italy   | 1993           | FemaleAge75to79     | 917664     |
| Italy   | 1993           | FemaleAge80to84     | 886027     |
| Italy   | 1993           | FemaleAge85to89     | 430431     |
| Italy   | 1993           | FemaleAge90to94     | 146714     |
| Italy   | 1993           | FemaleAge95to99     | 31739      |
| Italy   | 1993           | FemaleAgeAbove100   | 2407       |
| Italy   | 1993           | FemaleLactAge15to19 | 15757      |
| Italy   | 1993           | FemaleLactAge20to24 | 105142     |
| Italy   | 1993           | FemaleLactAge25to29 | 205329     |
| Italy   | 1993           | FemaleLactAge30to34 | 157263     |
| Italy   | 1993           | FemaleLactAge35to39 | 59142      |
| Italy   | 1993           | FemaleLactAge40to44 | 10806      |
| Italy   | 1993           | FemalePregAge15to19 | 11818      |
| Italy   | 1993           | FemalePregAge20to24 | 78856      |
| Italy   | 1993           | FemalePregAge25to29 | 153997     |
| Italy   | 1993           | FemalePregAge30to34 | 117947     |
| Italy   | 1993           | FemalePregAge35to39 | 44357      |
| Italy   | 1993           | FemalePregAge40to44 | 8104       |
| Italy   | 1993           | MaleAge0to4         | 1419879    |
| Italy   | 1993           | MaleAge10to14       | 1639901    |
| Italy   | 1993           | MaleAge15to19       | 2015200    |
| Italy   | 1993           | MaleAge20to24       | 2309569    |
| Italy   | 1993           | MaleAge25to29       | 2328633    |
| Italy   | 1993           | MaleAge30to34       | 2178684    |
| Italy   | 1993           | MaleAge35to39       | 1924470    |
| Italy   | 1993           | MaleAge40to44       | 1902956    |
| Italy   | 1993           | MaleAge45to49       | 1840238    |
| Italy   | 1993           | MaleAge50to54       | 1676581    |
| Italy   | 1993           | MaleAge55to59       | 1692453    |
| Italy   | 1993           | MaleAge5to9         | 1446393    |
| Italy   | 1993           | MaleAge60to64       | 1527554    |
| Italy   | 1993           | MaleAge65to69       | 1375087    |
| Italy   | 1993           | MaleAge70to74       | 968888     |
| Italy   | 1993           | MaleAge75to79       | 591851     |
| Italy   | 1993           | MaleAge80to84       | 505936     |
| Italy   | 1993           | MaleAge85to89       | 191343     |
| Italy   | 1993           | MaleAge90to94       | 51157      |
| Italy   | 1993           | MaleAge95to99       | 9449       |
| Italy   | 1993           | MaleAgeAbove100     | 640        |
| Italy   | 1994           | FemaleAge0to4       | 1332782    |
| Italy   | 1994           | FemaleAge10to14     | 1511884    |
| Italy   | 1994           | FemaleAge15to19     | 1829758    |
| Italy   | 1994           | FemaleAge20to24     | 2029725    |
| Italy   | 1994           | FemaleAge25to29     | 1921819    |
| Italy   | 1994           | FemaleAge30to34     | 1935850    |
| Italy   | 1994           | FemaleAge35to39     | 1856024    |
| Italy   | 1994           | FemaleAge40to44     | 1881186    |

Dietary calcium and zinc deficiency risks are decreasing but remain prevalent

| Country | Reference year | Age/gender group    | Population |
|---------|----------------|---------------------|------------|
| Italy   | 1994           | FemaleAge45to49     | 1931864    |
| Italy   | 1994           | FemaleAge50to54     | 1725119    |
| Italy   | 1994           | FemaleAge55to59     | 1824126    |
| Italy   | 1994           | FemaleAge5to9       | 1357488    |
| Italy   | 1994           | FemaleAge60to64     | 1721753    |
| Italy   | 1994           | FemaleAge65to69     | 1667653    |
| Italy   | 1994           | FemaleAge70to74     | 1448094    |
| Italy   | 1994           | FemaleAge75to79     | 868469     |
| Italy   | 1994           | FemaleAge80to84     | 910046     |
| Italy   | 1994           | FemaleAge85to89     | 453153     |
| Italy   | 1994           | FemaleAge90to94     | 151164     |
| Italy   | 1994           | FemaleAge95to99     | 33423      |
| Italy   | 1994           | FemaleAgeAbove100   | 2629       |
| Italy   | 1994           | FemaleLactAge15to19 | 15757      |
| Italy   | 1994           | FemaleLactAge20to24 | 105142     |
| Italy   | 1994           | FemaleLactAge25to29 | 205329     |
| Italy   | 1994           | FemaleLactAge30to34 | 157263     |
| Italy   | 1994           | FemaleLactAge35to39 | 59142      |
| Italy   | 1994           | FemaleLactAge40to44 | 10806      |
| Italy   | 1994           | FemalePregAge15to19 | 11818      |
| Italy   | 1994           | FemalePregAge20to24 | 78856      |
| Italy   | 1994           | FemalePregAge25to29 | 153997     |
| Italy   | 1994           | FemalePregAge30to34 | 117947     |
| Italy   | 1994           | FemalePregAge35to39 | 44357      |
| Italy   | 1994           | FemalePregAge40to44 | 8104       |
| Italy   | 1994           | MaleAge0to4         | 1413273    |
| Italy   | 1994           | MaleAge10to14       | 1587877    |
| Italy   | 1994           | MaleAge15to19       | 1926454    |
| Italy   | 1994           | MaleAge20to24       | 2280905    |
| Italy   | 1994           | MaleAge25to29       | 2326910    |
| Italy   | 1994           | MaleAge30to34       | 2229740    |
| Italy   | 1994           | MaleAge35to39       | 1958738    |
| Italy   | 1994           | MaleAge40to44       | 1875717    |
| Italy   | 1994           | MaleAge45to49       | 1894469    |
| Italy   | 1994           | MaleAge50to54       | 1655736    |
| Italy   | 1994           | MaleAge55to59       | 1706056    |
| Italy   | 1994           | MaleAge5to9         | 1434916    |
| Italy   | 1994           | MaleAge60to64       | 1535626    |
| Italy   | 1994           | MaleAge65to69       | 1375003    |
| Italy   | 1994           | MaleAge70to74       | 1059745    |
| Italy   | 1994           | MaleAge75to79       | 559874     |
| Italy   | 1994           | MaleAge80to84       | 517202     |
| Italy   | 1994           | MaleAge85to89       | 200778     |
| Italy   | 1994           | MaleAge90to94       | 52315      |
| Italy   | 1994           | MaleAge95to99       | 9726       |
| Italy   | 1994           | MaleAgeAbove100     | 671        |
| Italy   | 1995           | FemaleAge0to4       | 1324815    |
| Italy   | 1995           | FemaleAge10to14     | 1466640    |
| Italy   | 1995           | FemaleAge15to19     | 1750543    |
| Italy   | 1995           | FemaleAge20to24     | 1985098    |
| Italy   | 1995           | FemaleAge25to29     | 1916747    |
| Italy   | 1995           | FemaleAge30to34     | 1974095    |
| Italy   | 1995           | FemaleAge35to39     | 1894140    |
| Italy   | 1995           | FemaleAge40to44     | 1868991    |
| Italy   | 1995           | FemaleAge45to49     | 1958469    |
| Italy   | 1995           | FemaleAge50to54     | 1725868    |
| Italy   | 1995           | FemaleAge55to59     | 1818292    |
| Italy   | 1995           | FemaleAge5to9       | 1347882    |
| Italy   | 1995           | FemaleAge60to64     | 1728947    |
| Italy   | 1995           | FemaleAge65to69     | 1658278    |
| Italy   | 1995           | FemaleAge70to74     | 1532044    |
| Italy   | 1995           | FemaleAge75to79     | 879206     |
| Italy   | 1995           | FemaleAge80to84     | 905538     |
| Italy   | 1995           | FemaleAge85to89     | 479118     |
| Italy   | 1995           | FemaleAge90to94     | 155482     |
| Italy   | 1995           | FemaleAge95to99     | 31063      |
| Italy   | 1995           | FemaleAgeAbove100   | 2873       |
| Italy   | 1995           | FemaleLactAge15to19 | 15757      |
| Italy   | 1995           | FemaleLactAge20to24 | 105142     |
| Italy   | 1995           | FemaleLactAge25to29 | 205329     |
| Italy   | 1995           | FemaleLactAge30to34 | 157263     |
| Italy   | 1995           | FemaleLactAge35to39 | 59142      |
| Italy   | 1995           | FemaleLactAge40to44 | 10806      |
| Italy   | 1995           | FemalePregAge15to19 | 11818      |
| Italy   | 1995           | FemalePregAge20to24 | 78856      |
| Italy   | 1995           | FemalePregAge25to29 | 153997     |
| Italy   | 1995           | FemalePregAge30to34 | 117947     |
| Italy   | 1995           | FemalePregAge35to39 | 44357      |
| Italy   | 1995           | FemalePregAge40to44 | 8104       |
| Italy   | 1995           | MaleAge0to4         | 1405292    |
| Italy   | 1995           | MaleAge10to14       | 1543292    |
| Italy   | 1995           | MaleAge15to19       | 1845083    |
| Italy   | 1995           | MaleAge20to24       | 2233120    |
| Italy   | 1995           | MaleAge25to29       | 2323082    |
| Italy   | 1995           | MaleAge30to34       | 2268152    |
| Italy   | 1995           | MaleAge35to39       | 1998629    |
| Italy   | 1995           | MaleAge40to44       | 1863840    |
| Italy   | 1995           | MaleAge45to49       | 1922455    |

Dietary calcium and zinc deficiency risks are decreasing but remain prevalent

| Country | Reference year | Age/gender group    | Population |
|---------|----------------|---------------------|------------|
| Italy   | 1995           | MaleAge50to54       | 1660259    |
| Italy   | 1995           | MaleAge55to59       | 1705711    |
| Italy   | 1995           | MaleAge5to9         | 1424595    |
| Italy   | 1995           | MaleAge60to64       | 1548731    |
| Italy   | 1995           | MaleAge65to69       | 1380601    |
| Italy   | 1995           | MaleAge70to74       | 1122604    |
| Italy   | 1995           | MaleAge75to79       | 570991     |
| Italy   | 1995           | MaleAge80to84       | 506006     |
| Italy   | 1995           | MaleAge85to89       | 211076     |
| Italy   | 1995           | MaleAge90to94       | 52104      |
| Italy   | 1995           | MaleAge95to99       | 8100       |
| Italy   | 1995           | MaleAgeAbove100     | 702        |
| Italy   | 1996           | FemaleAge0to4       | 1319424    |
| Italy   | 1996           | FemaleAge10to14     | 1431750    |
| Italy   | 1996           | FemaleAge15to19     | 1684809    |
| Italy   | 1996           | FemaleAge20to24     | 1986747    |
| Italy   | 1996           | FemaleAge25to29     | 1959905    |
| Italy   | 1996           | FemaleAge30to34     | 1960932    |
| Italy   | 1996           | FemaleAge35to39     | 1910771    |
| Italy   | 1996           | FemaleAge40to44     | 1865150    |
| Italy   | 1996           | FemaleAge45to49     | 1961339    |
| Italy   | 1996           | FemaleAge50to54     | 1749699    |
| Italy   | 1996           | FemaleAge55to59     | 1797983    |
| Italy   | 1996           | FemaleAge5to9       | 1340500    |
| Italy   | 1996           | FemaleAge60to64     | 1737866    |
| Italy   | 1996           | FemaleAge65to69     | 1649457    |
| Italy   | 1996           | FemaleAge70to74     | 1571393    |
| Italy   | 1996           | FemaleAge75to79     | 932804     |
| Italy   | 1996           | FemaleAge80to84     | 857978     |
| Italy   | 1996           | FemaleAge85to89     | 514671     |
| Italy   | 1996           | FemaleAge90to94     | 176242     |
| Italy   | 1996           | FemaleAge95to99     | 33848      |
| Italy   | 1996           | FemaleAgeAbove100   | 3143       |
| Italy   | 1996           | FemaleLactAge15to19 | 11439      |
| Italy   | 1996           | FemaleLactAge20to24 | 69315      |
| Italy   | 1996           | FemaleLactAge25to29 | 176608     |
| Italy   | 1996           | FemaleLactAge30to34 | 179643     |
| Italy   | 1996           | FemaleLactAge35to39 | 75654      |
| Italy   | 1996           | FemaleLactAge40to44 | 12418      |
| Italy   | 1996           | FemaleLactAge45to49 | 769        |
| Italy   | 1996           | FemalePregAge15to19 | 8579       |
| Italy   | 1996           | FemalePregAge20to24 | 51986      |
| Italy   | 1996           | FemalePregAge25to29 | 132456     |
| Italy   | 1996           | FemalePregAge30to34 | 134732     |
| Italy   | 1996           | FemalePregAge35to39 | 56740      |
| Italy   | 1996           | FemalePregAge40to44 | 9314       |
| Italy   | 1996           | FemalePregAge45to49 | 577        |
| Italy   | 1996           | MaleAge0to4         | 1399427    |
| Italy   | 1996           | MaleAge10to14       | 1507680    |
| Italy   | 1996           | MaleAge15to19       | 1769703    |
| Italy   | 1996           | MaleAge20to24       | 2166442    |
| Italy   | 1996           | MaleAge25to29       | 2315020    |
| Italy   | 1996           | MaleAge30to34       | 2294243    |
| Italy   | 1996           | MaleAge35to39       | 2043949    |
| Italy   | 1996           | MaleAge40to44       | 1862346    |
| Italy   | 1996           | MaleAge45to49       | 1925255    |
| Italy   | 1996           | MaleAge50to54       | 1685244    |
| Italy   | 1996           | MaleAge55to59       | 1688045    |
| Italy   | 1996           | MaleAge5to9         | 1416091    |
| Italy   | 1996           | MaleAge60to64       | 1561376    |
| Italy   | 1996           | MaleAge65to69       | 1381249    |
| Italy   | 1996           | MaleAge70to74       | 1156143    |
| Italy   | 1996           | MaleAge75to79       | 612746     |
| Italy   | 1996           | MaleAge80to84       | 478812     |
| Italy   | 1996           | MaleAge85to89       | 235784     |
| Italy   | 1996           | MaleAge90to94       | 61524      |
| Italy   | 1996           | MaleAge95to99       | 8855       |
| Italy   | 1996           | MaleAgeAbove100     | 734        |
| Italy   | 1997           | FemaleAge0to4       | 1306383    |
| Italy   | 1997           | FemaleAge10to14     | 1405122    |
| Italy   | 1997           | FemaleAge15to19     | 1618187    |
| Italy   | 1997           | FemaleAge20to24     | 1910657    |
| Italy   | 1997           | FemaleAge25to29     | 1950212    |
| Italy   | 1997           | FemaleAge30to34     | 1972813    |
| Italy   | 1997           | FemaleAge35to39     | 1965139    |
| Italy   | 1997           | FemaleAge40to44     | 1875198    |
| Italy   | 1997           | FemaleAge45to49     | 1942484    |
| Italy   | 1997           | FemaleAge50to54     | 1799367    |
| Italy   | 1997           | FemaleAge55to59     | 1762575    |
| Italy   | 1997           | FemaleAge5to9       | 1335499    |
| Italy   | 1997           | FemaleAge60to64     | 1753958    |
| Italy   | 1997           | FemaleAge65to69     | 1646007    |
| Italy   | 1997           | FemaleAge70to74     | 1577674    |
| Italy   | 1997           | FemaleAge75to79     | 1038249    |
| Italy   | 1997           | FemaleAge80to84     | 783115     |
| Italy   | 1997           | FemaleAge85to89     | 554611     |
| Italy   | 1997           | FemaleAge90to94     | 192240     |
| Italy   | 1997           | FemaleAge95to99     | 37082      |

Dietary calcium and zinc deficiency risks are decreasing but remain prevalent

| Country | Reference year | Age/gender group    | Population |
|---------|----------------|---------------------|------------|
| Italy   | 1997           | FemaleAgeAbove100   | 3439       |
| Italy   | 1997           | FemaleLactAge15to19 | 11439      |
| Italy   | 1997           | FemaleLactAge20to24 | 69315      |
| Italy   | 1997           | FemaleLactAge25to29 | 176608     |
| Italy   | 1997           | FemaleLactAge30to34 | 179643     |
| Italy   | 1997           | FemaleLactAge35to39 | 75654      |
| Italy   | 1997           | FemaleLactAge40to44 | 12418      |
| Italy   | 1997           | FemaleLactAge45to49 | 769        |
| Italy   | 1997           | FemalePregAge15to19 | 8579       |
| Italy   | 1997           | FemalePregAge20to24 | 51986      |
| Italy   | 1997           | FemalePregAge25to29 | 132456     |
| Italy   | 1997           | FemalePregAge30to34 | 134732     |
| Italy   | 1997           | FemalePregAge35to39 | 56740      |
| Italy   | 1997           | FemalePregAge40to44 | 9314       |
| Italy   | 1997           | FemalePregAge45to49 | 577        |
| Italy   | 1997           | MaleAge0to4         | 1384853    |
| Italy   | 1997           | MaleAge10to14       | 1480219    |
| Italy   | 1997           | MaleAge15to19       | 1702998    |
| Italy   | 1997           | MaleAge20to24       | 2085165    |
| Italy   | 1997           | MaleAge25to29       | 2302991    |
| Italy   | 1997           | MaleAge30to34       | 2307244    |
| Italy   | 1997           | MaleAge35to39       | 2097290    |
| Italy   | 1997           | MaleAge40to44       | 1873490    |
| Italy   | 1997           | MaleAge45to49       | 1904226    |
| Italy   | 1997           | MaleAge50to54       | 1736662    |
| Italy   | 1997           | MaleAge55to59       | 1655687    |
| Italy   | 1997           | MaleAge5to9         | 1410210    |
| Italy   | 1997           | MaleAge60to64       | 1581985    |
| Italy   | 1997           | MaleAge65to69       | 1384319    |
| Italy   | 1997           | MaleAge70to74       | 1170717    |
| Italy   | 1997           | MaleAge75to79       | 684098     |
| Italy   | 1997           | MaleAge80to84       | 434384     |
| Italy   | 1997           | MaleAge85to89       | 261841     |
| Italy   | 1997           | MaleAge90to94       | 67853      |
| Italy   | 1997           | MaleAge95to99       | 9887       |
| Italy   | 1997           | MaleAgeAbove100     | 767        |
| Italy   | 1998           | FemaleAge0to4       | 1290793    |
| Italy   | 1998           | FemaleAge10to14     | 1385370    |
| Italy   | 1998           | FemaleAge15to19     | 1559747    |
| Italy   | 1998           | FemaleAge20to24     | 1826543    |
| Italy   | 1998           | FemaleAge25to29     | 1934049    |
| Italy   | 1998           | FemaleAge30to34     | 1974648    |
| Italy   | 1998           | FemaleAge35to39     | 2023028    |
| Italy   | 1998           | FemaleAge40to44     | 1896543    |
| Italy   | 1998           | FemaleAge45to49     | 1911386    |
| Italy   | 1998           | FemaleAge50to54     | 1861127    |
| Italy   | 1998           | FemaleAge55to59     | 1724443    |
| Italy   | 1998           | FemaleAge5to9       | 1332635    |
| Italy   | 1998           | FemaleAge60to64     | 1771490    |
| Italy   | 1998           | FemaleAge65to69     | 1648255    |
| Italy   | 1998           | FemaleAge70to74     | 1564517    |
| Italy   | 1998           | FemaleAge75to79     | 1166912    |
| Italy   | 1998           | FemaleAge80to84     | 710609     |
| Italy   | 1998           | FemaleAge85to89     | 588373     |
| Italy   | 1998           | FemaleAge90to94     | 203607     |
| Italy   | 1998           | FemaleAge95to99     | 40574      |
| Italy   | 1998           | FemaleAgeAbove100   | 3757       |
| Italy   | 1998           | FemaleLactAge15to19 | 11439      |
| Italy   | 1998           | FemaleLactAge20to24 | 69315      |
| Italy   | 1998           | FemaleLactAge25to29 | 176608     |
| Italy   | 1998           | FemaleLactAge30to34 | 179643     |
| Italy   | 1998           | FemaleLactAge35to39 | 75654      |
| Italy   | 1998           | FemaleLactAge40to44 | 12418      |
| Italy   | 1998           | FemaleLactAge45to49 | 769        |
| Italy   | 1998           | FemalePregAge15to19 | 8579       |
| Italy   | 1998           | FemalePregAge20to24 | 51986      |
| Italy   | 1998           | FemalePregAge25to29 | 132456     |
| Italy   | 1998           | FemalePregAge30to34 | 134732     |
| Italy   | 1998           | FemalePregAge35to39 | 56740      |
| Italy   | 1998           | FemalePregAge40to44 | 9314       |
| Italy   | 1998           | FemalePregAge45to49 | 577        |
| Italy   | 1998           | MaleAge0to4         | 1367028    |
| Italy   | 1998           | MaleAge10to14       | 1459712    |
| Italy   | 1998           | MaleAge15to19       | 1646112    |
| Italy   | 1998           | MaleAge20to24       | 1997616    |
| Italy   | 1998           | MaleAge25to29       | 2283316    |
| Italy   | 1998           | MaleAge30to34       | 2311215    |
| Italy   | 1998           | MaleAge35to39       | 2153990    |
| Italy   | 1998           | MaleAge40to44       | 1897315    |
| Italy   | 1998           | MaleAge45to49       | 1870837    |
| Italy   | 1998           | MaleAge50to54       | 1800832    |
| Italy   | 1998           | MaleAge55to59       | 1620980    |
| Italy   | 1998           | MaleAge5to9         | 1406835    |
| Italy   | 1998           | MaleAge60to64       | 1604954    |
| Italy   | 1998           | MaleAge65to69       | 1391870    |
| Italy   | 1998           | MaleAge70to74       | 1175335    |
| Italy   | 1998           | MaleAge75to79       | 766739     |
| Italy   | 1998           | MaleAge80to84       | 392612     |

Dietary calcium and zinc deficiency risks are decreasing but remain prevalent

| Country | Reference year | Age/gender group    | Population |
|---------|----------------|---------------------|------------|
| Italy   | 1998           | MaleAge85to89       | 280882     |
| Italy   | 1998           | MaleAge90to94       | 71647      |
| Italy   | 1998           | MaleAge95to99       | 11038      |
| Italy   | 1998           | MaleAgeAbove100     | 802        |
| Italy   | 1999           | FemaleAge0to4       | 1279679    |
| Italy   | 1999           | FemaleAge10to14     | 1370956    |
| Italy   | 1999           | FemaleAge15to19     | 1510230    |
| Italy   | 1999           | FemaleAge20to24     | 1744360    |
| Italy   | 1999           | FemaleAge25to29     | 1905868    |
| Italy   | 1999           | FemaleAge30to34     | 1973349    |
| Italy   | 1999           | FemaleAge35to39     | 2076413    |
| Italy   | 1999           | FemaleAge40to44     | 1928473    |
| Italy   | 1999           | FemaleAge45to49     | 1885775    |
| Italy   | 1999           | FemaleAge50to54     | 1913156    |
| Italy   | 1999           | FemaleAge55to59     | 1702607    |
| Italy   | 1999           | FemaleAge5to9       | 1331402    |
| Italy   | 1999           | FemaleAge60to64     | 1781941    |
| Italy   | 1999           | FemaleAge65to69     | 1656067    |
| Italy   | 1999           | FemaleAge70to74     | 1552257    |
| Italy   | 1999           | FemaleAge75to79     | 1280287    |
| Italy   | 1999           | FemaleAge80to84     | 677430     |
| Italy   | 1999           | FemaleAge85to89     | 601274     |
| Italy   | 1999           | FemaleAge90to94     | 213055     |
| Italy   | 1999           | FemaleAge95to99     | 43646      |
| Italy   | 1999           | FemaleAgeAbove100   | 4090       |
| Italy   | 1999           | FemaleLactAge15to19 | 11439      |
| Italy   | 1999           | FemaleLactAge20to24 | 69315      |
| Italy   | 1999           | FemaleLactAge25to29 | 176608     |
| Italy   | 1999           | FemaleLactAge30to34 | 179643     |
| Italy   | 1999           | FemaleLactAge35to39 | 75654      |
| Italy   | 1999           | FemaleLactAge40to44 | 12418      |
| Italy   | 1999           | FemaleLactAge45to49 | 769        |
| Italy   | 1999           | FemalePregAge15to19 | 8579       |
| Italy   | 1999           | FemalePregAge20to24 | 51986      |
| Italy   | 1999           | FemalePregAge25to29 | 132456     |
| Italy   | 1999           | FemalePregAge30to34 | 134732     |
| Italy   | 1999           | FemalePregAge35to39 | 56740      |
| Italy   | 1999           | FemalePregAge40to44 | 9314       |
| Italy   | 1999           | FemalePregAge45to49 | 577        |
| Italy   | 1999           | MaleAge0to4         | 1353903    |
| Italy   | 1999           | MaleAge10to14       | 1445126    |
| Italy   | 1999           | MaleAge15to19       | 1599196    |
| Italy   | 1999           | MaleAge20to24       | 1914613    |
| Italy   | 1999           | MaleAge25to29       | 2251516    |
| Italy   | 1999           | MaleAge30to34       | 2312440    |
| Italy   | 1999           | MaleAge35to39       | 2207294    |
| Italy   | 1999           | MaleAge40to44       | 1932389    |
| Italy   | 1999           | MaleAge45to49       | 1844075    |
| Italy   | 1999           | MaleAge50to54       | 1855680    |
| Italy   | 1999           | MaleAge55to59       | 1603186    |
| Italy   | 1999           | MaleAge5to9         | 1405492    |
| Italy   | 1999           | MaleAge60to64       | 1621906    |
| Italy   | 1999           | MaleAge65to69       | 1406205    |
| Italy   | 1999           | MaleAge70to74       | 1181619    |
| Italy   | 1999           | MaleAge75to79       | 838643     |
| Italy   | 1999           | MaleAge80to84       | 375775     |
| Italy   | 1999           | MaleAge85to89       | 283897     |
| Italy   | 1999           | MaleAge90to94       | 74543      |
| Italy   | 1999           | MaleAge95to99       | 11851      |
| Italy   | 1999           | MaleAgeAbove100     | 842        |
| Jamaica | 1992           | FemaleAge0to4       | 139813     |
| Jamaica | 1992           | FemaleAge10to14     | 130299     |
| Jamaica | 1992           | FemaleAge15to19     | 102890     |
| Jamaica | 1992           | FemaleAge20to24     | 88512      |
| Jamaica | 1992           | FemaleAge25to29     | 83808      |
| Jamaica | 1992           | FemaleAge30to34     | 75838      |
| Jamaica | 1992           | FemaleAge35to39     | 62272      |
| Jamaica | 1992           | FemaleAge40to44     | 50606      |
| Jamaica | 1992           | FemaleAge45to49     | 42847      |
| Jamaica | 1992           | FemaleAge50to54     | 36977      |
| Jamaica | 1992           | FemaleAge55to59     | 33292      |
| Jamaica | 1992           | FemaleAge5to9       | 140847     |
| Jamaica | 1992           | FemaleAge60to64     | 31141      |
| Jamaica | 1992           | FemaleAge65to69     | 28167      |
| Jamaica | 1992           | FemaleAge70to74     | 23728      |
| Jamaica | 1992           | FemaleAge75to79     | 18808      |
| Jamaica | 1992           | FemaleAge80to84     | 13859      |
| Jamaica | 1992           | FemaleAge85to89     | 6826       |
| Jamaica | 1992           | FemaleAge90to94     | 3271       |
| Jamaica | 1992           | FemaleAge95to99     | 1098       |
| Jamaica | 1992           | FemaleAgeAbove100   | 55         |
| Jamaica | 1992           | FemaleLactAge15to19 | 13006      |
| Jamaica | 1992           | FemaleLactAge20to24 | 18720      |
| Jamaica | 1992           | FemaleLactAge25to29 | 14290      |
| Jamaica | 1992           | FemaleLactAge30to34 | 8608       |
| Jamaica | 1992           | FemaleLactAge35to39 | 4094       |
| Jamaica | 1992           | FemaleLactAge40to44 | 1171       |
| Jamaica | 1992           | FemaleLactAge45to49 | 150        |

Dietary calcium and zinc deficiency risks are decreasing but remain prevalent

| Country | Reference year | Age/gender group    | Population |
|---------|----------------|---------------------|------------|
| Jamaica | 1992           | FemalePregAge15to19 | 9755       |
| Jamaica | 1992           | FemalePregAge20to24 | 14040      |
| Jamaica | 1992           | FemalePregAge25to29 | 10717      |
| Jamaica | 1992           | FemalePregAge30to34 | 6456       |
| Jamaica | 1992           | FemalePregAge35to39 | 3071       |
| Jamaica | 1992           | FemalePregAge40to44 | 878        |
| Jamaica | 1992           | FemalePregAge45to49 | 112        |
| Jamaica | 1992           | MaleAge0to4         | 143991     |
| Jamaica | 1992           | MaleAge10to14       | 130414     |
| Jamaica | 1992           | MaleAge15to19       | 124289     |
| Jamaica | 1992           | MaleAge20to24       | 117115     |
| Jamaica | 1992           | MaleAge25to29       | 100774     |
| Jamaica | 1992           | MaleAge30to34       | 83166      |
| Jamaica | 1992           | MaleAge35to39       | 65022      |
| Jamaica | 1992           | MaleAge40to44       | 51229      |
| Jamaica | 1992           | MaleAge45to49       | 43307      |
| Jamaica | 1992           | MaleAge50to54       | 36741      |
| Jamaica | 1992           | MaleAge55to59       | 31997      |
| Jamaica | 1992           | MaleAge5to9         | 142575     |
| Jamaica | 1992           | MaleAge60to64       | 29348      |
| Jamaica | 1992           | MaleAge65to69       | 25708      |
| Jamaica | 1992           | MaleAge70to74       | 20619      |
| Jamaica | 1992           | MaleAge75to79       | 15470      |
| Jamaica | 1992           | MaleAge80to84       | 9771       |
| Jamaica | 1992           | MaleAge85to89       | 4801       |
| Jamaica | 1992           | MaleAge90to94       | 1901       |
| Jamaica | 1992           | MaleAge95to99       | 378        |
| Jamaica | 1992           | MaleAgeAbove100     | 24         |
| Jamaica | 1993           | FemaleAge0to4       | 140033     |
| Jamaica | 1993           | FemaleAge10to14     | 131914     |
| Jamaica | 1993           | FemaleAge15to19     | 100835     |
| Jamaica | 1993           | FemaleAge20to24     | 88190      |
| Jamaica | 1993           | FemaleAge25to29     | 84789      |
| Jamaica | 1993           | FemaleAge30to34     | 78498      |
| Jamaica | 1993           | FemaleAge35to39     | 65661      |
| Jamaica | 1993           | FemaleAge40to44     | 52457      |
| Jamaica | 1993           | FemaleAge45to49     | 43840      |
| Jamaica | 1993           | FemaleAge50to54     | 37634      |
| Jamaica | 1993           | FemaleAge55to59     | 33264      |
| Jamaica | 1993           | FemaleAge5to9       | 140026     |
| Jamaica | 1993           | FemaleAge60to64     | 30799      |
| Jamaica | 1993           | FemaleAge65to69     | 28053      |
| Jamaica | 1993           | FemaleAge70to74     | 23781      |
| Jamaica | 1993           | FemaleAge75to79     | 18814      |
| Jamaica | 1993           | FemaleAge80to84     | 13771      |
| Jamaica | 1993           | FemaleAge85to89     | 7477       |
| Jamaica | 1993           | FemaleAge90to94     | 2782       |
| Jamaica | 1993           | FemaleAge95to99     | 1448       |
| Jamaica | 1993           | FemaleAgeAbove100   | 56         |
| Jamaica | 1993           | FemaleLactAge15to19 | 13006      |
| Jamaica | 1993           | FemaleLactAge20to24 | 18720      |
| Jamaica | 1993           | FemaleLactAge25to29 | 14290      |
| Jamaica | 1993           | FemaleLactAge30to34 | 8608       |
| Jamaica | 1993           | FemaleLactAge35to39 | 4094       |
| Jamaica | 1993           | FemaleLactAge40to44 | 1171       |
| Jamaica | 1993           | FemaleLactAge45to49 | 150        |
| Jamaica | 1993           | FemalePregAge15to19 | 9755       |
| Jamaica | 1993           | FemalePregAge20to24 | 14040      |
| Jamaica | 1993           | FemalePregAge25to29 | 10717      |
| Jamaica | 1993           | FemalePregAge30to34 | 6456       |
| Jamaica | 1993           | FemalePregAge35to39 | 3071       |
| Jamaica | 1993           | FemalePregAge40to44 | 878        |
| Jamaica | 1993           | FemalePregAge45to49 | 112        |
| Jamaica | 1993           | MaleAge0to4         | 144590     |
| Jamaica | 1993           | MaleAge10to14       | 132145     |
| Jamaica | 1993           | MaleAge15to19       | 122411     |
| Jamaica | 1993           | MaleAge20to24       | 117022     |
| Jamaica | 1993           | MaleAge25to29       | 101971     |
| Jamaica | 1993           | MaleAge30to34       | 85070      |
| Jamaica | 1993           | MaleAge35to39       | 68009      |
| Jamaica | 1993           | MaleAge40to44       | 52847      |
| Jamaica | 1993           | MaleAge45to49       | 44334      |
| Jamaica | 1993           | MaleAge50to54       | 37716      |
| Jamaica | 1993           | MaleAge55to59       | 32281      |
| Jamaica | 1993           | MaleAge5to9         | 141852     |
| Jamaica | 1993           | MaleAge60to64       | 29464      |
| Jamaica | 1993           | MaleAge65to69       | 26196      |
| Jamaica | 1993           | MaleAge70to74       | 20890      |
| Jamaica | 1993           | MaleAge75to79       | 15338      |
| Jamaica | 1993           | MaleAge80to84       | 9890       |
| Jamaica | 1993           | MaleAge85to89       | 4913       |
| Jamaica | 1993           | MaleAge90to94       | 1910       |
| Jamaica | 1993           | MaleAge95to99       | 476        |
| Jamaica | 1993           | MaleAgeAbove100     | 26         |
| Jamaica | 1994           | FemaleAge0to4       | 140513     |
| Jamaica | 1994           | FemaleAge10to14     | 133553     |
| Jamaica | 1994           | FemaleAge15to19     | 99564      |
| Jamaica | 1994           | FemaleAge20to24     | 87600      |

Dietary calcium and zinc deficiency risks are decreasing but remain prevalent

| Country | Reference year | Age/gender group    | Population |
|---------|----------------|---------------------|------------|
| Jamaica | 1994           | FemaleAge25to29     | 85383      |
| Jamaica | 1994           | FemaleAge30to34     | 80860      |
| Jamaica | 1994           | FemaleAge35to39     | 69066      |
| Jamaica | 1994           | FemaleAge40to44     | 54592      |
| Jamaica | 1994           | FemaleAge45to49     | 44973      |
| Jamaica | 1994           | FemaleAge50to54     | 38397      |
| Jamaica | 1994           | FemaleAge55to59     | 33420      |
| Jamaica | 1994           | FemaleAge5to9       | 138904     |
| Jamaica | 1994           | FemaleAge60to64     | 30536      |
| Jamaica | 1994           | FemaleAge65to69     | 27911      |
| Jamaica | 1994           | FemaleAge70to74     | 23858      |
| Jamaica | 1994           | FemaleAge75to79     | 18823      |
| Jamaica | 1994           | FemaleAge80to84     | 13775      |
| Jamaica | 1994           | FemaleAge85to89     | 7888       |
| Jamaica | 1994           | FemaleAge90to94     | 2515       |
| Jamaica | 1994           | FemaleAge95to99     | 1467       |
| Jamaica | 1994           | FemaleAgeAbove100   | 62         |
| Jamaica | 1994           | FemaleLactAge15to19 | 13006      |
| Jamaica | 1994           | FemaleLactAge20to24 | 18720      |
| Jamaica | 1994           | FemaleLactAge25to29 | 14290      |
| Jamaica | 1994           | FemaleLactAge30to34 | 8608       |
| Jamaica | 1994           | FemaleLactAge35to39 | 4094       |
| Jamaica | 1994           | FemaleLactAge40to44 | 1171       |
| Jamaica | 1994           | FemaleLactAge45to49 | 150        |
| Jamaica | 1994           | FemalePregAge15to19 | 9755       |
| Jamaica | 1994           | FemalePregAge20to24 | 14040      |
| Jamaica | 1994           | FemalePregAge25to29 | 10717      |
| Jamaica | 1994           | FemalePregAge30to34 | 6456       |
| Jamaica | 1994           | FemalePregAge35to39 | 3071       |
| Jamaica | 1994           | FemalePregAge40to44 | 878        |
| Jamaica | 1994           | FemalePregAge45to49 | 112        |
| Jamaica | 1994           | MaleAge0to4         | 145562     |
| Jamaica | 1994           | MaleAge10to14       | 133897     |
| Jamaica | 1994           | MaleAge15to19       | 121426     |
| Jamaica | 1994           | MaleAge20to24       | 116792     |
| Jamaica | 1994           | MaleAge25to29       | 102823     |
| Jamaica | 1994           | MaleAge30to34       | 86752      |
| Jamaica | 1994           | MaleAge35to39       | 70927      |
| Jamaica | 1994           | MaleAge40to44       | 54739      |
| Jamaica | 1994           | MaleAge45to49       | 45496      |
| Jamaica | 1994           | MaleAge50to54       | 38806      |
| Jamaica | 1994           | MaleAge55to59       | 32700      |
| Jamaica | 1994           | MaleAge5to9         | 140914     |
| Jamaica | 1994           | MaleAge60to64       | 29596      |
| Jamaica | 1994           | MaleAge65to69       | 26719      |
| Jamaica | 1994           | MaleAge70to74       | 21330      |
| Jamaica | 1994           | MaleAge75to79       | 15340      |
| Jamaica | 1994           | MaleAge80to84       | 9883       |
| Jamaica | 1994           | MaleAge85to89       | 4991       |
| Jamaica | 1994           | MaleAge90to94       | 1875       |
| Jamaica | 1994           | MaleAge95to99       | 512        |
| Jamaica | 1994           | MaleAgeAbove100     | 30         |
| Jamaica | 1995           | FemaleAge0to4       | 140678     |
| Jamaica | 1995           | FemaleAge10to14     | 134679     |
| Jamaica | 1995           | FemaleAge15to19     | 99399      |
| Jamaica | 1995           | FemaleAge20to24     | 86754      |
| Jamaica | 1995           | FemaleAge25to29     | 85725      |
| Jamaica | 1995           | FemaleAge30to34     | 82884      |
| Jamaica | 1995           | FemaleAge35to39     | 72333      |
| Jamaica | 1995           | FemaleAge40to44     | 57088      |
| Jamaica | 1995           | FemaleAge45to49     | 46282      |
| Jamaica | 1995           | FemaleAge50to54     | 39230      |
| Jamaica | 1995           | FemaleAge55to59     | 33768      |
| Jamaica | 1995           | FemaleAge5to9       | 138094     |
| Jamaica | 1995           | FemaleAge60to64     | 30395      |
| Jamaica | 1995           | FemaleAge65to69     | 27751      |
| Jamaica | 1995           | FemaleAge70to74     | 23936      |
| Jamaica | 1995           | FemaleAge75to79     | 18870      |
| Jamaica | 1995           | FemaleAge80to84     | 13866      |
| Jamaica | 1995           | FemaleAge85to89     | 8055       |
| Jamaica | 1995           | FemaleAge90to94     | 2496       |
| Jamaica | 1995           | FemaleAge95to99     | 1200       |
| Jamaica | 1995           | FemaleAgeAbove100   | 77         |
| Jamaica | 1995           | FemaleLactAge15to19 | 13006      |
| Jamaica | 1995           | FemaleLactAge20to24 | 18720      |
| Jamaica | 1995           | FemaleLactAge25to29 | 14290      |
| Jamaica | 1995           | FemaleLactAge30to34 | 8608       |
| Jamaica | 1995           | FemaleLactAge35to39 | 4094       |
| Jamaica | 1995           | FemaleLactAge40to44 | 1171       |
| Jamaica | 1995           | FemaleLactAge45to49 | 150        |
| Jamaica | 1995           | FemalePregAge15to19 | 9755       |
| Jamaica | 1995           | FemalePregAge20to24 | 14040      |
| Jamaica | 1995           | FemalePregAge25to29 | 10717      |
| Jamaica | 1995           | FemalePregAge30to34 | 6456       |
| Jamaica | 1995           | FemalePregAge35to39 | 3071       |
| Jamaica | 1995           | FemalePregAge40to44 | 878        |
| Jamaica | 1995           | FemalePregAge45to49 | 112        |
| Jamaica | 1995           | MaleAge0to4         | 146260     |

Dietary calcium and zinc deficiency risks are decreasing but remain prevalent

| Country | Reference year | Age/gender group    | Population |
|---------|----------------|---------------------|------------|
| Jamaica | 1995           | MaleAge10to14       | 135117     |
| Jamaica | 1995           | MaleAge15to19       | 121577     |
| Jamaica | 1995           | MaleAge20to24       | 116385     |
| Jamaica | 1995           | MaleAge25to29       | 103410     |
| Jamaica | 1995           | MaleAge30to34       | 88247      |
| Jamaica | 1995           | MaleAge35to39       | 73558      |
| Jamaica | 1995           | MaleAge40to44       | 56951      |
| Jamaica | 1995           | MaleAge45to49       | 46815      |
| Jamaica | 1995           | MaleAge50to54       | 39935      |
| Jamaica | 1995           | MaleAge55to59       | 33299      |
| Jamaica | 1995           | MaleAge5to9         | 140334     |
| Jamaica | 1995           | MaleAge60to64       | 29782      |
| Jamaica | 1995           | MaleAge65to69       | 27211      |
| Jamaica | 1995           | MaleAge70to74       | 21911      |
| Jamaica | 1995           | MaleAge75to79       | 15520      |
| Jamaica | 1995           | MaleAge80to84       | 9796       |
| Jamaica | 1995           | MaleAge85to89       | 5008       |
| Jamaica | 1995           | MaleAge90to94       | 1807       |
| Jamaica | 1995           | MaleAge95to99       | 464        |
| Jamaica | 1995           | MaleAgeAbove100     | 35         |
| Jamaica | 1996           | FemaleAge0to4       | 141393     |
| Jamaica | 1996           | FemaleAge10to14     | 134528     |
| Jamaica | 1996           | FemaleAge15to19     | 101408     |
| Jamaica | 1996           | FemaleAge20to24     | 87558      |
| Jamaica | 1996           | FemaleAge25to29     | 86828      |
| Jamaica | 1996           | FemaleAge30to34     | 84130      |
| Jamaica | 1996           | FemaleAge35to39     | 74533      |
| Jamaica | 1996           | FemaleAge40to44     | 59362      |
| Jamaica | 1996           | FemaleAge45to49     | 47438      |
| Jamaica | 1996           | FemaleAge50to54     | 39904      |
| Jamaica | 1996           | FemaleAge55to59     | 34366      |
| Jamaica | 1996           | FemaleAge5to9       | 137960     |
| Jamaica | 1996           | FemaleAge60to64     | 31003      |
| Jamaica | 1996           | FemaleAge65to69     | 28098      |
| Jamaica | 1996           | FemaleAge70to74     | 23943      |
| Jamaica | 1996           | FemaleAge75to79     | 18884      |
| Jamaica | 1996           | FemaleAge80to84     | 13793      |
| Jamaica | 1996           | FemaleAge85to89     | 8300       |
| Jamaica | 1996           | FemaleAge90to94     | 2865       |
| Jamaica | 1996           | FemaleAge95to99     | 1156       |
| Jamaica | 1996           | FemaleAgeAbove100   | 103        |
| Jamaica | 1996           | FemaleLactAge15to19 | 11610      |
| Jamaica | 1996           | FemaleLactAge20to24 | 17394      |
| Jamaica | 1996           | FemaleLactAge25to29 | 14031      |
| Jamaica | 1996           | FemaleLactAge30to34 | 8982       |
| Jamaica | 1996           | FemaleLactAge35to39 | 4473       |
| Jamaica | 1996           | FemaleLactAge40to44 | 1266       |
| Jamaica | 1996           | FemaleLactAge45to49 | 147        |
| Jamaica | 1996           | FemalePregAge15to19 | 8707       |
| Jamaica | 1996           | FemalePregAge20to24 | 13046      |
| Jamaica | 1996           | FemalePregAge25to29 | 10523      |
| Jamaica | 1996           | FemalePregAge30to34 | 6737       |
| Jamaica | 1996           | FemalePregAge35to39 | 3355       |
| Jamaica | 1996           | FemalePregAge40to44 | 949        |
| Jamaica | 1996           | FemalePregAge45to49 | 111        |
| Jamaica | 1996           | MaleAge0to4         | 147651     |
| Jamaica | 1996           | MaleAge10to14       | 134886     |
| Jamaica | 1996           | MaleAge15to19       | 120835     |
| Jamaica | 1996           | MaleAge20to24       | 115183     |
| Jamaica | 1996           | MaleAge25to29       | 104812     |
| Jamaica | 1996           | MaleAge30to34       | 90498      |
| Jamaica | 1996           | MaleAge35to39       | 76370      |
| Jamaica | 1996           | MaleAge40to44       | 59524      |
| Jamaica | 1996           | MaleAge45to49       | 48068      |
| Jamaica | 1996           | MaleAge50to54       | 40859      |
| Jamaica | 1996           | MaleAge55to59       | 33865      |
| Jamaica | 1996           | MaleAge5to9         | 140617     |
| Jamaica | 1996           | MaleAge60to64       | 29877      |
| Jamaica | 1996           | MaleAge65to69       | 27464      |
| Jamaica | 1996           | MaleAge70to74       | 22340      |
| Jamaica | 1996           | MaleAge75to79       | 15863      |
| Jamaica | 1996           | MaleAge80to84       | 9945       |
| Jamaica | 1996           | MaleAge85to89       | 5182       |
| Jamaica | 1996           | MaleAge90to94       | 1970       |
| Jamaica | 1996           | MaleAge95to99       | 496        |
| Jamaica | 1996           | MaleAgeAbove100     | 42         |
| Jamaica | 1997           | FemaleAge0to4       | 141552     |
| Jamaica | 1997           | FemaleAge10to14     | 134328     |
| Jamaica | 1997           | FemaleAge15to19     | 101975     |
| Jamaica | 1997           | FemaleAge20to24     | 85456      |
| Jamaica | 1997           | FemaleAge25to29     | 87211      |
| Jamaica | 1997           | FemaleAge30to34     | 85765      |
| Jamaica | 1997           | FemaleAge35to39     | 77364      |
| Jamaica | 1997           | FemaleAge40to44     | 62198      |
| Jamaica | 1997           | FemaleAge45to49     | 48647      |
| Jamaica | 1997           | FemaleAge50to54     | 40582      |
| Jamaica | 1997           | FemaleAge55to59     | 34987      |
| Jamaica | 1997           | FemaleAge5to9       | 138364     |



Dietary calcium and zinc deficiency risks are decreasing but remain prevalent

| Country | Reference year | Age/gender group    | Population |
|---------|----------------|---------------------|------------|
| Jamaica | 1997           | FemaleAge60to64     | 31566      |
| Jamaica | 1997           | FemaleAge65to69     | 28635      |
| Jamaica | 1997           | FemaleAge70to74     | 24144      |
| Jamaica | 1997           | FemaleAge75to79     | 18922      |
| Jamaica | 1997           | FemaleAge80to84     | 13724      |
| Jamaica | 1997           | FemaleAge85to89     | 8398       |
| Jamaica | 1997           | FemaleAge90to94     | 3258       |
| Jamaica | 1997           | FemaleAge95to99     | 971        |
| Jamaica | 1997           | FemaleAgeAbove100   | 138        |
| Jamaica | 1997           | FemaleLactAge15to19 | 11610      |
| Jamaica | 1997           | FemaleLactAge20to24 | 17394      |
| Jamaica | 1997           | FemaleLactAge25to29 | 14031      |
| Jamaica | 1997           | FemaleLactAge30to34 | 8982       |
| Jamaica | 1997           | FemaleLactAge35to39 | 4473       |
| Jamaica | 1997           | FemaleLactAge40to44 | 1266       |
| Jamaica | 1997           | FemaleLactAge45to49 | 147        |
| Jamaica | 1997           | FemalePregAge15to19 | 8707       |
| Jamaica | 1997           | FemalePregAge20to24 | 13046      |
| Jamaica | 1997           | FemalePregAge25to29 | 10523      |
| Jamaica | 1997           | FemalePregAge30to34 | 6737       |
| Jamaica | 1997           | FemalePregAge35to39 | 3355       |
| Jamaica | 1997           | FemalePregAge40to44 | 949        |
| Jamaica | 1997           | FemalePregAge45to49 | 111        |
| Jamaica | 1997           | MaleAge0to4         | 148244     |
| Jamaica | 1997           | MaleAge10to14       | 134783     |
| Jamaica | 1997           | MaleAge15to19       | 121122     |
| Jamaica | 1997           | MaleAge20to24       | 113181     |
| Jamaica | 1997           | MaleAge25to29       | 105906     |
| Jamaica | 1997           | MaleAge30to34       | 92642      |
| Jamaica | 1997           | MaleAge35to39       | 78953      |
| Jamaica | 1997           | MaleAge40to44       | 62590      |
| Jamaica | 1997           | MaleAge45to49       | 49463      |
| Jamaica | 1997           | MaleAge50to54       | 41816      |
| Jamaica | 1997           | MaleAge55to59       | 34701      |
| Jamaica | 1997           | MaleAge5to9         | 141654     |
| Jamaica | 1997           | MaleAge60to64       | 29978      |
| Jamaica | 1997           | MaleAge65to69       | 27649      |
| Jamaica | 1997           | MaleAge70to74       | 22921      |
| Jamaica | 1997           | MaleAge75to79       | 16262      |
| Jamaica | 1997           | MaleAge80to84       | 10113      |
| Jamaica | 1997           | MaleAge85to89       | 5285       |
| Jamaica | 1997           | MaleAge90to94       | 2087       |
| Jamaica | 1997           | MaleAge95to99       | 522        |
| Jamaica | 1997           | MaleAgeAbove100     | 52         |
| Jamaica | 1998           | FemaleAge0to4       | 141006     |
| Jamaica | 1998           | FemaleAge10to14     | 134268     |
| Jamaica | 1998           | FemaleAge15to19     | 103257     |
| Jamaica | 1998           | FemaleAge20to24     | 83203      |
| Jamaica | 1998           | FemaleAge25to29     | 87177      |
| Jamaica | 1998           | FemaleAge30to34     | 87130      |
| Jamaica | 1998           | FemaleAge35to39     | 80135      |
| Jamaica | 1998           | FemaleAge40to44     | 65335      |
| Jamaica | 1998           | FemaleAge45to49     | 49983      |
| Jamaica | 1998           | FemaleAge50to54     | 41314      |
| Jamaica | 1998           | FemaleAge55to59     | 35630      |
| Jamaica | 1998           | FemaleAge5to9       | 139217     |
| Jamaica | 1998           | FemaleAge60to64     | 32018      |
| Jamaica | 1998           | FemaleAge65to69     | 29333      |
| Jamaica | 1998           | FemaleAge70to74     | 24597      |
| Jamaica | 1998           | FemaleAge75to79     | 18961      |
| Jamaica | 1998           | FemaleAge80to84     | 13716      |
| Jamaica | 1998           | FemaleAge85to89     | 8395       |
| Jamaica | 1998           | FemaleAge90to94     | 3563       |
| Jamaica | 1998           | FemaleAge95to99     | 807        |
| Jamaica | 1998           | FemaleAgeAbove100   | 176        |
| Jamaica | 1998           | FemaleLactAge15to19 | 11610      |
| Jamaica | 1998           | FemaleLactAge20to24 | 17394      |
| Jamaica | 1998           | FemaleLactAge25to29 | 14031      |
| Jamaica | 1998           | FemaleLactAge30to34 | 8982       |
| Jamaica | 1998           | FemaleLactAge35to39 | 4473       |
| Jamaica | 1998           | FemaleLactAge40to44 | 1266       |
| Jamaica | 1998           | FemaleLactAge45to49 | 147        |
| Jamaica | 1998           | FemalePregAge15to19 | 8707       |
| Jamaica | 1998           | FemalePregAge20to24 | 13046      |
| Jamaica | 1998           | FemalePregAge25to29 | 10523      |
| Jamaica | 1998           | FemalePregAge30to34 | 6737       |
| Jamaica | 1998           | FemalePregAge35to39 | 3355       |
| Jamaica | 1998           | FemalePregAge40to44 | 949        |
| Jamaica | 1998           | FemalePregAge45to49 | 111        |
| Jamaica | 1998           | MaleAge0to4         | 147931     |
| Jamaica | 1998           | MaleAge10to14       | 134925     |
| Jamaica | 1998           | MaleAge15to19       | 122180     |
| Jamaica | 1998           | MaleAge20to24       | 110771     |
| Jamaica | 1998           | MaleAge25to29       | 106460     |
| Jamaica | 1998           | MaleAge30to34       | 94573      |
| Jamaica | 1998           | MaleAge35to39       | 81291      |
| Jamaica | 1998           | MaleAge40to44       | 65972      |
| Jamaica | 1998           | MaleAge45to49       | 51059      |

Dietary calcium and zinc deficiency risks are decreasing but remain prevalent

| Country | Reference year | Age/gender group    | Population |
|---------|----------------|---------------------|------------|
| Jamaica | 1998           | MaleAge50to54       | 42809      |
| Jamaica | 1998           | MaleAge55to59       | 35761      |
| Jamaica | 1998           | MaleAge5to9         | 143254     |
| Jamaica | 1998           | MaleAge60to64       | 30097      |
| Jamaica | 1998           | MaleAge65to69       | 27758      |
| Jamaica | 1998           | MaleAge70to74       | 23632      |
| Jamaica | 1998           | MaleAge75to79       | 16700      |
| Jamaica | 1998           | MaleAge80to84       | 10335      |
| Jamaica | 1998           | MaleAge85to89       | 5322       |
| Jamaica | 1998           | MaleAge90to94       | 2142       |
| Jamaica | 1998           | MaleAge95to99       | 542        |
| Jamaica | 1998           | MaleAgeAbov e100    | 62         |
| Jamaica | 1999           | FemaleAge0to4       | 139846     |
| Jamaica | 1999           | FemaleAge10to14     | 134640     |
| Jamaica | 1999           | FemaleAge15to19     | 104707     |
| Jamaica | 1999           | FemaleAge20to24     | 81437      |
| Jamaica | 1999           | FemaleAge25to29     | 86557      |
| Jamaica | 1999           | FemaleAge30to34     | 88224      |
| Jamaica | 1999           | FemaleAge35to39     | 82783      |
| Jamaica | 1999           | FemaleAge40to44     | 68584      |
| Jamaica | 1999           | FemaleAge45to49     | 51595      |
| Jamaica | 1999           | FemaleAge50to54     | 42132      |
| Jamaica | 1999           | FemaleAge55to59     | 36255      |
| Jamaica | 1999           | FemaleAge5to9       | 140286     |
| Jamaica | 1999           | FemaleAge60to64     | 32388      |
| Jamaica | 1999           | FemaleAge65to69     | 30119      |
| Jamaica | 1999           | FemaleAge70to74     | 25286      |
| Jamaica | 1999           | FemaleAge75to79     | 19051      |
| Jamaica | 1999           | FemaleAge80to84     | 13783      |
| Jamaica | 1999           | FemaleAge85to89     | 8340       |
| Jamaica | 1999           | FemaleAge90to94     | 3698       |
| Jamaica | 1999           | FemaleAge95to99     | 771        |
| Jamaica | 1999           | FemaleAgeAbov e100  | 207        |
| Jamaica | 1999           | FemaleLactAge15to19 | 11610      |
| Jamaica | 1999           | FemaleLactAge20to24 | 17394      |
| Jamaica | 1999           | FemaleLactAge25to29 | 14031      |
| Jamaica | 1999           | FemaleLactAge30to34 | 8982       |
| Jamaica | 1999           | FemaleLactAge35to39 | 4473       |
| Jamaica | 1999           | FemaleLactAge40to44 | 1266       |
| Jamaica | 1999           | FemaleLactAge45to49 | 147        |
| Jamaica | 1999           | FemalePregAge15to19 | 8707       |
| Jamaica | 1999           | FemalePregAge20to24 | 13046      |
| Jamaica | 1999           | FemalePregAge25to29 | 10523      |
| Jamaica | 1999           | FemalePregAge30to34 | 6737       |
| Jamaica | 1999           | FemalePregAge35to39 | 3355       |
| Jamaica | 1999           | FemalePregAge40to44 | 949        |
| Jamaica | 1999           | FemalePregAge45to49 | 111        |
| Jamaica | 1999           | MaleAge0to4         | 146727     |
| Jamaica | 1999           | MaleAge10to14       | 135545     |
| Jamaica | 1999           | MaleAge15to19       | 123448     |
| Jamaica | 1999           | MaleAge20to24       | 108620     |
| Jamaica | 1999           | MaleAge25to29       | 106190     |
| Jamaica | 1999           | MaleAge30to34       | 96129      |
| Jamaica | 1999           | MaleAge35to39       | 83442      |
| Jamaica | 1999           | MaleAge40to44       | 69329      |
| Jamaica | 1999           | MaleAge45to49       | 52974      |
| Jamaica | 1999           | MaleAge50to54       | 43881      |
| Jamaica | 1999           | MaleAge55to59       | 36895      |
| Jamaica | 1999           | MaleAge5to9         | 145022     |
| Jamaica | 1999           | MaleAge60to64       | 30305      |
| Jamaica | 1999           | MaleAge65to69       | 27819      |
| Jamaica | 1999           | MaleAge70to74       | 24362      |
| Jamaica | 1999           | MaleAge75to79       | 17197      |
| Jamaica | 1999           | MaleAge80to84       | 10625      |
| Jamaica | 1999           | MaleAge85to89       | 5315       |
| Jamaica | 1999           | MaleAge90to94       | 2121       |
| Jamaica | 1999           | MaleAge95to99       | 543        |
| Jamaica | 1999           | MaleAgeAbov e100    | 71         |
| Japan   | 1992           | FemaleAge0to4       | 2978499    |
| Japan   | 1992           | FemaleAge10to14     | 3912055    |
| Japan   | 1992           | FemaleAge15to19     | 4654036    |
| Japan   | 1992           | FemaleAge20to24     | 4236473    |
| Japan   | 1992           | FemaleAge25to29     | 3129662    |
| Japan   | 1992           | FemaleAge30to34     | 3180788    |
| Japan   | 1992           | FemaleAge35to39     | 3988644    |
| Japan   | 1992           | FemaleAge40to44     | 5065669    |
| Japan   | 1992           | FemaleAge45to49     | 4858831    |
| Japan   | 1992           | FemaleAge50to54     | 4163821    |
| Japan   | 1992           | FemaleAge55to59     | 3950025    |
| Japan   | 1992           | FemaleAge5to9       | 3456177    |
| Japan   | 1992           | FemaleAge60to64     | 3640061    |
| Japan   | 1992           | FemaleAge65to69     | 3083407    |
| Japan   | 1992           | FemaleAge70to74     | 2382994    |
| Japan   | 1992           | FemaleAge75to79     | 1852147    |
| Japan   | 1992           | FemaleAge80to84     | 1251004    |
| Japan   | 1992           | FemaleAge85to89     | 618826     |
| Japan   | 1992           | FemaleAge90to94     | 215856     |
| Japan   | 1992           | FemaleAge95to99     | 37054      |

Dietary calcium and zinc deficiency risks are decreasing but remain prevalent

| Country | Reference year | Age/gender group    | Population |
|---------|----------------|---------------------|------------|
| Japan   | 1992           | FemaleAgeAbove100   | 2772       |
| Japan   | 1992           | FemaleLactAge15to19 | 18077      |
| Japan   | 1992           | FemaleLactAge20to24 | 196390     |
| Japan   | 1992           | FemaleLactAge25to29 | 535222     |
| Japan   | 1992           | FemaleLactAge30to34 | 364764     |
| Japan   | 1992           | FemaleLactAge35to39 | 95003      |
| Japan   | 1992           | FemaleLactAge40to44 | 10715      |
| Japan   | 1992           | FemalePregAge15to19 | 13557      |
| Japan   | 1992           | FemalePregAge20to24 | 147292     |
| Japan   | 1992           | FemalePregAge25to29 | 401417     |
| Japan   | 1992           | FemalePregAge30to34 | 273573     |
| Japan   | 1992           | FemalePregAge35to39 | 71252      |
| Japan   | 1992           | FemalePregAge40to44 | 8036       |
| Japan   | 1992           | MaleAge0to4         | 3131679    |
| Japan   | 1992           | MaleAge10to14       | 4110491    |
| Japan   | 1992           | MaleAge15to19       | 4910582    |
| Japan   | 1992           | MaleAge20to24       | 4741682    |
| Japan   | 1992           | MaleAge25to29       | 4165823    |
| Japan   | 1992           | MaleAge30to34       | 3892453    |
| Japan   | 1992           | MaleAge35to39       | 4204522    |
| Japan   | 1992           | MaleAge40to44       | 5131296    |
| Japan   | 1992           | MaleAge45to49       | 4833290    |
| Japan   | 1992           | MaleAge50to54       | 4066127    |
| Japan   | 1992           | MaleAge55to59       | 3786826    |
| Japan   | 1992           | MaleAge5to9         | 3621301    |
| Japan   | 1992           | MaleAge60to64       | 3394083    |
| Japan   | 1992           | MaleAge65to69       | 2458058    |
| Japan   | 1992           | MaleAge70to74       | 1611462    |
| Japan   | 1992           | MaleAge75to79       | 1181074    |
| Japan   | 1992           | MaleAge80to84       | 729099     |
| Japan   | 1992           | MaleAge85to89       | 311152     |
| Japan   | 1992           | MaleAge90to94       | 91474      |
| Japan   | 1992           | MaleAge95to99       | 12969      |
| Japan   | 1992           | MaleAgeAbove100     | 815        |
| Japan   | 1993           | FemaleAge0to4       | 2950110    |
| Japan   | 1993           | FemaleAge10to14     | 3827396    |
| Japan   | 1993           | FemaleAge15to19     | 4467148    |
| Japan   | 1993           | FemaleAge20to24     | 4390786    |
| Japan   | 1993           | FemaleAge25to29     | 3182178    |
| Japan   | 1993           | FemaleAge30to34     | 3226846    |
| Japan   | 1993           | FemaleAge35to39     | 3854171    |
| Japan   | 1993           | FemaleAge40to44     | 4868520    |
| Japan   | 1993           | FemaleAge45to49     | 5058207    |
| Japan   | 1993           | FemaleAge50to54     | 4234050    |
| Japan   | 1993           | FemaleAge55to59     | 3962206    |
| Japan   | 1993           | FemaleAge5to9       | 3358870    |
| Japan   | 1993           | FemaleAge60to64     | 3714625    |
| Japan   | 1993           | FemaleAge65to69     | 3180060    |
| Japan   | 1993           | FemaleAge70to74     | 2495593    |
| Japan   | 1993           | FemaleAge75to79     | 1876129    |
| Japan   | 1993           | FemaleAge80to84     | 1323437    |
| Japan   | 1993           | FemaleAge85to89     | 654337     |
| Japan   | 1993           | FemaleAge90to94     | 233054     |
| Japan   | 1993           | FemaleAge95to99     | 43249      |
| Japan   | 1993           | FemaleAgeAbove100   | 3143       |
| Japan   | 1993           | FemaleLactAge15to19 | 18077      |
| Japan   | 1993           | FemaleLactAge20to24 | 196390     |
| Japan   | 1993           | FemaleLactAge25to29 | 535222     |
| Japan   | 1993           | FemaleLactAge30to34 | 364764     |
| Japan   | 1993           | FemaleLactAge35to39 | 95003      |
| Japan   | 1993           | FemaleLactAge40to44 | 10715      |
| Japan   | 1993           | FemalePregAge15to19 | 13557      |
| Japan   | 1993           | FemalePregAge20to24 | 147292     |
| Japan   | 1993           | FemalePregAge25to29 | 401417     |
| Japan   | 1993           | FemalePregAge30to34 | 273573     |
| Japan   | 1993           | FemalePregAge35to39 | 71252      |
| Japan   | 1993           | FemalePregAge40to44 | 8036       |
| Japan   | 1993           | MaleAge0to4         | 3100180    |
| Japan   | 1993           | MaleAge10to14       | 4018928    |
| Japan   | 1993           | MaleAge15to19       | 4717899    |
| Japan   | 1993           | MaleAge20to24       | 4909190    |
| Japan   | 1993           | MaleAge25to29       | 4223748    |
| Japan   | 1993           | MaleAge30to34       | 3948140    |
| Japan   | 1993           | MaleAge35to39       | 4076053    |
| Japan   | 1993           | MaleAge40to44       | 4934515    |
| Japan   | 1993           | MaleAge45to49       | 5056096    |
| Japan   | 1993           | MaleAge50to54       | 4138128    |
| Japan   | 1993           | MaleAge55to59       | 3805653    |
| Japan   | 1993           | MaleAge5to9         | 3521481    |
| Japan   | 1993           | MaleAge60to64       | 3464478    |
| Japan   | 1993           | MaleAge65to69       | 2640977    |
| Japan   | 1993           | MaleAge70to74       | 1680131    |
| Japan   | 1993           | MaleAge75to79       | 1182186    |
| Japan   | 1993           | MaleAge80to84       | 762932     |
| Japan   | 1993           | MaleAge85to89       | 324780     |
| Japan   | 1993           | MaleAge90to94       | 97731      |
| Japan   | 1993           | MaleAge95to99       | 15298      |
| Japan   | 1993           | MaleAgeAbove100     | 917        |

Dietary calcium and zinc deficiency risks are decreasing but remain prevalent

| Country | Reference year | Age/gender group    | Population |
|---------|----------------|---------------------|------------|
| Japan   | 1994           | FemaleAge0to4       | 2933359    |
| Japan   | 1994           | FemaleAge10to14     | 3742952    |
| Japan   | 1994           | FemaleAge15to19     | 4281735    |
| Japan   | 1994           | FemaleAge20to24     | 4489689    |
| Japan   | 1994           | FemaleAge25to29     | 3254309    |
| Japan   | 1994           | FemaleAge30to34     | 3284199    |
| Japan   | 1994           | FemaleAge35to39     | 3750226    |
| Japan   | 1994           | FemaleAge40to44     | 4657812    |
| Japan   | 1994           | FemaleAge45to49     | 5198039    |
| Japan   | 1994           | FemaleAge50to54     | 4331379    |
| Japan   | 1994           | FemaleAge55to59     | 3981957    |
| Japan   | 1994           | FemaleAge5to9       | 3265292    |
| Japan   | 1994           | FemaleAge60to64     | 3776545    |
| Japan   | 1994           | FemaleAge65to69     | 3273664    |
| Japan   | 1994           | FemaleAge70to74     | 2612149    |
| Japan   | 1994           | FemaleAge75to79     | 1918232    |
| Japan   | 1994           | FemaleAge80to84     | 1390728    |
| Japan   | 1994           | FemaleAge85to89     | 693612     |
| Japan   | 1994           | FemaleAge90to94     | 245724     |
| Japan   | 1994           | FemaleAge95to99     | 48332      |
| Japan   | 1994           | FemaleAgeAbove100   | 3587       |
| Japan   | 1994           | FemaleLactAge15to19 | 18077      |
| Japan   | 1994           | FemaleLactAge20to24 | 196390     |
| Japan   | 1994           | FemaleLactAge25to29 | 535222     |
| Japan   | 1994           | FemaleLactAge30to34 | 364764     |
| Japan   | 1994           | FemaleLactAge35to39 | 95003      |
| Japan   | 1994           | FemaleLactAge40to44 | 10715      |
| Japan   | 1994           | FemalePregAge15to19 | 13557      |
| Japan   | 1994           | FemalePregAge20to24 | 147292     |
| Japan   | 1994           | FemalePregAge25to29 | 401417     |
| Japan   | 1994           | FemalePregAge30to34 | 273573     |
| Japan   | 1994           | FemalePregAge35to39 | 71252      |
| Japan   | 1994           | FemalePregAge40to44 | 8036       |
| Japan   | 1994           | MaleAge0to4         | 3080327    |
| Japan   | 1994           | MaleAge10to14       | 3926433    |
| Japan   | 1994           | MaleAge15to19       | 4529127    |
| Japan   | 1994           | MaleAge20to24       | 5015972    |
| Japan   | 1994           | MaleAge25to29       | 4300525    |
| Japan   | 1994           | MaleAge30to34       | 4015351    |
| Japan   | 1994           | MaleAge35to39       | 3978534    |
| Japan   | 1994           | MaleAge40to44       | 4723530    |
| Japan   | 1994           | MaleAge45to49       | 5217536    |
| Japan   | 1994           | MaleAge50to54       | 4240881    |
| Japan   | 1994           | MaleAge55to59       | 3833312    |
| Japan   | 1994           | MaleAge5to9         | 3426311    |
| Japan   | 1994           | MaleAge60to64       | 3521397    |
| Japan   | 1994           | MaleAge65to69       | 2810899    |
| Japan   | 1994           | MaleAge70to74       | 1773547    |
| Japan   | 1994           | MaleAge75to79       | 1197049    |
| Japan   | 1994           | MaleAge80to84       | 787760     |
| Japan   | 1994           | MaleAge85to89       | 336414     |
| Japan   | 1994           | MaleAge90to94       | 100033     |
| Japan   | 1994           | MaleAge95to99       | 16762      |
| Japan   | 1994           | MaleAgeAbove100     | 1027       |
| Japan   | 1995           | FemaleAge0to4       | 2913293    |
| Japan   | 1995           | FemaleAge10to14     | 3648148    |
| Japan   | 1995           | FemaleAge15to19     | 4127194    |
| Japan   | 1995           | FemaleAge20to24     | 4506311    |
| Japan   | 1995           | FemaleAge25to29     | 3353621    |
| Japan   | 1995           | FemaleAge30to34     | 3339526    |
| Japan   | 1995           | FemaleAge35to39     | 3681049    |
| Japan   | 1995           | FemaleAge40to44     | 4467051    |
| Japan   | 1995           | FemaleAge45to49     | 5242475    |
| Japan   | 1995           | FemaleAge50to54     | 4460669    |
| Japan   | 1995           | FemaleAge55to59     | 4016924    |
| Japan   | 1995           | FemaleAge5to9       | 3184744    |
| Japan   | 1995           | FemaleAge60to64     | 3823224    |
| Japan   | 1995           | FemaleAge65to69     | 3364107    |
| Japan   | 1995           | FemaleAge70to74     | 2725329    |
| Japan   | 1995           | FemaleAge75to79     | 1986541    |
| Japan   | 1995           | FemaleAge80to84     | 1448498    |
| Japan   | 1995           | FemaleAge85to89     | 739523     |
| Japan   | 1995           | FemaleAge90to94     | 256140     |
| Japan   | 1995           | FemaleAge95to99     | 49201      |
| Japan   | 1995           | FemaleAgeAbove100   | 4123       |
| Japan   | 1995           | FemaleLactAge15to19 | 18077      |
| Japan   | 1995           | FemaleLactAge20to24 | 196390     |
| Japan   | 1995           | FemaleLactAge25to29 | 535222     |
| Japan   | 1995           | FemaleLactAge30to34 | 364764     |
| Japan   | 1995           | FemaleLactAge35to39 | 95003      |
| Japan   | 1995           | FemaleLactAge40to44 | 10715      |
| Japan   | 1995           | FemalePregAge15to19 | 13557      |
| Japan   | 1995           | FemalePregAge20to24 | 147292     |
| Japan   | 1995           | FemalePregAge25to29 | 401417     |
| Japan   | 1995           | FemalePregAge30to34 | 273573     |
| Japan   | 1995           | FemalePregAge35to39 | 71252      |
| Japan   | 1995           | FemalePregAge40to44 | 8036       |
| Japan   | 1995           | MaleAge0to4         | 3057412    |

Dietary calcium and zinc deficiency risks are decreasing but remain prevalent

| Country | Reference year | Age/gender group    | Population |
|---------|----------------|---------------------|------------|
| Japan   | 1995           | MaleAge10to14       | 3823618    |
| Japan   | 1995           | MaleAge15to19       | 4372105    |
| Japan   | 1995           | MaleAge20to24       | 5034937    |
| Japan   | 1995           | MaleAge25to29       | 4404325    |
| Japan   | 1995           | MaleAge30to34       | 4078463    |
| Japan   | 1995           | MaleAge35to39       | 3915726    |
| Japan   | 1995           | MaleAge40to44       | 4533684    |
| Japan   | 1995           | MaleAge45to49       | 5277366    |
| Japan   | 1995           | MaleAge50to54       | 4380844    |
| Japan   | 1995           | MaleAge55to59       | 3874998    |
| Japan   | 1995           | MaleAge5to9         | 3343466    |
| Japan   | 1995           | MaleAge60to64       | 3569740    |
| Japan   | 1995           | MaleAge65to69       | 2953642    |
| Japan   | 1995           | MaleAge70to74       | 1894112    |
| Japan   | 1995           | MaleAge75to79       | 1230375    |
| Japan   | 1995           | MaleAge80to84       | 802700     |
| Japan   | 1995           | MaleAge85to89       | 347820     |
| Japan   | 1995           | MaleAge90to94       | 98422      |
| Japan   | 1995           | MaleAge95to99       | 15416      |
| Japan   | 1995           | MaleAgeAbove100     | 1145       |
| Japan   | 1996           | FemaleAge0to4       | 2898328    |
| Japan   | 1996           | FemaleAge10to14     | 3553702    |
| Japan   | 1996           | FemaleAge15to19     | 3988273    |
| Japan   | 1996           | FemaleAge20to24     | 4488453    |
| Japan   | 1996           | FemaleAge25to29     | 3569975    |
| Japan   | 1996           | FemaleAge30to34     | 3362275    |
| Japan   | 1996           | FemaleAge35to39     | 3624750    |
| Japan   | 1996           | FemaleAge40to44     | 4286450    |
| Japan   | 1996           | FemaleAge45to49     | 5195757    |
| Japan   | 1996           | FemaleAge50to54     | 4620833    |
| Japan   | 1996           | FemaleAge55to59     | 4064614    |
| Japan   | 1996           | FemaleAge5to9       | 3112809    |
| Japan   | 1996           | FemaleAge60to64     | 3854702    |
| Japan   | 1996           | FemaleAge65to69     | 3443953    |
| Japan   | 1996           | FemaleAge70to74     | 2825317    |
| Japan   | 1996           | FemaleAge75to79     | 2055782    |
| Japan   | 1996           | FemaleAge80to84     | 1483235    |
| Japan   | 1996           | FemaleAge85to89     | 797943     |
| Japan   | 1996           | FemaleAge90to94     | 288967     |
| Japan   | 1996           | FemaleAge95to99     | 56589      |
| Japan   | 1996           | FemaleAgeAbove100   | 4761       |
| Japan   | 1996           | FemaleLactAge15to19 | 17183      |
| Japan   | 1996           | FemaleLactAge20to24 | 175438     |
| Japan   | 1996           | FemaleLactAge25to29 | 483840     |
| Japan   | 1996           | FemaleLactAge30to34 | 383006     |
| Japan   | 1996           | FemaleLactAge35to39 | 110424     |
| Japan   | 1996           | FemaleLactAge40to44 | 13337      |
| Japan   | 1996           | FemalePregAge15to19 | 12887      |
| Japan   | 1996           | FemalePregAge20to24 | 131579     |
| Japan   | 1996           | FemalePregAge25to29 | 362880     |
| Japan   | 1996           | FemalePregAge30to34 | 287255     |
| Japan   | 1996           | FemalePregAge35to39 | 82818      |
| Japan   | 1996           | FemalePregAge40to44 | 10003      |
| Japan   | 1996           | MaleAge0to4         | 3039909    |
| Japan   | 1996           | MaleAge10to14       | 3725151    |
| Japan   | 1996           | MaleAge15to19       | 4225957    |
| Japan   | 1996           | MaleAge20to24       | 4983685    |
| Japan   | 1996           | MaleAge25to29       | 4537929    |
| Japan   | 1996           | MaleAge30to34       | 4132501    |
| Japan   | 1996           | MaleAge35to39       | 3889286    |
| Japan   | 1996           | MaleAge40to44       | 4355697    |
| Japan   | 1996           | MaleAge45to49       | 5231432    |
| Japan   | 1996           | MaleAge50to54       | 4548377    |
| Japan   | 1996           | MaleAge55to59       | 3919497    |
| Japan   | 1996           | MaleAge5to9         | 3269739    |
| Japan   | 1996           | MaleAge60to64       | 3599000    |
| Japan   | 1996           | MaleAge65to69       | 3059242    |
| Japan   | 1996           | MaleAge70to74       | 2028998    |
| Japan   | 1996           | MaleAge75to79       | 1272614    |
| Japan   | 1996           | MaleAge80to84       | 817115     |
| Japan   | 1996           | MaleAge85to89       | 378669     |
| Japan   | 1996           | MaleAge90to94       | 113184     |
| Japan   | 1996           | MaleAge95to99       | 17534      |
| Japan   | 1996           | MaleAgeAbove100     | 1272       |
| Japan   | 1997           | FemaleAge0to4       | 2889296    |
| Japan   | 1997           | FemaleAge10to14     | 3457493    |
| Japan   | 1997           | FemaleAge15to19     | 3876380    |
| Japan   | 1997           | FemaleAge20to24     | 4349087    |
| Japan   | 1997           | FemaleAge25to29     | 3721787    |
| Japan   | 1997           | FemaleAge30to34     | 3408485    |
| Japan   | 1997           | FemaleAge35to39     | 3637583    |
| Japan   | 1997           | FemaleAge40to44     | 4126587    |
| Japan   | 1997           | FemaleAge45to49     | 5056007    |
| Japan   | 1997           | FemaleAge50to54     | 4815965    |
| Japan   | 1997           | FemaleAge55to59     | 4117418    |
| Japan   | 1997           | FemaleAge5to9       | 3050113    |
| Japan   | 1997           | FemaleAge60to64     | 3874204    |
| Japan   | 1997           | FemaleAge65to69     | 3521523    |

Dietary calcium and zinc deficiency risks are decreasing but remain prevalent

| Country | Reference year | Age/gender group    | Population |
|---------|----------------|---------------------|------------|
| Japan   | 1997           | FemaleAge70to74     | 2922342    |
| Japan   | 1997           | FemaleAge75to79     | 2148570    |
| Japan   | 1997           | FemaleAge80to84     | 1506408    |
| Japan   | 1997           | FemaleAge85to89     | 860766     |
| Japan   | 1997           | FemaleAge90to94     | 317232     |
| Japan   | 1997           | FemaleAge95to99     | 65941      |
| Japan   | 1997           | FemaleAgeAbove100   | 5517       |
| Japan   | 1997           | FemaleLactAge15to19 | 17183      |
| Japan   | 1997           | FemaleLactAge20to24 | 175438     |
| Japan   | 1997           | FemaleLactAge25to29 | 483840     |
| Japan   | 1997           | FemaleLactAge30to34 | 383006     |
| Japan   | 1997           | FemaleLactAge35to39 | 110424     |
| Japan   | 1997           | FemaleLactAge40to44 | 13337      |
| Japan   | 1997           | FemalePregAge15to19 | 12887      |
| Japan   | 1997           | FemalePregAge20to24 | 131579     |
| Japan   | 1997           | FemalePregAge25to29 | 362880     |
| Japan   | 1997           | FemalePregAge30to34 | 287255     |
| Japan   | 1997           | FemalePregAge35to39 | 82818      |
| Japan   | 1997           | FemalePregAge40to44 | 10003      |
| Japan   | 1997           | MaleAge0to4         | 3029344    |
| Japan   | 1997           | MaleAge10to14       | 3626103    |
| Japan   | 1997           | MaleAge15to19       | 4106197    |
| Japan   | 1997           | MaleAge20to24       | 4846147    |
| Japan   | 1997           | MaleAge25to29       | 4697332    |
| Japan   | 1997           | MaleAge30to34       | 4176134    |
| Japan   | 1997           | MaleAge35to39       | 3905146    |
| Japan   | 1997           | MaleAge40to44       | 4195355    |
| Japan   | 1997           | MaleAge45to49       | 5087681    |
| Japan   | 1997           | MaleAge50to54       | 4756223    |
| Japan   | 1997           | MaleAge55to59       | 3966996    |
| Japan   | 1997           | MaleAge5to9         | 3204278    |
| Japan   | 1997           | MaleAge60to64       | 3620693    |
| Japan   | 1997           | MaleAge65to69       | 3142038    |
| Japan   | 1997           | MaleAge70to74       | 2185420    |
| Japan   | 1997           | MaleAge75to79       | 1323737    |
| Japan   | 1997           | MaleAge80to84       | 826825     |
| Japan   | 1997           | MaleAge85to89       | 407669     |
| Japan   | 1997           | MaleAge90to94       | 124120     |
| Japan   | 1997           | MaleAge95to99       | 20511      |
| Japan   | 1997           | MaleAgeAbove100     | 1409       |
| Japan   | 1998           | FemaleAge0to4       | 2881025    |
| Japan   | 1998           | FemaleAge10to14     | 3360586    |
| Japan   | 1998           | FemaleAge15to19     | 3788569    |
| Japan   | 1998           | FemaleAge20to24     | 4155092    |
| Japan   | 1998           | FemaleAge25to29     | 3868162    |
| Japan   | 1998           | FemaleAge30to34     | 3457003    |
| Japan   | 1998           | FemaleAge35to39     | 3681007    |
| Japan   | 1998           | FemaleAge40to44     | 3991765    |
| Japan   | 1998           | FemaleAge45to49     | 4854691    |
| Japan   | 1998           | FemaleAge50to54     | 5008937    |
| Japan   | 1998           | FemaleAge55to59     | 4183792    |
| Japan   | 1998           | FemaleAge5to9       | 2998431    |
| Japan   | 1998           | FemaleAge60to64     | 3890534    |
| Japan   | 1998           | FemaleAge65to69     | 3594031    |
| Japan   | 1998           | FemaleAge70to74     | 3015460    |
| Japan   | 1998           | FemaleAge75to79     | 2259673    |
| Japan   | 1998           | FemaleAge80to84     | 1530377    |
| Japan   | 1998           | FemaleAge85to89     | 923663     |
| Japan   | 1998           | FemaleAge90to94     | 341351     |
| Japan   | 1998           | FemaleAge95to99     | 75669      |
| Japan   | 1998           | FemaleAgeAbove100   | 6423       |
| Japan   | 1998           | FemaleLactAge15to19 | 17183      |
| Japan   | 1998           | FemaleLactAge20to24 | 175438     |
| Japan   | 1998           | FemaleLactAge25to29 | 483840     |
| Japan   | 1998           | FemaleLactAge30to34 | 383006     |
| Japan   | 1998           | FemaleLactAge35to39 | 110424     |
| Japan   | 1998           | FemaleLactAge40to44 | 13337      |
| Japan   | 1998           | FemalePregAge15to19 | 12887      |
| Japan   | 1998           | FemalePregAge20to24 | 131579     |
| Japan   | 1998           | FemalePregAge25to29 | 362880     |
| Japan   | 1998           | FemalePregAge30to34 | 287255     |
| Japan   | 1998           | FemalePregAge35to39 | 82818      |
| Japan   | 1998           | FemalePregAge40to44 | 10003      |
| Japan   | 1998           | MaleAge0to4         | 3020379    |
| Japan   | 1998           | MaleAge10to14       | 3526662    |
| Japan   | 1998           | MaleAge15to19       | 4009732    |
| Japan   | 1998           | MaleAge20to24       | 4653703    |
| Japan   | 1998           | MaleAge25to29       | 4849565    |
| Japan   | 1998           | MaleAge30to34       | 4222153    |
| Japan   | 1998           | MaleAge35to39       | 3950953    |
| Japan   | 1998           | MaleAge40to44       | 4060944    |
| Japan   | 1998           | MaleAge45to49       | 4880349    |
| Japan   | 1998           | MaleAge50to54       | 4964011    |
| Japan   | 1998           | MaleAge55to59       | 4027760    |
| Japan   | 1998           | MaleAge5to9         | 3149187    |
| Japan   | 1998           | MaleAge60to64       | 3642460    |
| Japan   | 1998           | MaleAge65to69       | 3207519    |
| Japan   | 1998           | MaleAge70to74       | 2348680    |

Dietary calcium and zinc deficiency risks are decreasing but remain prevalent

| Country | Reference year | Age/gender group    | Population |
|---------|----------------|---------------------|------------|
| Japan   | 1998           | MaleAge75to79       | 1388802    |
| Japan   | 1998           | MaleAge80to84       | 840090     |
| Japan   | 1998           | MaleAge85to89       | 430832     |
| Japan   | 1998           | MaleAge90to94       | 131093     |
| Japan   | 1998           | MaleAge95to99       | 23525      |
| Japan   | 1998           | MaleAgeAbove100     | 1565       |
| Japan   | 1999           | FemaleAge0to4       | 2871320    |
| Japan   | 1999           | FemaleAge10to14     | 3268658    |
| Japan   | 1999           | FemaleAge15to19     | 3707973    |
| Japan   | 1999           | FemaleAge20to24     | 3958229    |
| Japan   | 1999           | FemaleAge25to29     | 3961901    |
| Japan   | 1999           | FemaleAge30to34     | 3526182    |
| Japan   | 1999           | FemaleAge35to39     | 3736142    |
| Japan   | 1999           | FemaleAge40to44     | 3889493    |
| Japan   | 1999           | FemaleAge45to49     | 4642937    |
| Japan   | 1999           | FemaleAge50to54     | 5142820    |
| Japan   | 1999           | FemaleAge55to59     | 4277482    |
| Japan   | 1999           | FemaleAge5to9       | 2957226    |
| Japan   | 1999           | FemaleAge60to64     | 3915592    |
| Japan   | 1999           | FemaleAge65to69     | 3657109    |
| Japan   | 1999           | FemaleAge70to74     | 3106504    |
| Japan   | 1999           | FemaleAge75to79     | 2378568    |
| Japan   | 1999           | FemaleAge80to84     | 1571577    |
| Japan   | 1999           | FemaleAge85to89     | 978916     |
| Japan   | 1999           | FemaleAge90to94     | 364581     |
| Japan   | 1999           | FemaleAge95to99     | 83872      |
| Japan   | 1999           | FemaleAgeAbove100   | 7513       |
| Japan   | 1999           | FemaleLactAge15to19 | 17183      |
| Japan   | 1999           | FemaleLactAge20to24 | 175438     |
| Japan   | 1999           | FemaleLactAge25to29 | 483840     |
| Japan   | 1999           | FemaleLactAge30to34 | 383006     |
| Japan   | 1999           | FemaleLactAge35to39 | 110424     |
| Japan   | 1999           | FemaleLactAge40to44 | 13337      |
| Japan   | 1999           | FemalePregAge15to19 | 12887      |
| Japan   | 1999           | FemalePregAge20to24 | 131579     |
| Japan   | 1999           | FemalePregAge25to29 | 362880     |
| Japan   | 1999           | FemalePregAge30to34 | 287255     |
| Japan   | 1999           | FemalePregAge35to39 | 82818      |
| Japan   | 1999           | FemalePregAge40to44 | 10003      |
| Japan   | 1999           | MaleAge0to4         | 3010577    |
| Japan   | 1999           | MaleAge10to14       | 3431695    |
| Japan   | 1999           | MaleAge15to19       | 3921717    |
| Japan   | 1999           | MaleAge20to24       | 4458016    |
| Japan   | 1999           | MaleAge25to29       | 4946508    |
| Japan   | 1999           | MaleAge30to34       | 4290717    |
| Japan   | 1999           | MaleAge35to39       | 4007072    |
| Japan   | 1999           | MaleAge40to44       | 3959436    |
| Japan   | 1999           | MaleAge45to49       | 4664044    |
| Japan   | 1999           | MaleAge50to54       | 5110227    |
| Japan   | 1999           | MaleAge55to59       | 4119194    |
| Japan   | 1999           | MaleAge5to9         | 3104465    |
| Japan   | 1999           | MaleAge60to64       | 3673165    |
| Japan   | 1999           | MaleAge65to69       | 3263514    |
| Japan   | 1999           | MaleAge70to74       | 2499514    |
| Japan   | 1999           | MaleAge75to79       | 1475188    |
| Japan   | 1999           | MaleAge80to84       | 864026     |
| Japan   | 1999           | MaleAge85to89       | 445047     |
| Japan   | 1999           | MaleAge90to94       | 135089     |
| Japan   | 1999           | MaleAge95to99       | 25233      |
| Japan   | 1999           | MaleAgeAbove100     | 1747       |
| Jordan  | 1992           | FemaleAge0to4       | 280151     |
| Jordan  | 1992           | FemaleAge10to14     | 242237     |
| Jordan  | 1992           | FemaleAge15to19     | 195311     |
| Jordan  | 1992           | FemaleAge20to24     | 110321     |
| Jordan  | 1992           | FemaleAge25to29     | 66270      |
| Jordan  | 1992           | FemaleAge30to34     | 54022      |
| Jordan  | 1992           | FemaleAge35to39     | 47894      |
| Jordan  | 1992           | FemaleAge40to44     | 50308      |
| Jordan  | 1992           | FemaleAge45to49     | 52800      |
| Jordan  | 1992           | FemaleAge50to54     | 48220      |
| Jordan  | 1992           | FemaleAge55to59     | 39336      |
| Jordan  | 1992           | FemaleAge5to9       | 271632     |
| Jordan  | 1992           | FemaleAge60to64     | 30345      |
| Jordan  | 1992           | FemaleAge65to69     | 23166      |
| Jordan  | 1992           | FemaleAge70to74     | 15603      |
| Jordan  | 1992           | FemaleAge75to79     | 10138      |
| Jordan  | 1992           | FemaleAge80to84     | 6579       |
| Jordan  | 1992           | FemaleAge85to89     | 2847       |
| Jordan  | 1992           | FemaleAge90to94     | 646        |
| Jordan  | 1992           | FemaleAge95to99     | 80         |
| Jordan  | 1992           | FemaleAgeAbove100   | 4          |
| Jordan  | 1992           | FemaleLactAge15to19 | 10526      |
| Jordan  | 1992           | FemaleLactAge20to24 | 37984      |
| Jordan  | 1992           | FemaleLactAge25to29 | 38716      |
| Jordan  | 1992           | FemaleLactAge30to34 | 25266      |
| Jordan  | 1992           | FemaleLactAge35to39 | 13019      |
| Jordan  | 1992           | FemaleLactAge40to44 | 4314       |
| Jordan  | 1992           | FemaleLactAge45to49 | 593        |

Dietary calcium and zinc deficiency risks are decreasing but remain prevalent

| Country | Reference year | Age/gender group    | Population |
|---------|----------------|---------------------|------------|
| Jordan  | 1992           | FemalePregAge15to19 | 7894       |
| Jordan  | 1992           | FemalePregAge20to24 | 28488      |
| Jordan  | 1992           | FemalePregAge25to29 | 29037      |
| Jordan  | 1992           | FemalePregAge30to34 | 18950      |
| Jordan  | 1992           | FemalePregAge35to39 | 9764       |
| Jordan  | 1992           | FemalePregAge40to44 | 3235       |
| Jordan  | 1992           | FemalePregAge45to49 | 445        |
| Jordan  | 1992           | MaleAge0to4         | 296458     |
| Jordan  | 1992           | MaleAge10to14       | 260113     |
| Jordan  | 1992           | MaleAge15to19       | 238588     |
| Jordan  | 1992           | MaleAge20to24       | 212526     |
| Jordan  | 1992           | MaleAge25to29       | 167679     |
| Jordan  | 1992           | MaleAge30to34       | 119197     |
| Jordan  | 1992           | MaleAge35to39       | 81913      |
| Jordan  | 1992           | MaleAge40to44       | 62844      |
| Jordan  | 1992           | MaleAge45to49       | 54945      |
| Jordan  | 1992           | MaleAge50to54       | 50890      |
| Jordan  | 1992           | MaleAge55to59       | 42380      |
| Jordan  | 1992           | MaleAge5to9         | 290126     |
| Jordan  | 1992           | MaleAge60to64       | 31266      |
| Jordan  | 1992           | MaleAge65to69       | 22396      |
| Jordan  | 1992           | MaleAge70to74       | 14419      |
| Jordan  | 1992           | MaleAge75to79       | 10070      |
| Jordan  | 1992           | MaleAge80to84       | 7273       |
| Jordan  | 1992           | MaleAge85to89       | 3190       |
| Jordan  | 1992           | MaleAge90to94       | 648        |
| Jordan  | 1992           | MaleAge95to99       | 66         |
| Jordan  | 1992           | MaleAgeAbov e100    | 2          |
| Jordan  | 1993           | FemaleAge0to4       | 291953     |
| Jordan  | 1993           | FemaleAge10to14     | 254546     |
| Jordan  | 1993           | FemaleAge15to19     | 204267     |
| Jordan  | 1993           | FemaleAge20to24     | 126366     |
| Jordan  | 1993           | FemaleAge25to29     | 79984      |
| Jordan  | 1993           | FemaleAge30to34     | 65857      |
| Jordan  | 1993           | FemaleAge35to39     | 55564      |
| Jordan  | 1993           | FemaleAge40to44     | 53465      |
| Jordan  | 1993           | FemaleAge45to49     | 55266      |
| Jordan  | 1993           | FemaleAge50to54     | 51109      |
| Jordan  | 1993           | FemaleAge55to59     | 41926      |
| Jordan  | 1993           | FemaleAge5to9       | 274362     |
| Jordan  | 1993           | FemaleAge60to64     | 32319      |
| Jordan  | 1993           | FemaleAge65to69     | 24186      |
| Jordan  | 1993           | FemaleAge70to74     | 16677      |
| Jordan  | 1993           | FemaleAge75to79     | 10168      |
| Jordan  | 1993           | FemaleAge80to84     | 6547       |
| Jordan  | 1993           | FemaleAge85to89     | 3019       |
| Jordan  | 1993           | FemaleAge90to94     | 683        |
| Jordan  | 1993           | FemaleAge95to99     | 95         |
| Jordan  | 1993           | FemaleAgeAbov e100  | 4          |
| Jordan  | 1993           | FemaleLactAge15to19 | 10526      |
| Jordan  | 1993           | FemaleLactAge20to24 | 37984      |
| Jordan  | 1993           | FemaleLactAge25to29 | 38716      |
| Jordan  | 1993           | FemaleLactAge30to34 | 25266      |
| Jordan  | 1993           | FemaleLactAge35to39 | 13019      |
| Jordan  | 1993           | FemaleLactAge40to44 | 4314       |
| Jordan  | 1993           | FemaleLactAge45to49 | 593        |
| Jordan  | 1993           | FemalePregAge15to19 | 7894       |
| Jordan  | 1993           | FemalePregAge20to24 | 28488      |
| Jordan  | 1993           | FemalePregAge25to29 | 29037      |
| Jordan  | 1993           | FemalePregAge30to34 | 18950      |
| Jordan  | 1993           | FemalePregAge35to39 | 9764       |
| Jordan  | 1993           | FemalePregAge40to44 | 3235       |
| Jordan  | 1993           | FemalePregAge45to49 | 445        |
| Jordan  | 1993           | MaleAge0to4         | 308739     |
| Jordan  | 1993           | MaleAge10to14       | 272589     |
| Jordan  | 1993           | MaleAge15to19       | 245660     |
| Jordan  | 1993           | MaleAge20to24       | 227855     |
| Jordan  | 1993           | MaleAge25to29       | 185338     |
| Jordan  | 1993           | MaleAge30to34       | 135374     |
| Jordan  | 1993           | MaleAge35to39       | 91646      |
| Jordan  | 1993           | MaleAge40to44       | 67838      |
| Jordan  | 1993           | MaleAge45to49       | 58320      |
| Jordan  | 1993           | MaleAge50to54       | 53710      |
| Jordan  | 1993           | MaleAge55to59       | 46152      |
| Jordan  | 1993           | MaleAge5to9         | 292413     |
| Jordan  | 1993           | MaleAge60to64       | 33907      |
| Jordan  | 1993           | MaleAge65to69       | 23678      |
| Jordan  | 1993           | MaleAge70to74       | 15290      |
| Jordan  | 1993           | MaleAge75to79       | 9670       |
| Jordan  | 1993           | MaleAge80to84       | 7040       |
| Jordan  | 1993           | MaleAge85to89       | 3357       |
| Jordan  | 1993           | MaleAge90to94       | 682        |
| Jordan  | 1993           | MaleAge95to99       | 86         |
| Jordan  | 1993           | MaleAgeAbov e100    | 2          |
| Jordan  | 1994           | FemaleAge0to4       | 302725     |
| Jordan  | 1994           | FemaleAge10to14     | 264503     |
| Jordan  | 1994           | FemaleAge15to19     | 212303     |
| Jordan  | 1994           | FemaleAge20to24     | 140517     |



Dietary calcium and zinc deficiency risks are decreasing but remain prevalent

| Country | Reference year | Age/gender group    | Population |
|---------|----------------|---------------------|------------|
| Jordan  | 1994           | FemaleAge25to29     | 93843      |
| Jordan  | 1994           | FemaleAge30to34     | 78099      |
| Jordan  | 1994           | FemaleAge35to39     | 64320      |
| Jordan  | 1994           | FemaleAge40to44     | 57076      |
| Jordan  | 1994           | FemaleAge45to49     | 57550      |
| Jordan  | 1994           | FemaleAge50to54     | 53943      |
| Jordan  | 1994           | FemaleAge55to59     | 44464      |
| Jordan  | 1994           | FemaleAge5to9       | 274697     |
| Jordan  | 1994           | FemaleAge60to64     | 34440      |
| Jordan  | 1994           | FemaleAge65to69     | 25370      |
| Jordan  | 1994           | FemaleAge70to74     | 17715      |
| Jordan  | 1994           | FemaleAge75to79     | 10373      |
| Jordan  | 1994           | FemaleAge80to84     | 6478       |
| Jordan  | 1994           | FemaleAge85to89     | 3047       |
| Jordan  | 1994           | FemaleAge90to94     | 694        |
| Jordan  | 1994           | FemaleAge95to99     | 101        |
| Jordan  | 1994           | FemaleAgeAbove100   | 5          |
| Jordan  | 1994           | FemaleLactAge15to19 | 10526      |
| Jordan  | 1994           | FemaleLactAge20to24 | 37984      |
| Jordan  | 1994           | FemaleLactAge25to29 | 38716      |
| Jordan  | 1994           | FemaleLactAge30to34 | 25266      |
| Jordan  | 1994           | FemaleLactAge35to39 | 13019      |
| Jordan  | 1994           | FemaleLactAge40to44 | 4314       |
| Jordan  | 1994           | FemaleLactAge45to49 | 593        |
| Jordan  | 1994           | FemalePregAge15to19 | 7894       |
| Jordan  | 1994           | FemalePregAge20to24 | 28488      |
| Jordan  | 1994           | FemalePregAge25to29 | 29037      |
| Jordan  | 1994           | FemalePregAge30to34 | 18950      |
| Jordan  | 1994           | FemalePregAge35to39 | 9764       |
| Jordan  | 1994           | FemalePregAge40to44 | 3235       |
| Jordan  | 1994           | FemalePregAge45to49 | 445        |
| Jordan  | 1994           | MaleAge0to4         | 319820     |
| Jordan  | 1994           | MaleAge10to14       | 282375     |
| Jordan  | 1994           | MaleAge15to19       | 251939     |
| Jordan  | 1994           | MaleAge20to24       | 240246     |
| Jordan  | 1994           | MaleAge25to29       | 202029     |
| Jordan  | 1994           | MaleAge30to34       | 152251     |
| Jordan  | 1994           | MaleAge35to39       | 102707     |
| Jordan  | 1994           | MaleAge40to44       | 73402      |
| Jordan  | 1994           | MaleAge45to49       | 61645      |
| Jordan  | 1994           | MaleAge50to54       | 56402      |
| Jordan  | 1994           | MaleAge55to59       | 49756      |
| Jordan  | 1994           | MaleAge5to9         | 292074     |
| Jordan  | 1994           | MaleAge60to64       | 36848      |
| Jordan  | 1994           | MaleAge65to69       | 25261      |
| Jordan  | 1994           | MaleAge70to74       | 16184      |
| Jordan  | 1994           | MaleAge75to79       | 9472       |
| Jordan  | 1994           | MaleAge80to84       | 6723       |
| Jordan  | 1994           | MaleAge85to89       | 3308       |
| Jordan  | 1994           | MaleAge90to94       | 686        |
| Jordan  | 1994           | MaleAge95to99       | 93         |
| Jordan  | 1994           | MaleAgeAbove100     | 3          |
| Jordan  | 1995           | FemaleAge0to4       | 309304     |
| Jordan  | 1995           | FemaleAge10to14     | 269882     |
| Jordan  | 1995           | FemaleAge15to19     | 219539     |
| Jordan  | 1995           | FemaleAge20to24     | 151431     |
| Jordan  | 1995           | FemaleAge25to29     | 107219     |
| Jordan  | 1995           | FemaleAge30to34     | 90137      |
| Jordan  | 1995           | FemaleAge35to39     | 73658      |
| Jordan  | 1995           | FemaleAge40to44     | 61352      |
| Jordan  | 1995           | FemaleAge45to49     | 59559      |
| Jordan  | 1995           | FemaleAge50to54     | 56394      |
| Jordan  | 1995           | FemaleAge55to59     | 46868      |
| Jordan  | 1995           | FemaleAge5to9       | 274283     |
| Jordan  | 1995           | FemaleAge60to64     | 36544      |
| Jordan  | 1995           | FemaleAge65to69     | 26702      |
| Jordan  | 1995           | FemaleAge70to74     | 18632      |
| Jordan  | 1995           | FemaleAge75to79     | 10766      |
| Jordan  | 1995           | FemaleAge80to84     | 6377       |
| Jordan  | 1995           | FemaleAge85to89     | 2941       |
| Jordan  | 1995           | FemaleAge90to94     | 668        |
| Jordan  | 1995           | FemaleAge95to99     | 80         |
| Jordan  | 1995           | FemaleAgeAbove100   | 5          |
| Jordan  | 1995           | FemaleLactAge15to19 | 10526      |
| Jordan  | 1995           | FemaleLactAge20to24 | 37984      |
| Jordan  | 1995           | FemaleLactAge25to29 | 38716      |
| Jordan  | 1995           | FemaleLactAge30to34 | 25266      |
| Jordan  | 1995           | FemaleLactAge35to39 | 13019      |
| Jordan  | 1995           | FemaleLactAge40to44 | 4314       |
| Jordan  | 1995           | FemaleLactAge45to49 | 593        |
| Jordan  | 1995           | FemalePregAge15to19 | 7894       |
| Jordan  | 1995           | FemalePregAge20to24 | 28488      |
| Jordan  | 1995           | FemalePregAge25to29 | 29037      |
| Jordan  | 1995           | FemalePregAge30to34 | 18950      |
| Jordan  | 1995           | FemalePregAge35to39 | 9764       |
| Jordan  | 1995           | FemalePregAge40to44 | 3235       |
| Jordan  | 1995           | FemalePregAge45to49 | 445        |
| Jordan  | 1995           | MaleAge0to4         | 326146     |

Dietary calcium and zinc deficiency risks are decreasing but remain prevalent

| Country | Reference year | Age/gender group    | Population |
|---------|----------------|---------------------|------------|
| Jordan  | 1995           | MaleAge10to14       | 286926     |
| Jordan  | 1995           | MaleAge15to19       | 257438     |
| Jordan  | 1995           | MaleAge20to24       | 248583     |
| Jordan  | 1995           | MaleAge25to29       | 216586     |
| Jordan  | 1995           | MaleAge30to34       | 168591     |
| Jordan  | 1995           | MaleAge35to39       | 114775     |
| Jordan  | 1995           | MaleAge40to44       | 79552      |
| Jordan  | 1995           | MaleAge45to49       | 64769      |
| Jordan  | 1995           | MaleAge50to54       | 58820      |
| Jordan  | 1995           | MaleAge55to59       | 52847      |
| Jordan  | 1995           | MaleAge5to9         | 290882     |
| Jordan  | 1995           | MaleAge60to64       | 39907      |
| Jordan  | 1995           | MaleAge65to69       | 27111      |
| Jordan  | 1995           | MaleAge70to74       | 17052      |
| Jordan  | 1995           | MaleAge75to79       | 9511       |
| Jordan  | 1995           | MaleAge80to84       | 6322       |
| Jordan  | 1995           | MaleAge85to89       | 3063       |
| Jordan  | 1995           | MaleAge90to94       | 639        |
| Jordan  | 1995           | MaleAge95to99       | 64         |
| Jordan  | 1995           | MaleAgeAbove100     | 3          |
| Jordan  | 1996           | FemaleAge0to4       | 322218     |
| Jordan  | 1996           | FemaleAge10to14     | 274335     |
| Jordan  | 1996           | FemaleAge15to19     | 226515     |
| Jordan  | 1996           | FemaleAge20to24     | 150813     |
| Jordan  | 1996           | FemaleAge25to29     | 104258     |
| Jordan  | 1996           | FemaleAge30to34     | 88283      |
| Jordan  | 1996           | FemaleAge35to39     | 75381      |
| Jordan  | 1996           | FemaleAge40to44     | 64447      |
| Jordan  | 1996           | FemaleAge45to49     | 60502      |
| Jordan  | 1996           | FemaleAge50to54     | 57380      |
| Jordan  | 1996           | FemaleAge55to59     | 48445      |
| Jordan  | 1996           | FemaleAge5to9       | 279142     |
| Jordan  | 1996           | FemaleAge60to64     | 37783      |
| Jordan  | 1996           | FemaleAge65to69     | 27469      |
| Jordan  | 1996           | FemaleAge70to74     | 19142      |
| Jordan  | 1996           | FemaleAge75to79     | 11260      |
| Jordan  | 1996           | FemaleAge80to84     | 6444       |
| Jordan  | 1996           | FemaleAge85to89     | 3098       |
| Jordan  | 1996           | FemaleAge90to94     | 831        |
| Jordan  | 1996           | FemaleAge95to99     | 88         |
| Jordan  | 1996           | FemaleAgeAbove100   | 5          |
| Jordan  | 1996           | FemaleLactAge15to19 | 10291      |
| Jordan  | 1996           | FemaleLactAge20to24 | 40892      |
| Jordan  | 1996           | FemaleLactAge25to29 | 44823      |
| Jordan  | 1996           | FemaleLactAge30to34 | 30354      |
| Jordan  | 1996           | FemaleLactAge35to39 | 15587      |
| Jordan  | 1996           | FemaleLactAge40to44 | 4444       |
| Jordan  | 1996           | FemaleLactAge45to49 | 439        |
| Jordan  | 1996           | FemalePregAge15to19 | 7719       |
| Jordan  | 1996           | FemalePregAge20to24 | 30669      |
| Jordan  | 1996           | FemalePregAge25to29 | 33617      |
| Jordan  | 1996           | FemalePregAge30to34 | 22765      |
| Jordan  | 1996           | FemalePregAge35to39 | 11691      |
| Jordan  | 1996           | FemalePregAge40to44 | 3333       |
| Jordan  | 1996           | FemalePregAge45to49 | 329        |
| Jordan  | 1996           | MaleAge0to4         | 340185     |
| Jordan  | 1996           | MaleAge10to14       | 292601     |
| Jordan  | 1996           | MaleAge15to19       | 264409     |
| Jordan  | 1996           | MaleAge20to24       | 251077     |
| Jordan  | 1996           | MaleAge25to29       | 222140     |
| Jordan  | 1996           | MaleAge30to34       | 175896     |
| Jordan  | 1996           | MaleAge35to39       | 121831     |
| Jordan  | 1996           | MaleAge40to44       | 83208      |
| Jordan  | 1996           | MaleAge45to49       | 65976      |
| Jordan  | 1996           | MaleAge50to54       | 59534      |
| Jordan  | 1996           | MaleAge55to59       | 54159      |
| Jordan  | 1996           | MaleAge5to9         | 296698     |
| Jordan  | 1996           | MaleAge60to64       | 41820      |
| Jordan  | 1996           | MaleAge65to69       | 28451      |
| Jordan  | 1996           | MaleAge70to74       | 17911      |
| Jordan  | 1996           | MaleAge75to79       | 9892       |
| Jordan  | 1996           | MaleAge80to84       | 6175       |
| Jordan  | 1996           | MaleAge85to89       | 3191       |
| Jordan  | 1996           | MaleAge90to94       | 822        |
| Jordan  | 1996           | MaleAge95to99       | 78         |
| Jordan  | 1996           | MaleAgeAbove100     | 3          |
| Jordan  | 1997           | FemaleAge0to4       | 330187     |
| Jordan  | 1997           | FemaleAge10to14     | 275681     |
| Jordan  | 1997           | FemaleAge15to19     | 233754     |
| Jordan  | 1997           | FemaleAge20to24     | 152858     |
| Jordan  | 1997           | FemaleAge25to29     | 111282     |
| Jordan  | 1997           | FemaleAge30to34     | 94234      |
| Jordan  | 1997           | FemaleAge35to39     | 81333      |
| Jordan  | 1997           | FemaleAge40to44     | 68188      |
| Jordan  | 1997           | FemaleAge45to49     | 60767      |
| Jordan  | 1997           | FemaleAge50to54     | 57834      |
| Jordan  | 1997           | FemaleAge55to59     | 49932      |
| Jordan  | 1997           | FemaleAge5to9       | 283978     |

Dietary calcium and zinc deficiency risks are decreasing but remain prevalent

| Country | Reference year | Age/gender group    | Population |
|---------|----------------|---------------------|------------|
| Jordan  | 1997           | FemaleAge60to64     | 38885      |
| Jordan  | 1997           | FemaleAge65to69     | 28231      |
| Jordan  | 1997           | FemaleAge70to74     | 19443      |
| Jordan  | 1997           | FemaleAge75to79     | 11754      |
| Jordan  | 1997           | FemaleAge80to84     | 6417       |
| Jordan  | 1997           | FemaleAge85to89     | 3172       |
| Jordan  | 1997           | FemaleAge90to94     | 958        |
| Jordan  | 1997           | FemaleAge95to99     | 98         |
| Jordan  | 1997           | FemaleAgeAbove100   | 6          |
| Jordan  | 1997           | FemaleLactAge15to19 | 10291      |
| Jordan  | 1997           | FemaleLactAge20to24 | 40892      |
| Jordan  | 1997           | FemaleLactAge25to29 | 44823      |
| Jordan  | 1997           | FemaleLactAge30to34 | 30354      |
| Jordan  | 1997           | FemaleLactAge35to39 | 15587      |
| Jordan  | 1997           | FemaleLactAge40to44 | 4444       |
| Jordan  | 1997           | FemaleLactAge45to49 | 439        |
| Jordan  | 1997           | FemalePregAge15to19 | 7719       |
| Jordan  | 1997           | FemalePregAge20to24 | 30669      |
| Jordan  | 1997           | FemalePregAge25to29 | 33617      |
| Jordan  | 1997           | FemalePregAge30to34 | 22765      |
| Jordan  | 1997           | FemalePregAge35to39 | 11691      |
| Jordan  | 1997           | FemalePregAge40to44 | 3333       |
| Jordan  | 1997           | FemalePregAge45to49 | 329        |
| Jordan  | 1997           | MaleAge0to4         | 348895     |
| Jordan  | 1997           | MaleAge10to14       | 294553     |
| Jordan  | 1997           | MaleAge15to19       | 272214     |
| Jordan  | 1997           | MaleAge20to24       | 251369     |
| Jordan  | 1997           | MaleAge25to29       | 226338     |
| Jordan  | 1997           | MaleAge30to34       | 181507     |
| Jordan  | 1997           | MaleAge35to39       | 128458     |
| Jordan  | 1997           | MaleAge40to44       | 86617      |
| Jordan  | 1997           | MaleAge45to49       | 66769      |
| Jordan  | 1997           | MaleAge50to54       | 59803      |
| Jordan  | 1997           | MaleAge55to59       | 54874      |
| Jordan  | 1997           | MaleAge5to9         | 302068     |
| Jordan  | 1997           | MaleAge60to64       | 43659      |
| Jordan  | 1997           | MaleAge65to69       | 29682      |
| Jordan  | 1997           | MaleAge70to74       | 18633      |
| Jordan  | 1997           | MaleAge75to79       | 10349      |
| Jordan  | 1997           | MaleAge80to84       | 5905       |
| Jordan  | 1997           | MaleAge85to89       | 3216       |
| Jordan  | 1997           | MaleAge90to94       | 955        |
| Jordan  | 1997           | MaleAge95to99       | 95         |
| Jordan  | 1997           | MaleAgeAbove100     | 4          |
| Jordan  | 1998           | FemaleAge0to4       | 334145     |
| Jordan  | 1998           | FemaleAge10to14     | 275001     |
| Jordan  | 1998           | FemaleAge15to19     | 240942     |
| Jordan  | 1998           | FemaleAge20to24     | 153845     |
| Jordan  | 1998           | FemaleAge25to29     | 117371     |
| Jordan  | 1998           | FemaleAge30to34     | 99379      |
| Jordan  | 1998           | FemaleAge35to39     | 87038      |
| Jordan  | 1998           | FemaleAge40to44     | 72297      |
| Jordan  | 1998           | FemaleAge45to49     | 60938      |
| Jordan  | 1998           | FemaleAge50to54     | 57900      |
| Jordan  | 1998           | FemaleAge55to59     | 51291      |
| Jordan  | 1998           | FemaleAge5to9       | 289072     |
| Jordan  | 1998           | FemaleAge60to64     | 39910      |
| Jordan  | 1998           | FemaleAge65to69     | 29035      |
| Jordan  | 1998           | FemaleAge70to74     | 19646      |
| Jordan  | 1998           | FemaleAge75to79     | 12181      |
| Jordan  | 1998           | FemaleAge80to84     | 6370       |
| Jordan  | 1998           | FemaleAge85to89     | 3164       |
| Jordan  | 1998           | FemaleAge90to94     | 1015       |
| Jordan  | 1998           | FemaleAge95to99     | 115        |
| Jordan  | 1998           | FemaleAgeAbove100   | 7          |
| Jordan  | 1998           | FemaleLactAge15to19 | 10291      |
| Jordan  | 1998           | FemaleLactAge20to24 | 40892      |
| Jordan  | 1998           | FemaleLactAge25to29 | 44823      |
| Jordan  | 1998           | FemaleLactAge30to34 | 30354      |
| Jordan  | 1998           | FemaleLactAge35to39 | 15587      |
| Jordan  | 1998           | FemaleLactAge40to44 | 4444       |
| Jordan  | 1998           | FemaleLactAge45to49 | 439        |
| Jordan  | 1998           | FemalePregAge15to19 | 7719       |
| Jordan  | 1998           | FemalePregAge20to24 | 30669      |
| Jordan  | 1998           | FemalePregAge25to29 | 33617      |
| Jordan  | 1998           | FemalePregAge30to34 | 22765      |
| Jordan  | 1998           | FemalePregAge35to39 | 11691      |
| Jordan  | 1998           | FemalePregAge40to44 | 3333       |
| Jordan  | 1998           | FemalePregAge45to49 | 329        |
| Jordan  | 1998           | MaleAge0to4         | 353193     |
| Jordan  | 1998           | MaleAge10to14       | 293878     |
| Jordan  | 1998           | MaleAge15to19       | 279860     |
| Jordan  | 1998           | MaleAge20to24       | 250879     |
| Jordan  | 1998           | MaleAge25to29       | 229417     |
| Jordan  | 1998           | MaleAge30to34       | 185781     |
| Jordan  | 1998           | MaleAge35to39       | 134508     |
| Jordan  | 1998           | MaleAge40to44       | 89888      |
| Jordan  | 1998           | MaleAge45to49       | 67356      |

Dietary calcium and zinc deficiency risks are decreasing but remain prevalent

| Country    | Reference year | Age/gender group    | Population |
|------------|----------------|---------------------|------------|
| Jordan     | 1998           | MaleAge50to54       | 59711      |
| Jordan     | 1998           | MaleAge55to59       | 55134      |
| Jordan     | 1998           | MaleAge5to9         | 307342     |
| Jordan     | 1998           | MaleAge60to64       | 45365      |
| Jordan     | 1998           | MaleAge65to69       | 30858      |
| Jordan     | 1998           | MaleAge70to74       | 19278      |
| Jordan     | 1998           | MaleAge75to79       | 10822      |
| Jordan     | 1998           | MaleAge80to84       | 5628       |
| Jordan     | 1998           | MaleAge85to89       | 3129       |
| Jordan     | 1998           | MaleAge90to94       | 999        |
| Jordan     | 1998           | MaleAge95to99       | 114        |
| Jordan     | 1998           | MaleAgeAbov e100    | 4          |
| Jordan     | 1999           | FemaleAge0to4       | 336110     |
| Jordan     | 1999           | FemaleAge10to14     | 274279     |
| Jordan     | 1999           | FemaleAge15to19     | 246892     |
| Jordan     | 1999           | FemaleAge20to24     | 155666     |
| Jordan     | 1999           | FemaleAge25to29     | 122274     |
| Jordan     | 1999           | FemaleAge30to34     | 104316     |
| Jordan     | 1999           | FemaleAge35to39     | 92548      |
| Jordan     | 1999           | FemaleAge40to44     | 76666      |
| Jordan     | 1999           | FemaleAge45to49     | 61522      |
| Jordan     | 1999           | FemaleAge50to54     | 57786      |
| Jordan     | 1999           | FemaleAge55to59     | 52427      |
| Jordan     | 1999           | FemaleAge5to9       | 294163     |
| Jordan     | 1999           | FemaleAge60to64     | 40988      |
| Jordan     | 1999           | FemaleAge65to69     | 29913      |
| Jordan     | 1999           | FemaleAge70to74     | 19900      |
| Jordan     | 1999           | FemaleAge75to79     | 12486      |
| Jordan     | 1999           | FemaleAge80to84     | 6377       |
| Jordan     | 1999           | FemaleAge85to89     | 3081       |
| Jordan     | 1999           | FemaleAge90to94     | 985        |
| Jordan     | 1999           | FemaleAge95to99     | 129        |
| Jordan     | 1999           | FemaleAgeAbov e100  | 7          |
| Jordan     | 1999           | FemaleLactAge15to19 | 10291      |
| Jordan     | 1999           | FemaleLactAge20to24 | 40892      |
| Jordan     | 1999           | FemaleLactAge25to29 | 44823      |
| Jordan     | 1999           | FemaleLactAge30to34 | 30354      |
| Jordan     | 1999           | FemaleLactAge35to39 | 15587      |
| Jordan     | 1999           | FemaleLactAge40to44 | 4444       |
| Jordan     | 1999           | FemaleLactAge45to49 | 439        |
| Jordan     | 1999           | FemalePregAge15to19 | 7719       |
| Jordan     | 1999           | FemalePregAge20to24 | 30669      |
| Jordan     | 1999           | FemalePregAge25to29 | 33617      |
| Jordan     | 1999           | FemalePregAge30to34 | 22765      |
| Jordan     | 1999           | FemalePregAge35to39 | 11691      |
| Jordan     | 1999           | FemalePregAge40to44 | 3333       |
| Jordan     | 1999           | FemalePregAge45to49 | 329        |
| Jordan     | 1999           | MaleAge0to4         | 355103     |
| Jordan     | 1999           | MaleAge10to14       | 292712     |
| Jordan     | 1999           | MaleAge15to19       | 285893     |
| Jordan     | 1999           | MaleAge20to24       | 251553     |
| Jordan     | 1999           | MaleAge25to29       | 231609     |
| Jordan     | 1999           | MaleAge30to34       | 189351     |
| Jordan     | 1999           | MaleAge35to39       | 139869     |
| Jordan     | 1999           | MaleAge40to44       | 93254      |
| Jordan     | 1999           | MaleAge45to49       | 68034      |
| Jordan     | 1999           | MaleAge50to54       | 59401      |
| Jordan     | 1999           | MaleAge55to59       | 55150      |
| Jordan     | 1999           | MaleAge5to9         | 312319     |
| Jordan     | 1999           | MaleAge60to64       | 46826      |
| Jordan     | 1999           | MaleAge65to69       | 32085      |
| Jordan     | 1999           | MaleAge70to74       | 19939      |
| Jordan     | 1999           | MaleAge75to79       | 11257      |
| Jordan     | 1999           | MaleAge80to84       | 5461       |
| Jordan     | 1999           | MaleAge85to89       | 2922       |
| Jordan     | 1999           | MaleAge90to94       | 936        |
| Jordan     | 1999           | MaleAge95to99       | 128        |
| Jordan     | 1999           | MaleAgeAbov e100    | 5          |
| Kazakhstan | 1992           | FemaleAge0to4       | 858104     |
| Kazakhstan | 1992           | FemaleAge10to14     | 769948     |
| Kazakhstan | 1992           | FemaleAge15to19     | 639320     |
| Kazakhstan | 1992           | FemaleAge20to24     | 404794     |
| Kazakhstan | 1992           | FemaleAge25to29     | 499753     |
| Kazakhstan | 1992           | FemaleAge30to34     | 590462     |
| Kazakhstan | 1992           | FemaleAge35to39     | 583499     |
| Kazakhstan | 1992           | FemaleAge40to44     | 479953     |
| Kazakhstan | 1992           | FemaleAge45to49     | 300336     |
| Kazakhstan | 1992           | FemaleAge50to54     | 401506     |
| Kazakhstan | 1992           | FemaleAge55to59     | 341952     |
| Kazakhstan | 1992           | FemaleAge5to9       | 829895     |
| Kazakhstan | 1992           | FemaleAge60to64     | 306684     |
| Kazakhstan | 1992           | FemaleAge65to69     | 273522     |
| Kazakhstan | 1992           | FemaleAge70to74     | 153110     |
| Kazakhstan | 1992           | FemaleAge75to79     | 128600     |
| Kazakhstan | 1992           | FemaleAge80to84     | 87835      |
| Kazakhstan | 1992           | FemaleAge85to89     | 41100      |
| Kazakhstan | 1992           | FemaleAge90to94     | 18290      |
| Kazakhstan | 1992           | FemaleAge95to99     | 4150       |

Dietary calcium and zinc deficiency risks are decreasing but remain prevalent

| Country    | Reference year | Age/gender group    | Population |
|------------|----------------|---------------------|------------|
| Kazakhstan | 1992           | FemaleAgeAbove100   | 883        |
| Kazakhstan | 1992           | FemaleLactAge15to19 | 37369      |
| Kazakhstan | 1992           | FemaleLactAge20to24 | 126344     |
| Kazakhstan | 1992           | FemaleLactAge25to29 | 89824      |
| Kazakhstan | 1992           | FemaleLactAge30to34 | 50226      |
| Kazakhstan | 1992           | FemaleLactAge35to39 | 20578      |
| Kazakhstan | 1992           | FemaleLactAge40to44 | 4230       |
| Kazakhstan | 1992           | FemaleLactAge45to49 | 239        |
| Kazakhstan | 1992           | FemalePregAge15to19 | 28027      |
| Kazakhstan | 1992           | FemalePregAge20to24 | 94758      |
| Kazakhstan | 1992           | FemalePregAge25to29 | 67368      |
| Kazakhstan | 1992           | FemalePregAge30to34 | 37670      |
| Kazakhstan | 1992           | FemalePregAge35to39 | 15433      |
| Kazakhstan | 1992           | FemalePregAge40to44 | 3173       |
| Kazakhstan | 1992           | FemalePregAge45to49 | 179        |
| Kazakhstan | 1992           | MaleAge0to4         | 894263     |
| Kazakhstan | 1992           | MaleAge10to14       | 783829     |
| Kazakhstan | 1992           | MaleAge15to19       | 724008     |
| Kazakhstan | 1992           | MaleAge20to24       | 645559     |
| Kazakhstan | 1992           | MaleAge25to29       | 659052     |
| Kazakhstan | 1992           | MaleAge30to34       | 674465     |
| Kazakhstan | 1992           | MaleAge35to39       | 597667     |
| Kazakhstan | 1992           | MaleAge40to44       | 460421     |
| Kazakhstan | 1992           | MaleAge45to49       | 277094     |
| Kazakhstan | 1992           | MaleAge50to54       | 354686     |
| Kazakhstan | 1992           | MaleAge55to59       | 300566     |
| Kazakhstan | 1992           | MaleAge5to9         | 858952     |
| Kazakhstan | 1992           | MaleAge60to64       | 228389     |
| Kazakhstan | 1992           | MaleAge65to69       | 157978     |
| Kazakhstan | 1992           | MaleAge70to74       | 66144      |
| Kazakhstan | 1992           | MaleAge75to79       | 49096      |
| Kazakhstan | 1992           | MaleAge80to84       | 30288      |
| Kazakhstan | 1992           | MaleAge85to89       | 12368      |
| Kazakhstan | 1992           | MaleAge90to94       | 4969       |
| Kazakhstan | 1992           | MaleAge95to99       | 1104       |
| Kazakhstan | 1992           | MaleAgeAbove100     | 174        |
| Kazakhstan | 1993           | FemaleAge0to4       | 805040     |
| Kazakhstan | 1993           | FemaleAge10to14     | 761002     |
| Kazakhstan | 1993           | FemaleAge15to19     | 641042     |
| Kazakhstan | 1993           | FemaleAge20to24     | 409116     |
| Kazakhstan | 1993           | FemaleAge25to29     | 467621     |
| Kazakhstan | 1993           | FemaleAge30to34     | 582216     |
| Kazakhstan | 1993           | FemaleAge35to39     | 585354     |
| Kazakhstan | 1993           | FemaleAge40to44     | 503573     |
| Kazakhstan | 1993           | FemaleAge45to49     | 328748     |
| Kazakhstan | 1993           | FemaleAge50to54     | 339158     |
| Kazakhstan | 1993           | FemaleAge55to59     | 389781     |
| Kazakhstan | 1993           | FemaleAge5to9       | 832150     |
| Kazakhstan | 1993           | FemaleAge60to64     | 269107     |
| Kazakhstan | 1993           | FemaleAge65to69     | 293761     |
| Kazakhstan | 1993           | FemaleAge70to74     | 161388     |
| Kazakhstan | 1993           | FemaleAge75to79     | 116822     |
| Kazakhstan | 1993           | FemaleAge80to84     | 94721      |
| Kazakhstan | 1993           | FemaleAge85to89     | 39279      |
| Kazakhstan | 1993           | FemaleAge90to94     | 18980      |
| Kazakhstan | 1993           | FemaleAge95to99     | 4315       |
| Kazakhstan | 1993           | FemaleAgeAbove100   | 846        |
| Kazakhstan | 1993           | FemaleLactAge15to19 | 37369      |
| Kazakhstan | 1993           | FemaleLactAge20to24 | 126344     |
| Kazakhstan | 1993           | FemaleLactAge25to29 | 89824      |
| Kazakhstan | 1993           | FemaleLactAge30to34 | 50226      |
| Kazakhstan | 1993           | FemaleLactAge35to39 | 20578      |
| Kazakhstan | 1993           | FemaleLactAge40to44 | 4230       |
| Kazakhstan | 1993           | FemaleLactAge45to49 | 239        |
| Kazakhstan | 1993           | FemalePregAge15to19 | 28027      |
| Kazakhstan | 1993           | FemalePregAge20to24 | 94758      |
| Kazakhstan | 1993           | FemalePregAge25to29 | 67368      |
| Kazakhstan | 1993           | FemalePregAge30to34 | 37670      |
| Kazakhstan | 1993           | FemalePregAge35to39 | 15433      |
| Kazakhstan | 1993           | FemalePregAge40to44 | 3173       |
| Kazakhstan | 1993           | FemalePregAge45to49 | 179        |
| Kazakhstan | 1993           | MaleAge0to4         | 842376     |
| Kazakhstan | 1993           | MaleAge10to14       | 777823     |
| Kazakhstan | 1993           | MaleAge15to19       | 718589     |
| Kazakhstan | 1993           | MaleAge20to24       | 648210     |
| Kazakhstan | 1993           | MaleAge25to29       | 627532     |
| Kazakhstan | 1993           | MaleAge30to34       | 662282     |
| Kazakhstan | 1993           | MaleAge35to39       | 601537     |
| Kazakhstan | 1993           | MaleAge40to44       | 478323     |
| Kazakhstan | 1993           | MaleAge45to49       | 304336     |
| Kazakhstan | 1993           | MaleAge50to54       | 296287     |
| Kazakhstan | 1993           | MaleAge55to59       | 339731     |
| Kazakhstan | 1993           | MaleAge5to9         | 863083     |
| Kazakhstan | 1993           | MaleAge60to64       | 205874     |
| Kazakhstan | 1993           | MaleAge65to69       | 180236     |
| Kazakhstan | 1993           | MaleAge70to74       | 68726      |
| Kazakhstan | 1993           | MaleAge75to79       | 45244      |
| Kazakhstan | 1993           | MaleAge80to84       | 31905      |

Dietary calcium and zinc deficiency risks are decreasing but remain prevalent

| Country    | Reference year | Age/gender group    | Population |
|------------|----------------|---------------------|------------|
| Kazakhstan | 1993           | MaleAge85to89       | 11849      |
| Kazakhstan | 1993           | MaleAge90to94       | 4989       |
| Kazakhstan | 1993           | MaleAge95to99       | 1174       |
| Kazakhstan | 1993           | MaleAgeAbove100     | 170        |
| Kazakhstan | 1994           | FemaleAge0to4       | 747191     |
| Kazakhstan | 1994           | FemaleAge10to14     | 752249     |
| Kazakhstan | 1994           | FemaleAge15to19     | 638649     |
| Kazakhstan | 1994           | FemaleAge20to24     | 414701     |
| Kazakhstan | 1994           | FemaleAge25to29     | 440371     |
| Kazakhstan | 1994           | FemaleAge30to34     | 568516     |
| Kazakhstan | 1994           | FemaleAge35to39     | 581953     |
| Kazakhstan | 1994           | FemaleAge40to44     | 524109     |
| Kazakhstan | 1994           | FemaleAge45to49     | 359488     |
| Kazakhstan | 1994           | FemaleAge50to54     | 286982     |
| Kazakhstan | 1994           | FemaleAge55to59     | 421914     |
| Kazakhstan | 1994           | FemaleAge5to9       | 832465     |
| Kazakhstan | 1994           | FemaleAge60to64     | 243765     |
| Kazakhstan | 1994           | FemaleAge65to69     | 304019     |
| Kazakhstan | 1994           | FemaleAge70to74     | 172300     |
| Kazakhstan | 1994           | FemaleAge75to79     | 108080     |
| Kazakhstan | 1994           | FemaleAge80to84     | 97705      |
| Kazakhstan | 1994           | FemaleAge85to89     | 38723      |
| Kazakhstan | 1994           | FemaleAge90to94     | 18474      |
| Kazakhstan | 1994           | FemaleAge95to99     | 4389       |
| Kazakhstan | 1994           | FemaleAgeAbove100   | 802        |
| Kazakhstan | 1994           | FemaleLactAge15to19 | 37369      |
| Kazakhstan | 1994           | FemaleLactAge20to24 | 126344     |
| Kazakhstan | 1994           | FemaleLactAge25to29 | 89824      |
| Kazakhstan | 1994           | FemaleLactAge30to34 | 50226      |
| Kazakhstan | 1994           | FemaleLactAge35to39 | 20578      |
| Kazakhstan | 1994           | FemaleLactAge40to44 | 4230       |
| Kazakhstan | 1994           | FemaleLactAge45to49 | 239        |
| Kazakhstan | 1994           | FemalePregAge15to19 | 28027      |
| Kazakhstan | 1994           | FemalePregAge20to24 | 94758      |
| Kazakhstan | 1994           | FemalePregAge25to29 | 67368      |
| Kazakhstan | 1994           | FemalePregAge30to34 | 37670      |
| Kazakhstan | 1994           | FemalePregAge35to39 | 15433      |
| Kazakhstan | 1994           | FemalePregAge40to44 | 3173       |
| Kazakhstan | 1994           | FemalePregAge45to49 | 179        |
| Kazakhstan | 1994           | MaleAge0to4         | 784962     |
| Kazakhstan | 1994           | MaleAge10to14       | 772580     |
| Kazakhstan | 1994           | MaleAge15to19       | 710865     |
| Kazakhstan | 1994           | MaleAge20to24       | 650169     |
| Kazakhstan | 1994           | MaleAge25to29       | 600525     |
| Kazakhstan | 1994           | MaleAge30to34       | 645053     |
| Kazakhstan | 1994           | MaleAge35to39       | 599379     |
| Kazakhstan | 1994           | MaleAge40to44       | 493499     |
| Kazakhstan | 1994           | MaleAge45to49       | 332766     |
| Kazakhstan | 1994           | MaleAge50to54       | 248219     |
| Kazakhstan | 1994           | MaleAge55to59       | 363369     |
| Kazakhstan | 1994           | MaleAge5to9         | 864157     |
| Kazakhstan | 1994           | MaleAge60to64       | 192304     |
| Kazakhstan | 1994           | MaleAge65to69       | 194305     |
| Kazakhstan | 1994           | MaleAge70to74       | 74724      |
| Kazakhstan | 1994           | MaleAge75to79       | 42287      |
| Kazakhstan | 1994           | MaleAge80to84       | 31925      |
| Kazakhstan | 1994           | MaleAge85to89       | 11476      |
| Kazakhstan | 1994           | MaleAge90to94       | 4662       |
| Kazakhstan | 1994           | MaleAge95to99       | 1151       |
| Kazakhstan | 1994           | MaleAgeAbove100     | 163        |
| Kazakhstan | 1995           | FemaleAge0to4       | 695216     |
| Kazakhstan | 1995           | FemaleAge10to14     | 747046     |
| Kazakhstan | 1995           | FemaleAge15to19     | 632862     |
| Kazakhstan | 1995           | FemaleAge20to24     | 417962     |
| Kazakhstan | 1995           | FemaleAge25to29     | 421971     |
| Kazakhstan | 1995           | FemaleAge30to34     | 548585     |
| Kazakhstan | 1995           | FemaleAge35to39     | 575563     |
| Kazakhstan | 1995           | FemaleAge40to44     | 539924     |
| Kazakhstan | 1995           | FemaleAge45to49     | 386001     |
| Kazakhstan | 1995           | FemaleAge50to54     | 258593     |
| Kazakhstan | 1995           | FemaleAge55to59     | 425199     |
| Kazakhstan | 1995           | FemaleAge5to9       | 824241     |
| Kazakhstan | 1995           | FemaleAge60to64     | 240125     |
| Kazakhstan | 1995           | FemaleAge65to69     | 300305     |
| Kazakhstan | 1995           | FemaleAge70to74     | 185189     |
| Kazakhstan | 1995           | FemaleAge75to79     | 104623     |
| Kazakhstan | 1995           | FemaleAge80to84     | 95574      |
| Kazakhstan | 1995           | FemaleAge85to89     | 39862      |
| Kazakhstan | 1995           | FemaleAge90to94     | 16829      |
| Kazakhstan | 1995           | FemaleAge95to99     | 4011       |
| Kazakhstan | 1995           | FemaleAgeAbove100   | 755        |
| Kazakhstan | 1995           | FemaleLactAge15to19 | 37369      |
| Kazakhstan | 1995           | FemaleLactAge20to24 | 126344     |
| Kazakhstan | 1995           | FemaleLactAge25to29 | 89824      |
| Kazakhstan | 1995           | FemaleLactAge30to34 | 50226      |
| Kazakhstan | 1995           | FemaleLactAge35to39 | 20578      |
| Kazakhstan | 1995           | FemaleLactAge40to44 | 4230       |
| Kazakhstan | 1995           | FemaleLactAge45to49 | 239        |

Dietary calcium and zinc deficiency risks are decreasing but remain prevalent

| Country    | Reference year | Age/gender group    | Population |
|------------|----------------|---------------------|------------|
| Kazakhstan | 1995           | FemalePregAge15to19 | 28027      |
| Kazakhstan | 1995           | FemalePregAge20to24 | 94758      |
| Kazakhstan | 1995           | FemalePregAge25to29 | 67368      |
| Kazakhstan | 1995           | FemalePregAge30to34 | 37670      |
| Kazakhstan | 1995           | FemalePregAge35to39 | 15433      |
| Kazakhstan | 1995           | FemalePregAge40to44 | 3173       |
| Kazakhstan | 1995           | FemalePregAge45to49 | 179        |
| Kazakhstan | 1995           | MaleAge0to4         | 732413     |
| Kazakhstan | 1995           | MaleAge10to14       | 770268     |
| Kazakhstan | 1995           | MaleAge15to19       | 702386     |
| Kazakhstan | 1995           | MaleAge20to24       | 648220     |
| Kazakhstan | 1995           | MaleAge25to29       | 581337     |
| Kazakhstan | 1995           | MaleAge30to34       | 622728     |
| Kazakhstan | 1995           | MaleAge35to39       | 592434     |
| Kazakhstan | 1995           | MaleAge40to44       | 505378     |
| Kazakhstan | 1995           | MaleAge45to49       | 355773     |
| Kazakhstan | 1995           | MaleAge50to54       | 222436     |
| Kazakhstan | 1995           | MaleAge55to59       | 361486     |
| Kazakhstan | 1995           | MaleAge5to9         | 855947     |
| Kazakhstan | 1995           | MaleAge60to64       | 194327     |
| Kazakhstan | 1995           | MaleAge65to69       | 196799     |
| Kazakhstan | 1995           | MaleAge70to74       | 84561      |
| Kazakhstan | 1995           | MaleAge75to79       | 40793      |
| Kazakhstan | 1995           | MaleAge80to84       | 30153      |
| Kazakhstan | 1995           | MaleAge85to89       | 11284      |
| Kazakhstan | 1995           | MaleAge90to94       | 3970       |
| Kazakhstan | 1995           | MaleAge95to99       | 933        |
| Kazakhstan | 1995           | MaleAgeAbov e100    | 154        |
| Kazakhstan | 1996           | FemaleAge0to4       | 633980     |
| Kazakhstan | 1996           | FemaleAge10to14     | 749718     |
| Kazakhstan | 1996           | FemaleAge15to19     | 641343     |
| Kazakhstan | 1996           | FemaleAge20to24     | 474049     |
| Kazakhstan | 1996           | FemaleAge25to29     | 459128     |
| Kazakhstan | 1996           | FemaleAge30to34     | 551071     |
| Kazakhstan | 1996           | FemaleAge35to39     | 576768     |
| Kazakhstan | 1996           | FemaleAge40to44     | 551140     |
| Kazakhstan | 1996           | FemaleAge45to49     | 410801     |
| Kazakhstan | 1996           | FemaleAge50to54     | 250517     |
| Kazakhstan | 1996           | FemaleAge55to59     | 401703     |
| Kazakhstan | 1996           | FemaleAge5to9       | 809660     |
| Kazakhstan | 1996           | FemaleAge60to64     | 255078     |
| Kazakhstan | 1996           | FemaleAge65to69     | 280232     |
| Kazakhstan | 1996           | FemaleAge70to74     | 197279     |
| Kazakhstan | 1996           | FemaleAge75to79     | 103228     |
| Kazakhstan | 1996           | FemaleAge80to84     | 89362      |
| Kazakhstan | 1996           | FemaleAge85to89     | 43753      |
| Kazakhstan | 1996           | FemaleAge90to94     | 16887      |
| Kazakhstan | 1996           | FemaleAge95to99     | 4220       |
| Kazakhstan | 1996           | FemaleAgeAbov e100  | 705        |
| Kazakhstan | 1996           | FemaleLactAge15to19 | 28937      |
| Kazakhstan | 1996           | FemaleLactAge20to24 | 96033      |
| Kazakhstan | 1996           | FemaleLactAge25to29 | 64851      |
| Kazakhstan | 1996           | FemaleLactAge30to34 | 36400      |
| Kazakhstan | 1996           | FemaleLactAge35to39 | 15903      |
| Kazakhstan | 1996           | FemaleLactAge40to44 | 3289       |
| Kazakhstan | 1996           | FemaleLactAge45to49 | 228        |
| Kazakhstan | 1996           | FemalePregAge15to19 | 21703      |
| Kazakhstan | 1996           | FemalePregAge20to24 | 72025      |
| Kazakhstan | 1996           | FemalePregAge25to29 | 48638      |
| Kazakhstan | 1996           | FemalePregAge30to34 | 27300      |
| Kazakhstan | 1996           | FemalePregAge35to39 | 11927      |
| Kazakhstan | 1996           | FemalePregAge40to44 | 2467       |
| Kazakhstan | 1996           | FemalePregAge45to49 | 171        |
| Kazakhstan | 1996           | MaleAge0to4         | 671395     |
| Kazakhstan | 1996           | MaleAge10to14       | 776066     |
| Kazakhstan | 1996           | MaleAge15to19       | 696951     |
| Kazakhstan | 1996           | MaleAge20to24       | 645195     |
| Kazakhstan | 1996           | MaleAge25to29       | 572781     |
| Kazakhstan | 1996           | MaleAge30to34       | 599071     |
| Kazakhstan | 1996           | MaleAge35to39       | 582442     |
| Kazakhstan | 1996           | MaleAge40to44       | 510502     |
| Kazakhstan | 1996           | MaleAge45to49       | 373557     |
| Kazakhstan | 1996           | MaleAge50to54       | 214672     |
| Kazakhstan | 1996           | MaleAge55to59       | 334074     |
| Kazakhstan | 1996           | MaleAge5to9         | 842256     |
| Kazakhstan | 1996           | MaleAge60to64       | 207349     |
| Kazakhstan | 1996           | MaleAge65to69       | 186586     |
| Kazakhstan | 1996           | MaleAge70to74       | 96683      |
| Kazakhstan | 1996           | MaleAge75to79       | 40288      |
| Kazakhstan | 1996           | MaleAge80to84       | 28243      |
| Kazakhstan | 1996           | MaleAge85to89       | 12394      |
| Kazakhstan | 1996           | MaleAge90to94       | 4048       |
| Kazakhstan | 1996           | MaleAge95to99       | 943        |
| Kazakhstan | 1996           | MaleAgeAbov e100    | 142        |
| Kazakhstan | 1997           | FemaleAge0to4       | 588611     |
| Kazakhstan | 1997           | FemaleAge10to14     | 755395     |
| Kazakhstan | 1997           | FemaleAge15to19     | 631985     |
| Kazakhstan | 1997           | FemaleAge20to24     | 472564     |

Dietary calcium and zinc deficiency risks are decreasing but remain prevalent

| Country    | Reference year | Age/gender group    | Population |
|------------|----------------|---------------------|------------|
| Kazakhstan | 1997           | FemaleAge25to29     | 460068     |
| Kazakhstan | 1997           | FemaleAge30to34     | 524535     |
| Kazakhstan | 1997           | FemaleAge35to39     | 569449     |
| Kazakhstan | 1997           | FemaleAge40to44     | 551839     |
| Kazakhstan | 1997           | FemaleAge45to49     | 434892     |
| Kazakhstan | 1997           | FemaleAge50to54     | 261082     |
| Kazakhstan | 1997           | FemaleAge55to59     | 353310     |
| Kazakhstan | 1997           | FemaleAge5to9       | 782746     |
| Kazakhstan | 1997           | FemaleAge60to64     | 290639     |
| Kazakhstan | 1997           | FemaleAge65to69     | 246737     |
| Kazakhstan | 1997           | FemaleAge70to74     | 211996     |
| Kazakhstan | 1997           | FemaleAge75to79     | 104355     |
| Kazakhstan | 1997           | FemaleAge80to84     | 78990      |
| Kazakhstan | 1997           | FemaleAge85to89     | 48266      |
| Kazakhstan | 1997           | FemaleAge90to94     | 15934      |
| Kazakhstan | 1997           | FemaleAge95to99     | 4760       |
| Kazakhstan | 1997           | FemaleAgeAbove100   | 653        |
| Kazakhstan | 1997           | FemaleLactAge15to19 | 28937      |
| Kazakhstan | 1997           | FemaleLactAge20to24 | 96033      |
| Kazakhstan | 1997           | FemaleLactAge25to29 | 64851      |
| Kazakhstan | 1997           | FemaleLactAge30to34 | 36400      |
| Kazakhstan | 1997           | FemaleLactAge35to39 | 15903      |
| Kazakhstan | 1997           | FemaleLactAge40to44 | 3289       |
| Kazakhstan | 1997           | FemaleLactAge45to49 | 228        |
| Kazakhstan | 1997           | FemalePregAge15to19 | 21703      |
| Kazakhstan | 1997           | FemalePregAge20to24 | 72025      |
| Kazakhstan | 1997           | FemalePregAge25to29 | 48638      |
| Kazakhstan | 1997           | FemalePregAge30to34 | 27300      |
| Kazakhstan | 1997           | FemalePregAge35to39 | 11927      |
| Kazakhstan | 1997           | FemalePregAge40to44 | 2467       |
| Kazakhstan | 1997           | FemalePregAge45to49 | 171        |
| Kazakhstan | 1997           | MaleAge0to4         | 624563     |
| Kazakhstan | 1997           | MaleAge10to14       | 783551     |
| Kazakhstan | 1997           | MaleAge15to19       | 690928     |
| Kazakhstan | 1997           | MaleAge20to24       | 637817     |
| Kazakhstan | 1997           | MaleAge25to29       | 570217     |
| Kazakhstan | 1997           | MaleAge30to34       | 571604     |
| Kazakhstan | 1997           | MaleAge35to39       | 570903     |
| Kazakhstan | 1997           | MaleAge40to44       | 509323     |
| Kazakhstan | 1997           | MaleAge45to49       | 388225     |
| Kazakhstan | 1997           | MaleAge50to54       | 223976     |
| Kazakhstan | 1997           | MaleAge55to59       | 286470     |
| Kazakhstan | 1997           | MaleAge5to9         | 815771     |
| Kazakhstan | 1997           | MaleAge60to64       | 233460     |
| Kazakhstan | 1997           | MaleAge65to69       | 165754     |
| Kazakhstan | 1997           | MaleAge70to74       | 111263     |
| Kazakhstan | 1997           | MaleAge75to79       | 39770      |
| Kazakhstan | 1997           | MaleAge80to84       | 25257      |
| Kazakhstan | 1997           | MaleAge85to89       | 13438      |
| Kazakhstan | 1997           | MaleAge90to94       | 3849       |
| Kazakhstan | 1997           | MaleAge95to99       | 1021       |
| Kazakhstan | 1997           | MaleAgeAbove100     | 127        |
| Kazakhstan | 1998           | FemaleAge0to4       | 558564     |
| Kazakhstan | 1998           | FemaleAge10to14     | 763010     |
| Kazakhstan | 1998           | FemaleAge15to19     | 623582     |
| Kazakhstan | 1998           | FemaleAge20to24     | 467474     |
| Kazakhstan | 1998           | FemaleAge25to29     | 466378     |
| Kazakhstan | 1998           | FemaleAge30to34     | 498377     |
| Kazakhstan | 1998           | FemaleAge35to39     | 562050     |
| Kazakhstan | 1998           | FemaleAge40to44     | 545847     |
| Kazakhstan | 1998           | FemaleAge45to49     | 458103     |
| Kazakhstan | 1998           | FemaleAge50to54     | 283898     |
| Kazakhstan | 1998           | FemaleAge55to59     | 295269     |
| Kazakhstan | 1998           | FemaleAge5to9       | 745576     |
| Kazakhstan | 1998           | FemaleAge60to64     | 332390     |
| Kazakhstan | 1998           | FemaleAge65to69     | 211425     |
| Kazakhstan | 1998           | FemaleAge70to74     | 224685     |
| Kazakhstan | 1998           | FemaleAge75to79     | 107902     |
| Kazakhstan | 1998           | FemaleAge80to84     | 67447      |
| Kazakhstan | 1998           | FemaleAge85to89     | 51468      |
| Kazakhstan | 1998           | FemaleAge90to94     | 14652      |
| Kazakhstan | 1998           | FemaleAge95to99     | 5072       |
| Kazakhstan | 1998           | FemaleAgeAbove100   | 602        |
| Kazakhstan | 1998           | FemaleLactAge15to19 | 28937      |
| Kazakhstan | 1998           | FemaleLactAge20to24 | 96033      |
| Kazakhstan | 1998           | FemaleLactAge25to29 | 64851      |
| Kazakhstan | 1998           | FemaleLactAge30to34 | 36400      |
| Kazakhstan | 1998           | FemaleLactAge35to39 | 15903      |
| Kazakhstan | 1998           | FemaleLactAge40to44 | 3289       |
| Kazakhstan | 1998           | FemaleLactAge45to49 | 228        |
| Kazakhstan | 1998           | FemalePregAge15to19 | 21703      |
| Kazakhstan | 1998           | FemalePregAge20to24 | 72025      |
| Kazakhstan | 1998           | FemalePregAge25to29 | 48638      |
| Kazakhstan | 1998           | FemalePregAge30to34 | 27300      |
| Kazakhstan | 1998           | FemalePregAge35to39 | 11927      |
| Kazakhstan | 1998           | FemalePregAge40to44 | 2467       |
| Kazakhstan | 1998           | FemalePregAge45to49 | 171        |
| Kazakhstan | 1998           | MaleAge0to4         | 592364     |



Dietary calcium and zinc deficiency risks are decreasing but remain prevalent

| Country    | Reference year | Age/gender group    | Population |
|------------|----------------|---------------------|------------|
| Kazakhstan | 1998           | MaleAge10to14       | 791935     |
| Kazakhstan | 1998           | MaleAge15to19       | 687552     |
| Kazakhstan | 1998           | MaleAge20to24       | 628629     |
| Kazakhstan | 1998           | MaleAge25to29       | 571525     |
| Kazakhstan | 1998           | MaleAge30to34       | 545184     |
| Kazakhstan | 1998           | MaleAge35to39       | 558924     |
| Kazakhstan | 1998           | MaleAge40to44       | 503422     |
| Kazakhstan | 1998           | MaleAge45to49       | 400691     |
| Kazakhstan | 1998           | MaleAge50to54       | 243479     |
| Kazakhstan | 1998           | MaleAge55to59       | 232983     |
| Kazakhstan | 1998           | MaleAge5to9         | 779045     |
| Kazakhstan | 1998           | MaleAge60to64       | 261170     |
| Kazakhstan | 1998           | MaleAge65to69       | 143102     |
| Kazakhstan | 1998           | MaleAge70to74       | 123833     |
| Kazakhstan | 1998           | MaleAge75to79       | 40308      |
| Kazakhstan | 1998           | MaleAge80to84       | 21960      |
| Kazakhstan | 1998           | MaleAge85to89       | 13822      |
| Kazakhstan | 1998           | MaleAge90to94       | 3508       |
| Kazakhstan | 1998           | MaleAge95to99       | 1051       |
| Kazakhstan | 1998           | MaleAgeAbove100     | 111        |
| Kazakhstan | 1999           | FemaleAge0to4       | 539919     |
| Kazakhstan | 1999           | FemaleAge10to14     | 768639     |
| Kazakhstan | 1999           | FemaleAge15to19     | 620916     |
| Kazakhstan | 1999           | FemaleAge20to24     | 461695     |
| Kazakhstan | 1999           | FemaleAge25to29     | 474330     |
| Kazakhstan | 1999           | FemaleAge30to34     | 479553     |
| Kazakhstan | 1999           | FemaleAge35to39     | 553532     |
| Kazakhstan | 1999           | FemaleAge40to44     | 538258     |
| Kazakhstan | 1999           | FemaleAge45to49     | 479303     |
| Kazakhstan | 1999           | FemaleAge50to54     | 310221     |
| Kazakhstan | 1999           | FemaleAge55to59     | 248835     |
| Kazakhstan | 1999           | FemaleAge5to9       | 705201     |
| Kazakhstan | 1999           | FemaleAge60to64     | 360177     |
| Kazakhstan | 1999           | FemaleAge65to69     | 189796     |
| Kazakhstan | 1999           | FemaleAge70to74     | 229325     |
| Kazakhstan | 1999           | FemaleAge75to79     | 113779     |
| Kazakhstan | 1999           | FemaleAge80to84     | 58291      |
| Kazakhstan | 1999           | FemaleAge85to89     | 51172      |
| Kazakhstan | 1999           | FemaleAge90to94     | 13820      |
| Kazakhstan | 1999           | FemaleAge95to99     | 4715       |
| Kazakhstan | 1999           | FemaleAgeAbove100   | 557        |
| Kazakhstan | 1999           | FemaleLactAge15to19 | 28937      |
| Kazakhstan | 1999           | FemaleLactAge20to24 | 96033      |
| Kazakhstan | 1999           | FemaleLactAge25to29 | 64851      |
| Kazakhstan | 1999           | FemaleLactAge30to34 | 36400      |
| Kazakhstan | 1999           | FemaleLactAge35to39 | 15903      |
| Kazakhstan | 1999           | FemaleLactAge40to44 | 3289       |
| Kazakhstan | 1999           | FemaleLactAge45to49 | 228        |
| Kazakhstan | 1999           | FemalePregAge15to19 | 21703      |
| Kazakhstan | 1999           | FemalePregAge20to24 | 72025      |
| Kazakhstan | 1999           | FemalePregAge25to29 | 48638      |
| Kazakhstan | 1999           | FemalePregAge30to34 | 27300      |
| Kazakhstan | 1999           | FemalePregAge35to39 | 11927      |
| Kazakhstan | 1999           | FemalePregAge40to44 | 2467       |
| Kazakhstan | 1999           | FemalePregAge45to49 | 171        |
| Kazakhstan | 1999           | MaleAge0to4         | 572282     |
| Kazakhstan | 1999           | MaleAge10to14       | 798342     |
| Kazakhstan | 1999           | MaleAge15to19       | 690547     |
| Kazakhstan | 1999           | MaleAge20to24       | 621847     |
| Kazakhstan | 1999           | MaleAge25to29       | 573893     |
| Kazakhstan | 1999           | MaleAge30to34       | 525946     |
| Kazakhstan | 1999           | MaleAge35to39       | 546858     |
| Kazakhstan | 1999           | MaleAge40to44       | 496254     |
| Kazakhstan | 1999           | MaleAge45to49       | 411904     |
| Kazakhstan | 1999           | MaleAge50to54       | 264496     |
| Kazakhstan | 1999           | MaleAge55to59       | 191722     |
| Kazakhstan | 1999           | MaleAge5to9         | 739508     |
| Kazakhstan | 1999           | MaleAge60to64       | 275710     |
| Kazakhstan | 1999           | MaleAge65to69       | 129557     |
| Kazakhstan | 1999           | MaleAge70to74       | 129376     |
| Kazakhstan | 1999           | MaleAge75to79       | 43126      |
| Kazakhstan | 1999           | MaleAge80to84       | 19138      |
| Kazakhstan | 1999           | MaleAge85to89       | 12985      |
| Kazakhstan | 1999           | MaleAge90to94       | 3147       |
| Kazakhstan | 1999           | MaleAge95to99       | 927        |
| Kazakhstan | 1999           | MaleAgeAbove100     | 97         |
| Kenya      | 1992           | FemaleAge0to4       | 2256655    |
| Kenya      | 1992           | FemaleAge10to14     | 1711059    |
| Kenya      | 1992           | FemaleAge15to19     | 1122178    |
| Kenya      | 1992           | FemaleAge20to24     | 592656     |
| Kenya      | 1992           | FemaleAge25to29     | 503910     |
| Kenya      | 1992           | FemaleAge30to34     | 467194     |
| Kenya      | 1992           | FemaleAge35to39     | 426395     |
| Kenya      | 1992           | FemaleAge40to44     | 393788     |
| Kenya      | 1992           | FemaleAge45to49     | 283834     |
| Kenya      | 1992           | FemaleAge50to54     | 254012     |
| Kenya      | 1992           | FemaleAge55to59     | 234212     |
| Kenya      | 1992           | FemaleAge5to9       | 2022767    |

Dietary calcium and zinc deficiency risks are decreasing but remain prevalent

| Country | Reference year | Age/gender group    | Population |
|---------|----------------|---------------------|------------|
| Kenya   | 1992           | FemaleAge60to64     | 189939     |
| Kenya   | 1992           | FemaleAge65to69     | 137042     |
| Kenya   | 1992           | FemaleAge70to74     | 95661      |
| Kenya   | 1992           | FemaleAge75to79     | 61423      |
| Kenya   | 1992           | FemaleAge80to84     | 33522      |
| Kenya   | 1992           | FemaleAge85to89     | 14601      |
| Kenya   | 1992           | FemaleAge90to94     | 4387       |
| Kenya   | 1992           | FemaleAge95to99     | 662        |
| Kenya   | 1992           | FemaleAgeAbove100   | 48         |
| Kenya   | 1992           | FemaleLactAge15to19 | 163319     |
| Kenya   | 1992           | FemaleLactAge20to24 | 308625     |
| Kenya   | 1992           | FemaleLactAge25to29 | 232445     |
| Kenya   | 1992           | FemaleLactAge30to34 | 154001     |
| Kenya   | 1992           | FemaleLactAge35to39 | 96781      |
| Kenya   | 1992           | FemaleLactAge40to44 | 33776      |
| Kenya   | 1992           | FemaleLactAge45to49 | 17113      |
| Kenya   | 1992           | FemalePregAge15to19 | 122489     |
| Kenya   | 1992           | FemalePregAge20to24 | 231468     |
| Kenya   | 1992           | FemalePregAge25to29 | 174334     |
| Kenya   | 1992           | FemalePregAge30to34 | 115501     |
| Kenya   | 1992           | FemalePregAge35to39 | 72586      |
| Kenya   | 1992           | FemalePregAge40to44 | 25332      |
| Kenya   | 1992           | FemalePregAge45to49 | 12834      |
| Kenya   | 1992           | MaleAge0to4         | 2291656    |
| Kenya   | 1992           | MaleAge10to14       | 1722134    |
| Kenya   | 1992           | MaleAge15to19       | 1407490    |
| Kenya   | 1992           | MaleAge20to24       | 1122281    |
| Kenya   | 1992           | MaleAge25to29       | 892083     |
| Kenya   | 1992           | MaleAge30to34       | 715137     |
| Kenya   | 1992           | MaleAge35to39       | 572650     |
| Kenya   | 1992           | MaleAge40to44       | 433935     |
| Kenya   | 1992           | MaleAge45to49       | 300535     |
| Kenya   | 1992           | MaleAge50to54       | 239060     |
| Kenya   | 1992           | MaleAge55to59       | 220073     |
| Kenya   | 1992           | MaleAge5to9         | 2045302    |
| Kenya   | 1992           | MaleAge60to64       | 180951     |
| Kenya   | 1992           | MaleAge65to69       | 133212     |
| Kenya   | 1992           | MaleAge70to74       | 92055      |
| Kenya   | 1992           | MaleAge75to79       | 57627      |
| Kenya   | 1992           | MaleAge80to84       | 30050      |
| Kenya   | 1992           | MaleAge85to89       | 11219      |
| Kenya   | 1992           | MaleAge90to94       | 2611       |
| Kenya   | 1992           | MaleAge95to99       | 318        |
| Kenya   | 1992           | MaleAgeAbove100     | 14         |
| Kenya   | 1993           | FemaleAge0to4       | 2262191    |
| Kenya   | 1993           | FemaleAge10to14     | 1774440    |
| Kenya   | 1993           | FemaleAge15to19     | 1179550    |
| Kenya   | 1993           | FemaleAge20to24     | 645964     |
| Kenya   | 1993           | FemaleAge25to29     | 541981     |
| Kenya   | 1993           | FemaleAge30to34     | 498788     |
| Kenya   | 1993           | FemaleAge35to39     | 450925     |
| Kenya   | 1993           | FemaleAge40to44     | 422878     |
| Kenya   | 1993           | FemaleAge45to49     | 307711     |
| Kenya   | 1993           | FemaleAge50to54     | 255948     |
| Kenya   | 1993           | FemaleAge55to59     | 237348     |
| Kenya   | 1993           | FemaleAge5to9       | 2074085    |
| Kenya   | 1993           | FemaleAge60to64     | 197969     |
| Kenya   | 1993           | FemaleAge65to69     | 142977     |
| Kenya   | 1993           | FemaleAge70to74     | 98393      |
| Kenya   | 1993           | FemaleAge75to79     | 63314      |
| Kenya   | 1993           | FemaleAge80to84     | 34184      |
| Kenya   | 1993           | FemaleAge85to89     | 14872      |
| Kenya   | 1993           | FemaleAge90to94     | 4556       |
| Kenya   | 1993           | FemaleAge95to99     | 756        |
| Kenya   | 1993           | FemaleAgeAbove100   | 50         |
| Kenya   | 1993           | FemaleLactAge15to19 | 163319     |
| Kenya   | 1993           | FemaleLactAge20to24 | 308625     |
| Kenya   | 1993           | FemaleLactAge25to29 | 232445     |
| Kenya   | 1993           | FemaleLactAge30to34 | 154001     |
| Kenya   | 1993           | FemaleLactAge35to39 | 96781      |
| Kenya   | 1993           | FemaleLactAge40to44 | 33776      |
| Kenya   | 1993           | FemaleLactAge45to49 | 17113      |
| Kenya   | 1993           | FemalePregAge15to19 | 122489     |
| Kenya   | 1993           | FemalePregAge20to24 | 231468     |
| Kenya   | 1993           | FemalePregAge25to29 | 174334     |
| Kenya   | 1993           | FemalePregAge30to34 | 115501     |
| Kenya   | 1993           | FemalePregAge35to39 | 72586      |
| Kenya   | 1993           | FemalePregAge40to44 | 25332      |
| Kenya   | 1993           | FemalePregAge45to49 | 12834      |
| Kenya   | 1993           | MaleAge0to4         | 2297384    |
| Kenya   | 1993           | MaleAge10to14       | 1787368    |
| Kenya   | 1993           | MaleAge15to19       | 1466125    |
| Kenya   | 1993           | MaleAge20to24       | 1176349    |
| Kenya   | 1993           | MaleAge25to29       | 931287     |
| Kenya   | 1993           | MaleAge30to34       | 746301     |
| Kenya   | 1993           | MaleAge35to39       | 596762     |
| Kenya   | 1993           | MaleAge40to44       | 460551     |
| Kenya   | 1993           | MaleAge45to49       | 323210     |

Dietary calcium and zinc deficiency risks are decreasing but remain prevalent

| Country | Reference year | Age/gender group    | Population |
|---------|----------------|---------------------|------------|
| Kenya   | 1993           | MaleAge50to54       | 241413     |
| Kenya   | 1993           | MaleAge55to59       | 221612     |
| Kenya   | 1993           | MaleAge5to9         | 2097251    |
| Kenya   | 1993           | MaleAge60to64       | 187230     |
| Kenya   | 1993           | MaleAge65to69       | 137441     |
| Kenya   | 1993           | MaleAge70to74       | 94795      |
| Kenya   | 1993           | MaleAge75to79       | 58885      |
| Kenya   | 1993           | MaleAge80to84       | 30828      |
| Kenya   | 1993           | MaleAge85to89       | 11712      |
| Kenya   | 1993           | MaleAge90to94       | 2747       |
| Kenya   | 1993           | MaleAge95to99       | 383        |
| Kenya   | 1993           | MaleAgeAbove100     | 15         |
| Kenya   | 1994           | FemaleAge0to4       | 2269073    |
| Kenya   | 1994           | FemaleAge10to14     | 1834997    |
| Kenya   | 1994           | FemaleAge15to19     | 1236884    |
| Kenya   | 1994           | FemaleAge20to24     | 699819     |
| Kenya   | 1994           | FemaleAge25to29     | 582196     |
| Kenya   | 1994           | FemaleAge30to34     | 530883     |
| Kenya   | 1994           | FemaleAge35to39     | 475706     |
| Kenya   | 1994           | FemaleAge40to44     | 450987     |
| Kenya   | 1994           | FemaleAge45to49     | 333312     |
| Kenya   | 1994           | FemaleAge50to54     | 261247     |
| Kenya   | 1994           | FemaleAge55to59     | 239706     |
| Kenya   | 1994           | FemaleAge5to9       | 2116910    |
| Kenya   | 1994           | FemaleAge60to64     | 205174     |
| Kenya   | 1994           | FemaleAge65to69     | 149469     |
| Kenya   | 1994           | FemaleAge70to74     | 101749     |
| Kenya   | 1994           | FemaleAge75to79     | 65278      |
| Kenya   | 1994           | FemaleAge80to84     | 34811      |
| Kenya   | 1994           | FemaleAge85to89     | 14822      |
| Kenya   | 1994           | FemaleAge90to94     | 4454       |
| Kenya   | 1994           | FemaleAge95to99     | 786        |
| Kenya   | 1994           | FemaleAgeAbove100   | 52         |
| Kenya   | 1994           | FemaleLactAge15to19 | 163319     |
| Kenya   | 1994           | FemaleLactAge20to24 | 308625     |
| Kenya   | 1994           | FemaleLactAge25to29 | 232445     |
| Kenya   | 1994           | FemaleLactAge30to34 | 154001     |
| Kenya   | 1994           | FemaleLactAge35to39 | 96781      |
| Kenya   | 1994           | FemaleLactAge40to44 | 33776      |
| Kenya   | 1994           | FemaleLactAge45to49 | 17113      |
| Kenya   | 1994           | FemalePregAge15to19 | 122489     |
| Kenya   | 1994           | FemalePregAge20to24 | 231468     |
| Kenya   | 1994           | FemalePregAge25to29 | 174334     |
| Kenya   | 1994           | FemalePregAge30to34 | 115501     |
| Kenya   | 1994           | FemalePregAge35to39 | 72586      |
| Kenya   | 1994           | FemalePregAge40to44 | 25332      |
| Kenya   | 1994           | FemalePregAge45to49 | 12834      |
| Kenya   | 1994           | MaleAge0to4         | 2304547    |
| Kenya   | 1994           | MaleAge10to14       | 1849732    |
| Kenya   | 1994           | MaleAge15to19       | 1525153    |
| Kenya   | 1994           | MaleAge20to24       | 1230865    |
| Kenya   | 1994           | MaleAge25to29       | 972661     |
| Kenya   | 1994           | MaleAge30to34       | 778446     |
| Kenya   | 1994           | MaleAge35to39       | 621293     |
| Kenya   | 1994           | MaleAge40to44       | 486401     |
| Kenya   | 1994           | MaleAge45to49       | 347311     |
| Kenya   | 1994           | MaleAge50to54       | 247020     |
| Kenya   | 1994           | MaleAge55to59       | 222797     |
| Kenya   | 1994           | MaleAge5to9         | 2140221    |
| Kenya   | 1994           | MaleAge60to64       | 192714     |
| Kenya   | 1994           | MaleAge65to69       | 142122     |
| Kenya   | 1994           | MaleAge70to74       | 97850      |
| Kenya   | 1994           | MaleAge75to79       | 60289      |
| Kenya   | 1994           | MaleAge80to84       | 31360      |
| Kenya   | 1994           | MaleAge85to89       | 11821      |
| Kenya   | 1994           | MaleAge90to94       | 2727       |
| Kenya   | 1994           | MaleAge95to99       | 395        |
| Kenya   | 1994           | MaleAgeAbove100     | 16         |
| Kenya   | 1995           | FemaleAge0to4       | 2284958    |
| Kenya   | 1995           | FemaleAge10to14     | 1889921    |
| Kenya   | 1995           | FemaleAge15to19     | 1293504    |
| Kenya   | 1995           | FemaleAge20to24     | 752484     |
| Kenya   | 1995           | FemaleAge25to29     | 624342     |
| Kenya   | 1995           | FemaleAge30to34     | 562864     |
| Kenya   | 1995           | FemaleAge35to39     | 501095     |
| Kenya   | 1995           | FemaleAge40to44     | 477221     |
| Kenya   | 1995           | FemaleAge45to49     | 359076     |
| Kenya   | 1995           | FemaleAge50to54     | 271158     |
| Kenya   | 1995           | FemaleAge55to59     | 241356     |
| Kenya   | 1995           | FemaleAge5to9       | 2148273    |
| Kenya   | 1995           | FemaleAge60to64     | 210948     |
| Kenya   | 1995           | FemaleAge65to69     | 156362     |
| Kenya   | 1995           | FemaleAge70to74     | 105817     |
| Kenya   | 1995           | FemaleAge75to79     | 67290      |
| Kenya   | 1995           | FemaleAge80to84     | 35479      |
| Kenya   | 1995           | FemaleAge85to89     | 14513      |
| Kenya   | 1995           | FemaleAge90to94     | 4048       |
| Kenya   | 1995           | FemaleAge95to99     | 642        |

Dietary calcium and zinc deficiency risks are decreasing but remain prevalent

| Country | Reference year | Age/gender group    | Population |
|---------|----------------|---------------------|------------|
| Kenya   | 1995           | FemaleAgeAbove100   | 55         |
| Kenya   | 1995           | FemaleLactAge15to19 | 163319     |
| Kenya   | 1995           | FemaleLactAge20to24 | 308625     |
| Kenya   | 1995           | FemaleLactAge25to29 | 232445     |
| Kenya   | 1995           | FemaleLactAge30to34 | 154001     |
| Kenya   | 1995           | FemaleLactAge35to39 | 96781      |
| Kenya   | 1995           | FemaleLactAge40to44 | 33776      |
| Kenya   | 1995           | FemaleLactAge45to49 | 17113      |
| Kenya   | 1995           | FemalePregAge15to19 | 122489     |
| Kenya   | 1995           | FemalePregAge20to24 | 231468     |
| Kenya   | 1995           | FemalePregAge25to29 | 174334     |
| Kenya   | 1995           | FemalePregAge30to34 | 115501     |
| Kenya   | 1995           | FemalePregAge35to39 | 72586      |
| Kenya   | 1995           | FemalePregAge40to44 | 25332      |
| Kenya   | 1995           | FemalePregAge45to49 | 12834      |
| Kenya   | 1995           | MaleAge0to4         | 2320991    |
| Kenya   | 1995           | MaleAge10to14       | 1906142    |
| Kenya   | 1995           | MaleAge15to19       | 1583784    |
| Kenya   | 1995           | MaleAge20to24       | 1284369    |
| Kenya   | 1995           | MaleAge25to29       | 1015832    |
| Kenya   | 1995           | MaleAge30to34       | 810995     |
| Kenya   | 1995           | MaleAge35to39       | 646492     |
| Kenya   | 1995           | MaleAge40to44       | 510883     |
| Kenya   | 1995           | MaleAge45to49       | 371317     |
| Kenya   | 1995           | MaleAge50to54       | 256872     |
| Kenya   | 1995           | MaleAge55to59       | 223830     |
| Kenya   | 1995           | MaleAge5to9         | 2171363    |
| Kenya   | 1995           | MaleAge60to64       | 196824     |
| Kenya   | 1995           | MaleAge65to69       | 147229     |
| Kenya   | 1995           | MaleAge70to74       | 101176     |
| Kenya   | 1995           | MaleAge75to79       | 61892      |
| Kenya   | 1995           | MaleAge80to84       | 31709      |
| Kenya   | 1995           | MaleAge85to89       | 11587      |
| Kenya   | 1995           | MaleAge90to94       | 2478       |
| Kenya   | 1995           | MaleAge95to99       | 286        |
| Kenya   | 1995           | MaleAgeAbove100     | 17         |
| Kenya   | 1996           | FemaleAge0to4       | 2299930    |
| Kenya   | 1996           | FemaleAge10to14     | 1948877    |
| Kenya   | 1996           | FemaleAge15to19     | 1320249    |
| Kenya   | 1996           | FemaleAge20to24     | 726716     |
| Kenya   | 1996           | FemaleAge25to29     | 591409     |
| Kenya   | 1996           | FemaleAge30to34     | 566327     |
| Kenya   | 1996           | FemaleAge35to39     | 521286     |
| Kenya   | 1996           | FemaleAge40to44     | 499368     |
| Kenya   | 1996           | FemaleAge45to49     | 382810     |
| Kenya   | 1996           | FemaleAge50to54     | 285122     |
| Kenya   | 1996           | FemaleAge55to59     | 242135     |
| Kenya   | 1996           | FemaleAge5to9       | 2184452    |
| Kenya   | 1996           | FemaleAge60to64     | 214873     |
| Kenya   | 1996           | FemaleAge65to69     | 162721     |
| Kenya   | 1996           | FemaleAge70to74     | 109663     |
| Kenya   | 1996           | FemaleAge75to79     | 69117      |
| Kenya   | 1996           | FemaleAge80to84     | 36937      |
| Kenya   | 1996           | FemaleAge85to89     | 15479      |
| Kenya   | 1996           | FemaleAge90to94     | 4596       |
| Kenya   | 1996           | FemaleAge95to99     | 711        |
| Kenya   | 1996           | FemaleAgeAbove100   | 58         |
| Kenya   | 1996           | FemaleLactAge15to19 | 182260     |
| Kenya   | 1996           | FemaleLactAge20to24 | 350824     |
| Kenya   | 1996           | FemaleLactAge25to29 | 271893     |
| Kenya   | 1996           | FemaleLactAge30to34 | 166725     |
| Kenya   | 1996           | FemaleLactAge35to39 | 98097      |
| Kenya   | 1996           | FemaleLactAge40to44 | 34515      |
| Kenya   | 1996           | FemaleLactAge45to49 | 18216      |
| Kenya   | 1996           | FemalePregAge15to19 | 136695     |
| Kenya   | 1996           | FemalePregAge20to24 | 263118     |
| Kenya   | 1996           | FemalePregAge25to29 | 203920     |
| Kenya   | 1996           | FemalePregAge30to34 | 125044     |
| Kenya   | 1996           | FemalePregAge35to39 | 73573      |
| Kenya   | 1996           | FemalePregAge40to44 | 25886      |
| Kenya   | 1996           | FemalePregAge45to49 | 13662      |
| Kenya   | 1996           | MaleAge0to4         | 2336786    |
| Kenya   | 1996           | MaleAge10to14       | 1965593    |
| Kenya   | 1996           | MaleAge15to19       | 1644827    |
| Kenya   | 1996           | MaleAge20to24       | 1335623    |
| Kenya   | 1996           | MaleAge25to29       | 1055867    |
| Kenya   | 1996           | MaleAge30to34       | 837953     |
| Kenya   | 1996           | MaleAge35to39       | 667287     |
| Kenya   | 1996           | MaleAge40to44       | 531694     |
| Kenya   | 1996           | MaleAge45to49       | 394226     |
| Kenya   | 1996           | MaleAge50to54       | 269970     |
| Kenya   | 1996           | MaleAge55to59       | 224061     |
| Kenya   | 1996           | MaleAge5to9         | 2207817    |
| Kenya   | 1996           | MaleAge60to64       | 198802     |
| Kenya   | 1996           | MaleAge65to69       | 151806     |
| Kenya   | 1996           | MaleAge70to74       | 104032     |
| Kenya   | 1996           | MaleAge75to79       | 63680      |
| Kenya   | 1996           | MaleAge80to84       | 32949      |

Dietary calcium and zinc deficiency risks are decreasing but remain prevalent

| Country | Reference year | Age/gender group    | Population |
|---------|----------------|---------------------|------------|
| Kenya   | 1996           | MaleAge85to89       | 12645      |
| Kenya   | 1996           | MaleAge90to94       | 3000       |
| Kenya   | 1996           | MaleAge95to99       | 325        |
| Kenya   | 1996           | MaleAgeAbove100     | 18         |
| Kenya   | 1997           | FemaleAge0to4       | 2338617    |
| Kenya   | 1997           | FemaleAge10to14     | 2002071    |
| Kenya   | 1997           | FemaleAge15to19     | 1378961    |
| Kenya   | 1997           | FemaleAge20to24     | 774334     |
| Kenya   | 1997           | FemaleAge25to29     | 628883     |
| Kenya   | 1997           | FemaleAge30to34     | 589990     |
| Kenya   | 1997           | FemaleAge35to39     | 542368     |
| Kenya   | 1997           | FemaleAge40to44     | 519282     |
| Kenya   | 1997           | FemaleAge45to49     | 408335     |
| Kenya   | 1997           | FemaleAge50to54     | 302992     |
| Kenya   | 1997           | FemaleAge55to59     | 241934     |
| Kenya   | 1997           | FemaleAge5to9       | 2203051    |
| Kenya   | 1997           | FemaleAge60to64     | 217708     |
| Kenya   | 1997           | FemaleAge65to69     | 169342     |
| Kenya   | 1997           | FemaleAge70to74     | 113777     |
| Kenya   | 1997           | FemaleAge75to79     | 70742      |
| Kenya   | 1997           | FemaleAge80to84     | 38161      |
| Kenya   | 1997           | FemaleAge85to89     | 16097      |
| Kenya   | 1997           | FemaleAge90to94     | 4959       |
| Kenya   | 1997           | FemaleAge95to99     | 828        |
| Kenya   | 1997           | FemaleAgeAbove100   | 61         |
| Kenya   | 1997           | FemaleLactAge15to19 | 182260     |
| Kenya   | 1997           | FemaleLactAge20to24 | 350824     |
| Kenya   | 1997           | FemaleLactAge25to29 | 271893     |
| Kenya   | 1997           | FemaleLactAge30to34 | 166725     |
| Kenya   | 1997           | FemaleLactAge35to39 | 98097      |
| Kenya   | 1997           | FemaleLactAge40to44 | 34515      |
| Kenya   | 1997           | FemaleLactAge45to49 | 18216      |
| Kenya   | 1997           | FemalePregAge15to19 | 136695     |
| Kenya   | 1997           | FemalePregAge20to24 | 263118     |
| Kenya   | 1997           | FemalePregAge25to29 | 203920     |
| Kenya   | 1997           | FemalePregAge30to34 | 125044     |
| Kenya   | 1997           | FemalePregAge35to39 | 73573      |
| Kenya   | 1997           | FemalePregAge40to44 | 25886      |
| Kenya   | 1997           | FemalePregAge45to49 | 13662      |
| Kenya   | 1997           | MaleAge0to4         | 2375914    |
| Kenya   | 1997           | MaleAge10to14       | 2019169    |
| Kenya   | 1997           | MaleAge15to19       | 1704724    |
| Kenya   | 1997           | MaleAge20to24       | 1385549    |
| Kenya   | 1997           | MaleAge25to29       | 1097216    |
| Kenya   | 1997           | MaleAge30to34       | 864562     |
| Kenya   | 1997           | MaleAge35to39       | 687342     |
| Kenya   | 1997           | MaleAge40to44       | 549349     |
| Kenya   | 1997           | MaleAge45to49       | 416421     |
| Kenya   | 1997           | MaleAge50to54       | 286634     |
| Kenya   | 1997           | MaleAge55to59       | 223843     |
| Kenya   | 1997           | MaleAge5to9         | 2226625    |
| Kenya   | 1997           | MaleAge60to64       | 199742     |
| Kenya   | 1997           | MaleAge65to69       | 156580     |
| Kenya   | 1997           | MaleAge70to74       | 106779     |
| Kenya   | 1997           | MaleAge75to79       | 65328      |
| Kenya   | 1997           | MaleAge80to84       | 33800      |
| Kenya   | 1997           | MaleAge85to89       | 13365      |
| Kenya   | 1997           | MaleAge90to94       | 3375       |
| Kenya   | 1997           | MaleAge95to99       | 391        |
| Kenya   | 1997           | MaleAgeAbove100     | 19         |
| Kenya   | 1998           | FemaleAge0to4       | 2395876    |
| Kenya   | 1998           | FemaleAge10to14     | 2050309    |
| Kenya   | 1998           | FemaleAge15to19     | 1436639    |
| Kenya   | 1998           | FemaleAge20to24     | 823361     |
| Kenya   | 1998           | FemaleAge25to29     | 668699     |
| Kenya   | 1998           | FemaleAge30to34     | 613275     |
| Kenya   | 1998           | FemaleAge35to39     | 562555     |
| Kenya   | 1998           | FemaleAge40to44     | 536710     |
| Kenya   | 1998           | FemaleAge45to49     | 433314     |
| Kenya   | 1998           | FemaleAge50to54     | 323839     |
| Kenya   | 1998           | FemaleAge55to59     | 242543     |
| Kenya   | 1998           | FemaleAge5to9       | 2206953    |
| Kenya   | 1998           | FemaleAge60to64     | 219745     |
| Kenya   | 1998           | FemaleAge65to69     | 175886     |
| Kenya   | 1998           | FemaleAge70to74     | 118296     |
| Kenya   | 1998           | FemaleAge75to79     | 72504      |
| Kenya   | 1998           | FemaleAge80to84     | 39184      |
| Kenya   | 1998           | FemaleAge85to89     | 16366      |
| Kenya   | 1998           | FemaleAge90to94     | 5079       |
| Kenya   | 1998           | FemaleAge95to99     | 935        |
| Kenya   | 1998           | FemaleAgeAbove100   | 63         |
| Kenya   | 1998           | FemaleLactAge15to19 | 182260     |
| Kenya   | 1998           | FemaleLactAge20to24 | 350824     |
| Kenya   | 1998           | FemaleLactAge25to29 | 271893     |
| Kenya   | 1998           | FemaleLactAge30to34 | 166725     |
| Kenya   | 1998           | FemaleLactAge35to39 | 98097      |
| Kenya   | 1998           | FemaleLactAge40to44 | 34515      |
| Kenya   | 1998           | FemaleLactAge45to49 | 18216      |

Dietary calcium and zinc deficiency risks are decreasing but remain prevalent

| Country | Reference year | Age/gender group    | Population |
|---------|----------------|---------------------|------------|
| Kenya   | 1998           | FemalePregAge15to19 | 136695     |
| Kenya   | 1998           | FemalePregAge20to24 | 263118     |
| Kenya   | 1998           | FemalePregAge25to29 | 203920     |
| Kenya   | 1998           | FemalePregAge30to34 | 125044     |
| Kenya   | 1998           | FemalePregAge35to39 | 73573      |
| Kenya   | 1998           | FemalePregAge40to44 | 25886      |
| Kenya   | 1998           | FemalePregAge45to49 | 13662      |
| Kenya   | 1998           | MaleAge0to4         | 2433611    |
| Kenya   | 1998           | MaleAge10to14       | 2067805    |
| Kenya   | 1998           | MaleAge15to19       | 1764000    |
| Kenya   | 1998           | MaleAge20to24       | 1435922    |
| Kenya   | 1998           | MaleAge25to29       | 1140461    |
| Kenya   | 1998           | MaleAge30to34       | 892408     |
| Kenya   | 1998           | MaleAge35to39       | 707555     |
| Kenya   | 1998           | MaleAge40to44       | 564857     |
| Kenya   | 1998           | MaleAge45to49       | 437698     |
| Kenya   | 1998           | MaleAge50to54       | 305903     |
| Kenya   | 1998           | MaleAge55to59       | 224697     |
| Kenya   | 1998           | MaleAge5to9         | 2230689    |
| Kenya   | 1998           | MaleAge60to64       | 200120     |
| Kenya   | 1998           | MaleAge65to69       | 161205     |
| Kenya   | 1998           | MaleAge70to74       | 109677     |
| Kenya   | 1998           | MaleAge75to79       | 66999      |
| Kenya   | 1998           | MaleAge80to84       | 34385      |
| Kenya   | 1998           | MaleAge85to89       | 13675      |
| Kenya   | 1998           | MaleAge90to94       | 3542       |
| Kenya   | 1998           | MaleAge95to99       | 459        |
| Kenya   | 1998           | MaleAgeAbove100     | 20         |
| Kenya   | 1999           | FemaleAge0to4       | 2462708    |
| Kenya   | 1999           | FemaleAge10to14     | 2091599    |
| Kenya   | 1999           | FemaleAge15to19     | 1493845    |
| Kenya   | 1999           | FemaleAge20to24     | 876043     |
| Kenya   | 1999           | FemaleAge25to29     | 711595     |
| Kenya   | 1999           | FemaleAge30to34     | 638752     |
| Kenya   | 1999           | FemaleAge35to39     | 582422     |
| Kenya   | 1999           | FemaleAge40to44     | 553449     |
| Kenya   | 1999           | FemaleAge45to49     | 457147     |
| Kenya   | 1999           | FemaleAge50to54     | 346245     |
| Kenya   | 1999           | FemaleAge55to59     | 246490     |
| Kenya   | 1999           | FemaleAge5to9       | 2205605    |
| Kenya   | 1999           | FemaleAge60to64     | 221301     |
| Kenya   | 1999           | FemaleAge65to69     | 181840     |
| Kenya   | 1999           | FemaleAge70to74     | 123408     |
| Kenya   | 1999           | FemaleAge75to79     | 74772      |
| Kenya   | 1999           | FemaleAge80to84     | 40050      |
| Kenya   | 1999           | FemaleAge85to89     | 16349      |
| Kenya   | 1999           | FemaleAge90to94     | 4922       |
| Kenya   | 1999           | FemaleAge95to99     | 947        |
| Kenya   | 1999           | FemaleAgeAbove100   | 66         |
| Kenya   | 1999           | FemaleLactAge15to19 | 182260     |
| Kenya   | 1999           | FemaleLactAge20to24 | 350824     |
| Kenya   | 1999           | FemaleLactAge25to29 | 271893     |
| Kenya   | 1999           | FemaleLactAge30to34 | 166725     |
| Kenya   | 1999           | FemaleLactAge35to39 | 98097      |
| Kenya   | 1999           | FemaleLactAge40to44 | 34515      |
| Kenya   | 1999           | FemaleLactAge45to49 | 18216      |
| Kenya   | 1999           | FemalePregAge15to19 | 136695     |
| Kenya   | 1999           | FemalePregAge20to24 | 263118     |
| Kenya   | 1999           | FemalePregAge25to29 | 203920     |
| Kenya   | 1999           | FemalePregAge30to34 | 125044     |
| Kenya   | 1999           | FemalePregAge35to39 | 73573      |
| Kenya   | 1999           | FemalePregAge40to44 | 25886      |
| Kenya   | 1999           | FemalePregAge45to49 | 13662      |
| Kenya   | 1999           | MaleAge0to4         | 2501384    |
| Kenya   | 1999           | MaleAge10to14       | 2109707    |
| Kenya   | 1999           | MaleAge15to19       | 1823187    |
| Kenya   | 1999           | MaleAge20to24       | 1489340    |
| Kenya   | 1999           | MaleAge25to29       | 1186256    |
| Kenya   | 1999           | MaleAge30to34       | 923460     |
| Kenya   | 1999           | MaleAge35to39       | 728897     |
| Kenya   | 1999           | MaleAge40to44       | 580017     |
| Kenya   | 1999           | MaleAge45to49       | 457838     |
| Kenya   | 1999           | MaleAge50to54       | 326308     |
| Kenya   | 1999           | MaleAge55to59       | 228748     |
| Kenya   | 1999           | MaleAge5to9         | 2229552    |
| Kenya   | 1999           | MaleAge60to64       | 200453     |
| Kenya   | 1999           | MaleAge65to69       | 165193     |
| Kenya   | 1999           | MaleAge70to74       | 113045     |
| Kenya   | 1999           | MaleAge75to79       | 68847      |
| Kenya   | 1999           | MaleAge80to84       | 34849      |
| Kenya   | 1999           | MaleAge85to89       | 13579      |
| Kenya   | 1999           | MaleAge90to94       | 3451       |
| Kenya   | 1999           | MaleAge95to99       | 483        |
| Kenya   | 1999           | MaleAgeAbove100     | 21         |
| Kuwait  | 1992           | FemaleAge0to4       | 93052      |
| Kuwait  | 1992           | FemaleAge10to14     | 96351      |
| Kuwait  | 1992           | FemaleAge15to19     | 88462      |
| Kuwait  | 1992           | FemaleAge20to24     | 81980      |

Dietary calcium and zinc deficiency risks are decreasing but remain prevalent

| Country | Reference year | Age/gender group    | Population |
|---------|----------------|---------------------|------------|
| Kuwait  | 1992           | FemaleAge25to29     | 73516      |
| Kuwait  | 1992           | FemaleAge30to34     | 63097      |
| Kuwait  | 1992           | FemaleAge35to39     | 57759      |
| Kuwait  | 1992           | FemaleAge40to44     | 48329      |
| Kuwait  | 1992           | FemaleAge45to49     | 34854      |
| Kuwait  | 1992           | FemaleAge50to54     | 22783      |
| Kuwait  | 1992           | FemaleAge55to59     | 13594      |
| Kuwait  | 1992           | FemaleAge5to9       | 104872     |
| Kuwait  | 1992           | FemaleAge60to64     | 7635       |
| Kuwait  | 1992           | FemaleAge65to69     | 6029       |
| Kuwait  | 1992           | FemaleAge70to74     | 3799       |
| Kuwait  | 1992           | FemaleAge75to79     | 1616       |
| Kuwait  | 1992           | FemaleAge80to84     | 1483       |
| Kuwait  | 1992           | FemaleAge85to89     | 702        |
| Kuwait  | 1992           | FemaleAge90to94     | 73         |
| Kuwait  | 1992           | FemaleAge95to99     | 8          |
| Kuwait  | 1992           | FemaleLactAge15to19 | 1529       |
| Kuwait  | 1992           | FemaleLactAge20to24 | 7559       |
| Kuwait  | 1992           | FemaleLactAge25to29 | 9211       |
| Kuwait  | 1992           | FemaleLactAge30to34 | 6807       |
| Kuwait  | 1992           | FemaleLactAge35to39 | 4148       |
| Kuwait  | 1992           | FemaleLactAge40to44 | 1159       |
| Kuwait  | 1992           | FemaleLactAge45to49 | 159        |
| Kuwait  | 1992           | FemalePregAge15to19 | 1147       |
| Kuwait  | 1992           | FemalePregAge20to24 | 5669       |
| Kuwait  | 1992           | FemalePregAge25to29 | 6908       |
| Kuwait  | 1992           | FemalePregAge30to34 | 5106       |
| Kuwait  | 1992           | FemalePregAge35to39 | 3111       |
| Kuwait  | 1992           | FemalePregAge40to44 | 869        |
| Kuwait  | 1992           | FemalePregAge45to49 | 119        |
| Kuwait  | 1992           | MaleAge0to4         | 94805      |
| Kuwait  | 1992           | MaleAge10to14       | 98249      |
| Kuwait  | 1992           | MaleAge15to19       | 88164      |
| Kuwait  | 1992           | MaleAge20to24       | 92765      |
| Kuwait  | 1992           | MaleAge25to29       | 97146      |
| Kuwait  | 1992           | MaleAge30to34       | 105593     |
| Kuwait  | 1992           | MaleAge35to39       | 101168     |
| Kuwait  | 1992           | MaleAge40to44       | 75365      |
| Kuwait  | 1992           | MaleAge45to49       | 62236      |
| Kuwait  | 1992           | MaleAge50to54       | 44478      |
| Kuwait  | 1992           | MaleAge55to59       | 28369      |
| Kuwait  | 1992           | MaleAge5to9         | 107933     |
| Kuwait  | 1992           | MaleAge60to64       | 20497      |
| Kuwait  | 1992           | MaleAge65to69       | 11048      |
| Kuwait  | 1992           | MaleAge70to74       | 4589       |
| Kuwait  | 1992           | MaleAge75to79       | 1791       |
| Kuwait  | 1992           | MaleAge80to84       | 1083       |
| Kuwait  | 1992           | MaleAge85to89       | 622        |
| Kuwait  | 1992           | MaleAge90to94       | 126        |
| Kuwait  | 1992           | MaleAge95to99       | 14         |
| Kuwait  | 1993           | FemaleAge0to4       | 83102      |
| Kuwait  | 1993           | FemaleAge10to14     | 84290      |
| Kuwait  | 1993           | FemaleAge15to19     | 75631      |
| Kuwait  | 1993           | FemaleAge20to24     | 70680      |
| Kuwait  | 1993           | FemaleAge25to29     | 69710      |
| Kuwait  | 1993           | FemaleAge30to34     | 59687      |
| Kuwait  | 1993           | FemaleAge35to39     | 52477      |
| Kuwait  | 1993           | FemaleAge40to44     | 44602      |
| Kuwait  | 1993           | FemaleAge45to49     | 30913      |
| Kuwait  | 1993           | FemaleAge50to54     | 20790      |
| Kuwait  | 1993           | FemaleAge55to59     | 12328      |
| Kuwait  | 1993           | FemaleAge5to9       | 89956      |
| Kuwait  | 1993           | FemaleAge60to64     | 7885       |
| Kuwait  | 1993           | FemaleAge65to69     | 4894       |
| Kuwait  | 1993           | FemaleAge70to74     | 4162       |
| Kuwait  | 1993           | FemaleAge75to79     | 1504       |
| Kuwait  | 1993           | FemaleAge80to84     | 1219       |
| Kuwait  | 1993           | FemaleAge85to89     | 739        |
| Kuwait  | 1993           | FemaleAge90to94     | 77         |
| Kuwait  | 1993           | FemaleAge95to99     | 11         |
| Kuwait  | 1993           | FemaleLactAge15to19 | 1529       |
| Kuwait  | 1993           | FemaleLactAge20to24 | 7559       |
| Kuwait  | 1993           | FemaleLactAge25to29 | 9211       |
| Kuwait  | 1993           | FemaleLactAge30to34 | 6807       |
| Kuwait  | 1993           | FemaleLactAge35to39 | 4148       |
| Kuwait  | 1993           | FemaleLactAge40to44 | 1159       |
| Kuwait  | 1993           | FemaleLactAge45to49 | 159        |
| Kuwait  | 1993           | FemalePregAge15to19 | 1147       |
| Kuwait  | 1993           | FemalePregAge20to24 | 5669       |
| Kuwait  | 1993           | FemalePregAge25to29 | 6908       |
| Kuwait  | 1993           | FemalePregAge30to34 | 5106       |
| Kuwait  | 1993           | FemalePregAge35to39 | 3111       |
| Kuwait  | 1993           | FemalePregAge40to44 | 869        |
| Kuwait  | 1993           | FemalePregAge45to49 | 119        |
| Kuwait  | 1993           | MaleAge0to4         | 87110      |
| Kuwait  | 1993           | MaleAge10to14       | 87619      |
| Kuwait  | 1993           | MaleAge15to19       | 78192      |
| Kuwait  | 1993           | MaleAge20to24       | 89805      |

Dietary calcium and zinc deficiency risks are decreasing but remain prevalent

| Country | Reference year | Age/gender group    | Population |
|---------|----------------|---------------------|------------|
| Kuwait  | 1993           | MaleAge25to29       | 108630     |
| Kuwait  | 1993           | MaleAge30to34       | 105470     |
| Kuwait  | 1993           | MaleAge35to39       | 99461      |
| Kuwait  | 1993           | MaleAge40to44       | 75983      |
| Kuwait  | 1993           | MaleAge45to49       | 54816      |
| Kuwait  | 1993           | MaleAge50to54       | 42767      |
| Kuwait  | 1993           | MaleAge55to59       | 25456      |
| Kuwait  | 1993           | MaleAge5to9         | 93855      |
| Kuwait  | 1993           | MaleAge60to64       | 20798      |
| Kuwait  | 1993           | MaleAge65to69       | 11879      |
| Kuwait  | 1993           | MaleAge70to74       | 4940       |
| Kuwait  | 1993           | MaleAge75to79       | 1955       |
| Kuwait  | 1993           | MaleAge80to84       | 911        |
| Kuwait  | 1993           | MaleAge85to89       | 634        |
| Kuwait  | 1993           | MaleAge90to94       | 123        |
| Kuwait  | 1993           | MaleAge95to99       | 17         |
| Kuwait  | 1994           | FemaleAge0to4       | 75907      |
| Kuwait  | 1994           | FemaleAge10to14     | 72662      |
| Kuwait  | 1994           | FemaleAge15to19     | 64969      |
| Kuwait  | 1994           | FemaleAge20to24     | 58488      |
| Kuwait  | 1994           | FemaleAge25to29     | 66394      |
| Kuwait  | 1994           | FemaleAge30to34     | 57185      |
| Kuwait  | 1994           | FemaleAge35to39     | 49056      |
| Kuwait  | 1994           | FemaleAge40to44     | 41413      |
| Kuwait  | 1994           | FemaleAge45to49     | 27111      |
| Kuwait  | 1994           | FemaleAge50to54     | 18894      |
| Kuwait  | 1994           | FemaleAge55to59     | 10339      |
| Kuwait  | 1994           | FemaleAge5to9       | 77753      |
| Kuwait  | 1994           | FemaleAge60to64     | 8353       |
| Kuwait  | 1994           | FemaleAge65to69     | 3851       |
| Kuwait  | 1994           | FemaleAge70to74     | 4308       |
| Kuwait  | 1994           | FemaleAge75to79     | 1498       |
| Kuwait  | 1994           | FemaleAge80to84     | 1029       |
| Kuwait  | 1994           | FemaleAge85to89     | 684        |
| Kuwait  | 1994           | FemaleAge90to94     | 85         |
| Kuwait  | 1994           | FemaleAge95to99     | 12         |
| Kuwait  | 1994           | FemaleLactAge15to19 | 1529       |
| Kuwait  | 1994           | FemaleLactAge20to24 | 7559       |
| Kuwait  | 1994           | FemaleLactAge25to29 | 9211       |
| Kuwait  | 1994           | FemaleLactAge30to34 | 6807       |
| Kuwait  | 1994           | FemaleLactAge35to39 | 4148       |
| Kuwait  | 1994           | FemaleLactAge40to44 | 1159       |
| Kuwait  | 1994           | FemaleLactAge45to49 | 159        |
| Kuwait  | 1994           | FemalePregAge15to19 | 1147       |
| Kuwait  | 1994           | FemalePregAge20to24 | 5669       |
| Kuwait  | 1994           | FemalePregAge25to29 | 6908       |
| Kuwait  | 1994           | FemalePregAge30to34 | 5106       |
| Kuwait  | 1994           | FemalePregAge35to39 | 3111       |
| Kuwait  | 1994           | FemalePregAge40to44 | 869        |
| Kuwait  | 1994           | FemalePregAge45to49 | 119        |
| Kuwait  | 1994           | MaleAge0to4         | 81875      |
| Kuwait  | 1994           | MaleAge10to14       | 76623      |
| Kuwait  | 1994           | MaleAge15to19       | 69824      |
| Kuwait  | 1994           | MaleAge20to24       | 80064      |
| Kuwait  | 1994           | MaleAge25to29       | 120717     |
| Kuwait  | 1994           | MaleAge30to34       | 111651     |
| Kuwait  | 1994           | MaleAge35to39       | 98187      |
| Kuwait  | 1994           | MaleAge40to44       | 78658      |
| Kuwait  | 1994           | MaleAge45to49       | 49289      |
| Kuwait  | 1994           | MaleAge50to54       | 40544      |
| Kuwait  | 1994           | MaleAge55to59       | 21880      |
| Kuwait  | 1994           | MaleAge5to9         | 82247      |
| Kuwait  | 1994           | MaleAge60to64       | 20947      |
| Kuwait  | 1994           | MaleAge65to69       | 12592      |
| Kuwait  | 1994           | MaleAge70to74       | 5432       |
| Kuwait  | 1994           | MaleAge75to79       | 2142       |
| Kuwait  | 1994           | MaleAge80to84       | 818        |
| Kuwait  | 1994           | MaleAge85to89       | 584        |
| Kuwait  | 1994           | MaleAge90to94       | 116        |
| Kuwait  | 1994           | MaleAge95to99       | 16         |
| Kuwait  | 1995           | FemaleAge0to4       | 73736      |
| Kuwait  | 1995           | FemaleAge10to14     | 63426      |
| Kuwait  | 1995           | FemaleAge15to19     | 57196      |
| Kuwait  | 1995           | FemaleAge20to24     | 48283      |
| Kuwait  | 1995           | FemaleAge25to29     | 64625      |
| Kuwait  | 1995           | FemaleAge30to34     | 57753      |
| Kuwait  | 1995           | FemaleAge35to39     | 48954      |
| Kuwait  | 1995           | FemaleAge40to44     | 39961      |
| Kuwait  | 1995           | FemaleAge45to49     | 24455      |
| Kuwait  | 1995           | FemaleAge50to54     | 17203      |
| Kuwait  | 1995           | FemaleAge55to59     | 8295       |
| Kuwait  | 1995           | FemaleAge5to9       | 70954      |
| Kuwait  | 1995           | FemaleAge60to64     | 8702       |
| Kuwait  | 1995           | FemaleAge65to69     | 3304       |
| Kuwait  | 1995           | FemaleAge70to74     | 4225       |
| Kuwait  | 1995           | FemaleAge75to79     | 1658       |
| Kuwait  | 1995           | FemaleAge80to84     | 936        |
| Kuwait  | 1995           | FemaleAge85to89     | 588        |



Dietary calcium and zinc deficiency risks are decreasing but remain prevalent

| Country | Reference year | Age/gender group    | Population |
|---------|----------------|---------------------|------------|
| Kuwait  | 1995           | FemaleAge90to94     | 69         |
| Kuwait  | 1995           | FemaleAge95to99     | 5          |
| Kuwait  | 1995           | FemaleLactAge15to19 | 1529       |
| Kuwait  | 1995           | FemaleLactAge20to24 | 7559       |
| Kuwait  | 1995           | FemaleLactAge25to29 | 9211       |
| Kuwait  | 1995           | FemaleLactAge30to34 | 6807       |
| Kuwait  | 1995           | FemaleLactAge35to39 | 4148       |
| Kuwait  | 1995           | FemaleLactAge40to44 | 1159       |
| Kuwait  | 1995           | FemaleLactAge45to49 | 159        |
| Kuwait  | 1995           | FemalePregAge15to19 | 1147       |
| Kuwait  | 1995           | FemalePregAge20to24 | 5669       |
| Kuwait  | 1995           | FemalePregAge25to29 | 6908       |
| Kuwait  | 1995           | FemalePregAge30to34 | 5106       |
| Kuwait  | 1995           | FemalePregAge35to39 | 3111       |
| Kuwait  | 1995           | FemalePregAge40to44 | 869        |
| Kuwait  | 1995           | FemalePregAge45to49 | 119        |
| Kuwait  | 1995           | MaleAge0to4         | 79621      |
| Kuwait  | 1995           | MaleAge10to14       | 66415      |
| Kuwait  | 1995           | MaleAge15to19       | 62354      |
| Kuwait  | 1995           | MaleAge20to24       | 67755      |
| Kuwait  | 1995           | MaleAge25to29       | 131191     |
| Kuwait  | 1995           | MaleAge30to34       | 125177     |
| Kuwait  | 1995           | MaleAge35to39       | 100559     |
| Kuwait  | 1995           | MaleAge40to44       | 83012      |
| Kuwait  | 1995           | MaleAge45to49       | 47272      |
| Kuwait  | 1995           | MaleAge50to54       | 37695      |
| Kuwait  | 1995           | MaleAge55to59       | 18509      |
| Kuwait  | 1995           | MaleAge5to9         | 74870      |
| Kuwait  | 1995           | MaleAge60to64       | 20528      |
| Kuwait  | 1995           | MaleAge65to69       | 13412      |
| Kuwait  | 1995           | MaleAge70to74       | 6133       |
| Kuwait  | 1995           | MaleAge75to79       | 2383       |
| Kuwait  | 1995           | MaleAge80to84       | 813        |
| Kuwait  | 1995           | MaleAge85to89       | 486        |
| Kuwait  | 1995           | MaleAge90to94       | 99         |
| Kuwait  | 1995           | MaleAge95to99       | 10         |
| Kuwait  | 1996           | FemaleAge0to4       | 70841      |
| Kuwait  | 1996           | FemaleAge10to14     | 60838      |
| Kuwait  | 1996           | FemaleAge15to19     | 57402      |
| Kuwait  | 1996           | FemaleAge20to24     | 43536      |
| Kuwait  | 1996           | FemaleAge25to29     | 52689      |
| Kuwait  | 1996           | FemaleAge30to34     | 50713      |
| Kuwait  | 1996           | FemaleAge35to39     | 45981      |
| Kuwait  | 1996           | FemaleAge40to44     | 37888      |
| Kuwait  | 1996           | FemaleAge45to49     | 25733      |
| Kuwait  | 1996           | FemaleAge50to54     | 16973      |
| Kuwait  | 1996           | FemaleAge55to59     | 9145       |
| Kuwait  | 1996           | FemaleAge5to9       | 68929      |
| Kuwait  | 1996           | FemaleAge60to64     | 9033       |
| Kuwait  | 1996           | FemaleAge65to69     | 3782       |
| Kuwait  | 1996           | FemaleAge70to74     | 3704       |
| Kuwait  | 1996           | FemaleAge75to79     | 1856       |
| Kuwait  | 1996           | FemaleAge80to84     | 831        |
| Kuwait  | 1996           | FemaleAge85to89     | 534        |
| Kuwait  | 1996           | FemaleAge90to94     | 107        |
| Kuwait  | 1996           | FemaleAge95to99     | 8          |
| Kuwait  | 1996           | FemaleLactAge15to19 | 1603       |
| Kuwait  | 1996           | FemaleLactAge20to24 | 10521      |
| Kuwait  | 1996           | FemaleLactAge25to29 | 13991      |
| Kuwait  | 1996           | FemaleLactAge30to34 | 10464      |
| Kuwait  | 1996           | FemaleLactAge35to39 | 5703       |
| Kuwait  | 1996           | FemaleLactAge40to44 | 1827       |
| Kuwait  | 1996           | FemaleLactAge45to49 | 159        |
| Kuwait  | 1996           | FemalePregAge15to19 | 1203       |
| Kuwait  | 1996           | FemalePregAge20to24 | 7890       |
| Kuwait  | 1996           | FemalePregAge25to29 | 10493      |
| Kuwait  | 1996           | FemalePregAge30to34 | 7848       |
| Kuwait  | 1996           | FemalePregAge35to39 | 4277       |
| Kuwait  | 1996           | FemalePregAge40to44 | 1370       |
| Kuwait  | 1996           | FemalePregAge45to49 | 120        |
| Kuwait  | 1996           | MaleAge0to4         | 78266      |
| Kuwait  | 1996           | MaleAge10to14       | 64768      |
| Kuwait  | 1996           | MaleAge15to19       | 65654      |
| Kuwait  | 1996           | MaleAge20to24       | 74727      |
| Kuwait  | 1996           | MaleAge25to29       | 124752     |
| Kuwait  | 1996           | MaleAge30to34       | 125297     |
| Kuwait  | 1996           | MaleAge35to39       | 103827     |
| Kuwait  | 1996           | MaleAge40to44       | 81709      |
| Kuwait  | 1996           | MaleAge45to49       | 51174      |
| Kuwait  | 1996           | MaleAge50to54       | 36977      |
| Kuwait  | 1996           | MaleAge55to59       | 20057      |
| Kuwait  | 1996           | MaleAge5to9         | 74171      |
| Kuwait  | 1996           | MaleAge60to64       | 20817      |
| Kuwait  | 1996           | MaleAge65to69       | 14343      |
| Kuwait  | 1996           | MaleAge70to74       | 6696       |
| Kuwait  | 1996           | MaleAge75to79       | 2592       |
| Kuwait  | 1996           | MaleAge80to84       | 848        |
| Kuwait  | 1996           | MaleAge85to89       | 439        |

Dietary calcium and zinc deficiency risks are decreasing but remain prevalent

| Country | Reference year | Age/gender group    | Population |
|---------|----------------|---------------------|------------|
| Kuwait  | 1996           | MaleAge90to94       | 127        |
| Kuwait  | 1996           | MaleAge95to99       | 10         |
| Kuwait  | 1997           | FemaleAge0to4       | 72650      |
| Kuwait  | 1997           | FemaleAge10to14     | 61463      |
| Kuwait  | 1997           | FemaleAge15to19     | 58399      |
| Kuwait  | 1997           | FemaleAge20to24     | 47646      |
| Kuwait  | 1997           | FemaleAge25to29     | 52581      |
| Kuwait  | 1997           | FemaleAge30to34     | 53971      |
| Kuwait  | 1997           | FemaleAge35to39     | 47955      |
| Kuwait  | 1997           | FemaleAge40to44     | 39325      |
| Kuwait  | 1997           | FemaleAge45to49     | 27647      |
| Kuwait  | 1997           | FemaleAge50to54     | 17779      |
| Kuwait  | 1997           | FemaleAge55to59     | 10280      |
| Kuwait  | 1997           | FemaleAge5to9       | 69785      |
| Kuwait  | 1997           | FemaleAge60to64     | 9367       |
| Kuwait  | 1997           | FemaleAge65to69     | 5166       |
| Kuwait  | 1997           | FemaleAge70to74     | 3046       |
| Kuwait  | 1997           | FemaleAge75to79     | 2252       |
| Kuwait  | 1997           | FemaleAge80to84     | 747        |
| Kuwait  | 1997           | FemaleAge85to89     | 482        |
| Kuwait  | 1997           | FemaleAge90to94     | 143        |
| Kuwait  | 1997           | FemaleAge95to99     | 10         |
| Kuwait  | 1997           | FemaleLactAge15to19 | 1603       |
| Kuwait  | 1997           | FemaleLactAge20to24 | 10521      |
| Kuwait  | 1997           | FemaleLactAge25to29 | 13991      |
| Kuwait  | 1997           | FemaleLactAge30to34 | 10464      |
| Kuwait  | 1997           | FemaleLactAge35to39 | 5703       |
| Kuwait  | 1997           | FemaleLactAge40to44 | 1827       |
| Kuwait  | 1997           | FemaleLactAge45to49 | 159        |
| Kuwait  | 1997           | FemalePregAge15to19 | 1203       |
| Kuwait  | 1997           | FemalePregAge20to24 | 7890       |
| Kuwait  | 1997           | FemalePregAge25to29 | 10493      |
| Kuwait  | 1997           | FemalePregAge30to34 | 7848       |
| Kuwait  | 1997           | FemalePregAge35to39 | 4277       |
| Kuwait  | 1997           | FemalePregAge40to44 | 1370       |
| Kuwait  | 1997           | FemalePregAge45to49 | 120        |
| Kuwait  | 1997           | MaleAge0to4         | 79964      |
| Kuwait  | 1997           | MaleAge10to14       | 64869      |
| Kuwait  | 1997           | MaleAge15to19       | 66574      |
| Kuwait  | 1997           | MaleAge20to24       | 84045      |
| Kuwait  | 1997           | MaleAge25to29       | 122675     |
| Kuwait  | 1997           | MaleAge30to34       | 128954     |
| Kuwait  | 1997           | MaleAge35to39       | 108705     |
| Kuwait  | 1997           | MaleAge40to44       | 83418      |
| Kuwait  | 1997           | MaleAge45to49       | 55367      |
| Kuwait  | 1997           | MaleAge50to54       | 37449      |
| Kuwait  | 1997           | MaleAge55to59       | 22172      |
| Kuwait  | 1997           | MaleAge5to9         | 74917      |
| Kuwait  | 1997           | MaleAge60to64       | 20641      |
| Kuwait  | 1997           | MaleAge65to69       | 16462      |
| Kuwait  | 1997           | MaleAge70to74       | 7267       |
| Kuwait  | 1997           | MaleAge75to79       | 2887       |
| Kuwait  | 1997           | MaleAge80to84       | 918        |
| Kuwait  | 1997           | MaleAge85to89       | 384        |
| Kuwait  | 1997           | MaleAge90to94       | 155        |
| Kuwait  | 1997           | MaleAge95to99       | 12         |
| Kuwait  | 1998           | FemaleAge0to4       | 78184      |
| Kuwait  | 1998           | FemaleAge10to14     | 64780      |
| Kuwait  | 1998           | FemaleAge15to19     | 59094      |
| Kuwait  | 1998           | FemaleAge20to24     | 53563      |
| Kuwait  | 1998           | FemaleAge25to29     | 55396      |
| Kuwait  | 1998           | FemaleAge30to34     | 59820      |
| Kuwait  | 1998           | FemaleAge35to39     | 51138      |
| Kuwait  | 1998           | FemaleAge40to44     | 43028      |
| Kuwait  | 1998           | FemaleAge45to49     | 29347      |
| Kuwait  | 1998           | FemaleAge50to54     | 19879      |
| Kuwait  | 1998           | FemaleAge55to59     | 11293      |
| Kuwait  | 1998           | FemaleAge5to9       | 72194      |
| Kuwait  | 1998           | FemaleAge60to64     | 9780       |
| Kuwait  | 1998           | FemaleAge65to69     | 7256       |
| Kuwait  | 1998           | FemaleAge70to74     | 2384       |
| Kuwait  | 1998           | FemaleAge75to79     | 2714       |
| Kuwait  | 1998           | FemaleAge80to84     | 702        |
| Kuwait  | 1998           | FemaleAge85to89     | 431        |
| Kuwait  | 1998           | FemaleAge90to94     | 161        |
| Kuwait  | 1998           | FemaleAge95to99     | 13         |
| Kuwait  | 1998           | FemaleLactAge15to19 | 1603       |
| Kuwait  | 1998           | FemaleLactAge20to24 | 10521      |
| Kuwait  | 1998           | FemaleLactAge25to29 | 13991      |
| Kuwait  | 1998           | FemaleLactAge30to34 | 10464      |
| Kuwait  | 1998           | FemaleLactAge35to39 | 5703       |
| Kuwait  | 1998           | FemaleLactAge40to44 | 1827       |
| Kuwait  | 1998           | FemaleLactAge45to49 | 159        |
| Kuwait  | 1998           | FemalePregAge15to19 | 1203       |
| Kuwait  | 1998           | FemalePregAge20to24 | 7890       |
| Kuwait  | 1998           | FemalePregAge25to29 | 10493      |
| Kuwait  | 1998           | FemalePregAge30to34 | 7848       |
| Kuwait  | 1998           | FemalePregAge35to39 | 4277       |

Dietary calcium and zinc deficiency risks are decreasing but remain prevalent

| Country      | Reference year | Age/gender group    | Population |
|--------------|----------------|---------------------|------------|
| Kuwait       | 1998           | FemalePregAge40to44 | 1370       |
| Kuwait       | 1998           | FemalePregAge45to49 | 120        |
| Kuwait       | 1998           | MaleAge0to4         | 84239      |
| Kuwait       | 1998           | MaleAge10to14       | 66992      |
| Kuwait       | 1998           | MaleAge15to19       | 65681      |
| Kuwait       | 1998           | MaleAge20to24       | 91766      |
| Kuwait       | 1998           | MaleAge25to29       | 126330     |
| Kuwait       | 1998           | MaleAge30to34       | 135103     |
| Kuwait       | 1998           | MaleAge35to39       | 113233     |
| Kuwait       | 1998           | MaleAge40to44       | 89420      |
| Kuwait       | 1998           | MaleAge45to49       | 57955      |
| Kuwait       | 1998           | MaleAge50to54       | 40138      |
| Kuwait       | 1998           | MaleAge55to59       | 24019      |
| Kuwait       | 1998           | MaleAge5to9         | 76319      |
| Kuwait       | 1998           | MaleAge60to64       | 20108      |
| Kuwait       | 1998           | MaleAge65to69       | 19628      |
| Kuwait       | 1998           | MaleAge70to74       | 7829       |
| Kuwait       | 1998           | MaleAge75to79       | 3294       |
| Kuwait       | 1998           | MaleAge80to84       | 1012       |
| Kuwait       | 1998           | MaleAge85to89       | 336        |
| Kuwait       | 1998           | MaleAge90to94       | 165        |
| Kuwait       | 1998           | MaleAge95to99       | 14         |
| Kuwait       | 1999           | FemaleAge0to4       | 85220      |
| Kuwait       | 1999           | FemaleAge10to14     | 69028      |
| Kuwait       | 1999           | FemaleAge15to19     | 58840      |
| Kuwait       | 1999           | FemaleAge20to24     | 58670      |
| Kuwait       | 1999           | FemaleAge25to29     | 60059      |
| Kuwait       | 1999           | FemaleAge30to34     | 66078      |
| Kuwait       | 1999           | FemaleAge35to39     | 54669      |
| Kuwait       | 1999           | FemaleAge40to44     | 47853      |
| Kuwait       | 1999           | FemaleAge45to49     | 30468      |
| Kuwait       | 1999           | FemaleAge50to54     | 22747      |
| Kuwait       | 1999           | FemaleAge55to59     | 11961      |
| Kuwait       | 1999           | FemaleAge5to9       | 74855      |
| Kuwait       | 1999           | FemaleAge60to64     | 10306      |
| Kuwait       | 1999           | FemaleAge65to69     | 9469       |
| Kuwait       | 1999           | FemaleAge70to74     | 2095       |
| Kuwait       | 1999           | FemaleAge75to79     | 2997       |
| Kuwait       | 1999           | FemaleAge80to84     | 736        |
| Kuwait       | 1999           | FemaleAge85to89     | 373        |
| Kuwait       | 1999           | FemaleAge90to94     | 148        |
| Kuwait       | 1999           | FemaleAge95to99     | 13         |
| Kuwait       | 1999           | FemaleLactAge15to19 | 1603       |
| Kuwait       | 1999           | FemaleLactAge20to24 | 10521      |
| Kuwait       | 1999           | FemaleLactAge25to29 | 13991      |
| Kuwait       | 1999           | FemaleLactAge30to34 | 10464      |
| Kuwait       | 1999           | FemaleLactAge35to39 | 5703       |
| Kuwait       | 1999           | FemaleLactAge40to44 | 1827       |
| Kuwait       | 1999           | FemaleLactAge45to49 | 159        |
| Kuwait       | 1999           | FemalePregAge15to19 | 1203       |
| Kuwait       | 1999           | FemalePregAge20to24 | 7890       |
| Kuwait       | 1999           | FemalePregAge25to29 | 10493      |
| Kuwait       | 1999           | FemalePregAge30to34 | 7848       |
| Kuwait       | 1999           | FemalePregAge35to39 | 4277       |
| Kuwait       | 1999           | FemalePregAge40to44 | 1370       |
| Kuwait       | 1999           | FemalePregAge45to49 | 120        |
| Kuwait       | 1999           | MaleAge0to4         | 89843      |
| Kuwait       | 1999           | MaleAge10to14       | 70172      |
| Kuwait       | 1999           | MaleAge15to19       | 63564      |
| Kuwait       | 1999           | MaleAge20to24       | 95178      |
| Kuwait       | 1999           | MaleAge25to29       | 135088     |
| Kuwait       | 1999           | MaleAge30to34       | 142086     |
| Kuwait       | 1999           | MaleAge35to39       | 116836     |
| Kuwait       | 1999           | MaleAge40to44       | 98495      |
| Kuwait       | 1999           | MaleAge45to49       | 58815      |
| Kuwait       | 1999           | MaleAge50to54       | 44615      |
| Kuwait       | 1999           | MaleAge55to59       | 25138      |
| Kuwait       | 1999           | MaleAge5to9         | 77919      |
| Kuwait       | 1999           | MaleAge60to64       | 19623      |
| Kuwait       | 1999           | MaleAge65to69       | 22976      |
| Kuwait       | 1999           | MaleAge70to74       | 8653       |
| Kuwait       | 1999           | MaleAge75to79       | 3767       |
| Kuwait       | 1999           | MaleAge80to84       | 1119       |
| Kuwait       | 1999           | MaleAge85to89       | 303        |
| Kuwait       | 1999           | MaleAge90to94       | 144        |
| Kuwait       | 1999           | MaleAge95to99       | 16         |
| Ky rgy zstan | 1992           | FemaleAge0to4       | 308734     |
| Ky rgy zstan | 1992           | FemaleAge10to14     | 243034     |
| Ky rgy zstan | 1992           | FemaleAge15to19     | 192223     |
| Ky rgy zstan | 1992           | FemaleAge20to24     | 100980     |
| Ky rgy zstan | 1992           | FemaleAge25to29     | 118153     |
| Ky rgy zstan | 1992           | FemaleAge30to34     | 138240     |
| Ky rgy zstan | 1992           | FemaleAge35to39     | 128203     |
| Ky rgy zstan | 1992           | FemaleAge40to44     | 99744      |
| Ky rgy zstan | 1992           | FemaleAge45to49     | 58637      |
| Ky rgy zstan | 1992           | FemaleAge50to54     | 74404      |
| Ky rgy zstan | 1992           | FemaleAge55to59     | 78571      |
| Ky rgy zstan | 1992           | FemaleAge5to9       | 283220     |

Dietary calcium and zinc deficiency risks are decreasing but remain prevalent

| Country    | Reference year | Age/gender group    | Population |
|------------|----------------|---------------------|------------|
| Kyrgyzstan | 1992           | FemaleAge60to64     | 74179      |
| Kyrgyzstan | 1992           | FemaleAge65to69     | 60985      |
| Kyrgyzstan | 1992           | FemaleAge70to74     | 34749      |
| Kyrgyzstan | 1992           | FemaleAge75to79     | 25401      |
| Kyrgyzstan | 1992           | FemaleAge80to84     | 16465      |
| Kyrgyzstan | 1992           | FemaleAge85to89     | 9709       |
| Kyrgyzstan | 1992           | FemaleAge90to94     | 4971       |
| Kyrgyzstan | 1992           | FemaleAge95to99     | 1152       |
| Kyrgyzstan | 1992           | FemaleAgeAbove100   | 307        |
| Kyrgyzstan | 1992           | FemaleLactAge15to19 | 14969      |
| Kyrgyzstan | 1992           | FemaleLactAge20to24 | 48141      |
| Kyrgyzstan | 1992           | FemaleLactAge25to29 | 35586      |
| Kyrgyzstan | 1992           | FemaleLactAge30to34 | 21665      |
| Kyrgyzstan | 1992           | FemaleLactAge35to39 | 8489       |
| Kyrgyzstan | 1992           | FemaleLactAge40to44 | 1926       |
| Kyrgyzstan | 1992           | FemaleLactAge45to49 | 194        |
| Kyrgyzstan | 1992           | FemalePregAge15to19 | 11227      |
| Kyrgyzstan | 1992           | FemalePregAge20to24 | 36105      |
| Kyrgyzstan | 1992           | FemalePregAge25to29 | 26690      |
| Kyrgyzstan | 1992           | FemalePregAge30to34 | 16249      |
| Kyrgyzstan | 1992           | FemalePregAge35to39 | 6366       |
| Kyrgyzstan | 1992           | FemalePregAge40to44 | 1445       |
| Kyrgyzstan | 1992           | FemalePregAge45to49 | 145        |
| Kyrgyzstan | 1992           | MaleAge0to4         | 319353     |
| Kyrgyzstan | 1992           | MaleAge10to14       | 247033     |
| Kyrgyzstan | 1992           | MaleAge15to19       | 220240     |
| Kyrgyzstan | 1992           | MaleAge20to24       | 191680     |
| Kyrgyzstan | 1992           | MaleAge25to29       | 180204     |
| Kyrgyzstan | 1992           | MaleAge30to34       | 171138     |
| Kyrgyzstan | 1992           | MaleAge35to39       | 139566     |
| Kyrgyzstan | 1992           | MaleAge40to44       | 98525      |
| Kyrgyzstan | 1992           | MaleAge45to49       | 58062      |
| Kyrgyzstan | 1992           | MaleAge50to54       | 69563      |
| Kyrgyzstan | 1992           | MaleAge55to59       | 69566      |
| Kyrgyzstan | 1992           | MaleAge5to9         | 289248     |
| Kyrgyzstan | 1992           | MaleAge60to64       | 60542      |
| Kyrgyzstan | 1992           | MaleAge65to69       | 40014      |
| Kyrgyzstan | 1992           | MaleAge70to74       | 16323      |
| Kyrgyzstan | 1992           | MaleAge75to79       | 11101      |
| Kyrgyzstan | 1992           | MaleAge80to84       | 7009       |
| Kyrgyzstan | 1992           | MaleAge85to89       | 3564       |
| Kyrgyzstan | 1992           | MaleAge90to94       | 1819       |
| Kyrgyzstan | 1992           | MaleAge95to99       | 483        |
| Kyrgyzstan | 1992           | MaleAgeAbove100     | 113        |
| Kyrgyzstan | 1993           | FemaleAge0to4       | 303120     |
| Kyrgyzstan | 1993           | FemaleAge10to14     | 248319     |
| Kyrgyzstan | 1993           | FemaleAge15to19     | 192896     |
| Kyrgyzstan | 1993           | FemaleAge20to24     | 107492     |
| Kyrgyzstan | 1993           | FemaleAge25to29     | 111536     |
| Kyrgyzstan | 1993           | FemaleAge30to34     | 140108     |
| Kyrgyzstan | 1993           | FemaleAge35to39     | 133097     |
| Kyrgyzstan | 1993           | FemaleAge40to44     | 105292     |
| Kyrgyzstan | 1993           | FemaleAge45to49     | 65616      |
| Kyrgyzstan | 1993           | FemaleAge50to54     | 61664      |
| Kyrgyzstan | 1993           | FemaleAge55to59     | 82050      |
| Kyrgyzstan | 1993           | FemaleAge5to9       | 288215     |
| Kyrgyzstan | 1993           | FemaleAge60to64     | 68748      |
| Kyrgyzstan | 1993           | FemaleAge65to69     | 64315      |
| Kyrgyzstan | 1993           | FemaleAge70to74     | 36339      |
| Kyrgyzstan | 1993           | FemaleAge75to79     | 23127      |
| Kyrgyzstan | 1993           | FemaleAge80to84     | 16876      |
| Kyrgyzstan | 1993           | FemaleAge85to89     | 8939       |
| Kyrgyzstan | 1993           | FemaleAge90to94     | 5357       |
| Kyrgyzstan | 1993           | FemaleAge95to99     | 1160       |
| Kyrgyzstan | 1993           | FemaleAgeAbove100   | 319        |
| Kyrgyzstan | 1993           | FemaleLactAge15to19 | 14969      |
| Kyrgyzstan | 1993           | FemaleLactAge20to24 | 48141      |
| Kyrgyzstan | 1993           | FemaleLactAge25to29 | 35586      |
| Kyrgyzstan | 1993           | FemaleLactAge30to34 | 21665      |
| Kyrgyzstan | 1993           | FemaleLactAge35to39 | 8489       |
| Kyrgyzstan | 1993           | FemaleLactAge40to44 | 1926       |
| Kyrgyzstan | 1993           | FemaleLactAge45to49 | 194        |
| Kyrgyzstan | 1993           | FemalePregAge15to19 | 11227      |
| Kyrgyzstan | 1993           | FemalePregAge20to24 | 36105      |
| Kyrgyzstan | 1993           | FemalePregAge25to29 | 26690      |
| Kyrgyzstan | 1993           | FemalePregAge30to34 | 16249      |
| Kyrgyzstan | 1993           | FemalePregAge35to39 | 6366       |
| Kyrgyzstan | 1993           | FemalePregAge40to44 | 1445       |
| Kyrgyzstan | 1993           | FemalePregAge45to49 | 145        |
| Kyrgyzstan | 1993           | MaleAge0to4         | 314284     |
| Kyrgyzstan | 1993           | MaleAge10to14       | 252427     |
| Kyrgyzstan | 1993           | MaleAge15to19       | 221371     |
| Kyrgyzstan | 1993           | MaleAge20to24       | 196189     |
| Kyrgyzstan | 1993           | MaleAge25to29       | 176615     |
| Kyrgyzstan | 1993           | MaleAge30to34       | 171924     |
| Kyrgyzstan | 1993           | MaleAge35to39       | 144274     |
| Kyrgyzstan | 1993           | MaleAge40to44       | 104021     |
| Kyrgyzstan | 1993           | MaleAge45to49       | 63526      |

Dietary calcium and zinc deficiency risks are decreasing but remain prevalent

| Country      | Reference year | Age/gender group    | Population |
|--------------|----------------|---------------------|------------|
| Ky rgy zstan | 1993           | MaleAge50to54       | 58817      |
| Ky rgy zstan | 1993           | MaleAge55to59       | 72743      |
| Ky rgy zstan | 1993           | MaleAge5to9         | 294910     |
| Ky rgy zstan | 1993           | MaleAge60to64       | 56683      |
| Ky rgy zstan | 1993           | MaleAge65to69       | 44874      |
| Ky rgy zstan | 1993           | MaleAge70to74       | 17228      |
| Ky rgy zstan | 1993           | MaleAge75to79       | 9959       |
| Ky rgy zstan | 1993           | MaleAge80to84       | 7227       |
| Ky rgy zstan | 1993           | MaleAge85to89       | 3256       |
| Ky rgy zstan | 1993           | MaleAge90to94       | 1851       |
| Ky rgy zstan | 1993           | MaleAge95to99       | 488        |
| Ky rgy zstan | 1993           | MaleAgeAbov e100    | 116        |
| Ky rgy zstan | 1994           | FemaleAge0to4       | 296991     |
| Ky rgy zstan | 1994           | FemaleAge10to14     | 254358     |
| Ky rgy zstan | 1994           | FemaleAge15to19     | 194510     |
| Ky rgy zstan | 1994           | FemaleAge20to24     | 114080     |
| Ky rgy zstan | 1994           | FemaleAge25to29     | 107089     |
| Ky rgy zstan | 1994           | FemaleAge30to34     | 140664     |
| Ky rgy zstan | 1994           | FemaleAge35to39     | 137740     |
| Ky rgy zstan | 1994           | FemaleAge40to44     | 110869     |
| Ky rgy zstan | 1994           | FemaleAge45to49     | 73543      |
| Ky rgy zstan | 1994           | FemaleAge50to54     | 51648      |
| Ky rgy zstan | 1994           | FemaleAge55to59     | 83143      |
| Ky rgy zstan | 1994           | FemaleAge5to9       | 292827     |
| Ky rgy zstan | 1994           | FemaleAge60to64     | 64704      |
| Ky rgy zstan | 1994           | FemaleAge65to69     | 66368      |
| Ky rgy zstan | 1994           | FemaleAge70to74     | 38410      |
| Ky rgy zstan | 1994           | FemaleAge75to79     | 21757      |
| Ky rgy zstan | 1994           | FemaleAge80to84     | 16309      |
| Ky rgy zstan | 1994           | FemaleAge85to89     | 8500       |
| Ky rgy zstan | 1994           | FemaleAge90to94     | 5350       |
| Ky rgy zstan | 1994           | FemaleAge95to99     | 1233       |
| Ky rgy zstan | 1994           | FemaleAgeAbov e100  | 321        |
| Ky rgy zstan | 1994           | FemaleLactAge15to19 | 14969      |
| Ky rgy zstan | 1994           | FemaleLactAge20to24 | 48141      |
| Ky rgy zstan | 1994           | FemaleLactAge25to29 | 35586      |
| Ky rgy zstan | 1994           | FemaleLactAge30to34 | 21665      |
| Ky rgy zstan | 1994           | FemaleLactAge35to39 | 8489       |
| Ky rgy zstan | 1994           | FemaleLactAge40to44 | 1926       |
| Ky rgy zstan | 1994           | FemaleLactAge45to49 | 194        |
| Ky rgy zstan | 1994           | FemalePregAge15to19 | 11227      |
| Ky rgy zstan | 1994           | FemalePregAge20to24 | 36105      |
| Ky rgy zstan | 1994           | FemalePregAge25to29 | 26690      |
| Ky rgy zstan | 1994           | FemalePregAge30to34 | 16249      |
| Ky rgy zstan | 1994           | FemalePregAge35to39 | 6366       |
| Ky rgy zstan | 1994           | FemalePregAge40to44 | 1445       |
| Ky rgy zstan | 1994           | FemalePregAge45to49 | 145        |
| Ky rgy zstan | 1994           | MaleAge0to4         | 308671     |
| Ky rgy zstan | 1994           | MaleAge10to14       | 258597     |
| Ky rgy zstan | 1994           | MaleAge15to19       | 223455     |
| Ky rgy zstan | 1994           | MaleAge20to24       | 200913     |
| Ky rgy zstan | 1994           | MaleAge25to29       | 174533     |
| Ky rgy zstan | 1994           | MaleAge30to34       | 172011     |
| Ky rgy zstan | 1994           | MaleAge35to39       | 148530     |
| Ky rgy zstan | 1994           | MaleAge40to44       | 109548     |
| Ky rgy zstan | 1994           | MaleAge45to49       | 69921      |
| Ky rgy zstan | 1994           | MaleAge50to54       | 50366      |
| Ky rgy zstan | 1994           | MaleAge55to59       | 73742      |
| Ky rgy zstan | 1994           | MaleAge5to9         | 300181     |
| Ky rgy zstan | 1994           | MaleAge60to64       | 53910      |
| Ky rgy zstan | 1994           | MaleAge65to69       | 48326      |
| Ky rgy zstan | 1994           | MaleAge70to74       | 18857      |
| Ky rgy zstan | 1994           | MaleAge75to79       | 9191       |
| Ky rgy zstan | 1994           | MaleAge80to84       | 6985       |
| Ky rgy zstan | 1994           | MaleAge85to89       | 3051       |
| Ky rgy zstan | 1994           | MaleAge90to94       | 1749       |
| Ky rgy zstan | 1994           | MaleAge95to99       | 485        |
| Ky rgy zstan | 1994           | MaleAgeAbov e100    | 116        |
| Ky rgy zstan | 1995           | FemaleAge0to4       | 292181     |
| Ky rgy zstan | 1995           | FemaleAge10to14     | 261268     |
| Ky rgy zstan | 1995           | FemaleAge15to19     | 198183     |
| Ky rgy zstan | 1995           | FemaleAge20to24     | 119613     |
| Ky rgy zstan | 1995           | FemaleAge25to29     | 106415     |
| Ky rgy zstan | 1995           | FemaleAge30to34     | 139801     |
| Ky rgy zstan | 1995           | FemaleAge35to39     | 142241     |
| Ky rgy zstan | 1995           | FemaleAge40to44     | 116906     |
| Ky rgy zstan | 1995           | FemaleAge45to49     | 80909      |
| Ky rgy zstan | 1995           | FemaleAge50to54     | 46770      |
| Ky rgy zstan | 1995           | FemaleAge55to59     | 80288      |
| Ky rgy zstan | 1995           | FemaleAge5to9       | 296678     |
| Ky rgy zstan | 1995           | FemaleAge60to64     | 63227      |
| Ky rgy zstan | 1995           | FemaleAge65to69     | 66629      |
| Ky rgy zstan | 1995           | FemaleAge70to74     | 40953      |
| Ky rgy zstan | 1995           | FemaleAge75to79     | 21508      |
| Ky rgy zstan | 1995           | FemaleAge80to84     | 14898      |
| Ky rgy zstan | 1995           | FemaleAge85to89     | 8271       |
| Ky rgy zstan | 1995           | FemaleAge90to94     | 4983       |
| Ky rgy zstan | 1995           | FemaleAge95to99     | 1285       |

Dietary calcium and zinc deficiency risks are decreasing but remain prevalent

| Country      | Reference year | Age/gender group    | Population |
|--------------|----------------|---------------------|------------|
| Ky rgy zstan | 1995           | FemaleAgeAbov e100  | 311        |
| Ky rgy zstan | 1995           | FemaleLactAge15to19 | 14969      |
| Ky rgy zstan | 1995           | FemaleLactAge20to24 | 48141      |
| Ky rgy zstan | 1995           | FemaleLactAge25to29 | 35586      |
| Ky rgy zstan | 1995           | FemaleLactAge30to34 | 21665      |
| Ky rgy zstan | 1995           | FemaleLactAge35to39 | 8489       |
| Ky rgy zstan | 1995           | FemaleLactAge40to44 | 1926       |
| Ky rgy zstan | 1995           | FemaleLactAge45to49 | 194        |
| Ky rgy zstan | 1995           | FemalePregAge15to19 | 11227      |
| Ky rgy zstan | 1995           | FemalePregAge20to24 | 36105      |
| Ky rgy zstan | 1995           | FemalePregAge25to29 | 26690      |
| Ky rgy zstan | 1995           | FemalePregAge30to34 | 16249      |
| Ky rgy zstan | 1995           | FemalePregAge35to39 | 6366       |
| Ky rgy zstan | 1995           | FemalePregAge40to44 | 1445       |
| Ky rgy zstan | 1995           | FemalePregAge45to49 | 145        |
| Ky rgy zstan | 1995           | MaleAge0to4         | 304389     |
| Ky rgy zstan | 1995           | MaleAge10to14       | 265695     |
| Ky rgy zstan | 1995           | MaleAge15to19       | 227354     |
| Ky rgy zstan | 1995           | MaleAge20to24       | 205225     |
| Ky rgy zstan | 1995           | MaleAge25to29       | 174931     |
| Ky rgy zstan | 1995           | MaleAge30to34       | 171606     |
| Ky rgy zstan | 1995           | MaleAge35to39       | 152362     |
| Ky rgy zstan | 1995           | MaleAge40to44       | 115362     |
| Ky rgy zstan | 1995           | MaleAge45to49       | 76108      |
| Ky rgy zstan | 1995           | MaleAge50to54       | 46160      |
| Ky rgy zstan | 1995           | MaleAge55to59       | 71339      |
| Ky rgy zstan | 1995           | MaleAge5to9         | 304556     |
| Ky rgy zstan | 1995           | MaleAge60to64       | 53221      |
| Ky rgy zstan | 1995           | MaleAge65to69       | 49781      |
| Ky rgy zstan | 1995           | MaleAge70to74       | 21341      |
| Ky rgy zstan | 1995           | MaleAge75to79       | 8918       |
| Ky rgy zstan | 1995           | MaleAge80to84       | 6287       |
| Ky rgy zstan | 1995           | MaleAge85to89       | 2913       |
| Ky rgy zstan | 1995           | MaleAge90to94       | 1523       |
| Ky rgy zstan | 1995           | MaleAge95to99       | 441        |
| Ky rgy zstan | 1995           | MaleAgeAbov e100    | 110        |
| Ky rgy zstan | 1996           | FemaleAge0to4       | 284295     |
| Ky rgy zstan | 1996           | FemaleAge10to14     | 268729     |
| Ky rgy zstan | 1996           | FemaleAge15to19     | 202939     |
| Ky rgy zstan | 1996           | FemaleAge20to24     | 133624     |
| Ky rgy zstan | 1996           | FemaleAge25to29     | 119533     |
| Ky rgy zstan | 1996           | FemaleAge30to34     | 143945     |
| Ky rgy zstan | 1996           | FemaleAge35to39     | 147715     |
| Ky rgy zstan | 1996           | FemaleAge40to44     | 124120     |
| Ky rgy zstan | 1996           | FemaleAge45to49     | 88470      |
| Ky rgy zstan | 1996           | FemaleAge50to54     | 47419      |
| Ky rgy zstan | 1996           | FemaleAge55to59     | 74707      |
| Ky rgy zstan | 1996           | FemaleAge5to9       | 299145     |
| Ky rgy zstan | 1996           | FemaleAge60to64     | 64569      |
| Ky rgy zstan | 1996           | FemaleAge65to69     | 65487      |
| Ky rgy zstan | 1996           | FemaleAge70to74     | 44451      |
| Ky rgy zstan | 1996           | FemaleAge75to79     | 22588      |
| Ky rgy zstan | 1996           | FemaleAge80to84     | 14348      |
| Ky rgy zstan | 1996           | FemaleAge85to89     | 8126       |
| Ky rgy zstan | 1996           | FemaleAge90to94     | 4706       |
| Ky rgy zstan | 1996           | FemaleAge95to99     | 1315       |
| Ky rgy zstan | 1996           | FemaleAgeAbov e100  | 285        |
| Ky rgy zstan | 1996           | FemaleLactAge15to19 | 15281      |
| Ky rgy zstan | 1996           | FemaleLactAge20to24 | 42801      |
| Ky rgy zstan | 1996           | FemaleLactAge25to29 | 29890      |
| Ky rgy zstan | 1996           | FemaleLactAge30to34 | 18324      |
| Ky rgy zstan | 1996           | FemaleLactAge35to39 | 8296       |
| Ky rgy zstan | 1996           | FemaleLactAge40to44 | 1848       |
| Ky rgy zstan | 1996           | FemaleLactAge45to49 | 219        |
| Ky rgy zstan | 1996           | FemalePregAge15to19 | 11461      |
| Ky rgy zstan | 1996           | FemalePregAge20to24 | 32101      |
| Ky rgy zstan | 1996           | FemalePregAge25to29 | 22417      |
| Ky rgy zstan | 1996           | FemalePregAge30to34 | 13743      |
| Ky rgy zstan | 1996           | FemalePregAge35to39 | 6222       |
| Ky rgy zstan | 1996           | FemalePregAge40to44 | 1386       |
| Ky rgy zstan | 1996           | FemalePregAge45to49 | 164        |
| Ky rgy zstan | 1996           | MaleAge0to4         | 297263     |
| Ky rgy zstan | 1996           | MaleAge10to14       | 273660     |
| Ky rgy zstan | 1996           | MaleAge15to19       | 232874     |
| Ky rgy zstan | 1996           | MaleAge20to24       | 209287     |
| Ky rgy zstan | 1996           | MaleAge25to29       | 178102     |
| Ky rgy zstan | 1996           | MaleAge30to34       | 171435     |
| Ky rgy zstan | 1996           | MaleAge35to39       | 156522     |
| Ky rgy zstan | 1996           | MaleAge40to44       | 122072     |
| Ky rgy zstan | 1996           | MaleAge45to49       | 82754      |
| Ky rgy zstan | 1996           | MaleAge50to54       | 46475      |
| Ky rgy zstan | 1996           | MaleAge55to59       | 66589      |
| Ky rgy zstan | 1996           | MaleAge5to9         | 307849     |
| Ky rgy zstan | 1996           | MaleAge60to64       | 54517      |
| Ky rgy zstan | 1996           | MaleAge65to69       | 49619      |
| Ky rgy zstan | 1996           | MaleAge70to74       | 24975      |
| Ky rgy zstan | 1996           | MaleAge75to79       | 9356       |
| Ky rgy zstan | 1996           | MaleAge80to84       | 5868       |

Dietary calcium and zinc deficiency risks are decreasing but remain prevalent

| Country      | Reference year | Age/gender group    | Population |
|--------------|----------------|---------------------|------------|
| Ky rgy zstan | 1996           | MaleAge85to89       | 2962       |
| Ky rgy zstan | 1996           | MaleAge90to94       | 1440       |
| Ky rgy zstan | 1996           | MaleAge95to99       | 427        |
| Ky rgy zstan | 1996           | MaleAgeAbov e100    | 98         |
| Ky rgy zstan | 1997           | FemaleAge0to4       | 279103     |
| Ky rgy zstan | 1997           | FemaleAge10to14     | 276964     |
| Ky rgy zstan | 1997           | FemaleAge15to19     | 209838     |
| Ky rgy zstan | 1997           | FemaleAge20to24     | 137304     |
| Ky rgy zstan | 1997           | FemaleAge25to29     | 126390     |
| Ky rgy zstan | 1997           | FemaleAge30to34     | 140578     |
| Ky rgy zstan | 1997           | FemaleAge35to39     | 152967     |
| Ky rgy zstan | 1997           | FemaleAge40to44     | 131430     |
| Ky rgy zstan | 1997           | FemaleAge45to49     | 95770      |
| Ky rgy zstan | 1997           | FemaleAge50to54     | 52721      |
| Ky rgy zstan | 1997           | FemaleAge55to59     | 65576      |
| Ky rgy zstan | 1997           | FemaleAge5to9       | 299881     |
| Ky rgy zstan | 1997           | FemaleAge60to64     | 68637      |
| Ky rgy zstan | 1997           | FemaleAge65to69     | 62508      |
| Ky rgy zstan | 1997           | FemaleAge70to74     | 48630      |
| Ky rgy zstan | 1997           | FemaleAge75to79     | 24168      |
| Ky rgy zstan | 1997           | FemaleAge80to84     | 13655      |
| Ky rgy zstan | 1997           | FemaleAge85to89     | 8065       |
| Ky rgy zstan | 1997           | FemaleAge90to94     | 4222       |
| Ky rgy zstan | 1997           | FemaleAge95to99     | 1452       |
| Ky rgy zstan | 1997           | FemaleAgeAbov e100  | 247        |
| Ky rgy zstan | 1997           | FemaleLactAge15to19 | 15281      |
| Ky rgy zstan | 1997           | FemaleLactAge20to24 | 42801      |
| Ky rgy zstan | 1997           | FemaleLactAge25to29 | 29890      |
| Ky rgy zstan | 1997           | FemaleLactAge30to34 | 18324      |
| Ky rgy zstan | 1997           | FemaleLactAge35to39 | 8296       |
| Ky rgy zstan | 1997           | FemaleLactAge40to44 | 1848       |
| Ky rgy zstan | 1997           | FemaleLactAge45to49 | 219        |
| Ky rgy zstan | 1997           | FemalePregAge15to19 | 11461      |
| Ky rgy zstan | 1997           | FemalePregAge20to24 | 32101      |
| Ky rgy zstan | 1997           | FemalePregAge25to29 | 22417      |
| Ky rgy zstan | 1997           | FemalePregAge30to34 | 13743      |
| Ky rgy zstan | 1997           | FemalePregAge35to39 | 6222       |
| Ky rgy zstan | 1997           | FemalePregAge40to44 | 1386       |
| Ky rgy zstan | 1997           | FemalePregAge45to49 | 164        |
| Ky rgy zstan | 1997           | MaleAge0to4         | 292722     |
| Ky rgy zstan | 1997           | MaleAge10to14       | 282436     |
| Ky rgy zstan | 1997           | MaleAge15to19       | 239854     |
| Ky rgy zstan | 1997           | MaleAge20to24       | 212915     |
| Ky rgy zstan | 1997           | MaleAge25to29       | 183669     |
| Ky rgy zstan | 1997           | MaleAge30to34       | 170647     |
| Ky rgy zstan | 1997           | MaleAge35to39       | 160429     |
| Ky rgy zstan | 1997           | MaleAge40to44       | 128975     |
| Ky rgy zstan | 1997           | MaleAge45to49       | 89438      |
| Ky rgy zstan | 1997           | MaleAge50to54       | 50465      |
| Ky rgy zstan | 1997           | MaleAge55to59       | 59041      |
| Ky rgy zstan | 1997           | MaleAge5to9         | 309326     |
| Ky rgy zstan | 1997           | MaleAge60to64       | 57897      |
| Ky rgy zstan | 1997           | MaleAge65to69       | 47669      |
| Ky rgy zstan | 1997           | MaleAge70to74       | 29407      |
| Ky rgy zstan | 1997           | MaleAge75to79       | 9939       |
| Ky rgy zstan | 1997           | MaleAge80to84       | 5336       |
| Ky rgy zstan | 1997           | MaleAge85to89       | 3032       |
| Ky rgy zstan | 1997           | MaleAge90to94       | 1281       |
| Ky rgy zstan | 1997           | MaleAge95to99       | 442        |
| Ky rgy zstan | 1997           | MaleAgeAbov e100    | 82         |
| Ky rgy zstan | 1998           | FemaleAge0to4       | 275708     |
| Ky rgy zstan | 1998           | FemaleAge10to14     | 285113     |
| Ky rgy zstan | 1998           | FemaleAge15to19     | 217721     |
| Ky rgy zstan | 1998           | FemaleAge20to24     | 140388     |
| Ky rgy zstan | 1998           | FemaleAge25to29     | 135322     |
| Ky rgy zstan | 1998           | FemaleAge30to34     | 136706     |
| Ky rgy zstan | 1998           | FemaleAge35to39     | 157531     |
| Ky rgy zstan | 1998           | FemaleAge40to44     | 138623     |
| Ky rgy zstan | 1998           | FemaleAge45to49     | 102813     |
| Ky rgy zstan | 1998           | FemaleAge50to54     | 61153      |
| Ky rgy zstan | 1998           | FemaleAge55to59     | 55191      |
| Ky rgy zstan | 1998           | FemaleAge5to9       | 298272     |
| Ky rgy zstan | 1998           | FemaleAge60to64     | 73398      |
| Ky rgy zstan | 1998           | FemaleAge65to69     | 58883      |
| Ky rgy zstan | 1998           | FemaleAge70to74     | 52677      |
| Ky rgy zstan | 1998           | FemaleAge75to79     | 26207      |
| Ky rgy zstan | 1998           | FemaleAge80to84     | 13077      |
| Ky rgy zstan | 1998           | FemaleAge85to89     | 7940       |
| Ky rgy zstan | 1998           | FemaleAge90to94     | 3644       |
| Ky rgy zstan | 1998           | FemaleAge95to99     | 1508       |
| Ky rgy zstan | 1998           | FemaleAgeAbov e100  | 201        |
| Ky rgy zstan | 1998           | FemaleLactAge15to19 | 15281      |
| Ky rgy zstan | 1998           | FemaleLactAge20to24 | 42801      |
| Ky rgy zstan | 1998           | FemaleLactAge25to29 | 29890      |
| Ky rgy zstan | 1998           | FemaleLactAge30to34 | 18324      |
| Ky rgy zstan | 1998           | FemaleLactAge35to39 | 8296       |
| Ky rgy zstan | 1998           | FemaleLactAge40to44 | 1848       |
| Ky rgy zstan | 1998           | FemaleLactAge45to49 | 219        |

Dietary calcium and zinc deficiency risks are decreasing but remain prevalent

| Country                          | Reference year | Age/gender group    | Population |
|----------------------------------|----------------|---------------------|------------|
| Kyrgyzstan                       | 1998           | FemalePregAge15to19 | 11461      |
| Kyrgyzstan                       | 1998           | FemalePregAge20to24 | 32101      |
| Kyrgyzstan                       | 1998           | FemalePregAge25to29 | 22417      |
| Kyrgyzstan                       | 1998           | FemalePregAge30to34 | 13743      |
| Kyrgyzstan                       | 1998           | FemalePregAge35to39 | 6222       |
| Kyrgyzstan                       | 1998           | FemalePregAge40to44 | 1386       |
| Kyrgyzstan                       | 1998           | FemalePregAge45to49 | 164        |
| Kyrgyzstan                       | 1998           | MaleAge0to4         | 289854     |
| Kyrgyzstan                       | 1998           | MaleAge10to14       | 291165     |
| Kyrgyzstan                       | 1998           | MaleAge15to19       | 247767     |
| Kyrgyzstan                       | 1998           | MaleAge20to24       | 216350     |
| Kyrgyzstan                       | 1998           | MaleAge25to29       | 190516     |
| Kyrgyzstan                       | 1998           | MaleAge30to34       | 169777     |
| Kyrgyzstan                       | 1998           | MaleAge35to39       | 163723     |
| Kyrgyzstan                       | 1998           | MaleAge40to44       | 135677     |
| Kyrgyzstan                       | 1998           | MaleAge45to49       | 96117      |
| Kyrgyzstan                       | 1998           | MaleAge50to54       | 56928      |
| Kyrgyzstan                       | 1998           | MaleAge55to59       | 50608      |
| Kyrgyzstan                       | 1998           | MaleAge5to9         | 308388     |
| Kyrgyzstan                       | 1998           | MaleAge60to64       | 61702      |
| Kyrgyzstan                       | 1998           | MaleAge65to69       | 45056      |
| Kyrgyzstan                       | 1998           | MaleAge70to74       | 33726      |
| Kyrgyzstan                       | 1998           | MaleAge75to79       | 10848      |
| Kyrgyzstan                       | 1998           | MaleAge80to84       | 4853       |
| Kyrgyzstan                       | 1998           | MaleAge85to89       | 3001       |
| Kyrgyzstan                       | 1998           | MaleAge90to94       | 1086       |
| Kyrgyzstan                       | 1998           | MaleAge95to99       | 434        |
| Kyrgyzstan                       | 1998           | MaleAgeAbove100     | 63         |
| Kyrgyzstan                       | 1999           | FemaleAge0to4       | 271935     |
| Kyrgyzstan                       | 1999           | FemaleAge10to14     | 291607     |
| Kyrgyzstan                       | 1999           | FemaleAge15to19     | 225664     |
| Kyrgyzstan                       | 1999           | FemaleAge20to24     | 143729     |
| Kyrgyzstan                       | 1999           | FemaleAge25to29     | 143650     |
| Kyrgyzstan                       | 1999           | FemaleAge30to34     | 134275     |
| Kyrgyzstan                       | 1999           | FemaleAge35to39     | 160215     |
| Kyrgyzstan                       | 1999           | FemaleAge40to44     | 145205     |
| Kyrgyzstan                       | 1999           | FemaleAge45to49     | 109810     |
| Kyrgyzstan                       | 1999           | FemaleAge50to54     | 70180      |
| Kyrgyzstan                       | 1999           | FemaleAge55to59     | 47229      |
| Kyrgyzstan                       | 1999           | FemaleAge5to9       | 294375     |
| Kyrgyzstan                       | 1999           | FemaleAge60to64     | 75741      |
| Kyrgyzstan                       | 1999           | FemaleAge65to69     | 56422      |
| Kyrgyzstan                       | 1999           | FemaleAge70to74     | 55417      |
| Kyrgyzstan                       | 1999           | FemaleAge75to79     | 28657      |
| Kyrgyzstan                       | 1999           | FemaleAge80to84     | 12931      |
| Kyrgyzstan                       | 1999           | FemaleAge85to89     | 7586       |
| Kyrgyzstan                       | 1999           | FemaleAge90to94     | 3072       |
| Kyrgyzstan                       | 1999           | FemaleAge95to99     | 1318       |
| Kyrgyzstan                       | 1999           | FemaleAgeAbove100   | 159        |
| Kyrgyzstan                       | 1999           | FemaleLactAge15to19 | 15281      |
| Kyrgyzstan                       | 1999           | FemaleLactAge20to24 | 42801      |
| Kyrgyzstan                       | 1999           | FemaleLactAge25to29 | 29890      |
| Kyrgyzstan                       | 1999           | FemaleLactAge30to34 | 18324      |
| Kyrgyzstan                       | 1999           | FemaleLactAge35to39 | 8296       |
| Kyrgyzstan                       | 1999           | FemaleLactAge40to44 | 1848       |
| Kyrgyzstan                       | 1999           | FemaleLactAge45to49 | 219        |
| Kyrgyzstan                       | 1999           | FemalePregAge15to19 | 11461      |
| Kyrgyzstan                       | 1999           | FemalePregAge20to24 | 32101      |
| Kyrgyzstan                       | 1999           | FemalePregAge25to29 | 22417      |
| Kyrgyzstan                       | 1999           | FemalePregAge30to34 | 13743      |
| Kyrgyzstan                       | 1999           | FemalePregAge35to39 | 6222       |
| Kyrgyzstan                       | 1999           | FemalePregAge40to44 | 1386       |
| Kyrgyzstan                       | 1999           | FemalePregAge45to49 | 164        |
| Kyrgyzstan                       | 1999           | MaleAge0to4         | 286373     |
| Kyrgyzstan                       | 1999           | MaleAge10to14       | 298309     |
| Kyrgyzstan                       | 1999           | MaleAge15to19       | 255860     |
| Kyrgyzstan                       | 1999           | MaleAge20to24       | 220143     |
| Kyrgyzstan                       | 1999           | MaleAge25to29       | 196891     |
| Kyrgyzstan                       | 1999           | MaleAge30to34       | 169760     |
| Kyrgyzstan                       | 1999           | MaleAge35to39       | 165901     |
| Kyrgyzstan                       | 1999           | MaleAge40to44       | 141633     |
| Kyrgyzstan                       | 1999           | MaleAge45to49       | 102807     |
| Kyrgyzstan                       | 1999           | MaleAge50to54       | 63988      |
| Kyrgyzstan                       | 1999           | MaleAge55to59       | 44202      |
| Kyrgyzstan                       | 1999           | MaleAge5to9         | 305136     |
| Kyrgyzstan                       | 1999           | MaleAge60to64       | 63484      |
| Kyrgyzstan                       | 1999           | MaleAge65to69       | 43349      |
| Kyrgyzstan                       | 1999           | MaleAge70to74       | 36732      |
| Kyrgyzstan                       | 1999           | MaleAge75to79       | 12341      |
| Kyrgyzstan                       | 1999           | MaleAge80to84       | 4580       |
| Kyrgyzstan                       | 1999           | MaleAge85to89       | 2758       |
| Kyrgyzstan                       | 1999           | MaleAge90to94       | 883        |
| Kyrgyzstan                       | 1999           | MaleAge95to99       | 357        |
| Kyrgyzstan                       | 1999           | MaleAgeAbove100     | 46         |
| Lao People's Democratic Republic | 1992           | FemaleAge0to4       | 392779     |
| Lao People's Democratic Republic | 1992           | FemaleAge10to14     | 270628     |
| Lao People's Democratic Republic | 1992           | FemaleAge15to19     | 193558     |
| Lao People's Democratic Republic | 1992           | FemaleAge20to24     | 107716     |



Dietary calcium and zinc deficiency risks are decreasing but remain prevalent

| Country                          | Reference year | Age/gender group    | Population |
|----------------------------------|----------------|---------------------|------------|
| Lao People's Democratic Republic | 1992           | FemaleAge25to29     | 84354      |
| Lao People's Democratic Republic | 1992           | FemaleAge30to34     | 77555      |
| Lao People's Democratic Republic | 1992           | FemaleAge35to39     | 75967      |
| Lao People's Democratic Republic | 1992           | FemaleAge40to44     | 72738      |
| Lao People's Democratic Republic | 1992           | FemaleAge45to49     | 67939      |
| Lao People's Democratic Republic | 1992           | FemaleAge50to54     | 62882      |
| Lao People's Democratic Republic | 1992           | FemaleAge55to59     | 55591      |
| Lao People's Democratic Republic | 1992           | FemaleAge5to9       | 319423     |
| Lao People's Democratic Republic | 1992           | FemaleAge60to64     | 47723      |
| Lao People's Democratic Republic | 1992           | FemaleAge65to69     | 37715      |
| Lao People's Democratic Republic | 1992           | FemaleAge70to74     | 26258      |
| Lao People's Democratic Republic | 1992           | FemaleAge75to79     | 15747      |
| Lao People's Democratic Republic | 1992           | FemaleAge80to84     | 7409       |
| Lao People's Democratic Republic | 1992           | FemaleAge85to89     | 2542       |
| Lao People's Democratic Republic | 1992           | FemaleAge90to94     | 584        |
| Lao People's Democratic Republic | 1992           | FemaleAge95to99     | 70         |
| Lao People's Democratic Republic | 1992           | FemaleAgeAbove100   | 4          |
| Lao People's Democratic Republic | 1992           | FemaleLactAge15to19 | 25224      |
| Lao People's Democratic Republic | 1992           | FemaleLactAge20to24 | 54327      |
| Lao People's Democratic Republic | 1992           | FemaleLactAge25to29 | 47688      |
| Lao People's Democratic Republic | 1992           | FemaleLactAge30to34 | 32959      |
| Lao People's Democratic Republic | 1992           | FemaleLactAge35to39 | 18277      |
| Lao People's Democratic Republic | 1992           | FemaleLactAge40to44 | 8510       |
| Lao People's Democratic Republic | 1992           | FemaleLactAge45to49 | 2213       |
| Lao People's Democratic Republic | 1992           | FemalePregAge15to19 | 18918      |
| Lao People's Democratic Republic | 1992           | FemalePregAge20to24 | 40745      |
| Lao People's Democratic Republic | 1992           | FemalePregAge25to29 | 35766      |
| Lao People's Democratic Republic | 1992           | FemalePregAge30to34 | 24719      |
| Lao People's Democratic Republic | 1992           | FemalePregAge35to39 | 13708      |
| Lao People's Democratic Republic | 1992           | FemalePregAge40to44 | 6382       |
| Lao People's Democratic Republic | 1992           | FemalePregAge45to49 | 1660       |
| Lao People's Democratic Republic | 1992           | MaleAge0to4         | 406989     |
| Lao People's Democratic Republic | 1992           | MaleAge10to14       | 279192     |
| Lao People's Democratic Republic | 1992           | MaleAge15to19       | 244008     |
| Lao People's Democratic Republic | 1992           | MaleAge20to24       | 206099     |
| Lao People's Democratic Republic | 1992           | MaleAge25to29       | 168875     |
| Lao People's Democratic Republic | 1992           | MaleAge30to34       | 135212     |
| Lao People's Democratic Republic | 1992           | MaleAge35to39       | 108310     |
| Lao People's Democratic Republic | 1992           | MaleAge40to44       | 82261      |
| Lao People's Democratic Republic | 1992           | MaleAge45to49       | 64894      |
| Lao People's Democratic Republic | 1992           | MaleAge50to54       | 58721      |
| Lao People's Democratic Republic | 1992           | MaleAge55to59       | 51575      |
| Lao People's Democratic Republic | 1992           | MaleAge5to9         | 329809     |
| Lao People's Democratic Republic | 1992           | MaleAge60to64       | 42078      |
| Lao People's Democratic Republic | 1992           | MaleAge65to69       | 31215      |
| Lao People's Democratic Republic | 1992           | MaleAge70to74       | 20327      |
| Lao People's Democratic Republic | 1992           | MaleAge75to79       | 11274      |
| Lao People's Democratic Republic | 1992           | MaleAge80to84       | 4860       |
| Lao People's Democratic Republic | 1992           | MaleAge85to89       | 1511       |
| Lao People's Democratic Republic | 1992           | MaleAge90to94       | 307        |
| Lao People's Democratic Republic | 1992           | MaleAge95to99       | 32         |
| Lao People's Democratic Republic | 1992           | MaleAgeAbove100     | 1          |
| Lao People's Democratic Republic | 1993           | FemaleAge0to4       | 403356     |
| Lao People's Democratic Republic | 1993           | FemaleAge10to14     | 277894     |
| Lao People's Democratic Republic | 1993           | FemaleAge15to19     | 198873     |
| Lao People's Democratic Republic | 1993           | FemaleAge20to24     | 114394     |
| Lao People's Democratic Republic | 1993           | FemaleAge25to29     | 89776      |
| Lao People's Democratic Republic | 1993           | FemaleAge30to34     | 83080      |
| Lao People's Democratic Republic | 1993           | FemaleAge35to39     | 79903      |
| Lao People's Democratic Republic | 1993           | FemaleAge40to44     | 75729      |
| Lao People's Democratic Republic | 1993           | FemaleAge45to49     | 70168      |
| Lao People's Democratic Republic | 1993           | FemaleAge50to54     | 63336      |
| Lao People's Democratic Republic | 1993           | FemaleAge55to59     | 56448      |
| Lao People's Democratic Republic | 1993           | FemaleAge5to9       | 331371     |
| Lao People's Democratic Republic | 1993           | FemaleAge60to64     | 48071      |
| Lao People's Democratic Republic | 1993           | FemaleAge65to69     | 38636      |
| Lao People's Democratic Republic | 1993           | FemaleAge70to74     | 26890      |
| Lao People's Democratic Republic | 1993           | FemaleAge75to79     | 16214      |
| Lao People's Democratic Republic | 1993           | FemaleAge80to84     | 7697       |
| Lao People's Democratic Republic | 1993           | FemaleAge85to89     | 2635       |
| Lao People's Democratic Republic | 1993           | FemaleAge90to94     | 626        |
| Lao People's Democratic Republic | 1993           | FemaleAge95to99     | 83         |
| Lao People's Democratic Republic | 1993           | FemaleAgeAbove100   | 4          |
| Lao People's Democratic Republic | 1993           | FemaleLactAge15to19 | 25224      |
| Lao People's Democratic Republic | 1993           | FemaleLactAge20to24 | 54327      |
| Lao People's Democratic Republic | 1993           | FemaleLactAge25to29 | 47688      |
| Lao People's Democratic Republic | 1993           | FemaleLactAge30to34 | 32959      |
| Lao People's Democratic Republic | 1993           | FemaleLactAge35to39 | 18277      |
| Lao People's Democratic Republic | 1993           | FemaleLactAge40to44 | 8510       |
| Lao People's Democratic Republic | 1993           | FemaleLactAge45to49 | 2213       |
| Lao People's Democratic Republic | 1993           | FemalePregAge15to19 | 18918      |
| Lao People's Democratic Republic | 1993           | FemalePregAge20to24 | 40745      |
| Lao People's Democratic Republic | 1993           | FemalePregAge25to29 | 35766      |
| Lao People's Democratic Republic | 1993           | FemalePregAge30to34 | 24719      |
| Lao People's Democratic Republic | 1993           | FemalePregAge35to39 | 13708      |
| Lao People's Democratic Republic | 1993           | FemalePregAge40to44 | 6382       |
| Lao People's Democratic Republic | 1993           | FemalePregAge45to49 | 1660       |
| Lao People's Democratic Republic | 1993           | MaleAge0to4         | 417903     |

Dietary calcium and zinc deficiency risks are decreasing but remain prevalent

| Country                          | Reference year | Age/gender group    | Population |
|----------------------------------|----------------|---------------------|------------|
| Lao People's Democratic Republic | 1993           | MaleAge10to14       | 286318     |
| Lao People's Democratic Republic | 1993           | MaleAge15to19       | 249174     |
| Lao People's Democratic Republic | 1993           | MaleAge20to24       | 212098     |
| Lao People's Democratic Republic | 1993           | MaleAge25to29       | 173176     |
| Lao People's Democratic Republic | 1993           | MaleAge30to34       | 139645     |
| Lao People's Democratic Republic | 1993           | MaleAge35to39       | 111279     |
| Lao People's Democratic Republic | 1993           | MaleAge40to44       | 86792      |
| Lao People's Democratic Republic | 1993           | MaleAge45to49       | 66113      |
| Lao People's Democratic Republic | 1993           | MaleAge50to54       | 58734      |
| Lao People's Democratic Republic | 1993           | MaleAge55to59       | 52330      |
| Lao People's Democratic Republic | 1993           | MaleAge5to9         | 341848     |
| Lao People's Democratic Republic | 1993           | MaleAge60to64       | 42627      |
| Lao People's Democratic Republic | 1993           | MaleAge65to69       | 32038      |
| Lao People's Democratic Republic | 1993           | MaleAge70to74       | 20874      |
| Lao People's Democratic Republic | 1993           | MaleAge75to79       | 11636      |
| Lao People's Democratic Republic | 1993           | MaleAge80to84       | 5056       |
| Lao People's Democratic Republic | 1993           | MaleAge85to89       | 1566       |
| Lao People's Democratic Republic | 1993           | MaleAge90to94       | 333        |
| Lao People's Democratic Republic | 1993           | MaleAge95to99       | 40         |
| Lao People's Democratic Republic | 1993           | MaleAgeAbove100     | 2          |
| Lao People's Democratic Republic | 1994           | FemaleAge0to4       | 411196     |
| Lao People's Democratic Republic | 1994           | FemaleAge10to14     | 285801     |
| Lao People's Democratic Republic | 1994           | FemaleAge15to19     | 204321     |
| Lao People's Democratic Republic | 1994           | FemaleAge20to24     | 120787     |
| Lao People's Democratic Republic | 1994           | FemaleAge25to29     | 95323      |
| Lao People's Democratic Republic | 1994           | FemaleAge30to34     | 88574      |
| Lao People's Democratic Republic | 1994           | FemaleAge35to39     | 84053      |
| Lao People's Democratic Republic | 1994           | FemaleAge40to44     | 78843      |
| Lao People's Democratic Republic | 1994           | FemaleAge45to49     | 72558      |
| Lao People's Democratic Republic | 1994           | FemaleAge50to54     | 64050      |
| Lao People's Democratic Republic | 1994           | FemaleAge55to59     | 57248      |
| Lao People's Democratic Republic | 1994           | FemaleAge5to9       | 343299     |
| Lao People's Democratic Republic | 1994           | FemaleAge60to64     | 48510      |
| Lao People's Democratic Republic | 1994           | FemaleAge65to69     | 39498      |
| Lao People's Democratic Republic | 1994           | FemaleAge70to74     | 27597      |
| Lao People's Democratic Republic | 1994           | FemaleAge75to79     | 16669      |
| Lao People's Democratic Republic | 1994           | FemaleAge80to84     | 7902       |
| Lao People's Democratic Republic | 1994           | FemaleAge85to89     | 2656       |
| Lao People's Democratic Republic | 1994           | FemaleAge90to94     | 621        |
| Lao People's Democratic Republic | 1994           | FemaleAge95to99     | 87         |
| Lao People's Democratic Republic | 1994           | FemaleAgeAbove100   | 5          |
| Lao People's Democratic Republic | 1994           | FemaleLactAge15to19 | 25224      |
| Lao People's Democratic Republic | 1994           | FemaleLactAge20to24 | 54327      |
| Lao People's Democratic Republic | 1994           | FemaleLactAge25to29 | 47688      |
| Lao People's Democratic Republic | 1994           | FemaleLactAge30to34 | 32959      |
| Lao People's Democratic Republic | 1994           | FemaleLactAge35to39 | 18277      |
| Lao People's Democratic Republic | 1994           | FemaleLactAge40to44 | 8510       |
| Lao People's Democratic Republic | 1994           | FemaleLactAge45to49 | 2213       |
| Lao People's Democratic Republic | 1994           | FemalePregAge15to19 | 18918      |
| Lao People's Democratic Republic | 1994           | FemalePregAge20to24 | 40745      |
| Lao People's Democratic Republic | 1994           | FemalePregAge25to29 | 35766      |
| Lao People's Democratic Republic | 1994           | FemalePregAge30to34 | 24719      |
| Lao People's Democratic Republic | 1994           | FemalePregAge35to39 | 13708      |
| Lao People's Democratic Republic | 1994           | FemalePregAge40to44 | 6382       |
| Lao People's Democratic Republic | 1994           | FemalePregAge45to49 | 1660       |
| Lao People's Democratic Republic | 1994           | MaleAge0to4         | 426071     |
| Lao People's Democratic Republic | 1994           | MaleAge10to14       | 294180     |
| Lao People's Democratic Republic | 1994           | MaleAge15to19       | 254697     |
| Lao People's Democratic Republic | 1994           | MaleAge20to24       | 218052     |
| Lao People's Democratic Republic | 1994           | MaleAge25to29       | 177708     |
| Lao People's Democratic Republic | 1994           | MaleAge30to34       | 143982     |
| Lao People's Democratic Republic | 1994           | MaleAge35to39       | 114247     |
| Lao People's Democratic Republic | 1994           | MaleAge40to44       | 91138      |
| Lao People's Democratic Republic | 1994           | MaleAge45to49       | 67906      |
| Lao People's Democratic Republic | 1994           | MaleAge50to54       | 58915      |
| Lao People's Democratic Republic | 1994           | MaleAge55to59       | 52965      |
| Lao People's Democratic Republic | 1994           | MaleAge5to9         | 353966     |
| Lao People's Democratic Republic | 1994           | MaleAge60to64       | 43237      |
| Lao People's Democratic Republic | 1994           | MaleAge65to69       | 32839      |
| Lao People's Democratic Republic | 1994           | MaleAge70to74       | 21465      |
| Lao People's Democratic Republic | 1994           | MaleAge75to79       | 11965      |
| Lao People's Democratic Republic | 1994           | MaleAge80to84       | 5178       |
| Lao People's Democratic Republic | 1994           | MaleAge85to89       | 1569       |
| Lao People's Democratic Republic | 1994           | MaleAge90to94       | 326        |
| Lao People's Democratic Republic | 1994           | MaleAge95to99       | 41         |
| Lao People's Democratic Republic | 1994           | MaleAgeAbove100     | 2          |
| Lao People's Democratic Republic | 1995           | FemaleAge0to4       | 415901     |
| Lao People's Democratic Republic | 1995           | FemaleAge10to14     | 294472     |
| Lao People's Democratic Republic | 1995           | FemaleAge15to19     | 210056     |
| Lao People's Democratic Republic | 1995           | FemaleAge20to24     | 126679     |
| Lao People's Democratic Republic | 1995           | FemaleAge25to29     | 101065     |
| Lao People's Democratic Republic | 1995           | FemaleAge30to34     | 93896      |
| Lao People's Democratic Republic | 1995           | FemaleAge35to39     | 88440      |
| Lao People's Democratic Republic | 1995           | FemaleAge40to44     | 82063      |
| Lao People's Democratic Republic | 1995           | FemaleAge45to49     | 75000      |
| Lao People's Democratic Republic | 1995           | FemaleAge50to54     | 65136      |
| Lao People's Democratic Republic | 1995           | FemaleAge55to59     | 57907      |
| Lao People's Democratic Republic | 1995           | FemaleAge5to9       | 354142     |

Dietary calcium and zinc deficiency risks are decreasing but remain prevalent

| Country                          | Reference year | Age/gender group    | Population |
|----------------------------------|----------------|---------------------|------------|
| Lao People's Democratic Republic | 1995           | FemaleAge60to64     | 49096      |
| Lao People's Democratic Republic | 1995           | FemaleAge65to69     | 40247      |
| Lao People's Democratic Republic | 1995           | FemaleAge70to74     | 28391      |
| Lao People's Democratic Republic | 1995           | FemaleAge75to79     | 17129      |
| Lao People's Democratic Republic | 1995           | FemaleAge80to84     | 8048       |
| Lao People's Democratic Republic | 1995           | FemaleAge85to89     | 2606       |
| Lao People's Democratic Republic | 1995           | FemaleAge90to94     | 549        |
| Lao People's Democratic Republic | 1995           | FemaleAge95to99     | 66         |
| Lao People's Democratic Republic | 1995           | FemaleAgeAbove100   | 5          |
| Lao People's Democratic Republic | 1995           | FemaleLactAge15to19 | 25224      |
| Lao People's Democratic Republic | 1995           | FemaleLactAge20to24 | 54327      |
| Lao People's Democratic Republic | 1995           | FemaleLactAge25to29 | 47688      |
| Lao People's Democratic Republic | 1995           | FemaleLactAge30to34 | 32959      |
| Lao People's Democratic Republic | 1995           | FemaleLactAge35to39 | 18277      |
| Lao People's Democratic Republic | 1995           | FemaleLactAge40to44 | 8510       |
| Lao People's Democratic Republic | 1995           | FemaleLactAge45to49 | 2213       |
| Lao People's Democratic Republic | 1995           | FemalePregAge15to19 | 18918      |
| Lao People's Democratic Republic | 1995           | FemalePregAge20to24 | 40745      |
| Lao People's Democratic Republic | 1995           | FemalePregAge25to29 | 35766      |
| Lao People's Democratic Republic | 1995           | FemalePregAge30to34 | 24719      |
| Lao People's Democratic Republic | 1995           | FemalePregAge35to39 | 13708      |
| Lao People's Democratic Republic | 1995           | FemalePregAge40to44 | 6382       |
| Lao People's Democratic Republic | 1995           | FemalePregAge45to49 | 1660       |
| Lao People's Democratic Republic | 1995           | MaleAge0to4         | 431266     |
| Lao People's Democratic Republic | 1995           | MaleAge10to14       | 303022     |
| Lao People's Democratic Republic | 1995           | MaleAge15to19       | 260735     |
| Lao People's Democratic Republic | 1995           | MaleAge20to24       | 223845     |
| Lao People's Democratic Republic | 1995           | MaleAge25to29       | 182664     |
| Lao People's Democratic Republic | 1995           | MaleAge30to34       | 148153     |
| Lao People's Democratic Republic | 1995           | MaleAge35to39       | 117471     |
| Lao People's Democratic Republic | 1995           | MaleAge40to44       | 94947      |
| Lao People's Democratic Republic | 1995           | MaleAge45to49       | 70387      |
| Lao People's Democratic Republic | 1995           | MaleAge50to54       | 59367      |
| Lao People's Democratic Republic | 1995           | MaleAge55to59       | 53427      |
| Lao People's Democratic Republic | 1995           | MaleAge5to9         | 365196     |
| Lao People's Democratic Republic | 1995           | MaleAge60to64       | 43948      |
| Lao People's Democratic Republic | 1995           | MaleAge65to69       | 33602      |
| Lao People's Democratic Republic | 1995           | MaleAge70to74       | 22117      |
| Lao People's Democratic Republic | 1995           | MaleAge75to79       | 12284      |
| Lao People's Democratic Republic | 1995           | MaleAge80to84       | 5240       |
| Lao People's Democratic Republic | 1995           | MaleAge85to89       | 1510       |
| Lao People's Democratic Republic | 1995           | MaleAge90to94       | 273        |
| Lao People's Democratic Republic | 1995           | MaleAge95to99       | 27         |
| Lao People's Democratic Republic | 1995           | MaleAgeAbove100     | 2          |
| Lao People's Democratic Republic | 1996           | FemaleAge0to4       | 421387     |
| Lao People's Democratic Republic | 1996           | FemaleAge10to14     | 303798     |
| Lao People's Democratic Republic | 1996           | FemaleAge15to19     | 217882     |
| Lao People's Democratic Republic | 1996           | FemaleAge20to24     | 135045     |
| Lao People's Democratic Republic | 1996           | FemaleAge25to29     | 109431     |
| Lao People's Democratic Republic | 1996           | FemaleAge30to34     | 101279     |
| Lao People's Democratic Republic | 1996           | FemaleAge35to39     | 94505      |
| Lao People's Democratic Republic | 1996           | FemaleAge40to44     | 86833      |
| Lao People's Democratic Republic | 1996           | FemaleAge45to49     | 78027      |
| Lao People's Democratic Republic | 1996           | FemaleAge50to54     | 66552      |
| Lao People's Democratic Republic | 1996           | FemaleAge55to59     | 58366      |
| Lao People's Democratic Republic | 1996           | FemaleAge5to9       | 365694     |
| Lao People's Democratic Republic | 1996           | FemaleAge60to64     | 49641      |
| Lao People's Democratic Republic | 1996           | FemaleAge65to69     | 40685      |
| Lao People's Democratic Republic | 1996           | FemaleAge70to74     | 29096      |
| Lao People's Democratic Republic | 1996           | FemaleAge75to79     | 17675      |
| Lao People's Democratic Republic | 1996           | FemaleAge80to84     | 8520       |
| Lao People's Democratic Republic | 1996           | FemaleAge85to89     | 2912       |
| Lao People's Democratic Republic | 1996           | FemaleAge90to94     | 653        |
| Lao People's Democratic Republic | 1996           | FemaleAge95to99     | 76         |
| Lao People's Democratic Republic | 1996           | FemaleAgeAbove100   | 5          |
| Lao People's Democratic Republic | 1996           | FemaleLactAge15to19 | 23482      |
| Lao People's Democratic Republic | 1996           | FemaleLactAge20to24 | 51641      |
| Lao People's Democratic Republic | 1996           | FemaleLactAge25to29 | 45240      |
| Lao People's Democratic Republic | 1996           | FemaleLactAge30to34 | 30963      |
| Lao People's Democratic Republic | 1996           | FemaleLactAge35to39 | 17186      |
| Lao People's Democratic Republic | 1996           | FemaleLactAge40to44 | 7635       |
| Lao People's Democratic Republic | 1996           | FemaleLactAge45to49 | 1955       |
| Lao People's Democratic Republic | 1996           | FemalePregAge15to19 | 17612      |
| Lao People's Democratic Republic | 1996           | FemalePregAge20to24 | 38731      |
| Lao People's Democratic Republic | 1996           | FemalePregAge25to29 | 33930      |
| Lao People's Democratic Republic | 1996           | FemalePregAge30to34 | 23222      |
| Lao People's Democratic Republic | 1996           | FemalePregAge35to39 | 12889      |
| Lao People's Democratic Republic | 1996           | FemalePregAge40to44 | 5726       |
| Lao People's Democratic Republic | 1996           | FemalePregAge45to49 | 1466       |
| Lao People's Democratic Republic | 1996           | MaleAge0to4         | 437384     |
| Lao People's Democratic Republic | 1996           | MaleAge10to14       | 312489     |
| Lao People's Democratic Republic | 1996           | MaleAge15to19       | 265492     |
| Lao People's Democratic Republic | 1996           | MaleAge20to24       | 227587     |
| Lao People's Democratic Republic | 1996           | MaleAge25to29       | 186529     |
| Lao People's Democratic Republic | 1996           | MaleAge30to34       | 151531     |
| Lao People's Democratic Republic | 1996           | MaleAge35to39       | 121011     |
| Lao People's Democratic Republic | 1996           | MaleAge40to44       | 98418      |
| Lao People's Democratic Republic | 1996           | MaleAge45to49       | 73637      |

Dietary calcium and zinc deficiency risks are decreasing but remain prevalent

| Country                          | Reference year | Age/gender group    | Population |
|----------------------------------|----------------|---------------------|------------|
| Lao People's Democratic Republic | 1996           | MaleAge50to54       | 59960      |
| Lao People's Democratic Republic | 1996           | MaleAge55to59       | 53592      |
| Lao People's Democratic Republic | 1996           | MaleAge5to9         | 377218     |
| Lao People's Democratic Republic | 1996           | MaleAge60to64       | 44557      |
| Lao People's Democratic Republic | 1996           | MaleAge65to69       | 34183      |
| Lao People's Democratic Republic | 1996           | MaleAge70to74       | 22784      |
| Lao People's Democratic Republic | 1996           | MaleAge75to79       | 12782      |
| Lao People's Democratic Republic | 1996           | MaleAge80to84       | 5614       |
| Lao People's Democratic Republic | 1996           | MaleAge85to89       | 1718       |
| Lao People's Democratic Republic | 1996           | MaleAge90to94       | 332        |
| Lao People's Democratic Republic | 1996           | MaleAge95to99       | 32         |
| Lao People's Democratic Republic | 1996           | MaleAgeAbove100     | 2          |
| Lao People's Democratic Republic | 1997           | FemaleAge0to4       | 420682     |
| Lao People's Democratic Republic | 1997           | FemaleAge10to14     | 314318     |
| Lao People's Democratic Republic | 1997           | FemaleAge15to19     | 223545     |
| Lao People's Democratic Republic | 1997           | FemaleAge20to24     | 138725     |
| Lao People's Democratic Republic | 1997           | FemaleAge25to29     | 113856     |
| Lao People's Democratic Republic | 1997           | FemaleAge30to34     | 104846     |
| Lao People's Democratic Republic | 1997           | FemaleAge35to39     | 98726      |
| Lao People's Democratic Republic | 1997           | FemaleAge40to44     | 90149      |
| Lao People's Democratic Republic | 1997           | FemaleAge45to49     | 80742      |
| Lao People's Democratic Republic | 1997           | FemaleAge50to54     | 68435      |
| Lao People's Democratic Republic | 1997           | FemaleAge55to59     | 58795      |
| Lao People's Democratic Republic | 1997           | FemaleAge5to9       | 377326     |
| Lao People's Democratic Republic | 1997           | FemaleAge60to64     | 50408      |
| Lao People's Democratic Republic | 1997           | FemaleAge65to69     | 41078      |
| Lao People's Democratic Republic | 1997           | FemaleAge70to74     | 29887      |
| Lao People's Democratic Republic | 1997           | FemaleAge75to79     | 18186      |
| Lao People's Democratic Republic | 1997           | FemaleAge80to84     | 8908       |
| Lao People's Democratic Republic | 1997           | FemaleAge85to89     | 3146       |
| Lao People's Democratic Republic | 1997           | FemaleAge90to94     | 728        |
| Lao People's Democratic Republic | 1997           | FemaleAge95to99     | 98         |
| Lao People's Democratic Republic | 1997           | FemaleAgeAbove100   | 5          |
| Lao People's Democratic Republic | 1997           | FemaleLactAge15to19 | 23482      |
| Lao People's Democratic Republic | 1997           | FemaleLactAge20to24 | 51641      |
| Lao People's Democratic Republic | 1997           | FemaleLactAge25to29 | 45240      |
| Lao People's Democratic Republic | 1997           | FemaleLactAge30to34 | 30963      |
| Lao People's Democratic Republic | 1997           | FemaleLactAge35to39 | 17186      |
| Lao People's Democratic Republic | 1997           | FemaleLactAge40to44 | 7635       |
| Lao People's Democratic Republic | 1997           | FemaleLactAge45to49 | 1955       |
| Lao People's Democratic Republic | 1997           | FemalePregAge15to19 | 17612      |
| Lao People's Democratic Republic | 1997           | FemalePregAge20to24 | 38731      |
| Lao People's Democratic Republic | 1997           | FemalePregAge25to29 | 33930      |
| Lao People's Democratic Republic | 1997           | FemalePregAge30to34 | 23222      |
| Lao People's Democratic Republic | 1997           | FemalePregAge35to39 | 12889      |
| Lao People's Democratic Republic | 1997           | FemalePregAge40to44 | 5726       |
| Lao People's Democratic Republic | 1997           | FemalePregAge45to49 | 1466       |
| Lao People's Democratic Republic | 1997           | MaleAge0to4         | 437229     |
| Lao People's Democratic Republic | 1997           | MaleAge10to14       | 323459     |
| Lao People's Democratic Republic | 1997           | MaleAge15to19       | 271338     |
| Lao People's Democratic Republic | 1997           | MaleAge20to24       | 231605     |
| Lao People's Democratic Republic | 1997           | MaleAge25to29       | 190921     |
| Lao People's Democratic Republic | 1997           | MaleAge30to34       | 154671     |
| Lao People's Democratic Republic | 1997           | MaleAge35to39       | 124692     |
| Lao People's Democratic Republic | 1997           | MaleAge40to44       | 101464     |
| Lao People's Democratic Republic | 1997           | MaleAge45to49       | 77695      |
| Lao People's Democratic Republic | 1997           | MaleAge50to54       | 60876      |
| Lao People's Democratic Republic | 1997           | MaleAge55to59       | 53739      |
| Lao People's Democratic Republic | 1997           | MaleAge5to9         | 389704     |
| Lao People's Democratic Republic | 1997           | MaleAge60to64       | 45338      |
| Lao People's Democratic Republic | 1997           | MaleAge65to69       | 34766      |
| Lao People's Democratic Republic | 1997           | MaleAge70to74       | 23500      |
| Lao People's Democratic Republic | 1997           | MaleAge75to79       | 13238      |
| Lao People's Democratic Republic | 1997           | MaleAge80to84       | 5921       |
| Lao People's Democratic Republic | 1997           | MaleAge85to89       | 1878       |
| Lao People's Democratic Republic | 1997           | MaleAge90to94       | 376        |
| Lao People's Democratic Republic | 1997           | MaleAge95to99       | 45         |
| Lao People's Democratic Republic | 1997           | MaleAgeAbove100     | 2          |
| Lao People's Democratic Republic | 1998           | FemaleAge0to4       | 415404     |
| Lao People's Democratic Republic | 1998           | FemaleAge10to14     | 325512     |
| Lao People's Democratic Republic | 1998           | FemaleAge15to19     | 230205     |
| Lao People's Democratic Republic | 1998           | FemaleAge20to24     | 142580     |
| Lao People's Democratic Republic | 1998           | FemaleAge25to29     | 118426     |
| Lao People's Democratic Republic | 1998           | FemaleAge30to34     | 108178     |
| Lao People's Democratic Republic | 1998           | FemaleAge35to39     | 102798     |
| Lao People's Democratic Republic | 1998           | FemaleAge40to44     | 93516      |
| Lao People's Democratic Republic | 1998           | FemaleAge45to49     | 83534      |
| Lao People's Democratic Republic | 1998           | FemaleAge50to54     | 70669      |
| Lao People's Democratic Republic | 1998           | FemaleAge55to59     | 59304      |
| Lao People's Democratic Republic | 1998           | FemaleAge5to9       | 388376     |
| Lao People's Democratic Republic | 1998           | FemaleAge60to64     | 51293      |
| Lao People's Democratic Republic | 1998           | FemaleAge65to69     | 41489      |
| Lao People's Democratic Republic | 1998           | FemaleAge70to74     | 30719      |
| Lao People's Democratic Republic | 1998           | FemaleAge75to79     | 18694      |
| Lao People's Democratic Republic | 1998           | FemaleAge80to84     | 9213       |
| Lao People's Democratic Republic | 1998           | FemaleAge85to89     | 3285       |
| Lao People's Democratic Republic | 1998           | FemaleAge90to94     | 769        |
| Lao People's Democratic Republic | 1998           | FemaleAge95to99     | 116        |

Dietary calcium and zinc deficiency risks are decreasing but remain prevalent

| Country                          | Reference year | Age/gender group    | Population |
|----------------------------------|----------------|---------------------|------------|
| Lao People's Democratic Republic | 1998           | FemaleAgeAbove100   | 6          |
| Lao People's Democratic Republic | 1998           | FemaleLactAge15to19 | 23482      |
| Lao People's Democratic Republic | 1998           | FemaleLactAge20to24 | 51641      |
| Lao People's Democratic Republic | 1998           | FemaleLactAge25to29 | 45240      |
| Lao People's Democratic Republic | 1998           | FemaleLactAge30to34 | 30963      |
| Lao People's Democratic Republic | 1998           | FemaleLactAge35to39 | 17186      |
| Lao People's Democratic Republic | 1998           | FemaleLactAge40to44 | 7635       |
| Lao People's Democratic Republic | 1998           | FemaleLactAge45to49 | 1955       |
| Lao People's Democratic Republic | 1998           | FemalePregAge15to19 | 17612      |
| Lao People's Democratic Republic | 1998           | FemalePregAge20to24 | 38731      |
| Lao People's Democratic Republic | 1998           | FemalePregAge25to29 | 33930      |
| Lao People's Democratic Republic | 1998           | FemalePregAge30to34 | 23222      |
| Lao People's Democratic Republic | 1998           | FemalePregAge35to39 | 12889      |
| Lao People's Democratic Republic | 1998           | FemalePregAge40to44 | 5726       |
| Lao People's Democratic Republic | 1998           | FemalePregAge45to49 | 1466       |
| Lao People's Democratic Republic | 1998           | MaleAge0to4         | 432284     |
| Lao People's Democratic Republic | 1998           | MaleAge10to14       | 335189     |
| Lao People's Democratic Republic | 1998           | MaleAge15to19       | 278282     |
| Lao People's Democratic Republic | 1998           | MaleAge20to24       | 235896     |
| Lao People's Democratic Republic | 1998           | MaleAge25to29       | 195538     |
| Lao People's Democratic Republic | 1998           | MaleAge30to34       | 157595     |
| Lao People's Democratic Republic | 1998           | MaleAge35to39       | 128210     |
| Lao People's Democratic Republic | 1998           | MaleAge40to44       | 104174     |
| Lao People's Democratic Republic | 1998           | MaleAge45to49       | 82102      |
| Lao People's Democratic Republic | 1998           | MaleAge50to54       | 62210      |
| Lao People's Democratic Republic | 1998           | MaleAge55to59       | 53914      |
| Lao People's Democratic Republic | 1998           | MaleAge5to9         | 401733     |
| Lao People's Democratic Republic | 1998           | MaleAge60to64       | 46166      |
| Lao People's Democratic Republic | 1998           | MaleAge65to69       | 35365      |
| Lao People's Democratic Republic | 1998           | MaleAge70to74       | 24231      |
| Lao People's Democratic Republic | 1998           | MaleAge75to79       | 13666      |
| Lao People's Democratic Republic | 1998           | MaleAge80to84       | 6150       |
| Lao People's Democratic Republic | 1998           | MaleAge85to89       | 1970       |
| Lao People's Democratic Republic | 1998           | MaleAge90to94       | 402        |
| Lao People's Democratic Republic | 1998           | MaleAge95to99       | 55         |
| Lao People's Democratic Republic | 1998           | MaleAgeAbove100     | 2          |
| Lao People's Democratic Republic | 1999           | FemaleAge0to4       | 407722     |
| Lao People's Democratic Republic | 1999           | FemaleAge10to14     | 336964     |
| Lao People's Democratic Republic | 1999           | FemaleAge15to19     | 237976     |
| Lao People's Democratic Republic | 1999           | FemaleAge20to24     | 146883     |
| Lao People's Democratic Republic | 1999           | FemaleAge25to29     | 122826     |
| Lao People's Democratic Republic | 1999           | FemaleAge30to34     | 111465     |
| Lao People's Democratic Republic | 1999           | FemaleAge35to39     | 106503     |
| Lao People's Democratic Republic | 1999           | FemaleAge40to44     | 96903      |
| Lao People's Democratic Republic | 1999           | FemaleAge45to49     | 86365      |
| Lao People's Democratic Republic | 1999           | FemaleAge50to54     | 73065      |
| Lao People's Democratic Republic | 1999           | FemaleAge55to59     | 60086      |
| Lao People's Democratic Republic | 1999           | FemaleAge5to9       | 397711     |
| Lao People's Democratic Republic | 1999           | FemaleAge60to64     | 52144      |
| Lao People's Democratic Republic | 1999           | FemaleAge65to69     | 42014      |
| Lao People's Democratic Republic | 1999           | FemaleAge70to74     | 31516      |
| Lao People's Democratic Republic | 1999           | FemaleAge75to79     | 19235      |
| Lao People's Democratic Republic | 1999           | FemaleAge80to84     | 9441       |
| Lao People's Democratic Republic | 1999           | FemaleAge85to89     | 3325       |
| Lao People's Democratic Republic | 1999           | FemaleAge90to94     | 764        |
| Lao People's Democratic Republic | 1999           | FemaleAge95to99     | 119        |
| Lao People's Democratic Republic | 1999           | FemaleAgeAbove100   | 6          |
| Lao People's Democratic Republic | 1999           | FemaleLactAge15to19 | 23482      |
| Lao People's Democratic Republic | 1999           | FemaleLactAge20to24 | 51641      |
| Lao People's Democratic Republic | 1999           | FemaleLactAge25to29 | 45240      |
| Lao People's Democratic Republic | 1999           | FemaleLactAge30to34 | 30963      |
| Lao People's Democratic Republic | 1999           | FemaleLactAge35to39 | 17186      |
| Lao People's Democratic Republic | 1999           | FemaleLactAge40to44 | 7635       |
| Lao People's Democratic Republic | 1999           | FemaleLactAge45to49 | 1955       |
| Lao People's Democratic Republic | 1999           | FemalePregAge15to19 | 17612      |
| Lao People's Democratic Republic | 1999           | FemalePregAge20to24 | 38731      |
| Lao People's Democratic Republic | 1999           | FemalePregAge25to29 | 33930      |
| Lao People's Democratic Republic | 1999           | FemalePregAge30to34 | 23222      |
| Lao People's Democratic Republic | 1999           | FemalePregAge35to39 | 12889      |
| Lao People's Democratic Republic | 1999           | FemalePregAge40to44 | 5726       |
| Lao People's Democratic Republic | 1999           | FemalePregAge45to49 | 1466       |
| Lao People's Democratic Republic | 1999           | MaleAge0to4         | 424497     |
| Lao People's Democratic Republic | 1999           | MaleAge10to14       | 347009     |
| Lao People's Democratic Republic | 1999           | MaleAge15to19       | 286268     |
| Lao People's Democratic Republic | 1999           | MaleAge20to24       | 240501     |
| Lao People's Democratic Republic | 1999           | MaleAge25to29       | 199926     |
| Lao People's Democratic Republic | 1999           | MaleAge30to34       | 160401     |
| Lao People's Democratic Republic | 1999           | MaleAge35to39       | 131221     |
| Lao People's Democratic Republic | 1999           | MaleAge40to44       | 106721     |
| Lao People's Democratic Republic | 1999           | MaleAge45to49       | 86214      |
| Lao People's Democratic Republic | 1999           | MaleAge50to54       | 64089      |
| Lao People's Democratic Republic | 1999           | MaleAge55to59       | 54213      |
| Lao People's Democratic Republic | 1999           | MaleAge5to9         | 411771     |
| Lao People's Democratic Republic | 1999           | MaleAge60to64       | 46863      |
| Lao People's Democratic Republic | 1999           | MaleAge65to69       | 36000      |
| Lao People's Democratic Republic | 1999           | MaleAge70to74       | 24923      |
| Lao People's Democratic Republic | 1999           | MaleAge75to79       | 14077      |
| Lao People's Democratic Republic | 1999           | MaleAge80to84       | 6299       |

Dietary calcium and zinc deficiency risks are decreasing but remain prevalent

| Country                          | Reference year | Age/gender group    | Population |
|----------------------------------|----------------|---------------------|------------|
| Lao People's Democratic Republic | 1999           | MaleAge85to89       | 1987       |
| Lao People's Democratic Republic | 1999           | MaleAge90to94       | 398        |
| Lao People's Democratic Republic | 1999           | MaleAge95to99       | 55         |
| Lao People's Democratic Republic | 1999           | MaleAgeAbove100     | 2          |
| Latvia                           | 1992           | FemaleAge0to4       | 94251      |
| Latvia                           | 1992           | FemaleAge10to14     | 85750      |
| Latvia                           | 1992           | FemaleAge15to19     | 79112      |
| Latvia                           | 1992           | FemaleAge20to24     | 65961      |
| Latvia                           | 1992           | FemaleAge25to29     | 80908      |
| Latvia                           | 1992           | FemaleAge30to34     | 92629      |
| Latvia                           | 1992           | FemaleAge35to39     | 91278      |
| Latvia                           | 1992           | FemaleAge40to44     | 82700      |
| Latvia                           | 1992           | FemaleAge45to49     | 84852      |
| Latvia                           | 1992           | FemaleAge50to54     | 92469      |
| Latvia                           | 1992           | FemaleAge55to59     | 88078      |
| Latvia                           | 1992           | FemaleAge5to9       | 94999      |
| Latvia                           | 1992           | FemaleAge60to64     | 88719      |
| Latvia                           | 1992           | FemaleAge65to69     | 77631      |
| Latvia                           | 1992           | FemaleAge70to74     | 49092      |
| Latvia                           | 1992           | FemaleAge75to79     | 41355      |
| Latvia                           | 1992           | FemaleAge80to84     | 34246      |
| Latvia                           | 1992           | FemaleAge85to89     | 17486      |
| Latvia                           | 1992           | FemaleAge90to94     | 6006       |
| Latvia                           | 1992           | FemaleAge95to99     | 1122       |
| Latvia                           | 1992           | FemaleAgeAbove100   | 127        |
| Latvia                           | 1992           | FemaleLactAge15to19 | 3690       |
| Latvia                           | 1992           | FemaleLactAge20to24 | 11479      |
| Latvia                           | 1992           | FemaleLactAge25to29 | 7887       |
| Latvia                           | 1992           | FemaleLactAge30to34 | 4186       |
| Latvia                           | 1992           | FemaleLactAge35to39 | 1713       |
| Latvia                           | 1992           | FemaleLactAge40to44 | 361        |
| Latvia                           | 1992           | FemaleLactAge45to49 | 21         |
| Latvia                           | 1992           | FemalePregAge15to19 | 2767       |
| Latvia                           | 1992           | FemalePregAge20to24 | 8609       |
| Latvia                           | 1992           | FemalePregAge25to29 | 5915       |
| Latvia                           | 1992           | FemalePregAge30to34 | 3140       |
| Latvia                           | 1992           | FemalePregAge35to39 | 1284       |
| Latvia                           | 1992           | FemalePregAge40to44 | 271        |
| Latvia                           | 1992           | FemalePregAge45to49 | 16         |
| Latvia                           | 1992           | MaleAge0to4         | 98085      |
| Latvia                           | 1992           | MaleAge10to14       | 88597      |
| Latvia                           | 1992           | MaleAge15to19       | 90060      |
| Latvia                           | 1992           | MaleAge20to24       | 92276      |
| Latvia                           | 1992           | MaleAge25to29       | 95560      |
| Latvia                           | 1992           | MaleAge30to34       | 96631      |
| Latvia                           | 1992           | MaleAge35to39       | 89555      |
| Latvia                           | 1992           | MaleAge40to44       | 76539      |
| Latvia                           | 1992           | MaleAge45to49       | 75483      |
| Latvia                           | 1992           | MaleAge50to54       | 78548      |
| Latvia                           | 1992           | MaleAge55to59       | 71351      |
| Latvia                           | 1992           | MaleAge5to9         | 99253      |
| Latvia                           | 1992           | MaleAge60to64       | 59413      |
| Latvia                           | 1992           | MaleAge65to69       | 39679      |
| Latvia                           | 1992           | MaleAge70to74       | 22074      |
| Latvia                           | 1992           | MaleAge75to79       | 17372      |
| Latvia                           | 1992           | MaleAge80to84       | 13004      |
| Latvia                           | 1992           | MaleAge85to89       | 5891       |
| Latvia                           | 1992           | MaleAge90to94       | 1569       |
| Latvia                           | 1992           | MaleAge95to99       | 227        |
| Latvia                           | 1992           | MaleAgeAbove100     | 29         |
| Latvia                           | 1993           | FemaleAge0to4       | 85600      |
| Latvia                           | 1993           | FemaleAge10to14     | 86777      |
| Latvia                           | 1993           | FemaleAge15to19     | 76815      |
| Latvia                           | 1993           | FemaleAge20to24     | 65352      |
| Latvia                           | 1993           | FemaleAge25to29     | 75691      |
| Latvia                           | 1993           | FemaleAge30to34     | 90984      |
| Latvia                           | 1993           | FemaleAge35to39     | 91210      |
| Latvia                           | 1993           | FemaleAge40to44     | 84255      |
| Latvia                           | 1993           | FemaleAge45to49     | 81591      |
| Latvia                           | 1993           | FemaleAge50to54     | 89687      |
| Latvia                           | 1993           | FemaleAge55to59     | 89216      |
| Latvia                           | 1993           | FemaleAge5to9       | 95501      |
| Latvia                           | 1993           | FemaleAge60to64     | 84976      |
| Latvia                           | 1993           | FemaleAge65to69     | 80564      |
| Latvia                           | 1993           | FemaleAge70to74     | 53795      |
| Latvia                           | 1993           | FemaleAge75to79     | 37066      |
| Latvia                           | 1993           | FemaleAge80to84     | 33991      |
| Latvia                           | 1993           | FemaleAge85to89     | 17735      |
| Latvia                           | 1993           | FemaleAge90to94     | 6185       |
| Latvia                           | 1993           | FemaleAge95to99     | 1226       |
| Latvia                           | 1993           | FemaleAgeAbove100   | 130        |
| Latvia                           | 1993           | FemaleLactAge15to19 | 3690       |
| Latvia                           | 1993           | FemaleLactAge20to24 | 11479      |
| Latvia                           | 1993           | FemaleLactAge25to29 | 7887       |
| Latvia                           | 1993           | FemaleLactAge30to34 | 4186       |
| Latvia                           | 1993           | FemaleLactAge35to39 | 1713       |
| Latvia                           | 1993           | FemaleLactAge40to44 | 361        |
| Latvia                           | 1993           | FemaleLactAge45to49 | 21         |

Dietary calcium and zinc deficiency risks are decreasing but remain prevalent

| Country | Reference year | Age/gender group    | Population |
|---------|----------------|---------------------|------------|
| Latvia  | 1993           | FemalePregAge15to19 | 2767       |
| Latvia  | 1993           | FemalePregAge20to24 | 8609       |
| Latvia  | 1993           | FemalePregAge25to29 | 5915       |
| Latvia  | 1993           | FemalePregAge30to34 | 3140       |
| Latvia  | 1993           | FemalePregAge35to39 | 1284       |
| Latvia  | 1993           | FemalePregAge40to44 | 271        |
| Latvia  | 1993           | FemalePregAge45to49 | 16         |
| Latvia  | 1993           | MaleAge0to4         | 89073      |
| Latvia  | 1993           | MaleAge10to14       | 89781      |
| Latvia  | 1993           | MaleAge15to19       | 86730      |
| Latvia  | 1993           | MaleAge20to24       | 91214      |
| Latvia  | 1993           | MaleAge25to29       | 91353      |
| Latvia  | 1993           | MaleAge30to34       | 94019      |
| Latvia  | 1993           | MaleAge35to39       | 89247      |
| Latvia  | 1993           | MaleAge40to44       | 77665      |
| Latvia  | 1993           | MaleAge45to49       | 71928      |
| Latvia  | 1993           | MaleAge50to54       | 75903      |
| Latvia  | 1993           | MaleAge55to59       | 71473      |
| Latvia  | 1993           | MaleAge5to9         | 99680      |
| Latvia  | 1993           | MaleAge60to64       | 59173      |
| Latvia  | 1993           | MaleAge65to69       | 42811      |
| Latvia  | 1993           | MaleAge70to74       | 22852      |
| Latvia  | 1993           | MaleAge75to79       | 15514      |
| Latvia  | 1993           | MaleAge80to84       | 12615      |
| Latvia  | 1993           | MaleAge85to89       | 5966       |
| Latvia  | 1993           | MaleAge90to94       | 1658       |
| Latvia  | 1993           | MaleAge95to99       | 233        |
| Latvia  | 1993           | MaleAgeAbove100     | 29         |
| Latvia  | 1994           | FemaleAge0to4       | 76473      |
| Latvia  | 1994           | FemaleAge10to14     | 88244      |
| Latvia  | 1994           | FemaleAge15to19     | 74982      |
| Latvia  | 1994           | FemaleAge20to24     | 64814      |
| Latvia  | 1994           | FemaleAge25to29     | 71457      |
| Latvia  | 1994           | FemaleAge30to34     | 88270      |
| Latvia  | 1994           | FemaleAge35to39     | 91164      |
| Latvia  | 1994           | FemaleAge40to44     | 85226      |
| Latvia  | 1994           | FemaleAge45to49     | 80218      |
| Latvia  | 1994           | FemaleAge50to54     | 85668      |
| Latvia  | 1994           | FemaleAge55to59     | 90622      |
| Latvia  | 1994           | FemaleAge5to9       | 94992      |
| Latvia  | 1994           | FemaleAge60to64     | 81887      |
| Latvia  | 1994           | FemaleAge65to69     | 81815      |
| Latvia  | 1994           | FemaleAge70to74     | 59194      |
| Latvia  | 1994           | FemaleAge75to79     | 34483      |
| Latvia  | 1994           | FemaleAge80to84     | 32847      |
| Latvia  | 1994           | FemaleAge85to89     | 17724      |
| Latvia  | 1994           | FemaleAge90to94     | 6116       |
| Latvia  | 1994           | FemaleAge95to99     | 1269       |
| Latvia  | 1994           | FemaleAgeAbove100   | 132        |
| Latvia  | 1994           | FemaleLactAge15to19 | 3690       |
| Latvia  | 1994           | FemaleLactAge20to24 | 11479      |
| Latvia  | 1994           | FemaleLactAge25to29 | 7887       |
| Latvia  | 1994           | FemaleLactAge30to34 | 4186       |
| Latvia  | 1994           | FemaleLactAge35to39 | 1713       |
| Latvia  | 1994           | FemaleLactAge40to44 | 361        |
| Latvia  | 1994           | FemaleLactAge45to49 | 21         |
| Latvia  | 1994           | FemalePregAge15to19 | 2767       |
| Latvia  | 1994           | FemalePregAge20to24 | 8609       |
| Latvia  | 1994           | FemalePregAge25to29 | 5915       |
| Latvia  | 1994           | FemalePregAge30to34 | 3140       |
| Latvia  | 1994           | FemalePregAge35to39 | 1284       |
| Latvia  | 1994           | FemalePregAge40to44 | 271        |
| Latvia  | 1994           | FemalePregAge45to49 | 16         |
| Latvia  | 1994           | MaleAge0to4         | 79665      |
| Latvia  | 1994           | MaleAge10to14       | 91437      |
| Latvia  | 1994           | MaleAge15to19       | 84222      |
| Latvia  | 1994           | MaleAge20to24       | 89880      |
| Latvia  | 1994           | MaleAge25to29       | 88424      |
| Latvia  | 1994           | MaleAge30to34       | 90386      |
| Latvia  | 1994           | MaleAge35to39       | 88966      |
| Latvia  | 1994           | MaleAge40to44       | 78278      |
| Latvia  | 1994           | MaleAge45to49       | 70174      |
| Latvia  | 1994           | MaleAge50to54       | 72135      |
| Latvia  | 1994           | MaleAge55to59       | 71917      |
| Latvia  | 1994           | MaleAge5to9         | 99066      |
| Latvia  | 1994           | MaleAge60to64       | 58405      |
| Latvia  | 1994           | MaleAge65to69       | 45695      |
| Latvia  | 1994           | MaleAge70to74       | 24164      |
| Latvia  | 1994           | MaleAge75to79       | 14161      |
| Latvia  | 1994           | MaleAge80to84       | 11796      |
| Latvia  | 1994           | MaleAge85to89       | 5826       |
| Latvia  | 1994           | MaleAge90to94       | 1640       |
| Latvia  | 1994           | MaleAge95to99       | 243        |
| Latvia  | 1994           | MaleAgeAbove100     | 28         |
| Latvia  | 1995           | FemaleAge0to4       | 68887      |
| Latvia  | 1995           | FemaleAge10to14     | 89856      |
| Latvia  | 1995           | FemaleAge15to19     | 74217      |
| Latvia  | 1995           | FemaleAge20to24     | 63953      |

Dietary calcium and zinc deficiency risks are decreasing but remain prevalent

| Country | Reference year | Age/gender group    | Population |
|---------|----------------|---------------------|------------|
| Latvia  | 1995           | FemaleAge25to29     | 68654      |
| Latvia  | 1995           | FemaleAge30to34     | 84825      |
| Latvia  | 1995           | FemaleAge35to39     | 90957      |
| Latvia  | 1995           | FemaleAge40to44     | 85761      |
| Latvia  | 1995           | FemaleAge45to49     | 80342      |
| Latvia  | 1995           | FemaleAge50to54     | 81623      |
| Latvia  | 1995           | FemaleAge55to59     | 91176      |
| Latvia  | 1995           | FemaleAge5to9       | 92979      |
| Latvia  | 1995           | FemaleAge60to64     | 80406      |
| Latvia  | 1995           | FemaleAge65to69     | 81591      |
| Latvia  | 1995           | FemaleAge70to74     | 64243      |
| Latvia  | 1995           | FemaleAge75to79     | 34487      |
| Latvia  | 1995           | FemaleAge80to84     | 30826      |
| Latvia  | 1995           | FemaleAge85to89     | 17453      |
| Latvia  | 1995           | FemaleAge90to94     | 5844       |
| Latvia  | 1995           | FemaleAge95to99     | 1129       |
| Latvia  | 1995           | FemaleAgeAbove100   | 133        |
| Latvia  | 1995           | FemaleLactAge15to19 | 3690       |
| Latvia  | 1995           | FemaleLactAge20to24 | 11479      |
| Latvia  | 1995           | FemaleLactAge25to29 | 7887       |
| Latvia  | 1995           | FemaleLactAge30to34 | 4186       |
| Latvia  | 1995           | FemaleLactAge35to39 | 1713       |
| Latvia  | 1995           | FemaleLactAge40to44 | 361        |
| Latvia  | 1995           | FemaleLactAge45to49 | 21         |
| Latvia  | 1995           | FemalePregAge15to19 | 2767       |
| Latvia  | 1995           | FemalePregAge20to24 | 8609       |
| Latvia  | 1995           | FemalePregAge25to29 | 5915       |
| Latvia  | 1995           | FemalePregAge30to34 | 3140       |
| Latvia  | 1995           | FemalePregAge35to39 | 1284       |
| Latvia  | 1995           | FemalePregAge40to44 | 271        |
| Latvia  | 1995           | FemalePregAge45to49 | 16         |
| Latvia  | 1995           | MaleAge0to4         | 71920      |
| Latvia  | 1995           | MaleAge10to14       | 93255      |
| Latvia  | 1995           | MaleAge15to19       | 83186      |
| Latvia  | 1995           | MaleAge20to24       | 88212      |
| Latvia  | 1995           | MaleAge25to29       | 86765      |
| Latvia  | 1995           | MaleAge30to34       | 86572      |
| Latvia  | 1995           | MaleAge35to39       | 88384      |
| Latvia  | 1995           | MaleAge40to44       | 78583      |
| Latvia  | 1995           | MaleAge45to49       | 69946      |
| Latvia  | 1995           | MaleAge50to54       | 68288      |
| Latvia  | 1995           | MaleAge55to59       | 71949      |
| Latvia  | 1995           | MaleAge5to9         | 97034      |
| Latvia  | 1995           | MaleAge60to64       | 57958      |
| Latvia  | 1995           | MaleAge65to69       | 47852      |
| Latvia  | 1995           | MaleAge70to74       | 26077      |
| Latvia  | 1995           | MaleAge75to79       | 13527      |
| Latvia  | 1995           | MaleAge80to84       | 10596      |
| Latvia  | 1995           | MaleAge85to89       | 5461       |
| Latvia  | 1995           | MaleAge90to94       | 1504       |
| Latvia  | 1995           | MaleAge95to99       | 210        |
| Latvia  | 1995           | MaleAgeAbove100     | 28         |
| Latvia  | 1996           | FemaleAge0to4       | 60742      |
| Latvia  | 1996           | FemaleAge10to14     | 90893      |
| Latvia  | 1996           | FemaleAge15to19     | 77952      |
| Latvia  | 1996           | FemaleAge20to24     | 70876      |
| Latvia  | 1996           | FemaleAge25to29     | 71270      |
| Latvia  | 1996           | FemaleAge30to34     | 84121      |
| Latvia  | 1996           | FemaleAge35to39     | 91221      |
| Latvia  | 1996           | FemaleAge40to44     | 86630      |
| Latvia  | 1996           | FemaleAge45to49     | 80248      |
| Latvia  | 1996           | FemaleAge50to54     | 79640      |
| Latvia  | 1996           | FemaleAge55to59     | 89483      |
| Latvia  | 1996           | FemaleAge5to9       | 90245      |
| Latvia  | 1996           | FemaleAge60to64     | 80537      |
| Latvia  | 1996           | FemaleAge65to69     | 80095      |
| Latvia  | 1996           | FemaleAge70to74     | 66555      |
| Latvia  | 1996           | FemaleAge75to79     | 36603      |
| Latvia  | 1996           | FemaleAge80to84     | 28884      |
| Latvia  | 1996           | FemaleAge85to89     | 17859      |
| Latvia  | 1996           | FemaleAge90to94     | 6490       |
| Latvia  | 1996           | FemaleAge95to99     | 1197       |
| Latvia  | 1996           | FemaleAgeAbove100   | 133        |
| Latvia  | 1996           | FemaleLactAge15to19 | 1838       |
| Latvia  | 1996           | FemaleLactAge20to24 | 6899       |
| Latvia  | 1996           | FemaleLactAge25to29 | 5800       |
| Latvia  | 1996           | FemaleLactAge30to34 | 3184       |
| Latvia  | 1996           | FemaleLactAge35to39 | 1450       |
| Latvia  | 1996           | FemaleLactAge40to44 | 352        |
| Latvia  | 1996           | FemaleLactAge45to49 | 18         |
| Latvia  | 1996           | FemalePregAge15to19 | 1378       |
| Latvia  | 1996           | FemalePregAge20to24 | 5174       |
| Latvia  | 1996           | FemalePregAge25to29 | 4350       |
| Latvia  | 1996           | FemalePregAge30to34 | 2388       |
| Latvia  | 1996           | FemalePregAge35to39 | 1087       |
| Latvia  | 1996           | FemalePregAge40to44 | 264        |
| Latvia  | 1996           | FemalePregAge45to49 | 14         |
| Latvia  | 1996           | MaleAge0to4         | 63341      |



Dietary calcium and zinc deficiency risks are decreasing but remain prevalent

| Country | Reference year | Age/gender group    | Population |
|---------|----------------|---------------------|------------|
| Latvia  | 1996           | MaleAge10to14       | 94440      |
| Latvia  | 1996           | MaleAge15to19       | 83620      |
| Latvia  | 1996           | MaleAge20to24       | 86222      |
| Latvia  | 1996           | MaleAge25to29       | 85303      |
| Latvia  | 1996           | MaleAge30to34       | 85586      |
| Latvia  | 1996           | MaleAge35to39       | 87942      |
| Latvia  | 1996           | MaleAge40to44       | 79527      |
| Latvia  | 1996           | MaleAge45to49       | 69850      |
| Latvia  | 1996           | MaleAge50to54       | 66312      |
| Latvia  | 1996           | MaleAge55to59       | 70193      |
| Latvia  | 1996           | MaleAge5to9         | 94149      |
| Latvia  | 1996           | MaleAge60to64       | 58293      |
| Latvia  | 1996           | MaleAge65to69       | 48087      |
| Latvia  | 1996           | MaleAge70to74       | 28126      |
| Latvia  | 1996           | MaleAge75to79       | 13880      |
| Latvia  | 1996           | MaleAge80to84       | 9946       |
| Latvia  | 1996           | MaleAge85to89       | 5610       |
| Latvia  | 1996           | MaleAge90to94       | 1753       |
| Latvia  | 1996           | MaleAge95to99       | 228        |
| Latvia  | 1996           | MaleAgeAbove100     | 27         |
| Latvia  | 1997           | FemaleAge0to4       | 55068      |
| Latvia  | 1997           | FemaleAge10to14     | 91760      |
| Latvia  | 1997           | FemaleAge15to19     | 79197      |
| Latvia  | 1997           | FemaleAge20to24     | 69392      |
| Latvia  | 1997           | FemaleAge25to29     | 71162      |
| Latvia  | 1997           | FemaleAge30to34     | 81330      |
| Latvia  | 1997           | FemaleAge35to39     | 90718      |
| Latvia  | 1997           | FemaleAge40to44     | 87746      |
| Latvia  | 1997           | FemaleAge45to49     | 80495      |
| Latvia  | 1997           | FemaleAge50to54     | 78387      |
| Latvia  | 1997           | FemaleAge55to59     | 86749      |
| Latvia  | 1997           | FemaleAge5to9       | 86138      |
| Latvia  | 1997           | FemaleAge60to64     | 82037      |
| Latvia  | 1997           | FemaleAge65to69     | 77881      |
| Latvia  | 1997           | FemaleAge70to74     | 68354      |
| Latvia  | 1997           | FemaleAge75to79     | 40157      |
| Latvia  | 1997           | FemaleAge80to84     | 26435      |
| Latvia  | 1997           | FemaleAge85to89     | 18171      |
| Latvia  | 1997           | FemaleAge90to94     | 6892       |
| Latvia  | 1997           | FemaleAge95to99     | 1305       |
| Latvia  | 1997           | FemaleAgeAbove100   | 133        |
| Latvia  | 1997           | FemaleLactAge15to19 | 1838       |
| Latvia  | 1997           | FemaleLactAge20to24 | 6899       |
| Latvia  | 1997           | FemaleLactAge25to29 | 5800       |
| Latvia  | 1997           | FemaleLactAge30to34 | 3184       |
| Latvia  | 1997           | FemaleLactAge35to39 | 1450       |
| Latvia  | 1997           | FemaleLactAge40to44 | 352        |
| Latvia  | 1997           | FemaleLactAge45to49 | 18         |
| Latvia  | 1997           | FemalePregAge15to19 | 1378       |
| Latvia  | 1997           | FemalePregAge20to24 | 5174       |
| Latvia  | 1997           | FemalePregAge25to29 | 4350       |
| Latvia  | 1997           | FemalePregAge30to34 | 2388       |
| Latvia  | 1997           | FemalePregAge35to39 | 1087       |
| Latvia  | 1997           | FemalePregAge40to44 | 264        |
| Latvia  | 1997           | FemalePregAge45to49 | 14         |
| Latvia  | 1997           | MaleAge0to4         | 57555      |
| Latvia  | 1997           | MaleAge10to14       | 95488      |
| Latvia  | 1997           | MaleAge15to19       | 85066      |
| Latvia  | 1997           | MaleAge20to24       | 84167      |
| Latvia  | 1997           | MaleAge25to29       | 84346      |
| Latvia  | 1997           | MaleAge30to34       | 84397      |
| Latvia  | 1997           | MaleAge35to39       | 87300      |
| Latvia  | 1997           | MaleAge40to44       | 80866      |
| Latvia  | 1997           | MaleAge45to49       | 70195      |
| Latvia  | 1997           | MaleAge50to54       | 65051      |
| Latvia  | 1997           | MaleAge55to59       | 67750      |
| Latvia  | 1997           | MaleAge5to9         | 89844      |
| Latvia  | 1997           | MaleAge60to64       | 59377      |
| Latvia  | 1997           | MaleAge65to69       | 47544      |
| Latvia  | 1997           | MaleAge70to74       | 30493      |
| Latvia  | 1997           | MaleAge75to79       | 14434      |
| Latvia  | 1997           | MaleAge80to84       | 9171       |
| Latvia  | 1997           | MaleAge85to89       | 5672       |
| Latvia  | 1997           | MaleAge90to94       | 1920       |
| Latvia  | 1997           | MaleAge95to99       | 263        |
| Latvia  | 1997           | MaleAgeAbove100     | 26         |
| Latvia  | 1998           | FemaleAge0to4       | 51662      |
| Latvia  | 1998           | FemaleAge10to14     | 92284      |
| Latvia  | 1998           | FemaleAge15to19     | 80840      |
| Latvia  | 1998           | FemaleAge20to24     | 67914      |
| Latvia  | 1998           | FemaleAge25to29     | 71503      |
| Latvia  | 1998           | FemaleAge30to34     | 78539      |
| Latvia  | 1998           | FemaleAge35to39     | 89801      |
| Latvia  | 1998           | FemaleAge40to44     | 88930      |
| Latvia  | 1998           | FemaleAge45to49     | 81026      |
| Latvia  | 1998           | FemaleAge50to54     | 77648      |
| Latvia  | 1998           | FemaleAge55to59     | 83531      |
| Latvia  | 1998           | FemaleAge5to9       | 80712      |

Dietary calcium and zinc deficiency risks are decreasing but remain prevalent

| Country | Reference year | Age/gender group    | Population |
|---------|----------------|---------------------|------------|
| Latvia  | 1998           | FemaleAge60to64     | 84027      |
| Latvia  | 1998           | FemaleAge65to69     | 75550      |
| Latvia  | 1998           | FemaleAge70to74     | 69679      |
| Latvia  | 1998           | FemaleAge75to79     | 44240      |
| Latvia  | 1998           | FemaleAge80to84     | 24372      |
| Latvia  | 1998           | FemaleAge85to89     | 18175      |
| Latvia  | 1998           | FemaleAge90to94     | 6970       |
| Latvia  | 1998           | FemaleAge95to99     | 1413       |
| Latvia  | 1998           | FemaleAgeAbove100   | 132        |
| Latvia  | 1998           | FemaleLactAge15to19 | 1838       |
| Latvia  | 1998           | FemaleLactAge20to24 | 6899       |
| Latvia  | 1998           | FemaleLactAge25to29 | 5800       |
| Latvia  | 1998           | FemaleLactAge30to34 | 3184       |
| Latvia  | 1998           | FemaleLactAge35to39 | 1450       |
| Latvia  | 1998           | FemaleLactAge40to44 | 352        |
| Latvia  | 1998           | FemaleLactAge45to49 | 18         |
| Latvia  | 1998           | FemalePregAge15to19 | 1378       |
| Latvia  | 1998           | FemalePregAge20to24 | 5174       |
| Latvia  | 1998           | FemalePregAge25to29 | 4350       |
| Latvia  | 1998           | FemalePregAge30to34 | 2388       |
| Latvia  | 1998           | FemalePregAge35to39 | 1087       |
| Latvia  | 1998           | FemalePregAge40to44 | 264        |
| Latvia  | 1998           | FemalePregAge45to49 | 14         |
| Latvia  | 1998           | MaleAge0to4         | 54231      |
| Latvia  | 1998           | MaleAge10to14       | 96205      |
| Latvia  | 1998           | MaleAge15to19       | 87044      |
| Latvia  | 1998           | MaleAge20to24       | 82404      |
| Latvia  | 1998           | MaleAge25to29       | 83860      |
| Latvia  | 1998           | MaleAge30to34       | 82738      |
| Latvia  | 1998           | MaleAge35to39       | 86618      |
| Latvia  | 1998           | MaleAge40to44       | 82333      |
| Latvia  | 1998           | MaleAge45to49       | 70874      |
| Latvia  | 1998           | MaleAge50to54       | 64363      |
| Latvia  | 1998           | MaleAge55to59       | 65042      |
| Latvia  | 1998           | MaleAge5to9         | 84150      |
| Latvia  | 1998           | MaleAge60to64       | 60653      |
| Latvia  | 1998           | MaleAge65to69       | 46700      |
| Latvia  | 1998           | MaleAge70to74       | 32802      |
| Latvia  | 1998           | MaleAge75to79       | 15127      |
| Latvia  | 1998           | MaleAge80to84       | 8503       |
| Latvia  | 1998           | MaleAge85to89       | 5564       |
| Latvia  | 1998           | MaleAge90to94       | 1964       |
| Latvia  | 1998           | MaleAge95to99       | 305        |
| Latvia  | 1998           | MaleAgeAbove100     | 26         |
| Latvia  | 1999           | FemaleAge0to4       | 49541      |
| Latvia  | 1999           | FemaleAge10to14     | 91964      |
| Latvia  | 1999           | FemaleAge15to19     | 82436      |
| Latvia  | 1999           | FemaleAge20to24     | 66996      |
| Latvia  | 1999           | FemaleAge25to29     | 71612      |
| Latvia  | 1999           | FemaleAge30to34     | 76209      |
| Latvia  | 1999           | FemaleAge35to39     | 88401      |
| Latvia  | 1999           | FemaleAge40to44     | 89857      |
| Latvia  | 1999           | FemaleAge45to49     | 81765      |
| Latvia  | 1999           | FemaleAge50to54     | 77163      |
| Latvia  | 1999           | FemaleAge55to59     | 80610      |
| Latvia  | 1999           | FemaleAge5to9       | 74600      |
| Latvia  | 1999           | FemaleAge60to64     | 85286      |
| Latvia  | 1999           | FemaleAge65to69     | 73973      |
| Latvia  | 1999           | FemaleAge70to74     | 70441      |
| Latvia  | 1999           | FemaleAge75to79     | 47866      |
| Latvia  | 1999           | FemaleAge80to84     | 23645      |
| Latvia  | 1999           | FemaleAge85to89     | 17605      |
| Latvia  | 1999           | FemaleAge90to94     | 6720       |
| Latvia  | 1999           | FemaleAge95to99     | 1440       |
| Latvia  | 1999           | FemaleAgeAbove100   | 132        |
| Latvia  | 1999           | FemaleLactAge15to19 | 1838       |
| Latvia  | 1999           | FemaleLactAge20to24 | 6899       |
| Latvia  | 1999           | FemaleLactAge25to29 | 5800       |
| Latvia  | 1999           | FemaleLactAge30to34 | 3184       |
| Latvia  | 1999           | FemaleLactAge35to39 | 1450       |
| Latvia  | 1999           | FemaleLactAge40to44 | 352        |
| Latvia  | 1999           | FemaleLactAge45to49 | 18         |
| Latvia  | 1999           | FemalePregAge15to19 | 1378       |
| Latvia  | 1999           | FemalePregAge20to24 | 5174       |
| Latvia  | 1999           | FemalePregAge25to29 | 4350       |
| Latvia  | 1999           | FemalePregAge30to34 | 2388       |
| Latvia  | 1999           | FemalePregAge35to39 | 1087       |
| Latvia  | 1999           | FemalePregAge40to44 | 264        |
| Latvia  | 1999           | FemalePregAge45to49 | 14         |
| Latvia  | 1999           | MaleAge0to4         | 52222      |
| Latvia  | 1999           | MaleAge10to14       | 96024      |
| Latvia  | 1999           | MaleAge15to19       | 88981      |
| Latvia  | 1999           | MaleAge20to24       | 81448      |
| Latvia  | 1999           | MaleAge25to29       | 83434      |
| Latvia  | 1999           | MaleAge30to34       | 80723      |
| Latvia  | 1999           | MaleAge35to39       | 85908      |
| Latvia  | 1999           | MaleAge40to44       | 83550      |
| Latvia  | 1999           | MaleAge45to49       | 71791      |

Dietary calcium and zinc deficiency risks are decreasing but remain prevalent

| Country | Reference year | Age/gender group    | Population |
|---------|----------------|---------------------|------------|
| Latvia  | 1999           | MaleAge50to54       | 64040      |
| Latvia  | 1999           | MaleAge55to59       | 62635      |
| Latvia  | 1999           | MaleAge5to9         | 77718      |
| Latvia  | 1999           | MaleAge60to64       | 61334      |
| Latvia  | 1999           | MaleAge65to69       | 46189      |
| Latvia  | 1999           | MaleAge70to74       | 34522      |
| Latvia  | 1999           | MaleAge75to79       | 15994      |
| Latvia  | 1999           | MaleAge80to84       | 8120       |
| Latvia  | 1999           | MaleAge85to89       | 5217       |
| Latvia  | 1999           | MaleAge90to94       | 1859       |
| Latvia  | 1999           | MaleAge95to99       | 329        |
| Latvia  | 1999           | MaleAgeAbove100     | 25         |
| Lebanon | 1992           | FemaleAge0to4       | 153162     |
| Lebanon | 1992           | FemaleAge10to14     | 148574     |
| Lebanon | 1992           | FemaleAge15to19     | 131330     |
| Lebanon | 1992           | FemaleAge20to24     | 100707     |
| Lebanon | 1992           | FemaleAge25to29     | 92397      |
| Lebanon | 1992           | FemaleAge30to34     | 87354      |
| Lebanon | 1992           | FemaleAge35to39     | 74117      |
| Lebanon | 1992           | FemaleAge40to44     | 62305      |
| Lebanon | 1992           | FemaleAge45to49     | 63005      |
| Lebanon | 1992           | FemaleAge50to54     | 59749      |
| Lebanon | 1992           | FemaleAge55to59     | 52615      |
| Lebanon | 1992           | FemaleAge5to9       | 150834     |
| Lebanon | 1992           | FemaleAge60to64     | 46296      |
| Lebanon | 1992           | FemaleAge65to69     | 35866      |
| Lebanon | 1992           | FemaleAge70to74     | 21974      |
| Lebanon | 1992           | FemaleAge75to79     | 14610      |
| Lebanon | 1992           | FemaleAge80to84     | 9595       |
| Lebanon | 1992           | FemaleAge85to89     | 4137       |
| Lebanon | 1992           | FemaleAge90to94     | 1168       |
| Lebanon | 1992           | FemaleAge95to99     | 153        |
| Lebanon | 1992           | FemaleAgeAbove100   | 12         |
| Lebanon | 1992           | FemaleLactAge15to19 | 5528       |
| Lebanon | 1992           | FemaleLactAge20to24 | 17978      |
| Lebanon | 1992           | FemaleLactAge25to29 | 20622      |
| Lebanon | 1992           | FemaleLactAge30to34 | 14217      |
| Lebanon | 1992           | FemaleLactAge35to39 | 6474       |
| Lebanon | 1992           | FemaleLactAge40to44 | 1800       |
| Lebanon | 1992           | FemaleLactAge45to49 | 342        |
| Lebanon | 1992           | FemalePregAge15to19 | 4146       |
| Lebanon | 1992           | FemalePregAge20to24 | 13483      |
| Lebanon | 1992           | FemalePregAge25to29 | 15466      |
| Lebanon | 1992           | FemalePregAge30to34 | 10663      |
| Lebanon | 1992           | FemalePregAge35to39 | 4855       |
| Lebanon | 1992           | FemalePregAge40to44 | 1350       |
| Lebanon | 1992           | FemalePregAge45to49 | 257        |
| Lebanon | 1992           | MaleAge0to4         | 160331     |
| Lebanon | 1992           | MaleAge10to14       | 158342     |
| Lebanon | 1992           | MaleAge15to19       | 148615     |
| Lebanon | 1992           | MaleAge20to24       | 128149     |
| Lebanon | 1992           | MaleAge25to29       | 110558     |
| Lebanon | 1992           | MaleAge30to34       | 95648      |
| Lebanon | 1992           | MaleAge35to39       | 77105      |
| Lebanon | 1992           | MaleAge40to44       | 59908      |
| Lebanon | 1992           | MaleAge45to49       | 58893      |
| Lebanon | 1992           | MaleAge50to54       | 57532      |
| Lebanon | 1992           | MaleAge55to59       | 49703      |
| Lebanon | 1992           | MaleAge5to9         | 160141     |
| Lebanon | 1992           | MaleAge60to64       | 45062      |
| Lebanon | 1992           | MaleAge65to69       | 37308      |
| Lebanon | 1992           | MaleAge70to74       | 22618      |
| Lebanon | 1992           | MaleAge75to79       | 13207      |
| Lebanon | 1992           | MaleAge80to84       | 7764       |
| Lebanon | 1992           | MaleAge85to89       | 3013       |
| Lebanon | 1992           | MaleAge90to94       | 742        |
| Lebanon | 1992           | MaleAge95to99       | 86         |
| Lebanon | 1992           | MaleAgeAbove100     | 5          |
| Lebanon | 1993           | FemaleAge0to4       | 156543     |
| Lebanon | 1993           | FemaleAge10to14     | 150018     |
| Lebanon | 1993           | FemaleAge15to19     | 134588     |
| Lebanon | 1993           | FemaleAge20to24     | 104060     |
| Lebanon | 1993           | FemaleAge25to29     | 94598      |
| Lebanon | 1993           | FemaleAge30to34     | 93918      |
| Lebanon | 1993           | FemaleAge35to39     | 80195      |
| Lebanon | 1993           | FemaleAge40to44     | 65912      |
| Lebanon | 1993           | FemaleAge45to49     | 62119      |
| Lebanon | 1993           | FemaleAge50to54     | 62059      |
| Lebanon | 1993           | FemaleAge55to59     | 53311      |
| Lebanon | 1993           | FemaleAge5to9       | 151643     |
| Lebanon | 1993           | FemaleAge60to64     | 47497      |
| Lebanon | 1993           | FemaleAge65to69     | 37556      |
| Lebanon | 1993           | FemaleAge70to74     | 24052      |
| Lebanon | 1993           | FemaleAge75to79     | 14166      |
| Lebanon | 1993           | FemaleAge80to84     | 9879       |
| Lebanon | 1993           | FemaleAge85to89     | 4196       |
| Lebanon | 1993           | FemaleAge90to94     | 1239       |
| Lebanon | 1993           | FemaleAge95to99     | 165        |

Dietary calcium and zinc deficiency risks are decreasing but remain prevalent

| Country | Reference year | Age/gender group    | Population |
|---------|----------------|---------------------|------------|
| Lebanon | 1993           | FemaleAgeAbove100   | 13         |
| Lebanon | 1993           | FemaleLactAge15to19 | 5528       |
| Lebanon | 1993           | FemaleLactAge20to24 | 17978      |
| Lebanon | 1993           | FemaleLactAge25to29 | 20622      |
| Lebanon | 1993           | FemaleLactAge30to34 | 14217      |
| Lebanon | 1993           | FemaleLactAge35to39 | 6474       |
| Lebanon | 1993           | FemaleLactAge40to44 | 1800       |
| Lebanon | 1993           | FemaleLactAge45to49 | 342        |
| Lebanon | 1993           | FemalePregAge15to19 | 4146       |
| Lebanon | 1993           | FemalePregAge20to24 | 13483      |
| Lebanon | 1993           | FemalePregAge25to29 | 15466      |
| Lebanon | 1993           | FemalePregAge30to34 | 10663      |
| Lebanon | 1993           | FemalePregAge35to39 | 4855       |
| Lebanon | 1993           | FemalePregAge40to44 | 1350       |
| Lebanon | 1993           | FemalePregAge45to49 | 257        |
| Lebanon | 1993           | MaleAge0to4         | 163967     |
| Lebanon | 1993           | MaleAge10to14       | 160167     |
| Lebanon | 1993           | MaleAge15to19       | 152756     |
| Lebanon | 1993           | MaleAge20to24       | 135113     |
| Lebanon | 1993           | MaleAge25to29       | 115240     |
| Lebanon | 1993           | MaleAge30to34       | 100701     |
| Lebanon | 1993           | MaleAge35to39       | 82150      |
| Lebanon | 1993           | MaleAge40to44       | 63662      |
| Lebanon | 1993           | MaleAge45to49       | 57832      |
| Lebanon | 1993           | MaleAge50to54       | 59274      |
| Lebanon | 1993           | MaleAge55to59       | 50921      |
| Lebanon | 1993           | MaleAge5to9         | 160672     |
| Lebanon | 1993           | MaleAge60to64       | 45125      |
| Lebanon | 1993           | MaleAge65to69       | 38530      |
| Lebanon | 1993           | MaleAge70to74       | 24792      |
| Lebanon | 1993           | MaleAge75to79       | 13065      |
| Lebanon | 1993           | MaleAge80to84       | 8013       |
| Lebanon | 1993           | MaleAge85to89       | 3090       |
| Lebanon | 1993           | MaleAge90to94       | 785        |
| Lebanon | 1993           | MaleAge95to99       | 97         |
| Lebanon | 1993           | MaleAgeAbove100     | 5          |
| Lebanon | 1994           | FemaleAge0to4       | 159645     |
| Lebanon | 1994           | FemaleAge10to14     | 150945     |
| Lebanon | 1994           | FemaleAge15to19     | 137140     |
| Lebanon | 1994           | FemaleAge20to24     | 107185     |
| Lebanon | 1994           | FemaleAge25to29     | 96605      |
| Lebanon | 1994           | FemaleAge30to34     | 99673      |
| Lebanon | 1994           | FemaleAge35to39     | 86462      |
| Lebanon | 1994           | FemaleAge40to44     | 70105      |
| Lebanon | 1994           | FemaleAge45to49     | 61714      |
| Lebanon | 1994           | FemaleAge50to54     | 63796      |
| Lebanon | 1994           | FemaleAge55to59     | 54202      |
| Lebanon | 1994           | FemaleAge5to9       | 152286     |
| Lebanon | 1994           | FemaleAge60to64     | 48555      |
| Lebanon | 1994           | FemaleAge65to69     | 39145      |
| Lebanon | 1994           | FemaleAge70to74     | 26126      |
| Lebanon | 1994           | FemaleAge75to79     | 14176      |
| Lebanon | 1994           | FemaleAge80to84     | 9964       |
| Lebanon | 1994           | FemaleAge85to89     | 4181       |
| Lebanon | 1994           | FemaleAge90to94     | 1220       |
| Lebanon | 1994           | FemaleAge95to99     | 174        |
| Lebanon | 1994           | FemaleAgeAbove100   | 13         |
| Lebanon | 1994           | FemaleLactAge15to19 | 5528       |
| Lebanon | 1994           | FemaleLactAge20to24 | 17978      |
| Lebanon | 1994           | FemaleLactAge25to29 | 20622      |
| Lebanon | 1994           | FemaleLactAge30to34 | 14217      |
| Lebanon | 1994           | FemaleLactAge35to39 | 6474       |
| Lebanon | 1994           | FemaleLactAge40to44 | 1800       |
| Lebanon | 1994           | FemaleLactAge45to49 | 342        |
| Lebanon | 1994           | FemalePregAge15to19 | 4146       |
| Lebanon | 1994           | FemalePregAge20to24 | 13483      |
| Lebanon | 1994           | FemalePregAge25to29 | 15466      |
| Lebanon | 1994           | FemalePregAge30to34 | 10663      |
| Lebanon | 1994           | FemalePregAge35to39 | 4855       |
| Lebanon | 1994           | FemalePregAge40to44 | 1350       |
| Lebanon | 1994           | FemalePregAge45to49 | 257        |
| Lebanon | 1994           | MaleAge0to4         | 167255     |
| Lebanon | 1994           | MaleAge10to14       | 161215     |
| Lebanon | 1994           | MaleAge15to19       | 155840     |
| Lebanon | 1994           | MaleAge20to24       | 141382     |
| Lebanon | 1994           | MaleAge25to29       | 120115     |
| Lebanon | 1994           | MaleAge30to34       | 105543     |
| Lebanon | 1994           | MaleAge35to39       | 87169      |
| Lebanon | 1994           | MaleAge40to44       | 67797      |
| Lebanon | 1994           | MaleAge45to49       | 57321      |
| Lebanon | 1994           | MaleAge50to54       | 60449      |
| Lebanon | 1994           | MaleAge55to59       | 52222      |
| Lebanon | 1994           | MaleAge5to9         | 160894     |
| Lebanon | 1994           | MaleAge60to64       | 45294      |
| Lebanon | 1994           | MaleAge65to69       | 39488      |
| Lebanon | 1994           | MaleAge70to74       | 26807      |
| Lebanon | 1994           | MaleAge75to79       | 13317      |
| Lebanon | 1994           | MaleAge80to84       | 8098       |

Dietary calcium and zinc deficiency risks are decreasing but remain prevalent

| Country | Reference year | Age/gender group    | Population |
|---------|----------------|---------------------|------------|
| Lebanon | 1994           | MaleAge85to89       | 3079       |
| Lebanon | 1994           | MaleAge90to94       | 766        |
| Lebanon | 1994           | MaleAge95to99       | 101        |
| Lebanon | 1994           | MaleAgeAbove100     | 5          |
| Lebanon | 1995           | FemaleAge0to4       | 160478     |
| Lebanon | 1995           | FemaleAge10to14     | 151144     |
| Lebanon | 1995           | FemaleAge15to19     | 138631     |
| Lebanon | 1995           | FemaleAge20to24     | 109649     |
| Lebanon | 1995           | FemaleAge25to29     | 98518      |
| Lebanon | 1995           | FemaleAge30to34     | 104057     |
| Lebanon | 1995           | FemaleAge35to39     | 92594      |
| Lebanon | 1995           | FemaleAge40to44     | 74555      |
| Lebanon | 1995           | FemaleAge45to49     | 62201      |
| Lebanon | 1995           | FemaleAge50to54     | 64496      |
| Lebanon | 1995           | FemaleAge55to59     | 55318      |
| Lebanon | 1995           | FemaleAge5to9       | 152688     |
| Lebanon | 1995           | FemaleAge60to64     | 49380      |
| Lebanon | 1995           | FemaleAge65to69     | 40555      |
| Lebanon | 1995           | FemaleAge70to74     | 27975      |
| Lebanon | 1995           | FemaleAge75to79     | 14775      |
| Lebanon | 1995           | FemaleAge80to84     | 9811       |
| Lebanon | 1995           | FemaleAge85to89     | 4121       |
| Lebanon | 1995           | FemaleAge90to94     | 1103       |
| Lebanon | 1995           | FemaleAge95to99     | 144        |
| Lebanon | 1995           | FemaleAgeAbove100   | 13         |
| Lebanon | 1995           | FemaleLactAge15to19 | 5528       |
| Lebanon | 1995           | FemaleLactAge20to24 | 17978      |
| Lebanon | 1995           | FemaleLactAge25to29 | 20622      |
| Lebanon | 1995           | FemaleLactAge30to34 | 14217      |
| Lebanon | 1995           | FemaleLactAge35to39 | 6474       |
| Lebanon | 1995           | FemaleLactAge40to44 | 1800       |
| Lebanon | 1995           | FemaleLactAge45to49 | 342        |
| Lebanon | 1995           | FemalePregAge15to19 | 4146       |
| Lebanon | 1995           | FemalePregAge20to24 | 13483      |
| Lebanon | 1995           | FemalePregAge25to29 | 15466      |
| Lebanon | 1995           | FemalePregAge30to34 | 10663      |
| Lebanon | 1995           | FemalePregAge35to39 | 4855       |
| Lebanon | 1995           | FemalePregAge40to44 | 1350       |
| Lebanon | 1995           | FemalePregAge45to49 | 257        |
| Lebanon | 1995           | MaleAge0to4         | 168082     |
| Lebanon | 1995           | MaleAge10to14       | 161128     |
| Lebanon | 1995           | MaleAge15to19       | 157592     |
| Lebanon | 1995           | MaleAge20to24       | 146186     |
| Lebanon | 1995           | MaleAge25to29       | 124984     |
| Lebanon | 1995           | MaleAge30to34       | 109869     |
| Lebanon | 1995           | MaleAge35to39       | 91853      |
| Lebanon | 1995           | MaleAge40to44       | 71836      |
| Lebanon | 1995           | MaleAge45to49       | 57748      |
| Lebanon | 1995           | MaleAge50to54       | 60680      |
| Lebanon | 1995           | MaleAge55to59       | 53414      |
| Lebanon | 1995           | MaleAge5to9         | 160735     |
| Lebanon | 1995           | MaleAge60to64       | 45615      |
| Lebanon | 1995           | MaleAge65to69       | 40079      |
| Lebanon | 1995           | MaleAge70to74       | 28423      |
| Lebanon | 1995           | MaleAge75to79       | 14061      |
| Lebanon | 1995           | MaleAge80to84       | 7992       |
| Lebanon | 1995           | MaleAge85to89       | 2996       |
| Lebanon | 1995           | MaleAge90to94       | 671        |
| Lebanon | 1995           | MaleAge95to99       | 73         |
| Lebanon | 1995           | MaleAgeAbove100     | 5          |
| Lebanon | 1996           | FemaleAge0to4       | 160069     |
| Lebanon | 1996           | FemaleAge10to14     | 151139     |
| Lebanon | 1996           | FemaleAge15to19     | 141392     |
| Lebanon | 1996           | FemaleAge20to24     | 114443     |
| Lebanon | 1996           | FemaleAge25to29     | 100279     |
| Lebanon | 1996           | FemaleAge30to34     | 104121     |
| Lebanon | 1996           | FemaleAge35to39     | 96437      |
| Lebanon | 1996           | FemaleAge40to44     | 79246      |
| Lebanon | 1996           | FemaleAge45to49     | 63146      |
| Lebanon | 1996           | FemaleAge50to54     | 63703      |
| Lebanon | 1996           | FemaleAge55to59     | 56651      |
| Lebanon | 1996           | FemaleAge5to9       | 152644     |
| Lebanon | 1996           | FemaleAge60to64     | 50028      |
| Lebanon | 1996           | FemaleAge65to69     | 41691      |
| Lebanon | 1996           | FemaleAge70to74     | 29453      |
| Lebanon | 1996           | FemaleAge75to79     | 15669      |
| Lebanon | 1996           | FemaleAge80to84     | 9638       |
| Lebanon | 1996           | FemaleAge85to89     | 4459       |
| Lebanon | 1996           | FemaleAge90to94     | 1267       |
| Lebanon | 1996           | FemaleAge95to99     | 162        |
| Lebanon | 1996           | FemaleAgeAbove100   | 13         |
| Lebanon | 1996           | FemaleLactAge15to19 | 4247       |
| Lebanon | 1996           | FemaleLactAge20to24 | 15847      |
| Lebanon | 1996           | FemaleLactAge25to29 | 19931      |
| Lebanon | 1996           | FemaleLactAge30to34 | 15231      |
| Lebanon | 1996           | FemaleLactAge35to39 | 7238       |
| Lebanon | 1996           | FemaleLactAge40to44 | 1852       |
| Lebanon | 1996           | FemaleLactAge45to49 | 366        |

Dietary calcium and zinc deficiency risks are decreasing but remain prevalent

| Country | Reference year | Age/gender group    | Population |
|---------|----------------|---------------------|------------|
| Lebanon | 1996           | FemalePregAge15to19 | 3186       |
| Lebanon | 1996           | FemalePregAge20to24 | 11885      |
| Lebanon | 1996           | FemalePregAge25to29 | 14949      |
| Lebanon | 1996           | FemalePregAge30to34 | 11423      |
| Lebanon | 1996           | FemalePregAge35to39 | 5428       |
| Lebanon | 1996           | FemalePregAge40to44 | 1389       |
| Lebanon | 1996           | FemalePregAge45to49 | 275        |
| Lebanon | 1996           | MaleAge0to4         | 168001     |
| Lebanon | 1996           | MaleAge10to14       | 160540     |
| Lebanon | 1996           | MaleAge15to19       | 157974     |
| Lebanon | 1996           | MaleAge20to24       | 148374     |
| Lebanon | 1996           | MaleAge25to29       | 128223     |
| Lebanon | 1996           | MaleAge30to34       | 112251     |
| Lebanon | 1996           | MaleAge35to39       | 94910      |
| Lebanon | 1996           | MaleAge40to44       | 75430      |
| Lebanon | 1996           | MaleAge45to49       | 58732      |
| Lebanon | 1996           | MaleAge50to54       | 59497      |
| Lebanon | 1996           | MaleAge55to59       | 54504      |
| Lebanon | 1996           | MaleAge5to9         | 160301     |
| Lebanon | 1996           | MaleAge60to64       | 46323      |
| Lebanon | 1996           | MaleAge65to69       | 40333      |
| Lebanon | 1996           | MaleAge70to74       | 29512      |
| Lebanon | 1996           | MaleAge75to79       | 15055      |
| Lebanon | 1996           | MaleAge80to84       | 7965       |
| Lebanon | 1996           | MaleAge85to89       | 3273       |
| Lebanon | 1996           | MaleAge90to94       | 796        |
| Lebanon | 1996           | MaleAge95to99       | 88         |
| Lebanon | 1996           | MaleAgeAbov e100    | 5          |
| Lebanon | 1997           | FemaleAge0to4       | 157106     |
| Lebanon | 1997           | FemaleAge10to14     | 150527     |
| Lebanon | 1997           | FemaleAge15to19     | 141362     |
| Lebanon | 1997           | FemaleAge20to24     | 115121     |
| Lebanon | 1997           | FemaleAge25to29     | 100687     |
| Lebanon | 1997           | FemaleAge30to34     | 104519     |
| Lebanon | 1997           | FemaleAge35to39     | 101165     |
| Lebanon | 1997           | FemaleAge40to44     | 83975      |
| Lebanon | 1997           | FemaleAge45to49     | 65267      |
| Lebanon | 1997           | FemaleAge50to54     | 61963      |
| Lebanon | 1997           | FemaleAge55to59     | 58029      |
| Lebanon | 1997           | FemaleAge5to9       | 151966     |
| Lebanon | 1997           | FemaleAge60to64     | 50466      |
| Lebanon | 1997           | FemaleAge65to69     | 42675      |
| Lebanon | 1997           | FemaleAge70to74     | 30832      |
| Lebanon | 1997           | FemaleAge75to79     | 16909      |
| Lebanon | 1997           | FemaleAge80to84     | 9225       |
| Lebanon | 1997           | FemaleAge85to89     | 4762       |
| Lebanon | 1997           | FemaleAge90to94     | 1364       |
| Lebanon | 1997           | FemaleAge95to99     | 198        |
| Lebanon | 1997           | FemaleAgeAbov e100  | 13         |
| Lebanon | 1997           | FemaleLactAge15to19 | 4247       |
| Lebanon | 1997           | FemaleLactAge20to24 | 15847      |
| Lebanon | 1997           | FemaleLactAge25to29 | 19931      |
| Lebanon | 1997           | FemaleLactAge30to34 | 15231      |
| Lebanon | 1997           | FemaleLactAge35to39 | 7238       |
| Lebanon | 1997           | FemaleLactAge40to44 | 1852       |
| Lebanon | 1997           | FemaleLactAge45to49 | 366        |
| Lebanon | 1997           | FemalePregAge15to19 | 3186       |
| Lebanon | 1997           | FemalePregAge20to24 | 11885      |
| Lebanon | 1997           | FemalePregAge25to29 | 14949      |
| Lebanon | 1997           | FemalePregAge30to34 | 11423      |
| Lebanon | 1997           | FemalePregAge35to39 | 5428       |
| Lebanon | 1997           | FemalePregAge40to44 | 1389       |
| Lebanon | 1997           | FemalePregAge45to49 | 275        |
| Lebanon | 1997           | MaleAge0to4         | 164960     |
| Lebanon | 1997           | MaleAge10to14       | 159096     |
| Lebanon | 1997           | MaleAge15to19       | 157600     |
| Lebanon | 1997           | MaleAge20to24       | 149372     |
| Lebanon | 1997           | MaleAge25to29       | 131246     |
| Lebanon | 1997           | MaleAge30to34       | 113930     |
| Lebanon | 1997           | MaleAge35to39       | 97465      |
| Lebanon | 1997           | MaleAge40to44       | 78586      |
| Lebanon | 1997           | MaleAge45to49       | 60700      |
| Lebanon | 1997           | MaleAge50to54       | 57490      |
| Lebanon | 1997           | MaleAge55to59       | 55314      |
| Lebanon | 1997           | MaleAge5to9         | 159282     |
| Lebanon | 1997           | MaleAge60to64       | 47084      |
| Lebanon | 1997           | MaleAge65to69       | 40357      |
| Lebanon | 1997           | MaleAge70to74       | 30410      |
| Lebanon | 1997           | MaleAge75to79       | 16255      |
| Lebanon | 1997           | MaleAge80to84       | 7714       |
| Lebanon | 1997           | MaleAge85to89       | 3500       |
| Lebanon | 1997           | MaleAge90to94       | 872        |
| Lebanon | 1997           | MaleAge95to99       | 102        |
| Lebanon | 1997           | MaleAgeAbov e100    | 5          |
| Lebanon | 1998           | FemaleAge0to4       | 152457     |
| Lebanon | 1998           | FemaleAge10to14     | 149905     |
| Lebanon | 1998           | FemaleAge15to19     | 141462     |
| Lebanon | 1998           | FemaleAge20to24     | 115926     |

Dietary calcium and zinc deficiency risks are decreasing but remain prevalent

| Country | Reference year | Age/gender group    | Population |
|---------|----------------|---------------------|------------|
| Lebanon | 1998           | FemaleAge25to29     | 101439     |
| Lebanon | 1998           | FemaleAge30to34     | 104467     |
| Lebanon | 1998           | FemaleAge35to39     | 105634     |
| Lebanon | 1998           | FemaleAge40to44     | 88746      |
| Lebanon | 1998           | FemaleAge45to49     | 68664      |
| Lebanon | 1998           | FemaleAge50to54     | 60186      |
| Lebanon | 1998           | FemaleAge55to59     | 59252      |
| Lebanon | 1998           | FemaleAge5to9       | 151167     |
| Lebanon | 1998           | FemaleAge60to64     | 51038      |
| Lebanon | 1998           | FemaleAge65to69     | 43676      |
| Lebanon | 1998           | FemaleAge70to74     | 32263      |
| Lebanon | 1998           | FemaleAge75to79     | 18404      |
| Lebanon | 1998           | FemaleAge80to84     | 8848       |
| Lebanon | 1998           | FemaleAge85to89     | 4960       |
| Lebanon | 1998           | FemaleAge90to94     | 1397       |
| Lebanon | 1998           | FemaleAge95to99     | 234        |
| Lebanon | 1998           | FemaleAgeAbove100   | 14         |
| Lebanon | 1998           | FemaleLactAge15to19 | 4247       |
| Lebanon | 1998           | FemaleLactAge20to24 | 15847      |
| Lebanon | 1998           | FemaleLactAge25to29 | 19931      |
| Lebanon | 1998           | FemaleLactAge30to34 | 15231      |
| Lebanon | 1998           | FemaleLactAge35to39 | 7238       |
| Lebanon | 1998           | FemaleLactAge40to44 | 1852       |
| Lebanon | 1998           | FemaleLactAge45to49 | 366        |
| Lebanon | 1998           | FemalePregAge15to19 | 3186       |
| Lebanon | 1998           | FemalePregAge20to24 | 11885      |
| Lebanon | 1998           | FemalePregAge25to29 | 14949      |
| Lebanon | 1998           | FemalePregAge30to34 | 11423      |
| Lebanon | 1998           | FemalePregAge35to39 | 5428       |
| Lebanon | 1998           | FemalePregAge40to44 | 1389       |
| Lebanon | 1998           | FemalePregAge45to49 | 275        |
| Lebanon | 1998           | MaleAge0to4         | 160242     |
| Lebanon | 1998           | MaleAge10to14       | 157730     |
| Lebanon | 1998           | MaleAge15to19       | 157380     |
| Lebanon | 1998           | MaleAge20to24       | 150162     |
| Lebanon | 1998           | MaleAge25to29       | 134458     |
| Lebanon | 1998           | MaleAge30to34       | 115733     |
| Lebanon | 1998           | MaleAge35to39       | 100132     |
| Lebanon | 1998           | MaleAge40to44       | 81563      |
| Lebanon | 1998           | MaleAge45to49       | 63677      |
| Lebanon | 1998           | MaleAge50to54       | 55632      |
| Lebanon | 1998           | MaleAge55to59       | 55865      |
| Lebanon | 1998           | MaleAge5to9         | 158446     |
| Lebanon | 1998           | MaleAge60to64       | 48043      |
| Lebanon | 1998           | MaleAge65to69       | 40545      |
| Lebanon | 1998           | MaleAge70to74       | 31327      |
| Lebanon | 1998           | MaleAge75to79       | 17563      |
| Lebanon | 1998           | MaleAge80to84       | 7480       |
| Lebanon | 1998           | MaleAge85to89       | 3627       |
| Lebanon | 1998           | MaleAge90to94       | 896        |
| Lebanon | 1998           | MaleAge95to99       | 122        |
| Lebanon | 1998           | MaleAgeAbove100     | 5          |
| Lebanon | 1999           | FemaleAge0to4       | 148596     |
| Lebanon | 1999           | FemaleAge10to14     | 150029     |
| Lebanon | 1999           | FemaleAge15to19     | 142413     |
| Lebanon | 1999           | FemaleAge20to24     | 117489     |
| Lebanon | 1999           | FemaleAge25to29     | 103082     |
| Lebanon | 1999           | FemaleAge30to34     | 105209     |
| Lebanon | 1999           | FemaleAge35to39     | 110040     |
| Lebanon | 1999           | FemaleAge40to44     | 93982      |
| Lebanon | 1999           | FemaleAge45to49     | 73262      |
| Lebanon | 1999           | FemaleAge50to54     | 59550      |
| Lebanon | 1999           | FemaleAge55to59     | 60136      |
| Lebanon | 1999           | FemaleAge5to9       | 150740     |
| Lebanon | 1999           | FemaleAge60to64     | 52116      |
| Lebanon | 1999           | FemaleAge65to69     | 44924      |
| Lebanon | 1999           | FemaleAge70to74     | 33921      |
| Lebanon | 1999           | FemaleAge75to79     | 20059      |
| Lebanon | 1999           | FemaleAge80to84     | 8838       |
| Lebanon | 1999           | FemaleAge85to89     | 4975       |
| Lebanon | 1999           | FemaleAge90to94     | 1384       |
| Lebanon | 1999           | FemaleAge95to99     | 248        |
| Lebanon | 1999           | FemaleAgeAbove100   | 14         |
| Lebanon | 1999           | FemaleLactAge15to19 | 4247       |
| Lebanon | 1999           | FemaleLactAge20to24 | 15847      |
| Lebanon | 1999           | FemaleLactAge25to29 | 19931      |
| Lebanon | 1999           | FemaleLactAge30to34 | 15231      |
| Lebanon | 1999           | FemaleLactAge35to39 | 7238       |
| Lebanon | 1999           | FemaleLactAge40to44 | 1852       |
| Lebanon | 1999           | FemaleLactAge45to49 | 366        |
| Lebanon | 1999           | FemalePregAge15to19 | 3186       |
| Lebanon | 1999           | FemalePregAge20to24 | 11885      |
| Lebanon | 1999           | FemalePregAge25to29 | 14949      |
| Lebanon | 1999           | FemalePregAge30to34 | 11423      |
| Lebanon | 1999           | FemalePregAge35to39 | 5428       |
| Lebanon | 1999           | FemalePregAge40to44 | 1389       |
| Lebanon | 1999           | FemalePregAge45to49 | 275        |
| Lebanon | 1999           | MaleAge0to4         | 156625     |

Dietary calcium and zinc deficiency risks are decreasing but remain prevalent

| Country | Reference year | Age/gender group    | Population |
|---------|----------------|---------------------|------------|
| Lebanon | 1999           | MaleAge10to14       | 157674     |
| Lebanon | 1999           | MaleAge15to19       | 158370     |
| Lebanon | 1999           | MaleAge20to24       | 152019     |
| Lebanon | 1999           | MaleAge25to29       | 138449     |
| Lebanon | 1999           | MaleAge30to34       | 118796     |
| Lebanon | 1999           | MaleAge35to39       | 103612     |
| Lebanon | 1999           | MaleAge40to44       | 85005      |
| Lebanon | 1999           | MaleAge45to49       | 67578      |
| Lebanon | 1999           | MaleAge50to54       | 55093      |
| Lebanon | 1999           | MaleAge55to59       | 56285      |
| Lebanon | 1999           | MaleAge5to9         | 158585     |
| Lebanon | 1999           | MaleAge60to64       | 49411      |
| Lebanon | 1999           | MaleAge65to69       | 41359      |
| Lebanon | 1999           | MaleAge70to74       | 32494      |
| Lebanon | 1999           | MaleAge75to79       | 18939      |
| Lebanon | 1999           | MaleAge80to84       | 7544       |
| Lebanon | 1999           | MaleAge85to89       | 3608       |
| Lebanon | 1999           | MaleAge90to94       | 873        |
| Lebanon | 1999           | MaleAge95to99       | 128        |
| Lebanon | 1999           | MaleAgeAbove100     | 5          |
| Lesotho | 1992           | FemaleAge0to4       | 125657     |
| Lesotho | 1992           | FemaleAge10to14     | 106409     |
| Lesotho | 1992           | FemaleAge15to19     | 76155      |
| Lesotho | 1992           | FemaleAge20to24     | 45205      |
| Lesotho | 1992           | FemaleAge25to29     | 37796      |
| Lesotho | 1992           | FemaleAge30to34     | 33719      |
| Lesotho | 1992           | FemaleAge35to39     | 33900      |
| Lesotho | 1992           | FemaleAge40to44     | 32700      |
| Lesotho | 1992           | FemaleAge45to49     | 25245      |
| Lesotho | 1992           | FemaleAge50to54     | 23915      |
| Lesotho | 1992           | FemaleAge55to59     | 26272      |
| Lesotho | 1992           | FemaleAge5to9       | 119546     |
| Lesotho | 1992           | FemaleAge60to64     | 21077      |
| Lesotho | 1992           | FemaleAge65to69     | 16116      |
| Lesotho | 1992           | FemaleAge70to74     | 12113      |
| Lesotho | 1992           | FemaleAge75to79     | 7270       |
| Lesotho | 1992           | FemaleAge80to84     | 3719       |
| Lesotho | 1992           | FemaleAge85to89     | 1408       |
| Lesotho | 1992           | FemaleAge90to94     | 333        |
| Lesotho | 1992           | FemaleAge95to99     | 54         |
| Lesotho | 1992           | FemaleAgeAbove100   | 3          |
| Lesotho | 1992           | FemaleLactAge15to19 | 7799       |
| Lesotho | 1992           | FemaleLactAge20to24 | 17290      |
| Lesotho | 1992           | FemaleLactAge25to29 | 13212      |
| Lesotho | 1992           | FemaleLactAge30to34 | 9312       |
| Lesotho | 1992           | FemaleLactAge35to39 | 6127       |
| Lesotho | 1992           | FemaleLactAge40to44 | 2847       |
| Lesotho | 1992           | FemaleLactAge45to49 | 557        |
| Lesotho | 1992           | FemalePregAge15to19 | 5849       |
| Lesotho | 1992           | FemalePregAge20to24 | 12967      |
| Lesotho | 1992           | FemalePregAge25to29 | 9909       |
| Lesotho | 1992           | FemalePregAge30to34 | 6984       |
| Lesotho | 1992           | FemalePregAge35to39 | 4595       |
| Lesotho | 1992           | FemalePregAge40to44 | 2135       |
| Lesotho | 1992           | FemalePregAge45to49 | 418        |
| Lesotho | 1992           | MaleAge0to4         | 129324     |
| Lesotho | 1992           | MaleAge10to14       | 112351     |
| Lesotho | 1992           | MaleAge15to19       | 97151      |
| Lesotho | 1992           | MaleAge20to24       | 80150      |
| Lesotho | 1992           | MaleAge25to29       | 58855      |
| Lesotho | 1992           | MaleAge30to34       | 41768      |
| Lesotho | 1992           | MaleAge35to39       | 33243      |
| Lesotho | 1992           | MaleAge40to44       | 27737      |
| Lesotho | 1992           | MaleAge45to49       | 21666      |
| Lesotho | 1992           | MaleAge50to54       | 19970      |
| Lesotho | 1992           | MaleAge55to59       | 19795      |
| Lesotho | 1992           | MaleAge5to9         | 123929     |
| Lesotho | 1992           | MaleAge60to64       | 16234      |
| Lesotho | 1992           | MaleAge65to69       | 12472      |
| Lesotho | 1992           | MaleAge70to74       | 8544       |
| Lesotho | 1992           | MaleAge75to79       | 4925       |
| Lesotho | 1992           | MaleAge80to84       | 2519       |
| Lesotho | 1992           | MaleAge85to89       | 914        |
| Lesotho | 1992           | MaleAge90to94       | 181        |
| Lesotho | 1992           | MaleAge95to99       | 18         |
| Lesotho | 1992           | MaleAgeAbove100     | 1          |
| Lesotho | 1993           | FemaleAge0to4       | 126902     |
| Lesotho | 1993           | FemaleAge10to14     | 108429     |
| Lesotho | 1993           | FemaleAge15to19     | 77979      |
| Lesotho | 1993           | FemaleAge20to24     | 47082      |
| Lesotho | 1993           | FemaleAge25to29     | 40220      |
| Lesotho | 1993           | FemaleAge30to34     | 34382      |
| Lesotho | 1993           | FemaleAge35to39     | 34171      |
| Lesotho | 1993           | FemaleAge40to44     | 34232      |
| Lesotho | 1993           | FemaleAge45to49     | 27557      |
| Lesotho | 1993           | FemaleAge50to54     | 22860      |
| Lesotho | 1993           | FemaleAge55to59     | 25884      |
| Lesotho | 1993           | FemaleAge5to9       | 120212     |



Dietary calcium and zinc deficiency risks are decreasing but remain prevalent

| Country | Reference year | Age/gender group    | Population |
|---------|----------------|---------------------|------------|
| Lesotho | 1993           | FemaleAge60to64     | 22346      |
| Lesotho | 1993           | FemaleAge65to69     | 16074      |
| Lesotho | 1993           | FemaleAge70to74     | 12453      |
| Lesotho | 1993           | FemaleAge75to79     | 7542       |
| Lesotho | 1993           | FemaleAge80to84     | 3801       |
| Lesotho | 1993           | FemaleAge85to89     | 1478       |
| Lesotho | 1993           | FemaleAge90to94     | 340        |
| Lesotho | 1993           | FemaleAge95to99     | 63         |
| Lesotho | 1993           | FemaleAgeAbove100   | 3          |
| Lesotho | 1993           | FemaleLactAge15to19 | 7799       |
| Lesotho | 1993           | FemaleLactAge20to24 | 17290      |
| Lesotho | 1993           | FemaleLactAge25to29 | 13212      |
| Lesotho | 1993           | FemaleLactAge30to34 | 9312       |
| Lesotho | 1993           | FemaleLactAge35to39 | 6127       |
| Lesotho | 1993           | FemaleLactAge40to44 | 2847       |
| Lesotho | 1993           | FemaleLactAge45to49 | 557        |
| Lesotho | 1993           | FemalePregAge15to19 | 5849       |
| Lesotho | 1993           | FemalePregAge20to24 | 12967      |
| Lesotho | 1993           | FemalePregAge25to29 | 9909       |
| Lesotho | 1993           | FemalePregAge30to34 | 6984       |
| Lesotho | 1993           | FemalePregAge35to39 | 4595       |
| Lesotho | 1993           | FemalePregAge40to44 | 2135       |
| Lesotho | 1993           | FemalePregAge45to49 | 418        |
| Lesotho | 1993           | MaleAge0to4         | 130623     |
| Lesotho | 1993           | MaleAge10to14       | 114778     |
| Lesotho | 1993           | MaleAge15to19       | 99686      |
| Lesotho | 1993           | MaleAge20to24       | 82807      |
| Lesotho | 1993           | MaleAge25to29       | 61919      |
| Lesotho | 1993           | MaleAge30to34       | 43466      |
| Lesotho | 1993           | MaleAge35to39       | 34186      |
| Lesotho | 1993           | MaleAge40to44       | 28444      |
| Lesotho | 1993           | MaleAge45to49       | 22684      |
| Lesotho | 1993           | MaleAge50to54       | 19508      |
| Lesotho | 1993           | MaleAge55to59       | 19707      |
| Lesotho | 1993           | MaleAge5to9         | 124777     |
| Lesotho | 1993           | MaleAge60to64       | 16721      |
| Lesotho | 1993           | MaleAge65to69       | 12517      |
| Lesotho | 1993           | MaleAge70to74       | 8898       |
| Lesotho | 1993           | MaleAge75to79       | 5006       |
| Lesotho | 1993           | MaleAge80to84       | 2546       |
| Lesotho | 1993           | MaleAge85to89       | 957        |
| Lesotho | 1993           | MaleAge90to94       | 193        |
| Lesotho | 1993           | MaleAge95to99       | 24         |
| Lesotho | 1993           | MaleAgeAbove100     | 1          |
| Lesotho | 1994           | FemaleAge0to4       | 128286     |
| Lesotho | 1994           | FemaleAge10to14     | 110514     |
| Lesotho | 1994           | FemaleAge15to19     | 79647      |
| Lesotho | 1994           | FemaleAge20to24     | 48838      |
| Lesotho | 1994           | FemaleAge25to29     | 42777      |
| Lesotho | 1994           | FemaleAge30to34     | 35329      |
| Lesotho | 1994           | FemaleAge35to39     | 34299      |
| Lesotho | 1994           | FemaleAge40to44     | 35511      |
| Lesotho | 1994           | FemaleAge45to49     | 29905      |
| Lesotho | 1994           | FemaleAge50to54     | 22364      |
| Lesotho | 1994           | FemaleAge55to59     | 25317      |
| Lesotho | 1994           | FemaleAge5to9       | 120721     |
| Lesotho | 1994           | FemaleAge60to64     | 23355      |
| Lesotho | 1994           | FemaleAge65to69     | 16343      |
| Lesotho | 1994           | FemaleAge70to74     | 12712      |
| Lesotho | 1994           | FemaleAge75to79     | 7810       |
| Lesotho | 1994           | FemaleAge80to84     | 3904       |
| Lesotho | 1994           | FemaleAge85to89     | 1485       |
| Lesotho | 1994           | FemaleAge90to94     | 335        |
| Lesotho | 1994           | FemaleAge95to99     | 63         |
| Lesotho | 1994           | FemaleAgeAbove100   | 3          |
| Lesotho | 1994           | FemaleLactAge15to19 | 7799       |
| Lesotho | 1994           | FemaleLactAge20to24 | 17290      |
| Lesotho | 1994           | FemaleLactAge25to29 | 13212      |
| Lesotho | 1994           | FemaleLactAge30to34 | 9312       |
| Lesotho | 1994           | FemaleLactAge35to39 | 6127       |
| Lesotho | 1994           | FemaleLactAge40to44 | 2847       |
| Lesotho | 1994           | FemaleLactAge45to49 | 557        |
| Lesotho | 1994           | FemalePregAge15to19 | 5849       |
| Lesotho | 1994           | FemalePregAge20to24 | 12967      |
| Lesotho | 1994           | FemalePregAge25to29 | 9909       |
| Lesotho | 1994           | FemalePregAge30to34 | 6984       |
| Lesotho | 1994           | FemalePregAge35to39 | 4595       |
| Lesotho | 1994           | FemalePregAge40to44 | 2135       |
| Lesotho | 1994           | FemalePregAge45to49 | 418        |
| Lesotho | 1994           | MaleAge0to4         | 131776     |
| Lesotho | 1994           | MaleAge10to14       | 116824     |
| Lesotho | 1994           | MaleAge15to19       | 101919     |
| Lesotho | 1994           | MaleAge20to24       | 85571      |
| Lesotho | 1994           | MaleAge25to29       | 64800      |
| Lesotho | 1994           | MaleAge30to34       | 45089      |
| Lesotho | 1994           | MaleAge35to39       | 35260      |
| Lesotho | 1994           | MaleAge40to44       | 29074      |
| Lesotho | 1994           | MaleAge45to49       | 23619      |

Dietary calcium and zinc deficiency risks are decreasing but remain prevalent

| Country | Reference year | Age/gender group    | Population |
|---------|----------------|---------------------|------------|
| Lesotho | 1994           | MaleAge50to54       | 19287      |
| Lesotho | 1994           | MaleAge55to59       | 19484      |
| Lesotho | 1994           | MaleAge5to9         | 125148     |
| Lesotho | 1994           | MaleAge60to64       | 17117      |
| Lesotho | 1994           | MaleAge65to69       | 12613      |
| Lesotho | 1994           | MaleAge70to74       | 9189       |
| Lesotho | 1994           | MaleAge75to79       | 5113       |
| Lesotho | 1994           | MaleAge80to84       | 2545       |
| Lesotho | 1994           | MaleAge85to89       | 954        |
| Lesotho | 1994           | MaleAge90to94       | 192        |
| Lesotho | 1994           | MaleAge95to99       | 24         |
| Lesotho | 1994           | MaleAgeAbov e100    | 1          |
| Lesotho | 1995           | FemaleAge0to4       | 129483     |
| Lesotho | 1995           | FemaleAge10to14     | 112319     |
| Lesotho | 1995           | FemaleAge15to19     | 81282      |
| Lesotho | 1995           | FemaleAge20to24     | 50465      |
| Lesotho | 1995           | FemaleAge25to29     | 45157      |
| Lesotho | 1995           | FemaleAge30to34     | 36644      |
| Lesotho | 1995           | FemaleAge35to39     | 34423      |
| Lesotho | 1995           | FemaleAge40to44     | 36456      |
| Lesotho | 1995           | FemaleAge45to49     | 31976      |
| Lesotho | 1995           | FemaleAge50to54     | 22653      |
| Lesotho | 1995           | FemaleAge55to59     | 24617      |
| Lesotho | 1995           | FemaleAge5to9       | 121290     |
| Lesotho | 1995           | FemaleAge60to64     | 23933      |
| Lesotho | 1995           | FemaleAge65to69     | 16973      |
| Lesotho | 1995           | FemaleAge70to74     | 12892      |
| Lesotho | 1995           | FemaleAge75to79     | 8067       |
| Lesotho | 1995           | FemaleAge80to84     | 4026       |
| Lesotho | 1995           | FemaleAge85to89     | 1447       |
| Lesotho | 1995           | FemaleAge90to94     | 306        |
| Lesotho | 1995           | FemaleAge95to99     | 44         |
| Lesotho | 1995           | FemaleAgeAbov e100  | 3          |
| Lesotho | 1995           | FemaleLactAge15to19 | 7799       |
| Lesotho | 1995           | FemaleLactAge20to24 | 17290      |
| Lesotho | 1995           | FemaleLactAge25to29 | 13212      |
| Lesotho | 1995           | FemaleLactAge30to34 | 9312       |
| Lesotho | 1995           | FemaleLactAge35to39 | 6127       |
| Lesotho | 1995           | FemaleLactAge40to44 | 2847       |
| Lesotho | 1995           | FemaleLactAge45to49 | 557        |
| Lesotho | 1995           | FemalePregAge15to19 | 5849       |
| Lesotho | 1995           | FemalePregAge20to24 | 12967      |
| Lesotho | 1995           | FemalePregAge25to29 | 9909       |
| Lesotho | 1995           | FemalePregAge30to34 | 6984       |
| Lesotho | 1995           | FemalePregAge35to39 | 4595       |
| Lesotho | 1995           | FemalePregAge40to44 | 2135       |
| Lesotho | 1995           | FemalePregAge45to49 | 418        |
| Lesotho | 1995           | MaleAge0to4         | 132452     |
| Lesotho | 1995           | MaleAge10to14       | 118182     |
| Lesotho | 1995           | MaleAge15to19       | 103873     |
| Lesotho | 1995           | MaleAge20to24       | 88232      |
| Lesotho | 1995           | MaleAge25to29       | 67424      |
| Lesotho | 1995           | MaleAge30to34       | 46744      |
| Lesotho | 1995           | MaleAge35to39       | 36324      |
| Lesotho | 1995           | MaleAge40to44       | 29666      |
| Lesotho | 1995           | MaleAge45to49       | 24340      |
| Lesotho | 1995           | MaleAge50to54       | 19370      |
| Lesotho | 1995           | MaleAge55to59       | 19143      |
| Lesotho | 1995           | MaleAge5to9         | 125226     |
| Lesotho | 1995           | MaleAge60to64       | 17339      |
| Lesotho | 1995           | MaleAge65to69       | 12806      |
| Lesotho | 1995           | MaleAge70to74       | 9379       |
| Lesotho | 1995           | MaleAge75to79       | 5254       |
| Lesotho | 1995           | MaleAge80to84       | 2523       |
| Lesotho | 1995           | MaleAge85to89       | 904        |
| Lesotho | 1995           | MaleAge90to94       | 169        |
| Lesotho | 1995           | MaleAge95to99       | 16         |
| Lesotho | 1995           | MaleAgeAbov e100    | 1          |
| Lesotho | 1996           | FemaleAge0to4       | 131095     |
| Lesotho | 1996           | FemaleAge10to14     | 113968     |
| Lesotho | 1996           | FemaleAge15to19     | 80749      |
| Lesotho | 1996           | FemaleAge20to24     | 49155      |
| Lesotho | 1996           | FemaleAge25to29     | 45755      |
| Lesotho | 1996           | FemaleAge30to34     | 38199      |
| Lesotho | 1996           | FemaleAge35to39     | 35748      |
| Lesotho | 1996           | FemaleAge40to44     | 37069      |
| Lesotho | 1996           | FemaleAge45to49     | 33759      |
| Lesotho | 1996           | FemaleAge50to54     | 23548      |
| Lesotho | 1996           | FemaleAge55to59     | 23616      |
| Lesotho | 1996           | FemaleAge5to9       | 122413     |
| Lesotho | 1996           | FemaleAge60to64     | 24043      |
| Lesotho | 1996           | FemaleAge65to69     | 17681      |
| Lesotho | 1996           | FemaleAge70to74     | 12974      |
| Lesotho | 1996           | FemaleAge75to79     | 8343       |
| Lesotho | 1996           | FemaleAge80to84     | 4232       |
| Lesotho | 1996           | FemaleAge85to89     | 1584       |
| Lesotho | 1996           | FemaleAge90to94     | 372        |
| Lesotho | 1996           | FemaleAge95to99     | 47         |

Dietary calcium and zinc deficiency risks are decreasing but remain prevalent

| Country | Reference year | Age/gender group    | Population |
|---------|----------------|---------------------|------------|
| Lesotho | 1996           | FemaleAgeAbove100   | 3          |
| Lesotho | 1996           | FemaleLactAge15to19 | 9487       |
| Lesotho | 1996           | FemaleLactAge20to24 | 18514      |
| Lesotho | 1996           | FemaleLactAge25to29 | 13285      |
| Lesotho | 1996           | FemaleLactAge30to34 | 9360       |
| Lesotho | 1996           | FemaleLactAge35to39 | 5775       |
| Lesotho | 1996           | FemaleLactAge40to44 | 2795       |
| Lesotho | 1996           | FemaleLactAge45to49 | 457        |
| Lesotho | 1996           | FemalePregAge15to19 | 7116       |
| Lesotho | 1996           | FemalePregAge20to24 | 13885      |
| Lesotho | 1996           | FemalePregAge25to29 | 9963       |
| Lesotho | 1996           | FemalePregAge30to34 | 7020       |
| Lesotho | 1996           | FemalePregAge35to39 | 4331       |
| Lesotho | 1996           | FemalePregAge40to44 | 2096       |
| Lesotho | 1996           | FemalePregAge45to49 | 343        |
| Lesotho | 1996           | MaleAge0to4         | 134134     |
| Lesotho | 1996           | MaleAge10to14       | 119326     |
| Lesotho | 1996           | MaleAge15to19       | 105340     |
| Lesotho | 1996           | MaleAge20to24       | 88652      |
| Lesotho | 1996           | MaleAge25to29       | 68644      |
| Lesotho | 1996           | MaleAge30to34       | 48621      |
| Lesotho | 1996           | MaleAge35to39       | 36977      |
| Lesotho | 1996           | MaleAge40to44       | 30147      |
| Lesotho | 1996           | MaleAge45to49       | 25125      |
| Lesotho | 1996           | MaleAge50to54       | 19566      |
| Lesotho | 1996           | MaleAge55to59       | 18526      |
| Lesotho | 1996           | MaleAge5to9         | 126237     |
| Lesotho | 1996           | MaleAge60to64       | 17216      |
| Lesotho | 1996           | MaleAge65to69       | 13009      |
| Lesotho | 1996           | MaleAge70to74       | 9498       |
| Lesotho | 1996           | MaleAge75to79       | 5540       |
| Lesotho | 1996           | MaleAge80to84       | 2643       |
| Lesotho | 1996           | MaleAge85to89       | 983        |
| Lesotho | 1996           | MaleAge90to94       | 214        |
| Lesotho | 1996           | MaleAge95to99       | 19         |
| Lesotho | 1996           | MaleAgeAbove100     | 1          |
| Lesotho | 1997           | FemaleAge0to4       | 132538     |
| Lesotho | 1997           | FemaleAge10to14     | 115266     |
| Lesotho | 1997           | FemaleAge15to19     | 83447      |
| Lesotho | 1997           | FemaleAge20to24     | 50315      |
| Lesotho | 1997           | FemaleAge25to29     | 46088      |
| Lesotho | 1997           | FemaleAge30to34     | 39726      |
| Lesotho | 1997           | FemaleAge35to39     | 36490      |
| Lesotho | 1997           | FemaleAge40to44     | 37401      |
| Lesotho | 1997           | FemaleAge45to49     | 35129      |
| Lesotho | 1997           | FemaleAge50to54     | 25108      |
| Lesotho | 1997           | FemaleAge55to59     | 22463      |
| Lesotho | 1997           | FemaleAge5to9       | 123539     |
| Lesotho | 1997           | FemaleAge60to64     | 23856      |
| Lesotho | 1997           | FemaleAge65to69     | 18621      |
| Lesotho | 1997           | FemaleAge70to74     | 12980      |
| Lesotho | 1997           | FemaleAge75to79     | 8606       |
| Lesotho | 1997           | FemaleAge80to84     | 4407       |
| Lesotho | 1997           | FemaleAge85to89     | 1684       |
| Lesotho | 1997           | FemaleAge90to94     | 420        |
| Lesotho | 1997           | FemaleAge95to99     | 53         |
| Lesotho | 1997           | FemaleAgeAbove100   | 3          |
| Lesotho | 1997           | FemaleLactAge15to19 | 9487       |
| Lesotho | 1997           | FemaleLactAge20to24 | 18514      |
| Lesotho | 1997           | FemaleLactAge25to29 | 13285      |
| Lesotho | 1997           | FemaleLactAge30to34 | 9360       |
| Lesotho | 1997           | FemaleLactAge35to39 | 5775       |
| Lesotho | 1997           | FemaleLactAge40to44 | 2795       |
| Lesotho | 1997           | FemaleLactAge45to49 | 457        |
| Lesotho | 1997           | FemalePregAge15to19 | 7116       |
| Lesotho | 1997           | FemalePregAge20to24 | 13885      |
| Lesotho | 1997           | FemalePregAge25to29 | 9963       |
| Lesotho | 1997           | FemalePregAge30to34 | 7020       |
| Lesotho | 1997           | FemalePregAge35to39 | 4331       |
| Lesotho | 1997           | FemalePregAge40to44 | 2096       |
| Lesotho | 1997           | FemalePregAge45to49 | 343        |
| Lesotho | 1997           | MaleAge0to4         | 135419     |
| Lesotho | 1997           | MaleAge10to14       | 120066     |
| Lesotho | 1997           | MaleAge15to19       | 106952     |
| Lesotho | 1997           | MaleAge20to24       | 89057      |
| Lesotho | 1997           | MaleAge25to29       | 69295      |
| Lesotho | 1997           | MaleAge30to34       | 50180      |
| Lesotho | 1997           | MaleAge35to39       | 37554      |
| Lesotho | 1997           | MaleAge40to44       | 30483      |
| Lesotho | 1997           | MaleAge45to49       | 25671      |
| Lesotho | 1997           | MaleAge50to54       | 20134      |
| Lesotho | 1997           | MaleAge55to59       | 17791      |
| Lesotho | 1997           | MaleAge5to9         | 127015     |
| Lesotho | 1997           | MaleAge60to64       | 16929      |
| Lesotho | 1997           | MaleAge65to69       | 13231      |
| Lesotho | 1997           | MaleAge70to74       | 9476       |
| Lesotho | 1997           | MaleAge75to79       | 5825       |
| Lesotho | 1997           | MaleAge80to84       | 2730       |

Dietary calcium and zinc deficiency risks are decreasing but remain prevalent

| Country | Reference year | Age/gender group    | Population |
|---------|----------------|---------------------|------------|
| Lesotho | 1997           | MaleAge85to89       | 1033       |
| Lesotho | 1997           | MaleAge90to94       | 247        |
| Lesotho | 1997           | MaleAge95to99       | 24         |
| Lesotho | 1997           | MaleAgeAbove100     | 1          |
| Lesotho | 1998           | FemaleAge0to4       | 133606     |
| Lesotho | 1998           | FemaleAge10to14     | 116347     |
| Lesotho | 1998           | FemaleAge15to19     | 86095      |
| Lesotho | 1998           | FemaleAge20to24     | 51899      |
| Lesotho | 1998           | FemaleAge25to29     | 46294      |
| Lesotho | 1998           | FemaleAge30to34     | 40890      |
| Lesotho | 1998           | FemaleAge35to39     | 37227      |
| Lesotho | 1998           | FemaleAge40to44     | 37680      |
| Lesotho | 1998           | FemaleAge45to49     | 36241      |
| Lesotho | 1998           | FemaleAge50to54     | 27017      |
| Lesotho | 1998           | FemaleAge55to59     | 21447      |
| Lesotho | 1998           | FemaleAge5to9       | 124588     |
| Lesotho | 1998           | FemaleAge60to64     | 23404      |
| Lesotho | 1998           | FemaleAge65to69     | 19597      |
| Lesotho | 1998           | FemaleAge70to74     | 13033      |
| Lesotho | 1998           | FemaleAge75to79     | 8833       |
| Lesotho | 1998           | FemaleAge80to84     | 4557       |
| Lesotho | 1998           | FemaleAge85to89     | 1738       |
| Lesotho | 1998           | FemaleAge90to94     | 444        |
| Lesotho | 1998           | FemaleAge95to99     | 61         |
| Lesotho | 1998           | FemaleAgeAbove100   | 4          |
| Lesotho | 1998           | FemaleLactAge15to19 | 9487       |
| Lesotho | 1998           | FemaleLactAge20to24 | 18514      |
| Lesotho | 1998           | FemaleLactAge25to29 | 13285      |
| Lesotho | 1998           | FemaleLactAge30to34 | 9360       |
| Lesotho | 1998           | FemaleLactAge35to39 | 5775       |
| Lesotho | 1998           | FemaleLactAge40to44 | 2795       |
| Lesotho | 1998           | FemaleLactAge45to49 | 457        |
| Lesotho | 1998           | FemalePregAge15to19 | 7116       |
| Lesotho | 1998           | FemalePregAge20to24 | 13885      |
| Lesotho | 1998           | FemalePregAge25to29 | 9963       |
| Lesotho | 1998           | FemalePregAge30to34 | 7020       |
| Lesotho | 1998           | FemalePregAge35to39 | 4331       |
| Lesotho | 1998           | FemalePregAge40to44 | 2096       |
| Lesotho | 1998           | FemalePregAge45to49 | 343        |
| Lesotho | 1998           | MaleAge0to4         | 136236     |
| Lesotho | 1998           | MaleAge10to14       | 120612     |
| Lesotho | 1998           | MaleAge15to19       | 108564     |
| Lesotho | 1998           | MaleAge20to24       | 89830      |
| Lesotho | 1998           | MaleAge25to29       | 69615      |
| Lesotho | 1998           | MaleAge30to34       | 51185      |
| Lesotho | 1998           | MaleAge35to39       | 38196      |
| Lesotho | 1998           | MaleAge40to44       | 30733      |
| Lesotho | 1998           | MaleAge45to49       | 25949      |
| Lesotho | 1998           | MaleAge50to54       | 20988      |
| Lesotho | 1998           | MaleAge55to59       | 17092      |
| Lesotho | 1998           | MaleAge5to9         | 127639     |
| Lesotho | 1998           | MaleAge60to64       | 16524      |
| Lesotho | 1998           | MaleAge65to69       | 13409      |
| Lesotho | 1998           | MaleAge70to74       | 9388       |
| Lesotho | 1998           | MaleAge75to79       | 6075       |
| Lesotho | 1998           | MaleAge80to84       | 2804       |
| Lesotho | 1998           | MaleAge85to89       | 1050       |
| Lesotho | 1998           | MaleAge90to94       | 262        |
| Lesotho | 1998           | MaleAge95to99       | 29         |
| Lesotho | 1998           | MaleAgeAbove100     | 1          |
| Lesotho | 1999           | FemaleAge0to4       | 134012     |
| Lesotho | 1999           | FemaleAge10to14     | 117360     |
| Lesotho | 1999           | FemaleAge15to19     | 88398      |
| Lesotho | 1999           | FemaleAge20to24     | 53890      |
| Lesotho | 1999           | FemaleAge25to29     | 46662      |
| Lesotho | 1999           | FemaleAge30to34     | 41524      |
| Lesotho | 1999           | FemaleAge35to39     | 37915      |
| Lesotho | 1999           | FemaleAge40to44     | 38022      |
| Lesotho | 1999           | FemaleAge45to49     | 37113      |
| Lesotho | 1999           | FemaleAge50to54     | 28856      |
| Lesotho | 1999           | FemaleAge55to59     | 20944      |
| Lesotho | 1999           | FemaleAge5to9       | 125474     |
| Lesotho | 1999           | FemaleAge60to64     | 22751      |
| Lesotho | 1999           | FemaleAge65to69     | 20342      |
| Lesotho | 1999           | FemaleAge70to74     | 13281      |
| Lesotho | 1999           | FemaleAge75to79     | 9000       |
| Lesotho | 1999           | FemaleAge80to84     | 4684       |
| Lesotho | 1999           | FemaleAge85to89     | 1753       |
| Lesotho | 1999           | FemaleAge90to94     | 436        |
| Lesotho | 1999           | FemaleAge95to99     | 63         |
| Lesotho | 1999           | FemaleAgeAbove100   | 4          |
| Lesotho | 1999           | FemaleLactAge15to19 | 9487       |
| Lesotho | 1999           | FemaleLactAge20to24 | 18514      |
| Lesotho | 1999           | FemaleLactAge25to29 | 13285      |
| Lesotho | 1999           | FemaleLactAge30to34 | 9360       |
| Lesotho | 1999           | FemaleLactAge35to39 | 5775       |
| Lesotho | 1999           | FemaleLactAge40to44 | 2795       |
| Lesotho | 1999           | FemaleLactAge45to49 | 457        |

Dietary calcium and zinc deficiency risks are decreasing but remain prevalent

| Country | Reference year | Age/gender group    | Population |
|---------|----------------|---------------------|------------|
| Lesotho | 1999           | FemalePregAge15to19 | 7116       |
| Lesotho | 1999           | FemalePregAge20to24 | 13885      |
| Lesotho | 1999           | FemalePregAge25to29 | 9963       |
| Lesotho | 1999           | FemalePregAge30to34 | 7020       |
| Lesotho | 1999           | FemalePregAge35to39 | 4331       |
| Lesotho | 1999           | FemalePregAge40to44 | 2096       |
| Lesotho | 1999           | FemalePregAge45to49 | 343        |
| Lesotho | 1999           | MaleAge0to4         | 136503     |
| Lesotho | 1999           | MaleAge10to14       | 121250     |
| Lesotho | 1999           | MaleAge15to19       | 110134     |
| Lesotho | 1999           | MaleAge20to24       | 91210      |
| Lesotho | 1999           | MaleAge25to29       | 69914      |
| Lesotho | 1999           | MaleAge30to34       | 51617      |
| Lesotho | 1999           | MaleAge35to39       | 38941      |
| Lesotho | 1999           | MaleAge40to44       | 30963      |
| Lesotho | 1999           | MaleAge45to49       | 26062      |
| Lesotho | 1999           | MaleAge50to54       | 21903      |
| Lesotho | 1999           | MaleAge55to59       | 16663      |
| Lesotho | 1999           | MaleAge5to9         | 128233     |
| Lesotho | 1999           | MaleAge60to64       | 16049      |
| Lesotho | 1999           | MaleAge65to69       | 13474      |
| Lesotho | 1999           | MaleAge70to74       | 9330       |
| Lesotho | 1999           | MaleAge75to79       | 6243       |
| Lesotho | 1999           | MaleAge80to84       | 2886       |
| Lesotho | 1999           | MaleAge85to89       | 1042       |
| Lesotho | 1999           | MaleAge90to94       | 250        |
| Lesotho | 1999           | MaleAge95to99       | 33         |
| Lesotho | 1999           | MaleAgeAbove100     | 1          |
| Liberia | 1992           | FemaleAge0to4       | 171497     |
| Liberia | 1992           | FemaleAge10to14     | 127790     |
| Liberia | 1992           | FemaleAge15to19     | 75913      |
| Liberia | 1992           | FemaleAge20to24     | 46435      |
| Liberia | 1992           | FemaleAge25to29     | 39798      |
| Liberia | 1992           | FemaleAge30to34     | 37128      |
| Liberia | 1992           | FemaleAge35to39     | 34955      |
| Liberia | 1992           | FemaleAge40to44     | 32172      |
| Liberia | 1992           | FemaleAge45to49     | 32057      |
| Liberia | 1992           | FemaleAge50to54     | 31756      |
| Liberia | 1992           | FemaleAge55to59     | 25537      |
| Liberia | 1992           | FemaleAge5to9       | 149912     |
| Liberia | 1992           | FemaleAge60to64     | 20290      |
| Liberia | 1992           | FemaleAge65to69     | 15227      |
| Liberia | 1992           | FemaleAge70to74     | 9659       |
| Liberia | 1992           | FemaleAge75to79     | 5029       |
| Liberia | 1992           | FemaleAge80to84     | 2023       |
| Liberia | 1992           | FemaleAge85to89     | 525        |
| Liberia | 1992           | FemaleAge90to94     | 79         |
| Liberia | 1992           | FemaleAge95to99     | 6          |
| Liberia | 1992           | FemaleLactAge15to19 | 17886      |
| Liberia | 1992           | FemaleLactAge20to24 | 24204      |
| Liberia | 1992           | FemaleLactAge25to29 | 19381      |
| Liberia | 1992           | FemaleLactAge30to34 | 14081      |
| Liberia | 1992           | FemaleLactAge35to39 | 9638       |
| Liberia | 1992           | FemaleLactAge40to44 | 4970       |
| Liberia | 1992           | FemaleLactAge45to49 | 2126       |
| Liberia | 1992           | FemalePregAge15to19 | 13415      |
| Liberia | 1992           | FemalePregAge20to24 | 18153      |
| Liberia | 1992           | FemalePregAge25to29 | 14536      |
| Liberia | 1992           | FemalePregAge30to34 | 10561      |
| Liberia | 1992           | FemalePregAge35to39 | 7229       |
| Liberia | 1992           | FemalePregAge40to44 | 3728       |
| Liberia | 1992           | FemalePregAge45to49 | 1594       |
| Liberia | 1992           | MaleAge0to4         | 174938     |
| Liberia | 1992           | MaleAge10to14       | 129270     |
| Liberia | 1992           | MaleAge15to19       | 107785     |
| Liberia | 1992           | MaleAge20to24       | 88242      |
| Liberia | 1992           | MaleAge25to29       | 72218      |
| Liberia | 1992           | MaleAge30to34       | 59702      |
| Liberia | 1992           | MaleAge35to39       | 49020      |
| Liberia | 1992           | MaleAge40to44       | 39005      |
| Liberia | 1992           | MaleAge45to49       | 35161      |
| Liberia | 1992           | MaleAge50to54       | 30718      |
| Liberia | 1992           | MaleAge55to59       | 23903      |
| Liberia | 1992           | MaleAge5to9         | 152171     |
| Liberia | 1992           | MaleAge60to64       | 18206      |
| Liberia | 1992           | MaleAge65to69       | 13480      |
| Liberia | 1992           | MaleAge70to74       | 8798       |
| Liberia | 1992           | MaleAge75to79       | 4557       |
| Liberia | 1992           | MaleAge80to84       | 1736       |
| Liberia | 1992           | MaleAge85to89       | 415        |
| Liberia | 1992           | MaleAge90to94       | 51         |
| Liberia | 1992           | MaleAge95to99       | 5          |
| Liberia | 1993           | FemaleAge0to4       | 165752     |
| Liberia | 1993           | FemaleAge10to14     | 127424     |
| Liberia | 1993           | FemaleAge15to19     | 75569      |
| Liberia | 1993           | FemaleAge20to24     | 46347      |
| Liberia | 1993           | FemaleAge25to29     | 39427      |
| Liberia | 1993           | FemaleAge30to34     | 36796      |

Dietary calcium and zinc deficiency risks are decreasing but remain prevalent

| Country | Reference year | Age/gender group    | Population |
|---------|----------------|---------------------|------------|
| Liberia | 1993           | FemaleAge35to39     | 34646      |
| Liberia | 1993           | FemaleAge40to44     | 32737      |
| Liberia | 1993           | FemaleAge45to49     | 30670      |
| Liberia | 1993           | FemaleAge50to54     | 31628      |
| Liberia | 1993           | FemaleAge55to59     | 25393      |
| Liberia | 1993           | FemaleAge5to9       | 147688     |
| Liberia | 1993           | FemaleAge60to64     | 20042      |
| Liberia | 1993           | FemaleAge65to69     | 15122      |
| Liberia | 1993           | FemaleAge70to74     | 9778       |
| Liberia | 1993           | FemaleAge75to79     | 5031       |
| Liberia | 1993           | FemaleAge80to84     | 2060       |
| Liberia | 1993           | FemaleAge85to89     | 538        |
| Liberia | 1993           | FemaleAge90to94     | 89         |
| Liberia | 1993           | FemaleAge95to99     | 9          |
| Liberia | 1993           | FemaleLactAge15to19 | 17886      |
| Liberia | 1993           | FemaleLactAge20to24 | 24204      |
| Liberia | 1993           | FemaleLactAge25to29 | 19381      |
| Liberia | 1993           | FemaleLactAge30to34 | 14081      |
| Liberia | 1993           | FemaleLactAge35to39 | 9638       |
| Liberia | 1993           | FemaleLactAge40to44 | 4970       |
| Liberia | 1993           | FemaleLactAge45to49 | 2126       |
| Liberia | 1993           | FemalePregAge15to19 | 13415      |
| Liberia | 1993           | FemalePregAge20to24 | 18153      |
| Liberia | 1993           | FemalePregAge25to29 | 14536      |
| Liberia | 1993           | FemalePregAge30to34 | 10561      |
| Liberia | 1993           | FemalePregAge35to39 | 7229       |
| Liberia | 1993           | FemalePregAge40to44 | 3728       |
| Liberia | 1993           | FemalePregAge45to49 | 1594       |
| Liberia | 1993           | MaleAge0to4         | 169079     |
| Liberia | 1993           | MaleAge10to14       | 128974     |
| Liberia | 1993           | MaleAge15to19       | 107569     |
| Liberia | 1993           | MaleAge20to24       | 88295      |
| Liberia | 1993           | MaleAge25to29       | 71974      |
| Liberia | 1993           | MaleAge30to34       | 59477      |
| Liberia | 1993           | MaleAge35to39       | 48911      |
| Liberia | 1993           | MaleAge40to44       | 39150      |
| Liberia | 1993           | MaleAge45to49       | 33581      |
| Liberia | 1993           | MaleAge50to54       | 30676      |
| Liberia | 1993           | MaleAge55to59       | 23725      |
| Liberia | 1993           | MaleAge5to9         | 149906     |
| Liberia | 1993           | MaleAge60to64       | 18033      |
| Liberia | 1993           | MaleAge65to69       | 13198      |
| Liberia | 1993           | MaleAge70to74       | 8760       |
| Liberia | 1993           | MaleAge75to79       | 4541       |
| Liberia | 1993           | MaleAge80to84       | 1757       |
| Liberia | 1993           | MaleAge85to89       | 427        |
| Liberia | 1993           | MaleAge90to94       | 60         |
| Liberia | 1993           | MaleAge95to99       | 7          |
| Liberia | 1994           | FemaleAge0to4       | 164980     |
| Liberia | 1994           | FemaleAge10to14     | 128895     |
| Liberia | 1994           | FemaleAge15to19     | 76954      |
| Liberia | 1994           | FemaleAge20to24     | 47672      |
| Liberia | 1994           | FemaleAge25to29     | 40281      |
| Liberia | 1994           | FemaleAge30to34     | 37439      |
| Liberia | 1994           | FemaleAge35to39     | 35120      |
| Liberia | 1994           | FemaleAge40to44     | 33914      |
| Liberia | 1994           | FemaleAge45to49     | 30122      |
| Liberia | 1994           | FemaleAge50to54     | 31795      |
| Liberia | 1994           | FemaleAge55to59     | 25683      |
| Liberia | 1994           | FemaleAge5to9       | 147085     |
| Liberia | 1994           | FemaleAge60to64     | 20153      |
| Liberia | 1994           | FemaleAge65to69     | 15240      |
| Liberia | 1994           | FemaleAge70to74     | 10004      |
| Liberia | 1994           | FemaleAge75to79     | 5097       |
| Liberia | 1994           | FemaleAge80to84     | 2062       |
| Liberia | 1994           | FemaleAge85to89     | 526        |
| Liberia | 1994           | FemaleAge90to94     | 88         |
| Liberia | 1994           | FemaleAge95to99     | 8          |
| Liberia | 1994           | FemaleLactAge15to19 | 17886      |
| Liberia | 1994           | FemaleLactAge20to24 | 24204      |
| Liberia | 1994           | FemaleLactAge25to29 | 19381      |
| Liberia | 1994           | FemaleLactAge30to34 | 14081      |
| Liberia | 1994           | FemaleLactAge35to39 | 9638       |
| Liberia | 1994           | FemaleLactAge40to44 | 4970       |
| Liberia | 1994           | FemaleLactAge45to49 | 2126       |
| Liberia | 1994           | FemalePregAge15to19 | 13415      |
| Liberia | 1994           | FemalePregAge20to24 | 18153      |
| Liberia | 1994           | FemalePregAge25to29 | 14536      |
| Liberia | 1994           | FemalePregAge30to34 | 10561      |
| Liberia | 1994           | FemalePregAge35to39 | 7229       |
| Liberia | 1994           | FemalePregAge40to44 | 3728       |
| Liberia | 1994           | FemalePregAge45to49 | 1594       |
| Liberia | 1994           | MaleAge0to4         | 168397     |
| Liberia | 1994           | MaleAge10to14       | 130572     |
| Liberia | 1994           | MaleAge15to19       | 109151     |
| Liberia | 1994           | MaleAge20to24       | 89792      |
| Liberia | 1994           | MaleAge25to29       | 72955      |
| Liberia | 1994           | MaleAge30to34       | 60222      |

Dietary calcium and zinc deficiency risks are decreasing but remain prevalent

| Country | Reference year | Age/gender group    | Population |
|---------|----------------|---------------------|------------|
| Liberia | 1994           | MaleAge35to39       | 49581      |
| Liberia | 1994           | MaleAge40to44       | 39989      |
| Liberia | 1994           | MaleAge45to49       | 32794      |
| Liberia | 1994           | MaleAge50to54       | 30886      |
| Liberia | 1994           | MaleAge55to59       | 23980      |
| Liberia | 1994           | MaleAge5to9         | 149313     |
| Liberia | 1994           | MaleAge60to64       | 18174      |
| Liberia | 1994           | MaleAge65to69       | 13150      |
| Liberia | 1994           | MaleAge70to74       | 8806       |
| Liberia | 1994           | MaleAge75to79       | 4546       |
| Liberia | 1994           | MaleAge80to84       | 1739       |
| Liberia | 1994           | MaleAge85to89       | 414        |
| Liberia | 1994           | MaleAge90to94       | 60         |
| Liberia | 1994           | MaleAge95to99       | 6          |
| Liberia | 1995           | FemaleAge0to4       | 173018     |
| Liberia | 1995           | FemaleAge10to14     | 132285     |
| Liberia | 1995           | FemaleAge15to19     | 80486      |
| Liberia | 1995           | FemaleAge20to24     | 50707      |
| Liberia | 1995           | FemaleAge25to29     | 42640      |
| Liberia | 1995           | FemaleAge30to34     | 39256      |
| Liberia | 1995           | FemaleAge35to39     | 36613      |
| Liberia | 1995           | FemaleAge40to44     | 35680      |
| Liberia | 1995           | FemaleAge45to49     | 30694      |
| Liberia | 1995           | FemaleAge50to54     | 32262      |
| Liberia | 1995           | FemaleAge55to59     | 26489      |
| Liberia | 1995           | FemaleAge5to9       | 148591     |
| Liberia | 1995           | FemaleAge60to64     | 20702      |
| Liberia | 1995           | FemaleAge65to69     | 15635      |
| Liberia | 1995           | FemaleAge70to74     | 10368      |
| Liberia | 1995           | FemaleAge75to79     | 5257       |
| Liberia | 1995           | FemaleAge80to84     | 2035       |
| Liberia | 1995           | FemaleAge85to89     | 479        |
| Liberia | 1995           | FemaleAge90to94     | 63         |
| Liberia | 1995           | FemaleAge95to99     | 4          |
| Liberia | 1995           | FemaleLactAge15to19 | 17886      |
| Liberia | 1995           | FemaleLactAge20to24 | 24204      |
| Liberia | 1995           | FemaleLactAge25to29 | 19381      |
| Liberia | 1995           | FemaleLactAge30to34 | 14081      |
| Liberia | 1995           | FemaleLactAge35to39 | 9638       |
| Liberia | 1995           | FemaleLactAge40to44 | 4970       |
| Liberia | 1995           | FemaleLactAge45to49 | 2126       |
| Liberia | 1995           | FemalePregAge15to19 | 13415      |
| Liberia | 1995           | FemalePregAge20to24 | 18153      |
| Liberia | 1995           | FemalePregAge25to29 | 14536      |
| Liberia | 1995           | FemalePregAge30to34 | 10561      |
| Liberia | 1995           | FemalePregAge35to39 | 7229       |
| Liberia | 1995           | FemalePregAge40to44 | 3728       |
| Liberia | 1995           | FemalePregAge45to49 | 1594       |
| Liberia | 1995           | MaleAge0to4         | 176875     |
| Liberia | 1995           | MaleAge10to14       | 134148     |
| Liberia | 1995           | MaleAge15to19       | 112957     |
| Liberia | 1995           | MaleAge20to24       | 93048      |
| Liberia | 1995           | MaleAge25to29       | 75453      |
| Liberia | 1995           | MaleAge30to34       | 62147      |
| Liberia | 1995           | MaleAge35to39       | 51222      |
| Liberia | 1995           | MaleAge40to44       | 41528      |
| Liberia | 1995           | MaleAge45to49       | 33070      |
| Liberia | 1995           | MaleAge50to54       | 31330      |
| Liberia | 1995           | MaleAge55to59       | 24762      |
| Liberia | 1995           | MaleAge5to9         | 150898     |
| Liberia | 1995           | MaleAge60to64       | 18684      |
| Liberia | 1995           | MaleAge65to69       | 13392      |
| Liberia | 1995           | MaleAge70to74       | 8956       |
| Liberia | 1995           | MaleAge75to79       | 4597       |
| Liberia | 1995           | MaleAge80to84       | 1683       |
| Liberia | 1995           | MaleAge85to89       | 362        |
| Liberia | 1995           | MaleAge90to94       | 40         |
| Liberia | 1995           | MaleAge95to99       | 2          |
| Liberia | 1996           | FemaleAge0to4       | 182446     |
| Liberia | 1996           | FemaleAge10to14     | 139083     |
| Liberia | 1996           | FemaleAge15to19     | 82965      |
| Liberia | 1996           | FemaleAge20to24     | 48054      |
| Liberia | 1996           | FemaleAge25to29     | 41448      |
| Liberia | 1996           | FemaleAge30to34     | 38600      |
| Liberia | 1996           | FemaleAge35to39     | 36795      |
| Liberia | 1996           | FemaleAge40to44     | 37124      |
| Liberia | 1996           | FemaleAge45to49     | 32619      |
| Liberia | 1996           | FemaleAge50to54     | 33257      |
| Liberia | 1996           | FemaleAge55to59     | 27990      |
| Liberia | 1996           | FemaleAge5to9       | 155974     |
| Liberia | 1996           | FemaleAge60to64     | 21764      |
| Liberia | 1996           | FemaleAge65to69     | 16314      |
| Liberia | 1996           | FemaleAge70to74     | 10887      |
| Liberia | 1996           | FemaleAge75to79     | 5638       |
| Liberia | 1996           | FemaleAge80to84     | 2213       |
| Liberia | 1996           | FemaleAge85to89     | 570        |
| Liberia | 1996           | FemaleAge90to94     | 79         |
| Liberia | 1996           | FemaleAge95to99     | 6          |

Dietary calcium and zinc deficiency risks are decreasing but remain prevalent

| Country | Reference year | Age/gender group    | Population |
|---------|----------------|---------------------|------------|
| Liberia | 1996           | FemaleLactAge15to19 | 20398      |
| Liberia | 1996           | FemaleLactAge20to24 | 29041      |
| Liberia | 1996           | FemaleLactAge25to29 | 22815      |
| Liberia | 1996           | FemaleLactAge30to34 | 16614      |
| Liberia | 1996           | FemaleLactAge35to39 | 11319      |
| Liberia | 1996           | FemaleLactAge40to44 | 5793       |
| Liberia | 1996           | FemaleLactAge45to49 | 2250       |
| Liberia | 1996           | FemalePregAge15to19 | 15298      |
| Liberia | 1996           | FemalePregAge20to24 | 21781      |
| Liberia | 1996           | FemalePregAge25to29 | 17111      |
| Liberia | 1996           | FemalePregAge30to34 | 12460      |
| Liberia | 1996           | FemalePregAge35to39 | 8489       |
| Liberia | 1996           | FemalePregAge40to44 | 4344       |
| Liberia | 1996           | FemalePregAge45to49 | 1687       |
| Liberia | 1996           | MaleAge0to4         | 186769     |
| Liberia | 1996           | MaleAge10to14       | 141141     |
| Liberia | 1996           | MaleAge15to19       | 120077     |
| Liberia | 1996           | MaleAge20to24       | 99140      |
| Liberia | 1996           | MaleAge25to29       | 80474      |
| Liberia | 1996           | MaleAge30to34       | 66019      |
| Liberia | 1996           | MaleAge35to39       | 54422      |
| Liberia | 1996           | MaleAge40to44       | 44276      |
| Liberia | 1996           | MaleAge45to49       | 34813      |
| Liberia | 1996           | MaleAge50to54       | 32223      |
| Liberia | 1996           | MaleAge55to59       | 26282      |
| Liberia | 1996           | MaleAge5to9         | 158593     |
| Liberia | 1996           | MaleAge60to64       | 19714      |
| Liberia | 1996           | MaleAge65to69       | 14040      |
| Liberia | 1996           | MaleAge70to74       | 9331       |
| Liberia | 1996           | MaleAge75to79       | 4911       |
| Liberia | 1996           | MaleAge80to84       | 1857       |
| Liberia | 1996           | MaleAge85to89       | 440        |
| Liberia | 1996           | MaleAge90to94       | 51         |
| Liberia | 1996           | MaleAge95to99       | 2          |
| Liberia | 1997           | FemaleAge0to4       | 197080     |
| Liberia | 1997           | FemaleAge10to14     | 148420     |
| Liberia | 1997           | FemaleAge15to19     | 92450      |
| Liberia | 1997           | FemaleAge20to24     | 55948      |
| Liberia | 1997           | FemaleAge25to29     | 48112      |
| Liberia | 1997           | FemaleAge30to34     | 43840      |
| Liberia | 1997           | FemaleAge35to39     | 41156      |
| Liberia | 1997           | FemaleAge40to44     | 40842      |
| Liberia | 1997           | FemaleAge45to49     | 36046      |
| Liberia | 1997           | FemaleAge50to54     | 34648      |
| Liberia | 1997           | FemaleAge55to59     | 30187      |
| Liberia | 1997           | FemaleAge5to9       | 166328     |
| Liberia | 1997           | FemaleAge60to64     | 23387      |
| Liberia | 1997           | FemaleAge65to69     | 17400      |
| Liberia | 1997           | FemaleAge70to74     | 11677      |
| Liberia | 1997           | FemaleAge75to79     | 6181       |
| Liberia | 1997           | FemaleAge80to84     | 2412       |
| Liberia | 1997           | FemaleAge85to89     | 654        |
| Liberia | 1997           | FemaleAge90to94     | 96         |
| Liberia | 1997           | FemaleAge95to99     | 8          |
| Liberia | 1997           | FemaleLactAge15to19 | 20398      |
| Liberia | 1997           | FemaleLactAge20to24 | 29041      |
| Liberia | 1997           | FemaleLactAge25to29 | 22815      |
| Liberia | 1997           | FemaleLactAge30to34 | 16614      |
| Liberia | 1997           | FemaleLactAge35to39 | 11319      |
| Liberia | 1997           | FemaleLactAge40to44 | 5793       |
| Liberia | 1997           | FemaleLactAge45to49 | 2250       |
| Liberia | 1997           | FemalePregAge15to19 | 15298      |
| Liberia | 1997           | FemalePregAge20to24 | 21781      |
| Liberia | 1997           | FemalePregAge25to29 | 17111      |
| Liberia | 1997           | FemalePregAge30to34 | 12460      |
| Liberia | 1997           | FemalePregAge35to39 | 8489       |
| Liberia | 1997           | FemalePregAge40to44 | 4344       |
| Liberia | 1997           | FemalePregAge45to49 | 1687       |
| Liberia | 1997           | MaleAge0to4         | 202015     |
| Liberia | 1997           | MaleAge10to14       | 150791     |
| Liberia | 1997           | MaleAge15to19       | 129886     |
| Liberia | 1997           | MaleAge20to24       | 107384     |
| Liberia | 1997           | MaleAge25to29       | 87394      |
| Liberia | 1997           | MaleAge30to34       | 71379      |
| Liberia | 1997           | MaleAge35to39       | 58835      |
| Liberia | 1997           | MaleAge40to44       | 47978      |
| Liberia | 1997           | MaleAge45to49       | 37749      |
| Liberia | 1997           | MaleAge50to54       | 33464      |
| Liberia | 1997           | MaleAge55to59       | 28511      |
| Liberia | 1997           | MaleAge5to9         | 169393     |
| Liberia | 1997           | MaleAge60to64       | 21237      |
| Liberia | 1997           | MaleAge65to69       | 15089      |
| Liberia | 1997           | MaleAge70to74       | 9930       |
| Liberia | 1997           | MaleAge75to79       | 5355       |
| Liberia | 1997           | MaleAge80to84       | 2051       |
| Liberia | 1997           | MaleAge85to89       | 509        |
| Liberia | 1997           | MaleAge90to94       | 64         |
| Liberia | 1997           | MaleAge95to99       | 4          |



Dietary calcium and zinc deficiency risks are decreasing but remain prevalent

| Country | Reference year | Age/gender group    | Population |
|---------|----------------|---------------------|------------|
| Liberia | 1998           | FemaleAge0to4       | 215410     |
| Liberia | 1998           | FemaleAge10to14     | 158756     |
| Liberia | 1998           | FemaleAge15to19     | 103036     |
| Liberia | 1998           | FemaleAge20to24     | 64841      |
| Liberia | 1998           | FemaleAge25to29     | 55684      |
| Liberia | 1998           | FemaleAge30to34     | 49809      |
| Liberia | 1998           | FemaleAge35to39     | 46107      |
| Liberia | 1998           | FemaleAge40to44     | 44920      |
| Liberia | 1998           | FemaleAge45to49     | 40170      |
| Liberia | 1998           | FemaleAge50to54     | 36257      |
| Liberia | 1998           | FemaleAge55to59     | 32641      |
| Liberia | 1998           | FemaleAge5to9       | 177802     |
| Liberia | 1998           | FemaleAge60to64     | 25321      |
| Liberia | 1998           | FemaleAge65to69     | 18726      |
| Liberia | 1998           | FemaleAge70to74     | 12640      |
| Liberia | 1998           | FemaleAge75to79     | 6819       |
| Liberia | 1998           | FemaleAge80to84     | 2624       |
| Liberia | 1998           | FemaleAge85to89     | 721        |
| Liberia | 1998           | FemaleAge90to94     | 112        |
| Liberia | 1998           | FemaleAge95to99     | 11         |
| Liberia | 1998           | FemaleLactAge15to19 | 20398      |
| Liberia | 1998           | FemaleLactAge20to24 | 29041      |
| Liberia | 1998           | FemaleLactAge25to29 | 22815      |
| Liberia | 1998           | FemaleLactAge30to34 | 16614      |
| Liberia | 1998           | FemaleLactAge35to39 | 11319      |
| Liberia | 1998           | FemaleLactAge40to44 | 5793       |
| Liberia | 1998           | FemaleLactAge45to49 | 2250       |
| Liberia | 1998           | FemalePregAge15to19 | 15298      |
| Liberia | 1998           | FemalePregAge20to24 | 21781      |
| Liberia | 1998           | FemalePregAge25to29 | 17111      |
| Liberia | 1998           | FemalePregAge30to34 | 12460      |
| Liberia | 1998           | FemalePregAge35to39 | 8489       |
| Liberia | 1998           | FemalePregAge40to44 | 4344       |
| Liberia | 1998           | FemalePregAge45to49 | 1687       |
| Liberia | 1998           | MaleAge0to4         | 221072     |
| Liberia | 1998           | MaleAge10to14       | 161506     |
| Liberia | 1998           | MaleAge15to19       | 140828     |
| Liberia | 1998           | MaleAge20to24       | 116665     |
| Liberia | 1998           | MaleAge25to29       | 95265      |
| Liberia | 1998           | MaleAge30to34       | 77501      |
| Liberia | 1998           | MaleAge35to39       | 63839      |
| Liberia | 1998           | MaleAge40to44       | 52147      |
| Liberia | 1998           | MaleAge45to49       | 41352      |
| Liberia | 1998           | MaleAge50to54       | 34868      |
| Liberia | 1998           | MaleAge55to59       | 31002      |
| Liberia | 1998           | MaleAge5to9         | 181362     |
| Liberia | 1998           | MaleAge60to64       | 23043      |
| Liberia | 1998           | MaleAge65to69       | 16376      |
| Liberia | 1998           | MaleAge70to74       | 10681      |
| Liberia | 1998           | MaleAge75to79       | 5872       |
| Liberia | 1998           | MaleAge80to84       | 2250       |
| Liberia | 1998           | MaleAge85to89       | 564        |
| Liberia | 1998           | MaleAge90to94       | 78         |
| Liberia | 1998           | MaleAge95to99       | 7          |
| Liberia | 1999           | FemaleAge0to4       | 232836     |
| Liberia | 1999           | FemaleAge10to14     | 168234     |
| Liberia | 1999           | FemaleAge15to19     | 112838     |
| Liberia | 1999           | FemaleAge20to24     | 73431      |
| Liberia | 1999           | FemaleAge25to29     | 63005      |
| Liberia | 1999           | FemaleAge30to34     | 55626      |
| Liberia | 1999           | FemaleAge35to39     | 50868      |
| Liberia | 1999           | FemaleAge40to44     | 48820      |
| Liberia | 1999           | FemaleAge45to49     | 44165      |
| Liberia | 1999           | FemaleAge50to54     | 38024      |
| Liberia | 1999           | FemaleAge55to59     | 34792      |
| Liberia | 1999           | FemaleAge5to9       | 188439     |
| Liberia | 1999           | FemaleAge60to64     | 27263      |
| Liberia | 1999           | FemaleAge65to69     | 20107      |
| Liberia | 1999           | FemaleAge70to74     | 13638      |
| Liberia | 1999           | FemaleAge75to79     | 7471       |
| Liberia | 1999           | FemaleAge80to84     | 2845       |
| Liberia | 1999           | FemaleAge85to89     | 762        |
| Liberia | 1999           | FemaleAge90to94     | 119        |
| Liberia | 1999           | FemaleAge95to99     | 11         |
| Liberia | 1999           | FemaleLactAge15to19 | 20398      |
| Liberia | 1999           | FemaleLactAge20to24 | 29041      |
| Liberia | 1999           | FemaleLactAge25to29 | 22815      |
| Liberia | 1999           | FemaleLactAge30to34 | 16614      |
| Liberia | 1999           | FemaleLactAge35to39 | 11319      |
| Liberia | 1999           | FemaleLactAge40to44 | 5793       |
| Liberia | 1999           | FemaleLactAge45to49 | 2250       |
| Liberia | 1999           | FemalePregAge15to19 | 15298      |
| Liberia | 1999           | FemalePregAge20to24 | 21781      |
| Liberia | 1999           | FemalePregAge25to29 | 17111      |
| Liberia | 1999           | FemalePregAge30to34 | 12460      |
| Liberia | 1999           | FemalePregAge35to39 | 8489       |
| Liberia | 1999           | FemalePregAge40to44 | 4344       |
| Liberia | 1999           | FemalePregAge45to49 | 1687       |

Dietary calcium and zinc deficiency risks are decreasing but remain prevalent

| Country | Reference year | Age/gender group    | Population |
|---------|----------------|---------------------|------------|
| Liberia | 1999           | MaleAge0to4         | 239243     |
| Liberia | 1999           | MaleAge10to14       | 171362     |
| Liberia | 1999           | MaleAge15to19       | 150974     |
| Liberia | 1999           | MaleAge20to24       | 125639     |
| Liberia | 1999           | MaleAge25to29       | 102909     |
| Liberia | 1999           | MaleAge30to34       | 83517      |
| Liberia | 1999           | MaleAge35to39       | 68688      |
| Liberia | 1999           | MaleAge40to44       | 56192      |
| Liberia | 1999           | MaleAge45to49       | 44920      |
| Liberia | 1999           | MaleAge50to54       | 36373      |
| Liberia | 1999           | MaleAge55to59       | 33167      |
| Liberia | 1999           | MaleAge5to9         | 192463     |
| Liberia | 1999           | MaleAge60to64       | 24889      |
| Liberia | 1999           | MaleAge65to69       | 17707      |
| Liberia | 1999           | MaleAge70to74       | 11498      |
| Liberia | 1999           | MaleAge75to79       | 6385       |
| Liberia | 1999           | MaleAge80to84       | 2442       |
| Liberia | 1999           | MaleAge85to89       | 603        |
| Liberia | 1999           | MaleAge90to94       | 83         |
| Liberia | 1999           | MaleAge95to99       | 7          |
| Libya   | 1992           | FemaleAge0to4       | 284455     |
| Libya   | 1992           | FemaleAge10to14     | 290657     |
| Libya   | 1992           | FemaleAge15to19     | 244292     |
| Libya   | 1992           | FemaleAge20to24     | 172467     |
| Libya   | 1992           | FemaleAge25to29     | 108947     |
| Libya   | 1992           | FemaleAge30to34     | 71416      |
| Libya   | 1992           | FemaleAge35to39     | 67899      |
| Libya   | 1992           | FemaleAge40to44     | 64118      |
| Libya   | 1992           | FemaleAge45to49     | 65498      |
| Libya   | 1992           | FemaleAge50to54     | 59973      |
| Libya   | 1992           | FemaleAge55to59     | 50280      |
| Libya   | 1992           | FemaleAge5to9       | 306125     |
| Libya   | 1992           | FemaleAge60to64     | 41101      |
| Libya   | 1992           | FemaleAge65to69     | 32231      |
| Libya   | 1992           | FemaleAge70to74     | 21960      |
| Libya   | 1992           | FemaleAge75to79     | 12803      |
| Libya   | 1992           | FemaleAge80to84     | 6203       |
| Libya   | 1992           | FemaleAge85to89     | 2187       |
| Libya   | 1992           | FemaleAge90to94     | 505        |
| Libya   | 1992           | FemaleAge95to99     | 58         |
| Libya   | 1992           | FemaleAgeAbove100   | 2          |
| Libya   | 1992           | FemaleLactAge15to19 | 2141       |
| Libya   | 1992           | FemaleLactAge20to24 | 18817      |
| Libya   | 1992           | FemaleLactAge25to29 | 33854      |
| Libya   | 1992           | FemaleLactAge30to34 | 33906      |
| Libya   | 1992           | FemaleLactAge35to39 | 19797      |
| Libya   | 1992           | FemaleLactAge40to44 | 9333       |
| Libya   | 1992           | FemaleLactAge45to49 | 1290       |
| Libya   | 1992           | FemalePregAge15to19 | 1606       |
| Libya   | 1992           | FemalePregAge20to24 | 14113      |
| Libya   | 1992           | FemalePregAge25to29 | 25391      |
| Libya   | 1992           | FemalePregAge30to34 | 25429      |
| Libya   | 1992           | FemalePregAge35to39 | 14848      |
| Libya   | 1992           | FemalePregAge40to44 | 7000       |
| Libya   | 1992           | FemalePregAge45to49 | 968        |
| Libya   | 1992           | MaleAge0to4         | 298206     |
| Libya   | 1992           | MaleAge10to14       | 302296     |
| Libya   | 1992           | MaleAge15to19       | 256288     |
| Libya   | 1992           | MaleAge20to24       | 213547     |
| Libya   | 1992           | MaleAge25to29       | 186640     |
| Libya   | 1992           | MaleAge30to34       | 168530     |
| Libya   | 1992           | MaleAge35to39       | 146188     |
| Libya   | 1992           | MaleAge40to44       | 114447     |
| Libya   | 1992           | MaleAge45to49       | 90429      |
| Libya   | 1992           | MaleAge50to54       | 73328      |
| Libya   | 1992           | MaleAge55to59       | 58557      |
| Libya   | 1992           | MaleAge5to9         | 319640     |
| Libya   | 1992           | MaleAge60to64       | 45722      |
| Libya   | 1992           | MaleAge65to69       | 33648      |
| Libya   | 1992           | MaleAge70to74       | 21243      |
| Libya   | 1992           | MaleAge75to79       | 11317      |
| Libya   | 1992           | MaleAge80to84       | 5315       |
| Libya   | 1992           | MaleAge85to89       | 1789       |
| Libya   | 1992           | MaleAge90to94       | 362        |
| Libya   | 1992           | MaleAge95to99       | 52         |
| Libya   | 1992           | MaleAgeAbove100     | 2          |
| Libya   | 1993           | FemaleAge0to4       | 283601     |
| Libya   | 1993           | FemaleAge10to14     | 297078     |
| Libya   | 1993           | FemaleAge15to19     | 253362     |
| Libya   | 1993           | FemaleAge20to24     | 180035     |
| Libya   | 1993           | FemaleAge25to29     | 116047     |
| Libya   | 1993           | FemaleAge30to34     | 78784      |
| Libya   | 1993           | FemaleAge35to39     | 71986      |
| Libya   | 1993           | FemaleAge40to44     | 68334      |
| Libya   | 1993           | FemaleAge45to49     | 66488      |
| Libya   | 1993           | FemaleAge50to54     | 61440      |
| Libya   | 1993           | FemaleAge55to59     | 51773      |
| Libya   | 1993           | FemaleAge5to9       | 302540     |

Dietary calcium and zinc deficiency risks are decreasing but remain prevalent

| Country | Reference year | Age/gender group    | Population |
|---------|----------------|---------------------|------------|
| Libya   | 1993           | FemaleAge60to64     | 42192      |
| Libya   | 1993           | FemaleAge65to69     | 33207      |
| Libya   | 1993           | FemaleAge70to74     | 23133      |
| Libya   | 1993           | FemaleAge75to79     | 13345      |
| Libya   | 1993           | FemaleAge80to84     | 6517       |
| Libya   | 1993           | FemaleAge85to89     | 2287       |
| Libya   | 1993           | FemaleAge90to94     | 541        |
| Libya   | 1993           | FemaleAge95to99     | 69         |
| Libya   | 1993           | FemaleAgeAbove100   | 3          |
| Libya   | 1993           | FemaleLactAge15to19 | 2141       |
| Libya   | 1993           | FemaleLactAge20to24 | 18817      |
| Libya   | 1993           | FemaleLactAge25to29 | 33854      |
| Libya   | 1993           | FemaleLactAge30to34 | 33906      |
| Libya   | 1993           | FemaleLactAge35to39 | 19797      |
| Libya   | 1993           | FemaleLactAge40to44 | 9333       |
| Libya   | 1993           | FemaleLactAge45to49 | 1290       |
| Libya   | 1993           | FemalePregAge15to19 | 1606       |
| Libya   | 1993           | FemalePregAge20to24 | 14113      |
| Libya   | 1993           | FemalePregAge25to29 | 25391      |
| Libya   | 1993           | FemalePregAge30to34 | 25429      |
| Libya   | 1993           | FemalePregAge35to39 | 14848      |
| Libya   | 1993           | FemalePregAge40to44 | 7000       |
| Libya   | 1993           | FemalePregAge45to49 | 968        |
| Libya   | 1993           | MaleAge0to4         | 297819     |
| Libya   | 1993           | MaleAge10to14       | 309339     |
| Libya   | 1993           | MaleAge15to19       | 266084     |
| Libya   | 1993           | MaleAge20to24       | 220689     |
| Libya   | 1993           | MaleAge25to29       | 190820     |
| Libya   | 1993           | MaleAge30to34       | 171720     |
| Libya   | 1993           | MaleAge35to39       | 150848     |
| Libya   | 1993           | MaleAge40to44       | 120581     |
| Libya   | 1993           | MaleAge45to49       | 92913      |
| Libya   | 1993           | MaleAge50to54       | 75886      |
| Libya   | 1993           | MaleAge55to59       | 59978      |
| Libya   | 1993           | MaleAge5to9         | 316179     |
| Libya   | 1993           | MaleAge60to64       | 47069      |
| Libya   | 1993           | MaleAge65to69       | 34660      |
| Libya   | 1993           | MaleAge70to74       | 22541      |
| Libya   | 1993           | MaleAge75to79       | 11804      |
| Libya   | 1993           | MaleAge80to84       | 5493       |
| Libya   | 1993           | MaleAge85to89       | 1905       |
| Libya   | 1993           | MaleAge90to94       | 375        |
| Libya   | 1993           | MaleAge95to99       | 63         |
| Libya   | 1993           | MaleAgeAbove100     | 2          |
| Libya   | 1994           | FemaleAge0to4       | 282799     |
| Libya   | 1994           | FemaleAge10to14     | 302077     |
| Libya   | 1994           | FemaleAge15to19     | 262266     |
| Libya   | 1994           | FemaleAge20to24     | 187998     |
| Libya   | 1994           | FemaleAge25to29     | 123275     |
| Libya   | 1994           | FemaleAge30to34     | 86319      |
| Libya   | 1994           | FemaleAge35to39     | 76650      |
| Libya   | 1994           | FemaleAge40to44     | 72685      |
| Libya   | 1994           | FemaleAge45to49     | 68001      |
| Libya   | 1994           | FemaleAge50to54     | 62825      |
| Libya   | 1994           | FemaleAge55to59     | 53304      |
| Libya   | 1994           | FemaleAge5to9       | 297595     |
| Libya   | 1994           | FemaleAge60to64     | 43404      |
| Libya   | 1994           | FemaleAge65to69     | 34248      |
| Libya   | 1994           | FemaleAge70to74     | 24325      |
| Libya   | 1994           | FemaleAge75to79     | 14010      |
| Libya   | 1994           | FemaleAge80to84     | 6807       |
| Libya   | 1994           | FemaleAge85to89     | 2345       |
| Libya   | 1994           | FemaleAge90to94     | 542        |
| Libya   | 1994           | FemaleAge95to99     | 72         |
| Libya   | 1994           | FemaleAgeAbove100   | 3          |
| Libya   | 1994           | FemaleLactAge15to19 | 2141       |
| Libya   | 1994           | FemaleLactAge20to24 | 18817      |
| Libya   | 1994           | FemaleLactAge25to29 | 33854      |
| Libya   | 1994           | FemaleLactAge30to34 | 33906      |
| Libya   | 1994           | FemaleLactAge35to39 | 19797      |
| Libya   | 1994           | FemaleLactAge40to44 | 9333       |
| Libya   | 1994           | FemaleLactAge45to49 | 1290       |
| Libya   | 1994           | FemalePregAge15to19 | 1606       |
| Libya   | 1994           | FemalePregAge20to24 | 14113      |
| Libya   | 1994           | FemalePregAge25to29 | 25391      |
| Libya   | 1994           | FemalePregAge30to34 | 25429      |
| Libya   | 1994           | FemalePregAge35to39 | 14848      |
| Libya   | 1994           | FemalePregAge40to44 | 7000       |
| Libya   | 1994           | FemalePregAge45to49 | 968        |
| Libya   | 1994           | MaleAge0to4         | 297384     |
| Libya   | 1994           | MaleAge10to14       | 314802     |
| Libya   | 1994           | MaleAge15to19       | 275669     |
| Libya   | 1994           | MaleAge20to24       | 228474     |
| Libya   | 1994           | MaleAge25to29       | 195538     |
| Libya   | 1994           | MaleAge30to34       | 174984     |
| Libya   | 1994           | MaleAge35to39       | 155218     |
| Libya   | 1994           | MaleAge40to44       | 126674     |
| Libya   | 1994           | MaleAge45to49       | 96056      |

Dietary calcium and zinc deficiency risks are decreasing but remain prevalent

| Country | Reference year | Age/gender group    | Population |
|---------|----------------|---------------------|------------|
| Libya   | 1994           | MaleAge50to54       | 78481      |
| Libya   | 1994           | MaleAge55to59       | 61598      |
| Libya   | 1994           | MaleAge5to9         | 311178     |
| Libya   | 1994           | MaleAge60to64       | 48429      |
| Libya   | 1994           | MaleAge65to69       | 35727      |
| Libya   | 1994           | MaleAge70to74       | 23802      |
| Libya   | 1994           | MaleAge75to79       | 12400      |
| Libya   | 1994           | MaleAge80to84       | 5652       |
| Libya   | 1994           | MaleAge85to89       | 1941       |
| Libya   | 1994           | MaleAge90to94       | 372        |
| Libya   | 1994           | MaleAge95to99       | 61         |
| Libya   | 1994           | MaleAgeAbove100     | 2          |
| Libya   | 1995           | FemaleAge0to4       | 280577     |
| Libya   | 1995           | FemaleAge10to14     | 304945     |
| Libya   | 1995           | FemaleAge15to19     | 270860     |
| Libya   | 1995           | FemaleAge20to24     | 196543     |
| Libya   | 1995           | FemaleAge25to29     | 130772     |
| Libya   | 1995           | FemaleAge30to34     | 93823      |
| Libya   | 1995           | FemaleAge35to39     | 82182      |
| Libya   | 1995           | FemaleAge40to44     | 76961      |
| Libya   | 1995           | FemaleAge45to49     | 70290      |
| Libya   | 1995           | FemaleAge50to54     | 64115      |
| Libya   | 1995           | FemaleAge55to59     | 54862      |
| Libya   | 1995           | FemaleAge5to9       | 293014     |
| Libya   | 1995           | FemaleAge60to64     | 44765      |
| Libya   | 1995           | FemaleAge65to69     | 35391      |
| Libya   | 1995           | FemaleAge70to74     | 25505      |
| Libya   | 1995           | FemaleAge75to79     | 14831      |
| Libya   | 1995           | FemaleAge80to84     | 7103       |
| Libya   | 1995           | FemaleAge85to89     | 2370       |
| Libya   | 1995           | FemaleAge90to94     | 496        |
| Libya   | 1995           | FemaleAge95to99     | 54         |
| Libya   | 1995           | FemaleAgeAbove100   | 3          |
| Libya   | 1995           | FemaleLactAge15to19 | 2141       |
| Libya   | 1995           | FemaleLactAge20to24 | 18817      |
| Libya   | 1995           | FemaleLactAge25to29 | 33854      |
| Libya   | 1995           | FemaleLactAge30to34 | 33906      |
| Libya   | 1995           | FemaleLactAge35to39 | 19797      |
| Libya   | 1995           | FemaleLactAge40to44 | 9333       |
| Libya   | 1995           | FemaleLactAge45to49 | 1290       |
| Libya   | 1995           | FemalePregAge15to19 | 1606       |
| Libya   | 1995           | FemalePregAge20to24 | 14113      |
| Libya   | 1995           | FemalePregAge25to29 | 25391      |
| Libya   | 1995           | FemalePregAge30to34 | 25429      |
| Libya   | 1995           | FemalePregAge35to39 | 14848      |
| Libya   | 1995           | FemalePregAge40to44 | 7000       |
| Libya   | 1995           | FemalePregAge45to49 | 968        |
| Libya   | 1995           | MaleAge0to4         | 295219     |
| Libya   | 1995           | MaleAge10to14       | 317836     |
| Libya   | 1995           | MaleAge15to19       | 284747     |
| Libya   | 1995           | MaleAge20to24       | 236902     |
| Libya   | 1995           | MaleAge25to29       | 200881     |
| Libya   | 1995           | MaleAge30to34       | 178469     |
| Libya   | 1995           | MaleAge35to39       | 159328     |
| Libya   | 1995           | MaleAge40to44       | 132400     |
| Libya   | 1995           | MaleAge45to49       | 100100     |
| Libya   | 1995           | MaleAge50to54       | 81027      |
| Libya   | 1995           | MaleAge55to59       | 63482      |
| Libya   | 1995           | MaleAge5to9         | 306389     |
| Libya   | 1995           | MaleAge60to64       | 49798      |
| Libya   | 1995           | MaleAge65to69       | 36887      |
| Libya   | 1995           | MaleAge70to74       | 24967      |
| Libya   | 1995           | MaleAge75to79       | 13143      |
| Libya   | 1995           | MaleAge80to84       | 5814       |
| Libya   | 1995           | MaleAge85to89       | 1900       |
| Libya   | 1995           | MaleAge90to94       | 337        |
| Libya   | 1995           | MaleAge95to99       | 38         |
| Libya   | 1995           | MaleAgeAbove100     | 2          |
| Libya   | 1996           | FemaleAge0to4       | 279562     |
| Libya   | 1996           | FemaleAge10to14     | 305274     |
| Libya   | 1996           | FemaleAge15to19     | 280161     |
| Libya   | 1996           | FemaleAge20to24     | 213546     |
| Libya   | 1996           | FemaleAge25to29     | 140430     |
| Libya   | 1996           | FemaleAge30to34     | 98836      |
| Libya   | 1996           | FemaleAge35to39     | 86482      |
| Libya   | 1996           | FemaleAge40to44     | 84473      |
| Libya   | 1996           | FemaleAge45to49     | 73447      |
| Libya   | 1996           | FemaleAge50to54     | 65148      |
| Libya   | 1996           | FemaleAge55to59     | 56258      |
| Libya   | 1996           | FemaleAge5to9       | 289238     |
| Libya   | 1996           | FemaleAge60to64     | 45999      |
| Libya   | 1996           | FemaleAge65to69     | 36284      |
| Libya   | 1996           | FemaleAge70to74     | 26375      |
| Libya   | 1996           | FemaleAge75to79     | 15632      |
| Libya   | 1996           | FemaleAge80to84     | 7534       |
| Libya   | 1996           | FemaleAge85to89     | 2647       |
| Libya   | 1996           | FemaleAge90to94     | 595        |
| Libya   | 1996           | FemaleAge95to99     | 64         |

Dietary calcium and zinc deficiency risks are decreasing but remain prevalent

| Country | Reference year | Age/gender group    | Population |
|---------|----------------|---------------------|------------|
| Libya   | 1996           | FemaleAgeAbove100   | 3          |
| Libya   | 1996           | FemaleLactAge15to19 | 1377       |
| Libya   | 1996           | FemaleLactAge20to24 | 14124      |
| Libya   | 1996           | FemaleLactAge25to29 | 32574      |
| Libya   | 1996           | FemaleLactAge30to34 | 35172      |
| Libya   | 1996           | FemaleLactAge35to39 | 20834      |
| Libya   | 1996           | FemaleLactAge40to44 | 7373       |
| Libya   | 1996           | FemaleLactAge45to49 | 1130       |
| Libya   | 1996           | FemalePregAge15to19 | 1033       |
| Libya   | 1996           | FemalePregAge20to24 | 10593      |
| Libya   | 1996           | FemalePregAge25to29 | 24430      |
| Libya   | 1996           | FemalePregAge30to34 | 26379      |
| Libya   | 1996           | FemalePregAge35to39 | 15626      |
| Libya   | 1996           | FemalePregAge40to44 | 5529       |
| Libya   | 1996           | FemalePregAge45to49 | 848        |
| Libya   | 1996           | MaleAge0to4         | 294778     |
| Libya   | 1996           | MaleAge10to14       | 318569     |
| Libya   | 1996           | MaleAge15to19       | 293567     |
| Libya   | 1996           | MaleAge20to24       | 246138     |
| Libya   | 1996           | MaleAge25to29       | 206878     |
| Libya   | 1996           | MaleAge30to34       | 181773     |
| Libya   | 1996           | MaleAge35to39       | 162283     |
| Libya   | 1996           | MaleAge40to44       | 136889     |
| Libya   | 1996           | MaleAge45to49       | 103938     |
| Libya   | 1996           | MaleAge50to54       | 82566      |
| Libya   | 1996           | MaleAge55to59       | 64801      |
| Libya   | 1996           | MaleAge5to9         | 302903     |
| Libya   | 1996           | MaleAge60to64       | 50706      |
| Libya   | 1996           | MaleAge65to69       | 37876      |
| Libya   | 1996           | MaleAge70to74       | 25894      |
| Libya   | 1996           | MaleAge75to79       | 14024      |
| Libya   | 1996           | MaleAge80to84       | 6187       |
| Libya   | 1996           | MaleAge85to89       | 2105       |
| Libya   | 1996           | MaleAge90to94       | 427        |
| Libya   | 1996           | MaleAge95to99       | 42         |
| Libya   | 1996           | MaleAgeAbove100     | 2          |
| Libya   | 1997           | FemaleAge0to4       | 276125     |
| Libya   | 1997           | FemaleAge10to14     | 303670     |
| Libya   | 1997           | FemaleAge15to19     | 287969     |
| Libya   | 1997           | FemaleAge20to24     | 222838     |
| Libya   | 1997           | FemaleAge25to29     | 148064     |
| Libya   | 1997           | FemaleAge30to34     | 106135     |
| Libya   | 1997           | FemaleAge35to39     | 93456      |
| Libya   | 1997           | FemaleAge40to44     | 88532      |
| Libya   | 1997           | FemaleAge45to49     | 77180      |
| Libya   | 1997           | FemaleAge50to54     | 66110      |
| Libya   | 1997           | FemaleAge55to59     | 57776      |
| Libya   | 1997           | FemaleAge5to9       | 286405     |
| Libya   | 1997           | FemaleAge60to64     | 47417      |
| Libya   | 1997           | FemaleAge65to69     | 37281      |
| Libya   | 1997           | FemaleAge70to74     | 27265      |
| Libya   | 1997           | FemaleAge75to79     | 16533      |
| Libya   | 1997           | FemaleAge80to84     | 7919       |
| Libya   | 1997           | FemaleAge85to89     | 2880       |
| Libya   | 1997           | FemaleAge90to94     | 671        |
| Libya   | 1997           | FemaleAge95to99     | 82         |
| Libya   | 1997           | FemaleAgeAbove100   | 3          |
| Libya   | 1997           | FemaleLactAge15to19 | 1377       |
| Libya   | 1997           | FemaleLactAge20to24 | 14124      |
| Libya   | 1997           | FemaleLactAge25to29 | 32574      |
| Libya   | 1997           | FemaleLactAge30to34 | 35172      |
| Libya   | 1997           | FemaleLactAge35to39 | 20834      |
| Libya   | 1997           | FemaleLactAge40to44 | 7373       |
| Libya   | 1997           | FemaleLactAge45to49 | 1130       |
| Libya   | 1997           | FemalePregAge15to19 | 1033       |
| Libya   | 1997           | FemalePregAge20to24 | 10593      |
| Libya   | 1997           | FemalePregAge25to29 | 24430      |
| Libya   | 1997           | FemalePregAge30to34 | 26379      |
| Libya   | 1997           | FemalePregAge35to39 | 15626      |
| Libya   | 1997           | FemalePregAge40to44 | 5529       |
| Libya   | 1997           | FemalePregAge45to49 | 848        |
| Libya   | 1997           | MaleAge0to4         | 291485     |
| Libya   | 1997           | MaleAge10to14       | 317092     |
| Libya   | 1997           | MaleAge15to19       | 302036     |
| Libya   | 1997           | MaleAge20to24       | 255973     |
| Libya   | 1997           | MaleAge25to29       | 213597     |
| Libya   | 1997           | MaleAge30to34       | 185615     |
| Libya   | 1997           | MaleAge35to39       | 165198     |
| Libya   | 1997           | MaleAge40to44       | 141145     |
| Libya   | 1997           | MaleAge45to49       | 108680     |
| Libya   | 1997           | MaleAge50to54       | 84022      |
| Libya   | 1997           | MaleAge55to59       | 66383      |
| Libya   | 1997           | MaleAge5to9         | 300308     |
| Libya   | 1997           | MaleAge60to64       | 51524      |
| Libya   | 1997           | MaleAge65to69       | 38894      |
| Libya   | 1997           | MaleAge70to74       | 26766      |
| Libya   | 1997           | MaleAge75to79       | 14981      |
| Libya   | 1997           | MaleAge80to84       | 6503       |

Dietary calcium and zinc deficiency risks are decreasing but remain prevalent

| Country | Reference year | Age/gender group    | Population |
|---------|----------------|---------------------|------------|
| Libya   | 1997           | MaleAge85to89       | 2261       |
| Libya   | 1997           | MaleAge90to94       | 500        |
| Libya   | 1997           | MaleAge95to99       | 51         |
| Libya   | 1997           | MaleAgeAbove100     | 2          |
| Libya   | 1998           | FemaleAge0to4       | 271385     |
| Libya   | 1998           | FemaleAge10to14     | 300526     |
| Libya   | 1998           | FemaleAge15to19     | 294917     |
| Libya   | 1998           | FemaleAge20to24     | 232303     |
| Libya   | 1998           | FemaleAge25to29     | 155955     |
| Libya   | 1998           | FemaleAge30to34     | 113488     |
| Libya   | 1998           | FemaleAge35to39     | 101006     |
| Libya   | 1998           | FemaleAge40to44     | 92770      |
| Libya   | 1998           | FemaleAge45to49     | 81488      |
| Libya   | 1998           | FemaleAge50to54     | 67214      |
| Libya   | 1998           | FemaleAge55to59     | 59330      |
| Libya   | 1998           | FemaleAge5to9       | 284475     |
| Libya   | 1998           | FemaleAge60to64     | 48955      |
| Libya   | 1998           | FemaleAge65to69     | 38392      |
| Libya   | 1998           | FemaleAge70to74     | 28205      |
| Libya   | 1998           | FemaleAge75to79     | 17501      |
| Libya   | 1998           | FemaleAge80to84     | 8296       |
| Libya   | 1998           | FemaleAge85to89     | 3048       |
| Libya   | 1998           | FemaleAge90to94     | 716        |
| Libya   | 1998           | FemaleAge95to99     | 98         |
| Libya   | 1998           | FemaleAgeAbove100   | 3          |
| Libya   | 1998           | FemaleLactAge15to19 | 1377       |
| Libya   | 1998           | FemaleLactAge20to24 | 14124      |
| Libya   | 1998           | FemaleLactAge25to29 | 32574      |
| Libya   | 1998           | FemaleLactAge30to34 | 35172      |
| Libya   | 1998           | FemaleLactAge35to39 | 20834      |
| Libya   | 1998           | FemaleLactAge40to44 | 7373       |
| Libya   | 1998           | FemaleLactAge45to49 | 1130       |
| Libya   | 1998           | FemalePregAge15to19 | 1033       |
| Libya   | 1998           | FemalePregAge20to24 | 10593      |
| Libya   | 1998           | FemalePregAge25to29 | 24430      |
| Libya   | 1998           | FemalePregAge30to34 | 26379      |
| Libya   | 1998           | FemalePregAge35to39 | 15626      |
| Libya   | 1998           | FemalePregAge40to44 | 5529       |
| Libya   | 1998           | FemalePregAge45to49 | 848        |
| Libya   | 1998           | MaleAge0to4         | 286611     |
| Libya   | 1998           | MaleAge10to14       | 313888     |
| Libya   | 1998           | MaleAge15to19       | 309445     |
| Libya   | 1998           | MaleAge20to24       | 266027     |
| Libya   | 1998           | MaleAge25to29       | 220956     |
| Libya   | 1998           | MaleAge30to34       | 190038     |
| Libya   | 1998           | MaleAge35to39       | 168197     |
| Libya   | 1998           | MaleAge40to44       | 145104     |
| Libya   | 1998           | MaleAge45to49       | 113972     |
| Libya   | 1998           | MaleAge50to54       | 85660      |
| Libya   | 1998           | MaleAge55to59       | 68125      |
| Libya   | 1998           | MaleAge5to9         | 298600     |
| Libya   | 1998           | MaleAge60to64       | 52298      |
| Libya   | 1998           | MaleAge65to69       | 39880      |
| Libya   | 1998           | MaleAge70to74       | 27634      |
| Libya   | 1998           | MaleAge75to79       | 15947      |
| Libya   | 1998           | MaleAge80to84       | 6802       |
| Libya   | 1998           | MaleAge85to89       | 2356       |
| Libya   | 1998           | MaleAge90to94       | 543        |
| Libya   | 1998           | MaleAge95to99       | 63         |
| Libya   | 1998           | MaleAgeAbove100     | 3          |
| Libya   | 1999           | FemaleAge0to4       | 267671     |
| Libya   | 1999           | FemaleAge10to14     | 296706     |
| Libya   | 1999           | FemaleAge15to19     | 299909     |
| Libya   | 1999           | FemaleAge20to24     | 241408     |
| Libya   | 1999           | FemaleAge25to29     | 164118     |
| Libya   | 1999           | FemaleAge30to34     | 120855     |
| Libya   | 1999           | FemaleAge35to39     | 108619     |
| Libya   | 1999           | FemaleAge40to44     | 97506      |
| Libya   | 1999           | FemaleAge45to49     | 85880      |
| Libya   | 1999           | FemaleAge50to54     | 68785      |
| Libya   | 1999           | FemaleAge55to59     | 60767      |
| Libya   | 1999           | FemaleAge5to9       | 282770     |
| Libya   | 1999           | FemaleAge60to64     | 50515      |
| Libya   | 1999           | FemaleAge65to69     | 39616      |
| Libya   | 1999           | FemaleAge70to74     | 29206      |
| Libya   | 1999           | FemaleAge75to79     | 18469      |
| Libya   | 1999           | FemaleAge80to84     | 8710       |
| Libya   | 1999           | FemaleAge85to89     | 3148       |
| Libya   | 1999           | FemaleAge90to94     | 724        |
| Libya   | 1999           | FemaleAge95to99     | 103        |
| Libya   | 1999           | FemaleAgeAbove100   | 4          |
| Libya   | 1999           | FemaleLactAge15to19 | 1377       |
| Libya   | 1999           | FemaleLactAge20to24 | 14124      |
| Libya   | 1999           | FemaleLactAge25to29 | 32574      |
| Libya   | 1999           | FemaleLactAge30to34 | 35172      |
| Libya   | 1999           | FemaleLactAge35to39 | 20834      |
| Libya   | 1999           | FemaleLactAge40to44 | 7373       |
| Libya   | 1999           | FemaleLactAge45to49 | 1130       |

Dietary calcium and zinc deficiency risks are decreasing but remain prevalent

| Country   | Reference year | Age/gender group    | Population |
|-----------|----------------|---------------------|------------|
| Libya     | 1999           | FemalePregAge15to19 | 1033       |
| Libya     | 1999           | FemalePregAge20to24 | 10593      |
| Libya     | 1999           | FemalePregAge25to29 | 24430      |
| Libya     | 1999           | FemalePregAge30to34 | 26379      |
| Libya     | 1999           | FemalePregAge35to39 | 15626      |
| Libya     | 1999           | FemalePregAge40to44 | 5529       |
| Libya     | 1999           | FemalePregAge45to49 | 848        |
| Libya     | 1999           | MaleAge0to4         | 282745     |
| Libya     | 1999           | MaleAge10to14       | 309963     |
| Libya     | 1999           | MaleAge15to19       | 314727     |
| Libya     | 1999           | MaleAge20to24       | 275705     |
| Libya     | 1999           | MaleAge25to29       | 228848     |
| Libya     | 1999           | MaleAge30to34       | 195006     |
| Libya     | 1999           | MaleAge35to39       | 171367     |
| Libya     | 1999           | MaleAge40to44       | 148732     |
| Libya     | 1999           | MaleAge45to49       | 119204     |
| Libya     | 1999           | MaleAge50to54       | 87874      |
| Libya     | 1999           | MaleAge55to59       | 69820      |
| Libya     | 1999           | MaleAge5to9         | 297094     |
| Libya     | 1999           | MaleAge60to64       | 53104      |
| Libya     | 1999           | MaleAge65to69       | 40753      |
| Libya     | 1999           | MaleAge70to74       | 28516      |
| Libya     | 1999           | MaleAge75to79       | 16843      |
| Libya     | 1999           | MaleAge80to84       | 7133       |
| Libya     | 1999           | MaleAge85to89       | 2387       |
| Libya     | 1999           | MaleAge90to94       | 539        |
| Libya     | 1999           | MaleAge95to99       | 67         |
| Libya     | 1999           | MaleAgeAbove100     | 3          |
| Lithuania | 1992           | FemaleAge0to4       | 135168     |
| Lithuania | 1992           | FemaleAge10to14     | 130591     |
| Lithuania | 1992           | FemaleAge15to19     | 121765     |
| Lithuania | 1992           | FemaleAge20to24     | 98826      |
| Lithuania | 1992           | FemaleAge25to29     | 117825     |
| Lithuania | 1992           | FemaleAge30to34     | 136676     |
| Lithuania | 1992           | FemaleAge35to39     | 127833     |
| Lithuania | 1992           | FemaleAge40to44     | 115602     |
| Lithuania | 1992           | FemaleAge45to49     | 113130     |
| Lithuania | 1992           | FemaleAge50to54     | 116359     |
| Lithuania | 1992           | FemaleAge55to59     | 115923     |
| Lithuania | 1992           | FemaleAge5to9       | 139175     |
| Lithuania | 1992           | FemaleAge60to64     | 112930     |
| Lithuania | 1992           | FemaleAge65to69     | 100209     |
| Lithuania | 1992           | FemaleAge70to74     | 62128      |
| Lithuania | 1992           | FemaleAge75to79     | 46202      |
| Lithuania | 1992           | FemaleAge80to84     | 38577      |
| Lithuania | 1992           | FemaleAge85to89     | 20092      |
| Lithuania | 1992           | FemaleAge90to94     | 7416       |
| Lithuania | 1992           | FemaleAge95to99     | 1864       |
| Lithuania | 1992           | FemaleAgeAbove100   | 340        |
| Lithuania | 1992           | FemaleLactAge15to19 | 5855       |
| Lithuania | 1992           | FemaleLactAge20to24 | 19615      |
| Lithuania | 1992           | FemaleLactAge25to29 | 13926      |
| Lithuania | 1992           | FemaleLactAge30to34 | 7017       |
| Lithuania | 1992           | FemaleLactAge35to39 | 2579       |
| Lithuania | 1992           | FemaleLactAge40to44 | 506        |
| Lithuania | 1992           | FemaleLactAge45to49 | 27         |
| Lithuania | 1992           | FemalePregAge15to19 | 4391       |
| Lithuania | 1992           | FemalePregAge20to24 | 14712      |
| Lithuania | 1992           | FemalePregAge25to29 | 10445      |
| Lithuania | 1992           | FemalePregAge30to34 | 5263       |
| Lithuania | 1992           | FemalePregAge35to39 | 1934       |
| Lithuania | 1992           | FemalePregAge40to44 | 379        |
| Lithuania | 1992           | FemalePregAge45to49 | 20         |
| Lithuania | 1992           | MaleAge0to4         | 141362     |
| Lithuania | 1992           | MaleAge10to14       | 134502     |
| Lithuania | 1992           | MaleAge15to19       | 135906     |
| Lithuania | 1992           | MaleAge20to24       | 140472     |
| Lithuania | 1992           | MaleAge25to29       | 148811     |
| Lithuania | 1992           | MaleAge30to34       | 148346     |
| Lithuania | 1992           | MaleAge35to39       | 127340     |
| Lithuania | 1992           | MaleAge40to44       | 107427     |
| Lithuania | 1992           | MaleAge45to49       | 100209     |
| Lithuania | 1992           | MaleAge50to54       | 98096      |
| Lithuania | 1992           | MaleAge55to59       | 91626      |
| Lithuania | 1992           | MaleAge5to9         | 144609     |
| Lithuania | 1992           | MaleAge60to64       | 80158      |
| Lithuania | 1992           | MaleAge65to69       | 59187      |
| Lithuania | 1992           | MaleAge70to74       | 32587      |
| Lithuania | 1992           | MaleAge75to79       | 20854      |
| Lithuania | 1992           | MaleAge80to84       | 18906      |
| Lithuania | 1992           | MaleAge85to89       | 10200      |
| Lithuania | 1992           | MaleAge90to94       | 2667       |
| Lithuania | 1992           | MaleAge95to99       | 687        |
| Lithuania | 1992           | MaleAgeAbove100     | 114        |
| Lithuania | 1993           | FemaleAge0to4       | 129854     |
| Lithuania | 1993           | FemaleAge10to14     | 131284     |
| Lithuania | 1993           | FemaleAge15to19     | 119061     |
| Lithuania | 1993           | FemaleAge20to24     | 98904      |

Dietary calcium and zinc deficiency risks are decreasing but remain prevalent

| Country   | Reference year | Age/gender group    | Population |
|-----------|----------------|---------------------|------------|
| Lithuania | 1993           | FemaleAge25to29     | 113581     |
| Lithuania | 1993           | FemaleAge30to34     | 135693     |
| Lithuania | 1993           | FemaleAge35to39     | 131455     |
| Lithuania | 1993           | FemaleAge40to44     | 115932     |
| Lithuania | 1993           | FemaleAge45to49     | 112104     |
| Lithuania | 1993           | FemaleAge50to54     | 114345     |
| Lithuania | 1993           | FemaleAge55to59     | 115473     |
| Lithuania | 1993           | FemaleAge5to9       | 138846     |
| Lithuania | 1993           | FemaleAge60to64     | 111795     |
| Lithuania | 1993           | FemaleAge65to69     | 101977     |
| Lithuania | 1993           | FemaleAge70to74     | 69460      |
| Lithuania | 1993           | FemaleAge75to79     | 42503      |
| Lithuania | 1993           | FemaleAge80to84     | 38447      |
| Lithuania | 1993           | FemaleAge85to89     | 20555      |
| Lithuania | 1993           | FemaleAge90to94     | 7449       |
| Lithuania | 1993           | FemaleAge95to99     | 1972       |
| Lithuania | 1993           | FemaleAgeAbove100   | 325        |
| Lithuania | 1993           | FemaleLactAge15to19 | 5855       |
| Lithuania | 1993           | FemaleLactAge20to24 | 19615      |
| Lithuania | 1993           | FemaleLactAge25to29 | 13926      |
| Lithuania | 1993           | FemaleLactAge30to34 | 7017       |
| Lithuania | 1993           | FemaleLactAge35to39 | 2579       |
| Lithuania | 1993           | FemaleLactAge40to44 | 506        |
| Lithuania | 1993           | FemaleLactAge45to49 | 27         |
| Lithuania | 1993           | FemalePregAge15to19 | 4391       |
| Lithuania | 1993           | FemalePregAge20to24 | 14712      |
| Lithuania | 1993           | FemalePregAge25to29 | 10445      |
| Lithuania | 1993           | FemalePregAge30to34 | 5263       |
| Lithuania | 1993           | FemalePregAge35to39 | 1934       |
| Lithuania | 1993           | FemalePregAge40to44 | 379        |
| Lithuania | 1993           | FemalePregAge45to49 | 20         |
| Lithuania | 1993           | MaleAge0to4         | 135913     |
| Lithuania | 1993           | MaleAge10to14       | 135421     |
| Lithuania | 1993           | MaleAge15to19       | 132852     |
| Lithuania | 1993           | MaleAge20to24       | 139297     |
| Lithuania | 1993           | MaleAge25to29       | 144856     |
| Lithuania | 1993           | MaleAge30to34       | 148328     |
| Lithuania | 1993           | MaleAge35to39       | 130500     |
| Lithuania | 1993           | MaleAge40to44       | 108153     |
| Lithuania | 1993           | MaleAge45to49       | 98869      |
| Lithuania | 1993           | MaleAge50to54       | 96401      |
| Lithuania | 1993           | MaleAge55to59       | 91032      |
| Lithuania | 1993           | MaleAge5to9         | 144434     |
| Lithuania | 1993           | MaleAge60to64       | 79941      |
| Lithuania | 1993           | MaleAge65to69       | 61532      |
| Lithuania | 1993           | MaleAge70to74       | 35541      |
| Lithuania | 1993           | MaleAge75to79       | 19559      |
| Lithuania | 1993           | MaleAge80to84       | 17200      |
| Lithuania | 1993           | MaleAge85to89       | 10799      |
| Lithuania | 1993           | MaleAge90to94       | 2707       |
| Lithuania | 1993           | MaleAge95to99       | 669        |
| Lithuania | 1993           | MaleAgeAbove100     | 116        |
| Lithuania | 1994           | FemaleAge0to4       | 123882     |
| Lithuania | 1994           | FemaleAge10to14     | 132000     |
| Lithuania | 1994           | FemaleAge15to19     | 116731     |
| Lithuania | 1994           | FemaleAge20to24     | 98623      |
| Lithuania | 1994           | FemaleAge25to29     | 109937     |
| Lithuania | 1994           | FemaleAge30to34     | 133930     |
| Lithuania | 1994           | FemaleAge35to39     | 134434     |
| Lithuania | 1994           | FemaleAge40to44     | 116915     |
| Lithuania | 1994           | FemaleAge45to49     | 111230     |
| Lithuania | 1994           | FemaleAge50to54     | 112405     |
| Lithuania | 1994           | FemaleAge55to59     | 114775     |
| Lithuania | 1994           | FemaleAge5to9       | 137925     |
| Lithuania | 1994           | FemaleAge60to64     | 110677     |
| Lithuania | 1994           | FemaleAge65to69     | 103115     |
| Lithuania | 1994           | FemaleAge70to74     | 76231      |
| Lithuania | 1994           | FemaleAge75to79     | 40989      |
| Lithuania | 1994           | FemaleAge80to84     | 37565      |
| Lithuania | 1994           | FemaleAge85to89     | 20662      |
| Lithuania | 1994           | FemaleAge90to94     | 7309       |
| Lithuania | 1994           | FemaleAge95to99     | 1955       |
| Lithuania | 1994           | FemaleAgeAbove100   | 308        |
| Lithuania | 1994           | FemaleLactAge15to19 | 5855       |
| Lithuania | 1994           | FemaleLactAge20to24 | 19615      |
| Lithuania | 1994           | FemaleLactAge25to29 | 13926      |
| Lithuania | 1994           | FemaleLactAge30to34 | 7017       |
| Lithuania | 1994           | FemaleLactAge35to39 | 2579       |
| Lithuania | 1994           | FemaleLactAge40to44 | 506        |
| Lithuania | 1994           | FemaleLactAge45to49 | 27         |
| Lithuania | 1994           | FemalePregAge15to19 | 4391       |
| Lithuania | 1994           | FemalePregAge20to24 | 14712      |
| Lithuania | 1994           | FemalePregAge25to29 | 10445      |
| Lithuania | 1994           | FemalePregAge30to34 | 5263       |
| Lithuania | 1994           | FemalePregAge35to39 | 1934       |
| Lithuania | 1994           | FemalePregAge40to44 | 379        |
| Lithuania | 1994           | FemalePregAge45to49 | 20         |
| Lithuania | 1994           | MaleAge0to4         | 129779     |



Dietary calcium and zinc deficiency risks are decreasing but remain prevalent

| Country   | Reference year | Age/gender group    | Population |
|-----------|----------------|---------------------|------------|
| Lithuania | 1994           | MaleAge10to14       | 136382     |
| Lithuania | 1994           | MaleAge15to19       | 130310     |
| Lithuania | 1994           | MaleAge20to24       | 137847     |
| Lithuania | 1994           | MaleAge25to29       | 141224     |
| Lithuania | 1994           | MaleAge30to34       | 147480     |
| Lithuania | 1994           | MaleAge35to39       | 133230     |
| Lithuania | 1994           | MaleAge40to44       | 109368     |
| Lithuania | 1994           | MaleAge45to49       | 97821      |
| Lithuania | 1994           | MaleAge50to54       | 94720      |
| Lithuania | 1994           | MaleAge55to59       | 90203      |
| Lithuania | 1994           | MaleAge5to9         | 143570     |
| Lithuania | 1994           | MaleAge60to64       | 79589      |
| Lithuania | 1994           | MaleAge65to69       | 63353      |
| Lithuania | 1994           | MaleAge70to74       | 38409      |
| Lithuania | 1994           | MaleAge75to79       | 19107      |
| Lithuania | 1994           | MaleAge80to84       | 15513      |
| Lithuania | 1994           | MaleAge85to89       | 10680      |
| Lithuania | 1994           | MaleAge90to94       | 2743       |
| Lithuania | 1994           | MaleAge95to99       | 637        |
| Lithuania | 1994           | MaleAgeAbove100     | 117        |
| Lithuania | 1995           | FemaleAge0to4       | 117834     |
| Lithuania | 1995           | FemaleAge10to14     | 132553     |
| Lithuania | 1995           | FemaleAge15to19     | 115307     |
| Lithuania | 1995           | FemaleAge20to24     | 97543      |
| Lithuania | 1995           | FemaleAge25to29     | 107396     |
| Lithuania | 1995           | FemaleAge30to34     | 131628     |
| Lithuania | 1995           | FemaleAge35to39     | 136382     |
| Lithuania | 1995           | FemaleAge40to44     | 118735     |
| Lithuania | 1995           | FemaleAge45to49     | 110612     |
| Lithuania | 1995           | FemaleAge50to54     | 110719     |
| Lithuania | 1995           | FemaleAge55to59     | 113718     |
| Lithuania | 1995           | FemaleAge5to9       | 136337     |
| Lithuania | 1995           | FemaleAge60to64     | 109867     |
| Lithuania | 1995           | FemaleAge65to69     | 103916     |
| Lithuania | 1995           | FemaleAge70to74     | 81519      |
| Lithuania | 1995           | FemaleAge75to79     | 42375      |
| Lithuania | 1995           | FemaleAge80to84     | 35925      |
| Lithuania | 1995           | FemaleAge85to89     | 20456      |
| Lithuania | 1995           | FemaleAge90to94     | 7036       |
| Lithuania | 1995           | FemaleAge95to99     | 1697       |
| Lithuania | 1995           | FemaleAgeAbove100   | 291        |
| Lithuania | 1995           | FemaleLactAge15to19 | 5855       |
| Lithuania | 1995           | FemaleLactAge20to24 | 19615      |
| Lithuania | 1995           | FemaleLactAge25to29 | 13926      |
| Lithuania | 1995           | FemaleLactAge30to34 | 7017       |
| Lithuania | 1995           | FemaleLactAge35to39 | 2579       |
| Lithuania | 1995           | FemaleLactAge40to44 | 506        |
| Lithuania | 1995           | FemaleLactAge45to49 | 27         |
| Lithuania | 1995           | FemalePregAge15to19 | 4391       |
| Lithuania | 1995           | FemalePregAge20to24 | 14712      |
| Lithuania | 1995           | FemalePregAge25to29 | 10445      |
| Lithuania | 1995           | FemalePregAge30to34 | 5263       |
| Lithuania | 1995           | FemalePregAge35to39 | 1934       |
| Lithuania | 1995           | FemalePregAge40to44 | 379        |
| Lithuania | 1995           | FemalePregAge45to49 | 20         |
| Lithuania | 1995           | MaleAge0to4         | 123598     |
| Lithuania | 1995           | MaleAge10to14       | 137158     |
| Lithuania | 1995           | MaleAge15to19       | 128791     |
| Lithuania | 1995           | MaleAge20to24       | 135862     |
| Lithuania | 1995           | MaleAge25to29       | 138400     |
| Lithuania | 1995           | MaleAge30to34       | 145933     |
| Lithuania | 1995           | MaleAge35to39       | 135305     |
| Lithuania | 1995           | MaleAge40to44       | 111176     |
| Lithuania | 1995           | MaleAge45to49       | 97239      |
| Lithuania | 1995           | MaleAge50to54       | 93160      |
| Lithuania | 1995           | MaleAge55to59       | 89172      |
| Lithuania | 1995           | MaleAge5to9         | 141982     |
| Lithuania | 1995           | MaleAge60to64       | 79304      |
| Lithuania | 1995           | MaleAge65to69       | 64647      |
| Lithuania | 1995           | MaleAge70to74       | 40971      |
| Lithuania | 1995           | MaleAge75to79       | 19631      |
| Lithuania | 1995           | MaleAge80to84       | 13993      |
| Lithuania | 1995           | MaleAge85to89       | 9853       |
| Lithuania | 1995           | MaleAge90to94       | 2742       |
| Lithuania | 1995           | MaleAge95to99       | 535        |
| Lithuania | 1995           | MaleAgeAbove100     | 113        |
| Lithuania | 1996           | FemaleAge0to4       | 110804     |
| Lithuania | 1996           | FemaleAge10to14     | 133720     |
| Lithuania | 1996           | FemaleAge15to19     | 117423     |
| Lithuania | 1996           | FemaleAge20to24     | 105478     |
| Lithuania | 1996           | FemaleAge25to29     | 110641     |
| Lithuania | 1996           | FemaleAge30to34     | 130645     |
| Lithuania | 1996           | FemaleAge35to39     | 137758     |
| Lithuania | 1996           | FemaleAge40to44     | 121567     |
| Lithuania | 1996           | FemaleAge45to49     | 110344     |
| Lithuania | 1996           | FemaleAge50to54     | 109181     |
| Lithuania | 1996           | FemaleAge55to59     | 112283     |
| Lithuania | 1996           | FemaleAge5to9       | 134629     |

Dietary calcium and zinc deficiency risks are decreasing but remain prevalent

| Country   | Reference year | Age/gender group    | Population |
|-----------|----------------|---------------------|------------|
| Lithuania | 1996           | FemaleAge60to64     | 109126     |
| Lithuania | 1996           | FemaleAge65to69     | 103892     |
| Lithuania | 1996           | FemaleAge70to74     | 85117      |
| Lithuania | 1996           | FemaleAge75to79     | 45513      |
| Lithuania | 1996           | FemaleAge80to84     | 33956      |
| Lithuania | 1996           | FemaleAge85to89     | 20944      |
| Lithuania | 1996           | FemaleAge90to94     | 7761       |
| Lithuania | 1996           | FemaleAge95to99     | 1717       |
| Lithuania | 1996           | FemaleAgeAbove100   | 274        |
| Lithuania | 1996           | FemaleLactAge15to19 | 4050       |
| Lithuania | 1996           | FemaleLactAge20to24 | 13537      |
| Lithuania | 1996           | FemaleLactAge25to29 | 11120      |
| Lithuania | 1996           | FemaleLactAge30to34 | 6086       |
| Lithuania | 1996           | FemaleLactAge35to39 | 2494       |
| Lithuania | 1996           | FemaleLactAge40to44 | 497        |
| Lithuania | 1996           | FemaleLactAge45to49 | 21         |
| Lithuania | 1996           | FemalePregAge15to19 | 3038       |
| Lithuania | 1996           | FemalePregAge20to24 | 10152      |
| Lithuania | 1996           | FemalePregAge25to29 | 8340       |
| Lithuania | 1996           | FemalePregAge30to34 | 4565       |
| Lithuania | 1996           | FemalePregAge35to39 | 1871       |
| Lithuania | 1996           | FemalePregAge40to44 | 373        |
| Lithuania | 1996           | FemalePregAge45to49 | 16         |
| Lithuania | 1996           | MaleAge0to4         | 116457     |
| Lithuania | 1996           | MaleAge10to14       | 138624     |
| Lithuania | 1996           | MaleAge15to19       | 127874     |
| Lithuania | 1996           | MaleAge20to24       | 132037     |
| Lithuania | 1996           | MaleAge25to29       | 135060     |
| Lithuania | 1996           | MaleAge30to34       | 143340     |
| Lithuania | 1996           | MaleAge35to39       | 136822     |
| Lithuania | 1996           | MaleAge40to44       | 113936     |
| Lithuania | 1996           | MaleAge45to49       | 97276      |
| Lithuania | 1996           | MaleAge50to54       | 91729      |
| Lithuania | 1996           | MaleAge55to59       | 88033      |
| Lithuania | 1996           | MaleAge5to9         | 140333     |
| Lithuania | 1996           | MaleAge60to64       | 79045      |
| Lithuania | 1996           | MaleAge65to69       | 65507      |
| Lithuania | 1996           | MaleAge70to74       | 43306      |
| Lithuania | 1996           | MaleAge75to79       | 21465      |
| Lithuania | 1996           | MaleAge80to84       | 13017      |
| Lithuania | 1996           | MaleAge85to89       | 9338       |
| Lithuania | 1996           | MaleAge90to94       | 3266       |
| Lithuania | 1996           | MaleAge95to99       | 512        |
| Lithuania | 1996           | MaleAgeAbove100     | 105        |
| Lithuania | 1997           | FemaleAge0to4       | 104777     |
| Lithuania | 1997           | FemaleAge10to14     | 134860     |
| Lithuania | 1997           | FemaleAge15to19     | 117610     |
| Lithuania | 1997           | FemaleAge20to24     | 101965     |
| Lithuania | 1997           | FemaleAge25to29     | 109572     |
| Lithuania | 1997           | FemaleAge30to34     | 127332     |
| Lithuania | 1997           | FemaleAge35to39     | 138143     |
| Lithuania | 1997           | FemaleAge40to44     | 125044     |
| Lithuania | 1997           | FemaleAge45to49     | 110394     |
| Lithuania | 1997           | FemaleAge50to54     | 107763     |
| Lithuania | 1997           | FemaleAge55to59     | 110609     |
| Lithuania | 1997           | FemaleAge5to9       | 131589     |
| Lithuania | 1997           | FemaleAge60to64     | 108704     |
| Lithuania | 1997           | FemaleAge65to69     | 103341     |
| Lithuania | 1997           | FemaleAge70to74     | 87728      |
| Lithuania | 1997           | FemaleAge75to79     | 50657      |
| Lithuania | 1997           | FemaleAge80to84     | 31244      |
| Lithuania | 1997           | FemaleAge85to89     | 21336      |
| Lithuania | 1997           | FemaleAge90to94     | 8230       |
| Lithuania | 1997           | FemaleAge95to99     | 1760       |
| Lithuania | 1997           | FemaleAgeAbove100   | 257        |
| Lithuania | 1997           | FemaleLactAge15to19 | 4050       |
| Lithuania | 1997           | FemaleLactAge20to24 | 13537      |
| Lithuania | 1997           | FemaleLactAge25to29 | 11120      |
| Lithuania | 1997           | FemaleLactAge30to34 | 6086       |
| Lithuania | 1997           | FemaleLactAge35to39 | 2494       |
| Lithuania | 1997           | FemaleLactAge40to44 | 497        |
| Lithuania | 1997           | FemaleLactAge45to49 | 21         |
| Lithuania | 1997           | FemalePregAge15to19 | 3038       |
| Lithuania | 1997           | FemalePregAge20to24 | 10152      |
| Lithuania | 1997           | FemalePregAge25to29 | 8340       |
| Lithuania | 1997           | FemalePregAge30to34 | 4565       |
| Lithuania | 1997           | FemalePregAge35to39 | 1871       |
| Lithuania | 1997           | FemalePregAge40to44 | 373        |
| Lithuania | 1997           | FemalePregAge45to49 | 16         |
| Lithuania | 1997           | MaleAge0to4         | 110365     |
| Lithuania | 1997           | MaleAge10to14       | 139983     |
| Lithuania | 1997           | MaleAge15to19       | 128372     |
| Lithuania | 1997           | MaleAge20to24       | 127920     |
| Lithuania | 1997           | MaleAge25to29       | 132169     |
| Lithuania | 1997           | MaleAge30to34       | 139656     |
| Lithuania | 1997           | MaleAge35to39       | 137672     |
| Lithuania | 1997           | MaleAge40to44       | 117073     |
| Lithuania | 1997           | MaleAge45to49       | 97796      |

Dietary calcium and zinc deficiency risks are decreasing but remain prevalent

| Country   | Reference year | Age/gender group    | Population |
|-----------|----------------|---------------------|------------|
| Lithuania | 1997           | MaleAge50to54       | 90348      |
| Lithuania | 1997           | MaleAge55to59       | 86794      |
| Lithuania | 1997           | MaleAge5to9         | 137302     |
| Lithuania | 1997           | MaleAge60to64       | 78765      |
| Lithuania | 1997           | MaleAge65to69       | 65897      |
| Lithuania | 1997           | MaleAge70to74       | 45449      |
| Lithuania | 1997           | MaleAge75to79       | 23602      |
| Lithuania | 1997           | MaleAge80to84       | 12339      |
| Lithuania | 1997           | MaleAge85to89       | 8441       |
| Lithuania | 1997           | MaleAge90to94       | 3669       |
| Lithuania | 1997           | MaleAge95to99       | 495        |
| Lithuania | 1997           | MaleAgeAbov e100    | 93         |
| Lithuania | 1998           | FemaleAge0to4       | 99562      |
| Lithuania | 1998           | FemaleAge10to14     | 135667     |
| Lithuania | 1998           | FemaleAge15to19     | 118848     |
| Lithuania | 1998           | FemaleAge20to24     | 98264      |
| Lithuania | 1998           | FemaleAge25to29     | 108477     |
| Lithuania | 1998           | FemaleAge30to34     | 123757     |
| Lithuania | 1998           | FemaleAge35to39     | 137757     |
| Lithuania | 1998           | FemaleAge40to44     | 128608     |
| Lithuania | 1998           | FemaleAge45to49     | 110969     |
| Lithuania | 1998           | FemaleAge50to54     | 106463     |
| Lithuania | 1998           | FemaleAge55to59     | 108804     |
| Lithuania | 1998           | FemaleAge5to9       | 127199     |
| Lithuania | 1998           | FemaleAge60to64     | 108378     |
| Lithuania | 1998           | FemaleAge65to69     | 102490     |
| Lithuania | 1998           | FemaleAge70to74     | 89564      |
| Lithuania | 1998           | FemaleAge75to79     | 56740      |
| Lithuania | 1998           | FemaleAge80to84     | 28843      |
| Lithuania | 1998           | FemaleAge85to89     | 21414      |
| Lithuania | 1998           | FemaleAge90to94     | 8332       |
| Lithuania | 1998           | FemaleAge95to99     | 1812       |
| Lithuania | 1998           | FemaleAgeAbov e100  | 241        |
| Lithuania | 1998           | FemaleLactAge15to19 | 4050       |
| Lithuania | 1998           | FemaleLactAge20to24 | 13537      |
| Lithuania | 1998           | FemaleLactAge25to29 | 11120      |
| Lithuania | 1998           | FemaleLactAge30to34 | 6086       |
| Lithuania | 1998           | FemaleLactAge35to39 | 2494       |
| Lithuania | 1998           | FemaleLactAge40to44 | 497        |
| Lithuania | 1998           | FemaleLactAge45to49 | 21         |
| Lithuania | 1998           | FemalePregAge15to19 | 3038       |
| Lithuania | 1998           | FemalePregAge20to24 | 10152      |
| Lithuania | 1998           | FemalePregAge25to29 | 8340       |
| Lithuania | 1998           | FemalePregAge30to34 | 4565       |
| Lithuania | 1998           | FemalePregAge35to39 | 1871       |
| Lithuania | 1998           | FemalePregAge40to44 | 373        |
| Lithuania | 1998           | FemalePregAge45to49 | 16         |
| Lithuania | 1998           | MaleAge0to4         | 105130     |
| Lithuania | 1998           | MaleAge10to14       | 140936     |
| Lithuania | 1998           | MaleAge15to19       | 129996     |
| Lithuania | 1998           | MaleAge20to24       | 124078     |
| Lithuania | 1998           | MaleAge25to29       | 129426     |
| Lithuania | 1998           | MaleAge30to34       | 135265     |
| Lithuania | 1998           | MaleAge35to39       | 137794     |
| Lithuania | 1998           | MaleAge40to44       | 120165     |
| Lithuania | 1998           | MaleAge45to49       | 98864      |
| Lithuania | 1998           | MaleAge50to54       | 89123      |
| Lithuania | 1998           | MaleAge55to59       | 85507      |
| Lithuania | 1998           | MaleAge5to9         | 132892     |
| Lithuania | 1998           | MaleAge60to64       | 78390      |
| Lithuania | 1998           | MaleAge65to69       | 65977      |
| Lithuania | 1998           | MaleAge70to74       | 47406      |
| Lithuania | 1998           | MaleAge75to79       | 25607      |
| Lithuania | 1998           | MaleAge80to84       | 12272      |
| Lithuania | 1998           | MaleAge85to89       | 7318       |
| Lithuania | 1998           | MaleAge90to94       | 3744       |
| Lithuania | 1998           | MaleAge95to99       | 512        |
| Lithuania | 1998           | MaleAgeAbov e100    | 79         |
| Lithuania | 1999           | FemaleAge0to4       | 94689      |
| Lithuania | 1999           | FemaleAge10to14     | 135696     |
| Lithuania | 1999           | FemaleAge15to19     | 120589     |
| Lithuania | 1999           | FemaleAge20to24     | 95253      |
| Lithuania | 1999           | FemaleAge25to29     | 106633     |
| Lithuania | 1999           | FemaleAge30to34     | 120448     |
| Lithuania | 1999           | FemaleAge35to39     | 136665     |
| Lithuania | 1999           | FemaleAge40to44     | 131539     |
| Lithuania | 1999           | FemaleAge45to49     | 112229     |
| Lithuania | 1999           | FemaleAge50to54     | 105347     |
| Lithuania | 1999           | FemaleAge55to59     | 106990     |
| Lithuania | 1999           | FemaleAge5to9       | 121842     |
| Lithuania | 1999           | FemaleAge60to64     | 107811     |
| Lithuania | 1999           | FemaleAge65to69     | 101657     |
| Lithuania | 1999           | FemaleAge70to74     | 90895      |
| Lithuania | 1999           | FemaleAge75to79     | 62363      |
| Lithuania | 1999           | FemaleAge80to84     | 28048      |
| Lithuania | 1999           | FemaleAge85to89     | 20847      |
| Lithuania | 1999           | FemaleAge90to94     | 8058       |
| Lithuania | 1999           | FemaleAge95to99     | 1800       |

Dietary calcium and zinc deficiency risks are decreasing but remain prevalent

| Country    | Reference year | Age/gender group    | Population |
|------------|----------------|---------------------|------------|
| Lithuania  | 1999           | FemaleAgeAbove100   | 228        |
| Lithuania  | 1999           | FemaleLactAge15to19 | 4050       |
| Lithuania  | 1999           | FemaleLactAge20to24 | 13537      |
| Lithuania  | 1999           | FemaleLactAge25to29 | 11120      |
| Lithuania  | 1999           | FemaleLactAge30to34 | 6086       |
| Lithuania  | 1999           | FemaleLactAge35to39 | 2494       |
| Lithuania  | 1999           | FemaleLactAge40to44 | 497        |
| Lithuania  | 1999           | FemaleLactAge45to49 | 21         |
| Lithuania  | 1999           | FemalePregAge15to19 | 3038       |
| Lithuania  | 1999           | FemalePregAge20to24 | 10152      |
| Lithuania  | 1999           | FemalePregAge25to29 | 8340       |
| Lithuania  | 1999           | FemalePregAge30to34 | 4565       |
| Lithuania  | 1999           | FemalePregAge35to39 | 1871       |
| Lithuania  | 1999           | FemalePregAge40to44 | 373        |
| Lithuania  | 1999           | FemalePregAge45to49 | 16         |
| Lithuania  | 1999           | MaleAge0to4         | 100232     |
| Lithuania  | 1999           | MaleAge10to14       | 141064     |
| Lithuania  | 1999           | MaleAge15to19       | 132121     |
| Lithuania  | 1999           | MaleAge20to24       | 121278     |
| Lithuania  | 1999           | MaleAge25to29       | 126380     |
| Lithuania  | 1999           | MaleAge30to34       | 130785     |
| Lithuania  | 1999           | MaleAge35to39       | 137011     |
| Lithuania  | 1999           | MaleAge40to44       | 122726     |
| Lithuania  | 1999           | MaleAge45to49       | 100481     |
| Lithuania  | 1999           | MaleAge50to54       | 88237      |
| Lithuania  | 1999           | MaleAge55to59       | 84203      |
| Lithuania  | 1999           | MaleAge5to9         | 127515     |
| Lithuania  | 1999           | MaleAge60to64       | 77826      |
| Lithuania  | 1999           | MaleAge65to69       | 65942      |
| Lithuania  | 1999           | MaleAge70to74       | 49038      |
| Lithuania  | 1999           | MaleAge75to79       | 27268      |
| Lithuania  | 1999           | MaleAge80to84       | 12902      |
| Lithuania  | 1999           | MaleAge85to89       | 6207       |
| Lithuania  | 1999           | MaleAge90to94       | 3329       |
| Lithuania  | 1999           | MaleAge95to99       | 537        |
| Lithuania  | 1999           | MaleAgeAbove100     | 66         |
| Madagascar | 1992           | FemaleAge0to4       | 1150459    |
| Madagascar | 1992           | FemaleAge10to14     | 753083     |
| Madagascar | 1992           | FemaleAge15to19     | 493498     |
| Madagascar | 1992           | FemaleAge20to24     | 290445     |
| Madagascar | 1992           | FemaleAge25to29     | 233177     |
| Madagascar | 1992           | FemaleAge30to34     | 217808     |
| Madagascar | 1992           | FemaleAge35to39     | 215776     |
| Madagascar | 1992           | FemaleAge40to44     | 197429     |
| Madagascar | 1992           | FemaleAge45to49     | 174402     |
| Madagascar | 1992           | FemaleAge50to54     | 161009     |
| Madagascar | 1992           | FemaleAge55to59     | 138841     |
| Madagascar | 1992           | FemaleAge5to9       | 857355     |
| Madagascar | 1992           | FemaleAge60to64     | 107677     |
| Madagascar | 1992           | FemaleAge65to69     | 75593      |
| Madagascar | 1992           | FemaleAge70to74     | 46372      |
| Madagascar | 1992           | FemaleAge75to79     | 27436      |
| Madagascar | 1992           | FemaleAge80to84     | 17123      |
| Madagascar | 1992           | FemaleAge85to89     | 7306       |
| Madagascar | 1992           | FemaleAge90to94     | 1541       |
| Madagascar | 1992           | FemaleAge95to99     | 198        |
| Madagascar | 1992           | FemaleAgeAbove100   | 10         |
| Madagascar | 1992           | FemaleLactAge15to19 | 102135     |
| Madagascar | 1992           | FemaleLactAge20to24 | 149892     |
| Madagascar | 1992           | FemaleLactAge25to29 | 127447     |
| Madagascar | 1992           | FemaleLactAge30to34 | 93216      |
| Madagascar | 1992           | FemaleLactAge35to39 | 58220      |
| Madagascar | 1992           | FemaleLactAge40to44 | 23369      |
| Madagascar | 1992           | FemaleLactAge45to49 | 5229       |
| Madagascar | 1992           | FemalePregAge15to19 | 76601      |
| Madagascar | 1992           | FemalePregAge20to24 | 112419     |
| Madagascar | 1992           | FemalePregAge25to29 | 95585      |
| Madagascar | 1992           | FemalePregAge30to34 | 69912      |
| Madagascar | 1992           | FemalePregAge35to39 | 43665      |
| Madagascar | 1992           | FemalePregAge40to44 | 17527      |
| Madagascar | 1992           | FemalePregAge45to49 | 3922       |
| Madagascar | 1992           | MaleAge0to4         | 1155736    |
| Madagascar | 1992           | MaleAge10to14       | 758316     |
| Madagascar | 1992           | MaleAge15to19       | 672622     |
| Madagascar | 1992           | MaleAge20to24       | 548569     |
| Madagascar | 1992           | MaleAge25to29       | 449604     |
| Madagascar | 1992           | MaleAge30to34       | 373273     |
| Madagascar | 1992           | MaleAge35to39       | 311381     |
| Madagascar | 1992           | MaleAge40to44       | 229493     |
| Madagascar | 1992           | MaleAge45to49       | 169551     |
| Madagascar | 1992           | MaleAge50to54       | 149224     |
| Madagascar | 1992           | MaleAge55to59       | 133412     |
| Madagascar | 1992           | MaleAge5to9         | 861079     |
| Madagascar | 1992           | MaleAge60to64       | 110170     |
| Madagascar | 1992           | MaleAge65to69       | 84128      |
| Madagascar | 1992           | MaleAge70to74       | 55908      |
| Madagascar | 1992           | MaleAge75to79       | 32150      |
| Madagascar | 1992           | MaleAge80to84       | 16590      |

Dietary calcium and zinc deficiency risks are decreasing but remain prevalent

| Country    | Reference year | Age/gender group    | Population |
|------------|----------------|---------------------|------------|
| Madagascar | 1992           | MaleAge85to89       | 5884       |
| Madagascar | 1992           | MaleAge90to94       | 1006       |
| Madagascar | 1992           | MaleAge95to99       | 122        |
| Madagascar | 1992           | MaleAgeAbove100     | 5          |
| Madagascar | 1993           | FemaleAge0to4       | 1175312    |
| Madagascar | 1993           | FemaleAge10to14     | 757607     |
| Madagascar | 1993           | FemaleAge15to19     | 516506     |
| Madagascar | 1993           | FemaleAge20to24     | 311686     |
| Madagascar | 1993           | FemaleAge25to29     | 247900     |
| Madagascar | 1993           | FemaleAge30to34     | 230265     |
| Madagascar | 1993           | FemaleAge35to39     | 225837     |
| Madagascar | 1993           | FemaleAge40to44     | 213922     |
| Madagascar | 1993           | FemaleAge45to49     | 178824     |
| Madagascar | 1993           | FemaleAge50to54     | 163490     |
| Madagascar | 1993           | FemaleAge55to59     | 141777     |
| Madagascar | 1993           | FemaleAge5to9       | 902198     |
| Madagascar | 1993           | FemaleAge60to64     | 112276     |
| Madagascar | 1993           | FemaleAge65to69     | 78705      |
| Madagascar | 1993           | FemaleAge70to74     | 49330      |
| Madagascar | 1993           | FemaleAge75to79     | 27434      |
| Madagascar | 1993           | FemaleAge80to84     | 16679      |
| Madagascar | 1993           | FemaleAge85to89     | 7739       |
| Madagascar | 1993           | FemaleAge90to94     | 1626       |
| Madagascar | 1993           | FemaleAge95to99     | 234        |
| Madagascar | 1993           | FemaleAgeAbove100   | 11         |
| Madagascar | 1993           | FemaleLactAge15to19 | 102135     |
| Madagascar | 1993           | FemaleLactAge20to24 | 149892     |
| Madagascar | 1993           | FemaleLactAge25to29 | 127447     |
| Madagascar | 1993           | FemaleLactAge30to34 | 93216      |
| Madagascar | 1993           | FemaleLactAge35to39 | 58220      |
| Madagascar | 1993           | FemaleLactAge40to44 | 23369      |
| Madagascar | 1993           | FemaleLactAge45to49 | 5229       |
| Madagascar | 1993           | FemalePregAge15to19 | 76601      |
| Madagascar | 1993           | FemalePregAge20to24 | 112419     |
| Madagascar | 1993           | FemalePregAge25to29 | 95585      |
| Madagascar | 1993           | FemalePregAge30to34 | 69912      |
| Madagascar | 1993           | FemalePregAge35to39 | 43665      |
| Madagascar | 1993           | FemalePregAge40to44 | 17527      |
| Madagascar | 1993           | FemalePregAge45to49 | 3922       |
| Madagascar | 1993           | MaleAge0to4         | 1180422    |
| Madagascar | 1993           | MaleAge10to14       | 762534     |
| Madagascar | 1993           | MaleAge15to19       | 697081     |
| Madagascar | 1993           | MaleAge20to24       | 569464     |
| Madagascar | 1993           | MaleAge25to29       | 464452     |
| Madagascar | 1993           | MaleAge30to34       | 385413     |
| Madagascar | 1993           | MaleAge35to39       | 320925     |
| Madagascar | 1993           | MaleAge40to44       | 246820     |
| Madagascar | 1993           | MaleAge45to49       | 174580     |
| Madagascar | 1993           | MaleAge50to54       | 150044     |
| Madagascar | 1993           | MaleAge55to59       | 134768     |
| Madagascar | 1993           | MaleAge5to9         | 905691     |
| Madagascar | 1993           | MaleAge60to64       | 112440     |
| Madagascar | 1993           | MaleAge65to69       | 85771      |
| Madagascar | 1993           | MaleAge70to74       | 58088      |
| Madagascar | 1993           | MaleAge75to79       | 32719      |
| Madagascar | 1993           | MaleAge80to84       | 16604      |
| Madagascar | 1993           | MaleAge85to89       | 6313       |
| Madagascar | 1993           | MaleAge90to94       | 1086       |
| Madagascar | 1993           | MaleAge95to99       | 148        |
| Madagascar | 1993           | MaleAgeAbove100     | 5          |
| Madagascar | 1994           | FemaleAge0to4       | 1198746    |
| Madagascar | 1994           | FemaleAge10to14     | 766088     |
| Madagascar | 1994           | FemaleAge15to19     | 536220     |
| Madagascar | 1994           | FemaleAge20to24     | 333585     |
| Madagascar | 1994           | FemaleAge25to29     | 263926     |
| Madagascar | 1994           | FemaleAge30to34     | 243137     |
| Madagascar | 1994           | FemaleAge35to39     | 235940     |
| Madagascar | 1994           | FemaleAge40to44     | 229908     |
| Madagascar | 1994           | FemaleAge45to49     | 185405     |
| Madagascar | 1994           | FemaleAge50to54     | 166209     |
| Madagascar | 1994           | FemaleAge55to59     | 144564     |
| Madagascar | 1994           | FemaleAge5to9       | 951354     |
| Madagascar | 1994           | FemaleAge60to64     | 116740     |
| Madagascar | 1994           | FemaleAge65to69     | 82172      |
| Madagascar | 1994           | FemaleAge70to74     | 52372      |
| Madagascar | 1994           | FemaleAge75to79     | 27923      |
| Madagascar | 1994           | FemaleAge80to84     | 16188      |
| Madagascar | 1994           | FemaleAge85to89     | 7711       |
| Madagascar | 1994           | FemaleAge90to94     | 1661       |
| Madagascar | 1994           | FemaleAge95to99     | 246        |
| Madagascar | 1994           | FemaleAgeAbove100   | 12         |
| Madagascar | 1994           | FemaleLactAge15to19 | 102135     |
| Madagascar | 1994           | FemaleLactAge20to24 | 149892     |
| Madagascar | 1994           | FemaleLactAge25to29 | 127447     |
| Madagascar | 1994           | FemaleLactAge30to34 | 93216      |
| Madagascar | 1994           | FemaleLactAge35to39 | 58220      |
| Madagascar | 1994           | FemaleLactAge40to44 | 23369      |
| Madagascar | 1994           | FemaleLactAge45to49 | 5229       |

Dietary calcium and zinc deficiency risks are decreasing but remain prevalent

| Country    | Reference year | Age/gender group    | Population |
|------------|----------------|---------------------|------------|
| Madagascar | 1994           | FemalePregAge15to19 | 76601      |
| Madagascar | 1994           | FemalePregAge20to24 | 112419     |
| Madagascar | 1994           | FemalePregAge25to29 | 95585      |
| Madagascar | 1994           | FemalePregAge30to34 | 69912      |
| Madagascar | 1994           | FemalePregAge35to39 | 43665      |
| Madagascar | 1994           | FemalePregAge40to44 | 17527      |
| Madagascar | 1994           | FemalePregAge45to49 | 3922       |
| Madagascar | 1994           | MaleAge0to4         | 1203745    |
| Madagascar | 1994           | MaleAge10to14       | 770651     |
| Madagascar | 1994           | MaleAge15to19       | 718166     |
| Madagascar | 1994           | MaleAge20to24       | 591337     |
| Madagascar | 1994           | MaleAge25to29       | 480488     |
| Madagascar | 1994           | MaleAge30to34       | 398020     |
| Madagascar | 1994           | MaleAge35to39       | 330486     |
| Madagascar | 1994           | MaleAge40to44       | 263441     |
| Madagascar | 1994           | MaleAge45to49       | 181950     |
| Madagascar | 1994           | MaleAge50to54       | 151505     |
| Madagascar | 1994           | MaleAge55to59       | 135981     |
| Madagascar | 1994           | MaleAge5to9         | 954601     |
| Madagascar | 1994           | MaleAge60to64       | 114670     |
| Madagascar | 1994           | MaleAge65to69       | 87626      |
| Madagascar | 1994           | MaleAge70to74       | 60229      |
| Madagascar | 1994           | MaleAge75to79       | 33477      |
| Madagascar | 1994           | MaleAge80to84       | 16493      |
| Madagascar | 1994           | MaleAge85to89       | 6353       |
| Madagascar | 1994           | MaleAge90to94       | 1134       |
| Madagascar | 1994           | MaleAge95to99       | 151        |
| Madagascar | 1994           | MaleAgeAbove100     | 5          |
| Madagascar | 1995           | FemaleAge0to4       | 1230282    |
| Madagascar | 1995           | FemaleAge10to14     | 783252     |
| Madagascar | 1995           | FemaleAge15to19     | 550574     |
| Madagascar | 1995           | FemaleAge20to24     | 355386     |
| Madagascar | 1995           | FemaleAge25to29     | 281176     |
| Madagascar | 1995           | FemaleAge30to34     | 256059     |
| Madagascar | 1995           | FemaleAge35to39     | 246511     |
| Madagascar | 1995           | FemaleAge40to44     | 243920     |
| Madagascar | 1995           | FemaleAge45to49     | 194608     |
| Madagascar | 1995           | FemaleAge50to54     | 169159     |
| Madagascar | 1995           | FemaleAge55to59     | 147151     |
| Madagascar | 1995           | FemaleAge5to9       | 995201     |
| Madagascar | 1995           | FemaleAge60to64     | 120784     |
| Madagascar | 1995           | FemaleAge65to69     | 86035      |
| Madagascar | 1995           | FemaleAge70to74     | 55327      |
| Madagascar | 1995           | FemaleAge75to79     | 29012      |
| Madagascar | 1995           | FemaleAge80to84     | 15706      |
| Madagascar | 1995           | FemaleAge85to89     | 7241       |
| Madagascar | 1995           | FemaleAge90to94     | 1597       |
| Madagascar | 1995           | FemaleAge95to99     | 195        |
| Madagascar | 1995           | FemaleAgeAbove100   | 13         |
| Madagascar | 1995           | FemaleLactAge15to19 | 102135     |
| Madagascar | 1995           | FemaleLactAge20to24 | 149892     |
| Madagascar | 1995           | FemaleLactAge25to29 | 127447     |
| Madagascar | 1995           | FemaleLactAge30to34 | 93216      |
| Madagascar | 1995           | FemaleLactAge35to39 | 58220      |
| Madagascar | 1995           | FemaleLactAge40to44 | 23369      |
| Madagascar | 1995           | FemaleLactAge45to49 | 5229       |
| Madagascar | 1995           | FemalePregAge15to19 | 76601      |
| Madagascar | 1995           | FemalePregAge20to24 | 112419     |
| Madagascar | 1995           | FemalePregAge25to29 | 95585      |
| Madagascar | 1995           | FemalePregAge30to34 | 69912      |
| Madagascar | 1995           | FemalePregAge35to39 | 43665      |
| Madagascar | 1995           | FemalePregAge40to44 | 17527      |
| Madagascar | 1995           | FemalePregAge45to49 | 3922       |
| Madagascar | 1995           | MaleAge0to4         | 1235376    |
| Madagascar | 1995           | MaleAge10to14       | 787515     |
| Madagascar | 1995           | MaleAge15to19       | 733540     |
| Madagascar | 1995           | MaleAge20to24       | 613625     |
| Madagascar | 1995           | MaleAge25to29       | 497611     |
| Madagascar | 1995           | MaleAge30to34       | 410731     |
| Madagascar | 1995           | MaleAge35to39       | 340595     |
| Madagascar | 1995           | MaleAge40to44       | 277815     |
| Madagascar | 1995           | MaleAge45to49       | 191992     |
| Madagascar | 1995           | MaleAge50to54       | 153758     |
| Madagascar | 1995           | MaleAge55to59       | 136945     |
| Madagascar | 1995           | MaleAge5to9         | 998109     |
| Madagascar | 1995           | MaleAge60to64       | 116671     |
| Madagascar | 1995           | MaleAge65to69       | 89712      |
| Madagascar | 1995           | MaleAge70to74       | 62200      |
| Madagascar | 1995           | MaleAge75to79       | 34490      |
| Madagascar | 1995           | MaleAge80to84       | 16317      |
| Madagascar | 1995           | MaleAge85to89       | 6004       |
| Madagascar | 1995           | MaleAge90to94       | 1081       |
| Madagascar | 1995           | MaleAge95to99       | 106        |
| Madagascar | 1995           | MaleAgeAbove100     | 6          |
| Madagascar | 1996           | FemaleAge0to4       | 1262220    |
| Madagascar | 1996           | FemaleAge10to14     | 810998     |
| Madagascar | 1996           | FemaleAge15to19     | 534646     |
| Madagascar | 1996           | FemaleAge20to24     | 332418     |

Dietary calcium and zinc deficiency risks are decreasing but remain prevalent

| Country    | Reference year | Age/gender group    | Population |
|------------|----------------|---------------------|------------|
| Madagascar | 1996           | FemaleAge25to29     | 273668     |
| Madagascar | 1996           | FemaleAge30to34     | 259959     |
| Madagascar | 1996           | FemaleAge35to39     | 252526     |
| Madagascar | 1996           | FemaleAge40to44     | 250715     |
| Madagascar | 1996           | FemaleAge45to49     | 205484     |
| Madagascar | 1996           | FemaleAge50to54     | 171891     |
| Madagascar | 1996           | FemaleAge55to59     | 148901     |
| Madagascar | 1996           | FemaleAge5to9       | 1040009    |
| Madagascar | 1996           | FemaleAge60to64     | 123504     |
| Madagascar | 1996           | FemaleAge65to69     | 89262      |
| Madagascar | 1996           | FemaleAge70to74     | 57657      |
| Madagascar | 1996           | FemaleAge75to79     | 30609      |
| Madagascar | 1996           | FemaleAge80to84     | 15841      |
| Madagascar | 1996           | FemaleAge85to89     | 7520       |
| Madagascar | 1996           | FemaleAge90to94     | 2007       |
| Madagascar | 1996           | FemaleAge95to99     | 217        |
| Madagascar | 1996           | FemaleAgeAbove100   | 14         |
| Madagascar | 1996           | FemaleLactAge15to19 | 116542     |
| Madagascar | 1996           | FemaleLactAge20to24 | 175668     |
| Madagascar | 1996           | FemaleLactAge25to29 | 142400     |
| Madagascar | 1996           | FemaleLactAge30to34 | 98660      |
| Madagascar | 1996           | FemaleLactAge35to39 | 61096      |
| Madagascar | 1996           | FemaleLactAge40to44 | 26383      |
| Madagascar | 1996           | FemaleLactAge45to49 | 5473       |
| Madagascar | 1996           | FemalePregAge15to19 | 87406      |
| Madagascar | 1996           | FemalePregAge20to24 | 131751     |
| Madagascar | 1996           | FemalePregAge25to29 | 106800     |
| Madagascar | 1996           | FemalePregAge30to34 | 73995      |
| Madagascar | 1996           | FemalePregAge35to39 | 45822      |
| Madagascar | 1996           | FemalePregAge40to44 | 19787      |
| Madagascar | 1996           | FemalePregAge45to49 | 4104       |
| Madagascar | 1996           | MaleAge0to4         | 1267226    |
| Madagascar | 1996           | MaleAge10to14       | 814618     |
| Madagascar | 1996           | MaleAge15to19       | 743290     |
| Madagascar | 1996           | MaleAge20to24       | 637075     |
| Madagascar | 1996           | MaleAge25to29       | 516494     |
| Madagascar | 1996           | MaleAge30to34       | 423976     |
| Madagascar | 1996           | MaleAge35to39       | 350949     |
| Madagascar | 1996           | MaleAge40to44       | 289858     |
| Madagascar | 1996           | MaleAge45to49       | 204175     |
| Madagascar | 1996           | MaleAge50to54       | 156361     |
| Madagascar | 1996           | MaleAge55to59       | 137189     |
| Madagascar | 1996           | MaleAge5to9         | 1042278    |
| Madagascar | 1996           | MaleAge60to64       | 117599     |
| Madagascar | 1996           | MaleAge65to69       | 90987      |
| Madagascar | 1996           | MaleAge70to74       | 63485      |
| Madagascar | 1996           | MaleAge75to79       | 36009      |
| Madagascar | 1996           | MaleAge80to84       | 17061      |
| Madagascar | 1996           | MaleAge85to89       | 6519       |
| Madagascar | 1996           | MaleAge90to94       | 1415       |
| Madagascar | 1996           | MaleAge95to99       | 122        |
| Madagascar | 1996           | MaleAgeAbove100     | 7          |
| Madagascar | 1997           | FemaleAge0to4       | 1299675    |
| Madagascar | 1997           | FemaleAge10to14     | 847674     |
| Madagascar | 1997           | FemaleAge15to19     | 538493     |
| Madagascar | 1997           | FemaleAge20to24     | 355259     |
| Madagascar | 1997           | FemaleAge25to29     | 293301     |
| Madagascar | 1997           | FemaleAge30to34     | 273539     |
| Madagascar | 1997           | FemaleAge35to39     | 264054     |
| Madagascar | 1997           | FemaleAge40to44     | 261140     |
| Madagascar | 1997           | FemaleAge45to49     | 219406     |
| Madagascar | 1997           | FemaleAge50to54     | 174759     |
| Madagascar | 1997           | FemaleAge55to59     | 150730     |
| Madagascar | 1997           | FemaleAge5to9       | 1080681    |
| Madagascar | 1997           | FemaleAge60to64     | 125992     |
| Madagascar | 1997           | FemaleAge65to69     | 92779      |
| Madagascar | 1997           | FemaleAge70to74     | 59839      |
| Madagascar | 1997           | FemaleAge75to79     | 32457      |
| Madagascar | 1997           | FemaleAge80to84     | 15809      |
| Madagascar | 1997           | FemaleAge85to89     | 7602       |
| Madagascar | 1997           | FemaleAge90to94     | 2351       |
| Madagascar | 1997           | FemaleAge95to99     | 236        |
| Madagascar | 1997           | FemaleAgeAbove100   | 16         |
| Madagascar | 1997           | FemaleLactAge15to19 | 116542     |
| Madagascar | 1997           | FemaleLactAge20to24 | 175668     |
| Madagascar | 1997           | FemaleLactAge25to29 | 142400     |
| Madagascar | 1997           | FemaleLactAge30to34 | 98660      |
| Madagascar | 1997           | FemaleLactAge35to39 | 61096      |
| Madagascar | 1997           | FemaleLactAge40to44 | 26383      |
| Madagascar | 1997           | FemaleLactAge45to49 | 5473       |
| Madagascar | 1997           | FemalePregAge15to19 | 87406      |
| Madagascar | 1997           | FemalePregAge20to24 | 131751     |
| Madagascar | 1997           | FemalePregAge25to29 | 106800     |
| Madagascar | 1997           | FemalePregAge30to34 | 73995      |
| Madagascar | 1997           | FemalePregAge35to39 | 45822      |
| Madagascar | 1997           | FemalePregAge40to44 | 19787      |
| Madagascar | 1997           | FemalePregAge45to49 | 4104       |
| Madagascar | 1997           | MaleAge0to4         | 1304823    |

Dietary calcium and zinc deficiency risks are decreasing but remain prevalent

| Country    | Reference year | Age/gender group    | Population |
|------------|----------------|---------------------|------------|
| Madagascar | 1997           | MaleAge10to14       | 850653     |
| Madagascar | 1997           | MaleAge15to19       | 747109     |
| Madagascar | 1997           | MaleAge20to24       | 661646     |
| Madagascar | 1997           | MaleAge25to29       | 536318     |
| Madagascar | 1997           | MaleAge30to34       | 437675     |
| Madagascar | 1997           | MaleAge35to39       | 361826     |
| Madagascar | 1997           | MaleAge40to44       | 299881     |
| Madagascar | 1997           | MaleAge45to49       | 219033     |
| Madagascar | 1997           | MaleAge50to54       | 159577     |
| Madagascar | 1997           | MaleAge55to59       | 137482     |
| Madagascar | 1997           | MaleAge5to9         | 1082265    |
| Madagascar | 1997           | MaleAge60to64       | 118571     |
| Madagascar | 1997           | MaleAge65to69       | 92421      |
| Madagascar | 1997           | MaleAge70to74       | 64497      |
| Madagascar | 1997           | MaleAge75to79       | 37497      |
| Madagascar | 1997           | MaleAge80to84       | 17578      |
| Madagascar | 1997           | MaleAge85to89       | 6844       |
| Madagascar | 1997           | MaleAge90to94       | 1706       |
| Madagascar | 1997           | MaleAge95to99       | 150        |
| Madagascar | 1997           | MaleAgeAbove100     | 8          |
| Madagascar | 1998           | FemaleAge0to4       | 1341301    |
| Madagascar | 1998           | FemaleAge10to14     | 890885     |
| Madagascar | 1998           | FemaleAge15to19     | 541340     |
| Madagascar | 1998           | FemaleAge20to24     | 377116     |
| Madagascar | 1998           | FemaleAge25to29     | 313747     |
| Madagascar | 1998           | FemaleAge30to34     | 287676     |
| Madagascar | 1998           | FemaleAge35to39     | 276066     |
| Madagascar | 1998           | FemaleAge40to44     | 270616     |
| Madagascar | 1998           | FemaleAge45to49     | 234703     |
| Madagascar | 1998           | FemaleAge50to54     | 178531     |
| Madagascar | 1998           | FemaleAge55to59     | 152733     |
| Madagascar | 1998           | FemaleAge5to9       | 1116507    |
| Madagascar | 1998           | FemaleAge60to64     | 128333     |
| Madagascar | 1998           | FemaleAge65to69     | 96438      |
| Madagascar | 1998           | FemaleAge70to74     | 62063      |
| Madagascar | 1998           | FemaleAge75to79     | 34392      |
| Madagascar | 1998           | FemaleAge80to84     | 15780      |
| Madagascar | 1998           | FemaleAge85to89     | 7492       |
| Madagascar | 1998           | FemaleAge90to94     | 2531       |
| Madagascar | 1998           | FemaleAge95to99     | 275        |
| Madagascar | 1998           | FemaleAgeAbove100   | 18         |
| Madagascar | 1998           | FemaleLactAge15to19 | 116542     |
| Madagascar | 1998           | FemaleLactAge20to24 | 175668     |
| Madagascar | 1998           | FemaleLactAge25to29 | 142400     |
| Madagascar | 1998           | FemaleLactAge30to34 | 98660      |
| Madagascar | 1998           | FemaleLactAge35to39 | 61096      |
| Madagascar | 1998           | FemaleLactAge40to44 | 26383      |
| Madagascar | 1998           | FemaleLactAge45to49 | 5473       |
| Madagascar | 1998           | FemalePregAge15to19 | 87406      |
| Madagascar | 1998           | FemalePregAge20to24 | 131751     |
| Madagascar | 1998           | FemalePregAge25to29 | 106800     |
| Madagascar | 1998           | FemalePregAge30to34 | 73995      |
| Madagascar | 1998           | FemalePregAge35to39 | 45822      |
| Madagascar | 1998           | FemalePregAge40to44 | 19787      |
| Madagascar | 1998           | FemalePregAge45to49 | 4104       |
| Madagascar | 1998           | MaleAge0to4         | 1346860    |
| Madagascar | 1998           | MaleAge10to14       | 893239     |
| Madagascar | 1998           | MaleAge15to19       | 749590     |
| Madagascar | 1998           | MaleAge20to24       | 685369     |
| Madagascar | 1998           | MaleAge25to29       | 557054     |
| Madagascar | 1998           | MaleAge30to34       | 452201     |
| Madagascar | 1998           | MaleAge35to39       | 373289     |
| Madagascar | 1998           | MaleAge40to44       | 308675     |
| Madagascar | 1998           | MaleAge45to49       | 235210     |
| Madagascar | 1998           | MaleAge50to54       | 164053     |
| Madagascar | 1998           | MaleAge55to59       | 138070     |
| Madagascar | 1998           | MaleAge5to9         | 1117371    |
| Madagascar | 1998           | MaleAge60to64       | 119590     |
| Madagascar | 1998           | MaleAge65to69       | 93974      |
| Madagascar | 1998           | MaleAge70to74       | 65430      |
| Madagascar | 1998           | MaleAge75to79       | 38854      |
| Madagascar | 1998           | MaleAge80to84       | 17931      |
| Madagascar | 1998           | MaleAge85to89       | 6970       |
| Madagascar | 1998           | MaleAge90to94       | 1886       |
| Madagascar | 1998           | MaleAge95to99       | 190        |
| Madagascar | 1998           | MaleAgeAbove100     | 9          |
| Madagascar | 1999           | FemaleAge0to4       | 1381549    |
| Madagascar | 1999           | FemaleAge10to14     | 935789     |
| Madagascar | 1999           | FemaleAge15to19     | 550269     |
| Madagascar | 1999           | FemaleAge20to24     | 395762     |
| Madagascar | 1999           | FemaleAge25to29     | 334998     |
| Madagascar | 1999           | FemaleAge30to34     | 303215     |
| Madagascar | 1999           | FemaleAge35to39     | 288655     |
| Madagascar | 1999           | FemaleAge40to44     | 280393     |
| Madagascar | 1999           | FemaleAge45to49     | 249625     |
| Madagascar | 1999           | FemaleAge50to54     | 184442     |
| Madagascar | 1999           | FemaleAge55to59     | 155072     |
| Madagascar | 1999           | FemaleAge5to9       | 1149538    |



Dietary calcium and zinc deficiency risks are decreasing but remain prevalent

| Country    | Reference year | Age/gender group    | Population |
|------------|----------------|---------------------|------------|
| Madagascar | 1999           | FemaleAge60to64     | 130675     |
| Madagascar | 1999           | FemaleAge65to69     | 100045     |
| Madagascar | 1999           | FemaleAge70to74     | 64587      |
| Madagascar | 1999           | FemaleAge75to79     | 36257      |
| Madagascar | 1999           | FemaleAge80to84     | 15959      |
| Madagascar | 1999           | FemaleAge85to89     | 7205       |
| Madagascar | 1999           | FemaleAge90to94     | 2470       |
| Madagascar | 1999           | FemaleAge95to99     | 321        |
| Madagascar | 1999           | FemaleAgeAbove100   | 20         |
| Madagascar | 1999           | FemaleLactAge15to19 | 116542     |
| Madagascar | 1999           | FemaleLactAge20to24 | 175668     |
| Madagascar | 1999           | FemaleLactAge25to29 | 142400     |
| Madagascar | 1999           | FemaleLactAge30to34 | 98660      |
| Madagascar | 1999           | FemaleLactAge35to39 | 61096      |
| Madagascar | 1999           | FemaleLactAge40to44 | 26383      |
| Madagascar | 1999           | FemaleLactAge45to49 | 5473       |
| Madagascar | 1999           | FemalePregAge15to19 | 87406      |
| Madagascar | 1999           | FemalePregAge20to24 | 131751     |
| Madagascar | 1999           | FemalePregAge25to29 | 106800     |
| Madagascar | 1999           | FemalePregAge30to34 | 73995      |
| Madagascar | 1999           | FemalePregAge35to39 | 45822      |
| Madagascar | 1999           | FemalePregAge40to44 | 19787      |
| Madagascar | 1999           | FemalePregAge45to49 | 4104       |
| Madagascar | 1999           | MaleAge0to4         | 1387875    |
| Madagascar | 1999           | MaleAge10to14       | 937493     |
| Madagascar | 1999           | MaleAge15to19       | 758045     |
| Madagascar | 1999           | MaleAge20to24       | 705618     |
| Madagascar | 1999           | MaleAge25to29       | 578924     |
| Madagascar | 1999           | MaleAge30to34       | 468265     |
| Madagascar | 1999           | MaleAge35to39       | 385499     |
| Madagascar | 1999           | MaleAge40to44       | 317679     |
| Madagascar | 1999           | MaleAge45to49       | 250785     |
| Madagascar | 1999           | MaleAge50to54       | 170821     |
| Madagascar | 1999           | MaleAge55to59       | 139356     |
| Madagascar | 1999           | MaleAge5to9         | 1149705    |
| Madagascar | 1999           | MaleAge60to64       | 120648     |
| Madagascar | 1999           | MaleAge65to69       | 95608      |
| Madagascar | 1999           | MaleAge70to74       | 66523      |
| Madagascar | 1999           | MaleAge75to79       | 39984      |
| Madagascar | 1999           | MaleAge80to84       | 18228      |
| Madagascar | 1999           | MaleAge85to89       | 6901       |
| Madagascar | 1999           | MaleAge90to94       | 1896       |
| Madagascar | 1999           | MaleAge95to99       | 221        |
| Madagascar | 1999           | MaleAgeAbove100     | 10         |
| Malawi     | 1992           | FemaleAge0to4       | 888391     |
| Malawi     | 1992           | FemaleAge10to14     | 616868     |
| Malawi     | 1992           | FemaleAge15to19     | 374398     |
| Malawi     | 1992           | FemaleAge20to24     | 203217     |
| Malawi     | 1992           | FemaleAge25to29     | 196956     |
| Malawi     | 1992           | FemaleAge30to34     | 187195     |
| Malawi     | 1992           | FemaleAge35to39     | 173554     |
| Malawi     | 1992           | FemaleAge40to44     | 175779     |
| Malawi     | 1992           | FemaleAge45to49     | 153517     |
| Malawi     | 1992           | FemaleAge50to54     | 127334     |
| Malawi     | 1992           | FemaleAge55to59     | 102557     |
| Malawi     | 1992           | FemaleAge5to9       | 699147     |
| Malawi     | 1992           | FemaleAge60to64     | 82028      |
| Malawi     | 1992           | FemaleAge65to69     | 63598      |
| Malawi     | 1992           | FemaleAge70to74     | 46024      |
| Malawi     | 1992           | FemaleAge75to79     | 27101      |
| Malawi     | 1992           | FemaleAge80to84     | 11041      |
| Malawi     | 1992           | FemaleAge85to89     | 2793       |
| Malawi     | 1992           | FemaleAge90to94     | 410        |
| Malawi     | 1992           | FemaleAge95to99     | 51         |
| Malawi     | 1992           | FemaleAgeAbove100   | 1          |
| Malawi     | 1992           | FemaleLactAge15to19 | 83614      |
| Malawi     | 1992           | FemaleLactAge20to24 | 126463     |
| Malawi     | 1992           | FemaleLactAge25to29 | 100544     |
| Malawi     | 1992           | FemaleLactAge30to34 | 76494      |
| Malawi     | 1992           | FemaleLactAge35to39 | 46544      |
| Malawi     | 1992           | FemaleLactAge40to44 | 23965      |
| Malawi     | 1992           | FemaleLactAge45to49 | 10057      |
| Malawi     | 1992           | FemalePregAge15to19 | 62711      |
| Malawi     | 1992           | FemalePregAge20to24 | 94847      |
| Malawi     | 1992           | FemalePregAge25to29 | 75408      |
| Malawi     | 1992           | FemalePregAge30to34 | 57371      |
| Malawi     | 1992           | FemalePregAge35to39 | 34908      |
| Malawi     | 1992           | FemalePregAge40to44 | 17973      |
| Malawi     | 1992           | FemalePregAge45to49 | 7543       |
| Malawi     | 1992           | MaleAge0to4         | 901796     |
| Malawi     | 1992           | MaleAge10to14       | 624071     |
| Malawi     | 1992           | MaleAge15to19       | 518412     |
| Malawi     | 1992           | MaleAge20to24       | 406108     |
| Malawi     | 1992           | MaleAge25to29       | 349110     |
| Malawi     | 1992           | MaleAge30to34       | 296624     |
| Malawi     | 1992           | MaleAge35to39       | 233047     |
| Malawi     | 1992           | MaleAge40to44       | 198014     |
| Malawi     | 1992           | MaleAge45to49       | 158247     |

Dietary calcium and zinc deficiency risks are decreasing but remain prevalent

| Country | Reference year | Age/gender group    | Population |
|---------|----------------|---------------------|------------|
| Malawi  | 1992           | MaleAge50to54       | 119306     |
| Malawi  | 1992           | MaleAge55to59       | 96979      |
| Malawi  | 1992           | MaleAge5to9         | 705820     |
| Malawi  | 1992           | MaleAge60to64       | 75760      |
| Malawi  | 1992           | MaleAge65to69       | 54754      |
| Malawi  | 1992           | MaleAge70to74       | 38032      |
| Malawi  | 1992           | MaleAge75to79       | 21812      |
| Malawi  | 1992           | MaleAge80to84       | 8695       |
| Malawi  | 1992           | MaleAge85to89       | 2141       |
| Malawi  | 1992           | MaleAge90to94       | 257        |
| Malawi  | 1992           | MaleAge95to99       | 47         |
| Malawi  | 1993           | FemaleAge0to4       | 894106     |
| Malawi  | 1993           | FemaleAge10to14     | 606032     |
| Malawi  | 1993           | FemaleAge15to19     | 388521     |
| Malawi  | 1993           | FemaleAge20to24     | 208892     |
| Malawi  | 1993           | FemaleAge25to29     | 193590     |
| Malawi  | 1993           | FemaleAge30to34     | 185077     |
| Malawi  | 1993           | FemaleAge35to39     | 174188     |
| Malawi  | 1993           | FemaleAge40to44     | 169264     |
| Malawi  | 1993           | FemaleAge45to49     | 159169     |
| Malawi  | 1993           | FemaleAge50to54     | 127763     |
| Malawi  | 1993           | FemaleAge55to59     | 103548     |
| Malawi  | 1993           | FemaleAge5to9       | 700175     |
| Malawi  | 1993           | FemaleAge60to64     | 82732      |
| Malawi  | 1993           | FemaleAge65to69     | 64671      |
| Malawi  | 1993           | FemaleAge70to74     | 46858      |
| Malawi  | 1993           | FemaleAge75to79     | 28515      |
| Malawi  | 1993           | FemaleAge80to84     | 11780      |
| Malawi  | 1993           | FemaleAge85to89     | 2900       |
| Malawi  | 1993           | FemaleAge90to94     | 448        |
| Malawi  | 1993           | FemaleAge95to99     | 70         |
| Malawi  | 1993           | FemaleAgeAbove100   | 1          |
| Malawi  | 1993           | FemaleLactAge15to19 | 83614      |
| Malawi  | 1993           | FemaleLactAge20to24 | 126463     |
| Malawi  | 1993           | FemaleLactAge25to29 | 100544     |
| Malawi  | 1993           | FemaleLactAge30to34 | 76494      |
| Malawi  | 1993           | FemaleLactAge35to39 | 46544      |
| Malawi  | 1993           | FemaleLactAge40to44 | 23965      |
| Malawi  | 1993           | FemaleLactAge45to49 | 10057      |
| Malawi  | 1993           | FemalePregAge15to19 | 62711      |
| Malawi  | 1993           | FemalePregAge20to24 | 94847      |
| Malawi  | 1993           | FemalePregAge25to29 | 75408      |
| Malawi  | 1993           | FemalePregAge30to34 | 57371      |
| Malawi  | 1993           | FemalePregAge35to39 | 34908      |
| Malawi  | 1993           | FemalePregAge40to44 | 17973      |
| Malawi  | 1993           | FemalePregAge45to49 | 7543       |
| Malawi  | 1993           | MaleAge0to4         | 907277     |
| Malawi  | 1993           | MaleAge10to14       | 610969     |
| Malawi  | 1993           | MaleAge15to19       | 533177     |
| Malawi  | 1993           | MaleAge20to24       | 411968     |
| Malawi  | 1993           | MaleAge25to29       | 344601     |
| Malawi  | 1993           | MaleAge30to34       | 295584     |
| Malawi  | 1993           | MaleAge35to39       | 234385     |
| Malawi  | 1993           | MaleAge40to44       | 194388     |
| Malawi  | 1993           | MaleAge45to49       | 164798     |
| Malawi  | 1993           | MaleAge50to54       | 122013     |
| Malawi  | 1993           | MaleAge55to59       | 99112      |
| Malawi  | 1993           | MaleAge5to9         | 705787     |
| Malawi  | 1993           | MaleAge60to64       | 78569      |
| Malawi  | 1993           | MaleAge65to69       | 57101      |
| Malawi  | 1993           | MaleAge70to74       | 39131      |
| Malawi  | 1993           | MaleAge75to79       | 23213      |
| Malawi  | 1993           | MaleAge80to84       | 9226       |
| Malawi  | 1993           | MaleAge85to89       | 2257       |
| Malawi  | 1993           | MaleAge90to94       | 285        |
| Malawi  | 1993           | MaleAge95to99       | 51         |
| Malawi  | 1993           | MaleAgeAbove100     | 1          |
| Malawi  | 1994           | FemaleAge0to4       | 899280     |
| Malawi  | 1994           | FemaleAge10to14     | 594287     |
| Malawi  | 1994           | FemaleAge15to19     | 398779     |
| Malawi  | 1994           | FemaleAge20to24     | 217857     |
| Malawi  | 1994           | FemaleAge25to29     | 193554     |
| Malawi  | 1994           | FemaleAge30to34     | 183267     |
| Malawi  | 1994           | FemaleAge35to39     | 174796     |
| Malawi  | 1994           | FemaleAge40to44     | 163502     |
| Malawi  | 1994           | FemaleAge45to49     | 162852     |
| Malawi  | 1994           | FemaleAge50to54     | 129136     |
| Malawi  | 1994           | FemaleAge55to59     | 104545     |
| Malawi  | 1994           | FemaleAge5to9       | 704771     |
| Malawi  | 1994           | FemaleAge60to64     | 83520      |
| Malawi  | 1994           | FemaleAge65to69     | 65782      |
| Malawi  | 1994           | FemaleAge70to74     | 47923      |
| Malawi  | 1994           | FemaleAge75to79     | 29848      |
| Malawi  | 1994           | FemaleAge80to84     | 12576      |
| Malawi  | 1994           | FemaleAge85to89     | 2877       |
| Malawi  | 1994           | FemaleAge90to94     | 454        |
| Malawi  | 1994           | FemaleAge95to99     | 60         |
| Malawi  | 1994           | FemaleAgeAbove100   | 1          |

Dietary calcium and zinc deficiency risks are decreasing but remain prevalent

| Country | Reference year | Age/gender group    | Population |
|---------|----------------|---------------------|------------|
| Malawi  | 1994           | FemaleLactAge15to19 | 83614      |
| Malawi  | 1994           | FemaleLactAge20to24 | 126463     |
| Malawi  | 1994           | FemaleLactAge25to29 | 100544     |
| Malawi  | 1994           | FemaleLactAge30to34 | 76494      |
| Malawi  | 1994           | FemaleLactAge35to39 | 46544      |
| Malawi  | 1994           | FemaleLactAge40to44 | 23965      |
| Malawi  | 1994           | FemaleLactAge45to49 | 10057      |
| Malawi  | 1994           | FemalePregAge15to19 | 62711      |
| Malawi  | 1994           | FemalePregAge20to24 | 94847      |
| Malawi  | 1994           | FemalePregAge25to29 | 75408      |
| Malawi  | 1994           | FemalePregAge30to34 | 57371      |
| Malawi  | 1994           | FemalePregAge35to39 | 34908      |
| Malawi  | 1994           | FemalePregAge40to44 | 17973      |
| Malawi  | 1994           | FemalePregAge45to49 | 7543       |
| Malawi  | 1994           | MaleAge0to4         | 912310     |
| Malawi  | 1994           | MaleAge10to14       | 597096     |
| Malawi  | 1994           | MaleAge15to19       | 543954     |
| Malawi  | 1994           | MaleAge20to24       | 421089     |
| Malawi  | 1994           | MaleAge25to29       | 343062     |
| Malawi  | 1994           | MaleAge30to34       | 294354     |
| Malawi  | 1994           | MaleAge35to39       | 235315     |
| Malawi  | 1994           | MaleAge40to44       | 191011     |
| Malawi  | 1994           | MaleAge45to49       | 169814     |
| Malawi  | 1994           | MaleAge50to54       | 125523     |
| Malawi  | 1994           | MaleAge55to59       | 101469     |
| Malawi  | 1994           | MaleAge5to9         | 709773     |
| Malawi  | 1994           | MaleAge60to64       | 81459      |
| Malawi  | 1994           | MaleAge65to69       | 59695      |
| Malawi  | 1994           | MaleAge70to74       | 40690      |
| Malawi  | 1994           | MaleAge75to79       | 24566      |
| Malawi  | 1994           | MaleAge80to84       | 9873       |
| Malawi  | 1994           | MaleAge85to89       | 2225       |
| Malawi  | 1994           | MaleAge90to94       | 305        |
| Malawi  | 1994           | MaleAge95to99       | 44         |
| Malawi  | 1994           | MaleAgeAbov e100    | 1          |
| Malawi  | 1995           | FemaleAge0to4       | 912922     |
| Malawi  | 1995           | FemaleAge10to14     | 587830     |
| Malawi  | 1995           | FemaleAge15to19     | 405078     |
| Malawi  | 1995           | FemaleAge20to24     | 231488     |
| Malawi  | 1995           | FemaleAge25to29     | 198784     |
| Malawi  | 1995           | FemaleAge30to34     | 183630     |
| Malawi  | 1995           | FemaleAge35to39     | 175978     |
| Malawi  | 1995           | FemaleAge40to44     | 160619     |
| Malawi  | 1995           | FemaleAge45to49     | 164281     |
| Malawi  | 1995           | FemaleAge50to54     | 132323     |
| Malawi  | 1995           | FemaleAge55to59     | 105895     |
| Malawi  | 1995           | FemaleAge5to9       | 713712     |
| Malawi  | 1995           | FemaleAge60to64     | 84791      |
| Malawi  | 1995           | FemaleAge65to69     | 67184      |
| Malawi  | 1995           | FemaleAge70to74     | 49430      |
| Malawi  | 1995           | FemaleAge75to79     | 31242      |
| Malawi  | 1995           | FemaleAge80to84     | 13500      |
| Malawi  | 1995           | FemaleAge85to89     | 2828       |
| Malawi  | 1995           | FemaleAge90to94     | 337        |
| Malawi  | 1995           | FemaleAge95to99     | 27         |
| Malawi  | 1995           | FemaleAgeAbov e100  | 1          |
| Malawi  | 1995           | FemaleLactAge15to19 | 83614      |
| Malawi  | 1995           | FemaleLactAge20to24 | 126463     |
| Malawi  | 1995           | FemaleLactAge25to29 | 100544     |
| Malawi  | 1995           | FemaleLactAge30to34 | 76494      |
| Malawi  | 1995           | FemaleLactAge35to39 | 46544      |
| Malawi  | 1995           | FemaleLactAge40to44 | 23965      |
| Malawi  | 1995           | FemaleLactAge45to49 | 10057      |
| Malawi  | 1995           | FemalePregAge15to19 | 62711      |
| Malawi  | 1995           | FemalePregAge20to24 | 94847      |
| Malawi  | 1995           | FemalePregAge25to29 | 75408      |
| Malawi  | 1995           | FemalePregAge30to34 | 57371      |
| Malawi  | 1995           | FemalePregAge35to39 | 34908      |
| Malawi  | 1995           | FemalePregAge40to44 | 17973      |
| Malawi  | 1995           | FemalePregAge45to49 | 7543       |
| Malawi  | 1995           | MaleAge0to4         | 926324     |
| Malawi  | 1995           | MaleAge10to14       | 588969     |
| Malawi  | 1995           | MaleAge15to19       | 550309     |
| Malawi  | 1995           | MaleAge20to24       | 434848     |
| Malawi  | 1995           | MaleAge25to29       | 346684     |
| Malawi  | 1995           | MaleAge30to34       | 294339     |
| Malawi  | 1995           | MaleAge35to39       | 236593     |
| Malawi  | 1995           | MaleAge40to44       | 189674     |
| Malawi  | 1995           | MaleAge45to49       | 173043     |
| Malawi  | 1995           | MaleAge50to54       | 130572     |
| Malawi  | 1995           | MaleAge55to59       | 104557     |
| Malawi  | 1995           | MaleAge5to9         | 718300     |
| Malawi  | 1995           | MaleAge60to64       | 84699      |
| Malawi  | 1995           | MaleAge65to69       | 62803      |
| Malawi  | 1995           | MaleAge70to74       | 42925      |
| Malawi  | 1995           | MaleAge75to79       | 26013      |
| Malawi  | 1995           | MaleAge80to84       | 10700      |
| Malawi  | 1995           | MaleAge85to89       | 2141       |

Dietary calcium and zinc deficiency risks are decreasing but remain prevalent

| Country | Reference year | Age/gender group    | Population |
|---------|----------------|---------------------|------------|
| Malawi  | 1995           | MaleAge90to94       | 230        |
| Malawi  | 1995           | MaleAge95to99       | 19         |
| Malawi  | 1995           | MaleAgeAbov e100    | 1          |
| Malawi  | 1996           | FemaleAge0to4       | 934740     |
| Malawi  | 1996           | FemaleAge10to14     | 597962     |
| Malawi  | 1996           | FemaleAge15to19     | 388702     |
| Malawi  | 1996           | FemaleAge20to24     | 197275     |
| Malawi  | 1996           | FemaleAge25to29     | 185303     |
| Malawi  | 1996           | FemaleAge30to34     | 194201     |
| Malawi  | 1996           | FemaleAge35to39     | 182621     |
| Malawi  | 1996           | FemaleAge40to44     | 167850     |
| Malawi  | 1996           | FemaleAge45to49     | 167527     |
| Malawi  | 1996           | FemaleAge50to54     | 138378     |
| Malawi  | 1996           | FemaleAge55to59     | 107703     |
| Malawi  | 1996           | FemaleAge5to9       | 738702     |
| Malawi  | 1996           | FemaleAge60to64     | 85973      |
| Malawi  | 1996           | FemaleAge65to69     | 67533      |
| Malawi  | 1996           | FemaleAge70to74     | 49533      |
| Malawi  | 1996           | FemaleAge75to79     | 31538      |
| Malawi  | 1996           | FemaleAge80to84     | 14468      |
| Malawi  | 1996           | FemaleAge85to89     | 3566       |
| Malawi  | 1996           | FemaleAge90to94     | 410        |
| Malawi  | 1996           | FemaleAge95to99     | 24         |
| Malawi  | 1996           | FemaleAgeAbov e100  | 1          |
| Malawi  | 1996           | FemaleLactAge15to19 | 94494      |
| Malawi  | 1996           | FemaleLactAge20to24 | 151346     |
| Malawi  | 1996           | FemaleLactAge25to29 | 108892     |
| Malawi  | 1996           | FemaleLactAge30to34 | 70640      |
| Malawi  | 1996           | FemaleLactAge35to39 | 45235      |
| Malawi  | 1996           | FemaleLactAge40to44 | 21490      |
| Malawi  | 1996           | FemaleLactAge45to49 | 9216       |
| Malawi  | 1996           | FemalePregAge15to19 | 70870      |
| Malawi  | 1996           | FemalePregAge20to24 | 113510     |
| Malawi  | 1996           | FemalePregAge25to29 | 81669      |
| Malawi  | 1996           | FemalePregAge30to34 | 52980      |
| Malawi  | 1996           | FemalePregAge35to39 | 33927      |
| Malawi  | 1996           | FemalePregAge40to44 | 16117      |
| Malawi  | 1996           | FemalePregAge45to49 | 6912       |
| Malawi  | 1996           | MaleAge0to4         | 949577     |
| Malawi  | 1996           | MaleAge10to14       | 599291     |
| Malawi  | 1996           | MaleAge15to19       | 554927     |
| Malawi  | 1996           | MaleAge20to24       | 450022     |
| Malawi  | 1996           | MaleAge25to29       | 351684     |
| Malawi  | 1996           | MaleAge30to34       | 295172     |
| Malawi  | 1996           | MaleAge35to39       | 239991     |
| Malawi  | 1996           | MaleAge40to44       | 190434     |
| Malawi  | 1996           | MaleAge45to49       | 173032     |
| Malawi  | 1996           | MaleAge50to54       | 134952     |
| Malawi  | 1996           | MaleAge55to59       | 105658     |
| Malawi  | 1996           | MaleAge5to9         | 744321     |
| Malawi  | 1996           | MaleAge60to64       | 85403      |
| Malawi  | 1996           | MaleAge65to69       | 63672      |
| Malawi  | 1996           | MaleAge70to74       | 43180      |
| Malawi  | 1996           | MaleAge75to79       | 26176      |
| Malawi  | 1996           | MaleAge80to84       | 11501      |
| Malawi  | 1996           | MaleAge85to89       | 2710       |
| Malawi  | 1996           | MaleAge90to94       | 290        |
| Malawi  | 1996           | MaleAge95to99       | 14         |
| Malawi  | 1996           | MaleAgeAbov e100    | 1          |
| Malawi  | 1997           | FemaleAge0to4       | 953516     |
| Malawi  | 1997           | FemaleAge10to14     | 617351     |
| Malawi  | 1997           | FemaleAge15to19     | 391592     |
| Malawi  | 1997           | FemaleAge20to24     | 213581     |
| Malawi  | 1997           | FemaleAge25to29     | 190159     |
| Malawi  | 1997           | FemaleAge30to34     | 195525     |
| Malawi  | 1997           | FemaleAge35to39     | 187698     |
| Malawi  | 1997           | FemaleAge40to44     | 173708     |
| Malawi  | 1997           | FemaleAge45to49     | 167970     |
| Malawi  | 1997           | FemaleAge50to54     | 146941     |
| Malawi  | 1997           | FemaleAge55to59     | 110128     |
| Malawi  | 1997           | FemaleAge5to9       | 769203     |
| Malawi  | 1997           | FemaleAge60to64     | 88165      |
| Malawi  | 1997           | FemaleAge65to69     | 68564      |
| Malawi  | 1997           | FemaleAge70to74     | 50136      |
| Malawi  | 1997           | FemaleAge75to79     | 31886      |
| Malawi  | 1997           | FemaleAge80to84     | 15259      |
| Malawi  | 1997           | FemaleAge85to89     | 4208       |
| Malawi  | 1997           | FemaleAge90to94     | 463        |
| Malawi  | 1997           | FemaleAge95to99     | 45         |
| Malawi  | 1997           | FemaleAgeAbov e100  | 1          |
| Malawi  | 1997           | FemaleLactAge15to19 | 94494      |
| Malawi  | 1997           | FemaleLactAge20to24 | 151346     |
| Malawi  | 1997           | FemaleLactAge25to29 | 108892     |
| Malawi  | 1997           | FemaleLactAge30to34 | 70640      |
| Malawi  | 1997           | FemaleLactAge35to39 | 45235      |
| Malawi  | 1997           | FemaleLactAge40to44 | 21490      |
| Malawi  | 1997           | FemaleLactAge45to49 | 9216       |
| Malawi  | 1997           | FemalePregAge15to19 | 70870      |

Dietary calcium and zinc deficiency risks are decreasing but remain prevalent

| Country | Reference year | Age/gender group    | Population |
|---------|----------------|---------------------|------------|
| Malawi  | 1997           | FemalePregAge20to24 | 113510     |
| Malawi  | 1997           | FemalePregAge25to29 | 81669      |
| Malawi  | 1997           | FemalePregAge30to34 | 52980      |
| Malawi  | 1997           | FemalePregAge35to39 | 33927      |
| Malawi  | 1997           | FemalePregAge40to44 | 16117      |
| Malawi  | 1997           | FemalePregAge45to49 | 6912       |
| Malawi  | 1997           | MaleAge0to4         | 969327     |
| Malawi  | 1997           | MaleAge10to14       | 619145     |
| Malawi  | 1997           | MaleAge15to19       | 558527     |
| Malawi  | 1997           | MaleAge20to24       | 471697     |
| Malawi  | 1997           | MaleAge25to29       | 361156     |
| Malawi  | 1997           | MaleAge30to34       | 297334     |
| Malawi  | 1997           | MaleAge35to39       | 244999     |
| Malawi  | 1997           | MaleAge40to44       | 193811     |
| Malawi  | 1997           | MaleAge45to49       | 171943     |
| Malawi  | 1997           | MaleAge50to54       | 141338     |
| Malawi  | 1997           | MaleAge55to59       | 107593     |
| Malawi  | 1997           | MaleAge5to9         | 776167     |
| Malawi  | 1997           | MaleAge60to64       | 86705      |
| Malawi  | 1997           | MaleAge65to69       | 65233      |
| Malawi  | 1997           | MaleAge70to74       | 43895      |
| Malawi  | 1997           | MaleAge75to79       | 26311      |
| Malawi  | 1997           | MaleAge80to84       | 12122      |
| Malawi  | 1997           | MaleAge85to89       | 3180       |
| Malawi  | 1997           | MaleAge90to94       | 349        |
| Malawi  | 1997           | MaleAge95to99       | 30         |
| Malawi  | 1997           | MaleAgeAbov e100    | 1          |
| Malawi  | 1998           | FemaleAge0to4       | 972379     |
| Malawi  | 1998           | FemaleAge10to14     | 643347     |
| Malawi  | 1998           | FemaleAge15to19     | 395545     |
| Malawi  | 1998           | FemaleAge20to24     | 233848     |
| Malawi  | 1998           | FemaleAge25to29     | 198440     |
| Malawi  | 1998           | FemaleAge30to34     | 197589     |
| Malawi  | 1998           | FemaleAge35to39     | 192643     |
| Malawi  | 1998           | FemaleAge40to44     | 181219     |
| Malawi  | 1998           | FemaleAge45to49     | 167833     |
| Malawi  | 1998           | FemaleAge50to54     | 156481     |
| Malawi  | 1998           | FemaleAge55to59     | 113360     |
| Malawi  | 1998           | FemaleAge5to9       | 802389     |
| Malawi  | 1998           | FemaleAge60to64     | 91043      |
| Malawi  | 1998           | FemaleAge65to69     | 70135      |
| Malawi  | 1998           | FemaleAge70to74     | 51140      |
| Malawi  | 1998           | FemaleAge75to79     | 32354      |
| Malawi  | 1998           | FemaleAge80to84     | 15805      |
| Malawi  | 1998           | FemaleAge85to89     | 4648       |
| Malawi  | 1998           | FemaleAge90to94     | 529        |
| Malawi  | 1998           | FemaleAge95to99     | 65         |
| Malawi  | 1998           | FemaleAgeAbov e100  | 2          |
| Malawi  | 1998           | FemaleLactAge15to19 | 94494      |
| Malawi  | 1998           | FemaleLactAge20to24 | 151346     |
| Malawi  | 1998           | FemaleLactAge25to29 | 108892     |
| Malawi  | 1998           | FemaleLactAge30to34 | 70640      |
| Malawi  | 1998           | FemaleLactAge35to39 | 45235      |
| Malawi  | 1998           | FemaleLactAge40to44 | 21490      |
| Malawi  | 1998           | FemaleLactAge45to49 | 9216       |
| Malawi  | 1998           | FemalePregAge15to19 | 70870      |
| Malawi  | 1998           | FemalePregAge20to24 | 113510     |
| Malawi  | 1998           | FemalePregAge25to29 | 81669      |
| Malawi  | 1998           | FemalePregAge30to34 | 52980      |
| Malawi  | 1998           | FemalePregAge35to39 | 33927      |
| Malawi  | 1998           | FemalePregAge40to44 | 16117      |
| Malawi  | 1998           | FemalePregAge45to49 | 6912       |
| Malawi  | 1998           | MaleAge0to4         | 988988     |
| Malawi  | 1998           | MaleAge10to14       | 645865     |
| Malawi  | 1998           | MaleAge15to19       | 562409     |
| Malawi  | 1998           | MaleAge20to24       | 496403     |
| Malawi  | 1998           | MaleAge25to29       | 374525     |
| Malawi  | 1998           | MaleAge30to34       | 300923     |
| Malawi  | 1998           | MaleAge35to39       | 250672     |
| Malawi  | 1998           | MaleAge40to44       | 198781     |
| Malawi  | 1998           | MaleAge45to49       | 170353     |
| Malawi  | 1998           | MaleAge50to54       | 148362     |
| Malawi  | 1998           | MaleAge55to59       | 110355     |
| Malawi  | 1998           | MaleAge5to9         | 810867     |
| Malawi  | 1998           | MaleAge60to64       | 88445      |
| Malawi  | 1998           | MaleAge65to69       | 67225      |
| Malawi  | 1998           | MaleAge70to74       | 44988      |
| Malawi  | 1998           | MaleAge75to79       | 26516      |
| Malawi  | 1998           | MaleAge80to84       | 12465      |
| Malawi  | 1998           | MaleAge85to89       | 3476       |
| Malawi  | 1998           | MaleAge90to94       | 425        |
| Malawi  | 1998           | MaleAge95to99       | 45         |
| Malawi  | 1998           | MaleAgeAbov e100    | 1          |
| Malawi  | 1999           | FemaleAge0to4       | 992569     |
| Malawi  | 1999           | FemaleAge10to14     | 671946     |
| Malawi  | 1999           | FemaleAge15to19     | 402792     |
| Malawi  | 1999           | FemaleAge20to24     | 253162     |
| Malawi  | 1999           | FemaleAge25to29     | 209731     |

Dietary calcium and zinc deficiency risks are decreasing but remain prevalent

| Country   | Reference year | Age/gender group    | Population |
|-----------|----------------|---------------------|------------|
| Malawi    | 1999           | FemaleAge30to34     | 200324     |
| Malawi    | 1999           | FemaleAge35to39     | 196472     |
| Malawi    | 1999           | FemaleAge40to44     | 188414     |
| Malawi    | 1999           | FemaleAge45to49     | 168464     |
| Malawi    | 1999           | FemaleAge50to54     | 164656     |
| Malawi    | 1999           | FemaleAge55to59     | 117782     |
| Malawi    | 1999           | FemaleAge5to9       | 834293     |
| Malawi    | 1999           | FemaleAge60to64     | 94150      |
| Malawi    | 1999           | FemaleAge65to69     | 72071      |
| Malawi    | 1999           | FemaleAge70to74     | 52387      |
| Malawi    | 1999           | FemaleAge75to79     | 32945      |
| Malawi    | 1999           | FemaleAge80to84     | 16054      |
| Malawi    | 1999           | FemaleAge85to89     | 4824       |
| Malawi    | 1999           | FemaleAge90to94     | 597        |
| Malawi    | 1999           | FemaleAge95to99     | 65         |
| Malawi    | 1999           | FemaleAgeAbov e100  | 2          |
| Malawi    | 1999           | FemaleLactAge15to19 | 94494      |
| Malawi    | 1999           | FemaleLactAge20to24 | 151346     |
| Malawi    | 1999           | FemaleLactAge25to29 | 108892     |
| Malawi    | 1999           | FemaleLactAge30to34 | 70640      |
| Malawi    | 1999           | FemaleLactAge35to39 | 45235      |
| Malawi    | 1999           | FemaleLactAge40to44 | 21490      |
| Malawi    | 1999           | FemaleLactAge45to49 | 9216       |
| Malawi    | 1999           | FemalePregAge15to19 | 70870      |
| Malawi    | 1999           | FemalePregAge20to24 | 113510     |
| Malawi    | 1999           | FemalePregAge25to29 | 81669      |
| Malawi    | 1999           | FemalePregAge30to34 | 52980      |
| Malawi    | 1999           | FemalePregAge35to39 | 33927      |
| Malawi    | 1999           | FemalePregAge40to44 | 16117      |
| Malawi    | 1999           | FemalePregAge45to49 | 6912       |
| Malawi    | 1999           | MaleAge0to4         | 1010017    |
| Malawi    | 1999           | MaleAge10to14       | 675371     |
| Malawi    | 1999           | MaleAge15to19       | 569383     |
| Malawi    | 1999           | MaleAge20to24       | 518837     |
| Malawi    | 1999           | MaleAge25to29       | 390997     |
| Malawi    | 1999           | MaleAge30to34       | 306267     |
| Malawi    | 1999           | MaleAge35to39       | 255801     |
| Malawi    | 1999           | MaleAge40to44       | 203916     |
| Malawi    | 1999           | MaleAge45to49       | 169344     |
| Malawi    | 1999           | MaleAge50to54       | 154030     |
| Malawi    | 1999           | MaleAge55to59       | 113997     |
| Malawi    | 1999           | MaleAge5to9         | 844277     |
| Malawi    | 1999           | MaleAge60to64       | 90450      |
| Malawi    | 1999           | MaleAge65to69       | 69289      |
| Malawi    | 1999           | MaleAge70to74       | 46337      |
| Malawi    | 1999           | MaleAge75to79       | 26841      |
| Malawi    | 1999           | MaleAge80to84       | 12475      |
| Malawi    | 1999           | MaleAge85to89       | 3555       |
| Malawi    | 1999           | MaleAge90to94       | 481        |
| Malawi    | 1999           | MaleAge95to99       | 44         |
| Malawi    | 1999           | MaleAgeAbov e100    | 1          |
| Malay sia | 1992           | FemaleAge0to4       | 1219842    |
| Malay sia | 1992           | FemaleAge10to14     | 1043633    |
| Malay sia | 1992           | FemaleAge15to19     | 910953     |
| Malay sia | 1992           | FemaleAge20to24     | 658815     |
| Malay sia | 1992           | FemaleAge25to29     | 525434     |
| Malay sia | 1992           | FemaleAge30to34     | 528472     |
| Malay sia | 1992           | FemaleAge35to39     | 517268     |
| Malay sia | 1992           | FemaleAge40to44     | 478970     |
| Malay sia | 1992           | FemaleAge45to49     | 363754     |
| Malay sia | 1992           | FemaleAge50to54     | 303939     |
| Malay sia | 1992           | FemaleAge55to59     | 252587     |
| Malay sia | 1992           | FemaleAge5to9       | 1152618    |
| Malay sia | 1992           | FemaleAge60to64     | 193619     |
| Malay sia | 1992           | FemaleAge65to69     | 144688     |
| Malay sia | 1992           | FemaleAge70to74     | 101936     |
| Malay sia | 1992           | FemaleAge75to79     | 65143      |
| Malay sia | 1992           | FemaleAge80to84     | 36074      |
| Malay sia | 1992           | FemaleAge85to89     | 13799      |
| Malay sia | 1992           | FemaleAge90to94     | 2501       |
| Malay sia | 1992           | FemaleAge95to99     | 421        |
| Malay sia | 1992           | FemaleAgeAbov e100  | 14         |
| Malay sia | 1992           | FemaleLactAge15to19 | 18102      |
| Malay sia | 1992           | FemaleLactAge20to24 | 115586     |
| Malay sia | 1992           | FemaleLactAge25to29 | 179784     |
| Malay sia | 1992           | FemaleLactAge30to34 | 133137     |
| Malay sia | 1992           | FemaleLactAge35to39 | 67541      |
| Malay sia | 1992           | FemaleLactAge40to44 | 19413      |
| Malay sia | 1992           | FemaleLactAge45to49 | 1562       |
| Malay sia | 1992           | FemalePregAge15to19 | 13577      |
| Malay sia | 1992           | FemalePregAge20to24 | 86690      |
| Malay sia | 1992           | FemalePregAge25to29 | 134838     |
| Malay sia | 1992           | FemalePregAge30to34 | 99852      |
| Malay sia | 1992           | FemalePregAge35to39 | 50655      |
| Malay sia | 1992           | FemalePregAge40to44 | 14560      |
| Malay sia | 1992           | FemalePregAge45to49 | 1171       |
| Malay sia | 1992           | MaleAge0to4         | 1291335    |
| Malay sia | 1992           | MaleAge10to14       | 1090610    |

Dietary calcium and zinc deficiency risks are decreasing but remain prevalent

| Country   | Reference year | Age/gender group    | Population |
|-----------|----------------|---------------------|------------|
| Malay sia | 1992           | MaleAge15to19       | 971005     |
| Malay sia | 1992           | MaleAge20to24       | 872390     |
| Malay sia | 1992           | MaleAge25to29       | 846577     |
| Malay sia | 1992           | MaleAge30to34       | 773160     |
| Malay sia | 1992           | MaleAge35to39       | 655558     |
| Malay sia | 1992           | MaleAge40to44       | 527888     |
| Malay sia | 1992           | MaleAge45to49       | 392435     |
| Malay sia | 1992           | MaleAge50to54       | 330418     |
| Malay sia | 1992           | MaleAge55to59       | 256120     |
| Malay sia | 1992           | MaleAge5to9         | 1216818    |
| Malay sia | 1992           | MaleAge60to64       | 191197     |
| Malay sia | 1992           | MaleAge65to69       | 137713     |
| Malay sia | 1992           | MaleAge70to74       | 93503      |
| Malay sia | 1992           | MaleAge75to79       | 60816      |
| Malay sia | 1992           | MaleAge80to84       | 31862      |
| Malay sia | 1992           | MaleAge85to89       | 11899      |
| Malay sia | 1992           | MaleAge90to94       | 2474       |
| Malay sia | 1992           | MaleAge95to99       | 370        |
| Malay sia | 1992           | MaleAgeAbov e100    | 17         |
| Malay sia | 1993           | FemaleAge0to4       | 1245385    |
| Malay sia | 1993           | FemaleAge10to14     | 1069256    |
| Malay sia | 1993           | FemaleAge15to19     | 929677     |
| Malay sia | 1993           | FemaleAge20to24     | 678319     |
| Malay sia | 1993           | FemaleAge25to29     | 526658     |
| Malay sia | 1993           | FemaleAge30to34     | 559851     |
| Malay sia | 1993           | FemaleAge35to39     | 541286     |
| Malay sia | 1993           | FemaleAge40to44     | 505130     |
| Malay sia | 1993           | FemaleAge45to49     | 393367     |
| Malay sia | 1993           | FemaleAge50to54     | 302989     |
| Malay sia | 1993           | FemaleAge55to59     | 267084     |
| Malay sia | 1993           | FemaleAge5to9       | 1166986    |
| Malay sia | 1993           | FemaleAge60to64     | 197697     |
| Malay sia | 1993           | FemaleAge65to69     | 151171     |
| Malay sia | 1993           | FemaleAge70to74     | 103790     |
| Malay sia | 1993           | FemaleAge75to79     | 67671      |
| Malay sia | 1993           | FemaleAge80to84     | 35608      |
| Malay sia | 1993           | FemaleAge85to89     | 15070      |
| Malay sia | 1993           | FemaleAge90to94     | 2479       |
| Malay sia | 1993           | FemaleAge95to99     | 514        |
| Malay sia | 1993           | FemaleAgeAbov e100  | 15         |
| Malay sia | 1993           | FemaleLactAge15to19 | 18102      |
| Malay sia | 1993           | FemaleLactAge20to24 | 115586     |
| Malay sia | 1993           | FemaleLactAge25to29 | 179784     |
| Malay sia | 1993           | FemaleLactAge30to34 | 133137     |
| Malay sia | 1993           | FemaleLactAge35to39 | 67541      |
| Malay sia | 1993           | FemaleLactAge40to44 | 19413      |
| Malay sia | 1993           | FemaleLactAge45to49 | 1562       |
| Malay sia | 1993           | FemalePregAge15to19 | 13577      |
| Malay sia | 1993           | FemalePregAge20to24 | 86690      |
| Malay sia | 1993           | FemalePregAge25to29 | 134838     |
| Malay sia | 1993           | FemalePregAge30to34 | 99852      |
| Malay sia | 1993           | FemalePregAge35to39 | 50655      |
| Malay sia | 1993           | FemalePregAge40to44 | 14560      |
| Malay sia | 1993           | FemalePregAge45to49 | 1171       |
| Malay sia | 1993           | MaleAge0to4         | 1315899    |
| Malay sia | 1993           | MaleAge10to14       | 1118240    |
| Malay sia | 1993           | MaleAge15to19       | 990451     |
| Malay sia | 1993           | MaleAge20to24       | 893196     |
| Malay sia | 1993           | MaleAge25to29       | 846653     |
| Malay sia | 1993           | MaleAge30to34       | 803726     |
| Malay sia | 1993           | MaleAge35to39       | 678321     |
| Malay sia | 1993           | MaleAge40to44       | 557542     |
| Malay sia | 1993           | MaleAge45to49       | 417457     |
| Malay sia | 1993           | MaleAge50to54       | 333238     |
| Malay sia | 1993           | MaleAge55to59       | 274862     |
| Malay sia | 1993           | MaleAge5to9         | 1232003    |
| Malay sia | 1993           | MaleAge60to64       | 193195     |
| Malay sia | 1993           | MaleAge65to69       | 145807     |
| Malay sia | 1993           | MaleAge70to74       | 93974      |
| Malay sia | 1993           | MaleAge75to79       | 62747      |
| Malay sia | 1993           | MaleAge80to84       | 31921      |
| Malay sia | 1993           | MaleAge85to89       | 12704      |
| Malay sia | 1993           | MaleAge90to94       | 2541       |
| Malay sia | 1993           | MaleAge95to99       | 445        |
| Malay sia | 1993           | MaleAgeAbov e100    | 18         |
| Malay sia | 1994           | FemaleAge0to4       | 1270615    |
| Malay sia | 1994           | FemaleAge10to14     | 1093344    |
| Malay sia | 1994           | FemaleAge15to19     | 949476     |
| Malay sia | 1994           | FemaleAge20to24     | 698424     |
| Malay sia | 1994           | FemaleAge25to29     | 529285     |
| Malay sia | 1994           | FemaleAge30to34     | 586656     |
| Malay sia | 1994           | FemaleAge35to39     | 566904     |
| Malay sia | 1994           | FemaleAge40to44     | 531240     |
| Malay sia | 1994           | FemaleAge45to49     | 424153     |
| Malay sia | 1994           | FemaleAge50to54     | 306562     |
| Malay sia | 1994           | FemaleAge55to59     | 279356     |
| Malay sia | 1994           | FemaleAge5to9       | 1180294    |
| Malay sia | 1994           | FemaleAge60to64     | 203692     |

Dietary calcium and zinc deficiency risks are decreasing but remain prevalent

| Country   | Reference year | Age/gender group    | Population |
|-----------|----------------|---------------------|------------|
| Malay sia | 1994           | FemaleAge65to69     | 157486     |
| Malay sia | 1994           | FemaleAge70to74     | 106448     |
| Malay sia | 1994           | FemaleAge75to79     | 70256      |
| Malay sia | 1994           | FemaleAge80to84     | 35435      |
| Malay sia | 1994           | FemaleAge85to89     | 15400      |
| Malay sia | 1994           | FemaleAge90to94     | 2508       |
| Malay sia | 1994           | FemaleAge95to99     | 484        |
| Malay sia | 1994           | FemaleAgeAbov e100  | 15         |
| Malay sia | 1994           | FemaleLactAge15to19 | 18102      |
| Malay sia | 1994           | FemaleLactAge20to24 | 115586     |
| Malay sia | 1994           | FemaleLactAge25to29 | 179784     |
| Malay sia | 1994           | FemaleLactAge30to34 | 133137     |
| Malay sia | 1994           | FemaleLactAge35to39 | 67541      |
| Malay sia | 1994           | FemaleLactAge40to44 | 19413      |
| Malay sia | 1994           | FemaleLactAge45to49 | 1562       |
| Malay sia | 1994           | FemalePregAge15to19 | 13577      |
| Malay sia | 1994           | FemalePregAge20to24 | 86690      |
| Malay sia | 1994           | FemalePregAge25to29 | 134838     |
| Malay sia | 1994           | FemalePregAge30to34 | 99852      |
| Malay sia | 1994           | FemalePregAge35to39 | 50655      |
| Malay sia | 1994           | FemalePregAge40to44 | 14560      |
| Malay sia | 1994           | FemalePregAge45to49 | 1171       |
| Malay sia | 1994           | MaleAge0to4         | 1340843    |
| Malay sia | 1994           | MaleAge10to14       | 1144918    |
| Malay sia | 1994           | MaleAge15to19       | 1011614    |
| Malay sia | 1994           | MaleAge20to24       | 914631     |
| Malay sia | 1994           | MaleAge25to29       | 848626     |
| Malay sia | 1994           | MaleAge30to34       | 829834     |
| Malay sia | 1994           | MaleAge35to39       | 702784     |
| Malay sia | 1994           | MaleAge40to44       | 586914     |
| Malay sia | 1994           | MaleAge45to49       | 444801     |
| Malay sia | 1994           | MaleAge50to54       | 339458     |
| Malay sia | 1994           | MaleAge55to59       | 291828     |
| Malay sia | 1994           | MaleAge5to9         | 1246331    |
| Malay sia | 1994           | MaleAge60to64       | 198250     |
| Malay sia | 1994           | MaleAge65to69       | 153051     |
| Malay sia | 1994           | MaleAge70to74       | 95770      |
| Malay sia | 1994           | MaleAge75to79       | 64537      |
| Malay sia | 1994           | MaleAge80to84       | 31953      |
| Malay sia | 1994           | MaleAge85to89       | 12890      |
| Malay sia | 1994           | MaleAge90to94       | 2553       |
| Malay sia | 1994           | MaleAge95to99       | 441        |
| Malay sia | 1994           | MaleAgeAbov e100    | 19         |
| Malay sia | 1995           | FemaleAge0to4       | 1290263    |
| Malay sia | 1995           | FemaleAge10to14     | 1114910    |
| Malay sia | 1995           | FemaleAge15to19     | 971284     |
| Malay sia | 1995           | FemaleAge20to24     | 717889     |
| Malay sia | 1995           | FemaleAge25to29     | 537028     |
| Malay sia | 1995           | FemaleAge30to34     | 606648     |
| Malay sia | 1995           | FemaleAge35to39     | 595124     |
| Malay sia | 1995           | FemaleAge40to44     | 557898     |
| Malay sia | 1995           | FemaleAge45to49     | 453866     |
| Malay sia | 1995           | FemaleAge50to54     | 317930     |
| Malay sia | 1995           | FemaleAge55to59     | 287795     |
| Malay sia | 1995           | FemaleAge5to9       | 1196003    |
| Malay sia | 1995           | FemaleAge60to64     | 212464     |
| Malay sia | 1995           | FemaleAge65to69     | 163330     |
| Malay sia | 1995           | FemaleAge70to74     | 110318     |
| Malay sia | 1995           | FemaleAge75to79     | 72672      |
| Malay sia | 1995           | FemaleAge80to84     | 35897      |
| Malay sia | 1995           | FemaleAge85to89     | 14842      |
| Malay sia | 1995           | FemaleAge90to94     | 2478       |
| Malay sia | 1995           | FemaleAge95to99     | 283        |
| Malay sia | 1995           | FemaleAgeAbov e100  | 16         |
| Malay sia | 1995           | FemaleLactAge15to19 | 18102      |
| Malay sia | 1995           | FemaleLactAge20to24 | 115586     |
| Malay sia | 1995           | FemaleLactAge25to29 | 179784     |
| Malay sia | 1995           | FemaleLactAge30to34 | 133137     |
| Malay sia | 1995           | FemaleLactAge35to39 | 67541      |
| Malay sia | 1995           | FemaleLactAge40to44 | 19413      |
| Malay sia | 1995           | FemaleLactAge45to49 | 1562       |
| Malay sia | 1995           | FemalePregAge15to19 | 13577      |
| Malay sia | 1995           | FemalePregAge20to24 | 86690      |
| Malay sia | 1995           | FemalePregAge25to29 | 134838     |
| Malay sia | 1995           | FemalePregAge30to34 | 99852      |
| Malay sia | 1995           | FemalePregAge35to39 | 50655      |
| Malay sia | 1995           | FemalePregAge40to44 | 14560      |
| Malay sia | 1995           | FemalePregAge45to49 | 1171       |
| Malay sia | 1995           | MaleAge0to4         | 1361908    |
| Malay sia | 1995           | MaleAge10to14       | 1169800    |
| Malay sia | 1995           | MaleAge15to19       | 1035965    |
| Malay sia | 1995           | MaleAge20to24       | 935713     |
| Malay sia | 1995           | MaleAge25to29       | 856600     |
| Malay sia | 1995           | MaleAge30to34       | 849405     |
| Malay sia | 1995           | MaleAge35to39       | 730550     |
| Malay sia | 1995           | MaleAge40to44       | 615904     |
| Malay sia | 1995           | MaleAge45to49       | 473517     |
| Malay sia | 1995           | MaleAge50to54       | 351940     |



Dietary calcium and zinc deficiency risks are decreasing but remain prevalent

| Country   | Reference year | Age/gender group    | Population |
|-----------|----------------|---------------------|------------|
| Malay sia | 1995           | MaleAge55to59       | 305101     |
| Malay sia | 1995           | MaleAge5to9         | 1263802    |
| Malay sia | 1995           | MaleAge60to64       | 207932     |
| Malay sia | 1995           | MaleAge65to69       | 158886     |
| Malay sia | 1995           | MaleAge70to74       | 99475      |
| Malay sia | 1995           | MaleAge75to79       | 65997      |
| Malay sia | 1995           | MaleAge80to84       | 32257      |
| Malay sia | 1995           | MaleAge85to89       | 12474      |
| Malay sia | 1995           | MaleAge90to94       | 2421       |
| Malay sia | 1995           | MaleAge95to99       | 302        |
| Malay sia | 1995           | MaleAgeAbov e100    | 20         |
| Malay sia | 1996           | FemaleAge0to4       | 1305875    |
| Malay sia | 1996           | FemaleAge10to14     | 1136153    |
| Malay sia | 1996           | FemaleAge15to19     | 1001237    |
| Malay sia | 1996           | FemaleAge20to24     | 745176     |
| Malay sia | 1996           | FemaleAge25to29     | 542629     |
| Malay sia | 1996           | FemaleAge30to34     | 599851     |
| Malay sia | 1996           | FemaleAge35to39     | 610429     |
| Malay sia | 1996           | FemaleAge40to44     | 578574     |
| Malay sia | 1996           | FemaleAge45to49     | 479838     |
| Malay sia | 1996           | FemaleAge50to54     | 334406     |
| Malay sia | 1996           | FemaleAge55to59     | 290968     |
| Malay sia | 1996           | FemaleAge5to9       | 1211719    |
| Malay sia | 1996           | FemaleAge60to64     | 221756     |
| Malay sia | 1996           | FemaleAge65to69     | 167061     |
| Malay sia | 1996           | FemaleAge70to74     | 114204     |
| Malay sia | 1996           | FemaleAge75to79     | 74040      |
| Malay sia | 1996           | FemaleAge80to84     | 37675      |
| Malay sia | 1996           | FemaleAge85to89     | 15576      |
| Malay sia | 1996           | FemaleAge90to94     | 3373       |
| Malay sia | 1996           | FemaleAge95to99     | 293        |
| Malay sia | 1996           | FemaleAgeAbov e100  | 17         |
| Malay sia | 1996           | FemaleLactAge15to19 | 16067      |
| Malay sia | 1996           | FemaleLactAge20to24 | 112622     |
| Malay sia | 1996           | FemaleLactAge25to29 | 184832     |
| Malay sia | 1996           | FemaleLactAge30to34 | 145281     |
| Malay sia | 1996           | FemaleLactAge35to39 | 75944      |
| Malay sia | 1996           | FemaleLactAge40to44 | 21798      |
| Malay sia | 1996           | FemaleLactAge45to49 | 2100       |
| Malay sia | 1996           | FemalePregAge15to19 | 12050      |
| Malay sia | 1996           | FemalePregAge20to24 | 84467      |
| Malay sia | 1996           | FemalePregAge25to29 | 138624     |
| Malay sia | 1996           | FemalePregAge30to34 | 108960     |
| Malay sia | 1996           | FemalePregAge35to39 | 56958      |
| Malay sia | 1996           | FemalePregAge40to44 | 16348      |
| Malay sia | 1996           | FemalePregAge45to49 | 1575       |
| Malay sia | 1996           | MaleAge0to4         | 1379139    |
| Malay sia | 1996           | MaleAge10to14       | 1192880    |
| Malay sia | 1996           | MaleAge15to19       | 1064286    |
| Malay sia | 1996           | MaleAge20to24       | 961087     |
| Malay sia | 1996           | MaleAge25to29       | 874941     |
| Malay sia | 1996           | MaleAge30to34       | 865999     |
| Malay sia | 1996           | MaleAge35to39       | 762079     |
| Malay sia | 1996           | MaleAge40to44       | 643715     |
| Malay sia | 1996           | MaleAge45to49       | 502494     |
| Malay sia | 1996           | MaleAge50to54       | 367964     |
| Malay sia | 1996           | MaleAge55to59       | 312575     |
| Malay sia | 1996           | MaleAge5to9         | 1281425    |
| Malay sia | 1996           | MaleAge60to64       | 219099     |
| Malay sia | 1996           | MaleAge65to69       | 162166     |
| Malay sia | 1996           | MaleAge70to74       | 104152     |
| Malay sia | 1996           | MaleAge75to79       | 66571      |
| Malay sia | 1996           | MaleAge80to84       | 34008      |
| Malay sia | 1996           | MaleAge85to89       | 13344      |
| Malay sia | 1996           | MaleAge90to94       | 3083       |
| Malay sia | 1996           | MaleAge95to99       | 327        |
| Malay sia | 1996           | MaleAgeAbov e100    | 21         |
| Malay sia | 1997           | FemaleAge0to4       | 1316044    |
| Malay sia | 1997           | FemaleAge10to14     | 1154649    |
| Malay sia | 1997           | FemaleAge15to19     | 1029325    |
| Malay sia | 1997           | FemaleAge20to24     | 767157     |
| Malay sia | 1997           | FemaleAge25to29     | 562343     |
| Malay sia | 1997           | FemaleAge30to34     | 608098     |
| Malay sia | 1997           | FemaleAge35to39     | 644059     |
| Malay sia | 1997           | FemaleAge40to44     | 603435     |
| Malay sia | 1997           | FemaleAge45to49     | 506427     |
| Malay sia | 1997           | FemaleAge50to54     | 358238     |
| Malay sia | 1997           | FemaleAge55to59     | 290439     |
| Malay sia | 1997           | FemaleAge5to9       | 1227584    |
| Malay sia | 1997           | FemaleAge60to64     | 234252     |
| Malay sia | 1997           | FemaleAge65to69     | 170216     |
| Malay sia | 1997           | FemaleAge70to74     | 119091     |
| Malay sia | 1997           | FemaleAge75to79     | 75174      |
| Malay sia | 1997           | FemaleAge80to84     | 39568      |
| Malay sia | 1997           | FemaleAge85to89     | 15765      |
| Malay sia | 1997           | FemaleAge90to94     | 4134       |
| Malay sia | 1997           | FemaleAge95to99     | 300        |
| Malay sia | 1997           | FemaleAgeAbov e100  | 17         |

Dietary calcium and zinc deficiency risks are decreasing but remain prevalent

| Country   | Reference year | Age/gender group    | Population |
|-----------|----------------|---------------------|------------|
| Malay sia | 1997           | FemaleLactAge15to19 | 16067      |
| Malay sia | 1997           | FemaleLactAge20to24 | 112622     |
| Malay sia | 1997           | FemaleLactAge25to29 | 184832     |
| Malay sia | 1997           | FemaleLactAge30to34 | 145281     |
| Malay sia | 1997           | FemaleLactAge35to39 | 75944      |
| Malay sia | 1997           | FemaleLactAge40to44 | 21798      |
| Malay sia | 1997           | FemaleLactAge45to49 | 2100       |
| Malay sia | 1997           | FemalePregAge15to19 | 12050      |
| Malay sia | 1997           | FemalePregAge20to24 | 84467      |
| Malay sia | 1997           | FemalePregAge25to29 | 138624     |
| Malay sia | 1997           | FemalePregAge30to34 | 108960     |
| Malay sia | 1997           | FemalePregAge35to39 | 56958      |
| Malay sia | 1997           | FemalePregAge40to44 | 16348      |
| Malay sia | 1997           | FemalePregAge45to49 | 1575       |
| Malay sia | 1997           | MaleAge0to4         | 1393288    |
| Malay sia | 1997           | MaleAge10to14       | 1214171    |
| Malay sia | 1997           | MaleAge15to19       | 1094853    |
| Malay sia | 1997           | MaleAge20to24       | 985508     |
| Malay sia | 1997           | MaleAge25to29       | 898903     |
| Malay sia | 1997           | MaleAge30to34       | 876834     |
| Malay sia | 1997           | MaleAge35to39       | 797928     |
| Malay sia | 1997           | MaleAge40to44       | 670787     |
| Malay sia | 1997           | MaleAge45to49       | 533669     |
| Malay sia | 1997           | MaleAge50to54       | 389838     |
| Malay sia | 1997           | MaleAge55to59       | 317048     |
| Malay sia | 1997           | MaleAge5to9         | 1299678    |
| Malay sia | 1997           | MaleAge60to64       | 234773     |
| Malay sia | 1997           | MaleAge65to69       | 163905     |
| Malay sia | 1997           | MaleAge70to74       | 110446     |
| Malay sia | 1997           | MaleAge75to79       | 66716      |
| Malay sia | 1997           | MaleAge80to84       | 35730      |
| Malay sia | 1997           | MaleAge85to89       | 13802      |
| Malay sia | 1997           | MaleAge90to94       | 3640       |
| Malay sia | 1997           | MaleAge95to99       | 354        |
| Malay sia | 1997           | MaleAgeAbov e100    | 23         |
| Malay sia | 1998           | FemaleAge0to4       | 1320957    |
| Malay sia | 1998           | FemaleAge10to14     | 1171288    |
| Malay sia | 1998           | FemaleAge15to19     | 1058071    |
| Malay sia | 1998           | FemaleAge20to24     | 789809     |
| Malay sia | 1998           | FemaleAge25to29     | 586119     |
| Malay sia | 1998           | FemaleAge30to34     | 613565     |
| Malay sia | 1998           | FemaleAge35to39     | 678718     |
| Malay sia | 1998           | FemaleAge40to44     | 629497     |
| Malay sia | 1998           | FemaleAge45to49     | 533124     |
| Malay sia | 1998           | FemaleAge50to54     | 387306     |
| Malay sia | 1998           | FemaleAge55to59     | 289511     |
| Malay sia | 1998           | FemaleAge5to9       | 1243703    |
| Malay sia | 1998           | FemaleAge60to64     | 248064     |
| Malay sia | 1998           | FemaleAge65to69     | 173868     |
| Malay sia | 1998           | FemaleAge70to74     | 124455     |
| Malay sia | 1998           | FemaleAge75to79     | 76669      |
| Malay sia | 1998           | FemaleAge80to84     | 41338      |
| Malay sia | 1998           | FemaleAge85to89     | 15629      |
| Malay sia | 1998           | FemaleAge90to94     | 4527       |
| Malay sia | 1998           | FemaleAge95to99     | 383        |
| Malay sia | 1998           | FemaleAgeAbov e100  | 18         |
| Malay sia | 1998           | FemaleLactAge15to19 | 16067      |
| Malay sia | 1998           | FemaleLactAge20to24 | 112622     |
| Malay sia | 1998           | FemaleLactAge25to29 | 184832     |
| Malay sia | 1998           | FemaleLactAge30to34 | 145281     |
| Malay sia | 1998           | FemaleLactAge35to39 | 75944      |
| Malay sia | 1998           | FemaleLactAge40to44 | 21798      |
| Malay sia | 1998           | FemaleLactAge45to49 | 2100       |
| Malay sia | 1998           | FemalePregAge15to19 | 12050      |
| Malay sia | 1998           | FemalePregAge20to24 | 84467      |
| Malay sia | 1998           | FemalePregAge25to29 | 138624     |
| Malay sia | 1998           | FemalePregAge30to34 | 108960     |
| Malay sia | 1998           | FemalePregAge35to39 | 56958      |
| Malay sia | 1998           | FemalePregAge40to44 | 16348      |
| Malay sia | 1998           | FemalePregAge45to49 | 1575       |
| Malay sia | 1998           | MaleAge0to4         | 1402295    |
| Malay sia | 1998           | MaleAge10to14       | 1233364    |
| Malay sia | 1998           | MaleAge15to19       | 1125621    |
| Malay sia | 1998           | MaleAge20to24       | 1008764    |
| Malay sia | 1998           | MaleAge25to29       | 925824     |
| Malay sia | 1998           | MaleAge30to34       | 884431     |
| Malay sia | 1998           | MaleAge35to39       | 834595     |
| Malay sia | 1998           | MaleAge40to44       | 697845     |
| Malay sia | 1998           | MaleAge45to49       | 565916     |
| Malay sia | 1998           | MaleAge50to54       | 416146     |
| Malay sia | 1998           | MaleAge55to59       | 320977     |
| Malay sia | 1998           | MaleAge5to9         | 1317029    |
| Malay sia | 1998           | MaleAge60to64       | 252519     |
| Malay sia | 1998           | MaleAge65to69       | 165672     |
| Malay sia | 1998           | MaleAge70to74       | 117193     |
| Malay sia | 1998           | MaleAge75to79       | 67231      |
| Malay sia | 1998           | MaleAge80to84       | 37087      |
| Malay sia | 1998           | MaleAge85to89       | 13930      |

Dietary calcium and zinc deficiency risks are decreasing but remain prevalent

| Country   | Reference year | Age/gender group    | Population |
|-----------|----------------|---------------------|------------|
| Malay sia | 1998           | MaleAge90to94       | 3945       |
| Malay sia | 1998           | MaleAge95to99       | 404        |
| Malay sia | 1998           | MaleAgeAbov e100    | 24         |
| Malay sia | 1999           | FemaleAge0to4       | 1322748    |
| Malay sia | 1999           | FemaleAge10to14     | 1187642    |
| Malay sia | 1999           | FemaleAge15to19     | 1085748    |
| Malay sia | 1999           | FemaleAge20to24     | 814359     |
| Malay sia | 1999           | FemaleAge25to29     | 611512     |
| Malay sia | 1999           | FemaleAge30to34     | 621626     |
| Malay sia | 1999           | FemaleAge35to39     | 710180     |
| Malay sia | 1999           | FemaleAge40to44     | 658417     |
| Malay sia | 1999           | FemaleAge45to49     | 560713     |
| Malay sia | 1999           | FemaleAge50to54     | 418051     |
| Malay sia | 1999           | FemaleAge55to59     | 293303     |
| Malay sia | 1999           | FemaleAge5to9       | 1259304    |
| Malay sia | 1999           | FemaleAge60to64     | 260122     |
| Malay sia | 1999           | FemaleAge65to69     | 179521     |
| Malay sia | 1999           | FemaleAge70to74     | 129678     |
| Malay sia | 1999           | FemaleAge75to79     | 79062      |
| Malay sia | 1999           | FemaleAge80to84     | 42753      |
| Malay sia | 1999           | FemaleAge85to89     | 15442      |
| Malay sia | 1999           | FemaleAge90to94     | 4396       |
| Malay sia | 1999           | FemaleAge95to99     | 455        |
| Malay sia | 1999           | FemaleAgeAbov e100  | 19         |
| Malay sia | 1999           | FemaleLactAge15to19 | 16067      |
| Malay sia | 1999           | FemaleLactAge20to24 | 112622     |
| Malay sia | 1999           | FemaleLactAge25to29 | 184832     |
| Malay sia | 1999           | FemaleLactAge30to34 | 145281     |
| Malay sia | 1999           | FemaleLactAge35to39 | 75944      |
| Malay sia | 1999           | FemaleLactAge40to44 | 21798      |
| Malay sia | 1999           | FemaleLactAge45to49 | 2100       |
| Malay sia | 1999           | FemalePregAge15to19 | 12050      |
| Malay sia | 1999           | FemalePregAge20to24 | 84467      |
| Malay sia | 1999           | FemalePregAge25to29 | 138624     |
| Malay sia | 1999           | FemalePregAge30to34 | 108960     |
| Malay sia | 1999           | FemalePregAge35to39 | 56958      |
| Malay sia | 1999           | FemalePregAge40to44 | 16348      |
| Malay sia | 1999           | FemalePregAge45to49 | 1575       |
| Malay sia | 1999           | MaleAge0to4         | 1404250    |
| Malay sia | 1999           | MaleAge10to14       | 1250190    |
| Malay sia | 1999           | MaleAge15to19       | 1153291    |
| Malay sia | 1999           | MaleAge20to24       | 1031181    |
| Malay sia | 1999           | MaleAge25to29       | 951484     |
| Malay sia | 1999           | MaleAge30to34       | 893009     |
| Malay sia | 1999           | MaleAge35to39       | 866465     |
| Malay sia | 1999           | MaleAge40to44       | 726203     |
| Malay sia | 1999           | MaleAge45to49       | 597611     |
| Malay sia | 1999           | MaleAge50to54       | 444508     |
| Malay sia | 1999           | MaleAge55to59       | 328128     |
| Malay sia | 1999           | MaleAge5to9         | 1331050    |
| Malay sia | 1999           | MaleAge60to64       | 268450     |
| Malay sia | 1999           | MaleAge65to69       | 169810     |
| Malay sia | 1999           | MaleAge70to74       | 122881     |
| Malay sia | 1999           | MaleAge75to79       | 68872      |
| Malay sia | 1999           | MaleAge80to84       | 37779      |
| Malay sia | 1999           | MaleAge85to89       | 13848      |
| Malay sia | 1999           | MaleAge90to94       | 3880       |
| Malay sia | 1999           | MaleAge95to99       | 455        |
| Malay sia | 1999           | MaleAgeAbov e100    | 26         |
| Malay sia | 2000           | FemaleAge0to4       | 1323595    |
| Malay sia | 2000           | FemaleAge10to14     | 1204873    |
| Malay sia | 2000           | FemaleAge15to19     | 1111294    |
| Malay sia | 2000           | FemaleAge20to24     | 841426     |
| Malay sia | 2000           | FemaleAge25to29     | 636971     |
| Malay sia | 2000           | FemaleAge30to34     | 635632     |
| Malay sia | 2000           | FemaleAge35to39     | 735949     |
| Malay sia | 2000           | FemaleAge40to44     | 691019     |
| Malay sia | 2000           | FemaleAge45to49     | 589738     |
| Malay sia | 2000           | FemaleAge50to54     | 448310     |
| Malay sia | 2000           | FemaleAge55to59     | 304918     |
| Malay sia | 2000           | FemaleAge5to9       | 1272910    |
| Malay sia | 2000           | FemaleAge60to64     | 268738     |
| Malay sia | 2000           | FemaleAge65to69     | 187966     |
| Malay sia | 2000           | FemaleAge70to74     | 134596     |
| Malay sia | 2000           | FemaleAge75to79     | 82473      |
| Malay sia | 2000           | FemaleAge80to84     | 43889      |
| Malay sia | 2000           | FemaleAge85to89     | 15326      |
| Malay sia | 2000           | FemaleAge90to94     | 3765       |
| Malay sia | 2000           | FemaleAge95to99     | 324        |
| Malay sia | 2000           | FemaleAgeAbov e100  | 19         |
| Malay sia | 2000           | FemaleLactAge15to19 | 16067      |
| Malay sia | 2000           | FemaleLactAge20to24 | 112622     |
| Malay sia | 2000           | FemaleLactAge25to29 | 184832     |
| Malay sia | 2000           | FemaleLactAge30to34 | 145281     |
| Malay sia | 2000           | FemaleLactAge35to39 | 75944      |
| Malay sia | 2000           | FemaleLactAge40to44 | 21798      |
| Malay sia | 2000           | FemaleLactAge45to49 | 2100       |
| Malay sia | 2000           | FemalePregAge15to19 | 12050      |

Dietary calcium and zinc deficiency risks are decreasing but remain prevalent

| Country  | Reference year | Age/gender group    | Population |
|----------|----------------|---------------------|------------|
| Malaysia | 2000           | FemalePregAge20to24 | 84467      |
| Malaysia | 2000           | FemalePregAge25to29 | 138624     |
| Malaysia | 2000           | FemalePregAge30to34 | 108960     |
| Malaysia | 2000           | FemalePregAge35to39 | 56958      |
| Malaysia | 2000           | FemalePregAge40to44 | 16348      |
| Malaysia | 2000           | FemalePregAge45to49 | 1575       |
| Malaysia | 2000           | MaleAge0to4         | 1397376    |
| Malaysia | 2000           | MaleAge10to14       | 1264495    |
| Malaysia | 2000           | MaleAge15to19       | 1175909    |
| Malaysia | 2000           | MaleAge20to24       | 1053174    |
| Malaysia | 2000           | MaleAge25to29       | 973280     |
| Malaysia | 2000           | MaleAge30to34       | 905059     |
| Malaysia | 2000           | MaleAge35to39       | 890166     |
| Malaysia | 2000           | MaleAge40to44       | 756501     |
| Malaysia | 2000           | MaleAge45to49       | 627727     |
| Malaysia | 2000           | MaleAge50to54       | 473345     |
| Malaysia | 2000           | MaleAge55to59       | 340709     |
| Malaysia | 2000           | MaleAge5to9         | 1339657    |
| Malaysia | 2000           | MaleAge60to64       | 280416     |
| Malaysia | 2000           | MaleAge65to69       | 177617     |
| Malaysia | 2000           | MaleAge70to74       | 126877     |
| Malaysia | 2000           | MaleAge75to79       | 71784      |
| Malaysia | 2000           | MaleAge80to84       | 37896      |
| Malaysia | 2000           | MaleAge85to89       | 13597      |
| Malaysia | 2000           | MaleAge90to94       | 3397       |
| Malaysia | 2000           | MaleAge95to99       | 385        |
| Malaysia | 2000           | MaleAgeAbove100     | 27         |
| Mali     | 1992           | FemaleAge0to4       | 754197     |
| Mali     | 1992           | FemaleAge10to14     | 528372     |
| Mali     | 1992           | FemaleAge15to19     | 291431     |
| Mali     | 1992           | FemaleAge20to24     | 167432     |
| Mali     | 1992           | FemaleAge25to29     | 129240     |
| Mali     | 1992           | FemaleAge30to34     | 117642     |
| Mali     | 1992           | FemaleAge35to39     | 117979     |
| Mali     | 1992           | FemaleAge40to44     | 129130     |
| Mali     | 1992           | FemaleAge45to49     | 143835     |
| Mali     | 1992           | FemaleAge50to54     | 129180     |
| Mali     | 1992           | FemaleAge55to59     | 106060     |
| Mali     | 1992           | FemaleAge5to9       | 617416     |
| Mali     | 1992           | FemaleAge60to64     | 92224      |
| Mali     | 1992           | FemaleAge65to69     | 75581      |
| Mali     | 1992           | FemaleAge70to74     | 54535      |
| Mali     | 1992           | FemaleAge75to79     | 30917      |
| Mali     | 1992           | FemaleAge80to84     | 11949      |
| Mali     | 1992           | FemaleAge85to89     | 2754       |
| Mali     | 1992           | FemaleAge90to94     | 289        |
| Mali     | 1992           | FemaleAge95to99     | 28         |
| Mali     | 1992           | FemaleLactAge15to19 | 87665      |
| Mali     | 1992           | FemaleLactAge20to24 | 108094     |
| Mali     | 1992           | FemaleLactAge25to29 | 84608      |
| Mali     | 1992           | FemaleLactAge30to34 | 59945      |
| Mali     | 1992           | FemaleLactAge35to39 | 39656      |
| Mali     | 1992           | FemaleLactAge40to44 | 19388      |
| Mali     | 1992           | FemaleLactAge45to49 | 4574       |
| Mali     | 1992           | FemalePregAge15to19 | 65749      |
| Mali     | 1992           | FemalePregAge20to24 | 81070      |
| Mali     | 1992           | FemalePregAge25to29 | 63456      |
| Mali     | 1992           | FemalePregAge30to34 | 44958      |
| Mali     | 1992           | FemalePregAge35to39 | 29742      |
| Mali     | 1992           | FemalePregAge40to44 | 14541      |
| Mali     | 1992           | FemalePregAge45to49 | 3431       |
| Mali     | 1992           | MaleAge0to4         | 778500     |
| Mali     | 1992           | MaleAge10to14       | 547306     |
| Mali     | 1992           | MaleAge15to19       | 458407     |
| Mali     | 1992           | MaleAge20to24       | 359300     |
| Mali     | 1992           | MaleAge25to29       | 267513     |
| Mali     | 1992           | MaleAge30to34       | 204613     |
| Mali     | 1992           | MaleAge35to39       | 167157     |
| Mali     | 1992           | MaleAge40to44       | 140331     |
| Mali     | 1992           | MaleAge45to49       | 127562     |
| Mali     | 1992           | MaleAge50to54       | 107265     |
| Mali     | 1992           | MaleAge55to59       | 88528      |
| Mali     | 1992           | MaleAge5to9         | 637812     |
| Mali     | 1992           | MaleAge60to64       | 77875      |
| Mali     | 1992           | MaleAge65to69       | 65245      |
| Mali     | 1992           | MaleAge70to74       | 48508      |
| Mali     | 1992           | MaleAge75to79       | 27489      |
| Mali     | 1992           | MaleAge80to84       | 10031      |
| Mali     | 1992           | MaleAge85to89       | 2019       |
| Mali     | 1992           | MaleAge90to94       | 197        |
| Mali     | 1992           | MaleAge95to99       | 16         |
| Mali     | 1993           | FemaleAge0to4       | 770523     |
| Mali     | 1993           | FemaleAge10to14     | 543326     |
| Mali     | 1993           | FemaleAge15to19     | 305702     |
| Mali     | 1993           | FemaleAge20to24     | 180649     |
| Mali     | 1993           | FemaleAge25to29     | 139315     |
| Mali     | 1993           | FemaleAge30to34     | 122923     |
| Mali     | 1993           | FemaleAge35to39     | 121483     |

Dietary calcium and zinc deficiency risks are decreasing but remain prevalent

| Country | Reference year | Age/gender group    | Population |
|---------|----------------|---------------------|------------|
| Mali    | 1993           | FemaleAge40to44     | 131230     |
| Mali    | 1993           | FemaleAge45to49     | 143307     |
| Mali    | 1993           | FemaleAge50to54     | 134073     |
| Mali    | 1993           | FemaleAge55to59     | 107231     |
| Mali    | 1993           | FemaleAge5to9       | 631708     |
| Mali    | 1993           | FemaleAge60to64     | 92635      |
| Mali    | 1993           | FemaleAge65to69     | 76265      |
| Mali    | 1993           | FemaleAge70to74     | 55057      |
| Mali    | 1993           | FemaleAge75to79     | 31899      |
| Mali    | 1993           | FemaleAge80to84     | 12527      |
| Mali    | 1993           | FemaleAge85to89     | 2970       |
| Mali    | 1993           | FemaleAge90to94     | 364        |
| Mali    | 1993           | FemaleAge95to99     | 34         |
| Mali    | 1993           | FemaleLactAge15to19 | 87665      |
| Mali    | 1993           | FemaleLactAge20to24 | 108094     |
| Mali    | 1993           | FemaleLactAge25to29 | 84608      |
| Mali    | 1993           | FemaleLactAge30to34 | 59945      |
| Mali    | 1993           | FemaleLactAge35to39 | 39656      |
| Mali    | 1993           | FemaleLactAge40to44 | 19388      |
| Mali    | 1993           | FemaleLactAge45to49 | 4574       |
| Mali    | 1993           | FemalePregAge15to19 | 65749      |
| Mali    | 1993           | FemalePregAge20to24 | 81070      |
| Mali    | 1993           | FemalePregAge25to29 | 63456      |
| Mali    | 1993           | FemalePregAge30to34 | 44958      |
| Mali    | 1993           | FemalePregAge35to39 | 29742      |
| Mali    | 1993           | FemalePregAge40to44 | 14541      |
| Mali    | 1993           | FemalePregAge45to49 | 3431       |
| Mali    | 1993           | MaleAge0to4         | 795726     |
| Mali    | 1993           | MaleAge10to14       | 563664     |
| Mali    | 1993           | MaleAge15to19       | 474404     |
| Mali    | 1993           | MaleAge20to24       | 374553     |
| Mali    | 1993           | MaleAge25to29       | 279254     |
| Mali    | 1993           | MaleAge30to34       | 210427     |
| Mali    | 1993           | MaleAge35to39       | 170352     |
| Mali    | 1993           | MaleAge40to44       | 142887     |
| Mali    | 1993           | MaleAge45to49       | 126712     |
| Mali    | 1993           | MaleAge50to54       | 111225     |
| Mali    | 1993           | MaleAge55to59       | 88724      |
| Mali    | 1993           | MaleAge5to9         | 653029     |
| Mali    | 1993           | MaleAge60to64       | 78123      |
| Mali    | 1993           | MaleAge65to69       | 65439      |
| Mali    | 1993           | MaleAge70to74       | 48900      |
| Mali    | 1993           | MaleAge75to79       | 28593      |
| Mali    | 1993           | MaleAge80to84       | 10733      |
| Mali    | 1993           | MaleAge85to89       | 2213       |
| Mali    | 1993           | MaleAge90to94       | 258        |
| Mali    | 1993           | MaleAge95to99       | 23         |
| Mali    | 1994           | FemaleAge0to4       | 788647     |
| Mali    | 1994           | FemaleAge10to14     | 558890     |
| Mali    | 1994           | FemaleAge15to19     | 320796     |
| Mali    | 1994           | FemaleAge20to24     | 194646     |
| Mali    | 1994           | FemaleAge25to29     | 150257     |
| Mali    | 1994           | FemaleAge30to34     | 129092     |
| Mali    | 1994           | FemaleAge35to39     | 125342     |
| Mali    | 1994           | FemaleAge40to44     | 133680     |
| Mali    | 1994           | FemaleAge45to49     | 143039     |
| Mali    | 1994           | FemaleAge50to54     | 138357     |
| Mali    | 1994           | FemaleAge55to59     | 109228     |
| Mali    | 1994           | FemaleAge5to9       | 644158     |
| Mali    | 1994           | FemaleAge60to64     | 93361      |
| Mali    | 1994           | FemaleAge65to69     | 77141      |
| Mali    | 1994           | FemaleAge70to74     | 55761      |
| Mali    | 1994           | FemaleAge75to79     | 32684      |
| Mali    | 1994           | FemaleAge80to84     | 12822      |
| Mali    | 1994           | FemaleAge85to89     | 3023       |
| Mali    | 1994           | FemaleAge90to94     | 400        |
| Mali    | 1994           | FemaleAge95to99     | 33         |
| Mali    | 1994           | FemaleLactAge15to19 | 87665      |
| Mali    | 1994           | FemaleLactAge20to24 | 108094     |
| Mali    | 1994           | FemaleLactAge25to29 | 84608      |
| Mali    | 1994           | FemaleLactAge30to34 | 59945      |
| Mali    | 1994           | FemaleLactAge35to39 | 39656      |
| Mali    | 1994           | FemaleLactAge40to44 | 19388      |
| Mali    | 1994           | FemaleLactAge45to49 | 4574       |
| Mali    | 1994           | FemalePregAge15to19 | 65749      |
| Mali    | 1994           | FemalePregAge20to24 | 81070      |
| Mali    | 1994           | FemalePregAge25to29 | 63456      |
| Mali    | 1994           | FemalePregAge30to34 | 44958      |
| Mali    | 1994           | FemalePregAge35to39 | 29742      |
| Mali    | 1994           | FemalePregAge40to44 | 14541      |
| Mali    | 1994           | FemalePregAge45to49 | 3431       |
| Mali    | 1994           | MaleAge0to4         | 815002     |
| Mali    | 1994           | MaleAge10to14       | 580861     |
| Mali    | 1994           | MaleAge15to19       | 491465     |
| Mali    | 1994           | MaleAge20to24       | 390787     |
| Mali    | 1994           | MaleAge25to29       | 292045     |
| Mali    | 1994           | MaleAge30to34       | 217375     |
| Mali    | 1994           | MaleAge35to39       | 173987     |

Dietary calcium and zinc deficiency risks are decreasing but remain prevalent

| Country | Reference year | Age/gender group    | Population |
|---------|----------------|---------------------|------------|
| Mali    | 1994           | MaleAge40to44       | 145711     |
| Mali    | 1994           | MaleAge45to49       | 126281     |
| Mali    | 1994           | MaleAge50to54       | 114673     |
| Mali    | 1994           | MaleAge55to59       | 89653      |
| Mali    | 1994           | MaleAge5to9         | 666302     |
| Mali    | 1994           | MaleAge60to64       | 78486      |
| Mali    | 1994           | MaleAge65to69       | 65863      |
| Mali    | 1994           | MaleAge70to74       | 49407      |
| Mali    | 1994           | MaleAge75to79       | 29492      |
| Mali    | 1994           | MaleAge80to84       | 11189      |
| Mali    | 1994           | MaleAge85to89       | 2318       |
| Mali    | 1994           | MaleAge90to94       | 289        |
| Mali    | 1994           | MaleAge95to99       | 21         |
| Mali    | 1995           | FemaleAge0to4       | 809998     |
| Mali    | 1995           | FemaleAge10to14     | 573325     |
| Mali    | 1995           | FemaleAge15to19     | 336333     |
| Mali    | 1995           | FemaleAge20to24     | 209153     |
| Mali    | 1995           | FemaleAge25to29     | 161833     |
| Mali    | 1995           | FemaleAge30to34     | 136158     |
| Mali    | 1995           | FemaleAge35to39     | 129372     |
| Mali    | 1995           | FemaleAge40to44     | 136195     |
| Mali    | 1995           | FemaleAge45to49     | 143447     |
| Mali    | 1995           | FemaleAge50to54     | 141297     |
| Mali    | 1995           | FemaleAge55to59     | 112149     |
| Mali    | 1995           | FemaleAge5to9       | 654303     |
| Mali    | 1995           | FemaleAge60to64     | 94365      |
| Mali    | 1995           | FemaleAge65to69     | 78099      |
| Mali    | 1995           | FemaleAge70to74     | 56668      |
| Mali    | 1995           | FemaleAge75to79     | 33292      |
| Mali    | 1995           | FemaleAge80to84     | 12912      |
| Mali    | 1995           | FemaleAge85to89     | 2865       |
| Mali    | 1995           | FemaleAge90to94     | 314        |
| Mali    | 1995           | FemaleAge95to99     | 16         |
| Mali    | 1995           | FemaleLactAge15to19 | 87665      |
| Mali    | 1995           | FemaleLactAge20to24 | 108094     |
| Mali    | 1995           | FemaleLactAge25to29 | 84608      |
| Mali    | 1995           | FemaleLactAge30to34 | 59945      |
| Mali    | 1995           | FemaleLactAge35to39 | 39656      |
| Mali    | 1995           | FemaleLactAge40to44 | 19388      |
| Mali    | 1995           | FemaleLactAge45to49 | 4574       |
| Mali    | 1995           | FemalePregAge15to19 | 65749      |
| Mali    | 1995           | FemalePregAge20to24 | 81070      |
| Mali    | 1995           | FemalePregAge25to29 | 63456      |
| Mali    | 1995           | FemalePregAge30to34 | 44958      |
| Mali    | 1995           | FemalePregAge35to39 | 29742      |
| Mali    | 1995           | FemalePregAge40to44 | 14541      |
| Mali    | 1995           | FemalePregAge45to49 | 3431       |
| Mali    | 1995           | MaleAge0to4         | 837706     |
| Mali    | 1995           | MaleAge10to14       | 596786     |
| Mali    | 1995           | MaleAge15to19       | 509057     |
| Mali    | 1995           | MaleAge20to24       | 407598     |
| Mali    | 1995           | MaleAge25to29       | 305580     |
| Mali    | 1995           | MaleAge30to34       | 225424     |
| Mali    | 1995           | MaleAge35to39       | 177954     |
| Mali    | 1995           | MaleAge40to44       | 148370     |
| Mali    | 1995           | MaleAge45to49       | 126676     |
| Mali    | 1995           | MaleAge50to54       | 116885     |
| Mali    | 1995           | MaleAge55to59       | 91468      |
| Mali    | 1995           | MaleAge5to9         | 676930     |
| Mali    | 1995           | MaleAge60to64       | 78852      |
| Mali    | 1995           | MaleAge65to69       | 66411      |
| Mali    | 1995           | MaleAge70to74       | 50026      |
| Mali    | 1995           | MaleAge75to79       | 30173      |
| Mali    | 1995           | MaleAge80to84       | 11466      |
| Mali    | 1995           | MaleAge85to89       | 2293       |
| Mali    | 1995           | MaleAge90to94       | 216        |
| Mali    | 1995           | MaleAge95to99       | 10         |
| Mali    | 1996           | FemaleAge0to4       | 836819     |
| Mali    | 1996           | FemaleAge10to14     | 584384     |
| Mali    | 1996           | FemaleAge15to19     | 328720     |
| Mali    | 1996           | FemaleAge20to24     | 190809     |
| Mali    | 1996           | FemaleAge25to29     | 146308     |
| Mali    | 1996           | FemaleAge30to34     | 128059     |
| Mali    | 1996           | FemaleAge35to39     | 127968     |
| Mali    | 1996           | FemaleAge40to44     | 138076     |
| Mali    | 1996           | FemaleAge45to49     | 143647     |
| Mali    | 1996           | FemaleAge50to54     | 142233     |
| Mali    | 1996           | FemaleAge55to59     | 115066     |
| Mali    | 1996           | FemaleAge5to9       | 671364     |
| Mali    | 1996           | FemaleAge60to64     | 94399      |
| Mali    | 1996           | FemaleAge65to69     | 77720      |
| Mali    | 1996           | FemaleAge70to74     | 56738      |
| Mali    | 1996           | FemaleAge75to79     | 33896      |
| Mali    | 1996           | FemaleAge80to84     | 14016      |
| Mali    | 1996           | FemaleAge85to89     | 3450       |
| Mali    | 1996           | FemaleAge90to94     | 417        |
| Mali    | 1996           | FemaleAge95to99     | 13         |
| Mali    | 1996           | FemaleLactAge15to19 | 99038      |

Dietary calcium and zinc deficiency risks are decreasing but remain prevalent

| Country | Reference year | Age/gender group    | Population |
|---------|----------------|---------------------|------------|
| Mali    | 1996           | FemaleLactAge20to24 | 125920     |
| Mali    | 1996           | FemaleLactAge25to29 | 100187     |
| Mali    | 1996           | FemaleLactAge30to34 | 69087      |
| Mali    | 1996           | FemaleLactAge35to39 | 42818      |
| Mali    | 1996           | FemaleLactAge40to44 | 19726      |
| Mali    | 1996           | FemaleLactAge45to49 | 4737       |
| Mali    | 1996           | FemalePregAge15to19 | 74279      |
| Mali    | 1996           | FemalePregAge20to24 | 94440      |
| Mali    | 1996           | FemalePregAge25to29 | 75140      |
| Mali    | 1996           | FemalePregAge30to34 | 51815      |
| Mali    | 1996           | FemalePregAge35to39 | 32113      |
| Mali    | 1996           | FemalePregAge40to44 | 14795      |
| Mali    | 1996           | FemalePregAge45to49 | 3553       |
| Mali    | 1996           | MaleAge0to4         | 866042     |
| Mali    | 1996           | MaleAge10to14       | 608274     |
| Mali    | 1996           | MaleAge15to19       | 522451     |
| Mali    | 1996           | MaleAge20to24       | 422253     |
| Mali    | 1996           | MaleAge25to29       | 319489     |
| Mali    | 1996           | MaleAge30to34       | 234773     |
| Mali    | 1996           | MaleAge35to39       | 182403     |
| Mali    | 1996           | MaleAge40to44       | 150889     |
| Mali    | 1996           | MaleAge45to49       | 127445     |
| Mali    | 1996           | MaleAge50to54       | 117354     |
| Mali    | 1996           | MaleAge55to59       | 93635      |
| Mali    | 1996           | MaleAge5to9         | 694867     |
| Mali    | 1996           | MaleAge60to64       | 78428      |
| Mali    | 1996           | MaleAge65to69       | 65886      |
| Mali    | 1996           | MaleAge70to74       | 49811      |
| Mali    | 1996           | MaleAge75to79       | 30684      |
| Mali    | 1996           | MaleAge80to84       | 12575      |
| Mali    | 1996           | MaleAge85to89       | 2852       |
| Mali    | 1996           | MaleAge90to94       | 278        |
| Mali    | 1996           | MaleAge95to99       | 19         |
| Mali    | 1997           | FemaleAge0to4       | 861738     |
| Mali    | 1997           | FemaleAge10to14     | 596083     |
| Mali    | 1997           | FemaleAge15to19     | 341786     |
| Mali    | 1997           | FemaleAge20to24     | 203942     |
| Mali    | 1997           | FemaleAge25to29     | 158623     |
| Mali    | 1997           | FemaleAge30to34     | 136931     |
| Mali    | 1997           | FemaleAge35to39     | 132448     |
| Mali    | 1997           | FemaleAge40to44     | 140961     |
| Mali    | 1997           | FemaleAge45to49     | 144892     |
| Mali    | 1997           | FemaleAge50to54     | 142090     |
| Mali    | 1997           | FemaleAge55to59     | 119063     |
| Mali    | 1997           | FemaleAge5to9       | 689133     |
| Mali    | 1997           | FemaleAge60to64     | 94713      |
| Mali    | 1997           | FemaleAge65to69     | 77524      |
| Mali    | 1997           | FemaleAge70to74     | 56877      |
| Mali    | 1997           | FemaleAge75to79     | 34198      |
| Mali    | 1997           | FemaleAge80to84     | 14810      |
| Mali    | 1997           | FemaleAge85to89     | 3857       |
| Mali    | 1997           | FemaleAge90to94     | 508        |
| Mali    | 1997           | FemaleAge95to99     | 30         |
| Mali    | 1997           | FemaleLactAge15to19 | 99038      |
| Mali    | 1997           | FemaleLactAge20to24 | 125920     |
| Mali    | 1997           | FemaleLactAge25to29 | 100187     |
| Mali    | 1997           | FemaleLactAge30to34 | 69087      |
| Mali    | 1997           | FemaleLactAge35to39 | 42818      |
| Mali    | 1997           | FemaleLactAge40to44 | 19726      |
| Mali    | 1997           | FemaleLactAge45to49 | 4737       |
| Mali    | 1997           | FemalePregAge15to19 | 74279      |
| Mali    | 1997           | FemalePregAge20to24 | 94440      |
| Mali    | 1997           | FemalePregAge25to29 | 75140      |
| Mali    | 1997           | FemalePregAge30to34 | 51815      |
| Mali    | 1997           | FemalePregAge35to39 | 32113      |
| Mali    | 1997           | FemalePregAge40to44 | 14795      |
| Mali    | 1997           | FemalePregAge45to49 | 3553       |
| Mali    | 1997           | MaleAge0to4         | 891989     |
| Mali    | 1997           | MaleAge10to14       | 620552     |
| Mali    | 1997           | MaleAge15to19       | 536698     |
| Mali    | 1997           | MaleAge20to24       | 437154     |
| Mali    | 1997           | MaleAge25to29       | 334012     |
| Mali    | 1997           | MaleAge30to34       | 245330     |
| Mali    | 1997           | MaleAge35to39       | 187384     |
| Mali    | 1997           | MaleAge40to44       | 153645     |
| Mali    | 1997           | MaleAge45to49       | 129135     |
| Mali    | 1997           | MaleAge50to54       | 116825     |
| Mali    | 1997           | MaleAge55to59       | 96812      |
| Mali    | 1997           | MaleAge5to9         | 713592     |
| Mali    | 1997           | MaleAge60to64       | 78078      |
| Mali    | 1997           | MaleAge65to69       | 65601      |
| Mali    | 1997           | MaleAge70to74       | 49621      |
| Mali    | 1997           | MaleAge75to79       | 30916      |
| Mali    | 1997           | MaleAge80to84       | 13418      |
| Mali    | 1997           | MaleAge85to89       | 3252       |
| Mali    | 1997           | MaleAge90to94       | 356        |
| Mali    | 1997           | MaleAge95to99       | 32         |
| Mali    | 1998           | FemaleAge0to4       | 886410     |

Dietary calcium and zinc deficiency risks are decreasing but remain prevalent

| Country | Reference year | Age/gender group    | Population |
|---------|----------------|---------------------|------------|
| Mali    | 1998           | FemaleAge10to14     | 608865     |
| Mali    | 1998           | FemaleAge15to19     | 355524     |
| Mali    | 1998           | FemaleAge20to24     | 217444     |
| Mali    | 1998           | FemaleAge25to29     | 171427     |
| Mali    | 1998           | FemaleAge30to34     | 146717     |
| Mali    | 1998           | FemaleAge35to39     | 137505     |
| Mali    | 1998           | FemaleAge40to44     | 144236     |
| Mali    | 1998           | FemaleAge45to49     | 146773     |
| Mali    | 1998           | FemaleAge50to54     | 141430     |
| Mali    | 1998           | FemaleAge55to59     | 123463     |
| Mali    | 1998           | FemaleAge5to9       | 706887     |
| Mali    | 1998           | FemaleAge60to64     | 95541      |
| Mali    | 1998           | FemaleAge65to69     | 77615      |
| Mali    | 1998           | FemaleAge70to74     | 57140      |
| Mali    | 1998           | FemaleAge75to79     | 34337      |
| Mali    | 1998           | FemaleAge80to84     | 15188      |
| Mali    | 1998           | FemaleAge85to89     | 4037       |
| Mali    | 1998           | FemaleAge90to94     | 584        |
| Mali    | 1998           | FemaleAge95to99     | 50         |
| Mali    | 1998           | FemaleAgeAbove100   | 1          |
| Mali    | 1998           | FemaleLactAge15to19 | 99038      |
| Mali    | 1998           | FemaleLactAge20to24 | 125920     |
| Mali    | 1998           | FemaleLactAge25to29 | 100187     |
| Mali    | 1998           | FemaleLactAge30to34 | 69087      |
| Mali    | 1998           | FemaleLactAge35to39 | 42818      |
| Mali    | 1998           | FemaleLactAge40to44 | 19726      |
| Mali    | 1998           | FemaleLactAge45to49 | 4737       |
| Mali    | 1998           | FemalePregAge15to19 | 74279      |
| Mali    | 1998           | FemalePregAge20to24 | 94440      |
| Mali    | 1998           | FemalePregAge25to29 | 75140      |
| Mali    | 1998           | FemalePregAge30to34 | 51815      |
| Mali    | 1998           | FemalePregAge35to39 | 32113      |
| Mali    | 1998           | FemalePregAge40to44 | 14795      |
| Mali    | 1998           | FemalePregAge45to49 | 3553       |
| Mali    | 1998           | MaleAge0to4         | 917454     |
| Mali    | 1998           | MaleAge10to14       | 634125     |
| Mali    | 1998           | MaleAge15to19       | 551692     |
| Mali    | 1998           | MaleAge20to24       | 452424     |
| Mali    | 1998           | MaleAge25to29       | 349015     |
| Mali    | 1998           | MaleAge30to34       | 256994     |
| Mali    | 1998           | MaleAge35to39       | 193136     |
| Mali    | 1998           | MaleAge40to44       | 156728     |
| Mali    | 1998           | MaleAge45to49       | 131506     |
| Mali    | 1998           | MaleAge50to54       | 115901     |
| Mali    | 1998           | MaleAge55to59       | 100346     |
| Mali    | 1998           | MaleAge5to9         | 732229     |
| Mali    | 1998           | MaleAge60to64       | 78063      |
| Mali    | 1998           | MaleAge65to69       | 65569      |
| Mali    | 1998           | MaleAge70to74       | 49541      |
| Mali    | 1998           | MaleAge75to79       | 31005      |
| Mali    | 1998           | MaleAge80to84       | 13879      |
| Mali    | 1998           | MaleAge85to89       | 3455       |
| Mali    | 1998           | MaleAge90to94       | 441        |
| Mali    | 1998           | MaleAge95to99       | 41         |
| Mali    | 1999           | FemaleAge0to4       | 912761     |
| Mali    | 1999           | FemaleAge10to14     | 622912     |
| Mali    | 1999           | FemaleAge15to19     | 369761     |
| Mali    | 1999           | FemaleAge20to24     | 231513     |
| Mali    | 1999           | FemaleAge25to29     | 184710     |
| Mali    | 1999           | FemaleAge30to34     | 157347     |
| Mali    | 1999           | FemaleAge35to39     | 143494     |
| Mali    | 1999           | FemaleAge40to44     | 147898     |
| Mali    | 1999           | FemaleAge45to49     | 149079     |
| Mali    | 1999           | FemaleAge50to54     | 141123     |
| Mali    | 1999           | FemaleAge55to59     | 127312     |
| Mali    | 1999           | FemaleAge5to9       | 724259     |
| Mali    | 1999           | FemaleAge60to64     | 97262      |
| Mali    | 1999           | FemaleAge65to69     | 78096      |
| Mali    | 1999           | FemaleAge70to74     | 57540      |
| Mali    | 1999           | FemaleAge75to79     | 34427      |
| Mali    | 1999           | FemaleAge80to84     | 15133      |
| Mali    | 1999           | FemaleAge85to89     | 3970       |
| Mali    | 1999           | FemaleAge90to94     | 600        |
| Mali    | 1999           | FemaleAge95to99     | 53         |
| Mali    | 1999           | FemaleAgeAbove100   | 1          |
| Mali    | 1999           | FemaleLactAge15to19 | 99038      |
| Mali    | 1999           | FemaleLactAge20to24 | 125920     |
| Mali    | 1999           | FemaleLactAge25to29 | 100187     |
| Mali    | 1999           | FemaleLactAge30to34 | 69087      |
| Mali    | 1999           | FemaleLactAge35to39 | 42818      |
| Mali    | 1999           | FemaleLactAge40to44 | 19726      |
| Mali    | 1999           | FemaleLactAge45to49 | 4737       |
| Mali    | 1999           | FemalePregAge15to19 | 74279      |
| Mali    | 1999           | FemalePregAge20to24 | 94440      |
| Mali    | 1999           | FemalePregAge25to29 | 75140      |
| Mali    | 1999           | FemalePregAge30to34 | 51815      |
| Mali    | 1999           | FemalePregAge35to39 | 32113      |
| Mali    | 1999           | FemalePregAge40to44 | 14795      |



Dietary calcium and zinc deficiency risks are decreasing but remain prevalent

| Country    | Reference year | Age/gender group    | Population |
|------------|----------------|---------------------|------------|
| Mali       | 1999           | FemalePregAge45to49 | 3553       |
| Mali       | 1999           | MaleAge0to4         | 944693     |
| Mali       | 1999           | MaleAge10to14       | 649177     |
| Mali       | 1999           | MaleAge15to19       | 567272     |
| Mali       | 1999           | MaleAge20to24       | 468321     |
| Mali       | 1999           | MaleAge25to29       | 364474     |
| Mali       | 1999           | MaleAge30to34       | 269639     |
| Mali       | 1999           | MaleAge35to39       | 200038     |
| Mali       | 1999           | MaleAge40to44       | 160303     |
| Mali       | 1999           | MaleAge45to49       | 134182     |
| Mali       | 1999           | MaleAge50to54       | 115478     |
| Mali       | 1999           | MaleAge55to59       | 103332     |
| Mali       | 1999           | MaleAge5to9         | 750335     |
| Mali       | 1999           | MaleAge60to64       | 78822      |
| Mali       | 1999           | MaleAge65to69       | 65768      |
| Mali       | 1999           | MaleAge70to74       | 49630      |
| Mali       | 1999           | MaleAge75to79       | 31044      |
| Mali       | 1999           | MaleAge80to84       | 13925      |
| Mali       | 1999           | MaleAge85to89       | 3460       |
| Mali       | 1999           | MaleAge90to94       | 478        |
| Mali       | 1999           | MaleAge95to99       | 39         |
| Mali       | 2000           | FemaleAge0to4       | 942961     |
| Mali       | 2000           | FemaleAge10to14     | 637639     |
| Mali       | 2000           | FemaleAge15to19     | 384437     |
| Mali       | 2000           | FemaleAge20to24     | 246348     |
| Mali       | 2000           | FemaleAge25to29     | 198523     |
| Mali       | 2000           | FemaleAge30to34     | 168747     |
| Mali       | 2000           | FemaleAge35to39     | 150598     |
| Mali       | 2000           | FemaleAge40to44     | 151965     |
| Mali       | 2000           | FemaleAge45to49     | 151671     |
| Mali       | 2000           | FemaleAge50to54     | 141675     |
| Mali       | 2000           | FemaleAge55to59     | 130075     |
| Mali       | 2000           | FemaleAge5to9       | 740890     |
| Mali       | 2000           | FemaleAge60to64     | 100042     |
| Mali       | 2000           | FemaleAge65to69     | 79010      |
| Mali       | 2000           | FemaleAge70to74     | 58089      |
| Mali       | 2000           | FemaleAge75to79     | 34561      |
| Mali       | 2000           | FemaleAge80to84     | 14741      |
| Mali       | 2000           | FemaleAge85to89     | 3619       |
| Mali       | 2000           | FemaleAge90to94     | 454        |
| Mali       | 2000           | FemaleAge95to99     | 27         |
| Mali       | 2000           | FemaleAgeAbove100   | 1          |
| Mali       | 2000           | FemaleLactAge15to19 | 99038      |
| Mali       | 2000           | FemaleLactAge20to24 | 125920     |
| Mali       | 2000           | FemaleLactAge25to29 | 100187     |
| Mali       | 2000           | FemaleLactAge30to34 | 69087      |
| Mali       | 2000           | FemaleLactAge35to39 | 42818      |
| Mali       | 2000           | FemaleLactAge40to44 | 19726      |
| Mali       | 2000           | FemaleLactAge45to49 | 4737       |
| Mali       | 2000           | FemalePregAge15to19 | 74279      |
| Mali       | 2000           | FemalePregAge20to24 | 94440      |
| Mali       | 2000           | FemalePregAge25to29 | 75140      |
| Mali       | 2000           | FemalePregAge30to34 | 51815      |
| Mali       | 2000           | FemalePregAge35to39 | 32113      |
| Mali       | 2000           | FemalePregAge40to44 | 14795      |
| Mali       | 2000           | FemalePregAge45to49 | 3553       |
| Mali       | 2000           | MaleAge0to4         | 976212     |
| Mali       | 2000           | MaleAge10to14       | 665002     |
| Mali       | 2000           | MaleAge15to19       | 583416     |
| Mali       | 2000           | MaleAge20to24       | 485080     |
| Mali       | 2000           | MaleAge25to29       | 380464     |
| Mali       | 2000           | MaleAge30to34       | 283141     |
| Mali       | 2000           | MaleAge35to39       | 208293     |
| Mali       | 2000           | MaleAge40to44       | 164484     |
| Mali       | 2000           | MaleAge45to49       | 136946     |
| Mali       | 2000           | MaleAge50to54       | 116048     |
| Mali       | 2000           | MaleAge55to59       | 105299     |
| Mali       | 2000           | MaleAge5to9         | 767456     |
| Mali       | 2000           | MaleAge60to64       | 80556      |
| Mali       | 2000           | MaleAge65to69       | 66164      |
| Mali       | 2000           | MaleAge70to74       | 49922      |
| Mali       | 2000           | MaleAge75to79       | 31098      |
| Mali       | 2000           | MaleAge80to84       | 13651      |
| Mali       | 2000           | MaleAge85to89       | 3257       |
| Mali       | 2000           | MaleAge90to94       | 351        |
| Mali       | 2000           | MaleAge95to99       | 17         |
| Mauritania | 1992           | FemaleAge0to4       | 180671     |
| Mauritania | 1992           | FemaleAge10to14     | 132927     |
| Mauritania | 1992           | FemaleAge15to19     | 92560      |
| Mauritania | 1992           | FemaleAge20to24     | 60450      |
| Mauritania | 1992           | FemaleAge25to29     | 44077      |
| Mauritania | 1992           | FemaleAge30to34     | 37969      |
| Mauritania | 1992           | FemaleAge35to39     | 34277      |
| Mauritania | 1992           | FemaleAge40to44     | 33950      |
| Mauritania | 1992           | FemaleAge45to49     | 33606      |
| Mauritania | 1992           | FemaleAge50to54     | 31332      |
| Mauritania | 1992           | FemaleAge55to59     | 26198      |
| Mauritania | 1992           | FemaleAge5to9       | 153460     |

Dietary calcium and zinc deficiency risks are decreasing but remain prevalent

| Country    | Reference year | Age/gender group    | Population |
|------------|----------------|---------------------|------------|
| Mauritania | 1992           | FemaleAge60to64     | 21170      |
| Mauritania | 1992           | FemaleAge65to69     | 16156      |
| Mauritania | 1992           | FemaleAge70to74     | 11114      |
| Mauritania | 1992           | FemaleAge75to79     | 6455       |
| Mauritania | 1992           | FemaleAge80to84     | 2844       |
| Mauritania | 1992           | FemaleAge85to89     | 826        |
| Mauritania | 1992           | FemaleAge90to94     | 133        |
| Mauritania | 1992           | FemaleAge95to99     | 9          |
| Mauritania | 1992           | FemaleLactAge15to19 | 12568      |
| Mauritania | 1992           | FemaleLactAge20to24 | 20535      |
| Mauritania | 1992           | FemaleLactAge25to29 | 20579      |
| Mauritania | 1992           | FemaleLactAge30to34 | 16154      |
| Mauritania | 1992           | FemaleLactAge35to39 | 10443      |
| Mauritania | 1992           | FemaleLactAge40to44 | 5247       |
| Mauritania | 1992           | FemaleLactAge45to49 | 1888       |
| Mauritania | 1992           | FemalePregAge15to19 | 9426       |
| Mauritania | 1992           | FemalePregAge20to24 | 15401      |
| Mauritania | 1992           | FemalePregAge25to29 | 15434      |
| Mauritania | 1992           | FemalePregAge30to34 | 12116      |
| Mauritania | 1992           | FemalePregAge35to39 | 7832       |
| Mauritania | 1992           | FemalePregAge40to44 | 3935       |
| Mauritania | 1992           | FemalePregAge45to49 | 1416       |
| Mauritania | 1992           | MaleAge0to4         | 187490     |
| Mauritania | 1992           | MaleAge10to14       | 137149     |
| Mauritania | 1992           | MaleAge15to19       | 118006     |
| Mauritania | 1992           | MaleAge20to24       | 98738      |
| Mauritania | 1992           | MaleAge25to29       | 81382      |
| Mauritania | 1992           | MaleAge30to34       | 66752      |
| Mauritania | 1992           | MaleAge35to39       | 52937      |
| Mauritania | 1992           | MaleAge40to44       | 39559      |
| Mauritania | 1992           | MaleAge45to49       | 31037      |
| Mauritania | 1992           | MaleAge50to54       | 26181      |
| Mauritania | 1992           | MaleAge55to59       | 22148      |
| Mauritania | 1992           | MaleAge5to9         | 158423     |
| Mauritania | 1992           | MaleAge60to64       | 18043      |
| Mauritania | 1992           | MaleAge65to69       | 13476      |
| Mauritania | 1992           | MaleAge70to74       | 8910       |
| Mauritania | 1992           | MaleAge75to79       | 4876       |
| Mauritania | 1992           | MaleAge80to84       | 2027       |
| Mauritania | 1992           | MaleAge85to89       | 572        |
| Mauritania | 1992           | MaleAge90to94       | 88         |
| Mauritania | 1992           | MaleAge95to99       | 5          |
| Mauritania | 1993           | FemaleAge0to4       | 184780     |
| Mauritania | 1993           | FemaleAge10to14     | 136396     |
| Mauritania | 1993           | FemaleAge15to19     | 95922      |
| Mauritania | 1993           | FemaleAge20to24     | 63538      |
| Mauritania | 1993           | FemaleAge25to29     | 46644      |
| Mauritania | 1993           | FemaleAge30to34     | 40166      |
| Mauritania | 1993           | FemaleAge35to39     | 36734      |
| Mauritania | 1993           | FemaleAge40to44     | 34952      |
| Mauritania | 1993           | FemaleAge45to49     | 34619      |
| Mauritania | 1993           | FemaleAge50to54     | 32081      |
| Mauritania | 1993           | FemaleAge55to59     | 26901      |
| Mauritania | 1993           | FemaleAge5to9       | 157729     |
| Mauritania | 1993           | FemaleAge60to64     | 21735      |
| Mauritania | 1993           | FemaleAge65to69     | 16635      |
| Mauritania | 1993           | FemaleAge70to74     | 11475      |
| Mauritania | 1993           | FemaleAge75to79     | 6679       |
| Mauritania | 1993           | FemaleAge80to84     | 2969       |
| Mauritania | 1993           | FemaleAge85to89     | 871        |
| Mauritania | 1993           | FemaleAge90to94     | 148        |
| Mauritania | 1993           | FemaleAge95to99     | 15         |
| Mauritania | 1993           | FemaleLactAge15to19 | 12568      |
| Mauritania | 1993           | FemaleLactAge20to24 | 20535      |
| Mauritania | 1993           | FemaleLactAge25to29 | 20579      |
| Mauritania | 1993           | FemaleLactAge30to34 | 16154      |
| Mauritania | 1993           | FemaleLactAge35to39 | 10443      |
| Mauritania | 1993           | FemaleLactAge40to44 | 5247       |
| Mauritania | 1993           | FemaleLactAge45to49 | 1888       |
| Mauritania | 1993           | FemalePregAge15to19 | 9426       |
| Mauritania | 1993           | FemalePregAge20to24 | 15401      |
| Mauritania | 1993           | FemalePregAge25to29 | 15434      |
| Mauritania | 1993           | FemalePregAge30to34 | 12116      |
| Mauritania | 1993           | FemalePregAge35to39 | 7832       |
| Mauritania | 1993           | FemalePregAge40to44 | 3935       |
| Mauritania | 1993           | FemalePregAge45to49 | 1416       |
| Mauritania | 1993           | MaleAge0to4         | 191704     |
| Mauritania | 1993           | MaleAge10to14       | 140739     |
| Mauritania | 1993           | MaleAge15to19       | 121477     |
| Mauritania | 1993           | MaleAge20to24       | 101893     |
| Mauritania | 1993           | MaleAge25to29       | 83968      |
| Mauritania | 1993           | MaleAge30to34       | 68955      |
| Mauritania | 1993           | MaleAge35to39       | 55270      |
| Mauritania | 1993           | MaleAge40to44       | 41742      |
| Mauritania | 1993           | MaleAge45to49       | 31837      |
| Mauritania | 1993           | MaleAge50to54       | 26736      |
| Mauritania | 1993           | MaleAge55to59       | 22499      |
| Mauritania | 1993           | MaleAge5to9         | 162844     |

Dietary calcium and zinc deficiency risks are decreasing but remain prevalent

| Country    | Reference year | Age/gender group    | Population |
|------------|----------------|---------------------|------------|
| Mauritania | 1993           | MaleAge60to64       | 18429      |
| Mauritania | 1993           | MaleAge65to69       | 13851      |
| Mauritania | 1993           | MaleAge70to74       | 9188       |
| Mauritania | 1993           | MaleAge75to79       | 5064       |
| Mauritania | 1993           | MaleAge80to84       | 2102       |
| Mauritania | 1993           | MaleAge85to89       | 599        |
| Mauritania | 1993           | MaleAge90to94       | 98         |
| Mauritania | 1993           | MaleAge95to99       | 8          |
| Mauritania | 1994           | FemaleAge0to4       | 188956     |
| Mauritania | 1994           | FemaleAge10to14     | 140043     |
| Mauritania | 1994           | FemaleAge15to19     | 99384      |
| Mauritania | 1994           | FemaleAge20to24     | 66743      |
| Mauritania | 1994           | FemaleAge25to29     | 49331      |
| Mauritania | 1994           | FemaleAge30to34     | 42423      |
| Mauritania | 1994           | FemaleAge35to39     | 39227      |
| Mauritania | 1994           | FemaleAge40to44     | 36205      |
| Mauritania | 1994           | FemaleAge45to49     | 35644      |
| Mauritania | 1994           | FemaleAge50to54     | 32886      |
| Mauritania | 1994           | FemaleAge55to59     | 27643      |
| Mauritania | 1994           | FemaleAge5to9       | 162002     |
| Mauritania | 1994           | FemaleAge60to64     | 22351      |
| Mauritania | 1994           | FemaleAge65to69     | 17165      |
| Mauritania | 1994           | FemaleAge70to74     | 11886      |
| Mauritania | 1994           | FemaleAge75to79     | 6921       |
| Mauritania | 1994           | FemaleAge80to84     | 3057       |
| Mauritania | 1994           | FemaleAge85to89     | 881        |
| Mauritania | 1994           | FemaleAge90to94     | 150        |
| Mauritania | 1994           | FemaleAge95to99     | 16         |
| Mauritania | 1994           | FemaleLactAge15to19 | 12568      |
| Mauritania | 1994           | FemaleLactAge20to24 | 20535      |
| Mauritania | 1994           | FemaleLactAge25to29 | 20579      |
| Mauritania | 1994           | FemaleLactAge30to34 | 16154      |
| Mauritania | 1994           | FemaleLactAge35to39 | 10443      |
| Mauritania | 1994           | FemaleLactAge40to44 | 5247       |
| Mauritania | 1994           | FemaleLactAge45to49 | 1888       |
| Mauritania | 1994           | FemalePregAge15to19 | 9426       |
| Mauritania | 1994           | FemalePregAge20to24 | 15401      |
| Mauritania | 1994           | FemalePregAge25to29 | 15434      |
| Mauritania | 1994           | FemalePregAge30to34 | 12116      |
| Mauritania | 1994           | FemalePregAge35to39 | 7832       |
| Mauritania | 1994           | FemalePregAge40to44 | 3935       |
| Mauritania | 1994           | FemalePregAge45to49 | 1416       |
| Mauritania | 1994           | MaleAge0to4         | 196016     |
| Mauritania | 1994           | MaleAge10to14       | 144558     |
| Mauritania | 1994           | MaleAge15to19       | 125101     |
| Mauritania | 1994           | MaleAge20to24       | 105209     |
| Mauritania | 1994           | MaleAge25to29       | 86698      |
| Mauritania | 1994           | MaleAge30to34       | 71232      |
| Mauritania | 1994           | MaleAge35to39       | 57606      |
| Mauritania | 1994           | MaleAge40to44       | 44036      |
| Mauritania | 1994           | MaleAge45to49       | 32898      |
| Mauritania | 1994           | MaleAge50to54       | 27347      |
| Mauritania | 1994           | MaleAge55to59       | 22899      |
| Mauritania | 1994           | MaleAge5to9         | 167252     |
| Mauritania | 1994           | MaleAge60to64       | 18831      |
| Mauritania | 1994           | MaleAge65to69       | 14258      |
| Mauritania | 1994           | MaleAge70to74       | 9499       |
| Mauritania | 1994           | MaleAge75to79       | 5249       |
| Mauritania | 1994           | MaleAge80to84       | 2152       |
| Mauritania | 1994           | MaleAge85to89       | 596        |
| Mauritania | 1994           | MaleAge90to94       | 98         |
| Mauritania | 1994           | MaleAge95to99       | 10         |
| Mauritania | 1995           | FemaleAge0to4       | 193448     |
| Mauritania | 1995           | FemaleAge10to14     | 143843     |
| Mauritania | 1995           | FemaleAge15to19     | 102914     |
| Mauritania | 1995           | FemaleAge20to24     | 70048      |
| Mauritania | 1995           | FemaleAge25to29     | 52150      |
| Mauritania | 1995           | FemaleAge30to34     | 44782      |
| Mauritania | 1995           | FemaleAge35to39     | 41629      |
| Mauritania | 1995           | FemaleAge40to44     | 37797      |
| Mauritania | 1995           | FemaleAge45to49     | 36652      |
| Mauritania | 1995           | FemaleAge50to54     | 33755      |
| Mauritania | 1995           | FemaleAge55to59     | 28407      |
| Mauritania | 1995           | FemaleAge5to9       | 166109     |
| Mauritania | 1995           | FemaleAge60to64     | 23025      |
| Mauritania | 1995           | FemaleAge65to69     | 17737      |
| Mauritania | 1995           | FemaleAge70to74     | 12347      |
| Mauritania | 1995           | FemaleAge75to79     | 7191       |
| Mauritania | 1995           | FemaleAge80to84     | 3128       |
| Mauritania | 1995           | FemaleAge85to89     | 854        |
| Mauritania | 1995           | FemaleAge90to94     | 125        |
| Mauritania | 1995           | FemaleAge95to99     | 9          |
| Mauritania | 1995           | FemaleLactAge15to19 | 12568      |
| Mauritania | 1995           | FemaleLactAge20to24 | 20535      |
| Mauritania | 1995           | FemaleLactAge25to29 | 20579      |
| Mauritania | 1995           | FemaleLactAge30to34 | 16154      |
| Mauritania | 1995           | FemaleLactAge35to39 | 10443      |
| Mauritania | 1995           | FemaleLactAge40to44 | 5247       |

Dietary calcium and zinc deficiency risks are decreasing but remain prevalent

| Country    | Reference year | Age/gender group    | Population |
|------------|----------------|---------------------|------------|
| Mauritania | 1995           | FemaleLactAge45to49 | 1888       |
| Mauritania | 1995           | FemalePregAge15to19 | 9426       |
| Mauritania | 1995           | FemalePregAge20to24 | 15401      |
| Mauritania | 1995           | FemalePregAge25to29 | 15434      |
| Mauritania | 1995           | FemalePregAge30to34 | 12116      |
| Mauritania | 1995           | FemalePregAge35to39 | 7832       |
| Mauritania | 1995           | FemalePregAge40to44 | 3935       |
| Mauritania | 1995           | FemalePregAge45to49 | 1416       |
| Mauritania | 1995           | MaleAge0to4         | 200728     |
| Mauritania | 1995           | MaleAge10to14       | 148563     |
| Mauritania | 1995           | MaleAge15to19       | 128844     |
| Mauritania | 1995           | MaleAge20to24       | 108675     |
| Mauritania | 1995           | MaleAge25to29       | 89590      |
| Mauritania | 1995           | MaleAge30to34       | 73615      |
| Mauritania | 1995           | MaleAge35to39       | 59927      |
| Mauritania | 1995           | MaleAge40to44       | 46355      |
| Mauritania | 1995           | MaleAge45to49       | 34283      |
| Mauritania | 1995           | MaleAge50to54       | 28011      |
| Mauritania | 1995           | MaleAge55to59       | 23352      |
| Mauritania | 1995           | MaleAge5to9         | 171468     |
| Mauritania | 1995           | MaleAge60to64       | 19248      |
| Mauritania | 1995           | MaleAge65to69       | 14690      |
| Mauritania | 1995           | MaleAge70to74       | 9845       |
| Mauritania | 1995           | MaleAge75to79       | 5440       |
| Mauritania | 1995           | MaleAge80to84       | 2190       |
| Mauritania | 1995           | MaleAge85to89       | 560        |
| Mauritania | 1995           | MaleAge90to94       | 75         |
| Mauritania | 1995           | MaleAge95to99       | 5          |
| Mauritania | 1996           | FemaleAge0to4       | 198109     |
| Mauritania | 1996           | FemaleAge10to14     | 147617     |
| Mauritania | 1996           | FemaleAge15to19     | 104607     |
| Mauritania | 1996           | FemaleAge20to24     | 69774      |
| Mauritania | 1996           | FemaleAge25to29     | 50595      |
| Mauritania | 1996           | FemaleAge30to34     | 43337      |
| Mauritania | 1996           | FemaleAge35to39     | 41343      |
| Mauritania | 1996           | FemaleAge40to44     | 38604      |
| Mauritania | 1996           | FemaleAge45to49     | 37524      |
| Mauritania | 1996           | FemaleAge50to54     | 34605      |
| Mauritania | 1996           | FemaleAge55to59     | 29058      |
| Mauritania | 1996           | FemaleAge5to9       | 170547     |
| Mauritania | 1996           | FemaleAge60to64     | 23566      |
| Mauritania | 1996           | FemaleAge65to69     | 18132      |
| Mauritania | 1996           | FemaleAge70to74     | 12651      |
| Mauritania | 1996           | FemaleAge75to79     | 7438       |
| Mauritania | 1996           | FemaleAge80to84     | 3335       |
| Mauritania | 1996           | FemaleAge85to89     | 985        |
| Mauritania | 1996           | FemaleAge90to94     | 162        |
| Mauritania | 1996           | FemaleAge95to99     | 9          |
| Mauritania | 1996           | FemaleLactAge15to19 | 13559      |
| Mauritania | 1996           | FemaleLactAge20to24 | 22676      |
| Mauritania | 1996           | FemaleLactAge25to29 | 23252      |
| Mauritania | 1996           | FemaleLactAge30to34 | 18455      |
| Mauritania | 1996           | FemaleLactAge35to39 | 11978      |
| Mauritania | 1996           | FemaleLactAge40to44 | 5889       |
| Mauritania | 1996           | FemaleLactAge45to49 | 1935       |
| Mauritania | 1996           | FemalePregAge15to19 | 10169      |
| Mauritania | 1996           | FemalePregAge20to24 | 17007      |
| Mauritania | 1996           | FemalePregAge25to29 | 17439      |
| Mauritania | 1996           | FemalePregAge30to34 | 13841      |
| Mauritania | 1996           | FemalePregAge35to39 | 8984       |
| Mauritania | 1996           | FemalePregAge40to44 | 4416       |
| Mauritania | 1996           | FemalePregAge45to49 | 1451       |
| Mauritania | 1996           | MaleAge0to4         | 205565     |
| Mauritania | 1996           | MaleAge10to14       | 152390     |
| Mauritania | 1996           | MaleAge15to19       | 132402     |
| Mauritania | 1996           | MaleAge20to24       | 112370     |
| Mauritania | 1996           | MaleAge25to29       | 92920      |
| Mauritania | 1996           | MaleAge30to34       | 76305      |
| Mauritania | 1996           | MaleAge35to39       | 62331      |
| Mauritania | 1996           | MaleAge40to44       | 48717      |
| Mauritania | 1996           | MaleAge45to49       | 35940      |
| Mauritania | 1996           | MaleAge50to54       | 28655      |
| Mauritania | 1996           | MaleAge55to59       | 23757      |
| Mauritania | 1996           | MaleAge5to9         | 176035     |
| Mauritania | 1996           | MaleAge60to64       | 19530      |
| Mauritania | 1996           | MaleAge65to69       | 14978      |
| Mauritania | 1996           | MaleAge70to74       | 10102      |
| Mauritania | 1996           | MaleAge75to79       | 5648       |
| Mauritania | 1996           | MaleAge80to84       | 2359       |
| Mauritania | 1996           | MaleAge85to89       | 649        |
| Mauritania | 1996           | MaleAge90to94       | 97         |
| Mauritania | 1996           | MaleAge95to99       | 6          |
| Mauritania | 1997           | FemaleAge0to4       | 202675     |
| Mauritania | 1997           | FemaleAge10to14     | 151626     |
| Mauritania | 1997           | FemaleAge15to19     | 108051     |
| Mauritania | 1997           | FemaleAge20to24     | 73339      |
| Mauritania | 1997           | FemaleAge25to29     | 53881      |
| Mauritania | 1997           | FemaleAge30to34     | 46040      |

Dietary calcium and zinc deficiency risks are decreasing but remain prevalent

| Country    | Reference year | Age/gender group    | Population |
|------------|----------------|---------------------|------------|
| Mauritania | 1997           | FemaleAge35to39     | 43709      |
| Mauritania | 1997           | FemaleAge40to44     | 40902      |
| Mauritania | 1997           | FemaleAge45to49     | 38485      |
| Mauritania | 1997           | FemaleAge50to54     | 35565      |
| Mauritania | 1997           | FemaleAge55to59     | 29754      |
| Mauritania | 1997           | FemaleAge5to9       | 174997     |
| Mauritania | 1997           | FemaleAge60to64     | 24185      |
| Mauritania | 1997           | FemaleAge65to69     | 18582      |
| Mauritania | 1997           | FemaleAge70to74     | 12991      |
| Mauritania | 1997           | FemaleAge75to79     | 7677       |
| Mauritania | 1997           | FemaleAge80to84     | 3500       |
| Mauritania | 1997           | FemaleAge85to89     | 1082       |
| Mauritania | 1997           | FemaleAge90to94     | 188        |
| Mauritania | 1997           | FemaleAge95to99     | 15         |
| Mauritania | 1997           | FemaleLactAge15to19 | 13559      |
| Mauritania | 1997           | FemaleLactAge20to24 | 22676      |
| Mauritania | 1997           | FemaleLactAge25to29 | 23252      |
| Mauritania | 1997           | FemaleLactAge30to34 | 18455      |
| Mauritania | 1997           | FemaleLactAge35to39 | 11978      |
| Mauritania | 1997           | FemaleLactAge40to44 | 5889       |
| Mauritania | 1997           | FemaleLactAge45to49 | 1935       |
| Mauritania | 1997           | FemalePregAge15to19 | 10169      |
| Mauritania | 1997           | FemalePregAge20to24 | 17007      |
| Mauritania | 1997           | FemalePregAge25to29 | 17439      |
| Mauritania | 1997           | FemalePregAge30to34 | 13841      |
| Mauritania | 1997           | FemalePregAge35to39 | 8984       |
| Mauritania | 1997           | FemalePregAge40to44 | 4416       |
| Mauritania | 1997           | FemalePregAge45to49 | 1451       |
| Mauritania | 1997           | MaleAge0to4         | 210268     |
| Mauritania | 1997           | MaleAge10to14       | 156506     |
| Mauritania | 1997           | MaleAge15to19       | 136003     |
| Mauritania | 1997           | MaleAge20to24       | 116181     |
| Mauritania | 1997           | MaleAge25to29       | 96455      |
| Mauritania | 1997           | MaleAge30to34       | 79168      |
| Mauritania | 1997           | MaleAge35to39       | 64772      |
| Mauritania | 1997           | MaleAge40to44       | 51160      |
| Mauritania | 1997           | MaleAge45to49       | 37938      |
| Mauritania | 1997           | MaleAge50to54       | 29373      |
| Mauritania | 1997           | MaleAge55to59       | 24264      |
| Mauritania | 1997           | MaleAge5to9         | 180643     |
| Mauritania | 1997           | MaleAge60to64       | 19849      |
| Mauritania | 1997           | MaleAge65to69       | 15303      |
| Mauritania | 1997           | MaleAge70to74       | 10380      |
| Mauritania | 1997           | MaleAge75to79       | 5840       |
| Mauritania | 1997           | MaleAge80to84       | 2493       |
| Mauritania | 1997           | MaleAge85to89       | 711        |
| Mauritania | 1997           | MaleAge90to94       | 116        |
| Mauritania | 1997           | MaleAge95to99       | 8          |
| Mauritania | 1998           | FemaleAge0to4       | 207289     |
| Mauritania | 1998           | FemaleAge10to14     | 155854     |
| Mauritania | 1998           | FemaleAge15to19     | 111563     |
| Mauritania | 1998           | FemaleAge20to24     | 76964      |
| Mauritania | 1998           | FemaleAge25to29     | 57309      |
| Mauritania | 1998           | FemaleAge30to34     | 48880      |
| Mauritania | 1998           | FemaleAge35to39     | 46090      |
| Mauritania | 1998           | FemaleAge40to44     | 43449      |
| Mauritania | 1998           | FemaleAge45to49     | 39557      |
| Mauritania | 1998           | FemaleAge50to54     | 36602      |
| Mauritania | 1998           | FemaleAge55to59     | 30507      |
| Mauritania | 1998           | FemaleAge5to9       | 179392     |
| Mauritania | 1998           | FemaleAge60to64     | 24873      |
| Mauritania | 1998           | FemaleAge65to69     | 19093      |
| Mauritania | 1998           | FemaleAge70to74     | 13381      |
| Mauritania | 1998           | FemaleAge75to79     | 7928       |
| Mauritania | 1998           | FemaleAge80to84     | 3620       |
| Mauritania | 1998           | FemaleAge85to89     | 1131       |
| Mauritania | 1998           | FemaleAge90to94     | 206        |
| Mauritania | 1998           | FemaleAge95to99     | 22         |
| Mauritania | 1998           | FemaleLactAge15to19 | 13559      |
| Mauritania | 1998           | FemaleLactAge20to24 | 22676      |
| Mauritania | 1998           | FemaleLactAge25to29 | 23252      |
| Mauritania | 1998           | FemaleLactAge30to34 | 18455      |
| Mauritania | 1998           | FemaleLactAge35to39 | 11978      |
| Mauritania | 1998           | FemaleLactAge40to44 | 5889       |
| Mauritania | 1998           | FemaleLactAge45to49 | 1935       |
| Mauritania | 1998           | FemalePregAge15to19 | 10169      |
| Mauritania | 1998           | FemalePregAge20to24 | 17007      |
| Mauritania | 1998           | FemalePregAge25to29 | 17439      |
| Mauritania | 1998           | FemalePregAge30to34 | 13841      |
| Mauritania | 1998           | FemalePregAge35to39 | 8984       |
| Mauritania | 1998           | FemalePregAge40to44 | 4416       |
| Mauritania | 1998           | FemalePregAge45to49 | 1451       |
| Mauritania | 1998           | MaleAge0to4         | 215015     |
| Mauritania | 1998           | MaleAge10to14       | 160896     |
| Mauritania | 1998           | MaleAge15to19       | 139688     |
| Mauritania | 1998           | MaleAge20to24       | 120068     |
| Mauritania | 1998           | MaleAge25to29       | 100161     |
| Mauritania | 1998           | MaleAge30to34       | 82214      |

Dietary calcium and zinc deficiency risks are decreasing but remain prevalent

| Country    | Reference year | Age/gender group    | Population |
|------------|----------------|---------------------|------------|
| Mauritania | 1998           | MaleAge35to39       | 67284      |
| Mauritania | 1998           | MaleAge40to44       | 53668      |
| Mauritania | 1998           | MaleAge45to49       | 40200      |
| Mauritania | 1998           | MaleAge50to54       | 30242      |
| Mauritania | 1998           | MaleAge55to59       | 24862      |
| Mauritania | 1998           | MaleAge5to9         | 185186     |
| Mauritania | 1998           | MaleAge60to64       | 20215      |
| Mauritania | 1998           | MaleAge65to69       | 15663      |
| Mauritania | 1998           | MaleAge70to74       | 10691      |
| Mauritania | 1998           | MaleAge75to79       | 6027       |
| Mauritania | 1998           | MaleAge80to84       | 2586       |
| Mauritania | 1998           | MaleAge85to89       | 739        |
| Mauritania | 1998           | MaleAge90to94       | 129        |
| Mauritania | 1998           | MaleAge95to99       | 12         |
| Mauritania | 1999           | FemaleAge0to4       | 212098     |
| Mauritania | 1999           | FemaleAge10to14     | 160211     |
| Mauritania | 1999           | FemaleAge15to19     | 115230     |
| Mauritania | 1999           | FemaleAge20to24     | 80618      |
| Mauritania | 1999           | FemaleAge25to29     | 60847      |
| Mauritania | 1999           | FemaleAge30to34     | 51876      |
| Mauritania | 1999           | FemaleAge35to39     | 48571      |
| Mauritania | 1999           | FemaleAge40to44     | 46060      |
| Mauritania | 1999           | FemaleAge45to49     | 40902      |
| Mauritania | 1999           | FemaleAge50to54     | 37669      |
| Mauritania | 1999           | FemaleAge55to59     | 31335      |
| Mauritania | 1999           | FemaleAge5to9       | 183717     |
| Mauritania | 1999           | FemaleAge60to64     | 25614      |
| Mauritania | 1999           | FemaleAge65to69     | 19678      |
| Mauritania | 1999           | FemaleAge70to74     | 13828      |
| Mauritania | 1999           | FemaleAge75to79     | 8200       |
| Mauritania | 1999           | FemaleAge80to84     | 3706       |
| Mauritania | 1999           | FemaleAge85to89     | 1132       |
| Mauritania | 1999           | FemaleAge90to94     | 206        |
| Mauritania | 1999           | FemaleAge95to99     | 22         |
| Mauritania | 1999           | FemaleLactAge15to19 | 13559      |
| Mauritania | 1999           | FemaleLactAge20to24 | 22676      |
| Mauritania | 1999           | FemaleLactAge25to29 | 23252      |
| Mauritania | 1999           | FemaleLactAge30to34 | 18455      |
| Mauritania | 1999           | FemaleLactAge35to39 | 11978      |
| Mauritania | 1999           | FemaleLactAge40to44 | 5889       |
| Mauritania | 1999           | FemaleLactAge45to49 | 1935       |
| Mauritania | 1999           | FemalePregAge15to19 | 10169      |
| Mauritania | 1999           | FemalePregAge20to24 | 17007      |
| Mauritania | 1999           | FemalePregAge25to29 | 17439      |
| Mauritania | 1999           | FemalePregAge30to34 | 13841      |
| Mauritania | 1999           | FemalePregAge35to39 | 8984       |
| Mauritania | 1999           | FemalePregAge40to44 | 4416       |
| Mauritania | 1999           | FemalePregAge45to49 | 1451       |
| Mauritania | 1999           | MaleAge0to4         | 219978     |
| Mauritania | 1999           | MaleAge10to14       | 165446     |
| Mauritania | 1999           | MaleAge15to19       | 143543     |
| Mauritania | 1999           | MaleAge20to24       | 123991     |
| Mauritania | 1999           | MaleAge25to29       | 103990     |
| Mauritania | 1999           | MaleAge30to34       | 85457      |
| Mauritania | 1999           | MaleAge35to39       | 69926      |
| Mauritania | 1999           | MaleAge40to44       | 56227      |
| Mauritania | 1999           | MaleAge45to49       | 42601      |
| Mauritania | 1999           | MaleAge50to54       | 31382      |
| Mauritania | 1999           | MaleAge55to59       | 25531      |
| Mauritania | 1999           | MaleAge5to9         | 189626     |
| Mauritania | 1999           | MaleAge60to64       | 20644      |
| Mauritania | 1999           | MaleAge65to69       | 16055      |
| Mauritania | 1999           | MaleAge70to74       | 11034      |
| Mauritania | 1999           | MaleAge75to79       | 6222       |
| Mauritania | 1999           | MaleAge80to84       | 2642       |
| Mauritania | 1999           | MaleAge85to89       | 735        |
| Mauritania | 1999           | MaleAge90to94       | 126        |
| Mauritania | 1999           | MaleAge95to99       | 12         |
| Mauritania | 2000           | FemaleAge0to4       | 217246     |
| Mauritania | 2000           | FemaleAge10to14     | 164569     |
| Mauritania | 2000           | FemaleAge15to19     | 119107     |
| Mauritania | 2000           | FemaleAge20to24     | 84288      |
| Mauritania | 2000           | FemaleAge25to29     | 64460      |
| Mauritania | 2000           | FemaleAge30to34     | 55038      |
| Mauritania | 2000           | FemaleAge35to39     | 51199      |
| Mauritania | 2000           | FemaleAge40to44     | 48622      |
| Mauritania | 2000           | FemaleAge45to49     | 42611      |
| Mauritania | 2000           | FemaleAge50to54     | 38744      |
| Mauritania | 2000           | FemaleAge55to59     | 32246      |
| Mauritania | 2000           | FemaleAge5to9       | 187983     |
| Mauritania | 2000           | FemaleAge60to64     | 26399      |
| Mauritania | 2000           | FemaleAge65to69     | 20338      |
| Mauritania | 2000           | FemaleAge70to74     | 14333      |
| Mauritania | 2000           | FemaleAge75to79     | 8505       |
| Mauritania | 2000           | FemaleAge80to84     | 3780       |
| Mauritania | 2000           | FemaleAge85to89     | 1087       |
| Mauritania | 2000           | FemaleAge90to94     | 170        |
| Mauritania | 2000           | FemaleAge95to99     | 13         |

Dietary calcium and zinc deficiency risks are decreasing but remain prevalent

| Country    | Reference year | Age/gender group    | Population |
|------------|----------------|---------------------|------------|
| Mauritania | 2000           | FemaleLactAge15to19 | 13559      |
| Mauritania | 2000           | FemaleLactAge20to24 | 22676      |
| Mauritania | 2000           | FemaleLactAge25to29 | 23252      |
| Mauritania | 2000           | FemaleLactAge30to34 | 18455      |
| Mauritania | 2000           | FemaleLactAge35to39 | 11978      |
| Mauritania | 2000           | FemaleLactAge40to44 | 5889       |
| Mauritania | 2000           | FemaleLactAge45to49 | 1935       |
| Mauritania | 2000           | FemalePregAge15to19 | 10169      |
| Mauritania | 2000           | FemalePregAge20to24 | 17007      |
| Mauritania | 2000           | FemalePregAge25to29 | 17439      |
| Mauritania | 2000           | FemalePregAge30to34 | 13841      |
| Mauritania | 2000           | FemalePregAge35to39 | 8984       |
| Mauritania | 2000           | FemalePregAge40to44 | 4416       |
| Mauritania | 2000           | FemalePregAge45to49 | 1451       |
| Mauritania | 2000           | MaleAge0to4         | 225344     |
| Mauritania | 2000           | MaleAge10to14       | 169987     |
| Mauritania | 2000           | MaleAge15to19       | 147627     |
| Mauritania | 2000           | MaleAge20to24       | 127921     |
| Mauritania | 2000           | MaleAge25to29       | 107906     |
| Mauritania | 2000           | MaleAge30to34       | 88890      |
| Mauritania | 2000           | MaleAge35to39       | 72730      |
| Mauritania | 2000           | MaleAge40to44       | 58825      |
| Mauritania | 2000           | MaleAge45to49       | 45063      |
| Mauritania | 2000           | MaleAge50to54       | 32861      |
| Mauritania | 2000           | MaleAge55to59       | 26265      |
| Mauritania | 2000           | MaleAge5to9         | 193952     |
| Mauritania | 2000           | MaleAge60to64       | 21144      |
| Mauritania | 2000           | MaleAge65to69       | 16475      |
| Mauritania | 2000           | MaleAge70to74       | 11408      |
| Mauritania | 2000           | MaleAge75to79       | 6437       |
| Mauritania | 2000           | MaleAge80to84       | 2675       |
| Mauritania | 2000           | MaleAge85to89       | 693        |
| Mauritania | 2000           | MaleAge90to94       | 96         |
| Mauritania | 2000           | MaleAge95to99       | 7          |
| Mauritius  | 1992           | FemaleAge0to4       | 49940      |
| Mauritius  | 1992           | FemaleAge10to14     | 51216      |
| Mauritius  | 1992           | FemaleAge15to19     | 49882      |
| Mauritius  | 1992           | FemaleAge20to24     | 41986      |
| Mauritius  | 1992           | FemaleAge25to29     | 38420      |
| Mauritius  | 1992           | FemaleAge30to34     | 36638      |
| Mauritius  | 1992           | FemaleAge35to39     | 36283      |
| Mauritius  | 1992           | FemaleAge40to44     | 33653      |
| Mauritius  | 1992           | FemaleAge45to49     | 28355      |
| Mauritius  | 1992           | FemaleAge50to54     | 22782      |
| Mauritius  | 1992           | FemaleAge55to59     | 18597      |
| Mauritius  | 1992           | FemaleAge5to9       | 49165      |
| Mauritius  | 1992           | FemaleAge60to64     | 14738      |
| Mauritius  | 1992           | FemaleAge65to69     | 12025      |
| Mauritius  | 1992           | FemaleAge70to74     | 9047       |
| Mauritius  | 1992           | FemaleAge75to79     | 5798       |
| Mauritius  | 1992           | FemaleAge80to84     | 3163       |
| Mauritius  | 1992           | FemaleAge85to89     | 1313       |
| Mauritius  | 1992           | FemaleAge90to94     | 421        |
| Mauritius  | 1992           | FemaleAge95to99     | 84         |
| Mauritius  | 1992           | FemaleAgeAbove100   | 8          |
| Mauritius  | 1992           | FemaleLactAge15to19 | 2283       |
| Mauritius  | 1992           | FemaleLactAge20to24 | 7785       |
| Mauritius  | 1992           | FemaleLactAge25to29 | 6667       |
| Mauritius  | 1992           | FemaleLactAge30to34 | 3756       |
| Mauritius  | 1992           | FemaleLactAge35to39 | 1460       |
| Mauritius  | 1992           | FemaleLactAge40to44 | 336        |
| Mauritius  | 1992           | FemaleLactAge45to49 | 17         |
| Mauritius  | 1992           | FemalePregAge15to19 | 1712       |
| Mauritius  | 1992           | FemalePregAge20to24 | 5839       |
| Mauritius  | 1992           | FemalePregAge25to29 | 5001       |
| Mauritius  | 1992           | FemalePregAge30to34 | 2817       |
| Mauritius  | 1992           | FemalePregAge35to39 | 1095       |
| Mauritius  | 1992           | FemalePregAge40to44 | 252        |
| Mauritius  | 1992           | FemalePregAge45to49 | 12         |
| Mauritius  | 1992           | MaleAge0to4         | 51133      |
| Mauritius  | 1992           | MaleAge10to14       | 52616      |
| Mauritius  | 1992           | MaleAge15to19       | 54815      |
| Mauritius  | 1992           | MaleAge20to24       | 57523      |
| Mauritius  | 1992           | MaleAge25to29       | 54337      |
| Mauritius  | 1992           | MaleAge30to34       | 45670      |
| Mauritius  | 1992           | MaleAge35to39       | 39077      |
| Mauritius  | 1992           | MaleAge40to44       | 34826      |
| Mauritius  | 1992           | MaleAge45to49       | 27544      |
| Mauritius  | 1992           | MaleAge50to54       | 20557      |
| Mauritius  | 1992           | MaleAge55to59       | 16623      |
| Mauritius  | 1992           | MaleAge5to9         | 51061      |
| Mauritius  | 1992           | MaleAge60to64       | 12998      |
| Mauritius  | 1992           | MaleAge65to69       | 9829       |
| Mauritius  | 1992           | MaleAge70to74       | 6311       |
| Mauritius  | 1992           | MaleAge75to79       | 3355       |
| Mauritius  | 1992           | MaleAge80to84       | 1579       |
| Mauritius  | 1992           | MaleAge85to89       | 427        |
| Mauritius  | 1992           | MaleAge90to94       | 38         |

Dietary calcium and zinc deficiency risks are decreasing but remain prevalent

| Country   | Reference year | Age/gender group    | Population |
|-----------|----------------|---------------------|------------|
| Mauritius | 1992           | MaleAge95to99       | 11         |
| Mauritius | 1992           | MaleAgeAbov e100    | 1          |
| Mauritius | 1993           | FemaleAge0to4       | 51991      |
| Mauritius | 1993           | FemaleAge10to14     | 50803      |
| Mauritius | 1993           | FemaleAge15to19     | 49154      |
| Mauritius | 1993           | FemaleAge20to24     | 41665      |
| Mauritius | 1993           | FemaleAge25to29     | 40037      |
| Mauritius | 1993           | FemaleAge30to34     | 37411      |
| Mauritius | 1993           | FemaleAge35to39     | 36959      |
| Mauritius | 1993           | FemaleAge40to44     | 34494      |
| Mauritius | 1993           | FemaleAge45to49     | 29463      |
| Mauritius | 1993           | FemaleAge50to54     | 23592      |
| Mauritius | 1993           | FemaleAge55to59     | 19109      |
| Mauritius | 1993           | FemaleAge5to9       | 48595      |
| Mauritius | 1993           | FemaleAge60to64     | 15278      |
| Mauritius | 1993           | FemaleAge65to69     | 12100      |
| Mauritius | 1993           | FemaleAge70to74     | 9424       |
| Mauritius | 1993           | FemaleAge75to79     | 5980       |
| Mauritius | 1993           | FemaleAge80to84     | 3313       |
| Mauritius | 1993           | FemaleAge85to89     | 1427       |
| Mauritius | 1993           | FemaleAge90to94     | 446        |
| Mauritius | 1993           | FemaleAge95to99     | 101        |
| Mauritius | 1993           | FemaleAgeAbov e100  | 9          |
| Mauritius | 1993           | FemaleLactAge15to19 | 2283       |
| Mauritius | 1993           | FemaleLactAge20to24 | 7785       |
| Mauritius | 1993           | FemaleLactAge25to29 | 6667       |
| Mauritius | 1993           | FemaleLactAge30to34 | 3756       |
| Mauritius | 1993           | FemaleLactAge35to39 | 1460       |
| Mauritius | 1993           | FemaleLactAge40to44 | 336        |
| Mauritius | 1993           | FemaleLactAge45to49 | 17         |
| Mauritius | 1993           | FemalePregAge15to19 | 1712       |
| Mauritius | 1993           | FemalePregAge20to24 | 5839       |
| Mauritius | 1993           | FemalePregAge25to29 | 5001       |
| Mauritius | 1993           | FemalePregAge30to34 | 2817       |
| Mauritius | 1993           | FemalePregAge35to39 | 1095       |
| Mauritius | 1993           | FemalePregAge40to44 | 252        |
| Mauritius | 1993           | FemalePregAge45to49 | 12         |
| Mauritius | 1993           | MaleAge0to4         | 53475      |
| Mauritius | 1993           | MaleAge10to14       | 52415      |
| Mauritius | 1993           | MaleAge15to19       | 54069      |
| Mauritius | 1993           | MaleAge20to24       | 56911      |
| Mauritius | 1993           | MaleAge25to29       | 55434      |
| Mauritius | 1993           | MaleAge30to34       | 47329      |
| Mauritius | 1993           | MaleAge35to39       | 39766      |
| Mauritius | 1993           | MaleAge40to44       | 35442      |
| Mauritius | 1993           | MaleAge45to49       | 29067      |
| Mauritius | 1993           | MaleAge50to54       | 21305      |
| Mauritius | 1993           | MaleAge55to59       | 16902      |
| Mauritius | 1993           | MaleAge5to9         | 50280      |
| Mauritius | 1993           | MaleAge60to64       | 13394      |
| Mauritius | 1993           | MaleAge65to69       | 9896       |
| Mauritius | 1993           | MaleAge70to74       | 6697       |
| Mauritius | 1993           | MaleAge75to79       | 3448       |
| Mauritius | 1993           | MaleAge80to84       | 1665       |
| Mauritius | 1993           | MaleAge85to89       | 535        |
| Mauritius | 1993           | MaleAge90to94       | 44         |
| Mauritius | 1993           | MaleAge95to99       | 13         |
| Mauritius | 1993           | MaleAgeAbov e100    | 1          |
| Mauritius | 1994           | FemaleAge0to4       | 53765      |
| Mauritius | 1994           | FemaleAge10to14     | 50429      |
| Mauritius | 1994           | FemaleAge15to19     | 48507      |
| Mauritius | 1994           | FemaleAge20to24     | 41232      |
| Mauritius | 1994           | FemaleAge25to29     | 41428      |
| Mauritius | 1994           | FemaleAge30to34     | 38381      |
| Mauritius | 1994           | FemaleAge35to39     | 37676      |
| Mauritius | 1994           | FemaleAge40to44     | 35320      |
| Mauritius | 1994           | FemaleAge45to49     | 30572      |
| Mauritius | 1994           | FemaleAge50to54     | 24500      |
| Mauritius | 1994           | FemaleAge55to59     | 19694      |
| Mauritius | 1994           | FemaleAge5to9       | 48168      |
| Mauritius | 1994           | FemaleAge60to64     | 15846      |
| Mauritius | 1994           | FemaleAge65to69     | 12268      |
| Mauritius | 1994           | FemaleAge70to74     | 9758       |
| Mauritius | 1994           | FemaleAge75to79     | 6229       |
| Mauritius | 1994           | FemaleAge80to84     | 3423       |
| Mauritius | 1994           | FemaleAge85to89     | 1535       |
| Mauritius | 1994           | FemaleAge90to94     | 470        |
| Mauritius | 1994           | FemaleAge95to99     | 111        |
| Mauritius | 1994           | FemaleAgeAbov e100  | 10         |
| Mauritius | 1994           | FemaleLactAge15to19 | 2283       |
| Mauritius | 1994           | FemaleLactAge20to24 | 7785       |
| Mauritius | 1994           | FemaleLactAge25to29 | 6667       |
| Mauritius | 1994           | FemaleLactAge30to34 | 3756       |
| Mauritius | 1994           | FemaleLactAge35to39 | 1460       |
| Mauritius | 1994           | FemaleLactAge40to44 | 336        |
| Mauritius | 1994           | FemaleLactAge45to49 | 17         |
| Mauritius | 1994           | FemalePregAge15to19 | 1712       |
| Mauritius | 1994           | FemalePregAge20to24 | 5839       |



Dietary calcium and zinc deficiency risks are decreasing but remain prevalent

| Country   | Reference year | Age/gender group    | Population |
|-----------|----------------|---------------------|------------|
| Mauritius | 1994           | FemalePregAge25to29 | 5001       |
| Mauritius | 1994           | FemalePregAge30to34 | 2817       |
| Mauritius | 1994           | FemalePregAge35to39 | 1095       |
| Mauritius | 1994           | FemalePregAge40to44 | 252        |
| Mauritius | 1994           | FemalePregAge45to49 | 12         |
| Mauritius | 1994           | MaleAge0to4         | 55522      |
| Mauritius | 1994           | MaleAge10to14       | 52186      |
| Mauritius | 1994           | MaleAge15to19       | 53437      |
| Mauritius | 1994           | MaleAge20to24       | 56215      |
| Mauritius | 1994           | MaleAge25to29       | 56245      |
| Mauritius | 1994           | MaleAge30to34       | 48988      |
| Mauritius | 1994           | MaleAge35to39       | 40653      |
| Mauritius | 1994           | MaleAge40to44       | 36041      |
| Mauritius | 1994           | MaleAge45to49       | 30495      |
| Mauritius | 1994           | MaleAge50to54       | 22226      |
| Mauritius | 1994           | MaleAge55to59       | 17270      |
| Mauritius | 1994           | MaleAge5to9         | 49572      |
| Mauritius | 1994           | MaleAge60to64       | 13790      |
| Mauritius | 1994           | MaleAge65to69       | 10022      |
| Mauritius | 1994           | MaleAge70to74       | 7015       |
| Mauritius | 1994           | MaleAge75to79       | 3592       |
| Mauritius | 1994           | MaleAge80to84       | 1707       |
| Mauritius | 1994           | MaleAge85to89       | 626        |
| Mauritius | 1994           | MaleAge90to94       | 63         |
| Mauritius | 1994           | MaleAge95to99       | 13         |
| Mauritius | 1994           | MaleAgeAbov e100    | 1          |
| Mauritius | 1995           | FemaleAge0to4       | 54577      |
| Mauritius | 1995           | FemaleAge10to14     | 50005      |
| Mauritius | 1995           | FemaleAge15to19     | 47976      |
| Mauritius | 1995           | FemaleAge20to24     | 40815      |
| Mauritius | 1995           | FemaleAge25to29     | 42424      |
| Mauritius | 1995           | FemaleAge30to34     | 39611      |
| Mauritius | 1995           | FemaleAge35to39     | 38457      |
| Mauritius | 1995           | FemaleAge40to44     | 36147      |
| Mauritius | 1995           | FemaleAge45to49     | 31655      |
| Mauritius | 1995           | FemaleAge50to54     | 25509      |
| Mauritius | 1995           | FemaleAge55to59     | 20378      |
| Mauritius | 1995           | FemaleAge5to9       | 48114      |
| Mauritius | 1995           | FemaleAge60to64     | 16416      |
| Mauritius | 1995           | FemaleAge65to69     | 12574      |
| Mauritius | 1995           | FemaleAge70to74     | 10034      |
| Mauritius | 1995           | FemaleAge75to79     | 6537       |
| Mauritius | 1995           | FemaleAge80to84     | 3525       |
| Mauritius | 1995           | FemaleAge85to89     | 1625       |
| Mauritius | 1995           | FemaleAge90to94     | 495        |
| Mauritius | 1995           | FemaleAge95to99     | 107        |
| Mauritius | 1995           | FemaleAgeAbov e100  | 11         |
| Mauritius | 1995           | FemaleLactAge15to19 | 2283       |
| Mauritius | 1995           | FemaleLactAge20to24 | 7785       |
| Mauritius | 1995           | FemaleLactAge25to29 | 6667       |
| Mauritius | 1995           | FemaleLactAge30to34 | 3756       |
| Mauritius | 1995           | FemaleLactAge35to39 | 1460       |
| Mauritius | 1995           | FemaleLactAge40to44 | 336        |
| Mauritius | 1995           | FemaleLactAge45to49 | 17         |
| Mauritius | 1995           | FemalePregAge15to19 | 1712       |
| Mauritius | 1995           | FemalePregAge20to24 | 5839       |
| Mauritius | 1995           | FemalePregAge25to29 | 5001       |
| Mauritius | 1995           | FemalePregAge30to34 | 2817       |
| Mauritius | 1995           | FemalePregAge35to39 | 1095       |
| Mauritius | 1995           | FemalePregAge40to44 | 252        |
| Mauritius | 1995           | FemalePregAge45to49 | 12         |
| Mauritius | 1995           | MaleAge0to4         | 56434      |
| Mauritius | 1995           | MaleAge10to14       | 51780      |
| Mauritius | 1995           | MaleAge15to19       | 52958      |
| Mauritius | 1995           | MaleAge20to24       | 55567      |
| Mauritius | 1995           | MaleAge25to29       | 56731      |
| Mauritius | 1995           | MaleAge30to34       | 50560      |
| Mauritius | 1995           | MaleAge35to39       | 41808      |
| Mauritius | 1995           | MaleAge40to44       | 36711      |
| Mauritius | 1995           | MaleAge45to49       | 31729      |
| Mauritius | 1995           | MaleAge50to54       | 23347      |
| Mauritius | 1995           | MaleAge55to59       | 17772      |
| Mauritius | 1995           | MaleAge5to9         | 49294      |
| Mauritius | 1995           | MaleAge60to64       | 14163      |
| Mauritius | 1995           | MaleAge65to69       | 10243      |
| Mauritius | 1995           | MaleAge70to74       | 7250       |
| Mauritius | 1995           | MaleAge75to79       | 3794       |
| Mauritius | 1995           | MaleAge80to84       | 1722       |
| Mauritius | 1995           | MaleAge85to89       | 683        |
| Mauritius | 1995           | MaleAge90to94       | 95         |
| Mauritius | 1995           | MaleAge95to99       | 10         |
| Mauritius | 1995           | MaleAgeAbov e100    | 1          |
| Mauritius | 1996           | FemaleAge0to4       | 55927      |
| Mauritius | 1996           | FemaleAge10to14     | 49371      |
| Mauritius | 1996           | FemaleAge15to19     | 49042      |
| Mauritius | 1996           | FemaleAge20to24     | 40483      |
| Mauritius | 1996           | FemaleAge25to29     | 42651      |
| Mauritius | 1996           | FemaleAge30to34     | 41902      |

Dietary calcium and zinc deficiency risks are decreasing but remain prevalent

| Country   | Reference year | Age/gender group    | Population |
|-----------|----------------|---------------------|------------|
| Mauritius | 1996           | FemaleAge35to39     | 39822      |
| Mauritius | 1996           | FemaleAge40to44     | 37495      |
| Mauritius | 1996           | FemaleAge45to49     | 32375      |
| Mauritius | 1996           | FemaleAge50to54     | 25809      |
| Mauritius | 1996           | FemaleAge55to59     | 20689      |
| Mauritius | 1996           | FemaleAge5to9       | 48520      |
| Mauritius | 1996           | FemaleAge60to64     | 16651      |
| Mauritius | 1996           | FemaleAge65to69     | 13091      |
| Mauritius | 1996           | FemaleAge70to74     | 10385      |
| Mauritius | 1996           | FemaleAge75to79     | 6850       |
| Mauritius | 1996           | FemaleAge80to84     | 3654       |
| Mauritius | 1996           | FemaleAge85to89     | 1683       |
| Mauritius | 1996           | FemaleAge90to94     | 557        |
| Mauritius | 1996           | FemaleAge95to99     | 114        |
| Mauritius | 1996           | FemaleAgeAbov e100  | 12         |
| Mauritius | 1996           | FemaleLactAge15to19 | 1858       |
| Mauritius | 1996           | FemaleLactAge20to24 | 7040       |
| Mauritius | 1996           | FemaleLactAge25to29 | 6211       |
| Mauritius | 1996           | FemaleLactAge30to34 | 3627       |
| Mauritius | 1996           | FemaleLactAge35to39 | 1599       |
| Mauritius | 1996           | FemaleLactAge40to44 | 337        |
| Mauritius | 1996           | FemaleLactAge45to49 | 26         |
| Mauritius | 1996           | FemalePregAge15to19 | 1393       |
| Mauritius | 1996           | FemalePregAge20to24 | 5280       |
| Mauritius | 1996           | FemalePregAge25to29 | 4658       |
| Mauritius | 1996           | FemalePregAge30to34 | 2720       |
| Mauritius | 1996           | FemalePregAge35to39 | 1199       |
| Mauritius | 1996           | FemalePregAge40to44 | 253        |
| Mauritius | 1996           | FemalePregAge45to49 | 20         |
| Mauritius | 1996           | MaleAge0to4         | 58009      |
| Mauritius | 1996           | MaleAge10to14       | 51039      |
| Mauritius | 1996           | MaleAge15to19       | 53104      |
| Mauritius | 1996           | MaleAge20to24       | 53490      |
| Mauritius | 1996           | MaleAge25to29       | 55334      |
| Mauritius | 1996           | MaleAge30to34       | 52028      |
| Mauritius | 1996           | MaleAge35to39       | 44022      |
| Mauritius | 1996           | MaleAge40to44       | 38177      |
| Mauritius | 1996           | MaleAge45to49       | 32364      |
| Mauritius | 1996           | MaleAge50to54       | 23996      |
| Mauritius | 1996           | MaleAge55to59       | 18098      |
| Mauritius | 1996           | MaleAge5to9         | 49632      |
| Mauritius | 1996           | MaleAge60to64       | 14350      |
| Mauritius | 1996           | MaleAge65to69       | 10754      |
| Mauritius | 1996           | MaleAge70to74       | 7646       |
| Mauritius | 1996           | MaleAge75to79       | 4157       |
| Mauritius | 1996           | MaleAge80to84       | 1811       |
| Mauritius | 1996           | MaleAge85to89       | 723        |
| Mauritius | 1996           | MaleAge90to94       | 141        |
| Mauritius | 1996           | MaleAge95to99       | 11         |
| Mauritius | 1996           | MaleAgeAbov e100    | 1          |
| Mauritius | 1997           | FemaleAge0to4       | 55111      |
| Mauritius | 1997           | FemaleAge10to14     | 48737      |
| Mauritius | 1997           | FemaleAge15to19     | 49362      |
| Mauritius | 1997           | FemaleAge20to24     | 39940      |
| Mauritius | 1997           | FemaleAge25to29     | 41282      |
| Mauritius | 1997           | FemaleAge30to34     | 43636      |
| Mauritius | 1997           | FemaleAge35to39     | 41717      |
| Mauritius | 1997           | FemaleAge40to44     | 39039      |
| Mauritius | 1997           | FemaleAge45to49     | 33526      |
| Mauritius | 1997           | FemaleAge50to54     | 26314      |
| Mauritius | 1997           | FemaleAge55to59     | 20932      |
| Mauritius | 1997           | FemaleAge5to9       | 49625      |
| Mauritius | 1997           | FemaleAge60to64     | 16916      |
| Mauritius | 1997           | FemaleAge65to69     | 13555      |
| Mauritius | 1997           | FemaleAge70to74     | 10794      |
| Mauritius | 1997           | FemaleAge75to79     | 7268       |
| Mauritius | 1997           | FemaleAge80to84     | 3810       |
| Mauritius | 1997           | FemaleAge85to89     | 1707       |
| Mauritius | 1997           | FemaleAge90to94     | 604        |
| Mauritius | 1997           | FemaleAge95to99     | 122        |
| Mauritius | 1997           | FemaleAgeAbov e100  | 12         |
| Mauritius | 1997           | FemaleLactAge15to19 | 1858       |
| Mauritius | 1997           | FemaleLactAge20to24 | 7040       |
| Mauritius | 1997           | FemaleLactAge25to29 | 6211       |
| Mauritius | 1997           | FemaleLactAge30to34 | 3627       |
| Mauritius | 1997           | FemaleLactAge35to39 | 1599       |
| Mauritius | 1997           | FemaleLactAge40to44 | 337        |
| Mauritius | 1997           | FemaleLactAge45to49 | 26         |
| Mauritius | 1997           | FemalePregAge15to19 | 1393       |
| Mauritius | 1997           | FemalePregAge20to24 | 5280       |
| Mauritius | 1997           | FemalePregAge25to29 | 4658       |
| Mauritius | 1997           | FemalePregAge30to34 | 2720       |
| Mauritius | 1997           | FemalePregAge35to39 | 1199       |
| Mauritius | 1997           | FemalePregAge40to44 | 253        |
| Mauritius | 1997           | FemalePregAge45to49 | 20         |
| Mauritius | 1997           | MaleAge0to4         | 57169      |
| Mauritius | 1997           | MaleAge10to14       | 50246      |
| Mauritius | 1997           | MaleAge15to19       | 53402      |

Dietary calcium and zinc deficiency risks are decreasing but remain prevalent

| Country   | Reference year | Age/gender group    | Population |
|-----------|----------------|---------------------|------------|
| Mauritius | 1997           | MaleAge20to24       | 52526      |
| Mauritius | 1997           | MaleAge25to29       | 53286      |
| Mauritius | 1997           | MaleAge30to34       | 52865      |
| Mauritius | 1997           | MaleAge35to39       | 46422      |
| Mauritius | 1997           | MaleAge40to44       | 39925      |
| Mauritius | 1997           | MaleAge45to49       | 33394      |
| Mauritius | 1997           | MaleAge50to54       | 24806      |
| Mauritius | 1997           | MaleAge55to59       | 18399      |
| Mauritius | 1997           | MaleAge5to9         | 50746      |
| Mauritius | 1997           | MaleAge60to64       | 14546      |
| Mauritius | 1997           | MaleAge65to69       | 11214      |
| Mauritius | 1997           | MaleAge70to74       | 8074       |
| Mauritius | 1997           | MaleAge75to79       | 4598       |
| Mauritius | 1997           | MaleAge80to84       | 1926       |
| Mauritius | 1997           | MaleAge85to89       | 728        |
| Mauritius | 1997           | MaleAge90to94       | 189        |
| Mauritius | 1997           | MaleAge95to99       | 9          |
| Mauritius | 1997           | MaleAgeAbov e100    | 1          |
| Mauritius | 1998           | FemaleAge0to4       | 52815      |
| Mauritius | 1998           | FemaleAge10to14     | 48250      |
| Mauritius | 1998           | FemaleAge15to19     | 49141      |
| Mauritius | 1998           | FemaleAge20to24     | 40681      |
| Mauritius | 1998           | FemaleAge25to29     | 39363      |
| Mauritius | 1998           | FemaleAge30to34     | 44586      |
| Mauritius | 1998           | FemaleAge35to39     | 43858      |
| Mauritius | 1998           | FemaleAge40to44     | 40650      |
| Mauritius | 1998           | FemaleAge45to49     | 35083      |
| Mauritius | 1998           | FemaleAge50to54     | 27056      |
| Mauritius | 1998           | FemaleAge55to59     | 21049      |
| Mauritius | 1998           | FemaleAge5to9       | 51265      |
| Mauritius | 1998           | FemaleAge60to64     | 17258      |
| Mauritius | 1998           | FemaleAge65to69     | 13856      |
| Mauritius | 1998           | FemaleAge70to74     | 11274      |
| Mauritius | 1998           | FemaleAge75to79     | 7773       |
| Mauritius | 1998           | FemaleAge80to84     | 4000       |
| Mauritius | 1998           | FemaleAge85to89     | 1703       |
| Mauritius | 1998           | FemaleAge90to94     | 625        |
| Mauritius | 1998           | FemaleAge95to99     | 132        |
| Mauritius | 1998           | FemaleAgeAbov e100  | 13         |
| Mauritius | 1998           | FemaleLactAge15to19 | 1858       |
| Mauritius | 1998           | FemaleLactAge20to24 | 7040       |
| Mauritius | 1998           | FemaleLactAge25to29 | 6211       |
| Mauritius | 1998           | FemaleLactAge30to34 | 3627       |
| Mauritius | 1998           | FemaleLactAge35to39 | 1599       |
| Mauritius | 1998           | FemaleLactAge40to44 | 337        |
| Mauritius | 1998           | FemaleLactAge45to49 | 26         |
| Mauritius | 1998           | FemalePregAge15to19 | 1393       |
| Mauritius | 1998           | FemalePregAge20to24 | 5280       |
| Mauritius | 1998           | FemalePregAge25to29 | 4658       |
| Mauritius | 1998           | FemalePregAge30to34 | 2720       |
| Mauritius | 1998           | FemalePregAge35to39 | 1199       |
| Mauritius | 1998           | FemalePregAge40to44 | 253        |
| Mauritius | 1998           | FemalePregAge45to49 | 20         |
| Mauritius | 1998           | MaleAge0to4         | 54660      |
| Mauritius | 1998           | MaleAge10to14       | 49575      |
| Mauritius | 1998           | MaleAge15to19       | 53304      |
| Mauritius | 1998           | MaleAge20to24       | 52858      |
| Mauritius | 1998           | MaleAge25to29       | 50815      |
| Mauritius | 1998           | MaleAge30to34       | 52853      |
| Mauritius | 1998           | MaleAge35to39       | 48759      |
| Mauritius | 1998           | MaleAge40to44       | 41823      |
| Mauritius | 1998           | MaleAge45to49       | 34950      |
| Mauritius | 1998           | MaleAge50to54       | 25711      |
| Mauritius | 1998           | MaleAge55to59       | 18648      |
| Mauritius | 1998           | MaleAge5to9         | 52455      |
| Mauritius | 1998           | MaleAge60to64       | 14806      |
| Mauritius | 1998           | MaleAge65to69       | 11535      |
| Mauritius | 1998           | MaleAge70to74       | 8554       |
| Mauritius | 1998           | MaleAge75to79       | 5084       |
| Mauritius | 1998           | MaleAge80to84       | 2083       |
| Mauritius | 1998           | MaleAge85to89       | 711        |
| Mauritius | 1998           | MaleAge90to94       | 220        |
| Mauritius | 1998           | MaleAge95to99       | 13         |
| Mauritius | 1998           | MaleAgeAbov e100    | 1          |
| Mauritius | 1999           | FemaleAge0to4       | 50323      |
| Mauritius | 1999           | FemaleAge10to14     | 48067      |
| Mauritius | 1999           | FemaleAge15to19     | 48295      |
| Mauritius | 1999           | FemaleAge20to24     | 42156      |
| Mauritius | 1999           | FemaleAge25to29     | 37444      |
| Mauritius | 1999           | FemaleAge30to34     | 44431      |
| Mauritius | 1999           | FemaleAge35to39     | 45936      |
| Mauritius | 1999           | FemaleAge40to44     | 42293      |
| Mauritius | 1999           | FemaleAge45to49     | 36894      |
| Mauritius | 1999           | FemaleAge50to54     | 28011      |
| Mauritius | 1999           | FemaleAge55to59     | 21095      |
| Mauritius | 1999           | FemaleAge5to9       | 52903      |
| Mauritius | 1999           | FemaleAge60to64     | 17596      |
| Mauritius | 1999           | FemaleAge65to69     | 13979      |

Dietary calcium and zinc deficiency risks are decreasing but remain prevalent

| Country   | Reference year | Age/gender group    | Population |
|-----------|----------------|---------------------|------------|
| Mauritius | 1999           | FemaleAge70to74     | 11779      |
| Mauritius | 1999           | FemaleAge75to79     | 8313       |
| Mauritius | 1999           | FemaleAge80to84     | 4240       |
| Mauritius | 1999           | FemaleAge85to89     | 1694       |
| Mauritius | 1999           | FemaleAge90to94     | 606        |
| Mauritius | 1999           | FemaleAge95to99     | 135        |
| Mauritius | 1999           | FemaleAgeAbove100   | 14         |
| Mauritius | 1999           | FemaleLactAge15to19 | 1858       |
| Mauritius | 1999           | FemaleLactAge20to24 | 7040       |
| Mauritius | 1999           | FemaleLactAge25to29 | 6211       |
| Mauritius | 1999           | FemaleLactAge30to34 | 3627       |
| Mauritius | 1999           | FemaleLactAge35to39 | 1599       |
| Mauritius | 1999           | FemaleLactAge40to44 | 337        |
| Mauritius | 1999           | FemaleLactAge45to49 | 26         |
| Mauritius | 1999           | FemalePregAge15to19 | 1393       |
| Mauritius | 1999           | FemalePregAge20to24 | 5280       |
| Mauritius | 1999           | FemalePregAge25to29 | 4658       |
| Mauritius | 1999           | FemalePregAge30to34 | 2720       |
| Mauritius | 1999           | FemalePregAge35to39 | 1199       |
| Mauritius | 1999           | FemalePregAge40to44 | 253        |
| Mauritius | 1999           | FemalePregAge45to49 | 20         |
| Mauritius | 1999           | MaleAge0to4         | 51918      |
| Mauritius | 1999           | MaleAge10to14       | 49239      |
| Mauritius | 1999           | MaleAge15to19       | 52644      |
| Mauritius | 1999           | MaleAge20to24       | 53990      |
| Mauritius | 1999           | MaleAge25to29       | 48430      |
| Mauritius | 1999           | MaleAge30to34       | 51852      |
| Mauritius | 1999           | MaleAge35to39       | 50606      |
| Mauritius | 1999           | MaleAge40to44       | 43796      |
| Mauritius | 1999           | MaleAge45to49       | 36942      |
| Mauritius | 1999           | MaleAge50to54       | 26684      |
| Mauritius | 1999           | MaleAge55to59       | 18882      |
| Mauritius | 1999           | MaleAge5to9         | 54178      |
| Mauritius | 1999           | MaleAge60to64       | 15089      |
| Mauritius | 1999           | MaleAge65to69       | 11693      |
| Mauritius | 1999           | MaleAge70to74       | 9056       |
| Mauritius | 1999           | MaleAge75to79       | 5569       |
| Mauritius | 1999           | MaleAge80to84       | 2302       |
| Mauritius | 1999           | MaleAge85to89       | 688        |
| Mauritius | 1999           | MaleAge90to94       | 223        |
| Mauritius | 1999           | MaleAge95to99       | 20         |
| Mauritius | 1999           | MaleAgeAbove100     | 1          |
| Mauritius | 2000           | FemaleAge0to4       | 48566      |
| Mauritius | 2000           | FemaleAge10to14     | 48308      |
| Mauritius | 2000           | FemaleAge15to19     | 47172      |
| Mauritius | 2000           | FemaleAge20to24     | 43476      |
| Mauritius | 2000           | FemaleAge25to29     | 36185      |
| Mauritius | 2000           | FemaleAge30to34     | 43207      |
| Mauritius | 2000           | FemaleAge35to39     | 47501      |
| Mauritius | 2000           | FemaleAge40to44     | 44025      |
| Mauritius | 2000           | FemaleAge45to49     | 38772      |
| Mauritius | 2000           | FemaleAge50to54     | 29192      |
| Mauritius | 2000           | FemaleAge55to59     | 21208      |
| Mauritius | 2000           | FemaleAge5to9       | 53821      |
| Mauritius | 2000           | FemaleAge60to64     | 17794      |
| Mauritius | 2000           | FemaleAge65to69     | 14012      |
| Mauritius | 2000           | FemaleAge70to74     | 12205      |
| Mauritius | 2000           | FemaleAge75to79     | 8864       |
| Mauritius | 2000           | FemaleAge80to84     | 4549       |
| Mauritius | 2000           | FemaleAge85to89     | 1699       |
| Mauritius | 2000           | FemaleAge90to94     | 545        |
| Mauritius | 2000           | FemaleAge95to99     | 117        |
| Mauritius | 2000           | FemaleAgeAbove100   | 15         |
| Mauritius | 2000           | FemaleLactAge15to19 | 1858       |
| Mauritius | 2000           | FemaleLactAge20to24 | 7040       |
| Mauritius | 2000           | FemaleLactAge25to29 | 6211       |
| Mauritius | 2000           | FemaleLactAge30to34 | 3627       |
| Mauritius | 2000           | FemaleLactAge35to39 | 1599       |
| Mauritius | 2000           | FemaleLactAge40to44 | 337        |
| Mauritius | 2000           | FemaleLactAge45to49 | 26         |
| Mauritius | 2000           | FemalePregAge15to19 | 1393       |
| Mauritius | 2000           | FemalePregAge20to24 | 5280       |
| Mauritius | 2000           | FemalePregAge25to29 | 4658       |
| Mauritius | 2000           | FemalePregAge30to34 | 2720       |
| Mauritius | 2000           | FemalePregAge35to39 | 1199       |
| Mauritius | 2000           | FemalePregAge40to44 | 253        |
| Mauritius | 2000           | FemalePregAge45to49 | 20         |
| Mauritius | 2000           | MaleAge0to4         | 50017      |
| Mauritius | 2000           | MaleAge10to14       | 49420      |
| Mauritius | 2000           | MaleAge15to19       | 51676      |
| Mauritius | 2000           | MaleAge20to24       | 55119      |
| Mauritius | 2000           | MaleAge25to29       | 46752      |
| Mauritius | 2000           | MaleAge30to34       | 49955      |
| Mauritius | 2000           | MaleAge35to39       | 51595      |
| Mauritius | 2000           | MaleAge40to44       | 45804      |
| Mauritius | 2000           | MaleAge45to49       | 39145      |
| Mauritius | 2000           | MaleAge50to54       | 27836      |
| Mauritius | 2000           | MaleAge55to59       | 19177      |

Dietary calcium and zinc deficiency risks are decreasing but remain prevalent

| Country   | Reference year | Age/gender group    | Population |
|-----------|----------------|---------------------|------------|
| Mauritius | 2000           | MaleAge5to9         | 55117      |
| Mauritius | 2000           | MaleAge60to64       | 15298      |
| Mauritius | 2000           | MaleAge65to69       | 11759      |
| Mauritius | 2000           | MaleAge70to74       | 9493       |
| Mauritius | 2000           | MaleAge75to79       | 6047       |
| Mauritius | 2000           | MaleAge80to84       | 2584       |
| Mauritius | 2000           | MaleAge85to89       | 684        |
| Mauritius | 2000           | MaleAge90to94       | 191        |
| Mauritius | 2000           | MaleAge95to99       | 19         |
| Mauritius | 2000           | MaleAgeAbov e100    | 1          |
| Mexico    | 1992           | FemaleAge0to4       | 5757255    |
| Mexico    | 1992           | FemaleAge10to14     | 5294039    |
| Mexico    | 1992           | FemaleAge15to19     | 4586914    |
| Mexico    | 1992           | FemaleAge20to24     | 3265145    |
| Mexico    | 1992           | FemaleAge25to29     | 2673457    |
| Mexico    | 1992           | FemaleAge30to34     | 2451869    |
| Mexico    | 1992           | FemaleAge35to39     | 2345531    |
| Mexico    | 1992           | FemaleAge40to44     | 1989380    |
| Mexico    | 1992           | FemaleAge45to49     | 1657170    |
| Mexico    | 1992           | FemaleAge50to54     | 1365453    |
| Mexico    | 1992           | FemaleAge55to59     | 1159039    |
| Mexico    | 1992           | FemaleAge5to9       | 5451428    |
| Mexico    | 1992           | FemaleAge60to64     | 1012068    |
| Mexico    | 1992           | FemaleAge65to69     | 818437     |
| Mexico    | 1992           | FemaleAge70to74     | 557723     |
| Mexico    | 1992           | FemaleAge75to79     | 386067     |
| Mexico    | 1992           | FemaleAge80to84     | 256322     |
| Mexico    | 1992           | FemaleAge85to89     | 129186     |
| Mexico    | 1992           | FemaleAge90to94     | 51679      |
| Mexico    | 1992           | FemaleAge95to99     | 12547      |
| Mexico    | 1992           | FemaleAgeAbov e100  | 2307       |
| Mexico    | 1992           | FemaleLactAge15to19 | 401266     |
| Mexico    | 1992           | FemaleLactAge20to24 | 821067     |
| Mexico    | 1992           | FemaleLactAge25to29 | 637574     |
| Mexico    | 1992           | FemaleLactAge30to34 | 377568     |
| Mexico    | 1992           | FemaleLactAge35to39 | 194508     |
| Mexico    | 1992           | FemaleLactAge40to44 | 52670      |
| Mexico    | 1992           | FemaleLactAge45to49 | 8158       |
| Mexico    | 1992           | FemalePregAge15to19 | 300950     |
| Mexico    | 1992           | FemalePregAge20to24 | 615800     |
| Mexico    | 1992           | FemalePregAge25to29 | 478180     |
| Mexico    | 1992           | FemalePregAge30to34 | 283176     |
| Mexico    | 1992           | FemalePregAge35to39 | 145881     |
| Mexico    | 1992           | FemalePregAge40to44 | 39503      |
| Mexico    | 1992           | FemalePregAge45to49 | 6119       |
| Mexico    | 1992           | MaleAge0to4         | 5919062    |
| Mexico    | 1992           | MaleAge10to14       | 5449320    |
| Mexico    | 1992           | MaleAge15to19       | 5256962    |
| Mexico    | 1992           | MaleAge20to24       | 4435155    |
| Mexico    | 1992           | MaleAge25to29       | 3482881    |
| Mexico    | 1992           | MaleAge30to34       | 2914743    |
| Mexico    | 1992           | MaleAge35to39       | 2533858    |
| Mexico    | 1992           | MaleAge40to44       | 2008298    |
| Mexico    | 1992           | MaleAge45to49       | 1616892    |
| Mexico    | 1992           | MaleAge50to54       | 1316417    |
| Mexico    | 1992           | MaleAge55to59       | 1060747    |
| Mexico    | 1992           | MaleAge5to9         | 5569113    |
| Mexico    | 1992           | MaleAge60to64       | 867243     |
| Mexico    | 1992           | MaleAge65to69       | 673592     |
| Mexico    | 1992           | MaleAge70to74       | 449734     |
| Mexico    | 1992           | MaleAge75to79       | 297345     |
| Mexico    | 1992           | MaleAge80to84       | 185551     |
| Mexico    | 1992           | MaleAge85to89       | 90701      |
| Mexico    | 1992           | MaleAge90to94       | 35305      |
| Mexico    | 1992           | MaleAge95to99       | 8129       |
| Mexico    | 1992           | MaleAgeAbov e100    | 1432       |
| Mexico    | 1993           | FemaleAge0to4       | 5850739    |
| Mexico    | 1993           | FemaleAge10to14     | 5298315    |
| Mexico    | 1993           | FemaleAge15to19     | 4558908    |
| Mexico    | 1993           | FemaleAge20to24     | 3482837    |
| Mexico    | 1993           | FemaleAge25to29     | 2866122    |
| Mexico    | 1993           | FemaleAge30to34     | 2588743    |
| Mexico    | 1993           | FemaleAge35to39     | 2434592    |
| Mexico    | 1993           | FemaleAge40to44     | 2174052    |
| Mexico    | 1993           | FemaleAge45to49     | 1706877    |
| Mexico    | 1993           | FemaleAge50to54     | 1457509    |
| Mexico    | 1993           | FemaleAge55to59     | 1159395    |
| Mexico    | 1993           | FemaleAge5to9       | 5530574    |
| Mexico    | 1993           | FemaleAge60to64     | 1031190    |
| Mexico    | 1993           | FemaleAge65to69     | 833705     |
| Mexico    | 1993           | FemaleAge70to74     | 597192     |
| Mexico    | 1993           | FemaleAge75to79     | 378014     |
| Mexico    | 1993           | FemaleAge80to84     | 270589     |
| Mexico    | 1993           | FemaleAge85to89     | 132210     |
| Mexico    | 1993           | FemaleAge90to94     | 54742      |
| Mexico    | 1993           | FemaleAge95to99     | 13809      |
| Mexico    | 1993           | FemaleAgeAbov e100  | 2470       |
| Mexico    | 1993           | FemaleLactAge15to19 | 401266     |

Dietary calcium and zinc deficiency risks are decreasing but remain prevalent

| Country | Reference year | Age/gender group    | Population |
|---------|----------------|---------------------|------------|
| Mexico  | 1993           | FemaleLactAge20to24 | 821067     |
| Mexico  | 1993           | FemaleLactAge25to29 | 637574     |
| Mexico  | 1993           | FemaleLactAge30to34 | 377568     |
| Mexico  | 1993           | FemaleLactAge35to39 | 194508     |
| Mexico  | 1993           | FemaleLactAge40to44 | 52670      |
| Mexico  | 1993           | FemaleLactAge45to49 | 8158       |
| Mexico  | 1993           | FemalePregAge15to19 | 300950     |
| Mexico  | 1993           | FemalePregAge20to24 | 615800     |
| Mexico  | 1993           | FemalePregAge25to29 | 478180     |
| Mexico  | 1993           | FemalePregAge30to34 | 283176     |
| Mexico  | 1993           | FemalePregAge35to39 | 145881     |
| Mexico  | 1993           | FemalePregAge40to44 | 39503      |
| Mexico  | 1993           | FemalePregAge45to49 | 6119       |
| Mexico  | 1993           | MaleAge0to4         | 5967871    |
| Mexico  | 1993           | MaleAge10to14       | 5441626    |
| Mexico  | 1993           | MaleAge15to19       | 5262382    |
| Mexico  | 1993           | MaleAge20to24       | 4589492    |
| Mexico  | 1993           | MaleAge25to29       | 3577777    |
| Mexico  | 1993           | MaleAge30to34       | 2964886    |
| Mexico  | 1993           | MaleAge35to39       | 2579985    |
| Mexico  | 1993           | MaleAge40to44       | 2110086    |
| Mexico  | 1993           | MaleAge45to49       | 1643580    |
| Mexico  | 1993           | MaleAge50to54       | 1369317    |
| Mexico  | 1993           | MaleAge55to59       | 1080887    |
| Mexico  | 1993           | MaleAge5to9         | 5592159    |
| Mexico  | 1993           | MaleAge60to64       | 888756     |
| Mexico  | 1993           | MaleAge65to69       | 691236     |
| Mexico  | 1993           | MaleAge70to74       | 478420     |
| Mexico  | 1993           | MaleAge75to79       | 297722     |
| Mexico  | 1993           | MaleAge80to84       | 193600     |
| Mexico  | 1993           | MaleAge85to89       | 91665      |
| Mexico  | 1993           | MaleAge90to94       | 36988      |
| Mexico  | 1993           | MaleAge95to99       | 8879       |
| Mexico  | 1993           | MaleAgeAbov e100    | 1508       |
| Mexico  | 1994           | FemaleAge0to4       | 5935613    |
| Mexico  | 1994           | FemaleAge10to14     | 5323118    |
| Mexico  | 1994           | FemaleAge15to19     | 4501308    |
| Mexico  | 1994           | FemaleAge20to24     | 3655003    |
| Mexico  | 1994           | FemaleAge25to29     | 3061648    |
| Mexico  | 1994           | FemaleAge30to34     | 2743706    |
| Mexico  | 1994           | FemaleAge35to39     | 2510947    |
| Mexico  | 1994           | FemaleAge40to44     | 2356737    |
| Mexico  | 1994           | FemaleAge45to49     | 1770173    |
| Mexico  | 1994           | FemaleAge50to54     | 1553464    |
| Mexico  | 1994           | FemaleAge55to59     | 1173576    |
| Mexico  | 1994           | FemaleAge5to9       | 5622013    |
| Mexico  | 1994           | FemaleAge60to64     | 1047208    |
| Mexico  | 1994           | FemaleAge65to69     | 844614     |
| Mexico  | 1994           | FemaleAge70to74     | 638109     |
| Mexico  | 1994           | FemaleAge75to79     | 373697     |
| Mexico  | 1994           | FemaleAge80to84     | 281685     |
| Mexico  | 1994           | FemaleAge85to89     | 135558     |
| Mexico  | 1994           | FemaleAge90to94     | 56209      |
| Mexico  | 1994           | FemaleAge95to99     | 14767      |
| Mexico  | 1994           | FemaleAgeAbov e100  | 2640       |
| Mexico  | 1994           | FemaleLactAge15to19 | 401266     |
| Mexico  | 1994           | FemaleLactAge20to24 | 821067     |
| Mexico  | 1994           | FemaleLactAge25to29 | 637574     |
| Mexico  | 1994           | FemaleLactAge30to34 | 377568     |
| Mexico  | 1994           | FemaleLactAge35to39 | 194508     |
| Mexico  | 1994           | FemaleLactAge40to44 | 52670      |
| Mexico  | 1994           | FemaleLactAge45to49 | 8158       |
| Mexico  | 1994           | FemalePregAge15to19 | 300950     |
| Mexico  | 1994           | FemalePregAge20to24 | 615800     |
| Mexico  | 1994           | FemalePregAge25to29 | 478180     |
| Mexico  | 1994           | FemalePregAge30to34 | 283176     |
| Mexico  | 1994           | FemalePregAge35to39 | 145881     |
| Mexico  | 1994           | FemalePregAge40to44 | 39503      |
| Mexico  | 1994           | FemalePregAge45to49 | 6119       |
| Mexico  | 1994           | MaleAge0to4         | 6014551    |
| Mexico  | 1994           | MaleAge10to14       | 5440639    |
| Mexico  | 1994           | MaleAge15to19       | 5267435    |
| Mexico  | 1994           | MaleAge20to24       | 4723139    |
| Mexico  | 1994           | MaleAge25to29       | 3682494    |
| Mexico  | 1994           | MaleAge30to34       | 3020752    |
| Mexico  | 1994           | MaleAge35to39       | 2622982    |
| Mexico  | 1994           | MaleAge40to44       | 2205937    |
| Mexico  | 1994           | MaleAge45to49       | 1681801    |
| Mexico  | 1994           | MaleAge50to54       | 1419434    |
| Mexico  | 1994           | MaleAge55to59       | 1106530    |
| Mexico  | 1994           | MaleAge5to9         | 5621811    |
| Mexico  | 1994           | MaleAge60to64       | 910603     |
| Mexico  | 1994           | MaleAge65to69       | 709364     |
| Mexico  | 1994           | MaleAge70to74       | 506071     |
| Mexico  | 1994           | MaleAge75to79       | 303001     |
| Mexico  | 1994           | MaleAge80to84       | 199960     |
| Mexico  | 1994           | MaleAge85to89       | 92650      |
| Mexico  | 1994           | MaleAge90to94       | 37266      |

Dietary calcium and zinc deficiency risks are decreasing but remain prevalent

| Country | Reference year | Age/gender group    | Population |
|---------|----------------|---------------------|------------|
| Mexico  | 1994           | MaleAge95to99       | 9360       |
| Mexico  | 1994           | MaleAgeAbov e100    | 1584       |
| Mexico  | 1995           | FemaleAge0to4       | 5996299    |
| Mexico  | 1995           | FemaleAge10to14     | 5362247    |
| Mexico  | 1995           | FemaleAge15to19     | 4443601    |
| Mexico  | 1995           | FemaleAge20to24     | 3755708    |
| Mexico  | 1995           | FemaleAge25to29     | 3256199    |
| Mexico  | 1995           | FemaleAge30to34     | 2907920    |
| Mexico  | 1995           | FemaleAge35to39     | 2593327    |
| Mexico  | 1995           | FemaleAge40to44     | 2509957    |
| Mexico  | 1995           | FemaleAge45to49     | 1864517    |
| Mexico  | 1995           | FemaleAge50to54     | 1637368    |
| Mexico  | 1995           | FemaleAge55to59     | 1210463    |
| Mexico  | 1995           | FemaleAge5to9       | 5711981    |
| Mexico  | 1995           | FemaleAge60to64     | 1057500    |
| Mexico  | 1995           | FemaleAge65to69     | 855089     |
| Mexico  | 1995           | FemaleAge70to74     | 671998     |
| Mexico  | 1995           | FemaleAge75to79     | 380206     |
| Mexico  | 1995           | FemaleAge80to84     | 285963     |
| Mexico  | 1995           | FemaleAge85to89     | 140380     |
| Mexico  | 1995           | FemaleAge90to94     | 56083      |
| Mexico  | 1995           | FemaleAge95to99     | 14731      |
| Mexico  | 1995           | FemaleAgeAbov e100  | 2816       |
| Mexico  | 1995           | FemaleLactAge15to19 | 401266     |
| Mexico  | 1995           | FemaleLactAge20to24 | 821067     |
| Mexico  | 1995           | FemaleLactAge25to29 | 637574     |
| Mexico  | 1995           | FemaleLactAge30to34 | 377568     |
| Mexico  | 1995           | FemaleLactAge35to39 | 194508     |
| Mexico  | 1995           | FemaleLactAge40to44 | 52670      |
| Mexico  | 1995           | FemaleLactAge45to49 | 8158       |
| Mexico  | 1995           | FemalePregAge15to19 | 300950     |
| Mexico  | 1995           | FemalePregAge20to24 | 615800     |
| Mexico  | 1995           | FemalePregAge25to29 | 478180     |
| Mexico  | 1995           | FemalePregAge30to34 | 283176     |
| Mexico  | 1995           | FemalePregAge35to39 | 145881     |
| Mexico  | 1995           | FemalePregAge40to44 | 39503      |
| Mexico  | 1995           | FemalePregAge45to49 | 6119       |
| Mexico  | 1995           | MaleAge0to4         | 6065819    |
| Mexico  | 1995           | MaleAge10to14       | 5449580    |
| Mexico  | 1995           | MaleAge15to19       | 5281769    |
| Mexico  | 1995           | MaleAge20to24       | 4827752    |
| Mexico  | 1995           | MaleAge25to29       | 3801498    |
| Mexico  | 1995           | MaleAge30to34       | 3084939    |
| Mexico  | 1995           | MaleAge35to39       | 2667501    |
| Mexico  | 1995           | MaleAge40to44       | 2287486    |
| Mexico  | 1995           | MaleAge45to49       | 1739252    |
| Mexico  | 1995           | MaleAge50to54       | 1463008    |
| Mexico  | 1995           | MaleAge55to59       | 1140289    |
| Mexico  | 1995           | MaleAge5to9         | 5653933    |
| Mexico  | 1995           | MaleAge60to64       | 932581     |
| Mexico  | 1995           | MaleAge65to69       | 729390     |
| Mexico  | 1995           | MaleAge70to74       | 530663     |
| Mexico  | 1995           | MaleAge75to79       | 315271     |
| Mexico  | 1995           | MaleAge80to84       | 203985     |
| Mexico  | 1995           | MaleAge85to89       | 94356      |
| Mexico  | 1995           | MaleAge90to94       | 36122      |
| Mexico  | 1995           | MaleAge95to99       | 9021       |
| Mexico  | 1995           | MaleAgeAbov e100    | 1659       |
| Mexico  | 1996           | FemaleAge0to4       | 6033271    |
| Mexico  | 1996           | FemaleAge10to14     | 5426907    |
| Mexico  | 1996           | FemaleAge15to19     | 4399618    |
| Mexico  | 1996           | FemaleAge20to24     | 3916845    |
| Mexico  | 1996           | FemaleAge25to29     | 3302879    |
| Mexico  | 1996           | FemaleAge30to34     | 3000363    |
| Mexico  | 1996           | FemaleAge35to39     | 2684963    |
| Mexico  | 1996           | FemaleAge40to44     | 2623790    |
| Mexico  | 1996           | FemaleAge45to49     | 1977567    |
| Mexico  | 1996           | FemaleAge50to54     | 1683053    |
| Mexico  | 1996           | FemaleAge55to59     | 1271079    |
| Mexico  | 1996           | FemaleAge5to9       | 5781216    |
| Mexico  | 1996           | FemaleAge60to64     | 1072842    |
| Mexico  | 1996           | FemaleAge65to69     | 878453     |
| Mexico  | 1996           | FemaleAge70to74     | 698631     |
| Mexico  | 1996           | FemaleAge75to79     | 407805     |
| Mexico  | 1996           | FemaleAge80to84     | 282645     |
| Mexico  | 1996           | FemaleAge85to89     | 150558     |
| Mexico  | 1996           | FemaleAge90to94     | 60087      |
| Mexico  | 1996           | FemaleAge95to99     | 16087      |
| Mexico  | 1996           | FemaleAgeAbov e100  | 2998       |
| Mexico  | 1996           | FemaleLactAge15to19 | 426258     |
| Mexico  | 1996           | FemaleLactAge20to24 | 748226     |
| Mexico  | 1996           | FemaleLactAge25to29 | 711298     |
| Mexico  | 1996           | FemaleLactAge30to34 | 408356     |
| Mexico  | 1996           | FemaleLactAge35to39 | 195103     |
| Mexico  | 1996           | FemaleLactAge40to44 | 38562      |
| Mexico  | 1996           | FemaleLactAge45to49 | 6971       |
| Mexico  | 1996           | FemalePregAge15to19 | 319693     |
| Mexico  | 1996           | FemalePregAge20to24 | 561170     |

Dietary calcium and zinc deficiency risks are decreasing but remain prevalent

| Country | Reference year | Age/gender group    | Population |
|---------|----------------|---------------------|------------|
| Mexico  | 1996           | FemalePregAge25to29 | 533474     |
| Mexico  | 1996           | FemalePregAge30to34 | 306267     |
| Mexico  | 1996           | FemalePregAge35to39 | 146327     |
| Mexico  | 1996           | FemalePregAge40to44 | 28922      |
| Mexico  | 1996           | FemalePregAge45to49 | 5228       |
| Mexico  | 1996           | MaleAge0to4         | 6139768    |
| Mexico  | 1996           | MaleAge10to14       | 5449138    |
| Mexico  | 1996           | MaleAge15to19       | 5266731    |
| Mexico  | 1996           | MaleAge20to24       | 4905054    |
| Mexico  | 1996           | MaleAge25to29       | 3956475    |
| Mexico  | 1996           | MaleAge30to34       | 3169860    |
| Mexico  | 1996           | MaleAge35to39       | 2716354    |
| Mexico  | 1996           | MaleAge40to44       | 2358664    |
| Mexico  | 1996           | MaleAge45to49       | 1815504    |
| Mexico  | 1996           | MaleAge50to54       | 1499540    |
| Mexico  | 1996           | MaleAge55to59       | 1180238    |
| Mexico  | 1996           | MaleAge5to9         | 5698621    |
| Mexico  | 1996           | MaleAge60to64       | 951425     |
| Mexico  | 1996           | MaleAge65to69       | 747907     |
| Mexico  | 1996           | MaleAge70to74       | 550405     |
| Mexico  | 1996           | MaleAge75to79       | 332165     |
| Mexico  | 1996           | MaleAge80to84       | 205690     |
| Mexico  | 1996           | MaleAge85to89       | 100510     |
| Mexico  | 1996           | MaleAge90to94       | 38497      |
| Mexico  | 1996           | MaleAge95to99       | 9745       |
| Mexico  | 1996           | MaleAgeAbov e100    | 1732       |
| Mexico  | 1997           | FemaleAge0to4       | 6061685    |
| Mexico  | 1997           | FemaleAge10to14     | 5489680    |
| Mexico  | 1997           | FemaleAge15to19     | 4418662    |
| Mexico  | 1997           | FemaleAge20to24     | 3887477    |
| Mexico  | 1997           | FemaleAge25to29     | 3479848    |
| Mexico  | 1997           | FemaleAge30to34     | 3141262    |
| Mexico  | 1997           | FemaleAge35to39     | 2793200    |
| Mexico  | 1997           | FemaleAge40to44     | 2677378    |
| Mexico  | 1997           | FemaleAge45to49     | 2122504    |
| Mexico  | 1997           | FemaleAge50to54     | 1704835    |
| Mexico  | 1997           | FemaleAge55to59     | 1351438    |
| Mexico  | 1997           | FemaleAge5to9       | 5834108    |
| Mexico  | 1997           | FemaleAge60to64     | 1080465    |
| Mexico  | 1997           | FemaleAge65to69     | 905855     |
| Mexico  | 1997           | FemaleAge70to74     | 716164     |
| Mexico  | 1997           | FemaleAge75to79     | 447492     |
| Mexico  | 1997           | FemaleAge80to84     | 273658     |
| Mexico  | 1997           | FemaleAge85to89     | 161352     |
| Mexico  | 1997           | FemaleAge90to94     | 62337      |
| Mexico  | 1997           | FemaleAge95to99     | 17937      |
| Mexico  | 1997           | FemaleAgeAbov e100  | 3186       |
| Mexico  | 1997           | FemaleLactAge15to19 | 426258     |
| Mexico  | 1997           | FemaleLactAge20to24 | 748226     |
| Mexico  | 1997           | FemaleLactAge25to29 | 711298     |
| Mexico  | 1997           | FemaleLactAge30to34 | 408356     |
| Mexico  | 1997           | FemaleLactAge35to39 | 195103     |
| Mexico  | 1997           | FemaleLactAge40to44 | 38562      |
| Mexico  | 1997           | FemaleLactAge45to49 | 6971       |
| Mexico  | 1997           | FemalePregAge15to19 | 319693     |
| Mexico  | 1997           | FemalePregAge20to24 | 561170     |
| Mexico  | 1997           | FemalePregAge25to29 | 533474     |
| Mexico  | 1997           | FemalePregAge30to34 | 306267     |
| Mexico  | 1997           | FemalePregAge35to39 | 146327     |
| Mexico  | 1997           | FemalePregAge40to44 | 28922      |
| Mexico  | 1997           | FemalePregAge45to49 | 5228       |
| Mexico  | 1997           | MaleAge0to4         | 6193238    |
| Mexico  | 1997           | MaleAge10to14       | 5466707    |
| Mexico  | 1997           | MaleAge15to19       | 5257649    |
| Mexico  | 1997           | MaleAge20to24       | 4949200    |
| Mexico  | 1997           | MaleAge25to29       | 4126480    |
| Mexico  | 1997           | MaleAge30to34       | 3264581    |
| Mexico  | 1997           | MaleAge35to39       | 2767882    |
| Mexico  | 1997           | MaleAge40to44       | 2418630    |
| Mexico  | 1997           | MaleAge45to49       | 1911491    |
| Mexico  | 1997           | MaleAge50to54       | 1529581    |
| Mexico  | 1997           | MaleAge55to59       | 1230263    |
| Mexico  | 1997           | MaleAge5to9         | 5759965    |
| Mexico  | 1997           | MaleAge60to64       | 970617     |
| Mexico  | 1997           | MaleAge65to69       | 768690     |
| Mexico  | 1997           | MaleAge70to74       | 568361     |
| Mexico  | 1997           | MaleAge75to79       | 354223     |
| Mexico  | 1997           | MaleAge80to84       | 205643     |
| Mexico  | 1997           | MaleAge85to89       | 106589     |
| Mexico  | 1997           | MaleAge90to94       | 39729      |
| Mexico  | 1997           | MaleAge95to99       | 10859      |
| Mexico  | 1997           | MaleAgeAbov e100    | 1804       |
| Mexico  | 1998           | FemaleAge0to4       | 6075264    |
| Mexico  | 1998           | FemaleAge10to14     | 5549937    |
| Mexico  | 1998           | FemaleAge15to19     | 4455403    |
| Mexico  | 1998           | FemaleAge20to24     | 3820546    |
| Mexico  | 1998           | FemaleAge25to29     | 3640688    |
| Mexico  | 1998           | FemaleAge30to34     | 3279765    |



Dietary calcium and zinc deficiency risks are decreasing but remain prevalent

| Country | Reference year | Age/gender group    | Population |
|---------|----------------|---------------------|------------|
| Mexico  | 1998           | FemaleAge35to39     | 2914088    |
| Mexico  | 1998           | FemaleAge40to44     | 2711238    |
| Mexico  | 1998           | FemaleAge45to49     | 2282127    |
| Mexico  | 1998           | FemaleAge50to54     | 1719971    |
| Mexico  | 1998           | FemaleAge55to59     | 1439968    |
| Mexico  | 1998           | FemaleAge5to9       | 5871645    |
| Mexico  | 1998           | FemaleAge60to64     | 1088471    |
| Mexico  | 1998           | FemaleAge65to69     | 934415     |
| Mexico  | 1998           | FemaleAge70to74     | 729003     |
| Mexico  | 1998           | FemaleAge75to79     | 492184     |
| Mexico  | 1998           | FemaleAge80to84     | 266190     |
| Mexico  | 1998           | FemaleAge85to89     | 170060     |
| Mexico  | 1998           | FemaleAge90to94     | 63427      |
| Mexico  | 1998           | FemaleAge95to99     | 19475      |
| Mexico  | 1998           | FemaleAgeAbove100   | 3381       |
| Mexico  | 1998           | FemaleLactAge15to19 | 426258     |
| Mexico  | 1998           | FemaleLactAge20to24 | 748226     |
| Mexico  | 1998           | FemaleLactAge25to29 | 711298     |
| Mexico  | 1998           | FemaleLactAge30to34 | 408356     |
| Mexico  | 1998           | FemaleLactAge35to39 | 195103     |
| Mexico  | 1998           | FemaleLactAge40to44 | 38562      |
| Mexico  | 1998           | FemaleLactAge45to49 | 6971       |
| Mexico  | 1998           | FemalePregAge15to19 | 319693     |
| Mexico  | 1998           | FemalePregAge20to24 | 561170     |
| Mexico  | 1998           | FemalePregAge25to29 | 533474     |
| Mexico  | 1998           | FemalePregAge30to34 | 306267     |
| Mexico  | 1998           | FemalePregAge35to39 | 146327     |
| Mexico  | 1998           | FemalePregAge40to44 | 28922      |
| Mexico  | 1998           | FemalePregAge45to49 | 5228       |
| Mexico  | 1998           | MaleAge0to4         | 6227628    |
| Mexico  | 1998           | MaleAge10to14       | 5497131    |
| Mexico  | 1998           | MaleAge15to19       | 5257757    |
| Mexico  | 1998           | MaleAge20to24       | 4966288    |
| Mexico  | 1998           | MaleAge25to29       | 4293174    |
| Mexico  | 1998           | MaleAge30to34       | 3369764    |
| Mexico  | 1998           | MaleAge35to39       | 2823600    |
| Mexico  | 1998           | MaleAge40to44       | 2469354    |
| Mexico  | 1998           | MaleAge45to49       | 2016776    |
| Mexico  | 1998           | MaleAge50to54       | 1559890    |
| Mexico  | 1998           | MaleAge55to59       | 1285058    |
| Mexico  | 1998           | MaleAge5to9         | 5830647    |
| Mexico  | 1998           | MaleAge60to64       | 992110     |
| Mexico  | 1998           | MaleAge65to69       | 790803     |
| Mexico  | 1998           | MaleAge70to74       | 585494     |
| Mexico  | 1998           | MaleAge75to79       | 378463     |
| Mexico  | 1998           | MaleAge80to84       | 206861     |
| Mexico  | 1998           | MaleAge85to89       | 111261     |
| Mexico  | 1998           | MaleAge90to94       | 40078      |
| Mexico  | 1998           | MaleAge95to99       | 11757      |
| Mexico  | 1998           | MaleAgeAbove100     | 1874       |
| Mexico  | 1999           | FemaleAge0to4       | 6071319    |
| Mexico  | 1999           | FemaleAge10to14     | 5606567    |
| Mexico  | 1999           | FemaleAge15to19     | 4501185    |
| Mexico  | 1999           | FemaleAge20to24     | 3755887    |
| Mexico  | 1999           | FemaleAge25to29     | 3759678    |
| Mexico  | 1999           | FemaleAge30to34     | 3421799    |
| Mexico  | 1999           | FemaleAge35to39     | 3040878    |
| Mexico  | 1999           | FemaleAge40to44     | 2751466    |
| Mexico  | 1999           | FemaleAge45to49     | 2425659    |
| Mexico  | 1999           | FemaleAge50to54     | 1755662    |
| Mexico  | 1999           | FemaleAge55to59     | 1518562    |
| Mexico  | 1999           | FemaleAge5to9       | 5897679    |
| Mexico  | 1999           | FemaleAge60to64     | 1108959    |
| Mexico  | 1999           | FemaleAge65to69     | 959528     |
| Mexico  | 1999           | FemaleAge70to74     | 743455     |
| Mexico  | 1999           | FemaleAge75to79     | 532620     |
| Mexico  | 1999           | FemaleAge80to84     | 268601     |
| Mexico  | 1999           | FemaleAge85to89     | 173766     |
| Mexico  | 1999           | FemaleAge90to94     | 64256      |
| Mexico  | 1999           | FemaleAge95to99     | 19970      |
| Mexico  | 1999           | FemaleAgeAbove100   | 3584       |
| Mexico  | 1999           | FemaleLactAge15to19 | 426258     |
| Mexico  | 1999           | FemaleLactAge20to24 | 748226     |
| Mexico  | 1999           | FemaleLactAge25to29 | 711298     |
| Mexico  | 1999           | FemaleLactAge30to34 | 408356     |
| Mexico  | 1999           | FemaleLactAge35to39 | 195103     |
| Mexico  | 1999           | FemaleLactAge40to44 | 38562      |
| Mexico  | 1999           | FemaleLactAge45to49 | 6971       |
| Mexico  | 1999           | FemalePregAge15to19 | 319693     |
| Mexico  | 1999           | FemalePregAge20to24 | 561170     |
| Mexico  | 1999           | FemalePregAge25to29 | 533474     |
| Mexico  | 1999           | FemalePregAge30to34 | 306267     |
| Mexico  | 1999           | FemalePregAge35to39 | 146327     |
| Mexico  | 1999           | FemalePregAge40to44 | 28922      |
| Mexico  | 1999           | FemalePregAge45to49 | 5228       |
| Mexico  | 1999           | MaleAge0to4         | 6242694    |
| Mexico  | 1999           | MaleAge10to14       | 5535777    |
| Mexico  | 1999           | MaleAge15to19       | 5266534    |

Dietary calcium and zinc deficiency risks are decreasing but remain prevalent

| Country  | Reference year | Age/gender group    | Population |
|----------|----------------|---------------------|------------|
| Mexico   | 1999           | MaleAge20to24       | 4968969    |
| Mexico   | 1999           | MaleAge25to29       | 4431772    |
| Mexico   | 1999           | MaleAge30to34       | 3486110    |
| Mexico   | 1999           | MaleAge35to39       | 2885272    |
| Mexico   | 1999           | MaleAge40to44       | 2515378    |
| Mexico   | 1999           | MaleAge45to49       | 2115078    |
| Mexico   | 1999           | MaleAge50to54       | 1601352    |
| Mexico   | 1999           | MaleAge55to59       | 1336468    |
| Mexico   | 1999           | MaleAge5to9         | 5898971    |
| Mexico   | 1999           | MaleAge60to64       | 1018946    |
| Mexico   | 1999           | MaleAge65to69       | 812744     |
| Mexico   | 1999           | MaleAge70to74       | 603016     |
| Mexico   | 1999           | MaleAge75to79       | 401320     |
| Mexico   | 1999           | MaleAge80to84       | 212367     |
| Mexico   | 1999           | MaleAge85to89       | 113388     |
| Mexico   | 1999           | MaleAge90to94       | 39909      |
| Mexico   | 1999           | MaleAge95to99       | 11840      |
| Mexico   | 1999           | MaleAgeAbov e100    | 1943       |
| Mongolia | 1992           | FemaleAge0to4       | 162236     |
| Mongolia | 1992           | FemaleAge10to14     | 133645     |
| Mongolia | 1992           | FemaleAge15to19     | 115670     |
| Mongolia | 1992           | FemaleAge20to24     | 71095      |
| Mongolia | 1992           | FemaleAge25to29     | 66412      |
| Mongolia | 1992           | FemaleAge30to34     | 62817      |
| Mongolia | 1992           | FemaleAge35to39     | 51882      |
| Mongolia | 1992           | FemaleAge40to44     | 40835      |
| Mongolia | 1992           | FemaleAge45to49     | 34749      |
| Mongolia | 1992           | FemaleAge50to54     | 32425      |
| Mongolia | 1992           | FemaleAge55to59     | 28774      |
| Mongolia | 1992           | FemaleAge5to9       | 152399     |
| Mongolia | 1992           | FemaleAge60to64     | 24402      |
| Mongolia | 1992           | FemaleAge65to69     | 18801      |
| Mongolia | 1992           | FemaleAge70to74     | 14814      |
| Mongolia | 1992           | FemaleAge75to79     | 9113       |
| Mongolia | 1992           | FemaleAge80to84     | 4758       |
| Mongolia | 1992           | FemaleAge85to89     | 1999       |
| Mongolia | 1992           | FemaleAge90to94     | 336        |
| Mongolia | 1992           | FemaleAge95to99     | 46         |
| Mongolia | 1992           | FemaleAgeAbov e100  | 1          |
| Mongolia | 1992           | FemaleLactAge15to19 | 4755       |
| Mongolia | 1992           | FemaleLactAge20to24 | 22918      |
| Mongolia | 1992           | FemaleLactAge25to29 | 18874      |
| Mongolia | 1992           | FemaleLactAge30to34 | 9333       |
| Mongolia | 1992           | FemaleLactAge35to39 | 4152       |
| Mongolia | 1992           | FemaleLactAge40to44 | 1247       |
| Mongolia | 1992           | FemaleLactAge45to49 | 298        |
| Mongolia | 1992           | FemalePregAge15to19 | 3567       |
| Mongolia | 1992           | FemalePregAge20to24 | 17189      |
| Mongolia | 1992           | FemalePregAge25to29 | 14156      |
| Mongolia | 1992           | FemalePregAge30to34 | 7000       |
| Mongolia | 1992           | FemalePregAge35to39 | 3114       |
| Mongolia | 1992           | FemalePregAge40to44 | 935        |
| Mongolia | 1992           | FemalePregAge45to49 | 224        |
| Mongolia | 1992           | MaleAge0to4         | 164067     |
| Mongolia | 1992           | MaleAge10to14       | 132574     |
| Mongolia | 1992           | MaleAge15to19       | 122538     |
| Mongolia | 1992           | MaleAge20to24       | 109800     |
| Mongolia | 1992           | MaleAge25to29       | 97585      |
| Mongolia | 1992           | MaleAge30to34       | 76313      |
| Mongolia | 1992           | MaleAge35to39       | 56242      |
| Mongolia | 1992           | MaleAge40to44       | 41401      |
| Mongolia | 1992           | MaleAge45to49       | 33913      |
| Mongolia | 1992           | MaleAge50to54       | 31605      |
| Mongolia | 1992           | MaleAge55to59       | 27551      |
| Mongolia | 1992           | MaleAge5to9         | 152315     |
| Mongolia | 1992           | MaleAge60to64       | 22177      |
| Mongolia | 1992           | MaleAge65to69       | 16525      |
| Mongolia | 1992           | MaleAge70to74       | 11943      |
| Mongolia | 1992           | MaleAge75to79       | 7183       |
| Mongolia | 1992           | MaleAge80to84       | 3377       |
| Mongolia | 1992           | MaleAge85to89       | 1198       |
| Mongolia | 1992           | MaleAge90to94       | 224        |
| Mongolia | 1992           | MaleAge95to99       | 25         |
| Mongolia | 1992           | MaleAgeAbov e100    | 1          |
| Mongolia | 1993           | FemaleAge0to4       | 154750     |
| Mongolia | 1993           | FemaleAge10to14     | 135307     |
| Mongolia | 1993           | FemaleAge15to19     | 115810     |
| Mongolia | 1993           | FemaleAge20to24     | 73295      |
| Mongolia | 1993           | FemaleAge25to29     | 66968      |
| Mongolia | 1993           | FemaleAge30to34     | 67773      |
| Mongolia | 1993           | FemaleAge35to39     | 54065      |
| Mongolia | 1993           | FemaleAge40to44     | 43272      |
| Mongolia | 1993           | FemaleAge45to49     | 34140      |
| Mongolia | 1993           | FemaleAge50to54     | 32202      |
| Mongolia | 1993           | FemaleAge55to59     | 28203      |
| Mongolia | 1993           | FemaleAge5to9       | 156482     |
| Mongolia | 1993           | FemaleAge60to64     | 24566      |
| Mongolia | 1993           | FemaleAge65to69     | 18854      |

Dietary calcium and zinc deficiency risks are decreasing but remain prevalent

| Country  | Reference year | Age/gender group    | Population |
|----------|----------------|---------------------|------------|
| Mongolia | 1993           | FemaleAge70to74     | 14220      |
| Mongolia | 1993           | FemaleAge75to79     | 9656       |
| Mongolia | 1993           | FemaleAge80to84     | 4390       |
| Mongolia | 1993           | FemaleAge85to89     | 2116       |
| Mongolia | 1993           | FemaleAge90to94     | 329        |
| Mongolia | 1993           | FemaleAge95to99     | 59         |
| Mongolia | 1993           | FemaleAgeAbov e100  | 1          |
| Mongolia | 1993           | FemaleLactAge15to19 | 4755       |
| Mongolia | 1993           | FemaleLactAge20to24 | 22918      |
| Mongolia | 1993           | FemaleLactAge25to29 | 18874      |
| Mongolia | 1993           | FemaleLactAge30to34 | 9333       |
| Mongolia | 1993           | FemaleLactAge35to39 | 4152       |
| Mongolia | 1993           | FemaleLactAge40to44 | 1247       |
| Mongolia | 1993           | FemaleLactAge45to49 | 298        |
| Mongolia | 1993           | FemalePregAge15to19 | 3567       |
| Mongolia | 1993           | FemalePregAge20to24 | 17189      |
| Mongolia | 1993           | FemalePregAge25to29 | 14156      |
| Mongolia | 1993           | FemalePregAge30to34 | 7000       |
| Mongolia | 1993           | FemalePregAge35to39 | 3114       |
| Mongolia | 1993           | FemalePregAge40to44 | 935        |
| Mongolia | 1993           | FemalePregAge45to49 | 224        |
| Mongolia | 1993           | MaleAge0to4         | 156963     |
| Mongolia | 1993           | MaleAge10to14       | 134761     |
| Mongolia | 1993           | MaleAge15to19       | 122559     |
| Mongolia | 1993           | MaleAge20to24       | 112114     |
| Mongolia | 1993           | MaleAge25to29       | 98313      |
| Mongolia | 1993           | MaleAge30to34       | 81373      |
| Mongolia | 1993           | MaleAge35to39       | 58196      |
| Mongolia | 1993           | MaleAge40to44       | 43517      |
| Mongolia | 1993           | MaleAge45to49       | 33350      |
| Mongolia | 1993           | MaleAge50to54       | 31308      |
| Mongolia | 1993           | MaleAge55to59       | 27541      |
| Mongolia | 1993           | MaleAge5to9         | 156605     |
| Mongolia | 1993           | MaleAge60to64       | 22262      |
| Mongolia | 1993           | MaleAge65to69       | 16464      |
| Mongolia | 1993           | MaleAge70to74       | 11604      |
| Mongolia | 1993           | MaleAge75to79       | 7323       |
| Mongolia | 1993           | MaleAge80to84       | 3275       |
| Mongolia | 1993           | MaleAge85to89       | 1221       |
| Mongolia | 1993           | MaleAge90to94       | 227        |
| Mongolia | 1993           | MaleAge95to99       | 31         |
| Mongolia | 1994           | FemaleAge0to4       | 146627     |
| Mongolia | 1994           | FemaleAge10to14     | 137264     |
| Mongolia | 1994           | FemaleAge15to19     | 116001     |
| Mongolia | 1994           | FemaleAge20to24     | 75121      |
| Mongolia | 1994           | FemaleAge25to29     | 67370      |
| Mongolia | 1994           | FemaleAge30to34     | 71916      |
| Mongolia | 1994           | FemaleAge35to39     | 56845      |
| Mongolia | 1994           | FemaleAge40to44     | 45749      |
| Mongolia | 1994           | FemaleAge45to49     | 33880      |
| Mongolia | 1994           | FemaleAge50to54     | 32089      |
| Mongolia | 1994           | FemaleAge55to59     | 27380      |
| Mongolia | 1994           | FemaleAge5to9       | 160161     |
| Mongolia | 1994           | FemaleAge60to64     | 24671      |
| Mongolia | 1994           | FemaleAge65to69     | 18986      |
| Mongolia | 1994           | FemaleAge70to74     | 13623      |
| Mongolia | 1994           | FemaleAge75to79     | 9990       |
| Mongolia | 1994           | FemaleAge80to84     | 4162       |
| Mongolia | 1994           | FemaleAge85to89     | 2019       |
| Mongolia | 1994           | FemaleAge90to94     | 318        |
| Mongolia | 1994           | FemaleAge95to99     | 55         |
| Mongolia | 1994           | FemaleAgeAbov e100  | 1          |
| Mongolia | 1994           | FemaleLactAge15to19 | 4755       |
| Mongolia | 1994           | FemaleLactAge20to24 | 22918      |
| Mongolia | 1994           | FemaleLactAge25to29 | 18874      |
| Mongolia | 1994           | FemaleLactAge30to34 | 9333       |
| Mongolia | 1994           | FemaleLactAge35to39 | 4152       |
| Mongolia | 1994           | FemaleLactAge40to44 | 1247       |
| Mongolia | 1994           | FemaleLactAge45to49 | 298        |
| Mongolia | 1994           | FemalePregAge15to19 | 3567       |
| Mongolia | 1994           | FemalePregAge20to24 | 17189      |
| Mongolia | 1994           | FemalePregAge25to29 | 14156      |
| Mongolia | 1994           | FemalePregAge30to34 | 7000       |
| Mongolia | 1994           | FemalePregAge35to39 | 3114       |
| Mongolia | 1994           | FemalePregAge40to44 | 935        |
| Mongolia | 1994           | FemalePregAge45to49 | 224        |
| Mongolia | 1994           | MaleAge0to4         | 149157     |
| Mongolia | 1994           | MaleAge10to14       | 137475     |
| Mongolia | 1994           | MaleAge15to19       | 122745     |
| Mongolia | 1994           | MaleAge20to24       | 114067     |
| Mongolia | 1994           | MaleAge25to29       | 98991      |
| Mongolia | 1994           | MaleAge30to34       | 85739      |
| Mongolia | 1994           | MaleAge35to39       | 60789      |
| Mongolia | 1994           | MaleAge40to44       | 45730      |
| Mongolia | 1994           | MaleAge45to49       | 33124      |
| Mongolia | 1994           | MaleAge50to54       | 30947      |
| Mongolia | 1994           | MaleAge55to59       | 27435      |
| Mongolia | 1994           | MaleAge5to9         | 160375     |

Dietary calcium and zinc deficiency risks are decreasing but remain prevalent

| Country  | Reference year | Age/gender group    | Population |
|----------|----------------|---------------------|------------|
| Mongolia | 1994           | MaleAge60to64       | 22378      |
| Mongolia | 1994           | MaleAge65to69       | 16450      |
| Mongolia | 1994           | MaleAge70to74       | 11241      |
| Mongolia | 1994           | MaleAge75to79       | 7346       |
| Mongolia | 1994           | MaleAge80to84       | 3157       |
| Mongolia | 1994           | MaleAge85to89       | 1149       |
| Mongolia | 1994           | MaleAge90to94       | 208        |
| Mongolia | 1994           | MaleAge95to99       | 29         |
| Mongolia | 1995           | FemaleAge0to4       | 139628     |
| Mongolia | 1995           | FemaleAge10to14     | 139964     |
| Mongolia | 1995           | FemaleAge15to19     | 116539     |
| Mongolia | 1995           | FemaleAge20to24     | 76303      |
| Mongolia | 1995           | FemaleAge25to29     | 68144      |
| Mongolia | 1995           | FemaleAge30to34     | 74836      |
| Mongolia | 1995           | FemaleAge35to39     | 60333      |
| Mongolia | 1995           | FemaleAge40to44     | 48099      |
| Mongolia | 1995           | FemaleAge45to49     | 34270      |
| Mongolia | 1995           | FemaleAge50to54     | 31877      |
| Mongolia | 1995           | FemaleAge55to59     | 26579      |
| Mongolia | 1995           | FemaleAge5to9       | 162180     |
| Mongolia | 1995           | FemaleAge60to64     | 24569      |
| Mongolia | 1995           | FemaleAge65to69     | 19155      |
| Mongolia | 1995           | FemaleAge70to74     | 13196      |
| Mongolia | 1995           | FemaleAge75to79     | 9992       |
| Mongolia | 1995           | FemaleAge80to84     | 4131       |
| Mongolia | 1995           | FemaleAge85to89     | 1731       |
| Mongolia | 1995           | FemaleAge90to94     | 272        |
| Mongolia | 1995           | FemaleAge95to99     | 27         |
| Mongolia | 1995           | FemaleAgeAbove100   | 1          |
| Mongolia | 1995           | FemaleLactAge15to19 | 4755       |
| Mongolia | 1995           | FemaleLactAge20to24 | 22918      |
| Mongolia | 1995           | FemaleLactAge25to29 | 18874      |
| Mongolia | 1995           | FemaleLactAge30to34 | 9333       |
| Mongolia | 1995           | FemaleLactAge35to39 | 4152       |
| Mongolia | 1995           | FemaleLactAge40to44 | 1247       |
| Mongolia | 1995           | FemaleLactAge45to49 | 298        |
| Mongolia | 1995           | FemalePregAge15to19 | 3567       |
| Mongolia | 1995           | FemalePregAge20to24 | 17189      |
| Mongolia | 1995           | FemalePregAge25to29 | 14156      |
| Mongolia | 1995           | FemalePregAge30to34 | 7000       |
| Mongolia | 1995           | FemalePregAge35to39 | 3114       |
| Mongolia | 1995           | FemalePregAge40to44 | 935        |
| Mongolia | 1995           | FemalePregAge45to49 | 224        |
| Mongolia | 1995           | MaleAge0to4         | 142448     |
| Mongolia | 1995           | MaleAge10to14       | 140946     |
| Mongolia | 1995           | MaleAge15to19       | 123535     |
| Mongolia | 1995           | MaleAge20to24       | 115383     |
| Mongolia | 1995           | MaleAge25to29       | 100117     |
| Mongolia | 1995           | MaleAge30to34       | 88986      |
| Mongolia | 1995           | MaleAge35to39       | 64198      |
| Mongolia | 1995           | MaleAge40to44       | 47878      |
| Mongolia | 1995           | MaleAge45to49       | 33477      |
| Mongolia | 1995           | MaleAge50to54       | 30489      |
| Mongolia | 1995           | MaleAge55to59       | 27255      |
| Mongolia | 1995           | MaleAge5to9         | 162448     |
| Mongolia | 1995           | MaleAge60to64       | 22498      |
| Mongolia | 1995           | MaleAge65to69       | 16488      |
| Mongolia | 1995           | MaleAge70to74       | 10935      |
| Mongolia | 1995           | MaleAge75to79       | 7209       |
| Mongolia | 1995           | MaleAge80to84       | 3046       |
| Mongolia | 1995           | MaleAge85to89       | 981        |
| Mongolia | 1995           | MaleAge90to94       | 149        |
| Mongolia | 1995           | MaleAge95to99       | 12         |
| Mongolia | 1996           | FemaleAge0to4       | 129111     |
| Mongolia | 1996           | FemaleAge10to14     | 143593     |
| Mongolia | 1996           | FemaleAge15to19     | 118906     |
| Mongolia | 1996           | FemaleAge20to24     | 84945      |
| Mongolia | 1996           | FemaleAge25to29     | 76669      |
| Mongolia | 1996           | FemaleAge30to34     | 80168      |
| Mongolia | 1996           | FemaleAge35to39     | 66010      |
| Mongolia | 1996           | FemaleAge40to44     | 50852      |
| Mongolia | 1996           | FemaleAge45to49     | 35776      |
| Mongolia | 1996           | FemaleAge50to54     | 31576      |
| Mongolia | 1996           | FemaleAge55to59     | 26779      |
| Mongolia | 1996           | FemaleAge5to9       | 162387     |
| Mongolia | 1996           | FemaleAge60to64     | 24339      |
| Mongolia | 1996           | FemaleAge65to69     | 19403      |
| Mongolia | 1996           | FemaleAge70to74     | 13245      |
| Mongolia | 1996           | FemaleAge75to79     | 9793       |
| Mongolia | 1996           | FemaleAge80to84     | 4492       |
| Mongolia | 1996           | FemaleAge85to89     | 1747       |
| Mongolia | 1996           | FemaleAge90to94     | 381        |
| Mongolia | 1996           | FemaleAge95to99     | 28         |
| Mongolia | 1996           | FemaleAgeAbove100   | 1          |
| Mongolia | 1996           | FemaleLactAge15to19 | 4041       |
| Mongolia | 1996           | FemaleLactAge20to24 | 18411      |
| Mongolia | 1996           | FemaleLactAge25to29 | 14937      |
| Mongolia | 1996           | FemaleLactAge30to34 | 7759       |

Dietary calcium and zinc deficiency risks are decreasing but remain prevalent

| Country  | Reference year | Age/gender group    | Population |
|----------|----------------|---------------------|------------|
| Mongolia | 1996           | FemaleLactAge35to39 | 3408       |
| Mongolia | 1996           | FemaleLactAge40to44 | 1020       |
| Mongolia | 1996           | FemaleLactAge45to49 | 212        |
| Mongolia | 1996           | FemalePregAge15to19 | 3031       |
| Mongolia | 1996           | FemalePregAge20to24 | 13808      |
| Mongolia | 1996           | FemalePregAge25to29 | 11203      |
| Mongolia | 1996           | FemalePregAge30to34 | 5819       |
| Mongolia | 1996           | FemalePregAge35to39 | 2556       |
| Mongolia | 1996           | FemalePregAge40to44 | 765        |
| Mongolia | 1996           | FemalePregAge45to49 | 159        |
| Mongolia | 1996           | MaleAge0to4         | 132626     |
| Mongolia | 1996           | MaleAge10to14       | 145303     |
| Mongolia | 1996           | MaleAge15to19       | 125532     |
| Mongolia | 1996           | MaleAge20to24       | 116577     |
| Mongolia | 1996           | MaleAge25to29       | 102087     |
| Mongolia | 1996           | MaleAge30to34       | 91769      |
| Mongolia | 1996           | MaleAge35to39       | 68525      |
| Mongolia | 1996           | MaleAge40to44       | 50220      |
| Mongolia | 1996           | MaleAge45to49       | 34769      |
| Mongolia | 1996           | MaleAge50to54       | 30138      |
| Mongolia | 1996           | MaleAge55to59       | 27178      |
| Mongolia | 1996           | MaleAge5to9         | 162752     |
| Mongolia | 1996           | MaleAge60to64       | 22566      |
| Mongolia | 1996           | MaleAge65to69       | 16618      |
| Mongolia | 1996           | MaleAge70to74       | 10960      |
| Mongolia | 1996           | MaleAge75to79       | 7129       |
| Mongolia | 1996           | MaleAge80to84       | 3251       |
| Mongolia | 1996           | MaleAge85to89       | 1059       |
| Mongolia | 1996           | MaleAge90to94       | 199        |
| Mongolia | 1996           | MaleAge95to99       | 11         |
| Mongolia | 1997           | FemaleAge0to4       | 123046     |
| Mongolia | 1997           | FemaleAge10to14     | 148077     |
| Mongolia | 1997           | FemaleAge15to19     | 119663     |
| Mongolia | 1997           | FemaleAge20to24     | 85091      |
| Mongolia | 1997           | FemaleAge25to29     | 78382      |
| Mongolia | 1997           | FemaleAge30to34     | 81324      |
| Mongolia | 1997           | FemaleAge35to39     | 70849      |
| Mongolia | 1997           | FemaleAge40to44     | 53214      |
| Mongolia | 1997           | FemaleAge45to49     | 37614      |
| Mongolia | 1997           | FemaleAge50to54     | 30952      |
| Mongolia | 1997           | FemaleAge55to59     | 27148      |
| Mongolia | 1997           | FemaleAge5to9       | 159243     |
| Mongolia | 1997           | FemaleAge60to64     | 23918      |
| Mongolia | 1997           | FemaleAge65to69     | 19649      |
| Mongolia | 1997           | FemaleAge70to74     | 13399      |
| Mongolia | 1997           | FemaleAge75to79     | 9371       |
| Mongolia | 1997           | FemaleAge80to84     | 4870       |
| Mongolia | 1997           | FemaleAge85to89     | 1656       |
| Mongolia | 1997           | FemaleAge90to94     | 474        |
| Mongolia | 1997           | FemaleAge95to99     | 27         |
| Mongolia | 1997           | FemaleAgeAbove100   | 1          |
| Mongolia | 1997           | FemaleLactAge15to19 | 4041       |
| Mongolia | 1997           | FemaleLactAge20to24 | 18411      |
| Mongolia | 1997           | FemaleLactAge25to29 | 14937      |
| Mongolia | 1997           | FemaleLactAge30to34 | 7759       |
| Mongolia | 1997           | FemaleLactAge35to39 | 3408       |
| Mongolia | 1997           | FemaleLactAge40to44 | 1020       |
| Mongolia | 1997           | FemaleLactAge45to49 | 212        |
| Mongolia | 1997           | FemalePregAge15to19 | 3031       |
| Mongolia | 1997           | FemalePregAge20to24 | 13808      |
| Mongolia | 1997           | FemalePregAge25to29 | 11203      |
| Mongolia | 1997           | FemalePregAge30to34 | 5819       |
| Mongolia | 1997           | FemalePregAge35to39 | 2556       |
| Mongolia | 1997           | FemalePregAge40to44 | 765        |
| Mongolia | 1997           | FemalePregAge45to49 | 159        |
| Mongolia | 1997           | MaleAge0to4         | 126575     |
| Mongolia | 1997           | MaleAge10to14       | 150156     |
| Mongolia | 1997           | MaleAge15to19       | 127671     |
| Mongolia | 1997           | MaleAge20to24       | 117182     |
| Mongolia | 1997           | MaleAge25to29       | 104373     |
| Mongolia | 1997           | MaleAge30to34       | 93295      |
| Mongolia | 1997           | MaleAge35to39       | 73481      |
| Mongolia | 1997           | MaleAge40to44       | 52461      |
| Mongolia | 1997           | MaleAge45to49       | 36652      |
| Mongolia | 1997           | MaleAge50to54       | 29624      |
| Mongolia | 1997           | MaleAge55to59       | 27129      |
| Mongolia | 1997           | MaleAge5to9         | 160025     |
| Mongolia | 1997           | MaleAge60to64       | 22599      |
| Mongolia | 1997           | MaleAge65to69       | 16744      |
| Mongolia | 1997           | MaleAge70to74       | 10992      |
| Mongolia | 1997           | MaleAge75to79       | 6928       |
| Mongolia | 1997           | MaleAge80to84       | 3409       |
| Mongolia | 1997           | MaleAge85to89       | 1079       |
| Mongolia | 1997           | MaleAge90to94       | 236        |
| Mongolia | 1997           | MaleAge95to99       | 16         |
| Mongolia | 1998           | FemaleAge0to4       | 120230     |
| Mongolia | 1998           | FemaleAge10to14     | 153240     |
| Mongolia | 1998           | FemaleAge15to19     | 120430     |

Dietary calcium and zinc deficiency risks are decreasing but remain prevalent

| Country  | Reference year | Age/gender group    | Population |
|----------|----------------|---------------------|------------|
| Mongolia | 1998           | FemaleAge20to24     | 85167      |
| Mongolia | 1998           | FemaleAge25to29     | 80078      |
| Mongolia | 1998           | FemaleAge30to34     | 81587      |
| Mongolia | 1998           | FemaleAge35to39     | 75715      |
| Mongolia | 1998           | FemaleAge40to44     | 55987      |
| Mongolia | 1998           | FemaleAge45to49     | 39717      |
| Mongolia | 1998           | FemaleAge50to54     | 30405      |
| Mongolia | 1998           | FemaleAge55to59     | 27508      |
| Mongolia | 1998           | FemaleAge5to9       | 152937     |
| Mongolia | 1998           | FemaleAge60to64     | 23483      |
| Mongolia | 1998           | FemaleAge65to69     | 19895      |
| Mongolia | 1998           | FemaleAge70to74     | 13598      |
| Mongolia | 1998           | FemaleAge75to79     | 8927       |
| Mongolia | 1998           | FemaleAge80to84     | 5133       |
| Mongolia | 1998           | FemaleAge85to89     | 1527       |
| Mongolia | 1998           | FemaleAge90to94     | 511        |
| Mongolia | 1998           | FemaleAge95to99     | 35         |
| Mongolia | 1998           | FemaleAgeAbove100   | 1          |
| Mongolia | 1998           | FemaleLactAge15to19 | 4041       |
| Mongolia | 1998           | FemaleLactAge20to24 | 18411      |
| Mongolia | 1998           | FemaleLactAge25to29 | 14937      |
| Mongolia | 1998           | FemaleLactAge30to34 | 7759       |
| Mongolia | 1998           | FemaleLactAge35to39 | 3408       |
| Mongolia | 1998           | FemaleLactAge40to44 | 1020       |
| Mongolia | 1998           | FemaleLactAge45to49 | 212        |
| Mongolia | 1998           | FemalePregAge15to19 | 3031       |
| Mongolia | 1998           | FemalePregAge20to24 | 13808      |
| Mongolia | 1998           | FemalePregAge25to29 | 11203      |
| Mongolia | 1998           | FemalePregAge30to34 | 5819       |
| Mongolia | 1998           | FemalePregAge35to39 | 2556       |
| Mongolia | 1998           | FemalePregAge40to44 | 765        |
| Mongolia | 1998           | FemalePregAge45to49 | 159        |
| Mongolia | 1998           | MaleAge0to4         | 123331     |
| Mongolia | 1998           | MaleAge10to14       | 155216     |
| Mongolia | 1998           | MaleAge15to19       | 130123     |
| Mongolia | 1998           | MaleAge20to24       | 117676     |
| Mongolia | 1998           | MaleAge25to29       | 106809     |
| Mongolia | 1998           | MaleAge30to34       | 94039      |
| Mongolia | 1998           | MaleAge35to39       | 78606      |
| Mongolia | 1998           | MaleAge40to44       | 54933      |
| Mongolia | 1998           | MaleAge45to49       | 38948      |
| Mongolia | 1998           | MaleAge50to54       | 29185      |
| Mongolia | 1998           | MaleAge55to59       | 27094      |
| Mongolia | 1998           | MaleAge5to9         | 154404     |
| Mongolia | 1998           | MaleAge60to64       | 22629      |
| Mongolia | 1998           | MaleAge65to69       | 16885      |
| Mongolia | 1998           | MaleAge70to74       | 11014      |
| Mongolia | 1998           | MaleAge75to79       | 6698       |
| Mongolia | 1998           | MaleAge80to84       | 3464       |
| Mongolia | 1998           | MaleAge85to89       | 1052       |
| Mongolia | 1998           | MaleAge90to94       | 251        |
| Mongolia | 1998           | MaleAge95to99       | 22         |
| Mongolia | 1999           | FemaleAge0to4       | 118379     |
| Mongolia | 1999           | FemaleAge10to14     | 157791     |
| Mongolia | 1999           | FemaleAge15to19     | 122066     |
| Mongolia | 1999           | FemaleAge20to24     | 85684      |
| Mongolia | 1999           | FemaleAge25to29     | 81582      |
| Mongolia | 1999           | FemaleAge30to34     | 81859      |
| Mongolia | 1999           | FemaleAge35to39     | 80038      |
| Mongolia | 1999           | FemaleAge40to44     | 59550      |
| Mongolia | 1999           | FemaleAge45to49     | 41948      |
| Mongolia | 1999           | FemaleAge50to54     | 30383      |
| Mongolia | 1999           | FemaleAge55to59     | 27671      |
| Mongolia | 1999           | FemaleAge5to9       | 145078     |
| Mongolia | 1999           | FemaleAge60to64     | 23246      |
| Mongolia | 1999           | FemaleAge65to69     | 20104      |
| Mongolia | 1999           | FemaleAge70to74     | 13813      |
| Mongolia | 1999           | FemaleAge75to79     | 8649       |
| Mongolia | 1999           | FemaleAge80to84     | 5169       |
| Mongolia | 1999           | FemaleAge85to89     | 1429       |
| Mongolia | 1999           | FemaleAge90to94     | 460        |
| Mongolia | 1999           | FemaleAge95to99     | 41         |
| Mongolia | 1999           | FemaleAgeAbove100   | 1          |
| Mongolia | 1999           | FemaleLactAge15to19 | 4041       |
| Mongolia | 1999           | FemaleLactAge20to24 | 18411      |
| Mongolia | 1999           | FemaleLactAge25to29 | 14937      |
| Mongolia | 1999           | FemaleLactAge30to34 | 7759       |
| Mongolia | 1999           | FemaleLactAge35to39 | 3408       |
| Mongolia | 1999           | FemaleLactAge40to44 | 1020       |
| Mongolia | 1999           | FemaleLactAge45to49 | 212        |
| Mongolia | 1999           | FemalePregAge15to19 | 3031       |
| Mongolia | 1999           | FemalePregAge20to24 | 13808      |
| Mongolia | 1999           | FemalePregAge25to29 | 11203      |
| Mongolia | 1999           | FemalePregAge30to34 | 5819       |
| Mongolia | 1999           | FemalePregAge35to39 | 2556       |
| Mongolia | 1999           | FemalePregAge40to44 | 765        |
| Mongolia | 1999           | FemalePregAge45to49 | 159        |
| Mongolia | 1999           | MaleAge0to4         | 120950     |

Dietary calcium and zinc deficiency risks are decreasing but remain prevalent

| Country  | Reference year | Age/gender group    | Population |
|----------|----------------|---------------------|------------|
| Mongolia | 1999           | MaleAge10to14       | 159344     |
| Mongolia | 1999           | MaleAge15to19       | 133272     |
| Mongolia | 1999           | MaleAge20to24       | 118657     |
| Mongolia | 1999           | MaleAge25to29       | 109049     |
| Mongolia | 1999           | MaleAge30to34       | 94839      |
| Mongolia | 1999           | MaleAge35to39       | 83218      |
| Mongolia | 1999           | MaleAge40to44       | 58070      |
| Mongolia | 1999           | MaleAge45to49       | 41405      |
| Mongolia | 1999           | MaleAge50to54       | 29181      |
| Mongolia | 1999           | MaleAge55to59       | 27024      |
| Mongolia | 1999           | MaleAge5to9         | 147212     |
| Mongolia | 1999           | MaleAge60to64       | 22688      |
| Mongolia | 1999           | MaleAge65to69       | 17054      |
| Mongolia | 1999           | MaleAge70to74       | 11031      |
| Mongolia | 1999           | MaleAge75to79       | 6512       |
| Mongolia | 1999           | MaleAge80to84       | 3381       |
| Mongolia | 1999           | MaleAge85to89       | 991        |
| Mongolia | 1999           | MaleAge90to94       | 226        |
| Mongolia | 1999           | MaleAge95to99       | 24         |
| Morocco  | 1992           | FemaleAge0to4       | 1650150    |
| Morocco  | 1992           | FemaleAge10to14     | 1580640    |
| Morocco  | 1992           | FemaleAge15to19     | 1254496    |
| Morocco  | 1992           | FemaleAge20to24     | 921577     |
| Morocco  | 1992           | FemaleAge25to29     | 754894     |
| Morocco  | 1992           | FemaleAge30to34     | 660433     |
| Morocco  | 1992           | FemaleAge35to39     | 597652     |
| Morocco  | 1992           | FemaleAge40to44     | 445657     |
| Morocco  | 1992           | FemaleAge45to49     | 368965     |
| Morocco  | 1992           | FemaleAge50to54     | 377780     |
| Morocco  | 1992           | FemaleAge55to59     | 356770     |
| Morocco  | 1992           | FemaleAge5to9       | 1711137    |
| Morocco  | 1992           | FemaleAge60to64     | 325762     |
| Morocco  | 1992           | FemaleAge65to69     | 251781     |
| Morocco  | 1992           | FemaleAge70to74     | 150285     |
| Morocco  | 1992           | FemaleAge75to79     | 78006      |
| Morocco  | 1992           | FemaleAge80to84     | 41194      |
| Morocco  | 1992           | FemaleAge85to89     | 17991      |
| Morocco  | 1992           | FemaleAge90to94     | 4384       |
| Morocco  | 1992           | FemaleAge95to99     | 433        |
| Morocco  | 1992           | FemaleAgeAbov e100  | 15         |
| Morocco  | 1992           | FemaleLactAge15to19 | 72674      |
| Morocco  | 1992           | FemaleLactAge20to24 | 169357     |
| Morocco  | 1992           | FemaleLactAge25to29 | 188500     |
| Morocco  | 1992           | FemaleLactAge30to34 | 155549     |
| Morocco  | 1992           | FemaleLactAge35to39 | 91177      |
| Morocco  | 1992           | FemaleLactAge40to44 | 36270      |
| Morocco  | 1992           | FemaleLactAge45to49 | 9810       |
| Morocco  | 1992           | FemalePregAge15to19 | 54505      |
| Morocco  | 1992           | FemalePregAge20to24 | 127018     |
| Morocco  | 1992           | FemalePregAge25to29 | 141375     |
| Morocco  | 1992           | FemalePregAge30to34 | 116662     |
| Morocco  | 1992           | FemalePregAge35to39 | 68382      |
| Morocco  | 1992           | FemalePregAge40to44 | 27203      |
| Morocco  | 1992           | FemalePregAge45to49 | 7358       |
| Morocco  | 1992           | MaleAge0to4         | 1732591    |
| Morocco  | 1992           | MaleAge10to14       | 1640515    |
| Morocco  | 1992           | MaleAge15to19       | 1424014    |
| Morocco  | 1992           | MaleAge20to24       | 1236799    |
| Morocco  | 1992           | MaleAge25to29       | 1097285    |
| Morocco  | 1992           | MaleAge30to34       | 941403     |
| Morocco  | 1992           | MaleAge35to39       | 760634     |
| Morocco  | 1992           | MaleAge40to44       | 506493     |
| Morocco  | 1992           | MaleAge45to49       | 333614     |
| Morocco  | 1992           | MaleAge50to54       | 307727     |
| Morocco  | 1992           | MaleAge55to59       | 303423     |
| Morocco  | 1992           | MaleAge5to9         | 1780740    |
| Morocco  | 1992           | MaleAge60to64       | 275869     |
| Morocco  | 1992           | MaleAge65to69       | 201301     |
| Morocco  | 1992           | MaleAge70to74       | 112740     |
| Morocco  | 1992           | MaleAge75to79       | 56282      |
| Morocco  | 1992           | MaleAge80to84       | 28249      |
| Morocco  | 1992           | MaleAge85to89       | 11489      |
| Morocco  | 1992           | MaleAge90to94       | 2456       |
| Morocco  | 1992           | MaleAge95to99       | 193        |
| Morocco  | 1992           | MaleAgeAbov e100    | 5          |
| Morocco  | 1993           | FemaleAge0to4       | 1653424    |
| Morocco  | 1993           | FemaleAge10to14     | 1618781    |
| Morocco  | 1993           | FemaleAge15to19     | 1276722    |
| Morocco  | 1993           | FemaleAge20to24     | 935787     |
| Morocco  | 1993           | FemaleAge25to29     | 765881     |
| Morocco  | 1993           | FemaleAge30to34     | 688245     |
| Morocco  | 1993           | FemaleAge35to39     | 628656     |
| Morocco  | 1993           | FemaleAge40to44     | 499229     |
| Morocco  | 1993           | FemaleAge45to49     | 368770     |
| Morocco  | 1993           | FemaleAge50to54     | 378551     |
| Morocco  | 1993           | FemaleAge55to59     | 358647     |
| Morocco  | 1993           | FemaleAge5to9       | 1695737    |
| Morocco  | 1993           | FemaleAge60to64     | 327662     |

Dietary calcium and zinc deficiency risks are decreasing but remain prevalent

| Country | Reference year | Age/gender group    | Population |
|---------|----------------|---------------------|------------|
| Morocco | 1993           | FemaleAge65to69     | 264518     |
| Morocco | 1993           | FemaleAge70to74     | 162657     |
| Morocco | 1993           | FemaleAge75to79     | 82060      |
| Morocco | 1993           | FemaleAge80to84     | 41141      |
| Morocco | 1993           | FemaleAge85to89     | 18395      |
| Morocco | 1993           | FemaleAge90to94     | 4667       |
| Morocco | 1993           | FemaleAge95to99     | 546        |
| Morocco | 1993           | FemaleAgeAbov e100  | 17         |
| Morocco | 1993           | FemaleLactAge15to19 | 72674      |
| Morocco | 1993           | FemaleLactAge20to24 | 169357     |
| Morocco | 1993           | FemaleLactAge25to29 | 188500     |
| Morocco | 1993           | FemaleLactAge30to34 | 155549     |
| Morocco | 1993           | FemaleLactAge35to39 | 91177      |
| Morocco | 1993           | FemaleLactAge40to44 | 36270      |
| Morocco | 1993           | FemaleLactAge45to49 | 9810       |
| Morocco | 1993           | FemalePregAge15to19 | 54505      |
| Morocco | 1993           | FemalePregAge20to24 | 127018     |
| Morocco | 1993           | FemalePregAge25to29 | 141375     |
| Morocco | 1993           | FemalePregAge30to34 | 116662     |
| Morocco | 1993           | FemalePregAge35to39 | 68382      |
| Morocco | 1993           | FemalePregAge40to44 | 27203      |
| Morocco | 1993           | FemalePregAge45to49 | 7358       |
| Morocco | 1993           | MaleAge0to4         | 1735431    |
| Morocco | 1993           | MaleAge10to14       | 1679217    |
| Morocco | 1993           | MaleAge15to19       | 1445637    |
| Morocco | 1993           | MaleAge20to24       | 1247306    |
| Morocco | 1993           | MaleAge25to29       | 1100580    |
| Morocco | 1993           | MaleAge30to34       | 968868     |
| Morocco | 1993           | MaleAge35to39       | 791930     |
| Morocco | 1993           | MaleAge40to44       | 561345     |
| Morocco | 1993           | MaleAge45to49       | 347511     |
| Morocco | 1993           | MaleAge50to54       | 303892     |
| Morocco | 1993           | MaleAge55to59       | 302407     |
| Morocco | 1993           | MaleAge5to9         | 1767148    |
| Morocco | 1993           | MaleAge60to64       | 276847     |
| Morocco | 1993           | MaleAge65to69       | 213219     |
| Morocco | 1993           | MaleAge70to74       | 121414     |
| Morocco | 1993           | MaleAge75to79       | 58941      |
| Morocco | 1993           | MaleAge80to84       | 28070      |
| Morocco | 1993           | MaleAge85to89       | 11759      |
| Morocco | 1993           | MaleAge90to94       | 2628       |
| Morocco | 1993           | MaleAge95to99       | 258        |
| Morocco | 1993           | MaleAgeAbov e100    | 6          |
| Morocco | 1994           | FemaleAge0to4       | 1655326    |
| Morocco | 1994           | FemaleAge10to14     | 1652669    |
| Morocco | 1994           | FemaleAge15to19     | 1304965    |
| Morocco | 1994           | FemaleAge20to24     | 952262     |
| Morocco | 1994           | FemaleAge25to29     | 775526     |
| Morocco | 1994           | FemaleAge30to34     | 712434     |
| Morocco | 1994           | FemaleAge35to39     | 658707     |
| Morocco | 1994           | FemaleAge40to44     | 552043     |
| Morocco | 1994           | FemaleAge45to49     | 377788     |
| Morocco | 1994           | FemaleAge50to54     | 378903     |
| Morocco | 1994           | FemaleAge55to59     | 360426     |
| Morocco | 1994           | FemaleAge5to9       | 1671698    |
| Morocco | 1994           | FemaleAge60to64     | 329582     |
| Morocco | 1994           | FemaleAge65to69     | 275970     |
| Morocco | 1994           | FemaleAge70to74     | 175643     |
| Morocco | 1994           | FemaleAge75to79     | 87651      |
| Morocco | 1994           | FemaleAge80to84     | 41533      |
| Morocco | 1994           | FemaleAge85to89     | 18073      |
| Morocco | 1994           | FemaleAge90to94     | 4578       |
| Morocco | 1994           | FemaleAge95to99     | 601        |
| Morocco | 1994           | FemaleAgeAbov e100  | 19         |
| Morocco | 1994           | FemaleLactAge15to19 | 72674      |
| Morocco | 1994           | FemaleLactAge20to24 | 169357     |
| Morocco | 1994           | FemaleLactAge25to29 | 188500     |
| Morocco | 1994           | FemaleLactAge30to34 | 155549     |
| Morocco | 1994           | FemaleLactAge35to39 | 91177      |
| Morocco | 1994           | FemaleLactAge40to44 | 36270      |
| Morocco | 1994           | FemaleLactAge45to49 | 9810       |
| Morocco | 1994           | FemalePregAge15to19 | 54505      |
| Morocco | 1994           | FemalePregAge20to24 | 127018     |
| Morocco | 1994           | FemalePregAge25to29 | 141375     |
| Morocco | 1994           | FemalePregAge30to34 | 116662     |
| Morocco | 1994           | FemalePregAge35to39 | 68382      |
| Morocco | 1994           | FemalePregAge40to44 | 27203      |
| Morocco | 1994           | FemalePregAge45to49 | 7358       |
| Morocco | 1994           | MaleAge0to4         | 1736382    |
| Morocco | 1994           | MaleAge10to14       | 1714192    |
| Morocco | 1994           | MaleAge15to19       | 1474443    |
| Morocco | 1994           | MaleAge20to24       | 1260920    |
| Morocco | 1994           | MaleAge25to29       | 1101666    |
| Morocco | 1994           | MaleAge30to34       | 990421     |
| Morocco | 1994           | MaleAge35to39       | 822225     |
| Morocco | 1994           | MaleAge40to44       | 614509     |
| Morocco | 1994           | MaleAge45to49       | 369367     |
| Morocco | 1994           | MaleAge50to54       | 302777     |



Dietary calcium and zinc deficiency risks are decreasing but remain prevalent

| Country | Reference year | Age/gender group    | Population |
|---------|----------------|---------------------|------------|
| Morocco | 1994           | MaleAge55to59       | 300790     |
| Morocco | 1994           | MaleAge5to9         | 1744506    |
| Morocco | 1994           | MaleAge60to64       | 277401     |
| Morocco | 1994           | MaleAge65to69       | 223679     |
| Morocco | 1994           | MaleAge70to74       | 130918     |
| Morocco | 1994           | MaleAge75to79       | 62527      |
| Morocco | 1994           | MaleAge80to84       | 28085      |
| Morocco | 1994           | MaleAge85to89       | 11415      |
| Morocco | 1994           | MaleAge90to94       | 2552       |
| Morocco | 1994           | MaleAge95to99       | 292        |
| Morocco | 1994           | MaleAgeAbov e100    | 7          |
| Morocco | 1995           | FemaleAge0to4       | 1646469    |
| Morocco | 1995           | FemaleAge10to14     | 1675466    |
| Morocco | 1995           | FemaleAge15to19     | 1340302    |
| Morocco | 1995           | FemaleAge20to24     | 972359     |
| Morocco | 1995           | FemaleAge25to29     | 786265     |
| Morocco | 1995           | FemaleAge30to34     | 732480     |
| Morocco | 1995           | FemaleAge35to39     | 689609     |
| Morocco | 1995           | FemaleAge40to44     | 599316     |
| Morocco | 1995           | FemaleAge45to49     | 399752     |
| Morocco | 1995           | FemaleAge50to54     | 378861     |
| Morocco | 1995           | FemaleAge55to59     | 362008     |
| Morocco | 1995           | FemaleAge5to9       | 1649698    |
| Morocco | 1995           | FemaleAge60to64     | 332402     |
| Morocco | 1995           | FemaleAge65to69     | 285671     |
| Morocco | 1995           | FemaleAge70to74     | 189014     |
| Morocco | 1995           | FemaleAge75to79     | 95128      |
| Morocco | 1995           | FemaleAge80to84     | 42624      |
| Morocco | 1995           | FemaleAge85to89     | 17132      |
| Morocco | 1995           | FemaleAge90to94     | 4084       |
| Morocco | 1995           | FemaleAge95to99     | 429        |
| Morocco | 1995           | FemaleAgeAbov e100  | 21         |
| Morocco | 1995           | FemaleLactAge15to19 | 72674      |
| Morocco | 1995           | FemaleLactAge20to24 | 169357     |
| Morocco | 1995           | FemaleLactAge25to29 | 188500     |
| Morocco | 1995           | FemaleLactAge30to34 | 155549     |
| Morocco | 1995           | FemaleLactAge35to39 | 91177      |
| Morocco | 1995           | FemaleLactAge40to44 | 36270      |
| Morocco | 1995           | FemaleLactAge45to49 | 9810       |
| Morocco | 1995           | FemalePregAge15to19 | 54505      |
| Morocco | 1995           | FemalePregAge20to24 | 127018     |
| Morocco | 1995           | FemalePregAge25to29 | 141375     |
| Morocco | 1995           | FemalePregAge30to34 | 116662     |
| Morocco | 1995           | FemalePregAge35to39 | 68382      |
| Morocco | 1995           | FemalePregAge40to44 | 27203      |
| Morocco | 1995           | FemalePregAge45to49 | 7358       |
| Morocco | 1995           | MaleAge0to4         | 1726841    |
| Morocco | 1995           | MaleAge10to14       | 1738513    |
| Morocco | 1995           | MaleAge15to19       | 1511206    |
| Morocco | 1995           | MaleAge20to24       | 1279023    |
| Morocco | 1995           | MaleAge25to29       | 1104213    |
| Morocco | 1995           | MaleAge30to34       | 1005093    |
| Morocco | 1995           | MaleAge35to39       | 852815     |
| Morocco | 1995           | MaleAge40to44       | 662277     |
| Morocco | 1995           | MaleAge45to49       | 400770     |
| Morocco | 1995           | MaleAge50to54       | 305656     |
| Morocco | 1995           | MaleAge55to59       | 298455     |
| Morocco | 1995           | MaleAge5to9         | 1723074    |
| Morocco | 1995           | MaleAge60to64       | 278264     |
| Morocco | 1995           | MaleAge65to69       | 232081     |
| Morocco | 1995           | MaleAge70to74       | 141269     |
| Morocco | 1995           | MaleAge75to79       | 67296      |
| Morocco | 1995           | MaleAge80to84       | 28436      |
| Morocco | 1995           | MaleAge85to89       | 10523      |
| Morocco | 1995           | MaleAge90to94       | 2164       |
| Morocco | 1995           | MaleAge95to99       | 188        |
| Morocco | 1995           | MaleAgeAbov e100    | 8          |
| Morocco | 1996           | FemaleAge0to4       | 1647148    |
| Morocco | 1996           | FemaleAge10to14     | 1678666    |
| Morocco | 1996           | FemaleAge15to19     | 1380328    |
| Morocco | 1996           | FemaleAge20to24     | 1019874    |
| Morocco | 1996           | FemaleAge25to29     | 841968     |
| Morocco | 1996           | FemaleAge30to34     | 781767     |
| Morocco | 1996           | FemaleAge35to39     | 723880     |
| Morocco | 1996           | FemaleAge40to44     | 644394     |
| Morocco | 1996           | FemaleAge45to49     | 434289     |
| Morocco | 1996           | FemaleAge50to54     | 377036     |
| Morocco | 1996           | FemaleAge55to59     | 361734     |
| Morocco | 1996           | FemaleAge5to9       | 1635479    |
| Morocco | 1996           | FemaleAge60to64     | 333150     |
| Morocco | 1996           | FemaleAge65to69     | 290195     |
| Morocco | 1996           | FemaleAge70to74     | 199756     |
| Morocco | 1996           | FemaleAge75to79     | 102856     |
| Morocco | 1996           | FemaleAge80to84     | 44957      |
| Morocco | 1996           | FemaleAge85to89     | 17952      |
| Morocco | 1996           | FemaleAge90to94     | 4852       |
| Morocco | 1996           | FemaleAge95to99     | 557        |
| Morocco | 1996           | FemaleAgeAbov e100  | 23         |

Dietary calcium and zinc deficiency risks are decreasing but remain prevalent

| Country | Reference year | Age/gender group    | Population |
|---------|----------------|---------------------|------------|
| Morocco | 1996           | FemaleLactAge15to19 | 68306      |
| Morocco | 1996           | FemaleLactAge20to24 | 155365     |
| Morocco | 1996           | FemaleLactAge25to29 | 166769     |
| Morocco | 1996           | FemaleLactAge30to34 | 137854     |
| Morocco | 1996           | FemaleLactAge35to39 | 88155      |
| Morocco | 1996           | FemaleLactAge40to44 | 33890      |
| Morocco | 1996           | FemaleLactAge45to49 | 8906       |
| Morocco | 1996           | FemalePregAge15to19 | 51230      |
| Morocco | 1996           | FemalePregAge20to24 | 116524     |
| Morocco | 1996           | FemalePregAge25to29 | 125077     |
| Morocco | 1996           | FemalePregAge30to34 | 103391     |
| Morocco | 1996           | FemalePregAge35to39 | 66116      |
| Morocco | 1996           | FemalePregAge40to44 | 25418      |
| Morocco | 1996           | FemalePregAge45to49 | 6680       |
| Morocco | 1996           | MaleAge0to4         | 1728543    |
| Morocco | 1996           | MaleAge10to14       | 1740194    |
| Morocco | 1996           | MaleAge15to19       | 1538939    |
| Morocco | 1996           | MaleAge20to24       | 1296801    |
| Morocco | 1996           | MaleAge25to29       | 1115841    |
| Morocco | 1996           | MaleAge30to34       | 1019831    |
| Morocco | 1996           | MaleAge35to39       | 881639     |
| Morocco | 1996           | MaleAge40to44       | 703933     |
| Morocco | 1996           | MaleAge45to49       | 440338     |
| Morocco | 1996           | MaleAge50to54       | 311014     |
| Morocco | 1996           | MaleAge55to59       | 293962     |
| Morocco | 1996           | MaleAge5to9         | 1710805    |
| Morocco | 1996           | MaleAge60to64       | 277105     |
| Morocco | 1996           | MaleAge65to69       | 236153     |
| Morocco | 1996           | MaleAge70to74       | 150602     |
| Morocco | 1996           | MaleAge75to79       | 72770      |
| Morocco | 1996           | MaleAge80to84       | 30090      |
| Morocco | 1996           | MaleAge85to89       | 11134      |
| Morocco | 1996           | MaleAge90to94       | 2663       |
| Morocco | 1996           | MaleAge95to99       | 243        |
| Morocco | 1996           | MaleAgeAbov e100    | 9          |
| Morocco | 1997           | FemaleAge0to4       | 1626032    |
| Morocco | 1997           | FemaleAge10to14     | 1672899    |
| Morocco | 1997           | FemaleAge15to19     | 1419997    |
| Morocco | 1997           | FemaleAge20to24     | 1044260    |
| Morocco | 1997           | FemaleAge25to29     | 861743     |
| Morocco | 1997           | FemaleAge30to34     | 798583     |
| Morocco | 1997           | FemaleAge35to39     | 753337     |
| Morocco | 1997           | FemaleAge40to44     | 680464     |
| Morocco | 1997           | FemaleAge45to49     | 480234     |
| Morocco | 1997           | FemaleAge50to54     | 374547     |
| Morocco | 1997           | FemaleAge55to59     | 362756     |
| Morocco | 1997           | FemaleAge5to9       | 1629157    |
| Morocco | 1997           | FemaleAge60to64     | 335093     |
| Morocco | 1997           | FemaleAge65to69     | 293399     |
| Morocco | 1997           | FemaleAge70to74     | 211127     |
| Morocco | 1997           | FemaleAge75to79     | 111582     |
| Morocco | 1997           | FemaleAge80to84     | 47190      |
| Morocco | 1997           | FemaleAge85to89     | 18387      |
| Morocco | 1997           | FemaleAge90to94     | 5454       |
| Morocco | 1997           | FemaleAge95to99     | 632        |
| Morocco | 1997           | FemaleAgeAbov e100  | 25         |
| Morocco | 1997           | FemaleLactAge15to19 | 68306      |
| Morocco | 1997           | FemaleLactAge20to24 | 155365     |
| Morocco | 1997           | FemaleLactAge25to29 | 166769     |
| Morocco | 1997           | FemaleLactAge30to34 | 137854     |
| Morocco | 1997           | FemaleLactAge35to39 | 88155      |
| Morocco | 1997           | FemaleLactAge40to44 | 33890      |
| Morocco | 1997           | FemaleLactAge45to49 | 8906       |
| Morocco | 1997           | FemalePregAge15to19 | 51230      |
| Morocco | 1997           | FemalePregAge20to24 | 116524     |
| Morocco | 1997           | FemalePregAge25to29 | 125077     |
| Morocco | 1997           | FemalePregAge30to34 | 103391     |
| Morocco | 1997           | FemalePregAge35to39 | 66116      |
| Morocco | 1997           | FemalePregAge40to44 | 25418      |
| Morocco | 1997           | FemalePregAge45to49 | 6680       |
| Morocco | 1997           | MaleAge0to4         | 1708155    |
| Morocco | 1997           | MaleAge10to14       | 1735056    |
| Morocco | 1997           | MaleAge15to19       | 1574887    |
| Morocco | 1997           | MaleAge20to24       | 1316077    |
| Morocco | 1997           | MaleAge25to29       | 1128834    |
| Morocco | 1997           | MaleAge30to34       | 1029794    |
| Morocco | 1997           | MaleAge35to39       | 911340     |
| Morocco | 1997           | MaleAge40to44       | 740490     |
| Morocco | 1997           | MaleAge45to49       | 489717     |
| Morocco | 1997           | MaleAge50to54       | 319920     |
| Morocco | 1997           | MaleAge55to59       | 289849     |
| Morocco | 1997           | MaleAge5to9         | 1706390    |
| Morocco | 1997           | MaleAge60to64       | 276752     |
| Morocco | 1997           | MaleAge65to69       | 238718     |
| Morocco | 1997           | MaleAge70to74       | 160700     |
| Morocco | 1997           | MaleAge75to79       | 78617      |
| Morocco | 1997           | MaleAge80to84       | 31592      |
| Morocco | 1997           | MaleAge85to89       | 11463      |

Dietary calcium and zinc deficiency risks are decreasing but remain prevalent

| Country | Reference year | Age/gender group    | Population |
|---------|----------------|---------------------|------------|
| Morocco | 1997           | MaleAge90to94       | 3066       |
| Morocco | 1997           | MaleAge95to99       | 316        |
| Morocco | 1997           | MaleAgeAbov e100    | 10         |
| Morocco | 1998           | FemaleAge0to4       | 1589687    |
| Morocco | 1998           | FemaleAge10to14     | 1660072    |
| Morocco | 1998           | FemaleAge15to19     | 1461798    |
| Morocco | 1998           | FemaleAge20to24     | 1070235    |
| Morocco | 1998           | FemaleAge25to29     | 882522     |
| Morocco | 1998           | FemaleAge30to34     | 814416     |
| Morocco | 1998           | FemaleAge35to39     | 781894     |
| Morocco | 1998           | FemaleAge40to44     | 712702     |
| Morocco | 1998           | FemaleAge45to49     | 533821     |
| Morocco | 1998           | FemaleAge50to54     | 375153     |
| Morocco | 1998           | FemaleAge55to59     | 364350     |
| Morocco | 1998           | FemaleAge5to9       | 1628964    |
| Morocco | 1998           | FemaleAge60to64     | 337648     |
| Morocco | 1998           | FemaleAge65to69     | 295899     |
| Morocco | 1998           | FemaleAge70to74     | 222504     |
| Morocco | 1998           | FemaleAge75to79     | 121005     |
| Morocco | 1998           | FemaleAge80to84     | 49646      |
| Morocco | 1998           | FemaleAge85to89     | 18532      |
| Morocco | 1998           | FemaleAge90to94     | 5707       |
| Morocco | 1998           | FemaleAge95to99     | 766        |
| Morocco | 1998           | FemaleAgeAbov e100  | 28         |
| Morocco | 1998           | FemaleLactAge15to19 | 68306      |
| Morocco | 1998           | FemaleLactAge20to24 | 155365     |
| Morocco | 1998           | FemaleLactAge25to29 | 166769     |
| Morocco | 1998           | FemaleLactAge30to34 | 137854     |
| Morocco | 1998           | FemaleLactAge35to39 | 88155      |
| Morocco | 1998           | FemaleLactAge40to44 | 33890      |
| Morocco | 1998           | FemaleLactAge45to49 | 8906       |
| Morocco | 1998           | FemalePregAge15to19 | 51230      |
| Morocco | 1998           | FemalePregAge20to24 | 116524     |
| Morocco | 1998           | FemalePregAge25to29 | 125077     |
| Morocco | 1998           | FemalePregAge30to34 | 103391     |
| Morocco | 1998           | FemalePregAge35to39 | 66116      |
| Morocco | 1998           | FemalePregAge40to44 | 25418      |
| Morocco | 1998           | FemalePregAge45to49 | 6680       |
| Morocco | 1998           | MaleAge0to4         | 1672145    |
| Morocco | 1998           | MaleAge10to14       | 1724713    |
| Morocco | 1998           | MaleAge15to19       | 1614293    |
| Morocco | 1998           | MaleAge20to24       | 1337451    |
| Morocco | 1998           | MaleAge25to29       | 1142044    |
| Morocco | 1998           | MaleAge30to34       | 1035505    |
| Morocco | 1998           | MaleAge35to39       | 940081     |
| Morocco | 1998           | MaleAge40to44       | 772905     |
| Morocco | 1998           | MaleAge45to49       | 544378     |
| Morocco | 1998           | MaleAge50to54       | 334038     |
| Morocco | 1998           | MaleAge55to59       | 286984     |
| Morocco | 1998           | MaleAge5to9         | 1707263    |
| Morocco | 1998           | MaleAge60to64       | 276584     |
| Morocco | 1998           | MaleAge65to69       | 240301     |
| Morocco | 1998           | MaleAge70to74       | 170753     |
| Morocco | 1998           | MaleAge75to79       | 84808      |
| Morocco | 1998           | MaleAge80to84       | 33136      |
| Morocco | 1998           | MaleAge85to89       | 11536      |
| Morocco | 1998           | MaleAge90to94       | 3236       |
| Morocco | 1998           | MaleAge95to99       | 392        |
| Morocco | 1998           | MaleAgeAbov e100    | 10         |
| Morocco | 1999           | FemaleAge0to4       | 1550850    |
| Morocco | 1999           | FemaleAge10to14     | 1645763    |
| Morocco | 1999           | FemaleAge15to19     | 1496545    |
| Morocco | 1999           | FemaleAge20to24     | 1098589    |
| Morocco | 1999           | FemaleAge25to29     | 902964     |
| Morocco | 1999           | FemaleAge30to34     | 829719     |
| Morocco | 1999           | FemaleAge35to39     | 807355     |
| Morocco | 1999           | FemaleAge40to44     | 743172     |
| Morocco | 1999           | FemaleAge45to49     | 586460     |
| Morocco | 1999           | FemaleAge50to54     | 384604     |
| Morocco | 1999           | FemaleAge55to59     | 365330     |
| Morocco | 1999           | FemaleAge5to9       | 1628629    |
| Morocco | 1999           | FemaleAge60to64     | 339967     |
| Morocco | 1999           | FemaleAge65to69     | 298490     |
| Morocco | 1999           | FemaleAge70to74     | 232742     |
| Morocco | 1999           | FemaleAge75to79     | 130747     |
| Morocco | 1999           | FemaleAge80to84     | 52828      |
| Morocco | 1999           | FemaleAge85to89     | 18487      |
| Morocco | 1999           | FemaleAge90to94     | 5447       |
| Morocco | 1999           | FemaleAge95to99     | 812        |
| Morocco | 1999           | FemaleAgeAbov e100  | 30         |
| Morocco | 1999           | FemaleLactAge15to19 | 68306      |
| Morocco | 1999           | FemaleLactAge20to24 | 155365     |
| Morocco | 1999           | FemaleLactAge25to29 | 166769     |
| Morocco | 1999           | FemaleLactAge30to34 | 137854     |
| Morocco | 1999           | FemaleLactAge35to39 | 88155      |
| Morocco | 1999           | FemaleLactAge40to44 | 33890      |
| Morocco | 1999           | FemaleLactAge45to49 | 8906       |
| Morocco | 1999           | FemalePregAge15to19 | 51230      |

Dietary calcium and zinc deficiency risks are decreasing but remain prevalent

| Country    | Reference year | Age/gender group    | Population |
|------------|----------------|---------------------|------------|
| Morocco    | 1999           | FemalePregAge20to24 | 116524     |
| Morocco    | 1999           | FemalePregAge25to29 | 125077     |
| Morocco    | 1999           | FemalePregAge30to34 | 103391     |
| Morocco    | 1999           | FemalePregAge35to39 | 66116      |
| Morocco    | 1999           | FemalePregAge40to44 | 25418      |
| Morocco    | 1999           | FemalePregAge45to49 | 6680       |
| Morocco    | 1999           | MaleAge0to4         | 1632891    |
| Morocco    | 1999           | MaleAge10to14       | 1713787    |
| Morocco    | 1999           | MaleAge15to19       | 1648302    |
| Morocco    | 1999           | MaleAge20to24       | 1361757    |
| Morocco    | 1999           | MaleAge25to29       | 1154078    |
| Morocco    | 1999           | MaleAge30to34       | 1038586    |
| Morocco    | 1999           | MaleAge35to39       | 964148     |
| Morocco    | 1999           | MaleAge40to44       | 803235     |
| Morocco    | 1999           | MaleAge45to49       | 597236     |
| Morocco    | 1999           | MaleAge50to54       | 355794     |
| Morocco    | 1999           | MaleAge55to59       | 286556     |
| Morocco    | 1999           | MaleAge5to9         | 1706766    |
| Morocco    | 1999           | MaleAge60to64       | 275643     |
| Morocco    | 1999           | MaleAge65to69       | 241488     |
| Morocco    | 1999           | MaleAge70to74       | 179476     |
| Morocco    | 1999           | MaleAge75to79       | 91396      |
| Morocco    | 1999           | MaleAge80to84       | 35007      |
| Morocco    | 1999           | MaleAge85to89       | 11380      |
| Morocco    | 1999           | MaleAge90to94       | 3047       |
| Morocco    | 1999           | MaleAge95to99       | 409        |
| Morocco    | 1999           | MaleAgeAbove100     | 11         |
| Mozambique | 1992           | FemaleAge0to4       | 1237525    |
| Mozambique | 1992           | FemaleAge10to14     | 953926     |
| Mozambique | 1992           | FemaleAge15to19     | 673749     |
| Mozambique | 1992           | FemaleAge20to24     | 379254     |
| Mozambique | 1992           | FemaleAge25to29     | 281373     |
| Mozambique | 1992           | FemaleAge30to34     | 245094     |
| Mozambique | 1992           | FemaleAge35to39     | 232851     |
| Mozambique | 1992           | FemaleAge40to44     | 241858     |
| Mozambique | 1992           | FemaleAge45to49     | 231867     |
| Mozambique | 1992           | FemaleAge50to54     | 229675     |
| Mozambique | 1992           | FemaleAge55to59     | 191338     |
| Mozambique | 1992           | FemaleAge5to9       | 1066644    |
| Mozambique | 1992           | FemaleAge60to64     | 154192     |
| Mozambique | 1992           | FemaleAge65to69     | 115777     |
| Mozambique | 1992           | FemaleAge70to74     | 78159      |
| Mozambique | 1992           | FemaleAge75to79     | 44977      |
| Mozambique | 1992           | FemaleAge80to84     | 20553      |
| Mozambique | 1992           | FemaleAge85to89     | 6878       |
| Mozambique | 1992           | FemaleAge90to94     | 1547       |
| Mozambique | 1992           | FemaleAge95to99     | 196        |
| Mozambique | 1992           | FemaleAgeAbove100   | 10         |
| Mozambique | 1992           | FemaleLactAge15to19 | 94491      |
| Mozambique | 1992           | FemaleLactAge20to24 | 172290     |
| Mozambique | 1992           | FemaleLactAge25to29 | 141602     |
| Mozambique | 1992           | FemaleLactAge30to34 | 104196     |
| Mozambique | 1992           | FemaleLactAge35to39 | 71324      |
| Mozambique | 1992           | FemaleLactAge40to44 | 37125      |
| Mozambique | 1992           | FemaleLactAge45to49 | 21103      |
| Mozambique | 1992           | FemalePregAge15to19 | 70868      |
| Mozambique | 1992           | FemalePregAge20to24 | 129217     |
| Mozambique | 1992           | FemalePregAge25to29 | 106201     |
| Mozambique | 1992           | FemalePregAge30to34 | 78147      |
| Mozambique | 1992           | FemalePregAge35to39 | 53493      |
| Mozambique | 1992           | FemalePregAge40to44 | 27843      |
| Mozambique | 1992           | FemalePregAge45to49 | 15827      |
| Mozambique | 1992           | MaleAge0to4         | 1234932    |
| Mozambique | 1992           | MaleAge10to14       | 933507     |
| Mozambique | 1992           | MaleAge15to19       | 771387     |
| Mozambique | 1992           | MaleAge20to24       | 591608     |
| Mozambique | 1992           | MaleAge25to29       | 449754     |
| Mozambique | 1992           | MaleAge30to34       | 358862     |
| Mozambique | 1992           | MaleAge35to39       | 300413     |
| Mozambique | 1992           | MaleAge40to44       | 257338     |
| Mozambique | 1992           | MaleAge45to49       | 221344     |
| Mozambique | 1992           | MaleAge50to54       | 186059     |
| Mozambique | 1992           | MaleAge55to59       | 152739     |
| Mozambique | 1992           | MaleAge5to9         | 1065438    |
| Mozambique | 1992           | MaleAge60to64       | 120821     |
| Mozambique | 1992           | MaleAge65to69       | 88507      |
| Mozambique | 1992           | MaleAge70to74       | 57764      |
| Mozambique | 1992           | MaleAge75to79       | 31440      |
| Mozambique | 1992           | MaleAge80to84       | 12887      |
| Mozambique | 1992           | MaleAge85to89       | 3691       |
| Mozambique | 1992           | MaleAge90to94       | 722        |
| Mozambique | 1992           | MaleAge95to99       | 72         |
| Mozambique | 1992           | MaleAgeAbove100     | 2          |
| Mozambique | 1993           | FemaleAge0to4       | 1289737    |
| Mozambique | 1993           | FemaleAge10to14     | 965872     |
| Mozambique | 1993           | FemaleAge15to19     | 703745     |
| Mozambique | 1993           | FemaleAge20to24     | 429362     |
| Mozambique | 1993           | FemaleAge25to29     | 321626     |

Dietary calcium and zinc deficiency risks are decreasing but remain prevalent

| Country    | Reference year | Age/gender group    | Population |
|------------|----------------|---------------------|------------|
| Mozambique | 1993           | FemaleAge30to34     | 271534     |
| Mozambique | 1993           | FemaleAge35to39     | 249977     |
| Mozambique | 1993           | FemaleAge40to44     | 250605     |
| Mozambique | 1993           | FemaleAge45to49     | 236732     |
| Mozambique | 1993           | FemaleAge50to54     | 235484     |
| Mozambique | 1993           | FemaleAge55to59     | 195379     |
| Mozambique | 1993           | FemaleAge5to9       | 1088012    |
| Mozambique | 1993           | FemaleAge60to64     | 157856     |
| Mozambique | 1993           | FemaleAge65to69     | 118650     |
| Mozambique | 1993           | FemaleAge70to74     | 80256      |
| Mozambique | 1993           | FemaleAge75to79     | 46300      |
| Mozambique | 1993           | FemaleAge80to84     | 21252      |
| Mozambique | 1993           | FemaleAge85to89     | 7136       |
| Mozambique | 1993           | FemaleAge90to94     | 1643       |
| Mozambique | 1993           | FemaleAge95to99     | 236        |
| Mozambique | 1993           | FemaleAgeAbove100   | 11         |
| Mozambique | 1993           | FemaleLactAge15to19 | 94491      |
| Mozambique | 1993           | FemaleLactAge20to24 | 172290     |
| Mozambique | 1993           | FemaleLactAge25to29 | 141602     |
| Mozambique | 1993           | FemaleLactAge30to34 | 104196     |
| Mozambique | 1993           | FemaleLactAge35to39 | 71324      |
| Mozambique | 1993           | FemaleLactAge40to44 | 37125      |
| Mozambique | 1993           | FemaleLactAge45to49 | 21103      |
| Mozambique | 1993           | FemalePregAge15to19 | 70868      |
| Mozambique | 1993           | FemalePregAge20to24 | 129217     |
| Mozambique | 1993           | FemalePregAge25to29 | 106201     |
| Mozambique | 1993           | FemalePregAge30to34 | 78147      |
| Mozambique | 1993           | FemalePregAge35to39 | 53493      |
| Mozambique | 1993           | FemalePregAge40to44 | 27843      |
| Mozambique | 1993           | FemalePregAge45to49 | 15827      |
| Mozambique | 1993           | MaleAge0to4         | 1289631    |
| Mozambique | 1993           | MaleAge10to14       | 948991     |
| Mozambique | 1993           | MaleAge15to19       | 789188     |
| Mozambique | 1993           | MaleAge20to24       | 613974     |
| Mozambique | 1993           | MaleAge25to29       | 477905     |
| Mozambique | 1993           | MaleAge30to34       | 389680     |
| Mozambique | 1993           | MaleAge35to39       | 324371     |
| Mozambique | 1993           | MaleAge40to44       | 273440     |
| Mozambique | 1993           | MaleAge45to49       | 229613     |
| Mozambique | 1993           | MaleAge50to54       | 192142     |
| Mozambique | 1993           | MaleAge55to59       | 157046     |
| Mozambique | 1993           | MaleAge5to9         | 1086453    |
| Mozambique | 1993           | MaleAge60to64       | 124376     |
| Mozambique | 1993           | MaleAge65to69       | 91168      |
| Mozambique | 1993           | MaleAge70to74       | 59455      |
| Mozambique | 1993           | MaleAge75to79       | 32477      |
| Mozambique | 1993           | MaleAge80to84       | 13473      |
| Mozambique | 1993           | MaleAge85to89       | 3822       |
| Mozambique | 1993           | MaleAge90to94       | 782        |
| Mozambique | 1993           | MaleAge95to99       | 95         |
| Mozambique | 1993           | MaleAgeAbove100     | 2          |
| Mozambique | 1994           | FemaleAge0to4       | 1345608    |
| Mozambique | 1994           | FemaleAge10to14     | 975949     |
| Mozambique | 1994           | FemaleAge15to19     | 724647     |
| Mozambique | 1994           | FemaleAge20to24     | 476731     |
| Mozambique | 1994           | FemaleAge25to29     | 364391     |
| Mozambique | 1994           | FemaleAge30to34     | 301588     |
| Mozambique | 1994           | FemaleAge35to39     | 269601     |
| Mozambique | 1994           | FemaleAge40to44     | 261308     |
| Mozambique | 1994           | FemaleAge45to49     | 241861     |
| Mozambique | 1994           | FemaleAge50to54     | 241072     |
| Mozambique | 1994           | FemaleAge55to59     | 199701     |
| Mozambique | 1994           | FemaleAge5to9       | 1114062    |
| Mozambique | 1994           | FemaleAge60to64     | 161639     |
| Mozambique | 1994           | FemaleAge65to69     | 121725     |
| Mozambique | 1994           | FemaleAge70to74     | 82432      |
| Mozambique | 1994           | FemaleAge75to79     | 47511      |
| Mozambique | 1994           | FemaleAge80to84     | 21660      |
| Mozambique | 1994           | FemaleAge85to89     | 7134       |
| Mozambique | 1994           | FemaleAge90to94     | 1617       |
| Mozambique | 1994           | FemaleAge95to99     | 240        |
| Mozambique | 1994           | FemaleAgeAbove100   | 11         |
| Mozambique | 1994           | FemaleLactAge15to19 | 94491      |
| Mozambique | 1994           | FemaleLactAge20to24 | 172290     |
| Mozambique | 1994           | FemaleLactAge25to29 | 141602     |
| Mozambique | 1994           | FemaleLactAge30to34 | 104196     |
| Mozambique | 1994           | FemaleLactAge35to39 | 71324      |
| Mozambique | 1994           | FemaleLactAge40to44 | 37125      |
| Mozambique | 1994           | FemaleLactAge45to49 | 21103      |
| Mozambique | 1994           | FemalePregAge15to19 | 70868      |
| Mozambique | 1994           | FemalePregAge20to24 | 129217     |
| Mozambique | 1994           | FemalePregAge25to29 | 106201     |
| Mozambique | 1994           | FemalePregAge30to34 | 78147      |
| Mozambique | 1994           | FemalePregAge35to39 | 53493      |
| Mozambique | 1994           | FemalePregAge40to44 | 27843      |
| Mozambique | 1994           | FemalePregAge45to49 | 15827      |
| Mozambique | 1994           | MaleAge0to4         | 1349040    |
| Mozambique | 1994           | MaleAge10to14       | 967099     |

Dietary calcium and zinc deficiency risks are decreasing but remain prevalent

| Country    | Reference year | Age/gender group    | Population |
|------------|----------------|---------------------|------------|
| Mozambique | 1994           | MaleAge15to19       | 807149     |
| Mozambique | 1994           | MaleAge20to24       | 632309     |
| Mozambique | 1994           | MaleAge25to29       | 501127     |
| Mozambique | 1994           | MaleAge30to34       | 420925     |
| Mozambique | 1994           | MaleAge35to39       | 350623     |
| Mozambique | 1994           | MaleAge40to44       | 293078     |
| Mozambique | 1994           | MaleAge45to49       | 240068     |
| Mozambique | 1994           | MaleAge50to54       | 198750     |
| Mozambique | 1994           | MaleAge55to59       | 161933     |
| Mozambique | 1994           | MaleAge5to9         | 1111482    |
| Mozambique | 1994           | MaleAge60to64       | 128259     |
| Mozambique | 1994           | MaleAge65to69       | 94196      |
| Mozambique | 1994           | MaleAge70to74       | 61336      |
| Mozambique | 1994           | MaleAge75to79       | 33414      |
| Mozambique | 1994           | MaleAge80to84       | 13795      |
| Mozambique | 1994           | MaleAge85to89       | 3808       |
| Mozambique | 1994           | MaleAge90to94       | 757        |
| Mozambique | 1994           | MaleAge95to99       | 97         |
| Mozambique | 1994           | MaleAgeAbov e100    | 2          |
| Mozambique | 1995           | FemaleAge0to4       | 1392532    |
| Mozambique | 1995           | FemaleAge10to14     | 984674     |
| Mozambique | 1995           | FemaleAge15to19     | 736441     |
| Mozambique | 1995           | FemaleAge20to24     | 515998     |
| Mozambique | 1995           | FemaleAge25to29     | 408073     |
| Mozambique | 1995           | FemaleAge30to34     | 334286     |
| Mozambique | 1995           | FemaleAge35to39     | 290991     |
| Mozambique | 1995           | FemaleAge40to44     | 273581     |
| Mozambique | 1995           | FemaleAge45to49     | 247308     |
| Mozambique | 1995           | FemaleAge50to54     | 245734     |
| Mozambique | 1995           | FemaleAge55to59     | 203972     |
| Mozambique | 1995           | FemaleAge5to9       | 1143326    |
| Mozambique | 1995           | FemaleAge60to64     | 165192     |
| Mozambique | 1995           | FemaleAge65to69     | 124773     |
| Mozambique | 1995           | FemaleAge70to74     | 84574      |
| Mozambique | 1995           | FemaleAge75to79     | 48589      |
| Mozambique | 1995           | FemaleAge80to84     | 21799      |
| Mozambique | 1995           | FemaleAge85to89     | 6846       |
| Mozambique | 1995           | FemaleAge90to94     | 1393       |
| Mozambique | 1995           | FemaleAge95to99     | 168        |
| Mozambique | 1995           | FemaleAgeAbov e100  | 12         |
| Mozambique | 1995           | FemaleLactAge15to19 | 94491      |
| Mozambique | 1995           | FemaleLactAge20to24 | 172290     |
| Mozambique | 1995           | FemaleLactAge25to29 | 141602     |
| Mozambique | 1995           | FemaleLactAge30to34 | 104196     |
| Mozambique | 1995           | FemaleLactAge35to39 | 71324      |
| Mozambique | 1995           | FemaleLactAge40to44 | 37125      |
| Mozambique | 1995           | FemaleLactAge45to49 | 21103      |
| Mozambique | 1995           | FemalePregAge15to19 | 70868      |
| Mozambique | 1995           | FemalePregAge20to24 | 129217     |
| Mozambique | 1995           | FemalePregAge25to29 | 106201     |
| Mozambique | 1995           | FemalePregAge30to34 | 78147      |
| Mozambique | 1995           | FemalePregAge35to39 | 53493      |
| Mozambique | 1995           | FemalePregAge40to44 | 27843      |
| Mozambique | 1995           | FemalePregAge45to49 | 15827      |
| Mozambique | 1995           | MaleAge0to4         | 1400239    |
| Mozambique | 1995           | MaleAge10to14       | 985305     |
| Mozambique | 1995           | MaleAge15to19       | 823656     |
| Mozambique | 1995           | MaleAge20to24       | 646537     |
| Mozambique | 1995           | MaleAge25to29       | 518718     |
| Mozambique | 1995           | MaleAge30to34       | 449216     |
| Mozambique | 1995           | MaleAge35to39       | 378146     |
| Mozambique | 1995           | MaleAge40to44       | 315125     |
| Mozambique | 1995           | MaleAge45to49       | 252846     |
| Mozambique | 1995           | MaleAge50to54       | 205744     |
| Mozambique | 1995           | MaleAge55to59       | 167018     |
| Mozambique | 1995           | MaleAge5to9         | 1139785    |
| Mozambique | 1995           | MaleAge60to64       | 132183     |
| Mozambique | 1995           | MaleAge65to69       | 97363      |
| Mozambique | 1995           | MaleAge70to74       | 63334      |
| Mozambique | 1995           | MaleAge75to79       | 34254      |
| Mozambique | 1995           | MaleAge80to84       | 13862      |
| Mozambique | 1995           | MaleAge85to89       | 3606       |
| Mozambique | 1995           | MaleAge90to94       | 588        |
| Mozambique | 1995           | MaleAge95to99       | 53         |
| Mozambique | 1995           | MaleAgeAbov e100    | 2          |
| Mozambique | 1996           | FemaleAge0to4       | 1436315    |
| Mozambique | 1996           | FemaleAge10to14     | 1008109    |
| Mozambique | 1996           | FemaleAge15to19     | 722985     |
| Mozambique | 1996           | FemaleAge20to24     | 495969     |
| Mozambique | 1996           | FemaleAge25to29     | 392068     |
| Mozambique | 1996           | FemaleAge30to34     | 324940     |
| Mozambique | 1996           | FemaleAge35to39     | 288335     |
| Mozambique | 1996           | FemaleAge40to44     | 275260     |
| Mozambique | 1996           | FemaleAge45to49     | 246221     |
| Mozambique | 1996           | FemaleAge50to54     | 250549     |
| Mozambique | 1996           | FemaleAge55to59     | 208780     |
| Mozambique | 1996           | FemaleAge5to9       | 1181063    |
| Mozambique | 1996           | FemaleAge60to64     | 168725     |

Dietary calcium and zinc deficiency risks are decreasing but remain prevalent

| Country    | Reference year | Age/gender group    | Population |
|------------|----------------|---------------------|------------|
| Mozambique | 1996           | FemaleAge65to69     | 127815     |
| Mozambique | 1996           | FemaleAge70to74     | 87070      |
| Mozambique | 1996           | FemaleAge75to79     | 50592      |
| Mozambique | 1996           | FemaleAge80to84     | 23282      |
| Mozambique | 1996           | FemaleAge85to89     | 7700       |
| Mozambique | 1996           | FemaleAge90to94     | 1671       |
| Mozambique | 1996           | FemaleAge95to99     | 196        |
| Mozambique | 1996           | FemaleAgeAbove100   | 13         |
| Mozambique | 1996           | FemaleLactAge15to19 | 109411     |
| Mozambique | 1996           | FemaleLactAge20to24 | 194988     |
| Mozambique | 1996           | FemaleLactAge25to29 | 167161     |
| Mozambique | 1996           | FemaleLactAge30to34 | 121546     |
| Mozambique | 1996           | FemaleLactAge35to39 | 81367      |
| Mozambique | 1996           | FemaleLactAge40to44 | 42498      |
| Mozambique | 1996           | FemaleLactAge45to49 | 25578      |
| Mozambique | 1996           | FemalePregAge15to19 | 82058      |
| Mozambique | 1996           | FemalePregAge20to24 | 146241     |
| Mozambique | 1996           | FemalePregAge25to29 | 125371     |
| Mozambique | 1996           | FemalePregAge30to34 | 91160      |
| Mozambique | 1996           | FemalePregAge35to39 | 61025      |
| Mozambique | 1996           | FemalePregAge40to44 | 31874      |
| Mozambique | 1996           | FemalePregAge45to49 | 19184      |
| Mozambique | 1996           | MaleAge0to4         | 1448547    |
| Mozambique | 1996           | MaleAge10to14       | 1011974    |
| Mozambique | 1996           | MaleAge15to19       | 854751     |
| Mozambique | 1996           | MaleAge20to24       | 675623     |
| Mozambique | 1996           | MaleAge25to29       | 534736     |
| Mozambique | 1996           | MaleAge30to34       | 457579     |
| Mozambique | 1996           | MaleAge35to39       | 387683     |
| Mozambique | 1996           | MaleAge40to44       | 324191     |
| Mozambique | 1996           | MaleAge45to49       | 261012     |
| Mozambique | 1996           | MaleAge50to54       | 210711     |
| Mozambique | 1996           | MaleAge55to59       | 170399     |
| Mozambique | 1996           | MaleAge5to9         | 1173801    |
| Mozambique | 1996           | MaleAge60to64       | 134672     |
| Mozambique | 1996           | MaleAge65to69       | 99566      |
| Mozambique | 1996           | MaleAge70to74       | 65249      |
| Mozambique | 1996           | MaleAge75to79       | 35810      |
| Mozambique | 1996           | MaleAge80to84       | 15018      |
| Mozambique | 1996           | MaleAge85to89       | 4204       |
| Mozambique | 1996           | MaleAge90to94       | 718        |
| Mozambique | 1996           | MaleAge95to99       | 62         |
| Mozambique | 1996           | MaleAgeAbove100     | 2          |
| Mozambique | 1997           | FemaleAge0to4       | 1472088    |
| Mozambique | 1997           | FemaleAge10to14     | 1033281    |
| Mozambique | 1997           | FemaleAge15to19     | 734153     |
| Mozambique | 1997           | FemaleAge20to24     | 510032     |
| Mozambique | 1997           | FemaleAge25to29     | 421241     |
| Mozambique | 1997           | FemaleAge30to34     | 345698     |
| Mozambique | 1997           | FemaleAge35to39     | 302746     |
| Mozambique | 1997           | FemaleAge40to44     | 286427     |
| Mozambique | 1997           | FemaleAge45to49     | 253178     |
| Mozambique | 1997           | FemaleAge50to54     | 254651     |
| Mozambique | 1997           | FemaleAge55to59     | 213673     |
| Mozambique | 1997           | FemaleAge5to9       | 1215165    |
| Mozambique | 1997           | FemaleAge60to64     | 172082     |
| Mozambique | 1997           | FemaleAge65to69     | 130825     |
| Mozambique | 1997           | FemaleAge70to74     | 89423      |
| Mozambique | 1997           | FemaleAge75to79     | 52347      |
| Mozambique | 1997           | FemaleAge80to84     | 24456      |
| Mozambique | 1997           | FemaleAge85to89     | 8341       |
| Mozambique | 1997           | FemaleAge90to94     | 1882       |
| Mozambique | 1997           | FemaleAge95to99     | 245        |
| Mozambique | 1997           | FemaleAgeAbove100   | 13         |
| Mozambique | 1997           | FemaleLactAge15to19 | 109411     |
| Mozambique | 1997           | FemaleLactAge20to24 | 194988     |
| Mozambique | 1997           | FemaleLactAge25to29 | 167161     |
| Mozambique | 1997           | FemaleLactAge30to34 | 121546     |
| Mozambique | 1997           | FemaleLactAge35to39 | 81367      |
| Mozambique | 1997           | FemaleLactAge40to44 | 42498      |
| Mozambique | 1997           | FemaleLactAge45to49 | 25578      |
| Mozambique | 1997           | FemalePregAge15to19 | 82058      |
| Mozambique | 1997           | FemalePregAge20to24 | 146241     |
| Mozambique | 1997           | FemalePregAge25to29 | 125371     |
| Mozambique | 1997           | FemalePregAge30to34 | 91160      |
| Mozambique | 1997           | FemalePregAge35to39 | 61025      |
| Mozambique | 1997           | FemalePregAge40to44 | 31874      |
| Mozambique | 1997           | FemalePregAge45to49 | 19184      |
| Mozambique | 1997           | MaleAge0to4         | 1485758    |
| Mozambique | 1997           | MaleAge10to14       | 1036979    |
| Mozambique | 1997           | MaleAge15to19       | 884467     |
| Mozambique | 1997           | MaleAge20to24       | 706530     |
| Mozambique | 1997           | MaleAge25to29       | 553091     |
| Mozambique | 1997           | MaleAge30to34       | 464861     |
| Mozambique | 1997           | MaleAge35to39       | 397354     |
| Mozambique | 1997           | MaleAge40to44       | 332400     |
| Mozambique | 1997           | MaleAge45to49       | 269770     |
| Mozambique | 1997           | MaleAge50to54       | 215858     |

Dietary calcium and zinc deficiency risks are decreasing but remain prevalent

| Country    | Reference year | Age/gender group    | Population |
|------------|----------------|---------------------|------------|
| Mozambique | 1997           | MaleAge55to59       | 173950     |
| Mozambique | 1997           | MaleAge5to9         | 1207488    |
| Mozambique | 1997           | MaleAge60to64       | 137201     |
| Mozambique | 1997           | MaleAge65to69       | 101753     |
| Mozambique | 1997           | MaleAge70to74       | 67100      |
| Mozambique | 1997           | MaleAge75to79       | 37147      |
| Mozambique | 1997           | MaleAge80to84       | 15935      |
| Mozambique | 1997           | MaleAge85to89       | 4668       |
| Mozambique | 1997           | MaleAge90to94       | 821        |
| Mozambique | 1997           | MaleAge95to99       | 88         |
| Mozambique | 1997           | MaleAgeAbov e100    | 2          |
| Mozambique | 1998           | FemaleAge0to4       | 1502288    |
| Mozambique | 1998           | FemaleAge10to14     | 1060634    |
| Mozambique | 1998           | FemaleAge15to19     | 745557     |
| Mozambique | 1998           | FemaleAge20to24     | 520622     |
| Mozambique | 1998           | FemaleAge25to29     | 449820     |
| Mozambique | 1998           | FemaleAge30to34     | 366939     |
| Mozambique | 1998           | FemaleAge35to39     | 317387     |
| Mozambique | 1998           | FemaleAge40to44     | 297874     |
| Mozambique | 1998           | FemaleAge45to49     | 260658     |
| Mozambique | 1998           | FemaleAge50to54     | 258584     |
| Mozambique | 1998           | FemaleAge55to59     | 218622     |
| Mozambique | 1998           | FemaleAge5to9       | 1245646    |
| Mozambique | 1998           | FemaleAge60to64     | 175544     |
| Mozambique | 1998           | FemaleAge65to69     | 133967     |
| Mozambique | 1998           | FemaleAge70to74     | 91806      |
| Mozambique | 1998           | FemaleAge75to79     | 53971      |
| Mozambique | 1998           | FemaleAge80to84     | 25336      |
| Mozambique | 1998           | FemaleAge85to89     | 8713       |
| Mozambique | 1998           | FemaleAge90to94     | 2004       |
| Mozambique | 1998           | FemaleAge95to99     | 292        |
| Mozambique | 1998           | FemaleAgeAbov e100  | 14         |
| Mozambique | 1998           | FemaleLactAge15to19 | 109411     |
| Mozambique | 1998           | FemaleLactAge20to24 | 194988     |
| Mozambique | 1998           | FemaleLactAge25to29 | 167161     |
| Mozambique | 1998           | FemaleLactAge30to34 | 121546     |
| Mozambique | 1998           | FemaleLactAge35to39 | 81367      |
| Mozambique | 1998           | FemaleLactAge40to44 | 42498      |
| Mozambique | 1998           | FemaleLactAge45to49 | 25578      |
| Mozambique | 1998           | FemalePregAge15to19 | 82058      |
| Mozambique | 1998           | FemalePregAge20to24 | 146241     |
| Mozambique | 1998           | FemalePregAge25to29 | 125371     |
| Mozambique | 1998           | FemalePregAge30to34 | 91160      |
| Mozambique | 1998           | FemalePregAge35to39 | 61025      |
| Mozambique | 1998           | FemalePregAge40to44 | 31874      |
| Mozambique | 1998           | FemalePregAge45to49 | 19184      |
| Mozambique | 1998           | MaleAge0to4         | 1515549    |
| Mozambique | 1998           | MaleAge10to14       | 1061566    |
| Mozambique | 1998           | MaleAge15to19       | 913117     |
| Mozambique | 1998           | MaleAge20to24       | 738633     |
| Mozambique | 1998           | MaleAge25to29       | 574070     |
| Mozambique | 1998           | MaleAge30to34       | 472471     |
| Mozambique | 1998           | MaleAge35to39       | 407006     |
| Mozambique | 1998           | MaleAge40to44       | 340101     |
| Mozambique | 1998           | MaleAge45to49       | 278935     |
| Mozambique | 1998           | MaleAge50to54       | 221466     |
| Mozambique | 1998           | MaleAge55to59       | 177782     |
| Mozambique | 1998           | MaleAge5to9         | 1240508    |
| Mozambique | 1998           | MaleAge60to64       | 139910     |
| Mozambique | 1998           | MaleAge65to69       | 104026     |
| Mozambique | 1998           | MaleAge70to74       | 68976      |
| Mozambique | 1998           | MaleAge75to79       | 38336      |
| Mozambique | 1998           | MaleAge80to84       | 16594      |
| Mozambique | 1998           | MaleAge85to89       | 4945       |
| Mozambique | 1998           | MaleAge90to94       | 893        |
| Mozambique | 1998           | MaleAge95to99       | 115        |
| Mozambique | 1998           | MaleAgeAbov e100    | 2          |
| Mozambique | 1999           | FemaleAge0to4       | 1536030    |
| Mozambique | 1999           | FemaleAge10to14     | 1089033    |
| Mozambique | 1999           | FemaleAge15to19     | 759178     |
| Mozambique | 1999           | FemaleAge20to24     | 530446     |
| Mozambique | 1999           | FemaleAge25to29     | 475763     |
| Mozambique | 1999           | FemaleAge30to34     | 389616     |
| Mozambique | 1999           | FemaleAge35to39     | 333077     |
| Mozambique | 1999           | FemaleAge40to44     | 309727     |
| Mozambique | 1999           | FemaleAge45to49     | 268848     |
| Mozambique | 1999           | FemaleAge50to54     | 263000     |
| Mozambique | 1999           | FemaleAge55to59     | 223469     |
| Mozambique | 1999           | FemaleAge5to9       | 1273340    |
| Mozambique | 1999           | FemaleAge60to64     | 179409     |
| Mozambique | 1999           | FemaleAge65to69     | 137340     |
| Mozambique | 1999           | FemaleAge70to74     | 94360      |
| Mozambique | 1999           | FemaleAge75to79     | 55565      |
| Mozambique | 1999           | FemaleAge80to84     | 25979      |
| Mozambique | 1999           | FemaleAge85to89     | 8813       |
| Mozambique | 1999           | FemaleAge90to94     | 2001       |
| Mozambique | 1999           | FemaleAge95to99     | 300        |
| Mozambique | 1999           | FemaleAgeAbov e100  | 15         |



Dietary calcium and zinc deficiency risks are decreasing but remain prevalent

| Country    | Reference year | Age/gender group    | Population |
|------------|----------------|---------------------|------------|
| Mozambique | 1999           | FemaleLactAge15to19 | 109411     |
| Mozambique | 1999           | FemaleLactAge20to24 | 194988     |
| Mozambique | 1999           | FemaleLactAge25to29 | 167161     |
| Mozambique | 1999           | FemaleLactAge30to34 | 121546     |
| Mozambique | 1999           | FemaleLactAge35to39 | 81367      |
| Mozambique | 1999           | FemaleLactAge40to44 | 42498      |
| Mozambique | 1999           | FemaleLactAge45to49 | 25578      |
| Mozambique | 1999           | FemalePregAge15to19 | 82058      |
| Mozambique | 1999           | FemalePregAge20to24 | 146241     |
| Mozambique | 1999           | FemalePregAge25to29 | 125371     |
| Mozambique | 1999           | FemalePregAge30to34 | 91160      |
| Mozambique | 1999           | FemalePregAge35to39 | 61025      |
| Mozambique | 1999           | FemalePregAge40to44 | 31874      |
| Mozambique | 1999           | FemalePregAge45to49 | 19184      |
| Mozambique | 1999           | MaleAge0to4         | 1548749    |
| Mozambique | 1999           | MaleAge10to14       | 1086688    |
| Mozambique | 1999           | MaleAge15to19       | 940821     |
| Mozambique | 1999           | MaleAge20to24       | 770794     |
| Mozambique | 1999           | MaleAge25to29       | 597696     |
| Mozambique | 1999           | MaleAge30to34       | 482158     |
| Mozambique | 1999           | MaleAge35to39       | 416114     |
| Mozambique | 1999           | MaleAge40to44       | 347808     |
| Mozambique | 1999           | MaleAge45to49       | 288038     |
| Mozambique | 1999           | MaleAge50to54       | 227819     |
| Mozambique | 1999           | MaleAge55to59       | 181986     |
| Mozambique | 1999           | MaleAge5to9         | 1271916    |
| Mozambique | 1999           | MaleAge60to64       | 142898     |
| Mozambique | 1999           | MaleAge65to69       | 106442     |
| Mozambique | 1999           | MaleAge70to74       | 70920      |
| Mozambique | 1999           | MaleAge75to79       | 39443      |
| Mozambique | 1999           | MaleAge80to84       | 17011      |
| Mozambique | 1999           | MaleAge85to89       | 5013       |
| Mozambique | 1999           | MaleAge90to94       | 901        |
| Mozambique | 1999           | MaleAge95to99       | 115        |
| Mozambique | 1999           | MaleAgeAbov e100    | 3          |
| Myanmar    | 1992           | FemaleAge0to4       | 2541724    |
| Myanmar    | 1992           | FemaleAge10to14     | 2634285    |
| Myanmar    | 1992           | FemaleAge15to19     | 2256199    |
| Myanmar    | 1992           | FemaleAge20to24     | 1695426    |
| Myanmar    | 1992           | FemaleAge25to29     | 1350330    |
| Myanmar    | 1992           | FemaleAge30to34     | 1182346    |
| Myanmar    | 1992           | FemaleAge35to39     | 1177118    |
| Myanmar    | 1992           | FemaleAge40to44     | 970479     |
| Myanmar    | 1992           | FemaleAge45to49     | 763111     |
| Myanmar    | 1992           | FemaleAge50to54     | 693588     |
| Myanmar    | 1992           | FemaleAge55to59     | 632787     |
| Myanmar    | 1992           | FemaleAge5to9       | 2738229    |
| Myanmar    | 1992           | FemaleAge60to64     | 564734     |
| Myanmar    | 1992           | FemaleAge65to69     | 437342     |
| Myanmar    | 1992           | FemaleAge70to74     | 307579     |
| Myanmar    | 1992           | FemaleAge75to79     | 189480     |
| Myanmar    | 1992           | FemaleAge80to84     | 91986      |
| Myanmar    | 1992           | FemaleAge85to89     | 34892      |
| Myanmar    | 1992           | FemaleAge90to94     | 8557       |
| Myanmar    | 1992           | FemaleAge95to99     | 1056       |
| Myanmar    | 1992           | FemaleAgeAbov e100  | 62         |
| Myanmar    | 1992           | FemaleLactAge15to19 | 71769      |
| Myanmar    | 1992           | FemaleLactAge20to24 | 256299     |
| Myanmar    | 1992           | FemaleLactAge25to29 | 299964     |
| Myanmar    | 1992           | FemaleLactAge30to34 | 253419     |
| Myanmar    | 1992           | FemaleLactAge35to39 | 151141     |
| Myanmar    | 1992           | FemaleLactAge40to44 | 50901      |
| Myanmar    | 1992           | FemaleLactAge45to49 | 7263       |
| Myanmar    | 1992           | FemalePregAge15to19 | 53827      |
| Myanmar    | 1992           | FemalePregAge20to24 | 192224     |
| Myanmar    | 1992           | FemalePregAge25to29 | 224973     |
| Myanmar    | 1992           | FemalePregAge30to34 | 190064     |
| Myanmar    | 1992           | FemalePregAge35to39 | 113355     |
| Myanmar    | 1992           | FemalePregAge40to44 | 38176      |
| Myanmar    | 1992           | FemalePregAge45to49 | 5448       |
| Myanmar    | 1992           | MaleAge0to4         | 2561957    |
| Myanmar    | 1992           | MaleAge10to14       | 2616469    |
| Myanmar    | 1992           | MaleAge15to19       | 2347013    |
| Myanmar    | 1992           | MaleAge20to24       | 2090439    |
| Myanmar    | 1992           | MaleAge25to29       | 1795019    |
| Myanmar    | 1992           | MaleAge30to34       | 1528192    |
| Myanmar    | 1992           | MaleAge35to39       | 1318780    |
| Myanmar    | 1992           | MaleAge40to44       | 981488     |
| Myanmar    | 1992           | MaleAge45to49       | 740939     |
| Myanmar    | 1992           | MaleAge50to54       | 647660     |
| Myanmar    | 1992           | MaleAge55to59       | 569860     |
| Myanmar    | 1992           | MaleAge5to9         | 2736543    |
| Myanmar    | 1992           | MaleAge60to64       | 488255     |
| Myanmar    | 1992           | MaleAge65to69       | 362315     |
| Myanmar    | 1992           | MaleAge70to74       | 238954     |
| Myanmar    | 1992           | MaleAge75to79       | 135135     |
| Myanmar    | 1992           | MaleAge80to84       | 58958      |
| Myanmar    | 1992           | MaleAge85to89       | 19789      |

Dietary calcium and zinc deficiency risks are decreasing but remain prevalent

| Country | Reference year | Age/gender group    | Population |
|---------|----------------|---------------------|------------|
| Myanmar | 1992           | MaleAge90to94       | 4098       |
| Myanmar | 1992           | MaleAge95to99       | 410        |
| Myanmar | 1992           | MaleAgeAbove100     | 17         |
| Myanmar | 1993           | FemaleAge0to4       | 2519314    |
| Myanmar | 1993           | FemaleAge10to14     | 2677637    |
| Myanmar | 1993           | FemaleAge15to19     | 2297282    |
| Myanmar | 1993           | FemaleAge20to24     | 1732263    |
| Myanmar | 1993           | FemaleAge25to29     | 1399122    |
| Myanmar | 1993           | FemaleAge30to34     | 1217781    |
| Myanmar | 1993           | FemaleAge35to39     | 1202873    |
| Myanmar | 1993           | FemaleAge40to44     | 1064483    |
| Myanmar | 1993           | FemaleAge45to49     | 780225     |
| Myanmar | 1993           | FemaleAge50to54     | 700190     |
| Myanmar | 1993           | FemaleAge55to59     | 635777     |
| Myanmar | 1993           | FemaleAge5to9       | 2696714    |
| Myanmar | 1993           | FemaleAge60to64     | 567357     |
| Myanmar | 1993           | FemaleAge65to69     | 453730     |
| Myanmar | 1993           | FemaleAge70to74     | 311642     |
| Myanmar | 1993           | FemaleAge75to79     | 196934     |
| Myanmar | 1993           | FemaleAge80to84     | 94045      |
| Myanmar | 1993           | FemaleAge85to89     | 35947      |
| Myanmar | 1993           | FemaleAge90to94     | 9041       |
| Myanmar | 1993           | FemaleAge95to99     | 1236       |
| Myanmar | 1993           | FemaleAgeAbove100   | 65         |
| Myanmar | 1993           | FemaleLactAge15to19 | 71769      |
| Myanmar | 1993           | FemaleLactAge20to24 | 256299     |
| Myanmar | 1993           | FemaleLactAge25to29 | 299964     |
| Myanmar | 1993           | FemaleLactAge30to34 | 253419     |
| Myanmar | 1993           | FemaleLactAge35to39 | 151141     |
| Myanmar | 1993           | FemaleLactAge40to44 | 50901      |
| Myanmar | 1993           | FemaleLactAge45to49 | 7263       |
| Myanmar | 1993           | FemalePregAge15to19 | 53827      |
| Myanmar | 1993           | FemalePregAge20to24 | 192224     |
| Myanmar | 1993           | FemalePregAge25to29 | 224973     |
| Myanmar | 1993           | FemalePregAge30to34 | 190064     |
| Myanmar | 1993           | FemalePregAge35to39 | 113355     |
| Myanmar | 1993           | FemalePregAge40to44 | 38176      |
| Myanmar | 1993           | FemalePregAge45to49 | 5448       |
| Myanmar | 1993           | MaleAge0to4         | 2539790    |
| Myanmar | 1993           | MaleAge10to14       | 2661876    |
| Myanmar | 1993           | MaleAge15to19       | 2389968    |
| Myanmar | 1993           | MaleAge20to24       | 2128103    |
| Myanmar | 1993           | MaleAge25to29       | 1847368    |
| Myanmar | 1993           | MaleAge30to34       | 1563183    |
| Myanmar | 1993           | MaleAge35to39       | 1349560    |
| Myanmar | 1993           | MaleAge40to44       | 1054877    |
| Myanmar | 1993           | MaleAge45to49       | 755147     |
| Myanmar | 1993           | MaleAge50to54       | 655387     |
| Myanmar | 1993           | MaleAge55to59       | 572873     |
| Myanmar | 1993           | MaleAge5to9         | 2697101    |
| Myanmar | 1993           | MaleAge60to64       | 490682     |
| Myanmar | 1993           | MaleAge65to69       | 374992     |
| Myanmar | 1993           | MaleAge70to74       | 242641     |
| Myanmar | 1993           | MaleAge75to79       | 140794     |
| Myanmar | 1993           | MaleAge80to84       | 60452      |
| Myanmar | 1993           | MaleAge85to89       | 20490      |
| Myanmar | 1993           | MaleAge90to94       | 4405       |
| Myanmar | 1993           | MaleAge95to99       | 523        |
| Myanmar | 1993           | MaleAgeAbove100     | 17         |
| Myanmar | 1994           | FemaleAge0to4       | 2503645    |
| Myanmar | 1994           | FemaleAge10to14     | 2711190    |
| Myanmar | 1994           | FemaleAge15to19     | 2341464    |
| Myanmar | 1994           | FemaleAge20to24     | 1770815    |
| Myanmar | 1994           | FemaleAge25to29     | 1447505    |
| Myanmar | 1994           | FemaleAge30to34     | 1256450    |
| Myanmar | 1994           | FemaleAge35to39     | 1227438    |
| Myanmar | 1994           | FemaleAge40to44     | 1151365    |
| Myanmar | 1994           | FemaleAge45to49     | 811716     |
| Myanmar | 1994           | FemaleAge50to54     | 708750     |
| Myanmar | 1994           | FemaleAge55to59     | 639543     |
| Myanmar | 1994           | FemaleAge5to9       | 2642009    |
| Myanmar | 1994           | FemaleAge60to64     | 570298     |
| Myanmar | 1994           | FemaleAge65to69     | 468935     |
| Myanmar | 1994           | FemaleAge70to74     | 318555     |
| Myanmar | 1994           | FemaleAge75to79     | 203603     |
| Myanmar | 1994           | FemaleAge80to84     | 96112      |
| Myanmar | 1994           | FemaleAge85to89     | 35896      |
| Myanmar | 1994           | FemaleAge90to94     | 8896       |
| Myanmar | 1994           | FemaleAge95to99     | 1293       |
| Myanmar | 1994           | FemaleAgeAbove100   | 68         |
| Myanmar | 1994           | FemaleLactAge15to19 | 71769      |
| Myanmar | 1994           | FemaleLactAge20to24 | 256299     |
| Myanmar | 1994           | FemaleLactAge25to29 | 299964     |
| Myanmar | 1994           | FemaleLactAge30to34 | 253419     |
| Myanmar | 1994           | FemaleLactAge35to39 | 151141     |
| Myanmar | 1994           | FemaleLactAge40to44 | 50901      |
| Myanmar | 1994           | FemaleLactAge45to49 | 7263       |
| Myanmar | 1994           | FemalePregAge15to19 | 53827      |

Dietary calcium and zinc deficiency risks are decreasing but remain prevalent

| Country | Reference year | Age/gender group    | Population |
|---------|----------------|---------------------|------------|
| Myanmar | 1994           | FemalePregAge20to24 | 192224     |
| Myanmar | 1994           | FemalePregAge25to29 | 224973     |
| Myanmar | 1994           | FemalePregAge30to34 | 190064     |
| Myanmar | 1994           | FemalePregAge35to39 | 113355     |
| Myanmar | 1994           | FemalePregAge40to44 | 38176      |
| Myanmar | 1994           | FemalePregAge45to49 | 5448       |
| Myanmar | 1994           | MaleAge0to4         | 2524750    |
| Myanmar | 1994           | MaleAge10to14       | 2698156    |
| Myanmar | 1994           | MaleAge15to19       | 2436968    |
| Myanmar | 1994           | MaleAge20to24       | 2168064    |
| Myanmar | 1994           | MaleAge25to29       | 1899206    |
| Myanmar | 1994           | MaleAge30to34       | 1602167    |
| Myanmar | 1994           | MaleAge35to39       | 1379797    |
| Myanmar | 1994           | MaleAge40to44       | 1124687    |
| Myanmar | 1994           | MaleAge45to49       | 780566     |
| Myanmar | 1994           | MaleAge50to54       | 664738     |
| Myanmar | 1994           | MaleAge55to59       | 577171     |
| Myanmar | 1994           | MaleAge5to9         | 2644521    |
| Myanmar | 1994           | MaleAge60to64       | 493654     |
| Myanmar | 1994           | MaleAge65to69       | 386647     |
| Myanmar | 1994           | MaleAge70to74       | 248203     |
| Myanmar | 1994           | MaleAge75to79       | 145482     |
| Myanmar | 1994           | MaleAge80to84       | 61693      |
| Myanmar | 1994           | MaleAge85to89       | 20361      |
| Myanmar | 1994           | MaleAge90to94       | 4323       |
| Myanmar | 1994           | MaleAge95to99       | 550        |
| Myanmar | 1994           | MaleAgeAbove100     | 18         |
| Myanmar | 1995           | FemaleAge0to4       | 2486315    |
| Myanmar | 1995           | FemaleAge10to14     | 2725891    |
| Myanmar | 1995           | FemaleAge15to19     | 2389413    |
| Myanmar | 1995           | FemaleAge20to24     | 1813259    |
| Myanmar | 1995           | FemaleAge25to29     | 1494349    |
| Myanmar | 1995           | FemaleAge30to34     | 1298732    |
| Myanmar | 1995           | FemaleAge35to39     | 1257287    |
| Myanmar | 1995           | FemaleAge40to44     | 1221868    |
| Myanmar | 1995           | FemaleAge45to49     | 862063     |
| Myanmar | 1995           | FemaleAge50to54     | 719736     |
| Myanmar | 1995           | FemaleAge55to59     | 644198     |
| Myanmar | 1995           | FemaleAge5to9       | 2589416    |
| Myanmar | 1995           | FemaleAge60to64     | 574590     |
| Myanmar | 1995           | FemaleAge65to69     | 481622     |
| Myanmar | 1995           | FemaleAge70to74     | 329344     |
| Myanmar | 1995           | FemaleAge75to79     | 209402     |
| Myanmar | 1995           | FemaleAge80to84     | 98628      |
| Myanmar | 1995           | FemaleAge85to89     | 34873      |
| Myanmar | 1995           | FemaleAge90to94     | 7910       |
| Myanmar | 1995           | FemaleAge95to99     | 983        |
| Myanmar | 1995           | FemaleAgeAbove100   | 71         |
| Myanmar | 1995           | FemaleLactAge15to19 | 71769      |
| Myanmar | 1995           | FemaleLactAge20to24 | 256299     |
| Myanmar | 1995           | FemaleLactAge25to29 | 299964     |
| Myanmar | 1995           | FemaleLactAge30to34 | 253419     |
| Myanmar | 1995           | FemaleLactAge35to39 | 151141     |
| Myanmar | 1995           | FemaleLactAge40to44 | 50901      |
| Myanmar | 1995           | FemaleLactAge45to49 | 7263       |
| Myanmar | 1995           | FemalePregAge15to19 | 53827      |
| Myanmar | 1995           | FemalePregAge20to24 | 192224     |
| Myanmar | 1995           | FemalePregAge25to29 | 224973     |
| Myanmar | 1995           | FemalePregAge30to34 | 190064     |
| Myanmar | 1995           | FemalePregAge35to39 | 113355     |
| Myanmar | 1995           | FemalePregAge40to44 | 38176      |
| Myanmar | 1995           | FemalePregAge45to49 | 5448       |
| Myanmar | 1995           | MaleAge0to4         | 2509163    |
| Myanmar | 1995           | MaleAge10to14       | 2716260    |
| Myanmar | 1995           | MaleAge15to19       | 2488659    |
| Myanmar | 1995           | MaleAge20to24       | 2213007    |
| Myanmar | 1995           | MaleAge25to29       | 1949223    |
| Myanmar | 1995           | MaleAge30to34       | 1646358    |
| Myanmar | 1995           | MaleAge35to39       | 1413656    |
| Myanmar | 1995           | MaleAge40to44       | 1184608    |
| Myanmar | 1995           | MaleAge45to49       | 820822     |
| Myanmar | 1995           | MaleAge50to54       | 675883     |
| Myanmar | 1995           | MaleAge55to59       | 583009     |
| Myanmar | 1995           | MaleAge5to9         | 2593973    |
| Myanmar | 1995           | MaleAge60to64       | 498019     |
| Myanmar | 1995           | MaleAge65to69       | 396481     |
| Myanmar | 1995           | MaleAge70to74       | 256387     |
| Myanmar | 1995           | MaleAge75to79       | 149242     |
| Myanmar | 1995           | MaleAge80to84       | 62934      |
| Myanmar | 1995           | MaleAge85to89       | 19389      |
| Myanmar | 1995           | MaleAge90to94       | 3650       |
| Myanmar | 1995           | MaleAge95to99       | 347        |
| Myanmar | 1995           | MaleAgeAbove100     | 19         |
| Myanmar | 1996           | FemaleAge0to4       | 2483266    |
| Myanmar | 1996           | FemaleAge10to14     | 2718421    |
| Myanmar | 1996           | FemaleAge15to19     | 2453797    |
| Myanmar | 1996           | FemaleAge20to24     | 1889831    |
| Myanmar | 1996           | FemaleAge25to29     | 1542734    |

Dietary calcium and zinc deficiency risks are decreasing but remain prevalent

| Country | Reference year | Age/gender group    | Population |
|---------|----------------|---------------------|------------|
| Myanmar | 1996           | FemaleAge30to34     | 1350546    |
| Myanmar | 1996           | FemaleAge35to39     | 1297908    |
| Myanmar | 1996           | FemaleAge40to44     | 1279747    |
| Myanmar | 1996           | FemaleAge45to49     | 927717     |
| Myanmar | 1996           | FemaleAge50to54     | 730726     |
| Myanmar | 1996           | FemaleAge55to59     | 647323     |
| Myanmar | 1996           | FemaleAge5to9       | 2550426    |
| Myanmar | 1996           | FemaleAge60to64     | 576015     |
| Myanmar | 1996           | FemaleAge65to69     | 487628     |
| Myanmar | 1996           | FemaleAge70to74     | 339603     |
| Myanmar | 1996           | FemaleAge75to79     | 213851     |
| Myanmar | 1996           | FemaleAge80to84     | 104698     |
| Myanmar | 1996           | FemaleAge85to89     | 37957      |
| Myanmar | 1996           | FemaleAge90to94     | 9336       |
| Myanmar | 1996           | FemaleAge95to99     | 1123       |
| Myanmar | 1996           | FemaleAgeAbove100   | 74         |
| Myanmar | 1996           | FemaleLactAge15to19 | 61969      |
| Myanmar | 1996           | FemaleLactAge20to24 | 237205     |
| Myanmar | 1996           | FemaleLactAge25to29 | 297774     |
| Myanmar | 1996           | FemaleLactAge30to34 | 249740     |
| Myanmar | 1996           | FemaleLactAge35to39 | 146260     |
| Myanmar | 1996           | FemaleLactAge40to44 | 48720      |
| Myanmar | 1996           | FemaleLactAge45to49 | 7457       |
| Myanmar | 1996           | FemalePregAge15to19 | 46477      |
| Myanmar | 1996           | FemalePregAge20to24 | 177904     |
| Myanmar | 1996           | FemalePregAge25to29 | 223330     |
| Myanmar | 1996           | FemalePregAge30to34 | 187305     |
| Myanmar | 1996           | FemalePregAge35to39 | 109695     |
| Myanmar | 1996           | FemalePregAge40to44 | 36540      |
| Myanmar | 1996           | FemalePregAge45to49 | 5593       |
| Myanmar | 1996           | MaleAge0to4         | 2508456    |
| Myanmar | 1996           | MaleAge10to14       | 2711416    |
| Myanmar | 1996           | MaleAge15to19       | 2538772    |
| Myanmar | 1996           | MaleAge20to24       | 2259557    |
| Myanmar | 1996           | MaleAge25to29       | 1997956    |
| Myanmar | 1996           | MaleAge30to34       | 1695571    |
| Myanmar | 1996           | MaleAge35to39       | 1448724    |
| Myanmar | 1996           | MaleAge40to44       | 1233967    |
| Myanmar | 1996           | MaleAge45to49       | 872734     |
| Myanmar | 1996           | MaleAge50to54       | 686094     |
| Myanmar | 1996           | MaleAge55to59       | 587455     |
| Myanmar | 1996           | MaleAge5to9         | 2557695    |
| Myanmar | 1996           | MaleAge60to64       | 499932     |
| Myanmar | 1996           | MaleAge65to69       | 401734     |
| Myanmar | 1996           | MaleAge70to74       | 265091     |
| Myanmar | 1996           | MaleAge75to79       | 153694     |
| Myanmar | 1996           | MaleAge80to84       | 67846      |
| Myanmar | 1996           | MaleAge85to89       | 21547      |
| Myanmar | 1996           | MaleAge90to94       | 4454       |
| Myanmar | 1996           | MaleAge95to99       | 415        |
| Myanmar | 1996           | MaleAgeAbove100     | 20         |
| Myanmar | 1997           | FemaleAge0to4       | 2474923    |
| Myanmar | 1997           | FemaleAge10to14     | 2694020    |
| Myanmar | 1997           | FemaleAge15to19     | 2505025    |
| Myanmar | 1997           | FemaleAge20to24     | 1934408    |
| Myanmar | 1997           | FemaleAge25to29     | 1585535    |
| Myanmar | 1997           | FemaleAge30to34     | 1400762    |
| Myanmar | 1997           | FemaleAge35to39     | 1333285    |
| Myanmar | 1997           | FemaleAge40to44     | 1318506    |
| Myanmar | 1997           | FemaleAge45to49     | 1012619    |
| Myanmar | 1997           | FemaleAge50to54     | 742716     |
| Myanmar | 1997           | FemaleAge55to59     | 652880     |
| Myanmar | 1997           | FemaleAge5to9       | 2517980    |
| Myanmar | 1997           | FemaleAge60to64     | 578952     |
| Myanmar | 1997           | FemaleAge65to69     | 491991     |
| Myanmar | 1997           | FemaleAge70to74     | 352596     |
| Myanmar | 1997           | FemaleAge75to79     | 216999     |
| Myanmar | 1997           | FemaleAge80to84     | 110341     |
| Myanmar | 1997           | FemaleAge85to89     | 39996      |
| Myanmar | 1997           | FemaleAge90to94     | 10388      |
| Myanmar | 1997           | FemaleAge95to99     | 1376       |
| Myanmar | 1997           | FemaleAgeAbove100   | 78         |
| Myanmar | 1997           | FemaleLactAge15to19 | 61969      |
| Myanmar | 1997           | FemaleLactAge20to24 | 237205     |
| Myanmar | 1997           | FemaleLactAge25to29 | 297774     |
| Myanmar | 1997           | FemaleLactAge30to34 | 249740     |
| Myanmar | 1997           | FemaleLactAge35to39 | 146260     |
| Myanmar | 1997           | FemaleLactAge40to44 | 48720      |
| Myanmar | 1997           | FemaleLactAge45to49 | 7457       |
| Myanmar | 1997           | FemalePregAge15to19 | 46477      |
| Myanmar | 1997           | FemalePregAge20to24 | 177904     |
| Myanmar | 1997           | FemalePregAge25to29 | 223330     |
| Myanmar | 1997           | FemalePregAge30to34 | 187305     |
| Myanmar | 1997           | FemalePregAge35to39 | 109695     |
| Myanmar | 1997           | FemalePregAge40to44 | 36540      |
| Myanmar | 1997           | FemalePregAge45to49 | 5593       |
| Myanmar | 1997           | MaleAge0to4         | 2502462    |
| Myanmar | 1997           | MaleAge10to14       | 2690446    |

Dietary calcium and zinc deficiency risks are decreasing but remain prevalent

| Country | Reference year | Age/gender group    | Population |
|---------|----------------|---------------------|------------|
| Myanmar | 1997           | MaleAge15to19       | 2593571    |
| Myanmar | 1997           | MaleAge20to24       | 2308220    |
| Myanmar | 1997           | MaleAge25to29       | 2044768    |
| Myanmar | 1997           | MaleAge30to34       | 1751022    |
| Myanmar | 1997           | MaleAge35to39       | 1486069    |
| Myanmar | 1997           | MaleAge40to44       | 1274671    |
| Myanmar | 1997           | MaleAge45to49       | 939420     |
| Myanmar | 1997           | MaleAge50to54       | 697280     |
| Myanmar | 1997           | MaleAge55to59       | 594591     |
| Myanmar | 1997           | MaleAge5to9         | 2528416    |
| Myanmar | 1997           | MaleAge60to64       | 503181     |
| Myanmar | 1997           | MaleAge65to69       | 405810     |
| Myanmar | 1997           | MaleAge70to74       | 275351     |
| Myanmar | 1997           | MaleAge75to79       | 156929     |
| Myanmar | 1997           | MaleAge80to84       | 72237      |
| Myanmar | 1997           | MaleAge85to89       | 23002      |
| Myanmar | 1997           | MaleAge90to94       | 5082       |
| Myanmar | 1997           | MaleAge95to99       | 559        |
| Myanmar | 1997           | MaleAgeAbove100     | 21         |
| Myanmar | 1998           | FemaleAge0to4       | 2460177    |
| Myanmar | 1998           | FemaleAge10to14     | 2656433    |
| Myanmar | 1998           | FemaleAge15to19     | 2552682    |
| Myanmar | 1998           | FemaleAge20to24     | 1979953    |
| Myanmar | 1998           | FemaleAge25to29     | 1627001    |
| Myanmar | 1998           | FemaleAge30to34     | 1453211    |
| Myanmar | 1998           | FemaleAge35to39     | 1371666    |
| Myanmar | 1998           | FemaleAge40to44     | 1346732    |
| Myanmar | 1998           | FemaleAge45to49     | 1106065    |
| Myanmar | 1998           | FemaleAge50to54     | 760632     |
| Myanmar | 1998           | FemaleAge55to59     | 660530     |
| Myanmar | 1998           | FemaleAge5to9       | 2491703    |
| Myanmar | 1998           | FemaleAge60to64     | 582985     |
| Myanmar | 1998           | FemaleAge65to69     | 495562     |
| Myanmar | 1998           | FemaleAge70to74     | 366685     |
| Myanmar | 1998           | FemaleAge75to79     | 220350     |
| Myanmar | 1998           | FemaleAge80to84     | 114960     |
| Myanmar | 1998           | FemaleAge85to89     | 41007      |
| Myanmar | 1998           | FemaleAge90to94     | 10882      |
| Myanmar | 1998           | FemaleAge95to99     | 1622       |
| Myanmar | 1998           | FemaleAgeAbove100   | 81         |
| Myanmar | 1998           | FemaleLactAge15to19 | 61969      |
| Myanmar | 1998           | FemaleLactAge20to24 | 237205     |
| Myanmar | 1998           | FemaleLactAge25to29 | 297774     |
| Myanmar | 1998           | FemaleLactAge30to34 | 249740     |
| Myanmar | 1998           | FemaleLactAge35to39 | 146260     |
| Myanmar | 1998           | FemaleLactAge40to44 | 48720      |
| Myanmar | 1998           | FemaleLactAge45to49 | 7457       |
| Myanmar | 1998           | FemalePregAge15to19 | 46477      |
| Myanmar | 1998           | FemalePregAge20to24 | 177904     |
| Myanmar | 1998           | FemalePregAge25to29 | 223330     |
| Myanmar | 1998           | FemalePregAge30to34 | 187305     |
| Myanmar | 1998           | FemalePregAge35to39 | 109695     |
| Myanmar | 1998           | FemalePregAge40to44 | 36540      |
| Myanmar | 1998           | FemalePregAge45to49 | 5593       |
| Myanmar | 1998           | MaleAge0to4         | 2489529    |
| Myanmar | 1998           | MaleAge10to14       | 2656121    |
| Myanmar | 1998           | MaleAge15to19       | 2644765    |
| Myanmar | 1998           | MaleAge20to24       | 2357769    |
| Myanmar | 1998           | MaleAge25to29       | 2089585    |
| Myanmar | 1998           | MaleAge30to34       | 1809155    |
| Myanmar | 1998           | MaleAge35to39       | 1525663    |
| Myanmar | 1998           | MaleAge40to44       | 1309007    |
| Myanmar | 1998           | MaleAge45to49       | 1013253    |
| Myanmar | 1998           | MaleAge50to54       | 712991     |
| Myanmar | 1998           | MaleAge55to59       | 603695     |
| Myanmar | 1998           | MaleAge5to9         | 2504758    |
| Myanmar | 1998           | MaleAge60to64       | 507468     |
| Myanmar | 1998           | MaleAge65to69       | 409280     |
| Myanmar | 1998           | MaleAge70to74       | 285950     |
| Myanmar | 1998           | MaleAge75to79       | 159884     |
| Myanmar | 1998           | MaleAge80to84       | 75569      |
| Myanmar | 1998           | MaleAge85to89       | 23729      |
| Myanmar | 1998           | MaleAge90to94       | 5412       |
| Myanmar | 1998           | MaleAge95to99       | 709        |
| Myanmar | 1998           | MaleAgeAbove100     | 22         |
| Myanmar | 1999           | FemaleAge0to4       | 2439479    |
| Myanmar | 1999           | FemaleAge10to14     | 2613576    |
| Myanmar | 1999           | FemaleAge15to19     | 2585330    |
| Myanmar | 1999           | FemaleAge20to24     | 2025970    |
| Myanmar | 1999           | FemaleAge25to29     | 1668113    |
| Myanmar | 1999           | FemaleAge30to34     | 1503831    |
| Myanmar | 1999           | FemaleAge35to39     | 1412019    |
| Myanmar | 1999           | FemaleAge40to44     | 1372815    |
| Myanmar | 1999           | FemaleAge45to49     | 1191933    |
| Myanmar | 1999           | FemaleAge50to54     | 792016     |
| Myanmar | 1999           | FemaleAge55to59     | 669647     |
| Myanmar | 1999           | FemaleAge5to9       | 2467577    |
| Myanmar | 1999           | FemaleAge60to64     | 587480     |

Dietary calcium and zinc deficiency risks are decreasing but remain prevalent

| Country | Reference year | Age/gender group    | Population |
|---------|----------------|---------------------|------------|
| Myanmar | 1999           | FemaleAge65to69     | 499364     |
| Myanmar | 1999           | FemaleAge70to74     | 379518     |
| Myanmar | 1999           | FemaleAge75to79     | 225543     |
| Myanmar | 1999           | FemaleAge80to84     | 118000     |
| Myanmar | 1999           | FemaleAge85to89     | 41224      |
| Myanmar | 1999           | FemaleAge90to94     | 10620      |
| Myanmar | 1999           | FemaleAge95to99     | 1672       |
| Myanmar | 1999           | FemaleAgeAbove100   | 85         |
| Myanmar | 1999           | FemaleLactAge15to19 | 61969      |
| Myanmar | 1999           | FemaleLactAge20to24 | 237205     |
| Myanmar | 1999           | FemaleLactAge25to29 | 297774     |
| Myanmar | 1999           | FemaleLactAge30to34 | 249740     |
| Myanmar | 1999           | FemaleLactAge35to39 | 146260     |
| Myanmar | 1999           | FemaleLactAge40to44 | 48720      |
| Myanmar | 1999           | FemaleLactAge45to49 | 7457       |
| Myanmar | 1999           | FemalePregAge15to19 | 46477      |
| Myanmar | 1999           | FemalePregAge20to24 | 177904     |
| Myanmar | 1999           | FemalePregAge25to29 | 223330     |
| Myanmar | 1999           | FemalePregAge30to34 | 187305     |
| Myanmar | 1999           | FemalePregAge35to39 | 109695     |
| Myanmar | 1999           | FemalePregAge40to44 | 36540      |
| Myanmar | 1999           | FemalePregAge45to49 | 5593       |
| Myanmar | 1999           | MaleAge0to4         | 2469256    |
| Myanmar | 1999           | MaleAge10to14       | 2615157    |
| Myanmar | 1999           | MaleAge15to19       | 2679819    |
| Myanmar | 1999           | MaleAge20to24       | 2406605    |
| Myanmar | 1999           | MaleAge25to29       | 2132908    |
| Myanmar | 1999           | MaleAge30to34       | 1864432    |
| Myanmar | 1999           | MaleAge35to39       | 1567208    |
| Myanmar | 1999           | MaleAge40to44       | 1341188    |
| Myanmar | 1999           | MaleAge45to49       | 1082425    |
| Myanmar | 1999           | MaleAge50to54       | 738661     |
| Myanmar | 1999           | MaleAge55to59       | 613587     |
| Myanmar | 1999           | MaleAge5to9         | 2481567    |
| Myanmar | 1999           | MaleAge60to64       | 512310     |
| Myanmar | 1999           | MaleAge65to69       | 412740     |
| Myanmar | 1999           | MaleAge70to74       | 295158     |
| Myanmar | 1999           | MaleAge75to79       | 163587     |
| Myanmar | 1999           | MaleAge80to84       | 77402      |
| Myanmar | 1999           | MaleAge85to89       | 23813      |
| Myanmar | 1999           | MaleAge90to94       | 5270       |
| Myanmar | 1999           | MaleAge95to99       | 731        |
| Myanmar | 1999           | MaleAgeAbove100     | 23         |
| Namibia | 1992           | FemaleAge0to4       | 124046     |
| Namibia | 1992           | FemaleAge10to14     | 94771      |
| Namibia | 1992           | FemaleAge15to19     | 69499      |
| Namibia | 1992           | FemaleAge20to24     | 47614      |
| Namibia | 1992           | FemaleAge25to29     | 38801      |
| Namibia | 1992           | FemaleAge30to34     | 33223      |
| Namibia | 1992           | FemaleAge35to39     | 28603      |
| Namibia | 1992           | FemaleAge40to44     | 26823      |
| Namibia | 1992           | FemaleAge45to49     | 23152      |
| Namibia | 1992           | FemaleAge50to54     | 20415      |
| Namibia | 1992           | FemaleAge55to59     | 16965      |
| Namibia | 1992           | FemaleAge5to9       | 106075     |
| Namibia | 1992           | FemaleAge60to64     | 14852      |
| Namibia | 1992           | FemaleAge65to69     | 11746      |
| Namibia | 1992           | FemaleAge70to74     | 8371       |
| Namibia | 1992           | FemaleAge75to79     | 5297       |
| Namibia | 1992           | FemaleAge80to84     | 2637       |
| Namibia | 1992           | FemaleAge85to89     | 1000       |
| Namibia | 1992           | FemaleAge90to94     | 260        |
| Namibia | 1992           | FemaleAge95to99     | 31         |
| Namibia | 1992           | FemaleAgeAbove100   | 2          |
| Namibia | 1992           | FemaleLactAge15to19 | 8834       |
| Namibia | 1992           | FemaleLactAge20to24 | 14449      |
| Namibia | 1992           | FemaleLactAge25to29 | 12941      |
| Namibia | 1992           | FemaleLactAge30to34 | 9680       |
| Namibia | 1992           | FemaleLactAge35to39 | 6645       |
| Namibia | 1992           | FemaleLactAge40to44 | 2720       |
| Namibia | 1992           | FemaleLactAge45to49 | 1155       |
| Namibia | 1992           | FemalePregAge15to19 | 6625       |
| Namibia | 1992           | FemalePregAge20to24 | 10837      |
| Namibia | 1992           | FemalePregAge25to29 | 9706       |
| Namibia | 1992           | FemalePregAge30to34 | 7260       |
| Namibia | 1992           | FemalePregAge35to39 | 4983       |
| Namibia | 1992           | FemalePregAge40to44 | 2040       |
| Namibia | 1992           | FemalePregAge45to49 | 867        |
| Namibia | 1992           | MaleAge0to4         | 125187     |
| Namibia | 1992           | MaleAge10to14       | 95228      |
| Namibia | 1992           | MaleAge15to19       | 85082      |
| Namibia | 1992           | MaleAge20to24       | 71820      |
| Namibia | 1992           | MaleAge25to29       | 58846      |
| Namibia | 1992           | MaleAge30to34       | 45855      |
| Namibia | 1992           | MaleAge35to39       | 34633      |
| Namibia | 1992           | MaleAge40to44       | 27453      |
| Namibia | 1992           | MaleAge45to49       | 22571      |
| Namibia | 1992           | MaleAge50to54       | 18238      |

Dietary calcium and zinc deficiency risks are decreasing but remain prevalent

| Country | Reference year | Age/gender group    | Population |
|---------|----------------|---------------------|------------|
| Namibia | 1992           | MaleAge55to59       | 15009      |
| Namibia | 1992           | MaleAge5to9         | 106141     |
| Namibia | 1992           | MaleAge60to64       | 12780      |
| Namibia | 1992           | MaleAge65to69       | 9761       |
| Namibia | 1992           | MaleAge70to74       | 6321       |
| Namibia | 1992           | MaleAge75to79       | 3536       |
| Namibia | 1992           | MaleAge80to84       | 1611       |
| Namibia | 1992           | MaleAge85to89       | 555        |
| Namibia | 1992           | MaleAge90to94       | 126        |
| Namibia | 1992           | MaleAge95to99       | 14         |
| Namibia | 1993           | FemaleAge0to4       | 126724     |
| Namibia | 1993           | FemaleAge10to14     | 96407      |
| Namibia | 1993           | FemaleAge15to19     | 71665      |
| Namibia | 1993           | FemaleAge20to24     | 50323      |
| Namibia | 1993           | FemaleAge25to29     | 41024      |
| Namibia | 1993           | FemaleAge30to34     | 35607      |
| Namibia | 1993           | FemaleAge35to39     | 30278      |
| Namibia | 1993           | FemaleAge40to44     | 28447      |
| Namibia | 1993           | FemaleAge45to49     | 24006      |
| Namibia | 1993           | FemaleAge50to54     | 21182      |
| Namibia | 1993           | FemaleAge55to59     | 17284      |
| Namibia | 1993           | FemaleAge5to9       | 109064     |
| Namibia | 1993           | FemaleAge60to64     | 14948      |
| Namibia | 1993           | FemaleAge65to69     | 12158      |
| Namibia | 1993           | FemaleAge70to74     | 8527       |
| Namibia | 1993           | FemaleAge75to79     | 5468       |
| Namibia | 1993           | FemaleAge80to84     | 2726       |
| Namibia | 1993           | FemaleAge85to89     | 1025       |
| Namibia | 1993           | FemaleAge90to94     | 274        |
| Namibia | 1993           | FemaleAge95to99     | 36         |
| Namibia | 1993           | FemaleAgeAbov e100  | 2          |
| Namibia | 1993           | FemaleLactAge15to19 | 8834       |
| Namibia | 1993           | FemaleLactAge20to24 | 14449      |
| Namibia | 1993           | FemaleLactAge25to29 | 12941      |
| Namibia | 1993           | FemaleLactAge30to34 | 9680       |
| Namibia | 1993           | FemaleLactAge35to39 | 6645       |
| Namibia | 1993           | FemaleLactAge40to44 | 2720       |
| Namibia | 1993           | FemaleLactAge45to49 | 1155       |
| Namibia | 1993           | FemalePregAge15to19 | 6625       |
| Namibia | 1993           | FemalePregAge20to24 | 10837      |
| Namibia | 1993           | FemalePregAge25to29 | 9706       |
| Namibia | 1993           | FemalePregAge30to34 | 7260       |
| Namibia | 1993           | FemalePregAge35to39 | 4983       |
| Namibia | 1993           | FemalePregAge40to44 | 2040       |
| Namibia | 1993           | FemalePregAge45to49 | 867        |
| Namibia | 1993           | MaleAge0to4         | 127859     |
| Namibia | 1993           | MaleAge10to14       | 96671      |
| Namibia | 1993           | MaleAge15to19       | 87391      |
| Namibia | 1993           | MaleAge20to24       | 74684      |
| Namibia | 1993           | MaleAge25to29       | 61358      |
| Namibia | 1993           | MaleAge30to34       | 48549      |
| Namibia | 1993           | MaleAge35to39       | 36487      |
| Namibia | 1993           | MaleAge40to44       | 28478      |
| Namibia | 1993           | MaleAge45to49       | 23307      |
| Namibia | 1993           | MaleAge50to54       | 18868      |
| Namibia | 1993           | MaleAge55to59       | 15258      |
| Namibia | 1993           | MaleAge5to9         | 109146     |
| Namibia | 1993           | MaleAge60to64       | 12853      |
| Namibia | 1993           | MaleAge65to69       | 10068      |
| Namibia | 1993           | MaleAge70to74       | 6542       |
| Namibia | 1993           | MaleAge75to79       | 3658       |
| Namibia | 1993           | MaleAge80to84       | 1666       |
| Namibia | 1993           | MaleAge85to89       | 570        |
| Namibia | 1993           | MaleAge90to94       | 135        |
| Namibia | 1993           | MaleAge95to99       | 17         |
| Namibia | 1993           | MaleAgeAbov e100    | 1          |
| Namibia | 1994           | FemaleAge0to4       | 129019     |
| Namibia | 1994           | FemaleAge10to14     | 98173      |
| Namibia | 1994           | FemaleAge15to19     | 73655      |
| Namibia | 1994           | FemaleAge20to24     | 52952      |
| Namibia | 1994           | FemaleAge25to29     | 43347      |
| Namibia | 1994           | FemaleAge30to34     | 38015      |
| Namibia | 1994           | FemaleAge35to39     | 32090      |
| Namibia | 1994           | FemaleAge40to44     | 30116      |
| Namibia | 1994           | FemaleAge45to49     | 24997      |
| Namibia | 1994           | FemaleAge50to54     | 21981      |
| Namibia | 1994           | FemaleAge55to59     | 17695      |
| Namibia | 1994           | FemaleAge5to9       | 112214     |
| Namibia | 1994           | FemaleAge60to64     | 15078      |
| Namibia | 1994           | FemaleAge65to69     | 12539      |
| Namibia | 1994           | FemaleAge70to74     | 8743       |
| Namibia | 1994           | FemaleAge75to79     | 5636       |
| Namibia | 1994           | FemaleAge80to84     | 2804       |
| Namibia | 1994           | FemaleAge85to89     | 1027       |
| Namibia | 1994           | FemaleAge90to94     | 269        |
| Namibia | 1994           | FemaleAge95to99     | 38         |
| Namibia | 1994           | FemaleAgeAbov e100  | 2          |
| Namibia | 1994           | FemaleLactAge15to19 | 8834       |

Dietary calcium and zinc deficiency risks are decreasing but remain prevalent

| Country | Reference year | Age/gender group    | Population |
|---------|----------------|---------------------|------------|
| Namibia | 1994           | FemaleLactAge20to24 | 14449      |
| Namibia | 1994           | FemaleLactAge25to29 | 12941      |
| Namibia | 1994           | FemaleLactAge30to34 | 9680       |
| Namibia | 1994           | FemaleLactAge35to39 | 6645       |
| Namibia | 1994           | FemaleLactAge40to44 | 2720       |
| Namibia | 1994           | FemaleLactAge45to49 | 1155       |
| Namibia | 1994           | FemalePregAge15to19 | 6625       |
| Namibia | 1994           | FemalePregAge20to24 | 10837      |
| Namibia | 1994           | FemalePregAge25to29 | 9706       |
| Namibia | 1994           | FemalePregAge30to34 | 7260       |
| Namibia | 1994           | FemalePregAge35to39 | 4983       |
| Namibia | 1994           | FemalePregAge40to44 | 2040       |
| Namibia | 1994           | FemalePregAge45to49 | 867        |
| Namibia | 1994           | MaleAge0to4         | 130155     |
| Namibia | 1994           | MaleAge10to14       | 98270      |
| Namibia | 1994           | MaleAge15to19       | 89487      |
| Namibia | 1994           | MaleAge20to24       | 77472      |
| Namibia | 1994           | MaleAge25to29       | 63951      |
| Namibia | 1994           | MaleAge30to34       | 51282      |
| Namibia | 1994           | MaleAge35to39       | 38542      |
| Namibia | 1994           | MaleAge40to44       | 29660      |
| Namibia | 1994           | MaleAge45to49       | 24098      |
| Namibia | 1994           | MaleAge50to54       | 19538      |
| Namibia | 1994           | MaleAge55to59       | 15591      |
| Namibia | 1994           | MaleAge5to9         | 112351     |
| Namibia | 1994           | MaleAge60to64       | 12962      |
| Namibia | 1994           | MaleAge65to69       | 10346      |
| Namibia | 1994           | MaleAge70to74       | 6782       |
| Namibia | 1994           | MaleAge75to79       | 3786       |
| Namibia | 1994           | MaleAge80to84       | 1708       |
| Namibia | 1994           | MaleAge85to89       | 569        |
| Namibia | 1994           | MaleAge90to94       | 131        |
| Namibia | 1994           | MaleAge95to99       | 17         |
| Namibia | 1994           | MaleAgeAbov e100    | 1          |
| Namibia | 1995           | FemaleAge0to4       | 131184     |
| Namibia | 1995           | FemaleAge10to14     | 100323     |
| Namibia | 1995           | FemaleAge15to19     | 75559      |
| Namibia | 1995           | FemaleAge20to24     | 55491      |
| Namibia | 1995           | FemaleAge25to29     | 45867      |
| Namibia | 1995           | FemaleAge30to34     | 40439      |
| Namibia | 1995           | FemaleAge35to39     | 34120      |
| Namibia | 1995           | FemaleAge40to44     | 31817      |
| Namibia | 1995           | FemaleAge45to49     | 26194      |
| Namibia | 1995           | FemaleAge50to54     | 22808      |
| Namibia | 1995           | FemaleAge55to59     | 18215      |
| Namibia | 1995           | FemaleAge5to9       | 115337     |
| Namibia | 1995           | FemaleAge60to64     | 15292      |
| Namibia | 1995           | FemaleAge65to69     | 12863      |
| Namibia | 1995           | FemaleAge70to74     | 9046       |
| Namibia | 1995           | FemaleAge75to79     | 5805       |
| Namibia | 1995           | FemaleAge80to84     | 2881       |
| Namibia | 1995           | FemaleAge85to89     | 1014       |
| Namibia | 1995           | FemaleAge90to94     | 240        |
| Namibia | 1995           | FemaleAge95to99     | 30         |
| Namibia | 1995           | FemaleAgeAbov e100  | 2          |
| Namibia | 1995           | FemaleLactAge15to19 | 8834       |
| Namibia | 1995           | FemaleLactAge20to24 | 14449      |
| Namibia | 1995           | FemaleLactAge25to29 | 12941      |
| Namibia | 1995           | FemaleLactAge30to34 | 9680       |
| Namibia | 1995           | FemaleLactAge35to39 | 6645       |
| Namibia | 1995           | FemaleLactAge40to44 | 2720       |
| Namibia | 1995           | FemaleLactAge45to49 | 1155       |
| Namibia | 1995           | FemalePregAge15to19 | 6625       |
| Namibia | 1995           | FemalePregAge20to24 | 10837      |
| Namibia | 1995           | FemalePregAge25to29 | 9706       |
| Namibia | 1995           | FemalePregAge30to34 | 7260       |
| Namibia | 1995           | FemalePregAge35to39 | 4983       |
| Namibia | 1995           | FemalePregAge40to44 | 2040       |
| Namibia | 1995           | FemalePregAge45to49 | 867        |
| Namibia | 1995           | MaleAge0to4         | 132403     |
| Namibia | 1995           | MaleAge10to14       | 100326     |
| Namibia | 1995           | MaleAge15to19       | 91446      |
| Namibia | 1995           | MaleAge20to24       | 80191      |
| Namibia | 1995           | MaleAge25to29       | 66725      |
| Namibia | 1995           | MaleAge30to34       | 54040      |
| Namibia | 1995           | MaleAge35to39       | 40837      |
| Namibia | 1995           | MaleAge40to44       | 31061      |
| Namibia | 1995           | MaleAge45to49       | 24979      |
| Namibia | 1995           | MaleAge50to54       | 20247      |
| Namibia | 1995           | MaleAge55to59       | 16032      |
| Namibia | 1995           | MaleAge5to9         | 115530     |
| Namibia | 1995           | MaleAge60to64       | 13143      |
| Namibia | 1995           | MaleAge65to69       | 10588      |
| Namibia | 1995           | MaleAge70to74       | 7054       |
| Namibia | 1995           | MaleAge75to79       | 3929       |
| Namibia | 1995           | MaleAge80to84       | 1743       |
| Namibia | 1995           | MaleAge85to89       | 550        |
| Namibia | 1995           | MaleAge90to94       | 112        |



Dietary calcium and zinc deficiency risks are decreasing but remain prevalent

| Country | Reference year | Age/gender group    | Population |
|---------|----------------|---------------------|------------|
| Namibia | 1995           | MaleAge95to99       | 11         |
| Namibia | 1995           | MaleAgeAbov e100    | 1          |
| Namibia | 1996           | FemaleAge0to4       | 133625     |
| Namibia | 1996           | FemaleAge10to14     | 103089     |
| Namibia | 1996           | FemaleAge15to19     | 78037      |
| Namibia | 1996           | FemaleAge20to24     | 57523      |
| Namibia | 1996           | FemaleAge25to29     | 47267      |
| Namibia | 1996           | FemaleAge30to34     | 41462      |
| Namibia | 1996           | FemaleAge35to39     | 35157      |
| Namibia | 1996           | FemaleAge40to44     | 32966      |
| Namibia | 1996           | FemaleAge45to49     | 27282      |
| Namibia | 1996           | FemaleAge50to54     | 23567      |
| Namibia | 1996           | FemaleAge55to59     | 18766      |
| Namibia | 1996           | FemaleAge5to9       | 118694     |
| Namibia | 1996           | FemaleAge60to64     | 15485      |
| Namibia | 1996           | FemaleAge65to69     | 13033      |
| Namibia | 1996           | FemaleAge70to74     | 9325       |
| Namibia | 1996           | FemaleAge75to79     | 5950       |
| Namibia | 1996           | FemaleAge80to84     | 3038       |
| Namibia | 1996           | FemaleAge85to89     | 1116       |
| Namibia | 1996           | FemaleAge90to94     | 280        |
| Namibia | 1996           | FemaleAge95to99     | 34         |
| Namibia | 1996           | FemaleAgeAbov e100  | 2          |
| Namibia | 1996           | FemaleLactAge15to19 | 8679       |
| Namibia | 1996           | FemaleLactAge20to24 | 14793      |
| Namibia | 1996           | FemaleLactAge25to29 | 13601      |
| Namibia | 1996           | FemaleLactAge30to34 | 10349      |
| Namibia | 1996           | FemaleLactAge35to39 | 7197       |
| Namibia | 1996           | FemaleLactAge40to44 | 2958       |
| Namibia | 1996           | FemaleLactAge45to49 | 1242       |
| Namibia | 1996           | FemalePregAge15to19 | 6509       |
| Namibia | 1996           | FemalePregAge20to24 | 11095      |
| Namibia | 1996           | FemalePregAge25to29 | 10201      |
| Namibia | 1996           | FemalePregAge30to34 | 7762       |
| Namibia | 1996           | FemalePregAge35to39 | 5398       |
| Namibia | 1996           | FemalePregAge40to44 | 2219       |
| Namibia | 1996           | FemalePregAge45to49 | 932        |
| Namibia | 1996           | MaleAge0to4         | 135034     |
| Namibia | 1996           | MaleAge10to14       | 103037     |
| Namibia | 1996           | MaleAge15to19       | 93607      |
| Namibia | 1996           | MaleAge20to24       | 83060      |
| Namibia | 1996           | MaleAge25to29       | 69575      |
| Namibia | 1996           | MaleAge30to34       | 56571      |
| Namibia | 1996           | MaleAge35to39       | 43103      |
| Namibia | 1996           | MaleAge40to44       | 32486      |
| Namibia | 1996           | MaleAge45to49       | 25785      |
| Namibia | 1996           | MaleAge50to54       | 20886      |
| Namibia | 1996           | MaleAge55to59       | 16477      |
| Namibia | 1996           | MaleAge5to9         | 119016     |
| Namibia | 1996           | MaleAge60to64       | 13289      |
| Namibia | 1996           | MaleAge65to69       | 10716      |
| Namibia | 1996           | MaleAge70to74       | 7302       |
| Namibia | 1996           | MaleAge75to79       | 4110       |
| Namibia | 1996           | MaleAge80to84       | 1860       |
| Namibia | 1996           | MaleAge85to89       | 614        |
| Namibia | 1996           | MaleAge90to94       | 134        |
| Namibia | 1996           | MaleAge95to99       | 14         |
| Namibia | 1996           | MaleAgeAbov e100    | 1          |
| Namibia | 1997           | FemaleAge0to4       | 135405     |
| Namibia | 1997           | FemaleAge10to14     | 106205     |
| Namibia | 1997           | FemaleAge15to19     | 80153      |
| Namibia | 1997           | FemaleAge20to24     | 60210      |
| Namibia | 1997           | FemaleAge25to29     | 50097      |
| Namibia | 1997           | FemaleAge30to34     | 43703      |
| Namibia | 1997           | FemaleAge35to39     | 37378      |
| Namibia | 1997           | FemaleAge40to44     | 34555      |
| Namibia | 1997           | FemaleAge45to49     | 28731      |
| Namibia | 1997           | FemaleAge50to54     | 24343      |
| Namibia | 1997           | FemaleAge55to59     | 19443      |
| Namibia | 1997           | FemaleAge5to9       | 122144     |
| Namibia | 1997           | FemaleAge60to64     | 15753      |
| Namibia | 1997           | FemaleAge65to69     | 13175      |
| Namibia | 1997           | FemaleAge70to74     | 9677       |
| Namibia | 1997           | FemaleAge75to79     | 6078       |
| Namibia | 1997           | FemaleAge80to84     | 3181       |
| Namibia | 1997           | FemaleAge85to89     | 1194       |
| Namibia | 1997           | FemaleAge90to94     | 307        |
| Namibia | 1997           | FemaleAge95to99     | 43         |
| Namibia | 1997           | FemaleAgeAbov e100  | 2          |
| Namibia | 1997           | FemaleLactAge15to19 | 8679       |
| Namibia | 1997           | FemaleLactAge20to24 | 14793      |
| Namibia | 1997           | FemaleLactAge25to29 | 13601      |
| Namibia | 1997           | FemaleLactAge30to34 | 10349      |
| Namibia | 1997           | FemaleLactAge35to39 | 7197       |
| Namibia | 1997           | FemaleLactAge40to44 | 2958       |
| Namibia | 1997           | FemaleLactAge45to49 | 1242       |
| Namibia | 1997           | FemalePregAge15to19 | 6509       |
| Namibia | 1997           | FemalePregAge20to24 | 11095      |

Dietary calcium and zinc deficiency risks are decreasing but remain prevalent

| Country | Reference year | Age/gender group    | Population |
|---------|----------------|---------------------|------------|
| Namibia | 1997           | FemalePregAge25to29 | 10201      |
| Namibia | 1997           | FemalePregAge30to34 | 7762       |
| Namibia | 1997           | FemalePregAge35to39 | 5398       |
| Namibia | 1997           | FemalePregAge40to44 | 2219       |
| Namibia | 1997           | FemalePregAge45to49 | 932        |
| Namibia | 1997           | MaleAge0to4         | 136985     |
| Namibia | 1997           | MaleAge10to14       | 106183     |
| Namibia | 1997           | MaleAge15to19       | 95620      |
| Namibia | 1997           | MaleAge20to24       | 85991      |
| Namibia | 1997           | MaleAge25to29       | 72685      |
| Namibia | 1997           | MaleAge30to34       | 59165      |
| Namibia | 1997           | MaleAge35to39       | 45620      |
| Namibia | 1997           | MaleAge40to44       | 34106      |
| Namibia | 1997           | MaleAge45to49       | 26687      |
| Namibia | 1997           | MaleAge50to54       | 21571      |
| Namibia | 1997           | MaleAge55to59       | 17033      |
| Namibia | 1997           | MaleAge5to9         | 122640     |
| Namibia | 1997           | MaleAge60to64       | 13499      |
| Namibia | 1997           | MaleAge65to69       | 10825      |
| Namibia | 1997           | MaleAge70to74       | 7574       |
| Namibia | 1997           | MaleAge75to79       | 4283       |
| Namibia | 1997           | MaleAge80to84       | 1958       |
| Namibia | 1997           | MaleAge85to89       | 663        |
| Namibia | 1997           | MaleAge90to94       | 151        |
| Namibia | 1997           | MaleAge95to99       | 18         |
| Namibia | 1997           | MaleAgeAbov e100    | 1          |
| Namibia | 1998           | FemaleAge0to4       | 136596     |
| Namibia | 1998           | FemaleAge10to14     | 109455     |
| Namibia | 1998           | FemaleAge15to19     | 82135      |
| Namibia | 1998           | FemaleAge20to24     | 62795      |
| Namibia | 1998           | FemaleAge25to29     | 53037      |
| Namibia | 1998           | FemaleAge30to34     | 45965      |
| Namibia | 1998           | FemaleAge35to39     | 39694      |
| Namibia | 1998           | FemaleAge40to44     | 36157      |
| Namibia | 1998           | FemaleAge45to49     | 30294      |
| Namibia | 1998           | FemaleAge50to54     | 25151      |
| Namibia | 1998           | FemaleAge55to59     | 20188      |
| Namibia | 1998           | FemaleAge5to9       | 125449     |
| Namibia | 1998           | FemaleAge60to64     | 16082      |
| Namibia | 1998           | FemaleAge65to69     | 13303      |
| Namibia | 1998           | FemaleAge70to74     | 10052      |
| Namibia | 1998           | FemaleAge75to79     | 6213       |
| Namibia | 1998           | FemaleAge80to84     | 3301       |
| Namibia | 1998           | FemaleAge85to89     | 1240       |
| Namibia | 1998           | FemaleAge90to94     | 319        |
| Namibia | 1998           | FemaleAge95to99     | 51         |
| Namibia | 1998           | FemaleAgeAbov e100  | 3          |
| Namibia | 1998           | FemaleLactAge15to19 | 8679       |
| Namibia | 1998           | FemaleLactAge20to24 | 14793      |
| Namibia | 1998           | FemaleLactAge25to29 | 13601      |
| Namibia | 1998           | FemaleLactAge30to34 | 10349      |
| Namibia | 1998           | FemaleLactAge35to39 | 7197       |
| Namibia | 1998           | FemaleLactAge40to44 | 2958       |
| Namibia | 1998           | FemaleLactAge45to49 | 1242       |
| Namibia | 1998           | FemalePregAge15to19 | 6509       |
| Namibia | 1998           | FemalePregAge20to24 | 11095      |
| Namibia | 1998           | FemalePregAge25to29 | 10201      |
| Namibia | 1998           | FemalePregAge30to34 | 7762       |
| Namibia | 1998           | FemalePregAge35to39 | 5398       |
| Namibia | 1998           | FemalePregAge40to44 | 2219       |
| Namibia | 1998           | FemalePregAge45to49 | 932        |
| Namibia | 1998           | MaleAge0to4         | 138288     |
| Namibia | 1998           | MaleAge10to14       | 109496     |
| Namibia | 1998           | MaleAge15to19       | 97449      |
| Namibia | 1998           | MaleAge20to24       | 88762      |
| Namibia | 1998           | MaleAge25to29       | 75860      |
| Namibia | 1998           | MaleAge30to34       | 61776      |
| Namibia | 1998           | MaleAge35to39       | 48250      |
| Namibia | 1998           | MaleAge40to44       | 35867      |
| Namibia | 1998           | MaleAge45to49       | 27668      |
| Namibia | 1998           | MaleAge50to54       | 22266      |
| Namibia | 1998           | MaleAge55to59       | 17648      |
| Namibia | 1998           | MaleAge5to9         | 126097     |
| Namibia | 1998           | MaleAge60to64       | 13758      |
| Namibia | 1998           | MaleAge65to69       | 10925      |
| Namibia | 1998           | MaleAge70to74       | 7837       |
| Namibia | 1998           | MaleAge75to79       | 4446       |
| Namibia | 1998           | MaleAge80to84       | 2037       |
| Namibia | 1998           | MaleAge85to89       | 694        |
| Namibia | 1998           | MaleAge90to94       | 157        |
| Namibia | 1998           | MaleAge95to99       | 23         |
| Namibia | 1998           | MaleAgeAbov e100    | 1          |
| Namibia | 1999           | FemaleAge0to4       | 137231     |
| Namibia | 1999           | FemaleAge10to14     | 112533     |
| Namibia | 1999           | FemaleAge15to19     | 84008      |
| Namibia | 1999           | FemaleAge20to24     | 65064      |
| Namibia | 1999           | FemaleAge25to29     | 55831      |
| Namibia | 1999           | FemaleAge30to34     | 48231      |

Dietary calcium and zinc deficiency risks are decreasing but remain prevalent

| Country | Reference year | Age/gender group    | Population |
|---------|----------------|---------------------|------------|
| Namibia | 1999           | FemaleAge35to39     | 41926      |
| Namibia | 1999           | FemaleAge40to44     | 37781      |
| Namibia | 1999           | FemaleAge45to49     | 31826      |
| Namibia | 1999           | FemaleAge50to54     | 26019      |
| Namibia | 1999           | FemaleAge55to59     | 20914      |
| Namibia | 1999           | FemaleAge5to9       | 128268     |
| Namibia | 1999           | FemaleAge60to64     | 16457      |
| Namibia | 1999           | FemaleAge65to69     | 13441      |
| Namibia | 1999           | FemaleAge70to74     | 10381      |
| Namibia | 1999           | FemaleAge75to79     | 6377       |
| Namibia | 1999           | FemaleAge80to84     | 3389       |
| Namibia | 1999           | FemaleAge85to89     | 1254       |
| Namibia | 1999           | FemaleAge90to94     | 314        |
| Namibia | 1999           | FemaleAge95to99     | 52         |
| Namibia | 1999           | FemaleAgeAbove100   | 3          |
| Namibia | 1999           | FemaleLactAge15to19 | 8679       |
| Namibia | 1999           | FemaleLactAge20to24 | 14793      |
| Namibia | 1999           | FemaleLactAge25to29 | 13601      |
| Namibia | 1999           | FemaleLactAge30to34 | 10349      |
| Namibia | 1999           | FemaleLactAge35to39 | 7197       |
| Namibia | 1999           | FemaleLactAge40to44 | 2958       |
| Namibia | 1999           | FemaleLactAge45to49 | 1242       |
| Namibia | 1999           | FemalePregAge15to19 | 6509       |
| Namibia | 1999           | FemalePregAge20to24 | 11095      |
| Namibia | 1999           | FemalePregAge25to29 | 10201      |
| Namibia | 1999           | FemalePregAge30to34 | 7762       |
| Namibia | 1999           | FemalePregAge35to39 | 5398       |
| Namibia | 1999           | FemalePregAge40to44 | 2219       |
| Namibia | 1999           | FemalePregAge45to49 | 932        |
| Namibia | 1999           | MaleAge0to4         | 138917     |
| Namibia | 1999           | MaleAge10to14       | 112591     |
| Namibia | 1999           | MaleAge15to19       | 99126      |
| Namibia | 1999           | MaleAge20to24       | 91080      |
| Namibia | 1999           | MaleAge25to29       | 78821      |
| Namibia | 1999           | MaleAge30to34       | 64349      |
| Namibia | 1999           | MaleAge35to39       | 50790      |
| Namibia | 1999           | MaleAge40to44       | 37697      |
| Namibia | 1999           | MaleAge45to49       | 28710      |
| Namibia | 1999           | MaleAge50to54       | 22931      |
| Namibia | 1999           | MaleAge55to59       | 18239      |
| Namibia | 1999           | MaleAge5to9         | 128968     |
| Namibia | 1999           | MaleAge60to64       | 14050      |
| Namibia | 1999           | MaleAge65to69       | 11026      |
| Namibia | 1999           | MaleAge70to74       | 8050       |
| Namibia | 1999           | MaleAge75to79       | 4596       |
| Namibia | 1999           | MaleAge80to84       | 2096       |
| Namibia | 1999           | MaleAge85to89       | 700        |
| Namibia | 1999           | MaleAge90to94       | 155        |
| Namibia | 1999           | MaleAge95to99       | 22         |
| Namibia | 1999           | MaleAgeAbove100     | 1          |
| Nepal   | 1992           | FemaleAge0to4       | 1485418    |
| Nepal   | 1992           | FemaleAge10to14     | 1115010    |
| Nepal   | 1992           | FemaleAge15to19     | 722037     |
| Nepal   | 1992           | FemaleAge20to24     | 404122     |
| Nepal   | 1992           | FemaleAge25to29     | 391520     |
| Nepal   | 1992           | FemaleAge30to34     | 399168     |
| Nepal   | 1992           | FemaleAge35to39     | 394851     |
| Nepal   | 1992           | FemaleAge40to44     | 372676     |
| Nepal   | 1992           | FemaleAge45to49     | 364953     |
| Nepal   | 1992           | FemaleAge50to54     | 329752     |
| Nepal   | 1992           | FemaleAge55to59     | 264056     |
| Nepal   | 1992           | FemaleAge5to9       | 1294161    |
| Nepal   | 1992           | FemaleAge60to64     | 208521     |
| Nepal   | 1992           | FemaleAge65to69     | 155143     |
| Nepal   | 1992           | FemaleAge70to74     | 103233     |
| Nepal   | 1992           | FemaleAge75to79     | 59857      |
| Nepal   | 1992           | FemaleAge80to84     | 28180      |
| Nepal   | 1992           | FemaleAge85to89     | 9653       |
| Nepal   | 1992           | FemaleAge90to94     | 2115       |
| Nepal   | 1992           | FemaleAge95to99     | 256        |
| Nepal   | 1992           | FemaleAgeAbove100   | 13         |
| Nepal   | 1992           | FemaleLactAge15to19 | 132924     |
| Nepal   | 1992           | FemaleLactAge20to24 | 229792     |
| Nepal   | 1992           | FemaleLactAge25to29 | 163153     |
| Nepal   | 1992           | FemaleLactAge30to34 | 100255     |
| Nepal   | 1992           | FemaleLactAge35to39 | 54222      |
| Nepal   | 1992           | FemaleLactAge40to44 | 19653      |
| Nepal   | 1992           | FemaleLactAge45to49 | 3786       |
| Nepal   | 1992           | FemalePregAge15to19 | 99693      |
| Nepal   | 1992           | FemalePregAge20to24 | 172344     |
| Nepal   | 1992           | FemalePregAge25to29 | 122365     |
| Nepal   | 1992           | FemalePregAge30to34 | 75191      |
| Nepal   | 1992           | FemalePregAge35to39 | 40667      |
| Nepal   | 1992           | FemalePregAge40to44 | 14740      |
| Nepal   | 1992           | FemalePregAge45to49 | 2840       |
| Nepal   | 1992           | MaleAge0to4         | 1556309    |
| Nepal   | 1992           | MaleAge10to14       | 1187164    |
| Nepal   | 1992           | MaleAge15to19       | 1050792    |

Dietary calcium and zinc deficiency risks are decreasing but remain prevalent

| Country | Reference year | Age/gender group    | Population |
|---------|----------------|---------------------|------------|
| Nepal   | 1992           | MaleAge20to24       | 899662     |
| Nepal   | 1992           | MaleAge25to29       | 727788     |
| Nepal   | 1992           | MaleAge30to34       | 592302     |
| Nepal   | 1992           | MaleAge35to39       | 497795     |
| Nepal   | 1992           | MaleAge40to44       | 404660     |
| Nepal   | 1992           | MaleAge45to49       | 359807     |
| Nepal   | 1992           | MaleAge50to54       | 315001     |
| Nepal   | 1992           | MaleAge55to59       | 247915     |
| Nepal   | 1992           | MaleAge5to9         | 1359226    |
| Nepal   | 1992           | MaleAge60to64       | 195232     |
| Nepal   | 1992           | MaleAge65to69       | 144664     |
| Nepal   | 1992           | MaleAge70to74       | 93266      |
| Nepal   | 1992           | MaleAge75to79       | 51497      |
| Nepal   | 1992           | MaleAge80to84       | 22786      |
| Nepal   | 1992           | MaleAge85to89       | 7178       |
| Nepal   | 1992           | MaleAge90to94       | 1376       |
| Nepal   | 1992           | MaleAge95to99       | 134        |
| Nepal   | 1992           | MaleAgeAbov e100    | 5          |
| Nepal   | 1993           | FemaleAge0to4       | 1495295    |
| Nepal   | 1993           | FemaleAge10to14     | 1143683    |
| Nepal   | 1993           | FemaleAge15to19     | 747097     |
| Nepal   | 1993           | FemaleAge20to24     | 419897     |
| Nepal   | 1993           | FemaleAge25to29     | 395515     |
| Nepal   | 1993           | FemaleAge30to34     | 399197     |
| Nepal   | 1993           | FemaleAge35to39     | 398012     |
| Nepal   | 1993           | FemaleAge40to44     | 380405     |
| Nepal   | 1993           | FemaleAge45to49     | 359785     |
| Nepal   | 1993           | FemaleAge50to54     | 337435     |
| Nepal   | 1993           | FemaleAge55to59     | 270850     |
| Nepal   | 1993           | FemaleAge5to9       | 1322424    |
| Nepal   | 1993           | FemaleAge60to64     | 212771     |
| Nepal   | 1993           | FemaleAge65to69     | 159749     |
| Nepal   | 1993           | FemaleAge70to74     | 106478     |
| Nepal   | 1993           | FemaleAge75to79     | 61678      |
| Nepal   | 1993           | FemaleAge80to84     | 29103      |
| Nepal   | 1993           | FemaleAge85to89     | 10074      |
| Nepal   | 1993           | FemaleAge90to94     | 2259       |
| Nepal   | 1993           | FemaleAge95to99     | 306        |
| Nepal   | 1993           | FemaleAgeAbov e100  | 14         |
| Nepal   | 1993           | FemaleLactAge15to19 | 132924     |
| Nepal   | 1993           | FemaleLactAge20to24 | 229792     |
| Nepal   | 1993           | FemaleLactAge25to29 | 163153     |
| Nepal   | 1993           | FemaleLactAge30to34 | 100255     |
| Nepal   | 1993           | FemaleLactAge35to39 | 54222      |
| Nepal   | 1993           | FemaleLactAge40to44 | 19653      |
| Nepal   | 1993           | FemaleLactAge45to49 | 3786       |
| Nepal   | 1993           | FemalePregAge15to19 | 99693      |
| Nepal   | 1993           | FemalePregAge20to24 | 172344     |
| Nepal   | 1993           | FemalePregAge25to29 | 122365     |
| Nepal   | 1993           | FemalePregAge30to34 | 75191      |
| Nepal   | 1993           | FemalePregAge35to39 | 40667      |
| Nepal   | 1993           | FemalePregAge40to44 | 14740      |
| Nepal   | 1993           | FemalePregAge45to49 | 2840       |
| Nepal   | 1993           | MaleAge0to4         | 1578496    |
| Nepal   | 1993           | MaleAge10to14       | 1223716    |
| Nepal   | 1993           | MaleAge15to19       | 1094467    |
| Nepal   | 1993           | MaleAge20to24       | 959493     |
| Nepal   | 1993           | MaleAge25to29       | 777584     |
| Nepal   | 1993           | MaleAge30to34       | 619095     |
| Nepal   | 1993           | MaleAge35to39       | 516758     |
| Nepal   | 1993           | MaleAge40to44       | 424672     |
| Nepal   | 1993           | MaleAge45to49       | 361411     |
| Nepal   | 1993           | MaleAge50to54       | 326543     |
| Nepal   | 1993           | MaleAge55to59       | 256997     |
| Nepal   | 1993           | MaleAge5to9         | 1396123    |
| Nepal   | 1993           | MaleAge60to64       | 199498     |
| Nepal   | 1993           | MaleAge65to69       | 149655     |
| Nepal   | 1993           | MaleAge70to74       | 96885      |
| Nepal   | 1993           | MaleAge75to79       | 53464      |
| Nepal   | 1993           | MaleAge80to84       | 23754      |
| Nepal   | 1993           | MaleAge85to89       | 7553       |
| Nepal   | 1993           | MaleAge90to94       | 1503       |
| Nepal   | 1993           | MaleAge95to99       | 175        |
| Nepal   | 1993           | MaleAgeAbov e100    | 6          |
| Nepal   | 1994           | FemaleAge0to4       | 1510565    |
| Nepal   | 1994           | FemaleAge10to14     | 1175806    |
| Nepal   | 1994           | FemaleAge15to19     | 777227     |
| Nepal   | 1994           | FemaleAge20to24     | 442833     |
| Nepal   | 1994           | FemaleAge25to29     | 404190     |
| Nepal   | 1994           | FemaleAge30to34     | 400361     |
| Nepal   | 1994           | FemaleAge35to39     | 401098     |
| Nepal   | 1994           | FemaleAge40to44     | 388763     |
| Nepal   | 1994           | FemaleAge45to49     | 357130     |
| Nepal   | 1994           | FemaleAge50to54     | 343926     |
| Nepal   | 1994           | FemaleAge55to59     | 278917     |
| Nepal   | 1994           | FemaleAge5to9       | 1351958    |
| Nepal   | 1994           | FemaleAge60to64     | 218325     |
| Nepal   | 1994           | FemaleAge65to69     | 164976     |

Dietary calcium and zinc deficiency risks are decreasing but remain prevalent

| Country | Reference year | Age/gender group    | Population |
|---------|----------------|---------------------|------------|
| Nepal   | 1994           | FemaleAge70to74     | 110395     |
| Nepal   | 1994           | FemaleAge75to79     | 63792      |
| Nepal   | 1994           | FemaleAge80to84     | 29872      |
| Nepal   | 1994           | FemaleAge85to89     | 10193      |
| Nepal   | 1994           | FemaleAge90to94     | 2264       |
| Nepal   | 1994           | FemaleAge95to99     | 317        |
| Nepal   | 1994           | FemaleAgeAbove100   | 15         |
| Nepal   | 1994           | FemaleLactAge15to19 | 132924     |
| Nepal   | 1994           | FemaleLactAge20to24 | 229792     |
| Nepal   | 1994           | FemaleLactAge25to29 | 163153     |
| Nepal   | 1994           | FemaleLactAge30to34 | 100255     |
| Nepal   | 1994           | FemaleLactAge35to39 | 54222      |
| Nepal   | 1994           | FemaleLactAge40to44 | 19653      |
| Nepal   | 1994           | FemaleLactAge45to49 | 3786       |
| Nepal   | 1994           | FemalePregAge15to19 | 99693      |
| Nepal   | 1994           | FemalePregAge20to24 | 172344     |
| Nepal   | 1994           | FemalePregAge25to29 | 122365     |
| Nepal   | 1994           | FemalePregAge30to34 | 75191      |
| Nepal   | 1994           | FemalePregAge35to39 | 40667      |
| Nepal   | 1994           | FemalePregAge40to44 | 14740      |
| Nepal   | 1994           | FemalePregAge45to49 | 2840       |
| Nepal   | 1994           | MaleAge0to4         | 1598390    |
| Nepal   | 1994           | MaleAge10to14       | 1254884    |
| Nepal   | 1994           | MaleAge15to19       | 1129020    |
| Nepal   | 1994           | MaleAge20to24       | 1015949    |
| Nepal   | 1994           | MaleAge25to29       | 831761     |
| Nepal   | 1994           | MaleAge30to34       | 648873     |
| Nepal   | 1994           | MaleAge35to39       | 535648     |
| Nepal   | 1994           | MaleAge40to44       | 444358     |
| Nepal   | 1994           | MaleAge45to49       | 364808     |
| Nepal   | 1994           | MaleAge50to54       | 335731     |
| Nepal   | 1994           | MaleAge55to59       | 266228     |
| Nepal   | 1994           | MaleAge5to9         | 1427292    |
| Nepal   | 1994           | MaleAge60to64       | 204245     |
| Nepal   | 1994           | MaleAge65to69       | 154212     |
| Nepal   | 1994           | MaleAge70to74       | 100458     |
| Nepal   | 1994           | MaleAge75to79       | 55307      |
| Nepal   | 1994           | MaleAge80to84       | 24392      |
| Nepal   | 1994           | MaleAge85to89       | 7617       |
| Nepal   | 1994           | MaleAge90to94       | 1502       |
| Nepal   | 1994           | MaleAge95to99       | 184        |
| Nepal   | 1994           | MaleAgeAbove100     | 6          |
| Nepal   | 1995           | FemaleAge0to4       | 1539264    |
| Nepal   | 1995           | FemaleAge10to14     | 1213151    |
| Nepal   | 1995           | FemaleAge15to19     | 813793     |
| Nepal   | 1995           | FemaleAge20to24     | 473655     |
| Nepal   | 1995           | FemaleAge25to29     | 419845     |
| Nepal   | 1995           | FemaleAge30to34     | 404689     |
| Nepal   | 1995           | FemaleAge35to39     | 405002     |
| Nepal   | 1995           | FemaleAge40to44     | 397044     |
| Nepal   | 1995           | FemaleAge45to49     | 359147     |
| Nepal   | 1995           | FemaleAge50to54     | 348897     |
| Nepal   | 1995           | FemaleAge55to59     | 288639     |
| Nepal   | 1995           | FemaleAge5to9       | 1383749    |
| Nepal   | 1995           | FemaleAge60to64     | 225786     |
| Nepal   | 1995           | FemaleAge65to69     | 171057     |
| Nepal   | 1995           | FemaleAge70to74     | 115233     |
| Nepal   | 1995           | FemaleAge75to79     | 66429      |
| Nepal   | 1995           | FemaleAge80to84     | 30633      |
| Nepal   | 1995           | FemaleAge85to89     | 10043      |
| Nepal   | 1995           | FemaleAge90to94     | 2047       |
| Nepal   | 1995           | FemaleAge95to99     | 235        |
| Nepal   | 1995           | FemaleAgeAbove100   | 16         |
| Nepal   | 1995           | FemaleLactAge15to19 | 132924     |
| Nepal   | 1995           | FemaleLactAge20to24 | 229792     |
| Nepal   | 1995           | FemaleLactAge25to29 | 163153     |
| Nepal   | 1995           | FemaleLactAge30to34 | 100255     |
| Nepal   | 1995           | FemaleLactAge35to39 | 54222      |
| Nepal   | 1995           | FemaleLactAge40to44 | 19653      |
| Nepal   | 1995           | FemaleLactAge45to49 | 3786       |
| Nepal   | 1995           | FemalePregAge15to19 | 99693      |
| Nepal   | 1995           | FemalePregAge20to24 | 172344     |
| Nepal   | 1995           | FemalePregAge25to29 | 122365     |
| Nepal   | 1995           | FemalePregAge30to34 | 75191      |
| Nepal   | 1995           | FemalePregAge35to39 | 40667      |
| Nepal   | 1995           | FemalePregAge40to44 | 14740      |
| Nepal   | 1995           | FemalePregAge45to49 | 2840       |
| Nepal   | 1995           | MaleAge0to4         | 1617197    |
| Nepal   | 1995           | MaleAge10to14       | 1277454    |
| Nepal   | 1995           | MaleAge15to19       | 1153234    |
| Nepal   | 1995           | MaleAge20to24       | 1062495    |
| Nepal   | 1995           | MaleAge25to29       | 885517     |
| Nepal   | 1995           | MaleAge30to34       | 681768     |
| Nepal   | 1995           | MaleAge35to39       | 553737     |
| Nepal   | 1995           | MaleAge40to44       | 460832     |
| Nepal   | 1995           | MaleAge45to49       | 370860     |
| Nepal   | 1995           | MaleAge50to54       | 340826     |
| Nepal   | 1995           | MaleAge55to59       | 274652     |

Dietary calcium and zinc deficiency risks are decreasing but remain prevalent

| Country | Reference year | Age/gender group    | Population |
|---------|----------------|---------------------|------------|
| Nepal   | 1995           | MaleAge5to9         | 1447409    |
| Nepal   | 1995           | MaleAge60to64       | 209252     |
| Nepal   | 1995           | MaleAge65to69       | 157817     |
| Nepal   | 1995           | MaleAge70to74       | 103718     |
| Nepal   | 1995           | MaleAge75to79       | 56968      |
| Nepal   | 1995           | MaleAge80to84       | 24693      |
| Nepal   | 1995           | MaleAge85to89       | 7346       |
| Nepal   | 1995           | MaleAge90to94       | 1282       |
| Nepal   | 1995           | MaleAge95to99       | 115        |
| Nepal   | 1995           | MaleAgeAbov e100    | 6          |
| Nepal   | 1996           | FemaleAge0to4       | 1556963    |
| Nepal   | 1996           | FemaleAge10to14     | 1248193    |
| Nepal   | 1996           | FemaleAge15to19     | 826120     |
| Nepal   | 1996           | FemaleAge20to24     | 464117     |
| Nepal   | 1996           | FemaleAge25to29     | 444658     |
| Nepal   | 1996           | FemaleAge30to34     | 438290     |
| Nepal   | 1996           | FemaleAge35to39     | 430087     |
| Nepal   | 1996           | FemaleAge40to44     | 412615     |
| Nepal   | 1996           | FemaleAge45to49     | 365808     |
| Nepal   | 1996           | FemaleAge50to54     | 349109     |
| Nepal   | 1996           | FemaleAge55to59     | 296156     |
| Nepal   | 1996           | FemaleAge5to9       | 1410709    |
| Nepal   | 1996           | FemaleAge60to64     | 231242     |
| Nepal   | 1996           | FemaleAge65to69     | 174715     |
| Nepal   | 1996           | FemaleAge70to74     | 118670     |
| Nepal   | 1996           | FemaleAge75to79     | 68901      |
| Nepal   | 1996           | FemaleAge80to84     | 32360      |
| Nepal   | 1996           | FemaleAge85to89     | 11131      |
| Nepal   | 1996           | FemaleAge90to94     | 2462       |
| Nepal   | 1996           | FemaleAge95to99     | 273        |
| Nepal   | 1996           | FemaleAgeAbov e100  | 17         |
| Nepal   | 1996           | FemaleLactAge15to19 | 148171     |
| Nepal   | 1996           | FemaleLactAge20to24 | 261393     |
| Nepal   | 1996           | FemaleLactAge25to29 | 174591     |
| Nepal   | 1996           | FemaleLactAge30to34 | 98059      |
| Nepal   | 1996           | FemaleLactAge35to39 | 49584      |
| Nepal   | 1996           | FemaleLactAge40to44 | 17855      |
| Nepal   | 1996           | FemaleLactAge45to49 | 2985       |
| Nepal   | 1996           | FemalePregAge15to19 | 111128     |
| Nepal   | 1996           | FemalePregAge20to24 | 196045     |
| Nepal   | 1996           | FemalePregAge25to29 | 130943     |
| Nepal   | 1996           | FemalePregAge30to34 | 73544      |
| Nepal   | 1996           | FemalePregAge35to39 | 37188      |
| Nepal   | 1996           | FemalePregAge40to44 | 13391      |
| Nepal   | 1996           | FemalePregAge45to49 | 2239       |
| Nepal   | 1996           | MaleAge0to4         | 1655638    |
| Nepal   | 1996           | MaleAge10to14       | 1303652    |
| Nepal   | 1996           | MaleAge15to19       | 1149896    |
| Nepal   | 1996           | MaleAge20to24       | 1054480    |
| Nepal   | 1996           | MaleAge25to29       | 905384     |
| Nepal   | 1996           | MaleAge30to34       | 711102     |
| Nepal   | 1996           | MaleAge35to39       | 574018     |
| Nepal   | 1996           | MaleAge40to44       | 478936     |
| Nepal   | 1996           | MaleAge45to49       | 382798     |
| Nepal   | 1996           | MaleAge50to54       | 345390     |
| Nepal   | 1996           | MaleAge55to59       | 284797     |
| Nepal   | 1996           | MaleAge5to9         | 1487606    |
| Nepal   | 1996           | MaleAge60to64       | 215957     |
| Nepal   | 1996           | MaleAge65to69       | 161740     |
| Nepal   | 1996           | MaleAge70to74       | 107716     |
| Nepal   | 1996           | MaleAge75to79       | 59846      |
| Nepal   | 1996           | MaleAge80to84       | 26501      |
| Nepal   | 1996           | MaleAge85to89       | 8357       |
| Nepal   | 1996           | MaleAge90to94       | 1600       |
| Nepal   | 1996           | MaleAge95to99       | 138        |
| Nepal   | 1996           | MaleAgeAbov e100    | 6          |
| Nepal   | 1997           | FemaleAge0to4       | 1587381    |
| Nepal   | 1997           | FemaleAge10to14     | 1287186    |
| Nepal   | 1997           | FemaleAge15to19     | 867866     |
| Nepal   | 1997           | FemaleAge20to24     | 511440     |
| Nepal   | 1997           | FemaleAge25to29     | 495002     |
| Nepal   | 1997           | FemaleAge30to34     | 475418     |
| Nepal   | 1997           | FemaleAge35to39     | 451905     |
| Nepal   | 1997           | FemaleAge40to44     | 428011     |
| Nepal   | 1997           | FemaleAge45to49     | 376838     |
| Nepal   | 1997           | FemaleAge50to54     | 348181     |
| Nepal   | 1997           | FemaleAge55to59     | 305804     |
| Nepal   | 1997           | FemaleAge5to9       | 1439022    |
| Nepal   | 1997           | FemaleAge60to64     | 238376     |
| Nepal   | 1997           | FemaleAge65to69     | 179220     |
| Nepal   | 1997           | FemaleAge70to74     | 122911     |
| Nepal   | 1997           | FemaleAge75to79     | 71615      |
| Nepal   | 1997           | FemaleAge80to84     | 33919      |
| Nepal   | 1997           | FemaleAge85to89     | 11985      |
| Nepal   | 1997           | FemaleAge90to94     | 2787       |
| Nepal   | 1997           | FemaleAge95to99     | 341        |
| Nepal   | 1997           | FemaleAgeAbov e100  | 18         |
| Nepal   | 1997           | FemaleLactAge15to19 | 148171     |

Dietary calcium and zinc deficiency risks are decreasing but remain prevalent

| Country | Reference year | Age/gender group    | Population |
|---------|----------------|---------------------|------------|
| Nepal   | 1997           | FemaleLactAge20to24 | 261393     |
| Nepal   | 1997           | FemaleLactAge25to29 | 174591     |
| Nepal   | 1997           | FemaleLactAge30to34 | 98059      |
| Nepal   | 1997           | FemaleLactAge35to39 | 49584      |
| Nepal   | 1997           | FemaleLactAge40to44 | 17855      |
| Nepal   | 1997           | FemaleLactAge45to49 | 2985       |
| Nepal   | 1997           | FemalePregAge15to19 | 111128     |
| Nepal   | 1997           | FemalePregAge20to24 | 196045     |
| Nepal   | 1997           | FemalePregAge25to29 | 130943     |
| Nepal   | 1997           | FemalePregAge30to34 | 73544      |
| Nepal   | 1997           | FemalePregAge35to39 | 37188      |
| Nepal   | 1997           | FemalePregAge40to44 | 13391      |
| Nepal   | 1997           | FemalePregAge45to49 | 2239       |
| Nepal   | 1997           | MaleAge0to4         | 1693964    |
| Nepal   | 1997           | MaleAge10to14       | 1330633    |
| Nepal   | 1997           | MaleAge15to19       | 1149142    |
| Nepal   | 1997           | MaleAge20to24       | 1035058    |
| Nepal   | 1997           | MaleAge25to29       | 912120     |
| Nepal   | 1997           | MaleAge30to34       | 735545     |
| Nepal   | 1997           | MaleAge35to39       | 590715     |
| Nepal   | 1997           | MaleAge40to44       | 493692     |
| Nepal   | 1997           | MaleAge45to49       | 396947     |
| Nepal   | 1997           | MaleAge50to54       | 345603     |
| Nepal   | 1997           | MaleAge55to59       | 294329     |
| Nepal   | 1997           | MaleAge5to9         | 1517834    |
| Nepal   | 1997           | MaleAge60to64       | 222398     |
| Nepal   | 1997           | MaleAge65to69       | 164577     |
| Nepal   | 1997           | MaleAge70to74       | 111235     |
| Nepal   | 1997           | MaleAge75to79       | 62227      |
| Nepal   | 1997           | MaleAge80to84       | 27818      |
| Nepal   | 1997           | MaleAge85to89       | 9085       |
| Nepal   | 1997           | MaleAge90to94       | 1843       |
| Nepal   | 1997           | MaleAge95to99       | 190        |
| Nepal   | 1997           | MaleAgeAbov e100    | 7          |
| Nepal   | 1998           | FemaleAge0to4       | 1624259    |
| Nepal   | 1998           | FemaleAge10to14     | 1326822    |
| Nepal   | 1998           | FemaleAge15to19     | 910351     |
| Nepal   | 1998           | FemaleAge20to24     | 558116     |
| Nepal   | 1998           | FemaleAge25to29     | 547790     |
| Nepal   | 1998           | FemaleAge30to34     | 518567     |
| Nepal   | 1998           | FemaleAge35to39     | 478175     |
| Nepal   | 1998           | FemaleAge40to44     | 445759     |
| Nepal   | 1998           | FemaleAge45to49     | 391862     |
| Nepal   | 1998           | FemaleAge50to54     | 347138     |
| Nepal   | 1998           | FemaleAge55to59     | 315862     |
| Nepal   | 1998           | FemaleAge5to9       | 1465381    |
| Nepal   | 1998           | FemaleAge60to64     | 246638     |
| Nepal   | 1998           | FemaleAge65to69     | 184454     |
| Nepal   | 1998           | FemaleAge70to74     | 127685     |
| Nepal   | 1998           | FemaleAge75to79     | 74530      |
| Nepal   | 1998           | FemaleAge80to84     | 35271      |
| Nepal   | 1998           | FemaleAge85to89     | 12514      |
| Nepal   | 1998           | FemaleAge90to94     | 2975       |
| Nepal   | 1998           | FemaleAge95to99     | 409        |
| Nepal   | 1998           | FemaleAgeAbov e100  | 19         |
| Nepal   | 1998           | FemaleLactAge15to19 | 148171     |
| Nepal   | 1998           | FemaleLactAge20to24 | 261393     |
| Nepal   | 1998           | FemaleLactAge25to29 | 174591     |
| Nepal   | 1998           | FemaleLactAge30to34 | 98059      |
| Nepal   | 1998           | FemaleLactAge35to39 | 49584      |
| Nepal   | 1998           | FemaleLactAge40to44 | 17855      |
| Nepal   | 1998           | FemaleLactAge45to49 | 2985       |
| Nepal   | 1998           | FemalePregAge15to19 | 111128     |
| Nepal   | 1998           | FemalePregAge20to24 | 196045     |
| Nepal   | 1998           | FemalePregAge25to29 | 130943     |
| Nepal   | 1998           | FemalePregAge30to34 | 73544      |
| Nepal   | 1998           | FemalePregAge35to39 | 37188      |
| Nepal   | 1998           | FemalePregAge40to44 | 13391      |
| Nepal   | 1998           | FemalePregAge45to49 | 2239       |
| Nepal   | 1998           | MaleAge0to4         | 1731218    |
| Nepal   | 1998           | MaleAge10to14       | 1359197    |
| Nepal   | 1998           | MaleAge15to19       | 1154840    |
| Nepal   | 1998           | MaleAge20to24       | 1011434    |
| Nepal   | 1998           | MaleAge25to29       | 907060     |
| Nepal   | 1998           | MaleAge30to34       | 754004     |
| Nepal   | 1998           | MaleAge35to39       | 605301     |
| Nepal   | 1998           | MaleAge40to44       | 506289     |
| Nepal   | 1998           | MaleAge45to49       | 412517     |
| Nepal   | 1998           | MaleAge50to54       | 344209     |
| Nepal   | 1998           | MaleAge55to59       | 302816     |
| Nepal   | 1998           | MaleAge5to9         | 1539741    |
| Nepal   | 1998           | MaleAge60to64       | 228892     |
| Nepal   | 1998           | MaleAge65to69       | 167124     |
| Nepal   | 1998           | MaleAge70to74       | 114427     |
| Nepal   | 1998           | MaleAge75to79       | 64274      |
| Nepal   | 1998           | MaleAge80to84       | 28707      |
| Nepal   | 1998           | MaleAge85to89       | 9456       |
| Nepal   | 1998           | MaleAge90to94       | 1981       |

Dietary calcium and zinc deficiency risks are decreasing but remain prevalent

| Country     | Reference year | Age/gender group    | Population |
|-------------|----------------|---------------------|------------|
| Nepal       | 1998           | MaleAge95to99       | 243        |
| Nepal       | 1998           | MaleAgeAbov e100    | 7          |
| Nepal       | 1999           | FemaleAge0to4       | 1656748    |
| Nepal       | 1999           | FemaleAge10to14     | 1361939    |
| Nepal       | 1999           | FemaleAge15to19     | 950443     |
| Nepal       | 1999           | FemaleAge20to24     | 601629     |
| Nepal       | 1999           | FemaleAge25to29     | 598998     |
| Nepal       | 1999           | FemaleAge30to34     | 565088     |
| Nepal       | 1999           | FemaleAge35to39     | 508237     |
| Nepal       | 1999           | FemaleAge40to44     | 465165     |
| Nepal       | 1999           | FemaleAge45to49     | 408040     |
| Nepal       | 1999           | FemaleAge50to54     | 347945     |
| Nepal       | 1999           | FemaleAge55to59     | 323842     |
| Nepal       | 1999           | FemaleAge5to9       | 1486948    |
| Nepal       | 1999           | FemaleAge60to64     | 255309     |
| Nepal       | 1999           | FemaleAge65to69     | 190266     |
| Nepal       | 1999           | FemaleAge70to74     | 132525     |
| Nepal       | 1999           | FemaleAge75to79     | 77533      |
| Nepal       | 1999           | FemaleAge80to84     | 36401      |
| Nepal       | 1999           | FemaleAge85to89     | 12674      |
| Nepal       | 1999           | FemaleAge90to94     | 2964       |
| Nepal       | 1999           | FemaleAge95to99     | 428        |
| Nepal       | 1999           | FemaleAgeAbov e100  | 20         |
| Nepal       | 1999           | FemaleLactAge15to19 | 148171     |
| Nepal       | 1999           | FemaleLactAge20to24 | 261393     |
| Nepal       | 1999           | FemaleLactAge25to29 | 174591     |
| Nepal       | 1999           | FemaleLactAge30to34 | 98059      |
| Nepal       | 1999           | FemaleLactAge35to39 | 49584      |
| Nepal       | 1999           | FemaleLactAge40to44 | 17855      |
| Nepal       | 1999           | FemaleLactAge45to49 | 2985       |
| Nepal       | 1999           | FemalePregAge15to19 | 111128     |
| Nepal       | 1999           | FemalePregAge20to24 | 196045     |
| Nepal       | 1999           | FemalePregAge25to29 | 130943     |
| Nepal       | 1999           | FemalePregAge30to34 | 73544      |
| Nepal       | 1999           | FemalePregAge35to39 | 37188      |
| Nepal       | 1999           | FemalePregAge40to44 | 13391      |
| Nepal       | 1999           | FemalePregAge45to49 | 2239       |
| Nepal       | 1999           | MaleAge0to4         | 1764402    |
| Nepal       | 1999           | MaleAge10to14       | 1390261    |
| Nepal       | 1999           | MaleAge15to19       | 1170032    |
| Nepal       | 1999           | MaleAge20to24       | 992569     |
| Nepal       | 1999           | MaleAge25to29       | 893910     |
| Nepal       | 1999           | MaleAge30to34       | 765937     |
| Nepal       | 1999           | MaleAge35to39       | 619974     |
| Nepal       | 1999           | MaleAge40to44       | 518860     |
| Nepal       | 1999           | MaleAge45to49       | 428312     |
| Nepal       | 1999           | MaleAge50to54       | 345342     |
| Nepal       | 1999           | MaleAge55to59       | 309734     |
| Nepal       | 1999           | MaleAge5to9         | 1559272    |
| Nepal       | 1999           | MaleAge60to64       | 236034     |
| Nepal       | 1999           | MaleAge65to69       | 170500     |
| Nepal       | 1999           | MaleAge70to74       | 117485     |
| Nepal       | 1999           | MaleAge75to79       | 66252      |
| Nepal       | 1999           | MaleAge80to84       | 29329      |
| Nepal       | 1999           | MaleAge85to89       | 9474       |
| Nepal       | 1999           | MaleAge90to94       | 1960       |
| Nepal       | 1999           | MaleAge95to99       | 252        |
| Nepal       | 1999           | MaleAgeAbov e100    | 8          |
| Netherlands | 1992           | FemaleAge0to4       | 464376     |
| Netherlands | 1992           | FemaleAge10to14     | 430964     |
| Netherlands | 1992           | FemaleAge15to19     | 498639     |
| Netherlands | 1992           | FemaleAge20to24     | 559052     |
| Netherlands | 1992           | FemaleAge25to29     | 510672     |
| Netherlands | 1992           | FemaleAge30to34     | 495696     |
| Netherlands | 1992           | FemaleAge35to39     | 533798     |
| Netherlands | 1992           | FemaleAge40to44     | 574818     |
| Netherlands | 1992           | FemaleAge45to49     | 492582     |
| Netherlands | 1992           | FemaleAge50to54     | 394414     |
| Netherlands | 1992           | FemaleAge55to59     | 369650     |
| Netherlands | 1992           | FemaleAge5to9       | 445784     |
| Netherlands | 1992           | FemaleAge60to64     | 351059     |
| Netherlands | 1992           | FemaleAge65to69     | 344263     |
| Netherlands | 1992           | FemaleAge70to74     | 287694     |
| Netherlands | 1992           | FemaleAge75to79     | 230700     |
| Netherlands | 1992           | FemaleAge80to84     | 173627     |
| Netherlands | 1992           | FemaleAge85to89     | 96162      |
| Netherlands | 1992           | FemaleAge90to94     | 36549      |
| Netherlands | 1992           | FemaleAge95to99     | 7333       |
| Netherlands | 1992           | FemaleAgeAbov e100  | 622        |
| Netherlands | 1992           | FemaleLactAge15to19 | 3508       |
| Netherlands | 1992           | FemaleLactAge20to24 | 25128      |
| Netherlands | 1992           | FemaleLactAge25to29 | 73492      |
| Netherlands | 1992           | FemaleLactAge30to34 | 68330      |
| Netherlands | 1992           | FemaleLactAge35to39 | 20507      |
| Netherlands | 1992           | FemaleLactAge40to44 | 2581       |
| Netherlands | 1992           | FemaleLactAge45to49 | 139        |
| Netherlands | 1992           | FemalePregAge15to19 | 2631       |
| Netherlands | 1992           | FemalePregAge20to24 | 18846      |



Dietary calcium and zinc deficiency risks are decreasing but remain prevalent

| Country     | Reference year | Age/gender group    | Population |
|-------------|----------------|---------------------|------------|
| Netherlands | 1992           | FemalePregAge25to29 | 55119      |
| Netherlands | 1992           | FemalePregAge30to34 | 51247      |
| Netherlands | 1992           | FemalePregAge35to39 | 15380      |
| Netherlands | 1992           | FemalePregAge40to44 | 1935       |
| Netherlands | 1992           | FemalePregAge45to49 | 104        |
| Netherlands | 1992           | MaleAge0to4         | 484638     |
| Netherlands | 1992           | MaleAge10to14       | 451779     |
| Netherlands | 1992           | MaleAge15to19       | 524681     |
| Netherlands | 1992           | MaleAge20to24       | 628123     |
| Netherlands | 1992           | MaleAge25to29       | 669733     |
| Netherlands | 1992           | MaleAge30to34       | 639744     |
| Netherlands | 1992           | MaleAge35to39       | 590743     |
| Netherlands | 1992           | MaleAge40to44       | 606309     |
| Netherlands | 1992           | MaleAge45to49       | 519136     |
| Netherlands | 1992           | MaleAge50to54       | 408683     |
| Netherlands | 1992           | MaleAge55to59       | 366401     |
| Netherlands | 1992           | MaleAge5to9         | 465205     |
| Netherlands | 1992           | MaleAge60to64       | 323659     |
| Netherlands | 1992           | MaleAge65to69       | 286037     |
| Netherlands | 1992           | MaleAge70to74       | 213072     |
| Netherlands | 1992           | MaleAge75to79       | 143469     |
| Netherlands | 1992           | MaleAge80to84       | 87340      |
| Netherlands | 1992           | MaleAge85to89       | 39245      |
| Netherlands | 1992           | MaleAge90to94       | 13041      |
| Netherlands | 1992           | MaleAge95to99       | 2407       |
| Netherlands | 1992           | MaleAgeAbov e100    | 215        |
| Netherlands | 1993           | FemaleAge0to4       | 472056     |
| Netherlands | 1993           | FemaleAge10to14     | 433414     |
| Netherlands | 1993           | FemaleAge15to19     | 477388     |
| Netherlands | 1993           | FemaleAge20to24     | 548500     |
| Netherlands | 1993           | FemaleAge25to29     | 511394     |
| Netherlands | 1993           | FemaleAge30to34     | 505867     |
| Netherlands | 1993           | FemaleAge35to39     | 543330     |
| Netherlands | 1993           | FemaleAge40to44     | 567108     |
| Netherlands | 1993           | FemaleAge45to49     | 525404     |
| Netherlands | 1993           | FemaleAge50to54     | 401932     |
| Netherlands | 1993           | FemaleAge55to59     | 370970     |
| Netherlands | 1993           | FemaleAge5to9       | 451271     |
| Netherlands | 1993           | FemaleAge60to64     | 353081     |
| Netherlands | 1993           | FemaleAge65to69     | 339940     |
| Netherlands | 1993           | FemaleAge70to74     | 300402     |
| Netherlands | 1993           | FemaleAge75to79     | 228307     |
| Netherlands | 1993           | FemaleAge80to84     | 176641     |
| Netherlands | 1993           | FemaleAge85to89     | 98828      |
| Netherlands | 1993           | FemaleAge90to94     | 37795      |
| Netherlands | 1993           | FemaleAge95to99     | 8013       |
| Netherlands | 1993           | FemaleAgeAbov e100  | 664        |
| Netherlands | 1993           | FemaleLactAge15to19 | 3508       |
| Netherlands | 1993           | FemaleLactAge20to24 | 25128      |
| Netherlands | 1993           | FemaleLactAge25to29 | 73492      |
| Netherlands | 1993           | FemaleLactAge30to34 | 68330      |
| Netherlands | 1993           | FemaleLactAge35to39 | 20507      |
| Netherlands | 1993           | FemaleLactAge40to44 | 2581       |
| Netherlands | 1993           | FemaleLactAge45to49 | 139        |
| Netherlands | 1993           | FemalePregAge15to19 | 2631       |
| Netherlands | 1993           | FemalePregAge20to24 | 18846      |
| Netherlands | 1993           | FemalePregAge25to29 | 55119      |
| Netherlands | 1993           | FemalePregAge30to34 | 51247      |
| Netherlands | 1993           | FemalePregAge35to39 | 15380      |
| Netherlands | 1993           | FemalePregAge40to44 | 1935       |
| Netherlands | 1993           | FemalePregAge45to49 | 104        |
| Netherlands | 1993           | MaleAge0to4         | 493448     |
| Netherlands | 1993           | MaleAge10to14       | 454047     |
| Netherlands | 1993           | MaleAge15to19       | 503190     |
| Netherlands | 1993           | MaleAge20to24       | 615345     |
| Netherlands | 1993           | MaleAge25to29       | 671361     |
| Netherlands | 1993           | MaleAge30to34       | 651908     |
| Netherlands | 1993           | MaleAge35to39       | 599344     |
| Netherlands | 1993           | MaleAge40to44       | 596350     |
| Netherlands | 1993           | MaleAge45to49       | 552460     |
| Netherlands | 1993           | MaleAge50to54       | 417985     |
| Netherlands | 1993           | MaleAge55to59       | 369742     |
| Netherlands | 1993           | MaleAge5to9         | 470768     |
| Netherlands | 1993           | MaleAge60to64       | 328557     |
| Netherlands | 1993           | MaleAge65to69       | 284587     |
| Netherlands | 1993           | MaleAge70to74       | 223204     |
| Netherlands | 1993           | MaleAge75to79       | 142295     |
| Netherlands | 1993           | MaleAge80to84       | 89362      |
| Netherlands | 1993           | MaleAge85to89       | 39538      |
| Netherlands | 1993           | MaleAge90to94       | 13254      |
| Netherlands | 1993           | MaleAge95to99       | 2591       |
| Netherlands | 1993           | MaleAgeAbov e100    | 210        |
| Netherlands | 1994           | FemaleAge0to4       | 478654     |
| Netherlands | 1994           | FemaleAge10to14     | 437743     |
| Netherlands | 1994           | FemaleAge15to19     | 458491     |
| Netherlands | 1994           | FemaleAge20to24     | 535554     |
| Netherlands | 1994           | FemaleAge25to29     | 509732     |
| Netherlands | 1994           | FemaleAge30to34     | 514823     |

Dietary calcium and zinc deficiency risks are decreasing but remain prevalent

| Country     | Reference year | Age/gender group    | Population |
|-------------|----------------|---------------------|------------|
| Netherlands | 1994           | FemaleAge35to39     | 553925     |
| Netherlands | 1994           | FemaleAge40to44     | 560205     |
| Netherlands | 1994           | FemaleAge45to49     | 552728     |
| Netherlands | 1994           | FemaleAge50to54     | 414254     |
| Netherlands | 1994           | FemaleAge55to59     | 373295     |
| Netherlands | 1994           | FemaleAge5to9       | 456654     |
| Netherlands | 1994           | FemaleAge60to64     | 355109     |
| Netherlands | 1994           | FemaleAge65to69     | 336163     |
| Netherlands | 1994           | FemaleAge70to74     | 311092     |
| Netherlands | 1994           | FemaleAge75to79     | 229114     |
| Netherlands | 1994           | FemaleAge80to84     | 179283     |
| Netherlands | 1994           | FemaleAge85to89     | 101125     |
| Netherlands | 1994           | FemaleAge90to94     | 38041      |
| Netherlands | 1994           | FemaleAge95to99     | 8289       |
| Netherlands | 1994           | FemaleAgeAbove100   | 707        |
| Netherlands | 1994           | FemaleLactAge15to19 | 3508       |
| Netherlands | 1994           | FemaleLactAge20to24 | 25128      |
| Netherlands | 1994           | FemaleLactAge25to29 | 73492      |
| Netherlands | 1994           | FemaleLactAge30to34 | 68330      |
| Netherlands | 1994           | FemaleLactAge35to39 | 20507      |
| Netherlands | 1994           | FemaleLactAge40to44 | 2581       |
| Netherlands | 1994           | FemaleLactAge45to49 | 139        |
| Netherlands | 1994           | FemalePregAge15to19 | 2631       |
| Netherlands | 1994           | FemalePregAge20to24 | 18846      |
| Netherlands | 1994           | FemalePregAge25to29 | 55119      |
| Netherlands | 1994           | FemalePregAge30to34 | 51247      |
| Netherlands | 1994           | FemalePregAge35to39 | 15380      |
| Netherlands | 1994           | FemalePregAge40to44 | 1935       |
| Netherlands | 1994           | FemalePregAge45to49 | 104        |
| Netherlands | 1994           | MaleAge0to4         | 501106     |
| Netherlands | 1994           | MaleAge10to14       | 458215     |
| Netherlands | 1994           | MaleAge15to19       | 484690     |
| Netherlands | 1994           | MaleAge20to24       | 599387     |
| Netherlands | 1994           | MaleAge25to29       | 670472     |
| Netherlands | 1994           | MaleAge30to34       | 662968     |
| Netherlands | 1994           | MaleAge35to39       | 609626     |
| Netherlands | 1994           | MaleAge40to44       | 587242     |
| Netherlands | 1994           | MaleAge45to49       | 579813     |
| Netherlands | 1994           | MaleAge50to54       | 431953     |
| Netherlands | 1994           | MaleAge55to59       | 374173     |
| Netherlands | 1994           | MaleAge5to9         | 476317     |
| Netherlands | 1994           | MaleAge60to64       | 333523     |
| Netherlands | 1994           | MaleAge65to69       | 284228     |
| Netherlands | 1994           | MaleAge70to74       | 231923     |
| Netherlands | 1994           | MaleAge75to79       | 143322     |
| Netherlands | 1994           | MaleAge80to84       | 90345      |
| Netherlands | 1994           | MaleAge85to89       | 39357      |
| Netherlands | 1994           | MaleAge90to94       | 12760      |
| Netherlands | 1994           | MaleAge95to99       | 2569       |
| Netherlands | 1994           | MaleAgeAbove100     | 206        |
| Netherlands | 1995           | FemaleAge0to4       | 482390     |
| Netherlands | 1995           | FemaleAge10to14     | 442060     |
| Netherlands | 1995           | FemaleAge15to19     | 444554     |
| Netherlands | 1995           | FemaleAge20to24     | 519757     |
| Netherlands | 1995           | FemaleAge25to29     | 505760     |
| Netherlands | 1995           | FemaleAge30to34     | 522002     |
| Netherlands | 1995           | FemaleAge35to39     | 564216     |
| Netherlands | 1995           | FemaleAge40to44     | 558392     |
| Netherlands | 1995           | FemaleAge45to49     | 570136     |
| Netherlands | 1995           | FemaleAge50to54     | 432670     |
| Netherlands | 1995           | FemaleAge55to59     | 377058     |
| Netherlands | 1995           | FemaleAge5to9       | 462604     |
| Netherlands | 1995           | FemaleAge60to64     | 356542     |
| Netherlands | 1995           | FemaleAge65to69     | 334484     |
| Netherlands | 1995           | FemaleAge70to74     | 317728     |
| Netherlands | 1995           | FemaleAge75to79     | 234297     |
| Netherlands | 1995           | FemaleAge80to84     | 181261     |
| Netherlands | 1995           | FemaleAge85to89     | 103342     |
| Netherlands | 1995           | FemaleAge90to94     | 37675      |
| Netherlands | 1995           | FemaleAge95to99     | 7564       |
| Netherlands | 1995           | FemaleAgeAbove100   | 748        |
| Netherlands | 1995           | FemaleLactAge15to19 | 3508       |
| Netherlands | 1995           | FemaleLactAge20to24 | 25128      |
| Netherlands | 1995           | FemaleLactAge25to29 | 73492      |
| Netherlands | 1995           | FemaleLactAge30to34 | 68330      |
| Netherlands | 1995           | FemaleLactAge35to39 | 20507      |
| Netherlands | 1995           | FemaleLactAge40to44 | 2581       |
| Netherlands | 1995           | FemaleLactAge45to49 | 139        |
| Netherlands | 1995           | FemalePregAge15to19 | 2631       |
| Netherlands | 1995           | FemalePregAge20to24 | 18846      |
| Netherlands | 1995           | FemalePregAge25to29 | 55119      |
| Netherlands | 1995           | FemalePregAge30to34 | 51247      |
| Netherlands | 1995           | FemalePregAge35to39 | 15380      |
| Netherlands | 1995           | FemalePregAge40to44 | 1935       |
| Netherlands | 1995           | FemalePregAge45to49 | 104        |
| Netherlands | 1995           | MaleAge0to4         | 505586     |
| Netherlands | 1995           | MaleAge10to14       | 462457     |
| Netherlands | 1995           | MaleAge15to19       | 471237     |

Dietary calcium and zinc deficiency risks are decreasing but remain prevalent

| Country     | Reference year | Age/gender group    | Population |
|-------------|----------------|---------------------|------------|
| Netherlands | 1995           | MaleAge20to24       | 580767     |
| Netherlands | 1995           | MaleAge25to29       | 666477     |
| Netherlands | 1995           | MaleAge30to34       | 672114     |
| Netherlands | 1995           | MaleAge35to39       | 620317     |
| Netherlands | 1995           | MaleAge40to44       | 583529     |
| Netherlands | 1995           | MaleAge45to49       | 596603     |
| Netherlands | 1995           | MaleAge50to54       | 451785     |
| Netherlands | 1995           | MaleAge55to59       | 380146     |
| Netherlands | 1995           | MaleAge5to9         | 482528     |
| Netherlands | 1995           | MaleAge60to64       | 337930     |
| Netherlands | 1995           | MaleAge65to69       | 286063     |
| Netherlands | 1995           | MaleAge70to74       | 237966     |
| Netherlands | 1995           | MaleAge75to79       | 147354     |
| Netherlands | 1995           | MaleAge80to84       | 90289      |
| Netherlands | 1995           | MaleAge85to89       | 38880      |
| Netherlands | 1995           | MaleAge90to94       | 11546      |
| Netherlands | 1995           | MaleAge95to99       | 2034       |
| Netherlands | 1995           | MaleAgeAbov e100    | 204        |
| Netherlands | 1996           | FemaleAge0to4       | 484723     |
| Netherlands | 1996           | FemaleAge10to14     | 447392     |
| Netherlands | 1996           | FemaleAge15to19     | 439705     |
| Netherlands | 1996           | FemaleAge20to24     | 510564     |
| Netherlands | 1996           | FemaleAge25to29     | 514442     |
| Netherlands | 1996           | FemaleAge30to34     | 510787     |
| Netherlands | 1996           | FemaleAge35to39     | 563396     |
| Netherlands | 1996           | FemaleAge40to44     | 559037     |
| Netherlands | 1996           | FemaleAge45to49     | 578024     |
| Netherlands | 1996           | FemaleAge50to54     | 456557     |
| Netherlands | 1996           | FemaleAge55to59     | 381546     |
| Netherlands | 1996           | FemaleAge5to9       | 469207     |
| Netherlands | 1996           | FemaleAge60to64     | 357164     |
| Netherlands | 1996           | FemaleAge65to69     | 333076     |
| Netherlands | 1996           | FemaleAge70to74     | 318628     |
| Netherlands | 1996           | FemaleAge75to79     | 240123     |
| Netherlands | 1996           | FemaleAge80to84     | 179701     |
| Netherlands | 1996           | FemaleAge85to89     | 106432     |
| Netherlands | 1996           | FemaleAge90to94     | 41307      |
| Netherlands | 1996           | FemaleAge95to99     | 8155       |
| Netherlands | 1996           | FemaleAgeAbov e100  | 788        |
| Netherlands | 1996           | FemaleLactAge15to19 | 2788       |
| Netherlands | 1996           | FemaleLactAge20to24 | 19771      |
| Netherlands | 1996           | FemaleLactAge25to29 | 64618      |
| Netherlands | 1996           | FemaleLactAge30to34 | 77393      |
| Netherlands | 1996           | FemaleLactAge35to39 | 26663      |
| Netherlands | 1996           | FemaleLactAge40to44 | 3262       |
| Netherlands | 1996           | FemaleLactAge45to49 | 114        |
| Netherlands | 1996           | FemalePregAge15to19 | 2091       |
| Netherlands | 1996           | FemalePregAge20to24 | 14828      |
| Netherlands | 1996           | FemalePregAge25to29 | 48463      |
| Netherlands | 1996           | FemalePregAge30to34 | 58045      |
| Netherlands | 1996           | FemalePregAge35to39 | 19997      |
| Netherlands | 1996           | FemalePregAge40to44 | 2446       |
| Netherlands | 1996           | FemalePregAge45to49 | 85         |
| Netherlands | 1996           | MaleAge0to4         | 508882     |
| Netherlands | 1996           | MaleAge10to14       | 468150     |
| Netherlands | 1996           | MaleAge15to19       | 463876     |
| Netherlands | 1996           | MaleAge20to24       | 560405     |
| Netherlands | 1996           | MaleAge25to29       | 656639     |
| Netherlands | 1996           | MaleAge30to34       | 677081     |
| Netherlands | 1996           | MaleAge35to39       | 630577     |
| Netherlands | 1996           | MaleAge40to44       | 583611     |
| Netherlands | 1996           | MaleAge45to49       | 602856     |
| Netherlands | 1996           | MaleAge50to54       | 476573     |
| Netherlands | 1996           | MaleAge55to59       | 386424     |
| Netherlands | 1996           | MaleAge5to9         | 489393     |
| Netherlands | 1996           | MaleAge60to64       | 340608     |
| Netherlands | 1996           | MaleAge65to69       | 287789     |
| Netherlands | 1996           | MaleAge70to74       | 239937     |
| Netherlands | 1996           | MaleAge75to79       | 153061     |
| Netherlands | 1996           | MaleAge80to84       | 90917      |
| Netherlands | 1996           | MaleAge85to89       | 41447      |
| Netherlands | 1996           | MaleAge90to94       | 12876      |
| Netherlands | 1996           | MaleAge95to99       | 2170       |
| Netherlands | 1996           | MaleAgeAbov e100    | 204        |
| Netherlands | 1997           | FemaleAge0to4       | 484057     |
| Netherlands | 1997           | FemaleAge10to14     | 452699     |
| Netherlands | 1997           | FemaleAge15to19     | 438813     |
| Netherlands | 1997           | FemaleAge20to24     | 489485     |
| Netherlands | 1997           | FemaleAge25to29     | 506024     |
| Netherlands | 1997           | FemaleAge30to34     | 513212     |
| Netherlands | 1997           | FemaleAge35to39     | 573584     |
| Netherlands | 1997           | FemaleAge40to44     | 565021     |
| Netherlands | 1997           | FemaleAge45to49     | 575955     |
| Netherlands | 1997           | FemaleAge50to54     | 486948     |
| Netherlands | 1997           | FemaleAge55to59     | 386558     |
| Netherlands | 1997           | FemaleAge5to9       | 475321     |
| Netherlands | 1997           | FemaleAge60to64     | 357979     |
| Netherlands | 1997           | FemaleAge65to69     | 333654     |

Dietary calcium and zinc deficiency risks are decreasing but remain prevalent

| Country     | Reference year | Age/gender group    | Population |
|-------------|----------------|---------------------|------------|
| Netherlands | 1997           | FemaleAge70to74     | 316299     |
| Netherlands | 1997           | FemaleAge75to79     | 249765     |
| Netherlands | 1997           | FemaleAge80to84     | 177016     |
| Netherlands | 1997           | FemaleAge85to89     | 109057     |
| Netherlands | 1997           | FemaleAge90to94     | 43819      |
| Netherlands | 1997           | FemaleAge95to99     | 9025       |
| Netherlands | 1997           | FemaleAgeAbove100   | 827        |
| Netherlands | 1997           | FemaleLactAge15to19 | 2788       |
| Netherlands | 1997           | FemaleLactAge20to24 | 19771      |
| Netherlands | 1997           | FemaleLactAge25to29 | 64618      |
| Netherlands | 1997           | FemaleLactAge30to34 | 77393      |
| Netherlands | 1997           | FemaleLactAge35to39 | 26663      |
| Netherlands | 1997           | FemaleLactAge40to44 | 3262       |
| Netherlands | 1997           | FemaleLactAge45to49 | 114        |
| Netherlands | 1997           | FemalePregAge15to19 | 2091       |
| Netherlands | 1997           | FemalePregAge20to24 | 14828      |
| Netherlands | 1997           | FemalePregAge25to29 | 48463      |
| Netherlands | 1997           | FemalePregAge30to34 | 58045      |
| Netherlands | 1997           | FemalePregAge35to39 | 19997      |
| Netherlands | 1997           | FemalePregAge40to44 | 2446       |
| Netherlands | 1997           | FemalePregAge45to49 | 85         |
| Netherlands | 1997           | MaleAge0to4         | 508472     |
| Netherlands | 1997           | MaleAge10to14       | 473750     |
| Netherlands | 1997           | MaleAge15to19       | 462392     |
| Netherlands | 1997           | MaleAge20to24       | 538128     |
| Netherlands | 1997           | MaleAge25to29       | 644228     |
| Netherlands | 1997           | MaleAge30to34       | 679730     |
| Netherlands | 1997           | MaleAge35to39       | 641612     |
| Netherlands | 1997           | MaleAge40to44       | 588018     |
| Netherlands | 1997           | MaleAge45to49       | 598739     |
| Netherlands | 1997           | MaleAge50to54       | 507668     |
| Netherlands | 1997           | MaleAge55to59       | 393343     |
| Netherlands | 1997           | MaleAge5to9         | 496016     |
| Netherlands | 1997           | MaleAge60to64       | 343496     |
| Netherlands | 1997           | MaleAge65to69       | 291304     |
| Netherlands | 1997           | MaleAge70to74       | 239920     |
| Netherlands | 1997           | MaleAge75to79       | 160731     |
| Netherlands | 1997           | MaleAge80to84       | 90279      |
| Netherlands | 1997           | MaleAge85to89       | 43521      |
| Netherlands | 1997           | MaleAge90to94       | 13652      |
| Netherlands | 1997           | MaleAge95to99       | 2457       |
| Netherlands | 1997           | MaleAgeAbove100     | 206        |
| Netherlands | 1998           | FemaleAge0to4       | 481454     |
| Netherlands | 1998           | FemaleAge10to14     | 458197     |
| Netherlands | 1998           | FemaleAge15to19     | 441318     |
| Netherlands | 1998           | FemaleAge20to24     | 468364     |
| Netherlands | 1998           | FemaleAge25to29     | 495853     |
| Netherlands | 1998           | FemaleAge30to34     | 513320     |
| Netherlands | 1998           | FemaleAge35to39     | 583394     |
| Netherlands | 1998           | FemaleAge40to44     | 574167     |
| Netherlands | 1998           | FemaleAge45to49     | 568035     |
| Netherlands | 1998           | FemaleAge50to54     | 519139     |
| Netherlands | 1998           | FemaleAge55to59     | 393785     |
| Netherlands | 1998           | FemaleAge5to9       | 480759     |
| Netherlands | 1998           | FemaleAge60to64     | 359315     |
| Netherlands | 1998           | FemaleAge65to69     | 335559     |
| Netherlands | 1998           | FemaleAge70to74     | 312321     |
| Netherlands | 1998           | FemaleAge75to79     | 260946     |
| Netherlands | 1998           | FemaleAge80to84     | 175172     |
| Netherlands | 1998           | FemaleAge85to89     | 111121     |
| Netherlands | 1998           | FemaleAge90to94     | 44939      |
| Netherlands | 1998           | FemaleAge95to99     | 9830       |
| Netherlands | 1998           | FemaleAgeAbove100   | 866        |
| Netherlands | 1998           | FemaleLactAge15to19 | 2788       |
| Netherlands | 1998           | FemaleLactAge20to24 | 19771      |
| Netherlands | 1998           | FemaleLactAge25to29 | 64618      |
| Netherlands | 1998           | FemaleLactAge30to34 | 77393      |
| Netherlands | 1998           | FemaleLactAge35to39 | 26663      |
| Netherlands | 1998           | FemaleLactAge40to44 | 3262       |
| Netherlands | 1998           | FemaleLactAge45to49 | 114        |
| Netherlands | 1998           | FemalePregAge15to19 | 2091       |
| Netherlands | 1998           | FemalePregAge20to24 | 14828      |
| Netherlands | 1998           | FemalePregAge25to29 | 48463      |
| Netherlands | 1998           | FemalePregAge30to34 | 58045      |
| Netherlands | 1998           | FemalePregAge35to39 | 19997      |
| Netherlands | 1998           | FemalePregAge40to44 | 2446       |
| Netherlands | 1998           | FemalePregAge45to49 | 85         |
| Netherlands | 1998           | MaleAge0to4         | 505639     |
| Netherlands | 1998           | MaleAge10to14       | 479101     |
| Netherlands | 1998           | MaleAge15to19       | 465458     |
| Netherlands | 1998           | MaleAge20to24       | 515871     |
| Netherlands | 1998           | MaleAge25to29       | 629634     |
| Netherlands | 1998           | MaleAge30to34       | 679782     |
| Netherlands | 1998           | MaleAge35to39       | 652564     |
| Netherlands | 1998           | MaleAge40to44       | 595804     |
| Netherlands | 1998           | MaleAge45to49       | 588593     |
| Netherlands | 1998           | MaleAge50to54       | 540192     |
| Netherlands | 1998           | MaleAge55to59       | 402469     |

Dietary calcium and zinc deficiency risks are decreasing but remain prevalent

| Country     | Reference year | Age/gender group    | Population |
|-------------|----------------|---------------------|------------|
| Netherlands | 1998           | MaleAge5to9         | 502277     |
| Netherlands | 1998           | MaleAge60to64       | 347048     |
| Netherlands | 1998           | MaleAge65to69       | 295927     |
| Netherlands | 1998           | MaleAge70to74       | 239340     |
| Netherlands | 1998           | MaleAge75to79       | 168956     |
| Netherlands | 1998           | MaleAge80to84       | 89605      |
| Netherlands | 1998           | MaleAge85to89       | 44676      |
| Netherlands | 1998           | MaleAge90to94       | 13814      |
| Netherlands | 1998           | MaleAge95to99       | 2713       |
| Netherlands | 1998           | MaleAgeAbov e100    | 210        |
| Netherlands | 1999           | FemaleAge0to4       | 479452     |
| Netherlands | 1999           | FemaleAge10to14     | 463995     |
| Netherlands | 1999           | FemaleAge15to19     | 444707     |
| Netherlands | 1999           | FemaleAge20to24     | 450624     |
| Netherlands | 1999           | FemaleAge25to29     | 483298     |
| Netherlands | 1999           | FemaleAge30to34     | 511165     |
| Netherlands | 1999           | FemaleAge35to39     | 591939     |
| Netherlands | 1999           | FemaleAge40to44     | 584376     |
| Netherlands | 1999           | FemaleAge45to49     | 560929     |
| Netherlands | 1999           | FemaleAge50to54     | 545812     |
| Netherlands | 1999           | FemaleAge55to59     | 405786     |
| Netherlands | 1999           | FemaleAge5to9       | 485321     |
| Netherlands | 1999           | FemaleAge60to64     | 361637     |
| Netherlands | 1999           | FemaleAge65to69     | 337654     |
| Netherlands | 1999           | FemaleAge70to74     | 309091     |
| Netherlands | 1999           | FemaleAge75to79     | 270468     |
| Netherlands | 1999           | FemaleAge80to84     | 176401     |
| Netherlands | 1999           | FemaleAge85to89     | 112220     |
| Netherlands | 1999           | FemaleAge90to94     | 44786      |
| Netherlands | 1999           | FemaleAge95to99     | 10102      |
| Netherlands | 1999           | FemaleAgeAbov e100  | 905        |
| Netherlands | 1999           | FemaleLactAge15to19 | 2788       |
| Netherlands | 1999           | FemaleLactAge20to24 | 19771      |
| Netherlands | 1999           | FemaleLactAge25to29 | 64618      |
| Netherlands | 1999           | FemaleLactAge30to34 | 77393      |
| Netherlands | 1999           | FemaleLactAge35to39 | 26663      |
| Netherlands | 1999           | FemaleLactAge40to44 | 3262       |
| Netherlands | 1999           | FemaleLactAge45to49 | 114        |
| Netherlands | 1999           | FemalePregAge15to19 | 2091       |
| Netherlands | 1999           | FemalePregAge20to24 | 14828      |
| Netherlands | 1999           | FemalePregAge25to29 | 48463      |
| Netherlands | 1999           | FemalePregAge30to34 | 58045      |
| Netherlands | 1999           | FemalePregAge35to39 | 19997      |
| Netherlands | 1999           | FemalePregAge40to44 | 2446       |
| Netherlands | 1999           | FemalePregAge45to49 | 85         |
| Netherlands | 1999           | MaleAge0to4         | 503290     |
| Netherlands | 1999           | MaleAge10to14       | 484491     |
| Netherlands | 1999           | MaleAge15to19       | 470321     |
| Netherlands | 1999           | MaleAge20to24       | 496841     |
| Netherlands | 1999           | MaleAge25to29       | 613015     |
| Netherlands | 1999           | MaleAge30to34       | 676898     |
| Netherlands | 1999           | MaleAge35to39       | 662187     |
| Netherlands | 1999           | MaleAge40to44       | 605022     |
| Netherlands | 1999           | MaleAge45to49       | 579374     |
| Netherlands | 1999           | MaleAge50to54       | 566654     |
| Netherlands | 1999           | MaleAge55to59       | 416221     |
| Netherlands | 1999           | MaleAge5to9         | 507801     |
| Netherlands | 1999           | MaleAge60to64       | 351807     |
| Netherlands | 1999           | MaleAge65to69       | 300682     |
| Netherlands | 1999           | MaleAge70to74       | 239902     |
| Netherlands | 1999           | MaleAge75to79       | 175839     |
| Netherlands | 1999           | MaleAge80to84       | 90312      |
| Netherlands | 1999           | MaleAge85to89       | 44558      |
| Netherlands | 1999           | MaleAge90to94       | 13395      |
| Netherlands | 1999           | MaleAge95to99       | 2703       |
| Netherlands | 1999           | MaleAgeAbov e100    | 213        |
| New Zealand | 1992           | FemaleAge0to4       | 140966     |
| New Zealand | 1992           | FemaleAge10to14     | 125983     |
| New Zealand | 1992           | FemaleAge15to19     | 131457     |
| New Zealand | 1992           | FemaleAge20to24     | 119511     |
| New Zealand | 1992           | FemaleAge25to29     | 111026     |
| New Zealand | 1992           | FemaleAge30to34     | 117625     |
| New Zealand | 1992           | FemaleAge35to39     | 121454     |
| New Zealand | 1992           | FemaleAge40to44     | 121625     |
| New Zealand | 1992           | FemaleAge45to49     | 103706     |
| New Zealand | 1992           | FemaleAge50to54     | 82827      |
| New Zealand | 1992           | FemaleAge55to59     | 73675      |
| New Zealand | 1992           | FemaleAge5to9       | 128574     |
| New Zealand | 1992           | FemaleAge60to64     | 69705      |
| New Zealand | 1992           | FemaleAge65to69     | 68104      |
| New Zealand | 1992           | FemaleAge70to74     | 57699      |
| New Zealand | 1992           | FemaleAge75to79     | 45571      |
| New Zealand | 1992           | FemaleAge80to84     | 31955      |
| New Zealand | 1992           | FemaleAge85to89     | 16108      |
| New Zealand | 1992           | FemaleAge90to94     | 6015       |
| New Zealand | 1992           | FemaleAge95to99     | 1455       |
| New Zealand | 1992           | FemaleAgeAbov e100  | 175        |
| New Zealand | 1992           | FemaleLactAge15to19 | 4654       |

Dietary calcium and zinc deficiency risks are decreasing but remain prevalent

| Country     | Reference year | Age/gender group    | Population |
|-------------|----------------|---------------------|------------|
| New Zealand | 1992           | FemaleLactAge20to24 | 12447      |
| New Zealand | 1992           | FemaleLactAge25to29 | 19011      |
| New Zealand | 1992           | FemaleLactAge30to34 | 15993      |
| New Zealand | 1992           | FemaleLactAge35to39 | 5626       |
| New Zealand | 1992           | FemaleLactAge40to44 | 854        |
| New Zealand | 1992           | FemaleLactAge45to49 | 38         |
| New Zealand | 1992           | FemalePregAge15to19 | 3491       |
| New Zealand | 1992           | FemalePregAge20to24 | 9335       |
| New Zealand | 1992           | FemalePregAge25to29 | 14258      |
| New Zealand | 1992           | FemalePregAge30to34 | 11995      |
| New Zealand | 1992           | FemalePregAge35to39 | 4220       |
| New Zealand | 1992           | FemalePregAge40to44 | 641        |
| New Zealand | 1992           | FemalePregAge45to49 | 29         |
| New Zealand | 1992           | MaleAge0to4         | 148045     |
| New Zealand | 1992           | MaleAge10to14       | 131520     |
| New Zealand | 1992           | MaleAge15to19       | 142616     |
| New Zealand | 1992           | MaleAge20to24       | 140441     |
| New Zealand | 1992           | MaleAge25to29       | 139160     |
| New Zealand | 1992           | MaleAge30to34       | 140190     |
| New Zealand | 1992           | MaleAge35to39       | 128009     |
| New Zealand | 1992           | MaleAge40to44       | 121509     |
| New Zealand | 1992           | MaleAge45to49       | 104666     |
| New Zealand | 1992           | MaleAge50to54       | 83175      |
| New Zealand | 1992           | MaleAge55to59       | 73011      |
| New Zealand | 1992           | MaleAge5to9         | 135223     |
| New Zealand | 1992           | MaleAge60to64       | 70051      |
| New Zealand | 1992           | MaleAge65to69       | 62469      |
| New Zealand | 1992           | MaleAge70to74       | 45591      |
| New Zealand | 1992           | MaleAge75to79       | 31291      |
| New Zealand | 1992           | MaleAge80to84       | 18426      |
| New Zealand | 1992           | MaleAge85to89       | 7445       |
| New Zealand | 1992           | MaleAge90to94       | 2107       |
| New Zealand | 1992           | MaleAge95to99       | 341        |
| New Zealand | 1992           | MaleAgeAbov e100    | 34         |
| New Zealand | 1993           | FemaleAge0to4       | 142547     |
| New Zealand | 1993           | FemaleAge10to14     | 126402     |
| New Zealand | 1993           | FemaleAge15to19     | 128541     |
| New Zealand | 1993           | FemaleAge20to24     | 121477     |
| New Zealand | 1993           | FemaleAge25to29     | 110753     |
| New Zealand | 1993           | FemaleAge30to34     | 120949     |
| New Zealand | 1993           | FemaleAge35to39     | 126430     |
| New Zealand | 1993           | FemaleAge40to44     | 123112     |
| New Zealand | 1993           | FemaleAge45to49     | 110149     |
| New Zealand | 1993           | FemaleAge50to54     | 85904      |
| New Zealand | 1993           | FemaleAge55to59     | 75091      |
| New Zealand | 1993           | FemaleAge5to9       | 132255     |
| New Zealand | 1993           | FemaleAge60to64     | 69658      |
| New Zealand | 1993           | FemaleAge65to69     | 68323      |
| New Zealand | 1993           | FemaleAge70to74     | 59899      |
| New Zealand | 1993           | FemaleAge75to79     | 45718      |
| New Zealand | 1993           | FemaleAge80to84     | 33143      |
| New Zealand | 1993           | FemaleAge85to89     | 17051      |
| New Zealand | 1993           | FemaleAge90to94     | 6180       |
| New Zealand | 1993           | FemaleAge95to99     | 1645       |
| New Zealand | 1993           | FemaleAgeAbov e100  | 182        |
| New Zealand | 1993           | FemaleLactAge15to19 | 4654       |
| New Zealand | 1993           | FemaleLactAge20to24 | 12447      |
| New Zealand | 1993           | FemaleLactAge25to29 | 19011      |
| New Zealand | 1993           | FemaleLactAge30to34 | 15993      |
| New Zealand | 1993           | FemaleLactAge35to39 | 5626       |
| New Zealand | 1993           | FemaleLactAge40to44 | 854        |
| New Zealand | 1993           | FemaleLactAge45to49 | 38         |
| New Zealand | 1993           | FemalePregAge15to19 | 3491       |
| New Zealand | 1993           | FemalePregAge20to24 | 9335       |
| New Zealand | 1993           | FemalePregAge25to29 | 14258      |
| New Zealand | 1993           | FemalePregAge30to34 | 11995      |
| New Zealand | 1993           | FemalePregAge35to39 | 4220       |
| New Zealand | 1993           | FemalePregAge40to44 | 641        |
| New Zealand | 1993           | FemalePregAge45to49 | 29         |
| New Zealand | 1993           | MaleAge0to4         | 150544     |
| New Zealand | 1993           | MaleAge10to14       | 132639     |
| New Zealand | 1993           | MaleAge15to19       | 140003     |
| New Zealand | 1993           | MaleAge20to24       | 142341     |
| New Zealand | 1993           | MaleAge25to29       | 138901     |
| New Zealand | 1993           | MaleAge30to34       | 143188     |
| New Zealand | 1993           | MaleAge35to39       | 132746     |
| New Zealand | 1993           | MaleAge40to44       | 122981     |
| New Zealand | 1993           | MaleAge45to49       | 110686     |
| New Zealand | 1993           | MaleAge50to54       | 86446      |
| New Zealand | 1993           | MaleAge55to59       | 74398      |
| New Zealand | 1993           | MaleAge5to9         | 139143     |
| New Zealand | 1993           | MaleAge60to64       | 69611      |
| New Zealand | 1993           | MaleAge65to69       | 63901      |
| New Zealand | 1993           | MaleAge70to74       | 47853      |
| New Zealand | 1993           | MaleAge75to79       | 31312      |
| New Zealand | 1993           | MaleAge80to84       | 19299      |
| New Zealand | 1993           | MaleAge85to89       | 7863       |
| New Zealand | 1993           | MaleAge90to94       | 2246       |

Dietary calcium and zinc deficiency risks are decreasing but remain prevalent

| Country     | Reference year | Age/gender group    | Population |
|-------------|----------------|---------------------|------------|
| New Zealand | 1993           | MaleAge95to99       | 397        |
| New Zealand | 1993           | MaleAgeAbov e100    | 35         |
| New Zealand | 1994           | FemaleAge0to4       | 143423     |
| New Zealand | 1994           | FemaleAge10to14     | 127025     |
| New Zealand | 1994           | FemaleAge15to19     | 126530     |
| New Zealand | 1994           | FemaleAge20to24     | 122028     |
| New Zealand | 1994           | FemaleAge25to29     | 110221     |
| New Zealand | 1994           | FemaleAge30to34     | 124033     |
| New Zealand | 1994           | FemaleAge35to39     | 130862     |
| New Zealand | 1994           | FemaleAge40to44     | 125268     |
| New Zealand | 1994           | FemaleAge45to49     | 115824     |
| New Zealand | 1994           | FemaleAge50to54     | 89399      |
| New Zealand | 1994           | FemaleAge55to59     | 77308      |
| New Zealand | 1994           | FemaleAge5to9       | 136227     |
| New Zealand | 1994           | FemaleAge60to64     | 69335      |
| New Zealand | 1994           | FemaleAge65to69     | 68548      |
| New Zealand | 1994           | FemaleAge70to74     | 61981      |
| New Zealand | 1994           | FemaleAge75to79     | 46200      |
| New Zealand | 1994           | FemaleAge80to84     | 34257      |
| New Zealand | 1994           | FemaleAge85to89     | 17883      |
| New Zealand | 1994           | FemaleAge90to94     | 6322       |
| New Zealand | 1994           | FemaleAge95to99     | 1710       |
| New Zealand | 1994           | FemaleAgeAbov e100  | 191        |
| New Zealand | 1994           | FemaleLactAge15to19 | 4654       |
| New Zealand | 1994           | FemaleLactAge20to24 | 12447      |
| New Zealand | 1994           | FemaleLactAge25to29 | 19011      |
| New Zealand | 1994           | FemaleLactAge30to34 | 15993      |
| New Zealand | 1994           | FemaleLactAge35to39 | 5626       |
| New Zealand | 1994           | FemaleLactAge40to44 | 854        |
| New Zealand | 1994           | FemaleLactAge45to49 | 38         |
| New Zealand | 1994           | FemalePregAge15to19 | 3491       |
| New Zealand | 1994           | FemalePregAge20to24 | 9335       |
| New Zealand | 1994           | FemalePregAge25to29 | 14258      |
| New Zealand | 1994           | FemalePregAge30to34 | 11995      |
| New Zealand | 1994           | FemalePregAge35to39 | 4220       |
| New Zealand | 1994           | FemalePregAge40to44 | 641        |
| New Zealand | 1994           | FemalePregAge45to49 | 29         |
| New Zealand | 1994           | MaleAge0to4         | 152181     |
| New Zealand | 1994           | MaleAge10to14       | 133940     |
| New Zealand | 1994           | MaleAge15to19       | 138493     |
| New Zealand | 1994           | MaleAge20to24       | 143011     |
| New Zealand | 1994           | MaleAge25to29       | 138053     |
| New Zealand | 1994           | MaleAge30to34       | 145939     |
| New Zealand | 1994           | MaleAge35to39       | 136945     |
| New Zealand | 1994           | MaleAge40to44       | 124878     |
| New Zealand | 1994           | MaleAge45to49       | 116242     |
| New Zealand | 1994           | MaleAge50to54       | 89943      |
| New Zealand | 1994           | MaleAge55to59       | 76466      |
| New Zealand | 1994           | MaleAge5to9         | 143220     |
| New Zealand | 1994           | MaleAge60to64       | 69189      |
| New Zealand | 1994           | MaleAge65to69       | 65017      |
| New Zealand | 1994           | MaleAge70to74       | 50179      |
| New Zealand | 1994           | MaleAge75to79       | 31708      |
| New Zealand | 1994           | MaleAge80to84       | 19892      |
| New Zealand | 1994           | MaleAge85to89       | 8187       |
| New Zealand | 1994           | MaleAge90to94       | 2315       |
| New Zealand | 1994           | MaleAge95to99       | 423        |
| New Zealand | 1994           | MaleAgeAbov e100    | 36         |
| New Zealand | 1995           | FemaleAge0to4       | 143565     |
| New Zealand | 1995           | FemaleAge10to14     | 128077     |
| New Zealand | 1995           | FemaleAge15to19     | 125369     |
| New Zealand | 1995           | FemaleAge20to24     | 120966     |
| New Zealand | 1995           | FemaleAge25to29     | 109749     |
| New Zealand | 1995           | FemaleAge30to34     | 126178     |
| New Zealand | 1995           | FemaleAge35to39     | 134614     |
| New Zealand | 1995           | FemaleAge40to44     | 128308     |
| New Zealand | 1995           | FemaleAge45to49     | 120165     |
| New Zealand | 1995           | FemaleAge50to54     | 93496      |
| New Zealand | 1995           | FemaleAge55to59     | 79884      |
| New Zealand | 1995           | FemaleAge5to9       | 139685     |
| New Zealand | 1995           | FemaleAge60to64     | 69142      |
| New Zealand | 1995           | FemaleAge65to69     | 68638      |
| New Zealand | 1995           | FemaleAge70to74     | 63590      |
| New Zealand | 1995           | FemaleAge75to79     | 47250      |
| New Zealand | 1995           | FemaleAge80to84     | 35150      |
| New Zealand | 1995           | FemaleAge85to89     | 18656      |
| New Zealand | 1995           | FemaleAge90to94     | 6477       |
| New Zealand | 1995           | FemaleAge95to99     | 1592       |
| New Zealand | 1995           | FemaleAgeAbov e100  | 201        |
| New Zealand | 1995           | FemaleLactAge15to19 | 4654       |
| New Zealand | 1995           | FemaleLactAge20to24 | 12447      |
| New Zealand | 1995           | FemaleLactAge25to29 | 19011      |
| New Zealand | 1995           | FemaleLactAge30to34 | 15993      |
| New Zealand | 1995           | FemaleLactAge35to39 | 5626       |
| New Zealand | 1995           | FemaleLactAge40to44 | 854        |
| New Zealand | 1995           | FemaleLactAge45to49 | 38         |
| New Zealand | 1995           | FemalePregAge15to19 | 3491       |
| New Zealand | 1995           | FemalePregAge20to24 | 9335       |

Dietary calcium and zinc deficiency risks are decreasing but remain prevalent

| Country     | Reference year | Age/gender group    | Population |
|-------------|----------------|---------------------|------------|
| New Zealand | 1995           | FemalePregAge25to29 | 14258      |
| New Zealand | 1995           | FemalePregAge30to34 | 11995      |
| New Zealand | 1995           | FemalePregAge35to39 | 4220       |
| New Zealand | 1995           | FemalePregAge40to44 | 641        |
| New Zealand | 1995           | FemalePregAge45to49 | 29         |
| New Zealand | 1995           | MaleAge0to4         | 152645     |
| New Zealand | 1995           | MaleAge10to14       | 135478     |
| New Zealand | 1995           | MaleAge15to19       | 137960     |
| New Zealand | 1995           | MaleAge20to24       | 142189     |
| New Zealand | 1995           | MaleAge25to29       | 137058     |
| New Zealand | 1995           | MaleAge30to34       | 147638     |
| New Zealand | 1995           | MaleAge35to39       | 140346     |
| New Zealand | 1995           | MaleAge40to44       | 127471     |
| New Zealand | 1995           | MaleAge45to49       | 120591     |
| New Zealand | 1995           | MaleAge50to54       | 93857      |
| New Zealand | 1995           | MaleAge55to59       | 78818      |
| New Zealand | 1995           | MaleAge5to9         | 146696     |
| New Zealand | 1995           | MaleAge60to64       | 69098      |
| New Zealand | 1995           | MaleAge65to69       | 65627      |
| New Zealand | 1995           | MaleAge70to74       | 52275      |
| New Zealand | 1995           | MaleAge75to79       | 32667      |
| New Zealand | 1995           | MaleAge80to84       | 20158      |
| New Zealand | 1995           | MaleAge85to89       | 8432       |
| New Zealand | 1995           | MaleAge90to94       | 2297       |
| New Zealand | 1995           | MaleAge95to99       | 381        |
| New Zealand | 1995           | MaleAgeAbov e100    | 37         |
| New Zealand | 1996           | FemaleAge0to4       | 142573     |
| New Zealand | 1996           | FemaleAge10to14     | 131138     |
| New Zealand | 1996           | FemaleAge15to19     | 123864     |
| New Zealand | 1996           | FemaleAge20to24     | 122290     |
| New Zealand | 1996           | FemaleAge25to29     | 115714     |
| New Zealand | 1996           | FemaleAge30to34     | 125107     |
| New Zealand | 1996           | FemaleAge35to39     | 135260     |
| New Zealand | 1996           | FemaleAge40to44     | 130342     |
| New Zealand | 1996           | FemaleAge45to49     | 123301     |
| New Zealand | 1996           | FemaleAge50to54     | 98461      |
| New Zealand | 1996           | FemaleAge55to59     | 81950      |
| New Zealand | 1996           | FemaleAge5to9       | 142439     |
| New Zealand | 1996           | FemaleAge60to64     | 70124      |
| New Zealand | 1996           | FemaleAge65to69     | 67918      |
| New Zealand | 1996           | FemaleAge70to74     | 63828      |
| New Zealand | 1996           | FemaleAge75to79     | 48639      |
| New Zealand | 1996           | FemaleAge80to84     | 35456      |
| New Zealand | 1996           | FemaleAge85to89     | 19710      |
| New Zealand | 1996           | FemaleAge90to94     | 7225       |
| New Zealand | 1996           | FemaleAge95to99     | 1685       |
| New Zealand | 1996           | FemaleAgeAbov e100  | 213        |
| New Zealand | 1996           | FemaleLactAge15to19 | 4018       |
| New Zealand | 1996           | FemaleLactAge20to24 | 10445      |
| New Zealand | 1996           | FemaleLactAge25to29 | 16067      |
| New Zealand | 1996           | FemaleLactAge30to34 | 16808      |
| New Zealand | 1996           | FemaleLactAge35to39 | 7529       |
| New Zealand | 1996           | FemaleLactAge40to44 | 1285       |
| New Zealand | 1996           | FemaleLactAge45to49 | 52         |
| New Zealand | 1996           | FemalePregAge15to19 | 3014       |
| New Zealand | 1996           | FemalePregAge20to24 | 7834       |
| New Zealand | 1996           | FemalePregAge25to29 | 12050      |
| New Zealand | 1996           | FemalePregAge30to34 | 12606      |
| New Zealand | 1996           | FemalePregAge35to39 | 5647       |
| New Zealand | 1996           | FemalePregAge40to44 | 964        |
| New Zealand | 1996           | FemalePregAge45to49 | 39         |
| New Zealand | 1996           | MaleAge0to4         | 152408     |
| New Zealand | 1996           | MaleAge10to14       | 138395     |
| New Zealand | 1996           | MaleAge15to19       | 135445     |
| New Zealand | 1996           | MaleAge20to24       | 139704     |
| New Zealand | 1996           | MaleAge25to29       | 137489     |
| New Zealand | 1996           | MaleAge30to34       | 147251     |
| New Zealand | 1996           | MaleAge35to39       | 143535     |
| New Zealand | 1996           | MaleAge40to44       | 129773     |
| New Zealand | 1996           | MaleAge45to49       | 123245     |
| New Zealand | 1996           | MaleAge50to54       | 98772      |
| New Zealand | 1996           | MaleAge55to59       | 80742      |
| New Zealand | 1996           | MaleAge5to9         | 149557     |
| New Zealand | 1996           | MaleAge60to64       | 69537      |
| New Zealand | 1996           | MaleAge65to69       | 65396      |
| New Zealand | 1996           | MaleAge70to74       | 53474      |
| New Zealand | 1996           | MaleAge75to79       | 34160      |
| New Zealand | 1996           | MaleAge80to84       | 20567      |
| New Zealand | 1996           | MaleAge85to89       | 9186       |
| New Zealand | 1996           | MaleAge90to94       | 2650       |
| New Zealand | 1996           | MaleAge95to99       | 423        |
| New Zealand | 1996           | MaleAgeAbov e100    | 39         |
| New Zealand | 1997           | FemaleAge0to4       | 141272     |
| New Zealand | 1997           | FemaleAge10to14     | 134603     |
| New Zealand | 1997           | FemaleAge15to19     | 122435     |
| New Zealand | 1997           | FemaleAge20to24     | 118684     |
| New Zealand | 1997           | FemaleAge25to29     | 116188     |
| New Zealand | 1997           | FemaleAge30to34     | 124416     |



Dietary calcium and zinc deficiency risks are decreasing but remain prevalent

| Country     | Reference year | Age/gender group    | Population |
|-------------|----------------|---------------------|------------|
| New Zealand | 1997           | FemaleAge35to39     | 138928     |
| New Zealand | 1997           | FemaleAge40to44     | 133731     |
| New Zealand | 1997           | FemaleAge45to49     | 125026     |
| New Zealand | 1997           | FemaleAge50to54     | 104164     |
| New Zealand | 1997           | FemaleAge55to59     | 83887      |
| New Zealand | 1997           | FemaleAge5to9       | 144196     |
| New Zealand | 1997           | FemaleAge60to64     | 71652      |
| New Zealand | 1997           | FemaleAge65to69     | 67109      |
| New Zealand | 1997           | FemaleAge70to74     | 63698      |
| New Zealand | 1997           | FemaleAge75to79     | 50274      |
| New Zealand | 1997           | FemaleAge80to84     | 35575      |
| New Zealand | 1997           | FemaleAge85to89     | 20675      |
| New Zealand | 1997           | FemaleAge90to94     | 7832       |
| New Zealand | 1997           | FemaleAge95to99     | 1773       |
| New Zealand | 1997           | FemaleAgeAbov e100  | 227        |
| New Zealand | 1997           | FemaleLactAge15to19 | 4018       |
| New Zealand | 1997           | FemaleLactAge20to24 | 10445      |
| New Zealand | 1997           | FemaleLactAge25to29 | 16067      |
| New Zealand | 1997           | FemaleLactAge30to34 | 16808      |
| New Zealand | 1997           | FemaleLactAge35to39 | 7529       |
| New Zealand | 1997           | FemaleLactAge40to44 | 1285       |
| New Zealand | 1997           | FemaleLactAge45to49 | 52         |
| New Zealand | 1997           | FemalePregAge15to19 | 3014       |
| New Zealand | 1997           | FemalePregAge20to24 | 7834       |
| New Zealand | 1997           | FemalePregAge25to29 | 12050      |
| New Zealand | 1997           | FemalePregAge30to34 | 12606      |
| New Zealand | 1997           | FemalePregAge35to39 | 5647       |
| New Zealand | 1997           | FemalePregAge40to44 | 964        |
| New Zealand | 1997           | FemalePregAge45to49 | 39         |
| New Zealand | 1997           | MaleAge0to4         | 150988     |
| New Zealand | 1997           | MaleAge10to14       | 141606     |
| New Zealand | 1997           | MaleAge15to19       | 134228     |
| New Zealand | 1997           | MaleAge20to24       | 135909     |
| New Zealand | 1997           | MaleAge25to29       | 137516     |
| New Zealand | 1997           | MaleAge30to34       | 145683     |
| New Zealand | 1997           | MaleAge35to39       | 146275     |
| New Zealand | 1997           | MaleAge40to44       | 132642     |
| New Zealand | 1997           | MaleAge45to49       | 124343     |
| New Zealand | 1997           | MaleAge50to54       | 104342     |
| New Zealand | 1997           | MaleAge55to59       | 82707      |
| New Zealand | 1997           | MaleAge5to9         | 151654     |
| New Zealand | 1997           | MaleAge60to64       | 70422      |
| New Zealand | 1997           | MaleAge65to69       | 64751      |
| New Zealand | 1997           | MaleAge70to74       | 54521      |
| New Zealand | 1997           | MaleAge75to79       | 35816      |
| New Zealand | 1997           | MaleAge80to84       | 20753      |
| New Zealand | 1997           | MaleAge85to89       | 9847       |
| New Zealand | 1997           | MaleAge90to94       | 2904       |
| New Zealand | 1997           | MaleAge95to99       | 481        |
| New Zealand | 1997           | MaleAgeAbov e100    | 41         |
| New Zealand | 1998           | FemaleAge0to4       | 139871     |
| New Zealand | 1998           | FemaleAge10to14     | 137761     |
| New Zealand | 1998           | FemaleAge15to19     | 122878     |
| New Zealand | 1998           | FemaleAge20to24     | 114438     |
| New Zealand | 1998           | FemaleAge25to29     | 115596     |
| New Zealand | 1998           | FemaleAge30to34     | 123510     |
| New Zealand | 1998           | FemaleAge35to39     | 141973     |
| New Zealand | 1998           | FemaleAge40to44     | 137725     |
| New Zealand | 1998           | FemaleAge45to49     | 126020     |
| New Zealand | 1998           | FemaleAge50to54     | 109985     |
| New Zealand | 1998           | FemaleAge55to59     | 86155      |
| New Zealand | 1998           | FemaleAge5to9       | 145196     |
| New Zealand | 1998           | FemaleAge60to64     | 73524      |
| New Zealand | 1998           | FemaleAge65to69     | 66457      |
| New Zealand | 1998           | FemaleAge70to74     | 63480      |
| New Zealand | 1998           | FemaleAge75to79     | 51803      |
| New Zealand | 1998           | FemaleAge80to84     | 35887      |
| New Zealand | 1998           | FemaleAge85to89     | 21498      |
| New Zealand | 1998           | FemaleAge90to94     | 8262       |
| New Zealand | 1998           | FemaleAge95to99     | 1868       |
| New Zealand | 1998           | FemaleAgeAbov e100  | 242        |
| New Zealand | 1998           | FemaleLactAge15to19 | 4018       |
| New Zealand | 1998           | FemaleLactAge20to24 | 10445      |
| New Zealand | 1998           | FemaleLactAge25to29 | 16067      |
| New Zealand | 1998           | FemaleLactAge30to34 | 16808      |
| New Zealand | 1998           | FemaleLactAge35to39 | 7529       |
| New Zealand | 1998           | FemaleLactAge40to44 | 1285       |
| New Zealand | 1998           | FemaleLactAge45to49 | 52         |
| New Zealand | 1998           | FemalePregAge15to19 | 3014       |
| New Zealand | 1998           | FemalePregAge20to24 | 7834       |
| New Zealand | 1998           | FemalePregAge25to29 | 12050      |
| New Zealand | 1998           | FemalePregAge30to34 | 12606      |
| New Zealand | 1998           | FemalePregAge35to39 | 5647       |
| New Zealand | 1998           | FemalePregAge40to44 | 964        |
| New Zealand | 1998           | FemalePregAge45to49 | 39         |
| New Zealand | 1998           | MaleAge0to4         | 148889     |
| New Zealand | 1998           | MaleAge10to14       | 144457     |
| New Zealand | 1998           | MaleAge15to19       | 134927     |

Dietary calcium and zinc deficiency risks are decreasing but remain prevalent

| Country     | Reference year | Age/gender group    | Population |
|-------------|----------------|---------------------|------------|
| New Zealand | 1998           | MaleAge20to24       | 131739     |
| New Zealand | 1998           | MaleAge25to29       | 136395     |
| New Zealand | 1998           | MaleAge30to34       | 143768     |
| New Zealand | 1998           | MaleAge35to39       | 148324     |
| New Zealand | 1998           | MaleAge40to44       | 136002     |
| New Zealand | 1998           | MaleAge45to49       | 124664     |
| New Zealand | 1998           | MaleAge50to54       | 109952     |
| New Zealand | 1998           | MaleAge55to59       | 85058      |
| New Zealand | 1998           | MaleAge5to9         | 153214     |
| New Zealand | 1998           | MaleAge60to64       | 71694      |
| New Zealand | 1998           | MaleAge65to69       | 64005      |
| New Zealand | 1998           | MaleAge70to74       | 55512      |
| New Zealand | 1998           | MaleAge75to79       | 37433      |
| New Zealand | 1998           | MaleAge80to84       | 20996      |
| New Zealand | 1998           | MaleAge85to89       | 10326      |
| New Zealand | 1998           | MaleAge90to94       | 3048       |
| New Zealand | 1998           | MaleAge95to99       | 538        |
| New Zealand | 1998           | MaleAgeAbov e100    | 43         |
| New Zealand | 1999           | FemaleAge0to4       | 138663     |
| New Zealand | 1999           | FemaleAge10to14     | 140358     |
| New Zealand | 1999           | FemaleAge15to19     | 125168     |
| New Zealand | 1999           | FemaleAge20to24     | 110682     |
| New Zealand | 1999           | FemaleAge25to29     | 113565     |
| New Zealand | 1999           | FemaleAge30to34     | 123024     |
| New Zealand | 1999           | FemaleAge35to39     | 144278     |
| New Zealand | 1999           | FemaleAge40to44     | 142097     |
| New Zealand | 1999           | FemaleAge45to49     | 127409     |
| New Zealand | 1999           | FemaleAge50to54     | 115137     |
| New Zealand | 1999           | FemaleAge55to59     | 89300      |
| New Zealand | 1999           | FemaleAge5to9       | 145787     |
| New Zealand | 1999           | FemaleAge60to64     | 75545      |
| New Zealand | 1999           | FemaleAge65to69     | 66320      |
| New Zealand | 1999           | FemaleAge70to74     | 63387      |
| New Zealand | 1999           | FemaleAge75to79     | 52977      |
| New Zealand | 1999           | FemaleAge80to84     | 36694      |
| New Zealand | 1999           | FemaleAge85to89     | 22144      |
| New Zealand | 1999           | FemaleAge90to94     | 8541       |
| New Zealand | 1999           | FemaleAge95to99     | 1948       |
| New Zealand | 1999           | FemaleAgeAbov e100  | 256        |
| New Zealand | 1999           | FemaleLactAge15to19 | 4018       |
| New Zealand | 1999           | FemaleLactAge20to24 | 10445      |
| New Zealand | 1999           | FemaleLactAge25to29 | 16067      |
| New Zealand | 1999           | FemaleLactAge30to34 | 16808      |
| New Zealand | 1999           | FemaleLactAge35to39 | 7529       |
| New Zealand | 1999           | FemaleLactAge40to44 | 1285       |
| New Zealand | 1999           | FemaleLactAge45to49 | 52         |
| New Zealand | 1999           | FemalePregAge15to19 | 3014       |
| New Zealand | 1999           | FemalePregAge20to24 | 7834       |
| New Zealand | 1999           | FemalePregAge25to29 | 12050      |
| New Zealand | 1999           | FemalePregAge30to34 | 12606      |
| New Zealand | 1999           | FemalePregAge35to39 | 5647       |
| New Zealand | 1999           | FemalePregAge40to44 | 964        |
| New Zealand | 1999           | FemalePregAge45to49 | 39         |
| New Zealand | 1999           | MaleAge0to4         | 146894     |
| New Zealand | 1999           | MaleAge10to14       | 146879     |
| New Zealand | 1999           | MaleAge15to19       | 137461     |
| New Zealand | 1999           | MaleAge20to24       | 128340     |
| New Zealand | 1999           | MaleAge25to29       | 133811     |
| New Zealand | 1999           | MaleAge30to34       | 142201     |
| New Zealand | 1999           | MaleAge35to39       | 149595     |
| New Zealand | 1999           | MaleAge40to44       | 139571     |
| New Zealand | 1999           | MaleAge45to49       | 125408     |
| New Zealand | 1999           | MaleAge50to54       | 114821     |
| New Zealand | 1999           | MaleAge55to59       | 88237      |
| New Zealand | 1999           | MaleAge5to9         | 154444     |
| New Zealand | 1999           | MaleAge60to64       | 73294      |
| New Zealand | 1999           | MaleAge65to69       | 63630      |
| New Zealand | 1999           | MaleAge70to74       | 56414      |
| New Zealand | 1999           | MaleAge75to79       | 38897      |
| New Zealand | 1999           | MaleAge80to84       | 21553      |
| New Zealand | 1999           | MaleAge85to89       | 10570      |
| New Zealand | 1999           | MaleAge90to94       | 3099       |
| New Zealand | 1999           | MaleAge95to99       | 565        |
| New Zealand | 1999           | MaleAgeAbov e100    | 46         |
| Nicaragua   | 1992           | FemaleAge0to4       | 345633     |
| Nicaragua   | 1992           | FemaleAge10to14     | 292915     |
| Nicaragua   | 1992           | FemaleAge15to19     | 176346     |
| Nicaragua   | 1992           | FemaleAge20to24     | 115503     |
| Nicaragua   | 1992           | FemaleAge25to29     | 104297     |
| Nicaragua   | 1992           | FemaleAge30to34     | 102566     |
| Nicaragua   | 1992           | FemaleAge35to39     | 96698      |
| Nicaragua   | 1992           | FemaleAge40to44     | 69241      |
| Nicaragua   | 1992           | FemaleAge45to49     | 57122      |
| Nicaragua   | 1992           | FemaleAge50to54     | 53762      |
| Nicaragua   | 1992           | FemaleAge55to59     | 44792      |
| Nicaragua   | 1992           | FemaleAge5to9       | 329185     |
| Nicaragua   | 1992           | FemaleAge60to64     | 38215      |
| Nicaragua   | 1992           | FemaleAge65to69     | 31163      |

Dietary calcium and zinc deficiency risks are decreasing but remain prevalent

| Country   | Reference year | Age/gender group    | Population |
|-----------|----------------|---------------------|------------|
| Nicaragua | 1992           | FemaleAge70to74     | 22182      |
| Nicaragua | 1992           | FemaleAge75to79     | 13923      |
| Nicaragua | 1992           | FemaleAge80to84     | 7521       |
| Nicaragua | 1992           | FemaleAge85to89     | 3112       |
| Nicaragua | 1992           | FemaleAge90to94     | 912        |
| Nicaragua | 1992           | FemaleAge95to99     | 179        |
| Nicaragua | 1992           | FemaleAgeAbov e100  | 28         |
| Nicaragua | 1992           | FemaleLactAge15to19 | 38886      |
| Nicaragua | 1992           | FemaleLactAge20to24 | 46116      |
| Nicaragua | 1992           | FemaleLactAge25to29 | 32357      |
| Nicaragua | 1992           | FemaleLactAge30to34 | 21886      |
| Nicaragua | 1992           | FemaleLactAge35to39 | 11745      |
| Nicaragua | 1992           | FemaleLactAge40to44 | 3991       |
| Nicaragua | 1992           | FemaleLactAge45to49 | 789        |
| Nicaragua | 1992           | FemalePregAge15to19 | 29165      |
| Nicaragua | 1992           | FemalePregAge20to24 | 34587      |
| Nicaragua | 1992           | FemalePregAge25to29 | 24268      |
| Nicaragua | 1992           | FemalePregAge30to34 | 16415      |
| Nicaragua | 1992           | FemalePregAge35to39 | 8809       |
| Nicaragua | 1992           | FemalePregAge40to44 | 2993       |
| Nicaragua | 1992           | FemalePregAge45to49 | 592        |
| Nicaragua | 1992           | MaleAge0to4         | 357897     |
| Nicaragua | 1992           | MaleAge10to14       | 298267     |
| Nicaragua | 1992           | MaleAge15to19       | 244943     |
| Nicaragua | 1992           | MaleAge20to24       | 192429     |
| Nicaragua | 1992           | MaleAge25to29       | 156040     |
| Nicaragua | 1992           | MaleAge30to34       | 134847     |
| Nicaragua | 1992           | MaleAge35to39       | 112192     |
| Nicaragua | 1992           | MaleAge40to44       | 74651      |
| Nicaragua | 1992           | MaleAge45to49       | 58648      |
| Nicaragua | 1992           | MaleAge50to54       | 53900      |
| Nicaragua | 1992           | MaleAge55to59       | 43936      |
| Nicaragua | 1992           | MaleAge5to9         | 338625     |
| Nicaragua | 1992           | MaleAge60to64       | 35278      |
| Nicaragua | 1992           | MaleAge65to69       | 26794      |
| Nicaragua | 1992           | MaleAge70to74       | 18060      |
| Nicaragua | 1992           | MaleAge75to79       | 10456      |
| Nicaragua | 1992           | MaleAge80to84       | 4978       |
| Nicaragua | 1992           | MaleAge85to89       | 1848       |
| Nicaragua | 1992           | MaleAge90to94       | 532        |
| Nicaragua | 1992           | MaleAge95to99       | 95         |
| Nicaragua | 1992           | MaleAgeAbov e100    | 11         |
| Nicaragua | 1993           | FemaleAge0to4       | 352556     |
| Nicaragua | 1993           | FemaleAge10to14     | 300634     |
| Nicaragua | 1993           | FemaleAge15to19     | 183677     |
| Nicaragua | 1993           | FemaleAge20to24     | 122744     |
| Nicaragua | 1993           | FemaleAge25to29     | 108236     |
| Nicaragua | 1993           | FemaleAge30to34     | 104673     |
| Nicaragua | 1993           | FemaleAge35to39     | 101224     |
| Nicaragua | 1993           | FemaleAge40to44     | 77757      |
| Nicaragua | 1993           | FemaleAge45to49     | 56100      |
| Nicaragua | 1993           | FemaleAge50to54     | 55383      |
| Nicaragua | 1993           | FemaleAge55to59     | 45694      |
| Nicaragua | 1993           | FemaleAge5to9       | 330911     |
| Nicaragua | 1993           | FemaleAge60to64     | 38678      |
| Nicaragua | 1993           | FemaleAge65to69     | 31916      |
| Nicaragua | 1993           | FemaleAge70to74     | 23191      |
| Nicaragua | 1993           | FemaleAge75to79     | 14492      |
| Nicaragua | 1993           | FemaleAge80to84     | 7867       |
| Nicaragua | 1993           | FemaleAge85to89     | 3253       |
| Nicaragua | 1993           | FemaleAge90to94     | 967        |
| Nicaragua | 1993           | FemaleAge95to99     | 192        |
| Nicaragua | 1993           | FemaleAgeAbov e100  | 28         |
| Nicaragua | 1993           | FemaleLactAge15to19 | 38886      |
| Nicaragua | 1993           | FemaleLactAge20to24 | 46116      |
| Nicaragua | 1993           | FemaleLactAge25to29 | 32357      |
| Nicaragua | 1993           | FemaleLactAge30to34 | 21886      |
| Nicaragua | 1993           | FemaleLactAge35to39 | 11745      |
| Nicaragua | 1993           | FemaleLactAge40to44 | 3991       |
| Nicaragua | 1993           | FemaleLactAge45to49 | 789        |
| Nicaragua | 1993           | FemalePregAge15to19 | 29165      |
| Nicaragua | 1993           | FemalePregAge20to24 | 34587      |
| Nicaragua | 1993           | FemalePregAge25to29 | 24268      |
| Nicaragua | 1993           | FemalePregAge30to34 | 16415      |
| Nicaragua | 1993           | FemalePregAge35to39 | 8809       |
| Nicaragua | 1993           | FemalePregAge40to44 | 2993       |
| Nicaragua | 1993           | FemalePregAge45to49 | 592        |
| Nicaragua | 1993           | MaleAge0to4         | 365031     |
| Nicaragua | 1993           | MaleAge10to14       | 306568     |
| Nicaragua | 1993           | MaleAge15to19       | 251971     |
| Nicaragua | 1993           | MaleAge20to24       | 199597     |
| Nicaragua | 1993           | MaleAge25to29       | 159257     |
| Nicaragua | 1993           | MaleAge30to34       | 137065     |
| Nicaragua | 1993           | MaleAge35to39       | 115911     |
| Nicaragua | 1993           | MaleAge40to44       | 82275      |
| Nicaragua | 1993           | MaleAge45to49       | 57304      |
| Nicaragua | 1993           | MaleAge50to54       | 55343      |
| Nicaragua | 1993           | MaleAge55to59       | 44912      |

Dietary calcium and zinc deficiency risks are decreasing but remain prevalent

| Country   | Reference year | Age/gender group    | Population |
|-----------|----------------|---------------------|------------|
| Nicaragua | 1993           | MaleAge5to9         | 340818     |
| Nicaragua | 1993           | MaleAge60to64       | 36085      |
| Nicaragua | 1993           | MaleAge65to69       | 27644      |
| Nicaragua | 1993           | MaleAge70to74       | 18923      |
| Nicaragua | 1993           | MaleAge75to79       | 11013      |
| Nicaragua | 1993           | MaleAge80to84       | 5276       |
| Nicaragua | 1993           | MaleAge85to89       | 1929       |
| Nicaragua | 1993           | MaleAge90to94       | 558        |
| Nicaragua | 1993           | MaleAge95to99       | 110        |
| Nicaragua | 1993           | MaleAgeAbov e100    | 11         |
| Nicaragua | 1994           | FemaleAge0to4       | 358554     |
| Nicaragua | 1994           | FemaleAge10to14     | 307742     |
| Nicaragua | 1994           | FemaleAge15to19     | 191262     |
| Nicaragua | 1994           | FemaleAge20to24     | 130127     |
| Nicaragua | 1994           | FemaleAge25to29     | 112675     |
| Nicaragua | 1994           | FemaleAge30to34     | 107026     |
| Nicaragua | 1994           | FemaleAge35to39     | 105019     |
| Nicaragua | 1994           | FemaleAge40to44     | 86104      |
| Nicaragua | 1994           | FemaleAge45to49     | 56543      |
| Nicaragua | 1994           | FemaleAge50to54     | 56523      |
| Nicaragua | 1994           | FemaleAge55to59     | 46754      |
| Nicaragua | 1994           | FemaleAge5to9       | 331959     |
| Nicaragua | 1994           | FemaleAge60to64     | 39209      |
| Nicaragua | 1994           | FemaleAge65to69     | 32644      |
| Nicaragua | 1994           | FemaleAge70to74     | 24173      |
| Nicaragua | 1994           | FemaleAge75to79     | 15165      |
| Nicaragua | 1994           | FemaleAge80to84     | 8228       |
| Nicaragua | 1994           | FemaleAge85to89     | 3349       |
| Nicaragua | 1994           | FemaleAge90to94     | 987        |
| Nicaragua | 1994           | FemaleAge95to99     | 199        |
| Nicaragua | 1994           | FemaleAgeAbov e100  | 29         |
| Nicaragua | 1994           | FemaleLactAge15to19 | 38886      |
| Nicaragua | 1994           | FemaleLactAge20to24 | 46116      |
| Nicaragua | 1994           | FemaleLactAge25to29 | 32357      |
| Nicaragua | 1994           | FemaleLactAge30to34 | 21886      |
| Nicaragua | 1994           | FemaleLactAge35to39 | 11745      |
| Nicaragua | 1994           | FemaleLactAge40to44 | 3991       |
| Nicaragua | 1994           | FemaleLactAge45to49 | 789        |
| Nicaragua | 1994           | FemalePregAge15to19 | 29165      |
| Nicaragua | 1994           | FemalePregAge20to24 | 34587      |
| Nicaragua | 1994           | FemalePregAge25to29 | 24268      |
| Nicaragua | 1994           | FemalePregAge30to34 | 16415      |
| Nicaragua | 1994           | FemalePregAge35to39 | 8809       |
| Nicaragua | 1994           | FemalePregAge40to44 | 2993       |
| Nicaragua | 1994           | FemalePregAge45to49 | 592        |
| Nicaragua | 1994           | MaleAge0to4         | 371242     |
| Nicaragua | 1994           | MaleAge10to14       | 314638     |
| Nicaragua | 1994           | MaleAge15to19       | 259392     |
| Nicaragua | 1994           | MaleAge20to24       | 206803     |
| Nicaragua | 1994           | MaleAge25to29       | 163092     |
| Nicaragua | 1994           | MaleAge30to34       | 139326     |
| Nicaragua | 1994           | MaleAge35to39       | 119128     |
| Nicaragua | 1994           | MaleAge40to44       | 89687      |
| Nicaragua | 1994           | MaleAge45to49       | 57348      |
| Nicaragua | 1994           | MaleAge50to54       | 56270      |
| Nicaragua | 1994           | MaleAge55to59       | 46001      |
| Nicaragua | 1994           | MaleAge5to9         | 342238     |
| Nicaragua | 1994           | MaleAge60to64       | 36912      |
| Nicaragua | 1994           | MaleAge65to69       | 28519      |
| Nicaragua | 1994           | MaleAge70to74       | 19785      |
| Nicaragua | 1994           | MaleAge75to79       | 11627      |
| Nicaragua | 1994           | MaleAge80to84       | 5576       |
| Nicaragua | 1994           | MaleAge85to89       | 1987       |
| Nicaragua | 1994           | MaleAge90to94       | 561        |
| Nicaragua | 1994           | MaleAge95to99       | 114        |
| Nicaragua | 1994           | MaleAgeAbov e100    | 11         |
| Nicaragua | 1995           | FemaleAge0to4       | 361358     |
| Nicaragua | 1995           | FemaleAge10to14     | 313522     |
| Nicaragua | 1995           | FemaleAge15to19     | 199188     |
| Nicaragua | 1995           | FemaleAge20to24     | 137518     |
| Nicaragua | 1995           | FemaleAge25to29     | 117720     |
| Nicaragua | 1995           | FemaleAge30to34     | 109781     |
| Nicaragua | 1995           | FemaleAge35to39     | 108369     |
| Nicaragua | 1995           | FemaleAge40to44     | 93304      |
| Nicaragua | 1995           | FemaleAge45to49     | 59270      |
| Nicaragua | 1995           | FemaleAge50to54     | 56947      |
| Nicaragua | 1995           | FemaleAge55to59     | 47955      |
| Nicaragua | 1995           | FemaleAge5to9       | 333617     |
| Nicaragua | 1995           | FemaleAge60to64     | 39875      |
| Nicaragua | 1995           | FemaleAge65to69     | 33336      |
| Nicaragua | 1995           | FemaleAge70to74     | 25108      |
| Nicaragua | 1995           | FemaleAge75to79     | 15947      |
| Nicaragua | 1995           | FemaleAge80to84     | 8617       |
| Nicaragua | 1995           | FemaleAge85to89     | 3427       |
| Nicaragua | 1995           | FemaleAge90to94     | 962        |
| Nicaragua | 1995           | FemaleAge95to99     | 178        |
| Nicaragua | 1995           | FemaleAgeAbov e100  | 29         |
| Nicaragua | 1995           | FemaleLactAge15to19 | 38886      |

Dietary calcium and zinc deficiency risks are decreasing but remain prevalent

| Country   | Reference year | Age/gender group    | Population |
|-----------|----------------|---------------------|------------|
| Nicaragua | 1995           | FemaleLactAge20to24 | 46116      |
| Nicaragua | 1995           | FemaleLactAge25to29 | 32357      |
| Nicaragua | 1995           | FemaleLactAge30to34 | 21886      |
| Nicaragua | 1995           | FemaleLactAge35to39 | 11745      |
| Nicaragua | 1995           | FemaleLactAge40to44 | 3991       |
| Nicaragua | 1995           | FemaleLactAge45to49 | 789        |
| Nicaragua | 1995           | FemalePregAge15to19 | 29165      |
| Nicaragua | 1995           | FemalePregAge20to24 | 34587      |
| Nicaragua | 1995           | FemalePregAge25to29 | 24268      |
| Nicaragua | 1995           | FemalePregAge30to34 | 16415      |
| Nicaragua | 1995           | FemalePregAge35to39 | 8809       |
| Nicaragua | 1995           | FemalePregAge40to44 | 2993       |
| Nicaragua | 1995           | FemalePregAge45to49 | 592        |
| Nicaragua | 1995           | MaleAge0to4         | 374368     |
| Nicaragua | 1995           | MaleAge10to14       | 321505     |
| Nicaragua | 1995           | MaleAge15to19       | 267480     |
| Nicaragua | 1995           | MaleAge20to24       | 213904     |
| Nicaragua | 1995           | MaleAge25to29       | 167673     |
| Nicaragua | 1995           | MaleAge30to34       | 141729     |
| Nicaragua | 1995           | MaleAge35to39       | 122101     |
| Nicaragua | 1995           | MaleAge40to44       | 95983      |
| Nicaragua | 1995           | MaleAge45to49       | 59546      |
| Nicaragua | 1995           | MaleAge50to54       | 56467      |
| Nicaragua | 1995           | MaleAge55to59       | 47186      |
| Nicaragua | 1995           | MaleAge5to9         | 344178     |
| Nicaragua | 1995           | MaleAge60to64       | 37804      |
| Nicaragua | 1995           | MaleAge65to69       | 29400      |
| Nicaragua | 1995           | MaleAge70to74       | 20647      |
| Nicaragua | 1995           | MaleAge75to79       | 12295      |
| Nicaragua | 1995           | MaleAge80to84       | 5892       |
| Nicaragua | 1995           | MaleAge85to89       | 2036       |
| Nicaragua | 1995           | MaleAge90to94       | 530        |
| Nicaragua | 1995           | MaleAge95to99       | 97         |
| Nicaragua | 1995           | MaleAgeAbov e100    | 12         |
| Nicaragua | 1996           | FemaleAge0to4       | 365482     |
| Nicaragua | 1996           | FemaleAge10to14     | 316727     |
| Nicaragua | 1996           | FemaleAge15to19     | 208279     |
| Nicaragua | 1996           | FemaleAge20to24     | 143161     |
| Nicaragua | 1996           | FemaleAge25to29     | 126028     |
| Nicaragua | 1996           | FemaleAge30to34     | 117650     |
| Nicaragua | 1996           | FemaleAge35to39     | 115051     |
| Nicaragua | 1996           | FemaleAge40to44     | 100817     |
| Nicaragua | 1996           | FemaleAge45to49     | 64179      |
| Nicaragua | 1996           | FemaleAge50to54     | 56570      |
| Nicaragua | 1996           | FemaleAge55to59     | 49251      |
| Nicaragua | 1996           | FemaleAge5to9       | 335998     |
| Nicaragua | 1996           | FemaleAge60to64     | 40568      |
| Nicaragua | 1996           | FemaleAge65to69     | 33800      |
| Nicaragua | 1996           | FemaleAge70to74     | 25880      |
| Nicaragua | 1996           | FemaleAge75to79     | 16708      |
| Nicaragua | 1996           | FemaleAge80to84     | 9092       |
| Nicaragua | 1996           | FemaleAge85to89     | 3775       |
| Nicaragua | 1996           | FemaleAge90to94     | 1110       |
| Nicaragua | 1996           | FemaleAge95to99     | 199        |
| Nicaragua | 1996           | FemaleAgeAbov e100  | 30         |
| Nicaragua | 1996           | FemaleLactAge15to19 | 37672      |
| Nicaragua | 1996           | FemaleLactAge20to24 | 46649      |
| Nicaragua | 1996           | FemaleLactAge25to29 | 30560      |
| Nicaragua | 1996           | FemaleLactAge30to34 | 18790      |
| Nicaragua | 1996           | FemaleLactAge35to39 | 9602       |
| Nicaragua | 1996           | FemaleLactAge40to44 | 3240       |
| Nicaragua | 1996           | FemaleLactAge45to49 | 516        |
| Nicaragua | 1996           | FemalePregAge15to19 | 28254      |
| Nicaragua | 1996           | FemalePregAge20to24 | 34987      |
| Nicaragua | 1996           | FemalePregAge25to29 | 22920      |
| Nicaragua | 1996           | FemalePregAge30to34 | 14093      |
| Nicaragua | 1996           | FemalePregAge35to39 | 7201       |
| Nicaragua | 1996           | FemalePregAge40to44 | 2430       |
| Nicaragua | 1996           | FemalePregAge45to49 | 387        |
| Nicaragua | 1996           | MaleAge0to4         | 379076     |
| Nicaragua | 1996           | MaleAge10to14       | 324903     |
| Nicaragua | 1996           | MaleAge15to19       | 274608     |
| Nicaragua | 1996           | MaleAge20to24       | 220338     |
| Nicaragua | 1996           | MaleAge25to29       | 172844     |
| Nicaragua | 1996           | MaleAge30to34       | 144166     |
| Nicaragua | 1996           | MaleAge35to39       | 124739     |
| Nicaragua | 1996           | MaleAge40to44       | 101275     |
| Nicaragua | 1996           | MaleAge45to49       | 63359      |
| Nicaragua | 1996           | MaleAge50to54       | 55857      |
| Nicaragua | 1996           | MaleAge55to59       | 48435      |
| Nicaragua | 1996           | MaleAge5to9         | 346837     |
| Nicaragua | 1996           | MaleAge60to64       | 38699      |
| Nicaragua | 1996           | MaleAge65to69       | 30103      |
| Nicaragua | 1996           | MaleAge70to74       | 21423      |
| Nicaragua | 1996           | MaleAge75to79       | 12965      |
| Nicaragua | 1996           | MaleAge80to84       | 6334       |
| Nicaragua | 1996           | MaleAge85to89       | 2288       |
| Nicaragua | 1996           | MaleAge90to94       | 608        |

Dietary calcium and zinc deficiency risks are decreasing but remain prevalent

| Country   | Reference year | Age/gender group    | Population |
|-----------|----------------|---------------------|------------|
| Nicaragua | 1996           | MaleAge95to99       | 109        |
| Nicaragua | 1996           | MaleAgeAbov e100    | 13         |
| Nicaragua | 1997           | FemaleAge0to4       | 363841     |
| Nicaragua | 1997           | FemaleAge10to14     | 319028     |
| Nicaragua | 1997           | FemaleAge15to19     | 215866     |
| Nicaragua | 1997           | FemaleAge20to24     | 149865     |
| Nicaragua | 1997           | FemaleAge25to29     | 131922     |
| Nicaragua | 1997           | FemaleAge30to34     | 120440     |
| Nicaragua | 1997           | FemaleAge35to39     | 117502     |
| Nicaragua | 1997           | FemaleAge40to44     | 106170     |
| Nicaragua | 1997           | FemaleAge45to49     | 71001      |
| Nicaragua | 1997           | FemaleAge50to54     | 55222      |
| Nicaragua | 1997           | FemaleAge55to59     | 50935      |
| Nicaragua | 1997           | FemaleAge5to9       | 340159     |
| Nicaragua | 1997           | FemaleAge60to64     | 41436      |
| Nicaragua | 1997           | FemaleAge65to69     | 34257      |
| Nicaragua | 1997           | FemaleAge70to74     | 26653      |
| Nicaragua | 1997           | FemaleAge75to79     | 17550      |
| Nicaragua | 1997           | FemaleAge80to84     | 9557       |
| Nicaragua | 1997           | FemaleAge85to89     | 4092       |
| Nicaragua | 1997           | FemaleAge90to94     | 1236       |
| Nicaragua | 1997           | FemaleAge95to99     | 233        |
| Nicaragua | 1997           | FemaleAgeAbov e100  | 31         |
| Nicaragua | 1997           | FemaleLactAge15to19 | 37672      |
| Nicaragua | 1997           | FemaleLactAge20to24 | 46649      |
| Nicaragua | 1997           | FemaleLactAge25to29 | 30560      |
| Nicaragua | 1997           | FemaleLactAge30to34 | 18790      |
| Nicaragua | 1997           | FemaleLactAge35to39 | 9602       |
| Nicaragua | 1997           | FemaleLactAge40to44 | 3240       |
| Nicaragua | 1997           | FemaleLactAge45to49 | 516        |
| Nicaragua | 1997           | FemalePregAge15to19 | 28254      |
| Nicaragua | 1997           | FemalePregAge20to24 | 34987      |
| Nicaragua | 1997           | FemalePregAge25to29 | 22920      |
| Nicaragua | 1997           | FemalePregAge30to34 | 14093      |
| Nicaragua | 1997           | FemalePregAge35to39 | 7201       |
| Nicaragua | 1997           | FemalePregAge40to44 | 2430       |
| Nicaragua | 1997           | FemalePregAge45to49 | 387        |
| Nicaragua | 1997           | MaleAge0to4         | 377856     |
| Nicaragua | 1997           | MaleAge10to14       | 327470     |
| Nicaragua | 1997           | MaleAge15to19       | 282736     |
| Nicaragua | 1997           | MaleAge20to24       | 226663     |
| Nicaragua | 1997           | MaleAge25to29       | 178716     |
| Nicaragua | 1997           | MaleAge30to34       | 146849     |
| Nicaragua | 1997           | MaleAge35to39       | 127210     |
| Nicaragua | 1997           | MaleAge40to44       | 105731     |
| Nicaragua | 1997           | MaleAge45to49       | 69397      |
| Nicaragua | 1997           | MaleAge50to54       | 54326      |
| Nicaragua | 1997           | MaleAge55to59       | 49989      |
| Nicaragua | 1997           | MaleAge5to9         | 351486     |
| Nicaragua | 1997           | MaleAge60to64       | 39719      |
| Nicaragua | 1997           | MaleAge65to69       | 30832      |
| Nicaragua | 1997           | MaleAge70to74       | 22221      |
| Nicaragua | 1997           | MaleAge75to79       | 13677      |
| Nicaragua | 1997           | MaleAge80to84       | 6768       |
| Nicaragua | 1997           | MaleAge85to89       | 2517       |
| Nicaragua | 1997           | MaleAge90to94       | 673        |
| Nicaragua | 1997           | MaleAge95to99       | 129        |
| Nicaragua | 1997           | MaleAgeAbov e100    | 14         |
| Nicaragua | 1998           | FemaleAge0to4       | 358039     |
| Nicaragua | 1998           | FemaleAge10to14     | 320653     |
| Nicaragua | 1998           | FemaleAge15to19     | 223442     |
| Nicaragua | 1998           | FemaleAge20to24     | 156670     |
| Nicaragua | 1998           | FemaleAge25to29     | 138197     |
| Nicaragua | 1998           | FemaleAge30to34     | 123642     |
| Nicaragua | 1998           | FemaleAge35to39     | 119561     |
| Nicaragua | 1998           | FemaleAge40to44     | 110647     |
| Nicaragua | 1998           | FemaleAge45to49     | 79353      |
| Nicaragua | 1998           | FemaleAge50to54     | 53718      |
| Nicaragua | 1998           | FemaleAge55to59     | 52659      |
| Nicaragua | 1998           | FemaleAge5to9       | 345666     |
| Nicaragua | 1998           | FemaleAge60to64     | 42452      |
| Nicaragua | 1998           | FemaleAge65to69     | 34748      |
| Nicaragua | 1998           | FemaleAge70to74     | 27399      |
| Nicaragua | 1998           | FemaleAge75to79     | 18441      |
| Nicaragua | 1998           | FemaleAge80to84     | 10041      |
| Nicaragua | 1998           | FemaleAge85to89     | 4363       |
| Nicaragua | 1998           | FemaleAge90to94     | 1336       |
| Nicaragua | 1998           | FemaleAge95to99     | 270        |
| Nicaragua | 1998           | FemaleAgeAbov e100  | 33         |
| Nicaragua | 1998           | FemaleLactAge15to19 | 37672      |
| Nicaragua | 1998           | FemaleLactAge20to24 | 46649      |
| Nicaragua | 1998           | FemaleLactAge25to29 | 30560      |
| Nicaragua | 1998           | FemaleLactAge30to34 | 18790      |
| Nicaragua | 1998           | FemaleLactAge35to39 | 9602       |
| Nicaragua | 1998           | FemaleLactAge40to44 | 3240       |
| Nicaragua | 1998           | FemaleLactAge45to49 | 516        |
| Nicaragua | 1998           | FemalePregAge15to19 | 28254      |
| Nicaragua | 1998           | FemalePregAge20to24 | 34987      |

Dietary calcium and zinc deficiency risks are decreasing but remain prevalent

| Country   | Reference year | Age/gender group    | Population |
|-----------|----------------|---------------------|------------|
| Nicaragua | 1998           | FemalePregAge25to29 | 22920      |
| Nicaragua | 1998           | FemalePregAge30to34 | 14093      |
| Nicaragua | 1998           | FemalePregAge35to39 | 7201       |
| Nicaragua | 1998           | FemalePregAge40to44 | 2430       |
| Nicaragua | 1998           | FemalePregAge45to49 | 387        |
| Nicaragua | 1998           | MaleAge0to4         | 372327     |
| Nicaragua | 1998           | MaleAge10to14       | 329460     |
| Nicaragua | 1998           | MaleAge15to19       | 291173     |
| Nicaragua | 1998           | MaleAge20to24       | 232913     |
| Nicaragua | 1998           | MaleAge25to29       | 184859     |
| Nicaragua | 1998           | MaleAge30to34       | 149836     |
| Nicaragua | 1998           | MaleAge35to39       | 129534     |
| Nicaragua | 1998           | MaleAge40to44       | 109378     |
| Nicaragua | 1998           | MaleAge45to49       | 76811      |
| Nicaragua | 1998           | MaleAge50to54       | 52657      |
| Nicaragua | 1998           | MaleAge55to59       | 51502      |
| Nicaragua | 1998           | MaleAge5to9         | 357566     |
| Nicaragua | 1998           | MaleAge60to64       | 40835      |
| Nicaragua | 1998           | MaleAge65to69       | 31604      |
| Nicaragua | 1998           | MaleAge70to74       | 23016      |
| Nicaragua | 1998           | MaleAge75to79       | 14421      |
| Nicaragua | 1998           | MaleAge80to84       | 7201       |
| Nicaragua | 1998           | MaleAge85to89       | 2711       |
| Nicaragua | 1998           | MaleAge90to94       | 726        |
| Nicaragua | 1998           | MaleAge95to99       | 148        |
| Nicaragua | 1998           | MaleAgeAbov e100    | 15         |
| Nicaragua | 1999           | FemaleAge0to4       | 351132     |
| Nicaragua | 1999           | FemaleAge10to14     | 322414     |
| Nicaragua | 1999           | FemaleAge15to19     | 229999     |
| Nicaragua | 1999           | FemaleAge20to24     | 163515     |
| Nicaragua | 1999           | FemaleAge25to29     | 144412     |
| Nicaragua | 1999           | FemaleAge30to34     | 127229     |
| Nicaragua | 1999           | FemaleAge35to39     | 121403     |
| Nicaragua | 1999           | FemaleAge40to44     | 114377     |
| Nicaragua | 1999           | FemaleAge45to49     | 87636      |
| Nicaragua | 1999           | FemaleAge50to54     | 53509      |
| Nicaragua | 1999           | FemaleAge55to59     | 53803      |
| Nicaragua | 1999           | FemaleAge5to9       | 351023     |
| Nicaragua | 1999           | FemaleAge60to64     | 43584      |
| Nicaragua | 1999           | FemaleAge65to69     | 35325      |
| Nicaragua | 1999           | FemaleAge70to74     | 28083      |
| Nicaragua | 1999           | FemaleAge75to79     | 19316      |
| Nicaragua | 1999           | FemaleAge80to84     | 10571      |
| Nicaragua | 1999           | FemaleAge85to89     | 4584       |
| Nicaragua | 1999           | FemaleAge90to94     | 1408       |
| Nicaragua | 1999           | FemaleAge95to99     | 298        |
| Nicaragua | 1999           | FemaleAgeAbov e100  | 36         |
| Nicaragua | 1999           | FemaleLactAge15to19 | 37672      |
| Nicaragua | 1999           | FemaleLactAge20to24 | 46649      |
| Nicaragua | 1999           | FemaleLactAge25to29 | 30560      |
| Nicaragua | 1999           | FemaleLactAge30to34 | 18790      |
| Nicaragua | 1999           | FemaleLactAge35to39 | 9602       |
| Nicaragua | 1999           | FemaleLactAge40to44 | 3240       |
| Nicaragua | 1999           | FemaleLactAge45to49 | 516        |
| Nicaragua | 1999           | FemalePregAge15to19 | 28254      |
| Nicaragua | 1999           | FemalePregAge20to24 | 34987      |
| Nicaragua | 1999           | FemalePregAge25to29 | 22920      |
| Nicaragua | 1999           | FemalePregAge30to34 | 14093      |
| Nicaragua | 1999           | FemalePregAge35to39 | 7201       |
| Nicaragua | 1999           | FemalePregAge40to44 | 2430       |
| Nicaragua | 1999           | FemalePregAge45to49 | 387        |
| Nicaragua | 1999           | MaleAge0to4         | 365534     |
| Nicaragua | 1999           | MaleAge10to14       | 331730     |
| Nicaragua | 1999           | MaleAge15to19       | 298680     |
| Nicaragua | 1999           | MaleAge20to24       | 239233     |
| Nicaragua | 1999           | MaleAge25to29       | 190729     |
| Nicaragua | 1999           | MaleAge30to34       | 153148     |
| Nicaragua | 1999           | MaleAge35to39       | 131689     |
| Nicaragua | 1999           | MaleAge40to44       | 112441     |
| Nicaragua | 1999           | MaleAge45to49       | 84080      |
| Nicaragua | 1999           | MaleAge50to54       | 52192      |
| Nicaragua | 1999           | MaleAge55to59       | 52403      |
| Nicaragua | 1999           | MaleAge5to9         | 363435     |
| Nicaragua | 1999           | MaleAge60to64       | 42004      |
| Nicaragua | 1999           | MaleAge65to69       | 32432      |
| Nicaragua | 1999           | MaleAge70to74       | 23784      |
| Nicaragua | 1999           | MaleAge75to79       | 15162      |
| Nicaragua | 1999           | MaleAge80to84       | 7640       |
| Nicaragua | 1999           | MaleAge85to89       | 2871       |
| Nicaragua | 1999           | MaleAge90to94       | 764        |
| Nicaragua | 1999           | MaleAge95to99       | 157        |
| Nicaragua | 1999           | MaleAgeAbov e100    | 17         |
| Niger     | 1992           | FemaleAge0to4       | 811567     |
| Niger     | 1992           | FemaleAge10to14     | 509288     |
| Niger     | 1992           | FemaleAge15to19     | 257182     |
| Niger     | 1992           | FemaleAge20to24     | 149835     |
| Niger     | 1992           | FemaleAge25to29     | 125486     |
| Niger     | 1992           | FemaleAge30to34     | 118612     |

Dietary calcium and zinc deficiency risks are decreasing but remain prevalent

| Country | Reference year | Age/gender group    | Population |
|---------|----------------|---------------------|------------|
| Niger   | 1992           | FemaleAge35to39     | 114871     |
| Niger   | 1992           | FemaleAge40to44     | 135794     |
| Niger   | 1992           | FemaleAge45to49     | 145214     |
| Niger   | 1992           | FemaleAge50to54     | 125610     |
| Niger   | 1992           | FemaleAge55to59     | 95673      |
| Niger   | 1992           | FemaleAge5to9       | 617067     |
| Niger   | 1992           | FemaleAge60to64     | 71610      |
| Niger   | 1992           | FemaleAge65to69     | 51217      |
| Niger   | 1992           | FemaleAge70to74     | 33081      |
| Niger   | 1992           | FemaleAge75to79     | 17287      |
| Niger   | 1992           | FemaleAge80to84     | 6449       |
| Niger   | 1992           | FemaleAge85to89     | 1474       |
| Niger   | 1992           | FemaleAge90to94     | 172        |
| Niger   | 1992           | FemaleAge95to99     | 17         |
| Niger   | 1992           | FemaleLactAge15to19 | 98458      |
| Niger   | 1992           | FemaleLactAge20to24 | 121358     |
| Niger   | 1992           | FemaleLactAge25to29 | 100043     |
| Niger   | 1992           | FemaleLactAge30to34 | 71321      |
| Niger   | 1992           | FemaleLactAge35to39 | 44320      |
| Niger   | 1992           | FemaleLactAge40to44 | 21504      |
| Niger   | 1992           | FemaleLactAge45to49 | 7157       |
| Niger   | 1992           | FemalePregAge15to19 | 73843      |
| Niger   | 1992           | FemalePregAge20to24 | 91018      |
| Niger   | 1992           | FemalePregAge25to29 | 75033      |
| Niger   | 1992           | FemalePregAge30to34 | 53491      |
| Niger   | 1992           | FemalePregAge35to39 | 33240      |
| Niger   | 1992           | FemalePregAge40to44 | 16128      |
| Niger   | 1992           | FemalePregAge45to49 | 5367       |
| Niger   | 1992           | MaleAge0to4         | 844593     |
| Niger   | 1992           | MaleAge10to14       | 536083     |
| Niger   | 1992           | MaleAge15to19       | 383789     |
| Niger   | 1992           | MaleAge20to24       | 254278     |
| Niger   | 1992           | MaleAge25to29       | 278193     |
| Niger   | 1992           | MaleAge30to34       | 271879     |
| Niger   | 1992           | MaleAge35to39       | 209595     |
| Niger   | 1992           | MaleAge40to44       | 169989     |
| Niger   | 1992           | MaleAge45to49       | 137881     |
| Niger   | 1992           | MaleAge50to54       | 105540     |
| Niger   | 1992           | MaleAge55to59       | 82002      |
| Niger   | 1992           | MaleAge5to9         | 638938     |
| Niger   | 1992           | MaleAge60to64       | 65365      |
| Niger   | 1992           | MaleAge65to69       | 46600      |
| Niger   | 1992           | MaleAge70to74       | 26931      |
| Niger   | 1992           | MaleAge75to79       | 12781      |
| Niger   | 1992           | MaleAge80to84       | 4787       |
| Niger   | 1992           | MaleAge85to89       | 1112       |
| Niger   | 1992           | MaleAge90to94       | 117        |
| Niger   | 1992           | MaleAge95to99       | 9          |
| Niger   | 1993           | FemaleAge0to4       | 838576     |
| Niger   | 1993           | FemaleAge10to14     | 527095     |
| Niger   | 1993           | FemaleAge15to19     | 270761     |
| Niger   | 1993           | FemaleAge20to24     | 160776     |
| Niger   | 1993           | FemaleAge25to29     | 136238     |
| Niger   | 1993           | FemaleAge30to34     | 128065     |
| Niger   | 1993           | FemaleAge35to39     | 123287     |
| Niger   | 1993           | FemaleAge40to44     | 134948     |
| Niger   | 1993           | FemaleAge45to49     | 149481     |
| Niger   | 1993           | FemaleAge50to54     | 131145     |
| Niger   | 1993           | FemaleAge55to59     | 99457      |
| Niger   | 1993           | FemaleAge5to9       | 636265     |
| Niger   | 1993           | FemaleAge60to64     | 74390      |
| Niger   | 1993           | FemaleAge65to69     | 52943      |
| Niger   | 1993           | FemaleAge70to74     | 34305      |
| Niger   | 1993           | FemaleAge75to79     | 18131      |
| Niger   | 1993           | FemaleAge80to84     | 6856       |
| Niger   | 1993           | FemaleAge85to89     | 1606       |
| Niger   | 1993           | FemaleAge90to94     | 206        |
| Niger   | 1993           | FemaleAge95to99     | 24         |
| Niger   | 1993           | FemaleLactAge15to19 | 98458      |
| Niger   | 1993           | FemaleLactAge20to24 | 121358     |
| Niger   | 1993           | FemaleLactAge25to29 | 100043     |
| Niger   | 1993           | FemaleLactAge30to34 | 71321      |
| Niger   | 1993           | FemaleLactAge35to39 | 44320      |
| Niger   | 1993           | FemaleLactAge40to44 | 21504      |
| Niger   | 1993           | FemaleLactAge45to49 | 7157       |
| Niger   | 1993           | FemalePregAge15to19 | 73843      |
| Niger   | 1993           | FemalePregAge20to24 | 91018      |
| Niger   | 1993           | FemalePregAge25to29 | 75033      |
| Niger   | 1993           | FemalePregAge30to34 | 53491      |
| Niger   | 1993           | FemalePregAge35to39 | 33240      |
| Niger   | 1993           | FemalePregAge40to44 | 16128      |
| Niger   | 1993           | FemalePregAge45to49 | 5367       |
| Niger   | 1993           | MaleAge0to4         | 871398     |
| Niger   | 1993           | MaleAge10to14       | 552569     |
| Niger   | 1993           | MaleAge15to19       | 414015     |
| Niger   | 1993           | MaleAge20to24       | 263102     |
| Niger   | 1993           | MaleAge25to29       | 260089     |
| Niger   | 1993           | MaleAge30to34       | 288446     |



Dietary calcium and zinc deficiency risks are decreasing but remain prevalent

| Country | Reference year | Age/gender group    | Population |
|---------|----------------|---------------------|------------|
| Niger   | 1993           | MaleAge35to39       | 223175     |
| Niger   | 1993           | MaleAge40to44       | 178699     |
| Niger   | 1993           | MaleAge45to49       | 145027     |
| Niger   | 1993           | MaleAge50to54       | 111387     |
| Niger   | 1993           | MaleAge55to59       | 84289      |
| Niger   | 1993           | MaleAge5to9         | 659836     |
| Niger   | 1993           | MaleAge60to64       | 66791      |
| Niger   | 1993           | MaleAge65to69       | 48638      |
| Niger   | 1993           | MaleAge70to74       | 28671      |
| Niger   | 1993           | MaleAge75to79       | 13405      |
| Niger   | 1993           | MaleAge80to84       | 5072       |
| Niger   | 1993           | MaleAge85to89       | 1205       |
| Niger   | 1993           | MaleAge90to94       | 152        |
| Niger   | 1993           | MaleAge95to99       | 11         |
| Niger   | 1994           | FemaleAge0to4       | 868040     |
| Niger   | 1994           | FemaleAge10to14     | 546181     |
| Niger   | 1994           | FemaleAge15to19     | 285307     |
| Niger   | 1994           | FemaleAge20to24     | 172512     |
| Niger   | 1994           | FemaleAge25to29     | 147359     |
| Niger   | 1994           | FemaleAge30to34     | 138065     |
| Niger   | 1994           | FemaleAge35to39     | 132538     |
| Niger   | 1994           | FemaleAge40to44     | 135534     |
| Niger   | 1994           | FemaleAge45to49     | 152937     |
| Niger   | 1994           | FemaleAge50to54     | 136742     |
| Niger   | 1994           | FemaleAge55to59     | 103788     |
| Niger   | 1994           | FemaleAge5to9       | 653144     |
| Niger   | 1994           | FemaleAge60to64     | 77532      |
| Niger   | 1994           | FemaleAge65to69     | 54975      |
| Niger   | 1994           | FemaleAge70to74     | 35678      |
| Niger   | 1994           | FemaleAge75to79     | 18953      |
| Niger   | 1994           | FemaleAge80to84     | 7151       |
| Niger   | 1994           | FemaleAge85to89     | 1665       |
| Niger   | 1994           | FemaleAge90to94     | 222        |
| Niger   | 1994           | FemaleAge95to99     | 22         |
| Niger   | 1994           | FemaleLactAge15to19 | 98458      |
| Niger   | 1994           | FemaleLactAge20to24 | 121358     |
| Niger   | 1994           | FemaleLactAge25to29 | 100043     |
| Niger   | 1994           | FemaleLactAge30to34 | 71321      |
| Niger   | 1994           | FemaleLactAge35to39 | 44320      |
| Niger   | 1994           | FemaleLactAge40to44 | 21504      |
| Niger   | 1994           | FemaleLactAge45to49 | 7157       |
| Niger   | 1994           | FemalePregAge15to19 | 73843      |
| Niger   | 1994           | FemalePregAge20to24 | 91018      |
| Niger   | 1994           | FemalePregAge25to29 | 75033      |
| Niger   | 1994           | FemalePregAge30to34 | 53491      |
| Niger   | 1994           | FemalePregAge35to39 | 33240      |
| Niger   | 1994           | FemalePregAge40to44 | 16128      |
| Niger   | 1994           | FemalePregAge45to49 | 5367       |
| Niger   | 1994           | MaleAge0to4         | 901087     |
| Niger   | 1994           | MaleAge10to14       | 571356     |
| Niger   | 1994           | MaleAge15to19       | 444400     |
| Niger   | 1994           | MaleAge20to24       | 275852     |
| Niger   | 1994           | MaleAge25to29       | 244190     |
| Niger   | 1994           | MaleAge30to34       | 298863     |
| Niger   | 1994           | MaleAge35to39       | 238241     |
| Niger   | 1994           | MaleAge40to44       | 189214     |
| Niger   | 1994           | MaleAge45to49       | 152872     |
| Niger   | 1994           | MaleAge50to54       | 118036     |
| Niger   | 1994           | MaleAge55to59       | 87452      |
| Niger   | 1994           | MaleAge5to9         | 679084     |
| Niger   | 1994           | MaleAge60to64       | 68459      |
| Niger   | 1994           | MaleAge65to69       | 50685      |
| Niger   | 1994           | MaleAge70to74       | 30515      |
| Niger   | 1994           | MaleAge75to79       | 14154      |
| Niger   | 1994           | MaleAge80to84       | 5267       |
| Niger   | 1994           | MaleAge85to89       | 1234       |
| Niger   | 1994           | MaleAge90to94       | 165        |
| Niger   | 1994           | MaleAge95to99       | 12         |
| Niger   | 1995           | FemaleAge0to4       | 902418     |
| Niger   | 1995           | FemaleAge10to14     | 564269     |
| Niger   | 1995           | FemaleAge15to19     | 301007     |
| Niger   | 1995           | FemaleAge20to24     | 185143     |
| Niger   | 1995           | FemaleAge25to29     | 158731     |
| Niger   | 1995           | FemaleAge30to34     | 148612     |
| Niger   | 1995           | FemaleAge35to39     | 141937     |
| Niger   | 1995           | FemaleAge40to44     | 138440     |
| Niger   | 1995           | FemaleAge45to49     | 155281     |
| Niger   | 1995           | FemaleAge50to54     | 142173     |
| Niger   | 1995           | FemaleAge55to59     | 108695     |
| Niger   | 1995           | FemaleAge5to9       | 667896     |
| Niger   | 1995           | FemaleAge60to64     | 81011      |
| Niger   | 1995           | FemaleAge65to69     | 57338      |
| Niger   | 1995           | FemaleAge70to74     | 37209      |
| Niger   | 1995           | FemaleAge75to79     | 19791      |
| Niger   | 1995           | FemaleAge80to84     | 7374       |
| Niger   | 1995           | FemaleAge85to89     | 1626       |
| Niger   | 1995           | FemaleAge90to94     | 180        |
| Niger   | 1995           | FemaleAge95to99     | 11         |

Dietary calcium and zinc deficiency risks are decreasing but remain prevalent

| Country | Reference year | Age/gender group    | Population |
|---------|----------------|---------------------|------------|
| Niger   | 1995           | FemaleLactAge15to19 | 98458      |
| Niger   | 1995           | FemaleLactAge20to24 | 121358     |
| Niger   | 1995           | FemaleLactAge25to29 | 100043     |
| Niger   | 1995           | FemaleLactAge30to34 | 71321      |
| Niger   | 1995           | FemaleLactAge35to39 | 44320      |
| Niger   | 1995           | FemaleLactAge40to44 | 21504      |
| Niger   | 1995           | FemaleLactAge45to49 | 7157       |
| Niger   | 1995           | FemalePregAge15to19 | 73843      |
| Niger   | 1995           | FemalePregAge20to24 | 91018      |
| Niger   | 1995           | FemalePregAge25to29 | 75033      |
| Niger   | 1995           | FemalePregAge30to34 | 53491      |
| Niger   | 1995           | FemalePregAge35to39 | 33240      |
| Niger   | 1995           | FemalePregAge40to44 | 16128      |
| Niger   | 1995           | FemalePregAge45to49 | 5367       |
| Niger   | 1995           | MaleAge0to4         | 937337     |
| Niger   | 1995           | MaleAge10to14       | 591365     |
| Niger   | 1995           | MaleAge15to19       | 472720     |
| Niger   | 1995           | MaleAge20to24       | 292685     |
| Niger   | 1995           | MaleAge25to29       | 234200     |
| Niger   | 1995           | MaleAge30to34       | 300409     |
| Niger   | 1995           | MaleAge35to39       | 254309     |
| Niger   | 1995           | MaleAge40to44       | 201575     |
| Niger   | 1995           | MaleAge45to49       | 161526     |
| Niger   | 1995           | MaleAge50to54       | 125250     |
| Niger   | 1995           | MaleAge55to59       | 91654      |
| Niger   | 1995           | MaleAge5to9         | 695284     |
| Niger   | 1995           | MaleAge60to64       | 70458      |
| Niger   | 1995           | MaleAge65to69       | 52667      |
| Niger   | 1995           | MaleAge70to74       | 32425      |
| Niger   | 1995           | MaleAge75to79       | 15085      |
| Niger   | 1995           | MaleAge80to84       | 5393       |
| Niger   | 1995           | MaleAge85to89       | 1185       |
| Niger   | 1995           | MaleAge90to94       | 124        |
| Niger   | 1995           | MaleAge95to99       | 5          |
| Niger   | 1996           | FemaleAge0to4       | 947013     |
| Niger   | 1996           | FemaleAge10to14     | 578814     |
| Niger   | 1996           | FemaleAge15to19     | 287210     |
| Niger   | 1996           | FemaleAge20to24     | 160579     |
| Niger   | 1996           | FemaleAge25to29     | 137178     |
| Niger   | 1996           | FemaleAge30to34     | 132121     |
| Niger   | 1996           | FemaleAge35to39     | 133964     |
| Niger   | 1996           | FemaleAge40to44     | 139429     |
| Niger   | 1996           | FemaleAge45to49     | 154137     |
| Niger   | 1996           | FemaleAge50to54     | 146317     |
| Niger   | 1996           | FemaleAge55to59     | 112941     |
| Niger   | 1996           | FemaleAge5to9       | 694977     |
| Niger   | 1996           | FemaleAge60to64     | 83656      |
| Niger   | 1996           | FemaleAge65to69     | 59013      |
| Niger   | 1996           | FemaleAge70to74     | 38221      |
| Niger   | 1996           | FemaleAge75to79     | 20651      |
| Niger   | 1996           | FemaleAge80to84     | 8080       |
| Niger   | 1996           | FemaleAge85to89     | 1960       |
| Niger   | 1996           | FemaleAge90to94     | 239        |
| Niger   | 1996           | FemaleAge95to99     | 8          |
| Niger   | 1996           | FemaleLactAge15to19 | 114321     |
| Niger   | 1996           | FemaleLactAge20to24 | 141636     |
| Niger   | 1996           | FemaleLactAge25to29 | 117843     |
| Niger   | 1996           | FemaleLactAge30to34 | 86078      |
| Niger   | 1996           | FemaleLactAge35to39 | 53624      |
| Niger   | 1996           | FemaleLactAge40to44 | 23214      |
| Niger   | 1996           | FemaleLactAge45to49 | 7902       |
| Niger   | 1996           | FemalePregAge15to19 | 85741      |
| Niger   | 1996           | FemalePregAge20to24 | 106227     |
| Niger   | 1996           | FemalePregAge25to29 | 88382      |
| Niger   | 1996           | FemalePregAge30to34 | 64559      |
| Niger   | 1996           | FemalePregAge35to39 | 40218      |
| Niger   | 1996           | FemalePregAge40to44 | 17410      |
| Niger   | 1996           | FemalePregAge45to49 | 5927       |
| Niger   | 1996           | MaleAge0to4         | 984770     |
| Niger   | 1996           | MaleAge10to14       | 593926     |
| Niger   | 1996           | MaleAge15to19       | 479541     |
| Niger   | 1996           | MaleAge20to24       | 322241     |
| Niger   | 1996           | MaleAge25to29       | 244465     |
| Niger   | 1996           | MaleAge30to34       | 301218     |
| Niger   | 1996           | MaleAge35to39       | 271241     |
| Niger   | 1996           | MaleAge40to44       | 211791     |
| Niger   | 1996           | MaleAge45to49       | 168164     |
| Niger   | 1996           | MaleAge50to54       | 130653     |
| Niger   | 1996           | MaleAge55to59       | 95265      |
| Niger   | 1996           | MaleAge5to9         | 723735     |
| Niger   | 1996           | MaleAge60to64       | 71745      |
| Niger   | 1996           | MaleAge65to69       | 53729      |
| Niger   | 1996           | MaleAge70to74       | 33865      |
| Niger   | 1996           | MaleAge75to79       | 16187      |
| Niger   | 1996           | MaleAge80to84       | 5887       |
| Niger   | 1996           | MaleAge85to89       | 1420       |
| Niger   | 1996           | MaleAge90to94       | 161        |
| Niger   | 1996           | MaleAge95to99       | 10         |

Dietary calcium and zinc deficiency risks are decreasing but remain prevalent

| Country | Reference year | Age/gender group    | Population |
|---------|----------------|---------------------|------------|
| Niger   | 1997           | FemaleAge0to4       | 987543     |
| Niger   | 1997           | FemaleAge10to14     | 594884     |
| Niger   | 1997           | FemaleAge15to19     | 303143     |
| Niger   | 1997           | FemaleAge20to24     | 172641     |
| Niger   | 1997           | FemaleAge25to29     | 147252     |
| Niger   | 1997           | FemaleAge30to34     | 142077     |
| Niger   | 1997           | FemaleAge35to39     | 142710     |
| Niger   | 1997           | FemaleAge40to44     | 145810     |
| Niger   | 1997           | FemaleAge45to49     | 153356     |
| Niger   | 1997           | FemaleAge50to54     | 150642     |
| Niger   | 1997           | FemaleAge55to59     | 117780     |
| Niger   | 1997           | FemaleAge5to9       | 724798     |
| Niger   | 1997           | FemaleAge60to64     | 86663      |
| Niger   | 1997           | FemaleAge65to69     | 61037      |
| Niger   | 1997           | FemaleAge70to74     | 39344      |
| Niger   | 1997           | FemaleAge75to79     | 21454      |
| Niger   | 1997           | FemaleAge80to84     | 8655       |
| Niger   | 1997           | FemaleAge85to89     | 2213       |
| Niger   | 1997           | FemaleAge90to94     | 292        |
| Niger   | 1997           | FemaleAge95to99     | 19         |
| Niger   | 1997           | FemaleLactAge15to19 | 114321     |
| Niger   | 1997           | FemaleLactAge20to24 | 141636     |
| Niger   | 1997           | FemaleLactAge25to29 | 117843     |
| Niger   | 1997           | FemaleLactAge30to34 | 86078      |
| Niger   | 1997           | FemaleLactAge35to39 | 53624      |
| Niger   | 1997           | FemaleLactAge40to44 | 23214      |
| Niger   | 1997           | FemaleLactAge45to49 | 7902       |
| Niger   | 1997           | FemalePregAge15to19 | 85741      |
| Niger   | 1997           | FemalePregAge20to24 | 106227     |
| Niger   | 1997           | FemalePregAge25to29 | 88382      |
| Niger   | 1997           | FemalePregAge30to34 | 64559      |
| Niger   | 1997           | FemalePregAge35to39 | 40218      |
| Niger   | 1997           | FemalePregAge40to44 | 17410      |
| Niger   | 1997           | FemalePregAge45to49 | 5927       |
| Niger   | 1997           | MaleAge0to4         | 1027678    |
| Niger   | 1997           | MaleAge10to14       | 605049     |
| Niger   | 1997           | MaleAge15to19       | 482278     |
| Niger   | 1997           | MaleAge20to24       | 347616     |
| Niger   | 1997           | MaleAge25to29       | 260657     |
| Niger   | 1997           | MaleAge30to34       | 297521     |
| Niger   | 1997           | MaleAge35to39       | 291647     |
| Niger   | 1997           | MaleAge40to44       | 224088     |
| Niger   | 1997           | MaleAge45to49       | 175429     |
| Niger   | 1997           | MaleAge50to54       | 136775     |
| Niger   | 1997           | MaleAge55to59       | 99886      |
| Niger   | 1997           | MaleAge5to9         | 756573     |
| Niger   | 1997           | MaleAge60to64       | 73368      |
| Niger   | 1997           | MaleAge65to69       | 54851      |
| Niger   | 1997           | MaleAge70to74       | 35400      |
| Niger   | 1997           | MaleAge75to79       | 17309      |
| Niger   | 1997           | MaleAge80to84       | 6272       |
| Niger   | 1997           | MaleAge85to89       | 1607       |
| Niger   | 1997           | MaleAge90to94       | 204        |
| Niger   | 1997           | MaleAge95to99       | 17         |
| Niger   | 1998           | FemaleAge0to4       | 1026240    |
| Niger   | 1998           | FemaleAge10to14     | 613140     |
| Niger   | 1998           | FemaleAge15to19     | 320277     |
| Niger   | 1998           | FemaleAge20to24     | 185768     |
| Niger   | 1998           | FemaleAge25to29     | 157830     |
| Niger   | 1998           | FemaleAge30to34     | 152480     |
| Niger   | 1998           | FemaleAge35to39     | 151853     |
| Niger   | 1998           | FemaleAge40to44     | 153938     |
| Niger   | 1998           | FemaleAge45to49     | 152536     |
| Niger   | 1998           | FemaleAge50to54     | 154736     |
| Niger   | 1998           | FemaleAge55to59     | 122987     |
| Niger   | 1998           | FemaleAge5to9       | 755826     |
| Niger   | 1998           | FemaleAge60to64     | 90097      |
| Niger   | 1998           | FemaleAge65to69     | 63406      |
| Niger   | 1998           | FemaleAge70to74     | 40654      |
| Niger   | 1998           | FemaleAge75to79     | 22231      |
| Niger   | 1998           | FemaleAge80to84     | 9062       |
| Niger   | 1998           | FemaleAge85to89     | 2359       |
| Niger   | 1998           | FemaleAge90to94     | 342        |
| Niger   | 1998           | FemaleAge95to99     | 30         |
| Niger   | 1998           | FemaleAgeAbove100   | 1          |
| Niger   | 1998           | FemaleLactAge15to19 | 114321     |
| Niger   | 1998           | FemaleLactAge20to24 | 141636     |
| Niger   | 1998           | FemaleLactAge25to29 | 117843     |
| Niger   | 1998           | FemaleLactAge30to34 | 86078      |
| Niger   | 1998           | FemaleLactAge35to39 | 53624      |
| Niger   | 1998           | FemaleLactAge40to44 | 23214      |
| Niger   | 1998           | FemaleLactAge45to49 | 7902       |
| Niger   | 1998           | FemalePregAge15to19 | 85741      |
| Niger   | 1998           | FemalePregAge20to24 | 106227     |
| Niger   | 1998           | FemalePregAge25to29 | 88382      |
| Niger   | 1998           | FemalePregAge30to34 | 64559      |
| Niger   | 1998           | FemalePregAge35to39 | 40218      |
| Niger   | 1998           | FemalePregAge40to44 | 17410      |

Dietary calcium and zinc deficiency risks are decreasing but remain prevalent

| Country | Reference year | Age/gender group    | Population |
|---------|----------------|---------------------|------------|
| Niger   | 1998           | FemalePregAge45to49 | 5927       |
| Niger   | 1998           | MaleAge0to4         | 1068277    |
| Niger   | 1998           | MaleAge10to14       | 625984     |
| Niger   | 1998           | MaleAge15to19       | 485181     |
| Niger   | 1998           | MaleAge20to24       | 364504     |
| Niger   | 1998           | MaleAge25to29       | 280829     |
| Niger   | 1998           | MaleAge30to34       | 292941     |
| Niger   | 1998           | MaleAge35to39       | 312631     |
| Niger   | 1998           | MaleAge40to44       | 238842     |
| Niger   | 1998           | MaleAge45to49       | 183515     |
| Niger   | 1998           | MaleAge50to54       | 143612     |
| Niger   | 1998           | MaleAge55to59       | 105314     |
| Niger   | 1998           | MaleAge5to9         | 789789     |
| Niger   | 1998           | MaleAge60to64       | 75437      |
| Niger   | 1998           | MaleAge65to69       | 56105      |
| Niger   | 1998           | MaleAge70to74       | 36992      |
| Niger   | 1998           | MaleAge75to79       | 18419      |
| Niger   | 1998           | MaleAge80to84       | 6572       |
| Niger   | 1998           | MaleAge85to89       | 1719       |
| Niger   | 1998           | MaleAge90to94       | 243        |
| Niger   | 1998           | MaleAge95to99       | 24         |
| Niger   | 1999           | FemaleAge0to4       | 1065519    |
| Niger   | 1999           | FemaleAge10to14     | 633864     |
| Niger   | 1999           | FemaleAge15to19     | 337784     |
| Niger   | 1999           | FemaleAge20to24     | 199948     |
| Niger   | 1999           | FemaleAge25to29     | 169050     |
| Niger   | 1999           | FemaleAge30to34     | 163141     |
| Niger   | 1999           | FemaleAge35to39     | 161454     |
| Niger   | 1999           | FemaleAge40to44     | 162793     |
| Niger   | 1999           | FemaleAge45to49     | 153088     |
| Niger   | 1999           | FemaleAge50to54     | 158030     |
| Niger   | 1999           | FemaleAge55to59     | 128268     |
| Niger   | 1999           | FemaleAge5to9       | 786470     |
| Niger   | 1999           | FemaleAge60to64     | 94075      |
| Niger   | 1999           | FemaleAge65to69     | 66111      |
| Niger   | 1999           | FemaleAge70to74     | 42215      |
| Niger   | 1999           | FemaleAge75to79     | 23010      |
| Niger   | 1999           | FemaleAge80to84     | 9304       |
| Niger   | 1999           | FemaleAge85to89     | 2385       |
| Niger   | 1999           | FemaleAge90to94     | 357        |
| Niger   | 1999           | FemaleAge95to99     | 32         |
| Niger   | 1999           | FemaleAgeAbov e100  | 1          |
| Niger   | 1999           | FemaleLactAge15to19 | 114321     |
| Niger   | 1999           | FemaleLactAge20to24 | 141636     |
| Niger   | 1999           | FemaleLactAge25to29 | 117843     |
| Niger   | 1999           | FemaleLactAge30to34 | 86078      |
| Niger   | 1999           | FemaleLactAge35to39 | 53624      |
| Niger   | 1999           | FemaleLactAge40to44 | 23214      |
| Niger   | 1999           | FemaleLactAge45to49 | 7902       |
| Niger   | 1999           | FemalePregAge15to19 | 85741      |
| Niger   | 1999           | FemalePregAge20to24 | 106227     |
| Niger   | 1999           | FemalePregAge25to29 | 88382      |
| Niger   | 1999           | FemalePregAge30to34 | 64559      |
| Niger   | 1999           | FemalePregAge35to39 | 40218      |
| Niger   | 1999           | FemalePregAge40to44 | 17410      |
| Niger   | 1999           | FemalePregAge45to49 | 5927       |
| Niger   | 1999           | MaleAge0to4         | 1108919    |
| Niger   | 1999           | MaleAge10to14       | 654715     |
| Niger   | 1999           | MaleAge15to19       | 491901     |
| Niger   | 1999           | MaleAge20to24       | 371777     |
| Niger   | 1999           | MaleAge25to29       | 301024     |
| Niger   | 1999           | MaleAge30to34       | 292468     |
| Niger   | 1999           | MaleAge35to39       | 330248     |
| Niger   | 1999           | MaleAge40to44       | 256274     |
| Niger   | 1999           | MaleAge45to49       | 193071     |
| Niger   | 1999           | MaleAge50to54       | 151059     |
| Niger   | 1999           | MaleAge55to59       | 111262     |
| Niger   | 1999           | MaleAge5to9         | 820933     |
| Niger   | 1999           | MaleAge60to64       | 78173      |
| Niger   | 1999           | MaleAge65to69       | 57555      |
| Niger   | 1999           | MaleAge70to74       | 38551      |
| Niger   | 1999           | MaleAge75to79       | 19496      |
| Niger   | 1999           | MaleAge80to84       | 6843       |
| Niger   | 1999           | MaleAge85to89       | 1732       |
| Niger   | 1999           | MaleAge90to94       | 253        |
| Niger   | 1999           | MaleAge95to99       | 22         |
| Nigeria | 1992           | FemaleAge0to4       | 8587847    |
| Nigeria | 1992           | FemaleAge10to14     | 6230028    |
| Nigeria | 1992           | FemaleAge15to19     | 3878468    |
| Nigeria | 1992           | FemaleAge20to24     | 2262614    |
| Nigeria | 1992           | FemaleAge25to29     | 1738016    |
| Nigeria | 1992           | FemaleAge30to34     | 1619276    |
| Nigeria | 1992           | FemaleAge35to39     | 1676657    |
| Nigeria | 1992           | FemaleAge40to44     | 1718615    |
| Nigeria | 1992           | FemaleAge45to49     | 1695150    |
| Nigeria | 1992           | FemaleAge50to54     | 1540970    |
| Nigeria | 1992           | FemaleAge55to59     | 1249034    |
| Nigeria | 1992           | FemaleAge5to9       | 7250495    |

Dietary calcium and zinc deficiency risks are decreasing but remain prevalent

| Country | Reference year | Age/gender group    | Population |
|---------|----------------|---------------------|------------|
| Nigeria | 1992           | FemaleAge60to64     | 983033     |
| Nigeria | 1992           | FemaleAge65to69     | 727302     |
| Nigeria | 1992           | FemaleAge70to74     | 473089     |
| Nigeria | 1992           | FemaleAge75to79     | 248654     |
| Nigeria | 1992           | FemaleAge80to84     | 97090      |
| Nigeria | 1992           | FemaleAge85to89     | 25360      |
| Nigeria | 1992           | FemaleAge90to94     | 3727       |
| Nigeria | 1992           | FemaleAge95to99     | 307        |
| Nigeria | 1992           | FemaleAgeAbove100   | 6          |
| Nigeria | 1992           | FemaleLactAge15to19 | 762453     |
| Nigeria | 1992           | FemaleLactAge20to24 | 1127468    |
| Nigeria | 1992           | FemaleLactAge25to29 | 1013514    |
| Nigeria | 1992           | FemaleLactAge30to34 | 769936     |
| Nigeria | 1992           | FemaleLactAge35to39 | 463575     |
| Nigeria | 1992           | FemaleLactAge40to44 | 230463     |
| Nigeria | 1992           | FemaleLactAge45to49 | 78964      |
| Nigeria | 1992           | FemalePregAge15to19 | 571840     |
| Nigeria | 1992           | FemalePregAge20to24 | 845601     |
| Nigeria | 1992           | FemalePregAge25to29 | 760136     |
| Nigeria | 1992           | FemalePregAge30to34 | 577452     |
| Nigeria | 1992           | FemalePregAge35to39 | 347681     |
| Nigeria | 1992           | FemalePregAge40to44 | 172848     |
| Nigeria | 1992           | FemalePregAge45to49 | 59223      |
| Nigeria | 1992           | MaleAge0to4         | 8919750    |
| Nigeria | 1992           | MaleAge10to14       | 6475591    |
| Nigeria | 1992           | MaleAge15to19       | 5413265    |
| Nigeria | 1992           | MaleAge20to24       | 4363549    |
| Nigeria | 1992           | MaleAge25to29       | 3592365    |
| Nigeria | 1992           | MaleAge30to34       | 3030184    |
| Nigeria | 1992           | MaleAge35to39       | 2509201    |
| Nigeria | 1992           | MaleAge40to44       | 2161146    |
| Nigeria | 1992           | MaleAge45to49       | 1872017    |
| Nigeria | 1992           | MaleAge50to54       | 1522054    |
| Nigeria | 1992           | MaleAge55to59       | 1186583    |
| Nigeria | 1992           | MaleAge5to9         | 7530078    |
| Nigeria | 1992           | MaleAge60to64       | 900062     |
| Nigeria | 1992           | MaleAge65to69       | 640461     |
| Nigeria | 1992           | MaleAge70to74       | 398233     |
| Nigeria | 1992           | MaleAge75to79       | 198029     |
| Nigeria | 1992           | MaleAge80to84       | 72598      |
| Nigeria | 1992           | MaleAge85to89       | 17696      |
| Nigeria | 1992           | MaleAge90to94       | 2318       |
| Nigeria | 1992           | MaleAge95to99       | 169        |
| Nigeria | 1992           | MaleAgeAbove100     | 2          |
| Nigeria | 1993           | FemaleAge0to4       | 8750744    |
| Nigeria | 1993           | FemaleAge10to14     | 6400718    |
| Nigeria | 1993           | FemaleAge15to19     | 4058419    |
| Nigeria | 1993           | FemaleAge20to24     | 2414397    |
| Nigeria | 1993           | FemaleAge25to29     | 1828450    |
| Nigeria | 1993           | FemaleAge30to34     | 1698286    |
| Nigeria | 1993           | FemaleAge35to39     | 1744496    |
| Nigeria | 1993           | FemaleAge40to44     | 1760928    |
| Nigeria | 1993           | FemaleAge45to49     | 1731747    |
| Nigeria | 1993           | FemaleAge50to54     | 1580462    |
| Nigeria | 1993           | FemaleAge55to59     | 1281403    |
| Nigeria | 1993           | FemaleAge5to9       | 7394914    |
| Nigeria | 1993           | FemaleAge60to64     | 1003946    |
| Nigeria | 1993           | FemaleAge65to69     | 742288     |
| Nigeria | 1993           | FemaleAge70to74     | 483967     |
| Nigeria | 1993           | FemaleAge75to79     | 255468     |
| Nigeria | 1993           | FemaleAge80to84     | 99424      |
| Nigeria | 1993           | FemaleAge85to89     | 26389      |
| Nigeria | 1993           | FemaleAge90to94     | 4164       |
| Nigeria | 1993           | FemaleAge95to99     | 444        |
| Nigeria | 1993           | FemaleAgeAbove100   | 6          |
| Nigeria | 1993           | FemaleLactAge15to19 | 762453     |
| Nigeria | 1993           | FemaleLactAge20to24 | 1127468    |
| Nigeria | 1993           | FemaleLactAge25to29 | 1013514    |
| Nigeria | 1993           | FemaleLactAge30to34 | 769936     |
| Nigeria | 1993           | FemaleLactAge35to39 | 463575     |
| Nigeria | 1993           | FemaleLactAge40to44 | 230463     |
| Nigeria | 1993           | FemaleLactAge45to49 | 78964      |
| Nigeria | 1993           | FemalePregAge15to19 | 571840     |
| Nigeria | 1993           | FemalePregAge20to24 | 845601     |
| Nigeria | 1993           | FemalePregAge25to29 | 760136     |
| Nigeria | 1993           | FemalePregAge30to34 | 577452     |
| Nigeria | 1993           | FemalePregAge35to39 | 347681     |
| Nigeria | 1993           | FemalePregAge40to44 | 172848     |
| Nigeria | 1993           | FemalePregAge45to49 | 59223      |
| Nigeria | 1993           | MaleAge0to4         | 9089028    |
| Nigeria | 1993           | MaleAge10to14       | 6656587    |
| Nigeria | 1993           | MaleAge15to19       | 5602784    |
| Nigeria | 1993           | MaleAge20to24       | 4528307    |
| Nigeria | 1993           | MaleAge25to29       | 3683930    |
| Nigeria | 1993           | MaleAge30to34       | 3110922    |
| Nigeria | 1993           | MaleAge35to39       | 2586007    |
| Nigeria | 1993           | MaleAge40to44       | 2186202    |
| Nigeria | 1993           | MaleAge45to49       | 1911240    |

Dietary calcium and zinc deficiency risks are decreasing but remain prevalent

| Country | Reference year | Age/gender group    | Population |
|---------|----------------|---------------------|------------|
| Nigeria | 1993           | MaleAge50to54       | 1566158    |
| Nigeria | 1993           | MaleAge55to59       | 1219011    |
| Nigeria | 1993           | MaleAge5to9         | 7678533    |
| Nigeria | 1993           | MaleAge60to64       | 920155     |
| Nigeria | 1993           | MaleAge65to69       | 654776     |
| Nigeria | 1993           | MaleAge70to74       | 408606     |
| Nigeria | 1993           | MaleAge75to79       | 204309     |
| Nigeria | 1993           | MaleAge80to84       | 74530      |
| Nigeria | 1993           | MaleAge85to89       | 18530      |
| Nigeria | 1993           | MaleAge90to94       | 2655       |
| Nigeria | 1993           | MaleAge95to99       | 263        |
| Nigeria | 1993           | MaleAgeAbov e100    | 3          |
| Nigeria | 1994           | FemaleAge0to4       | 8922974    |
| Nigeria | 1994           | FemaleAge10to14     | 6568151    |
| Nigeria | 1994           | FemaleAge15to19     | 4240801    |
| Nigeria | 1994           | FemaleAge20to24     | 2575175    |
| Nigeria | 1994           | FemaleAge25to29     | 1929942    |
| Nigeria | 1994           | FemaleAge30to34     | 1779455    |
| Nigeria | 1994           | FemaleAge35to39     | 1815476    |
| Nigeria | 1994           | FemaleAge40to44     | 1807803    |
| Nigeria | 1994           | FemaleAge45to49     | 1769625    |
| Nigeria | 1994           | FemaleAge50to54     | 1620594    |
| Nigeria | 1994           | FemaleAge55to59     | 1316908    |
| Nigeria | 1994           | FemaleAge5to9       | 7519760    |
| Nigeria | 1994           | FemaleAge60to64     | 1028749    |
| Nigeria | 1994           | FemaleAge65to69     | 759690     |
| Nigeria | 1994           | FemaleAge70to74     | 495919     |
| Nigeria | 1994           | FemaleAge75to79     | 261077     |
| Nigeria | 1994           | FemaleAge80to84     | 99483      |
| Nigeria | 1994           | FemaleAge85to89     | 25619      |
| Nigeria | 1994           | FemaleAge90to94     | 4100       |
| Nigeria | 1994           | FemaleAge95to99     | 439        |
| Nigeria | 1994           | FemaleAgeAbov e100  | 7          |
| Nigeria | 1994           | FemaleLactAge15to19 | 762453     |
| Nigeria | 1994           | FemaleLactAge20to24 | 1127468    |
| Nigeria | 1994           | FemaleLactAge25to29 | 1013514    |
| Nigeria | 1994           | FemaleLactAge30to34 | 769936     |
| Nigeria | 1994           | FemaleLactAge35to39 | 463575     |
| Nigeria | 1994           | FemaleLactAge40to44 | 230463     |
| Nigeria | 1994           | FemaleLactAge45to49 | 78964      |
| Nigeria | 1994           | FemalePregAge15to19 | 571840     |
| Nigeria | 1994           | FemalePregAge20to24 | 845601     |
| Nigeria | 1994           | FemalePregAge25to29 | 760136     |
| Nigeria | 1994           | FemalePregAge30to34 | 577452     |
| Nigeria | 1994           | FemalePregAge35to39 | 347681     |
| Nigeria | 1994           | FemalePregAge40to44 | 172848     |
| Nigeria | 1994           | FemalePregAge45to49 | 59223      |
| Nigeria | 1994           | MaleAge0to4         | 9268790    |
| Nigeria | 1994           | MaleAge10to14       | 6834409    |
| Nigeria | 1994           | MaleAge15to19       | 5796413    |
| Nigeria | 1994           | MaleAge20to24       | 4702872    |
| Nigeria | 1994           | MaleAge25to29       | 3788291    |
| Nigeria | 1994           | MaleAge30to34       | 3193800    |
| Nigeria | 1994           | MaleAge35to39       | 2666420    |
| Nigeria | 1994           | MaleAge40to44       | 2220201    |
| Nigeria | 1994           | MaleAge45to49       | 1948481    |
| Nigeria | 1994           | MaleAge50to54       | 1611012    |
| Nigeria | 1994           | MaleAge55to59       | 1255312    |
| Nigeria | 1994           | MaleAge5to9         | 7805394    |
| Nigeria | 1994           | MaleAge60to64       | 943658     |
| Nigeria | 1994           | MaleAge65to69       | 670791     |
| Nigeria | 1994           | MaleAge70to74       | 419447     |
| Nigeria | 1994           | MaleAge75to79       | 209160     |
| Nigeria | 1994           | MaleAge80to84       | 74594      |
| Nigeria | 1994           | MaleAge85to89       | 17965      |
| Nigeria | 1994           | MaleAge90to94       | 2628       |
| Nigeria | 1994           | MaleAge95to99       | 255        |
| Nigeria | 1994           | MaleAgeAbov e100    | 3          |
| Nigeria | 1995           | FemaleAge0to4       | 9118126    |
| Nigeria | 1995           | FemaleAge10to14     | 6721866    |
| Nigeria | 1995           | FemaleAge15to19     | 4422464    |
| Nigeria | 1995           | FemaleAge20to24     | 2743167    |
| Nigeria | 1995           | FemaleAge25to29     | 2045634    |
| Nigeria | 1995           | FemaleAge30to34     | 1862418    |
| Nigeria | 1995           | FemaleAge35to39     | 1888047    |
| Nigeria | 1995           | FemaleAge40to44     | 1860224    |
| Nigeria | 1995           | FemaleAge45to49     | 1808922    |
| Nigeria | 1995           | FemaleAge50to54     | 1660494    |
| Nigeria | 1995           | FemaleAge55to59     | 1354988    |
| Nigeria | 1995           | FemaleAge5to9       | 7628067    |
| Nigeria | 1995           | FemaleAge60to64     | 1057580    |
| Nigeria | 1995           | FemaleAge65to69     | 779727     |
| Nigeria | 1995           | FemaleAge70to74     | 509205     |
| Nigeria | 1995           | FemaleAge75to79     | 266166     |
| Nigeria | 1995           | FemaleAge80to84     | 97797      |
| Nigeria | 1995           | FemaleAge85to89     | 22648      |
| Nigeria | 1995           | FemaleAge90to94     | 2876       |
| Nigeria | 1995           | FemaleAge95to99     | 205        |

Dietary calcium and zinc deficiency risks are decreasing but remain prevalent

| Country | Reference year | Age/gender group    | Population |
|---------|----------------|---------------------|------------|
| Nigeria | 1995           | FemaleAgeAbove100   | 7          |
| Nigeria | 1995           | FemaleLactAge15to19 | 762453     |
| Nigeria | 1995           | FemaleLactAge20to24 | 1127468    |
| Nigeria | 1995           | FemaleLactAge25to29 | 1013514    |
| Nigeria | 1995           | FemaleLactAge30to34 | 769936     |
| Nigeria | 1995           | FemaleLactAge35to39 | 463575     |
| Nigeria | 1995           | FemaleLactAge40to44 | 230463     |
| Nigeria | 1995           | FemaleLactAge45to49 | 78964      |
| Nigeria | 1995           | FemalePregAge15to19 | 571840     |
| Nigeria | 1995           | FemalePregAge20to24 | 845601     |
| Nigeria | 1995           | FemalePregAge25to29 | 760136     |
| Nigeria | 1995           | FemalePregAge30to34 | 577452     |
| Nigeria | 1995           | FemalePregAge35to39 | 347681     |
| Nigeria | 1995           | FemalePregAge40to44 | 172848     |
| Nigeria | 1995           | FemalePregAge45to49 | 59223      |
| Nigeria | 1995           | MaleAge0to4         | 9474125    |
| Nigeria | 1995           | MaleAge10to14       | 6997284    |
| Nigeria | 1995           | MaleAge15to19       | 5991316    |
| Nigeria | 1995           | MaleAge20to24       | 4884899    |
| Nigeria | 1995           | MaleAge25to29       | 3909977    |
| Nigeria | 1995           | MaleAge30to34       | 3278886    |
| Nigeria | 1995           | MaleAge35to39       | 2746529    |
| Nigeria | 1995           | MaleAge40to44       | 2267045    |
| Nigeria | 1995           | MaleAge45to49       | 1983066    |
| Nigeria | 1995           | MaleAge50to54       | 1655489    |
| Nigeria | 1995           | MaleAge55to59       | 1295320    |
| Nigeria | 1995           | MaleAge5to9         | 7914796    |
| Nigeria | 1995           | MaleAge60to64       | 970944     |
| Nigeria | 1995           | MaleAge65to69       | 688740     |
| Nigeria | 1995           | MaleAge70to74       | 430961     |
| Nigeria | 1995           | MaleAge75to79       | 213184     |
| Nigeria | 1995           | MaleAge80to84       | 73082      |
| Nigeria | 1995           | MaleAge85to89       | 15585      |
| Nigeria | 1995           | MaleAge90to94       | 1711       |
| Nigeria | 1995           | MaleAge95to99       | 104        |
| Nigeria | 1995           | MaleAgeAbove100     | 3          |
| Nigeria | 1996           | FemaleAge0to4       | 9365058    |
| Nigeria | 1996           | FemaleAge10to14     | 6856913    |
| Nigeria | 1996           | FemaleAge15to19     | 4443736    |
| Nigeria | 1996           | FemaleAge20to24     | 2650843    |
| Nigeria | 1996           | FemaleAge25to29     | 1898141    |
| Nigeria | 1996           | FemaleAge30to34     | 1764747    |
| Nigeria | 1996           | FemaleAge35to39     | 1872989    |
| Nigeria | 1996           | FemaleAge40to44     | 1885351    |
| Nigeria | 1996           | FemaleAge45to49     | 1844711    |
| Nigeria | 1996           | FemaleAge50to54     | 1691252    |
| Nigeria | 1996           | FemaleAge55to59     | 1383544    |
| Nigeria | 1996           | FemaleAge5to9       | 7796629    |
| Nigeria | 1996           | FemaleAge60to64     | 1076192    |
| Nigeria | 1996           | FemaleAge65to69     | 789961     |
| Nigeria | 1996           | FemaleAge70to74     | 517344     |
| Nigeria | 1996           | FemaleAge75to79     | 275372     |
| Nigeria | 1996           | FemaleAge80to84     | 106089     |
| Nigeria | 1996           | FemaleAge85to89     | 26533      |
| Nigeria | 1996           | FemaleAge90to94     | 3687       |
| Nigeria | 1996           | FemaleAge95to99     | 192        |
| Nigeria | 1996           | FemaleAgeAbove100   | 7          |
| Nigeria | 1996           | FemaleLactAge15to19 | 841143     |
| Nigeria | 1996           | FemaleLactAge20to24 | 1271711    |
| Nigeria | 1996           | FemaleLactAge25to29 | 1166244    |
| Nigeria | 1996           | FemaleLactAge30to34 | 870037     |
| Nigeria | 1996           | FemaleLactAge35to39 | 511081     |
| Nigeria | 1996           | FemaleLactAge40to44 | 246051     |
| Nigeria | 1996           | FemaleLactAge45to49 | 77626      |
| Nigeria | 1996           | FemalePregAge15to19 | 630857     |
| Nigeria | 1996           | FemalePregAge20to24 | 953784     |
| Nigeria | 1996           | FemalePregAge25to29 | 874683     |
| Nigeria | 1996           | FemalePregAge30to34 | 652528     |
| Nigeria | 1996           | FemalePregAge35to39 | 383311     |
| Nigeria | 1996           | FemalePregAge40to44 | 184538     |
| Nigeria | 1996           | FemalePregAge45to49 | 58220      |
| Nigeria | 1996           | MaleAge0to4         | 9736519    |
| Nigeria | 1996           | MaleAge10to14       | 7137526    |
| Nigeria | 1996           | MaleAge15to19       | 6158587    |
| Nigeria | 1996           | MaleAge20to24       | 5056064    |
| Nigeria | 1996           | MaleAge25to29       | 4039747    |
| Nigeria | 1996           | MaleAge30to34       | 3357890    |
| Nigeria | 1996           | MaleAge35to39       | 2818784    |
| Nigeria | 1996           | MaleAge40to44       | 2317032    |
| Nigeria | 1996           | MaleAge45to49       | 2006037    |
| Nigeria | 1996           | MaleAge50to54       | 1689968    |
| Nigeria | 1996           | MaleAge55to59       | 1327921    |
| Nigeria | 1996           | MaleAge5to9         | 8092417    |
| Nigeria | 1996           | MaleAge60to64       | 991447     |
| Nigeria | 1996           | MaleAge65to69       | 700683     |
| Nigeria | 1996           | MaleAge70to74       | 440522     |
| Nigeria | 1996           | MaleAge75to79       | 222742     |
| Nigeria | 1996           | MaleAge80to84       | 80371      |

Dietary calcium and zinc deficiency risks are decreasing but remain prevalent

| Country | Reference year | Age/gender group    | Population |
|---------|----------------|---------------------|------------|
| Nigeria | 1996           | MaleAge85to89       | 18520      |
| Nigeria | 1996           | MaleAge90to94       | 2244       |
| Nigeria | 1996           | MaleAge95to99       | 81         |
| Nigeria | 1996           | MaleAgeAbove100     | 3          |
| Nigeria | 1997           | FemaleAge0to4       | 9597506    |
| Nigeria | 1997           | FemaleAge10to14     | 6991120    |
| Nigeria | 1997           | FemaleAge15to19     | 4605934    |
| Nigeria | 1997           | FemaleAge20to24     | 2817752    |
| Nigeria | 1997           | FemaleAge25to29     | 2031246    |
| Nigeria | 1997           | FemaleAge30to34     | 1844583    |
| Nigeria | 1997           | FemaleAge35to39     | 1944462    |
| Nigeria | 1997           | FemaleAge40to44     | 1944200    |
| Nigeria | 1997           | FemaleAge45to49     | 1880635    |
| Nigeria | 1997           | FemaleAge50to54     | 1723405    |
| Nigeria | 1997           | FemaleAge55to59     | 1415952    |
| Nigeria | 1997           | FemaleAge5to9       | 7969629    |
| Nigeria | 1997           | FemaleAge60to64     | 1099027    |
| Nigeria | 1997           | FemaleAge65to69     | 802191     |
| Nigeria | 1997           | FemaleAge70to74     | 525298     |
| Nigeria | 1997           | FemaleAge75to79     | 282210     |
| Nigeria | 1997           | FemaleAge80to84     | 111713     |
| Nigeria | 1997           | FemaleAge85to89     | 29083      |
| Nigeria | 1997           | FemaleAge90to94     | 4406       |
| Nigeria | 1997           | FemaleAge95to99     | 337        |
| Nigeria | 1997           | FemaleAgeAbove100   | 7          |
| Nigeria | 1997           | FemaleLactAge15to19 | 841143     |
| Nigeria | 1997           | FemaleLactAge20to24 | 1271711    |
| Nigeria | 1997           | FemaleLactAge25to29 | 1166244    |
| Nigeria | 1997           | FemaleLactAge30to34 | 870037     |
| Nigeria | 1997           | FemaleLactAge35to39 | 511081     |
| Nigeria | 1997           | FemaleLactAge40to44 | 246051     |
| Nigeria | 1997           | FemaleLactAge45to49 | 77626      |
| Nigeria | 1997           | FemalePregAge15to19 | 630857     |
| Nigeria | 1997           | FemalePregAge20to24 | 953784     |
| Nigeria | 1997           | FemalePregAge25to29 | 874683     |
| Nigeria | 1997           | FemalePregAge30to34 | 652528     |
| Nigeria | 1997           | FemalePregAge35to39 | 383311     |
| Nigeria | 1997           | FemalePregAge40to44 | 184538     |
| Nigeria | 1997           | FemalePregAge45to49 | 58220      |
| Nigeria | 1997           | MaleAge0to4         | 9980681    |
| Nigeria | 1997           | MaleAge10to14       | 7278457    |
| Nigeria | 1997           | MaleAge15to19       | 6331308    |
| Nigeria | 1997           | MaleAge20to24       | 5233992    |
| Nigeria | 1997           | MaleAge25to29       | 4185796    |
| Nigeria | 1997           | MaleAge30to34       | 3439691    |
| Nigeria | 1997           | MaleAge35to39       | 2893934    |
| Nigeria | 1997           | MaleAge40to44       | 2380509    |
| Nigeria | 1997           | MaleAge45to49       | 2027262    |
| Nigeria | 1997           | MaleAge50to54       | 1726054    |
| Nigeria | 1997           | MaleAge55to59       | 1364593    |
| Nigeria | 1997           | MaleAge5to9         | 8276293    |
| Nigeria | 1997           | MaleAge60to64       | 1015369    |
| Nigeria | 1997           | MaleAge65to69       | 714039     |
| Nigeria | 1997           | MaleAge70to74       | 449675     |
| Nigeria | 1997           | MaleAge75to79       | 230249     |
| Nigeria | 1997           | MaleAge80to84       | 85596      |
| Nigeria | 1997           | MaleAge85to89       | 20516      |
| Nigeria | 1997           | MaleAge90to94       | 2775       |
| Nigeria | 1997           | MaleAge95to99       | 179        |
| Nigeria | 1997           | MaleAgeAbove100     | 3          |
| Nigeria | 1998           | FemaleAge0to4       | 9826721    |
| Nigeria | 1998           | FemaleAge10to14     | 7126760    |
| Nigeria | 1998           | FemaleAge15to19     | 4769157    |
| Nigeria | 1998           | FemaleAge20to24     | 2988661    |
| Nigeria | 1998           | FemaleAge25to29     | 2175410    |
| Nigeria | 1998           | FemaleAge30to34     | 1929949    |
| Nigeria | 1998           | FemaleAge35to39     | 2018722    |
| Nigeria | 1998           | FemaleAge40to44     | 2007789    |
| Nigeria | 1998           | FemaleAge45to49     | 1919993    |
| Nigeria | 1998           | FemaleAge50to54     | 1756897    |
| Nigeria | 1998           | FemaleAge55to59     | 1451210    |
| Nigeria | 1998           | FemaleAge5to9       | 8141022    |
| Nigeria | 1998           | FemaleAge60to64     | 1125951    |
| Nigeria | 1998           | FemaleAge65to69     | 817204     |
| Nigeria | 1998           | FemaleAge70to74     | 534076     |
| Nigeria | 1998           | FemaleAge75to79     | 287040     |
| Nigeria | 1998           | FemaleAge80to84     | 114035     |
| Nigeria | 1998           | FemaleAge85to89     | 29917      |
| Nigeria | 1998           | FemaleAge90to94     | 4921       |
| Nigeria | 1998           | FemaleAge95to99     | 489        |
| Nigeria | 1998           | FemaleAgeAbove100   | 8          |
| Nigeria | 1998           | FemaleLactAge15to19 | 841143     |
| Nigeria | 1998           | FemaleLactAge20to24 | 1271711    |
| Nigeria | 1998           | FemaleLactAge25to29 | 1166244    |
| Nigeria | 1998           | FemaleLactAge30to34 | 870037     |
| Nigeria | 1998           | FemaleLactAge35to39 | 511081     |
| Nigeria | 1998           | FemaleLactAge40to44 | 246051     |
| Nigeria | 1998           | FemaleLactAge45to49 | 77626      |



Dietary calcium and zinc deficiency risks are decreasing but remain prevalent

| Country | Reference year | Age/gender group    | Population |
|---------|----------------|---------------------|------------|
| Nigeria | 1998           | FemalePregAge15to19 | 630857     |
| Nigeria | 1998           | FemalePregAge20to24 | 953784     |
| Nigeria | 1998           | FemalePregAge25to29 | 874683     |
| Nigeria | 1998           | FemalePregAge30to34 | 652528     |
| Nigeria | 1998           | FemalePregAge35to39 | 383311     |
| Nigeria | 1998           | FemalePregAge40to44 | 184538     |
| Nigeria | 1998           | FemalePregAge45to49 | 58220      |
| Nigeria | 1998           | MaleAge0to4         | 10219918   |
| Nigeria | 1998           | MaleAge10to14       | 7422368    |
| Nigeria | 1998           | MaleAge15to19       | 6506803    |
| Nigeria | 1998           | MaleAge20to24       | 5416308    |
| Nigeria | 1998           | MaleAge25to29       | 4344300    |
| Nigeria | 1998           | MaleAge30to34       | 3528254    |
| Nigeria | 1998           | MaleAge35to39       | 2971512    |
| Nigeria | 1998           | MaleAge40to44       | 2453539    |
| Nigeria | 1998           | MaleAge45to49       | 2050841    |
| Nigeria | 1998           | MaleAge50to54       | 1762380    |
| Nigeria | 1998           | MaleAge55to59       | 1404140    |
| Nigeria | 1998           | MaleAge5to9         | 8458906    |
| Nigeria | 1998           | MaleAge60to64       | 1042827    |
| Nigeria | 1998           | MaleAge65to69       | 729531     |
| Nigeria | 1998           | MaleAge70to74       | 459211     |
| Nigeria | 1998           | MaleAge75to79       | 235793     |
| Nigeria | 1998           | MaleAge80to84       | 88188      |
| Nigeria | 1998           | MaleAge85to89       | 21316      |
| Nigeria | 1998           | MaleAge90to94       | 3201       |
| Nigeria | 1998           | MaleAge95to99       | 285        |
| Nigeria | 1998           | MaleAgeAbov e100    | 4          |
| Nigeria | 1999           | FemaleAge0to4       | 10066158   |
| Nigeria | 1999           | FemaleAge10to14     | 7264787    |
| Nigeria | 1999           | FemaleAge15to19     | 4929324    |
| Nigeria | 1999           | FemaleAge20to24     | 3160649    |
| Nigeria | 1999           | FemaleAge25to29     | 2327384    |
| Nigeria | 1999           | FemaleAge30to34     | 2025603    |
| Nigeria | 1999           | FemaleAge35to39     | 2094819    |
| Nigeria | 1999           | FemaleAge40to44     | 2073870    |
| Nigeria | 1999           | FemaleAge45to49     | 1964155    |
| Nigeria | 1999           | FemaleAge50to54     | 1791950    |
| Nigeria | 1999           | FemaleAge55to59     | 1487962    |
| Nigeria | 1999           | FemaleAge5to9       | 8305905    |
| Nigeria | 1999           | FemaleAge60to64     | 1156636    |
| Nigeria | 1999           | FemaleAge65to69     | 835838     |
| Nigeria | 1999           | FemaleAge70to74     | 544268     |
| Nigeria | 1999           | FemaleAge75to79     | 290312     |
| Nigeria | 1999           | FemaleAge80to84     | 113066     |
| Nigeria | 1999           | FemaleAge85to89     | 28731      |
| Nigeria | 1999           | FemaleAge90to94     | 4776       |
| Nigeria | 1999           | FemaleAge95to99     | 491        |
| Nigeria | 1999           | FemaleAgeAbov e100  | 8          |
| Nigeria | 1999           | FemaleLactAge15to19 | 841143     |
| Nigeria | 1999           | FemaleLactAge20to24 | 1271711    |
| Nigeria | 1999           | FemaleLactAge25to29 | 1166244    |
| Nigeria | 1999           | FemaleLactAge30to34 | 870037     |
| Nigeria | 1999           | FemaleLactAge35to39 | 511081     |
| Nigeria | 1999           | FemaleLactAge40to44 | 246051     |
| Nigeria | 1999           | FemaleLactAge45to49 | 77626      |
| Nigeria | 1999           | FemalePregAge15to19 | 630857     |
| Nigeria | 1999           | FemalePregAge20to24 | 953784     |
| Nigeria | 1999           | FemalePregAge25to29 | 874683     |
| Nigeria | 1999           | FemalePregAge30to34 | 652528     |
| Nigeria | 1999           | FemalePregAge35to39 | 383311     |
| Nigeria | 1999           | FemalePregAge40to44 | 184538     |
| Nigeria | 1999           | FemalePregAge45to49 | 58220      |
| Nigeria | 1999           | MaleAge0to4         | 10470449   |
| Nigeria | 1999           | MaleAge10to14       | 7569878    |
| Nigeria | 1999           | MaleAge15to19       | 6679949    |
| Nigeria | 1999           | MaleAge20to24       | 5600547    |
| Nigeria | 1999           | MaleAge25to29       | 4510268    |
| Nigeria | 1999           | MaleAge30to34       | 3629329    |
| Nigeria | 1999           | MaleAge35to39       | 3051088    |
| Nigeria | 1999           | MaleAge40to44       | 2529987    |
| Nigeria | 1999           | MaleAge45to49       | 2082973    |
| Nigeria | 1999           | MaleAge50to54       | 1797054    |
| Nigeria | 1999           | MaleAge55to59       | 1444855    |
| Nigeria | 1999           | MaleAge5to9         | 8633777    |
| Nigeria | 1999           | MaleAge60to64       | 1073992    |
| Nigeria | 1999           | MaleAge65to69       | 747907     |
| Nigeria | 1999           | MaleAge70to74       | 469525     |
| Nigeria | 1999           | MaleAge75to79       | 239630     |
| Nigeria | 1999           | MaleAge80to84       | 88088      |
| Nigeria | 1999           | MaleAge85to89       | 20655      |
| Nigeria | 1999           | MaleAge90to94       | 3144       |
| Nigeria | 1999           | MaleAge95to99       | 283        |
| Nigeria | 1999           | MaleAgeAbov e100    | 4          |
| Norway  | 1992           | FemaleAge0to4       | 142479     |
| Norway  | 1992           | FemaleAge10to14     | 125848     |
| Norway  | 1992           | FemaleAge15to19     | 141405     |
| Norway  | 1992           | FemaleAge20to24     | 140417     |

Dietary calcium and zinc deficiency risks are decreasing but remain prevalent

| Country | Reference year | Age/gender group    | Population |
|---------|----------------|---------------------|------------|
| Norway  | 1992           | FemaleAge25to29     | 122587     |
| Norway  | 1992           | FemaleAge30to34     | 129458     |
| Norway  | 1992           | FemaleAge35to39     | 141285     |
| Norway  | 1992           | FemaleAge40to44     | 152314     |
| Norway  | 1992           | FemaleAge45to49     | 135681     |
| Norway  | 1992           | FemaleAge50to54     | 105319     |
| Norway  | 1992           | FemaleAge55to59     | 93027      |
| Norway  | 1992           | FemaleAge5to9       | 129384     |
| Norway  | 1992           | FemaleAge60to64     | 95890      |
| Norway  | 1992           | FemaleAge65to69     | 107230     |
| Norway  | 1992           | FemaleAge70to74     | 103779     |
| Norway  | 1992           | FemaleAge75to79     | 84828      |
| Norway  | 1992           | FemaleAge80to84     | 60859      |
| Norway  | 1992           | FemaleAge85to89     | 34432      |
| Norway  | 1992           | FemaleAge90to94     | 13457      |
| Norway  | 1992           | FemaleAge95to99     | 2759       |
| Norway  | 1992           | FemaleAgeAbove100   | 254        |
| Norway  | 1992           | FemaleLactAge15to19 | 2250       |
| Norway  | 1992           | FemaleLactAge20to24 | 13726      |
| Norway  | 1992           | FemaleLactAge25to29 | 22368      |
| Norway  | 1992           | FemaleLactAge30to34 | 15376      |
| Norway  | 1992           | FemaleLactAge35to39 | 5386       |
| Norway  | 1992           | FemaleLactAge40to44 | 800        |
| Norway  | 1992           | FemaleLactAge45to49 | 31         |
| Norway  | 1992           | FemalePregAge15to19 | 1688       |
| Norway  | 1992           | FemalePregAge20to24 | 10295      |
| Norway  | 1992           | FemalePregAge25to29 | 16776      |
| Norway  | 1992           | FemalePregAge30to34 | 11532      |
| Norway  | 1992           | FemalePregAge35to39 | 4039       |
| Norway  | 1992           | FemalePregAge40to44 | 600        |
| Norway  | 1992           | FemalePregAge45to49 | 23         |
| Norway  | 1992           | MaleAge0to4         | 150071     |
| Norway  | 1992           | MaleAge10to14       | 132269     |
| Norway  | 1992           | MaleAge15to19       | 151294     |
| Norway  | 1992           | MaleAge20to24       | 171925     |
| Norway  | 1992           | MaleAge25to29       | 170649     |
| Norway  | 1992           | MaleAge30to34       | 164299     |
| Norway  | 1992           | MaleAge35to39       | 158034     |
| Norway  | 1992           | MaleAge40to44       | 162661     |
| Norway  | 1992           | MaleAge45to49       | 142730     |
| Norway  | 1992           | MaleAge50to54       | 106768     |
| Norway  | 1992           | MaleAge55to59       | 90913      |
| Norway  | 1992           | MaleAge5to9         | 136081     |
| Norway  | 1992           | MaleAge60to64       | 90631      |
| Norway  | 1992           | MaleAge65to69       | 94038      |
| Norway  | 1992           | MaleAge70to74       | 81583      |
| Norway  | 1992           | MaleAge75to79       | 58159      |
| Norway  | 1992           | MaleAge80to84       | 34758      |
| Norway  | 1992           | MaleAge85to89       | 15492      |
| Norway  | 1992           | MaleAge90to94       | 4730       |
| Norway  | 1992           | MaleAge95to99       | 783        |
| Norway  | 1992           | MaleAgeAbove100     | 54         |
| Norway  | 1993           | FemaleAge0to4       | 144614     |
| Norway  | 1993           | FemaleAge10to14     | 125615     |
| Norway  | 1993           | FemaleAge15to19     | 136101     |
| Norway  | 1993           | FemaleAge20to24     | 139039     |
| Norway  | 1993           | FemaleAge25to29     | 125384     |
| Norway  | 1993           | FemaleAge30to34     | 130008     |
| Norway  | 1993           | FemaleAge35to39     | 143217     |
| Norway  | 1993           | FemaleAge40to44     | 150472     |
| Norway  | 1993           | FemaleAge45to49     | 142766     |
| Norway  | 1993           | FemaleAge50to54     | 109865     |
| Norway  | 1993           | FemaleAge55to59     | 93458      |
| Norway  | 1993           | FemaleAge5to9       | 132285     |
| Norway  | 1993           | FemaleAge60to64     | 93966      |
| Norway  | 1993           | FemaleAge65to69     | 103464     |
| Norway  | 1993           | FemaleAge70to74     | 104654     |
| Norway  | 1993           | FemaleAge75to79     | 85778      |
| Norway  | 1993           | FemaleAge80to84     | 61605      |
| Norway  | 1993           | FemaleAge85to89     | 35305      |
| Norway  | 1993           | FemaleAge90to94     | 13985      |
| Norway  | 1993           | FemaleAge95to99     | 3070       |
| Norway  | 1993           | FemaleAgeAbove100   | 274        |
| Norway  | 1993           | FemaleLactAge15to19 | 2250       |
| Norway  | 1993           | FemaleLactAge20to24 | 13726      |
| Norway  | 1993           | FemaleLactAge25to29 | 22368      |
| Norway  | 1993           | FemaleLactAge30to34 | 15376      |
| Norway  | 1993           | FemaleLactAge35to39 | 5386       |
| Norway  | 1993           | FemaleLactAge40to44 | 800        |
| Norway  | 1993           | FemaleLactAge45to49 | 31         |
| Norway  | 1993           | FemalePregAge15to19 | 1688       |
| Norway  | 1993           | FemalePregAge20to24 | 10295      |
| Norway  | 1993           | FemalePregAge25to29 | 16776      |
| Norway  | 1993           | FemalePregAge30to34 | 11532      |
| Norway  | 1993           | FemalePregAge35to39 | 4039       |
| Norway  | 1993           | FemalePregAge40to44 | 600        |
| Norway  | 1993           | FemalePregAge45to49 | 23         |
| Norway  | 1993           | MaleAge0to4         | 152587     |

Dietary calcium and zinc deficiency risks are decreasing but remain prevalent

| Country | Reference year | Age/gender group    | Population |
|---------|----------------|---------------------|------------|
| Norway  | 1993           | MaleAge10to14       | 132036     |
| Norway  | 1993           | MaleAge15to19       | 145937     |
| Norway  | 1993           | MaleAge20to24       | 169729     |
| Norway  | 1993           | MaleAge25to29       | 173259     |
| Norway  | 1993           | MaleAge30to34       | 164985     |
| Norway  | 1993           | MaleAge35to39       | 159685     |
| Norway  | 1993           | MaleAge40to44       | 160080     |
| Norway  | 1993           | MaleAge45to49       | 150437     |
| Norway  | 1993           | MaleAge50to54       | 112106     |
| Norway  | 1993           | MaleAge55to59       | 91358      |
| Norway  | 1993           | MaleAge5to9         | 139096     |
| Norway  | 1993           | MaleAge60to64       | 88826      |
| Norway  | 1993           | MaleAge65to69       | 91243      |
| Norway  | 1993           | MaleAge70to74       | 82683      |
| Norway  | 1993           | MaleAge75to79       | 58699      |
| Norway  | 1993           | MaleAge80to84       | 35347      |
| Norway  | 1993           | MaleAge85to89       | 15907      |
| Norway  | 1993           | MaleAge90to94       | 4850       |
| Norway  | 1993           | MaleAge95to99       | 884        |
| Norway  | 1993           | MaleAgeAbove100     | 57         |
| Norway  | 1994           | FemaleAge0to4       | 146289     |
| Norway  | 1994           | FemaleAge10to14     | 126122     |
| Norway  | 1994           | FemaleAge15to19     | 131289     |
| Norway  | 1994           | FemaleAge20to24     | 136671     |
| Norway  | 1994           | FemaleAge25to29     | 127682     |
| Norway  | 1994           | FemaleAge30to34     | 130965     |
| Norway  | 1994           | FemaleAge35to39     | 145108     |
| Norway  | 1994           | FemaleAge40to44     | 148800     |
| Norway  | 1994           | FemaleAge45to49     | 148510     |
| Norway  | 1994           | FemaleAge50to54     | 115143     |
| Norway  | 1994           | FemaleAge55to59     | 94736      |
| Norway  | 1994           | FemaleAge5to9       | 135525     |
| Norway  | 1994           | FemaleAge60to64     | 92508      |
| Norway  | 1994           | FemaleAge65to69     | 99856      |
| Norway  | 1994           | FemaleAge70to74     | 104874     |
| Norway  | 1994           | FemaleAge75to79     | 87044      |
| Norway  | 1994           | FemaleAge80to84     | 62607      |
| Norway  | 1994           | FemaleAge85to89     | 35990      |
| Norway  | 1994           | FemaleAge90to94     | 14154      |
| Norway  | 1994           | FemaleAge95to99     | 3231       |
| Norway  | 1994           | FemaleAgeAbove100   | 295        |
| Norway  | 1994           | FemaleLactAge15to19 | 2250       |
| Norway  | 1994           | FemaleLactAge20to24 | 13726      |
| Norway  | 1994           | FemaleLactAge25to29 | 22368      |
| Norway  | 1994           | FemaleLactAge30to34 | 15376      |
| Norway  | 1994           | FemaleLactAge35to39 | 5386       |
| Norway  | 1994           | FemaleLactAge40to44 | 800        |
| Norway  | 1994           | FemaleLactAge45to49 | 31         |
| Norway  | 1994           | FemalePregAge15to19 | 1688       |
| Norway  | 1994           | FemalePregAge20to24 | 10295      |
| Norway  | 1994           | FemalePregAge25to29 | 16776      |
| Norway  | 1994           | FemalePregAge30to34 | 11532      |
| Norway  | 1994           | FemalePregAge35to39 | 4039       |
| Norway  | 1994           | FemalePregAge40to44 | 600        |
| Norway  | 1994           | FemalePregAge45to49 | 23         |
| Norway  | 1994           | MaleAge0to4         | 154614     |
| Norway  | 1994           | MaleAge10to14       | 132585     |
| Norway  | 1994           | MaleAge15to19       | 141216     |
| Norway  | 1994           | MaleAge20to24       | 166589     |
| Norway  | 1994           | MaleAge25to29       | 175295     |
| Norway  | 1994           | MaleAge30to34       | 166081     |
| Norway  | 1994           | MaleAge35to39       | 161423     |
| Norway  | 1994           | MaleAge40to44       | 157703     |
| Norway  | 1994           | MaleAge45to49       | 156597     |
| Norway  | 1994           | MaleAge50to54       | 118210     |
| Norway  | 1994           | MaleAge55to59       | 92846      |
| Norway  | 1994           | MaleAge5to9         | 142499     |
| Norway  | 1994           | MaleAge60to64       | 87478      |
| Norway  | 1994           | MaleAge65to69       | 88632      |
| Norway  | 1994           | MaleAge70to74       | 83287      |
| Norway  | 1994           | MaleAge75to79       | 59519      |
| Norway  | 1994           | MaleAge80to84       | 35821      |
| Norway  | 1994           | MaleAge85to89       | 16038      |
| Norway  | 1994           | MaleAge90to94       | 4751       |
| Norway  | 1994           | MaleAge95to99       | 901        |
| Norway  | 1994           | MaleAgeAbove100     | 60         |
| Norway  | 1995           | FemaleAge0to4       | 147531     |
| Norway  | 1995           | FemaleAge10to14     | 127238     |
| Norway  | 1995           | FemaleAge15to19     | 127573     |
| Norway  | 1995           | FemaleAge20to24     | 133355     |
| Norway  | 1995           | FemaleAge25to29     | 128999     |
| Norway  | 1995           | FemaleAge30to34     | 132605     |
| Norway  | 1995           | FemaleAge35to39     | 146544     |
| Norway  | 1995           | FemaleAge40to44     | 148214     |
| Norway  | 1995           | FemaleAge45to49     | 152187     |
| Norway  | 1995           | FemaleAge50to54     | 121057     |
| Norway  | 1995           | FemaleAge55to59     | 96967      |
| Norway  | 1995           | FemaleAge5to9       | 138725     |

Dietary calcium and zinc deficiency risks are decreasing but remain prevalent

| Country | Reference year | Age/gender group    | Population |
|---------|----------------|---------------------|------------|
| Norway  | 1995           | FemaleAge60to64     | 91475      |
| Norway  | 1995           | FemaleAge65to69     | 96799      |
| Norway  | 1995           | FemaleAge70to74     | 104158     |
| Norway  | 1995           | FemaleAge75to79     | 88585      |
| Norway  | 1995           | FemaleAge80to84     | 63919      |
| Norway  | 1995           | FemaleAge85to89     | 36589      |
| Norway  | 1995           | FemaleAge90to94     | 14067      |
| Norway  | 1995           | FemaleAge95to99     | 3046       |
| Norway  | 1995           | FemaleAgeAbove100   | 314        |
| Norway  | 1995           | FemaleLactAge15to19 | 2250       |
| Norway  | 1995           | FemaleLactAge20to24 | 13726      |
| Norway  | 1995           | FemaleLactAge25to29 | 22368      |
| Norway  | 1995           | FemaleLactAge30to34 | 15376      |
| Norway  | 1995           | FemaleLactAge35to39 | 5386       |
| Norway  | 1995           | FemaleLactAge40to44 | 800        |
| Norway  | 1995           | FemaleLactAge45to49 | 31         |
| Norway  | 1995           | FemalePregAge15to19 | 1688       |
| Norway  | 1995           | FemalePregAge20to24 | 10295      |
| Norway  | 1995           | FemalePregAge25to29 | 16776      |
| Norway  | 1995           | FemalePregAge30to34 | 11532      |
| Norway  | 1995           | FemalePregAge35to39 | 4039       |
| Norway  | 1995           | FemalePregAge40to44 | 600        |
| Norway  | 1995           | FemalePregAge45to49 | 23         |
| Norway  | 1995           | MaleAge0to4         | 156113     |
| Norway  | 1995           | MaleAge10to14       | 133811     |
| Norway  | 1995           | MaleAge15to19       | 137645     |
| Norway  | 1995           | MaleAge20to24       | 162709     |
| Norway  | 1995           | MaleAge25to29       | 176239     |
| Norway  | 1995           | MaleAge30to34       | 167831     |
| Norway  | 1995           | MaleAge35to39       | 162832     |
| Norway  | 1995           | MaleAge40to44       | 156586     |
| Norway  | 1995           | MaleAge45to49       | 160417     |
| Norway  | 1995           | MaleAge50to54       | 124939     |
| Norway  | 1995           | MaleAge55to59       | 95515      |
| Norway  | 1995           | MaleAge5to9         | 145930     |
| Norway  | 1995           | MaleAge60to64       | 86631      |
| Norway  | 1995           | MaleAge65to69       | 86476      |
| Norway  | 1995           | MaleAge70to74       | 83175      |
| Norway  | 1995           | MaleAge75to79       | 60670      |
| Norway  | 1995           | MaleAge80to84       | 36268      |
| Norway  | 1995           | MaleAge85to89       | 15950      |
| Norway  | 1995           | MaleAge90to94       | 4425       |
| Norway  | 1995           | MaleAge95to99       | 727        |
| Norway  | 1995           | MaleAgeAbove100     | 62         |
| Norway  | 1996           | FemaleAge0to4       | 148102     |
| Norway  | 1996           | FemaleAge10to14     | 129154     |
| Norway  | 1996           | FemaleAge15to19     | 126514     |
| Norway  | 1996           | FemaleAge20to24     | 135098     |
| Norway  | 1996           | FemaleAge25to29     | 130555     |
| Norway  | 1996           | FemaleAge30to34     | 130943     |
| Norway  | 1996           | FemaleAge35to39     | 145296     |
| Norway  | 1996           | FemaleAge40to44     | 148089     |
| Norway  | 1996           | FemaleAge45to49     | 153755     |
| Norway  | 1996           | FemaleAge50to54     | 127427     |
| Norway  | 1996           | FemaleAge55to59     | 99922      |
| Norway  | 1996           | FemaleAge5to9       | 141676     |
| Norway  | 1996           | FemaleAge60to64     | 90732      |
| Norway  | 1996           | FemaleAge65to69     | 93890      |
| Norway  | 1996           | FemaleAge70to74     | 101933     |
| Norway  | 1996           | FemaleAge75to79     | 89308      |
| Norway  | 1996           | FemaleAge80to84     | 64650      |
| Norway  | 1996           | FemaleAge85to89     | 37571      |
| Norway  | 1996           | FemaleAge90to94     | 15254      |
| Norway  | 1996           | FemaleAge95to99     | 3288       |
| Norway  | 1996           | FemaleAgeAbove100   | 333        |
| Norway  | 1996           | FemaleLactAge15to19 | 1673       |
| Norway  | 1996           | FemaleLactAge20to24 | 10621      |
| Norway  | 1996           | FemaleLactAge25to29 | 21794      |
| Norway  | 1996           | FemaleLactAge30to34 | 17588      |
| Norway  | 1996           | FemaleLactAge35to39 | 6728       |
| Norway  | 1996           | FemaleLactAge40to44 | 1024       |
| Norway  | 1996           | FemaleLactAge45to49 | 30         |
| Norway  | 1996           | FemalePregAge15to19 | 1255       |
| Norway  | 1996           | FemalePregAge20to24 | 7965       |
| Norway  | 1996           | FemalePregAge25to29 | 16346      |
| Norway  | 1996           | FemalePregAge30to34 | 13191      |
| Norway  | 1996           | FemalePregAge35to39 | 5046       |
| Norway  | 1996           | FemalePregAge40to44 | 768        |
| Norway  | 1996           | FemalePregAge45to49 | 23         |
| Norway  | 1996           | MaleAge0to4         | 156892     |
| Norway  | 1996           | MaleAge10to14       | 135788     |
| Norway  | 1996           | MaleAge15to19       | 135372     |
| Norway  | 1996           | MaleAge20to24       | 158601     |
| Norway  | 1996           | MaleAge25to29       | 176157     |
| Norway  | 1996           | MaleAge30to34       | 170069     |
| Norway  | 1996           | MaleAge35to39       | 163943     |
| Norway  | 1996           | MaleAge40to44       | 156392     |
| Norway  | 1996           | MaleAge45to49       | 161767     |

Dietary calcium and zinc deficiency risks are decreasing but remain prevalent

| Country | Reference year | Age/gender group    | Population |
|---------|----------------|---------------------|------------|
| Norway  | 1996           | MaleAge50to54       | 132023     |
| Norway  | 1996           | MaleAge55to59       | 98928      |
| Norway  | 1996           | MaleAge5to9         | 149045     |
| Norway  | 1996           | MaleAge60to64       | 85946      |
| Norway  | 1996           | MaleAge65to69       | 84168      |
| Norway  | 1996           | MaleAge70to74       | 81799      |
| Norway  | 1996           | MaleAge75to79       | 61666      |
| Norway  | 1996           | MaleAge80to84       | 37093      |
| Norway  | 1996           | MaleAge85to89       | 16865      |
| Norway  | 1996           | MaleAge90to94       | 5053       |
| Norway  | 1996           | MaleAge95to99       | 782        |
| Norway  | 1996           | MaleAgeAbov e100    | 63         |
| Norway  | 1997           | FemaleAge0to4       | 148309     |
| Norway  | 1997           | FemaleAge10to14     | 131643     |
| Norway  | 1997           | FemaleAge15to19     | 125466     |
| Norway  | 1997           | FemaleAge20to24     | 130512     |
| Norway  | 1997           | FemaleAge25to29     | 130330     |
| Norway  | 1997           | FemaleAge30to34     | 133799     |
| Norway  | 1997           | FemaleAge35to39     | 146038     |
| Norway  | 1997           | FemaleAge40to44     | 149406     |
| Norway  | 1997           | FemaleAge45to49     | 153187     |
| Norway  | 1997           | FemaleAge50to54     | 134512     |
| Norway  | 1997           | FemaleAge55to59     | 103638     |
| Norway  | 1997           | FemaleAge5to9       | 144322     |
| Norway  | 1997           | FemaleAge60to64     | 90528      |
| Norway  | 1997           | FemaleAge65to69     | 91575      |
| Norway  | 1997           | FemaleAge70to74     | 98971      |
| Norway  | 1997           | FemaleAge75to79     | 90319      |
| Norway  | 1997           | FemaleAge80to84     | 65478      |
| Norway  | 1997           | FemaleAge85to89     | 38296      |
| Norway  | 1997           | FemaleAge90to94     | 16091      |
| Norway  | 1997           | FemaleAge95to99     | 3619       |
| Norway  | 1997           | FemaleAgeAbov e100  | 350        |
| Norway  | 1997           | FemaleLactAge15to19 | 1673       |
| Norway  | 1997           | FemaleLactAge20to24 | 10621      |
| Norway  | 1997           | FemaleLactAge25to29 | 21794      |
| Norway  | 1997           | FemaleLactAge30to34 | 17588      |
| Norway  | 1997           | FemaleLactAge35to39 | 6728       |
| Norway  | 1997           | FemaleLactAge40to44 | 1024       |
| Norway  | 1997           | FemaleLactAge45to49 | 30         |
| Norway  | 1997           | FemalePregAge15to19 | 1255       |
| Norway  | 1997           | FemalePregAge20to24 | 7965       |
| Norway  | 1997           | FemalePregAge25to29 | 16346      |
| Norway  | 1997           | FemalePregAge30to34 | 13191      |
| Norway  | 1997           | FemalePregAge35to39 | 5046       |
| Norway  | 1997           | FemalePregAge40to44 | 768        |
| Norway  | 1997           | FemalePregAge45to49 | 23         |
| Norway  | 1997           | MaleAge0to4         | 157098     |
| Norway  | 1997           | MaleAge10to14       | 138415     |
| Norway  | 1997           | MaleAge15to19       | 134253     |
| Norway  | 1997           | MaleAge20to24       | 153807     |
| Norway  | 1997           | MaleAge25to29       | 175154     |
| Norway  | 1997           | MaleAge30to34       | 172961     |
| Norway  | 1997           | MaleAge35to39       | 164890     |
| Norway  | 1997           | MaleAge40to44       | 157416     |
| Norway  | 1997           | MaleAge45to49       | 160762     |
| Norway  | 1997           | MaleAge50to54       | 139878     |
| Norway  | 1997           | MaleAge55to59       | 103321     |
| Norway  | 1997           | MaleAge5to9         | 151978     |
| Norway  | 1997           | MaleAge60to64       | 85839      |
| Norway  | 1997           | MaleAge65to69       | 82306      |
| Norway  | 1997           | MaleAge70to74       | 79944      |
| Norway  | 1997           | MaleAge75to79       | 62845      |
| Norway  | 1997           | MaleAge80to84       | 37752      |
| Norway  | 1997           | MaleAge85to89       | 17489      |
| Norway  | 1997           | MaleAge90to94       | 5474       |
| Norway  | 1997           | MaleAge95to99       | 874        |
| Norway  | 1997           | MaleAgeAbov e100    | 64         |
| Norway  | 1998           | FemaleAge0to4       | 148189     |
| Norway  | 1998           | FemaleAge10to14     | 134564     |
| Norway  | 1998           | FemaleAge15to19     | 125282     |
| Norway  | 1998           | FemaleAge20to24     | 125571     |
| Norway  | 1998           | FemaleAge25to29     | 129263     |
| Norway  | 1998           | FemaleAge30to34     | 136871     |
| Norway  | 1998           | FemaleAge35to39     | 146698     |
| Norway  | 1998           | FemaleAge40to44     | 151392     |
| Norway  | 1998           | FemaleAge45to49     | 151360     |
| Norway  | 1998           | FemaleAge50to54     | 141490     |
| Norway  | 1998           | FemaleAge55to59     | 108076     |
| Norway  | 1998           | FemaleAge5to9       | 146563     |
| Norway  | 1998           | FemaleAge60to64     | 90981      |
| Norway  | 1998           | FemaleAge65to69     | 89798      |
| Norway  | 1998           | FemaleAge70to74     | 95635      |
| Norway  | 1998           | FemaleAge75to79     | 91292      |
| Norway  | 1998           | FemaleAge80to84     | 66550      |
| Norway  | 1998           | FemaleAge85to89     | 38904      |
| Norway  | 1998           | FemaleAge90to94     | 16496      |
| Norway  | 1998           | FemaleAge95to99     | 3915       |

Dietary calcium and zinc deficiency risks are decreasing but remain prevalent

| Country | Reference year | Age/gender group    | Population |
|---------|----------------|---------------------|------------|
| Norway  | 1998           | FemaleAgeAbove100   | 368        |
| Norway  | 1998           | FemaleLactAge15to19 | 1673       |
| Norway  | 1998           | FemaleLactAge20to24 | 10621      |
| Norway  | 1998           | FemaleLactAge25to29 | 21794      |
| Norway  | 1998           | FemaleLactAge30to34 | 17588      |
| Norway  | 1998           | FemaleLactAge35to39 | 6728       |
| Norway  | 1998           | FemaleLactAge40to44 | 1024       |
| Norway  | 1998           | FemaleLactAge45to49 | 30         |
| Norway  | 1998           | FemalePregAge15to19 | 1255       |
| Norway  | 1998           | FemalePregAge20to24 | 7965       |
| Norway  | 1998           | FemalePregAge25to29 | 16346      |
| Norway  | 1998           | FemalePregAge30to34 | 13191      |
| Norway  | 1998           | FemalePregAge35to39 | 5046       |
| Norway  | 1998           | FemalePregAge40to44 | 768        |
| Norway  | 1998           | FemalePregAge45to49 | 23         |
| Norway  | 1998           | MaleAge0to4         | 156807     |
| Norway  | 1998           | MaleAge10to14       | 141486     |
| Norway  | 1998           | MaleAge15to19       | 134182     |
| Norway  | 1998           | MaleAge20to24       | 148762     |
| Norway  | 1998           | MaleAge25to29       | 173243     |
| Norway  | 1998           | MaleAge30to34       | 176000     |
| Norway  | 1998           | MaleAge35to39       | 165879     |
| Norway  | 1998           | MaleAge40to44       | 159250     |
| Norway  | 1998           | MaleAge45to49       | 158375     |
| Norway  | 1998           | MaleAge50to54       | 147564     |
| Norway  | 1998           | MaleAge55to59       | 108594     |
| Norway  | 1998           | MaleAge5to9         | 154597     |
| Norway  | 1998           | MaleAge60to64       | 86467      |
| Norway  | 1998           | MaleAge65to69       | 80870      |
| Norway  | 1998           | MaleAge70to74       | 77920      |
| Norway  | 1998           | MaleAge75to79       | 63959      |
| Norway  | 1998           | MaleAge80to84       | 38395      |
| Norway  | 1998           | MaleAge85to89       | 17803      |
| Norway  | 1998           | MaleAge90to94       | 5617       |
| Norway  | 1998           | MaleAge95to99       | 967        |
| Norway  | 1998           | MaleAgeAbove100     | 65         |
| Norway  | 1999           | FemaleAge0to4       | 147724     |
| Norway  | 1999           | FemaleAge10to14     | 137631     |
| Norway  | 1999           | FemaleAge15to19     | 125716     |
| Norway  | 1999           | FemaleAge20to24     | 121093     |
| Norway  | 1999           | FemaleAge25to29     | 127303     |
| Norway  | 1999           | FemaleAge30to34     | 139457     |
| Norway  | 1999           | FemaleAge35to39     | 147771     |
| Norway  | 1999           | FemaleAge40to44     | 153346     |
| Norway  | 1999           | FemaleAge45to49     | 149711     |
| Norway  | 1999           | FemaleAge50to54     | 147129     |
| Norway  | 1999           | FemaleAge55to59     | 113217     |
| Norway  | 1999           | FemaleAge5to9       | 148399     |
| Norway  | 1999           | FemaleAge60to64     | 92258      |
| Norway  | 1999           | FemaleAge65to69     | 88464      |
| Norway  | 1999           | FemaleAge70to74     | 92492      |
| Norway  | 1999           | FemaleAge75to79     | 91749      |
| Norway  | 1999           | FemaleAge80to84     | 67930      |
| Norway  | 1999           | FemaleAge85to89     | 39530      |
| Norway  | 1999           | FemaleAge90to94     | 16494      |
| Norway  | 1999           | FemaleAge95to99     | 4007       |
| Norway  | 1999           | FemaleAgeAbove100   | 385        |
| Norway  | 1999           | FemaleLactAge15to19 | 1673       |
| Norway  | 1999           | FemaleLactAge20to24 | 10621      |
| Norway  | 1999           | FemaleLactAge25to29 | 21794      |
| Norway  | 1999           | FemaleLactAge30to34 | 17588      |
| Norway  | 1999           | FemaleLactAge35to39 | 6728       |
| Norway  | 1999           | FemaleLactAge40to44 | 1024       |
| Norway  | 1999           | FemaleLactAge45to49 | 30         |
| Norway  | 1999           | FemalePregAge15to19 | 1255       |
| Norway  | 1999           | FemalePregAge20to24 | 7965       |
| Norway  | 1999           | FemalePregAge25to29 | 16346      |
| Norway  | 1999           | FemalePregAge30to34 | 13191      |
| Norway  | 1999           | FemalePregAge35to39 | 5046       |
| Norway  | 1999           | FemalePregAge40to44 | 768        |
| Norway  | 1999           | FemalePregAge45to49 | 23         |
| Norway  | 1999           | MaleAge0to4         | 156065     |
| Norway  | 1999           | MaleAge10to14       | 144709     |
| Norway  | 1999           | MaleAge15to19       | 134873     |
| Norway  | 1999           | MaleAge20to24       | 144185     |
| Norway  | 1999           | MaleAge25to29       | 170492     |
| Norway  | 1999           | MaleAge30to34       | 178388     |
| Norway  | 1999           | MaleAge35to39       | 167280     |
| Norway  | 1999           | MaleAge40to44       | 161154     |
| Norway  | 1999           | MaleAge45to49       | 156185     |
| Norway  | 1999           | MaleAge50to54       | 153692     |
| Norway  | 1999           | MaleAge55to59       | 114620     |
| Norway  | 1999           | MaleAge5to9         | 156813     |
| Norway  | 1999           | MaleAge60to64       | 88066      |
| Norway  | 1999           | MaleAge65to69       | 79859      |
| Norway  | 1999           | MaleAge70to74       | 76083      |
| Norway  | 1999           | MaleAge75to79       | 64641      |
| Norway  | 1999           | MaleAge80to84       | 39136      |

Dietary calcium and zinc deficiency risks are decreasing but remain prevalent

| Country  | Reference year | Age/gender group    | Population |
|----------|----------------|---------------------|------------|
| Norway   | 1999           | MaleAge85to89       | 17862      |
| Norway   | 1999           | MaleAge90to94       | 5464       |
| Norway   | 1999           | MaleAge95to99       | 981        |
| Norway   | 1999           | MaleAgeAbove100     | 65         |
| Pakistan | 1992           | FemaleAge0to4       | 9770207    |
| Pakistan | 1992           | FemaleAge10to14     | 6869280    |
| Pakistan | 1992           | FemaleAge15to19     | 4908652    |
| Pakistan | 1992           | FemaleAge20to24     | 2712636    |
| Pakistan | 1992           | FemaleAge25to29     | 2091479    |
| Pakistan | 1992           | FemaleAge30to34     | 2073043    |
| Pakistan | 1992           | FemaleAge35to39     | 1963087    |
| Pakistan | 1992           | FemaleAge40to44     | 1887446    |
| Pakistan | 1992           | FemaleAge45to49     | 1915920    |
| Pakistan | 1992           | FemaleAge50to54     | 1706710    |
| Pakistan | 1992           | FemaleAge55to59     | 1370170    |
| Pakistan | 1992           | FemaleAge5to9       | 8281080    |
| Pakistan | 1992           | FemaleAge60to64     | 1083947    |
| Pakistan | 1992           | FemaleAge65to69     | 816944     |
| Pakistan | 1992           | FemaleAge70to74     | 571336     |
| Pakistan | 1992           | FemaleAge75to79     | 355433     |
| Pakistan | 1992           | FemaleAge80to84     | 183365     |
| Pakistan | 1992           | FemaleAge85to89     | 72332      |
| Pakistan | 1992           | FemaleAge90to94     | 19711      |
| Pakistan | 1992           | FemaleAge95to99     | 2611       |
| Pakistan | 1992           | FemaleAgeAbove100   | 160        |
| Pakistan | 1992           | FemaleLactAge15to19 | 443807     |
| Pakistan | 1992           | FemaleLactAge20to24 | 1212386    |
| Pakistan | 1992           | FemaleLactAge25to29 | 1236558    |
| Pakistan | 1992           | FemaleLactAge30to34 | 890006     |
| Pakistan | 1992           | FemaleLactAge35to39 | 497442     |
| Pakistan | 1992           | FemaleLactAge40to44 | 200294     |
| Pakistan | 1992           | FemaleLactAge45to49 | 47412      |
| Pakistan | 1992           | FemalePregAge15to19 | 332855     |
| Pakistan | 1992           | FemalePregAge20to24 | 909290     |
| Pakistan | 1992           | FemalePregAge25to29 | 927418     |
| Pakistan | 1992           | FemalePregAge30to34 | 667504     |
| Pakistan | 1992           | FemalePregAge35to39 | 373082     |
| Pakistan | 1992           | FemalePregAge40to44 | 150220     |
| Pakistan | 1992           | FemalePregAge45to49 | 35559      |
| Pakistan | 1992           | MaleAge0to4         | 10328243   |
| Pakistan | 1992           | MaleAge10to14       | 7270539    |
| Pakistan | 1992           | MaleAge15to19       | 6018791    |
| Pakistan | 1992           | MaleAge20to24       | 5111124    |
| Pakistan | 1992           | MaleAge25to29       | 4496463    |
| Pakistan | 1992           | MaleAge30to34       | 3814307    |
| Pakistan | 1992           | MaleAge35to39       | 3006534    |
| Pakistan | 1992           | MaleAge40to44       | 2415424    |
| Pakistan | 1992           | MaleAge45to49       | 2199521    |
| Pakistan | 1992           | MaleAge50to54       | 1940503    |
| Pakistan | 1992           | MaleAge55to59       | 1591885    |
| Pakistan | 1992           | MaleAge5to9         | 8764941    |
| Pakistan | 1992           | MaleAge60to64       | 1284061    |
| Pakistan | 1992           | MaleAge65to69       | 989977     |
| Pakistan | 1992           | MaleAge70to74       | 703450     |
| Pakistan | 1992           | MaleAge75to79       | 439142     |
| Pakistan | 1992           | MaleAge80to84       | 223873     |
| Pakistan | 1992           | MaleAge85to89       | 86761      |
| Pakistan | 1992           | MaleAge90to94       | 23177      |
| Pakistan | 1992           | MaleAge95to99       | 3061       |
| Pakistan | 1992           | MaleAgeAbove100     | 184        |
| Pakistan | 1993           | FemaleAge0to4       | 9815786    |
| Pakistan | 1993           | FemaleAge10to14     | 7106104    |
| Pakistan | 1993           | FemaleAge15to19     | 5100339    |
| Pakistan | 1993           | FemaleAge20to24     | 2807836    |
| Pakistan | 1993           | FemaleAge25to29     | 2170418    |
| Pakistan | 1993           | FemaleAge30to34     | 2191221    |
| Pakistan | 1993           | FemaleAge35to39     | 2113808    |
| Pakistan | 1993           | FemaleAge40to44     | 1954658    |
| Pakistan | 1993           | FemaleAge45to49     | 1929146    |
| Pakistan | 1993           | FemaleAge50to54     | 1769279    |
| Pakistan | 1993           | FemaleAge55to59     | 1408176    |
| Pakistan | 1993           | FemaleAge5to9       | 8583022    |
| Pakistan | 1993           | FemaleAge60to64     | 1119123    |
| Pakistan | 1993           | FemaleAge65to69     | 842290     |
| Pakistan | 1993           | FemaleAge70to74     | 591093     |
| Pakistan | 1993           | FemaleAge75to79     | 367022     |
| Pakistan | 1993           | FemaleAge80to84     | 190345     |
| Pakistan | 1993           | FemaleAge85to89     | 74379      |
| Pakistan | 1993           | FemaleAge90to94     | 20638      |
| Pakistan | 1993           | FemaleAge95to99     | 2989       |
| Pakistan | 1993           | FemaleAgeAbove100   | 161        |
| Pakistan | 1993           | FemaleLactAge15to19 | 443807     |
| Pakistan | 1993           | FemaleLactAge20to24 | 1212386    |
| Pakistan | 1993           | FemaleLactAge25to29 | 1236558    |
| Pakistan | 1993           | FemaleLactAge30to34 | 890006     |
| Pakistan | 1993           | FemaleLactAge35to39 | 497442     |
| Pakistan | 1993           | FemaleLactAge40to44 | 200294     |
| Pakistan | 1993           | FemaleLactAge45to49 | 47412      |

Dietary calcium and zinc deficiency risks are decreasing but remain prevalent

| Country  | Reference year | Age/gender group    | Population |
|----------|----------------|---------------------|------------|
| Pakistan | 1993           | FemalePregAge15to19 | 332855     |
| Pakistan | 1993           | FemalePregAge20to24 | 909290     |
| Pakistan | 1993           | FemalePregAge25to29 | 927418     |
| Pakistan | 1993           | FemalePregAge30to34 | 667504     |
| Pakistan | 1993           | FemalePregAge35to39 | 373082     |
| Pakistan | 1993           | FemalePregAge40to44 | 150220     |
| Pakistan | 1993           | FemalePregAge45to49 | 35559      |
| Pakistan | 1993           | MaleAge0to4         | 10373076   |
| Pakistan | 1993           | MaleAge10to14       | 7522671    |
| Pakistan | 1993           | MaleAge15to19       | 6224922    |
| Pakistan | 1993           | MaleAge20to24       | 5216332    |
| Pakistan | 1993           | MaleAge25to29       | 4577008    |
| Pakistan | 1993           | MaleAge30to34       | 3944337    |
| Pakistan | 1993           | MaleAge35to39       | 3149209    |
| Pakistan | 1993           | MaleAge40to44       | 2484272    |
| Pakistan | 1993           | MaleAge45to49       | 2200677    |
| Pakistan | 1993           | MaleAge50to54       | 1995110    |
| Pakistan | 1993           | MaleAge55to59       | 1630547    |
| Pakistan | 1993           | MaleAge5to9         | 9086386    |
| Pakistan | 1993           | MaleAge60to64       | 1314594    |
| Pakistan | 1993           | MaleAge65to69       | 1013703    |
| Pakistan | 1993           | MaleAge70to74       | 721936     |
| Pakistan | 1993           | MaleAge75to79       | 451565     |
| Pakistan | 1993           | MaleAge80to84       | 231540     |
| Pakistan | 1993           | MaleAge85to89       | 89167      |
| Pakistan | 1993           | MaleAge90to94       | 24293      |
| Pakistan | 1993           | MaleAge95to99       | 3523       |
| Pakistan | 1993           | MaleAgeAbove100     | 187        |
| Pakistan | 1994           | FemaleAge0to4       | 9842059    |
| Pakistan | 1994           | FemaleAge10to14     | 7360647    |
| Pakistan | 1994           | FemaleAge15to19     | 5310142    |
| Pakistan | 1994           | FemaleAge20to24     | 2917776    |
| Pakistan | 1994           | FemaleAge25to29     | 2246747    |
| Pakistan | 1994           | FemaleAge30to34     | 2301065    |
| Pakistan | 1994           | FemaleAge35to39     | 2264373    |
| Pakistan | 1994           | FemaleAge40to44     | 2039112    |
| Pakistan | 1994           | FemaleAge45to49     | 1948592    |
| Pakistan | 1994           | FemaleAge50to54     | 1824531    |
| Pakistan | 1994           | FemaleAge55to59     | 1451457    |
| Pakistan | 1994           | FemaleAge5to9       | 8869635    |
| Pakistan | 1994           | FemaleAge60to64     | 1156126    |
| Pakistan | 1994           | FemaleAge65to69     | 870324     |
| Pakistan | 1994           | FemaleAge70to74     | 612535     |
| Pakistan | 1994           | FemaleAge75to79     | 379977     |
| Pakistan | 1994           | FemaleAge80to84     | 196668     |
| Pakistan | 1994           | FemaleAge85to89     | 75244      |
| Pakistan | 1994           | FemaleAge90to94     | 20235      |
| Pakistan | 1994           | FemaleAge95to99     | 3086       |
| Pakistan | 1994           | FemaleAgeAbove100   | 162        |
| Pakistan | 1994           | FemaleLactAge15to19 | 443807     |
| Pakistan | 1994           | FemaleLactAge20to24 | 1212386    |
| Pakistan | 1994           | FemaleLactAge25to29 | 1236558    |
| Pakistan | 1994           | FemaleLactAge30to34 | 890006     |
| Pakistan | 1994           | FemaleLactAge35to39 | 497442     |
| Pakistan | 1994           | FemaleLactAge40to44 | 200294     |
| Pakistan | 1994           | FemaleLactAge45to49 | 47412      |
| Pakistan | 1994           | FemalePregAge15to19 | 332855     |
| Pakistan | 1994           | FemalePregAge20to24 | 909290     |
| Pakistan | 1994           | FemalePregAge25to29 | 927418     |
| Pakistan | 1994           | FemalePregAge30to34 | 667504     |
| Pakistan | 1994           | FemalePregAge35to39 | 373082     |
| Pakistan | 1994           | FemalePregAge40to44 | 150220     |
| Pakistan | 1994           | FemalePregAge45to49 | 35559      |
| Pakistan | 1994           | MaleAge0to4         | 10403342   |
| Pakistan | 1994           | MaleAge10to14       | 7792854    |
| Pakistan | 1994           | MaleAge15to19       | 6449440    |
| Pakistan | 1994           | MaleAge20to24       | 5338481    |
| Pakistan | 1994           | MaleAge25to29       | 4655905    |
| Pakistan | 1994           | MaleAge30to34       | 4064744    |
| Pakistan | 1994           | MaleAge35to39       | 3294513    |
| Pakistan | 1994           | MaleAge40to44       | 2569367    |
| Pakistan | 1994           | MaleAge45to49       | 2210369    |
| Pakistan | 1994           | MaleAge50to54       | 2041508    |
| Pakistan | 1994           | MaleAge55to59       | 1673618    |
| Pakistan | 1994           | MaleAge5to9         | 9392155    |
| Pakistan | 1994           | MaleAge60to64       | 1348184    |
| Pakistan | 1994           | MaleAge65to69       | 1039885    |
| Pakistan | 1994           | MaleAge70to74       | 742089     |
| Pakistan | 1994           | MaleAge75to79       | 464716     |
| Pakistan | 1994           | MaleAge80to84       | 237933     |
| Pakistan | 1994           | MaleAge85to89       | 89863      |
| Pakistan | 1994           | MaleAge90to94       | 23811      |
| Pakistan | 1994           | MaleAge95to99       | 3638       |
| Pakistan | 1994           | MaleAgeAbove100     | 191        |
| Pakistan | 1995           | FemaleAge0to4       | 9899703    |
| Pakistan | 1995           | FemaleAge10to14     | 7636272    |
| Pakistan | 1995           | FemaleAge15to19     | 5533548    |
| Pakistan | 1995           | FemaleAge20to24     | 3049573    |



Dietary calcium and zinc deficiency risks are decreasing but remain prevalent

| Country  | Reference year | Age/gender group    | Population |
|----------|----------------|---------------------|------------|
| Pakistan | 1995           | FemaleAge25to29     | 2324516    |
| Pakistan | 1995           | FemaleAge30to34     | 2401953    |
| Pakistan | 1995           | FemaleAge35to39     | 2406908    |
| Pakistan | 1995           | FemaleAge40to44     | 2142181    |
| Pakistan | 1995           | FemaleAge45to49     | 1981155    |
| Pakistan | 1995           | FemaleAge50to54     | 1867330    |
| Pakistan | 1995           | FemaleAge55to59     | 1501370    |
| Pakistan | 1995           | FemaleAge5to9       | 9109953    |
| Pakistan | 1995           | FemaleAge60to64     | 1194534    |
| Pakistan | 1995           | FemaleAge65to69     | 901319     |
| Pakistan | 1995           | FemaleAge70to74     | 635657     |
| Pakistan | 1995           | FemaleAge75to79     | 394668     |
| Pakistan | 1995           | FemaleAge80to84     | 202750     |
| Pakistan | 1995           | FemaleAge85to89     | 75274      |
| Pakistan | 1995           | FemaleAge90to94     | 18312      |
| Pakistan | 1995           | FemaleAge95to99     | 2356       |
| Pakistan | 1995           | FemaleAgeAbove100   | 164        |
| Pakistan | 1995           | FemaleLactAge15to19 | 443807     |
| Pakistan | 1995           | FemaleLactAge20to24 | 1212386    |
| Pakistan | 1995           | FemaleLactAge25to29 | 1236558    |
| Pakistan | 1995           | FemaleLactAge30to34 | 890006     |
| Pakistan | 1995           | FemaleLactAge35to39 | 497442     |
| Pakistan | 1995           | FemaleLactAge40to44 | 200294     |
| Pakistan | 1995           | FemaleLactAge45to49 | 47412      |
| Pakistan | 1995           | FemalePregAge15to19 | 332855     |
| Pakistan | 1995           | FemalePregAge20to24 | 909290     |
| Pakistan | 1995           | FemalePregAge25to29 | 927418     |
| Pakistan | 1995           | FemalePregAge30to34 | 667504     |
| Pakistan | 1995           | FemalePregAge35to39 | 373082     |
| Pakistan | 1995           | FemalePregAge40to44 | 150220     |
| Pakistan | 1995           | FemalePregAge45to49 | 35559      |
| Pakistan | 1995           | MaleAge0to4         | 10476003   |
| Pakistan | 1995           | MaleAge10to14       | 8085050    |
| Pakistan | 1995           | MaleAge15to19       | 6687493    |
| Pakistan | 1995           | MaleAge20to24       | 5483674    |
| Pakistan | 1995           | MaleAge25to29       | 4738790    |
| Pakistan | 1995           | MaleAge30to34       | 4172964    |
| Pakistan | 1995           | MaleAge35to39       | 3436386    |
| Pakistan | 1995           | MaleAge40to44       | 2670252    |
| Pakistan | 1995           | MaleAge45to49       | 2236450    |
| Pakistan | 1995           | MaleAge50to54       | 2074859    |
| Pakistan | 1995           | MaleAge55to59       | 1721466    |
| Pakistan | 1995           | MaleAge5to9         | 9649135    |
| Pakistan | 1995           | MaleAge60to64       | 1384915    |
| Pakistan | 1995           | MaleAge65to69       | 1068639    |
| Pakistan | 1995           | MaleAge70to74       | 764073     |
| Pakistan | 1995           | MaleAge75to79       | 478968     |
| Pakistan | 1995           | MaleAge80to84       | 243581     |
| Pakistan | 1995           | MaleAge85to89       | 89168      |
| Pakistan | 1995           | MaleAge90to94       | 21413      |
| Pakistan | 1995           | MaleAge95to99       | 2773       |
| Pakistan | 1995           | MaleAgeAbove100     | 195        |
| Pakistan | 1996           | FemaleAge0to4       | 9915290    |
| Pakistan | 1996           | FemaleAge10to14     | 7926918    |
| Pakistan | 1996           | FemaleAge15to19     | 5835832    |
| Pakistan | 1996           | FemaleAge20to24     | 3154391    |
| Pakistan | 1996           | FemaleAge25to29     | 2358136    |
| Pakistan | 1996           | FemaleAge30to34     | 2455350    |
| Pakistan | 1996           | FemaleAge35to39     | 2510618    |
| Pakistan | 1996           | FemaleAge40to44     | 2267513    |
| Pakistan | 1996           | FemaleAge45to49     | 2029775    |
| Pakistan | 1996           | FemaleAge50to54     | 1898281    |
| Pakistan | 1996           | FemaleAge55to59     | 1554003    |
| Pakistan | 1996           | FemaleAge5to9       | 9329389    |
| Pakistan | 1996           | FemaleAge60to64     | 1228342    |
| Pakistan | 1996           | FemaleAge65to69     | 928215     |
| Pakistan | 1996           | FemaleAge70to74     | 654226     |
| Pakistan | 1996           | FemaleAge75to79     | 408252     |
| Pakistan | 1996           | FemaleAge80to84     | 212151     |
| Pakistan | 1996           | FemaleAge85to89     | 81991      |
| Pakistan | 1996           | FemaleAge90to94     | 21259      |
| Pakistan | 1996           | FemaleAge95to99     | 2668       |
| Pakistan | 1996           | FemaleAgeAbove100   | 167        |
| Pakistan | 1996           | FemaleLactAge15to19 | 408244     |
| Pakistan | 1996           | FemaleLactAge20to24 | 1255561    |
| Pakistan | 1996           | FemaleLactAge25to29 | 1276248    |
| Pakistan | 1996           | FemaleLactAge30to34 | 918006     |
| Pakistan | 1996           | FemaleLactAge35to39 | 518794     |
| Pakistan | 1996           | FemaleLactAge40to44 | 200177     |
| Pakistan | 1996           | FemaleLactAge45to49 | 45954      |
| Pakistan | 1996           | FemalePregAge15to19 | 306183     |
| Pakistan | 1996           | FemalePregAge20to24 | 941671     |
| Pakistan | 1996           | FemalePregAge25to29 | 957186     |
| Pakistan | 1996           | FemalePregAge30to34 | 688504     |
| Pakistan | 1996           | FemalePregAge35to39 | 389096     |
| Pakistan | 1996           | FemalePregAge40to44 | 150133     |
| Pakistan | 1996           | FemalePregAge45to49 | 34465      |
| Pakistan | 1996           | MaleAge0to4         | 10504384   |

Dietary calcium and zinc deficiency risks are decreasing but remain prevalent

| Country  | Reference year | Age/gender group    | Population |
|----------|----------------|---------------------|------------|
| Pakistan | 1996           | MaleAge10to14       | 8396395    |
| Pakistan | 1996           | MaleAge15to19       | 6943686    |
| Pakistan | 1996           | MaleAge20to24       | 5678270    |
| Pakistan | 1996           | MaleAge25to29       | 4851769    |
| Pakistan | 1996           | MaleAge30to34       | 4283514    |
| Pakistan | 1996           | MaleAge35to39       | 3581991    |
| Pakistan | 1996           | MaleAge40to44       | 2790254    |
| Pakistan | 1996           | MaleAge45to49       | 2278190    |
| Pakistan | 1996           | MaleAge50to54       | 2094432    |
| Pakistan | 1996           | MaleAge55to59       | 1768951    |
| Pakistan | 1996           | MaleAge5to9         | 9885160    |
| Pakistan | 1996           | MaleAge60to64       | 1417128    |
| Pakistan | 1996           | MaleAge65to69       | 1091794    |
| Pakistan | 1996           | MaleAge70to74       | 781432     |
| Pakistan | 1996           | MaleAge75to79       | 492905     |
| Pakistan | 1996           | MaleAge80to84       | 254913     |
| Pakistan | 1996           | MaleAge85to89       | 97288      |
| Pakistan | 1996           | MaleAge90to94       | 24914      |
| Pakistan | 1996           | MaleAge95to99       | 3142       |
| Pakistan | 1996           | MaleAgeAbove100     | 200        |
| Pakistan | 1997           | FemaleAge0to4       | 9992404    |
| Pakistan | 1997           | FemaleAge10to14     | 8229421    |
| Pakistan | 1997           | FemaleAge15to19     | 6076621    |
| Pakistan | 1997           | FemaleAge20to24     | 3356352    |
| Pakistan | 1997           | FemaleAge25to29     | 2465564    |
| Pakistan | 1997           | FemaleAge30to34     | 2549528    |
| Pakistan | 1997           | FemaleAge35to39     | 2643850    |
| Pakistan | 1997           | FemaleAge40to44     | 2411333    |
| Pakistan | 1997           | FemaleAge45to49     | 2086944    |
| Pakistan | 1997           | FemaleAge50to54     | 1918809    |
| Pakistan | 1997           | FemaleAge55to59     | 1614464    |
| Pakistan | 1997           | FemaleAge5to9       | 9490292    |
| Pakistan | 1997           | FemaleAge60to64     | 1262839    |
| Pakistan | 1997           | FemaleAge65to69     | 958030     |
| Pakistan | 1997           | FemaleAge70to74     | 673965     |
| Pakistan | 1997           | FemaleAge75to79     | 422267     |
| Pakistan | 1997           | FemaleAge80to84     | 220273     |
| Pakistan | 1997           | FemaleAge85to89     | 87178      |
| Pakistan | 1997           | FemaleAge90to94     | 23248      |
| Pakistan | 1997           | FemaleAge95to99     | 3251       |
| Pakistan | 1997           | FemaleAgeAbove100   | 170        |
| Pakistan | 1997           | FemaleLactAge15to19 | 408244     |
| Pakistan | 1997           | FemaleLactAge20to24 | 1255561    |
| Pakistan | 1997           | FemaleLactAge25to29 | 1276248    |
| Pakistan | 1997           | FemaleLactAge30to34 | 918006     |
| Pakistan | 1997           | FemaleLactAge35to39 | 518794     |
| Pakistan | 1997           | FemaleLactAge40to44 | 200177     |
| Pakistan | 1997           | FemaleLactAge45to49 | 45954      |
| Pakistan | 1997           | FemalePregAge15to19 | 306183     |
| Pakistan | 1997           | FemalePregAge20to24 | 941671     |
| Pakistan | 1997           | FemalePregAge25to29 | 957186     |
| Pakistan | 1997           | FemalePregAge30to34 | 688504     |
| Pakistan | 1997           | FemalePregAge35to39 | 389096     |
| Pakistan | 1997           | FemalePregAge40to44 | 150133     |
| Pakistan | 1997           | FemalePregAge45to49 | 34465      |
| Pakistan | 1997           | MaleAge0to4         | 10615996   |
| Pakistan | 1997           | MaleAge10to14       | 8719952    |
| Pakistan | 1997           | MaleAge15to19       | 7199118    |
| Pakistan | 1997           | MaleAge20to24       | 5894039    |
| Pakistan | 1997           | MaleAge25to29       | 4970334    |
| Pakistan | 1997           | MaleAge30to34       | 4382847    |
| Pakistan | 1997           | MaleAge35to39       | 3724200    |
| Pakistan | 1997           | MaleAge40to44       | 2925813    |
| Pakistan | 1997           | MaleAge45to49       | 2334270    |
| Pakistan | 1997           | MaleAge50to54       | 2102424    |
| Pakistan | 1997           | MaleAge55to59       | 1822478    |
| Pakistan | 1997           | MaleAge5to9         | 10055938   |
| Pakistan | 1997           | MaleAge60to64       | 1451232    |
| Pakistan | 1997           | MaleAge65to69       | 1116964    |
| Pakistan | 1997           | MaleAge70to74       | 799660     |
| Pakistan | 1997           | MaleAge75to79       | 506269     |
| Pakistan | 1997           | MaleAge80to84       | 264256     |
| Pakistan | 1997           | MaleAge85to89       | 103361     |
| Pakistan | 1997           | MaleAge90to94       | 27289      |
| Pakistan | 1997           | MaleAge95to99       | 3822       |
| Pakistan | 1997           | MaleAgeAbove100     | 206        |
| Pakistan | 1998           | FemaleAge0to4       | 10099571   |
| Pakistan | 1998           | FemaleAge10to14     | 8533064    |
| Pakistan | 1998           | FemaleAge15to19     | 6322673    |
| Pakistan | 1998           | FemaleAge20to24     | 3574884    |
| Pakistan | 1998           | FemaleAge25to29     | 2582178    |
| Pakistan | 1998           | FemaleAge30to34     | 2638943    |
| Pakistan | 1998           | FemaleAge35to39     | 2768402    |
| Pakistan | 1998           | FemaleAge40to44     | 2566116    |
| Pakistan | 1998           | FemaleAge45to49     | 2157731    |
| Pakistan | 1998           | FemaleAge50to54     | 1935469    |
| Pakistan | 1998           | FemaleAge55to59     | 1676873    |
| Pakistan | 1998           | FemaleAge5to9       | 9588956    |

Dietary calcium and zinc deficiency risks are decreasing but remain prevalent

| Country  | Reference year | Age/gender group    | Population |
|----------|----------------|---------------------|------------|
| Pakistan | 1998           | FemaleAge60to64     | 1299857    |
| Pakistan | 1998           | FemaleAge65to69     | 990425     |
| Pakistan | 1998           | FemaleAge70to74     | 695551     |
| Pakistan | 1998           | FemaleAge75to79     | 437073     |
| Pakistan | 1998           | FemaleAge80to84     | 227603     |
| Pakistan | 1998           | FemaleAge85to89     | 90456      |
| Pakistan | 1998           | FemaleAge90to94     | 24057      |
| Pakistan | 1998           | FemaleAge95to99     | 3794       |
| Pakistan | 1998           | FemaleAgeAbove100   | 174        |
| Pakistan | 1998           | FemaleLactAge15to19 | 408244     |
| Pakistan | 1998           | FemaleLactAge20to24 | 1255561    |
| Pakistan | 1998           | FemaleLactAge25to29 | 1276248    |
| Pakistan | 1998           | FemaleLactAge30to34 | 918006     |
| Pakistan | 1998           | FemaleLactAge35to39 | 518794     |
| Pakistan | 1998           | FemaleLactAge40to44 | 200177     |
| Pakistan | 1998           | FemaleLactAge45to49 | 45954      |
| Pakistan | 1998           | FemalePregAge15to19 | 306183     |
| Pakistan | 1998           | FemalePregAge20to24 | 941671     |
| Pakistan | 1998           | FemalePregAge25to29 | 957186     |
| Pakistan | 1998           | FemalePregAge30to34 | 688504     |
| Pakistan | 1998           | FemalePregAge35to39 | 389096     |
| Pakistan | 1998           | FemalePregAge40to44 | 150133     |
| Pakistan | 1998           | FemalePregAge45to49 | 34465      |
| Pakistan | 1998           | MaleAge0to4         | 10770855   |
| Pakistan | 1998           | MaleAge10to14       | 9044101    |
| Pakistan | 1998           | MaleAge15to19       | 7458509    |
| Pakistan | 1998           | MaleAge20to24       | 6125887    |
| Pakistan | 1998           | MaleAge25to29       | 5098890    |
| Pakistan | 1998           | MaleAge30to34       | 4475476    |
| Pakistan | 1998           | MaleAge35to39       | 3860092    |
| Pakistan | 1998           | MaleAge40to44       | 3071320    |
| Pakistan | 1998           | MaleAge45to49       | 2405375    |
| Pakistan | 1998           | MaleAge50to54       | 2106620    |
| Pakistan | 1998           | MaleAge55to59       | 1876365    |
| Pakistan | 1998           | MaleAge5to9         | 10158349   |
| Pakistan | 1998           | MaleAge60to64       | 1488080    |
| Pakistan | 1998           | MaleAge65to69       | 1144531    |
| Pakistan | 1998           | MaleAge70to74       | 819340     |
| Pakistan | 1998           | MaleAge75to79       | 519688     |
| Pakistan | 1998           | MaleAge80to84       | 271915     |
| Pakistan | 1998           | MaleAge85to89       | 106900     |
| Pakistan | 1998           | MaleAge90to94       | 28255      |
| Pakistan | 1998           | MaleAge95to99       | 4459       |
| Pakistan | 1998           | MaleAgeAbove100     | 212        |
| Pakistan | 1999           | FemaleAge0to4       | 10167599   |
| Pakistan | 1999           | FemaleAge10to14     | 8813857    |
| Pakistan | 1999           | FemaleAge15to19     | 6583603    |
| Pakistan | 1999           | FemaleAge20to24     | 3803533    |
| Pakistan | 1999           | FemaleAge25to29     | 2715905    |
| Pakistan | 1999           | FemaleAge30to34     | 2729566    |
| Pakistan | 1999           | FemaleAge35to39     | 2885094    |
| Pakistan | 1999           | FemaleAge40to44     | 2720911    |
| Pakistan | 1999           | FemaleAge45to49     | 2245834    |
| Pakistan | 1999           | FemaleAge50to54     | 1958818    |
| Pakistan | 1999           | FemaleAge55to59     | 1732712    |
| Pakistan | 1999           | FemaleAge5to9       | 9643758    |
| Pakistan | 1999           | FemaleAge60to64     | 1342556    |
| Pakistan | 1999           | FemaleAge65to69     | 1025032    |
| Pakistan | 1999           | FemaleAge70to74     | 719801     |
| Pakistan | 1999           | FemaleAge75to79     | 452936     |
| Pakistan | 1999           | FemaleAge80to84     | 234723     |
| Pakistan | 1999           | FemaleAge85to89     | 91867      |
| Pakistan | 1999           | FemaleAge90to94     | 23575      |
| Pakistan | 1999           | FemaleAge95to99     | 3864       |
| Pakistan | 1999           | FemaleAgeAbove100   | 179        |
| Pakistan | 1999           | FemaleLactAge15to19 | 408244     |
| Pakistan | 1999           | FemaleLactAge20to24 | 1255561    |
| Pakistan | 1999           | FemaleLactAge25to29 | 1276248    |
| Pakistan | 1999           | FemaleLactAge30to34 | 918006     |
| Pakistan | 1999           | FemaleLactAge35to39 | 518794     |
| Pakistan | 1999           | FemaleLactAge40to44 | 200177     |
| Pakistan | 1999           | FemaleLactAge45to49 | 45954      |
| Pakistan | 1999           | FemalePregAge15to19 | 306183     |
| Pakistan | 1999           | FemalePregAge20to24 | 941671     |
| Pakistan | 1999           | FemalePregAge25to29 | 957186     |
| Pakistan | 1999           | FemalePregAge30to34 | 688504     |
| Pakistan | 1999           | FemalePregAge35to39 | 389096     |
| Pakistan | 1999           | FemalePregAge40to44 | 150133     |
| Pakistan | 1999           | FemalePregAge45to49 | 34465      |
| Pakistan | 1999           | MaleAge0to4         | 10885144   |
| Pakistan | 1999           | MaleAge10to14       | 9341930    |
| Pakistan | 1999           | MaleAge15to19       | 7732402    |
| Pakistan | 1999           | MaleAge20to24       | 6367235    |
| Pakistan | 1999           | MaleAge25to29       | 5244545    |
| Pakistan | 1999           | MaleAge30to34       | 4569507    |
| Pakistan | 1999           | MaleAge35to39       | 3987118    |
| Pakistan | 1999           | MaleAge40to44       | 3219318    |
| Pakistan | 1999           | MaleAge45to49       | 2492365    |

Dietary calcium and zinc deficiency risks are decreasing but remain prevalent

| Country   | Reference year | Age/gender group    | Population |
|-----------|----------------|---------------------|------------|
| Pakistan  | 1999           | MaleAge50to54       | 2119376    |
| Pakistan  | 1999           | MaleAge55to59       | 1922512    |
| Pakistan  | 1999           | MaleAge5to9         | 10214929   |
| Pakistan  | 1999           | MaleAge60to64       | 1529428    |
| Pakistan  | 1999           | MaleAge65to69       | 1175159    |
| Pakistan  | 1999           | MaleAge70to74       | 841101     |
| Pakistan  | 1999           | MaleAge75to79       | 533707     |
| Pakistan  | 1999           | MaleAge80to84       | 278353     |
| Pakistan  | 1999           | MaleAge85to89       | 107934     |
| Pakistan  | 1999           | MaleAge90to94       | 27632      |
| Pakistan  | 1999           | MaleAge95to99       | 4540       |
| Pakistan  | 1999           | MaleAgeAbov e100    | 219        |
| Palestine | 1992           | FemaleAge0to4       | 213484     |
| Palestine | 1992           | FemaleAge10to14     | 147017     |
| Palestine | 1992           | FemaleAge15to19     | 97990      |
| Palestine | 1992           | FemaleAge20to24     | 45074      |
| Palestine | 1992           | FemaleAge25to29     | 33481      |
| Palestine | 1992           | FemaleAge30to34     | 31125      |
| Palestine | 1992           | FemaleAge35to39     | 31137      |
| Palestine | 1992           | FemaleAge40to44     | 34784      |
| Palestine | 1992           | FemaleAge45to49     | 32164      |
| Palestine | 1992           | FemaleAge50to54     | 27126      |
| Palestine | 1992           | FemaleAge55to59     | 21045      |
| Palestine | 1992           | FemaleAge5to9       | 172779     |
| Palestine | 1992           | FemaleAge60to64     | 15280      |
| Palestine | 1992           | FemaleAge65to69     | 11763      |
| Palestine | 1992           | FemaleAge70to74     | 7901       |
| Palestine | 1992           | FemaleAge75to79     | 4356       |
| Palestine | 1992           | FemaleAge80to84     | 2256       |
| Palestine | 1992           | FemaleAge85to89     | 886        |
| Palestine | 1992           | FemaleAge90to94     | 216        |
| Palestine | 1992           | FemaleAge95to99     | 38         |
| Palestine | 1992           | FemaleAgeAbov e100  | 2          |
| Palestine | 1992           | FemaleLactAge15to19 | 13850      |
| Palestine | 1992           | FemaleLactAge20to24 | 32625      |
| Palestine | 1992           | FemaleLactAge25to29 | 29406      |
| Palestine | 1992           | FemaleLactAge30to34 | 18468      |
| Palestine | 1992           | FemaleLactAge35to39 | 9810       |
| Palestine | 1992           | FemaleLactAge40to44 | 3118       |
| Palestine | 1992           | FemaleLactAge45to49 | 429        |
| Palestine | 1992           | FemalePregAge15to19 | 10388      |
| Palestine | 1992           | FemalePregAge20to24 | 24469      |
| Palestine | 1992           | FemalePregAge25to29 | 22054      |
| Palestine | 1992           | FemalePregAge30to34 | 13851      |
| Palestine | 1992           | FemalePregAge35to39 | 7358       |
| Palestine | 1992           | FemalePregAge40to44 | 2338       |
| Palestine | 1992           | FemalePregAge45to49 | 322        |
| Palestine | 1992           | MaleAge0to4         | 222833     |
| Palestine | 1992           | MaleAge10to14       | 152253     |
| Palestine | 1992           | MaleAge15to19       | 125880     |
| Palestine | 1992           | MaleAge20to24       | 104456     |
| Palestine | 1992           | MaleAge25to29       | 86157      |
| Palestine | 1992           | MaleAge30to34       | 64142      |
| Palestine | 1992           | MaleAge35to39       | 47204      |
| Palestine | 1992           | MaleAge40to44       | 43508      |
| Palestine | 1992           | MaleAge45to49       | 36249      |
| Palestine | 1992           | MaleAge50to54       | 27784      |
| Palestine | 1992           | MaleAge55to59       | 21363      |
| Palestine | 1992           | MaleAge5to9         | 179715     |
| Palestine | 1992           | MaleAge60to64       | 14353      |
| Palestine | 1992           | MaleAge65to69       | 9268       |
| Palestine | 1992           | MaleAge70to74       | 5918       |
| Palestine | 1992           | MaleAge75to79       | 3456       |
| Palestine | 1992           | MaleAge80to84       | 1760       |
| Palestine | 1992           | MaleAge85to89       | 670        |
| Palestine | 1992           | MaleAge90to94       | 157        |
| Palestine | 1992           | MaleAge95to99       | 22         |
| Palestine | 1992           | MaleAgeAbov e100    | 1          |
| Palestine | 1993           | FemaleAge0to4       | 228255     |
| Palestine | 1993           | FemaleAge10to14     | 152162     |
| Palestine | 1993           | FemaleAge15to19     | 103125     |
| Palestine | 1993           | FemaleAge20to24     | 48506      |
| Palestine | 1993           | FemaleAge25to29     | 37080      |
| Palestine | 1993           | FemaleAge30to34     | 35797      |
| Palestine | 1993           | FemaleAge35to39     | 32989      |
| Palestine | 1993           | FemaleAge40to44     | 36268      |
| Palestine | 1993           | FemaleAge45to49     | 33522      |
| Palestine | 1993           | FemaleAge50to54     | 27979      |
| Palestine | 1993           | FemaleAge55to59     | 22234      |
| Palestine | 1993           | FemaleAge5to9       | 178565     |
| Palestine | 1993           | FemaleAge60to64     | 16044      |
| Palestine | 1993           | FemaleAge65to69     | 12010      |
| Palestine | 1993           | FemaleAge70to74     | 8477       |
| Palestine | 1993           | FemaleAge75to79     | 4558       |
| Palestine | 1993           | FemaleAge80to84     | 2311       |
| Palestine | 1993           | FemaleAge85to89     | 933        |
| Palestine | 1993           | FemaleAge90to94     | 225        |
| Palestine | 1993           | FemaleAge95to99     | 39         |

Dietary calcium and zinc deficiency risks are decreasing but remain prevalent

| Country   | Reference year | Age/gender group    | Population |
|-----------|----------------|---------------------|------------|
| Palestine | 1993           | FemaleAgeAbove100   | 3          |
| Palestine | 1993           | FemaleLactAge15to19 | 13850      |
| Palestine | 1993           | FemaleLactAge20to24 | 32625      |
| Palestine | 1993           | FemaleLactAge25to29 | 29406      |
| Palestine | 1993           | FemaleLactAge30to34 | 18468      |
| Palestine | 1993           | FemaleLactAge35to39 | 9810       |
| Palestine | 1993           | FemaleLactAge40to44 | 3118       |
| Palestine | 1993           | FemaleLactAge45to49 | 429        |
| Palestine | 1993           | FemalePregAge15to19 | 10388      |
| Palestine | 1993           | FemalePregAge20to24 | 24469      |
| Palestine | 1993           | FemalePregAge25to29 | 22054      |
| Palestine | 1993           | FemalePregAge30to34 | 13851      |
| Palestine | 1993           | FemalePregAge35to39 | 7358       |
| Palestine | 1993           | FemalePregAge40to44 | 2338       |
| Palestine | 1993           | FemalePregAge45to49 | 322        |
| Palestine | 1993           | MaleAge0to4         | 238297     |
| Palestine | 1993           | MaleAge10to14       | 157706     |
| Palestine | 1993           | MaleAge15to19       | 131287     |
| Palestine | 1993           | MaleAge20to24       | 108083     |
| Palestine | 1993           | MaleAge25to29       | 89919      |
| Palestine | 1993           | MaleAge30to34       | 68840      |
| Palestine | 1993           | MaleAge35to39       | 49567      |
| Palestine | 1993           | MaleAge40to44       | 43254      |
| Palestine | 1993           | MaleAge45to49       | 38711      |
| Palestine | 1993           | MaleAge50to54       | 28597      |
| Palestine | 1993           | MaleAge55to59       | 22573      |
| Palestine | 1993           | MaleAge5to9         | 185827     |
| Palestine | 1993           | MaleAge60to64       | 15360      |
| Palestine | 1993           | MaleAge65to69       | 9752       |
| Palestine | 1993           | MaleAge70to74       | 6177       |
| Palestine | 1993           | MaleAge75to79       | 3575       |
| Palestine | 1993           | MaleAge80to84       | 1786       |
| Palestine | 1993           | MaleAge85to89       | 697        |
| Palestine | 1993           | MaleAge90to94       | 161        |
| Palestine | 1993           | MaleAge95to99       | 26         |
| Palestine | 1993           | MaleAgeAbove100     | 1          |
| Palestine | 1994           | FemaleAge0to4       | 242859     |
| Palestine | 1994           | FemaleAge10to14     | 157693     |
| Palestine | 1994           | FemaleAge15to19     | 108591     |
| Palestine | 1994           | FemaleAge20to24     | 52426      |
| Palestine | 1994           | FemaleAge25to29     | 40776      |
| Palestine | 1994           | FemaleAge30to34     | 40589      |
| Palestine | 1994           | FemaleAge35to39     | 35447      |
| Palestine | 1994           | FemaleAge40to44     | 37889      |
| Palestine | 1994           | FemaleAge45to49     | 34986      |
| Palestine | 1994           | FemaleAge50to54     | 28960      |
| Palestine | 1994           | FemaleAge55to59     | 23442      |
| Palestine | 1994           | FemaleAge5to9       | 185318     |
| Palestine | 1994           | FemaleAge60to64     | 16947      |
| Palestine | 1994           | FemaleAge65to69     | 12374      |
| Palestine | 1994           | FemaleAge70to74     | 9027       |
| Palestine | 1994           | FemaleAge75to79     | 4838       |
| Palestine | 1994           | FemaleAge80to84     | 2381       |
| Palestine | 1994           | FemaleAge85to89     | 950        |
| Palestine | 1994           | FemaleAge90to94     | 224        |
| Palestine | 1994           | FemaleAge95to99     | 40         |
| Palestine | 1994           | FemaleAgeAbove100   | 3          |
| Palestine | 1994           | FemaleLactAge15to19 | 13850      |
| Palestine | 1994           | FemaleLactAge20to24 | 32625      |
| Palestine | 1994           | FemaleLactAge25to29 | 29406      |
| Palestine | 1994           | FemaleLactAge30to34 | 18468      |
| Palestine | 1994           | FemaleLactAge35to39 | 9810       |
| Palestine | 1994           | FemaleLactAge40to44 | 3118       |
| Palestine | 1994           | FemaleLactAge45to49 | 429        |
| Palestine | 1994           | FemalePregAge15to19 | 10388      |
| Palestine | 1994           | FemalePregAge20to24 | 24469      |
| Palestine | 1994           | FemalePregAge25to29 | 22054      |
| Palestine | 1994           | FemalePregAge30to34 | 13851      |
| Palestine | 1994           | FemalePregAge35to39 | 7358       |
| Palestine | 1994           | FemalePregAge40to44 | 2338       |
| Palestine | 1994           | FemalePregAge45to49 | 322        |
| Palestine | 1994           | MaleAge0to4         | 253588     |
| Palestine | 1994           | MaleAge10to14       | 163567     |
| Palestine | 1994           | MaleAge15to19       | 137049     |
| Palestine | 1994           | MaleAge20to24       | 112217     |
| Palestine | 1994           | MaleAge25to29       | 93787      |
| Palestine | 1994           | MaleAge30to34       | 73665      |
| Palestine | 1994           | MaleAge35to39       | 52562      |
| Palestine | 1994           | MaleAge40to44       | 43373      |
| Palestine | 1994           | MaleAge45to49       | 40860      |
| Palestine | 1994           | MaleAge50to54       | 29756      |
| Palestine | 1994           | MaleAge55to59       | 23784      |
| Palestine | 1994           | MaleAge5to9         | 192938     |
| Palestine | 1994           | MaleAge60to64       | 16462      |
| Palestine | 1994           | MaleAge65to69       | 10360      |
| Palestine | 1994           | MaleAge70to74       | 6489       |
| Palestine | 1994           | MaleAge75to79       | 3715       |
| Palestine | 1994           | MaleAge80to84       | 1815       |

Dietary calcium and zinc deficiency risks are decreasing but remain prevalent

| Country   | Reference year | Age/gender group    | Population |
|-----------|----------------|---------------------|------------|
| Palestine | 1994           | MaleAge85to89       | 698        |
| Palestine | 1994           | MaleAge90to94       | 155        |
| Palestine | 1994           | MaleAge95to99       | 27         |
| Palestine | 1994           | MaleAgeAbove100     | 1          |
| Palestine | 1995           | FemaleAge0to4       | 255679     |
| Palestine | 1995           | FemaleAge10to14     | 163597     |
| Palestine | 1995           | FemaleAge15to19     | 114316     |
| Palestine | 1995           | FemaleAge20to24     | 57015      |
| Palestine | 1995           | FemaleAge25to29     | 44706      |
| Palestine | 1995           | FemaleAge30to34     | 45279      |
| Palestine | 1995           | FemaleAge35to39     | 38708      |
| Palestine | 1995           | FemaleAge40to44     | 39682      |
| Palestine | 1995           | FemaleAge45to49     | 36541      |
| Palestine | 1995           | FemaleAge50to54     | 30146      |
| Palestine | 1995           | FemaleAge55to59     | 24630      |
| Palestine | 1995           | FemaleAge5to9       | 193753     |
| Palestine | 1995           | FemaleAge60to64     | 17992      |
| Palestine | 1995           | FemaleAge65to69     | 12911      |
| Palestine | 1995           | FemaleAge70to74     | 9521       |
| Palestine | 1995           | FemaleAge75to79     | 5214       |
| Palestine | 1995           | FemaleAge80to84     | 2478       |
| Palestine | 1995           | FemaleAge85to89     | 943        |
| Palestine | 1995           | FemaleAge90to94     | 210        |
| Palestine | 1995           | FemaleAge95to99     | 29         |
| Palestine | 1995           | FemaleAgeAbove100   | 3          |
| Palestine | 1995           | FemaleLactAge15to19 | 13850      |
| Palestine | 1995           | FemaleLactAge20to24 | 32625      |
| Palestine | 1995           | FemaleLactAge25to29 | 29406      |
| Palestine | 1995           | FemaleLactAge30to34 | 18468      |
| Palestine | 1995           | FemaleLactAge35to39 | 9810       |
| Palestine | 1995           | FemaleLactAge40to44 | 3118       |
| Palestine | 1995           | FemaleLactAge45to49 | 429        |
| Palestine | 1995           | FemalePregAge15to19 | 10388      |
| Palestine | 1995           | FemalePregAge20to24 | 24469      |
| Palestine | 1995           | FemalePregAge25to29 | 22054      |
| Palestine | 1995           | FemalePregAge30to34 | 13851      |
| Palestine | 1995           | FemalePregAge35to39 | 7358       |
| Palestine | 1995           | FemalePregAge40to44 | 2338       |
| Palestine | 1995           | FemalePregAge45to49 | 322        |
| Palestine | 1995           | MaleAge0to4         | 267029     |
| Palestine | 1995           | MaleAge10to14       | 169811     |
| Palestine | 1995           | MaleAge15to19       | 143096     |
| Palestine | 1995           | MaleAge20to24       | 117046     |
| Palestine | 1995           | MaleAge25to29       | 97894      |
| Palestine | 1995           | MaleAge30to34       | 78448      |
| Palestine | 1995           | MaleAge35to39       | 56177      |
| Palestine | 1995           | MaleAge40to44       | 44251      |
| Palestine | 1995           | MaleAge45to49       | 42415      |
| Palestine | 1995           | MaleAge50to54       | 31413      |
| Palestine | 1995           | MaleAge55to59       | 24981      |
| Palestine | 1995           | MaleAge5to9         | 201796     |
| Palestine | 1995           | MaleAge60to64       | 17651      |
| Palestine | 1995           | MaleAge65to69       | 11117      |
| Palestine | 1995           | MaleAge70to74       | 6860       |
| Palestine | 1995           | MaleAge75to79       | 3886       |
| Palestine | 1995           | MaleAge80to84       | 1853       |
| Palestine | 1995           | MaleAge85to89       | 675        |
| Palestine | 1995           | MaleAge90to94       | 139        |
| Palestine | 1995           | MaleAge95to99       | 17         |
| Palestine | 1995           | MaleAgeAbove100     | 1          |
| Palestine | 1996           | FemaleAge0to4       | 270549     |
| Palestine | 1996           | FemaleAge10to14     | 169297     |
| Palestine | 1996           | FemaleAge15to19     | 117978     |
| Palestine | 1996           | FemaleAge20to24     | 53946      |
| Palestine | 1996           | FemaleAge25to29     | 45759      |
| Palestine | 1996           | FemaleAge30to34     | 44233      |
| Palestine | 1996           | FemaleAge35to39     | 40247      |
| Palestine | 1996           | FemaleAge40to44     | 41072      |
| Palestine | 1996           | FemaleAge45to49     | 38404      |
| Palestine | 1996           | FemaleAge50to54     | 31358      |
| Palestine | 1996           | FemaleAge55to59     | 25637      |
| Palestine | 1996           | FemaleAge5to9       | 203933     |
| Palestine | 1996           | FemaleAge60to64     | 19017      |
| Palestine | 1996           | FemaleAge65to69     | 13435      |
| Palestine | 1996           | FemaleAge70to74     | 9822       |
| Palestine | 1996           | FemaleAge75to79     | 5598       |
| Palestine | 1996           | FemaleAge80to84     | 2617       |
| Palestine | 1996           | FemaleAge85to89     | 1017       |
| Palestine | 1996           | FemaleAge90to94     | 254        |
| Palestine | 1996           | FemaleAge95to99     | 31         |
| Palestine | 1996           | FemaleAgeAbove100   | 3          |
| Palestine | 1996           | FemaleLactAge15to19 | 14906      |
| Palestine | 1996           | FemaleLactAge20to24 | 37131      |
| Palestine | 1996           | FemaleLactAge25to29 | 30956      |
| Palestine | 1996           | FemaleLactAge30to34 | 21541      |
| Palestine | 1996           | FemaleLactAge35to39 | 11107      |
| Palestine | 1996           | FemaleLactAge40to44 | 3333       |
| Palestine | 1996           | FemaleLactAge45to49 | 214        |

Dietary calcium and zinc deficiency risks are decreasing but remain prevalent

| Country   | Reference year | Age/gender group    | Population |
|-----------|----------------|---------------------|------------|
| Palestine | 1996           | FemalePregAge15to19 | 11180      |
| Palestine | 1996           | FemalePregAge20to24 | 27849      |
| Palestine | 1996           | FemalePregAge25to29 | 23217      |
| Palestine | 1996           | FemalePregAge30to34 | 16156      |
| Palestine | 1996           | FemalePregAge35to39 | 8331       |
| Palestine | 1996           | FemalePregAge40to44 | 2500       |
| Palestine | 1996           | FemalePregAge45to49 | 160        |
| Palestine | 1996           | MaleAge0to4         | 282609     |
| Palestine | 1996           | MaleAge10to14       | 175822     |
| Palestine | 1996           | MaleAge15to19       | 148893     |
| Palestine | 1996           | MaleAge20to24       | 122115     |
| Palestine | 1996           | MaleAge25to29       | 101852     |
| Palestine | 1996           | MaleAge30to34       | 82904      |
| Palestine | 1996           | MaleAge35to39       | 60209      |
| Palestine | 1996           | MaleAge40to44       | 45605      |
| Palestine | 1996           | MaleAge45to49       | 43215      |
| Palestine | 1996           | MaleAge50to54       | 33326      |
| Palestine | 1996           | MaleAge55to59       | 25940      |
| Palestine | 1996           | MaleAge5to9         | 212487     |
| Palestine | 1996           | MaleAge60to64       | 18747      |
| Palestine | 1996           | MaleAge65to69       | 11865      |
| Palestine | 1996           | MaleAge70to74       | 7195       |
| Palestine | 1996           | MaleAge75to79       | 4059       |
| Palestine | 1996           | MaleAge80to84       | 1948       |
| Palestine | 1996           | MaleAge85to89       | 729        |
| Palestine | 1996           | MaleAge90to94       | 171        |
| Palestine | 1996           | MaleAge95to99       | 18         |
| Palestine | 1996           | MaleAgeAbov e100    | 1          |
| Palestine | 1997           | FemaleAge0to4       | 279723     |
| Palestine | 1997           | FemaleAge10to14     | 175714     |
| Palestine | 1997           | FemaleAge15to19     | 124208     |
| Palestine | 1997           | FemaleAge20to24     | 59725      |
| Palestine | 1997           | FemaleAge25to29     | 49904      |
| Palestine | 1997           | FemaleAge30to34     | 48686      |
| Palestine | 1997           | FemaleAge35to39     | 45005      |
| Palestine | 1997           | FemaleAge40to44     | 43079      |
| Palestine | 1997           | FemaleAge45to49     | 40125      |
| Palestine | 1997           | FemaleAge50to54     | 32846      |
| Palestine | 1997           | FemaleAge55to59     | 26690      |
| Palestine | 1997           | FemaleAge5to9       | 217369     |
| Palestine | 1997           | FemaleAge60to64     | 20250      |
| Palestine | 1997           | FemaleAge65to69     | 14139      |
| Palestine | 1997           | FemaleAge70to74     | 10113      |
| Palestine | 1997           | FemaleAge75to79     | 6073       |
| Palestine | 1997           | FemaleAge80to84     | 2757       |
| Palestine | 1997           | FemaleAge85to89     | 1074       |
| Palestine | 1997           | FemaleAge90to94     | 291        |
| Palestine | 1997           | FemaleAge95to99     | 36         |
| Palestine | 1997           | FemaleAgeAbov e100  | 3          |
| Palestine | 1997           | FemaleLactAge15to19 | 14906      |
| Palestine | 1997           | FemaleLactAge20to24 | 37131      |
| Palestine | 1997           | FemaleLactAge25to29 | 30956      |
| Palestine | 1997           | FemaleLactAge30to34 | 21541      |
| Palestine | 1997           | FemaleLactAge35to39 | 11107      |
| Palestine | 1997           | FemaleLactAge40to44 | 3333       |
| Palestine | 1997           | FemaleLactAge45to49 | 214        |
| Palestine | 1997           | FemalePregAge15to19 | 11180      |
| Palestine | 1997           | FemalePregAge20to24 | 27849      |
| Palestine | 1997           | FemalePregAge25to29 | 23217      |
| Palestine | 1997           | FemalePregAge30to34 | 16156      |
| Palestine | 1997           | FemalePregAge35to39 | 8331       |
| Palestine | 1997           | FemalePregAge40to44 | 2500       |
| Palestine | 1997           | FemalePregAge45to49 | 160        |
| Palestine | 1997           | MaleAge0to4         | 292253     |
| Palestine | 1997           | MaleAge10to14       | 182590     |
| Palestine | 1997           | MaleAge15to19       | 155456     |
| Palestine | 1997           | MaleAge20to24       | 128178     |
| Palestine | 1997           | MaleAge25to29       | 106206     |
| Palestine | 1997           | MaleAge30to34       | 87511      |
| Palestine | 1997           | MaleAge35to39       | 65078      |
| Palestine | 1997           | MaleAge40to44       | 47748      |
| Palestine | 1997           | MaleAge45to49       | 43574      |
| Palestine | 1997           | MaleAge50to54       | 35869      |
| Palestine | 1997           | MaleAge55to59       | 26896      |
| Palestine | 1997           | MaleAge5to9         | 226577     |
| Palestine | 1997           | MaleAge60to64       | 20003      |
| Palestine | 1997           | MaleAge65to69       | 12776      |
| Palestine | 1997           | MaleAge70to74       | 7595       |
| Palestine | 1997           | MaleAge75to79       | 4264       |
| Palestine | 1997           | MaleAge80to84       | 2041       |
| Palestine | 1997           | MaleAge85to89       | 770        |
| Palestine | 1997           | MaleAge90to94       | 195        |
| Palestine | 1997           | MaleAge95to99       | 22         |
| Palestine | 1997           | MaleAgeAbov e100    | 1          |
| Palestine | 1998           | FemaleAge0to4       | 284249     |
| Palestine | 1998           | FemaleAge10to14     | 182468     |
| Palestine | 1998           | FemaleAge15to19     | 130565     |
| Palestine | 1998           | FemaleAge20to24     | 65867      |

Dietary calcium and zinc deficiency risks are decreasing but remain prevalent

| Country   | Reference year | Age/gender group    | Population |
|-----------|----------------|---------------------|------------|
| Palestine | 1998           | FemaleAge25to29     | 54174      |
| Palestine | 1998           | FemaleAge30to34     | 52991      |
| Palestine | 1998           | FemaleAge35to39     | 50229      |
| Palestine | 1998           | FemaleAge40to44     | 45335      |
| Palestine | 1998           | FemaleAge45to49     | 41929      |
| Palestine | 1998           | FemaleAge50to54     | 34454      |
| Palestine | 1998           | FemaleAge55to59     | 27744      |
| Palestine | 1998           | FemaleAge5to9       | 233040     |
| Palestine | 1998           | FemaleAge60to64     | 21566      |
| Palestine | 1998           | FemaleAge65to69     | 14967      |
| Palestine | 1998           | FemaleAge70to74     | 10423      |
| Palestine | 1998           | FemaleAge75to79     | 6576       |
| Palestine | 1998           | FemaleAge80to84     | 2907       |
| Palestine | 1998           | FemaleAge85to89     | 1114       |
| Palestine | 1998           | FemaleAge90to94     | 312        |
| Palestine | 1998           | FemaleAge95to99     | 41         |
| Palestine | 1998           | FemaleAgeAbove100   | 3          |
| Palestine | 1998           | FemaleLactAge15to19 | 14906      |
| Palestine | 1998           | FemaleLactAge20to24 | 37131      |
| Palestine | 1998           | FemaleLactAge25to29 | 30956      |
| Palestine | 1998           | FemaleLactAge30to34 | 21541      |
| Palestine | 1998           | FemaleLactAge35to39 | 11107      |
| Palestine | 1998           | FemaleLactAge40to44 | 3333       |
| Palestine | 1998           | FemaleLactAge45to49 | 214        |
| Palestine | 1998           | FemalePregAge15to19 | 11180      |
| Palestine | 1998           | FemalePregAge20to24 | 27849      |
| Palestine | 1998           | FemalePregAge25to29 | 23217      |
| Palestine | 1998           | FemalePregAge30to34 | 16156      |
| Palestine | 1998           | FemalePregAge35to39 | 8331       |
| Palestine | 1998           | FemalePregAge40to44 | 2500       |
| Palestine | 1998           | FemalePregAge45to49 | 160        |
| Palestine | 1998           | MaleAge0to4         | 297044     |
| Palestine | 1998           | MaleAge10to14       | 189715     |
| Palestine | 1998           | MaleAge15to19       | 162165     |
| Palestine | 1998           | MaleAge20to24       | 134621     |
| Palestine | 1998           | MaleAge25to29       | 110692     |
| Palestine | 1998           | MaleAge30to34       | 91995      |
| Palestine | 1998           | MaleAge35to39       | 70335      |
| Palestine | 1998           | MaleAge40to44       | 50504      |
| Palestine | 1998           | MaleAge45to49       | 43673      |
| Palestine | 1998           | MaleAge50to54       | 38578      |
| Palestine | 1998           | MaleAge55to59       | 27909      |
| Palestine | 1998           | MaleAge5to9         | 242995     |
| Palestine | 1998           | MaleAge60to64       | 21310      |
| Palestine | 1998           | MaleAge65to69       | 13786      |
| Palestine | 1998           | MaleAge70to74       | 8061       |
| Palestine | 1998           | MaleAge75to79       | 4490       |
| Palestine | 1998           | MaleAge80to84       | 2131       |
| Palestine | 1998           | MaleAge85to89       | 791        |
| Palestine | 1998           | MaleAge90to94       | 207        |
| Palestine | 1998           | MaleAge95to99       | 26         |
| Palestine | 1998           | MaleAgeAbove100     | 1          |
| Palestine | 1999           | FemaleAge0to4       | 285981     |
| Palestine | 1999           | FemaleAge10to14     | 189741     |
| Palestine | 1999           | FemaleAge15to19     | 136291     |
| Palestine | 1999           | FemaleAge20to24     | 71558      |
| Palestine | 1999           | FemaleAge25to29     | 58285      |
| Palestine | 1999           | FemaleAge30to34     | 56857      |
| Palestine | 1999           | FemaleAge35to39     | 55172      |
| Palestine | 1999           | FemaleAge40to44     | 47906      |
| Palestine | 1999           | FemaleAge45to49     | 43622      |
| Palestine | 1999           | FemaleAge50to54     | 35967      |
| Palestine | 1999           | FemaleAge55to59     | 28767      |
| Palestine | 1999           | FemaleAge5to9       | 248415     |
| Palestine | 1999           | FemaleAge60to64     | 22781      |
| Palestine | 1999           | FemaleAge65to69     | 15851      |
| Palestine | 1999           | FemaleAge70to74     | 10789      |
| Palestine | 1999           | FemaleAge75to79     | 7014       |
| Palestine | 1999           | FemaleAge80to84     | 3084       |
| Palestine | 1999           | FemaleAge85to89     | 1136       |
| Palestine | 1999           | FemaleAge90to94     | 310        |
| Palestine | 1999           | FemaleAge95to99     | 44         |
| Palestine | 1999           | FemaleAgeAbove100   | 3          |
| Palestine | 1999           | FemaleLactAge15to19 | 14906      |
| Palestine | 1999           | FemaleLactAge20to24 | 37131      |
| Palestine | 1999           | FemaleLactAge25to29 | 30956      |
| Palestine | 1999           | FemaleLactAge30to34 | 21541      |
| Palestine | 1999           | FemaleLactAge35to39 | 11107      |
| Palestine | 1999           | FemaleLactAge40to44 | 3333       |
| Palestine | 1999           | FemaleLactAge45to49 | 214        |
| Palestine | 1999           | FemalePregAge15to19 | 11180      |
| Palestine | 1999           | FemalePregAge20to24 | 27849      |
| Palestine | 1999           | FemalePregAge25to29 | 23217      |
| Palestine | 1999           | FemalePregAge30to34 | 16156      |
| Palestine | 1999           | FemalePregAge35to39 | 8331       |
| Palestine | 1999           | FemalePregAge40to44 | 2500       |
| Palestine | 1999           | FemalePregAge45to49 | 160        |
| Palestine | 1999           | MaleAge0to4         | 298907     |



Dietary calcium and zinc deficiency risks are decreasing but remain prevalent

| Country   | Reference year | Age/gender group    | Population |
|-----------|----------------|---------------------|------------|
| Palestine | 1999           | MaleAge10to14       | 197382     |
| Palestine | 1999           | MaleAge15to19       | 168233     |
| Palestine | 1999           | MaleAge20to24       | 140598     |
| Palestine | 1999           | MaleAge25to29       | 115020     |
| Palestine | 1999           | MaleAge30to34       | 96041      |
| Palestine | 1999           | MaleAge35to39       | 75316      |
| Palestine | 1999           | MaleAge40to44       | 53606      |
| Palestine | 1999           | MaleAge45to49       | 43883      |
| Palestine | 1999           | MaleAge50to54       | 40756      |
| Palestine | 1999           | MaleAge55to59       | 29105      |
| Palestine | 1999           | MaleAge5to9         | 259090     |
| Palestine | 1999           | MaleAge60to64       | 22501      |
| Palestine | 1999           | MaleAge65to69       | 14812      |
| Palestine | 1999           | MaleAge70to74       | 8591       |
| Palestine | 1999           | MaleAge75to79       | 4727       |
| Palestine | 1999           | MaleAge80to84       | 2207       |
| Palestine | 1999           | MaleAge85to89       | 793        |
| Palestine | 1999           | MaleAge90to94       | 201        |
| Palestine | 1999           | MaleAge95to99       | 27         |
| Palestine | 1999           | MaleAgeAbove100     | 1          |
| Panama    | 1992           | FemaleAge0to4       | 155378     |
| Panama    | 1992           | FemaleAge10to14     | 140978     |
| Panama    | 1992           | FemaleAge15to19     | 113349     |
| Panama    | 1992           | FemaleAge20to24     | 87933      |
| Panama    | 1992           | FemaleAge25to29     | 81534      |
| Panama    | 1992           | FemaleAge30to34     | 77142      |
| Panama    | 1992           | FemaleAge35to39     | 72063      |
| Panama    | 1992           | FemaleAge40to44     | 62841      |
| Panama    | 1992           | FemaleAge45to49     | 52869      |
| Panama    | 1992           | FemaleAge50to54     | 43901      |
| Panama    | 1992           | FemaleAge55to59     | 35723      |
| Panama    | 1992           | FemaleAge5to9       | 146779     |
| Panama    | 1992           | FemaleAge60to64     | 28577      |
| Panama    | 1992           | FemaleAge65to69     | 22598      |
| Panama    | 1992           | FemaleAge70to74     | 17308      |
| Panama    | 1992           | FemaleAge75to79     | 12202      |
| Panama    | 1992           | FemaleAge80to84     | 7584       |
| Panama    | 1992           | FemaleAge85to89     | 3905       |
| Panama    | 1992           | FemaleAge90to94     | 1517       |
| Panama    | 1992           | FemaleAge95to99     | 369        |
| Panama    | 1992           | FemaleAgeAbove100   | 51         |
| Panama    | 1992           | FemaleLactAge15to19 | 12709      |
| Panama    | 1992           | FemaleLactAge20to24 | 21159      |
| Panama    | 1992           | FemaleLactAge25to29 | 16891      |
| Panama    | 1992           | FemaleLactAge30to34 | 10587      |
| Panama    | 1992           | FemaleLactAge35to39 | 4203       |
| Panama    | 1992           | FemaleLactAge40to44 | 1053       |
| Panama    | 1992           | FemaleLactAge45to49 | 134        |
| Panama    | 1992           | FemalePregAge15to19 | 9531       |
| Panama    | 1992           | FemalePregAge20to24 | 15869      |
| Panama    | 1992           | FemalePregAge25to29 | 12669      |
| Panama    | 1992           | FemalePregAge30to34 | 7940       |
| Panama    | 1992           | FemalePregAge35to39 | 3152       |
| Panama    | 1992           | FemalePregAge40to44 | 789        |
| Panama    | 1992           | FemalePregAge45to49 | 101        |
| Panama    | 1992           | MaleAge0to4         | 161715     |
| Panama    | 1992           | MaleAge10to14       | 147481     |
| Panama    | 1992           | MaleAge15to19       | 140971     |
| Panama    | 1992           | MaleAge20to24       | 129108     |
| Panama    | 1992           | MaleAge25to29       | 113767     |
| Panama    | 1992           | MaleAge30to34       | 97018      |
| Panama    | 1992           | MaleAge35to39       | 79836      |
| Panama    | 1992           | MaleAge40to44       | 64657      |
| Panama    | 1992           | MaleAge45to49       | 53112      |
| Panama    | 1992           | MaleAge50to54       | 43984      |
| Panama    | 1992           | MaleAge55to59       | 35828      |
| Panama    | 1992           | MaleAge5to9         | 153859     |
| Panama    | 1992           | MaleAge60to64       | 28683      |
| Panama    | 1992           | MaleAge65to69       | 22397      |
| Panama    | 1992           | MaleAge70to74       | 16595      |
| Panama    | 1992           | MaleAge75to79       | 11114      |
| Panama    | 1992           | MaleAge80to84       | 6363       |
| Panama    | 1992           | MaleAge85to89       | 2956       |
| Panama    | 1992           | MaleAge90to94       | 1033       |
| Panama    | 1992           | MaleAge95to99       | 223        |
| Panama    | 1992           | MaleAgeAbove100     | 28         |
| Panama    | 1993           | FemaleAge0to4       | 156232     |
| Panama    | 1993           | FemaleAge10to14     | 141740     |
| Panama    | 1993           | FemaleAge15to19     | 114423     |
| Panama    | 1993           | FemaleAge20to24     | 90409      |
| Panama    | 1993           | FemaleAge25to29     | 84074      |
| Panama    | 1993           | FemaleAge30to34     | 80163      |
| Panama    | 1993           | FemaleAge35to39     | 75030      |
| Panama    | 1993           | FemaleAge40to44     | 65397      |
| Panama    | 1993           | FemaleAge45to49     | 54742      |
| Panama    | 1993           | FemaleAge50to54     | 45457      |
| Panama    | 1993           | FemaleAge55to59     | 37073      |
| Panama    | 1993           | FemaleAge5to9       | 148315     |

Dietary calcium and zinc deficiency risks are decreasing but remain prevalent

| Country | Reference year | Age/gender group    | Population |
|---------|----------------|---------------------|------------|
| Panama  | 1993           | FemaleAge60to64     | 29620      |
| Panama  | 1993           | FemaleAge65to69     | 23349      |
| Panama  | 1993           | FemaleAge70to74     | 17887      |
| Panama  | 1993           | FemaleAge75to79     | 12675      |
| Panama  | 1993           | FemaleAge80to84     | 7881       |
| Panama  | 1993           | FemaleAge85to89     | 4088       |
| Panama  | 1993           | FemaleAge90to94     | 1598       |
| Panama  | 1993           | FemaleAge95to99     | 406        |
| Panama  | 1993           | FemaleAgeAbove100   | 55         |
| Panama  | 1993           | FemaleLactAge15to19 | 12709      |
| Panama  | 1993           | FemaleLactAge20to24 | 21159      |
| Panama  | 1993           | FemaleLactAge25to29 | 16891      |
| Panama  | 1993           | FemaleLactAge30to34 | 10587      |
| Panama  | 1993           | FemaleLactAge35to39 | 4203       |
| Panama  | 1993           | FemaleLactAge40to44 | 1053       |
| Panama  | 1993           | FemaleLactAge45to49 | 134        |
| Panama  | 1993           | FemalePregAge15to19 | 9531       |
| Panama  | 1993           | FemalePregAge20to24 | 15869      |
| Panama  | 1993           | FemalePregAge25to29 | 12669      |
| Panama  | 1993           | FemalePregAge30to34 | 7940       |
| Panama  | 1993           | FemalePregAge35to39 | 3152       |
| Panama  | 1993           | FemalePregAge40to44 | 789        |
| Panama  | 1993           | FemalePregAge45to49 | 101        |
| Panama  | 1993           | MaleAge0to4         | 162769     |
| Panama  | 1993           | MaleAge10to14       | 148722     |
| Panama  | 1993           | MaleAge15to19       | 142417     |
| Panama  | 1993           | MaleAge20to24       | 132001     |
| Panama  | 1993           | MaleAge25to29       | 116697     |
| Panama  | 1993           | MaleAge30to34       | 100386     |
| Panama  | 1993           | MaleAge35to39       | 83063      |
| Panama  | 1993           | MaleAge40to44       | 67311      |
| Panama  | 1993           | MaleAge45to49       | 54897      |
| Panama  | 1993           | MaleAge50to54       | 45451      |
| Panama  | 1993           | MaleAge55to59       | 37050      |
| Panama  | 1993           | MaleAge5to9         | 155309     |
| Panama  | 1993           | MaleAge60to64       | 29589      |
| Panama  | 1993           | MaleAge65to69       | 23078      |
| Panama  | 1993           | MaleAge70to74       | 17120      |
| Panama  | 1993           | MaleAge75to79       | 11533      |
| Panama  | 1993           | MaleAge80to84       | 6646       |
| Panama  | 1993           | MaleAge85to89       | 3104       |
| Panama  | 1993           | MaleAge90to94       | 1096       |
| Panama  | 1993           | MaleAge95to99       | 250        |
| Panama  | 1993           | MaleAgeAbove100     | 31         |
| Panama  | 1994           | FemaleAge0to4       | 157282     |
| Panama  | 1994           | FemaleAge10to14     | 142596     |
| Panama  | 1994           | FemaleAge15to19     | 115382     |
| Panama  | 1994           | FemaleAge20to24     | 92664      |
| Panama  | 1994           | FemaleAge25to29     | 86607      |
| Panama  | 1994           | FemaleAge30to34     | 83128      |
| Panama  | 1994           | FemaleAge35to39     | 78038      |
| Panama  | 1994           | FemaleAge40to44     | 68054      |
| Panama  | 1994           | FemaleAge45to49     | 56744      |
| Panama  | 1994           | FemaleAge50to54     | 47077      |
| Panama  | 1994           | FemaleAge55to59     | 38478      |
| Panama  | 1994           | FemaleAge5to9       | 149969     |
| Panama  | 1994           | FemaleAge60to64     | 30742      |
| Panama  | 1994           | FemaleAge65to69     | 24169      |
| Panama  | 1994           | FemaleAge70to74     | 18516      |
| Panama  | 1994           | FemaleAge75to79     | 13185      |
| Panama  | 1994           | FemaleAge80to84     | 8210       |
| Panama  | 1994           | FemaleAge85to89     | 4260       |
| Panama  | 1994           | FemaleAge90to94     | 1655       |
| Panama  | 1994           | FemaleAge95to99     | 432        |
| Panama  | 1994           | FemaleAgeAbove100   | 59         |
| Panama  | 1994           | FemaleLactAge15to19 | 12709      |
| Panama  | 1994           | FemaleLactAge20to24 | 21159      |
| Panama  | 1994           | FemaleLactAge25to29 | 16891      |
| Panama  | 1994           | FemaleLactAge30to34 | 10587      |
| Panama  | 1994           | FemaleLactAge35to39 | 4203       |
| Panama  | 1994           | FemaleLactAge40to44 | 1053       |
| Panama  | 1994           | FemaleLactAge45to49 | 134        |
| Panama  | 1994           | FemalePregAge15to19 | 9531       |
| Panama  | 1994           | FemalePregAge20to24 | 15869      |
| Panama  | 1994           | FemalePregAge25to29 | 12669      |
| Panama  | 1994           | FemalePregAge30to34 | 7940       |
| Panama  | 1994           | FemalePregAge35to39 | 3152       |
| Panama  | 1994           | FemalePregAge40to44 | 789        |
| Panama  | 1994           | FemalePregAge45to49 | 101        |
| Panama  | 1994           | MaleAge0to4         | 164018     |
| Panama  | 1994           | MaleAge10to14       | 149970     |
| Panama  | 1994           | MaleAge15to19       | 143767     |
| Panama  | 1994           | MaleAge20to24       | 134670     |
| Panama  | 1994           | MaleAge25to29       | 119622     |
| Panama  | 1994           | MaleAge30to34       | 103696     |
| Panama  | 1994           | MaleAge35to39       | 86351      |
| Panama  | 1994           | MaleAge40to44       | 70121      |
| Panama  | 1994           | MaleAge45to49       | 56848      |

Dietary calcium and zinc deficiency risks are decreasing but remain prevalent

| Country | Reference year | Age/gender group    | Population |
|---------|----------------|---------------------|------------|
| Panama  | 1994           | MaleAge50to54       | 46980      |
| Panama  | 1994           | MaleAge55to59       | 38335      |
| Panama  | 1994           | MaleAge5to9         | 156754     |
| Panama  | 1994           | MaleAge60to64       | 30576      |
| Panama  | 1994           | MaleAge65to69       | 23814      |
| Panama  | 1994           | MaleAge70to74       | 17689      |
| Panama  | 1994           | MaleAge75to79       | 11974      |
| Panama  | 1994           | MaleAge80to84       | 6932       |
| Panama  | 1994           | MaleAge85to89       | 3233       |
| Panama  | 1994           | MaleAge90to94       | 1137       |
| Panama  | 1994           | MaleAge95to99       | 268        |
| Panama  | 1994           | MaleAgeAbov e100    | 33         |
| Panama  | 1995           | FemaleAge0to4       | 158870     |
| Panama  | 1995           | FemaleAge10to14     | 143644     |
| Panama  | 1995           | FemaleAge15to19     | 116300     |
| Panama  | 1995           | FemaleAge20to24     | 94612      |
| Panama  | 1995           | FemaleAge25to29     | 89170      |
| Panama  | 1995           | FemaleAge30to34     | 86010      |
| Panama  | 1995           | FemaleAge35to39     | 81072      |
| Panama  | 1995           | FemaleAge40to44     | 70796      |
| Panama  | 1995           | FemaleAge45to49     | 58894      |
| Panama  | 1995           | FemaleAge50to54     | 48765      |
| Panama  | 1995           | FemaleAge55to59     | 39931      |
| Panama  | 1995           | FemaleAge5to9       | 151550     |
| Panama  | 1995           | FemaleAge60to64     | 31939      |
| Panama  | 1995           | FemaleAge65to69     | 25065      |
| Panama  | 1995           | FemaleAge70to74     | 19203      |
| Panama  | 1995           | FemaleAge75to79     | 13729      |
| Panama  | 1995           | FemaleAge80to84     | 8576       |
| Panama  | 1995           | FemaleAge85to89     | 4434       |
| Panama  | 1995           | FemaleAge90to94     | 1695       |
| Panama  | 1995           | FemaleAge95to99     | 426        |
| Panama  | 1995           | FemaleAgeAbov e100  | 64         |
| Panama  | 1995           | FemaleLactAge15to19 | 12709      |
| Panama  | 1995           | FemaleLactAge20to24 | 21159      |
| Panama  | 1995           | FemaleLactAge25to29 | 16891      |
| Panama  | 1995           | FemaleLactAge30to34 | 10587      |
| Panama  | 1995           | FemaleLactAge35to39 | 4203       |
| Panama  | 1995           | FemaleLactAge40to44 | 1053       |
| Panama  | 1995           | FemaleLactAge45to49 | 134        |
| Panama  | 1995           | FemalePregAge15to19 | 9531       |
| Panama  | 1995           | FemalePregAge20to24 | 15869      |
| Panama  | 1995           | FemalePregAge25to29 | 12669      |
| Panama  | 1995           | FemalePregAge30to34 | 7940       |
| Panama  | 1995           | FemalePregAge35to39 | 3152       |
| Panama  | 1995           | FemalePregAge40to44 | 789        |
| Panama  | 1995           | FemalePregAge45to49 | 101        |
| Panama  | 1995           | MaleAge0to4         | 165693     |
| Panama  | 1995           | MaleAge10to14       | 151209     |
| Panama  | 1995           | MaleAge15to19       | 145081     |
| Panama  | 1995           | MaleAge20to24       | 136998     |
| Panama  | 1995           | MaleAge25to29       | 122555     |
| Panama  | 1995           | MaleAge30to34       | 106901     |
| Panama  | 1995           | MaleAge35to39       | 89662      |
| Panama  | 1995           | MaleAge40to44       | 73044      |
| Panama  | 1995           | MaleAge45to49       | 58986      |
| Panama  | 1995           | MaleAge50to54       | 48569      |
| Panama  | 1995           | MaleAge55to59       | 39669      |
| Panama  | 1995           | MaleAge5to9         | 158084     |
| Panama  | 1995           | MaleAge60to64       | 31638      |
| Panama  | 1995           | MaleAge65to69       | 24609      |
| Panama  | 1995           | MaleAge70to74       | 18302      |
| Panama  | 1995           | MaleAge75to79       | 12436      |
| Panama  | 1995           | MaleAge80to84       | 7229       |
| Panama  | 1995           | MaleAge85to89       | 3353       |
| Panama  | 1995           | MaleAge90to94       | 1154       |
| Panama  | 1995           | MaleAge95to99       | 262        |
| Panama  | 1995           | MaleAgeAbov e100    | 37         |
| Panama  | 1996           | FemaleAge0to4       | 160349     |
| Panama  | 1996           | FemaleAge10to14     | 145061     |
| Panama  | 1996           | FemaleAge15to19     | 115908     |
| Panama  | 1996           | FemaleAge20to24     | 95552      |
| Panama  | 1996           | FemaleAge25to29     | 89732      |
| Panama  | 1996           | FemaleAge30to34     | 87023      |
| Panama  | 1996           | FemaleAge35to39     | 82964      |
| Panama  | 1996           | FemaleAge40to44     | 73521      |
| Panama  | 1996           | FemaleAge45to49     | 61186      |
| Panama  | 1996           | FemaleAge50to54     | 50452      |
| Panama  | 1996           | FemaleAge55to59     | 41340      |
| Panama  | 1996           | FemaleAge5to9       | 153136     |
| Panama  | 1996           | FemaleAge60to64     | 33093      |
| Panama  | 1996           | FemaleAge65to69     | 25903      |
| Panama  | 1996           | FemaleAge70to74     | 19773      |
| Panama  | 1996           | FemaleAge75to79     | 14163      |
| Panama  | 1996           | FemaleAge80to84     | 8914       |
| Panama  | 1996           | FemaleAge85to89     | 4673       |
| Panama  | 1996           | FemaleAge90to94     | 1855       |
| Panama  | 1996           | FemaleAge95to99     | 464        |

Dietary calcium and zinc deficiency risks are decreasing but remain prevalent

| Country | Reference year | Age/gender group    | Population |
|---------|----------------|---------------------|------------|
| Panama  | 1996           | FemaleAgeAbove100   | 69         |
| Panama  | 1996           | FemaleLactAge15to19 | 13538      |
| Panama  | 1996           | FemaleLactAge20to24 | 21694      |
| Panama  | 1996           | FemaleLactAge25to29 | 18165      |
| Panama  | 1996           | FemaleLactAge30to34 | 11713      |
| Panama  | 1996           | FemaleLactAge35to39 | 4959       |
| Panama  | 1996           | FemaleLactAge40to44 | 1157       |
| Panama  | 1996           | FemaleLactAge45to49 | 122        |
| Panama  | 1996           | FemalePregAge15to19 | 10154      |
| Panama  | 1996           | FemalePregAge20to24 | 16270      |
| Panama  | 1996           | FemalePregAge25to29 | 13624      |
| Panama  | 1996           | FemalePregAge30to34 | 8784       |
| Panama  | 1996           | FemalePregAge35to39 | 3719       |
| Panama  | 1996           | FemalePregAge40to44 | 868        |
| Panama  | 1996           | FemalePregAge45to49 | 91         |
| Panama  | 1996           | MaleAge0to4         | 167478     |
| Panama  | 1996           | MaleAge10to14       | 152570     |
| Panama  | 1996           | MaleAge15to19       | 146353     |
| Panama  | 1996           | MaleAge20to24       | 139017     |
| Panama  | 1996           | MaleAge25to29       | 125531     |
| Panama  | 1996           | MaleAge30to34       | 110059     |
| Panama  | 1996           | MaleAge35to39       | 93008      |
| Panama  | 1996           | MaleAge40to44       | 76024      |
| Panama  | 1996           | MaleAge45to49       | 61237      |
| Panama  | 1996           | MaleAge50to54       | 50151      |
| Panama  | 1996           | MaleAge55to59       | 40962      |
| Panama  | 1996           | MaleAge5to9         | 159565     |
| Panama  | 1996           | MaleAge60to64       | 32656      |
| Panama  | 1996           | MaleAge65to69       | 25358      |
| Panama  | 1996           | MaleAge70to74       | 18859      |
| Panama  | 1996           | MaleAge75to79       | 12888      |
| Panama  | 1996           | MaleAge80to84       | 7596       |
| Panama  | 1996           | MaleAge85to89       | 3605       |
| Panama  | 1996           | MaleAge90to94       | 1289       |
| Panama  | 1996           | MaleAge95to99       | 290        |
| Panama  | 1996           | MaleAgeAbove100     | 41         |
| Panama  | 1997           | FemaleAge0to4       | 162659     |
| Panama  | 1997           | FemaleAge10to14     | 146646     |
| Panama  | 1997           | FemaleAge15to19     | 116870     |
| Panama  | 1997           | FemaleAge20to24     | 97107      |
| Panama  | 1997           | FemaleAge25to29     | 92528      |
| Panama  | 1997           | FemaleAge30to34     | 89871      |
| Panama  | 1997           | FemaleAge35to39     | 86194      |
| Panama  | 1997           | FemaleAge40to44     | 76527      |
| Panama  | 1997           | FemaleAge45to49     | 63609      |
| Panama  | 1997           | FemaleAge50to54     | 52199      |
| Panama  | 1997           | FemaleAge55to59     | 42805      |
| Panama  | 1997           | FemaleAge5to9       | 154522     |
| Panama  | 1997           | FemaleAge60to64     | 34325      |
| Panama  | 1997           | FemaleAge65to69     | 26818      |
| Panama  | 1997           | FemaleAge70to74     | 20400      |
| Panama  | 1997           | FemaleAge75to79     | 14624      |
| Panama  | 1997           | FemaleAge80to84     | 9268       |
| Panama  | 1997           | FemaleAge85to89     | 4889       |
| Panama  | 1997           | FemaleAge90to94     | 1989       |
| Panama  | 1997           | FemaleAge95to99     | 511        |
| Panama  | 1997           | FemaleAgeAbove100   | 75         |
| Panama  | 1997           | FemaleLactAge15to19 | 13538      |
| Panama  | 1997           | FemaleLactAge20to24 | 21694      |
| Panama  | 1997           | FemaleLactAge25to29 | 18165      |
| Panama  | 1997           | FemaleLactAge30to34 | 11713      |
| Panama  | 1997           | FemaleLactAge35to39 | 4959       |
| Panama  | 1997           | FemaleLactAge40to44 | 1157       |
| Panama  | 1997           | FemaleLactAge45to49 | 122        |
| Panama  | 1997           | FemalePregAge15to19 | 10154      |
| Panama  | 1997           | FemalePregAge20to24 | 16270      |
| Panama  | 1997           | FemalePregAge25to29 | 13624      |
| Panama  | 1997           | FemalePregAge30to34 | 8784       |
| Panama  | 1997           | FemalePregAge35to39 | 3719       |
| Panama  | 1997           | FemalePregAge40to44 | 868        |
| Panama  | 1997           | FemalePregAge45to49 | 91         |
| Panama  | 1997           | MaleAge0to4         | 169859     |
| Panama  | 1997           | MaleAge10to14       | 153960     |
| Panama  | 1997           | MaleAge15to19       | 147558     |
| Panama  | 1997           | MaleAge20to24       | 140680     |
| Panama  | 1997           | MaleAge25to29       | 128484     |
| Panama  | 1997           | MaleAge30to34       | 113056     |
| Panama  | 1997           | MaleAge35to39       | 96355      |
| Panama  | 1997           | MaleAge40to44       | 79102      |
| Panama  | 1997           | MaleAge45to49       | 63661      |
| Panama  | 1997           | MaleAge50to54       | 51787      |
| Panama  | 1997           | MaleAge55to59       | 42314      |
| Panama  | 1997           | MaleAge5to9         | 160906     |
| Panama  | 1997           | MaleAge60to64       | 33747      |
| Panama  | 1997           | MaleAge65to69       | 26156      |
| Panama  | 1997           | MaleAge70to74       | 19451      |
| Panama  | 1997           | MaleAge75to79       | 13346      |
| Panama  | 1997           | MaleAge80to84       | 7958       |

Dietary calcium and zinc deficiency risks are decreasing but remain prevalent

| Country | Reference year | Age/gender group    | Population |
|---------|----------------|---------------------|------------|
| Panama  | 1997           | MaleAge85to89       | 3839       |
| Panama  | 1997           | MaleAge90to94       | 1402       |
| Panama  | 1997           | MaleAge95to99       | 328        |
| Panama  | 1997           | MaleAgeAbove100     | 46         |
| Panama  | 1998           | FemaleAge0to4       | 165495     |
| Panama  | 1998           | FemaleAge10to14     | 148349     |
| Panama  | 1998           | FemaleAge15to19     | 117825     |
| Panama  | 1998           | FemaleAge20to24     | 98411      |
| Panama  | 1998           | FemaleAge25to29     | 95241      |
| Panama  | 1998           | FemaleAge30to34     | 92628      |
| Panama  | 1998           | FemaleAge35to39     | 89409      |
| Panama  | 1998           | FemaleAge40to44     | 79625      |
| Panama  | 1998           | FemaleAge45to49     | 66178      |
| Panama  | 1998           | FemaleAge50to54     | 54040      |
| Panama  | 1998           | FemaleAge55to59     | 44326      |
| Panama  | 1998           | FemaleAge5to9       | 155734     |
| Panama  | 1998           | FemaleAge60to64     | 35632      |
| Panama  | 1998           | FemaleAge65to69     | 27809      |
| Panama  | 1998           | FemaleAge70to74     | 21091      |
| Panama  | 1998           | FemaleAge75to79     | 15128      |
| Panama  | 1998           | FemaleAge80to84     | 9642       |
| Panama  | 1998           | FemaleAge85to89     | 5093       |
| Panama  | 1998           | FemaleAge90to94     | 2090       |
| Panama  | 1998           | FemaleAge95to99     | 560        |
| Panama  | 1998           | FemaleAgeAbove100   | 81         |
| Panama  | 1998           | FemaleLactAge15to19 | 13538      |
| Panama  | 1998           | FemaleLactAge20to24 | 21694      |
| Panama  | 1998           | FemaleLactAge25to29 | 18165      |
| Panama  | 1998           | FemaleLactAge30to34 | 11713      |
| Panama  | 1998           | FemaleLactAge35to39 | 4959       |
| Panama  | 1998           | FemaleLactAge40to44 | 1157       |
| Panama  | 1998           | FemaleLactAge45to49 | 122        |
| Panama  | 1998           | FemalePregAge15to19 | 10154      |
| Panama  | 1998           | FemalePregAge20to24 | 16270      |
| Panama  | 1998           | FemalePregAge25to29 | 13624      |
| Panama  | 1998           | FemalePregAge30to34 | 8784       |
| Panama  | 1998           | FemalePregAge35to39 | 3719       |
| Panama  | 1998           | FemalePregAge40to44 | 868        |
| Panama  | 1998           | FemalePregAge45to49 | 91         |
| Panama  | 1998           | MaleAge0to4         | 172614     |
| Panama  | 1998           | MaleAge10to14       | 155383     |
| Panama  | 1998           | MaleAge15to19       | 148754     |
| Panama  | 1998           | MaleAge20to24       | 142092     |
| Panama  | 1998           | MaleAge25to29       | 131336     |
| Panama  | 1998           | MaleAge30to34       | 115947     |
| Panama  | 1998           | MaleAge35to39       | 99679      |
| Panama  | 1998           | MaleAge40to44       | 82275      |
| Panama  | 1998           | MaleAge45to49       | 66253      |
| Panama  | 1998           | MaleAge50to54       | 53519      |
| Panama  | 1998           | MaleAge55to59       | 43732      |
| Panama  | 1998           | MaleAge5to9         | 162147     |
| Panama  | 1998           | MaleAge60to64       | 34915      |
| Panama  | 1998           | MaleAge65to69       | 27011      |
| Panama  | 1998           | MaleAge70to74       | 20090      |
| Panama  | 1998           | MaleAge75to79       | 13825      |
| Panama  | 1998           | MaleAge80to84       | 8317       |
| Panama  | 1998           | MaleAge85to89       | 4056       |
| Panama  | 1998           | MaleAge90to94       | 1491       |
| Panama  | 1998           | MaleAge95to99       | 368        |
| Panama  | 1998           | MaleAgeAbove100     | 52         |
| Panama  | 1999           | FemaleAge0to4       | 168292     |
| Panama  | 1999           | FemaleAge10to14     | 150034     |
| Panama  | 1999           | FemaleAge15to19     | 118894     |
| Panama  | 1999           | FemaleAge20to24     | 99590      |
| Panama  | 1999           | FemaleAge25to29     | 97737      |
| Panama  | 1999           | FemaleAge30to34     | 95385      |
| Panama  | 1999           | FemaleAge35to39     | 92583      |
| Panama  | 1999           | FemaleAge40to44     | 82798      |
| Panama  | 1999           | FemaleAge45to49     | 68890      |
| Panama  | 1999           | FemaleAge50to54     | 56024      |
| Panama  | 1999           | FemaleAge55to59     | 45915      |
| Panama  | 1999           | FemaleAge5to9       | 156935     |
| Panama  | 1999           | FemaleAge60to64     | 37004      |
| Panama  | 1999           | FemaleAge65to69     | 28878      |
| Panama  | 1999           | FemaleAge70to74     | 21866      |
| Panama  | 1999           | FemaleAge75to79     | 15683      |
| Panama  | 1999           | FemaleAge80to84     | 10041      |
| Panama  | 1999           | FemaleAge85to89     | 5295       |
| Panama  | 1999           | FemaleAge90to94     | 2161       |
| Panama  | 1999           | FemaleAge95to99     | 592        |
| Panama  | 1999           | FemaleAgeAbove100   | 88         |
| Panama  | 1999           | FemaleLactAge15to19 | 13538      |
| Panama  | 1999           | FemaleLactAge20to24 | 21694      |
| Panama  | 1999           | FemaleLactAge25to29 | 18165      |
| Panama  | 1999           | FemaleLactAge30to34 | 11713      |
| Panama  | 1999           | FemaleLactAge35to39 | 4959       |
| Panama  | 1999           | FemaleLactAge40to44 | 1157       |
| Panama  | 1999           | FemaleLactAge45to49 | 122        |

Dietary calcium and zinc deficiency risks are decreasing but remain prevalent

| Country  | Reference year | Age/gender group    | Population |
|----------|----------------|---------------------|------------|
| Panama   | 1999           | FemalePregAge15to19 | 10154      |
| Panama   | 1999           | FemalePregAge20to24 | 16270      |
| Panama   | 1999           | FemalePregAge25to29 | 13624      |
| Panama   | 1999           | FemalePregAge30to34 | 8784       |
| Panama   | 1999           | FemalePregAge35to39 | 3719       |
| Panama   | 1999           | FemalePregAge40to44 | 868        |
| Panama   | 1999           | FemalePregAge45to49 | 91         |
| Panama   | 1999           | MaleAge0to4         | 175330     |
| Panama   | 1999           | MaleAge10to14       | 156806     |
| Panama   | 1999           | MaleAge15to19       | 150007     |
| Panama   | 1999           | MaleAge20to24       | 143425     |
| Panama   | 1999           | MaleAge25to29       | 133976     |
| Panama   | 1999           | MaleAge30to34       | 118837     |
| Panama   | 1999           | MaleAge35to39       | 102967     |
| Panama   | 1999           | MaleAge40to44       | 85538      |
| Panama   | 1999           | MaleAge45to49       | 69006      |
| Panama   | 1999           | MaleAge50to54       | 55422      |
| Panama   | 1999           | MaleAge55to59       | 45223      |
| Panama   | 1999           | MaleAge5to9         | 163427     |
| Panama   | 1999           | MaleAge60to64       | 36159      |
| Panama   | 1999           | MaleAge65to69       | 27939      |
| Panama   | 1999           | MaleAge70to74       | 20790      |
| Panama   | 1999           | MaleAge75to79       | 14337      |
| Panama   | 1999           | MaleAge80to84       | 8681       |
| Panama   | 1999           | MaleAge85to89       | 4260       |
| Panama   | 1999           | MaleAge90to94       | 1559       |
| Panama   | 1999           | MaleAge95to99       | 396        |
| Panama   | 1999           | MaleAgeAbove100     | 58         |
| Paraguay | 1992           | FemaleAge0to4       | 327858     |
| Paraguay | 1992           | FemaleAge10to14     | 265845     |
| Paraguay | 1992           | FemaleAge15to19     | 183107     |
| Paraguay | 1992           | FemaleAge20to24     | 125030     |
| Paraguay | 1992           | FemaleAge25to29     | 111783     |
| Paraguay | 1992           | FemaleAge30to34     | 103162     |
| Paraguay | 1992           | FemaleAge35to39     | 98788      |
| Paraguay | 1992           | FemaleAge40to44     | 90614      |
| Paraguay | 1992           | FemaleAge45to49     | 77031      |
| Paraguay | 1992           | FemaleAge50to54     | 65880      |
| Paraguay | 1992           | FemaleAge55to59     | 52096      |
| Paraguay | 1992           | FemaleAge5to9       | 310239     |
| Paraguay | 1992           | FemaleAge60to64     | 45311      |
| Paraguay | 1992           | FemaleAge65to69     | 38136      |
| Paraguay | 1992           | FemaleAge70to74     | 27827      |
| Paraguay | 1992           | FemaleAge75to79     | 18750      |
| Paraguay | 1992           | FemaleAge80to84     | 10615      |
| Paraguay | 1992           | FemaleAge85to89     | 4591       |
| Paraguay | 1992           | FemaleAge90to94     | 1350       |
| Paraguay | 1992           | FemaleAge95to99     | 232        |
| Paraguay | 1992           | FemaleAgeAbove100   | 24         |
| Paraguay | 1992           | FemaleLactAge15to19 | 20884      |
| Paraguay | 1992           | FemaleLactAge20to24 | 40703      |
| Paraguay | 1992           | FemaleLactAge25to29 | 35436      |
| Paraguay | 1992           | FemaleLactAge30to34 | 25301      |
| Paraguay | 1992           | FemaleLactAge35to39 | 15353      |
| Paraguay | 1992           | FemaleLactAge40to44 | 5866       |
| Paraguay | 1992           | FemaleLactAge45to49 | 1086       |
| Paraguay | 1992           | FemalePregAge15to19 | 15663      |
| Paraguay | 1992           | FemalePregAge20to24 | 30527      |
| Paraguay | 1992           | FemalePregAge25to29 | 26577      |
| Paraguay | 1992           | FemalePregAge30to34 | 18976      |
| Paraguay | 1992           | FemalePregAge35to39 | 11515      |
| Paraguay | 1992           | FemalePregAge40to44 | 4400       |
| Paraguay | 1992           | FemalePregAge45to49 | 814        |
| Paraguay | 1992           | MaleAge0to4         | 339720     |
| Paraguay | 1992           | MaleAge10to14       | 273967     |
| Paraguay | 1992           | MaleAge15to19       | 225723     |
| Paraguay | 1992           | MaleAge20to24       | 200845     |
| Paraguay | 1992           | MaleAge25to29       | 178333     |
| Paraguay | 1992           | MaleAge30to34       | 151890     |
| Paraguay | 1992           | MaleAge35to39       | 131640     |
| Paraguay | 1992           | MaleAge40to44       | 106776     |
| Paraguay | 1992           | MaleAge45to49       | 82402      |
| Paraguay | 1992           | MaleAge50to54       | 67628      |
| Paraguay | 1992           | MaleAge55to59       | 52368      |
| Paraguay | 1992           | MaleAge5to9         | 320018     |
| Paraguay | 1992           | MaleAge60to64       | 43030      |
| Paraguay | 1992           | MaleAge65to69       | 34569      |
| Paraguay | 1992           | MaleAge70to74       | 23968      |
| Paraguay | 1992           | MaleAge75to79       | 15078      |
| Paraguay | 1992           | MaleAge80to84       | 7744       |
| Paraguay | 1992           | MaleAge85to89       | 2957       |
| Paraguay | 1992           | MaleAge90to94       | 779        |
| Paraguay | 1992           | MaleAge95to99       | 120        |
| Paraguay | 1992           | MaleAgeAbove100     | 11         |
| Paraguay | 1993           | FemaleAge0to4       | 331678     |
| Paraguay | 1993           | FemaleAge10to14     | 276140     |
| Paraguay | 1993           | FemaleAge15to19     | 190069     |
| Paraguay | 1993           | FemaleAge20to24     | 126421     |

Dietary calcium and zinc deficiency risks are decreasing but remain prevalent

| Country  | Reference year | Age/gender group    | Population |
|----------|----------------|---------------------|------------|
| Paraguay | 1993           | FemaleAge25to29     | 116030     |
| Paraguay | 1993           | FemaleAge30to34     | 106988     |
| Paraguay | 1993           | FemaleAge35to39     | 102451     |
| Paraguay | 1993           | FemaleAge40to44     | 95770      |
| Paraguay | 1993           | FemaleAge45to49     | 80255      |
| Paraguay | 1993           | FemaleAge50to54     | 67472      |
| Paraguay | 1993           | FemaleAge55to59     | 54765      |
| Paraguay | 1993           | FemaleAge5to9       | 314559     |
| Paraguay | 1993           | FemaleAge60to64     | 44815      |
| Paraguay | 1993           | FemaleAge65to69     | 39616      |
| Paraguay | 1993           | FemaleAge70to74     | 28642      |
| Paraguay | 1993           | FemaleAge75to79     | 19478      |
| Paraguay | 1993           | FemaleAge80to84     | 11015      |
| Paraguay | 1993           | FemaleAge85to89     | 4805       |
| Paraguay | 1993           | FemaleAge90to94     | 1434       |
| Paraguay | 1993           | FemaleAge95to99     | 263        |
| Paraguay | 1993           | FemaleAgeAbove100   | 26         |
| Paraguay | 1993           | FemaleLactAge15to19 | 20884      |
| Paraguay | 1993           | FemaleLactAge20to24 | 40703      |
| Paraguay | 1993           | FemaleLactAge25to29 | 35436      |
| Paraguay | 1993           | FemaleLactAge30to34 | 25301      |
| Paraguay | 1993           | FemaleLactAge35to39 | 15353      |
| Paraguay | 1993           | FemaleLactAge40to44 | 5866       |
| Paraguay | 1993           | FemaleLactAge45to49 | 1086       |
| Paraguay | 1993           | FemalePregAge15to19 | 15663      |
| Paraguay | 1993           | FemalePregAge20to24 | 30527      |
| Paraguay | 1993           | FemalePregAge25to29 | 26577      |
| Paraguay | 1993           | FemalePregAge30to34 | 18976      |
| Paraguay | 1993           | FemalePregAge35to39 | 11515      |
| Paraguay | 1993           | FemalePregAge40to44 | 4400       |
| Paraguay | 1993           | FemalePregAge45to49 | 814        |
| Paraguay | 1993           | MaleAge0to4         | 343728     |
| Paraguay | 1993           | MaleAge10to14       | 284507     |
| Paraguay | 1993           | MaleAge15to19       | 232999     |
| Paraguay | 1993           | MaleAge20to24       | 202142     |
| Paraguay | 1993           | MaleAge25to29       | 182410     |
| Paraguay | 1993           | MaleAge30to34       | 156008     |
| Paraguay | 1993           | MaleAge35to39       | 134804     |
| Paraguay | 1993           | MaleAge40to44       | 112302     |
| Paraguay | 1993           | MaleAge45to49       | 86033      |
| Paraguay | 1993           | MaleAge50to54       | 69358      |
| Paraguay | 1993           | MaleAge55to59       | 55256      |
| Paraguay | 1993           | MaleAge5to9         | 324569     |
| Paraguay | 1993           | MaleAge60to64       | 42956      |
| Paraguay | 1993           | MaleAge65to69       | 35882      |
| Paraguay | 1993           | MaleAge70to74       | 24748      |
| Paraguay | 1993           | MaleAge75to79       | 15687      |
| Paraguay | 1993           | MaleAge80to84       | 8122       |
| Paraguay | 1993           | MaleAge85to89       | 3101       |
| Paraguay | 1993           | MaleAge90to94       | 835        |
| Paraguay | 1993           | MaleAge95to99       | 140        |
| Paraguay | 1993           | MaleAgeAbove100     | 12         |
| Paraguay | 1994           | FemaleAge0to4       | 335361     |
| Paraguay | 1994           | FemaleAge10to14     | 285962     |
| Paraguay | 1994           | FemaleAge15to19     | 197956     |
| Paraguay | 1994           | FemaleAge20to24     | 128738     |
| Paraguay | 1994           | FemaleAge25to29     | 119627     |
| Paraguay | 1994           | FemaleAge30to34     | 110721     |
| Paraguay | 1994           | FemaleAge35to39     | 106020     |
| Paraguay | 1994           | FemaleAge40to44     | 100768     |
| Paraguay | 1994           | FemaleAge45to49     | 83896      |
| Paraguay | 1994           | FemaleAge50to54     | 69290      |
| Paraguay | 1994           | FemaleAge55to59     | 57379      |
| Paraguay | 1994           | FemaleAge5to9       | 317604     |
| Paraguay | 1994           | FemaleAge60to64     | 44797      |
| Paraguay | 1994           | FemaleAge65to69     | 40790      |
| Paraguay | 1994           | FemaleAge70to74     | 29593      |
| Paraguay | 1994           | FemaleAge75to79     | 20265      |
| Paraguay | 1994           | FemaleAge80to84     | 11460      |
| Paraguay | 1994           | FemaleAge85to89     | 4944       |
| Paraguay | 1994           | FemaleAge90to94     | 1469       |
| Paraguay | 1994           | FemaleAge95to99     | 281        |
| Paraguay | 1994           | FemaleAgeAbove100   | 29         |
| Paraguay | 1994           | FemaleLactAge15to19 | 20884      |
| Paraguay | 1994           | FemaleLactAge20to24 | 40703      |
| Paraguay | 1994           | FemaleLactAge25to29 | 35436      |
| Paraguay | 1994           | FemaleLactAge30to34 | 25301      |
| Paraguay | 1994           | FemaleLactAge35to39 | 15353      |
| Paraguay | 1994           | FemaleLactAge40to44 | 5866       |
| Paraguay | 1994           | FemaleLactAge45to49 | 1086       |
| Paraguay | 1994           | FemalePregAge15to19 | 15663      |
| Paraguay | 1994           | FemalePregAge20to24 | 30527      |
| Paraguay | 1994           | FemalePregAge25to29 | 26577      |
| Paraguay | 1994           | FemalePregAge30to34 | 18976      |
| Paraguay | 1994           | FemalePregAge35to39 | 11515      |
| Paraguay | 1994           | FemalePregAge40to44 | 4400       |
| Paraguay | 1994           | FemalePregAge45to49 | 814        |
| Paraguay | 1994           | MaleAge0to4         | 347612     |

Dietary calcium and zinc deficiency risks are decreasing but remain prevalent

| Country  | Reference year | Age/gender group    | Population |
|----------|----------------|---------------------|------------|
| Paraguay | 1994           | MaleAge10to14       | 294598     |
| Paraguay | 1994           | MaleAge15to19       | 241252     |
| Paraguay | 1994           | MaleAge20to24       | 204504     |
| Paraguay | 1994           | MaleAge25to29       | 185680     |
| Paraguay | 1994           | MaleAge30to34       | 160071     |
| Paraguay | 1994           | MaleAge35to39       | 137980     |
| Paraguay | 1994           | MaleAge40to44       | 117545     |
| Paraguay | 1994           | MaleAge45to49       | 90109      |
| Paraguay | 1994           | MaleAge50to54       | 71364      |
| Paraguay | 1994           | MaleAge55to59       | 58082      |
| Paraguay | 1994           | MaleAge5to9         | 327835     |
| Paraguay | 1994           | MaleAge60to64       | 43368      |
| Paraguay | 1994           | MaleAge65to69       | 36985      |
| Paraguay | 1994           | MaleAge70to74       | 25619      |
| Paraguay | 1994           | MaleAge75to79       | 16338      |
| Paraguay | 1994           | MaleAge80to84       | 8495       |
| Paraguay | 1994           | MaleAge85to89       | 3190       |
| Paraguay | 1994           | MaleAge90to94       | 856        |
| Paraguay | 1994           | MaleAge95to99       | 150        |
| Paraguay | 1994           | MaleAgeAbove100     | 13         |
| Paraguay | 1995           | FemaleAge0to4       | 338216     |
| Paraguay | 1995           | FemaleAge10to14     | 294446     |
| Paraguay | 1995           | FemaleAge15to19     | 206671     |
| Paraguay | 1995           | FemaleAge20to24     | 132519     |
| Paraguay | 1995           | FemaleAge25to29     | 122475     |
| Paraguay | 1995           | FemaleAge30to34     | 114417     |
| Paraguay | 1995           | FemaleAge35to39     | 109612     |
| Paraguay | 1995           | FemaleAge40to44     | 105383     |
| Paraguay | 1995           | FemaleAge45to49     | 87975      |
| Paraguay | 1995           | FemaleAge50to54     | 71540      |
| Paraguay | 1995           | FemaleAge55to59     | 59650      |
| Paraguay | 1995           | FemaleAge5to9       | 320469     |
| Paraguay | 1995           | FemaleAge60to64     | 45584      |
| Paraguay | 1995           | FemaleAge65to69     | 41503      |
| Paraguay | 1995           | FemaleAge70to74     | 30730      |
| Paraguay | 1995           | FemaleAge75to79     | 21099      |
| Paraguay | 1995           | FemaleAge80to84     | 11967      |
| Paraguay | 1995           | FemaleAge85to89     | 5050       |
| Paraguay | 1995           | FemaleAge90to94     | 1444       |
| Paraguay | 1995           | FemaleAge95to99     | 260        |
| Paraguay | 1995           | FemaleAgeAbove100   | 31         |
| Paraguay | 1995           | FemaleLactAge15to19 | 20884      |
| Paraguay | 1995           | FemaleLactAge20to24 | 40703      |
| Paraguay | 1995           | FemaleLactAge25to29 | 35436      |
| Paraguay | 1995           | FemaleLactAge30to34 | 25301      |
| Paraguay | 1995           | FemaleLactAge35to39 | 15353      |
| Paraguay | 1995           | FemaleLactAge40to44 | 5866       |
| Paraguay | 1995           | FemaleLactAge45to49 | 1086       |
| Paraguay | 1995           | FemalePregAge15to19 | 15663      |
| Paraguay | 1995           | FemalePregAge20to24 | 30527      |
| Paraguay | 1995           | FemalePregAge25to29 | 26577      |
| Paraguay | 1995           | FemalePregAge30to34 | 18976      |
| Paraguay | 1995           | FemalePregAge35to39 | 11515      |
| Paraguay | 1995           | FemalePregAge40to44 | 4400       |
| Paraguay | 1995           | FemalePregAge45to49 | 814        |
| Paraguay | 1995           | MaleAge0to4         | 350690     |
| Paraguay | 1995           | MaleAge10to14       | 303369     |
| Paraguay | 1995           | MaleAge15to19       | 250353     |
| Paraguay | 1995           | MaleAge20to24       | 208455     |
| Paraguay | 1995           | MaleAge25to29       | 188180     |
| Paraguay | 1995           | MaleAge30to34       | 163960     |
| Paraguay | 1995           | MaleAge35to39       | 141410     |
| Paraguay | 1995           | MaleAge40to44       | 122227     |
| Paraguay | 1995           | MaleAge45to49       | 94633      |
| Paraguay | 1995           | MaleAge50to54       | 73880      |
| Paraguay | 1995           | MaleAge55to59       | 60564      |
| Paraguay | 1995           | MaleAge5to9         | 330906     |
| Paraguay | 1995           | MaleAge60to64       | 44540      |
| Paraguay | 1995           | MaleAge65to69       | 37774      |
| Paraguay | 1995           | MaleAge70to74       | 26623      |
| Paraguay | 1995           | MaleAge75to79       | 17028      |
| Paraguay | 1995           | MaleAge80to84       | 8877       |
| Paraguay | 1995           | MaleAge85to89       | 3253       |
| Paraguay | 1995           | MaleAge90to94       | 825        |
| Paraguay | 1995           | MaleAge95to99       | 133        |
| Paraguay | 1995           | MaleAgeAbove100     | 14         |
| Paraguay | 1996           | FemaleAge0to4       | 341388     |
| Paraguay | 1996           | FemaleAge10to14     | 301366     |
| Paraguay | 1996           | FemaleAge15to19     | 209473     |
| Paraguay | 1996           | FemaleAge20to24     | 136131     |
| Paraguay | 1996           | FemaleAge25to29     | 124257     |
| Paraguay | 1996           | FemaleAge30to34     | 117701     |
| Paraguay | 1996           | FemaleAge35to39     | 113726     |
| Paraguay | 1996           | FemaleAge40to44     | 110082     |
| Paraguay | 1996           | FemaleAge45to49     | 92499      |
| Paraguay | 1996           | FemaleAge50to54     | 73970      |
| Paraguay | 1996           | FemaleAge55to59     | 61509      |
| Paraguay | 1996           | FemaleAge5to9       | 323918     |



Dietary calcium and zinc deficiency risks are decreasing but remain prevalent

| Country  | Reference year | Age/gender group    | Population |
|----------|----------------|---------------------|------------|
| Paraguay | 1996           | FemaleAge60to64     | 46913      |
| Paraguay | 1996           | FemaleAge65to69     | 41609      |
| Paraguay | 1996           | FemaleAge70to74     | 31890      |
| Paraguay | 1996           | FemaleAge75to79     | 21761      |
| Paraguay | 1996           | FemaleAge80to84     | 12505      |
| Paraguay | 1996           | FemaleAge85to89     | 5459       |
| Paraguay | 1996           | FemaleAge90to94     | 1657       |
| Paraguay | 1996           | FemaleAge95to99     | 291        |
| Paraguay | 1996           | FemaleAgeAbove100   | 34         |
| Paraguay | 1996           | FemaleLactAge15to19 | 24583      |
| Paraguay | 1996           | FemaleLactAge20to24 | 41280      |
| Paraguay | 1996           | FemaleLactAge25to29 | 35604      |
| Paraguay | 1996           | FemaleLactAge30to34 | 25652      |
| Paraguay | 1996           | FemaleLactAge35to39 | 14975      |
| Paraguay | 1996           | FemaleLactAge40to44 | 5457       |
| Paraguay | 1996           | FemaleLactAge45to49 | 941        |
| Paraguay | 1996           | FemalePregAge15to19 | 18437      |
| Paraguay | 1996           | FemalePregAge20to24 | 30960      |
| Paraguay | 1996           | FemalePregAge25to29 | 26703      |
| Paraguay | 1996           | FemalePregAge30to34 | 19239      |
| Paraguay | 1996           | FemalePregAge35to39 | 11231      |
| Paraguay | 1996           | FemalePregAge40to44 | 4093       |
| Paraguay | 1996           | FemalePregAge45to49 | 706        |
| Paraguay | 1996           | MaleAge0to4         | 354131     |
| Paraguay | 1996           | MaleAge10to14       | 310624     |
| Paraguay | 1996           | MaleAge15to19       | 260065     |
| Paraguay | 1996           | MaleAge20to24       | 213222     |
| Paraguay | 1996           | MaleAge25to29       | 190073     |
| Paraguay | 1996           | MaleAge30to34       | 167537     |
| Paraguay | 1996           | MaleAge35to39       | 145000     |
| Paraguay | 1996           | MaleAge40to44       | 126213     |
| Paraguay | 1996           | MaleAge45to49       | 99372      |
| Paraguay | 1996           | MaleAge50to54       | 76651      |
| Paraguay | 1996           | MaleAge55to59       | 62556      |
| Paraguay | 1996           | MaleAge5to9         | 334596     |
| Paraguay | 1996           | MaleAge60to64       | 46148      |
| Paraguay | 1996           | MaleAge65to69       | 38065      |
| Paraguay | 1996           | MaleAge70to74       | 27678      |
| Paraguay | 1996           | MaleAge75to79       | 17668      |
| Paraguay | 1996           | MaleAge80to84       | 9366       |
| Paraguay | 1996           | MaleAge85to89       | 3608       |
| Paraguay | 1996           | MaleAge90to94       | 959        |
| Paraguay | 1996           | MaleAge95to99       | 152        |
| Paraguay | 1996           | MaleAgeAbove100     | 15         |
| Paraguay | 1997           | FemaleAge0to4       | 343787     |
| Paraguay | 1997           | FemaleAge10to14     | 306919     |
| Paraguay | 1997           | FemaleAge15to19     | 219711     |
| Paraguay | 1997           | FemaleAge20to24     | 141937     |
| Paraguay | 1997           | FemaleAge25to29     | 125781     |
| Paraguay | 1997           | FemaleAge30to34     | 121595     |
| Paraguay | 1997           | FemaleAge35to39     | 117147     |
| Paraguay | 1997           | FemaleAge40to44     | 113656     |
| Paraguay | 1997           | FemaleAge45to49     | 97187      |
| Paraguay | 1997           | FemaleAge50to54     | 76712      |
| Paraguay | 1997           | FemaleAge55to59     | 63123      |
| Paraguay | 1997           | FemaleAge5to9       | 327203     |
| Paraguay | 1997           | FemaleAge60to64     | 49000      |
| Paraguay | 1997           | FemaleAge65to69     | 41275      |
| Paraguay | 1997           | FemaleAge70to74     | 33268      |
| Paraguay | 1997           | FemaleAge75to79     | 22432      |
| Paraguay | 1997           | FemaleAge80to84     | 13055      |
| Paraguay | 1997           | FemaleAge85to89     | 5795       |
| Paraguay | 1997           | FemaleAge90to94     | 1825       |
| Paraguay | 1997           | FemaleAge95to99     | 334        |
| Paraguay | 1997           | FemaleAgeAbove100   | 37         |
| Paraguay | 1997           | FemaleLactAge15to19 | 24583      |
| Paraguay | 1997           | FemaleLactAge20to24 | 41280      |
| Paraguay | 1997           | FemaleLactAge25to29 | 35604      |
| Paraguay | 1997           | FemaleLactAge30to34 | 25652      |
| Paraguay | 1997           | FemaleLactAge35to39 | 14975      |
| Paraguay | 1997           | FemaleLactAge40to44 | 5457       |
| Paraguay | 1997           | FemaleLactAge45to49 | 941        |
| Paraguay | 1997           | FemalePregAge15to19 | 18437      |
| Paraguay | 1997           | FemalePregAge20to24 | 30960      |
| Paraguay | 1997           | FemalePregAge25to29 | 26703      |
| Paraguay | 1997           | FemalePregAge30to34 | 19239      |
| Paraguay | 1997           | FemalePregAge35to39 | 11231      |
| Paraguay | 1997           | FemalePregAge40to44 | 4093       |
| Paraguay | 1997           | FemalePregAge45to49 | 706        |
| Paraguay | 1997           | MaleAge0to4         | 356714     |
| Paraguay | 1997           | MaleAge10to14       | 316484     |
| Paraguay | 1997           | MaleAge15to19       | 270771     |
| Paraguay | 1997           | MaleAge20to24       | 219361     |
| Paraguay | 1997           | MaleAge25to29       | 191474     |
| Paraguay | 1997           | MaleAge30to34       | 170964     |
| Paraguay | 1997           | MaleAge35to39       | 148620     |
| Paraguay | 1997           | MaleAge40to44       | 129673     |
| Paraguay | 1997           | MaleAge45to49       | 104590     |

Dietary calcium and zinc deficiency risks are decreasing but remain prevalent

| Country  | Reference year | Age/gender group    | Population |
|----------|----------------|---------------------|------------|
| Paraguay | 1997           | MaleAge50to54       | 79803      |
| Paraguay | 1997           | MaleAge55to59       | 64313      |
| Paraguay | 1997           | MaleAge5to9         | 338153     |
| Paraguay | 1997           | MaleAge60to64       | 48471      |
| Paraguay | 1997           | MaleAge65to69       | 38047      |
| Paraguay | 1997           | MaleAge70to74       | 28878      |
| Paraguay | 1997           | MaleAge75to79       | 18309      |
| Paraguay | 1997           | MaleAge80to84       | 9837       |
| Paraguay | 1997           | MaleAge85to89       | 3907       |
| Paraguay | 1997           | MaleAge90to94       | 1064       |
| Paraguay | 1997           | MaleAge95to99       | 179        |
| Paraguay | 1997           | MaleAgeAbov e100    | 17         |
| Paraguay | 1998           | FemaleAge0to4       | 345537     |
| Paraguay | 1998           | FemaleAge10to14     | 311390     |
| Paraguay | 1998           | FemaleAge15to19     | 230270     |
| Paraguay | 1998           | FemaleAge20to24     | 148885     |
| Paraguay | 1998           | FemaleAge25to29     | 127407     |
| Paraguay | 1998           | FemaleAge30to34     | 125175     |
| Paraguay | 1998           | FemaleAge35to39     | 120566     |
| Paraguay | 1998           | FemaleAge40to44     | 116954     |
| Paraguay | 1998           | FemaleAge45to49     | 102049     |
| Paraguay | 1998           | FemaleAge50to54     | 79809      |
| Paraguay | 1998           | FemaleAge55to59     | 64669      |
| Paraguay | 1998           | FemaleAge5to9       | 330362     |
| Paraguay | 1998           | FemaleAge60to64     | 51536      |
| Paraguay | 1998           | FemaleAge65to69     | 40871      |
| Paraguay | 1998           | FemaleAge70to74     | 34646      |
| Paraguay | 1998           | FemaleAge75to79     | 23189      |
| Paraguay | 1998           | FemaleAge80to84     | 13642      |
| Paraguay | 1998           | FemaleAge85to89     | 6051       |
| Paraguay | 1998           | FemaleAge90to94     | 1936       |
| Paraguay | 1998           | FemaleAge95to99     | 380        |
| Paraguay | 1998           | FemaleAgeAbov e100  | 40         |
| Paraguay | 1998           | FemaleLactAge15to19 | 24583      |
| Paraguay | 1998           | FemaleLactAge20to24 | 41280      |
| Paraguay | 1998           | FemaleLactAge25to29 | 35604      |
| Paraguay | 1998           | FemaleLactAge30to34 | 25652      |
| Paraguay | 1998           | FemaleLactAge35to39 | 14975      |
| Paraguay | 1998           | FemaleLactAge40to44 | 5457       |
| Paraguay | 1998           | FemaleLactAge45to49 | 941        |
| Paraguay | 1998           | FemalePregAge15to19 | 18437      |
| Paraguay | 1998           | FemalePregAge20to24 | 30960      |
| Paraguay | 1998           | FemalePregAge25to29 | 26703      |
| Paraguay | 1998           | FemalePregAge30to34 | 19239      |
| Paraguay | 1998           | FemalePregAge35to39 | 11231      |
| Paraguay | 1998           | FemalePregAge40to44 | 4093       |
| Paraguay | 1998           | FemalePregAge45to49 | 706        |
| Paraguay | 1998           | MaleAge0to4         | 358582     |
| Paraguay | 1998           | MaleAge10to14       | 321195     |
| Paraguay | 1998           | MaleAge15to19       | 281776     |
| Paraguay | 1998           | MaleAge20to24       | 226846     |
| Paraguay | 1998           | MaleAge25to29       | 192980     |
| Paraguay | 1998           | MaleAge30to34       | 174054     |
| Paraguay | 1998           | MaleAge35to39       | 152135     |
| Paraguay | 1998           | MaleAge40to44       | 132825     |
| Paraguay | 1998           | MaleAge45to49       | 109995     |
| Paraguay | 1998           | MaleAge50to54       | 83346      |
| Paraguay | 1998           | MaleAge55to59       | 66044      |
| Paraguay | 1998           | MaleAge5to9         | 341598     |
| Paraguay | 1998           | MaleAge60to64       | 51204      |
| Paraguay | 1998           | MaleAge65to69       | 38044      |
| Paraguay | 1998           | MaleAge70to74       | 30065      |
| Paraguay | 1998           | MaleAge75to79       | 19003      |
| Paraguay | 1998           | MaleAge80to84       | 10313      |
| Paraguay | 1998           | MaleAge85to89       | 4126       |
| Paraguay | 1998           | MaleAge90to94       | 1137       |
| Paraguay | 1998           | MaleAge95to99       | 209        |
| Paraguay | 1998           | MaleAgeAbov e100    | 19         |
| Paraguay | 1999           | FemaleAge0to4       | 347095     |
| Paraguay | 1999           | FemaleAge10to14     | 315329     |
| Paraguay | 1999           | FemaleAge15to19     | 240162     |
| Paraguay | 1999           | FemaleAge20to24     | 156863     |
| Paraguay | 1999           | FemaleAge25to29     | 129929     |
| Paraguay | 1999           | FemaleAge30to34     | 128118     |
| Paraguay | 1999           | FemaleAge35to39     | 123959     |
| Paraguay | 1999           | FemaleAge40to44     | 120173     |
| Paraguay | 1999           | FemaleAge45to49     | 106728     |
| Paraguay | 1999           | FemaleAge50to54     | 83297      |
| Paraguay | 1999           | FemaleAge55to59     | 66433      |
| Paraguay | 1999           | FemaleAge5to9       | 333286     |
| Paraguay | 1999           | FemaleAge60to64     | 54032      |
| Paraguay | 1999           | FemaleAge65to69     | 40924      |
| Paraguay | 1999           | FemaleAge70to74     | 35733      |
| Paraguay | 1999           | FemaleAge75to79     | 24110      |
| Paraguay | 1999           | FemaleAge80to84     | 14264      |
| Paraguay | 1999           | FemaleAge85to89     | 6254       |
| Paraguay | 1999           | FemaleAge90to94     | 1985       |
| Paraguay | 1999           | FemaleAge95to99     | 406        |

Dietary calcium and zinc deficiency risks are decreasing but remain prevalent

| Country  | Reference year | Age/gender group    | Population |
|----------|----------------|---------------------|------------|
| Paraguay | 1999           | FemaleAgeAbove100   | 44         |
| Paraguay | 1999           | FemaleLactAge15to19 | 24583      |
| Paraguay | 1999           | FemaleLactAge20to24 | 41280      |
| Paraguay | 1999           | FemaleLactAge25to29 | 35604      |
| Paraguay | 1999           | FemaleLactAge30to34 | 25652      |
| Paraguay | 1999           | FemaleLactAge35to39 | 14975      |
| Paraguay | 1999           | FemaleLactAge40to44 | 5457       |
| Paraguay | 1999           | FemaleLactAge45to49 | 941        |
| Paraguay | 1999           | FemalePregAge15to19 | 18437      |
| Paraguay | 1999           | FemalePregAge20to24 | 30960      |
| Paraguay | 1999           | FemalePregAge25to29 | 26703      |
| Paraguay | 1999           | FemalePregAge30to34 | 19239      |
| Paraguay | 1999           | FemalePregAge35to39 | 11231      |
| Paraguay | 1999           | FemalePregAge40to44 | 4093       |
| Paraguay | 1999           | FemalePregAge45to49 | 706        |
| Paraguay | 1999           | MaleAge0to4         | 360220     |
| Paraguay | 1999           | MaleAge10to14       | 325301     |
| Paraguay | 1999           | MaleAge15to19       | 292058     |
| Paraguay | 1999           | MaleAge20to24       | 235471     |
| Paraguay | 1999           | MaleAge25to29       | 195406     |
| Paraguay | 1999           | MaleAge30to34       | 176566     |
| Paraguay | 1999           | MaleAge35to39       | 155391     |
| Paraguay | 1999           | MaleAge40to44       | 135961     |
| Paraguay | 1999           | MaleAge45to49       | 115129     |
| Paraguay | 1999           | MaleAge50to54       | 87303      |
| Paraguay | 1999           | MaleAge55to59       | 68062      |
| Paraguay | 1999           | MaleAge5to9         | 344769     |
| Paraguay | 1999           | MaleAge60to64       | 53883      |
| Paraguay | 1999           | MaleAge65to69       | 38497      |
| Paraguay | 1999           | MaleAge70to74       | 31026      |
| Paraguay | 1999           | MaleAge75to79       | 19800      |
| Paraguay | 1999           | MaleAge80to84       | 10797      |
| Paraguay | 1999           | MaleAge85to89       | 4276       |
| Paraguay | 1999           | MaleAge90to94       | 1175       |
| Paraguay | 1999           | MaleAge95to99       | 222        |
| Paraguay | 1999           | MaleAgeAbove100     | 21         |
| Peru     | 1992           | FemaleAge0to4       | 1493426    |
| Peru     | 1992           | FemaleAge10to14     | 1312035    |
| Peru     | 1992           | FemaleAge15to19     | 1058019    |
| Peru     | 1992           | FemaleAge20to24     | 734405     |
| Peru     | 1992           | FemaleAge25to29     | 650797     |
| Peru     | 1992           | FemaleAge30to34     | 601711     |
| Peru     | 1992           | FemaleAge35to39     | 543995     |
| Peru     | 1992           | FemaleAge40to44     | 493882     |
| Peru     | 1992           | FemaleAge45to49     | 429958     |
| Peru     | 1992           | FemaleAge50to54     | 371484     |
| Peru     | 1992           | FemaleAge55to59     | 316710     |
| Peru     | 1992           | FemaleAge5to9       | 1376402    |
| Peru     | 1992           | FemaleAge60to64     | 254411     |
| Peru     | 1992           | FemaleAge65to69     | 191985     |
| Peru     | 1992           | FemaleAge70to74     | 137893     |
| Peru     | 1992           | FemaleAge75to79     | 93793      |
| Peru     | 1992           | FemaleAge80to84     | 53976      |
| Peru     | 1992           | FemaleAge85to89     | 22123      |
| Peru     | 1992           | FemaleAge90to94     | 6050       |
| Peru     | 1992           | FemaleAge95to99     | 1043       |
| Peru     | 1992           | FemaleAgeAbove100   | 87         |
| Peru     | 1992           | FemaleLactAge15to19 | 85193      |
| Peru     | 1992           | FemaleLactAge20to24 | 191266     |
| Peru     | 1992           | FemaleLactAge25to29 | 166514     |
| Peru     | 1992           | FemaleLactAge30to34 | 111197     |
| Peru     | 1992           | FemaleLactAge35to39 | 66174      |
| Peru     | 1992           | FemaleLactAge40to44 | 25543      |
| Peru     | 1992           | FemaleLactAge45to49 | 4354       |
| Peru     | 1992           | FemalePregAge15to19 | 63895      |
| Peru     | 1992           | FemalePregAge20to24 | 143449     |
| Peru     | 1992           | FemalePregAge25to29 | 124886     |
| Peru     | 1992           | FemalePregAge30to34 | 83398      |
| Peru     | 1992           | FemalePregAge35to39 | 49631      |
| Peru     | 1992           | FemalePregAge40to44 | 19157      |
| Peru     | 1992           | FemalePregAge45to49 | 3266       |
| Peru     | 1992           | MaleAge0to4         | 1544606    |
| Peru     | 1992           | MaleAge10to14       | 1351074    |
| Peru     | 1992           | MaleAge15to19       | 1239693    |
| Peru     | 1992           | MaleAge20to24       | 1090840    |
| Peru     | 1992           | MaleAge25to29       | 953557     |
| Peru     | 1992           | MaleAge30to34       | 799681     |
| Peru     | 1992           | MaleAge35to39       | 658788     |
| Peru     | 1992           | MaleAge40to44       | 536931     |
| Peru     | 1992           | MaleAge45to49       | 435398     |
| Peru     | 1992           | MaleAge50to54       | 366280     |
| Peru     | 1992           | MaleAge55to59       | 306505     |
| Peru     | 1992           | MaleAge5to9         | 1418513    |
| Peru     | 1992           | MaleAge60to64       | 239095     |
| Peru     | 1992           | MaleAge65to69       | 173711     |
| Peru     | 1992           | MaleAge70to74       | 118689     |
| Peru     | 1992           | MaleAge75to79       | 75314      |
| Peru     | 1992           | MaleAge80to84       | 39764      |

Dietary calcium and zinc deficiency risks are decreasing but remain prevalent

| Country | Reference year | Age/gender group    | Population |
|---------|----------------|---------------------|------------|
| Peru    | 1992           | MaleAge85to89       | 14778      |
| Peru    | 1992           | MaleAge90to94       | 3654       |
| Peru    | 1992           | MaleAge95to99       | 590        |
| Peru    | 1992           | MaleAgeAbove100     | 44         |
| Peru    | 1993           | FemaleAge0to4       | 1494011    |
| Peru    | 1993           | FemaleAge10to14     | 1318545    |
| Peru    | 1993           | FemaleAge15to19     | 1083837    |
| Peru    | 1993           | FemaleAge20to24     | 755029     |
| Peru    | 1993           | FemaleAge25to29     | 670294     |
| Peru    | 1993           | FemaleAge30to34     | 628191     |
| Peru    | 1993           | FemaleAge35to39     | 563962     |
| Peru    | 1993           | FemaleAge40to44     | 514265     |
| Peru    | 1993           | FemaleAge45to49     | 443884     |
| Peru    | 1993           | FemaleAge50to54     | 378845     |
| Peru    | 1993           | FemaleAge55to59     | 324375     |
| Peru    | 1993           | FemaleAge5to9       | 1395665    |
| Peru    | 1993           | FemaleAge60to64     | 263071     |
| Peru    | 1993           | FemaleAge65to69     | 198661     |
| Peru    | 1993           | FemaleAge70to74     | 142210     |
| Peru    | 1993           | FemaleAge75to79     | 96031      |
| Peru    | 1993           | FemaleAge80to84     | 56486      |
| Peru    | 1993           | FemaleAge85to89     | 23875      |
| Peru    | 1993           | FemaleAge90to94     | 6588       |
| Peru    | 1993           | FemaleAge95to99     | 1254       |
| Peru    | 1993           | FemaleAgeAbove100   | 105        |
| Peru    | 1993           | FemaleLactAge15to19 | 85193      |
| Peru    | 1993           | FemaleLactAge20to24 | 191266     |
| Peru    | 1993           | FemaleLactAge25to29 | 166514     |
| Peru    | 1993           | FemaleLactAge30to34 | 111197     |
| Peru    | 1993           | FemaleLactAge35to39 | 66174      |
| Peru    | 1993           | FemaleLactAge40to44 | 25543      |
| Peru    | 1993           | FemaleLactAge45to49 | 4354       |
| Peru    | 1993           | FemalePregAge15to19 | 63895      |
| Peru    | 1993           | FemalePregAge20to24 | 143449     |
| Peru    | 1993           | FemalePregAge25to29 | 124886     |
| Peru    | 1993           | FemalePregAge30to34 | 83398      |
| Peru    | 1993           | FemalePregAge35to39 | 49631      |
| Peru    | 1993           | FemalePregAge40to44 | 19157      |
| Peru    | 1993           | FemalePregAge45to49 | 3266       |
| Peru    | 1993           | MaleAge0to4         | 1545634    |
| Peru    | 1993           | MaleAge10to14       | 1357594    |
| Peru    | 1993           | MaleAge15to19       | 1266690    |
| Peru    | 1993           | MaleAge20to24       | 1112541    |
| Peru    | 1993           | MaleAge25to29       | 974121     |
| Peru    | 1993           | MaleAge30to34       | 827053     |
| Peru    | 1993           | MaleAge35to39       | 678481     |
| Peru    | 1993           | MaleAge40to44       | 556663     |
| Peru    | 1993           | MaleAge45to49       | 449068     |
| Peru    | 1993           | MaleAge50to54       | 373645     |
| Peru    | 1993           | MaleAge55to59       | 314263     |
| Peru    | 1993           | MaleAge5to9         | 1438553    |
| Peru    | 1993           | MaleAge60to64       | 247690     |
| Peru    | 1993           | MaleAge65to69       | 180046     |
| Peru    | 1993           | MaleAge70to74       | 122780     |
| Peru    | 1993           | MaleAge75to79       | 77333      |
| Peru    | 1993           | MaleAge80to84       | 41706      |
| Peru    | 1993           | MaleAge85to89       | 16000      |
| Peru    | 1993           | MaleAge90to94       | 3997       |
| Peru    | 1993           | MaleAge95to99       | 718        |
| Peru    | 1993           | MaleAgeAbove100     | 53         |
| Peru    | 1994           | FemaleAge0to4       | 1491350    |
| Peru    | 1994           | FemaleAge10to14     | 1325473    |
| Peru    | 1994           | FemaleAge15to19     | 1107004    |
| Peru    | 1994           | FemaleAge20to24     | 776791     |
| Peru    | 1994           | FemaleAge25to29     | 689628     |
| Peru    | 1994           | FemaleAge30to34     | 653453     |
| Peru    | 1994           | FemaleAge35to39     | 585009     |
| Peru    | 1994           | FemaleAge40to44     | 534713     |
| Peru    | 1994           | FemaleAge45to49     | 459119     |
| Peru    | 1994           | FemaleAge50to54     | 387173     |
| Peru    | 1994           | FemaleAge55to59     | 331896     |
| Peru    | 1994           | FemaleAge5to9       | 1415413    |
| Peru    | 1994           | FemaleAge60to64     | 271763     |
| Peru    | 1994           | FemaleAge65to69     | 205962     |
| Peru    | 1994           | FemaleAge70to74     | 146992     |
| Peru    | 1994           | FemaleAge75to79     | 98619      |
| Peru    | 1994           | FemaleAge80to84     | 58729      |
| Peru    | 1994           | FemaleAge85to89     | 25256      |
| Peru    | 1994           | FemaleAge90to94     | 7051       |
| Peru    | 1994           | FemaleAge95to99     | 1398       |
| Peru    | 1994           | FemaleAgeAbove100   | 125        |
| Peru    | 1994           | FemaleLactAge15to19 | 85193      |
| Peru    | 1994           | FemaleLactAge20to24 | 191266     |
| Peru    | 1994           | FemaleLactAge25to29 | 166514     |
| Peru    | 1994           | FemaleLactAge30to34 | 111197     |
| Peru    | 1994           | FemaleLactAge35to39 | 66174      |
| Peru    | 1994           | FemaleLactAge40to44 | 25543      |
| Peru    | 1994           | FemaleLactAge45to49 | 4354       |

Dietary calcium and zinc deficiency risks are decreasing but remain prevalent

| Country | Reference year | Age/gender group    | Population |
|---------|----------------|---------------------|------------|
| Peru    | 1994           | FemalePregAge15to19 | 63895      |
| Peru    | 1994           | FemalePregAge20to24 | 143449     |
| Peru    | 1994           | FemalePregAge25to29 | 124886     |
| Peru    | 1994           | FemalePregAge30to34 | 83398      |
| Peru    | 1994           | FemalePregAge35to39 | 49631      |
| Peru    | 1994           | FemalePregAge40to44 | 19157      |
| Peru    | 1994           | FemalePregAge45to49 | 3266       |
| Peru    | 1994           | MaleAge0to4         | 1543340    |
| Peru    | 1994           | MaleAge10to14       | 1364626    |
| Peru    | 1994           | MaleAge15to19       | 1290942    |
| Peru    | 1994           | MaleAge20to24       | 1135507    |
| Peru    | 1994           | MaleAge25to29       | 994248     |
| Peru    | 1994           | MaleAge30to34       | 853544     |
| Peru    | 1994           | MaleAge35to39       | 699366     |
| Peru    | 1994           | MaleAge40to44       | 576453     |
| Peru    | 1994           | MaleAge45to49       | 464022     |
| Peru    | 1994           | MaleAge50to54       | 381969     |
| Peru    | 1994           | MaleAge55to59       | 321927     |
| Peru    | 1994           | MaleAge5to9         | 1459081    |
| Peru    | 1994           | MaleAge60to64       | 256321     |
| Peru    | 1994           | MaleAge65to69       | 186967     |
| Peru    | 1994           | MaleAge70to74       | 127248     |
| Peru    | 1994           | MaleAge75to79       | 79647      |
| Peru    | 1994           | MaleAge80to84       | 43261      |
| Peru    | 1994           | MaleAge85to89       | 16910      |
| Peru    | 1994           | MaleAge90to94       | 4283       |
| Peru    | 1994           | MaleAge95to99       | 794        |
| Peru    | 1994           | MaleAgeAbov e100    | 63         |
| Peru    | 1995           | FemaleAge0to4       | 1490144    |
| Peru    | 1995           | FemaleAge10to14     | 1335681    |
| Peru    | 1995           | FemaleAge15to19     | 1125574    |
| Peru    | 1995           | FemaleAge20to24     | 799922     |
| Peru    | 1995           | FemaleAge25to29     | 709386     |
| Peru    | 1995           | FemaleAge30to34     | 676648     |
| Peru    | 1995           | FemaleAge35to39     | 607447     |
| Peru    | 1995           | FemaleAge40to44     | 554765     |
| Peru    | 1995           | FemaleAge45to49     | 475503     |
| Peru    | 1995           | FemaleAge50to54     | 396835     |
| Peru    | 1995           | FemaleAge55to59     | 339258     |
| Peru    | 1995           | FemaleAge5to9       | 1430864    |
| Peru    | 1995           | FemaleAge60to64     | 280256     |
| Peru    | 1995           | FemaleAge65to69     | 213823     |
| Peru    | 1995           | FemaleAge70to74     | 152318     |
| Peru    | 1995           | FemaleAge75to79     | 101671     |
| Peru    | 1995           | FemaleAge80to84     | 60704      |
| Peru    | 1995           | FemaleAge85to89     | 26365      |
| Peru    | 1995           | FemaleAge90to94     | 7393       |
| Peru    | 1995           | FemaleAge95to99     | 1391       |
| Peru    | 1995           | FemaleAgeAbov e100  | 148        |
| Peru    | 1995           | FemaleLactAge15to19 | 85193      |
| Peru    | 1995           | FemaleLactAge20to24 | 191266     |
| Peru    | 1995           | FemaleLactAge25to29 | 166514     |
| Peru    | 1995           | FemaleLactAge30to34 | 111197     |
| Peru    | 1995           | FemaleLactAge35to39 | 66174      |
| Peru    | 1995           | FemaleLactAge40to44 | 25543      |
| Peru    | 1995           | FemaleLactAge45to49 | 4354       |
| Peru    | 1995           | FemalePregAge15to19 | 63895      |
| Peru    | 1995           | FemalePregAge20to24 | 143449     |
| Peru    | 1995           | FemalePregAge25to29 | 124886     |
| Peru    | 1995           | FemalePregAge30to34 | 83398      |
| Peru    | 1995           | FemalePregAge35to39 | 49631      |
| Peru    | 1995           | FemalePregAge40to44 | 19157      |
| Peru    | 1995           | FemalePregAge45to49 | 3266       |
| Peru    | 1995           | MaleAge0to4         | 1542620    |
| Peru    | 1995           | MaleAge10to14       | 1375043    |
| Peru    | 1995           | MaleAge15to19       | 1310327    |
| Peru    | 1995           | MaleAge20to24       | 1159877    |
| Peru    | 1995           | MaleAge25to29       | 1014663    |
| Peru    | 1995           | MaleAge30to34       | 877953     |
| Peru    | 1995           | MaleAge35to39       | 721869     |
| Peru    | 1995           | MaleAge40to44       | 595847     |
| Peru    | 1995           | MaleAge45to49       | 480019     |
| Peru    | 1995           | MaleAge50to54       | 391596     |
| Peru    | 1995           | MaleAge55to59       | 329445     |
| Peru    | 1995           | MaleAge5to9         | 1474985    |
| Peru    | 1995           | MaleAge60to64       | 264763     |
| Peru    | 1995           | MaleAge65to69       | 194446     |
| Peru    | 1995           | MaleAge70to74       | 132153     |
| Peru    | 1995           | MaleAge75to79       | 82328      |
| Peru    | 1995           | MaleAge80to84       | 44503      |
| Peru    | 1995           | MaleAge85to89       | 17527      |
| Peru    | 1995           | MaleAge90to94       | 4440       |
| Peru    | 1995           | MaleAge95to99       | 764        |
| Peru    | 1995           | MaleAgeAbov e100    | 75         |
| Peru    | 1996           | FemaleAge0to4       | 1488227    |
| Peru    | 1996           | FemaleAge10to14     | 1349353    |
| Peru    | 1996           | FemaleAge15to19     | 1127228    |
| Peru    | 1996           | FemaleAge20to24     | 839807     |

Dietary calcium and zinc deficiency risks are decreasing but remain prevalent

| Country | Reference year | Age/gender group    | Population |
|---------|----------------|---------------------|------------|
| Peru    | 1996           | FemaleAge25to29     | 753712     |
| Peru    | 1996           | FemaleAge30to34     | 692343     |
| Peru    | 1996           | FemaleAge35to39     | 630663     |
| Peru    | 1996           | FemaleAge40to44     | 578061     |
| Peru    | 1996           | FemaleAge45to49     | 495399     |
| Peru    | 1996           | FemaleAge50to54     | 407612     |
| Peru    | 1996           | FemaleAge55to59     | 346104     |
| Peru    | 1996           | FemaleAge5to9       | 1445279    |
| Peru    | 1996           | FemaleAge60to64     | 287847     |
| Peru    | 1996           | FemaleAge65to69     | 221352     |
| Peru    | 1996           | FemaleAge70to74     | 157867     |
| Peru    | 1996           | FemaleAge75to79     | 104848     |
| Peru    | 1996           | FemaleAge80to84     | 62859      |
| Peru    | 1996           | FemaleAge85to89     | 28680      |
| Peru    | 1996           | FemaleAge90to94     | 8654       |
| Peru    | 1996           | FemaleAge95to99     | 1578       |
| Peru    | 1996           | FemaleAgeAbove100   | 175        |
| Peru    | 1996           | FemaleLactAge15to19 | 91411      |
| Peru    | 1996           | FemaleLactAge20to24 | 181965     |
| Peru    | 1996           | FemaleLactAge25to29 | 152604     |
| Peru    | 1996           | FemaleLactAge30to34 | 114944     |
| Peru    | 1996           | FemaleLactAge35to39 | 66459      |
| Peru    | 1996           | FemaleLactAge40to44 | 23566      |
| Peru    | 1996           | FemaleLactAge45to49 | 2970       |
| Peru    | 1996           | FemalePregAge15to19 | 68558      |
| Peru    | 1996           | FemalePregAge20to24 | 136474     |
| Peru    | 1996           | FemalePregAge25to29 | 114453     |
| Peru    | 1996           | FemalePregAge30to34 | 86208      |
| Peru    | 1996           | FemalePregAge35to39 | 49844      |
| Peru    | 1996           | FemalePregAge40to44 | 17675      |
| Peru    | 1996           | FemalePregAge45to49 | 2227       |
| Peru    | 1996           | MaleAge0to4         | 1541710    |
| Peru    | 1996           | MaleAge10to14       | 1388940    |
| Peru    | 1996           | MaleAge15to19       | 1322940    |
| Peru    | 1996           | MaleAge20to24       | 1184551    |
| Peru    | 1996           | MaleAge25to29       | 1035825    |
| Peru    | 1996           | MaleAge30to34       | 900772     |
| Peru    | 1996           | MaleAge35to39       | 746014     |
| Peru    | 1996           | MaleAge40to44       | 615070     |
| Peru    | 1996           | MaleAge45to49       | 496722     |
| Peru    | 1996           | MaleAge50to54       | 402045     |
| Peru    | 1996           | MaleAge55to59       | 336089     |
| Peru    | 1996           | MaleAge5to9         | 1490275    |
| Peru    | 1996           | MaleAge60to64       | 272126     |
| Peru    | 1996           | MaleAge65to69       | 201507     |
| Peru    | 1996           | MaleAge70to74       | 137138     |
| Peru    | 1996           | MaleAge75to79       | 85219      |
| Peru    | 1996           | MaleAge80to84       | 46516      |
| Peru    | 1996           | MaleAge85to89       | 19281      |
| Peru    | 1996           | MaleAge90to94       | 5275       |
| Peru    | 1996           | MaleAge95to99       | 874        |
| Peru    | 1996           | MaleAgeAbove100     | 89         |
| Peru    | 1997           | FemaleAge0to4       | 1485844    |
| Peru    | 1997           | FemaleAge10to14     | 1366528    |
| Peru    | 1997           | FemaleAge15to19     | 1135191    |
| Peru    | 1997           | FemaleAge20to24     | 865083     |
| Peru    | 1997           | FemaleAge25to29     | 773533     |
| Peru    | 1997           | FemaleAge30to34     | 712776     |
| Peru    | 1997           | FemaleAge35to39     | 655773     |
| Peru    | 1997           | FemaleAge40to44     | 597379     |
| Peru    | 1997           | FemaleAge45to49     | 514212     |
| Peru    | 1997           | FemaleAge50to54     | 419725     |
| Peru    | 1997           | FemaleAge55to59     | 352926     |
| Peru    | 1997           | FemaleAge5to9       | 1456271    |
| Peru    | 1997           | FemaleAge60to64     | 295436     |
| Peru    | 1997           | FemaleAge65to69     | 229395     |
| Peru    | 1997           | FemaleAge70to74     | 163872     |
| Peru    | 1997           | FemaleAge75to79     | 108408     |
| Peru    | 1997           | FemaleAge80to84     | 64733      |
| Peru    | 1997           | FemaleAge85to89     | 30719      |
| Peru    | 1997           | FemaleAge90to94     | 9736       |
| Peru    | 1997           | FemaleAge95to99     | 1791       |
| Peru    | 1997           | FemaleAgeAbove100   | 206        |
| Peru    | 1997           | FemaleLactAge15to19 | 91411      |
| Peru    | 1997           | FemaleLactAge20to24 | 181965     |
| Peru    | 1997           | FemaleLactAge25to29 | 152604     |
| Peru    | 1997           | FemaleLactAge30to34 | 114944     |
| Peru    | 1997           | FemaleLactAge35to39 | 66459      |
| Peru    | 1997           | FemaleLactAge40to44 | 23566      |
| Peru    | 1997           | FemaleLactAge45to49 | 2970       |
| Peru    | 1997           | FemalePregAge15to19 | 68558      |
| Peru    | 1997           | FemalePregAge20to24 | 136474     |
| Peru    | 1997           | FemalePregAge25to29 | 114453     |
| Peru    | 1997           | FemalePregAge30to34 | 86208      |
| Peru    | 1997           | FemalePregAge35to39 | 49844      |
| Peru    | 1997           | FemalePregAge40to44 | 17675      |
| Peru    | 1997           | FemalePregAge45to49 | 2227       |
| Peru    | 1997           | MaleAge0to4         | 1539931    |

Dietary calcium and zinc deficiency risks are decreasing but remain prevalent

| Country | Reference year | Age/gender group    | Population |
|---------|----------------|---------------------|------------|
| Peru    | 1997           | MaleAge10to14       | 1406562    |
| Peru    | 1997           | MaleAge15to19       | 1330814    |
| Peru    | 1997           | MaleAge20to24       | 1210793    |
| Peru    | 1997           | MaleAge25to29       | 1056823    |
| Peru    | 1997           | MaleAge30to34       | 921699     |
| Peru    | 1997           | MaleAge35to39       | 771786     |
| Peru    | 1997           | MaleAge40to44       | 633843     |
| Peru    | 1997           | MaleAge45to49       | 514680     |
| Peru    | 1997           | MaleAge50to54       | 413831     |
| Peru    | 1997           | MaleAge55to59       | 342736     |
| Peru    | 1997           | MaleAge5to9         | 1502107    |
| Peru    | 1997           | MaleAge60to64       | 279504     |
| Peru    | 1997           | MaleAge65to69       | 209060     |
| Peru    | 1997           | MaleAge70to74       | 142421     |
| Peru    | 1997           | MaleAge75to79       | 88301      |
| Peru    | 1997           | MaleAge80to84       | 48194      |
| Peru    | 1997           | MaleAge85to89       | 20779      |
| Peru    | 1997           | MaleAge90to94       | 5988       |
| Peru    | 1997           | MaleAge95to99       | 1002       |
| Peru    | 1997           | MaleAgeAbove100     | 105        |
| Peru    | 1998           | FemaleAge0to4       | 1483437    |
| Peru    | 1998           | FemaleAge10to14     | 1385583    |
| Peru    | 1998           | FemaleAge15to19     | 1140878    |
| Peru    | 1998           | FemaleAge20to24     | 890048     |
| Peru    | 1998           | FemaleAge25to29     | 793510     |
| Peru    | 1998           | FemaleAge30to34     | 731707     |
| Peru    | 1998           | FemaleAge35to39     | 681294     |
| Peru    | 1998           | FemaleAge40to44     | 616599     |
| Peru    | 1998           | FemaleAge45to49     | 533814     |
| Peru    | 1998           | FemaleAge50to54     | 433074     |
| Peru    | 1998           | FemaleAge55to59     | 360063     |
| Peru    | 1998           | FemaleAge5to9       | 1463047    |
| Peru    | 1998           | FemaleAge60to64     | 302954     |
| Peru    | 1998           | FemaleAge65to69     | 237771     |
| Peru    | 1998           | FemaleAge70to74     | 170272     |
| Peru    | 1998           | FemaleAge75to79     | 112442     |
| Peru    | 1998           | FemaleAge80to84     | 66589      |
| Peru    | 1998           | FemaleAge85to89     | 32344      |
| Peru    | 1998           | FemaleAge90to94     | 10557      |
| Peru    | 1998           | FemaleAge95to99     | 2032       |
| Peru    | 1998           | FemaleAgeAbove100   | 239        |
| Peru    | 1998           | FemaleLactAge15to19 | 91411      |
| Peru    | 1998           | FemaleLactAge20to24 | 181965     |
| Peru    | 1998           | FemaleLactAge25to29 | 152604     |
| Peru    | 1998           | FemaleLactAge30to34 | 114944     |
| Peru    | 1998           | FemaleLactAge35to39 | 66459      |
| Peru    | 1998           | FemaleLactAge40to44 | 23566      |
| Peru    | 1998           | FemaleLactAge45to49 | 2970       |
| Peru    | 1998           | FemalePregAge15to19 | 68558      |
| Peru    | 1998           | FemalePregAge20to24 | 136474     |
| Peru    | 1998           | FemalePregAge25to29 | 114453     |
| Peru    | 1998           | FemalePregAge30to34 | 86208      |
| Peru    | 1998           | FemalePregAge35to39 | 49844      |
| Peru    | 1998           | FemalePregAge40to44 | 17675      |
| Peru    | 1998           | FemalePregAge45to49 | 2227       |
| Peru    | 1998           | MaleAge0to4         | 1537886    |
| Peru    | 1998           | MaleAge10to14       | 1426198    |
| Peru    | 1998           | MaleAge15to19       | 1336424    |
| Peru    | 1998           | MaleAge20to24       | 1236599    |
| Peru    | 1998           | MaleAge25to29       | 1077820    |
| Peru    | 1998           | MaleAge30to34       | 941206     |
| Peru    | 1998           | MaleAge35to39       | 798064     |
| Peru    | 1998           | MaleAge40to44       | 652631     |
| Peru    | 1998           | MaleAge45to49       | 533394     |
| Peru    | 1998           | MaleAge50to54       | 426815     |
| Peru    | 1998           | MaleAge55to59       | 349744     |
| Peru    | 1998           | MaleAge5to9         | 1509602    |
| Peru    | 1998           | MaleAge60to64       | 286835     |
| Peru    | 1998           | MaleAge65to69       | 216931     |
| Peru    | 1998           | MaleAge70to74       | 148001     |
| Peru    | 1998           | MaleAge75to79       | 91697      |
| Peru    | 1998           | MaleAge80to84       | 49663      |
| Peru    | 1998           | MaleAge85to89       | 21906      |
| Peru    | 1998           | MaleAge90to94       | 6516       |
| Peru    | 1998           | MaleAge95to99       | 1150       |
| Peru    | 1998           | MaleAgeAbove100     | 122        |
| Peru    | 1999           | FemaleAge0to4       | 1480106    |
| Peru    | 1999           | FemaleAge10to14     | 1403464    |
| Peru    | 1999           | FemaleAge15to19     | 1147979    |
| Peru    | 1999           | FemaleAge20to24     | 911792     |
| Peru    | 1999           | FemaleAge25to29     | 814150     |
| Peru    | 1999           | FemaleAge30to34     | 749972     |
| Peru    | 1999           | FemaleAge35to39     | 705691     |
| Peru    | 1999           | FemaleAge40to44     | 636559     |
| Peru    | 1999           | FemaleAge45to49     | 553408     |
| Peru    | 1999           | FemaleAge50to54     | 447545     |
| Peru    | 1999           | FemaleAge55to59     | 368058     |
| Peru    | 1999           | FemaleAge5to9       | 1465956    |

Dietary calcium and zinc deficiency risks are decreasing but remain prevalent

| Country     | Reference year | Age/gender group    | Population |
|-------------|----------------|---------------------|------------|
| Peru        | 1999           | FemaleAge60to64     | 310321     |
| Peru        | 1999           | FemaleAge65to69     | 246174     |
| Peru        | 1999           | FemaleAge70to74     | 177076     |
| Peru        | 1999           | FemaleAge75to79     | 116988     |
| Peru        | 1999           | FemaleAge80to84     | 68670      |
| Peru        | 1999           | FemaleAge85to89     | 33480      |
| Peru        | 1999           | FemaleAge90to94     | 11089      |
| Peru        | 1999           | FemaleAge95to99     | 2253       |
| Peru        | 1999           | FemaleAgeAbove100   | 274        |
| Peru        | 1999           | FemaleLactAge15to19 | 91411      |
| Peru        | 1999           | FemaleLactAge20to24 | 181965     |
| Peru        | 1999           | FemaleLactAge25to29 | 152604     |
| Peru        | 1999           | FemaleLactAge30to34 | 114944     |
| Peru        | 1999           | FemaleLactAge35to39 | 66459      |
| Peru        | 1999           | FemaleLactAge40to44 | 23566      |
| Peru        | 1999           | FemaleLactAge45to49 | 2970       |
| Peru        | 1999           | FemalePregAge15to19 | 68558      |
| Peru        | 1999           | FemalePregAge20to24 | 136474     |
| Peru        | 1999           | FemalePregAge25to29 | 114453     |
| Peru        | 1999           | FemalePregAge30to34 | 86208      |
| Peru        | 1999           | FemalePregAge35to39 | 49844      |
| Peru        | 1999           | FemalePregAge40to44 | 17675      |
| Peru        | 1999           | FemalePregAge45to49 | 2227       |
| Peru        | 1999           | MaleAge0to4         | 1534842    |
| Peru        | 1999           | MaleAge10to14       | 1444702    |
| Peru        | 1999           | MaleAge15to19       | 1343646    |
| Peru        | 1999           | MaleAge20to24       | 1259005    |
| Peru        | 1999           | MaleAge25to29       | 1099283    |
| Peru        | 1999           | MaleAge30to34       | 960225     |
| Peru        | 1999           | MaleAge35to39       | 823168     |
| Peru        | 1999           | MaleAge40to44       | 672344     |
| Peru        | 1999           | MaleAge45to49       | 552150     |
| Peru        | 1999           | MaleAge50to54       | 440843     |
| Peru        | 1999           | MaleAge55to59       | 357650     |
| Peru        | 1999           | MaleAge5to9         | 1513047    |
| Peru        | 1999           | MaleAge60to64       | 294046     |
| Peru        | 1999           | MaleAge65to69       | 224834     |
| Peru        | 1999           | MaleAge70to74       | 153951     |
| Peru        | 1999           | MaleAge75to79       | 95454      |
| Peru        | 1999           | MaleAge80to84       | 51098      |
| Peru        | 1999           | MaleAge85to89       | 22592      |
| Peru        | 1999           | MaleAge90to94       | 6823       |
| Peru        | 1999           | MaleAge95to99       | 1274       |
| Peru        | 1999           | MaleAgeAbove100     | 141        |
| Philippines | 1992           | FemaleAge0to4       | 4763340    |
| Philippines | 1992           | FemaleAge10to14     | 3832970    |
| Philippines | 1992           | FemaleAge15to19     | 3070510    |
| Philippines | 1992           | FemaleAge20to24     | 1957460    |
| Philippines | 1992           | FemaleAge25to29     | 1603094    |
| Philippines | 1992           | FemaleAge30to34     | 1550982    |
| Philippines | 1992           | FemaleAge35to39     | 1566445    |
| Philippines | 1992           | FemaleAge40to44     | 1350636    |
| Philippines | 1992           | FemaleAge45to49     | 1097999    |
| Philippines | 1992           | FemaleAge50to54     | 932461     |
| Philippines | 1992           | FemaleAge55to59     | 754310     |
| Philippines | 1992           | FemaleAge5to9       | 4292903    |
| Philippines | 1992           | FemaleAge60to64     | 568208     |
| Philippines | 1992           | FemaleAge65to69     | 448854     |
| Philippines | 1992           | FemaleAge70to74     | 336349     |
| Philippines | 1992           | FemaleAge75to79     | 218348     |
| Philippines | 1992           | FemaleAge80to84     | 116585     |
| Philippines | 1992           | FemaleAge85to89     | 40402      |
| Philippines | 1992           | FemaleAge90to94     | 8732       |
| Philippines | 1992           | FemaleAge95to99     | 1301       |
| Philippines | 1992           | FemaleAgeAbove100   | 67         |
| Philippines | 1992           | FemaleLactAge15to19 | 174825     |
| Philippines | 1992           | FemaleLactAge20to24 | 581868     |
| Philippines | 1992           | FemaleLactAge25to29 | 589516     |
| Philippines | 1992           | FemaleLactAge30to34 | 420997     |
| Philippines | 1992           | FemaleLactAge35to39 | 241420     |
| Philippines | 1992           | FemaleLactAge40to44 | 78406      |
| Philippines | 1992           | FemaleLactAge45to49 | 9389       |
| Philippines | 1992           | FemalePregAge15to19 | 131119     |
| Philippines | 1992           | FemalePregAge20to24 | 436401     |
| Philippines | 1992           | FemalePregAge25to29 | 442137     |
| Philippines | 1992           | FemalePregAge30to34 | 315747     |
| Philippines | 1992           | FemalePregAge35to39 | 181065     |
| Philippines | 1992           | FemalePregAge40to44 | 58804      |
| Philippines | 1992           | FemalePregAge45to49 | 7041       |
| Philippines | 1992           | MaleAge0to4         | 5000162    |
| Philippines | 1992           | MaleAge10to14       | 3994712    |
| Philippines | 1992           | MaleAge15to19       | 3517651    |
| Philippines | 1992           | MaleAge20to24       | 3091313    |
| Philippines | 1992           | MaleAge25to29       | 2721854    |
| Philippines | 1992           | MaleAge30to34       | 2347961    |
| Philippines | 1992           | MaleAge35to39       | 2019944    |
| Philippines | 1992           | MaleAge40to44       | 1524217    |
| Philippines | 1992           | MaleAge45to49       | 1131484    |



Dietary calcium and zinc deficiency risks are decreasing but remain prevalent

| Country     | Reference year | Age/gender group    | Population |
|-------------|----------------|---------------------|------------|
| Philippines | 1992           | MaleAge50to54       | 900823     |
| Philippines | 1992           | MaleAge55to59       | 718121     |
| Philippines | 1992           | MaleAge5to9         | 4485171    |
| Philippines | 1992           | MaleAge60to64       | 506214     |
| Philippines | 1992           | MaleAge65to69       | 348245     |
| Philippines | 1992           | MaleAge70to74       | 243029     |
| Philippines | 1992           | MaleAge75to79       | 150695     |
| Philippines | 1992           | MaleAge80to84       | 79544      |
| Philippines | 1992           | MaleAge85to89       | 28109      |
| Philippines | 1992           | MaleAge90to94       | 5827       |
| Philippines | 1992           | MaleAge95to99       | 713        |
| Philippines | 1992           | MaleAgeAbov e100    | 28         |
| Philippines | 1993           | FemaleAge0to4       | 4806449    |
| Philippines | 1993           | FemaleAge10to14     | 3913964    |
| Philippines | 1993           | FemaleAge15to19     | 3151292    |
| Philippines | 1993           | FemaleAge20to24     | 2011830    |
| Philippines | 1993           | FemaleAge25to29     | 1655596    |
| Philippines | 1993           | FemaleAge30to34     | 1610094    |
| Philippines | 1993           | FemaleAge35to39     | 1609744    |
| Philippines | 1993           | FemaleAge40to44     | 1469219    |
| Philippines | 1993           | FemaleAge45to49     | 1126004    |
| Philippines | 1993           | FemaleAge50to54     | 962779     |
| Philippines | 1993           | FemaleAge55to59     | 778490     |
| Philippines | 1993           | FemaleAge5to9       | 4389568    |
| Philippines | 1993           | FemaleAge60to64     | 595765     |
| Philippines | 1993           | FemaleAge65to69     | 449783     |
| Philippines | 1993           | FemaleAge70to74     | 348918     |
| Philippines | 1993           | FemaleAge75to79     | 221049     |
| Philippines | 1993           | FemaleAge80to84     | 121009     |
| Philippines | 1993           | FemaleAge85to89     | 42667      |
| Philippines | 1993           | FemaleAge90to94     | 9010       |
| Philippines | 1993           | FemaleAge95to99     | 1520       |
| Philippines | 1993           | FemaleAgeAbov e100  | 67         |
| Philippines | 1993           | FemaleLactAge15to19 | 174825     |
| Philippines | 1993           | FemaleLactAge20to24 | 581868     |
| Philippines | 1993           | FemaleLactAge25to29 | 589516     |
| Philippines | 1993           | FemaleLactAge30to34 | 420997     |
| Philippines | 1993           | FemaleLactAge35to39 | 241420     |
| Philippines | 1993           | FemaleLactAge40to44 | 78406      |
| Philippines | 1993           | FemaleLactAge45to49 | 9389       |
| Philippines | 1993           | FemalePregAge15to19 | 131119     |
| Philippines | 1993           | FemalePregAge20to24 | 436401     |
| Philippines | 1993           | FemalePregAge25to29 | 442137     |
| Philippines | 1993           | FemalePregAge30to34 | 315747     |
| Philippines | 1993           | FemalePregAge35to39 | 181065     |
| Philippines | 1993           | FemalePregAge40to44 | 58804      |
| Philippines | 1993           | FemalePregAge45to49 | 7041       |
| Philippines | 1993           | MaleAge0to4         | 5044710    |
| Philippines | 1993           | MaleAge10to14       | 4079650    |
| Philippines | 1993           | MaleAge15to19       | 3599072    |
| Philippines | 1993           | MaleAge20to24       | 3145763    |
| Philippines | 1993           | MaleAge25to29       | 2773301    |
| Philippines | 1993           | MaleAge30to34       | 2406607    |
| Philippines | 1993           | MaleAge35to39       | 2063985    |
| Philippines | 1993           | MaleAge40to44       | 1632599    |
| Philippines | 1993           | MaleAge45to49       | 1164466    |
| Philippines | 1993           | MaleAge50to54       | 934148     |
| Philippines | 1993           | MaleAge55to59       | 732375     |
| Philippines | 1993           | MaleAge5to9         | 4589032    |
| Philippines | 1993           | MaleAge60to64       | 539446     |
| Philippines | 1993           | MaleAge65to69       | 350773     |
| Philippines | 1993           | MaleAge70to74       | 249730     |
| Philippines | 1993           | MaleAge75to79       | 150704     |
| Philippines | 1993           | MaleAge80to84       | 80642      |
| Philippines | 1993           | MaleAge85to89       | 29510      |
| Philippines | 1993           | MaleAge90to94       | 6118       |
| Philippines | 1993           | MaleAge95to99       | 874        |
| Philippines | 1993           | MaleAgeAbov e100    | 29         |
| Philippines | 1994           | FemaleAge0to4       | 4846588    |
| Philippines | 1994           | FemaleAge10to14     | 3997951    |
| Philippines | 1994           | FemaleAge15to19     | 3234347    |
| Philippines | 1994           | FemaleAge20to24     | 2069684    |
| Philippines | 1994           | FemaleAge25to29     | 1706808    |
| Philippines | 1994           | FemaleAge30to34     | 1667650    |
| Philippines | 1994           | FemaleAge35to39     | 1651350    |
| Philippines | 1994           | FemaleAge40to44     | 1579412    |
| Philippines | 1994           | FemaleAge45to49     | 1169370    |
| Philippines | 1994           | FemaleAge50to54     | 992238     |
| Philippines | 1994           | FemaleAge55to59     | 803239     |
| Philippines | 1994           | FemaleAge5to9       | 4483113    |
| Philippines | 1994           | FemaleAge60to64     | 624047     |
| Philippines | 1994           | FemaleAge65to69     | 455250     |
| Philippines | 1994           | FemaleAge70to74     | 359772     |
| Philippines | 1994           | FemaleAge75to79     | 225840     |
| Philippines | 1994           | FemaleAge80to84     | 124122     |
| Philippines | 1994           | FemaleAge85to89     | 43623      |
| Philippines | 1994           | FemaleAge90to94     | 8930       |
| Philippines | 1994           | FemaleAge95to99     | 1480       |

Dietary calcium and zinc deficiency risks are decreasing but remain prevalent

| Country     | Reference year | Age/gender group    | Population |
|-------------|----------------|---------------------|------------|
| Philippines | 1994           | FemaleAgeAbove100   | 68         |
| Philippines | 1994           | FemaleLactAge15to19 | 174825     |
| Philippines | 1994           | FemaleLactAge20to24 | 581868     |
| Philippines | 1994           | FemaleLactAge25to29 | 589516     |
| Philippines | 1994           | FemaleLactAge30to34 | 420997     |
| Philippines | 1994           | FemaleLactAge35to39 | 241420     |
| Philippines | 1994           | FemaleLactAge40to44 | 78406      |
| Philippines | 1994           | FemaleLactAge45to49 | 9389       |
| Philippines | 1994           | FemalePregAge15to19 | 131119     |
| Philippines | 1994           | FemalePregAge20to24 | 436401     |
| Philippines | 1994           | FemalePregAge25to29 | 442137     |
| Philippines | 1994           | FemalePregAge30to34 | 315747     |
| Philippines | 1994           | FemalePregAge35to39 | 181065     |
| Philippines | 1994           | FemalePregAge40to44 | 58804      |
| Philippines | 1994           | FemalePregAge45to49 | 7041       |
| Philippines | 1994           | MaleAge0to4         | 5085610    |
| Philippines | 1994           | MaleAge10to14       | 4168284    |
| Philippines | 1994           | MaleAge15to19       | 3683847    |
| Philippines | 1994           | MaleAge20to24       | 3203942    |
| Philippines | 1994           | MaleAge25to29       | 2823315    |
| Philippines | 1994           | MaleAge30to34       | 2463323    |
| Philippines | 1994           | MaleAge35to39       | 2106568    |
| Philippines | 1994           | MaleAge40to44       | 1733420    |
| Philippines | 1994           | MaleAge45to49       | 1210454    |
| Philippines | 1994           | MaleAge50to54       | 967640     |
| Philippines | 1994           | MaleAge55to59       | 748856     |
| Philippines | 1994           | MaleAge5to9         | 4689083    |
| Philippines | 1994           | MaleAge60to64       | 570298     |
| Philippines | 1994           | MaleAge65to69       | 358592     |
| Philippines | 1994           | MaleAge70to74       | 255400     |
| Philippines | 1994           | MaleAge75to79       | 151560     |
| Philippines | 1994           | MaleAge80to84       | 80370      |
| Philippines | 1994           | MaleAge85to89       | 29603      |
| Philippines | 1994           | MaleAge90to94       | 6101       |
| Philippines | 1994           | MaleAge95to99       | 894        |
| Philippines | 1994           | MaleAgeAbove100     | 31         |
| Philippines | 1995           | FemaleAge0to4       | 4895094    |
| Philippines | 1995           | FemaleAge10to14     | 4086331    |
| Philippines | 1995           | FemaleAge15to19     | 3317401    |
| Philippines | 1995           | FemaleAge20to24     | 2133067    |
| Philippines | 1995           | FemaleAge25to29     | 1757150    |
| Philippines | 1995           | FemaleAge30to34     | 1721430    |
| Philippines | 1995           | FemaleAge35to39     | 1698130    |
| Philippines | 1995           | FemaleAge40to44     | 1669733    |
| Philippines | 1995           | FemaleAge45to49     | 1234031    |
| Philippines | 1995           | FemaleAge50to54     | 1020147    |
| Philippines | 1995           | FemaleAge55to59     | 829065     |
| Philippines | 1995           | FemaleAge5to9       | 4566217    |
| Philippines | 1995           | FemaleAge60to64     | 650899     |
| Philippines | 1995           | FemaleAge65to69     | 467545     |
| Philippines | 1995           | FemaleAge70to74     | 367780     |
| Philippines | 1995           | FemaleAge75to79     | 233206     |
| Philippines | 1995           | FemaleAge80to84     | 126200     |
| Philippines | 1995           | FemaleAge85to89     | 43591      |
| Philippines | 1995           | FemaleAge90to94     | 8180       |
| Philippines | 1995           | FemaleAge95to99     | 953        |
| Philippines | 1995           | FemaleAgeAbove100   | 68         |
| Philippines | 1995           | FemaleLactAge15to19 | 174825     |
| Philippines | 1995           | FemaleLactAge20to24 | 581868     |
| Philippines | 1995           | FemaleLactAge25to29 | 589516     |
| Philippines | 1995           | FemaleLactAge30to34 | 420997     |
| Philippines | 1995           | FemaleLactAge35to39 | 241420     |
| Philippines | 1995           | FemaleLactAge40to44 | 78406      |
| Philippines | 1995           | FemaleLactAge45to49 | 9389       |
| Philippines | 1995           | FemalePregAge15to19 | 131119     |
| Philippines | 1995           | FemalePregAge20to24 | 436401     |
| Philippines | 1995           | FemalePregAge25to29 | 442137     |
| Philippines | 1995           | FemalePregAge30to34 | 315747     |
| Philippines | 1995           | FemalePregAge35to39 | 181065     |
| Philippines | 1995           | FemalePregAge40to44 | 58804      |
| Philippines | 1995           | FemalePregAge45to49 | 7041       |
| Philippines | 1995           | MaleAge0to4         | 5135812    |
| Philippines | 1995           | MaleAge10to14       | 4261886    |
| Philippines | 1995           | MaleAge15to19       | 3769690    |
| Philippines | 1995           | MaleAge20to24       | 3267976    |
| Philippines | 1995           | MaleAge25to29       | 2872633    |
| Philippines | 1995           | MaleAge30to34       | 2515986    |
| Philippines | 1995           | MaleAge35to39       | 2153500    |
| Philippines | 1995           | MaleAge40to44       | 1817091    |
| Philippines | 1995           | MaleAge45to49       | 1274188    |
| Philippines | 1995           | MaleAge50to54       | 999830     |
| Philippines | 1995           | MaleAge55to59       | 769931     |
| Philippines | 1995           | MaleAge5to9         | 4776991    |
| Philippines | 1995           | MaleAge60to64       | 595713     |
| Philippines | 1995           | MaleAge65to69       | 373656     |
| Philippines | 1995           | MaleAge70to74       | 259570     |
| Philippines | 1995           | MaleAge75to79       | 153559     |
| Philippines | 1995           | MaleAge80to84       | 79009      |

Dietary calcium and zinc deficiency risks are decreasing but remain prevalent

| Country     | Reference year | Age/gender group    | Population |
|-------------|----------------|---------------------|------------|
| Philippines | 1995           | MaleAge85to89       | 28402      |
| Philippines | 1995           | MaleAge90to94       | 5523       |
| Philippines | 1995           | MaleAge95to99       | 608        |
| Philippines | 1995           | MaleAgeAbove100     | 33         |
| Philippines | 1996           | FemaleAge0to4       | 4936711    |
| Philippines | 1996           | FemaleAge10to14     | 4176722    |
| Philippines | 1996           | FemaleAge15to19     | 3373826    |
| Philippines | 1996           | FemaleAge20to24     | 2132511    |
| Philippines | 1996           | FemaleAge25to29     | 1722448    |
| Philippines | 1996           | FemaleAge30to34     | 1780132    |
| Philippines | 1996           | FemaleAge35to39     | 1720900    |
| Philippines | 1996           | FemaleAge40to44     | 1736002    |
| Philippines | 1996           | FemaleAge45to49     | 1317510    |
| Philippines | 1996           | FemaleAge50to54     | 1045982    |
| Philippines | 1996           | FemaleAge55to59     | 854564     |
| Philippines | 1996           | FemaleAge5to9       | 4645818    |
| Philippines | 1996           | FemaleAge60to64     | 673918     |
| Philippines | 1996           | FemaleAge65to69     | 482795     |
| Philippines | 1996           | FemaleAge70to74     | 370643     |
| Philippines | 1996           | FemaleAge75to79     | 240467     |
| Philippines | 1996           | FemaleAge80to84     | 129912     |
| Philippines | 1996           | FemaleAge85to89     | 48516      |
| Philippines | 1996           | FemaleAge90to94     | 10185      |
| Philippines | 1996           | FemaleAge95to99     | 1064       |
| Philippines | 1996           | FemaleAgeAbove100   | 68         |
| Philippines | 1996           | FemaleLactAge15to19 | 187746     |
| Philippines | 1996           | FemaleLactAge20to24 | 622844     |
| Philippines | 1996           | FemaleLactAge25to29 | 640305     |
| Philippines | 1996           | FemaleLactAge30to34 | 418937     |
| Philippines | 1996           | FemaleLactAge35to39 | 258603     |
| Philippines | 1996           | FemaleLactAge40to44 | 82748      |
| Philippines | 1996           | FemaleLactAge45to49 | 9954       |
| Philippines | 1996           | FemalePregAge15to19 | 140810     |
| Philippines | 1996           | FemalePregAge20to24 | 467133     |
| Philippines | 1996           | FemalePregAge25to29 | 480229     |
| Philippines | 1996           | FemalePregAge30to34 | 314203     |
| Philippines | 1996           | FemalePregAge35to39 | 193952     |
| Philippines | 1996           | FemalePregAge40to44 | 62061      |
| Philippines | 1996           | FemalePregAge45to49 | 7465       |
| Philippines | 1996           | MaleAge0to4         | 5180247    |
| Philippines | 1996           | MaleAge10to14       | 4357735    |
| Philippines | 1996           | MaleAge15to19       | 3849737    |
| Philippines | 1996           | MaleAge20to24       | 3338558    |
| Philippines | 1996           | MaleAge25to29       | 2926193    |
| Philippines | 1996           | MaleAge30to34       | 2569923    |
| Philippines | 1996           | MaleAge35to39       | 2205804    |
| Philippines | 1996           | MaleAge40to44       | 1885806    |
| Philippines | 1996           | MaleAge45to49       | 1352642    |
| Philippines | 1996           | MaleAge50to54       | 1028759    |
| Philippines | 1996           | MaleAge55to59       | 792260     |
| Philippines | 1996           | MaleAge5to9         | 4862956    |
| Philippines | 1996           | MaleAge60to64       | 613588     |
| Philippines | 1996           | MaleAge65to69       | 393052     |
| Philippines | 1996           | MaleAge70to74       | 262183     |
| Philippines | 1996           | MaleAge75to79       | 157720     |
| Philippines | 1996           | MaleAge80to84       | 81206      |
| Philippines | 1996           | MaleAge85to89       | 31056      |
| Philippines | 1996           | MaleAge90to94       | 6877       |
| Philippines | 1996           | MaleAge95to99       | 698        |
| Philippines | 1996           | MaleAgeAbove100     | 36         |
| Philippines | 1997           | FemaleAge0to4       | 4994733    |
| Philippines | 1997           | FemaleAge10to14     | 4271006    |
| Philippines | 1997           | FemaleAge15to19     | 3450916    |
| Philippines | 1997           | FemaleAge20to24     | 2207765    |
| Philippines | 1997           | FemaleAge25to29     | 1774681    |
| Philippines | 1997           | FemaleAge30to34     | 1832797    |
| Philippines | 1997           | FemaleAge35to39     | 1776756    |
| Philippines | 1997           | FemaleAge40to44     | 1790639    |
| Philippines | 1997           | FemaleAge45to49     | 1423117    |
| Philippines | 1997           | FemaleAge50to54     | 1068627    |
| Philippines | 1997           | FemaleAge55to59     | 882257     |
| Philippines | 1997           | FemaleAge5to9       | 4711572    |
| Philippines | 1997           | FemaleAge60to64     | 696369     |
| Philippines | 1997           | FemaleAge65to69     | 503729     |
| Philippines | 1997           | FemaleAge70to74     | 371160     |
| Philippines | 1997           | FemaleAge75to79     | 249488     |
| Philippines | 1997           | FemaleAge80to84     | 132002     |
| Philippines | 1997           | FemaleAge85to89     | 52272      |
| Philippines | 1997           | FemaleAge90to94     | 11607      |
| Philippines | 1997           | FemaleAge95to99     | 1263       |
| Philippines | 1997           | FemaleAgeAbove100   | 68         |
| Philippines | 1997           | FemaleLactAge15to19 | 187746     |
| Philippines | 1997           | FemaleLactAge20to24 | 622844     |
| Philippines | 1997           | FemaleLactAge25to29 | 640305     |
| Philippines | 1997           | FemaleLactAge30to34 | 418937     |
| Philippines | 1997           | FemaleLactAge35to39 | 258603     |
| Philippines | 1997           | FemaleLactAge40to44 | 82748      |
| Philippines | 1997           | FemaleLactAge45to49 | 9954       |

Dietary calcium and zinc deficiency risks are decreasing but remain prevalent

| Country     | Reference year | Age/gender group    | Population |
|-------------|----------------|---------------------|------------|
| Philippines | 1997           | FemalePregAge15to19 | 140810     |
| Philippines | 1997           | FemalePregAge20to24 | 467133     |
| Philippines | 1997           | FemalePregAge25to29 | 480229     |
| Philippines | 1997           | FemalePregAge30to34 | 314203     |
| Philippines | 1997           | FemalePregAge35to39 | 193952     |
| Philippines | 1997           | FemalePregAge40to44 | 62061      |
| Philippines | 1997           | FemalePregAge45to49 | 7465       |
| Philippines | 1997           | MaleAge0to4         | 5241862    |
| Philippines | 1997           | MaleAge10to14       | 4458583    |
| Philippines | 1997           | MaleAge15to19       | 3928907    |
| Philippines | 1997           | MaleAge20to24       | 3413255    |
| Philippines | 1997           | MaleAge25to29       | 2977768    |
| Philippines | 1997           | MaleAge30to34       | 2620981    |
| Philippines | 1997           | MaleAge35to39       | 2260698    |
| Philippines | 1997           | MaleAge40to44       | 1938230    |
| Philippines | 1997           | MaleAge45to49       | 1448353    |
| Philippines | 1997           | MaleAge50to54       | 1055376    |
| Philippines | 1997           | MaleAge55to59       | 819275     |
| Philippines | 1997           | MaleAge5to9         | 4933474    |
| Philippines | 1997           | MaleAge60to64       | 627213     |
| Philippines | 1997           | MaleAge65to69       | 418088     |
| Philippines | 1997           | MaleAge70to74       | 262985     |
| Philippines | 1997           | MaleAge75to79       | 162372     |
| Philippines | 1997           | MaleAge80to84       | 82090      |
| Philippines | 1997           | MaleAge85to89       | 32850      |
| Philippines | 1997           | MaleAge90to94       | 7881       |
| Philippines | 1997           | MaleAge95to99       | 837        |
| Philippines | 1997           | MaleAgeAbove100     | 38         |
| Philippines | 1998           | FemaleAge0to4       | 5064910    |
| Philippines | 1998           | FemaleAge10to14     | 4367429    |
| Philippines | 1998           | FemaleAge15to19     | 3529060    |
| Philippines | 1998           | FemaleAge20to24     | 2285835    |
| Philippines | 1998           | FemaleAge25to29     | 1827106    |
| Philippines | 1998           | FemaleAge30to34     | 1883675    |
| Philippines | 1998           | FemaleAge35to39     | 1834268    |
| Philippines | 1998           | FemaleAge40to44     | 1832670    |
| Philippines | 1998           | FemaleAge45to49     | 1538535    |
| Philippines | 1998           | FemaleAge50to54     | 1095368    |
| Philippines | 1998           | FemaleAge55to59     | 911114     |
| Philippines | 1998           | FemaleAge5to9       | 4763464    |
| Philippines | 1998           | FemaleAge60to64     | 718968     |
| Philippines | 1998           | FemaleAge65to69     | 528265     |
| Philippines | 1998           | FemaleAge70to74     | 372140     |
| Philippines | 1998           | FemaleAge75to79     | 259178     |
| Philippines | 1998           | FemaleAge80to84     | 133582     |
| Philippines | 1998           | FemaleAge85to89     | 54247      |
| Philippines | 1998           | FemaleAge90to94     | 12306      |
| Philippines | 1998           | FemaleAge95to99     | 1475       |
| Philippines | 1998           | FemaleAgeAbove100   | 68         |
| Philippines | 1998           | FemaleLactAge15to19 | 187746     |
| Philippines | 1998           | FemaleLactAge20to24 | 622844     |
| Philippines | 1998           | FemaleLactAge25to29 | 640305     |
| Philippines | 1998           | FemaleLactAge30to34 | 418937     |
| Philippines | 1998           | FemaleLactAge35to39 | 258603     |
| Philippines | 1998           | FemaleLactAge40to44 | 82748      |
| Philippines | 1998           | FemaleLactAge45to49 | 9954       |
| Philippines | 1998           | FemalePregAge15to19 | 140810     |
| Philippines | 1998           | FemalePregAge20to24 | 467133     |
| Philippines | 1998           | FemalePregAge25to29 | 480229     |
| Philippines | 1998           | FemalePregAge30to34 | 314203     |
| Philippines | 1998           | FemalePregAge35to39 | 193952     |
| Philippines | 1998           | FemalePregAge40to44 | 62061      |
| Philippines | 1998           | FemalePregAge45to49 | 7465       |
| Philippines | 1998           | MaleAge0to4         | 5316174    |
| Philippines | 1998           | MaleAge10to14       | 4562179    |
| Philippines | 1998           | MaleAge15to19       | 4010478    |
| Philippines | 1998           | MaleAge20to24       | 3491104    |
| Philippines | 1998           | MaleAge25to29       | 3029398    |
| Philippines | 1998           | MaleAge30to34       | 2669925    |
| Philippines | 1998           | MaleAge35to39       | 2316765    |
| Philippines | 1998           | MaleAge40to44       | 1980147    |
| Philippines | 1998           | MaleAge45to49       | 1551834    |
| Philippines | 1998           | MaleAge50to54       | 1085693    |
| Philippines | 1998           | MaleAge55to59       | 849342     |
| Philippines | 1998           | MaleAge5to9         | 4988193    |
| Philippines | 1998           | MaleAge60to64       | 639458     |
| Philippines | 1998           | MaleAge65to69       | 445322     |
| Philippines | 1998           | MaleAge70to74       | 264623     |
| Philippines | 1998           | MaleAge75to79       | 166902     |
| Philippines | 1998           | MaleAge80to84       | 82084      |
| Philippines | 1998           | MaleAge85to89       | 33483      |
| Philippines | 1998           | MaleAge90to94       | 8352       |
| Philippines | 1998           | MaleAge95to99       | 998        |
| Philippines | 1998           | MaleAgeAbove100     | 42         |
| Philippines | 1999           | FemaleAge0to4       | 5139031    |
| Philippines | 1999           | FemaleAge10to14     | 4460083    |
| Philippines | 1999           | FemaleAge15to19     | 3612132    |
| Philippines | 1999           | FemaleAge20to24     | 2364762    |

Dietary calcium and zinc deficiency risks are decreasing but remain prevalent

| Country     | Reference year | Age/gender group    | Population |
|-------------|----------------|---------------------|------------|
| Philippines | 1999           | FemaleAge25to29     | 1882900    |
| Philippines | 1999           | FemaleAge30to34     | 1933633    |
| Philippines | 1999           | FemaleAge35to39     | 1890573    |
| Philippines | 1999           | FemaleAge40to44     | 1873523    |
| Philippines | 1999           | FemaleAge45to49     | 1646071    |
| Philippines | 1999           | FemaleAge50to54     | 1137357    |
| Philippines | 1999           | FemaleAge55to59     | 939432     |
| Philippines | 1999           | FemaleAge5to9       | 4807311    |
| Philippines | 1999           | FemaleAge60to64     | 742662     |
| Philippines | 1999           | FemaleAge65to69     | 553510     |
| Philippines | 1999           | FemaleAge70to74     | 377398     |
| Philippines | 1999           | FemaleAge75to79     | 267638     |
| Philippines | 1999           | FemaleAge80to84     | 135883     |
| Philippines | 1999           | FemaleAge85to89     | 54228      |
| Philippines | 1999           | FemaleAge90to94     | 12159      |
| Philippines | 1999           | FemaleAge95to99     | 1630       |
| Philippines | 1999           | FemaleAgeAbove100   | 69         |
| Philippines | 1999           | FemaleLactAge15to19 | 187746     |
| Philippines | 1999           | FemaleLactAge20to24 | 622844     |
| Philippines | 1999           | FemaleLactAge25to29 | 640305     |
| Philippines | 1999           | FemaleLactAge30to34 | 418937     |
| Philippines | 1999           | FemaleLactAge35to39 | 258603     |
| Philippines | 1999           | FemaleLactAge40to44 | 82748      |
| Philippines | 1999           | FemaleLactAge45to49 | 9954       |
| Philippines | 1999           | FemalePregAge15to19 | 140810     |
| Philippines | 1999           | FemalePregAge20to24 | 467133     |
| Philippines | 1999           | FemalePregAge25to29 | 480229     |
| Philippines | 1999           | FemalePregAge30to34 | 314203     |
| Philippines | 1999           | FemalePregAge35to39 | 193952     |
| Philippines | 1999           | FemalePregAge40to44 | 62061      |
| Philippines | 1999           | FemalePregAge45to49 | 7465       |
| Philippines | 1999           | MaleAge0to4         | 5394295    |
| Philippines | 1999           | MaleAge10to14       | 4661678    |
| Philippines | 1999           | MaleAge15to19       | 4098414    |
| Philippines | 1999           | MaleAge20to24       | 3570568    |
| Philippines | 1999           | MaleAge25to29       | 3084209    |
| Philippines | 1999           | MaleAge30to34       | 2717817    |
| Philippines | 1999           | MaleAge35to39       | 2371289    |
| Philippines | 1999           | MaleAge40to44       | 2021307    |
| Philippines | 1999           | MaleAge45to49       | 1648476    |
| Philippines | 1999           | MaleAge50to54       | 1128865    |
| Philippines | 1999           | MaleAge55to59       | 879797     |
| Philippines | 1999           | MaleAge5to9         | 5033291    |
| Philippines | 1999           | MaleAge60to64       | 654151     |
| Philippines | 1999           | MaleAge65to69       | 470174     |
| Philippines | 1999           | MaleAge70to74       | 270544     |
| Philippines | 1999           | MaleAge75to79       | 170311     |
| Philippines | 1999           | MaleAge80to84       | 81770      |
| Philippines | 1999           | MaleAge85to89       | 32771      |
| Philippines | 1999           | MaleAge90to94       | 8135       |
| Philippines | 1999           | MaleAge95to99       | 1126       |
| Philippines | 1999           | MaleAgeAbove100     | 45         |
| Poland      | 1992           | FemaleAge0to4       | 1296140    |
| Poland      | 1992           | FemaleAge10to14     | 1640344    |
| Poland      | 1992           | FemaleAge15to19     | 1396881    |
| Poland      | 1992           | FemaleAge20to24     | 915156     |
| Poland      | 1992           | FemaleAge25to29     | 979495     |
| Poland      | 1992           | FemaleAge30to34     | 1359118    |
| Poland      | 1992           | FemaleAge35to39     | 1588320    |
| Poland      | 1992           | FemaleAge40to44     | 1465760    |
| Poland      | 1992           | FemaleAge45to49     | 1021336    |
| Poland      | 1992           | FemaleAge50to54     | 933913     |
| Poland      | 1992           | FemaleAge55to59     | 1036290    |
| Poland      | 1992           | FemaleAge5to9       | 1610143    |
| Poland      | 1992           | FemaleAge60to64     | 1014569    |
| Poland      | 1992           | FemaleAge65to69     | 938424     |
| Poland      | 1992           | FemaleAge70to74     | 567882     |
| Poland      | 1992           | FemaleAge75to79     | 436911     |
| Poland      | 1992           | FemaleAge80to84     | 364067     |
| Poland      | 1992           | FemaleAge85to89     | 167026     |
| Poland      | 1992           | FemaleAge90to94     | 50607      |
| Poland      | 1992           | FemaleAge95to99     | 7118       |
| Poland      | 1992           | FemaleAgeAbove100   | 521        |
| Poland      | 1992           | FemaleLactAge15to19 | 45538      |
| Poland      | 1992           | FemaleLactAge20to24 | 184066     |
| Poland      | 1992           | FemaleLactAge25to29 | 133390     |
| Poland      | 1992           | FemaleLactAge30to34 | 85834      |
| Poland      | 1992           | FemaleLactAge35to39 | 46993      |
| Poland      | 1992           | FemaleLactAge40to44 | 11021      |
| Poland      | 1992           | FemaleLactAge45to49 | 363        |
| Poland      | 1992           | FemalePregAge15to19 | 34153      |
| Poland      | 1992           | FemalePregAge20to24 | 138049     |
| Poland      | 1992           | FemalePregAge25to29 | 100043     |
| Poland      | 1992           | FemalePregAge30to34 | 64375      |
| Poland      | 1992           | FemalePregAge35to39 | 35245      |
| Poland      | 1992           | FemalePregAge40to44 | 8265       |
| Poland      | 1992           | FemalePregAge45to49 | 272        |
| Poland      | 1992           | MaleAge0to4         | 1357099    |

Dietary calcium and zinc deficiency risks are decreasing but remain prevalent

| Country | Reference year | Age/gender group    | Population |
|---------|----------------|---------------------|------------|
| Poland  | 1992           | MaleAge10to14       | 1711185    |
| Poland  | 1992           | MaleAge15to19       | 1542287    |
| Poland  | 1992           | MaleAge20to24       | 1296970    |
| Poland  | 1992           | MaleAge25to29       | 1256735    |
| Poland  | 1992           | MaleAge30to34       | 1544104    |
| Poland  | 1992           | MaleAge35to39       | 1684851    |
| Poland  | 1992           | MaleAge40to44       | 1470457    |
| Poland  | 1992           | MaleAge45to49       | 985749     |
| Poland  | 1992           | MaleAge50to54       | 857330     |
| Poland  | 1992           | MaleAge55to59       | 924671     |
| Poland  | 1992           | MaleAge5to9         | 1680376    |
| Poland  | 1992           | MaleAge60to64       | 827781     |
| Poland  | 1992           | MaleAge65to69       | 661651     |
| Poland  | 1992           | MaleAge70to74       | 361852     |
| Poland  | 1992           | MaleAge75to79       | 240071     |
| Poland  | 1992           | MaleAge80to84       | 177025     |
| Poland  | 1992           | MaleAge85to89       | 66755      |
| Poland  | 1992           | MaleAge90to94       | 16040      |
| Poland  | 1992           | MaleAge95to99       | 2013       |
| Poland  | 1992           | MaleAgeAbove100     | 136        |
| Poland  | 1993           | FemaleAge0to4       | 1275688    |
| Poland  | 1993           | FemaleAge10to14     | 1657427    |
| Poland  | 1993           | FemaleAge15to19     | 1426849    |
| Poland  | 1993           | FemaleAge20to24     | 961282     |
| Poland  | 1993           | FemaleAge25to29     | 949852     |
| Poland  | 1993           | FemaleAge30to34     | 1280247    |
| Poland  | 1993           | FemaleAge35to39     | 1583539    |
| Poland  | 1993           | FemaleAge40to44     | 1517984    |
| Poland  | 1993           | FemaleAge45to49     | 1122191    |
| Poland  | 1993           | FemaleAge50to54     | 886506     |
| Poland  | 1993           | FemaleAge55to59     | 1028188    |
| Poland  | 1993           | FemaleAge5to9       | 1551401    |
| Poland  | 1993           | FemaleAge60to64     | 1010103    |
| Poland  | 1993           | FemaleAge65to69     | 939518     |
| Poland  | 1993           | FemaleAge70to74     | 651414     |
| Poland  | 1993           | FemaleAge75to79     | 386560     |
| Poland  | 1993           | FemaleAge80to84     | 373949     |
| Poland  | 1993           | FemaleAge85to89     | 170724     |
| Poland  | 1993           | FemaleAge90to94     | 52801      |
| Poland  | 1993           | FemaleAge95to99     | 8144       |
| Poland  | 1993           | FemaleAgeAbove100   | 534        |
| Poland  | 1993           | FemaleLactAge15to19 | 45538      |
| Poland  | 1993           | FemaleLactAge20to24 | 184066     |
| Poland  | 1993           | FemaleLactAge25to29 | 133390     |
| Poland  | 1993           | FemaleLactAge30to34 | 85834      |
| Poland  | 1993           | FemaleLactAge35to39 | 46993      |
| Poland  | 1993           | FemaleLactAge40to44 | 11021      |
| Poland  | 1993           | FemaleLactAge45to49 | 363        |
| Poland  | 1993           | FemalePregAge15to19 | 34153      |
| Poland  | 1993           | FemalePregAge20to24 | 138049     |
| Poland  | 1993           | FemalePregAge25to29 | 100043     |
| Poland  | 1993           | FemalePregAge30to34 | 64375      |
| Poland  | 1993           | FemalePregAge35to39 | 35245      |
| Poland  | 1993           | FemalePregAge40to44 | 8265       |
| Poland  | 1993           | FemalePregAge45to49 | 272        |
| Poland  | 1993           | MaleAge0to4         | 1336845    |
| Poland  | 1993           | MaleAge10to14       | 1727295    |
| Poland  | 1993           | MaleAge15to19       | 1570939    |
| Poland  | 1993           | MaleAge20to24       | 1341576    |
| Poland  | 1993           | MaleAge25to29       | 1229885    |
| Poland  | 1993           | MaleAge30to34       | 1462907    |
| Poland  | 1993           | MaleAge35to39       | 1681812    |
| Poland  | 1993           | MaleAge40to44       | 1521190    |
| Poland  | 1993           | MaleAge45to49       | 1084419    |
| Poland  | 1993           | MaleAge50to54       | 813485     |
| Poland  | 1993           | MaleAge55to59       | 910604     |
| Poland  | 1993           | MaleAge5to9         | 1620427    |
| Poland  | 1993           | MaleAge60to64       | 831793     |
| Poland  | 1993           | MaleAge65to69       | 666372     |
| Poland  | 1993           | MaleAge70to74       | 409681     |
| Poland  | 1993           | MaleAge75to79       | 210589     |
| Poland  | 1993           | MaleAge80to84       | 180667     |
| Poland  | 1993           | MaleAge85to89       | 68466      |
| Poland  | 1993           | MaleAge90to94       | 16875      |
| Poland  | 1993           | MaleAge95to99       | 2323       |
| Poland  | 1993           | MaleAgeAbove100     | 136        |
| Poland  | 1994           | FemaleAge0to4       | 1256062    |
| Poland  | 1994           | FemaleAge10to14     | 1663999    |
| Poland  | 1994           | FemaleAge15to19     | 1455229    |
| Poland  | 1994           | FemaleAge20to24     | 1008498    |
| Poland  | 1994           | FemaleAge25to29     | 936579     |
| Poland  | 1994           | FemaleAge30to34     | 1204570    |
| Poland  | 1994           | FemaleAge35to39     | 1562892    |
| Poland  | 1994           | FemaleAge40to44     | 1559566    |
| Poland  | 1994           | FemaleAge45to49     | 1223615    |
| Poland  | 1994           | FemaleAge50to54     | 862966     |
| Poland  | 1994           | FemaleAge55to59     | 1012613    |
| Poland  | 1994           | FemaleAge5to9       | 1484043    |

Dietary calcium and zinc deficiency risks are decreasing but remain prevalent

| Country | Reference year | Age/gender group    | Population |
|---------|----------------|---------------------|------------|
| Poland  | 1994           | FemaleAge60to64     | 1005439    |
| Poland  | 1994           | FemaleAge65to69     | 938160     |
| Poland  | 1994           | FemaleAge70to74     | 725808     |
| Poland  | 1994           | FemaleAge75to79     | 361128     |
| Poland  | 1994           | FemaleAge80to84     | 373080     |
| Poland  | 1994           | FemaleAge85to89     | 172748     |
| Poland  | 1994           | FemaleAge90to94     | 52560      |
| Poland  | 1994           | FemaleAge95to99     | 8650       |
| Poland  | 1994           | FemaleAgeAbove100   | 551        |
| Poland  | 1994           | FemaleLactAge15to19 | 45538      |
| Poland  | 1994           | FemaleLactAge20to24 | 184066     |
| Poland  | 1994           | FemaleLactAge25to29 | 133390     |
| Poland  | 1994           | FemaleLactAge30to34 | 85834      |
| Poland  | 1994           | FemaleLactAge35to39 | 46993      |
| Poland  | 1994           | FemaleLactAge40to44 | 11021      |
| Poland  | 1994           | FemaleLactAge45to49 | 363        |
| Poland  | 1994           | FemalePregAge15to19 | 34153      |
| Poland  | 1994           | FemalePregAge20to24 | 138049     |
| Poland  | 1994           | FemalePregAge25to29 | 100043     |
| Poland  | 1994           | FemalePregAge30to34 | 64375      |
| Poland  | 1994           | FemalePregAge35to39 | 35245      |
| Poland  | 1994           | FemalePregAge40to44 | 8265       |
| Poland  | 1994           | FemalePregAge45to49 | 272        |
| Poland  | 1994           | MaleAge0to4         | 1318034    |
| Poland  | 1994           | MaleAge10to14       | 1733137    |
| Poland  | 1994           | MaleAge15to19       | 1598353    |
| Poland  | 1994           | MaleAge20to24       | 1386782    |
| Poland  | 1994           | MaleAge25to29       | 1218786    |
| Poland  | 1994           | MaleAge30to34       | 1386193    |
| Poland  | 1994           | MaleAge35to39       | 1662750    |
| Poland  | 1994           | MaleAge40to44       | 1562042    |
| Poland  | 1994           | MaleAge45to49       | 1183124    |
| Poland  | 1994           | MaleAge50to54       | 793731     |
| Poland  | 1994           | MaleAge55to59       | 890731     |
| Poland  | 1994           | MaleAge5to9         | 1552201    |
| Poland  | 1994           | MaleAge60to64       | 833440     |
| Poland  | 1994           | MaleAge65to69       | 670727     |
| Poland  | 1994           | MaleAge70to74       | 450369     |
| Poland  | 1994           | MaleAge75to79       | 196482     |
| Poland  | 1994           | MaleAge80to84       | 175996     |
| Poland  | 1994           | MaleAge85to89       | 68315      |
| Poland  | 1994           | MaleAge90to94       | 16740      |
| Poland  | 1994           | MaleAge95to99       | 2434       |
| Poland  | 1994           | MaleAgeAbove100     | 136        |
| Poland  | 1995           | FemaleAge0to4       | 1221126    |
| Poland  | 1995           | FemaleAge10to14     | 1654075    |
| Poland  | 1995           | FemaleAge15to19     | 1483984    |
| Poland  | 1995           | FemaleAge20to24     | 1052001    |
| Poland  | 1995           | FemaleAge25to29     | 939914     |
| Poland  | 1995           | FemaleAge30to34     | 1140875    |
| Poland  | 1995           | FemaleAge35to39     | 1526020    |
| Poland  | 1995           | FemaleAge40to44     | 1592180    |
| Poland  | 1995           | FemaleAge45to49     | 1312633    |
| Poland  | 1995           | FemaleAge50to54     | 875814     |
| Poland  | 1995           | FemaleAge55to59     | 987323     |
| Poland  | 1995           | FemaleAge5to9       | 1422690    |
| Poland  | 1995           | FemaleAge60to64     | 1000570    |
| Poland  | 1995           | FemaleAge65to69     | 940408     |
| Poland  | 1995           | FemaleAge70to74     | 778667     |
| Poland  | 1995           | FemaleAge75to79     | 370918     |
| Poland  | 1995           | FemaleAge80to84     | 358770     |
| Poland  | 1995           | FemaleAge85to89     | 174576     |
| Poland  | 1995           | FemaleAge90to94     | 50101      |
| Poland  | 1995           | FemaleAge95to99     | 7387       |
| Poland  | 1995           | FemaleAgeAbove100   | 575        |
| Poland  | 1995           | FemaleLactAge15to19 | 45538      |
| Poland  | 1995           | FemaleLactAge20to24 | 184066     |
| Poland  | 1995           | FemaleLactAge25to29 | 133390     |
| Poland  | 1995           | FemaleLactAge30to34 | 85834      |
| Poland  | 1995           | FemaleLactAge35to39 | 46993      |
| Poland  | 1995           | FemaleLactAge40to44 | 11021      |
| Poland  | 1995           | FemaleLactAge45to49 | 363        |
| Poland  | 1995           | FemalePregAge15to19 | 34153      |
| Poland  | 1995           | FemalePregAge20to24 | 138049     |
| Poland  | 1995           | FemalePregAge25to29 | 100043     |
| Poland  | 1995           | FemalePregAge30to34 | 64375      |
| Poland  | 1995           | FemalePregAge35to39 | 35245      |
| Poland  | 1995           | FemalePregAge40to44 | 8265       |
| Poland  | 1995           | FemalePregAge45to49 | 272        |
| Poland  | 1995           | MaleAge0to4         | 1283308    |
| Poland  | 1995           | MaleAge10to14       | 1722958    |
| Poland  | 1995           | MaleAge15to19       | 1626648    |
| Poland  | 1995           | MaleAge20to24       | 1428562    |
| Poland  | 1995           | MaleAge25to29       | 1223197    |
| Poland  | 1995           | MaleAge30to34       | 1323278    |
| Poland  | 1995           | MaleAge35to39       | 1627094    |
| Poland  | 1995           | MaleAge40to44       | 1595036    |
| Poland  | 1995           | MaleAge45to49       | 1269817    |

Dietary calcium and zinc deficiency risks are decreasing but remain prevalent

| Country | Reference year | Age/gender group    | Population |
|---------|----------------|---------------------|------------|
| Poland  | 1995           | MaleAge50to54       | 809142     |
| Poland  | 1995           | MaleAge55to59       | 864591     |
| Poland  | 1995           | MaleAge5to9         | 1490700    |
| Poland  | 1995           | MaleAge60to64       | 832022     |
| Poland  | 1995           | MaleAge65to69       | 678098     |
| Poland  | 1995           | MaleAge70to74       | 478587     |
| Poland  | 1995           | MaleAge75to79       | 201932     |
| Poland  | 1995           | MaleAge80to84       | 162818     |
| Poland  | 1995           | MaleAge85to89       | 66596      |
| Poland  | 1995           | MaleAge90to94       | 15280      |
| Poland  | 1995           | MaleAge95to99       | 1883       |
| Poland  | 1995           | MaleAgeAbov e100    | 138        |
| Poland  | 1996           | FemaleAge0to4       | 1196120    |
| Poland  | 1996           | FemaleAge10to14     | 1625963    |
| Poland  | 1996           | FemaleAge15to19     | 1532623    |
| Poland  | 1996           | FemaleAge20to24     | 1154809    |
| Poland  | 1996           | FemaleAge25to29     | 985216     |
| Poland  | 1996           | FemaleAge30to34     | 1127618    |
| Poland  | 1996           | FemaleAge35to39     | 1491558    |
| Poland  | 1996           | FemaleAge40to44     | 1614028    |
| Poland  | 1996           | FemaleAge45to49     | 1387368    |
| Poland  | 1996           | FemaleAge50to54     | 918993     |
| Poland  | 1996           | FemaleAge55to59     | 949974     |
| Poland  | 1996           | FemaleAge5to9       | 1370554    |
| Poland  | 1996           | FemaleAge60to64     | 991705     |
| Poland  | 1996           | FemaleAge65to69     | 937460     |
| Poland  | 1996           | FemaleAge70to74     | 806818     |
| Poland  | 1996           | FemaleAge75to79     | 404106     |
| Poland  | 1996           | FemaleAge80to84     | 332549     |
| Poland  | 1996           | FemaleAge85to89     | 186932     |
| Poland  | 1996           | FemaleAge90to94     | 57456      |
| Poland  | 1996           | FemaleAge95to99     | 8264       |
| Poland  | 1996           | FemaleAgeAbov e100  | 608        |
| Poland  | 1996           | FemaleLactAge15to19 | 32662      |
| Poland  | 1996           | FemaleLactAge20to24 | 146605     |
| Poland  | 1996           | FemaleLactAge25to29 | 117224     |
| Poland  | 1996           | FemaleLactAge30to34 | 62860      |
| Poland  | 1996           | FemaleLactAge35to39 | 35143      |
| Poland  | 1996           | FemaleLactAge40to44 | 9302       |
| Poland  | 1996           | FemaleLactAge45to49 | 368        |
| Poland  | 1996           | FemalePregAge15to19 | 24496      |
| Poland  | 1996           | FemalePregAge20to24 | 109954     |
| Poland  | 1996           | FemalePregAge25to29 | 87918      |
| Poland  | 1996           | FemalePregAge30to34 | 47145      |
| Poland  | 1996           | FemalePregAge35to39 | 26358      |
| Poland  | 1996           | FemalePregAge40to44 | 6977       |
| Poland  | 1996           | FemalePregAge45to49 | 276        |
| Poland  | 1996           | MaleAge0to4         | 1256158    |
| Poland  | 1996           | MaleAge10to14       | 1694282    |
| Poland  | 1996           | MaleAge15to19       | 1651586    |
| Poland  | 1996           | MaleAge20to24       | 1464285    |
| Poland  | 1996           | MaleAge25to29       | 1239203    |
| Poland  | 1996           | MaleAge30to34       | 1270562    |
| Poland  | 1996           | MaleAge35to39       | 1571245    |
| Poland  | 1996           | MaleAge40to44       | 1613346    |
| Poland  | 1996           | MaleAge45to49       | 1340783    |
| Poland  | 1996           | MaleAge50to54       | 852004     |
| Poland  | 1996           | MaleAge55to59       | 828117     |
| Poland  | 1996           | MaleAge5to9         | 1437722    |
| Poland  | 1996           | MaleAge60to64       | 824154     |
| Poland  | 1996           | MaleAge65to69       | 683923     |
| Poland  | 1996           | MaleAge70to74       | 497255     |
| Poland  | 1996           | MaleAge75to79       | 222163     |
| Poland  | 1996           | MaleAge80to84       | 151455     |
| Poland  | 1996           | MaleAge85to89       | 73393      |
| Poland  | 1996           | MaleAge90to94       | 18324      |
| Poland  | 1996           | MaleAge95to99       | 2125       |
| Poland  | 1996           | MaleAgeAbov e100    | 142        |
| Poland  | 1997           | FemaleAge0to4       | 1147410    |
| Poland  | 1997           | FemaleAge10to14     | 1583866    |
| Poland  | 1997           | FemaleAge15to19     | 1559303    |
| Poland  | 1997           | FemaleAge20to24     | 1188779    |
| Poland  | 1997           | FemaleAge25to29     | 1017725    |
| Poland  | 1997           | FemaleAge30to34     | 1088051    |
| Poland  | 1997           | FemaleAge35to39     | 1422054    |
| Poland  | 1997           | FemaleAge40to44     | 1623448    |
| Poland  | 1997           | FemaleAge45to49     | 1451298    |
| Poland  | 1997           | FemaleAge50to54     | 996291     |
| Poland  | 1997           | FemaleAge55to59     | 902576     |
| Poland  | 1997           | FemaleAge5to9       | 1327058    |
| Poland  | 1997           | FemaleAge60to64     | 986558     |
| Poland  | 1997           | FemaleAge65to69     | 935959     |
| Poland  | 1997           | FemaleAge70to74     | 820017     |
| Poland  | 1997           | FemaleAge75to79     | 462810     |
| Poland  | 1997           | FemaleAge80to84     | 294639     |
| Poland  | 1997           | FemaleAge85to89     | 200037     |
| Poland  | 1997           | FemaleAge90to94     | 62095      |
| Poland  | 1997           | FemaleAge95to99     | 9590       |



Dietary calcium and zinc deficiency risks are decreasing but remain prevalent

| Country | Reference year | Age/gender group    | Population |
|---------|----------------|---------------------|------------|
| Poland  | 1997           | FemaleAgeAbove100   | 651        |
| Poland  | 1997           | FemaleLactAge15to19 | 32662      |
| Poland  | 1997           | FemaleLactAge20to24 | 146605     |
| Poland  | 1997           | FemaleLactAge25to29 | 117224     |
| Poland  | 1997           | FemaleLactAge30to34 | 62860      |
| Poland  | 1997           | FemaleLactAge35to39 | 35143      |
| Poland  | 1997           | FemaleLactAge40to44 | 9302       |
| Poland  | 1997           | FemaleLactAge45to49 | 368        |
| Poland  | 1997           | FemalePregAge15to19 | 24496      |
| Poland  | 1997           | FemalePregAge20to24 | 109954     |
| Poland  | 1997           | FemalePregAge25to29 | 87918      |
| Poland  | 1997           | FemalePregAge30to34 | 47145      |
| Poland  | 1997           | FemalePregAge35to39 | 26358      |
| Poland  | 1997           | FemalePregAge40to44 | 6977       |
| Poland  | 1997           | FemalePregAge45to49 | 276        |
| Poland  | 1997           | MaleAge0to4         | 1205970    |
| Poland  | 1997           | MaleAge10to14       | 1652395    |
| Poland  | 1997           | MaleAge15to19       | 1677880    |
| Poland  | 1997           | MaleAge20to24       | 1497227    |
| Poland  | 1997           | MaleAge25to29       | 1270110    |
| Poland  | 1997           | MaleAge30to34       | 1232691    |
| Poland  | 1997           | MaleAge35to39       | 1501191    |
| Poland  | 1997           | MaleAge40to44       | 1624075    |
| Poland  | 1997           | MaleAge45to49       | 1401479    |
| Poland  | 1997           | MaleAge50to54       | 926816     |
| Poland  | 1997           | MaleAge55to59       | 784615     |
| Poland  | 1997           | MaleAge5to9         | 1393050    |
| Poland  | 1997           | MaleAge60to64       | 816652     |
| Poland  | 1997           | MaleAge65to69       | 691116     |
| Poland  | 1997           | MaleAge70to74       | 508327     |
| Poland  | 1997           | MaleAge75to79       | 253004     |
| Poland  | 1997           | MaleAge80to84       | 134144     |
| Poland  | 1997           | MaleAge85to89       | 80108      |
| Poland  | 1997           | MaleAge90to94       | 20270      |
| Poland  | 1997           | MaleAge95to99       | 2510       |
| Poland  | 1997           | MaleAgeAbove100     | 149        |
| Poland  | 1998           | FemaleAge0to4       | 1082623    |
| Poland  | 1998           | FemaleAge10to14     | 1532004    |
| Poland  | 1998           | FemaleAge15to19     | 1581398    |
| Poland  | 1998           | FemaleAge20to24     | 1220691    |
| Poland  | 1998           | FemaleAge25to29     | 1059552    |
| Poland  | 1998           | FemaleAge30to34     | 1063773    |
| Poland  | 1998           | FemaleAge35to39     | 1345450    |
| Poland  | 1998           | FemaleAge40to44     | 1620987    |
| Poland  | 1998           | FemaleAge45to49     | 1504235    |
| Poland  | 1998           | FemaleAge50to54     | 1094859    |
| Poland  | 1998           | FemaleAge55to59     | 858284     |
| Poland  | 1998           | FemaleAge5to9       | 1291788    |
| Poland  | 1998           | FemaleAge60to64     | 980869     |
| Poland  | 1998           | FemaleAge65to69     | 935490     |
| Poland  | 1998           | FemaleAge70to74     | 824317     |
| Poland  | 1998           | FemaleAge75to79     | 532090     |
| Poland  | 1998           | FemaleAge80to84     | 259851     |
| Poland  | 1998           | FemaleAge85to89     | 208668     |
| Poland  | 1998           | FemaleAge90to94     | 63911      |
| Poland  | 1998           | FemaleAge95to99     | 10930      |
| Poland  | 1998           | FemaleAgeAbove100   | 700        |
| Poland  | 1998           | FemaleLactAge15to19 | 32662      |
| Poland  | 1998           | FemaleLactAge20to24 | 146605     |
| Poland  | 1998           | FemaleLactAge25to29 | 117224     |
| Poland  | 1998           | FemaleLactAge30to34 | 62860      |
| Poland  | 1998           | FemaleLactAge35to39 | 35143      |
| Poland  | 1998           | FemaleLactAge40to44 | 9302       |
| Poland  | 1998           | FemaleLactAge45to49 | 368        |
| Poland  | 1998           | FemalePregAge15to19 | 24496      |
| Poland  | 1998           | FemalePregAge20to24 | 109954     |
| Poland  | 1998           | FemalePregAge25to29 | 87918      |
| Poland  | 1998           | FemalePregAge30to34 | 47145      |
| Poland  | 1998           | FemalePregAge35to39 | 26358      |
| Poland  | 1998           | FemalePregAge40to44 | 6977       |
| Poland  | 1998           | FemalePregAge45to49 | 276        |
| Poland  | 1998           | MaleAge0to4         | 1139721    |
| Poland  | 1998           | MaleAge10to14       | 1601383    |
| Poland  | 1998           | MaleAge15to19       | 1700515    |
| Poland  | 1998           | MaleAge20to24       | 1528495    |
| Poland  | 1998           | MaleAge25to29       | 1310179    |
| Poland  | 1998           | MaleAge30to34       | 1210244    |
| Poland  | 1998           | MaleAge35to39       | 1424622    |
| Poland  | 1998           | MaleAge40to44       | 1624378    |
| Poland  | 1998           | MaleAge45to49       | 1452103    |
| Poland  | 1998           | MaleAge50to54       | 1021053    |
| Poland  | 1998           | MaleAge55to59       | 746137     |
| Poland  | 1998           | MaleAge5to9         | 1355996    |
| Poland  | 1998           | MaleAge60to64       | 807365     |
| Poland  | 1998           | MaleAge65to69       | 698414     |
| Poland  | 1998           | MaleAge70to74       | 515339     |
| Poland  | 1998           | MaleAge75to79       | 286869     |
| Poland  | 1998           | MaleAge80to84       | 118238     |

Dietary calcium and zinc deficiency risks are decreasing but remain prevalent

| Country  | Reference year | Age/gender group    | Population |
|----------|----------------|---------------------|------------|
| Poland   | 1998           | MaleAge85to89       | 83803      |
| Poland   | 1998           | MaleAge90to94       | 21081      |
| Poland   | 1998           | MaleAge95to99       | 2943       |
| Poland   | 1998           | MaleAgeAbove100     | 158        |
| Poland   | 1999           | FemaleAge0to4       | 1018969    |
| Poland   | 1999           | FemaleAge10to14     | 1478589    |
| Poland   | 1999           | FemaleAge15to19     | 1591023    |
| Poland   | 1999           | FemaleAge20to24     | 1252114    |
| Poland   | 1999           | FemaleAge25to29     | 1102584    |
| Poland   | 1999           | FemaleAge30to34     | 1054263    |
| Poland   | 1999           | FemaleAge35to39     | 1272642    |
| Poland   | 1999           | FemaleAge40to44     | 1602577    |
| Poland   | 1999           | FemaleAge45to49     | 1547108    |
| Poland   | 1999           | FemaleAge50to54     | 1194074    |
| Poland   | 1999           | FemaleAge55to59     | 836978     |
| Poland   | 1999           | FemaleAge5to9       | 1259186    |
| Poland   | 1999           | FemaleAge60to64     | 967975     |
| Poland   | 1999           | FemaleAge65to69     | 934917     |
| Poland   | 1999           | FemaleAge70to74     | 827573     |
| Poland   | 1999           | FemaleAge75to79     | 592912     |
| Poland   | 1999           | FemaleAge80to84     | 245510     |
| Poland   | 1999           | FemaleAge85to89     | 206472     |
| Poland   | 1999           | FemaleAge90to94     | 63729      |
| Poland   | 1999           | FemaleAge95to99     | 11585      |
| Poland   | 1999           | FemaleAgeAbove100   | 752        |
| Poland   | 1999           | FemaleLactAge15to19 | 32662      |
| Poland   | 1999           | FemaleLactAge20to24 | 146605     |
| Poland   | 1999           | FemaleLactAge25to29 | 117224     |
| Poland   | 1999           | FemaleLactAge30to34 | 62860      |
| Poland   | 1999           | FemaleLactAge35to39 | 35143      |
| Poland   | 1999           | FemaleLactAge40to44 | 9302       |
| Poland   | 1999           | FemaleLactAge45to49 | 368        |
| Poland   | 1999           | FemalePregAge15to19 | 24496      |
| Poland   | 1999           | FemalePregAge20to24 | 109954     |
| Poland   | 1999           | FemalePregAge25to29 | 87918      |
| Poland   | 1999           | FemalePregAge30to34 | 47145      |
| Poland   | 1999           | FemalePregAge35to39 | 26358      |
| Poland   | 1999           | FemalePregAge40to44 | 6977       |
| Poland   | 1999           | FemalePregAge45to49 | 276        |
| Poland   | 1999           | MaleAge0to4         | 1074387    |
| Poland   | 1999           | MaleAge10to14       | 1548924    |
| Poland   | 1999           | MaleAge15to19       | 1711426    |
| Poland   | 1999           | MaleAge20to24       | 1559554    |
| Poland   | 1999           | MaleAge25to29       | 1351698    |
| Poland   | 1999           | MaleAge30to34       | 1201890    |
| Poland   | 1999           | MaleAge35to39       | 1352878    |
| Poland   | 1999           | MaleAge40to44       | 1609264    |
| Poland   | 1999           | MaleAge45to49       | 1493847    |
| Poland   | 1999           | MaleAge50to54       | 1115415    |
| Poland   | 1999           | MaleAge55to59       | 730265     |
| Poland   | 1999           | MaleAge5to9         | 1320983    |
| Poland   | 1999           | MaleAge60to64       | 792522     |
| Poland   | 1999           | MaleAge65to69       | 703498     |
| Poland   | 1999           | MaleAge70to74       | 522277     |
| Poland   | 1999           | MaleAge75to79       | 315184     |
| Poland   | 1999           | MaleAge80to84       | 111664     |
| Poland   | 1999           | MaleAge85to89       | 81400      |
| Poland   | 1999           | MaleAge90to94       | 20963      |
| Poland   | 1999           | MaleAge95to99       | 3193       |
| Poland   | 1999           | MaleAgeAbove100     | 168        |
| Portugal | 1992           | FemaleAge0to4       | 268716     |
| Portugal | 1992           | FemaleAge10to14     | 370048     |
| Portugal | 1992           | FemaleAge15to19     | 393007     |
| Portugal | 1992           | FemaleAge20to24     | 336167     |
| Portugal | 1992           | FemaleAge25to29     | 304001     |
| Portugal | 1992           | FemaleAge30to34     | 319298     |
| Portugal | 1992           | FemaleAge35to39     | 328919     |
| Portugal | 1992           | FemaleAge40to44     | 327289     |
| Portugal | 1992           | FemaleAge45to49     | 301405     |
| Portugal | 1992           | FemaleAge50to54     | 293321     |
| Portugal | 1992           | FemaleAge55to59     | 299134     |
| Portugal | 1992           | FemaleAge5to9       | 302712     |
| Portugal | 1992           | FemaleAge60to64     | 289929     |
| Portugal | 1992           | FemaleAge65to69     | 263698     |
| Portugal | 1992           | FemaleAge70to74     | 202651     |
| Portugal | 1992           | FemaleAge75to79     | 160562     |
| Portugal | 1992           | FemaleAge80to84     | 118968     |
| Portugal | 1992           | FemaleAge85to89     | 60510      |
| Portugal | 1992           | FemaleAge90to94     | 19448      |
| Portugal | 1992           | FemaleAge95to99     | 2981       |
| Portugal | 1992           | FemaleAgeAbove100   | 208        |
| Portugal | 1992           | FemaleLactAge15to19 | 8935       |
| Portugal | 1992           | FemaleLactAge20to24 | 30345      |
| Portugal | 1992           | FemaleLactAge25to29 | 39356      |
| Portugal | 1992           | FemaleLactAge30to34 | 24091      |
| Portugal | 1992           | FemaleLactAge35to39 | 8313       |
| Portugal | 1992           | FemaleLactAge40to44 | 1803       |
| Portugal | 1992           | FemaleLactAge45to49 | 118        |

Dietary calcium and zinc deficiency risks are decreasing but remain prevalent

| Country  | Reference year | Age/gender group    | Population |
|----------|----------------|---------------------|------------|
| Portugal | 1992           | FemalePregAge15to19 | 6702       |
| Portugal | 1992           | FemalePregAge20to24 | 22758      |
| Portugal | 1992           | FemalePregAge25to29 | 29517      |
| Portugal | 1992           | FemalePregAge30to34 | 18069      |
| Portugal | 1992           | FemalePregAge35to39 | 6235       |
| Portugal | 1992           | FemalePregAge40to44 | 1352       |
| Portugal | 1992           | FemalePregAge45to49 | 88         |
| Portugal | 1992           | MaleAge0to4         | 282218     |
| Portugal | 1992           | MaleAge10to14       | 385431     |
| Portugal | 1992           | MaleAge15to19       | 420224     |
| Portugal | 1992           | MaleAge20to24       | 396365     |
| Portugal | 1992           | MaleAge25to29       | 369297     |
| Portugal | 1992           | MaleAge30to34       | 349422     |
| Portugal | 1992           | MaleAge35to39       | 328151     |
| Portugal | 1992           | MaleAge40to44       | 310247     |
| Portugal | 1992           | MaleAge45to49       | 276584     |
| Portugal | 1992           | MaleAge50to54       | 264440     |
| Portugal | 1992           | MaleAge55to59       | 264286     |
| Portugal | 1992           | MaleAge5to9         | 318441     |
| Portugal | 1992           | MaleAge60to64       | 246404     |
| Portugal | 1992           | MaleAge65to69       | 214868     |
| Portugal | 1992           | MaleAge70to74       | 155558     |
| Portugal | 1992           | MaleAge75to79       | 109254     |
| Portugal | 1992           | MaleAge80to84       | 68256      |
| Portugal | 1992           | MaleAge85to89       | 27405      |
| Portugal | 1992           | MaleAge90to94       | 6853       |
| Portugal | 1992           | MaleAge95to99       | 903        |
| Portugal | 1992           | MaleAgeAbov e100    | 54         |
| Portugal | 1993           | FemaleAge0to4       | 268257     |
| Portugal | 1993           | FemaleAge10to14     | 357716     |
| Portugal | 1993           | FemaleAge15to19     | 389591     |
| Portugal | 1993           | FemaleAge20to24     | 343289     |
| Portugal | 1993           | FemaleAge25to29     | 304531     |
| Portugal | 1993           | FemaleAge30to34     | 324944     |
| Portugal | 1993           | FemaleAge35to39     | 333395     |
| Portugal | 1993           | FemaleAge40to44     | 330727     |
| Portugal | 1993           | FemaleAge45to49     | 309817     |
| Portugal | 1993           | FemaleAge50to54     | 291389     |
| Portugal | 1993           | FemaleAge55to59     | 299482     |
| Portugal | 1993           | FemaleAge5to9       | 292859     |
| Portugal | 1993           | FemaleAge60to64     | 292042     |
| Portugal | 1993           | FemaleAge65to69     | 267248     |
| Portugal | 1993           | FemaleAge70to74     | 213018     |
| Portugal | 1993           | FemaleAge75to79     | 158452     |
| Portugal | 1993           | FemaleAge80to84     | 122573     |
| Portugal | 1993           | FemaleAge85to89     | 62302      |
| Portugal | 1993           | FemaleAge90to94     | 20529      |
| Portugal | 1993           | FemaleAge95to99     | 3356       |
| Portugal | 1993           | FemaleAgeAbov e100  | 225        |
| Portugal | 1993           | FemaleLactAge15to19 | 8935       |
| Portugal | 1993           | FemaleLactAge20to24 | 30345      |
| Portugal | 1993           | FemaleLactAge25to29 | 39356      |
| Portugal | 1993           | FemaleLactAge30to34 | 24091      |
| Portugal | 1993           | FemaleLactAge35to39 | 8313       |
| Portugal | 1993           | FemaleLactAge40to44 | 1803       |
| Portugal | 1993           | FemaleLactAge45to49 | 118        |
| Portugal | 1993           | FemalePregAge15to19 | 6702       |
| Portugal | 1993           | FemalePregAge20to24 | 22758      |
| Portugal | 1993           | FemalePregAge25to29 | 29517      |
| Portugal | 1993           | FemalePregAge30to34 | 18069      |
| Portugal | 1993           | FemalePregAge35to39 | 6235       |
| Portugal | 1993           | FemalePregAge40to44 | 1352       |
| Portugal | 1993           | FemalePregAge45to49 | 88         |
| Portugal | 1993           | MaleAge0to4         | 282081     |
| Portugal | 1993           | MaleAge10to14       | 373184     |
| Portugal | 1993           | MaleAge15to19       | 417207     |
| Portugal | 1993           | MaleAge20to24       | 403465     |
| Portugal | 1993           | MaleAge25to29       | 371809     |
| Portugal | 1993           | MaleAge30to34       | 355443     |
| Portugal | 1993           | MaleAge35to39       | 333048     |
| Portugal | 1993           | MaleAge40to44       | 314601     |
| Portugal | 1993           | MaleAge45to49       | 285413     |
| Portugal | 1993           | MaleAge50to54       | 262662     |
| Portugal | 1993           | MaleAge55to59       | 265138     |
| Portugal | 1993           | MaleAge5to9         | 307806     |
| Portugal | 1993           | MaleAge60to64       | 248953     |
| Portugal | 1993           | MaleAge65to69       | 217151     |
| Portugal | 1993           | MaleAge70to74       | 163599     |
| Portugal | 1993           | MaleAge75to79       | 107938     |
| Portugal | 1993           | MaleAge80to84       | 71220      |
| Portugal | 1993           | MaleAge85to89       | 28478      |
| Portugal | 1993           | MaleAge90to94       | 7312       |
| Portugal | 1993           | MaleAge95to99       | 1054       |
| Portugal | 1993           | MaleAgeAbov e100    | 58         |
| Portugal | 1994           | FemaleAge0to4       | 268541     |
| Portugal | 1994           | FemaleAge10to14     | 345366     |
| Portugal | 1994           | FemaleAge15to19     | 384625     |
| Portugal | 1994           | FemaleAge20to24     | 349016     |

Dietary calcium and zinc deficiency risks are decreasing but remain prevalent

| Country  | Reference year | Age/gender group    | Population |
|----------|----------------|---------------------|------------|
| Portugal | 1994           | FemaleAge25to29     | 305782     |
| Portugal | 1994           | FemaleAge30to34     | 330120     |
| Portugal | 1994           | FemaleAge35to39     | 338130     |
| Portugal | 1994           | FemaleAge40to44     | 334409     |
| Portugal | 1994           | FemaleAge45to49     | 318042     |
| Portugal | 1994           | FemaleAge50to54     | 291279     |
| Portugal | 1994           | FemaleAge55to59     | 299379     |
| Portugal | 1994           | FemaleAge5to9       | 284078     |
| Portugal | 1994           | FemaleAge60to64     | 294318     |
| Portugal | 1994           | FemaleAge65to69     | 270701     |
| Portugal | 1994           | FemaleAge70to74     | 223420     |
| Portugal | 1994           | FemaleAge75to79     | 157996     |
| Portugal | 1994           | FemaleAge80to84     | 126712     |
| Portugal | 1994           | FemaleAge85to89     | 63453      |
| Portugal | 1994           | FemaleAge90to94     | 20867      |
| Portugal | 1994           | FemaleAge95to99     | 3598       |
| Portugal | 1994           | FemaleAgeAbove100   | 243        |
| Portugal | 1994           | FemaleLactAge15to19 | 8935       |
| Portugal | 1994           | FemaleLactAge20to24 | 30345      |
| Portugal | 1994           | FemaleLactAge25to29 | 39356      |
| Portugal | 1994           | FemaleLactAge30to34 | 24091      |
| Portugal | 1994           | FemaleLactAge35to39 | 8313       |
| Portugal | 1994           | FemaleLactAge40to44 | 1803       |
| Portugal | 1994           | FemaleLactAge45to49 | 118        |
| Portugal | 1994           | FemalePregAge15to19 | 6702       |
| Portugal | 1994           | FemalePregAge20to24 | 22758      |
| Portugal | 1994           | FemalePregAge25to29 | 29517      |
| Portugal | 1994           | FemalePregAge30to34 | 18069      |
| Portugal | 1994           | FemalePregAge35to39 | 6235       |
| Portugal | 1994           | FemalePregAge40to44 | 1352       |
| Portugal | 1994           | FemalePregAge45to49 | 88         |
| Portugal | 1994           | MaleAge0to4         | 282816     |
| Portugal | 1994           | MaleAge10to14       | 360845     |
| Portugal | 1994           | MaleAge15to19       | 412726     |
| Portugal | 1994           | MaleAge20to24       | 409270     |
| Portugal | 1994           | MaleAge25to29       | 374757     |
| Portugal | 1994           | MaleAge30to34       | 361190     |
| Portugal | 1994           | MaleAge35to39       | 338257     |
| Portugal | 1994           | MaleAge40to44       | 319122     |
| Portugal | 1994           | MaleAge45to49       | 294243     |
| Portugal | 1994           | MaleAge50to54       | 262785     |
| Portugal | 1994           | MaleAge55to59       | 265569     |
| Portugal | 1994           | MaleAge5to9         | 298228     |
| Portugal | 1994           | MaleAge60to64       | 251899     |
| Portugal | 1994           | MaleAge65to69       | 219729     |
| Portugal | 1994           | MaleAge70to74       | 171455     |
| Portugal | 1994           | MaleAge75to79       | 107999     |
| Portugal | 1994           | MaleAge80to84       | 73829      |
| Portugal | 1994           | MaleAge85to89       | 28916      |
| Portugal | 1994           | MaleAge90to94       | 7458       |
| Portugal | 1994           | MaleAge95to99       | 1129       |
| Portugal | 1994           | MaleAgeAbove100     | 64         |
| Portugal | 1995           | FemaleAge0to4       | 268633     |
| Portugal | 1995           | FemaleAge10to14     | 333439     |
| Portugal | 1995           | FemaleAge15to19     | 378073     |
| Portugal | 1995           | FemaleAge20to24     | 352267     |
| Portugal | 1995           | FemaleAge25to29     | 308604     |
| Portugal | 1995           | FemaleAge30to34     | 334031     |
| Portugal | 1995           | FemaleAge35to39     | 343122     |
| Portugal | 1995           | FemaleAge40to44     | 338626     |
| Portugal | 1995           | FemaleAge45to49     | 324959     |
| Portugal | 1995           | FemaleAge50to54     | 293661     |
| Portugal | 1995           | FemaleAge55to59     | 298727     |
| Portugal | 1995           | FemaleAge5to9       | 276109     |
| Portugal | 1995           | FemaleAge60to64     | 296430     |
| Portugal | 1995           | FemaleAge65to69     | 274519     |
| Portugal | 1995           | FemaleAge70to74     | 232336     |
| Portugal | 1995           | FemaleAge75to79     | 160847     |
| Portugal | 1995           | FemaleAge80to84     | 130066     |
| Portugal | 1995           | FemaleAge85to89     | 64881      |
| Portugal | 1995           | FemaleAge90to94     | 20519      |
| Portugal | 1995           | FemaleAge95to99     | 3286       |
| Portugal | 1995           | FemaleAgeAbove100   | 261        |
| Portugal | 1995           | FemaleLactAge15to19 | 8935       |
| Portugal | 1995           | FemaleLactAge20to24 | 30345      |
| Portugal | 1995           | FemaleLactAge25to29 | 39356      |
| Portugal | 1995           | FemaleLactAge30to34 | 24091      |
| Portugal | 1995           | FemaleLactAge35to39 | 8313       |
| Portugal | 1995           | FemaleLactAge40to44 | 1803       |
| Portugal | 1995           | FemaleLactAge45to49 | 118        |
| Portugal | 1995           | FemalePregAge15to19 | 6702       |
| Portugal | 1995           | FemalePregAge20to24 | 22758      |
| Portugal | 1995           | FemalePregAge25to29 | 29517      |
| Portugal | 1995           | FemalePregAge30to34 | 18069      |
| Portugal | 1995           | FemalePregAge35to39 | 6235       |
| Portugal | 1995           | FemalePregAge40to44 | 1352       |
| Portugal | 1995           | FemalePregAge45to49 | 88         |
| Portugal | 1995           | MaleAge0to4         | 283125     |

Dietary calcium and zinc deficiency risks are decreasing but remain prevalent

| Country  | Reference year | Age/gender group    | Population |
|----------|----------------|---------------------|------------|
| Portugal | 1995           | MaleAge10to14       | 348761     |
| Portugal | 1995           | MaleAge15to19       | 406668     |
| Portugal | 1995           | MaleAge20to24       | 412864     |
| Portugal | 1995           | MaleAge25to29       | 378798     |
| Portugal | 1995           | MaleAge30to34       | 366009     |
| Portugal | 1995           | MaleAge35to39       | 343730     |
| Portugal | 1995           | MaleAge40to44       | 324078     |
| Portugal | 1995           | MaleAge45to49       | 301935     |
| Portugal | 1995           | MaleAge50to54       | 265542     |
| Portugal | 1995           | MaleAge55to59       | 265477     |
| Portugal | 1995           | MaleAge5to9         | 289637     |
| Portugal | 1995           | MaleAge60to64       | 254798     |
| Portugal | 1995           | MaleAge65to69       | 223095     |
| Portugal | 1995           | MaleAge70to74       | 178101     |
| Portugal | 1995           | MaleAge75to79       | 110514     |
| Portugal | 1995           | MaleAge80to84       | 75412      |
| Portugal | 1995           | MaleAge85to89       | 29281      |
| Portugal | 1995           | MaleAge90to94       | 7133       |
| Portugal | 1995           | MaleAge95to99       | 948        |
| Portugal | 1995           | MaleAgeAbove100     | 69         |
| Portugal | 1996           | FemaleAge0to4       | 272239     |
| Portugal | 1996           | FemaleAge10to14     | 322307     |
| Portugal | 1996           | FemaleAge15to19     | 371789     |
| Portugal | 1996           | FemaleAge20to24     | 362075     |
| Portugal | 1996           | FemaleAge25to29     | 314233     |
| Portugal | 1996           | FemaleAge30to34     | 328300     |
| Portugal | 1996           | FemaleAge35to39     | 344020     |
| Portugal | 1996           | FemaleAge40to44     | 342471     |
| Portugal | 1996           | FemaleAge45to49     | 330294     |
| Portugal | 1996           | FemaleAge50to54     | 297874     |
| Portugal | 1996           | FemaleAge55to59     | 297049     |
| Portugal | 1996           | FemaleAge5to9       | 270741     |
| Portugal | 1996           | FemaleAge60to64     | 297445     |
| Portugal | 1996           | FemaleAge65to69     | 276898     |
| Portugal | 1996           | FemaleAge70to74     | 237600     |
| Portugal | 1996           | FemaleAge75to79     | 165227     |
| Portugal | 1996           | FemaleAge80to84     | 127385     |
| Portugal | 1996           | FemaleAge85to89     | 68828      |
| Portugal | 1996           | FemaleAge90to94     | 23069      |
| Portugal | 1996           | FemaleAge95to99     | 3690       |
| Portugal | 1996           | FemaleAgeAbove100   | 280        |
| Portugal | 1996           | FemaleLactAge15to19 | 7643       |
| Portugal | 1996           | FemaleLactAge20to24 | 25149      |
| Portugal | 1996           | FemaleLactAge25to29 | 38636      |
| Portugal | 1996           | FemaleLactAge30to34 | 29126      |
| Portugal | 1996           | FemaleLactAge35to39 | 10994      |
| Portugal | 1996           | FemaleLactAge40to44 | 1979       |
| Portugal | 1996           | FemaleLactAge45to49 | 123        |
| Portugal | 1996           | FemalePregAge15to19 | 5733       |
| Portugal | 1996           | FemalePregAge20to24 | 18862      |
| Portugal | 1996           | FemalePregAge25to29 | 28977      |
| Portugal | 1996           | FemalePregAge30to34 | 21844      |
| Portugal | 1996           | FemalePregAge35to39 | 8246       |
| Portugal | 1996           | FemalePregAge40to44 | 1484       |
| Portugal | 1996           | FemalePregAge45to49 | 92         |
| Portugal | 1996           | MaleAge0to4         | 286998     |
| Portugal | 1996           | MaleAge10to14       | 337084     |
| Portugal | 1996           | MaleAge15to19       | 398152     |
| Portugal | 1996           | MaleAge20to24       | 413809     |
| Portugal | 1996           | MaleAge25to29       | 383709     |
| Portugal | 1996           | MaleAge30to34       | 370135     |
| Portugal | 1996           | MaleAge35to39       | 349646     |
| Portugal | 1996           | MaleAge40to44       | 328758     |
| Portugal | 1996           | MaleAge45to49       | 307792     |
| Portugal | 1996           | MaleAge50to54       | 269783     |
| Portugal | 1996           | MaleAge55to59       | 263766     |
| Portugal | 1996           | MaleAge5to9         | 283918     |
| Portugal | 1996           | MaleAge60to64       | 256086     |
| Portugal | 1996           | MaleAge65to69       | 225213     |
| Portugal | 1996           | MaleAge70to74       | 181699     |
| Portugal | 1996           | MaleAge75to79       | 114662     |
| Portugal | 1996           | MaleAge80to84       | 74698      |
| Portugal | 1996           | MaleAge85to89       | 32489      |
| Portugal | 1996           | MaleAge90to94       | 8364       |
| Portugal | 1996           | MaleAge95to99       | 1088       |
| Portugal | 1996           | MaleAgeAbove100     | 75         |
| Portugal | 1997           | FemaleAge0to4       | 271607     |
| Portugal | 1997           | FemaleAge10to14     | 311737     |
| Portugal | 1997           | FemaleAge15to19     | 362072     |
| Portugal | 1997           | FemaleAge20to24     | 361343     |
| Portugal | 1997           | FemaleAge25to29     | 319856     |
| Portugal | 1997           | FemaleAge30to34     | 329373     |
| Portugal | 1997           | FemaleAge35to39     | 350812     |
| Portugal | 1997           | FemaleAge40to44     | 346865     |
| Portugal | 1997           | FemaleAge45to49     | 334833     |
| Portugal | 1997           | FemaleAge50to54     | 304641     |
| Portugal | 1997           | FemaleAge55to59     | 294990     |
| Portugal | 1997           | FemaleAge5to9       | 267642     |

Dietary calcium and zinc deficiency risks are decreasing but remain prevalent

| Country  | Reference year | Age/gender group    | Population |
|----------|----------------|---------------------|------------|
| Portugal | 1997           | FemaleAge60to64     | 298386     |
| Portugal | 1997           | FemaleAge65to69     | 280058     |
| Portugal | 1997           | FemaleAge70to74     | 241817     |
| Portugal | 1997           | FemaleAge75to79     | 173158     |
| Portugal | 1997           | FemaleAge80to84     | 123183     |
| Portugal | 1997           | FemaleAge85to89     | 72644      |
| Portugal | 1997           | FemaleAge90to94     | 24786      |
| Portugal | 1997           | FemaleAge95to99     | 4290       |
| Portugal | 1997           | FemaleAgeAbove100   | 300        |
| Portugal | 1997           | FemaleLactAge15to19 | 7643       |
| Portugal | 1997           | FemaleLactAge20to24 | 25149      |
| Portugal | 1997           | FemaleLactAge25to29 | 38636      |
| Portugal | 1997           | FemaleLactAge30to34 | 29126      |
| Portugal | 1997           | FemaleLactAge35to39 | 10994      |
| Portugal | 1997           | FemaleLactAge40to44 | 1979       |
| Portugal | 1997           | FemaleLactAge45to49 | 123        |
| Portugal | 1997           | FemalePregAge15to19 | 5733       |
| Portugal | 1997           | FemalePregAge20to24 | 18862      |
| Portugal | 1997           | FemalePregAge25to29 | 28977      |
| Portugal | 1997           | FemalePregAge30to34 | 21844      |
| Portugal | 1997           | FemalePregAge35to39 | 8246       |
| Portugal | 1997           | FemalePregAge40to44 | 1484       |
| Portugal | 1997           | FemalePregAge45to49 | 92         |
| Portugal | 1997           | MaleAge0to4         | 286180     |
| Portugal | 1997           | MaleAge10to14       | 326021     |
| Portugal | 1997           | MaleAge15to19       | 388550     |
| Portugal | 1997           | MaleAge20to24       | 413492     |
| Portugal | 1997           | MaleAge25to29       | 389633     |
| Portugal | 1997           | MaleAge30to34       | 372597     |
| Portugal | 1997           | MaleAge35to39       | 356552     |
| Portugal | 1997           | MaleAge40to44       | 333824     |
| Portugal | 1997           | MaleAge45to49       | 313030     |
| Portugal | 1997           | MaleAge50to54       | 276785     |
| Portugal | 1997           | MaleAge55to59       | 261697     |
| Portugal | 1997           | MaleAge5to9         | 280656     |
| Portugal | 1997           | MaleAge60to64       | 257360     |
| Portugal | 1997           | MaleAge65to69       | 228484     |
| Portugal | 1997           | MaleAge70to74       | 184401     |
| Portugal | 1997           | MaleAge75to79       | 120844     |
| Portugal | 1997           | MaleAge80to84       | 72798      |
| Portugal | 1997           | MaleAge85to89       | 35403      |
| Portugal | 1997           | MaleAge90to94       | 9179       |
| Portugal | 1997           | MaleAge95to99       | 1309       |
| Portugal | 1997           | MaleAgeAbove100     | 81         |
| Portugal | 1998           | FemaleAge0to4       | 268203     |
| Portugal | 1998           | FemaleAge10to14     | 301681     |
| Portugal | 1998           | FemaleAge15to19     | 351660     |
| Portugal | 1998           | FemaleAge20to24     | 359295     |
| Portugal | 1998           | FemaleAge25to29     | 325633     |
| Portugal | 1998           | FemaleAge30to34     | 329108     |
| Portugal | 1998           | FemaleAge35to39     | 358208     |
| Portugal | 1998           | FemaleAge40to44     | 351486     |
| Portugal | 1998           | FemaleAge45to49     | 338958     |
| Portugal | 1998           | FemaleAge50to54     | 312850     |
| Portugal | 1998           | FemaleAge55to59     | 293381     |
| Portugal | 1998           | FemaleAge5to9       | 266545     |
| Portugal | 1998           | FemaleAge60to64     | 298913     |
| Portugal | 1998           | FemaleAge65to69     | 283845     |
| Portugal | 1998           | FemaleAge70to74     | 245545     |
| Portugal | 1998           | FemaleAge75to79     | 182814     |
| Portugal | 1998           | FemaleAge80to84     | 119808     |
| Portugal | 1998           | FemaleAge85to89     | 75497      |
| Portugal | 1998           | FemaleAge90to94     | 25630      |
| Portugal | 1998           | FemaleAge95to99     | 4868       |
| Portugal | 1998           | FemaleAgeAbove100   | 321        |
| Portugal | 1998           | FemaleLactAge15to19 | 7643       |
| Portugal | 1998           | FemaleLactAge20to24 | 25149      |
| Portugal | 1998           | FemaleLactAge25to29 | 38636      |
| Portugal | 1998           | FemaleLactAge30to34 | 29126      |
| Portugal | 1998           | FemaleLactAge35to39 | 10994      |
| Portugal | 1998           | FemaleLactAge40to44 | 1979       |
| Portugal | 1998           | FemaleLactAge45to49 | 123        |
| Portugal | 1998           | FemalePregAge15to19 | 5733       |
| Portugal | 1998           | FemalePregAge20to24 | 18862      |
| Portugal | 1998           | FemalePregAge25to29 | 28977      |
| Portugal | 1998           | FemalePregAge30to34 | 21844      |
| Portugal | 1998           | FemalePregAge35to39 | 8246       |
| Portugal | 1998           | FemalePregAge40to44 | 1484       |
| Portugal | 1998           | FemalePregAge45to49 | 92         |
| Portugal | 1998           | MaleAge0to4         | 282302     |
| Portugal | 1998           | MaleAge10to14       | 315575     |
| Portugal | 1998           | MaleAge15to19       | 378310     |
| Portugal | 1998           | MaleAge20to24       | 411956     |
| Portugal | 1998           | MaleAge25to29       | 395687     |
| Portugal | 1998           | MaleAge30to34       | 373850     |
| Portugal | 1998           | MaleAge35to39       | 363937     |
| Portugal | 1998           | MaleAge40to44       | 339257     |
| Portugal | 1998           | MaleAge45to49       | 317980     |

Dietary calcium and zinc deficiency risks are decreasing but remain prevalent

| Country           | Reference year | Age/gender group    | Population |
|-------------------|----------------|---------------------|------------|
| Portugal          | 1998           | MaleAge50to54       | 285451     |
| Portugal          | 1998           | MaleAge55to59       | 260146     |
| Portugal          | 1998           | MaleAge5to9         | 279507     |
| Portugal          | 1998           | MaleAge60to64       | 258285     |
| Portugal          | 1998           | MaleAge65to69       | 232691     |
| Portugal          | 1998           | MaleAge70to74       | 186884     |
| Portugal          | 1998           | MaleAge75to79       | 127804     |
| Portugal          | 1998           | MaleAge80to84       | 71296      |
| Portugal          | 1998           | MaleAge85to89       | 37247      |
| Portugal          | 1998           | MaleAge90to94       | 9620       |
| Portugal          | 1998           | MaleAge95to99       | 1529       |
| Portugal          | 1998           | MaleAgeAbov e100    | 88         |
| Portugal          | 1999           | FemaleAge0to4       | 264611     |
| Portugal          | 1999           | FemaleAge10to14     | 292587     |
| Portugal          | 1999           | FemaleAge15to19     | 341137     |
| Portugal          | 1999           | FemaleAge20to24     | 355852     |
| Portugal          | 1999           | FemaleAge25to29     | 330038     |
| Portugal          | 1999           | FemaleAge30to34     | 329058     |
| Portugal          | 1999           | FemaleAge35to39     | 364843     |
| Portugal          | 1999           | FemaleAge40to44     | 356542     |
| Portugal          | 1999           | FemaleAge45to49     | 343220     |
| Portugal          | 1999           | FemaleAge50to54     | 320836     |
| Portugal          | 1999           | FemaleAge55to59     | 293414     |
| Portugal          | 1999           | FemaleAge5to9       | 266296     |
| Portugal          | 1999           | FemaleAge60to64     | 298845     |
| Portugal          | 1999           | FemaleAge65to69     | 287744     |
| Portugal          | 1999           | FemaleAge70to74     | 249603     |
| Portugal          | 1999           | FemaleAge75to79     | 192064     |
| Portugal          | 1999           | FemaleAge80to84     | 119607     |
| Portugal          | 1999           | FemaleAge85to89     | 76495      |
| Portugal          | 1999           | FemaleAge90to94     | 25832      |
| Portugal          | 1999           | FemaleAge95to99     | 5122       |
| Portugal          | 1999           | FemaleAgeAbov e100  | 344        |
| Portugal          | 1999           | FemaleLactAge15to19 | 7643       |
| Portugal          | 1999           | FemaleLactAge20to24 | 25149      |
| Portugal          | 1999           | FemaleLactAge25to29 | 38636      |
| Portugal          | 1999           | FemaleLactAge30to34 | 29126      |
| Portugal          | 1999           | FemaleLactAge35to39 | 10994      |
| Portugal          | 1999           | FemaleLactAge40to44 | 1979       |
| Portugal          | 1999           | FemaleLactAge45to49 | 123        |
| Portugal          | 1999           | FemalePregAge15to19 | 5733       |
| Portugal          | 1999           | FemalePregAge20to24 | 18862      |
| Portugal          | 1999           | FemalePregAge25to29 | 28977      |
| Portugal          | 1999           | FemalePregAge30to34 | 21844      |
| Portugal          | 1999           | FemalePregAge35to39 | 8246       |
| Portugal          | 1999           | FemalePregAge40to44 | 1484       |
| Portugal          | 1999           | FemalePregAge45to49 | 92         |
| Portugal          | 1999           | MaleAge0to4         | 278386     |
| Portugal          | 1999           | MaleAge10to14       | 306233     |
| Portugal          | 1999           | MaleAge15to19       | 367949     |
| Portugal          | 1999           | MaleAge20to24       | 409047     |
| Portugal          | 1999           | MaleAge25to29       | 400531     |
| Portugal          | 1999           | MaleAge30to34       | 375124     |
| Portugal          | 1999           | MaleAge35to39       | 370690     |
| Portugal          | 1999           | MaleAge40to44       | 345136     |
| Portugal          | 1999           | MaleAge45to49       | 323139     |
| Portugal          | 1999           | MaleAge50to54       | 294106     |
| Portugal          | 1999           | MaleAge55to59       | 260385     |
| Portugal          | 1999           | MaleAge5to9         | 279203     |
| Portugal          | 1999           | MaleAge60to64       | 258684     |
| Portugal          | 1999           | MaleAge65to69       | 237181     |
| Portugal          | 1999           | MaleAge70to74       | 190007     |
| Portugal          | 1999           | MaleAge75to79       | 134147     |
| Portugal          | 1999           | MaleAge80to84       | 71653      |
| Portugal          | 1999           | MaleAge85to89       | 37459      |
| Portugal          | 1999           | MaleAge90to94       | 9772       |
| Portugal          | 1999           | MaleAge95to99       | 1626       |
| Portugal          | 1999           | MaleAgeAbov e100    | 95         |
| Republic of Korea | 1992           | FemaleAge0to4       | 1459132    |
| Republic of Korea | 1992           | FemaleAge10to14     | 1873982    |
| Republic of Korea | 1992           | FemaleAge15to19     | 2062191    |
| Republic of Korea | 1992           | FemaleAge20to24     | 1849703    |
| Republic of Korea | 1992           | FemaleAge25to29     | 1418325    |
| Republic of Korea | 1992           | FemaleAge30to34     | 1887970    |
| Republic of Korea | 1992           | FemaleAge35to39     | 1719624    |
| Republic of Korea | 1992           | FemaleAge40to44     | 1329599    |
| Republic of Korea | 1992           | FemaleAge45to49     | 1110219    |
| Republic of Korea | 1992           | FemaleAge50to54     | 1035747    |
| Republic of Korea | 1992           | FemaleAge55to59     | 925583     |
| Republic of Korea | 1992           | FemaleAge5to9       | 1729963    |
| Republic of Korea | 1992           | FemaleAge60to64     | 727837     |
| Republic of Korea | 1992           | FemaleAge65to69     | 560963     |
| Republic of Korea | 1992           | FemaleAge70to74     | 398317     |
| Republic of Korea | 1992           | FemaleAge75to79     | 263124     |
| Republic of Korea | 1992           | FemaleAge80to84     | 156507     |
| Republic of Korea | 1992           | FemaleAge85to89     | 65263      |
| Republic of Korea | 1992           | FemaleAge90to94     | 17951      |
| Republic of Korea | 1992           | FemaleAge95to99     | 3096       |

Dietary calcium and zinc deficiency risks are decreasing but remain prevalent

| Country           | Reference year | Age/gender group    | Population |
|-------------------|----------------|---------------------|------------|
| Republic of Korea | 1992           | FemaleAgeAbove100   | 187        |
| Republic of Korea | 1992           | FemaleLactAge15to19 | 8446       |
| Republic of Korea | 1992           | FemaleLactAge20to24 | 158488     |
| Republic of Korea | 1992           | FemaleLactAge25to29 | 381981     |
| Republic of Korea | 1992           | FemaleLactAge30to34 | 129015     |
| Republic of Korea | 1992           | FemaleLactAge35to39 | 21979      |
| Republic of Korea | 1992           | FemaleLactAge40to44 | 2316       |
| Republic of Korea | 1992           | FemalePregAge15to19 | 6335       |
| Republic of Korea | 1992           | FemalePregAge20to24 | 118866     |
| Republic of Korea | 1992           | FemalePregAge25to29 | 286486     |
| Republic of Korea | 1992           | FemalePregAge30to34 | 96761      |
| Republic of Korea | 1992           | FemalePregAge35to39 | 16484      |
| Republic of Korea | 1992           | FemalePregAge40to44 | 1737       |
| Republic of Korea | 1992           | MaleAge0to4         | 1664506    |
| Republic of Korea | 1992           | MaleAge10to14       | 1997517    |
| Republic of Korea | 1992           | MaleAge15to19       | 2201862    |
| Republic of Korea | 1992           | MaleAge20to24       | 2258768    |
| Republic of Korea | 1992           | MaleAge25to29       | 2177525    |
| Republic of Korea | 1992           | MaleAge30to34       | 2145363    |
| Republic of Korea | 1992           | MaleAge35to39       | 1774903    |
| Republic of Korea | 1992           | MaleAge40to44       | 1384732    |
| Republic of Korea | 1992           | MaleAge45to49       | 1138337    |
| Republic of Korea | 1992           | MaleAge50to54       | 1010264    |
| Republic of Korea | 1992           | MaleAge55to59       | 834418     |
| Republic of Korea | 1992           | MaleAge5to9         | 1881850    |
| Republic of Korea | 1992           | MaleAge60to64       | 559235     |
| Republic of Korea | 1992           | MaleAge65to69       | 384581     |
| Republic of Korea | 1992           | MaleAge70to74       | 256818     |
| Republic of Korea | 1992           | MaleAge75to79       | 139675     |
| Republic of Korea | 1992           | MaleAge80to84       | 63750      |
| Republic of Korea | 1992           | MaleAge85to89       | 19280      |
| Republic of Korea | 1992           | MaleAge90to94       | 2903       |
| Republic of Korea | 1992           | MaleAge95to99       | 376        |
| Republic of Korea | 1992           | MaleAgeAbove100     | 8          |
| Republic of Korea | 1993           | FemaleAge0to4       | 1522283    |
| Republic of Korea | 1993           | FemaleAge10to14     | 1861358    |
| Republic of Korea | 1993           | FemaleAge15to19     | 1985991    |
| Republic of Korea | 1993           | FemaleAge20to24     | 1861668    |
| Republic of Korea | 1993           | FemaleAge25to29     | 1402601    |
| Republic of Korea | 1993           | FemaleAge30to34     | 1874929    |
| Republic of Korea | 1993           | FemaleAge35to39     | 1827229    |
| Republic of Korea | 1993           | FemaleAge40to44     | 1378342    |
| Republic of Korea | 1993           | FemaleAge45to49     | 1140111    |
| Republic of Korea | 1993           | FemaleAge50to54     | 1031593    |
| Republic of Korea | 1993           | FemaleAge55to59     | 953872     |
| Republic of Korea | 1993           | FemaleAge5to9       | 1637819    |
| Republic of Korea | 1993           | FemaleAge60to64     | 759012     |
| Republic of Korea | 1993           | FemaleAge65to69     | 578645     |
| Republic of Korea | 1993           | FemaleAge70to74     | 420173     |
| Republic of Korea | 1993           | FemaleAge75to79     | 270387     |
| Republic of Korea | 1993           | FemaleAge80to84     | 164277     |
| Republic of Korea | 1993           | FemaleAge85to89     | 70000      |
| Republic of Korea | 1993           | FemaleAge90to94     | 18683      |
| Republic of Korea | 1993           | FemaleAge95to99     | 3676       |
| Republic of Korea | 1993           | FemaleAgeAbove100   | 202        |
| Republic of Korea | 1993           | FemaleLactAge15to19 | 8446       |
| Republic of Korea | 1993           | FemaleLactAge20to24 | 158488     |
| Republic of Korea | 1993           | FemaleLactAge25to29 | 381981     |
| Republic of Korea | 1993           | FemaleLactAge30to34 | 129015     |
| Republic of Korea | 1993           | FemaleLactAge35to39 | 21979      |
| Republic of Korea | 1993           | FemaleLactAge40to44 | 2316       |
| Republic of Korea | 1993           | FemalePregAge15to19 | 6335       |
| Republic of Korea | 1993           | FemalePregAge20to24 | 118866     |
| Republic of Korea | 1993           | FemalePregAge25to29 | 286486     |
| Republic of Korea | 1993           | FemalePregAge30to34 | 96761      |
| Republic of Korea | 1993           | FemalePregAge35to39 | 16484      |
| Republic of Korea | 1993           | FemalePregAge40to44 | 1737       |
| Republic of Korea | 1993           | MaleAge0to4         | 1722831    |
| Republic of Korea | 1993           | MaleAge10to14       | 1983679    |
| Republic of Korea | 1993           | MaleAge15to19       | 2128090    |
| Republic of Korea | 1993           | MaleAge20to24       | 2266828    |
| Republic of Korea | 1993           | MaleAge25to29       | 2163577    |
| Republic of Korea | 1993           | MaleAge30to34       | 2147101    |
| Republic of Korea | 1993           | MaleAge35to39       | 1877505    |
| Republic of Korea | 1993           | MaleAge40to44       | 1420358    |
| Republic of Korea | 1993           | MaleAge45to49       | 1175817    |
| Republic of Korea | 1993           | MaleAge50to54       | 1006947    |
| Republic of Korea | 1993           | MaleAge55to59       | 870194     |
| Republic of Korea | 1993           | MaleAge5to9         | 1799140    |
| Republic of Korea | 1993           | MaleAge60to64       | 596853     |
| Republic of Korea | 1993           | MaleAge65to69       | 390465     |
| Republic of Korea | 1993           | MaleAge70to74       | 269414     |
| Republic of Korea | 1993           | MaleAge75to79       | 145734     |
| Republic of Korea | 1993           | MaleAge80to84       | 67107      |
| Republic of Korea | 1993           | MaleAge85to89       | 21480      |
| Republic of Korea | 1993           | MaleAge90to94       | 3185       |
| Republic of Korea | 1993           | MaleAge95to99       | 537        |
| Republic of Korea | 1993           | MaleAgeAbove100     | 10         |



Dietary calcium and zinc deficiency risks are decreasing but remain prevalent

| Country           | Reference year | Age/gender group    | Population |
|-------------------|----------------|---------------------|------------|
| Republic of Korea | 1994           | FemaleAge0to4       | 1584559    |
| Republic of Korea | 1994           | FemaleAge10to14     | 1841342    |
| Republic of Korea | 1994           | FemaleAge15to19     | 1919562    |
| Republic of Korea | 1994           | FemaleAge20to24     | 1857943    |
| Republic of Korea | 1994           | FemaleAge25to29     | 1395296    |
| Republic of Korea | 1994           | FemaleAge30to34     | 1853541    |
| Republic of Korea | 1994           | FemaleAge35to39     | 1920730    |
| Republic of Korea | 1994           | FemaleAge40to44     | 1437908    |
| Republic of Korea | 1994           | FemaleAge45to49     | 1176469    |
| Republic of Korea | 1994           | FemaleAge50to54     | 1030411    |
| Republic of Korea | 1994           | FemaleAge55to59     | 977388     |
| Republic of Korea | 1994           | FemaleAge5to9       | 1540850    |
| Republic of Korea | 1994           | FemaleAge60to64     | 790697     |
| Republic of Korea | 1994           | FemaleAge65to69     | 599599     |
| Republic of Korea | 1994           | FemaleAge70to74     | 442683     |
| Republic of Korea | 1994           | FemaleAge75to79     | 279774     |
| Republic of Korea | 1994           | FemaleAge80to84     | 172645     |
| Republic of Korea | 1994           | FemaleAge85to89     | 73710      |
| Republic of Korea | 1994           | FemaleAge90to94     | 19278      |
| Republic of Korea | 1994           | FemaleAge95to99     | 3826       |
| Republic of Korea | 1994           | FemaleAgeAbove100   | 218        |
| Republic of Korea | 1994           | FemaleLactAge15to19 | 8446       |
| Republic of Korea | 1994           | FemaleLactAge20to24 | 158488     |
| Republic of Korea | 1994           | FemaleLactAge25to29 | 381981     |
| Republic of Korea | 1994           | FemaleLactAge30to34 | 129015     |
| Republic of Korea | 1994           | FemaleLactAge35to39 | 21979      |
| Republic of Korea | 1994           | FemaleLactAge40to44 | 2316       |
| Republic of Korea | 1994           | FemalePregAge15to19 | 6335       |
| Republic of Korea | 1994           | FemalePregAge20to24 | 118866     |
| Republic of Korea | 1994           | FemalePregAge25to29 | 286486     |
| Republic of Korea | 1994           | FemalePregAge30to34 | 96761      |
| Republic of Korea | 1994           | FemalePregAge35to39 | 16484      |
| Republic of Korea | 1994           | FemalePregAge40to44 | 1737       |
| Republic of Korea | 1994           | MaleAge0to4         | 1777709    |
| Republic of Korea | 1994           | MaleAge10to14       | 1965228    |
| Republic of Korea | 1994           | MaleAge15to19       | 2058618    |
| Republic of Korea | 1994           | MaleAge20to24       | 2272443    |
| Republic of Korea | 1994           | MaleAge25to29       | 2145853    |
| Republic of Korea | 1994           | MaleAge30to34       | 2145470    |
| Republic of Korea | 1994           | MaleAge35to39       | 1968884    |
| Republic of Korea | 1994           | MaleAge40to44       | 1468605    |
| Republic of Korea | 1994           | MaleAge45to49       | 1216524    |
| Republic of Korea | 1994           | MaleAge50to54       | 1008578    |
| Republic of Korea | 1994           | MaleAge55to59       | 900509     |
| Republic of Korea | 1994           | MaleAge5to9         | 1712906    |
| Republic of Korea | 1994           | MaleAge60to64       | 635696     |
| Republic of Korea | 1994           | MaleAge65to69       | 402461     |
| Republic of Korea | 1994           | MaleAge70to74       | 280779     |
| Republic of Korea | 1994           | MaleAge75to79       | 152179     |
| Republic of Korea | 1994           | MaleAge80to84       | 70298      |
| Republic of Korea | 1994           | MaleAge85to89       | 22791      |
| Republic of Korea | 1994           | MaleAge90to94       | 3524       |
| Republic of Korea | 1994           | MaleAge95to99       | 537        |
| Republic of Korea | 1994           | MaleAgeAbove100     | 12         |
| Republic of Korea | 1995           | FemaleAge0to4       | 1612956    |
| Republic of Korea | 1995           | FemaleAge10to14     | 1799414    |
| Republic of Korea | 1995           | FemaleAge15to19     | 1873453    |
| Republic of Korea | 1995           | FemaleAge20to24     | 1835233    |
| Republic of Korea | 1995           | FemaleAge25to29     | 1396935    |
| Republic of Korea | 1995           | FemaleAge30to34     | 1837060    |
| Republic of Korea | 1995           | FemaleAge35to39     | 1988429    |
| Republic of Korea | 1995           | FemaleAge40to44     | 1514216    |
| Republic of Korea | 1995           | FemaleAge45to49     | 1217837    |
| Republic of Korea | 1995           | FemaleAge50to54     | 1038348    |
| Republic of Korea | 1995           | FemaleAge55to59     | 994533     |
| Republic of Korea | 1995           | FemaleAge5to9       | 1466862    |
| Republic of Korea | 1995           | FemaleAge60to64     | 822963     |
| Republic of Korea | 1995           | FemaleAge65to69     | 625455     |
| Republic of Korea | 1995           | FemaleAge70to74     | 464994     |
| Republic of Korea | 1995           | FemaleAge75to79     | 293078     |
| Republic of Korea | 1995           | FemaleAge80to84     | 181035     |
| Republic of Korea | 1995           | FemaleAge85to89     | 77239      |
| Republic of Korea | 1995           | FemaleAge90to94     | 19696      |
| Republic of Korea | 1995           | FemaleAge95to99     | 3275       |
| Republic of Korea | 1995           | FemaleAgeAbove100   | 235        |
| Republic of Korea | 1995           | FemaleLactAge15to19 | 8446       |
| Republic of Korea | 1995           | FemaleLactAge20to24 | 158488     |
| Republic of Korea | 1995           | FemaleLactAge25to29 | 381981     |
| Republic of Korea | 1995           | FemaleLactAge30to34 | 129015     |
| Republic of Korea | 1995           | FemaleLactAge35to39 | 21979      |
| Republic of Korea | 1995           | FemaleLactAge40to44 | 2316       |
| Republic of Korea | 1995           | FemalePregAge15to19 | 6335       |
| Republic of Korea | 1995           | FemalePregAge20to24 | 118866     |
| Republic of Korea | 1995           | FemalePregAge25to29 | 286486     |
| Republic of Korea | 1995           | FemalePregAge30to34 | 96761      |
| Republic of Korea | 1995           | FemalePregAge35to39 | 16484      |
| Republic of Korea | 1995           | FemalePregAge40to44 | 1737       |
| Republic of Korea | 1995           | MaleAge0to4         | 1800597    |

Dietary calcium and zinc deficiency risks are decreasing but remain prevalent

| Country           | Reference year | Age/gender group    | Population |
|-------------------|----------------|---------------------|------------|
| Republic of Korea | 1995           | MaleAge10to14       | 1928363    |
| Republic of Korea | 1995           | MaleAge15to19       | 2007811    |
| Republic of Korea | 1995           | MaleAge20to24       | 2264755    |
| Republic of Korea | 1995           | MaleAge25to29       | 2135532    |
| Republic of Korea | 1995           | MaleAge30to34       | 2145705    |
| Republic of Korea | 1995           | MaleAge35to39       | 2040244    |
| Republic of Korea | 1995           | MaleAge40to44       | 1536807    |
| Republic of Korea | 1995           | MaleAge45to49       | 1257895    |
| Republic of Korea | 1995           | MaleAge50to54       | 1022006    |
| Republic of Korea | 1995           | MaleAge55to59       | 923658     |
| Republic of Korea | 1995           | MaleAge5to9         | 1648425    |
| Republic of Korea | 1995           | MaleAge60to64       | 674866     |
| Republic of Korea | 1995           | MaleAge65to69       | 423119     |
| Republic of Korea | 1995           | MaleAge70to74       | 290623     |
| Republic of Korea | 1995           | MaleAge75to79       | 159653     |
| Republic of Korea | 1995           | MaleAge80to84       | 73369      |
| Republic of Korea | 1995           | MaleAge85to89       | 23360      |
| Republic of Korea | 1995           | MaleAge90to94       | 3688       |
| Republic of Korea | 1995           | MaleAge95to99       | 366        |
| Republic of Korea | 1995           | MaleAgeAbov e100    | 14         |
| Republic of Korea | 1996           | FemaleAge0to4       | 1694042    |
| Republic of Korea | 1996           | FemaleAge10to14     | 1734400    |
| Republic of Korea | 1996           | FemaleAge15to19     | 1836582    |
| Republic of Korea | 1996           | FemaleAge20to24     | 1891165    |
| Republic of Korea | 1996           | FemaleAge25to29     | 1484137    |
| Republic of Korea | 1996           | FemaleAge30to34     | 1797800    |
| Republic of Korea | 1996           | FemaleAge35to39     | 2001058    |
| Republic of Korea | 1996           | FemaleAge40to44     | 1592379    |
| Republic of Korea | 1996           | FemaleAge45to49     | 1250796    |
| Republic of Korea | 1996           | FemaleAge50to54     | 1050635    |
| Republic of Korea | 1996           | FemaleAge55to59     | 998252     |
| Republic of Korea | 1996           | FemaleAge5to9       | 1433082    |
| Republic of Korea | 1996           | FemaleAge60to64     | 852150     |
| Republic of Korea | 1996           | FemaleAge65to69     | 650296     |
| Republic of Korea | 1996           | FemaleAge70to74     | 481930     |
| Republic of Korea | 1996           | FemaleAge75to79     | 306160     |
| Republic of Korea | 1996           | FemaleAge80to84     | 184897     |
| Republic of Korea | 1996           | FemaleAge85to89     | 83777      |
| Republic of Korea | 1996           | FemaleAge90to94     | 23226      |
| Republic of Korea | 1996           | FemaleAge95to99     | 3554       |
| Republic of Korea | 1996           | FemaleAgeAbov e100  | 254        |
| Republic of Korea | 1996           | FemaleLactAge15to19 | 5411       |
| Republic of Korea | 1996           | FemaleLactAge20to24 | 98269      |
| Republic of Korea | 1996           | FemaleLactAge25to29 | 329717     |
| Republic of Korea | 1996           | FemaleLactAge30to34 | 146062     |
| Republic of Korea | 1996           | FemaleLactAge35to39 | 31388      |
| Republic of Korea | 1996           | FemaleLactAge40to44 | 4148       |
| Republic of Korea | 1996           | FemalePregAge15to19 | 4059       |
| Republic of Korea | 1996           | FemalePregAge20to24 | 73702      |
| Republic of Korea | 1996           | FemalePregAge25to29 | 247288     |
| Republic of Korea | 1996           | FemalePregAge30to34 | 109547     |
| Republic of Korea | 1996           | FemalePregAge35to39 | 23541      |
| Republic of Korea | 1996           | FemalePregAge40to44 | 3111       |
| Republic of Korea | 1996           | MaleAge0to4         | 1875922    |
| Republic of Korea | 1996           | MaleAge10to14       | 1870636    |
| Republic of Korea | 1996           | MaleAge15to19       | 1981400    |
| Republic of Korea | 1996           | MaleAge20to24       | 2195718    |
| Republic of Korea | 1996           | MaleAge25to29       | 2133208    |
| Republic of Korea | 1996           | MaleAge30to34       | 2130849    |
| Republic of Korea | 1996           | MaleAge35to39       | 2087946    |
| Republic of Korea | 1996           | MaleAge40to44       | 1619617    |
| Republic of Korea | 1996           | MaleAge45to49       | 1289397    |
| Republic of Korea | 1996           | MaleAge50to54       | 1040955    |
| Republic of Korea | 1996           | MaleAge55to59       | 931688     |
| Republic of Korea | 1996           | MaleAge5to9         | 1619932    |
| Republic of Korea | 1996           | MaleAge60to64       | 711405     |
| Republic of Korea | 1996           | MaleAge65to69       | 448491     |
| Republic of Korea | 1996           | MaleAge70to74       | 298227     |
| Republic of Korea | 1996           | MaleAge75to79       | 168883     |
| Republic of Korea | 1996           | MaleAge80to84       | 78054      |
| Republic of Korea | 1996           | MaleAge85to89       | 26485      |
| Republic of Korea | 1996           | MaleAge90to94       | 4894       |
| Republic of Korea | 1996           | MaleAge95to99       | 435        |
| Republic of Korea | 1996           | MaleAgeAbov e100    | 17         |
| Republic of Korea | 1997           | FemaleAge0to4       | 1692111    |
| Republic of Korea | 1997           | FemaleAge10to14     | 1654470    |
| Republic of Korea | 1997           | FemaleAge15to19     | 1819984    |
| Republic of Korea | 1997           | FemaleAge20to24     | 1827490    |
| Republic of Korea | 1997           | FemaleAge25to29     | 1489277    |
| Republic of Korea | 1997           | FemaleAge30to34     | 1791865    |
| Republic of Korea | 1997           | FemaleAge35to39     | 2012484    |
| Republic of Korea | 1997           | FemaleAge40to44     | 1693466    |
| Republic of Korea | 1997           | FemaleAge45to49     | 1286765    |
| Republic of Korea | 1997           | FemaleAge50to54     | 1072969    |
| Republic of Korea | 1997           | FemaleAge55to59     | 997405     |
| Republic of Korea | 1997           | FemaleAge5to9       | 1442513    |
| Republic of Korea | 1997           | FemaleAge60to64     | 883510     |
| Republic of Korea | 1997           | FemaleAge65to69     | 680275     |

Dietary calcium and zinc deficiency risks are decreasing but remain prevalent

| Country           | Reference year | Age/gender group    | Population |
|-------------------|----------------|---------------------|------------|
| Republic of Korea | 1997           | FemaleAge70to74     | 499726     |
| Republic of Korea | 1997           | FemaleAge75to79     | 324158     |
| Republic of Korea | 1997           | FemaleAge80to84     | 187865     |
| Republic of Korea | 1997           | FemaleAge85to89     | 89998      |
| Republic of Korea | 1997           | FemaleAge90to94     | 26089      |
| Republic of Korea | 1997           | FemaleAge95to99     | 3899       |
| Republic of Korea | 1997           | FemaleAgeAbov e100  | 277        |
| Republic of Korea | 1997           | FemaleLactAge15to19 | 5411       |
| Republic of Korea | 1997           | FemaleLactAge20to24 | 98269      |
| Republic of Korea | 1997           | FemaleLactAge25to29 | 329717     |
| Republic of Korea | 1997           | FemaleLactAge30to34 | 146062     |
| Republic of Korea | 1997           | FemaleLactAge35to39 | 31388      |
| Republic of Korea | 1997           | FemaleLactAge40to44 | 4148       |
| Republic of Korea | 1997           | FemalePregAge15to19 | 4059       |
| Republic of Korea | 1997           | FemalePregAge20to24 | 73702      |
| Republic of Korea | 1997           | FemalePregAge25to29 | 247288     |
| Republic of Korea | 1997           | FemalePregAge30to34 | 109547     |
| Republic of Korea | 1997           | FemalePregAge35to39 | 23541      |
| Republic of Korea | 1997           | FemalePregAge40to44 | 3111       |
| Republic of Korea | 1997           | MaleAge0to4         | 1867110    |
| Republic of Korea | 1997           | MaleAge10to14       | 1797850    |
| Republic of Korea | 1997           | MaleAge15to19       | 1979383    |
| Republic of Korea | 1997           | MaleAge20to24       | 2126119    |
| Republic of Korea | 1997           | MaleAge25to29       | 2136253    |
| Republic of Korea | 1997           | MaleAge30to34       | 2115739    |
| Republic of Korea | 1997           | MaleAge35to39       | 2116996    |
| Republic of Korea | 1997           | MaleAge40to44       | 1727577    |
| Republic of Korea | 1997           | MaleAge45to49       | 1323213    |
| Republic of Korea | 1997           | MaleAge50to54       | 1072478    |
| Republic of Korea | 1997           | MaleAge55to59       | 934322     |
| Republic of Korea | 1997           | MaleAge5to9         | 1636408    |
| Republic of Korea | 1997           | MaleAge60to64       | 750111     |
| Republic of Korea | 1997           | MaleAge65to69       | 481195     |
| Republic of Korea | 1997           | MaleAge70to74       | 305195     |
| Republic of Korea | 1997           | MaleAge75to79       | 179958     |
| Republic of Korea | 1997           | MaleAge80to84       | 82088      |
| Republic of Korea | 1997           | MaleAge85to89       | 29217      |
| Republic of Korea | 1997           | MaleAge90to94       | 5962       |
| Republic of Korea | 1997           | MaleAge95to99       | 510        |
| Republic of Korea | 1997           | MaleAgeAbov e100    | 20         |
| Republic of Korea | 1998           | FemaleAge0to4       | 1631350    |
| Republic of Korea | 1998           | FemaleAge10to14     | 1565375    |
| Republic of Korea | 1998           | FemaleAge15to19     | 1816512    |
| Republic of Korea | 1998           | FemaleAge20to24     | 1757285    |
| Republic of Korea | 1998           | FemaleAge25to29     | 1495378    |
| Republic of Korea | 1998           | FemaleAge30to34     | 1785453    |
| Republic of Korea | 1998           | FemaleAge35to39     | 2013749    |
| Republic of Korea | 1998           | FemaleAge40to44     | 1800292    |
| Republic of Korea | 1998           | FemaleAge45to49     | 1329686    |
| Republic of Korea | 1998           | FemaleAge50to54     | 1102035    |
| Republic of Korea | 1998           | FemaleAge55to59     | 995692     |
| Republic of Korea | 1998           | FemaleAge5to9       | 1492662    |
| Republic of Korea | 1998           | FemaleAge60to64     | 913262     |
| Republic of Korea | 1998           | FemaleAge65to69     | 713876     |
| Republic of Korea | 1998           | FemaleAge70to74     | 519460     |
| Republic of Korea | 1998           | FemaleAge75to79     | 345464     |
| Republic of Korea | 1998           | FemaleAge80to84     | 191779     |
| Republic of Korea | 1998           | FemaleAge85to89     | 95223      |
| Republic of Korea | 1998           | FemaleAge90to94     | 28011      |
| Republic of Korea | 1998           | FemaleAge95to99     | 4329       |
| Republic of Korea | 1998           | FemaleAgeAbov e100  | 303        |
| Republic of Korea | 1998           | FemaleLactAge15to19 | 5411       |
| Republic of Korea | 1998           | FemaleLactAge20to24 | 98269      |
| Republic of Korea | 1998           | FemaleLactAge25to29 | 329717     |
| Republic of Korea | 1998           | FemaleLactAge30to34 | 146062     |
| Republic of Korea | 1998           | FemaleLactAge35to39 | 31388      |
| Republic of Korea | 1998           | FemaleLactAge40to44 | 4148       |
| Republic of Korea | 1998           | FemalePregAge15to19 | 4059       |
| Republic of Korea | 1998           | FemalePregAge20to24 | 73702      |
| Republic of Korea | 1998           | FemalePregAge25to29 | 247288     |
| Republic of Korea | 1998           | FemalePregAge30to34 | 109547     |
| Republic of Korea | 1998           | FemalePregAge35to39 | 23541      |
| Republic of Korea | 1998           | FemalePregAge40to44 | 3111       |
| Republic of Korea | 1998           | MaleAge0to4         | 1799919    |
| Republic of Korea | 1998           | MaleAge10to14       | 1716747    |
| Republic of Korea | 1998           | MaleAge15to19       | 1979466    |
| Republic of Korea | 1998           | MaleAge20to24       | 2072396    |
| Republic of Korea | 1998           | MaleAge25to29       | 2128654    |
| Republic of Korea | 1998           | MaleAge30to34       | 2101578    |
| Republic of Korea | 1998           | MaleAge35to39       | 2128069    |
| Republic of Korea | 1998           | MaleAge40to44       | 1846228    |
| Republic of Korea | 1998           | MaleAge45to49       | 1364606    |
| Republic of Korea | 1998           | MaleAge50to54       | 1111021    |
| Republic of Korea | 1998           | MaleAge55to59       | 936094     |
| Republic of Korea | 1998           | MaleAge5to9         | 1695097    |
| Republic of Korea | 1998           | MaleAge60to64       | 786829     |
| Republic of Korea | 1998           | MaleAge65to69       | 518695     |
| Republic of Korea | 1998           | MaleAge70to74       | 314002     |

Dietary calcium and zinc deficiency risks are decreasing but remain prevalent

| Country             | Reference year | Age/gender group    | Population |
|---------------------|----------------|---------------------|------------|
| Republic of Korea   | 1998           | MaleAge75to79       | 191740     |
| Republic of Korea   | 1998           | MaleAge80to84       | 85762      |
| Republic of Korea   | 1998           | MaleAge85to89       | 31328      |
| Republic of Korea   | 1998           | MaleAge90to94       | 6768       |
| Republic of Korea   | 1998           | MaleAge95to99       | 688        |
| Republic of Korea   | 1998           | MaleAgeAbove100     | 25         |
| Republic of Korea   | 1999           | FemaleAge0to4       | 1553969    |
| Republic of Korea   | 1999           | FemaleAge10to14     | 1489037    |
| Republic of Korea   | 1999           | FemaleAge15to19     | 1803858    |
| Republic of Korea   | 1999           | FemaleAge20to24     | 1694150    |
| Republic of Korea   | 1999           | FemaleAge25to29     | 1488492    |
| Republic of Korea   | 1999           | FemaleAge30to34     | 1776821    |
| Republic of Korea   | 1999           | FemaleAge35to39     | 2013335    |
| Republic of Korea   | 1999           | FemaleAge40to44     | 1892523    |
| Republic of Korea   | 1999           | FemaleAge45to49     | 1385208    |
| Republic of Korea   | 1999           | FemaleAge50to54     | 1133378    |
| Republic of Korea   | 1999           | FemaleAge55to59     | 997781     |
| Republic of Korea   | 1999           | FemaleAge5to9       | 1561067    |
| Republic of Korea   | 1999           | FemaleAge60to64     | 936618     |
| Republic of Korea   | 1999           | FemaleAge65to69     | 748472     |
| Republic of Korea   | 1999           | FemaleAge70to74     | 542571     |
| Republic of Korea   | 1999           | FemaleAge75to79     | 367545     |
| Republic of Korea   | 1999           | FemaleAge80to84     | 198678     |
| Republic of Korea   | 1999           | FemaleAge85to89     | 98733      |
| Republic of Korea   | 1999           | FemaleAge90to94     | 29004      |
| Republic of Korea   | 1999           | FemaleAge95to99     | 4680       |
| Republic of Korea   | 1999           | FemaleAgeAbove100   | 332        |
| Republic of Korea   | 1999           | FemaleLactAge15to19 | 5411       |
| Republic of Korea   | 1999           | FemaleLactAge20to24 | 98269      |
| Republic of Korea   | 1999           | FemaleLactAge25to29 | 329717     |
| Republic of Korea   | 1999           | FemaleLactAge30to34 | 146062     |
| Republic of Korea   | 1999           | FemaleLactAge35to39 | 31388      |
| Republic of Korea   | 1999           | FemaleLactAge40to44 | 4148       |
| Republic of Korea   | 1999           | FemalePregAge15to19 | 4059       |
| Republic of Korea   | 1999           | FemalePregAge20to24 | 73702      |
| Republic of Korea   | 1999           | FemalePregAge25to29 | 247288     |
| Republic of Korea   | 1999           | FemalePregAge30to34 | 109547     |
| Republic of Korea   | 1999           | FemalePregAge35to39 | 23541      |
| Republic of Korea   | 1999           | FemalePregAge40to44 | 3111       |
| Republic of Korea   | 1999           | MaleAge0to4         | 1715946    |
| Republic of Korea   | 1999           | MaleAge10to14       | 1648133    |
| Republic of Korea   | 1999           | MaleAge15to19       | 1959748    |
| Republic of Korea   | 1999           | MaleAge20to24       | 2041960    |
| Republic of Korea   | 1999           | MaleAge25to29       | 2099700    |
| Republic of Korea   | 1999           | MaleAge30to34       | 2086530    |
| Republic of Korea   | 1999           | MaleAge35to39       | 2126330    |
| Republic of Korea   | 1999           | MaleAge40to44       | 1952017    |
| Republic of Korea   | 1999           | MaleAge45to49       | 1421032    |
| Republic of Korea   | 1999           | MaleAge50to54       | 1149565    |
| Republic of Korea   | 1999           | MaleAge55to59       | 942677     |
| Republic of Korea   | 1999           | MaleAge5to9         | 1772231    |
| Republic of Korea   | 1999           | MaleAge60to64       | 816145     |
| Republic of Korea   | 1999           | MaleAge65to69       | 557128     |
| Republic of Korea   | 1999           | MaleAge70to74       | 327830     |
| Republic of Korea   | 1999           | MaleAge75to79       | 202401     |
| Republic of Korea   | 1999           | MaleAge80to84       | 89615      |
| Republic of Korea   | 1999           | MaleAge85to89       | 32607      |
| Republic of Korea   | 1999           | MaleAge90to94       | 7172       |
| Republic of Korea   | 1999           | MaleAge95to99       | 812        |
| Republic of Korea   | 1999           | MaleAgeAbove100     | 29         |
| Republic of Moldova | 1992           | FemaleAge0to4       | 195460     |
| Republic of Moldova | 1992           | FemaleAge10to14     | 192110     |
| Republic of Moldova | 1992           | FemaleAge15to19     | 154981     |
| Republic of Moldova | 1992           | FemaleAge20to24     | 98664      |
| Republic of Moldova | 1992           | FemaleAge25to29     | 131141     |
| Republic of Moldova | 1992           | FemaleAge30to34     | 172058     |
| Republic of Moldova | 1992           | FemaleAge35to39     | 179461     |
| Republic of Moldova | 1992           | FemaleAge40to44     | 146713     |
| Republic of Moldova | 1992           | FemaleAge45to49     | 110194     |
| Republic of Moldova | 1992           | FemaleAge50to54     | 118423     |
| Republic of Moldova | 1992           | FemaleAge55to59     | 115568     |
| Republic of Moldova | 1992           | FemaleAge5to9       | 208324     |
| Republic of Moldova | 1992           | FemaleAge60to64     | 107899     |
| Republic of Moldova | 1992           | FemaleAge65to69     | 97768      |
| Republic of Moldova | 1992           | FemaleAge70to74     | 59588      |
| Republic of Moldova | 1992           | FemaleAge75to79     | 40196      |
| Republic of Moldova | 1992           | FemaleAge80to84     | 26536      |
| Republic of Moldova | 1992           | FemaleAge85to89     | 10918      |
| Republic of Moldova | 1992           | FemaleAge90to94     | 3465       |
| Republic of Moldova | 1992           | FemaleAge95to99     | 460        |
| Republic of Moldova | 1992           | FemaleAgeAbove100   | 45         |
| Republic of Moldova | 1992           | FemaleLactAge15to19 | 11066      |
| Republic of Moldova | 1992           | FemaleLactAge20to24 | 28079      |
| Republic of Moldova | 1992           | FemaleLactAge25to29 | 16127      |
| Republic of Moldova | 1992           | FemaleLactAge30to34 | 8930       |
| Republic of Moldova | 1992           | FemaleLactAge35to39 | 3445       |
| Republic of Moldova | 1992           | FemaleLactAge40to44 | 652        |
| Republic of Moldova | 1992           | FemaleLactAge45to49 | 26         |

Dietary calcium and zinc deficiency risks are decreasing but remain prevalent

| Country             | Reference year | Age/gender group    | Population |
|---------------------|----------------|---------------------|------------|
| Republic of Moldova | 1992           | FemalePregAge15to19 | 8300       |
| Republic of Moldova | 1992           | FemalePregAge20to24 | 21059      |
| Republic of Moldova | 1992           | FemalePregAge25to29 | 12095      |
| Republic of Moldova | 1992           | FemalePregAge30to34 | 6698       |
| Republic of Moldova | 1992           | FemalePregAge35to39 | 2584       |
| Republic of Moldova | 1992           | FemalePregAge40to44 | 489        |
| Republic of Moldova | 1992           | FemalePregAge45to49 | 19         |
| Republic of Moldova | 1992           | MaleAge0to4         | 204606     |
| Republic of Moldova | 1992           | MaleAge10to14       | 197750     |
| Republic of Moldova | 1992           | MaleAge15to19       | 175793     |
| Republic of Moldova | 1992           | MaleAge20to24       | 149743     |
| Republic of Moldova | 1992           | MaleAge25to29       | 152194     |
| Republic of Moldova | 1992           | MaleAge30to34       | 174992     |
| Republic of Moldova | 1992           | MaleAge35to39       | 174370     |
| Republic of Moldova | 1992           | MaleAge40to44       | 136583     |
| Republic of Moldova | 1992           | MaleAge45to49       | 96396      |
| Republic of Moldova | 1992           | MaleAge50to54       | 97936      |
| Republic of Moldova | 1992           | MaleAge55to59       | 93190      |
| Republic of Moldova | 1992           | MaleAge5to9         | 215162     |
| Republic of Moldova | 1992           | MaleAge60to64       | 80651      |
| Republic of Moldova | 1992           | MaleAge65to69       | 63129      |
| Republic of Moldova | 1992           | MaleAge70to74       | 35073      |
| Republic of Moldova | 1992           | MaleAge75to79       | 22513      |
| Republic of Moldova | 1992           | MaleAge80to84       | 13461      |
| Republic of Moldova | 1992           | MaleAge85to89       | 4666       |
| Republic of Moldova | 1992           | MaleAge90to94       | 1264       |
| Republic of Moldova | 1992           | MaleAge95to99       | 130        |
| Republic of Moldova | 1992           | MaleAgeAbove100     | 9          |
| Republic of Moldova | 1993           | FemaleAge0to4       | 183646     |
| Republic of Moldova | 1993           | FemaleAge10to14     | 195716     |
| Republic of Moldova | 1993           | FemaleAge15to19     | 156611     |
| Republic of Moldova | 1993           | FemaleAge20to24     | 103409     |
| Republic of Moldova | 1993           | FemaleAge25to29     | 122210     |
| Republic of Moldova | 1993           | FemaleAge30to34     | 167876     |
| Republic of Moldova | 1993           | FemaleAge35to39     | 181405     |
| Republic of Moldova | 1993           | FemaleAge40to44     | 155329     |
| Republic of Moldova | 1993           | FemaleAge45to49     | 114275     |
| Republic of Moldova | 1993           | FemaleAge50to54     | 111310     |
| Republic of Moldova | 1993           | FemaleAge55to59     | 118585     |
| Republic of Moldova | 1993           | FemaleAge5to9       | 209094     |
| Republic of Moldova | 1993           | FemaleAge60to64     | 104336     |
| Republic of Moldova | 1993           | FemaleAge65to69     | 98340      |
| Republic of Moldova | 1993           | FemaleAge70to74     | 65446      |
| Republic of Moldova | 1993           | FemaleAge75to79     | 36584      |
| Republic of Moldova | 1993           | FemaleAge80to84     | 27280      |
| Republic of Moldova | 1993           | FemaleAge85to89     | 10941      |
| Republic of Moldova | 1993           | FemaleAge90to94     | 3707       |
| Republic of Moldova | 1993           | FemaleAge95to99     | 495        |
| Republic of Moldova | 1993           | FemaleAgeAbove100   | 46         |
| Republic of Moldova | 1993           | FemaleLactAge15to19 | 11066      |
| Republic of Moldova | 1993           | FemaleLactAge20to24 | 28079      |
| Republic of Moldova | 1993           | FemaleLactAge25to29 | 16127      |
| Republic of Moldova | 1993           | FemaleLactAge30to34 | 8930       |
| Republic of Moldova | 1993           | FemaleLactAge35to39 | 3445       |
| Republic of Moldova | 1993           | FemaleLactAge40to44 | 652        |
| Republic of Moldova | 1993           | FemaleLactAge45to49 | 26         |
| Republic of Moldova | 1993           | FemalePregAge15to19 | 8300       |
| Republic of Moldova | 1993           | FemalePregAge20to24 | 21059      |
| Republic of Moldova | 1993           | FemalePregAge25to29 | 12095      |
| Republic of Moldova | 1993           | FemalePregAge30to34 | 6698       |
| Republic of Moldova | 1993           | FemalePregAge35to39 | 2584       |
| Republic of Moldova | 1993           | FemalePregAge40to44 | 489        |
| Republic of Moldova | 1993           | FemalePregAge45to49 | 19         |
| Republic of Moldova | 1993           | MaleAge0to4         | 192189     |
| Republic of Moldova | 1993           | MaleAge10to14       | 201338     |
| Republic of Moldova | 1993           | MaleAge15to19       | 178502     |
| Republic of Moldova | 1993           | MaleAge20to24       | 153200     |
| Republic of Moldova | 1993           | MaleAge25to29       | 146649     |
| Republic of Moldova | 1993           | MaleAge30to34       | 169880     |
| Republic of Moldova | 1993           | MaleAge35to39       | 175897     |
| Republic of Moldova | 1993           | MaleAge40to44       | 144654     |
| Republic of Moldova | 1993           | MaleAge45to49       | 100771     |
| Republic of Moldova | 1993           | MaleAge50to54       | 91862      |
| Republic of Moldova | 1993           | MaleAge55to59       | 95300      |
| Republic of Moldova | 1993           | MaleAge5to9         | 216420     |
| Republic of Moldova | 1993           | MaleAge60to64       | 78588      |
| Republic of Moldova | 1993           | MaleAge65to69       | 64826      |
| Republic of Moldova | 1993           | MaleAge70to74       | 37789      |
| Republic of Moldova | 1993           | MaleAge75to79       | 20527      |
| Republic of Moldova | 1993           | MaleAge80to84       | 13863      |
| Republic of Moldova | 1993           | MaleAge85to89       | 4657       |
| Republic of Moldova | 1993           | MaleAge90to94       | 1355       |
| Republic of Moldova | 1993           | MaleAge95to99       | 148        |
| Republic of Moldova | 1993           | MaleAgeAbove100     | 10         |
| Republic of Moldova | 1994           | FemaleAge0to4       | 171344     |
| Republic of Moldova | 1994           | FemaleAge10to14     | 198825     |
| Republic of Moldova | 1994           | FemaleAge15to19     | 158636     |
| Republic of Moldova | 1994           | FemaleAge20to24     | 107874     |

Dietary calcium and zinc deficiency risks are decreasing but remain prevalent

| Country             | Reference year | Age/gender group    | Population |
|---------------------|----------------|---------------------|------------|
| Republic of Moldova | 1994           | FemaleAge25to29     | 115064     |
| Republic of Moldova | 1994           | FemaleAge30to34     | 162191     |
| Republic of Moldova | 1994           | FemaleAge35to39     | 181731     |
| Republic of Moldova | 1994           | FemaleAge40to44     | 163038     |
| Republic of Moldova | 1994           | FemaleAge45to49     | 119498     |
| Republic of Moldova | 1994           | FemaleAge50to54     | 105566     |
| Republic of Moldova | 1994           | FemaleAge55to59     | 119975     |
| Republic of Moldova | 1994           | FemaleAge5to9       | 208255     |
| Republic of Moldova | 1994           | FemaleAge60to64     | 101716     |
| Republic of Moldova | 1994           | FemaleAge65to69     | 98075      |
| Republic of Moldova | 1994           | FemaleAge70to74     | 70388      |
| Republic of Moldova | 1994           | FemaleAge75to79     | 35041      |
| Republic of Moldova | 1994           | FemaleAge80to84     | 26496      |
| Republic of Moldova | 1994           | FemaleAge85to89     | 10989      |
| Republic of Moldova | 1994           | FemaleAge90to94     | 3651       |
| Republic of Moldova | 1994           | FemaleAge95to99     | 536        |
| Republic of Moldova | 1994           | FemaleAgeAbove100   | 47         |
| Republic of Moldova | 1994           | FemaleLactAge15to19 | 11066      |
| Republic of Moldova | 1994           | FemaleLactAge20to24 | 28079      |
| Republic of Moldova | 1994           | FemaleLactAge25to29 | 16127      |
| Republic of Moldova | 1994           | FemaleLactAge30to34 | 8930       |
| Republic of Moldova | 1994           | FemaleLactAge35to39 | 3445       |
| Republic of Moldova | 1994           | FemaleLactAge40to44 | 652        |
| Republic of Moldova | 1994           | FemaleLactAge45to49 | 26         |
| Republic of Moldova | 1994           | FemalePregAge15to19 | 8300       |
| Republic of Moldova | 1994           | FemalePregAge20to24 | 21059      |
| Republic of Moldova | 1994           | FemalePregAge25to29 | 12095      |
| Republic of Moldova | 1994           | FemalePregAge30to34 | 6698       |
| Republic of Moldova | 1994           | FemalePregAge35to39 | 2584       |
| Republic of Moldova | 1994           | FemalePregAge40to44 | 489        |
| Republic of Moldova | 1994           | FemalePregAge45to49 | 19         |
| Republic of Moldova | 1994           | MaleAge0to4         | 179241     |
| Republic of Moldova | 1994           | MaleAge10to14       | 204386     |
| Republic of Moldova | 1994           | MaleAge15to19       | 181597     |
| Republic of Moldova | 1994           | MaleAge20to24       | 156448     |
| Republic of Moldova | 1994           | MaleAge25to29       | 142315     |
| Republic of Moldova | 1994           | MaleAge30to34       | 164012     |
| Republic of Moldova | 1994           | MaleAge35to39       | 175760     |
| Republic of Moldova | 1994           | MaleAge40to44       | 151743     |
| Republic of Moldova | 1994           | MaleAge45to49       | 106109     |
| Republic of Moldova | 1994           | MaleAge50to54       | 87194      |
| Republic of Moldova | 1994           | MaleAge55to59       | 95942      |
| Republic of Moldova | 1994           | MaleAge5to9         | 216049     |
| Republic of Moldova | 1994           | MaleAge60to64       | 77141      |
| Republic of Moldova | 1994           | MaleAge65to69       | 65747      |
| Republic of Moldova | 1994           | MaleAge70to74       | 40178      |
| Republic of Moldova | 1994           | MaleAge75to79       | 19547      |
| Republic of Moldova | 1994           | MaleAge80to84       | 13350      |
| Republic of Moldova | 1994           | MaleAge85to89       | 4616       |
| Republic of Moldova | 1994           | MaleAge90to94       | 1307       |
| Republic of Moldova | 1994           | MaleAge95to99       | 162        |
| Republic of Moldova | 1994           | MaleAgeAbove100     | 10         |
| Republic of Moldova | 1995           | FemaleAge0to4       | 160350     |
| Republic of Moldova | 1995           | FemaleAge10to14     | 201150     |
| Republic of Moldova | 1995           | FemaleAge15to19     | 161234     |
| Republic of Moldova | 1995           | FemaleAge20to24     | 110961     |
| Republic of Moldova | 1995           | FemaleAge25to29     | 110728     |
| Republic of Moldova | 1995           | FemaleAge30to34     | 154972     |
| Republic of Moldova | 1995           | FemaleAge35to39     | 180471     |
| Republic of Moldova | 1995           | FemaleAge40to44     | 169009     |
| Republic of Moldova | 1995           | FemaleAge45to49     | 125305     |
| Republic of Moldova | 1995           | FemaleAge50to54     | 102500     |
| Republic of Moldova | 1995           | FemaleAge55to59     | 118550     |
| Republic of Moldova | 1995           | FemaleAge5to9       | 205100     |
| Republic of Moldova | 1995           | FemaleAge60to64     | 100650     |
| Republic of Moldova | 1995           | FemaleAge65to69     | 97000      |
| Republic of Moldova | 1995           | FemaleAge70to74     | 73700      |
| Republic of Moldova | 1995           | FemaleAge75to79     | 35950      |
| Republic of Moldova | 1995           | FemaleAge80to84     | 24398      |
| Republic of Moldova | 1995           | FemaleAge85to89     | 10882      |
| Republic of Moldova | 1995           | FemaleAge90to94     | 3324       |
| Republic of Moldova | 1995           | FemaleAge95to99     | 483        |
| Republic of Moldova | 1995           | FemaleAgeAbove100   | 48         |
| Republic of Moldova | 1995           | FemaleLactAge15to19 | 11066      |
| Republic of Moldova | 1995           | FemaleLactAge20to24 | 28079      |
| Republic of Moldova | 1995           | FemaleLactAge25to29 | 16127      |
| Republic of Moldova | 1995           | FemaleLactAge30to34 | 8930       |
| Republic of Moldova | 1995           | FemaleLactAge35to39 | 3445       |
| Republic of Moldova | 1995           | FemaleLactAge40to44 | 652        |
| Republic of Moldova | 1995           | FemaleLactAge45to49 | 26         |
| Republic of Moldova | 1995           | FemalePregAge15to19 | 8300       |
| Republic of Moldova | 1995           | FemalePregAge20to24 | 21059      |
| Republic of Moldova | 1995           | FemalePregAge25to29 | 12095      |
| Republic of Moldova | 1995           | FemalePregAge30to34 | 6698       |
| Republic of Moldova | 1995           | FemalePregAge35to39 | 2584       |
| Republic of Moldova | 1995           | FemalePregAge40to44 | 489        |
| Republic of Moldova | 1995           | FemalePregAge45to49 | 19         |
| Republic of Moldova | 1995           | MaleAge0to4         | 167800     |

Dietary calcium and zinc deficiency risks are decreasing but remain prevalent

| Country             | Reference year | Age/gender group    | Population |
|---------------------|----------------|---------------------|------------|
| Republic of Moldova | 1995           | MaleAge10to14       | 206750     |
| Republic of Moldova | 1995           | MaleAge15to19       | 184900     |
| Republic of Moldova | 1995           | MaleAge20to24       | 158950     |
| Republic of Moldova | 1995           | MaleAge25to29       | 139550     |
| Republic of Moldova | 1995           | MaleAge30to34       | 157650     |
| Republic of Moldova | 1995           | MaleAge35to39       | 173900     |
| Republic of Moldova | 1995           | MaleAge40to44       | 157100     |
| Republic of Moldova | 1995           | MaleAge45to49       | 111850     |
| Republic of Moldova | 1995           | MaleAge50to54       | 85000      |
| Republic of Moldova | 1995           | MaleAge55to59       | 94300      |
| Republic of Moldova | 1995           | MaleAge5to9         | 213100     |
| Republic of Moldova | 1995           | MaleAge60to64       | 76700      |
| Republic of Moldova | 1995           | MaleAge65to69       | 65750      |
| Republic of Moldova | 1995           | MaleAge70to74       | 42000      |
| Republic of Moldova | 1995           | MaleAge75to79       | 19704      |
| Republic of Moldova | 1995           | MaleAge80to84       | 12045      |
| Republic of Moldova | 1995           | MaleAge85to89       | 4448       |
| Republic of Moldova | 1995           | MaleAge90to94       | 1108       |
| Republic of Moldova | 1995           | MaleAge95to99       | 131        |
| Republic of Moldova | 1995           | MaleAgeAbove100     | 10         |
| Republic of Moldova | 1996           | FemaleAge0to4       | 146881     |
| Republic of Moldova | 1996           | FemaleAge10to14     | 201497     |
| Republic of Moldova | 1996           | FemaleAge15to19     | 162649     |
| Republic of Moldova | 1996           | FemaleAge20to24     | 125604     |
| Republic of Moldova | 1996           | FemaleAge25to29     | 114887     |
| Republic of Moldova | 1996           | FemaleAge30to34     | 151258     |
| Republic of Moldova | 1996           | FemaleAge35to39     | 178688     |
| Republic of Moldova | 1996           | FemaleAge40to44     | 173277     |
| Republic of Moldova | 1996           | FemaleAge45to49     | 131853     |
| Republic of Moldova | 1996           | FemaleAge50to54     | 101608     |
| Republic of Moldova | 1996           | FemaleAge55to59     | 115248     |
| Republic of Moldova | 1996           | FemaleAge5to9       | 200453     |
| Republic of Moldova | 1996           | FemaleAge60to64     | 101619     |
| Republic of Moldova | 1996           | FemaleAge65to69     | 95621      |
| Republic of Moldova | 1996           | FemaleAge70to74     | 76393      |
| Republic of Moldova | 1996           | FemaleAge75to79     | 39055      |
| Republic of Moldova | 1996           | FemaleAge80to84     | 23701      |
| Republic of Moldova | 1996           | FemaleAge85to89     | 11613      |
| Republic of Moldova | 1996           | FemaleAge90to94     | 3714       |
| Republic of Moldova | 1996           | FemaleAge95to99     | 551        |
| Republic of Moldova | 1996           | FemaleAgeAbove100   | 49         |
| Republic of Moldova | 1996           | FemaleLactAge15to19 | 10529      |
| Republic of Moldova | 1996           | FemaleLactAge20to24 | 20569      |
| Republic of Moldova | 1996           | FemaleLactAge25to29 | 12839      |
| Republic of Moldova | 1996           | FemaleLactAge30to34 | 6298       |
| Republic of Moldova | 1996           | FemaleLactAge35to39 | 2633       |
| Republic of Moldova | 1996           | FemaleLactAge40to44 | 579        |
| Republic of Moldova | 1996           | FemaleLactAge45to49 | 38         |
| Republic of Moldova | 1996           | FemalePregAge15to19 | 7897       |
| Republic of Moldova | 1996           | FemalePregAge20to24 | 15427      |
| Republic of Moldova | 1996           | FemalePregAge25to29 | 9629       |
| Republic of Moldova | 1996           | FemalePregAge30to34 | 4724       |
| Republic of Moldova | 1996           | FemalePregAge35to39 | 1975       |
| Republic of Moldova | 1996           | FemalePregAge40to44 | 434        |
| Republic of Moldova | 1996           | FemalePregAge45to49 | 29         |
| Republic of Moldova | 1996           | MaleAge0to4         | 153563     |
| Republic of Moldova | 1996           | MaleAge10to14       | 206999     |
| Republic of Moldova | 1996           | MaleAge15to19       | 185519     |
| Republic of Moldova | 1996           | MaleAge20to24       | 159976     |
| Republic of Moldova | 1996           | MaleAge25to29       | 138546     |
| Republic of Moldova | 1996           | MaleAge30to34       | 151850     |
| Republic of Moldova | 1996           | MaleAge35to39       | 170290     |
| Republic of Moldova | 1996           | MaleAge40to44       | 161302     |
| Republic of Moldova | 1996           | MaleAge45to49       | 119426     |
| Republic of Moldova | 1996           | MaleAge50to54       | 85535      |
| Republic of Moldova | 1996           | MaleAge55to59       | 91139      |
| Republic of Moldova | 1996           | MaleAge5to9         | 207817     |
| Republic of Moldova | 1996           | MaleAge60to64       | 77400      |
| Republic of Moldova | 1996           | MaleAge65to69       | 65513      |
| Republic of Moldova | 1996           | MaleAge70to74       | 44139      |
| Republic of Moldova | 1996           | MaleAge75to79       | 21090      |
| Republic of Moldova | 1996           | MaleAge80to84       | 11769      |
| Republic of Moldova | 1996           | MaleAge85to89       | 4919       |
| Republic of Moldova | 1996           | MaleAge90to94       | 1275       |
| Republic of Moldova | 1996           | MaleAge95to99       | 155        |
| Republic of Moldova | 1996           | MaleAgeAbove100     | 10         |
| Republic of Moldova | 1997           | FemaleAge0to4       | 138527     |
| Republic of Moldova | 1997           | FemaleAge10to14     | 201827     |
| Republic of Moldova | 1997           | FemaleAge15to19     | 162702     |
| Republic of Moldova | 1997           | FemaleAge20to24     | 125414     |
| Republic of Moldova | 1997           | FemaleAge25to29     | 115647     |
| Republic of Moldova | 1997           | FemaleAge30to34     | 141359     |
| Republic of Moldova | 1997           | FemaleAge35to39     | 174165     |
| Republic of Moldova | 1997           | FemaleAge40to44     | 175007     |
| Republic of Moldova | 1997           | FemaleAge45to49     | 139030     |
| Republic of Moldova | 1997           | FemaleAge50to54     | 102608     |
| Republic of Moldova | 1997           | FemaleAge55to59     | 109182     |
| Republic of Moldova | 1997           | FemaleAge5to9       | 192534     |

Dietary calcium and zinc deficiency risks are decreasing but remain prevalent

| Country             | Reference year | Age/gender group    | Population |
|---------------------|----------------|---------------------|------------|
| Republic of Moldova | 1997           | FemaleAge60to64     | 104095     |
| Republic of Moldova | 1997           | FemaleAge65to69     | 92996      |
| Republic of Moldova | 1997           | FemaleAge70to74     | 78176      |
| Republic of Moldova | 1997           | FemaleAge75to79     | 43126      |
| Republic of Moldova | 1997           | FemaleAge80to84     | 22361      |
| Republic of Moldova | 1997           | FemaleAge85to89     | 12226      |
| Republic of Moldova | 1997           | FemaleAge90to94     | 3917       |
| Republic of Moldova | 1997           | FemaleAge95to99     | 673        |
| Republic of Moldova | 1997           | FemaleAgeAbove100   | 49         |
| Republic of Moldova | 1997           | FemaleLactAge15to19 | 10529      |
| Republic of Moldova | 1997           | FemaleLactAge20to24 | 20569      |
| Republic of Moldova | 1997           | FemaleLactAge25to29 | 12839      |
| Republic of Moldova | 1997           | FemaleLactAge30to34 | 6298       |
| Republic of Moldova | 1997           | FemaleLactAge35to39 | 2633       |
| Republic of Moldova | 1997           | FemaleLactAge40to44 | 579        |
| Republic of Moldova | 1997           | FemaleLactAge45to49 | 38         |
| Republic of Moldova | 1997           | FemalePregAge15to19 | 7897       |
| Republic of Moldova | 1997           | FemalePregAge20to24 | 15427      |
| Republic of Moldova | 1997           | FemalePregAge25to29 | 9629       |
| Republic of Moldova | 1997           | FemalePregAge30to34 | 4724       |
| Republic of Moldova | 1997           | FemalePregAge35to39 | 1975       |
| Republic of Moldova | 1997           | FemalePregAge40to44 | 434        |
| Republic of Moldova | 1997           | FemalePregAge45to49 | 29         |
| Republic of Moldova | 1997           | MaleAge0to4         | 145087     |
| Republic of Moldova | 1997           | MaleAge10to14       | 207011     |
| Republic of Moldova | 1997           | MaleAge15to19       | 185365     |
| Republic of Moldova | 1997           | MaleAge20to24       | 160009     |
| Republic of Moldova | 1997           | MaleAge25to29       | 138187     |
| Republic of Moldova | 1997           | MaleAge30to34       | 145398     |
| Republic of Moldova | 1997           | MaleAge35to39       | 165308     |
| Republic of Moldova | 1997           | MaleAge40to44       | 162986     |
| Republic of Moldova | 1997           | MaleAge45to49       | 127160     |
| Republic of Moldova | 1997           | MaleAge50to54       | 88142      |
| Republic of Moldova | 1997           | MaleAge55to59       | 86057      |
| Republic of Moldova | 1997           | MaleAge5to9         | 199077     |
| Republic of Moldova | 1997           | MaleAge60to64       | 78862      |
| Republic of Moldova | 1997           | MaleAge65to69       | 64184      |
| Republic of Moldova | 1997           | MaleAge70to74       | 45996      |
| Republic of Moldova | 1997           | MaleAge75to79       | 22727      |
| Republic of Moldova | 1997           | MaleAge80to84       | 11119      |
| Republic of Moldova | 1997           | MaleAge85to89       | 5307       |
| Republic of Moldova | 1997           | MaleAge90to94       | 1363       |
| Republic of Moldova | 1997           | MaleAge95to99       | 198        |
| Republic of Moldova | 1997           | MaleAgeAbove100     | 11         |
| Republic of Moldova | 1998           | FemaleAge0to4       | 133894     |
| Republic of Moldova | 1998           | FemaleAge10to14     | 202124     |
| Republic of Moldova | 1998           | FemaleAge15to19     | 162614     |
| Republic of Moldova | 1998           | FemaleAge20to24     | 124069     |
| Republic of Moldova | 1998           | FemaleAge25to29     | 117643     |
| Republic of Moldova | 1998           | FemaleAge30to34     | 131219     |
| Republic of Moldova | 1998           | FemaleAge35to39     | 168609     |
| Republic of Moldova | 1998           | FemaleAge40to44     | 174498     |
| Republic of Moldova | 1998           | FemaleAge45to49     | 146140     |
| Republic of Moldova | 1998           | FemaleAge50to54     | 105246     |
| Republic of Moldova | 1998           | FemaleAge55to59     | 101900     |
| Republic of Moldova | 1998           | FemaleAge5to9       | 181470     |
| Republic of Moldova | 1998           | FemaleAge60to64     | 106839     |
| Republic of Moldova | 1998           | FemaleAge65to69     | 89997      |
| Republic of Moldova | 1998           | FemaleAge70to74     | 79231      |
| Republic of Moldova | 1998           | FemaleAge75to79     | 47341      |
| Republic of Moldova | 1998           | FemaleAge80to84     | 21175      |
| Republic of Moldova | 1998           | FemaleAge85to89     | 12473      |
| Republic of Moldova | 1998           | FemaleAge90to94     | 3930       |
| Republic of Moldova | 1998           | FemaleAge95to99     | 780        |
| Republic of Moldova | 1998           | FemaleAgeAbove100   | 50         |
| Republic of Moldova | 1998           | FemaleLactAge15to19 | 10529      |
| Republic of Moldova | 1998           | FemaleLactAge20to24 | 20569      |
| Republic of Moldova | 1998           | FemaleLactAge25to29 | 12839      |
| Republic of Moldova | 1998           | FemaleLactAge30to34 | 6298       |
| Republic of Moldova | 1998           | FemaleLactAge35to39 | 2633       |
| Republic of Moldova | 1998           | FemaleLactAge40to44 | 579        |
| Republic of Moldova | 1998           | FemaleLactAge45to49 | 38         |
| Republic of Moldova | 1998           | FemalePregAge15to19 | 7897       |
| Republic of Moldova | 1998           | FemalePregAge20to24 | 15427      |
| Republic of Moldova | 1998           | FemalePregAge25to29 | 9629       |
| Republic of Moldova | 1998           | FemalePregAge30to34 | 4724       |
| Republic of Moldova | 1998           | FemalePregAge35to39 | 1975       |
| Republic of Moldova | 1998           | FemalePregAge40to44 | 434        |
| Republic of Moldova | 1998           | FemalePregAge45to49 | 29         |
| Republic of Moldova | 1998           | MaleAge0to4         | 140779     |
| Republic of Moldova | 1998           | MaleAge10to14       | 206695     |
| Republic of Moldova | 1998           | MaleAge15to19       | 184805     |
| Republic of Moldova | 1998           | MaleAge20to24       | 159474     |
| Republic of Moldova | 1998           | MaleAge25to29       | 137880     |
| Republic of Moldova | 1998           | MaleAge30to34       | 138836     |
| Republic of Moldova | 1998           | MaleAge35to39       | 159700     |
| Republic of Moldova | 1998           | MaleAge40to44       | 162332     |
| Republic of Moldova | 1998           | MaleAge45to49       | 134276     |



Dietary calcium and zinc deficiency risks are decreasing but remain prevalent

| Country             | Reference year | Age/gender group    | Population |
|---------------------|----------------|---------------------|------------|
| Republic of Moldova | 1998           | MaleAge50to54       | 92478      |
| Republic of Moldova | 1998           | MaleAge55to59       | 80495      |
| Republic of Moldova | 1998           | MaleAge5to9         | 187176     |
| Republic of Moldova | 1998           | MaleAge60to64       | 80228      |
| Republic of Moldova | 1998           | MaleAge65to69       | 62421      |
| Republic of Moldova | 1998           | MaleAge70to74       | 47430      |
| Republic of Moldova | 1998           | MaleAge75to79       | 24349      |
| Republic of Moldova | 1998           | MaleAge80to84       | 10463      |
| Republic of Moldova | 1998           | MaleAge85to89       | 5446       |
| Republic of Moldova | 1998           | MaleAge90to94       | 1375       |
| Republic of Moldova | 1998           | MaleAge95to99       | 236        |
| Republic of Moldova | 1998           | MaleAgeAbove100     | 11         |
| Republic of Moldova | 1999           | FemaleAge0to4       | 129982     |
| Republic of Moldova | 1999           | FemaleAge10to14     | 201447     |
| Republic of Moldova | 1999           | FemaleAge15to19     | 162802     |
| Republic of Moldova | 1999           | FemaleAge20to24     | 122575     |
| Republic of Moldova | 1999           | FemaleAge25to29     | 119243     |
| Republic of Moldova | 1999           | FemaleAge30to34     | 122794     |
| Republic of Moldova | 1999           | FemaleAge35to39     | 162089     |
| Republic of Moldova | 1999           | FemaleAge40to44     | 172428     |
| Republic of Moldova | 1999           | FemaleAge45to49     | 152237     |
| Republic of Moldova | 1999           | FemaleAge50to54     | 109062     |
| Republic of Moldova | 1999           | FemaleAge55to59     | 95764      |
| Republic of Moldova | 1999           | FemaleAge5to9       | 168862     |
| Republic of Moldova | 1999           | FemaleAge60to64     | 108010     |
| Republic of Moldova | 1999           | FemaleAge65to69     | 87924      |
| Republic of Moldova | 1999           | FemaleAge70to74     | 79648      |
| Republic of Moldova | 1999           | FemaleAge75to79     | 50864      |
| Republic of Moldova | 1999           | FemaleAge80to84     | 21004      |
| Republic of Moldova | 1999           | FemaleAge85to89     | 12130      |
| Republic of Moldova | 1999           | FemaleAge90to94     | 3773       |
| Republic of Moldova | 1999           | FemaleAge95to99     | 798        |
| Republic of Moldova | 1999           | FemaleAgeAbove100   | 52         |
| Republic of Moldova | 1999           | FemaleLactAge15to19 | 10529      |
| Republic of Moldova | 1999           | FemaleLactAge20to24 | 20569      |
| Republic of Moldova | 1999           | FemaleLactAge25to29 | 12839      |
| Republic of Moldova | 1999           | FemaleLactAge30to34 | 6298       |
| Republic of Moldova | 1999           | FemaleLactAge35to39 | 2633       |
| Republic of Moldova | 1999           | FemaleLactAge40to44 | 579        |
| Republic of Moldova | 1999           | FemaleLactAge45to49 | 38         |
| Republic of Moldova | 1999           | FemalePregAge15to19 | 7897       |
| Republic of Moldova | 1999           | FemalePregAge20to24 | 15427      |
| Republic of Moldova | 1999           | FemalePregAge25to29 | 9629       |
| Republic of Moldova | 1999           | FemalePregAge30to34 | 4724       |
| Republic of Moldova | 1999           | FemalePregAge35to39 | 1975       |
| Republic of Moldova | 1999           | FemalePregAge40to44 | 434        |
| Republic of Moldova | 1999           | FemalePregAge45to49 | 29         |
| Republic of Moldova | 1999           | MaleAge0to4         | 137130     |
| Republic of Moldova | 1999           | MaleAge10to14       | 205165     |
| Republic of Moldova | 1999           | MaleAge15to19       | 184459     |
| Republic of Moldova | 1999           | MaleAge20to24       | 158889     |
| Republic of Moldova | 1999           | MaleAge25to29       | 137100     |
| Republic of Moldova | 1999           | MaleAge30to34       | 133041     |
| Republic of Moldova | 1999           | MaleAge35to39       | 153998     |
| Republic of Moldova | 1999           | MaleAge40to44       | 160032     |
| Republic of Moldova | 1999           | MaleAge45to49       | 139990     |
| Republic of Moldova | 1999           | MaleAge50to54       | 97899      |
| Republic of Moldova | 1999           | MaleAge55to59       | 76466      |
| Republic of Moldova | 1999           | MaleAge5to9         | 173901     |
| Republic of Moldova | 1999           | MaleAge60to64       | 80345      |
| Republic of Moldova | 1999           | MaleAge65to69       | 61125      |
| Republic of Moldova | 1999           | MaleAge70to74       | 48236      |
| Republic of Moldova | 1999           | MaleAge75to79       | 25750      |
| Republic of Moldova | 1999           | MaleAge80to84       | 10173      |
| Republic of Moldova | 1999           | MaleAge85to89       | 5200       |
| Republic of Moldova | 1999           | MaleAge90to94       | 1314       |
| Republic of Moldova | 1999           | MaleAge95to99       | 241        |
| Republic of Moldova | 1999           | MaleAgeAbove100     | 11         |
| Romania             | 1992           | FemaleAge0to4       | 870640     |
| Romania             | 1992           | FemaleAge10to14     | 928931     |
| Romania             | 1992           | FemaleAge15to19     | 832077     |
| Romania             | 1992           | FemaleAge20to24     | 842631     |
| Romania             | 1992           | FemaleAge25to29     | 567572     |
| Romania             | 1992           | FemaleAge30to34     | 702905     |
| Romania             | 1992           | FemaleAge35to39     | 893401     |
| Romania             | 1992           | FemaleAge40to44     | 779574     |
| Romania             | 1992           | FemaleAge45to49     | 584899     |
| Romania             | 1992           | FemaleAge50to54     | 680947     |
| Romania             | 1992           | FemaleAge55to59     | 732270     |
| Romania             | 1992           | FemaleAge5to9       | 798399     |
| Romania             | 1992           | FemaleAge60to64     | 645110     |
| Romania             | 1992           | FemaleAge65to69     | 590736     |
| Romania             | 1992           | FemaleAge70to74     | 350375     |
| Romania             | 1992           | FemaleAge75to79     | 268987     |
| Romania             | 1992           | FemaleAge80to84     | 205182     |
| Romania             | 1992           | FemaleAge85to89     | 74671      |
| Romania             | 1992           | FemaleAge90to94     | 18336      |
| Romania             | 1992           | FemaleAge95to99     | 2359       |

Dietary calcium and zinc deficiency risks are decreasing but remain prevalent

| Country | Reference year | Age/gender group    | Population |
|---------|----------------|---------------------|------------|
| Romania | 1992           | FemaleAgeAbove100   | 124        |
| Romania | 1992           | FemaleLactAge15to19 | 43285      |
| Romania | 1992           | FemaleLactAge20to24 | 125591     |
| Romania | 1992           | FemaleLactAge25to29 | 64990      |
| Romania | 1992           | FemaleLactAge30to34 | 22749      |
| Romania | 1992           | FemaleLactAge35to39 | 8636       |
| Romania | 1992           | FemaleLactAge40to44 | 1228       |
| Romania | 1992           | FemaleLactAge45to49 | 36         |
| Romania | 1992           | FemalePregAge15to19 | 32464      |
| Romania | 1992           | FemalePregAge20to24 | 94193      |
| Romania | 1992           | FemalePregAge25to29 | 48742      |
| Romania | 1992           | FemalePregAge30to34 | 17062      |
| Romania | 1992           | FemalePregAge35to39 | 6477       |
| Romania | 1992           | FemalePregAge40to44 | 921        |
| Romania | 1992           | FemalePregAge45to49 | 27         |
| Romania | 1992           | MaleAge0to4         | 909958     |
| Romania | 1992           | MaleAge10to14       | 970218     |
| Romania | 1992           | MaleAge15to19       | 959495     |
| Romania | 1992           | MaleAge20to24       | 1088999    |
| Romania | 1992           | MaleAge25to29       | 698487     |
| Romania | 1992           | MaleAge30to34       | 756335     |
| Romania | 1992           | MaleAge35to39       | 911130     |
| Romania | 1992           | MaleAge40to44       | 780816     |
| Romania | 1992           | MaleAge45to49       | 574861     |
| Romania | 1992           | MaleAge50to54       | 637076     |
| Romania | 1992           | MaleAge55to59       | 674227     |
| Romania | 1992           | MaleAge5to9         | 835680     |
| Romania | 1992           | MaleAge60to64       | 576987     |
| Romania | 1992           | MaleAge65to69       | 480788     |
| Romania | 1992           | MaleAge70to74       | 241800     |
| Romania | 1992           | MaleAge75to79       | 167690     |
| Romania | 1992           | MaleAge80to84       | 132595     |
| Romania | 1992           | MaleAge85to89       | 47366      |
| Romania | 1992           | MaleAge90to94       | 11537      |
| Romania | 1992           | MaleAge95to99       | 1279       |
| Romania | 1992           | MaleAgeAbove100     | 79         |
| Romania | 1993           | FemaleAge0to4       | 770904     |
| Romania | 1993           | FemaleAge10to14     | 876600     |
| Romania | 1993           | FemaleAge15to19     | 866186     |
| Romania | 1993           | FemaleAge20to24     | 761279     |
| Romania | 1993           | FemaleAge25to29     | 734875     |
| Romania | 1993           | FemaleAge30to34     | 565586     |
| Romania | 1993           | FemaleAge35to39     | 937757     |
| Romania | 1993           | FemaleAge40to44     | 786654     |
| Romania | 1993           | FemaleAge45to49     | 638537     |
| Romania | 1993           | FemaleAge50to54     | 611618     |
| Romania | 1993           | FemaleAge55to59     | 758737     |
| Romania | 1993           | FemaleAge5to9       | 829068     |
| Romania | 1993           | FemaleAge60to64     | 644017     |
| Romania | 1993           | FemaleAge65to69     | 593572     |
| Romania | 1993           | FemaleAge70to74     | 404009     |
| Romania | 1993           | FemaleAge75to79     | 234424     |
| Romania | 1993           | FemaleAge80to84     | 216192     |
| Romania | 1993           | FemaleAge85to89     | 77631      |
| Romania | 1993           | FemaleAge90to94     | 19346      |
| Romania | 1993           | FemaleAge95to99     | 2857       |
| Romania | 1993           | FemaleAgeAbove100   | 135        |
| Romania | 1993           | FemaleLactAge15to19 | 43285      |
| Romania | 1993           | FemaleLactAge20to24 | 125591     |
| Romania | 1993           | FemaleLactAge25to29 | 64990      |
| Romania | 1993           | FemaleLactAge30to34 | 22749      |
| Romania | 1993           | FemaleLactAge35to39 | 8636       |
| Romania | 1993           | FemaleLactAge40to44 | 1228       |
| Romania | 1993           | FemaleLactAge45to49 | 36         |
| Romania | 1993           | FemalePregAge15to19 | 32464      |
| Romania | 1993           | FemalePregAge20to24 | 94193      |
| Romania | 1993           | FemalePregAge25to29 | 48742      |
| Romania | 1993           | FemalePregAge30to34 | 17062      |
| Romania | 1993           | FemalePregAge35to39 | 6477       |
| Romania | 1993           | FemalePregAge40to44 | 921        |
| Romania | 1993           | FemalePregAge45to49 | 27         |
| Romania | 1993           | MaleAge0to4         | 807359     |
| Romania | 1993           | MaleAge10to14       | 917345     |
| Romania | 1993           | MaleAge15to19       | 990448     |
| Romania | 1993           | MaleAge20to24       | 1015436    |
| Romania | 1993           | MaleAge25to29       | 861950     |
| Romania | 1993           | MaleAge30to34       | 621413     |
| Romania | 1993           | MaleAge35to39       | 954038     |
| Romania | 1993           | MaleAge40to44       | 785637     |
| Romania | 1993           | MaleAge45to49       | 628057     |
| Romania | 1993           | MaleAge50to54       | 572238     |
| Romania | 1993           | MaleAge55to59       | 692505     |
| Romania | 1993           | MaleAge5to9         | 867262     |
| Romania | 1993           | MaleAge60to64       | 573460     |
| Romania | 1993           | MaleAge65to69       | 487645     |
| Romania | 1993           | MaleAge70to74       | 286330     |
| Romania | 1993           | MaleAge75to79       | 138988     |
| Romania | 1993           | MaleAge80to84       | 138441     |

Dietary calcium and zinc deficiency risks are decreasing but remain prevalent

| Country | Reference year | Age/gender group    | Population |
|---------|----------------|---------------------|------------|
| Romania | 1993           | MaleAge85to89       | 48397      |
| Romania | 1993           | MaleAge90to94       | 12357      |
| Romania | 1993           | MaleAge95to99       | 1576       |
| Romania | 1993           | MaleAgeAbove100     | 83         |
| Romania | 1994           | FemaleAge0to4       | 671544     |
| Romania | 1994           | FemaleAge10to14     | 830438     |
| Romania | 1994           | FemaleAge15to19     | 891249     |
| Romania | 1994           | FemaleAge20to24     | 683290     |
| Romania | 1994           | FemaleAge25to29     | 876635     |
| Romania | 1994           | FemaleAge30to34     | 467750     |
| Romania | 1994           | FemaleAge35to39     | 952375     |
| Romania | 1994           | FemaleAge40to44     | 796182     |
| Romania | 1994           | FemaleAge45to49     | 691072     |
| Romania | 1994           | FemaleAge50to54     | 556785     |
| Romania | 1994           | FemaleAge55to59     | 769612     |
| Romania | 1994           | FemaleAge5to9       | 866292     |
| Romania | 1994           | FemaleAge60to64     | 646783     |
| Romania | 1994           | FemaleAge65to69     | 594538     |
| Romania | 1994           | FemaleAge70to74     | 450893     |
| Romania | 1994           | FemaleAge75to79     | 216621     |
| Romania | 1994           | FemaleAge80to84     | 217320     |
| Romania | 1994           | FemaleAge85to89     | 79653      |
| Romania | 1994           | FemaleAge90to94     | 19454      |
| Romania | 1994           | FemaleAge95to99     | 3029       |
| Romania | 1994           | FemaleAgeAbove100   | 144        |
| Romania | 1994           | FemaleLactAge15to19 | 43285      |
| Romania | 1994           | FemaleLactAge20to24 | 125591     |
| Romania | 1994           | FemaleLactAge25to29 | 64990      |
| Romania | 1994           | FemaleLactAge30to34 | 22749      |
| Romania | 1994           | FemaleLactAge35to39 | 8636       |
| Romania | 1994           | FemaleLactAge40to44 | 1228       |
| Romania | 1994           | FemaleLactAge45to49 | 36         |
| Romania | 1994           | FemalePregAge15to19 | 32464      |
| Romania | 1994           | FemalePregAge20to24 | 94193      |
| Romania | 1994           | FemalePregAge25to29 | 48742      |
| Romania | 1994           | FemalePregAge30to34 | 17062      |
| Romania | 1994           | FemalePregAge35to39 | 6477       |
| Romania | 1994           | FemalePregAge40to44 | 921        |
| Romania | 1994           | FemalePregAge45to49 | 27         |
| Romania | 1994           | MaleAge0to4         | 704918     |
| Romania | 1994           | MaleAge10to14       | 870882     |
| Romania | 1994           | MaleAge15to19       | 1012616    |
| Romania | 1994           | MaleAge20to24       | 943284     |
| Romania | 1994           | MaleAge25to29       | 1001367    |
| Romania | 1994           | MaleAge30to34       | 525451     |
| Romania | 1994           | MaleAge35to39       | 967586     |
| Romania | 1994           | MaleAge40to44       | 793131     |
| Romania | 1994           | MaleAge45to49       | 679050     |
| Romania | 1994           | MaleAge50to54       | 522830     |
| Romania | 1994           | MaleAge55to59       | 696684     |
| Romania | 1994           | MaleAge5to9         | 904945     |
| Romania | 1994           | MaleAge60to64       | 572728     |
| Romania | 1994           | MaleAge65to69       | 491659     |
| Romania | 1994           | MaleAge70to74       | 324549     |
| Romania | 1994           | MaleAge75to79       | 124292     |
| Romania | 1994           | MaleAge80to84       | 135988     |
| Romania | 1994           | MaleAge85to89       | 48594      |
| Romania | 1994           | MaleAge90to94       | 12376      |
| Romania | 1994           | MaleAge95to99       | 1738       |
| Romania | 1994           | MaleAgeAbove100     | 88         |
| Romania | 1995           | FemaleAge0to4       | 607554     |
| Romania | 1995           | FemaleAge10to14     | 807313     |
| Romania | 1995           | FemaleAge15to19     | 890089     |
| Romania | 1995           | FemaleAge20to24     | 637235     |
| Romania | 1995           | FemaleAge25to29     | 949739     |
| Romania | 1995           | FemaleAge30to34     | 444006     |
| Romania | 1995           | FemaleAge35to39     | 919763     |
| Romania | 1995           | FemaleAge40to44     | 814473     |
| Romania | 1995           | FemaleAge45to49     | 728414     |
| Romania | 1995           | FemaleAge50to54     | 531428     |
| Romania | 1995           | FemaleAge55to59     | 754985     |
| Romania | 1995           | FemaleAge5to9       | 882520     |
| Romania | 1995           | FemaleAge60to64     | 654848     |
| Romania | 1995           | FemaleAge65to69     | 595918     |
| Romania | 1995           | FemaleAge70to74     | 482511     |
| Romania | 1995           | FemaleAge75to79     | 221674     |
| Romania | 1995           | FemaleAge80to84     | 206830     |
| Romania | 1995           | FemaleAge85to89     | 81415      |
| Romania | 1995           | FemaleAge90to94     | 18330      |
| Romania | 1995           | FemaleAge95to99     | 2391       |
| Romania | 1995           | FemaleAgeAbove100   | 152        |
| Romania | 1995           | FemaleLactAge15to19 | 43285      |
| Romania | 1995           | FemaleLactAge20to24 | 125591     |
| Romania | 1995           | FemaleLactAge25to29 | 64990      |
| Romania | 1995           | FemaleLactAge30to34 | 22749      |
| Romania | 1995           | FemaleLactAge35to39 | 8636       |
| Romania | 1995           | FemaleLactAge40to44 | 1228       |
| Romania | 1995           | FemaleLactAge45to49 | 36         |

Dietary calcium and zinc deficiency risks are decreasing but remain prevalent

| Country | Reference year | Age/gender group    | Population |
|---------|----------------|---------------------|------------|
| Romania | 1995           | FemalePregAge15to19 | 32464      |
| Romania | 1995           | FemalePregAge20to24 | 94193      |
| Romania | 1995           | FemalePregAge25to29 | 48742      |
| Romania | 1995           | FemalePregAge30to34 | 17062      |
| Romania | 1995           | FemalePregAge35to39 | 6477       |
| Romania | 1995           | FemalePregAge40to44 | 921        |
| Romania | 1995           | FemalePregAge45to49 | 27         |
| Romania | 1995           | MaleAge0to4         | 638759     |
| Romania | 1995           | MaleAge10to14       | 847445     |
| Romania | 1995           | MaleAge15to19       | 1009451    |
| Romania | 1995           | MaleAge20to24       | 899849     |
| Romania | 1995           | MaleAge25to29       | 1074632    |
| Romania | 1995           | MaleAge30to34       | 502043     |
| Romania | 1995           | MaleAge35to39       | 934652     |
| Romania | 1995           | MaleAge40to44       | 809474     |
| Romania | 1995           | MaleAge45to49       | 714441     |
| Romania | 1995           | MaleAge50to54       | 501864     |
| Romania | 1995           | MaleAge55to59       | 678727     |
| Romania | 1995           | MaleAge5to9         | 920421     |
| Romania | 1995           | MaleAge60to64       | 576248     |
| Romania | 1995           | MaleAge65to69       | 493996     |
| Romania | 1995           | MaleAge70to74       | 350313     |
| Romania | 1995           | MaleAge75to79       | 127864     |
| Romania | 1995           | MaleAge80to84       | 124336     |
| Romania | 1995           | MaleAge85to89       | 48201      |
| Romania | 1995           | MaleAge90to94       | 11280      |
| Romania | 1995           | MaleAge95to99       | 1435       |
| Romania | 1995           | MaleAgeAbove100     | 92         |
| Romania | 1996           | FemaleAge0to4       | 508835     |
| Romania | 1996           | FemaleAge10to14     | 810305     |
| Romania | 1996           | FemaleAge15to19     | 887514     |
| Romania | 1996           | FemaleAge20to24     | 714182     |
| Romania | 1996           | FemaleAge25to29     | 946734     |
| Romania | 1996           | FemaleAge30to34     | 484960     |
| Romania | 1996           | FemaleAge35to39     | 839363     |
| Romania | 1996           | FemaleAge40to44     | 848900     |
| Romania | 1996           | FemaleAge45to49     | 757301     |
| Romania | 1996           | FemaleAge50to54     | 537108     |
| Romania | 1996           | FemaleAge55to59     | 718152     |
| Romania | 1996           | FemaleAge5to9       | 875993     |
| Romania | 1996           | FemaleAge60to64     | 671147     |
| Romania | 1996           | FemaleAge65to69     | 595158     |
| Romania | 1996           | FemaleAge70to74     | 499909     |
| Romania | 1996           | FemaleAge75to79     | 242669     |
| Romania | 1996           | FemaleAge80to84     | 191011     |
| Romania | 1996           | FemaleAge85to89     | 91461      |
| Romania | 1996           | FemaleAge90to94     | 21884      |
| Romania | 1996           | FemaleAge95to99     | 2672       |
| Romania | 1996           | FemaleAgeAbove100   | 158        |
| Romania | 1996           | FemaleLactAge15to19 | 32865      |
| Romania | 1996           | FemaleLactAge20to24 | 75479      |
| Romania | 1996           | FemaleLactAge25to29 | 80911      |
| Romania | 1996           | FemaleLactAge30to34 | 29969      |
| Romania | 1996           | FemaleLactAge35to39 | 8876       |
| Romania | 1996           | FemaleLactAge40to44 | 1624       |
| Romania | 1996           | FemaleLactAge45to49 | 56         |
| Romania | 1996           | FemalePregAge15to19 | 24648      |
| Romania | 1996           | FemalePregAge20to24 | 56609      |
| Romania | 1996           | FemalePregAge25to29 | 60684      |
| Romania | 1996           | FemalePregAge30to34 | 22476      |
| Romania | 1996           | FemalePregAge35to39 | 6657       |
| Romania | 1996           | FemalePregAge40to44 | 1218       |
| Romania | 1996           | FemalePregAge45to49 | 42         |
| Romania | 1996           | MaleAge0to4         | 538032     |
| Romania | 1996           | MaleAge10to14       | 850968     |
| Romania | 1996           | MaleAge15to19       | 986817     |
| Romania | 1996           | MaleAge20to24       | 888321     |
| Romania | 1996           | MaleAge25to29       | 1104036    |
| Romania | 1996           | MaleAge30to34       | 553579     |
| Romania | 1996           | MaleAge35to39       | 855099     |
| Romania | 1996           | MaleAge40to44       | 841361     |
| Romania | 1996           | MaleAge45to49       | 739701     |
| Romania | 1996           | MaleAge50to54       | 509123     |
| Romania | 1996           | MaleAge55to59       | 641143     |
| Romania | 1996           | MaleAge5to9         | 912988     |
| Romania | 1996           | MaleAge60to64       | 585642     |
| Romania | 1996           | MaleAge65to69       | 493608     |
| Romania | 1996           | MaleAge70to74       | 367398     |
| Romania | 1996           | MaleAge75to79       | 145640     |
| Romania | 1996           | MaleAge80to84       | 111629     |
| Romania | 1996           | MaleAge85to89       | 54339      |
| Romania | 1996           | MaleAge90to94       | 13251      |
| Romania | 1996           | MaleAge95to99       | 1641       |
| Romania | 1996           | MaleAgeAbove100     | 96         |
| Romania | 1997           | FemaleAge0to4       | 483705     |
| Romania | 1997           | FemaleAge10to14     | 833501     |
| Romania | 1997           | FemaleAge15to19     | 840743     |
| Romania | 1997           | FemaleAge20to24     | 729450     |

Dietary calcium and zinc deficiency risks are decreasing but remain prevalent

| Country | Reference year | Age/gender group    | Population |
|---------|----------------|---------------------|------------|
| Romania | 1997           | FemaleAge25to29     | 899592     |
| Romania | 1997           | FemaleAge30to34     | 617816     |
| Romania | 1997           | FemaleAge35to39     | 706893     |
| Romania | 1997           | FemaleAge40to44     | 890886     |
| Romania | 1997           | FemaleAge45to49     | 770478     |
| Romania | 1997           | FemaleAge50to54     | 570526     |
| Romania | 1997           | FemaleAge55to59     | 654807     |
| Romania | 1997           | FemaleAge5to9       | 833206     |
| Romania | 1997           | FemaleAge60to64     | 693787     |
| Romania | 1997           | FemaleAge65to69     | 590743     |
| Romania | 1997           | FemaleAge70to74     | 506190     |
| Romania | 1997           | FemaleAge75to79     | 277069     |
| Romania | 1997           | FemaleAge80to84     | 166608     |
| Romania | 1997           | FemaleAge85to89     | 101015     |
| Romania | 1997           | FemaleAge90to94     | 23719      |
| Romania | 1997           | FemaleAge95to99     | 3106       |
| Romania | 1997           | FemaleAgeAbove100   | 163        |
| Romania | 1997           | FemaleLactAge15to19 | 32865      |
| Romania | 1997           | FemaleLactAge20to24 | 75479      |
| Romania | 1997           | FemaleLactAge25to29 | 80911      |
| Romania | 1997           | FemaleLactAge30to34 | 29969      |
| Romania | 1997           | FemaleLactAge35to39 | 8876       |
| Romania | 1997           | FemaleLactAge40to44 | 1624       |
| Romania | 1997           | FemaleLactAge45to49 | 56         |
| Romania | 1997           | FemalePregAge15to19 | 24648      |
| Romania | 1997           | FemalePregAge20to24 | 56609      |
| Romania | 1997           | FemalePregAge25to29 | 60684      |
| Romania | 1997           | FemalePregAge30to34 | 22476      |
| Romania | 1997           | FemalePregAge35to39 | 6657       |
| Romania | 1997           | FemalePregAge40to44 | 1218       |
| Romania | 1997           | FemalePregAge45to49 | 42         |
| Romania | 1997           | MaleAge0to4         | 512089     |
| Romania | 1997           | MaleAge10to14       | 874134     |
| Romania | 1997           | MaleAge15to19       | 939030     |
| Romania | 1997           | MaleAge20to24       | 900556     |
| Romania | 1997           | MaleAge25to29       | 1061830    |
| Romania | 1997           | MaleAge30to34       | 683774     |
| Romania | 1997           | MaleAge35to39       | 723997     |
| Romania | 1997           | MaleAge40to44       | 880230     |
| Romania | 1997           | MaleAge45to49       | 749147     |
| Romania | 1997           | MaleAge50to54       | 541571     |
| Romania | 1997           | MaleAge55to59       | 581786     |
| Romania | 1997           | MaleAge5to9         | 868176     |
| Romania | 1997           | MaleAge60to64       | 599234     |
| Romania | 1997           | MaleAge65to69       | 488139     |
| Romania | 1997           | MaleAge70to74       | 375801     |
| Romania | 1997           | MaleAge75to79       | 172618     |
| Romania | 1997           | MaleAge80to84       | 92762      |
| Romania | 1997           | MaleAge85to89       | 60217      |
| Romania | 1997           | MaleAge90to94       | 14134      |
| Romania | 1997           | MaleAge95to99       | 1971       |
| Romania | 1997           | MaleAgeAbove100     | 101        |
| Romania | 1998           | FemaleAge0to4       | 509196     |
| Romania | 1998           | FemaleAge10to14     | 869861     |
| Romania | 1998           | FemaleAge15to19     | 784529     |
| Romania | 1998           | FemaleAge20to24     | 758611     |
| Romania | 1998           | FemaleAge25to29     | 808567     |
| Romania | 1998           | FemaleAge30to34     | 789330     |
| Romania | 1998           | FemaleAge35to39     | 563632     |
| Romania | 1998           | FemaleAge40to44     | 922677     |
| Romania | 1998           | FemaleAge45to49     | 776518     |
| Romania | 1998           | FemaleAge50to54     | 620490     |
| Romania | 1998           | FemaleAge55to59     | 583422     |
| Romania | 1998           | FemaleAge5to9       | 756049     |
| Romania | 1998           | FemaleAge60to64     | 714000     |
| Romania | 1998           | FemaleAge65to69     | 586788     |
| Romania | 1998           | FemaleAge70to74     | 506561     |
| Romania | 1998           | FemaleAge75to79     | 315500     |
| Romania | 1998           | FemaleAge80to84     | 144365     |
| Romania | 1998           | FemaleAge85to89     | 105985     |
| Romania | 1998           | FemaleAge90to94     | 24100      |
| Romania | 1998           | FemaleAge95to99     | 3544       |
| Romania | 1998           | FemaleAgeAbove100   | 169        |
| Romania | 1998           | FemaleLactAge15to19 | 32865      |
| Romania | 1998           | FemaleLactAge20to24 | 75479      |
| Romania | 1998           | FemaleLactAge25to29 | 80911      |
| Romania | 1998           | FemaleLactAge30to34 | 29969      |
| Romania | 1998           | FemaleLactAge35to39 | 8876       |
| Romania | 1998           | FemaleLactAge40to44 | 1624       |
| Romania | 1998           | FemaleLactAge45to49 | 56         |
| Romania | 1998           | FemalePregAge15to19 | 24648      |
| Romania | 1998           | FemalePregAge20to24 | 56609      |
| Romania | 1998           | FemalePregAge25to29 | 60684      |
| Romania | 1998           | FemalePregAge30to34 | 22476      |
| Romania | 1998           | FemalePregAge35to39 | 6657       |
| Romania | 1998           | FemalePregAge40to44 | 1218       |
| Romania | 1998           | FemalePregAge45to49 | 42         |
| Romania | 1998           | MaleAge0to4         | 537788     |

Dietary calcium and zinc deficiency risks are decreasing but remain prevalent

| Country            | Reference year | Age/gender group    | Population |
|--------------------|----------------|---------------------|------------|
| Romania            | 1998           | MaleAge10to14       | 909716     |
| Romania            | 1998           | MaleAge15to19       | 882883     |
| Romania            | 1998           | MaleAge20to24       | 926420     |
| Romania            | 1998           | MaleAge25to29       | 974132     |
| Romania            | 1998           | MaleAge30to34       | 853754     |
| Romania            | 1998           | MaleAge35to39       | 582404     |
| Romania            | 1998           | MaleAge40to44       | 909574     |
| Romania            | 1998           | MaleAge45to49       | 751858     |
| Romania            | 1998           | MaleAge50to54       | 588151     |
| Romania            | 1998           | MaleAge55to59       | 517843     |
| Romania            | 1998           | MaleAge5to9         | 788444     |
| Romania            | 1998           | MaleAge60to64       | 609948     |
| Romania            | 1998           | MaleAge65to69       | 481788     |
| Romania            | 1998           | MaleAge70to74       | 379014     |
| Romania            | 1998           | MaleAge75to79       | 201387     |
| Romania            | 1998           | MaleAge80to84       | 75740      |
| Romania            | 1998           | MaleAge85to89       | 62769      |
| Romania            | 1998           | MaleAge90to94       | 14173      |
| Romania            | 1998           | MaleAge95to99       | 2281       |
| Romania            | 1998           | MaleAgeAbove100     | 107        |
| Romania            | 1999           | FemaleAge0to4       | 541164     |
| Romania            | 1999           | FemaleAge10to14     | 899183     |
| Romania            | 1999           | FemaleAge15to19     | 743912     |
| Romania            | 1999           | FemaleAge20to24     | 779518     |
| Romania            | 1999           | FemaleAge25to29     | 723810     |
| Romania            | 1999           | FemaleAge30to34     | 935003     |
| Romania            | 1999           | FemaleAge35to39     | 469285     |
| Romania            | 1999           | FemaleAge40to44     | 922242     |
| Romania            | 1999           | FemaleAge45to49     | 788313     |
| Romania            | 1999           | FemaleAge50to54     | 670086     |
| Romania            | 1999           | FemaleAge55to59     | 530462     |
| Romania            | 1999           | FemaleAge5to9       | 664027     |
| Romania            | 1999           | FemaleAge60to64     | 719846     |
| Romania            | 1999           | FemaleAge65to69     | 589161     |
| Romania            | 1999           | FemaleAge70to74     | 507541     |
| Romania            | 1999           | FemaleAge75to79     | 348033     |
| Romania            | 1999           | FemaleAge80to84     | 135339     |
| Romania            | 1999           | FemaleAge85to89     | 102823     |
| Romania            | 1999           | FemaleAge90to94     | 23692      |
| Romania            | 1999           | FemaleAge95to99     | 3683       |
| Romania            | 1999           | FemaleAgeAbove100   | 178        |
| Romania            | 1999           | FemaleLactAge15to19 | 32865      |
| Romania            | 1999           | FemaleLactAge20to24 | 75479      |
| Romania            | 1999           | FemaleLactAge25to29 | 80911      |
| Romania            | 1999           | FemaleLactAge30to34 | 29969      |
| Romania            | 1999           | FemaleLactAge35to39 | 8876       |
| Romania            | 1999           | FemaleLactAge40to44 | 1624       |
| Romania            | 1999           | FemaleLactAge45to49 | 56         |
| Romania            | 1999           | FemalePregAge15to19 | 24648      |
| Romania            | 1999           | FemalePregAge20to24 | 56609      |
| Romania            | 1999           | FemalePregAge25to29 | 60684      |
| Romania            | 1999           | FemalePregAge30to34 | 22476      |
| Romania            | 1999           | FemalePregAge35to39 | 6657       |
| Romania            | 1999           | FemalePregAge40to44 | 1218       |
| Romania            | 1999           | FemalePregAge45to49 | 42         |
| Romania            | 1999           | MaleAge0to4         | 570374     |
| Romania            | 1999           | MaleAge10to14       | 937898     |
| Romania            | 1999           | MaleAge15to19       | 843429     |
| Romania            | 1999           | MaleAge20to24       | 945581     |
| Romania            | 1999           | MaleAge25to29       | 890276     |
| Romania            | 1999           | MaleAge30to34       | 1000413    |
| Romania            | 1999           | MaleAge35to39       | 489420     |
| Romania            | 1999           | MaleAge40to44       | 908092     |
| Romania            | 1999           | MaleAge45to49       | 760957     |
| Romania            | 1999           | MaleAge50to54       | 633463     |
| Romania            | 1999           | MaleAge55to59       | 472593     |
| Romania            | 1999           | MaleAge5to9         | 694081     |
| Romania            | 1999           | MaleAge60to64       | 608667     |
| Romania            | 1999           | MaleAge65to69       | 480146     |
| Romania            | 1999           | MaleAge70to74       | 381237     |
| Romania            | 1999           | MaleAge75to79       | 224828     |
| Romania            | 1999           | MaleAge80to84       | 68498      |
| Romania            | 1999           | MaleAge85to89       | 59352      |
| Romania            | 1999           | MaleAge90to94       | 13750      |
| Romania            | 1999           | MaleAge95to99       | 2353       |
| Romania            | 1999           | MaleAgeAbove100     | 116        |
| Russian Federation | 1992           | FemaleAge0to4       | 5122794    |
| Russian Federation | 1992           | FemaleAge10to14     | 5514079    |
| Russian Federation | 1992           | FemaleAge15to19     | 4704788    |
| Russian Federation | 1992           | FemaleAge20to24     | 3546054    |
| Russian Federation | 1992           | FemaleAge25to29     | 4615851    |
| Russian Federation | 1992           | FemaleAge30to34     | 5937772    |
| Russian Federation | 1992           | FemaleAge35to39     | 6143005    |
| Russian Federation | 1992           | FemaleAge40to44     | 5437511    |
| Russian Federation | 1992           | FemaleAge45to49     | 3469239    |
| Russian Federation | 1992           | FemaleAge50to54     | 4691373    |
| Russian Federation | 1992           | FemaleAge55to59     | 4765284    |
| Russian Federation | 1992           | FemaleAge5to9       | 5863310    |

Dietary calcium and zinc deficiency risks are decreasing but remain prevalent

| Country            | Reference year | Age/gender group    | Population |
|--------------------|----------------|---------------------|------------|
| Russian Federation | 1992           | FemaleAge60to64     | 4728403    |
| Russian Federation | 1992           | FemaleAge65to69     | 4213124    |
| Russian Federation | 1992           | FemaleAge70to74     | 2516798    |
| Russian Federation | 1992           | FemaleAge75to79     | 2263076    |
| Russian Federation | 1992           | FemaleAge80to84     | 1769497    |
| Russian Federation | 1992           | FemaleAge85to89     | 762424     |
| Russian Federation | 1992           | FemaleAge90to94     | 217482     |
| Russian Federation | 1992           | FemaleAge95to99     | 39412      |
| Russian Federation | 1992           | FemaleAgeAbove100   | 5225       |
| Russian Federation | 1992           | FemaleLactAge15to19 | 268888     |
| Russian Federation | 1992           | FemaleLactAge20to24 | 648420     |
| Russian Federation | 1992           | FemaleLactAge25to29 | 380895     |
| Russian Federation | 1992           | FemaleLactAge30to34 | 211196     |
| Russian Federation | 1992           | FemaleLactAge35to39 | 82469      |
| Russian Federation | 1992           | FemaleLactAge40to44 | 16343      |
| Russian Federation | 1992           | FemaleLactAge45to49 | 618        |
| Russian Federation | 1992           | FemalePregAge15to19 | 201666     |
| Russian Federation | 1992           | FemalePregAge20to24 | 486315     |
| Russian Federation | 1992           | FemalePregAge25to29 | 285671     |
| Russian Federation | 1992           | FemalePregAge30to34 | 158397     |
| Russian Federation | 1992           | FemalePregAge35to39 | 61852      |
| Russian Federation | 1992           | FemalePregAge40to44 | 12257      |
| Russian Federation | 1992           | FemalePregAge45to49 | 463        |
| Russian Federation | 1992           | MaleAge0to4         | 5371782    |
| Russian Federation | 1992           | MaleAge10to14       | 5690367    |
| Russian Federation | 1992           | MaleAge15to19       | 5359440    |
| Russian Federation | 1992           | MaleAge20to24       | 4893157    |
| Russian Federation | 1992           | MaleAge25to29       | 5422914    |
| Russian Federation | 1992           | MaleAge30to34       | 6372347    |
| Russian Federation | 1992           | MaleAge35to39       | 6240831    |
| Russian Federation | 1992           | MaleAge40to44       | 5267543    |
| Russian Federation | 1992           | MaleAge45to49       | 3226731    |
| Russian Federation | 1992           | MaleAge50to54       | 3979082    |
| Russian Federation | 1992           | MaleAge55to59       | 3846744    |
| Russian Federation | 1992           | MaleAge5to9         | 6081862    |
| Russian Federation | 1992           | MaleAge60to64       | 3338143    |
| Russian Federation | 1992           | MaleAge65to69       | 2216870    |
| Russian Federation | 1992           | MaleAge70to74       | 929173     |
| Russian Federation | 1992           | MaleAge75to79       | 745024     |
| Russian Federation | 1992           | MaleAge80to84       | 479913     |
| Russian Federation | 1992           | MaleAge85to89       | 154820     |
| Russian Federation | 1992           | MaleAge90to94       | 32782      |
| Russian Federation | 1992           | MaleAge95to99       | 6274       |
| Russian Federation | 1992           | MaleAgeAbove100     | 590        |
| Russian Federation | 1993           | FemaleAge0to4       | 4689879    |
| Russian Federation | 1993           | FemaleAge10to14     | 5633728    |
| Russian Federation | 1993           | FemaleAge15to19     | 4752191    |
| Russian Federation | 1993           | FemaleAge20to24     | 3691416    |
| Russian Federation | 1993           | FemaleAge25to29     | 4357516    |
| Russian Federation | 1993           | FemaleAge30to34     | 5825525    |
| Russian Federation | 1993           | FemaleAge35to39     | 6248397    |
| Russian Federation | 1993           | FemaleAge40to44     | 5631680    |
| Russian Federation | 1993           | FemaleAge45to49     | 3952961    |
| Russian Federation | 1993           | FemaleAge50to54     | 3966152    |
| Russian Federation | 1993           | FemaleAge55to59     | 5195480    |
| Russian Federation | 1993           | FemaleAge5to9       | 5886975    |
| Russian Federation | 1993           | FemaleAge60to64     | 4363481    |
| Russian Federation | 1993           | FemaleAge65to69     | 4503238    |
| Russian Federation | 1993           | FemaleAge70to74     | 2692060    |
| Russian Federation | 1993           | FemaleAge75to79     | 2054101    |
| Russian Federation | 1993           | FemaleAge80to84     | 1830155    |
| Russian Federation | 1993           | FemaleAge85to89     | 789031     |
| Russian Federation | 1993           | FemaleAge90to94     | 228857     |
| Russian Federation | 1993           | FemaleAge95to99     | 41542      |
| Russian Federation | 1993           | FemaleAgeAbove100   | 5027       |
| Russian Federation | 1993           | FemaleLactAge15to19 | 268888     |
| Russian Federation | 1993           | FemaleLactAge20to24 | 648420     |
| Russian Federation | 1993           | FemaleLactAge25to29 | 380895     |
| Russian Federation | 1993           | FemaleLactAge30to34 | 211196     |
| Russian Federation | 1993           | FemaleLactAge35to39 | 82469      |
| Russian Federation | 1993           | FemaleLactAge40to44 | 16343      |
| Russian Federation | 1993           | FemaleLactAge45to49 | 618        |
| Russian Federation | 1993           | FemalePregAge15to19 | 201666     |
| Russian Federation | 1993           | FemalePregAge20to24 | 486315     |
| Russian Federation | 1993           | FemalePregAge25to29 | 285671     |
| Russian Federation | 1993           | FemalePregAge30to34 | 158397     |
| Russian Federation | 1993           | FemalePregAge35to39 | 61852      |
| Russian Federation | 1993           | FemalePregAge40to44 | 12257      |
| Russian Federation | 1993           | FemalePregAge45to49 | 463        |
| Russian Federation | 1993           | MaleAge0to4         | 4924092    |
| Russian Federation | 1993           | MaleAge10to14       | 5819168    |
| Russian Federation | 1993           | MaleAge15to19       | 5403349    |
| Russian Federation | 1993           | MaleAge20to24       | 5025557    |
| Russian Federation | 1993           | MaleAge25to29       | 5173373    |
| Russian Federation | 1993           | MaleAge30to34       | 6237341    |
| Russian Federation | 1993           | MaleAge35to39       | 6339344    |
| Russian Federation | 1993           | MaleAge40to44       | 5448003    |
| Russian Federation | 1993           | MaleAge45to49       | 3670681    |

Dietary calcium and zinc deficiency risks are decreasing but remain prevalent

| Country            | Reference year | Age/gender group    | Population |
|--------------------|----------------|---------------------|------------|
| Russian Federation | 1993           | MaleAge50to54       | 3360174    |
| Russian Federation | 1993           | MaleAge55to59       | 4181578    |
| Russian Federation | 1993           | MaleAge5to9         | 6120210    |
| Russian Federation | 1993           | MaleAge60to64       | 3089140    |
| Russian Federation | 1993           | MaleAge65to69       | 2547332    |
| Russian Federation | 1993           | MaleAge70to74       | 9611116    |
| Russian Federation | 1993           | MaleAge75to79       | 683580     |
| Russian Federation | 1993           | MaleAge80to84       | 501461     |
| Russian Federation | 1993           | MaleAge85to89       | 161200     |
| Russian Federation | 1993           | MaleAge90to94       | 33944      |
| Russian Federation | 1993           | MaleAge95to99       | 6628       |
| Russian Federation | 1993           | MaleAgeAbov e100    | 564        |
| Russian Federation | 1994           | FemaleAge0to4       | 4268093    |
| Russian Federation | 1994           | FemaleAge10to14     | 5746319    |
| Russian Federation | 1994           | FemaleAge15to19     | 4806791    |
| Russian Federation | 1994           | FemaleAge20to24     | 3837111    |
| Russian Federation | 1994           | FemaleAge25to29     | 4155714    |
| Russian Federation | 1994           | FemaleAge30to34     | 5670337    |
| Russian Federation | 1994           | FemaleAge35to39     | 6309575    |
| Russian Federation | 1994           | FemaleAge40to44     | 5802545    |
| Russian Federation | 1994           | FemaleAge45to49     | 4447606    |
| Russian Federation | 1994           | FemaleAge50to54     | 3390449    |
| Russian Federation | 1994           | FemaleAge55to59     | 5457520    |
| Russian Federation | 1994           | FemaleAge5to9       | 5863071    |
| Russian Federation | 1994           | FemaleAge60to64     | 4110336    |
| Russian Federation | 1994           | FemaleAge65to69     | 4692437    |
| Russian Federation | 1994           | FemaleAge70to74     | 2899075    |
| Russian Federation | 1994           | FemaleAge75to79     | 1915279    |
| Russian Federation | 1994           | FemaleAge80to84     | 1844504    |
| Russian Federation | 1994           | FemaleAge85to89     | 802811     |
| Russian Federation | 1994           | FemaleAge90to94     | 232626     |
| Russian Federation | 1994           | FemaleAge95to99     | 42150      |
| Russian Federation | 1994           | FemaleAgeAbov e100  | 4809       |
| Russian Federation | 1994           | FemaleLactAge15to19 | 268888     |
| Russian Federation | 1994           | FemaleLactAge20to24 | 648420     |
| Russian Federation | 1994           | FemaleLactAge25to29 | 380895     |
| Russian Federation | 1994           | FemaleLactAge30to34 | 211196     |
| Russian Federation | 1994           | FemaleLactAge35to39 | 82469      |
| Russian Federation | 1994           | FemaleLactAge40to44 | 16343      |
| Russian Federation | 1994           | FemaleLactAge45to49 | 618        |
| Russian Federation | 1994           | FemalePregAge15to19 | 201666     |
| Russian Federation | 1994           | FemalePregAge20to24 | 486315     |
| Russian Federation | 1994           | FemalePregAge25to29 | 285671     |
| Russian Federation | 1994           | FemalePregAge30to34 | 158397     |
| Russian Federation | 1994           | FemalePregAge35to39 | 61852      |
| Russian Federation | 1994           | FemalePregAge40to44 | 12257      |
| Russian Federation | 1994           | FemalePregAge45to49 | 463        |
| Russian Federation | 1994           | MaleAge0to4         | 4485065    |
| Russian Federation | 1994           | MaleAge10to14       | 5939411    |
| Russian Federation | 1994           | MaleAge15to19       | 5457970    |
| Russian Federation | 1994           | MaleAge20to24       | 5158236    |
| Russian Federation | 1994           | MaleAge25to29       | 4978408    |
| Russian Federation | 1994           | MaleAge30to34       | 6065830    |
| Russian Federation | 1994           | MaleAge35to39       | 6388697    |
| Russian Federation | 1994           | MaleAge40to44       | 5608682    |
| Russian Federation | 1994           | MaleAge45to49       | 4115374    |
| Russian Federation | 1994           | MaleAge50to54       | 2887192    |
| Russian Federation | 1994           | MaleAge55to59       | 4364759    |
| Russian Federation | 1994           | MaleAge5to9         | 6107521    |
| Russian Federation | 1994           | MaleAge60to64       | 2928829    |
| Russian Federation | 1994           | MaleAge65to69       | 2775120    |
| Russian Federation | 1994           | MaleAge70to74       | 1045840    |
| Russian Federation | 1994           | MaleAge75to79       | 637470     |
| Russian Federation | 1994           | MaleAge80to84       | 501314     |
| Russian Federation | 1994           | MaleAge85to89       | 162618     |
| Russian Federation | 1994           | MaleAge90to94       | 33964      |
| Russian Federation | 1994           | MaleAge95to99       | 6158       |
| Russian Federation | 1994           | MaleAgeAbov e100    | 534        |
| Russian Federation | 1995           | FemaleAge0to4       | 3922016    |
| Russian Federation | 1995           | FemaleAge10to14     | 5841942    |
| Russian Federation | 1995           | FemaleAge15to19     | 4883446    |
| Russian Federation | 1995           | FemaleAge20to24     | 3944676    |
| Russian Federation | 1995           | FemaleAge25to29     | 4042484    |
| Russian Federation | 1995           | FemaleAge30to34     | 5474702    |
| Russian Federation | 1995           | FemaleAge35to39     | 6316465    |
| Russian Federation | 1995           | FemaleAge40to44     | 5969236    |
| Russian Federation | 1995           | FemaleAge45to49     | 4841233    |
| Russian Federation | 1995           | FemaleAge50to54     | 3125407    |
| Russian Federation | 1995           | FemaleAge55to59     | 5416018    |
| Russian Federation | 1995           | FemaleAge5to9       | 5769489    |
| Russian Federation | 1995           | FemaleAge60to64     | 4062849    |
| Russian Federation | 1995           | FemaleAge65to69     | 4731130    |
| Russian Federation | 1995           | FemaleAge70to74     | 3122910    |
| Russian Federation | 1995           | FemaleAge75to79     | 1880146    |
| Russian Federation | 1995           | FemaleAge80to84     | 1795961    |
| Russian Federation | 1995           | FemaleAge85to89     | 814005     |
| Russian Federation | 1995           | FemaleAge90to94     | 226587     |
| Russian Federation | 1995           | FemaleAge95to99     | 36292      |



Dietary calcium and zinc deficiency risks are decreasing but remain prevalent

| Country            | Reference year | Age/gender group    | Population |
|--------------------|----------------|---------------------|------------|
| Russian Federation | 1995           | FemaleAgeAbove100   | 4596       |
| Russian Federation | 1995           | FemaleLactAge15to19 | 268888     |
| Russian Federation | 1995           | FemaleLactAge20to24 | 648420     |
| Russian Federation | 1995           | FemaleLactAge25to29 | 380895     |
| Russian Federation | 1995           | FemaleLactAge30to34 | 211196     |
| Russian Federation | 1995           | FemaleLactAge35to39 | 82469      |
| Russian Federation | 1995           | FemaleLactAge40to44 | 16343      |
| Russian Federation | 1995           | FemaleLactAge45to49 | 618        |
| Russian Federation | 1995           | FemalePregAge15to19 | 201666     |
| Russian Federation | 1995           | FemalePregAge20to24 | 486315     |
| Russian Federation | 1995           | FemalePregAge25to29 | 285671     |
| Russian Federation | 1995           | FemalePregAge30to34 | 158397     |
| Russian Federation | 1995           | FemalePregAge35to39 | 61852      |
| Russian Federation | 1995           | FemalePregAge40to44 | 12257      |
| Russian Federation | 1995           | FemalePregAge45to49 | 463        |
| Russian Federation | 1995           | MaleAge0to4         | 4123685    |
| Russian Federation | 1995           | MaleAge10to14       | 6042117    |
| Russian Federation | 1995           | MaleAge15to19       | 5536710    |
| Russian Federation | 1995           | MaleAge20to24       | 5255661    |
| Russian Federation | 1995           | MaleAge25to29       | 4866756    |
| Russian Federation | 1995           | MaleAge30to34       | 5863038    |
| Russian Federation | 1995           | MaleAge35to39       | 6379618    |
| Russian Federation | 1995           | MaleAge40to44       | 5764446    |
| Russian Federation | 1995           | MaleAge45to49       | 4467309    |
| Russian Federation | 1995           | MaleAge50to54       | 2688443    |
| Russian Federation | 1995           | MaleAge55to59       | 4299415    |
| Russian Federation | 1995           | MaleAge5to9         | 6018934    |
| Russian Federation | 1995           | MaleAge60to64       | 2925154    |
| Russian Federation | 1995           | MaleAge65to69       | 2855952    |
| Russian Federation | 1995           | MaleAge70to74       | 1191312    |
| Russian Federation | 1995           | MaleAge75to79       | 613626     |
| Russian Federation | 1995           | MaleAge80to84       | 476290     |
| Russian Federation | 1995           | MaleAge85to89       | 161156     |
| Russian Federation | 1995           | MaleAge90to94       | 30917      |
| Russian Federation | 1995           | MaleAge95to99       | 4067       |
| Russian Federation | 1995           | MaleAgeAbove100     | 500        |
| Russian Federation | 1996           | FemaleAge0to4       | 3441995    |
| Russian Federation | 1996           | FemaleAge10to14     | 5950850    |
| Russian Federation | 1996           | FemaleAge15to19     | 5129855    |
| Russian Federation | 1996           | FemaleAge20to24     | 4251713    |
| Russian Federation | 1996           | FemaleAge25to29     | 4120328    |
| Russian Federation | 1996           | FemaleAge30to34     | 5331375    |
| Russian Federation | 1996           | FemaleAge35to39     | 6313586    |
| Russian Federation | 1996           | FemaleAge40to44     | 6137273    |
| Russian Federation | 1996           | FemaleAge45to49     | 5172884    |
| Russian Federation | 1996           | FemaleAge50to54     | 3144531    |
| Russian Federation | 1996           | FemaleAge55to59     | 5119584    |
| Russian Federation | 1996           | FemaleAge5to9       | 5605868    |
| Russian Federation | 1996           | FemaleAge60to64     | 4193249    |
| Russian Federation | 1996           | FemaleAge65to69     | 4603931    |
| Russian Federation | 1996           | FemaleAge70to74     | 3346731    |
| Russian Federation | 1996           | FemaleAge75to79     | 1891825    |
| Russian Federation | 1996           | FemaleAge80to84     | 1678258    |
| Russian Federation | 1996           | FemaleAge85to89     | 883282     |
| Russian Federation | 1996           | FemaleAge90to94     | 259632     |
| Russian Federation | 1996           | FemaleAge95to99     | 39253      |
| Russian Federation | 1996           | FemaleAgeAbove100   | 4397       |
| Russian Federation | 1996           | FemaleLactAge15to19 | 198678     |
| Russian Federation | 1996           | FemaleLactAge20to24 | 532855     |
| Russian Federation | 1996           | FemaleLactAge25to29 | 331734     |
| Russian Federation | 1996           | FemaleLactAge30to34 | 171375     |
| Russian Federation | 1996           | FemaleLactAge35to39 | 69699      |
| Russian Federation | 1996           | FemaleLactAge40to44 | 14075      |
| Russian Federation | 1996           | FemaleLactAge45to49 | 631        |
| Russian Federation | 1996           | FemalePregAge15to19 | 149008     |
| Russian Federation | 1996           | FemalePregAge20to24 | 399641     |
| Russian Federation | 1996           | FemalePregAge25to29 | 248801     |
| Russian Federation | 1996           | FemalePregAge30to34 | 128531     |
| Russian Federation | 1996           | FemalePregAge35to39 | 52274      |
| Russian Federation | 1996           | FemalePregAge40to44 | 10557      |
| Russian Federation | 1996           | FemalePregAge45to49 | 473        |
| Russian Federation | 1996           | MaleAge0to4         | 3622458    |
| Russian Federation | 1996           | MaleAge10to14       | 6163606    |
| Russian Federation | 1996           | MaleAge15to19       | 5656164    |
| Russian Federation | 1996           | MaleAge20to24       | 5345324    |
| Russian Federation | 1996           | MaleAge25to29       | 4851975    |
| Russian Federation | 1996           | MaleAge30to34       | 5650432    |
| Russian Federation | 1996           | MaleAge35to39       | 6332828    |
| Russian Federation | 1996           | MaleAge40to44       | 5907783    |
| Russian Federation | 1996           | MaleAge45to49       | 4756829    |
| Russian Federation | 1996           | MaleAge50to54       | 2726390    |
| Russian Federation | 1996           | MaleAge55to59       | 4025098    |
| Russian Federation | 1996           | MaleAge5to9         | 5861398    |
| Russian Federation | 1996           | MaleAge60to64       | 3047338    |
| Russian Federation | 1996           | MaleAge65to69       | 2815336    |
| Russian Federation | 1996           | MaleAge70to74       | 1393260    |
| Russian Federation | 1996           | MaleAge75to79       | 610553     |
| Russian Federation | 1996           | MaleAge80to84       | 451178     |

Dietary calcium and zinc deficiency risks are decreasing but remain prevalent

| Country            | Reference year | Age/gender group    | Population |
|--------------------|----------------|---------------------|------------|
| Russian Federation | 1996           | MaleAge85to89       | 186047     |
| Russian Federation | 1996           | MaleAge90to94       | 37737      |
| Russian Federation | 1996           | MaleAge95to99       | 4316       |
| Russian Federation | 1996           | MaleAgeAbove100     | 463        |
| Russian Federation | 1997           | FemaleAge0to4       | 3212885    |
| Russian Federation | 1997           | FemaleAge10to14     | 6030891    |
| Russian Federation | 1997           | FemaleAge15to19     | 5257659    |
| Russian Federation | 1997           | FemaleAge20to24     | 4316018    |
| Russian Federation | 1997           | FemaleAge25to29     | 4198330    |
| Russian Federation | 1997           | FemaleAge30to34     | 5071024    |
| Russian Federation | 1997           | FemaleAge35to39     | 6235044    |
| Russian Federation | 1997           | FemaleAge40to44     | 6267145    |
| Russian Federation | 1997           | FemaleAge45to49     | 5420374    |
| Russian Federation | 1997           | FemaleAge50to54     | 3436989    |
| Russian Federation | 1997           | FemaleAge55to59     | 4538165    |
| Russian Federation | 1997           | FemaleAge5to9       | 5305885    |
| Russian Federation | 1997           | FemaleAge60to64     | 4530049    |
| Russian Federation | 1997           | FemaleAge65to69     | 4310796    |
| Russian Federation | 1997           | FemaleAge70to74     | 3612179    |
| Russian Federation | 1997           | FemaleAge75to79     | 1958889    |
| Russian Federation | 1997           | FemaleAge80to84     | 1505532    |
| Russian Federation | 1997           | FemaleAge85to89     | 947123     |
| Russian Federation | 1997           | FemaleAge90to94     | 278034     |
| Russian Federation | 1997           | FemaleAge95to99     | 44587      |
| Russian Federation | 1997           | FemaleAgeAbove100   | 4214       |
| Russian Federation | 1997           | FemaleLactAge15to19 | 198678     |
| Russian Federation | 1997           | FemaleLactAge20to24 | 532855     |
| Russian Federation | 1997           | FemaleLactAge25to29 | 331734     |
| Russian Federation | 1997           | FemaleLactAge30to34 | 171375     |
| Russian Federation | 1997           | FemaleLactAge35to39 | 69699      |
| Russian Federation | 1997           | FemaleLactAge40to44 | 14075      |
| Russian Federation | 1997           | FemaleLactAge45to49 | 631        |
| Russian Federation | 1997           | FemalePregAge15to19 | 149008     |
| Russian Federation | 1997           | FemalePregAge20to24 | 399641     |
| Russian Federation | 1997           | FemalePregAge25to29 | 248801     |
| Russian Federation | 1997           | FemalePregAge30to34 | 128531     |
| Russian Federation | 1997           | FemalePregAge35to39 | 52274      |
| Russian Federation | 1997           | FemalePregAge40to44 | 10557      |
| Russian Federation | 1997           | FemalePregAge45to49 | 473        |
| Russian Federation | 1997           | MaleAge0to4         | 3382684    |
| Russian Federation | 1997           | MaleAge10to14       | 6257344    |
| Russian Federation | 1997           | MaleAge15to19       | 5780740    |
| Russian Federation | 1997           | MaleAge20to24       | 5395476    |
| Russian Federation | 1997           | MaleAge25to29       | 4914435    |
| Russian Federation | 1997           | MaleAge30to34       | 5396212    |
| Russian Federation | 1997           | MaleAge35to39       | 6232994    |
| Russian Federation | 1997           | MaleAge40to44       | 6016285    |
| Russian Federation | 1997           | MaleAge45to49       | 4971948    |
| Russian Federation | 1997           | MaleAge50to54       | 2988548    |
| Russian Federation | 1997           | MaleAge55to59       | 3534080    |
| Russian Federation | 1997           | MaleAge5to9         | 5555673    |
| Russian Federation | 1997           | MaleAge60to64       | 3302576    |
| Russian Federation | 1997           | MaleAge65to69       | 2644683    |
| Russian Federation | 1997           | MaleAge70to74       | 1642225    |
| Russian Federation | 1997           | MaleAge75to79       | 606056     |
| Russian Federation | 1997           | MaleAge80to84       | 412819     |
| Russian Federation | 1997           | MaleAge85to89       | 208247     |
| Russian Federation | 1997           | MaleAge90to94       | 41317      |
| Russian Federation | 1997           | MaleAge95to99       | 5009       |
| Russian Federation | 1997           | MaleAgeAbove100     | 423        |
| Russian Federation | 1998           | FemaleAge0to4       | 3161024    |
| Russian Federation | 1998           | FemaleAge10to14     | 6075301    |
| Russian Federation | 1998           | FemaleAge15to19     | 5388488    |
| Russian Federation | 1998           | FemaleAge20to24     | 4359721    |
| Russian Federation | 1998           | FemaleAge25to29     | 4332543    |
| Russian Federation | 1998           | FemaleAge30to34     | 4808650    |
| Russian Federation | 1998           | FemaleAge35to39     | 6111266    |
| Russian Federation | 1998           | FemaleAge40to44     | 6360559    |
| Russian Federation | 1998           | FemaleAge45to49     | 5605256    |
| Russian Federation | 1998           | FemaleAge50to54     | 3901524    |
| Russian Federation | 1998           | FemaleAge55to59     | 3846133    |
| Russian Federation | 1998           | FemaleAge5to9       | 4885193    |
| Russian Federation | 1998           | FemaleAge60to64     | 4928984    |
| Russian Federation | 1998           | FemaleAge65to69     | 3966493    |
| Russian Federation | 1998           | FemaleAge70to74     | 3866848    |
| Russian Federation | 1998           | FemaleAge75to79     | 2067393    |
| Russian Federation | 1998           | FemaleAge80to84     | 1334651    |
| Russian Federation | 1998           | FemaleAge85to89     | 979308     |
| Russian Federation | 1998           | FemaleAge90to94     | 282743     |
| Russian Federation | 1998           | FemaleAge95to99     | 49960      |
| Russian Federation | 1998           | FemaleAgeAbove100   | 4059       |
| Russian Federation | 1998           | FemaleLactAge15to19 | 198678     |
| Russian Federation | 1998           | FemaleLactAge20to24 | 532855     |
| Russian Federation | 1998           | FemaleLactAge25to29 | 331734     |
| Russian Federation | 1998           | FemaleLactAge30to34 | 171375     |
| Russian Federation | 1998           | FemaleLactAge35to39 | 69699      |
| Russian Federation | 1998           | FemaleLactAge40to44 | 14075      |
| Russian Federation | 1998           | FemaleLactAge45to49 | 631        |

Dietary calcium and zinc deficiency risks are decreasing but remain prevalent

| Country            | Reference year | Age/gender group    | Population |
|--------------------|----------------|---------------------|------------|
| Russian Federation | 1998           | FemalePregAge15to19 | 149008     |
| Russian Federation | 1998           | FemalePregAge20to24 | 399641     |
| Russian Federation | 1998           | FemalePregAge25to29 | 248801     |
| Russian Federation | 1998           | FemalePregAge30to34 | 128531     |
| Russian Federation | 1998           | FemalePregAge35to39 | 52274      |
| Russian Federation | 1998           | FemalePregAge40to44 | 10557      |
| Russian Federation | 1998           | FemalePregAge45to49 | 473        |
| Russian Federation | 1998           | MaleAge0to4         | 3327501    |
| Russian Federation | 1998           | MaleAge10to14       | 6314886    |
| Russian Federation | 1998           | MaleAge15to19       | 5910508    |
| Russian Federation | 1998           | MaleAge20to24       | 5427472    |
| Russian Federation | 1998           | MaleAge25to29       | 5026683    |
| Russian Federation | 1998           | MaleAge30to34       | 5141687    |
| Russian Federation | 1998           | MaleAge35to39       | 6092615    |
| Russian Federation | 1998           | MaleAge40to44       | 6087316    |
| Russian Federation | 1998           | MaleAge45to49       | 5133565    |
| Russian Federation | 1998           | MaleAge50to54       | 3383369    |
| Russian Federation | 1998           | MaleAge55to59       | 2977062    |
| Russian Federation | 1998           | MaleAge5to9         | 5118243    |
| Russian Federation | 1998           | MaleAge60to64       | 3578362    |
| Russian Federation | 1998           | MaleAge65to69       | 2436953    |
| Russian Federation | 1998           | MaleAge70to74       | 1877593    |
| Russian Federation | 1998           | MaleAge75to79       | 616650     |
| Russian Federation | 1998           | MaleAge80to84       | 373913     |
| Russian Federation | 1998           | MaleAge85to89       | 218158     |
| Russian Federation | 1998           | MaleAge90to94       | 42425      |
| Russian Federation | 1998           | MaleAge95to99       | 5775       |
| Russian Federation | 1998           | MaleAgeAbov e100    | 384        |
| Russian Federation | 1999           | FemaleAge0to4       | 3166754    |
| Russian Federation | 1999           | FemaleAge10to14     | 6050757    |
| Russian Federation | 1999           | FemaleAge15to19     | 5517381    |
| Russian Federation | 1999           | FemaleAge20to24     | 4417996    |
| Russian Federation | 1999           | FemaleAge25to29     | 4472108    |
| Russian Federation | 1999           | FemaleAge30to34     | 4606955    |
| Russian Federation | 1999           | FemaleAge35to39     | 5951628    |
| Russian Federation | 1999           | FemaleAge40to44     | 6413691    |
| Russian Federation | 1999           | FemaleAge45to49     | 5771130    |
| Russian Federation | 1999           | FemaleAge50to54     | 4374504    |
| Russian Federation | 1999           | FemaleAge55to59     | 3307309    |
| Russian Federation | 1999           | FemaleAge5to9       | 4413100    |
| Russian Federation | 1999           | FemaleAge60to64     | 5171049    |
| Russian Federation | 1999           | FemaleAge65to69     | 3738429    |
| Russian Federation | 1999           | FemaleAge70to74     | 4032022    |
| Russian Federation | 1999           | FemaleAge75to79     | 2209198    |
| Russian Federation | 1999           | FemaleAge80to84     | 1223383    |
| Russian Federation | 1999           | FemaleAge85to89     | 953756     |
| Russian Federation | 1999           | FemaleAge90to94     | 278431     |
| Russian Federation | 1999           | FemaleAge95to99     | 51685      |
| Russian Federation | 1999           | FemaleAgeAbov e100  | 3945       |
| Russian Federation | 1999           | FemaleLactAge15to19 | 198678     |
| Russian Federation | 1999           | FemaleLactAge20to24 | 532855     |
| Russian Federation | 1999           | FemaleLactAge25to29 | 331734     |
| Russian Federation | 1999           | FemaleLactAge30to34 | 171375     |
| Russian Federation | 1999           | FemaleLactAge35to39 | 69699      |
| Russian Federation | 1999           | FemaleLactAge40to44 | 14075      |
| Russian Federation | 1999           | FemaleLactAge45to49 | 631        |
| Russian Federation | 1999           | FemalePregAge15to19 | 149008     |
| Russian Federation | 1999           | FemalePregAge20to24 | 399641     |
| Russian Federation | 1999           | FemalePregAge25to29 | 248801     |
| Russian Federation | 1999           | FemalePregAge30to34 | 128531     |
| Russian Federation | 1999           | FemalePregAge35to39 | 52274      |
| Russian Federation | 1999           | FemalePregAge40to44 | 10557      |
| Russian Federation | 1999           | FemalePregAge45to49 | 473        |
| Russian Federation | 1999           | MaleAge0to4         | 3331577    |
| Russian Federation | 1999           | MaleAge10to14       | 6299058    |
| Russian Federation | 1999           | MaleAge15to19       | 6041919    |
| Russian Federation | 1999           | MaleAge20to24       | 5476902    |
| Russian Federation | 1999           | MaleAge25to29       | 5142939    |
| Russian Federation | 1999           | MaleAge30to34       | 4944130    |
| Russian Federation | 1999           | MaleAge35to39       | 5924397    |
| Russian Federation | 1999           | MaleAge40to44       | 6117916    |
| Russian Federation | 1999           | MaleAge45to49       | 5278208    |
| Russian Federation | 1999           | MaleAge50to54       | 3776498    |
| Russian Federation | 1999           | MaleAge55to59       | 2563413    |
| Russian Federation | 1999           | MaleAge5to9         | 4623201    |
| Russian Federation | 1999           | MaleAge60to64       | 3718080    |
| Russian Federation | 1999           | MaleAge65to69       | 2311187    |
| Russian Federation | 1999           | MaleAge70to74       | 2026652    |
| Russian Federation | 1999           | MaleAge75to79       | 665685     |
| Russian Federation | 1999           | MaleAge80to84       | 344086     |
| Russian Federation | 1999           | MaleAge85to89       | 208236     |
| Russian Federation | 1999           | MaleAge90to94       | 41937      |
| Russian Federation | 1999           | MaleAge95to99       | 5959       |
| Russian Federation | 1999           | MaleAgeAbov e100    | 351        |
| Rwanda             | 1992           | FemaleAge0to4       | 573074     |
| Rwanda             | 1992           | FemaleAge10to14     | 466398     |
| Rwanda             | 1992           | FemaleAge15to19     | 327657     |
| Rwanda             | 1992           | FemaleAge20to24     | 152016     |

Dietary calcium and zinc deficiency risks are decreasing but remain prevalent

| Country | Reference year | Age/gender group    | Population |
|---------|----------------|---------------------|------------|
| Rwanda  | 1992           | FemaleAge25to29     | 108234     |
| Rwanda  | 1992           | FemaleAge30to34     | 102238     |
| Rwanda  | 1992           | FemaleAge35to39     | 103955     |
| Rwanda  | 1992           | FemaleAge40to44     | 98942      |
| Rwanda  | 1992           | FemaleAge45to49     | 79402      |
| Rwanda  | 1992           | FemaleAge50to54     | 63518      |
| Rwanda  | 1992           | FemaleAge55to59     | 60888      |
| Rwanda  | 1992           | FemaleAge5to9       | 558029     |
| Rwanda  | 1992           | FemaleAge60to64     | 54939      |
| Rwanda  | 1992           | FemaleAge65to69     | 38696      |
| Rwanda  | 1992           | FemaleAge70to74     | 22454      |
| Rwanda  | 1992           | FemaleAge75to79     | 12720      |
| Rwanda  | 1992           | FemaleAge80to84     | 6890       |
| Rwanda  | 1992           | FemaleAge85to89     | 2756       |
| Rwanda  | 1992           | FemaleAge90to94     | 707        |
| Rwanda  | 1992           | FemaleAge95to99     | 114        |
| Rwanda  | 1992           | FemaleAgeAbove100   | 7          |
| Rwanda  | 1992           | FemaleLactAge15to19 | 21999      |
| Rwanda  | 1992           | FemaleLactAge20to24 | 76656      |
| Rwanda  | 1992           | FemaleLactAge25to29 | 71221      |
| Rwanda  | 1992           | FemaleLactAge30to34 | 57216      |
| Rwanda  | 1992           | FemaleLactAge35to39 | 37360      |
| Rwanda  | 1992           | FemaleLactAge40to44 | 18030      |
| Rwanda  | 1992           | FemaleLactAge45to49 | 4484       |
| Rwanda  | 1992           | FemalePregAge15to19 | 16499      |
| Rwanda  | 1992           | FemalePregAge20to24 | 57492      |
| Rwanda  | 1992           | FemalePregAge25to29 | 53416      |
| Rwanda  | 1992           | FemalePregAge30to34 | 42912      |
| Rwanda  | 1992           | FemalePregAge35to39 | 28020      |
| Rwanda  | 1992           | FemalePregAge40to44 | 13523      |
| Rwanda  | 1992           | FemalePregAge45to49 | 3363       |
| Rwanda  | 1992           | MaleAge0to4         | 557173     |
| Rwanda  | 1992           | MaleAge10to14       | 457814     |
| Rwanda  | 1992           | MaleAge15to19       | 355349     |
| Rwanda  | 1992           | MaleAge20to24       | 277182     |
| Rwanda  | 1992           | MaleAge25to29       | 224518     |
| Rwanda  | 1992           | MaleAge30to34       | 192344     |
| Rwanda  | 1992           | MaleAge35to39       | 158239     |
| Rwanda  | 1992           | MaleAge40to44       | 122257     |
| Rwanda  | 1992           | MaleAge45to49       | 82552      |
| Rwanda  | 1992           | MaleAge50to54       | 60076      |
| Rwanda  | 1992           | MaleAge55to59       | 56748      |
| Rwanda  | 1992           | MaleAge5to9         | 548992     |
| Rwanda  | 1992           | MaleAge60to64       | 50505      |
| Rwanda  | 1992           | MaleAge65to69       | 33859      |
| Rwanda  | 1992           | MaleAge70to74       | 17381      |
| Rwanda  | 1992           | MaleAge75to79       | 8215       |
| Rwanda  | 1992           | MaleAge80to84       | 4004       |
| Rwanda  | 1992           | MaleAge85to89       | 1633       |
| Rwanda  | 1992           | MaleAge90to94       | 384        |
| Rwanda  | 1992           | MaleAge95to99       | 47         |
| Rwanda  | 1992           | MaleAgeAbove100     | 2          |
| Rwanda  | 1993           | FemaleAge0to4       | 454541     |
| Rwanda  | 1993           | FemaleAge10to14     | 453885     |
| Rwanda  | 1993           | FemaleAge15to19     | 319933     |
| Rwanda  | 1993           | FemaleAge20to24     | 143562     |
| Rwanda  | 1993           | FemaleAge25to29     | 98277      |
| Rwanda  | 1993           | FemaleAge30to34     | 90491      |
| Rwanda  | 1993           | FemaleAge35to39     | 98006      |
| Rwanda  | 1993           | FemaleAge40to44     | 94857      |
| Rwanda  | 1993           | FemaleAge45to49     | 80185      |
| Rwanda  | 1993           | FemaleAge50to54     | 58795      |
| Rwanda  | 1993           | FemaleAge55to59     | 54704      |
| Rwanda  | 1993           | FemaleAge5to9       | 522355     |
| Rwanda  | 1993           | FemaleAge60to64     | 50718      |
| Rwanda  | 1993           | FemaleAge65to69     | 37145      |
| Rwanda  | 1993           | FemaleAge70to74     | 21199      |
| Rwanda  | 1993           | FemaleAge75to79     | 11519      |
| Rwanda  | 1993           | FemaleAge80to84     | 5745       |
| Rwanda  | 1993           | FemaleAge85to89     | 2581       |
| Rwanda  | 1993           | FemaleAge90to94     | 636        |
| Rwanda  | 1993           | FemaleAge95to99     | 127        |
| Rwanda  | 1993           | FemaleAgeAbove100   | 6          |
| Rwanda  | 1993           | FemaleLactAge15to19 | 21999      |
| Rwanda  | 1993           | FemaleLactAge20to24 | 76656      |
| Rwanda  | 1993           | FemaleLactAge25to29 | 71221      |
| Rwanda  | 1993           | FemaleLactAge30to34 | 57216      |
| Rwanda  | 1993           | FemaleLactAge35to39 | 37360      |
| Rwanda  | 1993           | FemaleLactAge40to44 | 18030      |
| Rwanda  | 1993           | FemaleLactAge45to49 | 4484       |
| Rwanda  | 1993           | FemalePregAge15to19 | 16499      |
| Rwanda  | 1993           | FemalePregAge20to24 | 57492      |
| Rwanda  | 1993           | FemalePregAge25to29 | 53416      |
| Rwanda  | 1993           | FemalePregAge30to34 | 42912      |
| Rwanda  | 1993           | FemalePregAge35to39 | 28020      |
| Rwanda  | 1993           | FemalePregAge40to44 | 13523      |
| Rwanda  | 1993           | FemalePregAge45to49 | 3363       |
| Rwanda  | 1993           | MaleAge0to4         | 432531     |

Dietary calcium and zinc deficiency risks are decreasing but remain prevalent

| Country | Reference year | Age/gender group    | Population |
|---------|----------------|---------------------|------------|
| Rwanda  | 1993           | MaleAge10to14       | 445640     |
| Rwanda  | 1993           | MaleAge15to19       | 347206     |
| Rwanda  | 1993           | MaleAge20to24       | 267246     |
| Rwanda  | 1993           | MaleAge25to29       | 214818     |
| Rwanda  | 1993           | MaleAge30to34       | 180518     |
| Rwanda  | 1993           | MaleAge35to39       | 152129     |
| Rwanda  | 1993           | MaleAge40to44       | 116814     |
| Rwanda  | 1993           | MaleAge45to49       | 82306      |
| Rwanda  | 1993           | MaleAge50to54       | 54826      |
| Rwanda  | 1993           | MaleAge55to59       | 50698      |
| Rwanda  | 1993           | MaleAge5to9         | 511539     |
| Rwanda  | 1993           | MaleAge60to64       | 46125      |
| Rwanda  | 1993           | MaleAge65to69       | 32831      |
| Rwanda  | 1993           | MaleAge70to74       | 16758      |
| Rwanda  | 1993           | MaleAge75to79       | 7745       |
| Rwanda  | 1993           | MaleAge80to84       | 3183       |
| Rwanda  | 1993           | MaleAge85to89       | 1489       |
| Rwanda  | 1993           | MaleAge90to94       | 350        |
| Rwanda  | 1993           | MaleAge95to99       | 55         |
| Rwanda  | 1993           | MaleAgeAbove100     | 2          |
| Rwanda  | 1994           | FemaleAge0to4       | 364266     |
| Rwanda  | 1994           | FemaleAge10to14     | 448345     |
| Rwanda  | 1994           | FemaleAge15to19     | 319969     |
| Rwanda  | 1994           | FemaleAge20to24     | 141768     |
| Rwanda  | 1994           | FemaleAge25to29     | 94064      |
| Rwanda  | 1994           | FemaleAge30to34     | 82916      |
| Rwanda  | 1994           | FemaleAge35to39     | 94905      |
| Rwanda  | 1994           | FemaleAge40to44     | 92858      |
| Rwanda  | 1994           | FemaleAge45to49     | 82370      |
| Rwanda  | 1994           | FemaleAge50to54     | 56480      |
| Rwanda  | 1994           | FemaleAge55to59     | 50142      |
| Rwanda  | 1994           | FemaleAge5to9       | 487203     |
| Rwanda  | 1994           | FemaleAge60to64     | 47101      |
| Rwanda  | 1994           | FemaleAge65to69     | 36068      |
| Rwanda  | 1994           | FemaleAge70to74     | 20011      |
| Rwanda  | 1994           | FemaleAge75to79     | 10807      |
| Rwanda  | 1994           | FemaleAge80to84     | 4346       |
| Rwanda  | 1994           | FemaleAge85to89     | 2180       |
| Rwanda  | 1994           | FemaleAge90to94     | 507        |
| Rwanda  | 1994           | FemaleAge95to99     | 111        |
| Rwanda  | 1994           | FemaleAgeAbove100   | 5          |
| Rwanda  | 1994           | FemaleLactAge15to19 | 21999      |
| Rwanda  | 1994           | FemaleLactAge20to24 | 76656      |
| Rwanda  | 1994           | FemaleLactAge25to29 | 71221      |
| Rwanda  | 1994           | FemaleLactAge30to34 | 57216      |
| Rwanda  | 1994           | FemaleLactAge35to39 | 37360      |
| Rwanda  | 1994           | FemaleLactAge40to44 | 18030      |
| Rwanda  | 1994           | FemaleLactAge45to49 | 4484       |
| Rwanda  | 1994           | FemalePregAge15to19 | 16499      |
| Rwanda  | 1994           | FemalePregAge20to24 | 57492      |
| Rwanda  | 1994           | FemalePregAge25to29 | 53416      |
| Rwanda  | 1994           | FemalePregAge30to34 | 42912      |
| Rwanda  | 1994           | FemalePregAge35to39 | 28020      |
| Rwanda  | 1994           | FemalePregAge40to44 | 13523      |
| Rwanda  | 1994           | FemalePregAge45to49 | 3363       |
| Rwanda  | 1994           | MaleAge0to4         | 337213     |
| Rwanda  | 1994           | MaleAge10to14       | 440350     |
| Rwanda  | 1994           | MaleAge15to19       | 346996     |
| Rwanda  | 1994           | MaleAge20to24       | 263633     |
| Rwanda  | 1994           | MaleAge25to29       | 210538     |
| Rwanda  | 1994           | MaleAge30to34       | 172800     |
| Rwanda  | 1994           | MaleAge35to39       | 148660     |
| Rwanda  | 1994           | MaleAge40to44       | 113540     |
| Rwanda  | 1994           | MaleAge45to49       | 83249      |
| Rwanda  | 1994           | MaleAge50to54       | 51688      |
| Rwanda  | 1994           | MaleAge55to59       | 46134      |
| Rwanda  | 1994           | MaleAge5to9         | 473479     |
| Rwanda  | 1994           | MaleAge60to64       | 42224      |
| Rwanda  | 1994           | MaleAge65to69       | 31952      |
| Rwanda  | 1994           | MaleAge70to74       | 16060      |
| Rwanda  | 1994           | MaleAge75to79       | 7605       |
| Rwanda  | 1994           | MaleAge80to84       | 2244       |
| Rwanda  | 1994           | MaleAge85to89       | 1168       |
| Rwanda  | 1994           | MaleAge90to94       | 266        |
| Rwanda  | 1994           | MaleAge95to99       | 49         |
| Rwanda  | 1994           | MaleAgeAbove100     | 2          |
| Rwanda  | 1995           | FemaleAge0to4       | 347335     |
| Rwanda  | 1995           | FemaleAge10to14     | 452305     |
| Rwanda  | 1995           | FemaleAge15to19     | 332127     |
| Rwanda  | 1995           | FemaleAge20to24     | 150120     |
| Rwanda  | 1995           | FemaleAge25to29     | 97793      |
| Rwanda  | 1995           | FemaleAge30to34     | 81912      |
| Rwanda  | 1995           | FemaleAge35to39     | 95920      |
| Rwanda  | 1995           | FemaleAge40to44     | 94817      |
| Rwanda  | 1995           | FemaleAge45to49     | 86501      |
| Rwanda  | 1995           | FemaleAge50to54     | 57336      |
| Rwanda  | 1995           | FemaleAge55to59     | 47535      |
| Rwanda  | 1995           | FemaleAge5to9       | 453115     |

Dietary calcium and zinc deficiency risks are decreasing but remain prevalent

| Country | Reference year | Age/gender group    | Population |
|---------|----------------|---------------------|------------|
| Rwanda  | 1995           | FemaleAge60to64     | 44557      |
| Rwanda  | 1995           | FemaleAge65to69     | 35581      |
| Rwanda  | 1995           | FemaleAge70to74     | 19263      |
| Rwanda  | 1995           | FemaleAge75to79     | 10367      |
| Rwanda  | 1995           | FemaleAge80to84     | 2885       |
| Rwanda  | 1995           | FemaleAge85to89     | 1418       |
| Rwanda  | 1995           | FemaleAge90to94     | 272        |
| Rwanda  | 1995           | FemaleAge95to99     | 43         |
| Rwanda  | 1995           | FemaleAgeAbove100   | 5          |
| Rwanda  | 1995           | FemaleLactAge15to19 | 21999      |
| Rwanda  | 1995           | FemaleLactAge20to24 | 76656      |
| Rwanda  | 1995           | FemaleLactAge25to29 | 71221      |
| Rwanda  | 1995           | FemaleLactAge30to34 | 57216      |
| Rwanda  | 1995           | FemaleLactAge35to39 | 37360      |
| Rwanda  | 1995           | FemaleLactAge40to44 | 18030      |
| Rwanda  | 1995           | FemaleLactAge45to49 | 4484       |
| Rwanda  | 1995           | FemalePregAge15to19 | 16499      |
| Rwanda  | 1995           | FemalePregAge20to24 | 57492      |
| Rwanda  | 1995           | FemalePregAge25to29 | 53416      |
| Rwanda  | 1995           | FemalePregAge30to34 | 42912      |
| Rwanda  | 1995           | FemalePregAge35to39 | 28020      |
| Rwanda  | 1995           | FemalePregAge40to44 | 13523      |
| Rwanda  | 1995           | FemalePregAge45to49 | 3363       |
| Rwanda  | 1995           | MaleAge0to4         | 317678     |
| Rwanda  | 1995           | MaleAge10to14       | 444079     |
| Rwanda  | 1995           | MaleAge15to19       | 359065     |
| Rwanda  | 1995           | MaleAge20to24       | 270047     |
| Rwanda  | 1995           | MaleAge25to29       | 213572     |
| Rwanda  | 1995           | MaleAge30to34       | 171548     |
| Rwanda  | 1995           | MaleAge35to39       | 148973     |
| Rwanda  | 1995           | MaleAge40to44       | 114153     |
| Rwanda  | 1995           | MaleAge45to49       | 85791      |
| Rwanda  | 1995           | MaleAge50to54       | 51383      |
| Rwanda  | 1995           | MaleAge55to59       | 43226      |
| Rwanda  | 1995           | MaleAge5to9         | 435116     |
| Rwanda  | 1995           | MaleAge60to64       | 39292      |
| Rwanda  | 1995           | MaleAge65to69       | 31303      |
| Rwanda  | 1995           | MaleAge70to74       | 15612      |
| Rwanda  | 1995           | MaleAge75to79       | 7587       |
| Rwanda  | 1995           | MaleAge80to84       | 1322       |
| Rwanda  | 1995           | MaleAge85to89       | 579        |
| Rwanda  | 1995           | MaleAge90to94       | 96         |
| Rwanda  | 1995           | MaleAge95to99       | 15         |
| Rwanda  | 1995           | MaleAgeAbove100     | 2          |
| Rwanda  | 1996           | FemaleAge0to4       | 371406     |
| Rwanda  | 1996           | FemaleAge10to14     | 471930     |
| Rwanda  | 1996           | FemaleAge15to19     | 346573     |
| Rwanda  | 1996           | FemaleAge20to24     | 147207     |
| Rwanda  | 1996           | FemaleAge25to29     | 98710      |
| Rwanda  | 1996           | FemaleAge30to34     | 94561      |
| Rwanda  | 1996           | FemaleAge35to39     | 99931      |
| Rwanda  | 1996           | FemaleAge40to44     | 101316     |
| Rwanda  | 1996           | FemaleAge45to49     | 94254      |
| Rwanda  | 1996           | FemaleAge50to54     | 62729      |
| Rwanda  | 1996           | FemaleAge55to59     | 47344      |
| Rwanda  | 1996           | FemaleAge5to9       | 462336     |
| Rwanda  | 1996           | FemaleAge60to64     | 46139      |
| Rwanda  | 1996           | FemaleAge65to69     | 36084      |
| Rwanda  | 1996           | FemaleAge70to74     | 24543      |
| Rwanda  | 1996           | FemaleAge75to79     | 13338      |
| Rwanda  | 1996           | FemaleAge80to84     | 3617       |
| Rwanda  | 1996           | FemaleAge85to89     | 1318       |
| Rwanda  | 1996           | FemaleAge90to94     | 359        |
| Rwanda  | 1996           | FemaleAge95to99     | 37         |
| Rwanda  | 1996           | FemaleAgeAbove100   | 5          |
| Rwanda  | 1996           | FemaleLactAge15to19 | 24988      |
| Rwanda  | 1996           | FemaleLactAge20to24 | 86382      |
| Rwanda  | 1996           | FemaleLactAge25to29 | 74648      |
| Rwanda  | 1996           | FemaleLactAge30to34 | 55143      |
| Rwanda  | 1996           | FemaleLactAge35to39 | 38085      |
| Rwanda  | 1996           | FemaleLactAge40to44 | 19597      |
| Rwanda  | 1996           | FemaleLactAge45to49 | 4498       |
| Rwanda  | 1996           | FemalePregAge15to19 | 18741      |
| Rwanda  | 1996           | FemalePregAge20to24 | 64786      |
| Rwanda  | 1996           | FemalePregAge25to29 | 55986      |
| Rwanda  | 1996           | FemalePregAge30to34 | 41357      |
| Rwanda  | 1996           | FemalePregAge35to39 | 28564      |
| Rwanda  | 1996           | FemalePregAge40to44 | 14697      |
| Rwanda  | 1996           | FemalePregAge45to49 | 3374       |
| Rwanda  | 1996           | MaleAge0to4         | 341785     |
| Rwanda  | 1996           | MaleAge10to14       | 456938     |
| Rwanda  | 1996           | MaleAge15to19       | 378582     |
| Rwanda  | 1996           | MaleAge20to24       | 282479     |
| Rwanda  | 1996           | MaleAge25to29       | 220162     |
| Rwanda  | 1996           | MaleAge30to34       | 181755     |
| Rwanda  | 1996           | MaleAge35to39       | 152658     |
| Rwanda  | 1996           | MaleAge40to44       | 120504     |
| Rwanda  | 1996           | MaleAge45to49       | 91508      |

Dietary calcium and zinc deficiency risks are decreasing but remain prevalent

| Country | Reference year | Age/gender group    | Population |
|---------|----------------|---------------------|------------|
| Rwanda  | 1996           | MaleAge50to54       | 56712      |
| Rwanda  | 1996           | MaleAge55to59       | 43033      |
| Rwanda  | 1996           | MaleAge5to9         | 442267     |
| Rwanda  | 1996           | MaleAge60to64       | 41209      |
| Rwanda  | 1996           | MaleAge65to69       | 31700      |
| Rwanda  | 1996           | MaleAge70to74       | 20870      |
| Rwanda  | 1996           | MaleAge75to79       | 10198      |
| Rwanda  | 1996           | MaleAge80to84       | 1986       |
| Rwanda  | 1996           | MaleAge85to89       | 496        |
| Rwanda  | 1996           | MaleAge90to94       | 136        |
| Rwanda  | 1996           | MaleAge95to99       | 12         |
| Rwanda  | 1996           | MaleAgeAbov e100    | 2          |
| Rwanda  | 1997           | FemaleAge0to4       | 464807     |
| Rwanda  | 1997           | FemaleAge10to14     | 503830     |
| Rwanda  | 1997           | FemaleAge15to19     | 379436     |
| Rwanda  | 1997           | FemaleAge20to24     | 169708     |
| Rwanda  | 1997           | FemaleAge25to29     | 112362     |
| Rwanda  | 1997           | FemaleAge30to34     | 106339     |
| Rwanda  | 1997           | FemaleAge35to39     | 110349     |
| Rwanda  | 1997           | FemaleAge40to44     | 112951     |
| Rwanda  | 1997           | FemaleAge45to49     | 105108     |
| Rwanda  | 1997           | FemaleAge50to54     | 71489      |
| Rwanda  | 1997           | FemaleAge55to59     | 48530      |
| Rwanda  | 1997           | FemaleAge5to9       | 479189     |
| Rwanda  | 1997           | FemaleAge60to64     | 47944      |
| Rwanda  | 1997           | FemaleAge65to69     | 38310      |
| Rwanda  | 1997           | FemaleAge70to74     | 28474      |
| Rwanda  | 1997           | FemaleAge75to79     | 18022      |
| Rwanda  | 1997           | FemaleAge80to84     | 5011       |
| Rwanda  | 1997           | FemaleAge85to89     | 1192       |
| Rwanda  | 1997           | FemaleAge90to94     | 452        |
| Rwanda  | 1997           | FemaleAge95to99     | 31         |
| Rwanda  | 1997           | FemaleAgeAbov e100  | 4          |
| Rwanda  | 1997           | FemaleLactAge15to19 | 24988      |
| Rwanda  | 1997           | FemaleLactAge20to24 | 86382      |
| Rwanda  | 1997           | FemaleLactAge25to29 | 74648      |
| Rwanda  | 1997           | FemaleLactAge30to34 | 55143      |
| Rwanda  | 1997           | FemaleLactAge35to39 | 38085      |
| Rwanda  | 1997           | FemaleLactAge40to44 | 19597      |
| Rwanda  | 1997           | FemaleLactAge45to49 | 4498       |
| Rwanda  | 1997           | FemalePregAge15to19 | 18741      |
| Rwanda  | 1997           | FemalePregAge20to24 | 64786      |
| Rwanda  | 1997           | FemalePregAge25to29 | 55986      |
| Rwanda  | 1997           | FemalePregAge30to34 | 41357      |
| Rwanda  | 1997           | FemalePregAge35to39 | 28564      |
| Rwanda  | 1997           | FemalePregAge40to44 | 14697      |
| Rwanda  | 1997           | FemalePregAge45to49 | 3374       |
| Rwanda  | 1997           | MaleAge0to4         | 439813     |
| Rwanda  | 1997           | MaleAge10to14       | 483501     |
| Rwanda  | 1997           | MaleAge15to19       | 407635     |
| Rwanda  | 1997           | MaleAge20to24       | 304332     |
| Rwanda  | 1997           | MaleAge25to29       | 231248     |
| Rwanda  | 1997           | MaleAge30to34       | 194994     |
| Rwanda  | 1997           | MaleAge35to39       | 162171     |
| Rwanda  | 1997           | MaleAge40to44       | 128834     |
| Rwanda  | 1997           | MaleAge45to49       | 99202      |
| Rwanda  | 1997           | MaleAge50to54       | 64671      |
| Rwanda  | 1997           | MaleAge55to59       | 44242      |
| Rwanda  | 1997           | MaleAge5to9         | 455769     |
| Rwanda  | 1997           | MaleAge60to64       | 43176      |
| Rwanda  | 1997           | MaleAge65to69       | 33738      |
| Rwanda  | 1997           | MaleAge70to74       | 24678      |
| Rwanda  | 1997           | MaleAge75to79       | 14557      |
| Rwanda  | 1997           | MaleAge80to84       | 3084       |
| Rwanda  | 1997           | MaleAge85to89       | 406        |
| Rwanda  | 1997           | MaleAge90to94       | 183        |
| Rwanda  | 1997           | MaleAge95to99       | 8          |
| Rwanda  | 1997           | MaleAgeAbov e100    | 2          |
| Rwanda  | 1998           | FemaleAge0to4       | 611460     |
| Rwanda  | 1998           | FemaleAge10to14     | 539629     |
| Rwanda  | 1998           | FemaleAge15to19     | 418872     |
| Rwanda  | 1998           | FemaleAge20to24     | 195459     |
| Rwanda  | 1998           | FemaleAge25to29     | 130194     |
| Rwanda  | 1998           | FemaleAge30to34     | 116227     |
| Rwanda  | 1998           | FemaleAge35to39     | 124170     |
| Rwanda  | 1998           | FemaleAge40to44     | 123787     |
| Rwanda  | 1998           | FemaleAge45to49     | 117751     |
| Rwanda  | 1998           | FemaleAge50to54     | 82106      |
| Rwanda  | 1998           | FemaleAge55to59     | 51041      |
| Rwanda  | 1998           | FemaleAge5to9       | 497493     |
| Rwanda  | 1998           | FemaleAge60to64     | 48550      |
| Rwanda  | 1998           | FemaleAge65to69     | 42654      |
| Rwanda  | 1998           | FemaleAge70to74     | 29713      |
| Rwanda  | 1998           | FemaleAge75to79     | 24408      |
| Rwanda  | 1998           | FemaleAge80to84     | 7166       |
| Rwanda  | 1998           | FemaleAge85to89     | 1128       |
| Rwanda  | 1998           | FemaleAge90to94     | 494        |
| Rwanda  | 1998           | FemaleAge95to99     | 48         |

Dietary calcium and zinc deficiency risks are decreasing but remain prevalent

| Country | Reference year | Age/gender group    | Population |
|---------|----------------|---------------------|------------|
| Rwanda  | 1998           | FemaleAgeAbove100   | 4          |
| Rwanda  | 1998           | FemaleLactAge15to19 | 24988      |
| Rwanda  | 1998           | FemaleLactAge20to24 | 86382      |
| Rwanda  | 1998           | FemaleLactAge25to29 | 74648      |
| Rwanda  | 1998           | FemaleLactAge30to34 | 55143      |
| Rwanda  | 1998           | FemaleLactAge35to39 | 38085      |
| Rwanda  | 1998           | FemaleLactAge40to44 | 19597      |
| Rwanda  | 1998           | FemaleLactAge45to49 | 4498       |
| Rwanda  | 1998           | FemalePregAge15to19 | 18741      |
| Rwanda  | 1998           | FemalePregAge20to24 | 64786      |
| Rwanda  | 1998           | FemalePregAge25to29 | 55986      |
| Rwanda  | 1998           | FemalePregAge30to34 | 41357      |
| Rwanda  | 1998           | FemalePregAge35to39 | 28564      |
| Rwanda  | 1998           | FemalePregAge40to44 | 14697      |
| Rwanda  | 1998           | FemalePregAge45to49 | 3374       |
| Rwanda  | 1998           | MaleAge0to4         | 594122     |
| Rwanda  | 1998           | MaleAge10to14       | 517425     |
| Rwanda  | 1998           | MaleAge15to19       | 438941     |
| Rwanda  | 1998           | MaleAge20to24       | 331184     |
| Rwanda  | 1998           | MaleAge25to29       | 244545     |
| Rwanda  | 1998           | MaleAge30to34       | 206386     |
| Rwanda  | 1998           | MaleAge35to39       | 176314     |
| Rwanda  | 1998           | MaleAge40to44       | 136430     |
| Rwanda  | 1998           | MaleAge45to49       | 107915     |
| Rwanda  | 1998           | MaleAge50to54       | 73570      |
| Rwanda  | 1998           | MaleAge55to59       | 46999      |
| Rwanda  | 1998           | MaleAge5to9         | 469062     |
| Rwanda  | 1998           | MaleAge60to64       | 43770      |
| Rwanda  | 1998           | MaleAge65to69       | 37982      |
| Rwanda  | 1998           | MaleAge70to74       | 25717      |
| Rwanda  | 1998           | MaleAge75to79       | 20777      |
| Rwanda  | 1998           | MaleAge80to84       | 4716       |
| Rwanda  | 1998           | MaleAge85to89       | 385        |
| Rwanda  | 1998           | MaleAge90to94       | 202        |
| Rwanda  | 1998           | MaleAge95to99       | 15         |
| Rwanda  | 1998           | MaleAgeAbove100     | 1          |
| Rwanda  | 1999           | FemaleAge0to4       | 754911     |
| Rwanda  | 1999           | FemaleAge10to14     | 570512     |
| Rwanda  | 1999           | FemaleAge15to19     | 457771     |
| Rwanda  | 1999           | FemaleAge20to24     | 221444     |
| Rwanda  | 1999           | FemaleAge25to29     | 149083     |
| Rwanda  | 1999           | FemaleAge30to34     | 122722     |
| Rwanda  | 1999           | FemaleAge35to39     | 138111     |
| Rwanda  | 1999           | FemaleAge40to44     | 132415     |
| Rwanda  | 1999           | FemaleAge45to49     | 130346     |
| Rwanda  | 1999           | FemaleAge50to54     | 92992      |
| Rwanda  | 1999           | FemaleAge55to59     | 54918      |
| Rwanda  | 1999           | FemaleAge5to9       | 519092     |
| Rwanda  | 1999           | FemaleAge60to64     | 47880      |
| Rwanda  | 1999           | FemaleAge65to69     | 47808      |
| Rwanda  | 1999           | FemaleAge70to74     | 28831      |
| Rwanda  | 1999           | FemaleAge75to79     | 31168      |
| Rwanda  | 1999           | FemaleAge80to84     | 10445      |
| Rwanda  | 1999           | FemaleAge85to89     | 1147       |
| Rwanda  | 1999           | FemaleAge90to94     | 456        |
| Rwanda  | 1999           | FemaleAge95to99     | 55         |
| Rwanda  | 1999           | FemaleAgeAbove100   | 4          |
| Rwanda  | 1999           | FemaleLactAge15to19 | 24988      |
| Rwanda  | 1999           | FemaleLactAge20to24 | 86382      |
| Rwanda  | 1999           | FemaleLactAge25to29 | 74648      |
| Rwanda  | 1999           | FemaleLactAge30to34 | 55143      |
| Rwanda  | 1999           | FemaleLactAge35to39 | 38085      |
| Rwanda  | 1999           | FemaleLactAge40to44 | 19597      |
| Rwanda  | 1999           | FemaleLactAge45to49 | 4498       |
| Rwanda  | 1999           | FemalePregAge15to19 | 18741      |
| Rwanda  | 1999           | FemalePregAge20to24 | 64786      |
| Rwanda  | 1999           | FemalePregAge25to29 | 55986      |
| Rwanda  | 1999           | FemalePregAge30to34 | 41357      |
| Rwanda  | 1999           | FemalePregAge35to39 | 28564      |
| Rwanda  | 1999           | FemalePregAge40to44 | 14697      |
| Rwanda  | 1999           | FemalePregAge45to49 | 3374       |
| Rwanda  | 1999           | MaleAge0to4         | 745191     |
| Rwanda  | 1999           | MaleAge10to14       | 549510     |
| Rwanda  | 1999           | MaleAge15to19       | 467902     |
| Rwanda  | 1999           | MaleAge20to24       | 358792     |
| Rwanda  | 1999           | MaleAge25to29       | 258678     |
| Rwanda  | 1999           | MaleAge30to34       | 213874     |
| Rwanda  | 1999           | MaleAge35to39       | 191985     |
| Rwanda  | 1999           | MaleAge40to44       | 142667     |
| Rwanda  | 1999           | MaleAge45to49       | 116405     |
| Rwanda  | 1999           | MaleAge50to54       | 81901      |
| Rwanda  | 1999           | MaleAge55to59       | 51197      |
| Rwanda  | 1999           | MaleAge5to9         | 485503     |
| Rwanda  | 1999           | MaleAge60to64       | 43062      |
| Rwanda  | 1999           | MaleAge65to69       | 43227      |
| Rwanda  | 1999           | MaleAge70to74       | 24651      |
| Rwanda  | 1999           | MaleAge75to79       | 27543      |
| Rwanda  | 1999           | MaleAge80to84       | 7336       |



Dietary calcium and zinc deficiency risks are decreasing but remain prevalent

| Country      | Reference year | Age/gender group    | Population |
|--------------|----------------|---------------------|------------|
| Rwanda       | 1999           | MaleAge85to89       | 441        |
| Rwanda       | 1999           | MaleAge90to94       | 175        |
| Rwanda       | 1999           | MaleAge95to99       | 17         |
| Rwanda       | 1999           | MaleAgeAbove100     | 1          |
| Saudi Arabia | 1992           | FemaleAge0to4       | 1333204    |
| Saudi Arabia | 1992           | FemaleAge10to14     | 996555     |
| Saudi Arabia | 1992           | FemaleAge15to19     | 643565     |
| Saudi Arabia | 1992           | FemaleAge20to24     | 389330     |
| Saudi Arabia | 1992           | FemaleAge25to29     | 349913     |
| Saudi Arabia | 1992           | FemaleAge30to34     | 338466     |
| Saudi Arabia | 1992           | FemaleAge35to39     | 273219     |
| Saudi Arabia | 1992           | FemaleAge40to44     | 191544     |
| Saudi Arabia | 1992           | FemaleAge45to49     | 187253     |
| Saudi Arabia | 1992           | FemaleAge50to54     | 164464     |
| Saudi Arabia | 1992           | FemaleAge55to59     | 116144     |
| Saudi Arabia | 1992           | FemaleAge5to9       | 1252465    |
| Saudi Arabia | 1992           | FemaleAge60to64     | 94776      |
| Saudi Arabia | 1992           | FemaleAge65to69     | 70572      |
| Saudi Arabia | 1992           | FemaleAge70to74     | 50323      |
| Saudi Arabia | 1992           | FemaleAge75to79     | 41217      |
| Saudi Arabia | 1992           | FemaleAge80to84     | 35907      |
| Saudi Arabia | 1992           | FemaleAge85to89     | 13880      |
| Saudi Arabia | 1992           | FemaleAge90to94     | 1482       |
| Saudi Arabia | 1992           | FemaleAge95to99     | 338        |
| Saudi Arabia | 1992           | FemaleAgeAbove100   | 12         |
| Saudi Arabia | 1992           | FemaleLactAge15to19 | 45133      |
| Saudi Arabia | 1992           | FemaleLactAge20to24 | 127662     |
| Saudi Arabia | 1992           | FemaleLactAge25to29 | 155292     |
| Saudi Arabia | 1992           | FemaleLactAge30to34 | 132726     |
| Saudi Arabia | 1992           | FemaleLactAge35to39 | 80343      |
| Saudi Arabia | 1992           | FemaleLactAge40to44 | 28600      |
| Saudi Arabia | 1992           | FemaleLactAge45to49 | 10357      |
| Saudi Arabia | 1992           | FemalePregAge15to19 | 33850      |
| Saudi Arabia | 1992           | FemalePregAge20to24 | 95746      |
| Saudi Arabia | 1992           | FemalePregAge25to29 | 116469     |
| Saudi Arabia | 1992           | FemalePregAge30to34 | 99545      |
| Saudi Arabia | 1992           | FemalePregAge35to39 | 60257      |
| Saudi Arabia | 1992           | FemalePregAge40to44 | 21450      |
| Saudi Arabia | 1992           | FemalePregAge45to49 | 7767       |
| Saudi Arabia | 1992           | MaleAge0to4         | 1337588    |
| Saudi Arabia | 1992           | MaleAge10to14       | 1040524    |
| Saudi Arabia | 1992           | MaleAge15to19       | 676778     |
| Saudi Arabia | 1992           | MaleAge20to24       | 850017     |
| Saudi Arabia | 1992           | MaleAge25to29       | 1081155    |
| Saudi Arabia | 1992           | MaleAge30to34       | 967421     |
| Saudi Arabia | 1992           | MaleAge35to39       | 761012     |
| Saudi Arabia | 1992           | MaleAge40to44       | 492438     |
| Saudi Arabia | 1992           | MaleAge45to49       | 343502     |
| Saudi Arabia | 1992           | MaleAge50to54       | 234997     |
| Saudi Arabia | 1992           | MaleAge55to59       | 178733     |
| Saudi Arabia | 1992           | MaleAge5to9         | 1352560    |
| Saudi Arabia | 1992           | MaleAge60to64       | 143861     |
| Saudi Arabia | 1992           | MaleAge65to69       | 92659      |
| Saudi Arabia | 1992           | MaleAge70to74       | 57648      |
| Saudi Arabia | 1992           | MaleAge75to79       | 41555      |
| Saudi Arabia | 1992           | MaleAge80to84       | 37154      |
| Saudi Arabia | 1992           | MaleAge85to89       | 12759      |
| Saudi Arabia | 1992           | MaleAge90to94       | 1153       |
| Saudi Arabia | 1992           | MaleAge95to99       | 268        |
| Saudi Arabia | 1992           | MaleAgeAbove100     | 6          |
| Saudi Arabia | 1993           | FemaleAge0to4       | 1318617    |
| Saudi Arabia | 1993           | FemaleAge10to14     | 1063685    |
| Saudi Arabia | 1993           | FemaleAge15to19     | 682648     |
| Saudi Arabia | 1993           | FemaleAge20to24     | 391622     |
| Saudi Arabia | 1993           | FemaleAge25to29     | 350088     |
| Saudi Arabia | 1993           | FemaleAge30to34     | 366175     |
| Saudi Arabia | 1993           | FemaleAge35to39     | 310559     |
| Saudi Arabia | 1993           | FemaleAge40to44     | 215872     |
| Saudi Arabia | 1993           | FemaleAge45to49     | 173771     |
| Saudi Arabia | 1993           | FemaleAge50to54     | 182941     |
| Saudi Arabia | 1993           | FemaleAge55to59     | 116224     |
| Saudi Arabia | 1993           | FemaleAge5to9       | 1270131    |
| Saudi Arabia | 1993           | FemaleAge60to64     | 98868      |
| Saudi Arabia | 1993           | FemaleAge65to69     | 72216      |
| Saudi Arabia | 1993           | FemaleAge70to74     | 50853      |
| Saudi Arabia | 1993           | FemaleAge75to79     | 38621      |
| Saudi Arabia | 1993           | FemaleAge80to84     | 34877      |
| Saudi Arabia | 1993           | FemaleAge85to89     | 16946      |
| Saudi Arabia | 1993           | FemaleAge90to94     | 1538       |
| Saudi Arabia | 1993           | FemaleAge95to99     | 392        |
| Saudi Arabia | 1993           | FemaleAgeAbove100   | 10         |
| Saudi Arabia | 1993           | FemaleLactAge15to19 | 45133      |
| Saudi Arabia | 1993           | FemaleLactAge20to24 | 127662     |
| Saudi Arabia | 1993           | FemaleLactAge25to29 | 155292     |
| Saudi Arabia | 1993           | FemaleLactAge30to34 | 132726     |
| Saudi Arabia | 1993           | FemaleLactAge35to39 | 80343      |
| Saudi Arabia | 1993           | FemaleLactAge40to44 | 28600      |
| Saudi Arabia | 1993           | FemaleLactAge45to49 | 10357      |

Dietary calcium and zinc deficiency risks are decreasing but remain prevalent

| Country      | Reference year | Age/gender group    | Population |
|--------------|----------------|---------------------|------------|
| Saudi Arabia | 1993           | FemalePregAge15to19 | 33850      |
| Saudi Arabia | 1993           | FemalePregAge20to24 | 95746      |
| Saudi Arabia | 1993           | FemalePregAge25to29 | 116469     |
| Saudi Arabia | 1993           | FemalePregAge30to34 | 99545      |
| Saudi Arabia | 1993           | FemalePregAge35to39 | 60257      |
| Saudi Arabia | 1993           | FemalePregAge40to44 | 21450      |
| Saudi Arabia | 1993           | FemalePregAge45to49 | 7767       |
| Saudi Arabia | 1993           | MaleAge0to4         | 1342561    |
| Saudi Arabia | 1993           | MaleAge10to14       | 1138213    |
| Saudi Arabia | 1993           | MaleAge15to19       | 719224     |
| Saudi Arabia | 1993           | MaleAge20to24       | 766422     |
| Saudi Arabia | 1993           | MaleAge25to29       | 1104909    |
| Saudi Arabia | 1993           | MaleAge30to34       | 1034730    |
| Saudi Arabia | 1993           | MaleAge35to39       | 802581     |
| Saudi Arabia | 1993           | MaleAge40to44       | 545302     |
| Saudi Arabia | 1993           | MaleAge45to49       | 340477     |
| Saudi Arabia | 1993           | MaleAge50to54       | 262154     |
| Saudi Arabia | 1993           | MaleAge55to59       | 172818     |
| Saudi Arabia | 1993           | MaleAge5to9         | 1349545    |
| Saudi Arabia | 1993           | MaleAge60to64       | 156113     |
| Saudi Arabia | 1993           | MaleAge65to69       | 96985      |
| Saudi Arabia | 1993           | MaleAge70to74       | 60875      |
| Saudi Arabia | 1993           | MaleAge75to79       | 39371      |
| Saudi Arabia | 1993           | MaleAge80to84       | 35651      |
| Saudi Arabia | 1993           | MaleAge85to89       | 16666      |
| Saudi Arabia | 1993           | MaleAge90to94       | 1315       |
| Saudi Arabia | 1993           | MaleAge95to99       | 327        |
| Saudi Arabia | 1993           | MaleAgeAbov e100    | 7          |
| Saudi Arabia | 1994           | FemaleAge0to4       | 1303474    |
| Saudi Arabia | 1994           | FemaleAge10to14     | 1129155    |
| Saudi Arabia | 1994           | FemaleAge15to19     | 730882     |
| Saudi Arabia | 1994           | FemaleAge20to24     | 397825     |
| Saudi Arabia | 1994           | FemaleAge25to29     | 347963     |
| Saudi Arabia | 1994           | FemaleAge30to34     | 389611     |
| Saudi Arabia | 1994           | FemaleAge35to39     | 349430     |
| Saudi Arabia | 1994           | FemaleAge40to44     | 246403     |
| Saudi Arabia | 1994           | FemaleAge45to49     | 162321     |
| Saudi Arabia | 1994           | FemaleAge50to54     | 197877     |
| Saudi Arabia | 1994           | FemaleAge55to59     | 118800     |
| Saudi Arabia | 1994           | FemaleAge5to9       | 1272926    |
| Saudi Arabia | 1994           | FemaleAge60to64     | 102632     |
| Saudi Arabia | 1994           | FemaleAge65to69     | 74504      |
| Saudi Arabia | 1994           | FemaleAge70to74     | 51976      |
| Saudi Arabia | 1994           | FemaleAge75to79     | 36005      |
| Saudi Arabia | 1994           | FemaleAge80to84     | 33740      |
| Saudi Arabia | 1994           | FemaleAge85to89     | 19228      |
| Saudi Arabia | 1994           | FemaleAge90to94     | 1799       |
| Saudi Arabia | 1994           | FemaleAge95to99     | 328        |
| Saudi Arabia | 1994           | FemaleAgeAbov e100  | 9          |
| Saudi Arabia | 1994           | FemaleLactAge15to19 | 45133      |
| Saudi Arabia | 1994           | FemaleLactAge20to24 | 127662     |
| Saudi Arabia | 1994           | FemaleLactAge25to29 | 155292     |
| Saudi Arabia | 1994           | FemaleLactAge30to34 | 132726     |
| Saudi Arabia | 1994           | FemaleLactAge35to39 | 80343      |
| Saudi Arabia | 1994           | FemaleLactAge40to44 | 28600      |
| Saudi Arabia | 1994           | FemaleLactAge45to49 | 10357      |
| Saudi Arabia | 1994           | FemalePregAge15to19 | 33850      |
| Saudi Arabia | 1994           | FemalePregAge20to24 | 95746      |
| Saudi Arabia | 1994           | FemalePregAge25to29 | 116469     |
| Saudi Arabia | 1994           | FemalePregAge30to34 | 99545      |
| Saudi Arabia | 1994           | FemalePregAge35to39 | 60257      |
| Saudi Arabia | 1994           | FemalePregAge40to44 | 21450      |
| Saudi Arabia | 1994           | FemalePregAge45to49 | 7767       |
| Saudi Arabia | 1994           | MaleAge0to4         | 1340369    |
| Saudi Arabia | 1994           | MaleAge10to14       | 1226115    |
| Saudi Arabia | 1994           | MaleAge15to19       | 778530     |
| Saudi Arabia | 1994           | MaleAge20to24       | 683706     |
| Saudi Arabia | 1994           | MaleAge25to29       | 1102937    |
| Saudi Arabia | 1994           | MaleAge30to34       | 1097618    |
| Saudi Arabia | 1994           | MaleAge35to39       | 848114     |
| Saudi Arabia | 1994           | MaleAge40to44       | 600243     |
| Saudi Arabia | 1994           | MaleAge45to49       | 340689     |
| Saudi Arabia | 1994           | MaleAge50to54       | 285649     |
| Saudi Arabia | 1994           | MaleAge55to59       | 169211     |
| Saudi Arabia | 1994           | MaleAge5to9         | 1316417    |
| Saudi Arabia | 1994           | MaleAge60to64       | 165701     |
| Saudi Arabia | 1994           | MaleAge65to69       | 102081     |
| Saudi Arabia | 1994           | MaleAge70to74       | 64764      |
| Saudi Arabia | 1994           | MaleAge75to79       | 37181      |
| Saudi Arabia | 1994           | MaleAge80to84       | 34106      |
| Saudi Arabia | 1994           | MaleAge85to89       | 19796      |
| Saudi Arabia | 1994           | MaleAge90to94       | 1429       |
| Saudi Arabia | 1994           | MaleAge95to99       | 264        |
| Saudi Arabia | 1994           | MaleAgeAbov e100    | 7          |
| Saudi Arabia | 1995           | FemaleAge0to4       | 1296592    |
| Saudi Arabia | 1995           | FemaleAge10to14     | 1182445    |
| Saudi Arabia | 1995           | FemaleAge15to19     | 786650     |
| Saudi Arabia | 1995           | FemaleAge20to24     | 410906     |

Dietary calcium and zinc deficiency risks are decreasing but remain prevalent

| Country      | Reference year | Age/gender group    | Population |
|--------------|----------------|---------------------|------------|
| Saudi Arabia | 1995           | FemaleAge25to29     | 344277     |
| Saudi Arabia | 1995           | FemaleAge30to34     | 406423     |
| Saudi Arabia | 1995           | FemaleAge35to39     | 387678     |
| Saudi Arabia | 1995           | FemaleAge40to44     | 280454     |
| Saudi Arabia | 1995           | FemaleAge45to49     | 159514     |
| Saudi Arabia | 1995           | FemaleAge50to54     | 204062     |
| Saudi Arabia | 1995           | FemaleAge55to59     | 125725     |
| Saudi Arabia | 1995           | FemaleAge5to9       | 1265373    |
| Saudi Arabia | 1995           | FemaleAge60to64     | 105354     |
| Saudi Arabia | 1995           | FemaleAge65to69     | 77434      |
| Saudi Arabia | 1995           | FemaleAge70to74     | 53374      |
| Saudi Arabia | 1995           | FemaleAge75to79     | 33950      |
| Saudi Arabia | 1995           | FemaleAge80to84     | 32315      |
| Saudi Arabia | 1995           | FemaleAge85to89     | 21147      |
| Saudi Arabia | 1995           | FemaleAge90to94     | 1666       |
| Saudi Arabia | 1995           | FemaleAge95to99     | 139        |
| Saudi Arabia | 1995           | FemaleAgeAbove100   | 8          |
| Saudi Arabia | 1995           | FemaleLactAge15to19 | 45133      |
| Saudi Arabia | 1995           | FemaleLactAge20to24 | 127662     |
| Saudi Arabia | 1995           | FemaleLactAge25to29 | 155292     |
| Saudi Arabia | 1995           | FemaleLactAge30to34 | 132726     |
| Saudi Arabia | 1995           | FemaleLactAge35to39 | 80343      |
| Saudi Arabia | 1995           | FemaleLactAge40to44 | 28600      |
| Saudi Arabia | 1995           | FemaleLactAge45to49 | 10357      |
| Saudi Arabia | 1995           | FemalePregAge15to19 | 33850      |
| Saudi Arabia | 1995           | FemalePregAge20to24 | 95746      |
| Saudi Arabia | 1995           | FemalePregAge25to29 | 116469     |
| Saudi Arabia | 1995           | FemalePregAge30to34 | 99545      |
| Saudi Arabia | 1995           | FemalePregAge35to39 | 60257      |
| Saudi Arabia | 1995           | FemalePregAge40to44 | 21450      |
| Saudi Arabia | 1995           | FemalePregAge45to49 | 7767       |
| Saudi Arabia | 1995           | MaleAge0to4         | 1330059    |
| Saudi Arabia | 1995           | MaleAge10to14       | 1283051    |
| Saudi Arabia | 1995           | MaleAge15to19       | 845384     |
| Saudi Arabia | 1995           | MaleAge20to24       | 623458     |
| Saudi Arabia | 1995           | MaleAge25to29       | 1066201    |
| Saudi Arabia | 1995           | MaleAge30to34       | 1146305    |
| Saudi Arabia | 1995           | MaleAge35to39       | 900088     |
| Saudi Arabia | 1995           | MaleAge40to44       | 650172     |
| Saudi Arabia | 1995           | MaleAge45to49       | 352222     |
| Saudi Arabia | 1995           | MaleAge50to54       | 298446     |
| Saudi Arabia | 1995           | MaleAge55to59       | 172075     |
| Saudi Arabia | 1995           | MaleAge5to9         | 1270809    |
| Saudi Arabia | 1995           | MaleAge60to64       | 169690     |
| Saudi Arabia | 1995           | MaleAge65to69       | 108539     |
| Saudi Arabia | 1995           | MaleAge70to74       | 68526      |
| Saudi Arabia | 1995           | MaleAge75to79       | 35811      |
| Saudi Arabia | 1995           | MaleAge80to84       | 32338      |
| Saudi Arabia | 1995           | MaleAge85to89       | 22058      |
| Saudi Arabia | 1995           | MaleAge90to94       | 1280       |
| Saudi Arabia | 1995           | MaleAge95to99       | 141        |
| Saudi Arabia | 1995           | MaleAgeAbove100     | 8          |
| Saudi Arabia | 1996           | FemaleAge0to4       | 1306723    |
| Saudi Arabia | 1996           | FemaleAge10to14     | 1176721    |
| Saudi Arabia | 1996           | FemaleAge15to19     | 861016     |
| Saudi Arabia | 1996           | FemaleAge20to24     | 489115     |
| Saudi Arabia | 1996           | FemaleAge25to29     | 358490     |
| Saudi Arabia | 1996           | FemaleAge30to34     | 395794     |
| Saudi Arabia | 1996           | FemaleAge35to39     | 379988     |
| Saudi Arabia | 1996           | FemaleAge40to44     | 310327     |
| Saudi Arabia | 1996           | FemaleAge45to49     | 178886     |
| Saudi Arabia | 1996           | FemaleAge50to54     | 197626     |
| Saudi Arabia | 1996           | FemaleAge55to59     | 139111     |
| Saudi Arabia | 1996           | FemaleAge5to9       | 1253933    |
| Saudi Arabia | 1996           | FemaleAge60to64     | 114745     |
| Saudi Arabia | 1996           | FemaleAge65to69     | 81337      |
| Saudi Arabia | 1996           | FemaleAge70to74     | 55733      |
| Saudi Arabia | 1996           | FemaleAge75to79     | 36040      |
| Saudi Arabia | 1996           | FemaleAge80to84     | 30580      |
| Saudi Arabia | 1996           | FemaleAge85to89     | 21069      |
| Saudi Arabia | 1996           | FemaleAge90to94     | 3443       |
| Saudi Arabia | 1996           | FemaleAge95to99     | 175        |
| Saudi Arabia | 1996           | FemaleAgeAbove100   | 8          |
| Saudi Arabia | 1996           | FemaleLactAge15to19 | 34503      |
| Saudi Arabia | 1996           | FemaleLactAge20to24 | 117525     |
| Saudi Arabia | 1996           | FemaleLactAge25to29 | 159434     |
| Saudi Arabia | 1996           | FemaleLactAge30to34 | 135403     |
| Saudi Arabia | 1996           | FemaleLactAge35to39 | 84842      |
| Saudi Arabia | 1996           | FemaleLactAge40to44 | 30884      |
| Saudi Arabia | 1996           | FemaleLactAge45to49 | 11094      |
| Saudi Arabia | 1996           | FemalePregAge15to19 | 25877      |
| Saudi Arabia | 1996           | FemalePregAge20to24 | 88144      |
| Saudi Arabia | 1996           | FemalePregAge25to29 | 119576     |
| Saudi Arabia | 1996           | FemalePregAge30to34 | 101552     |
| Saudi Arabia | 1996           | FemalePregAge35to39 | 63631      |
| Saudi Arabia | 1996           | FemalePregAge40to44 | 23163      |
| Saudi Arabia | 1996           | FemalePregAge45to49 | 8321       |
| Saudi Arabia | 1996           | MaleAge0to4         | 1369221    |

Dietary calcium and zinc deficiency risks are decreasing but remain prevalent

| Country      | Reference year | Age/gender group    | Population |
|--------------|----------------|---------------------|------------|
| Saudi Arabia | 1996           | MaleAge10to14       | 1249342    |
| Saudi Arabia | 1996           | MaleAge15to19       | 926076     |
| Saudi Arabia | 1996           | MaleAge20to24       | 718068     |
| Saudi Arabia | 1996           | MaleAge25to29       | 996724     |
| Saudi Arabia | 1996           | MaleAge30to34       | 1092789    |
| Saudi Arabia | 1996           | MaleAge35to39       | 908934     |
| Saudi Arabia | 1996           | MaleAge40to44       | 650603     |
| Saudi Arabia | 1996           | MaleAge45to49       | 370565     |
| Saudi Arabia | 1996           | MaleAge50to54       | 291055     |
| Saudi Arabia | 1996           | MaleAge55to59       | 173161     |
| Saudi Arabia | 1996           | MaleAge5to9         | 1246226    |
| Saudi Arabia | 1996           | MaleAge60to64       | 171042     |
| Saudi Arabia | 1996           | MaleAge65to69       | 119401     |
| Saudi Arabia | 1996           | MaleAge70to74       | 74996      |
| Saudi Arabia | 1996           | MaleAge75to79       | 40181      |
| Saudi Arabia | 1996           | MaleAge80to84       | 30050      |
| Saudi Arabia | 1996           | MaleAge85to89       | 21686      |
| Saudi Arabia | 1996           | MaleAge90to94       | 3254       |
| Saudi Arabia | 1996           | MaleAge95to99       | 159        |
| Saudi Arabia | 1996           | MaleAgeAbove100     | 9          |
| Saudi Arabia | 1997           | FemaleAge0to4       | 1320947    |
| Saudi Arabia | 1997           | FemaleAge10to14     | 1163146    |
| Saudi Arabia | 1997           | FemaleAge15to19     | 900518     |
| Saudi Arabia | 1997           | FemaleAge20to24     | 547625     |
| Saudi Arabia | 1997           | FemaleAge25to29     | 390299     |
| Saudi Arabia | 1997           | FemaleAge30to34     | 398612     |
| Saudi Arabia | 1997           | FemaleAge35to39     | 378771     |
| Saudi Arabia | 1997           | FemaleAge40to44     | 331009     |
| Saudi Arabia | 1997           | FemaleAge45to49     | 210617     |
| Saudi Arabia | 1997           | FemaleAge50to54     | 186993     |
| Saudi Arabia | 1997           | FemaleAge55to59     | 153396     |
| Saudi Arabia | 1997           | FemaleAge5to9       | 1249141    |
| Saudi Arabia | 1997           | FemaleAge60to64     | 121339     |
| Saudi Arabia | 1997           | FemaleAge65to69     | 89947      |
| Saudi Arabia | 1997           | FemaleAge70to74     | 56580      |
| Saudi Arabia | 1997           | FemaleAge75to79     | 38923      |
| Saudi Arabia | 1997           | FemaleAge80to84     | 29324      |
| Saudi Arabia | 1997           | FemaleAge85to89     | 20398      |
| Saudi Arabia | 1997           | FemaleAge90to94     | 5001       |
| Saudi Arabia | 1997           | FemaleAge95to99     | 259        |
| Saudi Arabia | 1997           | FemaleAgeAbove100   | 8          |
| Saudi Arabia | 1997           | FemaleLactAge15to19 | 34503      |
| Saudi Arabia | 1997           | FemaleLactAge20to24 | 117525     |
| Saudi Arabia | 1997           | FemaleLactAge25to29 | 159434     |
| Saudi Arabia | 1997           | FemaleLactAge30to34 | 135403     |
| Saudi Arabia | 1997           | FemaleLactAge35to39 | 84842      |
| Saudi Arabia | 1997           | FemaleLactAge40to44 | 30884      |
| Saudi Arabia | 1997           | FemaleLactAge45to49 | 11094      |
| Saudi Arabia | 1997           | FemalePregAge15to19 | 25877      |
| Saudi Arabia | 1997           | FemalePregAge20to24 | 88144      |
| Saudi Arabia | 1997           | FemalePregAge25to29 | 119576     |
| Saudi Arabia | 1997           | FemalePregAge30to34 | 101552     |
| Saudi Arabia | 1997           | FemalePregAge35to39 | 63631      |
| Saudi Arabia | 1997           | FemalePregAge40to44 | 23163      |
| Saudi Arabia | 1997           | FemalePregAge45to49 | 8321       |
| Saudi Arabia | 1997           | MaleAge0to4         | 1381240    |
| Saudi Arabia | 1997           | MaleAge10to14       | 1196909    |
| Saudi Arabia | 1997           | MaleAge15to19       | 971877     |
| Saudi Arabia | 1997           | MaleAge20to24       | 813487     |
| Saudi Arabia | 1997           | MaleAge25to29       | 961957     |
| Saudi Arabia | 1997           | MaleAge30to34       | 1036205    |
| Saudi Arabia | 1997           | MaleAge35to39       | 900085     |
| Saudi Arabia | 1997           | MaleAge40to44       | 648814     |
| Saudi Arabia | 1997           | MaleAge45to49       | 385155     |
| Saudi Arabia | 1997           | MaleAge50to54       | 277426     |
| Saudi Arabia | 1997           | MaleAge55to59       | 179691     |
| Saudi Arabia | 1997           | MaleAge5to9         | 1237015    |
| Saudi Arabia | 1997           | MaleAge60to64       | 159825     |
| Saudi Arabia | 1997           | MaleAge65to69       | 134707     |
| Saudi Arabia | 1997           | MaleAge70to74       | 79358      |
| Saudi Arabia | 1997           | MaleAge75to79       | 46296      |
| Saudi Arabia | 1997           | MaleAge80to84       | 28393      |
| Saudi Arabia | 1997           | MaleAge85to89       | 20317      |
| Saudi Arabia | 1997           | MaleAge90to94       | 5069       |
| Saudi Arabia | 1997           | MaleAge95to99       | 213        |
| Saudi Arabia | 1997           | MaleAgeAbove100     | 10         |
| Saudi Arabia | 1998           | FemaleAge0to4       | 1340314    |
| Saudi Arabia | 1998           | FemaleAge10to14     | 1153599    |
| Saudi Arabia | 1998           | FemaleAge15to19     | 921112     |
| Saudi Arabia | 1998           | FemaleAge20to24     | 598667     |
| Saudi Arabia | 1998           | FemaleAge25to29     | 431391     |
| Saudi Arabia | 1998           | FemaleAge30to34     | 414063     |
| Saudi Arabia | 1998           | FemaleAge35to39     | 382001     |
| Saudi Arabia | 1998           | FemaleAge40to44     | 336142     |
| Saudi Arabia | 1998           | FemaleAge45to49     | 248167     |
| Saudi Arabia | 1998           | FemaleAge50to54     | 180049     |
| Saudi Arabia | 1998           | FemaleAge55to59     | 164959     |
| Saudi Arabia | 1998           | FemaleAge5to9       | 1251202    |

Dietary calcium and zinc deficiency risks are decreasing but remain prevalent

| Country      | Reference year | Age/gender group    | Population |
|--------------|----------------|---------------------|------------|
| Saudi Arabia | 1998           | FemaleAge60to64     | 125197     |
| Saudi Arabia | 1998           | FemaleAge65to69     | 103756     |
| Saudi Arabia | 1998           | FemaleAge70to74     | 56401      |
| Saudi Arabia | 1998           | FemaleAge75to79     | 41861      |
| Saudi Arabia | 1998           | FemaleAge80to84     | 29140      |
| Saudi Arabia | 1998           | FemaleAge85to89     | 19598      |
| Saudi Arabia | 1998           | FemaleAge90to94     | 5938       |
| Saudi Arabia | 1998           | FemaleAge95to99     | 334        |
| Saudi Arabia | 1998           | FemaleAgeAbove100   | 8          |
| Saudi Arabia | 1998           | FemaleLactAge15to19 | 34503      |
| Saudi Arabia | 1998           | FemaleLactAge20to24 | 117525     |
| Saudi Arabia | 1998           | FemaleLactAge25to29 | 159434     |
| Saudi Arabia | 1998           | FemaleLactAge30to34 | 135403     |
| Saudi Arabia | 1998           | FemaleLactAge35to39 | 84842      |
| Saudi Arabia | 1998           | FemaleLactAge40to44 | 30884      |
| Saudi Arabia | 1998           | FemaleLactAge45to49 | 11094      |
| Saudi Arabia | 1998           | FemalePregAge15to19 | 25877      |
| Saudi Arabia | 1998           | FemalePregAge20to24 | 88144      |
| Saudi Arabia | 1998           | FemalePregAge25to29 | 119576     |
| Saudi Arabia | 1998           | FemalePregAge30to34 | 101552     |
| Saudi Arabia | 1998           | FemalePregAge35to39 | 63631      |
| Saudi Arabia | 1998           | FemalePregAge40to44 | 23163      |
| Saudi Arabia | 1998           | FemalePregAge45to49 | 8321       |
| Saudi Arabia | 1998           | MaleAge0to4         | 1381424    |
| Saudi Arabia | 1998           | MaleAge10to14       | 1153990    |
| Saudi Arabia | 1998           | MaleAge15to19       | 987091     |
| Saudi Arabia | 1998           | MaleAge20to24       | 878550     |
| Saudi Arabia | 1998           | MaleAge25to29       | 985763     |
| Saudi Arabia | 1998           | MaleAge30to34       | 991245     |
| Saudi Arabia | 1998           | MaleAge35to39       | 869493     |
| Saudi Arabia | 1998           | MaleAge40to44       | 657240     |
| Saudi Arabia | 1998           | MaleAge45to49       | 388575     |
| Saudi Arabia | 1998           | MaleAge50to54       | 266087     |
| Saudi Arabia | 1998           | MaleAge55to59       | 189058     |
| Saudi Arabia | 1998           | MaleAge5to9         | 1244965    |
| Saudi Arabia | 1998           | MaleAge60to64       | 139152     |
| Saudi Arabia | 1998           | MaleAge65to69       | 152991     |
| Saudi Arabia | 1998           | MaleAge70to74       | 82718      |
| Saudi Arabia | 1998           | MaleAge75to79       | 53301      |
| Saudi Arabia | 1998           | MaleAge80to84       | 28382      |
| Saudi Arabia | 1998           | MaleAge85to89       | 18581      |
| Saudi Arabia | 1998           | MaleAge90to94       | 6235       |
| Saudi Arabia | 1998           | MaleAge95to99       | 267        |
| Saudi Arabia | 1998           | MaleAgeAbove100     | 10         |
| Saudi Arabia | 1999           | FemaleAge0to4       | 1361738    |
| Saudi Arabia | 1999           | FemaleAge10to14     | 1155706    |
| Saudi Arabia | 1999           | FemaleAge15to19     | 926110     |
| Saudi Arabia | 1999           | FemaleAge20to24     | 639426     |
| Saudi Arabia | 1999           | FemaleAge25to29     | 480558     |
| Saudi Arabia | 1999           | FemaleAge30to34     | 444763     |
| Saudi Arabia | 1999           | FemaleAge35to39     | 393064     |
| Saudi Arabia | 1999           | FemaleAge40to44     | 330894     |
| Saudi Arabia | 1999           | FemaleAge45to49     | 283076     |
| Saudi Arabia | 1999           | FemaleAge50to54     | 184359     |
| Saudi Arabia | 1999           | FemaleAge55to59     | 170866     |
| Saudi Arabia | 1999           | FemaleAge5to9       | 1262111    |
| Saudi Arabia | 1999           | FemaleAge60to64     | 128640     |
| Saudi Arabia | 1999           | FemaleAge65to69     | 120206     |
| Saudi Arabia | 1999           | FemaleAge70to74     | 57466      |
| Saudi Arabia | 1999           | FemaleAge75to79     | 44131      |
| Saudi Arabia | 1999           | FemaleAge80to84     | 30313      |
| Saudi Arabia | 1999           | FemaleAge85to89     | 19032      |
| Saudi Arabia | 1999           | FemaleAge90to94     | 6077       |
| Saudi Arabia | 1999           | FemaleAge95to99     | 335        |
| Saudi Arabia | 1999           | FemaleAgeAbove100   | 8          |
| Saudi Arabia | 1999           | FemaleLactAge15to19 | 34503      |
| Saudi Arabia | 1999           | FemaleLactAge20to24 | 117525     |
| Saudi Arabia | 1999           | FemaleLactAge25to29 | 159434     |
| Saudi Arabia | 1999           | FemaleLactAge30to34 | 135403     |
| Saudi Arabia | 1999           | FemaleLactAge35to39 | 84842      |
| Saudi Arabia | 1999           | FemaleLactAge40to44 | 30884      |
| Saudi Arabia | 1999           | FemaleLactAge45to49 | 11094      |
| Saudi Arabia | 1999           | FemalePregAge15to19 | 25877      |
| Saudi Arabia | 1999           | FemalePregAge20to24 | 88144      |
| Saudi Arabia | 1999           | FemalePregAge25to29 | 119576     |
| Saudi Arabia | 1999           | FemalePregAge30to34 | 101552     |
| Saudi Arabia | 1999           | FemalePregAge35to39 | 63631      |
| Saudi Arabia | 1999           | FemalePregAge40to44 | 23163      |
| Saudi Arabia | 1999           | FemalePregAge45to49 | 8321       |
| Saudi Arabia | 1999           | MaleAge0to4         | 1389770    |
| Saudi Arabia | 1999           | MaleAge10to14       | 1142305    |
| Saudi Arabia | 1999           | MaleAge15to19       | 980681     |
| Saudi Arabia | 1999           | MaleAge20to24       | 909222     |
| Saudi Arabia | 1999           | MaleAge25to29       | 1069641    |
| Saudi Arabia | 1999           | MaleAge30to34       | 974839     |
| Saudi Arabia | 1999           | MaleAge35to39       | 828126     |
| Saudi Arabia | 1999           | MaleAge40to44       | 676992     |
| Saudi Arabia | 1999           | MaleAge45to49       | 383513     |

Dietary calcium and zinc deficiency risks are decreasing but remain prevalent

| Country      | Reference year | Age/gender group    | Population |
|--------------|----------------|---------------------|------------|
| Saudi Arabia | 1999           | MaleAge50to54       | 262983     |
| Saudi Arabia | 1999           | MaleAge55to59       | 196455     |
| Saudi Arabia | 1999           | MaleAge5to9         | 1273095    |
| Saudi Arabia | 1999           | MaleAge60to64       | 117892     |
| Saudi Arabia | 1999           | MaleAge65to69       | 169008     |
| Saudi Arabia | 1999           | MaleAge70to74       | 88244      |
| Saudi Arabia | 1999           | MaleAge75to79       | 60423      |
| Saudi Arabia | 1999           | MaleAge80to84       | 30774      |
| Saudi Arabia | 1999           | MaleAge85to89       | 17157      |
| Saudi Arabia | 1999           | MaleAge90to94       | 6459       |
| Saudi Arabia | 1999           | MaleAge95to99       | 275        |
| Saudi Arabia | 1999           | MaleAgeAbov e100    | 11         |
| Senegal      | 1992           | FemaleAge0to4       | 721470     |
| Senegal      | 1992           | FemaleAge10to14     | 522611     |
| Senegal      | 1992           | FemaleAge15to19     | 339203     |
| Senegal      | 1992           | FemaleAge20to24     | 192542     |
| Senegal      | 1992           | FemaleAge25to29     | 140192     |
| Senegal      | 1992           | FemaleAge30to34     | 121685     |
| Senegal      | 1992           | FemaleAge35to39     | 115705     |
| Senegal      | 1992           | FemaleAge40to44     | 115004     |
| Senegal      | 1992           | FemaleAge45to49     | 119274     |
| Senegal      | 1992           | FemaleAge50to54     | 113145     |
| Senegal      | 1992           | FemaleAge55to59     | 95684      |
| Senegal      | 1992           | FemaleAge5to9       | 607729     |
| Senegal      | 1992           | FemaleAge60to64     | 77458      |
| Senegal      | 1992           | FemaleAge65to69     | 58353      |
| Senegal      | 1992           | FemaleAge70to74     | 39343      |
| Senegal      | 1992           | FemaleAge75to79     | 22122      |
| Senegal      | 1992           | FemaleAge80to84     | 9298       |
| Senegal      | 1992           | FemaleAge85to89     | 2559       |
| Senegal      | 1992           | FemaleAge90to94     | 386        |
| Senegal      | 1992           | FemaleAge95to99     | 28         |
| Senegal      | 1992           | FemaleAgeAbov e100  | 1          |
| Senegal      | 1992           | FemaleLactAge15to19 | 56172      |
| Senegal      | 1992           | FemaleLactAge20to24 | 88563      |
| Senegal      | 1992           | FemaleLactAge25to29 | 77789      |
| Senegal      | 1992           | FemaleLactAge30to34 | 59139      |
| Senegal      | 1992           | FemaleLactAge35to39 | 39195      |
| Senegal      | 1992           | FemaleLactAge40to44 | 18578      |
| Senegal      | 1992           | FemaleLactAge45to49 | 4435       |
| Senegal      | 1992           | FemalePregAge15to19 | 42129      |
| Senegal      | 1992           | FemalePregAge20to24 | 66422      |
| Senegal      | 1992           | FemalePregAge25to29 | 58342      |
| Senegal      | 1992           | FemalePregAge30to34 | 44354      |
| Senegal      | 1992           | FemalePregAge35to39 | 29396      |
| Senegal      | 1992           | FemalePregAge40to44 | 13933      |
| Senegal      | 1992           | FemalePregAge45to49 | 3326       |
| Senegal      | 1992           | MaleAge0to4         | 739914     |
| Senegal      | 1992           | MaleAge10to14       | 531276     |
| Senegal      | 1992           | MaleAge15to19       | 441986     |
| Senegal      | 1992           | MaleAge20to24       | 346242     |
| Senegal      | 1992           | MaleAge25to29       | 269080     |
| Senegal      | 1992           | MaleAge30to34       | 213476     |
| Senegal      | 1992           | MaleAge35to39       | 173067     |
| Senegal      | 1992           | MaleAge40to44       | 137616     |
| Senegal      | 1992           | MaleAge45to49       | 120033     |
| Senegal      | 1992           | MaleAge50to54       | 109010     |
| Senegal      | 1992           | MaleAge55to59       | 91446      |
| Senegal      | 1992           | MaleAge5to9         | 619943     |
| Senegal      | 1992           | MaleAge60to64       | 72035      |
| Senegal      | 1992           | MaleAge65to69       | 51864      |
| Senegal      | 1992           | MaleAge70to74       | 32753      |
| Senegal      | 1992           | MaleAge75to79       | 17111      |
| Senegal      | 1992           | MaleAge80to84       | 6643       |
| Senegal      | 1992           | MaleAge85to89       | 1666       |
| Senegal      | 1992           | MaleAge90to94       | 225        |
| Senegal      | 1992           | MaleAge95to99       | 15         |
| Senegal      | 1993           | FemaleAge0to4       | 735660     |
| Senegal      | 1993           | FemaleAge10to14     | 537553     |
| Senegal      | 1993           | FemaleAge15to19     | 356180     |
| Senegal      | 1993           | FemaleAge20to24     | 208525     |
| Senegal      | 1993           | FemaleAge25to29     | 150574     |
| Senegal      | 1993           | FemaleAge30to34     | 129704     |
| Senegal      | 1993           | FemaleAge35to39     | 122198     |
| Senegal      | 1993           | FemaleAge40to44     | 121245     |
| Senegal      | 1993           | FemaleAge45to49     | 120578     |
| Senegal      | 1993           | FemaleAge50to54     | 115593     |
| Senegal      | 1993           | FemaleAge55to59     | 98071      |
| Senegal      | 1993           | FemaleAge5to9       | 624879     |
| Senegal      | 1993           | FemaleAge60to64     | 79649      |
| Senegal      | 1993           | FemaleAge65to69     | 60321      |
| Senegal      | 1993           | FemaleAge70to74     | 40786      |
| Senegal      | 1993           | FemaleAge75to79     | 23098      |
| Senegal      | 1993           | FemaleAge80to84     | 9787       |
| Senegal      | 1993           | FemaleAge85to89     | 2729       |
| Senegal      | 1993           | FemaleAge90to94     | 438        |
| Senegal      | 1993           | FemaleAge95to99     | 42         |
| Senegal      | 1993           | FemaleAgeAbov e100  | 1          |

Dietary calcium and zinc deficiency risks are decreasing but remain prevalent

| Country | Reference year | Age/gender group    | Population |
|---------|----------------|---------------------|------------|
| Senegal | 1993           | FemaleLactAge15to19 | 56172      |
| Senegal | 1993           | FemaleLactAge20to24 | 88563      |
| Senegal | 1993           | FemaleLactAge25to29 | 77789      |
| Senegal | 1993           | FemaleLactAge30to34 | 59139      |
| Senegal | 1993           | FemaleLactAge35to39 | 39195      |
| Senegal | 1993           | FemaleLactAge40to44 | 18578      |
| Senegal | 1993           | FemaleLactAge45to49 | 4435       |
| Senegal | 1993           | FemalePregAge15to19 | 42129      |
| Senegal | 1993           | FemalePregAge20to24 | 66422      |
| Senegal | 1993           | FemalePregAge25to29 | 58342      |
| Senegal | 1993           | FemalePregAge30to34 | 44354      |
| Senegal | 1993           | FemalePregAge35to39 | 29396      |
| Senegal | 1993           | FemalePregAge40to44 | 13933      |
| Senegal | 1993           | FemalePregAge45to49 | 3326       |
| Senegal | 1993           | MaleAge0to4         | 754629     |
| Senegal | 1993           | MaleAge10to14       | 546920     |
| Senegal | 1993           | MaleAge15to19       | 459372     |
| Senegal | 1993           | MaleAge20to24       | 362185     |
| Senegal | 1993           | MaleAge25to29       | 279229     |
| Senegal | 1993           | MaleAge30to34       | 221132     |
| Senegal | 1993           | MaleAge35to39       | 178164     |
| Senegal | 1993           | MaleAge40to44       | 143196     |
| Senegal | 1993           | MaleAge45to49       | 119838     |
| Senegal | 1993           | MaleAge50to54       | 110587     |
| Senegal | 1993           | MaleAge55to59       | 93450      |
| Senegal | 1993           | MaleAge5to9         | 637858     |
| Senegal | 1993           | MaleAge60to64       | 73943      |
| Senegal | 1993           | MaleAge65to69       | 53714      |
| Senegal | 1993           | MaleAge70to74       | 34066      |
| Senegal | 1993           | MaleAge75to79       | 17867      |
| Senegal | 1993           | MaleAge80to84       | 6991       |
| Senegal | 1993           | MaleAge85to89       | 1774       |
| Senegal | 1993           | MaleAge90to94       | 262        |
| Senegal | 1993           | MaleAge95to99       | 23         |
| Senegal | 1994           | FemaleAge0to4       | 748856     |
| Senegal | 1994           | FemaleAge10to14     | 552579     |
| Senegal | 1994           | FemaleAge15to19     | 372783     |
| Senegal | 1994           | FemaleAge20to24     | 224900     |
| Senegal | 1994           | FemaleAge25to29     | 161875     |
| Senegal | 1994           | FemaleAge30to34     | 138004     |
| Senegal | 1994           | FemaleAge35to39     | 128828     |
| Senegal | 1994           | FemaleAge40to44     | 127673     |
| Senegal | 1994           | FemaleAge45to49     | 122599     |
| Senegal | 1994           | FemaleAge50to54     | 117789     |
| Senegal | 1994           | FemaleAge55to59     | 100487     |
| Senegal | 1994           | FemaleAge5to9       | 640910     |
| Senegal | 1994           | FemaleAge60to64     | 81945      |
| Senegal | 1994           | FemaleAge65to69     | 62420      |
| Senegal | 1994           | FemaleAge70to74     | 42385      |
| Senegal | 1994           | FemaleAge75to79     | 24101      |
| Senegal | 1994           | FemaleAge80to84     | 10166      |
| Senegal | 1994           | FemaleAge85to89     | 2787       |
| Senegal | 1994           | FemaleAge90to94     | 452        |
| Senegal | 1994           | FemaleAge95to99     | 46         |
| Senegal | 1994           | FemaleAgeAbove100   | 1          |
| Senegal | 1994           | FemaleLactAge15to19 | 56172      |
| Senegal | 1994           | FemaleLactAge20to24 | 88563      |
| Senegal | 1994           | FemaleLactAge25to29 | 77789      |
| Senegal | 1994           | FemaleLactAge30to34 | 59139      |
| Senegal | 1994           | FemaleLactAge35to39 | 39195      |
| Senegal | 1994           | FemaleLactAge40to44 | 18578      |
| Senegal | 1994           | FemaleLactAge45to49 | 4435       |
| Senegal | 1994           | FemalePregAge15to19 | 42129      |
| Senegal | 1994           | FemalePregAge20to24 | 66422      |
| Senegal | 1994           | FemalePregAge25to29 | 58342      |
| Senegal | 1994           | FemalePregAge30to34 | 44354      |
| Senegal | 1994           | FemalePregAge35to39 | 29396      |
| Senegal | 1994           | FemalePregAge40to44 | 13933      |
| Senegal | 1994           | FemalePregAge45to49 | 3326       |
| Senegal | 1994           | MaleAge0to4         | 767773     |
| Senegal | 1994           | MaleAge10to14       | 562376     |
| Senegal | 1994           | MaleAge15to19       | 476344     |
| Senegal | 1994           | MaleAge20to24       | 378426     |
| Senegal | 1994           | MaleAge25to29       | 290098     |
| Senegal | 1994           | MaleAge30to34       | 228948     |
| Senegal | 1994           | MaleAge35to39       | 183368     |
| Senegal | 1994           | MaleAge40to44       | 148761     |
| Senegal | 1994           | MaleAge45to49       | 120381     |
| Senegal | 1994           | MaleAge50to54       | 111714     |
| Senegal | 1994           | MaleAge55to59       | 95335      |
| Senegal | 1994           | MaleAge5to9         | 654060     |
| Senegal | 1994           | MaleAge60to64       | 75865      |
| Senegal | 1994           | MaleAge65to69       | 55587      |
| Senegal | 1994           | MaleAge70to74       | 35466      |
| Senegal | 1994           | MaleAge75to79       | 18606      |
| Senegal | 1994           | MaleAge80to84       | 7212       |
| Senegal | 1994           | MaleAge85to89       | 1792       |
| Senegal | 1994           | MaleAge90to94       | 268        |

Dietary calcium and zinc deficiency risks are decreasing but remain prevalent

| Country | Reference year | Age/gender group    | Population |
|---------|----------------|---------------------|------------|
| Senegal | 1994           | MaleAge95to99       | 25         |
| Senegal | 1995           | FemaleAge0to4       | 762072     |
| Senegal | 1995           | FemaleAge10to14     | 567490     |
| Senegal | 1995           | FemaleAge15to19     | 388741     |
| Senegal | 1995           | FemaleAge20to24     | 241292     |
| Senegal | 1995           | FemaleAge25to29     | 174254     |
| Senegal | 1995           | FemaleAge30to34     | 146565     |
| Senegal | 1995           | FemaleAge35to39     | 135628     |
| Senegal | 1995           | FemaleAge40to44     | 133893     |
| Senegal | 1995           | FemaleAge45to49     | 125676     |
| Senegal | 1995           | FemaleAge50to54     | 119612     |
| Senegal | 1995           | FemaleAge55to59     | 102884     |
| Senegal | 1995           | FemaleAge5to9       | 654798     |
| Senegal | 1995           | FemaleAge60to64     | 84320      |
| Senegal | 1995           | FemaleAge65to69     | 64619      |
| Senegal | 1995           | FemaleAge70to74     | 44145      |
| Senegal | 1995           | FemaleAge75to79     | 25160      |
| Senegal | 1995           | FemaleAge80to84     | 10490      |
| Senegal | 1995           | FemaleAge85to89     | 2731       |
| Senegal | 1995           | FemaleAge90to94     | 380        |
| Senegal | 1995           | FemaleAge95to99     | 26         |
| Senegal | 1995           | FemaleAgeAbove100   | 1          |
| Senegal | 1995           | FemaleLactAge15to19 | 56172      |
| Senegal | 1995           | FemaleLactAge20to24 | 88563      |
| Senegal | 1995           | FemaleLactAge25to29 | 77789      |
| Senegal | 1995           | FemaleLactAge30to34 | 59139      |
| Senegal | 1995           | FemaleLactAge35to39 | 39195      |
| Senegal | 1995           | FemaleLactAge40to44 | 18578      |
| Senegal | 1995           | FemaleLactAge45to49 | 4435       |
| Senegal | 1995           | FemalePregAge15to19 | 42129      |
| Senegal | 1995           | FemalePregAge20to24 | 66422      |
| Senegal | 1995           | FemalePregAge25to29 | 58342      |
| Senegal | 1995           | FemalePregAge30to34 | 44354      |
| Senegal | 1995           | FemalePregAge35to39 | 29396      |
| Senegal | 1995           | FemalePregAge40to44 | 13933      |
| Senegal | 1995           | FemalePregAge45to49 | 3326       |
| Senegal | 1995           | MaleAge0to4         | 780262     |
| Senegal | 1995           | MaleAge10to14       | 577209     |
| Senegal | 1995           | MaleAge15to19       | 492436     |
| Senegal | 1995           | MaleAge20to24       | 394552     |
| Senegal | 1995           | MaleAge25to29       | 301823     |
| Senegal | 1995           | MaleAge30to34       | 236770     |
| Senegal | 1995           | MaleAge35to39       | 188789     |
| Senegal | 1995           | MaleAge40to44       | 153745     |
| Senegal | 1995           | MaleAge45to49       | 122076     |
| Senegal | 1995           | MaleAge50to54       | 112235     |
| Senegal | 1995           | MaleAge55to59       | 97015      |
| Senegal | 1995           | MaleAge5to9         | 667294     |
| Senegal | 1995           | MaleAge60to64       | 77771      |
| Senegal | 1995           | MaleAge65to69       | 57437      |
| Senegal | 1995           | MaleAge70to74       | 36941      |
| Senegal | 1995           | MaleAge75to79       | 19358      |
| Senegal | 1995           | MaleAge80to84       | 7341       |
| Senegal | 1995           | MaleAge85to89       | 1705       |
| Senegal | 1995           | MaleAge90to94       | 205        |
| Senegal | 1995           | MaleAge95to99       | 12         |
| Senegal | 1996           | FemaleAge0to4       | 777388     |
| Senegal | 1996           | FemaleAge10to14     | 582184     |
| Senegal | 1996           | FemaleAge15to19     | 398725     |
| Senegal | 1996           | FemaleAge20to24     | 238586     |
| Senegal | 1996           | FemaleAge25to29     | 167337     |
| Senegal | 1996           | FemaleAge30to34     | 143134     |
| Senegal | 1996           | FemaleAge35to39     | 138398     |
| Senegal | 1996           | FemaleAge40to44     | 139067     |
| Senegal | 1996           | FemaleAge45to49     | 130061     |
| Senegal | 1996           | FemaleAge50to54     | 120757     |
| Senegal | 1996           | FemaleAge55to59     | 104803     |
| Senegal | 1996           | FemaleAge5to9       | 671653     |
| Senegal | 1996           | FemaleAge60to64     | 86083      |
| Senegal | 1996           | FemaleAge65to69     | 66105      |
| Senegal | 1996           | FemaleAge70to74     | 45340      |
| Senegal | 1996           | FemaleAge75to79     | 26101      |
| Senegal | 1996           | FemaleAge80to84     | 11286      |
| Senegal | 1996           | FemaleAge85to89     | 3183       |
| Senegal | 1996           | FemaleAge90to94     | 491        |
| Senegal | 1996           | FemaleAge95to99     | 29         |
| Senegal | 1996           | FemaleAgeAbove100   | 1          |
| Senegal | 1996           | FemaleLactAge15to19 | 58355      |
| Senegal | 1996           | FemaleLactAge20to24 | 98607      |
| Senegal | 1996           | FemaleLactAge25to29 | 88795      |
| Senegal | 1996           | FemaleLactAge30to34 | 65772      |
| Senegal | 1996           | FemaleLactAge35to39 | 41324      |
| Senegal | 1996           | FemaleLactAge40to44 | 18929      |
| Senegal | 1996           | FemaleLactAge45to49 | 4083       |
| Senegal | 1996           | FemalePregAge15to19 | 43766      |
| Senegal | 1996           | FemalePregAge20to24 | 73955      |
| Senegal | 1996           | FemalePregAge25to29 | 66596      |
| Senegal | 1996           | FemalePregAge30to34 | 49329      |



Dietary calcium and zinc deficiency risks are decreasing but remain prevalent

| Country | Reference year | Age/gender group    | Population |
|---------|----------------|---------------------|------------|
| Senegal | 1996           | FemalePregAge35to39 | 30993      |
| Senegal | 1996           | FemalePregAge40to44 | 14197      |
| Senegal | 1996           | FemalePregAge45to49 | 3062       |
| Senegal | 1996           | MaleAge0to4         | 796476     |
| Senegal | 1996           | MaleAge10to14       | 591980     |
| Senegal | 1996           | MaleAge15to19       | 504756     |
| Senegal | 1996           | MaleAge20to24       | 407041     |
| Senegal | 1996           | MaleAge25to29       | 311837     |
| Senegal | 1996           | MaleAge30to34       | 243003     |
| Senegal | 1996           | MaleAge35to39       | 193351     |
| Senegal | 1996           | MaleAge40to44       | 157583     |
| Senegal | 1996           | MaleAge45to49       | 124331     |
| Senegal | 1996           | MaleAge50to54       | 111770     |
| Senegal | 1996           | MaleAge55to59       | 98070      |
| Senegal | 1996           | MaleAge5to9         | 685094     |
| Senegal | 1996           | MaleAge60to64       | 79154      |
| Senegal | 1996           | MaleAge65to69       | 58746      |
| Senegal | 1996           | MaleAge70to74       | 38097      |
| Senegal | 1996           | MaleAge75to79       | 20240      |
| Senegal | 1996           | MaleAge80to84       | 7991       |
| Senegal | 1996           | MaleAge85to89       | 2025       |
| Senegal | 1996           | MaleAge90to94       | 268        |
| Senegal | 1996           | MaleAge95to99       | 11         |
| Senegal | 1997           | FemaleAge0to4       | 790609     |
| Senegal | 1997           | FemaleAge10to14     | 597721     |
| Senegal | 1997           | FemaleAge15to19     | 412252     |
| Senegal | 1997           | FemaleAge20to24     | 253598     |
| Senegal | 1997           | FemaleAge25to29     | 180595     |
| Senegal | 1997           | FemaleAge30to34     | 151487     |
| Senegal | 1997           | FemaleAge35to39     | 145050     |
| Senegal | 1997           | FemaleAge40to44     | 144750     |
| Senegal | 1997           | FemaleAge45to49     | 134908     |
| Senegal | 1997           | FemaleAge50to54     | 121584     |
| Senegal | 1997           | FemaleAge55to59     | 106868     |
| Senegal | 1997           | FemaleAge5to9       | 687238     |
| Senegal | 1997           | FemaleAge60to64     | 87974      |
| Senegal | 1997           | FemaleAge65to69     | 67715      |
| Senegal | 1997           | FemaleAge70to74     | 46633      |
| Senegal | 1997           | FemaleAge75to79     | 26972      |
| Senegal | 1997           | FemaleAge80to84     | 11919      |
| Senegal | 1997           | FemaleAge85to89     | 3514       |
| Senegal | 1997           | FemaleAge90to94     | 581        |
| Senegal | 1997           | FemaleAge95to99     | 45         |
| Senegal | 1997           | FemaleAgeAbove100   | 1          |
| Senegal | 1997           | FemaleLactAge15to19 | 58355      |
| Senegal | 1997           | FemaleLactAge20to24 | 98607      |
| Senegal | 1997           | FemaleLactAge25to29 | 88795      |
| Senegal | 1997           | FemaleLactAge30to34 | 65772      |
| Senegal | 1997           | FemaleLactAge35to39 | 41324      |
| Senegal | 1997           | FemaleLactAge40to44 | 18929      |
| Senegal | 1997           | FemaleLactAge45to49 | 4083       |
| Senegal | 1997           | FemalePregAge15to19 | 43766      |
| Senegal | 1997           | FemalePregAge20to24 | 73955      |
| Senegal | 1997           | FemalePregAge25to29 | 66596      |
| Senegal | 1997           | FemalePregAge30to34 | 49329      |
| Senegal | 1997           | FemalePregAge35to39 | 30993      |
| Senegal | 1997           | FemalePregAge40to44 | 14197      |
| Senegal | 1997           | FemalePregAge45to49 | 3062       |
| Senegal | 1997           | MaleAge0to4         | 809690     |
| Senegal | 1997           | MaleAge10to14       | 607649     |
| Senegal | 1997           | MaleAge15to19       | 517123     |
| Senegal | 1997           | MaleAge20to24       | 419608     |
| Senegal | 1997           | MaleAge25to29       | 322276     |
| Senegal | 1997           | MaleAge30to34       | 248943     |
| Senegal | 1997           | MaleAge35to39       | 197920     |
| Senegal | 1997           | MaleAge40to44       | 160859     |
| Senegal | 1997           | MaleAge45to49       | 127670     |
| Senegal | 1997           | MaleAge50to54       | 110690     |
| Senegal | 1997           | MaleAge55to59       | 99048      |
| Senegal | 1997           | MaleAge5to9         | 700942     |
| Senegal | 1997           | MaleAge60to64       | 80510      |
| Senegal | 1997           | MaleAge65to69       | 60014      |
| Senegal | 1997           | MaleAge70to74       | 39246      |
| Senegal | 1997           | MaleAge75to79       | 21005      |
| Senegal | 1997           | MaleAge80to84       | 8475       |
| Senegal | 1997           | MaleAge85to89       | 2258       |
| Senegal | 1997           | MaleAge90to94       | 326        |
| Senegal | 1997           | MaleAge95to99       | 22         |
| Senegal | 1998           | FemaleAge0to4       | 803008     |
| Senegal | 1998           | FemaleAge10to14     | 614053     |
| Senegal | 1998           | FemaleAge15to19     | 425945     |
| Senegal | 1998           | FemaleAge20to24     | 268721     |
| Senegal | 1998           | FemaleAge25to29     | 194594     |
| Senegal | 1998           | FemaleAge30to34     | 160326     |
| Senegal | 1998           | FemaleAge35to39     | 151935     |
| Senegal | 1998           | FemaleAge40to44     | 150421     |
| Senegal | 1998           | FemaleAge45to49     | 140519     |
| Senegal | 1998           | FemaleAge50to54     | 122524     |

Dietary calcium and zinc deficiency risks are decreasing but remain prevalent

| Country | Reference year | Age/gender group    | Population |
|---------|----------------|---------------------|------------|
| Senegal | 1998           | FemaleAge55to59     | 108964     |
| Senegal | 1998           | FemaleAge5to9       | 701128     |
| Senegal | 1998           | FemaleAge60to64     | 89997      |
| Senegal | 1998           | FemaleAge65to69     | 69485      |
| Senegal | 1998           | FemaleAge70to74     | 48076      |
| Senegal | 1998           | FemaleAge75to79     | 27849      |
| Senegal | 1998           | FemaleAge80to84     | 12376      |
| Senegal | 1998           | FemaleAge85to89     | 3688       |
| Senegal | 1998           | FemaleAge90to94     | 643        |
| Senegal | 1998           | FemaleAge95to99     | 64         |
| Senegal | 1998           | FemaleAgeAbove100   | 1          |
| Senegal | 1998           | FemaleLactAge15to19 | 58355      |
| Senegal | 1998           | FemaleLactAge20to24 | 98607      |
| Senegal | 1998           | FemaleLactAge25to29 | 88795      |
| Senegal | 1998           | FemaleLactAge30to34 | 65772      |
| Senegal | 1998           | FemaleLactAge35to39 | 41324      |
| Senegal | 1998           | FemaleLactAge40to44 | 18929      |
| Senegal | 1998           | FemaleLactAge45to49 | 4083       |
| Senegal | 1998           | FemalePregAge15to19 | 43766      |
| Senegal | 1998           | FemalePregAge20to24 | 73955      |
| Senegal | 1998           | FemalePregAge25to29 | 66596      |
| Senegal | 1998           | FemalePregAge30to34 | 49329      |
| Senegal | 1998           | FemalePregAge35to39 | 30993      |
| Senegal | 1998           | FemalePregAge40to44 | 14197      |
| Senegal | 1998           | FemalePregAge45to49 | 3062       |
| Senegal | 1998           | MaleAge0to4         | 821600     |
| Senegal | 1998           | MaleAge10to14       | 624252     |
| Senegal | 1998           | MaleAge15to19       | 530279     |
| Senegal | 1998           | MaleAge20to24       | 432532     |
| Senegal | 1998           | MaleAge25to29       | 333151     |
| Senegal | 1998           | MaleAge30to34       | 254998     |
| Senegal | 1998           | MaleAge35to39       | 202561     |
| Senegal | 1998           | MaleAge40to44       | 163836     |
| Senegal | 1998           | MaleAge45to49       | 131685     |
| Senegal | 1998           | MaleAge50to54       | 109571     |
| Senegal | 1998           | MaleAge55to59       | 99866      |
| Senegal | 1998           | MaleAge5to9         | 714511     |
| Senegal | 1998           | MaleAge60to64       | 81847      |
| Senegal | 1998           | MaleAge65to69       | 61310      |
| Senegal | 1998           | MaleAge70to74       | 40444      |
| Senegal | 1998           | MaleAge75to79       | 21707      |
| Senegal | 1998           | MaleAge80to84       | 8773       |
| Senegal | 1998           | MaleAge85to89       | 2378       |
| Senegal | 1998           | MaleAge90to94       | 368        |
| Senegal | 1998           | MaleAge95to99       | 34         |
| Senegal | 1998           | MaleAgeAbove100     | 1          |
| Senegal | 1999           | FemaleAge0to4       | 816406     |
| Senegal | 1999           | FemaleAge10to14     | 630546     |
| Senegal | 1999           | FemaleAge15to19     | 440411     |
| Senegal | 1999           | FemaleAge20to24     | 283899     |
| Senegal | 1999           | FemaleAge25to29     | 209072     |
| Senegal | 1999           | FemaleAge30to34     | 170092     |
| Senegal | 1999           | FemaleAge35to39     | 159126     |
| Senegal | 1999           | FemaleAge40to44     | 156251     |
| Senegal | 1999           | FemaleAge45to49     | 146372     |
| Senegal | 1999           | FemaleAge50to54     | 124225     |
| Senegal | 1999           | FemaleAge55to59     | 110907     |
| Senegal | 1999           | FemaleAge5to9       | 713411     |
| Senegal | 1999           | FemaleAge60to64     | 92153      |
| Senegal | 1999           | FemaleAge65to69     | 71450      |
| Senegal | 1999           | FemaleAge70to74     | 49695      |
| Senegal | 1999           | FemaleAge75to79     | 28795      |
| Senegal | 1999           | FemaleAge80to84     | 12682      |
| Senegal | 1999           | FemaleAge85to89     | 3699       |
| Senegal | 1999           | FemaleAge90to94     | 648        |
| Senegal | 1999           | FemaleAge95to99     | 68         |
| Senegal | 1999           | FemaleAgeAbove100   | 1          |
| Senegal | 1999           | FemaleLactAge15to19 | 58355      |
| Senegal | 1999           | FemaleLactAge20to24 | 98607      |
| Senegal | 1999           | FemaleLactAge25to29 | 88795      |
| Senegal | 1999           | FemaleLactAge30to34 | 65772      |
| Senegal | 1999           | FemaleLactAge35to39 | 41324      |
| Senegal | 1999           | FemaleLactAge40to44 | 18929      |
| Senegal | 1999           | FemaleLactAge45to49 | 4083       |
| Senegal | 1999           | FemalePregAge15to19 | 43766      |
| Senegal | 1999           | FemalePregAge20to24 | 73955      |
| Senegal | 1999           | FemalePregAge25to29 | 66596      |
| Senegal | 1999           | FemalePregAge30to34 | 49329      |
| Senegal | 1999           | FemalePregAge35to39 | 30993      |
| Senegal | 1999           | FemalePregAge40to44 | 14197      |
| Senegal | 1999           | FemalePregAge45to49 | 3062       |
| Senegal | 1999           | MaleAge0to4         | 834664     |
| Senegal | 1999           | MaleAge10to14       | 641278     |
| Senegal | 1999           | MaleAge15to19       | 545034     |
| Senegal | 1999           | MaleAge20to24       | 446116     |
| Senegal | 1999           | MaleAge25to29       | 344535     |
| Senegal | 1999           | MaleAge30to34       | 261761     |
| Senegal | 1999           | MaleAge35to39       | 207314     |

Dietary calcium and zinc deficiency risks are decreasing but remain prevalent

| Country | Reference year | Age/gender group    | Population |
|---------|----------------|---------------------|------------|
| Senegal | 1999           | MaleAge40to44       | 166931     |
| Senegal | 1999           | MaleAge45to49       | 135717     |
| Senegal | 1999           | MaleAge50to54       | 109251     |
| Senegal | 1999           | MaleAge55to59       | 100363     |
| Senegal | 1999           | MaleAge5to9         | 726223     |
| Senegal | 1999           | MaleAge60to64       | 83182      |
| Senegal | 1999           | MaleAge65to69       | 62717      |
| Senegal | 1999           | MaleAge70to74       | 41718      |
| Senegal | 1999           | MaleAge75to79       | 22403      |
| Senegal | 1999           | MaleAge80to84       | 8914       |
| Senegal | 1999           | MaleAge85to89       | 2364       |
| Senegal | 1999           | MaleAge90to94       | 372        |
| Senegal | 1999           | MaleAge95to99       | 35         |
| Senegal | 1999           | MaleAgeAbov e100    | 1          |
| Serbia  | 1992           | FemaleAge0to4       | 363516     |
| Serbia  | 1992           | FemaleAge10to14     | 405716     |
| Serbia  | 1992           | FemaleAge15to19     | 357126     |
| Serbia  | 1992           | FemaleAge20to24     | 258046     |
| Serbia  | 1992           | FemaleAge25to29     | 260600     |
| Serbia  | 1992           | FemaleAge30to34     | 314515     |
| Serbia  | 1992           | FemaleAge35to39     | 384523     |
| Serbia  | 1992           | FemaleAge40to44     | 376167     |
| Serbia  | 1992           | FemaleAge45to49     | 270828     |
| Serbia  | 1992           | FemaleAge50to54     | 257978     |
| Serbia  | 1992           | FemaleAge55to59     | 296571     |
| Serbia  | 1992           | FemaleAge5to9       | 391142     |
| Serbia  | 1992           | FemaleAge60to64     | 294902     |
| Serbia  | 1992           | FemaleAge65to69     | 250971     |
| Serbia  | 1992           | FemaleAge70to74     | 140928     |
| Serbia  | 1992           | FemaleAge75to79     | 87629      |
| Serbia  | 1992           | FemaleAge80to84     | 69330      |
| Serbia  | 1992           | FemaleAge85to89     | 32834      |
| Serbia  | 1992           | FemaleAge90to94     | 9527       |
| Serbia  | 1992           | FemaleAge95to99     | 1336       |
| Serbia  | 1992           | FemaleAgeAbov e100  | 78         |
| Serbia  | 1992           | FemaleLactAge15to19 | 14302      |
| Serbia  | 1992           | FemaleLactAge20to24 | 47674      |
| Serbia  | 1992           | FemaleLactAge25to29 | 42005      |
| Serbia  | 1992           | FemaleLactAge30to34 | 23426      |
| Serbia  | 1992           | FemaleLactAge35to39 | 9005       |
| Serbia  | 1992           | FemaleLactAge40to44 | 1908       |
| Serbia  | 1992           | FemaleLactAge45to49 | 217        |
| Serbia  | 1992           | FemalePregAge15to19 | 10726      |
| Serbia  | 1992           | FemalePregAge20to24 | 35756      |
| Serbia  | 1992           | FemalePregAge25to29 | 31503      |
| Serbia  | 1992           | FemalePregAge30to34 | 17569      |
| Serbia  | 1992           | FemalePregAge35to39 | 6754       |
| Serbia  | 1992           | FemalePregAge40to44 | 1431       |
| Serbia  | 1992           | FemalePregAge45to49 | 163        |
| Serbia  | 1992           | MaleAge0to4         | 383561     |
| Serbia  | 1992           | MaleAge10to14       | 420781     |
| Serbia  | 1992           | MaleAge15to19       | 396492     |
| Serbia  | 1992           | MaleAge20to24       | 354410     |
| Serbia  | 1992           | MaleAge25to29       | 343583     |
| Serbia  | 1992           | MaleAge30to34       | 361492     |
| Serbia  | 1992           | MaleAge35to39       | 404246     |
| Serbia  | 1992           | MaleAge40to44       | 384565     |
| Serbia  | 1992           | MaleAge45to49       | 271557     |
| Serbia  | 1992           | MaleAge50to54       | 248447     |
| Serbia  | 1992           | MaleAge55to59       | 279099     |
| Serbia  | 1992           | MaleAge5to9         | 408191     |
| Serbia  | 1992           | MaleAge60to64       | 263166     |
| Serbia  | 1992           | MaleAge65to69       | 194682     |
| Serbia  | 1992           | MaleAge70to74       | 97867      |
| Serbia  | 1992           | MaleAge75to79       | 56641      |
| Serbia  | 1992           | MaleAge80to84       | 43270      |
| Serbia  | 1992           | MaleAge85to89       | 19425      |
| Serbia  | 1992           | MaleAge90to94       | 4630       |
| Serbia  | 1992           | MaleAge95to99       | 572        |
| Serbia  | 1992           | MaleAgeAbov e100    | 28         |
| Serbia  | 1993           | FemaleAge0to4       | 360683     |
| Serbia  | 1993           | FemaleAge10to14     | 408641     |
| Serbia  | 1993           | FemaleAge15to19     | 369873     |
| Serbia  | 1993           | FemaleAge20to24     | 268912     |
| Serbia  | 1993           | FemaleAge25to29     | 261570     |
| Serbia  | 1993           | FemaleAge30to34     | 313415     |
| Serbia  | 1993           | FemaleAge35to39     | 378151     |
| Serbia  | 1993           | FemaleAge40to44     | 392276     |
| Serbia  | 1993           | FemaleAge45to49     | 296417     |
| Serbia  | 1993           | FemaleAge50to54     | 248011     |
| Serbia  | 1993           | FemaleAge55to59     | 295339     |
| Serbia  | 1993           | FemaleAge5to9       | 390617     |
| Serbia  | 1993           | FemaleAge60to64     | 298071     |
| Serbia  | 1993           | FemaleAge65to69     | 260626     |
| Serbia  | 1993           | FemaleAge70to74     | 163557     |
| Serbia  | 1993           | FemaleAge75to79     | 82753      |
| Serbia  | 1993           | FemaleAge80to84     | 69728      |
| Serbia  | 1993           | FemaleAge85to89     | 33770      |

Dietary calcium and zinc deficiency risks are decreasing but remain prevalent

| Country | Reference year | Age/gender group    | Population |
|---------|----------------|---------------------|------------|
| Serbia  | 1993           | FemaleAge90to94     | 9764       |
| Serbia  | 1993           | FemaleAge95to99     | 1621       |
| Serbia  | 1993           | FemaleAgeAbove100   | 77         |
| Serbia  | 1993           | FemaleLactAge15to19 | 14302      |
| Serbia  | 1993           | FemaleLactAge20to24 | 47674      |
| Serbia  | 1993           | FemaleLactAge25to29 | 42005      |
| Serbia  | 1993           | FemaleLactAge30to34 | 23426      |
| Serbia  | 1993           | FemaleLactAge35to39 | 9005       |
| Serbia  | 1993           | FemaleLactAge40to44 | 1908       |
| Serbia  | 1993           | FemaleLactAge45to49 | 217        |
| Serbia  | 1993           | FemalePregAge15to19 | 10726      |
| Serbia  | 1993           | FemalePregAge20to24 | 35756      |
| Serbia  | 1993           | FemalePregAge25to29 | 31503      |
| Serbia  | 1993           | FemalePregAge30to34 | 17569      |
| Serbia  | 1993           | FemalePregAge35to39 | 6754       |
| Serbia  | 1993           | FemalePregAge40to44 | 1431       |
| Serbia  | 1993           | FemalePregAge45to49 | 163        |
| Serbia  | 1993           | MaleAge0to4         | 378939     |
| Serbia  | 1993           | MaleAge10to14       | 423261     |
| Serbia  | 1993           | MaleAge15to19       | 409029     |
| Serbia  | 1993           | MaleAge20to24       | 365131     |
| Serbia  | 1993           | MaleAge25to29       | 344904     |
| Serbia  | 1993           | MaleAge30to34       | 360273     |
| Serbia  | 1993           | MaleAge35to39       | 397534     |
| Serbia  | 1993           | MaleAge40to44       | 399401     |
| Serbia  | 1993           | MaleAge45to49       | 298223     |
| Serbia  | 1993           | MaleAge50to54       | 239423     |
| Serbia  | 1993           | MaleAge55to59       | 277402     |
| Serbia  | 1993           | MaleAge5to9         | 408217     |
| Serbia  | 1993           | MaleAge60to64       | 266964     |
| Serbia  | 1993           | MaleAge65to69       | 206934     |
| Serbia  | 1993           | MaleAge70to74       | 112330     |
| Serbia  | 1993           | MaleAge75to79       | 53677      |
| Serbia  | 1993           | MaleAge80to84       | 42384      |
| Serbia  | 1993           | MaleAge85to89       | 19959      |
| Serbia  | 1993           | MaleAge90to94       | 4792       |
| Serbia  | 1993           | MaleAge95to99       | 660        |
| Serbia  | 1993           | MaleAgeAbove100     | 27         |
| Serbia  | 1994           | FemaleAge0to4       | 356421     |
| Serbia  | 1994           | FemaleAge10to14     | 409527     |
| Serbia  | 1994           | FemaleAge15to19     | 380463     |
| Serbia  | 1994           | FemaleAge20to24     | 280180     |
| Serbia  | 1994           | FemaleAge25to29     | 263662     |
| Serbia  | 1994           | FemaleAge30to34     | 311777     |
| Serbia  | 1994           | FemaleAge35to39     | 370783     |
| Serbia  | 1994           | FemaleAge40to44     | 403947     |
| Serbia  | 1994           | FemaleAge45to49     | 321651     |
| Serbia  | 1994           | FemaleAge50to54     | 243008     |
| Serbia  | 1994           | FemaleAge55to59     | 291773     |
| Serbia  | 1994           | FemaleAge5to9       | 388796     |
| Serbia  | 1994           | FemaleAge60to64     | 299728     |
| Serbia  | 1994           | FemaleAge65to69     | 269087     |
| Serbia  | 1994           | FemaleAge70to74     | 184576     |
| Serbia  | 1994           | FemaleAge75to79     | 82937      |
| Serbia  | 1994           | FemaleAge80to84     | 69153      |
| Serbia  | 1994           | FemaleAge85to89     | 33652      |
| Serbia  | 1994           | FemaleAge90to94     | 9592       |
| Serbia  | 1994           | FemaleAge95to99     | 1707       |
| Serbia  | 1994           | FemaleAgeAbove100   | 77         |
| Serbia  | 1994           | FemaleLactAge15to19 | 14302      |
| Serbia  | 1994           | FemaleLactAge20to24 | 47674      |
| Serbia  | 1994           | FemaleLactAge25to29 | 42005      |
| Serbia  | 1994           | FemaleLactAge30to34 | 23426      |
| Serbia  | 1994           | FemaleLactAge35to39 | 9005       |
| Serbia  | 1994           | FemaleLactAge40to44 | 1908       |
| Serbia  | 1994           | FemaleLactAge45to49 | 217        |
| Serbia  | 1994           | FemalePregAge15to19 | 10726      |
| Serbia  | 1994           | FemalePregAge20to24 | 35756      |
| Serbia  | 1994           | FemalePregAge25to29 | 31503      |
| Serbia  | 1994           | FemalePregAge30to34 | 17569      |
| Serbia  | 1994           | FemalePregAge35to39 | 6754       |
| Serbia  | 1994           | FemalePregAge40to44 | 1431       |
| Serbia  | 1994           | FemalePregAge45to49 | 163        |
| Serbia  | 1994           | MaleAge0to4         | 372847     |
| Serbia  | 1994           | MaleAge10to14       | 423748     |
| Serbia  | 1994           | MaleAge15to19       | 419319     |
| Serbia  | 1994           | MaleAge20to24       | 376162     |
| Serbia  | 1994           | MaleAge25to29       | 347282     |
| Serbia  | 1994           | MaleAge30to34       | 358570     |
| Serbia  | 1994           | MaleAge35to39       | 389889     |
| Serbia  | 1994           | MaleAge40to44       | 409834     |
| Serbia  | 1994           | MaleAge45to49       | 324065     |
| Serbia  | 1994           | MaleAge50to54       | 235575     |
| Serbia  | 1994           | MaleAge55to59       | 273817     |
| Serbia  | 1994           | MaleAge5to9         | 406938     |
| Serbia  | 1994           | MaleAge60to64       | 269319     |
| Serbia  | 1994           | MaleAge65to69       | 217700     |
| Serbia  | 1994           | MaleAge70to74       | 126395     |

Dietary calcium and zinc deficiency risks are decreasing but remain prevalent

| Country | Reference year | Age/gender group    | Population |
|---------|----------------|---------------------|------------|
| Serbia  | 1994           | MaleAge75to79       | 54011      |
| Serbia  | 1994           | MaleAge80to84       | 40908      |
| Serbia  | 1994           | MaleAge85to89       | 19384      |
| Serbia  | 1994           | MaleAge90to94       | 4703       |
| Serbia  | 1994           | MaleAge95to99       | 704        |
| Serbia  | 1994           | MaleAgeAbove100     | 27         |
| Serbia  | 1995           | FemaleAge0to4       | 349271     |
| Serbia  | 1995           | FemaleAge10to14     | 408350     |
| Serbia  | 1995           | FemaleAge15to19     | 387447     |
| Serbia  | 1995           | FemaleAge20to24     | 290605     |
| Serbia  | 1995           | FemaleAge25to29     | 266807     |
| Serbia  | 1995           | FemaleAge30to34     | 308710     |
| Serbia  | 1995           | FemaleAge35to39     | 363649     |
| Serbia  | 1995           | FemaleAge40to44     | 409755     |
| Serbia  | 1995           | FemaleAge45to49     | 342925     |
| Serbia  | 1995           | FemaleAge50to54     | 245487     |
| Serbia  | 1995           | FemaleAge55to59     | 284869     |
| Serbia  | 1995           | FemaleAge5to9       | 384894     |
| Serbia  | 1995           | FemaleAge60to64     | 299555     |
| Serbia  | 1995           | FemaleAge65to69     | 276224     |
| Serbia  | 1995           | FemaleAge70to74     | 201453     |
| Serbia  | 1995           | FemaleAge75to79     | 89698      |
| Serbia  | 1995           | FemaleAge80to84     | 67227      |
| Serbia  | 1995           | FemaleAge85to89     | 32790      |
| Serbia  | 1995           | FemaleAge90to94     | 8953       |
| Serbia  | 1995           | FemaleAge95to99     | 1366       |
| Serbia  | 1995           | FemaleAgeAbove100   | 80         |
| Serbia  | 1995           | FemaleLactAge15to19 | 14302      |
| Serbia  | 1995           | FemaleLactAge20to24 | 47674      |
| Serbia  | 1995           | FemaleLactAge25to29 | 42005      |
| Serbia  | 1995           | FemaleLactAge30to34 | 23426      |
| Serbia  | 1995           | FemaleLactAge35to39 | 9005       |
| Serbia  | 1995           | FemaleLactAge40to44 | 1908       |
| Serbia  | 1995           | FemaleLactAge45to49 | 217        |
| Serbia  | 1995           | FemalePregAge15to19 | 10726      |
| Serbia  | 1995           | FemalePregAge20to24 | 35756      |
| Serbia  | 1995           | FemalePregAge25to29 | 31503      |
| Serbia  | 1995           | FemalePregAge30to34 | 17569      |
| Serbia  | 1995           | FemalePregAge35to39 | 6754       |
| Serbia  | 1995           | FemalePregAge40to44 | 1431       |
| Serbia  | 1995           | FemalePregAge45to49 | 163        |
| Serbia  | 1995           | MaleAge0to4         | 364414     |
| Serbia  | 1995           | MaleAge10to14       | 422347     |
| Serbia  | 1995           | MaleAge15to19       | 425835     |
| Serbia  | 1995           | MaleAge20to24       | 386257     |
| Serbia  | 1995           | MaleAge25to29       | 350532     |
| Serbia  | 1995           | MaleAge30to34       | 355497     |
| Serbia  | 1995           | MaleAge35to39       | 382437     |
| Serbia  | 1995           | MaleAge40to44       | 414618     |
| Serbia  | 1995           | MaleAge45to49       | 345335     |
| Serbia  | 1995           | MaleAge50to54       | 239271     |
| Serbia  | 1995           | MaleAge55to59       | 267505     |
| Serbia  | 1995           | MaleAge5to9         | 403163     |
| Serbia  | 1995           | MaleAge60to64       | 269988     |
| Serbia  | 1995           | MaleAge65to69       | 226310     |
| Serbia  | 1995           | MaleAge70to74       | 138938     |
| Serbia  | 1995           | MaleAge75to79       | 58283      |
| Serbia  | 1995           | MaleAge80to84       | 38789      |
| Serbia  | 1995           | MaleAge85to89       | 17919      |
| Serbia  | 1995           | MaleAge90to94       | 4229       |
| Serbia  | 1995           | MaleAge95to99       | 529        |
| Serbia  | 1995           | MaleAgeAbove100     | 28         |
| Serbia  | 1996           | FemaleAge0to4       | 341387     |
| Serbia  | 1996           | FemaleAge10to14     | 404838     |
| Serbia  | 1996           | FemaleAge15to19     | 395650     |
| Serbia  | 1996           | FemaleAge20to24     | 306171     |
| Serbia  | 1996           | FemaleAge25to29     | 274123     |
| Serbia  | 1996           | FemaleAge30to34     | 306754     |
| Serbia  | 1996           | FemaleAge35to39     | 356072     |
| Serbia  | 1996           | FemaleAge40to44     | 409838     |
| Serbia  | 1996           | FemaleAge45to49     | 361784     |
| Serbia  | 1996           | FemaleAge50to54     | 253683     |
| Serbia  | 1996           | FemaleAge55to59     | 273507     |
| Serbia  | 1996           | FemaleAge5to9       | 378505     |
| Serbia  | 1996           | FemaleAge60to64     | 296317     |
| Serbia  | 1996           | FemaleAge65to69     | 279149     |
| Serbia  | 1996           | FemaleAge70to74     | 213067     |
| Serbia  | 1996           | FemaleAge75to79     | 99752      |
| Serbia  | 1996           | FemaleAge80to84     | 63917      |
| Serbia  | 1996           | FemaleAge85to89     | 34551      |
| Serbia  | 1996           | FemaleAge90to94     | 10452      |
| Serbia  | 1996           | FemaleAge95to99     | 1502       |
| Serbia  | 1996           | FemaleAgeAbove100   | 85         |
| Serbia  | 1996           | FemaleLactAge15to19 | 11350      |
| Serbia  | 1996           | FemaleLactAge20to24 | 43987      |
| Serbia  | 1996           | FemaleLactAge25to29 | 39957      |
| Serbia  | 1996           | FemaleLactAge30to34 | 22110      |
| Serbia  | 1996           | FemaleLactAge35to39 | 8810       |

Dietary calcium and zinc deficiency risks are decreasing but remain prevalent

| Country | Reference year | Age/gender group    | Population |
|---------|----------------|---------------------|------------|
| Serbia  | 1996           | FemaleLactAge40to44 | 1885       |
| Serbia  | 1996           | FemaleLactAge45to49 | 195        |
| Serbia  | 1996           | FemalePregAge15to19 | 8512       |
| Serbia  | 1996           | FemalePregAge20to24 | 32991      |
| Serbia  | 1996           | FemalePregAge25to29 | 29968      |
| Serbia  | 1996           | FemalePregAge30to34 | 16582      |
| Serbia  | 1996           | FemalePregAge35to39 | 6608       |
| Serbia  | 1996           | FemalePregAge40to44 | 1414       |
| Serbia  | 1996           | FemalePregAge45to49 | 146        |
| Serbia  | 1996           | MaleAge0to4         | 354898     |
| Serbia  | 1996           | MaleAge10to14       | 419087     |
| Serbia  | 1996           | MaleAge15to19       | 428429     |
| Serbia  | 1996           | MaleAge20to24       | 395156     |
| Serbia  | 1996           | MaleAge25to29       | 354351     |
| Serbia  | 1996           | MaleAge30to34       | 351397     |
| Serbia  | 1996           | MaleAge35to39       | 374166     |
| Serbia  | 1996           | MaleAge40to44       | 413643     |
| Serbia  | 1996           | MaleAge45to49       | 363368     |
| Serbia  | 1996           | MaleAge50to54       | 248336     |
| Serbia  | 1996           | MaleAge55to59       | 256364     |
| Serbia  | 1996           | MaleAge5to9         | 396638     |
| Serbia  | 1996           | MaleAge60to64       | 266929     |
| Serbia  | 1996           | MaleAge65to69       | 231154     |
| Serbia  | 1996           | MaleAge70to74       | 149462     |
| Serbia  | 1996           | MaleAge75to79       | 64347      |
| Serbia  | 1996           | MaleAge80to84       | 36919      |
| Serbia  | 1996           | MaleAge85to89       | 18838      |
| Serbia  | 1996           | MaleAge90to94       | 5139       |
| Serbia  | 1996           | MaleAge95to99       | 588        |
| Serbia  | 1996           | MaleAgeAbove100     | 30         |
| Serbia  | 1997           | FemaleAge0to4       | 331786     |
| Serbia  | 1997           | FemaleAge10to14     | 399280     |
| Serbia  | 1997           | FemaleAge15to19     | 394721     |
| Serbia  | 1997           | FemaleAge20to24     | 314203     |
| Serbia  | 1997           | FemaleAge25to29     | 278774     |
| Serbia  | 1997           | FemaleAge30to34     | 301862     |
| Serbia  | 1997           | FemaleAge35to39     | 348206     |
| Serbia  | 1997           | FemaleAge40to44     | 402854     |
| Serbia  | 1997           | FemaleAge45to49     | 377802     |
| Serbia  | 1997           | FemaleAge50to54     | 269184     |
| Serbia  | 1997           | FemaleAge55to59     | 258382     |
| Serbia  | 1997           | FemaleAge5to9       | 370396     |
| Serbia  | 1997           | FemaleAge60to64     | 292178     |
| Serbia  | 1997           | FemaleAge65to69     | 279871     |
| Serbia  | 1997           | FemaleAge70to74     | 221692     |
| Serbia  | 1997           | FemaleAge75to79     | 113935     |
| Serbia  | 1997           | FemaleAge80to84     | 58564      |
| Serbia  | 1997           | FemaleAge85to89     | 35966      |
| Serbia  | 1997           | FemaleAge90to94     | 11442      |
| Serbia  | 1997           | FemaleAge95to99     | 1667       |
| Serbia  | 1997           | FemaleAgeAbove100   | 93         |
| Serbia  | 1997           | FemaleLactAge15to19 | 11350      |
| Serbia  | 1997           | FemaleLactAge20to24 | 43987      |
| Serbia  | 1997           | FemaleLactAge25to29 | 39957      |
| Serbia  | 1997           | FemaleLactAge30to34 | 22110      |
| Serbia  | 1997           | FemaleLactAge35to39 | 8810       |
| Serbia  | 1997           | FemaleLactAge40to44 | 1885       |
| Serbia  | 1997           | FemaleLactAge45to49 | 195        |
| Serbia  | 1997           | FemalePregAge15to19 | 8512       |
| Serbia  | 1997           | FemalePregAge20to24 | 32991      |
| Serbia  | 1997           | FemalePregAge25to29 | 29968      |
| Serbia  | 1997           | FemalePregAge30to34 | 16582      |
| Serbia  | 1997           | FemalePregAge35to39 | 6608       |
| Serbia  | 1997           | FemalePregAge40to44 | 1414       |
| Serbia  | 1997           | FemalePregAge45to49 | 146        |
| Serbia  | 1997           | MaleAge0to4         | 345013     |
| Serbia  | 1997           | MaleAge10to14       | 413942     |
| Serbia  | 1997           | MaleAge15to19       | 426832     |
| Serbia  | 1997           | MaleAge20to24       | 402848     |
| Serbia  | 1997           | MaleAge25to29       | 358854     |
| Serbia  | 1997           | MaleAge30to34       | 346749     |
| Serbia  | 1997           | MaleAge35to39       | 365934     |
| Serbia  | 1997           | MaleAge40to44       | 405873     |
| Serbia  | 1997           | MaleAge45to49       | 378057     |
| Serbia  | 1997           | MaleAge50to54       | 264643     |
| Serbia  | 1997           | MaleAge55to59       | 241952     |
| Serbia  | 1997           | MaleAge5to9         | 387768     |
| Serbia  | 1997           | MaleAge60to64       | 262648     |
| Serbia  | 1997           | MaleAge65to69       | 233384     |
| Serbia  | 1997           | MaleAge70to74       | 158943     |
| Serbia  | 1997           | MaleAge75to79       | 72216      |
| Serbia  | 1997           | MaleAge80to84       | 33897      |
| Serbia  | 1997           | MaleAge85to89       | 19394      |
| Serbia  | 1997           | MaleAge90to94       | 5770       |
| Serbia  | 1997           | MaleAge95to99       | 660        |
| Serbia  | 1997           | MaleAgeAbove100     | 33         |
| Serbia  | 1998           | FemaleAge0to4       | 320820     |
| Serbia  | 1998           | FemaleAge10to14     | 392163     |

Dietary calcium and zinc deficiency risks are decreasing but remain prevalent

| Country | Reference year | Age/gender group    | Population |
|---------|----------------|---------------------|------------|
| Serbia  | 1998           | FemaleAge15to19     | 390721     |
| Serbia  | 1998           | FemaleAge20to24     | 320687     |
| Serbia  | 1998           | FemaleAge25to29     | 284200     |
| Serbia  | 1998           | FemaleAge30to34     | 297220     |
| Serbia  | 1998           | FemaleAge35to39     | 340595     |
| Serbia  | 1998           | FemaleAge40to44     | 391138     |
| Serbia  | 1998           | FemaleAge45to49     | 390146     |
| Serbia  | 1998           | FemaleAge50to54     | 289325     |
| Serbia  | 1998           | FemaleAge55to59     | 243056     |
| Serbia  | 1998           | FemaleAge5to9       | 361082     |
| Serbia  | 1998           | FemaleAge60to64     | 286714     |
| Serbia  | 1998           | FemaleAge65to69     | 278859     |
| Serbia  | 1998           | FemaleAge70to74     | 228168     |
| Serbia  | 1998           | FemaleAge75to79     | 129618     |
| Serbia  | 1998           | FemaleAge80to84     | 53848      |
| Serbia  | 1998           | FemaleAge85to89     | 36397      |
| Serbia  | 1998           | FemaleAge90to94     | 11731      |
| Serbia  | 1998           | FemaleAge95to99     | 1837       |
| Serbia  | 1998           | FemaleAgeAbov e100  | 102        |
| Serbia  | 1998           | FemaleLactAge15to19 | 11350      |
| Serbia  | 1998           | FemaleLactAge20to24 | 43987      |
| Serbia  | 1998           | FemaleLactAge25to29 | 39957      |
| Serbia  | 1998           | FemaleLactAge30to34 | 22110      |
| Serbia  | 1998           | FemaleLactAge35to39 | 8810       |
| Serbia  | 1998           | FemaleLactAge40to44 | 1885       |
| Serbia  | 1998           | FemaleLactAge45to49 | 195        |
| Serbia  | 1998           | FemalePregAge15to19 | 8512       |
| Serbia  | 1998           | FemalePregAge20to24 | 32991      |
| Serbia  | 1998           | FemalePregAge25to29 | 29968      |
| Serbia  | 1998           | FemalePregAge30to34 | 16582      |
| Serbia  | 1998           | FemalePregAge35to39 | 6608       |
| Serbia  | 1998           | FemalePregAge40to44 | 1414       |
| Serbia  | 1998           | FemalePregAge45to49 | 146        |
| Serbia  | 1998           | MaleAge0to4         | 334680     |
| Serbia  | 1998           | MaleAge10to14       | 407303     |
| Serbia  | 1998           | MaleAge15to19       | 422099     |
| Serbia  | 1998           | MaleAge20to24       | 408869     |
| Serbia  | 1998           | MaleAge25to29       | 363950     |
| Serbia  | 1998           | MaleAge30to34       | 342384     |
| Serbia  | 1998           | MaleAge35to39       | 357980     |
| Serbia  | 1998           | MaleAge40to44       | 393585     |
| Serbia  | 1998           | MaleAge45to49       | 388799     |
| Serbia  | 1998           | MaleAge50to54       | 285248     |
| Serbia  | 1998           | MaleAge55to59       | 227775     |
| Serbia  | 1998           | MaleAge5to9         | 377154     |
| Serbia  | 1998           | MaleAge60to64       | 257069     |
| Serbia  | 1998           | MaleAge65to69       | 233490     |
| Serbia  | 1998           | MaleAge70to74       | 167218     |
| Serbia  | 1998           | MaleAge75to79       | 80771      |
| Serbia  | 1998           | MaleAge80to84       | 31185      |
| Serbia  | 1998           | MaleAge85to89       | 19225      |
| Serbia  | 1998           | MaleAge90to94       | 5951       |
| Serbia  | 1998           | MaleAge95to99       | 750        |
| Serbia  | 1998           | MaleAgeAbov e100    | 36         |
| Serbia  | 1999           | FemaleAge0to4       | 309643     |
| Serbia  | 1999           | FemaleAge10to14     | 384066     |
| Serbia  | 1999           | FemaleAge15to19     | 385163     |
| Serbia  | 1999           | FemaleAge20to24     | 325104     |
| Serbia  | 1999           | FemaleAge25to29     | 290110     |
| Serbia  | 1999           | FemaleAge30to34     | 294073     |
| Serbia  | 1999           | FemaleAge35to39     | 333111     |
| Serbia  | 1999           | FemaleAge40to44     | 378339     |
| Serbia  | 1999           | FemaleAge45to49     | 397932     |
| Serbia  | 1999           | FemaleAge50to54     | 309835     |
| Serbia  | 1999           | FemaleAge55to59     | 232970     |
| Serbia  | 1999           | FemaleAge5to9       | 351156     |
| Serbia  | 1999           | FemaleAge60to64     | 279079     |
| Serbia  | 1999           | FemaleAge65to69     | 276814     |
| Serbia  | 1999           | FemaleAge70to74     | 233457     |
| Serbia  | 1999           | FemaleAge75to79     | 143805     |
| Serbia  | 1999           | FemaleAge80to84     | 52880      |
| Serbia  | 1999           | FemaleAge85to89     | 35111      |
| Serbia  | 1999           | FemaleAge90to94     | 11295      |
| Serbia  | 1999           | FemaleAge95to99     | 1905       |
| Serbia  | 1999           | FemaleAgeAbov e100  | 111        |
| Serbia  | 1999           | FemaleLactAge15to19 | 11350      |
| Serbia  | 1999           | FemaleLactAge20to24 | 43987      |
| Serbia  | 1999           | FemaleLactAge25to29 | 39957      |
| Serbia  | 1999           | FemaleLactAge30to34 | 22110      |
| Serbia  | 1999           | FemaleLactAge35to39 | 8810       |
| Serbia  | 1999           | FemaleLactAge40to44 | 1885       |
| Serbia  | 1999           | FemaleLactAge45to49 | 195        |
| Serbia  | 1999           | FemalePregAge15to19 | 8512       |
| Serbia  | 1999           | FemalePregAge20to24 | 32991      |
| Serbia  | 1999           | FemalePregAge25to29 | 29968      |
| Serbia  | 1999           | FemalePregAge30to34 | 16582      |
| Serbia  | 1999           | FemalePregAge35to39 | 6608       |
| Serbia  | 1999           | FemalePregAge40to44 | 1414       |

Dietary calcium and zinc deficiency risks are decreasing but remain prevalent

| Country      | Reference year | Age/gender group    | Population |
|--------------|----------------|---------------------|------------|
| Serbia       | 1999           | FemalePregAge45to49 | 146        |
| Serbia       | 1999           | MaleAge0to4         | 324179     |
| Serbia       | 1999           | MaleAge10to14       | 399491     |
| Serbia       | 1999           | MaleAge15to19       | 415989     |
| Serbia       | 1999           | MaleAge20to24       | 412722     |
| Serbia       | 1999           | MaleAge25to29       | 369451     |
| Serbia       | 1999           | MaleAge30to34       | 339458     |
| Serbia       | 1999           | MaleAge35to39       | 350275     |
| Serbia       | 1999           | MaleAge40to44       | 380344     |
| Serbia       | 1999           | MaleAge45to49       | 395071     |
| Serbia       | 1999           | MaleAge50to54       | 305721     |
| Serbia       | 1999           | MaleAge55to59       | 219064     |
| Serbia       | 1999           | MaleAge5to9         | 365753     |
| Serbia       | 1999           | MaleAge60to64       | 249713     |
| Serbia       | 1999           | MaleAge65to69       | 232219     |
| Serbia       | 1999           | MaleAge70to74       | 174020     |
| Serbia       | 1999           | MaleAge75to79       | 88970      |
| Serbia       | 1999           | MaleAge80to84       | 30377      |
| Serbia       | 1999           | MaleAge85to89       | 17955      |
| Serbia       | 1999           | MaleAge90to94       | 5591       |
| Serbia       | 1999           | MaleAge95to99       | 805        |
| Serbia       | 1999           | MaleAgeAbove100     | 39         |
| Serbia       | 2000           | FemaleAge0to4       | 299272     |
| Serbia       | 2000           | FemaleAge10to14     | 375447     |
| Serbia       | 2000           | FemaleAge15to19     | 379106     |
| Serbia       | 2000           | FemaleAge20to24     | 327209     |
| Serbia       | 2000           | FemaleAge25to29     | 296240     |
| Serbia       | 2000           | FemaleAge30to34     | 293207     |
| Serbia       | 2000           | FemaleAge35to39     | 325802     |
| Serbia       | 2000           | FemaleAge40to44     | 366869     |
| Serbia       | 2000           | FemaleAge45to49     | 400736     |
| Serbia       | 2000           | FemaleAge50to54     | 328012     |
| Serbia       | 2000           | FemaleAge55to59     | 231360     |
| Serbia       | 2000           | FemaleAge5to9       | 341003     |
| Serbia       | 2000           | FemaleAge60to64     | 268993     |
| Serbia       | 2000           | FemaleAge65to69     | 274212     |
| Serbia       | 2000           | FemaleAge70to74     | 237963     |
| Serbia       | 2000           | FemaleAge75to79     | 155345     |
| Serbia       | 2000           | FemaleAge80to84     | 56775      |
| Serbia       | 2000           | FemaleAge85to89     | 32169      |
| Serbia       | 2000           | FemaleAge90to94     | 10206      |
| Serbia       | 2000           | FemaleAge95to99     | 1569       |
| Serbia       | 2000           | FemaleAgeAbove100   | 118        |
| Serbia       | 2000           | FemaleLactAge15to19 | 11350      |
| Serbia       | 2000           | FemaleLactAge20to24 | 43987      |
| Serbia       | 2000           | FemaleLactAge25to29 | 39957      |
| Serbia       | 2000           | FemaleLactAge30to34 | 22110      |
| Serbia       | 2000           | FemaleLactAge35to39 | 8810       |
| Serbia       | 2000           | FemaleLactAge40to44 | 1885       |
| Serbia       | 2000           | FemaleLactAge45to49 | 195        |
| Serbia       | 2000           | FemalePregAge15to19 | 8512       |
| Serbia       | 2000           | FemalePregAge20to24 | 32991      |
| Serbia       | 2000           | FemalePregAge25to29 | 29968      |
| Serbia       | 2000           | FemalePregAge30to34 | 16582      |
| Serbia       | 2000           | FemalePregAge35to39 | 6608       |
| Serbia       | 2000           | FemalePregAge40to44 | 1414       |
| Serbia       | 2000           | FemalePregAge45to49 | 146        |
| Serbia       | 2000           | MaleAge0to4         | 313902     |
| Serbia       | 2000           | MaleAge10to14       | 390707     |
| Serbia       | 2000           | MaleAge15to19       | 409687     |
| Serbia       | 2000           | MaleAge20to24       | 414189     |
| Serbia       | 2000           | MaleAge25to29       | 375154     |
| Serbia       | 2000           | MaleAge30to34       | 338684     |
| Serbia       | 2000           | MaleAge35to39       | 342923     |
| Serbia       | 2000           | MaleAge40to44       | 368482     |
| Serbia       | 2000           | MaleAge45to49       | 396653     |
| Serbia       | 2000           | MaleAge50to54       | 323378     |
| Serbia       | 2000           | MaleAge55to59       | 218788     |
| Serbia       | 2000           | MaleAge5to9         | 354471     |
| Serbia       | 2000           | MaleAge60to64       | 240470     |
| Serbia       | 2000           | MaleAge65to69       | 230129     |
| Serbia       | 2000           | MaleAge70to74       | 179213     |
| Serbia       | 2000           | MaleAge75to79       | 96520      |
| Serbia       | 2000           | MaleAge80to84       | 31954      |
| Serbia       | 2000           | MaleAge85to89       | 15656      |
| Serbia       | 2000           | MaleAge90to94       | 4680       |
| Serbia       | 2000           | MaleAge95to99       | 636        |
| Serbia       | 2000           | MaleAgeAbove100     | 42         |
| Sierra Leone | 1992           | FemaleAge0to4       | 347586     |
| Sierra Leone | 1992           | FemaleAge10to14     | 259506     |
| Sierra Leone | 1992           | FemaleAge15to19     | 169291     |
| Sierra Leone | 1992           | FemaleAge20to24     | 101746     |
| Sierra Leone | 1992           | FemaleAge25to29     | 75277      |
| Sierra Leone | 1992           | FemaleAge30to34     | 64836      |
| Sierra Leone | 1992           | FemaleAge35to39     | 61767      |
| Sierra Leone | 1992           | FemaleAge40to44     | 68077      |
| Sierra Leone | 1992           | FemaleAge45to49     | 71294      |
| Sierra Leone | 1992           | FemaleAge50to54     | 63985      |



Dietary calcium and zinc deficiency risks are decreasing but remain prevalent

| Country      | Reference year | Age/gender group    | Population |
|--------------|----------------|---------------------|------------|
| Sierra Leone | 1992           | FemaleAge55to59     | 52668      |
| Sierra Leone | 1992           | FemaleAge5to9       | 297922     |
| Sierra Leone | 1992           | FemaleAge60to64     | 41339      |
| Sierra Leone | 1992           | FemaleAge65to69     | 29542      |
| Sierra Leone | 1992           | FemaleAge70to74     | 17972      |
| Sierra Leone | 1992           | FemaleAge75to79     | 8555       |
| Sierra Leone | 1992           | FemaleAge80to84     | 2861       |
| Sierra Leone | 1992           | FemaleAge85to89     | 582        |
| Sierra Leone | 1992           | FemaleAge90to94     | 58         |
| Sierra Leone | 1992           | FemaleAge95to99     | 6          |
| Sierra Leone | 1992           | FemaleLactAge15to19 | 29040      |
| Sierra Leone | 1992           | FemaleLactAge20to24 | 44299      |
| Sierra Leone | 1992           | FemaleLactAge25to29 | 38700      |
| Sierra Leone | 1992           | FemaleLactAge30to34 | 29431      |
| Sierra Leone | 1992           | FemaleLactAge35to39 | 19948      |
| Sierra Leone | 1992           | FemaleLactAge40to44 | 10313      |
| Sierra Leone | 1992           | FemaleLactAge45to49 | 2789       |
| Sierra Leone | 1992           | FemalePregAge15to19 | 21780      |
| Sierra Leone | 1992           | FemalePregAge20to24 | 33224      |
| Sierra Leone | 1992           | FemalePregAge25to29 | 29025      |
| Sierra Leone | 1992           | FemalePregAge30to34 | 22073      |
| Sierra Leone | 1992           | FemalePregAge35to39 | 14961      |
| Sierra Leone | 1992           | FemalePregAge40to44 | 7735       |
| Sierra Leone | 1992           | FemalePregAge45to49 | 2092       |
| Sierra Leone | 1992           | MaleAge0to4         | 340440     |
| Sierra Leone | 1992           | MaleAge10to14       | 254891     |
| Sierra Leone | 1992           | MaleAge15to19       | 214941     |
| Sierra Leone | 1992           | MaleAge20to24       | 172690     |
| Sierra Leone | 1992           | MaleAge25to29       | 135970     |
| Sierra Leone | 1992           | MaleAge30to34       | 109919     |
| Sierra Leone | 1992           | MaleAge35to39       | 90205      |
| Sierra Leone | 1992           | MaleAge40to44       | 85017      |
| Sierra Leone | 1992           | MaleAge45to49       | 78888      |
| Sierra Leone | 1992           | MaleAge50to54       | 65250      |
| Sierra Leone | 1992           | MaleAge55to59       | 52354      |
| Sierra Leone | 1992           | MaleAge5to9         | 292098     |
| Sierra Leone | 1992           | MaleAge60to64       | 40264      |
| Sierra Leone | 1992           | MaleAge65to69       | 28476      |
| Sierra Leone | 1992           | MaleAge70to74       | 17497      |
| Sierra Leone | 1992           | MaleAge75to79       | 8634       |
| Sierra Leone | 1992           | MaleAge80to84       | 3111       |
| Sierra Leone | 1992           | MaleAge85to89       | 715        |
| Sierra Leone | 1992           | MaleAge90to94       | 83         |
| Sierra Leone | 1992           | MaleAge95to99       | 7          |
| Sierra Leone | 1993           | FemaleAge0to4       | 339817     |
| Sierra Leone | 1993           | FemaleAge10to14     | 257959     |
| Sierra Leone | 1993           | FemaleAge15to19     | 169503     |
| Sierra Leone | 1993           | FemaleAge20to24     | 102615     |
| Sierra Leone | 1993           | FemaleAge25to29     | 75974      |
| Sierra Leone | 1993           | FemaleAge30to34     | 64450      |
| Sierra Leone | 1993           | FemaleAge35to39     | 61254      |
| Sierra Leone | 1993           | FemaleAge40to44     | 65701      |
| Sierra Leone | 1993           | FemaleAge45to49     | 70579      |
| Sierra Leone | 1993           | FemaleAge50to54     | 63204      |
| Sierra Leone | 1993           | FemaleAge55to59     | 51880      |
| Sierra Leone | 1993           | FemaleAge5to9       | 293189     |
| Sierra Leone | 1993           | FemaleAge60to64     | 40516      |
| Sierra Leone | 1993           | FemaleAge65to69     | 28829      |
| Sierra Leone | 1993           | FemaleAge70to74     | 17474      |
| Sierra Leone | 1993           | FemaleAge75to79     | 8279       |
| Sierra Leone | 1993           | FemaleAge80to84     | 2785       |
| Sierra Leone | 1993           | FemaleAge85to89     | 593        |
| Sierra Leone | 1993           | FemaleAge90to94     | 72         |
| Sierra Leone | 1993           | FemaleAge95to99     | 7          |
| Sierra Leone | 1993           | FemaleLactAge15to19 | 29040      |
| Sierra Leone | 1993           | FemaleLactAge20to24 | 44299      |
| Sierra Leone | 1993           | FemaleLactAge25to29 | 38700      |
| Sierra Leone | 1993           | FemaleLactAge30to34 | 29431      |
| Sierra Leone | 1993           | FemaleLactAge35to39 | 19948      |
| Sierra Leone | 1993           | FemaleLactAge40to44 | 10313      |
| Sierra Leone | 1993           | FemaleLactAge45to49 | 2789       |
| Sierra Leone | 1993           | FemalePregAge15to19 | 21780      |
| Sierra Leone | 1993           | FemalePregAge20to24 | 33224      |
| Sierra Leone | 1993           | FemalePregAge25to29 | 29025      |
| Sierra Leone | 1993           | FemalePregAge30to34 | 22073      |
| Sierra Leone | 1993           | FemalePregAge35to39 | 14961      |
| Sierra Leone | 1993           | FemalePregAge40to44 | 7735       |
| Sierra Leone | 1993           | FemalePregAge45to49 | 2092       |
| Sierra Leone | 1993           | MaleAge0to4         | 332580     |
| Sierra Leone | 1993           | MaleAge10to14       | 253813     |
| Sierra Leone | 1993           | MaleAge15to19       | 215777     |
| Sierra Leone | 1993           | MaleAge20to24       | 174022     |
| Sierra Leone | 1993           | MaleAge25to29       | 136887     |
| Sierra Leone | 1993           | MaleAge30to34       | 109706     |
| Sierra Leone | 1993           | MaleAge35to39       | 90046      |
| Sierra Leone | 1993           | MaleAge40to44       | 80803      |
| Sierra Leone | 1993           | MaleAge45to49       | 77773      |
| Sierra Leone | 1993           | MaleAge50to54       | 64482      |

Dietary calcium and zinc deficiency risks are decreasing but remain prevalent

| Country      | Reference year | Age/gender group    | Population |
|--------------|----------------|---------------------|------------|
| Sierra Leone | 1993           | MaleAge55to59       | 51496      |
| Sierra Leone | 1993           | MaleAge5to9         | 287589     |
| Sierra Leone | 1993           | MaleAge60to64       | 39471      |
| Sierra Leone | 1993           | MaleAge65to69       | 27769      |
| Sierra Leone | 1993           | MaleAge70to74       | 16981      |
| Sierra Leone | 1993           | MaleAge75to79       | 8326       |
| Sierra Leone | 1993           | MaleAge80to84       | 3001       |
| Sierra Leone | 1993           | MaleAge85to89       | 716        |
| Sierra Leone | 1993           | MaleAge90to94       | 96         |
| Sierra Leone | 1993           | MaleAge95to99       | 10         |
| Sierra Leone | 1994           | FemaleAge0to4       | 332678     |
| Sierra Leone | 1994           | FemaleAge10to14     | 256117     |
| Sierra Leone | 1994           | FemaleAge15to19     | 169849     |
| Sierra Leone | 1994           | FemaleAge20to24     | 103601     |
| Sierra Leone | 1994           | FemaleAge25to29     | 76894      |
| Sierra Leone | 1994           | FemaleAge30to34     | 64379      |
| Sierra Leone | 1994           | FemaleAge35to39     | 60948      |
| Sierra Leone | 1994           | FemaleAge40to44     | 63672      |
| Sierra Leone | 1994           | FemaleAge45to49     | 69699      |
| Sierra Leone | 1994           | FemaleAge50to54     | 62568      |
| Sierra Leone | 1994           | FemaleAge55to59     | 51248      |
| Sierra Leone | 1994           | FemaleAge5to9       | 287388     |
| Sierra Leone | 1994           | FemaleAge60to64     | 39832      |
| Sierra Leone | 1994           | FemaleAge65to69     | 28139      |
| Sierra Leone | 1994           | FemaleAge70to74     | 16876      |
| Sierra Leone | 1994           | FemaleAge75to79     | 7777       |
| Sierra Leone | 1994           | FemaleAge80to84     | 2504       |
| Sierra Leone | 1994           | FemaleAge85to89     | 525        |
| Sierra Leone | 1994           | FemaleAge90to94     | 68         |
| Sierra Leone | 1994           | FemaleAge95to99     | 6          |
| Sierra Leone | 1994           | FemaleLactAge15to19 | 29040      |
| Sierra Leone | 1994           | FemaleLactAge20to24 | 44299      |
| Sierra Leone | 1994           | FemaleLactAge25to29 | 38700      |
| Sierra Leone | 1994           | FemaleLactAge30to34 | 29431      |
| Sierra Leone | 1994           | FemaleLactAge35to39 | 19948      |
| Sierra Leone | 1994           | FemaleLactAge40to44 | 10313      |
| Sierra Leone | 1994           | FemaleLactAge45to49 | 2789       |
| Sierra Leone | 1994           | FemalePregAge15to19 | 21780      |
| Sierra Leone | 1994           | FemalePregAge20to24 | 33224      |
| Sierra Leone | 1994           | FemalePregAge25to29 | 29025      |
| Sierra Leone | 1994           | FemalePregAge30to34 | 22073      |
| Sierra Leone | 1994           | FemalePregAge35to39 | 14961      |
| Sierra Leone | 1994           | FemalePregAge40to44 | 7735       |
| Sierra Leone | 1994           | FemalePregAge45to49 | 2092       |
| Sierra Leone | 1994           | MaleAge0to4         | 325348     |
| Sierra Leone | 1994           | MaleAge10to14       | 252429     |
| Sierra Leone | 1994           | MaleAge15to19       | 216735     |
| Sierra Leone | 1994           | MaleAge20to24       | 175513     |
| Sierra Leone | 1994           | MaleAge25to29       | 137991     |
| Sierra Leone | 1994           | MaleAge30to34       | 109797     |
| Sierra Leone | 1994           | MaleAge35to39       | 90177      |
| Sierra Leone | 1994           | MaleAge40to44       | 77315      |
| Sierra Leone | 1994           | MaleAge45to49       | 76230      |
| Sierra Leone | 1994           | MaleAge50to54       | 63787      |
| Sierra Leone | 1994           | MaleAge55to59       | 50783      |
| Sierra Leone | 1994           | MaleAge5to9         | 281836     |
| Sierra Leone | 1994           | MaleAge60to64       | 38752      |
| Sierra Leone | 1994           | MaleAge65to69       | 27070      |
| Sierra Leone | 1994           | MaleAge70to74       | 16370      |
| Sierra Leone | 1994           | MaleAge75to79       | 7814       |
| Sierra Leone | 1994           | MaleAge80to84       | 2697       |
| Sierra Leone | 1994           | MaleAge85to89       | 625        |
| Sierra Leone | 1994           | MaleAge90to94       | 89         |
| Sierra Leone | 1994           | MaleAge95to99       | 8          |
| Sierra Leone | 1995           | FemaleAge0to4       | 329784     |
| Sierra Leone | 1995           | FemaleAge10to14     | 254194     |
| Sierra Leone | 1995           | FemaleAge15to19     | 170782     |
| Sierra Leone | 1995           | FemaleAge20to24     | 105251     |
| Sierra Leone | 1995           | FemaleAge25to29     | 78398      |
| Sierra Leone | 1995           | FemaleAge30to34     | 64984      |
| Sierra Leone | 1995           | FemaleAge35to39     | 60956      |
| Sierra Leone | 1995           | FemaleAge40to44     | 62410      |
| Sierra Leone | 1995           | FemaleAge45to49     | 68727      |
| Sierra Leone | 1995           | FemaleAge50to54     | 62241      |
| Sierra Leone | 1995           | FemaleAge55to59     | 50894      |
| Sierra Leone | 1995           | FemaleAge5to9       | 281364     |
| Sierra Leone | 1995           | FemaleAge60to64     | 39391      |
| Sierra Leone | 1995           | FemaleAge65to69     | 27576      |
| Sierra Leone | 1995           | FemaleAge70to74     | 16243      |
| Sierra Leone | 1995           | FemaleAge75to79     | 7105       |
| Sierra Leone | 1995           | FemaleAge80to84     | 2009       |
| Sierra Leone | 1995           | FemaleAge85to89     | 325        |
| Sierra Leone | 1995           | FemaleAge90to94     | 28         |
| Sierra Leone | 1995           | FemaleAge95to99     | 2          |
| Sierra Leone | 1995           | FemaleLactAge15to19 | 29040      |
| Sierra Leone | 1995           | FemaleLactAge20to24 | 44299      |
| Sierra Leone | 1995           | FemaleLactAge25to29 | 38700      |
| Sierra Leone | 1995           | FemaleLactAge30to34 | 29431      |

Dietary calcium and zinc deficiency risks are decreasing but remain prevalent

| Country      | Reference year | Age/gender group    | Population |
|--------------|----------------|---------------------|------------|
| Sierra Leone | 1995           | FemaleLactAge35to39 | 19948      |
| Sierra Leone | 1995           | FemaleLactAge40to44 | 10313      |
| Sierra Leone | 1995           | FemaleLactAge45to49 | 2789       |
| Sierra Leone | 1995           | FemalePregAge15to19 | 21780      |
| Sierra Leone | 1995           | FemalePregAge20to24 | 33224      |
| Sierra Leone | 1995           | FemalePregAge25to29 | 29025      |
| Sierra Leone | 1995           | FemalePregAge30to34 | 22073      |
| Sierra Leone | 1995           | FemalePregAge35to39 | 14961      |
| Sierra Leone | 1995           | FemalePregAge40to44 | 7735       |
| Sierra Leone | 1995           | FemalePregAge45to49 | 2092       |
| Sierra Leone | 1995           | MaleAge0to4         | 322473     |
| Sierra Leone | 1995           | MaleAge10to14       | 250887     |
| Sierra Leone | 1995           | MaleAge15to19       | 218262     |
| Sierra Leone | 1995           | MaleAge20to24       | 177699     |
| Sierra Leone | 1995           | MaleAge25to29       | 139677     |
| Sierra Leone | 1995           | MaleAge30to34       | 110542     |
| Sierra Leone | 1995           | MaleAge35to39       | 90514      |
| Sierra Leone | 1995           | MaleAge40to44       | 75162      |
| Sierra Leone | 1995           | MaleAge45to49       | 74292      |
| Sierra Leone | 1995           | MaleAge50to54       | 63314      |
| Sierra Leone | 1995           | MaleAge55to59       | 50358      |
| Sierra Leone | 1995           | MaleAge5to9         | 275672     |
| Sierra Leone | 1995           | MaleAge60to64       | 38209      |
| Sierra Leone | 1995           | MaleAge65to69       | 26467      |
| Sierra Leone | 1995           | MaleAge70to74       | 15723      |
| Sierra Leone | 1995           | MaleAge75to79       | 7148       |
| Sierra Leone | 1995           | MaleAge80to84       | 2193       |
| Sierra Leone | 1995           | MaleAge85to89       | 400        |
| Sierra Leone | 1995           | MaleAge90to94       | 37         |
| Sierra Leone | 1995           | MaleAge95to99       | 2          |
| Sierra Leone | 1996           | FemaleAge0to4       | 329130     |
| Sierra Leone | 1996           | FemaleAge10to14     | 252221     |
| Sierra Leone | 1996           | FemaleAge15to19     | 170579     |
| Sierra Leone | 1996           | FemaleAge20to24     | 104750     |
| Sierra Leone | 1996           | FemaleAge25to29     | 76431      |
| Sierra Leone | 1996           | FemaleAge30to34     | 64580      |
| Sierra Leone | 1996           | FemaleAge35to39     | 62476      |
| Sierra Leone | 1996           | FemaleAge40to44     | 63284      |
| Sierra Leone | 1996           | FemaleAge45to49     | 67879      |
| Sierra Leone | 1996           | FemaleAge50to54     | 61885      |
| Sierra Leone | 1996           | FemaleAge55to59     | 50367      |
| Sierra Leone | 1996           | FemaleAge5to9       | 279249     |
| Sierra Leone | 1996           | FemaleAge60to64     | 38826      |
| Sierra Leone | 1996           | FemaleAge65to69     | 27166      |
| Sierra Leone | 1996           | FemaleAge70to74     | 16140      |
| Sierra Leone | 1996           | FemaleAge75to79     | 7309       |
| Sierra Leone | 1996           | FemaleAge80to84     | 2226       |
| Sierra Leone | 1996           | FemaleAge85to89     | 397        |
| Sierra Leone | 1996           | FemaleAge90to94     | 32         |
| Sierra Leone | 1996           | FemaleAge95to99     | 4          |
| Sierra Leone | 1996           | FemaleLactAge15to19 | 29225      |
| Sierra Leone | 1996           | FemaleLactAge20to24 | 45477      |
| Sierra Leone | 1996           | FemaleLactAge25to29 | 40810      |
| Sierra Leone | 1996           | FemaleLactAge30to34 | 30238      |
| Sierra Leone | 1996           | FemaleLactAge35to39 | 19187      |
| Sierra Leone | 1996           | FemaleLactAge40to44 | 9457       |
| Sierra Leone | 1996           | FemaleLactAge45to49 | 2534       |
| Sierra Leone | 1996           | FemalePregAge15to19 | 21918      |
| Sierra Leone | 1996           | FemalePregAge20to24 | 34108      |
| Sierra Leone | 1996           | FemalePregAge25to29 | 30608      |
| Sierra Leone | 1996           | FemalePregAge30to34 | 22679      |
| Sierra Leone | 1996           | FemalePregAge35to39 | 14390      |
| Sierra Leone | 1996           | FemalePregAge40to44 | 7093       |
| Sierra Leone | 1996           | FemalePregAge45to49 | 1900       |
| Sierra Leone | 1996           | MaleAge0to4         | 322209     |
| Sierra Leone | 1996           | MaleAge10to14       | 248947     |
| Sierra Leone | 1996           | MaleAge15to19       | 218685     |
| Sierra Leone | 1996           | MaleAge20to24       | 179636     |
| Sierra Leone | 1996           | MaleAge25to29       | 141729     |
| Sierra Leone | 1996           | MaleAge30to34       | 111639     |
| Sierra Leone | 1996           | MaleAge35to39       | 90805      |
| Sierra Leone | 1996           | MaleAge40to44       | 73995      |
| Sierra Leone | 1996           | MaleAge45to49       | 71713      |
| Sierra Leone | 1996           | MaleAge50to54       | 62776      |
| Sierra Leone | 1996           | MaleAge55to59       | 49885      |
| Sierra Leone | 1996           | MaleAge5to9         | 273639     |
| Sierra Leone | 1996           | MaleAge60to64       | 37655      |
| Sierra Leone | 1996           | MaleAge65to69       | 26066      |
| Sierra Leone | 1996           | MaleAge70to74       | 15577      |
| Sierra Leone | 1996           | MaleAge75to79       | 7288       |
| Sierra Leone | 1996           | MaleAge80to84       | 2382       |
| Sierra Leone | 1996           | MaleAge85to89       | 478        |
| Sierra Leone | 1996           | MaleAge90to94       | 45         |
| Sierra Leone | 1996           | MaleAge95to99       | 4          |
| Sierra Leone | 1997           | FemaleAge0to4       | 329225     |
| Sierra Leone | 1997           | FemaleAge10to14     | 251052     |
| Sierra Leone | 1997           | FemaleAge15to19     | 171692     |
| Sierra Leone | 1997           | FemaleAge20to24     | 107075     |

Dietary calcium and zinc deficiency risks are decreasing but remain prevalent

| Country      | Reference year | Age/gender group    | Population |
|--------------|----------------|---------------------|------------|
| Sierra Leone | 1997           | FemaleAge25to29     | 78849      |
| Sierra Leone | 1997           | FemaleAge30to34     | 66340      |
| Sierra Leone | 1997           | FemaleAge35to39     | 63121      |
| Sierra Leone | 1997           | FemaleAge40to44     | 63490      |
| Sierra Leone | 1997           | FemaleAge45to49     | 66659      |
| Sierra Leone | 1997           | FemaleAge50to54     | 61982      |
| Sierra Leone | 1997           | FemaleAge55to59     | 50176      |
| Sierra Leone | 1997           | FemaleAge5to9       | 278244     |
| Sierra Leone | 1997           | FemaleAge60to64     | 38527      |
| Sierra Leone | 1997           | FemaleAge65to69     | 26863      |
| Sierra Leone | 1997           | FemaleAge70to74     | 15977      |
| Sierra Leone | 1997           | FemaleAge75to79     | 7364       |
| Sierra Leone | 1997           | FemaleAge80to84     | 2338       |
| Sierra Leone | 1997           | FemaleAge85to89     | 446        |
| Sierra Leone | 1997           | FemaleAge90to94     | 44         |
| Sierra Leone | 1997           | FemaleAge95to99     | 4          |
| Sierra Leone | 1997           | FemaleLactAge15to19 | 29225      |
| Sierra Leone | 1997           | FemaleLactAge20to24 | 45477      |
| Sierra Leone | 1997           | FemaleLactAge25to29 | 40810      |
| Sierra Leone | 1997           | FemaleLactAge30to34 | 30238      |
| Sierra Leone | 1997           | FemaleLactAge35to39 | 19187      |
| Sierra Leone | 1997           | FemaleLactAge40to44 | 9457       |
| Sierra Leone | 1997           | FemaleLactAge45to49 | 2534       |
| Sierra Leone | 1997           | FemalePregAge15to19 | 21918      |
| Sierra Leone | 1997           | FemalePregAge20to24 | 34108      |
| Sierra Leone | 1997           | FemalePregAge25to29 | 30608      |
| Sierra Leone | 1997           | FemalePregAge30to34 | 22679      |
| Sierra Leone | 1997           | FemalePregAge35to39 | 14390      |
| Sierra Leone | 1997           | FemalePregAge40to44 | 7093       |
| Sierra Leone | 1997           | FemalePregAge45to49 | 1900       |
| Sierra Leone | 1997           | MaleAge0to4         | 322711     |
| Sierra Leone | 1997           | MaleAge10to14       | 247789     |
| Sierra Leone | 1997           | MaleAge15to19       | 220091     |
| Sierra Leone | 1997           | MaleAge20to24       | 182331     |
| Sierra Leone | 1997           | MaleAge25to29       | 144433     |
| Sierra Leone | 1997           | MaleAge30to34       | 113465     |
| Sierra Leone | 1997           | MaleAge35to39       | 91500      |
| Sierra Leone | 1997           | MaleAge40to44       | 74116      |
| Sierra Leone | 1997           | MaleAge45to49       | 68932      |
| Sierra Leone | 1997           | MaleAge50to54       | 62648      |
| Sierra Leone | 1997           | MaleAge55to59       | 49721      |
| Sierra Leone | 1997           | MaleAge5to9         | 272694     |
| Sierra Leone | 1997           | MaleAge60to64       | 37308      |
| Sierra Leone | 1997           | MaleAge65to69       | 25758      |
| Sierra Leone | 1997           | MaleAge70to74       | 15375      |
| Sierra Leone | 1997           | MaleAge75to79       | 7292       |
| Sierra Leone | 1997           | MaleAge80to84       | 2467       |
| Sierra Leone | 1997           | MaleAge85to89       | 526        |
| Sierra Leone | 1997           | MaleAge90to94       | 59         |
| Sierra Leone | 1997           | MaleAge95to99       | 5          |
| Sierra Leone | 1998           | FemaleAge0to4       | 331998     |
| Sierra Leone | 1998           | FemaleAge10to14     | 251145     |
| Sierra Leone | 1998           | FemaleAge15to19     | 174135     |
| Sierra Leone | 1998           | FemaleAge20to24     | 110434     |
| Sierra Leone | 1998           | FemaleAge25to29     | 82211      |
| Sierra Leone | 1998           | FemaleAge30to34     | 69036      |
| Sierra Leone | 1998           | FemaleAge35to39     | 64465      |
| Sierra Leone | 1998           | FemaleAge40to44     | 64498      |
| Sierra Leone | 1998           | FemaleAge45to49     | 65839      |
| Sierra Leone | 1998           | FemaleAge50to54     | 62478      |
| Sierra Leone | 1998           | FemaleAge55to59     | 50411      |
| Sierra Leone | 1998           | FemaleAge5to9       | 278659     |
| Sierra Leone | 1998           | FemaleAge60to64     | 38580      |
| Sierra Leone | 1998           | FemaleAge65to69     | 26743      |
| Sierra Leone | 1998           | FemaleAge70to74     | 15822      |
| Sierra Leone | 1998           | FemaleAge75to79     | 7269       |
| Sierra Leone | 1998           | FemaleAge80to84     | 2316       |
| Sierra Leone | 1998           | FemaleAge85to89     | 463        |
| Sierra Leone | 1998           | FemaleAge90to94     | 55         |
| Sierra Leone | 1998           | FemaleAge95to99     | 4          |
| Sierra Leone | 1998           | FemaleLactAge15to19 | 29225      |
| Sierra Leone | 1998           | FemaleLactAge20to24 | 45477      |
| Sierra Leone | 1998           | FemaleLactAge25to29 | 40810      |
| Sierra Leone | 1998           | FemaleLactAge30to34 | 30238      |
| Sierra Leone | 1998           | FemaleLactAge35to39 | 19187      |
| Sierra Leone | 1998           | FemaleLactAge40to44 | 9457       |
| Sierra Leone | 1998           | FemaleLactAge45to49 | 2534       |
| Sierra Leone | 1998           | FemalePregAge15to19 | 21918      |
| Sierra Leone | 1998           | FemalePregAge20to24 | 34108      |
| Sierra Leone | 1998           | FemalePregAge25to29 | 30608      |
| Sierra Leone | 1998           | FemalePregAge30to34 | 22679      |
| Sierra Leone | 1998           | FemalePregAge35to39 | 14390      |
| Sierra Leone | 1998           | FemalePregAge40to44 | 7093       |
| Sierra Leone | 1998           | FemalePregAge45to49 | 1900       |
| Sierra Leone | 1998           | MaleAge0to4         | 325895     |
| Sierra Leone | 1998           | MaleAge10to14       | 247902     |
| Sierra Leone | 1998           | MaleAge15to19       | 222813     |
| Sierra Leone | 1998           | MaleAge20to24       | 186076     |

Dietary calcium and zinc deficiency risks are decreasing but remain prevalent

| Country      | Reference year | Age/gender group    | Population |
|--------------|----------------|---------------------|------------|
| Sierra Leone | 1998           | MaleAge25to29       | 148010     |
| Sierra Leone | 1998           | MaleAge30to34       | 116211     |
| Sierra Leone | 1998           | MaleAge35to39       | 92853      |
| Sierra Leone | 1998           | MaleAge40to44       | 75328      |
| Sierra Leone | 1998           | MaleAge45to49       | 66494      |
| Sierra Leone | 1998           | MaleAge50to54       | 62804      |
| Sierra Leone | 1998           | MaleAge55to59       | 49934      |
| Sierra Leone | 1998           | MaleAge5to9         | 273119     |
| Sierra Leone | 1998           | MaleAge60to64       | 37261      |
| Sierra Leone | 1998           | MaleAge65to69       | 25608      |
| Sierra Leone | 1998           | MaleAge70to74       | 15181      |
| Sierra Leone | 1998           | MaleAge75to79       | 7160       |
| Sierra Leone | 1998           | MaleAge80to84       | 2423       |
| Sierra Leone | 1998           | MaleAge85to89       | 535        |
| Sierra Leone | 1998           | MaleAge90to94       | 70         |
| Sierra Leone | 1998           | MaleAge95to99       | 7          |
| Sierra Leone | 1999           | FemaleAge0to4       | 339609     |
| Sierra Leone | 1999           | FemaleAge10to14     | 252979     |
| Sierra Leone | 1999           | FemaleAge15to19     | 178112     |
| Sierra Leone | 1999           | FemaleAge20to24     | 115182     |
| Sierra Leone | 1999           | FemaleAge25to29     | 86836      |
| Sierra Leone | 1999           | FemaleAge30to34     | 72870      |
| Sierra Leone | 1999           | FemaleAge35to39     | 66811      |
| Sierra Leone | 1999           | FemaleAge40to44     | 66248      |
| Sierra Leone | 1999           | FemaleAge45to49     | 65846      |
| Sierra Leone | 1999           | FemaleAge50to54     | 63281      |
| Sierra Leone | 1999           | FemaleAge55to59     | 51182      |
| Sierra Leone | 1999           | FemaleAge5to9       | 280973     |
| Sierra Leone | 1999           | FemaleAge60to64     | 39066      |
| Sierra Leone | 1999           | FemaleAge65to69     | 26882      |
| Sierra Leone | 1999           | FemaleAge70to74     | 15728      |
| Sierra Leone | 1999           | FemaleAge75to79     | 7042       |
| Sierra Leone | 1999           | FemaleAge80to84     | 2147       |
| Sierra Leone | 1999           | FemaleAge85to89     | 424        |
| Sierra Leone | 1999           | FemaleAge90to94     | 52         |
| Sierra Leone | 1999           | FemaleAge95to99     | 4          |
| Sierra Leone | 1999           | FemaleLactAge15to19 | 29225      |
| Sierra Leone | 1999           | FemaleLactAge20to24 | 45477      |
| Sierra Leone | 1999           | FemaleLactAge25to29 | 40810      |
| Sierra Leone | 1999           | FemaleLactAge30to34 | 30238      |
| Sierra Leone | 1999           | FemaleLactAge35to39 | 19187      |
| Sierra Leone | 1999           | FemaleLactAge40to44 | 9457       |
| Sierra Leone | 1999           | FemaleLactAge45to49 | 2534       |
| Sierra Leone | 1999           | FemalePregAge15to19 | 21918      |
| Sierra Leone | 1999           | FemalePregAge20to24 | 34108      |
| Sierra Leone | 1999           | FemalePregAge25to29 | 30608      |
| Sierra Leone | 1999           | FemalePregAge30to34 | 22679      |
| Sierra Leone | 1999           | FemalePregAge35to39 | 14390      |
| Sierra Leone | 1999           | FemalePregAge40to44 | 7093       |
| Sierra Leone | 1999           | FemalePregAge45to49 | 1900       |
| Sierra Leone | 1999           | MaleAge0to4         | 333862     |
| Sierra Leone | 1999           | MaleAge10to14       | 249777     |
| Sierra Leone | 1999           | MaleAge15to19       | 227063     |
| Sierra Leone | 1999           | MaleAge20to24       | 191228     |
| Sierra Leone | 1999           | MaleAge25to29       | 152790     |
| Sierra Leone | 1999           | MaleAge30to34       | 120089     |
| Sierra Leone | 1999           | MaleAge35to39       | 95205      |
| Sierra Leone | 1999           | MaleAge40to44       | 77326      |
| Sierra Leone | 1999           | MaleAge45to49       | 65132      |
| Sierra Leone | 1999           | MaleAge50to54       | 63024      |
| Sierra Leone | 1999           | MaleAge55to59       | 50613      |
| Sierra Leone | 1999           | MaleAge5to9         | 275397     |
| Sierra Leone | 1999           | MaleAge60to64       | 37617      |
| Sierra Leone | 1999           | MaleAge65to69       | 25681      |
| Sierra Leone | 1999           | MaleAge70to74       | 15042      |
| Sierra Leone | 1999           | MaleAge75to79       | 6909       |
| Sierra Leone | 1999           | MaleAge80to84       | 2239       |
| Sierra Leone | 1999           | MaleAge85to89       | 479        |
| Sierra Leone | 1999           | MaleAge90to94       | 66         |
| Sierra Leone | 1999           | MaleAge95to99       | 6          |
| Sierra Leone | 2000           | FemaleAge0to4       | 354358     |
| Sierra Leone | 2000           | FemaleAge10to14     | 256510     |
| Sierra Leone | 2000           | FemaleAge15to19     | 183507     |
| Sierra Leone | 2000           | FemaleAge20to24     | 121495     |
| Sierra Leone | 2000           | FemaleAge25to29     | 92848      |
| Sierra Leone | 2000           | FemaleAge30to34     | 77896      |
| Sierra Leone | 2000           | FemaleAge35to39     | 70291      |
| Sierra Leone | 2000           | FemaleAge40to44     | 68672      |
| Sierra Leone | 2000           | FemaleAge45to49     | 66864      |
| Sierra Leone | 2000           | FemaleAge50to54     | 64311      |
| Sierra Leone | 2000           | FemaleAge55to59     | 52511      |
| Sierra Leone | 2000           | FemaleAge5to9       | 285346     |
| Sierra Leone | 2000           | FemaleAge60to64     | 39999      |
| Sierra Leone | 2000           | FemaleAge65to69     | 27319      |
| Sierra Leone | 2000           | FemaleAge70to74     | 15724      |
| Sierra Leone | 2000           | FemaleAge75to79     | 6712       |
| Sierra Leone | 2000           | FemaleAge80to84     | 1814       |
| Sierra Leone | 2000           | FemaleAge85to89     | 277        |

Dietary calcium and zinc deficiency risks are decreasing but remain prevalent

| Country      | Reference year | Age/gender group    | Population |
|--------------|----------------|---------------------|------------|
| Sierra Leone | 2000           | FemaleAge90to94     | 22         |
| Sierra Leone | 2000           | FemaleAge95to99     | 1          |
| Sierra Leone | 2000           | FemaleLactAge15to19 | 29225      |
| Sierra Leone | 2000           | FemaleLactAge20to24 | 45477      |
| Sierra Leone | 2000           | FemaleLactAge25to29 | 40810      |
| Sierra Leone | 2000           | FemaleLactAge30to34 | 30238      |
| Sierra Leone | 2000           | FemaleLactAge35to39 | 19187      |
| Sierra Leone | 2000           | FemaleLactAge40to44 | 9457       |
| Sierra Leone | 2000           | FemaleLactAge45to49 | 2534       |
| Sierra Leone | 2000           | FemalePregAge15to19 | 21918      |
| Sierra Leone | 2000           | FemalePregAge20to24 | 34108      |
| Sierra Leone | 2000           | FemalePregAge25to29 | 30608      |
| Sierra Leone | 2000           | FemalePregAge30to34 | 22679      |
| Sierra Leone | 2000           | FemalePregAge35to39 | 14390      |
| Sierra Leone | 2000           | FemalePregAge40to44 | 7093       |
| Sierra Leone | 2000           | FemalePregAge45to49 | 1900       |
| Sierra Leone | 2000           | MaleAge0to4         | 348885     |
| Sierra Leone | 2000           | MaleAge10to14       | 253355     |
| Sierra Leone | 2000           | MaleAge15to19       | 232737     |
| Sierra Leone | 2000           | MaleAge20to24       | 197959     |
| Sierra Leone | 2000           | MaleAge25to29       | 158949     |
| Sierra Leone | 2000           | MaleAge30to34       | 125144     |
| Sierra Leone | 2000           | MaleAge35to39       | 98701      |
| Sierra Leone | 2000           | MaleAge40to44       | 79901      |
| Sierra Leone | 2000           | MaleAge45to49       | 65208      |
| Sierra Leone | 2000           | MaleAge50to54       | 63166      |
| Sierra Leone | 2000           | MaleAge55to59       | 51756      |
| Sierra Leone | 2000           | MaleAge5to9         | 279700     |
| Sierra Leone | 2000           | MaleAge60to64       | 38409      |
| Sierra Leone | 2000           | MaleAge65to69       | 25997      |
| Sierra Leone | 2000           | MaleAge70to74       | 14980      |
| Sierra Leone | 2000           | MaleAge75to79       | 6565       |
| Sierra Leone | 2000           | MaleAge80to84       | 1896       |
| Sierra Leone | 2000           | MaleAge85to89       | 318        |
| Sierra Leone | 2000           | MaleAge90to94       | 28         |
| Sierra Leone | 2000           | MaleAge95to99       | 2          |
| Slovakia     | 1992           | FemaleAge0to4       | 196476     |
| Slovakia     | 1992           | FemaleAge10to14     | 231204     |
| Slovakia     | 1992           | FemaleAge15to19     | 205855     |
| Slovakia     | 1992           | FemaleAge20to24     | 133820     |
| Slovakia     | 1992           | FemaleAge25to29     | 150468     |
| Slovakia     | 1992           | FemaleAge30to34     | 187603     |
| Slovakia     | 1992           | FemaleAge35to39     | 210091     |
| Slovakia     | 1992           | FemaleAge40to44     | 186243     |
| Slovakia     | 1992           | FemaleAge45to49     | 152440     |
| Slovakia     | 1992           | FemaleAge50to54     | 132142     |
| Slovakia     | 1992           | FemaleAge55to59     | 129636     |
| Slovakia     | 1992           | FemaleAge5to9       | 210441     |
| Slovakia     | 1992           | FemaleAge60to64     | 126904     |
| Slovakia     | 1992           | FemaleAge65to69     | 133272     |
| Slovakia     | 1992           | FemaleAge70to74     | 77863      |
| Slovakia     | 1992           | FemaleAge75to79     | 54957      |
| Slovakia     | 1992           | FemaleAge80to84     | 48554      |
| Slovakia     | 1992           | FemaleAge85to89     | 20328      |
| Slovakia     | 1992           | FemaleAge90to94     | 5692       |
| Slovakia     | 1992           | FemaleAge95to99     | 796        |
| Slovakia     | 1992           | FemaleAgeAbove100   | 42         |
| Slovakia     | 1992           | FemaleLactAge15to19 | 10116      |
| Slovakia     | 1992           | FemaleLactAge20to24 | 31512      |
| Slovakia     | 1992           | FemaleLactAge25to29 | 19498      |
| Slovakia     | 1992           | FemaleLactAge30to34 | 8847       |
| Slovakia     | 1992           | FemaleLactAge35to39 | 3173       |
| Slovakia     | 1992           | FemaleLactAge40to44 | 555        |
| Slovakia     | 1992           | FemaleLactAge45to49 | 17         |
| Slovakia     | 1992           | FemalePregAge15to19 | 7587       |
| Slovakia     | 1992           | FemalePregAge20to24 | 23634      |
| Slovakia     | 1992           | FemalePregAge25to29 | 14624      |
| Slovakia     | 1992           | FemalePregAge30to34 | 6635       |
| Slovakia     | 1992           | FemalePregAge35to39 | 2380       |
| Slovakia     | 1992           | FemalePregAge40to44 | 416        |
| Slovakia     | 1992           | FemalePregAge45to49 | 13         |
| Slovakia     | 1992           | MaleAge0to4         | 205145     |
| Slovakia     | 1992           | MaleAge10to14       | 240927     |
| Slovakia     | 1992           | MaleAge15to19       | 232454     |
| Slovakia     | 1992           | MaleAge20to24       | 195630     |
| Slovakia     | 1992           | MaleAge25to29       | 190193     |
| Slovakia     | 1992           | MaleAge30to34       | 207969     |
| Slovakia     | 1992           | MaleAge35to39       | 219737     |
| Slovakia     | 1992           | MaleAge40to44       | 185888     |
| Slovakia     | 1992           | MaleAge45to49       | 142723     |
| Slovakia     | 1992           | MaleAge50to54       | 116660     |
| Slovakia     | 1992           | MaleAge55to59       | 110388     |
| Slovakia     | 1992           | MaleAge5to9         | 219662     |
| Slovakia     | 1992           | MaleAge60to64       | 102067     |
| Slovakia     | 1992           | MaleAge65to69       | 96718      |
| Slovakia     | 1992           | MaleAge70to74       | 53879      |
| Slovakia     | 1992           | MaleAge75to79       | 34350      |
| Slovakia     | 1992           | MaleAge80to84       | 27277      |

Dietary calcium and zinc deficiency risks are decreasing but remain prevalent

| Country  | Reference year | Age/gender group    | Population |
|----------|----------------|---------------------|------------|
| Slovakia | 1992           | MaleAge85to89       | 9416       |
| Slovakia | 1992           | MaleAge90to94       | 2154       |
| Slovakia | 1992           | MaleAge95to99       | 301        |
| Slovakia | 1992           | MaleAgeAbove100     | 15         |
| Slovakia | 1993           | FemaleAge0to4       | 190679     |
| Slovakia | 1993           | FemaleAge10to14     | 227160     |
| Slovakia | 1993           | FemaleAge15to19     | 211032     |
| Slovakia | 1993           | FemaleAge20to24     | 140701     |
| Slovakia | 1993           | FemaleAge25to29     | 146800     |
| Slovakia | 1993           | FemaleAge30to34     | 184257     |
| Slovakia | 1993           | FemaleAge35to39     | 208419     |
| Slovakia | 1993           | FemaleAge40to44     | 196250     |
| Slovakia | 1993           | FemaleAge45to49     | 156313     |
| Slovakia | 1993           | FemaleAge50to54     | 135395     |
| Slovakia | 1993           | FemaleAge55to59     | 127101     |
| Slovakia | 1993           | FemaleAge5to9       | 207404     |
| Slovakia | 1993           | FemaleAge60to64     | 127608     |
| Slovakia | 1993           | FemaleAge65to69     | 127520     |
| Slovakia | 1993           | FemaleAge70to74     | 94613      |
| Slovakia | 1993           | FemaleAge75to79     | 45983      |
| Slovakia | 1993           | FemaleAge80to84     | 50329      |
| Slovakia | 1993           | FemaleAge85to89     | 21126      |
| Slovakia | 1993           | FemaleAge90to94     | 5854       |
| Slovakia | 1993           | FemaleAge95to99     | 979        |
| Slovakia | 1993           | FemaleAgeAbove100   | 43         |
| Slovakia | 1993           | FemaleLactAge15to19 | 10116      |
| Slovakia | 1993           | FemaleLactAge20to24 | 31512      |
| Slovakia | 1993           | FemaleLactAge25to29 | 19498      |
| Slovakia | 1993           | FemaleLactAge30to34 | 8847       |
| Slovakia | 1993           | FemaleLactAge35to39 | 3173       |
| Slovakia | 1993           | FemaleLactAge40to44 | 555        |
| Slovakia | 1993           | FemaleLactAge45to49 | 17         |
| Slovakia | 1993           | FemalePregAge15to19 | 7587       |
| Slovakia | 1993           | FemalePregAge20to24 | 23634      |
| Slovakia | 1993           | FemalePregAge25to29 | 14624      |
| Slovakia | 1993           | FemalePregAge30to34 | 6635       |
| Slovakia | 1993           | FemalePregAge35to39 | 2380       |
| Slovakia | 1993           | FemalePregAge40to44 | 416        |
| Slovakia | 1993           | FemalePregAge45to49 | 13         |
| Slovakia | 1993           | MaleAge0to4         | 199342     |
| Slovakia | 1993           | MaleAge10to14       | 236840     |
| Slovakia | 1993           | MaleAge15to19       | 237896     |
| Slovakia | 1993           | MaleAge20to24       | 202724     |
| Slovakia | 1993           | MaleAge25to29       | 186146     |
| Slovakia | 1993           | MaleAge30to34       | 204459     |
| Slovakia | 1993           | MaleAge35to39       | 217666     |
| Slovakia | 1993           | MaleAge40to44       | 196889     |
| Slovakia | 1993           | MaleAge45to49       | 147388     |
| Slovakia | 1993           | MaleAge50to54       | 119794     |
| Slovakia | 1993           | MaleAge55to59       | 107294     |
| Slovakia | 1993           | MaleAge5to9         | 216521     |
| Slovakia | 1993           | MaleAge60to64       | 102493     |
| Slovakia | 1993           | MaleAge65to69       | 92173      |
| Slovakia | 1993           | MaleAge70to74       | 63966      |
| Slovakia | 1993           | MaleAge75to79       | 28396      |
| Slovakia | 1993           | MaleAge80to84       | 28244      |
| Slovakia | 1993           | MaleAge85to89       | 9769       |
| Slovakia | 1993           | MaleAge90to94       | 2201       |
| Slovakia | 1993           | MaleAge95to99       | 376        |
| Slovakia | 1993           | MaleAgeAbove100     | 15         |
| Slovakia | 1994           | FemaleAge0to4       | 184068     |
| Slovakia | 1994           | FemaleAge10to14     | 222581     |
| Slovakia | 1994           | FemaleAge15to19     | 214779     |
| Slovakia | 1994           | FemaleAge20to24     | 147945     |
| Slovakia | 1994           | FemaleAge25to29     | 144901     |
| Slovakia | 1994           | FemaleAge30to34     | 180653     |
| Slovakia | 1994           | FemaleAge35to39     | 205791     |
| Slovakia | 1994           | FemaleAge40to44     | 204724     |
| Slovakia | 1994           | FemaleAge45to49     | 161466     |
| Slovakia | 1994           | FemaleAge50to54     | 139082     |
| Slovakia | 1994           | FemaleAge55to59     | 125444     |
| Slovakia | 1994           | FemaleAge5to9       | 204551     |
| Slovakia | 1994           | FemaleAge60to64     | 128026     |
| Slovakia | 1994           | FemaleAge65to69     | 122286     |
| Slovakia | 1994           | FemaleAge70to74     | 108273     |
| Slovakia | 1994           | FemaleAge75to79     | 41786      |
| Slovakia | 1994           | FemaleAge80to84     | 50099      |
| Slovakia | 1994           | FemaleAge85to89     | 21636      |
| Slovakia | 1994           | FemaleAge90to94     | 5842       |
| Slovakia | 1994           | FemaleAge95to99     | 1033       |
| Slovakia | 1994           | FemaleAgeAbove100   | 45         |
| Slovakia | 1994           | FemaleLactAge15to19 | 10116      |
| Slovakia | 1994           | FemaleLactAge20to24 | 31512      |
| Slovakia | 1994           | FemaleLactAge25to29 | 19498      |
| Slovakia | 1994           | FemaleLactAge30to34 | 8847       |
| Slovakia | 1994           | FemaleLactAge35to39 | 3173       |
| Slovakia | 1994           | FemaleLactAge40to44 | 555        |
| Slovakia | 1994           | FemaleLactAge45to49 | 17         |

Dietary calcium and zinc deficiency risks are decreasing but remain prevalent

| Country  | Reference year | Age/gender group    | Population |
|----------|----------------|---------------------|------------|
| Slovakia | 1994           | FemalePregAge15to19 | 7587       |
| Slovakia | 1994           | FemalePregAge20to24 | 23634      |
| Slovakia | 1994           | FemalePregAge25to29 | 14624      |
| Slovakia | 1994           | FemalePregAge30to34 | 6635       |
| Slovakia | 1994           | FemalePregAge35to39 | 2380       |
| Slovakia | 1994           | FemalePregAge40to44 | 416        |
| Slovakia | 1994           | FemalePregAge45to49 | 13         |
| Slovakia | 1994           | MaleAge0to4         | 192716     |
| Slovakia | 1994           | MaleAge10to14       | 232188     |
| Slovakia | 1994           | MaleAge15to19       | 241949     |
| Slovakia | 1994           | MaleAge20to24       | 210285     |
| Slovakia | 1994           | MaleAge25to29       | 183969     |
| Slovakia | 1994           | MaleAge30to34       | 200688     |
| Slovakia | 1994           | MaleAge35to39       | 214670     |
| Slovakia | 1994           | MaleAge40to44       | 206168     |
| Slovakia | 1994           | MaleAge45to49       | 153474     |
| Slovakia | 1994           | MaleAge50to54       | 123586     |
| Slovakia | 1994           | MaleAge55to59       | 105233     |
| Slovakia | 1994           | MaleAge5to9         | 213592     |
| Slovakia | 1994           | MaleAge60to64       | 102541     |
| Slovakia | 1994           | MaleAge65to69       | 88282      |
| Slovakia | 1994           | MaleAge70to74       | 71522      |
| Slovakia | 1994           | MaleAge75to79       | 25610      |
| Slovakia | 1994           | MaleAge80to84       | 27622      |
| Slovakia | 1994           | MaleAge85to89       | 9857       |
| Slovakia | 1994           | MaleAge90to94       | 2172       |
| Slovakia | 1994           | MaleAge95to99       | 381        |
| Slovakia | 1994           | MaleAgeAbove100     | 15         |
| Slovakia | 1995           | FemaleAge0to4       | 177293     |
| Slovakia | 1995           | FemaleAge10to14     | 218401     |
| Slovakia | 1995           | FemaleAge15to19     | 216582     |
| Slovakia | 1995           | FemaleAge20to24     | 154720     |
| Slovakia | 1995           | FemaleAge25to29     | 145430     |
| Slovakia | 1995           | FemaleAge30to34     | 176735     |
| Slovakia | 1995           | FemaleAge35to39     | 202953     |
| Slovakia | 1995           | FemaleAge40to44     | 210438     |
| Slovakia | 1995           | FemaleAge45to49     | 168269     |
| Slovakia | 1995           | FemaleAge50to54     | 142815     |
| Slovakia | 1995           | FemaleAge55to59     | 125202     |
| Slovakia | 1995           | FemaleAge5to9       | 200958     |
| Slovakia | 1995           | FemaleAge60to64     | 127415     |
| Slovakia | 1995           | FemaleAge65to69     | 119435     |
| Slovakia | 1995           | FemaleAge70to74     | 116038     |
| Slovakia | 1995           | FemaleAge75to79     | 44229      |
| Slovakia | 1995           | FemaleAge80to84     | 47388      |
| Slovakia | 1995           | FemaleAge85to89     | 22042      |
| Slovakia | 1995           | FemaleAge90to94     | 5644       |
| Slovakia | 1995           | FemaleAge95to99     | 826        |
| Slovakia | 1995           | FemaleAgeAbove100   | 48         |
| Slovakia | 1995           | FemaleLactAge15to19 | 10116      |
| Slovakia | 1995           | FemaleLactAge20to24 | 31512      |
| Slovakia | 1995           | FemaleLactAge25to29 | 19498      |
| Slovakia | 1995           | FemaleLactAge30to34 | 8847       |
| Slovakia | 1995           | FemaleLactAge35to39 | 3173       |
| Slovakia | 1995           | FemaleLactAge40to44 | 555        |
| Slovakia | 1995           | FemaleLactAge45to49 | 17         |
| Slovakia | 1995           | FemalePregAge15to19 | 7587       |
| Slovakia | 1995           | FemalePregAge20to24 | 23634      |
| Slovakia | 1995           | FemalePregAge25to29 | 14624      |
| Slovakia | 1995           | FemalePregAge30to34 | 6635       |
| Slovakia | 1995           | FemalePregAge35to39 | 2380       |
| Slovakia | 1995           | FemalePregAge40to44 | 416        |
| Slovakia | 1995           | FemalePregAge45to49 | 13         |
| Slovakia | 1995           | MaleAge0to4         | 185863     |
| Slovakia | 1995           | MaleAge10to14       | 227947     |
| Slovakia | 1995           | MaleAge15to19       | 244046     |
| Slovakia | 1995           | MaleAge20to24       | 217451     |
| Slovakia | 1995           | MaleAge25to29       | 184399     |
| Slovakia | 1995           | MaleAge30to34       | 196558     |
| Slovakia | 1995           | MaleAge35to39       | 211601     |
| Slovakia | 1995           | MaleAge40to44       | 212419     |
| Slovakia | 1995           | MaleAge45to49       | 161307     |
| Slovakia | 1995           | MaleAge50to54       | 127684     |
| Slovakia | 1995           | MaleAge55to59       | 104772     |
| Slovakia | 1995           | MaleAge5to9         | 209959     |
| Slovakia | 1995           | MaleAge60to64       | 101646     |
| Slovakia | 1995           | MaleAge65to69       | 86186      |
| Slovakia | 1995           | MaleAge70to74       | 75087      |
| Slovakia | 1995           | MaleAge75to79       | 26872      |
| Slovakia | 1995           | MaleAge80to84       | 25270      |
| Slovakia | 1995           | MaleAge85to89       | 9744       |
| Slovakia | 1995           | MaleAge90to94       | 1994       |
| Slovakia | 1995           | MaleAge95to99       | 263        |
| Slovakia | 1995           | MaleAgeAbove100     | 15         |
| Slovakia | 1996           | FemaleAge0to4       | 170578     |
| Slovakia | 1996           | FemaleAge10to14     | 214904     |
| Slovakia | 1996           | FemaleAge15to19     | 223119     |
| Slovakia | 1996           | FemaleAge20to24     | 175801     |



Dietary calcium and zinc deficiency risks are decreasing but remain prevalent

| Country  | Reference year | Age/gender group    | Population |
|----------|----------------|---------------------|------------|
| Slovakia | 1996           | FemaleAge25to29     | 151497     |
| Slovakia | 1996           | FemaleAge30to34     | 174636     |
| Slovakia | 1996           | FemaleAge35to39     | 200020     |
| Slovakia | 1996           | FemaleAge40to44     | 213138     |
| Slovakia | 1996           | FemaleAge45to49     | 176230     |
| Slovakia | 1996           | FemaleAge50to54     | 146392     |
| Slovakia | 1996           | FemaleAge55to59     | 125885     |
| Slovakia | 1996           | FemaleAge5to9       | 196995     |
| Slovakia | 1996           | FemaleAge60to64     | 125559     |
| Slovakia | 1996           | FemaleAge65to69     | 117495     |
| Slovakia | 1996           | FemaleAge70to74     | 117869     |
| Slovakia | 1996           | FemaleAge75to79     | 51456      |
| Slovakia | 1996           | FemaleAge80to84     | 42843      |
| Slovakia | 1996           | FemaleAge85to89     | 24011      |
| Slovakia | 1996           | FemaleAge90to94     | 6652       |
| Slovakia | 1996           | FemaleAge95to99     | 914        |
| Slovakia | 1996           | FemaleAgeAbove100   | 52         |
| Slovakia | 1996           | FemaleLactAge15to19 | 6218       |
| Slovakia | 1996           | FemaleLactAge20to24 | 23117      |
| Slovakia | 1996           | FemaleLactAge25to29 | 17579      |
| Slovakia | 1996           | FemaleLactAge30to34 | 7759       |
| Slovakia | 1996           | FemaleLactAge35to39 | 3028       |
| Slovakia | 1996           | FemaleLactAge40to44 | 581        |
| Slovakia | 1996           | FemaleLactAge45to49 | 21         |
| Slovakia | 1996           | FemalePregAge15to19 | 4664       |
| Slovakia | 1996           | FemalePregAge20to24 | 17337      |
| Slovakia | 1996           | FemalePregAge25to29 | 13184      |
| Slovakia | 1996           | FemalePregAge30to34 | 5819       |
| Slovakia | 1996           | FemalePregAge35to39 | 2271       |
| Slovakia | 1996           | FemalePregAge40to44 | 435        |
| Slovakia | 1996           | FemalePregAge45to49 | 16         |
| Slovakia | 1996           | MaleAge0to4         | 178977     |
| Slovakia | 1996           | MaleAge10to14       | 224259     |
| Slovakia | 1996           | MaleAge15to19       | 243759     |
| Slovakia | 1996           | MaleAge20to24       | 224108     |
| Slovakia | 1996           | MaleAge25to29       | 187127     |
| Slovakia | 1996           | MaleAge30to34       | 192216     |
| Slovakia | 1996           | MaleAge35to39       | 208095     |
| Slovakia | 1996           | MaleAge40to44       | 215107     |
| Slovakia | 1996           | MaleAge45to49       | 170026     |
| Slovakia | 1996           | MaleAge50to54       | 131606     |
| Slovakia | 1996           | MaleAge55to59       | 105262     |
| Slovakia | 1996           | MaleAge5to9         | 205749     |
| Slovakia | 1996           | MaleAge60to64       | 99598      |
| Slovakia | 1996           | MaleAge65to69       | 84981      |
| Slovakia | 1996           | MaleAge70to74       | 75531      |
| Slovakia | 1996           | MaleAge75to79       | 31262      |
| Slovakia | 1996           | MaleAge80to84       | 22827      |
| Slovakia | 1996           | MaleAge85to89       | 11031      |
| Slovakia | 1996           | MaleAge90to94       | 2449       |
| Slovakia | 1996           | MaleAge95to99       | 291        |
| Slovakia | 1996           | MaleAgeAbove100     | 16         |
| Slovakia | 1997           | FemaleAge0to4       | 162728     |
| Slovakia | 1997           | FemaleAge10to14     | 211853     |
| Slovakia | 1997           | FemaleAge15to19     | 220705     |
| Slovakia | 1997           | FemaleAge20to24     | 182065     |
| Slovakia | 1997           | FemaleAge25to29     | 156562     |
| Slovakia | 1997           | FemaleAge30to34     | 170365     |
| Slovakia | 1997           | FemaleAge35to39     | 196930     |
| Slovakia | 1997           | FemaleAge40to44     | 213252     |
| Slovakia | 1997           | FemaleAge45to49     | 185712     |
| Slovakia | 1997           | FemaleAge50to54     | 149953     |
| Slovakia | 1997           | FemaleAge55to59     | 128051     |
| Slovakia | 1997           | FemaleAge5to9       | 192642     |
| Slovakia | 1997           | FemaleAge60to64     | 123163     |
| Slovakia | 1997           | FemaleAge65to69     | 117282     |
| Slovakia | 1997           | FemaleAge70to74     | 115393     |
| Slovakia | 1997           | FemaleAge75to79     | 63419      |
| Slovakia | 1997           | FemaleAge80to84     | 36155      |
| Slovakia | 1997           | FemaleAge85to89     | 26187      |
| Slovakia | 1997           | FemaleAge90to94     | 7292       |
| Slovakia | 1997           | FemaleAge95to99     | 1018       |
| Slovakia | 1997           | FemaleAgeAbove100   | 58         |
| Slovakia | 1997           | FemaleLactAge15to19 | 6218       |
| Slovakia | 1997           | FemaleLactAge20to24 | 23117      |
| Slovakia | 1997           | FemaleLactAge25to29 | 17579      |
| Slovakia | 1997           | FemaleLactAge30to34 | 7759       |
| Slovakia | 1997           | FemaleLactAge35to39 | 3028       |
| Slovakia | 1997           | FemaleLactAge40to44 | 581        |
| Slovakia | 1997           | FemaleLactAge45to49 | 21         |
| Slovakia | 1997           | FemalePregAge15to19 | 4664       |
| Slovakia | 1997           | FemalePregAge20to24 | 17337      |
| Slovakia | 1997           | FemalePregAge25to29 | 13184      |
| Slovakia | 1997           | FemalePregAge30to34 | 5819       |
| Slovakia | 1997           | FemalePregAge35to39 | 2271       |
| Slovakia | 1997           | FemalePregAge40to44 | 435        |
| Slovakia | 1997           | FemalePregAge45to49 | 16         |
| Slovakia | 1997           | MaleAge0to4         | 170836     |

Dietary calcium and zinc deficiency risks are decreasing but remain prevalent

| Country  | Reference year | Age/gender group    | Population |
|----------|----------------|---------------------|------------|
| Slovakia | 1997           | MaleAge10to14       | 221027     |
| Slovakia | 1997           | MaleAge15to19       | 241320     |
| Slovakia | 1997           | MaleAge20to24       | 230722     |
| Slovakia | 1997           | MaleAge25to29       | 192408     |
| Slovakia | 1997           | MaleAge30to34       | 187615     |
| Slovakia | 1997           | MaleAge35to39       | 204849     |
| Slovakia | 1997           | MaleAge40to44       | 215008     |
| Slovakia | 1997           | MaleAge45to49       | 180331     |
| Slovakia | 1997           | MaleAge50to54       | 135706     |
| Slovakia | 1997           | MaleAge55to59       | 107298     |
| Slovakia | 1997           | MaleAge5to9         | 201251     |
| Slovakia | 1997           | MaleAge60to64       | 96999      |
| Slovakia | 1997           | MaleAge65to69       | 84990      |
| Slovakia | 1997           | MaleAge70to74       | 73425      |
| Slovakia | 1997           | MaleAge75to79       | 37893      |
| Slovakia | 1997           | MaleAge80to84       | 19162      |
| Slovakia | 1997           | MaleAge85to89       | 12383      |
| Slovakia | 1997           | MaleAge90to94       | 2719       |
| Slovakia | 1997           | MaleAge95to99       | 328        |
| Slovakia | 1997           | MaleAgeAbove100     | 18         |
| Slovakia | 1998           | FemaleAge0to4       | 154514     |
| Slovakia | 1998           | FemaleAge10to14     | 208985     |
| Slovakia | 1998           | FemaleAge15to19     | 216842     |
| Slovakia | 1998           | FemaleAge20to24     | 187641     |
| Slovakia | 1998           | FemaleAge25to29     | 163260     |
| Slovakia | 1998           | FemaleAge30to34     | 166534     |
| Slovakia | 1998           | FemaleAge35to39     | 193880     |
| Slovakia | 1998           | FemaleAge40to44     | 211373     |
| Slovakia | 1998           | FemaleAge45to49     | 195445     |
| Slovakia | 1998           | FemaleAge50to54     | 153960     |
| Slovakia | 1998           | FemaleAge55to59     | 131321     |
| Slovakia | 1998           | FemaleAge5to9       | 187796     |
| Slovakia | 1998           | FemaleAge60to64     | 120767     |
| Slovakia | 1998           | FemaleAge65to69     | 117975     |
| Slovakia | 1998           | FemaleAge70to74     | 110796     |
| Slovakia | 1998           | FemaleAge75to79     | 76710      |
| Slovakia | 1998           | FemaleAge80to84     | 30073      |
| Slovakia | 1998           | FemaleAge85to89     | 27643      |
| Slovakia | 1998           | FemaleAge90to94     | 7553       |
| Slovakia | 1998           | FemaleAge95to99     | 1133       |
| Slovakia | 1998           | FemaleAgeAbove100   | 65         |
| Slovakia | 1998           | FemaleLactAge15to19 | 6218       |
| Slovakia | 1998           | FemaleLactAge20to24 | 23117      |
| Slovakia | 1998           | FemaleLactAge25to29 | 17579      |
| Slovakia | 1998           | FemaleLactAge30to34 | 7759       |
| Slovakia | 1998           | FemaleLactAge35to39 | 3028       |
| Slovakia | 1998           | FemaleLactAge40to44 | 581        |
| Slovakia | 1998           | FemaleLactAge45to49 | 21         |
| Slovakia | 1998           | FemalePregAge15to19 | 4664       |
| Slovakia | 1998           | FemalePregAge20to24 | 17337      |
| Slovakia | 1998           | FemalePregAge25to29 | 13184      |
| Slovakia | 1998           | FemalePregAge30to34 | 5819       |
| Slovakia | 1998           | FemalePregAge35to39 | 2271       |
| Slovakia | 1998           | FemalePregAge40to44 | 435        |
| Slovakia | 1998           | FemalePregAge45to49 | 16         |
| Slovakia | 1998           | MaleAge0to4         | 162260     |
| Slovakia | 1998           | MaleAge10to14       | 217954     |
| Slovakia | 1998           | MaleAge15to19       | 237420     |
| Slovakia | 1998           | MaleAge20to24       | 236699     |
| Slovakia | 1998           | MaleAge25to29       | 199470     |
| Slovakia | 1998           | MaleAge30to34       | 183504     |
| Slovakia | 1998           | MaleAge35to39       | 201733     |
| Slovakia | 1998           | MaleAge40to44       | 212879     |
| Slovakia | 1998           | MaleAge45to49       | 190861     |
| Slovakia | 1998           | MaleAge50to54       | 140410     |
| Slovakia | 1998           | MaleAge55to59       | 110523     |
| Slovakia | 1998           | MaleAge5to9         | 196370     |
| Slovakia | 1998           | MaleAge60to64       | 94468      |
| Slovakia | 1998           | MaleAge65to69       | 85542      |
| Slovakia | 1998           | MaleAge70to74       | 70242      |
| Slovakia | 1998           | MaleAge75to79       | 44685      |
| Slovakia | 1998           | MaleAge80to84       | 15877      |
| Slovakia | 1998           | MaleAge85to89       | 13184      |
| Slovakia | 1998           | MaleAge90to94       | 2827       |
| Slovakia | 1998           | MaleAge95to99       | 368        |
| Slovakia | 1998           | MaleAgeAbove100     | 20         |
| Slovakia | 1999           | FemaleAge0to4       | 146823     |
| Slovakia | 1999           | FemaleAge10to14     | 205829     |
| Slovakia | 1999           | FemaleAge15to19     | 212690     |
| Slovakia | 1999           | FemaleAge20to24     | 191741     |
| Slovakia | 1999           | FemaleAge25to29     | 170411     |
| Slovakia | 1999           | FemaleAge30to34     | 164330     |
| Slovakia | 1999           | FemaleAge35to39     | 190571     |
| Slovakia | 1999           | FemaleAge40to44     | 208655     |
| Slovakia | 1999           | FemaleAge45to49     | 203557     |
| Slovakia | 1999           | FemaleAge50to54     | 159168     |
| Slovakia | 1999           | FemaleAge55to59     | 135056     |
| Slovakia | 1999           | FemaleAge5to9       | 182384     |

Dietary calcium and zinc deficiency risks are decreasing but remain prevalent

| Country  | Reference year | Age/gender group    | Population |
|----------|----------------|---------------------|------------|
| Slovakia | 1999           | FemaleAge60to64     | 119248     |
| Slovakia | 1999           | FemaleAge65to69     | 118373     |
| Slovakia | 1999           | FemaleAge70to74     | 106901     |
| Slovakia | 1999           | FemaleAge75to79     | 87105      |
| Slovakia | 1999           | FemaleAge80to84     | 27826      |
| Slovakia | 1999           | FemaleAge85to89     | 27275      |
| Slovakia | 1999           | FemaleAge90to94     | 7577       |
| Slovakia | 1999           | FemaleAge95to99     | 1203       |
| Slovakia | 1999           | FemaleAgeAbove100   | 72         |
| Slovakia | 1999           | FemaleLactAge15to19 | 6218       |
| Slovakia | 1999           | FemaleLactAge20to24 | 23117      |
| Slovakia | 1999           | FemaleLactAge25to29 | 17579      |
| Slovakia | 1999           | FemaleLactAge30to34 | 7759       |
| Slovakia | 1999           | FemaleLactAge35to39 | 3028       |
| Slovakia | 1999           | FemaleLactAge40to44 | 581        |
| Slovakia | 1999           | FemaleLactAge45to49 | 21         |
| Slovakia | 1999           | FemalePregAge15to19 | 4664       |
| Slovakia | 1999           | FemalePregAge20to24 | 17337      |
| Slovakia | 1999           | FemalePregAge25to29 | 13184      |
| Slovakia | 1999           | FemalePregAge30to34 | 5819       |
| Slovakia | 1999           | FemalePregAge35to39 | 2271       |
| Slovakia | 1999           | FemalePregAge40to44 | 435        |
| Slovakia | 1999           | FemalePregAge45to49 | 16         |
| Slovakia | 1999           | MaleAge0to4         | 154233     |
| Slovakia | 1999           | MaleAge10to14       | 214580     |
| Slovakia | 1999           | MaleAge15to19       | 233227     |
| Slovakia | 1999           | MaleAge20to24       | 241189     |
| Slovakia | 1999           | MaleAge25to29       | 207063     |
| Slovakia | 1999           | MaleAge30to34       | 181142     |
| Slovakia | 1999           | MaleAge35to39       | 198360     |
| Slovakia | 1999           | MaleAge40to44       | 209997     |
| Slovakia | 1999           | MaleAge45to49       | 199623     |
| Slovakia | 1999           | MaleAge50to54       | 146413     |
| Slovakia | 1999           | MaleAge55to59       | 114369     |
| Slovakia | 1999           | MaleAge5to9         | 190988     |
| Slovakia | 1999           | MaleAge60to64       | 92903      |
| Slovakia | 1999           | MaleAge65to69       | 85709      |
| Slovakia | 1999           | MaleAge70to74       | 67674      |
| Slovakia | 1999           | MaleAge75to79       | 49366      |
| Slovakia | 1999           | MaleAge80to84       | 14657      |
| Slovakia | 1999           | MaleAge85to89       | 12811      |
| Slovakia | 1999           | MaleAge90to94       | 2839       |
| Slovakia | 1999           | MaleAge95to99       | 396        |
| Slovakia | 1999           | MaleAgeAbove100     | 22         |
| Slovenia | 1992           | FemaleAge0to4       | 56459      |
| Slovenia | 1992           | FemaleAge10to14     | 72999      |
| Slovenia | 1992           | FemaleAge15to19     | 69723      |
| Slovenia | 1992           | FemaleAge20to24     | 62152      |
| Slovenia | 1992           | FemaleAge25to29     | 63253      |
| Slovenia | 1992           | FemaleAge30to34     | 70692      |
| Slovenia | 1992           | FemaleAge35to39     | 80241      |
| Slovenia | 1992           | FemaleAge40to44     | 70651      |
| Slovenia | 1992           | FemaleAge45to49     | 60872      |
| Slovenia | 1992           | FemaleAge50to54     | 58159      |
| Slovenia | 1992           | FemaleAge55to59     | 59720      |
| Slovenia | 1992           | FemaleAge5to9       | 65577      |
| Slovenia | 1992           | FemaleAge60to64     | 58275      |
| Slovenia | 1992           | FemaleAge65to69     | 55569      |
| Slovenia | 1992           | FemaleAge70to74     | 31452      |
| Slovenia | 1992           | FemaleAge75to79     | 25515      |
| Slovenia | 1992           | FemaleAge80to84     | 22950      |
| Slovenia | 1992           | FemaleAge85to89     | 9489       |
| Slovenia | 1992           | FemaleAge90to94     | 2853       |
| Slovenia | 1992           | FemaleAge95to99     | 477        |
| Slovenia | 1992           | FemaleAgeAbove100   | 18         |
| Slovenia | 1992           | FemaleLactAge15to19 | 912        |
| Slovenia | 1992           | FemaleLactAge20to24 | 6141       |
| Slovenia | 1992           | FemaleLactAge25to29 | 7904       |
| Slovenia | 1992           | FemaleLactAge30to34 | 4043       |
| Slovenia | 1992           | FemaleLactAge35to39 | 1280       |
| Slovenia | 1992           | FemaleLactAge40to44 | 192        |
| Slovenia | 1992           | FemaleLactAge45to49 | 8          |
| Slovenia | 1992           | FemalePregAge15to19 | 684        |
| Slovenia | 1992           | FemalePregAge20to24 | 4606       |
| Slovenia | 1992           | FemalePregAge25to29 | 5928       |
| Slovenia | 1992           | FemalePregAge30to34 | 3032       |
| Slovenia | 1992           | FemalePregAge35to39 | 960        |
| Slovenia | 1992           | FemalePregAge40to44 | 144        |
| Slovenia | 1992           | FemalePregAge45to49 | 6          |
| Slovenia | 1992           | MaleAge0to4         | 59784      |
| Slovenia | 1992           | MaleAge10to14       | 76830      |
| Slovenia | 1992           | MaleAge15to19       | 75120      |
| Slovenia | 1992           | MaleAge20to24       | 73406      |
| Slovenia | 1992           | MaleAge25to29       | 75811      |
| Slovenia | 1992           | MaleAge30to34       | 78709      |
| Slovenia | 1992           | MaleAge35to39       | 86507      |
| Slovenia | 1992           | MaleAge40to44       | 74930      |
| Slovenia | 1992           | MaleAge45to49       | 62588      |

Dietary calcium and zinc deficiency risks are decreasing but remain prevalent

| Country  | Reference year | Age/gender group    | Population |
|----------|----------------|---------------------|------------|
| Slovenia | 1992           | MaleAge50to54       | 58163      |
| Slovenia | 1992           | MaleAge55to59       | 55124      |
| Slovenia | 1992           | MaleAge5to9         | 68213      |
| Slovenia | 1992           | MaleAge60to64       | 46082      |
| Slovenia | 1992           | MaleAge65to69       | 33492      |
| Slovenia | 1992           | MaleAge70to74       | 16737      |
| Slovenia | 1992           | MaleAge75to79       | 13425      |
| Slovenia | 1992           | MaleAge80to84       | 10871      |
| Slovenia | 1992           | MaleAge85to89       | 3620       |
| Slovenia | 1992           | MaleAge90to94       | 854        |
| Slovenia | 1992           | MaleAge95to99       | 149        |
| Slovenia | 1992           | MaleAgeAbove100     | 5          |
| Slovenia | 1993           | FemaleAge0to4       | 53542      |
| Slovenia | 1993           | FemaleAge10to14     | 71672      |
| Slovenia | 1993           | FemaleAge15to19     | 70868      |
| Slovenia | 1993           | FemaleAge20to24     | 60495      |
| Slovenia | 1993           | FemaleAge25to29     | 62679      |
| Slovenia | 1993           | FemaleAge30to34     | 70362      |
| Slovenia | 1993           | FemaleAge35to39     | 78521      |
| Slovenia | 1993           | FemaleAge40to44     | 74990      |
| Slovenia | 1993           | FemaleAge45to49     | 60668      |
| Slovenia | 1993           | FemaleAge50to54     | 58817      |
| Slovenia | 1993           | FemaleAge55to59     | 58280      |
| Slovenia | 1993           | FemaleAge5to9       | 63896      |
| Slovenia | 1993           | FemaleAge60to64     | 58985      |
| Slovenia | 1993           | FemaleAge65to69     | 54850      |
| Slovenia | 1993           | FemaleAge70to74     | 38092      |
| Slovenia | 1993           | FemaleAge75to79     | 21188      |
| Slovenia | 1993           | FemaleAge80to84     | 24123      |
| Slovenia | 1993           | FemaleAge85to89     | 9968       |
| Slovenia | 1993           | FemaleAge90to94     | 2842       |
| Slovenia | 1993           | FemaleAge95to99     | 597        |
| Slovenia | 1993           | FemaleAgeAbove100   | 19         |
| Slovenia | 1993           | FemaleLactAge15to19 | 912        |
| Slovenia | 1993           | FemaleLactAge20to24 | 6141       |
| Slovenia | 1993           | FemaleLactAge25to29 | 7904       |
| Slovenia | 1993           | FemaleLactAge30to34 | 4043       |
| Slovenia | 1993           | FemaleLactAge35to39 | 1280       |
| Slovenia | 1993           | FemaleLactAge40to44 | 192        |
| Slovenia | 1993           | FemaleLactAge45to49 | 8          |
| Slovenia | 1993           | FemalePregAge15to19 | 684        |
| Slovenia | 1993           | FemalePregAge20to24 | 4606       |
| Slovenia | 1993           | FemalePregAge25to29 | 5928       |
| Slovenia | 1993           | FemalePregAge30to34 | 3032       |
| Slovenia | 1993           | FemalePregAge35to39 | 960        |
| Slovenia | 1993           | FemalePregAge40to44 | 144        |
| Slovenia | 1993           | FemalePregAge45to49 | 6          |
| Slovenia | 1993           | MaleAge0to4         | 56501      |
| Slovenia | 1993           | MaleAge10to14       | 75112      |
| Slovenia | 1993           | MaleAge15to19       | 76516      |
| Slovenia | 1993           | MaleAge20to24       | 72528      |
| Slovenia | 1993           | MaleAge25to29       | 75186      |
| Slovenia | 1993           | MaleAge30to34       | 77642      |
| Slovenia | 1993           | MaleAge35to39       | 84084      |
| Slovenia | 1993           | MaleAge40to44       | 79373      |
| Slovenia | 1993           | MaleAge45to49       | 62524      |
| Slovenia | 1993           | MaleAge50to54       | 58674      |
| Slovenia | 1993           | MaleAge55to59       | 54448      |
| Slovenia | 1993           | MaleAge5to9         | 66640      |
| Slovenia | 1993           | MaleAge60to64       | 47677      |
| Slovenia | 1993           | MaleAge65to69       | 34465      |
| Slovenia | 1993           | MaleAge70to74       | 19655      |
| Slovenia | 1993           | MaleAge75to79       | 10971      |
| Slovenia | 1993           | MaleAge80to84       | 11408      |
| Slovenia | 1993           | MaleAge85to89       | 3814       |
| Slovenia | 1993           | MaleAge90to94       | 852        |
| Slovenia | 1993           | MaleAge95to99       | 178        |
| Slovenia | 1993           | MaleAgeAbove100     | 5          |
| Slovenia | 1994           | FemaleAge0to4       | 50753      |
| Slovenia | 1994           | FemaleAge10to14     | 70135      |
| Slovenia | 1994           | FemaleAge15to19     | 71776      |
| Slovenia | 1994           | FemaleAge20to24     | 59223      |
| Slovenia | 1994           | FemaleAge25to29     | 61915      |
| Slovenia | 1994           | FemaleAge30to34     | 70024      |
| Slovenia | 1994           | FemaleAge35to39     | 76689      |
| Slovenia | 1994           | FemaleAge40to44     | 78537      |
| Slovenia | 1994           | FemaleAge45to49     | 61200      |
| Slovenia | 1994           | FemaleAge50to54     | 59418      |
| Slovenia | 1994           | FemaleAge55to59     | 57075      |
| Slovenia | 1994           | FemaleAge5to9       | 62097      |
| Slovenia | 1994           | FemaleAge60to64     | 59373      |
| Slovenia | 1994           | FemaleAge65to69     | 54136      |
| Slovenia | 1994           | FemaleAge70to74     | 43901      |
| Slovenia | 1994           | FemaleAge75to79     | 18780      |
| Slovenia | 1994           | FemaleAge80to84     | 24341      |
| Slovenia | 1994           | FemaleAge85to89     | 10386      |
| Slovenia | 1994           | FemaleAge90to94     | 2806       |
| Slovenia | 1994           | FemaleAge95to99     | 611        |

Dietary calcium and zinc deficiency risks are decreasing but remain prevalent

| Country  | Reference year | Age/gender group    | Population |
|----------|----------------|---------------------|------------|
| Slovenia | 1994           | FemaleAgeAbove100   | 20         |
| Slovenia | 1994           | FemaleLactAge15to19 | 912        |
| Slovenia | 1994           | FemaleLactAge20to24 | 6141       |
| Slovenia | 1994           | FemaleLactAge25to29 | 7904       |
| Slovenia | 1994           | FemaleLactAge30to34 | 4043       |
| Slovenia | 1994           | FemaleLactAge35to39 | 1280       |
| Slovenia | 1994           | FemaleLactAge40to44 | 192        |
| Slovenia | 1994           | FemaleLactAge45to49 | 8          |
| Slovenia | 1994           | FemalePregAge15to19 | 684        |
| Slovenia | 1994           | FemalePregAge20to24 | 4606       |
| Slovenia | 1994           | FemalePregAge25to29 | 5928       |
| Slovenia | 1994           | FemalePregAge30to34 | 3032       |
| Slovenia | 1994           | FemalePregAge35to39 | 960        |
| Slovenia | 1994           | FemalePregAge40to44 | 144        |
| Slovenia | 1994           | FemalePregAge45to49 | 6          |
| Slovenia | 1994           | MaleAge0to4         | 53392      |
| Slovenia | 1994           | MaleAge10to14       | 73257      |
| Slovenia | 1994           | MaleAge15to19       | 77607      |
| Slovenia | 1994           | MaleAge20to24       | 72056      |
| Slovenia | 1994           | MaleAge25to29       | 74586      |
| Slovenia | 1994           | MaleAge30to34       | 76770      |
| Slovenia | 1994           | MaleAge35to39       | 81557      |
| Slovenia | 1994           | MaleAge40to44       | 82957      |
| Slovenia | 1994           | MaleAge45to49       | 63284      |
| Slovenia | 1994           | MaleAge50to54       | 59188      |
| Slovenia | 1994           | MaleAge55to59       | 53945      |
| Slovenia | 1994           | MaleAge5to9         | 65072      |
| Slovenia | 1994           | MaleAge60to64       | 48923      |
| Slovenia | 1994           | MaleAge65to69       | 35536      |
| Slovenia | 1994           | MaleAge70to74       | 22343      |
| Slovenia | 1994           | MaleAge75to79       | 9543       |
| Slovenia | 1994           | MaleAge80to84       | 11291      |
| Slovenia | 1994           | MaleAge85to89       | 3941       |
| Slovenia | 1994           | MaleAge90to94       | 847        |
| Slovenia | 1994           | MaleAge95to99       | 176        |
| Slovenia | 1994           | MaleAgeAbove100     | 5          |
| Slovenia | 1995           | FemaleAge0to4       | 48548      |
| Slovenia | 1995           | FemaleAge10to14     | 68593      |
| Slovenia | 1995           | FemaleAge15to19     | 72072      |
| Slovenia | 1995           | FemaleAge20to24     | 58642      |
| Slovenia | 1995           | FemaleAge25to29     | 60891      |
| Slovenia | 1995           | FemaleAge30to34     | 69541      |
| Slovenia | 1995           | FemaleAge35to39     | 75329      |
| Slovenia | 1995           | FemaleAge40to44     | 80571      |
| Slovenia | 1995           | FemaleAge45to49     | 62860      |
| Slovenia | 1995           | FemaleAge50to54     | 59737      |
| Slovenia | 1995           | FemaleAge55to59     | 56386      |
| Slovenia | 1995           | FemaleAge5to9       | 60068      |
| Slovenia | 1995           | FemaleAge60to64     | 59186      |
| Slovenia | 1995           | FemaleAge65to69     | 54051      |
| Slovenia | 1995           | FemaleAge70to74     | 47739      |
| Slovenia | 1995           | FemaleAge75to79     | 19223      |
| Slovenia | 1995           | FemaleAge80to84     | 23294      |
| Slovenia | 1995           | FemaleAge85to89     | 10846      |
| Slovenia | 1995           | FemaleAge90to94     | 2755       |
| Slovenia | 1995           | FemaleAge95to99     | 469        |
| Slovenia | 1995           | FemaleAgeAbove100   | 23         |
| Slovenia | 1995           | FemaleLactAge15to19 | 912        |
| Slovenia | 1995           | FemaleLactAge20to24 | 6141       |
| Slovenia | 1995           | FemaleLactAge25to29 | 7904       |
| Slovenia | 1995           | FemaleLactAge30to34 | 4043       |
| Slovenia | 1995           | FemaleLactAge35to39 | 1280       |
| Slovenia | 1995           | FemaleLactAge40to44 | 192        |
| Slovenia | 1995           | FemaleLactAge45to49 | 8          |
| Slovenia | 1995           | FemalePregAge15to19 | 684        |
| Slovenia | 1995           | FemalePregAge20to24 | 4606       |
| Slovenia | 1995           | FemalePregAge25to29 | 5928       |
| Slovenia | 1995           | FemalePregAge30to34 | 3032       |
| Slovenia | 1995           | FemalePregAge35to39 | 960        |
| Slovenia | 1995           | FemalePregAge40to44 | 144        |
| Slovenia | 1995           | FemalePregAge45to49 | 6          |
| Slovenia | 1995           | MaleAge0to4         | 51101      |
| Slovenia | 1995           | MaleAge10to14       | 71590      |
| Slovenia | 1995           | MaleAge15to19       | 78025      |
| Slovenia | 1995           | MaleAge20to24       | 72215      |
| Slovenia | 1995           | MaleAge25to29       | 73968      |
| Slovenia | 1995           | MaleAge30to34       | 75974      |
| Slovenia | 1995           | MaleAge35to39       | 79581      |
| Slovenia | 1995           | MaleAge40to44       | 84927      |
| Slovenia | 1995           | MaleAge45to49       | 65231      |
| Slovenia | 1995           | MaleAge50to54       | 59583      |
| Slovenia | 1995           | MaleAge55to59       | 53837      |
| Slovenia | 1995           | MaleAge5to9         | 63247      |
| Slovenia | 1995           | MaleAge60to64       | 49684      |
| Slovenia | 1995           | MaleAge65to69       | 36884      |
| Slovenia | 1995           | MaleAge70to74       | 24418      |
| Slovenia | 1995           | MaleAge75to79       | 9508       |
| Slovenia | 1995           | MaleAge80to84       | 10439      |

Dietary calcium and zinc deficiency risks are decreasing but remain prevalent

| Country  | Reference year | Age/gender group    | Population |
|----------|----------------|---------------------|------------|
| Slovenia | 1995           | MaleAge85to89       | 4031       |
| Slovenia | 1995           | MaleAge90to94       | 812        |
| Slovenia | 1995           | MaleAge95to99       | 121        |
| Slovenia | 1995           | MaleAgeAbove100     | 6          |
| Slovenia | 1996           | FemaleAge0to4       | 46504      |
| Slovenia | 1996           | FemaleAge10to14     | 67029      |
| Slovenia | 1996           | FemaleAge15to19     | 72605      |
| Slovenia | 1996           | FemaleAge20to24     | 62747      |
| Slovenia | 1996           | FemaleAge25to29     | 60951      |
| Slovenia | 1996           | FemaleAge30to34     | 67984      |
| Slovenia | 1996           | FemaleAge35to39     | 74060      |
| Slovenia | 1996           | FemaleAge40to44     | 80822      |
| Slovenia | 1996           | FemaleAge45to49     | 65139      |
| Slovenia | 1996           | FemaleAge50to54     | 59464      |
| Slovenia | 1996           | FemaleAge55to59     | 56038      |
| Slovenia | 1996           | FemaleAge5to9       | 57992      |
| Slovenia | 1996           | FemaleAge60to64     | 58378      |
| Slovenia | 1996           | FemaleAge65to69     | 54158      |
| Slovenia | 1996           | FemaleAge70to74     | 49623      |
| Slovenia | 1996           | FemaleAge75to79     | 21905      |
| Slovenia | 1996           | FemaleAge80to84     | 21069      |
| Slovenia | 1996           | FemaleAge85to89     | 11965      |
| Slovenia | 1996           | FemaleAge90to94     | 3267       |
| Slovenia | 1996           | FemaleAge95to99     | 505        |
| Slovenia | 1996           | FemaleAgeAbove100   | 27         |
| Slovenia | 1996           | FemaleLactAge15to19 | 495        |
| Slovenia | 1996           | FemaleLactAge20to24 | 3982       |
| Slovenia | 1996           | FemaleLactAge25to29 | 7267       |
| Slovenia | 1996           | FemaleLactAge30to34 | 4796       |
| Slovenia | 1996           | FemaleLactAge35to39 | 1543       |
| Slovenia | 1996           | FemaleLactAge40to44 | 253        |
| Slovenia | 1996           | FemaleLactAge45to49 | 7          |
| Slovenia | 1996           | FemalePregAge15to19 | 371        |
| Slovenia | 1996           | FemalePregAge20to24 | 2986       |
| Slovenia | 1996           | FemalePregAge25to29 | 5451       |
| Slovenia | 1996           | FemalePregAge30to34 | 3597       |
| Slovenia | 1996           | FemalePregAge35to39 | 1157       |
| Slovenia | 1996           | FemalePregAge40to44 | 190        |
| Slovenia | 1996           | FemalePregAge45to49 | 5          |
| Slovenia | 1996           | MaleAge0to4         | 48769      |
| Slovenia | 1996           | MaleAge10to14       | 69889      |
| Slovenia | 1996           | MaleAge15to19       | 77823      |
| Slovenia | 1996           | MaleAge20to24       | 73301      |
| Slovenia | 1996           | MaleAge25to29       | 73857      |
| Slovenia | 1996           | MaleAge30to34       | 75895      |
| Slovenia | 1996           | MaleAge35to39       | 78640      |
| Slovenia | 1996           | MaleAge40to44       | 85634      |
| Slovenia | 1996           | MaleAge45to49       | 67944      |
| Slovenia | 1996           | MaleAge50to54       | 59377      |
| Slovenia | 1996           | MaleAge55to59       | 53704      |
| Slovenia | 1996           | MaleAge5to9         | 61114      |
| Slovenia | 1996           | MaleAge60to64       | 49693      |
| Slovenia | 1996           | MaleAge65to69       | 38161      |
| Slovenia | 1996           | MaleAge70to74       | 25896      |
| Slovenia | 1996           | MaleAge75to79       | 10550      |
| Slovenia | 1996           | MaleAge80to84       | 9378       |
| Slovenia | 1996           | MaleAge85to89       | 4610       |
| Slovenia | 1996           | MaleAge90to94       | 1001       |
| Slovenia | 1996           | MaleAge95to99       | 132        |
| Slovenia | 1996           | MaleAgeAbove100     | 7          |
| Slovenia | 1997           | FemaleAge0to4       | 45305      |
| Slovenia | 1997           | FemaleAge10to14     | 65408      |
| Slovenia | 1997           | FemaleAge15to19     | 71740      |
| Slovenia | 1997           | FemaleAge20to24     | 63737      |
| Slovenia | 1997           | FemaleAge25to29     | 59522      |
| Slovenia | 1997           | FemaleAge30to34     | 67763      |
| Slovenia | 1997           | FemaleAge35to39     | 73689      |
| Slovenia | 1997           | FemaleAge40to44     | 79878      |
| Slovenia | 1997           | FemaleAge45to49     | 68525      |
| Slovenia | 1997           | FemaleAge50to54     | 58747      |
| Slovenia | 1997           | FemaleAge55to59     | 56171      |
| Slovenia | 1997           | FemaleAge5to9       | 55774      |
| Slovenia | 1997           | FemaleAge60to64     | 57124      |
| Slovenia | 1997           | FemaleAge65to69     | 54671      |
| Slovenia | 1997           | FemaleAge70to74     | 49943      |
| Slovenia | 1997           | FemaleAge75to79     | 26776      |
| Slovenia | 1997           | FemaleAge80to84     | 17773      |
| Slovenia | 1997           | FemaleAge85to89     | 13231      |
| Slovenia | 1997           | FemaleAge90to94     | 3616       |
| Slovenia | 1997           | FemaleAge95to99     | 534        |
| Slovenia | 1997           | FemaleAgeAbove100   | 32         |
| Slovenia | 1997           | FemaleLactAge15to19 | 495        |
| Slovenia | 1997           | FemaleLactAge20to24 | 3982       |
| Slovenia | 1997           | FemaleLactAge25to29 | 7267       |
| Slovenia | 1997           | FemaleLactAge30to34 | 4796       |
| Slovenia | 1997           | FemaleLactAge35to39 | 1543       |
| Slovenia | 1997           | FemaleLactAge40to44 | 253        |
| Slovenia | 1997           | FemaleLactAge45to49 | 7          |

Dietary calcium and zinc deficiency risks are decreasing but remain prevalent

| Country  | Reference year | Age/gender group    | Population |
|----------|----------------|---------------------|------------|
| Slovenia | 1997           | FemalePregAge15to19 | 371        |
| Slovenia | 1997           | FemalePregAge20to24 | 2986       |
| Slovenia | 1997           | FemalePregAge25to29 | 5451       |
| Slovenia | 1997           | FemalePregAge30to34 | 3597       |
| Slovenia | 1997           | FemalePregAge35to39 | 1157       |
| Slovenia | 1997           | FemalePregAge40to44 | 190        |
| Slovenia | 1997           | FemalePregAge45to49 | 5          |
| Slovenia | 1997           | MaleAge0to4         | 47598      |
| Slovenia | 1997           | MaleAge10to14       | 68296      |
| Slovenia | 1997           | MaleAge15to19       | 76778      |
| Slovenia | 1997           | MaleAge20to24       | 74977      |
| Slovenia | 1997           | MaleAge25to29       | 73541      |
| Slovenia | 1997           | MaleAge30to34       | 76022      |
| Slovenia | 1997           | MaleAge35to39       | 78193      |
| Slovenia | 1997           | MaleAge40to44       | 84956      |
| Slovenia | 1997           | MaleAge45to49       | 72085      |
| Slovenia | 1997           | MaleAge50to54       | 58914      |
| Slovenia | 1997           | MaleAge55to59       | 53911      |
| Slovenia | 1997           | MaleAge5to9         | 58820      |
| Slovenia | 1997           | MaleAge60to64       | 49339      |
| Slovenia | 1997           | MaleAge65to69       | 39579      |
| Slovenia | 1997           | MaleAge70to74       | 26968      |
| Slovenia | 1997           | MaleAge75to79       | 12414      |
| Slovenia | 1997           | MaleAge80to84       | 7848       |
| Slovenia | 1997           | MaleAge85to89       | 5227       |
| Slovenia | 1997           | MaleAge90to94       | 1110       |
| Slovenia | 1997           | MaleAge95to99       | 145        |
| Slovenia | 1997           | MaleAgeAbove100     | 8          |
| Slovenia | 1998           | FemaleAge0to4       | 44796      |
| Slovenia | 1998           | FemaleAge10to14     | 63745      |
| Slovenia | 1998           | FemaleAge15to19     | 70395      |
| Slovenia | 1998           | FemaleAge20to24     | 65035      |
| Slovenia | 1998           | FemaleAge25to29     | 58041      |
| Slovenia | 1998           | FemaleAge30to34     | 67483      |
| Slovenia | 1998           | FemaleAge35to39     | 73617      |
| Slovenia | 1998           | FemaleAge40to44     | 78214      |
| Slovenia | 1998           | FemaleAge45to49     | 72321      |
| Slovenia | 1998           | FemaleAge50to54     | 58048      |
| Slovenia | 1998           | FemaleAge55to59     | 56548      |
| Slovenia | 1998           | FemaleAge5to9       | 53487      |
| Slovenia | 1998           | FemaleAge60to64     | 55703      |
| Slovenia | 1998           | FemaleAge65to69     | 55325      |
| Slovenia | 1998           | FemaleAge70to74     | 49397      |
| Slovenia | 1998           | FemaleAge75to79     | 32509      |
| Slovenia | 1998           | FemaleAge80to84     | 14691      |
| Slovenia | 1998           | FemaleAge85to89     | 14167      |
| Slovenia | 1998           | FemaleAge90to94     | 3813       |
| Slovenia | 1998           | FemaleAge95to99     | 568        |
| Slovenia | 1998           | FemaleAgeAbove100   | 38         |
| Slovenia | 1998           | FemaleLactAge15to19 | 495        |
| Slovenia | 1998           | FemaleLactAge20to24 | 3982       |
| Slovenia | 1998           | FemaleLactAge25to29 | 7267       |
| Slovenia | 1998           | FemaleLactAge30to34 | 4796       |
| Slovenia | 1998           | FemaleLactAge35to39 | 1543       |
| Slovenia | 1998           | FemaleLactAge40to44 | 253        |
| Slovenia | 1998           | FemaleLactAge45to49 | 7          |
| Slovenia | 1998           | FemalePregAge15to19 | 371        |
| Slovenia | 1998           | FemalePregAge20to24 | 2986       |
| Slovenia | 1998           | FemalePregAge25to29 | 5451       |
| Slovenia | 1998           | FemalePregAge30to34 | 3597       |
| Slovenia | 1998           | FemalePregAge35to39 | 1157       |
| Slovenia | 1998           | FemalePregAge40to44 | 190        |
| Slovenia | 1998           | FemalePregAge45to49 | 5          |
| Slovenia | 1998           | MaleAge0to4         | 47329      |
| Slovenia | 1998           | MaleAge10to14       | 66767      |
| Slovenia | 1998           | MaleAge15to19       | 75099      |
| Slovenia | 1998           | MaleAge20to24       | 76854      |
| Slovenia | 1998           | MaleAge25to29       | 73180      |
| Slovenia | 1998           | MaleAge30to34       | 76263      |
| Slovenia | 1998           | MaleAge35to39       | 78098      |
| Slovenia | 1998           | MaleAge40to44       | 83393      |
| Slovenia | 1998           | MaleAge45to49       | 76887      |
| Slovenia | 1998           | MaleAge50to54       | 58617      |
| Slovenia | 1998           | MaleAge55to59       | 54283      |
| Slovenia | 1998           | MaleAge5to9         | 56398      |
| Slovenia | 1998           | MaleAge60to64       | 48844      |
| Slovenia | 1998           | MaleAge65to69       | 40930      |
| Slovenia | 1998           | MaleAge70to74       | 27857      |
| Slovenia | 1998           | MaleAge75to79       | 14588      |
| Slovenia | 1998           | MaleAge80to84       | 6435       |
| Slovenia | 1998           | MaleAge85to89       | 5611       |
| Slovenia | 1998           | MaleAge90to94       | 1162       |
| Slovenia | 1998           | MaleAge95to99       | 159        |
| Slovenia | 1998           | MaleAgeAbove100     | 9          |
| Slovenia | 1999           | FemaleAge0to4       | 44546      |
| Slovenia | 1999           | FemaleAge10to14     | 61999      |
| Slovenia | 1999           | FemaleAge15to19     | 68898      |
| Slovenia | 1999           | FemaleAge20to24     | 66078      |

Dietary calcium and zinc deficiency risks are decreasing but remain prevalent

| Country  | Reference year | Age/gender group    | Population |
|----------|----------------|---------------------|------------|
| Slovenia | 1999           | FemaleAge25to29     | 57017      |
| Slovenia | 1999           | FemaleAge30to34     | 67035      |
| Slovenia | 1999           | FemaleAge35to39     | 73625      |
| Slovenia | 1999           | FemaleAge40to44     | 76717      |
| Slovenia | 1999           | FemaleAge45to49     | 75461      |
| Slovenia | 1999           | FemaleAge50to54     | 58100      |
| Slovenia | 1999           | FemaleAge55to59     | 56809      |
| Slovenia | 1999           | FemaleAge5to9       | 51305      |
| Slovenia | 1999           | FemaleAge60to64     | 54543      |
| Slovenia | 1999           | FemaleAge65to69     | 55712      |
| Slovenia | 1999           | FemaleAge70to74     | 48963      |
| Slovenia | 1999           | FemaleAge75to79     | 37412      |
| Slovenia | 1999           | FemaleAge80to84     | 13349      |
| Slovenia | 1999           | FemaleAge85to89     | 14199      |
| Slovenia | 1999           | FemaleAge90to94     | 3944       |
| Slovenia | 1999           | FemaleAge95to99     | 608        |
| Slovenia | 1999           | FemaleAgeAbove100   | 43         |
| Slovenia | 1999           | FemaleLactAge15to19 | 495        |
| Slovenia | 1999           | FemaleLactAge20to24 | 3982       |
| Slovenia | 1999           | FemaleLactAge25to29 | 7267       |
| Slovenia | 1999           | FemaleLactAge30to34 | 4796       |
| Slovenia | 1999           | FemaleLactAge35to39 | 1543       |
| Slovenia | 1999           | FemaleLactAge40to44 | 253        |
| Slovenia | 1999           | FemaleLactAge45to49 | 7          |
| Slovenia | 1999           | FemalePregAge15to19 | 371        |
| Slovenia | 1999           | FemalePregAge20to24 | 2986       |
| Slovenia | 1999           | FemalePregAge25to29 | 5451       |
| Slovenia | 1999           | FemalePregAge30to34 | 3597       |
| Slovenia | 1999           | FemalePregAge35to39 | 1157       |
| Slovenia | 1999           | FemalePregAge40to44 | 190        |
| Slovenia | 1999           | FemalePregAge45to49 | 5          |
| Slovenia | 1999           | MaleAge0to4         | 47298      |
| Slovenia | 1999           | MaleAge10to14       | 65119      |
| Slovenia | 1999           | MaleAge15to19       | 73215      |
| Slovenia | 1999           | MaleAge20to24       | 78276      |
| Slovenia | 1999           | MaleAge25to29       | 73123      |
| Slovenia | 1999           | MaleAge30to34       | 76458      |
| Slovenia | 1999           | MaleAge35to39       | 78124      |
| Slovenia | 1999           | MaleAge40to44       | 81838      |
| Slovenia | 1999           | MaleAge45to49       | 81060      |
| Slovenia | 1999           | MaleAge50to54       | 59206      |
| Slovenia | 1999           | MaleAge55to59       | 54568      |
| Slovenia | 1999           | MaleAge5to9         | 54033      |
| Slovenia | 1999           | MaleAge60to64       | 48486      |
| Slovenia | 1999           | MaleAge65to69       | 41955      |
| Slovenia | 1999           | MaleAge70to74       | 28825      |
| Slovenia | 1999           | MaleAge75to79       | 16513      |
| Slovenia | 1999           | MaleAge80to84       | 5747       |
| Slovenia | 1999           | MaleAge85to89       | 5493       |
| Slovenia | 1999           | MaleAge90to94       | 1196       |
| Slovenia | 1999           | MaleAge95to99       | 170        |
| Slovenia | 1999           | MaleAgeAbove100     | 10         |
| Somalia  | 1992           | FemaleAge0to4       | 592342     |
| Somalia  | 1992           | FemaleAge10to14     | 372931     |
| Somalia  | 1992           | FemaleAge15to19     | 258470     |
| Somalia  | 1992           | FemaleAge20to24     | 142972     |
| Somalia  | 1992           | FemaleAge25to29     | 101433     |
| Somalia  | 1992           | FemaleAge30to34     | 92016      |
| Somalia  | 1992           | FemaleAge35to39     | 90136      |
| Somalia  | 1992           | FemaleAge40to44     | 96545      |
| Somalia  | 1992           | FemaleAge45to49     | 89386      |
| Somalia  | 1992           | FemaleAge50to54     | 93364      |
| Somalia  | 1992           | FemaleAge55to59     | 75289      |
| Somalia  | 1992           | FemaleAge5to9       | 458438     |
| Somalia  | 1992           | FemaleAge60to64     | 58344      |
| Somalia  | 1992           | FemaleAge65to69     | 45379      |
| Somalia  | 1992           | FemaleAge70to74     | 31723      |
| Somalia  | 1992           | FemaleAge75to79     | 19084      |
| Somalia  | 1992           | FemaleAge80to84     | 9264       |
| Somalia  | 1992           | FemaleAge85to89     | 3331       |
| Somalia  | 1992           | FemaleAge90to94     | 796        |
| Somalia  | 1992           | FemaleAge95to99     | 100        |
| Somalia  | 1992           | FemaleAgeAbove100   | 5          |
| Somalia  | 1992           | FemaleLactAge15to19 | 32346      |
| Somalia  | 1992           | FemaleLactAge20to24 | 72703      |
| Somalia  | 1992           | FemaleLactAge25to29 | 73003      |
| Somalia  | 1992           | FemaleLactAge30to34 | 57644      |
| Somalia  | 1992           | FemaleLactAge35to39 | 41933      |
| Somalia  | 1992           | FemaleLactAge40to44 | 22578      |
| Somalia  | 1992           | FemaleLactAge45to49 | 11456      |
| Somalia  | 1992           | FemalePregAge15to19 | 24260      |
| Somalia  | 1992           | FemalePregAge20to24 | 54527      |
| Somalia  | 1992           | FemalePregAge25to29 | 54752      |
| Somalia  | 1992           | FemalePregAge30to34 | 43233      |
| Somalia  | 1992           | FemalePregAge35to39 | 31450      |
| Somalia  | 1992           | FemalePregAge40to44 | 16934      |
| Somalia  | 1992           | FemalePregAge45to49 | 8592       |
| Somalia  | 1992           | MaleAge0to4         | 596385     |



Dietary calcium and zinc deficiency risks are decreasing but remain prevalent

| Country | Reference year | Age/gender group    | Population |
|---------|----------------|---------------------|------------|
| Somalia | 1992           | MaleAge10to14       | 372995     |
| Somalia | 1992           | MaleAge15to19       | 313828     |
| Somalia | 1992           | MaleAge20to24       | 267216     |
| Somalia | 1992           | MaleAge25to29       | 224437     |
| Somalia | 1992           | MaleAge30to34       | 187154     |
| Somalia | 1992           | MaleAge35to39       | 157011     |
| Somalia | 1992           | MaleAge40to44       | 131314     |
| Somalia | 1992           | MaleAge45to49       | 104567     |
| Somalia | 1992           | MaleAge50to54       | 85972      |
| Somalia | 1992           | MaleAge55to59       | 69885      |
| Somalia | 1992           | MaleAge5to9         | 459989     |
| Somalia | 1992           | MaleAge60to64       | 54170      |
| Somalia | 1992           | MaleAge65to69       | 40359      |
| Somalia | 1992           | MaleAge70to74       | 27006      |
| Somalia | 1992           | MaleAge75to79       | 15406      |
| Somalia | 1992           | MaleAge80to84       | 6865       |
| Somalia | 1992           | MaleAge85to89       | 2194       |
| Somalia | 1992           | MaleAge90to94       | 456        |
| Somalia | 1992           | MaleAge95to99       | 48         |
| Somalia | 1992           | MaleAgeAbove100     | 2          |
| Somalia | 1993           | FemaleAge0to4       | 588670     |
| Somalia | 1993           | FemaleAge10to14     | 373187     |
| Somalia | 1993           | FemaleAge15to19     | 256920     |
| Somalia | 1993           | FemaleAge20to24     | 140989     |
| Somalia | 1993           | FemaleAge25to29     | 100558     |
| Somalia | 1993           | FemaleAge30to34     | 90777      |
| Somalia | 1993           | FemaleAge35to39     | 88740      |
| Somalia | 1993           | FemaleAge40to44     | 96262      |
| Somalia | 1993           | FemaleAge45to49     | 89581      |
| Somalia | 1993           | FemaleAge50to54     | 91125      |
| Somalia | 1993           | FemaleAge55to59     | 76058      |
| Somalia | 1993           | FemaleAge5to9       | 460126     |
| Somalia | 1993           | FemaleAge60to64     | 57253      |
| Somalia | 1993           | FemaleAge65to69     | 44724      |
| Somalia | 1993           | FemaleAge70to74     | 31293      |
| Somalia | 1993           | FemaleAge75to79     | 18848      |
| Somalia | 1993           | FemaleAge80to84     | 9191       |
| Somalia | 1993           | FemaleAge85to89     | 3339       |
| Somalia | 1993           | FemaleAge90to94     | 820        |
| Somalia | 1993           | FemaleAge95to99     | 117        |
| Somalia | 1993           | FemaleAgeAbove100   | 5          |
| Somalia | 1993           | FemaleLactAge15to19 | 32346      |
| Somalia | 1993           | FemaleLactAge20to24 | 72703      |
| Somalia | 1993           | FemaleLactAge25to29 | 73003      |
| Somalia | 1993           | FemaleLactAge30to34 | 57644      |
| Somalia | 1993           | FemaleLactAge35to39 | 41933      |
| Somalia | 1993           | FemaleLactAge40to44 | 22578      |
| Somalia | 1993           | FemaleLactAge45to49 | 11456      |
| Somalia | 1993           | FemalePregAge15to19 | 24260      |
| Somalia | 1993           | FemalePregAge20to24 | 54527      |
| Somalia | 1993           | FemalePregAge25to29 | 54752      |
| Somalia | 1993           | FemalePregAge30to34 | 43233      |
| Somalia | 1993           | FemalePregAge35to39 | 31450      |
| Somalia | 1993           | FemalePregAge40to44 | 16934      |
| Somalia | 1993           | FemalePregAge45to49 | 8592       |
| Somalia | 1993           | MaleAge0to4         | 592341     |
| Somalia | 1993           | MaleAge10to14       | 373523     |
| Somalia | 1993           | MaleAge15to19       | 312482     |
| Somalia | 1993           | MaleAge20to24       | 265375     |
| Somalia | 1993           | MaleAge25to29       | 223770     |
| Somalia | 1993           | MaleAge30to34       | 186112     |
| Somalia | 1993           | MaleAge35to39       | 155883     |
| Somalia | 1993           | MaleAge40to44       | 130345     |
| Somalia | 1993           | MaleAge45to49       | 105139     |
| Somalia | 1993           | MaleAge50to54       | 84101      |
| Somalia | 1993           | MaleAge55to59       | 69687      |
| Somalia | 1993           | MaleAge5to9         | 461874     |
| Somalia | 1993           | MaleAge60to64       | 53271      |
| Somalia | 1993           | MaleAge65to69       | 39862      |
| Somalia | 1993           | MaleAge70to74       | 26640      |
| Somalia | 1993           | MaleAge75to79       | 15244      |
| Somalia | 1993           | MaleAge80to84       | 6852       |
| Somalia | 1993           | MaleAge85to89       | 2210       |
| Somalia | 1993           | MaleAge90to94       | 478        |
| Somalia | 1993           | MaleAge95to99       | 60         |
| Somalia | 1993           | MaleAgeAbove100     | 2          |
| Somalia | 1994           | FemaleAge0to4       | 590324     |
| Somalia | 1994           | FemaleAge10to14     | 375704     |
| Somalia | 1994           | FemaleAge15to19     | 257262     |
| Somalia | 1994           | FemaleAge20to24     | 140479     |
| Somalia | 1994           | FemaleAge25to29     | 100771     |
| Somalia | 1994           | FemaleAge30to34     | 90667      |
| Somalia | 1994           | FemaleAge35to39     | 88193      |
| Somalia | 1994           | FemaleAge40to44     | 96473      |
| Somalia | 1994           | FemaleAge45to49     | 90394      |
| Somalia | 1994           | FemaleAge50to54     | 89691      |
| Somalia | 1994           | FemaleAge55to59     | 76801      |
| Somalia | 1994           | FemaleAge5to9       | 462671     |

Dietary calcium and zinc deficiency risks are decreasing but remain prevalent

| Country | Reference year | Age/gender group    | Population |
|---------|----------------|---------------------|------------|
| Somalia | 1994           | FemaleAge60to64     | 56826      |
| Somalia | 1994           | FemaleAge65to69     | 44250      |
| Somalia | 1994           | FemaleAge70to74     | 30967      |
| Somalia | 1994           | FemaleAge75to79     | 18562      |
| Somalia | 1994           | FemaleAge80to84     | 8973       |
| Somalia | 1994           | FemaleAge85to89     | 3202       |
| Somalia | 1994           | FemaleAge90to94     | 777        |
| Somalia | 1994           | FemaleAge95to99     | 118        |
| Somalia | 1994           | FemaleAgeAbove100   | 5          |
| Somalia | 1994           | FemaleLactAge15to19 | 32346      |
| Somalia | 1994           | FemaleLactAge20to24 | 72703      |
| Somalia | 1994           | FemaleLactAge25to29 | 73003      |
| Somalia | 1994           | FemaleLactAge30to34 | 57644      |
| Somalia | 1994           | FemaleLactAge35to39 | 41933      |
| Somalia | 1994           | FemaleLactAge40to44 | 22578      |
| Somalia | 1994           | FemaleLactAge45to49 | 11456      |
| Somalia | 1994           | FemalePregAge15to19 | 24260      |
| Somalia | 1994           | FemalePregAge20to24 | 54527      |
| Somalia | 1994           | FemalePregAge25to29 | 54752      |
| Somalia | 1994           | FemalePregAge30to34 | 43233      |
| Somalia | 1994           | FemalePregAge35to39 | 31450      |
| Somalia | 1994           | FemalePregAge40to44 | 16934      |
| Somalia | 1994           | FemalePregAge45to49 | 8592       |
| Somalia | 1994           | MaleAge0to4         | 593819     |
| Somalia | 1994           | MaleAge10to14       | 376325     |
| Somalia | 1994           | MaleAge15to19       | 313112     |
| Somalia | 1994           | MaleAge20to24       | 265014     |
| Somalia | 1994           | MaleAge25to29       | 224106     |
| Somalia | 1994           | MaleAge30to34       | 186166     |
| Somalia | 1994           | MaleAge35to39       | 155620     |
| Somalia | 1994           | MaleAge40to44       | 129981     |
| Somalia | 1994           | MaleAge45to49       | 106119     |
| Somalia | 1994           | MaleAge50to54       | 83059      |
| Somalia | 1994           | MaleAge55to59       | 69606      |
| Somalia | 1994           | MaleAge5to9         | 464521     |
| Somalia | 1994           | MaleAge60to64       | 52787      |
| Somalia | 1994           | MaleAge65to69       | 39500      |
| Somalia | 1994           | MaleAge70to74       | 26352      |
| Somalia | 1994           | MaleAge75to79       | 14992      |
| Somalia | 1994           | MaleAge80to84       | 6683       |
| Somalia | 1994           | MaleAge85to89       | 2113       |
| Somalia | 1994           | MaleAge90to94       | 454        |
| Somalia | 1994           | MaleAge95to99       | 60         |
| Somalia | 1994           | MaleAgeAbove100     | 2          |
| Somalia | 1995           | FemaleAge0to4       | 605184     |
| Somalia | 1995           | FemaleAge10to14     | 380553     |
| Somalia | 1995           | FemaleAge15to19     | 260197     |
| Somalia | 1995           | FemaleAge20to24     | 142048     |
| Somalia | 1995           | FemaleAge25to29     | 102422     |
| Somalia | 1995           | FemaleAge30to34     | 92063      |
| Somalia | 1995           | FemaleAge35to39     | 88884      |
| Somalia | 1995           | FemaleAge40to44     | 97424      |
| Somalia | 1995           | FemaleAge45to49     | 91832      |
| Somalia | 1995           | FemaleAge50to54     | 89557      |
| Somalia | 1995           | FemaleAge55to59     | 77365      |
| Somalia | 1995           | FemaleAge5to9       | 466494     |
| Somalia | 1995           | FemaleAge60to64     | 57297      |
| Somalia | 1995           | FemaleAge65to69     | 44024      |
| Somalia | 1995           | FemaleAge70to74     | 30805      |
| Somalia | 1995           | FemaleAge75to79     | 18290      |
| Somalia | 1995           | FemaleAge80to84     | 8628       |
| Somalia | 1995           | FemaleAge85to89     | 2910       |
| Somalia | 1995           | FemaleAge90to94     | 630        |
| Somalia | 1995           | FemaleAge95to99     | 78         |
| Somalia | 1995           | FemaleAgeAbove100   | 5          |
| Somalia | 1995           | FemaleLactAge15to19 | 32346      |
| Somalia | 1995           | FemaleLactAge20to24 | 72703      |
| Somalia | 1995           | FemaleLactAge25to29 | 73003      |
| Somalia | 1995           | FemaleLactAge30to34 | 57644      |
| Somalia | 1995           | FemaleLactAge35to39 | 41933      |
| Somalia | 1995           | FemaleLactAge40to44 | 22578      |
| Somalia | 1995           | FemaleLactAge45to49 | 11456      |
| Somalia | 1995           | FemalePregAge15to19 | 24260      |
| Somalia | 1995           | FemalePregAge20to24 | 54527      |
| Somalia | 1995           | FemalePregAge25to29 | 54752      |
| Somalia | 1995           | FemalePregAge30to34 | 43233      |
| Somalia | 1995           | FemalePregAge35to39 | 31450      |
| Somalia | 1995           | FemalePregAge40to44 | 16934      |
| Somalia | 1995           | FemalePregAge45to49 | 8592       |
| Somalia | 1995           | MaleAge0to4         | 608943     |
| Somalia | 1995           | MaleAge10to14       | 381417     |
| Somalia | 1995           | MaleAge15to19       | 316382     |
| Somalia | 1995           | MaleAge20to24       | 266751     |
| Somalia | 1995           | MaleAge25to29       | 225794     |
| Somalia | 1995           | MaleAge30to34       | 187665     |
| Somalia | 1995           | MaleAge35to39       | 156510     |
| Somalia | 1995           | MaleAge40to44       | 130566     |
| Somalia | 1995           | MaleAge45to49       | 107451     |

Dietary calcium and zinc deficiency risks are decreasing but remain prevalent

| Country | Reference year | Age/gender group    | Population |
|---------|----------------|---------------------|------------|
| Somalia | 1995           | MaleAge50to54       | 83238      |
| Somalia | 1995           | MaleAge55to59       | 69613      |
| Somalia | 1995           | MaleAge5to9         | 468278     |
| Somalia | 1995           | MaleAge60to64       | 52871      |
| Somalia | 1995           | MaleAge65to69       | 39331      |
| Somalia | 1995           | MaleAge70to74       | 26194      |
| Somalia | 1995           | MaleAge75to79       | 14701      |
| Somalia | 1995           | MaleAge80to84       | 6366       |
| Somalia | 1995           | MaleAge85to89       | 1881       |
| Somalia | 1995           | MaleAge90to94       | 350        |
| Somalia | 1995           | MaleAge95to99       | 36         |
| Somalia | 1995           | MaleAgeAbov e100    | 2          |
| Somalia | 1996           | FemaleAge0to4       | 623550     |
| Somalia | 1996           | FemaleAge10to14     | 388998     |
| Somalia | 1996           | FemaleAge15to19     | 246865     |
| Somalia | 1996           | FemaleAge20to24     | 133335     |
| Somalia | 1996           | FemaleAge25to29     | 99390      |
| Somalia | 1996           | FemaleAge30to34     | 88375      |
| Somalia | 1996           | FemaleAge35to39     | 90003      |
| Somalia | 1996           | FemaleAge40to44     | 94640      |
| Somalia | 1996           | FemaleAge45to49     | 92759      |
| Somalia | 1996           | FemaleAge50to54     | 90765      |
| Somalia | 1996           | FemaleAge55to59     | 77811      |
| Somalia | 1996           | FemaleAge5to9       | 480104     |
| Somalia | 1996           | FemaleAge60to64     | 58673      |
| Somalia | 1996           | FemaleAge65to69     | 44134      |
| Somalia | 1996           | FemaleAge70to74     | 31096      |
| Somalia | 1996           | FemaleAge75to79     | 18685      |
| Somalia | 1996           | FemaleAge80to84     | 9011       |
| Somalia | 1996           | FemaleAge85to89     | 3189       |
| Somalia | 1996           | FemaleAge90to94     | 742        |
| Somalia | 1996           | FemaleAge95to99     | 88         |
| Somalia | 1996           | FemaleAgeAbov e100  | 5          |
| Somalia | 1996           | FemaleLactAge15to19 | 43316      |
| Somalia | 1996           | FemaleLactAge20to24 | 79821      |
| Somalia | 1996           | FemaleLactAge25to29 | 76549      |
| Somalia | 1996           | FemaleLactAge30to34 | 61498      |
| Somalia | 1996           | FemaleLactAge35to39 | 42511      |
| Somalia | 1996           | FemaleLactAge40to44 | 25284      |
| Somalia | 1996           | FemaleLactAge45to49 | 12243      |
| Somalia | 1996           | FemalePregAge15to19 | 32487      |
| Somalia | 1996           | FemalePregAge20to24 | 59866      |
| Somalia | 1996           | FemalePregAge25to29 | 57412      |
| Somalia | 1996           | FemalePregAge30to34 | 46123      |
| Somalia | 1996           | FemalePregAge35to39 | 31883      |
| Somalia | 1996           | FemalePregAge40to44 | 18963      |
| Somalia | 1996           | FemalePregAge45to49 | 9182       |
| Somalia | 1996           | MaleAge0to4         | 627607     |
| Somalia | 1996           | MaleAge10to14       | 390003     |
| Somalia | 1996           | MaleAge15to19       | 322318     |
| Somalia | 1996           | MaleAge20to24       | 270629     |
| Somalia | 1996           | MaleAge25to29       | 229154     |
| Somalia | 1996           | MaleAge30to34       | 190811     |
| Somalia | 1996           | MaleAge35to39       | 158673     |
| Somalia | 1996           | MaleAge40to44       | 132249     |
| Somalia | 1996           | MaleAge45to49       | 109359     |
| Somalia | 1996           | MaleAge50to54       | 84770      |
| Somalia | 1996           | MaleAge55to59       | 69861      |
| Somalia | 1996           | MaleAge5to9         | 482082     |
| Somalia | 1996           | MaleAge60to64       | 53643      |
| Somalia | 1996           | MaleAge65to69       | 39575      |
| Somalia | 1996           | MaleAge70to74       | 26543      |
| Somalia | 1996           | MaleAge75to79       | 15089      |
| Somalia | 1996           | MaleAge80to84       | 6734       |
| Somalia | 1996           | MaleAge85to89       | 2113       |
| Somalia | 1996           | MaleAge90to94       | 422        |
| Somalia | 1996           | MaleAge95to99       | 43         |
| Somalia | 1996           | MaleAgeAbov e100    | 2          |
| Somalia | 1997           | FemaleAge0to4       | 647084     |
| Somalia | 1997           | FemaleAge10to14     | 401224     |
| Somalia | 1997           | FemaleAge15to19     | 256015     |
| Somalia | 1997           | FemaleAge20to24     | 139591     |
| Somalia | 1997           | FemaleAge25to29     | 104403     |
| Somalia | 1997           | FemaleAge30to34     | 93261      |
| Somalia | 1997           | FemaleAge35to39     | 93598      |
| Somalia | 1997           | FemaleAge40to44     | 97561      |
| Somalia | 1997           | FemaleAge45to49     | 95990      |
| Somalia | 1997           | FemaleAge50to54     | 93345      |
| Somalia | 1997           | FemaleAge55to59     | 78321      |
| Somalia | 1997           | FemaleAge5to9       | 497833     |
| Somalia | 1997           | FemaleAge60to64     | 61082      |
| Somalia | 1997           | FemaleAge65to69     | 44552      |
| Somalia | 1997           | FemaleAge70to74     | 31666      |
| Somalia | 1997           | FemaleAge75to79     | 19162      |
| Somalia | 1997           | FemaleAge80to84     | 9361       |
| Somalia | 1997           | FemaleAge85to89     | 3408       |
| Somalia | 1997           | FemaleAge90to94     | 830        |
| Somalia | 1997           | FemaleAge95to99     | 108        |

Dietary calcium and zinc deficiency risks are decreasing but remain prevalent

| Country | Reference year | Age/gender group    | Population |
|---------|----------------|---------------------|------------|
| Somalia | 1997           | FemaleAgeAbove100   | 6          |
| Somalia | 1997           | FemaleLactAge15to19 | 43316      |
| Somalia | 1997           | FemaleLactAge20to24 | 79821      |
| Somalia | 1997           | FemaleLactAge25to29 | 76549      |
| Somalia | 1997           | FemaleLactAge30to34 | 61498      |
| Somalia | 1997           | FemaleLactAge35to39 | 42511      |
| Somalia | 1997           | FemaleLactAge40to44 | 25284      |
| Somalia | 1997           | FemaleLactAge45to49 | 12243      |
| Somalia | 1997           | FemalePregAge15to19 | 32487      |
| Somalia | 1997           | FemalePregAge20to24 | 59866      |
| Somalia | 1997           | FemalePregAge25to29 | 57412      |
| Somalia | 1997           | FemalePregAge30to34 | 46123      |
| Somalia | 1997           | FemalePregAge35to39 | 31883      |
| Somalia | 1997           | FemalePregAge40to44 | 18963      |
| Somalia | 1997           | FemalePregAge45to49 | 9182       |
| Somalia | 1997           | MaleAge0to4         | 651952     |
| Somalia | 1997           | MaleAge10to14       | 402439     |
| Somalia | 1997           | MaleAge15to19       | 331556     |
| Somalia | 1997           | MaleAge20to24       | 276977     |
| Somalia | 1997           | MaleAge25to29       | 234271     |
| Somalia | 1997           | MaleAge30to34       | 195751     |
| Somalia | 1997           | MaleAge35to39       | 162244     |
| Somalia | 1997           | MaleAge40to44       | 135063     |
| Somalia | 1997           | MaleAge45to49       | 111902     |
| Somalia | 1997           | MaleAge50to54       | 87618      |
| Somalia | 1997           | MaleAge55to59       | 70378      |
| Somalia | 1997           | MaleAge5to9         | 499818     |
| Somalia | 1997           | MaleAge60to64       | 55134      |
| Somalia | 1997           | MaleAge65to69       | 40106      |
| Somalia | 1997           | MaleAge70to74       | 27107      |
| Somalia | 1997           | MaleAge75to79       | 15510      |
| Somalia | 1997           | MaleAge80to84       | 7054       |
| Somalia | 1997           | MaleAge85to89       | 2299       |
| Somalia | 1997           | MaleAge90to94       | 478        |
| Somalia | 1997           | MaleAge95to99       | 57         |
| Somalia | 1997           | MaleAgeAbove100     | 2          |
| Somalia | 1998           | FemaleAge0to4       | 675395     |
| Somalia | 1998           | FemaleAge10to14     | 416130     |
| Somalia | 1998           | FemaleAge15to19     | 267307     |
| Somalia | 1998           | FemaleAge20to24     | 147536     |
| Somalia | 1998           | FemaleAge25to29     | 110582     |
| Somalia | 1998           | FemaleAge30to34     | 99244      |
| Somalia | 1998           | FemaleAge35to39     | 98150      |
| Somalia | 1998           | FemaleAge40to44     | 101069     |
| Somalia | 1998           | FemaleAge45to49     | 99742      |
| Somalia | 1998           | FemaleAge50to54     | 96810      |
| Somalia | 1998           | FemaleAge55to59     | 79000      |
| Somalia | 1998           | FemaleAge5to9       | 517830     |
| Somalia | 1998           | FemaleAge60to64     | 63992      |
| Somalia | 1998           | FemaleAge65to69     | 45314      |
| Somalia | 1998           | FemaleAge70to74     | 32421      |
| Somalia | 1998           | FemaleAge75to79     | 19674      |
| Somalia | 1998           | FemaleAge80to84     | 9652       |
| Somalia | 1998           | FemaleAge85to89     | 3541       |
| Somalia | 1998           | FemaleAge90to94     | 878        |
| Somalia | 1998           | FemaleAge95to99     | 130        |
| Somalia | 1998           | FemaleAgeAbove100   | 6          |
| Somalia | 1998           | FemaleLactAge15to19 | 43316      |
| Somalia | 1998           | FemaleLactAge20to24 | 79821      |
| Somalia | 1998           | FemaleLactAge25to29 | 76549      |
| Somalia | 1998           | FemaleLactAge30to34 | 61498      |
| Somalia | 1998           | FemaleLactAge35to39 | 42511      |
| Somalia | 1998           | FemaleLactAge40to44 | 25284      |
| Somalia | 1998           | FemaleLactAge45to49 | 12243      |
| Somalia | 1998           | FemalePregAge15to19 | 32487      |
| Somalia | 1998           | FemalePregAge20to24 | 59866      |
| Somalia | 1998           | FemalePregAge25to29 | 57412      |
| Somalia | 1998           | FemalePregAge30to34 | 46123      |
| Somalia | 1998           | FemalePregAge35to39 | 31883      |
| Somalia | 1998           | FemalePregAge40to44 | 18963      |
| Somalia | 1998           | FemalePregAge45to49 | 9182       |
| Somalia | 1998           | MaleAge0to4         | 681428     |
| Somalia | 1998           | MaleAge10to14       | 417615     |
| Somalia | 1998           | MaleAge15to19       | 342988     |
| Somalia | 1998           | MaleAge20to24       | 285004     |
| Somalia | 1998           | MaleAge25to29       | 240476     |
| Somalia | 1998           | MaleAge30to34       | 201770     |
| Somalia | 1998           | MaleAge35to39       | 166754     |
| Somalia | 1998           | MaleAge40to44       | 138585     |
| Somalia | 1998           | MaleAge45to49       | 114824     |
| Somalia | 1998           | MaleAge50to54       | 91245      |
| Somalia | 1998           | MaleAge55to59       | 71216      |
| Somalia | 1998           | MaleAge5to9         | 519610     |
| Somalia | 1998           | MaleAge60to64       | 56996      |
| Somalia | 1998           | MaleAge65to69       | 40884      |
| Somalia | 1998           | MaleAge70to74       | 27810      |
| Somalia | 1998           | MaleAge75to79       | 15935      |
| Somalia | 1998           | MaleAge80to84       | 7298       |

Dietary calcium and zinc deficiency risks are decreasing but remain prevalent

| Country      | Reference year | Age/gender group    | Population |
|--------------|----------------|---------------------|------------|
| Somalia      | 1998           | MaleAge85to89       | 2413       |
| Somalia      | 1998           | MaleAge90to94       | 514        |
| Somalia      | 1998           | MaleAge95to99       | 70         |
| Somalia      | 1998           | MaleAgeAbove100     | 3          |
| Somalia      | 1999           | FemaleAge0to4       | 704367     |
| Somalia      | 1999           | FemaleAge10to14     | 432230     |
| Somalia      | 1999           | FemaleAge15to19     | 279495     |
| Somalia      | 1999           | FemaleAge20to24     | 156308     |
| Somalia      | 1999           | FemaleAge25to29     | 117246     |
| Somalia      | 1999           | FemaleAge30to34     | 105484     |
| Somalia      | 1999           | FemaleAge35to39     | 103118     |
| Somalia      | 1999           | FemaleAge40to44     | 104810     |
| Somalia      | 1999           | FemaleAge45to49     | 103559     |
| Somalia      | 1999           | FemaleAge50to54     | 100540     |
| Somalia      | 1999           | FemaleAge55to59     | 80149      |
| Somalia      | 1999           | FemaleAge5to9       | 538208     |
| Somalia      | 1999           | FemaleAge60to64     | 66683      |
| Somalia      | 1999           | FemaleAge65to69     | 46530      |
| Somalia      | 1999           | FemaleAge70to74     | 33225      |
| Somalia      | 1999           | FemaleAge75to79     | 20174      |
| Somalia      | 1999           | FemaleAge80to84     | 9860       |
| Somalia      | 1999           | FemaleAge85to89     | 3571       |
| Somalia      | 1999           | FemaleAge90to94     | 874        |
| Somalia      | 1999           | FemaleAge95to99     | 134        |
| Somalia      | 1999           | FemaleAgeAbove100   | 6          |
| Somalia      | 1999           | FemaleLactAge15to19 | 43316      |
| Somalia      | 1999           | FemaleLactAge20to24 | 79821      |
| Somalia      | 1999           | FemaleLactAge25to29 | 76549      |
| Somalia      | 1999           | FemaleLactAge30to34 | 61498      |
| Somalia      | 1999           | FemaleLactAge35to39 | 42511      |
| Somalia      | 1999           | FemaleLactAge40to44 | 25284      |
| Somalia      | 1999           | FemaleLactAge45to49 | 12243      |
| Somalia      | 1999           | FemalePregAge15to19 | 32487      |
| Somalia      | 1999           | FemalePregAge20to24 | 59866      |
| Somalia      | 1999           | FemalePregAge25to29 | 57412      |
| Somalia      | 1999           | FemalePregAge30to34 | 46123      |
| Somalia      | 1999           | FemalePregAge35to39 | 31883      |
| Somalia      | 1999           | FemalePregAge40to44 | 18963      |
| Somalia      | 1999           | FemalePregAge45to49 | 9182       |
| Somalia      | 1999           | MaleAge0to4         | 711612     |
| Somalia      | 1999           | MaleAge10to14       | 433976     |
| Somalia      | 1999           | MaleAge15to19       | 355406     |
| Somalia      | 1999           | MaleAge20to24       | 293895     |
| Somalia      | 1999           | MaleAge25to29       | 247130     |
| Somalia      | 1999           | MaleAge30to34       | 208051     |
| Somalia      | 1999           | MaleAge35to39       | 171715     |
| Somalia      | 1999           | MaleAge40to44       | 142385     |
| Somalia      | 1999           | MaleAge45to49       | 117907     |
| Somalia      | 1999           | MaleAge50to54       | 94953      |
| Somalia      | 1999           | MaleAge55to59       | 72575      |
| Somalia      | 1999           | MaleAge5to9         | 539690     |
| Somalia      | 1999           | MaleAge60to64       | 58783      |
| Somalia      | 1999           | MaleAge65to69       | 41899      |
| Somalia      | 1999           | MaleAge70to74       | 28553      |
| Somalia      | 1999           | MaleAge75to79       | 16333      |
| Somalia      | 1999           | MaleAge80to84       | 7445       |
| Somalia      | 1999           | MaleAge85to89       | 2436       |
| Somalia      | 1999           | MaleAge90to94       | 516        |
| Somalia      | 1999           | MaleAge95to99       | 73         |
| Somalia      | 1999           | MaleAgeAbove100     | 3          |
| South Africa | 1992           | FemaleAge0to4       | 2536590    |
| South Africa | 1992           | FemaleAge10to14     | 2279095    |
| South Africa | 1992           | FemaleAge15to19     | 1755565    |
| South Africa | 1992           | FemaleAge20to24     | 1363776    |
| South Africa | 1992           | FemaleAge25to29     | 1149249    |
| South Africa | 1992           | FemaleAge30to34     | 1062465    |
| South Africa | 1992           | FemaleAge35to39     | 1013546    |
| South Africa | 1992           | FemaleAge40to44     | 897712     |
| South Africa | 1992           | FemaleAge45to49     | 780818     |
| South Africa | 1992           | FemaleAge50to54     | 664903     |
| South Africa | 1992           | FemaleAge55to59     | 535398     |
| South Africa | 1992           | FemaleAge5to9       | 2464008    |
| South Africa | 1992           | FemaleAge60to64     | 410554     |
| South Africa | 1992           | FemaleAge65to69     | 302872     |
| South Africa | 1992           | FemaleAge70to74     | 217163     |
| South Africa | 1992           | FemaleAge75to79     | 134899     |
| South Africa | 1992           | FemaleAge80to84     | 71355      |
| South Africa | 1992           | FemaleAge85to89     | 30328      |
| South Africa | 1992           | FemaleAge90to94     | 8833       |
| South Africa | 1992           | FemaleAge95to99     | 1766       |
| South Africa | 1992           | FemaleAgeAbove100   | 182        |
| South Africa | 1992           | FemaleLactAge15to19 | 190638     |
| South Africa | 1992           | FemaleLactAge20to24 | 287748     |
| South Africa | 1992           | FemaleLactAge25to29 | 254069     |
| South Africa | 1992           | FemaleLactAge30to34 | 184649     |
| South Africa | 1992           | FemaleLactAge35to39 | 106006     |
| South Africa | 1992           | FemaleLactAge40to44 | 41125      |
| South Africa | 1992           | FemaleLactAge45to49 | 9602       |

Dietary calcium and zinc deficiency risks are decreasing but remain prevalent

| Country      | Reference year | Age/gender group    | Population |
|--------------|----------------|---------------------|------------|
| South Africa | 1992           | FemalePregAge15to19 | 142978     |
| South Africa | 1992           | FemalePregAge20to24 | 215811     |
| South Africa | 1992           | FemalePregAge25to29 | 190552     |
| South Africa | 1992           | FemalePregAge30to34 | 138486     |
| South Africa | 1992           | FemalePregAge35to39 | 79505      |
| South Africa | 1992           | FemalePregAge40to44 | 30844      |
| South Africa | 1992           | FemalePregAge45to49 | 7201       |
| South Africa | 1992           | MaleAge0to4         | 2578780    |
| South Africa | 1992           | MaleAge10to14       | 2282673    |
| South Africa | 1992           | MaleAge15to19       | 2076989    |
| South Africa | 1992           | MaleAge20to24       | 1832912    |
| South Africa | 1992           | MaleAge25to29       | 1570583    |
| South Africa | 1992           | MaleAge30to34       | 1373756    |
| South Africa | 1992           | MaleAge35to39       | 1189030    |
| South Africa | 1992           | MaleAge40to44       | 964238     |
| South Africa | 1992           | MaleAge45to49       | 775975     |
| South Africa | 1992           | MaleAge50to54       | 617558     |
| South Africa | 1992           | MaleAge55to59       | 482050     |
| South Africa | 1992           | MaleAge5to9         | 2487533    |
| South Africa | 1992           | MaleAge60to64       | 362046     |
| South Africa | 1992           | MaleAge65to69       | 237820     |
| South Africa | 1992           | MaleAge70to74       | 140316     |
| South Africa | 1992           | MaleAge75to79       | 73225      |
| South Africa | 1992           | MaleAge80to84       | 30770      |
| South Africa | 1992           | MaleAge85to89       | 10192      |
| South Africa | 1992           | MaleAge90to94       | 2475       |
| South Africa | 1992           | MaleAge95to99       | 421        |
| South Africa | 1992           | MaleAgeAbove100     | 32         |
| South Africa | 1993           | FemaleAge0to4       | 2536122    |
| South Africa | 1993           | FemaleAge10to14     | 2324521    |
| South Africa | 1993           | FemaleAge15to19     | 1797095    |
| South Africa | 1993           | FemaleAge20to24     | 1427294    |
| South Africa | 1993           | FemaleAge25to29     | 1216138    |
| South Africa | 1993           | FemaleAge30to34     | 1103880    |
| South Africa | 1993           | FemaleAge35to39     | 1062773    |
| South Africa | 1993           | FemaleAge40to44     | 951107     |
| South Africa | 1993           | FemaleAge45to49     | 809927     |
| South Africa | 1993           | FemaleAge50to54     | 694545     |
| South Africa | 1993           | FemaleAge55to59     | 557516     |
| South Africa | 1993           | FemaleAge5to9       | 2487323    |
| South Africa | 1993           | FemaleAge60to64     | 429384     |
| South Africa | 1993           | FemaleAge65to69     | 312877     |
| South Africa | 1993           | FemaleAge70to74     | 222428     |
| South Africa | 1993           | FemaleAge75to79     | 140778     |
| South Africa | 1993           | FemaleAge80to84     | 72828      |
| South Africa | 1993           | FemaleAge85to89     | 32008      |
| South Africa | 1993           | FemaleAge90to94     | 9172       |
| South Africa | 1993           | FemaleAge95to99     | 1964       |
| South Africa | 1993           | FemaleAgeAbove100   | 190        |
| South Africa | 1993           | FemaleLactAge15to19 | 190638     |
| South Africa | 1993           | FemaleLactAge20to24 | 287748     |
| South Africa | 1993           | FemaleLactAge25to29 | 254069     |
| South Africa | 1993           | FemaleLactAge30to34 | 184649     |
| South Africa | 1993           | FemaleLactAge35to39 | 106006     |
| South Africa | 1993           | FemaleLactAge40to44 | 41125      |
| South Africa | 1993           | FemaleLactAge45to49 | 9602       |
| South Africa | 1993           | FemalePregAge15to19 | 142978     |
| South Africa | 1993           | FemalePregAge20to24 | 215811     |
| South Africa | 1993           | FemalePregAge25to29 | 190552     |
| South Africa | 1993           | FemalePregAge30to34 | 138486     |
| South Africa | 1993           | FemalePregAge35to39 | 79505      |
| South Africa | 1993           | FemalePregAge40to44 | 30844      |
| South Africa | 1993           | FemalePregAge45to49 | 7201       |
| South Africa | 1993           | MaleAge0to4         | 2579676    |
| South Africa | 1993           | MaleAge10to14       | 2330874    |
| South Africa | 1993           | MaleAge15to19       | 2117466    |
| South Africa | 1993           | MaleAge20to24       | 1895629    |
| South Africa | 1993           | MaleAge25to29       | 1623826    |
| South Africa | 1993           | MaleAge30to34       | 1410010    |
| South Africa | 1993           | MaleAge35to39       | 1228680    |
| South Africa | 1993           | MaleAge40to44       | 1010387    |
| South Africa | 1993           | MaleAge45to49       | 806113     |
| South Africa | 1993           | MaleAge50to54       | 647835     |
| South Africa | 1993           | MaleAge55to59       | 498991     |
| South Africa | 1993           | MaleAge5to9         | 2511901    |
| South Africa | 1993           | MaleAge60to64       | 376012     |
| South Africa | 1993           | MaleAge65to69       | 250216     |
| South Africa | 1993           | MaleAge70to74       | 144651     |
| South Africa | 1993           | MaleAge75to79       | 76347      |
| South Africa | 1993           | MaleAge80to84       | 32034      |
| South Africa | 1993           | MaleAge85to89       | 10669      |
| South Africa | 1993           | MaleAge90to94       | 2583       |
| South Africa | 1993           | MaleAge95to99       | 481        |
| South Africa | 1993           | MaleAgeAbove100     | 32         |
| South Africa | 1994           | FemaleAge0to4       | 2529139    |
| South Africa | 1994           | FemaleAge10to14     | 2365371    |
| South Africa | 1994           | FemaleAge15to19     | 1835312    |
| South Africa | 1994           | FemaleAge20to24     | 1485763    |

Dietary calcium and zinc deficiency risks are decreasing but remain prevalent

| Country      | Reference year | Age/gender group    | Population |
|--------------|----------------|---------------------|------------|
| South Africa | 1994           | FemaleAge25to29     | 1283807    |
| South Africa | 1994           | FemaleAge30to34     | 1148144    |
| South Africa | 1994           | FemaleAge35to39     | 1110056    |
| South Africa | 1994           | FemaleAge40to44     | 1004736    |
| South Africa | 1994           | FemaleAge45to49     | 842816     |
| South Africa | 1994           | FemaleAge50to54     | 724456     |
| South Africa | 1994           | FemaleAge55to59     | 581461     |
| South Africa | 1994           | FemaleAge5to9       | 2503088    |
| South Africa | 1994           | FemaleAge60to64     | 449465     |
| South Africa | 1994           | FemaleAge65to69     | 324725     |
| South Africa | 1994           | FemaleAge70to74     | 228509     |
| South Africa | 1994           | FemaleAge75to79     | 146173     |
| South Africa | 1994           | FemaleAge80to84     | 74533      |
| South Africa | 1994           | FemaleAge85to89     | 32803      |
| South Africa | 1994           | FemaleAge90to94     | 9286       |
| South Africa | 1994           | FemaleAge95to99     | 1998       |
| South Africa | 1994           | FemaleAgeAbove100   | 198        |
| South Africa | 1994           | FemaleLactAge15to19 | 190638     |
| South Africa | 1994           | FemaleLactAge20to24 | 287748     |
| South Africa | 1994           | FemaleLactAge25to29 | 254069     |
| South Africa | 1994           | FemaleLactAge30to34 | 184649     |
| South Africa | 1994           | FemaleLactAge35to39 | 106006     |
| South Africa | 1994           | FemaleLactAge40to44 | 41125      |
| South Africa | 1994           | FemaleLactAge45to49 | 9602       |
| South Africa | 1994           | FemalePregAge15to19 | 142978     |
| South Africa | 1994           | FemalePregAge20to24 | 215811     |
| South Africa | 1994           | FemalePregAge25to29 | 190552     |
| South Africa | 1994           | FemalePregAge30to34 | 138486     |
| South Africa | 1994           | FemalePregAge35to39 | 79505      |
| South Africa | 1994           | FemalePregAge40to44 | 30844      |
| South Africa | 1994           | FemalePregAge45to49 | 7201       |
| South Africa | 1994           | MaleAge0to4         | 2573110    |
| South Africa | 1994           | MaleAge10to14       | 2374442    |
| South Africa | 1994           | MaleAge15to19       | 2156055    |
| South Africa | 1994           | MaleAge20to24       | 1954160    |
| South Africa | 1994           | MaleAge25to29       | 1679080    |
| South Africa | 1994           | MaleAge30to34       | 1448263    |
| South Africa | 1994           | MaleAge35to39       | 1267214    |
| South Africa | 1994           | MaleAge40to44       | 1055116    |
| South Africa | 1994           | MaleAge45to49       | 838473     |
| South Africa | 1994           | MaleAge50to54       | 678987     |
| South Africa | 1994           | MaleAge55to59       | 518718     |
| South Africa | 1994           | MaleAge5to9         | 2527800    |
| South Africa | 1994           | MaleAge60to64       | 390801     |
| South Africa | 1994           | MaleAge65to69       | 262976     |
| South Africa | 1994           | MaleAge70to74       | 150027     |
| South Africa | 1994           | MaleAge75to79       | 78715      |
| South Africa | 1994           | MaleAge80to84       | 32981      |
| South Africa | 1994           | MaleAge85to89       | 10759      |
| South Africa | 1994           | MaleAge90to94       | 2546       |
| South Africa | 1994           | MaleAge95to99       | 469        |
| South Africa | 1994           | MaleAgeAbove100     | 32         |
| South Africa | 1995           | FemaleAge0to4       | 2512150    |
| South Africa | 1995           | FemaleAge10to14     | 2397508    |
| South Africa | 1995           | FemaleAge15to19     | 1871129    |
| South Africa | 1995           | FemaleAge20to24     | 1536136    |
| South Africa | 1995           | FemaleAge25to29     | 1348216    |
| South Africa | 1995           | FemaleAge30to34     | 1196795    |
| South Africa | 1995           | FemaleAge35to39     | 1154072    |
| South Africa | 1995           | FemaleAge40to44     | 1055690    |
| South Africa | 1995           | FemaleAge45to49     | 880534     |
| South Africa | 1995           | FemaleAge50to54     | 753350     |
| South Africa | 1995           | FemaleAge55to59     | 606941     |
| South Africa | 1995           | FemaleAge5to9       | 2510551    |
| South Africa | 1995           | FemaleAge60to64     | 470146     |
| South Africa | 1995           | FemaleAge65to69     | 338483     |
| South Africa | 1995           | FemaleAge70to74     | 235594     |
| South Africa | 1995           | FemaleAge75to79     | 150883     |
| South Africa | 1995           | FemaleAge80to84     | 76679      |
| South Africa | 1995           | FemaleAge85to89     | 32730      |
| South Africa | 1995           | FemaleAge90to94     | 9074       |
| South Africa | 1995           | FemaleAge95to99     | 1715       |
| South Africa | 1995           | FemaleAgeAbove100   | 207        |
| South Africa | 1995           | FemaleLactAge15to19 | 190638     |
| South Africa | 1995           | FemaleLactAge20to24 | 287748     |
| South Africa | 1995           | FemaleLactAge25to29 | 254069     |
| South Africa | 1995           | FemaleLactAge30to34 | 184649     |
| South Africa | 1995           | FemaleLactAge35to39 | 106006     |
| South Africa | 1995           | FemaleLactAge40to44 | 41125      |
| South Africa | 1995           | FemaleLactAge45to49 | 9602       |
| South Africa | 1995           | FemalePregAge15to19 | 142978     |
| South Africa | 1995           | FemalePregAge20to24 | 215811     |
| South Africa | 1995           | FemalePregAge25to29 | 190552     |
| South Africa | 1995           | FemalePregAge30to34 | 138486     |
| South Africa | 1995           | FemalePregAge35to39 | 79505      |
| South Africa | 1995           | FemalePregAge40to44 | 30844      |
| South Africa | 1995           | FemalePregAge45to49 | 7201       |
| South Africa | 1995           | MaleAge0to4         | 2554008    |

Dietary calcium and zinc deficiency risks are decreasing but remain prevalent

| Country      | Reference year | Age/gender group    | Population |
|--------------|----------------|---------------------|------------|
| South Africa | 1995           | MaleAge10to14       | 2408717    |
| South Africa | 1995           | MaleAge15to19       | 2193756    |
| South Africa | 1995           | MaleAge20to24       | 2004623    |
| South Africa | 1995           | MaleAge25to29       | 1734242    |
| South Africa | 1995           | MaleAge30to34       | 1488864    |
| South Africa | 1995           | MaleAge35to39       | 1303720    |
| South Africa | 1995           | MaleAge40to44       | 1096480    |
| South Africa | 1995           | MaleAge45to49       | 873440     |
| South Africa | 1995           | MaleAge50to54       | 709196     |
| South Africa | 1995           | MaleAge55to59       | 541443     |
| South Africa | 1995           | MaleAge5to9         | 2534726    |
| South Africa | 1995           | MaleAge60to64       | 406309     |
| South Africa | 1995           | MaleAge65to69       | 275694     |
| South Africa | 1995           | MaleAge70to74       | 156787     |
| South Africa | 1995           | MaleAge75to79       | 80457      |
| South Africa | 1995           | MaleAge80to84       | 33504      |
| South Africa | 1995           | MaleAge85to89       | 10419      |
| South Africa | 1995           | MaleAge90to94       | 2259       |
| South Africa | 1995           | MaleAge95to99       | 337        |
| South Africa | 1995           | MaleAgeAbove100     | 33         |
| South Africa | 1996           | FemaleAge0to4       | 2494322    |
| South Africa | 1996           | FemaleAge10to14     | 2437151    |
| South Africa | 1996           | FemaleAge15to19     | 1908441    |
| South Africa | 1996           | FemaleAge20to24     | 1524629    |
| South Africa | 1996           | FemaleAge25to29     | 1360419    |
| South Africa | 1996           | FemaleAge30to34     | 1257003    |
| South Africa | 1996           | FemaleAge35to39     | 1213104    |
| South Africa | 1996           | FemaleAge40to44     | 1133217    |
| South Africa | 1996           | FemaleAge45to49     | 944135     |
| South Africa | 1996           | FemaleAge50to54     | 792868     |
| South Africa | 1996           | FemaleAge55to59     | 633911     |
| South Africa | 1996           | FemaleAge5to9       | 2520758    |
| South Africa | 1996           | FemaleAge60to64     | 485434     |
| South Africa | 1996           | FemaleAge65to69     | 347214     |
| South Africa | 1996           | FemaleAge70to74     | 237613     |
| South Africa | 1996           | FemaleAge75to79     | 149172     |
| South Africa | 1996           | FemaleAge80to84     | 80121      |
| South Africa | 1996           | FemaleAge85to89     | 34991      |
| South Africa | 1996           | FemaleAge90to94     | 10501      |
| South Africa | 1996           | FemaleAge95to99     | 1853       |
| South Africa | 1996           | FemaleAgeAbove100   | 216        |
| South Africa | 1996           | FemaleLactAge15to19 | 186238     |
| South Africa | 1996           | FemaleLactAge20to24 | 292015     |
| South Africa | 1996           | FemaleLactAge25to29 | 255622     |
| South Africa | 1996           | FemaleLactAge30to34 | 174379     |
| South Africa | 1996           | FemaleLactAge35to39 | 106130     |
| South Africa | 1996           | FemaleLactAge40to44 | 40065      |
| South Africa | 1996           | FemaleLactAge45to49 | 11184      |
| South Africa | 1996           | FemalePregAge15to19 | 139678     |
| South Africa | 1996           | FemalePregAge20to24 | 219011     |
| South Africa | 1996           | FemalePregAge25to29 | 191716     |
| South Africa | 1996           | FemalePregAge30to34 | 130784     |
| South Africa | 1996           | FemalePregAge35to39 | 79598      |
| South Africa | 1996           | FemalePregAge40to44 | 30049      |
| South Africa | 1996           | FemalePregAge45to49 | 8388       |
| South Africa | 1996           | MaleAge0to4         | 2531706    |
| South Africa | 1996           | MaleAge10to14       | 2450312    |
| South Africa | 1996           | MaleAge15to19       | 2248665    |
| South Africa | 1996           | MaleAge20to24       | 2046308    |
| South Africa | 1996           | MaleAge25to29       | 1772507    |
| South Africa | 1996           | MaleAge30to34       | 1514503    |
| South Africa | 1996           | MaleAge35to39       | 1331084    |
| South Africa | 1996           | MaleAge40to44       | 1135710    |
| South Africa | 1996           | MaleAge45to49       | 913739     |
| South Africa | 1996           | MaleAge50to54       | 734787     |
| South Africa | 1996           | MaleAge55to59       | 558689     |
| South Africa | 1996           | MaleAge5to9         | 2543386    |
| South Africa | 1996           | MaleAge60to64       | 412796     |
| South Africa | 1996           | MaleAge65to69       | 281898     |
| South Africa | 1996           | MaleAge70to74       | 162780     |
| South Africa | 1996           | MaleAge75to79       | 82649      |
| South Africa | 1996           | MaleAge80to84       | 35835      |
| South Africa | 1996           | MaleAge85to89       | 11700      |
| South Africa | 1996           | MaleAge90to94       | 2653       |
| South Africa | 1996           | MaleAge95to99       | 374        |
| South Africa | 1996           | MaleAgeAbove100     | 33         |
| South Africa | 1997           | FemaleAge0to4       | 2468693    |
| South Africa | 1997           | FemaleAge10to14     | 2467506    |
| South Africa | 1997           | FemaleAge15to19     | 1949155    |
| South Africa | 1997           | FemaleAge20to24     | 1524489    |
| South Africa | 1997           | FemaleAge25to29     | 1362996    |
| South Africa | 1997           | FemaleAge30to34     | 1287608    |
| South Africa | 1997           | FemaleAge35to39     | 1259036    |
| South Africa | 1997           | FemaleAge40to44     | 1206420    |
| South Africa | 1997           | FemaleAge45to49     | 1017164    |
| South Africa | 1997           | FemaleAge50to54     | 836417     |
| South Africa | 1997           | FemaleAge55to59     | 666016     |
| South Africa | 1997           | FemaleAge5to9       | 2519998    |



Dietary calcium and zinc deficiency risks are decreasing but remain prevalent

| Country      | Reference year | Age/gender group    | Population |
|--------------|----------------|---------------------|------------|
| South Africa | 1997           | FemaleAge60to64     | 502939     |
| South Africa | 1997           | FemaleAge65to69     | 357638     |
| South Africa | 1997           | FemaleAge70to74     | 240219     |
| South Africa | 1997           | FemaleAge75to79     | 147159     |
| South Africa | 1997           | FemaleAge80to84     | 80574      |
| South Africa | 1997           | FemaleAge85to89     | 37053      |
| South Africa | 1997           | FemaleAge90to94     | 11605      |
| South Africa | 1997           | FemaleAge95to99     | 2049       |
| South Africa | 1997           | FemaleAgeAbove100   | 225        |
| South Africa | 1997           | FemaleLactAge15to19 | 186238     |
| South Africa | 1997           | FemaleLactAge20to24 | 292015     |
| South Africa | 1997           | FemaleLactAge25to29 | 255622     |
| South Africa | 1997           | FemaleLactAge30to34 | 174379     |
| South Africa | 1997           | FemaleLactAge35to39 | 106130     |
| South Africa | 1997           | FemaleLactAge40to44 | 40065      |
| South Africa | 1997           | FemaleLactAge45to49 | 11184      |
| South Africa | 1997           | FemalePregAge15to19 | 139678     |
| South Africa | 1997           | FemalePregAge20to24 | 219011     |
| South Africa | 1997           | FemalePregAge25to29 | 191716     |
| South Africa | 1997           | FemalePregAge30to34 | 130784     |
| South Africa | 1997           | FemalePregAge35to39 | 79598      |
| South Africa | 1997           | FemalePregAge40to44 | 30049      |
| South Africa | 1997           | FemalePregAge45to49 | 8388       |
| South Africa | 1997           | MaleAge0to4         | 2500032    |
| South Africa | 1997           | MaleAge10to14       | 2479905    |
| South Africa | 1997           | MaleAge15to19       | 2303825    |
| South Africa | 1997           | MaleAge20to24       | 2087543    |
| South Africa | 1997           | MaleAge25to29       | 1814606    |
| South Africa | 1997           | MaleAge30to34       | 1539575    |
| South Africa | 1997           | MaleAge35to39       | 1351114    |
| South Africa | 1997           | MaleAge40to44       | 1171092    |
| South Africa | 1997           | MaleAge45to49       | 955366     |
| South Africa | 1997           | MaleAge50to54       | 761900     |
| South Africa | 1997           | MaleAge55to59       | 579943     |
| South Africa | 1997           | MaleAge5to9         | 2539295    |
| South Africa | 1997           | MaleAge60to64       | 419950     |
| South Africa | 1997           | MaleAge65to69       | 287007     |
| South Africa | 1997           | MaleAge70to74       | 168345     |
| South Africa | 1997           | MaleAge75to79       | 83967      |
| South Africa | 1997           | MaleAge80to84       | 37038      |
| South Africa | 1997           | MaleAge85to89       | 12832      |
| South Africa | 1997           | MaleAge90to94       | 2948       |
| South Africa | 1997           | MaleAge95to99       | 449        |
| South Africa | 1997           | MaleAgeAbove100     | 34         |
| South Africa | 1998           | FemaleAge0to4       | 2440586    |
| South Africa | 1998           | FemaleAge10to14     | 2486574    |
| South Africa | 1998           | FemaleAge15to19     | 1997123    |
| South Africa | 1998           | FemaleAge20to24     | 1536077    |
| South Africa | 1998           | FemaleAge25to29     | 1357259    |
| South Africa | 1998           | FemaleAge30to34     | 1305037    |
| South Africa | 1998           | FemaleAge35to39     | 1292091    |
| South Africa | 1998           | FemaleAge40to44     | 1275732    |
| South Africa | 1998           | FemaleAge45to49     | 1093802    |
| South Africa | 1998           | FemaleAge50to54     | 886058     |
| South Africa | 1998           | FemaleAge55to59     | 703296     |
| South Africa | 1998           | FemaleAge5to9       | 2510613    |
| South Africa | 1998           | FemaleAge60to64     | 523835     |
| South Africa | 1998           | FemaleAge65to69     | 369805     |
| South Africa | 1998           | FemaleAge70to74     | 243685     |
| South Africa | 1998           | FemaleAge75to79     | 146396     |
| South Africa | 1998           | FemaleAge80to84     | 77195      |
| South Africa | 1998           | FemaleAge85to89     | 38967      |
| South Africa | 1998           | FemaleAge90to94     | 12172      |
| South Africa | 1998           | FemaleAge95to99     | 2252       |
| South Africa | 1998           | FemaleAgeAbove100   | 235        |
| South Africa | 1998           | FemaleLactAge15to19 | 186238     |
| South Africa | 1998           | FemaleLactAge20to24 | 292015     |
| South Africa | 1998           | FemaleLactAge25to29 | 255622     |
| South Africa | 1998           | FemaleLactAge30to34 | 174379     |
| South Africa | 1998           | FemaleLactAge35to39 | 106130     |
| South Africa | 1998           | FemaleLactAge40to44 | 40065      |
| South Africa | 1998           | FemaleLactAge45to49 | 11184      |
| South Africa | 1998           | FemalePregAge15to19 | 139678     |
| South Africa | 1998           | FemalePregAge20to24 | 219011     |
| South Africa | 1998           | FemalePregAge25to29 | 191716     |
| South Africa | 1998           | FemalePregAge30to34 | 130784     |
| South Africa | 1998           | FemalePregAge35to39 | 79598      |
| South Africa | 1998           | FemalePregAge40to44 | 30049      |
| South Africa | 1998           | FemalePregAge45to49 | 8388       |
| South Africa | 1998           | MaleAge0to4         | 2464389    |
| South Africa | 1998           | MaleAge10to14       | 2498271    |
| South Africa | 1998           | MaleAge15to19       | 2355412    |
| South Africa | 1998           | MaleAge20to24       | 2131549    |
| South Africa | 1998           | MaleAge25to29       | 1860803    |
| South Africa | 1998           | MaleAge30to34       | 1565786    |
| South Africa | 1998           | MaleAge35to39       | 1365567    |
| South Africa | 1998           | MaleAge40to44       | 1202879    |
| South Africa | 1998           | MaleAge45to49       | 995890     |

Dietary calcium and zinc deficiency risks are decreasing but remain prevalent

| Country       | Reference year | Age/gender group    | Population |
|---------------|----------------|---------------------|------------|
| South Af rica | 1998           | MaleAge50to54       | 792059     |
| South Af rica | 1998           | MaleAge55to59       | 604620     |
| South Af rica | 1998           | MaleAge5to9         | 2524392    |
| South Af rica | 1998           | MaleAge60to64       | 429270     |
| South Af rica | 1998           | MaleAge65to69       | 291615     |
| South Af rica | 1998           | MaleAge70to74       | 173028     |
| South Af rica | 1998           | MaleAge75to79       | 84939      |
| South Af rica | 1998           | MaleAge80to84       | 36838      |
| South Af rica | 1998           | MaleAge85to89       | 13686      |
| South Af rica | 1998           | MaleAge90to94       | 3097       |
| South Af rica | 1998           | MaleAge95to99       | 514        |
| South Af rica | 1998           | MaleAgeAbov e100    | 35         |
| South Af rica | 1999           | FemaleAge0to4       | 2419214    |
| South Af rica | 1999           | FemaleAge10to14     | 2495839    |
| South Af rica | 1999           | FemaleAge15to19     | 2046419    |
| South Af rica | 1999           | FemaleAge20to24     | 1563629    |
| South Af rica | 1999           | FemaleAge25to29     | 1349568    |
| South Af rica | 1999           | FemaleAge30to34     | 1308971    |
| South Af rica | 1999           | FemaleAge35to39     | 1314766    |
| South Af rica | 1999           | FemaleAge40to44     | 1338273    |
| South Af rica | 1999           | FemaleAge45to49     | 1170881    |
| South Af rica | 1999           | FemaleAge50to54     | 944054     |
| South Af rica | 1999           | FemaleAge55to59     | 745569     |
| South Af rica | 1999           | FemaleAge5to9       | 2495301    |
| South Af rica | 1999           | FemaleAge60to64     | 549381     |
| South Af rica | 1999           | FemaleAge65to69     | 383948     |
| South Af rica | 1999           | FemaleAge70to74     | 248679     |
| South Af rica | 1999           | FemaleAge75to79     | 147153     |
| South Af rica | 1999           | FemaleAge80to84     | 70922      |
| South Af rica | 1999           | FemaleAge85to89     | 39859      |
| South Af rica | 1999           | FemaleAge90to94     | 12228      |
| South Af rica | 1999           | FemaleAge95to99     | 2366       |
| South Af rica | 1999           | FemaleAgeAbov e100  | 246        |
| South Af rica | 1999           | FemaleLactAge15to19 | 186238     |
| South Af rica | 1999           | FemaleLactAge20to24 | 292015     |
| South Af rica | 1999           | FemaleLactAge25to29 | 255622     |
| South Af rica | 1999           | FemaleLactAge30to34 | 174379     |
| South Af rica | 1999           | FemaleLactAge35to39 | 106130     |
| South Af rica | 1999           | FemaleLactAge40to44 | 40065      |
| South Af rica | 1999           | FemaleLactAge45to49 | 11184      |
| South Af rica | 1999           | FemalePregAge15to19 | 139678     |
| South Af rica | 1999           | FemalePregAge20to24 | 219011     |
| South Af rica | 1999           | FemalePregAge25to29 | 191716     |
| South Af rica | 1999           | FemalePregAge30to34 | 130784     |
| South Af rica | 1999           | FemalePregAge35to39 | 79598      |
| South Af rica | 1999           | FemalePregAge40to44 | 30049      |
| South Af rica | 1999           | FemalePregAge45to49 | 8388       |
| South Af rica | 1999           | MaleAge0to4         | 2435933    |
| South Af rica | 1999           | MaleAge10to14       | 2506531    |
| South Af rica | 1999           | MaleAge15to19       | 2399814    |
| South Af rica | 1999           | MaleAge20to24       | 2180878    |
| South Af rica | 1999           | MaleAge25to29       | 1909967    |
| South Af rica | 1999           | MaleAge30to34       | 1595021    |
| South Af rica | 1999           | MaleAge35to39       | 1378064    |
| South Af rica | 1999           | MaleAge40to44       | 1230327    |
| South Af rica | 1999           | MaleAge45to49       | 1033550    |
| South Af rica | 1999           | MaleAge50to54       | 826260     |
| South Af rica | 1999           | MaleAge55to59       | 631862     |
| South Af rica | 1999           | MaleAge5to9         | 2501526    |
| South Af rica | 1999           | MaleAge60to64       | 442269     |
| South Af rica | 1999           | MaleAge65to69       | 296473     |
| South Af rica | 1999           | MaleAge70to74       | 176520     |
| South Af rica | 1999           | MaleAge75to79       | 85858      |
| South Af rica | 1999           | MaleAge80to84       | 35371      |
| South Af rica | 1999           | MaleAge85to89       | 13915      |
| South Af rica | 1999           | MaleAge90to94       | 3080       |
| South Af rica | 1999           | MaleAge95to99       | 514        |
| South Af rica | 1999           | MaleAgeAbov e100    | 35         |
| South Sudan   | 1992           | FemaleAge0to4       | 511343     |
| South Sudan   | 1992           | FemaleAge10to14     | 329603     |
| South Sudan   | 1992           | FemaleAge15to19     | 219367     |
| South Sudan   | 1992           | FemaleAge20to24     | 119174     |
| South Sudan   | 1992           | FemaleAge25to29     | 100162     |
| South Sudan   | 1992           | FemaleAge30to34     | 98063      |
| South Sudan   | 1992           | FemaleAge35to39     | 90756      |
| South Sudan   | 1992           | FemaleAge40to44     | 94186      |
| South Sudan   | 1992           | FemaleAge45to49     | 94685      |
| South Sudan   | 1992           | FemaleAge50to54     | 89696      |
| South Sudan   | 1992           | FemaleAge55to59     | 72129      |
| South Sudan   | 1992           | FemaleAge5to9       | 394655     |
| South Sudan   | 1992           | FemaleAge60to64     | 54987      |
| South Sudan   | 1992           | FemaleAge65to69     | 38494      |
| South Sudan   | 1992           | FemaleAge70to74     | 24604      |
| South Sudan   | 1992           | FemaleAge75to79     | 13670      |
| South Sudan   | 1992           | FemaleAge80to84     | 5999       |
| South Sudan   | 1992           | FemaleAge85to89     | 1841       |
| South Sudan   | 1992           | FemaleAge90to94     | 368        |
| South Sudan   | 1992           | FemaleAge95to99     | 43         |

Dietary calcium and zinc deficiency risks are decreasing but remain prevalent

| Country     | Reference year | Age/gender group    | Population |
|-------------|----------------|---------------------|------------|
| South Sudan | 1992           | FemaleAgeAbove100   | 2          |
| South Sudan | 1992           | FemaleLactAge15to19 | 39301      |
| South Sudan | 1992           | FemaleLactAge20to24 | 73760      |
| South Sudan | 1992           | FemaleLactAge25to29 | 61563      |
| South Sudan | 1992           | FemaleLactAge30to34 | 41125      |
| South Sudan | 1992           | FemaleLactAge35to39 | 24260      |
| South Sudan | 1992           | FemaleLactAge40to44 | 13248      |
| South Sudan | 1992           | FemaleLactAge45to49 | 7600       |
| South Sudan | 1992           | FemalePregAge15to19 | 29476      |
| South Sudan | 1992           | FemalePregAge20to24 | 55320      |
| South Sudan | 1992           | FemalePregAge25to29 | 46173      |
| South Sudan | 1992           | FemalePregAge30to34 | 30844      |
| South Sudan | 1992           | FemalePregAge35to39 | 18195      |
| South Sudan | 1992           | FemalePregAge40to44 | 9936       |
| South Sudan | 1992           | FemalePregAge45to49 | 5700       |
| South Sudan | 1992           | MaleAge0to4         | 519156     |
| South Sudan | 1992           | MaleAge10to14       | 331039     |
| South Sudan | 1992           | MaleAge15to19       | 288677     |
| South Sudan | 1992           | MaleAge20to24       | 246881     |
| South Sudan | 1992           | MaleAge25to29       | 204398     |
| South Sudan | 1992           | MaleAge30to34       | 165403     |
| South Sudan | 1992           | MaleAge35to39       | 127668     |
| South Sudan | 1992           | MaleAge40to44       | 114349     |
| South Sudan | 1992           | MaleAge45to49       | 106302     |
| South Sudan | 1992           | MaleAge50to54       | 86637      |
| South Sudan | 1992           | MaleAge55to59       | 66707      |
| South Sudan | 1992           | MaleAge5to9         | 397815     |
| South Sudan | 1992           | MaleAge60to64       | 49629      |
| South Sudan | 1992           | MaleAge65to69       | 34900      |
| South Sudan | 1992           | MaleAge70to74       | 21773      |
| South Sudan | 1992           | MaleAge75to79       | 11281      |
| South Sudan | 1992           | MaleAge80to84       | 4545       |
| South Sudan | 1992           | MaleAge85to89       | 1255       |
| South Sudan | 1992           | MaleAge90to94       | 201        |
| South Sudan | 1992           | MaleAge95to99       | 16         |
| South Sudan | 1993           | FemaleAge0to4       | 494836     |
| South Sudan | 1993           | FemaleAge10to14     | 321896     |
| South Sudan | 1993           | FemaleAge15to19     | 212936     |
| South Sudan | 1993           | FemaleAge20to24     | 114229     |
| South Sudan | 1993           | FemaleAge25to29     | 97184      |
| South Sudan | 1993           | FemaleAge30to34     | 95878      |
| South Sudan | 1993           | FemaleAge35to39     | 90408      |
| South Sudan | 1993           | FemaleAge40to44     | 88126      |
| South Sudan | 1993           | FemaleAge45to49     | 91692      |
| South Sudan | 1993           | FemaleAge50to54     | 88257      |
| South Sudan | 1993           | FemaleAge55to59     | 70556      |
| South Sudan | 1993           | FemaleAge5to9       | 391525     |
| South Sudan | 1993           | FemaleAge60to64     | 54479      |
| South Sudan | 1993           | FemaleAge65to69     | 38061      |
| South Sudan | 1993           | FemaleAge70to74     | 24351      |
| South Sudan | 1993           | FemaleAge75to79     | 13519      |
| South Sudan | 1993           | FemaleAge80to84     | 6038       |
| South Sudan | 1993           | FemaleAge85to89     | 1874       |
| South Sudan | 1993           | FemaleAge90to94     | 390        |
| South Sudan | 1993           | FemaleAge95to99     | 51         |
| South Sudan | 1993           | FemaleAgeAbove100   | 2          |
| South Sudan | 1993           | FemaleLactAge15to19 | 39301      |
| South Sudan | 1993           | FemaleLactAge20to24 | 73760      |
| South Sudan | 1993           | FemaleLactAge25to29 | 61563      |
| South Sudan | 1993           | FemaleLactAge30to34 | 41125      |
| South Sudan | 1993           | FemaleLactAge35to39 | 24260      |
| South Sudan | 1993           | FemaleLactAge40to44 | 13248      |
| South Sudan | 1993           | FemaleLactAge45to49 | 7600       |
| South Sudan | 1993           | FemalePregAge15to19 | 29476      |
| South Sudan | 1993           | FemalePregAge20to24 | 55320      |
| South Sudan | 1993           | FemalePregAge25to29 | 46173      |
| South Sudan | 1993           | FemalePregAge30to34 | 30844      |
| South Sudan | 1993           | FemalePregAge35to39 | 18195      |
| South Sudan | 1993           | FemalePregAge40to44 | 9936       |
| South Sudan | 1993           | FemalePregAge45to49 | 5700       |
| South Sudan | 1993           | MaleAge0to4         | 502869     |
| South Sudan | 1993           | MaleAge10to14       | 323496     |
| South Sudan | 1993           | MaleAge15to19       | 282316     |
| South Sudan | 1993           | MaleAge20to24       | 242165     |
| South Sudan | 1993           | MaleAge25to29       | 201685     |
| South Sudan | 1993           | MaleAge30to34       | 163495     |
| South Sudan | 1993           | MaleAge35to39       | 127711     |
| South Sudan | 1993           | MaleAge40to44       | 107417     |
| South Sudan | 1993           | MaleAge45to49       | 103366     |
| South Sudan | 1993           | MaleAge50to54       | 85324      |
| South Sudan | 1993           | MaleAge55to59       | 65689      |
| South Sudan | 1993           | MaleAge5to9         | 395011     |
| South Sudan | 1993           | MaleAge60to64       | 48853      |
| South Sudan | 1993           | MaleAge65to69       | 34316      |
| South Sudan | 1993           | MaleAge70to74       | 21600      |
| South Sudan | 1993           | MaleAge75to79       | 11223      |
| South Sudan | 1993           | MaleAge80to84       | 4567       |
| South Sudan | 1993           | MaleAge85to89       | 1289       |

Dietary calcium and zinc deficiency risks are decreasing but remain prevalent

| Country     | Reference year | Age/gender group    | Population |
|-------------|----------------|---------------------|------------|
| South Sudan | 1993           | MaleAge90to94       | 220        |
| South Sudan | 1993           | MaleAge95to99       | 24         |
| South Sudan | 1994           | FemaleAge0to4       | 484152     |
| South Sudan | 1994           | FemaleAge10to14     | 317835     |
| South Sudan | 1994           | FemaleAge15to19     | 208883     |
| South Sudan | 1994           | FemaleAge20to24     | 111305     |
| South Sudan | 1994           | FemaleAge25to29     | 95831      |
| South Sudan | 1994           | FemaleAge30to34     | 95087      |
| South Sudan | 1994           | FemaleAge35to39     | 91294      |
| South Sudan | 1994           | FemaleAge40to44     | 84014      |
| South Sudan | 1994           | FemaleAge45to49     | 89110      |
| South Sudan | 1994           | FemaleAge50to54     | 87431      |
| South Sudan | 1994           | FemaleAge55to59     | 69682      |
| South Sudan | 1994           | FemaleAge5to9       | 390834     |
| South Sudan | 1994           | FemaleAge60to64     | 54312      |
| South Sudan | 1994           | FemaleAge65to69     | 37956      |
| South Sudan | 1994           | FemaleAge70to74     | 24225      |
| South Sudan | 1994           | FemaleAge75to79     | 13361      |
| South Sudan | 1994           | FemaleAge80to84     | 5953       |
| South Sudan | 1994           | FemaleAge85to89     | 1827       |
| South Sudan | 1994           | FemaleAge90to94     | 380        |
| South Sudan | 1994           | FemaleAge95to99     | 52         |
| South Sudan | 1994           | FemaleAgeAbove100   | 2          |
| South Sudan | 1994           | FemaleLactAge15to19 | 39301      |
| South Sudan | 1994           | FemaleLactAge20to24 | 73760      |
| South Sudan | 1994           | FemaleLactAge25to29 | 61563      |
| South Sudan | 1994           | FemaleLactAge30to34 | 41125      |
| South Sudan | 1994           | FemaleLactAge35to39 | 24260      |
| South Sudan | 1994           | FemaleLactAge40to44 | 13248      |
| South Sudan | 1994           | FemaleLactAge45to49 | 7600       |
| South Sudan | 1994           | FemalePregAge15to19 | 29476      |
| South Sudan | 1994           | FemalePregAge20to24 | 55320      |
| South Sudan | 1994           | FemalePregAge25to29 | 46173      |
| South Sudan | 1994           | FemalePregAge30to34 | 30844      |
| South Sudan | 1994           | FemalePregAge35to39 | 18195      |
| South Sudan | 1994           | FemalePregAge40to44 | 9936       |
| South Sudan | 1994           | FemalePregAge45to49 | 5700       |
| South Sudan | 1994           | MaleAge0to4         | 492464     |
| South Sudan | 1994           | MaleAge10to14       | 319675     |
| South Sudan | 1994           | MaleAge15to19       | 278436     |
| South Sudan | 1994           | MaleAge20to24       | 239456     |
| South Sudan | 1994           | MaleAge25to29       | 200516     |
| South Sudan | 1994           | MaleAge30to34       | 162937     |
| South Sudan | 1994           | MaleAge35to39       | 128994     |
| South Sudan | 1994           | MaleAge40to44       | 102618     |
| South Sudan | 1994           | MaleAge45to49       | 100684     |
| South Sudan | 1994           | MaleAge50to54       | 84554      |
| South Sudan | 1994           | MaleAge55to59       | 65270      |
| South Sudan | 1994           | MaleAge5to9         | 394647     |
| South Sudan | 1994           | MaleAge60to64       | 48493      |
| South Sudan | 1994           | MaleAge65to69       | 33982      |
| South Sudan | 1994           | MaleAge70to74       | 21476      |
| South Sudan | 1994           | MaleAge75to79       | 11119      |
| South Sudan | 1994           | MaleAge80to84       | 4484       |
| South Sudan | 1994           | MaleAge85to89       | 1248       |
| South Sudan | 1994           | MaleAge90to94       | 215        |
| South Sudan | 1994           | MaleAge95to99       | 24         |
| South Sudan | 1995           | FemaleAge0to4       | 490415     |
| South Sudan | 1995           | FemaleAge10to14     | 318859     |
| South Sudan | 1995           | FemaleAge15to19     | 208354     |
| South Sudan | 1995           | FemaleAge20to24     | 111479     |
| South Sudan | 1995           | FemaleAge25to29     | 96954      |
| South Sudan | 1995           | FemaleAge30to34     | 96575      |
| South Sudan | 1995           | FemaleAge35to39     | 93522      |
| South Sudan | 1995           | FemaleAge40to44     | 82750      |
| South Sudan | 1995           | FemaleAge45to49     | 87219      |
| South Sudan | 1995           | FemaleAge50to54     | 87488      |
| South Sudan | 1995           | FemaleAge55to59     | 69890      |
| South Sudan | 1995           | FemaleAge5to9       | 392515     |
| South Sudan | 1995           | FemaleAge60to64     | 54678      |
| South Sudan | 1995           | FemaleAge65to69     | 38362      |
| South Sudan | 1995           | FemaleAge70to74     | 24347      |
| South Sudan | 1995           | FemaleAge75to79     | 13260      |
| South Sudan | 1995           | FemaleAge80to84     | 5765       |
| South Sudan | 1995           | FemaleAge85to89     | 1684       |
| South Sudan | 1995           | FemaleAge90to94     | 310        |
| South Sudan | 1995           | FemaleAge95to99     | 32         |
| South Sudan | 1995           | FemaleAgeAbove100   | 2          |
| South Sudan | 1995           | FemaleLactAge15to19 | 39301      |
| South Sudan | 1995           | FemaleLactAge20to24 | 73760      |
| South Sudan | 1995           | FemaleLactAge25to29 | 61563      |
| South Sudan | 1995           | FemaleLactAge30to34 | 41125      |
| South Sudan | 1995           | FemaleLactAge35to39 | 24260      |
| South Sudan | 1995           | FemaleLactAge40to44 | 13248      |
| South Sudan | 1995           | FemaleLactAge45to49 | 7600       |
| South Sudan | 1995           | FemalePregAge15to19 | 29476      |
| South Sudan | 1995           | FemalePregAge20to24 | 55320      |
| South Sudan | 1995           | FemalePregAge25to29 | 46173      |

Dietary calcium and zinc deficiency risks are decreasing but remain prevalent

| Country     | Reference year | Age/gender group    | Population |
|-------------|----------------|---------------------|------------|
| South Sudan | 1995           | FemalePregAge30to34 | 30844      |
| South Sudan | 1995           | FemalePregAge35to39 | 18195      |
| South Sudan | 1995           | FemalePregAge40to44 | 9936       |
| South Sudan | 1995           | FemalePregAge45to49 | 5700       |
| South Sudan | 1995           | MaleAge0to4         | 499266     |
| South Sudan | 1995           | MaleAge10to14       | 320977     |
| South Sudan | 1995           | MaleAge15to19       | 278159     |
| South Sudan | 1995           | MaleAge20to24       | 239822     |
| South Sudan | 1995           | MaleAge25to29       | 201747     |
| South Sudan | 1995           | MaleAge30to34       | 164582     |
| South Sudan | 1995           | MaleAge35to39       | 131494     |
| South Sudan | 1995           | MaleAge40to44       | 100927     |
| South Sudan | 1995           | MaleAge45to49       | 98460      |
| South Sudan | 1995           | MaleAge50to54       | 84630      |
| South Sudan | 1995           | MaleAge55to59       | 65740      |
| South Sudan | 1995           | MaleAge5to9         | 396594     |
| South Sudan | 1995           | MaleAge60to64       | 48753      |
| South Sudan | 1995           | MaleAge65to69       | 34058      |
| South Sudan | 1995           | MaleAge70to74       | 21485      |
| South Sudan | 1995           | MaleAge75to79       | 11027      |
| South Sudan | 1995           | MaleAge80to84       | 4304       |
| South Sudan | 1995           | MaleAge85to89       | 1108       |
| South Sudan | 1995           | MaleAge90to94       | 161        |
| South Sudan | 1995           | MaleAge95to99       | 12         |
| South Sudan | 1996           | FemaleAge0to4       | 498781     |
| South Sudan | 1996           | FemaleAge10to14     | 328131     |
| South Sudan | 1996           | FemaleAge15to19     | 213493     |
| South Sudan | 1996           | FemaleAge20to24     | 117602     |
| South Sudan | 1996           | FemaleAge25to29     | 99830      |
| South Sudan | 1996           | FemaleAge30to34     | 96448      |
| South Sudan | 1996           | FemaleAge35to39     | 94871      |
| South Sudan | 1996           | FemaleAge40to44     | 84154      |
| South Sudan | 1996           | FemaleAge45to49     | 86983      |
| South Sudan | 1996           | FemaleAge50to54     | 88878      |
| South Sudan | 1996           | FemaleAge55to59     | 71516      |
| South Sudan | 1996           | FemaleAge5to9       | 405701     |
| South Sudan | 1996           | FemaleAge60to64     | 55818      |
| South Sudan | 1996           | FemaleAge65to69     | 39532      |
| South Sudan | 1996           | FemaleAge70to74     | 25092      |
| South Sudan | 1996           | FemaleAge75to79     | 13760      |
| South Sudan | 1996           | FemaleAge80to84     | 6102       |
| South Sudan | 1996           | FemaleAge85to89     | 1903       |
| South Sudan | 1996           | FemaleAge90to94     | 372        |
| South Sudan | 1996           | FemaleAge95to99     | 38         |
| South Sudan | 1996           | FemaleAgeAbove100   | 2          |
| South Sudan | 1996           | FemaleLactAge15to19 | 39060      |
| South Sudan | 1996           | FemaleLactAge20to24 | 72887      |
| South Sudan | 1996           | FemaleLactAge25to29 | 62611      |
| South Sudan | 1996           | FemaleLactAge30to34 | 43889      |
| South Sudan | 1996           | FemaleLactAge35to39 | 26072      |
| South Sudan | 1996           | FemaleLactAge40to44 | 13873      |
| South Sudan | 1996           | FemaleLactAge45to49 | 7354       |
| South Sudan | 1996           | FemalePregAge15to19 | 29295      |
| South Sudan | 1996           | FemalePregAge20to24 | 54666      |
| South Sudan | 1996           | FemalePregAge25to29 | 46958      |
| South Sudan | 1996           | FemalePregAge30to34 | 32917      |
| South Sudan | 1996           | FemalePregAge35to39 | 19554      |
| South Sudan | 1996           | FemalePregAge40to44 | 10405      |
| South Sudan | 1996           | FemalePregAge45to49 | 5516       |
| South Sudan | 1996           | MaleAge0to4         | 508373     |
| South Sudan | 1996           | MaleAge10to14       | 330460     |
| South Sudan | 1996           | MaleAge15to19       | 282846     |
| South Sudan | 1996           | MaleAge20to24       | 244506     |
| South Sudan | 1996           | MaleAge25to29       | 206695     |
| South Sudan | 1996           | MaleAge30to34       | 169405     |
| South Sudan | 1996           | MaleAge35to39       | 136108     |
| South Sudan | 1996           | MaleAge40to44       | 103144     |
| South Sudan | 1996           | MaleAge45to49       | 97131      |
| South Sudan | 1996           | MaleAge50to54       | 86019      |
| South Sudan | 1996           | MaleAge55to59       | 67491      |
| South Sudan | 1996           | MaleAge5to9         | 410372     |
| South Sudan | 1996           | MaleAge60to64       | 49959      |
| South Sudan | 1996           | MaleAge65to69       | 34851      |
| South Sudan | 1996           | MaleAge70to74       | 22056      |
| South Sudan | 1996           | MaleAge75to79       | 11530      |
| South Sudan | 1996           | MaleAge80to84       | 4625       |
| South Sudan | 1996           | MaleAge85to89       | 1271       |
| South Sudan | 1996           | MaleAge90to94       | 202        |
| South Sudan | 1996           | MaleAge95to99       | 13         |
| South Sudan | 1997           | FemaleAge0to4       | 513278     |
| South Sudan | 1997           | FemaleAge10to14     | 344403     |
| South Sudan | 1997           | FemaleAge15to19     | 222896     |
| South Sudan | 1997           | FemaleAge20to24     | 126406     |
| South Sudan | 1997           | FemaleAge25to29     | 107964     |
| South Sudan | 1997           | FemaleAge30to34     | 104177     |
| South Sudan | 1997           | FemaleAge35to39     | 101493     |
| South Sudan | 1997           | FemaleAge40to44     | 89874      |
| South Sudan | 1997           | FemaleAge45to49     | 87366      |

Dietary calcium and zinc deficiency risks are decreasing but remain prevalent

| Country     | Reference year | Age/gender group    | Population |
|-------------|----------------|---------------------|------------|
| South Sudan | 1997           | FemaleAge50to54     | 91698      |
| South Sudan | 1997           | FemaleAge55to59     | 74568      |
| South Sudan | 1997           | FemaleAge5to9       | 424524     |
| South Sudan | 1997           | FemaleAge60to64     | 57866      |
| South Sudan | 1997           | FemaleAge65to69     | 41539      |
| South Sudan | 1997           | FemaleAge70to74     | 26317      |
| South Sudan | 1997           | FemaleAge75to79     | 14494      |
| South Sudan | 1997           | FemaleAge80to84     | 6482       |
| South Sudan | 1997           | FemaleAge85to89     | 2108       |
| South Sudan | 1997           | FemaleAge90to94     | 427        |
| South Sudan | 1997           | FemaleAge95to99     | 51         |
| South Sudan | 1997           | FemaleAgeAbove100   | 2          |
| South Sudan | 1997           | FemaleLactAge15to19 | 39060      |
| South Sudan | 1997           | FemaleLactAge20to24 | 72887      |
| South Sudan | 1997           | FemaleLactAge25to29 | 62611      |
| South Sudan | 1997           | FemaleLactAge30to34 | 43889      |
| South Sudan | 1997           | FemaleLactAge35to39 | 26072      |
| South Sudan | 1997           | FemaleLactAge40to44 | 13873      |
| South Sudan | 1997           | FemaleLactAge45to49 | 7354       |
| South Sudan | 1997           | FemalePregAge15to19 | 29295      |
| South Sudan | 1997           | FemalePregAge20to24 | 54666      |
| South Sudan | 1997           | FemalePregAge25to29 | 46958      |
| South Sudan | 1997           | FemalePregAge30to34 | 32917      |
| South Sudan | 1997           | FemalePregAge35to39 | 19554      |
| South Sudan | 1997           | FemalePregAge40to44 | 10405      |
| South Sudan | 1997           | FemalePregAge45to49 | 5516       |
| South Sudan | 1997           | MaleAge0to4         | 523305     |
| South Sudan | 1997           | MaleAge10to14       | 347091     |
| South Sudan | 1997           | MaleAge15to19       | 292353     |
| South Sudan | 1997           | MaleAge20to24       | 253381     |
| South Sudan | 1997           | MaleAge25to29       | 215040     |
| South Sudan | 1997           | MaleAge30to34       | 177213     |
| South Sudan | 1997           | MaleAge35to39       | 142753     |
| South Sudan | 1997           | MaleAge40to44       | 108791     |
| South Sudan | 1997           | MaleAge45to49       | 96630      |
| South Sudan | 1997           | MaleAge50to54       | 88833      |
| South Sudan | 1997           | MaleAge55to59       | 70509      |
| South Sudan | 1997           | MaleAge5to9         | 430043     |
| South Sudan | 1997           | MaleAge60to64       | 52130      |
| South Sudan | 1997           | MaleAge65to69       | 36346      |
| South Sudan | 1997           | MaleAge70to74       | 23014      |
| South Sudan | 1997           | MaleAge75to79       | 12213      |
| South Sudan | 1997           | MaleAge80to84       | 4964       |
| South Sudan | 1997           | MaleAge85to89       | 1418       |
| South Sudan | 1997           | MaleAge90to94       | 241        |
| South Sudan | 1997           | MaleAge95to99       | 21         |
| South Sudan | 1998           | FemaleAge0to4       | 534420     |
| South Sudan | 1998           | FemaleAge10to14     | 365375     |
| South Sudan | 1998           | FemaleAge15to19     | 235602     |
| South Sudan | 1998           | FemaleAge20to24     | 137804     |
| South Sudan | 1998           | FemaleAge25to29     | 118235     |
| South Sudan | 1998           | FemaleAge30to34     | 113811     |
| South Sudan | 1998           | FemaleAge35to39     | 109514     |
| South Sudan | 1998           | FemaleAge40to44     | 97696      |
| South Sudan | 1998           | FemaleAge45to49     | 88683      |
| South Sudan | 1998           | FemaleAge50to54     | 95185      |
| South Sudan | 1998           | FemaleAge55to59     | 78484      |
| South Sudan | 1998           | FemaleAge5to9       | 446013     |
| South Sudan | 1998           | FemaleAge60to64     | 60573      |
| South Sudan | 1998           | FemaleAge65to69     | 44107      |
| South Sudan | 1998           | FemaleAge70to74     | 27919      |
| South Sudan | 1998           | FemaleAge75to79     | 15405      |
| South Sudan | 1998           | FemaleAge80to84     | 6880       |
| South Sudan | 1998           | FemaleAge85to89     | 2277       |
| South Sudan | 1998           | FemaleAge90to94     | 470        |
| South Sudan | 1998           | FemaleAge95to99     | 64         |
| South Sudan | 1998           | FemaleAgeAbove100   | 2          |
| South Sudan | 1998           | FemaleLactAge15to19 | 39060      |
| South Sudan | 1998           | FemaleLactAge20to24 | 72887      |
| South Sudan | 1998           | FemaleLactAge25to29 | 62611      |
| South Sudan | 1998           | FemaleLactAge30to34 | 43889      |
| South Sudan | 1998           | FemaleLactAge35to39 | 26072      |
| South Sudan | 1998           | FemaleLactAge40to44 | 13873      |
| South Sudan | 1998           | FemaleLactAge45to49 | 7354       |
| South Sudan | 1998           | FemalePregAge15to19 | 29295      |
| South Sudan | 1998           | FemalePregAge20to24 | 54666      |
| South Sudan | 1998           | FemalePregAge25to29 | 46958      |
| South Sudan | 1998           | FemalePregAge30to34 | 32917      |
| South Sudan | 1998           | FemalePregAge35to39 | 19554      |
| South Sudan | 1998           | FemalePregAge40to44 | 10405      |
| South Sudan | 1998           | FemalePregAge45to49 | 5516       |
| South Sudan | 1998           | MaleAge0to4         | 544780     |
| South Sudan | 1998           | MaleAge10to14       | 368504     |
| South Sudan | 1998           | MaleAge15to19       | 305293     |
| South Sudan | 1998           | MaleAge20to24       | 264836     |
| South Sudan | 1998           | MaleAge25to29       | 225462     |
| South Sudan | 1998           | MaleAge30to34       | 186906     |
| South Sudan | 1998           | MaleAge35to39       | 150754     |

Dietary calcium and zinc deficiency risks are decreasing but remain prevalent

| Country     | Reference year | Age/gender group    | Population |
|-------------|----------------|---------------------|------------|
| South Sudan | 1998           | MaleAge40to44       | 116684     |
| South Sudan | 1998           | MaleAge45to49       | 96970      |
| South Sudan | 1998           | MaleAge50to54       | 92248      |
| South Sudan | 1998           | MaleAge55to59       | 74291      |
| South Sudan | 1998           | MaleAge5to9         | 452553     |
| South Sudan | 1998           | MaleAge60to64       | 54982      |
| South Sudan | 1998           | MaleAge65to69       | 38348      |
| South Sudan | 1998           | MaleAge70to74       | 24270      |
| South Sudan | 1998           | MaleAge75to79       | 13009      |
| South Sudan | 1998           | MaleAge80to84       | 5302       |
| South Sudan | 1998           | MaleAge85to89       | 1530       |
| South Sudan | 1998           | MaleAge90to94       | 273        |
| South Sudan | 1998           | MaleAge95to99       | 29         |
| South Sudan | 1998           | MaleAgeAbov e100    | 1          |
| South Sudan | 1999           | FemaleAge0to4       | 558367     |
| South Sudan | 1999           | FemaleAge10to14     | 387618     |
| South Sudan | 1999           | FemaleAge15to19     | 250198     |
| South Sudan | 1999           | FemaleAge20to24     | 149856     |
| South Sudan | 1999           | FemaleAge25to29     | 129092     |
| South Sudan | 1999           | FemaleAge30to34     | 123956     |
| South Sudan | 1999           | FemaleAge35to39     | 118110     |
| South Sudan | 1999           | FemaleAge40to44     | 106064     |
| South Sudan | 1999           | FemaleAge45to49     | 91107      |
| South Sudan | 1999           | FemaleAge50to54     | 98390      |
| South Sudan | 1999           | FemaleAge55to59     | 82551      |
| South Sudan | 1999           | FemaleAge5to9       | 466942     |
| South Sudan | 1999           | FemaleAge60to64     | 63674      |
| South Sudan | 1999           | FemaleAge65to69     | 46861      |
| South Sudan | 1999           | FemaleAge70to74     | 29762      |
| South Sudan | 1999           | FemaleAge75to79     | 16415      |
| South Sudan | 1999           | FemaleAge80to84     | 7274       |
| South Sudan | 1999           | FemaleAge85to89     | 2384       |
| South Sudan | 1999           | FemaleAge90to94     | 492        |
| South Sudan | 1999           | FemaleAge95to99     | 68         |
| South Sudan | 1999           | FemaleAgeAbov e100  | 3          |
| South Sudan | 1999           | FemaleLactAge15to19 | 39060      |
| South Sudan | 1999           | FemaleLactAge20to24 | 72887      |
| South Sudan | 1999           | FemaleLactAge25to29 | 62611      |
| South Sudan | 1999           | FemaleLactAge30to34 | 43889      |
| South Sudan | 1999           | FemaleLactAge35to39 | 26072      |
| South Sudan | 1999           | FemaleLactAge40to44 | 13873      |
| South Sudan | 1999           | FemaleLactAge45to49 | 7354       |
| South Sudan | 1999           | FemalePregAge15to19 | 29295      |
| South Sudan | 1999           | FemalePregAge20to24 | 54666      |
| South Sudan | 1999           | FemalePregAge25to29 | 46958      |
| South Sudan | 1999           | FemalePregAge30to34 | 32917      |
| South Sudan | 1999           | FemalePregAge35to39 | 19554      |
| South Sudan | 1999           | FemalePregAge40to44 | 10405      |
| South Sudan | 1999           | FemalePregAge45to49 | 5516       |
| South Sudan | 1999           | MaleAge0to4         | 569176     |
| South Sudan | 1999           | MaleAge10to14       | 391262     |
| South Sudan | 1999           | MaleAge15to19       | 320221     |
| South Sudan | 1999           | MaleAge20to24       | 276953     |
| South Sudan | 1999           | MaleAge25to29       | 236394     |
| South Sudan | 1999           | MaleAge30to34       | 197110     |
| South Sudan | 1999           | MaleAge35to39       | 159339     |
| South Sudan | 1999           | MaleAge40to44       | 125155     |
| South Sudan | 1999           | MaleAge45to49       | 98553      |
| South Sudan | 1999           | MaleAge50to54       | 95211      |
| South Sudan | 1999           | MaleAge55to59       | 78211      |
| South Sudan | 1999           | MaleAge5to9         | 474517     |
| South Sudan | 1999           | MaleAge60to64       | 58183      |
| South Sudan | 1999           | MaleAge65to69       | 40616      |
| South Sudan | 1999           | MaleAge70to74       | 25697      |
| South Sudan | 1999           | MaleAge75to79       | 13835      |
| South Sudan | 1999           | MaleAge80to84       | 5616       |
| South Sudan | 1999           | MaleAge85to89       | 1596       |
| South Sudan | 1999           | MaleAge90to94       | 283        |
| South Sudan | 1999           | MaleAge95to99       | 32         |
| South Sudan | 1999           | MaleAgeAbov e100    | 1          |
| Spain       | 1992           | FemaleAge0to4       | 971943     |
| Spain       | 1992           | FemaleAge10to14     | 1432833    |
| Spain       | 1992           | FemaleAge15to19     | 1583773    |
| Spain       | 1992           | FemaleAge20to24     | 1496288    |
| Spain       | 1992           | FemaleAge25to29     | 1304735    |
| Spain       | 1992           | FemaleAge30to34     | 1258572    |
| Spain       | 1992           | FemaleAge35to39     | 1230139    |
| Spain       | 1992           | FemaleAge40to44     | 1212238    |
| Spain       | 1992           | FemaleAge45to49     | 1136221    |
| Spain       | 1992           | FemaleAge50to54     | 1017181    |
| Spain       | 1992           | FemaleAge55to59     | 1101893    |
| Spain       | 1992           | FemaleAge5to9       | 1116203    |
| Spain       | 1992           | FemaleAge60to64     | 1121866    |
| Spain       | 1992           | FemaleAge65to69     | 1008019    |
| Spain       | 1992           | FemaleAge70to74     | 809064     |
| Spain       | 1992           | FemaleAge75to79     | 641945     |
| Spain       | 1992           | FemaleAge80to84     | 472447     |
| Spain       | 1992           | FemaleAge85to89     | 255834     |

Dietary calcium and zinc deficiency risks are decreasing but remain prevalent

| Country | Reference year | Age/gender group    | Population |
|---------|----------------|---------------------|------------|
| Spain   | 1992           | FemaleAge90to94     | 89763      |
| Spain   | 1992           | FemaleAge95to99     | 15069      |
| Spain   | 1992           | FemaleAgeAbove100   | 1228       |
| Spain   | 1992           | FemaleLactAge15to19 | 15320      |
| Spain   | 1992           | FemaleLactAge20to24 | 62642      |
| Spain   | 1992           | FemaleLactAge25to29 | 144598     |
| Spain   | 1992           | FemaleLactAge30to34 | 117310     |
| Spain   | 1992           | FemaleLactAge35to39 | 38331      |
| Spain   | 1992           | FemaleLactAge40to44 | 6712       |
| Spain   | 1992           | FemaleLactAge45to49 | 364        |
| Spain   | 1992           | FemalePregAge15to19 | 11490      |
| Spain   | 1992           | FemalePregAge20to24 | 46981      |
| Spain   | 1992           | FemalePregAge25to29 | 108448     |
| Spain   | 1992           | FemalePregAge30to34 | 87983      |
| Spain   | 1992           | FemalePregAge35to39 | 28749      |
| Spain   | 1992           | FemalePregAge40to44 | 5034       |
| Spain   | 1992           | FemalePregAge45to49 | 273        |
| Spain   | 1992           | MaleAge0to4         | 1028022    |
| Spain   | 1992           | MaleAge10to14       | 1504985    |
| Spain   | 1992           | MaleAge15to19       | 1687392    |
| Spain   | 1992           | MaleAge20to24       | 1672145    |
| Spain   | 1992           | MaleAge25to29       | 1598868    |
| Spain   | 1992           | MaleAge30to34       | 1478392    |
| Spain   | 1992           | MaleAge35to39       | 1301757    |
| Spain   | 1992           | MaleAge40to44       | 1217412    |
| Spain   | 1992           | MaleAge45to49       | 1123094    |
| Spain   | 1992           | MaleAge50to54       | 979910     |
| Spain   | 1992           | MaleAge55to59       | 1032798    |
| Spain   | 1992           | MaleAge5to9         | 1177325    |
| Spain   | 1992           | MaleAge60to64       | 1018527    |
| Spain   | 1992           | MaleAge65to69       | 862179     |
| Spain   | 1992           | MaleAge70to74       | 607248     |
| Spain   | 1992           | MaleAge75to79       | 408042     |
| Spain   | 1992           | MaleAge80to84       | 266126     |
| Spain   | 1992           | MaleAge85to89       | 122739     |
| Spain   | 1992           | MaleAge90to94       | 35716      |
| Spain   | 1992           | MaleAge95to99       | 5359       |
| Spain   | 1992           | MaleAgeAbove100     | 434        |
| Spain   | 1993           | FemaleAge0to4       | 955708     |
| Spain   | 1993           | FemaleAge10to14     | 1367846    |
| Spain   | 1993           | FemaleAge15to19     | 1572152    |
| Spain   | 1993           | FemaleAge20to24     | 1504135    |
| Spain   | 1993           | FemaleAge25to29     | 1317443    |
| Spain   | 1993           | FemaleAge30to34     | 1285615    |
| Spain   | 1993           | FemaleAge35to39     | 1270801    |
| Spain   | 1993           | FemaleAge40to44     | 1214542    |
| Spain   | 1993           | FemaleAge45to49     | 1164473    |
| Spain   | 1993           | FemaleAge50to54     | 1033760    |
| Spain   | 1993           | FemaleAge55to59     | 1063182    |
| Spain   | 1993           | FemaleAge5to9       | 1076276    |
| Spain   | 1993           | FemaleAge60to64     | 1137194    |
| Spain   | 1993           | FemaleAge65to69     | 1020743    |
| Spain   | 1993           | FemaleAge70to74     | 842806     |
| Spain   | 1993           | FemaleAge75to79     | 645000     |
| Spain   | 1993           | FemaleAge80to84     | 486013     |
| Spain   | 1993           | FemaleAge85to89     | 265842     |
| Spain   | 1993           | FemaleAge90to94     | 95913      |
| Spain   | 1993           | FemaleAge95to99     | 16913      |
| Spain   | 1993           | FemaleAgeAbove100   | 1333       |
| Spain   | 1993           | FemaleLactAge15to19 | 15320      |
| Spain   | 1993           | FemaleLactAge20to24 | 62642      |
| Spain   | 1993           | FemaleLactAge25to29 | 144598     |
| Spain   | 1993           | FemaleLactAge30to34 | 117310     |
| Spain   | 1993           | FemaleLactAge35to39 | 38331      |
| Spain   | 1993           | FemaleLactAge40to44 | 6712       |
| Spain   | 1993           | FemaleLactAge45to49 | 364        |
| Spain   | 1993           | FemalePregAge15to19 | 11490      |
| Spain   | 1993           | FemalePregAge20to24 | 46981      |
| Spain   | 1993           | FemalePregAge25to29 | 108448     |
| Spain   | 1993           | FemalePregAge30to34 | 87983      |
| Spain   | 1993           | FemalePregAge35to39 | 28749      |
| Spain   | 1993           | FemalePregAge40to44 | 5034       |
| Spain   | 1993           | FemalePregAge45to49 | 273        |
| Spain   | 1993           | MaleAge0to4         | 1012771    |
| Spain   | 1993           | MaleAge10to14       | 1437550    |
| Spain   | 1993           | MaleAge15to19       | 1675373    |
| Spain   | 1993           | MaleAge20to24       | 1681103    |
| Spain   | 1993           | MaleAge25to29       | 1614712    |
| Spain   | 1993           | MaleAge30to34       | 1508022    |
| Spain   | 1993           | MaleAge35to39       | 1341177    |
| Spain   | 1993           | MaleAge40to44       | 1222187    |
| Spain   | 1993           | MaleAge45to49       | 1149721    |
| Spain   | 1993           | MaleAge50to54       | 1001545    |
| Spain   | 1993           | MaleAge55to59       | 995229     |
| Spain   | 1993           | MaleAge5to9         | 1135216    |
| Spain   | 1993           | MaleAge60to64       | 1034444    |
| Spain   | 1993           | MaleAge65to69       | 874658     |
| Spain   | 1993           | MaleAge70to74       | 645694     |



Dietary calcium and zinc deficiency risks are decreasing but remain prevalent

| Country | Reference year | Age/gender group    | Population |
|---------|----------------|---------------------|------------|
| Spain   | 1993           | MaleAge75to79       | 410016     |
| Spain   | 1993           | MaleAge80to84       | 272549     |
| Spain   | 1993           | MaleAge85to89       | 128224     |
| Spain   | 1993           | MaleAge90to94       | 38215      |
| Spain   | 1993           | MaleAge95to99       | 6145       |
| Spain   | 1993           | MaleAgeAbov e100    | 472        |
| Spain   | 1994           | FemaleAge0to4       | 940409     |
| Spain   | 1994           | FemaleAge10to14     | 1303418    |
| Spain   | 1994           | FemaleAge15to19     | 1550591    |
| Spain   | 1994           | FemaleAge20to24     | 1508560    |
| Spain   | 1994           | FemaleAge25to29     | 1328796    |
| Spain   | 1994           | FemaleAge30to34     | 1310337    |
| Spain   | 1994           | FemaleAge35to39     | 1310708    |
| Spain   | 1994           | FemaleAge40to44     | 1223041    |
| Spain   | 1994           | FemaleAge45to49     | 1189653    |
| Spain   | 1994           | FemaleAge50to54     | 1054039    |
| Spain   | 1994           | FemaleAge55to59     | 1032157    |
| Spain   | 1994           | FemaleAge5to9       | 1043109    |
| Spain   | 1994           | FemaleAge60to64     | 1143111    |
| Spain   | 1994           | FemaleAge65to69     | 1035096    |
| Spain   | 1994           | FemaleAge70to74     | 875130     |
| Spain   | 1994           | FemaleAge75to79     | 653839     |
| Spain   | 1994           | FemaleAge80to84     | 501158     |
| Spain   | 1994           | FemaleAge85to89     | 274728     |
| Spain   | 1994           | FemaleAge90to94     | 99462      |
| Spain   | 1994           | FemaleAge95to99     | 18446      |
| Spain   | 1994           | FemaleAgeAbov e100  | 1449       |
| Spain   | 1994           | FemaleLactAge15to19 | 15320      |
| Spain   | 1994           | FemaleLactAge20to24 | 62642      |
| Spain   | 1994           | FemaleLactAge25to29 | 144598     |
| Spain   | 1994           | FemaleLactAge30to34 | 117310     |
| Spain   | 1994           | FemaleLactAge35to39 | 38331      |
| Spain   | 1994           | FemaleLactAge40to44 | 6712       |
| Spain   | 1994           | FemaleLactAge45to49 | 364        |
| Spain   | 1994           | FemalePregAge15to19 | 11490      |
| Spain   | 1994           | FemalePregAge20to24 | 46981      |
| Spain   | 1994           | FemalePregAge25to29 | 108448     |
| Spain   | 1994           | FemalePregAge30to34 | 87983      |
| Spain   | 1994           | FemalePregAge35to39 | 28749      |
| Spain   | 1994           | FemalePregAge40to44 | 5034       |
| Spain   | 1994           | FemalePregAge45to49 | 273        |
| Spain   | 1994           | MaleAge0to4         | 998788     |
| Spain   | 1994           | MaleAge10to14       | 1370357    |
| Spain   | 1994           | MaleAge15to19       | 1653495    |
| Spain   | 1994           | MaleAge20to24       | 1686642    |
| Spain   | 1994           | MaleAge25to29       | 1628839    |
| Spain   | 1994           | MaleAge30to34       | 1535665    |
| Spain   | 1994           | MaleAge35to39       | 1380214    |
| Spain   | 1994           | MaleAge40to44       | 1232640    |
| Spain   | 1994           | MaleAge45to49       | 1174151    |
| Spain   | 1994           | MaleAge50to54       | 1025652    |
| Spain   | 1994           | MaleAge55to59       | 967183     |
| Spain   | 1994           | MaleAge5to9         | 1100260    |
| Spain   | 1994           | MaleAge60to64       | 1041193    |
| Spain   | 1994           | MaleAge65to69       | 889403     |
| Spain   | 1994           | MaleAge70to74       | 680594     |
| Spain   | 1994           | MaleAge75to79       | 419469     |
| Spain   | 1994           | MaleAge80to84       | 278303     |
| Spain   | 1994           | MaleAge85to89       | 131279     |
| Spain   | 1994           | MaleAge90to94       | 39392      |
| Spain   | 1994           | MaleAge95to99       | 6708       |
| Spain   | 1994           | MaleAgeAbov e100    | 513        |
| Spain   | 1995           | FemaleAge0to4       | 928399     |
| Spain   | 1995           | FemaleAge10to14     | 1245085    |
| Spain   | 1995           | FemaleAge15to19     | 1516829    |
| Spain   | 1995           | FemaleAge20to24     | 1508715    |
| Spain   | 1995           | FemaleAge25to29     | 1339449    |
| Spain   | 1995           | FemaleAge30to34     | 1332459    |
| Spain   | 1995           | FemaleAge35to39     | 1346468    |
| Spain   | 1995           | FemaleAge40to44     | 1241629    |
| Spain   | 1995           | FemaleAge45to49     | 1209203    |
| Spain   | 1995           | FemaleAge50to54     | 1075156    |
| Spain   | 1995           | FemaleAge55to59     | 1015037    |
| Spain   | 1995           | FemaleAge5to9       | 1012135    |
| Spain   | 1995           | FemaleAge60to64     | 1136161    |
| Spain   | 1995           | FemaleAge65to69     | 1052070    |
| Spain   | 1995           | FemaleAge70to74     | 903019     |
| Spain   | 1995           | FemaleAge75to79     | 671342     |
| Spain   | 1995           | FemaleAge80to84     | 515732     |
| Spain   | 1995           | FemaleAge85to89     | 284238     |
| Spain   | 1995           | FemaleAge90to94     | 101157     |
| Spain   | 1995           | FemaleAge95to99     | 18110      |
| Spain   | 1995           | FemaleAgeAbov e100  | 1576       |
| Spain   | 1995           | FemaleLactAge15to19 | 15320      |
| Spain   | 1995           | FemaleLactAge20to24 | 62642      |
| Spain   | 1995           | FemaleLactAge25to29 | 144598     |
| Spain   | 1995           | FemaleLactAge30to34 | 117310     |
| Spain   | 1995           | FemaleLactAge35to39 | 38331      |

Dietary calcium and zinc deficiency risks are decreasing but remain prevalent

| Country | Reference year | Age/gender group    | Population |
|---------|----------------|---------------------|------------|
| Spain   | 1995           | FemaleLactAge40to44 | 6712       |
| Spain   | 1995           | FemaleLactAge45to49 | 364        |
| Spain   | 1995           | FemalePregAge15to19 | 11490      |
| Spain   | 1995           | FemalePregAge20to24 | 46981      |
| Spain   | 1995           | FemalePregAge25to29 | 108448     |
| Spain   | 1995           | FemalePregAge30to34 | 87983      |
| Spain   | 1995           | FemalePregAge35to39 | 28749      |
| Spain   | 1995           | FemalePregAge40to44 | 5034       |
| Spain   | 1995           | FemalePregAge45to49 | 273        |
| Spain   | 1995           | MaleAge0to4         | 987284     |
| Spain   | 1995           | MaleAge10to14       | 1309174    |
| Spain   | 1995           | MaleAge15to19       | 1619114    |
| Spain   | 1995           | MaleAge20to24       | 1687924    |
| Spain   | 1995           | MaleAge25to29       | 1641887    |
| Spain   | 1995           | MaleAge30to34       | 1560670    |
| Spain   | 1995           | MaleAge35to39       | 1415961    |
| Spain   | 1995           | MaleAge40to44       | 1252067    |
| Spain   | 1995           | MaleAge45to49       | 1194233    |
| Spain   | 1995           | MaleAge50to54       | 1049048    |
| Spain   | 1995           | MaleAge55to59       | 954491     |
| Spain   | 1995           | MaleAge5to9         | 1067888    |
| Spain   | 1995           | MaleAge60to64       | 1035704    |
| Spain   | 1995           | MaleAge65to69       | 907484     |
| Spain   | 1995           | MaleAge70to74       | 709371     |
| Spain   | 1995           | MaleAge75to79       | 438166     |
| Spain   | 1995           | MaleAge80to84       | 283072     |
| Spain   | 1995           | MaleAge85to89       | 132852     |
| Spain   | 1995           | MaleAge90to94       | 39123      |
| Spain   | 1995           | MaleAge95to99       | 6293       |
| Spain   | 1995           | MaleAgeAbove100     | 558        |
| Spain   | 1996           | FemaleAge0to4       | 927544     |
| Spain   | 1996           | FemaleAge10to14     | 1191475    |
| Spain   | 1996           | FemaleAge15to19     | 1481978    |
| Spain   | 1996           | FemaleAge20to24     | 1548558    |
| Spain   | 1996           | FemaleAge25to29     | 1400292    |
| Spain   | 1996           | FemaleAge30to34     | 1310335    |
| Spain   | 1996           | FemaleAge35to39     | 1352130    |
| Spain   | 1996           | FemaleAge40to44     | 1264324    |
| Spain   | 1996           | FemaleAge45to49     | 1222173    |
| Spain   | 1996           | FemaleAge50to54     | 1099250    |
| Spain   | 1996           | FemaleAge55to59     | 1006107    |
| Spain   | 1996           | FemaleAge5to9       | 985607     |
| Spain   | 1996           | FemaleAge60to64     | 1115144    |
| Spain   | 1996           | FemaleAge65to69     | 1065337    |
| Spain   | 1996           | FemaleAge70to74     | 920304     |
| Spain   | 1996           | FemaleAge75to79     | 687388     |
| Spain   | 1996           | FemaleAge80to84     | 514985     |
| Spain   | 1996           | FemaleAge85to89     | 296506     |
| Spain   | 1996           | FemaleAge90to94     | 112022     |
| Spain   | 1996           | FemaleAge95to99     | 20395      |
| Spain   | 1996           | FemaleAgeAbove100   | 1717       |
| Spain   | 1996           | FemaleLactAge15to19 | 11350      |
| Spain   | 1996           | FemaleLactAge20to24 | 40517      |
| Spain   | 1996           | FemaleLactAge25to29 | 117296     |
| Spain   | 1996           | FemaleLactAge30to34 | 142252     |
| Spain   | 1996           | FemaleLactAge35to39 | 54699      |
| Spain   | 1996           | FemaleLactAge40to44 | 7826       |
| Spain   | 1996           | FemaleLactAge45to49 | 321        |
| Spain   | 1996           | FemalePregAge15to19 | 8513       |
| Spain   | 1996           | FemalePregAge20to24 | 30388      |
| Spain   | 1996           | FemalePregAge25to29 | 87972      |
| Spain   | 1996           | FemalePregAge30to34 | 106689     |
| Spain   | 1996           | FemalePregAge35to39 | 41024      |
| Spain   | 1996           | FemalePregAge40to44 | 5869       |
| Spain   | 1996           | FemalePregAge45to49 | 241        |
| Spain   | 1996           | MaleAge0to4         | 986372     |
| Spain   | 1996           | MaleAge10to14       | 1252760    |
| Spain   | 1996           | MaleAge15to19       | 1574589    |
| Spain   | 1996           | MaleAge20to24       | 1689441    |
| Spain   | 1996           | MaleAge25to29       | 1656990    |
| Spain   | 1996           | MaleAge30to34       | 1584177    |
| Spain   | 1996           | MaleAge35to39       | 1450146    |
| Spain   | 1996           | MaleAge40to44       | 1275405    |
| Spain   | 1996           | MaleAge45to49       | 1206456    |
| Spain   | 1996           | MaleAge50to54       | 1072664    |
| Spain   | 1996           | MaleAge55to59       | 948219     |
| Spain   | 1996           | MaleAge5to9         | 1040434    |
| Spain   | 1996           | MaleAge60to64       | 1015125    |
| Spain   | 1996           | MaleAge65to69       | 920255     |
| Spain   | 1996           | MaleAge70to74       | 727323     |
| Spain   | 1996           | MaleAge75to79       | 457657     |
| Spain   | 1996           | MaleAge80to84       | 284167     |
| Spain   | 1996           | MaleAge85to89       | 140573     |
| Spain   | 1996           | MaleAge90to94       | 44752      |
| Spain   | 1996           | MaleAge95to99       | 7080       |
| Spain   | 1996           | MaleAgeAbove100     | 607        |
| Spain   | 1997           | FemaleAge0to4       | 917202     |
| Spain   | 1997           | FemaleAge10to14     | 1143995    |

Dietary calcium and zinc deficiency risks are decreasing but remain prevalent

| Country | Reference year | Age/gender group    | Population |
|---------|----------------|---------------------|------------|
| Spain   | 1997           | FemaleAge15to19     | 1427831    |
| Spain   | 1997           | FemaleAge20to24     | 1547967    |
| Spain   | 1997           | FemaleAge25to29     | 1412646    |
| Spain   | 1997           | FemaleAge30to34     | 1328467    |
| Spain   | 1997           | FemaleAge35to39     | 1385207    |
| Spain   | 1997           | FemaleAge40to44     | 1298357    |
| Spain   | 1997           | FemaleAge45to49     | 1228318    |
| Spain   | 1997           | FemaleAge50to54     | 1128283    |
| Spain   | 1997           | FemaleAge55to59     | 1009899    |
| Spain   | 1997           | FemaleAge5to9       | 966500     |
| Spain   | 1997           | FemaleAge60to64     | 1082806    |
| Spain   | 1997           | FemaleAge65to69     | 1082077    |
| Spain   | 1997           | FemaleAge70to74     | 935531     |
| Spain   | 1997           | FemaleAge75to79     | 711782     |
| Spain   | 1997           | FemaleAge80to84     | 512205     |
| Spain   | 1997           | FemaleAge85to89     | 308225     |
| Spain   | 1997           | FemaleAge90to94     | 120231     |
| Spain   | 1997           | FemaleAge95to99     | 23535      |
| Spain   | 1997           | FemaleAgeAbov e100  | 1873       |
| Spain   | 1997           | FemaleLactAge15to19 | 11350      |
| Spain   | 1997           | FemaleLactAge20to24 | 40517      |
| Spain   | 1997           | FemaleLactAge25to29 | 117296     |
| Spain   | 1997           | FemaleLactAge30to34 | 142252     |
| Spain   | 1997           | FemaleLactAge35to39 | 54699      |
| Spain   | 1997           | FemaleLactAge40to44 | 7826       |
| Spain   | 1997           | FemaleLactAge45to49 | 321        |
| Spain   | 1997           | FemalePregAge15to19 | 8513       |
| Spain   | 1997           | FemalePregAge20to24 | 30388      |
| Spain   | 1997           | FemalePregAge25to29 | 87972      |
| Spain   | 1997           | FemalePregAge30to34 | 106689     |
| Spain   | 1997           | FemalePregAge35to39 | 41024      |
| Spain   | 1997           | FemalePregAge40to44 | 5869       |
| Spain   | 1997           | FemalePregAge45to49 | 241        |
| Spain   | 1997           | MaleAge0to4         | 974387     |
| Spain   | 1997           | MaleAge10to14       | 1203181    |
| Spain   | 1997           | MaleAge15to19       | 1517479    |
| Spain   | 1997           | MaleAge20to24       | 1689123    |
| Spain   | 1997           | MaleAge25to29       | 1671530    |
| Spain   | 1997           | MaleAge30to34       | 1604708    |
| Spain   | 1997           | MaleAge35to39       | 1484010    |
| Spain   | 1997           | MaleAge40to44       | 1307468    |
| Spain   | 1997           | MaleAge45to49       | 1213182    |
| Spain   | 1997           | MaleAge50to54       | 1100250    |
| Spain   | 1997           | MaleAge55to59       | 955376     |
| Spain   | 1997           | MaleAge5to9         | 1020722    |
| Spain   | 1997           | MaleAge60to64       | 984375     |
| Spain   | 1997           | MaleAge65to69       | 936686     |
| Spain   | 1997           | MaleAge70to74       | 742401     |
| Spain   | 1997           | MaleAge75to79       | 483218     |
| Spain   | 1997           | MaleAge80to84       | 283117     |
| Spain   | 1997           | MaleAge85to89       | 146860     |
| Spain   | 1997           | MaleAge90to94       | 48977      |
| Spain   | 1997           | MaleAge95to99       | 8172       |
| Spain   | 1997           | MaleAgeAbov e100    | 661        |
| Spain   | 1998           | FemaleAge0to4       | 903917     |
| Spain   | 1998           | FemaleAge10to14     | 1103419    |
| Spain   | 1998           | FemaleAge15to19     | 1366554    |
| Spain   | 1998           | FemaleAge20to24     | 1543587    |
| Spain   | 1998           | FemaleAge25to29     | 1424579    |
| Spain   | 1998           | FemaleAge30to34     | 1344938    |
| Spain   | 1998           | FemaleAge35to39     | 1417599    |
| Spain   | 1998           | FemaleAge40to44     | 1339661    |
| Spain   | 1998           | FemaleAge45to49     | 1233117    |
| Spain   | 1998           | FemaleAge50to54     | 1159657    |
| Spain   | 1998           | FemaleAge55to59     | 1024650    |
| Spain   | 1998           | FemaleAge5to9       | 954655     |
| Spain   | 1998           | FemaleAge60to64     | 1046621    |
| Spain   | 1998           | FemaleAge65to69     | 1098309    |
| Spain   | 1998           | FemaleAge70to74     | 951173     |
| Spain   | 1998           | FemaleAge75to79     | 740945     |
| Spain   | 1998           | FemaleAge80to84     | 512809     |
| Spain   | 1998           | FemaleAge85to89     | 318791     |
| Spain   | 1998           | FemaleAge90to94     | 125467     |
| Spain   | 1998           | FemaleAge95to99     | 26596      |
| Spain   | 1998           | FemaleAgeAbov e100  | 2044       |
| Spain   | 1998           | FemaleLactAge15to19 | 11350      |
| Spain   | 1998           | FemaleLactAge20to24 | 40517      |
| Spain   | 1998           | FemaleLactAge25to29 | 117296     |
| Spain   | 1998           | FemaleLactAge30to34 | 142252     |
| Spain   | 1998           | FemaleLactAge35to39 | 54699      |
| Spain   | 1998           | FemaleLactAge40to44 | 7826       |
| Spain   | 1998           | FemaleLactAge45to49 | 321        |
| Spain   | 1998           | FemalePregAge15to19 | 8513       |
| Spain   | 1998           | FemalePregAge20to24 | 30388      |
| Spain   | 1998           | FemalePregAge25to29 | 87972      |
| Spain   | 1998           | FemalePregAge30to34 | 106689     |
| Spain   | 1998           | FemalePregAge35to39 | 41024      |
| Spain   | 1998           | FemalePregAge40to44 | 5869       |

Dietary calcium and zinc deficiency risks are decreasing but remain prevalent

| Country   | Reference year | Age/gender group    | Population |
|-----------|----------------|---------------------|------------|
| Spain     | 1998           | FemalePregAge45to49 | 241        |
| Spain     | 1998           | MaleAge0to4         | 958586     |
| Spain     | 1998           | MaleAge10to14       | 1161336    |
| Spain     | 1998           | MaleAge15to19       | 1453603    |
| Spain     | 1998           | MaleAge20to24       | 1685101    |
| Spain     | 1998           | MaleAge25to29       | 1686093    |
| Spain     | 1998           | MaleAge30to34       | 1624304    |
| Spain     | 1998           | MaleAge35to39       | 1518172    |
| Spain     | 1998           | MaleAge40to44       | 1346797    |
| Spain     | 1998           | MaleAge45to49       | 1219548    |
| Spain     | 1998           | MaleAge50to54       | 1129979    |
| Spain     | 1998           | MaleAge55to59       | 973673     |
| Spain     | 1998           | MaleAge5to9         | 1008599    |
| Spain     | 1998           | MaleAge60to64       | 951132     |
| Spain     | 1998           | MaleAge65to69       | 953225     |
| Spain     | 1998           | MaleAge70to74       | 757712     |
| Spain     | 1998           | MaleAge75to79       | 511627     |
| Spain     | 1998           | MaleAge80to84       | 284049     |
| Spain     | 1998           | MaleAge85to89       | 150961     |
| Spain     | 1998           | MaleAge90to94       | 51358      |
| Spain     | 1998           | MaleAge95to99       | 9321       |
| Spain     | 1998           | MaleAgeAbove100     | 720        |
| Spain     | 1999           | FemaleAge0to4       | 897264     |
| Spain     | 1999           | FemaleAge10to14     | 1069964    |
| Spain     | 1999           | FemaleAge15to19     | 1306714    |
| Spain     | 1999           | FemaleAge20to24     | 1531613    |
| Spain     | 1999           | FemaleAge25to29     | 1436548    |
| Spain     | 1999           | FemaleAge30to34     | 1362732    |
| Spain     | 1999           | FemaleAge35to39     | 1450308    |
| Spain     | 1999           | FemaleAge40to44     | 1384396    |
| Spain     | 1999           | FemaleAge45to49     | 1245141    |
| Spain     | 1999           | FemaleAge50to54     | 1189657    |
| Spain     | 1999           | FemaleAge55to59     | 1046808    |
| Spain     | 1999           | FemaleAge5to9       | 948344     |
| Spain     | 1999           | FemaleAge60to64     | 1018225    |
| Spain     | 1999           | FemaleAge65to69     | 1108097    |
| Spain     | 1999           | FemaleAge70to74     | 970402     |
| Spain     | 1999           | FemaleAge75to79     | 771151     |
| Spain     | 1999           | FemaleAge80to84     | 522186     |
| Spain     | 1999           | FemaleAge85to89     | 327175     |
| Spain     | 1999           | FemaleAge90to94     | 128382     |
| Spain     | 1999           | FemaleAge95to99     | 28379      |
| Spain     | 1999           | FemaleAgeAbove100   | 2231       |
| Spain     | 1999           | FemaleLactAge15to19 | 11350      |
| Spain     | 1999           | FemaleLactAge20to24 | 40517      |
| Spain     | 1999           | FemaleLactAge25to29 | 117296     |
| Spain     | 1999           | FemaleLactAge30to34 | 142252     |
| Spain     | 1999           | FemaleLactAge35to39 | 54699      |
| Spain     | 1999           | FemaleLactAge40to44 | 7826       |
| Spain     | 1999           | FemaleLactAge45to49 | 321        |
| Spain     | 1999           | FemalePregAge15to19 | 8513       |
| Spain     | 1999           | FemalePregAge20to24 | 30388      |
| Spain     | 1999           | FemalePregAge25to29 | 87972      |
| Spain     | 1999           | FemalePregAge30to34 | 106689     |
| Spain     | 1999           | FemalePregAge35to39 | 41024      |
| Spain     | 1999           | FemalePregAge40to44 | 5869       |
| Spain     | 1999           | FemalePregAge45to49 | 241        |
| Spain     | 1999           | MaleAge0to4         | 950132     |
| Spain     | 1999           | MaleAge10to14       | 1127519    |
| Spain     | 1999           | MaleAge15to19       | 1392203    |
| Spain     | 1999           | MaleAge20to24       | 1673878    |
| Spain     | 1999           | MaleAge25to29       | 1701461    |
| Spain     | 1999           | MaleAge30to34       | 1646265    |
| Spain     | 1999           | MaleAge35to39       | 1553724    |
| Spain     | 1999           | MaleAge40to44       | 1390636    |
| Spain     | 1999           | MaleAge45to49       | 1233473    |
| Spain     | 1999           | MaleAge50to54       | 1159309    |
| Spain     | 1999           | MaleAge55to59       | 999090     |
| Spain     | 1999           | MaleAge5to9         | 1002306    |
| Spain     | 1999           | MaleAge60to64       | 927011     |
| Spain     | 1999           | MaleAge65to69       | 964459     |
| Spain     | 1999           | MaleAge70to74       | 776772     |
| Spain     | 1999           | MaleAge75to79       | 539580     |
| Spain     | 1999           | MaleAge80to84       | 291171     |
| Spain     | 1999           | MaleAge85to89       | 152403     |
| Spain     | 1999           | MaleAge90to94       | 51825      |
| Spain     | 1999           | MaleAge95to99       | 10015      |
| Spain     | 1999           | MaleAgeAbove100     | 785        |
| Sri Lanka | 1992           | FemaleAge0to4       | 843798     |
| Sri Lanka | 1992           | FemaleAge10to14     | 933648     |
| Sri Lanka | 1992           | FemaleAge15to19     | 815711     |
| Sri Lanka | 1992           | FemaleAge20to24     | 669473     |
| Sri Lanka | 1992           | FemaleAge25to29     | 581613     |
| Sri Lanka | 1992           | FemaleAge30to34     | 576632     |
| Sri Lanka | 1992           | FemaleAge35to39     | 531789     |
| Sri Lanka | 1992           | FemaleAge40to44     | 493117     |
| Sri Lanka | 1992           | FemaleAge45to49     | 420038     |
| Sri Lanka | 1992           | FemaleAge50to54     | 345110     |

Dietary calcium and zinc deficiency risks are decreasing but remain prevalent

| Country   | Reference year | Age/gender group    | Population |
|-----------|----------------|---------------------|------------|
| Sri Lanka | 1992           | FemaleAge55to59     | 293003     |
| Sri Lanka | 1992           | FemaleAge5to9       | 923819     |
| Sri Lanka | 1992           | FemaleAge60to64     | 246292     |
| Sri Lanka | 1992           | FemaleAge65to69     | 196566     |
| Sri Lanka | 1992           | FemaleAge70to74     | 139221     |
| Sri Lanka | 1992           | FemaleAge75to79     | 90200      |
| Sri Lanka | 1992           | FemaleAge80to84     | 51943      |
| Sri Lanka | 1992           | FemaleAge85to89     | 22541      |
| Sri Lanka | 1992           | FemaleAge90to94     | 6347       |
| Sri Lanka | 1992           | FemaleAge95to99     | 1009       |
| Sri Lanka | 1992           | FemaleAgeAbove100   | 92         |
| Sri Lanka | 1992           | FemaleLactAge15to19 | 25966      |
| Sri Lanka | 1992           | FemaleLactAge20to24 | 86706      |
| Sri Lanka | 1992           | FemaleLactAge25to29 | 107528     |
| Sri Lanka | 1992           | FemaleLactAge30to34 | 77660      |
| Sri Lanka | 1992           | FemaleLactAge35to39 | 42897      |
| Sri Lanka | 1992           | FemaleLactAge40to44 | 10156      |
| Sri Lanka | 1992           | FemaleLactAge45to49 | 1012       |
| Sri Lanka | 1992           | FemalePregAge15to19 | 19475      |
| Sri Lanka | 1992           | FemalePregAge20to24 | 65029      |
| Sri Lanka | 1992           | FemalePregAge25to29 | 80646      |
| Sri Lanka | 1992           | FemalePregAge30to34 | 58245      |
| Sri Lanka | 1992           | FemalePregAge35to39 | 32173      |
| Sri Lanka | 1992           | FemalePregAge40to44 | 7617       |
| Sri Lanka | 1992           | FemalePregAge45to49 | 759        |
| Sri Lanka | 1992           | MaleAge0to4         | 877474     |
| Sri Lanka | 1992           | MaleAge10to14       | 967083     |
| Sri Lanka | 1992           | MaleAge15to19       | 888282     |
| Sri Lanka | 1992           | MaleAge20to24       | 839891     |
| Sri Lanka | 1992           | MaleAge25to29       | 781530     |
| Sri Lanka | 1992           | MaleAge30to34       | 712761     |
| Sri Lanka | 1992           | MaleAge35to39       | 602654     |
| Sri Lanka | 1992           | MaleAge40to44       | 509342     |
| Sri Lanka | 1992           | MaleAge45to49       | 418148     |
| Sri Lanka | 1992           | MaleAge50to54       | 338468     |
| Sri Lanka | 1992           | MaleAge55to59       | 286913     |
| Sri Lanka | 1992           | MaleAge5to9         | 961518     |
| Sri Lanka | 1992           | MaleAge60to64       | 243793     |
| Sri Lanka | 1992           | MaleAge65to69       | 195709     |
| Sri Lanka | 1992           | MaleAge70to74       | 140208     |
| Sri Lanka | 1992           | MaleAge75to79       | 90776      |
| Sri Lanka | 1992           | MaleAge80to84       | 51250      |
| Sri Lanka | 1992           | MaleAge85to89       | 22191      |
| Sri Lanka | 1992           | MaleAge90to94       | 6295       |
| Sri Lanka | 1992           | MaleAge95to99       | 1063       |
| Sri Lanka | 1992           | MaleAgeAbove100     | 125        |
| Sri Lanka | 1993           | FemaleAge0to4       | 845163     |
| Sri Lanka | 1993           | FemaleAge10to14     | 938222     |
| Sri Lanka | 1993           | FemaleAge15to19     | 830615     |
| Sri Lanka | 1993           | FemaleAge20to24     | 664940     |
| Sri Lanka | 1993           | FemaleAge25to29     | 592060     |
| Sri Lanka | 1993           | FemaleAge30to34     | 578751     |
| Sri Lanka | 1993           | FemaleAge35to39     | 556976     |
| Sri Lanka | 1993           | FemaleAge40to44     | 501992     |
| Sri Lanka | 1993           | FemaleAge45to49     | 439327     |
| Sri Lanka | 1993           | FemaleAge50to54     | 353404     |
| Sri Lanka | 1993           | FemaleAge55to59     | 300773     |
| Sri Lanka | 1993           | FemaleAge5to9       | 904462     |
| Sri Lanka | 1993           | FemaleAge60to64     | 251522     |
| Sri Lanka | 1993           | FemaleAge65to69     | 202370     |
| Sri Lanka | 1993           | FemaleAge70to74     | 144906     |
| Sri Lanka | 1993           | FemaleAge75to79     | 92622      |
| Sri Lanka | 1993           | FemaleAge80to84     | 53744      |
| Sri Lanka | 1993           | FemaleAge85to89     | 23937      |
| Sri Lanka | 1993           | FemaleAge90to94     | 6976       |
| Sri Lanka | 1993           | FemaleAge95to99     | 1148       |
| Sri Lanka | 1993           | FemaleAgeAbove100   | 108        |
| Sri Lanka | 1993           | FemaleLactAge15to19 | 25966      |
| Sri Lanka | 1993           | FemaleLactAge20to24 | 86706      |
| Sri Lanka | 1993           | FemaleLactAge25to29 | 107528     |
| Sri Lanka | 1993           | FemaleLactAge30to34 | 77660      |
| Sri Lanka | 1993           | FemaleLactAge35to39 | 42897      |
| Sri Lanka | 1993           | FemaleLactAge40to44 | 10156      |
| Sri Lanka | 1993           | FemaleLactAge45to49 | 1012       |
| Sri Lanka | 1993           | FemalePregAge15to19 | 19475      |
| Sri Lanka | 1993           | FemalePregAge20to24 | 65029      |
| Sri Lanka | 1993           | FemalePregAge25to29 | 80646      |
| Sri Lanka | 1993           | FemalePregAge30to34 | 58245      |
| Sri Lanka | 1993           | FemalePregAge35to39 | 32173      |
| Sri Lanka | 1993           | FemalePregAge40to44 | 7617       |
| Sri Lanka | 1993           | FemalePregAge45to49 | 759        |
| Sri Lanka | 1993           | MaleAge0to4         | 876989     |
| Sri Lanka | 1993           | MaleAge10to14       | 973019     |
| Sri Lanka | 1993           | MaleAge15to19       | 904041     |
| Sri Lanka | 1993           | MaleAge20to24       | 836127     |
| Sri Lanka | 1993           | MaleAge25to29       | 791387     |
| Sri Lanka | 1993           | MaleAge30to34       | 716475     |
| Sri Lanka | 1993           | MaleAge35to39       | 625482     |

Dietary calcium and zinc deficiency risks are decreasing but remain prevalent

| Country   | Reference year | Age/gender group    | Population |
|-----------|----------------|---------------------|------------|
| Sri Lanka | 1993           | MaleAge40to44       | 515925     |
| Sri Lanka | 1993           | MaleAge45to49       | 436257     |
| Sri Lanka | 1993           | MaleAge50to54       | 345080     |
| Sri Lanka | 1993           | MaleAge55to59       | 292145     |
| Sri Lanka | 1993           | MaleAge5to9         | 942143     |
| Sri Lanka | 1993           | MaleAge60to64       | 245756     |
| Sri Lanka | 1993           | MaleAge65to69       | 199299     |
| Sri Lanka | 1993           | MaleAge70to74       | 143581     |
| Sri Lanka | 1993           | MaleAge75to79       | 92734      |
| Sri Lanka | 1993           | MaleAge80to84       | 52814      |
| Sri Lanka | 1993           | MaleAge85to89       | 23663      |
| Sri Lanka | 1993           | MaleAge90to94       | 7040       |
| Sri Lanka | 1993           | MaleAge95to99       | 1213       |
| Sri Lanka | 1993           | MaleAgeAbove100     | 151        |
| Sri Lanka | 1994           | FemaleAge0to4       | 847150     |
| Sri Lanka | 1994           | FemaleAge10to14     | 938526     |
| Sri Lanka | 1994           | FemaleAge15to19     | 845084     |
| Sri Lanka | 1994           | FemaleAge20to24     | 663122     |
| Sri Lanka | 1994           | FemaleAge25to29     | 599918     |
| Sri Lanka | 1994           | FemaleAge30to34     | 580561     |
| Sri Lanka | 1994           | FemaleAge35to39     | 578530     |
| Sri Lanka | 1994           | FemaleAge40to44     | 512898     |
| Sri Lanka | 1994           | FemaleAge45to49     | 457162     |
| Sri Lanka | 1994           | FemaleAge50to54     | 363414     |
| Sri Lanka | 1994           | FemaleAge55to59     | 308616     |
| Sri Lanka | 1994           | FemaleAge5to9       | 882231     |
| Sri Lanka | 1994           | FemaleAge60to64     | 257184     |
| Sri Lanka | 1994           | FemaleAge65to69     | 208340     |
| Sri Lanka | 1994           | FemaleAge70to74     | 150716     |
| Sri Lanka | 1994           | FemaleAge75to79     | 95592      |
| Sri Lanka | 1994           | FemaleAge80to84     | 55396      |
| Sri Lanka | 1994           | FemaleAge85to89     | 24907      |
| Sri Lanka | 1994           | FemaleAge90to94     | 7417       |
| Sri Lanka | 1994           | FemaleAge95to99     | 1277       |
| Sri Lanka | 1994           | FemaleAgeAbove100   | 123        |
| Sri Lanka | 1994           | FemaleLactAge15to19 | 25966      |
| Sri Lanka | 1994           | FemaleLactAge20to24 | 86706      |
| Sri Lanka | 1994           | FemaleLactAge25to29 | 107528     |
| Sri Lanka | 1994           | FemaleLactAge30to34 | 77660      |
| Sri Lanka | 1994           | FemaleLactAge35to39 | 42897      |
| Sri Lanka | 1994           | FemaleLactAge40to44 | 10156      |
| Sri Lanka | 1994           | FemaleLactAge45to49 | 1012       |
| Sri Lanka | 1994           | FemalePregAge15to19 | 19475      |
| Sri Lanka | 1994           | FemalePregAge20to24 | 65029      |
| Sri Lanka | 1994           | FemalePregAge25to29 | 80646      |
| Sri Lanka | 1994           | FemalePregAge30to34 | 58245      |
| Sri Lanka | 1994           | FemalePregAge35to39 | 32173      |
| Sri Lanka | 1994           | FemalePregAge40to44 | 7617       |
| Sri Lanka | 1994           | FemalePregAge45to49 | 759        |
| Sri Lanka | 1994           | MaleAge0to4         | 877348     |
| Sri Lanka | 1994           | MaleAge10to14       | 974282     |
| Sri Lanka | 1994           | MaleAge15to19       | 919449     |
| Sri Lanka | 1994           | MaleAge20to24       | 835175     |
| Sri Lanka | 1994           | MaleAge25to29       | 798470     |
| Sri Lanka | 1994           | MaleAge30to34       | 719652     |
| Sri Lanka | 1994           | MaleAge35to39       | 645222     |
| Sri Lanka | 1994           | MaleAge40to44       | 524403     |
| Sri Lanka | 1994           | MaleAge45to49       | 452584     |
| Sri Lanka | 1994           | MaleAge50to54       | 353503     |
| Sri Lanka | 1994           | MaleAge55to59       | 297614     |
| Sri Lanka | 1994           | MaleAge5to9         | 919341     |
| Sri Lanka | 1994           | MaleAge60to64       | 248219     |
| Sri Lanka | 1994           | MaleAge65to69       | 202694     |
| Sri Lanka | 1994           | MaleAge70to74       | 146889     |
| Sri Lanka | 1994           | MaleAge75to79       | 94742      |
| Sri Lanka | 1994           | MaleAge80to84       | 54028      |
| Sri Lanka | 1994           | MaleAge85to89       | 24657      |
| Sri Lanka | 1994           | MaleAge90to94       | 7615       |
| Sri Lanka | 1994           | MaleAge95to99       | 1383       |
| Sri Lanka | 1994           | MaleAgeAbove100     | 175        |
| Sri Lanka | 1995           | FemaleAge0to4       | 843854     |
| Sri Lanka | 1995           | FemaleAge10to14     | 933096     |
| Sri Lanka | 1995           | FemaleAge15to19     | 857133     |
| Sri Lanka | 1995           | FemaleAge20to24     | 666693     |
| Sri Lanka | 1995           | FemaleAge25to29     | 603866     |
| Sri Lanka | 1995           | FemaleAge30to34     | 584681     |
| Sri Lanka | 1995           | FemaleAge35to39     | 593991     |
| Sri Lanka | 1995           | FemaleAge40to44     | 527817     |
| Sri Lanka | 1995           | FemaleAge45to49     | 472198     |
| Sri Lanka | 1995           | FemaleAge50to54     | 375915     |
| Sri Lanka | 1995           | FemaleAge55to59     | 316445     |
| Sri Lanka | 1995           | FemaleAge5to9       | 862513     |
| Sri Lanka | 1995           | FemaleAge60to64     | 263520     |
| Sri Lanka | 1995           | FemaleAge65to69     | 214437     |
| Sri Lanka | 1995           | FemaleAge70to74     | 156634     |
| Sri Lanka | 1995           | FemaleAge75to79     | 99317      |
| Sri Lanka | 1995           | FemaleAge80to84     | 56985      |
| Sri Lanka | 1995           | FemaleAge85to89     | 25539      |

Dietary calcium and zinc deficiency risks are decreasing but remain prevalent

| Country   | Reference year | Age/gender group    | Population |
|-----------|----------------|---------------------|------------|
| Sri Lanka | 1995           | FemaleAge90to94     | 7625       |
| Sri Lanka | 1995           | FemaleAge95to99     | 1289       |
| Sri Lanka | 1995           | FemaleAgeAbove100   | 134        |
| Sri Lanka | 1995           | FemaleLactAge15to19 | 25966      |
| Sri Lanka | 1995           | FemaleLactAge20to24 | 86706      |
| Sri Lanka | 1995           | FemaleLactAge25to29 | 107528     |
| Sri Lanka | 1995           | FemaleLactAge30to34 | 77660      |
| Sri Lanka | 1995           | FemaleLactAge35to39 | 42897      |
| Sri Lanka | 1995           | FemaleLactAge40to44 | 10156      |
| Sri Lanka | 1995           | FemaleLactAge45to49 | 1012       |
| Sri Lanka | 1995           | FemalePregAge15to19 | 19475      |
| Sri Lanka | 1995           | FemalePregAge20to24 | 65029      |
| Sri Lanka | 1995           | FemalePregAge25to29 | 80646      |
| Sri Lanka | 1995           | FemalePregAge30to34 | 58245      |
| Sri Lanka | 1995           | FemalePregAge35to39 | 32173      |
| Sri Lanka | 1995           | FemalePregAge40to44 | 7617       |
| Sri Lanka | 1995           | FemalePregAge45to49 | 759        |
| Sri Lanka | 1995           | MaleAge0to4         | 872872     |
| Sri Lanka | 1995           | MaleAge10to14       | 969165     |
| Sri Lanka | 1995           | MaleAge15to19       | 932360     |
| Sri Lanka | 1995           | MaleAge20to24       | 839451     |
| Sri Lanka | 1995           | MaleAge25to29       | 801769     |
| Sri Lanka | 1995           | MaleAge30to34       | 724300     |
| Sri Lanka | 1995           | MaleAge35to39       | 659581     |
| Sri Lanka | 1995           | MaleAge40to44       | 536724     |
| Sri Lanka | 1995           | MaleAge45to49       | 465657     |
| Sri Lanka | 1995           | MaleAge50to54       | 364399     |
| Sri Lanka | 1995           | MaleAge55to59       | 303182     |
| Sri Lanka | 1995           | MaleAge5to9         | 898484     |
| Sri Lanka | 1995           | MaleAge60to64       | 251482     |
| Sri Lanka | 1995           | MaleAge65to69       | 205817     |
| Sri Lanka | 1995           | MaleAge70to74       | 150210     |
| Sri Lanka | 1995           | MaleAge75to79       | 96907      |
| Sri Lanka | 1995           | MaleAge80to84       | 54985      |
| Sri Lanka | 1995           | MaleAge85to89       | 25185      |
| Sri Lanka | 1995           | MaleAge90to94       | 7950       |
| Sri Lanka | 1995           | MaleAge95to99       | 1484       |
| Sri Lanka | 1995           | MaleAgeAbove100     | 197        |
| Sri Lanka | 1996           | FemaleAge0to4       | 846005     |
| Sri Lanka | 1996           | FemaleAge10to14     | 921183     |
| Sri Lanka | 1996           | FemaleAge15to19     | 860970     |
| Sri Lanka | 1996           | FemaleAge20to24     | 681399     |
| Sri Lanka | 1996           | FemaleAge25to29     | 614033     |
| Sri Lanka | 1996           | FemaleAge30to34     | 588832     |
| Sri Lanka | 1996           | FemaleAge35to39     | 601564     |
| Sri Lanka | 1996           | FemaleAge40to44     | 548142     |
| Sri Lanka | 1996           | FemaleAge45to49     | 487611     |
| Sri Lanka | 1996           | FemaleAge50to54     | 392127     |
| Sri Lanka | 1996           | FemaleAge55to59     | 323668     |
| Sri Lanka | 1996           | FemaleAge5to9       | 846740     |
| Sri Lanka | 1996           | FemaleAge60to64     | 267378     |
| Sri Lanka | 1996           | FemaleAge65to69     | 216145     |
| Sri Lanka | 1996           | FemaleAge70to74     | 159733     |
| Sri Lanka | 1996           | FemaleAge75to79     | 101886     |
| Sri Lanka | 1996           | FemaleAge80to84     | 58011      |
| Sri Lanka | 1996           | FemaleAge85to89     | 26839      |
| Sri Lanka | 1996           | FemaleAge90to94     | 8600       |
| Sri Lanka | 1996           | FemaleAge95to99     | 1417       |
| Sri Lanka | 1996           | FemaleAgeAbove100   | 140        |
| Sri Lanka | 1996           | FemaleLactAge15to19 | 26426      |
| Sri Lanka | 1996           | FemaleLactAge20to24 | 78514      |
| Sri Lanka | 1996           | FemaleLactAge25to29 | 100617     |
| Sri Lanka | 1996           | FemaleLactAge30to34 | 80535      |
| Sri Lanka | 1996           | FemaleLactAge35to39 | 46133      |
| Sri Lanka | 1996           | FemaleLactAge40to44 | 10931      |
| Sri Lanka | 1996           | FemaleLactAge45to49 | 1021       |
| Sri Lanka | 1996           | FemalePregAge15to19 | 19819      |
| Sri Lanka | 1996           | FemalePregAge20to24 | 58886      |
| Sri Lanka | 1996           | FemalePregAge25to29 | 75463      |
| Sri Lanka | 1996           | FemalePregAge30to34 | 60401      |
| Sri Lanka | 1996           | FemalePregAge35to39 | 34599      |
| Sri Lanka | 1996           | FemalePregAge40to44 | 8198       |
| Sri Lanka | 1996           | FemalePregAge45to49 | 766        |
| Sri Lanka | 1996           | MaleAge0to4         | 874094     |
| Sri Lanka | 1996           | MaleAge10to14       | 957443     |
| Sri Lanka | 1996           | MaleAge15to19       | 935515     |
| Sri Lanka | 1996           | MaleAge20to24       | 836642     |
| Sri Lanka | 1996           | MaleAge25to29       | 796845     |
| Sri Lanka | 1996           | MaleAge30to34       | 731685     |
| Sri Lanka | 1996           | MaleAge35to39       | 671808     |
| Sri Lanka | 1996           | MaleAge40to44       | 555550     |
| Sri Lanka | 1996           | MaleAge45to49       | 479307     |
| Sri Lanka | 1996           | MaleAge50to54       | 379931     |
| Sri Lanka | 1996           | MaleAge55to59       | 309328     |
| Sri Lanka | 1996           | MaleAge5to9         | 882143     |
| Sri Lanka | 1996           | MaleAge60to64       | 253546     |
| Sri Lanka | 1996           | MaleAge65to69       | 205465     |
| Sri Lanka | 1996           | MaleAge70to74       | 151653     |

Dietary calcium and zinc deficiency risks are decreasing but remain prevalent

| Country   | Reference year | Age/gender group    | Population |
|-----------|----------------|---------------------|------------|
| Sri Lanka | 1996           | MaleAge75to79       | 98509      |
| Sri Lanka | 1996           | MaleAge80to84       | 56243      |
| Sri Lanka | 1996           | MaleAge85to89       | 26513      |
| Sri Lanka | 1996           | MaleAge90to94       | 8963       |
| Sri Lanka | 1996           | MaleAge95to99       | 1667       |
| Sri Lanka | 1996           | MaleAgeAbove100     | 213        |
| Sri Lanka | 1997           | FemaleAge0to4       | 838877     |
| Sri Lanka | 1997           | FemaleAge10to14     | 904571     |
| Sri Lanka | 1997           | FemaleAge15to19     | 865952     |
| Sri Lanka | 1997           | FemaleAge20to24     | 686949     |
| Sri Lanka | 1997           | FemaleAge25to29     | 605973     |
| Sri Lanka | 1997           | FemaleAge30to34     | 599186     |
| Sri Lanka | 1997           | FemaleAge35to39     | 609488     |
| Sri Lanka | 1997           | FemaleAge40to44     | 573465     |
| Sri Lanka | 1997           | FemaleAge45to49     | 500255     |
| Sri Lanka | 1997           | FemaleAge50to54     | 411963     |
| Sri Lanka | 1997           | FemaleAge55to59     | 331552     |
| Sri Lanka | 1997           | FemaleAge5to9       | 835113     |
| Sri Lanka | 1997           | FemaleAge60to64     | 272960     |
| Sri Lanka | 1997           | FemaleAge65to69     | 218063     |
| Sri Lanka | 1997           | FemaleAge70to74     | 162615     |
| Sri Lanka | 1997           | FemaleAge75to79     | 104774     |
| Sri Lanka | 1997           | FemaleAge80to84     | 58659      |
| Sri Lanka | 1997           | FemaleAge85to89     | 27628      |
| Sri Lanka | 1997           | FemaleAge90to94     | 9282       |
| Sri Lanka | 1997           | FemaleAge95to99     | 1615       |
| Sri Lanka | 1997           | FemaleAgeAbove100   | 142        |
| Sri Lanka | 1997           | FemaleLactAge15to19 | 26426      |
| Sri Lanka | 1997           | FemaleLactAge20to24 | 78514      |
| Sri Lanka | 1997           | FemaleLactAge25to29 | 100617     |
| Sri Lanka | 1997           | FemaleLactAge30to34 | 80535      |
| Sri Lanka | 1997           | FemaleLactAge35to39 | 46133      |
| Sri Lanka | 1997           | FemaleLactAge40to44 | 10931      |
| Sri Lanka | 1997           | FemaleLactAge45to49 | 1021       |
| Sri Lanka | 1997           | FemalePregAge15to19 | 19819      |
| Sri Lanka | 1997           | FemalePregAge20to24 | 58886      |
| Sri Lanka | 1997           | FemalePregAge25to29 | 75463      |
| Sri Lanka | 1997           | FemalePregAge30to34 | 60401      |
| Sri Lanka | 1997           | FemalePregAge35to39 | 34599      |
| Sri Lanka | 1997           | FemalePregAge40to44 | 8198       |
| Sri Lanka | 1997           | FemalePregAge45to49 | 766        |
| Sri Lanka | 1997           | MaleAge0to4         | 867536     |
| Sri Lanka | 1997           | MaleAge10to14       | 940866     |
| Sri Lanka | 1997           | MaleAge15to19       | 939721     |
| Sri Lanka | 1997           | MaleAge20to24       | 838950     |
| Sri Lanka | 1997           | MaleAge25to29       | 785319     |
| Sri Lanka | 1997           | MaleAge30to34       | 738754     |
| Sri Lanka | 1997           | MaleAge35to39       | 679127     |
| Sri Lanka | 1997           | MaleAge40to44       | 577400     |
| Sri Lanka | 1997           | MaleAge45to49       | 489587     |
| Sri Lanka | 1997           | MaleAge50to54       | 398744     |
| Sri Lanka | 1997           | MaleAge55to59       | 316129     |
| Sri Lanka | 1997           | MaleAge5to9         | 869071     |
| Sri Lanka | 1997           | MaleAge60to64       | 257367     |
| Sri Lanka | 1997           | MaleAge65to69       | 205126     |
| Sri Lanka | 1997           | MaleAge70to74       | 152735     |
| Sri Lanka | 1997           | MaleAge75to79       | 99829      |
| Sri Lanka | 1997           | MaleAge80to84       | 56994      |
| Sri Lanka | 1997           | MaleAge85to89       | 27340      |
| Sri Lanka | 1997           | MaleAge90to94       | 9732       |
| Sri Lanka | 1997           | MaleAge95to99       | 1919       |
| Sri Lanka | 1997           | MaleAgeAbove100     | 225        |
| Sri Lanka | 1998           | FemaleAge0to4       | 826012     |
| Sri Lanka | 1998           | FemaleAge10to14     | 884766     |
| Sri Lanka | 1998           | FemaleAge15to19     | 870458     |
| Sri Lanka | 1998           | FemaleAge20to24     | 697118     |
| Sri Lanka | 1998           | FemaleAge25to29     | 594801     |
| Sri Lanka | 1998           | FemaleAge30to34     | 608695     |
| Sri Lanka | 1998           | FemaleAge35to39     | 614619     |
| Sri Lanka | 1998           | FemaleAge40to44     | 599870     |
| Sri Lanka | 1998           | FemaleAge45to49     | 512136     |
| Sri Lanka | 1998           | FemaleAge50to54     | 434014     |
| Sri Lanka | 1998           | FemaleAge55to59     | 340906     |
| Sri Lanka | 1998           | FemaleAge5to9       | 828039     |
| Sri Lanka | 1998           | FemaleAge60to64     | 280261     |
| Sri Lanka | 1998           | FemaleAge65to69     | 220774     |
| Sri Lanka | 1998           | FemaleAge70to74     | 165315     |
| Sri Lanka | 1998           | FemaleAge75to79     | 107896     |
| Sri Lanka | 1998           | FemaleAge80to84     | 59250      |
| Sri Lanka | 1998           | FemaleAge85to89     | 27853      |
| Sri Lanka | 1998           | FemaleAge90to94     | 9564       |
| Sri Lanka | 1998           | FemaleAge95to99     | 1819       |
| Sri Lanka | 1998           | FemaleAgeAbove100   | 144        |
| Sri Lanka | 1998           | FemaleLactAge15to19 | 26426      |
| Sri Lanka | 1998           | FemaleLactAge20to24 | 78514      |
| Sri Lanka | 1998           | FemaleLactAge25to29 | 100617     |
| Sri Lanka | 1998           | FemaleLactAge30to34 | 80535      |
| Sri Lanka | 1998           | FemaleLactAge35to39 | 46133      |



Dietary calcium and zinc deficiency risks are decreasing but remain prevalent

| Country   | Reference year | Age/gender group    | Population |
|-----------|----------------|---------------------|------------|
| Sri Lanka | 1998           | FemaleLactAge40to44 | 10931      |
| Sri Lanka | 1998           | FemaleLactAge45to49 | 1021       |
| Sri Lanka | 1998           | FemalePregAge15to19 | 19819      |
| Sri Lanka | 1998           | FemalePregAge20to24 | 58886      |
| Sri Lanka | 1998           | FemalePregAge25to29 | 75463      |
| Sri Lanka | 1998           | FemalePregAge30to34 | 60401      |
| Sri Lanka | 1998           | FemalePregAge35to39 | 34599      |
| Sri Lanka | 1998           | FemalePregAge40to44 | 8198       |
| Sri Lanka | 1998           | FemalePregAge45to49 | 766        |
| Sri Lanka | 1998           | MaleAge0to4         | 856244     |
| Sri Lanka | 1998           | MaleAge10to14       | 920969     |
| Sri Lanka | 1998           | MaleAge15to19       | 944377     |
| Sri Lanka | 1998           | MaleAge20to24       | 846407     |
| Sri Lanka | 1998           | MaleAge25to29       | 770399     |
| Sri Lanka | 1998           | MaleAge30to34       | 743924     |
| Sri Lanka | 1998           | MaleAge35to39       | 683746     |
| Sri Lanka | 1998           | MaleAge40to44       | 600130     |
| Sri Lanka | 1998           | MaleAge45to49       | 498684     |
| Sri Lanka | 1998           | MaleAge50to54       | 419343     |
| Sri Lanka | 1998           | MaleAge55to59       | 324429     |
| Sri Lanka | 1998           | MaleAge5to9         | 859933     |
| Sri Lanka | 1998           | MaleAge60to64       | 262996     |
| Sri Lanka | 1998           | MaleAge65to69       | 205550     |
| Sri Lanka | 1998           | MaleAge70to74       | 153490     |
| Sri Lanka | 1998           | MaleAge75to79       | 100936     |
| Sri Lanka | 1998           | MaleAge80to84       | 57369      |
| Sri Lanka | 1998           | MaleAge85to89       | 27641      |
| Sri Lanka | 1998           | MaleAge90to94       | 10152      |
| Sri Lanka | 1998           | MaleAge95to99       | 2186       |
| Sri Lanka | 1998           | MaleAgeAbove100     | 239        |
| Sri Lanka | 1999           | FemaleAge0to4       | 815414     |
| Sri Lanka | 1999           | FemaleAge10to14     | 865490     |
| Sri Lanka | 1999           | FemaleAge15to19     | 872683     |
| Sri Lanka | 1999           | FemaleAge20to24     | 709449     |
| Sri Lanka | 1999           | FemaleAge25to29     | 585674     |
| Sri Lanka | 1999           | FemaleAge30to34     | 614291     |
| Sri Lanka | 1999           | FemaleAge35to39     | 620221     |
| Sri Lanka | 1999           | FemaleAge40to44     | 623508     |
| Sri Lanka | 1999           | FemaleAge45to49     | 526514     |
| Sri Lanka | 1999           | FemaleAge50to54     | 455778     |
| Sri Lanka | 1999           | FemaleAge55to59     | 353105     |
| Sri Lanka | 1999           | FemaleAge5to9       | 823685     |
| Sri Lanka | 1999           | FemaleAge60to64     | 288967     |
| Sri Lanka | 1999           | FemaleAge65to69     | 224852     |
| Sri Lanka | 1999           | FemaleAge70to74     | 167993     |
| Sri Lanka | 1999           | FemaleAge75to79     | 111023     |
| Sri Lanka | 1999           | FemaleAge80to84     | 60097      |
| Sri Lanka | 1999           | FemaleAge85to89     | 27547      |
| Sri Lanka | 1999           | FemaleAge90to94     | 9361       |
| Sri Lanka | 1999           | FemaleAge95to99     | 1896       |
| Sri Lanka | 1999           | FemaleAgeAbove100   | 151        |
| Sri Lanka | 1999           | FemaleLactAge15to19 | 26426      |
| Sri Lanka | 1999           | FemaleLactAge20to24 | 78514      |
| Sri Lanka | 1999           | FemaleLactAge25to29 | 100617     |
| Sri Lanka | 1999           | FemaleLactAge30to34 | 80535      |
| Sri Lanka | 1999           | FemaleLactAge35to39 | 46133      |
| Sri Lanka | 1999           | FemaleLactAge40to44 | 10931      |
| Sri Lanka | 1999           | FemaleLactAge45to49 | 1021       |
| Sri Lanka | 1999           | FemalePregAge15to19 | 19819      |
| Sri Lanka | 1999           | FemalePregAge20to24 | 58886      |
| Sri Lanka | 1999           | FemalePregAge25to29 | 75463      |
| Sri Lanka | 1999           | FemalePregAge30to34 | 60401      |
| Sri Lanka | 1999           | FemalePregAge35to39 | 34599      |
| Sri Lanka | 1999           | FemalePregAge40to44 | 8198       |
| Sri Lanka | 1999           | FemalePregAge45to49 | 766        |
| Sri Lanka | 1999           | MaleAge0to4         | 847442     |
| Sri Lanka | 1999           | MaleAge10to14       | 901569     |
| Sri Lanka | 1999           | MaleAge15to19       | 947719     |
| Sri Lanka | 1999           | MaleAge20to24       | 857158     |
| Sri Lanka | 1999           | MaleAge25to29       | 757581     |
| Sri Lanka | 1999           | MaleAge30to34       | 744908     |
| Sri Lanka | 1999           | MaleAge35to39       | 688362     |
| Sri Lanka | 1999           | MaleAge40to44       | 620560     |
| Sri Lanka | 1999           | MaleAge45to49       | 510039     |
| Sri Lanka | 1999           | MaleAge50to54       | 439265     |
| Sri Lanka | 1999           | MaleAge55to59       | 335617     |
| Sri Lanka | 1999           | MaleAge5to9         | 853521     |
| Sri Lanka | 1999           | MaleAge60to64       | 270202     |
| Sri Lanka | 1999           | MaleAge65to69       | 207486     |
| Sri Lanka | 1999           | MaleAge70to74       | 154064     |
| Sri Lanka | 1999           | MaleAge75to79       | 101837     |
| Sri Lanka | 1999           | MaleAge80to84       | 57517      |
| Sri Lanka | 1999           | MaleAge85to89       | 27437      |
| Sri Lanka | 1999           | MaleAge90to94       | 10139      |
| Sri Lanka | 1999           | MaleAge95to99       | 2348       |
| Sri Lanka | 1999           | MaleAgeAbove100     | 262        |
| Sudan     | 1992           | FemaleAge0to4       | 1874063    |
| Sudan     | 1992           | FemaleAge10to14     | 1386920    |

Dietary calcium and zinc deficiency risks are decreasing but remain prevalent

| Country | Reference year | Age/gender group    | Population |
|---------|----------------|---------------------|------------|
| Sudan   | 1992           | FemaleAge15to19     | 955741     |
| Sudan   | 1992           | FemaleAge20to24     | 569788     |
| Sudan   | 1992           | FemaleAge25to29     | 402153     |
| Sudan   | 1992           | FemaleAge30to34     | 350674     |
| Sudan   | 1992           | FemaleAge35to39     | 360148     |
| Sudan   | 1992           | FemaleAge40to44     | 355753     |
| Sudan   | 1992           | FemaleAge45to49     | 325847     |
| Sudan   | 1992           | FemaleAge50to54     | 288071     |
| Sudan   | 1992           | FemaleAge55to59     | 234046     |
| Sudan   | 1992           | FemaleAge5to9       | 1589890    |
| Sudan   | 1992           | FemaleAge60to64     | 185515     |
| Sudan   | 1992           | FemaleAge65to69     | 140340     |
| Sudan   | 1992           | FemaleAge70to74     | 96919      |
| Sudan   | 1992           | FemaleAge75to79     | 58755      |
| Sudan   | 1992           | FemaleAge80to84     | 30114      |
| Sudan   | 1992           | FemaleAge85to89     | 11766      |
| Sudan   | 1992           | FemaleAge90to94     | 3091       |
| Sudan   | 1992           | FemaleAge95to99     | 479        |
| Sudan   | 1992           | FemaleAgeAbov e100  | 35         |
| Sudan   | 1992           | FemaleLactAge15to19 | 130685     |
| Sudan   | 1992           | FemaleLactAge20to24 | 235414     |
| Sudan   | 1992           | FemaleLactAge25to29 | 227209     |
| Sudan   | 1992           | FemaleLactAge30to34 | 171111     |
| Sudan   | 1992           | FemaleLactAge35to39 | 99295      |
| Sudan   | 1992           | FemaleLactAge40to44 | 45942      |
| Sudan   | 1992           | FemaleLactAge45to49 | 15750      |
| Sudan   | 1992           | FemalePregAge15to19 | 98014      |
| Sudan   | 1992           | FemalePregAge20to24 | 176561     |
| Sudan   | 1992           | FemalePregAge25to29 | 170407     |
| Sudan   | 1992           | FemalePregAge30to34 | 128334     |
| Sudan   | 1992           | FemalePregAge35to39 | 74471      |
| Sudan   | 1992           | FemalePregAge40to44 | 34456      |
| Sudan   | 1992           | FemalePregAge45to49 | 11813      |
| Sudan   | 1992           | MaleAge0to4         | 1926231    |
| Sudan   | 1992           | MaleAge10to14       | 1417650    |
| Sudan   | 1992           | MaleAge15to19       | 1208334    |
| Sudan   | 1992           | MaleAge20to24       | 996383     |
| Sudan   | 1992           | MaleAge25to29       | 806462     |
| Sudan   | 1992           | MaleAge30to34       | 650633     |
| Sudan   | 1992           | MaleAge35to39       | 529440     |
| Sudan   | 1992           | MaleAge40to44       | 435205     |
| Sudan   | 1992           | MaleAge45to49       | 352390     |
| Sudan   | 1992           | MaleAge50to54       | 282907     |
| Sudan   | 1992           | MaleAge55to59       | 225709     |
| Sudan   | 1992           | MaleAge5to9         | 1627038    |
| Sudan   | 1992           | MaleAge60to64       | 174574     |
| Sudan   | 1992           | MaleAge65to69       | 128117     |
| Sudan   | 1992           | MaleAge70to74       | 85834      |
| Sudan   | 1992           | MaleAge75to79       | 50257      |
| Sudan   | 1992           | MaleAge80to84       | 24074      |
| Sudan   | 1992           | MaleAge85to89       | 8575       |
| Sudan   | 1992           | MaleAge90to94       | 2083       |
| Sudan   | 1992           | MaleAge95to99       | 297        |
| Sudan   | 1992           | MaleAgeAbov e100    | 18         |
| Sudan   | 1993           | FemaleAge0to4       | 1961476    |
| Sudan   | 1993           | FemaleAge10to14     | 1440558    |
| Sudan   | 1993           | FemaleAge15to19     | 1010212    |
| Sudan   | 1993           | FemaleAge20to24     | 618597     |
| Sudan   | 1993           | FemaleAge25to29     | 443821     |
| Sudan   | 1993           | FemaleAge30to34     | 383254     |
| Sudan   | 1993           | FemaleAge35to39     | 385254     |
| Sudan   | 1993           | FemaleAge40to44     | 377449     |
| Sudan   | 1993           | FemaleAge45to49     | 342901     |
| Sudan   | 1993           | FemaleAge50to54     | 300698     |
| Sudan   | 1993           | FemaleAge55to59     | 244026     |
| Sudan   | 1993           | FemaleAge5to9       | 1646418    |
| Sudan   | 1993           | FemaleAge60to64     | 193633     |
| Sudan   | 1993           | FemaleAge65to69     | 146280     |
| Sudan   | 1993           | FemaleAge70to74     | 101474     |
| Sudan   | 1993           | FemaleAge75to79     | 61316      |
| Sudan   | 1993           | FemaleAge80to84     | 31310      |
| Sudan   | 1993           | FemaleAge85to89     | 12361      |
| Sudan   | 1993           | FemaleAge90to94     | 3265       |
| Sudan   | 1993           | FemaleAge95to99     | 543        |
| Sudan   | 1993           | FemaleAgeAbov e100  | 37         |
| Sudan   | 1993           | FemaleLactAge15to19 | 130685     |
| Sudan   | 1993           | FemaleLactAge20to24 | 235414     |
| Sudan   | 1993           | FemaleLactAge25to29 | 227209     |
| Sudan   | 1993           | FemaleLactAge30to34 | 171111     |
| Sudan   | 1993           | FemaleLactAge35to39 | 99295      |
| Sudan   | 1993           | FemaleLactAge40to44 | 45942      |
| Sudan   | 1993           | FemaleLactAge45to49 | 15750      |
| Sudan   | 1993           | FemalePregAge15to19 | 98014      |
| Sudan   | 1993           | FemalePregAge20to24 | 176561     |
| Sudan   | 1993           | FemalePregAge25to29 | 170407     |
| Sudan   | 1993           | FemalePregAge30to34 | 128334     |
| Sudan   | 1993           | FemalePregAge35to39 | 74471      |
| Sudan   | 1993           | FemalePregAge40to44 | 34456      |

Dietary calcium and zinc deficiency risks are decreasing but remain prevalent

| Country | Reference year | Age/gender group    | Population |
|---------|----------------|---------------------|------------|
| Sudan   | 1993           | FemalePregAge45to49 | 11813      |
| Sudan   | 1993           | MaleAge0to4         | 2016154    |
| Sudan   | 1993           | MaleAge10to14       | 1472725    |
| Sudan   | 1993           | MaleAge15to19       | 1264073    |
| Sudan   | 1993           | MaleAge20to24       | 1046059    |
| Sudan   | 1993           | MaleAge25to29       | 848437     |
| Sudan   | 1993           | MaleAge30to34       | 683623     |
| Sudan   | 1993           | MaleAge35to39       | 554688     |
| Sudan   | 1993           | MaleAge40to44       | 454582     |
| Sudan   | 1993           | MaleAge45to49       | 369787     |
| Sudan   | 1993           | MaleAge50to54       | 295250     |
| Sudan   | 1993           | MaleAge55to59       | 235557     |
| Sudan   | 1993           | MaleAge5to9         | 1685457    |
| Sudan   | 1993           | MaleAge60to64       | 182098     |
| Sudan   | 1993           | MaleAge65to69       | 133690     |
| Sudan   | 1993           | MaleAge70to74       | 89736      |
| Sudan   | 1993           | MaleAge75to79       | 52420      |
| Sudan   | 1993           | MaleAge80to84       | 25207      |
| Sudan   | 1993           | MaleAge85to89       | 9023       |
| Sudan   | 1993           | MaleAge90to94       | 2212       |
| Sudan   | 1993           | MaleAge95to99       | 348        |
| Sudan   | 1993           | MaleAgeAbove100     | 19         |
| Sudan   | 1994           | FemaleAge0to4       | 2042911    |
| Sudan   | 1994           | FemaleAge10to14     | 1490754    |
| Sudan   | 1994           | FemaleAge15to19     | 1061698    |
| Sudan   | 1994           | FemaleAge20to24     | 666338     |
| Sudan   | 1994           | FemaleAge25to29     | 485160     |
| Sudan   | 1994           | FemaleAge30to34     | 416026     |
| Sudan   | 1994           | FemaleAge35to39     | 410345     |
| Sudan   | 1994           | FemaleAge40to44     | 398744     |
| Sudan   | 1994           | FemaleAge45to49     | 360009     |
| Sudan   | 1994           | FemaleAge50to54     | 313607     |
| Sudan   | 1994           | FemaleAge55to59     | 253825     |
| Sudan   | 1994           | FemaleAge5to9       | 1698917    |
| Sudan   | 1994           | FemaleAge60to64     | 201945     |
| Sudan   | 1994           | FemaleAge65to69     | 152444     |
| Sudan   | 1994           | FemaleAge70to74     | 106227     |
| Sudan   | 1994           | FemaleAge75to79     | 64020      |
| Sudan   | 1994           | FemaleAge80to84     | 32415      |
| Sudan   | 1994           | FemaleAge85to89     | 12654      |
| Sudan   | 1994           | FemaleAge90to94     | 3285       |
| Sudan   | 1994           | FemaleAge95to99     | 558        |
| Sudan   | 1994           | FemaleAgeAbove100   | 38         |
| Sudan   | 1994           | FemaleLactAge15to19 | 130685     |
| Sudan   | 1994           | FemaleLactAge20to24 | 235414     |
| Sudan   | 1994           | FemaleLactAge25to29 | 227209     |
| Sudan   | 1994           | FemaleLactAge30to34 | 171111     |
| Sudan   | 1994           | FemaleLactAge35to39 | 99295      |
| Sudan   | 1994           | FemaleLactAge40to44 | 45942      |
| Sudan   | 1994           | FemaleLactAge45to49 | 15750      |
| Sudan   | 1994           | FemalePregAge15to19 | 98014      |
| Sudan   | 1994           | FemalePregAge20to24 | 176561     |
| Sudan   | 1994           | FemalePregAge25to29 | 170407     |
| Sudan   | 1994           | FemalePregAge30to34 | 128334     |
| Sudan   | 1994           | FemalePregAge35to39 | 74471      |
| Sudan   | 1994           | FemalePregAge40to44 | 34456      |
| Sudan   | 1994           | FemalePregAge45to49 | 11813      |
| Sudan   | 1994           | MaleAge0to4         | 2099793    |
| Sudan   | 1994           | MaleAge10to14       | 1524413    |
| Sudan   | 1994           | MaleAge15to19       | 1316940    |
| Sudan   | 1994           | MaleAge20to24       | 1094729    |
| Sudan   | 1994           | MaleAge25to29       | 890034     |
| Sudan   | 1994           | MaleAge30to34       | 716773     |
| Sudan   | 1994           | MaleAge35to39       | 580070     |
| Sudan   | 1994           | MaleAge40to44       | 473823     |
| Sudan   | 1994           | MaleAge45to49       | 386849     |
| Sudan   | 1994           | MaleAge50to54       | 307883     |
| Sudan   | 1994           | MaleAge55to59       | 245411     |
| Sudan   | 1994           | MaleAge5to9         | 1739454    |
| Sudan   | 1994           | MaleAge60to64       | 189779     |
| Sudan   | 1994           | MaleAge65to69       | 139425     |
| Sudan   | 1994           | MaleAge70to74       | 93840      |
| Sudan   | 1994           | MaleAge75to79       | 54628      |
| Sudan   | 1994           | MaleAge80to84       | 26152      |
| Sudan   | 1994           | MaleAge85to89       | 9236       |
| Sudan   | 1994           | MaleAge90to94       | 2219       |
| Sudan   | 1994           | MaleAge95to99       | 358        |
| Sudan   | 1994           | MaleAgeAbove100     | 20         |
| Sudan   | 1995           | FemaleAge0to4       | 2105488    |
| Sudan   | 1995           | FemaleAge10to14     | 1534307    |
| Sudan   | 1995           | FemaleAge15to19     | 1107724    |
| Sudan   | 1995           | FemaleAge20to24     | 711268     |
| Sudan   | 1995           | FemaleAge25to29     | 524648     |
| Sudan   | 1995           | FemaleAge30to34     | 447931     |
| Sudan   | 1995           | FemaleAge35to39     | 434751     |
| Sudan   | 1995           | FemaleAge40to44     | 418784     |
| Sudan   | 1995           | FemaleAge45to49     | 376560     |
| Sudan   | 1995           | FemaleAge50to54     | 326311     |

Dietary calcium and zinc deficiency risks are decreasing but remain prevalent

| Country | Reference year | Age/gender group    | Population |
|---------|----------------|---------------------|------------|
| Sudan   | 1995           | FemaleAge55to59     | 263218     |
| Sudan   | 1995           | FemaleAge5to9       | 1746500    |
| Sudan   | 1995           | FemaleAge60to64     | 209979     |
| Sudan   | 1995           | FemaleAge65to69     | 158694     |
| Sudan   | 1995           | FemaleAge70to74     | 110985     |
| Sudan   | 1995           | FemaleAge75to79     | 66882      |
| Sudan   | 1995           | FemaleAge80to84     | 33476      |
| Sudan   | 1995           | FemaleAge85to89     | 12680      |
| Sudan   | 1995           | FemaleAge90to94     | 3099       |
| Sudan   | 1995           | FemaleAge95to99     | 453        |
| Sudan   | 1995           | FemaleAgeAbove100   | 40         |
| Sudan   | 1995           | FemaleLactAge15to19 | 130685     |
| Sudan   | 1995           | FemaleLactAge20to24 | 235414     |
| Sudan   | 1995           | FemaleLactAge25to29 | 227209     |
| Sudan   | 1995           | FemaleLactAge30to34 | 171111     |
| Sudan   | 1995           | FemaleLactAge35to39 | 99295      |
| Sudan   | 1995           | FemaleLactAge40to44 | 45942      |
| Sudan   | 1995           | FemaleLactAge45to49 | 15750      |
| Sudan   | 1995           | FemalePregAge15to19 | 98014      |
| Sudan   | 1995           | FemalePregAge20to24 | 176561     |
| Sudan   | 1995           | FemalePregAge25to29 | 170407     |
| Sudan   | 1995           | FemalePregAge30to34 | 128334     |
| Sudan   | 1995           | FemalePregAge35to39 | 74471      |
| Sudan   | 1995           | FemalePregAge40to44 | 34456      |
| Sudan   | 1995           | FemalePregAge45to49 | 11813      |
| Sudan   | 1995           | MaleAge0to4         | 2164245    |
| Sudan   | 1995           | MaleAge10to14       | 1569291    |
| Sudan   | 1995           | MaleAge15to19       | 1364367    |
| Sudan   | 1995           | MaleAge20to24       | 1140655    |
| Sudan   | 1995           | MaleAge25to29       | 929827     |
| Sudan   | 1995           | MaleAge30to34       | 748964     |
| Sudan   | 1995           | MaleAge35to39       | 604730     |
| Sudan   | 1995           | MaleAge40to44       | 492448     |
| Sudan   | 1995           | MaleAge45to49       | 402714     |
| Sudan   | 1995           | MaleAge50to54       | 320468     |
| Sudan   | 1995           | MaleAge55to59       | 254891     |
| Sudan   | 1995           | MaleAge5to9         | 1787988    |
| Sudan   | 1995           | MaleAge60to64       | 197318     |
| Sudan   | 1995           | MaleAge65to69       | 145154     |
| Sudan   | 1995           | MaleAge70to74       | 97994      |
| Sudan   | 1995           | MaleAge75to79       | 56917      |
| Sudan   | 1995           | MaleAge80to84       | 26942      |
| Sudan   | 1995           | MaleAge85to89       | 9224       |
| Sudan   | 1995           | MaleAge90to94       | 2049       |
| Sudan   | 1995           | MaleAge95to99       | 275        |
| Sudan   | 1995           | MaleAgeAbove100     | 21         |
| Sudan   | 1996           | FemaleAge0to4       | 2176357    |
| Sudan   | 1996           | FemaleAge10to14     | 1566161    |
| Sudan   | 1996           | FemaleAge15to19     | 1098866    |
| Sudan   | 1996           | FemaleAge20to24     | 687125     |
| Sudan   | 1996           | FemaleAge25to29     | 493892     |
| Sudan   | 1996           | FemaleAge30to34     | 435474     |
| Sudan   | 1996           | FemaleAge35to39     | 438930     |
| Sudan   | 1996           | FemaleAge40to44     | 435064     |
| Sudan   | 1996           | FemaleAge45to49     | 387822     |
| Sudan   | 1996           | FemaleAge50to54     | 336032     |
| Sudan   | 1996           | FemaleAge55to59     | 270625     |
| Sudan   | 1996           | FemaleAge5to9       | 1793353    |
| Sudan   | 1996           | FemaleAge60to64     | 215224     |
| Sudan   | 1996           | FemaleAge65to69     | 162769     |
| Sudan   | 1996           | FemaleAge70to74     | 113935     |
| Sudan   | 1996           | FemaleAge75to79     | 69303      |
| Sudan   | 1996           | FemaleAge80to84     | 35084      |
| Sudan   | 1996           | FemaleAge85to89     | 13751      |
| Sudan   | 1996           | FemaleAge90to94     | 3633       |
| Sudan   | 1996           | FemaleAge95to99     | 503        |
| Sudan   | 1996           | FemaleAgeAbove100   | 41         |
| Sudan   | 1996           | FemaleLactAge15to19 | 155435     |
| Sudan   | 1996           | FemaleLactAge20to24 | 269985     |
| Sudan   | 1996           | FemaleLactAge25to29 | 263545     |
| Sudan   | 1996           | FemaleLactAge30to34 | 193724     |
| Sudan   | 1996           | FemaleLactAge35to39 | 108582     |
| Sudan   | 1996           | FemaleLactAge40to44 | 45904      |
| Sudan   | 1996           | FemaleLactAge45to49 | 17128      |
| Sudan   | 1996           | FemalePregAge15to19 | 116576     |
| Sudan   | 1996           | FemalePregAge20to24 | 202489     |
| Sudan   | 1996           | FemalePregAge25to29 | 197659     |
| Sudan   | 1996           | FemalePregAge30to34 | 145293     |
| Sudan   | 1996           | FemalePregAge35to39 | 81436      |
| Sudan   | 1996           | FemalePregAge40to44 | 34428      |
| Sudan   | 1996           | FemalePregAge45to49 | 12846      |
| Sudan   | 1996           | MaleAge0to4         | 2238367    |
| Sudan   | 1996           | MaleAge10to14       | 1601779    |
| Sudan   | 1996           | MaleAge15to19       | 1399249    |
| Sudan   | 1996           | MaleAge20to24       | 1177571    |
| Sudan   | 1996           | MaleAge25to29       | 962945     |
| Sudan   | 1996           | MaleAge30to34       | 775831     |
| Sudan   | 1996           | MaleAge35to39       | 624819     |

Dietary calcium and zinc deficiency risks are decreasing but remain prevalent

| Country | Reference year | Age/gender group    | Population |
|---------|----------------|---------------------|------------|
| Sudan   | 1996           | MaleAge40to44       | 507294     |
| Sudan   | 1996           | MaleAge45to49       | 414691     |
| Sudan   | 1996           | MaleAge50to54       | 330516     |
| Sudan   | 1996           | MaleAge55to59       | 261707     |
| Sudan   | 1996           | MaleAge5to9         | 1836663    |
| Sudan   | 1996           | MaleAge60to64       | 202415     |
| Sudan   | 1996           | MaleAge65to69       | 148929     |
| Sudan   | 1996           | MaleAge70to74       | 100752     |
| Sudan   | 1996           | MaleAge75to79       | 59086      |
| Sudan   | 1996           | MaleAge80to84       | 28459      |
| Sudan   | 1996           | MaleAge85to89       | 10207      |
| Sudan   | 1996           | MaleAge90to94       | 2434       |
| Sudan   | 1996           | MaleAge95to99       | 311        |
| Sudan   | 1996           | MaleAgeAbov e100    | 22         |
| Sudan   | 1997           | FemaleAge0to4       | 2226349    |
| Sudan   | 1997           | FemaleAge10to14     | 1592735    |
| Sudan   | 1997           | FemaleAge15to19     | 1128124    |
| Sudan   | 1997           | FemaleAge20to24     | 720114     |
| Sudan   | 1997           | FemaleAge25to29     | 524173     |
| Sudan   | 1997           | FemaleAge30to34     | 461252     |
| Sudan   | 1997           | FemaleAge35to39     | 458310     |
| Sudan   | 1997           | FemaleAge40to44     | 449826     |
| Sudan   | 1997           | FemaleAge45to49     | 400865     |
| Sudan   | 1997           | FemaleAge50to54     | 345436     |
| Sudan   | 1997           | FemaleAge55to59     | 277390     |
| Sudan   | 1997           | FemaleAge5to9       | 1838784    |
| Sudan   | 1997           | FemaleAge60to64     | 220282     |
| Sudan   | 1997           | FemaleAge65to69     | 166694     |
| Sudan   | 1997           | FemaleAge70to74     | 116589     |
| Sudan   | 1997           | FemaleAge75to79     | 71446      |
| Sudan   | 1997           | FemaleAge80to84     | 36292      |
| Sudan   | 1997           | FemaleAge85to89     | 14475      |
| Sudan   | 1997           | FemaleAge90to94     | 4020       |
| Sudan   | 1997           | FemaleAge95to99     | 585        |
| Sudan   | 1997           | FemaleAgeAbov e100  | 42         |
| Sudan   | 1997           | FemaleLactAge15to19 | 155435     |
| Sudan   | 1997           | FemaleLactAge20to24 | 269985     |
| Sudan   | 1997           | FemaleLactAge25to29 | 263545     |
| Sudan   | 1997           | FemaleLactAge30to34 | 193724     |
| Sudan   | 1997           | FemaleLactAge35to39 | 108582     |
| Sudan   | 1997           | FemaleLactAge40to44 | 45904      |
| Sudan   | 1997           | FemaleLactAge45to49 | 17128      |
| Sudan   | 1997           | FemalePregAge15to19 | 116576     |
| Sudan   | 1997           | FemalePregAge20to24 | 202489     |
| Sudan   | 1997           | FemalePregAge25to29 | 197659     |
| Sudan   | 1997           | FemalePregAge30to34 | 145293     |
| Sudan   | 1997           | FemalePregAge35to39 | 81436      |
| Sudan   | 1997           | FemalePregAge40to44 | 34428      |
| Sudan   | 1997           | FemalePregAge45to49 | 12846      |
| Sudan   | 1997           | MaleAge0to4         | 2290440    |
| Sudan   | 1997           | MaleAge10to14       | 1629047    |
| Sudan   | 1997           | MaleAge15to19       | 1429036    |
| Sudan   | 1997           | MaleAge20to24       | 1211127    |
| Sudan   | 1997           | MaleAge25to29       | 993564     |
| Sudan   | 1997           | MaleAge30to34       | 801349     |
| Sudan   | 1997           | MaleAge35to39       | 643914     |
| Sudan   | 1997           | MaleAge40to44       | 521220     |
| Sudan   | 1997           | MaleAge45to49       | 425341     |
| Sudan   | 1997           | MaleAge50to54       | 340362     |
| Sudan   | 1997           | MaleAge55to59       | 268006     |
| Sudan   | 1997           | MaleAge5to9         | 1884036    |
| Sudan   | 1997           | MaleAge60to64       | 207253     |
| Sudan   | 1997           | MaleAge65to69       | 152448     |
| Sudan   | 1997           | MaleAge70to74       | 103231     |
| Sudan   | 1997           | MaleAge75to79       | 60917      |
| Sudan   | 1997           | MaleAge80to84       | 29572      |
| Sudan   | 1997           | MaleAge85to89       | 10917      |
| Sudan   | 1997           | MaleAge90to94       | 2715       |
| Sudan   | 1997           | MaleAge95to99       | 373        |
| Sudan   | 1997           | MaleAgeAbov e100    | 23         |
| Sudan   | 1998           | FemaleAge0to4       | 2260417    |
| Sudan   | 1998           | FemaleAge10to14     | 1617392    |
| Sudan   | 1998           | FemaleAge15to19     | 1154153    |
| Sudan   | 1998           | FemaleAge20to24     | 750932     |
| Sudan   | 1998           | FemaleAge25to29     | 553236     |
| Sudan   | 1998           | FemaleAge30to34     | 486666     |
| Sudan   | 1998           | FemaleAge35to39     | 477641     |
| Sudan   | 1998           | FemaleAge40to44     | 464093     |
| Sudan   | 1998           | FemaleAge45to49     | 413645     |
| Sudan   | 1998           | FemaleAge50to54     | 355175     |
| Sudan   | 1998           | FemaleAge55to59     | 283789     |
| Sudan   | 1998           | FemaleAge5to9       | 1884309    |
| Sudan   | 1998           | FemaleAge60to64     | 225587     |
| Sudan   | 1998           | FemaleAge65to69     | 170673     |
| Sudan   | 1998           | FemaleAge70to74     | 119288     |
| Sudan   | 1998           | FemaleAge75to79     | 73425      |
| Sudan   | 1998           | FemaleAge80to84     | 37201      |
| Sudan   | 1998           | FemaleAge85to89     | 14826      |

Dietary calcium and zinc deficiency risks are decreasing but remain prevalent

| Country | Reference year | Age/gender group    | Population |
|---------|----------------|---------------------|------------|
| Sudan   | 1998           | FemaleAge90to94     | 4199       |
| Sudan   | 1998           | FemaleAge95to99     | 669        |
| Sudan   | 1998           | FemaleAgeAbove100   | 43         |
| Sudan   | 1998           | FemaleLactAge15to19 | 155435     |
| Sudan   | 1998           | FemaleLactAge20to24 | 269985     |
| Sudan   | 1998           | FemaleLactAge25to29 | 263545     |
| Sudan   | 1998           | FemaleLactAge30to34 | 193724     |
| Sudan   | 1998           | FemaleLactAge35to39 | 108582     |
| Sudan   | 1998           | FemaleLactAge40to44 | 45904      |
| Sudan   | 1998           | FemaleLactAge45to49 | 17128      |
| Sudan   | 1998           | FemalePregAge15to19 | 116576     |
| Sudan   | 1998           | FemalePregAge20to24 | 202489     |
| Sudan   | 1998           | FemalePregAge25to29 | 197659     |
| Sudan   | 1998           | FemalePregAge30to34 | 145293     |
| Sudan   | 1998           | FemalePregAge35to39 | 81436      |
| Sudan   | 1998           | FemalePregAge40to44 | 34428      |
| Sudan   | 1998           | FemalePregAge45to49 | 12846      |
| Sudan   | 1998           | MaleAge0to4         | 2325793    |
| Sudan   | 1998           | MaleAge10to14       | 1654487    |
| Sudan   | 1998           | MaleAge15to19       | 1455783    |
| Sudan   | 1998           | MaleAge20to24       | 1242532    |
| Sudan   | 1998           | MaleAge25to29       | 1022952    |
| Sudan   | 1998           | MaleAge30to34       | 826553     |
| Sudan   | 1998           | MaleAge35to39       | 662995     |
| Sudan   | 1998           | MaleAge40to44       | 535001     |
| Sudan   | 1998           | MaleAge45to49       | 435472     |
| Sudan   | 1998           | MaleAge50to54       | 350195     |
| Sudan   | 1998           | MaleAge55to59       | 274313     |
| Sudan   | 1998           | MaleAge5to9         | 1931512    |
| Sudan   | 1998           | MaleAge60to64       | 212148     |
| Sudan   | 1998           | MaleAge65to69       | 155951     |
| Sudan   | 1998           | MaleAge70to74       | 105699     |
| Sudan   | 1998           | MaleAge75to79       | 62523      |
| Sudan   | 1998           | MaleAge80to84       | 30342      |
| Sudan   | 1998           | MaleAge85to89       | 11294      |
| Sudan   | 1998           | MaleAge90to94       | 2862       |
| Sudan   | 1998           | MaleAge95to99       | 433        |
| Sudan   | 1998           | MaleAgeAbove100     | 24         |
| Sudan   | 1999           | FemaleAge0to4       | 2291621    |
| Sudan   | 1999           | FemaleAge10to14     | 1644674    |
| Sudan   | 1999           | FemaleAge15to19     | 1179360    |
| Sudan   | 1999           | FemaleAge20to24     | 780944     |
| Sudan   | 1999           | FemaleAge25to29     | 582781     |
| Sudan   | 1999           | FemaleAge30to34     | 512919     |
| Sudan   | 1999           | FemaleAge35to39     | 498120     |
| Sudan   | 1999           | FemaleAge40to44     | 479108     |
| Sudan   | 1999           | FemaleAge45to49     | 426669     |
| Sudan   | 1999           | FemaleAge50to54     | 365776     |
| Sudan   | 1999           | FemaleAge55to59     | 290504     |
| Sudan   | 1999           | FemaleAge5to9       | 1930114    |
| Sudan   | 1999           | FemaleAge60to64     | 231436     |
| Sudan   | 1999           | FemaleAge65to69     | 175007     |
| Sudan   | 1999           | FemaleAge70to74     | 122348     |
| Sudan   | 1999           | FemaleAge75to79     | 75374      |
| Sudan   | 1999           | FemaleAge80to84     | 37952      |
| Sudan   | 1999           | FemaleAge85to89     | 14839      |
| Sudan   | 1999           | FemaleAge90to94     | 4121       |
| Sudan   | 1999           | FemaleAge95to99     | 691        |
| Sudan   | 1999           | FemaleAgeAbove100   | 45         |
| Sudan   | 1999           | FemaleLactAge15to19 | 155435     |
| Sudan   | 1999           | FemaleLactAge20to24 | 269985     |
| Sudan   | 1999           | FemaleLactAge25to29 | 263545     |
| Sudan   | 1999           | FemaleLactAge30to34 | 193724     |
| Sudan   | 1999           | FemaleLactAge35to39 | 108582     |
| Sudan   | 1999           | FemaleLactAge40to44 | 45904      |
| Sudan   | 1999           | FemaleLactAge45to49 | 17128      |
| Sudan   | 1999           | FemalePregAge15to19 | 116576     |
| Sudan   | 1999           | FemalePregAge20to24 | 202489     |
| Sudan   | 1999           | FemalePregAge25to29 | 197659     |
| Sudan   | 1999           | FemalePregAge30to34 | 145293     |
| Sudan   | 1999           | FemalePregAge35to39 | 81436      |
| Sudan   | 1999           | FemalePregAge40to44 | 34428      |
| Sudan   | 1999           | FemalePregAge45to49 | 12846      |
| Sudan   | 1999           | MaleAge0to4         | 2358092    |
| Sudan   | 1999           | MaleAge10to14       | 1682723    |
| Sudan   | 1999           | MaleAge15to19       | 1481893    |
| Sudan   | 1999           | MaleAge20to24       | 1273175    |
| Sudan   | 1999           | MaleAge25to29       | 1052794    |
| Sudan   | 1999           | MaleAge30to34       | 852693     |
| Sudan   | 1999           | MaleAge35to39       | 683235     |
| Sudan   | 1999           | MaleAge40to44       | 549605     |
| Sudan   | 1999           | MaleAge45to49       | 446113     |
| Sudan   | 1999           | MaleAge50to54       | 360172     |
| Sudan   | 1999           | MaleAge55to59       | 281310     |
| Sudan   | 1999           | MaleAge5to9         | 1979102    |
| Sudan   | 1999           | MaleAge60to64       | 217422     |
| Sudan   | 1999           | MaleAge65to69       | 159750     |
| Sudan   | 1999           | MaleAge70to74       | 108390     |

Dietary calcium and zinc deficiency risks are decreasing but remain prevalent

| Country   | Reference year | Age/gender group    | Population |
|-----------|----------------|---------------------|------------|
| Sudan     | 1999           | MaleAge75to79       | 64052      |
| Sudan     | 1999           | MaleAge80to84       | 30873      |
| Sudan     | 1999           | MaleAge85to89       | 11334      |
| Sudan     | 1999           | MaleAge90to94       | 2831       |
| Sudan     | 1999           | MaleAge95to99       | 447        |
| Sudan     | 1999           | MaleAgeAbov e100    | 26         |
| Swaziland | 1997           | FemaleAge0to4       | 79897      |
| Swaziland | 1997           | FemaleAge10to14     | 72242      |
| Swaziland | 1997           | FemaleAge15to19     | 46653      |
| Swaziland | 1997           | FemaleAge20to24     | 27972      |
| Swaziland | 1997           | FemaleAge25to29     | 24569      |
| Swaziland | 1997           | FemaleAge30to34     | 21734      |
| Swaziland | 1997           | FemaleAge35to39     | 20234      |
| Swaziland | 1997           | FemaleAge40to44     | 19517      |
| Swaziland | 1997           | FemaleAge45to49     | 16776      |
| Swaziland | 1997           | FemaleAge50to54     | 13585      |
| Swaziland | 1997           | FemaleAge55to59     | 10799      |
| Swaziland | 1997           | FemaleAge5to9       | 81000      |
| Swaziland | 1997           | FemaleAge60to64     | 8715       |
| Swaziland | 1997           | FemaleAge65to69     | 6730       |
| Swaziland | 1997           | FemaleAge70to74     | 4806       |
| Swaziland | 1997           | FemaleAge75to79     | 2963       |
| Swaziland | 1997           | FemaleAge80to84     | 1467       |
| Swaziland | 1997           | FemaleAge85to89     | 536        |
| Swaziland | 1997           | FemaleAge90to94     | 132        |
| Swaziland | 1997           | FemaleAge95to99     | 18         |
| Swaziland | 1997           | FemaleAgeAbov e100  | 1          |
| Swaziland | 1997           | FemaleLactAge15to19 | 6553       |
| Swaziland | 1997           | FemaleLactAge20to24 | 10251      |
| Swaziland | 1997           | FemaleLactAge25to29 | 7587       |
| Swaziland | 1997           | FemaleLactAge30to34 | 5433       |
| Swaziland | 1997           | FemaleLactAge35to39 | 3156       |
| Swaziland | 1997           | FemaleLactAge40to44 | 1163       |
| Swaziland | 1997           | FemaleLactAge45to49 | 430        |
| Swaziland | 1997           | FemalePregAge15to19 | 4915       |
| Swaziland | 1997           | FemalePregAge20to24 | 7688       |
| Swaziland | 1997           | FemalePregAge25to29 | 5690       |
| Swaziland | 1997           | FemalePregAge30to34 | 4075       |
| Swaziland | 1997           | FemalePregAge35to39 | 2367       |
| Swaziland | 1997           | FemalePregAge40to44 | 872        |
| Swaziland | 1997           | FemalePregAge45to49 | 322        |
| Swaziland | 1997           | MaleAge0to4         | 81422      |
| Swaziland | 1997           | MaleAge10to14       | 72682      |
| Swaziland | 1997           | MaleAge15to19       | 56850      |
| Swaziland | 1997           | MaleAge20to24       | 41785      |
| Swaziland | 1997           | MaleAge25to29       | 30366      |
| Swaziland | 1997           | MaleAge30to34       | 23637      |
| Swaziland | 1997           | MaleAge35to39       | 20080      |
| Swaziland | 1997           | MaleAge40to44       | 17403      |
| Swaziland | 1997           | MaleAge45to49       | 15215      |
| Swaziland | 1997           | MaleAge50to54       | 12851      |
| Swaziland | 1997           | MaleAge55to59       | 10908      |
| Swaziland | 1997           | MaleAge5to9         | 82334      |
| Swaziland | 1997           | MaleAge60to64       | 8306       |
| Swaziland | 1997           | MaleAge65to69       | 5316       |
| Swaziland | 1997           | MaleAge70to74       | 3411       |
| Swaziland | 1997           | MaleAge75to79       | 2062       |
| Swaziland | 1997           | MaleAge80to84       | 924        |
| Swaziland | 1997           | MaleAge85to89       | 287        |
| Swaziland | 1997           | MaleAge90to94       | 63         |
| Swaziland | 1997           | MaleAge95to99       | 9          |
| Swaziland | 1998           | FemaleAge0to4       | 79336      |
| Swaziland | 1998           | FemaleAge10to14     | 74823      |
| Swaziland | 1998           | FemaleAge15to19     | 49271      |
| Swaziland | 1998           | FemaleAge20to24     | 29365      |
| Swaziland | 1998           | FemaleAge25to29     | 25068      |
| Swaziland | 1998           | FemaleAge30to34     | 22491      |
| Swaziland | 1998           | FemaleAge35to39     | 20847      |
| Swaziland | 1998           | FemaleAge40to44     | 20107      |
| Swaziland | 1998           | FemaleAge45to49     | 17446      |
| Swaziland | 1998           | FemaleAge50to54     | 14206      |
| Swaziland | 1998           | FemaleAge55to59     | 11085      |
| Swaziland | 1998           | FemaleAge5to9       | 81126      |
| Swaziland | 1998           | FemaleAge60to64     | 8967       |
| Swaziland | 1998           | FemaleAge65to69     | 6896       |
| Swaziland | 1998           | FemaleAge70to74     | 4934       |
| Swaziland | 1998           | FemaleAge75to79     | 3051       |
| Swaziland | 1998           | FemaleAge80to84     | 1517       |
| Swaziland | 1998           | FemaleAge85to89     | 557        |
| Swaziland | 1998           | FemaleAge90to94     | 140        |
| Swaziland | 1998           | FemaleAge95to99     | 20         |
| Swaziland | 1998           | FemaleAgeAbov e100  | 1          |
| Swaziland | 1998           | FemaleLactAge15to19 | 6553       |
| Swaziland | 1998           | FemaleLactAge20to24 | 10251      |
| Swaziland | 1998           | FemaleLactAge25to29 | 7587       |
| Swaziland | 1998           | FemaleLactAge30to34 | 5433       |
| Swaziland | 1998           | FemaleLactAge35to39 | 3156       |
| Swaziland | 1998           | FemaleLactAge40to44 | 1163       |

Dietary calcium and zinc deficiency risks are decreasing but remain prevalent

| Country   | Reference year | Age/gender group    | Population |
|-----------|----------------|---------------------|------------|
| Swaziland | 1998           | FemaleLactAge45to49 | 430        |
| Swaziland | 1998           | FemalePregAge15to19 | 4915       |
| Swaziland | 1998           | FemalePregAge20to24 | 7688       |
| Swaziland | 1998           | FemalePregAge25to29 | 5690       |
| Swaziland | 1998           | FemalePregAge30to34 | 4075       |
| Swaziland | 1998           | FemalePregAge35to39 | 2367       |
| Swaziland | 1998           | FemalePregAge40to44 | 872        |
| Swaziland | 1998           | FemalePregAge45to49 | 322        |
| Swaziland | 1998           | MaleAge0to4         | 80760      |
| Swaziland | 1998           | MaleAge10to14       | 75388      |
| Swaziland | 1998           | MaleAge15to19       | 59524      |
| Swaziland | 1998           | MaleAge20to24       | 43609      |
| Swaziland | 1998           | MaleAge25to29       | 31691      |
| Swaziland | 1998           | MaleAge30to34       | 24371      |
| Swaziland | 1998           | MaleAge35to39       | 20529      |
| Swaziland | 1998           | MaleAge40to44       | 17799      |
| Swaziland | 1998           | MaleAge45to49       | 15410      |
| Swaziland | 1998           | MaleAge50to54       | 13160      |
| Swaziland | 1998           | MaleAge55to59       | 11000      |
| Swaziland | 1998           | MaleAge5to9         | 82435      |
| Swaziland | 1998           | MaleAge60to64       | 8734       |
| Swaziland | 1998           | MaleAge65to69       | 5608       |
| Swaziland | 1998           | MaleAge70to74       | 3462       |
| Swaziland | 1998           | MaleAge75to79       | 2112       |
| Swaziland | 1998           | MaleAge80to84       | 969        |
| Swaziland | 1998           | MaleAge85to89       | 298        |
| Swaziland | 1998           | MaleAge90to94       | 68         |
| Swaziland | 1998           | MaleAge95to99       | 10         |
| Swaziland | 1999           | FemaleAge0to4       | 78704      |
| Swaziland | 1999           | FemaleAge10to14     | 76937      |
| Swaziland | 1999           | FemaleAge15to19     | 51950      |
| Swaziland | 1999           | FemaleAge20to24     | 31001      |
| Swaziland | 1999           | FemaleAge25to29     | 25571      |
| Swaziland | 1999           | FemaleAge30to34     | 23063      |
| Swaziland | 1999           | FemaleAge35to39     | 21401      |
| Swaziland | 1999           | FemaleAge40to44     | 20628      |
| Swaziland | 1999           | FemaleAge45to49     | 18064      |
| Swaziland | 1999           | FemaleAge50to54     | 14820      |
| Swaziland | 1999           | FemaleAge55to59     | 11407      |
| Swaziland | 1999           | FemaleAge5to9       | 80555      |
| Swaziland | 1999           | FemaleAge60to64     | 9214       |
| Swaziland | 1999           | FemaleAge65to69     | 7070       |
| Swaziland | 1999           | FemaleAge70to74     | 5065       |
| Swaziland | 1999           | FemaleAge75to79     | 3136       |
| Swaziland | 1999           | FemaleAge80to84     | 1553       |
| Swaziland | 1999           | FemaleAge85to89     | 561        |
| Swaziland | 1999           | FemaleAge90to94     | 138        |
| Swaziland | 1999           | FemaleAge95to99     | 21         |
| Swaziland | 1999           | FemaleAgeAbove100   | 1          |
| Swaziland | 1999           | FemaleLactAge15to19 | 6553       |
| Swaziland | 1999           | FemaleLactAge20to24 | 10251      |
| Swaziland | 1999           | FemaleLactAge25to29 | 7587       |
| Swaziland | 1999           | FemaleLactAge30to34 | 5433       |
| Swaziland | 1999           | FemaleLactAge35to39 | 3156       |
| Swaziland | 1999           | FemaleLactAge40to44 | 1163       |
| Swaziland | 1999           | FemaleLactAge45to49 | 430        |
| Swaziland | 1999           | FemalePregAge15to19 | 4915       |
| Swaziland | 1999           | FemalePregAge20to24 | 7688       |
| Swaziland | 1999           | FemalePregAge25to29 | 5690       |
| Swaziland | 1999           | FemalePregAge30to34 | 4075       |
| Swaziland | 1999           | FemalePregAge35to39 | 2367       |
| Swaziland | 1999           | FemalePregAge40to44 | 872        |
| Swaziland | 1999           | FemalePregAge45to49 | 322        |
| Swaziland | 1999           | MaleAge0to4         | 80038      |
| Swaziland | 1999           | MaleAge10to14       | 77662      |
| Swaziland | 1999           | MaleAge15to19       | 62321      |
| Swaziland | 1999           | MaleAge20to24       | 45504      |
| Swaziland | 1999           | MaleAge25to29       | 32947      |
| Swaziland | 1999           | MaleAge30to34       | 25138      |
| Swaziland | 1999           | MaleAge35to39       | 20964      |
| Swaziland | 1999           | MaleAge40to44       | 18179      |
| Swaziland | 1999           | MaleAge45to49       | 15620      |
| Swaziland | 1999           | MaleAge50to54       | 13419      |
| Swaziland | 1999           | MaleAge55to59       | 11101      |
| Swaziland | 1999           | MaleAge5to9         | 81806      |
| Swaziland | 1999           | MaleAge60to64       | 9098       |
| Swaziland | 1999           | MaleAge65to69       | 5922       |
| Swaziland | 1999           | MaleAge70to74       | 3550       |
| Swaziland | 1999           | MaleAge75to79       | 2147       |
| Swaziland | 1999           | MaleAge80to84       | 993        |
| Swaziland | 1999           | MaleAge85to89       | 302        |
| Swaziland | 1999           | MaleAge90to94       | 67         |
| Swaziland | 1999           | MaleAge95to99       | 10         |
| Sweden    | 1992           | FemaleAge0to4       | 288052     |
| Sweden    | 1992           | FemaleAge10to14     | 237846     |
| Sweden    | 1992           | FemaleAge15to19     | 260271     |
| Sweden    | 1992           | FemaleAge20to24     | 252203     |
| Sweden    | 1992           | FemaleAge25to29     | 223999     |



Dietary calcium and zinc deficiency risks are decreasing but remain prevalent

| Country | Reference year | Age/gender group    | Population |
|---------|----------------|---------------------|------------|
| Sweden  | 1992           | FemaleAge30to34     | 232966     |
| Sweden  | 1992           | FemaleAge35to39     | 260722     |
| Sweden  | 1992           | FemaleAge40to44     | 310663     |
| Sweden  | 1992           | FemaleAge45to49     | 310355     |
| Sweden  | 1992           | FemaleAge50to54     | 249809     |
| Sweden  | 1992           | FemaleAge55to59     | 212440     |
| Sweden  | 1992           | FemaleAge5to9       | 248607     |
| Sweden  | 1992           | FemaleAge60to64     | 212642     |
| Sweden  | 1992           | FemaleAge65to69     | 230619     |
| Sweden  | 1992           | FemaleAge70to74     | 216386     |
| Sweden  | 1992           | FemaleAge75to79     | 183585     |
| Sweden  | 1992           | FemaleAge80to84     | 139579     |
| Sweden  | 1992           | FemaleAge85to89     | 78428      |
| Sweden  | 1992           | FemaleAge90to94     | 29116      |
| Sweden  | 1992           | FemaleAge95to99     | 5713       |
| Sweden  | 1992           | FemaleAgeAbov e100  | 552        |
| Sweden  | 1992           | FemaleLactAge15to19 | 2980       |
| Sweden  | 1992           | FemaleLactAge20to24 | 24570      |
| Sweden  | 1992           | FemaleLactAge25to29 | 43837      |
| Sweden  | 1992           | FemaleLactAge30to34 | 31751      |
| Sweden  | 1992           | FemaleLactAge35to39 | 12326      |
| Sweden  | 1992           | FemaleLactAge40to44 | 2242       |
| Sweden  | 1992           | FemaleLactAge45to49 | 84         |
| Sweden  | 1992           | FemalePregAge15to19 | 2235       |
| Sweden  | 1992           | FemalePregAge20to24 | 18427      |
| Sweden  | 1992           | FemalePregAge25to29 | 32878      |
| Sweden  | 1992           | FemalePregAge30to34 | 23813      |
| Sweden  | 1992           | FemalePregAge35to39 | 9245       |
| Sweden  | 1992           | FemalePregAge40to44 | 1682       |
| Sweden  | 1992           | FemalePregAge45to49 | 63         |
| Sweden  | 1992           | MaleAge0to4         | 303329     |
| Sweden  | 1992           | MaleAge10to14       | 250543     |
| Sweden  | 1992           | MaleAge15to19       | 277571     |
| Sweden  | 1992           | MaleAge20to24       | 309205     |
| Sweden  | 1992           | MaleAge25to29       | 317640     |
| Sweden  | 1992           | MaleAge30to34       | 304093     |
| Sweden  | 1992           | MaleAge35to39       | 294477     |
| Sweden  | 1992           | MaleAge40to44       | 325137     |
| Sweden  | 1992           | MaleAge45to49       | 323930     |
| Sweden  | 1992           | MaleAge50to54       | 257626     |
| Sweden  | 1992           | MaleAge55to59       | 208389     |
| Sweden  | 1992           | MaleAge5to9         | 262367     |
| Sweden  | 1992           | MaleAge60to64       | 198019     |
| Sweden  | 1992           | MaleAge65to69       | 204048     |
| Sweden  | 1992           | MaleAge70to74       | 178462     |
| Sweden  | 1992           | MaleAge75to79       | 134006     |
| Sweden  | 1992           | MaleAge80to84       | 86155      |
| Sweden  | 1992           | MaleAge85to89       | 38893      |
| Sweden  | 1992           | MaleAge90to94       | 11289      |
| Sweden  | 1992           | MaleAge95to99       | 1794       |
| Sweden  | 1992           | MaleAgeAbov e100    | 129        |
| Sweden  | 1993           | FemaleAge0to4       | 292740     |
| Sweden  | 1993           | FemaleAge10to14     | 237927     |
| Sweden  | 1993           | FemaleAge15to19     | 254058     |
| Sweden  | 1993           | FemaleAge20to24     | 250522     |
| Sweden  | 1993           | FemaleAge25to29     | 227137     |
| Sweden  | 1993           | FemaleAge30to34     | 237693     |
| Sweden  | 1993           | FemaleAge35to39     | 261515     |
| Sweden  | 1993           | FemaleAge40to44     | 301399     |
| Sweden  | 1993           | FemaleAge45to49     | 318573     |
| Sweden  | 1993           | FemaleAge50to54     | 263020     |
| Sweden  | 1993           | FemaleAge55to59     | 214782     |
| Sweden  | 1993           | FemaleAge5to9       | 258063     |
| Sweden  | 1993           | FemaleAge60to64     | 210144     |
| Sweden  | 1993           | FemaleAge65to69     | 224271     |
| Sweden  | 1993           | FemaleAge70to74     | 220156     |
| Sweden  | 1993           | FemaleAge75to79     | 183004     |
| Sweden  | 1993           | FemaleAge80to84     | 141320     |
| Sweden  | 1993           | FemaleAge85to89     | 81172      |
| Sweden  | 1993           | FemaleAge90to94     | 30365      |
| Sweden  | 1993           | FemaleAge95to99     | 6272       |
| Sweden  | 1993           | FemaleAgeAbov e100  | 580        |
| Sweden  | 1993           | FemaleLactAge15to19 | 2980       |
| Sweden  | 1993           | FemaleLactAge20to24 | 24570      |
| Sweden  | 1993           | FemaleLactAge25to29 | 43837      |
| Sweden  | 1993           | FemaleLactAge30to34 | 31751      |
| Sweden  | 1993           | FemaleLactAge35to39 | 12326      |
| Sweden  | 1993           | FemaleLactAge40to44 | 2242       |
| Sweden  | 1993           | FemaleLactAge45to49 | 84         |
| Sweden  | 1993           | FemalePregAge15to19 | 2235       |
| Sweden  | 1993           | FemalePregAge20to24 | 18427      |
| Sweden  | 1993           | FemalePregAge25to29 | 32878      |
| Sweden  | 1993           | FemalePregAge30to34 | 23813      |
| Sweden  | 1993           | FemalePregAge35to39 | 9245       |
| Sweden  | 1993           | FemalePregAge40to44 | 1682       |
| Sweden  | 1993           | FemalePregAge45to49 | 63         |
| Sweden  | 1993           | MaleAge0to4         | 308161     |
| Sweden  | 1993           | MaleAge10to14       | 250906     |

Dietary calcium and zinc deficiency risks are decreasing but remain prevalent

| Country | Reference year | Age/gender group    | Population |
|---------|----------------|---------------------|------------|
| Sweden  | 1993           | MaleAge15to19       | 271279     |
| Sweden  | 1993           | MaleAge20to24       | 306424     |
| Sweden  | 1993           | MaleAge25to29       | 320246     |
| Sweden  | 1993           | MaleAge30to34       | 309389     |
| Sweden  | 1993           | MaleAge35to39       | 295531     |
| Sweden  | 1993           | MaleAge40to44       | 315615     |
| Sweden  | 1993           | MaleAge45to49       | 330659     |
| Sweden  | 1993           | MaleAge50to54       | 272594     |
| Sweden  | 1993           | MaleAge55to59       | 211912     |
| Sweden  | 1993           | MaleAge5to9         | 272269     |
| Sweden  | 1993           | MaleAge60to64       | 196211     |
| Sweden  | 1993           | MaleAge65to69       | 198272     |
| Sweden  | 1993           | MaleAge70to74       | 181723     |
| Sweden  | 1993           | MaleAge75to79       | 133720     |
| Sweden  | 1993           | MaleAge80to84       | 87467      |
| Sweden  | 1993           | MaleAge85to89       | 40440      |
| Sweden  | 1993           | MaleAge90to94       | 11670      |
| Sweden  | 1993           | MaleAge95to99       | 2037       |
| Sweden  | 1993           | MaleAgeAbov e100    | 130        |
| Sweden  | 1994           | FemaleAge0to4       | 293415     |
| Sweden  | 1994           | FemaleAge10to14     | 239639     |
| Sweden  | 1994           | FemaleAge15to19     | 248096     |
| Sweden  | 1994           | FemaleAge20to24     | 247437     |
| Sweden  | 1994           | FemaleAge25to29     | 229305     |
| Sweden  | 1994           | FemaleAge30to34     | 242394     |
| Sweden  | 1994           | FemaleAge35to39     | 263415     |
| Sweden  | 1994           | FemaleAge40to44     | 292687     |
| Sweden  | 1994           | FemaleAge45to49     | 323391     |
| Sweden  | 1994           | FemaleAge50to54     | 275965     |
| Sweden  | 1994           | FemaleAge55to59     | 219226     |
| Sweden  | 1994           | FemaleAge5to9       | 268263     |
| Sweden  | 1994           | FemaleAge60to64     | 208486     |
| Sweden  | 1994           | FemaleAge65to69     | 218101     |
| Sweden  | 1994           | FemaleAge70to74     | 222526     |
| Sweden  | 1994           | FemaleAge75to79     | 183568     |
| Sweden  | 1994           | FemaleAge80to84     | 143222     |
| Sweden  | 1994           | FemaleAge85to89     | 83378      |
| Sweden  | 1994           | FemaleAge90to94     | 30867      |
| Sweden  | 1994           | FemaleAge95to99     | 6569       |
| Sweden  | 1994           | FemaleAgeAbov e100  | 610        |
| Sweden  | 1994           | FemaleLactAge15to19 | 2980       |
| Sweden  | 1994           | FemaleLactAge20to24 | 24570      |
| Sweden  | 1994           | FemaleLactAge25to29 | 43837      |
| Sweden  | 1994           | FemaleLactAge30to34 | 31751      |
| Sweden  | 1994           | FemaleLactAge35to39 | 12326      |
| Sweden  | 1994           | FemaleLactAge40to44 | 2242       |
| Sweden  | 1994           | FemaleLactAge45to49 | 84         |
| Sweden  | 1994           | FemalePregAge15to19 | 2235       |
| Sweden  | 1994           | FemalePregAge20to24 | 18427      |
| Sweden  | 1994           | FemalePregAge25to29 | 32878      |
| Sweden  | 1994           | FemalePregAge30to34 | 23813      |
| Sweden  | 1994           | FemalePregAge35to39 | 9245       |
| Sweden  | 1994           | FemalePregAge40to44 | 1682       |
| Sweden  | 1994           | FemalePregAge45to49 | 63         |
| Sweden  | 1994           | MaleAge0to4         | 308822     |
| Sweden  | 1994           | MaleAge10to14       | 252931     |
| Sweden  | 1994           | MaleAge15to19       | 265575     |
| Sweden  | 1994           | MaleAge20to24       | 302226     |
| Sweden  | 1994           | MaleAge25to29       | 321753     |
| Sweden  | 1994           | MaleAge30to34       | 314533     |
| Sweden  | 1994           | MaleAge35to39       | 297830     |
| Sweden  | 1994           | MaleAge40to44       | 306825     |
| Sweden  | 1994           | MaleAge45to49       | 334077     |
| Sweden  | 1994           | MaleAge50to54       | 286804     |
| Sweden  | 1994           | MaleAge55to59       | 217787     |
| Sweden  | 1994           | MaleAge5to9         | 282894     |
| Sweden  | 1994           | MaleAge60to64       | 195436     |
| Sweden  | 1994           | MaleAge65to69       | 192964     |
| Sweden  | 1994           | MaleAge70to74       | 183779     |
| Sweden  | 1994           | MaleAge75to79       | 134392     |
| Sweden  | 1994           | MaleAge80to84       | 88396      |
| Sweden  | 1994           | MaleAge85to89       | 41134      |
| Sweden  | 1994           | MaleAge90to94       | 11616      |
| Sweden  | 1994           | MaleAge95to99       | 2097       |
| Sweden  | 1994           | MaleAgeAbov e100    | 133        |
| Sweden  | 1995           | FemaleAge0to4       | 289405     |
| Sweden  | 1995           | FemaleAge10to14     | 243374     |
| Sweden  | 1995           | FemaleAge15to19     | 243172     |
| Sweden  | 1995           | FemaleAge20to24     | 242875     |
| Sweden  | 1995           | FemaleAge25to29     | 230226     |
| Sweden  | 1995           | FemaleAge30to34     | 246671     |
| Sweden  | 1995           | FemaleAge35to39     | 265762     |
| Sweden  | 1995           | FemaleAge40to44     | 286399     |
| Sweden  | 1995           | FemaleAge45to49     | 324058     |
| Sweden  | 1995           | FemaleAge50to54     | 287553     |
| Sweden  | 1995           | FemaleAge55to59     | 226099     |
| Sweden  | 1995           | FemaleAge5to9       | 277304     |
| Sweden  | 1995           | FemaleAge60to64     | 207577     |

Dietary calcium and zinc deficiency risks are decreasing but remain prevalent

| Country | Reference year | Age/gender group    | Population |
|---------|----------------|---------------------|------------|
| Sweden  | 1995           | FemaleAge65to69     | 212947     |
| Sweden  | 1995           | FemaleAge70to74     | 222509     |
| Sweden  | 1995           | FemaleAge75to79     | 185650     |
| Sweden  | 1995           | FemaleAge80to84     | 145127     |
| Sweden  | 1995           | FemaleAge85to89     | 85236      |
| Sweden  | 1995           | FemaleAge90to94     | 30934      |
| Sweden  | 1995           | FemaleAge95to99     | 6129       |
| Sweden  | 1995           | FemaleAgeAbove100   | 644        |
| Sweden  | 1995           | FemaleLactAge15to19 | 2980       |
| Sweden  | 1995           | FemaleLactAge20to24 | 24570      |
| Sweden  | 1995           | FemaleLactAge25to29 | 43837      |
| Sweden  | 1995           | FemaleLactAge30to34 | 31751      |
| Sweden  | 1995           | FemaleLactAge35to39 | 12326      |
| Sweden  | 1995           | FemaleLactAge40to44 | 2242       |
| Sweden  | 1995           | FemaleLactAge45to49 | 84         |
| Sweden  | 1995           | FemalePregAge15to19 | 2235       |
| Sweden  | 1995           | FemalePregAge20to24 | 18427      |
| Sweden  | 1995           | FemalePregAge25to29 | 32878      |
| Sweden  | 1995           | FemalePregAge30to34 | 23813      |
| Sweden  | 1995           | FemalePregAge35to39 | 9245       |
| Sweden  | 1995           | FemalePregAge40to44 | 1682       |
| Sweden  | 1995           | FemalePregAge45to49 | 63         |
| Sweden  | 1995           | MaleAge0to4         | 304606     |
| Sweden  | 1995           | MaleAge10to14       | 257052     |
| Sweden  | 1995           | MaleAge15to19       | 261073     |
| Sweden  | 1995           | MaleAge20to24       | 296797     |
| Sweden  | 1995           | MaleAge25to29       | 321887     |
| Sweden  | 1995           | MaleAge30to34       | 319038     |
| Sweden  | 1995           | MaleAge35to39       | 300712     |
| Sweden  | 1995           | MaleAge40to44       | 300576     |
| Sweden  | 1995           | MaleAge45to49       | 333749     |
| Sweden  | 1995           | MaleAge50to54       | 298942     |
| Sweden  | 1995           | MaleAge55to59       | 226332     |
| Sweden  | 1995           | MaleAge5to9         | 292296     |
| Sweden  | 1995           | MaleAge60to64       | 195665     |
| Sweden  | 1995           | MaleAge65to69       | 188860     |
| Sweden  | 1995           | MaleAge70to74       | 183870     |
| Sweden  | 1995           | MaleAge75to79       | 136316     |
| Sweden  | 1995           | MaleAge80to84       | 89006      |
| Sweden  | 1995           | MaleAge85to89       | 41182      |
| Sweden  | 1995           | MaleAge90to94       | 11120      |
| Sweden  | 1995           | MaleAge95to99       | 1721       |
| Sweden  | 1995           | MaleAgeAbove100     | 137        |
| Sweden  | 1996           | FemaleAge0to4       | 282495     |
| Sweden  | 1996           | FemaleAge10to14     | 248778     |
| Sweden  | 1996           | FemaleAge15to19     | 242018     |
| Sweden  | 1996           | FemaleAge20to24     | 254569     |
| Sweden  | 1996           | FemaleAge25to29     | 248216     |
| Sweden  | 1996           | FemaleAge30to34     | 254984     |
| Sweden  | 1996           | FemaleAge35to39     | 269089     |
| Sweden  | 1996           | FemaleAge40to44     | 282473     |
| Sweden  | 1996           | FemaleAge45to49     | 320963     |
| Sweden  | 1996           | FemaleAge50to54     | 298089     |
| Sweden  | 1996           | FemaleAge55to59     | 235090     |
| Sweden  | 1996           | FemaleAge5to9       | 283983     |
| Sweden  | 1996           | FemaleAge60to64     | 207175     |
| Sweden  | 1996           | FemaleAge65to69     | 208071     |
| Sweden  | 1996           | FemaleAge70to74     | 219226     |
| Sweden  | 1996           | FemaleAge75to79     | 187011     |
| Sweden  | 1996           | FemaleAge80to84     | 144792     |
| Sweden  | 1996           | FemaleAge85to89     | 87733      |
| Sweden  | 1996           | FemaleAge90to94     | 34267      |
| Sweden  | 1996           | FemaleAge95to99     | 6701       |
| Sweden  | 1996           | FemaleAgeAbove100   | 681        |
| Sweden  | 1996           | FemaleLactAge15to19 | 1785       |
| Sweden  | 1996           | FemaleLactAge20to24 | 14483      |
| Sweden  | 1996           | FemaleLactAge25to29 | 32870      |
| Sweden  | 1996           | FemaleLactAge30to34 | 28648      |
| Sweden  | 1996           | FemaleLactAge35to39 | 11819      |
| Sweden  | 1996           | FemaleLactAge40to44 | 2097       |
| Sweden  | 1996           | FemaleLactAge45to49 | 85         |
| Sweden  | 1996           | FemalePregAge15to19 | 1339       |
| Sweden  | 1996           | FemalePregAge20to24 | 10863      |
| Sweden  | 1996           | FemalePregAge25to29 | 24652      |
| Sweden  | 1996           | FemalePregAge30to34 | 21486      |
| Sweden  | 1996           | FemalePregAge35to39 | 8864       |
| Sweden  | 1996           | FemalePregAge40to44 | 1573       |
| Sweden  | 1996           | FemalePregAge45to49 | 64         |
| Sweden  | 1996           | MaleAge0to4         | 297230     |
| Sweden  | 1996           | MaleAge10to14       | 262711     |
| Sweden  | 1996           | MaleAge15to19       | 257518     |
| Sweden  | 1996           | MaleAge20to24       | 290413     |
| Sweden  | 1996           | MaleAge25to29       | 319641     |
| Sweden  | 1996           | MaleAge30to34       | 321571     |
| Sweden  | 1996           | MaleAge35to39       | 303344     |
| Sweden  | 1996           | MaleAge40to44       | 296210     |
| Sweden  | 1996           | MaleAge45to49       | 329645     |
| Sweden  | 1996           | MaleAge50to54       | 309082     |

Dietary calcium and zinc deficiency risks are decreasing but remain prevalent

| Country | Reference year | Age/gender group    | Population |
|---------|----------------|---------------------|------------|
| Sweden  | 1996           | MaleAge55to59       | 236964     |
| Sweden  | 1996           | MaleAge5to9         | 299107     |
| Sweden  | 1996           | MaleAge60to64       | 196358     |
| Sweden  | 1996           | MaleAge65to69       | 184833     |
| Sweden  | 1996           | MaleAge70to74       | 181058     |
| Sweden  | 1996           | MaleAge75to79       | 138323     |
| Sweden  | 1996           | MaleAge80to84       | 89860      |
| Sweden  | 1996           | MaleAge85to89       | 43539      |
| Sweden  | 1996           | MaleAge90to94       | 12958      |
| Sweden  | 1996           | MaleAge95to99       | 1880       |
| Sweden  | 1996           | MaleAgeAbov e100    | 143        |
| Sweden  | 1997           | FemaleAge0to4       | 268786     |
| Sweden  | 1997           | FemaleAge10to14     | 255929     |
| Sweden  | 1997           | FemaleAge15to19     | 239967     |
| Sweden  | 1997           | FemaleAge20to24     | 247715     |
| Sweden  | 1997           | FemaleAge25to29     | 246152     |
| Sweden  | 1997           | FemaleAge30to34     | 257391     |
| Sweden  | 1997           | FemaleAge35to39     | 272279     |
| Sweden  | 1997           | FemaleAge40to44     | 280673     |
| Sweden  | 1997           | FemaleAge45to49     | 313774     |
| Sweden  | 1997           | FemaleAge50to54     | 307781     |
| Sweden  | 1997           | FemaleAge55to59     | 246371     |
| Sweden  | 1997           | FemaleAge5to9       | 289123     |
| Sweden  | 1997           | FemaleAge60to64     | 207698     |
| Sweden  | 1997           | FemaleAge65to69     | 204361     |
| Sweden  | 1997           | FemaleAge70to74     | 214269     |
| Sweden  | 1997           | FemaleAge75to79     | 189960     |
| Sweden  | 1997           | FemaleAge80to84     | 144005     |
| Sweden  | 1997           | FemaleAge85to89     | 89719      |
| Sweden  | 1997           | FemaleAge90to94     | 36827      |
| Sweden  | 1997           | FemaleAge95to99     | 7480       |
| Sweden  | 1997           | FemaleAgeAbov e100  | 722        |
| Sweden  | 1997           | FemaleLactAge15to19 | 1785       |
| Sweden  | 1997           | FemaleLactAge20to24 | 14483      |
| Sweden  | 1997           | FemaleLactAge25to29 | 32870      |
| Sweden  | 1997           | FemaleLactAge30to34 | 28648      |
| Sweden  | 1997           | FemaleLactAge35to39 | 11819      |
| Sweden  | 1997           | FemaleLactAge40to44 | 2097       |
| Sweden  | 1997           | FemaleLactAge45to49 | 85         |
| Sweden  | 1997           | FemalePregAge15to19 | 1339       |
| Sweden  | 1997           | FemalePregAge20to24 | 10863      |
| Sweden  | 1997           | FemalePregAge25to29 | 24652      |
| Sweden  | 1997           | FemalePregAge30to34 | 21486      |
| Sweden  | 1997           | FemalePregAge35to39 | 8864       |
| Sweden  | 1997           | FemalePregAge40to44 | 1573       |
| Sweden  | 1997           | FemalePregAge45to49 | 64         |
| Sweden  | 1997           | MaleAge0to4         | 282802     |
| Sweden  | 1997           | MaleAge10to14       | 270253     |
| Sweden  | 1997           | MaleAge15to19       | 255360     |
| Sweden  | 1997           | MaleAge20to24       | 283341     |
| Sweden  | 1997           | MaleAge25to29       | 316493     |
| Sweden  | 1997           | MaleAge30to34       | 323562     |
| Sweden  | 1997           | MaleAge35to39       | 306900     |
| Sweden  | 1997           | MaleAge40to44       | 294385     |
| Sweden  | 1997           | MaleAge45to49       | 321843     |
| Sweden  | 1997           | MaleAge50to54       | 317731     |
| Sweden  | 1997           | MaleAge55to59       | 250102     |
| Sweden  | 1997           | MaleAge5to9         | 304355     |
| Sweden  | 1997           | MaleAge60to64       | 198199     |
| Sweden  | 1997           | MaleAge65to69       | 182041     |
| Sweden  | 1997           | MaleAge70to74       | 176916     |
| Sweden  | 1997           | MaleAge75to79       | 141278     |
| Sweden  | 1997           | MaleAge80to84       | 90115      |
| Sweden  | 1997           | MaleAge85to89       | 45268      |
| Sweden  | 1997           | MaleAge90to94       | 14290      |
| Sweden  | 1997           | MaleAge95to99       | 2111       |
| Sweden  | 1997           | MaleAgeAbov e100    | 151        |
| Sweden  | 1998           | FemaleAge0to4       | 251433     |
| Sweden  | 1998           | FemaleAge10to14     | 264201     |
| Sweden  | 1998           | FemaleAge15to19     | 239311     |
| Sweden  | 1998           | FemaleAge20to24     | 240617     |
| Sweden  | 1998           | FemaleAge25to29     | 243207     |
| Sweden  | 1998           | FemaleAge30to34     | 259149     |
| Sweden  | 1998           | FemaleAge35to39     | 275905     |
| Sweden  | 1998           | FemaleAge40to44     | 280842     |
| Sweden  | 1998           | FemaleAge45to49     | 304336     |
| Sweden  | 1998           | FemaleAge50to54     | 315658     |
| Sweden  | 1998           | FemaleAge55to59     | 258989     |
| Sweden  | 1998           | FemaleAge5to9       | 292253     |
| Sweden  | 1998           | FemaleAge60to64     | 209671     |
| Sweden  | 1998           | FemaleAge65to69     | 201736     |
| Sweden  | 1998           | FemaleAge70to74     | 208456     |
| Sweden  | 1998           | FemaleAge75to79     | 193426     |
| Sweden  | 1998           | FemaleAge80to84     | 143634     |
| Sweden  | 1998           | FemaleAge85to89     | 91383      |
| Sweden  | 1998           | FemaleAge90to94     | 38305      |
| Sweden  | 1998           | FemaleAge95to99     | 8262       |
| Sweden  | 1998           | FemaleAgeAbov e100  | 767        |

Dietary calcium and zinc deficiency risks are decreasing but remain prevalent

| Country | Reference year | Age/gender group    | Population |
|---------|----------------|---------------------|------------|
| Sweden  | 1998           | FemaleLactAge15to19 | 1785       |
| Sweden  | 1998           | FemaleLactAge20to24 | 14483      |
| Sweden  | 1998           | FemaleLactAge25to29 | 32870      |
| Sweden  | 1998           | FemaleLactAge30to34 | 28648      |
| Sweden  | 1998           | FemaleLactAge35to39 | 11819      |
| Sweden  | 1998           | FemaleLactAge40to44 | 2097       |
| Sweden  | 1998           | FemaleLactAge45to49 | 85         |
| Sweden  | 1998           | FemalePregAge15to19 | 1339       |
| Sweden  | 1998           | FemalePregAge20to24 | 10863      |
| Sweden  | 1998           | FemalePregAge25to29 | 24652      |
| Sweden  | 1998           | FemalePregAge30to34 | 21486      |
| Sweden  | 1998           | FemalePregAge35to39 | 8864       |
| Sweden  | 1998           | FemalePregAge40to44 | 1573       |
| Sweden  | 1998           | FemalePregAge45to49 | 64         |
| Sweden  | 1998           | MaleAge0to4         | 264612     |
| Sweden  | 1998           | MaleAge10to14       | 278936     |
| Sweden  | 1998           | MaleAge15to19       | 254962     |
| Sweden  | 1998           | MaleAge20to24       | 276073     |
| Sweden  | 1998           | MaleAge25to29       | 312514     |
| Sweden  | 1998           | MaleAge30to34       | 324864     |
| Sweden  | 1998           | MaleAge35to39       | 310987     |
| Sweden  | 1998           | MaleAge40to44       | 294674     |
| Sweden  | 1998           | MaleAge45to49       | 312135     |
| Sweden  | 1998           | MaleAge50to54       | 324220     |
| Sweden  | 1998           | MaleAge55to59       | 264504     |
| Sweden  | 1998           | MaleAge5to9         | 307555     |
| Sweden  | 1998           | MaleAge60to64       | 201715     |
| Sweden  | 1998           | MaleAge65to69       | 180445     |
| Sweden  | 1998           | MaleAge70to74       | 172302     |
| Sweden  | 1998           | MaleAge75to79       | 144404     |
| Sweden  | 1998           | MaleAge80to84       | 90426      |
| Sweden  | 1998           | MaleAge85to89       | 46278      |
| Sweden  | 1998           | MaleAge90to94       | 14897      |
| Sweden  | 1998           | MaleAge95to99       | 2371       |
| Sweden  | 1998           | MaleAgeAbov e100    | 161        |
| Sweden  | 1999           | FemaleAge0to4       | 235808     |
| Sweden  | 1999           | FemaleAge10to14     | 272458     |
| Sweden  | 1999           | FemaleAge15to19     | 240337     |
| Sweden  | 1999           | FemaleAge20to24     | 234179     |
| Sweden  | 1999           | FemaleAge25to29     | 239228     |
| Sweden  | 1999           | FemaleAge30to34     | 260018     |
| Sweden  | 1999           | FemaleAge35to39     | 279486     |
| Sweden  | 1999           | FemaleAge40to44     | 282030     |
| Sweden  | 1999           | FemaleAge45to49     | 295482     |
| Sweden  | 1999           | FemaleAge50to54     | 320312     |
| Sweden  | 1999           | FemaleAge55to59     | 271493     |
| Sweden  | 1999           | FemaleAge5to9       | 292945     |
| Sweden  | 1999           | FemaleAge60to64     | 213829     |
| Sweden  | 1999           | FemaleAge65to69     | 200006     |
| Sweden  | 1999           | FemaleAge70to74     | 202998     |
| Sweden  | 1999           | FemaleAge75to79     | 195861     |
| Sweden  | 1999           | FemaleAge80to84     | 144566     |
| Sweden  | 1999           | FemaleAge85to89     | 92672      |
| Sweden  | 1999           | FemaleAge90to94     | 38707      |
| Sweden  | 1999           | FemaleAge95to99     | 8719       |
| Sweden  | 1999           | FemaleAgeAbov e100  | 815        |
| Sweden  | 1999           | FemaleLactAge15to19 | 1785       |
| Sweden  | 1999           | FemaleLactAge20to24 | 14483      |
| Sweden  | 1999           | FemaleLactAge25to29 | 32870      |
| Sweden  | 1999           | FemaleLactAge30to34 | 28648      |
| Sweden  | 1999           | FemaleLactAge35to39 | 11819      |
| Sweden  | 1999           | FemaleLactAge40to44 | 2097       |
| Sweden  | 1999           | FemaleLactAge45to49 | 85         |
| Sweden  | 1999           | FemalePregAge15to19 | 1339       |
| Sweden  | 1999           | FemalePregAge20to24 | 10863      |
| Sweden  | 1999           | FemalePregAge25to29 | 24652      |
| Sweden  | 1999           | FemalePregAge30to34 | 21486      |
| Sweden  | 1999           | FemalePregAge35to39 | 8864       |
| Sweden  | 1999           | FemalePregAge40to44 | 1573       |
| Sweden  | 1999           | FemalePregAge45to49 | 64         |
| Sweden  | 1999           | MaleAge0to4         | 248265     |
| Sweden  | 1999           | MaleAge10to14       | 287575     |
| Sweden  | 1999           | MaleAge15to19       | 256587     |
| Sweden  | 1999           | MaleAge20to24       | 269442     |
| Sweden  | 1999           | MaleAge25to29       | 307662     |
| Sweden  | 1999           | MaleAge30to34       | 325239     |
| Sweden  | 1999           | MaleAge35to39       | 314984     |
| Sweden  | 1999           | MaleAge40to44       | 296126     |
| Sweden  | 1999           | MaleAge45to49       | 303197     |
| Sweden  | 1999           | MaleAge50to54       | 327590     |
| Sweden  | 1999           | MaleAge55to59       | 278312     |
| Sweden  | 1999           | MaleAge5to9         | 308234     |
| Sweden  | 1999           | MaleAge60to64       | 207645     |
| Sweden  | 1999           | MaleAge65to69       | 179967     |
| Sweden  | 1999           | MaleAge70to74       | 168282     |
| Sweden  | 1999           | MaleAge75to79       | 146536     |
| Sweden  | 1999           | MaleAge80to84       | 91418      |
| Sweden  | 1999           | MaleAge85to89       | 46535      |

Dietary calcium and zinc deficiency risks are decreasing but remain prevalent

| Country     | Reference year | Age/gender group    | Population |
|-------------|----------------|---------------------|------------|
| Sweden      | 1999           | MaleAge90to94       | 14743      |
| Sweden      | 1999           | MaleAge95to99       | 2509       |
| Sweden      | 1999           | MaleAgeAbov e100    | 170        |
| Switzerland | 1992           | FemaleAge0to4       | 194208     |
| Switzerland | 1992           | FemaleAge10to14     | 184933     |
| Switzerland | 1992           | FemaleAge15to19     | 199484     |
| Switzerland | 1992           | FemaleAge20to24     | 226547     |
| Switzerland | 1992           | FemaleAge25to29     | 224031     |
| Switzerland | 1992           | FemaleAge30to34     | 226751     |
| Switzerland | 1992           | FemaleAge35to39     | 237582     |
| Switzerland | 1992           | FemaleAge40to44     | 249809     |
| Switzerland | 1992           | FemaleAge45to49     | 239315     |
| Switzerland | 1992           | FemaleAge50to54     | 205386     |
| Switzerland | 1992           | FemaleAge55to59     | 186156     |
| Switzerland | 1992           | FemaleAge5to9       | 192355     |
| Switzerland | 1992           | FemaleAge60to64     | 175710     |
| Switzerland | 1992           | FemaleAge65to69     | 167401     |
| Switzerland | 1992           | FemaleAge70to74     | 135458     |
| Switzerland | 1992           | FemaleAge75to79     | 119272     |
| Switzerland | 1992           | FemaleAge80to84     | 98522      |
| Switzerland | 1992           | FemaleAge85to89     | 55463      |
| Switzerland | 1992           | FemaleAge90to94     | 20647      |
| Switzerland | 1992           | FemaleAge95to99     | 3726       |
| Switzerland | 1992           | FemaleAgeAbov e100  | 281        |
| Switzerland | 1992           | FemaleLactAge15to19 | 1321       |
| Switzerland | 1992           | FemaleLactAge20to24 | 12925      |
| Switzerland | 1992           | FemaleLactAge25to29 | 32949      |
| Switzerland | 1992           | FemaleLactAge30to34 | 25885      |
| Switzerland | 1992           | FemaleLactAge35to39 | 8014       |
| Switzerland | 1992           | FemaleLactAge40to44 | 1128       |
| Switzerland | 1992           | FemaleLactAge45to49 | 32         |
| Switzerland | 1992           | FemalePregAge15to19 | 991        |
| Switzerland | 1992           | FemalePregAge20to24 | 9694       |
| Switzerland | 1992           | FemalePregAge25to29 | 24712      |
| Switzerland | 1992           | FemalePregAge30to34 | 19413      |
| Switzerland | 1992           | FemalePregAge35to39 | 6011       |
| Switzerland | 1992           | FemalePregAge40to44 | 846        |
| Switzerland | 1992           | FemalePregAge45to49 | 24         |
| Switzerland | 1992           | MaleAge0to4         | 203002     |
| Switzerland | 1992           | MaleAge10to14       | 194738     |
| Switzerland | 1992           | MaleAge15to19       | 210475     |
| Switzerland | 1992           | MaleAge20to24       | 252541     |
| Switzerland | 1992           | MaleAge25to29       | 284810     |
| Switzerland | 1992           | MaleAge30to34       | 280791     |
| Switzerland | 1992           | MaleAge35to39       | 258586     |
| Switzerland | 1992           | MaleAge40to44       | 258053     |
| Switzerland | 1992           | MaleAge45to49       | 244735     |
| Switzerland | 1992           | MaleAge50to54       | 205116     |
| Switzerland | 1992           | MaleAge55to59       | 178280     |
| Switzerland | 1992           | MaleAge5to9         | 202311     |
| Switzerland | 1992           | MaleAge60to64       | 154848     |
| Switzerland | 1992           | MaleAge65to69       | 134267     |
| Switzerland | 1992           | MaleAge70to74       | 101908     |
| Switzerland | 1992           | MaleAge75to79       | 77475      |
| Switzerland | 1992           | MaleAge80to84       | 52969      |
| Switzerland | 1992           | MaleAge85to89       | 24108      |
| Switzerland | 1992           | MaleAge90to94       | 7119       |
| Switzerland | 1992           | MaleAge95to99       | 998        |
| Switzerland | 1992           | MaleAgeAbov e100    | 74         |
| Switzerland | 1993           | FemaleAge0to4       | 199696     |
| Switzerland | 1993           | FemaleAge10to14     | 188374     |
| Switzerland | 1993           | FemaleAge15to19     | 195617     |
| Switzerland | 1993           | FemaleAge20to24     | 220675     |
| Switzerland | 1993           | FemaleAge25to29     | 227492     |
| Switzerland | 1993           | FemaleAge30to34     | 236476     |
| Switzerland | 1993           | FemaleAge35to39     | 242546     |
| Switzerland | 1993           | FemaleAge40to44     | 248614     |
| Switzerland | 1993           | FemaleAge45to49     | 244485     |
| Switzerland | 1993           | FemaleAge50to54     | 211503     |
| Switzerland | 1993           | FemaleAge55to59     | 186110     |
| Switzerland | 1993           | FemaleAge5to9       | 195193     |
| Switzerland | 1993           | FemaleAge60to64     | 176741     |
| Switzerland | 1993           | FemaleAge65to69     | 166687     |
| Switzerland | 1993           | FemaleAge70to74     | 142707     |
| Switzerland | 1993           | FemaleAge75to79     | 114794     |
| Switzerland | 1993           | FemaleAge80to84     | 100507     |
| Switzerland | 1993           | FemaleAge85to89     | 57362      |
| Switzerland | 1993           | FemaleAge90to94     | 21655      |
| Switzerland | 1993           | FemaleAge95to99     | 4194       |
| Switzerland | 1993           | FemaleAgeAbov e100  | 304        |
| Switzerland | 1993           | FemaleLactAge15to19 | 1321       |
| Switzerland | 1993           | FemaleLactAge20to24 | 12925      |
| Switzerland | 1993           | FemaleLactAge25to29 | 32949      |
| Switzerland | 1993           | FemaleLactAge30to34 | 25885      |
| Switzerland | 1993           | FemaleLactAge35to39 | 8014       |
| Switzerland | 1993           | FemaleLactAge40to44 | 1128       |
| Switzerland | 1993           | FemaleLactAge45to49 | 32         |
| Switzerland | 1993           | FemalePregAge15to19 | 991        |

Dietary calcium and zinc deficiency risks are decreasing but remain prevalent

| Country     | Reference year | Age/gender group    | Population |
|-------------|----------------|---------------------|------------|
| Switzerland | 1993           | FemalePregAge20to24 | 9694       |
| Switzerland | 1993           | FemalePregAge25to29 | 24712      |
| Switzerland | 1993           | FemalePregAge30to34 | 19413      |
| Switzerland | 1993           | FemalePregAge35to39 | 6011       |
| Switzerland | 1993           | FemalePregAge40to44 | 846        |
| Switzerland | 1993           | FemalePregAge45to49 | 24         |
| Switzerland | 1993           | MaleAge0to4         | 209560     |
| Switzerland | 1993           | MaleAge10to14       | 198971     |
| Switzerland | 1993           | MaleAge15to19       | 206073     |
| Switzerland | 1993           | MaleAge20to24       | 245778     |
| Switzerland | 1993           | MaleAge25to29       | 286454     |
| Switzerland | 1993           | MaleAge30to34       | 290234     |
| Switzerland | 1993           | MaleAge35to39       | 265168     |
| Switzerland | 1993           | MaleAge40to44       | 255855     |
| Switzerland | 1993           | MaleAge45to49       | 250178     |
| Switzerland | 1993           | MaleAge50to54       | 211860     |
| Switzerland | 1993           | MaleAge55to59       | 178760     |
| Switzerland | 1993           | MaleAge5to9         | 205221     |
| Switzerland | 1993           | MaleAge60to64       | 157312     |
| Switzerland | 1993           | MaleAge65to69       | 133626     |
| Switzerland | 1993           | MaleAge70to74       | 106590     |
| Switzerland | 1993           | MaleAge75to79       | 75144      |
| Switzerland | 1993           | MaleAge80to84       | 54221      |
| Switzerland | 1993           | MaleAge85to89       | 24889      |
| Switzerland | 1993           | MaleAge90to94       | 7514       |
| Switzerland | 1993           | MaleAge95to99       | 1137       |
| Switzerland | 1993           | MaleAgeAbove100     | 78         |
| Switzerland | 1994           | FemaleAge0to4       | 204470     |
| Switzerland | 1994           | FemaleAge10to14     | 192011     |
| Switzerland | 1994           | FemaleAge15to19     | 192696     |
| Switzerland | 1994           | FemaleAge20to24     | 213461     |
| Switzerland | 1994           | FemaleAge25to29     | 228779     |
| Switzerland | 1994           | FemaleAge30to34     | 245994     |
| Switzerland | 1994           | FemaleAge35to39     | 248707     |
| Switzerland | 1994           | FemaleAge40to44     | 248033     |
| Switzerland | 1994           | FemaleAge45to49     | 248329     |
| Switzerland | 1994           | FemaleAge50to54     | 217784     |
| Switzerland | 1994           | FemaleAge55to59     | 186859     |
| Switzerland | 1994           | FemaleAge5to9       | 197722     |
| Switzerland | 1994           | FemaleAge60to64     | 177441     |
| Switzerland | 1994           | FemaleAge65to69     | 165718     |
| Switzerland | 1994           | FemaleAge70to74     | 149123     |
| Switzerland | 1994           | FemaleAge75to79     | 112282     |
| Switzerland | 1994           | FemaleAge80to84     | 101784     |
| Switzerland | 1994           | FemaleAge85to89     | 59062      |
| Switzerland | 1994           | FemaleAge90to94     | 22118      |
| Switzerland | 1994           | FemaleAge95to99     | 4469       |
| Switzerland | 1994           | FemaleAgeAbove100   | 329        |
| Switzerland | 1994           | FemaleLactAge15to19 | 1321       |
| Switzerland | 1994           | FemaleLactAge20to24 | 12925      |
| Switzerland | 1994           | FemaleLactAge25to29 | 32949      |
| Switzerland | 1994           | FemaleLactAge30to34 | 25885      |
| Switzerland | 1994           | FemaleLactAge35to39 | 8014       |
| Switzerland | 1994           | FemaleLactAge40to44 | 1128       |
| Switzerland | 1994           | FemaleLactAge45to49 | 32         |
| Switzerland | 1994           | FemalePregAge15to19 | 991        |
| Switzerland | 1994           | FemalePregAge20to24 | 9694       |
| Switzerland | 1994           | FemalePregAge25to29 | 24712      |
| Switzerland | 1994           | FemalePregAge30to34 | 19413      |
| Switzerland | 1994           | FemalePregAge35to39 | 6011       |
| Switzerland | 1994           | FemalePregAge40to44 | 846        |
| Switzerland | 1994           | FemalePregAge45to49 | 24         |
| Switzerland | 1994           | MaleAge0to4         | 215298     |
| Switzerland | 1994           | MaleAge10to14       | 203245     |
| Switzerland | 1994           | MaleAge15to19       | 203615     |
| Switzerland | 1994           | MaleAge20to24       | 237640     |
| Switzerland | 1994           | MaleAge25to29       | 285356     |
| Switzerland | 1994           | MaleAge30to34       | 299123     |
| Switzerland | 1994           | MaleAge35to39       | 272979     |
| Switzerland | 1994           | MaleAge40to44       | 254665     |
| Switzerland | 1994           | MaleAge45to49       | 254079     |
| Switzerland | 1994           | MaleAge50to54       | 218726     |
| Switzerland | 1994           | MaleAge55to59       | 180191     |
| Switzerland | 1994           | MaleAge5to9         | 207694     |
| Switzerland | 1994           | MaleAge60to64       | 159444     |
| Switzerland | 1994           | MaleAge65to69       | 133120     |
| Switzerland | 1994           | MaleAge70to74       | 110585     |
| Switzerland | 1994           | MaleAge75to79       | 74133      |
| Switzerland | 1994           | MaleAge80to84       | 54688      |
| Switzerland | 1994           | MaleAge85to89       | 25309      |
| Switzerland | 1994           | MaleAge90to94       | 7557       |
| Switzerland | 1994           | MaleAge95to99       | 1216       |
| Switzerland | 1994           | MaleAgeAbove100     | 81         |
| Switzerland | 1995           | FemaleAge0to4       | 206641     |
| Switzerland | 1995           | FemaleAge10to14     | 195095     |
| Switzerland | 1995           | FemaleAge15to19     | 190839     |
| Switzerland | 1995           | FemaleAge20to24     | 205863     |
| Switzerland | 1995           | FemaleAge25to29     | 227391     |

Dietary calcium and zinc deficiency risks are decreasing but remain prevalent

| Country     | Reference year | Age/gender group    | Population |
|-------------|----------------|---------------------|------------|
| Switzerland | 1995           | FemaleAge30to34     | 254115     |
| Switzerland | 1995           | FemaleAge35to39     | 255973     |
| Switzerland | 1995           | FemaleAge40to44     | 248874     |
| Switzerland | 1995           | FemaleAge45to49     | 250472     |
| Switzerland | 1995           | FemaleAge50to54     | 223563     |
| Switzerland | 1995           | FemaleAge55to59     | 188877     |
| Switzerland | 1995           | FemaleAge5to9       | 200505     |
| Switzerland | 1995           | FemaleAge60to64     | 177479     |
| Switzerland | 1995           | FemaleAge65to69     | 165153     |
| Switzerland | 1995           | FemaleAge70to74     | 153241     |
| Switzerland | 1995           | FemaleAge75to79     | 112835     |
| Switzerland | 1995           | FemaleAge80to84     | 101811     |
| Switzerland | 1995           | FemaleAge85to89     | 60732      |
| Switzerland | 1995           | FemaleAge90to94     | 22271      |
| Switzerland | 1995           | FemaleAge95to99     | 4221       |
| Switzerland | 1995           | FemaleAgeAbov e100  | 354        |
| Switzerland | 1995           | FemaleLactAge15to19 | 1321       |
| Switzerland | 1995           | FemaleLactAge20to24 | 12925      |
| Switzerland | 1995           | FemaleLactAge25to29 | 32949      |
| Switzerland | 1995           | FemaleLactAge30to34 | 25885      |
| Switzerland | 1995           | FemaleLactAge35to39 | 8014       |
| Switzerland | 1995           | FemaleLactAge40to44 | 1128       |
| Switzerland | 1995           | FemaleLactAge45to49 | 32         |
| Switzerland | 1995           | FemalePregAge15to19 | 991        |
| Switzerland | 1995           | FemalePregAge20to24 | 9694       |
| Switzerland | 1995           | FemalePregAge25to29 | 24712      |
| Switzerland | 1995           | FemalePregAge30to34 | 19413      |
| Switzerland | 1995           | FemalePregAge35to39 | 6011       |
| Switzerland | 1995           | FemalePregAge40to44 | 846        |
| Switzerland | 1995           | FemalePregAge45to49 | 24         |
| Switzerland | 1995           | MaleAge0to4         | 217997     |
| Switzerland | 1995           | MaleAge10to14       | 206769     |
| Switzerland | 1995           | MaleAge15to19       | 202929     |
| Switzerland | 1995           | MaleAge20to24       | 229320     |
| Switzerland | 1995           | MaleAge25to29       | 281482     |
| Switzerland | 1995           | MaleAge30to34       | 306113     |
| Switzerland | 1995           | MaleAge35to39       | 281511     |
| Switzerland | 1995           | MaleAge40to44       | 255666     |
| Switzerland | 1995           | MaleAge45to49       | 256031     |
| Switzerland | 1995           | MaleAge50to54       | 225057     |
| Switzerland | 1995           | MaleAge55to59       | 183096     |
| Switzerland | 1995           | MaleAge5to9         | 210479     |
| Switzerland | 1995           | MaleAge60to64       | 160835     |
| Switzerland | 1995           | MaleAge65to69       | 133333     |
| Switzerland | 1995           | MaleAge70to74       | 113051     |
| Switzerland | 1995           | MaleAge75to79       | 74963      |
| Switzerland | 1995           | MaleAge80to84       | 54254      |
| Switzerland | 1995           | MaleAge85to89       | 25495      |
| Switzerland | 1995           | MaleAge90to94       | 7264       |
| Switzerland | 1995           | MaleAge95to99       | 1062       |
| Switzerland | 1995           | MaleAgeAbov e100    | 85         |
| Switzerland | 1996           | FemaleAge0to4       | 207582     |
| Switzerland | 1996           | FemaleAge10to14     | 197740     |
| Switzerland | 1996           | FemaleAge15to19     | 191381     |
| Switzerland | 1996           | FemaleAge20to24     | 203986     |
| Switzerland | 1996           | FemaleAge25to29     | 229968     |
| Switzerland | 1996           | FemaleAge30to34     | 251566     |
| Switzerland | 1996           | FemaleAge35to39     | 258695     |
| Switzerland | 1996           | FemaleAge40to44     | 250082     |
| Switzerland | 1996           | FemaleAge45to49     | 251182     |
| Switzerland | 1996           | FemaleAge50to54     | 229135     |
| Switzerland | 1996           | FemaleAge55to59     | 192723     |
| Switzerland | 1996           | FemaleAge5to9       | 202808     |
| Switzerland | 1996           | FemaleAge60to64     | 177765     |
| Switzerland | 1996           | FemaleAge65to69     | 165577     |
| Switzerland | 1996           | FemaleAge70to74     | 155158     |
| Switzerland | 1996           | FemaleAge75to79     | 115388     |
| Switzerland | 1996           | FemaleAge80to84     | 99146      |
| Switzerland | 1996           | FemaleAge85to89     | 62792      |
| Switzerland | 1996           | FemaleAge90to94     | 24556      |
| Switzerland | 1996           | FemaleAge95to99     | 4639       |
| Switzerland | 1996           | FemaleAgeAbov e100  | 380        |
| Switzerland | 1996           | FemaleLactAge15to19 | 1121       |
| Switzerland | 1996           | FemaleLactAge20to24 | 10279      |
| Switzerland | 1996           | FemaleLactAge25to29 | 27868      |
| Switzerland | 1996           | FemaleLactAge30to34 | 28844      |
| Switzerland | 1996           | FemaleLactAge35to39 | 10226      |
| Switzerland | 1996           | FemaleLactAge40to44 | 1417       |
| Switzerland | 1996           | FemaleLactAge45to49 | 50         |
| Switzerland | 1996           | FemalePregAge15to19 | 841        |
| Switzerland | 1996           | FemalePregAge20to24 | 7709       |
| Switzerland | 1996           | FemalePregAge25to29 | 20901      |
| Switzerland | 1996           | FemalePregAge30to34 | 21633      |
| Switzerland | 1996           | FemalePregAge35to39 | 7669       |
| Switzerland | 1996           | FemalePregAge40to44 | 1062       |
| Switzerland | 1996           | FemalePregAge45to49 | 38         |
| Switzerland | 1996           | MaleAge0to4         | 219788     |
| Switzerland | 1996           | MaleAge10to14       | 209461     |



Dietary calcium and zinc deficiency risks are decreasing but remain prevalent

| Country     | Reference year | Age/gender group    | Population |
|-------------|----------------|---------------------|------------|
| Switzerland | 1996           | MaleAge15to19       | 202926     |
| Switzerland | 1996           | MaleAge20to24       | 223007     |
| Switzerland | 1996           | MaleAge25to29       | 274380     |
| Switzerland | 1996           | MaleAge30to34       | 306468     |
| Switzerland | 1996           | MaleAge35to39       | 287507     |
| Switzerland | 1996           | MaleAge40to44       | 257638     |
| Switzerland | 1996           | MaleAge45to49       | 256066     |
| Switzerland | 1996           | MaleAge50to54       | 230904     |
| Switzerland | 1996           | MaleAge55to59       | 187478     |
| Switzerland | 1996           | MaleAge5to9         | 212863     |
| Switzerland | 1996           | MaleAge60to64       | 162130     |
| Switzerland | 1996           | MaleAge65to69       | 135120     |
| Switzerland | 1996           | MaleAge70to74       | 114251     |
| Switzerland | 1996           | MaleAge75to79       | 77309      |
| Switzerland | 1996           | MaleAge80to84       | 53704      |
| Switzerland | 1996           | MaleAge85to89       | 27123      |
| Switzerland | 1996           | MaleAge90to94       | 8332       |
| Switzerland | 1996           | MaleAge95to99       | 1183       |
| Switzerland | 1996           | MaleAgeAbov e100    | 88         |
| Switzerland | 1997           | FemaleAge0to4       | 206361     |
| Switzerland | 1997           | FemaleAge10to14     | 199684     |
| Switzerland | 1997           | FemaleAge15to19     | 192744     |
| Switzerland | 1997           | FemaleAge20to24     | 198104     |
| Switzerland | 1997           | FemaleAge25to29     | 221674     |
| Switzerland | 1997           | FemaleAge30to34     | 252383     |
| Switzerland | 1997           | FemaleAge35to39     | 265843     |
| Switzerland | 1997           | FemaleAge40to44     | 252653     |
| Switzerland | 1997           | FemaleAge45to49     | 250153     |
| Switzerland | 1997           | FemaleAge50to54     | 234259     |
| Switzerland | 1997           | FemaleAge55to59     | 197672     |
| Switzerland | 1997           | FemaleAge5to9       | 204684     |
| Switzerland | 1997           | FemaleAge60to64     | 177389     |
| Switzerland | 1997           | FemaleAge65to69     | 166393     |
| Switzerland | 1997           | FemaleAge70to74     | 155367     |
| Switzerland | 1997           | FemaleAge75to79     | 120581     |
| Switzerland | 1997           | FemaleAge80to84     | 95185      |
| Switzerland | 1997           | FemaleAge85to89     | 64805      |
| Switzerland | 1997           | FemaleAge90to94     | 26176      |
| Switzerland | 1997           | FemaleAge95to99     | 5192       |
| Switzerland | 1997           | FemaleAgeAbov e100  | 406        |
| Switzerland | 1997           | FemaleLactAge15to19 | 1121       |
| Switzerland | 1997           | FemaleLactAge20to24 | 10279      |
| Switzerland | 1997           | FemaleLactAge25to29 | 27868      |
| Switzerland | 1997           | FemaleLactAge30to34 | 28844      |
| Switzerland | 1997           | FemaleLactAge35to39 | 10226      |
| Switzerland | 1997           | FemaleLactAge40to44 | 1417       |
| Switzerland | 1997           | FemaleLactAge45to49 | 50         |
| Switzerland | 1997           | FemalePregAge15to19 | 841        |
| Switzerland | 1997           | FemalePregAge20to24 | 7709       |
| Switzerland | 1997           | FemalePregAge25to29 | 20901      |
| Switzerland | 1997           | FemalePregAge30to34 | 21633      |
| Switzerland | 1997           | FemalePregAge35to39 | 7669       |
| Switzerland | 1997           | FemalePregAge40to44 | 1062       |
| Switzerland | 1997           | FemalePregAge45to49 | 38         |
| Switzerland | 1997           | MaleAge0to4         | 218510     |
| Switzerland | 1997           | MaleAge10to14       | 211428     |
| Switzerland | 1997           | MaleAge15to19       | 204441     |
| Switzerland | 1997           | MaleAge20to24       | 217384     |
| Switzerland | 1997           | MaleAge25to29       | 265699     |
| Switzerland | 1997           | MaleAge30to34       | 304856     |
| Switzerland | 1997           | MaleAge35to39       | 293748     |
| Switzerland | 1997           | MaleAge40to44       | 261071     |
| Switzerland | 1997           | MaleAge45to49       | 254025     |
| Switzerland | 1997           | MaleAge50to54       | 236414     |
| Switzerland | 1997           | MaleAge55to59       | 193056     |
| Switzerland | 1997           | MaleAge5to9         | 215184     |
| Switzerland | 1997           | MaleAge60to64       | 162666     |
| Switzerland | 1997           | MaleAge65to69       | 137543     |
| Switzerland | 1997           | MaleAge70to74       | 114464     |
| Switzerland | 1997           | MaleAge75to79       | 80870      |
| Switzerland | 1997           | MaleAge80to84       | 52416      |
| Switzerland | 1997           | MaleAge85to89       | 28538      |
| Switzerland | 1997           | MaleAge90to94       | 9039       |
| Switzerland | 1997           | MaleAge95to99       | 1366       |
| Switzerland | 1997           | MaleAgeAbov e100    | 92         |
| Switzerland | 1998           | FemaleAge0to4       | 203243     |
| Switzerland | 1998           | FemaleAge10to14     | 201220     |
| Switzerland | 1998           | FemaleAge15to19     | 194878     |
| Switzerland | 1998           | FemaleAge20to24     | 193031     |
| Switzerland | 1998           | FemaleAge25to29     | 212394     |
| Switzerland | 1998           | FemaleAge30to34     | 251594     |
| Switzerland | 1998           | FemaleAge35to39     | 272949     |
| Switzerland | 1998           | FemaleAge40to44     | 256205     |
| Switzerland | 1998           | FemaleAge45to49     | 248374     |
| Switzerland | 1998           | FemaleAge50to54     | 238703     |
| Switzerland | 1998           | FemaleAge55to59     | 203402     |
| Switzerland | 1998           | FemaleAge5to9       | 206138     |
| Switzerland | 1998           | FemaleAge60to64     | 177009     |

Dietary calcium and zinc deficiency risks are decreasing but remain prevalent

| Country     | Reference year | Age/gender group    | Population |
|-------------|----------------|---------------------|------------|
| Switzerland | 1998           | FemaleAge65to69     | 167360     |
| Switzerland | 1998           | FemaleAge70to74     | 154701     |
| Switzerland | 1998           | FemaleAge75to79     | 126936     |
| Switzerland | 1998           | FemaleAge80to84     | 91584      |
| Switzerland | 1998           | FemaleAge85to89     | 66520      |
| Switzerland | 1998           | FemaleAge90to94     | 27025      |
| Switzerland | 1998           | FemaleAge95to99     | 5710       |
| Switzerland | 1998           | FemaleAgeAbov e100  | 434        |
| Switzerland | 1998           | FemaleLactAge15to19 | 1121       |
| Switzerland | 1998           | FemaleLactAge20to24 | 10279      |
| Switzerland | 1998           | FemaleLactAge25to29 | 27868      |
| Switzerland | 1998           | FemaleLactAge30to34 | 28844      |
| Switzerland | 1998           | FemaleLactAge35to39 | 10226      |
| Switzerland | 1998           | FemaleLactAge40to44 | 1417       |
| Switzerland | 1998           | FemaleLactAge45to49 | 50         |
| Switzerland | 1998           | FemalePregAge15to19 | 841        |
| Switzerland | 1998           | FemalePregAge20to24 | 7709       |
| Switzerland | 1998           | FemalePregAge25to29 | 20901      |
| Switzerland | 1998           | FemalePregAge30to34 | 21633      |
| Switzerland | 1998           | FemalePregAge35to39 | 7669       |
| Switzerland | 1998           | FemalePregAge40to44 | 1062       |
| Switzerland | 1998           | FemalePregAge45to49 | 38         |
| Switzerland | 1998           | MaleAge0to4         | 214725     |
| Switzerland | 1998           | MaleAge10to14       | 212793     |
| Switzerland | 1998           | MaleAge15to19       | 207265     |
| Switzerland | 1998           | MaleAge20to24       | 212653     |
| Switzerland | 1998           | MaleAge25to29       | 256128     |
| Switzerland | 1998           | MaleAge30to34       | 301692     |
| Switzerland | 1998           | MaleAge35to39       | 299754     |
| Switzerland | 1998           | MaleAge40to44       | 265715     |
| Switzerland | 1998           | MaleAge45to49       | 251178     |
| Switzerland | 1998           | MaleAge50to54       | 241234     |
| Switzerland | 1998           | MaleAge55to59       | 199476     |
| Switzerland | 1998           | MaleAge5to9         | 217451     |
| Switzerland | 1998           | MaleAge60to64       | 163209     |
| Switzerland | 1998           | MaleAge65to69       | 140128     |
| Switzerland | 1998           | MaleAge70to74       | 114455     |
| Switzerland | 1998           | MaleAge75to79       | 84825      |
| Switzerland | 1998           | MaleAge80to84       | 51312      |
| Switzerland | 1998           | MaleAge85to89       | 29470      |
| Switzerland | 1998           | MaleAge90to94       | 9328       |
| Switzerland | 1998           | MaleAge95to99       | 1550       |
| Switzerland | 1998           | MaleAgeAbov e100    | 96         |
| Switzerland | 1999           | FemaleAge0to4       | 199295     |
| Switzerland | 1999           | FemaleAge10to14     | 202775     |
| Switzerland | 1999           | FemaleAge15to19     | 197131     |
| Switzerland | 1999           | FemaleAge20to24     | 189069     |
| Switzerland | 1999           | FemaleAge25to29     | 203481     |
| Switzerland | 1999           | FemaleAge30to34     | 249364     |
| Switzerland | 1999           | FemaleAge35to39     | 279185     |
| Switzerland | 1999           | FemaleAge40to44     | 260839     |
| Switzerland | 1999           | FemaleAge45to49     | 247321     |
| Switzerland | 1999           | FemaleAge50to54     | 242136     |
| Switzerland | 1999           | FemaleAge55to59     | 209337     |
| Switzerland | 1999           | FemaleAge5to9       | 207100     |
| Switzerland | 1999           | FemaleAge60to64     | 177620     |
| Switzerland | 1999           | FemaleAge65to69     | 168121     |
| Switzerland | 1999           | FemaleAge70to74     | 154311     |
| Switzerland | 1999           | FemaleAge75to79     | 132587     |
| Switzerland | 1999           | FemaleAge80to84     | 90275      |
| Switzerland | 1999           | FemaleAge85to89     | 67360      |
| Switzerland | 1999           | FemaleAge90to94     | 27278      |
| Switzerland | 1999           | FemaleAge95to99     | 5956       |
| Switzerland | 1999           | FemaleAgeAbov e100  | 464        |
| Switzerland | 1999           | FemaleLactAge15to19 | 1121       |
| Switzerland | 1999           | FemaleLactAge20to24 | 10279      |
| Switzerland | 1999           | FemaleLactAge25to29 | 27868      |
| Switzerland | 1999           | FemaleLactAge30to34 | 28844      |
| Switzerland | 1999           | FemaleLactAge35to39 | 10226      |
| Switzerland | 1999           | FemaleLactAge40to44 | 1417       |
| Switzerland | 1999           | FemaleLactAge45to49 | 50         |
| Switzerland | 1999           | FemalePregAge15to19 | 841        |
| Switzerland | 1999           | FemalePregAge20to24 | 7709       |
| Switzerland | 1999           | FemalePregAge25to29 | 20901      |
| Switzerland | 1999           | FemalePregAge30to34 | 21633      |
| Switzerland | 1999           | FemalePregAge35to39 | 7669       |
| Switzerland | 1999           | FemalePregAge40to44 | 1062       |
| Switzerland | 1999           | FemalePregAge45to49 | 38         |
| Switzerland | 1999           | MaleAge0to4         | 210056     |
| Switzerland | 1999           | MaleAge10to14       | 214146     |
| Switzerland | 1999           | MaleAge15to19       | 210607     |
| Switzerland | 1999           | MaleAge20to24       | 209134     |
| Switzerland | 1999           | MaleAge25to29       | 246794     |
| Switzerland | 1999           | MaleAge30to34       | 297393     |
| Switzerland | 1999           | MaleAge35to39       | 304740     |
| Switzerland | 1999           | MaleAge40to44       | 271152     |
| Switzerland | 1999           | MaleAge45to49       | 249385     |
| Switzerland | 1999           | MaleAge50to54       | 244830     |

Dietary calcium and zinc deficiency risks are decreasing but remain prevalent

| Country              | Reference year | Age/gender group    | Population |
|----------------------|----------------|---------------------|------------|
| Switzerland          | 1999           | MaleAge55to59       | 206126     |
| Switzerland          | 1999           | MaleAge5to9         | 219362     |
| Switzerland          | 1999           | MaleAge60to64       | 164817     |
| Switzerland          | 1999           | MaleAge65to69       | 142343     |
| Switzerland          | 1999           | MaleAge70to74       | 115089     |
| Switzerland          | 1999           | MaleAge75to79       | 88217      |
| Switzerland          | 1999           | MaleAge80to84       | 51323      |
| Switzerland          | 1999           | MaleAge85to89       | 29659      |
| Switzerland          | 1999           | MaleAge90to94       | 9255       |
| Switzerland          | 1999           | MaleAge95to99       | 1622       |
| Switzerland          | 1999           | MaleAgeAbove100     | 100        |
| Syrian Arab Republic | 1992           | FemaleAge0to4       | 1051407    |
| Syrian Arab Republic | 1992           | FemaleAge10to14     | 897355     |
| Syrian Arab Republic | 1992           | FemaleAge15to19     | 662922     |
| Syrian Arab Republic | 1992           | FemaleAge20to24     | 394477     |
| Syrian Arab Republic | 1992           | FemaleAge25to29     | 280093     |
| Syrian Arab Republic | 1992           | FemaleAge30to34     | 246242     |
| Syrian Arab Republic | 1992           | FemaleAge35to39     | 238503     |
| Syrian Arab Republic | 1992           | FemaleAge40to44     | 194065     |
| Syrian Arab Republic | 1992           | FemaleAge45to49     | 150883     |
| Syrian Arab Republic | 1992           | FemaleAge50to54     | 134259     |
| Syrian Arab Republic | 1992           | FemaleAge55to59     | 128839     |
| Syrian Arab Republic | 1992           | FemaleAge5to9       | 1004763    |
| Syrian Arab Republic | 1992           | FemaleAge60to64     | 111672     |
| Syrian Arab Republic | 1992           | FemaleAge65to69     | 82963      |
| Syrian Arab Republic | 1992           | FemaleAge70to74     | 58295      |
| Syrian Arab Republic | 1992           | FemaleAge75to79     | 36234      |
| Syrian Arab Republic | 1992           | FemaleAge80to84     | 18590      |
| Syrian Arab Republic | 1992           | FemaleAge85to89     | 7220       |
| Syrian Arab Republic | 1992           | FemaleAge90to94     | 1877       |
| Syrian Arab Republic | 1992           | FemaleAge95to99     | 268        |
| Syrian Arab Republic | 1992           | FemaleAgeAbove100   | 16         |
| Syrian Arab Republic | 1992           | FemaleLactAge15to19 | 52234      |
| Syrian Arab Republic | 1992           | FemaleLactAge20to24 | 119603     |
| Syrian Arab Republic | 1992           | FemaleLactAge25to29 | 117144     |
| Syrian Arab Republic | 1992           | FemaleLactAge30to34 | 85027      |
| Syrian Arab Republic | 1992           | FemaleLactAge35to39 | 52072      |
| Syrian Arab Republic | 1992           | FemaleLactAge40to44 | 19215      |
| Syrian Arab Republic | 1992           | FemaleLactAge45to49 | 3110       |
| Syrian Arab Republic | 1992           | FemalePregAge15to19 | 39175      |
| Syrian Arab Republic | 1992           | FemalePregAge20to24 | 89702      |
| Syrian Arab Republic | 1992           | FemalePregAge25to29 | 87858      |
| Syrian Arab Republic | 1992           | FemalePregAge30to34 | 63770      |
| Syrian Arab Republic | 1992           | FemalePregAge35to39 | 39054      |
| Syrian Arab Republic | 1992           | FemalePregAge40to44 | 14411      |
| Syrian Arab Republic | 1992           | FemalePregAge45to49 | 2333       |
| Syrian Arab Republic | 1992           | MaleAge0to4         | 1098308    |
| Syrian Arab Republic | 1992           | MaleAge10to14       | 934401     |
| Syrian Arab Republic | 1992           | MaleAge15to19       | 783167     |
| Syrian Arab Republic | 1992           | MaleAge20to24       | 623699     |
| Syrian Arab Republic | 1992           | MaleAge25to29       | 496797     |
| Syrian Arab Republic | 1992           | MaleAge30to34       | 400502     |
| Syrian Arab Republic | 1992           | MaleAge35to39       | 328110     |
| Syrian Arab Republic | 1992           | MaleAge40to44       | 238682     |
| Syrian Arab Republic | 1992           | MaleAge45to49       | 168820     |
| Syrian Arab Republic | 1992           | MaleAge50to54       | 138915     |
| Syrian Arab Republic | 1992           | MaleAge55to59       | 127415     |
| Syrian Arab Republic | 1992           | MaleAge5to9         | 1048435    |
| Syrian Arab Republic | 1992           | MaleAge60to64       | 112654     |
| Syrian Arab Republic | 1992           | MaleAge65to69       | 89217      |
| Syrian Arab Republic | 1992           | MaleAge70to74       | 57767      |
| Syrian Arab Republic | 1992           | MaleAge75to79       | 31732      |
| Syrian Arab Republic | 1992           | MaleAge80to84       | 15926      |
| Syrian Arab Republic | 1992           | MaleAge85to89       | 6023       |
| Syrian Arab Republic | 1992           | MaleAge90to94       | 1523       |
| Syrian Arab Republic | 1992           | MaleAge95to99       | 204        |
| Syrian Arab Republic | 1992           | MaleAgeAbove100     | 11         |
| Syrian Arab Republic | 1993           | FemaleAge0to4       | 1051380    |
| Syrian Arab Republic | 1993           | FemaleAge10to14     | 922426     |
| Syrian Arab Republic | 1993           | FemaleAge15to19     | 692010     |
| Syrian Arab Republic | 1993           | FemaleAge20to24     | 422104     |
| Syrian Arab Republic | 1993           | FemaleAge25to29     | 298018     |
| Syrian Arab Republic | 1993           | FemaleAge30to34     | 261855     |
| Syrian Arab Republic | 1993           | FemaleAge35to39     | 248279     |
| Syrian Arab Republic | 1993           | FemaleAge40to44     | 219141     |
| Syrian Arab Republic | 1993           | FemaleAge45to49     | 155785     |
| Syrian Arab Republic | 1993           | FemaleAge50to54     | 137561     |
| Syrian Arab Republic | 1993           | FemaleAge55to59     | 127383     |
| Syrian Arab Republic | 1993           | FemaleAge5to9       | 1018805    |
| Syrian Arab Republic | 1993           | FemaleAge60to64     | 116211     |
| Syrian Arab Republic | 1993           | FemaleAge65to69     | 86137      |
| Syrian Arab Republic | 1993           | FemaleAge70to74     | 60464      |
| Syrian Arab Republic | 1993           | FemaleAge75to79     | 37732      |
| Syrian Arab Republic | 1993           | FemaleAge80to84     | 19265      |
| Syrian Arab Republic | 1993           | FemaleAge85to89     | 7511       |
| Syrian Arab Republic | 1993           | FemaleAge90to94     | 1960       |
| Syrian Arab Republic | 1993           | FemaleAge95to99     | 310        |
| Syrian Arab Republic | 1993           | FemaleAgeAbove100   | 17         |

Dietary calcium and zinc deficiency risks are decreasing but remain prevalent

| Country              | Reference year | Age/gender group    | Population |
|----------------------|----------------|---------------------|------------|
| Syrian Arab Republic | 1993           | FemaleLactAge15to19 | 52234      |
| Syrian Arab Republic | 1993           | FemaleLactAge20to24 | 119603     |
| Syrian Arab Republic | 1993           | FemaleLactAge25to29 | 117144     |
| Syrian Arab Republic | 1993           | FemaleLactAge30to34 | 85027      |
| Syrian Arab Republic | 1993           | FemaleLactAge35to39 | 52072      |
| Syrian Arab Republic | 1993           | FemaleLactAge40to44 | 19215      |
| Syrian Arab Republic | 1993           | FemaleLactAge45to49 | 3110       |
| Syrian Arab Republic | 1993           | FemalePregAge15to19 | 39175      |
| Syrian Arab Republic | 1993           | FemalePregAge20to24 | 89702      |
| Syrian Arab Republic | 1993           | FemalePregAge25to29 | 87858      |
| Syrian Arab Republic | 1993           | FemalePregAge30to34 | 63770      |
| Syrian Arab Republic | 1993           | FemalePregAge35to39 | 39054      |
| Syrian Arab Republic | 1993           | FemalePregAge40to44 | 14411      |
| Syrian Arab Republic | 1993           | FemalePregAge45to49 | 2333       |
| Syrian Arab Republic | 1993           | MaleAge0to4         | 1098666    |
| Syrian Arab Republic | 1993           | MaleAge10to14       | 961105     |
| Syrian Arab Republic | 1993           | MaleAge15to19       | 813943     |
| Syrian Arab Republic | 1993           | MaleAge20to24       | 653084     |
| Syrian Arab Republic | 1993           | MaleAge25to29       | 516170     |
| Syrian Arab Republic | 1993           | MaleAge30to34       | 417141     |
| Syrian Arab Republic | 1993           | MaleAge35to39       | 339383     |
| Syrian Arab Republic | 1993           | MaleAge40to44       | 258859     |
| Syrian Arab Republic | 1993           | MaleAge45to49       | 176516     |
| Syrian Arab Republic | 1993           | MaleAge50to54       | 142471     |
| Syrian Arab Republic | 1993           | MaleAge55to59       | 127296     |
| Syrian Arab Republic | 1993           | MaleAge5to9         | 1063580    |
| Syrian Arab Republic | 1993           | MaleAge60to64       | 114893     |
| Syrian Arab Republic | 1993           | MaleAge65to69       | 91369      |
| Syrian Arab Republic | 1993           | MaleAge70to74       | 61773      |
| Syrian Arab Republic | 1993           | MaleAge75to79       | 32885      |
| Syrian Arab Republic | 1993           | MaleAge80to84       | 16493      |
| Syrian Arab Republic | 1993           | MaleAge85to89       | 6221       |
| Syrian Arab Republic | 1993           | MaleAge90to94       | 1583       |
| Syrian Arab Republic | 1993           | MaleAge95to99       | 237        |
| Syrian Arab Republic | 1993           | MaleAgeAbove100     | 11         |
| Syrian Arab Republic | 1994           | FemaleAge0to4       | 1054787    |
| Syrian Arab Republic | 1994           | FemaleAge10to14     | 945839     |
| Syrian Arab Republic | 1994           | FemaleAge15to19     | 720947     |
| Syrian Arab Republic | 1994           | FemaleAge20to24     | 450688     |
| Syrian Arab Republic | 1994           | FemaleAge25to29     | 317634     |
| Syrian Arab Republic | 1994           | FemaleAge30to34     | 277894     |
| Syrian Arab Republic | 1994           | FemaleAge35to39     | 258111     |
| Syrian Arab Republic | 1994           | FemaleAge40to44     | 242670     |
| Syrian Arab Republic | 1994           | FemaleAge45to49     | 164208     |
| Syrian Arab Republic | 1994           | FemaleAge50to54     | 141197     |
| Syrian Arab Republic | 1994           | FemaleAge55to59     | 126378     |
| Syrian Arab Republic | 1994           | FemaleAge5to9       | 1030291    |
| Syrian Arab Republic | 1994           | FemaleAge60to64     | 119839     |
| Syrian Arab Republic | 1994           | FemaleAge65to69     | 89733      |
| Syrian Arab Republic | 1994           | FemaleAge70to74     | 62939      |
| Syrian Arab Republic | 1994           | FemaleAge75to79     | 39371      |
| Syrian Arab Republic | 1994           | FemaleAge80to84     | 19947      |
| Syrian Arab Republic | 1994           | FemaleAge85to89     | 7638       |
| Syrian Arab Republic | 1994           | FemaleAge90to94     | 1937       |
| Syrian Arab Republic | 1994           | FemaleAge95to99     | 317        |
| Syrian Arab Republic | 1994           | FemaleAgeAbove100   | 18         |
| Syrian Arab Republic | 1994           | FemaleLactAge15to19 | 52234      |
| Syrian Arab Republic | 1994           | FemaleLactAge20to24 | 119603     |
| Syrian Arab Republic | 1994           | FemaleLactAge25to29 | 117144     |
| Syrian Arab Republic | 1994           | FemaleLactAge30to34 | 85027      |
| Syrian Arab Republic | 1994           | FemaleLactAge35to39 | 52072      |
| Syrian Arab Republic | 1994           | FemaleLactAge40to44 | 19215      |
| Syrian Arab Republic | 1994           | FemaleLactAge45to49 | 3110       |
| Syrian Arab Republic | 1994           | FemalePregAge15to19 | 39175      |
| Syrian Arab Republic | 1994           | FemalePregAge20to24 | 89702      |
| Syrian Arab Republic | 1994           | FemalePregAge25to29 | 87858      |
| Syrian Arab Republic | 1994           | FemalePregAge30to34 | 63770      |
| Syrian Arab Republic | 1994           | FemalePregAge35to39 | 39054      |
| Syrian Arab Republic | 1994           | FemalePregAge40to44 | 14411      |
| Syrian Arab Republic | 1994           | FemalePregAge45to49 | 2333       |
| Syrian Arab Republic | 1994           | MaleAge0to4         | 1102370    |
| Syrian Arab Republic | 1994           | MaleAge10to14       | 985897     |
| Syrian Arab Republic | 1994           | MaleAge15to19       | 844420     |
| Syrian Arab Republic | 1994           | MaleAge20to24       | 683296     |
| Syrian Arab Republic | 1994           | MaleAge25to29       | 537191     |
| Syrian Arab Republic | 1994           | MaleAge30to34       | 434176     |
| Syrian Arab Republic | 1994           | MaleAge35to39       | 350866     |
| Syrian Arab Republic | 1994           | MaleAge40to44       | 278108     |
| Syrian Arab Republic | 1994           | MaleAge45to49       | 186493     |
| Syrian Arab Republic | 1994           | MaleAge50to54       | 146781     |
| Syrian Arab Republic | 1994           | MaleAge55to59       | 127651     |
| Syrian Arab Republic | 1994           | MaleAge5to9         | 1075838    |
| Syrian Arab Republic | 1994           | MaleAge60to64       | 116760     |
| Syrian Arab Republic | 1994           | MaleAge65to69       | 93593      |
| Syrian Arab Republic | 1994           | MaleAge70to74       | 65555      |
| Syrian Arab Republic | 1994           | MaleAge75to79       | 34518      |
| Syrian Arab Republic | 1994           | MaleAge80to84       | 16996      |
| Syrian Arab Republic | 1994           | MaleAge85to89       | 6257       |

Dietary calcium and zinc deficiency risks are decreasing but remain prevalent

| Country              | Reference year | Age/gender group    | Population |
|----------------------|----------------|---------------------|------------|
| Syrian Arab Republic | 1994           | MaleAge90to94       | 1535       |
| Syrian Arab Republic | 1994           | MaleAge95to99       | 241        |
| Syrian Arab Republic | 1994           | MaleAgeAbove100     | 12         |
| Syrian Arab Republic | 1995           | FemaleAge0to4       | 1064551    |
| Syrian Arab Republic | 1995           | FemaleAge10to14     | 966766     |
| Syrian Arab Republic | 1995           | FemaleAge15to19     | 749206     |
| Syrian Arab Republic | 1995           | FemaleAge20to24     | 479543     |
| Syrian Arab Republic | 1995           | FemaleAge25to29     | 339330     |
| Syrian Arab Republic | 1995           | FemaleAge30to34     | 293888     |
| Syrian Arab Republic | 1995           | FemaleAge35to39     | 269508     |
| Syrian Arab Republic | 1995           | FemaleAge40to44     | 262120     |
| Syrian Arab Republic | 1995           | FemaleAge45to49     | 177336     |
| Syrian Arab Republic | 1995           | FemaleAge50to54     | 144828     |
| Syrian Arab Republic | 1995           | FemaleAge55to59     | 126450     |
| Syrian Arab Republic | 1995           | FemaleAge5to9       | 1039474    |
| Syrian Arab Republic | 1995           | FemaleAge60to64     | 122049     |
| Syrian Arab Republic | 1995           | FemaleAge65to69     | 93753      |
| Syrian Arab Republic | 1995           | FemaleAge70to74     | 65742      |
| Syrian Arab Republic | 1995           | FemaleAge75to79     | 41153      |
| Syrian Arab Republic | 1995           | FemaleAge80to84     | 20700      |
| Syrian Arab Republic | 1995           | FemaleAge85to89     | 7643       |
| Syrian Arab Republic | 1995           | FemaleAge90to94     | 1779       |
| Syrian Arab Republic | 1995           | FemaleAge95to99     | 243        |
| Syrian Arab Republic | 1995           | FemaleAgeAbove100   | 19         |
| Syrian Arab Republic | 1995           | FemaleLactAge15to19 | 52234      |
| Syrian Arab Republic | 1995           | FemaleLactAge20to24 | 119603     |
| Syrian Arab Republic | 1995           | FemaleLactAge25to29 | 117144     |
| Syrian Arab Republic | 1995           | FemaleLactAge30to34 | 85027      |
| Syrian Arab Republic | 1995           | FemaleLactAge35to39 | 52072      |
| Syrian Arab Republic | 1995           | FemaleLactAge40to44 | 19215      |
| Syrian Arab Republic | 1995           | FemaleLactAge45to49 | 3110       |
| Syrian Arab Republic | 1995           | FemalePregAge15to19 | 39175      |
| Syrian Arab Republic | 1995           | FemalePregAge20to24 | 89702      |
| Syrian Arab Republic | 1995           | FemalePregAge25to29 | 87858      |
| Syrian Arab Republic | 1995           | FemalePregAge30to34 | 63770      |
| Syrian Arab Republic | 1995           | FemalePregAge35to39 | 39054      |
| Syrian Arab Republic | 1995           | FemalePregAge40to44 | 14411      |
| Syrian Arab Republic | 1995           | FemalePregAge45to49 | 2333       |
| Syrian Arab Republic | 1995           | MaleAge0to4         | 1112396    |
| Syrian Arab Republic | 1995           | MaleAge10to14       | 1007817    |
| Syrian Arab Republic | 1995           | MaleAge15to19       | 873990     |
| Syrian Arab Republic | 1995           | MaleAge20to24       | 713566     |
| Syrian Arab Republic | 1995           | MaleAge25to29       | 560197     |
| Syrian Arab Republic | 1995           | MaleAge30to34       | 451186     |
| Syrian Arab Republic | 1995           | MaleAge35to39       | 363492     |
| Syrian Arab Republic | 1995           | MaleAge40to44       | 294836     |
| Syrian Arab Republic | 1995           | MaleAge45to49       | 199226     |
| Syrian Arab Republic | 1995           | MaleAge50to54       | 151754     |
| Syrian Arab Republic | 1995           | MaleAge55to59       | 128760     |
| Syrian Arab Republic | 1995           | MaleAge5to9         | 1085399    |
| Syrian Arab Republic | 1995           | MaleAge60to64       | 118051     |
| Syrian Arab Republic | 1995           | MaleAge65to69       | 95990      |
| Syrian Arab Republic | 1995           | MaleAge70to74       | 68872      |
| Syrian Arab Republic | 1995           | MaleAge75to79       | 36752      |
| Syrian Arab Republic | 1995           | MaleAge80to84       | 17470      |
| Syrian Arab Republic | 1995           | MaleAge85to89       | 6158       |
| Syrian Arab Republic | 1995           | MaleAge90to94       | 1354       |
| Syrian Arab Republic | 1995           | MaleAge95to99       | 172        |
| Syrian Arab Republic | 1995           | MaleAgeAbove100     | 12         |
| Syrian Arab Republic | 1996           | FemaleAge0to4       | 1074062    |
| Syrian Arab Republic | 1996           | FemaleAge10to14     | 987154     |
| Syrian Arab Republic | 1996           | FemaleAge15to19     | 767593     |
| Syrian Arab Republic | 1996           | FemaleAge20to24     | 476910     |
| Syrian Arab Republic | 1996           | FemaleAge25to29     | 339582     |
| Syrian Arab Republic | 1996           | FemaleAge30to34     | 300593     |
| Syrian Arab Republic | 1996           | FemaleAge35to39     | 283103     |
| Syrian Arab Republic | 1996           | FemaleAge40to44     | 278959     |
| Syrian Arab Republic | 1996           | FemaleAge45to49     | 194835     |
| Syrian Arab Republic | 1996           | FemaleAge50to54     | 148907     |
| Syrian Arab Republic | 1996           | FemaleAge55to59     | 127683     |
| Syrian Arab Republic | 1996           | FemaleAge5to9       | 1049361    |
| Syrian Arab Republic | 1996           | FemaleAge60to64     | 122874     |
| Syrian Arab Republic | 1996           | FemaleAge65to69     | 97821      |
| Syrian Arab Republic | 1996           | FemaleAge70to74     | 68413      |
| Syrian Arab Republic | 1996           | FemaleAge75to79     | 42925      |
| Syrian Arab Republic | 1996           | FemaleAge80to84     | 21972      |
| Syrian Arab Republic | 1996           | FemaleAge85to89     | 8401       |
| Syrian Arab Republic | 1996           | FemaleAge90to94     | 2114       |
| Syrian Arab Republic | 1996           | FemaleAge95to99     | 275        |
| Syrian Arab Republic | 1996           | FemaleAgeAbove100   | 20         |
| Syrian Arab Republic | 1996           | FemaleLactAge15to19 | 57671      |
| Syrian Arab Republic | 1996           | FemaleLactAge20to24 | 137835     |
| Syrian Arab Republic | 1996           | FemaleLactAge25to29 | 130821     |
| Syrian Arab Republic | 1996           | FemaleLactAge30to34 | 90897      |
| Syrian Arab Republic | 1996           | FemaleLactAge35to39 | 51961      |
| Syrian Arab Republic | 1996           | FemaleLactAge40to44 | 18929      |
| Syrian Arab Republic | 1996           | FemaleLactAge45to49 | 3384       |
| Syrian Arab Republic | 1996           | FemalePregAge15to19 | 43254      |

Dietary calcium and zinc deficiency risks are decreasing but remain prevalent

| Country              | Reference year | Age/gender group    | Population |
|----------------------|----------------|---------------------|------------|
| Syrian Arab Republic | 1996           | FemalePregAge20to24 | 103376     |
| Syrian Arab Republic | 1996           | FemalePregAge25to29 | 98116      |
| Syrian Arab Republic | 1996           | FemalePregAge30to34 | 68173      |
| Syrian Arab Republic | 1996           | FemalePregAge35to39 | 38970      |
| Syrian Arab Republic | 1996           | FemalePregAge40to44 | 14197      |
| Syrian Arab Republic | 1996           | FemalePregAge45to49 | 2538       |
| Syrian Arab Republic | 1996           | MaleAge0to4         | 1122041    |
| Syrian Arab Republic | 1996           | MaleAge10to14       | 1028954    |
| Syrian Arab Republic | 1996           | MaleAge15to19       | 902981     |
| Syrian Arab Republic | 1996           | MaleAge20to24       | 744046     |
| Syrian Arab Republic | 1996           | MaleAge25to29       | 585572     |
| Syrian Arab Republic | 1996           | MaleAge30to34       | 469094     |
| Syrian Arab Republic | 1996           | MaleAge35to39       | 377785     |
| Syrian Arab Republic | 1996           | MaleAge40to44       | 309668     |
| Syrian Arab Republic | 1996           | MaleAge45to49       | 214896     |
| Syrian Arab Republic | 1996           | MaleAge50to54       | 157575     |
| Syrian Arab Republic | 1996           | MaleAge55to59       | 130450     |
| Syrian Arab Republic | 1996           | MaleAge5to9         | 1095493    |
| Syrian Arab Republic | 1996           | MaleAge60to64       | 118494     |
| Syrian Arab Republic | 1996           | MaleAge65to69       | 97938      |
| Syrian Arab Republic | 1996           | MaleAge70to74       | 71319      |
| Syrian Arab Republic | 1996           | MaleAge75to79       | 39376      |
| Syrian Arab Republic | 1996           | MaleAge80to84       | 18372      |
| Syrian Arab Republic | 1996           | MaleAge85to89       | 6754       |
| Syrian Arab Republic | 1996           | MaleAge90to94       | 1614       |
| Syrian Arab Republic | 1996           | MaleAge95to99       | 193        |
| Syrian Arab Republic | 1996           | MaleAgeAbove100     | 12         |
| Syrian Arab Republic | 1997           | FemaleAge0to4       | 1098052    |
| Syrian Arab Republic | 1997           | FemaleAge10to14     | 1004809    |
| Syrian Arab Republic | 1997           | FemaleAge15to19     | 794156     |
| Syrian Arab Republic | 1997           | FemaleAge20to24     | 505728     |
| Syrian Arab Republic | 1997           | FemaleAge25to29     | 365131     |
| Syrian Arab Republic | 1997           | FemaleAge30to34     | 317316     |
| Syrian Arab Republic | 1997           | FemaleAge35to39     | 297482     |
| Syrian Arab Republic | 1997           | FemaleAge40to44     | 291145     |
| Syrian Arab Republic | 1997           | FemaleAge45to49     | 217427     |
| Syrian Arab Republic | 1997           | FemaleAge50to54     | 152661     |
| Syrian Arab Republic | 1997           | FemaleAge55to59     | 130164     |
| Syrian Arab Republic | 1997           | FemaleAge5to9       | 1054928    |
| Syrian Arab Republic | 1997           | FemaleAge60to64     | 122371     |
| Syrian Arab Republic | 1997           | FemaleAge65to69     | 102368     |
| Syrian Arab Republic | 1997           | FemaleAge70to74     | 71208      |
| Syrian Arab Republic | 1997           | FemaleAge75to79     | 44730      |
| Syrian Arab Republic | 1997           | FemaleAge80to84     | 23183      |
| Syrian Arab Republic | 1997           | FemaleAge85to89     | 9007       |
| Syrian Arab Republic | 1997           | FemaleAge90to94     | 2374       |
| Syrian Arab Republic | 1997           | FemaleAge95to99     | 327        |
| Syrian Arab Republic | 1997           | FemaleAgeAbove100   | 21         |
| Syrian Arab Republic | 1997           | FemaleLactAge15to19 | 57671      |
| Syrian Arab Republic | 1997           | FemaleLactAge20to24 | 137835     |
| Syrian Arab Republic | 1997           | FemaleLactAge25to29 | 130821     |
| Syrian Arab Republic | 1997           | FemaleLactAge30to34 | 90897      |
| Syrian Arab Republic | 1997           | FemaleLactAge35to39 | 51961      |
| Syrian Arab Republic | 1997           | FemaleLactAge40to44 | 18929      |
| Syrian Arab Republic | 1997           | FemaleLactAge45to49 | 3384       |
| Syrian Arab Republic | 1997           | FemalePregAge15to19 | 43254      |
| Syrian Arab Republic | 1997           | FemalePregAge20to24 | 103376     |
| Syrian Arab Republic | 1997           | FemalePregAge25to29 | 98116      |
| Syrian Arab Republic | 1997           | FemalePregAge30to34 | 68173      |
| Syrian Arab Republic | 1997           | FemalePregAge35to39 | 38970      |
| Syrian Arab Republic | 1997           | FemalePregAge40to44 | 14197      |
| Syrian Arab Republic | 1997           | FemalePregAge45to49 | 2538       |
| Syrian Arab Republic | 1997           | MaleAge0to4         | 1146367    |
| Syrian Arab Republic | 1997           | MaleAge10to14       | 1046897    |
| Syrian Arab Republic | 1997           | MaleAge15to19       | 930308     |
| Syrian Arab Republic | 1997           | MaleAge20to24       | 773756     |
| Syrian Arab Republic | 1997           | MaleAge25to29       | 612132     |
| Syrian Arab Republic | 1997           | MaleAge30to34       | 486612     |
| Syrian Arab Republic | 1997           | MaleAge35to39       | 392769     |
| Syrian Arab Republic | 1997           | MaleAge40to44       | 321805     |
| Syrian Arab Republic | 1997           | MaleAge45to49       | 233193     |
| Syrian Arab Republic | 1997           | MaleAge50to54       | 163801     |
| Syrian Arab Republic | 1997           | MaleAge55to59       | 132988     |
| Syrian Arab Republic | 1997           | MaleAge5to9         | 1100764    |
| Syrian Arab Republic | 1997           | MaleAge60to64       | 118464     |
| Syrian Arab Republic | 1997           | MaleAge65to69       | 100003     |
| Syrian Arab Republic | 1997           | MaleAge70to74       | 73337      |
| Syrian Arab Republic | 1997           | MaleAge75to79       | 42287      |
| Syrian Arab Republic | 1997           | MaleAge80to84       | 19066      |
| Syrian Arab Republic | 1997           | MaleAge85to89       | 7214       |
| Syrian Arab Republic | 1997           | MaleAge90to94       | 1804       |
| Syrian Arab Republic | 1997           | MaleAge95to99       | 233        |
| Syrian Arab Republic | 1997           | MaleAgeAbove100     | 13         |
| Syrian Arab Republic | 1998           | FemaleAge0to4       | 1129615    |
| Syrian Arab Republic | 1998           | FemaleAge10to14     | 1019445    |
| Syrian Arab Republic | 1998           | FemaleAge15to19     | 818769     |
| Syrian Arab Republic | 1998           | FemaleAge20to24     | 533688     |
| Syrian Arab Republic | 1998           | FemaleAge25to29     | 391407     |

Dietary calcium and zinc deficiency risks are decreasing but remain prevalent

| Country              | Reference year | Age/gender group    | Population |
|----------------------|----------------|---------------------|------------|
| Syrian Arab Republic | 1998           | FemaleAge30to34     | 334154     |
| Syrian Arab Republic | 1998           | FemaleAge35to39     | 312373     |
| Syrian Arab Republic | 1998           | FemaleAge40to44     | 300508     |
| Syrian Arab Republic | 1998           | FemaleAge45to49     | 242034     |
| Syrian Arab Republic | 1998           | FemaleAge50to54     | 157457     |
| Syrian Arab Republic | 1998           | FemaleAge55to59     | 133502     |
| Syrian Arab Republic | 1998           | FemaleAge5to9       | 1056476    |
| Syrian Arab Republic | 1998           | FemaleAge60to64     | 121174     |
| Syrian Arab Republic | 1998           | FemaleAge65to69     | 106813     |
| Syrian Arab Republic | 1998           | FemaleAge70to74     | 74199      |
| Syrian Arab Republic | 1998           | FemaleAge75to79     | 46665      |
| Syrian Arab Republic | 1998           | FemaleAge80to84     | 24341      |
| Syrian Arab Republic | 1998           | FemaleAge85to89     | 9447       |
| Syrian Arab Republic | 1998           | FemaleAge90to94     | 2524       |
| Syrian Arab Republic | 1998           | FemaleAge95to99     | 381        |
| Syrian Arab Republic | 1998           | FemaleAgeAbove100   | 22         |
| Syrian Arab Republic | 1998           | FemaleLactAge15to19 | 57671      |
| Syrian Arab Republic | 1998           | FemaleLactAge20to24 | 137835     |
| Syrian Arab Republic | 1998           | FemaleLactAge25to29 | 130821     |
| Syrian Arab Republic | 1998           | FemaleLactAge30to34 | 90897      |
| Syrian Arab Republic | 1998           | FemaleLactAge35to39 | 51961      |
| Syrian Arab Republic | 1998           | FemaleLactAge40to44 | 18929      |
| Syrian Arab Republic | 1998           | FemaleLactAge45to49 | 3384       |
| Syrian Arab Republic | 1998           | FemalePregAge15to19 | 43254      |
| Syrian Arab Republic | 1998           | FemalePregAge20to24 | 103376     |
| Syrian Arab Republic | 1998           | FemalePregAge25to29 | 98116      |
| Syrian Arab Republic | 1998           | FemalePregAge30to34 | 68173      |
| Syrian Arab Republic | 1998           | FemalePregAge35to39 | 38970      |
| Syrian Arab Republic | 1998           | FemalePregAge40to44 | 14197      |
| Syrian Arab Republic | 1998           | FemalePregAge45to49 | 2538       |
| Syrian Arab Republic | 1998           | MaleAge0to4         | 1178788    |
| Syrian Arab Republic | 1998           | MaleAge10to14       | 1061931    |
| Syrian Arab Republic | 1998           | MaleAge15to19       | 955847     |
| Syrian Arab Republic | 1998           | MaleAge20to24       | 802719     |
| Syrian Arab Republic | 1998           | MaleAge25to29       | 639549     |
| Syrian Arab Republic | 1998           | MaleAge30to34       | 504374     |
| Syrian Arab Republic | 1998           | MaleAge35to39       | 408240     |
| Syrian Arab Republic | 1998           | MaleAge40to44       | 332289     |
| Syrian Arab Republic | 1998           | MaleAge45to49       | 252611     |
| Syrian Arab Republic | 1998           | MaleAge50to54       | 171106     |
| Syrian Arab Republic | 1998           | MaleAge55to59       | 136361     |
| Syrian Arab Republic | 1998           | MaleAge5to9         | 1102157    |
| Syrian Arab Republic | 1998           | MaleAge60to64       | 118338     |
| Syrian Arab Republic | 1998           | MaleAge65to69       | 102020     |
| Syrian Arab Republic | 1998           | MaleAge70to74       | 75164      |
| Syrian Arab Republic | 1998           | MaleAge75to79       | 45237      |
| Syrian Arab Republic | 1998           | MaleAge80to84       | 19744      |
| Syrian Arab Republic | 1998           | MaleAge85to89       | 7496       |
| Syrian Arab Republic | 1998           | MaleAge90to94       | 1890       |
| Syrian Arab Republic | 1998           | MaleAge95to99       | 271        |
| Syrian Arab Republic | 1998           | MaleAgeAbove100     | 13         |
| Syrian Arab Republic | 1999           | FemaleAge0to4       | 1156972    |
| Syrian Arab Republic | 1999           | FemaleAge10to14     | 1030191    |
| Syrian Arab Republic | 1999           | FemaleAge15to19     | 840705     |
| Syrian Arab Republic | 1999           | FemaleAge20to24     | 560471     |
| Syrian Arab Republic | 1999           | FemaleAge25to29     | 417602     |
| Syrian Arab Republic | 1999           | FemaleAge30to34     | 351828     |
| Syrian Arab Republic | 1999           | FemaleAge35to39     | 326997     |
| Syrian Arab Republic | 1999           | FemaleAge40to44     | 309463     |
| Syrian Arab Republic | 1999           | FemaleAge45to49     | 264649     |
| Syrian Arab Republic | 1999           | FemaleAge50to54     | 165483     |
| Syrian Arab Republic | 1999           | FemaleAge55to59     | 137008     |
| Syrian Arab Republic | 1999           | FemaleAge5to9       | 1056268    |
| Syrian Arab Republic | 1999           | FemaleAge60to64     | 120290     |
| Syrian Arab Republic | 1999           | FemaleAge65to69     | 110302     |
| Syrian Arab Republic | 1999           | FemaleAge70to74     | 77522      |
| Syrian Arab Republic | 1999           | FemaleAge75to79     | 48802      |
| Syrian Arab Republic | 1999           | FemaleAge80to84     | 25463      |
| Syrian Arab Republic | 1999           | FemaleAge85to89     | 9749       |
| Syrian Arab Republic | 1999           | FemaleAge90to94     | 2547       |
| Syrian Arab Republic | 1999           | FemaleAge95to99     | 402        |
| Syrian Arab Republic | 1999           | FemaleAgeAbove100   | 23         |
| Syrian Arab Republic | 1999           | FemaleLactAge15to19 | 57671      |
| Syrian Arab Republic | 1999           | FemaleLactAge20to24 | 137835     |
| Syrian Arab Republic | 1999           | FemaleLactAge25to29 | 130821     |
| Syrian Arab Republic | 1999           | FemaleLactAge30to34 | 90897      |
| Syrian Arab Republic | 1999           | FemaleLactAge35to39 | 51961      |
| Syrian Arab Republic | 1999           | FemaleLactAge40to44 | 18929      |
| Syrian Arab Republic | 1999           | FemaleLactAge45to49 | 3384       |
| Syrian Arab Republic | 1999           | FemalePregAge15to19 | 43254      |
| Syrian Arab Republic | 1999           | FemalePregAge20to24 | 103376     |
| Syrian Arab Republic | 1999           | FemalePregAge25to29 | 98116      |
| Syrian Arab Republic | 1999           | FemalePregAge30to34 | 68173      |
| Syrian Arab Republic | 1999           | FemalePregAge35to39 | 38970      |
| Syrian Arab Republic | 1999           | FemalePregAge40to44 | 14197      |
| Syrian Arab Republic | 1999           | FemalePregAge45to49 | 2538       |
| Syrian Arab Republic | 1999           | MaleAge0to4         | 1208031    |
| Syrian Arab Republic | 1999           | MaleAge10to14       | 1073900    |

Dietary calcium and zinc deficiency risks are decreasing but remain prevalent

| Country              | Reference year | Age/gender group    | Population |
|----------------------|----------------|---------------------|------------|
| Syrian Arab Republic | 1999           | MaleAge15to19       | 979499     |
| Syrian Arab Republic | 1999           | MaleAge20to24       | 831211     |
| Syrian Arab Republic | 1999           | MaleAge25to29       | 667447     |
| Syrian Arab Republic | 1999           | MaleAge30to34       | 523472     |
| Syrian Arab Republic | 1999           | MaleAge35to39       | 423857     |
| Syrian Arab Republic | 1999           | MaleAge40to44       | 342909     |
| Syrian Arab Republic | 1999           | MaleAge45to49       | 270924     |
| Syrian Arab Republic | 1999           | MaleAge50to54       | 180589     |
| Syrian Arab Republic | 1999           | MaleAge55to59       | 140490     |
| Syrian Arab Republic | 1999           | MaleAge5to9         | 1102774    |
| Syrian Arab Republic | 1999           | MaleAge60to64       | 118672     |
| Syrian Arab Republic | 1999           | MaleAge65to69       | 103729     |
| Syrian Arab Republic | 1999           | MaleAge70to74       | 77081      |
| Syrian Arab Republic | 1999           | MaleAge75to79       | 47935      |
| Syrian Arab Republic | 1999           | MaleAge80to84       | 20656      |
| Syrian Arab Republic | 1999           | MaleAge85to89       | 7585       |
| Syrian Arab Republic | 1999           | MaleAge90to94       | 1846       |
| Syrian Arab Republic | 1999           | MaleAge95to99       | 280        |
| Syrian Arab Republic | 1999           | MaleAgeAbove100     | 14         |
| Tajikistan           | 1992           | FemaleAge0to4       | 482410     |
| Tajikistan           | 1992           | FemaleAge10to14     | 318429     |
| Tajikistan           | 1992           | FemaleAge15to19     | 242818     |
| Tajikistan           | 1992           | FemaleAge20to24     | 115840     |
| Tajikistan           | 1992           | FemaleAge25to29     | 115610     |
| Tajikistan           | 1992           | FemaleAge30to34     | 124548     |
| Tajikistan           | 1992           | FemaleAge35to39     | 112047     |
| Tajikistan           | 1992           | FemaleAge40to44     | 91120      |
| Tajikistan           | 1992           | FemaleAge45to49     | 59637      |
| Tajikistan           | 1992           | FemaleAge50to54     | 71484      |
| Tajikistan           | 1992           | FemaleAge55to59     | 75590      |
| Tajikistan           | 1992           | FemaleAge5to9       | 405218     |
| Tajikistan           | 1992           | FemaleAge60to64     | 64056      |
| Tajikistan           | 1992           | FemaleAge65to69     | 49925      |
| Tajikistan           | 1992           | FemaleAge70to74     | 31007      |
| Tajikistan           | 1992           | FemaleAge75to79     | 20640      |
| Tajikistan           | 1992           | FemaleAge80to84     | 13578      |
| Tajikistan           | 1992           | FemaleAge85to89     | 8222       |
| Tajikistan           | 1992           | FemaleAge90to94     | 3652       |
| Tajikistan           | 1992           | FemaleAge95to99     | 757        |
| Tajikistan           | 1992           | FemaleAgeAbove100   | 180        |
| Tajikistan           | 1992           | FemaleLactAge15to19 | 15776      |
| Tajikistan           | 1992           | FemaleLactAge20to24 | 72557      |
| Tajikistan           | 1992           | FemaleLactAge25to29 | 63749      |
| Tajikistan           | 1992           | FemaleLactAge30to34 | 38689      |
| Tajikistan           | 1992           | FemaleLactAge35to39 | 15883      |
| Tajikistan           | 1992           | FemaleLactAge40to44 | 2426       |
| Tajikistan           | 1992           | FemaleLactAge45to49 | 59         |
| Tajikistan           | 1992           | FemalePregAge15to19 | 11832      |
| Tajikistan           | 1992           | FemalePregAge20to24 | 54418      |
| Tajikistan           | 1992           | FemalePregAge25to29 | 47812      |
| Tajikistan           | 1992           | FemalePregAge30to34 | 29017      |
| Tajikistan           | 1992           | FemalePregAge35to39 | 11912      |
| Tajikistan           | 1992           | FemalePregAge40to44 | 1819       |
| Tajikistan           | 1992           | FemalePregAge45to49 | 45         |
| Tajikistan           | 1992           | MaleAge0to4         | 496894     |
| Tajikistan           | 1992           | MaleAge10to14       | 324635     |
| Tajikistan           | 1992           | MaleAge15to19       | 276423     |
| Tajikistan           | 1992           | MaleAge20to24       | 238805     |
| Tajikistan           | 1992           | MaleAge25to29       | 218208     |
| Tajikistan           | 1992           | MaleAge30to34       | 188999     |
| Tajikistan           | 1992           | MaleAge35to39       | 137750     |
| Tajikistan           | 1992           | MaleAge40to44       | 93256      |
| Tajikistan           | 1992           | MaleAge45to49       | 66762      |
| Tajikistan           | 1992           | MaleAge50to54       | 76121      |
| Tajikistan           | 1992           | MaleAge55to59       | 71446      |
| Tajikistan           | 1992           | MaleAge5to9         | 415466     |
| Tajikistan           | 1992           | MaleAge60to64       | 60759      |
| Tajikistan           | 1992           | MaleAge65to69       | 39277      |
| Tajikistan           | 1992           | MaleAge70to74       | 17404      |
| Tajikistan           | 1992           | MaleAge75to79       | 12017      |
| Tajikistan           | 1992           | MaleAge80to84       | 8559       |
| Tajikistan           | 1992           | MaleAge85to89       | 5016       |
| Tajikistan           | 1992           | MaleAge90to94       | 2177       |
| Tajikistan           | 1992           | MaleAge95to99       | 404        |
| Tajikistan           | 1992           | MaleAgeAbove100     | 68         |
| Tajikistan           | 1993           | FemaleAge0to4       | 475211     |
| Tajikistan           | 1993           | FemaleAge10to14     | 330763     |
| Tajikistan           | 1993           | FemaleAge15to19     | 245927     |
| Tajikistan           | 1993           | FemaleAge20to24     | 118181     |
| Tajikistan           | 1993           | FemaleAge25to29     | 114297     |
| Tajikistan           | 1993           | FemaleAge30to34     | 131899     |
| Tajikistan           | 1993           | FemaleAge35to39     | 119332     |
| Tajikistan           | 1993           | FemaleAge40to44     | 96568      |
| Tajikistan           | 1993           | FemaleAge45to49     | 64236      |
| Tajikistan           | 1993           | FemaleAge50to54     | 62254      |
| Tajikistan           | 1993           | FemaleAge55to59     | 77456      |
| Tajikistan           | 1993           | FemaleAge5to9       | 422082     |
| Tajikistan           | 1993           | FemaleAge60to64     | 62200      |



Dietary calcium and zinc deficiency risks are decreasing but remain prevalent

| Country    | Reference year | Age/gender group    | Population |
|------------|----------------|---------------------|------------|
| Tajikistan | 1993           | FemaleAge65to69     | 51316      |
| Tajikistan | 1993           | FemaleAge70to74     | 32063      |
| Tajikistan | 1993           | FemaleAge75to79     | 19429      |
| Tajikistan | 1993           | FemaleAge80to84     | 13115      |
| Tajikistan | 1993           | FemaleAge85to89     | 7965       |
| Tajikistan | 1993           | FemaleAge90to94     | 3910       |
| Tajikistan | 1993           | FemaleAge95to99     | 761        |
| Tajikistan | 1993           | FemaleAgeAbov e100  | 175        |
| Tajikistan | 1993           | FemaleLactAge15to19 | 15776      |
| Tajikistan | 1993           | FemaleLactAge20to24 | 72557      |
| Tajikistan | 1993           | FemaleLactAge25to29 | 63749      |
| Tajikistan | 1993           | FemaleLactAge30to34 | 38689      |
| Tajikistan | 1993           | FemaleLactAge35to39 | 15883      |
| Tajikistan | 1993           | FemaleLactAge40to44 | 2426       |
| Tajikistan | 1993           | FemaleLactAge45to49 | 59         |
| Tajikistan | 1993           | FemalePregAge15to19 | 11832      |
| Tajikistan | 1993           | FemalePregAge20to24 | 54418      |
| Tajikistan | 1993           | FemalePregAge25to29 | 47812      |
| Tajikistan | 1993           | FemalePregAge30to34 | 29017      |
| Tajikistan | 1993           | FemalePregAge35to39 | 11912      |
| Tajikistan | 1993           | FemalePregAge40to44 | 1819       |
| Tajikistan | 1993           | FemalePregAge45to49 | 45         |
| Tajikistan | 1993           | MaleAge0to4         | 491046     |
| Tajikistan | 1993           | MaleAge10to14       | 337833     |
| Tajikistan | 1993           | MaleAge15to19       | 278983     |
| Tajikistan | 1993           | MaleAge20to24       | 244394     |
| Tajikistan | 1993           | MaleAge25to29       | 216414     |
| Tajikistan | 1993           | MaleAge30to34       | 195919     |
| Tajikistan | 1993           | MaleAge35to39       | 145850     |
| Tajikistan | 1993           | MaleAge40to44       | 98383      |
| Tajikistan | 1993           | MaleAge45to49       | 68724      |
| Tajikistan | 1993           | MaleAge50to54       | 69369      |
| Tajikistan | 1993           | MaleAge55to59       | 74488      |
| Tajikistan | 1993           | MaleAge5to9         | 432725     |
| Tajikistan | 1993           | MaleAge60to64       | 58488      |
| Tajikistan | 1993           | MaleAge65to69       | 44157      |
| Tajikistan | 1993           | MaleAge70to74       | 18290      |
| Tajikistan | 1993           | MaleAge75to79       | 11012      |
| Tajikistan | 1993           | MaleAge80to84       | 8198       |
| Tajikistan | 1993           | MaleAge85to89       | 4680       |
| Tajikistan | 1993           | MaleAge90to94       | 2214       |
| Tajikistan | 1993           | MaleAge95to99       | 433        |
| Tajikistan | 1993           | MaleAgeAbov e100    | 64         |
| Tajikistan | 1994           | FemaleAge0to4       | 465603     |
| Tajikistan | 1994           | FemaleAge10to14     | 344071     |
| Tajikistan | 1994           | FemaleAge15to19     | 250432     |
| Tajikistan | 1994           | FemaleAge20to24     | 120430     |
| Tajikistan | 1994           | FemaleAge25to29     | 112801     |
| Tajikistan | 1994           | FemaleAge30to34     | 137492     |
| Tajikistan | 1994           | FemaleAge35to39     | 126606     |
| Tajikistan | 1994           | FemaleAge40to44     | 102208     |
| Tajikistan | 1994           | FemaleAge45to49     | 69423      |
| Tajikistan | 1994           | FemaleAge50to54     | 54780      |
| Tajikistan | 1994           | FemaleAge55to59     | 77529      |
| Tajikistan | 1994           | FemaleAge5to9       | 436980     |
| Tajikistan | 1994           | FemaleAge60to64     | 60830      |
| Tajikistan | 1994           | FemaleAge65to69     | 52092      |
| Tajikistan | 1994           | FemaleAge70to74     | 33162      |
| Tajikistan | 1994           | FemaleAge75to79     | 18801      |
| Tajikistan | 1994           | FemaleAge80to84     | 11975      |
| Tajikistan | 1994           | FemaleAge85to89     | 7753       |
| Tajikistan | 1994           | FemaleAge90to94     | 3903       |
| Tajikistan | 1994           | FemaleAge95to99     | 810        |
| Tajikistan | 1994           | FemaleAgeAbov e100  | 171        |
| Tajikistan | 1994           | FemaleLactAge15to19 | 15776      |
| Tajikistan | 1994           | FemaleLactAge20to24 | 72557      |
| Tajikistan | 1994           | FemaleLactAge25to29 | 63749      |
| Tajikistan | 1994           | FemaleLactAge30to34 | 38689      |
| Tajikistan | 1994           | FemaleLactAge35to39 | 15883      |
| Tajikistan | 1994           | FemaleLactAge40to44 | 2426       |
| Tajikistan | 1994           | FemaleLactAge45to49 | 59         |
| Tajikistan | 1994           | FemalePregAge15to19 | 11832      |
| Tajikistan | 1994           | FemalePregAge20to24 | 54418      |
| Tajikistan | 1994           | FemalePregAge25to29 | 47812      |
| Tajikistan | 1994           | FemalePregAge30to34 | 29017      |
| Tajikistan | 1994           | FemalePregAge35to39 | 11912      |
| Tajikistan | 1994           | FemalePregAge40to44 | 1819       |
| Tajikistan | 1994           | FemalePregAge45to49 | 45         |
| Tajikistan | 1994           | MaleAge0to4         | 482588     |
| Tajikistan | 1994           | MaleAge10to14       | 351929     |
| Tajikistan | 1994           | MaleAge15to19       | 283054     |
| Tajikistan | 1994           | MaleAge20to24       | 249361     |
| Tajikistan | 1994           | MaleAge25to29       | 214881     |
| Tajikistan | 1994           | MaleAge30to34       | 201003     |
| Tajikistan | 1994           | MaleAge35to39       | 153885     |
| Tajikistan | 1994           | MaleAge40to44       | 104018     |
| Tajikistan | 1994           | MaleAge45to49       | 71369      |
| Tajikistan | 1994           | MaleAge50to54       | 63600      |

Dietary calcium and zinc deficiency risks are decreasing but remain prevalent

| Country    | Reference year | Age/gender group    | Population |
|------------|----------------|---------------------|------------|
| Tajikistan | 1994           | MaleAge55to59       | 75905      |
| Tajikistan | 1994           | MaleAge5to9         | 447874     |
| Tajikistan | 1994           | MaleAge60to64       | 56871      |
| Tajikistan | 1994           | MaleAge65to69       | 47771      |
| Tajikistan | 1994           | MaleAge70to74       | 19911      |
| Tajikistan | 1994           | MaleAge75to79       | 10369      |
| Tajikistan | 1994           | MaleAge80to84       | 7490       |
| Tajikistan | 1994           | MaleAge85to89       | 4314       |
| Tajikistan | 1994           | MaleAge90to94       | 2065       |
| Tajikistan | 1994           | MaleAge95to99       | 448        |
| Tajikistan | 1994           | MaleAgeAbov e100    | 60         |
| Tajikistan | 1995           | FemaleAge0to4       | 457661     |
| Tajikistan | 1995           | FemaleAge10to14     | 358358     |
| Tajikistan | 1995           | FemaleAge15to19     | 256918     |
| Tajikistan | 1995           | FemaleAge20to24     | 122362     |
| Tajikistan | 1995           | FemaleAge25to29     | 112024     |
| Tajikistan | 1995           | FemaleAge30to34     | 140830     |
| Tajikistan | 1995           | FemaleAge35to39     | 133775     |
| Tajikistan | 1995           | FemaleAge40to44     | 108224     |
| Tajikistan | 1995           | FemaleAge45to49     | 74210      |
| Tajikistan | 1995           | FemaleAge50to54     | 50673      |
| Tajikistan | 1995           | FemaleAge55to59     | 74809      |
| Tajikistan | 1995           | FemaleAge5to9       | 447521     |
| Tajikistan | 1995           | FemaleAge60to64     | 60448      |
| Tajikistan | 1995           | FemaleAge65to69     | 52098      |
| Tajikistan | 1995           | FemaleAge70to74     | 34229      |
| Tajikistan | 1995           | FemaleAge75to79     | 18748      |
| Tajikistan | 1995           | FemaleAge80to84     | 10457      |
| Tajikistan | 1995           | FemaleAge85to89     | 7371       |
| Tajikistan | 1995           | FemaleAge90to94     | 3680       |
| Tajikistan | 1995           | FemaleAge95to99     | 822        |
| Tajikistan | 1995           | FemaleAgeAbov e100  | 168        |
| Tajikistan | 1995           | FemaleLactAge15to19 | 15776      |
| Tajikistan | 1995           | FemaleLactAge20to24 | 72557      |
| Tajikistan | 1995           | FemaleLactAge25to29 | 63749      |
| Tajikistan | 1995           | FemaleLactAge30to34 | 38689      |
| Tajikistan | 1995           | FemaleLactAge35to39 | 15883      |
| Tajikistan | 1995           | FemaleLactAge40to44 | 2426       |
| Tajikistan | 1995           | FemaleLactAge45to49 | 59         |
| Tajikistan | 1995           | FemalePregAge15to19 | 11832      |
| Tajikistan | 1995           | FemalePregAge20to24 | 54418      |
| Tajikistan | 1995           | FemalePregAge25to29 | 47812      |
| Tajikistan | 1995           | FemalePregAge30to34 | 29017      |
| Tajikistan | 1995           | FemalePregAge35to39 | 11912      |
| Tajikistan | 1995           | FemalePregAge40to44 | 1819       |
| Tajikistan | 1995           | FemalePregAge45to49 | 45         |
| Tajikistan | 1995           | MaleAge0to4         | 475125     |
| Tajikistan | 1995           | MaleAge10to14       | 366611     |
| Tajikistan | 1995           | MaleAge15to19       | 289444     |
| Tajikistan | 1995           | MaleAge20to24       | 252912     |
| Tajikistan | 1995           | MaleAge25to29       | 214740     |
| Tajikistan | 1995           | MaleAge30to34       | 203703     |
| Tajikistan | 1995           | MaleAge35to39       | 161494     |
| Tajikistan | 1995           | MaleAge40to44       | 110211     |
| Tajikistan | 1995           | MaleAge45to49       | 74242      |
| Tajikistan | 1995           | MaleAge50to54       | 59938      |
| Tajikistan | 1995           | MaleAge55to59       | 74717      |
| Tajikistan | 1995           | MaleAge5to9         | 458514     |
| Tajikistan | 1995           | MaleAge60to64       | 56698      |
| Tajikistan | 1995           | MaleAge65to69       | 49527      |
| Tajikistan | 1995           | MaleAge70to74       | 22336      |
| Tajikistan | 1995           | MaleAge75to79       | 10159      |
| Tajikistan | 1995           | MaleAge80to84       | 6515       |
| Tajikistan | 1995           | MaleAge85to89       | 3866       |
| Tajikistan | 1995           | MaleAge90to94       | 1752       |
| Tajikistan | 1995           | MaleAge95to99       | 390        |
| Tajikistan | 1995           | MaleAgeAbov e100    | 57         |
| Tajikistan | 1996           | FemaleAge0to4       | 444806     |
| Tajikistan | 1996           | FemaleAge10to14     | 374084     |
| Tajikistan | 1996           | FemaleAge15to19     | 265180     |
| Tajikistan | 1996           | FemaleAge20to24     | 131885     |
| Tajikistan | 1996           | FemaleAge25to29     | 131350     |
| Tajikistan | 1996           | FemaleAge30to34     | 147797     |
| Tajikistan | 1996           | FemaleAge35to39     | 136025     |
| Tajikistan | 1996           | FemaleAge40to44     | 111973     |
| Tajikistan | 1996           | FemaleAge45to49     | 78990      |
| Tajikistan | 1996           | FemaleAge50to54     | 49631      |
| Tajikistan | 1996           | FemaleAge55to59     | 69494      |
| Tajikistan | 1996           | FemaleAge5to9       | 455257     |
| Tajikistan | 1996           | FemaleAge60to64     | 60368      |
| Tajikistan | 1996           | FemaleAge65to69     | 50931      |
| Tajikistan | 1996           | FemaleAge70to74     | 35470      |
| Tajikistan | 1996           | FemaleAge75to79     | 18783      |
| Tajikistan | 1996           | FemaleAge80to84     | 10458      |
| Tajikistan | 1996           | FemaleAge85to89     | 7134       |
| Tajikistan | 1996           | FemaleAge90to94     | 3830       |
| Tajikistan | 1996           | FemaleAge95to99     | 923        |
| Tajikistan | 1996           | FemaleAgeAbov e100  | 168        |

Dietary calcium and zinc deficiency risks are decreasing but remain prevalent

| Country    | Reference year | Age/gender group    | Population |
|------------|----------------|---------------------|------------|
| Tajikistan | 1996           | FemaleLactAge15to19 | 15751      |
| Tajikistan | 1996           | FemaleLactAge20to24 | 68556      |
| Tajikistan | 1996           | FemaleLactAge25to29 | 53245      |
| Tajikistan | 1996           | FemaleLactAge30to34 | 35942      |
| Tajikistan | 1996           | FemaleLactAge35to39 | 18831      |
| Tajikistan | 1996           | FemaleLactAge40to44 | 3974       |
| Tajikistan | 1996           | FemaleLactAge45to49 | 62         |
| Tajikistan | 1996           | FemalePregAge15to19 | 11813      |
| Tajikistan | 1996           | FemalePregAge20to24 | 51417      |
| Tajikistan | 1996           | FemalePregAge25to29 | 39934      |
| Tajikistan | 1996           | FemalePregAge30to34 | 26956      |
| Tajikistan | 1996           | FemalePregAge35to39 | 14123      |
| Tajikistan | 1996           | FemalePregAge40to44 | 2981       |
| Tajikistan | 1996           | FemalePregAge45to49 | 46         |
| Tajikistan | 1996           | MaleAge0to4         | 463411     |
| Tajikistan | 1996           | MaleAge10to14       | 382777     |
| Tajikistan | 1996           | MaleAge15to19       | 297310     |
| Tajikistan | 1996           | MaleAge20to24       | 255307     |
| Tajikistan | 1996           | MaleAge25to29       | 216954     |
| Tajikistan | 1996           | MaleAge30to34       | 205204     |
| Tajikistan | 1996           | MaleAge35to39       | 168282     |
| Tajikistan | 1996           | MaleAge40to44       | 116501     |
| Tajikistan | 1996           | MaleAge45to49       | 77713      |
| Tajikistan | 1996           | MaleAge50to54       | 58135      |
| Tajikistan | 1996           | MaleAge55to59       | 70989      |
| Tajikistan | 1996           | MaleAge5to9         | 466978     |
| Tajikistan | 1996           | MaleAge60to64       | 57194      |
| Tajikistan | 1996           | MaleAge65to69       | 49428      |
| Tajikistan | 1996           | MaleAge70to74       | 25412      |
| Tajikistan | 1996           | MaleAge75to79       | 10385      |
| Tajikistan | 1996           | MaleAge80to84       | 6182       |
| Tajikistan | 1996           | MaleAge85to89       | 3768       |
| Tajikistan | 1996           | MaleAge90to94       | 1786       |
| Tajikistan | 1996           | MaleAge95to99       | 410        |
| Tajikistan | 1996           | MaleAgeAbov e100    | 54         |
| Tajikistan | 1997           | FemaleAge0to4       | 438720     |
| Tajikistan | 1997           | FemaleAge10to14     | 390345     |
| Tajikistan | 1997           | FemaleAge15to19     | 274530     |
| Tajikistan | 1997           | FemaleAge20to24     | 133759     |
| Tajikistan | 1997           | FemaleAge25to29     | 132880     |
| Tajikistan | 1997           | FemaleAge30to34     | 147646     |
| Tajikistan | 1997           | FemaleAge35to39     | 143335     |
| Tajikistan | 1997           | FemaleAge40to44     | 118384     |
| Tajikistan | 1997           | FemaleAge45to49     | 83524      |
| Tajikistan | 1997           | FemaleAge50to54     | 51479      |
| Tajikistan | 1997           | FemaleAge55to59     | 61671      |
| Tajikistan | 1997           | FemaleAge5to9       | 456405     |
| Tajikistan | 1997           | FemaleAge60to64     | 61673      |
| Tajikistan | 1997           | FemaleAge65to69     | 48639      |
| Tajikistan | 1997           | FemaleAge70to74     | 36510      |
| Tajikistan | 1997           | FemaleAge75to79     | 19122      |
| Tajikistan | 1997           | FemaleAge80to84     | 9964       |
| Tajikistan | 1997           | FemaleAge85to89     | 6899       |
| Tajikistan | 1997           | FemaleAge90to94     | 3868       |
| Tajikistan | 1997           | FemaleAge95to99     | 1094       |
| Tajikistan | 1997           | FemaleAgeAbov e100  | 169        |
| Tajikistan | 1997           | FemaleLactAge15to19 | 15751      |
| Tajikistan | 1997           | FemaleLactAge20to24 | 68556      |
| Tajikistan | 1997           | FemaleLactAge25to29 | 53245      |
| Tajikistan | 1997           | FemaleLactAge30to34 | 35942      |
| Tajikistan | 1997           | FemaleLactAge35to39 | 18831      |
| Tajikistan | 1997           | FemaleLactAge40to44 | 3974       |
| Tajikistan | 1997           | FemaleLactAge45to49 | 62         |
| Tajikistan | 1997           | FemalePregAge15to19 | 11813      |
| Tajikistan | 1997           | FemalePregAge20to24 | 51417      |
| Tajikistan | 1997           | FemalePregAge25to29 | 39934      |
| Tajikistan | 1997           | FemalePregAge30to34 | 26956      |
| Tajikistan | 1997           | FemalePregAge35to39 | 14123      |
| Tajikistan | 1997           | FemalePregAge40to44 | 2981       |
| Tajikistan | 1997           | FemalePregAge45to49 | 46         |
| Tajikistan | 1997           | MaleAge0to4         | 457319     |
| Tajikistan | 1997           | MaleAge10to14       | 399287     |
| Tajikistan | 1997           | MaleAge15to19       | 306807     |
| Tajikistan | 1997           | MaleAge20to24       | 256173     |
| Tajikistan | 1997           | MaleAge25to29       | 220193     |
| Tajikistan | 1997           | MaleAge30to34       | 204044     |
| Tajikistan | 1997           | MaleAge35to39       | 175046     |
| Tajikistan | 1997           | MaleAge40to44       | 122883     |
| Tajikistan | 1997           | MaleAge45to49       | 81244      |
| Tajikistan | 1997           | MaleAge50to54       | 58116      |
| Tajikistan | 1997           | MaleAge55to59       | 65254      |
| Tajikistan | 1997           | MaleAge5to9         | 468880     |
| Tajikistan | 1997           | MaleAge60to64       | 58905      |
| Tajikistan | 1997           | MaleAge65to69       | 47526      |
| Tajikistan | 1997           | MaleAge70to74       | 29018      |
| Tajikistan | 1997           | MaleAge75to79       | 10657      |
| Tajikistan | 1997           | MaleAge80to84       | 5696       |
| Tajikistan | 1997           | MaleAge85to89       | 3633       |

Dietary calcium and zinc deficiency risks are decreasing but remain prevalent

| Country    | Reference year | Age/gender group    | Population |
|------------|----------------|---------------------|------------|
| Tajikistan | 1997           | MaleAge90to94       | 1739       |
| Tajikistan | 1997           | MaleAge95to99       | 459        |
| Tajikistan | 1997           | MaleAgeAbove100     | 52         |
| Tajikistan | 1998           | FemaleAge0to4       | 437583     |
| Tajikistan | 1998           | FemaleAge10to14     | 406708     |
| Tajikistan | 1998           | FemaleAge15to19     | 285555     |
| Tajikistan | 1998           | FemaleAge20to24     | 135993     |
| Tajikistan | 1998           | FemaleAge25to29     | 135041     |
| Tajikistan | 1998           | FemaleAge30to34     | 146317     |
| Tajikistan | 1998           | FemaleAge35to39     | 150225     |
| Tajikistan | 1998           | FemaleAge40to44     | 124924     |
| Tajikistan | 1998           | FemaleAge45to49     | 88072      |
| Tajikistan | 1998           | FemaleAge50to54     | 55315      |
| Tajikistan | 1998           | FemaleAge55to59     | 53110      |
| Tajikistan | 1998           | FemaleAge5to9       | 451655     |
| Tajikistan | 1998           | FemaleAge60to64     | 63403      |
| Tajikistan | 1998           | FemaleAge65to69     | 45942      |
| Tajikistan | 1998           | FemaleAge70to74     | 37027      |
| Tajikistan | 1998           | FemaleAge75to79     | 19980      |
| Tajikistan | 1998           | FemaleAge80to84     | 8883       |
| Tajikistan | 1998           | FemaleAge85to89     | 6759       |
| Tajikistan | 1998           | FemaleAge90to94     | 3774       |
| Tajikistan | 1998           | FemaleAge95to99     | 1239       |
| Tajikistan | 1998           | FemaleAgeAbove100   | 173        |
| Tajikistan | 1998           | FemaleLactAge15to19 | 15751      |
| Tajikistan | 1998           | FemaleLactAge20to24 | 68556      |
| Tajikistan | 1998           | FemaleLactAge25to29 | 53245      |
| Tajikistan | 1998           | FemaleLactAge30to34 | 35942      |
| Tajikistan | 1998           | FemaleLactAge35to39 | 18831      |
| Tajikistan | 1998           | FemaleLactAge40to44 | 3974       |
| Tajikistan | 1998           | FemaleLactAge45to49 | 62         |
| Tajikistan | 1998           | FemalePregAge15to19 | 11813      |
| Tajikistan | 1998           | FemalePregAge20to24 | 51417      |
| Tajikistan | 1998           | FemalePregAge25to29 | 39934      |
| Tajikistan | 1998           | FemalePregAge30to34 | 26956      |
| Tajikistan | 1998           | FemalePregAge35to39 | 14123      |
| Tajikistan | 1998           | FemalePregAge40to44 | 2981       |
| Tajikistan | 1998           | FemalePregAge45to49 | 46         |
| Tajikistan | 1998           | MaleAge0to4         | 455451     |
| Tajikistan | 1998           | MaleAge10to14       | 415724     |
| Tajikistan | 1998           | MaleAge15to19       | 318402     |
| Tajikistan | 1998           | MaleAge20to24       | 257092     |
| Tajikistan | 1998           | MaleAge25to29       | 223975     |
| Tajikistan | 1998           | MaleAge30to34       | 201484     |
| Tajikistan | 1998           | MaleAge35to39       | 181637     |
| Tajikistan | 1998           | MaleAge40to44       | 129450     |
| Tajikistan | 1998           | MaleAge45to49       | 84942      |
| Tajikistan | 1998           | MaleAge50to54       | 59503      |
| Tajikistan | 1998           | MaleAge55to59       | 58917      |
| Tajikistan | 1998           | MaleAge5to9         | 464966     |
| Tajikistan | 1998           | MaleAge60to64       | 60848      |
| Tajikistan | 1998           | MaleAge65to69       | 44879      |
| Tajikistan | 1998           | MaleAge70to74       | 32415      |
| Tajikistan | 1998           | MaleAge75to79       | 11214      |
| Tajikistan | 1998           | MaleAge80to84       | 5134       |
| Tajikistan | 1998           | MaleAge85to89       | 3448       |
| Tajikistan | 1998           | MaleAge90to94       | 1605       |
| Tajikistan | 1998           | MaleAge95to99       | 488        |
| Tajikistan | 1998           | MaleAgeAbove100     | 51         |
| Tajikistan | 1999           | FemaleAge0to4       | 437331     |
| Tajikistan | 1999           | FemaleAge10to14     | 421555     |
| Tajikistan | 1999           | FemaleAge15to19     | 298944     |
| Tajikistan | 1999           | FemaleAge20to24     | 140152     |
| Tajikistan | 1999           | FemaleAge25to29     | 137690     |
| Tajikistan | 1999           | FemaleAge30to34     | 145511     |
| Tajikistan | 1999           | FemaleAge35to39     | 156170     |
| Tajikistan | 1999           | FemaleAge40to44     | 131913     |
| Tajikistan | 1999           | FemaleAge45to49     | 93137      |
| Tajikistan | 1999           | FemaleAge50to54     | 59789      |
| Tajikistan | 1999           | FemaleAge55to59     | 46390      |
| Tajikistan | 1999           | FemaleAge5to9       | 444137     |
| Tajikistan | 1999           | FemaleAge60to64     | 63881      |
| Tajikistan | 1999           | FemaleAge65to69     | 43914      |
| Tajikistan | 1999           | FemaleAge70to74     | 36816      |
| Tajikistan | 1999           | FemaleAge75to79     | 21179      |
| Tajikistan | 1999           | FemaleAge80to84     | 7565       |
| Tajikistan | 1999           | FemaleAge85to89     | 6582       |
| Tajikistan | 1999           | FemaleAge90to94     | 3568       |
| Tajikistan | 1999           | FemaleAge95to99     | 1276       |
| Tajikistan | 1999           | FemaleAgeAbove100   | 179        |
| Tajikistan | 1999           | FemaleLactAge15to19 | 15751      |
| Tajikistan | 1999           | FemaleLactAge20to24 | 68556      |
| Tajikistan | 1999           | FemaleLactAge25to29 | 53245      |
| Tajikistan | 1999           | FemaleLactAge30to34 | 35942      |
| Tajikistan | 1999           | FemaleLactAge35to39 | 18831      |
| Tajikistan | 1999           | FemaleLactAge40to44 | 3974       |
| Tajikistan | 1999           | FemaleLactAge45to49 | 62         |
| Tajikistan | 1999           | FemalePregAge15to19 | 11813      |

Dietary calcium and zinc deficiency risks are decreasing but remain prevalent

| Country    | Reference year | Age/gender group    | Population |
|------------|----------------|---------------------|------------|
| Tajikistan | 1999           | FemalePregAge20to24 | 51417      |
| Tajikistan | 1999           | FemalePregAge25to29 | 39934      |
| Tajikistan | 1999           | FemalePregAge30to34 | 26956      |
| Tajikistan | 1999           | FemalePregAge35to39 | 14123      |
| Tajikistan | 1999           | FemalePregAge40to44 | 2981       |
| Tajikistan | 1999           | FemalePregAge45to49 | 46         |
| Tajikistan | 1999           | MaleAge0to4         | 454493     |
| Tajikistan | 1999           | MaleAge10to14       | 430694     |
| Tajikistan | 1999           | MaleAge15to19       | 332558     |
| Tajikistan | 1999           | MaleAge20to24       | 260292     |
| Tajikistan | 1999           | MaleAge25to29       | 227531     |
| Tajikistan | 1999           | MaleAge30to34       | 199656     |
| Tajikistan | 1999           | MaleAge35to39       | 187458     |
| Tajikistan | 1999           | MaleAge40to44       | 136427     |
| Tajikistan | 1999           | MaleAge45to49       | 89196      |
| Tajikistan | 1999           | MaleAge50to54       | 61659      |
| Tajikistan | 1999           | MaleAge55to59       | 53833      |
| Tajikistan | 1999           | MaleAge5to9         | 458312     |
| Tajikistan | 1999           | MaleAge60to64       | 61591      |
| Tajikistan | 1999           | MaleAge65to69       | 42926      |
| Tajikistan | 1999           | MaleAge70to74       | 34713      |
| Tajikistan | 1999           | MaleAge75to79       | 12327      |
| Tajikistan | 1999           | MaleAge80to84       | 4641       |
| Tajikistan | 1999           | MaleAge85to89       | 3145       |
| Tajikistan | 1999           | MaleAge90to94       | 1395       |
| Tajikistan | 1999           | MaleAge95to99       | 456        |
| Tajikistan | 1999           | MaleAgeAbov e100    | 49         |
| Thailand   | 1992           | FemaleAge0to4       | 2582946    |
| Thailand   | 1992           | FemaleAge10to14     | 2903733    |
| Thailand   | 1992           | FemaleAge15to19     | 2718657    |
| Thailand   | 1992           | FemaleAge20to24     | 2291641    |
| Thailand   | 1992           | FemaleAge25to29     | 2132254    |
| Thailand   | 1992           | FemaleAge30to34     | 2123912    |
| Thailand   | 1992           | FemaleAge35to39     | 2039518    |
| Thailand   | 1992           | FemaleAge40to44     | 1711015    |
| Thailand   | 1992           | FemaleAge45to49     | 1347982    |
| Thailand   | 1992           | FemaleAge50to54     | 1219237    |
| Thailand   | 1992           | FemaleAge55to59     | 1064083    |
| Thailand   | 1992           | FemaleAge5to9       | 2722135    |
| Thailand   | 1992           | FemaleAge60to64     | 838259     |
| Thailand   | 1992           | FemaleAge65to69     | 596557     |
| Thailand   | 1992           | FemaleAge70to74     | 392985     |
| Thailand   | 1992           | FemaleAge75to79     | 264082     |
| Thailand   | 1992           | FemaleAge80to84     | 163839     |
| Thailand   | 1992           | FemaleAge85to89     | 80355      |
| Thailand   | 1992           | FemaleAge90to94     | 29327      |
| Thailand   | 1992           | FemaleAge95to99     | 6822       |
| Thailand   | 1992           | FemaleAgeAbov e100  | 945        |
| Thailand   | 1992           | FemaleLactAge15to19 | 149373     |
| Thailand   | 1992           | FemaleLactAge20to24 | 343603     |
| Thailand   | 1992           | FemaleLactAge25to29 | 284643     |
| Thailand   | 1992           | FemaleLactAge30to34 | 165115     |
| Thailand   | 1992           | FemaleLactAge35to39 | 75923      |
| Thailand   | 1992           | FemaleLactAge40to44 | 22995      |
| Thailand   | 1992           | FemaleLactAge45to49 | 5382       |
| Thailand   | 1992           | FemalePregAge15to19 | 112030     |
| Thailand   | 1992           | FemalePregAge20to24 | 257703     |
| Thailand   | 1992           | FemalePregAge25to29 | 213482     |
| Thailand   | 1992           | FemalePregAge30to34 | 123837     |
| Thailand   | 1992           | FemalePregAge35to39 | 56942      |
| Thailand   | 1992           | FemalePregAge40to44 | 17246      |
| Thailand   | 1992           | FemalePregAge45to49 | 4036       |
| Thailand   | 1992           | MaleAge0to4         | 2690778    |
| Thailand   | 1992           | MaleAge10to14       | 2991552    |
| Thailand   | 1992           | MaleAge15to19       | 3060205    |
| Thailand   | 1992           | MaleAge20to24       | 2960822    |
| Thailand   | 1992           | MaleAge25to29       | 2641119    |
| Thailand   | 1992           | MaleAge30to34       | 2321962    |
| Thailand   | 1992           | MaleAge35to39       | 2030019    |
| Thailand   | 1992           | MaleAge40to44       | 1640774    |
| Thailand   | 1992           | MaleAge45to49       | 1286960    |
| Thailand   | 1992           | MaleAge50to54       | 1130945    |
| Thailand   | 1992           | MaleAge55to59       | 970284     |
| Thailand   | 1992           | MaleAge5to9         | 2830599    |
| Thailand   | 1992           | MaleAge60to64       | 774942     |
| Thailand   | 1992           | MaleAge65to69       | 547062     |
| Thailand   | 1992           | MaleAge70to74       | 336666     |
| Thailand   | 1992           | MaleAge75to79       | 207314     |
| Thailand   | 1992           | MaleAge80to84       | 112414     |
| Thailand   | 1992           | MaleAge85to89       | 46023      |
| Thailand   | 1992           | MaleAge90to94       | 14616      |
| Thailand   | 1992           | MaleAge95to99       | 3022       |
| Thailand   | 1992           | MaleAgeAbov e100    | 327        |
| Thailand   | 1993           | FemaleAge0to4       | 2553312    |
| Thailand   | 1993           | FemaleAge10to14     | 2859724    |
| Thailand   | 1993           | FemaleAge15to19     | 2692135    |
| Thailand   | 1993           | FemaleAge20to24     | 2276801    |
| Thailand   | 1993           | FemaleAge25to29     | 2160952    |

Dietary calcium and zinc deficiency risks are decreasing but remain prevalent

| Country  | Reference year | Age/gender group    | Population |
|----------|----------------|---------------------|------------|
| Thailand | 1993           | FemaleAge30to34     | 2128149    |
| Thailand | 1993           | FemaleAge35to39     | 2079593    |
| Thailand | 1993           | FemaleAge40to44     | 1786618    |
| Thailand | 1993           | FemaleAge45to49     | 1395963    |
| Thailand | 1993           | FemaleAge50to54     | 1213032    |
| Thailand | 1993           | FemaleAge55to59     | 1103048    |
| Thailand | 1993           | FemaleAge5to9       | 2682689    |
| Thailand | 1993           | FemaleAge60to64     | 866299     |
| Thailand | 1993           | FemaleAge65to69     | 634973     |
| Thailand | 1993           | FemaleAge70to74     | 411319     |
| Thailand | 1993           | FemaleAge75to79     | 271282     |
| Thailand | 1993           | FemaleAge80to84     | 166929     |
| Thailand | 1993           | FemaleAge85to89     | 83113      |
| Thailand | 1993           | FemaleAge90to94     | 30236      |
| Thailand | 1993           | FemaleAge95to99     | 7652       |
| Thailand | 1993           | FemaleAgeAbov e100  | 967        |
| Thailand | 1993           | FemaleLactAge15to19 | 149373     |
| Thailand | 1993           | FemaleLactAge20to24 | 343603     |
| Thailand | 1993           | FemaleLactAge25to29 | 284643     |
| Thailand | 1993           | FemaleLactAge30to34 | 165115     |
| Thailand | 1993           | FemaleLactAge35to39 | 75923      |
| Thailand | 1993           | FemaleLactAge40to44 | 22995      |
| Thailand | 1993           | FemaleLactAge45to49 | 5382       |
| Thailand | 1993           | FemalePregAge15to19 | 112030     |
| Thailand | 1993           | FemalePregAge20to24 | 257703     |
| Thailand | 1993           | FemalePregAge25to29 | 213482     |
| Thailand | 1993           | FemalePregAge30to34 | 123837     |
| Thailand | 1993           | FemalePregAge35to39 | 56942      |
| Thailand | 1993           | FemalePregAge40to44 | 17246      |
| Thailand | 1993           | FemalePregAge45to49 | 4036       |
| Thailand | 1993           | MaleAge0to4         | 2668960    |
| Thailand | 1993           | MaleAge10to14       | 2954507    |
| Thailand | 1993           | MaleAge15to19       | 3029996    |
| Thailand | 1993           | MaleAge20to24       | 2946190    |
| Thailand | 1993           | MaleAge25to29       | 2681266    |
| Thailand | 1993           | MaleAge30to34       | 2353159    |
| Thailand | 1993           | MaleAge35to39       | 2086182    |
| Thailand | 1993           | MaleAge40to44       | 1721292    |
| Thailand | 1993           | MaleAge45to49       | 1336730    |
| Thailand | 1993           | MaleAge50to54       | 1133099    |
| Thailand | 1993           | MaleAge55to59       | 1001768    |
| Thailand | 1993           | MaleAge5to9         | 2792334    |
| Thailand | 1993           | MaleAge60to64       | 793297     |
| Thailand | 1993           | MaleAge65to69       | 581950     |
| Thailand | 1993           | MaleAge70to74       | 355087     |
| Thailand | 1993           | MaleAge75to79       | 213050     |
| Thailand | 1993           | MaleAge80to84       | 116804     |
| Thailand | 1993           | MaleAge85to89       | 47779      |
| Thailand | 1993           | MaleAge90to94       | 15296      |
| Thailand | 1993           | MaleAge95to99       | 3416       |
| Thailand | 1993           | MaleAgeAbov e100    | 352        |
| Thailand | 1994           | FemaleAge0to4       | 2522932    |
| Thailand | 1994           | FemaleAge10to14     | 2818958    |
| Thailand | 1994           | FemaleAge15to19     | 2671763    |
| Thailand | 1994           | FemaleAge20to24     | 2261976    |
| Thailand | 1994           | FemaleAge25to29     | 2182835    |
| Thailand | 1994           | FemaleAge30to34     | 2138125    |
| Thailand | 1994           | FemaleAge35to39     | 2113630    |
| Thailand | 1994           | FemaleAge40to44     | 1860019    |
| Thailand | 1994           | FemaleAge45to49     | 1452584    |
| Thailand | 1994           | FemaleAge50to54     | 1213895    |
| Thailand | 1994           | FemaleAge55to59     | 1135997    |
| Thailand | 1994           | FemaleAge5to9       | 2647712    |
| Thailand | 1994           | FemaleAge60to64     | 897164     |
| Thailand | 1994           | FemaleAge65to69     | 673739     |
| Thailand | 1994           | FemaleAge70to74     | 434013     |
| Thailand | 1994           | FemaleAge75to79     | 281411     |
| Thailand | 1994           | FemaleAge80to84     | 170547     |
| Thailand | 1994           | FemaleAge85to89     | 84586      |
| Thailand | 1994           | FemaleAge90to94     | 30635      |
| Thailand | 1994           | FemaleAge95to99     | 7985       |
| Thailand | 1994           | FemaleAgeAbov e100  | 999        |
| Thailand | 1994           | FemaleLactAge15to19 | 149373     |
| Thailand | 1994           | FemaleLactAge20to24 | 343603     |
| Thailand | 1994           | FemaleLactAge25to29 | 284643     |
| Thailand | 1994           | FemaleLactAge30to34 | 165115     |
| Thailand | 1994           | FemaleLactAge35to39 | 75923      |
| Thailand | 1994           | FemaleLactAge40to44 | 22995      |
| Thailand | 1994           | FemaleLactAge45to49 | 5382       |
| Thailand | 1994           | FemalePregAge15to19 | 112030     |
| Thailand | 1994           | FemalePregAge20to24 | 257703     |
| Thailand | 1994           | FemalePregAge25to29 | 213482     |
| Thailand | 1994           | FemalePregAge30to34 | 123837     |
| Thailand | 1994           | FemalePregAge35to39 | 56942      |
| Thailand | 1994           | FemalePregAge40to44 | 17246      |
| Thailand | 1994           | FemalePregAge45to49 | 4036       |
| Thailand | 1994           | MaleAge0to4         | 2644082    |
| Thailand | 1994           | MaleAge10to14       | 2917852    |

Dietary calcium and zinc deficiency risks are decreasing but remain prevalent

| Country  | Reference year | Age/gender group    | Population |
|----------|----------------|---------------------|------------|
| Thailand | 1994           | MaleAge15to19       | 3005403    |
| Thailand | 1994           | MaleAge20to24       | 2927251    |
| Thailand | 1994           | MaleAge25to29       | 2708267    |
| Thailand | 1994           | MaleAge30to34       | 2383064    |
| Thailand | 1994           | MaleAge35to39       | 2135007    |
| Thailand | 1994           | MaleAge40to44       | 1800737    |
| Thailand | 1994           | MaleAge45to49       | 1395483    |
| Thailand | 1994           | MaleAge50to54       | 1141484    |
| Thailand | 1994           | MaleAge55to59       | 1028801    |
| Thailand | 1994           | MaleAge5to9         | 2754901    |
| Thailand | 1994           | MaleAge60to64       | 813717     |
| Thailand | 1994           | MaleAge65to69       | 614894     |
| Thailand | 1994           | MaleAge70to74       | 376532     |
| Thailand | 1994           | MaleAge75to79       | 221378     |
| Thailand | 1994           | MaleAge80to84       | 120314     |
| Thailand | 1994           | MaleAge85to89       | 48684      |
| Thailand | 1994           | MaleAge90to94       | 15547      |
| Thailand | 1994           | MaleAge95to99       | 3552       |
| Thailand | 1994           | MaleAgeAbov e100    | 378        |
| Thailand | 1995           | FemaleAge0to4       | 2493102    |
| Thailand | 1995           | FemaleAge10to14     | 2787430    |
| Thailand | 1995           | FemaleAge15to19     | 2658934    |
| Thailand | 1995           | FemaleAge20to24     | 2255764    |
| Thailand | 1995           | FemaleAge25to29     | 2199705    |
| Thailand | 1995           | FemaleAge30to34     | 2159855    |
| Thailand | 1995           | FemaleAge35to39     | 2146082    |
| Thailand | 1995           | FemaleAge40to44     | 1930464    |
| Thailand | 1995           | FemaleAge45to49     | 1518237    |
| Thailand | 1995           | FemaleAge50to54     | 1230599    |
| Thailand | 1995           | FemaleAge55to59     | 1160466    |
| Thailand | 1995           | FemaleAge5to9       | 2619265    |
| Thailand | 1995           | FemaleAge60to64     | 934019     |
| Thailand | 1995           | FemaleAge65to69     | 712204     |
| Thailand | 1995           | FemaleAge70to74     | 462617     |
| Thailand | 1995           | FemaleAge75to79     | 295040     |
| Thailand | 1995           | FemaleAge80to84     | 175397     |
| Thailand | 1995           | FemaleAge85to89     | 85334      |
| Thailand | 1995           | FemaleAge90to94     | 30435      |
| Thailand | 1995           | FemaleAge95to99     | 7479       |
| Thailand | 1995           | FemaleAgeAbov e100  | 1050       |
| Thailand | 1995           | FemaleLactAge15to19 | 149373     |
| Thailand | 1995           | FemaleLactAge20to24 | 343603     |
| Thailand | 1995           | FemaleLactAge25to29 | 284643     |
| Thailand | 1995           | FemaleLactAge30to34 | 165115     |
| Thailand | 1995           | FemaleLactAge35to39 | 75923      |
| Thailand | 1995           | FemaleLactAge40to44 | 22995      |
| Thailand | 1995           | FemaleLactAge45to49 | 5382       |
| Thailand | 1995           | FemalePregAge15to19 | 112030     |
| Thailand | 1995           | FemalePregAge20to24 | 257703     |
| Thailand | 1995           | FemalePregAge25to29 | 213482     |
| Thailand | 1995           | FemalePregAge30to34 | 123837     |
| Thailand | 1995           | FemalePregAge35to39 | 56942      |
| Thailand | 1995           | FemalePregAge40to44 | 17246      |
| Thailand | 1995           | FemalePregAge45to49 | 4036       |
| Thailand | 1995           | MaleAge0to4         | 2613572    |
| Thailand | 1995           | MaleAge10to14       | 2883690    |
| Thailand | 1995           | MaleAge15to19       | 2985980    |
| Thailand | 1995           | MaleAge20to24       | 2911008    |
| Thailand | 1995           | MaleAge25to29       | 2722255    |
| Thailand | 1995           | MaleAge30to34       | 2414470    |
| Thailand | 1995           | MaleAge35to39       | 2178476    |
| Thailand | 1995           | MaleAge40to44       | 1875792    |
| Thailand | 1995           | MaleAge45to49       | 1462474    |
| Thailand | 1995           | MaleAge50to54       | 1162579    |
| Thailand | 1995           | MaleAge55to59       | 1048992    |
| Thailand | 1995           | MaleAge5to9         | 2720012    |
| Thailand | 1995           | MaleAge60to64       | 838769     |
| Thailand | 1995           | MaleAge65to69       | 644474     |
| Thailand | 1995           | MaleAge70to74       | 401759     |
| Thailand | 1995           | MaleAge75to79       | 232701     |
| Thailand | 1995           | MaleAge80to84       | 123398     |
| Thailand | 1995           | MaleAge85to89       | 49010      |
| Thailand | 1995           | MaleAge90to94       | 15128      |
| Thailand | 1995           | MaleAge95to99       | 3219       |
| Thailand | 1995           | MaleAgeAbov e100    | 406        |
| Thailand | 1996           | FemaleAge0to4       | 2458600    |
| Thailand | 1996           | FemaleAge10to14     | 2731532    |
| Thailand | 1996           | FemaleAge15to19     | 2620097    |
| Thailand | 1996           | FemaleAge20to24     | 2331017    |
| Thailand | 1996           | FemaleAge25to29     | 2297794    |
| Thailand | 1996           | FemaleAge30to34     | 2243850    |
| Thailand | 1996           | FemaleAge35to39     | 2234494    |
| Thailand | 1996           | FemaleAge40to44     | 2032276    |
| Thailand | 1996           | FemaleAge45to49     | 1602273    |
| Thailand | 1996           | FemaleAge50to54     | 1256966    |
| Thailand | 1996           | FemaleAge55to59     | 1166330    |
| Thailand | 1996           | FemaleAge5to9       | 2580126    |
| Thailand | 1996           | FemaleAge60to64     | 966181     |

Dietary calcium and zinc deficiency risks are decreasing but remain prevalent

| Country  | Reference year | Age/gender group    | Population |
|----------|----------------|---------------------|------------|
| Thailand | 1996           | FemaleAge65to69     | 741104     |
| Thailand | 1996           | FemaleAge70to74     | 490212     |
| Thailand | 1996           | FemaleAge75to79     | 306133     |
| Thailand | 1996           | FemaleAge80to84     | 180904     |
| Thailand | 1996           | FemaleAge85to89     | 89851      |
| Thailand | 1996           | FemaleAge90to94     | 33386      |
| Thailand | 1996           | FemaleAge95to99     | 8041       |
| Thailand | 1996           | FemaleAgeAbov e100  | 1125       |
| Thailand | 1996           | FemaleLactAge15to19 | 128387     |
| Thailand | 1996           | FemaleLactAge20to24 | 286786     |
| Thailand | 1996           | FemaleLactAge25to29 | 262360     |
| Thailand | 1996           | FemaleLactAge30to34 | 170813     |
| Thailand | 1996           | FemaleLactAge35to39 | 77031      |
| Thailand | 1996           | FemaleLactAge40to44 | 21685      |
| Thailand | 1996           | FemaleLactAge45to49 | 3827       |
| Thailand | 1996           | FemalePregAge15to19 | 96290      |
| Thailand | 1996           | FemalePregAge20to24 | 215090     |
| Thailand | 1996           | FemalePregAge25to29 | 196770     |
| Thailand | 1996           | FemalePregAge30to34 | 128110     |
| Thailand | 1996           | FemalePregAge35to39 | 57773      |
| Thailand | 1996           | FemalePregAge40to44 | 16264      |
| Thailand | 1996           | FemalePregAge45to49 | 2870       |
| Thailand | 1996           | MaleAge0to4         | 2588987    |
| Thailand | 1996           | MaleAge10to14       | 2830105    |
| Thailand | 1996           | MaleAge15to19       | 2908412    |
| Thailand | 1996           | MaleAge20to24       | 2860328    |
| Thailand | 1996           | MaleAge25to29       | 2741197    |
| Thailand | 1996           | MaleAge30to34       | 2482570    |
| Thailand | 1996           | MaleAge35to39       | 2260013    |
| Thailand | 1996           | MaleAge40to44       | 1972608    |
| Thailand | 1996           | MaleAge45to49       | 1542168    |
| Thailand | 1996           | MaleAge50to54       | 1192012    |
| Thailand | 1996           | MaleAge55to59       | 1057903    |
| Thailand | 1996           | MaleAge5to9         | 2684942    |
| Thailand | 1996           | MaleAge60to64       | 862658     |
| Thailand | 1996           | MaleAge65to69       | 666502     |
| Thailand | 1996           | MaleAge70to74       | 427975     |
| Thailand | 1996           | MaleAge75to79       | 244152     |
| Thailand | 1996           | MaleAge80to84       | 129008     |
| Thailand | 1996           | MaleAge85to89       | 53502      |
| Thailand | 1996           | MaleAge90to94       | 16797      |
| Thailand | 1996           | MaleAge95to99       | 3513       |
| Thailand | 1996           | MaleAgeAbov e100    | 436        |
| Thailand | 1997           | FemaleAge0to4       | 2413056    |
| Thailand | 1997           | FemaleAge10to14     | 2692112    |
| Thailand | 1997           | FemaleAge15to19     | 2557879    |
| Thailand | 1997           | FemaleAge20to24     | 2294584    |
| Thailand | 1997           | FemaleAge25to29     | 2332155    |
| Thailand | 1997           | FemaleAge30to34     | 2346903    |
| Thailand | 1997           | FemaleAge35to39     | 2327388    |
| Thailand | 1997           | FemaleAge40to44     | 2143441    |
| Thailand | 1997           | FemaleAge45to49     | 1703378    |
| Thailand | 1997           | FemaleAge50to54     | 1301114    |
| Thailand | 1997           | FemaleAge55to59     | 1165292    |
| Thailand | 1997           | FemaleAge5to9       | 2553070    |
| Thailand | 1997           | FemaleAge60to64     | 1005506    |
| Thailand | 1997           | FemaleAge65to69     | 769570     |
| Thailand | 1997           | FemaleAge70to74     | 523623     |
| Thailand | 1997           | FemaleAge75to79     | 319527     |
| Thailand | 1997           | FemaleAge80to84     | 187035     |
| Thailand | 1997           | FemaleAge85to89     | 93902      |
| Thailand | 1997           | FemaleAge90to94     | 35852      |
| Thailand | 1997           | FemaleAge95to99     | 8754       |
| Thailand | 1997           | FemaleAgeAbov e100  | 1218       |
| Thailand | 1997           | FemaleLactAge15to19 | 128387     |
| Thailand | 1997           | FemaleLactAge20to24 | 286786     |
| Thailand | 1997           | FemaleLactAge25to29 | 262360     |
| Thailand | 1997           | FemaleLactAge30to34 | 170813     |
| Thailand | 1997           | FemaleLactAge35to39 | 77031      |
| Thailand | 1997           | FemaleLactAge40to44 | 21685      |
| Thailand | 1997           | FemaleLactAge45to49 | 3827       |
| Thailand | 1997           | FemalePregAge15to19 | 96290      |
| Thailand | 1997           | FemalePregAge20to24 | 215090     |
| Thailand | 1997           | FemalePregAge25to29 | 196770     |
| Thailand | 1997           | FemalePregAge30to34 | 128110     |
| Thailand | 1997           | FemalePregAge35to39 | 57773      |
| Thailand | 1997           | FemalePregAge40to44 | 16264      |
| Thailand | 1997           | FemalePregAge45to49 | 2870       |
| Thailand | 1997           | MaleAge0to4         | 2545888    |
| Thailand | 1997           | MaleAge10to14       | 2787846    |
| Thailand | 1997           | MaleAge15to19       | 2844897    |
| Thailand | 1997           | MaleAge20to24       | 2801414    |
| Thailand | 1997           | MaleAge25to29       | 2733531    |
| Thailand | 1997           | MaleAge30to34       | 2546364    |
| Thailand | 1997           | MaleAge35to39       | 2334226    |
| Thailand | 1997           | MaleAge40to44       | 2072095    |
| Thailand | 1997           | MaleAge45to49       | 1639150    |
| Thailand | 1997           | MaleAge50to54       | 1235689    |



Dietary calcium and zinc deficiency risks are decreasing but remain prevalent

| Country  | Reference year | Age/gender group    | Population |
|----------|----------------|---------------------|------------|
| Thailand | 1997           | MaleAge55to59       | 1060927    |
| Thailand | 1997           | MaleAge5to9         | 2659127    |
| Thailand | 1997           | MaleAge60to64       | 891867     |
| Thailand | 1997           | MaleAge65to69       | 685389     |
| Thailand | 1997           | MaleAge70to74       | 457872     |
| Thailand | 1997           | MaleAge75to79       | 257038     |
| Thailand | 1997           | MaleAge80to84       | 134096     |
| Thailand | 1997           | MaleAge85to89       | 57617      |
| Thailand | 1997           | MaleAge90to94       | 18082      |
| Thailand | 1997           | MaleAge95to99       | 3943       |
| Thailand | 1997           | MaleAgeAbov e100    | 468        |
| Thailand | 1998           | FemaleAge0to4       | 2359602    |
| Thailand | 1998           | FemaleAge10to14     | 2661908    |
| Thailand | 1998           | FemaleAge15to19     | 2515054    |
| Thailand | 1998           | FemaleAge20to24     | 2247318    |
| Thailand | 1998           | FemaleAge25to29     | 2336550    |
| Thailand | 1998           | FemaleAge30to34     | 2450044    |
| Thailand | 1998           | FemaleAge35to39     | 2421478    |
| Thailand | 1998           | FemaleAge40to44     | 2264449    |
| Thailand | 1998           | FemaleAge45to49     | 1821143    |
| Thailand | 1998           | FemaleAge50to54     | 1361678    |
| Thailand | 1998           | FemaleAge55to59     | 1163437    |
| Thailand | 1998           | FemaleAge5to9       | 2533287    |
| Thailand | 1998           | FemaleAge60to64     | 1046698    |
| Thailand | 1998           | FemaleAge65to69     | 798968     |
| Thailand | 1998           | FemaleAge70to74     | 560504     |
| Thailand | 1998           | FemaleAge75to79     | 336193     |
| Thailand | 1998           | FemaleAge80to84     | 194241     |
| Thailand | 1998           | FemaleAge85to89     | 97367      |
| Thailand | 1998           | FemaleAge90to94     | 37623      |
| Thailand | 1998           | FemaleAge95to99     | 9443       |
| Thailand | 1998           | FemaleAgeAbov e100  | 1322       |
| Thailand | 1998           | FemaleLactAge15to19 | 128387     |
| Thailand | 1998           | FemaleLactAge20to24 | 286786     |
| Thailand | 1998           | FemaleLactAge25to29 | 262360     |
| Thailand | 1998           | FemaleLactAge30to34 | 170813     |
| Thailand | 1998           | FemaleLactAge35to39 | 77031      |
| Thailand | 1998           | FemaleLactAge40to44 | 21685      |
| Thailand | 1998           | FemaleLactAge45to49 | 3827       |
| Thailand | 1998           | FemalePregAge15to19 | 96290      |
| Thailand | 1998           | FemalePregAge20to24 | 215090     |
| Thailand | 1998           | FemalePregAge25to29 | 196770     |
| Thailand | 1998           | FemalePregAge30to34 | 128110     |
| Thailand | 1998           | FemalePregAge35to39 | 57773      |
| Thailand | 1998           | FemalePregAge40to44 | 16264      |
| Thailand | 1998           | FemalePregAge45to49 | 2870       |
| Thailand | 1998           | MaleAge0to4         | 2490657    |
| Thailand | 1998           | MaleAge10to14       | 2752892    |
| Thailand | 1998           | MaleAge15to19       | 2801494    |
| Thailand | 1998           | MaleAge20to24       | 2739441    |
| Thailand | 1998           | MaleAge25to29       | 2700208    |
| Thailand | 1998           | MaleAge30to34       | 2600790    |
| Thailand | 1998           | MaleAge35to39       | 2400541    |
| Thailand | 1998           | MaleAge40to44       | 2172805    |
| Thailand | 1998           | MaleAge45to49       | 1751387    |
| Thailand | 1998           | MaleAge50to54       | 1294027    |
| Thailand | 1998           | MaleAge55to59       | 1063621    |
| Thailand | 1998           | MaleAge5to9         | 2640335    |
| Thailand | 1998           | MaleAge60to64       | 923113     |
| Thailand | 1998           | MaleAge65to69       | 703639     |
| Thailand | 1998           | MaleAge70to74       | 489267     |
| Thailand | 1998           | MaleAge75to79       | 272344     |
| Thailand | 1998           | MaleAge80to84       | 139352     |
| Thailand | 1998           | MaleAge85to89       | 60929      |
| Thailand | 1998           | MaleAge90to94       | 19005      |
| Thailand | 1998           | MaleAge95to99       | 4332       |
| Thailand | 1998           | MaleAgeAbov e100    | 500        |
| Thailand | 1999           | FemaleAge0to4       | 2307497    |
| Thailand | 1999           | FemaleAge10to14     | 2635946    |
| Thailand | 1999           | FemaleAge15to19     | 2488373    |
| Thailand | 1999           | FemaleAge20to24     | 2191461    |
| Thailand | 1999           | FemaleAge25to29     | 2311768    |
| Thailand | 1999           | FemaleAge30to34     | 2535998    |
| Thailand | 1999           | FemaleAge35to39     | 2517168    |
| Thailand | 1999           | FemaleAge40to44     | 2389723    |
| Thailand | 1999           | FemaleAge45to49     | 1948865    |
| Thailand | 1999           | FemaleAge50to54     | 1436366    |
| Thailand | 1999           | FemaleAge55to59     | 1170081    |
| Thailand | 1999           | FemaleAge5to9       | 2513106    |
| Thailand | 1999           | FemaleAge60to64     | 1081171    |
| Thailand | 1999           | FemaleAge65to69     | 831022     |
| Thailand | 1999           | FemaleAge70to74     | 597355     |
| Thailand | 1999           | FemaleAge75to79     | 357097     |
| Thailand | 1999           | FemaleAge80to84     | 202793     |
| Thailand | 1999           | FemaleAge85to89     | 100205     |
| Thailand | 1999           | FemaleAge90to94     | 38540      |
| Thailand | 1999           | FemaleAge95to99     | 9838       |
| Thailand | 1999           | FemaleAgeAbov e100  | 1421       |

Dietary calcium and zinc deficiency risks are decreasing but remain prevalent

| Country                                   | Reference year | Age/gender group    | Population |
|-------------------------------------------|----------------|---------------------|------------|
| Thailand                                  | 1999           | FemaleLactAge15to19 | 128387     |
| Thailand                                  | 1999           | FemaleLactAge20to24 | 286786     |
| Thailand                                  | 1999           | FemaleLactAge25to29 | 262360     |
| Thailand                                  | 1999           | FemaleLactAge30to34 | 170813     |
| Thailand                                  | 1999           | FemaleLactAge35to39 | 77031      |
| Thailand                                  | 1999           | FemaleLactAge40to44 | 21685      |
| Thailand                                  | 1999           | FemaleLactAge45to49 | 3827       |
| Thailand                                  | 1999           | FemalePregAge15to19 | 96290      |
| Thailand                                  | 1999           | FemalePregAge20to24 | 215090     |
| Thailand                                  | 1999           | FemalePregAge25to29 | 196770     |
| Thailand                                  | 1999           | FemalePregAge30to34 | 128110     |
| Thailand                                  | 1999           | FemalePregAge35to39 | 57773      |
| Thailand                                  | 1999           | FemalePregAge40to44 | 16264      |
| Thailand                                  | 1999           | FemalePregAge45to49 | 2870       |
| Thailand                                  | 1999           | MaleAge0to4         | 2437277    |
| Thailand                                  | 1999           | MaleAge10to14       | 2724905    |
| Thailand                                  | 1999           | MaleAge15to19       | 2776556    |
| Thailand                                  | 1999           | MaleAge20to24       | 2679755    |
| Thailand                                  | 1999           | MaleAge25to29       | 2647706    |
| Thailand                                  | 1999           | MaleAge30to34       | 2636240    |
| Thailand                                  | 1999           | MaleAge35to39       | 2460996    |
| Thailand                                  | 1999           | MaleAge40to44       | 2272498    |
| Thailand                                  | 1999           | MaleAge45to49       | 1872850    |
| Thailand                                  | 1999           | MaleAge50to54       | 1367271    |
| Thailand                                  | 1999           | MaleAge55to59       | 1074826    |
| Thailand                                  | 1999           | MaleAge5to9         | 2623496    |
| Thailand                                  | 1999           | MaleAge60to64       | 950751     |
| Thailand                                  | 1999           | MaleAge65to69       | 724602     |
| Thailand                                  | 1999           | MaleAge70to74       | 519198     |
| Thailand                                  | 1999           | MaleAge75to79       | 291036     |
| Thailand                                  | 1999           | MaleAge80to84       | 145601     |
| Thailand                                  | 1999           | MaleAge85to89       | 63167      |
| Thailand                                  | 1999           | MaleAge90to94       | 19561      |
| Thailand                                  | 1999           | MaleAge95to99       | 4469       |
| Thailand                                  | 1999           | MaleAgeAbov e100    | 532        |
| The former Yugoslav Republic of Macedonia | 1992           | FemaleAge0to4       | 80568      |
| The former Yugoslav Republic of Macedonia | 1992           | FemaleAge10to14     | 84607      |
| The former Yugoslav Republic of Macedonia | 1992           | FemaleAge15to19     | 75570      |
| The former Yugoslav Republic of Macedonia | 1992           | FemaleAge20to24     | 56741      |
| The former Yugoslav Republic of Macedonia | 1992           | FemaleAge25to29     | 58483      |
| The former Yugoslav Republic of Macedonia | 1992           | FemaleAge30to34     | 67923      |
| The former Yugoslav Republic of Macedonia | 1992           | FemaleAge35to39     | 72850      |
| The former Yugoslav Republic of Macedonia | 1992           | FemaleAge40to44     | 66556      |
| The former Yugoslav Republic of Macedonia | 1992           | FemaleAge45to49     | 55099      |
| The former Yugoslav Republic of Macedonia | 1992           | FemaleAge50to54     | 51063      |
| The former Yugoslav Republic of Macedonia | 1992           | FemaleAge55to59     | 51505      |
| The former Yugoslav Republic of Macedonia | 1992           | FemaleAge5to9       | 83738      |
| The former Yugoslav Republic of Macedonia | 1992           | FemaleAge60to64     | 44518      |
| The former Yugoslav Republic of Macedonia | 1992           | FemaleAge65to69     | 36899      |
| The former Yugoslav Republic of Macedonia | 1992           | FemaleAge70to74     | 20789      |
| The former Yugoslav Republic of Macedonia | 1992           | FemaleAge75to79     | 12317      |
| The former Yugoslav Republic of Macedonia | 1992           | FemaleAge80to84     | 9393       |
| The former Yugoslav Republic of Macedonia | 1992           | FemaleAge85to89     | 3758       |
| The former Yugoslav Republic of Macedonia | 1992           | FemaleAge90to94     | 874        |
| The former Yugoslav Republic of Macedonia | 1992           | FemaleAge95to99     | 123        |
| The former Yugoslav Republic of Macedonia | 1992           | FemaleAgeAbov e100  | 6          |
| The former Yugoslav Republic of Macedonia | 1992           | FemaleLactAge15to19 | 3261       |
| The former Yugoslav Republic of Macedonia | 1992           | FemaleLactAge20to24 | 12425      |
| The former Yugoslav Republic of Macedonia | 1992           | FemaleLactAge25to29 | 11028      |
| The former Yugoslav Republic of Macedonia | 1992           | FemaleLactAge30to34 | 5009       |
| The former Yugoslav Republic of Macedonia | 1992           | FemaleLactAge35to39 | 1480       |
| The former Yugoslav Republic of Macedonia | 1992           | FemaleLactAge40to44 | 300        |
| The former Yugoslav Republic of Macedonia | 1992           | FemalePregAge15to19 | 2446       |
| The former Yugoslav Republic of Macedonia | 1992           | FemalePregAge20to24 | 9319       |
| The former Yugoslav Republic of Macedonia | 1992           | FemalePregAge25to29 | 8271       |
| The former Yugoslav Republic of Macedonia | 1992           | FemalePregAge30to34 | 3756       |
| The former Yugoslav Republic of Macedonia | 1992           | FemalePregAge35to39 | 1110       |
| The former Yugoslav Republic of Macedonia | 1992           | FemalePregAge40to44 | 225        |
| The former Yugoslav Republic of Macedonia | 1992           | MaleAge0to4         | 84768      |
| The former Yugoslav Republic of Macedonia | 1992           | MaleAge10to14       | 88427      |
| The former Yugoslav Republic of Macedonia | 1992           | MaleAge15to19       | 85045      |
| The former Yugoslav Republic of Macedonia | 1992           | MaleAge20to24       | 81897      |
| The former Yugoslav Republic of Macedonia | 1992           | MaleAge25to29       | 80430      |
| The former Yugoslav Republic of Macedonia | 1992           | MaleAge30to34       | 80039      |
| The former Yugoslav Republic of Macedonia | 1992           | MaleAge35to39       | 78494      |
| The former Yugoslav Republic of Macedonia | 1992           | MaleAge40to44       | 67474      |
| The former Yugoslav Republic of Macedonia | 1992           | MaleAge45to49       | 54341      |
| The former Yugoslav Republic of Macedonia | 1992           | MaleAge50to54       | 49612      |
| The former Yugoslav Republic of Macedonia | 1992           | MaleAge55to59       | 48958      |
| The former Yugoslav Republic of Macedonia | 1992           | MaleAge5to9         | 88149      |
| The former Yugoslav Republic of Macedonia | 1992           | MaleAge60to64       | 40510      |
| The former Yugoslav Republic of Macedonia | 1992           | MaleAge65to69       | 31624      |
| The former Yugoslav Republic of Macedonia | 1992           | MaleAge70to74       | 17555      |
| The former Yugoslav Republic of Macedonia | 1992           | MaleAge75to79       | 11697      |
| The former Yugoslav Republic of Macedonia | 1992           | MaleAge80to84       | 8394       |
| The former Yugoslav Republic of Macedonia | 1992           | MaleAge85to89       | 2870       |
| The former Yugoslav Republic of Macedonia | 1992           | MaleAge90to94       | 693        |
| The former Yugoslav Republic of Macedonia | 1992           | MaleAge95to99       | 87         |

Dietary calcium and zinc deficiency risks are decreasing but remain prevalent

| Country                                   | Reference year | Age/gender group    | Population |
|-------------------------------------------|----------------|---------------------|------------|
| The former Yugoslav Republic of Macedonia | 1992           | MaleAgeAbove100     | 6          |
| The former Yugoslav Republic of Macedonia | 1993           | FemaleAge0to4       | 78414      |
| The former Yugoslav Republic of Macedonia | 1993           | FemaleAge10to14     | 83391      |
| The former Yugoslav Republic of Macedonia | 1993           | FemaleAge15to19     | 75166      |
| The former Yugoslav Republic of Macedonia | 1993           | FemaleAge20to24     | 55508      |
| The former Yugoslav Republic of Macedonia | 1993           | FemaleAge25to29     | 57287      |
| The former Yugoslav Republic of Macedonia | 1993           | FemaleAge30to34     | 66735      |
| The former Yugoslav Republic of Macedonia | 1993           | FemaleAge35to39     | 71780      |
| The former Yugoslav Republic of Macedonia | 1993           | FemaleAge40to44     | 67837      |
| The former Yugoslav Republic of Macedonia | 1993           | FemaleAge45to49     | 56106      |
| The former Yugoslav Republic of Macedonia | 1993           | FemaleAge50to54     | 50412      |
| The former Yugoslav Republic of Macedonia | 1993           | FemaleAge55to59     | 50686      |
| The former Yugoslav Republic of Macedonia | 1993           | FemaleAge5to9       | 82067      |
| The former Yugoslav Republic of Macedonia | 1993           | FemaleAge60to64     | 45771      |
| The former Yugoslav Republic of Macedonia | 1993           | FemaleAge65to69     | 36923      |
| The former Yugoslav Republic of Macedonia | 1993           | FemaleAge70to74     | 24564      |
| The former Yugoslav Republic of Macedonia | 1993           | FemaleAge75to79     | 10684      |
| The former Yugoslav Republic of Macedonia | 1993           | FemaleAge80to84     | 9307       |
| The former Yugoslav Republic of Macedonia | 1993           | FemaleAge85to89     | 3979       |
| The former Yugoslav Republic of Macedonia | 1993           | FemaleAge90to94     | 896        |
| The former Yugoslav Republic of Macedonia | 1993           | FemaleAge95to99     | 143        |
| The former Yugoslav Republic of Macedonia | 1993           | FemaleAgeAbove100   | 7          |
| The former Yugoslav Republic of Macedonia | 1993           | FemaleLactAge15to19 | 3261       |
| The former Yugoslav Republic of Macedonia | 1993           | FemaleLactAge20to24 | 12425      |
| The former Yugoslav Republic of Macedonia | 1993           | FemaleLactAge25to29 | 11028      |
| The former Yugoslav Republic of Macedonia | 1993           | FemaleLactAge30to34 | 5009       |
| The former Yugoslav Republic of Macedonia | 1993           | FemaleLactAge35to39 | 1480       |
| The former Yugoslav Republic of Macedonia | 1993           | FemaleLactAge40to44 | 300        |
| The former Yugoslav Republic of Macedonia | 1993           | FemalePregAge15to19 | 2446       |
| The former Yugoslav Republic of Macedonia | 1993           | FemalePregAge20to24 | 9319       |
| The former Yugoslav Republic of Macedonia | 1993           | FemalePregAge25to29 | 8271       |
| The former Yugoslav Republic of Macedonia | 1993           | FemalePregAge30to34 | 3756       |
| The former Yugoslav Republic of Macedonia | 1993           | FemalePregAge35to39 | 1110       |
| The former Yugoslav Republic of Macedonia | 1993           | FemalePregAge40to44 | 225        |
| The former Yugoslav Republic of Macedonia | 1993           | MaleAge0to4         | 82631      |
| The former Yugoslav Republic of Macedonia | 1993           | MaleAge10to14       | 87283      |
| The former Yugoslav Republic of Macedonia | 1993           | MaleAge15to19       | 84346      |
| The former Yugoslav Republic of Macedonia | 1993           | MaleAge20to24       | 80554      |
| The former Yugoslav Republic of Macedonia | 1993           | MaleAge25to29       | 78968      |
| The former Yugoslav Republic of Macedonia | 1993           | MaleAge30to34       | 78299      |
| The former Yugoslav Republic of Macedonia | 1993           | MaleAge35to39       | 77489      |
| The former Yugoslav Republic of Macedonia | 1993           | MaleAge40to44       | 68939      |
| The former Yugoslav Republic of Macedonia | 1993           | MaleAge45to49       | 54834      |
| The former Yugoslav Republic of Macedonia | 1993           | MaleAge50to54       | 48887      |
| The former Yugoslav Republic of Macedonia | 1993           | MaleAge55to59       | 47945      |
| The former Yugoslav Republic of Macedonia | 1993           | MaleAge5to9         | 86426      |
| The former Yugoslav Republic of Macedonia | 1993           | MaleAge60to64       | 41785      |
| The former Yugoslav Republic of Macedonia | 1993           | MaleAge65to69       | 31506      |
| The former Yugoslav Republic of Macedonia | 1993           | MaleAge70to74       | 20348      |
| The former Yugoslav Republic of Macedonia | 1993           | MaleAge75to79       | 9858       |
| The former Yugoslav Republic of Macedonia | 1993           | MaleAge80to84       | 8837       |
| The former Yugoslav Republic of Macedonia | 1993           | MaleAge85to89       | 2932       |
| The former Yugoslav Republic of Macedonia | 1993           | MaleAge90to94       | 731        |
| The former Yugoslav Republic of Macedonia | 1993           | MaleAge95to99       | 102        |
| The former Yugoslav Republic of Macedonia | 1993           | MaleAgeAbove100     | 6          |
| The former Yugoslav Republic of Macedonia | 1994           | FemaleAge0to4       | 76131      |
| The former Yugoslav Republic of Macedonia | 1994           | FemaleAge10to14     | 82289      |
| The former Yugoslav Republic of Macedonia | 1994           | FemaleAge15to19     | 74961      |
| The former Yugoslav Republic of Macedonia | 1994           | FemaleAge20to24     | 54529      |
| The former Yugoslav Republic of Macedonia | 1994           | FemaleAge25to29     | 56330      |
| The former Yugoslav Republic of Macedonia | 1994           | FemaleAge30to34     | 65760      |
| The former Yugoslav Republic of Macedonia | 1994           | FemaleAge35to39     | 70608      |
| The former Yugoslav Republic of Macedonia | 1994           | FemaleAge40to44     | 69112      |
| The former Yugoslav Republic of Macedonia | 1994           | FemaleAge45to49     | 57123      |
| The former Yugoslav Republic of Macedonia | 1994           | FemaleAge50to54     | 50309      |
| The former Yugoslav Republic of Macedonia | 1994           | FemaleAge55to59     | 49854      |
| The former Yugoslav Republic of Macedonia | 1994           | FemaleAge5to9       | 80510      |
| The former Yugoslav Republic of Macedonia | 1994           | FemaleAge60to64     | 46984      |
| The former Yugoslav Republic of Macedonia | 1994           | FemaleAge65to69     | 36867      |
| The former Yugoslav Republic of Macedonia | 1994           | FemaleAge70to74     | 28233      |
| The former Yugoslav Republic of Macedonia | 1994           | FemaleAge75to79     | 10043      |
| The former Yugoslav Republic of Macedonia | 1994           | FemaleAge80to84     | 8790       |
| The former Yugoslav Republic of Macedonia | 1994           | FemaleAge85to89     | 4063       |
| The former Yugoslav Republic of Macedonia | 1994           | FemaleAge90to94     | 896        |
| The former Yugoslav Republic of Macedonia | 1994           | FemaleAge95to99     | 144        |
| The former Yugoslav Republic of Macedonia | 1994           | FemaleAgeAbove100   | 7          |
| The former Yugoslav Republic of Macedonia | 1994           | FemaleLactAge15to19 | 3261       |
| The former Yugoslav Republic of Macedonia | 1994           | FemaleLactAge20to24 | 12425      |
| The former Yugoslav Republic of Macedonia | 1994           | FemaleLactAge25to29 | 11028      |
| The former Yugoslav Republic of Macedonia | 1994           | FemaleLactAge30to34 | 5009       |
| The former Yugoslav Republic of Macedonia | 1994           | FemaleLactAge35to39 | 1480       |
| The former Yugoslav Republic of Macedonia | 1994           | FemaleLactAge40to44 | 300        |
| The former Yugoslav Republic of Macedonia | 1994           | FemalePregAge15to19 | 2446       |
| The former Yugoslav Republic of Macedonia | 1994           | FemalePregAge20to24 | 9319       |
| The former Yugoslav Republic of Macedonia | 1994           | FemalePregAge25to29 | 8271       |
| The former Yugoslav Republic of Macedonia | 1994           | FemalePregAge30to34 | 3756       |
| The former Yugoslav Republic of Macedonia | 1994           | FemalePregAge35to39 | 1110       |
| The former Yugoslav Republic of Macedonia | 1994           | FemalePregAge40to44 | 225        |

Dietary calcium and zinc deficiency risks are decreasing but remain prevalent

| Country                                   | Reference year | Age/gender group    | Population |
|-------------------------------------------|----------------|---------------------|------------|
| The former Yugoslav Republic of Macedonia | 1994           | MaleAge0to4         | 80438      |
| The former Yugoslav Republic of Macedonia | 1994           | MaleAge10to14       | 86358      |
| The former Yugoslav Republic of Macedonia | 1994           | MaleAge15to19       | 83975      |
| The former Yugoslav Republic of Macedonia | 1994           | MaleAge20to24       | 79546      |
| The former Yugoslav Republic of Macedonia | 1994           | MaleAge25to29       | 77852      |
| The former Yugoslav Republic of Macedonia | 1994           | MaleAge30to34       | 76786      |
| The former Yugoslav Republic of Macedonia | 1994           | MaleAge35to39       | 76401      |
| The former Yugoslav Republic of Macedonia | 1994           | MaleAge40to44       | 70505      |
| The former Yugoslav Republic of Macedonia | 1994           | MaleAge45to49       | 55437      |
| The former Yugoslav Republic of Macedonia | 1994           | MaleAge50to54       | 48665      |
| The former Yugoslav Republic of Macedonia | 1994           | MaleAge55to59       | 46978      |
| The former Yugoslav Republic of Macedonia | 1994           | MaleAge5to9         | 84868      |
| The former Yugoslav Republic of Macedonia | 1994           | MaleAge60to64       | 42970      |
| The former Yugoslav Republic of Macedonia | 1994           | MaleAge65to69       | 31444      |
| The former Yugoslav Republic of Macedonia | 1994           | MaleAge70to74       | 23056      |
| The former Yugoslav Republic of Macedonia | 1994           | MaleAge75to79       | 8770       |
| The former Yugoslav Republic of Macedonia | 1994           | MaleAge80to84       | 8817       |
| The former Yugoslav Republic of Macedonia | 1994           | MaleAge85to89       | 2973       |
| The former Yugoslav Republic of Macedonia | 1994           | MaleAge90to94       | 727        |
| The former Yugoslav Republic of Macedonia | 1994           | MaleAge95to99       | 106        |
| The former Yugoslav Republic of Macedonia | 1994           | MaleAgeAbov e100    | 6          |
| The former Yugoslav Republic of Macedonia | 1995           | FemaleAge0to4       | 74021      |
| The former Yugoslav Republic of Macedonia | 1995           | FemaleAge10to14     | 81490      |
| The former Yugoslav Republic of Macedonia | 1995           | FemaleAge15to19     | 74952      |
| The former Yugoslav Republic of Macedonia | 1995           | FemaleAge20to24     | 54071      |
| The former Yugoslav Republic of Macedonia | 1995           | FemaleAge25to29     | 55688      |
| The former Yugoslav Republic of Macedonia | 1995           | FemaleAge30to34     | 65092      |
| The former Yugoslav Republic of Macedonia | 1995           | FemaleAge35to39     | 69739      |
| The former Yugoslav Republic of Macedonia | 1995           | FemaleAge40to44     | 70191      |
| The former Yugoslav Republic of Macedonia | 1995           | FemaleAge45to49     | 58371      |
| The former Yugoslav Republic of Macedonia | 1995           | FemaleAge50to54     | 50769      |
| The former Yugoslav Republic of Macedonia | 1995           | FemaleAge55to59     | 49322      |
| The former Yugoslav Republic of Macedonia | 1995           | FemaleAge5to9       | 79184      |
| The former Yugoslav Republic of Macedonia | 1995           | FemaleAge60to64     | 47912      |
| The former Yugoslav Republic of Macedonia | 1995           | FemaleAge65to69     | 37356      |
| The former Yugoslav Republic of Macedonia | 1995           | FemaleAge70to74     | 31106      |
| The former Yugoslav Republic of Macedonia | 1995           | FemaleAge75to79     | 10866      |
| The former Yugoslav Republic of Macedonia | 1995           | FemaleAge80to84     | 7881       |
| The former Yugoslav Republic of Macedonia | 1995           | FemaleAge85to89     | 3968       |
| The former Yugoslav Republic of Macedonia | 1995           | FemaleAge90to94     | 871        |
| The former Yugoslav Republic of Macedonia | 1995           | FemaleAge95to99     | 107        |
| The former Yugoslav Republic of Macedonia | 1995           | FemaleAgeAbov e100  | 7          |
| The former Yugoslav Republic of Macedonia | 1995           | FemaleLactAge15to19 | 3261       |
| The former Yugoslav Republic of Macedonia | 1995           | FemaleLactAge20to24 | 12425      |
| The former Yugoslav Republic of Macedonia | 1995           | FemaleLactAge25to29 | 11028      |
| The former Yugoslav Republic of Macedonia | 1995           | FemaleLactAge30to34 | 5009       |
| The former Yugoslav Republic of Macedonia | 1995           | FemaleLactAge35to39 | 1480       |
| The former Yugoslav Republic of Macedonia | 1995           | FemaleLactAge40to44 | 300        |
| The former Yugoslav Republic of Macedonia | 1995           | FemalePregAge15to19 | 2446       |
| The former Yugoslav Republic of Macedonia | 1995           | FemalePregAge20to24 | 9319       |
| The former Yugoslav Republic of Macedonia | 1995           | FemalePregAge25to29 | 8271       |
| The former Yugoslav Republic of Macedonia | 1995           | FemalePregAge30to34 | 3756       |
| The former Yugoslav Republic of Macedonia | 1995           | FemalePregAge35to39 | 1110       |
| The former Yugoslav Republic of Macedonia | 1995           | FemalePregAge40to44 | 225        |
| The former Yugoslav Republic of Macedonia | 1995           | MaleAge0to4         | 78491      |
| The former Yugoslav Republic of Macedonia | 1995           | MaleAge10to14       | 85842      |
| The former Yugoslav Republic of Macedonia | 1995           | MaleAge15to19       | 84029      |
| The former Yugoslav Republic of Macedonia | 1995           | MaleAge20to24       | 79152      |
| The former Yugoslav Republic of Macedonia | 1995           | MaleAge25to29       | 77186      |
| The former Yugoslav Republic of Macedonia | 1995           | MaleAge30to34       | 75737      |
| The former Yugoslav Republic of Macedonia | 1995           | MaleAge35to39       | 75602      |
| The former Yugoslav Republic of Macedonia | 1995           | MaleAge40to44       | 71971      |
| The former Yugoslav Republic of Macedonia | 1995           | MaleAge45to49       | 56509      |
| The former Yugoslav Republic of Macedonia | 1995           | MaleAge50to54       | 48937      |
| The former Yugoslav Republic of Macedonia | 1995           | MaleAge55to59       | 46393      |
| The former Yugoslav Republic of Macedonia | 1995           | MaleAge5to9         | 83678      |
| The former Yugoslav Republic of Macedonia | 1995           | MaleAge60to64       | 43859      |
| The former Yugoslav Republic of Macedonia | 1995           | MaleAge65to69       | 31966      |
| The former Yugoslav Republic of Macedonia | 1995           | MaleAge70to74       | 25140      |
| The former Yugoslav Republic of Macedonia | 1995           | MaleAge75to79       | 8914       |
| The former Yugoslav Republic of Macedonia | 1995           | MaleAge80to84       | 8233       |
| The former Yugoslav Republic of Macedonia | 1995           | MaleAge85to89       | 3027       |
| The former Yugoslav Republic of Macedonia | 1995           | MaleAge90to94       | 667        |
| The former Yugoslav Republic of Macedonia | 1995           | MaleAge95to99       | 80         |
| The former Yugoslav Republic of Macedonia | 1995           | MaleAgeAbov e100    | 6          |
| The former Yugoslav Republic of Macedonia | 1996           | FemaleAge0to4       | 72437      |
| The former Yugoslav Republic of Macedonia | 1996           | FemaleAge10to14     | 80958      |
| The former Yugoslav Republic of Macedonia | 1996           | FemaleAge15to19     | 75654      |
| The former Yugoslav Republic of Macedonia | 1996           | FemaleAge20to24     | 58007      |
| The former Yugoslav Republic of Macedonia | 1996           | FemaleAge25to29     | 58880      |
| The former Yugoslav Republic of Macedonia | 1996           | FemaleAge30to34     | 66954      |
| The former Yugoslav Republic of Macedonia | 1996           | FemaleAge35to39     | 70137      |
| The former Yugoslav Republic of Macedonia | 1996           | FemaleAge40to44     | 70938      |
| The former Yugoslav Republic of Macedonia | 1996           | FemaleAge45to49     | 61469      |
| The former Yugoslav Republic of Macedonia | 1996           | FemaleAge50to54     | 50113      |
| The former Yugoslav Republic of Macedonia | 1996           | FemaleAge55to59     | 49068      |
| The former Yugoslav Republic of Macedonia | 1996           | FemaleAge5to9       | 78682      |
| The former Yugoslav Republic of Macedonia | 1996           | FemaleAge60to64     | 48320      |

Dietary calcium and zinc deficiency risks are decreasing but remain prevalent

| Country                                   | Reference year | Age/gender group    | Population |
|-------------------------------------------|----------------|---------------------|------------|
| The former Yugoslav Republic of Macedonia | 1996           | FemaleAge65to69     | 37828      |
| The former Yugoslav Republic of Macedonia | 1996           | FemaleAge70to74     | 31477      |
| The former Yugoslav Republic of Macedonia | 1996           | FemaleAge75to79     | 13405      |
| The former Yugoslav Republic of Macedonia | 1996           | FemaleAge80to84     | 7355       |
| The former Yugoslav Republic of Macedonia | 1996           | FemaleAge85to89     | 4098       |
| The former Yugoslav Republic of Macedonia | 1996           | FemaleAge90to94     | 1091       |
| The former Yugoslav Republic of Macedonia | 1996           | FemaleAge95to99     | 114        |
| The former Yugoslav Republic of Macedonia | 1996           | FemaleAgeAbov e100  | 7          |
| The former Yugoslav Republic of Macedonia | 1996           | FemaleLactAge15to19 | 2723       |
| The former Yugoslav Republic of Macedonia | 1996           | FemaleLactAge20to24 | 10300      |
| The former Yugoslav Republic of Macedonia | 1996           | FemaleLactAge25to29 | 8973       |
| The former Yugoslav Republic of Macedonia | 1996           | FemaleLactAge30to34 | 4089       |
| The former Yugoslav Republic of Macedonia | 1996           | FemaleLactAge35to39 | 1245       |
| The former Yugoslav Republic of Macedonia | 1996           | FemaleLactAge40to44 | 268        |
| The former Yugoslav Republic of Macedonia | 1996           | FemalePregAge15to19 | 2042       |
| The former Yugoslav Republic of Macedonia | 1996           | FemalePregAge20to24 | 7725       |
| The former Yugoslav Republic of Macedonia | 1996           | FemalePregAge25to29 | 6729       |
| The former Yugoslav Republic of Macedonia | 1996           | FemalePregAge30to34 | 3067       |
| The former Yugoslav Republic of Macedonia | 1996           | FemalePregAge35to39 | 934        |
| The former Yugoslav Republic of Macedonia | 1996           | FemalePregAge40to44 | 201        |
| The former Yugoslav Republic of Macedonia | 1996           | MaleAge0to4         | 76840      |
| The former Yugoslav Republic of Macedonia | 1996           | MaleAge10to14       | 85205      |
| The former Yugoslav Republic of Macedonia | 1996           | MaleAge15to19       | 84280      |
| The former Yugoslav Republic of Macedonia | 1996           | MaleAge20to24       | 79246      |
| The former Yugoslav Republic of Macedonia | 1996           | MaleAge25to29       | 76843      |
| The former Yugoslav Republic of Macedonia | 1996           | MaleAge30to34       | 76120      |
| The former Yugoslav Republic of Macedonia | 1996           | MaleAge35to39       | 75491      |
| The former Yugoslav Republic of Macedonia | 1996           | MaleAge40to44       | 73599      |
| The former Yugoslav Republic of Macedonia | 1996           | MaleAge45to49       | 59851      |
| The former Yugoslav Republic of Macedonia | 1996           | MaleAge50to54       | 48402      |
| The former Yugoslav Republic of Macedonia | 1996           | MaleAge55to59       | 46318      |
| The former Yugoslav Republic of Macedonia | 1996           | MaleAge5to9         | 83073      |
| The former Yugoslav Republic of Macedonia | 1996           | MaleAge60to64       | 44433      |
| The former Yugoslav Republic of Macedonia | 1996           | MaleAge65to69       | 32616      |
| The former Yugoslav Republic of Macedonia | 1996           | MaleAge70to74       | 25358      |
| The former Yugoslav Republic of Macedonia | 1996           | MaleAge75to79       | 10490      |
| The former Yugoslav Republic of Macedonia | 1996           | MaleAge80to84       | 7433       |
| The former Yugoslav Republic of Macedonia | 1996           | MaleAge85to89       | 3440       |
| The former Yugoslav Republic of Macedonia | 1996           | MaleAge90to94       | 786        |
| The former Yugoslav Republic of Macedonia | 1996           | MaleAge95to99       | 90         |
| The former Yugoslav Republic of Macedonia | 1996           | MaleAgeAbov e100    | 6          |
| The former Yugoslav Republic of Macedonia | 1997           | FemaleAge0to4       | 69897      |
| The former Yugoslav Republic of Macedonia | 1997           | FemaleAge10to14     | 80943      |
| The former Yugoslav Republic of Macedonia | 1997           | FemaleAge15to19     | 75669      |
| The former Yugoslav Republic of Macedonia | 1997           | FemaleAge20to24     | 58694      |
| The former Yugoslav Republic of Macedonia | 1997           | FemaleAge25to29     | 58754      |
| The former Yugoslav Republic of Macedonia | 1997           | FemaleAge30to34     | 67355      |
| The former Yugoslav Republic of Macedonia | 1997           | FemaleAge35to39     | 70771      |
| The former Yugoslav Republic of Macedonia | 1997           | FemaleAge40to44     | 71260      |
| The former Yugoslav Republic of Macedonia | 1997           | FemaleAge45to49     | 64876      |
| The former Yugoslav Republic of Macedonia | 1997           | FemaleAge50to54     | 51051      |
| The former Yugoslav Republic of Macedonia | 1997           | FemaleAge55to59     | 48105      |
| The former Yugoslav Republic of Macedonia | 1997           | FemaleAge5to9       | 78642      |
| The former Yugoslav Republic of Macedonia | 1997           | FemaleAge60to64     | 48957      |
| The former Yugoslav Republic of Macedonia | 1997           | FemaleAge65to69     | 39255      |
| The former Yugoslav Republic of Macedonia | 1997           | FemaleAge70to74     | 30987      |
| The former Yugoslav Republic of Macedonia | 1997           | FemaleAge75to79     | 16575      |
| The former Yugoslav Republic of Macedonia | 1997           | FemaleAge80to84     | 6865       |
| The former Yugoslav Republic of Macedonia | 1997           | FemaleAge85to89     | 4160       |
| The former Yugoslav Republic of Macedonia | 1997           | FemaleAge90to94     | 1270       |
| The former Yugoslav Republic of Macedonia | 1997           | FemaleAge95to99     | 122        |
| The former Yugoslav Republic of Macedonia | 1997           | FemaleAgeAbov e100  | 7          |
| The former Yugoslav Republic of Macedonia | 1997           | FemaleLactAge15to19 | 2723       |
| The former Yugoslav Republic of Macedonia | 1997           | FemaleLactAge20to24 | 10300      |
| The former Yugoslav Republic of Macedonia | 1997           | FemaleLactAge25to29 | 8973       |
| The former Yugoslav Republic of Macedonia | 1997           | FemaleLactAge30to34 | 4089       |
| The former Yugoslav Republic of Macedonia | 1997           | FemaleLactAge35to39 | 1245       |
| The former Yugoslav Republic of Macedonia | 1997           | FemaleLactAge40to44 | 268        |
| The former Yugoslav Republic of Macedonia | 1997           | FemalePregAge15to19 | 2042       |
| The former Yugoslav Republic of Macedonia | 1997           | FemalePregAge20to24 | 7725       |
| The former Yugoslav Republic of Macedonia | 1997           | FemalePregAge25to29 | 6729       |
| The former Yugoslav Republic of Macedonia | 1997           | FemalePregAge30to34 | 3067       |
| The former Yugoslav Republic of Macedonia | 1997           | FemalePregAge35to39 | 934        |
| The former Yugoslav Republic of Macedonia | 1997           | FemalePregAge40to44 | 201        |
| The former Yugoslav Republic of Macedonia | 1997           | MaleAge0to4         | 74310      |
| The former Yugoslav Republic of Macedonia | 1997           | MaleAge10to14       | 85158      |
| The former Yugoslav Republic of Macedonia | 1997           | MaleAge15to19       | 84763      |
| The former Yugoslav Republic of Macedonia | 1997           | MaleAge20to24       | 80180      |
| The former Yugoslav Republic of Macedonia | 1997           | MaleAge25to29       | 76759      |
| The former Yugoslav Republic of Macedonia | 1997           | MaleAge30to34       | 76765      |
| The former Yugoslav Republic of Macedonia | 1997           | MaleAge35to39       | 76073      |
| The former Yugoslav Republic of Macedonia | 1997           | MaleAge40to44       | 74737      |
| The former Yugoslav Republic of Macedonia | 1997           | MaleAge45to49       | 64048      |
| The former Yugoslav Republic of Macedonia | 1997           | MaleAge50to54       | 49190      |
| The former Yugoslav Republic of Macedonia | 1997           | MaleAge55to59       | 45774      |
| The former Yugoslav Republic of Macedonia | 1997           | MaleAge5to9         | 83076      |
| The former Yugoslav Republic of Macedonia | 1997           | MaleAge60to64       | 45200      |
| The former Yugoslav Republic of Macedonia | 1997           | MaleAge65to69       | 34246      |

Dietary calcium and zinc deficiency risks are decreasing but remain prevalent

| Country                                   | Reference year | Age/gender group    | Population |
|-------------------------------------------|----------------|---------------------|------------|
| The former Yugoslav Republic of Macedonia | 1997           | MaleAge70to74       | 24926      |
| The former Yugoslav Republic of Macedonia | 1997           | MaleAge75to79       | 12720      |
| The former Yugoslav Republic of Macedonia | 1997           | MaleAge80to84       | 6418       |
| The former Yugoslav Republic of Macedonia | 1997           | MaleAge85to89       | 3867       |
| The former Yugoslav Republic of Macedonia | 1997           | MaleAge90to94       | 851        |
| The former Yugoslav Republic of Macedonia | 1997           | MaleAge95to99       | 110        |
| The former Yugoslav Republic of Macedonia | 1997           | MaleAgeAbov e100    | 6          |
| The former Yugoslav Republic of Macedonia | 1998           | FemaleAge0to4       | 66968      |
| The former Yugoslav Republic of Macedonia | 1998           | FemaleAge10to14     | 81268      |
| The former Yugoslav Republic of Macedonia | 1998           | FemaleAge15to19     | 75900      |
| The former Yugoslav Republic of Macedonia | 1998           | FemaleAge20to24     | 59520      |
| The former Yugoslav Republic of Macedonia | 1998           | FemaleAge25to29     | 58913      |
| The former Yugoslav Republic of Macedonia | 1998           | FemaleAge30to34     | 67642      |
| The former Yugoslav Republic of Macedonia | 1998           | FemaleAge35to39     | 71846      |
| The former Yugoslav Republic of Macedonia | 1998           | FemaleAge40to44     | 71482      |
| The former Yugoslav Republic of Macedonia | 1998           | FemaleAge45to49     | 67726      |
| The former Yugoslav Republic of Macedonia | 1998           | FemaleAge50to54     | 54006      |
| The former Yugoslav Republic of Macedonia | 1998           | FemaleAge55to59     | 46180      |
| The former Yugoslav Republic of Macedonia | 1998           | FemaleAge5to9       | 78800      |
| The former Yugoslav Republic of Macedonia | 1998           | FemaleAge60to64     | 49821      |
| The former Yugoslav Republic of Macedonia | 1998           | FemaleAge65to69     | 41241      |
| The former Yugoslav Republic of Macedonia | 1998           | FemaleAge70to74     | 30304      |
| The former Yugoslav Republic of Macedonia | 1998           | FemaleAge75to79     | 19523      |
| The former Yugoslav Republic of Macedonia | 1998           | FemaleAge80to84     | 6878       |
| The former Yugoslav Republic of Macedonia | 1998           | FemaleAge85to89     | 4085       |
| The former Yugoslav Republic of Macedonia | 1998           | FemaleAge90to94     | 1356       |
| The former Yugoslav Republic of Macedonia | 1998           | FemaleAge95to99     | 166        |
| The former Yugoslav Republic of Macedonia | 1998           | FemaleAgeAbov e100  | 7          |
| The former Yugoslav Republic of Macedonia | 1998           | FemaleLactAge15to19 | 2723       |
| The former Yugoslav Republic of Macedonia | 1998           | FemaleLactAge20to24 | 10300      |
| The former Yugoslav Republic of Macedonia | 1998           | FemaleLactAge25to29 | 8973       |
| The former Yugoslav Republic of Macedonia | 1998           | FemaleLactAge30to34 | 4089       |
| The former Yugoslav Republic of Macedonia | 1998           | FemaleLactAge35to39 | 1245       |
| The former Yugoslav Republic of Macedonia | 1998           | FemaleLactAge40to44 | 268        |
| The former Yugoslav Republic of Macedonia | 1998           | FemalePregAge15to19 | 2042       |
| The former Yugoslav Republic of Macedonia | 1998           | FemalePregAge20to24 | 7725       |
| The former Yugoslav Republic of Macedonia | 1998           | FemalePregAge25to29 | 6729       |
| The former Yugoslav Republic of Macedonia | 1998           | FemalePregAge30to34 | 3067       |
| The former Yugoslav Republic of Macedonia | 1998           | FemalePregAge35to39 | 934        |
| The former Yugoslav Republic of Macedonia | 1998           | FemalePregAge40to44 | 201        |
| The former Yugoslav Republic of Macedonia | 1998           | MaleAge0to4         | 71402      |
| The former Yugoslav Republic of Macedonia | 1998           | MaleAge10to14       | 85573      |
| The former Yugoslav Republic of Macedonia | 1998           | MaleAge15to19       | 85186      |
| The former Yugoslav Republic of Macedonia | 1998           | MaleAge20to24       | 81689      |
| The former Yugoslav Republic of Macedonia | 1998           | MaleAge25to29       | 76902      |
| The former Yugoslav Republic of Macedonia | 1998           | MaleAge30to34       | 77247      |
| The former Yugoslav Republic of Macedonia | 1998           | MaleAge35to39       | 77264      |
| The former Yugoslav Republic of Macedonia | 1998           | MaleAge40to44       | 75441      |
| The former Yugoslav Republic of Macedonia | 1998           | MaleAge45to49       | 68251      |
| The former Yugoslav Republic of Macedonia | 1998           | MaleAge50to54       | 51725      |
| The former Yugoslav Republic of Macedonia | 1998           | MaleAge55to59       | 44472      |
| The former Yugoslav Republic of Macedonia | 1998           | MaleAge5to9         | 83340      |
| The former Yugoslav Republic of Macedonia | 1998           | MaleAge60to64       | 46150      |
| The former Yugoslav Republic of Macedonia | 1998           | MaleAge65to69       | 36482      |
| The former Yugoslav Republic of Macedonia | 1998           | MaleAge70to74       | 24368      |
| The former Yugoslav Republic of Macedonia | 1998           | MaleAge75to79       | 14893      |
| The former Yugoslav Republic of Macedonia | 1998           | MaleAge80to84       | 5698       |
| The former Yugoslav Republic of Macedonia | 1998           | MaleAge85to89       | 4091       |
| The former Yugoslav Republic of Macedonia | 1998           | MaleAge90to94       | 881        |
| The former Yugoslav Republic of Macedonia | 1998           | MaleAge95to99       | 129        |
| The former Yugoslav Republic of Macedonia | 1998           | MaleAgeAbov e100    | 6          |
| The former Yugoslav Republic of Macedonia | 1999           | FemaleAge0to4       | 64362      |
| The former Yugoslav Republic of Macedonia | 1999           | FemaleAge10to14     | 81708      |
| The former Yugoslav Republic of Macedonia | 1999           | FemaleAge15to19     | 76238      |
| The former Yugoslav Republic of Macedonia | 1999           | FemaleAge20to24     | 60143      |
| The former Yugoslav Republic of Macedonia | 1999           | FemaleAge25to29     | 59237      |
| The former Yugoslav Republic of Macedonia | 1999           | FemaleAge30to34     | 67656      |
| The former Yugoslav Republic of Macedonia | 1999           | FemaleAge35to39     | 72936      |
| The former Yugoslav Republic of Macedonia | 1999           | FemaleAge40to44     | 71806      |
| The former Yugoslav Republic of Macedonia | 1999           | FemaleAge45to49     | 69592      |
| The former Yugoslav Republic of Macedonia | 1999           | FemaleAge50to54     | 58297      |
| The former Yugoslav Republic of Macedonia | 1999           | FemaleAge55to59     | 44007      |
| The former Yugoslav Republic of Macedonia | 1999           | FemaleAge5to9       | 78766      |
| The former Yugoslav Republic of Macedonia | 1999           | FemaleAge60to64     | 50525      |
| The former Yugoslav Republic of Macedonia | 1999           | FemaleAge65to69     | 43245      |
| The former Yugoslav Republic of Macedonia | 1999           | FemaleAge70to74     | 30140      |
| The former Yugoslav Republic of Macedonia | 1999           | FemaleAge75to79     | 21467      |
| The former Yugoslav Republic of Macedonia | 1999           | FemaleAge80to84     | 7719       |
| The former Yugoslav Republic of Macedonia | 1999           | FemaleAge85to89     | 3859       |
| The former Yugoslav Republic of Macedonia | 1999           | FemaleAge90to94     | 1318       |
| The former Yugoslav Republic of Macedonia | 1999           | FemaleAge95to99     | 183        |
| The former Yugoslav Republic of Macedonia | 1999           | FemaleAgeAbov e100  | 8          |
| The former Yugoslav Republic of Macedonia | 1999           | FemaleLactAge15to19 | 2723       |
| The former Yugoslav Republic of Macedonia | 1999           | FemaleLactAge20to24 | 10300      |
| The former Yugoslav Republic of Macedonia | 1999           | FemaleLactAge25to29 | 8973       |
| The former Yugoslav Republic of Macedonia | 1999           | FemaleLactAge30to34 | 4089       |
| The former Yugoslav Republic of Macedonia | 1999           | FemaleLactAge35to39 | 1245       |
| The former Yugoslav Republic of Macedonia | 1999           | FemaleLactAge40to44 | 268        |

Dietary calcium and zinc deficiency risks are decreasing but remain prevalent

| Country                                   | Reference year | Age/gender group    | Population |
|-------------------------------------------|----------------|---------------------|------------|
| The former Yugoslav Republic of Macedonia | 1999           | FemalePregAge15to19 | 2042       |
| The former Yugoslav Republic of Macedonia | 1999           | FemalePregAge20to24 | 7725       |
| The former Yugoslav Republic of Macedonia | 1999           | FemalePregAge25to29 | 6729       |
| The former Yugoslav Republic of Macedonia | 1999           | FemalePregAge30to34 | 3067       |
| The former Yugoslav Republic of Macedonia | 1999           | FemalePregAge35to39 | 934        |
| The former Yugoslav Republic of Macedonia | 1999           | FemalePregAge40to44 | 201        |
| The former Yugoslav Republic of Macedonia | 1999           | MaleAge0to4         | 68748      |
| The former Yugoslav Republic of Macedonia | 1999           | MaleAge10to14       | 86140      |
| The former Yugoslav Republic of Macedonia | 1999           | MaleAge15to19       | 85386      |
| The former Yugoslav Republic of Macedonia | 1999           | MaleAge20to24       | 83215      |
| The former Yugoslav Republic of Macedonia | 1999           | MaleAge25to29       | 77184      |
| The former Yugoslav Republic of Macedonia | 1999           | MaleAge30to34       | 77278      |
| The former Yugoslav Republic of Macedonia | 1999           | MaleAge35to39       | 78589      |
| The former Yugoslav Republic of Macedonia | 1999           | MaleAge40to44       | 75902      |
| The former Yugoslav Republic of Macedonia | 1999           | MaleAge45to49       | 71679      |
| The former Yugoslav Republic of Macedonia | 1999           | MaleAge50to54       | 55615      |
| The former Yugoslav Republic of Macedonia | 1999           | MaleAge55to59       | 42892      |
| The former Yugoslav Republic of Macedonia | 1999           | MaleAge5to9         | 83376      |
| The former Yugoslav Republic of Macedonia | 1999           | MaleAge60to64       | 46953      |
| The former Yugoslav Republic of Macedonia | 1999           | MaleAge65to69       | 38747      |
| The former Yugoslav Republic of Macedonia | 1999           | MaleAge70to74       | 24299      |
| The former Yugoslav Republic of Macedonia | 1999           | MaleAge75to79       | 16309      |
| The former Yugoslav Republic of Macedonia | 1999           | MaleAge80to84       | 5692       |
| The former Yugoslav Republic of Macedonia | 1999           | MaleAge85to89       | 3945       |
| The former Yugoslav Republic of Macedonia | 1999           | MaleAge90to94       | 888        |
| The former Yugoslav Republic of Macedonia | 1999           | MaleAge95to99       | 136        |
| The former Yugoslav Republic of Macedonia | 1999           | MaleAgeAbov e100    | 7          |
| Togo                                      | 1992           | FemaleAge0to4       | 355975     |
| Togo                                      | 1992           | FemaleAge10to14     | 261259     |
| Togo                                      | 1992           | FemaleAge15to19     | 175289     |
| Togo                                      | 1992           | FemaleAge20to24     | 99255      |
| Togo                                      | 1992           | FemaleAge25to29     | 74731      |
| Togo                                      | 1992           | FemaleAge30to34     | 67754      |
| Togo                                      | 1992           | FemaleAge35to39     | 62732      |
| Togo                                      | 1992           | FemaleAge40to44     | 65293      |
| Togo                                      | 1992           | FemaleAge45to49     | 61996      |
| Togo                                      | 1992           | FemaleAge50to54     | 56306      |
| Togo                                      | 1992           | FemaleAge55to59     | 46324      |
| Togo                                      | 1992           | FemaleAge5to9       | 305826     |
| Togo                                      | 1992           | FemaleAge60to64     | 37107      |
| Togo                                      | 1992           | FemaleAge65to69     | 28316      |
| Togo                                      | 1992           | FemaleAge70to74     | 19608      |
| Togo                                      | 1992           | FemaleAge75to79     | 11586      |
| Togo                                      | 1992           | FemaleAge80to84     | 5137       |
| Togo                                      | 1992           | FemaleAge85to89     | 1469       |
| Togo                                      | 1992           | FemaleAge90to94     | 248        |
| Togo                                      | 1992           | FemaleAge95to99     | 22         |
| Togo                                      | 1992           | FemaleAgeAbov e100  | 1          |
| Togo                                      | 1992           | FemaleLactAge15to19 | 24401      |
| Togo                                      | 1992           | FemaleLactAge20to24 | 44394      |
| Togo                                      | 1992           | FemaleLactAge25to29 | 39043      |
| Togo                                      | 1992           | FemaleLactAge30to34 | 27795      |
| Togo                                      | 1992           | FemaleLactAge35to39 | 19024      |
| Togo                                      | 1992           | FemaleLactAge40to44 | 8719       |
| Togo                                      | 1992           | FemaleLactAge45to49 | 3155       |
| Togo                                      | 1992           | FemalePregAge15to19 | 18301      |
| Togo                                      | 1992           | FemalePregAge20to24 | 33296      |
| Togo                                      | 1992           | FemalePregAge25to29 | 29282      |
| Togo                                      | 1992           | FemalePregAge30to34 | 20846      |
| Togo                                      | 1992           | FemalePregAge35to39 | 14268      |
| Togo                                      | 1992           | FemalePregAge40to44 | 6539       |
| Togo                                      | 1992           | FemalePregAge45to49 | 2367       |
| Togo                                      | 1992           | MaleAge0to4         | 355884     |
| Togo                                      | 1992           | MaleAge10to14       | 258780     |
| Togo                                      | 1992           | MaleAge15to19       | 213348     |
| Togo                                      | 1992           | MaleAge20to24       | 170020     |
| Togo                                      | 1992           | MaleAge25to29       | 135737     |
| Togo                                      | 1992           | MaleAge30to34       | 110192     |
| Togo                                      | 1992           | MaleAge35to39       | 91092      |
| Togo                                      | 1992           | MaleAge40to44       | 76262      |
| Togo                                      | 1992           | MaleAge45to49       | 63931      |
| Togo                                      | 1992           | MaleAge50to54       | 52152      |
| Togo                                      | 1992           | MaleAge55to59       | 41504      |
| Togo                                      | 1992           | MaleAge5to9         | 304216     |
| Togo                                      | 1992           | MaleAge60to64       | 32250      |
| Togo                                      | 1992           | MaleAge65to69       | 23599      |
| Togo                                      | 1992           | MaleAge70to74       | 15608      |
| Togo                                      | 1992           | MaleAge75to79       | 8570       |
| Togo                                      | 1992           | MaleAge80to84       | 3478       |
| Togo                                      | 1992           | MaleAge85to89       | 926        |
| Togo                                      | 1992           | MaleAge90to94       | 140        |
| Togo                                      | 1992           | MaleAge95to99       | 9          |
| Togo                                      | 1993           | FemaleAge0to4       | 360672     |
| Togo                                      | 1993           | FemaleAge10to14     | 269064     |
| Togo                                      | 1993           | FemaleAge15to19     | 182934     |
| Togo                                      | 1993           | FemaleAge20to24     | 105564     |
| Togo                                      | 1993           | FemaleAge25to29     | 79392      |
| Togo                                      | 1993           | FemaleAge30to34     | 71454      |

Dietary calcium and zinc deficiency risks are decreasing but remain prevalent

| Country | Reference year | Age/gender group    | Population |
|---------|----------------|---------------------|------------|
| Togo    | 1993           | FemaleAge35to39     | 65408      |
| Togo    | 1993           | FemaleAge40to44     | 67356      |
| Togo    | 1993           | FemaleAge45to49     | 63835      |
| Togo    | 1993           | FemaleAge50to54     | 57740      |
| Togo    | 1993           | FemaleAge55to59     | 47550      |
| Togo    | 1993           | FemaleAge5to9       | 313580     |
| Togo    | 1993           | FemaleAge60to64     | 38008      |
| Togo    | 1993           | FemaleAge65to69     | 28968      |
| Togo    | 1993           | FemaleAge70to74     | 20055      |
| Togo    | 1993           | FemaleAge75to79     | 11803      |
| Togo    | 1993           | FemaleAge80to84     | 5320       |
| Togo    | 1993           | FemaleAge85to89     | 1526       |
| Togo    | 1993           | FemaleAge90to94     | 273        |
| Togo    | 1993           | FemaleAge95to99     | 29         |
| Togo    | 1993           | FemaleAgeAbov e100  | 1          |
| Togo    | 1993           | FemaleLactAge15to19 | 24401      |
| Togo    | 1993           | FemaleLactAge20to24 | 44394      |
| Togo    | 1993           | FemaleLactAge25to29 | 39043      |
| Togo    | 1993           | FemaleLactAge30to34 | 27795      |
| Togo    | 1993           | FemaleLactAge35to39 | 19024      |
| Togo    | 1993           | FemaleLactAge40to44 | 8719       |
| Togo    | 1993           | FemaleLactAge45to49 | 3155       |
| Togo    | 1993           | FemalePregAge15to19 | 18301      |
| Togo    | 1993           | FemalePregAge20to24 | 33296      |
| Togo    | 1993           | FemalePregAge25to29 | 29282      |
| Togo    | 1993           | FemalePregAge30to34 | 20846      |
| Togo    | 1993           | FemalePregAge35to39 | 14268      |
| Togo    | 1993           | FemalePregAge40to44 | 6539       |
| Togo    | 1993           | FemalePregAge45to49 | 2367       |
| Togo    | 1993           | MaleAge0to4         | 360117     |
| Togo    | 1993           | MaleAge10to14       | 266560     |
| Togo    | 1993           | MaleAge15to19       | 220414     |
| Togo    | 1993           | MaleAge20to24       | 174684     |
| Togo    | 1993           | MaleAge25to29       | 138166     |
| Togo    | 1993           | MaleAge30to34       | 111936     |
| Togo    | 1993           | MaleAge35to39       | 92309      |
| Togo    | 1993           | MaleAge40to44       | 77362      |
| Togo    | 1993           | MaleAge45to49       | 64902      |
| Togo    | 1993           | MaleAge50to54       | 53365      |
| Togo    | 1993           | MaleAge55to59       | 42350      |
| Togo    | 1993           | MaleAge5to9         | 311753     |
| Togo    | 1993           | MaleAge60to64       | 32927      |
| Togo    | 1993           | MaleAge65to69       | 24127      |
| Togo    | 1993           | MaleAge70to74       | 15947      |
| Togo    | 1993           | MaleAge75to79       | 8807       |
| Togo    | 1993           | MaleAge80to84       | 3592       |
| Togo    | 1993           | MaleAge85to89       | 969        |
| Togo    | 1993           | MaleAge90to94       | 156        |
| Togo    | 1993           | MaleAge95to99       | 15         |
| Togo    | 1994           | FemaleAge0to4       | 365156     |
| Togo    | 1994           | FemaleAge10to14     | 276898     |
| Togo    | 1994           | FemaleAge15to19     | 190787     |
| Togo    | 1994           | FemaleAge20to24     | 112202     |
| Togo    | 1994           | FemaleAge25to29     | 84315      |
| Togo    | 1994           | FemaleAge30to34     | 75291      |
| Togo    | 1994           | FemaleAge35to39     | 68230      |
| Togo    | 1994           | FemaleAge40to44     | 69482      |
| Togo    | 1994           | FemaleAge45to49     | 65711      |
| Togo    | 1994           | FemaleAge50to54     | 59252      |
| Togo    | 1994           | FemaleAge55to59     | 48843      |
| Togo    | 1994           | FemaleAge5to9       | 320617     |
| Togo    | 1994           | FemaleAge60to64     | 39009      |
| Togo    | 1994           | FemaleAge65to69     | 29714      |
| Togo    | 1994           | FemaleAge70to74     | 20576      |
| Togo    | 1994           | FemaleAge75to79     | 12035      |
| Togo    | 1994           | FemaleAge80to84     | 5392       |
| Togo    | 1994           | FemaleAge85to89     | 1515       |
| Togo    | 1994           | FemaleAge90to94     | 270        |
| Togo    | 1994           | FemaleAge95to99     | 29         |
| Togo    | 1994           | FemaleAgeAbov e100  | 1          |
| Togo    | 1994           | FemaleLactAge15to19 | 24401      |
| Togo    | 1994           | FemaleLactAge20to24 | 44394      |
| Togo    | 1994           | FemaleLactAge25to29 | 39043      |
| Togo    | 1994           | FemaleLactAge30to34 | 27795      |
| Togo    | 1994           | FemaleLactAge35to39 | 19024      |
| Togo    | 1994           | FemaleLactAge40to44 | 8719       |
| Togo    | 1994           | FemaleLactAge45to49 | 3155       |
| Togo    | 1994           | FemalePregAge15to19 | 18301      |
| Togo    | 1994           | FemalePregAge20to24 | 33296      |
| Togo    | 1994           | FemalePregAge25to29 | 29282      |
| Togo    | 1994           | FemalePregAge30to34 | 20846      |
| Togo    | 1994           | FemalePregAge35to39 | 14268      |
| Togo    | 1994           | FemalePregAge40to44 | 6539       |
| Togo    | 1994           | FemalePregAge45to49 | 2367       |
| Togo    | 1994           | MaleAge0to4         | 364321     |
| Togo    | 1994           | MaleAge10to14       | 274643     |
| Togo    | 1994           | MaleAge15to19       | 228217     |
| Togo    | 1994           | MaleAge20to24       | 180096     |



Dietary calcium and zinc deficiency risks are decreasing but remain prevalent

| Country | Reference year | Age/gender group    | Population |
|---------|----------------|---------------------|------------|
| Togo    | 1994           | MaleAge25to29       | 140940     |
| Togo    | 1994           | MaleAge30to34       | 113717     |
| Togo    | 1994           | MaleAge35to39       | 93544      |
| Togo    | 1994           | MaleAge40to44       | 78445      |
| Togo    | 1994           | MaleAge45to49       | 65873      |
| Togo    | 1994           | MaleAge50to54       | 54567      |
| Togo    | 1994           | MaleAge55to59       | 43291      |
| Togo    | 1994           | MaleAge5to9         | 318572     |
| Togo    | 1994           | MaleAge60to64       | 33665      |
| Togo    | 1994           | MaleAge65to69       | 24712      |
| Togo    | 1994           | MaleAge70to74       | 16337      |
| Togo    | 1994           | MaleAge75to79       | 9023       |
| Togo    | 1994           | MaleAge80to84       | 3632       |
| Togo    | 1994           | MaleAge85to89       | 957        |
| Togo    | 1994           | MaleAge90to94       | 155        |
| Togo    | 1994           | MaleAge95to99       | 17         |
| Togo    | 1995           | FemaleAge0to4       | 370261     |
| Togo    | 1995           | FemaleAge10to14     | 284590     |
| Togo    | 1995           | FemaleAge15to19     | 198739     |
| Togo    | 1995           | FemaleAge20to24     | 119179     |
| Togo    | 1995           | FemaleAge25to29     | 89571      |
| Togo    | 1995           | FemaleAge30to34     | 79250      |
| Togo    | 1995           | FemaleAge35to39     | 71201      |
| Togo    | 1995           | FemaleAge40to44     | 71692      |
| Togo    | 1995           | FemaleAge45to49     | 67597      |
| Togo    | 1995           | FemaleAge50to54     | 60844      |
| Togo    | 1995           | FemaleAge55to59     | 50187      |
| Togo    | 1995           | FemaleAge5to9       | 326615     |
| Togo    | 1995           | FemaleAge60to64     | 40111      |
| Togo    | 1995           | FemaleAge65to69     | 30554      |
| Togo    | 1995           | FemaleAge70to74     | 21170      |
| Togo    | 1995           | FemaleAge75to79     | 12309      |
| Togo    | 1995           | FemaleAge80to84     | 5387       |
| Togo    | 1995           | FemaleAge85to89     | 1429       |
| Togo    | 1995           | FemaleAge90to94     | 211        |
| Togo    | 1995           | FemaleAge95to99     | 16         |
| Togo    | 1995           | FemaleAgeAbove100   | 1          |
| Togo    | 1995           | FemaleLactAge15to19 | 24401      |
| Togo    | 1995           | FemaleLactAge20to24 | 44394      |
| Togo    | 1995           | FemaleLactAge25to29 | 39043      |
| Togo    | 1995           | FemaleLactAge30to34 | 27795      |
| Togo    | 1995           | FemaleLactAge35to39 | 19024      |
| Togo    | 1995           | FemaleLactAge40to44 | 8719       |
| Togo    | 1995           | FemaleLactAge45to49 | 3155       |
| Togo    | 1995           | FemalePregAge15to19 | 18301      |
| Togo    | 1995           | FemalePregAge20to24 | 33296      |
| Togo    | 1995           | FemalePregAge25to29 | 29282      |
| Togo    | 1995           | FemalePregAge30to34 | 20846      |
| Togo    | 1995           | FemalePregAge35to39 | 14268      |
| Togo    | 1995           | FemalePregAge40to44 | 6539       |
| Togo    | 1995           | FemalePregAge45to49 | 2367       |
| Togo    | 1995           | MaleAge0to4         | 369706     |
| Togo    | 1995           | MaleAge10to14       | 282903     |
| Togo    | 1995           | MaleAge15to19       | 236705     |
| Togo    | 1995           | MaleAge20to24       | 186454     |
| Togo    | 1995           | MaleAge25to29       | 144344     |
| Togo    | 1995           | MaleAge30to34       | 115605     |
| Togo    | 1995           | MaleAge35to39       | 94850      |
| Togo    | 1995           | MaleAge40to44       | 79535      |
| Togo    | 1995           | MaleAge45to49       | 66896      |
| Togo    | 1995           | MaleAge50to54       | 55737      |
| Togo    | 1995           | MaleAge55to59       | 44359      |
| Togo    | 1995           | MaleAge5to9         | 324546     |
| Togo    | 1995           | MaleAge60to64       | 34483      |
| Togo    | 1995           | MaleAge65to69       | 25368      |
| Togo    | 1995           | MaleAge70to74       | 16796      |
| Togo    | 1995           | MaleAge75to79       | 9236       |
| Togo    | 1995           | MaleAge80to84       | 3620       |
| Togo    | 1995           | MaleAge85to89       | 884        |
| Togo    | 1995           | MaleAge90to94       | 116        |
| Togo    | 1995           | MaleAge95to99       | 8          |
| Togo    | 1996           | FemaleAge0to4       | 375877     |
| Togo    | 1996           | FemaleAge10to14     | 291878     |
| Togo    | 1996           | FemaleAge15to19     | 205222     |
| Togo    | 1996           | FemaleAge20to24     | 117929     |
| Togo    | 1996           | FemaleAge25to29     | 85739      |
| Togo    | 1996           | FemaleAge30to34     | 78988      |
| Togo    | 1996           | FemaleAge35to39     | 73369      |
| Togo    | 1996           | FemaleAge40to44     | 74635      |
| Togo    | 1996           | FemaleAge45to49     | 70126      |
| Togo    | 1996           | FemaleAge50to54     | 62323      |
| Togo    | 1996           | FemaleAge55to59     | 51248      |
| Togo    | 1996           | FemaleAge5to9       | 333332     |
| Togo    | 1996           | FemaleAge60to64     | 40837      |
| Togo    | 1996           | FemaleAge65to69     | 30956      |
| Togo    | 1996           | FemaleAge70to74     | 21406      |
| Togo    | 1996           | FemaleAge75to79     | 12541      |
| Togo    | 1996           | FemaleAge80to84     | 5663       |

Dietary calcium and zinc deficiency risks are decreasing but remain prevalent

| Country | Reference year | Age/gender group    | Population |
|---------|----------------|---------------------|------------|
| Togo    | 1996           | FemaleAge85to89     | 1651       |
| Togo    | 1996           | FemaleAge90to94     | 266        |
| Togo    | 1996           | FemaleAge95to99     | 19         |
| Togo    | 1996           | FemaleAgeAbove100   | 1          |
| Togo    | 1996           | FemaleLactAge15to19 | 24929      |
| Togo    | 1996           | FemaleLactAge20to24 | 49210      |
| Togo    | 1996           | FemaleLactAge25to29 | 44563      |
| Togo    | 1996           | FemaleLactAge30to34 | 30426      |
| Togo    | 1996           | FemaleLactAge35to39 | 19650      |
| Togo    | 1996           | FemaleLactAge40to44 | 8377       |
| Togo    | 1996           | FemaleLactAge45to49 | 2753       |
| Togo    | 1996           | FemalePregAge15to19 | 18697      |
| Togo    | 1996           | FemalePregAge20to24 | 36908      |
| Togo    | 1996           | FemalePregAge25to29 | 33422      |
| Togo    | 1996           | FemalePregAge30to34 | 22819      |
| Togo    | 1996           | FemalePregAge35to39 | 14737      |
| Togo    | 1996           | FemalePregAge40to44 | 6283       |
| Togo    | 1996           | FemalePregAge45to49 | 2065       |
| Togo    | 1996           | MaleAge0to4         | 375133     |
| Togo    | 1996           | MaleAge10to14       | 289819     |
| Togo    | 1996           | MaleAge15to19       | 244230     |
| Togo    | 1996           | MaleAge20to24       | 193780     |
| Togo    | 1996           | MaleAge25to29       | 149707     |
| Togo    | 1996           | MaleAge30to34       | 118946     |
| Togo    | 1996           | MaleAge35to39       | 97135      |
| Togo    | 1996           | MaleAge40to44       | 81108      |
| Togo    | 1996           | MaleAge45to49       | 68113      |
| Togo    | 1996           | MaleAge50to54       | 56803      |
| Togo    | 1996           | MaleAge55to59       | 45310      |
| Togo    | 1996           | MaleAge5to9         | 330866     |
| Togo    | 1996           | MaleAge60to64       | 35050      |
| Togo    | 1996           | MaleAge65to69       | 25735      |
| Togo    | 1996           | MaleAge70to74       | 17044      |
| Togo    | 1996           | MaleAge75to79       | 9480       |
| Togo    | 1996           | MaleAge80to84       | 3887       |
| Togo    | 1996           | MaleAge85to89       | 1028       |
| Togo    | 1996           | MaleAge90to94       | 149        |
| Togo    | 1996           | MaleAge95to99       | 9          |
| Togo    | 1997           | FemaleAge0to4       | 381732     |
| Togo    | 1997           | FemaleAge10to14     | 299184     |
| Togo    | 1997           | FemaleAge15to19     | 212669     |
| Togo    | 1997           | FemaleAge20to24     | 125330     |
| Togo    | 1997           | FemaleAge25to29     | 91867      |
| Togo    | 1997           | FemaleAge30to34     | 83509      |
| Togo    | 1997           | FemaleAge35to39     | 76852      |
| Togo    | 1997           | FemaleAge40to44     | 77115      |
| Togo    | 1997           | FemaleAge45to49     | 72023      |
| Togo    | 1997           | FemaleAge50to54     | 63934      |
| Togo    | 1997           | FemaleAge55to59     | 52412      |
| Togo    | 1997           | FemaleAge5to9       | 339376     |
| Togo    | 1997           | FemaleAge60to64     | 41702      |
| Togo    | 1997           | FemaleAge65to69     | 31454      |
| Togo    | 1997           | FemaleAge70to74     | 21670      |
| Togo    | 1997           | FemaleAge75to79     | 12708      |
| Togo    | 1997           | FemaleAge80to84     | 5816       |
| Togo    | 1997           | FemaleAge85to89     | 1803       |
| Togo    | 1997           | FemaleAge90to94     | 306        |
| Togo    | 1997           | FemaleAge95to99     | 26         |
| Togo    | 1997           | FemaleAgeAbove100   | 1          |
| Togo    | 1997           | FemaleLactAge15to19 | 24929      |
| Togo    | 1997           | FemaleLactAge20to24 | 49210      |
| Togo    | 1997           | FemaleLactAge25to29 | 44563      |
| Togo    | 1997           | FemaleLactAge30to34 | 30426      |
| Togo    | 1997           | FemaleLactAge35to39 | 19650      |
| Togo    | 1997           | FemaleLactAge40to44 | 8377       |
| Togo    | 1997           | FemaleLactAge45to49 | 2753       |
| Togo    | 1997           | FemalePregAge15to19 | 18697      |
| Togo    | 1997           | FemalePregAge20to24 | 36908      |
| Togo    | 1997           | FemalePregAge25to29 | 33422      |
| Togo    | 1997           | FemalePregAge30to34 | 22819      |
| Togo    | 1997           | FemalePregAge35to39 | 14737      |
| Togo    | 1997           | FemalePregAge40to44 | 6283       |
| Togo    | 1997           | FemalePregAge45to49 | 2065       |
| Togo    | 1997           | MaleAge0to4         | 380996     |
| Togo    | 1997           | MaleAge10to14       | 297097     |
| Togo    | 1997           | MaleAge15to19       | 252109     |
| Togo    | 1997           | MaleAge20to24       | 201717     |
| Togo    | 1997           | MaleAge25to29       | 155679     |
| Togo    | 1997           | MaleAge30to34       | 122615     |
| Togo    | 1997           | MaleAge35to39       | 99735      |
| Togo    | 1997           | MaleAge40to44       | 82872      |
| Togo    | 1997           | MaleAge45to49       | 69506      |
| Togo    | 1997           | MaleAge50to54       | 57938      |
| Togo    | 1997           | MaleAge55to59       | 46452      |
| Togo    | 1997           | MaleAge5to9         | 336951     |
| Togo    | 1997           | MaleAge60to64       | 35731      |
| Togo    | 1997           | MaleAge65to69       | 26188      |
| Togo    | 1997           | MaleAge70to74       | 17325      |

Dietary calcium and zinc deficiency risks are decreasing but remain prevalent

| Country | Reference year | Age/gender group    | Population |
|---------|----------------|---------------------|------------|
| Togo    | 1997           | MaleAge75to79       | 9664       |
| Togo    | 1997           | MaleAge80to84       | 4073       |
| Togo    | 1997           | MaleAge85to89       | 1125       |
| Togo    | 1997           | MaleAge90to94       | 176        |
| Togo    | 1997           | MaleAge95to99       | 14         |
| Togo    | 1998           | FemaleAge0to4       | 388086     |
| Togo    | 1998           | FemaleAge10to14     | 306439     |
| Togo    | 1998           | FemaleAge15to19     | 220205     |
| Togo    | 1998           | FemaleAge20to24     | 132900     |
| Togo    | 1998           | FemaleAge25to29     | 98284      |
| Togo    | 1998           | FemaleAge30to34     | 88263      |
| Togo    | 1998           | FemaleAge35to39     | 80559      |
| Togo    | 1998           | FemaleAge40to44     | 79745      |
| Togo    | 1998           | FemaleAge45to49     | 74013      |
| Togo    | 1998           | FemaleAge50to54     | 65657      |
| Togo    | 1998           | FemaleAge55to59     | 53688      |
| Togo    | 1998           | FemaleAge5to9       | 344665     |
| Togo    | 1998           | FemaleAge60to64     | 42698      |
| Togo    | 1998           | FemaleAge65to69     | 32066      |
| Togo    | 1998           | FemaleAge70to74     | 21999      |
| Togo    | 1998           | FemaleAge75to79     | 12845      |
| Togo    | 1998           | FemaleAge80to84     | 5841       |
| Togo    | 1998           | FemaleAge85to89     | 1849       |
| Togo    | 1998           | FemaleAge90to94     | 329        |
| Togo    | 1998           | FemaleAge95to99     | 36         |
| Togo    | 1998           | FemaleAgeAbove100   | 1          |
| Togo    | 1998           | FemaleLactAge15to19 | 24929      |
| Togo    | 1998           | FemaleLactAge20to24 | 49210      |
| Togo    | 1998           | FemaleLactAge25to29 | 44563      |
| Togo    | 1998           | FemaleLactAge30to34 | 30426      |
| Togo    | 1998           | FemaleLactAge35to39 | 19650      |
| Togo    | 1998           | FemaleLactAge40to44 | 8377       |
| Togo    | 1998           | FemaleLactAge45to49 | 2753       |
| Togo    | 1998           | FemalePregAge15to19 | 18697      |
| Togo    | 1998           | FemalePregAge20to24 | 36908      |
| Togo    | 1998           | FemalePregAge25to29 | 33422      |
| Togo    | 1998           | FemalePregAge30to34 | 22819      |
| Togo    | 1998           | FemalePregAge35to39 | 14737      |
| Togo    | 1998           | FemalePregAge40to44 | 6283       |
| Togo    | 1998           | FemalePregAge45to49 | 2065       |
| Togo    | 1998           | MaleAge0to4         | 387551     |
| Togo    | 1998           | MaleAge10to14       | 304611     |
| Togo    | 1998           | MaleAge15to19       | 260327     |
| Togo    | 1998           | MaleAge20to24       | 210127     |
| Togo    | 1998           | MaleAge25to29       | 162201     |
| Togo    | 1998           | MaleAge30to34       | 126679     |
| Togo    | 1998           | MaleAge35to39       | 102623     |
| Togo    | 1998           | MaleAge40to44       | 84827      |
| Togo    | 1998           | MaleAge45to49       | 71047      |
| Togo    | 1998           | MaleAge50to54       | 59150      |
| Togo    | 1998           | MaleAge55to59       | 47730      |
| Togo    | 1998           | MaleAge5to9         | 342559     |
| Togo    | 1998           | MaleAge60to64       | 36538      |
| Togo    | 1998           | MaleAge65to69       | 26735      |
| Togo    | 1998           | MaleAge70to74       | 17658      |
| Togo    | 1998           | MaleAge75to79       | 9810       |
| Togo    | 1998           | MaleAge80to84       | 4158       |
| Togo    | 1998           | MaleAge85to89       | 1159       |
| Togo    | 1998           | MaleAge90to94       | 193        |
| Togo    | 1998           | MaleAge95to99       | 20         |
| Togo    | 1999           | FemaleAge0to4       | 395125     |
| Togo    | 1999           | FemaleAge10to14     | 313404     |
| Togo    | 1999           | FemaleAge15to19     | 227852     |
| Togo    | 1999           | FemaleAge20to24     | 140580     |
| Togo    | 1999           | FemaleAge25to29     | 104981     |
| Togo    | 1999           | FemaleAge30to34     | 93332      |
| Togo    | 1999           | FemaleAge35to39     | 84468      |
| Togo    | 1999           | FemaleAge40to44     | 82561      |
| Togo    | 1999           | FemaleAge45to49     | 76122      |
| Togo    | 1999           | FemaleAge50to54     | 67458      |
| Togo    | 1999           | FemaleAge55to59     | 55094      |
| Togo    | 1999           | FemaleAge5to9       | 349393     |
| Togo    | 1999           | FemaleAge60to64     | 43816      |
| Togo    | 1999           | FemaleAge65to69     | 32808      |
| Togo    | 1999           | FemaleAge70to74     | 22419      |
| Togo    | 1999           | FemaleAge75to79     | 12973      |
| Togo    | 1999           | FemaleAge80to84     | 5762       |
| Togo    | 1999           | FemaleAge85to89     | 1772       |
| Togo    | 1999           | FemaleAge90to94     | 317        |
| Togo    | 1999           | FemaleAge95to99     | 36         |
| Togo    | 1999           | FemaleAgeAbove100   | 1          |
| Togo    | 1999           | FemaleLactAge15to19 | 24929      |
| Togo    | 1999           | FemaleLactAge20to24 | 49210      |
| Togo    | 1999           | FemaleLactAge25to29 | 44563      |
| Togo    | 1999           | FemaleLactAge30to34 | 30426      |
| Togo    | 1999           | FemaleLactAge35to39 | 19650      |
| Togo    | 1999           | FemaleLactAge40to44 | 8377       |
| Togo    | 1999           | FemaleLactAge45to49 | 2753       |

Dietary calcium and zinc deficiency risks are decreasing but remain prevalent

| Country             | Reference year | Age/gender group    | Population |
|---------------------|----------------|---------------------|------------|
| Togo                | 1999           | FemalePregAge15to19 | 18697      |
| Togo                | 1999           | FemalePregAge20to24 | 36908      |
| Togo                | 1999           | FemalePregAge25to29 | 33422      |
| Togo                | 1999           | FemalePregAge30to34 | 22819      |
| Togo                | 1999           | FemalePregAge35to39 | 14737      |
| Togo                | 1999           | FemalePregAge40to44 | 6283       |
| Togo                | 1999           | FemalePregAge45to49 | 2065       |
| Togo                | 1999           | MaleAge0to4         | 394930     |
| Togo                | 1999           | MaleAge10to14       | 312012     |
| Togo                | 1999           | MaleAge15to19       | 268780     |
| Togo                | 1999           | MaleAge20to24       | 218803     |
| Togo                | 1999           | MaleAge25to29       | 169209     |
| Togo                | 1999           | MaleAge30to34       | 131224     |
| Togo                | 1999           | MaleAge35to39       | 105743     |
| Togo                | 1999           | MaleAge40to44       | 86966      |
| Togo                | 1999           | MaleAge45to49       | 72696      |
| Togo                | 1999           | MaleAge50to54       | 60456      |
| Togo                | 1999           | MaleAge55to59       | 49065      |
| Togo                | 1999           | MaleAge5to9         | 347663     |
| Togo                | 1999           | MaleAge60to64       | 37485      |
| Togo                | 1999           | MaleAge65to69       | 27372      |
| Togo                | 1999           | MaleAge70to74       | 18048      |
| Togo                | 1999           | MaleAge75to79       | 9939       |
| Togo                | 1999           | MaleAge80to84       | 4142       |
| Togo                | 1999           | MaleAge85to89       | 1121       |
| Togo                | 1999           | MaleAge90to94       | 187        |
| Togo                | 1999           | MaleAge95to99       | 20         |
| Trinidad and Tobago | 1992           | FemaleAge0to4       | 57709      |
| Trinidad and Tobago | 1992           | FemaleAge10to14     | 67108      |
| Trinidad and Tobago | 1992           | FemaleAge15to19     | 51879      |
| Trinidad and Tobago | 1992           | FemaleAge20to24     | 40004      |
| Trinidad and Tobago | 1992           | FemaleAge25to29     | 43863      |
| Trinidad and Tobago | 1992           | FemaleAge30to34     | 43417      |
| Trinidad and Tobago | 1992           | FemaleAge35to39     | 39074      |
| Trinidad and Tobago | 1992           | FemaleAge40to44     | 34469      |
| Trinidad and Tobago | 1992           | FemaleAge45to49     | 29156      |
| Trinidad and Tobago | 1992           | FemaleAge50to54     | 23957      |
| Trinidad and Tobago | 1992           | FemaleAge55to59     | 19433      |
| Trinidad and Tobago | 1992           | FemaleAge5to9       | 73629      |
| Trinidad and Tobago | 1992           | FemaleAge60to64     | 16790      |
| Trinidad and Tobago | 1992           | FemaleAge65to69     | 14224      |
| Trinidad and Tobago | 1992           | FemaleAge70to74     | 10922      |
| Trinidad and Tobago | 1992           | FemaleAge75to79     | 7998       |
| Trinidad and Tobago | 1992           | FemaleAge80to84     | 4995       |
| Trinidad and Tobago | 1992           | FemaleAge85to89     | 2288       |
| Trinidad and Tobago | 1992           | FemaleAge90to94     | 770        |
| Trinidad and Tobago | 1992           | FemaleAge95to99     | 160        |
| Trinidad and Tobago | 1992           | FemaleAgeAbove100   | 15         |
| Trinidad and Tobago | 1992           | FemaleLactAge15to19 | 3291       |
| Trinidad and Tobago | 1992           | FemaleLactAge20to24 | 6424       |
| Trinidad and Tobago | 1992           | FemaleLactAge25to29 | 5937       |
| Trinidad and Tobago | 1992           | FemaleLactAge30to34 | 4388       |
| Trinidad and Tobago | 1992           | FemaleLactAge35to39 | 1904       |
| Trinidad and Tobago | 1992           | FemaleLactAge40to44 | 427        |
| Trinidad and Tobago | 1992           | FemaleLactAge45to49 | 31         |
| Trinidad and Tobago | 1992           | FemalePregAge15to19 | 2468       |
| Trinidad and Tobago | 1992           | FemalePregAge20to24 | 4818       |
| Trinidad and Tobago | 1992           | FemalePregAge25to29 | 4453       |
| Trinidad and Tobago | 1992           | FemalePregAge30to34 | 3291       |
| Trinidad and Tobago | 1992           | FemalePregAge35to39 | 1428       |
| Trinidad and Tobago | 1992           | FemalePregAge40to44 | 320        |
| Trinidad and Tobago | 1992           | FemalePregAge45to49 | 23         |
| Trinidad and Tobago | 1992           | MaleAge0to4         | 59603      |
| Trinidad and Tobago | 1992           | MaleAge10to14       | 69068      |
| Trinidad and Tobago | 1992           | MaleAge15to19       | 59082      |
| Trinidad and Tobago | 1992           | MaleAge20to24       | 51602      |
| Trinidad and Tobago | 1992           | MaleAge25to29       | 53867      |
| Trinidad and Tobago | 1992           | MaleAge30to34       | 51372      |
| Trinidad and Tobago | 1992           | MaleAge35to39       | 42762      |
| Trinidad and Tobago | 1992           | MaleAge40to44       | 35738      |
| Trinidad and Tobago | 1992           | MaleAge45to49       | 29423      |
| Trinidad and Tobago | 1992           | MaleAge50to54       | 23677      |
| Trinidad and Tobago | 1992           | MaleAge55to59       | 18167      |
| Trinidad and Tobago | 1992           | MaleAge5to9         | 75617      |
| Trinidad and Tobago | 1992           | MaleAge60to64       | 14653      |
| Trinidad and Tobago | 1992           | MaleAge65to69       | 12073      |
| Trinidad and Tobago | 1992           | MaleAge70to74       | 8810       |
| Trinidad and Tobago | 1992           | MaleAge75to79       | 6008       |
| Trinidad and Tobago | 1992           | MaleAge80to84       | 3270       |
| Trinidad and Tobago | 1992           | MaleAge85to89       | 1219       |
| Trinidad and Tobago | 1992           | MaleAge90to94       | 354        |
| Trinidad and Tobago | 1992           | MaleAge95to99       | 54         |
| Trinidad and Tobago | 1992           | MaleAgeAbove100     | 5          |
| Trinidad and Tobago | 1993           | FemaleAge0to4       | 55788      |
| Trinidad and Tobago | 1993           | FemaleAge10to14     | 69873      |
| Trinidad and Tobago | 1993           | FemaleAge15to19     | 52098      |
| Trinidad and Tobago | 1993           | FemaleAge20to24     | 40530      |
| Trinidad and Tobago | 1993           | FemaleAge25to29     | 41275      |

Dietary calcium and zinc deficiency risks are decreasing but remain prevalent

| Country             | Reference year | Age/gender group    | Population |
|---------------------|----------------|---------------------|------------|
| Trinidad and Tobago | 1993           | FemaleAge30to34     | 45262      |
| Trinidad and Tobago | 1993           | FemaleAge35to39     | 39848      |
| Trinidad and Tobago | 1993           | FemaleAge40to44     | 35714      |
| Trinidad and Tobago | 1993           | FemaleAge45to49     | 29889      |
| Trinidad and Tobago | 1993           | FemaleAge50to54     | 24858      |
| Trinidad and Tobago | 1993           | FemaleAge55to59     | 19953      |
| Trinidad and Tobago | 1993           | FemaleAge5to9       | 71257      |
| Trinidad and Tobago | 1993           | FemaleAge60to64     | 16902      |
| Trinidad and Tobago | 1993           | FemaleAge65to69     | 14459      |
| Trinidad and Tobago | 1993           | FemaleAge70to74     | 11163      |
| Trinidad and Tobago | 1993           | FemaleAge75to79     | 8023       |
| Trinidad and Tobago | 1993           | FemaleAge80to84     | 5154       |
| Trinidad and Tobago | 1993           | FemaleAge85to89     | 2369       |
| Trinidad and Tobago | 1993           | FemaleAge90to94     | 799        |
| Trinidad and Tobago | 1993           | FemaleAge95to99     | 179        |
| Trinidad and Tobago | 1993           | FemaleAgeAbove100   | 17         |
| Trinidad and Tobago | 1993           | FemaleLactAge15to19 | 3291       |
| Trinidad and Tobago | 1993           | FemaleLactAge20to24 | 6424       |
| Trinidad and Tobago | 1993           | FemaleLactAge25to29 | 5937       |
| Trinidad and Tobago | 1993           | FemaleLactAge30to34 | 4388       |
| Trinidad and Tobago | 1993           | FemaleLactAge35to39 | 1904       |
| Trinidad and Tobago | 1993           | FemaleLactAge40to44 | 427        |
| Trinidad and Tobago | 1993           | FemaleLactAge45to49 | 31         |
| Trinidad and Tobago | 1993           | FemalePregAge15to19 | 2468       |
| Trinidad and Tobago | 1993           | FemalePregAge20to24 | 4818       |
| Trinidad and Tobago | 1993           | FemalePregAge25to29 | 4453       |
| Trinidad and Tobago | 1993           | FemalePregAge30to34 | 3291       |
| Trinidad and Tobago | 1993           | FemalePregAge35to39 | 1428       |
| Trinidad and Tobago | 1993           | FemalePregAge40to44 | 320        |
| Trinidad and Tobago | 1993           | FemalePregAge45to49 | 23         |
| Trinidad and Tobago | 1993           | MaleAge0to4         | 57566      |
| Trinidad and Tobago | 1993           | MaleAge10to14       | 71804      |
| Trinidad and Tobago | 1993           | MaleAge15to19       | 59360      |
| Trinidad and Tobago | 1993           | MaleAge20to24       | 52244      |
| Trinidad and Tobago | 1993           | MaleAge25to29       | 51274      |
| Trinidad and Tobago | 1993           | MaleAge30to34       | 52870      |
| Trinidad and Tobago | 1993           | MaleAge35to39       | 43731      |
| Trinidad and Tobago | 1993           | MaleAge40to44       | 37061      |
| Trinidad and Tobago | 1993           | MaleAge45to49       | 30378      |
| Trinidad and Tobago | 1993           | MaleAge50to54       | 24549      |
| Trinidad and Tobago | 1993           | MaleAge55to59       | 18884      |
| Trinidad and Tobago | 1993           | MaleAge5to9         | 73204      |
| Trinidad and Tobago | 1993           | MaleAge60to64       | 14751      |
| Trinidad and Tobago | 1993           | MaleAge65to69       | 12163      |
| Trinidad and Tobago | 1993           | MaleAge70to74       | 8958       |
| Trinidad and Tobago | 1993           | MaleAge75to79       | 5924       |
| Trinidad and Tobago | 1993           | MaleAge80to84       | 3412       |
| Trinidad and Tobago | 1993           | MaleAge85to89       | 1228       |
| Trinidad and Tobago | 1993           | MaleAge90to94       | 368        |
| Trinidad and Tobago | 1993           | MaleAge95to99       | 64         |
| Trinidad and Tobago | 1993           | MaleAgeAbove100     | 5          |
| Trinidad and Tobago | 1994           | FemaleAge0to4       | 54144      |
| Trinidad and Tobago | 1994           | FemaleAge10to14     | 72219      |
| Trinidad and Tobago | 1994           | FemaleAge15to19     | 52890      |
| Trinidad and Tobago | 1994           | FemaleAge20to24     | 41190      |
| Trinidad and Tobago | 1994           | FemaleAge25to29     | 38877      |
| Trinidad and Tobago | 1994           | FemaleAge30to34     | 46405      |
| Trinidad and Tobago | 1994           | FemaleAge35to39     | 40814      |
| Trinidad and Tobago | 1994           | FemaleAge40to44     | 36882      |
| Trinidad and Tobago | 1994           | FemaleAge45to49     | 30718      |
| Trinidad and Tobago | 1994           | FemaleAge50to54     | 25742      |
| Trinidad and Tobago | 1994           | FemaleAge55to59     | 20575      |
| Trinidad and Tobago | 1994           | FemaleAge5to9       | 68000      |
| Trinidad and Tobago | 1994           | FemaleAge60to64     | 17084      |
| Trinidad and Tobago | 1994           | FemaleAge65to69     | 14692      |
| Trinidad and Tobago | 1994           | FemaleAge70to74     | 11425      |
| Trinidad and Tobago | 1994           | FemaleAge75to79     | 8091       |
| Trinidad and Tobago | 1994           | FemaleAge80to84     | 5290       |
| Trinidad and Tobago | 1994           | FemaleAge85to89     | 2421       |
| Trinidad and Tobago | 1994           | FemaleAge90to94     | 808        |
| Trinidad and Tobago | 1994           | FemaleAge95to99     | 187        |
| Trinidad and Tobago | 1994           | FemaleAgeAbove100   | 19         |
| Trinidad and Tobago | 1994           | FemaleLactAge15to19 | 3291       |
| Trinidad and Tobago | 1994           | FemaleLactAge20to24 | 6424       |
| Trinidad and Tobago | 1994           | FemaleLactAge25to29 | 5937       |
| Trinidad and Tobago | 1994           | FemaleLactAge30to34 | 4388       |
| Trinidad and Tobago | 1994           | FemaleLactAge35to39 | 1904       |
| Trinidad and Tobago | 1994           | FemaleLactAge40to44 | 427        |
| Trinidad and Tobago | 1994           | FemaleLactAge45to49 | 31         |
| Trinidad and Tobago | 1994           | FemalePregAge15to19 | 2468       |
| Trinidad and Tobago | 1994           | FemalePregAge20to24 | 4818       |
| Trinidad and Tobago | 1994           | FemalePregAge25to29 | 4453       |
| Trinidad and Tobago | 1994           | FemalePregAge30to34 | 3291       |
| Trinidad and Tobago | 1994           | FemalePregAge35to39 | 1428       |
| Trinidad and Tobago | 1994           | FemalePregAge40to44 | 320        |
| Trinidad and Tobago | 1994           | FemalePregAge45to49 | 23         |
| Trinidad and Tobago | 1994           | MaleAge0to4         | 55810      |
| Trinidad and Tobago | 1994           | MaleAge10to14       | 74114      |

Dietary calcium and zinc deficiency risks are decreasing but remain prevalent

| Country             | Reference year | Age/gender group    | Population |
|---------------------|----------------|---------------------|------------|
| Trinidad and Tobago | 1994           | MaleAge15to19       | 60210      |
| Trinidad and Tobago | 1994           | MaleAge20to24       | 53008      |
| Trinidad and Tobago | 1994           | MaleAge25to29       | 48890      |
| Trinidad and Tobago | 1994           | MaleAge30to34       | 53740      |
| Trinidad and Tobago | 1994           | MaleAge35to39       | 44659      |
| Trinidad and Tobago | 1994           | MaleAge40to44       | 38416      |
| Trinidad and Tobago | 1994           | MaleAge45to49       | 31402      |
| Trinidad and Tobago | 1994           | MaleAge50to54       | 25475      |
| Trinidad and Tobago | 1994           | MaleAge55to59       | 19655      |
| Trinidad and Tobago | 1994           | MaleAge5to9         | 69903      |
| Trinidad and Tobago | 1994           | MaleAge60to64       | 14971      |
| Trinidad and Tobago | 1994           | MaleAge65to69       | 12272      |
| Trinidad and Tobago | 1994           | MaleAge70to74       | 9108       |
| Trinidad and Tobago | 1994           | MaleAge75to79       | 5869       |
| Trinidad and Tobago | 1994           | MaleAge80to84       | 3488       |
| Trinidad and Tobago | 1994           | MaleAge85to89       | 1220       |
| Trinidad and Tobago | 1994           | MaleAge90to94       | 359        |
| Trinidad and Tobago | 1994           | MaleAge95to99       | 67         |
| Trinidad and Tobago | 1994           | MaleAgeAbove100     | 5          |
| Trinidad and Tobago | 1995           | FemaleAge0to4       | 52126      |
| Trinidad and Tobago | 1995           | FemaleAge10to14     | 73405      |
| Trinidad and Tobago | 1995           | FemaleAge15to19     | 54491      |
| Trinidad and Tobago | 1995           | FemaleAge20to24     | 41742      |
| Trinidad and Tobago | 1995           | FemaleAge25to29     | 37254      |
| Trinidad and Tobago | 1995           | FemaleAge30to34     | 46456      |
| Trinidad and Tobago | 1995           | FemaleAge35to39     | 42085      |
| Trinidad and Tobago | 1995           | FemaleAge40to44     | 37940      |
| Trinidad and Tobago | 1995           | FemaleAge45to49     | 31678      |
| Trinidad and Tobago | 1995           | FemaleAge50to54     | 26589      |
| Trinidad and Tobago | 1995           | FemaleAge55to59     | 21290      |
| Trinidad and Tobago | 1995           | FemaleAge5to9       | 64803      |
| Trinidad and Tobago | 1995           | FemaleAge60to64     | 17380      |
| Trinidad and Tobago | 1995           | FemaleAge65to69     | 14913      |
| Trinidad and Tobago | 1995           | FemaleAge70to74     | 11702      |
| Trinidad and Tobago | 1995           | FemaleAge75to79     | 8226       |
| Trinidad and Tobago | 1995           | FemaleAge80to84     | 5395       |
| Trinidad and Tobago | 1995           | FemaleAge85to89     | 2463       |
| Trinidad and Tobago | 1995           | FemaleAge90to94     | 794        |
| Trinidad and Tobago | 1995           | FemaleAge95to99     | 171        |
| Trinidad and Tobago | 1995           | FemaleAgeAbove100   | 21         |
| Trinidad and Tobago | 1995           | FemaleLactAge15to19 | 3291       |
| Trinidad and Tobago | 1995           | FemaleLactAge20to24 | 6424       |
| Trinidad and Tobago | 1995           | FemaleLactAge25to29 | 5937       |
| Trinidad and Tobago | 1995           | FemaleLactAge30to34 | 4388       |
| Trinidad and Tobago | 1995           | FemaleLactAge35to39 | 1904       |
| Trinidad and Tobago | 1995           | FemaleLactAge40to44 | 427        |
| Trinidad and Tobago | 1995           | FemaleLactAge45to49 | 31         |
| Trinidad and Tobago | 1995           | FemalePregAge15to19 | 2468       |
| Trinidad and Tobago | 1995           | FemalePregAge20to24 | 4818       |
| Trinidad and Tobago | 1995           | FemalePregAge25to29 | 4453       |
| Trinidad and Tobago | 1995           | FemalePregAge30to34 | 3291       |
| Trinidad and Tobago | 1995           | FemalePregAge35to39 | 1428       |
| Trinidad and Tobago | 1995           | FemalePregAge40to44 | 320        |
| Trinidad and Tobago | 1995           | FemalePregAge45to49 | 23         |
| Trinidad and Tobago | 1995           | MaleAge0to4         | 53704      |
| Trinidad and Tobago | 1995           | MaleAge10to14       | 75274      |
| Trinidad and Tobago | 1995           | MaleAge15to19       | 61865      |
| Trinidad and Tobago | 1995           | MaleAge20to24       | 53654      |
| Trinidad and Tobago | 1995           | MaleAge25to29       | 47297      |
| Trinidad and Tobago | 1995           | MaleAge30to34       | 53610      |
| Trinidad and Tobago | 1995           | MaleAge35to39       | 45708      |
| Trinidad and Tobago | 1995           | MaleAge40to44       | 39701      |
| Trinidad and Tobago | 1995           | MaleAge45to49       | 32541      |
| Trinidad and Tobago | 1995           | MaleAge50to54       | 26451      |
| Trinidad and Tobago | 1995           | MaleAge55to59       | 20468      |
| Trinidad and Tobago | 1995           | MaleAge5to9         | 66646      |
| Trinidad and Tobago | 1995           | MaleAge60to64       | 15351      |
| Trinidad and Tobago | 1995           | MaleAge65to69       | 12404      |
| Trinidad and Tobago | 1995           | MaleAge70to74       | 9251       |
| Trinidad and Tobago | 1995           | MaleAge75to79       | 5878       |
| Trinidad and Tobago | 1995           | MaleAge80to84       | 3486       |
| Trinidad and Tobago | 1995           | MaleAge85to89       | 1207       |
| Trinidad and Tobago | 1995           | MaleAge90to94       | 320        |
| Trinidad and Tobago | 1995           | MaleAge95to99       | 54         |
| Trinidad and Tobago | 1995           | MaleAgeAbove100     | 5          |
| Trinidad and Tobago | 1996           | FemaleAge0to4       | 50348      |
| Trinidad and Tobago | 1996           | FemaleAge10to14     | 73007      |
| Trinidad and Tobago | 1996           | FemaleAge15to19     | 56986      |
| Trinidad and Tobago | 1996           | FemaleAge20to24     | 43132      |
| Trinidad and Tobago | 1996           | FemaleAge25to29     | 39364      |
| Trinidad and Tobago | 1996           | FemaleAge30to34     | 46728      |
| Trinidad and Tobago | 1996           | FemaleAge35to39     | 43873      |
| Trinidad and Tobago | 1996           | FemaleAge40to44     | 38968      |
| Trinidad and Tobago | 1996           | FemaleAge45to49     | 32699      |
| Trinidad and Tobago | 1996           | FemaleAge50to54     | 27377      |
| Trinidad and Tobago | 1996           | FemaleAge55to59     | 22015      |
| Trinidad and Tobago | 1996           | FemaleAge5to9       | 61922      |
| Trinidad and Tobago | 1996           | FemaleAge60to64     | 17686      |

Dietary calcium and zinc deficiency risks are decreasing but remain prevalent

| Country             | Reference year | Age/gender group    | Population |
|---------------------|----------------|---------------------|------------|
| Trinidad and Tobago | 1996           | FemaleAge65to69     | 15027      |
| Trinidad and Tobago | 1996           | FemaleAge70to74     | 11908      |
| Trinidad and Tobago | 1996           | FemaleAge75to79     | 8391       |
| Trinidad and Tobago | 1996           | FemaleAge80to84     | 5475       |
| Trinidad and Tobago | 1996           | FemaleAge85to89     | 2645       |
| Trinidad and Tobago | 1996           | FemaleAge90to94     | 888        |
| Trinidad and Tobago | 1996           | FemaleAge95to99     | 187        |
| Trinidad and Tobago | 1996           | FemaleAgeAbov e100  | 23         |
| Trinidad and Tobago | 1996           | FemaleLactAge15to19 | 2909       |
| Trinidad and Tobago | 1996           | FemaleLactAge20to24 | 5799       |
| Trinidad and Tobago | 1996           | FemaleLactAge25to29 | 4387       |
| Trinidad and Tobago | 1996           | FemaleLactAge30to34 | 3691       |
| Trinidad and Tobago | 1996           | FemaleLactAge35to39 | 1777       |
| Trinidad and Tobago | 1996           | FemaleLactAge40to44 | 417        |
| Trinidad and Tobago | 1996           | FemaleLactAge45to49 | 23         |
| Trinidad and Tobago | 1996           | FemalePregAge15to19 | 2182       |
| Trinidad and Tobago | 1996           | FemalePregAge20to24 | 4349       |
| Trinidad and Tobago | 1996           | FemalePregAge25to29 | 3290       |
| Trinidad and Tobago | 1996           | FemalePregAge30to34 | 2768       |
| Trinidad and Tobago | 1996           | FemalePregAge35to39 | 1332       |
| Trinidad and Tobago | 1996           | FemalePregAge40to44 | 313        |
| Trinidad and Tobago | 1996           | FemalePregAge45to49 | 17         |
| Trinidad and Tobago | 1996           | MaleAge0to4         | 51834      |
| Trinidad and Tobago | 1996           | MaleAge10to14       | 74799      |
| Trinidad and Tobago | 1996           | MaleAge15to19       | 63692      |
| Trinidad and Tobago | 1996           | MaleAge20to24       | 54079      |
| Trinidad and Tobago | 1996           | MaleAge25to29       | 46823      |
| Trinidad and Tobago | 1996           | MaleAge30to34       | 52570      |
| Trinidad and Tobago | 1996           | MaleAge35to39       | 47253      |
| Trinidad and Tobago | 1996           | MaleAge40to44       | 40727      |
| Trinidad and Tobago | 1996           | MaleAge45to49       | 33656      |
| Trinidad and Tobago | 1996           | MaleAge50to54       | 27269      |
| Trinidad and Tobago | 1996           | MaleAge55to59       | 21201      |
| Trinidad and Tobago | 1996           | MaleAge5to9         | 63711      |
| Trinidad and Tobago | 1996           | MaleAge60to64       | 15741      |
| Trinidad and Tobago | 1996           | MaleAge65to69       | 12444      |
| Trinidad and Tobago | 1996           | MaleAge70to74       | 9352       |
| Trinidad and Tobago | 1996           | MaleAge75to79       | 6000       |
| Trinidad and Tobago | 1996           | MaleAge80to84       | 3527       |
| Trinidad and Tobago | 1996           | MaleAge85to89       | 1360       |
| Trinidad and Tobago | 1996           | MaleAge90to94       | 357        |
| Trinidad and Tobago | 1996           | MaleAge95to99       | 62         |
| Trinidad and Tobago | 1996           | MaleAgeAbov e100    | 5          |
| Trinidad and Tobago | 1997           | FemaleAge0to4       | 48489      |
| Trinidad and Tobago | 1997           | FemaleAge10to14     | 71522      |
| Trinidad and Tobago | 1997           | FemaleAge15to19     | 59567      |
| Trinidad and Tobago | 1997           | FemaleAge20to24     | 43197      |
| Trinidad and Tobago | 1997           | FemaleAge25to29     | 39453      |
| Trinidad and Tobago | 1997           | FemaleAge30to34     | 44741      |
| Trinidad and Tobago | 1997           | FemaleAge35to39     | 45748      |
| Trinidad and Tobago | 1997           | FemaleAge40to44     | 39831      |
| Trinidad and Tobago | 1997           | FemaleAge45to49     | 33815      |
| Trinidad and Tobago | 1997           | FemaleAge50to54     | 28113      |
| Trinidad and Tobago | 1997           | FemaleAge55to59     | 22839      |
| Trinidad and Tobago | 1997           | FemaleAge5to9       | 59122      |
| Trinidad and Tobago | 1997           | FemaleAge60to64     | 18101      |
| Trinidad and Tobago | 1997           | FemaleAge65to69     | 15116      |
| Trinidad and Tobago | 1997           | FemaleAge70to74     | 12138      |
| Trinidad and Tobago | 1997           | FemaleAge75to79     | 8589       |
| Trinidad and Tobago | 1997           | FemaleAge80to84     | 5520       |
| Trinidad and Tobago | 1997           | FemaleAge85to89     | 2806       |
| Trinidad and Tobago | 1997           | FemaleAge90to94     | 959        |
| Trinidad and Tobago | 1997           | FemaleAge95to99     | 208        |
| Trinidad and Tobago | 1997           | FemaleAgeAbov e100  | 25         |
| Trinidad and Tobago | 1997           | FemaleLactAge15to19 | 2909       |
| Trinidad and Tobago | 1997           | FemaleLactAge20to24 | 5799       |
| Trinidad and Tobago | 1997           | FemaleLactAge25to29 | 4387       |
| Trinidad and Tobago | 1997           | FemaleLactAge30to34 | 3691       |
| Trinidad and Tobago | 1997           | FemaleLactAge35to39 | 1777       |
| Trinidad and Tobago | 1997           | FemaleLactAge40to44 | 417        |
| Trinidad and Tobago | 1997           | FemaleLactAge45to49 | 23         |
| Trinidad and Tobago | 1997           | FemalePregAge15to19 | 2182       |
| Trinidad and Tobago | 1997           | FemalePregAge20to24 | 4349       |
| Trinidad and Tobago | 1997           | FemalePregAge25to29 | 3290       |
| Trinidad and Tobago | 1997           | FemalePregAge30to34 | 2768       |
| Trinidad and Tobago | 1997           | FemalePregAge35to39 | 1332       |
| Trinidad and Tobago | 1997           | FemalePregAge40to44 | 313        |
| Trinidad and Tobago | 1997           | FemalePregAge45to49 | 17         |
| Trinidad and Tobago | 1997           | MaleAge0to4         | 49922      |
| Trinidad and Tobago | 1997           | MaleAge10to14       | 73269      |
| Trinidad and Tobago | 1997           | MaleAge15to19       | 66230      |
| Trinidad and Tobago | 1997           | MaleAge20to24       | 54257      |
| Trinidad and Tobago | 1997           | MaleAge25to29       | 47049      |
| Trinidad and Tobago | 1997           | MaleAge30to34       | 50539      |
| Trinidad and Tobago | 1997           | MaleAge35to39       | 49012      |
| Trinidad and Tobago | 1997           | MaleAge40to44       | 41636      |
| Trinidad and Tobago | 1997           | MaleAge45to49       | 34881      |
| Trinidad and Tobago | 1997           | MaleAge50to54       | 28112      |

Dietary calcium and zinc deficiency risks are decreasing but remain prevalent

| Country             | Reference year | Age/gender group    | Population |
|---------------------|----------------|---------------------|------------|
| Trinidad and Tobago | 1997           | MaleAge55to59       | 21976      |
| Trinidad and Tobago | 1997           | MaleAge5to9         | 60842      |
| Trinidad and Tobago | 1997           | MaleAge60to64       | 16266      |
| Trinidad and Tobago | 1997           | MaleAge65to69       | 12479      |
| Trinidad and Tobago | 1997           | MaleAge70to74       | 9452       |
| Trinidad and Tobago | 1997           | MaleAge75to79       | 6138       |
| Trinidad and Tobago | 1997           | MaleAge80to84       | 3515       |
| Trinidad and Tobago | 1997           | MaleAge85to89       | 1491       |
| Trinidad and Tobago | 1997           | MaleAge90to94       | 378        |
| Trinidad and Tobago | 1997           | MaleAge95to99       | 74         |
| Trinidad and Tobago | 1997           | MaleAgeAbov e100    | 6          |
| Trinidad and Tobago | 1998           | FemaleAge0to4       | 46608      |
| Trinidad and Tobago | 1998           | FemaleAge10to14     | 69240      |
| Trinidad and Tobago | 1998           | FemaleAge15to19     | 62431      |
| Trinidad and Tobago | 1998           | FemaleAge20to24     | 43349      |
| Trinidad and Tobago | 1998           | FemaleAge25to29     | 39948      |
| Trinidad and Tobago | 1998           | FemaleAge30to34     | 42278      |
| Trinidad and Tobago | 1998           | FemaleAge35to39     | 47534      |
| Trinidad and Tobago | 1998           | FemaleAge40to44     | 40680      |
| Trinidad and Tobago | 1998           | FemaleAge45to49     | 35004      |
| Trinidad and Tobago | 1998           | FemaleAge50to54     | 28843      |
| Trinidad and Tobago | 1998           | FemaleAge55to59     | 23739      |
| Trinidad and Tobago | 1998           | FemaleAge5to9       | 56486      |
| Trinidad and Tobago | 1998           | FemaleAge60to64     | 18627      |
| Trinidad and Tobago | 1998           | FemaleAge65to69     | 15225      |
| Trinidad and Tobago | 1998           | FemaleAge70to74     | 12391      |
| Trinidad and Tobago | 1998           | FemaleAge75to79     | 8806       |
| Trinidad and Tobago | 1998           | FemaleAge80to84     | 5576       |
| Trinidad and Tobago | 1998           | FemaleAge85to89     | 2924       |
| Trinidad and Tobago | 1998           | FemaleAge90to94     | 1006       |
| Trinidad and Tobago | 1998           | FemaleAge95to99     | 228        |
| Trinidad and Tobago | 1998           | FemaleAgeAbov e100  | 28         |
| Trinidad and Tobago | 1998           | FemaleLactAge15to19 | 2909       |
| Trinidad and Tobago | 1998           | FemaleLactAge20to24 | 5799       |
| Trinidad and Tobago | 1998           | FemaleLactAge25to29 | 4387       |
| Trinidad and Tobago | 1998           | FemaleLactAge30to34 | 3691       |
| Trinidad and Tobago | 1998           | FemaleLactAge35to39 | 1777       |
| Trinidad and Tobago | 1998           | FemaleLactAge40to44 | 417        |
| Trinidad and Tobago | 1998           | FemaleLactAge45to49 | 23         |
| Trinidad and Tobago | 1998           | FemalePregAge15to19 | 2182       |
| Trinidad and Tobago | 1998           | FemalePregAge20to24 | 4349       |
| Trinidad and Tobago | 1998           | FemalePregAge25to29 | 3290       |
| Trinidad and Tobago | 1998           | FemalePregAge30to34 | 2768       |
| Trinidad and Tobago | 1998           | FemalePregAge35to39 | 1332       |
| Trinidad and Tobago | 1998           | FemalePregAge40to44 | 313        |
| Trinidad and Tobago | 1998           | FemalePregAge45to49 | 17         |
| Trinidad and Tobago | 1998           | MaleAge0to4         | 48008      |
| Trinidad and Tobago | 1998           | MaleAge10to14       | 70976      |
| Trinidad and Tobago | 1998           | MaleAge15to19       | 69014      |
| Trinidad and Tobago | 1998           | MaleAge20to24       | 54505      |
| Trinidad and Tobago | 1998           | MaleAge25to29       | 47669      |
| Trinidad and Tobago | 1998           | MaleAge30to34       | 48101      |
| Trinidad and Tobago | 1998           | MaleAge35to39       | 50568      |
| Trinidad and Tobago | 1998           | MaleAge40to44       | 42570      |
| Trinidad and Tobago | 1998           | MaleAge45to49       | 36166      |
| Trinidad and Tobago | 1998           | MaleAge50to54       | 29027      |
| Trinidad and Tobago | 1998           | MaleAge55to59       | 22791      |
| Trinidad and Tobago | 1998           | MaleAge5to9         | 58110      |
| Trinidad and Tobago | 1998           | MaleAge60to64       | 16906      |
| Trinidad and Tobago | 1998           | MaleAge65to69       | 12558      |
| Trinidad and Tobago | 1998           | MaleAge70to74       | 9563       |
| Trinidad and Tobago | 1998           | MaleAge75to79       | 6266       |
| Trinidad and Tobago | 1998           | MaleAge80to84       | 3499       |
| Trinidad and Tobago | 1998           | MaleAge85to89       | 1565       |
| Trinidad and Tobago | 1998           | MaleAge90to94       | 389        |
| Trinidad and Tobago | 1998           | MaleAge95to99       | 82         |
| Trinidad and Tobago | 1998           | MaleAgeAbov e100    | 6          |
| Trinidad and Tobago | 1999           | FemaleAge0to4       | 45070      |
| Trinidad and Tobago | 1999           | FemaleAge10to14     | 66675      |
| Trinidad and Tobago | 1999           | FemaleAge15to19     | 64747      |
| Trinidad and Tobago | 1999           | FemaleAge20to24     | 44054      |
| Trinidad and Tobago | 1999           | FemaleAge25to29     | 40427      |
| Trinidad and Tobago | 1999           | FemaleAge30to34     | 40128      |
| Trinidad and Tobago | 1999           | FemaleAge35to39     | 48624      |
| Trinidad and Tobago | 1999           | FemaleAge40to44     | 41715      |
| Trinidad and Tobago | 1999           | FemaleAge45to49     | 36186      |
| Trinidad and Tobago | 1999           | FemaleAge50to54     | 29650      |
| Trinidad and Tobago | 1999           | FemaleAge55to59     | 24652      |
| Trinidad and Tobago | 1999           | FemaleAge5to9       | 54004      |
| Trinidad and Tobago | 1999           | FemaleAge60to64     | 19264      |
| Trinidad and Tobago | 1999           | FemaleAge65to69     | 15408      |
| Trinidad and Tobago | 1999           | FemaleAge70to74     | 12647      |
| Trinidad and Tobago | 1999           | FemaleAge75to79     | 9035       |
| Trinidad and Tobago | 1999           | FemaleAge80to84     | 5674       |
| Trinidad and Tobago | 1999           | FemaleAge85to89     | 2988       |
| Trinidad and Tobago | 1999           | FemaleAge90to94     | 1032       |
| Trinidad and Tobago | 1999           | FemaleAge95to99     | 240        |
| Trinidad and Tobago | 1999           | FemaleAgeAbov e100  | 30         |



Dietary calcium and zinc deficiency risks are decreasing but remain prevalent

| Country             | Reference year | Age/gender group    | Population |
|---------------------|----------------|---------------------|------------|
| Trinidad and Tobago | 1999           | FemaleLactAge15to19 | 2909       |
| Trinidad and Tobago | 1999           | FemaleLactAge20to24 | 5799       |
| Trinidad and Tobago | 1999           | FemaleLactAge25to29 | 4387       |
| Trinidad and Tobago | 1999           | FemaleLactAge30to34 | 3691       |
| Trinidad and Tobago | 1999           | FemaleLactAge35to39 | 1777       |
| Trinidad and Tobago | 1999           | FemaleLactAge40to44 | 417        |
| Trinidad and Tobago | 1999           | FemaleLactAge45to49 | 23         |
| Trinidad and Tobago | 1999           | FemalePregAge15to19 | 2182       |
| Trinidad and Tobago | 1999           | FemalePregAge20to24 | 4349       |
| Trinidad and Tobago | 1999           | FemalePregAge25to29 | 3290       |
| Trinidad and Tobago | 1999           | FemalePregAge30to34 | 2768       |
| Trinidad and Tobago | 1999           | FemalePregAge35to39 | 1332       |
| Trinidad and Tobago | 1999           | FemalePregAge40to44 | 313        |
| Trinidad and Tobago | 1999           | FemalePregAge45to49 | 17         |
| Trinidad and Tobago | 1999           | MaleAge0to4         | 46440      |
| Trinidad and Tobago | 1999           | MaleAge10to14       | 68407      |
| Trinidad and Tobago | 1999           | MaleAge15to19       | 71239      |
| Trinidad and Tobago | 1999           | MaleAge20to24       | 55270      |
| Trinidad and Tobago | 1999           | MaleAge25to29       | 48245      |
| Trinidad and Tobago | 1999           | MaleAge30to34       | 46026      |
| Trinidad and Tobago | 1999           | MaleAge35to39       | 51362      |
| Trinidad and Tobago | 1999           | MaleAge40to44       | 43677      |
| Trinidad and Tobago | 1999           | MaleAge45to49       | 37443      |
| Trinidad and Tobago | 1999           | MaleAge50to54       | 30054      |
| Trinidad and Tobago | 1999           | MaleAge55to59       | 23646      |
| Trinidad and Tobago | 1999           | MaleAge5to9         | 55505      |
| Trinidad and Tobago | 1999           | MaleAge60to64       | 17612      |
| Trinidad and Tobago | 1999           | MaleAge65to69       | 12745      |
| Trinidad and Tobago | 1999           | MaleAge70to74       | 9681       |
| Trinidad and Tobago | 1999           | MaleAge75to79       | 6371       |
| Trinidad and Tobago | 1999           | MaleAge80to84       | 3509       |
| Trinidad and Tobago | 1999           | MaleAge85to89       | 1563       |
| Trinidad and Tobago | 1999           | MaleAge90to94       | 392        |
| Trinidad and Tobago | 1999           | MaleAge95to99       | 83         |
| Trinidad and Tobago | 1999           | MaleAgeAbov e100    | 7          |
| Tunisia             | 1992           | FemaleAge0to4       | 510610     |
| Tunisia             | 1992           | FemaleAge10to14     | 497469     |
| Tunisia             | 1992           | FemaleAge15to19     | 420073     |
| Tunisia             | 1992           | FemaleAge20to24     | 320262     |
| Tunisia             | 1992           | FemaleAge25to29     | 252347     |
| Tunisia             | 1992           | FemaleAge30to34     | 220758     |
| Tunisia             | 1992           | FemaleAge35to39     | 208980     |
| Tunisia             | 1992           | FemaleAge40to44     | 178452     |
| Tunisia             | 1992           | FemaleAge45to49     | 143203     |
| Tunisia             | 1992           | FemaleAge50to54     | 139477     |
| Tunisia             | 1992           | FemaleAge55to59     | 133951     |
| Tunisia             | 1992           | FemaleAge5to9       | 522724     |
| Tunisia             | 1992           | FemaleAge60to64     | 111624     |
| Tunisia             | 1992           | FemaleAge65to69     | 80007      |
| Tunisia             | 1992           | FemaleAge70to74     | 55223      |
| Tunisia             | 1992           | FemaleAge75to79     | 34424      |
| Tunisia             | 1992           | FemaleAge80to84     | 16381      |
| Tunisia             | 1992           | FemaleAge85to89     | 5575       |
| Tunisia             | 1992           | FemaleAge90to94     | 1110       |
| Tunisia             | 1992           | FemaleAge95to99     | 132        |
| Tunisia             | 1992           | FemaleAgeAbov e100  | 6          |
| Tunisia             | 1992           | FemaleLactAge15to19 | 8037       |
| Tunisia             | 1992           | FemaleLactAge20to24 | 45653      |
| Tunisia             | 1992           | FemaleLactAge25to29 | 68462      |
| Tunisia             | 1992           | FemaleLactAge30to34 | 50623      |
| Tunisia             | 1992           | FemaleLactAge35to39 | 26738      |
| Tunisia             | 1992           | FemaleLactAge40to44 | 7795       |
| Tunisia             | 1992           | FemaleLactAge45to49 | 1054       |
| Tunisia             | 1992           | FemalePregAge15to19 | 6028       |
| Tunisia             | 1992           | FemalePregAge20to24 | 34240      |
| Tunisia             | 1992           | FemalePregAge25to29 | 51347      |
| Tunisia             | 1992           | FemalePregAge30to34 | 37968      |
| Tunisia             | 1992           | FemalePregAge35to39 | 20053      |
| Tunisia             | 1992           | FemalePregAge40to44 | 5846       |
| Tunisia             | 1992           | FemalePregAge45to49 | 791        |
| Tunisia             | 1992           | MaleAge0to4         | 532166     |
| Tunisia             | 1992           | MaleAge10to14       | 520651     |
| Tunisia             | 1992           | MaleAge15to19       | 449308     |
| Tunisia             | 1992           | MaleAge20to24       | 399689     |
| Tunisia             | 1992           | MaleAge25to29       | 364577     |
| Tunisia             | 1992           | MaleAge30to34       | 308586     |
| Tunisia             | 1992           | MaleAge35to39       | 258307     |
| Tunisia             | 1992           | MaleAge40to44       | 192206     |
| Tunisia             | 1992           | MaleAge45to49       | 140078     |
| Tunisia             | 1992           | MaleAge50to54       | 133255     |
| Tunisia             | 1992           | MaleAge55to59       | 129316     |
| Tunisia             | 1992           | MaleAge5to9         | 545876     |
| Tunisia             | 1992           | MaleAge60to64       | 112234     |
| Tunisia             | 1992           | MaleAge65to69       | 82144      |
| Tunisia             | 1992           | MaleAge70to74       | 57475      |
| Tunisia             | 1992           | MaleAge75to79       | 34987      |
| Tunisia             | 1992           | MaleAge80to84       | 14871      |
| Tunisia             | 1992           | MaleAge85to89       | 4831       |

Dietary calcium and zinc deficiency risks are decreasing but remain prevalent

| Country | Reference year | Age/gender group    | Population |
|---------|----------------|---------------------|------------|
| Tunisia | 1992           | MaleAge90to94       | 1135       |
| Tunisia | 1992           | MaleAge95to99       | 163        |
| Tunisia | 1992           | MaleAgeAbove100     | 9          |
| Tunisia | 1993           | FemaleAge0to4       | 503989     |
| Tunisia | 1993           | FemaleAge10to14     | 505209     |
| Tunisia | 1993           | FemaleAge15to19     | 434949     |
| Tunisia | 1993           | FemaleAge20to24     | 321629     |
| Tunisia | 1993           | FemaleAge25to29     | 260290     |
| Tunisia | 1993           | FemaleAge30to34     | 234098     |
| Tunisia | 1993           | FemaleAge35to39     | 217017     |
| Tunisia | 1993           | FemaleAge40to44     | 194873     |
| Tunisia | 1993           | FemaleAge45to49     | 148671     |
| Tunisia | 1993           | FemaleAge50to54     | 138913     |
| Tunisia | 1993           | FemaleAge55to59     | 136810     |
| Tunisia | 1993           | FemaleAge5to9       | 520676     |
| Tunisia | 1993           | FemaleAge60to64     | 116651     |
| Tunisia | 1993           | FemaleAge65to69     | 85460      |
| Tunisia | 1993           | FemaleAge70to74     | 57362      |
| Tunisia | 1993           | FemaleAge75to79     | 36824      |
| Tunisia | 1993           | FemaleAge80to84     | 17452      |
| Tunisia | 1993           | FemaleAge85to89     | 6123       |
| Tunisia | 1993           | FemaleAge90to94     | 1243       |
| Tunisia | 1993           | FemaleAge95to99     | 161        |
| Tunisia | 1993           | FemaleAgeAbove100   | 7          |
| Tunisia | 1993           | FemaleLactAge15to19 | 8037       |
| Tunisia | 1993           | FemaleLactAge20to24 | 45653      |
| Tunisia | 1993           | FemaleLactAge25to29 | 68462      |
| Tunisia | 1993           | FemaleLactAge30to34 | 50623      |
| Tunisia | 1993           | FemaleLactAge35to39 | 26738      |
| Tunisia | 1993           | FemaleLactAge40to44 | 7795       |
| Tunisia | 1993           | FemaleLactAge45to49 | 1054       |
| Tunisia | 1993           | FemalePregAge15to19 | 6028       |
| Tunisia | 1993           | FemalePregAge20to24 | 34240      |
| Tunisia | 1993           | FemalePregAge25to29 | 51347      |
| Tunisia | 1993           | FemalePregAge30to34 | 37968      |
| Tunisia | 1993           | FemalePregAge35to39 | 20053      |
| Tunisia | 1993           | FemalePregAge40to44 | 5846       |
| Tunisia | 1993           | FemalePregAge45to49 | 791        |
| Tunisia | 1993           | MaleAge0to4         | 526024     |
| Tunisia | 1993           | MaleAge10to14       | 529175     |
| Tunisia | 1993           | MaleAge15to19       | 466685     |
| Tunisia | 1993           | MaleAge20to24       | 403130     |
| Tunisia | 1993           | MaleAge25to29       | 369270     |
| Tunisia | 1993           | MaleAge30to34       | 318276     |
| Tunisia | 1993           | MaleAge35to39       | 267435     |
| Tunisia | 1993           | MaleAge40to44       | 209637     |
| Tunisia | 1993           | MaleAge45to49       | 146939     |
| Tunisia | 1993           | MaleAge50to54       | 132311     |
| Tunisia | 1993           | MaleAge55to59       | 132394     |
| Tunisia | 1993           | MaleAge5to9         | 543671     |
| Tunisia | 1993           | MaleAge60to64       | 116316     |
| Tunisia | 1993           | MaleAge65to69       | 88541      |
| Tunisia | 1993           | MaleAge70to74       | 59137      |
| Tunisia | 1993           | MaleAge75to79       | 37896      |
| Tunisia | 1993           | MaleAge80to84       | 15808      |
| Tunisia | 1993           | MaleAge85to89       | 5054       |
| Tunisia | 1993           | MaleAge90to94       | 1215       |
| Tunisia | 1993           | MaleAge95to99       | 194        |
| Tunisia | 1993           | MaleAgeAbove100     | 10         |
| Tunisia | 1994           | FemaleAge0to4       | 495132     |
| Tunisia | 1994           | FemaleAge10to14     | 511057     |
| Tunisia | 1994           | FemaleAge15to19     | 449326     |
| Tunisia | 1994           | FemaleAge20to24     | 325088     |
| Tunisia | 1994           | FemaleAge25to29     | 266961     |
| Tunisia | 1994           | FemaleAge30to34     | 246564     |
| Tunisia | 1994           | FemaleAge35to39     | 225204     |
| Tunisia | 1994           | FemaleAge40to44     | 210546     |
| Tunisia | 1994           | FemaleAge45to49     | 156305     |
| Tunisia | 1994           | FemaleAge50to54     | 139141     |
| Tunisia | 1994           | FemaleAge55to59     | 138801     |
| Tunisia | 1994           | FemaleAge5to9       | 516319     |
| Tunisia | 1994           | FemaleAge60to64     | 121523     |
| Tunisia | 1994           | FemaleAge65to69     | 91105      |
| Tunisia | 1994           | FemaleAge70to74     | 60155      |
| Tunisia | 1994           | FemaleAge75to79     | 39301      |
| Tunisia | 1994           | FemaleAge80to84     | 18601      |
| Tunisia | 1994           | FemaleAge85to89     | 6577       |
| Tunisia | 1994           | FemaleAge90to94     | 1344       |
| Tunisia | 1994           | FemaleAge95to99     | 177        |
| Tunisia | 1994           | FemaleAgeAbove100   | 9          |
| Tunisia | 1994           | FemaleLactAge15to19 | 8037       |
| Tunisia | 1994           | FemaleLactAge20to24 | 45653      |
| Tunisia | 1994           | FemaleLactAge25to29 | 68462      |
| Tunisia | 1994           | FemaleLactAge30to34 | 50623      |
| Tunisia | 1994           | FemaleLactAge35to39 | 26738      |
| Tunisia | 1994           | FemaleLactAge40to44 | 7795       |
| Tunisia | 1994           | FemaleLactAge45to49 | 1054       |
| Tunisia | 1994           | FemalePregAge15to19 | 6028       |

Dietary calcium and zinc deficiency risks are decreasing but remain prevalent

| Country | Reference year | Age/gender group    | Population |
|---------|----------------|---------------------|------------|
| Tunisia | 1994           | FemalePregAge20to24 | 34240      |
| Tunisia | 1994           | FemalePregAge25to29 | 51347      |
| Tunisia | 1994           | FemalePregAge30to34 | 37968      |
| Tunisia | 1994           | FemalePregAge35to39 | 20053      |
| Tunisia | 1994           | FemalePregAge40to44 | 5846       |
| Tunisia | 1994           | FemalePregAge45to49 | 791        |
| Tunisia | 1994           | MaleAge0to4         | 517309     |
| Tunisia | 1994           | MaleAge10to14       | 535475     |
| Tunisia | 1994           | MaleAge15to19       | 483122     |
| Tunisia | 1994           | MaleAge20to24       | 409718     |
| Tunisia | 1994           | MaleAge25to29       | 373539     |
| Tunisia | 1994           | MaleAge30to34       | 325891     |
| Tunisia | 1994           | MaleAge35to39       | 275893     |
| Tunisia | 1994           | MaleAge40to44       | 226377     |
| Tunisia | 1994           | MaleAge45to49       | 156033     |
| Tunisia | 1994           | MaleAge50to54       | 132340     |
| Tunisia | 1994           | MaleAge55to59       | 134439     |
| Tunisia | 1994           | MaleAge5to9         | 538897     |
| Tunisia | 1994           | MaleAge60to64       | 120301     |
| Tunisia | 1994           | MaleAge65to69       | 94941      |
| Tunisia | 1994           | MaleAge70to74       | 61735      |
| Tunisia | 1994           | MaleAge75to79       | 40742      |
| Tunisia | 1994           | MaleAge80to84       | 16891      |
| Tunisia | 1994           | MaleAge85to89       | 5180       |
| Tunisia | 1994           | MaleAge90to94       | 1218       |
| Tunisia | 1994           | MaleAge95to99       | 197        |
| Tunisia | 1994           | MaleAgeAbov e100    | 10         |
| Tunisia | 1995           | FemaleAge0to4       | 483265     |
| Tunisia | 1995           | FemaleAge10to14     | 514689     |
| Tunisia | 1995           | FemaleAge15to19     | 461719     |
| Tunisia | 1995           | FemaleAge20to24     | 331886     |
| Tunisia | 1995           | FemaleAge25to29     | 272245     |
| Tunisia | 1995           | FemaleAge30to34     | 257501     |
| Tunisia | 1995           | FemaleAge35to39     | 234697     |
| Tunisia | 1995           | FemaleAge40to44     | 223973     |
| Tunisia | 1995           | FemaleAge45to49     | 166359     |
| Tunisia | 1995           | FemaleAge50to54     | 140724     |
| Tunisia | 1995           | FemaleAge55to59     | 139897     |
| Tunisia | 1995           | FemaleAge5to9       | 510388     |
| Tunisia | 1995           | FemaleAge60to64     | 126031     |
| Tunisia | 1995           | FemaleAge65to69     | 96748      |
| Tunisia | 1995           | FemaleAge70to74     | 63847      |
| Tunisia | 1995           | FemaleAge75to79     | 41731      |
| Tunisia | 1995           | FemaleAge80to84     | 19962      |
| Tunisia | 1995           | FemaleAge85to89     | 6955       |
| Tunisia | 1995           | FemaleAge90to94     | 1390       |
| Tunisia | 1995           | FemaleAge95to99     | 155        |
| Tunisia | 1995           | FemaleAgeAbov e100  | 10         |
| Tunisia | 1995           | FemaleLactAge15to19 | 8037       |
| Tunisia | 1995           | FemaleLactAge20to24 | 45653      |
| Tunisia | 1995           | FemaleLactAge25to29 | 68462      |
| Tunisia | 1995           | FemaleLactAge30to34 | 50623      |
| Tunisia | 1995           | FemaleLactAge35to39 | 26738      |
| Tunisia | 1995           | FemaleLactAge40to44 | 7795       |
| Tunisia | 1995           | FemaleLactAge45to49 | 1054       |
| Tunisia | 1995           | FemalePregAge15to19 | 6028       |
| Tunisia | 1995           | FemalePregAge20to24 | 34240      |
| Tunisia | 1995           | FemalePregAge25to29 | 51347      |
| Tunisia | 1995           | FemalePregAge30to34 | 37968      |
| Tunisia | 1995           | FemalePregAge35to39 | 20053      |
| Tunisia | 1995           | FemalePregAge40to44 | 5846       |
| Tunisia | 1995           | FemalePregAge45to49 | 791        |
| Tunisia | 1995           | MaleAge0to4         | 505072     |
| Tunisia | 1995           | MaleAge10to14       | 539196     |
| Tunisia | 1995           | MaleAge15to19       | 497160     |
| Tunisia | 1995           | MaleAge20to24       | 419985     |
| Tunisia | 1995           | MaleAge25to29       | 377707     |
| Tunisia | 1995           | MaleAge30to34       | 331573     |
| Tunisia | 1995           | MaleAge35to39       | 284142     |
| Tunisia | 1995           | MaleAge40to44       | 240915     |
| Tunisia | 1995           | MaleAge45to49       | 167474     |
| Tunisia | 1995           | MaleAge50to54       | 134110     |
| Tunisia | 1995           | MaleAge55to59       | 135292     |
| Tunisia | 1995           | MaleAge5to9         | 532374     |
| Tunisia | 1995           | MaleAge60to64       | 124170     |
| Tunisia | 1995           | MaleAge65to69       | 100875     |
| Tunisia | 1995           | MaleAge70to74       | 65671      |
| Tunisia | 1995           | MaleAge75to79       | 43324      |
| Tunisia | 1995           | MaleAge80to84       | 18303      |
| Tunisia | 1995           | MaleAge85to89       | 5248       |
| Tunisia | 1995           | MaleAge90to94       | 1094       |
| Tunisia | 1995           | MaleAge95to99       | 148        |
| Tunisia | 1995           | MaleAgeAbov e100    | 11         |
| Tunisia | 1996           | FemaleAge0to4       | 472622     |
| Tunisia | 1996           | FemaleAge10to14     | 517469     |
| Tunisia | 1996           | FemaleAge15to19     | 478983     |
| Tunisia | 1996           | FemaleAge20to24     | 362314     |
| Tunisia | 1996           | FemaleAge25to29     | 299475     |

Dietary calcium and zinc deficiency risks are decreasing but remain prevalent

| Country | Reference year | Age/gender group    | Population |
|---------|----------------|---------------------|------------|
| Tunisia | 1996           | FemaleAge30to34     | 270789     |
| Tunisia | 1996           | FemaleAge35to39     | 248595     |
| Tunisia | 1996           | FemaleAge40to44     | 237020     |
| Tunisia | 1996           | FemaleAge45to49     | 178760     |
| Tunisia | 1996           | FemaleAge50to54     | 142864     |
| Tunisia | 1996           | FemaleAge55to59     | 139310     |
| Tunisia | 1996           | FemaleAge5to9       | 505847     |
| Tunisia | 1996           | FemaleAge60to64     | 128532     |
| Tunisia | 1996           | FemaleAge65to69     | 100799     |
| Tunisia | 1996           | FemaleAge70to74     | 66877      |
| Tunisia | 1996           | FemaleAge75to79     | 43206      |
| Tunisia | 1996           | FemaleAge80to84     | 21664      |
| Tunisia | 1996           | FemaleAge85to89     | 7789       |
| Tunisia | 1996           | FemaleAge90to94     | 1742       |
| Tunisia | 1996           | FemaleAge95to99     | 184        |
| Tunisia | 1996           | FemaleAgeAbov e100  | 11         |
| Tunisia | 1996           | FemaleLactAge15to19 | 4184       |
| Tunisia | 1996           | FemaleLactAge20to24 | 32919      |
| Tunisia | 1996           | FemaleLactAge25to29 | 54522      |
| Tunisia | 1996           | FemaleLactAge30to34 | 48842      |
| Tunisia | 1996           | FemaleLactAge35to39 | 25178      |
| Tunisia | 1996           | FemaleLactAge40to44 | 6511       |
| Tunisia | 1996           | FemaleLactAge45to49 | 697        |
| Tunisia | 1996           | FemalePregAge15to19 | 3138       |
| Tunisia | 1996           | FemalePregAge20to24 | 24689      |
| Tunisia | 1996           | FemalePregAge25to29 | 40892      |
| Tunisia | 1996           | FemalePregAge30to34 | 36632      |
| Tunisia | 1996           | FemalePregAge35to39 | 18883      |
| Tunisia | 1996           | FemalePregAge40to44 | 4883       |
| Tunisia | 1996           | FemalePregAge45to49 | 523        |
| Tunisia | 1996           | MaleAge0to4         | 495254     |
| Tunisia | 1996           | MaleAge10to14       | 540999     |
| Tunisia | 1996           | MaleAge15to19       | 506732     |
| Tunisia | 1996           | MaleAge20to24       | 428868     |
| Tunisia | 1996           | MaleAge25to29       | 381784     |
| Tunisia | 1996           | MaleAge30to34       | 339729     |
| Tunisia | 1996           | MaleAge35to39       | 293254     |
| Tunisia | 1996           | MaleAge40to44       | 252801     |
| Tunisia | 1996           | MaleAge45to49       | 180394     |
| Tunisia | 1996           | MaleAge50to54       | 136559     |
| Tunisia | 1996           | MaleAge55to59       | 134109     |
| Tunisia | 1996           | MaleAge5to9         | 528086     |
| Tunisia | 1996           | MaleAge60to64       | 126140     |
| Tunisia | 1996           | MaleAge65to69       | 104286     |
| Tunisia | 1996           | MaleAge70to74       | 68521      |
| Tunisia | 1996           | MaleAge75to79       | 44071      |
| Tunisia | 1996           | MaleAge80to84       | 20199      |
| Tunisia | 1996           | MaleAge85to89       | 6026       |
| Tunisia | 1996           | MaleAge90to94       | 1275       |
| Tunisia | 1996           | MaleAge95to99       | 173        |
| Tunisia | 1996           | MaleAgeAbov e100    | 12         |
| Tunisia | 1997           | FemaleAge0to4       | 456548     |
| Tunisia | 1997           | FemaleAge10to14     | 518192     |
| Tunisia | 1997           | FemaleAge15to19     | 488662     |
| Tunisia | 1997           | FemaleAge20to24     | 373907     |
| Tunisia | 1997           | FemaleAge25to29     | 300281     |
| Tunisia | 1997           | FemaleAge30to34     | 280024     |
| Tunisia | 1997           | FemaleAge35to39     | 261068     |
| Tunisia | 1997           | FemaleAge40to44     | 245504     |
| Tunisia | 1997           | FemaleAge45to49     | 193320     |
| Tunisia | 1997           | FemaleAge50to54     | 146234     |
| Tunisia | 1997           | FemaleAge55to59     | 138345     |
| Tunisia | 1997           | FemaleAge5to9       | 500511     |
| Tunisia | 1997           | FemaleAge60to64     | 130772     |
| Tunisia | 1997           | FemaleAge65to69     | 105002     |
| Tunisia | 1997           | FemaleAge70to74     | 70558      |
| Tunisia | 1997           | FemaleAge75to79     | 44377      |
| Tunisia | 1997           | FemaleAge80to84     | 23495      |
| Tunisia | 1997           | FemaleAge85to89     | 8492       |
| Tunisia | 1997           | FemaleAge90to94     | 2050       |
| Tunisia | 1997           | FemaleAge95to99     | 226        |
| Tunisia | 1997           | FemaleAgeAbov e100  | 13         |
| Tunisia | 1997           | FemaleLactAge15to19 | 4184       |
| Tunisia | 1997           | FemaleLactAge20to24 | 32919      |
| Tunisia | 1997           | FemaleLactAge25to29 | 54522      |
| Tunisia | 1997           | FemaleLactAge30to34 | 48842      |
| Tunisia | 1997           | FemaleLactAge35to39 | 25178      |
| Tunisia | 1997           | FemaleLactAge40to44 | 6511       |
| Tunisia | 1997           | FemaleLactAge45to49 | 697        |
| Tunisia | 1997           | FemalePregAge15to19 | 3138       |
| Tunisia | 1997           | FemalePregAge20to24 | 24689      |
| Tunisia | 1997           | FemalePregAge25to29 | 40892      |
| Tunisia | 1997           | FemalePregAge30to34 | 36632      |
| Tunisia | 1997           | FemalePregAge35to39 | 18883      |
| Tunisia | 1997           | FemalePregAge40to44 | 4883       |
| Tunisia | 1997           | FemalePregAge45to49 | 523        |
| Tunisia | 1997           | MaleAge0to4         | 478711     |
| Tunisia | 1997           | MaleAge10to14       | 541143     |

Dietary calcium and zinc deficiency risks are decreasing but remain prevalent

| Country | Reference year | Age/gender group    | Population |
|---------|----------------|---------------------|------------|
| Tunisia | 1997           | MaleAge15to19       | 515506     |
| Tunisia | 1997           | MaleAge20to24       | 440480     |
| Tunisia | 1997           | MaleAge25to29       | 384290     |
| Tunisia | 1997           | MaleAge30to34       | 347002     |
| Tunisia | 1997           | MaleAge35to39       | 302544     |
| Tunisia | 1997           | MaleAge40to44       | 262459     |
| Tunisia | 1997           | MaleAge45to49       | 196059     |
| Tunisia | 1997           | MaleAge50to54       | 140733     |
| Tunisia | 1997           | MaleAge55to59       | 132201     |
| Tunisia | 1997           | MaleAge5to9         | 523327     |
| Tunisia | 1997           | MaleAge60to64       | 128069     |
| Tunisia | 1997           | MaleAge65to69       | 107523     |
| Tunisia | 1997           | MaleAge70to74       | 72524      |
| Tunisia | 1997           | MaleAge75to79       | 44230      |
| Tunisia | 1997           | MaleAge80to84       | 22087      |
| Tunisia | 1997           | MaleAge85to89       | 6638       |
| Tunisia | 1997           | MaleAge90to94       | 1417       |
| Tunisia | 1997           | MaleAge95to99       | 220        |
| Tunisia | 1997           | MaleAgeAbov e100    | 12         |
| Tunisia | 1998           | FemaleAge0to4       | 437625     |
| Tunisia | 1998           | FemaleAge10to14     | 516818     |
| Tunisia | 1998           | FemaleAge15to19     | 497195     |
| Tunisia | 1998           | FemaleAge20to24     | 387730     |
| Tunisia | 1998           | FemaleAge25to29     | 300527     |
| Tunisia | 1998           | FemaleAge30to34     | 288000     |
| Tunisia | 1998           | FemaleAge35to39     | 273986     |
| Tunisia | 1998           | FemaleAge40to44     | 252687     |
| Tunisia | 1998           | FemaleAge45to49     | 209280     |
| Tunisia | 1998           | FemaleAge50to54     | 151187     |
| Tunisia | 1998           | FemaleAge55to59     | 137525     |
| Tunisia | 1998           | FemaleAge5to9       | 494222     |
| Tunisia | 1998           | FemaleAge60to64     | 132581     |
| Tunisia | 1998           | FemaleAge65to69     | 109250     |
| Tunisia | 1998           | FemaleAge70to74     | 74705      |
| Tunisia | 1998           | FemaleAge75to79     | 45581      |
| Tunisia | 1998           | FemaleAge80to84     | 25314      |
| Tunisia | 1998           | FemaleAge85to89     | 9089       |
| Tunisia | 1998           | FemaleAge90to94     | 2288       |
| Tunisia | 1998           | FemaleAge95to99     | 277        |
| Tunisia | 1998           | FemaleAgeAbov e100  | 15         |
| Tunisia | 1998           | FemaleLactAge15to19 | 4184       |
| Tunisia | 1998           | FemaleLactAge20to24 | 32919      |
| Tunisia | 1998           | FemaleLactAge25to29 | 54522      |
| Tunisia | 1998           | FemaleLactAge30to34 | 48842      |
| Tunisia | 1998           | FemaleLactAge35to39 | 25178      |
| Tunisia | 1998           | FemaleLactAge40to44 | 6511       |
| Tunisia | 1998           | FemaleLactAge45to49 | 697        |
| Tunisia | 1998           | FemalePregAge15to19 | 3138       |
| Tunisia | 1998           | FemalePregAge20to24 | 24689      |
| Tunisia | 1998           | FemalePregAge25to29 | 40892      |
| Tunisia | 1998           | FemalePregAge30to34 | 36632      |
| Tunisia | 1998           | FemalePregAge35to39 | 18883      |
| Tunisia | 1998           | FemalePregAge40to44 | 4883       |
| Tunisia | 1998           | FemalePregAge45to49 | 523        |
| Tunisia | 1998           | MaleAge0to4         | 458474     |
| Tunisia | 1998           | MaleAge10to14       | 539576     |
| Tunisia | 1998           | MaleAge15to19       | 523260     |
| Tunisia | 1998           | MaleAge20to24       | 453865     |
| Tunisia | 1998           | MaleAge25to29       | 386312     |
| Tunisia | 1998           | MaleAge30to34       | 353010     |
| Tunisia | 1998           | MaleAge35to39       | 311591     |
| Tunisia | 1998           | MaleAge40to44       | 270481     |
| Tunisia | 1998           | MaleAge45to49       | 213108     |
| Tunisia | 1998           | MaleAge50to54       | 146906     |
| Tunisia | 1998           | MaleAge55to59       | 130266     |
| Tunisia | 1998           | MaleAge5to9         | 517727     |
| Tunisia | 1998           | MaleAge60to64       | 129583     |
| Tunisia | 1998           | MaleAge65to69       | 110650     |
| Tunisia | 1998           | MaleAge70to74       | 77285      |
| Tunisia | 1998           | MaleAge75to79       | 44420      |
| Tunisia | 1998           | MaleAge80to84       | 23675      |
| Tunisia | 1998           | MaleAge85to89       | 7093       |
| Tunisia | 1998           | MaleAge90to94       | 1521       |
| Tunisia | 1998           | MaleAge95to99       | 260        |
| Tunisia | 1998           | MaleAgeAbov e100    | 13         |
| Tunisia | 1999           | FemaleAge0to4       | 419988     |
| Tunisia | 1999           | FemaleAge10to14     | 513739     |
| Tunisia | 1999           | FemaleAge15to19     | 504131     |
| Tunisia | 1999           | FemaleAge20to24     | 401614     |
| Tunisia | 1999           | FemaleAge25to29     | 302520     |
| Tunisia | 1999           | FemaleAge30to34     | 294172     |
| Tunisia | 1999           | FemaleAge35to39     | 286032     |
| Tunisia | 1999           | FemaleAge40to44     | 260320     |
| Tunisia | 1999           | FemaleAge45to49     | 224382     |
| Tunisia | 1999           | FemaleAge50to54     | 158273     |
| Tunisia | 1999           | FemaleAge55to59     | 137541     |
| Tunisia | 1999           | FemaleAge5to9       | 486336     |
| Tunisia | 1999           | FemaleAge60to64     | 133770     |

Dietary calcium and zinc deficiency risks are decreasing but remain prevalent

| Country | Reference year | Age/gender group    | Population |
|---------|----------------|---------------------|------------|
| Tunisia | 1999           | FemaleAge65to69     | 113292     |
| Tunisia | 1999           | FemaleAge70to74     | 79059      |
| Tunisia | 1999           | FemaleAge75to79     | 47256      |
| Tunisia | 1999           | FemaleAge80to84     | 26901      |
| Tunisia | 1999           | FemaleAge85to89     | 9668       |
| Tunisia | 1999           | FemaleAge90to94     | 2433       |
| Tunisia | 1999           | FemaleAge95to99     | 319        |
| Tunisia | 1999           | FemaleAgeAbove100   | 17         |
| Tunisia | 1999           | FemaleLactAge15to19 | 4184       |
| Tunisia | 1999           | FemaleLactAge20to24 | 32919      |
| Tunisia | 1999           | FemaleLactAge25to29 | 54522      |
| Tunisia | 1999           | FemaleLactAge30to34 | 48842      |
| Tunisia | 1999           | FemaleLactAge35to39 | 25178      |
| Tunisia | 1999           | FemaleLactAge40to44 | 6511       |
| Tunisia | 1999           | FemaleLactAge45to49 | 697        |
| Tunisia | 1999           | FemalePregAge15to19 | 3138       |
| Tunisia | 1999           | FemalePregAge20to24 | 24689      |
| Tunisia | 1999           | FemalePregAge25to29 | 40892      |
| Tunisia | 1999           | FemalePregAge30to34 | 36632      |
| Tunisia | 1999           | FemalePregAge35to39 | 18883      |
| Tunisia | 1999           | FemalePregAge40to44 | 4883       |
| Tunisia | 1999           | FemalePregAge45to49 | 523        |
| Tunisia | 1999           | MaleAge0to4         | 439435     |
| Tunisia | 1999           | MaleAge10to14       | 536637     |
| Tunisia | 1999           | MaleAge15to19       | 529608     |
| Tunisia | 1999           | MaleAge20to24       | 467151     |
| Tunisia | 1999           | MaleAge25to29       | 389545     |
| Tunisia | 1999           | MaleAge30to34       | 357338     |
| Tunisia | 1999           | MaleAge35to39       | 319661     |
| Tunisia | 1999           | MaleAge40to44       | 278024     |
| Tunisia | 1999           | MaleAge45to49       | 229331     |
| Tunisia | 1999           | MaleAge50to54       | 155382     |
| Tunisia | 1999           | MaleAge55to59       | 129354     |
| Tunisia | 1999           | MaleAge5to9         | 510336     |
| Tunisia | 1999           | MaleAge60to64       | 130224     |
| Tunisia | 1999           | MaleAge65to69       | 113689     |
| Tunisia | 1999           | MaleAge70to74       | 82154      |
| Tunisia | 1999           | MaleAge75to79       | 45394      |
| Tunisia | 1999           | MaleAge80to84       | 24660      |
| Tunisia | 1999           | MaleAge85to89       | 7460       |
| Tunisia | 1999           | MaleAge90to94       | 1568       |
| Tunisia | 1999           | MaleAge95to99       | 260        |
| Tunisia | 1999           | MaleAgeAbove100     | 14         |
| Turkey  | 1992           | FemaleAge0to4       | 3215136    |
| Turkey  | 1992           | FemaleAge10to14     | 3186965    |
| Turkey  | 1992           | FemaleAge15to19     | 2630868    |
| Turkey  | 1992           | FemaleAge20to24     | 1700036    |
| Turkey  | 1992           | FemaleAge25to29     | 1632080    |
| Turkey  | 1992           | FemaleAge30to34     | 1715553    |
| Turkey  | 1992           | FemaleAge35to39     | 1731519    |
| Turkey  | 1992           | FemaleAge40to44     | 1429780    |
| Turkey  | 1992           | FemaleAge45to49     | 1147204    |
| Turkey  | 1992           | FemaleAge50to54     | 975617     |
| Turkey  | 1992           | FemaleAge55to59     | 918015     |
| Turkey  | 1992           | FemaleAge5to9       | 3280440    |
| Turkey  | 1992           | FemaleAge60to64     | 797963     |
| Turkey  | 1992           | FemaleAge65to69     | 578507     |
| Turkey  | 1992           | FemaleAge70to74     | 378254     |
| Turkey  | 1992           | FemaleAge75to79     | 274721     |
| Turkey  | 1992           | FemaleAge80to84     | 185800     |
| Turkey  | 1992           | FemaleAge85to89     | 78159      |
| Turkey  | 1992           | FemaleAge90to94     | 21402      |
| Turkey  | 1992           | FemaleAge95to99     | 3903       |
| Turkey  | 1992           | FemaleAgeAbove100   | 209        |
| Turkey  | 1992           | FemaleLactAge15to19 | 179848     |
| Turkey  | 1992           | FemaleLactAge20to24 | 510285     |
| Turkey  | 1992           | FemaleLactAge25to29 | 379657     |
| Turkey  | 1992           | FemaleLactAge30to34 | 213991     |
| Turkey  | 1992           | FemaleLactAge35to39 | 77258      |
| Turkey  | 1992           | FemaleLactAge40to44 | 19993      |
| Turkey  | 1992           | FemalePregAge15to19 | 134886     |
| Turkey  | 1992           | FemalePregAge20to24 | 382714     |
| Turkey  | 1992           | FemalePregAge25to29 | 284742     |
| Turkey  | 1992           | FemalePregAge30to34 | 160493     |
| Turkey  | 1992           | FemalePregAge35to39 | 57944      |
| Turkey  | 1992           | FemalePregAge40to44 | 14995      |
| Turkey  | 1992           | MaleAge0to4         | 3314728    |
| Turkey  | 1992           | MaleAge10to14       | 3240962    |
| Turkey  | 1992           | MaleAge15to19       | 2936549    |
| Turkey  | 1992           | MaleAge20to24       | 2559197    |
| Turkey  | 1992           | MaleAge25to29       | 2236492    |
| Turkey  | 1992           | MaleAge30to34       | 1945598    |
| Turkey  | 1992           | MaleAge35to39       | 1652627    |
| Turkey  | 1992           | MaleAge40to44       | 1302426    |
| Turkey  | 1992           | MaleAge45to49       | 1070773    |
| Turkey  | 1992           | MaleAge50to54       | 1008321    |
| Turkey  | 1992           | MaleAge55to59       | 990524     |
| Turkey  | 1992           | MaleAge5to9         | 3362303    |

Dietary calcium and zinc deficiency risks are decreasing but remain prevalent

| Country | Reference year | Age/gender group    | Population |
|---------|----------------|---------------------|------------|
| Turkey  | 1992           | MaleAge60to64       | 773650     |
| Turkey  | 1992           | MaleAge65to69       | 493726     |
| Turkey  | 1992           | MaleAge70to74       | 276856     |
| Turkey  | 1992           | MaleAge75to79       | 196145     |
| Turkey  | 1992           | MaleAge80to84       | 114670     |
| Turkey  | 1992           | MaleAge85to89       | 32731      |
| Turkey  | 1992           | MaleAge90to94       | 7460       |
| Turkey  | 1992           | MaleAge95to99       | 485        |
| Turkey  | 1992           | MaleAgeAbov e100    | 15         |
| Turkey  | 1993           | FemaleAge0to4       | 3196900    |
| Turkey  | 1993           | FemaleAge10to14     | 3213113    |
| Turkey  | 1993           | FemaleAge15to19     | 2679478    |
| Turkey  | 1993           | FemaleAge20to24     | 1770527    |
| Turkey  | 1993           | FemaleAge25to29     | 1672925    |
| Turkey  | 1993           | FemaleAge30to34     | 1750712    |
| Turkey  | 1993           | FemaleAge35to39     | 1776092    |
| Turkey  | 1993           | FemaleAge40to44     | 1522798    |
| Turkey  | 1993           | FemaleAge45to49     | 1180222    |
| Turkey  | 1993           | FemaleAge50to54     | 1003218    |
| Turkey  | 1993           | FemaleAge55to59     | 910791     |
| Turkey  | 1993           | FemaleAge5to9       | 3260190    |
| Turkey  | 1993           | FemaleAge60to64     | 830095     |
| Turkey  | 1993           | FemaleAge65to69     | 610552     |
| Turkey  | 1993           | FemaleAge70to74     | 401516     |
| Turkey  | 1993           | FemaleAge75to79     | 269521     |
| Turkey  | 1993           | FemaleAge80to84     | 189635     |
| Turkey  | 1993           | FemaleAge85to89     | 83667      |
| Turkey  | 1993           | FemaleAge90to94     | 21250      |
| Turkey  | 1993           | FemaleAge95to99     | 4767       |
| Turkey  | 1993           | FemaleAgeAbov e100  | 210        |
| Turkey  | 1993           | FemaleLactAge15to19 | 179848     |
| Turkey  | 1993           | FemaleLactAge20to24 | 510285     |
| Turkey  | 1993           | FemaleLactAge25to29 | 379657     |
| Turkey  | 1993           | FemaleLactAge30to34 | 213991     |
| Turkey  | 1993           | FemaleLactAge35to39 | 77258      |
| Turkey  | 1993           | FemaleLactAge40to44 | 19993      |
| Turkey  | 1993           | FemalePregAge15to19 | 134886     |
| Turkey  | 1993           | FemalePregAge20to24 | 382714     |
| Turkey  | 1993           | FemalePregAge25to29 | 284742     |
| Turkey  | 1993           | FemalePregAge30to34 | 160493     |
| Turkey  | 1993           | FemalePregAge35to39 | 57944      |
| Turkey  | 1993           | FemalePregAge40to44 | 14995      |
| Turkey  | 1993           | MaleAge0to4         | 3297791    |
| Turkey  | 1993           | MaleAge10to14       | 3271286    |
| Turkey  | 1993           | MaleAge15to19       | 2996047    |
| Turkey  | 1993           | MaleAge20to24       | 2621589    |
| Turkey  | 1993           | MaleAge25to29       | 2282769    |
| Turkey  | 1993           | MaleAge30to34       | 1996166    |
| Turkey  | 1993           | MaleAge35to39       | 1701974    |
| Turkey  | 1993           | MaleAge40to44       | 1369915    |
| Turkey  | 1993           | MaleAge45to49       | 1087741    |
| Turkey  | 1993           | MaleAge50to54       | 1005202    |
| Turkey  | 1993           | MaleAge55to59       | 982157     |
| Turkey  | 1993           | MaleAge5to9         | 3343059    |
| Turkey  | 1993           | MaleAge60to64       | 824729     |
| Turkey  | 1993           | MaleAge65to69       | 521425     |
| Turkey  | 1993           | MaleAge70to74       | 302176     |
| Turkey  | 1993           | MaleAge75to79       | 178903     |
| Turkey  | 1993           | MaleAge80to84       | 123801     |
| Turkey  | 1993           | MaleAge85to89       | 32441      |
| Turkey  | 1993           | MaleAge90to94       | 8203       |
| Turkey  | 1993           | MaleAge95to99       | 699        |
| Turkey  | 1993           | MaleAgeAbov e100    | 15         |
| Turkey  | 1994           | FemaleAge0to4       | 3185335    |
| Turkey  | 1994           | FemaleAge10to14     | 3231332    |
| Turkey  | 1994           | FemaleAge15to19     | 2724523    |
| Turkey  | 1994           | FemaleAge20to24     | 1839498    |
| Turkey  | 1994           | FemaleAge25to29     | 1719624    |
| Turkey  | 1994           | FemaleAge30to34     | 1786215    |
| Turkey  | 1994           | FemaleAge35to39     | 1816807    |
| Turkey  | 1994           | FemaleAge40to44     | 1611327    |
| Turkey  | 1994           | FemaleAge45to49     | 1224373    |
| Turkey  | 1994           | FemaleAge50to54     | 1033292    |
| Turkey  | 1994           | FemaleAge55to59     | 907438     |
| Turkey  | 1994           | FemaleAge5to9       | 3233112    |
| Turkey  | 1994           | FemaleAge60to64     | 855822     |
| Turkey  | 1994           | FemaleAge65to69     | 644002     |
| Turkey  | 1994           | FemaleAge70to74     | 428013     |
| Turkey  | 1994           | FemaleAge75to79     | 269911     |
| Turkey  | 1994           | FemaleAge80to84     | 191461     |
| Turkey  | 1994           | FemaleAge85to89     | 86961      |
| Turkey  | 1994           | FemaleAge90to94     | 21162      |
| Turkey  | 1994           | FemaleAge95to99     | 4777       |
| Turkey  | 1994           | FemaleAgeAbov e100  | 214        |
| Turkey  | 1994           | FemaleLactAge15to19 | 179848     |
| Turkey  | 1994           | FemaleLactAge20to24 | 510285     |
| Turkey  | 1994           | FemaleLactAge25to29 | 379657     |
| Turkey  | 1994           | FemaleLactAge30to34 | 213991     |

Dietary calcium and zinc deficiency risks are decreasing but remain prevalent

| Country | Reference year | Age/gender group    | Population |
|---------|----------------|---------------------|------------|
| Turkey  | 1994           | FemaleLactAge35to39 | 77258      |
| Turkey  | 1994           | FemaleLactAge40to44 | 19993      |
| Turkey  | 1994           | FemalePregAge15to19 | 134886     |
| Turkey  | 1994           | FemalePregAge20to24 | 382714     |
| Turkey  | 1994           | FemalePregAge25to29 | 284742     |
| Turkey  | 1994           | FemalePregAge30to34 | 160493     |
| Turkey  | 1994           | FemalePregAge35to39 | 57944      |
| Turkey  | 1994           | FemalePregAge40to44 | 14995      |
| Turkey  | 1994           | MaleAge0to4         | 3287868    |
| Turkey  | 1994           | MaleAge10to14       | 3293215    |
| Turkey  | 1994           | MaleAge15to19       | 3052656    |
| Turkey  | 1994           | MaleAge20to24       | 2684852    |
| Turkey  | 1994           | MaleAge25to29       | 2331857    |
| Turkey  | 1994           | MaleAge30to34       | 2046028    |
| Turkey  | 1994           | MaleAge35to39       | 1750917    |
| Turkey  | 1994           | MaleAge40to44       | 1437363    |
| Turkey  | 1994           | MaleAge45to49       | 1114617    |
| Turkey  | 1994           | MaleAge50to54       | 1005525    |
| Turkey  | 1994           | MaleAge55to59       | 972513     |
| Turkey  | 1994           | MaleAge5to9         | 3316583    |
| Turkey  | 1994           | MaleAge60to64       | 867141     |
| Turkey  | 1994           | MaleAge65to69       | 554372     |
| Turkey  | 1994           | MaleAge70to74       | 329026     |
| Turkey  | 1994           | MaleAge75to79       | 169868     |
| Turkey  | 1994           | MaleAge80to84       | 125669     |
| Turkey  | 1994           | MaleAge85to89       | 32618      |
| Turkey  | 1994           | MaleAge90to94       | 7928       |
| Turkey  | 1994           | MaleAge95to99       | 805        |
| Turkey  | 1994           | MaleAgeAbov e100    | 15         |
| Turkey  | 1995           | FemaleAge0to4       | 3179870    |
| Turkey  | 1995           | FemaleAge10to14     | 3238723    |
| Turkey  | 1995           | FemaleAge15to19     | 2766227    |
| Turkey  | 1995           | FemaleAge20to24     | 1903875    |
| Turkey  | 1995           | FemaleAge25to29     | 1773509    |
| Turkey  | 1995           | FemaleAge30to34     | 1822860    |
| Turkey  | 1995           | FemaleAge35to39     | 1856988    |
| Turkey  | 1995           | FemaleAge40to44     | 1688144    |
| Turkey  | 1995           | FemaleAge45to49     | 1283432    |
| Turkey  | 1995           | FemaleAge50to54     | 1063370    |
| Turkey  | 1995           | FemaleAge55to59     | 912799     |
| Turkey  | 1995           | FemaleAge5to9       | 3205558    |
| Turkey  | 1995           | FemaleAge60to64     | 872711     |
| Turkey  | 1995           | FemaleAge65to69     | 678394     |
| Turkey  | 1995           | FemaleAge70to74     | 456631     |
| Turkey  | 1995           | FemaleAge75to79     | 277837     |
| Turkey  | 1995           | FemaleAge80to84     | 191175     |
| Turkey  | 1995           | FemaleAge85to89     | 88422      |
| Turkey  | 1995           | FemaleAge90to94     | 21067      |
| Turkey  | 1995           | FemaleAge95to99     | 3609       |
| Turkey  | 1995           | FemaleAgeAbov e100  | 224        |
| Turkey  | 1995           | FemaleLactAge15to19 | 179848     |
| Turkey  | 1995           | FemaleLactAge20to24 | 510285     |
| Turkey  | 1995           | FemaleLactAge25to29 | 379657     |
| Turkey  | 1995           | FemaleLactAge30to34 | 213991     |
| Turkey  | 1995           | FemaleLactAge35to39 | 77258      |
| Turkey  | 1995           | FemaleLactAge40to44 | 19993      |
| Turkey  | 1995           | FemalePregAge15to19 | 134886     |
| Turkey  | 1995           | FemalePregAge20to24 | 382714     |
| Turkey  | 1995           | FemalePregAge25to29 | 284742     |
| Turkey  | 1995           | FemalePregAge30to34 | 160493     |
| Turkey  | 1995           | FemalePregAge35to39 | 57944      |
| Turkey  | 1995           | FemalePregAge40to44 | 14995      |
| Turkey  | 1995           | MaleAge0to4         | 3284835    |
| Turkey  | 1995           | MaleAge10to14       | 3304254    |
| Turkey  | 1995           | MaleAge15to19       | 3104601    |
| Turkey  | 1995           | MaleAge20to24       | 2748526    |
| Turkey  | 1995           | MaleAge25to29       | 2385231    |
| Turkey  | 1995           | MaleAge30to34       | 2094873    |
| Turkey  | 1995           | MaleAge35to39       | 1801335    |
| Turkey  | 1995           | MaleAge40to44       | 1500251    |
| Turkey  | 1995           | MaleAge45to49       | 1153168    |
| Turkey  | 1995           | MaleAge50to54       | 1009783    |
| Turkey  | 1995           | MaleAge55to59       | 965868     |
| Turkey  | 1995           | MaleAge5to9         | 3289719    |
| Turkey  | 1995           | MaleAge60to64       | 896086     |
| Turkey  | 1995           | MaleAge65to69       | 594043     |
| Turkey  | 1995           | MaleAge70to74       | 355421     |
| Turkey  | 1995           | MaleAge75to79       | 171873     |
| Turkey  | 1995           | MaleAge80to84       | 119949     |
| Turkey  | 1995           | MaleAge85to89       | 33396      |
| Turkey  | 1995           | MaleAge90to94       | 6356       |
| Turkey  | 1995           | MaleAge95to99       | 505        |
| Turkey  | 1995           | MaleAgeAbov e100    | 16         |
| Turkey  | 1996           | FemaleAge0to4       | 3183391    |
| Turkey  | 1996           | FemaleAge10to14     | 3237547    |
| Turkey  | 1996           | FemaleAge15to19     | 2829283    |
| Turkey  | 1996           | FemaleAge20to24     | 1995002    |
| Turkey  | 1996           | FemaleAge25to29     | 1803383    |



Dietary calcium and zinc deficiency risks are decreasing but remain prevalent

| Country | Reference year | Age/gender group    | Population |
|---------|----------------|---------------------|------------|
| Turkey  | 1996           | FemaleAge30to34     | 1866294    |
| Turkey  | 1996           | FemaleAge35to39     | 1882344    |
| Turkey  | 1996           | FemaleAge40to44     | 1746272    |
| Turkey  | 1996           | FemaleAge45to49     | 1352236    |
| Turkey  | 1996           | FemaleAge50to54     | 1092735    |
| Turkey  | 1996           | FemaleAge55to59     | 924682     |
| Turkey  | 1996           | FemaleAge5to9       | 3187108    |
| Turkey  | 1996           | FemaleAge60to64     | 878665     |
| Turkey  | 1996           | FemaleAge65to69     | 709370     |
| Turkey  | 1996           | FemaleAge70to74     | 482446     |
| Turkey  | 1996           | FemaleAge75to79     | 288305     |
| Turkey  | 1996           | FemaleAge80to84     | 189271     |
| Turkey  | 1996           | FemaleAge85to89     | 94066      |
| Turkey  | 1996           | FemaleAge90to94     | 25541      |
| Turkey  | 1996           | FemaleAge95to99     | 3775       |
| Turkey  | 1996           | FemaleAgeAbov e100  | 241        |
| Turkey  | 1996           | FemaleLactAge15to19 | 164810     |
| Turkey  | 1996           | FemaleLactAge20to24 | 492535     |
| Turkey  | 1996           | FemaleLactAge25to29 | 396800     |
| Turkey  | 1996           | FemaleLactAge30to34 | 210269     |
| Turkey  | 1996           | FemaleLactAge35to39 | 84336      |
| Turkey  | 1996           | FemaleLactAge40to44 | 23951      |
| Turkey  | 1996           | FemaleLactAge45to49 | 1547       |
| Turkey  | 1996           | FemalePregAge15to19 | 123608     |
| Turkey  | 1996           | FemalePregAge20to24 | 369401     |
| Turkey  | 1996           | FemalePregAge25to29 | 297600     |
| Turkey  | 1996           | FemalePregAge30to34 | 157702     |
| Turkey  | 1996           | FemalePregAge35to39 | 63252      |
| Turkey  | 1996           | FemalePregAge40to44 | 17963      |
| Turkey  | 1996           | FemalePregAge45to49 | 1160       |
| Turkey  | 1996           | MaleAge0to4         | 3292120    |
| Turkey  | 1996           | MaleAge10to14       | 3304483    |
| Turkey  | 1996           | MaleAge15to19       | 3148795    |
| Turkey  | 1996           | MaleAge20to24       | 2813737    |
| Turkey  | 1996           | MaleAge25to29       | 2443243    |
| Turkey  | 1996           | MaleAge30to34       | 2142704    |
| Turkey  | 1996           | MaleAge35to39       | 1851520    |
| Turkey  | 1996           | MaleAge40to44       | 1557582    |
| Turkey  | 1996           | MaleAge45to49       | 1201425    |
| Turkey  | 1996           | MaleAge50to54       | 1016291    |
| Turkey  | 1996           | MaleAge55to59       | 957755     |
| Turkey  | 1996           | MaleAge5to9         | 3272074    |
| Turkey  | 1996           | MaleAge60to64       | 908320     |
| Turkey  | 1996           | MaleAge65to69       | 633919     |
| Turkey  | 1996           | MaleAge70to74       | 377176     |
| Turkey  | 1996           | MaleAge75to79       | 181024     |
| Turkey  | 1996           | MaleAge80to84       | 114822     |
| Turkey  | 1996           | MaleAge85to89       | 40605      |
| Turkey  | 1996           | MaleAge90to94       | 7317       |
| Turkey  | 1996           | MaleAge95to99       | 680        |
| Turkey  | 1996           | MaleAgeAbov e100    | 17         |
| Turkey  | 1997           | FemaleAge0to4       | 3193877    |
| Turkey  | 1997           | FemaleAge10to14     | 3227750    |
| Turkey  | 1997           | FemaleAge15to19     | 2861852    |
| Turkey  | 1997           | FemaleAge20to24     | 2049500    |
| Turkey  | 1997           | FemaleAge25to29     | 1870046    |
| Turkey  | 1997           | FemaleAge30to34     | 1904154    |
| Turkey  | 1997           | FemaleAge35to39     | 1918417    |
| Turkey  | 1997           | FemaleAge40to44     | 1799864    |
| Turkey  | 1997           | FemaleAge45to49     | 1437834    |
| Turkey  | 1997           | FemaleAge50to54     | 1121771    |
| Turkey  | 1997           | FemaleAge55to59     | 945705     |
| Turkey  | 1997           | FemaleAge5to9       | 3170226    |
| Turkey  | 1997           | FemaleAge60to64     | 876339     |
| Turkey  | 1997           | FemaleAge65to69     | 742094     |
| Turkey  | 1997           | FemaleAge70to74     | 510325     |
| Turkey  | 1997           | FemaleAge75to79     | 303734     |
| Turkey  | 1997           | FemaleAge80to84     | 185310     |
| Turkey  | 1997           | FemaleAge85to89     | 98602      |
| Turkey  | 1997           | FemaleAge90to94     | 29061      |
| Turkey  | 1997           | FemaleAge95to99     | 3822       |
| Turkey  | 1997           | FemaleAgeAbov e100  | 264        |
| Turkey  | 1997           | FemaleLactAge15to19 | 164810     |
| Turkey  | 1997           | FemaleLactAge20to24 | 492535     |
| Turkey  | 1997           | FemaleLactAge25to29 | 396800     |
| Turkey  | 1997           | FemaleLactAge30to34 | 210269     |
| Turkey  | 1997           | FemaleLactAge35to39 | 84336      |
| Turkey  | 1997           | FemaleLactAge40to44 | 23951      |
| Turkey  | 1997           | FemaleLactAge45to49 | 1547       |
| Turkey  | 1997           | FemalePregAge15to19 | 123608     |
| Turkey  | 1997           | FemalePregAge20to24 | 369401     |
| Turkey  | 1997           | FemalePregAge25to29 | 297600     |
| Turkey  | 1997           | FemalePregAge30to34 | 157702     |
| Turkey  | 1997           | FemalePregAge35to39 | 63252      |
| Turkey  | 1997           | FemalePregAge40to44 | 17963      |
| Turkey  | 1997           | FemalePregAge45to49 | 1160       |
| Turkey  | 1997           | MaleAge0to4         | 3306043    |
| Turkey  | 1997           | MaleAge10to14       | 3295833    |

Dietary calcium and zinc deficiency risks are decreasing but remain prevalent

| Country | Reference year | Age/gender group    | Population |
|---------|----------------|---------------------|------------|
| Turkey  | 1997           | MaleAge15to19       | 3187061    |
| Turkey  | 1997           | MaleAge20to24       | 2878238    |
| Turkey  | 1997           | MaleAge25to29       | 2504764    |
| Turkey  | 1997           | MaleAge30to34       | 2189574    |
| Turkey  | 1997           | MaleAge35to39       | 1902371    |
| Turkey  | 1997           | MaleAge40to44       | 1610250    |
| Turkey  | 1997           | MaleAge45to49       | 1261256    |
| Turkey  | 1997           | MaleAge50to54       | 1027149    |
| Turkey  | 1997           | MaleAge55to59       | 952478     |
| Turkey  | 1997           | MaleAge5to9         | 3257073    |
| Turkey  | 1997           | MaleAge60to64       | 909300     |
| Turkey  | 1997           | MaleAge65to69       | 679870     |
| Turkey  | 1997           | MaleAge70to74       | 398431     |
| Turkey  | 1997           | MaleAge75to79       | 195573     |
| Turkey  | 1997           | MaleAge80to84       | 105496     |
| Turkey  | 1997           | MaleAge85to89       | 47640      |
| Turkey  | 1997           | MaleAge90to94       | 7500       |
| Turkey  | 1997           | MaleAge95to99       | 1010       |
| Turkey  | 1997           | MaleAgeAbov e100    | 20         |
| Turkey  | 1998           | FemaleAge0to4       | 3207660    |
| Turkey  | 1998           | FemaleAge10to14     | 3211841    |
| Turkey  | 1998           | FemaleAge15to19     | 2888754    |
| Turkey  | 1998           | FemaleAge20to24     | 2098650    |
| Turkey  | 1998           | FemaleAge25to29     | 1940430    |
| Turkey  | 1998           | FemaleAge30to34     | 1944953    |
| Turkey  | 1998           | FemaleAge35to39     | 1953734    |
| Turkey  | 1998           | FemaleAge40to44     | 1844612    |
| Turkey  | 1998           | FemaleAge45to49     | 1530261    |
| Turkey  | 1998           | FemaleAge50to54     | 1154887    |
| Turkey  | 1998           | FemaleAge55to59     | 973409     |
| Turkey  | 1998           | FemaleAge5to9       | 3155818    |
| Turkey  | 1998           | FemaleAge60to64     | 870556     |
| Turkey  | 1998           | FemaleAge65to69     | 773575     |
| Turkey  | 1998           | FemaleAge70to74     | 540249     |
| Turkey  | 1998           | FemaleAge75to79     | 323134     |
| Turkey  | 1998           | FemaleAge80to84     | 182302     |
| Turkey  | 1998           | FemaleAge85to89     | 101249     |
| Turkey  | 1998           | FemaleAge90to94     | 30955      |
| Turkey  | 1998           | FemaleAge95to99     | 4007       |
| Turkey  | 1998           | FemaleAgeAbov e100  | 289        |
| Turkey  | 1998           | FemaleLactAge15to19 | 164810     |
| Turkey  | 1998           | FemaleLactAge20to24 | 492535     |
| Turkey  | 1998           | FemaleLactAge25to29 | 396800     |
| Turkey  | 1998           | FemaleLactAge30to34 | 210269     |
| Turkey  | 1998           | FemaleLactAge35to39 | 84336      |
| Turkey  | 1998           | FemaleLactAge40to44 | 23951      |
| Turkey  | 1998           | FemaleLactAge45to49 | 1547       |
| Turkey  | 1998           | FemalePregAge15to19 | 123608     |
| Turkey  | 1998           | FemalePregAge20to24 | 369401     |
| Turkey  | 1998           | FemalePregAge25to29 | 297600     |
| Turkey  | 1998           | FemalePregAge30to34 | 157702     |
| Turkey  | 1998           | FemalePregAge35to39 | 63252      |
| Turkey  | 1998           | FemalePregAge40to44 | 17963      |
| Turkey  | 1998           | FemalePregAge45to49 | 1160       |
| Turkey  | 1998           | MaleAge0to4         | 3323133    |
| Turkey  | 1998           | MaleAge10to14       | 3281025    |
| Turkey  | 1998           | MaleAge15to19       | 3218261    |
| Turkey  | 1998           | MaleAge20to24       | 2940307    |
| Turkey  | 1998           | MaleAge25to29       | 2568967    |
| Turkey  | 1998           | MaleAge30to34       | 2237071    |
| Turkey  | 1998           | MaleAge35to39       | 1953475    |
| Turkey  | 1998           | MaleAge40to44       | 1659785    |
| Turkey  | 1998           | MaleAge45to49       | 1328044    |
| Turkey  | 1998           | MaleAge50to54       | 1044522    |
| Turkey  | 1998           | MaleAge55to59       | 950543     |
| Turkey  | 1998           | MaleAge5to9         | 3245558    |
| Turkey  | 1998           | MaleAge60to64       | 903201     |
| Turkey  | 1998           | MaleAge65to69       | 726359     |
| Turkey  | 1998           | MaleAge70to74       | 421761     |
| Turkey  | 1998           | MaleAge75to79       | 213033     |
| Turkey  | 1998           | MaleAge80to84       | 96435      |
| Turkey  | 1998           | MaleAge85to89       | 51682      |
| Turkey  | 1998           | MaleAge90to94       | 7436       |
| Turkey  | 1998           | MaleAge95to99       | 1323       |
| Turkey  | 1998           | MaleAgeAbov e100    | 22         |
| Turkey  | 1999           | FemaleAge0to4       | 3218959    |
| Turkey  | 1999           | FemaleAge10to14     | 3193721    |
| Turkey  | 1999           | FemaleAge15to19     | 2907719    |
| Turkey  | 1999           | FemaleAge20to24     | 2143737    |
| Turkey  | 1999           | FemaleAge25to29     | 2009775    |
| Turkey  | 1999           | FemaleAge30to34     | 1991581    |
| Turkey  | 1999           | FemaleAge35to39     | 1989330    |
| Turkey  | 1999           | FemaleAge40to44     | 1885560    |
| Turkey  | 1999           | FemaleAge45to49     | 1618307    |
| Turkey  | 1999           | FemaleAge50to54     | 1199084    |
| Turkey  | 1999           | FemaleAge55to59     | 1003526    |
| Turkey  | 1999           | FemaleAge5to9       | 3144310    |
| Turkey  | 1999           | FemaleAge60to64     | 868784     |

Dietary calcium and zinc deficiency risks are decreasing but remain prevalent

| Country | Reference year | Age/gender group    | Population |
|---------|----------------|---------------------|------------|
| Turkey  | 1999           | FemaleAge65to69     | 799399     |
| Turkey  | 1999           | FemaleAge70to74     | 572091     |
| Turkey  | 1999           | FemaleAge75to79     | 345454     |
| Turkey  | 1999           | FemaleAge80to84     | 183438     |
| Turkey  | 1999           | FemaleAge85to89     | 101161     |
| Turkey  | 1999           | FemaleAge90to94     | 31033      |
| Turkey  | 1999           | FemaleAge95to99     | 4290       |
| Turkey  | 1999           | FemaleAgeAbov e100  | 310        |
| Turkey  | 1999           | FemaleLactAge15to19 | 164810     |
| Turkey  | 1999           | FemaleLactAge20to24 | 492535     |
| Turkey  | 1999           | FemaleLactAge25to29 | 396800     |
| Turkey  | 1999           | FemaleLactAge30to34 | 210269     |
| Turkey  | 1999           | FemaleLactAge35to39 | 84336      |
| Turkey  | 1999           | FemaleLactAge40to44 | 23951      |
| Turkey  | 1999           | FemaleLactAge45to49 | 1547       |
| Turkey  | 1999           | FemalePregAge15to19 | 123608     |
| Turkey  | 1999           | FemalePregAge20to24 | 369401     |
| Turkey  | 1999           | FemalePregAge25to29 | 297600     |
| Turkey  | 1999           | FemalePregAge30to34 | 157702     |
| Turkey  | 1999           | FemalePregAge35to39 | 63252      |
| Turkey  | 1999           | FemalePregAge40to44 | 17963      |
| Turkey  | 1999           | FemalePregAge45to49 | 1160       |
| Turkey  | 1999           | MaleAge0to4         | 3337690    |
| Turkey  | 1999           | MaleAge10to14       | 3264361    |
| Turkey  | 1999           | MaleAge15to19       | 3240899    |
| Turkey  | 1999           | MaleAge20to24       | 2997999    |
| Turkey  | 1999           | MaleAge25to29       | 2634617    |
| Turkey  | 1999           | MaleAge30to34       | 2287689    |
| Turkey  | 1999           | MaleAge35to39       | 2004145    |
| Turkey  | 1999           | MaleAge40to44       | 1709159    |
| Turkey  | 1999           | MaleAge45to49       | 1394839    |
| Turkey  | 1999           | MaleAge50to54       | 1071704    |
| Turkey  | 1999           | MaleAge55to59       | 952248     |
| Turkey  | 1999           | MaleAge5to9         | 3237630    |
| Turkey  | 1999           | MaleAge60to64       | 896227     |
| Turkey  | 1999           | MaleAge65to69       | 765449     |
| Turkey  | 1999           | MaleAge70to74       | 450385     |
| Turkey  | 1999           | MaleAge75to79       | 231025     |
| Turkey  | 1999           | MaleAge80to84       | 91965      |
| Turkey  | 1999           | MaleAge85to89       | 50433      |
| Turkey  | 1999           | MaleAge90to94       | 7512       |
| Turkey  | 1999           | MaleAge95to99       | 1273       |
| Turkey  | 1999           | MaleAgeAbov e100    | 25         |
| Turkey  | 2000           | FemaleAge0to4       | 3224392    |
| Turkey  | 2000           | FemaleAge10to14     | 3176169    |
| Turkey  | 2000           | FemaleAge15to19     | 2917600    |
| Turkey  | 2000           | FemaleAge20to24     | 2185502    |
| Turkey  | 2000           | FemaleAge25to29     | 2074770    |
| Turkey  | 2000           | FemaleAge30to34     | 2045550    |
| Turkey  | 2000           | FemaleAge35to39     | 2026097    |
| Turkey  | 2000           | FemaleAge40to44     | 1926004    |
| Turkey  | 2000           | FemaleAge45to49     | 1694890    |
| Turkey  | 2000           | FemaleAge50to54     | 1258082    |
| Turkey  | 2000           | FemaleAge55to59     | 1033772    |
| Turkey  | 2000           | FemaleAge5to9       | 3135493    |
| Turkey  | 2000           | FemaleAge60to64     | 875604     |
| Turkey  | 2000           | FemaleAge65to69     | 817181     |
| Turkey  | 2000           | FemaleAge70to74     | 605373     |
| Turkey  | 2000           | FemaleAge75to79     | 370350     |
| Turkey  | 2000           | FemaleAge80to84     | 190055     |
| Turkey  | 2000           | FemaleAge85to89     | 98658      |
| Turkey  | 2000           | FemaleAge90to94     | 29491      |
| Turkey  | 2000           | FemaleAge95to99     | 3851       |
| Turkey  | 2000           | FemaleAgeAbov e100  | 325        |
| Turkey  | 2000           | FemaleLactAge15to19 | 164810     |
| Turkey  | 2000           | FemaleLactAge20to24 | 492535     |
| Turkey  | 2000           | FemaleLactAge25to29 | 396800     |
| Turkey  | 2000           | FemaleLactAge30to34 | 210269     |
| Turkey  | 2000           | FemaleLactAge35to39 | 84336      |
| Turkey  | 2000           | FemaleLactAge40to44 | 23951      |
| Turkey  | 2000           | FemaleLactAge45to49 | 1547       |
| Turkey  | 2000           | FemalePregAge15to19 | 123608     |
| Turkey  | 2000           | FemalePregAge20to24 | 369401     |
| Turkey  | 2000           | FemalePregAge25to29 | 297600     |
| Turkey  | 2000           | FemalePregAge30to34 | 157702     |
| Turkey  | 2000           | FemalePregAge35to39 | 63252      |
| Turkey  | 2000           | FemalePregAge40to44 | 17963      |
| Turkey  | 2000           | FemalePregAge45to49 | 1160       |
| Turkey  | 2000           | MaleAge0to4         | 3346333    |
| Turkey  | 2000           | MaleAge10to14       | 3248950    |
| Turkey  | 2000           | MaleAge15to19       | 3254297    |
| Turkey  | 2000           | MaleAge20to24       | 3050034    |
| Turkey  | 2000           | MaleAge25to29       | 2700548    |
| Turkey  | 2000           | MaleAge30to34       | 2342818    |
| Turkey  | 2000           | MaleAge35to39       | 2054064    |
| Turkey  | 2000           | MaleAge40to44       | 1760117    |
| Turkey  | 2000           | MaleAge45to49       | 1457261    |
| Turkey  | 2000           | MaleAge50to54       | 1110362    |

Dietary calcium and zinc deficiency risks are decreasing but remain prevalent

| Country      | Reference year | Age/gender group    | Population |
|--------------|----------------|---------------------|------------|
| Turkey       | 2000           | MaleAge55to59       | 958041     |
| Turkey       | 2000           | MaleAge5to9         | 3232516    |
| Turkey       | 2000           | MaleAge60to64       | 892142     |
| Turkey       | 2000           | MaleAge65to69       | 792845     |
| Turkey       | 2000           | MaleAge70to74       | 485396     |
| Turkey       | 2000           | MaleAge75to79       | 249165     |
| Turkey       | 2000           | MaleAge80to84       | 93282      |
| Turkey       | 2000           | MaleAge85to89       | 44271      |
| Turkey       | 2000           | MaleAge90to94       | 7170       |
| Turkey       | 2000           | MaleAge95to99       | 699        |
| Turkey       | 2000           | MaleAgeAbov e100    | 27         |
| Turkmenistan | 1992           | FemaleAge0to4       | 297727     |
| Turkmenistan | 1992           | FemaleAge10to14     | 220678     |
| Turkmenistan | 1992           | FemaleAge15to19     | 186304     |
| Turkmenistan | 1992           | FemaleAge20to24     | 101747     |
| Turkmenistan | 1992           | FemaleAge25to29     | 89400      |
| Turkmenistan | 1992           | FemaleAge30to34     | 107198     |
| Turkmenistan | 1992           | FemaleAge35to39     | 100295     |
| Turkmenistan | 1992           | FemaleAge40to44     | 76782      |
| Turkmenistan | 1992           | FemaleAge45to49     | 49416      |
| Turkmenistan | 1992           | FemaleAge50to54     | 55370      |
| Turkmenistan | 1992           | FemaleAge55to59     | 53898      |
| Turkmenistan | 1992           | FemaleAge5to9       | 256653     |
| Turkmenistan | 1992           | FemaleAge60to64     | 47311      |
| Turkmenistan | 1992           | FemaleAge65to69     | 38639      |
| Turkmenistan | 1992           | FemaleAge70to74     | 24067      |
| Turkmenistan | 1992           | FemaleAge75to79     | 17173      |
| Turkmenistan | 1992           | FemaleAge80to84     | 10823      |
| Turkmenistan | 1992           | FemaleAge85to89     | 4840       |
| Turkmenistan | 1992           | FemaleAge90to94     | 1652       |
| Turkmenistan | 1992           | FemaleAge95to99     | 274        |
| Turkmenistan | 1992           | FemaleAgeAbov e100  | 31         |
| Turkmenistan | 1992           | FemaleLactAge15to19 | 5249       |
| Turkmenistan | 1992           | FemaleLactAge20to24 | 40277      |
| Turkmenistan | 1992           | FemaleLactAge25to29 | 44718      |
| Turkmenistan | 1992           | FemaleLactAge30to34 | 26560      |
| Turkmenistan | 1992           | FemaleLactAge35to39 | 10013      |
| Turkmenistan | 1992           | FemaleLactAge40to44 | 2174       |
| Turkmenistan | 1992           | FemaleLactAge45to49 | 194        |
| Turkmenistan | 1992           | FemalePregAge15to19 | 3936       |
| Turkmenistan | 1992           | FemalePregAge20to24 | 30208      |
| Turkmenistan | 1992           | FemalePregAge25to29 | 33539      |
| Turkmenistan | 1992           | FemalePregAge30to34 | 19920      |
| Turkmenistan | 1992           | FemalePregAge35to39 | 7510       |
| Turkmenistan | 1992           | FemalePregAge40to44 | 1631       |
| Turkmenistan | 1992           | FemalePregAge45to49 | 146        |
| Turkmenistan | 1992           | MaleAge0to4         | 307240     |
| Turkmenistan | 1992           | MaleAge10to14       | 223996     |
| Turkmenistan | 1992           | MaleAge15to19       | 197693     |
| Turkmenistan | 1992           | MaleAge20to24       | 178220     |
| Turkmenistan | 1992           | MaleAge25to29       | 163744     |
| Turkmenistan | 1992           | MaleAge30to34       | 145713     |
| Turkmenistan | 1992           | MaleAge35to39       | 112581     |
| Turkmenistan | 1992           | MaleAge40to44       | 76649      |
| Turkmenistan | 1992           | MaleAge45to49       | 48966      |
| Turkmenistan | 1992           | MaleAge50to54       | 53120      |
| Turkmenistan | 1992           | MaleAge55to59       | 50032      |
| Turkmenistan | 1992           | MaleAge5to9         | 262432     |
| Turkmenistan | 1992           | MaleAge60to64       | 40649      |
| Turkmenistan | 1992           | MaleAge65to69       | 26057      |
| Turkmenistan | 1992           | MaleAge70to74       | 11875      |
| Turkmenistan | 1992           | MaleAge75to79       | 8350       |
| Turkmenistan | 1992           | MaleAge80to84       | 5225       |
| Turkmenistan | 1992           | MaleAge85to89       | 2223       |
| Turkmenistan | 1992           | MaleAge90to94       | 739        |
| Turkmenistan | 1992           | MaleAge95to99       | 106        |
| Turkmenistan | 1992           | MaleAgeAbov e100    | 12         |
| Turkmenistan | 1993           | FemaleAge0to4       | 299373     |
| Turkmenistan | 1993           | FemaleAge10to14     | 227194     |
| Turkmenistan | 1993           | FemaleAge15to19     | 191483     |
| Turkmenistan | 1993           | FemaleAge20to24     | 106893     |
| Turkmenistan | 1993           | FemaleAge25to29     | 88565      |
| Turkmenistan | 1993           | FemaleAge30to34     | 113303     |
| Turkmenistan | 1993           | FemaleAge35to39     | 108232     |
| Turkmenistan | 1993           | FemaleAge40to44     | 83670      |
| Turkmenistan | 1993           | FemaleAge45to49     | 54739      |
| Turkmenistan | 1993           | FemaleAge50to54     | 50159      |
| Turkmenistan | 1993           | FemaleAge55to59     | 57668      |
| Turkmenistan | 1993           | FemaleAge5to9       | 266718     |
| Turkmenistan | 1993           | FemaleAge60to64     | 46044      |
| Turkmenistan | 1993           | FemaleAge65to69     | 41133      |
| Turkmenistan | 1993           | FemaleAge70to74     | 25503      |
| Turkmenistan | 1993           | FemaleAge75to79     | 16711      |
| Turkmenistan | 1993           | FemaleAge80to84     | 11236      |
| Turkmenistan | 1993           | FemaleAge85to89     | 4818       |
| Turkmenistan | 1993           | FemaleAge90to94     | 1728       |
| Turkmenistan | 1993           | FemaleAge95to99     | 292        |
| Turkmenistan | 1993           | FemaleAgeAbov e100  | 30         |

Dietary calcium and zinc deficiency risks are decreasing but remain prevalent

| Country      | Reference year | Age/gender group    | Population |
|--------------|----------------|---------------------|------------|
| Turkmenistan | 1993           | FemaleLactAge15to19 | 5249       |
| Turkmenistan | 1993           | FemaleLactAge20to24 | 40277      |
| Turkmenistan | 1993           | FemaleLactAge25to29 | 44718      |
| Turkmenistan | 1993           | FemaleLactAge30to34 | 26560      |
| Turkmenistan | 1993           | FemaleLactAge35to39 | 10013      |
| Turkmenistan | 1993           | FemaleLactAge40to44 | 2174       |
| Turkmenistan | 1993           | FemaleLactAge45to49 | 194        |
| Turkmenistan | 1993           | FemalePregAge15to19 | 3936       |
| Turkmenistan | 1993           | FemalePregAge20to24 | 30208      |
| Turkmenistan | 1993           | FemalePregAge25to29 | 33539      |
| Turkmenistan | 1993           | FemalePregAge30to34 | 19920      |
| Turkmenistan | 1993           | FemalePregAge35to39 | 7510       |
| Turkmenistan | 1993           | FemalePregAge40to44 | 1631       |
| Turkmenistan | 1993           | FemalePregAge45to49 | 146        |
| Turkmenistan | 1993           | MaleAge0to4         | 308455     |
| Turkmenistan | 1993           | MaleAge10to14       | 230720     |
| Turkmenistan | 1993           | MaleAge15to19       | 203020     |
| Turkmenistan | 1993           | MaleAge20to24       | 181981     |
| Turkmenistan | 1993           | MaleAge25to29       | 166619     |
| Turkmenistan | 1993           | MaleAge30to34       | 150049     |
| Turkmenistan | 1993           | MaleAge35to39       | 120371     |
| Turkmenistan | 1993           | MaleAge40to44       | 82649      |
| Turkmenistan | 1993           | MaleAge45to49       | 53375      |
| Turkmenistan | 1993           | MaleAge50to54       | 48423      |
| Turkmenistan | 1993           | MaleAge55to59       | 53267      |
| Turkmenistan | 1993           | MaleAge5to9         | 273210     |
| Turkmenistan | 1993           | MaleAge60to64       | 39885      |
| Turkmenistan | 1993           | MaleAge65to69       | 29464      |
| Turkmenistan | 1993           | MaleAge70to74       | 12542      |
| Turkmenistan | 1993           | MaleAge75to79       | 7894       |
| Turkmenistan | 1993           | MaleAge80to84       | 5414       |
| Turkmenistan | 1993           | MaleAge85to89       | 2121       |
| Turkmenistan | 1993           | MaleAge90to94       | 770        |
| Turkmenistan | 1993           | MaleAge95to99       | 111        |
| Turkmenistan | 1993           | MaleAgeAbov e100    | 12         |
| Turkmenistan | 1994           | FemaleAge0to4       | 297843     |
| Turkmenistan | 1994           | FemaleAge10to14     | 234115     |
| Turkmenistan | 1994           | FemaleAge15to19     | 196747     |
| Turkmenistan | 1994           | FemaleAge20to24     | 112157     |
| Turkmenistan | 1994           | FemaleAge25to29     | 88180      |
| Turkmenistan | 1994           | FemaleAge30to34     | 117986     |
| Turkmenistan | 1994           | FemaleAge35to39     | 115879     |
| Turkmenistan | 1994           | FemaleAge40to44     | 90853      |
| Turkmenistan | 1994           | FemaleAge45to49     | 60781      |
| Turkmenistan | 1994           | FemaleAge50to54     | 46211      |
| Turkmenistan | 1994           | FemaleAge55to59     | 60033      |
| Turkmenistan | 1994           | FemaleAge5to9       | 276264     |
| Turkmenistan | 1994           | FemaleAge60to64     | 45495      |
| Turkmenistan | 1994           | FemaleAge65to69     | 43052      |
| Turkmenistan | 1994           | FemaleAge70to74     | 27192      |
| Turkmenistan | 1994           | FemaleAge75to79     | 16621      |
| Turkmenistan | 1994           | FemaleAge80to84     | 11392      |
| Turkmenistan | 1994           | FemaleAge85to89     | 4791       |
| Turkmenistan | 1994           | FemaleAge90to94     | 1687       |
| Turkmenistan | 1994           | FemaleAge95to99     | 303        |
| Turkmenistan | 1994           | FemaleAgeAbov e100  | 30         |
| Turkmenistan | 1994           | FemaleLactAge15to19 | 5249       |
| Turkmenistan | 1994           | FemaleLactAge20to24 | 40277      |
| Turkmenistan | 1994           | FemaleLactAge25to29 | 44718      |
| Turkmenistan | 1994           | FemaleLactAge30to34 | 26560      |
| Turkmenistan | 1994           | FemaleLactAge35to39 | 10013      |
| Turkmenistan | 1994           | FemaleLactAge40to44 | 2174       |
| Turkmenistan | 1994           | FemaleLactAge45to49 | 194        |
| Turkmenistan | 1994           | FemalePregAge15to19 | 3936       |
| Turkmenistan | 1994           | FemalePregAge20to24 | 30208      |
| Turkmenistan | 1994           | FemalePregAge25to29 | 33539      |
| Turkmenistan | 1994           | FemalePregAge30to34 | 19920      |
| Turkmenistan | 1994           | FemalePregAge35to39 | 7510       |
| Turkmenistan | 1994           | FemalePregAge40to44 | 1631       |
| Turkmenistan | 1994           | FemalePregAge45to49 | 146        |
| Turkmenistan | 1994           | MaleAge0to4         | 306394     |
| Turkmenistan | 1994           | MaleAge10to14       | 237906     |
| Turkmenistan | 1994           | MaleAge15to19       | 208485     |
| Turkmenistan | 1994           | MaleAge20to24       | 185860     |
| Turkmenistan | 1994           | MaleAge25to29       | 169385     |
| Turkmenistan | 1994           | MaleAge30to34       | 153819     |
| Turkmenistan | 1994           | MaleAge35to39       | 127608     |
| Turkmenistan | 1994           | MaleAge40to44       | 89045      |
| Turkmenistan | 1994           | MaleAge45to49       | 58408      |
| Turkmenistan | 1994           | MaleAge50to54       | 44859      |
| Turkmenistan | 1994           | MaleAge55to59       | 55198      |
| Turkmenistan | 1994           | MaleAge5to9         | 283397     |
| Turkmenistan | 1994           | MaleAge60to64       | 39701      |
| Turkmenistan | 1994           | MaleAge65to69       | 32186      |
| Turkmenistan | 1994           | MaleAge70to74       | 13692      |
| Turkmenistan | 1994           | MaleAge75to79       | 7599       |
| Turkmenistan | 1994           | MaleAge80to84       | 5427       |
| Turkmenistan | 1994           | MaleAge85to89       | 2009       |

Dietary calcium and zinc deficiency risks are decreasing but remain prevalent

| Country      | Reference year | Age/gender group    | Population |
|--------------|----------------|---------------------|------------|
| Turkmenistan | 1994           | MaleAge90to94       | 724        |
| Turkmenistan | 1994           | MaleAge95to99       | 114        |
| Turkmenistan | 1994           | MaleAgeAbove100     | 11         |
| Turkmenistan | 1995           | FemaleAge0to4       | 293022     |
| Turkmenistan | 1995           | FemaleAge10to14     | 241651     |
| Turkmenistan | 1995           | FemaleAge15to19     | 202050     |
| Turkmenistan | 1995           | FemaleAge20to24     | 116918     |
| Turkmenistan | 1995           | FemaleAge25to29     | 89010      |
| Turkmenistan | 1995           | FemaleAge30to34     | 120800     |
| Turkmenistan | 1995           | FemaleAge35to39     | 122974     |
| Turkmenistan | 1995           | FemaleAge40to44     | 98269      |
| Turkmenistan | 1995           | FemaleAge45to49     | 66795      |
| Turkmenistan | 1995           | FemaleAge50to54     | 44817      |
| Turkmenistan | 1995           | FemaleAge55to59     | 59988      |
| Turkmenistan | 1995           | FemaleAge5to9       | 283665     |
| Turkmenistan | 1995           | FemaleAge60to64     | 46208      |
| Turkmenistan | 1995           | FemaleAge65to69     | 44073      |
| Turkmenistan | 1995           | FemaleAge70to74     | 29072      |
| Turkmenistan | 1995           | FemaleAge75to79     | 17025      |
| Turkmenistan | 1995           | FemaleAge80to84     | 11271      |
| Turkmenistan | 1995           | FemaleAge85to89     | 4777       |
| Turkmenistan | 1995           | FemaleAge90to94     | 1532       |
| Turkmenistan | 1995           | FemaleAge95to99     | 260        |
| Turkmenistan | 1995           | FemaleAgeAbove100   | 30         |
| Turkmenistan | 1995           | FemaleLactAge15to19 | 5249       |
| Turkmenistan | 1995           | FemaleLactAge20to24 | 40277      |
| Turkmenistan | 1995           | FemaleLactAge25to29 | 44718      |
| Turkmenistan | 1995           | FemaleLactAge30to34 | 26560      |
| Turkmenistan | 1995           | FemaleLactAge35to39 | 10013      |
| Turkmenistan | 1995           | FemaleLactAge40to44 | 2174       |
| Turkmenistan | 1995           | FemaleLactAge45to49 | 194        |
| Turkmenistan | 1995           | FemalePregAge15to19 | 3936       |
| Turkmenistan | 1995           | FemalePregAge20to24 | 30208      |
| Turkmenistan | 1995           | FemalePregAge25to29 | 33539      |
| Turkmenistan | 1995           | FemalePregAge30to34 | 19920      |
| Turkmenistan | 1995           | FemalePregAge35to39 | 7510       |
| Turkmenistan | 1995           | FemalePregAge40to44 | 1631       |
| Turkmenistan | 1995           | FemalePregAge45to49 | 146        |
| Turkmenistan | 1995           | MaleAge0to4         | 301173     |
| Turkmenistan | 1995           | MaleAge10to14       | 245803     |
| Turkmenistan | 1995           | MaleAge15to19       | 213903     |
| Turkmenistan | 1995           | MaleAge20to24       | 189726     |
| Turkmenistan | 1995           | MaleAge25to29       | 172053     |
| Turkmenistan | 1995           | MaleAge30to34       | 157080     |
| Turkmenistan | 1995           | MaleAge35to39       | 133865     |
| Turkmenistan | 1995           | MaleAge40to44       | 95811      |
| Turkmenistan | 1995           | MaleAge45to49       | 63442      |
| Turkmenistan | 1995           | MaleAge50to54       | 43508      |
| Turkmenistan | 1995           | MaleAge55to59       | 55011      |
| Turkmenistan | 1995           | MaleAge5to9         | 291184     |
| Turkmenistan | 1995           | MaleAge60to64       | 40575      |
| Turkmenistan | 1995           | MaleAge65to69       | 33833      |
| Turkmenistan | 1995           | MaleAge70to74       | 15393      |
| Turkmenistan | 1995           | MaleAge75to79       | 7544       |
| Turkmenistan | 1995           | MaleAge80to84       | 5220       |
| Turkmenistan | 1995           | MaleAge85to89       | 1911       |
| Turkmenistan | 1995           | MaleAge90to94       | 593        |
| Turkmenistan | 1995           | MaleAge95to99       | 91         |
| Turkmenistan | 1995           | MaleAgeAbove100     | 11         |
| Turkmenistan | 1996           | FemaleAge0to4       | 285732     |
| Turkmenistan | 1996           | FemaleAge10to14     | 249686     |
| Turkmenistan | 1996           | FemaleAge15to19     | 206266     |
| Turkmenistan | 1996           | FemaleAge20to24     | 126276     |
| Turkmenistan | 1996           | FemaleAge25to29     | 105513     |
| Turkmenistan | 1996           | FemaleAge30to34     | 133455     |
| Turkmenistan | 1996           | FemaleAge35to39     | 133500     |
| Turkmenistan | 1996           | FemaleAge40to44     | 106700     |
| Turkmenistan | 1996           | FemaleAge45to49     | 72894      |
| Turkmenistan | 1996           | FemaleAge50to54     | 45495      |
| Turkmenistan | 1996           | FemaleAge55to59     | 57574      |
| Turkmenistan | 1996           | FemaleAge5to9       | 289038     |
| Turkmenistan | 1996           | FemaleAge60to64     | 47753      |
| Turkmenistan | 1996           | FemaleAge65to69     | 43843      |
| Turkmenistan | 1996           | FemaleAge70to74     | 30817      |
| Turkmenistan | 1996           | FemaleAge75to79     | 17580      |
| Turkmenistan | 1996           | FemaleAge80to84     | 11210      |
| Turkmenistan | 1996           | FemaleAge85to89     | 5182       |
| Turkmenistan | 1996           | FemaleAge90to94     | 1682       |
| Turkmenistan | 1996           | FemaleAge95to99     | 291        |
| Turkmenistan | 1996           | FemaleAgeAbove100   | 30         |
| Turkmenistan | 1996           | FemaleLactAge15to19 | 5718       |
| Turkmenistan | 1996           | FemaleLactAge20to24 | 37371      |
| Turkmenistan | 1996           | FemaleLactAge25to29 | 36293      |
| Turkmenistan | 1996           | FemaleLactAge30to34 | 19831      |
| Turkmenistan | 1996           | FemaleLactAge35to39 | 7654       |
| Turkmenistan | 1996           | FemaleLactAge40to44 | 1548       |
| Turkmenistan | 1996           | FemaleLactAge45to49 | 141        |
| Turkmenistan | 1996           | FemalePregAge15to19 | 4289       |

Dietary calcium and zinc deficiency risks are decreasing but remain prevalent

| Country      | Reference year | Age/gender group    | Population |
|--------------|----------------|---------------------|------------|
| Turkmenistan | 1996           | FemalePregAge20to24 | 28029      |
| Turkmenistan | 1996           | FemalePregAge25to29 | 27220      |
| Turkmenistan | 1996           | FemalePregAge30to34 | 14873      |
| Turkmenistan | 1996           | FemalePregAge35to39 | 5741       |
| Turkmenistan | 1996           | FemalePregAge40to44 | 1161       |
| Turkmenistan | 1996           | FemalePregAge45to49 | 106        |
| Turkmenistan | 1996           | MaleAge0to4         | 293358     |
| Turkmenistan | 1996           | MaleAge10to14       | 254393     |
| Turkmenistan | 1996           | MaleAge15to19       | 219043     |
| Turkmenistan | 1996           | MaleAge20to24       | 193401     |
| Turkmenistan | 1996           | MaleAge25to29       | 174452     |
| Turkmenistan | 1996           | MaleAge30to34       | 159641     |
| Turkmenistan | 1996           | MaleAge35to39       | 138944     |
| Turkmenistan | 1996           | MaleAge40to44       | 102562     |
| Turkmenistan | 1996           | MaleAge45to49       | 68409      |
| Turkmenistan | 1996           | MaleAge50to54       | 43866      |
| Turkmenistan | 1996           | MaleAge55to59       | 52729      |
| Turkmenistan | 1996           | MaleAge5to9         | 296918     |
| Turkmenistan | 1996           | MaleAge60to64       | 42018      |
| Turkmenistan | 1996           | MaleAge65to69       | 34301      |
| Turkmenistan | 1996           | MaleAge70to74       | 17503      |
| Turkmenistan | 1996           | MaleAge75to79       | 7735       |
| Turkmenistan | 1996           | MaleAge80to84       | 5040       |
| Turkmenistan | 1996           | MaleAge85to89       | 2138       |
| Turkmenistan | 1996           | MaleAge90to94       | 636        |
| Turkmenistan | 1996           | MaleAge95to99       | 103        |
| Turkmenistan | 1996           | MaleAgeAbov e100    | 11         |
| Turkmenistan | 1997           | FemaleAge0to4       | 274537     |
| Turkmenistan | 1997           | FemaleAge10to14     | 258272     |
| Turkmenistan | 1997           | FemaleAge15to19     | 211238     |
| Turkmenistan | 1997           | FemaleAge20to24     | 130389     |
| Turkmenistan | 1997           | FemaleAge25to29     | 108654     |
| Turkmenistan | 1997           | FemaleAge30to34     | 132543     |
| Turkmenistan | 1997           | FemaleAge35to39     | 139508     |
| Turkmenistan | 1997           | FemaleAge40to44     | 114039     |
| Turkmenistan | 1997           | FemaleAge45to49     | 79060      |
| Turkmenistan | 1997           | FemaleAge50to54     | 48561      |
| Turkmenistan | 1997           | FemaleAge55to59     | 53026      |
| Turkmenistan | 1997           | FemaleAge5to9       | 292102     |
| Turkmenistan | 1997           | FemaleAge60to64     | 50673      |
| Turkmenistan | 1997           | FemaleAge65to69     | 42684      |
| Turkmenistan | 1997           | FemaleAge70to74     | 32837      |
| Turkmenistan | 1997           | FemaleAge75to79     | 18337      |
| Turkmenistan | 1997           | FemaleAge80to84     | 10917      |
| Turkmenistan | 1997           | FemaleAge85to89     | 5569       |
| Turkmenistan | 1997           | FemaleAge90to94     | 1757       |
| Turkmenistan | 1997           | FemaleAge95to99     | 350        |
| Turkmenistan | 1997           | FemaleAgeAbov e100  | 31         |
| Turkmenistan | 1997           | FemaleLactAge15to19 | 5718       |
| Turkmenistan | 1997           | FemaleLactAge20to24 | 37371      |
| Turkmenistan | 1997           | FemaleLactAge25to29 | 36293      |
| Turkmenistan | 1997           | FemaleLactAge30to34 | 19831      |
| Turkmenistan | 1997           | FemaleLactAge35to39 | 7654       |
| Turkmenistan | 1997           | FemaleLactAge40to44 | 1548       |
| Turkmenistan | 1997           | FemaleLactAge45to49 | 141        |
| Turkmenistan | 1997           | FemalePregAge15to19 | 4289       |
| Turkmenistan | 1997           | FemalePregAge20to24 | 28029      |
| Turkmenistan | 1997           | FemalePregAge25to29 | 27220      |
| Turkmenistan | 1997           | FemalePregAge30to34 | 14873      |
| Turkmenistan | 1997           | FemalePregAge35to39 | 5741       |
| Turkmenistan | 1997           | FemalePregAge40to44 | 1161       |
| Turkmenistan | 1997           | FemalePregAge45to49 | 106        |
| Turkmenistan | 1997           | MaleAge0to4         | 281944     |
| Turkmenistan | 1997           | MaleAge10to14       | 263607     |
| Turkmenistan | 1997           | MaleAge15to19       | 224114     |
| Turkmenistan | 1997           | MaleAge20to24       | 197291     |
| Turkmenistan | 1997           | MaleAge25to29       | 176953     |
| Turkmenistan | 1997           | MaleAge30to34       | 161773     |
| Turkmenistan | 1997           | MaleAge35to39       | 143118     |
| Turkmenistan | 1997           | MaleAge40to44       | 109562     |
| Turkmenistan | 1997           | MaleAge45to49       | 73515      |
| Turkmenistan | 1997           | MaleAge50to54       | 46209      |
| Turkmenistan | 1997           | MaleAge55to59       | 48680      |
| Turkmenistan | 1997           | MaleAge5to9         | 300027     |
| Turkmenistan | 1997           | MaleAge60to64       | 44474      |
| Turkmenistan | 1997           | MaleAge65to69       | 33796      |
| Turkmenistan | 1997           | MaleAge70to74       | 20047      |
| Turkmenistan | 1997           | MaleAge75to79       | 7953       |
| Turkmenistan | 1997           | MaleAge80to84       | 4738       |
| Turkmenistan | 1997           | MaleAge85to89       | 2355       |
| Turkmenistan | 1997           | MaleAge90to94       | 639        |
| Turkmenistan | 1997           | MaleAge95to99       | 130        |
| Turkmenistan | 1997           | MaleAgeAbov e100    | 10         |
| Turkmenistan | 1998           | FemaleAge0to4       | 261349     |
| Turkmenistan | 1998           | FemaleAge10to14     | 266828     |
| Turkmenistan | 1998           | FemaleAge15to19     | 216404     |
| Turkmenistan | 1998           | FemaleAge20to24     | 134401     |
| Turkmenistan | 1998           | FemaleAge25to29     | 112730     |

Dietary calcium and zinc deficiency risks are decreasing but remain prevalent

| Country      | Reference year | Age/gender group    | Population |
|--------------|----------------|---------------------|------------|
| Turkmenistan | 1998           | FemaleAge30to34     | 130715     |
| Turkmenistan | 1998           | FemaleAge35to39     | 144691     |
| Turkmenistan | 1998           | FemaleAge40to44     | 121223     |
| Turkmenistan | 1998           | FemaleAge45to49     | 85380      |
| Turkmenistan | 1998           | FemaleAge50to54     | 53384      |
| Turkmenistan | 1998           | FemaleAge55to59     | 47700      |
| Turkmenistan | 1998           | FemaleAge5to9       | 292553     |
| Turkmenistan | 1998           | FemaleAge60to64     | 53867      |
| Turkmenistan | 1998           | FemaleAge65to69     | 41268      |
| Turkmenistan | 1998           | FemaleAge70to74     | 34798      |
| Turkmenistan | 1998           | FemaleAge75to79     | 19292      |
| Turkmenistan | 1998           | FemaleAge80to84     | 10577      |
| Turkmenistan | 1998           | FemaleAge85to89     | 5832       |
| Turkmenistan | 1998           | FemaleAge90to94     | 1770       |
| Turkmenistan | 1998           | FemaleAge95to99     | 400        |
| Turkmenistan | 1998           | FemaleAgeAbov e100  | 32         |
| Turkmenistan | 1998           | FemaleLactAge15to19 | 5718       |
| Turkmenistan | 1998           | FemaleLactAge20to24 | 37371      |
| Turkmenistan | 1998           | FemaleLactAge25to29 | 36293      |
| Turkmenistan | 1998           | FemaleLactAge30to34 | 19831      |
| Turkmenistan | 1998           | FemaleLactAge35to39 | 7654       |
| Turkmenistan | 1998           | FemaleLactAge40to44 | 1548       |
| Turkmenistan | 1998           | FemaleLactAge45to49 | 141        |
| Turkmenistan | 1998           | FemalePregAge15to19 | 4289       |
| Turkmenistan | 1998           | FemalePregAge20to24 | 28029      |
| Turkmenistan | 1998           | FemalePregAge25to29 | 27220      |
| Turkmenistan | 1998           | FemalePregAge30to34 | 14873      |
| Turkmenistan | 1998           | FemalePregAge35to39 | 5741       |
| Turkmenistan | 1998           | FemalePregAge40to44 | 1161       |
| Turkmenistan | 1998           | FemalePregAge45to49 | 106        |
| Turkmenistan | 1998           | MaleAge0to4         | 268769     |
| Turkmenistan | 1998           | MaleAge10to14       | 272808     |
| Turkmenistan | 1998           | MaleAge15to19       | 229419     |
| Turkmenistan | 1998           | MaleAge20to24       | 201371     |
| Turkmenistan | 1998           | MaleAge25to29       | 179576     |
| Turkmenistan | 1998           | MaleAge30to34       | 163605     |
| Turkmenistan | 1998           | MaleAge35to39       | 146509     |
| Turkmenistan | 1998           | MaleAge40to44       | 116471     |
| Turkmenistan | 1998           | MaleAge45to49       | 78807      |
| Turkmenistan | 1998           | MaleAge50to54       | 49993      |
| Turkmenistan | 1998           | MaleAge55to59       | 44045      |
| Turkmenistan | 1998           | MaleAge5to9         | 300212     |
| Turkmenistan | 1998           | MaleAge60to64       | 47028      |
| Turkmenistan | 1998           | MaleAge65to69       | 32963      |
| Turkmenistan | 1998           | MaleAge70to74       | 22553      |
| Turkmenistan | 1998           | MaleAge75to79       | 8314       |
| Turkmenistan | 1998           | MaleAge80to84       | 4434       |
| Turkmenistan | 1998           | MaleAge85to89       | 2468       |
| Turkmenistan | 1998           | MaleAge90to94       | 620        |
| Turkmenistan | 1998           | MaleAge95to99       | 152        |
| Turkmenistan | 1998           | MaleAgeAbov e100    | 10         |
| Turkmenistan | 1999           | FemaleAge0to4       | 249457     |
| Turkmenistan | 1999           | FemaleAge10to14     | 274236     |
| Turkmenistan | 1999           | FemaleAge15to19     | 222092     |
| Turkmenistan | 1999           | FemaleAge20to24     | 138386     |
| Turkmenistan | 1999           | FemaleAge25to29     | 116855     |
| Turkmenistan | 1999           | FemaleAge30to34     | 129283     |
| Turkmenistan | 1999           | FemaleAge35to39     | 148359     |
| Turkmenistan | 1999           | FemaleAge40to44     | 128016     |
| Turkmenistan | 1999           | FemaleAge45to49     | 91898      |
| Turkmenistan | 1999           | FemaleAge50to54     | 58868      |
| Turkmenistan | 1999           | FemaleAge55to59     | 43641      |
| Turkmenistan | 1999           | FemaleAge5to9       | 290351     |
| Turkmenistan | 1999           | FemaleAge60to64     | 55671      |
| Turkmenistan | 1999           | FemaleAge65to69     | 40562      |
| Turkmenistan | 1999           | FemaleAge70to74     | 36199      |
| Turkmenistan | 1999           | FemaleAge75to79     | 20438      |
| Turkmenistan | 1999           | FemaleAge80to84     | 10406      |
| Turkmenistan | 1999           | FemaleAge85to89     | 5858       |
| Turkmenistan | 1999           | FemaleAge90to94     | 1745       |
| Turkmenistan | 1999           | FemaleAge95to99     | 407        |
| Turkmenistan | 1999           | FemaleAgeAbov e100  | 33         |
| Turkmenistan | 1999           | FemaleLactAge15to19 | 5718       |
| Turkmenistan | 1999           | FemaleLactAge20to24 | 37371      |
| Turkmenistan | 1999           | FemaleLactAge25to29 | 36293      |
| Turkmenistan | 1999           | FemaleLactAge30to34 | 19831      |
| Turkmenistan | 1999           | FemaleLactAge35to39 | 7654       |
| Turkmenistan | 1999           | FemaleLactAge40to44 | 1548       |
| Turkmenistan | 1999           | FemaleLactAge45to49 | 141        |
| Turkmenistan | 1999           | FemalePregAge15to19 | 4289       |
| Turkmenistan | 1999           | FemalePregAge20to24 | 28029      |
| Turkmenistan | 1999           | FemalePregAge25to29 | 27220      |
| Turkmenistan | 1999           | FemalePregAge30to34 | 14873      |
| Turkmenistan | 1999           | FemalePregAge35to39 | 5741       |
| Turkmenistan | 1999           | FemalePregAge40to44 | 1161       |
| Turkmenistan | 1999           | FemalePregAge45to49 | 106        |
| Turkmenistan | 1999           | MaleAge0to4         | 256934     |
| Turkmenistan | 1999           | MaleAge10to14       | 280751     |



Dietary calcium and zinc deficiency risks are decreasing but remain prevalent

| Country      | Reference year | Age/gender group    | Population |
|--------------|----------------|---------------------|------------|
| Turkmenistan | 1999           | MaleAge15to19       | 235354     |
| Turkmenistan | 1999           | MaleAge20to24       | 205519     |
| Turkmenistan | 1999           | MaleAge25to29       | 182248     |
| Turkmenistan | 1999           | MaleAge30to34       | 165260     |
| Turkmenistan | 1999           | MaleAge35to39       | 149290     |
| Turkmenistan | 1999           | MaleAge40to44       | 122753     |
| Turkmenistan | 1999           | MaleAge45to49       | 84402      |
| Turkmenistan | 1999           | MaleAge50to54       | 54322      |
| Turkmenistan | 1999           | MaleAge55to59       | 40522      |
| Turkmenistan | 1999           | MaleAge5to9         | 297561     |
| Turkmenistan | 1999           | MaleAge60to64       | 48345      |
| Turkmenistan | 1999           | MaleAge65to69       | 32651      |
| Turkmenistan | 1999           | MaleAge70to74       | 24408      |
| Turkmenistan | 1999           | MaleAge75to79       | 9004       |
| Turkmenistan | 1999           | MaleAge80to84       | 4223       |
| Turkmenistan | 1999           | MaleAge85to89       | 2395       |
| Turkmenistan | 1999           | MaleAge90to94       | 594        |
| Turkmenistan | 1999           | MaleAge95to99       | 148        |
| Turkmenistan | 1999           | MaleAgeAbov e100    | 10         |
| Uganda       | 1992           | FemaleAge0to4       | 1864024    |
| Uganda       | 1992           | FemaleAge10to14     | 1194785    |
| Uganda       | 1992           | FemaleAge15to19     | 630261     |
| Uganda       | 1992           | FemaleAge20to24     | 345809     |
| Uganda       | 1992           | FemaleAge25to29     | 290706     |
| Uganda       | 1992           | FemaleAge30to34     | 287892     |
| Uganda       | 1992           | FemaleAge35to39     | 295026     |
| Uganda       | 1992           | FemaleAge40to44     | 291190     |
| Uganda       | 1992           | FemaleAge45to49     | 264026     |
| Uganda       | 1992           | FemaleAge50to54     | 214369     |
| Uganda       | 1992           | FemaleAge55to59     | 187235     |
| Uganda       | 1992           | FemaleAge5to9       | 1467608    |
| Uganda       | 1992           | FemaleAge60to64     | 161548     |
| Uganda       | 1992           | FemaleAge65to69     | 118378     |
| Uganda       | 1992           | FemaleAge70to74     | 79024      |
| Uganda       | 1992           | FemaleAge75to79     | 45074      |
| Uganda       | 1992           | FemaleAge80to84     | 21414      |
| Uganda       | 1992           | FemaleAge85to89     | 7788       |
| Uganda       | 1992           | FemaleAge90to94     | 1917       |
| Uganda       | 1992           | FemaleAge95to99     | 258        |
| Uganda       | 1992           | FemaleAgeAbov e100  | 17         |
| Uganda       | 1992           | FemaleLactAge15to19 | 202959     |
| Uganda       | 1992           | FemaleLactAge20to24 | 268237     |
| Uganda       | 1992           | FemaleLactAge25to29 | 213388     |
| Uganda       | 1992           | FemaleLactAge30to34 | 141903     |
| Uganda       | 1992           | FemaleLactAge35to39 | 82923      |
| Uganda       | 1992           | FemaleLactAge40to44 | 33609      |
| Uganda       | 1992           | FemaleLactAge45to49 | 9947       |
| Uganda       | 1992           | FemalePregAge15to19 | 152219     |
| Uganda       | 1992           | FemalePregAge20to24 | 201178     |
| Uganda       | 1992           | FemalePregAge25to29 | 160041     |
| Uganda       | 1992           | FemalePregAge30to34 | 106427     |
| Uganda       | 1992           | FemalePregAge35to39 | 62192      |
| Uganda       | 1992           | FemalePregAge40to44 | 25207      |
| Uganda       | 1992           | FemalePregAge45to49 | 7461       |
| Uganda       | 1992           | MaleAge0to4         | 1886940    |
| Uganda       | 1992           | MaleAge10to14       | 1202601    |
| Uganda       | 1992           | MaleAge15to19       | 990628     |
| Uganda       | 1992           | MaleAge20to24       | 815151     |
| Uganda       | 1992           | MaleAge25to29       | 657131     |
| Uganda       | 1992           | MaleAge30to34       | 524755     |
| Uganda       | 1992           | MaleAge35to39       | 426008     |
| Uganda       | 1992           | MaleAge40to44       | 339480     |
| Uganda       | 1992           | MaleAge45to49       | 273908     |
| Uganda       | 1992           | MaleAge50to54       | 205419     |
| Uganda       | 1992           | MaleAge55to59       | 173400     |
| Uganda       | 1992           | MaleAge5to9         | 1479027    |
| Uganda       | 1992           | MaleAge60to64       | 146025     |
| Uganda       | 1992           | MaleAge65to69       | 104138     |
| Uganda       | 1992           | MaleAge70to74       | 67749      |
| Uganda       | 1992           | MaleAge75to79       | 37171      |
| Uganda       | 1992           | MaleAge80to84       | 16318      |
| Uganda       | 1992           | MaleAge85to89       | 5316       |
| Uganda       | 1992           | MaleAge90to94       | 1112       |
| Uganda       | 1992           | MaleAge95to99       | 120        |
| Uganda       | 1992           | MaleAgeAbov e100    | 4          |
| Uganda       | 1993           | FemaleAge0to4       | 1932240    |
| Uganda       | 1993           | FemaleAge10to14     | 1239946    |
| Uganda       | 1993           | FemaleAge15to19     | 666221     |
| Uganda       | 1993           | FemaleAge20to24     | 372542     |
| Uganda       | 1993           | FemaleAge25to29     | 313988     |
| Uganda       | 1993           | FemaleAge30to34     | 303440     |
| Uganda       | 1993           | FemaleAge35to39     | 304480     |
| Uganda       | 1993           | FemaleAge40to44     | 303249     |
| Uganda       | 1993           | FemaleAge45to49     | 270024     |
| Uganda       | 1993           | FemaleAge50to54     | 225838     |
| Uganda       | 1993           | FemaleAge55to59     | 182959     |
| Uganda       | 1993           | FemaleAge5to9       | 1523908    |
| Uganda       | 1993           | FemaleAge60to64     | 167012     |

Dietary calcium and zinc deficiency risks are decreasing but remain prevalent

| Country | Reference year | Age/gender group    | Population |
|---------|----------------|---------------------|------------|
| Uganda  | 1993           | FemaleAge65to69     | 121646     |
| Uganda  | 1993           | FemaleAge70to74     | 82230      |
| Uganda  | 1993           | FemaleAge75to79     | 46855      |
| Uganda  | 1993           | FemaleAge80to84     | 22173      |
| Uganda  | 1993           | FemaleAge85to89     | 8091       |
| Uganda  | 1993           | FemaleAge90to94     | 2029       |
| Uganda  | 1993           | FemaleAge95to99     | 302        |
| Uganda  | 1993           | FemaleAgeAbov e100  | 18         |
| Uganda  | 1993           | FemaleLactAge15to19 | 202959     |
| Uganda  | 1993           | FemaleLactAge20to24 | 268237     |
| Uganda  | 1993           | FemaleLactAge25to29 | 213388     |
| Uganda  | 1993           | FemaleLactAge30to34 | 141903     |
| Uganda  | 1993           | FemaleLactAge35to39 | 82923      |
| Uganda  | 1993           | FemaleLactAge40to44 | 33609      |
| Uganda  | 1993           | FemaleLactAge45to49 | 9947       |
| Uganda  | 1993           | FemalePregAge15to19 | 152219     |
| Uganda  | 1993           | FemalePregAge20to24 | 201178     |
| Uganda  | 1993           | FemalePregAge25to29 | 160041     |
| Uganda  | 1993           | FemalePregAge30to34 | 106427     |
| Uganda  | 1993           | FemalePregAge35to39 | 62192      |
| Uganda  | 1993           | FemalePregAge40to44 | 25207      |
| Uganda  | 1993           | FemalePregAge45to49 | 7461       |
| Uganda  | 1993           | MaleAge0to4         | 1956415    |
| Uganda  | 1993           | MaleAge10to14       | 1248052    |
| Uganda  | 1993           | MaleAge15to19       | 1026750    |
| Uganda  | 1993           | MaleAge20to24       | 842114     |
| Uganda  | 1993           | MaleAge25to29       | 681038     |
| Uganda  | 1993           | MaleAge30to34       | 540576     |
| Uganda  | 1993           | MaleAge35to39       | 435924     |
| Uganda  | 1993           | MaleAge40to44       | 349947     |
| Uganda  | 1993           | MaleAge45to49       | 279543     |
| Uganda  | 1993           | MaleAge50to54       | 216815     |
| Uganda  | 1993           | MaleAge55to59       | 169967     |
| Uganda  | 1993           | MaleAge5to9         | 1535773    |
| Uganda  | 1993           | MaleAge60to64       | 150820     |
| Uganda  | 1993           | MaleAge65to69       | 107097     |
| Uganda  | 1993           | MaleAge70to74       | 70214      |
| Uganda  | 1993           | MaleAge75to79       | 38705      |
| Uganda  | 1993           | MaleAge80to84       | 16948      |
| Uganda  | 1993           | MaleAge85to89       | 5535       |
| Uganda  | 1993           | MaleAge90to94       | 1192       |
| Uganda  | 1993           | MaleAge95to99       | 151        |
| Uganda  | 1993           | MaleAgeAbov e100    | 4          |
| Uganda  | 1994           | FemaleAge0to4       | 1998526    |
| Uganda  | 1994           | FemaleAge10to14     | 1286532    |
| Uganda  | 1994           | FemaleAge15to19     | 703574     |
| Uganda  | 1994           | FemaleAge20to24     | 400856     |
| Uganda  | 1994           | FemaleAge25to29     | 338166     |
| Uganda  | 1994           | FemaleAge30to34     | 320282     |
| Uganda  | 1994           | FemaleAge35to39     | 314795     |
| Uganda  | 1994           | FemaleAge40to44     | 314162     |
| Uganda  | 1994           | FemaleAge45to49     | 276638     |
| Uganda  | 1994           | FemaleAge50to54     | 236798     |
| Uganda  | 1994           | FemaleAge55to59     | 180916     |
| Uganda  | 1994           | FemaleAge5to9       | 1578636    |
| Uganda  | 1994           | FemaleAge60to64     | 170785     |
| Uganda  | 1994           | FemaleAge65to69     | 125368     |
| Uganda  | 1994           | FemaleAge70to74     | 85507      |
| Uganda  | 1994           | FemaleAge75to79     | 48752      |
| Uganda  | 1994           | FemaleAge80to84     | 22824      |
| Uganda  | 1994           | FemaleAge85to89     | 8166       |
| Uganda  | 1994           | FemaleAge90to94     | 2013       |
| Uganda  | 1994           | FemaleAge95to99     | 314        |
| Uganda  | 1994           | FemaleAgeAbov e100  | 18         |
| Uganda  | 1994           | FemaleLactAge15to19 | 202959     |
| Uganda  | 1994           | FemaleLactAge20to24 | 268237     |
| Uganda  | 1994           | FemaleLactAge25to29 | 213388     |
| Uganda  | 1994           | FemaleLactAge30to34 | 141903     |
| Uganda  | 1994           | FemaleLactAge35to39 | 82923      |
| Uganda  | 1994           | FemaleLactAge40to44 | 33609      |
| Uganda  | 1994           | FemaleLactAge45to49 | 9947       |
| Uganda  | 1994           | FemalePregAge15to19 | 152219     |
| Uganda  | 1994           | FemalePregAge20to24 | 201178     |
| Uganda  | 1994           | FemalePregAge25to29 | 160041     |
| Uganda  | 1994           | FemalePregAge30to34 | 106427     |
| Uganda  | 1994           | FemalePregAge35to39 | 62192      |
| Uganda  | 1994           | FemalePregAge40to44 | 25207      |
| Uganda  | 1994           | FemalePregAge45to49 | 7461       |
| Uganda  | 1994           | MaleAge0to4         | 2024235    |
| Uganda  | 1994           | MaleAge10to14       | 1295116    |
| Uganda  | 1994           | MaleAge15to19       | 1064662    |
| Uganda  | 1994           | MaleAge20to24       | 870763     |
| Uganda  | 1994           | MaleAge25to29       | 705783     |
| Uganda  | 1994           | MaleAge30to34       | 557815     |
| Uganda  | 1994           | MaleAge35to39       | 446801     |
| Uganda  | 1994           | MaleAge40to44       | 359704     |
| Uganda  | 1994           | MaleAge45to49       | 285622     |
| Uganda  | 1994           | MaleAge50to54       | 227641     |

Dietary calcium and zinc deficiency risks are decreasing but remain prevalent

| Country | Reference year | Age/gender group    | Population |
|---------|----------------|---------------------|------------|
| Uganda  | 1994           | MaleAge55to59       | 168746     |
| Uganda  | 1994           | MaleAge5to9         | 1591012    |
| Uganda  | 1994           | MaleAge60to64       | 154171     |
| Uganda  | 1994           | MaleAge65to69       | 110424     |
| Uganda  | 1994           | MaleAge70to74       | 72784      |
| Uganda  | 1994           | MaleAge75to79       | 40218      |
| Uganda  | 1994           | MaleAge80to84       | 17443      |
| Uganda  | 1994           | MaleAge85to89       | 5559       |
| Uganda  | 1994           | MaleAge90to94       | 1174       |
| Uganda  | 1994           | MaleAge95to99       | 156        |
| Uganda  | 1994           | MaleAgeAbov e100    | 5          |
| Uganda  | 1995           | FemaleAge0to4       | 2063798    |
| Uganda  | 1995           | FemaleAge10to14     | 1333431    |
| Uganda  | 1995           | FemaleAge15to19     | 742260     |
| Uganda  | 1995           | FemaleAge20to24     | 431144     |
| Uganda  | 1995           | FemaleAge25to29     | 362970     |
| Uganda  | 1995           | FemaleAge30to34     | 338657     |
| Uganda  | 1995           | FemaleAge35to39     | 326412     |
| Uganda  | 1995           | FemaleAge40to44     | 323747     |
| Uganda  | 1995           | FemaleAge45to49     | 284467     |
| Uganda  | 1995           | FemaleAge50to54     | 245781     |
| Uganda  | 1995           | FemaleAge55to59     | 182676     |
| Uganda  | 1995           | FemaleAge5to9       | 1631237    |
| Uganda  | 1995           | FemaleAge60to64     | 172150     |
| Uganda  | 1995           | FemaleAge65to69     | 129674     |
| Uganda  | 1995           | FemaleAge70to74     | 88821      |
| Uganda  | 1995           | FemaleAge75to79     | 50838      |
| Uganda  | 1995           | FemaleAge80to84     | 23440      |
| Uganda  | 1995           | FemaleAge85to89     | 8031       |
| Uganda  | 1995           | FemaleAge90to94     | 1818       |
| Uganda  | 1995           | FemaleAge95to99     | 241        |
| Uganda  | 1995           | FemaleAgeAbov e100  | 19         |
| Uganda  | 1995           | FemaleLactAge15to19 | 202959     |
| Uganda  | 1995           | FemaleLactAge20to24 | 268237     |
| Uganda  | 1995           | FemaleLactAge25to29 | 213388     |
| Uganda  | 1995           | FemaleLactAge30to34 | 141903     |
| Uganda  | 1995           | FemaleLactAge35to39 | 82923      |
| Uganda  | 1995           | FemaleLactAge40to44 | 33609      |
| Uganda  | 1995           | FemaleLactAge45to49 | 9947       |
| Uganda  | 1995           | FemalePregAge15to19 | 152219     |
| Uganda  | 1995           | FemalePregAge20to24 | 201178     |
| Uganda  | 1995           | FemalePregAge25to29 | 160041     |
| Uganda  | 1995           | FemalePregAge30to34 | 106427     |
| Uganda  | 1995           | FemalePregAge35to39 | 62192      |
| Uganda  | 1995           | FemalePregAge40to44 | 25207      |
| Uganda  | 1995           | FemalePregAge45to49 | 7461       |
| Uganda  | 1995           | MaleAge0to4         | 2091497    |
| Uganda  | 1995           | MaleAge10to14       | 1342637    |
| Uganda  | 1995           | MaleAge15to19       | 1104242    |
| Uganda  | 1995           | MaleAge20to24       | 901620     |
| Uganda  | 1995           | MaleAge25to29       | 731140     |
| Uganda  | 1995           | MaleAge30to34       | 576730     |
| Uganda  | 1995           | MaleAge35to39       | 458936     |
| Uganda  | 1995           | MaleAge40to44       | 368735     |
| Uganda  | 1995           | MaleAge45to49       | 292708     |
| Uganda  | 1995           | MaleAge50to54       | 236518     |
| Uganda  | 1995           | MaleAge55to59       | 171132     |
| Uganda  | 1995           | MaleAge5to9         | 1644232    |
| Uganda  | 1995           | MaleAge60to64       | 155498     |
| Uganda  | 1995           | MaleAge65to69       | 114208     |
| Uganda  | 1995           | MaleAge70to74       | 75469      |
| Uganda  | 1995           | MaleAge75to79       | 41771      |
| Uganda  | 1995           | MaleAge80to84       | 17859      |
| Uganda  | 1995           | MaleAge85to89       | 5387       |
| Uganda  | 1995           | MaleAge90to94       | 1002       |
| Uganda  | 1995           | MaleAge95to99       | 98         |
| Uganda  | 1995           | MaleAgeAbov e100    | 5          |
| Uganda  | 1996           | FemaleAge0to4       | 2139256    |
| Uganda  | 1996           | FemaleAge10to14     | 1380420    |
| Uganda  | 1996           | FemaleAge15to19     | 732629     |
| Uganda  | 1996           | FemaleAge20to24     | 359513     |
| Uganda  | 1996           | FemaleAge25to29     | 338079     |
| Uganda  | 1996           | FemaleAge30to34     | 314928     |
| Uganda  | 1996           | FemaleAge35to39     | 317706     |
| Uganda  | 1996           | FemaleAge40to44     | 330765     |
| Uganda  | 1996           | FemaleAge45to49     | 288307     |
| Uganda  | 1996           | FemaleAge50to54     | 252577     |
| Uganda  | 1996           | FemaleAge55to59     | 187136     |
| Uganda  | 1996           | FemaleAge5to9       | 1694330    |
| Uganda  | 1996           | FemaleAge60to64     | 170491     |
| Uganda  | 1996           | FemaleAge65to69     | 133518     |
| Uganda  | 1996           | FemaleAge70to74     | 91361      |
| Uganda  | 1996           | FemaleAge75to79     | 53086      |
| Uganda  | 1996           | FemaleAge80to84     | 24860      |
| Uganda  | 1996           | FemaleAge85to89     | 8832       |
| Uganda  | 1996           | FemaleAge90to94     | 2139       |
| Uganda  | 1996           | FemaleAge95to99     | 275        |
| Uganda  | 1996           | FemaleAgeAbov e100  | 20         |

Dietary calcium and zinc deficiency risks are decreasing but remain prevalent

| Country | Reference year | Age/gender group    | Population |
|---------|----------------|---------------------|------------|
| Uganda  | 1996           | FemaleLactAge15to19 | 229831     |
| Uganda  | 1996           | FemaleLactAge20to24 | 325101     |
| Uganda  | 1996           | FemaleLactAge25to29 | 239116     |
| Uganda  | 1996           | FemaleLactAge30to34 | 164131     |
| Uganda  | 1996           | FemaleLactAge35to39 | 92613      |
| Uganda  | 1996           | FemaleLactAge40to44 | 33997      |
| Uganda  | 1996           | FemaleLactAge45to49 | 12237      |
| Uganda  | 1996           | FemalePregAge15to19 | 172374     |
| Uganda  | 1996           | FemalePregAge20to24 | 243826     |
| Uganda  | 1996           | FemalePregAge25to29 | 179337     |
| Uganda  | 1996           | FemalePregAge30to34 | 123098     |
| Uganda  | 1996           | FemalePregAge35to39 | 69459      |
| Uganda  | 1996           | FemalePregAge40to44 | 25498      |
| Uganda  | 1996           | FemalePregAge45to49 | 9178       |
| Uganda  | 1996           | MaleAge0to4         | 2168398    |
| Uganda  | 1996           | MaleAge10to14       | 1389269    |
| Uganda  | 1996           | MaleAge15to19       | 1141088    |
| Uganda  | 1996           | MaleAge20to24       | 929946     |
| Uganda  | 1996           | MaleAge25to29       | 752790     |
| Uganda  | 1996           | MaleAge30to34       | 593684     |
| Uganda  | 1996           | MaleAge35to39       | 468979     |
| Uganda  | 1996           | MaleAge40to44       | 376820     |
| Uganda  | 1996           | MaleAge45to49       | 299835     |
| Uganda  | 1996           | MaleAge50to54       | 243319     |
| Uganda  | 1996           | MaleAge55to59       | 176072     |
| Uganda  | 1996           | MaleAge5to9         | 1707848    |
| Uganda  | 1996           | MaleAge60to64       | 154244     |
| Uganda  | 1996           | MaleAge65to69       | 117589     |
| Uganda  | 1996           | MaleAge70to74       | 77660      |
| Uganda  | 1996           | MaleAge75to79       | 43608      |
| Uganda  | 1996           | MaleAge80to84       | 19134      |
| Uganda  | 1996           | MaleAge85to89       | 6048       |
| Uganda  | 1996           | MaleAge90to94       | 1219       |
| Uganda  | 1996           | MaleAge95to99       | 115        |
| Uganda  | 1996           | MaleAgeAbov e100    | 5          |
| Uganda  | 1997           | FemaleAge0to4       | 2204634    |
| Uganda  | 1997           | FemaleAge10to14     | 1429845    |
| Uganda  | 1997           | FemaleAge15to19     | 772627     |
| Uganda  | 1997           | FemaleAge20to24     | 390381     |
| Uganda  | 1997           | FemaleAge25to29     | 359721     |
| Uganda  | 1997           | FemaleAge30to34     | 332049     |
| Uganda  | 1997           | FemaleAge35to39     | 326960     |
| Uganda  | 1997           | FemaleAge40to44     | 337077     |
| Uganda  | 1997           | FemaleAge45to49     | 296884     |
| Uganda  | 1997           | FemaleAge50to54     | 257889     |
| Uganda  | 1997           | FemaleAge55to59     | 195080     |
| Uganda  | 1997           | FemaleAge5to9       | 1759536    |
| Uganda  | 1997           | FemaleAge60to64     | 166749     |
| Uganda  | 1997           | FemaleAge65to69     | 138196     |
| Uganda  | 1997           | FemaleAge70to74     | 93774      |
| Uganda  | 1997           | FemaleAge75to79     | 55341      |
| Uganda  | 1997           | FemaleAge80to84     | 26072      |
| Uganda  | 1997           | FemaleAge85to89     | 9432       |
| Uganda  | 1997           | FemaleAge90to94     | 2382       |
| Uganda  | 1997           | FemaleAge95to99     | 332        |
| Uganda  | 1997           | FemaleAgeAbov e100  | 21         |
| Uganda  | 1997           | FemaleLactAge15to19 | 229831     |
| Uganda  | 1997           | FemaleLactAge20to24 | 325101     |
| Uganda  | 1997           | FemaleLactAge25to29 | 239116     |
| Uganda  | 1997           | FemaleLactAge30to34 | 164131     |
| Uganda  | 1997           | FemaleLactAge35to39 | 92613      |
| Uganda  | 1997           | FemaleLactAge40to44 | 33997      |
| Uganda  | 1997           | FemaleLactAge45to49 | 12237      |
| Uganda  | 1997           | FemalePregAge15to19 | 172374     |
| Uganda  | 1997           | FemalePregAge20to24 | 243826     |
| Uganda  | 1997           | FemalePregAge25to29 | 179337     |
| Uganda  | 1997           | FemalePregAge30to34 | 123098     |
| Uganda  | 1997           | FemalePregAge35to39 | 69459      |
| Uganda  | 1997           | FemalePregAge40to44 | 25498      |
| Uganda  | 1997           | FemalePregAge45to49 | 9178       |
| Uganda  | 1997           | MaleAge0to4         | 2234993    |
| Uganda  | 1997           | MaleAge10to14       | 1438790    |
| Uganda  | 1997           | MaleAge15to19       | 1180872    |
| Uganda  | 1997           | MaleAge20to24       | 961144     |
| Uganda  | 1997           | MaleAge25to29       | 775720     |
| Uganda  | 1997           | MaleAge30to34       | 612692     |
| Uganda  | 1997           | MaleAge35to39       | 480059     |
| Uganda  | 1997           | MaleAge40to44       | 384436     |
| Uganda  | 1997           | MaleAge45to49       | 307602     |
| Uganda  | 1997           | MaleAge50to54       | 248762     |
| Uganda  | 1997           | MaleAge55to59       | 184301     |
| Uganda  | 1997           | MaleAge5to9         | 1773997    |
| Uganda  | 1997           | MaleAge60to64       | 151288     |
| Uganda  | 1997           | MaleAge65to69       | 121675     |
| Uganda  | 1997           | MaleAge70to74       | 79781      |
| Uganda  | 1997           | MaleAge75to79       | 45345      |
| Uganda  | 1997           | MaleAge80to84       | 20207      |
| Uganda  | 1997           | MaleAge85to89       | 6538       |

Dietary calcium and zinc deficiency risks are decreasing but remain prevalent

| Country | Reference year | Age/gender group    | Population |
|---------|----------------|---------------------|------------|
| Uganda  | 1997           | MaleAge90to94       | 1388       |
| Uganda  | 1997           | MaleAge95to99       | 154        |
| Uganda  | 1997           | MaleAgeAbov e100    | 6          |
| Uganda  | 1998           | FemaleAge0to4       | 2264801    |
| Uganda  | 1998           | FemaleAge10to14     | 1481947    |
| Uganda  | 1998           | FemaleAge15to19     | 815052     |
| Uganda  | 1998           | FemaleAge20to24     | 424168     |
| Uganda  | 1998           | FemaleAge25to29     | 383503     |
| Uganda  | 1998           | FemaleAge30to34     | 350862     |
| Uganda  | 1998           | FemaleAge35to39     | 337825     |
| Uganda  | 1998           | FemaleAge40to44     | 342377     |
| Uganda  | 1998           | FemaleAge45to49     | 305561     |
| Uganda  | 1998           | FemaleAge50to54     | 262490     |
| Uganda  | 1998           | FemaleAge55to59     | 204934     |
| Uganda  | 1998           | FemaleAge5to9       | 1825698    |
| Uganda  | 1998           | FemaleAge60to64     | 162704     |
| Uganda  | 1998           | FemaleAge65to69     | 142817     |
| Uganda  | 1998           | FemaleAge70to74     | 96344      |
| Uganda  | 1998           | FemaleAge75to79     | 57604      |
| Uganda  | 1998           | FemaleAge80to84     | 27108      |
| Uganda  | 1998           | FemaleAge85to89     | 9795       |
| Uganda  | 1998           | FemaleAge90to94     | 2514       |
| Uganda  | 1998           | FemaleAge95to99     | 389        |
| Uganda  | 1998           | FemaleAgeAbov e100  | 22         |
| Uganda  | 1998           | FemaleLactAge15to19 | 229831     |
| Uganda  | 1998           | FemaleLactAge20to24 | 325101     |
| Uganda  | 1998           | FemaleLactAge25to29 | 239116     |
| Uganda  | 1998           | FemaleLactAge30to34 | 164131     |
| Uganda  | 1998           | FemaleLactAge35to39 | 92613      |
| Uganda  | 1998           | FemaleLactAge40to44 | 33997      |
| Uganda  | 1998           | FemaleLactAge45to49 | 12237      |
| Uganda  | 1998           | FemalePregAge15to19 | 172374     |
| Uganda  | 1998           | FemalePregAge20to24 | 243826     |
| Uganda  | 1998           | FemalePregAge25to29 | 179337     |
| Uganda  | 1998           | FemalePregAge30to34 | 123098     |
| Uganda  | 1998           | FemalePregAge35to39 | 69459      |
| Uganda  | 1998           | FemalePregAge40to44 | 25498      |
| Uganda  | 1998           | FemalePregAge45to49 | 9178       |
| Uganda  | 1998           | MaleAge0to4         | 2296361    |
| Uganda  | 1998           | MaleAge10to14       | 1491336    |
| Uganda  | 1998           | MaleAge15to19       | 1223516    |
| Uganda  | 1998           | MaleAge20to24       | 995155     |
| Uganda  | 1998           | MaleAge25to29       | 800468     |
| Uganda  | 1998           | MaleAge30to34       | 633430     |
| Uganda  | 1998           | MaleAge35to39       | 492658     |
| Uganda  | 1998           | MaleAge40to44       | 391831     |
| Uganda  | 1998           | MaleAge45to49       | 315603     |
| Uganda  | 1998           | MaleAge50to54       | 253544     |
| Uganda  | 1998           | MaleAge55to59       | 194311     |
| Uganda  | 1998           | MaleAge5to9         | 1841335    |
| Uganda  | 1998           | MaleAge60to64       | 148245     |
| Uganda  | 1998           | MaleAge65to69       | 125714     |
| Uganda  | 1998           | MaleAge70to74       | 82048      |
| Uganda  | 1998           | MaleAge75to79       | 47023      |
| Uganda  | 1998           | MaleAge80to84       | 21062      |
| Uganda  | 1998           | MaleAge85to89       | 6822       |
| Uganda  | 1998           | MaleAge90to94       | 1482       |
| Uganda  | 1998           | MaleAge95to99       | 191        |
| Uganda  | 1998           | MaleAgeAbov e100    | 6          |
| Uganda  | 1999           | FemaleAge0to4       | 2327286    |
| Uganda  | 1999           | FemaleAge10to14     | 1536778    |
| Uganda  | 1999           | FemaleAge15to19     | 859763     |
| Uganda  | 1999           | FemaleAge20to24     | 460626     |
| Uganda  | 1999           | FemaleAge25to29     | 410041     |
| Uganda  | 1999           | FemaleAge30to34     | 371080     |
| Uganda  | 1999           | FemaleAge35to39     | 350563     |
| Uganda  | 1999           | FemaleAge40to44     | 347616     |
| Uganda  | 1999           | FemaleAge45to49     | 313368     |
| Uganda  | 1999           | FemaleAge50to54     | 267520     |
| Uganda  | 1999           | FemaleAge55to59     | 214389     |
| Uganda  | 1999           | FemaleAge5to9       | 1891072    |
| Uganda  | 1999           | FemaleAge60to64     | 160880     |
| Uganda  | 1999           | FemaleAge65to69     | 146068     |
| Uganda  | 1999           | FemaleAge70to74     | 99407      |
| Uganda  | 1999           | FemaleAge75to79     | 59850      |
| Uganda  | 1999           | FemaleAge80to84     | 28043      |
| Uganda  | 1999           | FemaleAge85to89     | 9931       |
| Uganda  | 1999           | FemaleAge90to94     | 2492       |
| Uganda  | 1999           | FemaleAge95to99     | 400        |
| Uganda  | 1999           | FemaleAgeAbov e100  | 23         |
| Uganda  | 1999           | FemaleLactAge15to19 | 229831     |
| Uganda  | 1999           | FemaleLactAge20to24 | 325101     |
| Uganda  | 1999           | FemaleLactAge25to29 | 239116     |
| Uganda  | 1999           | FemaleLactAge30to34 | 164131     |
| Uganda  | 1999           | FemaleLactAge35to39 | 92613      |
| Uganda  | 1999           | FemaleLactAge40to44 | 33997      |
| Uganda  | 1999           | FemaleLactAge45to49 | 12237      |
| Uganda  | 1999           | FemalePregAge15to19 | 172374     |

Dietary calcium and zinc deficiency risks are decreasing but remain prevalent

| Country | Reference year | Age/gender group    | Population |
|---------|----------------|---------------------|------------|
| Uganda  | 1999           | FemalePregAge20to24 | 243826     |
| Uganda  | 1999           | FemalePregAge25to29 | 179337     |
| Uganda  | 1999           | FemalePregAge30to34 | 123098     |
| Uganda  | 1999           | FemalePregAge35to39 | 69459      |
| Uganda  | 1999           | FemalePregAge40to44 | 25498      |
| Uganda  | 1999           | FemalePregAge45to49 | 9178       |
| Uganda  | 1999           | MaleAge0to4         | 2360320    |
| Uganda  | 1999           | MaleAge10to14       | 1546844    |
| Uganda  | 1999           | MaleAge15to19       | 1268811    |
| Uganda  | 1999           | MaleAge20to24       | 1031767    |
| Uganda  | 1999           | MaleAge25to29       | 827636     |
| Uganda  | 1999           | MaleAge30to34       | 655440     |
| Uganda  | 1999           | MaleAge35to39       | 507082     |
| Uganda  | 1999           | MaleAge40to44       | 399555     |
| Uganda  | 1999           | MaleAge45to49       | 323257     |
| Uganda  | 1999           | MaleAge50to54       | 258661     |
| Uganda  | 1999           | MaleAge55to59       | 203916     |
| Uganda  | 1999           | MaleAge5to9         | 1907874    |
| Uganda  | 1999           | MaleAge60to64       | 147377     |
| Uganda  | 1999           | MaleAge65to69       | 128607     |
| Uganda  | 1999           | MaleAge70to74       | 84700      |
| Uganda  | 1999           | MaleAge75to79       | 48673      |
| Uganda  | 1999           | MaleAge80to84       | 21727      |
| Uganda  | 1999           | MaleAge85to89       | 6897       |
| Uganda  | 1999           | MaleAge90to94       | 1463       |
| Uganda  | 1999           | MaleAge95to99       | 195        |
| Uganda  | 1999           | MaleAgeAbove100     | 7          |
| Ukraine | 1992           | FemaleAge0to4       | 1658581    |
| Ukraine | 1992           | FemaleAge10to14     | 1855793    |
| Ukraine | 1992           | FemaleAge15to19     | 1620265    |
| Ukraine | 1992           | FemaleAge20to24     | 1253872    |
| Ukraine | 1992           | FemaleAge25to29     | 1537689    |
| Ukraine | 1992           | FemaleAge30to34     | 1814546    |
| Ukraine | 1992           | FemaleAge35to39     | 2040570    |
| Ukraine | 1992           | FemaleAge40to44     | 1821827    |
| Ukraine | 1992           | FemaleAge45to49     | 1361755    |
| Ukraine | 1992           | FemaleAge50to54     | 1910166    |
| Ukraine | 1992           | FemaleAge55to59     | 1689207    |
| Ukraine | 1992           | FemaleAge5to9       | 1855822    |
| Ukraine | 1992           | FemaleAge60to64     | 1666954    |
| Ukraine | 1992           | FemaleAge65to69     | 1678592    |
| Ukraine | 1992           | FemaleAge70to74     | 1012206    |
| Ukraine | 1992           | FemaleAge75to79     | 851322     |
| Ukraine | 1992           | FemaleAge80to84     | 652795     |
| Ukraine | 1992           | FemaleAge85to89     | 271051     |
| Ukraine | 1992           | FemaleAge90to94     | 80570      |
| Ukraine | 1992           | FemaleAge95to99     | 14836      |
| Ukraine | 1992           | FemaleAgeAbove100   | 1855       |
| Ukraine | 1992           | FemaleLactAge15to19 | 105763     |
| Ukraine | 1992           | FemaleLactAge20to24 | 243815     |
| Ukraine | 1992           | FemaleLactAge25to29 | 135225     |
| Ukraine | 1992           | FemaleLactAge30to34 | 66690      |
| Ukraine | 1992           | FemaleLactAge35to39 | 25655      |
| Ukraine | 1992           | FemaleLactAge40to44 | 5104       |
| Ukraine | 1992           | FemaleLactAge45to49 | 296        |
| Ukraine | 1992           | FemalePregAge15to19 | 79323      |
| Ukraine | 1992           | FemalePregAge20to24 | 182861     |
| Ukraine | 1992           | FemalePregAge25to29 | 101419     |
| Ukraine | 1992           | FemalePregAge30to34 | 50017      |
| Ukraine | 1992           | FemalePregAge35to39 | 19241      |
| Ukraine | 1992           | FemalePregAge40to44 | 3828       |
| Ukraine | 1992           | FemalePregAge45to49 | 222        |
| Ukraine | 1992           | MaleAge0to4         | 1745207    |
| Ukraine | 1992           | MaleAge10to14       | 1907962    |
| Ukraine | 1992           | MaleAge15to19       | 1855836    |
| Ukraine | 1992           | MaleAge20to24       | 1730086    |
| Ukraine | 1992           | MaleAge25to29       | 1799800    |
| Ukraine | 1992           | MaleAge30to34       | 1894728    |
| Ukraine | 1992           | MaleAge35to39       | 1984473    |
| Ukraine | 1992           | MaleAge40to44       | 1702572    |
| Ukraine | 1992           | MaleAge45to49       | 1200765    |
| Ukraine | 1992           | MaleAge50to54       | 1593378    |
| Ukraine | 1992           | MaleAge55to59       | 1395411    |
| Ukraine | 1992           | MaleAge5to9         | 1943874    |
| Ukraine | 1992           | MaleAge60to64       | 1211192    |
| Ukraine | 1992           | MaleAge65to69       | 934222     |
| Ukraine | 1992           | MaleAge70to74       | 428616     |
| Ukraine | 1992           | MaleAge75to79       | 315251     |
| Ukraine | 1992           | MaleAge80to84       | 222814     |
| Ukraine | 1992           | MaleAge85to89       | 85756      |
| Ukraine | 1992           | MaleAge90to94       | 22469      |
| Ukraine | 1992           | MaleAge95to99       | 3122       |
| Ukraine | 1992           | MaleAgeAbove100     | 233        |
| Ukraine | 1993           | FemaleAge0to4       | 1569734    |
| Ukraine | 1993           | FemaleAge10to14     | 1868109    |
| Ukraine | 1993           | FemaleAge15to19     | 1627730    |
| Ukraine | 1993           | FemaleAge20to24     | 1281357    |
| Ukraine | 1993           | FemaleAge25to29     | 1488877    |

Dietary calcium and zinc deficiency risks are decreasing but remain prevalent

| Country | Reference year | Age/gender group    | Population |
|---------|----------------|---------------------|------------|
| Ukraine | 1993           | FemaleAge30to34     | 1805290    |
| Ukraine | 1993           | FemaleAge35to39     | 2004985    |
| Ukraine | 1993           | FemaleAge40to44     | 1926586    |
| Ukraine | 1993           | FemaleAge45to49     | 1431511    |
| Ukraine | 1993           | FemaleAge50to54     | 1686065    |
| Ukraine | 1993           | FemaleAge55to59     | 1894468    |
| Ukraine | 1993           | FemaleAge5to9       | 1847028    |
| Ukraine | 1993           | FemaleAge60to64     | 1502142    |
| Ukraine | 1993           | FemaleAge65to69     | 1739517    |
| Ukraine | 1993           | FemaleAge70to74     | 1112036    |
| Ukraine | 1993           | FemaleAge75to79     | 753100     |
| Ukraine | 1993           | FemaleAge80to84     | 671913     |
| Ukraine | 1993           | FemaleAge85to89     | 276979     |
| Ukraine | 1993           | FemaleAge90to94     | 82889      |
| Ukraine | 1993           | FemaleAge95to99     | 15603      |
| Ukraine | 1993           | FemaleAgeAbove100   | 1767       |
| Ukraine | 1993           | FemaleLactAge15to19 | 105763     |
| Ukraine | 1993           | FemaleLactAge20to24 | 243815     |
| Ukraine | 1993           | FemaleLactAge25to29 | 135225     |
| Ukraine | 1993           | FemaleLactAge30to34 | 66690      |
| Ukraine | 1993           | FemaleLactAge35to39 | 25655      |
| Ukraine | 1993           | FemaleLactAge40to44 | 5104       |
| Ukraine | 1993           | FemaleLactAge45to49 | 296        |
| Ukraine | 1993           | FemalePregAge15to19 | 79323      |
| Ukraine | 1993           | FemalePregAge20to24 | 182861     |
| Ukraine | 1993           | FemalePregAge25to29 | 101419     |
| Ukraine | 1993           | FemalePregAge30to34 | 50017      |
| Ukraine | 1993           | FemalePregAge35to39 | 19241      |
| Ukraine | 1993           | FemalePregAge40to44 | 3828       |
| Ukraine | 1993           | FemalePregAge45to49 | 222        |
| Ukraine | 1993           | MaleAge0to4         | 1652708    |
| Ukraine | 1993           | MaleAge10to14       | 1928725    |
| Ukraine | 1993           | MaleAge15to19       | 1854150    |
| Ukraine | 1993           | MaleAge20to24       | 1758056    |
| Ukraine | 1993           | MaleAge25to29       | 1750444    |
| Ukraine | 1993           | MaleAge30to34       | 1893663    |
| Ukraine | 1993           | MaleAge35to39       | 1947886    |
| Ukraine | 1993           | MaleAge40to44       | 1798749    |
| Ukraine | 1993           | MaleAge45to49       | 1269277    |
| Ukraine | 1993           | MaleAge50to54       | 1396267    |
| Ukraine | 1993           | MaleAge55to59       | 1546964    |
| Ukraine | 1993           | MaleAge5to9         | 1938481    |
| Ukraine | 1993           | MaleAge60to64       | 1106362    |
| Ukraine | 1993           | MaleAge65to69       | 1025171    |
| Ukraine | 1993           | MaleAge70to74       | 463824     |
| Ukraine | 1993           | MaleAge75to79       | 279520     |
| Ukraine | 1993           | MaleAge80to84       | 224627     |
| Ukraine | 1993           | MaleAge85to89       | 86376      |
| Ukraine | 1993           | MaleAge90to94       | 23284      |
| Ukraine | 1993           | MaleAge95to99       | 3487       |
| Ukraine | 1993           | MaleAgeAbove100     | 231        |
| Ukraine | 1994           | FemaleAge0to4       | 1476690    |
| Ukraine | 1994           | FemaleAge10to14     | 1877165    |
| Ukraine | 1994           | FemaleAge15to19     | 1636527    |
| Ukraine | 1994           | FemaleAge20to24     | 1305878    |
| Ukraine | 1994           | FemaleAge25to29     | 1448560    |
| Ukraine | 1994           | FemaleAge30to34     | 1788326    |
| Ukraine | 1994           | FemaleAge35to39     | 1964856    |
| Ukraine | 1994           | FemaleAge40to44     | 2010092    |
| Ukraine | 1994           | FemaleAge45to49     | 1521131    |
| Ukraine | 1994           | FemaleAge50to54     | 1489559    |
| Ukraine | 1994           | FemaleAge55to59     | 2042546    |
| Ukraine | 1994           | FemaleAge5to9       | 1827604    |
| Ukraine | 1994           | FemaleAge60to64     | 1392272    |
| Ukraine | 1994           | FemaleAge65to69     | 1761324    |
| Ukraine | 1994           | FemaleAge70to74     | 1210971    |
| Ukraine | 1994           | FemaleAge75to79     | 695511     |
| Ukraine | 1994           | FemaleAge80to84     | 663618     |
| Ukraine | 1994           | FemaleAge85to89     | 279880     |
| Ukraine | 1994           | FemaleAge90to94     | 81227      |
| Ukraine | 1994           | FemaleAge95to99     | 15442      |
| Ukraine | 1994           | FemaleAgeAbove100   | 1667       |
| Ukraine | 1994           | FemaleLactAge15to19 | 105763     |
| Ukraine | 1994           | FemaleLactAge20to24 | 243815     |
| Ukraine | 1994           | FemaleLactAge25to29 | 135225     |
| Ukraine | 1994           | FemaleLactAge30to34 | 66690      |
| Ukraine | 1994           | FemaleLactAge35to39 | 25655      |
| Ukraine | 1994           | FemaleLactAge40to44 | 5104       |
| Ukraine | 1994           | FemaleLactAge45to49 | 296        |
| Ukraine | 1994           | FemalePregAge15to19 | 79323      |
| Ukraine | 1994           | FemalePregAge20to24 | 182861     |
| Ukraine | 1994           | FemalePregAge25to29 | 101419     |
| Ukraine | 1994           | FemalePregAge30to34 | 50017      |
| Ukraine | 1994           | FemalePregAge35to39 | 19241      |
| Ukraine | 1994           | FemalePregAge40to44 | 3828       |
| Ukraine | 1994           | FemalePregAge45to49 | 222        |
| Ukraine | 1994           | MaleAge0to4         | 1555196    |
| Ukraine | 1994           | MaleAge10to14       | 1947380    |

Dietary calcium and zinc deficiency risks are decreasing but remain prevalent

| Country | Reference year | Age/gender group    | Population |
|---------|----------------|---------------------|------------|
| Ukraine | 1994           | MaleAge15to19       | 1855665    |
| Ukraine | 1994           | MaleAge20to24       | 1780815    |
| Ukraine | 1994           | MaleAge25to29       | 1709710    |
| Ukraine | 1994           | MaleAge30to34       | 1883728    |
| Ukraine | 1994           | MaleAge35to39       | 1909177    |
| Ukraine | 1994           | MaleAge40to44       | 1873615    |
| Ukraine | 1994           | MaleAge45to49       | 1354490    |
| Ukraine | 1994           | MaleAge50to54       | 1229384    |
| Ukraine | 1994           | MaleAge55to59       | 1646008    |
| Ukraine | 1994           | MaleAge5to9         | 1919748    |
| Ukraine | 1994           | MaleAge60to64       | 1041596    |
| Ukraine | 1994           | MaleAge65to69       | 1081084    |
| Ukraine | 1994           | MaleAge70to74       | 508579     |
| Ukraine | 1994           | MaleAge75to79       | 258459     |
| Ukraine | 1994           | MaleAge80to84       | 214851     |
| Ukraine | 1994           | MaleAge85to89       | 84520      |
| Ukraine | 1994           | MaleAge90to94       | 22397      |
| Ukraine | 1994           | MaleAge95to99       | 3559       |
| Ukraine | 1994           | MaleAgeAbov e100    | 228        |
| Ukraine | 1995           | FemaleAge0to4       | 1387721    |
| Ukraine | 1995           | FemaleAge10to14     | 1881366    |
| Ukraine | 1995           | FemaleAge15to19     | 1647582    |
| Ukraine | 1995           | FemaleAge20to24     | 1321632    |
| Ukraine | 1995           | FemaleAge25to29     | 1423592    |
| Ukraine | 1995           | FemaleAge30to34     | 1757040    |
| Ukraine | 1995           | FemaleAge35to39     | 1932371    |
| Ukraine | 1995           | FemaleAge40to44     | 2061010    |
| Ukraine | 1995           | FemaleAge45to49     | 1609368    |
| Ukraine | 1995           | FemaleAge50to54     | 1371788    |
| Ukraine | 1995           | FemaleAge55to59     | 2077029    |
| Ukraine | 1995           | FemaleAge5to9       | 1793161    |
| Ukraine | 1995           | FemaleAge60to64     | 1375974    |
| Ukraine | 1995           | FemaleAge65to69     | 1732481    |
| Ukraine | 1995           | FemaleAge70to74     | 1295472    |
| Ukraine | 1995           | FemaleAge75to79     | 692294     |
| Ukraine | 1995           | FemaleAge80to84     | 626121     |
| Ukraine | 1995           | FemaleAge85to89     | 280476     |
| Ukraine | 1995           | FemaleAge90to94     | 75405      |
| Ukraine | 1995           | FemaleAge95to99     | 12333      |
| Ukraine | 1995           | FemaleAgeAbov e100  | 1571       |
| Ukraine | 1995           | FemaleLactAge15to19 | 105763     |
| Ukraine | 1995           | FemaleLactAge20to24 | 243815     |
| Ukraine | 1995           | FemaleLactAge25to29 | 135225     |
| Ukraine | 1995           | FemaleLactAge30to34 | 66690      |
| Ukraine | 1995           | FemaleLactAge35to39 | 25655      |
| Ukraine | 1995           | FemaleLactAge40to44 | 5104       |
| Ukraine | 1995           | FemaleLactAge45to49 | 296        |
| Ukraine | 1995           | FemalePregAge15to19 | 79323      |
| Ukraine | 1995           | FemalePregAge20to24 | 182861     |
| Ukraine | 1995           | FemalePregAge25to29 | 101419     |
| Ukraine | 1995           | FemalePregAge30to34 | 50017      |
| Ukraine | 1995           | FemalePregAge35to39 | 19241      |
| Ukraine | 1995           | FemalePregAge40to44 | 3828       |
| Ukraine | 1995           | FemalePregAge45to49 | 222        |
| Ukraine | 1995           | MaleAge0to4         | 1461276    |
| Ukraine | 1995           | MaleAge10to14       | 1959697    |
| Ukraine | 1995           | MaleAge15to19       | 1863698    |
| Ukraine | 1995           | MaleAge20to24       | 1791955    |
| Ukraine | 1995           | MaleAge25to29       | 1684891    |
| Ukraine | 1995           | MaleAge30to34       | 1857512    |
| Ukraine | 1995           | MaleAge35to39       | 1880271    |
| Ukraine | 1995           | MaleAge40to44       | 1917272    |
| Ukraine | 1995           | MaleAge45to49       | 1437547    |
| Ukraine | 1995           | MaleAge50to54       | 1133608    |
| Ukraine | 1995           | MaleAge55to59       | 1653295    |
| Ukraine | 1995           | MaleAge5to9         | 1884120    |
| Ukraine | 1995           | MaleAge60to64       | 1043824    |
| Ukraine | 1995           | MaleAge65to69       | 1088994    |
| Ukraine | 1995           | MaleAge70to74       | 562041     |
| Ukraine | 1995           | MaleAge75to79       | 255345     |
| Ukraine | 1995           | MaleAge80to84       | 194123     |
| Ukraine | 1995           | MaleAge85to89       | 79966      |
| Ukraine | 1995           | MaleAge90to94       | 19385      |
| Ukraine | 1995           | MaleAge95to99       | 2675       |
| Ukraine | 1995           | MaleAgeAbov e100    | 225        |
| Ukraine | 1996           | FemaleAge0to4       | 1275579    |
| Ukraine | 1996           | FemaleAge10to14     | 1879565    |
| Ukraine | 1996           | FemaleAge15to19     | 1703415    |
| Ukraine | 1996           | FemaleAge20to24     | 1439360    |
| Ukraine | 1996           | FemaleAge25to29     | 1473312    |
| Ukraine | 1996           | FemaleAge30to34     | 1746559    |
| Ukraine | 1996           | FemaleAge35to39     | 1918364    |
| Ukraine | 1996           | FemaleAge40to44     | 2080282    |
| Ukraine | 1996           | FemaleAge45to49     | 1701213    |
| Ukraine | 1996           | FemaleAge50to54     | 1319162    |
| Ukraine | 1996           | FemaleAge55to59     | 2009452    |
| Ukraine | 1996           | FemaleAge5to9       | 1738871    |
| Ukraine | 1996           | FemaleAge60to64     | 1440361    |



Dietary calcium and zinc deficiency risks are decreasing but remain prevalent

| Country | Reference year | Age/gender group    | Population |
|---------|----------------|---------------------|------------|
| Ukraine | 1996           | FemaleAge65to69     | 1645840    |
| Ukraine | 1996           | FemaleAge70to74     | 1361383    |
| Ukraine | 1996           | FemaleAge75to79     | 723263     |
| Ukraine | 1996           | FemaleAge80to84     | 583414     |
| Ukraine | 1996           | FemaleAge85to89     | 302639     |
| Ukraine | 1996           | FemaleAge90to94     | 86691      |
| Ukraine | 1996           | FemaleAge95to99     | 13030      |
| Ukraine | 1996           | FemaleAgeAbove100   | 1483       |
| Ukraine | 1996           | FemaleLactAge15to19 | 79501      |
| Ukraine | 1996           | FemaleLactAge20to24 | 183936     |
| Ukraine | 1996           | FemaleLactAge25to29 | 101078     |
| Ukraine | 1996           | FemaleLactAge30to34 | 46763      |
| Ukraine | 1996           | FemaleLactAge35to39 | 17114      |
| Ukraine | 1996           | FemaleLactAge40to44 | 3729       |
| Ukraine | 1996           | FemaleLactAge45to49 | 266        |
| Ukraine | 1996           | FemalePregAge15to19 | 59626      |
| Ukraine | 1996           | FemalePregAge20to24 | 137952     |
| Ukraine | 1996           | FemalePregAge25to29 | 75808      |
| Ukraine | 1996           | FemalePregAge30to34 | 35072      |
| Ukraine | 1996           | FemalePregAge35to39 | 12836      |
| Ukraine | 1996           | FemalePregAge40to44 | 2797       |
| Ukraine | 1996           | FemalePregAge45to49 | 200        |
| Ukraine | 1996           | MaleAge0to4         | 1344194    |
| Ukraine | 1996           | MaleAge10to14       | 1966142    |
| Ukraine | 1996           | MaleAge15to19       | 1879967    |
| Ukraine | 1996           | MaleAge20to24       | 1797968    |
| Ukraine | 1996           | MaleAge25to29       | 1675121    |
| Ukraine | 1996           | MaleAge30to34       | 1816583    |
| Ukraine | 1996           | MaleAge35to39       | 1856758    |
| Ukraine | 1996           | MaleAge40to44       | 1926750    |
| Ukraine | 1996           | MaleAge45to49       | 1519835    |
| Ukraine | 1996           | MaleAge50to54       | 1093724    |
| Ukraine | 1996           | MaleAge55to59       | 1576935    |
| Ukraine | 1996           | MaleAge5to9         | 1829730    |
| Ukraine | 1996           | MaleAge60to64       | 1097915    |
| Ukraine | 1996           | MaleAge65to69       | 1052928    |
| Ukraine | 1996           | MaleAge70to74       | 625476     |
| Ukraine | 1996           | MaleAge75to79       | 267155     |
| Ukraine | 1996           | MaleAge80to84       | 181523     |
| Ukraine | 1996           | MaleAge85to89       | 86603      |
| Ukraine | 1996           | MaleAge90to94       | 22679      |
| Ukraine | 1996           | MaleAge95to99       | 2897       |
| Ukraine | 1996           | MaleAgeAbove100     | 221        |
| Ukraine | 1997           | FemaleAge0to4       | 1193884    |
| Ukraine | 1997           | FemaleAge10to14     | 1869740    |
| Ukraine | 1997           | FemaleAge15to19     | 1711192    |
| Ukraine | 1997           | FemaleAge20to24     | 1446003    |
| Ukraine | 1997           | FemaleAge25to29     | 1477331    |
| Ukraine | 1997           | FemaleAge30to34     | 1688533    |
| Ukraine | 1997           | FemaleAge35to39     | 1895287    |
| Ukraine | 1997           | FemaleAge40to44     | 2059144    |
| Ukraine | 1997           | FemaleAge45to49     | 1799886    |
| Ukraine | 1997           | FemaleAge50to54     | 1331173    |
| Ukraine | 1997           | FemaleAge55to59     | 1838269    |
| Ukraine | 1997           | FemaleAge5to9       | 1662086    |
| Ukraine | 1997           | FemaleAge60to64     | 1596717    |
| Ukraine | 1997           | FemaleAge65to69     | 1502484    |
| Ukraine | 1997           | FemaleAge70to74     | 1426562    |
| Ukraine | 1997           | FemaleAge75to79     | 781640     |
| Ukraine | 1997           | FemaleAge80to84     | 521432     |
| Ukraine | 1997           | FemaleAge85to89     | 322679     |
| Ukraine | 1997           | FemaleAge90to94     | 92728      |
| Ukraine | 1997           | FemaleAge95to99     | 14561      |
| Ukraine | 1997           | FemaleAgeAbove100   | 1402       |
| Ukraine | 1997           | FemaleLactAge15to19 | 79501      |
| Ukraine | 1997           | FemaleLactAge20to24 | 183936     |
| Ukraine | 1997           | FemaleLactAge25to29 | 101078     |
| Ukraine | 1997           | FemaleLactAge30to34 | 46763      |
| Ukraine | 1997           | FemaleLactAge35to39 | 17114      |
| Ukraine | 1997           | FemaleLactAge40to44 | 3729       |
| Ukraine | 1997           | FemaleLactAge45to49 | 266        |
| Ukraine | 1997           | FemalePregAge15to19 | 59626      |
| Ukraine | 1997           | FemalePregAge20to24 | 137952     |
| Ukraine | 1997           | FemalePregAge25to29 | 75808      |
| Ukraine | 1997           | FemalePregAge30to34 | 35072      |
| Ukraine | 1997           | FemalePregAge35to39 | 12836      |
| Ukraine | 1997           | FemalePregAge40to44 | 2797       |
| Ukraine | 1997           | FemalePregAge45to49 | 200        |
| Ukraine | 1997           | MaleAge0to4         | 1258755    |
| Ukraine | 1997           | MaleAge10to14       | 1961351    |
| Ukraine | 1997           | MaleAge15to19       | 1898524    |
| Ukraine | 1997           | MaleAge20to24       | 1796939    |
| Ukraine | 1997           | MaleAge25to29       | 1678025    |
| Ukraine | 1997           | MaleAge30to34       | 1761205    |
| Ukraine | 1997           | MaleAge35to39       | 1841313    |
| Ukraine | 1997           | MaleAge40to44       | 1901547    |
| Ukraine | 1997           | MaleAge45to49       | 1606189    |
| Ukraine | 1997           | MaleAge50to54       | 1109673    |

Dietary calcium and zinc deficiency risks are decreasing but remain prevalent

| Country | Reference year | Age/gender group    | Population |
|---------|----------------|---------------------|------------|
| Ukraine | 1997           | MaleAge55to59       | 1423220    |
| Ukraine | 1997           | MaleAge5to9         | 1750199    |
| Ukraine | 1997           | MaleAge60to64       | 1208853    |
| Ukraine | 1997           | MaleAge65to69       | 972051     |
| Ukraine | 1997           | MaleAge70to74       | 698680     |
| Ukraine | 1997           | MaleAge75to79       | 282744     |
| Ukraine | 1997           | MaleAge80to84       | 163446     |
| Ukraine | 1997           | MaleAge85to89       | 91898      |
| Ukraine | 1997           | MaleAge90to94       | 24423      |
| Ukraine | 1997           | MaleAge95to99       | 3336       |
| Ukraine | 1997           | MaleAgeAbove100     | 217        |
| Ukraine | 1998           | FemaleAge0to4       | 1134710    |
| Ukraine | 1998           | FemaleAge10to14     | 1850850    |
| Ukraine | 1998           | FemaleAge15to19     | 1717784    |
| Ukraine | 1998           | FemaleAge20to24     | 1449766    |
| Ukraine | 1998           | FemaleAge25to29     | 1490267    |
| Ukraine | 1998           | FemaleAge30to34     | 1627643    |
| Ukraine | 1998           | FemaleAge35to39     | 1874260    |
| Ukraine | 1998           | FemaleAge40to44     | 2013644    |
| Ukraine | 1998           | FemaleAge45to49     | 1894152    |
| Ukraine | 1998           | FemaleAge50to54     | 1391658    |
| Ukraine | 1998           | FemaleAge55to59     | 1616359    |
| Ukraine | 1998           | FemaleAge5to9       | 1566102    |
| Ukraine | 1998           | FemaleAge60to64     | 1786174    |
| Ukraine | 1998           | FemaleAge65to69     | 1348407    |
| Ukraine | 1998           | FemaleAge70to74     | 1478727    |
| Ukraine | 1998           | FemaleAge75to79     | 853185     |
| Ukraine | 1998           | FemaleAge80to84     | 463276     |
| Ukraine | 1998           | FemaleAge85to89     | 331519     |
| Ukraine | 1998           | FemaleAge90to94     | 93437      |
| Ukraine | 1998           | FemaleAge95to99     | 16134      |
| Ukraine | 1998           | FemaleAgeAbove100   | 1331       |
| Ukraine | 1998           | FemaleLactAge15to19 | 79501      |
| Ukraine | 1998           | FemaleLactAge20to24 | 183936     |
| Ukraine | 1998           | FemaleLactAge25to29 | 101078     |
| Ukraine | 1998           | FemaleLactAge30to34 | 46763      |
| Ukraine | 1998           | FemaleLactAge35to39 | 17114      |
| Ukraine | 1998           | FemaleLactAge40to44 | 3729       |
| Ukraine | 1998           | FemaleLactAge45to49 | 266        |
| Ukraine | 1998           | FemalePregAge15to19 | 59626      |
| Ukraine | 1998           | FemalePregAge20to24 | 137952     |
| Ukraine | 1998           | FemalePregAge25to29 | 75808      |
| Ukraine | 1998           | FemalePregAge30to34 | 35072      |
| Ukraine | 1998           | FemalePregAge35to39 | 12836      |
| Ukraine | 1998           | FemalePregAge40to44 | 2797       |
| Ukraine | 1998           | FemalePregAge45to49 | 200        |
| Ukraine | 1998           | MaleAge0to4         | 1196779    |
| Ukraine | 1998           | MaleAge10to14       | 1944804    |
| Ukraine | 1998           | MaleAge15to19       | 1917934    |
| Ukraine | 1998           | MaleAge20to24       | 1795251    |
| Ukraine | 1998           | MaleAge25to29       | 1687830    |
| Ukraine | 1998           | MaleAge30to34       | 1701900    |
| Ukraine | 1998           | MaleAge35to39       | 1828869    |
| Ukraine | 1998           | MaleAge40to44       | 1855972    |
| Ukraine | 1998           | MaleAge45to49       | 1686612    |
| Ukraine | 1998           | MaleAge50to54       | 1165725    |
| Ukraine | 1998           | MaleAge55to59       | 1237997    |
| Ukraine | 1998           | MaleAge5to9         | 1649348    |
| Ukraine | 1998           | MaleAge60to64       | 1332494    |
| Ukraine | 1998           | MaleAge65to69       | 881962     |
| Ukraine | 1998           | MaleAge70to74       | 764375     |
| Ukraine | 1998           | MaleAge75to79       | 302528     |
| Ukraine | 1998           | MaleAge80to84       | 146480     |
| Ukraine | 1998           | MaleAge85to89       | 92800      |
| Ukraine | 1998           | MaleAge90to94       | 24469      |
| Ukraine | 1998           | MaleAge95to99       | 3783       |
| Ukraine | 1998           | MaleAgeAbove100     | 213        |
| Ukraine | 1999           | FemaleAge0to4       | 1085804    |
| Ukraine | 1999           | FemaleAge10to14     | 1819268    |
| Ukraine | 1999           | FemaleAge15to19     | 1723283    |
| Ukraine | 1999           | FemaleAge20to24     | 1455613    |
| Ukraine | 1999           | FemaleAge25to29     | 1504421    |
| Ukraine | 1999           | FemaleAge30to34     | 1577833    |
| Ukraine | 1999           | FemaleAge35to39     | 1847280    |
| Ukraine | 1999           | FemaleAge40to44     | 1965819    |
| Ukraine | 1999           | FemaleAge45to49     | 1968953    |
| Ukraine | 1999           | FemaleAge50to54     | 1472060    |
| Ukraine | 1999           | FemaleAge55to59     | 1425361    |
| Ukraine | 1999           | FemaleAge5to9       | 1461466    |
| Ukraine | 1999           | FemaleAge60to64     | 1920164    |
| Ukraine | 1999           | FemaleAge65to69     | 1250374    |
| Ukraine | 1999           | FemaleAge70to74     | 1497795    |
| Ukraine | 1999           | FemaleAge75to79     | 923499     |
| Ukraine | 1999           | FemaleAge80to84     | 432947     |
| Ukraine | 1999           | FemaleAge85to89     | 320319     |
| Ukraine | 1999           | FemaleAge90to94     | 90093      |
| Ukraine | 1999           | FemaleAge95to99     | 16416      |
| Ukraine | 1999           | FemaleAgeAbove100   | 1272       |

Dietary calcium and zinc deficiency risks are decreasing but remain prevalent

| Country              | Reference year | Age/gender group    | Population |
|----------------------|----------------|---------------------|------------|
| Ukraine              | 1999           | FemaleLactAge15to19 | 79501      |
| Ukraine              | 1999           | FemaleLactAge20to24 | 183936     |
| Ukraine              | 1999           | FemaleLactAge25to29 | 101078     |
| Ukraine              | 1999           | FemaleLactAge30to34 | 46763      |
| Ukraine              | 1999           | FemaleLactAge35to39 | 17114      |
| Ukraine              | 1999           | FemaleLactAge40to44 | 3729       |
| Ukraine              | 1999           | FemaleLactAge45to49 | 266        |
| Ukraine              | 1999           | FemalePregAge15to19 | 59626      |
| Ukraine              | 1999           | FemalePregAge20to24 | 137952     |
| Ukraine              | 1999           | FemalePregAge25to29 | 75808      |
| Ukraine              | 1999           | FemalePregAge30to34 | 35072      |
| Ukraine              | 1999           | FemalePregAge35to39 | 12836      |
| Ukraine              | 1999           | FemalePregAge40to44 | 2797       |
| Ukraine              | 1999           | FemalePregAge45to49 | 200        |
| Ukraine              | 1999           | MaleAge0to4         | 1145650    |
| Ukraine              | 1999           | MaleAge10to14       | 1913757    |
| Ukraine              | 1999           | MaleAge15to19       | 1935397    |
| Ukraine              | 1999           | MaleAge20to24       | 1800498    |
| Ukraine              | 1999           | MaleAge25to29       | 1697134    |
| Ukraine              | 1999           | MaleAge30to34       | 1653230    |
| Ukraine              | 1999           | MaleAge35to39       | 1810103    |
| Ukraine              | 1999           | MaleAge40to44       | 1811549    |
| Ukraine              | 1999           | MaleAge45to49       | 1748335    |
| Ukraine              | 1999           | MaleAge50to54       | 1237318    |
| Ukraine              | 1999           | MaleAge55to59       | 1085712    |
| Ukraine              | 1999           | MaleAge5to9         | 1538725    |
| Ukraine              | 1999           | MaleAge60to64       | 1407731    |
| Ukraine              | 1999           | MaleAge65to69       | 829084     |
| Ukraine              | 1999           | MaleAge70to74       | 800528     |
| Ukraine              | 1999           | MaleAge75to79       | 328953     |
| Ukraine              | 1999           | MaleAge80to84       | 136612     |
| Ukraine              | 1999           | MaleAge85to89       | 86670      |
| Ukraine              | 1999           | MaleAge90to94       | 22882      |
| Ukraine              | 1999           | MaleAge95to99       | 3832       |
| Ukraine              | 1999           | MaleAgeAbov e100    | 209        |
| United Arab Emirates | 1992           | FemaleAge0to4       | 109322     |
| United Arab Emirates | 1992           | FemaleAge10to14     | 79295      |
| United Arab Emirates | 1992           | FemaleAge15to19     | 59482      |
| United Arab Emirates | 1992           | FemaleAge20to24     | 44485      |
| United Arab Emirates | 1992           | FemaleAge25to29     | 40039      |
| United Arab Emirates | 1992           | FemaleAge30to34     | 44059      |
| United Arab Emirates | 1992           | FemaleAge35to39     | 41110      |
| United Arab Emirates | 1992           | FemaleAge40to44     | 30009      |
| United Arab Emirates | 1992           | FemaleAge45to49     | 19427      |
| United Arab Emirates | 1992           | FemaleAge50to54     | 11374      |
| United Arab Emirates | 1992           | FemaleAge55to59     | 7610       |
| United Arab Emirates | 1992           | FemaleAge5to9       | 100059     |
| United Arab Emirates | 1992           | FemaleAge60to64     | 5547       |
| United Arab Emirates | 1992           | FemaleAge65to69     | 4067       |
| United Arab Emirates | 1992           | FemaleAge70to74     | 2485       |
| United Arab Emirates | 1992           | FemaleAge75to79     | 1559       |
| United Arab Emirates | 1992           | FemaleAge80to84     | 951        |
| United Arab Emirates | 1992           | FemaleAge85to89     | 558        |
| United Arab Emirates | 1992           | FemaleAge90to94     | 321        |
| United Arab Emirates | 1992           | FemaleAge95to99     | 38         |
| United Arab Emirates | 1992           | FemaleAgeAbov e100  | 3          |
| United Arab Emirates | 1992           | FemaleLactAge15to19 | 2677       |
| United Arab Emirates | 1992           | FemaleLactAge20to24 | 10326      |
| United Arab Emirates | 1992           | FemaleLactAge25to29 | 13701      |
| United Arab Emirates | 1992           | FemaleLactAge30to34 | 11618      |
| United Arab Emirates | 1992           | FemaleLactAge35to39 | 6511       |
| United Arab Emirates | 1992           | FemaleLactAge40to44 | 2111       |
| United Arab Emirates | 1992           | FemaleLactAge45to49 | 640        |
| United Arab Emirates | 1992           | FemalePregAge15to19 | 2007       |
| United Arab Emirates | 1992           | FemalePregAge20to24 | 7744       |
| United Arab Emirates | 1992           | FemalePregAge25to29 | 10276      |
| United Arab Emirates | 1992           | FemalePregAge30to34 | 8714       |
| United Arab Emirates | 1992           | FemalePregAge35to39 | 4883       |
| United Arab Emirates | 1992           | FemalePregAge40to44 | 1583       |
| United Arab Emirates | 1992           | FemalePregAge45to49 | 480        |
| United Arab Emirates | 1992           | MaleAge0to4         | 113724     |
| United Arab Emirates | 1992           | MaleAge10to14       | 81487      |
| United Arab Emirates | 1992           | MaleAge15to19       | 86149      |
| United Arab Emirates | 1992           | MaleAge20to24       | 133950     |
| United Arab Emirates | 1992           | MaleAge25to29       | 161675     |
| United Arab Emirates | 1992           | MaleAge30to34       | 180544     |
| United Arab Emirates | 1992           | MaleAge35to39       | 175790     |
| United Arab Emirates | 1992           | MaleAge40to44       | 126829     |
| United Arab Emirates | 1992           | MaleAge45to49       | 78688      |
| United Arab Emirates | 1992           | MaleAge50to54       | 42476      |
| United Arab Emirates | 1992           | MaleAge55to59       | 19759      |
| United Arab Emirates | 1992           | MaleAge5to9         | 106590     |
| United Arab Emirates | 1992           | MaleAge60to64       | 9131       |
| United Arab Emirates | 1992           | MaleAge65to69       | 5076       |
| United Arab Emirates | 1992           | MaleAge70to74       | 2701       |
| United Arab Emirates | 1992           | MaleAge75to79       | 1754       |
| United Arab Emirates | 1992           | MaleAge80to84       | 907        |
| United Arab Emirates | 1992           | MaleAge85to89       | 385        |

Dietary calcium and zinc deficiency risks are decreasing but remain prevalent

| Country              | Reference year | Age/gender group    | Population |
|----------------------|----------------|---------------------|------------|
| United Arab Emirates | 1992           | MaleAge90to94       | 267        |
| United Arab Emirates | 1992           | MaleAge95to99       | 23         |
| United Arab Emirates | 1992           | MaleAgeAbove100     | 1          |
| United Arab Emirates | 1993           | FemaleAge0to4       | 107770     |
| United Arab Emirates | 1993           | FemaleAge10to14     | 84934      |
| United Arab Emirates | 1993           | FemaleAge15to19     | 62721      |
| United Arab Emirates | 1993           | FemaleAge20to24     | 49800      |
| United Arab Emirates | 1993           | FemaleAge25to29     | 46987      |
| United Arab Emirates | 1993           | FemaleAge30to34     | 47232      |
| United Arab Emirates | 1993           | FemaleAge35to39     | 44655      |
| United Arab Emirates | 1993           | FemaleAge40to44     | 32288      |
| United Arab Emirates | 1993           | FemaleAge45to49     | 20372      |
| United Arab Emirates | 1993           | FemaleAge50to54     | 12409      |
| United Arab Emirates | 1993           | FemaleAge55to59     | 7347       |
| United Arab Emirates | 1993           | FemaleAge5to9       | 102415     |
| United Arab Emirates | 1993           | FemaleAge60to64     | 5873       |
| United Arab Emirates | 1993           | FemaleAge65to69     | 4015       |
| United Arab Emirates | 1993           | FemaleAge70to74     | 2830       |
| United Arab Emirates | 1993           | FemaleAge75to79     | 1395       |
| United Arab Emirates | 1993           | FemaleAge80to84     | 1095       |
| United Arab Emirates | 1993           | FemaleAge85to89     | 475        |
| United Arab Emirates | 1993           | FemaleAge90to94     | 336        |
| United Arab Emirates | 1993           | FemaleAge95to99     | 47         |
| United Arab Emirates | 1993           | FemaleAgeAbove100   | 3          |
| United Arab Emirates | 1993           | FemaleLactAge15to19 | 2677       |
| United Arab Emirates | 1993           | FemaleLactAge20to24 | 10326      |
| United Arab Emirates | 1993           | FemaleLactAge25to29 | 13701      |
| United Arab Emirates | 1993           | FemaleLactAge30to34 | 11618      |
| United Arab Emirates | 1993           | FemaleLactAge35to39 | 6511       |
| United Arab Emirates | 1993           | FemaleLactAge40to44 | 2111       |
| United Arab Emirates | 1993           | FemaleLactAge45to49 | 640        |
| United Arab Emirates | 1993           | FemalePregAge15to19 | 2007       |
| United Arab Emirates | 1993           | FemalePregAge20to24 | 7744       |
| United Arab Emirates | 1993           | FemalePregAge25to29 | 10276      |
| United Arab Emirates | 1993           | FemalePregAge30to34 | 8714       |
| United Arab Emirates | 1993           | FemalePregAge35to39 | 4883       |
| United Arab Emirates | 1993           | FemalePregAge40to44 | 1583       |
| United Arab Emirates | 1993           | FemalePregAge45to49 | 480        |
| United Arab Emirates | 1993           | MaleAge0to4         | 112249     |
| United Arab Emirates | 1993           | MaleAge10to14       | 88070      |
| United Arab Emirates | 1993           | MaleAge15to19       | 85003      |
| United Arab Emirates | 1993           | MaleAge20to24       | 141086     |
| United Arab Emirates | 1993           | MaleAge25to29       | 185584     |
| United Arab Emirates | 1993           | MaleAge30to34       | 189163     |
| United Arab Emirates | 1993           | MaleAge35to39       | 183811     |
| United Arab Emirates | 1993           | MaleAge40to44       | 137931     |
| United Arab Emirates | 1993           | MaleAge45to49       | 82983      |
| United Arab Emirates | 1993           | MaleAge50to54       | 45853      |
| United Arab Emirates | 1993           | MaleAge55to59       | 20478      |
| United Arab Emirates | 1993           | MaleAge5to9         | 109028     |
| United Arab Emirates | 1993           | MaleAge60to64       | 10108      |
| United Arab Emirates | 1993           | MaleAge65to69       | 5119       |
| United Arab Emirates | 1993           | MaleAge70to74       | 3218       |
| United Arab Emirates | 1993           | MaleAge75to79       | 1480       |
| United Arab Emirates | 1993           | MaleAge80to84       | 1135       |
| United Arab Emirates | 1993           | MaleAge85to89       | 254        |
| United Arab Emirates | 1993           | MaleAge90to94       | 291        |
| United Arab Emirates | 1993           | MaleAge95to99       | 28         |
| United Arab Emirates | 1993           | MaleAgeAbove100     | 1          |
| United Arab Emirates | 1994           | FemaleAge0to4       | 106167     |
| United Arab Emirates | 1994           | FemaleAge10to14     | 90743      |
| United Arab Emirates | 1994           | FemaleAge15to19     | 65597      |
| United Arab Emirates | 1994           | FemaleAge20to24     | 53721      |
| United Arab Emirates | 1994           | FemaleAge25to29     | 54644      |
| United Arab Emirates | 1994           | FemaleAge30to34     | 52084      |
| United Arab Emirates | 1994           | FemaleAge35to39     | 48500      |
| United Arab Emirates | 1994           | FemaleAge40to44     | 34936      |
| United Arab Emirates | 1994           | FemaleAge45to49     | 21492      |
| United Arab Emirates | 1994           | FemaleAge50to54     | 13399      |
| United Arab Emirates | 1994           | FemaleAge55to59     | 7269       |
| United Arab Emirates | 1994           | FemaleAge5to9       | 103586     |
| United Arab Emirates | 1994           | FemaleAge60to64     | 6053       |
| United Arab Emirates | 1994           | FemaleAge65to69     | 3989       |
| United Arab Emirates | 1994           | FemaleAge70to74     | 3166       |
| United Arab Emirates | 1994           | FemaleAge75to79     | 1276       |
| United Arab Emirates | 1994           | FemaleAge80to84     | 1185       |
| United Arab Emirates | 1994           | FemaleAge85to89     | 443        |
| United Arab Emirates | 1994           | FemaleAge90to94     | 315        |
| United Arab Emirates | 1994           | FemaleAge95to99     | 56         |
| United Arab Emirates | 1994           | FemaleAgeAbove100   | 4          |
| United Arab Emirates | 1994           | FemaleLactAge15to19 | 2677       |
| United Arab Emirates | 1994           | FemaleLactAge20to24 | 10326      |
| United Arab Emirates | 1994           | FemaleLactAge25to29 | 13701      |
| United Arab Emirates | 1994           | FemaleLactAge30to34 | 11618      |
| United Arab Emirates | 1994           | FemaleLactAge35to39 | 6511       |
| United Arab Emirates | 1994           | FemaleLactAge40to44 | 2111       |
| United Arab Emirates | 1994           | FemaleLactAge45to49 | 640        |
| United Arab Emirates | 1994           | FemalePregAge15to19 | 2007       |

Dietary calcium and zinc deficiency risks are decreasing but remain prevalent

| Country              | Reference year | Age/gender group    | Population |
|----------------------|----------------|---------------------|------------|
| United Arab Emirates | 1994           | FemalePregAge20to24 | 7744       |
| United Arab Emirates | 1994           | FemalePregAge25to29 | 10276      |
| United Arab Emirates | 1994           | FemalePregAge30to34 | 8714       |
| United Arab Emirates | 1994           | FemalePregAge35to39 | 4883       |
| United Arab Emirates | 1994           | FemalePregAge40to44 | 1583       |
| United Arab Emirates | 1994           | FemalePregAge45to49 | 480        |
| United Arab Emirates | 1994           | MaleAge0to4         | 110888     |
| United Arab Emirates | 1994           | MaleAge10to14       | 95548      |
| United Arab Emirates | 1994           | MaleAge15to19       | 82685      |
| United Arab Emirates | 1994           | MaleAge20to24       | 142159     |
| United Arab Emirates | 1994           | MaleAge25to29       | 209724     |
| United Arab Emirates | 1994           | MaleAge30to34       | 204087     |
| United Arab Emirates | 1994           | MaleAge35to39       | 192810     |
| United Arab Emirates | 1994           | MaleAge40to44       | 149755     |
| United Arab Emirates | 1994           | MaleAge45to49       | 89081      |
| United Arab Emirates | 1994           | MaleAge50to54       | 49365      |
| United Arab Emirates | 1994           | MaleAge55to59       | 21216      |
| United Arab Emirates | 1994           | MaleAge5to9         | 110012     |
| United Arab Emirates | 1994           | MaleAge60to64       | 10949      |
| United Arab Emirates | 1994           | MaleAge65to69       | 5213       |
| United Arab Emirates | 1994           | MaleAge70to74       | 3698       |
| United Arab Emirates | 1994           | MaleAge75to79       | 1320       |
| United Arab Emirates | 1994           | MaleAge80to84       | 1251       |
| United Arab Emirates | 1994           | MaleAge85to89       | 203        |
| United Arab Emirates | 1994           | MaleAge90to94       | 266        |
| United Arab Emirates | 1994           | MaleAge95to99       | 32         |
| United Arab Emirates | 1994           | MaleAgeAbov e100    | 1          |
| United Arab Emirates | 1995           | FemaleAge0to4       | 106152     |
| United Arab Emirates | 1995           | FemaleAge10to14     | 95605      |
| United Arab Emirates | 1995           | FemaleAge15to19     | 68578      |
| United Arab Emirates | 1995           | FemaleAge20to24     | 56320      |
| United Arab Emirates | 1995           | FemaleAge25to29     | 61802      |
| United Arab Emirates | 1995           | FemaleAge30to34     | 58543      |
| United Arab Emirates | 1995           | FemaleAge35to39     | 52702      |
| United Arab Emirates | 1995           | FemaleAge40to44     | 37954      |
| United Arab Emirates | 1995           | FemaleAge45to49     | 22859      |
| United Arab Emirates | 1995           | FemaleAge50to54     | 14215      |
| United Arab Emirates | 1995           | FemaleAge55to59     | 7438       |
| United Arab Emirates | 1995           | FemaleAge5to9       | 103664     |
| United Arab Emirates | 1995           | FemaleAge60to64     | 6023       |
| United Arab Emirates | 1995           | FemaleAge65to69     | 4026       |
| United Arab Emirates | 1995           | FemaleAge70to74     | 3397       |
| United Arab Emirates | 1995           | FemaleAge75to79     | 1277       |
| United Arab Emirates | 1995           | FemaleAge80to84     | 1182       |
| United Arab Emirates | 1995           | FemaleAge85to89     | 468        |
| United Arab Emirates | 1995           | FemaleAge90to94     | 264        |
| United Arab Emirates | 1995           | FemaleAge95to99     | 55         |
| United Arab Emirates | 1995           | FemaleAgeAbov e100  | 4          |
| United Arab Emirates | 1995           | FemaleLactAge15to19 | 2677       |
| United Arab Emirates | 1995           | FemaleLactAge20to24 | 10326      |
| United Arab Emirates | 1995           | FemaleLactAge25to29 | 13701      |
| United Arab Emirates | 1995           | FemaleLactAge30to34 | 11618      |
| United Arab Emirates | 1995           | FemaleLactAge35to39 | 6511       |
| United Arab Emirates | 1995           | FemaleLactAge40to44 | 2111       |
| United Arab Emirates | 1995           | FemaleLactAge45to49 | 640        |
| United Arab Emirates | 1995           | FemalePregAge15to19 | 2007       |
| United Arab Emirates | 1995           | FemalePregAge20to24 | 7744       |
| United Arab Emirates | 1995           | FemalePregAge25to29 | 10276      |
| United Arab Emirates | 1995           | FemalePregAge30to34 | 8714       |
| United Arab Emirates | 1995           | FemalePregAge35to39 | 4883       |
| United Arab Emirates | 1995           | FemalePregAge40to44 | 1583       |
| United Arab Emirates | 1995           | FemalePregAge45to49 | 480        |
| United Arab Emirates | 1995           | MaleAge0to4         | 111233     |
| United Arab Emirates | 1995           | MaleAge10to14       | 102051     |
| United Arab Emirates | 1995           | MaleAge15to19       | 80838      |
| United Arab Emirates | 1995           | MaleAge20to24       | 138873     |
| United Arab Emirates | 1995           | MaleAge25to29       | 229678     |
| United Arab Emirates | 1995           | MaleAge30to34       | 225300     |
| United Arab Emirates | 1995           | MaleAge35to39       | 204018     |
| United Arab Emirates | 1995           | MaleAge40to44       | 161690     |
| United Arab Emirates | 1995           | MaleAge45to49       | 97334      |
| United Arab Emirates | 1995           | MaleAge50to54       | 53032      |
| United Arab Emirates | 1995           | MaleAge55to59       | 22236      |
| United Arab Emirates | 1995           | MaleAge5to9         | 110311     |
| United Arab Emirates | 1995           | MaleAge60to64       | 11429      |
| United Arab Emirates | 1995           | MaleAge65to69       | 5416       |
| United Arab Emirates | 1995           | MaleAge70to74       | 4021       |
| United Arab Emirates | 1995           | MaleAge75to79       | 1361       |
| United Arab Emirates | 1995           | MaleAge80to84       | 1220       |
| United Arab Emirates | 1995           | MaleAge85to89       | 233        |
| United Arab Emirates | 1995           | MaleAge90to94       | 199        |
| United Arab Emirates | 1995           | MaleAge95to99       | 32         |
| United Arab Emirates | 1995           | MaleAgeAbov e100    | 1          |
| United Arab Emirates | 1996           | FemaleAge0to4       | 110573     |
| United Arab Emirates | 1996           | FemaleAge10to14     | 98174      |
| United Arab Emirates | 1996           | FemaleAge15to19     | 75554      |
| United Arab Emirates | 1996           | FemaleAge20to24     | 61261      |
| United Arab Emirates | 1996           | FemaleAge25to29     | 62454      |

Dietary calcium and zinc deficiency risks are decreasing but remain prevalent

| Country              | Reference year | Age/gender group    | Population |
|----------------------|----------------|---------------------|------------|
| United Arab Emirates | 1996           | FemaleAge30to34     | 61887      |
| United Arab Emirates | 1996           | FemaleAge35to39     | 54792      |
| United Arab Emirates | 1996           | FemaleAge40to44     | 39608      |
| United Arab Emirates | 1996           | FemaleAge45to49     | 24380      |
| United Arab Emirates | 1996           | FemaleAge50to54     | 14826      |
| United Arab Emirates | 1996           | FemaleAge55to59     | 8074       |
| United Arab Emirates | 1996           | FemaleAge5to9       | 107723     |
| United Arab Emirates | 1996           | FemaleAge60to64     | 6210       |
| United Arab Emirates | 1996           | FemaleAge65to69     | 4249       |
| United Arab Emirates | 1996           | FemaleAge70to74     | 3337       |
| United Arab Emirates | 1996           | FemaleAge75to79     | 1507       |
| United Arab Emirates | 1996           | FemaleAge80to84     | 1176       |
| United Arab Emirates | 1996           | FemaleAge85to89     | 534        |
| United Arab Emirates | 1996           | FemaleAge90to94     | 249        |
| United Arab Emirates | 1996           | FemaleAge95to99     | 67         |
| United Arab Emirates | 1996           | FemaleAgeAbov e100  | 5          |
| United Arab Emirates | 1996           | FemaleLactAge15to19 | 2286       |
| United Arab Emirates | 1996           | FemaleLactAge20to24 | 10521      |
| United Arab Emirates | 1996           | FemaleLactAge25to29 | 14755      |
| United Arab Emirates | 1996           | FemaleLactAge30to34 | 11669      |
| United Arab Emirates | 1996           | FemaleLactAge35to39 | 6568       |
| United Arab Emirates | 1996           | FemaleLactAge40to44 | 2192       |
| United Arab Emirates | 1996           | FemaleLactAge45to49 | 638        |
| United Arab Emirates | 1996           | FemalePregAge15to19 | 1715       |
| United Arab Emirates | 1996           | FemalePregAge20to24 | 7890       |
| United Arab Emirates | 1996           | FemalePregAge25to29 | 11066      |
| United Arab Emirates | 1996           | FemalePregAge30to34 | 8752       |
| United Arab Emirates | 1996           | FemalePregAge35to39 | 4926       |
| United Arab Emirates | 1996           | FemalePregAge40to44 | 1644       |
| United Arab Emirates | 1996           | FemalePregAge45to49 | 479        |
| United Arab Emirates | 1996           | MaleAge0to4         | 115245     |
| United Arab Emirates | 1996           | MaleAge10to14       | 104603     |
| United Arab Emirates | 1996           | MaleAge15to19       | 97686      |
| United Arab Emirates | 1996           | MaleAge20to24       | 154303     |
| United Arab Emirates | 1996           | MaleAge25to29       | 234336     |
| United Arab Emirates | 1996           | MaleAge30to34       | 240096     |
| United Arab Emirates | 1996           | MaleAge35to39       | 213769     |
| United Arab Emirates | 1996           | MaleAge40to44       | 165968     |
| United Arab Emirates | 1996           | MaleAge45to49       | 103067     |
| United Arab Emirates | 1996           | MaleAge50to54       | 55775      |
| United Arab Emirates | 1996           | MaleAge55to59       | 24374      |
| United Arab Emirates | 1996           | MaleAge5to9         | 114411     |
| United Arab Emirates | 1996           | MaleAge60to64       | 12148      |
| United Arab Emirates | 1996           | MaleAge65to69       | 5884       |
| United Arab Emirates | 1996           | MaleAge70to74       | 3953       |
| United Arab Emirates | 1996           | MaleAge75to79       | 1669       |
| United Arab Emirates | 1996           | MaleAge80to84       | 1230       |
| United Arab Emirates | 1996           | MaleAge85to89       | 346        |
| United Arab Emirates | 1996           | MaleAge90to94       | 163        |
| United Arab Emirates | 1996           | MaleAge95to99       | 44         |
| United Arab Emirates | 1996           | MaleAgeAbov e100    | 1          |
| United Arab Emirates | 1997           | FemaleAge0to4       | 114632     |
| United Arab Emirates | 1997           | FemaleAge10to14     | 101097     |
| United Arab Emirates | 1997           | FemaleAge15to19     | 81006      |
| United Arab Emirates | 1997           | FemaleAge20to24     | 66443      |
| United Arab Emirates | 1997           | FemaleAge25to29     | 66192      |
| United Arab Emirates | 1997           | FemaleAge30to34     | 66087      |
| United Arab Emirates | 1997           | FemaleAge35to39     | 57709      |
| United Arab Emirates | 1997           | FemaleAge40to44     | 41780      |
| United Arab Emirates | 1997           | FemaleAge45to49     | 25661      |
| United Arab Emirates | 1997           | FemaleAge50to54     | 15526      |
| United Arab Emirates | 1997           | FemaleAge55to59     | 8681       |
| United Arab Emirates | 1997           | FemaleAge5to9       | 112911     |
| United Arab Emirates | 1997           | FemaleAge60to64     | 6334       |
| United Arab Emirates | 1997           | FemaleAge65to69     | 4643       |
| United Arab Emirates | 1997           | FemaleAge70to74     | 3219       |
| United Arab Emirates | 1997           | FemaleAge75to79     | 1763       |
| United Arab Emirates | 1997           | FemaleAge80to84     | 1126       |
| United Arab Emirates | 1997           | FemaleAge85to89     | 655        |
| United Arab Emirates | 1997           | FemaleAge90to94     | 211        |
| United Arab Emirates | 1997           | FemaleAge95to99     | 87         |
| United Arab Emirates | 1997           | FemaleAgeAbov e100  | 5          |
| United Arab Emirates | 1997           | FemaleLactAge15to19 | 2286       |
| United Arab Emirates | 1997           | FemaleLactAge20to24 | 10521      |
| United Arab Emirates | 1997           | FemaleLactAge25to29 | 14755      |
| United Arab Emirates | 1997           | FemaleLactAge30to34 | 11669      |
| United Arab Emirates | 1997           | FemaleLactAge35to39 | 6568       |
| United Arab Emirates | 1997           | FemaleLactAge40to44 | 2192       |
| United Arab Emirates | 1997           | FemaleLactAge45to49 | 638        |
| United Arab Emirates | 1997           | FemalePregAge15to19 | 1715       |
| United Arab Emirates | 1997           | FemalePregAge20to24 | 7890       |
| United Arab Emirates | 1997           | FemalePregAge25to29 | 11066      |
| United Arab Emirates | 1997           | FemalePregAge30to34 | 8752       |
| United Arab Emirates | 1997           | FemalePregAge35to39 | 4926       |
| United Arab Emirates | 1997           | FemalePregAge40to44 | 1644       |
| United Arab Emirates | 1997           | FemalePregAge45to49 | 479        |
| United Arab Emirates | 1997           | MaleAge0to4         | 119497     |
| United Arab Emirates | 1997           | MaleAge10to14       | 106483     |

Dietary calcium and zinc deficiency risks are decreasing but remain prevalent

| Country              | Reference year | Age/gender group    | Population |
|----------------------|----------------|---------------------|------------|
| United Arab Emirates | 1997           | MaleAge15to19       | 109285     |
| United Arab Emirates | 1997           | MaleAge20to24       | 170412     |
| United Arab Emirates | 1997           | MaleAge25to29       | 243424     |
| United Arab Emirates | 1997           | MaleAge30to34       | 256948     |
| United Arab Emirates | 1997           | MaleAge35to39       | 227299     |
| United Arab Emirates | 1997           | MaleAge40to44       | 173450     |
| United Arab Emirates | 1997           | MaleAge45to49       | 109099     |
| United Arab Emirates | 1997           | MaleAge50to54       | 58742      |
| United Arab Emirates | 1997           | MaleAge55to59       | 26554      |
| United Arab Emirates | 1997           | MaleAge5to9         | 119959     |
| United Arab Emirates | 1997           | MaleAge60to64       | 12598      |
| United Arab Emirates | 1997           | MaleAge65to69       | 6672       |
| United Arab Emirates | 1997           | MaleAge70to74       | 3785       |
| United Arab Emirates | 1997           | MaleAge75to79       | 2027       |
| United Arab Emirates | 1997           | MaleAge80to84       | 1187       |
| United Arab Emirates | 1997           | MaleAge85to89       | 520        |
| United Arab Emirates | 1997           | MaleAge90to94       | 118        |
| United Arab Emirates | 1997           | MaleAge95to99       | 65         |
| United Arab Emirates | 1997           | MaleAgeAbov e100    | 2          |
| United Arab Emirates | 1998           | FemaleAge0to4       | 119117     |
| United Arab Emirates | 1998           | FemaleAge10to14     | 105270     |
| United Arab Emirates | 1998           | FemaleAge15to19     | 84818      |
| United Arab Emirates | 1998           | FemaleAge20to24     | 70651      |
| United Arab Emirates | 1998           | FemaleAge25to29     | 71409      |
| United Arab Emirates | 1998           | FemaleAge30to34     | 70441      |
| United Arab Emirates | 1998           | FemaleAge35to39     | 61429      |
| United Arab Emirates | 1998           | FemaleAge40to44     | 44325      |
| United Arab Emirates | 1998           | FemaleAge45to49     | 26510      |
| United Arab Emirates | 1998           | FemaleAge50to54     | 16440      |
| United Arab Emirates | 1998           | FemaleAge55to59     | 9083       |
| United Arab Emirates | 1998           | FemaleAge5to9       | 118530     |
| United Arab Emirates | 1998           | FemaleAge60to64     | 6453       |
| United Arab Emirates | 1998           | FemaleAge65to69     | 5098       |
| United Arab Emirates | 1998           | FemaleAge70to74     | 3158       |
| United Arab Emirates | 1998           | FemaleAge75to79     | 1942       |
| United Arab Emirates | 1998           | FemaleAge80to84     | 1078       |
| United Arab Emirates | 1998           | FemaleAge85to89     | 801        |
| United Arab Emirates | 1998           | FemaleAge90to94     | 169        |
| United Arab Emirates | 1998           | FemaleAge95to99     | 98         |
| United Arab Emirates | 1998           | FemaleAgeAbov e100  | 6          |
| United Arab Emirates | 1998           | FemaleLactAge15to19 | 2286       |
| United Arab Emirates | 1998           | FemaleLactAge20to24 | 10521      |
| United Arab Emirates | 1998           | FemaleLactAge25to29 | 14755      |
| United Arab Emirates | 1998           | FemaleLactAge30to34 | 11669      |
| United Arab Emirates | 1998           | FemaleLactAge35to39 | 6568       |
| United Arab Emirates | 1998           | FemaleLactAge40to44 | 2192       |
| United Arab Emirates | 1998           | FemaleLactAge45to49 | 638        |
| United Arab Emirates | 1998           | FemalePregAge15to19 | 1715       |
| United Arab Emirates | 1998           | FemalePregAge20to24 | 7890       |
| United Arab Emirates | 1998           | FemalePregAge25to29 | 11066      |
| United Arab Emirates | 1998           | FemalePregAge30to34 | 8752       |
| United Arab Emirates | 1998           | FemalePregAge35to39 | 4926       |
| United Arab Emirates | 1998           | FemalePregAge40to44 | 1644       |
| United Arab Emirates | 1998           | FemalePregAge45to49 | 479        |
| United Arab Emirates | 1998           | MaleAge0to4         | 124537     |
| United Arab Emirates | 1998           | MaleAge10to14       | 110765     |
| United Arab Emirates | 1998           | MaleAge15to19       | 113389     |
| United Arab Emirates | 1998           | MaleAge20to24       | 183324     |
| United Arab Emirates | 1998           | MaleAge25to29       | 259155     |
| United Arab Emirates | 1998           | MaleAge30to34       | 272741     |
| United Arab Emirates | 1998           | MaleAge35to39       | 243543     |
| United Arab Emirates | 1998           | MaleAge40to44       | 184880     |
| United Arab Emirates | 1998           | MaleAge45to49       | 114429     |
| United Arab Emirates | 1998           | MaleAge50to54       | 62217      |
| United Arab Emirates | 1998           | MaleAge55to59       | 28392      |
| United Arab Emirates | 1998           | MaleAge5to9         | 125785     |
| United Arab Emirates | 1998           | MaleAge60to64       | 12844      |
| United Arab Emirates | 1998           | MaleAge65to69       | 7595       |
| United Arab Emirates | 1998           | MaleAge70to74       | 3652       |
| United Arab Emirates | 1998           | MaleAge75to79       | 2294       |
| United Arab Emirates | 1998           | MaleAge80to84       | 1161       |
| United Arab Emirates | 1998           | MaleAge85to89       | 708        |
| United Arab Emirates | 1998           | MaleAge90to94       | 87         |
| United Arab Emirates | 1998           | MaleAge95to99       | 73         |
| United Arab Emirates | 1998           | MaleAgeAbov e100    | 2          |
| United Arab Emirates | 1999           | FemaleAge0to4       | 123520     |
| United Arab Emirates | 1999           | FemaleAge10to14     | 110792     |
| United Arab Emirates | 1999           | FemaleAge15to19     | 86973      |
| United Arab Emirates | 1999           | FemaleAge20to24     | 73641      |
| United Arab Emirates | 1999           | FemaleAge25to29     | 77568      |
| United Arab Emirates | 1999           | FemaleAge30to34     | 74843      |
| United Arab Emirates | 1999           | FemaleAge35to39     | 65868      |
| United Arab Emirates | 1999           | FemaleAge40to44     | 47188      |
| United Arab Emirates | 1999           | FemaleAge45to49     | 27107      |
| United Arab Emirates | 1999           | FemaleAge50to54     | 17444      |
| United Arab Emirates | 1999           | FemaleAge55to59     | 9260       |
| United Arab Emirates | 1999           | FemaleAge5to9       | 124140     |
| United Arab Emirates | 1999           | FemaleAge60to64     | 6604       |

Dietary calcium and zinc deficiency risks are decreasing but remain prevalent

| Country              | Reference year | Age/gender group    | Population |
|----------------------|----------------|---------------------|------------|
| United Arab Emirates | 1999           | FemaleAge65to69     | 5491       |
| United Arab Emirates | 1999           | FemaleAge70to74     | 3242       |
| United Arab Emirates | 1999           | FemaleAge75to79     | 1983       |
| United Arab Emirates | 1999           | FemaleAge80to84     | 1078       |
| United Arab Emirates | 1999           | FemaleAge85to89     | 923        |
| United Arab Emirates | 1999           | FemaleAge90to94     | 150        |
| United Arab Emirates | 1999           | FemaleAge95to99     | 90         |
| United Arab Emirates | 1999           | FemaleAgeAbove100   | 7          |
| United Arab Emirates | 1999           | FemaleLactAge15to19 | 2286       |
| United Arab Emirates | 1999           | FemaleLactAge20to24 | 10521      |
| United Arab Emirates | 1999           | FemaleLactAge25to29 | 14755      |
| United Arab Emirates | 1999           | FemaleLactAge30to34 | 11669      |
| United Arab Emirates | 1999           | FemaleLactAge35to39 | 6568       |
| United Arab Emirates | 1999           | FemaleLactAge40to44 | 2192       |
| United Arab Emirates | 1999           | FemaleLactAge45to49 | 638        |
| United Arab Emirates | 1999           | FemalePregAge15to19 | 1715       |
| United Arab Emirates | 1999           | FemalePregAge20to24 | 7890       |
| United Arab Emirates | 1999           | FemalePregAge25to29 | 11066      |
| United Arab Emirates | 1999           | FemalePregAge30to34 | 8752       |
| United Arab Emirates | 1999           | FemalePregAge35to39 | 4926       |
| United Arab Emirates | 1999           | FemalePregAge40to44 | 1644       |
| United Arab Emirates | 1999           | FemalePregAge45to49 | 479        |
| United Arab Emirates | 1999           | MaleAge0to4         | 129418     |
| United Arab Emirates | 1999           | MaleAge10to14       | 117537     |
| United Arab Emirates | 1999           | MaleAge15to19       | 110394     |
| United Arab Emirates | 1999           | MaleAge20to24       | 190756     |
| United Arab Emirates | 1999           | MaleAge25to29       | 279663     |
| United Arab Emirates | 1999           | MaleAge30to34       | 286412     |
| United Arab Emirates | 1999           | MaleAge35to39       | 261040     |
| United Arab Emirates | 1999           | MaleAge40to44       | 199575     |
| United Arab Emirates | 1999           | MaleAge45to49       | 119269     |
| United Arab Emirates | 1999           | MaleAge50to54       | 65986      |
| United Arab Emirates | 1999           | MaleAge55to59       | 29680      |
| United Arab Emirates | 1999           | MaleAge5to9         | 131299     |
| United Arab Emirates | 1999           | MaleAge60to64       | 12997      |
| United Arab Emirates | 1999           | MaleAge65to69       | 8340       |
| United Arab Emirates | 1999           | MaleAge70to74       | 3692       |
| United Arab Emirates | 1999           | MaleAge75to79       | 2364       |
| United Arab Emirates | 1999           | MaleAge80to84       | 1204       |
| United Arab Emirates | 1999           | MaleAge85to89       | 867        |
| United Arab Emirates | 1999           | MaleAge90to94       | 82         |
| United Arab Emirates | 1999           | MaleAge95to99       | 60         |
| United Arab Emirates | 1999           | MaleAgeAbove100     | 2          |
| United Arab Emirates | 2000           | FemaleAge0to4       | 126599     |
| United Arab Emirates | 2000           | FemaleAge10to14     | 117278     |
| United Arab Emirates | 2000           | FemaleAge15to19     | 88684      |
| United Arab Emirates | 2000           | FemaleAge20to24     | 75621      |
| United Arab Emirates | 2000           | FemaleAge25to29     | 83673      |
| United Arab Emirates | 2000           | FemaleAge30to34     | 79935      |
| United Arab Emirates | 2000           | FemaleAge35to39     | 70926      |
| United Arab Emirates | 2000           | FemaleAge40to44     | 50530      |
| United Arab Emirates | 2000           | FemaleAge45to49     | 27912      |
| United Arab Emirates | 2000           | FemaleAge50to54     | 18253      |
| United Arab Emirates | 2000           | FemaleAge55to59     | 9388       |
| United Arab Emirates | 2000           | FemaleAge5to9       | 129714     |
| United Arab Emirates | 2000           | FemaleAge60to64     | 6734       |
| United Arab Emirates | 2000           | FemaleAge65to69     | 5781       |
| United Arab Emirates | 2000           | FemaleAge70to74     | 3481       |
| United Arab Emirates | 2000           | FemaleAge75to79     | 1935       |
| United Arab Emirates | 2000           | FemaleAge80to84     | 1115       |
| United Arab Emirates | 2000           | FemaleAge85to89     | 998        |
| United Arab Emirates | 2000           | FemaleAge90to94     | 175        |
| United Arab Emirates | 2000           | FemaleAge95to99     | 64         |
| United Arab Emirates | 2000           | FemaleAgeAbove100   | 8          |
| United Arab Emirates | 2000           | FemaleLactAge15to19 | 2286       |
| United Arab Emirates | 2000           | FemaleLactAge20to24 | 10521      |
| United Arab Emirates | 2000           | FemaleLactAge25to29 | 14755      |
| United Arab Emirates | 2000           | FemaleLactAge30to34 | 11669      |
| United Arab Emirates | 2000           | FemaleLactAge35to39 | 6568       |
| United Arab Emirates | 2000           | FemaleLactAge40to44 | 2192       |
| United Arab Emirates | 2000           | FemaleLactAge45to49 | 638        |
| United Arab Emirates | 2000           | FemalePregAge15to19 | 1715       |
| United Arab Emirates | 2000           | FemalePregAge20to24 | 7890       |
| United Arab Emirates | 2000           | FemalePregAge25to29 | 11066      |
| United Arab Emirates | 2000           | FemalePregAge30to34 | 8752       |
| United Arab Emirates | 2000           | FemalePregAge35to39 | 4926       |
| United Arab Emirates | 2000           | FemalePregAge40to44 | 1644       |
| United Arab Emirates | 2000           | FemalePregAge45to49 | 479        |
| United Arab Emirates | 2000           | MaleAge0to4         | 132431     |
| United Arab Emirates | 2000           | MaleAge10to14       | 125030     |
| United Arab Emirates | 2000           | MaleAge15to19       | 104169     |
| United Arab Emirates | 2000           | MaleAge20to24       | 192106     |
| United Arab Emirates | 2000           | MaleAge25to29       | 300118     |
| United Arab Emirates | 2000           | MaleAge30to34       | 300705     |
| United Arab Emirates | 2000           | MaleAge35to39       | 278703     |
| United Arab Emirates | 2000           | MaleAge40to44       | 216484     |
| United Arab Emirates | 2000           | MaleAge45to49       | 125466     |
| United Arab Emirates | 2000           | MaleAge50to54       | 69527      |



Dietary calcium and zinc deficiency risks are decreasing but remain prevalent

| Country              | Reference year | Age/gender group    | Population |
|----------------------|----------------|---------------------|------------|
| United Arab Emirates | 2000           | MaleAge55to59       | 30649      |
| United Arab Emirates | 2000           | MaleAge5to9         | 136691     |
| United Arab Emirates | 2000           | MaleAge60to64       | 13040      |
| United Arab Emirates | 2000           | MaleAge65to69       | 8691       |
| United Arab Emirates | 2000           | MaleAge70to74       | 3947       |
| United Arab Emirates | 2000           | MaleAge75to79       | 2270       |
| United Arab Emirates | 2000           | MaleAge80to84       | 1293       |
| United Arab Emirates | 2000           | MaleAge85to89       | 1010       |
| United Arab Emirates | 2000           | MaleAge90to94       | 76         |
| United Arab Emirates | 2000           | MaleAge95to99       | 40         |
| United Arab Emirates | 2000           | MaleAgeAbove100     | 3          |
| United Kingdom       | 1992           | FemaleAge0to4       | 1867343    |
| United Kingdom       | 1992           | FemaleAge10to14     | 1689349    |
| United Kingdom       | 1992           | FemaleAge15to19     | 1693927    |
| United Kingdom       | 1992           | FemaleAge20to24     | 1832587    |
| United Kingdom       | 1992           | FemaleAge25to29     | 1883308    |
| United Kingdom       | 1992           | FemaleAge30to34     | 1837799    |
| United Kingdom       | 1992           | FemaleAge35to39     | 1793652    |
| United Kingdom       | 1992           | FemaleAge40to44     | 1997703    |
| United Kingdom       | 1992           | FemaleAge45to49     | 1848326    |
| United Kingdom       | 1992           | FemaleAge50to54     | 1573788    |
| United Kingdom       | 1992           | FemaleAge55to59     | 1484876    |
| United Kingdom       | 1992           | FemaleAge5to9       | 1833074    |
| United Kingdom       | 1992           | FemaleAge60to64     | 1460093    |
| United Kingdom       | 1992           | FemaleAge65to69     | 1511446    |
| United Kingdom       | 1992           | FemaleAge70to74     | 1296508    |
| United Kingdom       | 1992           | FemaleAge75to79     | 1088671    |
| United Kingdom       | 1992           | FemaleAge80to84     | 846948     |
| United Kingdom       | 1992           | FemaleAge85to89     | 474394     |
| United Kingdom       | 1992           | FemaleAge90to94     | 182553     |
| United Kingdom       | 1992           | FemaleAge95to99     | 38266      |
| United Kingdom       | 1992           | FemaleAgeAbove100   | 4112       |
| United Kingdom       | 1992           | FemaleLactAge15to19 | 55643      |
| United Kingdom       | 1992           | FemaleLactAge20to24 | 173882     |
| United Kingdom       | 1992           | FemaleLactAge25to29 | 261909     |
| United Kingdom       | 1992           | FemaleLactAge30to34 | 189828     |
| United Kingdom       | 1992           | FemaleLactAge35to39 | 67027      |
| United Kingdom       | 1992           | FemaleLactAge40to44 | 11850      |
| United Kingdom       | 1992           | FemalePregAge15to19 | 41732      |
| United Kingdom       | 1992           | FemalePregAge20to24 | 130412     |
| United Kingdom       | 1992           | FemalePregAge25to29 | 196432     |
| United Kingdom       | 1992           | FemalePregAge30to34 | 142371     |
| United Kingdom       | 1992           | FemalePregAge35to39 | 50271      |
| United Kingdom       | 1992           | FemalePregAge40to44 | 8888       |
| United Kingdom       | 1992           | MaleAge0to4         | 1953916    |
| United Kingdom       | 1992           | MaleAge10to14       | 1763457    |
| United Kingdom       | 1992           | MaleAge15to19       | 1860949    |
| United Kingdom       | 1992           | MaleAge20to24       | 2172357    |
| United Kingdom       | 1992           | MaleAge25to29       | 2334928    |
| United Kingdom       | 1992           | MaleAge30to34       | 2150870    |
| United Kingdom       | 1992           | MaleAge35to39       | 1895686    |
| United Kingdom       | 1992           | MaleAge40to44       | 2007099    |
| United Kingdom       | 1992           | MaleAge45to49       | 1842355    |
| United Kingdom       | 1992           | MaleAge50to54       | 1563791    |
| United Kingdom       | 1992           | MaleAge55to59       | 1452689    |
| United Kingdom       | 1992           | MaleAge5to9         | 1916593    |
| United Kingdom       | 1992           | MaleAge60to64       | 1365428    |
| United Kingdom       | 1992           | MaleAge65to69       | 1298268    |
| United Kingdom       | 1992           | MaleAge70to74       | 993996     |
| United Kingdom       | 1992           | MaleAge75to79       | 701847     |
| United Kingdom       | 1992           | MaleAge80to84       | 440120     |
| United Kingdom       | 1992           | MaleAge85to89       | 181667     |
| United Kingdom       | 1992           | MaleAge90to94       | 48084      |
| United Kingdom       | 1992           | MaleAge95to99       | 6668       |
| United Kingdom       | 1992           | MaleAgeAbove100     | 533        |
| United Kingdom       | 1993           | FemaleAge0to4       | 1869395    |
| United Kingdom       | 1993           | FemaleAge10to14     | 1719534    |
| United Kingdom       | 1993           | FemaleAge15to19     | 1646080    |
| United Kingdom       | 1993           | FemaleAge20to24     | 1767925    |
| United Kingdom       | 1993           | FemaleAge25to29     | 1870531    |
| United Kingdom       | 1993           | FemaleAge30to34     | 1899523    |
| United Kingdom       | 1993           | FemaleAge35to39     | 1832857    |
| United Kingdom       | 1993           | FemaleAge40to44     | 1940610    |
| United Kingdom       | 1993           | FemaleAge45to49     | 1939579    |
| United Kingdom       | 1993           | FemaleAge50to54     | 1591997    |
| United Kingdom       | 1993           | FemaleAge55to59     | 1492487    |
| United Kingdom       | 1993           | FemaleAge5to9       | 1851173    |
| United Kingdom       | 1993           | FemaleAge60to64     | 1446307    |
| United Kingdom       | 1993           | FemaleAge65to69     | 1474267    |
| United Kingdom       | 1993           | FemaleAge70to74     | 1340678    |
| United Kingdom       | 1993           | FemaleAge75to79     | 1056915    |
| United Kingdom       | 1993           | FemaleAge80to84     | 855172     |
| United Kingdom       | 1993           | FemaleAge85to89     | 486193     |
| United Kingdom       | 1993           | FemaleAge90to94     | 190135     |
| United Kingdom       | 1993           | FemaleAge95to99     | 41749      |
| United Kingdom       | 1993           | FemaleAgeAbove100   | 4320       |
| United Kingdom       | 1993           | FemaleLactAge15to19 | 55643      |
| United Kingdom       | 1993           | FemaleLactAge20to24 | 173882     |

Dietary calcium and zinc deficiency risks are decreasing but remain prevalent

| Country        | Reference year | Age/gender group    | Population |
|----------------|----------------|---------------------|------------|
| United Kingdom | 1993           | FemaleLactAge25to29 | 261909     |
| United Kingdom | 1993           | FemaleLactAge30to34 | 189828     |
| United Kingdom | 1993           | FemaleLactAge35to39 | 67027      |
| United Kingdom | 1993           | FemaleLactAge40to44 | 11850      |
| United Kingdom | 1993           | FemalePregAge15to19 | 41732      |
| United Kingdom | 1993           | FemalePregAge20to24 | 130412     |
| United Kingdom | 1993           | FemalePregAge25to29 | 196432     |
| United Kingdom | 1993           | FemalePregAge30to34 | 142371     |
| United Kingdom | 1993           | FemalePregAge35to39 | 50271      |
| United Kingdom | 1993           | FemalePregAge40to44 | 8888       |
| United Kingdom | 1993           | MaleAge0to4         | 1957582    |
| United Kingdom | 1993           | MaleAge10to14       | 1793549    |
| United Kingdom | 1993           | MaleAge15to19       | 1803580    |
| United Kingdom | 1993           | MaleAge20to24       | 2106716    |
| United Kingdom | 1993           | MaleAge25to29       | 2318888    |
| United Kingdom | 1993           | MaleAge30to34       | 2207493    |
| United Kingdom | 1993           | MaleAge35to39       | 1930313    |
| United Kingdom | 1993           | MaleAge40to44       | 1947086    |
| United Kingdom | 1993           | MaleAge45to49       | 1929363    |
| United Kingdom | 1993           | MaleAge50to54       | 1580721    |
| United Kingdom | 1993           | MaleAge55to59       | 1460898    |
| United Kingdom | 1993           | MaleAge5to9         | 1935262    |
| United Kingdom | 1993           | MaleAge60to64       | 1359302    |
| United Kingdom | 1993           | MaleAge65to69       | 1274926    |
| United Kingdom | 1993           | MaleAge70to74       | 1035988    |
| United Kingdom | 1993           | MaleAge75to79       | 685210     |
| United Kingdom | 1993           | MaleAge80to84       | 451442     |
| United Kingdom | 1993           | MaleAge85to89       | 189021     |
| United Kingdom | 1993           | MaleAge90to94       | 51295      |
| United Kingdom | 1993           | MaleAge95to99       | 7479       |
| United Kingdom | 1993           | MaleAgeAbov e100    | 548        |
| United Kingdom | 1994           | FemaleAge0to4       | 1866920    |
| United Kingdom | 1994           | FemaleAge10to14     | 1753866    |
| United Kingdom | 1994           | FemaleAge15to19     | 1610355    |
| United Kingdom | 1994           | FemaleAge20to24     | 1703044    |
| United Kingdom | 1994           | FemaleAge25to29     | 1846899    |
| United Kingdom | 1994           | FemaleAge30to34     | 1950200    |
| United Kingdom | 1994           | FemaleAge35to39     | 1882068    |
| United Kingdom | 1994           | FemaleAge40to44     | 1892789    |
| United Kingdom | 1994           | FemaleAge45to49     | 2009161    |
| United Kingdom | 1994           | FemaleAge50to54     | 1624683    |
| United Kingdom | 1994           | FemaleAge55to59     | 1503850    |
| United Kingdom | 1994           | FemaleAge5to9       | 1863626    |
| United Kingdom | 1994           | FemaleAge60to64     | 1438093    |
| United Kingdom | 1994           | FemaleAge65to69     | 1439641    |
| United Kingdom | 1994           | FemaleAge70to74     | 1375658    |
| United Kingdom | 1994           | FemaleAge75to79     | 1041201    |
| United Kingdom | 1994           | FemaleAge80to84     | 858488     |
| United Kingdom | 1994           | FemaleAge85to89     | 494873     |
| United Kingdom | 1994           | FemaleAge90to94     | 192891     |
| United Kingdom | 1994           | FemaleAge95to99     | 43669      |
| United Kingdom | 1994           | FemaleAgeAbov e100  | 4531       |
| United Kingdom | 1994           | FemaleLactAge15to19 | 55643      |
| United Kingdom | 1994           | FemaleLactAge20to24 | 173882     |
| United Kingdom | 1994           | FemaleLactAge25to29 | 261909     |
| United Kingdom | 1994           | FemaleLactAge30to34 | 189828     |
| United Kingdom | 1994           | FemaleLactAge35to39 | 67027      |
| United Kingdom | 1994           | FemaleLactAge40to44 | 11850      |
| United Kingdom | 1994           | FemalePregAge15to19 | 41732      |
| United Kingdom | 1994           | FemalePregAge20to24 | 130412     |
| United Kingdom | 1994           | FemalePregAge25to29 | 196432     |
| United Kingdom | 1994           | FemalePregAge30to34 | 142371     |
| United Kingdom | 1994           | FemalePregAge35to39 | 50271      |
| United Kingdom | 1994           | FemalePregAge40to44 | 8888       |
| United Kingdom | 1994           | MaleAge0to4         | 1956808    |
| United Kingdom | 1994           | MaleAge10to14       | 1830074    |
| United Kingdom | 1994           | MaleAge15to19       | 1761074    |
| United Kingdom | 1994           | MaleAge20to24       | 2039523    |
| United Kingdom | 1994           | MaleAge25to29       | 2292010    |
| United Kingdom | 1994           | MaleAge30to34       | 2253354    |
| United Kingdom | 1994           | MaleAge35to39       | 1974758    |
| United Kingdom | 1994           | MaleAge40to44       | 1896389    |
| United Kingdom | 1994           | MaleAge45to49       | 1995407    |
| United Kingdom | 1994           | MaleAge50to54       | 1611778    |
| United Kingdom | 1994           | MaleAge55to59       | 1473147    |
| United Kingdom | 1994           | MaleAge5to9         | 1948569    |
| United Kingdom | 1994           | MaleAge60to64       | 1358241    |
| United Kingdom | 1994           | MaleAge65to69       | 1255552    |
| United Kingdom | 1994           | MaleAge70to74       | 1069350    |
| United Kingdom | 1994           | MaleAge75to79       | 680931     |
| United Kingdom | 1994           | MaleAge80to84       | 455485     |
| United Kingdom | 1994           | MaleAge85to89       | 192572     |
| United Kingdom | 1994           | MaleAge90to94       | 52241      |
| United Kingdom | 1994           | MaleAge95to99       | 7924       |
| United Kingdom | 1994           | MaleAgeAbov e100    | 562        |
| United Kingdom | 1995           | FemaleAge0to4       | 1855219    |
| United Kingdom | 1995           | FemaleAge10to14     | 1784838    |
| United Kingdom | 1995           | FemaleAge15to19     | 1591250    |

Dietary calcium and zinc deficiency risks are decreasing but remain prevalent

| Country        | Reference year | Age/gender group    | Population |
|----------------|----------------|---------------------|------------|
| United Kingdom | 1995           | FemaleAge20to24     | 1641625    |
| United Kingdom | 1995           | FemaleAge25to29     | 1814143    |
| United Kingdom | 1995           | FemaleAge30to34     | 1985530    |
| United Kingdom | 1995           | FemaleAge35to39     | 1935087    |
| United Kingdom | 1995           | FemaleAge40to44     | 1871772    |
| United Kingdom | 1995           | FemaleAge45to49     | 2042899    |
| United Kingdom | 1995           | FemaleAge50to54     | 1676163    |
| United Kingdom | 1995           | FemaleAge55to59     | 1518355    |
| United Kingdom | 1995           | FemaleAge5to9       | 1874710    |
| United Kingdom | 1995           | FemaleAge60to64     | 1434663    |
| United Kingdom | 1995           | FemaleAge65to69     | 1414659    |
| United Kingdom | 1995           | FemaleAge70to74     | 1391964    |
| United Kingdom | 1995           | FemaleAge75to79     | 1048179    |
| United Kingdom | 1995           | FemaleAge80to84     | 855480     |
| United Kingdom | 1995           | FemaleAge85to89     | 501813     |
| United Kingdom | 1995           | FemaleAge90to94     | 192138     |
| United Kingdom | 1995           | FemaleAge95to99     | 41267      |
| United Kingdom | 1995           | FemaleAgeAbove100   | 4745       |
| United Kingdom | 1995           | FemaleLactAge15to19 | 55643      |
| United Kingdom | 1995           | FemaleLactAge20to24 | 173882     |
| United Kingdom | 1995           | FemaleLactAge25to29 | 261909     |
| United Kingdom | 1995           | FemaleLactAge30to34 | 189828     |
| United Kingdom | 1995           | FemaleLactAge35to39 | 67027      |
| United Kingdom | 1995           | FemaleLactAge40to44 | 11850      |
| United Kingdom | 1995           | FemalePregAge15to19 | 41732      |
| United Kingdom | 1995           | FemalePregAge20to24 | 130412     |
| United Kingdom | 1995           | FemalePregAge25to29 | 196432     |
| United Kingdom | 1995           | FemalePregAge30to34 | 142371     |
| United Kingdom | 1995           | FemalePregAge35to39 | 50271      |
| United Kingdom | 1995           | FemalePregAge40to44 | 8888       |
| United Kingdom | 1995           | MaleAge0to4         | 1946571    |
| United Kingdom | 1995           | MaleAge10to14       | 1864422    |
| United Kingdom | 1995           | MaleAge15to19       | 1739177    |
| United Kingdom | 1995           | MaleAge20to24       | 1974432    |
| United Kingdom | 1995           | MaleAge25to29       | 2256422    |
| United Kingdom | 1995           | MaleAge30to34       | 2284186    |
| United Kingdom | 1995           | MaleAge35to39       | 2022952    |
| United Kingdom | 1995           | MaleAge40to44       | 1872303    |
| United Kingdom | 1995           | MaleAge45to49       | 2026503    |
| United Kingdom | 1995           | MaleAge50to54       | 1661410    |
| United Kingdom | 1995           | MaleAge55to59       | 1489021    |
| United Kingdom | 1995           | MaleAge5to9         | 1961031    |
| United Kingdom | 1995           | MaleAge60to64       | 1361777    |
| United Kingdom | 1995           | MaleAge65to69       | 1245294    |
| United Kingdom | 1995           | MaleAge70to74       | 1088226    |
| United Kingdom | 1995           | MaleAge75to79       | 693372     |
| United Kingdom | 1995           | MaleAge80to84       | 452244     |
| United Kingdom | 1995           | MaleAge85to89       | 193273     |
| United Kingdom | 1995           | MaleAge90to94       | 50426      |
| United Kingdom | 1995           | MaleAge95to99       | 6833       |
| United Kingdom | 1995           | MaleAgeAbove100     | 577        |
| United Kingdom | 1996           | FemaleAge0to4       | 1832237    |
| United Kingdom | 1996           | FemaleAge10to14     | 1809078    |
| United Kingdom | 1996           | FemaleAge15to19     | 1601030    |
| United Kingdom | 1996           | FemaleAge20to24     | 1654535    |
| United Kingdom | 1996           | FemaleAge25to29     | 1848845    |
| United Kingdom | 1996           | FemaleAge30to34     | 1970722    |
| United Kingdom | 1996           | FemaleAge35to39     | 1955147    |
| United Kingdom | 1996           | FemaleAge40to44     | 1864284    |
| United Kingdom | 1996           | FemaleAge45to49     | 2041677    |
| United Kingdom | 1996           | FemaleAge50to54     | 1741987    |
| United Kingdom | 1996           | FemaleAge55to59     | 1531878    |
| United Kingdom | 1996           | FemaleAge5to9       | 1883177    |
| United Kingdom | 1996           | FemaleAge60to64     | 1432765    |
| United Kingdom | 1996           | FemaleAge65to69     | 1390043    |
| United Kingdom | 1996           | FemaleAge70to74     | 1381615    |
| United Kingdom | 1996           | FemaleAge75to79     | 1063350    |
| United Kingdom | 1996           | FemaleAge80to84     | 838104     |
| United Kingdom | 1996           | FemaleAge85to89     | 515073     |
| United Kingdom | 1996           | FemaleAge90to94     | 208967     |
| United Kingdom | 1996           | FemaleAge95to99     | 44554      |
| United Kingdom | 1996           | FemaleAgeAbove100   | 4963       |
| United Kingdom | 1996           | FemaleLactAge15to19 | 53890      |
| United Kingdom | 1996           | FemaleLactAge20to24 | 139161     |
| United Kingdom | 1996           | FemaleLactAge25to29 | 220305     |
| United Kingdom | 1996           | FemaleLactAge30to34 | 211151     |
| United Kingdom | 1996           | FemaleLactAge35to39 | 87489      |
| United Kingdom | 1996           | FemaleLactAge40to44 | 15786      |
| United Kingdom | 1996           | FemalePregAge15to19 | 40418      |
| United Kingdom | 1996           | FemalePregAge20to24 | 104370     |
| United Kingdom | 1996           | FemalePregAge25to29 | 165229     |
| United Kingdom | 1996           | FemalePregAge30to34 | 158363     |
| United Kingdom | 1996           | FemalePregAge35to39 | 65616      |
| United Kingdom | 1996           | FemalePregAge40to44 | 11840      |
| United Kingdom | 1996           | MaleAge0to4         | 1924112    |
| United Kingdom | 1996           | MaleAge10to14       | 1888869    |
| United Kingdom | 1996           | MaleAge15to19       | 1741287    |
| United Kingdom | 1996           | MaleAge20to24       | 1919617    |

Dietary calcium and zinc deficiency risks are decreasing but remain prevalent

| Country        | Reference year | Age/gender group    | Population |
|----------------|----------------|---------------------|------------|
| United Kingdom | 1996           | MaleAge25to29       | 2219092    |
| United Kingdom | 1996           | MaleAge30to34       | 2303204    |
| United Kingdom | 1996           | MaleAge35to39       | 2075015    |
| United Kingdom | 1996           | MaleAge40to44       | 1867404    |
| United Kingdom | 1996           | MaleAge45to49       | 2020511    |
| United Kingdom | 1996           | MaleAge50to54       | 1722846    |
| United Kingdom | 1996           | MaleAge55to59       | 1500773    |
| United Kingdom | 1996           | MaleAge5to9         | 1970529    |
| United Kingdom | 1996           | MaleAge60to64       | 1362211    |
| United Kingdom | 1996           | MaleAge65to69       | 1232559    |
| United Kingdom | 1996           | MaleAge70to74       | 1088014    |
| United Kingdom | 1996           | MaleAge75to79       | 717546     |
| United Kingdom | 1996           | MaleAge80to84       | 451915     |
| United Kingdom | 1996           | MaleAge85to89       | 208358     |
| United Kingdom | 1996           | MaleAge90to94       | 58732      |
| United Kingdom | 1996           | MaleAge95to99       | 7683       |
| United Kingdom | 1996           | MaleAgeAbov e100    | 593        |
| United Kingdom | 1997           | FemaleAge0to4       | 1806800    |
| United Kingdom | 1997           | FemaleAge10to14     | 1829779    |
| United Kingdom | 1997           | FemaleAge15to19     | 1620811    |
| United Kingdom | 1997           | FemaleAge20to24     | 1608809    |
| United Kingdom | 1997           | FemaleAge25to29     | 1803579    |
| United Kingdom | 1997           | FemaleAge30to34     | 1980950    |
| United Kingdom | 1997           | FemaleAge35to39     | 2016086    |
| United Kingdom | 1997           | FemaleAge40to44     | 1885899    |
| United Kingdom | 1997           | FemaleAge45to49     | 2005692    |
| United Kingdom | 1997           | FemaleAge50to54     | 1827801    |
| United Kingdom | 1997           | FemaleAge55to59     | 1545462    |
| United Kingdom | 1997           | FemaleAge5to9       | 1884947    |
| United Kingdom | 1997           | FemaleAge60to64     | 1437342    |
| United Kingdom | 1997           | FemaleAge65to69     | 1373932    |
| United Kingdom | 1997           | FemaleAge70to74     | 1357506    |
| United Kingdom | 1997           | FemaleAge75to79     | 1096025    |
| United Kingdom | 1997           | FemaleAge80to84     | 813807     |
| United Kingdom | 1997           | FemaleAge85to89     | 525732     |
| United Kingdom | 1997           | FemaleAge90to94     | 220588     |
| United Kingdom | 1997           | FemaleAge95to99     | 49222      |
| United Kingdom | 1997           | FemaleAgeAbov e100  | 5188       |
| United Kingdom | 1997           | FemaleLactAge15to19 | 53890      |
| United Kingdom | 1997           | FemaleLactAge20to24 | 139161     |
| United Kingdom | 1997           | FemaleLactAge25to29 | 220305     |
| United Kingdom | 1997           | FemaleLactAge30to34 | 211151     |
| United Kingdom | 1997           | FemaleLactAge35to39 | 87489      |
| United Kingdom | 1997           | FemaleLactAge40to44 | 15786      |
| United Kingdom | 1997           | FemalePregAge15to19 | 40418      |
| United Kingdom | 1997           | FemalePregAge20to24 | 104370     |
| United Kingdom | 1997           | FemalePregAge25to29 | 165229     |
| United Kingdom | 1997           | FemalePregAge30to34 | 158363     |
| United Kingdom | 1997           | FemalePregAge35to39 | 65616      |
| United Kingdom | 1997           | FemalePregAge40to44 | 11840      |
| United Kingdom | 1997           | MaleAge0to4         | 1897807    |
| United Kingdom | 1997           | MaleAge10to14       | 1911328    |
| United Kingdom | 1997           | MaleAge15to19       | 1760850    |
| United Kingdom | 1997           | MaleAge20to24       | 1865606    |
| United Kingdom | 1997           | MaleAge25to29       | 2173959    |
| United Kingdom | 1997           | MaleAge30to34       | 2311410    |
| United Kingdom | 1997           | MaleAge35to39       | 2131911    |
| United Kingdom | 1997           | MaleAge40to44       | 1885920    |
| United Kingdom | 1997           | MaleAge45to49       | 1980988    |
| United Kingdom | 1997           | MaleAge50to54       | 1804593    |
| United Kingdom | 1997           | MaleAge55to59       | 1513110    |
| United Kingdom | 1997           | MaleAge5to9         | 1974143    |
| United Kingdom | 1997           | MaleAge60to64       | 1368863    |
| United Kingdom | 1997           | MaleAge65to69       | 1226450    |
| United Kingdom | 1997           | MaleAge70to74       | 1078280    |
| United Kingdom | 1997           | MaleAge75to79       | 750916     |
| United Kingdom | 1997           | MaleAge80to84       | 445675     |
| United Kingdom | 1997           | MaleAge85to89       | 221018     |
| United Kingdom | 1997           | MaleAge90to94       | 64564      |
| United Kingdom | 1997           | MaleAge95to99       | 9055       |
| United Kingdom | 1997           | MaleAgeAbov e100    | 612        |
| United Kingdom | 1998           | FemaleAge0to4       | 1779212    |
| United Kingdom | 1998           | FemaleAge10to14     | 1849103    |
| United Kingdom | 1998           | FemaleAge15to19     | 1647220    |
| United Kingdom | 1998           | FemaleAge20to24     | 1568433    |
| United Kingdom | 1998           | FemaleAge25to29     | 1755027    |
| United Kingdom | 1998           | FemaleAge30to34     | 1980340    |
| United Kingdom | 1998           | FemaleAge35to39     | 2076312    |
| United Kingdom | 1998           | FemaleAge40to44     | 1925623    |
| United Kingdom | 1998           | FemaleAge45to49     | 1951957    |
| United Kingdom | 1998           | FemaleAge50to54     | 1917645    |
| United Kingdom | 1998           | FemaleAge55to59     | 1564670    |
| United Kingdom | 1998           | FemaleAge5to9       | 1879270    |
| United Kingdom | 1998           | FemaleAge60to64     | 1447078    |
| United Kingdom | 1998           | FemaleAge65to69     | 1365552    |
| United Kingdom | 1998           | FemaleAge70to74     | 1327214    |
| United Kingdom | 1998           | FemaleAge75to79     | 1134801    |
| United Kingdom | 1998           | FemaleAge80to84     | 792990     |

Dietary calcium and zinc deficiency risks are decreasing but remain prevalent

| Country        | Reference year | Age/gender group    | Population |
|----------------|----------------|---------------------|------------|
| United Kingdom | 1998           | FemaleAge85to89     | 532415     |
| United Kingdom | 1998           | FemaleAge90to94     | 225978     |
| United Kingdom | 1998           | FemaleAge95to99     | 53560      |
| United Kingdom | 1998           | FemaleAgeAbove100   | 5420       |
| United Kingdom | 1998           | FemaleLactAge15to19 | 53890      |
| United Kingdom | 1998           | FemaleLactAge20to24 | 139161     |
| United Kingdom | 1998           | FemaleLactAge25to29 | 220305     |
| United Kingdom | 1998           | FemaleLactAge30to34 | 211151     |
| United Kingdom | 1998           | FemaleLactAge35to39 | 87489      |
| United Kingdom | 1998           | FemaleLactAge40to44 | 15786      |
| United Kingdom | 1998           | FemalePregAge15to19 | 40418      |
| United Kingdom | 1998           | FemalePregAge20to24 | 104370     |
| United Kingdom | 1998           | FemalePregAge25to29 | 165229     |
| United Kingdom | 1998           | FemalePregAge30to34 | 158363     |
| United Kingdom | 1998           | FemalePregAge35to39 | 65616      |
| United Kingdom | 1998           | FemalePregAge40to44 | 11840      |
| United Kingdom | 1998           | MaleAge0to4         | 1868575    |
| United Kingdom | 1998           | MaleAge10to14       | 1933731    |
| United Kingdom | 1998           | MaleAge15to19       | 1791240    |
| United Kingdom | 1998           | MaleAge20to24       | 1817589    |
| United Kingdom | 1998           | MaleAge25to29       | 2123398    |
| United Kingdom | 1998           | MaleAge30to34       | 2310656    |
| United Kingdom | 1998           | MaleAge35to39       | 2187671    |
| United Kingdom | 1998           | MaleAge40to44       | 1923783    |
| United Kingdom | 1998           | MaleAge45to49       | 1924814    |
| United Kingdom | 1998           | MaleAge50to54       | 1890903    |
| United Kingdom | 1998           | MaleAge55to59       | 1531335    |
| United Kingdom | 1998           | MaleAge5to9         | 1970592    |
| United Kingdom | 1998           | MaleAge60to64       | 1380959    |
| United Kingdom | 1998           | MaleAge65to69       | 1226444    |
| United Kingdom | 1998           | MaleAge70to74       | 1065653    |
| United Kingdom | 1998           | MaleAge75to79       | 785466     |
| United Kingdom | 1998           | MaleAge80to84       | 440761     |
| United Kingdom | 1998           | MaleAge85to89       | 228704     |
| United Kingdom | 1998           | MaleAge90to94       | 67459      |
| United Kingdom | 1998           | MaleAge95to99       | 10501      |
| United Kingdom | 1998           | MaleAgeAbove100     | 634        |
| United Kingdom | 1999           | FemaleAge0to4       | 1752199    |
| United Kingdom | 1999           | FemaleAge10to14     | 1866986    |
| United Kingdom | 1999           | FemaleAge15to19     | 1672536    |
| United Kingdom | 1999           | FemaleAge20to24     | 1538467    |
| United Kingdom | 1999           | FemaleAge25to29     | 1707145    |
| United Kingdom | 1999           | FemaleAge30to34     | 1970680    |
| United Kingdom | 1999           | FemaleAge35to39     | 2128592    |
| United Kingdom | 1999           | FemaleAge40to44     | 1974885    |
| United Kingdom | 1999           | FemaleAge45to49     | 1907406    |
| United Kingdom | 1999           | FemaleAge50to54     | 1986906    |
| United Kingdom | 1999           | FemaleAge55to59     | 1598051    |
| United Kingdom | 1999           | FemaleAge5to9       | 1867440    |
| United Kingdom | 1999           | FemaleAge60to64     | 1460332    |
| United Kingdom | 1999           | FemaleAge65to69     | 1363052    |
| United Kingdom | 1999           | FemaleAge70to74     | 1301041    |
| United Kingdom | 1999           | FemaleAge75to79     | 1165092    |
| United Kingdom | 1999           | FemaleAge80to84     | 786910     |
| United Kingdom | 1999           | FemaleAge85to89     | 532587     |
| United Kingdom | 1999           | FemaleAge90to94     | 225577     |
| United Kingdom | 1999           | FemaleAge95to99     | 55278      |
| United Kingdom | 1999           | FemaleAgeAbove100   | 5659       |
| United Kingdom | 1999           | FemaleLactAge15to19 | 53890      |
| United Kingdom | 1999           | FemaleLactAge20to24 | 139161     |
| United Kingdom | 1999           | FemaleLactAge25to29 | 220305     |
| United Kingdom | 1999           | FemaleLactAge30to34 | 211151     |
| United Kingdom | 1999           | FemaleLactAge35to39 | 87489      |
| United Kingdom | 1999           | FemaleLactAge40to44 | 15786      |
| United Kingdom | 1999           | FemalePregAge15to19 | 40418      |
| United Kingdom | 1999           | FemalePregAge20to24 | 104370     |
| United Kingdom | 1999           | FemalePregAge25to29 | 165229     |
| United Kingdom | 1999           | FemalePregAge30to34 | 158363     |
| United Kingdom | 1999           | FemalePregAge35to39 | 65616      |
| United Kingdom | 1999           | FemalePregAge40to44 | 11840      |
| United Kingdom | 1999           | MaleAge0to4         | 1840153    |
| United Kingdom | 1999           | MaleAge10to14       | 1955947    |
| United Kingdom | 1999           | MaleAge15to19       | 1823411    |
| United Kingdom | 1999           | MaleAge20to24       | 1782748    |
| United Kingdom | 1999           | MaleAge25to29       | 2070885    |
| United Kingdom | 1999           | MaleAge30to34       | 2301910    |
| United Kingdom | 1999           | MaleAge35to39       | 2235736    |
| United Kingdom | 1999           | MaleAge40to44       | 1971914    |
| United Kingdom | 1999           | MaleAge45to49       | 1878684    |
| United Kingdom | 1999           | MaleAge50to54       | 1957460    |
| United Kingdom | 1999           | MaleAge55to59       | 1563859    |
| United Kingdom | 1999           | MaleAge5to9         | 1960673    |
| United Kingdom | 1999           | MaleAge60to64       | 1397160    |
| United Kingdom | 1999           | MaleAge65to69       | 1231583    |
| United Kingdom | 1999           | MaleAge70to74       | 1057380    |
| United Kingdom | 1999           | MaleAge75to79       | 812019     |
| United Kingdom | 1999           | MaleAge80to84       | 444187     |
| United Kingdom | 1999           | MaleAge85to89       | 229500     |

Dietary calcium and zinc deficiency risks are decreasing but remain prevalent

| Country                     | Reference year | Age/gender group    | Population |
|-----------------------------|----------------|---------------------|------------|
| United Kingdom              | 1999           | MaleAge90to94       | 67518      |
| United Kingdom              | 1999           | MaleAge95to99       | 11180      |
| United Kingdom              | 1999           | MaleAgeAbove100     | 660        |
| United Republic of Tanzania | 1992           | FemaleAge0to4       | 2448080    |
| United Republic of Tanzania | 1992           | FemaleAge10to14     | 1735186    |
| United Republic of Tanzania | 1992           | FemaleAge15to19     | 1097460    |
| United Republic of Tanzania | 1992           | FemaleAge20to24     | 609796     |
| United Republic of Tanzania | 1992           | FemaleAge25to29     | 524679     |
| United Republic of Tanzania | 1992           | FemaleAge30to34     | 488317     |
| United Republic of Tanzania | 1992           | FemaleAge35to39     | 461977     |
| United Republic of Tanzania | 1992           | FemaleAge40to44     | 462464     |
| United Republic of Tanzania | 1992           | FemaleAge45to49     | 442411     |
| United Republic of Tanzania | 1992           | FemaleAge50to54     | 379360     |
| United Republic of Tanzania | 1992           | FemaleAge55to59     | 305173     |
| United Republic of Tanzania | 1992           | FemaleAge5to9       | 2039586    |
| United Republic of Tanzania | 1992           | FemaleAge60to64     | 238214     |
| United Republic of Tanzania | 1992           | FemaleAge65to69     | 175950     |
| United Republic of Tanzania | 1992           | FemaleAge70to74     | 118943     |
| United Republic of Tanzania | 1992           | FemaleAge75to79     | 70079      |
| United Republic of Tanzania | 1992           | FemaleAge80to84     | 33736      |
| United Republic of Tanzania | 1992           | FemaleAge85to89     | 12229      |
| United Republic of Tanzania | 1992           | FemaleAge90to94     | 3013       |
| United Republic of Tanzania | 1992           | FemaleAge95to99     | 416        |
| United Republic of Tanzania | 1992           | FemaleAgeAbove100   | 26         |
| United Republic of Tanzania | 1992           | FemaleLactAge15to19 | 208476     |
| United Republic of Tanzania | 1992           | FemaleLactAge20to24 | 342753     |
| United Republic of Tanzania | 1992           | FemaleLactAge25to29 | 267828     |
| United Republic of Tanzania | 1992           | FemaleLactAge30to34 | 187678     |
| United Republic of Tanzania | 1992           | FemaleLactAge35to39 | 116179     |
| United Republic of Tanzania | 1992           | FemaleLactAge40to44 | 57686      |
| United Republic of Tanzania | 1992           | FemaleLactAge45to49 | 16113      |
| United Republic of Tanzania | 1992           | FemalePregAge15to19 | 156357     |
| United Republic of Tanzania | 1992           | FemalePregAge20to24 | 257065     |
| United Republic of Tanzania | 1992           | FemalePregAge25to29 | 200871     |
| United Republic of Tanzania | 1992           | FemalePregAge30to34 | 140759     |
| United Republic of Tanzania | 1992           | FemalePregAge35to39 | 87134      |
| United Republic of Tanzania | 1992           | FemalePregAge40to44 | 43265      |
| United Republic of Tanzania | 1992           | FemalePregAge45to49 | 12085      |
| United Republic of Tanzania | 1992           | MaleAge0to4         | 2476040    |
| United Republic of Tanzania | 1992           | MaleAge10to14       | 1742582    |
| United Republic of Tanzania | 1992           | MaleAge15to19       | 1462580    |
| United Republic of Tanzania | 1992           | MaleAge20to24       | 1203038    |
| United Republic of Tanzania | 1992           | MaleAge25to29       | 981935     |
| United Republic of Tanzania | 1992           | MaleAge30to34       | 800166     |
| United Republic of Tanzania | 1992           | MaleAge35to39       | 644541     |
| United Republic of Tanzania | 1992           | MaleAge40to44       | 532074     |
| United Republic of Tanzania | 1992           | MaleAge45to49       | 435710     |
| United Republic of Tanzania | 1992           | MaleAge50to54       | 347101     |
| United Republic of Tanzania | 1992           | MaleAge55to59       | 273524     |
| United Republic of Tanzania | 1992           | MaleAge5to9         | 2054349    |
| United Republic of Tanzania | 1992           | MaleAge60to64       | 207794     |
| United Republic of Tanzania | 1992           | MaleAge65to69       | 148660     |
| United Republic of Tanzania | 1992           | MaleAge70to74       | 96663      |
| United Republic of Tanzania | 1992           | MaleAge75to79       | 54117      |
| United Republic of Tanzania | 1992           | MaleAge80to84       | 24217      |
| United Republic of Tanzania | 1992           | MaleAge85to89       | 7867       |
| United Republic of Tanzania | 1992           | MaleAge90to94       | 1618       |
| United Republic of Tanzania | 1992           | MaleAge95to99       | 175        |
| United Republic of Tanzania | 1992           | MaleAgeAbove100     | 7          |
| United Republic of Tanzania | 1993           | FemaleAge0to4       | 2510334    |
| United Republic of Tanzania | 1993           | FemaleAge10to14     | 1793898    |
| United Republic of Tanzania | 1993           | FemaleAge15to19     | 1155041    |
| United Republic of Tanzania | 1993           | FemaleAge20to24     | 656206     |
| United Republic of Tanzania | 1993           | FemaleAge25to29     | 561060     |
| United Republic of Tanzania | 1993           | FemaleAge30to34     | 515243     |
| United Republic of Tanzania | 1993           | FemaleAge35to39     | 487110     |
| United Republic of Tanzania | 1993           | FemaleAge40to44     | 474575     |
| United Republic of Tanzania | 1993           | FemaleAge45to49     | 461238     |
| United Republic of Tanzania | 1993           | FemaleAge50to54     | 392581     |
| United Republic of Tanzania | 1993           | FemaleAge55to59     | 315936     |
| United Republic of Tanzania | 1993           | FemaleAge5to9       | 2107746    |
| United Republic of Tanzania | 1993           | FemaleAge60to64     | 246793     |
| United Republic of Tanzania | 1993           | FemaleAge65to69     | 182505     |
| United Republic of Tanzania | 1993           | FemaleAge70to74     | 123443     |
| United Republic of Tanzania | 1993           | FemaleAge75to79     | 72851      |
| United Republic of Tanzania | 1993           | FemaleAge80to84     | 35074      |
| United Republic of Tanzania | 1993           | FemaleAge85to89     | 12760      |
| United Republic of Tanzania | 1993           | FemaleAge90to94     | 3191       |
| United Republic of Tanzania | 1993           | FemaleAge95to99     | 487        |
| United Republic of Tanzania | 1993           | FemaleAgeAbove100   | 27         |
| United Republic of Tanzania | 1993           | FemaleLactAge15to19 | 208476     |
| United Republic of Tanzania | 1993           | FemaleLactAge20to24 | 342753     |
| United Republic of Tanzania | 1993           | FemaleLactAge25to29 | 267828     |
| United Republic of Tanzania | 1993           | FemaleLactAge30to34 | 187678     |
| United Republic of Tanzania | 1993           | FemaleLactAge35to39 | 116179     |
| United Republic of Tanzania | 1993           | FemaleLactAge40to44 | 57686      |
| United Republic of Tanzania | 1993           | FemaleLactAge45to49 | 16113      |
| United Republic of Tanzania | 1993           | FemalePregAge15to19 | 156357     |

Dietary calcium and zinc deficiency risks are decreasing but remain prevalent

| Country                     | Reference year | Age/gender group    | Population |
|-----------------------------|----------------|---------------------|------------|
| United Republic of Tanzania | 1993           | FemalePregAge20to24 | 257065     |
| United Republic of Tanzania | 1993           | FemalePregAge25to29 | 200871     |
| United Republic of Tanzania | 1993           | FemalePregAge30to34 | 140759     |
| United Republic of Tanzania | 1993           | FemalePregAge35to39 | 87134      |
| United Republic of Tanzania | 1993           | FemalePregAge40to44 | 43265      |
| United Republic of Tanzania | 1993           | FemalePregAge45to49 | 12085      |
| United Republic of Tanzania | 1993           | MaleAge0to4         | 2538800    |
| United Republic of Tanzania | 1993           | MaleAge10to14       | 1802464    |
| United Republic of Tanzania | 1993           | MaleAge15to19       | 1520947    |
| United Republic of Tanzania | 1993           | MaleAge20to24       | 1250105    |
| United Republic of Tanzania | 1993           | MaleAge25to29       | 1019755    |
| United Republic of Tanzania | 1993           | MaleAge30to34       | 828807     |
| United Republic of Tanzania | 1993           | MaleAge35to39       | 669304     |
| United Republic of Tanzania | 1993           | MaleAge40to44       | 545598     |
| United Republic of Tanzania | 1993           | MaleAge45to49       | 452377     |
| United Republic of Tanzania | 1993           | MaleAge50to54       | 359077     |
| United Republic of Tanzania | 1993           | MaleAge55to59       | 283212     |
| United Republic of Tanzania | 1993           | MaleAge5to9         | 2122762    |
| United Republic of Tanzania | 1993           | MaleAge60to64       | 215260     |
| United Republic of Tanzania | 1993           | MaleAge65to69       | 154161     |
| United Republic of Tanzania | 1993           | MaleAge70to74       | 100367     |
| United Republic of Tanzania | 1993           | MaleAge75to79       | 56289      |
| United Republic of Tanzania | 1993           | MaleAge80to84       | 25224      |
| United Republic of Tanzania | 1993           | MaleAge85to89       | 8230       |
| United Republic of Tanzania | 1993           | MaleAge90to94       | 1743       |
| United Republic of Tanzania | 1993           | MaleAge95to99       | 221        |
| United Republic of Tanzania | 1993           | MaleAgeAbove100     | 7          |
| United Republic of Tanzania | 1994           | FemaleAge0to4       | 2568620    |
| United Republic of Tanzania | 1994           | FemaleAge10to14     | 1852003    |
| United Republic of Tanzania | 1994           | FemaleAge15to19     | 1211872    |
| United Republic of Tanzania | 1994           | FemaleAge20to24     | 704329     |
| United Republic of Tanzania | 1994           | FemaleAge25to29     | 598804     |
| United Republic of Tanzania | 1994           | FemaleAge30to34     | 542578     |
| United Republic of Tanzania | 1994           | FemaleAge35to39     | 512043     |
| United Republic of Tanzania | 1994           | FemaleAge40to44     | 487592     |
| United Republic of Tanzania | 1994           | FemaleAge45to49     | 478592     |
| United Republic of Tanzania | 1994           | FemaleAge50to54     | 406483     |
| United Republic of Tanzania | 1994           | FemaleAge55to59     | 326990     |
| United Republic of Tanzania | 1994           | FemaleAge5to9       | 2170854    |
| United Republic of Tanzania | 1994           | FemaleAge60to64     | 255737     |
| United Republic of Tanzania | 1994           | FemaleAge65to69     | 189482     |
| United Republic of Tanzania | 1994           | FemaleAge70to74     | 128288     |
| United Republic of Tanzania | 1994           | FemaleAge75to79     | 75704      |
| United Republic of Tanzania | 1994           | FemaleAge80to84     | 36207      |
| United Republic of Tanzania | 1994           | FemaleAge85to89     | 12951      |
| United Republic of Tanzania | 1994           | FemaleAge90to94     | 3179       |
| United Republic of Tanzania | 1994           | FemaleAge95to99     | 504        |
| United Republic of Tanzania | 1994           | FemaleAgeAbove100   | 28         |
| United Republic of Tanzania | 1994           | FemaleLactAge15to19 | 208476     |
| United Republic of Tanzania | 1994           | FemaleLactAge20to24 | 342753     |
| United Republic of Tanzania | 1994           | FemaleLactAge25to29 | 267828     |
| United Republic of Tanzania | 1994           | FemaleLactAge30to34 | 187678     |
| United Republic of Tanzania | 1994           | FemaleLactAge35to39 | 116179     |
| United Republic of Tanzania | 1994           | FemaleLactAge40to44 | 57686      |
| United Republic of Tanzania | 1994           | FemaleLactAge45to49 | 16113      |
| United Republic of Tanzania | 1994           | FemalePregAge15to19 | 156357     |
| United Republic of Tanzania | 1994           | FemalePregAge20to24 | 257065     |
| United Republic of Tanzania | 1994           | FemalePregAge25to29 | 200871     |
| United Republic of Tanzania | 1994           | FemalePregAge30to34 | 140759     |
| United Republic of Tanzania | 1994           | FemalePregAge35to39 | 87134      |
| United Republic of Tanzania | 1994           | FemalePregAge40to44 | 43265      |
| United Republic of Tanzania | 1994           | FemalePregAge45to49 | 12085      |
| United Republic of Tanzania | 1994           | MaleAge0to4         | 2598163    |
| United Republic of Tanzania | 1994           | MaleAge10to14       | 1861824    |
| United Republic of Tanzania | 1994           | MaleAge15to19       | 1579100    |
| United Republic of Tanzania | 1994           | MaleAge20to24       | 1298688    |
| United Republic of Tanzania | 1994           | MaleAge25to29       | 1058725    |
| United Republic of Tanzania | 1994           | MaleAge30to34       | 858415     |
| United Republic of Tanzania | 1994           | MaleAge35to39       | 694477     |
| United Republic of Tanzania | 1994           | MaleAge40to44       | 559953     |
| United Republic of Tanzania | 1994           | MaleAge45to49       | 468162     |
| United Republic of Tanzania | 1994           | MaleAge50to54       | 371629     |
| United Republic of Tanzania | 1994           | MaleAge55to59       | 293192     |
| United Republic of Tanzania | 1994           | MaleAge5to9         | 2185812    |
| United Republic of Tanzania | 1994           | MaleAge60to64       | 223098     |
| United Republic of Tanzania | 1994           | MaleAge65to69       | 159981     |
| United Republic of Tanzania | 1994           | MaleAge70to74       | 104314     |
| United Republic of Tanzania | 1994           | MaleAge75to79       | 58452      |
| United Republic of Tanzania | 1994           | MaleAge80to84       | 25990      |
| United Republic of Tanzania | 1994           | MaleAge85to89       | 8307       |
| United Republic of Tanzania | 1994           | MaleAge90to94       | 1729       |
| United Republic of Tanzania | 1994           | MaleAge95to99       | 228        |
| United Republic of Tanzania | 1994           | MaleAgeAbove100     | 8          |
| United Republic of Tanzania | 1995           | FemaleAge0to4       | 2623459    |
| United Republic of Tanzania | 1995           | FemaleAge10to14     | 1907516    |
| United Republic of Tanzania | 1995           | FemaleAge15to19     | 1266034    |
| United Republic of Tanzania | 1995           | FemaleAge20to24     | 753136     |
| United Republic of Tanzania | 1995           | FemaleAge25to29     | 637171     |

Dietary calcium and zinc deficiency risks are decreasing but remain prevalent

| Country                     | Reference year | Age/gender group    | Population |
|-----------------------------|----------------|---------------------|------------|
| United Republic of Tanzania | 1995           | FemaleAge30to34     | 570448     |
| United Republic of Tanzania | 1995           | FemaleAge35to39     | 535347     |
| United Republic of Tanzania | 1995           | FemaleAge40to44     | 502400     |
| United Republic of Tanzania | 1995           | FemaleAge45to49     | 493146     |
| United Republic of Tanzania | 1995           | FemaleAge50to54     | 420937     |
| United Republic of Tanzania | 1995           | FemaleAge55to59     | 338077     |
| United Republic of Tanzania | 1995           | FemaleAge5to9       | 2224882    |
| United Republic of Tanzania | 1995           | FemaleAge60to64     | 264830     |
| United Republic of Tanzania | 1995           | FemaleAge65to69     | 196737     |
| United Republic of Tanzania | 1995           | FemaleAge70to74     | 133444     |
| United Republic of Tanzania | 1995           | FemaleAge75to79     | 78672      |
| United Republic of Tanzania | 1995           | FemaleAge80to84     | 37223      |
| United Republic of Tanzania | 1995           | FemaleAge85to89     | 12827      |
| United Republic of Tanzania | 1995           | FemaleAge90to94     | 2899       |
| United Republic of Tanzania | 1995           | FemaleAge95to99     | 389        |
| United Republic of Tanzania | 1995           | FemaleAgeAbove100   | 30         |
| United Republic of Tanzania | 1995           | FemaleLactAge15to19 | 208476     |
| United Republic of Tanzania | 1995           | FemaleLactAge20to24 | 342753     |
| United Republic of Tanzania | 1995           | FemaleLactAge25to29 | 267828     |
| United Republic of Tanzania | 1995           | FemaleLactAge30to34 | 187678     |
| United Republic of Tanzania | 1995           | FemaleLactAge35to39 | 116179     |
| United Republic of Tanzania | 1995           | FemaleLactAge40to44 | 57686      |
| United Republic of Tanzania | 1995           | FemaleLactAge45to49 | 16113      |
| United Republic of Tanzania | 1995           | FemalePregAge15to19 | 156357     |
| United Republic of Tanzania | 1995           | FemalePregAge20to24 | 257065     |
| United Republic of Tanzania | 1995           | FemalePregAge25to29 | 200871     |
| United Republic of Tanzania | 1995           | FemalePregAge30to34 | 140759     |
| United Republic of Tanzania | 1995           | FemalePregAge35to39 | 87134      |
| United Republic of Tanzania | 1995           | FemalePregAge40to44 | 43265      |
| United Republic of Tanzania | 1995           | FemalePregAge45to49 | 12085      |
| United Republic of Tanzania | 1995           | MaleAge0to4         | 2655177    |
| United Republic of Tanzania | 1995           | MaleAge10to14       | 1918429    |
| United Republic of Tanzania | 1995           | MaleAge15to19       | 1634993    |
| United Republic of Tanzania | 1995           | MaleAge20to24       | 1348081    |
| United Republic of Tanzania | 1995           | MaleAge25to29       | 1098127    |
| United Republic of Tanzania | 1995           | MaleAge30to34       | 888726     |
| United Republic of Tanzania | 1995           | MaleAge35to39       | 718969     |
| United Republic of Tanzania | 1995           | MaleAge40to44       | 575794     |
| United Republic of Tanzania | 1995           | MaleAge45to49       | 482083     |
| United Republic of Tanzania | 1995           | MaleAge50to54       | 384580     |
| United Republic of Tanzania | 1995           | MaleAge55to59       | 303237     |
| United Republic of Tanzania | 1995           | MaleAge5to9         | 2239638    |
| United Republic of Tanzania | 1995           | MaleAge60to64       | 231138     |
| United Republic of Tanzania | 1995           | MaleAge65to69       | 166039     |
| United Republic of Tanzania | 1995           | MaleAge70to74       | 108466     |
| United Republic of Tanzania | 1995           | MaleAge75to79       | 60652      |
| United Republic of Tanzania | 1995           | MaleAge80to84       | 26582      |
| United Republic of Tanzania | 1995           | MaleAge85to89       | 8096       |
| United Republic of Tanzania | 1995           | MaleAge90to94       | 1492       |
| United Republic of Tanzania | 1995           | MaleAge95to99       | 145        |
| United Republic of Tanzania | 1995           | MaleAgeAbove100     | 8          |
| United Republic of Tanzania | 1996           | FemaleAge0to4       | 2687667    |
| United Republic of Tanzania | 1996           | FemaleAge10to14     | 1961282    |
| United Republic of Tanzania | 1996           | FemaleAge15to19     | 1271855    |
| United Republic of Tanzania | 1996           | FemaleAge20to24     | 702427     |
| United Republic of Tanzania | 1996           | FemaleAge25to29     | 605786     |
| United Republic of Tanzania | 1996           | FemaleAge30to34     | 556081     |
| United Republic of Tanzania | 1996           | FemaleAge35to39     | 538070     |
| United Republic of Tanzania | 1996           | FemaleAge40to44     | 518578     |
| United Republic of Tanzania | 1996           | FemaleAge45to49     | 507596     |
| United Republic of Tanzania | 1996           | FemaleAge50to54     | 434729     |
| United Republic of Tanzania | 1996           | FemaleAge55to59     | 347743     |
| United Republic of Tanzania | 1996           | FemaleAge5to9       | 2286592    |
| United Republic of Tanzania | 1996           | FemaleAge60to64     | 272318     |
| United Republic of Tanzania | 1996           | FemaleAge65to69     | 202462     |
| United Republic of Tanzania | 1996           | FemaleAge70to74     | 137698     |
| United Republic of Tanzania | 1996           | FemaleAge75to79     | 81735      |
| United Republic of Tanzania | 1996           | FemaleAge80to84     | 39425      |
| United Republic of Tanzania | 1996           | FemaleAge85to89     | 14159      |
| United Republic of Tanzania | 1996           | FemaleAge90to94     | 3423       |
| United Republic of Tanzania | 1996           | FemaleAge95to99     | 442        |
| United Republic of Tanzania | 1996           | FemaleAgeAbove100   | 32         |
| United Republic of Tanzania | 1996           | FemaleLactAge15to19 | 233080     |
| United Republic of Tanzania | 1996           | FemaleLactAge20to24 | 396357     |
| United Republic of Tanzania | 1996           | FemaleLactAge25to29 | 303069     |
| United Republic of Tanzania | 1996           | FemaleLactAge30to34 | 208214     |
| United Republic of Tanzania | 1996           | FemaleLactAge35to39 | 124732     |
| United Republic of Tanzania | 1996           | FemaleLactAge40to44 | 56949      |
| United Republic of Tanzania | 1996           | FemaleLactAge45to49 | 13977      |
| United Republic of Tanzania | 1996           | FemalePregAge15to19 | 174810     |
| United Republic of Tanzania | 1996           | FemalePregAge20to24 | 297268     |
| United Republic of Tanzania | 1996           | FemalePregAge25to29 | 227302     |
| United Republic of Tanzania | 1996           | FemalePregAge30to34 | 156161     |
| United Republic of Tanzania | 1996           | FemalePregAge35to39 | 93549      |
| United Republic of Tanzania | 1996           | FemalePregAge40to44 | 42712      |
| United Republic of Tanzania | 1996           | FemalePregAge45to49 | 10482      |
| United Republic of Tanzania | 1996           | MaleAge0to4         | 2722121    |
| United Republic of Tanzania | 1996           | MaleAge10to14       | 1972015    |



Dietary calcium and zinc deficiency risks are decreasing but remain prevalent

| Country                     | Reference year | Age/gender group    | Population |
|-----------------------------|----------------|---------------------|------------|
| United Republic of Tanzania | 1996           | MaleAge15to19       | 1683991    |
| United Republic of Tanzania | 1996           | MaleAge20to24       | 1393256    |
| United Republic of Tanzania | 1996           | MaleAge25to29       | 1132467    |
| United Republic of Tanzania | 1996           | MaleAge30to34       | 913430     |
| United Republic of Tanzania | 1996           | MaleAge35to39       | 737438     |
| United Republic of Tanzania | 1996           | MaleAge40to44       | 590423     |
| United Republic of Tanzania | 1996           | MaleAge45to49       | 492652     |
| United Republic of Tanzania | 1996           | MaleAge50to54       | 396544     |
| United Republic of Tanzania | 1996           | MaleAge55to59       | 311825     |
| United Republic of Tanzania | 1996           | MaleAge5to9         | 2301878    |
| United Republic of Tanzania | 1996           | MaleAge60to64       | 237718     |
| United Republic of Tanzania | 1996           | MaleAge65to69       | 171002     |
| United Republic of Tanzania | 1996           | MaleAge70to74       | 112099     |
| United Republic of Tanzania | 1996           | MaleAge75to79       | 63289      |
| United Republic of Tanzania | 1996           | MaleAge80to84       | 28412      |
| United Republic of Tanzania | 1996           | MaleAge85to89       | 9121       |
| United Republic of Tanzania | 1996           | MaleAge90to94       | 1829       |
| United Republic of Tanzania | 1996           | MaleAge95to99       | 173        |
| United Republic of Tanzania | 1996           | MaleAgeAbove100     | 8          |
| United Republic of Tanzania | 1997           | FemaleAge0to4       | 2745694    |
| United Republic of Tanzania | 1997           | FemaleAge10to14     | 2014308    |
| United Republic of Tanzania | 1997           | FemaleAge15to19     | 1318616    |
| United Republic of Tanzania | 1997           | FemaleAge20to24     | 747368     |
| United Republic of Tanzania | 1997           | FemaleAge25to29     | 637479     |
| United Republic of Tanzania | 1997           | FemaleAge30to34     | 577408     |
| United Republic of Tanzania | 1997           | FemaleAge35to39     | 553384     |
| United Republic of Tanzania | 1997           | FemaleAge40to44     | 534174     |
| United Republic of Tanzania | 1997           | FemaleAge45to49     | 515557     |
| United Republic of Tanzania | 1997           | FemaleAge50to54     | 449168     |
| United Republic of Tanzania | 1997           | FemaleAge55to59     | 357292     |
| United Republic of Tanzania | 1997           | FemaleAge5to9       | 2342237    |
| United Republic of Tanzania | 1997           | FemaleAge60to64     | 279987     |
| United Republic of Tanzania | 1997           | FemaleAge65to69     | 208352     |
| United Republic of Tanzania | 1997           | FemaleAge70to74     | 142011     |
| United Republic of Tanzania | 1997           | FemaleAge75to79     | 84588      |
| United Republic of Tanzania | 1997           | FemaleAge80to84     | 41246      |
| United Republic of Tanzania | 1997           | FemaleAge85to89     | 15150      |
| United Republic of Tanzania | 1997           | FemaleAge90to94     | 3812       |
| United Republic of Tanzania | 1997           | FemaleAge95to99     | 534        |
| United Republic of Tanzania | 1997           | FemaleAgeAbove100   | 33         |
| United Republic of Tanzania | 1997           | FemaleLactAge15to19 | 233080     |
| United Republic of Tanzania | 1997           | FemaleLactAge20to24 | 396357     |
| United Republic of Tanzania | 1997           | FemaleLactAge25to29 | 303069     |
| United Republic of Tanzania | 1997           | FemaleLactAge30to34 | 208214     |
| United Republic of Tanzania | 1997           | FemaleLactAge35to39 | 124732     |
| United Republic of Tanzania | 1997           | FemaleLactAge40to44 | 56949      |
| United Republic of Tanzania | 1997           | FemaleLactAge45to49 | 13977      |
| United Republic of Tanzania | 1997           | FemalePregAge15to19 | 174810     |
| United Republic of Tanzania | 1997           | FemalePregAge20to24 | 297268     |
| United Republic of Tanzania | 1997           | FemalePregAge25to29 | 227302     |
| United Republic of Tanzania | 1997           | FemalePregAge30to34 | 156161     |
| United Republic of Tanzania | 1997           | FemalePregAge35to39 | 93549      |
| United Republic of Tanzania | 1997           | FemalePregAge40to44 | 42712      |
| United Republic of Tanzania | 1997           | FemalePregAge45to49 | 10482      |
| United Republic of Tanzania | 1997           | MaleAge0to4         | 2783054    |
| United Republic of Tanzania | 1997           | MaleAge10to14       | 2025061    |
| United Republic of Tanzania | 1997           | MaleAge15to19       | 1731175    |
| United Republic of Tanzania | 1997           | MaleAge20to24       | 1439538    |
| United Republic of Tanzania | 1997           | MaleAge25to29       | 1167605    |
| United Republic of Tanzania | 1997           | MaleAge30to34       | 938999     |
| United Republic of Tanzania | 1997           | MaleAge35to39       | 755048     |
| United Republic of Tanzania | 1997           | MaleAge40to44       | 605490     |
| United Republic of Tanzania | 1997           | MaleAge45to49       | 501130     |
| United Republic of Tanzania | 1997           | MaleAge50to54       | 408913     |
| United Republic of Tanzania | 1997           | MaleAge55to59       | 320403     |
| United Republic of Tanzania | 1997           | MaleAge5to9         | 2358554    |
| United Republic of Tanzania | 1997           | MaleAge60to64       | 244474     |
| United Republic of Tanzania | 1997           | MaleAge65to69       | 176040     |
| United Republic of Tanzania | 1997           | MaleAge70to74       | 115687     |
| United Republic of Tanzania | 1997           | MaleAge75to79       | 65701      |
| United Republic of Tanzania | 1997           | MaleAge80to84       | 29895      |
| United Republic of Tanzania | 1997           | MaleAge85to89       | 9886       |
| United Republic of Tanzania | 1997           | MaleAge90to94       | 2085       |
| United Republic of Tanzania | 1997           | MaleAge95to99       | 232        |
| United Republic of Tanzania | 1997           | MaleAgeAbove100     | 9          |
| United Republic of Tanzania | 1998           | FemaleAge0to4       | 2801029    |
| United Republic of Tanzania | 1998           | FemaleAge10to14     | 2067178    |
| United Republic of Tanzania | 1998           | FemaleAge15to19     | 1364175    |
| United Republic of Tanzania | 1998           | FemaleAge20to24     | 794011     |
| United Republic of Tanzania | 1998           | FemaleAge25to29     | 671858     |
| United Republic of Tanzania | 1998           | FemaleAge30to34     | 599299     |
| United Republic of Tanzania | 1998           | FemaleAge35to39     | 567390     |
| United Republic of Tanzania | 1998           | FemaleAge40to44     | 549625     |
| United Republic of Tanzania | 1998           | FemaleAge45to49     | 522324     |
| United Republic of Tanzania | 1998           | FemaleAge50to54     | 463439     |
| United Republic of Tanzania | 1998           | FemaleAge55to59     | 367109     |
| United Republic of Tanzania | 1998           | FemaleAge5to9       | 2391798    |
| United Republic of Tanzania | 1998           | FemaleAge60to64     | 287985     |

Dietary calcium and zinc deficiency risks are decreasing but remain prevalent

| Country                     | Reference year | Age/gender group    | Population |
|-----------------------------|----------------|---------------------|------------|
| United Republic of Tanzania | 1998           | FemaleAge65to69     | 214563     |
| United Republic of Tanzania | 1998           | FemaleAge70to74     | 146550     |
| United Republic of Tanzania | 1998           | FemaleAge75to79     | 87399      |
| United Republic of Tanzania | 1998           | FemaleAge80to84     | 42719      |
| United Republic of Tanzania | 1998           | FemaleAge85to89     | 15730      |
| United Republic of Tanzania | 1998           | FemaleAge90to94     | 4019       |
| United Republic of Tanzania | 1998           | FemaleAge95to99     | 621        |
| United Republic of Tanzania | 1998           | FemaleAgeAbov e100  | 35         |
| United Republic of Tanzania | 1998           | FemaleLactAge15to19 | 233080     |
| United Republic of Tanzania | 1998           | FemaleLactAge20to24 | 396357     |
| United Republic of Tanzania | 1998           | FemaleLactAge25to29 | 303069     |
| United Republic of Tanzania | 1998           | FemaleLactAge30to34 | 208214     |
| United Republic of Tanzania | 1998           | FemaleLactAge35to39 | 124732     |
| United Republic of Tanzania | 1998           | FemaleLactAge40to44 | 56949      |
| United Republic of Tanzania | 1998           | FemaleLactAge45to49 | 13977      |
| United Republic of Tanzania | 1998           | FemalePregAge15to19 | 174810     |
| United Republic of Tanzania | 1998           | FemalePregAge20to24 | 297268     |
| United Republic of Tanzania | 1998           | FemalePregAge25to29 | 227302     |
| United Republic of Tanzania | 1998           | FemalePregAge30to34 | 156161     |
| United Republic of Tanzania | 1998           | FemalePregAge35to39 | 93549      |
| United Republic of Tanzania | 1998           | FemalePregAge40to44 | 42712      |
| United Republic of Tanzania | 1998           | FemalePregAge45to49 | 10482      |
| United Republic of Tanzania | 1998           | MaleAge0to4         | 2841599    |
| United Republic of Tanzania | 1998           | MaleAge10to14       | 2078125    |
| United Republic of Tanzania | 1998           | MaleAge15to19       | 1777758    |
| United Republic of Tanzania | 1998           | MaleAge20to24       | 1486788    |
| United Republic of Tanzania | 1998           | MaleAge25to29       | 1204315    |
| United Republic of Tanzania | 1998           | MaleAge30to34       | 966095     |
| United Republic of Tanzania | 1998           | MaleAge35to39       | 772881     |
| United Republic of Tanzania | 1998           | MaleAge40to44       | 620558     |
| United Republic of Tanzania | 1998           | MaleAge45to49       | 508653     |
| United Republic of Tanzania | 1998           | MaleAge50to54       | 421150     |
| United Republic of Tanzania | 1998           | MaleAge55to59       | 329262     |
| United Republic of Tanzania | 1998           | MaleAge5to9         | 2409529    |
| United Republic of Tanzania | 1998           | MaleAge60to64       | 251556     |
| United Republic of Tanzania | 1998           | MaleAge65to69       | 181282     |
| United Republic of Tanzania | 1998           | MaleAge70to74       | 119382     |
| United Republic of Tanzania | 1998           | MaleAge75to79       | 68000      |
| United Republic of Tanzania | 1998           | MaleAge80to84       | 31031      |
| United Republic of Tanzania | 1998           | MaleAge85to89       | 10318      |
| United Republic of Tanzania | 1998           | MaleAge90to94       | 2233       |
| United Republic of Tanzania | 1998           | MaleAge95to99       | 291        |
| United Republic of Tanzania | 1998           | MaleAgeAbov e100    | 9          |
| United Republic of Tanzania | 1999           | FemaleAge0to4       | 2859529    |
| United Republic of Tanzania | 1999           | FemaleAge10to14     | 2119234    |
| United Republic of Tanzania | 1999           | FemaleAge15to19     | 1410436    |
| United Republic of Tanzania | 1999           | FemaleAge20to24     | 841884     |
| United Republic of Tanzania | 1999           | FemaleAge25to29     | 709928     |
| United Republic of Tanzania | 1999           | FemaleAge30to34     | 622968     |
| United Republic of Tanzania | 1999           | FemaleAge35to39     | 581578     |
| United Republic of Tanzania | 1999           | FemaleAge40to44     | 563898     |
| United Republic of Tanzania | 1999           | FemaleAge45to49     | 529958     |
| United Republic of Tanzania | 1999           | FemaleAge50to54     | 476354     |
| United Republic of Tanzania | 1999           | FemaleAge55to59     | 377777     |
| United Republic of Tanzania | 1999           | FemaleAge5to9       | 2437015    |
| United Republic of Tanzania | 1999           | FemaleAge60to64     | 296483     |
| United Republic of Tanzania | 1999           | FemaleAge65to69     | 221258     |
| United Republic of Tanzania | 1999           | FemaleAge70to74     | 151459     |
| United Republic of Tanzania | 1999           | FemaleAge75to79     | 90325      |
| United Republic of Tanzania | 1999           | FemaleAge80to84     | 43926      |
| United Republic of Tanzania | 1999           | FemaleAge85to89     | 15914      |
| United Republic of Tanzania | 1999           | FemaleAge90to94     | 3989       |
| United Republic of Tanzania | 1999           | FemaleAge95to99     | 640        |
| United Republic of Tanzania | 1999           | FemaleAgeAbov e100  | 37         |
| United Republic of Tanzania | 1999           | FemaleLactAge15to19 | 233080     |
| United Republic of Tanzania | 1999           | FemaleLactAge20to24 | 396357     |
| United Republic of Tanzania | 1999           | FemaleLactAge25to29 | 303069     |
| United Republic of Tanzania | 1999           | FemaleLactAge30to34 | 208214     |
| United Republic of Tanzania | 1999           | FemaleLactAge35to39 | 124732     |
| United Republic of Tanzania | 1999           | FemaleLactAge40to44 | 56949      |
| United Republic of Tanzania | 1999           | FemaleLactAge45to49 | 13977      |
| United Republic of Tanzania | 1999           | FemalePregAge15to19 | 174810     |
| United Republic of Tanzania | 1999           | FemalePregAge20to24 | 297268     |
| United Republic of Tanzania | 1999           | FemalePregAge25to29 | 227302     |
| United Republic of Tanzania | 1999           | FemalePregAge30to34 | 156161     |
| United Republic of Tanzania | 1999           | FemalePregAge35to39 | 93549      |
| United Republic of Tanzania | 1999           | FemalePregAge40to44 | 42712      |
| United Republic of Tanzania | 1999           | FemalePregAge45to49 | 10482      |
| United Republic of Tanzania | 1999           | MaleAge0to4         | 2903602    |
| United Republic of Tanzania | 1999           | MaleAge10to14       | 2130665    |
| United Republic of Tanzania | 1999           | MaleAge15to19       | 1825484    |
| United Republic of Tanzania | 1999           | MaleAge20to24       | 1534753    |
| United Republic of Tanzania | 1999           | MaleAge25to29       | 1243629    |
| United Republic of Tanzania | 1999           | MaleAge30to34       | 995393     |
| United Republic of Tanzania | 1999           | MaleAge35to39       | 792157     |
| United Republic of Tanzania | 1999           | MaleAge40to44       | 635286     |
| United Republic of Tanzania | 1999           | MaleAge45to49       | 516783     |
| United Republic of Tanzania | 1999           | MaleAge50to54       | 432456     |

Dietary calcium and zinc deficiency risks are decreasing but remain prevalent

| Country                     | Reference year | Age/gender group    | Population |
|-----------------------------|----------------|---------------------|------------|
| United Republic of Tanzania | 1999           | MaleAge55to59       | 338803     |
| United Republic of Tanzania | 1999           | MaleAge5to9         | 2456407    |
| United Republic of Tanzania | 1999           | MaleAge60to64       | 259108     |
| United Republic of Tanzania | 1999           | MaleAge65to69       | 186894     |
| United Republic of Tanzania | 1999           | MaleAge70to74       | 123320     |
| United Republic of Tanzania | 1999           | MaleAge75to79       | 70287      |
| United Republic of Tanzania | 1999           | MaleAge80to84       | 31882      |
| United Republic of Tanzania | 1999           | MaleAge85to89       | 10410      |
| United Republic of Tanzania | 1999           | MaleAge90to94       | 2212       |
| United Republic of Tanzania | 1999           | MaleAge95to99       | 301        |
| United Republic of Tanzania | 1999           | MaleAgeAbove100     | 9          |
| United States of America    | 1992           | FemaleAge0to4       | 9495704    |
| United States of America    | 1992           | FemaleAge10to14     | 8899447    |
| United States of America    | 1992           | FemaleAge15to19     | 7859039    |
| United States of America    | 1992           | FemaleAge20to24     | 7498177    |
| United States of America    | 1992           | FemaleAge25to29     | 8401746    |
| United States of America    | 1992           | FemaleAge30to34     | 9719088    |
| United States of America    | 1992           | FemaleAge35to39     | 10142496   |
| United States of America    | 1992           | FemaleAge40to44     | 9590666    |
| United States of America    | 1992           | FemaleAge45to49     | 7942160    |
| United States of America    | 1992           | FemaleAge50to54     | 6321575    |
| United States of America    | 1992           | FemaleAge55to59     | 5582982    |
| United States of America    | 1992           | FemaleAge5to9       | 9290572    |
| United States of America    | 1992           | FemaleAge60to64     | 5594904    |
| United States of America    | 1992           | FemaleAge65to69     | 5593321    |
| United States of America    | 1992           | FemaleAge70to74     | 4848285    |
| United States of America    | 1992           | FemaleAge75to79     | 3814816    |
| United States of America    | 1992           | FemaleAge80to84     | 2748242    |
| United States of America    | 1992           | FemaleAge85to89     | 1572161    |
| United States of America    | 1992           | FemaleAge90to94     | 650164     |
| United States of America    | 1992           | FemaleAge95to99     | 187712     |
| United States of America    | 1992           | FemaleAgeAbove100   | 30836      |
| United States of America    | 1992           | FemaleLactAge15to19 | 533450     |
| United States of America    | 1992           | FemaleLactAge20to24 | 1053489    |
| United States of America    | 1992           | FemaleLactAge25to29 | 1183566    |
| United States of America    | 1992           | FemaleLactAge30to34 | 899281     |
| United States of America    | 1992           | FemaleLactAge35to39 | 353887     |
| United States of America    | 1992           | FemaleLactAge40to44 | 58335      |
| United States of America    | 1992           | FemaleLactAge45to49 | 2173       |
| United States of America    | 1992           | FemalePregAge15to19 | 400088     |
| United States of America    | 1992           | FemalePregAge20to24 | 790117     |
| United States of America    | 1992           | FemalePregAge25to29 | 887675     |
| United States of America    | 1992           | FemalePregAge30to34 | 674461     |
| United States of America    | 1992           | FemalePregAge35to39 | 265415     |
| United States of America    | 1992           | FemalePregAge40to44 | 43751      |
| United States of America    | 1992           | FemalePregAge45to49 | 1630       |
| United States of America    | 1992           | MaleAge0to4         | 9948045    |
| United States of America    | 1992           | MaleAge10to14       | 9367864    |
| United States of America    | 1992           | MaleAge15to19       | 9243208    |
| United States of America    | 1992           | MaleAge20to24       | 9650423    |
| United States of America    | 1992           | MaleAge25to29       | 10587766   |
| United States of America    | 1992           | MaleAge30to34       | 11249130   |
| United States of America    | 1992           | MaleAge35to39       | 10600458   |
| United States of America    | 1992           | MaleAge40to44       | 9385780    |
| United States of America    | 1992           | MaleAge45to49       | 7595104    |
| United States of America    | 1992           | MaleAge50to54       | 5992713    |
| United States of America    | 1992           | MaleAge55to59       | 5222069    |
| United States of America    | 1992           | MaleAge5to9         | 9740699    |
| United States of America    | 1992           | MaleAge60to64       | 4953763    |
| United States of America    | 1992           | MaleAge65to69       | 4588435    |
| United States of America    | 1992           | MaleAge70to74       | 3652977    |
| United States of America    | 1992           | MaleAge75to79       | 2517510    |
| United States of America    | 1992           | MaleAge80to84       | 1481345    |
| United States of America    | 1992           | MaleAge85to89       | 668334     |
| United States of America    | 1992           | MaleAge90to94       | 218780     |
| United States of America    | 1992           | MaleAge95to99       | 49829      |
| United States of America    | 1992           | MaleAgeAbove100     | 6646       |
| United States of America    | 1993           | FemaleAge0to4       | 9557240    |
| United States of America    | 1993           | FemaleAge10to14     | 9084573    |
| United States of America    | 1993           | FemaleAge15to19     | 7898940    |
| United States of America    | 1993           | FemaleAge20to24     | 7378528    |
| United States of America    | 1993           | FemaleAge25to29     | 8219016    |
| United States of America    | 1993           | FemaleAge30to34     | 9700651    |
| United States of America    | 1993           | FemaleAge35to39     | 10378783   |
| United States of America    | 1993           | FemaleAge40to44     | 9766077    |
| United States of America    | 1993           | FemaleAge45to49     | 8345376    |
| United States of America    | 1993           | FemaleAge50to54     | 6537218    |
| United States of America    | 1993           | FemaleAge55to59     | 5640104    |
| United States of America    | 1993           | FemaleAge5to9       | 9393495    |
| United States of America    | 1993           | FemaleAge60to64     | 5495983    |
| United States of America    | 1993           | FemaleAge65to69     | 5551780    |
| United States of America    | 1993           | FemaleAge70to74     | 4929507    |
| United States of America    | 1993           | FemaleAge75to79     | 3850408    |
| United States of America    | 1993           | FemaleAge80to84     | 2769808    |
| United States of America    | 1993           | FemaleAge85to89     | 1639822    |
| United States of America    | 1993           | FemaleAge90to94     | 676032     |
| United States of America    | 1993           | FemaleAge95to99     | 193264     |
| United States of America    | 1993           | FemaleAgeAbove100   | 33167      |

Dietary calcium and zinc deficiency risks are decreasing but remain prevalent

| Country                  | Reference year | Age/gender group    | Population |
|--------------------------|----------------|---------------------|------------|
| United States of America | 1993           | FemaleLactAge15to19 | 533450     |
| United States of America | 1993           | FemaleLactAge20to24 | 1053489    |
| United States of America | 1993           | FemaleLactAge25to29 | 1183566    |
| United States of America | 1993           | FemaleLactAge30to34 | 899281     |
| United States of America | 1993           | FemaleLactAge35to39 | 353887     |
| United States of America | 1993           | FemaleLactAge40to44 | 58335      |
| United States of America | 1993           | FemaleLactAge45to49 | 2173       |
| United States of America | 1993           | FemalePregAge15to19 | 400088     |
| United States of America | 1993           | FemalePregAge20to24 | 790117     |
| United States of America | 1993           | FemalePregAge25to29 | 887675     |
| United States of America | 1993           | FemalePregAge30to34 | 674461     |
| United States of America | 1993           | FemalePregAge35to39 | 265415     |
| United States of America | 1993           | FemalePregAge40to44 | 43751      |
| United States of America | 1993           | FemalePregAge45to49 | 1630       |
| United States of America | 1993           | MaleAge0to4         | 10013724   |
| United States of America | 1993           | MaleAge10to14       | 9563282    |
| United States of America | 1993           | MaleAge15to19       | 9299178    |
| United States of America | 1993           | MaleAge20to24       | 9529664    |
| United States of America | 1993           | MaleAge25to29       | 10416322   |
| United States of America | 1993           | MaleAge30to34       | 11264907   |
| United States of America | 1993           | MaleAge35to39       | 10857263   |
| United States of America | 1993           | MaleAge40to44       | 9581980    |
| United States of America | 1993           | MaleAge45to49       | 7978162    |
| United States of America | 1993           | MaleAge50to54       | 6192985    |
| United States of America | 1993           | MaleAge55to59       | 5272783    |
| United States of America | 1993           | MaleAge5to9         | 9849927    |
| United States of America | 1993           | MaleAge60to64       | 4911091    |
| United States of America | 1993           | MaleAge65to69       | 4579234    |
| United States of America | 1993           | MaleAge70to74       | 3735601    |
| United States of America | 1993           | MaleAge75to79       | 2563652    |
| United States of America | 1993           | MaleAge80to84       | 1509957    |
| United States of America | 1993           | MaleAge85to89       | 698152     |
| United States of America | 1993           | MaleAge90to94       | 226309     |
| United States of America | 1993           | MaleAge95to99       | 52195      |
| United States of America | 1993           | MaleAgeAbov e100    | 6917       |
| United States of America | 1994           | FemaleAge0to4       | 9596788    |
| United States of America | 1994           | FemaleAge10to14     | 9273641    |
| United States of America | 1994           | FemaleAge15to19     | 7988750    |
| United States of America | 1994           | FemaleAge20to24     | 7292420    |
| United States of America | 1994           | FemaleAge25to29     | 8020920    |
| United States of America | 1994           | FemaleAge30to34     | 9672255    |
| United States of America | 1994           | FemaleAge35to39     | 10578358   |
| United States of America | 1994           | FemaleAge40to44     | 9967319    |
| United States of America | 1994           | FemaleAge45to49     | 8712215    |
| United States of America | 1994           | FemaleAge50to54     | 6807940    |
| United States of America | 1994           | FemaleAge55to59     | 5732735    |
| United States of America | 1994           | FemaleAge5to9       | 9464495    |
| United States of America | 1994           | FemaleAge60to64     | 5421724    |
| United States of America | 1994           | FemaleAge65to69     | 5512795    |
| United States of America | 1994           | FemaleAge70to74     | 4988488    |
| United States of America | 1994           | FemaleAge75to79     | 3921146    |
| United States of America | 1994           | FemaleAge80to84     | 2785357    |
| United States of America | 1994           | FemaleAge85to89     | 1699126    |
| United States of America | 1994           | FemaleAge90to94     | 694841     |
| United States of America | 1994           | FemaleAge95to99     | 196490     |
| United States of America | 1994           | FemaleAgeAbov e100  | 35186      |
| United States of America | 1994           | FemaleLactAge15to19 | 533450     |
| United States of America | 1994           | FemaleLactAge20to24 | 1053489    |
| United States of America | 1994           | FemaleLactAge25to29 | 1183566    |
| United States of America | 1994           | FemaleLactAge30to34 | 899281     |
| United States of America | 1994           | FemaleLactAge35to39 | 353887     |
| United States of America | 1994           | FemaleLactAge40to44 | 58335      |
| United States of America | 1994           | FemaleLactAge45to49 | 2173       |
| United States of America | 1994           | FemalePregAge15to19 | 400088     |
| United States of America | 1994           | FemalePregAge20to24 | 790117     |
| United States of America | 1994           | FemalePregAge25to29 | 887675     |
| United States of America | 1994           | FemalePregAge30to34 | 674461     |
| United States of America | 1994           | FemalePregAge35to39 | 265415     |
| United States of America | 1994           | FemalePregAge40to44 | 43751      |
| United States of America | 1994           | FemalePregAge45to49 | 1630       |
| United States of America | 1994           | MaleAge0to4         | 10057446   |
| United States of America | 1994           | MaleAge10to14       | 9755066    |
| United States of America | 1994           | MaleAge15to19       | 9422082    |
| United States of America | 1994           | MaleAge20to24       | 9449156    |
| United States of America | 1994           | MaleAge25to29       | 10215700   |
| United States of America | 1994           | MaleAge30to34       | 11269353   |
| United States of America | 1994           | MaleAge35to39       | 11085534   |
| United States of America | 1994           | MaleAge40to44       | 9806657    |
| United States of America | 1994           | MaleAge45to49       | 8332313    |
| United States of America | 1994           | MaleAge50to54       | 6448605    |
| United States of America | 1994           | MaleAge55to59       | 5353629    |
| United States of America | 1994           | MaleAge5to9         | 9928686    |
| United States of America | 1994           | MaleAge60to64       | 4889612    |
| United States of America | 1994           | MaleAge65to69       | 4573692    |
| United States of America | 1994           | MaleAge70to74       | 3804131    |
| United States of America | 1994           | MaleAge75to79       | 2633998    |
| United States of America | 1994           | MaleAge80to84       | 1528041    |
| United States of America | 1994           | MaleAge85to89       | 718977     |

Dietary calcium and zinc deficiency risks are decreasing but remain prevalent

| Country                  | Reference year | Age/gender group    | Population |
|--------------------------|----------------|---------------------|------------|
| United States of America | 1994           | MaleAge90to94       | 227709     |
| United States of America | 1994           | MaleAge95to99       | 52249      |
| United States of America | 1994           | MaleAgeAbove100     | 7123       |
| United States of America | 1995           | FemaleAge0to4       | 9616724    |
| United States of America | 1995           | FemaleAge10to14     | 9446157    |
| United States of America | 1995           | FemaleAge15to19     | 8124209    |
| United States of America | 1995           | FemaleAge20to24     | 7247046    |
| United States of America | 1995           | FemaleAge25to29     | 7834528    |
| United States of America | 1995           | FemaleAge30to34     | 9623746    |
| United States of America | 1995           | FemaleAge35to39     | 10734889   |
| United States of America | 1995           | FemaleAge40to44     | 10210090   |
| United States of America | 1995           | FemaleAge45to49     | 9032773    |
| United States of America | 1995           | FemaleAge50to54     | 7128812    |
| United States of America | 1995           | FemaleAge55to59     | 5863143    |
| United States of America | 1995           | FemaleAge5to9       | 9518736    |
| United States of America | 1995           | FemaleAge60to64     | 5386894    |
| United States of America | 1995           | FemaleAge65to69     | 5473745    |
| United States of America | 1995           | FemaleAge70to74     | 5027568    |
| United States of America | 1995           | FemaleAge75to79     | 4017651    |
| United States of America | 1995           | FemaleAge80to84     | 2811971    |
| United States of America | 1995           | FemaleAge85to89     | 1743302    |
| United States of America | 1995           | FemaleAge90to94     | 712138     |
| United States of America | 1995           | FemaleAge95to99     | 190415     |
| United States of America | 1995           | FemaleAgeAbove100   | 36696      |
| United States of America | 1995           | FemaleLactAge15to19 | 533450     |
| United States of America | 1995           | FemaleLactAge20to24 | 1053489    |
| United States of America | 1995           | FemaleLactAge25to29 | 1183566    |
| United States of America | 1995           | FemaleLactAge30to34 | 899281     |
| United States of America | 1995           | FemaleLactAge35to39 | 353887     |
| United States of America | 1995           | FemaleLactAge40to44 | 58335      |
| United States of America | 1995           | FemaleLactAge45to49 | 2173       |
| United States of America | 1995           | FemalePregAge15to19 | 400088     |
| United States of America | 1995           | FemalePregAge20to24 | 790117     |
| United States of America | 1995           | FemalePregAge25to29 | 887675     |
| United States of America | 1995           | FemalePregAge30to34 | 674461     |
| United States of America | 1995           | FemalePregAge35to39 | 265415     |
| United States of America | 1995           | FemalePregAge40to44 | 43751      |
| United States of America | 1995           | FemalePregAge45to49 | 1630       |
| United States of America | 1995           | MaleAge0to4         | 10080674   |
| United States of America | 1995           | MaleAge10to14       | 9928056    |
| United States of America | 1995           | MaleAge15to19       | 9596305    |
| United States of America | 1995           | MaleAge20to24       | 9420203    |
| United States of America | 1995           | MaleAge25to29       | 10020442   |
| United States of America | 1995           | MaleAge30to34       | 11245237   |
| United States of America | 1995           | MaleAge35to39       | 11277045   |
| United States of America | 1995           | MaleAge40to44       | 10073917   |
| United States of America | 1995           | MaleAge45to49       | 8650031    |
| United States of America | 1995           | MaleAge50to54       | 6753152    |
| United States of America | 1995           | MaleAge55to59       | 5472219    |
| United States of America | 1995           | MaleAge5to9         | 9990479    |
| United States of America | 1995           | MaleAge60to64       | 4895249    |
| United States of America | 1995           | MaleAge65to69       | 4573104    |
| United States of America | 1995           | MaleAge70to74       | 3859422    |
| United States of America | 1995           | MaleAge75to79       | 2722518    |
| United States of America | 1995           | MaleAge80to84       | 1548102    |
| United States of America | 1995           | MaleAge85to89       | 728106     |
| United States of America | 1995           | MaleAge90to94       | 223453     |
| United States of America | 1995           | MaleAge95to99       | 46154      |
| United States of America | 1995           | MaleAgeAbove100     | 7237       |
| United States of America | 1996           | FemaleAge0to4       | 9687501    |
| United States of America | 1996           | FemaleAge10to14     | 9586289    |
| United States of America | 1996           | FemaleAge15to19     | 8351160    |
| United States of America | 1996           | FemaleAge20to24     | 7370461    |
| United States of America | 1996           | FemaleAge25to29     | 7879139    |
| United States of America | 1996           | FemaleAge30to34     | 9443095    |
| United States of America | 1996           | FemaleAge35to39     | 10716074   |
| United States of America | 1996           | FemaleAge40to44     | 10421857   |
| United States of America | 1996           | FemaleAge45to49     | 9360176    |
| United States of America | 1996           | FemaleAge50to54     | 7472933    |
| United States of America | 1996           | FemaleAge55to59     | 6028244    |
| United States of America | 1996           | FemaleAge5to9       | 9637693    |
| United States of America | 1996           | FemaleAge60to64     | 5379376    |
| United States of America | 1996           | FemaleAge65to69     | 5385085    |
| United States of America | 1996           | FemaleAge70to74     | 5044218    |
| United States of America | 1996           | FemaleAge75to79     | 4083193    |
| United States of America | 1996           | FemaleAge80to84     | 2853018    |
| United States of America | 1996           | FemaleAge85to89     | 1768236    |
| United States of America | 1996           | FemaleAge90to94     | 771076     |
| United States of America | 1996           | FemaleAge95to99     | 199198     |
| United States of America | 1996           | FemaleAgeAbove100   | 37625      |
| United States of America | 1996           | FemaleLactAge15to19 | 487428     |
| United States of America | 1996           | FemaleLactAge20to24 | 1006979    |
| United States of America | 1996           | FemaleLactAge25to29 | 1080004    |
| United States of America | 1996           | FemaleLactAge30to34 | 916757     |
| United States of America | 1996           | FemaleLactAge35to39 | 417201     |
| United States of America | 1996           | FemaleLactAge40to44 | 78393      |
| United States of America | 1996           | FemaleLactAge45to49 | 3561       |
| United States of America | 1996           | FemalePregAge15to19 | 365571     |

Dietary calcium and zinc deficiency risks are decreasing but remain prevalent

| Country                  | Reference year | Age/gender group    | Population |
|--------------------------|----------------|---------------------|------------|
| United States of America | 1996           | FemalePregAge20to24 | 755235     |
| United States of America | 1996           | FemalePregAge25to29 | 810003     |
| United States of America | 1996           | FemalePregAge30to34 | 687567     |
| United States of America | 1996           | FemalePregAge35to39 | 312901     |
| United States of America | 1996           | FemalePregAge40to44 | 58794      |
| United States of America | 1996           | FemalePregAge45to49 | 2670       |
| United States of America | 1996           | MaleAge0to4         | 10151782   |
| United States of America | 1996           | MaleAge10to14       | 10081295   |
| United States of America | 1996           | MaleAge15to19       | 9738852    |
| United States of America | 1996           | MaleAge20to24       | 9489071    |
| United States of America | 1996           | MaleAge25to29       | 9914129    |
| United States of America | 1996           | MaleAge30to34       | 11090428   |
| United States of America | 1996           | MaleAge35to39       | 11378215   |
| United States of America | 1996           | MaleAge40to44       | 10339264   |
| United States of America | 1996           | MaleAge45to49       | 8984167    |
| United States of America | 1996           | MaleAge50to54       | 7072685    |
| United States of America | 1996           | MaleAge55to59       | 5622091    |
| United States of America | 1996           | MaleAge5to9         | 10115923   |
| United States of America | 1996           | MaleAge60to64       | 4902233    |
| United States of America | 1996           | MaleAge65to69       | 4535994    |
| United States of America | 1996           | MaleAge70to74       | 3886462    |
| United States of America | 1996           | MaleAge75to79       | 2791694    |
| United States of America | 1996           | MaleAge80to84       | 1608201    |
| United States of America | 1996           | MaleAge85to89       | 762228     |
| United States of America | 1996           | MaleAge90to94       | 252405     |
| United States of America | 1996           | MaleAge95to99       | 48467      |
| United States of America | 1996           | MaleAgeAbov e100    | 7250       |
| United States of America | 1997           | FemaleAge0to4       | 9663501    |
| United States of America | 1997           | FemaleAge10to14     | 9722301    |
| United States of America | 1997           | FemaleAge15to19     | 8528397    |
| United States of America | 1997           | FemaleAge20to24     | 7443222    |
| United States of America | 1997           | FemaleAge25to29     | 7800363    |
| United States of America | 1997           | FemaleAge30to34     | 9264170    |
| United States of America | 1997           | FemaleAge35to39     | 10779743   |
| United States of America | 1997           | FemaleAge40to44     | 10681098   |
| United States of America | 1997           | FemaleAge45to49     | 9648918    |
| United States of America | 1997           | FemaleAge50to54     | 7878163    |
| United States of America | 1997           | FemaleAge55to59     | 6227199    |
| United States of America | 1997           | FemaleAge5to9       | 9767130    |
| United States of America | 1997           | FemaleAge60to64     | 5421209    |
| United States of America | 1997           | FemaleAge65to69     | 5296025    |
| United States of America | 1997           | FemaleAge70to74     | 5054165    |
| United States of America | 1997           | FemaleAge75to79     | 4162255    |
| United States of America | 1997           | FemaleAge80to84     | 2912118    |
| United States of America | 1997           | FemaleAge85to89     | 1777904    |
| United States of America | 1997           | FemaleAge90to94     | 820282     |
| United States of America | 1997           | FemaleAge95to99     | 212456     |
| United States of America | 1997           | FemaleAgeAbov e100  | 38061      |
| United States of America | 1997           | FemaleLactAge15to19 | 487428     |
| United States of America | 1997           | FemaleLactAge20to24 | 1006979    |
| United States of America | 1997           | FemaleLactAge25to29 | 1080004    |
| United States of America | 1997           | FemaleLactAge30to34 | 916757     |
| United States of America | 1997           | FemaleLactAge35to39 | 417201     |
| United States of America | 1997           | FemaleLactAge40to44 | 78393      |
| United States of America | 1997           | FemaleLactAge45to49 | 3561       |
| United States of America | 1997           | FemalePregAge15to19 | 365571     |
| United States of America | 1997           | FemalePregAge20to24 | 755235     |
| United States of America | 1997           | FemalePregAge25to29 | 810003     |
| United States of America | 1997           | FemalePregAge30to34 | 687567     |
| United States of America | 1997           | FemalePregAge35to39 | 312901     |
| United States of America | 1997           | FemalePregAge40to44 | 58794      |
| United States of America | 1997           | FemalePregAge45to49 | 2670       |
| United States of America | 1997           | MaleAge0to4         | 10125832   |
| United States of America | 1997           | MaleAge10to14       | 10233420   |
| United States of America | 1997           | MaleAge15to19       | 9915518    |
| United States of America | 1997           | MaleAge20to24       | 9589454    |
| United States of America | 1997           | MaleAge25to29       | 9866559    |
| United States of America | 1997           | MaleAge30to34       | 10914781   |
| United States of America | 1997           | MaleAge35to39       | 11447680   |
| United States of America | 1997           | MaleAge40to44       | 10615974   |
| United States of America | 1997           | MaleAge45to49       | 9287187    |
| United States of America | 1997           | MaleAge50to54       | 7454393    |
| United States of America | 1997           | MaleAge55to59       | 5805975    |
| United States of America | 1997           | MaleAge5to9         | 10251781   |
| United States of America | 1997           | MaleAge60to64       | 4944228    |
| United States of America | 1997           | MaleAge65to69       | 4505919    |
| United States of America | 1997           | MaleAge70to74       | 3910068    |
| United States of America | 1997           | MaleAge75to79       | 2865121    |
| United States of America | 1997           | MaleAge80to84       | 1671165    |
| United States of America | 1997           | MaleAge85to89       | 784813     |
| United States of America | 1997           | MaleAge90to94       | 275057     |
| United States of America | 1997           | MaleAge95to99       | 52627      |
| United States of America | 1997           | MaleAgeAbov e100    | 7180       |
| United States of America | 1998           | FemaleAge0to4       | 9588865    |
| United States of America | 1998           | FemaleAge10to14     | 9852732    |
| United States of America | 1998           | FemaleAge15to19     | 8723921    |
| United States of America | 1998           | FemaleAge20to24     | 7531837    |
| United States of America | 1998           | FemaleAge25to29     | 7770725    |

Dietary calcium and zinc deficiency risks are decreasing but remain prevalent

| Country                  | Reference year | Age/gender group    | Population |
|--------------------------|----------------|---------------------|------------|
| United States of America | 1998           | FemaleAge30to34     | 9072166    |
| United States of America | 1998           | FemaleAge35to39     | 10806872   |
| United States of America | 1998           | FemaleAge40to44     | 10931941   |
| United States of America | 1998           | FemaleAge45to49     | 9899247    |
| United States of America | 1998           | FemaleAge50to54     | 8321452    |
| United States of America | 1998           | FemaleAge55to59     | 6458346    |
| United States of America | 1998           | FemaleAge5to9       | 9892967    |
| United States of America | 1998           | FemaleAge60to64     | 5504652    |
| United States of America | 1998           | FemaleAge65to69     | 5221512    |
| United States of America | 1998           | FemaleAge70to74     | 5048816    |
| United States of America | 1998           | FemaleAge75to79     | 4247903    |
| United States of America | 1998           | FemaleAge80to84     | 2987228    |
| United States of America | 1998           | FemaleAge85to89     | 1785090    |
| United States of America | 1998           | FemaleAge90to94     | 851361     |
| United States of America | 1998           | FemaleAge95to99     | 226470     |
| United States of America | 1998           | FemaleAgeAbove100   | 38169      |
| United States of America | 1998           | FemaleLactAge15to19 | 487428     |
| United States of America | 1998           | FemaleLactAge20to24 | 1006979    |
| United States of America | 1998           | FemaleLactAge25to29 | 1080004    |
| United States of America | 1998           | FemaleLactAge30to34 | 916757     |
| United States of America | 1998           | FemaleLactAge35to39 | 417201     |
| United States of America | 1998           | FemaleLactAge40to44 | 78393      |
| United States of America | 1998           | FemaleLactAge45to49 | 3561       |
| United States of America | 1998           | FemalePregAge15to19 | 365571     |
| United States of America | 1998           | FemalePregAge20to24 | 755235     |
| United States of America | 1998           | FemalePregAge25to29 | 810003     |
| United States of America | 1998           | FemalePregAge30to34 | 687567     |
| United States of America | 1998           | FemalePregAge35to39 | 312901     |
| United States of America | 1998           | FemalePregAge40to44 | 58794      |
| United States of America | 1998           | FemalePregAge45to49 | 2670       |
| United States of America | 1998           | MaleAge0to4         | 10047773   |
| United States of America | 1998           | MaleAge10to14       | 10373613   |
| United States of America | 1998           | MaleAge15to19       | 10120749   |
| United States of America | 1998           | MaleAge20to24       | 9705006    |
| United States of America | 1998           | MaleAge25to29       | 9860844    |
| United States of America | 1998           | MaleAge30to34       | 10739073   |
| United States of America | 1998           | MaleAge35to39       | 11475669   |
| United States of America | 1998           | MaleAge40to44       | 10882142   |
| United States of America | 1998           | MaleAge45to49       | 9557316    |
| United States of America | 1998           | MaleAge50to54       | 7878974    |
| United States of America | 1998           | MaleAge55to59       | 6020014    |
| United States of America | 1998           | MaleAge5to9         | 10384740   |
| United States of America | 1998           | MaleAge60to64       | 5019756    |
| United States of America | 1998           | MaleAge65to69       | 4488681    |
| United States of America | 1998           | MaleAge70to74       | 3927193    |
| United States of America | 1998           | MaleAge75to79       | 2940557    |
| United States of America | 1998           | MaleAge80to84       | 1735152    |
| United States of America | 1998           | MaleAge85to89       | 799636     |
| United States of America | 1998           | MaleAge90to94       | 287067     |
| United States of America | 1998           | MaleAge95to99       | 57257      |
| United States of America | 1998           | MaleAgeAbove100     | 7060       |
| United States of America | 1999           | FemaleAge0to4       | 9525106    |
| United States of America | 1999           | FemaleAge10to14     | 9978240    |
| United States of America | 1999           | FemaleAge15to19     | 8913650    |
| United States of America | 1999           | FemaleAge20to24     | 7628402    |
| United States of America | 1999           | FemaleAge25to29     | 7769561    |
| United States of America | 1999           | FemaleAge30to34     | 8892959    |
| United States of America | 1999           | FemaleAge35to39     | 10784687   |
| United States of America | 1999           | FemaleAge40to44     | 11141294   |
| United States of America | 1999           | FemaleAge45to49     | 10131226   |
| United States of America | 1999           | FemaleAge50to54     | 8754650    |
| United States of America | 1999           | FemaleAge55to59     | 6727327    |
| United States of America | 1999           | FemaleAge5to9       | 9992853    |
| United States of America | 1999           | FemaleAge60to64     | 5619017    |
| United States of America | 1999           | FemaleAge65to69     | 5176640    |
| United States of America | 1999           | FemaleAge70to74     | 5023515    |
| United States of America | 1999           | FemaleAge75to79     | 4327244    |
| United States of America | 1999           | FemaleAge80to84     | 3073114    |
| United States of America | 1999           | FemaleAge85to89     | 1802026    |
| United States of America | 1999           | FemaleAge90to94     | 858785     |
| United States of America | 1999           | FemaleAge95to99     | 234646     |
| United States of America | 1999           | FemaleAgeAbove100   | 38194      |
| United States of America | 1999           | FemaleLactAge15to19 | 487428     |
| United States of America | 1999           | FemaleLactAge20to24 | 1006979    |
| United States of America | 1999           | FemaleLactAge25to29 | 1080004    |
| United States of America | 1999           | FemaleLactAge30to34 | 916757     |
| United States of America | 1999           | FemaleLactAge35to39 | 417201     |
| United States of America | 1999           | FemaleLactAge40to44 | 78393      |
| United States of America | 1999           | FemaleLactAge45to49 | 3561       |
| United States of America | 1999           | FemalePregAge15to19 | 365571     |
| United States of America | 1999           | FemalePregAge20to24 | 755235     |
| United States of America | 1999           | FemalePregAge25to29 | 810003     |
| United States of America | 1999           | FemalePregAge30to34 | 687567     |
| United States of America | 1999           | FemalePregAge35to39 | 312901     |
| United States of America | 1999           | FemalePregAge40to44 | 58794      |
| United States of America | 1999           | FemalePregAge45to49 | 2670       |
| United States of America | 1999           | MaleAge0to4         | 9979891    |
| United States of America | 1999           | MaleAge10to14       | 10499651   |

Dietary calcium and zinc deficiency risks are decreasing but remain prevalent

| Country                  | Reference year | Age/gender group    | Population |
|--------------------------|----------------|---------------------|------------|
| United States of America | 1999           | MaleAge15to19       | 10330659   |
| United States of America | 1999           | MaleAge20to24       | 9824887    |
| United States of America | 1999           | MaleAge25to29       | 9874879    |
| United States of America | 1999           | MaleAge30to34       | 10586528   |
| United States of America | 1999           | MaleAge35to39       | 11451510   |
| United States of America | 1999           | MaleAge40to44       | 11102763   |
| United States of America | 1999           | MaleAge45to49       | 9808803    |
| United States of America | 1999           | MaleAge50to54       | 8301514    |
| United States of America | 1999           | MaleAge55to59       | 6268903    |
| United States of America | 1999           | MaleAge5to9         | 10490323   |
| United States of America | 1999           | MaleAge60to64       | 5124725    |
| United States of America | 1999           | MaleAge65to69       | 4489660    |
| United States of America | 1999           | MaleAge70to74       | 3936026    |
| United States of America | 1999           | MaleAge75to79       | 3010384    |
| United States of America | 1999           | MaleAge80to84       | 1797549    |
| United States of America | 1999           | MaleAge85to89       | 812136     |
| United States of America | 1999           | MaleAge90to94       | 285909     |
| United States of America | 1999           | MaleAge95to99       | 59295      |
| United States of America | 1999           | MaleAgeAbov e100    | 6936       |
| Uruguay                  | 1992           | FemaleAge0to4       | 137693     |
| Uruguay                  | 1992           | FemaleAge10to14     | 132935     |
| Uruguay                  | 1992           | FemaleAge15to19     | 115952     |
| Uruguay                  | 1992           | FemaleAge20to24     | 91959      |
| Uruguay                  | 1992           | FemaleAge25to29     | 86892      |
| Uruguay                  | 1992           | FemaleAge30to34     | 92365      |
| Uruguay                  | 1992           | FemaleAge35to39     | 92281      |
| Uruguay                  | 1992           | FemaleAge40to44     | 90827      |
| Uruguay                  | 1992           | FemaleAge45to49     | 87486      |
| Uruguay                  | 1992           | FemaleAge50to54     | 82919      |
| Uruguay                  | 1992           | FemaleAge55to59     | 83042      |
| Uruguay                  | 1992           | FemaleAge5to9       | 126076     |
| Uruguay                  | 1992           | FemaleAge60to64     | 81880      |
| Uruguay                  | 1992           | FemaleAge65to69     | 71890      |
| Uruguay                  | 1992           | FemaleAge70to74     | 55515      |
| Uruguay                  | 1992           | FemaleAge75to79     | 44185      |
| Uruguay                  | 1992           | FemaleAge80to84     | 29404      |
| Uruguay                  | 1992           | FemaleAge85to89     | 14476      |
| Uruguay                  | 1992           | FemaleAge90to94     | 5755       |
| Uruguay                  | 1992           | FemaleAge95to99     | 1394       |
| Uruguay                  | 1992           | FemaleAgeAbov e100  | 238        |
| Uruguay                  | 1992           | FemaleLactAge15to19 | 9263       |
| Uruguay                  | 1992           | FemaleLactAge20to24 | 14859      |
| Uruguay                  | 1992           | FemaleLactAge25to29 | 15211      |
| Uruguay                  | 1992           | FemaleLactAge30to34 | 11309      |
| Uruguay                  | 1992           | FemaleLactAge35to39 | 5346       |
| Uruguay                  | 1992           | FemaleLactAge40to44 | 1461       |
| Uruguay                  | 1992           | FemaleLactAge45to49 | 80         |
| Uruguay                  | 1992           | FemalePregAge15to19 | 6947       |
| Uruguay                  | 1992           | FemalePregAge20to24 | 11144      |
| Uruguay                  | 1992           | FemalePregAge25to29 | 11408      |
| Uruguay                  | 1992           | FemalePregAge30to34 | 8482       |
| Uruguay                  | 1992           | FemalePregAge35to39 | 4009       |
| Uruguay                  | 1992           | FemalePregAge40to44 | 1096       |
| Uruguay                  | 1992           | FemalePregAge45to49 | 60         |
| Uruguay                  | 1992           | MaleAge0to4         | 143566     |
| Uruguay                  | 1992           | MaleAge10to14       | 137787     |
| Uruguay                  | 1992           | MaleAge15to19       | 137137     |
| Uruguay                  | 1992           | MaleAge20to24       | 119511     |
| Uruguay                  | 1992           | MaleAge25to29       | 110316     |
| Uruguay                  | 1992           | MaleAge30to34       | 106432     |
| Uruguay                  | 1992           | MaleAge35to39       | 97064      |
| Uruguay                  | 1992           | MaleAge40to44       | 88180      |
| Uruguay                  | 1992           | MaleAge45to49       | 81914      |
| Uruguay                  | 1992           | MaleAge50to54       | 75258      |
| Uruguay                  | 1992           | MaleAge55to59       | 74459      |
| Uruguay                  | 1992           | MaleAge5to9         | 131397     |
| Uruguay                  | 1992           | MaleAge60to64       | 70739      |
| Uruguay                  | 1992           | MaleAge65to69       | 58045      |
| Uruguay                  | 1992           | MaleAge70to74       | 41295      |
| Uruguay                  | 1992           | MaleAge75to79       | 28500      |
| Uruguay                  | 1992           | MaleAge80to84       | 16807      |
| Uruguay                  | 1992           | MaleAge85to89       | 7316       |
| Uruguay                  | 1992           | MaleAge90to94       | 2495       |
| Uruguay                  | 1992           | MaleAge95to99       | 519        |
| Uruguay                  | 1992           | MaleAgeAbov e100    | 82         |
| Uruguay                  | 1993           | FemaleAge0to4       | 137821     |
| Uruguay                  | 1993           | FemaleAge10to14     | 130183     |
| Uruguay                  | 1993           | FemaleAge15to19     | 117849     |
| Uruguay                  | 1993           | FemaleAge20to24     | 94720      |
| Uruguay                  | 1993           | FemaleAge25to29     | 86048      |
| Uruguay                  | 1993           | FemaleAge30to34     | 93167      |
| Uruguay                  | 1993           | FemaleAge35to39     | 94798      |
| Uruguay                  | 1993           | FemaleAge40to44     | 91441      |
| Uruguay                  | 1993           | FemaleAge45to49     | 88547      |
| Uruguay                  | 1993           | FemaleAge50to54     | 83135      |
| Uruguay                  | 1993           | FemaleAge55to59     | 82118      |
| Uruguay                  | 1993           | FemaleAge5to9       | 127425     |
| Uruguay                  | 1993           | FemaleAge60to64     | 81822      |



Dietary calcium and zinc deficiency risks are decreasing but remain prevalent

| Country | Reference year | Age/gender group    | Population |
|---------|----------------|---------------------|------------|
| Uruguay | 1993           | FemaleAge65to69     | 73499      |
| Uruguay | 1993           | FemaleAge70to74     | 57475      |
| Uruguay | 1993           | FemaleAge75to79     | 43740      |
| Uruguay | 1993           | FemaleAge80to84     | 30985      |
| Uruguay | 1993           | FemaleAge85to89     | 14810      |
| Uruguay | 1993           | FemaleAge90to94     | 6046       |
| Uruguay | 1993           | FemaleAge95to99     | 1525       |
| Uruguay | 1993           | FemaleAgeAbov e100  | 254        |
| Uruguay | 1993           | FemaleLactAge15to19 | 9263       |
| Uruguay | 1993           | FemaleLactAge20to24 | 14859      |
| Uruguay | 1993           | FemaleLactAge25to29 | 15211      |
| Uruguay | 1993           | FemaleLactAge30to34 | 11309      |
| Uruguay | 1993           | FemaleLactAge35to39 | 5346       |
| Uruguay | 1993           | FemaleLactAge40to44 | 1461       |
| Uruguay | 1993           | FemaleLactAge45to49 | 80         |
| Uruguay | 1993           | FemalePregAge15to19 | 6947       |
| Uruguay | 1993           | FemalePregAge20to24 | 11144      |
| Uruguay | 1993           | FemalePregAge25to29 | 11408      |
| Uruguay | 1993           | FemalePregAge30to34 | 8482       |
| Uruguay | 1993           | FemalePregAge35to39 | 4009       |
| Uruguay | 1993           | FemalePregAge40to44 | 1096       |
| Uruguay | 1993           | FemalePregAge45to49 | 60         |
| Uruguay | 1993           | MaleAge0to4         | 143775     |
| Uruguay | 1993           | MaleAge10to14       | 135125     |
| Uruguay | 1993           | MaleAge15to19       | 138927     |
| Uruguay | 1993           | MaleAge20to24       | 123330     |
| Uruguay | 1993           | MaleAge25to29       | 110097     |
| Uruguay | 1993           | MaleAge30to34       | 107490     |
| Uruguay | 1993           | MaleAge35to39       | 98953      |
| Uruguay | 1993           | MaleAge40to44       | 89284      |
| Uruguay | 1993           | MaleAge45to49       | 82545      |
| Uruguay | 1993           | MaleAge50to54       | 75945      |
| Uruguay | 1993           | MaleAge55to59       | 72766      |
| Uruguay | 1993           | MaleAge5to9         | 132870     |
| Uruguay | 1993           | MaleAge60to64       | 70868      |
| Uruguay | 1993           | MaleAge65to69       | 58974      |
| Uruguay | 1993           | MaleAge70to74       | 42543      |
| Uruguay | 1993           | MaleAge75to79       | 28184      |
| Uruguay | 1993           | MaleAge80to84       | 17374      |
| Uruguay | 1993           | MaleAge85to89       | 7448       |
| Uruguay | 1993           | MaleAge90to94       | 2626       |
| Uruguay | 1993           | MaleAge95to99       | 574        |
| Uruguay | 1993           | MaleAgeAbov e100    | 87         |
| Uruguay | 1994           | FemaleAge0to4       | 137447     |
| Uruguay | 1994           | FemaleAge10to14     | 127654     |
| Uruguay | 1994           | FemaleAge15to19     | 118900     |
| Uruguay | 1994           | FemaleAge20to24     | 97587      |
| Uruguay | 1994           | FemaleAge25to29     | 85687      |
| Uruguay | 1994           | FemaleAge30to34     | 93581      |
| Uruguay | 1994           | FemaleAge35to39     | 97125      |
| Uruguay | 1994           | FemaleAge40to44     | 92373      |
| Uruguay | 1994           | FemaleAge45to49     | 89588      |
| Uruguay | 1994           | FemaleAge50to54     | 83556      |
| Uruguay | 1994           | FemaleAge55to59     | 81354      |
| Uruguay | 1994           | FemaleAge5to9       | 129462     |
| Uruguay | 1994           | FemaleAge60to64     | 81574      |
| Uruguay | 1994           | FemaleAge65to69     | 74900      |
| Uruguay | 1994           | FemaleAge70to74     | 59544      |
| Uruguay | 1994           | FemaleAge75to79     | 43784      |
| Uruguay | 1994           | FemaleAge80to84     | 32229      |
| Uruguay | 1994           | FemaleAge85to89     | 15233      |
| Uruguay | 1994           | FemaleAge90to94     | 6168       |
| Uruguay | 1994           | FemaleAge95to99     | 1613       |
| Uruguay | 1994           | FemaleAgeAbov e100  | 271        |
| Uruguay | 1994           | FemaleLactAge15to19 | 9263       |
| Uruguay | 1994           | FemaleLactAge20to24 | 14859      |
| Uruguay | 1994           | FemaleLactAge25to29 | 15211      |
| Uruguay | 1994           | FemaleLactAge30to34 | 11309      |
| Uruguay | 1994           | FemaleLactAge35to39 | 5346       |
| Uruguay | 1994           | FemaleLactAge40to44 | 1461       |
| Uruguay | 1994           | FemaleLactAge45to49 | 80         |
| Uruguay | 1994           | FemalePregAge15to19 | 6947       |
| Uruguay | 1994           | FemalePregAge20to24 | 11144      |
| Uruguay | 1994           | FemalePregAge25to29 | 11408      |
| Uruguay | 1994           | FemalePregAge30to34 | 8482       |
| Uruguay | 1994           | FemalePregAge35to39 | 4009       |
| Uruguay | 1994           | FemalePregAge40to44 | 1096       |
| Uruguay | 1994           | FemalePregAge45to49 | 60         |
| Uruguay | 1994           | MaleAge0to4         | 143490     |
| Uruguay | 1994           | MaleAge10to14       | 132721     |
| Uruguay | 1994           | MaleAge15to19       | 139878     |
| Uruguay | 1994           | MaleAge20to24       | 127111     |
| Uruguay | 1994           | MaleAge25to29       | 110475     |
| Uruguay | 1994           | MaleAge30to34       | 108283     |
| Uruguay | 1994           | MaleAge35to39       | 100741     |
| Uruguay | 1994           | MaleAge40to44       | 90585      |
| Uruguay | 1994           | MaleAge45to49       | 83304      |
| Uruguay | 1994           | MaleAge50to54       | 76784      |

Dietary calcium and zinc deficiency risks are decreasing but remain prevalent

| Country | Reference year | Age/gender group    | Population |
|---------|----------------|---------------------|------------|
| Uruguay | 1994           | MaleAge55to59       | 71472      |
| Uruguay | 1994           | MaleAge5to9         | 135052     |
| Uruguay | 1994           | MaleAge60to64       | 70729      |
| Uruguay | 1994           | MaleAge65to69       | 59844      |
| Uruguay | 1994           | MaleAge70to74       | 43818      |
| Uruguay | 1994           | MaleAge75to79       | 28164      |
| Uruguay | 1994           | MaleAge80to84       | 17632      |
| Uruguay | 1994           | MaleAge85to89       | 7510       |
| Uruguay | 1994           | MaleAge90to94       | 2642       |
| Uruguay | 1994           | MaleAge95to99       | 604        |
| Uruguay | 1994           | MaleAgeAbov e100    | 92         |
| Uruguay | 1995           | FemaleAge0to4       | 137248     |
| Uruguay | 1995           | FemaleAge10to14     | 126145     |
| Uruguay | 1995           | FemaleAge15to19     | 118851     |
| Uruguay | 1995           | FemaleAge20to24     | 100186     |
| Uruguay | 1995           | FemaleAge25to29     | 86175      |
| Uruguay | 1995           | FemaleAge30to34     | 93592      |
| Uruguay | 1995           | FemaleAge35to39     | 98988      |
| Uruguay | 1995           | FemaleAge40to44     | 93774      |
| Uruguay | 1995           | FemaleAge45to49     | 90499      |
| Uruguay | 1995           | FemaleAge50to54     | 84128      |
| Uruguay | 1995           | FemaleAge55to59     | 80849      |
| Uruguay | 1995           | FemaleAge5to9       | 131186     |
| Uruguay | 1995           | FemaleAge60to64     | 81170      |
| Uruguay | 1995           | FemaleAge65to69     | 75997      |
| Uruguay | 1995           | FemaleAge70to74     | 61548      |
| Uruguay | 1995           | FemaleAge75to79     | 44557      |
| Uruguay | 1995           | FemaleAge80to84     | 32989      |
| Uruguay | 1995           | FemaleAge85to89     | 15856      |
| Uruguay | 1995           | FemaleAge90to94     | 6130       |
| Uruguay | 1995           | FemaleAge95to99     | 1576       |
| Uruguay | 1995           | FemaleAgeAbov e100  | 290        |
| Uruguay | 1995           | FemaleLactAge15to19 | 9263       |
| Uruguay | 1995           | FemaleLactAge20to24 | 14859      |
| Uruguay | 1995           | FemaleLactAge25to29 | 15211      |
| Uruguay | 1995           | FemaleLactAge30to34 | 11309      |
| Uruguay | 1995           | FemaleLactAge35to39 | 5346       |
| Uruguay | 1995           | FemaleLactAge40to44 | 1461       |
| Uruguay | 1995           | FemaleLactAge45to49 | 80         |
| Uruguay | 1995           | FemalePregAge15to19 | 6947       |
| Uruguay | 1995           | FemalePregAge20to24 | 11144      |
| Uruguay | 1995           | FemalePregAge25to29 | 11408      |
| Uruguay | 1995           | FemalePregAge30to34 | 8482       |
| Uruguay | 1995           | FemalePregAge35to39 | 4009       |
| Uruguay | 1995           | FemalePregAge40to44 | 1096       |
| Uruguay | 1995           | FemalePregAge45to49 | 60         |
| Uruguay | 1995           | MaleAge0to4         | 143362     |
| Uruguay | 1995           | MaleAge10to14       | 131332     |
| Uruguay | 1995           | MaleAge15to19       | 139811     |
| Uruguay | 1995           | MaleAge20to24       | 130364     |
| Uruguay | 1995           | MaleAge25to29       | 111815     |
| Uruguay | 1995           | MaleAge30to34       | 108733     |
| Uruguay | 1995           | MaleAge35to39       | 102291     |
| Uruguay | 1995           | MaleAge40to44       | 92067      |
| Uruguay | 1995           | MaleAge45to49       | 84201      |
| Uruguay | 1995           | MaleAge50to54       | 77559      |
| Uruguay | 1995           | MaleAge55to59       | 70808      |
| Uruguay | 1995           | MaleAge5to9         | 136911     |
| Uruguay | 1995           | MaleAge60to64       | 70240      |
| Uruguay | 1995           | MaleAge65to69       | 60624      |
| Uruguay | 1995           | MaleAge70to74       | 45022      |
| Uruguay | 1995           | MaleAge75to79       | 28552      |
| Uruguay | 1995           | MaleAge80to84       | 17576      |
| Uruguay | 1995           | MaleAge85to89       | 7519       |
| Uruguay | 1995           | MaleAge90to94       | 2522       |
| Uruguay | 1995           | MaleAge95to99       | 568        |
| Uruguay | 1995           | MaleAgeAbov e100    | 98         |
| Uruguay | 1996           | FemaleAge0to4       | 137125     |
| Uruguay | 1996           | FemaleAge10to14     | 125773     |
| Uruguay | 1996           | FemaleAge15to19     | 118652     |
| Uruguay | 1996           | FemaleAge20to24     | 101603     |
| Uruguay | 1996           | FemaleAge25to29     | 88280      |
| Uruguay | 1996           | FemaleAge30to34     | 95127      |
| Uruguay | 1996           | FemaleAge35to39     | 101299     |
| Uruguay | 1996           | FemaleAge40to44     | 95949      |
| Uruguay | 1996           | FemaleAge45to49     | 91313      |
| Uruguay | 1996           | FemaleAge50to54     | 84868      |
| Uruguay | 1996           | FemaleAge55to59     | 80531      |
| Uruguay | 1996           | FemaleAge5to9       | 132643     |
| Uruguay | 1996           | FemaleAge60to64     | 80431      |
| Uruguay | 1996           | FemaleAge65to69     | 76497      |
| Uruguay | 1996           | FemaleAge70to74     | 63160      |
| Uruguay | 1996           | FemaleAge75to79     | 45467      |
| Uruguay | 1996           | FemaleAge80to84     | 33143      |
| Uruguay | 1996           | FemaleAge85to89     | 17083      |
| Uruguay | 1996           | FemaleAge90to94     | 6611       |
| Uruguay | 1996           | FemaleAge95to99     | 1723       |
| Uruguay | 1996           | FemaleAgeAbov e100  | 310        |

Dietary calcium and zinc deficiency risks are decreasing but remain prevalent

| Country | Reference year | Age/gender group    | Population |
|---------|----------------|---------------------|------------|
| Uruguay | 1996           | FemaleLactAge15to19 | 8750       |
| Uruguay | 1996           | FemaleLactAge20to24 | 15380      |
| Uruguay | 1996           | FemaleLactAge25to29 | 14782      |
| Uruguay | 1996           | FemaleLactAge30to34 | 10234      |
| Uruguay | 1996           | FemaleLactAge35to39 | 4910       |
| Uruguay | 1996           | FemaleLactAge40to44 | 1281       |
| Uruguay | 1996           | FemaleLactAge45to49 | 65         |
| Uruguay | 1996           | FemalePregAge15to19 | 6562       |
| Uruguay | 1996           | FemalePregAge20to24 | 11535      |
| Uruguay | 1996           | FemalePregAge25to29 | 11087      |
| Uruguay | 1996           | FemalePregAge30to34 | 7676       |
| Uruguay | 1996           | FemalePregAge35to39 | 3683       |
| Uruguay | 1996           | FemalePregAge40to44 | 960        |
| Uruguay | 1996           | FemalePregAge45to49 | 49         |
| Uruguay | 1996           | MaleAge0to4         | 143250     |
| Uruguay | 1996           | MaleAge10to14       | 131005     |
| Uruguay | 1996           | MaleAge15to19       | 138645     |
| Uruguay | 1996           | MaleAge20to24       | 132980     |
| Uruguay | 1996           | MaleAge25to29       | 114054     |
| Uruguay | 1996           | MaleAge30to34       | 108762     |
| Uruguay | 1996           | MaleAge35to39       | 103614     |
| Uruguay | 1996           | MaleAge40to44       | 93661      |
| Uruguay | 1996           | MaleAge45to49       | 85100      |
| Uruguay | 1996           | MaleAge50to54       | 78171      |
| Uruguay | 1996           | MaleAge55to59       | 70478      |
| Uruguay | 1996           | MaleAge5to9         | 138436     |
| Uruguay | 1996           | MaleAge60to64       | 69101      |
| Uruguay | 1996           | MaleAge65to69       | 61014      |
| Uruguay | 1996           | MaleAge70to74       | 46065      |
| Uruguay | 1996           | MaleAge75to79       | 29311      |
| Uruguay | 1996           | MaleAge80to84       | 17793      |
| Uruguay | 1996           | MaleAge85to89       | 8116       |
| Uruguay | 1996           | MaleAge90to94       | 2763       |
| Uruguay | 1996           | MaleAge95to99       | 622        |
| Uruguay | 1996           | MaleAgeAbov e100    | 104        |
| Uruguay | 1997           | FemaleAge0to4       | 136456     |
| Uruguay | 1997           | FemaleAge10to14     | 126396     |
| Uruguay | 1997           | FemaleAge15to19     | 116451     |
| Uruguay | 1997           | FemaleAge20to24     | 103858     |
| Uruguay | 1997           | FemaleAge25to29     | 90459      |
| Uruguay | 1997           | FemaleAge30to34     | 94307      |
| Uruguay | 1997           | FemaleAge35to39     | 102512     |
| Uruguay | 1997           | FemaleAge40to44     | 98286      |
| Uruguay | 1997           | FemaleAge45to49     | 91944      |
| Uruguay | 1997           | FemaleAge50to54     | 85855      |
| Uruguay | 1997           | FemaleAge55to59     | 80534      |
| Uruguay | 1997           | FemaleAge5to9       | 134031     |
| Uruguay | 1997           | FemaleAge60to64     | 79593      |
| Uruguay | 1997           | FemaleAge65to69     | 76748      |
| Uruguay | 1997           | FemaleAge70to74     | 64820      |
| Uruguay | 1997           | FemaleAge75to79     | 46888      |
| Uruguay | 1997           | FemaleAge80to84     | 32916      |
| Uruguay | 1997           | FemaleAge85to89     | 18359      |
| Uruguay | 1997           | FemaleAge90to94     | 6918       |
| Uruguay | 1997           | FemaleAge95to99     | 1928       |
| Uruguay | 1997           | FemaleAgeAbov e100  | 332        |
| Uruguay | 1997           | FemaleLactAge15to19 | 8750       |
| Uruguay | 1997           | FemaleLactAge20to24 | 15380      |
| Uruguay | 1997           | FemaleLactAge25to29 | 14782      |
| Uruguay | 1997           | FemaleLactAge30to34 | 10234      |
| Uruguay | 1997           | FemaleLactAge35to39 | 4910       |
| Uruguay | 1997           | FemaleLactAge40to44 | 1281       |
| Uruguay | 1997           | FemaleLactAge45to49 | 65         |
| Uruguay | 1997           | FemalePregAge15to19 | 6562       |
| Uruguay | 1997           | FemalePregAge20to24 | 11535      |
| Uruguay | 1997           | FemalePregAge25to29 | 11087      |
| Uruguay | 1997           | FemalePregAge30to34 | 7676       |
| Uruguay | 1997           | FemalePregAge35to39 | 3683       |
| Uruguay | 1997           | FemalePregAge40to44 | 960        |
| Uruguay | 1997           | FemalePregAge45to49 | 49         |
| Uruguay | 1997           | MaleAge0to4         | 142590     |
| Uruguay | 1997           | MaleAge10to14       | 131706     |
| Uruguay | 1997           | MaleAge15to19       | 136449     |
| Uruguay | 1997           | MaleAge20to24       | 135271     |
| Uruguay | 1997           | MaleAge25to29       | 117235     |
| Uruguay | 1997           | MaleAge30to34       | 108396     |
| Uruguay | 1997           | MaleAge35to39       | 104803     |
| Uruguay | 1997           | MaleAge40to44       | 95451      |
| Uruguay | 1997           | MaleAge45to49       | 86120      |
| Uruguay | 1997           | MaleAge50to54       | 78829      |
| Uruguay | 1997           | MaleAge55to59       | 70797      |
| Uruguay | 1997           | MaleAge5to9         | 139897     |
| Uruguay | 1997           | MaleAge60to64       | 67667      |
| Uruguay | 1997           | MaleAge65to69       | 61359      |
| Uruguay | 1997           | MaleAge70to74       | 47040      |
| Uruguay | 1997           | MaleAge75to79       | 30262      |
| Uruguay | 1997           | MaleAge80to84       | 17768      |
| Uruguay | 1997           | MaleAge85to89       | 8638       |

Dietary calcium and zinc deficiency risks are decreasing but remain prevalent

| Country | Reference year | Age/gender group    | Population |
|---------|----------------|---------------------|------------|
| Uruguay | 1997           | MaleAge90to94       | 2914       |
| Uruguay | 1997           | MaleAge95to99       | 704        |
| Uruguay | 1997           | MaleAgeAbove100     | 110        |
| Uruguay | 1998           | FemaleAge0to4       | 135466     |
| Uruguay | 1998           | FemaleAge10to14     | 127683     |
| Uruguay | 1998           | FemaleAge15to19     | 113679     |
| Uruguay | 1998           | FemaleAge20to24     | 105682     |
| Uruguay | 1998           | FemaleAge25to29     | 93111      |
| Uruguay | 1998           | FemaleAge30to34     | 93338      |
| Uruguay | 1998           | FemaleAge35to39     | 103291     |
| Uruguay | 1998           | FemaleAge40to44     | 100794     |
| Uruguay | 1998           | FemaleAge45to49     | 92555      |
| Uruguay | 1998           | FemaleAge50to54     | 86940      |
| Uruguay | 1998           | FemaleAge55to59     | 80776      |
| Uruguay | 1998           | FemaleAge5to9       | 135180     |
| Uruguay | 1998           | FemaleAge60to64     | 78730      |
| Uruguay | 1998           | FemaleAge65to69     | 76743      |
| Uruguay | 1998           | FemaleAge70to74     | 66401      |
| Uruguay | 1998           | FemaleAge75to79     | 48633      |
| Uruguay | 1998           | FemaleAge80to84     | 32694      |
| Uruguay | 1998           | FemaleAge85to89     | 19440      |
| Uruguay | 1998           | FemaleAge90to94     | 7110       |
| Uruguay | 1998           | FemaleAge95to99     | 2106       |
| Uruguay | 1998           | FemaleAgeAbove100   | 355        |
| Uruguay | 1998           | FemaleLactAge15to19 | 8750       |
| Uruguay | 1998           | FemaleLactAge20to24 | 15380      |
| Uruguay | 1998           | FemaleLactAge25to29 | 14782      |
| Uruguay | 1998           | FemaleLactAge30to34 | 10234      |
| Uruguay | 1998           | FemaleLactAge35to39 | 4910       |
| Uruguay | 1998           | FemaleLactAge40to44 | 1281       |
| Uruguay | 1998           | FemaleLactAge45to49 | 65         |
| Uruguay | 1998           | FemalePregAge15to19 | 6562       |
| Uruguay | 1998           | FemalePregAge20to24 | 11535      |
| Uruguay | 1998           | FemalePregAge25to29 | 11087      |
| Uruguay | 1998           | FemalePregAge30to34 | 7676       |
| Uruguay | 1998           | FemalePregAge35to39 | 3683       |
| Uruguay | 1998           | FemalePregAge40to44 | 960        |
| Uruguay | 1998           | FemalePregAge45to49 | 49         |
| Uruguay | 1998           | MaleAge0to4         | 141590     |
| Uruguay | 1998           | MaleAge10to14       | 133084     |
| Uruguay | 1998           | MaleAge15to19       | 133725     |
| Uruguay | 1998           | MaleAge20to24       | 136966     |
| Uruguay | 1998           | MaleAge25to29       | 120870     |
| Uruguay | 1998           | MaleAge30to34       | 107978     |
| Uruguay | 1998           | MaleAge35to39       | 105719     |
| Uruguay | 1998           | MaleAge40to44       | 97248      |
| Uruguay | 1998           | MaleAge45to49       | 87237      |
| Uruguay | 1998           | MaleAge50to54       | 79507      |
| Uruguay | 1998           | MaleAge55to59       | 71528      |
| Uruguay | 1998           | MaleAge5to9         | 141098     |
| Uruguay | 1998           | MaleAge60to64       | 66183      |
| Uruguay | 1998           | MaleAge65to69       | 61550      |
| Uruguay | 1998           | MaleAge70to74       | 47912      |
| Uruguay | 1998           | MaleAge75to79       | 31307      |
| Uruguay | 1998           | MaleAge80to84       | 17668      |
| Uruguay | 1998           | MaleAge85to89       | 8973       |
| Uruguay | 1998           | MaleAge90to94       | 2983       |
| Uruguay | 1998           | MaleAge95to99       | 775        |
| Uruguay | 1998           | MaleAgeAbove100     | 117        |
| Uruguay | 1999           | FemaleAge0to4       | 134178     |
| Uruguay | 1999           | FemaleAge10to14     | 129076     |
| Uruguay | 1999           | FemaleAge15to19     | 111228     |
| Uruguay | 1999           | FemaleAge20to24     | 106577     |
| Uruguay | 1999           | FemaleAge25to29     | 95693      |
| Uruguay | 1999           | FemaleAge30to34     | 92760      |
| Uruguay | 1999           | FemaleAge35to39     | 103540     |
| Uruguay | 1999           | FemaleAge40to44     | 103016     |
| Uruguay | 1999           | FemaleAge45to49     | 93398      |
| Uruguay | 1999           | FemaleAge50to54     | 87909      |
| Uruguay | 1999           | FemaleAge55to59     | 81157      |
| Uruguay | 1999           | FemaleAge5to9       | 135942     |
| Uruguay | 1999           | FemaleAge60to64     | 77969      |
| Uruguay | 1999           | FemaleAge65to69     | 76500      |
| Uruguay | 1999           | FemaleAge70to74     | 67737      |
| Uruguay | 1999           | FemaleAge75to79     | 50466      |
| Uruguay | 1999           | FemaleAge80to84     | 32874      |
| Uruguay | 1999           | FemaleAge85to89     | 20079      |
| Uruguay | 1999           | FemaleAge90to94     | 7285       |
| Uruguay | 1999           | FemaleAge95to99     | 2179       |
| Uruguay | 1999           | FemaleAgeAbove100   | 379        |
| Uruguay | 1999           | FemaleLactAge15to19 | 8750       |
| Uruguay | 1999           | FemaleLactAge20to24 | 15380      |
| Uruguay | 1999           | FemaleLactAge25to29 | 14782      |
| Uruguay | 1999           | FemaleLactAge30to34 | 10234      |
| Uruguay | 1999           | FemaleLactAge35to39 | 4910       |
| Uruguay | 1999           | FemaleLactAge40to44 | 1281       |
| Uruguay | 1999           | FemaleLactAge45to49 | 65         |
| Uruguay | 1999           | FemalePregAge15to19 | 6562       |

Dietary calcium and zinc deficiency risks are decreasing but remain prevalent

| Country    | Reference year | Age/gender group    | Population |
|------------|----------------|---------------------|------------|
| Uruguay    | 1999           | FemalePregAge20to24 | 11535      |
| Uruguay    | 1999           | FemalePregAge25to29 | 11087      |
| Uruguay    | 1999           | FemalePregAge30to34 | 7676       |
| Uruguay    | 1999           | FemalePregAge35to39 | 3683       |
| Uruguay    | 1999           | FemalePregAge40to44 | 960        |
| Uruguay    | 1999           | FemalePregAge45to49 | 49         |
| Uruguay    | 1999           | MaleAge0to4         | 140252     |
| Uruguay    | 1999           | MaleAge10to14       | 134552     |
| Uruguay    | 1999           | MaleAge15to19       | 131320     |
| Uruguay    | 1999           | MaleAge20to24       | 137700     |
| Uruguay    | 1999           | MaleAge25to29       | 124244     |
| Uruguay    | 1999           | MaleAge30to34       | 108064     |
| Uruguay    | 1999           | MaleAge35to39       | 106197     |
| Uruguay    | 1999           | MaleAge40to44       | 98813      |
| Uruguay    | 1999           | MaleAge45to49       | 88433      |
| Uruguay    | 1999           | MaleAge50to54       | 80213      |
| Uruguay    | 1999           | MaleAge55to59       | 72329      |
| Uruguay    | 1999           | MaleAge5to9         | 141870     |
| Uruguay    | 1999           | MaleAge60to64       | 65021      |
| Uruguay    | 1999           | MaleAge65to69       | 61421      |
| Uruguay    | 1999           | MaleAge70to74       | 48642      |
| Uruguay    | 1999           | MaleAge75to79       | 32314      |
| Uruguay    | 1999           | MaleAge80to84       | 17683      |
| Uruguay    | 1999           | MaleAge85to89       | 9024       |
| Uruguay    | 1999           | MaleAge90to94       | 2981       |
| Uruguay    | 1999           | MaleAge95to99       | 794        |
| Uruguay    | 1999           | MaleAgeAbove100     | 123        |
| Uzbekistan | 1992           | FemaleAge0to4       | 1650555    |
| Uzbekistan | 1992           | FemaleAge10to14     | 1251188    |
| Uzbekistan | 1992           | FemaleAge15to19     | 962423     |
| Uzbekistan | 1992           | FemaleAge20to24     | 461424     |
| Uzbekistan | 1992           | FemaleAge25to29     | 564900     |
| Uzbekistan | 1992           | FemaleAge30to34     | 634738     |
| Uzbekistan | 1992           | FemaleAge35to39     | 569070     |
| Uzbekistan | 1992           | FemaleAge40to44     | 406613     |
| Uzbekistan | 1992           | FemaleAge45to49     | 261225     |
| Uzbekistan | 1992           | FemaleAge50to54     | 314476     |
| Uzbekistan | 1992           | FemaleAge55to59     | 306340     |
| Uzbekistan | 1992           | FemaleAge5to9       | 1445660    |
| Uzbekistan | 1992           | FemaleAge60to64     | 261644     |
| Uzbekistan | 1992           | FemaleAge65to69     | 209671     |
| Uzbekistan | 1992           | FemaleAge70to74     | 127274     |
| Uzbekistan | 1992           | FemaleAge75to79     | 94740      |
| Uzbekistan | 1992           | FemaleAge80to84     | 64977      |
| Uzbekistan | 1992           | FemaleAge85to89     | 38795      |
| Uzbekistan | 1992           | FemaleAge90to94     | 17981      |
| Uzbekistan | 1992           | FemaleAge95to99     | 3385       |
| Uzbekistan | 1992           | FemaleAgeAbove100   | 803        |
| Uzbekistan | 1992           | FemaleLactAge15to19 | 73270      |
| Uzbekistan | 1992           | FemaleLactAge20to24 | 277845     |
| Uzbekistan | 1992           | FemaleLactAge25to29 | 196549     |
| Uzbekistan | 1992           | FemaleLactAge30to34 | 103586     |
| Uzbekistan | 1992           | FemaleLactAge35to39 | 34241      |
| Uzbekistan | 1992           | FemaleLactAge40to44 | 5957       |
| Uzbekistan | 1992           | FemaleLactAge45to49 | 4029       |
| Uzbekistan | 1992           | FemalePregAge15to19 | 54953      |
| Uzbekistan | 1992           | FemalePregAge20to24 | 208384     |
| Uzbekistan | 1992           | FemalePregAge25to29 | 147412     |
| Uzbekistan | 1992           | FemalePregAge30to34 | 77690      |
| Uzbekistan | 1992           | FemalePregAge35to39 | 25681      |
| Uzbekistan | 1992           | FemalePregAge40to44 | 4468       |
| Uzbekistan | 1992           | FemalePregAge45to49 | 3022       |
| Uzbekistan | 1992           | MaleAge0to4         | 1715393    |
| Uzbekistan | 1992           | MaleAge10to14       | 1278984    |
| Uzbekistan | 1992           | MaleAge15to19       | 1116063    |
| Uzbekistan | 1992           | MaleAge20to24       | 941984     |
| Uzbekistan | 1992           | MaleAge25to29       | 883800     |
| Uzbekistan | 1992           | MaleAge30to34       | 819548     |
| Uzbekistan | 1992           | MaleAge35to39       | 627849     |
| Uzbekistan | 1992           | MaleAge40to44       | 396931     |
| Uzbekistan | 1992           | MaleAge45to49       | 268273     |
| Uzbekistan | 1992           | MaleAge50to54       | 310144     |
| Uzbekistan | 1992           | MaleAge55to59       | 282136     |
| Uzbekistan | 1992           | MaleAge5to9         | 1477022    |
| Uzbekistan | 1992           | MaleAge60to64       | 230086     |
| Uzbekistan | 1992           | MaleAge65to69       | 145691     |
| Uzbekistan | 1992           | MaleAge70to74       | 62044      |
| Uzbekistan | 1992           | MaleAge75to79       | 45467      |
| Uzbekistan | 1992           | MaleAge80to84       | 34379      |
| Uzbekistan | 1992           | MaleAge85to89       | 21372      |
| Uzbekistan | 1992           | MaleAge90to94       | 9793       |
| Uzbekistan | 1992           | MaleAge95to99       | 1978       |
| Uzbekistan | 1992           | MaleAgeAbove100     | 391        |
| Uzbekistan | 1993           | FemaleAge0to4       | 1650917    |
| Uzbekistan | 1993           | FemaleAge10to14     | 1281614    |
| Uzbekistan | 1993           | FemaleAge15to19     | 991201     |
| Uzbekistan | 1993           | FemaleAge20to24     | 485154     |
| Uzbekistan | 1993           | FemaleAge25to29     | 558952     |

Dietary calcium and zinc deficiency risks are decreasing but remain prevalent

| Country    | Reference year | Age/gender group    | Population |
|------------|----------------|---------------------|------------|
| Uzbekistan | 1993           | FemaleAge30to34     | 665352     |
| Uzbekistan | 1993           | FemaleAge35to39     | 603432     |
| Uzbekistan | 1993           | FemaleAge40to44     | 446426     |
| Uzbekistan | 1993           | FemaleAge45to49     | 277548     |
| Uzbekistan | 1993           | FemaleAge50to54     | 285097     |
| Uzbekistan | 1993           | FemaleAge55to59     | 322355     |
| Uzbekistan | 1993           | FemaleAge5to9       | 1490649    |
| Uzbekistan | 1993           | FemaleAge60to64     | 255484     |
| Uzbekistan | 1993           | FemaleAge65to69     | 219910     |
| Uzbekistan | 1993           | FemaleAge70to74     | 135667     |
| Uzbekistan | 1993           | FemaleAge75to79     | 89039      |
| Uzbekistan | 1993           | FemaleAge80to84     | 67587      |
| Uzbekistan | 1993           | FemaleAge85to89     | 35948      |
| Uzbekistan | 1993           | FemaleAge90to94     | 19558      |
| Uzbekistan | 1993           | FemaleAge95to99     | 3345       |
| Uzbekistan | 1993           | FemaleAgeAbov e100  | 792        |
| Uzbekistan | 1993           | FemaleLactAge15to19 | 73270      |
| Uzbekistan | 1993           | FemaleLactAge20to24 | 277845     |
| Uzbekistan | 1993           | FemaleLactAge25to29 | 196549     |
| Uzbekistan | 1993           | FemaleLactAge30to34 | 103586     |
| Uzbekistan | 1993           | FemaleLactAge35to39 | 34241      |
| Uzbekistan | 1993           | FemaleLactAge40to44 | 5957       |
| Uzbekistan | 1993           | FemaleLactAge45to49 | 4029       |
| Uzbekistan | 1993           | FemalePregAge15to19 | 54953      |
| Uzbekistan | 1993           | FemalePregAge20to24 | 208384     |
| Uzbekistan | 1993           | FemalePregAge25to29 | 147412     |
| Uzbekistan | 1993           | FemalePregAge30to34 | 77690      |
| Uzbekistan | 1993           | FemalePregAge35to39 | 25681      |
| Uzbekistan | 1993           | FemalePregAge40to44 | 4468       |
| Uzbekistan | 1993           | FemalePregAge45to49 | 3022       |
| Uzbekistan | 1993           | MaleAge0to4         | 1714080    |
| Uzbekistan | 1993           | MaleAge10to14       | 1307276    |
| Uzbekistan | 1993           | MaleAge15to19       | 1147358    |
| Uzbekistan | 1993           | MaleAge20to24       | 973428     |
| Uzbekistan | 1993           | MaleAge25to29       | 877743     |
| Uzbekistan | 1993           | MaleAge30to34       | 840226     |
| Uzbekistan | 1993           | MaleAge35to39       | 668915     |
| Uzbekistan | 1993           | MaleAge40to44       | 436276     |
| Uzbekistan | 1993           | MaleAge45to49       | 277289     |
| Uzbekistan | 1993           | MaleAge50to54       | 285278     |
| Uzbekistan | 1993           | MaleAge55to59       | 298734     |
| Uzbekistan | 1993           | MaleAge5to9         | 1528631    |
| Uzbekistan | 1993           | MaleAge60to64       | 223796     |
| Uzbekistan | 1993           | MaleAge65to69       | 165567     |
| Uzbekistan | 1993           | MaleAge70to74       | 66523      |
| Uzbekistan | 1993           | MaleAge75to79       | 41965      |
| Uzbekistan | 1993           | MaleAge80to84       | 34375      |
| Uzbekistan | 1993           | MaleAge85to89       | 19826      |
| Uzbekistan | 1993           | MaleAge90to94       | 10307      |
| Uzbekistan | 1993           | MaleAge95to99       | 2027       |
| Uzbekistan | 1993           | MaleAgeAbov e100    | 382        |
| Uzbekistan | 1994           | FemaleAge0to4       | 1639637    |
| Uzbekistan | 1994           | FemaleAge10to14     | 1313990    |
| Uzbekistan | 1994           | FemaleAge15to19     | 1020463    |
| Uzbekistan | 1994           | FemaleAge20to24     | 510963     |
| Uzbekistan | 1994           | FemaleAge25to29     | 555776     |
| Uzbekistan | 1994           | FemaleAge30to34     | 689263     |
| Uzbekistan | 1994           | FemaleAge35to39     | 637054     |
| Uzbekistan | 1994           | FemaleAge40to44     | 486725     |
| Uzbekistan | 1994           | FemaleAge45to49     | 300059     |
| Uzbekistan | 1994           | FemaleAge50to54     | 260945     |
| Uzbekistan | 1994           | FemaleAge55to59     | 331336     |
| Uzbekistan | 1994           | FemaleAge5to9       | 1533790    |
| Uzbekistan | 1994           | FemaleAge60to64     | 252760     |
| Uzbekistan | 1994           | FemaleAge65to69     | 227458     |
| Uzbekistan | 1994           | FemaleAge70to74     | 144840     |
| Uzbekistan | 1994           | FemaleAge75to79     | 85945      |
| Uzbekistan | 1994           | FemaleAge80to84     | 68047      |
| Uzbekistan | 1994           | FemaleAge85to89     | 34119      |
| Uzbekistan | 1994           | FemaleAge90to94     | 19531      |
| Uzbekistan | 1994           | FemaleAge95to99     | 3644       |
| Uzbekistan | 1994           | FemaleAgeAbov e100  | 781        |
| Uzbekistan | 1994           | FemaleLactAge15to19 | 73270      |
| Uzbekistan | 1994           | FemaleLactAge20to24 | 277845     |
| Uzbekistan | 1994           | FemaleLactAge25to29 | 196549     |
| Uzbekistan | 1994           | FemaleLactAge30to34 | 103586     |
| Uzbekistan | 1994           | FemaleLactAge35to39 | 34241      |
| Uzbekistan | 1994           | FemaleLactAge40to44 | 5957       |
| Uzbekistan | 1994           | FemaleLactAge45to49 | 4029       |
| Uzbekistan | 1994           | FemalePregAge15to19 | 54953      |
| Uzbekistan | 1994           | FemalePregAge20to24 | 208384     |
| Uzbekistan | 1994           | FemalePregAge25to29 | 147412     |
| Uzbekistan | 1994           | FemalePregAge30to34 | 77690      |
| Uzbekistan | 1994           | FemalePregAge35to39 | 25681      |
| Uzbekistan | 1994           | FemalePregAge40to44 | 4468       |
| Uzbekistan | 1994           | FemalePregAge45to49 | 3022       |
| Uzbekistan | 1994           | MaleAge0to4         | 1700289    |
| Uzbekistan | 1994           | MaleAge10to14       | 1338297    |

Dietary calcium and zinc deficiency risks are decreasing but remain prevalent

| Country    | Reference year | Age/gender group    | Population |
|------------|----------------|---------------------|------------|
| Uzbekistan | 1994           | MaleAge15to19       | 1178054    |
| Uzbekistan | 1994           | MaleAge20to24       | 1006599    |
| Uzbekistan | 1994           | MaleAge25to29       | 876317     |
| Uzbekistan | 1994           | MaleAge30to34       | 854877     |
| Uzbekistan | 1994           | MaleAge35to39       | 706767     |
| Uzbekistan | 1994           | MaleAge40to44       | 477689     |
| Uzbekistan | 1994           | MaleAge45to49       | 292989     |
| Uzbekistan | 1994           | MaleAge50to54       | 264066     |
| Uzbekistan | 1994           | MaleAge55to59       | 308811     |
| Uzbekistan | 1994           | MaleAge5to9         | 1579335    |
| Uzbekistan | 1994           | MaleAge60to64       | 220730     |
| Uzbekistan | 1994           | MaleAge65to69       | 181078     |
| Uzbekistan | 1994           | MaleAge70to74       | 73813      |
| Uzbekistan | 1994           | MaleAge75to79       | 39779      |
| Uzbekistan | 1994           | MaleAge80to84       | 33392      |
| Uzbekistan | 1994           | MaleAge85to89       | 18433      |
| Uzbekistan | 1994           | MaleAge90to94       | 10031      |
| Uzbekistan | 1994           | MaleAge95to99       | 2137       |
| Uzbekistan | 1994           | MaleAgeAbov e100    | 373        |
| Uzbekistan | 1995           | FemaleAge0to4       | 1619959    |
| Uzbekistan | 1995           | FemaleAge10to14     | 1350250    |
| Uzbekistan | 1995           | FemaleAge15to19     | 1049841    |
| Uzbekistan | 1995           | FemaleAge20to24     | 536513     |
| Uzbekistan | 1995           | FemaleAge25to29     | 559671     |
| Uzbekistan | 1995           | FemaleAge30to34     | 704167     |
| Uzbekistan | 1995           | FemaleAge35to39     | 670266     |
| Uzbekistan | 1995           | FemaleAge40to44     | 525727     |
| Uzbekistan | 1995           | FemaleAge45to49     | 326603     |
| Uzbekistan | 1995           | FemaleAge50to54     | 248112     |
| Uzbekistan | 1995           | FemaleAge55to59     | 328611     |
| Uzbekistan | 1995           | FemaleAge5to9       | 1568101    |
| Uzbekistan | 1995           | FemaleAge60to64     | 255907     |
| Uzbekistan | 1995           | FemaleAge65to69     | 231356     |
| Uzbekistan | 1995           | FemaleAge70to74     | 154034     |
| Uzbekistan | 1995           | FemaleAge75to79     | 86494      |
| Uzbekistan | 1995           | FemaleAge80to84     | 66045      |
| Uzbekistan | 1995           | FemaleAge85to89     | 33451      |
| Uzbekistan | 1995           | FemaleAge90to94     | 17971      |
| Uzbekistan | 1995           | FemaleAge95to99     | 3811       |
| Uzbekistan | 1995           | FemaleAgeAbov e100  | 774        |
| Uzbekistan | 1995           | FemaleLactAge15to19 | 73270      |
| Uzbekistan | 1995           | FemaleLactAge20to24 | 277845     |
| Uzbekistan | 1995           | FemaleLactAge25to29 | 196549     |
| Uzbekistan | 1995           | FemaleLactAge30to34 | 103586     |
| Uzbekistan | 1995           | FemaleLactAge35to39 | 34241      |
| Uzbekistan | 1995           | FemaleLactAge40to44 | 5957       |
| Uzbekistan | 1995           | FemaleLactAge45to49 | 4029       |
| Uzbekistan | 1995           | FemalePregAge15to19 | 54953      |
| Uzbekistan | 1995           | FemalePregAge20to24 | 208384     |
| Uzbekistan | 1995           | FemalePregAge25to29 | 147412     |
| Uzbekistan | 1995           | FemalePregAge30to34 | 77690      |
| Uzbekistan | 1995           | FemalePregAge35to39 | 25681      |
| Uzbekistan | 1995           | FemalePregAge40to44 | 4468       |
| Uzbekistan | 1995           | FemalePregAge45to49 | 3022       |
| Uzbekistan | 1995           | MaleAge0to4         | 1679077    |
| Uzbekistan | 1995           | MaleAge10to14       | 1375100    |
| Uzbekistan | 1995           | MaleAge15to19       | 1207639    |
| Uzbekistan | 1995           | MaleAge20to24       | 1038068    |
| Uzbekistan | 1995           | MaleAge25to29       | 883366     |
| Uzbekistan | 1995           | MaleAge30to34       | 862950     |
| Uzbekistan | 1995           | MaleAge35to39       | 739967     |
| Uzbekistan | 1995           | MaleAge40to44       | 519209     |
| Uzbekistan | 1995           | MaleAge45to49       | 314514     |
| Uzbekistan | 1995           | MaleAge50to54       | 251319     |
| Uzbekistan | 1995           | MaleAge55to59       | 308047     |
| Uzbekistan | 1995           | MaleAge5to9         | 1619447    |
| Uzbekistan | 1995           | MaleAge60to64       | 223940     |
| Uzbekistan | 1995           | MaleAge65to69       | 189951     |
| Uzbekistan | 1995           | MaleAge70to74       | 84186      |
| Uzbekistan | 1995           | MaleAge75to79       | 39385      |
| Uzbekistan | 1995           | MaleAge80to84       | 31270      |
| Uzbekistan | 1995           | MaleAge85to89       | 17284      |
| Uzbekistan | 1995           | MaleAge90to94       | 8987       |
| Uzbekistan | 1995           | MaleAge95to99       | 2073       |
| Uzbekistan | 1995           | MaleAgeAbov e100    | 368        |
| Uzbekistan | 1996           | FemaleAge0to4       | 1589139    |
| Uzbekistan | 1996           | FemaleAge10to14     | 1391116    |
| Uzbekistan | 1996           | FemaleAge15to19     | 1097714    |
| Uzbekistan | 1996           | FemaleAge20to24     | 589266     |
| Uzbekistan | 1996           | FemaleAge25to29     | 622823     |
| Uzbekistan | 1996           | FemaleAge30to34     | 746428     |
| Uzbekistan | 1996           | FemaleAge35to39     | 714756     |
| Uzbekistan | 1996           | FemaleAge40to44     | 564427     |
| Uzbekistan | 1996           | FemaleAge45to49     | 358288     |
| Uzbekistan | 1996           | FemaleAge50to54     | 244831     |
| Uzbekistan | 1996           | FemaleAge55to59     | 314582     |
| Uzbekistan | 1996           | FemaleAge5to9       | 1594503    |
| Uzbekistan | 1996           | FemaleAge60to64     | 263068     |

Dietary calcium and zinc deficiency risks are decreasing but remain prevalent

| Country    | Reference year | Age/gender group    | Population |
|------------|----------------|---------------------|------------|
| Uzbekistan | 1996           | FemaleAge65to69     | 230368     |
| Uzbekistan | 1996           | FemaleAge70to74     | 162597     |
| Uzbekistan | 1996           | FemaleAge75to79     | 89183      |
| Uzbekistan | 1996           | FemaleAge80to84     | 64226      |
| Uzbekistan | 1996           | FemaleAge85to89     | 35000      |
| Uzbekistan | 1996           | FemaleAge90to94     | 17928      |
| Uzbekistan | 1996           | FemaleAge95to99     | 4409       |
| Uzbekistan | 1996           | FemaleAgeAbove100   | 771        |
| Uzbekistan | 1996           | FemaleLactAge15to19 | 62744      |
| Uzbekistan | 1996           | FemaleLactAge20to24 | 262801     |
| Uzbekistan | 1996           | FemaleLactAge25to29 | 166572     |
| Uzbekistan | 1996           | FemaleLactAge30to34 | 83252      |
| Uzbekistan | 1996           | FemaleLactAge35to39 | 27289      |
| Uzbekistan | 1996           | FemaleLactAge40to44 | 4964       |
| Uzbekistan | 1996           | FemaleLactAge45to49 | 3383       |
| Uzbekistan | 1996           | FemalePregAge15to19 | 47058      |
| Uzbekistan | 1996           | FemalePregAge20to24 | 197101     |
| Uzbekistan | 1996           | FemalePregAge25to29 | 124929     |
| Uzbekistan | 1996           | FemalePregAge30to34 | 62439      |
| Uzbekistan | 1996           | FemalePregAge35to39 | 20466      |
| Uzbekistan | 1996           | FemalePregAge40to44 | 3723       |
| Uzbekistan | 1996           | FemalePregAge45to49 | 2537       |
| Uzbekistan | 1996           | MaleAge0to4         | 1644898    |
| Uzbekistan | 1996           | MaleAge10to14       | 1419109    |
| Uzbekistan | 1996           | MaleAge15to19       | 1236273    |
| Uzbekistan | 1996           | MaleAge20to24       | 1069170    |
| Uzbekistan | 1996           | MaleAge25to29       | 898884     |
| Uzbekistan | 1996           | MaleAge30to34       | 865107     |
| Uzbekistan | 1996           | MaleAge35to39       | 768441     |
| Uzbekistan | 1996           | MaleAge40to44       | 560116     |
| Uzbekistan | 1996           | MaleAge45to49       | 341375     |
| Uzbekistan | 1996           | MaleAge50to54       | 245414     |
| Uzbekistan | 1996           | MaleAge55to59       | 297359     |
| Uzbekistan | 1996           | MaleAge5to9         | 1650157    |
| Uzbekistan | 1996           | MaleAge60to64       | 231635     |
| Uzbekistan | 1996           | MaleAge65to69       | 192346     |
| Uzbekistan | 1996           | MaleAge70to74       | 97125      |
| Uzbekistan | 1996           | MaleAge75to79       | 40498      |
| Uzbekistan | 1996           | MaleAge80to84       | 29464      |
| Uzbekistan | 1996           | MaleAge85to89       | 17550      |
| Uzbekistan | 1996           | MaleAge90to94       | 8990       |
| Uzbekistan | 1996           | MaleAge95to99       | 2289       |
| Uzbekistan | 1996           | MaleAgeAbove100     | 368        |
| Uzbekistan | 1997           | FemaleAge0to4       | 1549669    |
| Uzbekistan | 1997           | FemaleAge10to14     | 1435160    |
| Uzbekistan | 1997           | FemaleAge15to19     | 1126483    |
| Uzbekistan | 1997           | FemaleAge20to24     | 616732     |
| Uzbekistan | 1997           | FemaleAge25to29     | 640846     |
| Uzbekistan | 1997           | FemaleAge30to34     | 744658     |
| Uzbekistan | 1997           | FemaleAge35to39     | 747230     |
| Uzbekistan | 1997           | FemaleAge40to44     | 599283     |
| Uzbekistan | 1997           | FemaleAge45to49     | 393486     |
| Uzbekistan | 1997           | FemaleAge50to54     | 251884     |
| Uzbekistan | 1997           | FemaleAge55to59     | 290369     |
| Uzbekistan | 1997           | FemaleAge5to9       | 1610587    |
| Uzbekistan | 1997           | FemaleAge60to64     | 276597     |
| Uzbekistan | 1997           | FemaleAge65to69     | 225418     |
| Uzbekistan | 1997           | FemaleAge70to74     | 171591     |
| Uzbekistan | 1997           | FemaleAge75to79     | 94002      |
| Uzbekistan | 1997           | FemaleAge80to84     | 60473      |
| Uzbekistan | 1997           | FemaleAge85to89     | 37113      |
| Uzbekistan | 1997           | FemaleAge90to94     | 17087      |
| Uzbekistan | 1997           | FemaleAge95to99     | 5533       |
| Uzbekistan | 1997           | FemaleAgeAbove100   | 772        |
| Uzbekistan | 1997           | FemaleLactAge15to19 | 62744      |
| Uzbekistan | 1997           | FemaleLactAge20to24 | 262801     |
| Uzbekistan | 1997           | FemaleLactAge25to29 | 166572     |
| Uzbekistan | 1997           | FemaleLactAge30to34 | 83252      |
| Uzbekistan | 1997           | FemaleLactAge35to39 | 27289      |
| Uzbekistan | 1997           | FemaleLactAge40to44 | 4964       |
| Uzbekistan | 1997           | FemaleLactAge45to49 | 3383       |
| Uzbekistan | 1997           | FemalePregAge15to19 | 47058      |
| Uzbekistan | 1997           | FemalePregAge20to24 | 197101     |
| Uzbekistan | 1997           | FemalePregAge25to29 | 124929     |
| Uzbekistan | 1997           | FemalePregAge30to34 | 62439      |
| Uzbekistan | 1997           | FemalePregAge35to39 | 20466      |
| Uzbekistan | 1997           | FemalePregAge40to44 | 3723       |
| Uzbekistan | 1997           | FemalePregAge45to49 | 2537       |
| Uzbekistan | 1997           | MaleAge0to4         | 1603940    |
| Uzbekistan | 1997           | MaleAge10to14       | 1468113    |
| Uzbekistan | 1997           | MaleAge15to19       | 1262725    |
| Uzbekistan | 1997           | MaleAge20to24       | 1099968    |
| Uzbekistan | 1997           | MaleAge25to29       | 923344     |
| Uzbekistan | 1997           | MaleAge30to34       | 860891     |
| Uzbekistan | 1997           | MaleAge35to39       | 792955     |
| Uzbekistan | 1997           | MaleAge40to44       | 600866     |
| Uzbekistan | 1997           | MaleAge45to49       | 374083     |
| Uzbekistan | 1997           | MaleAge50to54       | 246791     |



Dietary calcium and zinc deficiency risks are decreasing but remain prevalent

| Country    | Reference year | Age/gender group    | Population |
|------------|----------------|---------------------|------------|
| Uzbekistan | 1997           | MaleAge55to59       | 278006     |
| Uzbekistan | 1997           | MaleAge5to9         | 1668399    |
| Uzbekistan | 1997           | MaleAge60to64       | 245203     |
| Uzbekistan | 1997           | MaleAge65to69       | 188761     |
| Uzbekistan | 1997           | MaleAge70to74       | 112666     |
| Uzbekistan | 1997           | MaleAge75to79       | 42199      |
| Uzbekistan | 1997           | MaleAge80to84       | 26989      |
| Uzbekistan | 1997           | MaleAge85to89       | 17926      |
| Uzbekistan | 1997           | MaleAge90to94       | 8597       |
| Uzbekistan | 1997           | MaleAge95to99       | 2710       |
| Uzbekistan | 1997           | MaleAgeAbov e100    | 372        |
| Uzbekistan | 1998           | FemaleAge0to4       | 1505003    |
| Uzbekistan | 1998           | FemaleAge10to14     | 1479332    |
| Uzbekistan | 1998           | FemaleAge15to19     | 1155707    |
| Uzbekistan | 1998           | FemaleAge20to24     | 644603     |
| Uzbekistan | 1998           | FemaleAge25to29     | 664115     |
| Uzbekistan | 1998           | FemaleAge30to34     | 738612     |
| Uzbekistan | 1998           | FemaleAge35to39     | 777025     |
| Uzbekistan | 1998           | FemaleAge40to44     | 632337     |
| Uzbekistan | 1998           | FemaleAge45to49     | 431388     |
| Uzbekistan | 1998           | FemaleAge50to54     | 267687     |
| Uzbekistan | 1998           | FemaleAge55to59     | 262041     |
| Uzbekistan | 1998           | FemaleAge5to9       | 1614747    |
| Uzbekistan | 1998           | FemaleAge60to64     | 291205     |
| Uzbekistan | 1998           | FemaleAge65to69     | 219472     |
| Uzbekistan | 1998           | FemaleAge70to74     | 179673     |
| Uzbekistan | 1998           | FemaleAge75to79     | 100420     |
| Uzbekistan | 1998           | FemaleAge80to84     | 56106      |
| Uzbekistan | 1998           | FemaleAge85to89     | 38901      |
| Uzbekistan | 1998           | FemaleAge90to94     | 15955      |
| Uzbekistan | 1998           | FemaleAge95to99     | 6393       |
| Uzbekistan | 1998           | FemaleAgeAbov e100  | 781        |
| Uzbekistan | 1998           | FemaleLactAge15to19 | 62744      |
| Uzbekistan | 1998           | FemaleLactAge20to24 | 262801     |
| Uzbekistan | 1998           | FemaleLactAge25to29 | 166572     |
| Uzbekistan | 1998           | FemaleLactAge30to34 | 83252      |
| Uzbekistan | 1998           | FemaleLactAge35to39 | 27289      |
| Uzbekistan | 1998           | FemaleLactAge40to44 | 4964       |
| Uzbekistan | 1998           | FemaleLactAge45to49 | 3383       |
| Uzbekistan | 1998           | FemalePregAge15to19 | 47058      |
| Uzbekistan | 1998           | FemalePregAge20to24 | 197101     |
| Uzbekistan | 1998           | FemalePregAge25to29 | 124929     |
| Uzbekistan | 1998           | FemalePregAge30to34 | 62439      |
| Uzbekistan | 1998           | FemalePregAge35to39 | 20466      |
| Uzbekistan | 1998           | FemalePregAge40to44 | 3723       |
| Uzbekistan | 1998           | FemalePregAge45to49 | 2537       |
| Uzbekistan | 1998           | MaleAge0to4         | 1559142    |
| Uzbekistan | 1998           | MaleAge10to14       | 1518285    |
| Uzbekistan | 1998           | MaleAge15to19       | 1289151    |
| Uzbekistan | 1998           | MaleAge20to24       | 1129827    |
| Uzbekistan | 1998           | MaleAge25to29       | 953783     |
| Uzbekistan | 1998           | MaleAge30to34       | 854431     |
| Uzbekistan | 1998           | MaleAge35to39       | 812491     |
| Uzbekistan | 1998           | MaleAge40to44       | 640003     |
| Uzbekistan | 1998           | MaleAge45to49       | 410845     |
| Uzbekistan | 1998           | MaleAge50to54       | 255109     |
| Uzbekistan | 1998           | MaleAge55to59       | 254913     |
| Uzbekistan | 1998           | MaleAge5to9         | 1672450    |
| Uzbekistan | 1998           | MaleAge60to64       | 259708     |
| Uzbekistan | 1998           | MaleAge65to69       | 182995     |
| Uzbekistan | 1998           | MaleAge70to74       | 127896     |
| Uzbekistan | 1998           | MaleAge75to79       | 45126      |
| Uzbekistan | 1998           | MaleAge80to84       | 24486      |
| Uzbekistan | 1998           | MaleAge85to89       | 17992      |
| Uzbekistan | 1998           | MaleAge90to94       | 7971       |
| Uzbekistan | 1998           | MaleAge95to99       | 3015       |
| Uzbekistan | 1998           | MaleAgeAbov e100    | 379        |
| Uzbekistan | 1999           | FemaleAge0to4       | 1459023    |
| Uzbekistan | 1999           | FemaleAge10to14     | 1518105    |
| Uzbekistan | 1999           | FemaleAge15to19     | 1187245    |
| Uzbekistan | 1999           | FemaleAge20to24     | 672198     |
| Uzbekistan | 1999           | FemaleAge25to29     | 688807     |
| Uzbekistan | 1999           | FemaleAge30to34     | 734858     |
| Uzbekistan | 1999           | FemaleAge35to39     | 799797     |
| Uzbekistan | 1999           | FemaleAge40to44     | 664369     |
| Uzbekistan | 1999           | FemaleAge45to49     | 469439     |
| Uzbekistan | 1999           | FemaleAge50to54     | 289171     |
| Uzbekistan | 1999           | FemaleAge55to59     | 238918     |
| Uzbekistan | 1999           | FemaleAge5to9       | 1607289    |
| Uzbekistan | 1999           | FemaleAge60to64     | 298883     |
| Uzbekistan | 1999           | FemaleAge65to69     | 216778     |
| Uzbekistan | 1999           | FemaleAge70to74     | 185127     |
| Uzbekistan | 1999           | FemaleAge75to79     | 107476     |
| Uzbekistan | 1999           | FemaleAge80to84     | 53041      |
| Uzbekistan | 1999           | FemaleAge85to89     | 39178      |
| Uzbekistan | 1999           | FemaleAge90to94     | 15075      |
| Uzbekistan | 1999           | FemaleAge95to99     | 6391       |
| Uzbekistan | 1999           | FemaleAgeAbov e100  | 802        |

Dietary calcium and zinc deficiency risks are decreasing but remain prevalent

| Country    | Reference year | Age/gender group    | Population |
|------------|----------------|---------------------|------------|
| Uzbekistan | 1999           | FemaleLactAge15to19 | 62744      |
| Uzbekistan | 1999           | FemaleLactAge20to24 | 262801     |
| Uzbekistan | 1999           | FemaleLactAge25to29 | 166572     |
| Uzbekistan | 1999           | FemaleLactAge30to34 | 83252      |
| Uzbekistan | 1999           | FemaleLactAge35to39 | 27289      |
| Uzbekistan | 1999           | FemaleLactAge40to44 | 4964       |
| Uzbekistan | 1999           | FemaleLactAge45to49 | 3383       |
| Uzbekistan | 1999           | FemalePregAge15to19 | 47058      |
| Uzbekistan | 1999           | FemalePregAge20to24 | 197101     |
| Uzbekistan | 1999           | FemalePregAge25to29 | 124929     |
| Uzbekistan | 1999           | FemalePregAge30to34 | 62439      |
| Uzbekistan | 1999           | FemalePregAge35to39 | 20466      |
| Uzbekistan | 1999           | FemalePregAge40to44 | 3723       |
| Uzbekistan | 1999           | FemalePregAge45to49 | 2537       |
| Uzbekistan | 1999           | MaleAge0to4         | 1512997    |
| Uzbekistan | 1999           | MaleAge10to14       | 1562570    |
| Uzbekistan | 1999           | MaleAge15to19       | 1319038    |
| Uzbekistan | 1999           | MaleAge20to24       | 1158231    |
| Uzbekistan | 1999           | MaleAge25to29       | 985147     |
| Uzbekistan | 1999           | MaleAge30to34       | 852030     |
| Uzbekistan | 1999           | MaleAge35to39       | 825695     |
| Uzbekistan | 1999           | MaleAge40to44       | 675632     |
| Uzbekistan | 1999           | MaleAge45to49       | 449263     |
| Uzbekistan | 1999           | MaleAge50to54       | 269452     |
| Uzbekistan | 1999           | MaleAge55to59       | 235319     |
| Uzbekistan | 1999           | MaleAge5to9         | 1663403    |
| Uzbekistan | 1999           | MaleAge60to64       | 267938     |
| Uzbekistan | 1999           | MaleAge65to69       | 180222     |
| Uzbekistan | 1999           | MaleAge70to74       | 139100     |
| Uzbekistan | 1999           | MaleAge75to79       | 50154      |
| Uzbekistan | 1999           | MaleAge80to84       | 22694      |
| Uzbekistan | 1999           | MaleAge85to89       | 17240      |
| Uzbekistan | 1999           | MaleAge90to94       | 7282       |
| Uzbekistan | 1999           | MaleAge95to99       | 2938       |
| Uzbekistan | 1999           | MaleAgeAbov e100    | 388        |
| Venezuela  | 1992           | FemaleAge0to4       | 1358289    |
| Venezuela  | 1992           | FemaleAge10to14     | 1165279    |
| Venezuela  | 1992           | FemaleAge15to19     | 842982     |
| Venezuela  | 1992           | FemaleAge20to24     | 642965     |
| Venezuela  | 1992           | FemaleAge25to29     | 644712     |
| Venezuela  | 1992           | FemaleAge30to34     | 609088     |
| Venezuela  | 1992           | FemaleAge35to39     | 567601     |
| Venezuela  | 1992           | FemaleAge40to44     | 516981     |
| Venezuela  | 1992           | FemaleAge45to49     | 416879     |
| Venezuela  | 1992           | FemaleAge50to54     | 320713     |
| Venezuela  | 1992           | FemaleAge55to59     | 260579     |
| Venezuela  | 1992           | FemaleAge5to9       | 1266534    |
| Venezuela  | 1992           | FemaleAge60to64     | 220469     |
| Venezuela  | 1992           | FemaleAge65to69     | 168262     |
| Venezuela  | 1992           | FemaleAge70to74     | 118681     |
| Venezuela  | 1992           | FemaleAge75to79     | 79013      |
| Venezuela  | 1992           | FemaleAge80to84     | 45745      |
| Venezuela  | 1992           | FemaleAge85to89     | 20279      |
| Venezuela  | 1992           | FemaleAge90to94     | 5789       |
| Venezuela  | 1992           | FemaleAge95to99     | 1114       |
| Venezuela  | 1992           | FemaleAgeAbov e100  | 144        |
| Venezuela  | 1992           | FemaleLactAge15to19 | 102033     |
| Venezuela  | 1992           | FemaleLactAge20to24 | 167835     |
| Venezuela  | 1992           | FemaleLactAge25to29 | 141425     |
| Venezuela  | 1992           | FemaleLactAge30to34 | 89710      |
| Venezuela  | 1992           | FemaleLactAge35to39 | 45191      |
| Venezuela  | 1992           | FemaleLactAge40to44 | 14683      |
| Venezuela  | 1992           | FemaleLactAge45to49 | 2611       |
| Venezuela  | 1992           | FemalePregAge15to19 | 76525      |
| Venezuela  | 1992           | FemalePregAge20to24 | 125876     |
| Venezuela  | 1992           | FemalePregAge25to29 | 106069     |
| Venezuela  | 1992           | FemalePregAge30to34 | 67282      |
| Venezuela  | 1992           | FemalePregAge35to39 | 33893      |
| Venezuela  | 1992           | FemalePregAge40to44 | 11012      |
| Venezuela  | 1992           | FemalePregAge45to49 | 1958       |
| Venezuela  | 1992           | MaleAge0to4         | 1416668    |
| Venezuela  | 1992           | MaleAge10to14       | 1210413    |
| Venezuela  | 1992           | MaleAge15to19       | 1057868    |
| Venezuela  | 1992           | MaleAge20to24       | 962780     |
| Venezuela  | 1992           | MaleAge25to29       | 910280     |
| Venezuela  | 1992           | MaleAge30to34       | 776977     |
| Venezuela  | 1992           | MaleAge35to39       | 654315     |
| Venezuela  | 1992           | MaleAge40to44       | 552080     |
| Venezuela  | 1992           | MaleAge45to49       | 427085     |
| Venezuela  | 1992           | MaleAge50to54       | 318007     |
| Venezuela  | 1992           | MaleAge55to59       | 253311     |
| Venezuela  | 1992           | MaleAge5to9         | 1316966    |
| Venezuela  | 1992           | MaleAge60to64       | 210042     |
| Venezuela  | 1992           | MaleAge65to69       | 153435     |
| Venezuela  | 1992           | MaleAge70to74       | 100475     |
| Venezuela  | 1992           | MaleAge75to79       | 62375      |
| Venezuela  | 1992           | MaleAge80to84       | 33287      |
| Venezuela  | 1992           | MaleAge85to89       | 13204      |

Dietary calcium and zinc deficiency risks are decreasing but remain prevalent

| Country   | Reference year | Age/gender group    | Population |
|-----------|----------------|---------------------|------------|
| Venezuela | 1992           | MaleAge90to94       | 3281       |
| Venezuela | 1992           | MaleAge95to99       | 533        |
| Venezuela | 1992           | MaleAgeAbov e100    | 58         |
| Venezuela | 1993           | FemaleAge0to4       | 1353585    |
| Venezuela | 1993           | FemaleAge10to14     | 1184324    |
| Venezuela | 1993           | FemaleAge15to19     | 877440     |
| Venezuela | 1993           | FemaleAge20to24     | 648780     |
| Venezuela | 1993           | FemaleAge25to29     | 657898     |
| Venezuela | 1993           | FemaleAge30to34     | 641882     |
| Venezuela | 1993           | FemaleAge35to39     | 584328     |
| Venezuela | 1993           | FemaleAge40to44     | 539576     |
| Venezuela | 1993           | FemaleAge45to49     | 439825     |
| Venezuela | 1993           | FemaleAge50to54     | 336088     |
| Venezuela | 1993           | FemaleAge55to59     | 267487     |
| Venezuela | 1993           | FemaleAge5to9       | 1290558    |
| Venezuela | 1993           | FemaleAge60to64     | 225568     |
| Venezuela | 1993           | FemaleAge65to69     | 176916     |
| Venezuela | 1993           | FemaleAge70to74     | 123085     |
| Venezuela | 1993           | FemaleAge75to79     | 82480      |
| Venezuela | 1993           | FemaleAge80to84     | 47431      |
| Venezuela | 1993           | FemaleAge85to89     | 21698      |
| Venezuela | 1993           | FemaleAge90to94     | 6322       |
| Venezuela | 1993           | FemaleAge95to99     | 1204       |
| Venezuela | 1993           | FemaleAgeAbov e100  | 164        |
| Venezuela | 1993           | FemaleLactAge15to19 | 102033     |
| Venezuela | 1993           | FemaleLactAge20to24 | 167835     |
| Venezuela | 1993           | FemaleLactAge25to29 | 141425     |
| Venezuela | 1993           | FemaleLactAge30to34 | 89710      |
| Venezuela | 1993           | FemaleLactAge35to39 | 45191      |
| Venezuela | 1993           | FemaleLactAge40to44 | 14683      |
| Venezuela | 1993           | FemaleLactAge45to49 | 2611       |
| Venezuela | 1993           | FemalePregAge15to19 | 76525      |
| Venezuela | 1993           | FemalePregAge20to24 | 125876     |
| Venezuela | 1993           | FemalePregAge25to29 | 106069     |
| Venezuela | 1993           | FemalePregAge30to34 | 67282      |
| Venezuela | 1993           | FemalePregAge35to39 | 33893      |
| Venezuela | 1993           | FemalePregAge40to44 | 11012      |
| Venezuela | 1993           | FemalePregAge45to49 | 1958       |
| Venezuela | 1993           | MaleAge0to4         | 1412118    |
| Venezuela | 1993           | MaleAge10to14       | 1230076    |
| Venezuela | 1993           | MaleAge15to19       | 1093832    |
| Venezuela | 1993           | MaleAge20to24       | 968997     |
| Venezuela | 1993           | MaleAge25to29       | 923546     |
| Venezuela | 1993           | MaleAge30to34       | 810017     |
| Venezuela | 1993           | MaleAge35to39       | 670327     |
| Venezuela | 1993           | MaleAge40to44       | 573242     |
| Venezuela | 1993           | MaleAge45to49       | 450744     |
| Venezuela | 1993           | MaleAge50to54       | 333864     |
| Venezuela | 1993           | MaleAge55to59       | 259503     |
| Venezuela | 1993           | MaleAge5to9         | 1342410    |
| Venezuela | 1993           | MaleAge60to64       | 214557     |
| Venezuela | 1993           | MaleAge65to69       | 161700     |
| Venezuela | 1993           | MaleAge70to74       | 104602     |
| Venezuela | 1993           | MaleAge75to79       | 64984      |
| Venezuela | 1993           | MaleAge80to84       | 34618      |
| Venezuela | 1993           | MaleAge85to89       | 14119      |
| Venezuela | 1993           | MaleAge90to94       | 3609       |
| Venezuela | 1993           | MaleAge95to99       | 589        |
| Venezuela | 1993           | MaleAgeAbov e100    | 66         |
| Venezuela | 1994           | FemaleAge0to4       | 1347056    |
| Venezuela | 1994           | FemaleAge10to14     | 1202962    |
| Venezuela | 1994           | FemaleAge15to19     | 910592     |
| Venezuela | 1994           | FemaleAge20to24     | 658636     |
| Venezuela | 1994           | FemaleAge25to29     | 668404     |
| Venezuela | 1994           | FemaleAge30to34     | 672080     |
| Venezuela | 1994           | FemaleAge35to39     | 603486     |
| Venezuela | 1994           | FemaleAge40to44     | 561035     |
| Venezuela | 1994           | FemaleAge45to49     | 463036     |
| Venezuela | 1994           | FemaleAge50to54     | 353153     |
| Venezuela | 1994           | FemaleAge55to59     | 275799     |
| Venezuela | 1994           | FemaleAge5to9       | 1313254    |
| Venezuela | 1994           | FemaleAge60to64     | 230743     |
| Venezuela | 1994           | FemaleAge65to69     | 185134     |
| Venezuela | 1994           | FemaleAge70to74     | 128341     |
| Venezuela | 1994           | FemaleAge75to79     | 86197      |
| Venezuela | 1994           | FemaleAge80to84     | 49327      |
| Venezuela | 1994           | FemaleAge85to89     | 22745      |
| Venezuela | 1994           | FemaleAge90to94     | 6730       |
| Venezuela | 1994           | FemaleAge95to99     | 1297       |
| Venezuela | 1994           | FemaleAgeAbov e100  | 185        |
| Venezuela | 1994           | FemaleLactAge15to19 | 102033     |
| Venezuela | 1994           | FemaleLactAge20to24 | 167835     |
| Venezuela | 1994           | FemaleLactAge25to29 | 141425     |
| Venezuela | 1994           | FemaleLactAge30to34 | 89710      |
| Venezuela | 1994           | FemaleLactAge35to39 | 45191      |
| Venezuela | 1994           | FemaleLactAge40to44 | 14683      |
| Venezuela | 1994           | FemaleLactAge45to49 | 2611       |
| Venezuela | 1994           | FemalePregAge15to19 | 76525      |

Dietary calcium and zinc deficiency risks are decreasing but remain prevalent

| Country   | Reference year | Age/gender group    | Population |
|-----------|----------------|---------------------|------------|
| Venezuela | 1994           | FemalePregAge20to24 | 125876     |
| Venezuela | 1994           | FemalePregAge25to29 | 106069     |
| Venezuela | 1994           | FemalePregAge30to34 | 67282      |
| Venezuela | 1994           | FemalePregAge35to39 | 33893      |
| Venezuela | 1994           | FemalePregAge40to44 | 11012      |
| Venezuela | 1994           | FemalePregAge45to49 | 1958       |
| Venezuela | 1994           | MaleAge0to4         | 1405585    |
| Venezuela | 1994           | MaleAge10to14       | 1249405    |
| Venezuela | 1994           | MaleAge15to19       | 1128516    |
| Venezuela | 1994           | MaleAge20to24       | 979466     |
| Venezuela | 1994           | MaleAge25to29       | 934097     |
| Venezuela | 1994           | MaleAge30to34       | 840384     |
| Venezuela | 1994           | MaleAge35to39       | 688918     |
| Venezuela | 1994           | MaleAge40to44       | 593245     |
| Venezuela | 1994           | MaleAge45to49       | 474323     |
| Venezuela | 1994           | MaleAge50to54       | 351544     |
| Venezuela | 1994           | MaleAge55to59       | 267316     |
| Venezuela | 1994           | MaleAge5to9         | 1366491    |
| Venezuela | 1994           | MaleAge60to64       | 219148     |
| Venezuela | 1994           | MaleAge65to69       | 169419     |
| Venezuela | 1994           | MaleAge70to74       | 109428     |
| Venezuela | 1994           | MaleAge75to79       | 67839      |
| Venezuela | 1994           | MaleAge80to84       | 35948      |
| Venezuela | 1994           | MaleAge85to89       | 14696      |
| Venezuela | 1994           | MaleAge90to94       | 3832       |
| Venezuela | 1994           | MaleAge95to99       | 638        |
| Venezuela | 1994           | MaleAgeAbove100     | 74         |
| Venezuela | 1995           | FemaleAge0to4       | 1344081    |
| Venezuela | 1995           | FemaleAge10to14     | 1223312    |
| Venezuela | 1995           | FemaleAge15to19     | 939059     |
| Venezuela | 1995           | FemaleAge20to24     | 674656     |
| Venezuela | 1995           | FemaleAge25to29     | 677007     |
| Venezuela | 1995           | FemaleAge30to34     | 696955     |
| Venezuela | 1995           | FemaleAge35to39     | 626462     |
| Venezuela | 1995           | FemaleAge40to44     | 580945     |
| Venezuela | 1995           | FemaleAge45to49     | 485896     |
| Venezuela | 1995           | FemaleAge50to54     | 371708     |
| Venezuela | 1995           | FemaleAge55to59     | 285831     |
| Venezuela | 1995           | FemaleAge5to9       | 1330714    |
| Venezuela | 1995           | FemaleAge60to64     | 236287     |
| Venezuela | 1995           | FemaleAge65to69     | 192383     |
| Venezuela | 1995           | FemaleAge70to74     | 134631     |
| Venezuela | 1995           | FemaleAge75to79     | 90108      |
| Venezuela | 1995           | FemaleAge80to84     | 51529      |
| Venezuela | 1995           | FemaleAge85to89     | 23513      |
| Venezuela | 1995           | FemaleAge90to94     | 6985       |
| Venezuela | 1995           | FemaleAge95to99     | 1294       |
| Venezuela | 1995           | FemaleAgeAbove100   | 203        |
| Venezuela | 1995           | FemaleLactAge15to19 | 102033     |
| Venezuela | 1995           | FemaleLactAge20to24 | 167835     |
| Venezuela | 1995           | FemaleLactAge25to29 | 141425     |
| Venezuela | 1995           | FemaleLactAge30to34 | 89710      |
| Venezuela | 1995           | FemaleLactAge35to39 | 45191      |
| Venezuela | 1995           | FemaleLactAge40to44 | 14683      |
| Venezuela | 1995           | FemaleLactAge45to49 | 2611       |
| Venezuela | 1995           | FemalePregAge15to19 | 76525      |
| Venezuela | 1995           | FemalePregAge20to24 | 125876     |
| Venezuela | 1995           | FemalePregAge25to29 | 106069     |
| Venezuela | 1995           | FemalePregAge30to34 | 67282      |
| Venezuela | 1995           | FemalePregAge35to39 | 33893      |
| Venezuela | 1995           | FemalePregAge40to44 | 11012      |
| Venezuela | 1995           | FemalePregAge45to49 | 1958       |
| Venezuela | 1995           | MaleAge0to4         | 1402771    |
| Venezuela | 1995           | MaleAge10to14       | 1270625    |
| Venezuela | 1995           | MaleAge15to19       | 1158326    |
| Venezuela | 1995           | MaleAge20to24       | 996369     |
| Venezuela | 1995           | MaleAge25to29       | 942757     |
| Venezuela | 1995           | MaleAge30to34       | 865258     |
| Venezuela | 1995           | MaleAge35to39       | 711426     |
| Venezuela | 1995           | MaleAge40to44       | 611858     |
| Venezuela | 1995           | MaleAge45to49       | 497031     |
| Venezuela | 1995           | MaleAge50to54       | 370770     |
| Venezuela | 1995           | MaleAge55to59       | 277157     |
| Venezuela | 1995           | MaleAge5to9         | 1384966    |
| Venezuela | 1995           | MaleAge60to64       | 224095     |
| Venezuela | 1995           | MaleAge65to69       | 176091     |
| Venezuela | 1995           | MaleAge70to74       | 115128     |
| Venezuela | 1995           | MaleAge75to79       | 70913      |
| Venezuela | 1995           | MaleAge80to84       | 37349      |
| Venezuela | 1995           | MaleAge85to89       | 15009      |
| Venezuela | 1995           | MaleAge90to94       | 3890       |
| Venezuela | 1995           | MaleAge95to99       | 612        |
| Venezuela | 1995           | MaleAgeAbove100     | 81         |
| Venezuela | 1996           | FemaleAge0to4       | 1335628    |
| Venezuela | 1996           | FemaleAge10to14     | 1246813    |
| Venezuela | 1996           | FemaleAge15to19     | 951208     |
| Venezuela | 1996           | FemaleAge20to24     | 693594     |
| Venezuela | 1996           | FemaleAge25to29     | 695197     |

Dietary calcium and zinc deficiency risks are decreasing but remain prevalent

| Country   | Reference year | Age/gender group    | Population |
|-----------|----------------|---------------------|------------|
| Venezuela | 1996           | FemaleAge30to34     | 717627     |
| Venezuela | 1996           | FemaleAge35to39     | 652238     |
| Venezuela | 1996           | FemaleAge40to44     | 600155     |
| Venezuela | 1996           | FemaleAge45to49     | 508607     |
| Venezuela | 1996           | FemaleAge50to54     | 391599     |
| Venezuela | 1996           | FemaleAge55to59     | 297266     |
| Venezuela | 1996           | FemaleAge5to9       | 1344117    |
| Venezuela | 1996           | FemaleAge60to64     | 241657     |
| Venezuela | 1996           | FemaleAge65to69     | 198101     |
| Venezuela | 1996           | FemaleAge70to74     | 140950     |
| Venezuela | 1996           | FemaleAge75to79     | 93313      |
| Venezuela | 1996           | FemaleAge80to84     | 53837      |
| Venezuela | 1996           | FemaleAge85to89     | 25125      |
| Venezuela | 1996           | FemaleAge90to94     | 8076       |
| Venezuela | 1996           | FemaleAge95to99     | 1452       |
| Venezuela | 1996           | FemaleAgeAbov e100  | 219        |
| Venezuela | 1996           | FemaleLactAge15to19 | 110074     |
| Venezuela | 1996           | FemaleLactAge20to24 | 170555     |
| Venezuela | 1996           | FemaleLactAge25to29 | 135501     |
| Venezuela | 1996           | FemaleLactAge30to34 | 89991      |
| Venezuela | 1996           | FemaleLactAge35to39 | 45964      |
| Venezuela | 1996           | FemaleLactAge40to44 | 14435      |
| Venezuela | 1996           | FemaleLactAge45to49 | 2669       |
| Venezuela | 1996           | FemalePregAge15to19 | 82556      |
| Venezuela | 1996           | FemalePregAge20to24 | 127916     |
| Venezuela | 1996           | FemalePregAge25to29 | 101626     |
| Venezuela | 1996           | FemalePregAge30to34 | 67493      |
| Venezuela | 1996           | FemalePregAge35to39 | 34473      |
| Venezuela | 1996           | FemalePregAge40to44 | 10826      |
| Venezuela | 1996           | FemalePregAge45to49 | 2001       |
| Venezuela | 1996           | MaleAge0to4         | 1394645    |
| Venezuela | 1996           | MaleAge10to14       | 1294930    |
| Venezuela | 1996           | MaleAge15to19       | 1184545    |
| Venezuela | 1996           | MaleAge20to24       | 1020459    |
| Venezuela | 1996           | MaleAge25to29       | 950458     |
| Venezuela | 1996           | MaleAge30to34       | 886261     |
| Venezuela | 1996           | MaleAge35to39       | 738249     |
| Venezuela | 1996           | MaleAge40to44       | 629430     |
| Venezuela | 1996           | MaleAge45to49       | 519023     |
| Venezuela | 1996           | MaleAge50to54       | 391178     |
| Venezuela | 1996           | MaleAge55to59       | 288587     |
| Venezuela | 1996           | MaleAge5to9         | 1399490    |
| Venezuela | 1996           | MaleAge60to64       | 228802     |
| Venezuela | 1996           | MaleAge65to69       | 181444     |
| Venezuela | 1996           | MaleAge70to74       | 121523     |
| Venezuela | 1996           | MaleAge75to79       | 73998      |
| Venezuela | 1996           | MaleAge80to84       | 39271      |
| Venezuela | 1996           | MaleAge85to89       | 16318      |
| Venezuela | 1996           | MaleAge90to94       | 4584       |
| Venezuela | 1996           | MaleAge95to99       | 698        |
| Venezuela | 1996           | MaleAgeAbov e100    | 87         |
| Venezuela | 1997           | FemaleAge0to4       | 1336372    |
| Venezuela | 1997           | FemaleAge10to14     | 1270782    |
| Venezuela | 1997           | FemaleAge15to19     | 972228     |
| Venezuela | 1997           | FemaleAge20to24     | 723579     |
| Venezuela | 1997           | FemaleAge25to29     | 700139     |
| Venezuela | 1997           | FemaleAge30to34     | 733973     |
| Venezuela | 1997           | FemaleAge35to39     | 682933     |
| Venezuela | 1997           | FemaleAge40to44     | 616613     |
| Venezuela | 1997           | FemaleAge45to49     | 531120     |
| Venezuela | 1997           | FemaleAge50to54     | 412832     |
| Venezuela | 1997           | FemaleAge55to59     | 310304     |
| Venezuela | 1997           | FemaleAge5to9       | 1349915    |
| Venezuela | 1997           | FemaleAge60to64     | 247349     |
| Venezuela | 1997           | FemaleAge65to69     | 203149     |
| Venezuela | 1997           | FemaleAge70to74     | 148201     |
| Venezuela | 1997           | FemaleAge75to79     | 96543      |
| Venezuela | 1997           | FemaleAge80to84     | 56220      |
| Venezuela | 1997           | FemaleAge85to89     | 26390      |
| Venezuela | 1997           | FemaleAge90to94     | 9001       |
| Venezuela | 1997           | FemaleAge95to99     | 1669       |
| Venezuela | 1997           | FemaleAgeAbov e100  | 233        |
| Venezuela | 1997           | FemaleLactAge15to19 | 110074     |
| Venezuela | 1997           | FemaleLactAge20to24 | 170555     |
| Venezuela | 1997           | FemaleLactAge25to29 | 135501     |
| Venezuela | 1997           | FemaleLactAge30to34 | 89991      |
| Venezuela | 1997           | FemaleLactAge35to39 | 45964      |
| Venezuela | 1997           | FemaleLactAge40to44 | 14435      |
| Venezuela | 1997           | FemaleLactAge45to49 | 2669       |
| Venezuela | 1997           | FemalePregAge15to19 | 82556      |
| Venezuela | 1997           | FemalePregAge20to24 | 127916     |
| Venezuela | 1997           | FemalePregAge25to29 | 101626     |
| Venezuela | 1997           | FemalePregAge30to34 | 67493      |
| Venezuela | 1997           | FemalePregAge35to39 | 34473      |
| Venezuela | 1997           | FemalePregAge40to44 | 10826      |
| Venezuela | 1997           | FemalePregAge45to49 | 2001       |
| Venezuela | 1997           | MaleAge0to4         | 1395893    |
| Venezuela | 1997           | MaleAge10to14       | 1320046    |

Dietary calcium and zinc deficiency risks are decreasing but remain prevalent

| Country   | Reference year | Age/gender group    | Population |
|-----------|----------------|---------------------|------------|
| Venezuela | 1997           | MaleAge15to19       | 1205546    |
| Venezuela | 1997           | MaleAge20to24       | 1050916    |
| Venezuela | 1997           | MaleAge25to29       | 955137     |
| Venezuela | 1997           | MaleAge30to34       | 902253     |
| Venezuela | 1997           | MaleAge35to39       | 768709     |
| Venezuela | 1997           | MaleAge40to44       | 644839     |
| Venezuela | 1997           | MaleAge45to49       | 540236     |
| Venezuela | 1997           | MaleAge50to54       | 412981     |
| Venezuela | 1997           | MaleAge55to59       | 301814     |
| Venezuela | 1997           | MaleAge5to9         | 1406086    |
| Venezuela | 1997           | MaleAge60to64       | 233767     |
| Venezuela | 1997           | MaleAge65to69       | 186024     |
| Venezuela | 1997           | MaleAge70to74       | 128602     |
| Venezuela | 1997           | MaleAge75to79       | 77133      |
| Venezuela | 1997           | MaleAge80to84       | 41153      |
| Venezuela | 1997           | MaleAge85to89       | 17351      |
| Venezuela | 1997           | MaleAge90to94       | 5158       |
| Venezuela | 1997           | MaleAge95to99       | 823        |
| Venezuela | 1997           | MaleAgeAbov e100    | 93         |
| Venezuela | 1998           | FemaleAge0to4       | 1343902    |
| Venezuela | 1998           | FemaleAge10to14     | 1294411    |
| Venezuela | 1998           | FemaleAge15to19     | 990099     |
| Venezuela | 1998           | FemaleAge20to24     | 757091     |
| Venezuela | 1998           | FemaleAge25to29     | 705157     |
| Venezuela | 1998           | FemaleAge30to34     | 746383     |
| Venezuela | 1998           | FemaleAge35to39     | 714908     |
| Venezuela | 1998           | FemaleAge40to44     | 632674     |
| Venezuela | 1998           | FemaleAge45to49     | 553043     |
| Venezuela | 1998           | FemaleAge50to54     | 435028     |
| Venezuela | 1998           | FemaleAge55to59     | 325010     |
| Venezuela | 1998           | FemaleAge5to9       | 1348694    |
| Venezuela | 1998           | FemaleAge60to64     | 253849     |
| Venezuela | 1998           | FemaleAge65to69     | 207896     |
| Venezuela | 1998           | FemaleAge70to74     | 155870     |
| Venezuela | 1998           | FemaleAge75to79     | 100181     |
| Venezuela | 1998           | FemaleAge80to84     | 58741      |
| Venezuela | 1998           | FemaleAge85to89     | 27365      |
| Venezuela | 1998           | FemaleAge90to94     | 9656       |
| Venezuela | 1998           | FemaleAge95to99     | 1913       |
| Venezuela | 1998           | FemaleAgeAbov e100  | 248        |
| Venezuela | 1998           | FemaleLactAge15to19 | 110074     |
| Venezuela | 1998           | FemaleLactAge20to24 | 170555     |
| Venezuela | 1998           | FemaleLactAge25to29 | 135501     |
| Venezuela | 1998           | FemaleLactAge30to34 | 89991      |
| Venezuela | 1998           | FemaleLactAge35to39 | 45964      |
| Venezuela | 1998           | FemaleLactAge40to44 | 14435      |
| Venezuela | 1998           | FemaleLactAge45to49 | 2669       |
| Venezuela | 1998           | FemalePregAge15to19 | 82556      |
| Venezuela | 1998           | FemalePregAge20to24 | 127916     |
| Venezuela | 1998           | FemalePregAge25to29 | 101626     |
| Venezuela | 1998           | FemalePregAge30to34 | 67493      |
| Venezuela | 1998           | FemalePregAge35to39 | 34473      |
| Venezuela | 1998           | FemalePregAge40to44 | 10826      |
| Venezuela | 1998           | FemalePregAge45to49 | 2001       |
| Venezuela | 1998           | MaleAge0to4         | 1404053    |
| Venezuela | 1998           | MaleAge10to14       | 1345029    |
| Venezuela | 1998           | MaleAge15to19       | 1223663    |
| Venezuela | 1998           | MaleAge20to24       | 1084906    |
| Venezuela | 1998           | MaleAge25to29       | 959823     |
| Venezuela | 1998           | MaleAge30to34       | 914174     |
| Venezuela | 1998           | MaleAge35to39       | 800409     |
| Venezuela | 1998           | MaleAge40to44       | 660014     |
| Venezuela | 1998           | MaleAge45to49       | 560577     |
| Venezuela | 1998           | MaleAge50to54       | 435651     |
| Venezuela | 1998           | MaleAge55to59       | 316833     |
| Venezuela | 1998           | MaleAge5to9         | 1405292    |
| Venezuela | 1998           | MaleAge60to64       | 239599     |
| Venezuela | 1998           | MaleAge65to69       | 190254     |
| Venezuela | 1998           | MaleAge70to74       | 135801     |
| Venezuela | 1998           | MaleAge75to79       | 80643      |
| Venezuela | 1998           | MaleAge80to84       | 43089      |
| Venezuela | 1998           | MaleAge85to89       | 18082      |
| Venezuela | 1998           | MaleAge90to94       | 5550       |
| Venezuela | 1998           | MaleAge95to99       | 961        |
| Venezuela | 1998           | MaleAgeAbov e100    | 99         |
| Venezuela | 1999           | FemaleAge0to4       | 1353115    |
| Venezuela | 1999           | FemaleAge10to14     | 1315032    |
| Venezuela | 1999           | FemaleAge15to19     | 1008459    |
| Venezuela | 1999           | FemaleAge20to24     | 789614     |
| Venezuela | 1999           | FemaleAge25to29     | 714590     |
| Venezuela | 1999           | FemaleAge30to34     | 756456     |
| Venezuela | 1999           | FemaleAge35to39     | 744534     |
| Venezuela | 1999           | FemaleAge40to44     | 651367     |
| Venezuela | 1999           | FemaleAge45to49     | 574026     |
| Venezuela | 1999           | FemaleAge50to54     | 457670     |
| Venezuela | 1999           | FemaleAge55to59     | 341477     |
| Venezuela | 1999           | FemaleAge5to9       | 1343831    |
| Venezuela | 1999           | FemaleAge60to64     | 261833     |

Dietary calcium and zinc deficiency risks are decreasing but remain prevalent

| Country   | Reference year | Age/gender group    | Population |
|-----------|----------------|---------------------|------------|
| Venezuela | 1999           | FemaleAge65to69     | 212865     |
| Venezuela | 1999           | FemaleAge70to74     | 163250     |
| Venezuela | 1999           | FemaleAge75to79     | 104698     |
| Venezuela | 1999           | FemaleAge80to84     | 61403      |
| Venezuela | 1999           | FemaleAge85to89     | 28201      |
| Venezuela | 1999           | FemaleAge90to94     | 9976       |
| Venezuela | 1999           | FemaleAge95to99     | 2107       |
| Venezuela | 1999           | FemaleAgeAbove100   | 265        |
| Venezuela | 1999           | FemaleLactAge15to19 | 110074     |
| Venezuela | 1999           | FemaleLactAge20to24 | 170555     |
| Venezuela | 1999           | FemaleLactAge25to29 | 135501     |
| Venezuela | 1999           | FemaleLactAge30to34 | 89991      |
| Venezuela | 1999           | FemaleLactAge35to39 | 45964      |
| Venezuela | 1999           | FemaleLactAge40to44 | 14435      |
| Venezuela | 1999           | FemaleLactAge45to49 | 2669       |
| Venezuela | 1999           | FemalePregAge15to19 | 82556      |
| Venezuela | 1999           | FemalePregAge20to24 | 127916     |
| Venezuela | 1999           | FemalePregAge25to29 | 101626     |
| Venezuela | 1999           | FemalePregAge30to34 | 67493      |
| Venezuela | 1999           | FemalePregAge35to39 | 34473      |
| Venezuela | 1999           | FemalePregAge40to44 | 10826      |
| Venezuela | 1999           | FemalePregAge45to49 | 2001       |
| Venezuela | 1999           | MaleAge0to4         | 1413817    |
| Venezuela | 1999           | MaleAge10to14       | 1367018    |
| Venezuela | 1999           | MaleAge15to19       | 1242766    |
| Venezuela | 1999           | MaleAge20to24       | 1117861    |
| Venezuela | 1999           | MaleAge25to29       | 968987     |
| Venezuela | 1999           | MaleAge30to34       | 923687     |
| Venezuela | 1999           | MaleAge35to39       | 829635     |
| Venezuela | 1999           | MaleAge40to44       | 677946     |
| Venezuela | 1999           | MaleAge45to49       | 580005     |
| Venezuela | 1999           | MaleAge50to54       | 458437     |
| Venezuela | 1999           | MaleAge55to59       | 333678     |
| Venezuela | 1999           | MaleAge5to9         | 1400612    |
| Venezuela | 1999           | MaleAge60to64       | 247120     |
| Venezuela | 1999           | MaleAge65to69       | 194644     |
| Venezuela | 1999           | MaleAge70to74       | 142456     |
| Venezuela | 1999           | MaleAge75to79       | 84889      |
| Venezuela | 1999           | MaleAge80to84       | 45137      |
| Venezuela | 1999           | MaleAge85to89       | 18588      |
| Venezuela | 1999           | MaleAge90to94       | 5708       |
| Venezuela | 1999           | MaleAge95to99       | 1057       |
| Venezuela | 1999           | MaleAgeAbove100     | 106        |
| Viet Nam  | 1992           | FemaleAge0to4       | 4642614    |
| Viet Nam  | 1992           | FemaleAge10to14     | 3993878    |
| Viet Nam  | 1992           | FemaleAge15to19     | 3503185    |
| Viet Nam  | 1992           | FemaleAge20to24     | 2262483    |
| Viet Nam  | 1992           | FemaleAge25to29     | 2088669    |
| Viet Nam  | 1992           | FemaleAge30to34     | 2154814    |
| Viet Nam  | 1992           | FemaleAge35to39     | 1933750    |
| Viet Nam  | 1992           | FemaleAge40to44     | 1429485    |
| Viet Nam  | 1992           | FemaleAge45to49     | 1106966    |
| Viet Nam  | 1992           | FemaleAge50to54     | 1035426    |
| Viet Nam  | 1992           | FemaleAge55to59     | 1092518    |
| Viet Nam  | 1992           | FemaleAge5to9       | 4359075    |
| Viet Nam  | 1992           | FemaleAge60to64     | 985312     |
| Viet Nam  | 1992           | FemaleAge65to69     | 825433     |
| Viet Nam  | 1992           | FemaleAge70to74     | 647831     |
| Viet Nam  | 1992           | FemaleAge75to79     | 482208     |
| Viet Nam  | 1992           | FemaleAge80to84     | 317627     |
| Viet Nam  | 1992           | FemaleAge85to89     | 172552     |
| Viet Nam  | 1992           | FemaleAge90to94     | 71927      |
| Viet Nam  | 1992           | FemaleAge95to99     | 15705      |
| Viet Nam  | 1992           | FemaleAgeAbove100   | 2228       |
| Viet Nam  | 1992           | FemaleLactAge15to19 | 126204     |
| Viet Nam  | 1992           | FemaleLactAge20to24 | 658109     |
| Viet Nam  | 1992           | FemaleLactAge25to29 | 580349     |
| Viet Nam  | 1992           | FemaleLactAge30to34 | 350019     |
| Viet Nam  | 1992           | FemaleLactAge35to39 | 169496     |
| Viet Nam  | 1992           | FemaleLactAge40to44 | 52482      |
| Viet Nam  | 1992           | FemaleLactAge45to49 | 1499       |
| Viet Nam  | 1992           | FemalePregAge15to19 | 94653      |
| Viet Nam  | 1992           | FemalePregAge20to24 | 493581     |
| Viet Nam  | 1992           | FemalePregAge25to29 | 435262     |
| Viet Nam  | 1992           | FemalePregAge30to34 | 262515     |
| Viet Nam  | 1992           | FemalePregAge35to39 | 127122     |
| Viet Nam  | 1992           | FemalePregAge40to44 | 39361      |
| Viet Nam  | 1992           | FemalePregAge45to49 | 1124       |
| Viet Nam  | 1992           | MaleAge0to4         | 4852457    |
| Viet Nam  | 1992           | MaleAge10to14       | 4115579    |
| Viet Nam  | 1992           | MaleAge15to19       | 3797447    |
| Viet Nam  | 1992           | MaleAge20to24       | 3454365    |
| Viet Nam  | 1992           | MaleAge25to29       | 3108685    |
| Viet Nam  | 1992           | MaleAge30to34       | 2728328    |
| Viet Nam  | 1992           | MaleAge35to39       | 2181877    |
| Viet Nam  | 1992           | MaleAge40to44       | 1419438    |
| Viet Nam  | 1992           | MaleAge45to49       | 974502     |
| Viet Nam  | 1992           | MaleAge50to54       | 893399     |

Dietary calcium and zinc deficiency risks are decreasing but remain prevalent

| Country  | Reference year | Age/gender group    | Population |
|----------|----------------|---------------------|------------|
| Viet Nam | 1992           | MaleAge55to59       | 919876     |
| Viet Nam | 1992           | MaleAge5to9         | 4526613    |
| Viet Nam | 1992           | MaleAge60to64       | 797249     |
| Viet Nam | 1992           | MaleAge65to69       | 619813     |
| Viet Nam | 1992           | MaleAge70to74       | 450163     |
| Viet Nam | 1992           | MaleAge75to79       | 291750     |
| Viet Nam | 1992           | MaleAge80to84       | 159195     |
| Viet Nam | 1992           | MaleAge85to89       | 67977      |
| Viet Nam | 1992           | MaleAge90to94       | 21669      |
| Viet Nam | 1992           | MaleAge95to99       | 3044       |
| Viet Nam | 1992           | MaleAgeAbove100     | 309        |
| Viet Nam | 1993           | FemaleAge0to4       | 4662571    |
| Viet Nam | 1993           | FemaleAge10to14     | 4061384    |
| Viet Nam | 1993           | FemaleAge15to19     | 3537062    |
| Viet Nam | 1993           | FemaleAge20to24     | 2324249    |
| Viet Nam | 1993           | FemaleAge25to29     | 2128671    |
| Viet Nam | 1993           | FemaleAge30to34     | 2228463    |
| Viet Nam | 1993           | FemaleAge35to39     | 2054554    |
| Viet Nam | 1993           | FemaleAge40to44     | 1571446    |
| Viet Nam | 1993           | FemaleAge45to49     | 1140149    |
| Viet Nam | 1993           | FemaleAge50to54     | 1035316    |
| Viet Nam | 1993           | FemaleAge55to59     | 1069081    |
| Viet Nam | 1993           | FemaleAge5to9       | 4419882    |
| Viet Nam | 1993           | FemaleAge60to64     | 1023402    |
| Viet Nam | 1993           | FemaleAge65to69     | 832178     |
| Viet Nam | 1993           | FemaleAge70to74     | 675579     |
| Viet Nam | 1993           | FemaleAge75to79     | 485590     |
| Viet Nam | 1993           | FemaleAge80to84     | 333406     |
| Viet Nam | 1993           | FemaleAge85to89     | 175743     |
| Viet Nam | 1993           | FemaleAge90to94     | 78297      |
| Viet Nam | 1993           | FemaleAge95to99     | 17401      |
| Viet Nam | 1993           | FemaleAgeAbove100   | 2523       |
| Viet Nam | 1993           | FemaleLactAge15to19 | 126204     |
| Viet Nam | 1993           | FemaleLactAge20to24 | 658109     |
| Viet Nam | 1993           | FemaleLactAge25to29 | 580349     |
| Viet Nam | 1993           | FemaleLactAge30to34 | 350019     |
| Viet Nam | 1993           | FemaleLactAge35to39 | 169496     |
| Viet Nam | 1993           | FemaleLactAge40to44 | 52482      |
| Viet Nam | 1993           | FemaleLactAge45to49 | 1499       |
| Viet Nam | 1993           | FemalePregAge15to19 | 94653      |
| Viet Nam | 1993           | FemalePregAge20to24 | 493581     |
| Viet Nam | 1993           | FemalePregAge25to29 | 435262     |
| Viet Nam | 1993           | FemalePregAge30to34 | 262515     |
| Viet Nam | 1993           | FemalePregAge35to39 | 127122     |
| Viet Nam | 1993           | FemalePregAge40to44 | 39361      |
| Viet Nam | 1993           | FemalePregAge45to49 | 1124       |
| Viet Nam | 1993           | MaleAge0to4         | 4886879    |
| Viet Nam | 1993           | MaleAge10to14       | 4189681    |
| Viet Nam | 1993           | MaleAge15to19       | 3835340    |
| Viet Nam | 1993           | MaleAge20to24       | 3515884    |
| Viet Nam | 1993           | MaleAge25to29       | 3150173    |
| Viet Nam | 1993           | MaleAge30to34       | 2801833    |
| Viet Nam | 1993           | MaleAge35to39       | 2293924    |
| Viet Nam | 1993           | MaleAge40to44       | 1575619    |
| Viet Nam | 1993           | MaleAge45to49       | 1001943    |
| Viet Nam | 1993           | MaleAge50to54       | 893282     |
| Viet Nam | 1993           | MaleAge55to59       | 898194     |
| Viet Nam | 1993           | MaleAge5to9         | 4590878    |
| Viet Nam | 1993           | MaleAge60to64       | 828786     |
| Viet Nam | 1993           | MaleAge65to69       | 624777     |
| Viet Nam | 1993           | MaleAge70to74       | 466009     |
| Viet Nam | 1993           | MaleAge75to79       | 295781     |
| Viet Nam | 1993           | MaleAge80to84       | 167717     |
| Viet Nam | 1993           | MaleAge85to89       | 69731      |
| Viet Nam | 1993           | MaleAge90to94       | 24043      |
| Viet Nam | 1993           | MaleAge95to99       | 3506       |
| Viet Nam | 1993           | MaleAgeAbove100     | 356        |
| Viet Nam | 1994           | FemaleAge0to4       | 4635150    |
| Viet Nam | 1994           | FemaleAge10to14     | 4130279    |
| Viet Nam | 1994           | FemaleAge15to19     | 3577482    |
| Viet Nam | 1994           | FemaleAge20to24     | 2383795    |
| Viet Nam | 1994           | FemaleAge25to29     | 2168645    |
| Viet Nam | 1994           | FemaleAge30to34     | 2293375    |
| Viet Nam | 1994           | FemaleAge35to39     | 2167533    |
| Viet Nam | 1994           | FemaleAge40to44     | 1716554    |
| Viet Nam | 1994           | FemaleAge45to49     | 1193621    |
| Viet Nam | 1994           | FemaleAge50to54     | 1040889    |
| Viet Nam | 1994           | FemaleAge55to59     | 1045916    |
| Viet Nam | 1994           | FemaleAge5to9       | 4473429    |
| Viet Nam | 1994           | FemaleAge60to64     | 1053000    |
| Viet Nam | 1994           | FemaleAge65to69     | 845021     |
| Viet Nam | 1994           | FemaleAge70to74     | 701456     |
| Viet Nam | 1994           | FemaleAge75to79     | 493790     |
| Viet Nam | 1994           | FemaleAge80to84     | 346916     |
| Viet Nam | 1994           | FemaleAge85to89     | 180372     |
| Viet Nam | 1994           | FemaleAge90to94     | 82203      |
| Viet Nam | 1994           | FemaleAge95to99     | 19416      |
| Viet Nam | 1994           | FemaleAgeAbove100   | 2848       |



Dietary calcium and zinc deficiency risks are decreasing but remain prevalent

| Country  | Reference year | Age/gender group    | Population |
|----------|----------------|---------------------|------------|
| Viet Nam | 1994           | FemaleLactAge15to19 | 126204     |
| Viet Nam | 1994           | FemaleLactAge20to24 | 658109     |
| Viet Nam | 1994           | FemaleLactAge25to29 | 580349     |
| Viet Nam | 1994           | FemaleLactAge30to34 | 350019     |
| Viet Nam | 1994           | FemaleLactAge35to39 | 169496     |
| Viet Nam | 1994           | FemaleLactAge40to44 | 52482      |
| Viet Nam | 1994           | FemaleLactAge45to49 | 1499       |
| Viet Nam | 1994           | FemalePregAge15to19 | 94653      |
| Viet Nam | 1994           | FemalePregAge20to24 | 493581     |
| Viet Nam | 1994           | FemalePregAge25to29 | 435262     |
| Viet Nam | 1994           | FemalePregAge30to34 | 262515     |
| Viet Nam | 1994           | FemalePregAge35to39 | 127122     |
| Viet Nam | 1994           | FemalePregAge40to44 | 39361      |
| Viet Nam | 1994           | FemalePregAge45to49 | 1124       |
| Viet Nam | 1994           | MaleAge0to4         | 4871076    |
| Viet Nam | 1994           | MaleAge10to14       | 4265291    |
| Viet Nam | 1994           | MaleAge15to19       | 3880745    |
| Viet Nam | 1994           | MaleAge20to24       | 3575781    |
| Viet Nam | 1994           | MaleAge25to29       | 3192372    |
| Viet Nam | 1994           | MaleAge30to34       | 2867133    |
| Viet Nam | 1994           | MaleAge35to39       | 2397818    |
| Viet Nam | 1994           | MaleAge40to44       | 1731953    |
| Viet Nam | 1994           | MaleAge45to49       | 1052875    |
| Viet Nam | 1994           | MaleAge50to54       | 897802     |
| Viet Nam | 1994           | MaleAge55to59       | 877276     |
| Viet Nam | 1994           | MaleAge5to9         | 4648005    |
| Viet Nam | 1994           | MaleAge60to64       | 853233     |
| Viet Nam | 1994           | MaleAge65to69       | 635474     |
| Viet Nam | 1994           | MaleAge70to74       | 480440     |
| Viet Nam | 1994           | MaleAge75to79       | 301598     |
| Viet Nam | 1994           | MaleAge80to84       | 174126     |
| Viet Nam | 1994           | MaleAge85to89       | 71506      |
| Viet Nam | 1994           | MaleAge90to94       | 25097      |
| Viet Nam | 1994           | MaleAge95to99       | 4088       |
| Viet Nam | 1994           | MaleAgeAbov e100    | 409        |
| Viet Nam | 1995           | FemaleAge0to4       | 4541321    |
| Viet Nam | 1995           | FemaleAge10to14     | 4199618    |
| Viet Nam | 1995           | FemaleAge15to19     | 3629096    |
| Viet Nam | 1995           | FemaleAge20to24     | 2438031    |
| Viet Nam | 1995           | FemaleAge25to29     | 2214206    |
| Viet Nam | 1995           | FemaleAge30to34     | 2351236    |
| Viet Nam | 1995           | FemaleAge35to39     | 2272288    |
| Viet Nam | 1995           | FemaleAge40to44     | 1856751    |
| Viet Nam | 1995           | FemaleAge45to49     | 1272549    |
| Viet Nam | 1995           | FemaleAge50to54     | 1052184    |
| Viet Nam | 1995           | FemaleAge55to59     | 1028965    |
| Viet Nam | 1995           | FemaleAge5to9       | 4515950    |
| Viet Nam | 1995           | FemaleAge60to64     | 1068027    |
| Viet Nam | 1995           | FemaleAge65to69     | 867550     |
| Viet Nam | 1995           | FemaleAge70to74     | 723057     |
| Viet Nam | 1995           | FemaleAge75to79     | 509054     |
| Viet Nam | 1995           | FemaleAge80to84     | 357340     |
| Viet Nam | 1995           | FemaleAge85to89     | 187379     |
| Viet Nam | 1995           | FemaleAge90to94     | 83715      |
| Viet Nam | 1995           | FemaleAge95to99     | 20777      |
| Viet Nam | 1995           | FemaleAgeAbov e100  | 3205       |
| Viet Nam | 1995           | FemaleLactAge15to19 | 126204     |
| Viet Nam | 1995           | FemaleLactAge20to24 | 658109     |
| Viet Nam | 1995           | FemaleLactAge25to29 | 580349     |
| Viet Nam | 1995           | FemaleLactAge30to34 | 350019     |
| Viet Nam | 1995           | FemaleLactAge35to39 | 169496     |
| Viet Nam | 1995           | FemaleLactAge40to44 | 52482      |
| Viet Nam | 1995           | FemaleLactAge45to49 | 1499       |
| Viet Nam | 1995           | FemalePregAge15to19 | 94653      |
| Viet Nam | 1995           | FemalePregAge20to24 | 493581     |
| Viet Nam | 1995           | FemalePregAge25to29 | 435262     |
| Viet Nam | 1995           | FemalePregAge30to34 | 262515     |
| Viet Nam | 1995           | FemalePregAge35to39 | 127122     |
| Viet Nam | 1995           | FemalePregAge40to44 | 39361      |
| Viet Nam | 1995           | FemalePregAge45to49 | 1124       |
| Viet Nam | 1995           | MaleAge0to4         | 4782159    |
| Viet Nam | 1995           | MaleAge10to14       | 4340988    |
| Viet Nam | 1995           | MaleAge15to19       | 3938357    |
| Viet Nam | 1995           | MaleAge20to24       | 3631817    |
| Viet Nam | 1995           | MaleAge25to29       | 3240411    |
| Viet Nam | 1995           | MaleAge30to34       | 2925740    |
| Viet Nam | 1995           | MaleAge35to39       | 2495849    |
| Viet Nam | 1995           | MaleAge40to44       | 1877301    |
| Viet Nam | 1995           | MaleAge45to49       | 1134112    |
| Viet Nam | 1995           | MaleAge50to54       | 906828     |
| Viet Nam | 1995           | MaleAge55to59       | 862216     |
| Viet Nam | 1995           | MaleAge5to9         | 4695809    |
| Viet Nam | 1995           | MaleAge60to64       | 865536     |
| Viet Nam | 1995           | MaleAge65to69       | 654432     |
| Viet Nam | 1995           | MaleAge70to74       | 492787     |
| Viet Nam | 1995           | MaleAge75to79       | 310235     |
| Viet Nam | 1995           | MaleAge80to84       | 178334     |
| Viet Nam | 1995           | MaleAge85to89       | 73545      |

Dietary calcium and zinc deficiency risks are decreasing but remain prevalent

| Country  | Reference year | Age/gender group    | Population |
|----------|----------------|---------------------|------------|
| Viet Nam | 1995           | MaleAge90to94       | 24716      |
| Viet Nam | 1995           | MaleAge95to99       | 4326       |
| Viet Nam | 1995           | MaleAgeAbove100     | 469        |
| Viet Nam | 1996           | FemaleAge0to4       | 4430340    |
| Viet Nam | 1996           | FemaleAge10to14     | 4264585    |
| Viet Nam | 1996           | FemaleAge15to19     | 3698333    |
| Viet Nam | 1996           | FemaleAge20to24     | 2705090    |
| Viet Nam | 1996           | FemaleAge25to29     | 2532961    |
| Viet Nam | 1996           | FemaleAge30to34     | 2588425    |
| Viet Nam | 1996           | FemaleAge35to39     | 2457601    |
| Viet Nam | 1996           | FemaleAge40to44     | 2016759    |
| Viet Nam | 1996           | FemaleAge45to49     | 1372505    |
| Viet Nam | 1996           | FemaleAge50to54     | 1067295    |
| Viet Nam | 1996           | FemaleAge55to59     | 1014856    |
| Viet Nam | 1996           | FemaleAge5to9       | 4545635    |
| Viet Nam | 1996           | FemaleAge60to64     | 1065006    |
| Viet Nam | 1996           | FemaleAge65to69     | 891900     |
| Viet Nam | 1996           | FemaleAge70to74     | 734888     |
| Viet Nam | 1996           | FemaleAge75to79     | 525623     |
| Viet Nam | 1996           | FemaleAge80to84     | 364045     |
| Viet Nam | 1996           | FemaleAge85to89     | 198731     |
| Viet Nam | 1996           | FemaleAge90to94     | 88918      |
| Viet Nam | 1996           | FemaleAge95to99     | 23722      |
| Viet Nam | 1996           | FemaleAgeAbove100   | 3589       |
| Viet Nam | 1996           | FemaleLactAge15to19 | 115976     |
| Viet Nam | 1996           | FemaleLactAge20to24 | 530130     |
| Viet Nam | 1996           | FemaleLactAge25to29 | 428561     |
| Viet Nam | 1996           | FemaleLactAge30to34 | 241925     |
| Viet Nam | 1996           | FemaleLactAge35to39 | 115368     |
| Viet Nam | 1996           | FemaleLactAge40to44 | 36597      |
| Viet Nam | 1996           | FemaleLactAge45to49 | 1714       |
| Viet Nam | 1996           | FemalePregAge15to19 | 86982      |
| Viet Nam | 1996           | FemalePregAge20to24 | 397598     |
| Viet Nam | 1996           | FemalePregAge25to29 | 321420     |
| Viet Nam | 1996           | FemalePregAge30to34 | 181443     |
| Viet Nam | 1996           | FemalePregAge35to39 | 86526      |
| Viet Nam | 1996           | FemalePregAge40to44 | 27448      |
| Viet Nam | 1996           | FemalePregAge45to49 | 1285       |
| Viet Nam | 1996           | MaleAge0to4         | 4677639    |
| Viet Nam | 1996           | MaleAge10to14       | 4410054    |
| Viet Nam | 1996           | MaleAge15to19       | 3992977    |
| Viet Nam | 1996           | MaleAge20to24       | 3673649    |
| Viet Nam | 1996           | MaleAge25to29       | 3293224    |
| Viet Nam | 1996           | MaleAge30to34       | 2976580    |
| Viet Nam | 1996           | MaleAge35to39       | 2582848    |
| Viet Nam | 1996           | MaleAge40to44       | 2007447    |
| Viet Nam | 1996           | MaleAge45to49       | 1239737    |
| Viet Nam | 1996           | MaleAge50to54       | 917243     |
| Viet Nam | 1996           | MaleAge55to59       | 848415     |
| Viet Nam | 1996           | MaleAge5to9         | 4731371    |
| Viet Nam | 1996           | MaleAge60to64       | 859694     |
| Viet Nam | 1996           | MaleAge65to69       | 673605     |
| Viet Nam | 1996           | MaleAge70to74       | 500008     |
| Viet Nam | 1996           | MaleAge75to79       | 321062     |
| Viet Nam | 1996           | MaleAge80to84       | 184420     |
| Viet Nam | 1996           | MaleAge85to89       | 80263      |
| Viet Nam | 1996           | MaleAge90to94       | 27166      |
| Viet Nam | 1996           | MaleAge95to99       | 5157       |
| Viet Nam | 1996           | MaleAgeAbove100     | 534        |
| Viet Nam | 1997           | FemaleAge0to4       | 4208464    |
| Viet Nam | 1997           | FemaleAge10to14     | 4333083    |
| Viet Nam | 1997           | FemaleAge15to19     | 3763542    |
| Viet Nam | 1997           | FemaleAge20to24     | 2746672    |
| Viet Nam | 1997           | FemaleAge25to29     | 2598265    |
| Viet Nam | 1997           | FemaleAge30to34     | 2633304    |
| Viet Nam | 1997           | FemaleAge35to39     | 2541162    |
| Viet Nam | 1997           | FemaleAge40to44     | 2146383    |
| Viet Nam | 1997           | FemaleAge45to49     | 1498843    |
| Viet Nam | 1997           | FemaleAge50to54     | 1089693    |
| Viet Nam | 1997           | FemaleAge55to59     | 1009324    |
| Viet Nam | 1997           | FemaleAge5to9       | 4572488    |
| Viet Nam | 1997           | FemaleAge60to64     | 1051152    |
| Viet Nam | 1997           | FemaleAge65to69     | 926767     |
| Viet Nam | 1997           | FemaleAge70to74     | 743145     |
| Viet Nam | 1997           | FemaleAge75to79     | 548467     |
| Viet Nam | 1997           | FemaleAge80to84     | 368425     |
| Viet Nam | 1997           | FemaleAge85to89     | 211362     |
| Viet Nam | 1997           | FemaleAge90to94     | 92409      |
| Viet Nam | 1997           | FemaleAge95to99     | 27830      |
| Viet Nam | 1997           | FemaleAgeAbove100   | 4005       |
| Viet Nam | 1997           | FemaleLactAge15to19 | 115976     |
| Viet Nam | 1997           | FemaleLactAge20to24 | 530130     |
| Viet Nam | 1997           | FemaleLactAge25to29 | 428561     |
| Viet Nam | 1997           | FemaleLactAge30to34 | 241925     |
| Viet Nam | 1997           | FemaleLactAge35to39 | 115368     |
| Viet Nam | 1997           | FemaleLactAge40to44 | 36597      |
| Viet Nam | 1997           | FemaleLactAge45to49 | 1714       |
| Viet Nam | 1997           | FemalePregAge15to19 | 86982      |

Dietary calcium and zinc deficiency risks are decreasing but remain prevalent

| Country  | Reference year | Age/gender group    | Population |
|----------|----------------|---------------------|------------|
| Viet Nam | 1997           | FemalePregAge20to24 | 397598     |
| Viet Nam | 1997           | FemalePregAge25to29 | 321420     |
| Viet Nam | 1997           | FemalePregAge30to34 | 181443     |
| Viet Nam | 1997           | FemalePregAge35to39 | 86526      |
| Viet Nam | 1997           | FemalePregAge40to44 | 27448      |
| Viet Nam | 1997           | FemalePregAge45to49 | 1285       |
| Viet Nam | 1997           | MaleAge0to4         | 4449877    |
| Viet Nam | 1997           | MaleAge10to14       | 4483303    |
| Viet Nam | 1997           | MaleAge15to19       | 4064868    |
| Viet Nam | 1997           | MaleAge20to24       | 3716246    |
| Viet Nam | 1997           | MaleAge25to29       | 3357159    |
| Viet Nam | 1997           | MaleAge30to34       | 3025719    |
| Viet Nam | 1997           | MaleAge35to39       | 2666277    |
| Viet Nam | 1997           | MaleAge40to44       | 2130134    |
| Viet Nam | 1997           | MaleAge45to49       | 1376031    |
| Viet Nam | 1997           | MaleAge50to54       | 933123     |
| Viet Nam | 1997           | MaleAge55to59       | 843140     |
| Viet Nam | 1997           | MaleAge5to9         | 4768535    |
| Viet Nam | 1997           | MaleAge60to64       | 845613     |
| Viet Nam | 1997           | MaleAge65to69       | 700990     |
| Viet Nam | 1997           | MaleAge70to74       | 505084     |
| Viet Nam | 1997           | MaleAge75to79       | 333936     |
| Viet Nam | 1997           | MaleAge80to84       | 188829     |
| Viet Nam | 1997           | MaleAge85to89       | 86782      |
| Viet Nam | 1997           | MaleAge90to94       | 28838      |
| Viet Nam | 1997           | MaleAge95to99       | 6405       |
| Viet Nam | 1997           | MaleAgeAbov e100    | 607        |
| Viet Nam | 1998           | FemaleAge0to4       | 3923161    |
| Viet Nam | 1998           | FemaleAge10to14     | 4398313    |
| Viet Nam | 1998           | FemaleAge15to19     | 3837932    |
| Viet Nam | 1998           | FemaleAge20to24     | 2788708    |
| Viet Nam | 1998           | FemaleAge25to29     | 2668504    |
| Viet Nam | 1998           | FemaleAge30to34     | 2676577    |
| Viet Nam | 1998           | FemaleAge35to39     | 2616364    |
| Viet Nam | 1998           | FemaleAge40to44     | 2270386    |
| Viet Nam | 1998           | FemaleAge45to49     | 1642211    |
| Viet Nam | 1998           | FemaleAge50to54     | 1124398    |
| Viet Nam | 1998           | FemaleAge55to59     | 1011118    |
| Viet Nam | 1998           | FemaleAge5to9       | 4587959    |
| Viet Nam | 1998           | FemaleAge60to64     | 1030617    |
| Viet Nam | 1998           | FemaleAge65to69     | 964746     |
| Viet Nam | 1998           | FemaleAge70to74     | 751408     |
| Viet Nam | 1998           | FemaleAge75to79     | 574254     |
| Viet Nam | 1998           | FemaleAge80to84     | 373207     |
| Viet Nam | 1998           | FemaleAge85to89     | 223577     |
| Viet Nam | 1998           | FemaleAge90to94     | 95047      |
| Viet Nam | 1998           | FemaleAge95to99     | 31501      |
| Viet Nam | 1998           | FemaleAgeAbov e100  | 4470       |
| Viet Nam | 1998           | FemaleLactAge15to19 | 115976     |
| Viet Nam | 1998           | FemaleLactAge20to24 | 530130     |
| Viet Nam | 1998           | FemaleLactAge25to29 | 428561     |
| Viet Nam | 1998           | FemaleLactAge30to34 | 241925     |
| Viet Nam | 1998           | FemaleLactAge35to39 | 115368     |
| Viet Nam | 1998           | FemaleLactAge40to44 | 36597      |
| Viet Nam | 1998           | FemaleLactAge45to49 | 1714       |
| Viet Nam | 1998           | FemalePregAge15to19 | 86982      |
| Viet Nam | 1998           | FemalePregAge20to24 | 397598     |
| Viet Nam | 1998           | FemalePregAge25to29 | 321420     |
| Viet Nam | 1998           | FemalePregAge30to34 | 181443     |
| Viet Nam | 1998           | FemalePregAge35to39 | 86526      |
| Viet Nam | 1998           | FemalePregAge40to44 | 27448      |
| Viet Nam | 1998           | FemalePregAge45to49 | 1285       |
| Viet Nam | 1998           | MaleAge0to4         | 4150381    |
| Viet Nam | 1998           | MaleAge10to14       | 4553253    |
| Viet Nam | 1998           | MaleAge15to19       | 4148348    |
| Viet Nam | 1998           | MaleAge20to24       | 3761255    |
| Viet Nam | 1998           | MaleAge25to29       | 3425085    |
| Viet Nam | 1998           | MaleAge30to34       | 3073618    |
| Viet Nam | 1998           | MaleAge35to39       | 2743885    |
| Viet Nam | 1998           | MaleAge40to44       | 2244621    |
| Viet Nam | 1998           | MaleAge45to49       | 1530969    |
| Viet Nam | 1998           | MaleAge50to54       | 961316     |
| Viet Nam | 1998           | MaleAge55to59       | 844556     |
| Viet Nam | 1998           | MaleAge5to9         | 4797478    |
| Viet Nam | 1998           | MaleAge60to64       | 827126     |
| Viet Nam | 1998           | MaleAge65to69       | 730460     |
| Viet Nam | 1998           | MaleAge70to74       | 510716     |
| Viet Nam | 1998           | MaleAge75to79       | 347279     |
| Viet Nam | 1998           | MaleAge80to84       | 192619     |
| Viet Nam | 1998           | MaleAge85to89       | 92162      |
| Viet Nam | 1998           | MaleAge90to94       | 29952      |
| Viet Nam | 1998           | MaleAge95to99       | 7533       |
| Viet Nam | 1998           | MaleAgeAbov e100    | 691        |
| Viet Nam | 1999           | FemaleAge0to4       | 3656140    |
| Viet Nam | 1999           | FemaleAge10to14     | 4453730    |
| Viet Nam | 1999           | FemaleAge15to19     | 3912440    |
| Viet Nam | 1999           | FemaleAge20to24     | 2833142    |
| Viet Nam | 1999           | FemaleAge25to29     | 2731656    |

Dietary calcium and zinc deficiency risks are decreasing but remain prevalent

| Country  | Reference year | Age/gender group    | Population |
|----------|----------------|---------------------|------------|
| Viet Nam | 1999           | FemaleAge30to34     | 2719576    |
| Viet Nam | 1999           | FemaleAge35to39     | 2680793    |
| Viet Nam | 1999           | FemaleAge40to44     | 2384250    |
| Viet Nam | 1999           | FemaleAge45to49     | 1787679    |
| Viet Nam | 1999           | FemaleAge50to54     | 1178528    |
| Viet Nam | 1999           | FemaleAge55to59     | 1017527    |
| Viet Nam | 1999           | FemaleAge5to9       | 4574032    |
| Viet Nam | 1999           | FemaleAge60to64     | 1009972    |
| Viet Nam | 1999           | FemaleAge65to69     | 994129     |
| Viet Nam | 1999           | FemaleAge70to74     | 764872     |
| Viet Nam | 1999           | FemaleAge75to79     | 597911     |
| Viet Nam | 1999           | FemaleAge80to84     | 381500     |
| Viet Nam | 1999           | FemaleAge85to89     | 233194     |
| Viet Nam | 1999           | FemaleAge90to94     | 97883      |
| Viet Nam | 1999           | FemaleAge95to99     | 33432      |
| Viet Nam | 1999           | FemaleAgeAbov e100  | 5009       |
| Viet Nam | 1999           | FemaleLactAge15to19 | 115976     |
| Viet Nam | 1999           | FemaleLactAge20to24 | 530130     |
| Viet Nam | 1999           | FemaleLactAge25to29 | 428561     |
| Viet Nam | 1999           | FemaleLactAge30to34 | 241925     |
| Viet Nam | 1999           | FemaleLactAge35to39 | 115368     |
| Viet Nam | 1999           | FemaleLactAge40to44 | 36597      |
| Viet Nam | 1999           | FemaleLactAge45to49 | 1714       |
| Viet Nam | 1999           | FemalePregAge15to19 | 86982      |
| Viet Nam | 1999           | FemalePregAge20to24 | 397598     |
| Viet Nam | 1999           | FemalePregAge25to29 | 321420     |
| Viet Nam | 1999           | FemalePregAge30to34 | 181443     |
| Viet Nam | 1999           | FemalePregAge35to39 | 86526      |
| Viet Nam | 1999           | FemalePregAge40to44 | 27448      |
| Viet Nam | 1999           | FemalePregAge45to49 | 1285       |
| Viet Nam | 1999           | MaleAge0to4         | 3868255    |
| Viet Nam | 1999           | MaleAge10to14       | 4613833    |
| Viet Nam | 1999           | MaleAge15to19       | 4232163    |
| Viet Nam | 1999           | MaleAge20to24       | 3809858    |
| Viet Nam | 1999           | MaleAge25to29       | 3485620    |
| Viet Nam | 1999           | MaleAge30to34       | 3119938    |
| Viet Nam | 1999           | MaleAge35to39       | 2811545    |
| Viet Nam | 1999           | MaleAge40to44       | 2349908    |
| Viet Nam | 1999           | MaleAge45to49       | 1684914    |
| Viet Nam | 1999           | MaleAge50to54       | 1011814    |
| Viet Nam | 1999           | MaleAge55to59       | 849522     |
| Viet Nam | 1999           | MaleAge5to9         | 4796426    |
| Viet Nam | 1999           | MaleAge60to64       | 809555     |
| Viet Nam | 1999           | MaleAge65to69       | 752614     |
| Viet Nam | 1999           | MaleAge70to74       | 520500     |
| Viet Nam | 1999           | MaleAge75to79       | 358737     |
| Viet Nam | 1999           | MaleAge80to84       | 196909     |
| Viet Nam | 1999           | MaleAge85to89       | 95481      |
| Viet Nam | 1999           | MaleAge90to94       | 30748      |
| Viet Nam | 1999           | MaleAge95to99       | 8022       |
| Viet Nam | 1999           | MaleAgeAbov e100    | 791        |
| Yemen    | 1992           | FemaleAge0to4       | 1334893    |
| Yemen    | 1992           | FemaleAge10to14     | 859612     |
| Yemen    | 1992           | FemaleAge15to19     | 449729     |
| Yemen    | 1992           | FemaleAge20to24     | 204430     |
| Yemen    | 1992           | FemaleAge25to29     | 166905     |
| Yemen    | 1992           | FemaleAge30to34     | 151155     |
| Yemen    | 1992           | FemaleAge35to39     | 141360     |
| Yemen    | 1992           | FemaleAge40to44     | 168185     |
| Yemen    | 1992           | FemaleAge45to49     | 180680     |
| Yemen    | 1992           | FemaleAge50to54     | 161621     |
| Yemen    | 1992           | FemaleAge55to59     | 127290     |
| Yemen    | 1992           | FemaleAge5to9       | 1107941    |
| Yemen    | 1992           | FemaleAge60to64     | 103351     |
| Yemen    | 1992           | FemaleAge65to69     | 80668      |
| Yemen    | 1992           | FemaleAge70to74     | 57294      |
| Yemen    | 1992           | FemaleAge75to79     | 37447      |
| Yemen    | 1992           | FemaleAge80to84     | 19780      |
| Yemen    | 1992           | FemaleAge85to89     | 6424       |
| Yemen    | 1992           | FemaleAge90to94     | 1425       |
| Yemen    | 1992           | FemaleAge95to99     | 234        |
| Yemen    | 1992           | FemaleAgeAbov e100  | 11         |
| Yemen    | 1992           | FemaleLactAge15to19 | 97513      |
| Yemen    | 1992           | FemaleLactAge20to24 | 167863     |
| Yemen    | 1992           | FemaleLactAge25to29 | 152449     |
| Yemen    | 1992           | FemaleLactAge30to34 | 115812     |
| Yemen    | 1992           | FemaleLactAge35to39 | 71879      |
| Yemen    | 1992           | FemaleLactAge40to44 | 38904      |
| Yemen    | 1992           | FemaleLactAge45to49 | 16585      |
| Yemen    | 1992           | FemalePregAge15to19 | 73135      |
| Yemen    | 1992           | FemalePregAge20to24 | 125897     |
| Yemen    | 1992           | FemalePregAge25to29 | 114336     |
| Yemen    | 1992           | FemalePregAge30to34 | 86859      |
| Yemen    | 1992           | FemalePregAge35to39 | 53909      |
| Yemen    | 1992           | FemalePregAge40to44 | 29178      |
| Yemen    | 1992           | FemalePregAge45to49 | 12439      |
| Yemen    | 1992           | MaleAge0to4         | 1385292    |
| Yemen    | 1992           | MaleAge10to14       | 894337     |

Dietary calcium and zinc deficiency risks are decreasing but remain prevalent

| Country | Reference year | Age/gender group    | Population |
|---------|----------------|---------------------|------------|
| Yemen   | 1992           | MaleAge15to19       | 654704     |
| Yemen   | 1992           | MaleAge20to24       | 505478     |
| Yemen   | 1992           | MaleAge25to29       | 413850     |
| Yemen   | 1992           | MaleAge30to34       | 334518     |
| Yemen   | 1992           | MaleAge35to39       | 248326     |
| Yemen   | 1992           | MaleAge40to44       | 220183     |
| Yemen   | 1992           | MaleAge45to49       | 195275     |
| Yemen   | 1992           | MaleAge50to54       | 144618     |
| Yemen   | 1992           | MaleAge55to59       | 114538     |
| Yemen   | 1992           | MaleAge5to9         | 1144548    |
| Yemen   | 1992           | MaleAge60to64       | 94459      |
| Yemen   | 1992           | MaleAge65to69       | 72640      |
| Yemen   | 1992           | MaleAge70to74       | 49875      |
| Yemen   | 1992           | MaleAge75to79       | 31343      |
| Yemen   | 1992           | MaleAge80to84       | 15094      |
| Yemen   | 1992           | MaleAge85to89       | 3883       |
| Yemen   | 1992           | MaleAge90to94       | 717        |
| Yemen   | 1992           | MaleAge95to99       | 81         |
| Yemen   | 1992           | MaleAgeAbove100     | 3          |
| Yemen   | 1993           | FemaleAge0to4       | 1389681    |
| Yemen   | 1993           | FemaleAge10to14     | 912561     |
| Yemen   | 1993           | FemaleAge15to19     | 484481     |
| Yemen   | 1993           | FemaleAge20to24     | 202687     |
| Yemen   | 1993           | FemaleAge25to29     | 181028     |
| Yemen   | 1993           | FemaleAge30to34     | 180253     |
| Yemen   | 1993           | FemaleAge35to39     | 175234     |
| Yemen   | 1993           | FemaleAge40to44     | 179419     |
| Yemen   | 1993           | FemaleAge45to49     | 191940     |
| Yemen   | 1993           | FemaleAge50to54     | 167850     |
| Yemen   | 1993           | FemaleAge55to59     | 127241     |
| Yemen   | 1993           | FemaleAge5to9       | 1150629    |
| Yemen   | 1993           | FemaleAge60to64     | 104696     |
| Yemen   | 1993           | FemaleAge65to69     | 83496      |
| Yemen   | 1993           | FemaleAge70to74     | 60240      |
| Yemen   | 1993           | FemaleAge75to79     | 39639      |
| Yemen   | 1993           | FemaleAge80to84     | 22996      |
| Yemen   | 1993           | FemaleAge85to89     | 7512       |
| Yemen   | 1993           | FemaleAge90to94     | 1518       |
| Yemen   | 1993           | FemaleAge95to99     | 234        |
| Yemen   | 1993           | FemaleAgeAbove100   | 11         |
| Yemen   | 1993           | FemaleLactAge15to19 | 97513      |
| Yemen   | 1993           | FemaleLactAge20to24 | 167863     |
| Yemen   | 1993           | FemaleLactAge25to29 | 152449     |
| Yemen   | 1993           | FemaleLactAge30to34 | 115812     |
| Yemen   | 1993           | FemaleLactAge35to39 | 71879      |
| Yemen   | 1993           | FemaleLactAge40to44 | 38904      |
| Yemen   | 1993           | FemaleLactAge45to49 | 16585      |
| Yemen   | 1993           | FemalePregAge15to19 | 73135      |
| Yemen   | 1993           | FemalePregAge20to24 | 125897     |
| Yemen   | 1993           | FemalePregAge25to29 | 114336     |
| Yemen   | 1993           | FemalePregAge30to34 | 86859      |
| Yemen   | 1993           | FemalePregAge35to39 | 53909      |
| Yemen   | 1993           | FemalePregAge40to44 | 29178      |
| Yemen   | 1993           | FemalePregAge45to49 | 12439      |
| Yemen   | 1993           | MaleAge0to4         | 1445343    |
| Yemen   | 1993           | MaleAge10to14       | 951824     |
| Yemen   | 1993           | MaleAge15to19       | 701472     |
| Yemen   | 1993           | MaleAge20to24       | 516023     |
| Yemen   | 1993           | MaleAge25to29       | 422639     |
| Yemen   | 1993           | MaleAge30to34       | 354053     |
| Yemen   | 1993           | MaleAge35to39       | 283966     |
| Yemen   | 1993           | MaleAge40to44       | 235099     |
| Yemen   | 1993           | MaleAge45to49       | 216865     |
| Yemen   | 1993           | MaleAge50to54       | 160953     |
| Yemen   | 1993           | MaleAge55to59       | 122167     |
| Yemen   | 1993           | MaleAge5to9         | 1191806    |
| Yemen   | 1993           | MaleAge60to64       | 104107     |
| Yemen   | 1993           | MaleAge65to69       | 81423      |
| Yemen   | 1993           | MaleAge70to74       | 57270      |
| Yemen   | 1993           | MaleAge75to79       | 36258      |
| Yemen   | 1993           | MaleAge80to84       | 19686      |
| Yemen   | 1993           | MaleAge85to89       | 4885       |
| Yemen   | 1993           | MaleAge90to94       | 777        |
| Yemen   | 1993           | MaleAge95to99       | 103        |
| Yemen   | 1993           | MaleAgeAbove100     | 4          |
| Yemen   | 1994           | FemaleAge0to4       | 1438034    |
| Yemen   | 1994           | FemaleAge10to14     | 965263     |
| Yemen   | 1994           | FemaleAge15to19     | 527572     |
| Yemen   | 1994           | FemaleAge20to24     | 203489     |
| Yemen   | 1994           | FemaleAge25to29     | 187266     |
| Yemen   | 1994           | FemaleAge30to34     | 205410     |
| Yemen   | 1994           | FemaleAge35to39     | 208343     |
| Yemen   | 1994           | FemaleAge40to44     | 197900     |
| Yemen   | 1994           | FemaleAge45to49     | 203208     |
| Yemen   | 1994           | FemaleAge50to54     | 176550     |
| Yemen   | 1994           | FemaleAge55to59     | 127523     |
| Yemen   | 1994           | FemaleAge5to9       | 1189389    |
| Yemen   | 1994           | FemaleAge60to64     | 105159     |

Dietary calcium and zinc deficiency risks are decreasing but remain prevalent

| Country | Reference year | Age/gender group    | Population |
|---------|----------------|---------------------|------------|
| Yemen   | 1994           | FemaleAge65to69     | 85912      |
| Yemen   | 1994           | FemaleAge70to74     | 63364      |
| Yemen   | 1994           | FemaleAge75to79     | 41356      |
| Yemen   | 1994           | FemaleAge80to84     | 26329      |
| Yemen   | 1994           | FemaleAge85to89     | 9102       |
| Yemen   | 1994           | FemaleAge90to94     | 1510       |
| Yemen   | 1994           | FemaleAge95to99     | 239        |
| Yemen   | 1994           | FemaleAgeAbov e100  | 11         |
| Yemen   | 1994           | FemaleLactAge15to19 | 97513      |
| Yemen   | 1994           | FemaleLactAge20to24 | 167863     |
| Yemen   | 1994           | FemaleLactAge25to29 | 152449     |
| Yemen   | 1994           | FemaleLactAge30to34 | 115812     |
| Yemen   | 1994           | FemaleLactAge35to39 | 71879      |
| Yemen   | 1994           | FemaleLactAge40to44 | 38904      |
| Yemen   | 1994           | FemaleLactAge45to49 | 16585      |
| Yemen   | 1994           | FemalePregAge15to19 | 73135      |
| Yemen   | 1994           | FemalePregAge20to24 | 125897     |
| Yemen   | 1994           | FemalePregAge25to29 | 114336     |
| Yemen   | 1994           | FemalePregAge30to34 | 86859      |
| Yemen   | 1994           | FemalePregAge35to39 | 53909      |
| Yemen   | 1994           | FemalePregAge40to44 | 29178      |
| Yemen   | 1994           | FemalePregAge45to49 | 12439      |
| Yemen   | 1994           | MaleAge0to4         | 1496726    |
| Yemen   | 1994           | MaleAge10to14       | 1005278    |
| Yemen   | 1994           | MaleAge15to19       | 753412     |
| Yemen   | 1994           | MaleAge20to24       | 533283     |
| Yemen   | 1994           | MaleAge25to29       | 427082     |
| Yemen   | 1994           | MaleAge30to34       | 366905     |
| Yemen   | 1994           | MaleAge35to39       | 315712     |
| Yemen   | 1994           | MaleAge40to44       | 255065     |
| Yemen   | 1994           | MaleAge45to49       | 236789     |
| Yemen   | 1994           | MaleAge50to54       | 180149     |
| Yemen   | 1994           | MaleAge55to59       | 130029     |
| Yemen   | 1994           | MaleAge5to9         | 1233660    |
| Yemen   | 1994           | MaleAge60to64       | 113365     |
| Yemen   | 1994           | MaleAge65to69       | 90421      |
| Yemen   | 1994           | MaleAge70to74       | 65398      |
| Yemen   | 1994           | MaleAge75to79       | 41222      |
| Yemen   | 1994           | MaleAge80to84       | 25040      |
| Yemen   | 1994           | MaleAge85to89       | 6618       |
| Yemen   | 1994           | MaleAge90to94       | 770        |
| Yemen   | 1994           | MaleAge95to99       | 105        |
| Yemen   | 1994           | MaleAgeAbov e100    | 4          |
| Yemen   | 1995           | FemaleAge0to4       | 1472187    |
| Yemen   | 1995           | FemaleAge10to14     | 1014441    |
| Yemen   | 1995           | FemaleAge15to19     | 575376     |
| Yemen   | 1995           | FemaleAge20to24     | 211983     |
| Yemen   | 1995           | FemaleAge25to29     | 186263     |
| Yemen   | 1995           | FemaleAge30to34     | 224567     |
| Yemen   | 1995           | FemaleAge35to39     | 238896     |
| Yemen   | 1995           | FemaleAge40to44     | 222984     |
| Yemen   | 1995           | FemaleAge45to49     | 215428     |
| Yemen   | 1995           | FemaleAge50to54     | 186953     |
| Yemen   | 1995           | FemaleAge55to59     | 129246     |
| Yemen   | 1995           | FemaleAge5to9       | 1226383    |
| Yemen   | 1995           | FemaleAge60to64     | 104719     |
| Yemen   | 1995           | FemaleAge65to69     | 87640      |
| Yemen   | 1995           | FemaleAge70to74     | 66375      |
| Yemen   | 1995           | FemaleAge75to79     | 43049      |
| Yemen   | 1995           | FemaleAge80to84     | 29293      |
| Yemen   | 1995           | FemaleAge85to89     | 11472      |
| Yemen   | 1995           | FemaleAge90to94     | 1321       |
| Yemen   | 1995           | FemaleAge95to99     | 172        |
| Yemen   | 1995           | FemaleAgeAbov e100  | 12         |
| Yemen   | 1995           | FemaleLactAge15to19 | 97513      |
| Yemen   | 1995           | FemaleLactAge20to24 | 167863     |
| Yemen   | 1995           | FemaleLactAge25to29 | 152449     |
| Yemen   | 1995           | FemaleLactAge30to34 | 115812     |
| Yemen   | 1995           | FemaleLactAge35to39 | 71879      |
| Yemen   | 1995           | FemaleLactAge40to44 | 38904      |
| Yemen   | 1995           | FemaleLactAge45to49 | 16585      |
| Yemen   | 1995           | FemalePregAge15to19 | 73135      |
| Yemen   | 1995           | FemalePregAge20to24 | 125897     |
| Yemen   | 1995           | FemalePregAge25to29 | 114336     |
| Yemen   | 1995           | FemalePregAge30to34 | 86859      |
| Yemen   | 1995           | FemalePregAge35to39 | 53909      |
| Yemen   | 1995           | FemalePregAge40to44 | 29178      |
| Yemen   | 1995           | FemalePregAge45to49 | 12439      |
| Yemen   | 1995           | MaleAge0to4         | 1529256    |
| Yemen   | 1995           | MaleAge10to14       | 1051156    |
| Yemen   | 1995           | MaleAge15to19       | 805388     |
| Yemen   | 1995           | MaleAge20to24       | 558303     |
| Yemen   | 1995           | MaleAge25to29       | 428864     |
| Yemen   | 1995           | MaleAge30to34       | 373098     |
| Yemen   | 1995           | MaleAge35to39       | 339883     |
| Yemen   | 1995           | MaleAge40to44       | 279521     |
| Yemen   | 1995           | MaleAge45to49       | 254877     |
| Yemen   | 1995           | MaleAge50to54       | 200545     |

Dietary calcium and zinc deficiency risks are decreasing but remain prevalent

| Country | Reference year | Age/gender group    | Population |
|---------|----------------|---------------------|------------|
| Yemen   | 1995           | MaleAge55to59       | 139575     |
| Yemen   | 1995           | MaleAge5to9         | 1270207    |
| Yemen   | 1995           | MaleAge60to64       | 121442     |
| Yemen   | 1995           | MaleAge65to69       | 99348      |
| Yemen   | 1995           | MaleAge70to74       | 73815      |
| Yemen   | 1995           | MaleAge75to79       | 46667      |
| Yemen   | 1995           | MaleAge80to84       | 30498      |
| Yemen   | 1995           | MaleAge85to89       | 9535       |
| Yemen   | 1995           | MaleAge90to94       | 633        |
| Yemen   | 1995           | MaleAge95to99       | 68         |
| Yemen   | 1995           | MaleAgeAbov e100    | 4          |
| Yemen   | 1996           | FemaleAge0to4       | 1512369    |
| Yemen   | 1996           | FemaleAge10to14     | 1058900    |
| Yemen   | 1996           | FemaleAge15to19     | 620704     |
| Yemen   | 1996           | FemaleAge20to24     | 229670     |
| Yemen   | 1996           | FemaleAge25to29     | 191046     |
| Yemen   | 1996           | FemaleAge30to34     | 214441     |
| Yemen   | 1996           | FemaleAge35to39     | 232756     |
| Yemen   | 1996           | FemaleAge40to44     | 239844     |
| Yemen   | 1996           | FemaleAge45to49     | 230289     |
| Yemen   | 1996           | FemaleAge50to54     | 196962     |
| Yemen   | 1996           | FemaleAge55to59     | 136298     |
| Yemen   | 1996           | FemaleAge5to9       | 1268483    |
| Yemen   | 1996           | FemaleAge60to64     | 105740     |
| Yemen   | 1996           | FemaleAge65to69     | 87945      |
| Yemen   | 1996           | FemaleAge70to74     | 67113      |
| Yemen   | 1996           | FemaleAge75to79     | 43235      |
| Yemen   | 1996           | FemaleAge80to84     | 28603      |
| Yemen   | 1996           | FemaleAge85to89     | 12646      |
| Yemen   | 1996           | FemaleAge90to94     | 2034       |
| Yemen   | 1996           | FemaleAge95to99     | 240        |
| Yemen   | 1996           | FemaleAgeAbov e100  | 13         |
| Yemen   | 1996           | FemaleLactAge15to19 | 101731     |
| Yemen   | 1996           | FemaleLactAge20to24 | 175657     |
| Yemen   | 1996           | FemaleLactAge25to29 | 150460     |
| Yemen   | 1996           | FemaleLactAge30to34 | 124386     |
| Yemen   | 1996           | FemaleLactAge35to39 | 82394      |
| Yemen   | 1996           | FemaleLactAge40to44 | 35433      |
| Yemen   | 1996           | FemaleLactAge45to49 | 12300      |
| Yemen   | 1996           | FemalePregAge15to19 | 76298      |
| Yemen   | 1996           | FemalePregAge20to24 | 131743     |
| Yemen   | 1996           | FemalePregAge25to29 | 112845     |
| Yemen   | 1996           | FemalePregAge30to34 | 93289      |
| Yemen   | 1996           | FemalePregAge35to39 | 61796      |
| Yemen   | 1996           | FemalePregAge40to44 | 26575      |
| Yemen   | 1996           | FemalePregAge45to49 | 9225       |
| Yemen   | 1996           | MaleAge0to4         | 1575843    |
| Yemen   | 1996           | MaleAge10to14       | 1097732    |
| Yemen   | 1996           | MaleAge15to19       | 855999     |
| Yemen   | 1996           | MaleAge20to24       | 598000     |
| Yemen   | 1996           | MaleAge25to29       | 444949     |
| Yemen   | 1996           | MaleAge30to34       | 379003     |
| Yemen   | 1996           | MaleAge35to39       | 346858     |
| Yemen   | 1996           | MaleAge40to44       | 287558     |
| Yemen   | 1996           | MaleAge45to49       | 258882     |
| Yemen   | 1996           | MaleAge50to54       | 210572     |
| Yemen   | 1996           | MaleAge55to59       | 146000     |
| Yemen   | 1996           | MaleAge5to9         | 1319381    |
| Yemen   | 1996           | MaleAge60to64       | 120868     |
| Yemen   | 1996           | MaleAge65to69       | 99847      |
| Yemen   | 1996           | MaleAge70to74       | 74408      |
| Yemen   | 1996           | MaleAge75to79       | 46837      |
| Yemen   | 1996           | MaleAge80to84       | 29976      |
| Yemen   | 1996           | MaleAge85to89       | 11203      |
| Yemen   | 1996           | MaleAge90to94       | 1177       |
| Yemen   | 1996           | MaleAge95to99       | 79         |
| Yemen   | 1996           | MaleAgeAbov e100    | 4          |
| Yemen   | 1997           | FemaleAge0to4       | 1528227    |
| Yemen   | 1997           | FemaleAge10to14     | 1099693    |
| Yemen   | 1997           | FemaleAge15to19     | 674168     |
| Yemen   | 1997           | FemaleAge20to24     | 271107     |
| Yemen   | 1997           | FemaleAge25to29     | 192009     |
| Yemen   | 1997           | FemaleAge30to34     | 217751     |
| Yemen   | 1997           | FemaleAge35to39     | 244562     |
| Yemen   | 1997           | FemaleAge40to44     | 252256     |
| Yemen   | 1997           | FemaleAge45to49     | 236678     |
| Yemen   | 1997           | FemaleAge50to54     | 206874     |
| Yemen   | 1997           | FemaleAge55to59     | 145182     |
| Yemen   | 1997           | FemaleAge5to9       | 1313022    |
| Yemen   | 1997           | FemaleAge60to64     | 107053     |
| Yemen   | 1997           | FemaleAge65to69     | 88394      |
| Yemen   | 1997           | FemaleAge70to74     | 67879      |
| Yemen   | 1997           | FemaleAge75to79     | 43909      |
| Yemen   | 1997           | FemaleAge80to84     | 27301      |
| Yemen   | 1997           | FemaleAge85to89     | 13464      |
| Yemen   | 1997           | FemaleAge90to94     | 2628       |
| Yemen   | 1997           | FemaleAge95to99     | 244        |
| Yemen   | 1997           | FemaleAgeAbov e100  | 14         |

Dietary calcium and zinc deficiency risks are decreasing but remain prevalent

| Country | Reference year | Age/gender group    | Population |
|---------|----------------|---------------------|------------|
| Yemen   | 1997           | FemaleLactAge15to19 | 101731     |
| Yemen   | 1997           | FemaleLactAge20to24 | 175657     |
| Yemen   | 1997           | FemaleLactAge25to29 | 150460     |
| Yemen   | 1997           | FemaleLactAge30to34 | 124386     |
| Yemen   | 1997           | FemaleLactAge35to39 | 82394      |
| Yemen   | 1997           | FemaleLactAge40to44 | 35433      |
| Yemen   | 1997           | FemaleLactAge45to49 | 12300      |
| Yemen   | 1997           | FemalePregAge15to19 | 76298      |
| Yemen   | 1997           | FemalePregAge20to24 | 131743     |
| Yemen   | 1997           | FemalePregAge25to29 | 112845     |
| Yemen   | 1997           | FemalePregAge30to34 | 93289      |
| Yemen   | 1997           | FemalePregAge35to39 | 61796      |
| Yemen   | 1997           | FemalePregAge40to44 | 26575      |
| Yemen   | 1997           | FemalePregAge45to49 | 9225       |
| Yemen   | 1997           | MaleAge0to4         | 1593504    |
| Yemen   | 1997           | MaleAge10to14       | 1139775    |
| Yemen   | 1997           | MaleAge15to19       | 904108     |
| Yemen   | 1997           | MaleAge20to24       | 642141     |
| Yemen   | 1997           | MaleAge25to29       | 462138     |
| Yemen   | 1997           | MaleAge30to34       | 384941     |
| Yemen   | 1997           | MaleAge35to39       | 350863     |
| Yemen   | 1997           | MaleAge40to44       | 297684     |
| Yemen   | 1997           | MaleAge45to49       | 260062     |
| Yemen   | 1997           | MaleAge50to54       | 219777     |
| Yemen   | 1997           | MaleAge55to59       | 154553     |
| Yemen   | 1997           | MaleAge5to9         | 1367255    |
| Yemen   | 1997           | MaleAge60to64       | 119538     |
| Yemen   | 1997           | MaleAge65to69       | 100395     |
| Yemen   | 1997           | MaleAge70to74       | 74670      |
| Yemen   | 1997           | MaleAge75to79       | 47283      |
| Yemen   | 1997           | MaleAge80to84       | 28502      |
| Yemen   | 1997           | MaleAge85to89       | 12526      |
| Yemen   | 1997           | MaleAge90to94       | 1643       |
| Yemen   | 1997           | MaleAge95to99       | 108        |
| Yemen   | 1997           | MaleAgeAbov e100    | 5          |
| Yemen   | 1998           | FemaleAge0to4       | 1527182    |
| Yemen   | 1998           | FemaleAge10to14     | 1137701    |
| Yemen   | 1998           | FemaleAge15to19     | 727060     |
| Yemen   | 1998           | FemaleAge20to24     | 319952     |
| Yemen   | 1998           | FemaleAge25to29     | 195701     |
| Yemen   | 1998           | FemaleAge30to34     | 219764     |
| Yemen   | 1998           | FemaleAge35to39     | 255266     |
| Yemen   | 1998           | FemaleAge40to44     | 265601     |
| Yemen   | 1998           | FemaleAge45to49     | 242871     |
| Yemen   | 1998           | FemaleAge50to54     | 216436     |
| Yemen   | 1998           | FemaleAge55to59     | 155262     |
| Yemen   | 1998           | FemaleAge5to9       | 1358682    |
| Yemen   | 1998           | FemaleAge60to64     | 109125     |
| Yemen   | 1998           | FemaleAge65to69     | 89047      |
| Yemen   | 1998           | FemaleAge70to74     | 68702      |
| Yemen   | 1998           | FemaleAge75to79     | 44837      |
| Yemen   | 1998           | FemaleAge80to84     | 25881      |
| Yemen   | 1998           | FemaleAge85to89     | 13703      |
| Yemen   | 1998           | FemaleAge90to94     | 3050       |
| Yemen   | 1998           | FemaleAge95to99     | 297        |
| Yemen   | 1998           | FemaleAgeAbov e100  | 15         |
| Yemen   | 1998           | FemaleLactAge15to19 | 101731     |
| Yemen   | 1998           | FemaleLactAge20to24 | 175657     |
| Yemen   | 1998           | FemaleLactAge25to29 | 150460     |
| Yemen   | 1998           | FemaleLactAge30to34 | 124386     |
| Yemen   | 1998           | FemaleLactAge35to39 | 82394      |
| Yemen   | 1998           | FemaleLactAge40to44 | 35433      |
| Yemen   | 1998           | FemaleLactAge45to49 | 12300      |
| Yemen   | 1998           | FemalePregAge15to19 | 76298      |
| Yemen   | 1998           | FemalePregAge20to24 | 131743     |
| Yemen   | 1998           | FemalePregAge25to29 | 112845     |
| Yemen   | 1998           | FemalePregAge30to34 | 93289      |
| Yemen   | 1998           | FemalePregAge35to39 | 61796      |
| Yemen   | 1998           | FemalePregAge40to44 | 26575      |
| Yemen   | 1998           | FemalePregAge45to49 | 9225       |
| Yemen   | 1998           | MaleAge0to4         | 1591271    |
| Yemen   | 1998           | MaleAge10to14       | 1178574    |
| Yemen   | 1998           | MaleAge15to19       | 949997     |
| Yemen   | 1998           | MaleAge20to24       | 689238     |
| Yemen   | 1998           | MaleAge25to29       | 481881     |
| Yemen   | 1998           | MaleAge30to34       | 391655     |
| Yemen   | 1998           | MaleAge35to39       | 352948     |
| Yemen   | 1998           | MaleAge40to44       | 308598     |
| Yemen   | 1998           | MaleAge45to49       | 260079     |
| Yemen   | 1998           | MaleAge50to54       | 227831     |
| Yemen   | 1998           | MaleAge55to59       | 164401     |
| Yemen   | 1998           | MaleAge5to9         | 1413498    |
| Yemen   | 1998           | MaleAge60to64       | 118547     |
| Yemen   | 1998           | MaleAge65to69       | 100884     |
| Yemen   | 1998           | MaleAge70to74       | 74805      |
| Yemen   | 1998           | MaleAge75to79       | 47788      |
| Yemen   | 1998           | MaleAge80to84       | 26715      |
| Yemen   | 1998           | MaleAge85to89       | 13099      |



Dietary calcium and zinc deficiency risks are decreasing but remain prevalent

| Country | Reference year | Age/gender group    | Population |
|---------|----------------|---------------------|------------|
| Yemen   | 1998           | MaleAge90to94       | 2019       |
| Yemen   | 1998           | MaleAge95to99       | 134        |
| Yemen   | 1998           | MaleAgeAbov e100    | 5          |
| Yemen   | 1999           | FemaleAge0to4       | 1522943    |
| Yemen   | 1999           | FemaleAge10to14     | 1175458    |
| Yemen   | 1999           | FemaleAge15to19     | 777638     |
| Yemen   | 1999           | FemaleAge20to24     | 371678     |
| Yemen   | 1999           | FemaleAge25to29     | 206600     |
| Yemen   | 1999           | FemaleAge30to34     | 220781     |
| Yemen   | 1999           | FemaleAge35to39     | 263914     |
| Yemen   | 1999           | FemaleAge40to44     | 278748     |
| Yemen   | 1999           | FemaleAge45to49     | 250037     |
| Yemen   | 1999           | FemaleAge50to54     | 225291     |
| Yemen   | 1999           | FemaleAge55to59     | 165574     |
| Yemen   | 1999           | FemaleAge5to9       | 1401149    |
| Yemen   | 1999           | FemaleAge60to64     | 112638     |
| Yemen   | 1999           | FemaleAge65to69     | 89945      |
| Yemen   | 1999           | FemaleAge70to74     | 69544      |
| Yemen   | 1999           | FemaleAge75to79     | 45748      |
| Yemen   | 1999           | FemaleAge80to84     | 24825      |
| Yemen   | 1999           | FemaleAge85to89     | 13192      |
| Yemen   | 1999           | FemaleAge90to94     | 3235       |
| Yemen   | 1999           | FemaleAge95to99     | 302        |
| Yemen   | 1999           | FemaleAgeAbov e100  | 15         |
| Yemen   | 1999           | FemaleLactAge15to19 | 101731     |
| Yemen   | 1999           | FemaleLactAge20to24 | 175657     |
| Yemen   | 1999           | FemaleLactAge25to29 | 150460     |
| Yemen   | 1999           | FemaleLactAge30to34 | 124386     |
| Yemen   | 1999           | FemaleLactAge35to39 | 82394      |
| Yemen   | 1999           | FemaleLactAge40to44 | 35433      |
| Yemen   | 1999           | FemaleLactAge45to49 | 12300      |
| Yemen   | 1999           | FemalePregAge15to19 | 76298      |
| Yemen   | 1999           | FemalePregAge20to24 | 131743     |
| Yemen   | 1999           | FemalePregAge25to29 | 112845     |
| Yemen   | 1999           | FemalePregAge30to34 | 93289      |
| Yemen   | 1999           | FemalePregAge35to39 | 61796      |
| Yemen   | 1999           | FemalePregAge40to44 | 26575      |
| Yemen   | 1999           | FemalePregAge45to49 | 9225       |
| Yemen   | 1999           | MaleAge0to4         | 1585222    |
| Yemen   | 1999           | MaleAge10to14       | 1217114    |
| Yemen   | 1999           | MaleAge15to19       | 994265     |
| Yemen   | 1999           | MaleAge20to24       | 737025     |
| Yemen   | 1999           | MaleAge25to29       | 506264     |
| Yemen   | 1999           | MaleAge30to34       | 399951     |
| Yemen   | 1999           | MaleAge35to39       | 354722     |
| Yemen   | 1999           | MaleAge40to44       | 318144     |
| Yemen   | 1999           | MaleAge45to49       | 261395     |
| Yemen   | 1999           | MaleAge50to54       | 234289     |
| Yemen   | 1999           | MaleAge55to59       | 174329     |
| Yemen   | 1999           | MaleAge5to9         | 1455540    |
| Yemen   | 1999           | MaleAge60to64       | 119417     |
| Yemen   | 1999           | MaleAge65to69       | 101084     |
| Yemen   | 1999           | MaleAge70to74       | 75005      |
| Yemen   | 1999           | MaleAge75to79       | 48125      |
| Yemen   | 1999           | MaleAge80to84       | 25220      |
| Yemen   | 1999           | MaleAge85to89       | 12633      |
| Yemen   | 1999           | MaleAge90to94       | 2261       |
| Yemen   | 1999           | MaleAge95to99       | 133        |
| Yemen   | 1999           | MaleAgeAbov e100    | 5          |
| Zambia  | 1992           | FemaleAge0to4       | 734550     |
| Zambia  | 1992           | FemaleAge10to14     | 540107     |
| Zambia  | 1992           | FemaleAge15to19     | 368572     |
| Zambia  | 1992           | FemaleAge20to24     | 197945     |
| Zambia  | 1992           | FemaleAge25to29     | 152096     |
| Zambia  | 1992           | FemaleAge30to34     | 131803     |
| Zambia  | 1992           | FemaleAge35to39     | 121369     |
| Zambia  | 1992           | FemaleAge40to44     | 129384     |
| Zambia  | 1992           | FemaleAge45to49     | 121229     |
| Zambia  | 1992           | FemaleAge50to54     | 106262     |
| Zambia  | 1992           | FemaleAge55to59     | 87756      |
| Zambia  | 1992           | FemaleAge5to9       | 612328     |
| Zambia  | 1992           | FemaleAge60to64     | 70102      |
| Zambia  | 1992           | FemaleAge65to69     | 53300      |
| Zambia  | 1992           | FemaleAge70to74     | 36420      |
| Zambia  | 1992           | FemaleAge75to79     | 21576      |
| Zambia  | 1992           | FemaleAge80to84     | 10687      |
| Zambia  | 1992           | FemaleAge85to89     | 4005       |
| Zambia  | 1992           | FemaleAge90to94     | 1024       |
| Zambia  | 1992           | FemaleAge95to99     | 131        |
| Zambia  | 1992           | FemaleAgeAbov e100  | 8          |
| Zambia  | 1992           | FemaleLactAge15to19 | 54708      |
| Zambia  | 1992           | FemaleLactAge20to24 | 105201     |
| Zambia  | 1992           | FemaleLactAge25to29 | 87003      |
| Zambia  | 1992           | FemaleLactAge30to34 | 60544      |
| Zambia  | 1992           | FemaleLactAge35to39 | 37901      |
| Zambia  | 1992           | FemaleLactAge40to44 | 16578      |
| Zambia  | 1992           | FemaleLactAge45to49 | 5821       |
| Zambia  | 1992           | FemalePregAge15to19 | 41031      |

Dietary calcium and zinc deficiency risks are decreasing but remain prevalent

| Country | Reference year | Age/gender group    | Population |
|---------|----------------|---------------------|------------|
| Zambia  | 1992           | FemalePregAge20to24 | 78901      |
| Zambia  | 1992           | FemalePregAge25to29 | 65253      |
| Zambia  | 1992           | FemalePregAge30to34 | 45408      |
| Zambia  | 1992           | FemalePregAge35to39 | 28426      |
| Zambia  | 1992           | FemalePregAge40to44 | 12434      |
| Zambia  | 1992           | FemalePregAge45to49 | 4365       |
| Zambia  | 1992           | MaleAge0to4         | 736265     |
| Zambia  | 1992           | MaleAge10to14       | 537904     |
| Zambia  | 1992           | MaleAge15to19       | 463772     |
| Zambia  | 1992           | MaleAge20to24       | 382618     |
| Zambia  | 1992           | MaleAge25to29       | 304252     |
| Zambia  | 1992           | MaleAge30to34       | 235862     |
| Zambia  | 1992           | MaleAge35to39       | 182500     |
| Zambia  | 1992           | MaleAge40to44       | 154873     |
| Zambia  | 1992           | MaleAge45to49       | 127959     |
| Zambia  | 1992           | MaleAge50to54       | 101204     |
| Zambia  | 1992           | MaleAge55to59       | 80650      |
| Zambia  | 1992           | MaleAge5to9         | 611476     |
| Zambia  | 1992           | MaleAge60to64       | 61939      |
| Zambia  | 1992           | MaleAge65to69       | 45009      |
| Zambia  | 1992           | MaleAge70to74       | 30060      |
| Zambia  | 1992           | MaleAge75to79       | 17464      |
| Zambia  | 1992           | MaleAge80to84       | 8098       |
| Zambia  | 1992           | MaleAge85to89       | 2710       |
| Zambia  | 1992           | MaleAge90to94       | 569        |
| Zambia  | 1992           | MaleAge95to99       | 66         |
| Zambia  | 1992           | MaleAgeAbov e100    | 2          |
| Zambia  | 1993           | FemaleAge0to4       | 749600     |
| Zambia  | 1993           | FemaleAge10to14     | 550008     |
| Zambia  | 1993           | FemaleAge15to19     | 384016     |
| Zambia  | 1993           | FemaleAge20to24     | 210292     |
| Zambia  | 1993           | FemaleAge25to29     | 162443     |
| Zambia  | 1993           | FemaleAge30to34     | 137758     |
| Zambia  | 1993           | FemaleAge35to39     | 124861     |
| Zambia  | 1993           | FemaleAge40to44     | 129141     |
| Zambia  | 1993           | FemaleAge45to49     | 124075     |
| Zambia  | 1993           | FemaleAge50to54     | 107497     |
| Zambia  | 1993           | FemaleAge55to59     | 88945      |
| Zambia  | 1993           | FemaleAge5to9       | 626410     |
| Zambia  | 1993           | FemaleAge60to64     | 71463      |
| Zambia  | 1993           | FemaleAge65to69     | 54247      |
| Zambia  | 1993           | FemaleAge70to74     | 37532      |
| Zambia  | 1993           | FemaleAge75to79     | 22076      |
| Zambia  | 1993           | FemaleAge80to84     | 10998      |
| Zambia  | 1993           | FemaleAge85to89     | 4117       |
| Zambia  | 1993           | FemaleAge90to94     | 1081       |
| Zambia  | 1993           | FemaleAge95to99     | 155        |
| Zambia  | 1993           | FemaleAgeAbov e100  | 8          |
| Zambia  | 1993           | FemaleLactAge15to19 | 54708      |
| Zambia  | 1993           | FemaleLactAge20to24 | 105201     |
| Zambia  | 1993           | FemaleLactAge25to29 | 87003      |
| Zambia  | 1993           | FemaleLactAge30to34 | 60544      |
| Zambia  | 1993           | FemaleLactAge35to39 | 37901      |
| Zambia  | 1993           | FemaleLactAge40to44 | 16578      |
| Zambia  | 1993           | FemaleLactAge45to49 | 5821       |
| Zambia  | 1993           | FemalePregAge15to19 | 41031      |
| Zambia  | 1993           | FemalePregAge20to24 | 78901      |
| Zambia  | 1993           | FemalePregAge25to29 | 65253      |
| Zambia  | 1993           | FemalePregAge30to34 | 45408      |
| Zambia  | 1993           | FemalePregAge35to39 | 28426      |
| Zambia  | 1993           | FemalePregAge40to44 | 12434      |
| Zambia  | 1993           | FemalePregAge45to49 | 4365       |
| Zambia  | 1993           | MaleAge0to4         | 751512     |
| Zambia  | 1993           | MaleAge10to14       | 547996     |
| Zambia  | 1993           | MaleAge15to19       | 478404     |
| Zambia  | 1993           | MaleAge20to24       | 395078     |
| Zambia  | 1993           | MaleAge25to29       | 315462     |
| Zambia  | 1993           | MaleAge30to34       | 243049     |
| Zambia  | 1993           | MaleAge35to39       | 186955     |
| Zambia  | 1993           | MaleAge40to44       | 153496     |
| Zambia  | 1993           | MaleAge45to49       | 131150     |
| Zambia  | 1993           | MaleAge50to54       | 102273     |
| Zambia  | 1993           | MaleAge55to59       | 82348      |
| Zambia  | 1993           | MaleAge5to9         | 625536     |
| Zambia  | 1993           | MaleAge60to64       | 63150      |
| Zambia  | 1993           | MaleAge65to69       | 46065      |
| Zambia  | 1993           | MaleAge70to74       | 30600      |
| Zambia  | 1993           | MaleAge75to79       | 17874      |
| Zambia  | 1993           | MaleAge80to84       | 8309       |
| Zambia  | 1993           | MaleAge85to89       | 2821       |
| Zambia  | 1993           | MaleAge90to94       | 599        |
| Zambia  | 1993           | MaleAge95to99       | 81         |
| Zambia  | 1993           | MaleAgeAbov e100    | 3          |
| Zambia  | 1994           | FemaleAge0to4       | 766405     |
| Zambia  | 1994           | FemaleAge10to14     | 560125     |
| Zambia  | 1994           | FemaleAge15to19     | 398695     |
| Zambia  | 1994           | FemaleAge20to24     | 223850     |
| Zambia  | 1994           | FemaleAge25to29     | 173768     |

Dietary calcium and zinc deficiency risks are decreasing but remain prevalent

| Country | Reference year | Age/gender group    | Population |
|---------|----------------|---------------------|------------|
| Zambia  | 1994           | FemaleAge30to34     | 144590     |
| Zambia  | 1994           | FemaleAge35to39     | 128775     |
| Zambia  | 1994           | FemaleAge40to44     | 129157     |
| Zambia  | 1994           | FemaleAge45to49     | 126354     |
| Zambia  | 1994           | FemaleAge50to54     | 108887     |
| Zambia  | 1994           | FemaleAge55to59     | 90112      |
| Zambia  | 1994           | FemaleAge5to9       | 640312     |
| Zambia  | 1994           | FemaleAge60to64     | 72819      |
| Zambia  | 1994           | FemaleAge65to69     | 55310      |
| Zambia  | 1994           | FemaleAge70to74     | 38642      |
| Zambia  | 1994           | FemaleAge75to79     | 22623      |
| Zambia  | 1994           | FemaleAge80to84     | 11210      |
| Zambia  | 1994           | FemaleAge85to89     | 4121       |
| Zambia  | 1994           | FemaleAge90to94     | 1065       |
| Zambia  | 1994           | FemaleAge95to99     | 162        |
| Zambia  | 1994           | FemaleAgeAbov e100  | 9          |
| Zambia  | 1994           | FemaleLactAge15to19 | 54708      |
| Zambia  | 1994           | FemaleLactAge20to24 | 105201     |
| Zambia  | 1994           | FemaleLactAge25to29 | 87003      |
| Zambia  | 1994           | FemaleLactAge30to34 | 60544      |
| Zambia  | 1994           | FemaleLactAge35to39 | 37901      |
| Zambia  | 1994           | FemaleLactAge40to44 | 16578      |
| Zambia  | 1994           | FemaleLactAge45to49 | 5821       |
| Zambia  | 1994           | FemalePregAge15to19 | 41031      |
| Zambia  | 1994           | FemalePregAge20to24 | 78901      |
| Zambia  | 1994           | FemalePregAge25to29 | 65253      |
| Zambia  | 1994           | FemalePregAge30to34 | 45408      |
| Zambia  | 1994           | FemalePregAge35to39 | 28426      |
| Zambia  | 1994           | FemalePregAge40to44 | 12434      |
| Zambia  | 1994           | FemalePregAge45to49 | 4365       |
| Zambia  | 1994           | MaleAge0to4         | 768600     |
| Zambia  | 1994           | MaleAge10to14       | 558400     |
| Zambia  | 1994           | MaleAge15to19       | 492560     |
| Zambia  | 1994           | MaleAge20to24       | 408409     |
| Zambia  | 1994           | MaleAge25to29       | 327458     |
| Zambia  | 1994           | MaleAge30to34       | 251251     |
| Zambia  | 1994           | MaleAge35to39       | 192078     |
| Zambia  | 1994           | MaleAge40to44       | 152762     |
| Zambia  | 1994           | MaleAge45to49       | 133519     |
| Zambia  | 1994           | MaleAge50to54       | 103556     |
| Zambia  | 1994           | MaleAge55to59       | 83941      |
| Zambia  | 1994           | MaleAge5to9         | 639360     |
| Zambia  | 1994           | MaleAge60to64       | 64469      |
| Zambia  | 1994           | MaleAge65to69       | 47186      |
| Zambia  | 1994           | MaleAge70to74       | 31232      |
| Zambia  | 1994           | MaleAge75to79       | 18217      |
| Zambia  | 1994           | MaleAge80to84       | 8423       |
| Zambia  | 1994           | MaleAge85to89       | 2820       |
| Zambia  | 1994           | MaleAge90to94       | 586        |
| Zambia  | 1994           | MaleAge95to99       | 82         |
| Zambia  | 1994           | MaleAgeAbov e100    | 3          |
| Zambia  | 1995           | FemaleAge0to4       | 787791     |
| Zambia  | 1995           | FemaleAge10to14     | 570807     |
| Zambia  | 1995           | FemaleAge15to19     | 412123     |
| Zambia  | 1995           | FemaleAge20to24     | 238628     |
| Zambia  | 1995           | FemaleAge25to29     | 185992     |
| Zambia  | 1995           | FemaleAge30to34     | 152596     |
| Zambia  | 1995           | FemaleAge35to39     | 133051     |
| Zambia  | 1995           | FemaleAge40to44     | 129914     |
| Zambia  | 1995           | FemaleAge45to49     | 127717     |
| Zambia  | 1995           | FemaleAge50to54     | 110555     |
| Zambia  | 1995           | FemaleAge55to59     | 91245      |
| Zambia  | 1995           | FemaleAge5to9       | 653311     |
| Zambia  | 1995           | FemaleAge60to64     | 74125      |
| Zambia  | 1995           | FemaleAge65to69     | 56524      |
| Zambia  | 1995           | FemaleAge70to74     | 39723      |
| Zambia  | 1995           | FemaleAge75to79     | 23267      |
| Zambia  | 1995           | FemaleAge80to84     | 11345      |
| Zambia  | 1995           | FemaleAge85to89     | 4025       |
| Zambia  | 1995           | FemaleAge90to94     | 951        |
| Zambia  | 1995           | FemaleAge95to99     | 127        |
| Zambia  | 1995           | FemaleAgeAbov e100  | 9          |
| Zambia  | 1995           | FemaleLactAge15to19 | 54708      |
| Zambia  | 1995           | FemaleLactAge20to24 | 105201     |
| Zambia  | 1995           | FemaleLactAge25to29 | 87003      |
| Zambia  | 1995           | FemaleLactAge30to34 | 60544      |
| Zambia  | 1995           | FemaleLactAge35to39 | 37901      |
| Zambia  | 1995           | FemaleLactAge40to44 | 16578      |
| Zambia  | 1995           | FemaleLactAge45to49 | 5821       |
| Zambia  | 1995           | FemalePregAge15to19 | 41031      |
| Zambia  | 1995           | FemalePregAge20to24 | 78901      |
| Zambia  | 1995           | FemalePregAge25to29 | 65253      |
| Zambia  | 1995           | FemalePregAge30to34 | 45408      |
| Zambia  | 1995           | FemalePregAge35to39 | 28426      |
| Zambia  | 1995           | FemalePregAge40to44 | 12434      |
| Zambia  | 1995           | FemalePregAge45to49 | 4365       |
| Zambia  | 1995           | MaleAge0to4         | 790291     |
| Zambia  | 1995           | MaleAge10to14       | 569321     |

Dietary calcium and zinc deficiency risks are decreasing but remain prevalent

| Country | Reference year | Age/gender group    | Population |
|---------|----------------|---------------------|------------|
| Zambia  | 1995           | MaleAge15to19       | 505800     |
| Zambia  | 1995           | MaleAge20to24       | 422719     |
| Zambia  | 1995           | MaleAge25to29       | 340131     |
| Zambia  | 1995           | MaleAge30to34       | 260633     |
| Zambia  | 1995           | MaleAge35to39       | 197695     |
| Zambia  | 1995           | MaleAge40to44       | 153381     |
| Zambia  | 1995           | MaleAge45to49       | 134621     |
| Zambia  | 1995           | MaleAge50to54       | 105254     |
| Zambia  | 1995           | MaleAge55to59       | 85326      |
| Zambia  | 1995           | MaleAge5to9         | 652279     |
| Zambia  | 1995           | MaleAge60to64       | 65903      |
| Zambia  | 1995           | MaleAge65to69       | 48358      |
| Zambia  | 1995           | MaleAge70to74       | 31984      |
| Zambia  | 1995           | MaleAge75to79       | 18519      |
| Zambia  | 1995           | MaleAge80to84       | 8460       |
| Zambia  | 1995           | MaleAge85to89       | 2705       |
| Zambia  | 1995           | MaleAge90to94       | 503        |
| Zambia  | 1995           | MaleAge95to99       | 52         |
| Zambia  | 1995           | MaleAgeAbov e100    | 3          |
| Zambia  | 1996           | FemaleAge0to4       | 813313     |
| Zambia  | 1996           | FemaleAge10to14     | 582300     |
| Zambia  | 1996           | FemaleAge15to19     | 387570     |
| Zambia  | 1996           | FemaleAge20to24     | 210003     |
| Zambia  | 1996           | FemaleAge25to29     | 170693     |
| Zambia  | 1996           | FemaleAge30to34     | 148798     |
| Zambia  | 1996           | FemaleAge35to39     | 136996     |
| Zambia  | 1996           | FemaleAge40to44     | 135918     |
| Zambia  | 1996           | FemaleAge45to49     | 130915     |
| Zambia  | 1996           | FemaleAge50to54     | 112789     |
| Zambia  | 1996           | FemaleAge55to59     | 92337      |
| Zambia  | 1996           | FemaleAge5to9       | 670554     |
| Zambia  | 1996           | FemaleAge60to64     | 75159      |
| Zambia  | 1996           | FemaleAge65to69     | 57493      |
| Zambia  | 1996           | FemaleAge70to74     | 40531      |
| Zambia  | 1996           | FemaleAge75to79     | 24113      |
| Zambia  | 1996           | FemaleAge80to84     | 11869      |
| Zambia  | 1996           | FemaleAge85to89     | 4405       |
| Zambia  | 1996           | FemaleAge90to94     | 1108       |
| Zambia  | 1996           | FemaleAge95to99     | 144        |
| Zambia  | 1996           | FemaleAgeAbov e100  | 10         |
| Zambia  | 1996           | FemaleLactAge15to19 | 75884      |
| Zambia  | 1996           | FemaleLactAge20to24 | 129997     |
| Zambia  | 1996           | FemaleLactAge25to29 | 102099     |
| Zambia  | 1996           | FemaleLactAge30to34 | 67122      |
| Zambia  | 1996           | FemaleLactAge35to39 | 37997      |
| Zambia  | 1996           | FemaleLactAge40to44 | 14094      |
| Zambia  | 1996           | FemaleLactAge45to49 | 4304       |
| Zambia  | 1996           | FemalePregAge15to19 | 56913      |
| Zambia  | 1996           | FemalePregAge20to24 | 97498      |
| Zambia  | 1996           | FemalePregAge25to29 | 76574      |
| Zambia  | 1996           | FemalePregAge30to34 | 50342      |
| Zambia  | 1996           | FemalePregAge35to39 | 28498      |
| Zambia  | 1996           | FemalePregAge40to44 | 10571      |
| Zambia  | 1996           | FemalePregAge45to49 | 3228       |
| Zambia  | 1996           | MaleAge0to4         | 815916     |
| Zambia  | 1996           | MaleAge10to14       | 580614     |
| Zambia  | 1996           | MaleAge15to19       | 517587     |
| Zambia  | 1996           | MaleAge20to24       | 437175     |
| Zambia  | 1996           | MaleAge25to29       | 352218     |
| Zambia  | 1996           | MaleAge30to34       | 269735     |
| Zambia  | 1996           | MaleAge35to39       | 203189     |
| Zambia  | 1996           | MaleAge40to44       | 155339     |
| Zambia  | 1996           | MaleAge45to49       | 134695     |
| Zambia  | 1996           | MaleAge50to54       | 107734     |
| Zambia  | 1996           | MaleAge55to59       | 86536      |
| Zambia  | 1996           | MaleAge5to9         | 669501     |
| Zambia  | 1996           | MaleAge60to64       | 67218      |
| Zambia  | 1996           | MaleAge65to69       | 49304      |
| Zambia  | 1996           | MaleAge70to74       | 32731      |
| Zambia  | 1996           | MaleAge75to79       | 19061      |
| Zambia  | 1996           | MaleAge80to84       | 8929       |
| Zambia  | 1996           | MaleAge85to89       | 3008       |
| Zambia  | 1996           | MaleAge90to94       | 619        |
| Zambia  | 1996           | MaleAge95to99       | 61         |
| Zambia  | 1996           | MaleAgeAbov e100    | 3          |
| Zambia  | 1997           | FemaleAge0to4       | 841678     |
| Zambia  | 1997           | FemaleAge10to14     | 594942     |
| Zambia  | 1997           | FemaleAge15to19     | 398772     |
| Zambia  | 1997           | FemaleAge20to24     | 226333     |
| Zambia  | 1997           | FemaleAge25to29     | 183001     |
| Zambia  | 1997           | FemaleAge30to34     | 157709     |
| Zambia  | 1997           | FemaleAge35to39     | 141348     |
| Zambia  | 1997           | FemaleAge40to44     | 138114     |
| Zambia  | 1997           | FemaleAge45to49     | 130708     |
| Zambia  | 1997           | FemaleAge50to54     | 115294     |
| Zambia  | 1997           | FemaleAge55to59     | 93413      |
| Zambia  | 1997           | FemaleAge5to9       | 688271     |
| Zambia  | 1997           | FemaleAge60to64     | 76231      |

Dietary calcium and zinc deficiency risks are decreasing but remain prevalent

| Country | Reference year | Age/gender group    | Population |
|---------|----------------|---------------------|------------|
| Zambia  | 1997           | FemaleAge65to69     | 58599      |
| Zambia  | 1997           | FemaleAge70to74     | 41296      |
| Zambia  | 1997           | FemaleAge75to79     | 24956      |
| Zambia  | 1997           | FemaleAge80to84     | 12268      |
| Zambia  | 1997           | FemaleAge85to89     | 4686       |
| Zambia  | 1997           | FemaleAge90to94     | 1220       |
| Zambia  | 1997           | FemaleAge95to99     | 175        |
| Zambia  | 1997           | FemaleAgeAbov e100  | 10         |
| Zambia  | 1997           | FemaleLactAge15to19 | 75884      |
| Zambia  | 1997           | FemaleLactAge20to24 | 129997     |
| Zambia  | 1997           | FemaleLactAge25to29 | 102099     |
| Zambia  | 1997           | FemaleLactAge30to34 | 67122      |
| Zambia  | 1997           | FemaleLactAge35to39 | 37997      |
| Zambia  | 1997           | FemaleLactAge40to44 | 14094      |
| Zambia  | 1997           | FemaleLactAge45to49 | 4304       |
| Zambia  | 1997           | FemalePregAge15to19 | 56913      |
| Zambia  | 1997           | FemalePregAge20to24 | 97498      |
| Zambia  | 1997           | FemalePregAge25to29 | 76574      |
| Zambia  | 1997           | FemalePregAge30to34 | 50342      |
| Zambia  | 1997           | FemalePregAge35to39 | 28498      |
| Zambia  | 1997           | FemalePregAge40to44 | 10571      |
| Zambia  | 1997           | FemalePregAge45to49 | 3228       |
| Zambia  | 1997           | MaleAge0to4         | 844266     |
| Zambia  | 1997           | MaleAge10to14       | 593162     |
| Zambia  | 1997           | MaleAge15to19       | 528411     |
| Zambia  | 1997           | MaleAge20to24       | 452721     |
| Zambia  | 1997           | MaleAge25to29       | 365185     |
| Zambia  | 1997           | MaleAge30to34       | 280120     |
| Zambia  | 1997           | MaleAge35to39       | 209172     |
| Zambia  | 1997           | MaleAge40to44       | 158374     |
| Zambia  | 1997           | MaleAge45to49       | 133747     |
| Zambia  | 1997           | MaleAge50to54       | 110632     |
| Zambia  | 1997           | MaleAge55to59       | 87584      |
| Zambia  | 1997           | MaleAge5to9         | 687219     |
| Zambia  | 1997           | MaleAge60to64       | 68703      |
| Zambia  | 1997           | MaleAge65to69       | 50301      |
| Zambia  | 1997           | MaleAge70to74       | 33530      |
| Zambia  | 1997           | MaleAge75to79       | 19513      |
| Zambia  | 1997           | MaleAge80to84       | 9294       |
| Zambia  | 1997           | MaleAge85to89       | 3223       |
| Zambia  | 1997           | MaleAge90to94       | 707        |
| Zambia  | 1997           | MaleAge95to99       | 78         |
| Zambia  | 1997           | MaleAgeAbov e100    | 3          |
| Zambia  | 1998           | FemaleAge0to4       | 872084     |
| Zambia  | 1998           | FemaleAge10to14     | 608674     |
| Zambia  | 1998           | FemaleAge15to19     | 408794     |
| Zambia  | 1998           | FemaleAge20to24     | 243349     |
| Zambia  | 1998           | FemaleAge25to29     | 196679     |
| Zambia  | 1998           | FemaleAge30to34     | 167758     |
| Zambia  | 1998           | FemaleAge35to39     | 146124     |
| Zambia  | 1998           | FemaleAge40to44     | 140598     |
| Zambia  | 1998           | FemaleAge45to49     | 130205     |
| Zambia  | 1998           | FemaleAge50to54     | 117605     |
| Zambia  | 1998           | FemaleAge55to59     | 94549      |
| Zambia  | 1998           | FemaleAge5to9       | 706034     |
| Zambia  | 1998           | FemaleAge60to64     | 77316      |
| Zambia  | 1998           | FemaleAge65to69     | 59790      |
| Zambia  | 1998           | FemaleAge70to74     | 42087      |
| Zambia  | 1998           | FemaleAge75to79     | 25763      |
| Zambia  | 1998           | FemaleAge80to84     | 12573      |
| Zambia  | 1998           | FemaleAge85to89     | 4837       |
| Zambia  | 1998           | FemaleAge90to94     | 1272       |
| Zambia  | 1998           | FemaleAge95to99     | 204        |
| Zambia  | 1998           | FemaleAgeAbov e100  | 11         |
| Zambia  | 1998           | FemaleLactAge15to19 | 75884      |
| Zambia  | 1998           | FemaleLactAge20to24 | 129997     |
| Zambia  | 1998           | FemaleLactAge25to29 | 102099     |
| Zambia  | 1998           | FemaleLactAge30to34 | 67122      |
| Zambia  | 1998           | FemaleLactAge35to39 | 37997      |
| Zambia  | 1998           | FemaleLactAge40to44 | 14094      |
| Zambia  | 1998           | FemaleLactAge45to49 | 4304       |
| Zambia  | 1998           | FemalePregAge15to19 | 56913      |
| Zambia  | 1998           | FemalePregAge20to24 | 97498      |
| Zambia  | 1998           | FemalePregAge25to29 | 76574      |
| Zambia  | 1998           | FemalePregAge30to34 | 50342      |
| Zambia  | 1998           | FemalePregAge35to39 | 28498      |
| Zambia  | 1998           | FemalePregAge40to44 | 10571      |
| Zambia  | 1998           | FemalePregAge45to49 | 3228       |
| Zambia  | 1998           | MaleAge0to4         | 874560     |
| Zambia  | 1998           | MaleAge10to14       | 606843     |
| Zambia  | 1998           | MaleAge15to19       | 538452     |
| Zambia  | 1998           | MaleAge20to24       | 468572     |
| Zambia  | 1998           | MaleAge25to29       | 379041     |
| Zambia  | 1998           | MaleAge30to34       | 291689     |
| Zambia  | 1998           | MaleAge35to39       | 215789     |
| Zambia  | 1998           | MaleAge40to44       | 162136     |
| Zambia  | 1998           | MaleAge45to49       | 132482     |
| Zambia  | 1998           | MaleAge50to54       | 113323     |

Dietary calcium and zinc deficiency risks are decreasing but remain prevalent

| Country  | Reference year | Age/gender group    | Population |
|----------|----------------|---------------------|------------|
| Zambia   | 1998           | MaleAge55to59       | 88632      |
| Zambia   | 1998           | MaleAge5to9         | 704908     |
| Zambia   | 1998           | MaleAge60to64       | 70253      |
| Zambia   | 1998           | MaleAge65to69       | 51371      |
| Zambia   | 1998           | MaleAge70to74       | 34379      |
| Zambia   | 1998           | MaleAge75to79       | 19908      |
| Zambia   | 1998           | MaleAge80to84       | 9544       |
| Zambia   | 1998           | MaleAge85to89       | 3325       |
| Zambia   | 1998           | MaleAge90to94       | 753        |
| Zambia   | 1998           | MaleAge95to99       | 93         |
| Zambia   | 1998           | MaleAgeAbov e100    | 4          |
| Zambia   | 1999           | FemaleAge0to4       | 902514     |
| Zambia   | 1999           | FemaleAge10to14     | 622863     |
| Zambia   | 1999           | FemaleAge15to19     | 418478     |
| Zambia   | 1999           | FemaleAge20to24     | 259734     |
| Zambia   | 1999           | FemaleAge25to29     | 211817     |
| Zambia   | 1999           | FemaleAge30to34     | 178838     |
| Zambia   | 1999           | FemaleAge35to39     | 151648     |
| Zambia   | 1999           | FemaleAge40to44     | 143136     |
| Zambia   | 1999           | FemaleAge45to49     | 129947     |
| Zambia   | 1999           | FemaleAge50to54     | 119177     |
| Zambia   | 1999           | FemaleAge55to59     | 95847      |
| Zambia   | 1999           | FemaleAge5to9       | 723840     |
| Zambia   | 1999           | FemaleAge60to64     | 78398      |
| Zambia   | 1999           | FemaleAge65to69     | 60998      |
| Zambia   | 1999           | FemaleAge70to74     | 42969      |
| Zambia   | 1999           | FemaleAge75to79     | 26489      |
| Zambia   | 1999           | FemaleAge80to84     | 12829      |
| Zambia   | 1999           | FemaleAge85to89     | 4847       |
| Zambia   | 1999           | FemaleAge90to94     | 1248       |
| Zambia   | 1999           | FemaleAge95to99     | 209        |
| Zambia   | 1999           | FemaleAgeAbov e100  | 12         |
| Zambia   | 1999           | FemaleLactAge15to19 | 75884      |
| Zambia   | 1999           | FemaleLactAge20to24 | 129997     |
| Zambia   | 1999           | FemaleLactAge25to29 | 102099     |
| Zambia   | 1999           | FemaleLactAge30to34 | 67122      |
| Zambia   | 1999           | FemaleLactAge35to39 | 37997      |
| Zambia   | 1999           | FemaleLactAge40to44 | 14094      |
| Zambia   | 1999           | FemaleLactAge45to49 | 4304       |
| Zambia   | 1999           | FemalePregAge15to19 | 56913      |
| Zambia   | 1999           | FemalePregAge20to24 | 97498      |
| Zambia   | 1999           | FemalePregAge25to29 | 76574      |
| Zambia   | 1999           | FemalePregAge30to34 | 50342      |
| Zambia   | 1999           | FemalePregAge35to39 | 28498      |
| Zambia   | 1999           | FemalePregAge40to44 | 10571      |
| Zambia   | 1999           | FemalePregAge45to49 | 3228       |
| Zambia   | 1999           | MaleAge0to4         | 904775     |
| Zambia   | 1999           | MaleAge10to14       | 620985     |
| Zambia   | 1999           | MaleAge15to19       | 548386     |
| Zambia   | 1999           | MaleAge20to24       | 483662     |
| Zambia   | 1999           | MaleAge25to29       | 393808     |
| Zambia   | 1999           | MaleAge30to34       | 304198     |
| Zambia   | 1999           | MaleAge35to39       | 223296     |
| Zambia   | 1999           | MaleAge40to44       | 166235     |
| Zambia   | 1999           | MaleAge45to49       | 131793     |
| Zambia   | 1999           | MaleAge50to54       | 115054     |
| Zambia   | 1999           | MaleAge55to59       | 89909      |
| Zambia   | 1999           | MaleAge5to9         | 722488     |
| Zambia   | 1999           | MaleAge60to64       | 71726      |
| Zambia   | 1999           | MaleAge65to69       | 52539      |
| Zambia   | 1999           | MaleAge70to74       | 35259      |
| Zambia   | 1999           | MaleAge75to79       | 20286      |
| Zambia   | 1999           | MaleAge80to84       | 9673       |
| Zambia   | 1999           | MaleAge85to89       | 3309       |
| Zambia   | 1999           | MaleAge90to94       | 737        |
| Zambia   | 1999           | MaleAge95to99       | 99         |
| Zambia   | 1999           | MaleAgeAbov e100    | 4          |
| Zimbabwe | 1992           | FemaleAge0to4       | 891852     |
| Zimbabwe | 1992           | FemaleAge10to14     | 753462     |
| Zimbabwe | 1992           | FemaleAge15to19     | 494387     |
| Zimbabwe | 1992           | FemaleAge20to24     | 298609     |
| Zimbabwe | 1992           | FemaleAge25to29     | 260711     |
| Zimbabwe | 1992           | FemaleAge30to34     | 229420     |
| Zimbabwe | 1992           | FemaleAge35to39     | 212100     |
| Zimbabwe | 1992           | FemaleAge40to44     | 175318     |
| Zimbabwe | 1992           | FemaleAge45to49     | 151807     |
| Zimbabwe | 1992           | FemaleAge50to54     | 135443     |
| Zimbabwe | 1992           | FemaleAge55to59     | 108876     |
| Zimbabwe | 1992           | FemaleAge5to9       | 853270     |
| Zimbabwe | 1992           | FemaleAge60to64     | 91460      |
| Zimbabwe | 1992           | FemaleAge65to69     | 69614      |
| Zimbabwe | 1992           | FemaleAge70to74     | 52290      |
| Zimbabwe | 1992           | FemaleAge75to79     | 33564      |
| Zimbabwe | 1992           | FemaleAge80to84     | 16540      |
| Zimbabwe | 1992           | FemaleAge85to89     | 7021       |
| Zimbabwe | 1992           | FemaleAge90to94     | 2065       |
| Zimbabwe | 1992           | FemaleAge95to99     | 321        |
| Zimbabwe | 1992           | FemaleAgeAbov e100  | 24         |

Dietary calcium and zinc deficiency risks are decreasing but remain prevalent

| Country  | Reference year | Age/gender group    | Population |
|----------|----------------|---------------------|------------|
| Zimbabwe | 1992           | FemaleLactAge15to19 | 70136      |
| Zimbabwe | 1992           | FemaleLactAge20to24 | 114093     |
| Zimbabwe | 1992           | FemaleLactAge25to29 | 87307      |
| Zimbabwe | 1992           | FemaleLactAge30to34 | 63108      |
| Zimbabwe | 1992           | FemaleLactAge35to39 | 38380      |
| Zimbabwe | 1992           | FemaleLactAge40to44 | 13643      |
| Zimbabwe | 1992           | FemaleLactAge45to49 | 3341       |
| Zimbabwe | 1992           | FemalePregAge15to19 | 52602      |
| Zimbabwe | 1992           | FemalePregAge20to24 | 85569      |
| Zimbabwe | 1992           | FemalePregAge25to29 | 65480      |
| Zimbabwe | 1992           | FemalePregAge30to34 | 47331      |
| Zimbabwe | 1992           | FemalePregAge35to39 | 28785      |
| Zimbabwe | 1992           | FemalePregAge40to44 | 10232      |
| Zimbabwe | 1992           | FemalePregAge45to49 | 2505       |
| Zimbabwe | 1992           | MaleAge0to4         | 899914     |
| Zimbabwe | 1992           | MaleAge10to14       | 753095     |
| Zimbabwe | 1992           | MaleAge15to19       | 618483     |
| Zimbabwe | 1992           | MaleAge20to24       | 500688     |
| Zimbabwe | 1992           | MaleAge25to29       | 414319     |
| Zimbabwe | 1992           | MaleAge30to34       | 335696     |
| Zimbabwe | 1992           | MaleAge35to39       | 268083     |
| Zimbabwe | 1992           | MaleAge40to44       | 190001     |
| Zimbabwe | 1992           | MaleAge45to49       | 152098     |
| Zimbabwe | 1992           | MaleAge50to54       | 130930     |
| Zimbabwe | 1992           | MaleAge55to59       | 102827     |
| Zimbabwe | 1992           | MaleAge5to9         | 856902     |
| Zimbabwe | 1992           | MaleAge60to64       | 82937      |
| Zimbabwe | 1992           | MaleAge65to69       | 61596      |
| Zimbabwe | 1992           | MaleAge70to74       | 45324      |
| Zimbabwe | 1992           | MaleAge75to79       | 28176      |
| Zimbabwe | 1992           | MaleAge80to84       | 13027      |
| Zimbabwe | 1992           | MaleAge85to89       | 5041       |
| Zimbabwe | 1992           | MaleAge90to94       | 1294       |
| Zimbabwe | 1992           | MaleAge95to99       | 161        |
| Zimbabwe | 1992           | MaleAgeAbov e100    | 7          |
| Zimbabwe | 1993           | FemaleAge0to4       | 895288     |
| Zimbabwe | 1993           | FemaleAge10to14     | 776658     |
| Zimbabwe | 1993           | FemaleAge15to19     | 518558     |
| Zimbabwe | 1993           | FemaleAge20to24     | 312373     |
| Zimbabwe | 1993           | FemaleAge25to29     | 266395     |
| Zimbabwe | 1993           | FemaleAge30to34     | 235979     |
| Zimbabwe | 1993           | FemaleAge35to39     | 216726     |
| Zimbabwe | 1993           | FemaleAge40to44     | 190979     |
| Zimbabwe | 1993           | FemaleAge45to49     | 150572     |
| Zimbabwe | 1993           | FemaleAge50to54     | 140763     |
| Zimbabwe | 1993           | FemaleAge55to59     | 111167     |
| Zimbabwe | 1993           | FemaleAge5to9       | 860463     |
| Zimbabwe | 1993           | FemaleAge60to64     | 93057      |
| Zimbabwe | 1993           | FemaleAge65to69     | 72770      |
| Zimbabwe | 1993           | FemaleAge70to74     | 52506      |
| Zimbabwe | 1993           | FemaleAge75to79     | 35799      |
| Zimbabwe | 1993           | FemaleAge80to84     | 17077      |
| Zimbabwe | 1993           | FemaleAge85to89     | 7273       |
| Zimbabwe | 1993           | FemaleAge90to94     | 2164       |
| Zimbabwe | 1993           | FemaleAge95to99     | 366        |
| Zimbabwe | 1993           | FemaleAgeAbov e100  | 25         |
| Zimbabwe | 1993           | FemaleLactAge15to19 | 70136      |
| Zimbabwe | 1993           | FemaleLactAge20to24 | 114093     |
| Zimbabwe | 1993           | FemaleLactAge25to29 | 87307      |
| Zimbabwe | 1993           | FemaleLactAge30to34 | 63108      |
| Zimbabwe | 1993           | FemaleLactAge35to39 | 38380      |
| Zimbabwe | 1993           | FemaleLactAge40to44 | 13643      |
| Zimbabwe | 1993           | FemaleLactAge45to49 | 3341       |
| Zimbabwe | 1993           | FemalePregAge15to19 | 52602      |
| Zimbabwe | 1993           | FemalePregAge20to24 | 85569      |
| Zimbabwe | 1993           | FemalePregAge25to29 | 65480      |
| Zimbabwe | 1993           | FemalePregAge30to34 | 47331      |
| Zimbabwe | 1993           | FemalePregAge35to39 | 28785      |
| Zimbabwe | 1993           | FemalePregAge40to44 | 10232      |
| Zimbabwe | 1993           | FemalePregAge45to49 | 2505       |
| Zimbabwe | 1993           | MaleAge0to4         | 903720     |
| Zimbabwe | 1993           | MaleAge10to14       | 776498     |
| Zimbabwe | 1993           | MaleAge15to19       | 640848     |
| Zimbabwe | 1993           | MaleAge20to24       | 514338     |
| Zimbabwe | 1993           | MaleAge25to29       | 420408     |
| Zimbabwe | 1993           | MaleAge30to34       | 343096     |
| Zimbabwe | 1993           | MaleAge35to39       | 271992     |
| Zimbabwe | 1993           | MaleAge40to44       | 202287     |
| Zimbabwe | 1993           | MaleAge45to49       | 149705     |
| Zimbabwe | 1993           | MaleAge50to54       | 135325     |
| Zimbabwe | 1993           | MaleAge55to59       | 105145     |
| Zimbabwe | 1993           | MaleAge5to9         | 864111     |
| Zimbabwe | 1993           | MaleAge60to64       | 84286      |
| Zimbabwe | 1993           | MaleAge65to69       | 63954      |
| Zimbabwe | 1993           | MaleAge70to74       | 45321      |
| Zimbabwe | 1993           | MaleAge75to79       | 30008      |
| Zimbabwe | 1993           | MaleAge80to84       | 13480      |
| Zimbabwe | 1993           | MaleAge85to89       | 5241       |

Dietary calcium and zinc deficiency risks are decreasing but remain prevalent

| Country  | Reference year | Age/gender group    | Population |
|----------|----------------|---------------------|------------|
| Zimbabwe | 1993           | MaleAge90to94       | 1369       |
| Zimbabwe | 1993           | MaleAge95to99       | 190        |
| Zimbabwe | 1993           | MaleAgeAbov e100    | 8          |
| Zimbabwe | 1994           | FemaleAge0to4       | 897348     |
| Zimbabwe | 1994           | FemaleAge10to14     | 797071     |
| Zimbabwe | 1994           | FemaleAge15to19     | 543406     |
| Zimbabwe | 1994           | FemaleAge20to24     | 328646     |
| Zimbabwe | 1994           | FemaleAge25to29     | 273130     |
| Zimbabwe | 1994           | FemaleAge30to34     | 241492     |
| Zimbabwe | 1994           | FemaleAge35to39     | 220470     |
| Zimbabwe | 1994           | FemaleAge40to44     | 205000     |
| Zimbabwe | 1994           | FemaleAge45to49     | 151765     |
| Zimbabwe | 1994           | FemaleAge50to54     | 144772     |
| Zimbabwe | 1994           | FemaleAge55to59     | 113862     |
| Zimbabwe | 1994           | FemaleAge5to9       | 863436     |
| Zimbabwe | 1994           | FemaleAge60to64     | 94661      |
| Zimbabwe | 1994           | FemaleAge65to69     | 75735      |
| Zimbabwe | 1994           | FemaleAge70to74     | 53222      |
| Zimbabwe | 1994           | FemaleAge75to79     | 37657      |
| Zimbabwe | 1994           | FemaleAge80to84     | 17820      |
| Zimbabwe | 1994           | FemaleAge85to89     | 7400       |
| Zimbabwe | 1994           | FemaleAge90to94     | 2153       |
| Zimbabwe | 1994           | FemaleAge95to99     | 382        |
| Zimbabwe | 1994           | FemaleAgeAbov e100  | 27         |
| Zimbabwe | 1994           | FemaleLactAge15to19 | 70136      |
| Zimbabwe | 1994           | FemaleLactAge20to24 | 114093     |
| Zimbabwe | 1994           | FemaleLactAge25to29 | 87307      |
| Zimbabwe | 1994           | FemaleLactAge30to34 | 63108      |
| Zimbabwe | 1994           | FemaleLactAge35to39 | 38380      |
| Zimbabwe | 1994           | FemaleLactAge40to44 | 13643      |
| Zimbabwe | 1994           | FemaleLactAge45to49 | 3341       |
| Zimbabwe | 1994           | FemalePregAge15to19 | 52602      |
| Zimbabwe | 1994           | FemalePregAge20to24 | 85569      |
| Zimbabwe | 1994           | FemalePregAge25to29 | 65480      |
| Zimbabwe | 1994           | FemalePregAge30to34 | 47331      |
| Zimbabwe | 1994           | FemalePregAge35to39 | 28785      |
| Zimbabwe | 1994           | FemalePregAge40to44 | 10232      |
| Zimbabwe | 1994           | FemalePregAge45to49 | 2505       |
| Zimbabwe | 1994           | MaleAge0to4         | 906244     |
| Zimbabwe | 1994           | MaleAge10to14       | 797407     |
| Zimbabwe | 1994           | MaleAge15to19       | 664363     |
| Zimbabwe | 1994           | MaleAge20to24       | 530011     |
| Zimbabwe | 1994           | MaleAge25to29       | 427507     |
| Zimbabwe | 1994           | MaleAge30to34       | 349937     |
| Zimbabwe | 1994           | MaleAge35to39       | 275671     |
| Zimbabwe | 1994           | MaleAge40to44       | 213048     |
| Zimbabwe | 1994           | MaleAge45to49       | 149272     |
| Zimbabwe | 1994           | MaleAge50to54       | 138351     |
| Zimbabwe | 1994           | MaleAge55to59       | 107752     |
| Zimbabwe | 1994           | MaleAge5to9         | 867120     |
| Zimbabwe | 1994           | MaleAge60to64       | 85756      |
| Zimbabwe | 1994           | MaleAge65to69       | 66137      |
| Zimbabwe | 1994           | MaleAge70to74       | 45698      |
| Zimbabwe | 1994           | MaleAge75to79       | 31458      |
| Zimbabwe | 1994           | MaleAge80to84       | 14064      |
| Zimbabwe | 1994           | MaleAge85to89       | 5325       |
| Zimbabwe | 1994           | MaleAge90to94       | 1356       |
| Zimbabwe | 1994           | MaleAge95to99       | 200        |
| Zimbabwe | 1994           | MaleAgeAbov e100    | 9          |
| Zimbabwe | 1995           | FemaleAge0to4       | 897422     |
| Zimbabwe | 1995           | FemaleAge10to14     | 813480     |
| Zimbabwe | 1995           | FemaleAge15to19     | 568316     |
| Zimbabwe | 1995           | FemaleAge20to24     | 347715     |
| Zimbabwe | 1995           | FemaleAge25to29     | 281813     |
| Zimbabwe | 1995           | FemaleAge30to34     | 246147     |
| Zimbabwe | 1995           | FemaleAge35to39     | 224396     |
| Zimbabwe | 1995           | FemaleAge40to44     | 215537     |
| Zimbabwe | 1995           | FemaleAge45to49     | 156844     |
| Zimbabwe | 1995           | FemaleAge50to54     | 146926     |
| Zimbabwe | 1995           | FemaleAge55to59     | 117099     |
| Zimbabwe | 1995           | FemaleAge5to9       | 864567     |
| Zimbabwe | 1995           | FemaleAge60to64     | 96456      |
| Zimbabwe | 1995           | FemaleAge65to69     | 78248      |
| Zimbabwe | 1995           | FemaleAge70to74     | 54745      |
| Zimbabwe | 1995           | FemaleAge75to79     | 38991      |
| Zimbabwe | 1995           | FemaleAge80to84     | 18865      |
| Zimbabwe | 1995           | FemaleAge85to89     | 7438       |
| Zimbabwe | 1995           | FemaleAge90to94     | 2024       |
| Zimbabwe | 1995           | FemaleAge95to99     | 321        |
| Zimbabwe | 1995           | FemaleAgeAbov e100  | 28         |
| Zimbabwe | 1995           | FemaleLactAge15to19 | 70136      |
| Zimbabwe | 1995           | FemaleLactAge20to24 | 114093     |
| Zimbabwe | 1995           | FemaleLactAge25to29 | 87307      |
| Zimbabwe | 1995           | FemaleLactAge30to34 | 63108      |
| Zimbabwe | 1995           | FemaleLactAge35to39 | 38380      |
| Zimbabwe | 1995           | FemaleLactAge40to44 | 13643      |
| Zimbabwe | 1995           | FemaleLactAge45to49 | 3341       |
| Zimbabwe | 1995           | FemalePregAge15to19 | 52602      |



Dietary calcium and zinc deficiency risks are decreasing but remain prevalent

| Country  | Reference year | Age/gender group    | Population |
|----------|----------------|---------------------|------------|
| Zimbabwe | 1995           | FemalePregAge20to24 | 85569      |
| Zimbabwe | 1995           | FemalePregAge25to29 | 65480      |
| Zimbabwe | 1995           | FemalePregAge30to34 | 47331      |
| Zimbabwe | 1995           | FemalePregAge35to39 | 28785      |
| Zimbabwe | 1995           | FemalePregAge40to44 | 10232      |
| Zimbabwe | 1995           | FemalePregAge45to49 | 2505       |
| Zimbabwe | 1995           | MaleAge0to4         | 906916     |
| Zimbabwe | 1995           | MaleAge10to14       | 814530     |
| Zimbabwe | 1995           | MaleAge15to19       | 688752     |
| Zimbabwe | 1995           | MaleAge20to24       | 548188     |
| Zimbabwe | 1995           | MaleAge25to29       | 436577     |
| Zimbabwe | 1995           | MaleAge30to34       | 356193     |
| Zimbabwe | 1995           | MaleAge35to39       | 280171     |
| Zimbabwe | 1995           | MaleAge40to44       | 220999     |
| Zimbabwe | 1995           | MaleAge45to49       | 152099     |
| Zimbabwe | 1995           | MaleAge50to54       | 139502     |
| Zimbabwe | 1995           | MaleAge55to59       | 110739     |
| Zimbabwe | 1995           | MaleAge5to9         | 868593     |
| Zimbabwe | 1995           | MaleAge60to64       | 87511      |
| Zimbabwe | 1995           | MaleAge65to69       | 68006      |
| Zimbabwe | 1995           | MaleAge70to74       | 46705      |
| Zimbabwe | 1995           | MaleAge75to79       | 32409      |
| Zimbabwe | 1995           | MaleAge80to84       | 14860      |
| Zimbabwe | 1995           | MaleAge85to89       | 5317       |
| Zimbabwe | 1995           | MaleAge90to94       | 1240       |
| Zimbabwe | 1995           | MaleAge95to99       | 155        |
| Zimbabwe | 1995           | MaleAgeAbove100     | 10         |
| Zimbabwe | 1996           | FemaleAge0to4       | 902276     |
| Zimbabwe | 1996           | FemaleAge10to14     | 828879     |
| Zimbabwe | 1996           | FemaleAge15to19     | 571669     |
| Zimbabwe | 1996           | FemaleAge20to24     | 345553     |
| Zimbabwe | 1996           | FemaleAge25to29     | 288298     |
| Zimbabwe | 1996           | FemaleAge30to34     | 263655     |
| Zimbabwe | 1996           | FemaleAge35to39     | 234931     |
| Zimbabwe | 1996           | FemaleAge40to44     | 225479     |
| Zimbabwe | 1996           | FemaleAge45to49     | 165177     |
| Zimbabwe | 1996           | FemaleAge50to54     | 147795     |
| Zimbabwe | 1996           | FemaleAge55to59     | 121140     |
| Zimbabwe | 1996           | FemaleAge5to9       | 870533     |
| Zimbabwe | 1996           | FemaleAge60to64     | 98334      |
| Zimbabwe | 1996           | FemaleAge65to69     | 80211      |
| Zimbabwe | 1996           | FemaleAge70to74     | 56600      |
| Zimbabwe | 1996           | FemaleAge75to79     | 39684      |
| Zimbabwe | 1996           | FemaleAge80to84     | 20368      |
| Zimbabwe | 1996           | FemaleAge85to89     | 7987       |
| Zimbabwe | 1996           | FemaleAge90to94     | 2317       |
| Zimbabwe | 1996           | FemaleAge95to99     | 358        |
| Zimbabwe | 1996           | FemaleAgeAbove100   | 29         |
| Zimbabwe | 1996           | FemaleLactAge15to19 | 82171      |
| Zimbabwe | 1996           | FemaleLactAge20to24 | 125204     |
| Zimbabwe | 1996           | FemaleLactAge25to29 | 86379      |
| Zimbabwe | 1996           | FemaleLactAge30to34 | 53286      |
| Zimbabwe | 1996           | FemaleLactAge35to39 | 33332      |
| Zimbabwe | 1996           | FemaleLactAge40to44 | 12299      |
| Zimbabwe | 1996           | FemaleLactAge45to49 | 3503       |
| Zimbabwe | 1996           | FemalePregAge15to19 | 61628      |
| Zimbabwe | 1996           | FemalePregAge20to24 | 93903      |
| Zimbabwe | 1996           | FemalePregAge25to29 | 64784      |
| Zimbabwe | 1996           | FemalePregAge30to34 | 39965      |
| Zimbabwe | 1996           | FemalePregAge35to39 | 24999      |
| Zimbabwe | 1996           | FemalePregAge40to44 | 9225       |
| Zimbabwe | 1996           | FemalePregAge45to49 | 2627       |
| Zimbabwe | 1996           | MaleAge0to4         | 912112     |
| Zimbabwe | 1996           | MaleAge10to14       | 829878     |
| Zimbabwe | 1996           | MaleAge15to19       | 712695     |
| Zimbabwe | 1996           | MaleAge20to24       | 566248     |
| Zimbabwe | 1996           | MaleAge25to29       | 444340     |
| Zimbabwe | 1996           | MaleAge30to34       | 358541     |
| Zimbabwe | 1996           | MaleAge35to39       | 282133     |
| Zimbabwe | 1996           | MaleAge40to44       | 226216     |
| Zimbabwe | 1996           | MaleAge45to49       | 157918     |
| Zimbabwe | 1996           | MaleAge50to54       | 139253     |
| Zimbabwe | 1996           | MaleAge55to59       | 114148     |
| Zimbabwe | 1996           | MaleAge5to9         | 874779     |
| Zimbabwe | 1996           | MaleAge60to64       | 89204      |
| Zimbabwe | 1996           | MaleAge65to69       | 69512      |
| Zimbabwe | 1996           | MaleAge70to74       | 48047      |
| Zimbabwe | 1996           | MaleAge75to79       | 32921      |
| Zimbabwe | 1996           | MaleAge80to84       | 16146      |
| Zimbabwe | 1996           | MaleAge85to89       | 5790       |
| Zimbabwe | 1996           | MaleAge90to94       | 1461       |
| Zimbabwe | 1996           | MaleAge95to99       | 178        |
| Zimbabwe | 1996           | MaleAgeAbove100     | 11         |
| Zimbabwe | 1997           | FemaleAge0to4       | 904792     |
| Zimbabwe | 1997           | FemaleAge10to14     | 840680     |
| Zimbabwe | 1997           | FemaleAge15to19     | 596907     |
| Zimbabwe | 1997           | FemaleAge20to24     | 366581     |
| Zimbabwe | 1997           | FemaleAge25to29     | 295400     |

Dietary calcium and zinc deficiency risks are decreasing but remain prevalent

| Country  | Reference year | Age/gender group    | Population |
|----------|----------------|---------------------|------------|
| Zimbabwe | 1997           | FemaleAge30to34     | 262935     |
| Zimbabwe | 1997           | FemaleAge35to39     | 235663     |
| Zimbabwe | 1997           | FemaleAge40to44     | 228965     |
| Zimbabwe | 1997           | FemaleAge45to49     | 177298     |
| Zimbabwe | 1997           | FemaleAge50to54     | 146591     |
| Zimbabwe | 1997           | FemaleAge55to59     | 126017     |
| Zimbabwe | 1997           | FemaleAge5to9       | 875102     |
| Zimbabwe | 1997           | FemaleAge60to64     | 100264     |
| Zimbabwe | 1997           | FemaleAge65to69     | 81884      |
| Zimbabwe | 1997           | FemaleAge70to74     | 59088      |
| Zimbabwe | 1997           | FemaleAge75to79     | 39949      |
| Zimbabwe | 1997           | FemaleAge80to84     | 21995      |
| Zimbabwe | 1997           | FemaleAge85to89     | 8355       |
| Zimbabwe | 1997           | FemaleAge90to94     | 2539       |
| Zimbabwe | 1997           | FemaleAge95to99     | 419        |
| Zimbabwe | 1997           | FemaleAgeAbov e100  | 31         |
| Zimbabwe | 1997           | FemaleLactAge15to19 | 82171      |
| Zimbabwe | 1997           | FemaleLactAge20to24 | 125204     |
| Zimbabwe | 1997           | FemaleLactAge25to29 | 86379      |
| Zimbabwe | 1997           | FemaleLactAge30to34 | 53286      |
| Zimbabwe | 1997           | FemaleLactAge35to39 | 33332      |
| Zimbabwe | 1997           | FemaleLactAge40to44 | 12299      |
| Zimbabwe | 1997           | FemaleLactAge45to49 | 3503       |
| Zimbabwe | 1997           | FemalePregAge15to19 | 61628      |
| Zimbabwe | 1997           | FemalePregAge20to24 | 93903      |
| Zimbabwe | 1997           | FemalePregAge25to29 | 64784      |
| Zimbabwe | 1997           | FemalePregAge30to34 | 39965      |
| Zimbabwe | 1997           | FemalePregAge35to39 | 24999      |
| Zimbabwe | 1997           | FemalePregAge40to44 | 9225       |
| Zimbabwe | 1997           | FemalePregAge45to49 | 2627       |
| Zimbabwe | 1997           | MaleAge0to4         | 914841     |
| Zimbabwe | 1997           | MaleAge10to14       | 841963     |
| Zimbabwe | 1997           | MaleAge15to19       | 737964     |
| Zimbabwe | 1997           | MaleAge20to24       | 587102     |
| Zimbabwe | 1997           | MaleAge25to29       | 454342     |
| Zimbabwe | 1997           | MaleAge30to34       | 360792     |
| Zimbabwe | 1997           | MaleAge35to39       | 284313     |
| Zimbabwe | 1997           | MaleAge40to44       | 228052     |
| Zimbabwe | 1997           | MaleAge45to49       | 166297     |
| Zimbabwe | 1997           | MaleAge50to54       | 137037     |
| Zimbabwe | 1997           | MaleAge55to59       | 118236     |
| Zimbabwe | 1997           | MaleAge5to9         | 879969     |
| Zimbabwe | 1997           | MaleAge60to64       | 91023      |
| Zimbabwe | 1997           | MaleAge65to69       | 70782      |
| Zimbabwe | 1997           | MaleAge70to74       | 49827      |
| Zimbabwe | 1997           | MaleAge75to79       | 33050      |
| Zimbabwe | 1997           | MaleAge80to84       | 17496      |
| Zimbabwe | 1997           | MaleAge85to89       | 6105       |
| Zimbabwe | 1997           | MaleAge90to94       | 1631       |
| Zimbabwe | 1997           | MaleAge95to99       | 218        |
| Zimbabwe | 1997           | MaleAgeAbov e100    | 12         |
| Zimbabwe | 1998           | FemaleAge0to4       | 904968     |
| Zimbabwe | 1998           | FemaleAge10to14     | 848614     |
| Zimbabwe | 1998           | FemaleAge15to19     | 621111     |
| Zimbabwe | 1998           | FemaleAge20to24     | 390521     |
| Zimbabwe | 1998           | FemaleAge25to29     | 305234     |
| Zimbabwe | 1998           | FemaleAge30to34     | 261726     |
| Zimbabwe | 1998           | FemaleAge35to39     | 235152     |
| Zimbabwe | 1998           | FemaleAge40to44     | 228767     |
| Zimbabwe | 1998           | FemaleAge45to49     | 190770     |
| Zimbabwe | 1998           | FemaleAge50to54     | 144854     |
| Zimbabwe | 1998           | FemaleAge55to59     | 130827     |
| Zimbabwe | 1998           | FemaleAge5to9       | 877723     |
| Zimbabwe | 1998           | FemaleAge60to64     | 102335     |
| Zimbabwe | 1998           | FemaleAge65to69     | 83357      |
| Zimbabwe | 1998           | FemaleAge70to74     | 61855      |
| Zimbabwe | 1998           | FemaleAge75to79     | 40183      |
| Zimbabwe | 1998           | FemaleAge80to84     | 23494      |
| Zimbabwe | 1998           | FemaleAge85to89     | 8614       |
| Zimbabwe | 1998           | FemaleAge90to94     | 2656       |
| Zimbabwe | 1998           | FemaleAge95to99     | 476        |
| Zimbabwe | 1998           | FemaleAgeAbov e100  | 33         |
| Zimbabwe | 1998           | FemaleLactAge15to19 | 82171      |
| Zimbabwe | 1998           | FemaleLactAge20to24 | 125204     |
| Zimbabwe | 1998           | FemaleLactAge25to29 | 86379      |
| Zimbabwe | 1998           | FemaleLactAge30to34 | 53286      |
| Zimbabwe | 1998           | FemaleLactAge35to39 | 33332      |
| Zimbabwe | 1998           | FemaleLactAge40to44 | 12299      |
| Zimbabwe | 1998           | FemaleLactAge45to49 | 3503       |
| Zimbabwe | 1998           | FemalePregAge15to19 | 61628      |
| Zimbabwe | 1998           | FemalePregAge20to24 | 93903      |
| Zimbabwe | 1998           | FemalePregAge25to29 | 64784      |
| Zimbabwe | 1998           | FemalePregAge30to34 | 39965      |
| Zimbabwe | 1998           | FemalePregAge35to39 | 24999      |
| Zimbabwe | 1998           | FemalePregAge40to44 | 9225       |
| Zimbabwe | 1998           | FemalePregAge45to49 | 2627       |
| Zimbabwe | 1998           | MaleAge0to4         | 915014     |
| Zimbabwe | 1998           | MaleAge10to14       | 850365     |

Dietary calcium and zinc deficiency risks are decreasing but remain prevalent

| Country  | Reference year | Age/gender group    | Population |
|----------|----------------|---------------------|------------|
| Zimbabwe | 1998           | MaleAge15to19       | 762678     |
| Zimbabwe | 1998           | MaleAge20to24       | 609914     |
| Zimbabwe | 1998           | MaleAge25to29       | 466456     |
| Zimbabwe | 1998           | MaleAge30to34       | 363391     |
| Zimbabwe | 1998           | MaleAge35to39       | 286457     |
| Zimbabwe | 1998           | MaleAge40to44       | 226973     |
| Zimbabwe | 1998           | MaleAge45to49       | 175342     |
| Zimbabwe | 1998           | MaleAge50to54       | 134151     |
| Zimbabwe | 1998           | MaleAge55to59       | 122139     |
| Zimbabwe | 1998           | MaleAge5to9         | 883308     |
| Zimbabwe | 1998           | MaleAge60to64       | 93002      |
| Zimbabwe | 1998           | MaleAge65to69       | 71877      |
| Zimbabwe | 1998           | MaleAge70to74       | 51756      |
| Zimbabwe | 1998           | MaleAge75to79       | 33118      |
| Zimbabwe | 1998           | MaleAge80to84       | 18681      |
| Zimbabwe | 1998           | MaleAge85to89       | 6313       |
| Zimbabwe | 1998           | MaleAge90to94       | 1719       |
| Zimbabwe | 1998           | MaleAge95to99       | 258        |
| Zimbabwe | 1998           | MaleAgeAbov e100    | 12         |
| Zimbabwe | 1999           | FemaleAge0to4       | 903140     |
| Zimbabwe | 1999           | FemaleAge10to14     | 852864     |
| Zimbabwe | 1999           | FemaleAge15to19     | 641847     |
| Zimbabwe | 1999           | FemaleAge20to24     | 415668     |
| Zimbabwe | 1999           | FemaleAge25to29     | 317971     |
| Zimbabwe | 1999           | FemaleAge30to34     | 260973     |
| Zimbabwe | 1999           | FemaleAge35to39     | 232829     |
| Zimbabwe | 1999           | FemaleAge40to44     | 226204     |
| Zimbabwe | 1999           | FemaleAge45to49     | 202008     |
| Zimbabwe | 1999           | FemaleAge50to54     | 144988     |
| Zimbabwe | 1999           | FemaleAge55to59     | 134226     |
| Zimbabwe | 1999           | FemaleAge5to9       | 877401     |
| Zimbabwe | 1999           | FemaleAge60to64     | 104678     |
| Zimbabwe | 1999           | FemaleAge65to69     | 84762      |
| Zimbabwe | 1999           | FemaleAge70to74     | 64394      |
| Zimbabwe | 1999           | FemaleAge75to79     | 40829      |
| Zimbabwe | 1999           | FemaleAge80to84     | 24568      |
| Zimbabwe | 1999           | FemaleAge85to89     | 8883       |
| Zimbabwe | 1999           | FemaleAge90to94     | 2636       |
| Zimbabwe | 1999           | FemaleAge95to99     | 491        |
| Zimbabwe | 1999           | FemaleAgeAbov e100  | 34         |
| Zimbabwe | 1999           | FemaleLactAge15to19 | 82171      |
| Zimbabwe | 1999           | FemaleLactAge20to24 | 125204     |
| Zimbabwe | 1999           | FemaleLactAge25to29 | 86379      |
| Zimbabwe | 1999           | FemaleLactAge30to34 | 53286      |
| Zimbabwe | 1999           | FemaleLactAge35to39 | 33332      |
| Zimbabwe | 1999           | FemaleLactAge40to44 | 12299      |
| Zimbabwe | 1999           | FemaleLactAge45to49 | 3503       |
| Zimbabwe | 1999           | FemalePregAge15to19 | 61628      |
| Zimbabwe | 1999           | FemalePregAge20to24 | 93903      |
| Zimbabwe | 1999           | FemalePregAge25to29 | 64784      |
| Zimbabwe | 1999           | FemalePregAge30to34 | 39965      |
| Zimbabwe | 1999           | FemalePregAge35to39 | 24999      |
| Zimbabwe | 1999           | FemalePregAge40to44 | 9225       |
| Zimbabwe | 1999           | FemalePregAge45to49 | 2627       |
| Zimbabwe | 1999           | MaleAge0to4         | 912919     |
| Zimbabwe | 1999           | MaleAge10to14       | 855027     |
| Zimbabwe | 1999           | MaleAge15to19       | 783955     |
| Zimbabwe | 1999           | MaleAge20to24       | 633292     |
| Zimbabwe | 1999           | MaleAge25to29       | 480364     |
| Zimbabwe | 1999           | MaleAge30to34       | 366869     |
| Zimbabwe | 1999           | MaleAge35to39       | 287762     |
| Zimbabwe | 1999           | MaleAge40to44       | 224281     |
| Zimbabwe | 1999           | MaleAge45to49       | 182161     |
| Zimbabwe | 1999           | MaleAge50to54       | 132539     |
| Zimbabwe | 1999           | MaleAge55to59       | 124561     |
| Zimbabwe | 1999           | MaleAge5to9         | 883405     |
| Zimbabwe | 1999           | MaleAge60to64       | 95160      |
| Zimbabwe | 1999           | MaleAge65to69       | 72912      |
| Zimbabwe | 1999           | MaleAge70to74       | 53447      |
| Zimbabwe | 1999           | MaleAge75to79       | 33452      |
| Zimbabwe | 1999           | MaleAge80to84       | 19441      |
| Zimbabwe | 1999           | MaleAge85to89       | 6503       |
| Zimbabwe | 1999           | MaleAge90to94       | 1699       |
| Zimbabwe | 1999           | MaleAge95to99       | 265        |
| Zimbabwe | 1999           | MaleAgeAbov e100    | 13         |





| Case No. | Year | Month | Day | Area | Region | Province | City | Sub-District | Village | Land Use | Area (m <sup>2</sup> ) | Value (Rp) | Year | Month | Day | Area | Region | Province | City | Sub-District | Village | Land Use | Area (m <sup>2</sup> ) | Value (Rp) | Year | Month | Day | Area | Region | Province | City | Sub-District | Village | Land Use | Area (m <sup>2</sup> ) | Value (Rp) |     |
|----------|------|-------|-----|------|--------|----------|------|--------------|---------|----------|------------------------|------------|------|-------|-----|------|--------|----------|------|--------------|---------|----------|------------------------|------------|------|-------|-----|------|--------|----------|------|--------------|---------|----------|------------------------|------------|-----|
| 1        | 2010 | 01    | 01  | ...  | ...    | ...      | ...  | ...          | ...     | ...      | ...                    | ...        | 2010 | 01    | 01  | ...  | ...    | ...      | ...  | ...          | ...     | ...      | ...                    | ...        | ...  | 2010  | 01  | 01   | ...    | ...      | ...  | ...          | ...     | ...      | ...                    | ...        | ... |





























**Dietary calcium and zinc deficiency risks are decreasing but remain prevalent**

Diriba B. Kumssa<sup>1,2,3</sup>, Edward J. M. Joy<sup>1,2</sup>, E. Louise Ander<sup>2</sup>, Michael J. Watts<sup>2</sup>, Scott D. Young<sup>1</sup>, Sue Walker<sup>3</sup> & Martin R. Broadley<sup>1</sup>  
<sup>1</sup>School of Biosciences, University of Nottingham, Sutton Bonington Campus, Loughborough, LE12 5RD, UK, <sup>2</sup>Centre for Environmental Geochemistry, British Geological Survey, Keyworth, Nottingham, NG12 5GG, UK, <sup>3</sup>Crops For the Future, The University of Nottingham Malaysia Campus, Jalan Broga, 43500 Semenyih, Selangor Darul Ehsan, Malaysia.

Correspondence and requests for materials should be addressed to M.R.B. (martin.broadley@nottingham.ac.uk)

**Supplementary Table S7 : Global-level Ca and Zn supply, WtdEAR and deficiency risks between 1992 and 2011 (mean±SD; national-**

| Reference year | Ca supply (mg <i>capita</i> <sup>-1</sup> d <sup>-1</sup> ) | Ca WtdEAR (mg <i>capita</i> <sup>-1</sup> d <sup>-1</sup> ) | Ca deficiency risk (%) | Zn supply (mg <i>capita</i> <sup>-1</sup> d <sup>-1</sup> ) | ZN WtdEAR (mg <i>capita</i> <sup>-1</sup> d <sup>-1</sup> ) | Zn deficiency risk (%) |
|----------------|-------------------------------------------------------------|-------------------------------------------------------------|------------------------|-------------------------------------------------------------|-------------------------------------------------------------|------------------------|
| 1992           | 547±230                                                     | 642±4                                                       | 76±23                  | 15±3                                                        | 10.3±0.1                                                    | 22±19                  |
| 1993           | 553±229                                                     | 642±4                                                       | 76±23                  | 15±3                                                        | 10.3±0.1                                                    | 22±20                  |
| 1994           | 566±235                                                     | 643±4                                                       | 74±22                  | 15±3                                                        | 10.3±0.1                                                    | 22±20                  |
| 1995           | 576±226                                                     | 643±4                                                       | 72±22                  | 15±3                                                        | 10.3±0.1                                                    | 21±20                  |
| 1996           | 582±219                                                     | 644±4                                                       | 70±22                  | 15±3                                                        | 10.3±0.1                                                    | 21±20                  |
| 1997           | 587±220                                                     | 645±4                                                       | 69±22                  | 15±3                                                        | 10.3±0.1                                                    | 20±19                  |
| 1998           | 594±219                                                     | 646±4                                                       | 68±22                  | 15±3                                                        | 10.3±0.1                                                    | 20±19                  |
| 1999           | 604±218                                                     | 646±5                                                       | 66±23                  | 15±3                                                        | 10.3±0.1                                                    | 20±18                  |
| 2000           | 619±223                                                     | 647±5                                                       | 62±26                  | 15±4                                                        | 10.3±0.1                                                    | 19±18                  |
| 2001           | 622±227                                                     | 647±5                                                       | 62±27                  | 15±3                                                        | 10.4±0.1                                                    | 20±18                  |
| 2002           | 627±229                                                     | 647±5                                                       | 60±29                  | 15±3                                                        | 10.4±0.1                                                    | 20±18                  |
| 2003           | 634±230                                                     | 648±5                                                       | 59±29                  | 15±3                                                        | 10.4±0.1                                                    | 20±18                  |
| 2004           | 635±233                                                     | 648±5                                                       | 59±30                  | 15±4                                                        | 10.3±0.1                                                    | 20±18                  |
| 2005           | 639±224                                                     | 647±5                                                       | 57±32                  | 15±4                                                        | 10.3±0.1                                                    | 20±17                  |
| 2006           | 650±221                                                     | 647±4                                                       | 56±32                  | 15±3                                                        | 10.3±0.1                                                    | 19±16                  |
| 2007           | 659±216                                                     | 646±4                                                       | 55±32                  | 16±3                                                        | 10.3±0.1                                                    | 18±15                  |
| 2008           | 665±220                                                     | 646±3                                                       | 54±32                  | 16±3                                                        | 10.3±0.1                                                    | 17±15                  |
| 2009           | 664±213                                                     | 645±3                                                       | 54±33                  | 16±3                                                        | 10.3±0.1                                                    | 17±15                  |
| 2010           | 676±209                                                     | 645±3                                                       | 52±32                  | 16±3                                                        | 10.3±0.1                                                    | 16±14                  |
| 2011           | 684±211                                                     | 644±3                                                       | 51±32                  | 16±3                                                        | 10.3±0.1                                                    | 16±14                  |

**Dietary calcium and zinc deficiency risks are decreasing but remain prevalent**

Driba B. Kumssa<sup>1,2,3</sup>, Edward J. M. Joy<sup>1,2</sup>, E. Louise Ander<sup>2</sup>, Michael J. Watts<sup>2</sup>, Scott D. Young<sup>1</sup>, Sue Walker<sup>3</sup> & Martin R. Broadley<sup>1</sup>

<sup>1</sup>School of Biosciences, University of Nottingham, Sutton Bonington Campus, Loughborough, LE12 5RD, UK; <sup>2</sup>Centre for Environmental Geochemistry, British Geological Survey, Keyworth, Nottingham, NG12 5GG, UK

<sup>3</sup>Crops for the Future, The University of Nottingham Malaysia Campus, Jalan Broga, 43500 Semenyih, Selangor Darul Ehsan, Malaysia.

Correspondence and requests for materials should be addressed to M.R.B. (martin.broadley@nottingham.ac.uk)

**Supplementary Table S8 - Continental-level Ca and Zn supply, WtEaR and deficiency risks between 1992 and 2011 (mean±SD; national-level data were weighted by population size).**

| Continent | Reference year | Ca supply (mg capita <sup>-1</sup> d <sup>-1</sup> ) | Ca WtEaR (mg capita <sup>-1</sup> d <sup>-1</sup> ) | Ca deficiency risk (%) | Zn supply (mg capita <sup>-1</sup> d <sup>-1</sup> ) | Zn WtEaR (mg capita <sup>-1</sup> d <sup>-1</sup> ) | Zn deficiency risk (%) |
|-----------|----------------|------------------------------------------------------|-----------------------------------------------------|------------------------|------------------------------------------------------|-----------------------------------------------------|------------------------|
| Africa    | 1992           | 366±131                                              | 636±5                                               | 92±14                  | 1324                                                 | 10320                                               | 39±28                  |
| Africa    | 1993           | 369±132                                              | 637±5                                               | 93±14                  | 1324                                                 | 10320                                               | 39±28                  |
| Africa    | 1994           | 369±144                                              | 637±5                                               | 91±17                  | 1324                                                 | 10320                                               | 39±28                  |
| Africa    | 1995           | 369±145                                              | 638±5                                               | 90±19                  | 1324                                                 | 10320                                               | 37±28                  |
| Africa    | 1996           | 363±147                                              | 638±7                                               | 90±19                  | 1324                                                 | 10320                                               | 37±28                  |
| Africa    | 1997           | 361±150                                              | 638±7                                               | 90±19                  | 1324                                                 | 10320                                               | 35±27                  |
| Africa    | 1998           | 399±156                                              | 639±7                                               | 86±22                  | 1324                                                 | 10320                                               | 34±26                  |
| Africa    | 1999           | 404±164                                              | 639±7                                               | 87±24                  | 1324                                                 | 10320                                               | 33±26                  |
| Africa    | 2000           | 406±165                                              | 639±8                                               | 87±24                  | 1324                                                 | 10320                                               | 33±26                  |
| Africa    | 2001           | 414±169                                              | 639±8                                               | 86±24                  | 1324                                                 | 10320                                               | 33±26                  |
| Africa    | 2002           | 425±173                                              | 638±8                                               | 85±26                  | 1324                                                 | 10320                                               | 32±25                  |
| Africa    | 2003           | 437±179                                              | 638±8                                               | 84±28                  | 1324                                                 | 10320                                               | 31±24                  |
| Africa    | 2004           | 442±177                                              | 638±7                                               | 83±28                  | 1324                                                 | 10320                                               | 31±24                  |
| Africa    | 2005           | 448±183                                              | 638±7                                               | 82±29                  | 1324                                                 | 10320                                               | 29±23                  |
| Africa    | 2006           | 458±186                                              | 638±7                                               | 81±30                  | 1324                                                 | 10320                                               | 28±22                  |
| Africa    | 2007           | 457±187                                              | 638±6                                               | 82±30                  | 1324                                                 | 10320                                               | 27±22                  |
| Africa    | 2008           | 458±183                                              | 637±6                                               | 82±30                  | 1324                                                 | 10320                                               | 27±22                  |
| Africa    | 2009           | 457±180                                              | 637±5                                               | 82±30                  | 1324                                                 | 10320                                               | 26±21                  |
| Africa    | 2010           | 471±187                                              | 637±5                                               | 80±31                  | 1324                                                 | 10320                                               | 25±21                  |
| Africa    | 2011           | 474±188                                              | 637±5                                               | 80±31                  | 1324                                                 | 10320                                               | 25±20                  |
| Americas  | 1992           | 331±92                                               | 644±2                                               | 44±38                  | 1724                                                 | 10320                                               | 12±16                  |
| Americas  | 1993           | 336±97                                               | 644±2                                               | 45±39                  | 1724                                                 | 10320                                               | 12±16                  |
| Americas  | 1994           | 357±109                                              | 645±2                                               | 44±38                  | 1724                                                 | 10320                                               | 12±16                  |
| Americas  | 1995           | 356±108                                              | 645±2                                               | 40±36                  | 1724                                                 | 10320                                               | 11±15                  |
| Americas  | 1996           | 362±117                                              | 645±2                                               | 39±36                  | 1724                                                 | 10320                                               | 11±15                  |
| Americas  | 1997           | 348±108                                              | 645±2                                               | 39±36                  | 1724                                                 | 10320                                               | 10±15                  |
| Americas  | 1998           | 352±105                                              | 646±2                                               | 37±33                  | 1724                                                 | 10320                                               | 10±14                  |
| Americas  | 1999           | 349±104                                              | 646±2                                               | 36±32                  | 1724                                                 | 10320                                               | 10±15                  |
| Americas  | 2000           | 343±103                                              | 646±2                                               | 35±32                  | 1724                                                 | 10320                                               | 10±13                  |
| Americas  | 2001           | 351±100                                              | 646±2                                               | 35±32                  | 1724                                                 | 10320                                               | 9±14                   |
| Americas  | 2002           | 342±117                                              | 646±2                                               | 34±31                  | 1724                                                 | 10320                                               | 9±14                   |
| Americas  | 2003           | 342±115                                              | 646±2                                               | 33±30                  | 1724                                                 | 10320                                               | 9±15                   |
| Americas  | 2004           | 342±116                                              | 646±2                                               | 33±30                  | 1724                                                 | 10320                                               | 9±15                   |
| Americas  | 2005           | 338±109                                              | 646±2                                               | 33±30                  | 1724                                                 | 10320                                               | 9±13                   |
| Americas  | 2006           | 339±107                                              | 646±2                                               | 33±30                  | 1724                                                 | 10320                                               | 8±12                   |
| Americas  | 2007           | 331±107                                              | 646±2                                               | 31±28                  | 1724                                                 | 10320                                               | 8±11                   |
| Americas  | 2008           | 331±104                                              | 647±2                                               | 29±27                  | 1724                                                 | 10320                                               | 7±11                   |
| Americas  | 2009           | 327±102                                              | 647±1                                               | 31±28                  | 1724                                                 | 10320                                               | 8±11                   |
| Americas  | 2010           | 332±104                                              | 647±1                                               | 30±27                  | 1724                                                 | 10320                                               | 7±9                    |
| Americas  | 2011           | 332±104                                              | 647±1                                               | 29±27                  | 1724                                                 | 10320                                               | 7±10                   |
| Asia      | 1992           | 472±137                                              | 647±5                                               | 92±14                  | 1324                                                 | 10320                                               | 24±21                  |
| Asia      | 1993           | 476±143                                              | 647±5                                               | 90±19                  | 1324                                                 | 10320                                               | 23±21                  |
| Asia      | 1994           | 447±145                                              | 642±4                                               | 89±20                  | 1324                                                 | 10320                                               | 25±21                  |
| Asia      | 1995           | 459±146                                              | 643±3                                               | 87±20                  | 1324                                                 | 10320                                               | 24±21                  |
| Asia      | 1996           | 462±150                                              | 643±3                                               | 86±20                  | 1324                                                 | 10320                                               | 24±21                  |
| Asia      | 1997           | 478±149                                              | 645±3                                               | 85±21                  | 1324                                                 | 10320                                               | 23±20                  |
| Asia      | 1998           | 484±153                                              | 646±4                                               | 82±21                  | 1324                                                 | 10320                                               | 23±20                  |
| Asia      | 1999           | 500±156                                              | 647±4                                               | 79±22                  | 1324                                                 | 10320                                               | 22±19                  |
| Asia      | 2000           | 523±172                                              | 647±5                                               | 75±27                  | 1324                                                 | 10320                                               | 22±19                  |
| Asia      | 2001           | 527±175                                              | 649±5                                               | 72±28                  | 1324                                                 | 10320                                               | 22±19                  |
| Asia      | 2002           | 533±191                                              | 649±6                                               | 70±31                  | 1324                                                 | 10320                                               | 24±19                  |
| Asia      | 2003           | 545±190                                              | 649±6                                               | 69±32                  | 1324                                                 | 10320                                               | 24±19                  |
| Asia      | 2004           | 546±200                                              | 649±6                                               | 68±32                  | 1324                                                 | 10320                                               | 23±18                  |
| Asia      | 2005           | 550±208                                              | 649±5                                               | 66±35                  | 1324                                                 | 10320                                               | 23±19                  |
| Asia      | 2006           | 575±207                                              | 649±4                                               | 65±35                  | 1324                                                 | 10320                                               | 22±17                  |
| Asia      | 2007           | 591±205                                              | 649±4                                               | 63±36                  | 1324                                                 | 10320                                               | 20±16                  |
| Asia      | 2008           | 601±218                                              | 647±5                                               | 61±37                  | 1324                                                 | 10320                                               | 20±16                  |
| Asia      | 2009           | 607±213                                              | 646±2                                               | 61±37                  | 1324                                                 | 10320                                               | 20±15                  |
| Asia      | 2010           | 628±218                                              | 646±2                                               | 58±36                  | 1324                                                 | 10320                                               | 19±14                  |
| Asia      | 2011           | 639±223                                              | 645±2                                               | 57±36                  | 1324                                                 | 10320                                               | 17±14                  |
| Europe    | 1992           | 378±104                                              | 647±5                                               | 25±22                  | 2021                                                 | 10320                                               | 3±2                    |
| Europe    | 1993           | 381±105                                              | 648±3                                               | 24±21                  | 1922                                                 | 10320                                               | 4±3                    |
| Europe    | 1994           | 379±107                                              | 648±3                                               | 20±15                  | 1922                                                 | 10320                                               | 4±3                    |
| Europe    | 1995           | 390±117                                              | 649±3                                               | 19±14                  | 1922                                                 | 10320                                               | 4±3                    |
| Europe    | 1996           | 396±122                                              | 649±4                                               | 17±12                  | 1922                                                 | 10320                                               | 4±3                    |
| Europe    | 1997           | 404±122                                              | 650±4                                               | 16±10                  | 1922                                                 | 10320                                               | 4±3                    |
| Europe    | 1998           | 421±120                                              | 650±4                                               | 15±9                   | 1922                                                 | 10320                                               | 4±3                    |
| Europe    | 1999           | 430±128                                              | 651±4                                               | 14±9                   | 1922                                                 | 10320                                               | 4±3                    |
| Europe    | 2000           | 432±129                                              | 651±4                                               | 14±9                   | 1922                                                 | 10320                                               | 4±3                    |
| Europe    | 2001           | 437±131                                              | 651±4                                               | 14±10                  | 1922                                                 | 10320                                               | 4±2                    |
| Europe    | 2002           | 452±139                                              | 651±4                                               | 13±9                   | 1922                                                 | 10320                                               | 4±2                    |
| Europe    | 2003           | 446±145                                              | 650±4                                               | 14±10                  | 1922                                                 | 10320                                               | 4±2                    |
| Europe    | 2004           | 467±144                                              | 650±5                                               | 13±10                  | 1922                                                 | 10320                                               | 4±2                    |
| Europe    | 2005           | 466±130                                              | 649±3                                               | 12±8                   | 1922                                                 | 10320                                               | 3±2                    |
| Europe    | 2006           | 473±137                                              | 649±3                                               | 12±8                   | 1922                                                 | 10320                                               | 3±2                    |
| Europe    | 2007           | 481±135                                              | 649±2                                               | 11±7                   | 1922                                                 | 10320                                               | 3±2                    |
| Europe    | 2008           | 487±147                                              | 647±2                                               | 12±8                   | 1922                                                 | 10320                                               | 3±2                    |
| Europe    | 2009           | 477±133                                              | 647±2                                               | 11±8                   | 1922                                                 | 10320                                               | 3±2                    |
| Europe    | 2010           | 473±124                                              | 646±2                                               | 11±7                   | 1922                                                 | 10320                                               | 3±2                    |
| Europe    | 2011           | 482±130                                              | 645±2                                               | 11±7                   | 1922                                                 | 10320                                               | 3±2                    |
| Oceania   | 1992           | 912±218                                              | 646±2                                               | 12±8                   | 2021                                                 | 10320                                               | 3±2                    |
| Oceania   | 1993           | 910±28                                               | 645±1                                               | 12±8                   | 2021                                                 | 10320                                               | 3±2                    |
| Oceania   | 1994           | 938±11                                               | 645±1                                               | 11±1                   | 2020                                                 | 10320                                               | 3±2                    |
| Oceania   | 1995           | 947±12                                               | 645±1                                               | 10±1                   | 2121                                                 | 10320                                               | 3±2                    |
| Oceania   | 1996           | 950±5                                                | 645±1                                               | 10±0                   | 2020                                                 | 10320                                               | 3±2                    |
| Oceania   | 1997           | 904±31                                               | 645±0                                               | 13±2                   | 2021                                                 | 10320                                               | 3±2                    |
| Oceania   | 1998           | 830±41                                               | 645±0                                               | 19±5                   | 1920                                                 | 10320                                               | 3±2                    |
| Oceania   | 1999           | 822±83                                               | 645±0                                               | 22±13                  | 2020                                                 | 10320                                               | 3±2                    |
| Oceania   | 2000           | 838±85                                               | 646±0                                               | 19±6                   | 1920                                                 | 10320                                               | 3±2                    |
| Oceania   | 2001           | 835±85                                               | 646±0                                               | 19±6                   | 1920                                                 | 10320                                               | 3±2                    |
| Oceania   | 2002           | 845±85                                               | 647±0                                               | 19±9                   | 1921                                                 | 10320                                               | 3±2                    |
| Oceania   | 2003           | 824±88                                               | 647±0                                               | 21±8                   | 2021                                                 | 10320                                               | 3±1                    |
| Oceania   | 2004           | 811±85                                               | 647±0                                               | 21±8                   | 1920                                                 | 10320                                               | 4±0                    |
| Oceania   | 2005           | 848±85                                               | 647±0                                               | 18±7                   | 1921                                                 | 10320                                               | 3±1                    |
| Oceania   | 2006           | 932±81                                               | 647±0                                               | 13±7                   | 1920                                                 | 10320                                               | 3±0                    |
| Oceania   | 2007           | 914±80                                               | 647±0                                               | 14±8                   | 2121                                                 | 10320                                               | 2±0                    |
| Oceania   | 2008           | 907±88                                               | 647±0                                               | 15±10                  | 2020                                                 | 10320                                               | 2±0                    |
| Oceania   | 2009           | 860±81                                               | 646±0                                               | 17±8                   | 2021                                                 | 10320                                               | 3±0                    |
| Oceania   | 2010           | 864±81                                               | 646±0                                               | 16±10                  | 2021                                                 | 10320                                               | 3±0                    |
| Oceania   | 2011           | 936±80                                               | 645±0                                               | 11±4                   | 2020                                                 | 10320                                               | 2±0                    |

**Dietary calcium and zinc deficiency risks are decreasing but remain prevalent**

Dirba B. Kumssa<sup>1,2,3</sup>, Edward J. M. Joy<sup>1,2</sup>, E. Louise Ander<sup>2</sup>, Michael J. Wats<sup>2</sup>, Scott D. Young<sup>1</sup>, Sue Walker<sup>3</sup> & Martin R. Broadley<sup>1</sup>

<sup>1</sup>School of Biosciences, University of Nottingham, Sutton Bonington Campus, Loughborough, LE12 5RD, UK <sup>2</sup>Centre for Environmental Geochemistry, British Geological Survey, Keyworth, Nottingham, NG12 5GG, UK <sup>3</sup>Crops For the Future, The University of Nottingham Malaysia Campus, Jalan Broga, 43500 Semenyih, Selangor Darul Ehsan, Malaysia.

Correspondence and requests for materials should be addressed to MR.B. (martin.broadley@nottingham.ac.uk)

**Supplementary Table S9 - Regional-level Ca and Zn supply, WtdEAR and deficiency risks between 1992 and 2011 (means±SD; national-level data were weighted by population size).**

| Region                    | Reference year | Ca supply (mg capita <sup>-1</sup> d <sup>-1</sup> ) | Ca WtdEAR (mg capita <sup>-1</sup> d <sup>-1</sup> ) | Ca deficiency risk (%) | Zn supply (mg capita <sup>-1</sup> d <sup>-1</sup> ) | Zn WtdEAR (mg capita <sup>-1</sup> d <sup>-1</sup> ) | Zn deficiency risk (%) |
|---------------------------|----------------|------------------------------------------------------|------------------------------------------------------|------------------------|------------------------------------------------------|------------------------------------------------------|------------------------|
| Australia and New Zealand | 1992           | 913±228                                              | 846±20                                               | 12±1                   | 10.2±0                                               | 10.2±0                                               | 3±0                    |
| Australia and New Zealand | 1993           | 913±228                                              | 846±20                                               | 12±1                   | 20±1                                                 | 10.2±0                                               | 3±0                    |
| Australia and New Zealand | 1994           | 935±211                                              | 846±20                                               | 11±1                   | 20±1                                                 | 10.2±0                                               | 3±0                    |
| Australia and New Zealand | 1995           | 947±12                                               | 846±20                                               | 10±1                   | 21±1                                                 | 10.2±0                                               | 2±0                    |
| Australia and New Zealand | 1996           | 950±25                                               | 846±20                                               | 10±0                   | 20±0                                                 | 10.2±0                                               | 2±0                    |
| Australia and New Zealand | 1997           | 904±31                                               | 846±20                                               | 13±1                   | 20±1                                                 | 10.2±0                                               | 3±0                    |
| Australia and New Zealand | 1998           | 930±241                                              | 846±20                                               | 11±0                   | 19±0                                                 | 10.2±0                                               | 3±0                    |
| Australia and New Zealand | 1999           | 822±83                                               | 846±20                                               | 22±0                   | 20±0                                                 | 10.2±0                                               | 3±0                    |
| Australia and New Zealand | 2000           | 838±48                                               | 846±20                                               | 19±0                   | 19±0                                                 | 10.2±0                                               | 3±0                    |
| Australia and New Zealand | 2001           | 835±45                                               | 846±20                                               | 19±0                   | 19±0                                                 | 10.2±0                                               | 3±0                    |
| Australia and New Zealand | 2002           | 849±35                                               | 846±20                                               | 19±1                   | 19±1                                                 | 10.2±0                                               | 3±0                    |
| Australia and New Zealand | 2003           | 824±58                                               | 846±20                                               | 21±1                   | 20±1                                                 | 10.2±0                                               | 3±1                    |
| Australia and New Zealand | 2004           | 811±35                                               | 846±20                                               | 21±0                   | 19±0                                                 | 10.2±0                                               | 4±0                    |
| Australia and New Zealand | 2005           | 848±35                                               | 846±20                                               | 18±1                   | 18±1                                                 | 10.2±0                                               | 3±1                    |
| Australia and New Zealand | 2006           | 832±31                                               | 846±20                                               | 17±0                   | 18±0                                                 | 10.2±0                                               | 3±0                    |
| Australia and New Zealand | 2007           | 914±80                                               | 846±20                                               | 14±1                   | 21±1                                                 | 10.2±0                                               | 2±0                    |
| Australia and New Zealand | 2008           | 907±88                                               | 846±20                                               | 15±0                   | 20±0                                                 | 10.2±0                                               | 2±0                    |
| Australia and New Zealand | 2009           | 880±31                                               | 846±20                                               | 17±1                   | 20±1                                                 | 10.2±0                                               | 3±0                    |
| Australia and New Zealand | 2010           | 922±31                                               | 846±20                                               | 10±1                   | 20±1                                                 | 10.2±0                                               | 3±0                    |
| Australia and New Zealand | 2011           | 936±50                                               | 846±20                                               | 11±0                   | 20±0                                                 | 10.2±0                                               | 2±0                    |
| Caribbean                 | 1992           | 383±58                                               | 842±4                                                | 95±7                   | 10±7                                                 | 10.3±0                                               | 99±5                   |
| Caribbean                 | 1993           | 363±57                                               | 842±4                                                | 93±8                   | 9±8                                                  | 10.3±0                                               | 95±5                   |
| Caribbean                 | 1994           | 373±58                                               | 842±4                                                | 93±8                   | 9±8                                                  | 10.3±0                                               | 92±5                   |
| Caribbean                 | 1995           | 393±57                                               | 842±4                                                | 93±8                   | 10±8                                                 | 10.3±0                                               | 91±5                   |
| Caribbean                 | 1996           | 396±56                                               | 842±4                                                | 92±8                   | 10±8                                                 | 10.3±0                                               | 90±5                   |
| Caribbean                 | 1997           | 407±59                                               | 842±4                                                | 92±8                   | 10±8                                                 | 10.3±0                                               | 90±5                   |
| Caribbean                 | 1998           | 418±54                                               | 842±4                                                | 92±7                   | 10±7                                                 | 10.3±0                                               | 89±5                   |
| Caribbean                 | 1999           | 463±13                                               | 842±4                                                | 78±8                   | 11±8                                                 | 10.3±0                                               | 83±5                   |
| Caribbean                 | 2000           | 474±14                                               | 842±4                                                | 74±7                   | 11±7                                                 | 10.3±0                                               | 85±5                   |
| Caribbean                 | 2001           | 485±17                                               | 842±4                                                | 71±7                   | 11±7                                                 | 10.3±0                                               | 89±5                   |
| Caribbean                 | 2002           | 472±10                                               | 842±4                                                | 73±7                   | 11±7                                                 | 10.3±0                                               | 86±5                   |
| Caribbean                 | 2003           | 486±10                                               | 842±4                                                | 70±8                   | 11±8                                                 | 10.3±0                                               | 91±5                   |
| Caribbean                 | 2004           | 494±10                                               | 842±4                                                | 74±8                   | 11±8                                                 | 10.3±0                                               | 90±5                   |
| Caribbean                 | 2005           | 522±12                                               | 842±4                                                | 69±8                   | 12±7                                                 | 10.3±0                                               | 87±5                   |
| Caribbean                 | 2006           | 490±16                                               | 842±4                                                | 72±7                   | 12±7                                                 | 10.3±0                                               | 84±5                   |
| Caribbean                 | 2007           | 492±10                                               | 842±4                                                | 73±7                   | 12±7                                                 | 10.3±0                                               | 80±5                   |
| Caribbean                 | 2008           | 529±13                                               | 842±4                                                | 68±7                   | 12±7                                                 | 10.3±0                                               | 80±5                   |
| Caribbean                 | 2009           | 542±10                                               | 842±4                                                | 67±7                   | 12±7                                                 | 10.3±0                                               | 80±5                   |
| Caribbean                 | 2010           | 500±16                                               | 842±4                                                | 74±8                   | 12±8                                                 | 10.3±0                                               | 83±5                   |
| Caribbean                 | 2011           | 507±10                                               | 842±4                                                | 71±8                   | 12±8                                                 | 10.3±0                                               | 86±5                   |
| Central America           | 1992           | 549±39                                               | 842±3                                                | 72±3                   | 16±3                                                 | 10.4±0                                               | 125±5                  |
| Central America           | 1993           | 549±39                                               | 842±3                                                | 72±3                   | 16±3                                                 | 10.4±0                                               | 125±5                  |
| Central America           | 1994           | 541±26                                               | 842±3                                                | 75±3                   | 16±3                                                 | 10.4±0                                               | 113±4                  |
| Central America           | 1995           | 527±19                                               | 842±3                                                | 78±3                   | 16±3                                                 | 10.4±0                                               | 112±4                  |
| Central America           | 1996           | 507±14                                               | 842±3                                                | 82±3                   | 16±3                                                 | 10.4±0                                               | 118±4                  |
| Central America           | 1997           | 527±10                                               | 842±3                                                | 77±3                   | 16±3                                                 | 10.4±0                                               | 123±5                  |
| Central America           | 1998           | 575±19                                               | 842±3                                                | 65±3                   | 16±3                                                 | 10.4±0                                               | 102±4                  |
| Central America           | 1999           | 590±17                                               | 842±3                                                | 62±3                   | 16±3                                                 | 10.4±0                                               | 102±4                  |
| Central America           | 2000           | 618±15                                               | 842±3                                                | 56±3                   | 17±3                                                 | 10.4±0                                               | 105±4                  |
| Central America           | 2001           | 625±17                                               | 842±3                                                | 53±3                   | 17±3                                                 | 10.4±0                                               | 97±4                   |
| Central America           | 2002           | 634±13                                               | 842±3                                                | 53±3                   | 17±3                                                 | 10.4±0                                               | 93±4                   |
| Central America           | 2003           | 644±12                                               | 842±3                                                | 51±3                   | 17±3                                                 | 10.4±0                                               | 93±4                   |
| Central America           | 2004           | 638±10                                               | 842±3                                                | 52±3                   | 17±3                                                 | 10.4±0                                               | 93±4                   |
| Central America           | 2005           | 642±11                                               | 842±3                                                | 52±3                   | 17±3                                                 | 10.4±0                                               | 93±4                   |
| Central America           | 2006           | 613±17                                               | 842±3                                                | 59±3                   | 17±3                                                 | 10.4±0                                               | 93±4                   |
| Central America           | 2007           | 644±15                                               | 842±3                                                | 51±3                   | 17±3                                                 | 10.4±0                                               | 97±4                   |
| Central America           | 2008           | 624±14                                               | 842±3                                                | 56±3                   | 17±3                                                 | 10.4±0                                               | 97±4                   |
| Central America           | 2009           | 627±15                                               | 842±3                                                | 57±3                   | 17±3                                                 | 10.4±0                                               | 93±4                   |
| Central America           | 2010           | 607±16                                               | 842±3                                                | 60±2                   | 17±2                                                 | 10.4±0                                               | 93±4                   |
| Central America           | 2011           | 612±15                                               | 842±3                                                | 59±2                   | 17±2                                                 | 10.4±0                                               | 93±4                   |
| Central Asia              | 1992           | 732±12                                               | 832±4                                                | 34±8                   | 21±8                                                 | 10.2±0                                               | 32±3                   |
| Central Asia              | 1993           | 732±12                                               | 832±4                                                | 34±8                   | 21±8                                                 | 10.2±0                                               | 32±3                   |
| Central Asia              | 1994           | 750±16                                               | 832±4                                                | 31±8                   | 21±8                                                 | 10.2±0                                               | 32±3                   |
| Central Asia              | 1995           | 730±16                                               | 832±4                                                | 34±8                   | 21±8                                                 | 10.2±0                                               | 32±3                   |
| Central Asia              | 1996           | 729±17                                               | 832±4                                                | 33±8                   | 21±8                                                 | 10.2±0                                               | 32±3                   |
| Central Asia              | 1997           | 732±16                                               | 832±4                                                | 33±8                   | 21±8                                                 | 10.2±0                                               | 32±3                   |
| Central Asia              | 1998           | 748±10                                               | 832±4                                                | 33±8                   | 20±8                                                 | 10.2±0                                               | 32±3                   |
| Central Asia              | 1999           | 775±15                                               | 832±4                                                | 31±8                   | 20±8                                                 | 10.2±0                                               | 42±4                   |
| Central Asia              | 2000           | 772±10                                               | 832±4                                                | 33±8                   | 19±8                                                 | 10.2±0                                               | 42±4                   |
| Central Asia              | 2001           | 782±16                                               | 832±4                                                | 30±8                   | 19±8                                                 | 10.2±0                                               | 42±4                   |
| Central Asia              | 2002           | 818±14                                               | 832±4                                                | 23±8                   | 19±8                                                 | 10.2±0                                               | 42±4                   |
| Central Asia              | 2003           | 846±17                                               | 832±4                                                | 28±8                   | 20±8                                                 | 10.2±0                                               | 42±4                   |
| Central Asia              | 2004           | 847±16                                               | 832±4                                                | 27±8                   | 20±8                                                 | 10.2±0                                               | 42±4                   |
| Central Asia              | 2005           | 862±19                                               | 832±4                                                | 23±8                   | 20±8                                                 | 10.2±0                                               | 42±4                   |
| Central Asia              | 2006           | 889±17                                               | 832±4                                                | 23±8                   | 20±8                                                 | 10.2±0                                               | 31±3                   |
| Central Asia              | 2007           | 901±17                                               | 832±4                                                | 22±8                   | 20±8                                                 | 10.2±0                                               | 31±3                   |
| Central Asia              | 2008           | 916±19                                               | 832±4                                                | 22±7                   | 21±7                                                 | 10.2±0                                               | 31±3                   |
| Central Asia              | 2009           | 943±19                                               | 832±4                                                | 21±7                   | 21±7                                                 | 10.2±0                                               | 31±3                   |
| Central Asia              | 2010           | 956±15                                               | 832±4                                                | 20±7                   | 22±7                                                 | 10.2±0                                               | 31±3                   |
| Central Asia              | 2011           | 975±10                                               | 832±4                                                | 19±7                   | 22±7                                                 | 10.2±0                                               | 31±3                   |
| Eastern Africa            | 1992           | 313±13                                               | 832±4                                                | 96±3                   | 10±3                                                 | 10.3±0                                               | 89±3                   |
| Eastern Africa            | 1993           | 302±15                                               | 832±4                                                | 97±3                   | 10±3                                                 | 10.3±0                                               | 82±3                   |
| Eastern Africa            | 1994           | 308±16                                               | 832±4                                                | 95±3                   | 10±3                                                 | 10.3±0                                               | 90±3                   |
| Eastern Africa            | 1995           | 310±11                                               | 832±4                                                | 95±3                   | 11±3                                                 | 10.3±0                                               | 89±3                   |
| Eastern Africa            | 1996           | 307±11                                               | 832±4                                                | 95±3                   | 11±3                                                 | 10.3±0                                               | 87±3                   |
| Eastern Africa            | 1997           | 317±11                                               | 832±4                                                | 93±3                   | 11±3                                                 | 10.3±0                                               | 87±3                   |
| Eastern Africa            | 1998           | 317±12                                               | 832±4                                                | 93±3                   | 11±3                                                 | 10.3±0                                               | 85±3                   |
| Eastern Africa            | 1999           | 317±14                                               | 832±4                                                | 93±3                   | 11±3                                                 | 10.3±0                                               | 84±3                   |
| Eastern Africa            | 2000           | 315±12                                               | 832±4                                                | 93±3                   | 11±3                                                 | 10.3±0                                               | 84±3                   |
| Eastern Africa            | 2001           | 321±14                                               | 832±4                                                | 92±3                   | 11±3                                                 | 10.3±0                                               | 82±3                   |
| Eastern Africa            | 2002           | 347±18                                               | 832±4                                                | 84±3                   | 11±3                                                 | 10.3±0                                               | 82±3                   |
| Eastern Africa            | 2003           | 353±16                                               | 832±4                                                | 82±3                   | 11±3                                                 | 10.3±0                                               | 80±3                   |
| Eastern Africa            | 2004           | 356±14                                               | 832±4                                                | 83±3                   | 11±3                                                 | 10.3±0                                               | 81±3                   |
| Eastern Africa            | 2005           | 361±15                                               | 832±4                                                | 82±3                   | 12±3                                                 | 10.3±0                                               | 87±3                   |
| Eastern Africa            | 2006           | 363±18                                               | 832±4                                                | 83±3                   | 12±3                                                 | 10.3±0                                               | 87±3                   |
| Eastern Africa            | 2007           | 361±12                                               | 832±4                                                | 83±3                   | 11±3                                                 | 10.3±0                                               | 88±3                   |
| Eastern Africa            | 2008           | 365±11                                               | 832±4                                                | 83±3                   | 12±3                                                 | 10.3±0                                               | 88±3                   |
| Eastern Africa            | 2009           | 362±11                                               | 832±4                                                | 83±3                   | 12±3                                                 | 10.3±0                                               | 88±3                   |
| Eastern Africa            | 2010           | 390±11                                               | 832±4                                                | 82±3                   | 12±3                                                 | 10.3±0                                               | 85±3                   |
| Eastern Africa            | 2011           | 388±19                                               | 832±4                                                | 82±3                   | 12±3                                                 | 10.3±0                                               | 84±3                   |
| Eastern Asia              | 1992           | 446±19                                               | 840±4                                                | 91±1                   | 18±1                                                 | 10.3±0                                               | 133±3                  |
| Eastern Asia              | 1993           | 446±19                                               | 840±4                                                | 91±1                   | 18±1                                                 | 10.3±0                                               | 133±3                  |
| Eastern Asia              | 1994           | 504±13                                               | 840±4                                                | 85±2                   | 18±2                                                 | 10.3±0                                               | 92±1                   |
| Eastern Asia              | 1995           | 525±19                                               | 840±4                                                | 81±2                   | 18±2                                                 | 10.3±0                                               | 82±1                   |
| Eastern Asia              | 1996           | 547±19                                               | 840±4                                                | 76±2                   | 18±2                                                 | 10.3±0                                               | 82±1                   |
| Eastern Asia              | 1997           | 562±15                                               | 840±4                                                | 72±2                   | 18±2                                                 | 10.3±0                                               | 73±1                   |
| Eastern Asia              | 1998           | 572±10                                               | 840±4                                                | 71±3                   | 17±3                                                 | 10.3±0                                               | 72±1                   |
| Eastern Asia              | 1999           | 599±10                                               | 840±4                                                | 64±3                   | 17±3                                                 | 10.3±0                                               | 72±1                   |
| Eastern Asia              | 2000           | 663±14                                               | 840±4                                                | 48±3                   | 17±3                                                 | 10.3±0                                               | 62±1                   |
| Eastern Asia              | 2001           | 675±12                                               | 840±4                                                | 45±3                   | 17±3                                                 | 10.3±0                                               | 61±1                   |
| Eastern Asia              | 2002           | 706±17                                               | 840±4                                                | 39±3                   | 17±3                                                 | 10.3±0                                               | 62±1                   |
| Eastern Asia              | 2003           | 716±17                                               | 840±4                                                | 37±3                   | 17±3                                                 | 10.3±0                                               | 62±1                   |
| Eastern Asia              | 2004           | 735±12                                               | 840±4                                                | 33±3                   | 17±3                                                 | 10.3±0                                               | 62±1                   |
| Eastern Asia              | 2005           | 728±19                                               | 840±4                                                | 33±3                   | 17±3                                                 | 10.3±0                                               | 62±1                   |
| Eastern Asia              | 2006           | 770±12                                               | 840±4                                                | 28±3                   | 17±3                                                 | 10.3±0                                               | 62±1                   |
| Eastern Asia              | 2007           | 786±13                                               | 840±4                                                | 25±3                   | 18±3                                                 | 10.3±0                                               | 62±1                   |
| Eastern Asia              | 2008           | 810±19                                               | 840±4                                                | 23±3                   | 18±3                                                 | 10.3±0                                               | 62±1                   |
| Eastern Asia              | 2009           | 819±20                                               | 840±4                                                | 22±3                   | 18±3                                                 | 10.3±0                                               | 62±1                   |
| Eastern Asia              | 2010           | 837±26                                               | 840±4                                                | 20±4                   | 18±4                                                 | 10.3±0                                               | 62±1                   |
| Eastern Asia              | 2011           | 849±27                                               | 840±4                                                | 19±4                   | 18±4                                                 | 10.3±0                                               | 62±1                   |
| Eastern Europe            | 1992           | 722±16                                               | 847±2                                                | 41±2                   | 21±2                                                 | 10.1±0                                               | 22±2                   |
| Eastern Europe            | 1993           | 721±19                                               | 847±2                                                | 41±2                   | 21±2                                                 | 10.1±0                                               | 22±2                   |
| Eastern Europe            | 1994           | 761±17                                               | 850±2                                                | 32±2                   | 20±2                                                 | 10.2±0                                               | 32±2                   |
| Eastern Europe            | 1995           | 784±14                                               | 851±3                                                | 29±2                   | 19±2                                                 | 10.2±0                                               | 43±2                   |
| Eastern Europe            | 1996           | 791±14                                               | 853±3                                                | 27±2                   | 19±2                                                 | 10.2±0                                               | 48±2                   |
| Eastern Europe            | 1997           | 813±10                                               | 854±3                                                | 24±2                   | 19±2                                                 | 10.2±0                                               | 43±2                   |
| Eastern Europe            | 1998           | 832±11                                               | 855±4                                                | 21±2                   | 19±2                                                 | 10.2±0                                               | 43±2                   |
| Eastern Europe            | 1999           | 830±12                                               | 855±5                                                | 22±2                   | 18±2                                                 | 10.2±0                                               | 43±2                   |
| Eastern Europe            | 2000           | 832±17                                               | 855±5                                                | 21±1                   | 18±1                                                 | 10.2±0                                               | 42±2                   |
| Eastern Europe            | 2001           | 821±11                                               | 855±5                                                | 22±1                   | 18±1                                                 | 10.2±0                                               | 42±2                   |
| Eastern Europe            | 2002           | 840±11                                               | 855±4                                                | 21±2                   | 19±2                                                 | 10.2±0                                               | 42±2                   |
| Eastern Europe            | 2003           | 839±12                                               | 854±4                                                | 22±2                   | 19±2                                                 | 10.2±0                                               | 42±2                   |
| Eastern Europe            | 2004           | 870±19                                               | 854±4                                                | 20±2                   | 19±2                                                 | 10.2±0                                               | 42±2                   |
| Eastern Europe            | 2005           | 883±18                                               | 853±4                                                | 18±2                   | 19±2                                                 | 10.2±0                                               | 42±2                   |
| Eastern Europe            | 2006           | 897±18                                               | 851±3                                                | 17±2                   | 19±2                                                 | 10.2±0                                               | 42±2                   |
| Eastern Europe            | 2007           | 905±14                                               | 850±2                                                | 16±2                   | 19±2                                                 | 10.1±0                                               | 43±2                   |
| Eastern Europe            | 2008           | 882±17                                               | 849±1                                                | 18±2                   | 19±2                                                 | 10.1±0                                               | 43±2                   |
| Eastern Europe            | 2009           | 881±14                                               | 849±1                                                | 18±2                   | 19±2                                                 | 10.1±0                                               | 43±2                   |
| Eastern Europe            | 2010           | 904±19                                               | 849±2                                                | 15±2                   | 19±2                                                 | 10.1±0                                               | 43±2                   |
| Eastern Europe            | 2011           | 918±10                                               | 844±2                                                | 14±2                   | 19±2                                                 | 10.1±0                                               | 43±2                   |
| Middle Africa             | 1992           | 269±10                                               | 831±6                                                | 100±4                  | 9±4                                                  | 10.3±0                                               | 67±3                   |
| Middle Africa             | 1993           | 263±15                                               | 831±6                                                | 100±4                  | 9±4                                                  | 10.3±0                                               | 65±3                   |
| Middle Africa             | 1994           | 275±10                                               | 832±7                                                | 100±4                  | 9±4                                                  | 10.3±0                                               | 70±3                   |
| Middle Africa             | 1995           | 278±10                                               | 832±7                                                | 100±4                  | 9±4                                                  | 10.3±0                                               | 74±4                   |
| Middle Africa             | 1996           | 281±11                                               | 832±7                                                | 100±4                  | 9±4                                                  | 10.3±0                                               | 69±3                   |
| Middle Africa             | 1997           | 29                                                   |                                                      |                        |                                                      |                                                      |                        |

| Region             | Reference year | Ca supply (mg capita <sup>-1</sup> d <sup>-1</sup> ) | Ca WDEAR (mg capita <sup>-1</sup> d <sup>-1</sup> ) | Ca deficiency risk (%) | Zn supply (mg capita <sup>-1</sup> d <sup>-1</sup> ) | Zn WDEAR (mg capita <sup>-1</sup> d <sup>-1</sup> ) | Zn deficiency risk (%) |
|--------------------|----------------|------------------------------------------------------|-----------------------------------------------------|------------------------|------------------------------------------------------|-----------------------------------------------------|------------------------|
| Middle Africa      | 2003           | 3232126                                              | 83357                                               | 100.3                  | 10.35                                                | 10.35                                               | 52226                  |
| Middle Africa      | 2004           | 3252128                                              | 83358                                               | 100.3                  | 10.35                                                | 10.35                                               | 50225                  |
| Middle Africa      | 2005           | 3232134                                              | 83358                                               | 100.4                  | 11.24                                                | 10.35                                               | 47226                  |
| Middle Africa      | 2006           | 3252134                                              | 83358                                               | 100.4                  | 11.24                                                | 10.35                                               | 45225                  |
| Middle Africa      | 2007           | 3472127                                              | 83358                                               | 99.3                   | 11.23                                                | 10.35                                               | 43224                  |
| Middle Africa      | 2008           | 3582114                                              | 83358                                               | 99.3                   | 11.23                                                | 10.35                                               | 39221                  |
| Middle Africa      | 2009           | 3712139                                              | 83358                                               | 99.3                   | 11.23                                                | 10.35                                               | 38220                  |
| Middle Africa      | 2010           | 3532112                                              | 83357                                               | 99.3                   | 11.23                                                | 10.35                                               | 37220                  |
| Middle Africa      | 2011           | 3752110                                              | 83425                                               | 99.3                   | 12.23                                                | 10.35                                               | 34217                  |
| Northern Africa    | 1992           | 5442189                                              | 84126                                               | 75.26                  | 19.26                                                | 10.420                                              | 7233                   |
| Northern Africa    | 1993           | 5412184                                              | 84127                                               | 75.26                  | 19.26                                                | 10.420                                              | 7233                   |
| Northern Africa    | 1994           | 5412184                                              | 84127                                               | 75.26                  | 19.26                                                | 10.420                                              | 7233                   |
| Northern Africa    | 1995           | 5722203                                              | 84528                                               | 87.27                  | 19.27                                                | 10.420                                              | 8231                   |
| Northern Africa    | 1996           | 5922222                                              | 84629                                               | 84.27                  | 19.27                                                | 10.420                                              | 8232                   |
| Northern Africa    | 1997           | 6042228                                              | 847210                                              | 81.27                  | 19.27                                                | 10.420                                              | 8231                   |
| Northern Africa    | 1998           | 6222245                                              | 847210                                              | 81.27                  | 20.27                                                | 10.420                                              | 8230                   |
| Northern Africa    | 1999           | 6432263                                              | 848211                                              | 82.27                  | 19.27                                                | 10.420                                              | 8228                   |
| Northern Africa    | 2000           | 6502267                                              | 848212                                              | 82.27                  | 19.27                                                | 10.420                                              | 8228                   |
| Northern Africa    | 2001           | 6892276                                              | 848212                                              | 82.27                  | 20.27                                                | 10.420                                              | 8228                   |
| Northern Africa    | 2002           | 6892286                                              | 848212                                              | 82.27                  | 20.27                                                | 10.420                                              | 8228                   |
| Northern Africa    | 2003           | 7212305                                              | 848212                                              | 89.27                  | 20.27                                                | 10.420                                              | 8227                   |
| Northern Africa    | 2004           | 7252306                                              | 848212                                              | 87.27                  | 20.27                                                | 10.420                                              | 8226                   |
| Northern Africa    | 2005           | 7322301                                              | 847211                                              | 86.27                  | 20.27                                                | 10.420                                              | 8224                   |
| Northern Africa    | 2006           | 7322312                                              | 847210                                              | 86.27                  | 20.27                                                | 10.420                                              | 8224                   |
| Northern Africa    | 2007           | 7602319                                              | 846229                                              | 81.27                  | 20.27                                                | 10.420                                              | 4424                   |
| Northern Africa    | 2008           | 7542312                                              | 845228                                              | 80.27                  | 20.27                                                | 10.420                                              | 4223                   |
| Northern Africa    | 2009           | 7442300                                              | 844227                                              | 83.27                  | 20.27                                                | 10.350                                              | 5222                   |
| Northern Africa    | 2010           | 7222217                                              | 843226                                              | 82.27                  | 21.27                                                | 10.350                                              | 5222                   |
| Northern Africa    | 2011           | 7832322                                              | 842225                                              | 87.27                  | 21.27                                                | 10.350                                              | 5221                   |
| Northern America   | 1992           | 15262614                                             | 84420                                               | 1.23                   | 20.23                                                | 10.220                                              | 2210                   |
| Northern America   | 1993           | 15222621                                             | 84420                                               | 1.23                   | 20.23                                                | 10.220                                              | 2210                   |
| Northern America   | 1994           | 15222620                                             | 84420                                               | 1.23                   | 21.23                                                | 10.220                                              | 2210                   |
| Northern America   | 1995           | 15502611                                             | 84520                                               | 1.23                   | 20.23                                                | 10.220                                              | 2209                   |
| Northern America   | 1996           | 15032572                                             | 84520                                               | 1.23                   | 20.23                                                | 10.220                                              | 2208                   |
| Northern America   | 1997           | 15182588                                             | 84520                                               | 1.23                   | 21.23                                                | 10.220                                              | 2208                   |
| Northern America   | 1998           | 15222574                                             | 84520                                               | 1.23                   | 21.23                                                | 10.220                                              | 2207                   |
| Northern America   | 1999           | 14862561                                             | 84621                                               | 2.23                   | 21.23                                                | 10.220                                              | 2208                   |
| Northern America   | 2000           | 14852544                                             | 84721                                               | 1.23                   | 21.23                                                | 10.220                                              | 2207                   |
| Northern America   | 2001           | 14932556                                             | 84721                                               | 1.23                   | 21.23                                                | 10.220                                              | 2207                   |
| Northern America   | 2002           | 14922529                                             | 84721                                               | 1.23                   | 21.23                                                | 10.220                                              | 2207                   |
| Northern America   | 2003           | 14532529                                             | 84821                                               | 2.23                   | 21.23                                                | 10.220                                              | 2207                   |
| Northern America   | 2004           | 14342525                                             | 84821                                               | 2.23                   | 21.23                                                | 10.220                                              | 2207                   |
| Northern America   | 2005           | 13262447                                             | 84821                                               | 3.22                   | 20.22                                                | 10.220                                              | 2206                   |
| Northern America   | 2006           | 12222428                                             | 84721                                               | 3.22                   | 20.22                                                | 10.220                                              | 2204                   |
| Northern America   | 2007           | 12712398                                             | 84721                                               | 3.22                   | 20.22                                                | 10.220                                              | 2205                   |
| Northern America   | 2008           | 12702386                                             | 84721                                               | 3.22                   | 20.22                                                | 10.220                                              | 2205                   |
| Northern America   | 2009           | 12032347                                             | 84721                                               | 4.22                   | 19.22                                                | 10.220                                              | 2205                   |
| Northern America   | 2010           | 11922320                                             | 84720                                               | 4.21                   | 19.21                                                | 10.220                                              | 2204                   |
| Northern America   | 2011           | 11262269                                             | 84720                                               | 4.21                   | 19.21                                                | 10.220                                              | 2204                   |
| Northern Europe    | 1992           | 9202398                                              | 84523                                               | 13.23                  | 18.23                                                | 10.220                                              | 523                    |
| Northern Europe    | 1993           | 9262404                                              | 84524                                               | 12.23                  | 17.23                                                | 10.220                                              | 522                    |
| Northern Europe    | 1994           | 9252399                                              | 84524                                               | 12.23                  | 17.23                                                | 10.220                                              | 522                    |
| Northern Europe    | 1995           | 9262381                                              | 84524                                               | 12.22                  | 17.22                                                | 10.220                                              | 522                    |
| Northern Europe    | 1996           | 9502387                                              | 84525                                               | 11.22                  | 17.22                                                | 10.120                                              | 522                    |
| Northern Europe    | 1997           | 952395                                               | 84625                                               | 11.22                  | 18.22                                                | 10.220                                              | 522                    |
| Northern Europe    | 1998           | 952395                                               | 84625                                               | 11.22                  | 18.22                                                | 10.220                                              | 522                    |
| Northern Europe    | 1999           | 9612383                                              | 84725                                               | 11.22                  | 18.22                                                | 10.220                                              | 421                    |
| Northern Europe    | 2000           | 9602369                                              | 84724                                               | 10.22                  | 18.22                                                | 10.220                                              | 521                    |
| Northern Europe    | 2001           | 9892388                                              | 84824                                               | 9.22                   | 18.22                                                | 10.220                                              | 421                    |
| Northern Europe    | 2002           | 9872370                                              | 84823                                               | 9.21                   | 18.21                                                | 10.220                                              | 421                    |
| Northern Europe    | 2003           | 984237                                               | 84923                                               | 10.21                  | 19.21                                                | 10.220                                              | 421                    |
| Northern Europe    | 2004           | 10052376                                             | 84923                                               | 9.21                   | 19.21                                                | 10.220                                              | 421                    |
| Northern Europe    | 2005           | 10212300                                             | 84922                                               | 8.21                   | 19.21                                                | 10.220                                              | 321                    |
| Northern Europe    | 2006           | 1012324                                              | 84922                                               | 8.21                   | 19.21                                                | 10.220                                              | 321                    |
| Northern Europe    | 2007           | 1018233                                              | 84822                                               | 8.21                   | 19.21                                                | 10.220                                              | 321                    |
| Northern Europe    | 2008           | 1025231                                              | 84722                                               | 7.21                   | 19.21                                                | 10.220                                              | 321                    |
| Northern Europe    | 2009           | 10032355                                             | 84722                                               | 8.21                   | 19.21                                                | 10.220                                              | 421                    |
| Northern Europe    | 2010           | 10022380                                             | 84721                                               | 8.21                   | 19.21                                                | 10.220                                              | 421                    |
| Northern Europe    | 2011           | 10192398                                             | 84621                                               | 8.21                   | 19.21                                                | 10.220                                              | 421                    |
| South America      | 1992           | 5722380                                              | 84422                                               | 68.25                  | 15.25                                                | 10.320                                              | 17214                  |
| South America      | 1993           | 5712375                                              | 84523                                               | 69.25                  | 15.25                                                | 10.320                                              | 17214                  |
| South America      | 1994           | 5722381                                              | 84523                                               | 69.25                  | 15.25                                                | 10.320                                              | 16213                  |
| South America      | 1995           | 6302350                                              | 84523                                               | 65.25                  | 16.25                                                | 10.350                                              | 14212                  |
| South America      | 1996           | 6502327                                              | 84623                                               | 52.24                  | 16.24                                                | 10.320                                              | 13212                  |
| South America      | 1997           | 6442329                                              | 84623                                               | 52.24                  | 16.24                                                | 10.320                                              | 13210                  |
| South America      | 1998           | 6452322                                              | 84623                                               | 52.23                  | 16.23                                                | 10.320                                              | 13212                  |
| South America      | 1999           | 6492327                                              | 84622                                               | 52.25                  | 16.25                                                | 10.350                                              | 14213                  |
| South America      | 2000           | 6492332                                              | 84622                                               | 52.25                  | 16.25                                                | 10.320                                              | 13211                  |
| South America      | 2001           | 6332341                                              | 84621                                               | 52.24                  | 16.24                                                | 10.320                                              | 12211                  |
| South America      | 2002           | 6322315                                              | 84621                                               | 52.23                  | 16.23                                                | 10.320                                              | 12213                  |
| South America      | 2003           | 6462312                                              | 84621                                               | 50.24                  | 17.24                                                | 10.320                                              | 12213                  |
| South America      | 2004           | 6382306                                              | 84621                                               | 49.24                  | 17.24                                                | 10.320                                              | 12212                  |
| South America      | 2005           | 6392267                                              | 84621                                               | 49.24                  | 17.24                                                | 10.320                                              | 11211                  |
| South America      | 2006           | 6322345                                              | 84621                                               | 49.23                  | 17.23                                                | 10.320                                              | 10210                  |
| South America      | 2007           | 6802326                                              | 84621                                               | 45.24                  | 17.24                                                | 10.320                                              | 929                    |
| South America      | 2008           | 7102316                                              | 84621                                               | 39.24                  | 18.24                                                | 10.320                                              | 929                    |
| South America      | 2009           | 7082192                                              | 84621                                               | 40.24                  | 18.24                                                | 10.320                                              | 929                    |
| South America      | 2010           | 7432184                                              | 84721                                               | 35.24                  | 18.24                                                | 10.320                                              | 929                    |
| South America      | 2011           | 7542180                                              | 84721                                               | 35.24                  | 18.24                                                | 10.320                                              | 828                    |
| South-Eastern Asia | 1992           | 2402184                                              | 84526                                               | 100.24                 | 10.24                                                | 10.420                                              | 61240                  |
| South-Eastern Asia | 1993           | 2442185                                              | 84526                                               | 100.24                 | 10.24                                                | 10.420                                              | 58237                  |
| South-Eastern Asia | 1994           | 2632187                                              | 84525                                               | 100.24                 | 10.24                                                | 10.420                                              | 54235                  |
| South-Eastern Asia | 1995           | 2692193                                              | 84625                                               | 100.24                 | 10.24                                                | 10.420                                              | 52235                  |
| South-Eastern Asia | 1996           | 2692208                                              | 84624                                               | 100.24                 | 10.24                                                | 10.320                                              | 52235                  |
| South-Eastern Asia | 1997           | 2692217                                              | 84623                                               | 100.24                 | 10.24                                                | 10.320                                              | 52233                  |
| South-Eastern Asia | 1998           | 2822225                                              | 84723                                               | 100.24                 | 10.24                                                | 10.420                                              | 51233                  |
| South-Eastern Asia | 1999           | 2702224                                              | 84723                                               | 100.24                 | 10.24                                                | 10.420                                              | 53234                  |
| South-Eastern Asia | 2000           | 2822246                                              | 84823                                               | 100.24                 | 10.24                                                | 10.420                                              | 52233                  |
| South-Eastern Asia | 2001           | 2872246                                              | 84824                                               | 100.24                 | 10.24                                                | 10.420                                              | 50230                  |
| South-Eastern Asia | 2002           | 2922249                                              | 84824                                               | 112.24                 | 11.24                                                | 10.420                                              | 47227                  |
| South-Eastern Asia | 2003           | 3002249                                              | 84725                                               | 100.24                 | 11.24                                                | 10.350                                              | 47226                  |
| South-Eastern Asia | 2004           | 3082243                                              | 84725                                               | 110.24                 | 10.24                                                | 10.320                                              | 43222                  |
| South-Eastern Asia | 2005           | 3102237                                              | 84724                                               | 100.27                 | 11.23                                                | 10.320                                              | 42221                  |
| South-Eastern Asia | 2006           | 3222239                                              | 84624                                               | 100.23                 | 10.23                                                | 10.320                                              | 38219                  |
| South-Eastern Asia | 2007           | 3282269                                              | 84624                                               | 100.23                 | 11.23                                                | 10.350                                              | 37219                  |
| South-Eastern Asia | 2008           | 3292277                                              | 84624                                               | 100.23                 | 11.23                                                | 10.350                                              | 36219                  |
| South-Eastern Asia | 2009           | 3292278                                              | 84623                                               | 99.23                  | 11.23                                                | 10.320                                              | 34217                  |
| South-Eastern Asia | 2010           | 2932282                                              | 84623                                               | 98.23                  | 12.23                                                | 10.350                                              | 31216                  |
| South-Eastern Asia | 2011           | 3562295                                              | 84622                                               | 98.23                  | 12.23                                                | 10.320                                              | 30216                  |
| Southern Africa    | 1992           | 398249                                               | 84327                                               | 99.26                  | 18.26                                                | 10.320                                              | 5234                   |
| Southern Africa    | 1993           | 3772499                                              | 84327                                               | 99.26                  | 18.26                                                | 10.320                                              | 5234                   |
| Southern Africa    | 1994           | 385247                                               | 84426                                               | 99.25                  | 18.25                                                | 10.320                                              | 6233                   |
| Southern Africa    | 1995           | 392245                                               | 84427                                               | 98.24                  | 17.24                                                | 10.320                                              | 7231                   |
| Southern Africa    | 1996           | 398243                                               | 84527                                               | 98.24                  | 17.24                                                | 10.320                                              | 7231                   |
| Southern Africa    | 1997           | 412247                                               | 84527                                               | 97.24                  | 17.24                                                | 10.320                                              | 7229                   |
| Southern Africa    | 1998           | 395247                                               | 84725                                               | 98.24                  | 17.24                                                | 10.420                                              | 7228                   |
| Southern Africa    | 1999           | 389240                                               | 84729                                               | 98.24                  | 17.24                                                | 10.420                                              | 7227                   |
| Southern Africa    | 2000           | 4002364                                              | 84829                                               | 97.25                  | 18.25                                                | 10.420                                              | 5228                   |
| Southern Africa    | 2001           | 4052369                                              | 84829                                               | 97.25                  | 18.25                                                | 10.420                                              | 6227                   |
| Southern Africa    | 2002           | 3852379                                              | 848210                                              | 97.24                  | 17.24                                                | 10.420                                              | 6226                   |
| Southern Africa    | 2003           | 3862373                                              | 848210                                              | 98.24                  | 18.24                                                | 10.420                                              | 6226                   |
| Southern Africa    | 2004           | 3932365                                              | 84829                                               | 99.25                  | 18.25                                                | 10.320                                              | 5226                   |
| Southern Africa    | 2005           | 4052369                                              | 84729                                               | 97.25                  | 18.25                                                | 10.320                                              | 5225                   |
| Southern Africa    | 2006           | 4042364                                              | 84729                                               | 98.25                  | 18.25                                                | 10.320                                              | 5224                   |
| Southern Africa    | 2007           | 4112358                                              | 84628                                               | 98.25                  | 18.25                                                | 10.320                                              | 6223                   |
| Southern Africa    | 2008           | 4192352                                              | 84528                                               | 98.25                  | 18.25                                                | 10.320                                              | 6223                   |
| Southern Africa    | 2009           | 4052369                                              | 84427                                               | 98.24                  | 18.24                                                | 10.320                                              | 6221                   |
| Southern Africa    | 2010           | 4192365                                              | 84427                                               | 97.25                  | 18.25                                                | 10.350                                              | 6221                   |
| Southern Africa    | 2011           | 4222367                                              | 84326                                               | 97.25                  | 18.25                                                | 10.350                                              | 5221                   |
| Southern Asia      | 1992           | 4072375                                              | 84023                                               | 97.22                  | 12.22                                                | 10.420                                              | 30216                  |
| Southern Asia      | 1993           | 4052380                                              | 84123                                               | 97.22                  | 12.22                                                | 10.420                                              | 29219                  |
| Southern Asia      | 1994           | 4092382                                              | 84123                                               | 97.23                  | 12.23                                                | 10.420                                              | 34219                  |
| Southern Asia      | 1995           | 4102386                                              | 84223                                               | 97.23                  | 12.23                                                | 10.420                                              | 33218                  |
| Southern Asia      | 1996           | 4222396                                              | 84324                                               | 96.23                  | 12.23                                                | 10.420                                              | 33218                  |
| Southern Asia      | 1997           | 4252398                                              | 84324                                               | 96.23                  | 12.23                                                | 10.420                                              | 31217                  |
| Southern Asia      | 1998           | 4312100                                              | 84425                                               | 94.23                  | 12.23                                                | 10.420                                              | 32218                  |
| Southern Asia      | 1999           | 4412101                                              | 84425                                               | 93.23                  | 12.23                                                | 10.420                                              | 30213                  |
| Southern Asia      | 2000           | 4322122                                              | 84525                                               | 94.23                  | 12.23                                                | 10.420                                              | 30215                  |
| Southern Asia      | 2001           | 4322127                                              | 84525                                               | 94.23                  | 12.23                                                | 10.420                                              | 30215                  |
| Southern Asia      | 2002           | 4122146                                              | 84525                                               | 93.23                  | 12.23                                                | 10.420                                              | 30216                  |
| Southern Asia      | 2003           | 4282142                                              | 84526                                               | 95.23                  | 12.23                                                | 10.420                                              | 30216                  |
| Southern Asia      | 2004           | 4102159                                              | 84625                                               | 95.23                  | 12.23                                                | 10.420                                              | 36217                  |
| Southern Asia      | 2005           | 4252162                                              | 84625                                               | 95.23                  | 12.23                                                | 10.420                                              | 37218                  |
| Southern Asia      | 2006           | 4442157                                              | 84624                                               | 93.23                  | 12.23                                                | 10.420                                              | 34217                  |
| Southern Asia      | 20             |                                                      |                                                     |                        |                                                      |                                                     |                        |

| Region          | Reference year | Ca supply (mg capita <sup>-1</sup> d <sup>-1</sup> ) | Ca WtEAR (mg capita <sup>-1</sup> d <sup>-1</sup> ) | Ca deficiency risk (%) | Zn supply (mg capita <sup>-1</sup> d <sup>-1</sup> ) | Zn WtEAR (mg capita <sup>-1</sup> d <sup>-1</sup> ) | Zn deficiency risk (%) |
|-----------------|----------------|------------------------------------------------------|-----------------------------------------------------|------------------------|------------------------------------------------------|-----------------------------------------------------|------------------------|
| Southern Europe | 2005           | 1024180                                              | 84524                                               | 923                    | 2123                                                 | 101201                                              | 222                    |
| Southern Europe | 2006           | 10182152                                             | 84524                                               | 923                    | 2123                                                 | 101201                                              | 222                    |
| Southern Europe | 2007           | 10165155                                             | 84524                                               | 923                    | 2123                                                 | 101201                                              | 222                    |
| Southern Europe | 2008           | 10076152                                             | 84524                                               | 923                    | 2123                                                 | 101201                                              | 222                    |
| Southern Europe | 2009           | 9982153                                              | 84524                                               | 1023                   | 2123                                                 | 101201                                              | 222                    |
| Southern Europe | 2010           | 10002161                                             | 84524                                               | 1023                   | 2023                                                 | 101201                                              | 322                    |
| Southern Europe | 2011           | 9842161                                              | 84524                                               | 1123                   | 2023                                                 | 101201                                              | 322                    |
| Western Africa  | 1997           | 30126                                                | 85224                                               | 9923                   | 1023                                                 | 10320                                               | 34226                  |
| Western Africa  | 1993           | 317278                                               | 85224                                               | 9923                   | 1123                                                 | 10320                                               | 49224                  |
| Western Africa  | 1994           | 297287                                               | 85224                                               | 9923                   | 1023                                                 | 10320                                               | 51224                  |
| Western Africa  | 1995           | 352278                                               | 85224                                               | 9923                   | 1123                                                 | 10320                                               | 47224                  |
| Western Africa  | 1996           | 342281                                               | 85224                                               | 9923                   | 1123                                                 | 10320                                               | 49226                  |
| Western Africa  | 1997           | 326280                                               | 85224                                               | 9923                   | 1123                                                 | 10320                                               | 46224                  |
| Western Africa  | 1998           | 335284                                               | 85224                                               | 9923                   | 1123                                                 | 10320                                               | 45226                  |
| Western Africa  | 1999           | 341281                                               | 85224                                               | 9923                   | 1123                                                 | 10320                                               | 42226                  |
| Western Africa  | 2000           | 342281                                               | 85224                                               | 9923                   | 1123                                                 | 10320                                               | 42226                  |
| Western Africa  | 2001           | 346288                                               | 85224                                               | 9923                   | 1123                                                 | 10320                                               | 43226                  |
| Western Africa  | 2002           | 345288                                               | 85224                                               | 9923                   | 1123                                                 | 10320                                               | 43226                  |
| Western Africa  | 2003           | 359297                                               | 85224                                               | 9923                   | 1123                                                 | 10320                                               | 41226                  |
| Western Africa  | 2004           | 363295                                               | 85224                                               | 9923                   | 1223                                                 | 10320                                               | 39226                  |
| Western Africa  | 2005           | 372299                                               | 85224                                               | 9923                   | 1223                                                 | 10320                                               | 35222                  |
| Western Africa  | 2006           | 3852101                                              | 85224                                               | 9723                   | 1223                                                 | 10320                                               | 35222                  |
| Western Africa  | 2007           | 3842114                                              | 85224                                               | 9823                   | 1223                                                 | 10320                                               | 34222                  |
| Western Africa  | 2008           | 3852111                                              | 85224                                               | 9823                   | 1223                                                 | 10320                                               | 32221                  |
| Western Africa  | 2009           | 3822118                                              | 85224                                               | 9523                   | 1223                                                 | 10320                                               | 30220                  |
| Western Africa  | 2010           | 3882123                                              | 85224                                               | 9523                   | 1223                                                 | 10320                                               | 30219                  |
| Western Africa  | 2011           | 3922123                                              | 85224                                               | 9523                   | 1223                                                 | 10320                                               | 31219                  |
| Western Asia    | 1992           | 7412407                                              | 84227                                               | 4023                   | 1923                                                 | 104201                                              | 7220                   |
| Western Asia    | 1993           | 7202413                                              | 84227                                               | 4027                   | 1927                                                 | 104201                                              | 8219                   |
| Western Asia    | 1994           | 7262414                                              | 84227                                               | 4027                   | 1927                                                 | 104201                                              | 9219                   |
| Western Asia    | 1995           | 7422416                                              | 84227                                               | 4027                   | 1927                                                 | 104201                                              | 9219                   |
| Western Asia    | 1996           | 7412402                                              | 84227                                               | 4027                   | 1927                                                 | 104201                                              | 9219                   |
| Western Asia    | 1997           | 7172365                                              | 84227                                               | 4026                   | 1926                                                 | 104201                                              | 9218                   |
| Western Asia    | 1998           | 7422385                                              | 84227                                               | 4026                   | 1926                                                 | 104201                                              | 8218                   |
| Western Asia    | 1999           | 7392363                                              | 84227                                               | 4026                   | 1926                                                 | 104201                                              | 8217                   |
| Western Asia    | 2000           | 7352344                                              | 84227                                               | 4026                   | 1926                                                 | 104201                                              | 8217                   |
| Western Asia    | 2001           | 7202321                                              | 84227                                               | 4026                   | 1926                                                 | 104201                                              | 7217                   |
| Western Asia    | 2002           | 7362324                                              | 84227                                               | 4127                   | 1927                                                 | 104201                                              | 7218                   |
| Western Asia    | 2003           | 7352326                                              | 84227                                               | 4126                   | 1926                                                 | 104201                                              | 7218                   |
| Western Asia    | 2004           | 7482325                                              | 84227                                               | 4126                   | 1926                                                 | 104201                                              | 7218                   |
| Western Asia    | 2005           | 7622331                                              | 84227                                               | 3926                   | 1926                                                 | 104201                                              | 7218                   |
| Western Asia    | 2006           | 7592321                                              | 84227                                               | 4126                   | 1926                                                 | 104202                                              | 7217                   |
| Western Asia    | 2007           | 7522315                                              | 84227                                               | 4226                   | 1926                                                 | 104202                                              | 6215                   |
| Western Asia    | 2008           | 7452304                                              | 84227                                               | 4026                   | 1926                                                 | 104202                                              | 6215                   |
| Western Asia    | 2009           | 7332299                                              | 84227                                               | 4026                   | 1926                                                 | 104202                                              | 6215                   |
| Western Asia    | 2010           | 7462292                                              | 84227                                               | 4226                   | 1926                                                 | 104202                                              | 5213                   |
| Western Asia    | 2011           | 7792322                                              | 84227                                               | 3926                   | 1926                                                 | 104202                                              | 5213                   |
| Western Europe  | 1992           | 10402184                                             | 84227                                               | 722                    | 1922                                                 | 10220                                               | 422                    |
| Western Europe  | 1993           | 10052188                                             | 84227                                               | 922                    | 1922                                                 | 10120                                               | 422                    |
| Western Europe  | 1994           | 9922190                                              | 84227                                               | 922                    | 1922                                                 | 10120                                               | 422                    |
| Western Europe  | 1995           | 10062162                                             | 84227                                               | 922                    | 1922                                                 | 10120                                               | 422                    |
| Western Europe  | 1996           | 9892107                                              | 84227                                               | 922                    | 1922                                                 | 10220                                               | 422                    |
| Western Europe  | 1997           | 9952114                                              | 84227                                               | 923                    | 1923                                                 | 10220                                               | 422                    |
| Western Europe  | 1998           | 9992107                                              | 84227                                               | 922                    | 1922                                                 | 10220                                               | 422                    |
| Western Europe  | 1999           | 10062109                                             | 84227                                               | 922                    | 1922                                                 | 10220                                               | 422                    |
| Western Europe  | 2000           | 10222127                                             | 84227                                               | 922                    | 1922                                                 | 10220                                               | 422                    |
| Western Europe  | 2001           | 10392125                                             | 84227                                               | 722                    | 1922                                                 | 10220                                               | 422                    |
| Western Europe  | 2002           | 10702137                                             | 84227                                               | 622                    | 1922                                                 | 10220                                               | 421                    |
| Western Europe  | 2003           | 10512118                                             | 84227                                               | 722                    | 1922                                                 | 10220                                               | 422                    |
| Western Europe  | 2004           | 10532110                                             | 84227                                               | 722                    | 1922                                                 | 10220                                               | 422                    |
| Western Europe  | 2005           | 1021282                                              | 84227                                               | 722                    | 1922                                                 | 10220                                               | 422                    |
| Western Europe  | 2006           | 1032294                                              | 84227                                               | 722                    | 1922                                                 | 10220                                               | 422                    |
| Western Europe  | 2007           | 10522106                                             | 84227                                               | 721                    | 1921                                                 | 10220                                               | 321                    |
| Western Europe  | 2008           | 10592114                                             | 84227                                               | 722                    | 1922                                                 | 10220                                               | 321                    |
| Western Europe  | 2009           | 10522108                                             | 84227                                               | 722                    | 1922                                                 | 10220                                               | 321                    |
| Western Europe  | 2010           | 1046286                                              | 84227                                               | 722                    | 1922                                                 | 10220                                               | 321                    |
| Western Europe  | 2011           | 1060296                                              | 84227                                               | 622                    | 1922                                                 | 10220                                               | 321                    |

**Dietary calcium and zinc deficiency risks are decreasing but remain prevalent**

Diriba B. Kumssa<sup>1,2,3</sup>, Edward J. M. Joy<sup>2</sup>, E. Louise Ander<sup>2</sup>, Michael J. Watts<sup>2</sup>, Scott D. Young<sup>1</sup>, Sue Walker<sup>3</sup> & Martin R. Broadley<sup>1</sup>

<sup>1</sup>School of Biosciences, University of Nottingham, Sutton Bonington Campus, Loughborough, LE12 5RD, UK, <sup>2</sup>Centre for Environmental Geochemistry, British Geological Survey, Keyworth, Nottingham, NG12 5GG, UK, <sup>3</sup>Crops For the Future, The University of Nottingham Malaysia Campus, Jalan Broga, 43500 Semenyih, Selangor Darul Ehsan, Malaysia.

Correspondence and requests for materials should be addressed to M.R.B. (martin.broadley@nottingham.ac.uk)

**Supplementary Table S10 : Gross national income based on purchasing power parity (GNI-PPP) by country for comparison with the supplies and deficiency risks of Ca and Zn, and energy between 1992 and 2011. GNI-PPP obtained from the World Bank (<http://data.worldbank.org/indicator/NY.GNP.PCAP.PP.CD>, Accessed on 09 July 2014).**

| FAO country code | UNI | ISO3 | Country     | Region          | Continent | Reference year | Ca supply (mg capita <sup>-1</sup> d <sup>-1</sup> ) | Ca deficiency risk (%) | Phytate:Zn | Zn supply (mg capita <sup>-1</sup> d <sup>-1</sup> ) | Zn deficiency risk (%) | GNI-PPP (US \$) | Energy supply (kcal) |
|------------------|-----|------|-------------|-----------------|-----------|----------------|------------------------------------------------------|------------------------|------------|------------------------------------------------------|------------------------|-----------------|----------------------|
| 2                | 4   | AFG  | Afghanistan | Southern Asia   | Asia      | 2002           | 366.74                                               | 99.88                  | 10.37      | 14.77                                                | 11.30                  | 870             | 1,826                |
| 2                | 4   | AFG  | Afghanistan | Southern Asia   | Asia      | 2003           | 370.06                                               | 99.73                  | 10.49      | 15.12                                                | 10.08                  | 920             | 1,892                |
| 2                | 4   | AFG  | Afghanistan | Southern Asia   | Asia      | 2004           | 357.68                                               | 99.88                  | 10.63      | 15.51                                                | 8.91                   | 920             | 1,967                |
| 2                | 4   | AFG  | Afghanistan | Southern Asia   | Asia      | 2005           | 365.80                                               | 99.80                  | 10.00      | 15.19                                                | 9.87                   | 1,020           | 1,948                |
| 2                | 4   | AFG  | Afghanistan | Southern Asia   | Asia      | 2006           | 349.89                                               | 99.33                  | 10.46      | 15.28                                                | 9.64                   | 1,080           | 1,965                |
| 2                | 4   | AFG  | Afghanistan | Southern Asia   | Asia      | 2007           | 366.92                                               | 99.80                  | 10.52      | 16.26                                                | 7.16                   | 1,230           | 2,040                |
| 2                | 4   | AFG  | Afghanistan | Southern Asia   | Asia      | 2008           | 365.94                                               | 99.83                  | 10.53      | 16.39                                                | 6.93                   | 1,270           | 2,038                |
| 2                | 4   | AFG  | Afghanistan | Southern Asia   | Asia      | 2009           | 371.80                                               | 99.77                  | 10.37      | 16.81                                                | 6.19                   | 1,500           | 2,080                |
| 2                | 4   | AFG  | Afghanistan | Southern Asia   | Asia      | 2010           | 367.33                                               | 99.83                  | 10.72      | 16.84                                                | 6.19                   | 1,610           | 2,104                |
| 2                | 4   | AFG  | Afghanistan | Southern Asia   | Asia      | 2011           | 370.87                                               | 99.81                  | 10.87      | 16.97                                                | 5.98                   | 1,700           | 2,107                |
| 3                | 8   | ALB  | Albania     | Southern Europe | Europe    | 1992           | 890.89                                               | 13.30                  | 8.87       | 20.06                                                | 2.65                   | 1,900           | 2,657                |
| 3                | 8   | ALB  | Albania     | Southern Europe | Europe    | 1993           | 984.09                                               | 8.33                   | 8.85       | 20.62                                                | 2.32                   | 2,100           | 2,797                |
| 3                | 8   | ALB  | Albania     | Southern Europe | Europe    | 1994           | 1,140.78                                             | 4.09                   | 8.40       | 21.76                                                | 1.81                   | 2,370           | 2,880                |
| 3                | 8   | ALB  | Albania     | Southern Europe | Europe    | 1995           | 1,212.59                                             | 3.06                   | 8.27       | 19.92                                                | 2.75                   | 2,510           | 2,717                |
| 3                | 8   | ALB  | Albania     | Southern Europe | Europe    | 1996           | 1,310.54                                             | 2.13                   | 8.73       | 20.51                                                | 2.37                   | 3,150           | 2,837                |
| 3                | 8   | ALB  | Albania     | Southern Europe | Europe    | 1997           | 1,161.13                                             | 3.82                   | 8.79       | 20.01                                                | 2.68                   | 2,890           | 2,725                |
| 3                | 8   | ALB  | Albania     | Southern Europe | Europe    | 1998           | 1,159.92                                             | 3.85                   | 9.02       | 19.98                                                | 2.70                   | 3,290           | 2,797                |
| 3                | 8   | ALB  | Albania     | Southern Europe | Europe    | 1999           | 1,153.71                                             | 3.97                   | 8.95       | 20.76                                                | 2.25                   | 3,670           | 2,797                |
| 3                | 8   | ALB  | Albania     | Southern Europe | Europe    | 2000           | 1,189.61                                             | 3.44                   | 8.90       | 19.96                                                | 2.72                   | 4,060           | 2,794                |
| 3                | 8   | ALB  | Albania     | Southern Europe | Europe    | 2001           | 1,225.87                                             | 2.97                   | 8.85       | 20.18                                                | 2.53                   | 4,530           | 2,800                |
| 3                | 8   | ALB  | Albania     | Southern Europe | Europe    | 2002           | 1,268.62                                             | 2.53                   | 8.72       | 20.97                                                | 2.12                   | 4,730           | 2,861                |
| 3                | 8   | ALB  | Albania     | Southern Europe | Europe    | 2003           | 1,344.13                                             | 1.95                   | 8.33       | 20.25                                                | 2.52                   | 5,140           | 2,769                |
| 3                | 8   | ALB  | Albania     | Southern Europe | Europe    | 2004           | 1,361.09                                             | 1.86                   | 8.40       | 20.01                                                | 2.70                   | 5,610           | 2,787                |
| 3                | 8   | ALB  | Albania     | Southern Europe | Europe    | 2005           | 1,368.89                                             | 1.83                   | 8.60       | 20.77                                                | 2.29                   | 6,120           | 2,870                |
| 3                | 8   | ALB  | Albania     | Southern Europe | Europe    | 2006           | 1,378.42                                             | 1.79                   | 8.63       | 20.57                                                | 2.38                   | 6,920           | 2,855                |
| 3                | 8   | ALB  | Albania     | Southern Europe | Europe    | 2007           | 1,269.12                                             | 2.66                   | 8.59       | 20.79                                                | 2.28                   | 7,390           | 2,866                |
| 3                | 8   | ALB  | Albania     | Southern Europe | Europe    | 2008           | 1,366.74                                             | 1.88                   | 8.53       | 20.27                                                | 2.57                   | 8,350           | 2,896                |
| 3                | 8   | ALB  | Albania     | Southern Europe | Europe    | 2009           | 1,379.63                                             | 1.80                   | 8.81       | 20.04                                                | 2.72                   | 8,690           | 2,935                |
| 3                | 8   | ALB  | Albania     | Southern Europe | Europe    | 2010           | 1,439.75                                             | 1.48                   | 8.84       | 20.99                                                | 2.18                   | 8,480           | 2,967                |
| 3                | 8   | ALB  | Albania     | Southern Europe | Europe    | 2011           | 1,481.50                                             | 1.29                   | 8.86       | 21.26                                                | 2.05                   | 9,070           | 3,023                |
| 4                | 12  | DZA  | Algeria     | Northern Africa | Africa    | 1992           | 567.94                                               | 73.03                  | 10.30      | 18.41                                                | 4.06                   | 6,340           | 2,865                |
| 4                | 12  | DZA  | Algeria     | Northern Africa | Africa    | 1993           | 543.99                                               | 77.14                  | 10.10      | 18.38                                                | 4.14                   | 6,280           | 2,865                |
| 4                | 12  | DZA  | Algeria     | Northern Africa | Africa    | 1994           | 535.81                                               | 79.62                  | 10.00      | 18.05                                                | 4.55                   | 6,190           | 2,763                |
| 4                | 12  | DZA  | Algeria     | Northern Africa | Africa    | 1995           | 517.30                                               | 84.47                  | 10.39      | 18.12                                                | 4.51                   | 6,350           | 2,785                |
| 4                | 12  | DZA  | Algeria     | Northern Africa | Africa    | 1996           | 518.46                                               | 84.47                  | 10.76      | 18.63                                                | 3.92                   | 6,600           | 2,784                |
| 4                | 12  | DZA  | Algeria     | Northern Africa | Africa    | 1997           | 520.82                                               | 84.25                  | 10.66      | 17.61                                                | 5.21                   | 6,740           | 2,733                |
| 4                | 12  | DZA  | Algeria     | Northern Africa | Africa    | 1998           | 568.68                                               | 75.10                  | 10.32      | 19.01                                                | 3.64                   | 7,080           | 2,792                |
| 4                | 12  | DZA  | Algeria     | Northern Africa | Africa    | 1999           | 579.08                                               | 69.95                  | 10.46      | 19.16                                                | 3.54                   | 7,260           | 2,843                |
| 4                | 12  | DZA  | Algeria     | Northern Africa | Africa    | 2000           | 566.64                                               | 76.21                  | 10.94      | 18.37                                                | 4.36                   | 7,460           | 2,812                |
| 4                | 12  | DZA  | Algeria     | Northern Africa | Africa    | 2001           | 598.63                                               | 65.08                  | 10.75      | 18.55                                                | 4.17                   | 8,050           | 2,886                |
| 4                | 12  | DZA  | Algeria     | Northern Africa | Africa    | 2002           | 601.37                                               | 64.40                  | 10.97      | 18.88                                                | 3.83                   | 8,430           | 2,925                |
| 4                | 12  | DZA  | Algeria     | Northern Africa | Africa    | 2003           | 634.49                                               | 55.54                  | 10.97      | 19.72                                                | 3.10                   | 9,130           | 2,970                |
| 4                | 12  | DZA  | Algeria     | Northern Africa | Africa    | 2004           | 700.74                                               | 39.87                  | 10.60      | 19.87                                                | 2.97                   | 9,590           | 2,987                |
| 4                | 12  | DZA  | Algeria     | Northern Africa | Africa    | 2005           | 720.04                                               | 35.76                  | 10.77      | 19.99                                                | 2.85                   | 10,300          | 2,958                |
| 4                | 12  | DZA  | Algeria     | Northern Africa | Africa    | 2006           | 747.19                                               | 30.66                  | 11.42      | 19.89                                                | 2.95                   | 10,700          | 3,047                |
| 4                | 12  | DZA  | Algeria     | Northern Africa | Africa    | 2007           | 728.82                                               | 33.33                  | 11.34      | 19.72                                                | 3.03                   | 11,450          | 3,041                |
| 4                | 12  | DZA  | Algeria     | Northern Africa | Africa    | 2008           | 715.72                                               | 35.16                  | 11.48      | 19.82                                                | 2.89                   | 11,770          | 3,048                |
| 4                | 12  | DZA  | Algeria     | Northern Africa | Africa    | 2009           | 810.59                                               | 20.67                  | 11.22      | 20.50                                                | 2.41                   | 11,830          | 3,110                |
| 4                | 12  | DZA  | Algeria     | Northern Africa | Africa    | 2010           | 829.70                                               | 18.31                  | 11.73      | 20.30                                                | 2.48                   | 12,270          | 3,139                |
| 4                | 12  | DZA  | Algeria     | Northern Africa | Africa    | 2011           | 891.79                                               | 12.86                  | 11.16      | 20.77                                                | 2.20                   | 12,500          | 3,220                |
| 7                | 24  | AGO  | Angola      | Middle Africa   | Africa    | 1992           | 215.79                                               | 100.00                 | 17.09      | 7.33                                                 | 94.66                  | 1,520           | 1,628                |
| 7                | 24  | AGO  | Angola      | Middle Africa   | Africa    | 1993           | 202.16                                               | 100.00                 | 17.26      | 7.28                                                 | 95.03                  | 1,140           | 1,565                |
| 7                | 24  | AGO  | Angola      | Middle Africa   | Africa    | 1994           | 221.27                                               | 100.00                 | 18.91      | 7.58                                                 | 92.23                  | 910             | 1,646                |
| 7                | 24  | AGO  | Angola      | Middle Africa   | Africa    | 1995           | 223.37                                               | 100.00                 | 18.31      | 7.59                                                 | 92.04                  | 1,530           | 1,688                |
| 7                | 24  | AGO  | Angola      | Middle Africa   | Africa    | 1996           | 221.70                                               | 100.00                 | 18.08      | 8.18                                                 | 85.05                  | 1,800           | 1,733                |
| 7                | 24  | AGO  | Angola      | Middle Africa   | Africa    | 1997           | 228.07                                               | 100.00                 | 18.51      | 8.53                                                 | 79.56                  | 2,050           | 1,734                |
| 7                | 24  | AGO  | Angola      | Middle Africa   | Africa    | 1998           | 224.14                                               | 100.00                 | 17.28      | 8.48                                                 | 80.34                  | 2,100           | 1,754                |
| 7                | 24  | AGO  | Angola      | Middle Africa   | Africa    | 1999           | 213.97                                               | 100.00                 | 17.05      | 8.72                                                 | 76.27                  | 2,020           | 1,808                |
| 7                | 24  | AGO  | Angola      | Middle Africa   | Africa    | 2000           | 221.75                                               | 100.00                 | 16.65      | 8.96                                                 | 72.15                  | 2,190           | 1,794                |
| 7                | 24  | AGO  | Angola      | Middle Africa   | Africa    | 2001           | 232.48                                               | 100.00                 | 16.79      | 8.95                                                 | 72.70                  | 2,290           | 1,835                |
| 7                | 24  | AGO  | Angola      | Middle Africa   | Africa    | 2002           | 247.03                                               | 100.00                 | 16.94      | 9.38                                                 | 65.18                  | 2,690           | 1,917                |
| 7                | 24  | AGO  | Angola      | Middle Africa   | Africa    | 2003           | 251.86                                               | 100.00                 | 16.67      | 9.50                                                 | 62.92                  | 2,820           | 1,985                |
| 7                | 24  | AGO  | Angola      | Middle Africa   | Africa    | 2004           | 252.48                                               | 100.00                 | 16.44      | 9.54                                                 | 62.00                  | 3,080           | 2,032                |
| 7                | 24  | AGO  | Angola      | Middle Africa   | Africa    | 2005           | 263.16                                               | 100.00                 | 16.43      | 9.85                                                 | 56.49                  | 3,570           | 2,079                |
| 7                | 24  | AGO  | Angola      | Middle Africa   | Africa    | 2006           | 255.15                                               | 100.00                 | 16.36      | 9.91                                                 | 56.10                  | 4,260           | 2,121                |
| 7                | 24  | AGO  | Angola      | Middle Africa   | Africa    | 2007           | 278.39                                               | 100.00                 | 16.13      | 10.13                                                | 52.31                  | 5,320           | 2,171                |
| 7                | 24  | AGO  | Angola      | Middle Africa   | Africa    | 2008           | 313.93                                               | 100.00                 | 16.37      | 10.64                                                | 44.49                  | 5,720           | 2,238                |



Dietary calcium and zinc deficiency risks are decreasing but remain prevalent

| FAO country code | UNI | ISO3 | Country    | Region                    | Continent | Reference year | Ca supply (mg capita <sup>-1</sup> d <sup>-1</sup> ) | Ca deficiency risk (%) | Phytate:Zn | Zn supply (mg capita <sup>-1</sup> d <sup>-1</sup> ) | Zn deficiency risk (%) | GNI-PPP (US \$) | Energy supply (kcal) |
|------------------|-----|------|------------|---------------------------|-----------|----------------|------------------------------------------------------|------------------------|------------|------------------------------------------------------|------------------------|-----------------|----------------------|
| 7                | 24  | AGO  | Angola     | Middle Africa             | Africa    | 2009           | 350.65                                               | 99.93                  | 17.03      | 10.67                                                | 43.94                  | 6,200           | 2,299                |
| 7                | 24  | AGO  | Angola     | Middle Africa             | Africa    | 2010           | 356.50                                               | 99.89                  | 17.14      | 10.77                                                | 42.44                  | 6,230           | 2,339                |
| 7                | 24  | AGO  | Angola     | Middle Africa             | Africa    | 2011           | 370.18                                               | 99.75                  | 16.71      | 11.24                                                | 36.58                  | 6,270           | 2,400                |
| 1                | 51  | ARM  | Armenia    | Western Asia              | Asia      | 1992           | 673.94                                               | 42.16                  | 9.06       | 16.53                                                | 6.12                   | 1,130           | 2,184                |
| 1                | 51  | ARM  | Armenia    | Western Asia              | Asia      | 1993           | 451.18                                               | 95.48                  | 9.16       | 16.78                                                | 5.74                   | 1,180           | 2,103                |
| 1                | 51  | ARM  | Armenia    | Western Asia              | Asia      | 1994           | 637.86                                               | 51.54                  | 8.72       | 17.36                                                | 4.90                   | 1,420           | 2,251                |
| 1                | 51  | ARM  | Armenia    | Western Asia              | Asia      | 1995           | 504.18                                               | 86.98                  | 8.78       | 17.39                                                | 4.92                   | 1,580           | 2,276                |
| 1                | 51  | ARM  | Armenia    | Western Asia              | Asia      | 1996           | 616.23                                               | 58.33                  | 9.30       | 17.13                                                | 5.24                   | 1,780           | 2,420                |
| 1                | 51  | ARM  | Armenia    | Western Asia              | Asia      | 1997           | 576.84                                               | 69.71                  | 9.02       | 16.87                                                | 5.72                   | 1,960           | 2,330                |
| 1                | 51  | ARM  | Armenia    | Western Asia              | Asia      | 1998           | 609.18                                               | 61.51                  | 9.00       | 17.07                                                | 5.49                   | 2,080           | 2,312                |
| 1                | 51  | ARM  | Armenia    | Western Asia              | Asia      | 1999           | 662.44                                               | 48.41                  | 8.96       | 16.92                                                | 5.80                   | 2,190           | 2,281                |
| 1                | 51  | ARM  | Armenia    | Western Asia              | Asia      | 2000           | 620.17                                               | 59.50                  | 8.59       | 16.65                                                | 6.35                   | 2,380           | 2,235                |
| 1                | 51  | ARM  | Armenia    | Western Asia              | Asia      | 2001           | 662.15                                               | 49.11                  | 8.64       | 16.44                                                | 6.81                   | 2,690           | 2,242                |
| 1                | 51  | ARM  | Armenia    | Western Asia              | Asia      | 2002           | 753.25                                               | 30.78                  | 8.07       | 16.59                                                | 6.56                   | 3,120           | 2,291                |
| 1                | 51  | ARM  | Armenia    | Western Asia              | Asia      | 2003           | 820.90                                               | 21.41                  | 7.65       | 17.65                                                | 4.88                   | 3,630           | 2,458                |
| 1                | 51  | ARM  | Armenia    | Western Asia              | Asia      | 2004           | 830.81                                               | 20.18                  | 7.85       | 18.75                                                | 3.63                   | 4,120           | 2,564                |
| 1                | 51  | ARM  | Armenia    | Western Asia              | Asia      | 2005           | 944.23                                               | 11.11                  | 7.96       | 18.37                                                | 4.01                   | 4,850           | 2,657                |
| 1                | 51  | ARM  | Armenia    | Western Asia              | Asia      | 2006           | 1,031.07                                             | 7.18                   | 7.55       | 19.51                                                | 2.99                   | 5,720           | 2,755                |
| 1                | 51  | ARM  | Armenia    | Western Asia              | Asia      | 2007           | 1,094.99                                             | 5.29                   | 7.31       | 20.22                                                | 2.50                   | 6,680           | 2,791                |
| 1                | 51  | ARM  | Armenia    | Western Asia              | Asia      | 2008           | 1,069.59                                             | 5.84                   | 7.06       | 20.79                                                | 2.18                   | 7,390           | 2,833                |
| 1                | 51  | ARM  | Armenia    | Western Asia              | Asia      | 2009           | 1,137.91                                             | 4.27                   | 7.12       | 20.00                                                | 2.61                   | 6,280           | 2,784                |
| 1                | 51  | ARM  | Armenia    | Western Asia              | Asia      | 2010           | 1,115.04                                             | 4.66                   | 7.10       | 19.48                                                | 2.94                   | 6,620           | 2,786                |
| 1                | 51  | ARM  | Armenia    | Western Asia              | Asia      | 2011           | 1,155.25                                             | 3.88                   | 6.82       | 19.89                                                | 2.64                   | 7,180           | 2,809                |
| 10               | 36  | AUS  | Australia  | Australia and New Zealand | Oceania   | 1992           | 926.01                                               | 11.31                  | 6.59       | 19.92                                                | 2.61                   | 17,600          | 3,106                |
| 10               | 36  | AUS  | Australia  | Australia and New Zealand | Oceania   | 1993           | 913.69                                               | 12.01                  | 6.55       | 19.74                                                | 2.72                   | 18,760          | 3,033                |
| 10               | 36  | AUS  | Australia  | Australia and New Zealand | Oceania   | 1994           | 933.53                                               | 10.82                  | 6.53       | 20.00                                                | 2.54                   | 19,670          | 3,040                |
| 10               | 36  | AUS  | Australia  | Australia and New Zealand | Oceania   | 1995           | 941.24                                               | 10.39                  | 6.94       | 20.14                                                | 2.45                   | 20,350          | 3,091                |
| 10               | 36  | AUS  | Australia  | Australia and New Zealand | Oceania   | 1996           | 952.63                                               | 9.81                   | 7.30       | 19.90                                                | 2.59                   | 21,320          | 3,063                |
| 10               | 36  | AUS  | Australia  | Australia and New Zealand | Oceania   | 1997           | 917.86                                               | 11.71                  | 7.42       | 19.35                                                | 2.96                   | 22,150          | 3,087                |
| 10               | 36  | AUS  | Australia  | Australia and New Zealand | Oceania   | 1998           | 848.01                                               | 16.94                  | 7.30       | 19.09                                                | 3.16                   | 23,550          | 3,007                |
| 10               | 36  | AUS  | Australia  | Australia and New Zealand | Oceania   | 1999           | 859.02                                               | 16.02                  | 7.30       | 19.30                                                | 2.99                   | 24,540          | 3,006                |
| 10               | 36  | AUS  | Australia  | Australia and New Zealand | Oceania   | 2000           | 859.47                                               | 16.02                  | 7.12       | 19.06                                                | 3.19                   | 25,630          | 2,999                |
| 10               | 36  | AUS  | Australia  | Australia and New Zealand | Oceania   | 2001           | 855.27                                               | 16.44                  | 7.45       | 19.27                                                | 3.03                   | 26,740          | 3,078                |
| 10               | 36  | AUS  | Australia  | Australia and New Zealand | Oceania   | 2002           | 874.26                                               | 14.90                  | 7.96       | 19.68                                                | 2.74                   | 27,980          | 3,076                |
| 10               | 36  | AUS  | Australia  | Australia and New Zealand | Oceania   | 2003           | 850.14                                               | 16.96                  | 7.99       | 20.53                                                | 2.24                   | 28,950          | 3,116                |
| 10               | 36  | AUS  | Australia  | Australia and New Zealand | Oceania   | 2004           | 826.54                                               | 19.26                  | 8.05       | 18.72                                                | 3.48                   | 30,360          | 3,072                |
| 10               | 36  | AUS  | Australia  | Australia and New Zealand | Oceania   | 2005           | 872.47                                               | 15.07                  | 8.14       | 19.69                                                | 2.73                   | 31,320          | 3,122                |
| 10               | 36  | AUS  | Australia  | Australia and New Zealand | Oceania   | 2006           | 967.77                                               | 9.27                   | 8.38       | 19.51                                                | 2.88                   | 32,840          | 3,167                |
| 10               | 36  | AUS  | Australia  | Australia and New Zealand | Oceania   | 2007           | 949.81                                               | 10.13                  | 8.41       | 20.79                                                | 2.12                   | 34,820          | 3,213                |
| 10               | 36  | AUS  | Australia  | Australia and New Zealand | Oceania   | 2008           | 945.67                                               | 10.31                  | 8.82       | 20.25                                                | 2.39                   | 35,850          | 3,212                |
| 10               | 36  | AUS  | Australia  | Australia and New Zealand | Oceania   | 2009           | 882.80                                               | 14.20                  | 8.89       | 20.02                                                | 2.52                   | 36,670          | 3,205                |
| 10               | 36  | AUS  | Australia  | Australia and New Zealand | Oceania   | 2010           | 919.93                                               | 11.67                  | 9.15       | 20.02                                                | 2.51                   | 37,440          | 3,227                |
| 10               | 36  | AUS  | Australia  | Australia and New Zealand | Oceania   | 2011           | 957.87                                               | 9.60                   | 8.48       | 20.40                                                | 2.29                   | 40,000          | 3,265                |
| 11               | 40  | AUT  | Austria    | Western Europe            | Europe    | 1992           | 977.72                                               | 8.71                   | 10.09      | 17.84                                                | 4.19                   | 20,920          | 3,546                |
| 11               | 40  | AUT  | Austria    | Western Europe            | Europe    | 1993           | 973.41                                               | 8.87                   | 10.64      | 17.59                                                | 4.48                   | 21,360          | 3,508                |
| 11               | 40  | AUT  | Austria    | Western Europe            | Europe    | 1994           | 1,012.97                                             | 7.30                   | 9.89       | 17.79                                                | 4.24                   | 22,230          | 3,566                |
| 11               | 40  | AUT  | Austria    | Western Europe            | Europe    | 1995           | 1,045.24                                             | 6.27                   | 10.07      | 18.31                                                | 3.69                   | 23,130          | 3,582                |
| 11               | 40  | AUT  | Austria    | Western Europe            | Europe    | 1996           | 1,009.20                                             | 7.42                   | 9.48       | 18.85                                                | 3.19                   | 24,220          | 3,630                |
| 11               | 40  | AUT  | Austria    | Western Europe            | Europe    | 1997           | 1,061.54                                             | 5.83                   | 9.55       | 17.97                                                | 4.03                   | 24,730          | 3,578                |
| 11               | 40  | AUT  | Austria    | Western Europe            | Europe    | 1998           | 1,016.18                                             | 7.24                   | 9.76       | 19.43                                                | 2.78                   | 25,870          | 3,712                |
| 11               | 40  | AUT  | Austria    | Western Europe            | Europe    | 1999           | 1,051.94                                             | 6.16                   | 10.34      | 19.54                                                | 2.72                   | 26,700          | 3,776                |
| 11               | 40  | AUT  | Austria    | Western Europe            | Europe    | 2000           | 1,042.54                                             | 6.46                   | 10.60      | 19.79                                                | 2.57                   | 28,450          | 3,803                |
| 11               | 40  | AUT  | Austria    | Western Europe            | Europe    | 2001           | 1,077.44                                             | 5.54                   | 10.52      | 19.84                                                | 2.54                   | 28,440          | 3,815                |
| 11               | 40  | AUT  | Austria    | Western Europe            | Europe    | 2002           | 1,074.61                                             | 5.62                   | 10.37      | 19.77                                                | 2.59                   | 30,090          | 3,753                |
| 11               | 40  | AUT  | Austria    | Western Europe            | Europe    | 2003           | 918.27                                               | 11.98                  | 10.72      | 19.46                                                | 2.80                   | 31,020          | 3,711                |
| 11               | 40  | AUT  | Austria    | Western Europe            | Europe    | 2004           | 881.50                                               | 14.50                  | 10.78      | 19.14                                                | 3.04                   | 32,590          | 3,696                |
| 11               | 40  | AUT  | Austria    | Western Europe            | Europe    | 2005           | 894.67                                               | 13.54                  | 10.56      | 19.61                                                | 2.71                   | 33,300          | 3,734                |
| 11               | 40  | AUT  | Austria    | Western Europe            | Europe    | 2006           | 877.95                                               | 14.78                  | 10.83      | 19.04                                                | 3.12                   | 36,220          | 3,784                |
| 11               | 40  | AUT  | Austria    | Western Europe            | Europe    | 2007           | 901.45                                               | 13.08                  | 10.83      | 19.42                                                | 2.83                   | 37,560          | 3,798                |
| 11               | 40  | AUT  | Austria    | Western Europe            | Europe    | 2008           | 919.10                                               | 11.95                  | 10.89      | 19.22                                                | 2.98                   | 39,690          | 3,784                |
| 11               | 40  | AUT  | Austria    | Western Europe            | Europe    | 2009           | 901.49                                               | 13.08                  | 11.20      | 19.13                                                | 3.05                   | 38,890          | 3,793                |
| 11               | 40  | AUT  | Austria    | Western Europe            | Europe    | 2010           | 891.95                                               | 13.73                  | 10.84      | 18.61                                                | 3.47                   | 40,430          | 3,777                |
| 11               | 40  | AUT  | Austria    | Western Europe            | Europe    | 2011           | 912.55                                               | 12.32                  | 10.78      | 18.81                                                | 3.30                   | 42,600          | 3,784                |
| 52               | 31  | AZE  | Azerbaijan | Western Asia              | Asia      | 1993           | 531.14                                               | 79.13                  | 9.69       | 18.36                                                | 3.81                   | 3,370           | 2,235                |
| 52               | 31  | AZE  | Azerbaijan | Western Asia              | Asia      | 1994           | 535.21                                               | 78.26                  | 9.98       | 16.58                                                | 6.30                   | 2,720           | 2,112                |
| 52               | 31  | AZE  | Azerbaijan | Western Asia              | Asia      | 1995           | 526.86                                               | 80.71                  | 9.88       | 16.43                                                | 6.63                   | 2,410           | 2,115                |
| 52               | 31  | AZE  | Azerbaijan | Western Asia              | Asia      | 1996           | 484.30                                               | 90.46                  | 10.09      | 16.84                                                | 5.81                   | 2,430           | 2,262                |
| 52               | 31  | AZE  | Azerbaijan | Western Asia              | Asia      | 1997           | 504.66                                               | 86.67                  | 9.39       | 16.46                                                | 6.59                   | 2,630           | 2,076                |
| 52               | 31  | AZE  | Azerbaijan | Western Asia              | Asia      | 1998           | 492.82                                               | 89.50                  | 9.60       | 16.42                                                | 6.77                   | 2,900           | 2,119                |
| 52               | 31  | AZE  | Azerbaijan | Western Asia              | Asia      | 1999           | 525.65                                               | 82.73                  | 9.47       | 17.80                                                | 4.65                   | 3,110           | 2,279                |
| 52               | 31  | AZE  | Azerbaijan | Western Asia              | Asia      | 2000           | 553.00                                               | 76.26                  | 9.56       | 18.87                                                | 3.55                   | 3,350           | 2,395                |
| 52               | 31  | AZE  | Azerbaijan | Western Asia              | Asia      | 2001           | 577.98                                               | 70.03                  | 9.85       | 19.27                                                | 3.25                   | 3,710           | 2,463                |
| 52               | 31  | AZE  | Azerbaijan | Western Asia              | Asia      | 2002           | 608.67                                               | 62.07                  | 9.75       | 20.01                                                | 2.74                   | 4,130           | 2,585                |
| 52               | 31  | AZE  | Azerbaijan | Western Asia              | Asia      | 2003           | 655.56                                               | 50.20                  | 9.72       | 20.94                                                | 2.22                   | 4,650           | 2,706                |
| 52               | 31  | AZE  | Azerbaijan | Western Asia              | Asia      | 2004           | 644.72                                               | 52.98                  | 9.66       | 21.84                                                | 1.83                   | 5,110           | 2,842                |
| 52               | 31  | AZE  | Azerbaijan | Western Asia              | Asia      | 2005           | 730.56                                               | 34.28                  | 10.05      | 22.35                                                | 1.64                   | 6,290           | 2,918                |
| 52               | 31  | AZE  | Azerbaijan | Western Asia              | Asia      | 2006           | 750.10                                               | 30.77                  | 10.14      | 22.38                                                | 1.63                   | 6,580           | 2,912                |
| 52               | 31  | AZE  | Azerbaijan | Western Asia              | Asia      | 2007           | 752.58                                               | 30.13                  | 9.96       | 21.99                                                | 1.76                   | 10,570          | 2,890                |
| 52               | 31  | AZE  | Azerbaijan | Western Asia              | Asia      | 2008           | 746.39                                               | 30.83                  | 10.16      | 22.23                                                | 1.66                   | 12,320          | 2,868                |

| FAO country code | UNI | ISO3 | Country    | Region         | Continent | Reference year | Ca supply (mg capita <sup>-1</sup> d <sup>-1</sup> ) | Ca deficiency risk (%) | Phytate:Zn | Zn supply (mg capita <sup>-1</sup> d <sup>-1</sup> ) | Zn deficiency risk (%) | GNI-PPP (US \$) | Energy supply (kcal) |
|------------------|-----|------|------------|----------------|-----------|----------------|------------------------------------------------------|------------------------|------------|------------------------------------------------------|------------------------|-----------------|----------------------|
| 52               | 31  | AZE  | Azerbaijan | Western Asia   | Asia      | 2009           | 781.67                                               | 25.20                  | 9.62       | 22.82                                                | 1.45                   | 13,730          | 2,909                |
| 52               | 31  | AZE  | Azerbaijan | Western Asia   | Asia      | 2010           | 823.46                                               | 19.85                  | 9.33       | 23.29                                                | 1.30                   | 14,620          | 2,948                |
| 52               | 31  | AZE  | Azerbaijan | Western Asia   | Asia      | 2011           | 854.38                                               | 16.56                  | 9.14       | 23.31                                                | 1.28                   | 14,590          | 2,952                |
| 16               | 50  | BGD  | Bangladesh | Southern Asia  | Asia      | 1992           | 213.79                                               | 100.00                 | 20.26      | 9.25                                                 | 69.09                  | 780             | 2,111                |
| 16               | 50  | BGD  | Bangladesh | Southern Asia  | Asia      | 1993           | 208.36                                               | 100.00                 | 20.56      | 8.72                                                 | 78.10                  | 820             | 2,010                |
| 16               | 50  | BGD  | Bangladesh | Southern Asia  | Asia      | 1994           | 207.47                                               | 100.00                 | 20.68      | 8.72                                                 | 78.19                  | 850             | 2,003                |
| 16               | 50  | BGD  | Bangladesh | Southern Asia  | Asia      | 1995           | 206.59                                               | 100.00                 | 20.38      | 8.89                                                 | 75.49                  | 890             | 2,043                |
| 16               | 50  | BGD  | Bangladesh | Southern Asia  | Asia      | 1996           | 211.19                                               | 100.00                 | 20.20      | 8.99                                                 | 73.77                  | 930             | 2,048                |
| 16               | 50  | BGD  | Bangladesh | Southern Asia  | Asia      | 1997           | 217.22                                               | 100.00                 | 19.67      | 9.21                                                 | 70.14                  | 980             | 2,096                |
| 16               | 50  | BGD  | Bangladesh | Southern Asia  | Asia      | 1998           | 209.72                                               | 100.00                 | 19.80      | 9.16                                                 | 70.98                  | 1,020           | 2,161                |
| 16               | 50  | BGD  | Bangladesh | Southern Asia  | Asia      | 1999           | 224.96                                               | 100.00                 | 19.47      | 10.20                                                | 53.65                  | 1,070           | 2,266                |
| 16               | 50  | BGD  | Bangladesh | Southern Asia  | Asia      | 2000           | 221.72                                               | 100.00                 | 19.87      | 9.78                                                 | 60.55                  | 1,140           | 2,258                |
| 16               | 50  | BGD  | Bangladesh | Southern Asia  | Asia      | 2001           | 223.75                                               | 100.00                 | 20.41      | 9.79                                                 | 60.14                  | 1,200           | 2,331                |
| 16               | 50  | BGD  | Bangladesh | Southern Asia  | Asia      | 2002           | 226.24                                               | 100.00                 | 20.07      | 10.03                                                | 56.14                  | 1,270           | 2,313                |
| 16               | 50  | BGD  | Bangladesh | Southern Asia  | Asia      | 2003           | 230.76                                               | 100.00                 | 20.40      | 10.14                                                | 54.42                  | 1,350           | 2,350                |
| 16               | 50  | BGD  | Bangladesh | Southern Asia  | Asia      | 2004           | 249.34                                               | 100.00                 | 20.26      | 10.32                                                | 51.57                  | 1,450           | 2,382                |
| 16               | 50  | BGD  | Bangladesh | Southern Asia  | Asia      | 2005           | 256.79                                               | 100.00                 | 20.41      | 10.14                                                | 54.46                  | 1,560           | 2,372                |
| 16               | 50  | BGD  | Bangladesh | Southern Asia  | Asia      | 2006           | 259.40                                               | 100.00                 | 20.65      | 10.09                                                | 54.94                  | 1,720           | 2,372                |
| 16               | 50  | BGD  | Bangladesh | Southern Asia  | Asia      | 2007           | 278.06                                               | 100.00                 | 20.65      | 10.25                                                | 52.38                  | 1,870           | 2,417                |
| 16               | 50  | BGD  | Bangladesh | Southern Asia  | Asia      | 2008           | 289.15                                               | 100.00                 | 20.55      | 10.19                                                | 53.38                  | 2,030           | 2,386                |
| 16               | 50  | BGD  | Bangladesh | Southern Asia  | Asia      | 2009           | 303.73                                               | 100.00                 | 20.45      | 10.52                                                | 48.19                  | 2,150           | 2,428                |
| 16               | 50  | BGD  | Bangladesh | Southern Asia  | Asia      | 2010           | 306.30                                               | 100.00                 | 20.52      | 10.50                                                | 48.42                  | 2,290           | 2,436                |
| 16               | 50  | BGD  | Bangladesh | Southern Asia  | Asia      | 2011           | 308.06                                               | 100.00                 | 20.43      | 10.50                                                | 48.43                  | 2,460           | 2,430                |
| 57               | 112 | BLR  | Belarus    | Eastern Europe | Europe    | 1992           | 769.68                                               | 26.05                  | 7.62       | 23.08                                                | 1.22                   | 4,930           | 3,099                |
| 57               | 112 | BLR  | Belarus    | Eastern Europe | Europe    | 1993           | 910.55                                               | 12.39                  | 7.76       | 23.56                                                | 1.12                   | 4,650           | 3,194                |
| 57               | 112 | BLR  | Belarus    | Eastern Europe | Europe    | 1994           | 1,043.07                                             | 6.53                   | 7.78       | 22.97                                                | 1.27                   | 4,190           | 3,125                |
| 57               | 112 | BLR  | Belarus    | Eastern Europe | Europe    | 1995           | 973.55                                               | 9.21                   | 8.05       | 22.01                                                | 1.56                   | 3,840           | 3,195                |
| 57               | 112 | BLR  | Belarus    | Eastern Europe | Europe    | 1996           | 986.60                                               | 8.75                   | 8.28       | 22.20                                                | 1.51                   | 4,040           | 3,284                |
| 57               | 112 | BLR  | Belarus    | Eastern Europe | Europe    | 1997           | 882.79                                               | 14.93                  | 8.33       | 21.78                                                | 1.66                   | 4,580           | 3,282                |
| 57               | 112 | BLR  | Belarus    | Eastern Europe | Europe    | 1998           | 966.17                                               | 9.84                   | 8.11       | 21.84                                                | 1.65                   | 5,040           | 3,219                |
| 57               | 112 | BLR  | Belarus    | Eastern Europe | Europe    | 1999           | 889.92                                               | 14.58                  | 8.26       | 21.16                                                | 1.93                   | 5,320           | 3,117                |
| 57               | 112 | BLR  | Belarus    | Eastern Europe | Europe    | 2000           | 739.84                                               | 32.49                  | 9.09       | 19.58                                                | 2.80                   | 5,770           | 2,993                |
| 57               | 112 | BLR  | Belarus    | Eastern Europe | Europe    | 2001           | 810.05                                               | 22.31                  | 8.84       | 19.38                                                | 2.93                   | 6,230           | 3,046                |
| 57               | 112 | BLR  | Belarus    | Eastern Europe | Europe    | 2002           | 795.50                                               | 24.08                  | 9.09       | 18.54                                                | 3.62                   | 6,700           | 2,981                |
| 57               | 112 | BLR  | Belarus    | Eastern Europe | Europe    | 2003           | 702.72                                               | 39.32                  | 9.69       | 17.87                                                | 4.30                   | 7,390           | 2,821                |
| 57               | 112 | BLR  | Belarus    | Eastern Europe | Europe    | 2004           | 692.48                                               | 41.29                  | 9.78       | 18.42                                                | 3.69                   | 8,520           | 2,901                |
| 57               | 112 | BLR  | Belarus    | Eastern Europe | Europe    | 2005           | 776.96                                               | 26.23                  | 9.35       | 19.04                                                | 3.12                   | 9,680           | 2,987                |
| 57               | 112 | BLR  | Belarus    | Eastern Europe | Europe    | 2006           | 731.40                                               | 33.22                  | 9.14       | 19.22                                                | 2.97                   | 11,000          | 3,084                |
| 57               | 112 | BLR  | Belarus    | Eastern Europe | Europe    | 2007           | 759.21                                               | 28.35                  | 9.10       | 19.22                                                | 2.93                   | 12,250          | 3,186                |
| 57               | 112 | BLR  | Belarus    | Eastern Europe | Europe    | 2008           | 662.28                                               | 46.77                  | 9.30       | 18.84                                                | 3.19                   | 13,770          | 3,202                |
| 57               | 112 | BLR  | Belarus    | Eastern Europe | Europe    | 2009           | 721.16                                               | 34.10                  | 9.15       | 18.54                                                | 3.40                   | 13,790          | 3,129                |
| 57               | 112 | BLR  | Belarus    | Eastern Europe | Europe    | 2010           | 709.22                                               | 36.07                  | 9.35       | 18.60                                                | 3.32                   | 15,080          | 3,168                |
| 57               | 112 | BLR  | Belarus    | Eastern Europe | Europe    | 2011           | 722.79                                               | 33.27                  | 9.58       | 18.88                                                | 3.06                   | 16,410          | 3,253                |
| 255              | 56  | BEL  | Belgium    | Western Europe | Europe    | 1992           | 935.72                                               | 10.78                  | 9.73       | 17.75                                                | 4.38                   | 20,300          | 3,649                |
| 255              | 56  | BEL  | Belgium    | Western Europe | Europe    | 1993           | 945.36                                               | 10.25                  | 9.52       | 17.82                                                | 4.29                   | 20,700          | 3,598                |
| 255              | 56  | BEL  | Belgium    | Western Europe | Europe    | 1994           | 926.05                                               | 11.28                  | 9.95       | 17.36                                                | 4.87                   | 21,930          | 3,571                |
| 255              | 56  | BEL  | Belgium    | Western Europe | Europe    | 1995           | 910.70                                               | 12.20                  | 9.55       | 17.28                                                | 4.96                   | 22,810          | 3,554                |
| 255              | 56  | BEL  | Belgium    | Western Europe | Europe    | 1996           | 925.85                                               | 11.30                  | 9.42       | 17.12                                                | 5.19                   | 23,250          | 3,591                |
| 255              | 56  | BEL  | Belgium    | Western Europe | Europe    | 1997           | 930.36                                               | 11.06                  | 10.00      | 16.87                                                | 5.57                   | 24,320          | 3,665                |
| 255              | 56  | BEL  | Belgium    | Western Europe | Europe    | 1998           | 937.65                                               | 12.46                  | 10.04      | 16.73                                                | 5.82                   | 24,810          | 3,654                |
| 255              | 56  | BEL  | Belgium    | Western Europe | Europe    | 1999           | 949.34                                               | 10.09                  | 9.79       | 17.18                                                | 5.12                   | 25,850          | 3,670                |
| 255              | 56  | BEL  | Belgium    | Western Europe | Europe    | 2000           | 965.94                                               | 8.03                   | 10.53      | 17.38                                                | 4.84                   | 28,310          | 3,767                |
| 255              | 56  | BEL  | Belgium    | Western Europe | Europe    | 2001           | 991.92                                               | 8.22                   | 10.03      | 17.62                                                | 4.54                   | 29,000          | 3,786                |
| 255              | 56  | BEL  | Belgium    | Western Europe | Europe    | 2002           | 1,049.54                                             | 6.27                   | 10.25      | 17.73                                                | 4.41                   | 30,450          | 3,775                |
| 255              | 56  | BEL  | Belgium    | Western Europe | Europe    | 2003           | 1,010.24                                             | 7.55                   | 10.33      | 17.57                                                | 4.62                   | 30,780          | 3,745                |
| 255              | 56  | BEL  | Belgium    | Western Europe | Europe    | 2004           | 1,015.03                                             | 7.38                   | 10.12      | 17.69                                                | 4.47                   | 31,510          | 3,747                |
| 255              | 56  | BEL  | Belgium    | Western Europe | Europe    | 2005           | 1,012.76                                             | 7.45                   | 10.43      | 17.67                                                | 4.49                   | 32,400          | 3,733                |
| 255              | 56  | BEL  | Belgium    | Western Europe | Europe    | 2006           | 1,068.62                                             | 5.74                   | 10.66      | 18.12                                                | 3.98                   | 34,560          | 3,764                |
| 255              | 56  | BEL  | Belgium    | Western Europe | Europe    | 2007           | 1,053.98                                             | 6.13                   | 10.59      | 18.17                                                | 3.92                   | 35,960          | 3,772                |
| 255              | 56  | BEL  | Belgium    | Western Europe | Europe    | 2008           | 1,146.90                                             | 4.06                   | 10.05      | 18.08                                                | 4.01                   | 37,560          | 3,767                |
| 255              | 56  | BEL  | Belgium    | Western Europe | Europe    | 2009           | 1,040.38                                             | 6.49                   | 10.16      | 17.96                                                | 4.13                   | 36,670          | 3,756                |
| 255              | 56  | BEL  | Belgium    | Western Europe | Europe    | 2010           | 1,039.68                                             | 6.50                   | 9.99       | 19.30                                                | 2.91                   | 38,900          | 3,763                |
| 255              | 56  | BEL  | Belgium    | Western Europe | Europe    | 2011           | 1,005.93                                             | 7.60                   | 10.49      | 18.48                                                | 3.57                   | 40,210          | 3,793                |
| 53               | 204 | BEN  | Benin      | Western Africa | Africa    | 1992           | 292.18                                               | 100.00                 | 23.42      | 10.34                                                | 48.99                  | 900             | 2,143                |
| 53               | 204 | BEN  | Benin      | Western Africa | Africa    | 1993           | 288.84                                               | 100.00                 | 23.42      | 9.89                                                 | 56.06                  | 950             | 2,155                |
| 53               | 204 | BEN  | Benin      | Western Africa | Africa    | 1994           | 299.05                                               | 100.00                 | 23.63      | 10.13                                                | 52.10                  | 950             | 2,179                |
| 53               | 204 | BEN  | Benin      | Western Africa | Africa    | 1995           | 302.58                                               | 100.00                 | 24.41      | 10.09                                                | 52.66                  | 1,000           | 2,204                |
| 53               | 204 | BEN  | Benin      | Western Africa | Africa    | 1996           | 305.70                                               | 100.00                 | 24.70      | 10.10                                                | 52.91                  | 1,030           | 2,236                |
| 53               | 204 | BEN  | Benin      | Western Africa | Africa    | 1997           | 314.00                                               | 100.00                 | 25.28      | 10.41                                                | 48.05                  | 1,080           | 2,244                |
| 53               | 204 | BEN  | Benin      | Western Africa | Africa    | 1998           | 325.81                                               | 99.99                  | 25.08      | 10.63                                                | 44.69                  | 1,110           | 2,227                |
| 53               | 204 | BEN  | Benin      | Western Africa | Africa    | 1999           | 319.74                                               | 100.00                 | 24.42      | 10.39                                                | 48.14                  | 1,150           | 2,236                |
| 53               | 204 | BEN  | Benin      | Western Africa | Africa    | 2000           | 330.41                                               | 99.99                  | 25.28      | 10.35                                                | 48.79                  | 1,200           | 2,242                |
| 53               | 204 | BEN  | Benin      | Western Africa | Africa    | 2001           | 319.23                                               | 100.00                 | 25.35      | 10.27                                                | 50.46                  | 1,270           | 2,307                |
| 53               | 204 | BEN  | Benin      | Western Africa | Africa    | 2002           | 342.94                                               | 99.97                  | 25.74      | 10.79                                                | 42.69                  | 1,290           | 2,395                |
| 53               | 204 | BEN  | Benin      | Western Africa | Africa    | 2003           | 325.58                                               | 99.99                  | 25.02      | 10.38                                                | 48.72                  | 1,320           | 2,349                |
| 53               | 204 | BEN  | Benin      | Western Africa | Africa    | 2004           | 330.68                                               | 99.99                  | 25.69      | 10.82                                                | 42.29                  | 1,360           | 2,468                |
| 53               | 204 | BEN  | Benin      | Western Africa | Africa    | 2005           | 329.39                                               | 99.99                  | 25.90      | 10.78                                                | 42.79                  | 1,400           | 2,440                |
| 53               | 204 | BEN  | Benin      | Western Africa | Africa    | 2006           | 313.36                                               | 100.00                 | 24.46      | 10.55                                                | 46.45                  | 1,450           | 2,459                |
| 53               | 204 | BEN  | Benin      | Western Africa | Africa    | 2007           | 337.40                                               | 99.98                  | 25.50      | 11.12                                                | 38.53                  | 1,520           | 2,567                |

Dietary calcium and zinc deficiency risks are decreasing but remain prevalent

| FAO country code | UNI | ISO3 | Country                | Region          | Continent | Reference year | Ca supply (mg capita <sup>-1</sup> d <sup>-1</sup> ) | Ca deficiency risk (%) | Phytate:Zn | Zn supply (mg capita <sup>-1</sup> d <sup>-1</sup> ) | Zn deficiency risk (%) | GNI-PPP (US \$) | Energy supply (kcal) |
|------------------|-----|------|------------------------|-----------------|-----------|----------------|------------------------------------------------------|------------------------|------------|------------------------------------------------------|------------------------|-----------------|----------------------|
| 53               | 204 | BEN  | Benin                  | Western Africa  | Africa    | 2008           | 335.14                                               | 99.98                  | 25.61      | 11.34                                                | 36.87                  | 1,580           | 2,530                |
| 53               | 204 | BEN  | Benin                  | Western Africa  | Africa    | 2009           | 345.03                                               | 99.96                  | 26.42      | 12.14                                                | 27.36                  | 1,580           | 2,592                |
| 53               | 204 | BEN  | Benin                  | Western Africa  | Africa    | 2010           | 316.09                                               | 100.00                 | 25.87      | 11.23                                                | 37.14                  | 1,590           | 2,538                |
| 53               | 204 | BEN  | Benin                  | Western Africa  | Africa    | 2011           | 313.81                                               | 100.00                 | 24.69      | 11.15                                                | 38.46                  | 1,640           | 2,594                |
| 19               | 66  | BOL  | Bolivia                | South America   | Americas  | 1992           | 328.94                                               | 99.99                  | 13.07      | 13.37                                                | 18.00                  | 2,520           | 2,022                |
| 19               | 66  | BOL  | Bolivia                | South America   | Americas  | 1993           | 329.87                                               | 99.99                  | 12.35      | 13.37                                                | 17.92                  | 2,630           | 2,007                |
| 19               | 66  | BOL  | Bolivia                | South America   | Americas  | 1994           | 332.74                                               | 99.99                  | 12.49      | 12.74                                                | 22.09                  | 2,760           | 1,959                |
| 19               | 66  | BOL  | Bolivia                | South America   | Americas  | 1995           | 369.46                                               | 99.81                  | 13.18      | 13.92                                                | 14.86                  | 2,870           | 2,106                |
| 19               | 66  | BOL  | Bolivia                | South America   | Americas  | 1996           | 371.26                                               | 99.79                  | 14.43      | 13.20                                                | 18.85                  | 3,020           | 2,047                |
| 19               | 66  | BOL  | Bolivia                | South America   | Americas  | 1997           | 365.24                                               | 99.86                  | 14.33      | 13.31                                                | 18.18                  | 3,150           | 2,055                |
| 19               | 66  | BOL  | Bolivia                | South America   | Americas  | 1998           | 341.88                                               | 99.97                  | 13.39      | 12.76                                                | 21.97                  | 3,290           | 1,951                |
| 19               | 66  | BOL  | Bolivia                | South America   | Americas  | 1999           | 368.31                                               | 99.84                  | 13.34      | 13.63                                                | 16.44                  | 3,270           | 2,037                |
| 19               | 66  | BOL  | Bolivia                | South America   | Americas  | 2000           | 361.07                                               | 99.90                  | 13.40      | 13.86                                                | 15.26                  | 3,340           | 2,076                |
| 19               | 66  | BOL  | Bolivia                | South America   | Americas  | 2001           | 335.35                                               | 99.99                  | 13.47      | 13.86                                                | 15.36                  | 3,410           | 2,083                |
| 19               | 66  | BOL  | Bolivia                | South America   | Americas  | 2002           | 361.88                                               | 99.90                  | 13.74      | 14.14                                                | 14.02                  | 3,480           | 2,102                |
| 19               | 66  | BOL  | Bolivia                | South America   | Americas  | 2003           | 342.42                                               | 99.98                  | 13.86      | 14.20                                                | 13.77                  | 3,530           | 2,109                |
| 19               | 66  | BOL  | Bolivia                | South America   | Americas  | 2004           | 336.11                                               | 99.99                  | 14.23      | 13.88                                                | 15.33                  | 3,690           | 2,042                |
| 19               | 66  | BOL  | Bolivia                | South America   | Americas  | 2005           | 345.00                                               | 99.97                  | 14.32      | 14.19                                                | 13.87                  | 3,920           | 2,096                |
| 19               | 66  | BOL  | Bolivia                | South America   | Americas  | 2006           | 303.20                                               | 100.00                 | 13.60      | 14.79                                                | 11.42                  | 4,180           | 2,146                |
| 19               | 66  | BOL  | Bolivia                | South America   | Americas  | 2007           | 304.62                                               | 100.00                 | 12.20      | 15.39                                                | 9.47                   | 4,400           | 2,152                |
| 19               | 66  | BOL  | Bolivia                | South America   | Americas  | 2008           | 307.40                                               | 100.00                 | 12.38      | 15.43                                                | 9.39                   | 4,710           | 2,137                |
| 19               | 66  | BOL  | Bolivia                | South America   | Americas  | 2009           | 347.19                                               | 99.97                  | 13.47      | 14.84                                                | 11.30                  | 4,800           | 2,141                |
| 19               | 66  | BOL  | Bolivia                | South America   | Americas  | 2010           | 366.62                                               | 99.88                  | 13.70      | 15.01                                                | 10.73                  | 4,950           | 2,168                |
| 19               | 66  | BOL  | Bolivia                | South America   | Americas  | 2011           | 393.74                                               | 99.47                  | 14.09      | 15.17                                                | 10.23                  | 5,200           | 2,254                |
| 80               | 70  | BIH  | Bosnia and Herzegovina | Southern Europe | Europe    | 1994           | 710.76                                               | 36.54                  | 14.93      | 19.55                                                | 2.87                   | 870             | 2,648                |
| 80               | 70  | BIH  | Bosnia and Herzegovina | Southern Europe | Europe    | 1995           | 746.16                                               | 30.51                  | 14.49      | 19.08                                                | 3.25                   | 1,120           | 2,638                |
| 80               | 70  | BIH  | Bosnia and Herzegovina | Southern Europe | Europe    | 1996           | 713.57                                               | 36.63                  | 14.78      | 19.89                                                | 2.66                   | 2,310           | 2,679                |
| 80               | 70  | BIH  | Bosnia and Herzegovina | Southern Europe | Europe    | 1997           | 864.98                                               | 16.32                  | 15.32      | 21.06                                                | 2.03                   | 3,170           | 3,093                |
| 80               | 70  | BIH  | Bosnia and Herzegovina | Southern Europe | Europe    | 1998           | 933.45                                               | 11.38                  | 14.89      | 20.87                                                | 2.10                   | 4,590           | 3,026                |
| 80               | 70  | BIH  | Bosnia and Herzegovina | Southern Europe | Europe    | 1999           | 910.08                                               | 12.72                  | 14.84      | 19.50                                                | 2.88                   | 4,780           | 2,939                |
| 80               | 70  | BIH  | Bosnia and Herzegovina | Southern Europe | Europe    | 2000           | 835.42                                               | 18.76                  | 15.18      | 18.50                                                | 3.70                   | 4,840           | 2,805                |
| 80               | 70  | BIH  | Bosnia and Herzegovina | Southern Europe | Europe    | 2001           | 873.53                                               | 15.18                  | 15.88      | 18.65                                                | 3.49                   | 5,040           | 2,904                |
| 80               | 70  | BIH  | Bosnia and Herzegovina | Southern Europe | Europe    | 2002           | 894.99                                               | 13.54                  | 15.55      | 19.04                                                | 3.15                   | 5,280           | 2,903                |
| 80               | 70  | BIH  | Bosnia and Herzegovina | Southern Europe | Europe    | 2003           | 926.86                                               | 11.54                  | 16.35      | 18.13                                                | 4.00                   | 5,540           | 2,836                |
| 80               | 70  | BIH  | Bosnia and Herzegovina | Southern Europe | Europe    | 2004           | 1,032.25                                             | 6.92                   | 16.29      | 19.47                                                | 2.85                   | 5,980           | 2,892                |
| 80               | 70  | BIH  | Bosnia and Herzegovina | Southern Europe | Europe    | 2005           | 1,062.34                                             | 6.06                   | 15.46      | 19.24                                                | 3.02                   | 6,440           | 3,041                |
| 80               | 70  | BIH  | Bosnia and Herzegovina | Southern Europe | Europe    | 2006           | 1,068.21                                             | 5.94                   | 14.98      | 18.98                                                | 3.25                   | 7,230           | 3,019                |
| 80               | 70  | BIH  | Bosnia and Herzegovina | Southern Europe | Europe    | 2007           | 1,094.56                                             | 5.31                   | 14.61      | 19.33                                                | 2.99                   | 7,940           | 3,066                |
| 80               | 70  | BIH  | Bosnia and Herzegovina | Southern Europe | Europe    | 2008           | 1,100.15                                             | 5.20                   | 14.53      | 19.63                                                | 2.78                   | 8,800           | 3,098                |
| 80               | 70  | BIH  | Bosnia and Herzegovina | Southern Europe | Europe    | 2009           | 1,075.47                                             | 5.82                   | 14.69      | 19.68                                                | 2.76                   | 8,720           | 3,087                |
| 80               | 70  | BIH  | Bosnia and Herzegovina | Southern Europe | Europe    | 2010           | 1,054.43                                             | 6.43                   | 14.34      | 19.73                                                | 2.74                   | 8,850           | 3,101                |
| 80               | 70  | BIH  | Bosnia and Herzegovina | Southern Europe | Europe    | 2011           | 1,043.02                                             | 6.80                   | 14.18      | 19.87                                                | 2.65                   | 9,350           | 3,130                |
| 20               | 72  | BWA  | Botswana               | Southern Africa | Africa    | 1992           | 598.47                                               | 61.23                  | 13.62      | 12.62                                                | 21.63                  | 5,920           | 2,203                |
| 20               | 72  | BWA  | Botswana               | Southern Africa | Africa    | 1993           | 532.45                                               | 79.58                  | 13.42      | 12.55                                                | 24.20                  | 6,270           | 2,069                |
| 20               | 72  | BWA  | Botswana               | Southern Africa | Africa    | 1994           | 581.02                                               | 66.68                  | 15.48      | 12.89                                                | 21.69                  | 5,720           | 2,186                |
| 20               | 72  | BWA  | Botswana               | Southern Africa | Africa    | 1995           | 578.36                                               | 67.67                  | 14.83      | 13.90                                                | 16.09                  | 6,390           | 2,188                |
| 20               | 72  | BWA  | Botswana               | Southern Africa | Africa    | 1996           | 568.07                                               | 70.75                  | 14.85      | 13.46                                                | 18.09                  | 6,420           | 2,214                |
| 20               | 72  | BWA  | Botswana               | Southern Africa | Africa    | 1997           | 584.54                                               | 66.38                  | 15.57      | 12.51                                                | 24.94                  | 7,070           | 2,165                |
| 20               | 72  | BWA  | Botswana               | Southern Africa | Africa    | 1998           | 566.03                                               | 71.62                  | 16.31      | 11.37                                                | 36.65                  | 7,440           | 2,081                |
| 20               | 72  | BWA  | Botswana               | Southern Africa | Africa    | 1999           | 606.98                                               | 60.48                  | 16.95      | 11.29                                                | 37.68                  | 7,540           | 2,117                |
| 20               | 72  | BWA  | Botswana               | Southern Africa | Africa    | 2000           | 665.90                                               | 45.63                  | 16.53      | 11.45                                                | 35.82                  | 7,630           | 2,080                |
| 20               | 72  | BWA  | Botswana               | Southern Africa | Africa    | 2001           | 692.78                                               | 39.76                  | 17.88      | 11.48                                                | 35.50                  | 7,990           | 2,154                |
| 20               | 72  | BWA  | Botswana               | Southern Africa | Africa    | 2002           | 670.17                                               | 44.75                  | 16.76      | 11.62                                                | 33.90                  | 7,590           | 2,111                |
| 20               | 72  | BWA  | Botswana               | Southern Africa | Africa    | 2003           | 532.47                                               | 80.77                  | 18.75      | 10.64                                                | 46.65                  | 8,290           | 2,113                |
| 20               | 72  | BWA  | Botswana               | Southern Africa | Africa    | 2004           | 535.73                                               | 79.96                  | 17.56      | 11.56                                                | 34.53                  | 8,530           | 2,191                |
| 20               | 72  | BWA  | Botswana               | Southern Africa | Africa    | 2005           | 508.76                                               | 86.34                  | 15.71      | 11.19                                                | 38.96                  | 9,340           | 2,198                |
| 20               | 72  | BWA  | Botswana               | Southern Africa | Africa    | 2006           | 489.50                                               | 90.26                  | 15.53      | 11.01                                                | 41.40                  | 10,370          | 2,150                |
| 20               | 72  | BWA  | Botswana               | Southern Africa | Africa    | 2007           | 508.10                                               | 86.45                  | 16.18      | 10.44                                                | 49.49                  | 11,560          | 2,166                |
| 20               | 72  | BWA  | Botswana               | Southern Africa | Africa    | 2008           | 515.64                                               | 84.70                  | 16.25      | 10.69                                                | 45.76                  | 12,270          | 2,184                |
| 20               | 72  | BWA  | Botswana               | Southern Africa | Africa    | 2009           | 537.37                                               | 79.33                  | 16.14      | 11.08                                                | 40.26                  | 11,660          | 2,199                |
| 20               | 72  | BWA  | Botswana               | Southern Africa | Africa    | 2010           | 573.79                                               | 69.49                  | 15.83      | 11.22                                                | 38.46                  | 12,510          | 2,231                |
| 20               | 72  | BWA  | Botswana               | Southern Africa | Africa    | 2011           | 588.81                                               | 62.50                  | 15.32      | 11.51                                                | 34.88                  | 13,930          | 2,285                |
| 21               | 76  | BRA  | Brazil                 | South America   | Americas  | 1992           | 578.59                                               | 67.96                  | 13.28      | 14.62                                                | 12.43                  | 6,570           | 2,771                |
| 21               | 76  | BRA  | Brazil                 | South America   | Americas  | 1993           | 584.08                                               | 72.18                  | 13.84      | 14.38                                                | 13.09                  | 6,890           | 2,774                |
| 21               | 76  | BRA  | Brazil                 | South America   | Americas  | 1994           | 579.98                                               | 68.02                  | 13.67      | 14.74                                                | 11.71                  | 7,380           | 2,818                |
| 21               | 76  | BRA  | Brazil                 | South America   | Americas  | 1995           | 642.53                                               | 51.46                  | 11.51      | 15.33                                                | 9.73                   | 7,740           | 2,812                |
| 21               | 76  | BRA  | Brazil                 | South America   | Americas  | 1996           | 666.93                                               | 45.65                  | 12.75      | 15.78                                                | 8.48                   | 7,930           | 2,840                |
| 21               | 76  | BRA  | Brazil                 | South America   | Americas  | 1997           | 658.96                                               | 47.52                  | 12.01      | 15.52                                                | 9.17                   | 8,180           | 2,854                |
| 21               | 76  | BRA  | Brazil                 | South America   | Americas  | 1998           | 650.77                                               | 49.44                  | 12.23      | 15.34                                                | 9.67                   | 8,120           | 2,853                |
| 21               | 76  | BRA  | Brazil                 | South America   | Americas  | 1999           | 658.44                                               | 47.50                  | 11.83      | 15.93                                                | 8.04                   | 8,050           | 2,865                |
| 21               | 76  | BRA  | Brazil                 | South America   | Americas  | 2000           | 654.93                                               | 48.24                  | 11.88      | 15.71                                                | 9.56                   | 8,500           | 2,890                |
| 21               | 76  | BRA  | Brazil                 | South America   | Americas  | 2001           | 633.90                                               | 53.26                  | 12.03      | 16.20                                                | 7.33                   | 8,620           | 2,892                |
| 21               | 76  | BRA  | Brazil                 | South America   | Americas  | 2002           | 678.92                                               | 42.36                  | 11.85      | 16.62                                                | 6.43                   | 8,960           | 2,927                |
| 21               | 76  | BRA  | Brazil                 | South America   | Americas  | 2003           | 681.77                                               | 41.62                  | 12.37      | 17.47                                                | 5.01                   | 9,050           | 3,067                |
| 21               | 76  | BRA  | Brazil                 | South America   | Americas  | 2004           | 690.20                                               | 39.75                  | 12.00      | 17.23                                                | 5.34                   | 9,730           | 3,082                |
| 21               | 76  | BRA  | Brazil                 | South America   | Americas  | 2005           | 702.91                                               | 37.14                  | 11.82      | 17.53                                                | 4.93                   | 10,260          | 3,078                |
| 21               | 76  | BRA  | Brazil                 | South America   | Americas  | 2006           | 719.58                                               | 33.98                  | 11.67      | 17.86                                                | 4.43                   | 10,520          | 3,096                |
| 21               | 76  | BRA  | Brazil                 | South America   | Americas  | 2007           | 711.32                                               | 35.59                  | 11.62      | 17.96                                                | 4.31                   | 11,520          | 3,105                |
| 21               | 76  | BRA  | Brazil                 | South America   | Americas  | 2008           | 746.99                                               | 29.46                  | 11.57      | 18.25                                                | 4.00                   | 12,520          | 3,178                |

| FAO country code | UNI | ISO3 | Country      | Region             | Continent | Reference year | Ca supply (mg capita <sup>-1</sup> d <sup>-1</sup> ) | Ca deficiency risk (%) | Phytate:Zn | Zn supply (mg capita <sup>-1</sup> d <sup>-1</sup> ) | Zn deficiency risk (%) | GNI-PPP (US \$) | Energy supply (kcal) |
|------------------|-----|------|--------------|--------------------|-----------|----------------|------------------------------------------------------|------------------------|------------|------------------------------------------------------|------------------------|-----------------|----------------------|
| 21               | 76  | BRA  | Brazil       | South America      | Americas  | 2009           | 772.60                                               | 25.73                  | 11.17      | 18.57                                                | 3.68                   | 12,510          | 3,176                |
| 21               | 76  | BRA  | Brazil       | South America      | Americas  | 2010           | 806.16                                               | 21.53                  | 11.20      | 18.73                                                | 3.55                   | 13,520          | 3,229                |
| 21               | 76  | BRA  | Brazil       | South America      | Americas  | 2011           | 841.61                                               | 17.88                  | 11.29      | 19.30                                                | 3.07                   | 14,030          | 3,287                |
| 27               | 100 | BGR  | Bulgaria     | Eastern Europe     | Europe    | 1992           | 818.11                                               | 20.54                  | 9.38       | 19.22                                                | 3.05                   | 4,860           | 3,022                |
| 27               | 100 | BGR  | Bulgaria     | Eastern Europe     | Europe    | 1993           | 826.15                                               | 19.76                  | 8.50       | 19.27                                                | 3.02                   | 4,940           | 2,958                |
| 27               | 100 | BGR  | Bulgaria     | Eastern Europe     | Europe    | 1994           | 803.51                                               | 22.41                  | 8.85       | 18.47                                                | 3.72                   | 5,140           | 2,873                |
| 27               | 100 | BGR  | Bulgaria     | Eastern Europe     | Europe    | 1995           | 845.95                                               | 17.91                  | 8.78       | 18.17                                                | 4.03                   | 5,350           | 2,896                |
| 27               | 100 | BGR  | Bulgaria     | Eastern Europe     | Europe    | 1996           | 808.08                                               | 22.02                  | 8.66       | 17.54                                                | 4.76                   | 4,430           | 2,741                |
| 27               | 100 | BGR  | Bulgaria     | Eastern Europe     | Europe    | 1997           | 833.92                                               | 19.23                  | 8.49       | 16.99                                                | 5.56                   | 4,690           | 2,676                |
| 27               | 100 | BGR  | Bulgaria     | Eastern Europe     | Europe    | 1998           | 908.13                                               | 13.05                  | 8.16       | 18.09                                                | 4.10                   | 5,350           | 2,819                |
| 27               | 100 | BGR  | Bulgaria     | Eastern Europe     | Europe    | 1999           | 888.22                                               | 14.48                  | 8.94       | 18.39                                                | 3.79                   | 5,590           | 2,879                |
| 27               | 100 | BGR  | Bulgaria     | Eastern Europe     | Europe    | 2000           | 881.95                                               | 14.98                  | 9.15       | 17.51                                                | 4.80                   | 6,080           | 2,813                |
| 27               | 100 | BGR  | Bulgaria     | Eastern Europe     | Europe    | 2001           | 776.74                                               | 26.21                  | 9.39       | 17.27                                                | 5.13                   | 6,780           | 2,816                |
| 27               | 100 | BGR  | Bulgaria     | Eastern Europe     | Europe    | 2002           | 791.40                                               | 24.18                  | 9.96       | 16.29                                                | 6.80                   | 7,740           | 2,779                |
| 27               | 100 | BGR  | Bulgaria     | Eastern Europe     | Europe    | 2003           | 814.72                                               | 21.27                  | 10.47      | 15.43                                                | 8.79                   | 8,350           | 2,757                |
| 27               | 100 | BGR  | Bulgaria     | Eastern Europe     | Europe    | 2004           | 809.95                                               | 21.74                  | 10.57      | 15.74                                                | 7.97                   | 8,970           | 2,764                |
| 27               | 100 | BGR  | Bulgaria     | Eastern Europe     | Europe    | 2005           | 741.88                                               | 31.22                  | 10.62      | 15.42                                                | 8.74                   | 9,840           | 2,723                |
| 27               | 100 | BGR  | Bulgaria     | Eastern Europe     | Europe    | 2006           | 801.45                                               | 22.51                  | 10.34      | 15.85                                                | 7.62                   | 10,800          | 2,759                |
| 27               | 100 | BGR  | Bulgaria     | Eastern Europe     | Europe    | 2007           | 746.67                                               | 30.07                  | 10.87      | 14.71                                                | 10.84                  | 11,560          | 2,733                |
| 27               | 100 | BGR  | Bulgaria     | Eastern Europe     | Europe    | 2008           | 738.48                                               | 31.23                  | 11.58      | 15.36                                                | 8.74                   | 13,460          | 2,699                |
| 27               | 100 | BGR  | Bulgaria     | Eastern Europe     | Europe    | 2009           | 676.31                                               | 43.15                  | 11.34      | 15.36                                                | 8.69                   | 13,520          | 2,822                |
| 27               | 100 | BGR  | Bulgaria     | Eastern Europe     | Europe    | 2010           | 732.84                                               | 31.83                  | 11.64      | 16.11                                                | 6.85                   | 13,950          | 2,782                |
| 27               | 100 | BGR  | Bulgaria     | Eastern Europe     | Europe    | 2011           | 741.17                                               | 30.30                  | 11.80      | 16.68                                                | 5.92                   | 14,790          | 2,877                |
| 233              | 854 | BFA  | Burkina Faso | Western Africa     | Africa    | 1992           | 278.75                                               | 100.00                 | 22.83      | 13.39                                                | 17.74                  | 590             | 2,292                |
| 233              | 854 | BFA  | Burkina Faso | Western Africa     | Africa    | 1993           | 294.49                                               | 100.00                 | 23.59      | 13.69                                                | 16.04                  | 610             | 2,313                |
| 233              | 854 | BFA  | Burkina Faso | Western Africa     | Africa    | 1994           | 291.38                                               | 100.00                 | 23.06      | 13.50                                                | 17.07                  | 610             | 2,344                |
| 233              | 854 | BFA  | Burkina Faso | Western Africa     | Africa    | 1995           | 305.59                                               | 100.00                 | 23.17      | 13.72                                                | 15.80                  | 640             | 2,337                |
| 233              | 854 | BFA  | Burkina Faso | Western Africa     | Africa    | 1996           | 305.42                                               | 100.00                 | 23.23      | 13.25                                                | 18.79                  | 710             | 2,338                |
| 233              | 854 | BFA  | Burkina Faso | Western Africa     | Africa    | 1997           | 288.72                                               | 100.00                 | 22.39      | 13.10                                                | 19.65                  | 750             | 2,311                |
| 233              | 854 | BFA  | Burkina Faso | Western Africa     | Africa    | 1998           | 291.70                                               | 100.00                 | 22.87      | 13.31                                                | 18.27                  | 790             | 2,285                |
| 233              | 854 | BFA  | Burkina Faso | Western Africa     | Africa    | 1999           | 310.30                                               | 100.00                 | 22.80      | 13.53                                                | 16.90                  | 830             | 2,343                |
| 233              | 854 | BFA  | Burkina Faso | Western Africa     | Africa    | 2000           | 294.50                                               | 100.00                 | 22.75      | 14.08                                                | 14.04                  | 840             | 2,318                |
| 233              | 854 | BFA  | Burkina Faso | Western Africa     | Africa    | 2001           | 296.70                                               | 100.00                 | 23.10      | 13.40                                                | 17.81                  | 890             | 2,332                |
| 233              | 854 | BFA  | Burkina Faso | Western Africa     | Africa    | 2002           | 299.93                                               | 100.00                 | 23.79      | 13.78                                                | 15.62                  | 920             | 2,411                |
| 233              | 854 | BFA  | Burkina Faso | Western Africa     | Africa    | 2003           | 315.15                                               | 100.00                 | 23.51      | 15.04                                                | 10.34                  | 980             | 2,492                |
| 233              | 854 | BFA  | Burkina Faso | Western Africa     | Africa    | 2004           | 307.63                                               | 100.00                 | 22.75      | 14.89                                                | 10.81                  | 1,030           | 2,505                |
| 233              | 854 | BFA  | Burkina Faso | Western Africa     | Africa    | 2005           | 286.92                                               | 100.00                 | 22.12      | 14.65                                                | 11.63                  | 1,120           | 2,463                |
| 233              | 854 | BFA  | Burkina Faso | Western Africa     | Africa    | 2006           | 306.47                                               | 100.00                 | 22.11      | 15.16                                                | 10.01                  | 1,200           | 2,559                |
| 233              | 854 | BFA  | Burkina Faso | Western Africa     | Africa    | 2007           | 283.25                                               | 100.00                 | 22.80      | 15.39                                                | 9.28                   | 1,240           | 2,545                |
| 233              | 854 | BFA  | Burkina Faso | Western Africa     | Africa    | 2008           | 302.61                                               | 100.00                 | 23.52      | 15.54                                                | 8.84                   | 1,300           | 2,587                |
| 233              | 854 | BFA  | Burkina Faso | Western Africa     | Africa    | 2009           | 298.23                                               | 100.00                 | 23.46      | 15.73                                                | 8.32                   | 1,310           | 2,632                |
| 233              | 854 | BFA  | Burkina Faso | Western Africa     | Africa    | 2010           | 330.03                                               | 99.99                  | 24.06      | 15.89                                                | 7.94                   | 1,390           | 2,670                |
| 233              | 854 | BFA  | Burkina Faso | Western Africa     | Africa    | 2011           | 323.55                                               | 99.99                  | 23.72      | 15.71                                                | 8.46                   | 1,430           | 2,655                |
| 115              | 116 | KHM  | Cambodia     | South-Eastern Asia | Asia      | 1995           | 191.74                                               | 100.00                 | 19.98      | 8.77                                                 | 74.20                  | 780             | 2,038                |
| 115              | 116 | KHM  | Cambodia     | South-Eastern Asia | Asia      | 1996           | 179.48                                               | 100.00                 | 19.70      | 8.14                                                 | 84.66                  | 810             | 1,901                |
| 115              | 116 | KHM  | Cambodia     | South-Eastern Asia | Asia      | 1997           | 182.56                                               | 100.00                 | 20.01      | 8.06                                                 | 86.61                  | 860             | 1,895                |
| 115              | 116 | KHM  | Cambodia     | South-Eastern Asia | Asia      | 1998           | 182.26                                               | 100.00                 | 19.60      | 8.59                                                 | 79.51                  | 880             | 1,977                |
| 115              | 116 | KHM  | Cambodia     | South-Eastern Asia | Asia      | 1999           | 195.92                                               | 100.00                 | 20.10      | 8.86                                                 | 76.03                  | 970             | 2,052                |
| 115              | 116 | KHM  | Cambodia     | South-Eastern Asia | Asia      | 2000           | 212.56                                               | 100.00                 | 19.68      | 9.36                                                 | 68.35                  | 1,050           | 2,115                |
| 115              | 116 | KHM  | Cambodia     | South-Eastern Asia | Asia      | 2001           | 215.26                                               | 100.00                 | 19.50      | 9.44                                                 | 67.23                  | 1,140           | 2,172                |
| 115              | 116 | KHM  | Cambodia     | South-Eastern Asia | Asia      | 2002           | 214.25                                               | 100.00                 | 20.15      | 9.49                                                 | 66.28                  | 1,200           | 2,264                |
| 115              | 116 | KHM  | Cambodia     | South-Eastern Asia | Asia      | 2003           | 242.03                                               | 100.00                 | 21.07      | 9.77                                                 | 61.18                  | 1,310           | 2,261                |
| 115              | 116 | KHM  | Cambodia     | South-Eastern Asia | Asia      | 2004           | 262.98                                               | 100.00                 | 21.74      | 9.75                                                 | 61.28                  | 1,450           | 2,275                |
| 115              | 116 | KHM  | Cambodia     | South-Eastern Asia | Asia      | 2005           | 267.65                                               | 100.00                 | 21.49      | 10.22                                                | 53.37                  | 1,660           | 2,327                |
| 115              | 116 | KHM  | Cambodia     | South-Eastern Asia | Asia      | 2006           | 299.50                                               | 100.00                 | 21.24      | 10.80                                                | 44.30                  | 1,880           | 2,377                |
| 115              | 116 | KHM  | Cambodia     | South-Eastern Asia | Asia      | 2007           | 303.24                                               | 100.00                 | 21.17      | 10.84                                                | 43.51                  | 2,090           | 2,388                |
| 115              | 116 | KHM  | Cambodia     | South-Eastern Asia | Asia      | 2008           | 385.23                                               | 99.70                  | 21.10      | 10.96                                                | 41.71                  | 2,230           | 2,406                |
| 115              | 116 | KHM  | Cambodia     | South-Eastern Asia | Asia      | 2009           | 383.54                                               | 99.72                  | 21.13      | 11.06                                                | 40.16                  | 2,230           | 2,417                |
| 115              | 116 | KHM  | Cambodia     | South-Eastern Asia | Asia      | 2010           | 293.30                                               | 100.00                 | 22.11      | 10.81                                                | 43.34                  | 2,350           | 2,416                |
| 115              | 116 | KHM  | Cambodia     | South-Eastern Asia | Asia      | 2011           | 310.22                                               | 100.00                 | 22.17      | 10.91                                                | 41.76                  | 2,500           | 2,411                |
| 32               | 120 | CMR  | Cameroon     | Middle Africa      | Africa    | 1992           | 287.28                                               | 100.00                 | 20.75      | 10.08                                                | 53.14                  | 1,500           | 2,113                |
| 32               | 120 | CMR  | Cameroon     | Middle Africa      | Africa    | 1993           | 285.30                                               | 100.00                 | 22.14      | 9.20                                                 | 68.06                  | 1,450           | 2,021                |
| 32               | 120 | CMR  | Cameroon     | Middle Africa      | Africa    | 1994           | 297.50                                               | 100.00                 | 23.27      | 9.35                                                 | 65.45                  | 1,400           | 2,032                |
| 32               | 120 | CMR  | Cameroon     | Middle Africa      | Africa    | 1995           | 289.83                                               | 100.00                 | 23.23      | 9.20                                                 | 68.10                  | 1,430           | 2,048                |
| 32               | 120 | CMR  | Cameroon     | Middle Africa      | Africa    | 1996           | 303.07                                               | 100.00                 | 23.13      | 9.51                                                 | 63.21                  | 1,490           | 2,033                |
| 32               | 120 | CMR  | Cameroon     | Middle Africa      | Africa    | 1997           | 326.11                                               | 99.99                  | 22.95      | 9.69                                                 | 60.27                  | 1,550           | 2,097                |
| 32               | 120 | CMR  | Cameroon     | Middle Africa      | Africa    | 1998           | 322.72                                               | 99.99                  | 23.62      | 9.63                                                 | 61.32                  | 1,620           | 2,100                |
| 32               | 120 | CMR  | Cameroon     | Middle Africa      | Africa    | 1999           | 335.06                                               | 99.98                  | 23.12      | 10.47                                                | 47.68                  | 1,680           | 2,120                |
| 32               | 120 | CMR  | Cameroon     | Middle Africa      | Africa    | 2000           | 345.89                                               | 99.96                  | 23.89      | 10.24                                                | 51.21                  | 1,710           | 2,116                |
| 32               | 120 | CMR  | Cameroon     | Middle Africa      | Africa    | 2001           | 352.37                                               | 99.94                  | 23.42      | 10.54                                                | 47.16                  | 1,780           | 2,162                |
| 32               | 120 | CMR  | Cameroon     | Middle Africa      | Africa    | 2002           | 353.17                                               | 99.93                  | 23.48      | 10.27                                                | 51.27                  | 1,830           | 2,204                |
| 32               | 120 | CMR  | Cameroon     | Middle Africa      | Africa    | 2003           | 353.12                                               | 99.94                  | 23.80      | 10.31                                                | 50.45                  | 1,940           | 2,233                |
| 32               | 120 | CMR  | Cameroon     | Middle Africa      | Africa    | 2004           | 355.05                                               | 99.93                  | 23.64      | 10.50                                                | 47.51                  | 2,040           | 2,246                |
| 32               | 120 | CMR  | Cameroon     | Middle Africa      | Africa    | 2005           | 364.73                                               | 99.86                  | 24.74      | 10.88                                                | 42.04                  | 2,090           | 2,311                |
| 32               | 120 | CMR  | Cameroon     | Middle Africa      | Africa    | 2006           | 400.98                                               | 99.07                  | 24.36      | 11.19                                                | 38.30                  | 2,210           | 2,354                |
| 32               | 120 | CMR  | Cameroon     | Middle Africa      | Africa    | 2007           | 413.84                                               | 98.44                  | 24.25      | 11.29                                                | 36.88                  | 2,250           | 2,378                |
| 32               | 120 | CMR  | Cameroon     | Middle Africa      | Africa    | 2008           | 419.51                                               | 98.08                  | 24.34      | 11.72                                                | 31.79                  | 2,330           | 2,447                |
| 32               | 120 | CMR  | Cameroon     | Middle Africa      | Africa    | 2009           | 428.32                                               | 97.42                  | 24.09      | 11.67                                                | 30.16                  | 2,360           | 2,492                |
| 32               | 120 | CMR  | Cameroon     | Middle Africa      | Africa    | 2010           | 423.28                                               | 97.81                  | 24.27      | 11.88                                                | 30.04                  | 2,390           | 2,521                |

| FAO country code | UNI | ISO3 | Country                  | Region           | Continent | Reference year | Ca supply (mg capita <sup>-1</sup> d <sup>-1</sup> ) | Ca deficiency risk (%) | Phytate:Zn | Zn supply (mg capita <sup>-1</sup> d <sup>-1</sup> ) | Zn deficiency risk (%) | GNI-PPP (US \$) | Energy supply (kcal) |
|------------------|-----|------|--------------------------|------------------|-----------|----------------|------------------------------------------------------|------------------------|------------|------------------------------------------------------|------------------------|-----------------|----------------------|
| 32               | 120 | CMR  | Cameroon                 | Middle Africa    | Africa    | 2011           | 436.66                                               | 96.66                  | 23.77      | 12.28                                                | 26.38                  | 2,470           | 2,586                |
| 33               | 124 | CAN  | Canada                   | Northern America | Americas  | 1992           | 1,077.72                                             | 5.38                   | 8.51       | 17.48                                                | 4.81                   | 19,170          | 3,093                |
| 33               | 124 | CAN  | Canada                   | Northern America | Americas  | 1993           | 1,122.57                                             | 4.42                   | 8.41       | 17.75                                                | 4.46                   | 19,900          | 3,122                |
| 33               | 124 | CAN  | Canada                   | Northern America | Americas  | 1994           | 1,129.55                                             | 4.29                   | 8.58       | 18.25                                                | 3.90                   | 21,060          | 3,209                |
| 33               | 124 | CAN  | Canada                   | Northern America | Americas  | 1995           | 1,114.37                                             | 4.59                   | 8.28       | 18.01                                                | 4.16                   | 21,950          | 3,209                |
| 33               | 124 | CAN  | Canada                   | Northern America | Americas  | 1996           | 1,163.22                                             | 3.73                   | 8.36       | 18.37                                                | 3.76                   | 22,500          | 3,252                |
| 33               | 124 | CAN  | Canada                   | Northern America | Americas  | 1997           | 1,073.43                                             | 5.54                   | 8.81       | 18.69                                                | 3.47                   | 23,660          | 3,388                |
| 33               | 124 | CAN  | Canada                   | Northern America | Americas  | 1998           | 1,053.13                                             | 6.10                   | 8.74       | 18.94                                                | 3.27                   | 24,630          | 3,452                |
| 33               | 124 | CAN  | Canada                   | Northern America | Americas  | 1999           | 989.37                                               | 8.29                   | 9.29       | 19.40                                                | 2.91                   | 26,140          | 3,492                |
| 33               | 124 | CAN  | Canada                   | Northern America | Americas  | 2000           | 1,139.91                                             | 4.19                   | 9.26       | 19.78                                                | 2.66                   | 27,690          | 3,512                |
| 33               | 124 | CAN  | Canada                   | Northern America | Americas  | 2001           | 1,122.48                                             | 4.54                   | 9.29       | 19.74                                                | 2.70                   | 28,470          | 3,513                |
| 33               | 124 | CAN  | Canada                   | Northern America | Americas  | 2002           | 1,130.22                                             | 4.41                   | 9.57       | 19.87                                                | 2.62                   | 29,150          | 3,536                |
| 33               | 124 | CAN  | Canada                   | Northern America | Americas  | 2003           | 1,030.70                                             | 6.91                   | 9.60       | 19.47                                                | 2.89                   | 30,510          | 3,537                |
| 33               | 124 | CAN  | Canada                   | Northern America | Americas  | 2004           | 998.69                                               | 8.06                   | 9.71       | 19.36                                                | 2.97                   | 32,100          | 3,543                |
| 33               | 124 | CAN  | Canada                   | Northern America | Americas  | 2005           | 932.40                                               | 11.20                  | 9.89       | 18.93                                                | 3.31                   | 34,380          | 3,506                |
| 33               | 124 | CAN  | Canada                   | Northern America | Americas  | 2006           | 988.88                                               | 8.45                   | 9.97       | 19.19                                                | 3.11                   | 36,570          | 3,491                |
| 33               | 124 | CAN  | Canada                   | Northern America | Americas  | 2007           | 977.19                                               | 8.93                   | 9.89       | 19.32                                                | 3.00                   | 37,880          | 3,493                |
| 33               | 124 | CAN  | Canada                   | Northern America | Americas  | 2008           | 976.23                                               | 8.95                   | 10.35      | 18.98                                                | 3.26                   | 38,580          | 3,461                |
| 33               | 124 | CAN  | Canada                   | Northern America | Americas  | 2009           | 946.79                                               | 10.32                  | 10.32      | 18.91                                                | 3.30                   | 37,220          | 3,392                |
| 33               | 124 | CAN  | Canada                   | Northern America | Americas  | 2010           | 948.84                                               | 10.18                  | 10.72      | 19.02                                                | 3.19                   | 38,380          | 3,397                |
| 33               | 124 | CAN  | Canada                   | Northern America | Americas  | 2011           | 1,063.61                                             | 5.85                   | 10.78      | 18.64                                                | 3.51                   | 41,330          | 3,419                |
| 37               | 140 | CAF  | Central African Republic | Middle Africa    | Africa    | 1992           | 348.09                                               | 99.95                  | 18.90      | 9.02                                                 | 71.35                  | 460             | 1,904                |
| 37               | 140 | CAF  | Central African Republic | Middle Africa    | Africa    | 1993           | 348.59                                               | 99.95                  | 18.86      | 9.05                                                 | 70.95                  | 460             | 1,877                |
| 37               | 140 | CAF  | Central African Republic | Middle Africa    | Africa    | 1994           | 356.09                                               | 99.92                  | 19.99      | 8.94                                                 | 72.82                  | 480             | 1,880                |
| 37               | 140 | CAF  | Central African Republic | Middle Africa    | Africa    | 1995           | 379.40                                               | 99.67                  | 19.70      | 9.24                                                 | 67.66                  | 520             | 1,881                |
| 37               | 140 | CAF  | Central African Republic | Middle Africa    | Africa    | 1996           | 383.32                                               | 99.60                  | 19.54      | 9.96                                                 | 55.90                  | 490             | 1,896                |
| 37               | 140 | CAF  | Central African Republic | Middle Africa    | Africa    | 1997           | 379.91                                               | 99.67                  | 19.73      | 8.90                                                 | 73.98                  | 520             | 1,916                |
| 37               | 140 | CAF  | Central African Republic | Middle Africa    | Africa    | 1998           | 383.21                                               | 99.61                  | 19.60      | 9.42                                                 | 64.91                  | 530             | 1,987                |
| 37               | 140 | CAF  | Central African Republic | Middle Africa    | Africa    | 1999           | 367.95                                               | 99.83                  | 20.05      | 9.20                                                 | 68.76                  | 560             | 1,930                |
| 37               | 140 | CAF  | Central African Republic | Middle Africa    | Africa    | 2000           | 367.13                                               | 99.84                  | 18.22      | 10.09                                                | 53.55                  | 540             | 1,983                |
| 37               | 140 | CAF  | Central African Republic | Middle Africa    | Africa    | 2001           | 389.21                                               | 99.47                  | 19.59      | 10.21                                                | 51.86                  | 570             | 1,988                |
| 37               | 140 | CAF  | Central African Republic | Middle Africa    | Africa    | 2002           | 394.10                                               | 99.33                  | 20.03      | 10.44                                                | 48.16                  | 590             | 1,996                |
| 37               | 140 | CAF  | Central African Republic | Middle Africa    | Africa    | 2003           | 389.40                                               | 99.47                  | 20.42      | 10.19                                                | 52.02                  | 570             | 1,966                |
| 37               | 140 | CAF  | Central African Republic | Middle Africa    | Africa    | 2004           | 402.94                                               | 99.03                  | 20.07      | 10.55                                                | 46.55                  | 600             | 1,989                |
| 37               | 140 | CAF  | Central African Republic | Middle Africa    | Africa    | 2005           | 343.66                                               | 99.97                  | 17.98      | 10.41                                                | 48.65                  | 620             | 2,026                |
| 37               | 140 | CAF  | Central African Republic | Middle Africa    | Africa    | 2006           | 384.70                                               | 99.59                  | 19.31      | 10.93                                                | 41.27                  | 670             | 2,029                |
| 37               | 140 | CAF  | Central African Republic | Middle Africa    | Africa    | 2007           | 415.50                                               | 98.44                  | 20.11      | 11.22                                                | 37.48                  | 730             | 2,090                |
| 37               | 140 | CAF  | Central African Republic | Middle Africa    | Africa    | 2008           | 422.37                                               | 98.02                  | 20.49      | 11.27                                                | 36.94                  | 760             | 2,133                |
| 37               | 140 | CAF  | Central African Republic | Middle Africa    | Africa    | 2009           | 404.03                                               | 99.03                  | 20.00      | 11.35                                                | 36.00                  | 820             | 2,139                |
| 37               | 140 | CAF  | Central African Republic | Middle Africa    | Africa    | 2010           | 340.27                                               | 99.98                  | 18.30      | 11.23                                                | 37.44                  | 870             | 2,164                |
| 37               | 140 | CAF  | Central African Republic | Middle Africa    | Africa    | 2011           | 323.79                                               | 100.00                 | 17.31      | 11.18                                                | 38.31                  | 920             | 2,154                |
| 39               | 148 | TCD  | Chad                     | Middle Africa    | Africa    | 1992           | 297.43                                               | 100.00                 | 22.47      | 11.02                                                | 39.42                  | 840             | 1,819                |
| 39               | 148 | TCD  | Chad                     | Middle Africa    | Africa    | 1993           | 269.46                                               | 100.00                 | 21.89      | 9.87                                                 | 56.48                  | 680             | 1,652                |
| 39               | 148 | TCD  | Chad                     | Middle Africa    | Africa    | 1994           | 290.53                                               | 100.00                 | 23.65      | 11.57                                                | 32.64                  | 760             | 1,979                |
| 39               | 148 | TCD  | Chad                     | Middle Africa    | Africa    | 1995           | 285.44                                               | 100.00                 | 24.29      | 10.01                                                | 53.97                  | 760             | 1,798                |
| 39               | 148 | TCD  | Chad                     | Middle Africa    | Africa    | 1996           | 287.77                                               | 100.00                 | 24.47      | 10.16                                                | 52.25                  | 760             | 1,815                |
| 39               | 148 | TCD  | Chad                     | Middle Africa    | Africa    | 1997           | 333.07                                               | 99.98                  | 25.92      | 10.92                                                | 40.91                  | 790             | 1,897                |
| 39               | 148 | TCD  | Chad                     | Middle Africa    | Africa    | 1998           | 358.77                                               | 99.87                  | 26.04      | 12.03                                                | 28.00                  | 820             | 2,037                |
| 39               | 148 | TCD  | Chad                     | Middle Africa    | Africa    | 1999           | 336.94                                               | 99.97                  | 25.22      | 11.60                                                | 32.28                  | 800             | 1,989                |
| 39               | 148 | TCD  | Chad                     | Middle Africa    | Africa    | 2000           | 360.24                                               | 99.85                  | 27.10      | 11.64                                                | 31.73                  | 730             | 1,947                |
| 39               | 148 | TCD  | Chad                     | Middle Africa    | Africa    | 2001           | 370.88                                               | 99.73                  | 26.87      | 12.05                                                | 28.15                  | 700             | 2,018                |
| 39               | 148 | TCD  | Chad                     | Middle Africa    | Africa    | 2002           | 387.88                                               | 99.35                  | 27.84      | 11.70                                                | 31.49                  | 330             | 1,968                |
| 39               | 148 | TCD  | Chad                     | Middle Africa    | Africa    | 2003           | 367.65                                               | 99.77                  | 25.78      | 12.24                                                | 26.12                  | 710             | 2,024                |
| 39               | 148 | TCD  | Chad                     | Middle Africa    | Africa    | 2004           | 355.32                                               | 99.90                  | 26.34      | 12.01                                                | 28.17                  | 1,100           | 2,026                |
| 39               | 148 | TCD  | Chad                     | Middle Africa    | Africa    | 2005           | 355.52                                               | 99.90                  | 25.74      | 12.26                                                | 25.83                  | 1,380           | 2,034                |
| 39               | 148 | TCD  | Chad                     | Middle Africa    | Africa    | 2006           | 356.20                                               | 99.89                  | 25.30      | 12.90                                                | 25.91                  | 1,660           | 2,022                |
| 39               | 148 | TCD  | Chad                     | Middle Africa    | Africa    | 2007           | 341.85                                               | 99.96                  | 23.13      | 12.39                                                | 25.07                  | 1,620           | 2,008                |
| 39               | 148 | TCD  | Chad                     | Middle Africa    | Africa    | 2008           | 334.01                                               | 99.98                  | 23.68      | 12.51                                                | 24.06                  | 1,640           | 2,027                |
| 39               | 148 | TCD  | Chad                     | Middle Africa    | Africa    | 2009           | 327.43                                               | 99.99                  | 23.04      | 12.47                                                | 24.38                  | 1,650           | 2,006                |
| 39               | 148 | TCD  | Chad                     | Middle Africa    | Africa    | 2010           | 332.09                                               | 99.98                  | 23.13      | 12.58                                                | 23.44                  | 1,850           | 2,043                |
| 39               | 148 | TCD  | Chad                     | Middle Africa    | Africa    | 2011           | 325.18                                               | 99.99                  | 23.33      | 12.52                                                | 24.26                  | 1,850           | 2,061                |
| 40               | 152 | CHL  | Chile                    | South America    | Americas  | 1992           | 630.70                                               | 52.45                  | 8.76       | 18.26                                                | 3.94                   | 5,290           | 2,708                |
| 40               | 152 | CHL  | Chile                    | South America    | Americas  | 1993           | 653.31                                               | 46.81                  | 8.43       | 18.62                                                | 3.58                   | 5,790           | 2,712                |
| 40               | 152 | CHL  | Chile                    | South America    | Americas  | 1994           | 681.62                                               | 44.89                  | 8.08       | 19.16                                                | 3.11                   | 6,140           | 2,745                |
| 40               | 152 | CHL  | Chile                    | South America    | Americas  | 1995           | 685.00                                               | 39.85                  | 8.00       | 19.31                                                | 3.01                   | 6,950           | 2,756                |
| 40               | 152 | CHL  | Chile                    | South America    | Americas  | 1996           | 686.76                                               | 39.64                  | 7.90       | 19.52                                                | 2.84                   | 7,600           | 2,779                |
| 40               | 152 | CHL  | Chile                    | South America    | Americas  | 1997           | 651.59                                               | 47.85                  | 8.62       | 19.63                                                | 2.85                   | 8,180           | 2,789                |
| 40               | 152 | CHL  | Chile                    | South America    | Americas  | 1998           | 644.93                                               | 49.81                  | 8.54       | 19.28                                                | 3.05                   | 8,540           | 2,795                |
| 40               | 152 | CHL  | Chile                    | South America    | Americas  | 1999           | 625.28                                               | 55.15                  | 8.76       | 19.01                                                | 3.29                   | 8,420           | 2,800                |
| 40               | 152 | CHL  | Chile                    | South America    | Americas  | 2000           | 630.49                                               | 54.09                  | 8.74       | 19.18                                                | 3.19                   | 9,320           | 2,834                |
| 40               | 152 | CHL  | Chile                    | South America    | Americas  | 2001           | 634.54                                               | 53.35                  | 9.17       | 19.25                                                | 3.14                   | 9,720           | 2,868                |
| 40               | 152 | CHL  | Chile                    | South America    | Americas  | 2002           | 635.53                                               | 53.32                  | 9.23       | 19.29                                                | 3.12                   | 9,940           | 2,899                |
| 40               | 152 | CHL  | Chile                    | South America    | Americas  | 2003           | 639.30                                               | 52.51                  | 9.26       | 19.35                                                | 3.08                   | 10,320          | 2,893                |
| 40               | 152 | CHL  | Chile                    | South America    | Americas  | 2004           | 619.10                                               | 57.86                  | 9.42       | 19.73                                                | 2.81                   | 10,880          | 2,918                |
| 40               | 152 | CHL  | Chile                    | South America    | Americas  | 2005           | 609.69                                               | 60.45                  | 9.39       | 19.89                                                | 2.71                   | 11,700          | 2,911                |
| 40               | 152 | CHL  | Chile                    | South America    | Americas  | 2006           | 617.64                                               | 58.30                  | 9.63       | 20.17                                                | 2.53                   | 13,400          | 2,957                |
| 40               | 152 | CHL  | Chile                    | South America    | Americas  | 2007           | 576.08                                               | 69.58                  | 9.27       | 19.63                                                | 2.88                   | 14,660          | 2,940                |
| 40               | 152 | CHL  | Chile                    | South America    | Americas  | 2008           | 617.68                                               | 58.20                  | 9.24       | 19.72                                                | 2.81                   | 14,950          | 2,952                |
| 40               | 152 | CHL  | Chile                    | South America    | Americas  | 2009           | 596.32                                               | 66.63                  | 9.34       | 19.27                                                | 3.12                   | 14,840          | 2,911                |

Dietary calcium and zinc deficiency risks are decreasing but remain prevalent

| FAO country code | UNI | ISO3 | Country    | Region          | Continent | Reference year | Ca supply (mg capita <sup>-1</sup> d <sup>-1</sup> ) | Ca deficiency risk (%) | Phytate:Zn | Zn supply (mg capita <sup>-1</sup> d <sup>-1</sup> ) | Zn deficiency risk (%) | GNI-PPP (US \$) | Energy supply (kcal) |
|------------------|-----|------|------------|-----------------|-----------|----------------|------------------------------------------------------|------------------------|------------|------------------------------------------------------|------------------------|-----------------|----------------------|
| 40               | 152 | CHL  | Chile      | South America   | Americas  | 2010           | 594.27                                               | 64.34                  | 9.49       | 19.71                                                | 2.79                   | 17,010          | 2,949                |
| 40               | 152 | CHL  | Chile      | South America   | Americas  | 2011           | 607.24                                               | 60.67                  | 9.61       | 19.66                                                | 2.81                   | 19,030          | 2,989                |
| 351              | 156 | CHN  | China      | Eastern Asia    | Asia      | 1992           | 408.91                                               | 98.77                  | 12.16      | 14.30                                                | 13.01                  | 1,240           | 2,468                |
| 351              | 156 | CHN  | China      | Eastern Asia    | Asia      | 1993           | 452.80                                               | 95.00                  | 12.38      | 15.04                                                | 10.27                  | 1,430           | 2,550                |
| 351              | 156 | CHN  | China      | Eastern Asia    | Asia      | 1994           | 476.73                                               | 91.48                  | 12.02      | 15.61                                                | 8.64                   | 1,630           | 2,614                |
| 351              | 156 | CHN  | China      | Eastern Asia    | Asia      | 1995           | 499.61                                               | 87.20                  | 11.87      | 16.01                                                | 7.70                   | 1,800           | 2,700                |
| 351              | 156 | CHN  | China      | Eastern Asia    | Asia      | 1996           | 525.32                                               | 81.74                  | 11.75      | 16.28                                                | 7.11                   | 2,000           | 2,703                |
| 351              | 156 | CHN  | China      | Eastern Asia    | Asia      | 1997           | 544.89                                               | 77.27                  | 11.71      | 16.52                                                | 6.75                   | 2,200           | 2,733                |
| 351              | 156 | CHN  | China      | Eastern Asia    | Asia      | 1998           | 566.34                                               | 74.72                  | 11.73      | 16.80                                                | 6.30                   | 2,370           | 2,775                |
| 351              | 156 | CHN  | China      | Eastern Asia    | Asia      | 1999           | 586.13                                               | 67.10                  | 11.23      | 17.07                                                | 5.91                   | 2,560           | 2,770                |
| 351              | 156 | CHN  | China      | Eastern Asia    | Asia      | 2000           | 657.58                                               | 48.85                  | 11.20      | 17.55                                                | 5.24                   | 2,830           | 2,812                |
| 351              | 156 | CHN  | China      | Eastern Asia    | Asia      | 2001           | 672.42                                               | 45.63                  | 11.03      | 17.40                                                | 5.49                   | 3,110           | 2,819                |
| 351              | 156 | CHN  | China      | Eastern Asia    | Asia      | 2002           | 709.78                                               | 37.85                  | 11.00      | 17.51                                                | 5.36                   | 3,430           | 2,834                |
| 351              | 156 | CHN  | China      | Eastern Asia    | Asia      | 2003           | 721.70                                               | 35.67                  | 10.78      | 17.47                                                | 5.43                   | 3,850           | 2,835                |
| 351              | 156 | CHN  | China      | Eastern Asia    | Asia      | 2004           | 744.05                                               | 31.69                  | 10.73      | 17.69                                                | 5.11                   | 4,340           | 2,858                |
| 351              | 156 | CHN  | China      | Eastern Asia    | Asia      | 2005           | 766.06                                               | 28.07                  | 10.79      | 17.88                                                | 4.82                   | 4,930           | 2,880                |
| 351              | 156 | CHN  | China      | Eastern Asia    | Asia      | 2006           | 786.68                                               | 24.91                  | 10.54      | 17.83                                                | 4.87                   | 5,720           | 2,883                |
| 351              | 156 | CHN  | China      | Eastern Asia    | Asia      | 2007           | 802.88                                               | 22.56                  | 10.53      | 18.00                                                | 4.58                   | 6,700           | 2,918                |
| 351              | 156 | CHN  | China      | Eastern Asia    | Asia      | 2008           | 831.67                                               | 19.07                  | 10.68      | 18.38                                                | 4.08                   | 7,480           | 2,975                |
| 351              | 156 | CHN  | China      | Eastern Asia    | Asia      | 2009           | 840.55                                               | 17.93                  | 10.80      | 18.45                                                | 3.95                   | 8,130           | 2,992                |
| 351              | 156 | CHN  | China      | Eastern Asia    | Asia      | 2010           | 867.77                                               | 15.32                  | 11.05      | 18.82                                                | 3.54                   | 9,010           | 3,041                |
| 351              | 156 | CHN  | China      | Eastern Asia    | Asia      | 2011           | 879.47                                               | 14.24                  | 10.97      | 18.99                                                | 3.36                   | 9,940           | 3,074                |
| 44               | 170 | COL  | Colombia   | South America   | Americas  | 1992           | 539.71                                               | 77.78                  | 12.60      | 12.45                                                | 24.66                  | 5,270           | 2,442                |
| 44               | 170 | COL  | Colombia   | South America   | Americas  | 1993           | 562.76                                               | 71.60                  | 13.07      | 12.71                                                | 22.53                  | 5,470           | 2,487                |
| 44               | 170 | COL  | Colombia   | South America   | Americas  | 1994           | 574.53                                               | 68.41                  | 13.60      | 12.99                                                | 20.49                  | 5,900           | 2,521                |
| 44               | 170 | COL  | Colombia   | South America   | Americas  | 1995           | 604.93                                               | 60.08                  | 12.91      | 13.53                                                | 17.04                  | 6,220           | 2,579                |
| 44               | 170 | COL  | Colombia   | South America   | Americas  | 1996           | 623.71                                               | 55.08                  | 13.09      | 13.80                                                | 15.56                  | 6,320           | 2,669                |
| 44               | 170 | COL  | Colombia   | South America   | Americas  | 1997           | 635.05                                               | 52.20                  | 12.79      | 13.88                                                | 15.11                  | 6,530           | 2,678                |
| 44               | 170 | COL  | Colombia   | South America   | Americas  | 1998           | 633.88                                               | 52.55                  | 12.65      | 13.74                                                | 15.82                  | 6,550           | 2,551                |
| 44               | 170 | COL  | Colombia   | South America   | Americas  | 1999           | 645.11                                               | 49.79                  | 12.74      | 13.63                                                | 16.45                  | 6,260           | 2,600                |
| 44               | 170 | COL  | Colombia   | South America   | Americas  | 2000           | 662.28                                               | 45.73                  | 12.33      | 13.74                                                | 15.83                  | 6,540           | 2,661                |
| 44               | 170 | COL  | Colombia   | South America   | Americas  | 2001           | 665.43                                               | 45.07                  | 12.33      | 13.72                                                | 15.96                  | 6,660           | 2,682                |
| 44               | 170 | COL  | Colombia   | South America   | Americas  | 2002           | 677.84                                               | 42.33                  | 12.26      | 13.50                                                | 17.17                  | 6,810           | 2,630                |
| 44               | 170 | COL  | Colombia   | South America   | Americas  | 2003           | 667.68                                               | 44.65                  | 12.26      | 13.30                                                | 18.36                  | 7,050           | 2,649                |
| 44               | 170 | COL  | Colombia   | South America   | Americas  | 2004           | 640.27                                               | 51.28                  | 11.98      | 13.36                                                | 17.97                  | 7,510           | 2,631                |
| 44               | 170 | COL  | Colombia   | South America   | Americas  | 2005           | 625.93                                               | 54.99                  | 11.61      | 13.49                                                | 17.21                  | 7,990           | 2,599                |
| 44               | 170 | COL  | Colombia   | South America   | Americas  | 2006           | 661.76                                               | 46.12                  | 11.31      | 13.74                                                | 15.79                  | 8,660           | 2,594                |
| 44               | 170 | COL  | Colombia   | South America   | Americas  | 2007           | 653.98                                               | 47.97                  | 11.55      | 13.53                                                | 16.96                  | 9,340           | 2,610                |
| 44               | 170 | COL  | Colombia   | South America   | Americas  | 2008           | 695.22                                               | 38.77                  | 11.22      | 13.62                                                | 16.40                  | 9,690           | 2,634                |
| 44               | 170 | COL  | Colombia   | South America   | Americas  | 2009           | 615.44                                               | 57.78                  | 11.49      | 12.77                                                | 21.80                  | 9,800           | 2,538                |
| 44               | 170 | COL  | Colombia   | South America   | Americas  | 2010           | 602.93                                               | 61.16                  | 10.90      | 12.85                                                | 21.24                  | 10,150          | 2,546                |
| 44               | 170 | COL  | Colombia   | South America   | Americas  | 2011           | 604.31                                               | 60.76                  | 10.58      | 13.15                                                | 19.09                  | 10,820          | 2,593                |
| 46               | 178 | COG  | Congo      | Middle Africa   | Africa    | 1992           | 247.71                                               | 100.00                 | 13.18      | 8.13                                                 | 86.12                  | 3,130           | 2,012                |
| 46               | 178 | COG  | Congo      | Middle Africa   | Africa    | 1993           | 262.37                                               | 100.00                 | 12.94      | 7.77                                                 | 90.66                  | 2,860           | 1,995                |
| 46               | 178 | COG  | Congo      | Middle Africa   | Africa    | 1994           | 245.32                                               | 100.00                 | 14.14      | 7.22                                                 | 95.79                  | 2,850           | 1,980                |
| 46               | 178 | COG  | Congo      | Middle Africa   | Africa    | 1995           | 250.35                                               | 100.00                 | 14.84      | 6.82                                                 | 98.04                  | 2,000           | 1,978                |
| 46               | 178 | COG  | Congo      | Middle Africa   | Africa    | 1996           | 262.48                                               | 100.00                 | 14.55      | 6.28                                                 | 98.53                  | 2,040           | 1,970                |
| 46               | 178 | COG  | Congo      | Middle Africa   | Africa    | 1997           | 256.86                                               | 100.00                 | 14.75      | 6.84                                                 | 98.00                  | 2,500           | 1,993                |
| 46               | 178 | COG  | Congo      | Middle Africa   | Africa    | 1998           | 272.21                                               | 100.00                 | 14.51      | 7.31                                                 | 95.11                  | 2,700           | 2,045                |
| 46               | 178 | COG  | Congo      | Middle Africa   | Africa    | 1999           | 257.45                                               | 100.00                 | 14.85      | 7.29                                                 | 95.16                  | 2,390           | 2,099                |
| 46               | 178 | COG  | Congo      | Middle Africa   | Africa    | 2000           | 276.23                                               | 100.00                 | 14.19      | 7.68                                                 | 91.45                  | 2,590           | 2,177                |
| 46               | 178 | COG  | Congo      | Middle Africa   | Africa    | 2001           | 271.99                                               | 100.00                 | 14.74      | 7.79                                                 | 90.39                  | 2,670           | 2,232                |
| 46               | 178 | COG  | Congo      | Middle Africa   | Africa    | 2002           | 280.10                                               | 100.00                 | 14.74      | 7.91                                                 | 88.87                  | 2,830           | 2,259                |
| 46               | 178 | COG  | Congo      | Middle Africa   | Africa    | 2003           | 285.32                                               | 100.00                 | 13.93      | 8.02                                                 | 87.23                  | 2,920           | 2,236                |
| 46               | 178 | COG  | Congo      | Middle Africa   | Africa    | 2004           | 314.15                                               | 100.00                 | 13.36      | 8.24                                                 | 84.10                  | 2,790           | 2,263                |
| 46               | 178 | COG  | Congo      | Middle Africa   | Africa    | 2005           | 247.50                                               | 100.00                 | 14.99      | 6.64                                                 | 98.61                  | 2,940           | 2,043                |
| 46               | 178 | COG  | Congo      | Middle Africa   | Africa    | 2006           | 295.31                                               | 100.00                 | 13.98      | 6.98                                                 | 97.23                  | 3,120           | 2,143                |
| 46               | 178 | COG  | Congo      | Middle Africa   | Africa    | 2007           | 254.41                                               | 100.00                 | 14.24      | 6.97                                                 | 97.20                  | 3,180           | 2,135                |
| 46               | 178 | COG  | Congo      | Middle Africa   | Africa    | 2008           | 252.57                                               | 100.00                 | 14.56      | 6.98                                                 | 97.11                  | 3,570           | 2,110                |
| 46               | 178 | COG  | Congo      | Middle Africa   | Africa    | 2009           | 270.64                                               | 100.00                 | 13.97      | 7.65                                                 | 91.59                  | 3,690           | 2,141                |
| 46               | 178 | COG  | Congo      | Middle Africa   | Africa    | 2010           | 271.67                                               | 100.00                 | 14.26      | 7.59                                                 | 92.14                  | 4,080           | 2,136                |
| 46               | 178 | COG  | Congo      | Middle Africa   | Africa    | 2011           | 284.77                                               | 100.00                 | 13.02      | 8.33                                                 | 82.74                  | 4,140           | 2,195                |
| 48               | 188 | CRI  | Costa Rica | Central America | Americas  | 1992           | 763.53                                               | 25.69                  | 12.62      | 12.09                                                | 27.54                  | 5,200           | 2,710                |
| 48               | 188 | CRI  | Costa Rica | Central America | Americas  | 1993           | 775.80                                               | 24.22                  | 13.16      | 12.09                                                | 27.72                  | 5,580           | 2,749                |
| 48               | 188 | CRI  | Costa Rica | Central America | Americas  | 1994           | 851.95                                               | 16.16                  | 11.81      | 12.97                                                | 20.68                  | 5,890           | 2,744                |
| 48               | 188 | CRI  | Costa Rica | Central America | Americas  | 1995           | 879.79                                               | 14.06                  | 12.39      | 13.36                                                | 18.20                  | 6,060           | 2,771                |
| 48               | 188 | CRI  | Costa Rica | Central America | Americas  | 1996           | 779.41                                               | 24.42                  | 10.79      | 13.17                                                | 19.55                  | 6,100           | 2,713                |
| 48               | 188 | CRI  | Costa Rica | Central America | Americas  | 1997           | 831.10                                               | 18.60                  | 12.00      | 13.02                                                | 20.72                  | 6,380           | 2,718                |
| 48               | 188 | CRI  | Costa Rica | Central America | Americas  | 1998           | 849.73                                               | 16.95                  | 11.39      | 12.95                                                | 21.27                  | 6,700           | 2,759                |
| 48               | 188 | CRI  | Costa Rica | Central America | Americas  | 1999           | 862.30                                               | 15.94                  | 11.98      | 13.03                                                | 20.79                  | 6,570           | 2,803                |
| 48               | 188 | CRI  | Costa Rica | Central America | Americas  | 2000           | 865.17                                               | 16.64                  | 12.70      | 13.21                                                | 19.68                  | 6,960           | 2,800                |
| 48               | 188 | CRI  | Costa Rica | Central America | Americas  | 2001           | 845.83                                               | 17.53                  | 12.11      | 12.85                                                | 22.18                  | 7,330           | 2,801                |
| 48               | 188 | CRI  | Costa Rica | Central America | Americas  | 2002           | 855.78                                               | 16.67                  | 13.12      | 12.25                                                | 27.16                  | 7,630           | 2,764                |
| 48               | 188 | CRI  | Costa Rica | Central America | Americas  | 2003           | 838.98                                               | 18.26                  | 13.20      | 12.53                                                | 24.70                  | 7,980           | 2,747                |
| 48               | 188 | CRI  | Costa Rica | Central America | Americas  | 2004           | 788.95                                               | 26.66                  | 13.75      | 12.53                                                | 26.43                  | 8,580           | 2,760                |
| 48               | 188 | CRI  | Costa Rica | Central America | Americas  | 2005           | 813.35                                               | 20.97                  | 13.51      | 12.53                                                | 24.73                  | 8,340           | 2,811                |
| 48               | 188 | CRI  | Costa Rica | Central America | Americas  | 2006           | 852.23                                               | 17.01                  | 13.33      | 13.00                                                | 20.94                  | 10,410          | 2,872                |
| 48               | 188 | CRI  | Costa Rica | Central America | Americas  | 2007           | 835.93                                               | 18.55                  | 13.15      | 13.01                                                | 20.84                  | 10,970          | 2,857                |
| 48               | 188 | CRI  | Costa Rica | Central America | Americas  | 2008           | 847.75                                               | 17.39                  | 12.90      | 13.10                                                | 20.22                  | 11,540          | 2,844                |

| FAO country code | UNI | ISO3 | Country        | Region          | Continent | Reference year | Ca supply (mg capita <sup>-1</sup> d <sup>-1</sup> ) | Ca deficiency risk (%) | Phytate:Zn | Zn supply (mg capita <sup>-1</sup> d <sup>-1</sup> ) | Zn deficiency risk (%) | GNI-PPP (US \$) | Energy supply (kcal) |
|------------------|-----|------|----------------|-----------------|-----------|----------------|------------------------------------------------------|------------------------|------------|------------------------------------------------------|------------------------|-----------------|----------------------|
| 48               | 188 | CRI  | Costa Rica     | Central America | Americas  | 2009           | 842.77                                               | 17.84                  | 12.80      | 13.23                                                | 19.30                  | 11,070          | 2,842                |
| 48               | 188 | CRI  | Costa Rica     | Central America | Americas  | 2010           | 814.69                                               | 20.71                  | 12.78      | 13.32                                                | 18.64                  | 11,790          | 2,869                |
| 48               | 188 | CRI  | Costa Rica     | Central America | Americas  | 2011           | 794.93                                               | 23.03                  | 12.91      | 13.38                                                | 18.25                  | 12,460          | 2,898                |
| 107              | 384 | CIV  | Côte d'Ivoire  | Western Africa  | Africa    | 1992           | 278.89                                               | 100.00                 | 17.52      | 9.37                                                 | 66.99                  | 1,730           | 2,589                |
| 107              | 384 | CIV  | Côte d'Ivoire  | Western Africa  | Africa    | 1993           | 279.14                                               | 100.00                 | 17.84      | 9.11                                                 | 71.43                  | 1,710           | 2,516                |
| 107              | 384 | CIV  | Côte d'Ivoire  | Western Africa  | Africa    | 1994           | 276.15                                               | 100.00                 | 18.19      | 8.75                                                 | 77.48                  | 1,770           | 2,540                |
| 107              | 384 | CIV  | Côte d'Ivoire  | Western Africa  | Africa    | 1995           | 285.91                                               | 100.00                 | 18.16      | 8.94                                                 | 74.31                  | 1,880           | 2,570                |
| 107              | 384 | CIV  | Côte d'Ivoire  | Western Africa  | Africa    | 1996           | 297.33                                               | 100.00                 | 17.86      | 8.84                                                 | 76.24                  | 2,040           | 2,606                |
| 107              | 384 | CIV  | Côte d'Ivoire  | Western Africa  | Africa    | 1997           | 322.11                                               | 100.00                 | 18.95      | 9.20                                                 | 70.14                  | 2,160           | 2,672                |
| 107              | 384 | CIV  | Côte d'Ivoire  | Western Africa  | Africa    | 1998           | 325.31                                               | 99.99                  | 18.40      | 9.30                                                 | 68.24                  | 2,240           | 2,636                |
| 107              | 384 | CIV  | Côte d'Ivoire  | Western Africa  | Africa    | 1999           | 318.58                                               | 100.00                 | 18.35      | 9.19                                                 | 69.97                  | 2,240           | 2,643                |
| 107              | 384 | CIV  | Côte d'Ivoire  | Western Africa  | Africa    | 2000           | 319.75                                               | 100.00                 | 18.82      | 9.13                                                 | 70.84                  | 2,150           | 2,619                |
| 107              | 384 | CIV  | Côte d'Ivoire  | Western Africa  | Africa    | 2001           | 321.01                                               | 100.00                 | 19.44      | 9.39                                                 | 66.43                  | 2,180           | 2,624                |
| 107              | 384 | CIV  | Côte d'Ivoire  | Western Africa  | Africa    | 2002           | 322.12                                               | 100.00                 | 19.41      | 9.30                                                 | 67.91                  | 2,150           | 2,668                |
| 107              | 384 | CIV  | Côte d'Ivoire  | Western Africa  | Africa    | 2003           | 328.87                                               | 99.99                  | 18.80      | 9.37                                                 | 66.55                  | 2,140           | 2,693                |
| 107              | 384 | CIV  | Côte d'Ivoire  | Western Africa  | Africa    | 2004           | 317.22                                               | 100.00                 | 19.05      | 9.53                                                 | 63.86                  | 2,230           | 2,736                |
| 107              | 384 | CIV  | Côte d'Ivoire  | Western Africa  | Africa    | 2005           | 334.67                                               | 99.98                  | 19.49      | 9.87                                                 | 58.03                  | 2,300           | 2,789                |
| 107              | 384 | CIV  | Côte d'Ivoire  | Western Africa  | Africa    | 2006           | 330.68                                               | 99.99                  | 19.07      | 9.88                                                 | 58.18                  | 2,350           | 2,785                |
| 107              | 384 | CIV  | Côte d'Ivoire  | Western Africa  | Africa    | 2007           | 320.73                                               | 100.00                 | 19.15      | 9.67                                                 | 61.67                  | 2,410           | 2,798                |
| 107              | 384 | CIV  | Côte d'Ivoire  | Western Africa  | Africa    | 2008           | 324.08                                               | 99.99                  | 19.60      | 9.69                                                 | 61.41                  | 2,480           | 2,744                |
| 107              | 384 | CIV  | Côte d'Ivoire  | Western Africa  | Africa    | 2009           | 325.94                                               | 99.99                  | 19.03      | 9.82                                                 | 59.19                  | 2,540           | 2,729                |
| 107              | 384 | CIV  | Côte d'Ivoire  | Western Africa  | Africa    | 2010           | 329.38                                               | 99.99                  | 19.41      | 10.07                                                | 54.99                  | 2,580           | 2,734                |
| 107              | 384 | CIV  | Côte d'Ivoire  | Western Africa  | Africa    | 2011           | 314.79                                               | 100.00                 | 19.67      | 10.05                                                | 55.69                  | 2,460           | 2,781                |
| 98               | 191 | HRV  | Croatia        | Southern Europe | Europe    | 1995           | 805.78                                               | 21.91                  | 13.20      | 13.32                                                | 17.36                  | 7,970           | 2,546                |
| 98               | 191 | HRV  | Croatia        | Southern Europe | Europe    | 1996           | 804.23                                               | 22.11                  | 13.87      | 13.13                                                | 18.48                  | 8,980           | 2,552                |
| 98               | 191 | HRV  | Croatia        | Southern Europe | Europe    | 1997           | 726.12                                               | 33.69                  | 13.93      | 13.49                                                | 16.34                  | 9,620           | 2,529                |
| 98               | 191 | HRV  | Croatia        | Southern Europe | Europe    | 1998           | 773.68                                               | 26.05                  | 14.40      | 13.19                                                | 18.06                  | 10,020          | 2,517                |
| 98               | 191 | HRV  | Croatia        | Southern Europe | Europe    | 1999           | 830.03                                               | 19.19                  | 14.11      | 14.00                                                | 13.74                  | 9,760           | 2,543                |
| 98               | 191 | HRV  | Croatia        | Southern Europe | Europe    | 2000           | 798.71                                               | 22.70                  | 13.06      | 14.02                                                | 13.64                  | 10,730          | 2,556                |
| 98               | 191 | HRV  | Croatia        | Southern Europe | Europe    | 2001           | 875.52                                               | 15.03                  | 13.74      | 14.71                                                | 10.77                  | 11,460          | 2,738                |
| 98               | 191 | HRV  | Croatia        | Southern Europe | Europe    | 2002           | 909.87                                               | 12.57                  | 12.70      | 15.44                                                | 8.54                   | 12,370          | 2,820                |
| 98               | 191 | HRV  | Croatia        | Southern Europe | Europe    | 2003           | 863.29                                               | 16.04                  | 12.15      | 15.31                                                | 8.88                   | 12,980          | 2,868                |
| 98               | 191 | HRV  | Croatia        | Southern Europe | Europe    | 2004           | 868.70                                               | 15.59                  | 10.96      | 15.58                                                | 8.18                   | 14,200          | 2,943                |
| 98               | 191 | HRV  | Croatia        | Southern Europe | Europe    | 2005           | 905.14                                               | 12.88                  | 10.67      | 15.84                                                | 7.53                   | 14,930          | 2,979                |
| 98               | 191 | HRV  | Croatia        | Southern Europe | Europe    | 2006           | 983.55                                               | 8.70                   | 9.84       | 16.26                                                | 6.65                   | 16,440          | 3,086                |
| 98               | 191 | HRV  | Croatia        | Southern Europe | Europe    | 2007           | 968.49                                               | 9.84                   | 10.10      | 16.33                                                | 6.52                   | 18,290          | 3,094                |
| 98               | 191 | HRV  | Croatia        | Southern Europe | Europe    | 2008           | 947.93                                               | 10.34                  | 9.71       | 16.59                                                | 6.01                   | 19,660          | 3,136                |
| 98               | 191 | HRV  | Croatia        | Southern Europe | Europe    | 2009           | 927.18                                               | 11.46                  | 9.90       | 17.17                                                | 5.07                   | 18,710          | 3,143                |
| 98               | 191 | HRV  | Croatia        | Southern Europe | Europe    | 2010           | 917.80                                               | 12.00                  | 9.88       | 16.49                                                | 6.17                   | 18,070          | 3,041                |
| 98               | 191 | HRV  | Croatia        | Southern Europe | Europe    | 2011           | 941.40                                               | 10.60                  | 9.38       | 16.50                                                | 6.12                   | 19,550          | 3,052                |
| 49               | 192 | CUB  | Cuba           | Caribbean       | Americas  | 1992           | 430.09                                               | 97.68                  | 13.56      | 10.69                                                | 43.65                  | 7,100           | 2,503                |
| 49               | 192 | CUB  | Cuba           | Caribbean       | Americas  | 1993           | 373.62                                               | 99.80                  | 13.30      | 9.42                                                 | 63.67                  | 6,150           | 2,321                |
| 49               | 192 | CUB  | Cuba           | Caribbean       | Americas  | 1994           | 395.65                                               | 99.37                  | 14.25      | 9.93                                                 | 54.87                  | 6,290           | 2,361                |
| 49               | 192 | CUB  | Cuba           | Caribbean       | Americas  | 1995           | 444.38                                               | 96.26                  | 13.69      | 10.01                                                | 53.46                  | 6,500           | 2,325                |
| 49               | 192 | CUB  | Cuba           | Caribbean       | Americas  | 1996           | 469.06                                               | 93.09                  | 13.87      | 10.61                                                | 44.22                  | 7,130           | 2,447                |
| 49               | 192 | CUB  | Cuba           | Caribbean       | Americas  | 1997           | 502.89                                               | 86.85                  | 14.43      | 11.06                                                | 38.32                  | 7,430           | 2,563                |
| 49               | 192 | CUB  | Cuba           | Caribbean       | Americas  | 1998           | 520.01                                               | 83.08                  | 14.62      | 11.57                                                | 32.42                  | 7,500           | 2,611                |
| 49               | 192 | CUB  | Cuba           | Caribbean       | Americas  | 1999           | 637.84                                               | 51.87                  | 16.08      | 13.37                                                | 17.60                  | 8,050           | 2,898                |
| 49               | 192 | CUB  | Cuba           | Caribbean       | Americas  | 2000           | 683.51                                               | 41.35                  | 15.50      | 14.12                                                | 13.79                  | 8,670           | 3,031                |
| 49               | 192 | CUB  | Cuba           | Caribbean       | Americas  | 2001           | 713.98                                               | 35.31                  | 16.36      | 14.57                                                | 11.91                  | 9,160           | 3,076                |
| 49               | 192 | CUB  | Cuba           | Caribbean       | Americas  | 2002           | 653.84                                               | 48.39                  | 15.75      | 14.67                                                | 11.54                  | 9,380           | 3,154                |
| 49               | 192 | CUB  | Cuba           | Caribbean       | Americas  | 2003           | 738.80                                               | 31.10                  | 17.55      | 15.60                                                | 8.63                   | 9,930           | 3,246                |
| 49               | 192 | CUB  | Cuba           | Caribbean       | Americas  | 2004           | 681.62                                               | 42.20                  | 17.74      | 15.28                                                | 9.56                   | 10,750          | 3,346                |
| 49               | 192 | CUB  | Cuba           | Caribbean       | Americas  | 2005           | 703.06                                               | 37.79                  | 18.04      | 15.62                                                | 8.60                   | 12,340          | 3,254                |
| 49               | 192 | CUB  | Cuba           | Caribbean       | Americas  | 2006           | 718.60                                               | 34.77                  | 17.33      | 16.03                                                | 7.53                   | 14,290          | 3,260                |
| 49               | 192 | CUB  | Cuba           | Caribbean       | Americas  | 2007           | 715.90                                               | 35.27                  | 17.28      | 16.22                                                | 7.11                   | 15,660          | 3,251                |
| 49               | 192 | CUB  | Cuba           | Caribbean       | Americas  | 2008           | 815.81                                               | 20.57                  | 15.92      | 16.57                                                | 6.40                   | 16,660          | 3,120                |
| 49               | 192 | CUB  | Cuba           | Caribbean       | Americas  | 2009           | 815.56                                               | 20.60                  | 15.66      | 15.77                                                | 8.14                   | 17,040          | 3,234                |
| 49               | 192 | CUB  | Cuba           | Caribbean       | Americas  | 2010           | 719.28                                               | 34.66                  | 14.51      | 15.04                                                | 10.19                  | 17,680          | 3,159                |
| 49               | 192 | CUB  | Cuba           | Caribbean       | Americas  | 2011           | 744.46                                               | 30.31                  | 15.86      | 15.79                                                | 8.06                   | 18,520          | 3,277                |
| 50               | 196 | CYP  | Cyprus         | Western Asia    | Asia      | 2004           | 929.11                                               | 11.38                  | 10.20      | 14.51                                                | 12.30                  | 22,190          | 2,801                |
| 50               | 196 | CYP  | Cyprus         | Western Asia    | Asia      | 2005           | 883.09                                               | 14.40                  | 10.27      | 14.40                                                | 12.74                  | 23,400          | 2,565                |
| 50               | 196 | CYP  | Cyprus         | Western Asia    | Asia      | 2006           | 859.61                                               | 16.37                  | 10.85      | 14.39                                                | 12.86                  | 25,100          | 2,559                |
| 50               | 196 | CYP  | Cyprus         | Western Asia    | Asia      | 2007           | 841.46                                               | 18.06                  | 10.67      | 15.13                                                | 10.17                  | 26,350          | 2,639                |
| 50               | 196 | CYP  | Cyprus         | Western Asia    | Asia      | 2008           | 848.98                                               | 17.35                  | 10.78      | 15.39                                                | 9.38                   | 29,790          | 2,656                |
| 50               | 196 | CYP  | Cyprus         | Western Asia    | Asia      | 2009           | 808.73                                               | 21.48                  | 10.47      | 14.99                                                | 10.63                  | 31,230          | 2,631                |
| 50               | 196 | CYP  | Cyprus         | Western Asia    | Asia      | 2010           | 814.77                                               | 20.70                  | 10.36      | 15.12                                                | 10.15                  | 30,300          | 2,658                |
| 50               | 196 | CYP  | Cyprus         | Western Asia    | Asia      | 2011           | 778.70                                               | 25.09                  | 9.46       | 14.83                                                | 10.76                  | 31,540          | 2,661                |
| 167              | 203 | CZE  | Czech Republic | Eastern Europe  | Europe    | 1993           | 784.17                                               | 27.87                  | 7.85       | 15.14                                                | 9.84                   | 11,850          | 3,038                |
| 167              | 203 | CZE  | Czech Republic | Eastern Europe  | Europe    | 1994           | 711.78                                               | 36.79                  | 8.16       | 15.08                                                | 9.99                   | 12,450          | 2,978                |
| 167              | 203 | CZE  | Czech Republic | Eastern Europe  | Europe    | 1995           | 734.12                                               | 32.61                  | 8.27       | 16.18                                                | 7.11                   | 13,400          | 3,203                |
| 167              | 203 | CZE  | Czech Republic | Eastern Europe  | Europe    | 1996           | 751.18                                               | 29.70                  | 8.58       | 16.33                                                | 6.72                   | 14,160          | 3,319                |
| 167              | 203 | CZE  | Czech Republic | Eastern Europe  | Europe    | 1997           | 713.28                                               | 36.33                  | 8.67       | 15.62                                                | 8.31                   | 14,260          | 3,235                |
| 167              | 203 | CZE  | Czech Republic | Eastern Europe  | Europe    | 1998           | 735.48                                               | 32.26                  | 8.62       | 15.66                                                | 8.21                   | 14,260          | 3,269                |
| 167              | 203 | CZE  | Czech Republic | Eastern Europe  | Europe    | 1999           | 722.55                                               | 34.55                  | 8.53       | 14.47                                                | 11.96                  | 14,540          | 3,118                |
| 167              | 203 | CZE  | Czech Republic | Eastern Europe  | Europe    | 2000           | 765.03                                               | 27.50                  | 8.79       | 14.32                                                | 12.55                  | 15,320          | 3,079                |
| 167              | 203 | CZE  | Czech Republic | Eastern Europe  | Europe    | 2001           | 734.46                                               | 32.51                  | 9.26       | 14.65                                                | 11.31                  | 16,390          | 3,169                |
| 167              | 203 | CZE  | Czech Republic | Eastern Europe  | Europe    | 2002           | 718.74                                               | 35.36                  | 9.31       | 15.05                                                | 9.94                   | 16,930          | 3,243                |
| 167              | 203 | CZE  | Czech Republic | Eastern Europe  | Europe    | 2003           | 737.26                                               | 31.99                  | 9.15       | 15.13                                                | 9.68                   | 18,140          | 3,319                |

| FAO country code | UNI | ISO3 | Country            | Region          | Continent | Reference year | Ca supply (mg capita <sup>-1</sup> d <sup>-1</sup> ) | Ca deficiency risk (%) | Phytate:Zn | Zn supply (mg capita <sup>-1</sup> d <sup>-1</sup> ) | Zn deficiency risk (%) | GNI-PPP (US \$) | Energy supply (kcal) |
|------------------|-----|------|--------------------|-----------------|-----------|----------------|------------------------------------------------------|------------------------|------------|------------------------------------------------------|------------------------|-----------------|----------------------|
| 167              | 203 | CZE  | Czech Republic     | Eastern Europe  | Europe    | 2004           | 738.25                                               | 31.74                  | 9.10       | 15.65                                                | 8.22                   | 19,140          | 3,322                |
| 167              | 203 | CZE  | Czech Republic     | Eastern Europe  | Europe    | 2005           | 819.03                                               | 20.45                  | 8.86       | 16.46                                                | 6.41                   | 20,420          | 3,318                |
| 167              | 203 | CZE  | Czech Republic     | Eastern Europe  | Europe    | 2006           | 778.07                                               | 25.31                  | 8.85       | 15.85                                                | 7.68                   | 22,150          | 3,279                |
| 167              | 203 | CZE  | Czech Republic     | Eastern Europe  | Europe    | 2007           | 809.30                                               | 21.20                  | 8.82       | 15.72                                                | 7.93                   | 23,660          | 3,261                |
| 167              | 203 | CZE  | Czech Republic     | Eastern Europe  | Europe    | 2008           | 790.59                                               | 23.27                  | 8.92       | 15.54                                                | 8.34                   | 24,770          | 3,271                |
| 167              | 203 | CZE  | Czech Republic     | Eastern Europe  | Europe    | 2009           | 749.60                                               | 28.84                  | 8.77       | 15.45                                                | 8.50                   | 24,260          | 3,278                |
| 167              | 203 | CZE  | Czech Republic     | Eastern Europe  | Europe    | 2010           | 743.64                                               | 29.56                  | 8.68       | 15.25                                                | 8.98                   | 23,990          | 3,281                |
| 167              | 203 | CZE  | Czech Republic     | Eastern Europe  | Europe    | 2011           | 743.48                                               | 29.42                  | 8.83       | 15.34                                                | 8.68                   | 25,230          | 3,292                |
| 54               | 208 | DNK  | Denmark            | Northern Europe | Europe    | 1992           | 803.81                                               | 21.65                  | 8.47       | 17.51                                                | 4.75                   | 19,570          | 3,338                |
| 54               | 208 | DNK  | Denmark            | Northern Europe | Europe    | 1993           | 830.25                                               | 18.61                  | 8.63       | 17.52                                                | 4.71                   | 20,090          | 3,339                |
| 54               | 208 | DNK  | Denmark            | Northern Europe | Europe    | 1994           | 830.99                                               | 18.40                  | 8.42       | 17.66                                                | 4.49                   | 21,610          | 3,315                |
| 54               | 208 | DNK  | Denmark            | Northern Europe | Europe    | 1995           | 977.42                                               | 8.56                   | 8.29       | 18.25                                                | 3.80                   | 22,710          | 3,395                |
| 54               | 208 | DNK  | Denmark            | Northern Europe | Europe    | 1996           | 950.18                                               | 9.76                   | 8.38       | 17.88                                                | 4.18                   | 23,740          | 3,294                |
| 54               | 208 | DNK  | Denmark            | Northern Europe | Europe    | 1997           | 877.22                                               | 14.19                  | 8.99       | 18.11                                                | 3.92                   | 24,900          | 3,365                |
| 54               | 208 | DNK  | Denmark            | Northern Europe | Europe    | 1998           | 879.07                                               | 14.04                  | 8.41       | 19.11                                                | 3.02                   | 25,840          | 3,395                |
| 54               | 208 | DNK  | Denmark            | Northern Europe | Europe    | 1999           | 916.37                                               | 11.56                  | 8.63       | 18.11                                                | 3.92                   | 26,690          | 3,332                |
| 54               | 208 | DNK  | Denmark            | Northern Europe | Europe    | 2000           | 949.53                                               | 9.79                   | 8.81       | 17.68                                                | 4.40                   | 28,240          | 3,313                |
| 54               | 208 | DNK  | Denmark            | Northern Europe | Europe    | 2001           | 969.08                                               | 9.38                   | 8.59       | 18.57                                                | 3.49                   | 29,040          | 3,335                |
| 54               | 208 | DNK  | Denmark            | Northern Europe | Europe    | 2002           | 1,037.99                                             | 6.44                   | 8.15       | 18.95                                                | 3.17                   | 30,390          | 3,368                |
| 54               | 208 | DNK  | Denmark            | Northern Europe | Europe    | 2003           | 978.70                                               | 8.60                   | 8.38       | 18.75                                                | 3.35                   | 30,260          | 3,343                |
| 54               | 208 | DNK  | Denmark            | Northern Europe | Europe    | 2004           | 1,133.44                                             | 4.25                   | 8.29       | 19.08                                                | 3.10                   | 32,410          | 3,382                |
| 54               | 208 | DNK  | Denmark            | Northern Europe | Europe    | 2005           | 1,288.68                                             | 2.30                   | 7.71       | 20.08                                                | 2.44                   | 33,660          | 3,408                |
| 54               | 208 | DNK  | Denmark            | Northern Europe | Europe    | 2006           | 1,238.24                                             | 2.80                   | 8.10       | 19.87                                                | 2.57                   | 36,750          | 3,410                |
| 54               | 208 | DNK  | Denmark            | Northern Europe | Europe    | 2007           | 1,168.35                                             | 3.72                   | 8.18       | 19.47                                                | 2.84                   | 38,070          | 3,435                |
| 54               | 208 | DNK  | Denmark            | Northern Europe | Europe    | 2008           | 1,232.57                                             | 2.88                   | 7.92       | 19.59                                                | 2.77                   | 40,460          | 3,329                |
| 54               | 208 | DNK  | Denmark            | Northern Europe | Europe    | 2009           | 1,100.64                                             | 4.99                   | 8.63       | 18.46                                                | 3.69                   | 39,240          | 3,346                |
| 54               | 208 | DNK  | Denmark            | Northern Europe | Europe    | 2010           | 1,132.38                                             | 4.35                   | 8.14       | 19.98                                                | 2.52                   | 41,860          | 3,396                |
| 54               | 208 | DNK  | Denmark            | Northern Europe | Europe    | 2011           | 1,321.57                                             | 2.07                   | 8.24       | 19.59                                                | 2.77                   | 42,960          | 3,363                |
| 56               | 214 | DOM  | Dominican Republic | Caribbean       | Americas  | 1992           | 326.85                                               | 99.99                  | 12.44      | 8.72                                                 | 77.31                  | 3,360           | 2,140                |
| 56               | 214 | DOM  | Dominican Republic | Caribbean       | Americas  | 1993           | 332.47                                               | 99.99                  | 13.01      | 9.16                                                 | 69.82                  | 3,560           | 2,219                |
| 56               | 214 | DOM  | Dominican Republic | Caribbean       | Americas  | 1994           | 326.50                                               | 99.99                  | 12.66      | 9.43                                                 | 65.05                  | 3,680           | 2,250                |
| 56               | 214 | DOM  | Dominican Republic | Caribbean       | Americas  | 1995           | 332.77                                               | 99.99                  | 12.34      | 9.43                                                 | 65.12                  | 3,890           | 2,276                |
| 56               | 214 | DOM  | Dominican Republic | Caribbean       | Americas  | 1996           | 319.04                                               | 100.00                 | 12.08      | 8.90                                                 | 75.74                  | 4,200           | 2,171                |
| 56               | 214 | DOM  | Dominican Republic | Caribbean       | Americas  | 1997           | 309.84                                               | 100.00                 | 11.64      | 8.42                                                 | 81.91                  | 4,540           | 2,151                |
| 56               | 214 | DOM  | Dominican Republic | Caribbean       | Americas  | 1998           | 314.71                                               | 100.00                 | 11.44      | 8.61                                                 | 79.00                  | 4,820           | 2,139                |
| 56               | 214 | DOM  | Dominican Republic | Caribbean       | Americas  | 1999           | 324.61                                               | 100.00                 | 12.98      | 7.93                                                 | 88.91                  | 5,120           | 2,147                |
| 56               | 214 | DOM  | Dominican Republic | Caribbean       | Americas  | 2000           | 330.06                                               | 99.99                  | 11.95      | 8.60                                                 | 79.29                  | 5,460           | 2,222                |
| 56               | 214 | DOM  | Dominican Republic | Caribbean       | Americas  | 2001           | 355.62                                               | 99.94                  | 12.78      | 8.44                                                 | 81.82                  | 5,590           | 2,254                |
| 56               | 214 | DOM  | Dominican Republic | Caribbean       | Americas  | 2002           | 400.76                                               | 99.27                  | 12.16      | 8.85                                                 | 75.12                  | 5,920           | 2,279                |
| 56               | 214 | DOM  | Dominican Republic | Caribbean       | Americas  | 2003           | 337.65                                               | 99.99                  | 13.03      | 7.77                                                 | 90.81                  | 5,790           | 2,135                |
| 56               | 214 | DOM  | Dominican Republic | Caribbean       | Americas  | 2004           | 333.68                                               | 99.99                  | 12.68      | 8.05                                                 | 87.30                  | 5,830           | 2,211                |
| 56               | 214 | DOM  | Dominican Republic | Caribbean       | Americas  | 2005           | 370.73                                               | 99.85                  | 12.54      | 8.87                                                 | 74.76                  | 6,670           | 2,321                |
| 56               | 214 | DOM  | Dominican Republic | Caribbean       | Americas  | 2006           | 384.82                                               | 99.66                  | 11.20      | 9.58                                                 | 62.48                  | 7,530           | 2,363                |
| 56               | 214 | DOM  | Dominican Republic | Caribbean       | Americas  | 2007           | 394.08                                               | 99.46                  | 10.95      | 10.00                                                | 55.23                  | 8,280           | 2,397                |
| 56               | 214 | DOM  | Dominican Republic | Caribbean       | Americas  | 2008           | 400.01                                               | 99.29                  | 11.05      | 9.81                                                 | 58.38                  | 8,860           | 2,345                |
| 56               | 214 | DOM  | Dominican Republic | Caribbean       | Americas  | 2009           | 408.55                                               | 98.97                  | 11.38      | 9.85                                                 | 57.70                  | 9,130           | 2,387                |
| 56               | 214 | DOM  | Dominican Republic | Caribbean       | Americas  | 2010           | 413.90                                               | 98.72                  | 11.37      | 10.96                                                | 40.82                  | 9,880           | 2,527                |
| 56               | 214 | DOM  | Dominican Republic | Caribbean       | Americas  | 2011           | 416.31                                               | 98.60                  | 12.18      | 10.92                                                | 41.27                  | 10,340          | 2,597                |
| 58               | 218 | ECU  | Ecuador            | South America   | Americas  | 1992           | 472.74                                               | 92.35                  | 11.24      | 10.07                                                | 54.31                  | 4,850           | 2,292                |
| 58               | 218 | ECU  | Ecuador            | South America   | Americas  | 1993           | 478.57                                               | 91.39                  | 10.96      | 10.41                                                | 48.94                  | 4,990           | 2,292                |
| 58               | 218 | ECU  | Ecuador            | South America   | Americas  | 1994           | 504.57                                               | 86.24                  | 11.13      | 10.68                                                | 44.84                  | 5,220           | 2,398                |
| 58               | 218 | ECU  | Ecuador            | South America   | Americas  | 1995           | 514.56                                               | 84.00                  | 10.22      | 10.69                                                | 44.75                  | 5,330           | 2,304                |
| 58               | 218 | ECU  | Ecuador            | South America   | Americas  | 1996           | 567.12                                               | 70.35                  | 9.91       | 11.23                                                | 37.63                  | 5,400           | 2,303                |
| 58               | 218 | ECU  | Ecuador            | South America   | Americas  | 1997           | 573.18                                               | 68.73                  | 9.78       | 11.71                                                | 32.06                  | 5,640           | 2,335                |
| 58               | 218 | ECU  | Ecuador            | South America   | Americas  | 1998           | 582.94                                               | 66.08                  | 9.43       | 11.50                                                | 34.35                  | 5,730           | 2,252                |
| 58               | 218 | ECU  | Ecuador            | South America   | Americas  | 1999           | 546.25                                               | 76.20                  | 9.86       | 11.43                                                | 35.13                  | 5,290           | 2,314                |
| 58               | 218 | ECU  | Ecuador            | South America   | Americas  | 2000           | 588.38                                               | 64.67                  | 8.85       | 11.32                                                | 36.45                  | 5,310           | 2,254                |
| 58               | 218 | ECU  | Ecuador            | South America   | Americas  | 2001           | 618.87                                               | 56.42                  | 8.32       | 11.85                                                | 30.48                  | 5,680           | 2,259                |
| 58               | 218 | ECU  | Ecuador            | South America   | Americas  | 2002           | 644.00                                               | 49.99                  | 8.12       | 11.45                                                | 34.84                  | 5,950           | 2,304                |
| 58               | 218 | ECU  | Ecuador            | South America   | Americas  | 2003           | 653.74                                               | 47.64                  | 7.78       | 11.61                                                | 33.00                  | 6,100           | 2,261                |
| 58               | 218 | ECU  | Ecuador            | South America   | Americas  | 2004           | 693.05                                               | 38.89                  | 7.77       | 11.81                                                | 30.83                  | 6,630           | 2,301                |
| 58               | 218 | ECU  | Ecuador            | South America   | Americas  | 2005           | 713.65                                               | 34.86                  | 8.16       | 11.95                                                | 29.34                  | 7,130           | 2,342                |
| 58               | 218 | ECU  | Ecuador            | South America   | Americas  | 2006           | 726.27                                               | 32.56                  | 7.71       | 12.15                                                | 27.36                  | 7,570           | 2,314                |
| 58               | 218 | ECU  | Ecuador            | South America   | Americas  | 2007           | 740.10                                               | 30.21                  | 7.38       | 12.46                                                | 24.60                  | 7,810           | 2,331                |
| 58               | 218 | ECU  | Ecuador            | South America   | Americas  | 2008           | 765.24                                               | 26.35                  | 7.16       | 12.74                                                | 22.32                  | 8,460           | 2,381                |
| 58               | 218 | ECU  | Ecuador            | South America   | Americas  | 2009           | 761.66                                               | 26.89                  | 7.11       | 12.94                                                | 20.86                  | 8,450           | 2,375                |
| 58               | 218 | ECU  | Ecuador            | South America   | Americas  | 2010           | 783.20                                               | 23.92                  | 7.45       | 13.21                                                | 19.01                  | 8,710           | 2,450                |
| 58               | 218 | ECU  | Ecuador            | South America   | Americas  | 2011           | 801.32                                               | 21.70                  | 7.37       | 13.39                                                | 17.86                  | 9,420           | 2,477                |
| 59               | 818 | EGY  | Egypt              | Northern Africa | Africa    | 1992           | 537.92                                               | 77.59                  | 14.76      | 20.40                                                | 2.38                   | 4,170           | 3,175                |
| 59               | 818 | EGY  | Egypt              | Northern Africa | Africa    | 1993           | 532.05                                               | 79.49                  | 14.97      | 20.52                                                | 2.34                   | 4,300           | 3,197                |
| 59               | 818 | EGY  | Egypt              | Northern Africa | Africa    | 1994           | 568.47                                               | 70.08                  | 14.69      | 21.36                                                | 1.95                   | 4,540           | 3,259                |
| 59               | 818 | EGY  | Egypt              | Northern Africa | Africa    | 1995           | 603.36                                               | 60.83                  | 14.73      | 21.52                                                | 1.90                   | 4,800           | 3,315                |
| 59               | 818 | EGY  | Egypt              | Northern Africa | Africa    | 1996           | 631.81                                               | 53.69                  | 14.70      | 21.55                                                | 1.91                   | 5,080           | 3,332                |
| 59               | 818 | EGY  | Egypt              | Northern Africa | Africa    | 1997           | 662.05                                               | 46.49                  | 14.73      | 21.97                                                | 1.75                   | 5,390           | 3,361                |
| 59               | 818 | EGY  | Egypt              | Northern Africa | Africa    | 1998           | 661.31                                               | 46.81                  | 14.76      | 21.86                                                | 1.80                   | 5,590           | 3,339                |
| 59               | 818 | EGY  | Egypt              | Northern Africa | Africa    | 1999           | 700.08                                               | 38.42                  | 15.02      | 21.63                                                | 1.89                   | 5,910           | 3,366                |
| 59               | 818 | EGY  | Egypt              | Northern Africa | Africa    | 2000           | 718.68                                               | 34.89                  | 15.18      | 21.77                                                | 1.84                   | 6,260           | 3,368                |
| 59               | 818 | EGY  | Egypt              | Northern Africa | Africa    | 2001           | 721.52                                               | 34.31                  | 15.20      | 21.77                                                | 1.85                   | 6,530           | 3,409                |
| 59               | 818 | EGY  | Egypt              | Northern Africa | Africa    | 2002           | 737.36                                               | 31.49                  | 15.33      | 21.85                                                | 1.81                   | 6,610           | 3,434                |



| FAO country code | UNI | ISO3 | Country     | Region          | Continent | Reference year | Ca supply (mg capita <sup>-1</sup> d <sup>-1</sup> ) | Ca deficiency risk (%) | Phytate:Zn | Zn supply (mg capita <sup>-1</sup> d <sup>-1</sup> ) | Zn deficiency risk (%) | GNI-PPP (US \$) | Energy supply (kcal) |
|------------------|-----|------|-------------|-----------------|-----------|----------------|------------------------------------------------------|------------------------|------------|------------------------------------------------------|------------------------|-----------------|----------------------|
| 59               | 818 | EGY  | Egypt       | Northern Africa | Africa    | 2003           | 770.39                                               | 26.31                  | 15.35      | 21.73                                                | 1.85                   | 6,830           | 3,379                |
| 59               | 818 | EGY  | Egypt       | Northern Africa | Africa    | 2004           | 738.30                                               | 31.22                  | 14.93      | 21.49                                                | 1.94                   | 7,180           | 3,309                |
| 59               | 818 | EGY  | Egypt       | Northern Africa | Africa    | 2005           | 756.23                                               | 28.22                  | 14.46      | 22.27                                                | 1.64                   | 7,610           | 3,367                |
| 59               | 818 | EGY  | Egypt       | Northern Africa | Africa    | 2006           | 796.41                                               | 22.59                  | 14.09      | 22.75                                                | 1.48                   | 8,560           | 3,388                |
| 59               | 818 | EGY  | Egypt       | Northern Africa | Africa    | 2007           | 827.42                                               | 18.97                  | 13.90      | 23.02                                                | 1.39                   | 9,100           | 3,446                |
| 59               | 818 | EGY  | Egypt       | Northern Africa | Africa    | 2008           | 820.83                                               | 19.50                  | 13.96      | 23.11                                                | 1.36                   | 9,760           | 3,491                |
| 59               | 818 | EGY  | Egypt       | Northern Africa | Africa    | 2009           | 746.39                                               | 29.06                  | 14.22      | 23.02                                                | 1.37                   | 10,070          | 3,443                |
| 59               | 818 | EGY  | Egypt       | Northern Africa | Africa    | 2010           | 813.65                                               | 20.03                  | 14.23      | 23.53                                                | 1.23                   | 10,360          | 3,517                |
| 59               | 818 | EGY  | Egypt       | Northern Africa | Africa    | 2011           | 786.38                                               | 23.12                  | 14.24      | 23.29                                                | 1.29                   | 10,330          | 3,557                |
| 60               | 222 | SLV  | El Salvador | Central America | Americas  | 1992           | 487.72                                               | 89.81                  | 21.77      | 13.16                                                | 19.15                  | 3,240           | 2,410                |
| 60               | 222 | SLV  | El Salvador | Central America | Americas  | 1993           | 453.43                                               | 95.23                  | 21.70      | 12.88                                                | 20.99                  | 3,500           | 2,384                |
| 60               | 222 | SLV  | El Salvador | Central America | Americas  | 1994           | 456.70                                               | 94.80                  | 21.60      | 12.97                                                | 20.26                  | 3,760           | 2,379                |
| 60               | 222 | SLV  | El Salvador | Central America | Americas  | 1995           | 443.04                                               | 96.41                  | 21.64      | 13.19                                                | 18.80                  | 4,040           | 2,392                |
| 60               | 222 | SLV  | El Salvador | Central America | Americas  | 1996           | 470.30                                               | 92.84                  | 21.29      | 13.33                                                | 17.80                  | 4,150           | 2,404                |
| 60               | 222 | SLV  | El Salvador | Central America | Americas  | 1997           | 489.56                                               | 89.43                  | 20.82      | 13.30                                                | 17.95                  | 4,340           | 2,428                |
| 60               | 222 | SLV  | El Salvador | Central America | Americas  | 1998           | 475.59                                               | 92.01                  | 21.22      | 12.84                                                | 21.01                  | 4,520           | 2,432                |
| 60               | 222 | SLV  | El Salvador | Central America | Americas  | 1999           | 521.78                                               | 82.42                  | 20.74      | 12.90                                                | 20.61                  | 4,680           | 2,411                |
| 60               | 222 | SLV  | El Salvador | Central America | Americas  | 2000           | 561.69                                               | 72.15                  | 20.60      | 13.77                                                | 15.42                  | 4,880           | 2,541                |
| 60               | 222 | SLV  | El Salvador | Central America | Americas  | 2001           | 577.87                                               | 67.95                  | 20.79      | 14.29                                                | 12.86                  | 5,050           | 2,628                |
| 60               | 222 | SLV  | El Salvador | Central America | Americas  | 2002           | 621.23                                               | 56.55                  | 20.54      | 14.90                                                | 10.62                  | 5,210           | 2,643                |
| 60               | 222 | SLV  | El Salvador | Central America | Americas  | 2003           | 598.41                                               | 63.17                  | 20.79      | 14.37                                                | 12.77                  | 5,390           | 2,597                |
| 60               | 222 | SLV  | El Salvador | Central America | Americas  | 2004           | 594.67                                               | 64.65                  | 20.67      | 14.42                                                | 12.65                  | 5,610           | 2,568                |
| 60               | 222 | SLV  | El Salvador | Central America | Americas  | 2005           | 642.88                                               | 52.28                  | 20.06      | 13.96                                                | 14.87                  | 5,980           | 2,571                |
| 60               | 222 | SLV  | El Salvador | Central America | Americas  | 2006           | 654.55                                               | 49.78                  | 20.38      | 13.86                                                | 15.45                  | 6,410           | 2,578                |
| 60               | 222 | SLV  | El Salvador | Central America | Americas  | 2007           | 668.20                                               | 46.72                  | 19.05      | 13.94                                                | 15.13                  | 6,810           | 2,565                |
| 60               | 222 | SLV  | El Salvador | Central America | Americas  | 2008           | 686.35                                               | 42.69                  | 20.25      | 14.17                                                | 14.05                  | 7,030           | 2,570                |
| 60               | 222 | SLV  | El Salvador | Central America | Americas  | 2009           | 667.05                                               | 47.07                  | 19.82      | 13.97                                                | 14.99                  | 6,770           | 2,575                |
| 60               | 222 | SLV  | El Salvador | Central America | Americas  | 2010           | 621.39                                               | 58.49                  | 19.76      | 14.02                                                | 14.72                  | 6,920           | 2,524                |
| 60               | 222 | SLV  | El Salvador | Central America | Americas  | 2011           | 604.60                                               | 62.71                  | 20.61      | 13.60                                                | 16.77                  | 7,150           | 2,513                |
| 63               | 233 | EST  | Estonia     | Northern Europe | Europe    | 1995           | 1,170.73                                             | 3.77                   | 8.70       | 19.38                                                | 2.79                   | 6,320           | 2,944                |
| 63               | 233 | EST  | Estonia     | Northern Europe | Europe    | 1996           | 1,045.05                                             | 6.63                   | 9.10       | 19.84                                                | 2.50                   | 6,970           | 3,082                |
| 63               | 233 | EST  | Estonia     | Northern Europe | Europe    | 1997           | 957.47                                               | 10.21                  | 8.99       | 18.20                                                | 3.83                   | 7,780           | 3,027                |
| 63               | 233 | EST  | Estonia     | Northern Europe | Europe    | 1998           | 908.93                                               | 13.16                  | 8.64       | 17.97                                                | 4.10                   | 8,360           | 2,975                |
| 63               | 233 | EST  | Estonia     | Northern Europe | Europe    | 1999           | 1,145.84                                             | 4.35                   | 8.05       | 17.64                                                | 4.51                   | 8,620           | 3,124                |
| 63               | 233 | EST  | Estonia     | Northern Europe | Europe    | 2000           | 933.94                                               | 11.69                  | 9.25       | 16.65                                                | 5.98                   | 9,500           | 3,067                |
| 63               | 233 | EST  | Estonia     | Northern Europe | Europe    | 2001           | 1,051.19                                             | 6.62                   | 8.63       | 16.78                                                | 5.76                   | 10,220          | 3,060                |
| 63               | 233 | EST  | Estonia     | Northern Europe | Europe    | 2002           | 1,049.18                                             | 6.65                   | 8.02       | 17.28                                                | 4.98                   | 11,420          | 3,055                |
| 63               | 233 | EST  | Estonia     | Northern Europe | Europe    | 2003           | 1,049.92                                             | 6.60                   | 8.82       | 16.51                                                | 6.17                   | 12,630          | 3,086                |
| 63               | 233 | EST  | Estonia     | Northern Europe | Europe    | 2004           | 909.98                                               | 12.98                  | 8.47       | 15.84                                                | 7.50                   | 13,990          | 3,075                |
| 63               | 233 | EST  | Estonia     | Northern Europe | Europe    | 2005           | 935.37                                               | 11.30                  | 9.38       | 16.67                                                | 5.81                   | 15,860          | 3,171                |
| 63               | 233 | EST  | Estonia     | Northern Europe | Europe    | 2006           | 965.36                                               | 9.62                   | 9.47       | 17.17                                                | 4.99                   | 18,140          | 3,183                |
| 63               | 233 | EST  | Estonia     | Northern Europe | Europe    | 2007           | 980.91                                               | 8.80                   | 9.80       | 17.54                                                | 4.46                   | 20,130          | 3,189                |
| 63               | 233 | EST  | Estonia     | Northern Europe | Europe    | 2008           | 1,151.75                                             | 4.00                   | 9.29       | 18.53                                                | 3.38                   | 20,960          | 3,227                |
| 63               | 233 | EST  | Estonia     | Northern Europe | Europe    | 2009           | 1,022.23                                             | 7.06                   | 9.10       | 18.03                                                | 3.83                   | 19,350          | 3,263                |
| 63               | 233 | EST  | Estonia     | Northern Europe | Europe    | 2010           | 1,002.59                                             | 7.70                   | 9.70       | 17.84                                                | 4.00                   | 19,380          | 3,210                |
| 63               | 233 | EST  | Estonia     | Northern Europe | Europe    | 2011           | 1,028.13                                             | 6.78                   | 9.24       | 18.14                                                | 3.65                   | 21,960          | 3,214                |
| 238              | 231 | ETH  | Ethiopia    | Eastern Africa  | Africa    | 1992           | 243.72                                               | 100.00                 | 19.28      | 10.17                                                | 52.09                  | 340             | 1,557                |
| 238              | 231 | ETH  | Ethiopia    | Eastern Africa  | Africa    | 1993           | 216.05                                               | 100.00                 | 18.61      | 9.77                                                 | 58.56                  | 380             | 1,508                |
| 238              | 231 | ETH  | Ethiopia    | Eastern Africa  | Africa    | 1994           | 219.04                                               | 100.00                 | 18.48      | 9.98                                                 | 55.07                  | 390             | 1,545                |
| 238              | 231 | ETH  | Ethiopia    | Eastern Africa  | Africa    | 1995           | 231.26                                               | 100.00                 | 19.06      | 10.08                                                | 53.49                  | 410             | 1,571                |
| 238              | 231 | ETH  | Ethiopia    | Eastern Africa  | Africa    | 1996           | 242.70                                               | 100.00                 | 19.30      | 10.69                                                | 44.67                  | 460             | 1,655                |
| 238              | 231 | ETH  | Ethiopia    | Eastern Africa  | Africa    | 1997           | 247.00                                               | 100.00                 | 19.30      | 10.98                                                | 40.54                  | 460             | 1,684                |
| 238              | 231 | ETH  | Ethiopia    | Eastern Africa  | Africa    | 1998           | 244.27                                               | 100.00                 | 19.08      | 10.94                                                | 40.95                  | 440             | 1,684                |
| 238              | 231 | ETH  | Ethiopia    | Eastern Africa  | Africa    | 1999           | 246.79                                               | 100.00                 | 19.18      | 11.18                                                | 37.68                  | 460             | 1,727                |
| 238              | 231 | ETH  | Ethiopia    | Eastern Africa  | Africa    | 2000           | 249.44                                               | 100.00                 | 19.11      | 11.63                                                | 32.31                  | 480             | 1,786                |
| 238              | 231 | ETH  | Ethiopia    | Eastern Africa  | Africa    | 2001           | 259.89                                               | 100.00                 | 19.03      | 11.93                                                | 29.27                  | 520             | 1,829                |
| 238              | 231 | ETH  | Ethiopia    | Eastern Africa  | Africa    | 2002           | 321.80                                               | 99.99                  | 17.97      | 12.09                                                | 27.64                  | 520             | 1,844                |
| 238              | 231 | ETH  | Ethiopia    | Eastern Africa  | Africa    | 2003           | 327.00                                               | 99.99                  | 18.03      | 12.22                                                | 26.46                  | 500             | 1,884                |
| 238              | 231 | ETH  | Ethiopia    | Eastern Africa  | Africa    | 2004           | 330.23                                               | 99.99                  | 18.06      | 11.97                                                | 28.83                  | 570             | 1,882                |
| 238              | 231 | ETH  | Ethiopia    | Eastern Africa  | Africa    | 2005           | 324.55                                               | 99.99                  | 18.61      | 12.74                                                | 22.20                  | 640             | 1,978                |
| 238              | 231 | ETH  | Ethiopia    | Eastern Africa  | Africa    | 2006           | 326.44                                               | 99.99                  | 18.74      | 12.56                                                | 23.79                  | 720             | 1,967                |
| 238              | 231 | ETH  | Ethiopia    | Eastern Africa  | Africa    | 2007           | 343.74                                               | 99.97                  | 18.53      | 12.46                                                | 24.66                  | 800             | 1,959                |
| 238              | 231 | ETH  | Ethiopia    | Eastern Africa  | Africa    | 2008           | 370.55                                               | 99.81                  | 18.74      | 12.81                                                | 22.02                  | 880             | 2,019                |
| 238              | 231 | ETH  | Ethiopia    | Eastern Africa  | Africa    | 2009           | 362.03                                               | 99.89                  | 18.89      | 13.16                                                | 19.73                  | 940             | 2,053                |
| 238              | 231 | ETH  | Ethiopia    | Eastern Africa  | Africa    | 2010           | 405.99                                               | 98.38                  | 18.62      | 13.29                                                | 18.96                  | 1,040           | 2,083                |
| 238              | 231 | ETH  | Ethiopia    | Eastern Africa  | Africa    | 2011           | 381.73                                               | 99.68                  | 19.16      | 13.30                                                | 19.05                  | 1,150           | 2,105                |
| 67               | 246 | FIN  | Finland     | Northern Europe | Europe    | 1992           | 1,044.37                                             | 6.32                   | 6.35       | 17.65                                                | 4.50                   | 15,870          | 3,190                |
| 67               | 246 | FIN  | Finland     | Northern Europe | Europe    | 1993           | 1,007.08                                             | 7.54                   | 6.53       | 16.49                                                | 6.25                   | 15,930          | 3,038                |
| 67               | 246 | FIN  | Finland     | Northern Europe | Europe    | 1994           | 1,062.82                                             | 5.81                   | 6.56       | 16.69                                                | 5.91                   | 17,000          | 2,989                |
| 67               | 246 | FIN  | Finland     | Northern Europe | Europe    | 1995           | 1,019.55                                             | 7.12                   | 6.44       | 17.04                                                | 5.35                   | 18,160          | 3,031                |
| 67               | 246 | FIN  | Finland     | Northern Europe | Europe    | 1996           | 1,023.75                                             | 6.98                   | 6.71       | 17.07                                                | 5.27                   | 18,750          | 3,017                |
| 67               | 246 | FIN  | Finland     | Northern Europe | Europe    | 1997           | 1,065.76                                             | 5.76                   | 6.72       | 17.87                                                | 4.23                   | 20,570          | 3,150                |
| 67               | 246 | FIN  | Finland     | Northern Europe | Europe    | 1998           | 1,077.24                                             | 5.48                   | 6.69       | 17.90                                                | 4.21                   | 22,050          | 3,177                |
| 67               | 246 | FIN  | Finland     | Northern Europe | Europe    | 1999           | 1,058.31                                             | 6.00                   | 6.67       | 18.38                                                | 3.70                   | 23,310          | 3,173                |
| 67               | 246 | FIN  | Finland     | Northern Europe | Europe    | 2000           | 1,050.04                                             | 6.25                   | 6.81       | 18.06                                                | 4.04                   | 25,500          | 3,151                |
| 67               | 246 | FIN  | Finland     | Northern Europe | Europe    | 2001           | 1,048.05                                             | 6.33                   | 6.88       | 18.19                                                | 3.92                   | 26,530          | 3,171                |
| 67               | 246 | FIN  | Finland     | Northern Europe | Europe    | 2002           | 1,050.65                                             | 6.27                   | 6.80       | 18.10                                                | 4.02                   | 27,580          | 3,153                |
| 67               | 246 | FIN  | Finland     | Northern Europe | Europe    | 2003           | 1,054.48                                             | 6.17                   | 6.80       | 18.25                                                | 3.86                   | 27,420          | 3,152                |
| 67               | 246 | FIN  | Finland     | Northern Europe | Europe    | 2004           | 1,038.73                                             | 6.64                   | 6.69       | 18.41                                                | 3.70                   | 30,070          | 3,189                |

Dietary calcium and zinc deficiency risks are decreasing but remain prevalent

| FAO country code | UNI | ISO3 | Country | Region          | Continent | Reference year | Ca supply (mg capita <sup>-1</sup> d <sup>-1</sup> ) | Ca deficiency risk (%) | Phytate:Zn | Zn supply (mg capita <sup>-1</sup> d <sup>-1</sup> ) | Zn deficiency risk (%) | GNI-PPP (US \$) | Energy supply (kcal) |
|------------------|-----|------|---------|-----------------|-----------|----------------|------------------------------------------------------|------------------------|------------|------------------------------------------------------|------------------------|-----------------|----------------------|
| 67               | 246 | FIN  | Finland | Northern Europe | Europe    | 2005           | 1,050.77                                             | 6.29                   | 6.83       | 18.64                                                | 3.49                   | 30,850          | 3,199                |
| 67               | 246 | FIN  | Finland | Northern Europe | Europe    | 2006           | 1,057.05                                             | 6.10                   | 6.91       | 19.03                                                | 3.16                   | 33,480          | 3,232                |
| 67               | 246 | FIN  | Finland | Northern Europe | Europe    | 2007           | 1,084.16                                             | 5.39                   | 6.90       | 19.13                                                | 3.07                   | 36,130          | 3,278                |
| 67               | 246 | FIN  | Finland | Northern Europe | Europe    | 2008           | 1,126.01                                             | 4.49                   | 6.88       | 19.29                                                | 2.95                   | 38,240          | 3,233                |
| 67               | 246 | FIN  | Finland | Northern Europe | Europe    | 2009           | 1,125.04                                             | 4.50                   | 6.96       | 19.05                                                | 3.13                   | 36,450          | 3,229                |
| 67               | 246 | FIN  | Finland | Northern Europe | Europe    | 2010           | 1,119.57                                             | 4.60                   | 6.95       | 19.62                                                | 2.71                   | 37,130          | 3,276                |
| 67               | 246 | FIN  | Finland | Northern Europe | Europe    | 2011           | 1,152.21                                             | 3.99                   | 6.97       | 19.55                                                | 2.75                   | 38,710          | 3,285                |
| 68               | 250 | FRA  | France  | Western Europe  | Europe    | 1992           | 1,163.58                                             | 3.78                   | 8.83       | 21.28                                                | 1.84                   | 18,450          | 3,549                |
| 68               | 250 | FRA  | France  | Western Europe  | Europe    | 1993           | 1,150.50                                             | 3.98                   | 8.99       | 21.21                                                | 1.86                   | 18,710          | 3,543                |
| 68               | 250 | FRA  | France  | Western Europe  | Europe    | 1994           | 1,092.12                                             | 5.11                   | 8.79       | 20.87                                                | 2.01                   | 19,430          | 3,512                |
| 68               | 250 | FRA  | France  | Western Europe  | Europe    | 1995           | 1,093.69                                             | 5.08                   | 8.77       | 21.24                                                | 1.85                   | 20,160          | 3,534                |
| 68               | 250 | FRA  | France  | Western Europe  | Europe    | 1996           | 1,044.48                                             | 6.36                   | 8.71       | 21.13                                                | 1.90                   | 20,840          | 3,519                |
| 68               | 250 | FRA  | France  | Western Europe  | Europe    | 1997           | 1,050.94                                             | 6.19                   | 8.72       | 21.27                                                | 1.84                   | 21,820          | 3,547                |
| 68               | 250 | FRA  | France  | Western Europe  | Europe    | 1998           | 1,070.06                                             | 5.69                   | 8.64       | 21.68                                                | 1.69                   | 22,900          | 3,593                |
| 68               | 250 | FRA  | France  | Western Europe  | Europe    | 1999           | 1,076.25                                             | 5.55                   | 8.67       | 21.52                                                | 1.75                   | 23,920          | 3,604                |
| 68               | 250 | FRA  | France  | Western Europe  | Europe    | 2000           | 1,084.38                                             | 5.36                   | 8.61       | 21.62                                                | 1.71                   | 25,560          | 3,605                |
| 68               | 250 | FRA  | France  | Western Europe  | Europe    | 2001           | 1,105.13                                             | 4.89                   | 8.47       | 21.80                                                | 1.65                   | 26,920          | 3,640                |
| 68               | 250 | FRA  | France  | Western Europe  | Europe    | 2002           | 1,124.47                                             | 4.49                   | 8.51       | 21.89                                                | 1.61                   | 27,770          | 3,656                |
| 68               | 250 | FRA  | France  | Western Europe  | Europe    | 2003           | 1,099.61                                             | 5.00                   | 8.42       | 21.48                                                | 1.76                   | 27,480          | 3,588                |
| 68               | 250 | FRA  | France  | Western Europe  | Europe    | 2004           | 1,079.71                                             | 5.46                   | 8.64       | 21.25                                                | 1.84                   | 28,440          | 3,555                |
| 68               | 250 | FRA  | France  | Western Europe  | Europe    | 2005           | 1,037.10                                             | 6.63                   | 8.41       | 21.17                                                | 1.87                   | 29,910          | 3,538                |
| 68               | 250 | FRA  | France  | Western Europe  | Europe    | 2006           | 1,032.56                                             | 6.76                   | 8.63       | 21.08                                                | 1.91                   | 31,900          | 3,513                |
| 68               | 250 | FRA  | France  | Western Europe  | Europe    | 2007           | 1,042.86                                             | 6.43                   | 8.64       | 20.49                                                | 2.18                   | 33,560          | 3,466                |
| 68               | 250 | FRA  | France  | Western Europe  | Europe    | 2008           | 1,008.39                                             | 7.56                   | 8.29       | 21.42                                                | 1.76                   | 34,640          | 3,550                |
| 68               | 250 | FRA  | France  | Western Europe  | Europe    | 2009           | 1,014.85                                             | 7.33                   | 8.40       | 21.07                                                | 1.90                   | 34,610          | 3,534                |
| 68               | 250 | FRA  | France  | Western Europe  | Europe    | 2010           | 1,025.91                                             | 6.95                   | 8.36       | 21.66                                                | 1.67                   | 35,470          | 3,548                |
| 68               | 250 | FRA  | France  | Western Europe  | Europe    | 2011           | 1,016.96                                             | 7.26                   | 8.68       | 21.25                                                | 1.83                   | 37,020          | 3,524                |
| 74               | 266 | GAB  | Gabon   | Middle Africa   | Africa    | 1993           | 362.23                                               | 99.88                  | 11.80      | 11.52                                                | 32.86                  | 11,300          | 2,535                |
| 74               | 266 | GAB  | Gabon   | Middle Africa   | Africa    | 1994           | 320.75                                               | 100.00                 | 12.45      | 10.87                                                | 40.85                  | 12,020          | 2,462                |
| 74               | 266 | GAB  | Gabon   | Middle Africa   | Africa    | 1995           | 339.65                                               | 99.98                  | 13.42      | 11.14                                                | 37.49                  | 12,330          | 2,548                |
| 74               | 266 | GAB  | Gabon   | Middle Africa   | Africa    | 1996           | 347.08                                               | 99.96                  | 14.14      | 10.93                                                | 40.52                  | 12,680          | 2,635                |
| 74               | 266 | GAB  | Gabon   | Middle Africa   | Africa    | 1997           | 378.82                                               | 99.69                  | 14.27      | 10.69                                                | 43.95                  | 13,280          | 2,628                |
| 74               | 266 | GAB  | Gabon   | Middle Africa   | Africa    | 1998           | 367.90                                               | 99.84                  | 13.98      | 11.11                                                | 38.38                  | 13,860          | 2,661                |
| 74               | 266 | GAB  | Gabon   | Middle Africa   | Africa    | 1999           | 365.90                                               | 99.86                  | 14.10      | 11.34                                                | 35.56                  | 12,380          | 2,712                |
| 74               | 266 | GAB  | Gabon   | Middle Africa   | Africa    | 2000           | 376.09                                               | 99.75                  | 13.92      | 11.48                                                | 34.05                  | 11,690          | 2,718                |
| 74               | 266 | GAB  | Gabon   | Middle Africa   | Africa    | 2001           | 373.99                                               | 99.79                  | 13.43      | 11.46                                                | 34.55                  | 12,210          | 2,697                |
| 74               | 266 | GAB  | Gabon   | Middle Africa   | Africa    | 2002           | 351.03                                               | 99.95                  | 14.69      | 10.89                                                | 41.78                  | 12,580          | 2,645                |
| 74               | 266 | GAB  | Gabon   | Middle Africa   | Africa    | 2003           | 346.25                                               | 99.97                  | 14.25      | 11.02                                                | 40.05                  | 12,550          | 2,662                |
| 74               | 266 | GAB  | Gabon   | Middle Africa   | Africa    | 2004           | 376.77                                               | 99.75                  | 13.73      | 11.59                                                | 33.16                  | 12,070          | 2,684                |
| 74               | 266 | GAB  | Gabon   | Middle Africa   | Africa    | 2005           | 380.11                                               | 99.70                  | 13.28      | 12.26                                                | 26.38                  | 13,360          | 2,723                |
| 74               | 266 | GAB  | Gabon   | Middle Africa   | Africa    | 2006           | 384.30                                               | 99.62                  | 12.95      | 12.37                                                | 25.67                  | 13,120          | 2,722                |
| 74               | 266 | GAB  | Gabon   | Middle Africa   | Africa    | 2007           | 387.40                                               | 99.55                  | 13.30      | 11.87                                                | 30.28                  | 14,100          | 2,719                |
| 74               | 266 | GAB  | Gabon   | Middle Africa   | Africa    | 2008           | 360.32                                               | 99.90                  | 13.57      | 11.78                                                | 31.13                  | 14,340          | 2,671                |
| 74               | 266 | GAB  | Gabon   | Middle Africa   | Africa    | 2009           | 372.78                                               | 99.79                  | 12.95      | 11.92                                                | 29.65                  | 14,230          | 2,716                |
| 74               | 266 | GAB  | Gabon   | Middle Africa   | Africa    | 2010           | 379.88                                               | 99.69                  | 12.96      | 11.88                                                | 29.95                  | 14,470          | 2,743                |
| 74               | 266 | GAB  | Gabon   | Middle Africa   | Africa    | 2011           | 382.63                                               | 99.63                  | 13.41      | 12.31                                                | 25.99                  | 15,390          | 2,781                |
| 75               | 270 | GMB  | Gambia  | Western Africa  | Africa    | 1993           | 223.96                                               | 100.00                 | 19.79      | 9.95                                                 | 55.64                  | 1,030           | 2,467                |
| 75               | 270 | GMB  | Gambia  | Western Africa  | Africa    | 1994           | 209.93                                               | 100.00                 | 19.99      | 10.10                                                | 53.18                  | 1,020           | 2,380                |
| 75               | 270 | GMB  | Gambia  | Western Africa  | Africa    | 1995           | 213.23                                               | 100.00                 | 20.04      | 9.90                                                 | 56.55                  | 1,030           | 2,393                |
| 75               | 270 | GMB  | Gambia  | Western Africa  | Africa    | 1996           | 221.43                                               | 100.00                 | 19.28      | 10.10                                                | 53.70                  | 1,040           | 2,391                |
| 75               | 270 | GMB  | Gambia  | Western Africa  | Africa    | 1997           | 241.46                                               | 100.00                 | 19.99      | 10.23                                                | 51.62                  | 1,070           | 2,475                |
| 75               | 270 | GMB  | Gambia  | Western Africa  | Africa    | 1998           | 237.16                                               | 100.00                 | 19.41      | 9.88                                                 | 57.12                  | 1,090           | 2,357                |
| 75               | 270 | GMB  | Gambia  | Western Africa  | Africa    | 1999           | 323.90                                               | 99.99                  | 19.74      | 11.16                                                | 37.94                  | 1,130           | 2,508                |
| 75               | 270 | GMB  | Gambia  | Western Africa  | Africa    | 2000           | 321.75                                               | 99.99                  | 20.63      | 11.38                                                | 35.07                  | 1,190           | 2,579                |
| 75               | 270 | GMB  | Gambia  | Western Africa  | Africa    | 2001           | 282.84                                               | 100.00                 | 20.63      | 10.80                                                | 42.89                  | 1,240           | 2,521                |
| 75               | 270 | GMB  | Gambia  | Western Africa  | Africa    | 2002           | 299.02                                               | 100.00                 | 20.15      | 11.16                                                | 37.90                  | 1,160           | 2,468                |
| 75               | 270 | GMB  | Gambia  | Western Africa  | Africa    | 2003           | 286.81                                               | 100.00                 | 20.03      | 11.09                                                | 38.56                  | 1,220           | 2,455                |
| 75               | 270 | GMB  | Gambia  | Western Africa  | Africa    | 2004           | 256.09                                               | 100.00                 | 18.50      | 10.56                                                | 45.69                  | 1,340           | 2,464                |
| 75               | 270 | GMB  | Gambia  | Western Africa  | Africa    | 2005           | 263.08                                               | 100.00                 | 19.07      | 10.68                                                | 43.86                  | 1,320           | 2,469                |
| 75               | 270 | GMB  | Gambia  | Western Africa  | Africa    | 2006           | 259.45                                               | 100.00                 | 18.91      | 10.57                                                | 45.92                  | 1,330           | 2,389                |
| 75               | 270 | GMB  | Gambia  | Western Africa  | Africa    | 2007           | 337.86                                               | 99.97                  | 18.50      | 11.77                                                | 30.69                  | 1,380           | 2,546                |
| 75               | 270 | GMB  | Gambia  | Western Africa  | Africa    | 2008           | 303.05                                               | 100.00                 | 19.41      | 12.06                                                | 27.80                  | 1,460           | 2,534                |
| 75               | 270 | GMB  | Gambia  | Western Africa  | Africa    | 2009           | 324.71                                               | 99.99                  | 19.34      | 12.80                                                | 21.53                  | 1,510           | 2,687                |
| 75               | 270 | GMB  | Gambia  | Western Africa  | Africa    | 2010           | 383.17                                               | 99.53                  | 19.22      | 13.15                                                | 19.01                  | 1,570           | 2,804                |
| 75               | 270 | GMB  | Gambia  | Western Africa  | Africa    | 2011           | 405.63                                               | 98.72                  | 18.86      | 13.25                                                | 18.69                  | 1,480           | 2,849                |
| 73               | 268 | GEO  | Georgia | Western Asia    | Asia      | 1992           | 455.62                                               | 95.19                  | 13.65      | 15.00                                                | 9.74                   | 2,340           | 1,928                |
| 73               | 268 | GEO  | Georgia | Western Asia    | Asia      | 1993           | 426.58                                               | 97.99                  | 14.81      | 12.67                                                | 21.28                  | 1,665           | 1,665                |
| 73               | 268 | GEO  | Georgia | Western Asia    | Asia      | 1994           | 503.36                                               | 87.14                  | 14.93      | 15.06                                                | 9.62                   | 1,540           | 1,963                |
| 73               | 268 | GEO  | Georgia | Western Asia    | Asia      | 1995           | 585.62                                               | 66.14                  | 11.64      | 19.70                                                | 2.64                   | 1,610           | 2,388                |
| 73               | 268 | GEO  | Georgia | Western Asia    | Asia      | 1996           | 657.97                                               | 47.51                  | 12.37      | 19.87                                                | 2.52                   | 1,910           | 2,541                |
| 73               | 268 | GEO  | Georgia | Western Asia    | Asia      | 1997           | 725.26                                               | 33.71                  | 12.58      | 20.61                                                | 2.14                   | 2,320           | 2,649                |
| 73               | 268 | GEO  | Georgia | Western Asia    | Asia      | 1998           | 743.34                                               | 30.85                  | 12.48      | 19.78                                                | 2.62                   | 2,480           | 2,601                |
| 73               | 268 | GEO  | Georgia | Western Asia    | Asia      | 1999           | 727.48                                               | 33.87                  | 12.56      | 19.91                                                | 2.56                   | 2,610           | 2,604                |
| 73               | 268 | GEO  | Georgia | Western Asia    | Asia      | 2000           | 704.30                                               | 38.56                  | 11.63      | 18.55                                                | 3.64                   | 2,700           | 2,475                |
| 73               | 268 | GEO  | Georgia | Western Asia    | Asia      | 2001           | 791.70                                               | 24.38                  | 11.22      | 18.95                                                | 3.23                   | 2,540           | 2,638                |
| 73               | 268 | GEO  | Georgia | Western Asia    | Asia      | 2002           | 845.16                                               | 18.44                  | 11.70      | 20.27                                                | 2.38                   | 3,040           | 2,838                |
| 73               | 268 | GEO  | Georgia | Western Asia    | Asia      | 2003           | 873.61                                               | 15.95                  | 11.96      | 21.10                                                | 1.98                   | 3,460           | 2,937                |
| 73               | 268 | GEO  | Georgia | Western Asia    | Asia      | 2004           | 887.28                                               | 14.89                  | 10.90      | 20.63                                                | 2.21                   | 3,620           | 3,025                |
| 73               | 268 | GEO  | Georgia | Western Asia    | Asia      | 2005           | 905.45                                               | 13.52                  | 11.23      | 20.83                                                | 2.11                   | 4,250           | 3,044                |

| FAO country code | UNI | ISO3 | Country   | Region          | Continent | Reference year | Ca supply (mg capita <sup>-1</sup> d <sup>-1</sup> ) | Ca deficiency risk (%) | Phytate:Zn | Zn supply (mg capita <sup>-1</sup> d <sup>-1</sup> ) | Zn deficiency risk (%) | GNI-PPP (US \$) | Energy supply (kcal) |
|------------------|-----|------|-----------|-----------------|-----------|----------------|------------------------------------------------------|------------------------|------------|------------------------------------------------------|------------------------|-----------------|----------------------|
| 73               | 268 | GEO  | Georgia   | Western Asia    | Asia      | 2006           | 769.88                                               | 27.42                  | 11.16      | 18.60                                                | 3.60                   | 4,810           | 2,866                |
| 73               | 268 | GEO  | Georgia   | Western Asia    | Asia      | 2007           | 795.78                                               | 23.56                  | 11.55      | 18.78                                                | 3.38                   | 5,470           | 2,903                |
| 73               | 268 | GEO  | Georgia   | Western Asia    | Asia      | 2008           | 824.73                                               | 19.89                  | 11.70      | 19.09                                                | 3.08                   | 5,630           | 2,978                |
| 73               | 268 | GEO  | Georgia   | Western Asia    | Asia      | 2009           | 699.14                                               | 38.55                  | 12.45      | 18.22                                                | 3.80                   | 5,440           | 2,812                |
| 73               | 268 | GEO  | Georgia   | Western Asia    | Asia      | 2010           | 714.33                                               | 35.19                  | 10.95      | 17.60                                                | 4.43                   | 5,730           | 2,638                |
| 73               | 268 | GEO  | Georgia   | Western Asia    | Asia      | 2011           | 739.86                                               | 30.28                  | 11.62      | 18.40                                                | 3.51                   | 6,140           | 2,731                |
| 79               | 276 | DEU  | Germany   | Western Europe  | Europe    | 1992           | 975.01                                               | 8.73                   | 9.36       | 16.87                                                | 5.43                   | 20,730          | 3,393                |
| 79               | 276 | DEU  | Germany   | Western Europe  | Europe    | 1993           | 886.00                                               | 13.79                  | 9.19       | 16.28                                                | 6.47                   | 20,840          | 3,203                |
| 79               | 276 | DEU  | Germany   | Western Europe  | Europe    | 1994           | 914.26                                               | 11.94                  | 9.38       | 16.59                                                | 5.94                   | 21,580          | 3,214                |
| 79               | 276 | DEU  | Germany   | Western Europe  | Europe    | 1995           | 907.51                                               | 12.41                  | 9.37       | 16.35                                                | 6.41                   | 22,270          | 3,249                |
| 79               | 276 | DEU  | Germany   | Western Europe  | Europe    | 1996           | 940.02                                               | 10.56                  | 9.50       | 16.54                                                | 6.08                   | 22,890          | 3,297                |
| 79               | 276 | DEU  | Germany   | Western Europe  | Europe    | 1997           | 932.78                                               | 11.00                  | 9.59       | 15.30                                                | 8.90                   | 23,350          | 3,176                |
| 79               | 276 | DEU  | Germany   | Western Europe  | Europe    | 1998           | 934.03                                               | 10.96                  | 9.45       | 16.50                                                | 6.20                   | 23,910          | 3,285                |
| 79               | 276 | DEU  | Germany   | Western Europe  | Europe    | 1999           | 935.30                                               | 10.92                  | 9.73       | 16.27                                                | 6.67                   | 24,690          | 3,279                |
| 79               | 276 | DEU  | Germany   | Western Europe  | Europe    | 2000           | 937.53                                               | 10.83                  | 9.93       | 16.42                                                | 6.39                   | 25,510          | 3,336                |
| 79               | 276 | DEU  | Germany   | Western Europe  | Europe    | 2001           | 969.23                                               | 9.26                   | 9.92       | 16.72                                                | 5.84                   | 26,430          | 3,363                |
| 79               | 276 | DEU  | Germany   | Western Europe  | Europe    | 2002           | 1,005.38                                             | 7.78                   | 9.93       | 17.32                                                | 4.92                   | 27,070          | 3,427                |
| 79               | 276 | DEU  | Germany   | Western Europe  | Europe    | 2003           | 1,013.50                                             | 7.49                   | 9.66       | 16.72                                                | 5.85                   | 28,130          | 3,391                |
| 79               | 276 | DEU  | Germany   | Western Europe  | Europe    | 2004           | 1,021.54                                             | 7.22                   | 10.28      | 16.86                                                | 5.62                   | 29,920          | 3,411                |
| 79               | 276 | DEU  | Germany   | Western Europe  | Europe    | 2005           | 989.17                                               | 8.43                   | 10.01      | 16.87                                                | 5.60                   | 31,470          | 3,449                |
| 79               | 276 | DEU  | Germany   | Western Europe  | Europe    | 2006           | 999.99                                               | 8.00                   | 10.17      | 17.00                                                | 5.37                   | 34,260          | 3,463                |
| 79               | 276 | DEU  | Germany   | Western Europe  | Europe    | 2007           | 1,025.06                                             | 7.10                   | 10.10      | 17.66                                                | 4.46                   | 36,120          | 3,525                |
| 79               | 276 | DEU  | Germany   | Western Europe  | Europe    | 2008           | 1,005.22                                             | 7.80                   | 10.34      | 17.27                                                | 4.98                   | 37,550          | 3,512                |
| 79               | 276 | DEU  | Germany   | Western Europe  | Europe    | 2009           | 1,049.89                                             | 6.31                   | 10.20      | 17.60                                                | 4.53                   | 36,860          | 3,513                |
| 79               | 276 | DEU  | Germany   | Western Europe  | Europe    | 2010           | 1,054.56                                             | 6.17                   | 9.97       | 17.65                                                | 4.46                   | 39,150          | 3,600                |
| 79               | 276 | DEU  | Germany   | Western Europe  | Europe    | 2011           | 1,090.77                                             | 5.24                   | 10.32      | 17.94                                                | 4.12                   | 41,910          | 3,539                |
| 81               | 288 | GHA  | Ghana     | Western Africa  | Africa    | 1992           | 244.91                                               | 100.00                 | 18.03      | 7.10                                                 | 96.69                  | 1,320           | 2,118                |
| 81               | 288 | GHA  | Ghana     | Western Africa  | Africa    | 1993           | 255.07                                               | 100.00                 | 18.66      | 7.76                                                 | 90.97                  | 1,370           | 2,279                |
| 81               | 288 | GHA  | Ghana     | Western Africa  | Africa    | 1994           | 259.86                                               | 100.00                 | 18.97      | 7.71                                                 | 91.43                  | 1,410           | 2,312                |
| 81               | 288 | GHA  | Ghana     | Western Africa  | Africa    | 1995           | 281.30                                               | 100.00                 | 19.16      | 7.55                                                 | 93.03                  | 1,460           | 2,351                |
| 81               | 288 | GHA  | Ghana     | Western Africa  | Africa    | 1996           | 304.42                                               | 100.00                 | 18.76      | 7.38                                                 | 94.70                  | 1,510           | 2,377                |
| 81               | 288 | GHA  | Ghana     | Western Africa  | Africa    | 1997           | 310.59                                               | 100.00                 | 18.20      | 7.73                                                 | 91.24                  | 1,570           | 2,395                |
| 81               | 288 | GHA  | Ghana     | Western Africa  | Africa    | 1998           | 332.00                                               | 99.99                  | 18.26      | 7.70                                                 | 91.68                  | 1,620           | 2,427                |
| 81               | 288 | GHA  | Ghana     | Western Africa  | Africa    | 1999           | 345.37                                               | 99.97                  | 17.71      | 7.86                                                 | 89.77                  | 1,680           | 2,465                |
| 81               | 288 | GHA  | Ghana     | Western Africa  | Africa    | 2000           | 322.33                                               | 100.00                 | 18.13      | 8.04                                                 | 87.49                  | 1,720           | 2,511                |
| 81               | 288 | GHA  | Ghana     | Western Africa  | Africa    | 2001           | 338.97                                               | 99.98                  | 18.52      | 8.08                                                 | 87.30                  | 1,810           | 2,534                |
| 81               | 288 | GHA  | Ghana     | Western Africa  | Africa    | 2002           | 341.84                                               | 99.98                  | 17.98      | 7.89                                                 | 89.57                  | 1,870           | 2,589                |
| 81               | 288 | GHA  | Ghana     | Western Africa  | Africa    | 2003           | 335.89                                               | 99.99                  | 18.47      | 8.29                                                 | 84.15                  | 1,950           | 2,602                |
| 81               | 288 | GHA  | Ghana     | Western Africa  | Africa    | 2004           | 339.13                                               | 99.98                  | 18.25      | 8.57                                                 | 79.71                  | 2,060           | 2,616                |
| 81               | 288 | GHA  | Ghana     | Western Africa  | Africa    | 2005           | 388.07                                               | 99.53                  | 17.86      | 9.08                                                 | 70.97                  | 2,220           | 2,690                |
| 81               | 288 | GHA  | Ghana     | Western Africa  | Africa    | 2006           | 352.03                                               | 99.95                  | 18.30      | 9.10                                                 | 70.89                  | 2,390           | 2,750                |
| 81               | 288 | GHA  | Ghana     | Western Africa  | Africa    | 2007           | 346.46                                               | 99.96                  | 17.60      | 9.10                                                 | 70.67                  | 2,540           | 2,770                |
| 81               | 288 | GHA  | Ghana     | Western Africa  | Africa    | 2008           | 373.71                                               | 99.78                  | 18.42      | 9.51                                                 | 63.39                  | 2,740           | 2,867                |
| 81               | 288 | GHA  | Ghana     | Western Africa  | Africa    | 2009           | 340.97                                               | 99.98                  | 18.90      | 9.66                                                 | 60.69                  | 2,810           | 2,937                |
| 81               | 288 | GHA  | Ghana     | Western Africa  | Africa    | 2010           | 349.81                                               | 99.95                  | 19.02      | 9.86                                                 | 57.21                  | 2,960           | 2,976                |
| 81               | 288 | GHA  | Ghana     | Western Africa  | Africa    | 2011           | 372.40                                               | 99.79                  | 18.39      | 10.15                                                | 52.59                  | 3,340           | 3,003                |
| 84               | 300 | GRC  | Greece    | Southern Europe | Europe    | 1992           | 1,274.56                                             | 2.55                   | 10.70      | 22.95                                                | 1.35                   | 14,020          | 3,604                |
| 84               | 300 | GRC  | Greece    | Southern Europe | Europe    | 1993           | 1,284.70                                             | 2.46                   | 10.48      | 22.62                                                | 1.45                   | 13,940          | 3,545                |
| 84               | 300 | GRC  | Greece    | Southern Europe | Europe    | 1994           | 1,305.61                                             | 2.27                   | 10.62      | 22.63                                                | 1.44                   | 14,410          | 3,580                |
| 84               | 300 | GRC  | Greece    | Southern Europe | Europe    | 1995           | 1,283.72                                             | 2.46                   | 10.46      | 22.62                                                | 1.44                   | 14,910          | 3,515                |
| 84               | 300 | GRC  | Greece    | Southern Europe | Europe    | 1996           | 1,302.17                                             | 2.29                   | 10.76      | 22.66                                                | 1.42                   | 15,380          | 3,510                |
| 84               | 300 | GRC  | Greece    | Southern Europe | Europe    | 1997           | 1,323.08                                             | 2.11                   | 10.76      | 22.78                                                | 1.38                   | 16,260          | 3,515                |
| 84               | 300 | GRC  | Greece    | Southern Europe | Europe    | 1998           | 1,327.12                                             | 2.07                   | 10.31      | 22.22                                                | 1.55                   | 16,730          | 3,534                |
| 84               | 300 | GRC  | Greece    | Southern Europe | Europe    | 1999           | 1,349.14                                             | 1.91                   | 10.67      | 23.30                                                | 1.24                   | 17,030          | 3,625                |
| 84               | 300 | GRC  | Greece    | Southern Europe | Europe    | 2000           | 1,352.11                                             | 1.88                   | 10.19      | 24.30                                                | 1.02                   | 18,340          | 3,601                |
| 84               | 300 | GRC  | Greece    | Southern Europe | Europe    | 2001           | 1,316.04                                             | 2.13                   | 11.13      | 23.05                                                | 1.29                   | 19,920          | 3,614                |
| 84               | 300 | GRC  | Greece    | Southern Europe | Europe    | 2002           | 1,361.28                                             | 1.81                   | 11.15      | 23.10                                                | 1.27                   | 21,480          | 3,639                |
| 84               | 300 | GRC  | Greece    | Southern Europe | Europe    | 2003           | 1,419.65                                             | 1.48                   | 11.18      | 23.15                                                | 1.25                   | 22,410          | 3,651                |
| 84               | 300 | GRC  | Greece    | Southern Europe | Europe    | 2004           | 1,414.93                                             | 1.50                   | 11.18      | 23.50                                                | 1.16                   | 23,710          | 3,725                |
| 84               | 300 | GRC  | Greece    | Southern Europe | Europe    | 2005           | 1,376.68                                             | 1.70                   | 11.05      | 22.80                                                | 1.33                   | 23,990          | 3,597                |
| 84               | 300 | GRC  | Greece    | Southern Europe | Europe    | 2006           | 1,380.78                                             | 1.67                   | 11.29      | 22.71                                                | 1.35                   | 26,180          | 3,490                |
| 84               | 300 | GRC  | Greece    | Southern Europe | Europe    | 2007           | 1,467.98                                             | 1.25                   | 11.08      | 22.54                                                | 1.40                   | 26,630          | 3,508                |
| 84               | 300 | GRC  | Greece    | Southern Europe | Europe    | 2008           | 1,400.60                                             | 1.55                   | 10.46      | 22.53                                                | 1.40                   | 28,640          | 3,592                |
| 84               | 300 | GRC  | Greece    | Southern Europe | Europe    | 2009           | 1,400.44                                             | 1.55                   | 11.16      | 22.39                                                | 1.43                   | 28,760          | 3,542                |
| 84               | 300 | GRC  | Greece    | Southern Europe | Europe    | 2010           | 1,400.06                                             | 1.55                   | 10.71      | 22.09                                                | 1.52                   | 27,210          | 3,482                |
| 84               | 300 | GRC  | Greece    | Southern Europe | Europe    | 2011           | 1,362.27                                             | 1.76                   | 10.53      | 22.05                                                | 1.53                   | 26,260          | 3,433                |
| 89               | 320 | GTM  | Guatemala | Central America | Americas  | 1992           | 361.36                                               | 99.89                  | 24.04      | 13.20                                                | 19.34                  | 3,730           | 2,281                |
| 89               | 320 | GTM  | Guatemala | Central America | Americas  | 1993           | 342.56                                               | 99.97                  | 23.99      | 13.86                                                | 15.47                  | 3,890           | 2,355                |
| 89               | 320 | GTM  | Guatemala | Central America | Americas  | 1994           | 367.23                                               | 99.84                  | 23.02      | 14.02                                                | 14.58                  | 4,030           | 2,362                |
| 89               | 320 | GTM  | Guatemala | Central America | Americas  | 1995           | 368.46                                               | 99.83                  | 22.96      | 13.46                                                | 17.48                  | 4,220           | 2,276                |
| 89               | 320 | GTM  | Guatemala | Central America | Americas  | 1996           | 355.67                                               | 99.92                  | 22.64      | 13.47                                                | 17.51                  | 4,310           | 2,244                |
| 89               | 320 | GTM  | Guatemala | Central America | Americas  | 1997           | 357.07                                               | 99.92                  | 21.41      | 12.69                                                | 22.64                  | 4,470           | 2,130                |
| 89               | 320 | GTM  | Guatemala | Central America | Americas  | 1998           | 370.79                                               | 99.80                  | 21.61      | 12.85                                                | 4.670                  | 4,670           | 2,153                |
| 89               | 320 | GTM  | Guatemala | Central America | Americas  | 1999           | 373.08                                               | 99.77                  | 21.82      | 12.55                                                | 23.61                  | 4,790           | 2,147                |
| 89               | 320 | GTM  | Guatemala | Central America | Americas  | 2000           | 391.37                                               | 99.42                  | 22.25      | 12.46                                                | 24.25                  | 4,950           | 2,162                |
| 89               | 320 | GTM  | Guatemala | Central America | Americas  | 2001           | 414.80                                               | 98.45                  | 21.63      | 12.99                                                | 20.35                  | 5,100           | 2,221                |
| 89               | 320 | GTM  | Guatemala | Central America | Americas  | 2002           | 433.08                                               | 97.11                  | 21.28      | 13.33                                                | 18.08                  | 5,200           | 2,361                |
| 89               | 320 | GTM  | Guatemala | Central America | Americas  | 2003           | 471.80                                               | 92.13                  | 21.02      | 13.12                                                | 19.38                  | 5,300           | 2,349                |
| 89               | 320 | GTM  | Guatemala | Central America | Americas  | 2004           | 468.40                                               | 92.71                  | 21.59      | 13.08                                                | 19.55                  | 5,460           | 2,333                |

Dietary calcium and zinc deficiency risks are decreasing but remain prevalent

| FAO country code | UNI | ISO3 | Country       | Region          | Continent | Reference year | Ca supply (mg capita <sup>-1</sup> d <sup>-1</sup> ) | Ca deficiency risk (%) | Phytate:Zn | Zn supply (mg capita <sup>-1</sup> d <sup>-1</sup> ) | Zn deficiency risk (%) | GNI-PPP (US \$) | Energy supply (kcal) |
|------------------|-----|------|---------------|-----------------|-----------|----------------|------------------------------------------------------|------------------------|------------|------------------------------------------------------|------------------------|-----------------|----------------------|
| 89               | 320 | GTM  | Guatemala     | Central America | Americas  | 2005           | 472.74                                               | 92.03                  | 21.40      | 12.95                                                | 20.40                  | 5,670           | 2,391                |
| 89               | 320 | GTM  | Guatemala     | Central America | Americas  | 2006           | 476.46                                               | 91.42                  | 21.63      | 13.27                                                | 18.40                  | 5,980           | 2,419                |
| 89               | 320 | GTM  | Guatemala     | Central America | Americas  | 2007           | 460.25                                               | 95.38                  | 21.57      | 13.03                                                | 19.96                  | 6,350           | 2,447                |
| 89               | 320 | GTM  | Guatemala     | Central America | Americas  | 2008           | 446.74                                               | 95.84                  | 21.00      | 13.11                                                | 19.42                  | 6,530           | 2,377                |
| 89               | 320 | GTM  | Guatemala     | Central America | Americas  | 2009           | 460.21                                               | 95.47                  | 22.06      | 13.53                                                | 16.87                  | 6,420           | 2,464                |
| 89               | 320 | GTM  | Guatemala     | Central America | Americas  | 2010           | 466.03                                               | 93.36                  | 21.76      | 13.40                                                | 17.62                  | 6,520           | 2,432                |
| 89               | 320 | GTM  | Guatemala     | Central America | Americas  | 2011           | 503.69                                               | 86.32                  | 22.37      | 13.74                                                | 15.84                  | 6,720           | 2,502                |
| 90               | 324 | GIN  | Guinea        | Western Africa  | Africa    | 1992           | 332.37                                               | 99.98                  | 19.09      | 8.71                                                 | 76.54                  | 700             | 2,450                |
| 90               | 324 | GIN  | Guinea        | Western Africa  | Africa    | 1993           | 322.20                                               | 99.99                  | 18.48      | 8.62                                                 | 77.92                  | 720             | 2,432                |
| 90               | 324 | GIN  | Guinea        | Western Africa  | Africa    | 1994           | 323.55                                               | 99.99                  | 18.44      | 8.74                                                 | 75.66                  | 730             | 2,412                |
| 90               | 324 | GIN  | Guinea        | Western Africa  | Africa    | 1995           | 313.67                                               | 100.00                 | 18.15      | 8.43                                                 | 80.79                  | 750             | 2,377                |
| 90               | 324 | GIN  | Guinea        | Western Africa  | Africa    | 1996           | 317.06                                               | 100.00                 | 17.77      | 8.33                                                 | 82.68                  | 770             | 2,352                |
| 90               | 324 | GIN  | Guinea        | Western Africa  | Africa    | 1997           | 322.28                                               | 99.99                  | 17.78      | 8.39                                                 | 81.80                  | 800             | 2,293                |
| 90               | 324 | GIN  | Guinea        | Western Africa  | Africa    | 1998           | 286.75                                               | 100.00                 | 18.07      | 8.33                                                 | 82.63                  | 820             | 2,263                |
| 90               | 324 | GIN  | Guinea        | Western Africa  | Africa    | 1999           | 292.09                                               | 100.00                 | 18.02      | 8.45                                                 | 80.84                  | 860             | 2,323                |
| 90               | 324 | GIN  | Guinea        | Western Africa  | Africa    | 2000           | 300.49                                               | 100.00                 | 18.38      | 8.68                                                 | 77.27                  | 880             | 2,373                |
| 90               | 324 | GIN  | Guinea        | Western Africa  | Africa    | 2001           | 294.19                                               | 100.00                 | 18.60      | 8.63                                                 | 78.19                  | 910             | 2,341                |
| 90               | 324 | GIN  | Guinea        | Western Africa  | Africa    | 2002           | 297.90                                               | 100.00                 | 18.87      | 8.70                                                 | 77.16                  | 980             | 2,357                |
| 90               | 324 | GIN  | Guinea        | Western Africa  | Africa    | 2003           | 303.99                                               | 100.00                 | 18.21      | 8.88                                                 | 74.17                  | 930             | 2,394                |
| 90               | 324 | GIN  | Guinea        | Western Africa  | Africa    | 2004           | 310.04                                               | 100.00                 | 18.52      | 8.88                                                 | 74.07                  | 960             | 2,419                |
| 90               | 324 | GIN  | Guinea        | Western Africa  | Africa    | 2005           | 305.55                                               | 100.00                 | 18.13      | 8.94                                                 | 73.16                  | 980             | 2,434                |
| 90               | 324 | GIN  | Guinea        | Western Africa  | Africa    | 2006           | 299.89                                               | 100.00                 | 18.46      | 9.23                                                 | 68.40                  | 990             | 2,496                |
| 90               | 324 | GIN  | Guinea        | Western Africa  | Africa    | 2007           | 297.69                                               | 100.00                 | 18.37      | 9.24                                                 | 68.06                  | 1,030           | 2,494                |
| 90               | 324 | GIN  | Guinea        | Western Africa  | Africa    | 2008           | 293.98                                               | 100.00                 | 18.46      | 9.45                                                 | 64.51                  | 1,050           | 2,538                |
| 90               | 324 | GIN  | Guinea        | Western Africa  | Africa    | 2009           | 298.63                                               | 100.00                 | 18.13      | 9.54                                                 | 62.84                  | 1,030           | 2,534                |
| 90               | 324 | GIN  | Guinea        | Western Africa  | Africa    | 2010           | 310.47                                               | 100.00                 | 17.69      | 9.61                                                 | 61.58                  | 1,060           | 2,557                |
| 90               | 324 | GIN  | Guinea        | Western Africa  | Africa    | 2011           | 304.70                                               | 100.00                 | 17.79      | 9.48                                                 | 64.06                  | 1,100           | 2,653                |
| 175              | 624 | GNB  | Guinea-Bissau | Western Africa  | Africa    | 1992           | 235.16                                               | 100.00                 | 20.77      | 9.63                                                 | 61.94                  | 950             | 2,373                |
| 175              | 624 | GNB  | Guinea-Bissau | Western Africa  | Africa    | 1993           | 233.52                                               | 100.00                 | 21.23      | 9.75                                                 | 59.51                  | 970             | 2,307                |
| 175              | 624 | GNB  | Guinea-Bissau | Western Africa  | Africa    | 1994           | 233.47                                               | 100.00                 | 20.68      | 9.85                                                 | 57.52                  | 1,000           | 2,340                |
| 175              | 624 | GNB  | Guinea-Bissau | Western Africa  | Africa    | 1995           | 231.36                                               | 100.00                 | 21.28      | 9.92                                                 | 56.12                  | 1,030           | 2,357                |
| 175              | 624 | GNB  | Guinea-Bissau | Western Africa  | Africa    | 1996           | 233.46                                               | 100.00                 | 20.43      | 9.36                                                 | 65.78                  | 1,150           | 2,251                |
| 175              | 624 | GNB  | Guinea-Bissau | Western Africa  | Africa    | 1997           | 231.47                                               | 100.00                 | 20.35      | 9.03                                                 | 71.46                  | 1,240           | 2,185                |
| 175              | 624 | GNB  | Guinea-Bissau | Western Africa  | Africa    | 1998           | 223.54                                               | 100.00                 | 19.91      | 8.85                                                 | 74.53                  | 870             | 2,152                |
| 175              | 624 | GNB  | Guinea-Bissau | Western Africa  | Africa    | 1999           | 231.82                                               | 100.00                 | 20.29      | 9.06                                                 | 71.11                  | 870             | 2,160                |
| 175              | 624 | GNB  | Guinea-Bissau | Western Africa  | Africa    | 2000           | 234.88                                               | 100.00                 | 20.39      | 9.43                                                 | 64.81                  | 540             | 2,250                |
| 175              | 624 | GNB  | Guinea-Bissau | Western Africa  | Africa    | 2001           | 233.68                                               | 100.00                 | 19.27      | 9.49                                                 | 63.94                  | 990             | 2,255                |
| 175              | 624 | GNB  | Guinea-Bissau | Western Africa  | Africa    | 2002           | 236.54                                               | 100.00                 | 19.92      | 9.32                                                 | 66.88                  | 1,030           | 2,259                |
| 175              | 624 | GNB  | Guinea-Bissau | Western Africa  | Africa    | 2003           | 226.07                                               | 100.00                 | 19.32      | 9.12                                                 | 70.26                  | 970             | 2,249                |
| 175              | 624 | GNB  | Guinea-Bissau | Western Africa  | Africa    | 2004           | 231.25                                               | 100.00                 | 19.79      | 9.10                                                 | 70.64                  | 970             | 2,248                |
| 175              | 624 | GNB  | Guinea-Bissau | Western Africa  | Africa    | 2005           | 233.11                                               | 100.00                 | 19.66      | 9.21                                                 | 68.60                  | 1,030           | 2,269                |
| 175              | 624 | GNB  | Guinea-Bissau | Western Africa  | Africa    | 2006           | 229.55                                               | 100.00                 | 19.43      | 9.14                                                 | 70.10                  | 1,030           | 2,216                |
| 175              | 624 | GNB  | Guinea-Bissau | Western Africa  | Africa    | 2007           | 232.78                                               | 100.00                 | 19.84      | 9.14                                                 | 69.88                  | 1,100           | 2,234                |
| 175              | 624 | GNB  | Guinea-Bissau | Western Africa  | Africa    | 2008           | 236.76                                               | 100.00                 | 19.57      | 9.49                                                 | 63.97                  | 1,200           | 2,328                |
| 175              | 624 | GNB  | Guinea-Bissau | Western Africa  | Africa    | 2009           | 231.92                                               | 100.00                 | 19.96      | 9.20                                                 | 68.82                  | 1,200           | 2,292                |
| 175              | 624 | GNB  | Guinea-Bissau | Western Africa  | Africa    | 2010           | 242.36                                               | 100.00                 | 19.79      | 9.35                                                 | 66.21                  | 1,220           | 2,351                |
| 175              | 624 | GNB  | Guinea-Bissau | Western Africa  | Africa    | 2011           | 233.95                                               | 100.00                 | 19.59      | 9.03                                                 | 71.96                  | 1,280           | 2,304                |
| 93               | 332 | HTI  | Haiti         | Caribbean       | Americas  | 2004           | 242.40                                               | 100.00                 | 17.88      | 8.74                                                 | 77.13                  | 1,350           | 1,874                |
| 93               | 332 | HTI  | Haiti         | Caribbean       | Americas  | 2005           | 245.88                                               | 100.00                 | 18.26      | 8.73                                                 | 77.24                  | 1,390           | 1,884                |
| 93               | 332 | HTI  | Haiti         | Caribbean       | Americas  | 2006           | 250.75                                               | 100.00                 | 18.10      | 8.59                                                 | 79.47                  | 1,430           | 1,935                |
| 93               | 332 | HTI  | Haiti         | Caribbean       | Americas  | 2007           | 257.28                                               | 100.00                 | 19.22      | 8.99                                                 | 72.84                  | 1,490           | 1,989                |
| 93               | 332 | HTI  | Haiti         | Caribbean       | Americas  | 2008           | 257.30                                               | 100.00                 | 18.98      | 9.13                                                 | 70.40                  | 1,510           | 2,014                |
| 93               | 332 | HTI  | Haiti         | Caribbean       | Americas  | 2009           | 265.47                                               | 100.00                 | 19.06      | 9.33                                                 | 66.89                  | 1,550           | 2,056                |
| 93               | 332 | HTI  | Haiti         | Caribbean       | Americas  | 2010           | 283.88                                               | 100.00                 | 20.34      | 9.75                                                 | 59.62                  | 1,470           | 2,181                |
| 93               | 332 | HTI  | Haiti         | Caribbean       | Americas  | 2011           | 260.71                                               | 100.00                 | 20.23      | 9.14                                                 | 70.03                  | 1,560           | 2,105                |
| 95               | 340 | HND  | Honduras      | Central America | Americas  | 1992           | 441.32                                               | 96.18                  | 19.65      | 12.89                                                | 21.29                  | 2,050           | 2,321                |
| 95               | 340 | HND  | Honduras      | Central America | Americas  | 1993           | 440.60                                               | 96.29                  | 20.22      | 12.34                                                | 25.64                  | 2,260           | 2,329                |
| 95               | 340 | HND  | Honduras      | Central America | Americas  | 1994           | 447.32                                               | 95.57                  | 19.40      | 12.92                                                | 21.09                  | 2,230           | 2,355                |
| 95               | 340 | HND  | Honduras      | Central America | Americas  | 1995           | 474.46                                               | 91.64                  | 18.65      | 13.52                                                | 17.22                  | 2,280           | 2,389                |
| 95               | 340 | HND  | Honduras      | Central America | Americas  | 1996           | 510.01                                               | 84.35                  | 18.10      | 13.22                                                | 19.08                  | 2,360           | 2,409                |
| 95               | 340 | HND  | Honduras      | Central America | Americas  | 1997           | 519.52                                               | 82.16                  | 17.23      | 12.84                                                | 21.67                  | 2,510           | 2,404                |
| 95               | 340 | HND  | Honduras      | Central America | Americas  | 1998           | 542.39                                               | 76.39                  | 18.30      | 12.88                                                | 21.42                  | 2,570           | 2,410                |
| 95               | 340 | HND  | Honduras      | Central America | Americas  | 1999           | 526.32                                               | 80.75                  | 17.94      | 12.99                                                | 20.69                  | 2,530           | 2,396                |
| 95               | 340 | HND  | Honduras      | Central America | Americas  | 2000           | 514.28                                               | 83.86                  | 17.99      | 13.07                                                | 20.21                  | 2,700           | 2,369                |
| 95               | 340 | HND  | Honduras      | Central America | Americas  | 2001           | 541.13                                               | 77.25                  | 18.17      | 13.22                                                | 19.27                  | 2,710           | 2,452                |
| 95               | 340 | HND  | Honduras      | Central America | Americas  | 2002           | 495.44                                               | 88.32                  | 18.73      | 13.33                                                | 18.61                  | 2,790           | 2,474                |
| 95               | 340 | HND  | Honduras      | Central America | Americas  | 2003           | 528.28                                               | 80.87                  | 18.09      | 13.75                                                | 16.20                  | 2,930           | 2,482                |
| 95               | 340 | HND  | Honduras      | Central America | Americas  | 2004           | 529.40                                               | 80.71                  | 18.70      | 13.26                                                | 19.14                  | 3,120           | 2,480                |
| 95               | 340 | HND  | Honduras      | Central America | Americas  | 2005           | 545.22                                               | 76.73                  | 18.26      | 13.38                                                | 18.42                  | 3,360           | 2,490                |
| 95               | 340 | HND  | Honduras      | Central America | Americas  | 2006           | 578.19                                               | 67.85                  | 16.81      | 13.65                                                | 16.84                  | 3,610           | 2,533                |
| 95               | 340 | HND  | Honduras      | Central America | Americas  | 2007           | 588.14                                               | 65.18                  | 16.97      | 13.74                                                | 16.38                  | 3,920           | 2,572                |
| 95               | 340 | HND  | Honduras      | Central America | Americas  | 2008           | 605.41                                               | 60.51                  | 17.64      | 13.86                                                | 15.74                  | 4,100           | 2,605                |
| 95               | 340 | HND  | Honduras      | Central America | Americas  | 2009           | 636.65                                               | 79.21                  | 17.84      | 13.56                                                | 17.36                  | 3,990           | 2,599                |
| 95               | 340 | HND  | Honduras      | Central America | Americas  | 2010           | 634.83                                               | 79.67                  | 17.78      | 13.34                                                | 18.68                  | 4,020           | 2,573                |
| 95               | 340 | HND  | Honduras      | Central America | Americas  | 2011           | 685.38                                               | 65.97                  | 17.95      | 13.77                                                | 16.19                  | 4,100           | 2,651                |
| 97               | 348 | HUN  | Hungary       | Eastern Europe  | Europe    | 1992           | 810.14                                               | 21.72                  | 8.14       | 16.26                                                | 6.85                   | 7,540           | 3,262                |
| 97               | 348 | HUN  | Hungary       | Eastern Europe  | Europe    | 1993           | 763.39                                               | 27.93                  | 8.32       | 15.21                                                | 9.43                   | 8,110           | 3,105                |
| 97               | 348 | HUN  | Hungary       | Eastern Europe  | Europe    | 1994           | 740.91                                               | 31.47                  | 8.67       | 14.55                                                | 11.63                  | 8,510           | 3,026                |
| 97               | 348 | HUN  | Hungary       | Eastern Europe  | Europe    | 1995           | 718.80                                               | 35.32                  | 8.76       | 13.37                                                | 17.14                  | 8,680           | 2,949                |

| FAO country code | UNI | ISO3 | Country   | Region             | Continent | Reference year | Ca supply (mg capita <sup>-1</sup> d <sup>-1</sup> ) | Ca deficiency risk (%) | Phytate:Zn | Zn supply (mg capita <sup>-1</sup> d <sup>-1</sup> ) | Zn deficiency risk (%) | GNI-PPP (US \$) | Energy supply (kcal) |
|------------------|-----|------|-----------|--------------------|-----------|----------------|------------------------------------------------------|------------------------|------------|------------------------------------------------------|------------------------|-----------------|----------------------|
| 97               | 348 | HUN  | Hungary   | Eastern Europe     | Europe    | 1996           | 711.58                                               | 36.61                  | 9.39       | 12.53                                                | 22.56                  | 8,940           | 2,928                |
| 97               | 348 | HUN  | Hungary   | Eastern Europe     | Europe    | 1997           | 797.99                                               | 22.96                  | 8.84       | 13.68                                                | 15.20                  | 9,400           | 3,008                |
| 97               | 348 | HUN  | Hungary   | Eastern Europe     | Europe    | 1998           | 769.90                                               | 26.66                  | 9.19       | 12.89                                                | 19.83                  | 10,050          | 3,008                |
| 97               | 348 | HUN  | Hungary   | Eastern Europe     | Europe    | 1999           | 780.51                                               | 25.13                  | 9.25       | 13.50                                                | 16.03                  | 10,430          | 2,999                |
| 97               | 348 | HUN  | Hungary   | Eastern Europe     | Europe    | 2000           | 796.34                                               | 23.05                  | 8.42       | 15.37                                                | 8.69                   | 11,310          | 3,172                |
| 97               | 348 | HUN  | Hungary   | Eastern Europe     | Europe    | 2001           | 789.92                                               | 23.90                  | 9.04       | 14.67                                                | 10.88                  | 12,740          | 3,092                |
| 97               | 348 | HUN  | Hungary   | Eastern Europe     | Europe    | 2002           | 808.78                                               | 21.60                  | 8.35       | 14.48                                                | 11.55                  | 13,910          | 3,071                |
| 97               | 348 | HUN  | Hungary   | Eastern Europe     | Europe    | 2003           | 802.07                                               | 22.41                  | 8.24       | 14.82                                                | 10.34                  | 14,640          | 3,059                |
| 97               | 348 | HUN  | Hungary   | Eastern Europe     | Europe    | 2004           | 845.64                                               | 17.73                  | 8.65       | 15.11                                                | 9.41                   | 15,330          | 3,195                |
| 97               | 348 | HUN  | Hungary   | Eastern Europe     | Europe    | 2005           | 847.08                                               | 17.58                  | 8.84       | 15.67                                                | 7.89                   | 16,060          | 3,274                |
| 97               | 348 | HUN  | Hungary   | Eastern Europe     | Europe    | 2006           | 907.19                                               | 12.79                  | 8.51       | 15.66                                                | 7.90                   | 17,330          | 3,279                |
| 97               | 348 | HUN  | Hungary   | Eastern Europe     | Europe    | 2007           | 891.04                                               | 13.87                  | 8.40       | 14.78                                                | 10.38                  | 17,590          | 3,187                |
| 97               | 348 | HUN  | Hungary   | Eastern Europe     | Europe    | 2008           | 874.33                                               | 15.09                  | 8.63       | 14.54                                                | 11.20                  | 19,120          | 3,191                |
| 97               | 348 | HUN  | Hungary   | Eastern Europe     | Europe    | 2009           | 864.78                                               | 15.81                  | 8.33       | 14.97                                                | 9.70                   | 19,530          | 3,148                |
| 97               | 348 | HUN  | Hungary   | Eastern Europe     | Europe    | 2010           | 808.11                                               | 21.33                  | 8.35       | 14.28                                                | 12.09                  | 20,280          | 3,041                |
| 97               | 348 | HUN  | Hungary   | Eastern Europe     | Europe    | 2011           | 784.01                                               | 24.24                  | 8.70       | 13.49                                                | 15.71                  | 21,500          | 2,968                |
| 100              | 356 | IND  | India     | Southern Asia      | Asia      | 1992           | 415.30                                               | 98.50                  | 17.42      | 12.02                                                | 29.23                  | 1,250           | 2,331                |
| 100              | 356 | IND  | India     | Southern Asia      | Asia      | 1993           | 419.53                                               | 98.27                  | 17.39      | 11.62                                                | 33.47                  | 1,320           | 2,268                |
| 100              | 356 | IND  | India     | Southern Asia      | Asia      | 1994           | 420.88                                               | 98.21                  | 17.29      | 11.63                                                | 33.46                  | 1,410           | 2,291                |
| 100              | 356 | IND  | India     | Southern Asia      | Asia      | 1995           | 421.97                                               | 98.16                  | 17.30      | 11.74                                                | 32.26                  | 1,530           | 2,323                |
| 100              | 356 | IND  | India     | Southern Asia      | Asia      | 1996           | 426.09                                               | 97.90                  | 17.44      | 11.73                                                | 32.41                  | 1,640           | 2,343                |
| 100              | 356 | IND  | India     | Southern Asia      | Asia      | 1997           | 427.91                                               | 97.79                  | 17.41      | 11.88                                                | 30.83                  | 1,710           | 2,369                |
| 100              | 356 | IND  | India     | Southern Asia      | Asia      | 1998           | 435.36                                               | 97.21                  | 16.75      | 11.86                                                | 31.05                  | 1,800           | 2,360                |
| 100              | 356 | IND  | India     | Southern Asia      | Asia      | 1999           | 446.41                                               | 96.16                  | 16.88      | 11.90                                                | 30.73                  | 1,960           | 2,397                |
| 100              | 356 | IND  | India     | Southern Asia      | Asia      | 2000           | 436.93                                               | 97.11                  | 16.56      | 11.95                                                | 30.23                  | 2,040           | 2,378                |
| 100              | 356 | IND  | India     | Southern Asia      | Asia      | 2001           | 436.15                                               | 97.19                  | 16.66      | 11.68                                                | 33.06                  | 2,160           | 2,331                |
| 100              | 356 | IND  | India     | Southern Asia      | Asia      | 2002           | 409.61                                               | 98.91                  | 16.70      | 11.34                                                | 37.00                  | 2,240           | 2,282                |
| 100              | 356 | IND  | India     | Southern Asia      | Asia      | 2003           | 429.51                                               | 97.75                  | 17.11      | 11.29                                                | 37.59                  | 2,430           | 2,278                |
| 100              | 356 | IND  | India     | Southern Asia      | Asia      | 2004           | 399.47                                               | 99.30                  | 17.15      | 11.15                                                | 39.33                  | 2,650           | 2,253                |
| 100              | 356 | IND  | India     | Southern Asia      | Asia      | 2005           | 412.71                                               | 98.78                  | 17.15      | 11.09                                                | 40.10                  | 2,950           | 2,267                |
| 100              | 356 | IND  | India     | Southern Asia      | Asia      | 2006           | 437.79                                               | 97.08                  | 16.99      | 11.42                                                | 35.88                  | 3,270           | 2,331                |
| 100              | 356 | IND  | India     | Southern Asia      | Asia      | 2007           | 463.14                                               | 94.20                  | 16.93      | 11.75                                                | 32.11                  | 3,650           | 2,395                |
| 100              | 356 | IND  | India     | Southern Asia      | Asia      | 2008           | 470.88                                               | 93.08                  | 16.75      | 11.82                                                | 31.34                  | 3,800           | 2,419                |
| 100              | 356 | IND  | India     | Southern Asia      | Asia      | 2009           | 475.73                                               | 92.33                  | 16.92      | 11.66                                                | 33.14                  | 4,100           | 2,410                |
| 100              | 356 | IND  | India     | Southern Asia      | Asia      | 2010           | 510.36                                               | 85.55                  | 17.12      | 12.06                                                | 28.94                  | 4,500           | 2,450                |
| 100              | 356 | IND  | India     | Southern Asia      | Asia      | 2011           | 518.96                                               | 83.60                  | 17.16      | 12.13                                                | 28.26                  | 4,840           | 2,459                |
| 101              | 360 | IDN  | Indonesia | South-Eastern Asia | Asia      | 1992           | 226.00                                               | 100.00                 | 22.17      | 10.42                                                | 49.45                  | 2,910           | 2,416                |
| 101              | 360 | IDN  | Indonesia | South-Eastern Asia | Asia      | 1993           | 226.90                                               | 100.00                 | 21.84      | 10.68                                                | 45.55                  | 3,450           | 2,431                |
| 101              | 360 | IDN  | Indonesia | South-Eastern Asia | Asia      | 1994           | 235.23                                               | 100.00                 | 21.73      | 10.87                                                | 42.88                  | 3,770           | 2,471                |
| 101              | 360 | IDN  | Indonesia | South-Eastern Asia | Asia      | 1995           | 262.45                                               | 100.00                 | 21.11      | 11.35                                                | 36.63                  | 4,100           | 2,552                |
| 101              | 360 | IDN  | Indonesia | South-Eastern Asia | Asia      | 1996           | 248.83                                               | 100.00                 | 20.89      | 11.34                                                | 36.68                  | 4,430           | 2,548                |
| 101              | 360 | IDN  | Indonesia | South-Eastern Asia | Asia      | 1997           | 233.73                                               | 100.00                 | 20.95      | 11.04                                                | 40.48                  | 4,640           | 2,498                |
| 101              | 360 | IDN  | Indonesia | South-Eastern Asia | Asia      | 1998           | 230.79                                               | 100.00                 | 21.11      | 10.81                                                | 43.64                  | 3,900           | 2,486                |
| 101              | 360 | IDN  | Indonesia | South-Eastern Asia | Asia      | 1999           | 234.58                                               | 100.00                 | 21.08      | 10.60                                                | 46.69                  | 3,850           | 2,467                |
| 101              | 360 | IDN  | Indonesia | South-Eastern Asia | Asia      | 2000           | 241.23                                               | 100.00                 | 20.85      | 10.58                                                | 46.83                  | 4,010           | 2,436                |
| 101              | 360 | IDN  | Indonesia | South-Eastern Asia | Asia      | 2001           | 236.45                                               | 100.00                 | 20.67      | 10.43                                                | 49.01                  | 4,120           | 2,424                |
| 101              | 360 | IDN  | Indonesia | South-Eastern Asia | Asia      | 2002           | 239.46                                               | 100.00                 | 20.35      | 10.70                                                | 44.88                  | 4,240           | 2,451                |
| 101              | 360 | IDN  | Indonesia | South-Eastern Asia | Asia      | 2003           | 252.62                                               | 100.00                 | 20.23      | 10.64                                                | 45.66                  | 4,880           | 2,468                |
| 101              | 360 | IDN  | Indonesia | South-Eastern Asia | Asia      | 2004           | 260.18                                               | 100.00                 | 19.72      | 10.79                                                | 43.32                  | 5,150           | 2,472                |
| 101              | 360 | IDN  | Indonesia | South-Eastern Asia | Asia      | 2005           | 258.42                                               | 100.00                 | 19.89      | 10.57                                                | 46.43                  | 5,520           | 2,468                |
| 101              | 360 | IDN  | Indonesia | South-Eastern Asia | Asia      | 2006           | 274.43                                               | 100.00                 | 19.60      | 10.94                                                | 41.11                  | 5,960           | 2,484                |
| 101              | 360 | IDN  | Indonesia | South-Eastern Asia | Asia      | 2007           | 277.45                                               | 100.00                 | 19.62      | 10.97                                                | 40.45                  | 6,420           | 2,523                |
| 101              | 360 | IDN  | Indonesia | South-Eastern Asia | Asia      | 2008           | 273.38                                               | 100.00                 | 19.67      | 11.15                                                | 37.98                  | 6,890           | 2,544                |
| 101              | 360 | IDN  | Indonesia | South-Eastern Asia | Asia      | 2009           | 273.15                                               | 100.00                 | 19.99      | 11.20                                                | 37.15                  | 7,160           | 2,604                |
| 101              | 360 | IDN  | Indonesia | South-Eastern Asia | Asia      | 2010           | 274.12                                               | 100.00                 | 19.86      | 11.48                                                | 33.81                  | 7,650           | 2,653                |
| 101              | 360 | IDN  | Indonesia | South-Eastern Asia | Asia      | 2011           | 292.33                                               | 100.00                 | 19.62      | 11.75                                                | 30.77                  | 8,200           | 2,713                |
| 102              | 364 | IRN  | Iran      | Southern Asia      | Asia      | 1992           | 606.02                                               | 59.11                  | 11.79      | 19.87                                                | 2.76                   | 6,760           | 3,025                |
| 102              | 364 | IRN  | Iran      | Southern Asia      | Asia      | 1993           | 596.16                                               | 62.61                  | 12.10      | 20.61                                                | 2.36                   | 6,620           | 3,096                |
| 102              | 364 | IRN  | Iran      | Southern Asia      | Asia      | 1994           | 564.60                                               | 72.12                  | 11.95      | 20.62                                                | 2.41                   | 6,640           | 3,067                |
| 102              | 364 | IRN  | Iran      | Southern Asia      | Asia      | 1995           | 550.53                                               | 76.62                  | 12.61      | 18.96                                                | 3.67                   | 6,940           | 3,026                |
| 102              | 364 | IRN  | Iran      | Southern Asia      | Asia      | 1996           | 603.28                                               | 63.04                  | 12.11      | 20.23                                                | 2.69                   | 7,450           | 3,051                |
| 102              | 364 | IRN  | Iran      | Southern Asia      | Asia      | 1997           | 597.61                                               | 65.21                  | 12.13      | 20.79                                                | 2.40                   | 7,730           | 3,091                |
| 102              | 364 | IRN  | Iran      | Southern Asia      | Asia      | 1998           | 619.32                                               | 59.83                  | 12.04      | 20.39                                                | 2.66                   | 7,910           | 3,053                |
| 102              | 364 | IRN  | Iran      | Southern Asia      | Asia      | 1999           | 635.22                                               | 56.01                  | 12.10      | 20.46                                                | 2.65                   | 8,010           | 3,073                |
| 102              | 364 | IRN  | Iran      | Southern Asia      | Asia      | 2000           | 623.39                                               | 59.32                  | 12.10      | 19.98                                                | 2.98                   | 8,490           | 3,027                |
| 102              | 364 | IRN  | Iran      | Southern Asia      | Asia      | 2001           | 628.47                                               | 58.23                  | 11.95      | 20.39                                                | 2.72                   | 8,880           | 3,036                |
| 102              | 364 | IRN  | Iran      | Southern Asia      | Asia      | 2002           | 644.16                                               | 54.27                  | 12.35      | 19.81                                                | 3.13                   | 9,400           | 3,006                |
| 102              | 364 | IRN  | Iran      | Southern Asia      | Asia      | 2003           | 643.09                                               | 54.47                  | 12.23      | 19.59                                                | 3.31                   | 10,120          | 3,007                |
| 102              | 364 | IRN  | Iran      | Southern Asia      | Asia      | 2004           | 659.56                                               | 50.14                  | 11.89      | 19.97                                                | 3.00                   | 10,820          | 3,063                |
| 102              | 364 | IRN  | Iran      | Southern Asia      | Asia      | 2005           | 710.05                                               | 38.55                  | 12.45      | 20.15                                                | 2.84                   | 11,540          | 3,057                |
| 102              | 364 | IRN  | Iran      | Southern Asia      | Asia      | 2006           | 682.73                                               | 43.66                  | 12.62      | 19.65                                                | 3.16                   | 12,480          | 3,015                |
| 102              | 364 | IRN  | Iran      | Southern Asia      | Asia      | 2007           | 699.40                                               | 39.43                  | 13.12      | 19.89                                                | 2.91                   | 13,730          | 3,039                |
| 102              | 364 | IRN  | Iran      | Southern Asia      | Asia      | 2008           | 644.08                                               | 51.35                  | 14.12      | 19.95                                                | 2.80                   | 13,260          | 3,039                |
| 102              | 364 | IRN  | Iran      | Southern Asia      | Asia      | 2009           | 687.17                                               | 40.70                  | 14.08      | 20.14                                                | 2.62                   | 13,180          | 3,028                |
| 103              | 368 | IRQ  | Iraq      | Western Asia       | Asia      | 2005           | 423.41                                               | 97.86                  | 11.54      | 13.34                                                | 18.33                  | 9,700           | 2,354                |
| 103              | 368 | IRQ  | Iraq      | Western Asia       | Asia      | 2006           | 431.83                                               | 97.19                  | 11.09      | 13.69                                                | 15.31                  | 10,730          | 2,379                |
| 103              | 368 | IRQ  | Iraq      | Western Asia       | Asia      | 2007           | 395.56                                               | 99.29                  | 11.10      | 14.21                                                | 13.60                  | 10,940          | 2,394                |
| 103              | 368 | IRQ  | Iraq      | Western Asia       | Asia      | 2008           | 430.40                                               | 97.34                  | 10.92      | 14.03                                                | 14.60                  | 12,030          | 2,408                |
| 103              | 368 | IRQ  | Iraq      | Western Asia       | Asia      | 2009           | 423.70                                               | 97.88                  | 10.79      | 14.77                                                | 11.48                  | 12,210          | 2,436                |

| FAO country code | UNI | ISO3 | Country | Region          | Continent | Reference year | Ca supply (mg capita <sup>-1</sup> d <sup>-1</sup> ) | Ca deficiency risk (%) | Phytate:Zn | Zn supply (mg capita <sup>-1</sup> d <sup>-1</sup> ) | Zn deficiency risk (%) | GNI-PPP (US \$) | Energy supply (kcal) |
|------------------|-----|------|---------|-----------------|-----------|----------------|------------------------------------------------------|------------------------|------------|------------------------------------------------------|------------------------|-----------------|----------------------|
| 103              | 368 | IRQ  | Iraq    | Western Asia    | Asia      | 2010           | 423.47                                               | 97.91                  | 10.48      | 14.96                                                | 10.81                  | 12,660          | 2,495                |
| 103              | 368 | IRQ  | Iraq    | Western Asia    | Asia      | 2011           | 410.83                                               | 98.70                  | 10.74      | 15.04                                                | 10.62                  | 13,620          | 2,489                |
| 104              | 372 | IRL  | Ireland | Northern Europe | Europe    | 1992           | 1,146.36                                             | 4.26                   | 7.33       | 21.84                                                | 1.76                   | 13,140          | 3,621                |
| 104              | 372 | IRL  | Ireland | Northern Europe | Europe    | 1993           | 1,169.11                                             | 3.88                   | 7.52       | 21.47                                                | 1.91                   | 13,800          | 3,532                |
| 104              | 372 | IRL  | Ireland | Northern Europe | Europe    | 1994           | 1,047.75                                             | 6.61                   | 8.16       | 20.72                                                | 2.26                   | 14,920          | 3,578                |
| 104              | 372 | IRL  | Ireland | Northern Europe | Europe    | 1995           | 1,066.67                                             | 6.07                   | 7.95       | 20.54                                                | 2.36                   | 16,330          | 3,514                |
| 104              | 372 | IRL  | Ireland | Northern Europe | Europe    | 1996           | 1,102.41                                             | 5.14                   | 8.31       | 20.59                                                | 2.33                   | 17,790          | 3,611                |
| 104              | 372 | IRL  | Ireland | Northern Europe | Europe    | 1997           | 1,120.08                                             | 4.73                   | 7.66       | 21.38                                                | 1.94                   | 19,390          | 3,686                |
| 104              | 372 | IRL  | Ireland | Northern Europe | Europe    | 1998           | 1,134.81                                             | 4.42                   | 7.71       | 21.57                                                | 1.85                   | 21,300          | 3,684                |
| 104              | 372 | IRL  | Ireland | Northern Europe | Europe    | 1999           | 1,157.27                                             | 3.99                   | 7.68       | 21.81                                                | 1.74                   | 22,360          | 3,709                |
| 104              | 372 | IRL  | Ireland | Northern Europe | Europe    | 2000           | 1,231.93                                             | 2.93                   | 7.94       | 21.42                                                | 1.89                   | 24,930          | 3,730                |
| 104              | 372 | IRL  | Ireland | Northern Europe | Europe    | 2001           | 1,296.82                                             | 2.28                   | 7.72       | 21.71                                                | 1.77                   | 25,920          | 3,726                |
| 104              | 372 | IRL  | Ireland | Northern Europe | Europe    | 2002           | 1,227.08                                             | 2.94                   | 7.73       | 21.66                                                | 1.78                   | 27,500          | 3,589                |
| 104              | 372 | IRL  | Ireland | Northern Europe | Europe    | 2003           | 1,306.50                                             | 2.16                   | 7.68       | 21.59                                                | 1.79                   | 29,700          | 3,595                |
| 104              | 372 | IRL  | Ireland | Northern Europe | Europe    | 2004           | 1,252.32                                             | 2.62                   | 7.61       | 22.02                                                | 1.62                   | 31,390          | 3,572                |
| 104              | 372 | IRL  | Ireland | Northern Europe | Europe    | 2005           | 1,145.71                                             | 3.99                   | 7.07       | 21.10                                                | 1.96                   | 33,420          | 3,423                |
| 104              | 372 | IRL  | Ireland | Northern Europe | Europe    | 2006           | 1,076.21                                             | 5.37                   | 7.58       | 21.89                                                | 1.65                   | 37,030          | 3,532                |
| 104              | 372 | IRL  | Ireland | Northern Europe | Europe    | 2007           | 1,127.86                                             | 4.25                   | 7.84       | 20.75                                                | 2.11                   | 38,950          | 3,522                |
| 104              | 372 | IRL  | Ireland | Northern Europe | Europe    | 2008           | 1,120.52                                             | 4.36                   | 7.71       | 21.03                                                | 1.96                   | 36,570          | 3,573                |
| 104              | 372 | IRL  | Ireland | Northern Europe | Europe    | 2009           | 1,063.31                                             | 5.60                   | 8.19       | 21.65                                                | 1.70                   | 33,560          | 3,561                |
| 104              | 372 | IRL  | Ireland | Northern Europe | Europe    | 2010           | 1,031.23                                             | 6.49                   | 8.32       | 21.86                                                | 1.62                   | 34,570          | 3,582                |
| 104              | 372 | IRL  | Ireland | Northern Europe | Europe    | 2011           | 1,049.24                                             | 5.97                   | 8.18       | 21.29                                                | 1.83                   | 34,850          | 3,591                |
| 105              | 376 | ISR  | Israel  | Western Asia    | Asia      | 1992           | 1,216.05                                             | 3.05                   | 11.99      | 21.84                                                | 1.74                   | 14,350          | 3,449                |
| 105              | 376 | ISR  | Israel  | Western Asia    | Asia      | 1993           | 1,141.33                                             | 4.14                   | 11.57      | 21.59                                                | 1.83                   | 14,920          | 3,396                |
| 105              | 376 | ISR  | Israel  | Western Asia    | Asia      | 1994           | 1,254.42                                             | 2.63                   | 10.58      | 22.71                                                | 1.44                   | 15,910          | 3,351                |
| 105              | 376 | ISR  | Israel  | Western Asia    | Asia      | 1995           | 1,183.32                                             | 3.48                   | 11.52      | 21.05                                                | 2.04                   | 17,090          | 3,465                |
| 105              | 376 | ISR  | Israel  | Western Asia    | Asia      | 1996           | 1,192.69                                             | 3.34                   | 11.61      | 21.28                                                | 1.95                   | 18,340          | 3,505                |
| 105              | 376 | ISR  | Israel  | Western Asia    | Asia      | 1997           | 1,163.54                                             | 3.75                   | 11.26      | 20.94                                                | 2.09                   | 18,820          | 3,510                |
| 105              | 376 | ISR  | Israel  | Western Asia    | Asia      | 1998           | 1,198.75                                             | 3.23                   | 11.53      | 21.05                                                | 2.03                   | 19,160          | 3,502                |
| 105              | 376 | ISR  | Israel  | Western Asia    | Asia      | 1999           | 1,208.35                                             | 3.10                   | 11.49      | 21.03                                                | 2.02                   | 19,320          | 3,484                |
| 105              | 376 | ISR  | Israel  | Western Asia    | Asia      | 2000           | 1,162.01                                             | 3.73                   | 10.47      | 21.78                                                | 1.71                   | 21,480          | 3,555                |
| 105              | 376 | ISR  | Israel  | Western Asia    | Asia      | 2001           | 1,230.03                                             | 2.82                   | 11.49      | 22.35                                                | 1.52                   | 22,280          | 3,606                |
| 105              | 376 | ISR  | Israel  | Western Asia    | Asia      | 2002           | 1,229.61                                             | 2.82                   | 11.20      | 23.40                                                | 1.22                   | 22,580          | 3,699                |
| 105              | 376 | ISR  | Israel  | Western Asia    | Asia      | 2003           | 1,139.04                                             | 4.06                   | 10.51      | 23.19                                                | 1.27                   | 21,350          | 3,579                |
| 105              | 376 | ISR  | Israel  | Western Asia    | Asia      | 2004           | 1,247.92                                             | 2.61                   | 11.10      | 24.09                                                | 1.07                   | 23,000          | 3,624                |
| 105              | 376 | ISR  | Israel  | Western Asia    | Asia      | 2005           | 1,248.06                                             | 2.61                   | 11.42      | 24.27                                                | 1.03                   | 23,050          | 3,636                |
| 105              | 376 | ISR  | Israel  | Western Asia    | Asia      | 2006           | 1,194.43                                             | 3.22                   | 11.55      | 25.13                                                | 0.89                   | 24,790          | 3,625                |
| 105              | 376 | ISR  | Israel  | Western Asia    | Asia      | 2007           | 1,223.92                                             | 2.87                   | 11.10      | 24.29                                                | 1.03                   | 26,870          | 3,522                |
| 105              | 376 | ISR  | Israel  | Western Asia    | Asia      | 2008           | 1,239.79                                             | 2.69                   | 11.13      | 24.82                                                | 0.93                   | 26,550          | 3,527                |
| 105              | 376 | ISR  | Israel  | Western Asia    | Asia      | 2009           | 1,209.90                                             | 3.02                   | 12.12      | 24.07                                                | 1.07                   | 26,530          | 3,516                |
| 105              | 376 | ISR  | Israel  | Western Asia    | Asia      | 2010           | 1,180.00                                             | 3.41                   | 11.38      | 24.43                                                | 1.00                   | 27,960          | 3,534                |
| 105              | 376 | ISR  | Israel  | Western Asia    | Asia      | 2011           | 1,206.23                                             | 3.06                   | 10.85      | 24.42                                                | 1.00                   | 29,650          | 3,619                |
| 106              | 380 | ITA  | Italy   | Southern Europe | Europe    | 1992           | 1,031.93                                             | 6.98                   | 9.17       | 23.77                                                | 1.12                   | 18,680          | 3,540                |
| 106              | 380 | ITA  | Italy   | Southern Europe | Europe    | 1993           | 973.14                                               | 9.20                   | 8.97       | 23.10                                                | 1.27                   | 18,990          | 3,472                |
| 106              | 380 | ITA  | Italy   | Southern Europe | Europe    | 1994           | 970.04                                               | 9.28                   | 9.28       | 23.23                                                | 1.23                   | 19,780          | 3,484                |
| 106              | 380 | ITA  | Italy   | Southern Europe | Europe    | 1995           | 969.01                                               | 9.76                   | 9.20       | 23.08                                                | 1.26                   | 20,850          | 3,501                |
| 106              | 380 | ITA  | Italy   | Southern Europe | Europe    | 1996           | 983.12                                               | 8.21                   | 9.23       | 23.52                                                | 1.15                   | 21,610          | 3,558                |
| 106              | 380 | ITA  | Italy   | Southern Europe | Europe    | 1997           | 974.04                                               | 8.99                   | 9.40       | 23.27                                                | 1.20                   | 22,520          | 3,578                |
| 106              | 380 | ITA  | Italy   | Southern Europe | Europe    | 1998           | 1,036.99                                             | 6.63                   | 9.34       | 24.04                                                | 1.03                   | 23,660          | 3,675                |
| 106              | 380 | ITA  | Italy   | Southern Europe | Europe    | 1999           | 1,070.91                                             | 5.66                   | 9.11       | 24.31                                                | 0.98                   | 24,220          | 3,694                |
| 106              | 380 | ITA  | Italy   | Southern Europe | Europe    | 2000           | 1,049.99                                             | 6.22                   | 9.22       | 24.19                                                | 1.00                   | 25,590          | 3,670                |
| 106              | 380 | ITA  | Italy   | Southern Europe | Europe    | 2001           | 1,037.79                                             | 6.58                   | 9.32       | 24.03                                                | 1.03                   | 27,130          | 3,674                |
| 106              | 380 | ITA  | Italy   | Southern Europe | Europe    | 2002           | 1,041.21                                             | 6.47                   | 9.27       | 23.93                                                | 1.05                   | 26,760          | 3,662                |
| 106              | 380 | ITA  | Italy   | Southern Europe | Europe    | 2003           | 1,034.58                                             | 6.66                   | 9.09       | 23.77                                                | 1.08                   | 27,100          | 3,625                |
| 106              | 380 | ITA  | Italy   | Southern Europe | Europe    | 2004           | 1,055.76                                             | 6.04                   | 9.45       | 23.63                                                | 1.11                   | 27,420          | 3,627                |
| 106              | 380 | ITA  | Italy   | Southern Europe | Europe    | 2005           | 1,070.80                                             | 5.63                   | 9.30       | 23.50                                                | 1.13                   | 28,290          | 3,578                |
| 106              | 380 | ITA  | Italy   | Southern Europe | Europe    | 2006           | 1,057.85                                             | 5.97                   | 9.67       | 23.62                                                | 1.11                   | 30,520          | 3,810                |
| 106              | 380 | ITA  | Italy   | Southern Europe | Europe    | 2007           | 1,026.13                                             | 6.92                   | 9.29       | 23.28                                                | 1.18                   | 32,000          | 3,585                |
| 106              | 380 | ITA  | Italy   | Southern Europe | Europe    | 2008           | 1,044.04                                             | 6.36                   | 9.17       | 23.11                                                | 1.22                   | 33,010          | 3,573                |
| 106              | 380 | ITA  | Italy   | Southern Europe | Europe    | 2009           | 1,041.03                                             | 6.45                   | 9.06       | 23.41                                                | 1.15                   | 32,370          | 3,583                |
| 106              | 380 | ITA  | Italy   | Southern Europe | Europe    | 2010           | 1,053.25                                             | 6.10                   | 9.15       | 23.26                                                | 1.18                   | 32,730          | 3,556                |
| 106              | 380 | ITA  | Italy   | Southern Europe | Europe    | 2011           | 1,042.60                                             | 6.41                   | 9.41       | 22.88                                                | 1.28                   | 33,670          | 3,539                |
| 109              | 388 | JAM  | Jamaica | Caribbean       | Americas  | 1992           | 630.69                                               | 53.66                  | 8.68       | 12.28                                                | 26.04                  | 4,880           | 2,626                |
| 109              | 388 | JAM  | Jamaica | Caribbean       | Americas  | 1993           | 611.86                                               | 39.31                  | 8.33       | 12.71                                                | 22.47                  | 5,700           | 2,706                |
| 109              | 388 | JAM  | Jamaica | Caribbean       | Americas  | 1994           | 685.26                                               | 38.58                  | 8.38       | 13.11                                                | 19.58                  | 5,800           | 2,717                |
| 109              | 388 | JAM  | Jamaica | Caribbean       | Americas  | 1995           | 726.37                                               | 32.66                  | 8.52       | 13.52                                                | 17.04                  | 6,050           | 2,684                |
| 109              | 388 | JAM  | Jamaica | Caribbean       | Americas  | 1996           | 723.17                                               | 33.15                  | 8.39       | 11.82                                                | 30.26                  | 6,220           | 2,717                |
| 109              | 388 | JAM  | Jamaica | Caribbean       | Americas  | 1997           | 700.09                                               | 37.48                  | 8.06       | 12.82                                                | 21.48                  | 6,210           | 2,697                |
| 109              | 388 | JAM  | Jamaica | Caribbean       | Americas  | 1998           | 654.98                                               | 47.41                  | 8.14       | 12.80                                                | 21.64                  | 5,970           | 2,710                |
| 109              | 388 | JAM  | Jamaica | Caribbean       | Americas  | 1999           | 665.77                                               | 44.96                  | 8.57       | 13.05                                                | 19.91                  | 6,060           | 2,725                |
| 109              | 388 | JAM  | Jamaica | Caribbean       | Americas  | 2000           | 640.69                                               | 51.12                  | 8.66       | 12.21                                                | 26.60                  | 6,210           | 2,729                |
| 109              | 388 | JAM  | Jamaica | Caribbean       | Americas  | 2001           | 673.15                                               | 43.39                  | 8.89       | 12.71                                                | 22.34                  | 6,320           | 2,798                |
| 109              | 388 | JAM  | Jamaica | Caribbean       | Americas  | 2006           | 641.14                                               | 51.96                  | 9.82       | 12.94                                                | 20.88                  | 7,900           | 2,792                |
| 109              | 388 | JAM  | Jamaica | Caribbean       | Americas  | 2007           | 637.54                                               | 53.11                  | 9.39       | 12.98                                                | 20.73                  | 8,100           | 2,792                |
| 109              | 388 | JAM  | Jamaica | Caribbean       | Americas  | 2008           | 649.57                                               | 50.24                  | 9.32       | 13.15                                                | 19.64                  | 8,250           | 2,755                |
| 109              | 388 | JAM  | Jamaica | Caribbean       | Americas  | 2009           | 644.41                                               | 51.64                  | 9.81       | 12.88                                                | 21.61                  | 7,810           | 2,760                |
| 109              | 388 | JAM  | Jamaica | Caribbean       | Americas  | 2010           | 632.70                                               | 54.75                  | 9.46       | 12.67                                                | 21.73                  | 7,900           | 2,777                |
| 109              | 388 | JAM  | Jamaica | Caribbean       | Americas  | 2011           | 667.74                                               | 46.00                  | 9.66       | 13.04                                                | 20.38                  | 8,170           | 2,789                |
| 110              | 392 | JPN  | Japan   | Eastern Asia    | Asia      | 1992           | 711.66                                               | 36.81                  | 12.01      | 14.81                                                | 10.91                  | 21,260          | 2,943                |

Dietary calcium and zinc deficiency risks are decreasing but remain prevalent

| FAO country code | UNI | ISO3 | Country    | Region         | Continent | Reference year | Ca supply (mg capita <sup>-1</sup> d <sup>-1</sup> ) | Ca deficiency risk (%) | Phytate:Zn | Zn supply (mg capita <sup>-1</sup> d <sup>-1</sup> ) | Zn deficiency risk (%) | GNI-PPP (US \$) | Energy supply (kcal) |
|------------------|-----|------|------------|----------------|-----------|----------------|------------------------------------------------------|------------------------|------------|------------------------------------------------------|------------------------|-----------------|----------------------|
| 110              | 392 | JPN  | Japan      | Eastern Asia   | Asia      | 1993           | 689.31                                               | 41.24                  | 11.78      | 14.83                                                | 10.80                  | 21,760          | 2,926                |
| 110              | 392 | JPN  | Japan      | Eastern Asia   | Asia      | 1994           | 710.31                                               | 36.82                  | 11.53      | 15.13                                                | 9.77                   | 22,320          | 2,932                |
| 110              | 392 | JPN  | Japan      | Eastern Asia   | Asia      | 1995           | 725.78                                               | 33.82                  | 11.15      | 15.46                                                | 8.76                   | 23,180          | 2,921                |
| 110              | 392 | JPN  | Japan      | Eastern Asia   | Asia      | 1996           | 732.83                                               | 32.48                  | 11.27      | 15.58                                                | 8.38                   | 24,220          | 2,963                |
| 110              | 392 | JPN  | Japan      | Eastern Asia   | Asia      | 1997           | 726.87                                               | 33.47                  | 11.75      | 15.06                                                | 9.82                   | 24,990          | 2,939                |
| 110              | 392 | JPN  | Japan      | Eastern Asia   | Asia      | 1998           | 716.04                                               | 35.40                  | 11.51      | 14.88                                                | 10.36                  | 24,700          | 2,895                |
| 110              | 392 | JPN  | Japan      | Eastern Asia   | Asia      | 1999           | 720.64                                               | 34.50                  | 11.47      | 15.04                                                | 9.82                   | 24,940          | 2,898                |
| 110              | 392 | JPN  | Japan      | Eastern Asia   | Asia      | 2000           | 721.26                                               | 34.33                  | 11.58      | 15.14                                                | 9.47                   | 26,310          | 2,900                |
| 110              | 392 | JPN  | Japan      | Eastern Asia   | Asia      | 2001           | 716.42                                               | 35.17                  | 11.70      | 14.85                                                | 10.30                  | 27,000          | 2,890                |
| 110              | 392 | JPN  | Japan      | Eastern Asia   | Asia      | 2002           | 705.85                                               | 37.16                  | 11.54      | 15.00                                                | 9.79                   | 27,680          | 2,853                |
| 110              | 392 | JPN  | Japan      | Eastern Asia   | Asia      | 2003           | 708.27                                               | 36.65                  | 11.28      | 14.95                                                | 9.94                   | 28,410          | 2,842                |
| 110              | 392 | JPN  | Japan      | Eastern Asia   | Asia      | 2004           | 697.46                                               | 38.78                  | 11.54      | 14.66                                                | 10.87                  | 29,930          | 2,843                |
| 110              | 392 | JPN  | Japan      | Eastern Asia   | Asia      | 2005           | 702.10                                               | 37.82                  | 11.60      | 14.81                                                | 10.32                  | 31,150          | 2,828                |
| 110              | 392 | JPN  | Japan      | Eastern Asia   | Asia      | 2006           | 682.09                                               | 42.02                  | 11.64      | 14.22                                                | 12.49                  | 32,730          | 2,777                |
| 110              | 392 | JPN  | Japan      | Eastern Asia   | Asia      | 2007           | 700.20                                               | 38.25                  | 11.57      | 14.44                                                | 11.62                  | 34,500          | 2,816                |
| 110              | 392 | JPN  | Japan      | Eastern Asia   | Asia      | 2008           | 686.62                                               | 41.09                  | 11.48      | 14.09                                                | 13.02                  | 34,710          | 2,732                |
| 110              | 392 | JPN  | Japan      | Eastern Asia   | Asia      | 2009           | 660.21                                               | 47.07                  | 11.08      | 13.90                                                | 13.84                  | 32,880          | 2,674                |
| 110              | 392 | JPN  | Japan      | Eastern Asia   | Asia      | 2010           | 657.87                                               | 47.66                  | 11.25      | 14.11                                                | 12.91                  | 34,830          | 2,692                |
| 110              | 392 | JPN  | Japan      | Eastern Asia   | Asia      | 2011           | 664.41                                               | 46.13                  | 11.22      | 14.20                                                | 12.49                  | 35,330          | 2,719                |
| 112              | 400 | JOR  | Jordan     | Western Asia   | Asia      | 1992           | 643.65                                               | 49.92                  | 11.16      | 16.20                                                | 7.94                   | 4,630           | 2,739                |
| 112              | 400 | JOR  | Jordan     | Western Asia   | Asia      | 1993           | 624.13                                               | 54.89                  | 10.26      | 16.63                                                | 7.18                   | 4,790           | 2,727                |
| 112              | 400 | JOR  | Jordan     | Western Asia   | Asia      | 1994           | 564.58                                               | 73.86                  | 10.24      | 15.90                                                | 8.62                   | 4,970           | 2,630                |
| 112              | 400 | JOR  | Jordan     | Western Asia   | Asia      | 1995           | 563.15                                               | 71.48                  | 10.76      | 16.05                                                | 8.22                   | 5,260           | 2,687                |
| 112              | 400 | JOR  | Jordan     | Western Asia   | Asia      | 1996           | 503.53                                               | 86.52                  | 10.57      | 16.07                                                | 8.21                   | 5,290           | 2,659                |
| 112              | 400 | JOR  | Jordan     | Western Asia   | Asia      | 1997           | 515.75                                               | 83.65                  | 11.63      | 16.23                                                | 7.77                   | 5,480           | 2,748                |
| 112              | 400 | JOR  | Jordan     | Western Asia   | Asia      | 1998           | 526.37                                               | 81.03                  | 11.94      | 16.09                                                | 8.07                   | 5,600           | 2,727                |
| 112              | 400 | JOR  | Jordan     | Western Asia   | Asia      | 1999           | 534.25                                               | 79.02                  | 11.33      | 15.92                                                | 8.45                   | 5,760           | 2,657                |
| 112              | 400 | JOR  | Jordan     | Western Asia   | Asia      | 2000           | 576.71                                               | 67.48                  | 11.99      | 15.93                                                | 8.41                   | 6,180           | 2,727                |
| 112              | 400 | JOR  | Jordan     | Western Asia   | Asia      | 2001           | 540.35                                               | 77.33                  | 11.31      | 16.58                                                | 6.92                   | 6,530           | 2,839                |
| 112              | 400 | JOR  | Jordan     | Western Asia   | Asia      | 2002           | 631.90                                               | 52.43                  | 11.24      | 16.96                                                | 6.17                   | 6,780           | 2,938                |
| 112              | 400 | JOR  | Jordan     | Western Asia   | Asia      | 2003           | 626.65                                               | 53.81                  | 11.52      | 18.03                                                | 4.57                   | 7,060           | 3,076                |
| 112              | 400 | JOR  | Jordan     | Western Asia   | Asia      | 2004           | 669.89                                               | 43.33                  | 11.20      | 17.06                                                | 5.95                   | 7,770           | 3,122                |
| 112              | 400 | JOR  | Jordan     | Western Asia   | Asia      | 2005           | 687.44                                               | 39.49                  | 11.37      | 17.76                                                | 4.86                   | 8,500           | 3,119                |
| 112              | 400 | JOR  | Jordan     | Western Asia   | Asia      | 2006           | 692.23                                               | 38.55                  | 11.27      | 18.18                                                | 4.40                   | 9,290           | 3,152                |
| 112              | 400 | JOR  | Jordan     | Western Asia   | Asia      | 2007           | 684.69                                               | 40.05                  | 10.75      | 18.24                                                | 4.30                   | 10,190          | 3,125                |
| 112              | 400 | JOR  | Jordan     | Western Asia   | Asia      | 2008           | 678.98                                               | 41.13                  | 10.36      | 18.35                                                | 4.15                   | 10,810          | 3,080                |
| 112              | 400 | JOR  | Jordan     | Western Asia   | Asia      | 2009           | 619.51                                               | 55.32                  | 11.01      | 18.36                                                | 4.09                   | 11,130          | 3,106                |
| 112              | 400 | JOR  | Jordan     | Western Asia   | Asia      | 2010           | 639.38                                               | 50.04                  | 11.14      | 17.56                                                | 5.03                   | 11,000          | 3,114                |
| 112              | 400 | JOR  | Jordan     | Western Asia   | Asia      | 2011           | 648.88                                               | 47.47                  | 11.05      | 18.28                                                | 4.13                   | 11,220          | 3,149                |
| 108              | 398 | KAZ  | Kazakhstan | Central Asia   | Asia      | 1993           | 692.56                                               | 38.90                  | 7.89       | 22.96                                                | 1.32                   | 6,820           | 2,906                |
| 108              | 398 | KAZ  | Kazakhstan | Central Asia   | Asia      | 1994           | 760.93                                               | 27.14                  | 7.75       | 22.92                                                | 1.35                   | 6,160           | 2,885                |
| 108              | 398 | KAZ  | Kazakhstan | Central Asia   | Asia      | 1995           | 754.66                                               | 28.32                  | 7.36       | 23.57                                                | 1.19                   | 5,860           | 2,841                |
| 108              | 398 | KAZ  | Kazakhstan | Central Asia   | Asia      | 1996           | 807.35                                               | 21.53                  | 7.24       | 24.20                                                | 1.05                   | 6,070           | 2,862                |
| 108              | 398 | KAZ  | Kazakhstan | Central Asia   | Asia      | 1997           | 817.48                                               | 20.62                  | 7.61       | 23.63                                                | 1.19                   | 6,350           | 2,855                |
| 108              | 398 | KAZ  | Kazakhstan | Central Asia   | Asia      | 1998           | 877.93                                               | 15.10                  | 7.62       | 22.17                                                | 1.60                   | 6,410           | 2,727                |
| 108              | 398 | KAZ  | Kazakhstan | Central Asia   | Asia      | 1999           | 905.67                                               | 13.18                  | 7.54       | 22.17                                                | 1.62                   | 6,610           | 2,744                |
| 108              | 398 | KAZ  | Kazakhstan | Central Asia   | Asia      | 2000           | 966.51                                               | 10.25                  | 7.66       | 21.61                                                | 1.83                   | 7,170           | 2,808                |
| 108              | 398 | KAZ  | Kazakhstan | Central Asia   | Asia      | 2001           | 979.66                                               | 9.21                   | 7.76       | 21.32                                                | 1.97                   | 8,460           | 2,889                |
| 108              | 398 | KAZ  | Kazakhstan | Central Asia   | Asia      | 2002           | 1,057.84                                             | 6.38                   | 7.65       | 20.75                                                | 2.24                   | 9,530           | 2,932                |
| 108              | 398 | KAZ  | Kazakhstan | Central Asia   | Asia      | 2003           | 1,139.61                                             | 4.43                   | 7.61       | 21.14                                                | 2.05                   | 10,470          | 2,956                |
| 108              | 398 | KAZ  | Kazakhstan | Central Asia   | Asia      | 2004           | 1,106.86                                             | 5.07                   | 7.61       | 20.67                                                | 2.27                   | 11,580          | 2,976                |
| 108              | 398 | KAZ  | Kazakhstan | Central Asia   | Asia      | 2005           | 1,176.53                                             | 3.73                   | 7.41       | 19.93                                                | 2.67                   | 12,570          | 3,012                |
| 108              | 398 | KAZ  | Kazakhstan | Central Asia   | Asia      | 2006           | 1,175.07                                             | 3.69                   | 7.40       | 20.40                                                | 2.40                   | 13,900          | 3,058                |
| 108              | 398 | KAZ  | Kazakhstan | Central Asia   | Asia      | 2007           | 1,185.47                                             | 3.48                   | 7.29       | 21.37                                                | 1.90                   | 15,230          | 3,217                |
| 108              | 398 | KAZ  | Kazakhstan | Central Asia   | Asia      | 2008           | 1,242.39                                             | 2.72                   | 7.17       | 20.56                                                | 2.24                   | 15,450          | 3,147                |
| 108              | 398 | KAZ  | Kazakhstan | Central Asia   | Asia      | 2009           | 1,257.76                                             | 2.52                   | 7.48       | 21.17                                                | 1.92                   | 16,020          | 3,149                |
| 108              | 398 | KAZ  | Kazakhstan | Central Asia   | Asia      | 2010           | 1,327.93                                             | 1.93                   | 7.22       | 22.46                                                | 1.44                   | 16,710          | 3,168                |
| 108              | 398 | KAZ  | Kazakhstan | Central Asia   | Asia      | 2011           | 1,372.39                                             | 1.63                   | 7.37       | 21.07                                                | 1.91                   | 17,720          | 3,107                |
| 114              | 404 | KEN  | Kenya      | Eastern Africa | Africa    | 1992           | 485.18                                               | 67.17                  | 19.28      | 12.05                                                | 28.32                  | 1,220           | 1,938                |
| 114              | 404 | KEN  | Kenya      | Eastern Africa | Africa    | 1993           | 485.28                                               | 69.46                  | 19.54      | 11.87                                                | 30.29                  | 1,190           | 1,898                |
| 114              | 404 | KEN  | Kenya      | Eastern Africa | Africa    | 1994           | 517.30                                               | 62.55                  | 20.80      | 13.19                                                | 19.45                  | 1,220           | 2,049                |
| 114              | 404 | KEN  | Kenya      | Eastern Africa | Africa    | 1995           | 512.90                                               | 63.82                  | 21.67      | 13.05                                                | 20.50                  | 1,280           | 2,065                |
| 114              | 404 | KEN  | Kenya      | Eastern Africa | Africa    | 1996           | 491.93                                               | 68.67                  | 21.54      | 13.17                                                | 19.97                  | 1,350           | 2,060                |
| 114              | 404 | KEN  | Kenya      | Eastern Africa | Africa    | 1997           | 497.84                                               | 67.55                  | 21.80      | 12.98                                                | 21.37                  | 1,350           | 2,020                |
| 114              | 404 | KEN  | Kenya      | Eastern Africa | Africa    | 1998           | 503.28                                               | 66.43                  | 21.84      | 13.02                                                | 21.07                  | 1,380           | 2,051                |
| 114              | 404 | KEN  | Kenya      | Eastern Africa | Africa    | 1999           | 522.96                                               | 61.82                  | 20.53      | 13.10                                                | 20.49                  | 1,390           | 2,090                |
| 114              | 404 | KEN  | Kenya      | Eastern Africa | Africa    | 2000           | 501.45                                               | 66.82                  | 20.78      | 12.73                                                | 23.13                  | 1,400           | 2,050                |
| 114              | 404 | KEN  | Kenya      | Eastern Africa | Africa    | 2001           | 513.67                                               | 63.93                  | 20.01      | 12.79                                                | 22.91                  | 1,440           | 2,068                |
| 114              | 404 | KEN  | Kenya      | Eastern Africa | Africa    | 2002           | 540.67                                               | 76.93                  | 20.50      | 12.78                                                | 22.80                  | 1,440           | 2,024                |
| 114              | 404 | KEN  | Kenya      | Eastern Africa | Africa    | 2003           | 522.97                                               | 81.35                  | 19.88      | 12.74                                                | 22.90                  | 1,460           | 2,006                |
| 114              | 404 | KEN  | Kenya      | Eastern Africa | Africa    | 2004           | 563.68                                               | 73.02                  | 19.70      | 12.65                                                | 23.43                  | 1,540           | 2,030                |
| 114              | 404 | KEN  | Kenya      | Eastern Africa | Africa    | 2005           | 592.96                                               | 61.87                  | 19.52      | 13.58                                                | 16.99                  | 1,650           | 2,163                |
| 114              | 404 | KEN  | Kenya      | Eastern Africa | Africa    | 2006           | 565.86                                               | 71.98                  | 19.45      | 13.53                                                | 17.37                  | 1,760           | 2,163                |
| 114              | 404 | KEN  | Kenya      | Eastern Africa | Africa    | 2007           | 598.02                                               | 84.30                  | 19.64      | 13.27                                                | 16.75                  | 1,880           | 2,111                |
| 114              | 404 | KEN  | Kenya      | Eastern Africa | Africa    | 2008           | 523.66                                               | 80.31                  | 19.69      | 13.01                                                | 20.39                  | 1,900           | 2,109                |
| 114              | 404 | KEN  | Kenya      | Eastern Africa | Africa    | 2009           | 558.84                                               | 70.70                  | 19.12      | 13.33                                                | 18.18                  | 1,920           | 2,170                |
| 114              | 404 | KEN  | Kenya      | Eastern Africa | Africa    | 2010           | 571.05                                               | 67.24                  | 19.11      | 13.73                                                | 15.83                  | 1,990           | 2,165                |
| 114              | 404 | KEN  | Kenya      | Eastern Africa | Africa    | 2011           | 571.24                                               | 67.23                  | 19.63      | 13.99                                                | 14.60                  | 2,070           | 2,189                |
| 118              | 414 | KWT  | Kuwait     | Western Asia   | Asia      | 1995           | 890.33                                               | 13.39                  | 9.15       | 19.62                                                | 3.29                   | 76,240          | 3,214                |

| FAO country code | UNI | ISO3 | Country                          | Region             | Continent | Reference year | Ca supply (mg capita <sup>-1</sup> d <sup>-1</sup> ) | Ca deficiency risk (%) | Phytate:Zn | Zn supply (mg capita <sup>-1</sup> d <sup>-1</sup> ) | Zn deficiency risk (%) | GNI-PPP (US \$) | Energy supply (kcal) |
|------------------|-----|------|----------------------------------|--------------------|-----------|----------------|------------------------------------------------------|------------------------|------------|------------------------------------------------------|------------------------|-----------------|----------------------|
| 118              | 414 | KWT  | Kuwait                           | Western Asia       | Asia      | 1996           | 918.41                                               | 11.05                  | 20.02      | 3.12                                                 | 77,150                 | 3,269           |                      |
| 118              | 414 | KWT  | Kuwait                           | Western Asia       | Asia      | 1997           | 896.66                                               | 12.34                  | 9.25       | 20.46                                                | 2.79                   | 80,750          | 3,338                |
| 118              | 414 | KWT  | Kuwait                           | Western Asia       | Asia      | 1998           | 946.11                                               | 9.49                   | 9.31       | 20.82                                                | 2.53                   | 81,660          | 3,357                |
| 118              | 414 | KWT  | Kuwait                           | Western Asia       | Asia      | 1999           | 910.74                                               | 11.27                  | 9.76       | 20.24                                                | 2.85                   | 73,500          | 3,396                |
| 118              | 414 | KWT  | Kuwait                           | Western Asia       | Asia      | 2000           | 1,099.69                                             | 4.50                   | 9.75       | 20.69                                                | 2.53                   | 75,580          | 3,451                |
| 118              | 414 | KWT  | Kuwait                           | Western Asia       | Asia      | 2001           | 1,106.98                                             | 4.37                   | 9.73       | 20.18                                                | 2.85                   | 72,590          | 3,495                |
| 118              | 414 | KWT  | Kuwait                           | Western Asia       | Asia      | 2002           | 904.84                                               | 11.58                  | 9.81       | 19.78                                                | 3.14                   | 69,980          | 3,448                |
| 118              | 414 | KWT  | Kuwait                           | Western Asia       | Asia      | 2003           | 869.08                                               | 14.01                  | 9.65       | 21.15                                                | 2.29                   | 79,780          | 3,504                |
| 118              | 414 | KWT  | Kuwait                           | Western Asia       | Asia      | 2004           | 875.74                                               | 13.52                  | 9.12       | 21.93                                                | 1.93                   | 88,870          | 3,515                |
| 118              | 414 | KWT  | Kuwait                           | Western Asia       | Asia      | 2005           | 921.77                                               | 10.58                  | 8.81       | 22.80                                                | 1.60                   | 96,720          | 3,576                |
| 118              | 414 | KWT  | Kuwait                           | Western Asia       | Asia      | 2006           | 1,043.06                                             | 5.89                   | 9.26       | 21.99                                                | 1.94                   | 103,600         | 3,589                |
| 118              | 414 | KWT  | Kuwait                           | Western Asia       | Asia      | 2007           | 962.14                                               | 8.73                   | 9.65       | 21.87                                                | 1.99                   | 106,670         | 3,561                |
| 118              | 414 | KWT  | Kuwait                           | Western Asia       | Asia      | 2008           | 850.31                                               | 15.62                  | 9.38       | 21.10                                                | 2.35                   | 102,020         | 3,521                |
| 118              | 414 | KWT  | Kuwait                           | Western Asia       | Asia      | 2009           | 863.78                                               | 14.51                  | 9.28       | 20.75                                                | 2.54                   | 91,900          | 3,477                |
| 118              | 414 | KWT  | Kuwait                           | Western Asia       | Asia      | 2010           | 841.82                                               | 16.29                  | 10.61      | 20.22                                                | 2.85                   | 86,560          | 3,461                |
| 118              | 414 | KWT  | Kuwait                           | Western Asia       | Asia      | 2011           | 879.07                                               | 13.30                  | 10.92      | 20.47                                                | 2.71                   | 88,170          | 3,471                |
| 113              | 417 | KGZ  | Kyrgyzstan                       | Central Asia       | Asia      | 1992           | 791.12                                               | 22.05                  | 7.26       | 22.03                                                | 1.62                   | 1,840           | 2,667                |
| 113              | 417 | KGZ  | Kyrgyzstan                       | Central Asia       | Asia      | 1993           | 730.48                                               | 30.93                  | 7.00       | 21.75                                                | 1.73                   | 1,580           | 2,405                |
| 113              | 417 | KGZ  | Kyrgyzstan                       | Central Asia       | Asia      | 1994           | 780.70                                               | 23.63                  | 7.27       | 21.39                                                | 1.89                   | 1,280           | 2,414                |
| 113              | 417 | KGZ  | Kyrgyzstan                       | Central Asia       | Asia      | 1995           | 808.13                                               | 20.49                  | 7.71       | 21.63                                                | 1.80                   | 1,210           | 2,382                |
| 113              | 417 | KGZ  | Kyrgyzstan                       | Central Asia       | Asia      | 1996           | 856.61                                               | 15.94                  | 7.74       | 21.75                                                | 1.75                   | 1,300           | 2,508                |
| 113              | 417 | KGZ  | Kyrgyzstan                       | Central Asia       | Asia      | 1997           | 869.60                                               | 15.03                  | 8.04       | 23.07                                                | 1.35                   | 1,410           | 2,638                |
| 113              | 417 | KGZ  | Kyrgyzstan                       | Central Asia       | Asia      | 1998           | 894.83                                               | 13.30                  | 8.02       | 20.16                                                | 2.56                   | 1,420           | 2,488                |
| 113              | 417 | KGZ  | Kyrgyzstan                       | Central Asia       | Asia      | 1999           | 971.21                                               | 9.11                   | 8.05       | 21.23                                                | 2.02                   | 1,450           | 2,516                |
| 113              | 417 | KGZ  | Kyrgyzstan                       | Central Asia       | Asia      | 2000           | 987.33                                               | 8.51                   | 8.14       | 20.88                                                | 2.20                   | 1,590           | 2,392                |
| 113              | 417 | KGZ  | Kyrgyzstan                       | Central Asia       | Asia      | 2001           | 1,008.61                                             | 7.75                   | 9.41       | 21.07                                                | 2.11                   | 1,690           | 2,451                |
| 113              | 417 | KGZ  | Kyrgyzstan                       | Central Asia       | Asia      | 2002           | 994.85                                               | 8.36                   | 9.50       | 21.29                                                | 2.03                   | 1,700           | 2,486                |
| 113              | 417 | KGZ  | Kyrgyzstan                       | Central Asia       | Asia      | 2003           | 1,025.44                                             | 7.28                   | 9.87       | 21.72                                                | 1.86                   | 1,850           | 2,618                |
| 113              | 417 | KGZ  | Kyrgyzstan                       | Central Asia       | Asia      | 2004           | 1,015.90                                             | 7.66                   | 9.69       | 21.94                                                | 1.79                   | 1,980           | 2,728                |
| 113              | 417 | KGZ  | Kyrgyzstan                       | Central Asia       | Asia      | 2005           | 1,039.45                                             | 6.86                   | 10.60      | 21.67                                                | 1.90                   | 2,040           | 2,753                |
| 113              | 417 | KGZ  | Kyrgyzstan                       | Central Asia       | Asia      | 2006           | 971.38                                               | 9.50                   | 10.38      | 20.54                                                | 2.48                   | 2,180           | 2,708                |
| 113              | 417 | KGZ  | Kyrgyzstan                       | Central Asia       | Asia      | 2007           | 986.13                                               | 8.77                   | 10.11      | 20.07                                                | 2.75                   | 2,420           | 2,724                |
| 113              | 417 | KGZ  | Kyrgyzstan                       | Central Asia       | Asia      | 2008           | 982.88                                               | 8.81                   | 10.89      | 20.00                                                | 2.76                   | 2,590           | 2,710                |
| 113              | 417 | KGZ  | Kyrgyzstan                       | Central Asia       | Asia      | 2009           | 1,026.73                                             | 7.03                   | 10.44      | 20.79                                                | 2.26                   | 2,640           | 2,785                |
| 113              | 417 | KGZ  | Kyrgyzstan                       | Central Asia       | Asia      | 2010           | 1,031.20                                             | 6.77                   | 9.66       | 20.60                                                | 2.32                   | 2,540           | 2,799                |
| 113              | 417 | KGZ  | Kyrgyzstan                       | Central Asia       | Asia      | 2011           | 1,058.71                                             | 5.83                   | 9.53       | 20.95                                                | 2.14                   | 2,670           | 2,828                |
| 120              | 418 | LAO  | Lao People's Democratic Republic | South-Eastern Asia | Asia      | 1992           | 199.28                                               | 100.00                 | 21.83      | 8.53                                                 | 79.82                  | 1,150           | 1,959                |
| 120              | 418 | LAO  | Lao People's Democratic Republic | South-Eastern Asia | Asia      | 1993           | 209.65                                               | 100.00                 | 21.20      | 8.47                                                 | 80.60                  | 1,220           | 1,957                |
| 120              | 418 | LAO  | Lao People's Democratic Republic | South-Eastern Asia | Asia      | 1994           | 234.84                                               | 100.00                 | 20.86      | 8.66                                                 | 77.39                  | 1,310           | 1,984                |
| 120              | 418 | LAO  | Lao People's Democratic Republic | South-Eastern Asia | Asia      | 1995           | 199.32                                               | 100.00                 | 20.89      | 8.63                                                 | 77.85                  | 1,390           | 1,976                |
| 120              | 418 | LAO  | Lao People's Democratic Republic | South-Eastern Asia | Asia      | 1996           | 201.75                                               | 100.00                 | 21.36      | 8.97                                                 | 71.83                  | 1,480           | 2,029                |
| 120              | 418 | LAO  | Lao People's Democratic Republic | South-Eastern Asia | Asia      | 1997           | 206.63                                               | 100.00                 | 21.18      | 9.09                                                 | 69.96                  | 1,540           | 2,036                |
| 120              | 418 | LAO  | Lao People's Democratic Republic | South-Eastern Asia | Asia      | 1998           | 207.52                                               | 100.00                 | 21.04      | 9.10                                                 | 70.04                  | 1,580           | 2,050                |
| 120              | 418 | LAO  | Lao People's Democratic Republic | South-Eastern Asia | Asia      | 1999           | 237.94                                               | 100.00                 | 20.13      | 9.26                                                 | 67.53                  | 1,710           | 2,039                |
| 120              | 418 | LAO  | Lao People's Democratic Republic | South-Eastern Asia | Asia      | 2000           | 346.73                                               | 99.97                  | 19.70      | 9.69                                                 | 60.58                  | 1,770           | 2,116                |
| 120              | 418 | LAO  | Lao People's Democratic Republic | South-Eastern Asia | Asia      | 2001           | 332.07                                               | 99.99                  | 19.20      | 9.64                                                 | 61.45                  | 1,890           | 2,092                |
| 120              | 418 | LAO  | Lao People's Democratic Republic | South-Eastern Asia | Asia      | 2002           | 406.99                                               | 99.04                  | 18.93      | 10.07                                                | 54.67                  | 2,010           | 2,137                |
| 120              | 418 | LAO  | Lao People's Democratic Republic | South-Eastern Asia | Asia      | 2003           | 360.95                                               | 99.93                  | 18.64      | 10.12                                                | 54.33                  | 2,100           | 2,180                |
| 120              | 418 | LAO  | Lao People's Democratic Republic | South-Eastern Asia | Asia      | 2004           | 366.34                                               | 99.90                  | 18.77      | 10.43                                                | 49.76                  | 2,300           | 2,209                |
| 120              | 418 | LAO  | Lao People's Democratic Republic | South-Eastern Asia | Asia      | 2005           | 395.62                                               | 99.50                  | 19.42      | 10.58                                                | 47.75                  | 2,550           | 2,273                |
| 120              | 418 | LAO  | Lao People's Democratic Republic | South-Eastern Asia | Asia      | 2006           | 364.82                                               | 99.92                  | 19.08      | 10.31                                                | 52.36                  | 2,710           | 2,257                |
| 120              | 418 | LAO  | Lao People's Democratic Republic | South-Eastern Asia | Asia      | 2007           | 384.24                                               | 99.73                  | 19.02      | 10.49                                                | 49.55                  | 3,000           | 2,287                |
| 120              | 418 | LAO  | Lao People's Democratic Republic | South-Eastern Asia | Asia      | 2008           | 349.35                                               | 99.97                  | 19.44      | 10.38                                                | 51.01                  | 3,190           | 2,247                |
| 120              | 418 | LAO  | Lao People's Democratic Republic | South-Eastern Asia | Asia      | 2009           | 394.57                                               | 99.51                  | 18.88      | 10.77                                                | 45.01                  | 3,450           | 2,312                |
| 120              | 418 | LAO  | Lao People's Democratic Republic | South-Eastern Asia | Asia      | 2010           | 399.20                                               | 99.38                  | 19.06      | 10.73                                                | 45.27                  | 3,580           | 2,323                |
| 120              | 418 | LAO  | Lao People's Democratic Republic | South-Eastern Asia | Asia      | 2011           | 417.08                                               | 98.61                  | 19.03      | 10.94                                                | 42.04                  | 3,840           | 2,356                |
| 119              | 428 | LVA  | Latvia                           | Northern Europe    | Europe    | 1992           | 975.81                                               | 8.71                   | 7.32       | 23.35                                                | 1.13                   | 5,000           | 3,263                |
| 119              | 428 | LVA  | Latvia                           | Northern Europe    | Europe    | 1993           | 920.25                                               | 11.64                  | 7.81       | 23.14                                                | 1.19                   | 4,970           | 3,266                |
| 119              | 428 | LVA  | Latvia                           | Northern Europe    | Europe    | 1994           | 1,045.84                                             | 6.39                   | 7.84       | 22.37                                                | 1.40                   | 5,270           | 3,174                |
| 119              | 428 | LVA  | Latvia                           | Northern Europe    | Europe    | 1995           | 1,083.41                                             | 5.45                   | 8.05       | 20.95                                                | 1.91                   | 5,410           | 3,073                |
| 119              | 428 | LVA  | Latvia                           | Northern Europe    | Europe    | 1996           | 1,112.30                                             | 4.87                   | 9.75       | 16.68                                                | 5.72                   | 5,810           | 2,999                |
| 119              | 428 | LVA  | Latvia                           | Northern Europe    | Europe    | 1997           | 955.72                                               | 10.27                  | 10.04      | 16.25                                                | 6.58                   | 6,490           | 2,919                |
| 119              | 428 | LVA  | Latvia                           | Northern Europe    | Europe    | 1998           | 859.32                                               | 17.03                  | 10.09      | 15.76                                                | 7.69                   | 6,980           | 2,847                |
| 119              | 428 | LVA  | Latvia                           | Northern Europe    | Europe    | 1999           | 821.38                                               | 20.99                  | 10.31      | 15.47                                                | 8.48                   | 7,340           | 2,849                |
| 119              | 428 | LVA  | Latvia                           | Northern Europe    | Europe    | 2000           | 863.21                                               | 16.90                  | 9.91       | 15.16                                                | 9.41                   | 8,050           | 2,787                |
| 119              | 428 | LVA  | Latvia                           | Northern Europe    | Europe    | 2001           | 860.17                                               | 17.21                  | 9.51       | 15.45                                                | 8.60                   | 9,020           | 2,888                |
| 119              | 428 | LVA  | Latvia                           | Northern Europe    | Europe    | 2002           | 944.17                                               | 11.16                  | 10.19      | 15.17                                                | 9.39                   | 10,020          | 2,979                |
| 119              | 428 | LVA  | Latvia                           | Northern Europe    | Europe    | 2003           | 971.31                                               | 9.71                   | 10.09      | 16.29                                                | 6.62                   | 10,780          | 3,036                |
| 119              | 428 | LVA  | Latvia                           | Northern Europe    | Europe    | 2004           | 938.44                                               | 11.37                  | 9.66       | 16.28                                                | 6.61                   | 11,730          | 3,080                |
| 119              | 428 | LVA  | Latvia                           | Northern Europe    | Europe    | 2005           | 888.60                                               | 14.57                  | 9.50       | 15.68                                                | 7.85                   | 13,230          | 3,148                |
| 119              | 428 | LVA  | Latvia                           | Northern Europe    | Europe    | 2006           | 867.56                                               | 16.07                  | 9.94       | 15.76                                                | 7.58                   | 15,020          | 3,230                |
| 119              | 428 | LVA  | Latvia                           | Northern Europe    | Europe    | 2007           | 869.96                                               | 15.69                  | 9.43       | 16.48                                                | 6.04                   | 17,150          | 3,213                |
| 119              | 428 | LVA  | Latvia                           | Northern Europe    | Europe    | 2008           | 921.99                                               | 11.85                  | 9.18       | 16.78                                                | 5.46                   | 18,640          | 3,270                |
| 119              | 428 | LVA  | Latvia                           | Northern Europe    | Europe    | 2009           | 932.22                                               | 11.13                  | 9.16       | 16.41                                                | 6.01                   | 18,220          | 3,277                |
| 119              | 428 | LVA  | Latvia                           | Northern Europe    | Europe    | 2010           | 897.69                                               | 13.16                  | 8.95       | 16.05                                                | 6.64                   | 17,970          | 3,251                |
| 119              | 428 | LVA  | Latvia                           | Northern Europe    | Europe    | 2011           | 890.56                                               | 14.29                  | 9.11       | 16.47                                                | 5.80                   | 20,080          | 3,293                |
| 121              | 422 | LBN  | Lebanon                          | Western Asia       | Asia      | 1992           | 1,036.12                                             | 6.64                   | 13.33      | 20.57                                                | 2.32                   | 8,110           | 3,254                |
| 121              | 422 | LBN  | Lebanon                          | Western Asia       | Asia      | 1993           | 1,046.23                                             | 6.33                   | 12.86      | 20.93                                                | 2.14                   | 8,540           | 3,253                |
| 121              | 422 | LBN  | Lebanon                          | Western Asia       | Asia      | 1994           | 1,045.62                                             | 6.33                   | 12.86      | 20.92                                                | 2.14                   | 9,210           | 3,284                |



Dietary calcium and zinc deficiency risks are decreasing but remain prevalent

| FAO country code | UNI | ISO3 | Country    | Region          | Continent | Reference year | Ca supply (mg capita <sup>-1</sup> d <sup>-1</sup> ) | Ca deficiency risk (%) | Phytate:Zn | Zn supply (mg capita <sup>-1</sup> d <sup>-1</sup> ) | Zn deficiency risk (%) | GNI-PPP (US \$) | Energy supply (kcal) |
|------------------|-----|------|------------|-----------------|-----------|----------------|------------------------------------------------------|------------------------|------------|------------------------------------------------------|------------------------|-----------------|----------------------|
| 121              | 422 | LBN  | Lebanon    | Western Asia    | Asia      | 1995           | 1,119.07                                             | 4.55                   | 13.96      | 21.31                                                | 1.96                   | 9,900           | 3,287                |
| 121              | 422 | LBN  | Lebanon    | Western Asia    | Asia      | 1996           | 1,150.11                                             | 3.98                   | 14.10      | 21.62                                                | 1.82                   | 10,340          | 3,306                |
| 121              | 422 | LBN  | Lebanon    | Western Asia    | Asia      | 1997           | 1,218.90                                             | 3.01                   | 13.63      | 24.22                                                | 1.08                   | 10,110          | 3,388                |
| 121              | 422 | LBN  | Lebanon    | Western Asia    | Asia      | 1998           | 1,054.95                                             | 6.08                   | 14.33      | 23.09                                                | 1.34                   | 10,400          | 3,389                |
| 121              | 422 | LBN  | Lebanon    | Western Asia    | Asia      | 1999           | 1,083.93                                             | 5.35                   | 13.89      | 23.52                                                | 1.24                   | 10,390          | 3,385                |
| 121              | 422 | LBN  | Lebanon    | Western Asia    | Asia      | 2000           | 1,098.61                                             | 5.02                   | 13.64      | 23.48                                                | 1.25                   | 10,580          | 3,319                |
| 121              | 422 | LBN  | Lebanon    | Western Asia    | Asia      | 2001           | 1,061.73                                             | 5.95                   | 14.76      | 23.33                                                | 1.29                   | 10,590          | 3,325                |
| 121              | 422 | LBN  | Lebanon    | Western Asia    | Asia      | 2002           | 1,093.99                                             | 5.18                   | 13.72      | 23.10                                                | 1.37                   | 10,180          | 3,301                |
| 121              | 422 | LBN  | Lebanon    | Western Asia    | Asia      | 2003           | 1,021.69                                             | 7.28                   | 13.77      | 22.52                                                | 1.55                   | 8,870           | 3,210                |
| 121              | 422 | LBN  | Lebanon    | Western Asia    | Asia      | 2004           | 1,064.28                                             | 6.03                   | 13.72      | 22.33                                                | 1.63                   | 10,890          | 3,193                |
| 121              | 422 | LBN  | Lebanon    | Western Asia    | Asia      | 2005           | 996.32                                               | 8.38                   | 13.30      | 22.16                                                | 1.71                   | 11,300          | 3,128                |
| 121              | 422 | LBN  | Lebanon    | Western Asia    | Asia      | 2006           | 936.23                                               | 11.33                  | 13.06      | 21.41                                                | 2.01                   | 11,640          | 3,097                |
| 121              | 422 | LBN  | Lebanon    | Western Asia    | Asia      | 2007           | 986.27                                               | 8.89                   | 13.96      | 21.39                                                | 2.03                   | 12,930          | 3,173                |
| 121              | 422 | LBN  | Lebanon    | Western Asia    | Asia      | 2008           | 935.47                                               | 11.52                  | 13.61      | 21.35                                                | 2.06                   | 14,040          | 3,126                |
| 121              | 422 | LBN  | Lebanon    | Western Asia    | Asia      | 2009           | 841.90                                               | 18.82                  | 13.96      | 22.38                                                | 1.66                   | 14,820          | 3,133                |
| 121              | 422 | LBN  | Lebanon    | Western Asia    | Asia      | 2010           | 925.23                                               | 12.21                  | 13.19      | 21.50                                                | 2.00                   | 15,580          | 3,169                |
| 121              | 422 | LBN  | Lebanon    | Western Asia    | Asia      | 2011           | 920.67                                               | 12.49                  | 12.92      | 20.65                                                | 2.44                   | 16,360          | 3,181                |
| 122              | 426 | LSO  | Lesotho    | Southern Africa | Africa    | 1992           | 249.82                                               | 100.00                 | 19.57      | 17.10                                                | 5.64                   | 1,460           | 2,382                |
| 122              | 426 | LSO  | Lesotho    | Southern Africa | Africa    | 1993           | 252.93                                               | 100.00                 | 19.00      | 16.97                                                | 5.87                   | 1,450           | 2,377                |
| 122              | 426 | LSO  | Lesotho    | Southern Africa | Africa    | 1994           | 260.33                                               | 100.00                 | 19.92      | 16.96                                                | 5.89                   | 1,500           | 2,405                |
| 122              | 426 | LSO  | Lesotho    | Southern Africa | Africa    | 1995           | 246.88                                               | 100.00                 | 20.92      | 15.71                                                | 8.54                   | 1,490           | 2,296                |
| 122              | 426 | LSO  | Lesotho    | Southern Africa | Africa    | 1996           | 261.75                                               | 100.00                 | 21.31      | 16.29                                                | 7.19                   | 1,580           | 2,360                |
| 122              | 426 | LSO  | Lesotho    | Southern Africa | Africa    | 1997           | 256.49                                               | 100.00                 | 21.27      | 16.65                                                | 6.46                   | 1,630           | 2,398                |
| 122              | 426 | LSO  | Lesotho    | Southern Africa | Africa    | 1998           | 249.08                                               | 100.00                 | 21.62      | 16.79                                                | 6.19                   | 1,590           | 2,427                |
| 122              | 426 | LSO  | Lesotho    | Southern Africa | Africa    | 1999           | 256.10                                               | 100.00                 | 21.42      | 17.11                                                | 5.66                   | 1,640           | 2,456                |
| 122              | 426 | LSO  | Lesotho    | Southern Africa | Africa    | 2000           | 259.61                                               | 100.00                 | 21.51      | 17.04                                                | 5.78                   | 1,700           | 2,462                |
| 122              | 426 | LSO  | Lesotho    | Southern Africa | Africa    | 2001           | 265.37                                               | 100.00                 | 21.46      | 17.23                                                | 5.44                   | 2,080           | 2,485                |
| 122              | 426 | LSO  | Lesotho    | Southern Africa | Africa    | 2002           | 260.64                                               | 100.00                 | 21.54      | 17.45                                                | 5.14                   | 2,120           | 2,516                |
| 122              | 426 | LSO  | Lesotho    | Southern Africa | Africa    | 2003           | 258.77                                               | 100.00                 | 21.71      | 17.46                                                | 5.17                   | 2,220           | 2,518                |
| 122              | 426 | LSO  | Lesotho    | Southern Africa | Africa    | 2004           | 260.16                                               | 100.00                 | 21.83      | 17.61                                                | 4.99                   | 2,230           | 2,541                |
| 122              | 426 | LSO  | Lesotho    | Southern Africa | Africa    | 2005           | 269.99                                               | 100.00                 | 21.76      | 17.85                                                | 4.69                   | 2,210           | 2,567                |
| 122              | 426 | LSO  | Lesotho    | Southern Africa | Africa    | 2006           | 270.54                                               | 100.00                 | 20.95      | 18.62                                                | 3.84                   | 2,260           | 2,695                |
| 122              | 426 | LSO  | Lesotho    | Southern Africa | Africa    | 2007           | 280.68                                               | 100.00                 | 21.91      | 17.80                                                | 4.81                   | 2,330           | 2,658                |
| 122              | 426 | LSO  | Lesotho    | Southern Africa | Africa    | 2008           | 273.68                                               | 100.00                 | 21.73      | 17.90                                                | 4.69                   | 2,450           | 2,652                |
| 122              | 426 | LSO  | Lesotho    | Southern Africa | Africa    | 2009           | 276.16                                               | 100.00                 | 21.86      | 17.83                                                | 4.78                   | 2,510           | 2,660                |
| 122              | 426 | LSO  | Lesotho    | Southern Africa | Africa    | 2010           | 289.62                                               | 100.00                 | 22.29      | 18.16                                                | 4.37                   | 2,620           | 2,682                |
| 122              | 426 | LSO  | Lesotho    | Southern Africa | Africa    | 2011           | 300.34                                               | 100.00                 | 21.81      | 18.57                                                | 3.93                   | 2,610           | 2,695                |
| 123              | 430 | LBR  | Liberia    | Western Africa  | Africa    | 1997           | 224.46                                               | 100.00                 | 15.83      | 8.18                                                 | 85.91                  | 190             | 2,170                |
| 123              | 430 | LBR  | Liberia    | Western Africa  | Africa    | 1998           | 217.94                                               | 100.00                 | 17.25      | 7.79                                                 | 90.52                  | 240             | 2,144                |
| 123              | 430 | LBR  | Liberia    | Western Africa  | Africa    | 1999           | 221.13                                               | 100.00                 | 16.78      | 7.90                                                 | 89.02                  | 230             | 2,093                |
| 123              | 430 | LBR  | Liberia    | Western Africa  | Africa    | 2000           | 221.37                                               | 100.00                 | 17.06      | 7.35                                                 | 94.59                  | 360             | 2,122                |
| 123              | 430 | LBR  | Liberia    | Western Africa  | Africa    | 2001           | 204.80                                               | 100.00                 | 17.39      | 6.69                                                 | 98.53                  | 320             | 2,038                |
| 123              | 430 | LBR  | Liberia    | Western Africa  | Africa    | 2002           | 208.82                                               | 100.00                 | 17.57      | 6.71                                                 | 98.42                  | 420             | 2,066                |
| 123              | 430 | LBR  | Liberia    | Western Africa  | Africa    | 2003           | 209.53                                               | 100.00                 | 17.04      | 6.95                                                 | 97.32                  | 260             | 2,051                |
| 123              | 430 | LBR  | Liberia    | Western Africa  | Africa    | 2004           | 221.63                                               | 100.00                 | 16.29      | 7.15                                                 | 96.08                  | 250             | 2,092                |
| 123              | 430 | LBR  | Liberia    | Western Africa  | Africa    | 2005           | 235.80                                               | 100.00                 | 16.26      | 7.38                                                 | 94.19                  | 310             | 2,176                |
| 123              | 430 | LBR  | Liberia    | Western Africa  | Africa    | 2006           | 195.39                                               | 100.00                 | 17.11      | 6.91                                                 | 97.52                  | 340             | 2,131                |
| 123              | 430 | LBR  | Liberia    | Western Africa  | Africa    | 2007           | 195.38                                               | 100.00                 | 17.57      | 7.11                                                 | 96.32                  | 410             | 2,185                |
| 123              | 430 | LBR  | Liberia    | Western Africa  | Africa    | 2008           | 196.86                                               | 100.00                 | 18.12      | 7.34                                                 | 94.57                  | 460             | 2,259                |
| 123              | 430 | LBR  | Liberia    | Western Africa  | Africa    | 2009           | 183.84                                               | 100.00                 | 18.59      | 7.23                                                 | 95.46                  | 540             | 2,243                |
| 123              | 430 | LBR  | Liberia    | Western Africa  | Africa    | 2010           | 186.01                                               | 100.00                 | 18.48      | 7.02                                                 | 96.85                  | 580             | 2,226                |
| 123              | 430 | LBR  | Liberia    | Western Africa  | Africa    | 2011           | 189.97                                               | 100.00                 | 18.05      | 7.25                                                 | 95.42                  | 670             | 2,251                |
| 126              | 440 | LTU  | Lithuania  | Northern Europe | Europe    | 1992           | 677.08                                               | 42.56                  | 6.69       | 24.55                                                | 0.93                   | 7,310           | 2,984                |
| 126              | 440 | LTU  | Lithuania  | Northern Europe | Europe    | 1993           | 673.62                                               | 43.46                  | 6.96       | 23.00                                                | 1.25                   | 6,300           | 2,816                |
| 126              | 440 | LTU  | Lithuania  | Northern Europe | Europe    | 1994           | 797.61                                               | 22.44                  | 7.47       | 21.67                                                | 1.66                   | 5,840           | 2,777                |
| 126              | 440 | LTU  | Lithuania  | Northern Europe | Europe    | 1995           | 694.73                                               | 39.26                  | 8.75       | 20.93                                                | 1.96                   | 6,190           | 2,822                |
| 126              | 440 | LTU  | Lithuania  | Northern Europe | Europe    | 1996           | 730.80                                               | 32.60                  | 9.06       | 21.60                                                | 1.68                   | 6,600           | 3,000                |
| 126              | 440 | LTU  | Lithuania  | Northern Europe | Europe    | 1997           | 649.86                                               | 49.33                  | 9.54       | 21.55                                                | 1.71                   | 7,170           | 3,178                |
| 126              | 440 | LTU  | Lithuania  | Northern Europe | Europe    | 1998           | 659.67                                               | 47.85                  | 9.36       | 22.16                                                | 1.51                   | 7,830           | 3,191                |
| 126              | 440 | LTU  | Lithuania  | Northern Europe | Europe    | 1999           | 709.60                                               | 37.26                  | 9.15       | 21.19                                                | 1.87                   | 7,830           | 3,125                |
| 126              | 440 | LTU  | Lithuania  | Northern Europe | Europe    | 2000           | 921.57                                               | 12.19                  | 9.08       | 20.61                                                | 2.15                   | 8,480           | 3,155                |
| 126              | 440 | LTU  | Lithuania  | Northern Europe | Europe    | 2001           | 918.06                                               | 12.49                  | 9.50       | 19.43                                                | 2.84                   | 9,450           | 3,264                |
| 126              | 440 | LTU  | Lithuania  | Northern Europe | Europe    | 2002           | 889.09                                               | 14.56                  | 9.10       | 20.01                                                | 2.48                   | 10,520          | 3,273                |
| 126              | 440 | LTU  | Lithuania  | Northern Europe | Europe    | 2003           | 703.88                                               | 39.03                  | 9.24       | 19.62                                                | 2.73                   | 11,850          | 3,187                |
| 126              | 440 | LTU  | Lithuania  | Northern Europe | Europe    | 2004           | 1,009.23                                             | 8.01                   | 8.65       | 20.80                                                | 2.06                   | 12,830          | 3,364                |
| 126              | 440 | LTU  | Lithuania  | Northern Europe | Europe    | 2005           | 1,117.00                                             | 4.89                   | 8.28       | 21.49                                                | 1.76                   | 14,440          | 3,464                |
| 126              | 440 | LTU  | Lithuania  | Northern Europe | Europe    | 2006           | 1,066.28                                             | 6.10                   | 8.53       | 19.83                                                | 2.57                   | 16,430          | 3,463                |
| 126              | 440 | LTU  | Lithuania  | Northern Europe | Europe    | 2007           | 1,046.28                                             | 6.64                   | 8.30       | 21.02                                                | 1.94                   | 18,350          | 3,567                |
| 126              | 440 | LTU  | Lithuania  | Northern Europe | Europe    | 2008           | 1,056.38                                             | 6.28                   | 8.14       | 20.21                                                | 2.31                   | 20,010          | 3,495                |
| 126              | 440 | LTU  | Lithuania  | Northern Europe | Europe    | 2009           | 1,068.90                                             | 5.87                   | 8.39       | 19.85                                                | 2.49                   | 18,540          | 3,454                |
| 126              | 440 | LTU  | Lithuania  | Northern Europe | Europe    | 2010           | 1,024.33                                             | 7.14                   | 8.49       | 19.23                                                | 2.87                   | 19,470          | 3,396                |
| 126              | 440 | LTU  | Lithuania  | Northern Europe | Europe    | 2011           | 1,117.49                                             | 4.63                   | 8.54       | 19.17                                                | 2.89                   | 21,580          | 3,463                |
| 129              | 450 | MDG  | Madagascar | Eastern Africa  | Africa    | 1992           | 330.13                                               | 99.99                  | 16.18      | 9.79                                                 | 58.54                  | 970             | 2,099                |
| 129              | 450 | MDG  | Madagascar | Eastern Africa  | Africa    | 1993           | 326.92                                               | 99.99                  | 16.35      | 9.77                                                 | 58.68                  | 980             | 2,096                |
| 129              | 450 | MDG  | Madagascar | Eastern Africa  | Africa    | 1994           | 318.40                                               | 100.00                 | 16.35      | 9.36                                                 | 65.41                  | 960             | 2,033                |
| 129              | 450 | MDG  | Madagascar | Eastern Africa  | Africa    | 1995           | 312.08                                               | 100.00                 | 16.27      | 9.32                                                 | 65.95                  | 970             | 2,027                |
| 129              | 450 | MDG  | Madagascar | Eastern Africa  | Africa    | 1996           | 309.36                                               | 100.00                 | 16.54      | 9.24                                                 | 67.65                  | 990             | 2,019                |
| 129              | 450 | MDG  | Madagascar | Eastern Africa  | Africa    | 1997           | 309.62                                               | 100.00                 | 16.74      | 9.26                                                 | 67.06                  | 1,020           | 2,020                |
| 129              | 450 | MDG  | Madagascar | Eastern Africa  | Africa    | 1998           | 303.83                                               | 100.00                 | 16.86      | 9.14                                                 | 68.96                  | 1,050           | 2,013                |

| FAO country code | UNI | ISO3 | Country    | Region             | Continent | Reference year | Ca supply (mg capita <sup>-1</sup> d <sup>-1</sup> ) | Ca deficiency risk (%) | Phytate:Zn | Zn supply (mg capita <sup>-1</sup> d <sup>-1</sup> ) | Zn deficiency risk (%) | GNI-PPP (US \$) | Energy supply (kcal) |
|------------------|-----|------|------------|--------------------|-----------|----------------|------------------------------------------------------|------------------------|------------|------------------------------------------------------|------------------------|-----------------|----------------------|
| 129              | 450 | MDG  | Madagascar | Eastern Africa     | Africa    | 1999           | 299.45                                               | 100.00                 | 16.95      | 9.05                                                 | 70.43                  | 1,090           | 2,006                |
| 129              | 450 | MDG  | Madagascar | Eastern Africa     | Africa    | 2000           | 299.01                                               | 100.00                 | 17.07      | 8.99                                                 | 71.35                  | 1,120           | 2,006                |
| 129              | 450 | MDG  | Madagascar | Eastern Africa     | Africa    | 2001           | 275.18                                               | 100.00                 | 18.14      | 8.58                                                 | 78.47                  | 1,190           | 1,993                |
| 129              | 450 | MDG  | Madagascar | Eastern Africa     | Africa    | 2002           | 266.42                                               | 100.00                 | 18.65      | 8.39                                                 | 81.57                  | 1,020           | 1,947                |
| 129              | 450 | MDG  | Madagascar | Eastern Africa     | Africa    | 2003           | 264.71                                               | 100.00                 | 18.79      | 8.77                                                 | 75.41                  | 1,110           | 1,977                |
| 129              | 450 | MDG  | Madagascar | Eastern Africa     | Africa    | 2004           | 265.00                                               | 100.00                 | 19.00      | 8.79                                                 | 75.15                  | 1,160           | 1,980                |
| 129              | 450 | MDG  | Madagascar | Eastern Africa     | Africa    | 2005           | 275.10                                               | 100.00                 | 18.54      | 9.23                                                 | 67.84                  | 1,220           | 2,059                |
| 129              | 450 | MDG  | Madagascar | Eastern Africa     | Africa    | 2006           | 271.64                                               | 100.00                 | 18.58      | 9.28                                                 | 67.29                  | 1,280           | 2,082                |
| 129              | 450 | MDG  | Madagascar | Eastern Africa     | Africa    | 2007           | 269.86                                               | 100.00                 | 18.36      | 9.37                                                 | 65.78                  | 1,370           | 2,095                |
| 129              | 450 | MDG  | Madagascar | Eastern Africa     | Africa    | 2008           | 258.85                                               | 100.00                 | 18.33      | 9.23                                                 | 68.21                  | 1,460           | 2,060                |
| 129              | 450 | MDG  | Madagascar | Eastern Africa     | Africa    | 2009           | 261.93                                               | 100.00                 | 18.17      | 9.14                                                 | 69.74                  | 1,360           | 2,068                |
| 129              | 450 | MDG  | Madagascar | Eastern Africa     | Africa    | 2010           | 261.77                                               | 100.00                 | 17.93      | 9.20                                                 | 68.82                  | 1,350           | 2,071                |
| 129              | 450 | MDG  | Madagascar | Eastern Africa     | Africa    | 2011           | 273.98                                               | 100.00                 | 17.76      | 9.35                                                 | 66.52                  | 1,350           | 2,092                |
| 130              | 454 | MWI  | Malawi     | Eastern Africa     | Africa    | 1992           | 180.30                                               | 100.00                 | 27.41      | 11.39                                                | 35.41                  | 420             | 1,800                |
| 130              | 454 | MWI  | Malawi     | Eastern Africa     | Africa    | 1993           | 184.00                                               | 100.00                 | 27.43      | 11.97                                                | 29.13                  | 460             | 1,879                |
| 130              | 454 | MWI  | Malawi     | Eastern Africa     | Africa    | 1994           | 179.83                                               | 100.00                 | 27.14      | 11.96                                                | 29.12                  | 420             | 1,901                |
| 130              | 454 | MWI  | Malawi     | Eastern Africa     | Africa    | 1995           | 180.19                                               | 100.00                 | 27.63      | 12.11                                                | 27.59                  | 490             | 2,004                |
| 130              | 454 | MWI  | Malawi     | Eastern Africa     | Africa    | 1996           | 196.19                                               | 100.00                 | 27.26      | 12.45                                                | 24.58                  | 540             | 2,017                |
| 130              | 454 | MWI  | Malawi     | Eastern Africa     | Africa    | 1997           | 200.62                                               | 100.00                 | 27.90      | 12.23                                                | 26.42                  | 550             | 2,057                |
| 130              | 454 | MWI  | Malawi     | Eastern Africa     | Africa    | 1998           | 208.82                                               | 100.00                 | 28.17      | 12.51                                                | 23.93                  | 560             | 2,116                |
| 130              | 454 | MWI  | Malawi     | Eastern Africa     | Africa    | 1999           | 220.11                                               | 100.00                 | 28.34      | 12.89                                                | 20.96                  | 570             | 2,179                |
| 130              | 454 | MWI  | Malawi     | Eastern Africa     | Africa    | 2000           | 219.41                                               | 100.00                 | 28.02      | 13.06                                                | 19.79                  | 580             | 2,204                |
| 130              | 454 | MWI  | Malawi     | Eastern Africa     | Africa    | 2001           | 228.18                                               | 100.00                 | 28.32      | 13.12                                                | 19.52                  | 550             | 2,235                |
| 130              | 454 | MWI  | Malawi     | Eastern Africa     | Africa    | 2002           | 216.62                                               | 100.00                 | 28.23      | 12.86                                                | 21.37                  | 550             | 2,173                |
| 130              | 454 | MWI  | Malawi     | Eastern Africa     | Africa    | 2003           | 220.14                                               | 100.00                 | 28.26      | 12.81                                                | 21.75                  | 580             | 2,168                |
| 130              | 454 | MWI  | Malawi     | Eastern Africa     | Africa    | 2004           | 219.06                                               | 100.00                 | 28.26      | 12.85                                                | 21.50                  | 610             | 2,166                |
| 130              | 454 | MWI  | Malawi     | Eastern Africa     | Africa    | 2005           | 214.88                                               | 100.00                 | 28.09      | 12.90                                                | 21.18                  | 630             | 2,191                |
| 130              | 454 | MWI  | Malawi     | Eastern Africa     | Africa    | 2006           | 223.73                                               | 100.00                 | 28.39      | 13.28                                                | 18.80                  | 640             | 2,270                |
| 130              | 454 | MWI  | Malawi     | Eastern Africa     | Africa    | 2007           | 243.36                                               | 100.00                 | 28.34      | 13.54                                                | 17.18                  | 710             | 2,293                |
| 130              | 454 | MWI  | Malawi     | Eastern Africa     | Africa    | 2008           | 235.62                                               | 100.00                 | 27.96      | 13.53                                                | 17.11                  | 760             | 2,318                |
| 130              | 454 | MWI  | Malawi     | Eastern Africa     | Africa    | 2009           | 236.63                                               | 100.00                 | 27.82      | 13.47                                                | 17.39                  | 800             | 2,311                |
| 130              | 454 | MWI  | Malawi     | Eastern Africa     | Africa    | 2010           | 252.14                                               | 100.00                 | 28.18      | 13.82                                                | 15.42                  | 710             | 2,331                |
| 130              | 454 | MWI  | Malawi     | Eastern Africa     | Africa    | 2011           | 258.66                                               | 100.00                 | 27.99      | 14.05                                                | 14.42                  | 730             | 2,334                |
| 131              | 458 | MYS  | Malaysia   | South-Eastern Asia | Asia      | 1992           | 318.18                                               | 100.00                 | 12.74      | 11.95                                                | 29.56                  | 7,440           | 2,767                |
| 131              | 458 | MYS  | Malaysia   | South-Eastern Asia | Asia      | 1993           | 319.45                                               | 100.00                 | 12.62      | 11.87                                                | 30.40                  | 8,210           | 2,798                |
| 131              | 458 | MYS  | Malaysia   | South-Eastern Asia | Asia      | 1994           | 335.21                                               | 99.99                  | 12.68      | 12.00                                                | 29.06                  | 8,930           | 2,836                |
| 131              | 458 | MYS  | Malaysia   | South-Eastern Asia | Asia      | 1995           | 339.17                                               | 99.98                  | 12.66      | 12.22                                                | 26.93                  | 9,770           | 2,916                |
| 131              | 458 | MYS  | Malaysia   | South-Eastern Asia | Asia      | 1996           | 351.43                                               | 99.95                  | 12.90      | 12.27                                                | 26.62                  | 10,670          | 2,924                |
| 131              | 458 | MYS  | Malaysia   | South-Eastern Asia | Asia      | 1997           | 356.48                                               | 99.93                  | 12.46      | 12.72                                                | 22.81                  | 11,270          | 2,909                |
| 131              | 458 | MYS  | Malaysia   | South-Eastern Asia | Asia      | 1998           | 324.05                                               | 100.00                 | 12.26      | 12.63                                                | 23.56                  | 10,290          | 2,888                |
| 131              | 458 | MYS  | Malaysia   | South-Eastern Asia | Asia      | 1999           | 355.72                                               | 99.94                  | 12.54      | 12.80                                                | 22.25                  | 10,640          | 2,910                |
| 131              | 458 | MYS  | Malaysia   | South-Eastern Asia | Asia      | 2000           | 353.99                                               | 99.95                  | 12.52      | 12.56                                                | 24.16                  | 11,440          | 2,844                |
| 131              | 458 | MYS  | Malaysia   | South-Eastern Asia | Asia      | 2001           | 373.72                                               | 99.81                  | 12.68      | 12.50                                                | 24.49                  | 11,620          | 2,822                |
| 131              | 458 | MYS  | Malaysia   | South-Eastern Asia | Asia      | 2002           | 375.43                                               | 99.79                  | 12.11      | 12.75                                                | 22.48                  | 12,280          | 2,776                |
| 131              | 458 | MYS  | Malaysia   | South-Eastern Asia | Asia      | 2003           | 384.71                                               | 99.66                  | 12.23      | 13.06                                                | 20.25                  | 13,160          | 2,796                |
| 131              | 458 | MYS  | Malaysia   | South-Eastern Asia | Asia      | 2004           | 388.92                                               | 99.59                  | 12.17      | 13.82                                                | 15.68                  | 14,200          | 2,831                |
| 131              | 458 | MYS  | Malaysia   | South-Eastern Asia | Asia      | 2005           | 404.07                                               | 99.17                  | 12.09      | 13.83                                                | 15.60                  | 15,270          | 2,795                |
| 131              | 458 | MYS  | Malaysia   | South-Eastern Asia | Asia      | 2006           | 399.73                                               | 99.33                  | 12.04      | 13.68                                                | 16.39                  | 16,570          | 2,816                |
| 131              | 458 | MYS  | Malaysia   | South-Eastern Asia | Asia      | 2007           | 381.88                                               | 99.73                  | 11.94      | 13.47                                                | 17.60                  | 17,900          | 2,847                |
| 131              | 458 | MYS  | Malaysia   | South-Eastern Asia | Asia      | 2008           | 353.04                                               | 99.96                  | 12.10      | 12.99                                                | 20.72                  | 18,620          | 2,789                |
| 131              | 458 | MYS  | Malaysia   | South-Eastern Asia | Asia      | 2009           | 400.08                                               | 99.36                  | 11.54      | 13.62                                                | 16.76                  | 18,340          | 2,849                |
| 131              | 458 | MYS  | Malaysia   | South-Eastern Asia | Asia      | 2010           | 402.79                                               | 99.28                  | 11.58      | 13.60                                                | 16.82                  | 19,340          | 2,871                |
| 131              | 458 | MYS  | Malaysia   | South-Eastern Asia | Asia      | 2011           | 417.52                                               | 98.68                  | 11.95      | 13.56                                                | 17.10                  | 20,560          | 2,855                |
| 133              | 466 | MLI  | Mali       | Western Africa     | Africa    | 1992           | 379.54                                               | 99.64                  | 20.36      | 12.92                                                | 21.07                  | 790             | 2,355                |
| 133              | 466 | MLI  | Mali       | Western Africa     | Africa    | 1993           | 371.44                                               | 99.77                  | 20.42      | 13.09                                                | 19.86                  | 780             | 2,346                |
| 133              | 466 | MLI  | Mali       | Western Africa     | Africa    | 1994           | 365.71                                               | 99.84                  | 20.46      | 12.70                                                | 22.71                  | 770             | 2,331                |
| 133              | 466 | MLI  | Mali       | Western Africa     | Africa    | 1995           | 369.22                                               | 99.80                  | 20.03      | 13.15                                                | 19.45                  | 810             | 2,340                |
| 133              | 466 | MLI  | Mali       | Western Africa     | Africa    | 1996           | 379.58                                               | 99.64                  | 19.85      | 12.97                                                | 20.97                  | 830             | 2,373                |
| 133              | 466 | MLI  | Mali       | Western Africa     | Africa    | 1997           | 392.28                                               | 99.32                  | 19.94      | 13.28                                                | 18.76                  | 870             | 2,360                |
| 133              | 466 | MLI  | Mali       | Western Africa     | Africa    | 1998           | 409.26                                               | 98.60                  | 19.96      | 13.43                                                | 17.76                  | 920             | 2,427                |
| 133              | 466 | MLI  | Mali       | Western Africa     | Africa    | 1999           | 418.34                                               | 98.04                  | 19.95      | 13.72                                                | 16.05                  | 970             | 2,451                |
| 133              | 466 | MLI  | Mali       | Western Africa     | Africa    | 2000           | 410.95                                               | 98.49                  | 19.96      | 13.51                                                | 17.14                  | 1,000           | 2,453                |
| 133              | 466 | MLI  | Mali       | Western Africa     | Africa    | 2001           | 402.65                                               | 98.89                  | 19.65      | 13.72                                                | 16.22                  | 1,050           | 2,502                |
| 133              | 466 | MLI  | Mali       | Western Africa     | Africa    | 2002           | 422.00                                               | 97.68                  | 19.16      | 13.81                                                | 15.64                  | 1,070           | 2,498                |
| 133              | 466 | MLI  | Mali       | Western Africa     | Africa    | 2003           | 460.57                                               | 93.15                  | 18.98      | 14.23                                                | 13.52                  | 1,180           | 2,521                |
| 133              | 466 | MLI  | Mali       | Western Africa     | Africa    | 2004           | 482.11                                               | 89.24                  | 19.31      | 14.11                                                | 14.01                  | 1,200           | 2,545                |
| 133              | 466 | MLI  | Mali       | Western Africa     | Africa    | 2005           | 521.96                                               | 79.86                  | 18.72      | 14.47                                                | 12.39                  | 1,270           | 2,574                |
| 133              | 466 | MLI  | Mali       | Western Africa     | Africa    | 2006           | 533.12                                               | 76.80                  | 18.30      | 14.72                                                | 11.63                  | 1,380           | 2,654                |
| 133              | 466 | MLI  | Mali       | Western Africa     | Africa    | 2007           | 644.63                                               | 46.47                  | 17.87      | 15.28                                                | 9.67                   | 1,430           | 2,725                |
| 133              | 466 | MLI  | Mali       | Western Africa     | Africa    | 2008           | 629.20                                               | 50.26                  | 17.69      | 15.50                                                | 8.97                   | 1,490           | 2,777                |
| 133              | 466 | MLI  | Mali       | Western Africa     | Africa    | 2009           | 670.11                                               | 40.59                  | 17.54      | 16.19                                                | 7.24                   | 1,500           | 2,839                |
| 133              | 466 | MLI  | Mali       | Western Africa     | Africa    | 2010           | 657.13                                               | 43.49                  | 17.66      | 16.30                                                | 6.99                   | 1,560           | 2,813                |
| 133              | 466 | MLI  | Mali       | Western Africa     | Africa    | 2011           | 657.98                                               | 43.38                  | 17.50      | 16.49                                                | 6.72                   | 1,590           | 2,833                |
| 136              | 478 | MRT  | Mauritania | Western Africa     | Africa    | 1992           | 669.24                                               | 44.37                  | 11.77      | 14.86                                                | 11.13                  | 1,460           | 2,520                |
| 136              | 478 | MRT  | Mauritania | Western Africa     | Africa    | 1993           | 686.96                                               | 38.35                  | 13.60      | 13.69                                                | 16.27                  | 1,530           | 2,588                |
| 136              | 478 | MRT  | Mauritania | Western Africa     | Africa    | 1994           | 645.02                                               | 47.82                  | 13.46      | 13.72                                                | 16.05                  | 1,490           | 2,488                |
| 136              | 478 | MRT  | Mauritania | Western Africa     | Africa    | 1995           | 616.87                                               | 55.02                  | 14.10      | 12.46                                                | 24.50                  | 1,630           | 2,533                |
| 136              | 478 | MRT  | Mauritania | Western Africa     | Africa    | 1996           | 627.13                                               | 52.38                  | 14.36      | 13.09                                                | 20.01                  | 1,780           | 2,563                |
| 136              | 478 | MRT  | Mauritania | Western Africa     | Africa    | 1997           | 631.03                                               | 51.41                  | 13.39      | 13.37                                                | 18.19                  | 1,690           | 2,583                |

Dietary calcium and zinc deficiency risks are decreasing but remain prevalent

| FAO country code | UNI | ISO3 | Country    | Region          | Continent | Reference year | Ca supply (mg capita <sup>-1</sup> d <sup>-1</sup> ) | Ca deficiency risk (%) | Phytate:Zn | Zn supply (mg capita <sup>-1</sup> d <sup>-1</sup> ) | Zn deficiency risk (%) | GNI-PPP (US \$) | Energy supply (kcal) |
|------------------|-----|------|------------|-----------------|-----------|----------------|------------------------------------------------------|------------------------|------------|------------------------------------------------------|------------------------|-----------------|----------------------|
| 136              | 478 | MRT  | Mauritania | Western Africa  | Africa    | 1988           | 634.19                                               | 50.63                  | 12.67      | 14.51                                                | 12.46                  | 1,740           | 2,609                |
| 136              | 478 | MRT  | Mauritania | Western Africa  | Africa    | 1999           | 610.27                                               | 56.91                  | 13.31      | 13.46                                                | 17.57                  | 1,850           | 2,627                |
| 136              | 478 | MRT  | Mauritania | Western Africa  | Africa    | 2000           | 589.36                                               | 62.65                  | 12.23      | 14.02                                                | 14.54                  | 1,810           | 2,633                |
| 136              | 478 | MRT  | Mauritania | Western Africa  | Africa    | 2001           | 625.81                                               | 52.86                  | 10.40      | 15.57                                                | 8.98                   | 1,770           | 2,618                |
| 136              | 478 | MRT  | Mauritania | Western Africa  | Africa    | 2002           | 643.83                                               | 48.33                  | 10.23      | 16.03                                                | 7.79                   | 1,970           | 2,639                |
| 136              | 478 | MRT  | Mauritania | Western Africa  | Africa    | 2003           | 622.20                                               | 53.82                  | 10.80      | 16.26                                                | 7.25                   | 1,960           | 2,712                |
| 136              | 478 | MRT  | Mauritania | Western Africa  | Africa    | 2004           | 621.20                                               | 54.10                  | 10.10      | 15.74                                                | 8.46                   | 2,060           | 2,598                |
| 136              | 478 | MRT  | Mauritania | Western Africa  | Africa    | 2005           | 597.72                                               | 60.43                  | 11.36      | 15.23                                                | 9.90                   | 2,240           | 2,632                |
| 136              | 478 | MRT  | Mauritania | Western Africa  | Africa    | 2006           | 614.38                                               | 55.92                  | 11.39      | 15.12                                                | 10.33                  | 2,530           | 2,618                |
| 136              | 478 | MRT  | Mauritania | Western Africa  | Africa    | 2007           | 649.51                                               | 47.00                  | 11.15      | 15.81                                                | 8.34                   | 2,620           | 2,745                |
| 136              | 478 | MRT  | Mauritania | Western Africa  | Africa    | 2008           | 675.07                                               | 41.16                  | 11.70      | 15.81                                                | 8.30                   | 2,720           | 2,801                |
| 136              | 478 | MRT  | Mauritania | Western Africa  | Africa    | 2009           | 667.82                                               | 42.79                  | 11.51      | 15.76                                                | 8.41                   | 2,660           | 2,801                |
| 136              | 478 | MRT  | Mauritania | Western Africa  | Africa    | 2010           | 666.52                                               | 43.11                  | 11.98      | 15.63                                                | 8.75                   | 2,660           | 2,792                |
| 136              | 478 | MRT  | Mauritania | Western Africa  | Africa    | 2011           | 680.18                                               | 40.14                  | 11.36      | 15.44                                                | 9.35                   | 2,680           | 2,791                |
| 137              | 480 | MUS  | Mauritius  | Eastern Africa  | Africa    | 1992           | 613.48                                               | 58.74                  | 11.58      | 13.87                                                | 15.58                  | 5,650           | 2,814                |
| 137              | 480 | MUS  | Mauritius  | Eastern Africa  | Africa    | 1993           | 615.00                                               | 57.99                  | 11.50      | 13.71                                                | 16.27                  | 5,990           | 2,790                |
| 137              | 480 | MUS  | Mauritius  | Eastern Africa  | Africa    | 1994           | 645.64                                               | 49.80                  | 11.36      | 13.79                                                | 15.72                  | 6,230           | 2,834                |
| 137              | 480 | MUS  | Mauritius  | Eastern Africa  | Africa    | 1995           | 671.44                                               | 43.53                  | 11.52      | 14.00                                                | 14.56                  | 6,590           | 2,895                |
| 137              | 480 | MUS  | Mauritius  | Eastern Africa  | Africa    | 1996           | 664.78                                               | 44.84                  | 11.24      | 14.18                                                | 13.55                  | 6,980           | 2,871                |
| 137              | 480 | MUS  | Mauritius  | Eastern Africa  | Africa    | 1997           | 644.92                                               | 49.59                  | 11.53      | 14.15                                                | 13.67                  | 7,450           | 2,828                |
| 137              | 480 | MUS  | Mauritius  | Eastern Africa  | Africa    | 1998           | 637.02                                               | 51.67                  | 11.23      | 14.43                                                | 12.49                  | 7,890           | 2,861                |
| 137              | 480 | MUS  | Mauritius  | Eastern Africa  | Africa    | 1999           | 665.69                                               | 44.85                  | 11.10      | 14.75                                                | 11.26                  | 8,120           | 2,862                |
| 137              | 480 | MUS  | Mauritius  | Eastern Africa  | Africa    | 2000           | 703.23                                               | 36.90                  | 10.74      | 15.17                                                | 9.85                   | 8,950           | 2,904                |
| 137              | 480 | MUS  | Mauritius  | Eastern Africa  | Africa    | 2001           | 694.67                                               | 38.78                  | 10.84      | 15.43                                                | 9.07                   | 9,380           | 2,954                |
| 137              | 480 | MUS  | Mauritius  | Eastern Africa  | Africa    | 2002           | 657.06                                               | 47.21                  | 10.71      | 15.45                                                | 9.01                   | 9,640           | 2,953                |
| 137              | 480 | MUS  | Mauritius  | Eastern Africa  | Africa    | 2003           | 624.60                                               | 55.40                  | 10.73      | 15.57                                                | 8.71                   | 10,000          | 2,958                |
| 137              | 480 | MUS  | Mauritius  | Eastern Africa  | Africa    | 2004           | 644.39                                               | 50.43                  | 10.83      | 16.01                                                | 7.62                   | 10,810          | 3,023                |
| 137              | 480 | MUS  | Mauritius  | Eastern Africa  | Africa    | 2005           | 631.18                                               | 53.91                  | 10.72      | 16.09                                                | 7.45                   | 11,220          | 3,009                |
| 137              | 480 | MUS  | Mauritius  | Eastern Africa  | Africa    | 2006           | 654.87                                               | 48.04                  | 10.76      | 16.04                                                | 7.49                   | 12,030          | 3,025                |
| 137              | 480 | MUS  | Mauritius  | Eastern Africa  | Africa    | 2007           | 546.97                                               | 76.88                  | 11.15      | 15.98                                                | 7.64                   | 13,270          | 3,078                |
| 137              | 480 | MUS  | Mauritius  | Eastern Africa  | Africa    | 2008           | 517.15                                               | 84.48                  | 10.90      | 15.52                                                | 8.82                   | 13,890          | 3,001                |
| 137              | 480 | MUS  | Mauritius  | Eastern Africa  | Africa    | 2009           | 546.49                                               | 77.34                  | 11.42      | 16.36                                                | 6.88                   | 14,170          | 3,125                |
| 137              | 480 | MUS  | Mauritius  | Eastern Africa  | Africa    | 2010           | 571.76                                               | 70.65                  | 11.26      | 16.94                                                | 5.81                   | 15,120          | 3,153                |
| 137              | 480 | MUS  | Mauritius  | Eastern Africa  | Africa    | 2011           | 599.05                                               | 63.34                  | 10.84      | 16.72                                                | 6.20                   | 15,870          | 3,055                |
| 138              | 484 | MEX  | Mexico     | Central America | Americas  | 1992           | 584.03                                               | 66.53                  | 17.91      | 17.47                                                | 5.20                   | 6,390           | 3,000                |
| 138              | 484 | MEX  | Mexico     | Central America | Americas  | 1993           | 562.78                                               | 74.91                  | 18.13      | 17.18                                                | 5.57                   | 8,290           | 3,008                |
| 138              | 484 | MEX  | Mexico     | Central America | Americas  | 1994           | 571.20                                               | 69.71                  | 17.52      | 17.65                                                | 4.83                   | 6,680           | 3,005                |
| 138              | 484 | MEX  | Mexico     | Central America | Americas  | 1995           | 553.68                                               | 74.37                  | 18.77      | 17.17                                                | 5.48                   | 7,680           | 2,967                |
| 138              | 484 | MEX  | Mexico     | Central America | Americas  | 1996           | 529.34                                               | 80.67                  | 18.94      | 16.94                                                | 5.82                   | 8,070           | 2,991                |
| 138              | 484 | MEX  | Mexico     | Central America | Americas  | 1997           | 562.44                                               | 74.55                  | 18.89      | 17.11                                                | 5.52                   | 8,710           | 2,967                |
| 138              | 484 | MEX  | Mexico     | Central America | Americas  | 1998           | 610.65                                               | 58.54                  | 18.44      | 17.61                                                | 4.79                   | 9,050           | 2,971                |
| 138              | 484 | MEX  | Mexico     | Central America | Americas  | 1999           | 624.33                                               | 54.92                  | 17.97      | 17.83                                                | 4.50                   | 9,520           | 2,982                |
| 138              | 484 | MEX  | Mexico     | Central America | Americas  | 2000           | 669.27                                               | 46.27                  | 17.76      | 18.46                                                | 3.80                   | 10,110          | 3,037                |
| 138              | 484 | MEX  | Mexico     | Central America | Americas  | 2001           | 667.85                                               | 44.28                  | 17.55      | 18.61                                                | 3.63                   | 10,120          | 3,086                |
| 138              | 484 | MEX  | Mexico     | Central America | Americas  | 2002           | 672.50                                               | 43.27                  | 17.27      | 18.67                                                | 3.57                   | 10,190          | 3,103                |
| 138              | 484 | MEX  | Mexico     | Central America | Americas  | 2003           | 682.46                                               | 41.16                  | 17.52      | 18.71                                                | 3.54                   | 10,400          | 3,108                |
| 138              | 484 | MEX  | Mexico     | Central America | Americas  | 2004           | 677.84                                               | 42.27                  | 17.59      | 18.45                                                | 3.78                   | 10,920          | 3,105                |
| 138              | 484 | MEX  | Mexico     | Central America | Americas  | 2005           | 673.74                                               | 43.28                  | 17.02      | 18.37                                                | 3.87                   | 11,800          | 3,065                |
| 138              | 484 | MEX  | Mexico     | Central America | Americas  | 2006           | 630.16                                               | 53.91                  | 17.17      | 18.28                                                | 3.96                   | 12,830          | 3,079                |
| 138              | 484 | MEX  | Mexico     | Central America | Americas  | 2007           | 676.93                                               | 42.74                  | 17.12      | 18.45                                                | 3.79                   | 13,340          | 3,094                |
| 138              | 484 | MEX  | Mexico     | Central America | Americas  | 2008           | 646.43                                               | 49.97                  | 17.37      | 18.20                                                | 4.05                   | 14,040          | 3,070                |
| 138              | 484 | MEX  | Mexico     | Central America | Americas  | 2009           | 623.46                                               | 55.91                  | 17.07      | 17.71                                                | 4.63                   | 13,730          | 3,026                |
| 138              | 484 | MEX  | Mexico     | Central America | Americas  | 2010           | 630.23                                               | 54.23                  | 17.05      | 17.74                                                | 4.60                   | 14,510          | 3,029                |
| 138              | 484 | MEX  | Mexico     | Central America | Americas  | 2011           | 630.72                                               | 54.17                  | 16.85      | 17.65                                                | 4.72                   | 15,510          | 3,024                |
| 141              | 496 | MNG  | Mongolia   | Eastern Asia    | Asia      | 1992           | 470.47                                               | 92.61                  | 3.50       | 21.42                                                | 1.89                   | 2,330           | 1,851                |
| 141              | 496 | MNG  | Mongolia   | Eastern Asia    | Asia      | 1993           | 451.12                                               | 95.48                  | 3.77       | 20.44                                                | 2.38                   | 2,250           | 1,852                |
| 141              | 496 | MNG  | Mongolia   | Eastern Asia    | Asia      | 1994           | 491.32                                               | 89.26                  | 3.64       | 21.63                                                | 1.84                   | 2,370           | 1,852                |
| 141              | 496 | MNG  | Mongolia   | Eastern Asia    | Asia      | 1995           | 506.26                                               | 86.41                  | 4.00       | 23.50                                                | 1.27                   | 2,560           | 2,033                |
| 141              | 496 | MNG  | Mongolia   | Eastern Asia    | Asia      | 1996           | 501.30                                               | 87.89                  | 3.87       | 24.02                                                | 1.15                   | 2,660           | 2,039                |
| 141              | 496 | MNG  | Mongolia   | Eastern Asia    | Asia      | 1997           | 557.76                                               | 74.57                  | 3.66       | 23.85                                                | 1.20                   | 2,790           | 2,032                |
| 141              | 496 | MNG  | Mongolia   | Eastern Asia    | Asia      | 1998           | 577.84                                               | 69.53                  | 3.80       | 24.48                                                | 1.08                   | 2,920           | 2,099                |
| 141              | 496 | MNG  | Mongolia   | Eastern Asia    | Asia      | 1999           | 682.42                                               | 43.21                  | 3.67       | 24.81                                                | 1.03                   | 3,030           | 2,135                |
| 141              | 496 | MNG  | Mongolia   | Eastern Asia    | Asia      | 2000           | 634.66                                               | 55.02                  | 4.15       | 23.49                                                | 1.34                   | 3,080           | 2,177                |
| 141              | 496 | MNG  | Mongolia   | Eastern Asia    | Asia      | 2001           | 594.11                                               | 65.05                  | 4.57       | 22.84                                                | 1.52                   | 3,230           | 2,218                |
| 141              | 496 | MNG  | Mongolia   | Eastern Asia    | Asia      | 2002           | 581.89                                               | 69.57                  | 5.26       | 21.20                                                | 2.17                   | 3,400           | 2,228                |
| 141              | 496 | MNG  | Mongolia   | Eastern Asia    | Asia      | 2003           | 620.38                                               | 59.30                  | 5.50       | 20.77                                                | 2.40                   | 3,680           | 2,221                |
| 141              | 496 | MNG  | Mongolia   | Eastern Asia    | Asia      | 2004           | 637.68                                               | 54.76                  | 5.45       | 20.72                                                | 2.42                   | 4,120           | 2,230                |
| 141              | 496 | MNG  | Mongolia   | Eastern Asia    | Asia      | 2005           | 605.11                                               | 63.10                  | 5.91       | 20.26                                                | 2.68                   | 4,440           | 2,253                |
| 141              | 496 | MNG  | Mongolia   | Eastern Asia    | Asia      | 2006           | 655.82                                               | 49.59                  | 5.77       | 20.08                                                | 2.81                   | 4,940           | 2,288                |
| 141              | 496 | MNG  | Mongolia   | Eastern Asia    | Asia      | 2007           | 689.83                                               | 41.24                  | 5.89       | 21.12                                                | 2.17                   | 5,450           | 2,342                |
| 141              | 496 | MNG  | Mongolia   | Eastern Asia    | Asia      | 2008           | 678.71                                               | 42.97                  | 5.57       | 22.04                                                | 1.73                   | 5,920           | 2,375                |
| 141              | 496 | MNG  | Mongolia   | Eastern Asia    | Asia      | 2009           | 704.48                                               | 36.93                  | 5.13       | 23.33                                                | 1.31                   | 5,730           | 2,451                |
| 141              | 496 | MNG  | Mongolia   | Eastern Asia    | Asia      | 2010           | 673.72                                               | 68.58                  | 5.98       | 22.09                                                | 1.65                   | 5,780           | 2,437                |
| 141              | 496 | MNG  | Mongolia   | Eastern Asia    | Asia      | 2011           | 672.64                                               | 42.39                  | 5.99       | 22.38                                                | 1.53                   | 6,770           | 2,463                |
| 143              | 504 | MAR  | Morocco    | Northern Africa | Africa    | 1992           | 440.88                                               | 96.79                  | 11.75      | 19.29                                                | 3.22                   | 2,650           | 2,902                |
| 143              | 504 | MAR  | Morocco    | Northern Africa | Africa    | 1993           | 440.71                                               | 96.85                  | 11.44      | 18.93                                                | 3.53                   | 2,620           | 2,878                |
| 143              | 504 | MAR  | Morocco    | Northern Africa | Africa    | 1994           | 461.18                                               | 94.59                  | 12.23      | 19.49                                                | 3.08                   | 2,520           | 3,000                |
| 143              | 504 | MAR  | Morocco    | Northern Africa | Africa    | 1995           | 414.84                                               | 98.75                  | 12.26      | 19.01                                                | 3.49                   | 2,740           | 2,952                |
| 143              | 504 | MAR  | Morocco    | Northern Africa | Africa    | 1996           | 478.90                                               | 92.05                  | 12.04      | 20.62                                                | 2.35                   | 3,100           | 3,089                |

| FAO country code | UNI | ISO3 | Country     | Region          | Continent | Reference year | Ca supply (mg capita <sup>-1</sup> d <sup>-1</sup> ) | Ca deficiency risk (%) | Phytate:Zn | Zn supply (mg capita <sup>-1</sup> d <sup>-1</sup> ) | Zn deficiency risk (%) | GNI-PPP (US \$) | Energy supply (kcal) |
|------------------|-----|------|-------------|-----------------|-----------|----------------|------------------------------------------------------|------------------------|------------|------------------------------------------------------|------------------------|-----------------|----------------------|
| 143              | 504 | MAR  | Morocco     | Northern Africa | Africa    | 1997           | 477.93                                               | 92.28                  | 12.27      | 20.52                                                | 2.41                   | 3,040           | 3,097                |
| 143              | 504 | MAR  | Morocco     | Northern Africa | Africa    | 1998           | 493.87                                               | 89.52                  | 13.32      | 20.08                                                | 2.68                   | 3,290           | 3,152                |
| 143              | 504 | MAR  | Morocco     | Northern Africa | Africa    | 1999           | 481.93                                               | 91.78                  | 12.87      | 20.29                                                | 2.56                   | 3,310           | 3,078                |
| 143              | 504 | MAR  | Morocco     | Northern Africa | Africa    | 2000           | 466.37                                               | 94.24                  | 12.60      | 20.12                                                | 2.67                   | 3,400           | 3,063                |
| 143              | 504 | MAR  | Morocco     | Northern Africa | Africa    | 2001           | 480.70                                               | 92.07                  | 12.80      | 20.95                                                | 2.19                   | 3,700           | 3,117                |
| 143              | 504 | MAR  | Morocco     | Northern Africa | Africa    | 2002           | 508.07                                               | 86.84                  | 13.05      | 21.19                                                | 2.07                   | 3,850           | 3,155                |
| 143              | 504 | MAR  | Morocco     | Northern Africa | Africa    | 2003           | 531.57                                               | 81.39                  | 12.50      | 21.29                                                | 2.02                   | 4,140           | 3,203                |
| 143              | 504 | MAR  | Morocco     | Northern Africa | Africa    | 2004           | 565.88                                               | 72.43                  | 12.71      | 21.75                                                | 1.82                   | 4,430           | 3,263                |
| 143              | 504 | MAR  | Morocco     | Northern Africa | Africa    | 2005           | 532.18                                               | 81.23                  | 12.80      | 21.27                                                | 2.02                   | 4,690           | 3,207                |
| 143              | 504 | MAR  | Morocco     | Northern Africa | Africa    | 2006           | 588.79                                               | 66.07                  | 13.01      | 21.82                                                | 1.79                   | 5,150           | 3,271                |
| 143              | 504 | MAR  | Morocco     | Northern Africa | Africa    | 2007           | 549.07                                               | 76.78                  | 12.94      | 21.47                                                | 1.92                   | 5,380           | 3,252                |
| 143              | 504 | MAR  | Morocco     | Northern Africa | Africa    | 2008           | 550.27                                               | 76.40                  | 12.84      | 21.69                                                | 1.83                   | 5,720           | 3,272                |
| 143              | 504 | MAR  | Morocco     | Northern Africa | Africa    | 2009           | 557.18                                               | 74.43                  | 12.69      | 21.70                                                | 1.81                   | 5,910           | 3,286                |
| 143              | 504 | MAR  | Morocco     | Northern Africa | Africa    | 2010           | 563.28                                               | 72.56                  | 12.68      | 21.82                                                | 1.75                   | 6,140           | 3,279                |
| 143              | 504 | MAR  | Morocco     | Northern Africa | Africa    | 2011           | 603.32                                               | 61.27                  | 12.75      | 22.11                                                | 1.66                   | 6,490           | 3,334                |
| 144              | 508 | MOZ  | Mozambique  | Eastern Africa  | Africa    | 1992           | 157.47                                               | 100.00                 | 22.53      | 7.21                                                 | 96.72                  | 260             | 1,699                |
| 144              | 508 | MOZ  | Mozambique  | Eastern Africa  | Africa    | 1993           | 163.14                                               | 100.00                 | 22.80      | 7.39                                                 | 94.20                  | 280             | 1,705                |
| 144              | 508 | MOZ  | Mozambique  | Eastern Africa  | Africa    | 1994           | 158.76                                               | 100.00                 | 22.45      | 7.24                                                 | 95.26                  | 290             | 1,695                |
| 144              | 508 | MOZ  | Mozambique  | Eastern Africa  | Africa    | 1995           | 185.96                                               | 100.00                 | 21.95      | 8.45                                                 | 80.18                  | 290             | 1,862                |
| 144              | 508 | MOZ  | Mozambique  | Eastern Africa  | Africa    | 1996           | 181.28                                               | 100.00                 | 22.40      | 8.75                                                 | 75.72                  | 320             | 1,955                |
| 144              | 508 | MOZ  | Mozambique  | Eastern Africa  | Africa    | 1997           | 186.52                                               | 100.00                 | 22.80      | 8.83                                                 | 74.14                  | 350             | 1,986                |
| 144              | 508 | MOZ  | Mozambique  | Eastern Africa  | Africa    | 1998           | 189.79                                               | 100.00                 | 22.51      | 8.90                                                 | 72.98                  | 380             | 2,001                |
| 144              | 508 | MOZ  | Mozambique  | Eastern Africa  | Africa    | 1999           | 186.70                                               | 100.00                 | 22.44      | 8.97                                                 | 71.71                  | 410             | 2,013                |
| 144              | 508 | MOZ  | Mozambique  | Eastern Africa  | Africa    | 2000           | 182.34                                               | 100.00                 | 22.10      | 8.92                                                 | 72.40                  | 410             | 2,000                |
| 144              | 508 | MOZ  | Mozambique  | Eastern Africa  | Africa    | 2001           | 183.35                                               | 100.00                 | 21.98      | 8.71                                                 | 76.44                  | 450             | 1,993                |
| 144              | 508 | MOZ  | Mozambique  | Eastern Africa  | Africa    | 2002           | 202.58                                               | 100.00                 | 22.27      | 8.89                                                 | 73.09                  | 500             | 2,048                |
| 144              | 508 | MOZ  | Mozambique  | Eastern Africa  | Africa    | 2003           | 224.81                                               | 100.00                 | 22.18      | 9.08                                                 | 73.09                  | 520             | 2,101                |
| 144              | 508 | MOZ  | Mozambique  | Eastern Africa  | Africa    | 2004           | 223.42                                               | 100.00                 | 21.64      | 9.12                                                 | 68.69                  | 560             | 2,067                |
| 144              | 508 | MOZ  | Mozambique  | Eastern Africa  | Africa    | 2005           | 203.23                                               | 100.00                 | 22.01      | 9.24                                                 | 66.46                  | 610             | 2,046                |
| 144              | 508 | MOZ  | Mozambique  | Eastern Africa  | Africa    | 2006           | 226.96                                               | 100.00                 | 22.97      | 9.75                                                 | 57.78                  | 630             | 2,121                |
| 144              | 508 | MOZ  | Mozambique  | Eastern Africa  | Africa    | 2007           | 228.60                                               | 100.00                 | 23.27      | 9.70                                                 | 58.48                  | 690             | 2,094                |
| 144              | 508 | MOZ  | Mozambique  | Eastern Africa  | Africa    | 2008           | 232.07                                               | 100.00                 | 22.86      | 9.90                                                 | 55.23                  | 730             | 2,175                |
| 144              | 508 | MOZ  | Mozambique  | Eastern Africa  | Africa    | 2009           | 229.80                                               | 100.00                 | 22.50      | 9.60                                                 | 60.32                  | 800             | 2,176                |
| 144              | 508 | MOZ  | Mozambique  | Eastern Africa  | Africa    | 2010           | 235.10                                               | 100.00                 | 23.58      | 10.26                                                | 49.55                  | 860             | 2,254                |
| 144              | 508 | MOZ  | Mozambique  | Eastern Africa  | Africa    | 2011           | 239.98                                               | 100.00                 | 23.52      | 10.16                                                | 51.56                  | 910             | 2,267                |
| 147              | 516 | NAM  | Namibia     | Southern Africa | Africa    | 1992           | 405.59                                               | 98.91                  | 15.90      | 12.51                                                | 24.06                  | 4,170           | 2,034                |
| 147              | 516 | NAM  | Namibia     | Southern Africa | Africa    | 1993           | 390.68                                               | 99.43                  | 17.58      | 11.37                                                | 35.33                  | 4,120           | 2,001                |
| 147              | 516 | NAM  | Namibia     | Southern Africa | Africa    | 1994           | 387.55                                               | 99.51                  | 18.11      | 10.99                                                | 39.95                  | 4,360           | 1,997                |
| 147              | 516 | NAM  | Namibia     | Southern Africa | Africa    | 1995           | 403.07                                               | 99.01                  | 18.00      | 11.41                                                | 34.76                  | 4,630           | 2,033                |
| 147              | 516 | NAM  | Namibia     | Southern Africa | Africa    | 1996           | 378.23                                               | 99.70                  | 17.96      | 11.91                                                | 29.38                  | 4,610           | 2,037                |
| 147              | 516 | NAM  | Namibia     | Southern Africa | Africa    | 1997           | 410.02                                               | 98.71                  | 17.06      | 11.48                                                | 34.03                  | 4,730           | 2,082                |
| 147              | 516 | NAM  | Namibia     | Southern Africa | Africa    | 1998           | 414.21                                               | 98.50                  | 17.18      | 11.16                                                | 37.89                  | 4,830           | 2,064                |
| 147              | 516 | NAM  | Namibia     | Southern Africa | Africa    | 1999           | 444.60                                               | 96.01                  | 13.99      | 13.36                                                | 18.00                  | 4,790           | 2,165                |
| 147              | 516 | NAM  | Namibia     | Southern Africa | Africa    | 2000           | 464.25                                               | 93.50                  | 12.77      | 14.96                                                | 10.65                  | 5,030           | 2,246                |
| 147              | 516 | NAM  | Namibia     | Southern Africa | Africa    | 2001           | 502.53                                               | 86.44                  | 13.27      | 14.79                                                | 11.30                  | 5,070           | 2,273                |
| 147              | 516 | NAM  | Namibia     | Southern Africa | Africa    | 2002           | 464.54                                               | 93.63                  | 13.73      | 14.06                                                | 14.33                  | 5,370           | 2,215                |
| 147              | 516 | NAM  | Namibia     | Southern Africa | Africa    | 2003           | 479.78                                               | 91.25                  | 14.34      | 13.82                                                | 15.60                  | 5,850           | 2,247                |
| 147              | 516 | NAM  | Namibia     | Southern Africa | Africa    | 2004           | 480.56                                               | 91.24                  | 14.40      | 13.24                                                | 18.98                  | 6,460           | 2,268                |
| 147              | 516 | NAM  | Namibia     | Southern Africa | Africa    | 2005           | 502.56                                               | 87.05                  | 14.38      | 13.18                                                | 19.44                  | 6,570           | 2,241                |
| 147              | 516 | NAM  | Namibia     | Southern Africa | Africa    | 2006           | 480.78                                               | 91.39                  | 15.11      | 12.84                                                | 21.80                  | 7,220           | 2,229                |
| 147              | 516 | NAM  | Namibia     | Southern Africa | Africa    | 2007           | 478.38                                               | 91.88                  | 14.82      | 12.98                                                | 20.83                  | 7,600           | 2,216                |
| 147              | 516 | NAM  | Namibia     | Southern Africa | Africa    | 2008           | 458.66                                               | 94.88                  | 14.42      | 12.35                                                | 25.83                  | 7,920           | 2,118                |
| 147              | 516 | NAM  | Namibia     | Southern Africa | Africa    | 2009           | 447.62                                               | 96.22                  | 15.15      | 11.84                                                | 30.69                  | 7,790           | 2,051                |
| 147              | 516 | NAM  | Namibia     | Southern Africa | Africa    | 2010           | 455.92                                               | 95.29                  | 15.06      | 11.53                                                | 34.05                  | 7,990           | 2,057                |
| 147              | 516 | NAM  | Namibia     | Southern Africa | Africa    | 2011           | 469.75                                               | 93.41                  | 14.86      | 11.80                                                | 31.19                  | 8,580           | 2,088                |
| 149              | 524 | NPL  | Nepal       | Southern Asia   | Asia      | 1992           | 406.81                                               | 98.82                  | 18.65      | 12.78                                                | 22.27                  | 900             | 2,231                |
| 149              | 524 | NPL  | Nepal       | Southern Asia   | Asia      | 1993           | 412.15                                               | 98.58                  | 18.62      | 12.34                                                | 26.13                  | 930             | 2,189                |
| 149              | 524 | NPL  | Nepal       | Southern Asia   | Asia      | 1994           | 411.82                                               | 98.62                  | 18.78      | 12.75                                                | 22.85                  | 1,010           | 2,256                |
| 149              | 524 | NPL  | Nepal       | Southern Asia   | Asia      | 1995           | 436.31                                               | 96.84                  | 18.66      | 12.81                                                | 22.51                  | 1,030           | 2,244                |
| 149              | 524 | NPL  | Nepal       | Southern Asia   | Asia      | 1996           | 433.55                                               | 97.09                  | 18.49      | 12.80                                                | 22.57                  | 1,080           | 2,220                |
| 149              | 524 | NPL  | Nepal       | Southern Asia   | Asia      | 1997           | 450.47                                               | 95.29                  | 18.39      | 13.13                                                | 20.05                  | 1,130           | 2,278                |
| 149              | 524 | NPL  | Nepal       | Southern Asia   | Asia      | 1998           | 476.70                                               | 91.33                  | 18.20      | 13.14                                                | 19.77                  | 1,150           | 2,250                |
| 149              | 524 | NPL  | Nepal       | Southern Asia   | Asia      | 1999           | 464.67                                               | 93.35                  | 18.29      | 13.28                                                | 18.68                  | 1,190           | 2,312                |
| 149              | 524 | NPL  | Nepal       | Southern Asia   | Asia      | 2000           | 455.04                                               | 94.76                  | 18.60      | 12.93                                                | 20.88                  | 1,280           | 2,265                |
| 149              | 524 | NPL  | Nepal       | Southern Asia   | Asia      | 2001           | 473.09                                               | 91.95                  | 18.48      | 13.03                                                | 19.98                  | 1,330           | 2,281                |
| 149              | 524 | NPL  | Nepal       | Southern Asia   | Asia      | 2002           | 482.12                                               | 90.32                  | 18.54      | 13.06                                                | 19.69                  | 1,320           | 2,282                |
| 149              | 524 | NPL  | Nepal       | Southern Asia   | Asia      | 2003           | 508.21                                               | 84.89                  | 18.65      | 13.46                                                | 17.25                  | 1,370           | 2,342                |
| 149              | 524 | NPL  | Nepal       | Southern Asia   | Asia      | 2004           | 538.88                                               | 77.41                  | 18.41      | 13.74                                                | 15.73                  | 1,450           | 2,385                |
| 149              | 524 | NPL  | Nepal       | Southern Asia   | Asia      | 2005           | 543.08                                               | 76.56                  | 18.35      | 14.07                                                | 14.15                  | 1,540           | 2,414                |
| 149              | 524 | NPL  | Nepal       | Southern Asia   | Asia      | 2006           | 555.24                                               | 73.49                  | 18.42      | 13.90                                                | 14.87                  | 1,620           | 2,400                |
| 149              | 524 | NPL  | Nepal       | Southern Asia   | Asia      | 2007           | 554.38                                               | 73.99                  | 18.61      | 14.02                                                | 14.38                  | 1,700           | 2,444                |
| 149              | 524 | NPL  | Nepal       | Southern Asia   | Asia      | 2008           | 581.91                                               | 66.69                  | 18.38      | 14.19                                                | 13.63                  | 1,820           | 2,489                |
| 149              | 524 | NPL  | Nepal       | Southern Asia   | Asia      | 2009           | 611.36                                               | 58.95                  | 19.25      | 14.88                                                | 10.96                  | 1,900           | 2,535                |
| 149              | 524 | NPL  | Nepal       | Southern Asia   | Asia      | 2010           | 619.19                                               | 57.19                  | 18.95      | 14.71                                                | 11.64                  | 1,990           | 2,542                |
| 149              | 524 | NPL  | Nepal       | Southern Asia   | Asia      | 2011           | 637.36                                               | 52.83                  | 18.51      | 14.59                                                | 12.07                  | 2,070           | 2,591                |
| 150              | 528 | NLD  | Netherlands | Western Europe  | Europe    | 1992           | 1,018.68                                             | 7.10                   | 8.06       | 17.91                                                | 4.26                   | 18,570          | 3,315                |
| 150              | 528 | NLD  | Netherlands | Western Europe  | Europe    | 1993           | 1,111.70                                             | 4.62                   | 7.20       | 19.19                                                | 3.03                   | 19,670          | 3,322                |
| 150              | 528 | NLD  | Netherlands | Western Europe  | Europe    | 1994           | 1,061.67                                             | 5.74                   | 8.14       | 18.01                                                | 4.10                   | 20,690          | 3,236                |
| 150              | 528 | NLD  | Netherlands | Western Europe  | Europe    | 1995           | 1,251.98                                             | 2.58                   | 7.61       | 19.67                                                | 2.67                   | 21,850          | 3,364                |

| FAO country code | UNI | ISO3 | Country     | Region                    | Continent | Reference year | Ca supply (mg capita <sup>-1</sup> d <sup>-1</sup> ) | Ca deficiency risk (%) | Phytate:Zn | Zn supply (mg capita <sup>-1</sup> d <sup>-1</sup> ) | Zn deficiency risk (%) | GNI-PPP (US \$) | Energy supply (kcal) |
|------------------|-----|------|-------------|---------------------------|-----------|----------------|------------------------------------------------------|------------------------|------------|------------------------------------------------------|------------------------|-----------------|----------------------|
| 150              | 528 | NLD  | Netherlands | Western Europe            | Europe    | 1996           | 1,066.27                                             | 5.60                   | 7.99       | 19.46                                                | 2.81                   | 22,840          | 3,374                |
| 150              | 528 | NLD  | Netherlands | Western Europe            | Europe    | 1997           | 1,128.37                                             | 4.26                   | 8.17       | 18.16                                                | 3.91                   | 24,410          | 3,271                |
| 150              | 528 | NLD  | Netherlands | Western Europe            | Europe    | 1998           | 1,123.37                                             | 4.37                   | 7.18       | 19.42                                                | 2.84                   | 25,210          | 3,359                |
| 150              | 528 | NLD  | Netherlands | Western Europe            | Europe    | 1999           | 1,143.87                                             | 4.01                   | 7.65       | 17.36                                                | 4.88                   | 27,220          | 3,283                |
| 150              | 528 | NLD  | Netherlands | Western Europe            | Europe    | 2000           | 1,225.51                                             | 2.88                   | 7.85       | 17.98                                                | 4.12                   | 30,070          | 3,265                |
| 150              | 528 | NLD  | Netherlands | Western Europe            | Europe    | 2001           | 1,166.87                                             | 3.66                   | 8.05       | 18.21                                                | 3.89                   | 31,050          | 3,256                |
| 150              | 528 | NLD  | Netherlands | Western Europe            | Europe    | 2002           | 1,219.87                                             | 2.96                   | 7.92       | 17.75                                                | 4.40                   | 32,230          | 3,251                |
| 150              | 528 | NLD  | Netherlands | Western Europe            | Europe    | 2003           | 1,140.80                                             | 4.10                   | 9.33       | 17.21                                                | 5.12                   | 32,080          | 3,141                |
| 150              | 528 | NLD  | Netherlands | Western Europe            | Europe    | 2004           | 1,230.64                                             | 2.85                   | 8.38       | 17.79                                                | 4.37                   | 34,060          | 3,197                |
| 150              | 528 | NLD  | Netherlands | Western Europe            | Europe    | 2005           | 1,185.66                                             | 3.41                   | 9.48       | 17.82                                                | 4.33                   | 35,270          | 3,238                |
| 150              | 528 | NLD  | Netherlands | Western Europe            | Europe    | 2006           | 1,234.96                                             | 2.81                   | 9.37       | 18.08                                                | 4.02                   | 39,130          | 3,215                |
| 150              | 528 | NLD  | Netherlands | Western Europe            | Europe    | 2007           | 1,285.75                                             | 2.32                   | 9.90       | 19.09                                                | 3.10                   | 41,350          | 3,272                |
| 150              | 528 | NLD  | Netherlands | Western Europe            | Europe    | 2008           | 1,291.83                                             | 2.28                   | 10.37      | 19.35                                                | 2.92                   | 42,000          | 3,278                |
| 150              | 528 | NLD  | Netherlands | Western Europe            | Europe    | 2009           | 1,266.90                                             | 2.51                   | 10.29      | 19.28                                                | 2.97                   | 40,370          | 3,243                |
| 150              | 528 | NLD  | Netherlands | Western Europe            | Europe    | 2010           | 1,140.13                                             | 4.18                   | 8.25       | 18.14                                                | 3.99                   | 40,940          | 3,189                |
| 150              | 528 | NLD  | Netherlands | Western Europe            | Europe    | 2011           | 1,163.26                                             | 3.81                   | 9.19       | 17.61                                                | 4.61                   | 43,290          | 3,147                |
| 156              | 554 | NZL  | New Zealand | Australia and New Zealand | Oceania   | 1992           | 849.89                                               | 16.70                  | 6.70       | 19.42                                                | 2.91                   | 13,910          | 3,181                |
| 156              | 554 | NZL  | New Zealand | Australia and New Zealand | Oceania   | 1993           | 892.42                                               | 13.27                  | 6.70       | 21.35                                                | 1.85                   | 14,730          | 3,212                |
| 156              | 554 | NZL  | New Zealand | Australia and New Zealand | Oceania   | 1994           | 961.98                                               | 9.27                   | 7.12       | 19.67                                                | 2.71                   | 15,750          | 3,166                |
| 156              | 554 | NZL  | New Zealand | Australia and New Zealand | Oceania   | 1995           | 973.28                                               | 8.75                   | 6.07       | 22.66                                                | 1.39                   | 16,600          | 3,191                |
| 156              | 554 | NZL  | New Zealand | Australia and New Zealand | Oceania   | 1996           | 938.29                                               | 10.43                  | 6.70       | 20.85                                                | 2.04                   | 16,830          | 3,177                |
| 156              | 554 | NZL  | New Zealand | Australia and New Zealand | Oceania   | 1997           | 833.75                                               | 18.09                  | 6.84       | 21.07                                                | 1.95                   | 17,720          | 3,174                |
| 156              | 554 | NZL  | New Zealand | Australia and New Zealand | Oceania   | 1998           | 737.73                                               | 30.61                  | 7.23       | 20.24                                                | 2.36                   | 18,230          | 3,161                |
| 156              | 554 | NZL  | New Zealand | Australia and New Zealand | Oceania   | 1999           | 637.57                                               | 51.84                  | 7.21       | 20.53                                                | 2.21                   | 19,130          | 3,158                |
| 156              | 554 | NZL  | New Zealand | Australia and New Zealand | Oceania   | 2000           | 729.46                                               | 32.28                  | 8.00       | 18.57                                                | 3.59                   | 20,040          | 3,154                |
| 156              | 554 | NZL  | New Zealand | Australia and New Zealand | Oceania   | 2001           | 735.93                                               | 31.33                  | 7.45       | 18.39                                                | 3.77                   | 21,130          | 3,112                |
| 156              | 554 | NZL  | New Zealand | Australia and New Zealand | Oceania   | 2002           | 700.65                                               | 37.97                  | 7.70       | 18.11                                                | 4.08                   | 21,890          | 3,121                |
| 156              | 554 | NZL  | New Zealand | Australia and New Zealand | Oceania   | 2003           | 696.17                                               | 38.97                  | 7.50       | 18.38                                                | 3.81                   | 22,530          | 3,119                |
| 156              | 554 | NZL  | New Zealand | Australia and New Zealand | Oceania   | 2004           | 732.55                                               | 32.16                  | 7.87       | 18.57                                                | 3.62                   | 23,360          | 3,138                |
| 156              | 554 | NZL  | New Zealand | Australia and New Zealand | Oceania   | 2005           | 725.49                                               | 33.42                  | 8.21       | 17.77                                                | 4.48                   | 23,790          | 3,162                |
| 156              | 554 | NZL  | New Zealand | Australia and New Zealand | Oceania   | 2006           | 751.96                                               | 28.99                  | 7.82       | 18.73                                                | 3.49                   | 25,430          | 3,148                |
| 156              | 554 | NZL  | New Zealand | Australia and New Zealand | Oceania   | 2007           | 734.91                                               | 31.74                  | 7.87       | 19.42                                                | 2.93                   | 26,700          | 3,184                |
| 156              | 554 | NZL  | New Zealand | Australia and New Zealand | Oceania   | 2008           | 709.91                                               | 36.21                  | 7.82       | 19.37                                                | 2.95                   | 27,060          | 3,205                |
| 156              | 554 | NZL  | New Zealand | Australia and New Zealand | Oceania   | 2009           | 745.56                                               | 29.82                  | 8.23       | 18.62                                                | 3.55                   | 29,000          | 3,149                |
| 156              | 554 | NZL  | New Zealand | Australia and New Zealand | Oceania   | 2010           | 700.88                                               | 37.81                  | 9.11       | 18.29                                                | 3.86                   | 28,810          | 3,118                |
| 156              | 554 | NZL  | New Zealand | Australia and New Zealand | Oceania   | 2011           | 822.36                                               | 19.53                  | 6.78       | 20.63                                                | 2.15                   | 29,940          | 3,170                |
| 157              | 558 | NIC  | Nicaragua   | Central America           | Americas  | 1992           | 341.52                                               | 99.98                  | 22.35      | 8.65                                                 | 78.32                  | 1,400           | 1,786                |
| 157              | 558 | NIC  | Nicaragua   | Central America           | Americas  | 1993           | 353.14                                               | 99.94                  | 24.39      | 9.12                                                 | 70.47                  | 1,450           | 1,850                |
| 157              | 558 | NIC  | Nicaragua   | Central America           | Americas  | 1994           | 350.90                                               | 99.95                  | 23.63      | 8.93                                                 | 73.76                  | 1,740           | 1,927                |
| 157              | 558 | NIC  | Nicaragua   | Central America           | Americas  | 1995           | 305.54                                               | 100.00                 | 22.01      | 9.07                                                 | 71.42                  | 1,910           | 1,965                |
| 157              | 558 | NIC  | Nicaragua   | Central America           | Americas  | 1996           | 269.13                                               | 100.00                 | 21.36      | 9.62                                                 | 61.67                  | 2,050           | 1,976                |
| 157              | 558 | NIC  | Nicaragua   | Central America           | Americas  | 1997           | 291.16                                               | 100.00                 | 22.22      | 9.43                                                 | 65.03                  | 2,160           | 1,957                |
| 157              | 558 | NIC  | Nicaragua   | Central America           | Americas  | 1998           | 336.67                                               | 99.99                  | 21.75      | 9.98                                                 | 56.93                  | 2,280           | 2,069                |
| 157              | 558 | NIC  | Nicaragua   | Central America           | Americas  | 1999           | 425.10                                               | 98.05                  | 22.32      | 10.33                                                | 50.44                  | 2,430           | 2,078                |
| 157              | 558 | NIC  | Nicaragua   | Central America           | Americas  | 2000           | 400.46                                               | 99.28                  | 21.92      | 10.31                                                | 50.85                  | 2,550           | 2,135                |
| 157              | 558 | NIC  | Nicaragua   | Central America           | Americas  | 2001           | 413.43                                               | 98.79                  | 22.34      | 11.47                                                | 35.04                  | 2,630           | 2,304                |
| 157              | 558 | NIC  | Nicaragua   | Central America           | Americas  | 2002           | 432.33                                               | 97.65                  | 22.31      | 11.46                                                | 36.23                  | 2,670           | 2,292                |
| 157              | 558 | NIC  | Nicaragua   | Central America           | Americas  | 2003           | 413.22                                               | 98.84                  | 22.11      | 11.81                                                | 31.38                  | 2,760           | 2,320                |
| 157              | 558 | NIC  | Nicaragua   | Central America           | Americas  | 2004           | 426.11                                               | 98.14                  | 21.79      | 12.15                                                | 28.08                  | 2,960           | 2,359                |
| 157              | 558 | NIC  | Nicaragua   | Central America           | Americas  | 2005           | 435.31                                               | 97.49                  | 21.86      | 12.17                                                | 27.91                  | 3,180           | 2,400                |
| 157              | 558 | NIC  | Nicaragua   | Central America           | Americas  | 2006           | 452.76                                               | 95.82                  | 21.74      | 12.69                                                | 23.40                  | 3,320           | 2,411                |
| 157              | 558 | NIC  | Nicaragua   | Central America           | Americas  | 2007           | 448.16                                               | 96.32                  | 21.93      | 12.89                                                | 21.83                  | 3,560           | 2,471                |
| 157              | 558 | NIC  | Nicaragua   | Central America           | Americas  | 2008           | 444.46                                               | 96.68                  | 22.49      | 12.60                                                | 24.00                  | 3,740           | 2,465                |
| 157              | 558 | NIC  | Nicaragua   | Central America           | Americas  | 2009           | 450.45                                               | 96.04                  | 22.04      | 12.86                                                | 21.94                  | 3,620           | 2,471                |
| 157              | 558 | NIC  | Nicaragua   | Central America           | Americas  | 2010           | 466.66                                               | 93.98                  | 21.47      | 13.17                                                | 19.65                  | 3,760           | 2,512                |
| 157              | 558 | NIC  | Nicaragua   | Central America           | Americas  | 2011           | 474.91                                               | 92.66                  | 21.60      | 13.49                                                | 17.60                  | 3,990           | 2,564                |
| 158              | 562 | NER  | Niger       | Western Africa            | Africa    | 1992           | 312.96                                               | 100.00                 | 18.04      | 14.25                                                | 13.27                  | 560             | 2,066                |
| 158              | 562 | NER  | Niger       | Western Africa            | Africa    | 1993           | 329.90                                               | 99.98                  | 17.91      | 14.22                                                | 13.37                  | 560             | 2,037                |
| 158              | 562 | NER  | Niger       | Western Africa            | Africa    | 1994           | 321.69                                               | 99.99                  | 18.25      | 14.02                                                | 14.24                  | 570             | 1,979                |
| 158              | 562 | NER  | Niger       | Western Africa            | Africa    | 1995           | 342.57                                               | 99.96                  | 18.73      | 13.73                                                | 15.64                  | 580             | 2,059                |
| 158              | 562 | NER  | Niger       | Western Africa            | Africa    | 1996           | 346.21                                               | 99.94                  | 17.74      | 14.41                                                | 12.67                  | 590             | 2,099                |
| 158              | 562 | NER  | Niger       | Western Africa            | Africa    | 1997           | 335.83                                               | 99.97                  | 17.54      | 14.58                                                | 11.89                  | 600             | 2,173                |
| 158              | 562 | NER  | Niger       | Western Africa            | Africa    | 1998           | 371.78                                               | 99.68                  | 18.58      | 14.84                                                | 10.85                  | 650             | 2,186                |
| 158              | 562 | NER  | Niger       | Western Africa            | Africa    | 1999           | 369.64                                               | 99.72                  | 18.49      | 15.19                                                | 9.63                   | 630             | 2,217                |
| 158              | 562 | NER  | Niger       | Western Africa            | Africa    | 2000           | 417.54                                               | 97.66                  | 18.86      | 16.02                                                | 7.42                   | 610             | 2,328                |
| 158              | 562 | NER  | Niger       | Western Africa            | Africa    | 2001           | 442.35                                               | 95.01                  | 19.70      | 16.30                                                | 6.92                   | 650             | 2,341                |
| 158              | 562 | NER  | Niger       | Western Africa            | Africa    | 2002           | 439.51                                               | 95.35                  | 19.20      | 15.86                                                | 7.82                   | 650             | 2,309                |
| 158              | 562 | NER  | Niger       | Western Africa            | Africa    | 2003           | 466.43                                               | 91.19                  | 19.74      | 16.29                                                | 6.85                   | 680             | 2,401                |
| 158              | 562 | NER  | Niger       | Western Africa            | Africa    | 2004           | 468.88                                               | 90.79                  | 20.18      | 16.78                                                | 5.91                   | 670             | 2,453                |
| 158              | 562 | NER  | Niger       | Western Africa            | Africa    | 2005           | 489.07                                               | 86.66                  | 20.27      | 16.76                                                | 5.92                   | 700             | 2,444                |
| 158              | 562 | NER  | Niger       | Western Africa            | Africa    | 2006           | 493.02                                               | 85.77                  | 20.51      | 16.89                                                | 5.82                   | 740             | 2,442                |
| 158              | 562 | NER  | Niger       | Western Africa            | Africa    | 2007           | 504.83                                               | 82.96                  | 20.57      | 17.20                                                | 5.29                   | 750             | 2,461                |
| 158              | 562 | NER  | Niger       | Western Africa            | Africa    | 2008           | 519.82                                               | 79.17                  | 21.09      | 17.55                                                | 4.79                   | 810             | 2,519                |
| 158              | 562 | NER  | Niger       | Western Africa            | Africa    | 2009           | 544.78                                               | 72.42                  | 22.86      | 17.10                                                | 5.42                   | 780             | 2,524                |
| 158              | 562 | NER  | Niger       | Western Africa            | Africa    | 2010           | 561.59                                               | 67.76                  | 23.86      | 17.35                                                | 5.03                   | 820             | 2,557                |
| 158              | 562 | NER  | Niger       | Western Africa            | Africa    | 2011           | 561.27                                               | 67.90                  | 24.14      | 17.15                                                | 5.46                   | 820             | 2,546                |
| 159              | 506 | NGA  | Nigeria     | Western Africa            | Africa    | 1992           | 313.75                                               | 100.00                 | 21.76      | 10.22                                                | 52.08                  | 1,780           | 2,434                |
| 159              | 506 | NGA  | Nigeria     | Western Africa            | Africa    | 1993           | 340.00                                               | 99.97                  | 21.42      | 10.61                                                | 43.30                  | 1,720           | 2,524                |
| 159              | 506 | NGA  | Nigeria     | Western Africa            | Africa    | 1994           | 303.36                                               | 100.00                 | 21.78      | 10.58                                                | 46.61                  | 1,770           | 2,500                |

Dietary calcium and zinc deficiency risks are decreasing but remain prevalent

| FAO country code | UNI | ISO3 | Country  | Region          | Continent | Reference year | Ca supply (mg capita <sup>-1</sup> d <sup>-1</sup> ) | Ca deficiency risk (%) | Phytate:Zn | Zn supply (mg capita <sup>-1</sup> d <sup>-1</sup> ) | Zn deficiency risk (%) | GNI-PPP (US \$) | Energy supply (kcal) |
|------------------|-----|------|----------|-----------------|-----------|----------------|------------------------------------------------------|------------------------|------------|------------------------------------------------------|------------------------|-----------------|----------------------|
| 159              | 566 | NGA  | Nigeria  | Western Africa  | Africa    | 1995           | 389.10                                               | 99.12                  | 21.78      | 11.16                                                | 38.62                  | 1,860           | 2,561                |
| 159              | 566 | NGA  | Nigeria  | Western Africa  | Africa    | 1996           | 331.09                                               | 99.99                  | 22.08      | 10.91                                                | 42.27                  | 1,970           | 2,556                |
| 159              | 566 | NGA  | Nigeria  | Western Africa  | Africa    | 1997           | 337.98                                               | 99.98                  | 21.88      | 11.18                                                | 38.68                  | 2,010           | 2,599                |
| 159              | 566 | NGA  | Nigeria  | Western Africa  | Africa    | 1998           | 349.89                                               | 99.95                  | 21.68      | 11.40                                                | 35.85                  | 1,980           | 2,631                |
| 159              | 566 | NGA  | Nigeria  | Western Africa  | Africa    | 2000           | 361.02                                               | 99.88                  | 21.76      | 11.65                                                | 32.75                  | 1,970           | 2,610                |
| 159              | 566 | NGA  | Nigeria  | Western Africa  | Africa    | 2001           | 360.70                                               | 99.88                  | 21.76      | 11.46                                                | 35.15                  | 2,140           | 2,613                |
| 159              | 566 | NGA  | Nigeria  | Western Africa  | Africa    | 2002           | 355.36                                               | 99.92                  | 21.64      | 11.58                                                | 33.63                  | 2,170           | 2,605                |
| 159              | 566 | NGA  | Nigeria  | Western Africa  | Africa    | 2003           | 371.17                                               | 99.77                  | 21.88      | 11.53                                                | 34.07                  | 2,360           | 2,608                |
| 159              | 566 | NGA  | Nigeria  | Western Africa  | Africa    | 2004           | 385.82                                               | 99.49                  | 21.64      | 11.79                                                | 31.07                  | 3,160           | 2,655                |
| 159              | 566 | NGA  | Nigeria  | Western Africa  | Africa    | 2005           | 381.43                                               | 99.59                  | 21.51      | 12.27                                                | 26.26                  | 3,260           | 2,705                |
| 159              | 566 | NGA  | Nigeria  | Western Africa  | Africa    | 2006           | 408.76                                               | 98.59                  | 21.84      | 12.20                                                | 27.19                  | 3,900           | 2,725                |
| 159              | 566 | NGA  | Nigeria  | Western Africa  | Africa    | 2007           | 398.19                                               | 99.08                  | 21.84      | 12.35                                                | 25.64                  | 3,990           | 2,720                |
| 159              | 566 | NGA  | Nigeria  | Western Africa  | Africa    | 2008           | 390.49                                               | 99.34                  | 22.18      | 12.37                                                | 25.44                  | 4,200           | 2,721                |
| 159              | 566 | NGA  | Nigeria  | Western Africa  | Africa    | 2009           | 380.93                                               | 99.59                  | 22.08      | 12.60                                                | 23.43                  | 4,350           | 2,715                |
| 159              | 566 | NGA  | Nigeria  | Western Africa  | Africa    | 2010           | 385.70                                               | 99.48                  | 21.98      | 12.62                                                | 23.15                  | 4,780           | 2,742                |
| 159              | 566 | NGA  | Nigeria  | Western Africa  | Africa    | 2011           | 397.22                                               | 99.11                  | 21.90      | 12.33                                                | 25.89                  | 4,950           | 2,724                |
| 162              | 578 | NOR  | Norway   | Northern Europe | Europe    | 1992           | 866.42                                               | 15.36                  | 7.99       | 17.54                                                | 4.71                   | 19,530          | 3,219                |
| 162              | 578 | NOR  | Norway   | Northern Europe | Europe    | 1993           | 940.91                                               | 10.37                  | 7.90       | 17.86                                                | 4.28                   | 20,400          | 3,222                |
| 162              | 578 | NOR  | Norway   | Northern Europe | Europe    | 1994           | 938.31                                               | 10.45                  | 8.10       | 17.92                                                | 4.19                   | 21,900          | 3,277                |
| 162              | 578 | NOR  | Norway   | Northern Europe | Europe    | 1995           | 930.78                                               | 10.82                  | 7.76       | 17.85                                                | 4.25                   | 23,280          | 3,224                |
| 162              | 578 | NOR  | Norway   | Northern Europe | Europe    | 1996           | 982.56                                               | 8.34                   | 7.70       | 18.47                                                | 3.60                   | 25,750          | 3,311                |
| 162              | 578 | NOR  | Norway   | Northern Europe | Europe    | 1997           | 984.79                                               | 8.25                   | 7.82       | 18.35                                                | 3.72                   | 27,660          | 3,329                |
| 162              | 578 | NOR  | Norway   | Northern Europe | Europe    | 1998           | 938.01                                               | 10.44                  | 7.88       | 18.62                                                | 3.47                   | 27,110          | 3,402                |
| 162              | 578 | NOR  | Norway   | Northern Europe | Europe    | 1999           | 914.99                                               | 11.77                  | 8.07       | 18.16                                                | 3.92                   | 29,550          | 3,418                |
| 162              | 578 | NOR  | Norway   | Northern Europe | Europe    | 2000           | 908.74                                               | 12.19                  | 7.91       | 18.44                                                | 3.65                   | 35,690          | 3,378                |
| 162              | 578 | NOR  | Norway   | Northern Europe | Europe    | 2001           | 923.62                                               | 11.35                  | 8.20       | 18.56                                                | 3.54                   | 37,160          | 3,418                |
| 162              | 578 | NOR  | Norway   | Northern Europe | Europe    | 2002           | 925.39                                               | 11.30                  | 7.97       | 18.82                                                | 3.33                   | 37,170          | 3,459                |
| 162              | 578 | NOR  | Norway   | Northern Europe | Europe    | 2003           | 899.11                                               | 13.00                  | 8.25       | 18.54                                                | 3.60                   | 38,530          | 3,437                |
| 162              | 578 | NOR  | Norway   | Northern Europe | Europe    | 2004           | 906.02                                               | 12.59                  | 8.42       | 18.91                                                | 3.28                   | 42,530          | 3,477                |
| 162              | 578 | NOR  | Norway   | Northern Europe | Europe    | 2005           | 885.24                                               | 14.07                  | 8.32       | 19.22                                                | 3.04                   | 48,160          | 3,520                |
| 162              | 578 | NOR  | Norway   | Northern Europe | Europe    | 2006           | 884.29                                               | 14.18                  | 8.42       | 18.82                                                | 3.38                   | 53,940          | 3,446                |
| 162              | 578 | NOR  | Norway   | Northern Europe | Europe    | 2007           | 907.58                                               | 12.58                  | 8.46       | 19.14                                                | 3.13                   | 55,590          | 3,464                |
| 162              | 578 | NOR  | Norway   | Northern Europe | Europe    | 2008           | 915.72                                               | 12.06                  | 8.30       | 19.31                                                | 3.00                   | 61,060          | 3,478                |
| 162              | 578 | NOR  | Norway   | Northern Europe | Europe    | 2009           | 918.50                                               | 11.88                  | 8.23       | 19.00                                                | 3.25                   | 56,610          | 3,470                |
| 162              | 578 | NOR  | Norway   | Northern Europe | Europe    | 2010           | 900.69                                               | 13.00                  | 8.30       | 19.12                                                | 3.15                   | 58,420          | 3,489                |
| 162              | 578 | NOR  | Norway   | Northern Europe | Europe    | 2011           | 909.31                                               | 12.41                  | 8.39       | 19.07                                                | 3.18                   | 62,240          | 3,484                |
| 165              | 586 | PAK  | Pakistan | Southern Asia   | Asia      | 1992           | 440.27                                               | 96.03                  | 10.55      | 14.18                                                | 13.96                  | 2,200           | 2,325                |
| 165              | 586 | PAK  | Pakistan | Southern Asia   | Asia      | 1993           | 446.29                                               | 95.40                  | 10.72      | 14.08                                                | 14.43                  | 2,220           | 2,349                |
| 165              | 586 | PAK  | Pakistan | Southern Asia   | Asia      | 1994           | 455.85                                               | 94.25                  | 10.81      | 14.60                                                | 12.27                  | 2,280           | 2,396                |
| 165              | 586 | PAK  | Pakistan | Southern Asia   | Asia      | 1995           | 461.01                                               | 93.62                  | 10.69      | 14.03                                                | 14.80                  | 2,400           | 2,389                |
| 165              | 586 | PAK  | Pakistan | Southern Asia   | Asia      | 1996           | 531.53                                               | 78.85                  | 11.06      | 13.76                                                | 16.33                  | 2,470           | 2,406                |
| 165              | 586 | PAK  | Pakistan | Southern Asia   | Asia      | 1997           | 527.91                                               | 80.02                  | 10.56      | 14.26                                                | 13.89                  | 2,450           | 2,402                |
| 165              | 586 | PAK  | Pakistan | Southern Asia   | Asia      | 1998           | 522.75                                               | 81.53                  | 10.58      | 14.09                                                | 14.76                  | 2,480           | 2,371                |
| 165              | 586 | PAK  | Pakistan | Southern Asia   | Asia      | 1999           | 522.38                                               | 81.84                  | 10.70      | 14.14                                                | 14.57                  | 2,540           | 2,422                |
| 165              | 586 | PAK  | Pakistan | Southern Asia   | Asia      | 2000           | 520.69                                               | 82.49                  | 10.77      | 13.92                                                | 15.73                  | 2,640           | 2,398                |
| 165              | 586 | PAK  | Pakistan | Southern Asia   | Asia      | 2001           | 509.07                                               | 85.38                  | 10.80      | 13.17                                                | 20.10                  | 2,690           | 2,312                |
| 165              | 586 | PAK  | Pakistan | Southern Asia   | Asia      | 2002           | 501.42                                               | 87.28                  | 10.74      | 12.81                                                | 22.80                  | 2,820           | 2,255                |
| 165              | 586 | PAK  | Pakistan | Southern Asia   | Asia      | 2003           | 502.20                                               | 87.35                  | 11.10      | 12.98                                                | 21.73                  | 3,040           | 2,312                |
| 165              | 586 | PAK  | Pakistan | Southern Asia   | Asia      | 2004           | 515.87                                               | 84.52                  | 10.76      | 13.15                                                | 20.58                  | 3,260           | 2,340                |
| 165              | 586 | PAK  | Pakistan | Southern Asia   | Asia      | 2005           | 523.22                                               | 82.92                  | 11.06      | 13.23                                                | 20.12                  | 3,560           | 2,359                |
| 165              | 586 | PAK  | Pakistan | Southern Asia   | Asia      | 2006           | 552.31                                               | 75.67                  | 10.07      | 13.70                                                | 17.36                  | 3,810           | 2,381                |
| 165              | 586 | PAK  | Pakistan | Southern Asia   | Asia      | 2007           | 561.21                                               | 73.27                  | 11.27      | 13.63                                                | 17.71                  | 4,020           | 2,420                |
| 165              | 586 | PAK  | Pakistan | Southern Asia   | Asia      | 2008           | 558.72                                               | 73.83                  | 10.95      | 13.66                                                | 17.48                  | 4,110           | 2,422                |
| 165              | 586 | PAK  | Pakistan | Southern Asia   | Asia      | 2009           | 570.65                                               | 70.45                  | 10.98      | 13.98                                                | 15.66                  | 4,200           | 2,429                |
| 165              | 586 | PAK  | Pakistan | Southern Asia   | Asia      | 2010           | 568.15                                               | 71.05                  | 10.84      | 13.88                                                | 16.10                  | 4,300           | 2,437                |
| 165              | 586 | PAK  | Pakistan | Southern Asia   | Asia      | 2011           | 567.26                                               | 71.05                  | 11.26      | 14.03                                                | 15.24                  | 4,450           | 2,428                |
| 166              | 591 | PAN  | Panama   | Central America | Americas  | 1992           | 423.61                                               | 98.15                  | 12.14      | 11.36                                                | 36.35                  | 5,020           | 2,303                |
| 166              | 591 | PAN  | Panama   | Central America | Americas  | 1993           | 417.67                                               | 98.50                  | 12.17      | 11.44                                                | 35.30                  | 5,410           | 2,340                |
| 166              | 591 | PAN  | Panama   | Central America | Americas  | 1994           | 421.50                                               | 98.27                  | 11.90      | 11.69                                                | 33.47                  | 5,630           | 2,344                |
| 166              | 591 | PAN  | Panama   | Central America | Americas  | 1995           | 393.60                                               | 99.45                  | 12.03      | 11.10                                                | 39.35                  | 5,640           | 2,226                |
| 166              | 591 | PAN  | Panama   | Central America | Americas  | 1996           | 404.13                                               | 99.12                  | 12.30      | 10.91                                                | 42.00                  | 5,850           | 2,252                |
| 166              | 591 | PAN  | Panama   | Central America | Americas  | 1997           | 389.63                                               | 99.54                  | 11.53      | 10.77                                                | 43.76                  | 6,160           | 2,176                |
| 166              | 591 | PAN  | Panama   | Central America | Americas  | 1998           | 406.22                                               | 99.02                  | 11.72      | 11.67                                                | 32.42                  | 6,500           | 2,389                |
| 166              | 591 | PAN  | Panama   | Central America | Americas  | 1999           | 420.29                                               | 98.30                  | 10.94      | 10.76                                                | 43.72                  | 6,630           | 2,209                |
| 166              | 591 | PAN  | Panama   | Central America | Americas  | 2000           | 407.22                                               | 98.97                  | 11.15      | 10.83                                                | 42.64                  | 6,880           | 2,132                |
| 166              | 591 | PAN  | Panama   | Central America | Americas  | 2001           | 428.20                                               | 97.74                  | 12.01      | 11.12                                                | 38.74                  | 6,950           | 2,266                |
| 166              | 591 | PAN  | Panama   | Central America | Americas  | 2002           | 425.10                                               | 97.96                  | 12.67      | 11.08                                                | 39.21                  | 7,300           | 2,345                |
| 166              | 591 | PAN  | Panama   | Central America | Americas  | 2003           | 440.67                                               | 96.66                  | 12.65      | 11.35                                                | 36.81                  | 7,320           | 2,365                |
| 166              | 591 | PAN  | Panama   | Central America | Americas  | 2004           | 417.77                                               | 98.43                  | 12.33      | 10.81                                                | 42.68                  | 7,800           | 2,249                |
| 166              | 591 | PAN  | Panama   | Central America | Americas  | 2005           | 444.17                                               | 96.31                  | 12.24      | 11.55                                                | 33.42                  | 8,480           | 2,333                |
| 166              | 591 | PAN  | Panama   | Central America | Americas  | 2006           | 443.66                                               | 96.38                  | 12.63      | 11.44                                                | 34.66                  | 10,780          | 2,346                |
| 166              | 591 | PAN  | Panama   | Central America | Americas  | 2007           | 472.20                                               | 92.61                  | 12.49      | 12.15                                                | 27.24                  | 12,100          | 2,465                |
| 166              | 591 | PAN  | Panama   | Central America | Americas  | 2008           | 494.75                                               | 88.52                  | 12.30      | 12.32                                                | 25.72                  | 13,230          | 2,523                |
| 166              | 591 | PAN  | Panama   | Central America | Americas  | 2009           | 467.58                                               | 93.39                  | 12.33      | 12.23                                                | 26.46                  | 13,570          | 2,520                |
| 166              | 591 | PAN  | Panama   | Central America | Americas  | 2010           | 476.76                                               | 91.95                  | 12.65      | 12.80                                                | 21.85                  | 14,440          | 2,578                |
| 166              | 591 | PAN  | Panama   | Central America | Americas  | 2011           | 483.33                                               | 90.85                  | 12.28      | 13.02                                                | 20.24                  | 14,590          | 2,644                |
| 169              | 600 | PRY  | Paraguay | South America   | Americas  | 1995           | 555.74                                               | 73.00                  | 12.52      | 14.34                                                | 13.28                  | 4,480           | 2,537                |
| 169              | 600 | PRY  | Paraguay | South America   | Americas  | 1996           | 582.78                                               | 65.71                  | 13.20      | 14.44                                                | 12.91                  | 4,780           | 2,549                |
| 169              | 600 | PRY  | Paraguay | South America   | Americas  | 1997           | 601.42                                               | 60.77                  | 13.53      | 15.27                                                | 9.95                   | 4,790           | 2,602                |

| FAO country code | UNI | ISO3 | Country     | Region             | Continent | Reference year | Ca supply (mg capita <sup>-1</sup> d <sup>-1</sup> ) | Ca deficiency risk (%) | Phytate:Zn | Zn supply (mg capita <sup>-1</sup> d <sup>-1</sup> ) | Zn deficiency risk (%) | GNI-PPP (US \$) | Energy supply (kcal) |
|------------------|-----|------|-------------|--------------------|-----------|----------------|------------------------------------------------------|------------------------|------------|------------------------------------------------------|------------------------|-----------------|----------------------|
| 169              | 600 | PRY  | Paraguay    | South America      | Americas  | 1998           | 574.92                                               | 68.29                  | 12.59      | 14.88                                                | 11.30                  | 4,740           | 2,596                |
| 169              | 600 | PRY  | Paraguay    | South America      | Americas  | 1999           | 623.43                                               | 55.24                  | 13.63      | 15.26                                                | 10.03                  | 4,630           | 2,640                |
| 169              | 600 | PRY  | Paraguay    | South America      | Americas  | 2000           | 523.30                                               | 82.29                  | 13.53      | 14.54                                                | 12.67                  | 4,280           | 2,588                |
| 169              | 600 | PRY  | Paraguay    | South America      | Americas  | 2001           | 571.39                                               | 69.64                  | 14.83      | 14.93                                                | 11.18                  | 4,330           | 2,640                |
| 169              | 600 | PRY  | Paraguay    | South America      | Americas  | 2002           | 595.23                                               | 63.11                  | 13.94      | 15.85                                                | 8.41                   | 4,430           | 2,678                |
| 169              | 600 | PRY  | Paraguay    | South America      | Americas  | 2003           | 596.69                                               | 62.75                  | 15.68      | 14.80                                                | 11.64                  | 4,220           | 2,731                |
| 169              | 600 | PRY  | Paraguay    | South America      | Americas  | 2004           | 591.18                                               | 64.30                  | 16.77      | 13.83                                                | 15.95                  | 4,500           | 2,659                |
| 169              | 600 | PRY  | Paraguay    | South America      | Americas  | 2005           | 578.00                                               | 67.97                  | 17.05      | 13.08                                                | 20.48                  | 4,670           | 2,595                |
| 169              | 600 | PRY  | Paraguay    | South America      | Americas  | 2006           | 568.69                                               | 70.55                  | 17.02      | 13.34                                                | 18.77                  | 5,140           | 2,625                |
| 169              | 600 | PRY  | Paraguay    | South America      | Americas  | 2007           | 565.04                                               | 71.57                  | 17.56      | 13.09                                                | 20.38                  | 5,790           | 2,576                |
| 169              | 600 | PRY  | Paraguay    | South America      | Americas  | 2008           | 547.38                                               | 76.37                  | 17.31      | 12.64                                                | 23.71                  | 6,240           | 2,531                |
| 169              | 600 | PRY  | Paraguay    | South America      | Americas  | 2009           | 568.47                                               | 73.39                  | 17.38      | 13.16                                                | 19.87                  | 5,850           | 2,593                |
| 169              | 600 | PRY  | Paraguay    | South America      | Americas  | 2010           | 574.46                                               | 68.99                  | 16.72      | 14.11                                                | 14.42                  | 6,610           | 2,665                |
| 169              | 600 | PRY  | Paraguay    | South America      | Americas  | 2011           | 575.64                                               | 68.65                  | 16.30      | 14.80                                                | 11.56                  | 7,100           | 2,698                |
| 170              | 604 | PER  | Peru        | South America      | Americas  | 1992           | 318.33                                               | 100.00                 | 15.69      | 10.40                                                | 49.36                  | 3,550           | 2,140                |
| 170              | 604 | PER  | Peru        | South America      | Americas  | 1993           | 363.82                                               | 99.89                  | 16.10      | 10.63                                                | 46.00                  | 3,680           | 2,156                |
| 170              | 604 | PER  | Peru        | South America      | Americas  | 1994           | 391.93                                               | 99.49                  | 15.99      | 10.76                                                | 44.11                  | 4,180           | 2,206                |
| 170              | 604 | PER  | Peru        | South America      | Americas  | 1995           | 415.38                                               | 98.61                  | 15.78      | 11.13                                                | 39.07                  | 4,540           | 2,207                |
| 170              | 604 | PER  | Peru        | South America      | Americas  | 1996           | 431.17                                               | 97.59                  | 15.76      | 11.26                                                | 37.40                  | 4,710           | 2,269                |
| 170              | 604 | PER  | Peru        | South America      | Americas  | 1997           | 445.36                                               | 96.30                  | 16.27      | 11.82                                                | 31.04                  | 5,050           | 2,329                |
| 170              | 604 | PER  | Peru        | South America      | Americas  | 1998           | 445.67                                               | 96.29                  | 16.62      | 10.88                                                | 42.34                  | 5,040           | 2,263                |
| 170              | 604 | PER  | Peru        | South America      | Americas  | 1999           | 454.41                                               | 95.31                  | 16.75      | 10.62                                                | 46.08                  | 5,080           | 2,276                |
| 170              | 604 | PER  | Peru        | South America      | Americas  | 2000           | 457.75                                               | 94.92                  | 16.63      | 11.46                                                | 35.04                  | 5,240           | 2,366                |
| 170              | 604 | PER  | Peru        | South America      | Americas  | 2001           | 451.56                                               | 95.70                  | 15.92      | 10.99                                                | 40.78                  | 5,320           | 2,322                |
| 170              | 604 | PER  | Peru        | South America      | Americas  | 2002           | 458.35                                               | 94.89                  | 16.07      | 10.84                                                | 42.87                  | 5,580           | 2,338                |
| 170              | 604 | PER  | Peru        | South America      | Americas  | 2003           | 460.12                                               | 94.68                  | 15.92      | 10.59                                                | 46.47                  | 5,770           | 2,279                |
| 170              | 604 | PER  | Peru        | South America      | Americas  | 2004           | 451.25                                               | 95.80                  | 15.83      | 10.79                                                | 43.59                  | 6,040           | 2,296                |
| 170              | 604 | PER  | Peru        | South America      | Americas  | 2005           | 472.93                                               | 92.88                  | 16.13      | 11.27                                                | 37.35                  | 6,580           | 2,407                |
| 170              | 604 | PER  | Peru        | South America      | Americas  | 2006           | 520.88                                               | 83.25                  | 15.97      | 11.56                                                | 33.84                  | 7,020           | 2,432                |
| 170              | 604 | PER  | Peru        | South America      | Americas  | 2007           | 526.20                                               | 81.97                  | 15.79      | 11.57                                                | 33.68                  | 7,800           | 2,458                |
| 170              | 604 | PER  | Peru        | South America      | Americas  | 2008           | 542.84                                               | 77.75                  | 15.98      | 11.68                                                | 32.44                  | 8,730           | 2,520                |
| 170              | 604 | PER  | Peru        | South America      | Americas  | 2009           | 550.45                                               | 75.75                  | 16.25      | 11.97                                                | 29.35                  | 8,820           | 2,555                |
| 170              | 604 | PER  | Peru        | South America      | Americas  | 2010           | 575.20                                               | 69.01                  | 15.99      | 12.26                                                | 26.60                  | 9,530           | 2,609                |
| 170              | 604 | PER  | Peru        | South America      | Americas  | 2011           | 568.60                                               | 70.81                  | 16.16      | 12.07                                                | 28.34                  | 10,210          | 2,624                |
| 171              | 608 | PHL  | Philippines | South-Eastern Asia | Asia      | 1992           | 293.40                                               | 100.00                 | 14.13      | 10.55                                                | 46.95                  | 2,640           | 2,247                |
| 171              | 608 | PHL  | Philippines | South-Eastern Asia | Asia      | 1993           | 287.61                                               | 100.00                 | 13.73      | 10.41                                                | 48.95                  | 2,710           | 2,208                |
| 171              | 608 | PHL  | Philippines | South-Eastern Asia | Asia      | 1994           | 304.98                                               | 100.00                 | 14.88      | 10.76                                                | 43.78                  | 2,860           | 2,313                |
| 171              | 608 | PHL  | Philippines | South-Eastern Asia | Asia      | 1995           | 298.12                                               | 100.00                 | 14.49      | 10.59                                                | 46.33                  | 2,990           | 2,290                |
| 171              | 608 | PHL  | Philippines | South-Eastern Asia | Asia      | 1996           | 311.59                                               | 100.00                 | 13.95      | 10.39                                                | 49.57                  | 3,180           | 2,364                |
| 171              | 608 | PHL  | Philippines | South-Eastern Asia | Asia      | 1997           | 297.94                                               | 100.00                 | 14.58      | 10.85                                                | 42.83                  | 3,380           | 2,344                |
| 171              | 608 | PHL  | Philippines | South-Eastern Asia | Asia      | 1998           | 292.23                                               | 100.00                 | 13.99      | 10.89                                                | 42.17                  | 3,420           | 2,293                |
| 171              | 608 | PHL  | Philippines | South-Eastern Asia | Asia      | 1999           | 294.70                                               | 100.00                 | 14.29      | 10.45                                                | 48.54                  | 3,180           | 2,360                |
| 171              | 608 | PHL  | Philippines | South-Eastern Asia | Asia      | 2000           | 296.15                                               | 100.00                 | 14.44      | 10.52                                                | 47.46                  | 3,370           | 2,393                |
| 171              | 608 | PHL  | Philippines | South-Eastern Asia | Asia      | 2001           | 295.26                                               | 100.00                 | 14.25      | 10.84                                                | 42.96                  | 3,470           | 2,374                |
| 171              | 608 | PHL  | Philippines | South-Eastern Asia | Asia      | 2002           | 291.65                                               | 100.00                 | 14.45      | 10.68                                                | 45.21                  | 3,560           | 2,394                |
| 171              | 608 | PHL  | Philippines | South-Eastern Asia | Asia      | 2003           | 293.38                                               | 100.00                 | 14.59      | 10.56                                                | 46.87                  | 3,740           | 2,392                |
| 171              | 608 | PHL  | Philippines | South-Eastern Asia | Asia      | 2004           | 287.59                                               | 100.00                 | 14.79      | 10.95                                                | 41.34                  | 4,030           | 2,462                |
| 171              | 608 | PHL  | Philippines | South-Eastern Asia | Asia      | 2005           | 270.09                                               | 100.00                 | 15.36      | 10.95                                                | 41.24                  | 4,270           | 2,473                |
| 171              | 608 | PHL  | Philippines | South-Eastern Asia | Asia      | 2006           | 275.54                                               | 100.00                 | 15.56      | 11.23                                                | 37.59                  | 4,520           | 2,516                |
| 171              | 608 | PHL  | Philippines | South-Eastern Asia | Asia      | 2007           | 286.87                                               | 100.00                 | 15.46      | 11.20                                                | 37.94                  | 4,880           | 2,572                |
| 171              | 608 | PHL  | Philippines | South-Eastern Asia | Asia      | 2008           | 285.00                                               | 100.00                 | 15.55      | 11.14                                                | 38.75                  | 5,130           | 2,584                |
| 171              | 608 | PHL  | Philippines | South-Eastern Asia | Asia      | 2009           | 283.44                                               | 100.00                 | 15.57      | 11.56                                                | 33.70                  | 5,130           | 2,594                |
| 171              | 608 | PHL  | Philippines | South-Eastern Asia | Asia      | 2010           | 289.25                                               | 100.00                 | 15.35      | 11.79                                                | 31.20                  | 5,520           | 2,597                |
| 171              | 608 | PHL  | Philippines | South-Eastern Asia | Asia      | 2011           | 280.90                                               | 100.00                 | 15.90      | 11.54                                                | 34.14                  | 5,730           | 2,608                |
| 173              | 616 | POL  | Poland      | Eastern Europe     | Europe    | 1992           | 953.10                                               | 10.14                  | 8.57       | 19.44                                                | 2.92                   | 5,700           | 3,362                |
| 173              | 616 | POL  | Poland      | Eastern Europe     | Europe    | 1993           | 927.47                                               | 11.61                  | 8.85       | 19.28                                                | 3.06                   | 6,090           | 3,427                |
| 173              | 616 | POL  | Poland      | Eastern Europe     | Europe    | 1994           | 875.97                                               | 15.24                  | 8.79       | 18.32                                                | 3.93                   | 6,740           | 3,301                |
| 173              | 616 | POL  | Poland      | Eastern Europe     | Europe    | 1995           | 887.46                                               | 14.42                  | 8.86       | 18.50                                                | 3.77                   | 7,310           | 3,320                |
| 173              | 616 | POL  | Poland      | Eastern Europe     | Europe    | 1996           | 858.03                                               | 16.88                  | 8.99       | 18.47                                                | 3.77                   | 8,000           | 3,340                |
| 173              | 616 | POL  | Poland      | Eastern Europe     | Europe    | 1997           | 855.53                                               | 17.18                  | 9.14       | 18.14                                                | 4.13                   | 8,720           | 3,316                |
| 173              | 616 | POL  | Poland      | Eastern Europe     | Europe    | 1998           | 896.30                                               | 13.94                  | 9.03       | 18.43                                                | 3.84                   | 9,310           | 3,378                |
| 173              | 616 | POL  | Poland      | Eastern Europe     | Europe    | 1999           | 904.79                                               | 13.39                  | 9.00       | 18.56                                                | 3.71                   | 9,840           | 3,384                |
| 173              | 616 | POL  | Poland      | Eastern Europe     | Europe    | 2000           | 905.42                                               | 13.37                  | 9.07       | 18.68                                                | 3.60                   | 10,490          | 3,419                |
| 173              | 616 | POL  | Poland      | Eastern Europe     | Europe    | 2001           | 880.05                                               | 16.95                  | 9.26       | 18.41                                                | 3.85                   | 10,940          | 3,421                |
| 173              | 616 | POL  | Poland      | Eastern Europe     | Europe    | 2002           | 853.83                                               | 17.50                  | 9.19       | 18.47                                                | 3.78                   | 11,520          | 3,429                |
| 173              | 616 | POL  | Poland      | Eastern Europe     | Europe    | 2003           | 817.98                                               | 21.12                  | 9.11       | 18.53                                                | 3.71                   | 11,870          | 3,421                |
| 173              | 616 | POL  | Poland      | Eastern Europe     | Europe    | 2004           | 801.08                                               | 23.03                  | 9.25       | 18.16                                                | 4.06                   | 12,640          | 3,382                |
| 173              | 616 | POL  | Poland      | Eastern Europe     | Europe    | 2005           | 764.53                                               | 27.90                  | 9.44       | 17.98                                                | 4.24                   | 13,470          | 3,371                |
| 173              | 616 | POL  | Poland      | Eastern Europe     | Europe    | 2006           | 740.78                                               | 31.53                  | 9.68       | 17.94                                                | 4.27                   | 14,660          | 3,353                |
| 173              | 616 | POL  | Poland      | Eastern Europe     | Europe    | 2007           | 766.90                                               | 27.22                  | 9.48       | 18.05                                                | 4.11                   | 16,090          | 3,361                |
| 173              | 616 | POL  | Poland      | Eastern Europe     | Europe    | 2008           | 737.22                                               | 31.72                  | 9.60       | 17.89                                                | 4.26                   | 17,590          | 3,338                |
| 173              | 616 | POL  | Poland      | Eastern Europe     | Europe    | 2009           | 786.29                                               | 26.92                  | 9.33       | 18.11                                                | 3.98                   | 18,250          | 3,412                |
| 173              | 616 | POL  | Poland      | Eastern Europe     | Europe    | 2010           | 786.95                                               | 23.90                  | 9.28       | 18.06                                                | 4.00                   | 19,560          | 3,416                |
| 173              | 616 | POL  | Poland      | Eastern Europe     | Europe    | 2011           | 824.61                                               | 19.34                  | 9.42       | 18.26                                                | 3.76                   | 20,790          | 3,485                |
| 174              | 620 | PRT  | Portugal    | Southern Europe    | Europe    | 1992           | 759.99                                               | 28.84                  | 12.16      | 19.38                                                | 2.98                   | 12,340          | 3,405                |
| 174              | 620 | PRT  | Portugal    | Southern Europe    | Europe    | 1993           | 771.89                                               | 26.97                  | 11.85      | 19.57                                                | 2.84                   | 12,370          | 3,460                |
| 174              | 620 | PRT  | Portugal    | Southern Europe    | Europe    | 1994           | 790.69                                               | 24.27                  | 11.66      | 19.73                                                | 2.71                   | 12,670          | 3,489                |
| 174              | 620 | PRT  | Portugal    | Southern Europe    | Europe    | 1995           | 834.19                                               | 19.13                  | 11.48      | 19.30                                                | 3.00                   | 13,500          | 3,456                |
| 174              | 620 | PRT  | Portugal    | Southern Europe    | Europe    | 1996           | 842.41                                               | 18.20                  | 11.63      | 19.17                                                | 3.08                   | 14,020          | 3,507                |

| FAO country code | UNI | ISO3 | Country             | Region          | Continent | Reference year | Ca supply (mg capita <sup>-1</sup> d <sup>-1</sup> ) | Ca deficiency risk (%) | Phytate:Zn | Zn supply (mg capita <sup>-1</sup> d <sup>-1</sup> ) | Zn deficiency risk (%) | GNI-PPP (US \$) | Energy supply (kcal) |
|------------------|-----|------|---------------------|-----------------|-----------|----------------|------------------------------------------------------|------------------------|------------|------------------------------------------------------|------------------------|-----------------|----------------------|
| 174              | 620 | PRT  | Portugal            | Southern Europe | Europe    | 1997           | 799.59                                               | 22.79                  | 11.43      | 18.73                                                | 3.42                   | 14,800          | 3,388                |
| 174              | 620 | PRT  | Portugal            | Southern Europe | Europe    | 1998           | 850.93                                               | 17.23                  | 11.41      | 19.37                                                | 2.90                   | 15,560          | 3,508                |
| 174              | 620 | PRT  | Portugal            | Southern Europe | Europe    | 1999           | 886.91                                               | 14.20                  | 10.82      | 19.89                                                | 2.54                   | 16,500          | 3,561                |
| 174              | 620 | PRT  | Portugal            | Southern Europe | Europe    | 2000           | 873.78                                               | 15.14                  | 10.78      | 20.37                                                | 2.26                   | 17,340          | 3,543                |
| 174              | 620 | PRT  | Portugal            | Southern Europe | Europe    | 2001           | 905.82                                               | 12.75                  | 10.27      | 19.79                                                | 2.58                   | 17,940          | 3,537                |
| 174              | 620 | PRT  | Portugal            | Southern Europe | Europe    | 2002           | 869.14                                               | 15.37                  | 11.21      | 20.12                                                | 2.38                   | 18,750          | 3,533                |
| 174              | 620 | PRT  | Portugal            | Southern Europe | Europe    | 2003           | 839.74                                               | 17.90                  | 11.15      | 20.09                                                | 2.38                   | 19,250          | 3,522                |
| 174              | 620 | PRT  | Portugal            | Southern Europe | Europe    | 2004           | 916.47                                               | 11.92                  | 10.85      | 20.73                                                | 2.04                   | 19,670          | 3,608                |
| 174              | 620 | PRT  | Portugal            | Southern Europe | Europe    | 2005           | 911.47                                               | 12.20                  | 10.62      | 20.66                                                | 2.07                   | 21,140          | 3,600                |
| 174              | 620 | PRT  | Portugal            | Southern Europe | Europe    | 2006           | 859.95                                               | 15.94                  | 10.60      | 20.76                                                | 2.01                   | 22,430          | 3,565                |
| 174              | 620 | PRT  | Portugal            | Southern Europe | Europe    | 2007           | 894.03                                               | 13.32                  | 10.05      | 20.73                                                | 2.03                   | 23,550          | 3,557                |
| 174              | 620 | PRT  | Portugal            | Southern Europe | Europe    | 2008           | 859.55                                               | 15.99                  | 9.97       | 20.89                                                | 1.95                   | 24,190          | 3,582                |
| 174              | 620 | PRT  | Portugal            | Southern Europe | Europe    | 2009           | 843.00                                               | 17.49                  | 10.13      | 20.80                                                | 1.99                   | 24,250          | 3,574                |
| 174              | 620 | PRT  | Portugal            | Southern Europe | Europe    | 2010           | 827.63                                               | 19.03                  | 10.07      | 20.30                                                | 2.24                   | 24,980          | 3,518                |
| 174              | 620 | PRT  | Portugal            | Southern Europe | Europe    | 2011           | 783.20                                               | 24.27                  | 10.22      | 19.48                                                | 2.72                   | 24,890          | 3,456                |
| 117              | 410 | KOR  | Republic of Korea   | Eastern Asia    | Asia      | 1992           | 670.75                                               | 45.26                  | 13.55      | 16.13                                                | 7.67                   | 9,580           | 3,003                |
| 117              | 410 | KOR  | Republic of Korea   | Eastern Asia    | Asia      | 1993           | 704.84                                               | 37.67                  | 13.12      | 16.28                                                | 7.27                   | 10,290          | 2,959                |
| 117              | 410 | KOR  | Republic of Korea   | Eastern Asia    | Asia      | 1994           | 690.00                                               | 40.44                  | 13.67      | 16.24                                                | 7.28                   | 11,300          | 2,980                |
| 117              | 410 | KOR  | Republic of Korea   | Eastern Asia    | Asia      | 1995           | 716.40                                               | 34.99                  | 13.39      | 16.76                                                | 6.22                   | 12,450          | 3,022                |
| 117              | 410 | KOR  | Republic of Korea   | Eastern Asia    | Asia      | 1996           | 688.14                                               | 40.27                  | 12.94      | 16.59                                                | 6.41                   | 13,450          | 3,060                |
| 117              | 410 | KOR  | Republic of Korea   | Eastern Asia    | Asia      | 1997           | 687.26                                               | 40.29                  | 12.55      | 17.22                                                | 5.32                   | 14,260          | 3,071                |
| 117              | 410 | KOR  | Republic of Korea   | Eastern Asia    | Asia      | 1998           | 667.01                                               | 44.70                  | 12.72      | 16.07                                                | 7.41                   | 13,300          | 2,977                |
| 117              | 410 | KOR  | Republic of Korea   | Eastern Asia    | Asia      | 1999           | 706.23                                               | 36.37                  | 12.31      | 16.94                                                | 5.72                   | 14,870          | 3,089                |
| 117              | 410 | KOR  | Republic of Korea   | Eastern Asia    | Asia      | 2000           | 740.27                                               | 30.26                  | 12.32      | 16.82                                                | 5.91                   | 17,120          | 3,092                |
| 117              | 410 | KOR  | Republic of Korea   | Eastern Asia    | Asia      | 2001           | 759.45                                               | 27.37                  | 12.83      | 16.41                                                | 6.61                   | 18,130          | 3,080                |
| 117              | 410 | KOR  | Republic of Korea   | Eastern Asia    | Asia      | 2002           | 725.40                                               | 33.04                  | 12.00      | 16.87                                                | 5.80                   | 19,670          | 3,080                |
| 117              | 410 | KOR  | Republic of Korea   | Eastern Asia    | Asia      | 2003           | 722.88                                               | 33.62                  | 12.13      | 16.70                                                | 6.10                   | 20,200          | 3,061                |
| 117              | 410 | KOR  | Republic of Korea   | Eastern Asia    | Asia      | 2004           | 721.99                                               | 33.92                  | 12.32      | 16.22                                                | 7.05                   | 21,680          | 3,096                |
| 117              | 410 | KOR  | Republic of Korea   | Eastern Asia    | Asia      | 2005           | 716.60                                               | 35.08                  | 12.25      | 16.35                                                | 6.79                   | 22,760          | 3,102                |
| 117              | 410 | KOR  | Republic of Korea   | Eastern Asia    | Asia      | 2006           | 724.51                                               | 33.84                  | 11.75      | 16.71                                                | 6.14                   | 24,330          | 3,121                |
| 117              | 410 | KOR  | Republic of Korea   | Eastern Asia    | Asia      | 2007           | 719.97                                               | 34.82                  | 11.88      | 16.62                                                | 6.34                   | 26,130          | 3,137                |
| 117              | 410 | KOR  | Republic of Korea   | Eastern Asia    | Asia      | 2008           | 736.81                                               | 31.92                  | 11.36      | 17.24                                                | 5.31                   | 26,890          | 3,181                |
| 117              | 410 | KOR  | Republic of Korea   | Eastern Asia    | Asia      | 2009           | 720.20                                               | 34.94                  | 11.32      | 17.55                                                | 4.87                   | 26,450          | 3,209                |
| 117              | 410 | KOR  | Republic of Korea   | Eastern Asia    | Asia      | 2010           | 681.61                                               | 42.75                  | 11.54      | 17.59                                                | 4.81                   | 28,250          | 3,280                |
| 117              | 410 | KOR  | Republic of Korea   | Eastern Asia    | Asia      | 2011           | 721.28                                               | 34.63                  | 11.38      | 18.13                                                | 4.14                   | 29,110          | 3,329                |
| 146              | 498 | MDA  | Republic of Moldova | Eastern Europe  | Europe    | 1992           | 566.62                                               | 70.86                  | 13.98      | 16.80                                                | 5.67                   | 2,620           | 2,475                |
| 146              | 498 | MDA  | Republic of Moldova | Eastern Europe  | Europe    | 1993           | 649.73                                               | 49.11                  | 16.58      | 16.32                                                | 6.61                   | 2,650           | 2,480                |
| 146              | 498 | MDA  | Republic of Moldova | Eastern Europe  | Europe    | 1994           | 600.83                                               | 62.30                  | 16.45      | 15.52                                                | 8.53                   | 1,860           | 2,440                |
| 146              | 498 | MDA  | Republic of Moldova | Eastern Europe  | Europe    | 1995           | 695.00                                               | 39.69                  | 16.44      | 15.53                                                | 8.61                   | 1,870           | 2,489                |
| 146              | 498 | MDA  | Republic of Moldova | Eastern Europe  | Europe    | 1996           | 692.81                                               | 40.52                  | 15.87      | 15.27                                                | 9.32                   | 1,890           | 2,448                |
| 146              | 498 | MDA  | Republic of Moldova | Eastern Europe  | Europe    | 1997           | 700.64                                               | 39.17                  | 16.11      | 15.41                                                | 9.00                   | 1,950           | 2,454                |
| 146              | 498 | MDA  | Republic of Moldova | Eastern Europe  | Europe    | 1998           | 692.17                                               | 41.15                  | 15.47      | 15.60                                                | 8.55                   | 1,840           | 2,460                |
| 146              | 498 | MDA  | Republic of Moldova | Eastern Europe  | Europe    | 1999           | 695.00                                               | 40.75                  | 16.85      | 15.53                                                | 8.82                   | 1,800           | 2,479                |
| 146              | 498 | MDA  | Republic of Moldova | Eastern Europe  | Europe    | 2000           | 694.81                                               | 41.01                  | 16.51      | 15.90                                                | 7.93                   | 1,880           | 2,500                |
| 146              | 498 | MDA  | Republic of Moldova | Eastern Europe  | Europe    | 2001           | 719.78                                               | 36.18                  | 17.20      | 15.57                                                | 8.76                   | 2,140           | 2,525                |
| 146              | 498 | MDA  | Republic of Moldova | Eastern Europe  | Europe    | 2002           | 754.39                                               | 30.30                  | 17.07      | 15.73                                                | 8.40                   | 2,350           | 2,569                |
| 146              | 498 | MDA  | Republic of Moldova | Eastern Europe  | Europe    | 2003           | 745.23                                               | 32.01                  | 17.24      | 15.21                                                | 9.91                   | 2,690           | 2,555                |
| 146              | 498 | MDA  | Republic of Moldova | Eastern Europe  | Europe    | 2004           | 709.23                                               | 38.84                  | 15.55      | 15.94                                                | 7.96                   | 3,000           | 2,582                |
| 146              | 498 | MDA  | Republic of Moldova | Eastern Europe  | Europe    | 2005           | 786.53                                               | 25.84                  | 14.84      | 16.06                                                | 7.68                   | 3,310           | 2,629                |
| 146              | 498 | MDA  | Republic of Moldova | Eastern Europe  | Europe    | 2006           | 831.53                                               | 20.14                  | 15.00      | 15.72                                                | 8.44                   | 3,580           | 2,699                |
| 146              | 498 | MDA  | Republic of Moldova | Eastern Europe  | Europe    | 2007           | 730.12                                               | 34.15                  | 14.12      | 14.86                                                | 10.90                  | 3,720           | 2,740                |
| 146              | 498 | MDA  | Republic of Moldova | Eastern Europe  | Europe    | 2008           | 732.50                                               | 24.10                  | 14.19      | 14.57                                                | 11.75                  | 4,110           | 2,778                |
| 146              | 498 | MDA  | Republic of Moldova | Eastern Europe  | Europe    | 2009           | 722.87                                               | 34.50                  | 15.57      | 14.70                                                | 11.06                  | 3,750           | 2,785                |
| 146              | 498 | MDA  | Republic of Moldova | Eastern Europe  | Europe    | 2010           | 765.19                                               | 27.12                  | 15.68      | 14.94                                                | 10.07                  | 4,170           | 2,804                |
| 146              | 498 | MDA  | Republic of Moldova | Eastern Europe  | Europe    | 2011           | 743.04                                               | 30.11                  | 16.14      | 14.53                                                | 11.30                  | 4,520           | 2,837                |
| 183              | 642 | ROU  | Romania             | Eastern Europe  | Europe    | 1992           | 809.01                                               | 21.37                  | 11.75      | 17.60                                                | 4.69                   | 4,410           | 2,835                |
| 183              | 642 | ROU  | Romania             | Eastern Europe  | Europe    | 1993           | 902.45                                               | 13.15                  | 12.30      | 18.87                                                | 3.37                   | 4,580           | 3,000                |
| 183              | 642 | ROU  | Romania             | Eastern Europe  | Europe    | 1994           | 925.92                                               | 11.78                  | 11.67      | 18.75                                                | 3.51                   | 4,880           | 2,931                |
| 183              | 642 | ROU  | Romania             | Eastern Europe  | Europe    | 1995           | 981.37                                               | 8.99                   | 11.14      | 19.36                                                | 3.02                   | 5,330           | 3,027                |
| 183              | 642 | ROU  | Romania             | Eastern Europe  | Europe    | 1996           | 990.09                                               | 8.72                   | 11.61      | 18.96                                                | 3.35                   | 5,680           | 3,056                |
| 183              | 642 | ROU  | Romania             | Eastern Europe  | Europe    | 1997           | 1,005.48                                             | 8.12                   | 11.80      | 19.82                                                | 2.72                   | 5,450           | 3,046                |
| 183              | 642 | ROU  | Romania             | Eastern Europe  | Europe    | 1998           | 1,030.96                                             | 7.18                   | 11.23      | 19.70                                                | 2.79                   | 5,280           | 3,068                |
| 183              | 642 | ROU  | Romania             | Eastern Europe  | Europe    | 1999           | 1,070.93                                             | 5.96                   | 11.59      | 19.53                                                | 2.91                   | 5,280           | 3,081                |
| 183              | 642 | ROU  | Romania             | Eastern Europe  | Europe    | 2000           | 1,043.36                                             | 6.77                   | 11.58      | 19.28                                                | 3.10                   | 5,670           | 3,141                |
| 183              | 642 | ROU  | Romania             | Eastern Europe  | Europe    | 2001           | 1,097.10                                             | 5.26                   | 11.31      | 19.78                                                | 2.71                   | 6,440           | 3,239                |
| 183              | 642 | ROU  | Romania             | Eastern Europe  | Europe    | 2002           | 1,163.29                                             | 3.95                   | 11.11      | 20.43                                                | 2.31                   | 6,990           | 3,319                |
| 183              | 642 | ROU  | Romania             | Eastern Europe  | Europe    | 2003           | 1,229.64                                             | 3.02                   | 10.92      | 20.59                                                | 2.23                   | 7,650           | 3,365                |
| 183              | 642 | ROU  | Romania             | Eastern Europe  | Europe    | 2004           | 1,275.73                                             | 2.53                   | 10.87      | 20.62                                                | 2.21                   | 8,490           | 3,354                |
| 183              | 642 | ROU  | Romania             | Eastern Europe  | Europe    | 2005           | 1,280.15                                             | 2.67                   | 10.82      | 20.80                                                | 2.11                   | 9,250           | 3,424                |
| 183              | 642 | ROU  | Romania             | Eastern Europe  | Europe    | 2006           | 1,323.62                                             | 2.10                   | 11.12      | 20.63                                                | 2.18                   | 10,980          | 3,464                |
| 183              | 642 | ROU  | Romania             | Eastern Europe  | Europe    | 2007           | 1,310.54                                             | 2.18                   | 10.86      | 20.36                                                | 2.30                   | 12,720          | 3,384                |
| 183              | 642 | ROU  | Romania             | Eastern Europe  | Europe    | 2008           | 1,369.91                                             | 1.75                   | 11.40      | 20.78                                                | 2.06                   | 15,280          | 3,425                |
| 183              | 642 | ROU  | Romania             | Eastern Europe  | Europe    | 2009           | 1,300.17                                             | 2.22                   | 11.24      | 20.78                                                | 2.04                   | 15,340          | 3,421                |
| 183              | 642 | ROU  | Romania             | Eastern Europe  | Europe    | 2010           | 1,240.41                                             | 2.76                   | 11.23      | 20.06                                                | 2.40                   | 16,000          | 3,326                |
| 183              | 642 | ROU  | Romania             | Eastern Europe  | Europe    | 2011           | 1,268.90                                             | 2.46                   | 11.57      | 20.29                                                | 2.26                   | 16,820          | 3,363                |
| 185              | 643 | RUS  | Russian Federation  | Eastern Europe  | Europe    | 1992           | 600.38                                               | 62.01                  | 7.46       | 21.30                                                | 1.76                   | 6,790           | 2,926                |
| 185              | 643 | RUS  | Russian Federation  | Eastern Europe  | Europe    | 1993           | 605.25                                               | 61.11                  | 7.70       | 20.88                                                | 1.96                   | 6,360           | 2,973                |
| 185              | 643 | RUS  | Russian Federation  | Eastern Europe  | Europe    | 1994           | 676.71                                               | 43.64                  | 7.65       | 21.11                                                | 1.88                   | 5,720           | 2,918                |
| 185              | 643 | RUS  | Russian Federation  | Eastern Europe  | Europe    | 1995           | 688.13                                               | 41.50                  | 7.95       | 20.22                                                | 2.33                   | 5,590           | 2,893                |



Dietary calcium and zinc deficiency risks are decreasing but remain prevalent

| FAO country code | UNI | ISO3 | Country            | Region          | Continent | Reference year | Zn supply (mg capita <sup>-1</sup> d <sup>-1</sup> ) | Ca deficiency risk (%) | Phytate:Zn | Zn supply (mg capita <sup>-1</sup> d <sup>-1</sup> ) | Zn deficiency risk (%) | GNI-PPP (US \$) | Energy supply (kcal) |
|------------------|-----|------|--------------------|-----------------|-----------|----------------|------------------------------------------------------|------------------------|------------|------------------------------------------------------|------------------------|-----------------|----------------------|
| 185              | 643 | RUS  | Russian Federation | Eastern Europe  | Europe    | 1996           | 717.08                                               | 36.11                  | 8.13       | 19.36                                                | 2.90                   | 5,460           | 2,787                |
| 185              | 643 | RUS  | Russian Federation | Eastern Europe  | Europe    | 1997           | 764.95                                               | 28.24                  | 8.08       | 19.93                                                | 2.54                   | 5,600           | 2,856                |
| 185              | 643 | RUS  | Russian Federation | Eastern Europe  | Europe    | 1998           | 778.87                                               | 26.38                  | 8.16       | 19.45                                                | 2.88                   | 5,260           | 2,862                |
| 185              | 643 | RUS  | Russian Federation | Eastern Europe  | Europe    | 1999           | 781.28                                               | 26.16                  | 8.30       | 18.87                                                | 3.35                   | 5,720           | 2,889                |
| 185              | 643 | RUS  | Russian Federation | Eastern Europe  | Europe    | 2000           | 806.72                                               | 22.89                  | 8.29       | 18.47                                                | 3.72                   | 6,660           | 2,878                |
| 185              | 643 | RUS  | Russian Federation | Eastern Europe  | Europe    | 2001           | 788.78                                               | 25.13                  | 8.35       | 18.88                                                | 3.35                   | 7,270           | 2,955                |
| 185              | 643 | RUS  | Russian Federation | Eastern Europe  | Europe    | 2002           | 809.15                                               | 22.45                  | 8.22       | 19.19                                                | 3.08                   | 7,880           | 3,024                |
| 185              | 643 | RUS  | Russian Federation | Eastern Europe  | Europe    | 2003           | 804.22                                               | 22.92                  | 8.25       | 19.48                                                | 2.84                   | 8,970           | 3,061                |
| 185              | 643 | RUS  | Russian Federation | Eastern Europe  | Europe    | 2004           | 831.99                                               | 19.61                  | 8.24       | 19.49                                                | 2.81                   | 10,030          | 3,110                |
| 185              | 643 | RUS  | Russian Federation | Eastern Europe  | Europe    | 2005           | 877.49                                               | 15.25                  | 8.22       | 19.88                                                | 2.53                   | 11,560          | 3,200                |
| 185              | 643 | RUS  | Russian Federation | Eastern Europe  | Europe    | 2006           | 875.93                                               | 15.21                  | 8.25       | 19.82                                                | 2.54                   | 14,530          | 3,241                |
| 185              | 643 | RUS  | Russian Federation | Eastern Europe  | Europe    | 2007           | 906.89                                               | 12.78                  | 8.06       | 20.11                                                | 2.34                   | 16,340          | 3,302                |
| 185              | 643 | RUS  | Russian Federation | Eastern Europe  | Europe    | 2008           | 886.89                                               | 13.99                  | 8.18       | 20.20                                                | 2.26                   | 19,850          | 3,307                |
| 185              | 643 | RUS  | Russian Federation | Eastern Europe  | Europe    | 2009           | 937.56                                               | 10.64                  | 8.06       | 20.03                                                | 2.32                   | 18,860          | 3,278                |
| 185              | 643 | RUS  | Russian Federation | Eastern Europe  | Europe    | 2010           | 933.58                                               | 10.74                  | 8.12       | 20.26                                                | 2.17                   | 19,890          | 3,331                |
| 185              | 643 | RUS  | Russian Federation | Eastern Europe  | Europe    | 2011           | 947.71                                               | 9.91                   | 8.25       | 20.21                                                | 2.18                   | 21,790          | 3,358                |
| 184              | 646 | RWA  | Rwanda             | Eastern Africa  | Africa    | 1992           | 368.94                                               | 99.82                  | 26.55      | 7.19                                                 | 96.17                  | 650             | 1,830                |
| 184              | 646 | RWA  | Rwanda             | Eastern Africa  | Africa    | 1993           | 390.19                                               | 99.56                  | 26.20      | 7.23                                                 | 96.53                  | 660             | 1,831                |
| 184              | 646 | RWA  | Rwanda             | Eastern Africa  | Africa    | 1994           | 373.07                                               | 99.87                  | 27.02      | 7.30                                                 | 96.69                  | 350             | 1,802                |
| 184              | 646 | RWA  | Rwanda             | Eastern Africa  | Africa    | 1995           | 354.26                                               | 99.97                  | 27.38      | 6.96                                                 | 98.42                  | 500             | 1,740                |
| 184              | 646 | RWA  | Rwanda             | Eastern Africa  | Africa    | 1996           | 344.36                                               | 99.99                  | 26.64      | 6.55                                                 | 98.43                  | 540             | 1,696                |
| 184              | 646 | RWA  | Rwanda             | Eastern Africa  | Africa    | 1997           | 323.82                                               | 100.00                 | 26.36      | 6.24                                                 | 99.74                  | 570             | 1,650                |
| 184              | 646 | RWA  | Rwanda             | Eastern Africa  | Africa    | 1998           | 331.16                                               | 99.99                  | 25.10      | 6.01                                                 | 98.85                  | 570             | 1,662                |
| 184              | 646 | RWA  | Rwanda             | Eastern Africa  | Africa    | 1999           | 332.55                                               | 99.99                  | 25.61      | 5.98                                                 | 98.83                  | 570             | 1,661                |
| 184              | 646 | RWA  | Rwanda             | Eastern Africa  | Africa    | 2000           | 373.30                                               | 99.75                  | 27.64      | 6.91                                                 | 97.47                  | 590             | 1,801                |
| 184              | 646 | RWA  | Rwanda             | Eastern Africa  | Africa    | 2001           | 403.27                                               | 98.83                  | 28.01      | 7.39                                                 | 93.94                  | 620             | 1,869                |
| 184              | 646 | RWA  | Rwanda             | Eastern Africa  | Africa    | 2002           | 405.42                                               | 98.70                  | 28.06      | 7.71                                                 | 90.55                  | 700             | 2,020                |
| 184              | 646 | RWA  | Rwanda             | Eastern Africa  | Africa    | 2003           | 396.73                                               | 99.13                  | 28.49      | 7.70                                                 | 90.77                  | 710             | 1,948                |
| 184              | 646 | RWA  | Rwanda             | Eastern Africa  | Africa    | 2004           | 393.79                                               | 99.27                  | 27.98      | 7.61                                                 | 91.85                  | 770             | 1,913                |
| 184              | 646 | RWA  | Rwanda             | Eastern Africa  | Africa    | 2005           | 399.08                                               | 99.11                  | 28.12      | 7.92                                                 | 88.26                  | 850             | 1,979                |
| 184              | 646 | RWA  | Rwanda             | Eastern Africa  | Africa    | 2006           | 407.96                                               | 98.81                  | 28.36      | 8.10                                                 | 86.55                  | 930             | 1,985                |
| 184              | 646 | RWA  | Rwanda             | Eastern Africa  | Africa    | 2007           | 426.70                                               | 97.67                  | 28.76      | 8.51                                                 | 80.61                  | 1,010           | 1,997                |
| 184              | 646 | RWA  | Rwanda             | Eastern Africa  | Africa    | 2008           | 417.94                                               | 98.25                  | 27.83      | 8.84                                                 | 75.01                  | 1,110           | 2,023                |
| 184              | 646 | RWA  | Rwanda             | Eastern Africa  | Africa    | 2009           | 448.82                                               | 95.39                  | 27.68      | 9.10                                                 | 70.40                  | 1,150           | 2,128                |
| 184              | 646 | RWA  | Rwanda             | Eastern Africa  | Africa    | 2010           | 467.34                                               | 92.81                  | 27.03      | 9.25                                                 | 67.87                  | 1,210           | 2,141                |
| 184              | 646 | RWA  | Rwanda             | Eastern Africa  | Africa    | 2011           | 444.28                                               | 95.89                  | 26.68      | 9.04                                                 | 71.47                  | 1,300           | 2,148                |
| 194              | 682 | SAU  | Saudi Arabia       | Western Asia    | Asia      | 1992           | 569.81                                               | 66.59                  | 9.90       | 15.79                                                | 8.91                   | 26,880          | 2,783                |
| 194              | 682 | SAU  | Saudi Arabia       | Western Asia    | Asia      | 1993           | 526.40                                               | 79.27                  | 11.83      | 14.91                                                | 11.92                  | 26,500          | 2,745                |
| 194              | 682 | SAU  | Saudi Arabia       | Western Asia    | Asia      | 1994           | 533.32                                               | 78.13                  | 12.09      | 15.11                                                | 11.38                  | 26,100          | 2,706                |
| 194              | 682 | SAU  | Saudi Arabia       | Western Asia    | Asia      | 1995           | 622.82                                               | 54.30                  | 12.92      | 16.28                                                | 8.06                   | 26,390          | 2,852                |
| 194              | 682 | SAU  | Saudi Arabia       | Western Asia    | Asia      | 1996           | 624.88                                               | 53.89                  | 12.36      | 16.46                                                | 7.59                   | 27,260          | 2,916                |
| 194              | 682 | SAU  | Saudi Arabia       | Western Asia    | Asia      | 1997           | 618.79                                               | 55.46                  | 12.08      | 16.53                                                | 7.37                   | 28,170          | 2,978                |
| 194              | 682 | SAU  | Saudi Arabia       | Western Asia    | Asia      | 1998           | 626.50                                               | 53.32                  | 11.46      | 16.49                                                | 7.35                   | 29,000          | 3,014                |
| 194              | 682 | SAU  | Saudi Arabia       | Western Asia    | Asia      | 1999           | 662.61                                               | 46.65                  | 11.59      | 16.62                                                | 6.99                   | 28,670          | 3,074                |
| 194              | 682 | SAU  | Saudi Arabia       | Western Asia    | Asia      | 2000           | 634.78                                               | 50.89                  | 12.37      | 16.43                                                | 7.31                   | 29,490          | 3,113                |
| 194              | 682 | SAU  | Saudi Arabia       | Western Asia    | Asia      | 2001           | 634.07                                               | 51.17                  | 12.23      | 16.23                                                | 7.77                   | 29,090          | 3,081                |
| 194              | 682 | SAU  | Saudi Arabia       | Western Asia    | Asia      | 2002           | 641.68                                               | 49.43                  | 11.50      | 16.40                                                | 7.46                   | 28,350          | 3,021                |
| 194              | 682 | SAU  | Saudi Arabia       | Western Asia    | Asia      | 2003           | 615.41                                               | 56.42                  | 11.49      | 16.04                                                | 8.39                   | 29,760          | 3,001                |
| 194              | 682 | SAU  | Saudi Arabia       | Western Asia    | Asia      | 2004           | 604.97                                               | 59.44                  | 11.49      | 15.94                                                | 8.72                   | 32,190          | 2,958                |
| 194              | 682 | SAU  | Saudi Arabia       | Western Asia    | Asia      | 2005           | 609.16                                               | 58.45                  | 11.25      | 16.15                                                | 8.24                   | 34,850          | 2,973                |
| 194              | 682 | SAU  | Saudi Arabia       | Western Asia    | Asia      | 2006           | 582.84                                               | 65.85                  | 11.84      | 16.17                                                | 8.28                   | 37,070          | 3,016                |
| 194              | 682 | SAU  | Saudi Arabia       | Western Asia    | Asia      | 2007           | 557.79                                               | 72.63                  | 11.76      | 16.63                                                | 7.20                   | 39,220          | 3,017                |
| 194              | 682 | SAU  | Saudi Arabia       | Western Asia    | Asia      | 2008           | 523.42                                               | 81.37                  | 12.35      | 15.83                                                | 9.03                   | 42,710          | 2,977                |
| 194              | 682 | SAU  | Saudi Arabia       | Western Asia    | Asia      | 2009           | 486.18                                               | 89.45                  | 11.97      | 15.73                                                | 9.23                   | 43,220          | 2,967                |
| 194              | 682 | SAU  | Saudi Arabia       | Western Asia    | Asia      | 2010           | 590.25                                               | 62.32                  | 11.69      | 16.79                                                | 6.66                   | 45,900          | 3,099                |
| 194              | 682 | SAU  | Saudi Arabia       | Western Asia    | Asia      | 2011           | 621.18                                               | 54.03                  | 11.47      | 16.67                                                | 6.91                   | 49,940          | 3,122                |
| 195              | 686 | SEN  | Senegal            | Western Africa  | Africa    | 1992           | 188.44                                               | 100.00                 | 17.77      | 10.42                                                | 48.55                  | 1,210           | 2,108                |
| 195              | 686 | SEN  | Senegal            | Western Africa  | Africa    | 1993           | 199.38                                               | 100.00                 | 17.98      | 10.94                                                | 41.06                  | 1,210           | 2,227                |
| 195              | 686 | SEN  | Senegal            | Western Africa  | Africa    | 1994           | 198.27                                               | 100.00                 | 17.70      | 10.71                                                | 44.17                  | 1,190           | 2,148                |
| 195              | 686 | SEN  | Senegal            | Western Africa  | Africa    | 1995           | 216.12                                               | 100.00                 | 17.71      | 10.69                                                | 44.42                  | 1,260           | 2,167                |
| 195              | 686 | SEN  | Senegal            | Western Africa  | Africa    | 1996           | 208.25                                               | 100.00                 | 17.48      | 10.18                                                | 52.54                  | 1,290           | 2,107                |
| 195              | 686 | SEN  | Senegal            | Western Africa  | Africa    | 1997           | 224.38                                               | 100.00                 | 17.27      | 10.08                                                | 54.02                  | 1,320           | 2,114                |
| 195              | 686 | SEN  | Senegal            | Western Africa  | Africa    | 1998           | 220.37                                               | 100.00                 | 17.15      | 10.07                                                | 54.13                  | 1,390           | 2,106                |
| 195              | 686 | SEN  | Senegal            | Western Africa  | Africa    | 1999           | 238.44                                               | 100.00                 | 17.75      | 10.23                                                | 51.51                  | 1,450           | 2,154                |
| 195              | 686 | SEN  | Senegal            | Western Africa  | Africa    | 2000           | 221.75                                               | 100.00                 | 17.43      | 10.40                                                | 48.80                  | 1,490           | 2,164                |
| 195              | 686 | SEN  | Senegal            | Western Africa  | Africa    | 2001           | 280.75                                               | 100.00                 | 17.03      | 10.51                                                | 47.45                  | 1,560           | 2,173                |
| 195              | 686 | SEN  | Senegal            | Western Africa  | Africa    | 2002           | 250.47                                               | 100.00                 | 17.34      | 10.10                                                | 53.71                  | 1,550           | 2,144                |
| 195              | 686 | SEN  | Senegal            | Western Africa  | Africa    | 2003           | 294.70                                               | 100.00                 | 17.86      | 10.63                                                | 45.48                  | 1,650           | 2,222                |
| 195              | 686 | SEN  | Senegal            | Western Africa  | Africa    | 2004           | 330.52                                               | 99.99                  | 19.31      | 11.27                                                | 36.68                  | 1,750           | 2,248                |
| 195              | 686 | SEN  | Senegal            | Western Africa  | Africa    | 2005           | 307.46                                               | 100.00                 | 18.83      | 11.23                                                | 37.11                  | 1,840           | 2,237                |
| 195              | 686 | SEN  | Senegal            | Western Africa  | Africa    | 2006           | 324.84                                               | 99.99                  | 18.27      | 11.85                                                | 30.31                  | 1,910           | 2,310                |
| 195              | 686 | SEN  | Senegal            | Western Africa  | Africa    | 2007           | 300.86                                               | 100.00                 | 18.58      | 11.59                                                | 32.85                  | 2,000           | 2,344                |
| 195              | 686 | SEN  | Senegal            | Western Africa  | Africa    | 2008           | 333.38                                               | 99.99                  | 18.43      | 11.88                                                | 29.60                  | 2,070           | 2,433                |
| 195              | 686 | SEN  | Senegal            | Western Africa  | Africa    | 2009           | 360.16                                               | 99.89                  | 17.96      | 12.35                                                | 25.12                  | 2,060           | 2,442                |
| 195              | 686 | SEN  | Senegal            | Western Africa  | Africa    | 2010           | 327.29                                               | 99.99                  | 17.84      | 12.13                                                | 26.96                  | 2,120           | 2,435                |
| 195              | 686 | SEN  | Senegal            | Western Africa  | Africa    | 2011           | 232.26                                               | 100.00                 | 18.02      | 12.19                                                | 26.65                  | 2,140           | 2,426                |
| 272              | 688 | SRB  | Serbia             | Southern Europe | Europe    | 2006           | 847.21                                               | 17.60                  | 10.85      | 16.59                                                | 6.24                   | 9,320           | 2,699                |
| 272              | 688 | SRB  | Serbia             | Southern Europe | Europe    | 2007           | 827.58                                               | 19.51                  | 10.38      | 16.65                                                | 6.11                   | 9,890           | 2,723                |
| 272              | 688 | SRB  | Serbia             | Southern Europe | Europe    | 2008           | 862.93                                               | 16.12                  | 10.41      | 17.10                                                | 5.35                   | 11,200          | 2,697                |

Dietary calcium and zinc deficiency risks are decreasing but remain prevalent

| FAO country code | UNI | ISO3 | Country      | Region          | Continent | Reference year | Ca supply (mg capita <sup>-1</sup> d <sup>-1</sup> ) | Ca deficiency risk (%) | Phytate:Zn | Zn supply (mg capita <sup>-1</sup> d <sup>-1</sup> ) | Zn deficiency risk (%) | GNI-PPP (US \$) | Energy supply (kcal) |
|------------------|-----|------|--------------|-----------------|-----------|----------------|------------------------------------------------------|------------------------|------------|------------------------------------------------------|------------------------|-----------------|----------------------|
| 272              | 688 | SRB  | Serbia       | Southern Europe | Europe    | 2009           | 829.02                                               | 19.28                  | 10.93      | 17.24                                                | 5.14                   | 11,000          | 2,737                |
| 272              | 688 | SRB  | Serbia       | Southern Europe | Europe    | 2010           | 817.23                                               | 20.51                  | 11.00      | 17.86                                                | 4.32                   | 10,830          | 2,715                |
| 272              | 688 | SRB  | Serbia       | Southern Europe | Europe    | 2011           | 820.86                                               | 20.08                  | 11.17      | 17.56                                                | 4.66                   | 11,450          | 2,724                |
| 197              | 694 | SLE  | Sierra Leone | Western Africa  | Africa    | 1992           | 230.57                                               | 100.00                 | 22.09      | 7.32                                                 | 96.08                  | 680             | 2,018                |
| 197              | 694 | SLE  | Sierra Leone | Western Africa  | Africa    | 1993           | 225.66                                               | 100.00                 | 22.30      | 7.25                                                 | 96.73                  | 750             | 2,038                |
| 197              | 694 | SLE  | Sierra Leone | Western Africa  | Africa    | 1994           | 242.86                                               | 100.00                 | 23.18      | 8.09                                                 | 87.18                  | 700             | 2,116                |
| 197              | 694 | SLE  | Sierra Leone | Western Africa  | Africa    | 1995           | 236.42                                               | 100.00                 | 22.71      | 8.07                                                 | 87.49                  | 710             | 2,136                |
| 197              | 694 | SLE  | Sierra Leone | Western Africa  | Africa    | 1996           | 263.34                                               | 100.00                 | 22.92      | 8.29                                                 | 84.48                  | 760             | 2,177                |
| 197              | 694 | SLE  | Sierra Leone | Western Africa  | Africa    | 1997           | 271.77                                               | 100.00                 | 23.30      | 8.51                                                 | 81.28                  | 740             | 2,203                |
| 197              | 694 | SLE  | Sierra Leone | Western Africa  | Africa    | 1998           | 254.61                                               | 100.00                 | 23.39      | 8.55                                                 | 80.59                  | 730             | 2,153                |
| 197              | 694 | SLE  | Sierra Leone | Western Africa  | Africa    | 1999           | 243.25                                               | 100.00                 | 23.10      | 8.21                                                 | 86.47                  | 720             | 2,070                |
| 197              | 694 | SLE  | Sierra Leone | Western Africa  | Africa    | 2000           | 227.64                                               | 100.00                 | 21.84      | 7.66                                                 | 92.01                  | 770             | 1,991                |
| 197              | 694 | SLE  | Sierra Leone | Western Africa  | Africa    | 2001           | 242.49                                               | 100.00                 | 23.45      | 7.80                                                 | 90.63                  | 710             | 1,995                |
| 197              | 694 | SLE  | Sierra Leone | Western Africa  | Africa    | 2002           | 247.42                                               | 100.00                 | 23.42      | 8.02                                                 | 87.80                  | 870             | 2,045                |
| 197              | 694 | SLE  | Sierra Leone | Western Africa  | Africa    | 2003           | 260.19                                               | 100.00                 | 22.67      | 8.05                                                 | 87.06                  | 930             | 2,032                |
| 197              | 694 | SLE  | Sierra Leone | Western Africa  | Africa    | 2004           | 265.31                                               | 100.00                 | 23.06      | 8.03                                                 | 87.25                  | 970             | 2,024                |
| 197              | 694 | SLE  | Sierra Leone | Western Africa  | Africa    | 2005           | 267.81                                               | 100.00                 | 23.13      | 8.31                                                 | 83.10                  | 1,010           | 2,091                |
| 197              | 694 | SLE  | Sierra Leone | Western Africa  | Africa    | 2006           | 283.77                                               | 100.00                 | 23.01      | 8.61                                                 | 78.47                  | 1,070           | 2,188                |
| 197              | 694 | SLE  | Sierra Leone | Western Africa  | Africa    | 2007           | 276.08                                               | 100.00                 | 21.88      | 8.42                                                 | 81.50                  | 1,120           | 2,182                |
| 197              | 694 | SLE  | Sierra Leone | Western Africa  | Africa    | 2008           | 280.93                                               | 100.00                 | 21.60      | 8.54                                                 | 79.67                  | 1,200           | 2,200                |
| 197              | 694 | SLE  | Sierra Leone | Western Africa  | Africa    | 2009           | 291.09                                               | 100.00                 | 21.42      | 8.73                                                 | 76.63                  | 1,250           | 2,255                |
| 197              | 694 | SLE  | Sierra Leone | Western Africa  | Africa    | 2010           | 308.87                                               | 100.00                 | 21.38      | 8.90                                                 | 73.82                  | 1,300           | 2,276                |
| 197              | 694 | SLE  | Sierra Leone | Western Africa  | Africa    | 2011           | 312.36                                               | 100.00                 | 21.56      | 9.18                                                 | 69.19                  | 1,390           | 2,333                |
| 199              | 703 | SVK  | Slovakia     | Eastern Europe  | Europe    | 1993           | 738.53                                               | 31.71                  | 9.84       | 14.94                                                | 10.54                  | 7,080           | 2,790                |
| 199              | 703 | SVK  | Slovakia     | Eastern Europe  | Europe    | 1994           | 661.07                                               | 47.61                  | 9.08       | 16.31                                                | 6.94                   | 7,650           | 2,979                |
| 199              | 703 | SVK  | Slovakia     | Eastern Europe  | Europe    | 1995           | 631.64                                               | 55.02                  | 9.48       | 14.50                                                | 12.22                  | 8,340           | 2,835                |
| 199              | 703 | SVK  | Slovakia     | Eastern Europe  | Europe    | 1996           | 617.16                                               | 58.89                  | 9.47       | 15.05                                                | 10.16                  | 9,100           | 2,906                |
| 199              | 703 | SVK  | Slovakia     | Eastern Europe  | Europe    | 1997           | 624.60                                               | 57.00                  | 9.02       | 14.85                                                | 10.84                  | 9,760           | 2,904                |
| 199              | 703 | SVK  | Slovakia     | Eastern Europe  | Europe    | 1998           | 721.93                                               | 36.01                  | 9.21       | 15.19                                                | 9.75                   | 10,330          | 2,939                |
| 199              | 703 | SVK  | Slovakia     | Eastern Europe  | Europe    | 1999           | 675.99                                               | 44.50                  | 9.17       | 14.94                                                | 10.56                  | 10,350          | 2,883                |
| 199              | 703 | SVK  | Slovakia     | Eastern Europe  | Europe    | 2000           | 584.18                                               | 68.06                  | 9.45       | 14.27                                                | 13.08                  | 10,960          | 2,778                |
| 199              | 703 | SVK  | Slovakia     | Eastern Europe  | Europe    | 2001           | 599.96                                               | 63.80                  | 9.35       | 14.02                                                | 14.20                  | 12,080          | 2,785                |
| 199              | 703 | SVK  | Slovakia     | Eastern Europe  | Europe    | 2002           | 577.11                                               | 70.03                  | 9.70       | 14.13                                                | 13.65                  | 12,920          | 2,800                |
| 199              | 703 | SVK  | Slovakia     | Eastern Europe  | Europe    | 2003           | 567.73                                               | 75.21                  | 9.64       | 14.18                                                | 13.41                  | 12,950          | 2,790                |
| 199              | 703 | SVK  | Slovakia     | Eastern Europe  | Europe    | 2004           | 564.30                                               | 76.03                  | 10.05      | 13.97                                                | 14.35                  | 14,080          | 2,817                |
| 199              | 703 | SVK  | Slovakia     | Eastern Europe  | Europe    | 2005           | 661.44                                               | 50.08                  | 9.18       | 14.40                                                | 12.38                  | 15,760          | 2,841                |
| 199              | 703 | SVK  | Slovakia     | Eastern Europe  | Europe    | 2006           | 673.74                                               | 44.63                  | 9.24       | 14.28                                                | 12.86                  | 17,890          | 2,833                |
| 199              | 703 | SVK  | Slovakia     | Eastern Europe  | Europe    | 2007           | 665.34                                               | 48.71                  | 9.44       | 14.35                                                | 12.49                  | 20,280          | 2,794                |
| 199              | 703 | SVK  | Slovakia     | Eastern Europe  | Europe    | 2008           | 699.83                                               | 38.56                  | 9.27       | 14.59                                                | 11.47                  | 21,790          | 2,864                |
| 199              | 703 | SVK  | Slovakia     | Eastern Europe  | Europe    | 2009           | 723.96                                               | 33.70                  | 9.21       | 14.16                                                | 13.08                  | 21,640          | 2,899                |
| 199              | 703 | SVK  | Slovakia     | Eastern Europe  | Europe    | 2010           | 751.75                                               | 28.81                  | 9.22       | 14.46                                                | 11.76                  | 22,480          | 2,961                |
| 199              | 703 | SVK  | Slovakia     | Eastern Europe  | Europe    | 2011           | 721.83                                               | 33.63                  | 9.55       | 14.60                                                | 11.17                  | 24,620          | 2,902                |
| 198              | 705 | SVN  | Slovenia     | Southern Europe | Europe    | 1992           | 710.08                                               | 36.68                  | 12.58      | 15.22                                                | 9.41                   | 10,420          | 2,991                |
| 198              | 705 | SVN  | Slovenia     | Southern Europe | Europe    | 1993           | 748.04                                               | 30.09                  | 11.50      | 16.96                                                | 5.60                   | 11,040          | 2,781                |
| 198              | 705 | SVN  | Slovenia     | Southern Europe | Europe    | 1994           | 739.83                                               | 31.59                  | 11.35      | 17.82                                                | 4.42                   | 12,080          | 2,840                |
| 198              | 705 | SVN  | Slovenia     | Southern Europe | Europe    | 1995           | 792.29                                               | 23.88                  | 11.62      | 18.19                                                | 4.01                   | 13,120          | 2,907                |
| 198              | 705 | SVN  | Slovenia     | Southern Europe | Europe    | 1996           | 823.03                                               | 20.28                  | 11.20      | 18.85                                                | 3.38                   | 13,920          | 3,048                |
| 198              | 705 | SVN  | Slovenia     | Southern Europe | Europe    | 1997           | 798.55                                               | 23.13                  | 10.84      | 17.88                                                | 4.36                   | 14,890          | 2,927                |
| 198              | 705 | SVN  | Slovenia     | Southern Europe | Europe    | 1998           | 808.93                                               | 21.82                  | 11.20      | 17.36                                                | 5.03                   | 15,740          | 2,845                |
| 198              | 705 | SVN  | Slovenia     | Southern Europe | Europe    | 1999           | 867.51                                               | 15.91                  | 9.41       | 19.36                                                | 2.96                   | 16,770          | 3,062                |
| 198              | 705 | SVN  | Slovenia     | Southern Europe | Europe    | 2000           | 861.83                                               | 16.35                  | 11.21      | 18.55                                                | 3.63                   | 17,590          | 3,057                |
| 198              | 705 | SVN  | Slovenia     | Southern Europe | Europe    | 2001           | 778.95                                               | 25.41                  | 10.02      | 18.48                                                | 3.68                   | 18,500          | 3,057                |
| 198              | 705 | SVN  | Slovenia     | Southern Europe | Europe    | 2002           | 905.12                                               | 12.95                  | 10.49      | 18.31                                                | 3.83                   | 19,650          | 3,081                |
| 198              | 705 | SVN  | Slovenia     | Southern Europe | Europe    | 2003           | 829.90                                               | 19.20                  | 10.55      | 19.06                                                | 3.15                   | 20,380          | 3,113                |
| 198              | 705 | SVN  | Slovenia     | Southern Europe | Europe    | 2004           | 805.97                                               | 21.77                  | 11.37      | 18.45                                                | 3.67                   | 22,000          | 3,157                |
| 198              | 705 | SVN  | Slovenia     | Southern Europe | Europe    | 2005           | 811.14                                               | 21.08                  | 10.10      | 18.07                                                | 4.04                   | 23,280          | 3,090                |
| 198              | 705 | SVN  | Slovenia     | Southern Europe | Europe    | 2006           | 798.60                                               | 22.47                  | 10.85      | 19.17                                                | 3.04                   | 25,180          | 3,234                |
| 198              | 705 | SVN  | Slovenia     | Southern Europe | Europe    | 2007           | 775.72                                               | 25.30                  | 11.13      | 18.59                                                | 3.50                   | 26,610          | 3,159                |
| 198              | 705 | SVN  | Slovenia     | Southern Europe | Europe    | 2008           | 826.37                                               | 19.10                  | 10.62      | 19.00                                                | 3.14                   | 28,260          | 3,203                |
| 198              | 705 | SVN  | Slovenia     | Southern Europe | Europe    | 2009           | 825.59                                               | 19.06                  | 10.80      | 18.92                                                | 3.19                   | 28,420          | 3,208                |
| 198              | 705 | SVN  | Slovenia     | Southern Europe | Europe    | 2010           | 780.33                                               | 24.25                  | 11.12      | 18.67                                                | 3.39                   | 28,560          | 3,184                |
| 198              | 705 | SVN  | Slovenia     | Southern Europe | Europe    | 2011           | 758.60                                               | 27.19                  | 11.26      | 18.74                                                | 3.32                   | 27,780          | 3,173                |
| 202              | 710 | ZAF  | South Africa | Southern Africa | Africa    | 1992           | 363.25                                               | 99.90                  | 14.98      | 18.65                                                | 3.72                   | 6,160           | 2,797                |
| 202              | 710 | ZAF  | South Africa | Southern Africa | Africa    | 1993           | 375.87                                               | 99.78                  | 15.29      | 19.16                                                | 3.26                   | 6,280           | 2,838                |
| 202              | 710 | ZAF  | South Africa | Southern Africa | Africa    | 1994           | 385.58                                               | 99.63                  | 15.38      | 18.34                                                | 4.04                   | 6,480           | 2,826                |
| 202              | 710 | ZAF  | South Africa | Southern Africa | Africa    | 1995           | 390.83                                               | 99.53                  | 15.81      | 17.58                                                | 4.96                   | 6,670           | 2,810                |
| 202              | 710 | ZAF  | South Africa | Southern Africa | Africa    | 1996           | 395.65                                               | 99.42                  | 15.97      | 17.48                                                | 5.11                   | 6,910           | 2,796                |
| 202              | 710 | ZAF  | South Africa | Southern Africa | Africa    | 1997           | 408.46                                               | 99.00                  | 15.88      | 17.41                                                | 5.23                   | 7,050           | 2,815                |
| 202              | 710 | ZAF  | South Africa | Southern Africa | Africa    | 1998           | 390.28                                               | 99.57                  | 16.05      | 17.69                                                | 4.86                   | 6,980           | 2,847                |
| 202              | 710 | ZAF  | South Africa | Southern Africa | Africa    | 1999           | 378.60                                               | 99.78                  | 16.31      | 17.56                                                | 5.04                   | 7,070           | 2,835                |
| 202              | 710 | ZAF  | South Africa | Southern Africa | Africa    | 2000           | 387.87                                               | 99.63                  | 15.85      | 18.57                                                | 3.84                   | 7,350           | 2,886                |
| 202              | 710 | ZAF  | South Africa | Southern Africa | Africa    | 2001           | 389.27                                               | 99.61                  | 16.53      | 17.98                                                | 4.52                   | 7,510           | 2,911                |
| 202              | 710 | ZAF  | South Africa | Southern Africa | Africa    | 2002           | 370.69                                               | 99.86                  | 16.36      | 17.71                                                | 4.85                   | 7,800           | 2,907                |
| 202              | 710 | ZAF  | South Africa | Southern Africa | Africa    | 2003           | 376.45                                               | 99.81                  | 16.36      | 18.09                                                | 4.35                   | 8,060           | 2,930                |
| 202              | 710 | ZAF  | South Africa | Southern Africa | Africa    | 2004           | 386.94                                               | 99.65                  | 15.86      | 18.54                                                | 3.84                   | 8,620           | 2,942                |
| 202              | 710 | ZAF  | South Africa | Southern Africa | Africa    | 2005           | 386.12                                               | 99.44                  | 15.29      | 18.81                                                | 3.56                   | 9,240           | 2,946                |
| 202              | 710 | ZAF  | South Africa | Southern Africa | Africa    | 2006           | 400.86                                               | 99.29                  | 14.75      | 19.01                                                | 3.36                   | 9,530           | 2,919                |
| 202              | 710 | ZAF  | South Africa | Southern Africa | Africa    | 2007           | 407.59                                               | 99.02                  | 14.62      | 19.01                                                | 3.33                   | 10,460          | 2,910                |
| 202              | 710 | ZAF  | South Africa | Southern Africa | Africa    | 2008           | 418.06                                               | 98.49                  | 14.30      | 18.89                                                | 3.40                   | 10,920          | 2,920                |

| FAO country code | UNI | ISO3 | Country      | Region          | Continent | Reference year | Ca supply (mg capita <sup>-1</sup> d <sup>-1</sup> ) | Ca deficiency risk (%) | Phytate:Zn | Zn supply (mg capita <sup>-1</sup> d <sup>-1</sup> ) | Zn deficiency risk (%) | GNI-PPP (US \$) | Energy supply (kcal) |
|------------------|-----|------|--------------|-----------------|-----------|----------------|------------------------------------------------------|------------------------|------------|------------------------------------------------------|------------------------|-----------------|----------------------|
| 202              | 710 | ZAF  | South Africa | Southern Africa | Africa    | 2009           | 401.37                                               | 99.22                  | 14.53      | 18.72                                                | 3.53                   | 10,810          | 2,950                |
| 202              | 710 | ZAF  | South Africa | Southern Africa | Africa    | 2010           | 414.40                                               | 98.64                  | 14.46      | 19.14                                                | 3.15                   | 11,160          | 2,993                |
| 202              | 710 | ZAF  | South Africa | Southern Africa | Africa    | 2011           | 415.94                                               | 98.54                  | 14.55      | 19.16                                                | 3.12                   | 11,580          | 3,007                |
| 203              | 724 | ESP  | Spain        | Southern Europe | Europe    | 1992           | 982.39                                               | 9.12                   | 11.17      | 19.49                                                | 2.95                   | 14,350          | 3,364                |
| 203              | 724 | ESP  | Spain        | Southern Europe | Europe    | 1993           | 967.68                                               | 9.76                   | 10.74      | 19.12                                                | 3.23                   | 14,550          | 3,315                |
| 203              | 724 | ESP  | Spain        | Southern Europe | Europe    | 1994           | 965.14                                               | 9.84                   | 10.60      | 19.44                                                | 2.96                   | 14,980          | 3,285                |
| 203              | 724 | ESP  | Spain        | Southern Europe | Europe    | 1995           | 922.79                                               | 12.11                  | 10.22      | 19.23                                                | 3.10                   | 15,880          | 3,271                |
| 203              | 724 | ESP  | Spain        | Southern Europe | Europe    | 1996           | 945.01                                               | 10.76                  | 10.64      | 19.60                                                | 2.82                   | 16,550          | 3,360                |
| 203              | 724 | ESP  | Spain        | Southern Europe | Europe    | 1997           | 930.01                                               | 11.53                  | 10.65      | 19.22                                                | 3.07                   | 17,530          | 3,332                |
| 203              | 724 | ESP  | Spain        | Southern Europe | Europe    | 1998           | 945.47                                               | 10.60                  | 9.81       | 20.25                                                | 2.37                   | 18,710          | 3,364                |
| 203              | 724 | ESP  | Spain        | Southern Europe | Europe    | 1999           | 980.52                                               | 8.85                   | 10.19      | 20.17                                                | 2.41                   | 19,640          | 3,389                |
| 203              | 724 | ESP  | Spain        | Southern Europe | Europe    | 2000           | 967.74                                               | 9.37                   | 9.96       | 20.02                                                | 2.48                   | 21,160          | 3,384                |
| 203              | 724 | ESP  | Spain        | Southern Europe | Europe    | 2001           | 946.40                                               | 10.36                  | 9.97       | 19.97                                                | 2.50                   | 22,220          | 3,366                |
| 203              | 724 | ESP  | Spain        | Southern Europe | Europe    | 2002           | 950.00                                               | 10.11                  | 9.91       | 20.16                                                | 2.38                   | 23,640          | 3,368                |
| 203              | 724 | ESP  | Spain        | Southern Europe | Europe    | 2003           | 950.86                                               | 10.00                  | 10.11      | 19.78                                                | 2.60                   | 24,380          | 3,334                |
| 203              | 724 | ESP  | Spain        | Southern Europe | Europe    | 2004           | 957.71                                               | 9.60                   | 10.16      | 20.20                                                | 2.34                   | 25,460          | 3,350                |
| 203              | 724 | ESP  | Spain        | Southern Europe | Europe    | 2005           | 910.80                                               | 12.11                  | 10.09      | 19.30                                                | 2.89                   | 26,850          | 3,303                |
| 203              | 724 | ESP  | Spain        | Southern Europe | Europe    | 2006           | 949.96                                               | 9.87                   | 10.60      | 19.96                                                | 2.46                   | 29,700          | 3,278                |
| 203              | 724 | ESP  | Spain        | Southern Europe | Europe    | 2007           | 968.49                                               | 8.96                   | 9.54       | 19.69                                                | 2.61                   | 31,190          | 3,254                |
| 203              | 724 | ESP  | Spain        | Southern Europe | Europe    | 2008           | 921.30                                               | 11.32                  | 9.86       | 18.72                                                | 3.31                   | 31,990          | 3,191                |
| 203              | 724 | ESP  | Spain        | Southern Europe | Europe    | 2009           | 910.07                                               | 11.96                  | 10.36      | 18.69                                                | 3.33                   | 31,350          | 3,220                |
| 203              | 724 | ESP  | Spain        | Southern Europe | Europe    | 2010           | 905.46                                               | 12.23                  | 9.91       | 17.68                                                | 4.35                   | 30,900          | 3,186                |
| 203              | 724 | ESP  | Spain        | Southern Europe | Europe    | 2011           | 882.97                                               | 13.76                  | 9.90       | 17.25                                                | 4.89                   | 31,090          | 3,183                |
| 38               | 144 | LKA  | Sri Lanka    | Southern Asia   | Asia      | 1992           | 356.76                                               | 99.95                  | 17.61      | 9.55                                                 | 63.60                  | 2,430           | 2,153                |
| 38               | 144 | LKA  | Sri Lanka    | Southern Asia   | Asia      | 1993           | 317.47                                               | 100.00                 | 17.65      | 9.55                                                 | 63.53                  | 2,640           | 2,095                |
| 38               | 144 | LKA  | Sri Lanka    | Southern Asia   | Asia      | 1994           | 321.71                                               | 100.00                 | 17.61      | 9.80                                                 | 58.31                  | 2,790           | 2,291                |
| 38               | 144 | LKA  | Sri Lanka    | Southern Asia   | Asia      | 1995           | 345.43                                               | 99.98                  | 17.08      | 10.16                                                | 53.55                  | 2,940           | 2,221                |
| 38               | 144 | LKA  | Sri Lanka    | Southern Asia   | Asia      | 1996           | 345.69                                               | 99.98                  | 17.29      | 9.83                                                 | 58.71                  | 3,070           | 2,240                |
| 38               | 144 | LKA  | Sri Lanka    | Southern Asia   | Asia      | 1997           | 369.15                                               | 99.88                  | 17.56      | 9.82                                                 | 58.80                  | 3,290           | 2,270                |
| 38               | 144 | LKA  | Sri Lanka    | Southern Asia   | Asia      | 1998           | 342.19                                               | 99.98                  | 18.16      | 9.51                                                 | 64.02                  | 3,430           | 2,298                |
| 38               | 144 | LKA  | Sri Lanka    | Southern Asia   | Asia      | 1999           | 355.58                                               | 99.95                  | 17.76      | 10.34                                                | 50.17                  | 3,560           | 2,388                |
| 38               | 144 | LKA  | Sri Lanka    | Southern Asia   | Asia      | 2000           | 358.70                                               | 99.94                  | 17.90      | 9.72                                                 | 60.24                  | 3,850           | 2,319                |
| 38               | 144 | LKA  | Sri Lanka    | Southern Asia   | Asia      | 2001           | 347.82                                               | 99.97                  | 18.09      | 10.08                                                | 54.07                  | 3,950           | 2,361                |
| 38               | 144 | LKA  | Sri Lanka    | Southern Asia   | Asia      | 2002           | 354.43                                               | 99.95                  | 17.84      | 10.09                                                | 53.65                  | 4,150           | 2,336                |
| 38               | 144 | LKA  | Sri Lanka    | Southern Asia   | Asia      | 2003           | 351.82                                               | 99.96                  | 17.89      | 10.25                                                | 50.82                  | 4,450           | 2,332                |
| 38               | 144 | LKA  | Sri Lanka    | Southern Asia   | Asia      | 2004           | 338.33                                               | 99.99                  | 18.06      | 10.42                                                | 48.00                  | 4,750           | 2,349                |
| 38               | 144 | LKA  | Sri Lanka    | Southern Asia   | Asia      | 2005           | 332.51                                               | 99.99                  | 18.44      | 10.27                                                | 49.98                  | 5,150           | 2,348                |
| 38               | 144 | LKA  | Sri Lanka    | Southern Asia   | Asia      | 2006           | 357.71                                               | 99.93                  | 17.82      | 9.94                                                 | 55.12                  | 5,640           | 2,377                |
| 38               | 144 | LKA  | Sri Lanka    | Southern Asia   | Asia      | 2007           | 374.08                                               | 99.80                  | 18.34      | 10.19                                                | 50.88                  | 6,140           | 2,371                |
| 38               | 144 | LKA  | Sri Lanka    | Southern Asia   | Asia      | 2008           | 374.88                                               | 99.79                  | 18.80      | 10.21                                                | 50.48                  | 6,490           | 2,446                |
| 38               | 144 | LKA  | Sri Lanka    | Southern Asia   | Asia      | 2009           | 382.19                                               | 99.68                  | 18.53      | 10.65                                                | 43.73                  | 6,780           | 2,460                |
| 38               | 144 | LKA  | Sri Lanka    | Southern Asia   | Asia      | 2010           | 398.52                                               | 99.28                  | 19.02      | 10.18                                                | 50.58                  | 7,330           | 2,458                |
| 38               | 144 | LKA  | Sri Lanka    | Southern Asia   | Asia      | 2011           | 423.53                                               | 98.07                  | 18.69      | 10.67                                                | 43.13                  | 8,020           | 2,488                |
| 276              | 729 | SDN  | Sudan        | Northern Africa | Africa    | 1992           | 579.39                                               | 65.18                  | 14.87      | 11.64                                                | 33.01                  | 1,150           | 2,023                |
| 276              | 729 | SDN  | Sudan        | Northern Africa | Africa    | 1993           | 590.73                                               | 61.96                  | 15.38      | 11.89                                                | 30.17                  | 1,230           | 2,102                |
| 276              | 729 | SDN  | Sudan        | Northern Africa | Africa    | 1994           | 639.92                                               | 48.91                  | 15.19      | 12.37                                                | 26.52                  | 1,260           | 2,144                |
| 276              | 729 | SDN  | Sudan        | Northern Africa | Africa    | 1995           | 667.37                                               | 42.45                  | 15.02      | 12.63                                                | 23.26                  | 1,330           | 2,169                |
| 276              | 729 | SDN  | Sudan        | Northern Africa | Africa    | 1996           | 642.06                                               | 48.31                  | 15.18      | 12.52                                                | 24.32                  | 1,440           | 2,158                |
| 276              | 729 | SDN  | Sudan        | Northern Africa | Africa    | 1997           | 636.34                                               | 49.66                  | 15.02      | 12.62                                                | 23.46                  | 1,590           | 2,153                |
| 276              | 729 | SDN  | Sudan        | Northern Africa | Africa    | 1998           | 668.42                                               | 42.06                  | 15.03      | 12.70                                                | 22.75                  | 1,620           | 2,167                |
| 276              | 729 | SDN  | Sudan        | Northern Africa | Africa    | 1999           | 680.19                                               | 38.52                  | 14.02      | 12.61                                                | 23.40                  | 1,630           | 2,180                |
| 276              | 729 | SDN  | Sudan        | Northern Africa | Africa    | 2000           | 729.18                                               | 30.26                  | 13.73      | 12.88                                                | 21.27                  | 1,700           | 2,206                |
| 276              | 729 | SDN  | Sudan        | Northern Africa | Africa    | 2001           | 773.05                                               | 23.75                  | 13.40      | 13.36                                                | 18.20                  | 1,790           | 2,249                |
| 276              | 729 | SDN  | Sudan        | Northern Africa | Africa    | 2002           | 816.50                                               | 18.69                  | 13.40      | 13.49                                                | 17.40                  | 1,880           | 2,283                |
| 276              | 729 | SDN  | Sudan        | Northern Africa | Africa    | 2003           | 858.37                                               | 14.89                  | 12.81      | 13.50                                                | 17.26                  | 1,980           | 2,282                |
| 276              | 729 | SDN  | Sudan        | Northern Africa | Africa    | 2004           | 851.63                                               | 15.46                  | 12.31      | 13.20                                                | 19.07                  | 2,050           | 2,271                |
| 276              | 729 | SDN  | Sudan        | Northern Africa | Africa    | 2005           | 854.84                                               | 15.23                  | 12.23      | 13.53                                                | 17.04                  | 2,230           | 2,296                |
| 276              | 729 | SDN  | Sudan        | Northern Africa | Africa    | 2006           | 826.88                                               | 17.74                  | 12.74      | 13.74                                                | 15.95                  | 2,480           | 2,331                |
| 276              | 729 | SDN  | Sudan        | Northern Africa | Africa    | 2007           | 808.26                                               | 19.70                  | 12.86      | 13.67                                                | 16.34                  | 2,740           | 2,344                |
| 276              | 729 | SDN  | Sudan        | Northern Africa | Africa    | 2008           | 809.74                                               | 19.62                  | 13.12      | 13.74                                                | 15.94                  | 2,800           | 2,344                |
| 276              | 729 | SDN  | Sudan        | Northern Africa | Africa    | 2009           | 798.40                                               | 20.98                  | 13.09      | 13.38                                                | 18.01                  | 2,810           | 2,346                |
| 276              | 729 | SDN  | Sudan        | Northern Africa | Africa    | 2010           | 787.47                                               | 22.37                  | 13.23      | 13.33                                                | 18.34                  | 2,860           | 2,323                |
| 276              | 729 | SDN  | Sudan        | Northern Africa | Africa    | 2011           | 793.56                                               | 21.72                  | 13.80      | 13.42                                                | 17.94                  | 3,210           | 2,346                |
| 209              | 748 | SWZ  | Swaziland    | Southern Africa | Africa    | 1997           | 616.65                                               | 56.53                  | 15.96      | 14.43                                                | 12.64                  | 4,440           | 2,156                |
| 209              | 748 | SWZ  | Swaziland    | Southern Africa | Africa    | 1998           | 528.27                                               | 80.38                  | 17.11      | 14.36                                                | 13.10                  | 4,320           | 2,176                |
| 209              | 748 | SWZ  | Swaziland    | Southern Africa | Africa    | 1999           | 594.13                                               | 63.68                  | 16.96      | 14.29                                                | 13.57                  | 4,520           | 2,266                |
| 209              | 748 | SWZ  | Swaziland    | Southern Africa | Africa    | 2000           | 584.77                                               | 66.71                  | 16.61      | 14.67                                                | 12.16                  | 4,480           | 2,353                |
| 209              | 748 | SWZ  | Swaziland    | Southern Africa | Africa    | 2001           | 569.23                                               | 71.16                  | 17.40      | 14.71                                                | 12.04                  | 4,830           | 2,315                |
| 209              | 748 | SWZ  | Swaziland    | Southern Africa | Africa    | 2002           | 605.30                                               | 61.45                  | 15.66      | 17.16                                                | 5.77                   | 4,620           | 2,389                |
| 209              | 748 | SWZ  | Swaziland    | Southern Africa | Africa    | 2003           | 596.22                                               | 64.05                  | 15.52      | 16.85                                                | 6.34                   | 4,670           | 2,436                |
| 209              | 748 | SWZ  | Swaziland    | Southern Africa | Africa    | 2004           | 485.60                                               | 91.25                  | 15.35      | 18.92                                                | 3.63                   | 5,030           | 2,470                |
| 209              | 748 | SWZ  | Swaziland    | Southern Africa | Africa    | 2005           | 684.72                                               | 42.04                  | 16.13      | 16.65                                                | 6.77                   | 5,630           | 2,373                |
| 209              | 748 | SWZ  | Swaziland    | Southern Africa | Africa    | 2006           | 466.40                                               | 94.26                  | 16.71      | 15.08                                                | 10.94                  | 5,560           | 2,329                |
| 209              | 748 | SWZ  | Swaziland    | Southern Africa | Africa    | 2007           | 511.16                                               | 88.12                  | 16.99      | 15.03                                                | 11.09                  | 5,880           | 2,314                |
| 209              | 748 | SWZ  | Swaziland    | Southern Africa | Africa    | 2008           | 488.34                                               | 90.63                  | 15.89      | 14.37                                                | 13.65                  | 5,940           | 2,262                |
| 209              | 748 | SWZ  | Swaziland    | Southern Africa | Africa    | 2009           | 488.27                                               | 90.55                  | 16.08      | 14.35                                                | 13.67                  | 5,830           | 2,259                |
| 209              | 748 | SWZ  | Swaziland    | Southern Africa | Africa    | 2010           | 501.15                                               | 87.91                  | 16.00      | 14.37                                                | 13.48                  | 5,680           | 2,271                |
| 209              | 748 | SWZ  | Swaziland    | Southern Africa | Africa    | 2011           | 491.79                                               | 89.61                  | 15.99      | 14.18                                                | 14.29                  | 5,710           | 2,275                |
| 210              | 752 | SWE  | Sweden       | Northern Europe | Europe    | 1992           | 839.66                                               | 17.59                  | 8.54       | 15.15                                                | 9.43                   | 19,010          | 3,053                |

| FAO country code | UNI | ISO3 | Country     | Region             | Continent | Reference year | Ca supply (mg capita <sup>-1</sup> d <sup>-1</sup> ) | Ca deficiency risk (%) | Phytate:Zn | Zn supply (mg capita <sup>-1</sup> d <sup>-1</sup> ) | Zn deficiency risk (%) | GNI-PPP (US \$) | Energy supply (kcal) |
|------------------|-----|------|-------------|--------------------|-----------|----------------|------------------------------------------------------|------------------------|------------|------------------------------------------------------|------------------------|-----------------|----------------------|
| 210              | 752 | SWE  | Sweden      | Northern Europe    | Europe    | 1993           | 887.53                                               | 13.58                  | 8.38       | 15.56                                                | 8.24                   | 18,840          | 3,137                |
| 210              | 752 | SWE  | Sweden      | Northern Europe    | Europe    | 1994           | 936.54                                               | 10.51                  | 8.46       | 15.55                                                | 8.24                   | 20,180          | 3,087                |
| 210              | 752 | SWE  | Sweden      | Northern Europe    | Europe    | 1995           | 910.42                                               | 12.02                  | 8.16       | 15.34                                                | 8.80                   | 21,330          | 3,088                |
| 210              | 752 | SWE  | Sweden      | Northern Europe    | Europe    | 1996           | 862.31                                               | 15.52                  | 7.97       | 15.36                                                | 8.65                   | 22,150          | 3,039                |
| 210              | 752 | SWE  | Sweden      | Northern Europe    | Europe    | 1997           | 862.69                                               | 15.59                  | 7.83       | 15.47                                                | 8.41                   | 22,980          | 3,087                |
| 210              | 752 | SWE  | Sweden      | Northern Europe    | Europe    | 1998           | 905.00                                               | 12.60                  | 7.56       | 15.85                                                | 7.55                   | 24,060          | 3,064                |
| 210              | 752 | SWE  | Sweden      | Northern Europe    | Europe    | 1999           | 911.98                                               | 12.26                  | 7.61       | 16.26                                                | 6.72                   | 25,740          | 3,115                |
| 210              | 752 | SWE  | Sweden      | Northern Europe    | Europe    | 2000           | 929.15                                               | 11.32                  | 7.44       | 16.08                                                | 7.16                   | 27,750          | 3,100                |
| 210              | 752 | SWE  | Sweden      | Northern Europe    | Europe    | 2001           | 959.52                                               | 9.82                   | 7.57       | 16.48                                                | 6.42                   | 28,060          | 3,126                |
| 210              | 752 | SWE  | Sweden      | Northern Europe    | Europe    | 2002           | 970.00                                               | 9.38                   | 7.56       | 16.93                                                | 5.67                   | 29,160          | 3,135                |
| 210              | 752 | SWE  | Sweden      | Northern Europe    | Europe    | 2003           | 959.69                                               | 9.89                   | 7.35       | 16.95                                                | 5.67                   | 30,810          | 3,125                |
| 210              | 752 | SWE  | Sweden      | Northern Europe    | Europe    | 2004           | 957.24                                               | 10.01                  | 7.57       | 17.09                                                | 5.44                   | 32,470          | 3,154                |
| 210              | 752 | SWE  | Sweden      | Northern Europe    | Europe    | 2005           | 964.97                                               | 9.63                   | 7.86       | 17.08                                                | 5.46                   | 32,940          | 3,129                |
| 210              | 752 | SWE  | Sweden      | Northern Europe    | Europe    | 2006           | 962.82                                               | 9.69                   | 8.12       | 17.22                                                | 5.26                   | 36,200          | 3,097                |
| 210              | 752 | SWE  | Sweden      | Northern Europe    | Europe    | 2007           | 931.44                                               | 11.30                  | 8.48       | 17.36                                                | 5.03                   | 39,300          | 3,096                |
| 210              | 752 | SWE  | Sweden      | Northern Europe    | Europe    | 2008           | 966.51                                               | 9.44                   | 8.43       | 17.46                                                | 4.88                   | 41,000          | 3,131                |
| 210              | 752 | SWE  | Sweden      | Northern Europe    | Europe    | 2009           | 975.70                                               | 8.97                   | 8.18       | 17.49                                                | 4.82                   | 38,320          | 3,131                |
| 210              | 752 | SWE  | Sweden      | Northern Europe    | Europe    | 2010           | 955.31                                               | 9.87                   | 8.31       | 17.68                                                | 4.54                   | 40,460          | 3,153                |
| 210              | 752 | SWE  | Sweden      | Northern Europe    | Europe    | 2011           | 958.54                                               | 9.67                   | 8.42       | 17.42                                                | 4.86                   | 42,700          | 3,160                |
| 211              | 756 | CHE  | Switzerland | Western Europe     | Europe    | 1992           | 1,051.78                                             | 6.08                   | 9.83       | 18.41                                                | 3.65                   | 26,470          | 3,421                |
| 211              | 756 | CHE  | Switzerland | Western Europe     | Europe    | 1993           | 1,036.05                                             | 6.51                   | 9.88       | 17.83                                                | 4.24                   | 26,940          | 3,359                |
| 211              | 756 | CHE  | Switzerland | Western Europe     | Europe    | 1994           | 1,015.26                                             | 7.17                   | 10.06      | 17.64                                                | 4.45                   | 27,410          | 3,333                |
| 211              | 756 | CHE  | Switzerland | Western Europe     | Europe    | 1995           | 1,008.86                                             | 7.38                   | 9.99       | 17.47                                                | 4.66                   | 28,170          | 3,312                |
| 211              | 756 | CHE  | Switzerland | Western Europe     | Europe    | 1996           | 1,016.14                                             | 7.13                   | 10.39      | 17.28                                                | 4.91                   | 28,970          | 3,341                |
| 211              | 756 | CHE  | Switzerland | Western Europe     | Europe    | 1997           | 996.93                                               | 7.84                   | 10.49      | 17.41                                                | 4.74                   | 30,830          | 3,318                |
| 211              | 756 | CHE  | Switzerland | Western Europe     | Europe    | 1998           | 1,003.70                                             | 7.62                   | 10.41      | 17.55                                                | 4.57                   | 31,870          | 3,327                |
| 211              | 756 | CHE  | Switzerland | Western Europe     | Europe    | 1999           | 973.99                                               | 8.84                   | 10.41      | 17.60                                                | 4.51                   | 32,640          | 3,324                |
| 211              | 756 | CHE  | Switzerland | Western Europe     | Europe    | 2000           | 1,054.38                                             | 6.05                   | 10.54      | 18.18                                                | 3.87                   | 34,890          | 3,441                |
| 211              | 756 | CHE  | Switzerland | Western Europe     | Europe    | 2001           | 1,052.07                                             | 6.14                   | 10.30      | 17.49                                                | 4.68                   | 34,820          | 3,381                |
| 211              | 756 | CHE  | Switzerland | Western Europe     | Europe    | 2002           | 1,065.51                                             | 5.80                   | 10.07      | 17.73                                                | 4.39                   | 35,710          | 3,437                |
| 211              | 756 | CHE  | Switzerland | Western Europe     | Europe    | 2003           | 1,074.97                                             | 5.57                   | 9.90       | 17.70                                                | 4.44                   | 37,080          | 3,433                |
| 211              | 756 | CHE  | Switzerland | Western Europe     | Europe    | 2004           | 1,043.18                                             | 6.46                   | 9.94       | 17.40                                                | 4.83                   | 38,360          | 3,413                |
| 211              | 756 | CHE  | Switzerland | Western Europe     | Europe    | 2005           | 1,050.10                                             | 6.27                   | 9.85       | 17.33                                                | 4.94                   | 40,370          | 3,386                |
| 211              | 756 | CHE  | Switzerland | Western Europe     | Europe    | 2006           | 1,081.58                                             | 5.44                   | 9.55       | 17.44                                                | 4.80                   | 44,320          | 3,433                |
| 211              | 756 | CHE  | Switzerland | Western Europe     | Europe    | 2007           | 1,078.78                                             | 5.51                   | 10.05      | 17.54                                                | 4.68                   | 45,060          | 3,428                |
| 211              | 756 | CHE  | Switzerland | Western Europe     | Europe    | 2008           | 1,090.10                                             | 5.24                   | 10.01      | 17.38                                                | 4.89                   | 44,740          | 3,445                |
| 211              | 756 | CHE  | Switzerland | Western Europe     | Europe    | 2009           | 1,106.04                                             | 4.87                   | 9.90       | 17.77                                                | 4.38                   | 48,380          | 3,466                |
| 211              | 756 | CHE  | Switzerland | Western Europe     | Europe    | 2010           | 1,091.80                                             | 5.17                   | 9.91       | 17.78                                                | 4.35                   | 51,670          | 3,462                |
| 211              | 756 | CHE  | Switzerland | Western Europe     | Europe    | 2011           | 1,098.12                                             | 5.02                   | 9.87       | 17.81                                                | 4.33                   | 51,770          | 3,487                |
| 208              | 762 | TJK  | Tajikistan  | Central Asia       | Asia      | 1992           | 506.05                                               | 83.84                  | 9.66       | 15.19                                                | 9.60                   | 1,570           | 2,046                |
| 208              | 762 | TJK  | Tajikistan  | Central Asia       | Asia      | 1993           | 535.74                                               | 76.45                  | 9.58       | 14.77                                                | 11.08                  | 1,310           | 2,068                |
| 208              | 762 | TJK  | Tajikistan  | Central Asia       | Asia      | 1994           | 505.73                                               | 84.46                  | 9.56       | 14.81                                                | 11.05                  | 1,020           | 2,030                |
| 208              | 762 | TJK  | Tajikistan  | Central Asia       | Asia      | 1995           | 461.43                                               | 93.45                  | 9.02       | 14.96                                                | 10.63                  | 890             | 1,974                |
| 208              | 762 | TJK  | Tajikistan  | Central Asia       | Asia      | 1996           | 314.10                                               | 100.00                 | 9.27       | 14.61                                                | 11.99                  | 720             | 1,935                |
| 208              | 762 | TJK  | Tajikistan  | Central Asia       | Asia      | 1997           | 339.69                                               | 99.98                  | 9.36       | 14.48                                                | 12.67                  | 770             | 1,915                |
| 208              | 762 | TJK  | Tajikistan  | Central Asia       | Asia      | 1998           | 361.16                                               | 99.91                  | 9.52       | 15.02                                                | 10.77                  | 810             | 1,936                |
| 208              | 762 | TJK  | Tajikistan  | Central Asia       | Asia      | 1999           | 408.77                                               | 98.92                  | 9.59       | 15.31                                                | 9.97                   | 840             | 1,937                |
| 208              | 762 | TJK  | Tajikistan  | Central Asia       | Asia      | 2000           | 395.66                                               | 99.42                  | 9.75       | 14.95                                                | 11.27                  | 900             | 1,959                |
| 208              | 762 | TJK  | Tajikistan  | Central Asia       | Asia      | 2001           | 411.89                                               | 98.87                  | 10.83      | 14.60                                                | 12.65                  | 990             | 1,962                |
| 208              | 762 | TJK  | Tajikistan  | Central Asia       | Asia      | 2002           | 425.82                                               | 98.15                  | 9.80       | 14.62                                                | 12.68                  | 1,100           | 1,942                |
| 208              | 762 | TJK  | Tajikistan  | Central Asia       | Asia      | 2003           | 432.97                                               | 97.71                  | 10.48      | 14.35                                                | 13.90                  | 1,210           | 1,956                |
| 208              | 762 | TJK  | Tajikistan  | Central Asia       | Asia      | 2004           | 451.31                                               | 96.07                  | 10.87      | 14.26                                                | 14.37                  | 1,370           | 1,979                |
| 208              | 762 | TJK  | Tajikistan  | Central Asia       | Asia      | 2005           | 459.63                                               | 95.10                  | 10.17      | 14.81                                                | 12.02                  | 1,480           | 2,057                |
| 208              | 762 | TJK  | Tajikistan  | Central Asia       | Asia      | 2006           | 499.96                                               | 88.47                  | 10.43      | 14.68                                                | 12.71                  | 1,590           | 2,063                |
| 208              | 762 | TJK  | Tajikistan  | Central Asia       | Asia      | 2007           | 480.90                                               | 91.87                  | 10.00      | 14.66                                                | 12.70                  | 1,750           | 2,064                |
| 208              | 762 | TJK  | Tajikistan  | Central Asia       | Asia      | 2008           | 486.94                                               | 90.59                  | 10.01      | 14.37                                                | 13.79                  | 1,910           | 2,060                |
| 208              | 762 | TJK  | Tajikistan  | Central Asia       | Asia      | 2009           | 507.68                                               | 86.10                  | 9.95       | 14.61                                                | 12.56                  | 1,940           | 2,089                |
| 208              | 762 | TJK  | Tajikistan  | Central Asia       | Asia      | 2010           | 512.81                                               | 84.61                  | 9.90       | 14.51                                                | 12.82                  | 2,040           | 2,076                |
| 208              | 762 | TJK  | Tajikistan  | Central Asia       | Asia      | 2011           | 525.86                                               | 80.98                  | 10.03      | 14.41                                                | 13.26                  | 2,200           | 2,101                |
| 216              | 764 | THA  | Thailand    | South-Eastern Asia | Asia      | 1992           | 261.77                                               | 100.00                 | 16.75      | 9.57                                                 | 62.94                  | 4,910           | 2,265                |
| 216              | 764 | THA  | Thailand    | South-Eastern Asia | Asia      | 1993           | 280.42                                               | 100.00                 | 16.14      | 9.57                                                 | 62.92                  | 5,440           | 2,263                |
| 216              | 764 | THA  | Thailand    | South-Eastern Asia | Asia      | 1994           | 301.74                                               | 100.00                 | 16.20      | 9.97                                                 | 58.08                  | 6,010           | 2,357                |
| 216              | 764 | THA  | Thailand    | South-Eastern Asia | Asia      | 1995           | 317.77                                               | 100.00                 | 16.44      | 9.90                                                 | 57.15                  | 6,640           | 2,411                |
| 216              | 764 | THA  | Thailand    | South-Eastern Asia | Asia      | 1996           | 338.46                                               | 99.99                  | 16.68      | 10.47                                                | 47.71                  | 7,050           | 2,563                |
| 216              | 764 | THA  | Thailand    | South-Eastern Asia | Asia      | 1997           | 353.75                                               | 99.96                  | 16.65      | 10.24                                                | 50.97                  | 6,970           | 2,544                |
| 216              | 764 | THA  | Thailand    | South-Eastern Asia | Asia      | 1998           | 344.01                                               | 99.98                  | 17.38      | 10.20                                                | 51.47                  | 6,180           | 2,597                |
| 216              | 764 | THA  | Thailand    | South-Eastern Asia | Asia      | 1999           | 348.97                                               | 99.97                  | 17.49      | 10.04                                                | 53.92                  | 6,520           | 2,554                |
| 216              | 764 | THA  | Thailand    | South-Eastern Asia | Asia      | 2000           | 381.67                                               | 99.73                  | 17.21      | 10.38                                                | 48.47                  | 6,980           | 2,604                |
| 216              | 764 | THA  | Thailand    | South-Eastern Asia | Asia      | 2001           | 389.18                                               | 99.60                  | 16.57      | 10.32                                                | 49.09                  | 7,140           | 2,578                |
| 216              | 764 | THA  | Thailand    | South-Eastern Asia | Asia      | 2002           | 398.31                                               | 99.38                  | 16.30      | 10.49                                                | 46.55                  | 7,480           | 2,630                |
| 216              | 764 | THA  | Thailand    | South-Eastern Asia | Asia      | 2003           | 374.68                                               | 99.82                  | 16.34      | 10.34                                                | 48.75                  | 8,030           | 2,642                |
| 216              | 764 | THA  | Thailand    | South-Eastern Asia | Asia      | 2004           | 369.75                                               | 99.87                  | 16.34      | 10.41                                                | 47.53                  | 8,660           | 2,651                |
| 216              | 764 | THA  | Thailand    | South-Eastern Asia | Asia      | 2005           | 368.82                                               | 99.87                  | 16.45      | 11.02                                                | 39.07                  | 9,250           | 2,720                |
| 216              | 764 | THA  | Thailand    | South-Eastern Asia | Asia      | 2006           | 371.88                                               | 99.85                  | 16.56      | 10.99                                                | 38.25                  | 10,050          | 2,795                |
| 216              | 764 | THA  | Thailand    | South-Eastern Asia | Asia      | 2007           | 395.28                                               | 99.46                  | 16.05      | 10.66                                                | 43.63                  | 10,850          | 2,786                |
| 216              | 764 | THA  | Thailand    | South-Eastern Asia | Asia      | 2008           | 390.64                                               | 99.57                  | 16.59      | 10.45                                                | 46.65                  | 11,330          | 2,756                |
| 216              | 764 | THA  | Thailand    | South-Eastern Asia | Asia      | 2009           | 384.48                                               | 99.68                  | 16.66      | 10.46                                                | 46.44                  | 11,100          | 2,732                |
| 216              | 764 | THA  | Thailand    | South-Eastern Asia | Asia      | 2010           | 412.69                                               | 98.84                  | 16.59      | 10.64                                                | 43.67                  | 12,030          | 2,786                |
| 216              | 764 | THA  | Thailand    | South-Eastern Asia | Asia      | 2011           | 410.52                                               | 98.94                  | 16.19      | 10.44                                                | 46.51                  | 12,340          | 2,757                |

| FAO country code | UNI | ISO3 | Country                                   | Region             | Continent | Reference year | Ca supply (mg capita <sup>-1</sup> d <sup>-1</sup> ) | Ca deficiency risk (%) | Phytate:Zn | Zn supply (mg capita <sup>-1</sup> d <sup>-1</sup> ) | Zn deficiency risk (%) | GNI-PPP (US \$) | Energy supply (kcal) |
|------------------|-----|------|-------------------------------------------|--------------------|-----------|----------------|------------------------------------------------------|------------------------|------------|------------------------------------------------------|------------------------|-----------------|----------------------|
| 154              | 807 | MKD  | The former Yugoslav Republic of Macedonia | Southern Europe    | Europe    | 1992           | 584.96                                               | 66.29                  | 10.72      | 15.36                                                | 9.39                   | 4,790           | 2,365                |
| 154              | 807 | MKD  | The former Yugoslav Republic of Macedonia | Southern Europe    | Europe    | 1993           | 527.47                                               | 81.73                  | 11.20      | 15.54                                                | 8.88                   | 4,610           | 2,317                |
| 154              | 807 | MKD  | The former Yugoslav Republic of Macedonia | Southern Europe    | Europe    | 1994           | 591.39                                               | 64.73                  | 12.55      | 16.96                                                | 5.84                   | 4,690           | 2,688                |
| 154              | 807 | MKD  | The former Yugoslav Republic of Macedonia | Southern Europe    | Europe    | 1995           | 580.50                                               | 67.85                  | 12.82      | 15.75                                                | 8.37                   | 4,760           | 2,582                |
| 154              | 807 | MKD  | The former Yugoslav Republic of Macedonia | Southern Europe    | Europe    | 1996           | 545.68                                               | 77.33                  | 12.53      | 15.41                                                | 9.21                   | 4,870           | 2,585                |
| 154              | 807 | MKD  | The former Yugoslav Republic of Macedonia | Southern Europe    | Europe    | 1997           | 542.59                                               | 78.25                  | 13.25      | 16.86                                                | 5.98                   | 4,970           | 2,768                |
| 154              | 807 | MKD  | The former Yugoslav Republic of Macedonia | Southern Europe    | Europe    | 1998           | 594.12                                               | 64.46                  | 12.14      | 16.34                                                | 6.99                   | 5,160           | 2,870                |
| 154              | 807 | MKD  | The former Yugoslav Republic of Macedonia | Southern Europe    | Europe    | 1999           | 614.00                                               | 59.23                  | 13.12      | 16.23                                                | 7.25                   | 5,360           | 2,794                |
| 154              | 807 | MKD  | The former Yugoslav Republic of Macedonia | Southern Europe    | Europe    | 2000           | 633.42                                               | 54.27                  | 13.37      | 15.47                                                | 9.17                   | 5,710           | 2,751                |
| 154              | 807 | MKD  | The former Yugoslav Republic of Macedonia | Southern Europe    | Europe    | 2001           | 604.69                                               | 62.10                  | 13.00      | 14.67                                                | 11.81                  | 5,660           | 2,631                |
| 154              | 807 | MKD  | The former Yugoslav Republic of Macedonia | Southern Europe    | Europe    | 2002           | 622.78                                               | 57.36                  | 13.02      | 15.99                                                | 7.83                   | 5,810           | 2,722                |
| 154              | 807 | MKD  | The former Yugoslav Republic of Macedonia | Southern Europe    | Europe    | 2003           | 613.87                                               | 59.74                  | 13.37      | 15.56                                                | 8.94                   | 6,200           | 2,741                |
| 154              | 807 | MKD  | The former Yugoslav Republic of Macedonia | Southern Europe    | Europe    | 2004           | 630.43                                               | 55.34                  | 13.04      | 16.13                                                | 7.50                   | 6,800           | 2,874                |
| 154              | 807 | MKD  | The former Yugoslav Republic of Macedonia | Southern Europe    | Europe    | 2005           | 606.96                                               | 61.53                  | 12.44      | 15.84                                                | 8.17                   | 7,540           | 2,785                |
| 154              | 807 | MKD  | The former Yugoslav Republic of Macedonia | Southern Europe    | Europe    | 2006           | 618.68                                               | 58.26                  | 11.92      | 15.73                                                | 8.38                   | 8,530           | 2,841                |
| 154              | 807 | MKD  | The former Yugoslav Republic of Macedonia | Southern Europe    | Europe    | 2007           | 698.06                                               | 39.26                  | 11.71      | 16.41                                                | 6.82                   | 8,810           | 3,025                |
| 154              | 807 | MKD  | The former Yugoslav Republic of Macedonia | Southern Europe    | Europe    | 2008           | 697.91                                               | 39.20                  | 13.03      | 15.74                                                | 8.31                   | 10,360          | 2,968                |
| 154              | 807 | MKD  | The former Yugoslav Republic of Macedonia | Southern Europe    | Europe    | 2009           | 749.80                                               | 29.66                  | 13.14      | 16.61                                                | 6.38                   | 10,920          | 3,015                |
| 154              | 807 | MKD  | The former Yugoslav Republic of Macedonia | Southern Europe    | Europe    | 2010           | 754.81                                               | 28.77                  | 13.04      | 16.15                                                | 7.28                   | 11,220          | 2,983                |
| 154              | 807 | MKD  | The former Yugoslav Republic of Macedonia | Southern Europe    | Europe    | 2011           | 726.11                                               | 33.46                  | 13.19      | 16.02                                                | 7.53                   | 11,550          | 2,923                |
| 176              | 626 | TLS  | Timor-Leste                               | South-Eastern Asia | Asia      | 2006           | 242.63                                               | 100.00                 | 24.87      | 10.22                                                | 53.20                  | 3,070           | 2,037                |
| 176              | 626 | TLS  | Timor-Leste                               | South-Eastern Asia | Asia      | 2007           | 237.34                                               | 100.00                 | 25.32      | 10.21                                                | 53.55                  | 4,270           | 2,046                |
| 176              | 626 | TLS  | Timor-Leste                               | South-Eastern Asia | Asia      | 2008           | 228.13                                               | 100.00                 | 23.78      | 10.63                                                | 48.85                  | 6,610           | 2,061                |
| 176              | 626 | TLS  | Timor-Leste                               | South-Eastern Asia | Asia      | 2009           | 237.28                                               | 100.00                 | 23.88      | 10.03                                                | 56.94                  | 4,820           | 2,040                |
| 176              | 626 | TLS  | Timor-Leste                               | South-Eastern Asia | Asia      | 2010           | 223.89                                               | 100.00                 | 23.92      | 10.46                                                | 50.29                  | 5,900           | 2,074                |
| 176              | 626 | TLS  | Timor-Leste                               | South-Eastern Asia | Asia      | 2011           | 230.53                                               | 100.00                 | 24.20      | 10.43                                                | 50.62                  | 7,900           | 2,083                |
| 217              | 768 | TGO  | Togo                                      | Western Africa     | Africa    | 1992           | 246.74                                               | 100.00                 | 24.94      | 8.69                                                 | 77.20                  | 810             | 1,896                |
| 217              | 768 | TGO  | Togo                                      | Western Africa     | Africa    | 1993           | 261.01                                               | 100.00                 | 25.41      | 9.35                                                 | 65.92                  | 680             | 1,959                |
| 217              | 768 | TGO  | Togo                                      | Western Africa     | Africa    | 1994           | 273.18                                               | 100.00                 | 24.76      | 9.85                                                 | 57.40                  | 760             | 2,042                |
| 217              | 768 | TGO  | Togo                                      | Western Africa     | Africa    | 1995           | 239.66                                               | 100.00                 | 23.49      | 9.59                                                 | 61.81                  | 830             | 2,046                |
| 217              | 768 | TGO  | Togo                                      | Western Africa     | Africa    | 1996           | 245.11                                               | 100.00                 | 24.39      | 9.50                                                 | 63.61                  | 910             | 2,112                |
| 217              | 768 | TGO  | Togo                                      | Western Africa     | Africa    | 1997           | 241.85                                               | 100.00                 | 24.19      | 10.13                                                | 53.16                  | 1,030           | 2,154                |
| 217              | 768 | TGO  | Togo                                      | Western Africa     | Africa    | 1998           | 223.97                                               | 100.00                 | 23.57      | 9.54                                                 | 62.93                  | 1,000           | 2,123                |
| 217              | 768 | TGO  | Togo                                      | Western Africa     | Africa    | 1999           | 230.04                                               | 100.00                 | 25.59      | 9.45                                                 | 64.50                  | 1,000           | 2,149                |
| 217              | 768 | TGO  | Togo                                      | Western Africa     | Africa    | 2000           | 225.40                                               | 100.00                 | 25.09      | 9.86                                                 | 57.49                  | 990             | 2,171                |
| 217              | 768 | TGO  | Togo                                      | Western Africa     | Africa    | 2001           | 217.67                                               | 100.00                 | 25.99      | 9.88                                                 | 57.63                  | 980             | 2,155                |
| 217              | 768 | TGO  | Togo                                      | Western Africa     | Africa    | 2002           | 224.80                                               | 100.00                 | 26.29      | 9.62                                                 | 61.79                  | 960             | 2,157                |
| 217              | 768 | TGO  | Togo                                      | Western Africa     | Africa    | 2003           | 239.78                                               | 100.00                 | 26.32      | 9.93                                                 | 56.53                  | 1,010           | 2,199                |
| 217              | 768 | TGO  | Togo                                      | Western Africa     | Africa    | 2004           | 236.45                                               | 100.00                 | 27.60      | 9.94                                                 | 56.14                  | 1,020           | 2,246                |
| 217              | 768 | TGO  | Togo                                      | Western Africa     | Africa    | 2005           | 234.52                                               | 100.00                 | 26.31      | 10.20                                                | 51.82                  | 1,040           | 2,238                |
| 217              | 768 | TGO  | Togo                                      | Western Africa     | Africa    | 2006           | 235.67                                               | 100.00                 | 25.72      | 10.46                                                | 48.12                  | 1,090           | 2,282                |
| 217              | 768 | TGO  | Togo                                      | Western Africa     | Africa    | 2007           | 235.61                                               | 100.00                 | 26.01      | 10.58                                                | 46.20                  | 1,120           | 2,289                |
| 217              | 768 | TGO  | Togo                                      | Western Africa     | Africa    | 2008           | 236.69                                               | 100.00                 | 25.73      | 10.69                                                | 44.45                  | 1,020           | 2,319                |
| 217              | 768 | TGO  | Togo                                      | Western Africa     | Africa    | 2009           | 246.09                                               | 100.00                 | 25.94      | 10.92                                                | 41.08                  | 1,040           | 2,348                |
| 217              | 768 | TGO  | Togo                                      | Western Africa     | Africa    | 2010           | 242.32                                               | 100.00                 | 26.27      | 10.80                                                | 42.63                  | 1,040           | 2,356                |
| 217              | 768 | TGO  | Togo                                      | Western Africa     | Africa    | 2011           | 239.83                                               | 100.00                 | 25.85      | 10.59                                                | 45.84                  | 1,080           | 2,366                |
| 220              | 780 | TTO  | Trinidad and Tobago                       | Caribbean          | Americas  | 1992           | 501.52                                               | 87.82                  | 11.85      | 11.47                                                | 34.46                  | 8,450           | 2,568                |
| 220              | 780 | TTO  | Trinidad and Tobago                       | Caribbean          | Americas  | 1993           | 496.46                                               | 89.13                  | 10.99      | 11.37                                                | 36.07                  | 8,570           | 2,546                |
| 220              | 780 | TTO  | Trinidad and Tobago                       | Caribbean          | Americas  | 1994           | 497.03                                               | 89.29                  | 11.85      | 10.60                                                | 46.63                  | 8,900           | 2,549                |
| 220              | 780 | TTO  | Trinidad and Tobago                       | Caribbean          | Americas  | 1995           | 505.91                                               | 87.78                  | 12.40      | 11.12                                                | 39.86                  | 9,370           | 2,596                |
| 220              | 780 | TTO  | Trinidad and Tobago                       | Caribbean          | Americas  | 1996           | 473.81                                               | 93.63                  | 12.69      | 11.15                                                | 39.42                  | 9,860           | 2,840                |
| 220              | 780 | TTO  | Trinidad and Tobago                       | Caribbean          | Americas  | 1997           | 573.82                                               | 71.56                  | 11.38      | 11.50                                                | 35.38                  | 10,550          | 2,816                |
| 220              | 780 | TTO  | Trinidad and Tobago                       | Caribbean          | Americas  | 1998           | 599.90                                               | 64.74                  | 11.05      | 12.14                                                | 28.77                  | 11,590          | 2,864                |
| 220              | 780 | TTO  | Trinidad and Tobago                       | Caribbean          | Americas  | 1999           | 588.45                                               | 68.00                  | 11.39      | 12.31                                                | 27.21                  | 12,220          | 2,874                |
| 220              | 780 | TTO  | Trinidad and Tobago                       | Caribbean          | Americas  | 2000           | 617.63                                               | 60.16                  | 11.11      | 12.89                                                | 22.45                  | 12,980          | 2,777                |
| 220              | 780 | TTO  | Trinidad and Tobago                       | Caribbean          | Americas  | 2001           | 671.06                                               | 46.58                  | 11.33      | 13.08                                                | 20.97                  | 14,010          | 2,832                |
| 220              | 780 | TTO  | Trinidad and Tobago                       | Caribbean          | Americas  | 2002           | 627.39                                               | 57.10                  | 11.08      | 12.98                                                | 21.46                  | 15,430          | 2,790                |
| 220              | 780 | TTO  | Trinidad and Tobago                       | Caribbean          | Americas  | 2003           | 668.70                                               | 46.48                  | 10.80      | 13.15                                                | 20.05                  | 17,780          | 2,754                |
| 220              | 780 | TTO  | Trinidad and Tobago                       | Caribbean          | Americas  | 2004           | 655.92                                               | 49.12                  | 10.67      | 13.36                                                | 18.48                  | 20,240          | 2,777                |
| 220              | 780 | TTO  | Trinidad and Tobago                       | Caribbean          | Americas  | 2005           | 623.96                                               | 56.81                  | 10.88      | 13.24                                                | 19.03                  | 21,610          | 2,757                |
| 220              | 780 | TTO  | Trinidad and Tobago                       | Caribbean          | Americas  | 2006           | 676.42                                               | 43.52                  | 11.33      | 13.35                                                | 18.19                  | 25,110          | 2,797                |
| 220              | 780 | TTO  | Trinidad and Tobago                       | Caribbean          | Americas  | 2007           | 689.38                                               | 40.32                  | 10.43      | 13.86                                                | 15.13                  | 27,040          | 2,848                |
| 220              | 780 | TTO  | Trinidad and Tobago                       | Caribbean          | Americas  | 2008           | 662.69                                               | 45.92                  | 10.55      | 13.83                                                | 15.13                  | 28,380          | 2,827                |
| 220              | 780 | TTO  | Trinidad and Tobago                       | Caribbean          | Americas  | 2009           | 588.50                                               | 64.83                  | 10.69      | 13.90                                                | 14.65                  | 26,850          | 2,835                |
| 220              | 780 | TTO  | Trinidad and Tobago                       | Caribbean          | Americas  | 2010           | 625.89                                               | 54.50                  | 10.40      | 14.06                                                | 13.76                  | 27,250          | 2,833                |
| 220              | 780 | TTO  | Trinidad and Tobago                       | Caribbean          | Americas  | 2011           | 700.22                                               | 37.12                  | 11.12      | 14.87                                                | 10.48                  | 24,890          | 2,889                |
| 222              | 788 | TUN  | Tunisia                                   | Northern Africa    | Africa    | 1992           | 702.52                                               | 37.23                  | 10.83      | 21.13                                                | 2.08                   | 3,940           | 3,144                |
| 222              | 788 | TUN  | Tunisia                                   | Northern Africa    | Africa    | 1993           | 710.45                                               | 35.95                  | 10.97      | 21.49                                                | 1.94                   | 3,980           | 3,165                |
| 222              | 788 | TUN  | Tunisia                                   | Northern Africa    | Africa    | 1994           | 683.73                                               | 41.67                  | 10.69      | 21.06                                                | 2.15                   | 4,140           | 3,116                |
| 222              | 788 | TUN  | Tunisia                                   | Northern Africa    | Africa    | 1995           | 713.62                                               | 35.85                  | 10.74      | 21.49                                                | 1.96                   | 4,300           | 3,129                |
| 222              | 788 | TUN  | Tunisia                                   | Northern Africa    | Africa    | 1996           | 729.82                                               | 33.02                  | 10.86      | 21.83                                                | 1.80                   | 4,600           | 3,201                |
| 222              | 788 | TUN  | Tunisia                                   | Northern Africa    | Africa    | 1997           | 732.53                                               | 32.75                  | 10.86      | 22.89                                                | 1.79                   | 4,910           | 3,248                |
| 222              | 788 | TUN  | Tunisia                                   | Northern Africa    | Africa    | 1998           | 770.85                                               | 26.83                  | 10.88      | 22.30                                                | 1.65                   | 5,160           | 3,305                |
| 222              | 788 | TUN  | Tunisia                                   | Northern Africa    | Africa    | 1999           | 783.46                                               | 25.21                  | 11.17      | 22.17                                                | 1.71                   | 5,480           | 3,377                |
| 222              | 788 | TUN  | Tunisia                                   | Northern Africa    | Africa    | 2000           | 801.46                                               | 22.97                  | 10.97      | 21.88                                                | 1.82                   | 5,770           | 3,253                |
| 222              | 788 | TUN  | Tunisia                                   | Northern Africa    | Africa    | 2001           | 804.13                                               | 22.73                  | 10.68      | 21.80                                                | 1.85                   | 6,140           | 3,258                |
| 222              | 788 | TUN  | Tunisia                                   | Northern Africa    | Africa    | 2002           | 823.01                                               | 20.55                  | 10.31      | 21.45                                                | 1.99                   | 6,280           | 3,193                |
| 222              | 788 | TUN  | Tunisia                                   | Northern Africa    | Africa    | 2003           | 840.70                                               | 18.66                  | 10.73      | 21.57                                                | 1.93                   | 6,740           | 3,242                |
| 222              | 788 | TUN  | Tunisia                                   | Northern Africa    | Africa    | 2004           | 822.04                                               | 20.54                  | 10.88      | 21.47                                                | 1.97                   | 7,270           | 3,250                |

| FAO country code | UNI | ISO3 | Country      | Region          | Continent | Reference year | Ca supply (mg capita <sup>-1</sup> d <sup>-1</sup> ) | Ca deficiency risk (%) | Phytate:Zn | Zn supply (mg capita <sup>-1</sup> d <sup>-1</sup> ) | Zn deficiency risk (%) | GNI-PPP (US \$) | Energy supply (kcal) |
|------------------|-----|------|--------------|-----------------|-----------|----------------|------------------------------------------------------|------------------------|------------|------------------------------------------------------|------------------------|-----------------|----------------------|
| 222              | 788 | TUN  | Tunisia      | Northern Africa | Africa    | 2005           | 818.52                                               | 20.82                  | 10.54      | 21.92                                                | 1.77                   | 7,640           | 3,223                |
| 222              | 788 | TUN  | Tunisia      | Northern Africa | Africa    | 2006           | 851.71                                               | 17.29                  | 10.95      | 21.61                                                | 1.89                   | 8,260           | 3,275                |
| 222              | 788 | TUN  | Tunisia      | Northern Africa | Africa    | 2007           | 874.03                                               | 15.22                  | 11.14      | 22.05                                                | 1.70                   | 8,870           | 3,252                |
| 222              | 788 | TUN  | Tunisia      | Northern Africa | Africa    | 2008           | 844.83                                               | 17.60                  | 10.98      | 21.43                                                | 1.92                   | 9,330           | 3,304                |
| 222              | 788 | TUN  | Tunisia      | Northern Africa | Africa    | 2009           | 857.13                                               | 16.32                  | 11.30      | 22.30                                                | 1.58                   | 9,630           | 3,338                |
| 222              | 788 | TUN  | Tunisia      | Northern Africa | Africa    | 2010           | 875.34                                               | 14.68                  | 10.90      | 22.41                                                | 1.52                   | 9,940           | 3,329                |
| 222              | 788 | TUN  | Tunisia      | Northern Africa | Africa    | 2011           | 879.62                                               | 14.22                  | 11.40      | 22.63                                                | 1.45                   | 9,830           | 3,362                |
| 223              | 792 | TUR  | Turkey       | Western Asia    | Asia      | 1992           | 1,028.36                                             | 6.86                   | 12.90      | 24.91                                                | 0.97                   | 4,770           | 3,710                |
| 223              | 792 | TUR  | Turkey       | Western Asia    | Asia      | 1993           | 1,021.85                                             | 7.10                   | 12.74      | 24.57                                                | 1.03                   | 5,200           | 3,729                |
| 223              | 792 | TUR  | Turkey       | Western Asia    | Asia      | 1994           | 1,021.97                                             | 7.12                   | 12.06      | 24.93                                                | 0.97                   | 4,890           | 3,729                |
| 223              | 792 | TUR  | Turkey       | Western Asia    | Asia      | 1995           | 1,036.73                                             | 6.66                   | 12.63      | 24.48                                                | 1.05                   | 5,310           | 3,715                |
| 223              | 792 | TUR  | Turkey       | Western Asia    | Asia      | 1996           | 1,027.32                                             | 6.96                   | 12.79      | 24.05                                                | 1.13                   | 5,730           | 3,686                |
| 223              | 792 | TUR  | Turkey       | Western Asia    | Asia      | 1997           | 966.70                                               | 9.32                   | 12.94      | 22.88                                                | 1.42                   | 6,190           | 3,604                |
| 223              | 792 | TUR  | Turkey       | Western Asia    | Asia      | 1998           | 1,006.54                                             | 7.67                   | 12.99      | 23.60                                                | 1.23                   | 8,640           | 3,658                |
| 223              | 792 | TUR  | Turkey       | Western Asia    | Asia      | 1999           | 990.10                                               | 8.29                   | 12.62      | 23.45                                                | 1.26                   | 8,200           | 3,618                |
| 223              | 792 | TUR  | Turkey       | Western Asia    | Asia      | 2000           | 984.87                                               | 8.49                   | 12.82      | 23.42                                                | 1.26                   | 9,200           | 3,662                |
| 223              | 792 | TUR  | Turkey       | Western Asia    | Asia      | 2001           | 936.24                                               | 10.78                  | 12.80      | 23.48                                                | 1.24                   | 8,540           | 3,621                |
| 223              | 792 | TUR  | Turkey       | Western Asia    | Asia      | 2002           | 945.75                                               | 10.26                  | 13.19      | 23.65                                                | 1.20                   | 8,630           | 3,608                |
| 223              | 792 | TUR  | Turkey       | Western Asia    | Asia      | 2003           | 974.84                                               | 8.86                   | 13.18      | 23.21                                                | 1.30                   | 8,760           | 3,588                |
| 223              | 792 | TUR  | Turkey       | Western Asia    | Asia      | 2004           | 965.03                                               | 9.30                   | 12.74      | 23.01                                                | 1.35                   | 10,150          | 3,610                |
| 223              | 792 | TUR  | Turkey       | Western Asia    | Asia      | 2005           | 991.54                                               | 8.16                   | 13.31      | 22.87                                                | 1.39                   | 11,390          | 3,611                |
| 223              | 792 | TUR  | Turkey       | Western Asia    | Asia      | 2006           | 1,007.45                                             | 7.56                   | 12.73      | 23.21                                                | 1.29                   | 12,890          | 3,648                |
| 223              | 792 | TUR  | Turkey       | Western Asia    | Asia      | 2007           | 1,002.35                                             | 7.74                   | 12.96      | 23.01                                                | 1.34                   | 13,870          | 3,631                |
| 223              | 792 | TUR  | Turkey       | Western Asia    | Asia      | 2008           | 985.97                                               | 7.99                   | 12.92      | 22.45                                                | 1.50                   | 15,000          | 3,597                |
| 223              | 792 | TUR  | Turkey       | Western Asia    | Asia      | 2009           | 1,001.14                                             | 7.79                   | 13.13      | 22.10                                                | 1.61                   | 14,520          | 3,622                |
| 223              | 792 | TUR  | Turkey       | Western Asia    | Asia      | 2010           | 1,016.46                                             | 7.24                   | 13.42      | 22.52                                                | 1.48                   | 16,040          | 3,646                |
| 223              | 792 | TUR  | Turkey       | Western Asia    | Asia      | 2011           | 1,075.87                                             | 5.50                   | 13.01      | 22.47                                                | 1.49                   | 17,810          | 3,680                |
| 213              | 795 | TKM  | Turkmenistan | Central Asia    | Asia      | 1993           | 684.43                                               | 39.04                  | 7.44       | 20.01                                                | 2.58                   | 4,460           | 2,578                |
| 213              | 795 | TKM  | Turkmenistan | Central Asia    | Asia      | 1994           | 690.30                                               | 38.05                  | 7.76       | 19.43                                                | 2.98                   | 3,780           | 2,546                |
| 213              | 795 | TKM  | Turkmenistan | Central Asia    | Asia      | 1995           | 731.82                                               | 30.64                  | 7.20       | 20.21                                                | 2.49                   | 3,400           | 2,539                |
| 213              | 795 | TKM  | Turkmenistan | Central Asia    | Asia      | 1996           | 703.85                                               | 36.00                  | 7.23       | 20.04                                                | 2.57                   | 3,630           | 2,509                |
| 213              | 795 | TKM  | Turkmenistan | Central Asia    | Asia      | 1997           | 719.65                                               | 33.49                  | 7.30       | 20.71                                                | 2.23                   | 3,300           | 2,540                |
| 213              | 795 | TKM  | Turkmenistan | Central Asia    | Asia      | 1998           | 675.70                                               | 42.87                  | 7.02       | 21.45                                                | 1.91                   | 3,450           | 2,560                |
| 213              | 795 | TKM  | Turkmenistan | Central Asia    | Asia      | 1999           | 704.73                                               | 37.28                  | 7.18       | 21.76                                                | 1.82                   | 3,970           | 2,603                |
| 213              | 795 | TKM  | Turkmenistan | Central Asia    | Asia      | 2000           | 732.31                                               | 32.52                  | 7.14       | 22.55                                                | 1.55                   | 3,990           | 2,613                |
| 213              | 795 | TKM  | Turkmenistan | Central Asia    | Asia      | 2001           | 734.57                                               | 32.51                  | 7.18       | 23.19                                                | 1.38                   | 4,350           | 2,627                |
| 213              | 795 | TKM  | Turkmenistan | Central Asia    | Asia      | 2002           | 779.16                                               | 25.72                  | 7.03       | 23.78                                                | 1.24                   | 4,390           | 2,686                |
| 213              | 795 | TKM  | Turkmenistan | Central Asia    | Asia      | 2003           | 783.06                                               | 25.21                  | 7.00       | 24.63                                                | 1.06                   | 4,640           | 2,745                |
| 213              | 795 | TKM  | Turkmenistan | Central Asia    | Asia      | 2004           | 820.33                                               | 20.61                  | 7.02       | 24.84                                                | 1.02                   | 4,950           | 2,808                |
| 213              | 795 | TKM  | Turkmenistan | Central Asia    | Asia      | 2005           | 832.94                                               | 19.23                  | 7.08       | 24.95                                                | 0.99                   | 5,400           | 2,831                |
| 213              | 795 | TKM  | Turkmenistan | Central Asia    | Asia      | 2006           | 827.30                                               | 19.64                  | 7.29       | 24.88                                                | 1.00                   | 6,370           | 2,835                |
| 213              | 795 | TKM  | Turkmenistan | Central Asia    | Asia      | 2007           | 834.66                                               | 18.76                  | 6.51       | 27.07                                                | 0.69                   | 7,180           | 2,896                |
| 213              | 795 | TKM  | Turkmenistan | Central Asia    | Asia      | 2008           | 818.55                                               | 20.37                  | 6.42       | 26.66                                                | 0.73                   | 8,080           | 2,868                |
| 213              | 795 | TKM  | Turkmenistan | Central Asia    | Asia      | 2009           | 818.44                                               | 20.26                  | 6.36       | 26.73                                                | 0.72                   | 8,450           | 2,869                |
| 213              | 795 | TKM  | Turkmenistan | Central Asia    | Asia      | 2010           | 814.93                                               | 20.51                  | 6.47       | 26.66                                                | 0.72                   | 9,000           | 2,892                |
| 213              | 795 | TKM  | Turkmenistan | Central Asia    | Asia      | 2011           | 814.47                                               | 20.47                  | 6.44       | 26.61                                                | 0.72                   | 10,060          | 2,883                |
| 226              | 800 | UGA  | Uganda       | Eastern Africa  | Africa    | 1992           | 421.45                                               | 97.55                  | 24.37      | 9.39                                                 | 65.08                  | 440             | 2,220                |
| 226              | 800 | UGA  | Uganda       | Eastern Africa  | Africa    | 1993           | 425.75                                               | 97.18                  | 24.41      | 9.40                                                 | 64.63                  | 480             | 2,244                |
| 226              | 800 | UGA  | Uganda       | Eastern Africa  | Africa    | 1994           | 410.06                                               | 98.36                  | 24.28      | 9.29                                                 | 66.47                  | 500             | 2,229                |
| 226              | 800 | UGA  | Uganda       | Eastern Africa  | Africa    | 1995           | 396.27                                               | 99.06                  | 23.70      | 9.16                                                 | 68.58                  | 560             | 2,235                |
| 226              | 800 | UGA  | Uganda       | Eastern Africa  | Africa    | 1996           | 350.32                                               | 99.93                  | 23.40      | 8.73                                                 | 76.47                  | 600             | 2,130                |
| 226              | 800 | UGA  | Uganda       | Eastern Africa  | Africa    | 1997           | 365.06                                               | 99.81                  | 23.10      | 8.82                                                 | 74.82                  | 630             | 2,155                |
| 226              | 800 | UGA  | Uganda       | Eastern Africa  | Africa    | 1998           | 409.73                                               | 98.41                  | 24.37      | 9.48                                                 | 63.33                  | 650             | 2,266                |
| 226              | 800 | UGA  | Uganda       | Eastern Africa  | Africa    | 1999           | 392.36                                               | 99.23                  | 23.98      | 9.38                                                 | 65.02                  | 680             | 2,248                |
| 226              | 800 | UGA  | Uganda       | Eastern Africa  | Africa    | 2000           | 386.94                                               | 99.40                  | 23.51      | 9.42                                                 | 64.26                  | 690             | 2,266                |
| 226              | 800 | UGA  | Uganda       | Eastern Africa  | Africa    | 2001           | 401.26                                               | 98.88                  | 25.08      | 9.50                                                 | 63.43                  | 710             | 2,280                |
| 226              | 800 | UGA  | Uganda       | Eastern Africa  | Africa    | 2002           | 419.22                                               | 97.81                  | 24.45      | 9.83                                                 | 57.82                  | 760             | 2,329                |
| 226              | 800 | UGA  | Uganda       | Eastern Africa  | Africa    | 2003           | 457.31                                               | 93.52                  | 24.74      | 10.21                                                | 51.39                  | 800             | 2,380                |
| 226              | 800 | UGA  | Uganda       | Eastern Africa  | Africa    | 2004           | 441.98                                               | 95.62                  | 23.25      | 9.96                                                 | 55.40                  | 840             | 2,350                |
| 226              | 800 | UGA  | Uganda       | Eastern Africa  | Africa    | 2005           | 463.32                                               | 92.60                  | 23.86      | 10.37                                                | 48.74                  | 890             | 2,347                |
| 226              | 800 | UGA  | Uganda       | Eastern Africa  | Africa    | 2006           | 454.14                                               | 94.04                  | 22.82      | 10.01                                                | 55.08                  | 990             | 2,297                |
| 226              | 800 | UGA  | Uganda       | Eastern Africa  | Africa    | 2007           | 447.09                                               | 95.02                  | 22.65      | 9.79                                                 | 58.53                  | 1,070           | 2,256                |
| 226              | 800 | UGA  | Uganda       | Eastern Africa  | Africa    | 2008           | 432.68                                               | 96.69                  | 23.04      | 9.61                                                 | 61.53                  | 1,150           | 2,250                |
| 226              | 800 | UGA  | Uganda       | Eastern Africa  | Africa    | 2009           | 431.98                                               | 96.78                  | 23.40      | 9.91                                                 | 56.32                  | 1,200           | 2,273                |
| 226              | 800 | UGA  | Uganda       | Eastern Africa  | Africa    | 2010           | 443.11                                               | 95.59                  | 24.26      | 10.03                                                | 54.31                  | 1,240           | 2,291                |
| 226              | 800 | UGA  | Uganda       | Eastern Africa  | Africa    | 2011           | 454.86                                               | 94.07                  | 24.79      | 10.29                                                | 50.62                  | 1,310           | 2,279                |
| 230              | 804 | UKR  | Ukraine      | Eastern Europe  | Europe    | 1992           | 831.60                                               | 18.86                  | 8.35       | 23.13                                                | 1.21                   | 5,910           | 3,366                |
| 230              | 804 | UKR  | Ukraine      | Eastern Europe  | Europe    | 1993           | 749.54                                               | 29.57                  | 9.32       | 22.11                                                | 1.49                   | 5,070           | 3,242                |
| 230              | 804 | UKR  | Ukraine      | Eastern Europe  | Europe    | 1994           | 820.45                                               | 20.29                  | 8.68       | 21.24                                                | 1.81                   | 4,080           | 2,979                |
| 230              | 804 | UKR  | Ukraine      | Eastern Europe  | Europe    | 1995           | 895.50                                               | 13.74                  | 9.09       | 19.94                                                | 2.46                   | 3,650           | 2,884                |
| 230              | 804 | UKR  | Ukraine      | Eastern Europe  | Europe    | 1996           | 874.09                                               | 15.50                  | 9.38       | 18.92                                                | 3.17                   | 3,390           | 2,799                |
| 230              | 804 | UKR  | Ukraine      | Eastern Europe  | Europe    | 1997           | 858.74                                               | 16.92                  | 9.61       | 19.02                                                | 3.11                   | 3,370           | 2,854                |
| 230              | 804 | UKR  | Ukraine      | Eastern Europe  | Europe    | 1998           | 864.90                                               | 16.48                  | 9.74       | 18.64                                                | 3.44                   | 3,350           | 2,830                |
| 230              | 804 | UKR  | Ukraine      | Eastern Europe  | Europe    | 1999           | 844.07                                               | 18.48                  | 9.28       | 18.08                                                | 4.02                   | 3,400           | 2,781                |
| 230              | 804 | UKR  | Ukraine      | Eastern Europe  | Europe    | 2000           | 825.05                                               | 20.52                  | 9.96       | 18.24                                                | 3.86                   | 3,710           | 2,896                |
| 230              | 804 | UKR  | Ukraine      | Eastern Europe  | Europe    | 2001           | 875.07                                               | 15.77                  | 10.05      | 18.49                                                | 3.61                   | 4,240           | 3,013                |
| 230              | 804 | UKR  | Ukraine      | Eastern Europe  | Europe    | 2002           | 859.85                                               | 17.08                  | 9.93       | 18.81                                                | 3.32                   | 4,590           | 3,030                |
| 230              | 804 | UKR  | Ukraine      | Eastern Europe  | Europe    | 2003           | 879.35                                               | 15.39                  | 10.13      | 18.55                                                | 3.53                   | 5,170           | 3,050                |
| 230              | 804 | UKR  | Ukraine      | Eastern Europe  | Europe    | 2004           | 979.46                                               | 9.22                   | 9.88       | 18.97                                                | 3.15                   | 6,000           | 3,193                |

Dietary calcium and zinc deficiency risks are decreasing but remain prevalent

| FAO country code | UNI | ISO3 | Country                     | Region           | Continent | Reference year | Ca supply (mg capita <sup>-1</sup> d <sup>-1</sup> ) | Ca deficiency risk (%) | Phytate:Zn | Zn supply (mg capita <sup>-1</sup> d <sup>-1</sup> ) | Zn deficiency risk (%) | GNI-PPP (US \$) | Energy supply (kcal) |
|------------------|-----|------|-----------------------------|------------------|-----------|----------------|------------------------------------------------------|------------------------|------------|------------------------------------------------------|------------------------|-----------------|----------------------|
| 230              | 804 | UKR  | Ukraine                     | Eastern Europe   | Europe    | 2005           | 939.31                                               | 11.18                  | 10.03      | 18.84                                                | 3.24                   | 6,410           | 3,208                |
| 230              | 804 | UKR  | Ukraine                     | Eastern Europe   | Europe    | 2006           | 991.49                                               | 8.57                   | 9.63       | 19.12                                                | 3.01                   | 7,110           | 3,244                |
| 230              | 804 | UKR  | Ukraine                     | Eastern Europe   | Europe    | 2007           | 943.46                                               | 10.75                  | 9.71       | 18.61                                                | 3.40                   | 7,930           | 3,244                |
| 230              | 804 | UKR  | Ukraine                     | Eastern Europe   | Europe    | 2008           | 874.17                                               | 15.18                  | 9.72       | 18.55                                                | 3.41                   | 8,370           | 3,253                |
| 230              | 804 | UKR  | Ukraine                     | Eastern Europe   | Europe    | 2009           | 912.96                                               | 12.25                  | 9.71       | 17.86                                                | 4.04                   | 7,130           | 3,161                |
| 230              | 804 | UKR  | Ukraine                     | Eastern Europe   | Europe    | 2010           | 900.53                                               | 12.91                  | 9.83       | 17.74                                                | 4.13                   | 7,590           | 3,121                |
| 230              | 804 | UKR  | Ukraine                     | Eastern Europe   | Europe    | 2011           | 911.62                                               | 12.03                  | 10.11      | 17.78                                                | 4.03                   | 8,100           | 3,142                |
| 225              | 784 | ARE  | United Arab Emirates        | Western Asia     | Asia      | 2001           | 972.41                                               | 8.45                   | 10.01      | 20.92                                                | 2.85                   | 90,860          | 3,320                |
| 225              | 784 | ARE  | United Arab Emirates        | Western Asia     | Asia      | 2002           | 984.32                                               | 8.05                   | 9.23       | 22.92                                                | 1.86                   | 88,250          | 3,363                |
| 225              | 784 | ARE  | United Arab Emirates        | Western Asia     | Asia      | 2003           | 962.55                                               | 9.46                   | 9.18       | 22.98                                                | 1.84                   | 92,890          | 3,345                |
| 225              | 784 | ARE  | United Arab Emirates        | Western Asia     | Asia      | 2004           | 904.21                                               | 12.05                  | 11.14      | 21.34                                                | 2.60                   | 96,800          | 3,287                |
| 225              | 784 | ARE  | United Arab Emirates        | Western Asia     | Asia      | 2005           | 810.12                                               | 19.66                  | 11.96      | 20.20                                                | 3.35                   | 93,410          | 3,210                |
| 225              | 784 | ARE  | United Arab Emirates        | Western Asia     | Asia      | 2006           | 817.57                                               | 19.70                  | 13.22      | 20.75                                                | 3.16                   | 90,460          | 3,206                |
| 225              | 784 | ARE  | United Arab Emirates        | Western Asia     | Asia      | 2007           | 810.05                                               | 20.58                  | 11.01      | 21.26                                                | 2.82                   | 81,540          | 3,180                |
| 225              | 784 | ARE  | United Arab Emirates        | Western Asia     | Asia      | 2008           | 901.33                                               | 12.41                  | 11.12      | 20.77                                                | 3.11                   | 71,660          | 3,147                |
| 225              | 784 | ARE  | United Arab Emirates        | Western Asia     | Asia      | 2009           | 835.00                                               | 17.19                  | 14.18      | 20.76                                                | 3.06                   | 60,590          | 3,152                |
| 225              | 784 | ARE  | United Arab Emirates        | Western Asia     | Asia      | 2010           | 813.14                                               | 18.84                  | 16.16      | 20.40                                                | 3.25                   | 56,260          | 3,156                |
| 225              | 784 | ARE  | United Arab Emirates        | Western Asia     | Asia      | 2011           | 793.92                                               | 20.48                  | 19.26      | 21.08                                                | 2.75                   | 56,390          | 3,215                |
| 229              | 826 | GBR  | United Kingdom              | Northern Europe  | Europe    | 1992           | 928.00                                               | 11.08                  | 8.42       | 16.93                                                | 5.45                   | 16,710          | 3,272                |
| 229              | 826 | GBR  | United Kingdom              | Northern Europe  | Europe    | 1993           | 929.03                                               | 11.01                  | 8.80       | 16.65                                                | 5.89                   | 17,620          | 3,219                |
| 229              | 826 | GBR  | United Kingdom              | Northern Europe  | Europe    | 1994           | 916.66                                               | 11.72                  | 8.86       | 16.62                                                | 5.94                   | 18,990          | 3,236                |
| 229              | 826 | GBR  | United Kingdom              | Northern Europe  | Europe    | 1995           | 907.84                                               | 12.28                  | 8.64       | 16.62                                                | 5.95                   | 19,910          | 3,186                |
| 229              | 826 | GBR  | United Kingdom              | Northern Europe  | Europe    | 1996           | 948.66                                               | 10.00                  | 8.78       | 16.88                                                | 5.51                   | 21,150          | 3,270                |
| 229              | 826 | GBR  | United Kingdom              | Northern Europe  | Europe    | 1997           | 969.06                                               | 9.06                   | 8.89       | 17.32                                                | 4.88                   | 22,730          | 3,329                |
| 229              | 826 | GBR  | United Kingdom              | Northern Europe  | Europe    | 1998           | 962.89                                               | 9.39                   | 8.86       | 17.68                                                | 4.43                   | 23,830          | 3,354                |
| 229              | 826 | GBR  | United Kingdom              | Northern Europe  | Europe    | 1999           | 970.99                                               | 9.06                   | 8.86       | 17.80                                                | 4.31                   | 24,320          | 3,402                |
| 229              | 826 | GBR  | United Kingdom              | Northern Europe  | Europe    | 2000           | 950.55                                               | 10.07                  | 8.96       | 17.83                                                | 4.29                   | 26,280          | 3,363                |
| 229              | 826 | GBR  | United Kingdom              | Northern Europe  | Europe    | 2001           | 982.94                                               | 8.62                   | 9.28       | 17.77                                                | 4.37                   | 27,950          | 3,402                |
| 229              | 826 | GBR  | United Kingdom              | Northern Europe  | Europe    | 2002           | 977.94                                               | 8.86                   | 8.99       | 18.34                                                | 3.76                   | 29,400          | 3,418                |
| 229              | 826 | GBR  | United Kingdom              | Northern Europe  | Europe    | 2003           | 982.04                                               | 8.71                   | 8.71       | 18.64                                                | 3.49                   | 30,450          | 3,402                |
| 229              | 826 | GBR  | United Kingdom              | Northern Europe  | Europe    | 2004           | 993.43                                               | 8.24                   | 8.74       | 18.84                                                | 3.32                   | 32,430          | 3,446                |
| 229              | 826 | GBR  | United Kingdom              | Northern Europe  | Europe    | 2005           | 1,005.33                                             | 7.77                   | 9.22       | 18.86                                                | 3.30                   | 33,830          | 3,440                |
| 229              | 826 | GBR  | United Kingdom              | Northern Europe  | Europe    | 2006           | 1,018.01                                             | 7.31                   | 8.93       | 19.24                                                | 3.01                   | 35,630          | 3,440                |
| 229              | 826 | GBR  | United Kingdom              | Northern Europe  | Europe    | 2007           | 1,016.80                                             | 7.32                   | 9.04       | 19.45                                                | 2.85                   | 36,500          | 3,419                |
| 229              | 826 | GBR  | United Kingdom              | Northern Europe  | Europe    | 2008           | 1,007.54                                             | 7.61                   | 8.87       | 19.10                                                | 3.10                   | 37,130          | 3,424                |
| 229              | 826 | GBR  | United Kingdom              | Northern Europe  | Europe    | 2009           | 988.89                                               | 8.29                   | 8.77       | 18.66                                                | 3.45                   | 35,280          | 3,414                |
| 229              | 826 | GBR  | United Kingdom              | Northern Europe  | Europe    | 2010           | 995.50                                               | 7.99                   | 8.67       | 18.46                                                | 3.62                   | 34,520          | 3,405                |
| 229              | 826 | GBR  | United Kingdom              | Northern Europe  | Europe    | 2011           | 995.93                                               | 7.94                   | 8.65       | 18.32                                                | 3.73                   | 35,260          | 3,414                |
| 215              | 834 | TZA  | United Republic of Tanzania | Eastern Africa   | Africa    | 1992           | 300.54                                               | 100.00                 | 23.63      | 11.48                                                | 34.17                  | 650             | 2,145                |
| 215              | 834 | TZA  | United Republic of Tanzania | Eastern Africa   | Africa    | 1993           | 290.03                                               | 100.00                 | 23.69      | 11.24                                                | 36.98                  | 650             | 2,100                |
| 215              | 834 | TZA  | United Republic of Tanzania | Eastern Africa   | Africa    | 1994           | 291.03                                               | 100.00                 | 23.80      | 11.22                                                | 37.24                  | 660             | 2,084                |
| 215              | 834 | TZA  | United Republic of Tanzania | Eastern Africa   | Africa    | 1995           | 288.35                                               | 100.00                 | 23.55      | 11.36                                                | 35.56                  | 680             | 2,030                |
| 215              | 834 | TZA  | United Republic of Tanzania | Eastern Africa   | Africa    | 1996           | 291.53                                               | 100.00                 | 24.52      | 11.18                                                | 38.06                  | 720             | 2,040                |
| 215              | 834 | TZA  | United Republic of Tanzania | Eastern Africa   | Africa    | 1997           | 289.98                                               | 100.00                 | 24.33      | 10.74                                                | 43.94                  | 730             | 2,003                |
| 215              | 834 | TZA  | United Republic of Tanzania | Eastern Africa   | Africa    | 1998           | 298.62                                               | 100.00                 | 24.59      | 11.34                                                | 36.04                  | 750             | 2,076                |
| 215              | 834 | TZA  | United Republic of Tanzania | Eastern Africa   | Africa    | 1999           | 296.44                                               | 100.00                 | 24.05      | 11.54                                                | 33.67                  | 780             | 2,059                |
| 215              | 834 | TZA  | United Republic of Tanzania | Eastern Africa   | Africa    | 2000           | 292.52                                               | 100.00                 | 24.41      | 11.03                                                | 38.88                  | 820             | 2,004                |
| 215              | 834 | TZA  | United Republic of Tanzania | Eastern Africa   | Africa    | 2001           | 307.86                                               | 100.00                 | 23.83      | 11.36                                                | 36.15                  | 860             | 2,035                |
| 215              | 834 | TZA  | United Republic of Tanzania | Eastern Africa   | Africa    | 2002           | 314.90                                               | 100.00                 | 23.49      | 11.53                                                | 34.01                  | 920             | 2,083                |
| 215              | 834 | TZA  | United Republic of Tanzania | Eastern Africa   | Africa    | 2003           | 321.28                                               | 100.00                 | 23.49      | 11.31                                                | 36.42                  | 970             | 2,035                |
| 215              | 834 | TZA  | United Republic of Tanzania | Eastern Africa   | Africa    | 2004           | 319.68                                               | 100.00                 | 23.30      | 11.31                                                | 36.26                  | 1,050           | 2,108                |
| 215              | 834 | TZA  | United Republic of Tanzania | Eastern Africa   | Africa    | 2005           | 326.14                                               | 99.99                  | 23.39      | 11.14                                                | 38.24                  | 1,120           | 2,139                |
| 215              | 834 | TZA  | United Republic of Tanzania | Eastern Africa   | Africa    | 2006           | 331.34                                               | 99.99                  | 23.55      | 11.31                                                | 36.47                  | 1,210           | 2,145                |
| 215              | 834 | TZA  | United Republic of Tanzania | Eastern Africa   | Africa    | 2007           | 333.14                                               | 99.98                  | 23.95      | 11.46                                                | 34.51                  | 1,290           | 2,216                |
| 215              | 834 | TZA  | United Republic of Tanzania | Eastern Africa   | Africa    | 2008           | 312.21                                               | 100.00                 | 23.99      | 11.26                                                | 36.64                  | 1,370           | 2,124                |
| 215              | 834 | TZA  | United Republic of Tanzania | Eastern Africa   | Africa    | 2009           | 328.56                                               | 99.99                  | 23.77      | 11.25                                                | 36.59                  | 1,420           | 2,125                |
| 215              | 834 | TZA  | United Republic of Tanzania | Eastern Africa   | Africa    | 2010           | 329.77                                               | 99.99                  | 24.39      | 10.64                                                | 44.50                  | 1,500           | 2,073                |
| 215              | 834 | TZA  | United Republic of Tanzania | Eastern Africa   | Africa    | 2011           | 347.52                                               | 99.95                  | 24.90      | 11.25                                                | 36.64                  | 1,580           | 2,167                |
| 231              | 840 | USA  | United States of America    | Northern America | Americas  | 1992           | 1,575.07                                             | 0.90                   | 7.83       | 20.48                                                | 2.22                   | 25,180          | 3,559                |
| 231              | 840 | USA  | United States of America    | Northern America | Americas  | 1993           | 1,576.86                                             | 0.90                   | 7.84       | 20.55                                                | 2.18                   | 26,000          | 3,605                |
| 231              | 840 | USA  | United States of America    | Northern America | Americas  | 1994           | 1,639.69                                             | 0.76                   | 7.92       | 20.95                                                | 2.00                   | 27,350          | 3,665                |
| 231              | 840 | USA  | United States of America    | Northern America | Americas  | 1995           | 1,597.11                                             | 0.85                   | 7.89       | 20.65                                                | 2.14                   | 28,550          | 3,580                |
| 231              | 840 | USA  | United States of America    | Northern America | Americas  | 1996           | 1,539.95                                             | 1.00                   | 7.88       | 20.74                                                | 2.10                   | 29,980          | 3,587                |
| 231              | 840 | USA  | United States of America    | Northern America | Americas  | 1997           | 1,565.84                                             | 0.93                   | 8.34       | 20.90                                                | 2.03                   | 31,620          | 3,648                |
| 231              | 840 | USA  | United States of America    | Northern America | Americas  | 1998           | 1,554.90                                             | 0.97                   | 8.26       | 20.89                                                | 2.04                   | 33,230          | 3,658                |
| 231              | 840 | USA  | United States of America    | Northern America | Americas  | 1999           | 1,539.52                                             | 1.01                   | 8.36       | 21.12                                                | 1.94                   | 34,850          | 3,673                |
| 231              | 840 | USA  | United States of America    | Northern America | Americas  | 2000           | 1,522.75                                             | 1.07                   | 8.23       | 20.96                                                | 2.02                   | 36,930          | 3,755                |
| 231              | 840 | USA  | United States of America    | Northern America | Americas  | 2001           | 1,533.47                                             | 1.04                   | 8.34       | 20.83                                                | 2.09                   | 37,860          | 3,709                |
| 231              | 840 | USA  | United States of America    | Northern America | Americas  | 2002           | 1,493.93                                             | 1.17                   | 8.29       | 20.86                                                | 2.07                   | 38,590          | 3,783                |
| 231              | 840 | USA  | United States of America    | Northern America | Americas  | 2003           | 1,498.12                                             | 1.16                   | 8.15       | 20.89                                                | 2.06                   | 39,960          | 3,780                |
| 231              | 840 | USA  | United States of America    | Northern America | Americas  | 2004           | 1,481.37                                             | 1.22                   | 8.29       | 21.15                                                | 1.94                   | 42,260          | 3,813                |
| 231              | 840 | USA  | United States of America    | Northern America | Americas  | 2005           | 1,368.38                                             | 1.75                   | 8.43       | 20.45                                                | 2.28                   | 44,740          | 3,833                |
| 231              | 840 | USA  | United States of America    | Northern America | Americas  | 2006           | 1,334.51                                             | 1.97                   | 8.12       | 20.35                                                | 2.32                   | 47,390          | 3,787                |
| 231              | 840 | USA  | United States of America    | Northern America | Americas  | 2007           | 1,303.13                                             | 2.20                   | 8.63       | 20.59                                                | 2.19                   | 48,420          | 3,769                |
| 231              | 840 | USA  | United States of America    | Northern America | Americas  | 2008           | 1,302.01                                             | 2.21                   | 8.78       | 20.24                                                | 2.38                   | 48,650          | 3,708                |
| 231              | 840 | USA  | United States of America    | Northern America | Americas  | 2009           | 1,231.48                                             | 2.89                   | 8.41       | 19.55                                                | 2.81                   | 47,240          | 3,652                |
| 231              | 840 | USA  | United States of America    | Northern America | Americas  | 2010           | 1,157.01                                             | 3.90                   | 9.02       | 19.43                                                | 2.89                   | 48,680          | 3,659                |
| 231              | 840 | USA  | United States of America    | Northern America | Americas  | 2011           | 1,133.11                                             | 4.32                   | 8.56       | 18.76                                                | 3.41                   | 50,860          | 3,639                |
| 234              | 858 | URY  | Uruguay                     | South America    | Americas  | 1992           | 793.88                                               | 23.03                  | 5.29       | 27.40                                                | 0.61                   | 7,030           | 2,775                |

| FAO country code | UNI | ISO3 | Country    | Region             | Continent | Reference year | Ca supply (mg capita <sup>-1</sup> d <sup>-1</sup> ) | Ca deficiency risk (%) | Phytate:Zn | Zn supply (mg capita <sup>-1</sup> d <sup>-1</sup> ) | Zn deficiency risk (%) | GNI-PPP (US \$) | Energy supply (kcal) |
|------------------|-----|------|------------|--------------------|-----------|----------------|------------------------------------------------------|------------------------|------------|------------------------------------------------------|------------------------|-----------------|----------------------|
| 234              | 858 | URY  | Uruguay    | South America      | Americas  | 1993           | 750.22                                               | 29.14                  | 5.04       | 27.31                                                | 0.62                   | 7,340           | 2,763                |
| 234              | 858 | URY  | Uruguay    | South America      | Americas  | 1994           | 866.06                                               | 15.58                  | 5.04       | 28.23                                                | 0.53                   | 7,970           | 2,806                |
| 234              | 858 | URY  | Uruguay    | South America      | Americas  | 1995           | 804.07                                               | 21.68                  | 5.24       | 26.31                                                | 0.72                   | 7,980           | 2,699                |
| 234              | 858 | URY  | Uruguay    | South America      | Americas  | 1996           | 934.65                                               | 10.87                  | 5.15       | 27.13                                                | 0.63                   | 8,540           | 2,788                |
| 234              | 858 | URY  | Uruguay    | South America      | Americas  | 1997           | 888.29                                               | 13.78                  | 5.46       | 26.03                                                | 0.75                   | 9,410           | 2,752                |
| 234              | 858 | URY  | Uruguay    | South America      | Americas  | 1998           | 861.53                                               | 15.86                  | 5.45       | 26.59                                                | 0.68                   | 9,880           | 2,800                |
| 234              | 858 | URY  | Uruguay    | South America      | Americas  | 1999           | 923.22                                               | 11.49                  | 5.11       | 27.75                                                | 0.57                   | 9,840           | 2,845                |
| 234              | 858 | URY  | Uruguay    | South America      | Americas  | 2000           | 952.83                                               | 9.90                   | 6.18       | 25.85                                                | 0.77                   | 9,820           | 2,878                |
| 234              | 858 | URY  | Uruguay    | South America      | Americas  | 2001           | 1,008.58                                             | 7.55                   | 6.60       | 24.48                                                | 0.98                   | 9,640           | 2,843                |
| 234              | 858 | URY  | Uruguay    | South America      | Americas  | 2002           | 865.15                                               | 15.64                  | 6.66       | 24.13                                                | 1.04                   | 9,110           | 2,828                |
| 234              | 858 | URY  | Uruguay    | South America      | Americas  | 2003           | 901.04                                               | 12.99                  | 7.67       | 21.13                                                | 1.92                   | 8,940           | 2,811                |
| 234              | 858 | URY  | Uruguay    | South America      | Americas  | 2004           | 859.38                                               | 16.22                  | 8.26       | 20.88                                                | 2.04                   | 9,630           | 2,802                |
| 234              | 858 | URY  | Uruguay    | South America      | Americas  | 2005           | 758.41                                               | 28.02                  | 7.88       | 22.24                                                | 1.52                   | 10,830          | 2,859                |
| 234              | 858 | URY  | Uruguay    | South America      | Americas  | 2006           | 770.49                                               | 26.29                  | 8.83       | 20.27                                                | 2.35                   | 11,680          | 2,859                |
| 234              | 858 | URY  | Uruguay    | South America      | Americas  | 2007           | 907.21                                               | 12.70                  | 8.40       | 20.88                                                | 2.04                   | 12,750          | 2,897                |
| 234              | 858 | URY  | Uruguay    | South America      | Americas  | 2008           | 758.42                                               | 28.13                  | 8.37       | 20.82                                                | 2.07                   | 13,780          | 2,881                |
| 234              | 858 | URY  | Uruguay    | South America      | Americas  | 2009           | 754.19                                               | 28.80                  | 8.97       | 19.30                                                | 2.97                   | 14,080          | 2,861                |
| 234              | 858 | URY  | Uruguay    | South America      | Americas  | 2010           | 774.07                                               | 25.87                  | 7.85       | 22.16                                                | 1.55                   | 15,400          | 2,955                |
| 234              | 858 | URY  | Uruguay    | South America      | Americas  | 2011           | 842.66                                               | 17.86                  | 8.08       | 21.65                                                | 1.72                   | 16,740          | 2,939                |
| 235              | 860 | UZB  | Uzbekistan | Central Asia       | Asia      | 1992           | 819.29                                               | 18.66                  | 8.36       | 21.28                                                | 1.92                   | 1,750           | 2,713                |
| 235              | 860 | UZB  | Uzbekistan | Central Asia       | Asia      | 1993           | 809.28                                               | 19.81                  | 8.47       | 21.16                                                | 1.98                   | 1,710           | 2,707                |
| 235              | 860 | UZB  | Uzbekistan | Central Asia       | Asia      | 1994           | 807.90                                               | 20.09                  | 7.83       | 22.25                                                | 1.58                   | 1,630           | 2,693                |
| 235              | 860 | UZB  | Uzbekistan | Central Asia       | Asia      | 1995           | 766.14                                               | 25.46                  | 8.41       | 21.54                                                | 1.85                   | 1,620           | 2,655                |
| 235              | 860 | UZB  | Uzbekistan | Central Asia       | Asia      | 1996           | 760.30                                               | 26.54                  | 8.04       | 20.97                                                | 2.09                   | 1,640           | 2,593                |
| 235              | 860 | UZB  | Uzbekistan | Central Asia       | Asia      | 1997           | 752.85                                               | 27.94                  | 8.00       | 20.77                                                | 2.20                   | 1,710           | 2,541                |
| 235              | 860 | UZB  | Uzbekistan | Central Asia       | Asia      | 1998           | 748.13                                               | 29.00                  | 7.80       | 19.68                                                | 2.89                   | 1,780           | 2,492                |
| 235              | 860 | UZB  | Uzbekistan | Central Asia       | Asia      | 1999           | 760.83                                               | 27.38                  | 8.41       | 18.75                                                | 3.69                   | 1,860           | 2,427                |
| 235              | 860 | UZB  | Uzbekistan | Central Asia       | Asia      | 2000           | 721.40                                               | 34.22                  | 7.78       | 18.10                                                | 4.42                   | 1,940           | 2,351                |
| 235              | 860 | UZB  | Uzbekistan | Central Asia       | Asia      | 2001           | 739.53                                               | 31.38                  | 8.15       | 18.21                                                | 4.31                   | 2,030           | 2,272                |
| 235              | 860 | UZB  | Uzbekistan | Central Asia       | Asia      | 2002           | 750.45                                               | 29.87                  | 8.15       | 18.76                                                | 3.77                   | 2,130           | 2,275                |
| 235              | 860 | UZB  | Uzbekistan | Central Asia       | Asia      | 2003           | 758.98                                               | 28.74                  | 8.17       | 19.81                                                | 2.92                   | 2,240           | 2,344                |
| 235              | 860 | UZB  | Uzbekistan | Central Asia       | Asia      | 2004           | 770.39                                               | 27.17                  | 8.24       | 20.20                                                | 2.67                   | 2,470           | 2,381                |
| 235              | 860 | UZB  | Uzbekistan | Central Asia       | Asia      | 2005           | 794.97                                               | 23.86                  | 8.01       | 20.74                                                | 2.36                   | 2,710           | 2,465                |
| 235              | 860 | UZB  | Uzbekistan | Central Asia       | Asia      | 2006           | 822.71                                               | 20.52                  | 7.95       | 21.08                                                | 2.20                   | 2,950           | 2,545                |
| 235              | 860 | UZB  | Uzbekistan | Central Asia       | Asia      | 2007           | 843.59                                               | 18.26                  | 7.83       | 20.31                                                | 2.61                   | 3,420           | 2,569                |
| 235              | 860 | UZB  | Uzbekistan | Central Asia       | Asia      | 2008           | 847.91                                               | 17.70                  | 7.88       | 21.44                                                | 2.00                   | 3,810           | 2,582                |
| 235              | 860 | UZB  | Uzbekistan | Central Asia       | Asia      | 2009           | 865.11                                               | 16.00                  | 7.80       | 21.82                                                | 1.82                   | 3,970           | 2,588                |
| 235              | 860 | UZB  | Uzbekistan | Central Asia       | Asia      | 2010           | 875.21                                               | 15.03                  | 7.65       | 22.24                                                | 1.65                   | 4,230           | 2,635                |
| 235              | 860 | UZB  | Uzbekistan | Central Asia       | Asia      | 2011           | 885.41                                               | 14.07                  | 7.39       | 23.01                                                | 1.40                   | 4,590           | 2,675                |
| 236              | 862 | VEN  | Venezuela  | South America      | Americas  | 1992           | 504.02                                               | 86.08                  | 12.47      | 12.80                                                | 21.93                  | 10,720          | 2,546                |
| 236              | 862 | VEN  | Venezuela  | South America      | Americas  | 1993           | 483.77                                               | 90.38                  | 12.12      | 11.97                                                | 29.19                  | 10,770          | 2,427                |
| 236              | 862 | VEN  | Venezuela  | South America      | Americas  | 1994           | 464.52                                               | 93.71                  | 12.70      | 11.80                                                | 30.94                  | 10,460          | 2,397                |
| 236              | 862 | VEN  | Venezuela  | South America      | Americas  | 1995           | 479.94                                               | 91.29                  | 13.54      | 11.80                                                | 31.06                  | 10,950          | 2,457                |
| 236              | 862 | VEN  | Venezuela  | South America      | Americas  | 1996           | 466.85                                               | 94.92                  | 13.37      | 11.54                                                | 34.00                  | 10,910          | 2,402                |
| 236              | 862 | VEN  | Venezuela  | South America      | Americas  | 1997           | 458.73                                               | 94.72                  | 12.34      | 11.49                                                | 34.62                  | 11,520          | 2,305                |
| 236              | 862 | VEN  | Venezuela  | South America      | Americas  | 1998           | 507.95                                               | 85.92                  | 12.03      | 11.99                                                | 29.23                  | 11,470          | 2,379                |
| 236              | 862 | VEN  | Venezuela  | South America      | Americas  | 1999           | 482.51                                               | 91.11                  | 12.39      | 11.82                                                | 31.02                  | 10,870          | 2,366                |
| 236              | 862 | VEN  | Venezuela  | South America      | Americas  | 2000           | 468.37                                               | 93.46                  | 12.45      | 12.35                                                | 26.92                  | 11,340          | 2,478                |
| 236              | 862 | VEN  | Venezuela  | South America      | Americas  | 2001           | 462.57                                               | 94.31                  | 12.22      | 12.72                                                | 22.88                  | 11,710          | 2,529                |
| 236              | 862 | VEN  | Venezuela  | South America      | Americas  | 2002           | 433.44                                               | 97.48                  | 11.79      | 11.31                                                | 36.78                  | 10,500          | 2,247                |
| 236              | 862 | VEN  | Venezuela  | South America      | Americas  | 2003           | 469.97                                               | 93.25                  | 13.08      | 12.64                                                | 23.44                  | 9,720           | 2,443                |
| 236              | 862 | VEN  | Venezuela  | South America      | Americas  | 2004           | 479.19                                               | 91.76                  | 13.00      | 12.30                                                | 26.24                  | 11,550          | 2,516                |
| 236              | 862 | VEN  | Venezuela  | South America      | Americas  | 2005           | 434.83                                               | 97.37                  | 12.78      | 12.51                                                | 24.42                  | 13,150          | 2,518                |
| 236              | 862 | VEN  | Venezuela  | South America      | Americas  | 2006           | 444.74                                               | 96.44                  | 12.76      | 12.58                                                | 23.83                  | 14,780          | 2,553                |
| 236              | 862 | VEN  | Venezuela  | South America      | Americas  | 2007           | 540.62                                               | 78.03                  | 12.39      | 14.19                                                | 13.84                  | 16,510          | 2,712                |
| 236              | 862 | VEN  | Venezuela  | South America      | Americas  | 2008           | 597.85                                               | 62.35                  | 11.86      | 15.57                                                | 8.89                   | 17,250          | 2,878                |
| 236              | 862 | VEN  | Venezuela  | South America      | Americas  | 2009           | 612.88                                               | 58.22                  | 12.35      | 15.62                                                | 8.72                   | 16,350          | 2,919                |
| 236              | 862 | VEN  | Venezuela  | South America      | Americas  | 2010           | 701.46                                               | 37.28                  | 12.54      | 15.13                                                | 10.13                  | 15,960          | 2,906                |
| 236              | 862 | VEN  | Venezuela  | South America      | Americas  | 2011           | 704.74                                               | 36.62                  | 12.09      | 15.19                                                | 9.93                   | 16,580          | 2,880                |
| 237              | 704 | VNM  | Viet Nam   | South-Eastern Asia | Asia      | 1992           | 200.55                                               | 100.00                 | 18.71      | 8.32                                                 | 82.88                  | 1,100           | 1,923                |
| 237              | 704 | VNM  | Viet Nam   | South-Eastern Asia | Asia      | 1993           | 210.84                                               | 100.00                 | 19.30      | 8.90                                                 | 73.40                  | 1,190           | 2,025                |
| 237              | 704 | VNM  | Viet Nam   | South-Eastern Asia | Asia      | 1994           | 216.26                                               | 100.00                 | 18.75      | 9.19                                                 | 68.57                  | 1,320           | 2,054                |
| 237              | 704 | VNM  | Viet Nam   | South-Eastern Asia | Asia      | 1995           | 230.79                                               | 100.00                 | 18.74      | 9.04                                                 | 71.26                  | 1,480           | 2,026                |
| 237              | 704 | VNM  | Viet Nam   | South-Eastern Asia | Asia      | 1996           | 228.35                                               | 100.00                 | 18.57      | 8.92                                                 | 72.83                  | 1,610           | 2,018                |
| 237              | 704 | VNM  | Viet Nam   | South-Eastern Asia | Asia      | 1997           | 244.20                                               | 100.00                 | 18.55      | 9.11                                                 | 69.91                  | 1,740           | 1,985                |
| 237              | 704 | VNM  | Viet Nam   | South-Eastern Asia | Asia      | 1998           | 249.97                                               | 100.00                 | 18.50      | 9.84                                                 | 57.88                  | 1,830           | 2,112                |
| 237              | 704 | VNM  | Viet Nam   | South-Eastern Asia | Asia      | 1999           | 266.16                                               | 100.00                 | 18.16      | 10.20                                                | 52.34                  | 1,930           | 2,199                |
| 237              | 704 | VNM  | Viet Nam   | South-Eastern Asia | Asia      | 2000           | 280.42                                               | 100.00                 | 17.97      | 9.97                                                 | 56.42                  | 2,070           | 2,238                |
| 237              | 704 | VNM  | Viet Nam   | South-Eastern Asia | Asia      | 2001           | 308.83                                               | 100.00                 | 17.77      | 10.69                                                | 46.61                  | 2,230           | 2,298                |
| 237              | 704 | VNM  | Viet Nam   | South-Eastern Asia | Asia      | 2002           | 311.78                                               | 100.00                 | 17.70      | 11.00                                                | 41.49                  | 2,370           | 2,359                |
| 237              | 704 | VNM  | Viet Nam   | South-Eastern Asia | Asia      | 2003           | 335.58                                               | 99.99                  | 18.31      | 11.34                                                | 37.13                  | 2,560           | 2,415                |
| 237              | 704 | VNM  | Viet Nam   | South-Eastern Asia | Asia      | 2004           | 354.01                                               | 99.97                  | 18.15      | 12.17                                                | 28.12                  | 2,780           | 2,477                |
| 237              | 704 | VNM  | Viet Nam   | South-Eastern Asia | Asia      | 2005           | 385.18                                               | 99.74                  | 18.06      | 12.49                                                | 25.15                  | 3,050           | 2,467                |
| 237              | 704 | VNM  | Viet Nam   | South-Eastern Asia | Asia      | 2006           | 398.86                                               | 99.46                  | 17.60      | 12.55                                                | 24.47                  | 3,310           | 2,482                |
| 237              | 704 | VNM  | Viet Nam   | South-Eastern Asia | Asia      | 2007           | 394.65                                               | 99.54                  | 17.86      | 13.11                                                | 20.98                  | 3,580           | 2,546                |
| 237              | 704 | VNM  | Viet Nam   | South-Eastern Asia | Asia      | 2008           | 407.37                                               | 99.15                  | 17.61      | 13.61                                                | 16.67                  | 3,810           | 2,613                |
| 237              | 704 | VNM  | Viet Nam   | South-Eastern Asia | Asia      | 2009           | 451.89                                               | 95.97                  | 16.95      | 13.98                                                | 14.76                  | 3,950           | 2,646                |
| 237              | 704 | VNM  | Viet Nam   | South-Eastern Asia | Asia      | 2010           | 489.34                                               | 90.26                  | 16.75      | 14.17                                                | 13.75                  | 4,230           | 2,670                |
| 237              | 704 | VNM  | Viet Nam   | South-Eastern Asia | Asia      | 2011           | 500.39                                               | 87.87                  | 16.78      | 14.49                                                | 12.21                  | 4,510           | 2,703                |



Dietary calcium and zinc deficiency risks are decreasing but remain prevalent

| FAO country code | UNI | ISO3 | Country  | Region         | Continent | Reference year | Ca supply (mg capita <sup>-1</sup> d <sup>-1</sup> ) | Ca deficiency risk (%) | Phytate:Zn | Zn supply (mg capita <sup>-1</sup> d <sup>-1</sup> ) | Zn deficiency risk (%) | GNI-PPP (US \$) | Energy supply (kcal) |
|------------------|-----|------|----------|----------------|-----------|----------------|------------------------------------------------------|------------------------|------------|------------------------------------------------------|------------------------|-----------------|----------------------|
| 249              | 887 | YEM  | Yemen    | Western Asia   | Asia      | 1992           | 257.46                                               | 100.00                 | 13.44      | 13.22                                                | 18.49                  | 2,380           | 2,108                |
| 249              | 887 | YEM  | Yemen    | Western Asia   | Asia      | 1993           | 256.06                                               | 100.00                 | 13.25      | 13.06                                                | 19.59                  | 2,420           | 2,092                |
| 249              | 887 | YEM  | Yemen    | Western Asia   | Asia      | 1994           | 244.78                                               | 100.00                 | 12.53      | 13.26                                                | 18.39                  | 2,510           | 2,051                |
| 249              | 887 | YEM  | Yemen    | Western Asia   | Asia      | 1995           | 251.54                                               | 100.00                 | 12.54      | 13.27                                                | 18.44                  | 2,530           | 2,043                |
| 249              | 887 | YEM  | Yemen    | Western Asia   | Asia      | 1996           | 253.13                                               | 100.00                 | 12.22      | 13.27                                                | 18.59                  | 2,480           | 2,034                |
| 249              | 887 | YEM  | Yemen    | Western Asia   | Asia      | 1997           | 260.12                                               | 100.00                 | 12.05      | 13.42                                                | 17.79                  | 2,570           | 2,051                |
| 249              | 887 | YEM  | Yemen    | Western Asia   | Asia      | 1998           | 266.17                                               | 100.00                 | 12.48      | 13.41                                                | 17.99                  | 2,770           | 2,066                |
| 249              | 887 | YEM  | Yemen    | Western Asia   | Asia      | 1999           | 274.33                                               | 100.00                 | 12.51      | 13.68                                                | 16.55                  | 2,730           | 2,082                |
| 249              | 887 | YEM  | Yemen    | Western Asia   | Asia      | 2000           | 275.11                                               | 100.00                 | 12.92      | 13.43                                                | 18.07                  | 2,920           | 2,090                |
| 249              | 887 | YEM  | Yemen    | Western Asia   | Asia      | 2001           | 265.85                                               | 100.00                 | 12.88      | 13.27                                                | 19.34                  | 3,040           | 2,067                |
| 249              | 887 | YEM  | Yemen    | Western Asia   | Asia      | 2002           | 281.75                                               | 100.00                 | 13.19      | 13.44                                                | 18.31                  | 3,100           | 2,080                |
| 249              | 887 | YEM  | Yemen    | Western Asia   | Asia      | 2003           | 278.42                                               | 100.00                 | 12.77      | 12.96                                                | 21.58                  | 3,150           | 2,065                |
| 249              | 887 | YEM  | Yemen    | Western Asia   | Asia      | 2004           | 298.88                                               | 100.00                 | 12.25      | 12.61                                                | 24.39                  | 3,240           | 2,075                |
| 249              | 887 | YEM  | Yemen    | Western Asia   | Asia      | 2005           | 318.05                                               | 100.00                 | 12.79      | 12.83                                                | 22.71                  | 3,440           | 2,093                |
| 249              | 887 | YEM  | Yemen    | Western Asia   | Asia      | 2006           | 312.77                                               | 100.00                 | 12.84      | 12.83                                                | 22.77                  | 3,690           | 2,116                |
| 249              | 887 | YEM  | Yemen    | Western Asia   | Asia      | 2007           | 328.23                                               | 99.99                  | 12.99      | 13.26                                                | 19.69                  | 3,830           | 2,158                |
| 249              | 887 | YEM  | Yemen    | Western Asia   | Asia      | 2008           | 308.87                                               | 100.00                 | 12.87      | 13.32                                                | 19.35                  | 3,910           | 2,137                |
| 249              | 887 | YEM  | Yemen    | Western Asia   | Asia      | 2009           | 317.22                                               | 100.00                 | 12.73      | 13.73                                                | 16.87                  | 4,100           | 2,156                |
| 249              | 887 | YEM  | Yemen    | Western Asia   | Asia      | 2010           | 299.14                                               | 100.00                 | 12.73      | 14.04                                                | 15.24                  | 4,300           | 2,187                |
| 249              | 887 | YEM  | Yemen    | Western Asia   | Asia      | 2011           | 298.38                                               | 100.00                 | 12.33      | 13.81                                                | 16.50                  | 3,790           | 2,185                |
| 251              | 894 | ZMB  | Zambia   | Eastern Africa | Africa    | 1992           | 183.70                                               | 100.00                 | 22.50      | 12.44                                                | 25.22                  | 1,470           | 2,002                |
| 251              | 894 | ZMB  | Zambia   | Eastern Africa | Africa    | 1993           | 191.97                                               | 100.00                 | 22.54      | 12.19                                                | 27.37                  | 1,600           | 1,988                |
| 251              | 894 | ZMB  | Zambia   | Eastern Africa | Africa    | 1994           | 187.14                                               | 100.00                 | 22.61      | 12.59                                                | 23.92                  | 1,470           | 2,031                |
| 251              | 894 | ZMB  | Zambia   | Eastern Africa | Africa    | 1995           | 183.81                                               | 100.00                 | 23.20      | 12.87                                                | 21.65                  | 1,430           | 2,060                |
| 251              | 894 | ZMB  | Zambia   | Eastern Africa | Africa    | 1996           | 173.67                                               | 100.00                 | 23.29      | 12.52                                                | 24.67                  | 1,520           | 2,042                |
| 251              | 894 | ZMB  | Zambia   | Eastern Africa | Africa    | 1997           | 178.87                                               | 100.00                 | 22.29      | 12.22                                                | 27.19                  | 1,560           | 1,978                |
| 251              | 894 | ZMB  | Zambia   | Eastern Africa | Africa    | 1998           | 160.40                                               | 100.00                 | 22.59      | 12.04                                                | 28.63                  | 1,500           | 1,925                |
| 251              | 894 | ZMB  | Zambia   | Eastern Africa | Africa    | 1999           | 174.74                                               | 100.00                 | 22.16      | 11.95                                                | 29.38                  | 1,540           | 1,965                |
| 251              | 894 | ZMB  | Zambia   | Eastern Africa | Africa    | 2000           | 174.18                                               | 100.00                 | 22.88      | 11.23                                                | 37.24                  | 1,590           | 1,879                |
| 251              | 894 | ZMB  | Zambia   | Eastern Africa | Africa    | 2001           | 165.15                                               | 100.00                 | 22.25      | 11.22                                                | 37.61                  | 1,670           | 1,868                |
| 251              | 894 | ZMB  | Zambia   | Eastern Africa | Africa    | 2002           | 168.47                                               | 100.00                 | 22.25      | 11.12                                                | 38.66                  | 1,720           | 1,854                |
| 251              | 894 | ZMB  | Zambia   | Eastern Africa | Africa    | 2003           | 183.38                                               | 100.00                 | 22.16      | 11.46                                                | 34.31                  | 1,810           | 1,905                |
| 251              | 894 | ZMB  | Zambia   | Eastern Africa | Africa    | 2004           | 178.32                                               | 100.00                 | 22.21      | 11.01                                                | 39.72                  | 1,830           | 1,872                |
| 251              | 894 | ZMB  | Zambia   | Eastern Africa | Africa    | 2005           | 201.91                                               | 100.00                 | 22.84      | 11.34                                                | 35.51                  | 1,910           | 1,880                |
| 251              | 894 | ZMB  | Zambia   | Eastern Africa | Africa    | 2006           | 187.66                                               | 100.00                 | 22.67      | 10.98                                                | 40.39                  | 1,990           | 1,846                |
| 251              | 894 | ZMB  | Zambia   | Eastern Africa | Africa    | 2007           | 181.56                                               | 100.00                 | 21.97      | 10.78                                                | 43.07                  | 2,050           | 1,785                |
| 251              | 894 | ZMB  | Zambia   | Eastern Africa | Africa    | 2008           | 199.85                                               | 100.00                 | 22.74      | 10.85                                                | 42.06                  | 2,250           | 1,813                |
| 251              | 894 | ZMB  | Zambia   | Eastern Africa | Africa    | 2009           | 200.54                                               | 100.00                 | 23.18      | 11.27                                                | 36.62                  | 2,490           | 1,887                |
| 251              | 894 | ZMB  | Zambia   | Eastern Africa | Africa    | 2010           | 219.27                                               | 100.00                 | 23.68      | 11.50                                                | 33.82                  | 2,500           | 1,910                |
| 251              | 894 | ZMB  | Zambia   | Eastern Africa | Africa    | 2011           | 226.09                                               | 100.00                 | 23.69      | 11.80                                                | 31.06                  | 2,710           | 1,937                |
| 181              | 716 | ZWE  | Zimbabwe | Eastern Africa | Africa    | 1992           | 228.63                                               | 100.00                 | 22.52      | 12.02                                                | 28.97                  | 1,260           | 1,952                |
| 181              | 716 | ZWE  | Zimbabwe | Eastern Africa | Africa    | 1993           | 206.75                                               | 100.00                 | 24.04      | 11.41                                                | 35.75                  | 1,290           | 1,940                |
| 181              | 716 | ZWE  | Zimbabwe | Eastern Africa | Africa    | 1994           | 183.32                                               | 100.00                 | 23.66      | 11.16                                                | 38.01                  | 1,400           | 1,927                |
| 181              | 716 | ZWE  | Zimbabwe | Eastern Africa | Africa    | 1995           | 176.82                                               | 100.00                 | 23.55      | 11.13                                                | 39.50                  | 1,400           | 1,942                |
| 181              | 716 | ZWE  | Zimbabwe | Eastern Africa | Africa    | 1996           | 201.22                                               | 100.00                 | 23.54      | 11.30                                                | 37.51                  | 1,560           | 1,979                |
| 181              | 716 | ZWE  | Zimbabwe | Eastern Africa | Africa    | 1997           | 210.35                                               | 100.00                 | 23.31      | 11.15                                                | 39.47                  | 1,590           | 2,006                |
| 181              | 716 | ZWE  | Zimbabwe | Eastern Africa | Africa    | 1998           | 239.88                                               | 100.00                 | 23.49      | 11.08                                                | 40.51                  | 1,600           | 2,010                |
| 181              | 716 | ZWE  | Zimbabwe | Eastern Africa | Africa    | 1999           | 213.25                                               | 100.00                 | 23.10      | 11.16                                                | 39.66                  | 1,610           | 1,993                |
| 181              | 716 | ZWE  | Zimbabwe | Eastern Africa | Africa    | 2000           | 225.61                                               | 100.00                 | 22.51      | 11.14                                                | 39.93                  | 1,570           | 1,989                |
| 181              | 716 | ZWE  | Zimbabwe | Eastern Africa | Africa    | 2001           | 237.25                                               | 100.00                 | 21.94      | 11.40                                                | 36.78                  | 1,630           | 2,026                |
| 181              | 716 | ZWE  | Zimbabwe | Eastern Africa | Africa    | 2002           | 223.10                                               | 100.00                 | 22.66      | 11.24                                                | 38.76                  | 1,510           | 2,037                |
| 181              | 716 | ZWE  | Zimbabwe | Eastern Africa | Africa    | 2003           | 228.70                                               | 100.00                 | 22.28      | 11.32                                                | 37.77                  | 1,280           | 2,013                |
| 181              | 716 | ZWE  | Zimbabwe | Eastern Africa | Africa    | 2004           | 226.98                                               | 100.00                 | 21.94      | 11.68                                                | 33.46                  | 1,230           | 2,050                |
| 181              | 716 | ZWE  | Zimbabwe | Eastern Africa | Africa    | 2005           | 220.60                                               | 100.00                 | 21.80      | 11.73                                                | 32.91                  | 1,190           | 2,042                |
| 181              | 716 | ZWE  | Zimbabwe | Eastern Africa | Africa    | 2006           | 234.64                                               | 100.00                 | 21.43      | 12.22                                                | 27.94                  | 1,170           | 2,122                |
| 181              | 716 | ZWE  | Zimbabwe | Eastern Africa | Africa    | 2007           | 233.89                                               | 100.00                 | 21.11      | 12.32                                                | 26.91                  | 1,150           | 2,114                |
| 181              | 716 | ZWE  | Zimbabwe | Eastern Africa | Africa    | 2008           | 216.48                                               | 100.00                 | 20.68      | 11.87                                                | 31.10                  | 930             | 2,089                |
| 181              | 716 | ZWE  | Zimbabwe | Eastern Africa | Africa    | 2009           | 233.88                                               | 100.00                 | 20.51      | 12.41                                                | 25.85                  | 1,020           | 2,154                |
| 181              | 716 | ZWE  | Zimbabwe | Eastern Africa | Africa    | 2010           | 240.91                                               | 100.00                 | 20.63      | 12.20                                                | 27.55                  | 1,160           | 2,171                |
| 181              | 716 | ZWE  | Zimbabwe | Eastern Africa | Africa    | 2011           | 246.74                                               | 100.00                 | 20.48      | 12.34                                                | 26.29                  | 1,260           | 2,210                |

**Dietary calcium and zinc deficiency risks are decreasing but remain prevalent**

Diriba B. Kumssa<sup>1,2,3</sup>, Edward J. M. Joy<sup>1,2</sup>, E. Louise Ander<sup>2</sup>, Michael J. Wales<sup>2</sup>, Scot D. Young<sup>1</sup>, Sue Walker<sup>3</sup> & Marrin R. Broadley<sup>1</sup>

<sup>1</sup>School of Biosciences, University of Nottingham, Sutton Bonington Campus, Loughborough, LE12 5RD, UK; <sup>2</sup>Centre for Environmental Geochemistry, British Geological Survey, Keyworth, Nottingham, NG12 5GG, UK; <sup>3</sup>Crops For the Future, The University of Nottingham Malaysia Campus, Jalan Broga, 43500 Semenyih, Selangor Darul Ehsan, Malaysia.

Correspondence and requests for materials should be addressed to M.R.B. (marrin.broadley@nottingham.ac.uk)

**Supplementary Table S11 : Estimated Ca and Zn deficiency risks in 1992 and 2011; target Ca and Zn deficiency risks in 2011, consistent with MDG1 to have hunger in the period 1990-2015; and national MDG1 Ca and Zn deficiency risk reduction target status (Yes/No).**

| FAO country code | UNI | ISO3                   | Country                               | Region                    | Continent | Ca deficiency risk 1992 (%) | Zn deficiency risk 1992 (%) | Ca deficiency risk 2011 (%) | Zn deficiency risk 2011 (%) | Expected Ca Deficiency Risk in 2011 | Expected Zn deficiency risk in 2011 (%) | MDG1 Ca deficiency risk reduction on | MDG1 Zn deficiency risk reduction on |
|------------------|-----|------------------------|---------------------------------------|---------------------------|-----------|-----------------------------|-----------------------------|-----------------------------|-----------------------------|-------------------------------------|-----------------------------------------|--------------------------------------|--------------------------------------|
| Z                | 4   | AFU                    | Afghanistan                           | Southern Asia             | Asia      | 99.33                       | 10.61                       | 99.31                       | 5.98                        | 59.96                               | 6.36                                    | NO                                   | YES                                  |
| 1                | 4   | AFU                    | Afghanistan                           | Southern Asia             | Asia      | 99.33                       | 10.61                       | 99.31                       | 5.98                        | 59.96                               | 6.36                                    | NO                                   | YES                                  |
| 4                | 12  | DZA                    | Algeria                               | Northern Africa           | Africa    | 7.03                        | 4.06                        | 12.96                       | 2.20                        | 43.82                               | 2.44                                    | YES                                  | YES                                  |
| 24               | AFU | Angola                 | Middle Africa                         | Africa                    | Africa    | 94.66                       | 99.75                       | 36.58                       | 60.00                       | 60.00                               | 66.79                                   | NO                                   | YES                                  |
| 3                | 32  | ARG                    | Argentina                             | South America             | Americas  | 18.18                       | 0.64                        | 18.27                       | 0.68                        | 10.91                               | 0.38                                    | NO                                   | NO                                   |
| 31               | AFU | Armenia                | Western Asia                          | Asia                      | Asia      | 82.18                       | 6.12                        | 83.9                        | 2.94                        | 26.30                               | 3.07                                    | NO                                   | YES                                  |
| 36               | AUS | Australia              | Australia and New Zealand             | Oceania                   | Oceania   | 11.31                       | 9.90                        | 2.29                        | 6.79                        | 6.79                                | 1.57                                    | NO                                   | NO                                   |
| 11               | 40  | AUT                    | Austria                               | Western Europe            | Europe    | 6.71                        | 4.19                        | 12.32                       | 3.30                        | 5.23                                | 2.21                                    | NO                                   | NO                                   |
| 31               | AZE | Azerbaijan             | Western Asia                          | Asia                      | Asia      | 75.23                       | 3.73                        | 16.26                       | 1.28                        | 45.14                               | 2.24                                    | YES                                  | YES                                  |
| 18               | BDU | Bangladesh             | Southern Asia                         | Asia                      | Asia      | 100.00                      | 100.00                      | 100.00                      | 48.43                       | 60.00                               | 41.43                                   | NO                                   | YES                                  |
| 57               | 112 | BLK                    | Belarus                               | Eastern Europe            | Europe    | 26.05                       | 1.22                        | 33.27                       | 3.06                        | 15.83                               | 0.73                                    | NO                                   | NO                                   |
| 255              | 56  | BEL                    | Belgium                               | Western Europe            | Europe    | 10.78                       | 4.38                        | 7.60                        | 3.57                        | 6.47                                | 2.63                                    | NO                                   | NO                                   |
| 204              | 204 | BEN                    | Benin                                 | Western Africa            | Africa    | 100.00                      | 48.99                       | 100.00                      | 36.46                       | 60.00                               | 29.40                                   | NO                                   | NO                                   |
| 18               | 301 | BOL                    | Bolivia                               | South America             | Americas  | 19.91                       | 1.91                        | 19.92                       | 1.92                        | 19.91                               | 1.91                                    | NO                                   | NO                                   |
| 70               | BIH | Bosnia and Herzegovina | Southern Europe                       | Europe                    | Europe    | 98.87                       | 6.26                        | 6.80                        | 2.85                        | 29.32                               | 3.67                                    | YES                                  | YES                                  |
| 20               | 72  | BWA                    | Botswana                              | South America             | Africa    | 61.23                       | 2.163                       | 62.50                       | 34.88                       | 36.74                               | 1.298                                   | NO                                   | NO                                   |
| 16               | 76  | BRA                    | Brazil                                | South America             | Americas  | 67.36                       | 12.43                       | 17.88                       | 3.07                        | 40.77                               | 7.46                                    | YES                                  | YES                                  |
| 110              | 110 | BUR                    | Burkina Faso                          | Eastern Europe            | Europe    | 20.84                       | 2.084                       | 20.84                       | 2.084                       | 12.32                               | 1.33                                    | NO                                   | NO                                   |
| 234              | 854 | BFA                    | Burkina Faso                          | Western Africa            | Africa    | 100.00                      | 17.74                       | 99.99                       | 9.46                        | 60.00                               | 10.64                                   | NO                                   | YES                                  |
| 116              | 116 | BTM                    | Cambridge                             | South-Eastern Asia        | Asia      | 100.00                      | 69.70                       | 100.00                      | 41.76                       | 60.00                               | 41.82                                   | NO                                   | YES                                  |
| 120              | 120 | CMR                    | Cameroon                              | Western Africa            | Africa    | 100.00                      | 53.14                       | 96.86                       | 26.38                       | 60.00                               | 31.88                                   | NO                                   | YES                                  |
| 124              | 124 | CAN                    | Canada                                | Northern America          | Americas  | 4.38                        | 4.38                        | 4.38                        | 4.38                        | 60.00                               | 4.38                                    | NO                                   | YES                                  |
| 140              | 140 | CAF                    | Central African Republic              | Middle Africa             | Africa    | 99.95                       | 71.35                       | 100.00                      | 38.31                       | 59.97                               | 42.81                                   | NO                                   | YES                                  |
| 39               | 148 | CHD                    | Chad                                  | Western Africa            | Africa    | 100.00                      | 39.42                       | 99.99                       | 24.26                       | 60.00                               | 23.65                                   | NO                                   | YES                                  |
| 152              | 152 | CHL                    | Chile                                 | South America             | Americas  | 52.45                       | 3.94                        | 60.67                       | 2.81                        | 31.47                               | 2.36                                    | NO                                   | NO                                   |
| 148              | 148 | CHN                    | China                                 | Eastern Asia              | Asia      | 138.77                      | 13.877                      | 138.77                      | 13.877                      | 39.28                               | 3.928                                   | NO                                   | YES                                  |
| 170              | 170 | COL                    | Colombia                              | South America             | Americas  | 77.78                       | 24.66                       | 60.76                       | 19.09                       | 46.67                               | 14.79                                   | NO                                   | NO                                   |
| 178              | 178 | COG                    | Congo                                 | Middle Africa             | Africa    | 100.00                      | 86.12                       | 100.00                      | 82.74                       | 60.00                               | 51.67                                   | NO                                   | NO                                   |
| 188              | 188 | CRJ                    | Croatia                               | South America             | Americas  | 25.89                       | 27.54                       | 25.89                       | 25.89                       | 15.41                               | 15.41                                   | NO                                   | NO                                   |
| 384              | 384 | CVY                    | Cape Verde                            | Western Africa            | Africa    | 100.00                      | 100.00                      | 100.00                      | 55.89                       | 60.00                               | 46.89                                   | NO                                   | YES                                  |
| 191              | 191 | HRV                    | Croatia                               | Southern Europe           | Europe    | 33.04                       | 21.34                       | 10.60                       | 6.12                        | 19.82                               | 1.982                                   | YES                                  | YES                                  |
| 192              | 192 | CUB                    | Cuba                                  | Caribbean                 | Americas  | 97.68                       | 43.65                       | 30.31                       | 9.06                        | 58.61                               | 26.19                                   | YES                                  | YES                                  |
| 116              | 116 | PRK                    | Democratic People's Republic of Korea | Eastern Asia              | Asia      | 100.00                      | 17.39                       | 99.46                       | 35.01                       | 60.00                               | 10.74                                   | NO                                   | YES                                  |
| 208              | 208 | DNK                    | Denmark                               | Northern Europe           | Europe    | 21.65                       | 4.165                       | 21.65                       | 4.165                       | 12.39                               | 2.478                                   | YES                                  | YES                                  |
| 214              | 214 | DOM                    | Dominican Republic                    | Caribbean                 | Americas  | 99.99                       | 77.31                       | 98.00                       | 41.27                       | 60.00                               | 46.38                                   | NO                                   | YES                                  |
| 218              | 218 | ECU                    | Ecuador                               | South America             | Americas  | 92.35                       | 54.31                       | 21.70                       | 17.86                       | 55.41                               | 32.59                                   | YES                                  | YES                                  |
| 286              | 286 | EGY                    | Egypt                                 | Northern Africa           | Africa    | 77.38                       | 23.88                       | 77.38                       | 23.88                       | 60.00                               | 23.88                                   | NO                                   | YES                                  |
| 222              | 222 | SLV                    | El Salvador                           | Central America           | Americas  | 89.81                       | 19.15                       | 62.71                       | 16.77                       | 53.58                               | 11.39                                   | NO                                   | NO                                   |
| 233              | 233 | EST                    | Estonia                               | Northern Europe           | Europe    | 3.64                        | 2.79                        | 6.78                        | 3.65                        | 2.18                                | 1.68                                    | NO                                   | NO                                   |
| 238              | 238 | ETH                    | Ethiopia                              | Western Africa            | Africa    | 100.00                      | 62.09                       | 99.88                       | 19.05                       | 60.00                               | 31.25                                   | NO                                   | YES                                  |
| 166              | 166 | FIN                    | Finland                               | Western Europe            | Europe    | 6.32                        | 4.96                        | 6.32                        | 2.75                        | 37.9                                | 2.75                                    | NO                                   | NO                                   |
| 250              | 250 | FRA                    | France                                | Western Europe            | Europe    | 57.6                        | 1.94                        | 7.95                        | 1.83                        | 22.47                               | 1.10                                    | NO                                   | NO                                   |
| 73               | 268 | GEO                    | Georgia                               | Western Asia              | Asia      | 95.19                       | 9.74                        | 30.28                       | 3.51                        | 57.11                               | 5.24                                    | YES                                  | YES                                  |
| 276              | 276 | DEU                    | Germany                               | Western Europe            | Europe    | 67.9                        | 6.43                        | 62.4                        | 4.12                        | 5.24                                | 3.64                                    | NO                                   | NO                                   |
| 288              | 288 | GRC                    | Greece                                | Eastern Europe            | Europe    | 99.89                       | 69.89                       | 99.89                       | 69.89                       | 60.00                               | 60.00                                   | NO                                   | NO                                   |
| 300              | 300 | GRC                    | Greece                                | Southern Europe           | Europe    | 2.55                        | 1.55                        | 17.6                        | 1.53                        | 1.53                                | 0.21                                    | NO                                   | NO                                   |
| 320              | 320 | GIM                    | Guatemala                             | Central America           | Americas  | 99.89                       | 19.34                       | 86.32                       | 15.84                       | 59.93                               | 11.60                                   | NO                                   | NO                                   |
| 324              | 324 | GIN                    | Guinea                                | Western Africa            | Africa    | 99.98                       | 76.54                       | 100.00                      | 64.06                       | 59.99                               | 45.93                                   | NO                                   | NO                                   |
| 175              | 175 | GNB                    | Guinea-Bissau                         | Western Africa            | Africa    | 100.00                      | 10.91                       | 100.00                      | 60.00                       | 60.00                               | 31.77                                   | NO                                   | NO                                   |
| 332              | 332 | HTI                    | Haiti                                 | Caribbean                 | Americas  | 99.80                       | 78.30                       | 100.00                      | 70.03                       | 60.00                               | 46.38                                   | NO                                   | NO                                   |
| 340              | 340 | HND                    | Honduras                              | Central America           | Americas  | 96.18                       | 21.29                       | 65.97                       | 16.19                       | 57.71                               | 12.77                                   | NO                                   | NO                                   |
| 348              | 348 | HUN                    | Hungary                               | Eastern Europe            | Europe    | 21.72                       | 6.85                        | 24.24                       | 15.71                       | 13.03                               | 4.11                                    | NO                                   | NO                                   |
| 356              | 356 | IDN                    | Indonesia                             | Southern Asia             | Asia      | 89.23                       | 29.23                       | 69.23                       | 17.23                       | 60.00                               | 17.23                                   | NO                                   | NO                                   |
| 101              | 360 | IDN                    | Indonesia                             | South-Eastern Asia        | Asia      | 100.00                      | 39.45                       | 100.00                      | 30.77                       | 60.00                               | 29.67                                   | NO                                   | NO                                   |
| 364              | 364 | IRN                    | Iran                                  | Southern Asia             | Asia      | 59.11                       | 2.76                        | 30.30                       | 2.63                        | 35.47                               | 1.66                                    | NO                                   | NO                                   |
| 368              | 368 | IRQ                    | Iraq                                  | Western Asia              | Asia      | 99.18                       | 15.20                       | 99.70                       | 10.62                       | 59.51                               | 9.30                                    | NO                                   | NO                                   |
| 104              | 372 | ISL                    | Iceland                               | Northern Europe           | Europe    | 4.26                        | 4.26                        | 4.26                        | 4.26                        | 2.66                                | 1.66                                    | NO                                   | NO                                   |
| 376              | 376 | ISR                    | Israel                                | Western Asia              | Asia      | 3.05                        | 1.74                        | 3.05                        | 1.83                        | 1.83                                | 1.04                                    | NO                                   | YES                                  |
| 380              | 380 | ITA                    | Italy                                 | Southern Europe           | Europe    | 11.2                        | 6.41                        | 1.28                        | 4.19                        | 0.67                                | 0.67                                    | NO                                   | NO                                   |
| 109              | 388 | JAM                    | Jamaica                               | Caribbean                 | Americas  | 53.66                       | 26.04                       | 48.00                       | 20.38                       | 32.19                               | 15.63                                   | NO                                   | NO                                   |
| 392              | 392 | JPN                    | Japan                                 | Eastern Asia              | Asia      | 69.1                        | 10.91                       | 69.1                        | 10.91                       | 23.9                                | 11.4                                    | NO                                   | NO                                   |
| 112              | 400 | JOR                    | Jordan                                | Western Asia              | Asia      | 49.92                       | 7.94                        | 47.47                       | 4.13                        | 29.95                               | 4.76                                    | NO                                   | YES                                  |
| 398              | 398 | KAZ                    | Kazakhstan                            | Central Asia              | Asia      | 35.55                       | 1.77                        | 1.63                        | 1.91                        | 21.33                               | 1.06                                    | YES                                  | NO                                   |
| 114              | 404 | KEN                    | Kenya                                 | Eastern Africa            | Africa    | 87.17                       | 28.32                       | 67.23                       | 14.80                       | 52.30                               | 16.39                                   | NO                                   | YES                                  |
| 118              | 408 | KHM                    | Khmer                                 | South-Eastern Asia        | Asia      | 77.46                       | 17.46                       | 69.46                       | 17.46                       | 60.00                               | 16.39                                   | NO                                   | YES                                  |
| 113              | 417 | KGZ                    | Kyrgyzstan                            | Central Asia              | Asia      | 22.05                       | 1.82                        | 2.14                        | 5.83                        | 13.23                               | 0.97                                    | YES                                  | NO                                   |
| 110              | 418 | LAO                    | Lao People's Democratic Republic      | South-Eastern Asia        | Asia      | 100.00                      | 79.82                       | 98.61                       | 42.04                       | 60.00                               | 47.89                                   | NO                                   | YES                                  |
| 128              | 428 | LVA                    | Latvia                                | Northern Europe           | Europe    | 6.71                        | 11.3                        | 14.29                       | 5.80                        | 5.23                                | 0.68                                    | NO                                   | NO                                   |
| 124              | 432 | LES                    | Lesotho                               | Western Africa            | Africa    | 100.00                      | 22.22                       | 100.00                      | 22.22                       | 60.00                               | 22.22                                   | NO                                   | NO                                   |
| 122              | 426 | LSO                    | Lesotho                               | Southern Africa           | Africa    | 100.00                      | 5.84                        | 100.00                      | 3.93                        | 60.00                               | 3.38                                    | NO                                   | NO                                   |
| 123              | 430 | LEB                    | Liberia                               | Western Africa            | Africa    | 100.00                      | 98.47                       | 100.00                      | 96.42                       | 60.00                               | 57.88                                   | NO                                   | NO                                   |
| 124              | 434 | LYB                    | Libya                                 | Northern Africa           | Africa    | 46.95                       | 3.23                        | 24.08                       | 3.42                        | 28.17                               | 1.94                                    | YES                                  | NO                                   |
| 126              | 436 | LIT                    | Lithuania                             | Northern Europe           | Europe    | 42.86                       | 13.86                       | 42.86                       | 13.86                       | 25.24                               | 10.26                                   | NO                                   | NO                                   |
| 129              | 450 | MUG                    | Madagascar                            | Eastern Africa            | Africa    | 99.99                       | 59.54                       | 100.00                      | 66.52                       | 59.99                               | 35.13                                   | NO                                   | NO                                   |
| 130              | 454 | MWI                    | Malawi                                | Western Africa            | Africa    | 100.00                      | 35.41                       | 100.00                      | 14.42                       | 60.00                               | 21.24                                   | NO                                   | YES                                  |
| 158              | 458 | MYS                    | Malaysia                              | South-Eastern Asia        | Asia      | 100.00                      | 29.26                       | 98.68                       | 17.10                       | 60.00                               | 17.73                                   | NO                                   | YES                                  |
| 454              | 466 | MDA                    | Moldova                               | Eastern Europe            | Europe    | 99.84                       | 21.84                       | 99.84                       | 21.84                       | 39.76                               | 11.4                                    | NO                                   | YES                                  |
| 136              | 478 | MRT                    | Mauritania                            | Western Africa            | Africa    | 44.37                       | 11.13                       | 40.14                       | 9.35                        | 26.62                               | 6.88                                    | NO                                   | NO                                   |
| 140              | 480 | MUS                    | Mauritius                             | Africa                    | Africa    | 58.74                       | 15.28                       | 63.24                       | 6.20                        | 35.24                               | 9.35                                    | NO                                   | YES                                  |
| 138              | 484 | MEX                    | Mexico                                | Central America           | Americas  | 66.53                       | 3.20                        | 54.77                       | 4.72                        | 39.92                               | 3.12                                    | NO                                   | NO                                   |
| 141              | 486 | MNG                    | Mongolia                              | Eastern Asia              | Asia      | 99.89                       | 15.29                       | 99.87                       | 11.23                       | 35.26                               | 11.4                                    | NO                                   | YES                                  |
| 143              | 504 | MAR                    | Morocco                               | Western Africa            | Africa    | 96.29                       | 5.22                        | 61.27                       | 1.66                        | 58.07                               | 1.93                                    | NO                                   | YES                                  |
| 144              | 508 | MOZ                    | Mozambique                            | Eastern Africa            | Africa    | 100.00                      | 95.72                       | 100.00                      | 91.56                       | 60.00                               | 57.43                                   | NO                                   | NO                                   |
| 28               | 104 | MMR                    | Myanmar                               | South-Eastern Asia        | Asia      | 100.00                      | 98.27                       | 99.36                       | 28.70                       | 60.00                               | 58.36                                   | NO                                   | YES                                  |
| 147              | 104 | MMR                    | Myanmar                               | South-Eastern Asia        | Asia      | 100.00                      | 98.27                       | 99.36                       | 28.70                       | 60.00                               | 58.36                                   | NO                                   | YES                                  |
| 149              | 149 | NPL                    | Nepal                                 | Southern Asia             | Asia      | 98.82                       | 22.27                       | 52.83                       | 12.07                       | 59.29                               | 13.36                                   | YES                                  | YES                                  |
| 150              | 528 | NLD                    | Netherlands                           | Western Europe            | Europe    | 7.10                        | 4.26                        | 3.81                        | 4.61                        | 4.26                                | 2.55                                    | NO                                   | NO                                   |
| 158              | 554 | NZL                    | New Zealand                           | Australia and New Zealand | Oceania   | 16.70                       | 2.91                        | 19.53                       | 2.15                        | 10.02                               | 1.75                                    | NO                                   | NO                                   |
| 157              | 562 | NIC                    | Nicaragua                             | Central America           | Americas  | 99.29                       | 71.29                       | 99.29                       | 69.29                       | 60.00                               | 49.29                                   | NO                                   | NO                                   |
| 158              | 562 | NER                    | Niger                                 | Western Africa            | Africa    | 100.00                      | 13.27                       | 67.90                       | 5.46                        | 60.00                               | 7.96                                    | NO                                   | YES                                  |
| 159              | 566 | NGA                    | Nigeria                               | Western Africa            | Africa    | 100.00                      | 52.08                       | 99.11                       | 25.89                       | 60.00                               | 31.25                                   | NO                                   | YES                                  |
| 162              | 578 | NOR                    | Norway                                | Northern Europe           | Europe    | 15.36                       | 4.71                        | 12.41                       | 3.19                        | 9.22                                | 2.83                                    | NO                                   | NO                                   |
| 165              | 586 | PAN                    | Panama                                | South America             | Americas  | 19.15                       | 13.89                       | 13.89                       | 13.89                       | 39.28                               | 39.28                                   | NO                                   | NO                                   |
| 166              | 591 | PAN                    | Panama                                | Central America           | Americas  | 98.15                       | 36.35                       | 90.85                       | 20.24                       | 58.89                               | 21.81                                   | NO                                   | YES                                  |
| 169              | 600 | PRY                    | Paraguay                              | South America             | Americas  | 92.84                       | 12.39                       | 68.85                       | 11.56                       | 55.70                               | 7.43                                    | NO                                   | NO                                   |
| 170              | 604 | PER                    | Peru                                  | South America             | Americas  | 100.00                      | 49.36                       | 70.81                       | 28.34                       | 60.00                               | 29.62                                   | NO                                   | YES                                  |
| 171              | 608 | PHL                    | Philippines                           | South-Eastern Asia        | Asia      | 100.00                      | 46.95                       | 100.00                      | 34.14                       | 60.00                               | 28.17                                   | NO                                   | NO                                   |
| 173              | 616 | POL                    | Poland                                | Eastern Europe            | Europe    | 10.14                       | 2.92                        | 19.24                       | 3.76                        | 6.99                                | 1.69                                    | NO                                   | NO                                   |
| 174              | 620 |                        |                                       |                           |           |                             |                             |                             |                             |                                     |                                         |                                      |                                      |
